# Supplementary material for: ParB spreading on DNA requires cytidine triphosphate in vitro
Source: eLife journal article supplement (doi:10.7554/elife.53515), 2020-02-20
Supplement: fig1-data1 [file Fig1_panelB.xlsx]

## Sheet: FORMAT
	sample ID #1	sample ID #2	sample ID #3
data point	time point (sec), wavelength shift (nm)	time point (sec), wavelength shift (nm)	time point (sec), wavelength shift (nm)
1
2
3
.
.
.

## Sheet: Fig1_panelB_rep1
	parS20 ParB no NTP	parS20 ParB CTP	parS20 ParB ATP	parS20 ParB GTP	parS20 ParB UTP	TetR no NTP
1	0.000, 0.050	0.000, 0.043	0.000, 0.027	0.000, 0.041	0.000, 0.047	0.000, 0.031
2	0.200, 0.050	0.200, 0.043	0.200, 0.027	0.200, 0.041	0.200, 0.046	0.200, 0.030
3	0.400, 0.049	0.400, 0.042	0.400, 0.027	0.400, 0.041	0.400, 0.045	0.400, 0.030
4	0.600, 0.049	0.600, 0.041	0.600, 0.026	0.600, 0.041	0.600, 0.044	0.600, 0.029
5	0.800, 0.048	0.800, 0.040	0.800, 0.026	0.800, 0.041	0.800, 0.043	0.800, 0.028
6	1.000, 0.047	1.000, 0.040	1.000, 0.026	1.000, 0.041	1.000, 0.042	1.000, 0.027
7	1.200, 0.047	1.200, 0.039	1.200, 0.025	1.200, 0.040	1.200, 0.041	1.200, 0.027
8	1.400, 0.046	1.400, 0.038	1.400, 0.024	1.400, 0.040	1.400, 0.040	1.400, 0.026
9	1.600, 0.045	1.600, 0.038	1.600, 0.024	1.600, 0.039	1.600, 0.039	1.600, 0.025
10	1.800, 0.044	1.800, 0.037	1.800, 0.023	1.800, 0.039	1.800, 0.038	1.800, 0.025
11	2.000, 0.043	2.000, 0.037	2.000, 0.023	2.000, 0.038	2.000, 0.038	2.000, 0.024
12	2.200, 0.042	2.200, 0.037	2.200, 0.022	2.200, 0.037	2.200, 0.037	2.200, 0.023
13	2.400, 0.041	2.400, 0.037	2.400, 0.022	2.400, 0.037	2.400, 0.037	2.400, 0.023
14	2.600, 0.040	2.600, 0.037	2.600, 0.022	2.600, 0.037	2.600, 0.036	2.600, 0.022
15	2.800, 0.039	2.800, 0.037	2.800, 0.022	2.800, 0.036	2.800, 0.035	2.800, 0.022
16	3.000, 0.039	3.000, 0.037	3.000, 0.021	3.000, 0.036	3.000, 0.035	3.000, 0.021
17	3.200, 0.038	3.200, 0.037	3.200, 0.021	3.200, 0.035	3.200, 0.034	3.200, 0.020
18	3.400, 0.038	3.400, 0.037	3.400, 0.020	3.400, 0.034	3.400, 0.033	3.400, 0.020
19	3.600, 0.037	3.600, 0.036	3.600, 0.020	3.600, 0.034	3.600, 0.033	3.600, 0.019
20	3.800, 0.036	3.800, 0.035	3.800, 0.019	3.800, 0.033	3.800, 0.032	3.800, 0.019
21	4.000, 0.035	4.000, 0.035	4.000, 0.019	4.000, 0.032	4.000, 0.031	4.000, 0.018
22	4.200, 0.034	4.200, 0.034	4.200, 0.019	4.200, 0.031	4.200, 0.030	4.200, 0.018
23	4.400, 0.033	4.400, 0.033	4.400, 0.018	4.400, 0.031	4.400, 0.030	4.400, 0.018
24	4.600, 0.032	4.600, 0.032	4.600, 0.018	4.600, 0.030	4.600, 0.029	4.600, 0.018
25	4.800, 0.032	4.800, 0.031	4.800, 0.017	4.800, 0.029	4.800, 0.029	4.800, 0.018
26	5.000, 0.031	5.000, 0.030	5.000, 0.017	5.000, 0.029	5.000, 0.028	5.000, 0.018
27	5.200, 0.030	5.200, 0.030	5.200, 0.016	5.200, 0.028	5.200, 0.028	5.200, 0.018
28	5.400, 0.029	5.400, 0.029	5.400, 0.015	5.400, 0.028	5.400, 0.027	5.400, 0.018
29	5.600, 0.028	5.600, 0.028	5.600, 0.015	5.600, 0.027	5.600, 0.027	5.600, 0.018
30	5.800, 0.028	5.800, 0.028	5.800, 0.014	5.800, 0.027	5.800, 0.027	5.800, 0.017
31	6.000, 0.027	6.000, 0.028	6.000, 0.014	6.000, 0.026	6.000, 0.027	6.000, 0.017
32	6.200, 0.027	6.200, 0.028	6.200, 0.013	6.200, 0.026	6.200, 0.026	6.200, 0.017
33	6.400, 0.026	6.400, 0.028	6.400, 0.013	6.400, 0.025	6.400, 0.026	6.400, 0.016
34	6.600, 0.025	6.600, 0.028	6.600, 0.013	6.600, 0.025	6.600, 0.026	6.600, 0.016
35	6.800, 0.025	6.800, 0.027	6.800, 0.012	6.800, 0.024	6.800, 0.025	6.800, 0.016
36	7.000, 0.025	7.000, 0.027	7.000, 0.012	7.000, 0.024	7.000, 0.025	7.000, 0.016
37	7.200, 0.024	7.200, 0.027	7.200, 0.012	7.200, 0.023	7.200, 0.024	7.200, 0.016
38	7.400, 0.024	7.400, 0.027	7.400, 0.011	7.400, 0.023	7.400, 0.024	7.400, 0.015
39	7.600, 0.024	7.600, 0.026	7.600, 0.011	7.600, 0.022	7.600, 0.023	7.600, 0.015
40	7.800, 0.023	7.800, 0.026	7.800, 0.011	7.800, 0.022	7.800, 0.023	7.800, 0.015
41	8.000, 0.023	8.000, 0.025	8.000, 0.011	8.000, 0.022	8.000, 0.023	8.000, 0.014
42	8.200, 0.023	8.200, 0.024	8.200, 0.011	8.200, 0.021	8.200, 0.022	8.200, 0.014
43	8.400, 0.023	8.400, 0.024	8.400, 0.010	8.400, 0.021	8.400, 0.022	8.400, 0.014
44	8.600, 0.022	8.600, 0.023	8.600, 0.010	8.600, 0.021	8.600, 0.022	8.600, 0.013
45	8.800, 0.022	8.800, 0.022	8.800, 0.010	8.800, 0.021	8.800, 0.022	8.800, 0.013
46	9.000, 0.022	9.000, 0.021	9.000, 0.009	9.000, 0.021	9.000, 0.022	9.000, 0.013
47	9.200, 0.021	9.200, 0.021	9.200, 0.009	9.200, 0.021	9.200, 0.022	9.200, 0.013
48	9.400, 0.021	9.400, 0.020	9.400, 0.009	9.400, 0.021	9.400, 0.021	9.400, 0.013
49	9.600, 0.021	9.600, 0.019	9.600, 0.009	9.600, 0.021	9.600, 0.021	9.600, 0.012
50	9.800, 0.021	9.800, 0.019	9.800, 0.009	9.800, 0.021	9.800, 0.021	9.800, 0.012
51	10.000, 0.020	10.000, 0.019	10.000, 0.009	10.000, 0.021	10.000, 0.021	10.000, 0.012
52	10.200, 0.020	10.200, 0.019	10.200, 0.009	10.200, 0.020	10.200, 0.020	10.200, 0.012
53	10.400, 0.019	10.400, 0.019	10.400, 0.009	10.400, 0.020	10.400, 0.020	10.400, 0.012
54	10.600, 0.019	10.600, 0.019	10.600, 0.009	10.600, 0.020	10.600, 0.019	10.600, 0.012
55	10.800, 0.018	10.800, 0.019	10.800, 0.008	10.800, 0.019	10.800, 0.019	10.800, 0.012
56	11.000, 0.018	11.000, 0.019	11.000, 0.008	11.000, 0.019	11.000, 0.019	11.000, 0.013
57	11.200, 0.017	11.200, 0.019	11.200, 0.008	11.200, 0.019	11.200, 0.018	11.200, 0.013
58	11.400, 0.017	11.400, 0.019	11.400, 0.007	11.400, 0.018	11.400, 0.018	11.400, 0.012
59	11.600, 0.017	11.600, 0.019	11.600, 0.007	11.600, 0.018	11.600, 0.018	11.600, 0.012
60	11.800, 0.016	11.800, 0.019	11.800, 0.007	11.800, 0.018	11.800, 0.018	11.800, 0.012
61	12.000, 0.016	12.000, 0.019	12.000, 0.006	12.000, 0.017	12.000, 0.018	12.000, 0.011
62	12.200, 0.015	12.200, 0.019	12.200, 0.006	12.200, 0.017	12.200, 0.018	12.200, 0.011
63	12.400, 0.015	12.400, 0.018	12.400, 0.006	12.400, 0.017	12.400, 0.018	12.400, 0.011
64	12.600, 0.015	12.600, 0.018	12.600, 0.005	12.600, 0.017	12.600, 0.017	12.600, 0.010
65	12.800, 0.014	12.800, 0.018	12.800, 0.005	12.800, 0.017	12.800, 0.017	12.800, 0.010
66	13.000, 0.014	13.000, 0.017	13.000, 0.005	13.000, 0.017	13.000, 0.017	13.000, 0.010
67	13.200, 0.014	13.200, 0.017	13.200, 0.005	13.200, 0.017	13.200, 0.017	13.200, 0.010
68	13.400, 0.014	13.400, 0.016	13.400, 0.005	13.400, 0.017	13.400, 0.017	13.400, 0.010
69	13.600, 0.013	13.600, 0.016	13.600, 0.005	13.600, 0.017	13.600, 0.016	13.600, 0.010
70	13.800, 0.013	13.800, 0.015	13.800, 0.005	13.800, 0.017	13.800, 0.016	13.800, 0.009
71	14.000, 0.013	14.000, 0.015	14.000, 0.005	14.000, 0.017	14.000, 0.016	14.000, 0.009
72	14.200, 0.012	14.200, 0.015	14.200, 0.005	14.200, 0.016	14.200, 0.015	14.200, 0.009
73	14.400, 0.012	14.400, 0.014	14.400, 0.005	14.400, 0.016	14.400, 0.015	14.400, 0.009
74	14.600, 0.012	14.600, 0.014	14.600, 0.005	14.600, 0.016	14.600, 0.014	14.600, 0.009
75	14.800, 0.011	14.800, 0.013	14.800, 0.005	14.800, 0.015	14.800, 0.014	14.800, 0.009
76	15.000, 0.011	15.000, 0.013	15.000, 0.005	15.000, 0.015	15.000, 0.014	15.000, 0.009
77	15.200, 0.011	15.200, 0.013	15.200, 0.005	15.200, 0.014	15.200, 0.013	15.200, 0.009
78	15.400, 0.011	15.400, 0.013	15.400, 0.005	15.400, 0.014	15.400, 0.013	15.400, 0.009
79	15.600, 0.011	15.600, 0.013	15.600, 0.005	15.600, 0.014	15.600, 0.012	15.600, 0.008
80	15.800, 0.011	15.800, 0.013	15.800, 0.006	15.800, 0.014	15.800, 0.012	15.800, 0.008
81	16.000, 0.010	16.000, 0.013	16.000, 0.006	16.000, 0.013	16.000, 0.011	16.000, 0.007
82	16.200, 0.010	16.200, 0.013	16.200, 0.006	16.200, 0.013	16.200, 0.011	16.200, 0.007
83	16.400, 0.010	16.400, 0.013	16.400, 0.006	16.400, 0.013	16.400, 0.011	16.400, 0.007
84	16.600, 0.009	16.600, 0.013	16.600, 0.006	16.600, 0.013	16.600, 0.010	16.600, 0.007
85	16.800, 0.009	16.800, 0.012	16.800, 0.005	16.800, 0.012	16.800, 0.010	16.800, 0.007
86	17.000, 0.009	17.000, 0.012	17.000, 0.005	17.000, 0.012	17.000, 0.010	17.000, 0.007
87	17.200, 0.009	17.200, 0.012	17.200, 0.005	17.200, 0.012	17.200, 0.009	17.200, 0.007
88	17.400, 0.008	17.400, 0.012	17.400, 0.005	17.400, 0.012	17.400, 0.009	17.400, 0.008
89	17.600, 0.008	17.600, 0.011	17.600, 0.005	17.600, 0.012	17.600, 0.009	17.600, 0.008
90	17.800, 0.008	17.800, 0.011	17.800, 0.004	17.800, 0.011	17.800, 0.009	17.800, 0.008
91	18.000, 0.008	18.000, 0.011	18.000, 0.004	18.000, 0.011	18.000, 0.008	18.000, 0.008
92	18.200, 0.007	18.200, 0.011	18.200, 0.004	18.200, 0.011	18.200, 0.008	18.200, 0.009
93	18.400, 0.007	18.400, 0.011	18.400, 0.004	18.400, 0.010	18.400, 0.008	18.400, 0.009
94	18.600, 0.007	18.600, 0.011	18.600, 0.004	18.600, 0.010	18.600, 0.008	18.600, 0.009
95	18.800, 0.007	18.800, 0.011	18.800, 0.004	18.800, 0.009	18.800, 0.008	18.800, 0.008
96	19.000, 0.006	19.000, 0.011	19.000, 0.004	19.000, 0.009	19.000, 0.008	19.000, 0.008
97	19.200, 0.006	19.200, 0.011	19.200, 0.004	19.200, 0.009	19.200, 0.007	19.200, 0.007
98	19.400, 0.006	19.400, 0.011	19.400, 0.003	19.400, 0.008	19.400, 0.007	19.400, 0.007
99	19.600, 0.006	19.600, 0.011	19.600, 0.003	19.600, 0.008	19.600, 0.007	19.600, 0.006
100	19.800, 0.005	19.800, 0.011	19.800, 0.003	19.800, 0.007	19.800, 0.007	19.800, 0.006
101	20.000, 0.005	20.000, 0.011	20.000, 0.002	20.000, 0.007	20.000, 0.007	20.000, 0.005
102	20.200, 0.004	20.200, 0.011	20.200, 0.002	20.200, 0.007	20.200, 0.007	20.200, 0.005
103	20.400, 0.004	20.400, 0.010	20.400, 0.002	20.400, 0.007	20.400, 0.007	20.400, 0.005
104	20.600, 0.004	20.600, 0.010	20.600, 0.002	20.600, 0.007	20.600, 0.007	20.600, 0.005
105	20.800, 0.003	20.800, 0.009	20.800, 0.002	20.800, 0.006	20.800, 0.007	20.800, 0.005
106	21.000, 0.003	21.000, 0.009	21.000, 0.002	21.000, 0.007	21.000, 0.007	21.000, 0.004
107	21.200, 0.003	21.200, 0.009	21.200, 0.002	21.200, 0.007	21.200, 0.006	21.200, 0.004
108	21.400, 0.003	21.400, 0.008	21.400, 0.002	21.400, 0.007	21.400, 0.006	21.400, 0.004
109	21.600, 0.003	21.600, 0.008	21.600, 0.002	21.600, 0.007	21.600, 0.006	21.600, 0.004
110	21.800, 0.003	21.800, 0.008	21.800, 0.002	21.800, 0.007	21.800, 0.005	21.800, 0.004
111	22.000, 0.003	22.000, 0.007	22.000, 0.002	22.000, 0.007	22.000, 0.005	22.000, 0.004
112	22.200, 0.003	22.200, 0.007	22.200, 0.002	22.200, 0.007	22.200, 0.005	22.200, 0.004
113	22.400, 0.003	22.400, 0.007	22.400, 0.002	22.400, 0.007	22.400, 0.005	22.400, 0.004
114	22.600, 0.003	22.600, 0.006	22.600, 0.002	22.600, 0.007	22.600, 0.005	22.600, 0.003
115	22.800, 0.003	22.800, 0.006	22.800, 0.002	22.800, 0.006	22.800, 0.004	22.800, 0.003
116	23.000, 0.003	23.000, 0.006	23.000, 0.002	23.000, 0.006	23.000, 0.004	23.000, 0.002
117	23.200, 0.003	23.200, 0.005	23.200, 0.002	23.200, 0.006	23.200, 0.004	23.200, 0.002
118	23.400, 0.003	23.400, 0.005	23.400, 0.002	23.400, 0.005	23.400, 0.004	23.400, 0.002
119	23.600, 0.002	23.600, 0.005	23.600, 0.001	23.600, 0.005	23.600, 0.004	23.600, 0.002
120	23.800, 0.002	23.800, 0.004	23.800, 0.001	23.800, 0.005	23.800, 0.004	23.800, 0.002
121	24.000, 0.002	24.000, 0.004	24.000, 0.001	24.000, 0.005	24.000, 0.003	24.000, 0.002
122	24.200, 0.001	24.200, 0.004	24.200, 0.001	24.200, 0.004	24.200, 0.003	24.200, 0.001
123	24.400, 0.001	24.400, 0.004	24.400, 0.001	24.400, 0.004	24.400, 0.003	24.400, 0.001
124	24.600, 0.001	24.600, 0.003	24.600, 0.001	24.600, 0.004	24.600, 0.003	24.600, 0.001
125	24.800, 0.000	24.800, 0.003	24.800, 0.001	24.800, 0.004	24.800, 0.003	24.800, 0.002
126	25.000, -0.000	25.000, 0.003	25.000, 0.001	25.000, 0.004	25.000, 0.002	25.000, 0.002
127	25.200, -0.001	25.200, 0.003	25.200, 0.001	25.200, 0.004	25.200, 0.002	25.200, 0.002
128	25.400, -0.001	25.400, 0.003	25.400, 0.001	25.400, 0.004	25.400, 0.002	25.400, 0.002
129	25.600, -0.001	25.600, 0.003	25.600, 0.001	25.600, 0.003	25.600, 0.002	25.600, 0.002
130	25.800, -0.001	25.800, 0.002	25.800, 0.001	25.800, 0.003	25.800, 0.002	25.800, 0.002
131	26.000, -0.001	26.000, 0.002	26.000, 0.001	26.000, 0.002	26.000, 0.002	26.000, 0.003
132	26.200, -0.001	26.200, 0.002	26.200, 0.001	26.200, 0.002	26.200, 0.002	26.200, 0.003
133	26.400, -0.001	26.400, 0.002	26.400, 0.001	26.400, 0.001	26.400, 0.002	26.400, 0.002
134	26.600, -0.000	26.600, 0.002	26.600, 0.001	26.600, 0.001	26.600, 0.001	26.600, 0.002
135	26.800, -0.000	26.800, 0.002	26.800, 0.001	26.800, 0.000	26.800, 0.001	26.800, 0.002
136	27.000, -0.000	27.000, 0.001	27.000, 0.001	27.000, -0.000	27.000, 0.001	27.000, 0.002
137	27.200, -0.000	27.200, 0.001	27.200, 0.001	27.200, -0.001	27.200, 0.001	27.200, 0.001
138	27.400, 0.000	27.400, 0.001	27.400, 0.000	27.400, -0.001	27.400, 0.000	27.400, 0.001
139	27.600, 0.000	27.600, 0.001	27.600, 0.000	27.600, -0.001	27.600, 0.000	27.600, 0.000
140	27.800, 0.000	27.800, 0.000	27.800, 0.000	27.800, -0.001	27.800, -0.000	27.800, -0.000
141	28.000, 0.000	28.000, 0.000	28.000, 0.000	28.000, -0.001	28.000, -0.000	28.000, -0.001
142	28.200, 0.000	28.200, 0.000	28.200, 0.000	28.200, -0.001	28.200, -0.000	28.200, -0.001
143	28.400, 0.000	28.400, 0.000	28.400, 0.000	28.400, -0.000	28.400, -0.001	28.400, -0.001
144	28.600, 0.000	28.600, -0.000	28.600, 0.000	28.600, 0.000	28.600, -0.001	28.600, -0.001
145	28.800, -0.000	28.800, -0.000	28.800, -0.000	28.800, 0.000	28.800, -0.001	28.800, -0.001
146	29.000, -0.000	29.000, -0.001	29.000, -0.000	29.000, 0.001	29.000, -0.001	29.000, -0.001
147	29.200, -0.000	29.200, -0.001	29.200, -0.000	29.200, 0.001	29.200, -0.000	29.200, -0.000
148	29.400, -0.000	29.400, -0.001	29.400, -0.001	29.400, 0.001	29.400, -0.000	29.400, 0.000
149	29.600, -0.000	29.600, -0.001	29.600, -0.001	29.600, 0.001	29.600, 0.000	29.600, 0.000
150	29.800, -0.000	29.800, -0.001	29.800, -0.001	29.800, 0.001	29.800, 0.001	29.800, 0.001
151	30.000, 0.000	30.000, 0.000	30.000, 0.000	30.000, 0.000	30.000, 0.000	30.000, 0.000
152	30.200, 0.019	30.200, 0.019	30.200, 0.021	30.200, 0.021	30.200, 0.021	30.200, -0.002
153	30.400, 0.042	30.400, 0.041	30.400, 0.046	30.400, 0.047	30.400, 0.045	30.400, -0.004
154	30.600, 0.069	30.600, 0.066	30.600, 0.076	30.600, 0.077	30.600, 0.074	30.600, -0.006
155	30.800, 0.099	30.800, 0.094	30.800, 0.108	30.800, 0.110	30.800, 0.105	30.800, -0.008
156	31.000, 0.133	31.000, 0.124	31.000, 0.144	31.000, 0.145	31.000, 0.139	31.000, -0.011
157	31.200, 0.168	31.200, 0.155	31.200, 0.181	31.200, 0.183	31.200, 0.176	31.200, -0.013
158	31.400, 0.204	31.400, 0.186	31.400, 0.220	31.400, 0.222	31.400, 0.213	31.400, -0.016
159	31.600, 0.242	31.600, 0.216	31.600, 0.259	31.600, 0.260	31.600, 0.250	31.600, -0.018
160	31.800, 0.278	31.800, 0.245	31.800, 0.297	31.800, 0.298	31.800, 0.286	31.800, -0.020
161	32.000, 0.313	32.000, 0.271	32.000, 0.333	32.000, 0.332	32.000, 0.319	32.000, -0.022
162	32.200, 0.344	32.200, 0.293	32.200, 0.364	32.200, 0.363	32.200, 0.349	32.200, -0.024
163	32.400, 0.373	32.400, 0.312	32.400, 0.393	32.400, 0.390	32.400, 0.376	32.400, -0.026
164	32.600, 0.400	32.600, 0.330	32.600, 0.420	32.600, 0.416	32.600, 0.401	32.600, -0.028
165	32.800, 0.425	32.800, 0.345	32.800, 0.444	32.800, 0.439	32.800, 0.423	32.800, -0.030
166	33.000, 0.448	33.000, 0.358	33.000, 0.466	33.000, 0.459	33.000, 0.444	33.000, -0.032
167	33.200, 0.469	33.200, 0.370	33.200, 0.486	33.200, 0.477	33.200, 0.463	33.200, -0.034
168	33.400, 0.489	33.400, 0.380	33.400, 0.504	33.400, 0.494	33.400, 0.480	33.400, -0.035
169	33.600, 0.506	33.600, 0.389	33.600, 0.519	33.600, 0.508	33.600, 0.496	33.600, -0.037
170	33.800, 0.523	33.800, 0.397	33.800, 0.533	33.800, 0.520	33.800, 0.509	33.800, -0.038
171	34.000, 0.537	34.000, 0.404	34.000, 0.545	34.000, 0.531	34.000, 0.521	34.000, -0.039
172	34.200, 0.550	34.200, 0.410	34.200, 0.555	34.200, 0.540	34.200, 0.532	34.200, -0.040
173	34.400, 0.562	34.400, 0.415	34.400, 0.564	34.400, 0.548	34.400, 0.541	34.400, -0.041
174	34.600, 0.573	34.600, 0.420	34.600, 0.572	34.600, 0.555	34.600, 0.549	34.600, -0.042
175	34.800, 0.582	34.800, 0.424	34.800, 0.579	34.800, 0.561	34.800, 0.556	34.800, -0.043
176	35.000, 0.591	35.000, 0.428	35.000, 0.585	35.000, 0.566	35.000, 0.562	35.000, -0.043
177	35.200, 0.598	35.200, 0.432	35.200, 0.590	35.200, 0.570	35.200, 0.567	35.200, -0.044
178	35.400, 0.605	35.400, 0.435	35.400, 0.594	35.400, 0.573	35.400, 0.571	35.400, -0.045
179	35.600, 0.611	35.600, 0.438	35.600, 0.598	35.600, 0.576	35.600, 0.575	35.600, -0.045
180	35.800, 0.617	35.800, 0.440	35.800, 0.602	35.800, 0.579	35.800, 0.578	35.800, -0.046
181	36.000, 0.622	36.000, 0.442	36.000, 0.605	36.000, 0.581	36.000, 0.580	36.000, -0.047
182	36.200, 0.626	36.200, 0.443	36.200, 0.607	36.200, 0.583	36.200, 0.583	36.200, -0.048
183	36.400, 0.630	36.400, 0.445	36.400, 0.610	36.400, 0.585	36.400, 0.585	36.400, -0.048
184	36.600, 0.633	36.600, 0.446	36.600, 0.612	36.600, 0.587	36.600, 0.587	36.600, -0.049
185	36.800, 0.636	36.800, 0.446	36.800, 0.614	36.800, 0.588	36.800, 0.589	36.800, -0.050
186	37.000, 0.639	37.000, 0.447	37.000, 0.616	37.000, 0.590	37.000, 0.590	37.000, -0.050
187	37.200, 0.641	37.200, 0.448	37.200, 0.617	37.200, 0.591	37.200, 0.592	37.200, -0.051
188	37.400, 0.643	37.400, 0.449	37.400, 0.618	37.400, 0.592	37.400, 0.594	37.400, -0.052
189	37.600, 0.646	37.600, 0.449	37.600, 0.619	37.600, 0.593	37.600, 0.595	37.600, -0.053
190	37.800, 0.648	37.800, 0.450	37.800, 0.620	37.800, 0.593	37.800, 0.596	37.800, -0.053
191	38.000, 0.650	38.000, 0.450	38.000, 0.621	38.000, 0.593	38.000, 0.597	38.000, -0.054
192	38.200, 0.651	38.200, 0.450	38.200, 0.622	38.200, 0.594	38.200, 0.598	38.200, -0.054
193	38.400, 0.653	38.400, 0.451	38.400, 0.623	38.400, 0.594	38.400, 0.598	38.400, -0.055
194	38.600, 0.655	38.600, 0.451	38.600, 0.623	38.600, 0.594	38.600, 0.599	38.600, -0.055
195	38.800, 0.656	38.800, 0.451	38.800, 0.624	38.800, 0.595	38.800, 0.599	38.800, -0.056
196	39.000, 0.658	39.000, 0.452	39.000, 0.624	39.000, 0.595	39.000, 0.600	39.000, -0.056
197	39.200, 0.659	39.200, 0.452	39.200, 0.625	39.200, 0.595	39.200, 0.600	39.200, -0.056
198	39.400, 0.660	39.400, 0.452	39.400, 0.625	39.400, 0.595	39.400, 0.600	39.400, -0.057
199	39.600, 0.661	39.600, 0.452	39.600, 0.625	39.600, 0.595	39.600, 0.600	39.600, -0.057
200	39.800, 0.662	39.800, 0.452	39.800, 0.626	39.800, 0.595	39.800, 0.600	39.800, -0.058
201	40.000, 0.662	40.000, 0.452	40.000, 0.626	40.000, 0.595	40.000, 0.601	40.000, -0.058
202	40.200, 0.663	40.200, 0.452	40.200, 0.626	40.200, 0.596	40.200, 0.601	40.200, -0.059
203	40.400, 0.664	40.400, 0.452	40.400, 0.627	40.400, 0.596	40.400, 0.601	40.400, -0.059
204	40.600, 0.664	40.600, 0.451	40.600, 0.627	40.600, 0.597	40.600, 0.602	40.600, -0.059
205	40.800, 0.665	40.800, 0.451	40.800, 0.627	40.800, 0.597	40.800, 0.602	40.800, -0.059
206	41.000, 0.666	41.000, 0.451	41.000, 0.627	41.000, 0.597	41.000, 0.603	41.000, -0.059
207	41.200, 0.666	41.200, 0.451	41.200, 0.627	41.200, 0.597	41.200, 0.603	41.200, -0.060
208	41.400, 0.667	41.400, 0.450	41.400, 0.628	41.400, 0.597	41.400, 0.604	41.400, -0.060
209	41.600, 0.668	41.600, 0.450	41.600, 0.628	41.600, 0.597	41.600, 0.604	41.600, -0.060
210	41.800, 0.668	41.800, 0.450	41.800, 0.627	41.800, 0.597	41.800, 0.605	41.800, -0.060
211	42.000, 0.669	42.000, 0.450	42.000, 0.627	42.000, 0.597	42.000, 0.605	42.000, -0.060
212	42.200, 0.669	42.200, 0.450	42.200, 0.628	42.200, 0.597	42.200, 0.605	42.200, -0.060
213	42.400, 0.670	42.400, 0.450	42.400, 0.627	42.400, 0.597	42.400, 0.605	42.400, -0.060
214	42.600, 0.670	42.600, 0.450	42.600, 0.627	42.600, 0.597	42.600, 0.605	42.600, -0.061
215	42.800, 0.671	42.800, 0.450	42.800, 0.628	42.800, 0.598	42.800, 0.605	42.800, -0.061
216	43.000, 0.671	43.000, 0.450	43.000, 0.628	43.000, 0.598	43.000, 0.605	43.000, -0.061
217	43.200, 0.672	43.200, 0.451	43.200, 0.628	43.200, 0.598	43.200, 0.605	43.200, -0.061
218	43.400, 0.672	43.400, 0.451	43.400, 0.628	43.400, 0.598	43.400, 0.605	43.400, -0.062
219	43.600, 0.673	43.600, 0.451	43.600, 0.628	43.600, 0.598	43.600, 0.605	43.600, -0.062
220	43.800, 0.673	43.800, 0.451	43.800, 0.628	43.800, 0.598	43.800, 0.605	43.800, -0.063
221	44.000, 0.673	44.000, 0.451	44.000, 0.628	44.000, 0.598	44.000, 0.605	44.000, -0.063
222	44.200, 0.674	44.200, 0.450	44.200, 0.628	44.200, 0.598	44.200, 0.605	44.200, -0.064
223	44.400, 0.674	44.400, 0.450	44.400, 0.629	44.400, 0.598	44.400, 0.605	44.400, -0.064
224	44.600, 0.675	44.600, 0.450	44.600, 0.629	44.600, 0.598	44.600, 0.605	44.600, -0.064
225	44.800, 0.675	44.800, 0.449	44.800, 0.629	44.800, 0.598	44.800, 0.605	44.800, -0.065
226	45.000, 0.676	45.000, 0.449	45.000, 0.629	45.000, 0.598	45.000, 0.605	45.000, -0.065
227	45.200, 0.676	45.200, 0.448	45.200, 0.629	45.200, 0.598	45.200, 0.605	45.200, -0.065
228	45.400, 0.677	45.400, 0.447	45.400, 0.630	45.400, 0.597	45.400, 0.605	45.400, -0.065
229	45.600, 0.677	45.600, 0.447	45.600, 0.630	45.600, 0.597	45.600, 0.605	45.600, -0.066
230	45.800, 0.677	45.800, 0.446	45.800, 0.630	45.800, 0.597	45.800, 0.605	45.800, -0.066
231	46.000, 0.678	46.000, 0.446	46.000, 0.630	46.000, 0.596	46.000, 0.605	46.000, -0.067
232	46.200, 0.678	46.200, 0.445	46.200, 0.630	46.200, 0.596	46.200, 0.605	46.200, -0.067
233	46.400, 0.678	46.400, 0.445	46.400, 0.631	46.400, 0.596	46.400, 0.605	46.400, -0.067
234	46.600, 0.679	46.600, 0.445	46.600, 0.631	46.600, 0.596	46.600, 0.605	46.600, -0.067
235	46.800, 0.679	46.800, 0.445	46.800, 0.632	46.800, 0.596	46.800, 0.605	46.800, -0.066
236	47.000, 0.679	47.000, 0.445	47.000, 0.632	47.000, 0.596	47.000, 0.605	47.000, -0.066
237	47.200, 0.679	47.200, 0.446	47.200, 0.632	47.200, 0.596	47.200, 0.605	47.200, -0.066
238	47.400, 0.680	47.400, 0.446	47.400, 0.632	47.400, 0.596	47.400, 0.605	47.400, -0.066
239	47.600, 0.680	47.600, 0.446	47.600, 0.631	47.600, 0.596	47.600, 0.605	47.600, -0.066
240	47.800, 0.680	47.800, 0.446	47.800, 0.631	47.800, 0.596	47.800, 0.606	47.800, -0.066
241	48.000, 0.681	48.000, 0.446	48.000, 0.631	48.000, 0.596	48.000, 0.606	48.000, -0.066
242	48.200, 0.681	48.200, 0.446	48.200, 0.631	48.200, 0.597	48.200, 0.606	48.200, -0.066
243	48.400, 0.682	48.400, 0.446	48.400, 0.631	48.400, 0.597	48.400, 0.606	48.400, -0.066
244	48.600, 0.682	48.600, 0.445	48.600, 0.632	48.600, 0.597	48.600, 0.606	48.600, -0.066
245	48.800, 0.683	48.800, 0.445	48.800, 0.632	48.800, 0.597	48.800, 0.606	48.800, -0.066
246	49.000, 0.683	49.000, 0.444	49.000, 0.632	49.000, 0.598	49.000, 0.606	49.000, -0.066
247	49.200, 0.684	49.200, 0.444	49.200, 0.632	49.200, 0.597	49.200, 0.606	49.200, -0.067
248	49.400, 0.684	49.400, 0.444	49.400, 0.632	49.400, 0.597	49.400, 0.606	49.400, -0.067
249	49.600, 0.684	49.600, 0.444	49.600, 0.632	49.600, 0.597	49.600, 0.606	49.600, -0.068
250	49.800, 0.684	49.800, 0.443	49.800, 0.633	49.800, 0.597	49.800, 0.606	49.800, -0.068
251	50.000, 0.684	50.000, 0.444	50.000, 0.633	50.000, 0.596	50.000, 0.606	50.000, -0.069
252	50.200, 0.683	50.200, 0.444	50.200, 0.633	50.200, 0.596	50.200, 0.606	50.200, -0.069
253	50.400, 0.683	50.400, 0.444	50.400, 0.633	50.400, 0.596	50.400, 0.605	50.400, -0.069
254	50.600, 0.684	50.600, 0.444	50.600, 0.633	50.600, 0.596	50.600, 0.605	50.600, -0.070
255	50.800, 0.684	50.800, 0.444	50.800, 0.633	50.800, 0.595	50.800, 0.605	50.800, -0.070
256	51.000, 0.684	51.000, 0.444	51.000, 0.633	51.000, 0.595	51.000, 0.606	51.000, -0.071
257	51.200, 0.684	51.200, 0.444	51.200, 0.632	51.200, 0.595	51.200, 0.606	51.200, -0.071
258	51.400, 0.685	51.400, 0.444	51.400, 0.632	51.400, 0.596	51.400, 0.606	51.400, -0.071
259	51.600, 0.686	51.600, 0.443	51.600, 0.632	51.600, 0.596	51.600, 0.606	51.600, -0.071
260	51.800, 0.686	51.800, 0.443	51.800, 0.632	51.800, 0.596	51.800, 0.607	51.800, -0.071
261	52.000, 0.687	52.000, 0.443	52.000, 0.633	52.000, 0.596	52.000, 0.607	52.000, -0.071
262	52.200, 0.688	52.200, 0.443	52.200, 0.633	52.200, 0.596	52.200, 0.607	52.200, -0.071
263	52.400, 0.689	52.400, 0.442	52.400, 0.633	52.400, 0.596	52.400, 0.607	52.400, -0.071
264	52.600, 0.689	52.600, 0.442	52.600, 0.633	52.600, 0.596	52.600, 0.607	52.600, -0.070
265	52.800, 0.690	52.800, 0.442	52.800, 0.633	52.800, 0.595	52.800, 0.607	52.800, -0.070
266	53.000, 0.690	53.000, 0.442	53.000, 0.633	53.000, 0.595	53.000, 0.607	53.000, -0.070
267	53.200, 0.690	53.200, 0.441	53.200, 0.633	53.200, 0.595	53.200, 0.607	53.200, -0.070
268	53.400, 0.690	53.400, 0.441	53.400, 0.633	53.400, 0.595	53.400, 0.607	53.400, -0.070
269	53.600, 0.690	53.600, 0.441	53.600, 0.634	53.600, 0.595	53.600, 0.607	53.600, -0.070
270	53.800, 0.690	53.800, 0.441	53.800, 0.634	53.800, 0.594	53.800, 0.607	53.800, -0.071
271	54.000, 0.690	54.000, 0.440	54.000, 0.634	54.000, 0.594	54.000, 0.607	54.000, -0.071
272	54.200, 0.690	54.200, 0.440	54.200, 0.634	54.200, 0.594	54.200, 0.607	54.200, -0.071
273	54.400, 0.690	54.400, 0.440	54.400, 0.635	54.400, 0.594	54.400, 0.607	54.400, -0.072
274	54.600, 0.690	54.600, 0.439	54.600, 0.635	54.600, 0.594	54.600, 0.607	54.600, -0.072
275	54.800, 0.691	54.800, 0.439	54.800, 0.635	54.800, 0.594	54.800, 0.608	54.800, -0.072
276	55.000, 0.691	55.000, 0.438	55.000, 0.635	55.000, 0.595	55.000, 0.608	55.000, -0.072
277	55.200, 0.691	55.200, 0.438	55.200, 0.635	55.200, 0.595	55.200, 0.608	55.200, -0.072
278	55.400, 0.692	55.400, 0.437	55.400, 0.636	55.400, 0.595	55.400, 0.609	55.400, -0.072
279	55.600, 0.693	55.600, 0.437	55.600, 0.636	55.600, 0.595	55.600, 0.609	55.600, -0.072
280	55.800, 0.693	55.800, 0.437	55.800, 0.636	55.800, 0.595	55.800, 0.609	55.800, -0.072
281	56.000, 0.693	56.000, 0.437	56.000, 0.635	56.000, 0.595	56.000, 0.609	56.000, -0.071
282	56.200, 0.694	56.200, 0.437	56.200, 0.635	56.200, 0.595	56.200, 0.608	56.200, -0.071
283	56.400, 0.694	56.400, 0.437	56.400, 0.635	56.400, 0.596	56.400, 0.608	56.400, -0.071
284	56.600, 0.694	56.600, 0.437	56.600, 0.634	56.600, 0.596	56.600, 0.608	56.600, -0.071
285	56.800, 0.695	56.800, 0.437	56.800, 0.634	56.800, 0.596	56.800, 0.608	56.800, -0.070
286	57.000, 0.695	57.000, 0.436	57.000, 0.634	57.000, 0.596	57.000, 0.608	57.000, -0.070
287	57.200, 0.695	57.200, 0.436	57.200, 0.633	57.200, 0.596	57.200, 0.608	57.200, -0.070
288	57.400, 0.695	57.400, 0.436	57.400, 0.633	57.400, 0.596	57.400, 0.608	57.400, -0.070
289	57.600, 0.695	57.600, 0.436	57.600, 0.633	57.600, 0.596	57.600, 0.608	57.600, -0.070
290	57.800, 0.695	57.800, 0.436	57.800, 0.633	57.800, 0.596	57.800, 0.609	57.800, -0.070
291	58.000, 0.695	58.000, 0.436	58.000, 0.633	58.000, 0.595	58.000, 0.609	58.000, -0.071
292	58.200, 0.695	58.200, 0.436	58.200, 0.634	58.200, 0.595	58.200, 0.609	58.200, -0.071
293	58.400, 0.695	58.400, 0.435	58.400, 0.634	58.400, 0.595	58.400, 0.610	58.400, -0.072
294	58.600, 0.695	58.600, 0.435	58.600, 0.634	58.600, 0.595	58.600, 0.610	58.600, -0.072
295	58.800, 0.696	58.800, 0.435	58.800, 0.635	58.800, 0.595	58.800, 0.610	58.800, -0.072
296	59.000, 0.696	59.000, 0.435	59.000, 0.635	59.000, 0.595	59.000, 0.610	59.000, -0.072
297	59.200, 0.697	59.200, 0.435	59.200, 0.635	59.200, 0.594	59.200, 0.610	59.200, -0.073
298	59.400, 0.697	59.400, 0.435	59.400, 0.635	59.400, 0.594	59.400, 0.610	59.400, -0.073
299	59.600, 0.697	59.600, 0.435	59.600, 0.635	59.600, 0.594	59.600, 0.610	59.600, -0.073
300	59.800, 0.698	59.800, 0.434	59.800, 0.635	59.800, 0.594	59.800, 0.610	59.800, -0.073
301	60.000, 0.698	60.000, 0.434	60.000, 0.636	60.000, 0.593	60.000, 0.611	60.000, -0.074
302	60.200, 0.698	60.200, 0.434	60.200, 0.636	60.200, 0.593	60.200, 0.611	60.200, -0.073
303	60.400, 0.698	60.400, 0.434	60.400, 0.636	60.400, 0.593	60.400, 0.611	60.400, -0.073
304	60.600, 0.698	60.600, 0.434	60.600, 0.636	60.600, 0.593	60.600, 0.611	60.600, -0.073
305	60.800, 0.698	60.800, 0.434	60.800, 0.637	60.800, 0.593	60.800, 0.611	60.800, -0.073
306	61.000, 0.698	61.000, 0.434	61.000, 0.637	61.000, 0.593	61.000, 0.611	61.000, -0.072
307	61.200, 0.698	61.200, 0.435	61.200, 0.637	61.200, 0.593	61.200, 0.611	61.200, -0.072
308	61.400, 0.699	61.400, 0.435	61.400, 0.637	61.400, 0.593	61.400, 0.611	61.400, -0.072
309	61.600, 0.699	61.600, 0.435	61.600, 0.637	61.600, 0.593	61.600, 0.611	61.600, -0.072
310	61.800, 0.699	61.800, 0.435	61.800, 0.637	61.800, 0.593	61.800, 0.611	61.800, -0.073
311	62.000, 0.699	62.000, 0.435	62.000, 0.637	62.000, 0.593	62.000, 0.612	62.000, -0.073
312	62.200, 0.700	62.200, 0.434	62.200, 0.637	62.200, 0.593	62.200, 0.612	62.200, -0.073
313	62.400, 0.700	62.400, 0.434	62.400, 0.637	62.400, 0.593	62.400, 0.611	62.400, -0.074
314	62.600, 0.700	62.600, 0.434	62.600, 0.637	62.600, 0.593	62.600, 0.611	62.600, -0.074
315	62.800, 0.700	62.800, 0.433	62.800, 0.637	62.800, 0.593	62.800, 0.611	62.800, -0.074
316	63.000, 0.701	63.000, 0.433	63.000, 0.636	63.000, 0.593	63.000, 0.611	63.000, -0.074
317	63.200, 0.701	63.200, 0.432	63.200, 0.636	63.200, 0.593	63.200, 0.611	63.200, -0.074
318	63.400, 0.702	63.400, 0.432	63.400, 0.636	63.400, 0.593	63.400, 0.611	63.400, -0.074
319	63.600, 0.702	63.600, 0.431	63.600, 0.636	63.600, 0.593	63.600, 0.611	63.600, -0.074
320	63.800, 0.702	63.800, 0.431	63.800, 0.636	63.800, 0.593	63.800, 0.611	63.800, -0.074
321	64.000, 0.702	64.000, 0.430	64.000, 0.636	64.000, 0.593	64.000, 0.611	64.000, -0.074
322	64.200, 0.703	64.200, 0.430	64.200, 0.636	64.200, 0.593	64.200, 0.611	64.200, -0.073
323	64.400, 0.703	64.400, 0.430	64.400, 0.637	64.400, 0.594	64.400, 0.611	64.400, -0.073
324	64.600, 0.703	64.600, 0.430	64.600, 0.637	64.600, 0.594	64.600, 0.611	64.600, -0.072
325	64.800, 0.704	64.800, 0.429	64.800, 0.638	64.800, 0.594	64.800, 0.610	64.800, -0.072
326	65.000, 0.704	65.000, 0.429	65.000, 0.638	65.000, 0.595	65.000, 0.611	65.000, -0.072
327	65.200, 0.705	65.200, 0.429	65.200, 0.638	65.200, 0.595	65.200, 0.611	65.200, -0.072
328	65.400, 0.705	65.400, 0.429	65.400, 0.639	65.400, 0.595	65.400, 0.611	65.400, -0.072
329	65.600, 0.705	65.600, 0.429	65.600, 0.639	65.600, 0.595	65.600, 0.611	65.600, -0.072
330	65.800, 0.705	65.800, 0.429	65.800, 0.639	65.800, 0.595	65.800, 0.611	65.800, -0.072
331	66.000, 0.705	66.000, 0.429	66.000, 0.639	66.000, 0.595	66.000, 0.612	66.000, -0.072
332	66.200, 0.705	66.200, 0.429	66.200, 0.639	66.200, 0.595	66.200, 0.612	66.200, -0.072
333	66.400, 0.705	66.400, 0.429	66.400, 0.639	66.400, 0.595	66.400, 0.612	66.400, -0.072
334	66.600, 0.705	66.600, 0.429	66.600, 0.638	66.600, 0.596	66.600, 0.612	66.600, -0.072
335	66.800, 0.705	66.800, 0.429	66.800, 0.638	66.800, 0.596	66.800, 0.613	66.800, -0.072
336	67.000, 0.705	67.000, 0.429	67.000, 0.638	67.000, 0.596	67.000, 0.613	67.000, -0.072
337	67.200, 0.706	67.200, 0.429	67.200, 0.637	67.200, 0.596	67.200, 0.613	67.200, -0.072
338	67.400, 0.706	67.400, 0.429	67.400, 0.637	67.400, 0.595	67.400, 0.614	67.400, -0.072
339	67.600, 0.706	67.600, 0.428	67.600, 0.637	67.600, 0.595	67.600, 0.614	67.600, -0.072
340	67.800, 0.706	67.800, 0.428	67.800, 0.637	67.800, 0.595	67.800, 0.615	67.800, -0.072
341	68.000, 0.707	68.000, 0.428	68.000, 0.637	68.000, 0.594	68.000, 0.615	68.000, -0.072
342	68.200, 0.708	68.200, 0.427	68.200, 0.638	68.200, 0.594	68.200, 0.615	68.200, -0.072
343	68.400, 0.708	68.400, 0.426	68.400, 0.638	68.400, 0.594	68.400, 0.615	68.400, -0.072
344	68.600, 0.709	68.600, 0.426	68.600, 0.638	68.600, 0.594	68.600, 0.615	68.600, -0.072
345	68.800, 0.709	68.800, 0.425	68.800, 0.639	68.800, 0.593	68.800, 0.614	68.800, -0.072
346	69.000, 0.709	69.000, 0.425	69.000, 0.639	69.000, 0.593	69.000, 0.614	69.000, -0.072
347	69.200, 0.710	69.200, 0.424	69.200, 0.639	69.200, 0.593	69.200, 0.614	69.200, -0.072
348	69.400, 0.710	69.400, 0.424	69.400, 0.639	69.400, 0.592	69.400, 0.614	69.400, -0.072
349	69.600, 0.710	69.600, 0.424	69.600, 0.639	69.600, 0.593	69.600, 0.614	69.600, -0.072
350	69.800, 0.711	69.800, 0.424	69.800, 0.639	69.800, 0.593	69.800, 0.614	69.800, -0.072
351	70.000, 0.711	70.000, 0.424	70.000, 0.639	70.000, 0.593	70.000, 0.614	70.000, -0.072
352	70.200, 0.711	70.200, 0.424	70.200, 0.639	70.200, 0.594	70.200, 0.614	70.200, -0.072
353	70.400, 0.711	70.400, 0.424	70.400, 0.639	70.400, 0.594	70.400, 0.614	70.400, -0.071
354	70.600, 0.711	70.600, 0.424	70.600, 0.639	70.600, 0.595	70.600, 0.614	70.600, -0.071
355	70.800, 0.711	70.800, 0.424	70.800, 0.639	70.800, 0.595	70.800, 0.613	70.800, -0.071
356	71.000, 0.711	71.000, 0.424	71.000, 0.640	71.000, 0.595	71.000, 0.613	71.000, -0.070
357	71.200, 0.711	71.200, 0.424	71.200, 0.640	71.200, 0.595	71.200, 0.613	71.200, -0.070
358	71.400, 0.711	71.400, 0.424	71.400, 0.640	71.400, 0.596	71.400, 0.614	71.400, -0.070
359	71.600, 0.711	71.600, 0.424	71.600, 0.640	71.600, 0.596	71.600, 0.614	71.600, -0.070
360	71.800, 0.711	71.800, 0.423	71.800, 0.641	71.800, 0.596	71.800, 0.614	71.800, -0.070
361	72.000, 0.711	72.000, 0.423	72.000, 0.641	72.000, 0.596	72.000, 0.614	72.000, -0.070
362	72.200, 0.712	72.200, 0.423	72.200, 0.641	72.200, 0.596	72.200, 0.614	72.200, -0.071
363	72.400, 0.712	72.400, 0.422	72.400, 0.641	72.400, 0.596	72.400, 0.613	72.400, -0.071
364	72.600, 0.712	72.600, 0.422	72.600, 0.641	72.600, 0.596	72.600, 0.613	72.600, -0.071
365	72.800, 0.712	72.800, 0.422	72.800, 0.641	72.800, 0.596	72.800, 0.613	72.800, -0.072
366	73.000, 0.713	73.000, 0.422	73.000, 0.641	73.000, 0.596	73.000, 0.613	73.000, -0.072
367	73.200, 0.713	73.200, 0.422	73.200, 0.641	73.200, 0.596	73.200, 0.613	73.200, -0.072
368	73.400, 0.714	73.400, 0.422	73.400, 0.641	73.400, 0.596	73.400, 0.614	73.400, -0.072
369	73.600, 0.714	73.600, 0.422	73.600, 0.641	73.600, 0.596	73.600, 0.614	73.600, -0.072
370	73.800, 0.715	73.800, 0.421	73.800, 0.640	73.800, 0.596	73.800, 0.614	73.800, -0.072
371	74.000, 0.715	74.000, 0.421	74.000, 0.640	74.000, 0.596	74.000, 0.615	74.000, -0.072
372	74.200, 0.715	74.200, 0.421	74.200, 0.640	74.200, 0.596	74.200, 0.615	74.200, -0.072
373	74.400, 0.714	74.400, 0.421	74.400, 0.640	74.400, 0.596	74.400, 0.615	74.400, -0.072
374	74.600, 0.714	74.600, 0.421	74.600, 0.641	74.600, 0.596	74.600, 0.615	74.600, -0.072
375	74.800, 0.714	74.800, 0.421	74.800, 0.641	74.800, 0.596	74.800, 0.615	74.800, -0.071
376	75.000, 0.714	75.000, 0.421	75.000, 0.641	75.000, 0.596	75.000, 0.615	75.000, -0.071
377	75.200, 0.714	75.200, 0.421	75.200, 0.641	75.200, 0.596	75.200, 0.615	75.200, -0.071
378	75.400, 0.714	75.400, 0.421	75.400, 0.642	75.400, 0.596	75.400, 0.616	75.400, -0.071
379	75.600, 0.714	75.600, 0.421	75.600, 0.642	75.600, 0.596	75.600, 0.616	75.600, -0.072
380	75.800, 0.714	75.800, 0.420	75.800, 0.642	75.800, 0.595	75.800, 0.616	75.800, -0.072
381	76.000, 0.715	76.000, 0.420	76.000, 0.642	76.000, 0.596	76.000, 0.616	76.000, -0.072
382	76.200, 0.715	76.200, 0.420	76.200, 0.642	76.200, 0.596	76.200, 0.616	76.200, -0.072
383	76.400, 0.715	76.400, 0.419	76.400, 0.642	76.400, 0.596	76.400, 0.616	76.400, -0.073
384	76.600, 0.715	76.600, 0.419	76.600, 0.642	76.600, 0.596	76.600, 0.616	76.600, -0.073
385	76.800, 0.715	76.800, 0.419	76.800, 0.642	76.800, 0.596	76.800, 0.616	76.800, -0.073
386	77.000, 0.716	77.000, 0.419	77.000, 0.642	77.000, 0.596	77.000, 0.616	77.000, -0.073
387	77.200, 0.716	77.200, 0.418	77.200, 0.642	77.200, 0.596	77.200, 0.617	77.200, -0.073
388	77.400, 0.716	77.400, 0.418	77.400, 0.642	77.400, 0.596	77.400, 0.617	77.400, -0.072
389	77.600, 0.716	77.600, 0.418	77.600, 0.642	77.600, 0.596	77.600, 0.617	77.600, -0.072
390	77.800, 0.716	77.800, 0.419	77.800, 0.642	77.800, 0.596	77.800, 0.617	77.800, -0.072
391	78.000, 0.716	78.000, 0.419	78.000, 0.641	78.000, 0.596	78.000, 0.617	78.000, -0.072
392	78.200, 0.716	78.200, 0.419	78.200, 0.641	78.200, 0.596	78.200, 0.617	78.200, -0.072
393	78.400, 0.716	78.400, 0.419	78.400, 0.641	78.400, 0.596	78.400, 0.617	78.400, -0.072
394	78.600, 0.716	78.600, 0.419	78.600, 0.641	78.600, 0.597	78.600, 0.617	78.600, -0.072
395	78.800, 0.717	78.800, 0.419	78.800, 0.641	78.800, 0.597	78.800, 0.617	78.800, -0.072
396	79.000, 0.717	79.000, 0.418	79.000, 0.642	79.000, 0.597	79.000, 0.617	79.000, -0.072
397	79.200, 0.718	79.200, 0.418	79.200, 0.642	79.200, 0.597	79.200, 0.617	79.200, -0.073
398	79.400, 0.719	79.400, 0.418	79.400, 0.642	79.400, 0.597	79.400, 0.618	79.400, -0.073
399	79.600, 0.719	79.600, 0.418	79.600, 0.642	79.600, 0.597	79.600, 0.618	79.600, -0.073
400	79.800, 0.719	79.800, 0.418	79.800, 0.643	79.800, 0.597	79.800, 0.618	79.800, -0.073
401	80.000, 0.720	80.000, 0.417	80.000, 0.643	80.000, 0.597	80.000, 0.618	80.000, -0.073
402	80.200, 0.720	80.200, 0.417	80.200, 0.643	80.200, 0.597	80.200, 0.618	80.200, -0.073
403	80.400, 0.720	80.400, 0.416	80.400, 0.644	80.400, 0.597	80.400, 0.618	80.400, -0.073
404	80.600, 0.720	80.600, 0.416	80.600, 0.644	80.600, 0.597	80.600, 0.619	80.600, -0.073
405	80.800, 0.720	80.800, 0.416	80.800, 0.645	80.800, 0.597	80.800, 0.619	80.800, -0.072
406	81.000, 0.720	81.000, 0.416	81.000, 0.645	81.000, 0.597	81.000, 0.618	81.000, -0.072
407	81.200, 0.721	81.200, 0.416	81.200, 0.645	81.200, 0.597	81.200, 0.618	81.200, -0.071
408	81.400, 0.721	81.400, 0.416	81.400, 0.645	81.400, 0.597	81.400, 0.618	81.400, -0.071
409	81.600, 0.721	81.600, 0.416	81.600, 0.645	81.600, 0.597	81.600, 0.617	81.600, -0.070
410	81.800, 0.721	81.800, 0.416	81.800, 0.644	81.800, 0.597	81.800, 0.617	81.800, -0.070
411	82.000, 0.721	82.000, 0.416	82.000, 0.643	82.000, 0.597	82.000, 0.617	82.000, -0.070
412	82.200, 0.721	82.200, 0.416	82.200, 0.643	82.200, 0.597	82.200, 0.617	82.200, -0.070
413	82.400, 0.721	82.400, 0.416	82.400, 0.642	82.400, 0.596	82.400, 0.617	82.400, -0.070
414	82.600, 0.721	82.600, 0.416	82.600, 0.642	82.600, 0.596	82.600, 0.617	82.600, -0.070
415	82.800, 0.721	82.800, 0.416	82.800, 0.642	82.800, 0.596	82.800, 0.617	82.800, -0.070
416	83.000, 0.722	83.000, 0.416	83.000, 0.642	83.000, 0.596	83.000, 0.618	83.000, -0.070
417	83.200, 0.722	83.200, 0.415	83.200, 0.642	83.200, 0.595	83.200, 0.619	83.200, -0.070
418	83.400, 0.722	83.400, 0.415	83.400, 0.642	83.400, 0.595	83.400, 0.619	83.400, -0.071
419	83.600, 0.722	83.600, 0.415	83.600, 0.642	83.600, 0.595	83.600, 0.619	83.600, -0.071
420	83.800, 0.722	83.800, 0.415	83.800, 0.642	83.800, 0.594	83.800, 0.620	83.800, -0.071
421	84.000, 0.722	84.000, 0.415	84.000, 0.642	84.000, 0.594	84.000, 0.620	84.000, -0.071
422	84.200, 0.723	84.200, 0.414	84.200, 0.643	84.200, 0.593	84.200, 0.620	84.200, -0.071
423	84.400, 0.723	84.400, 0.414	84.400, 0.643	84.400, 0.593	84.400, 0.621	84.400, -0.071
424	84.600, 0.723	84.600, 0.413	84.600, 0.644	84.600, 0.593	84.600, 0.620	84.600, -0.071
425	84.800, 0.723	84.800, 0.413	84.800, 0.644	84.800, 0.594	84.800, 0.620	84.800, -0.071
426	85.000, 0.724	85.000, 0.413	85.000, 0.645	85.000, 0.594	85.000, 0.620	85.000, -0.072
427	85.200, 0.724	85.200, 0.413	85.200, 0.646	85.200, 0.595	85.200, 0.620	85.200, -0.071
428	85.400, 0.724	85.400, 0.412	85.400, 0.646	85.400, 0.595	85.400, 0.619	85.400, -0.071
429	85.600, 0.724	85.600, 0.412	85.600, 0.646	85.600, 0.596	85.600, 0.619	85.600, -0.071
430	85.800, 0.724	85.800, 0.412	85.800, 0.646	85.800, 0.596	85.800, 0.619	85.800, -0.071
431	86.000, 0.725	86.000, 0.412	86.000, 0.646	86.000, 0.597	86.000, 0.618	86.000, -0.071
432	86.200, 0.725	86.200, 0.412	86.200, 0.646	86.200, 0.597	86.200, 0.618	86.200, -0.071
433	86.400, 0.725	86.400, 0.412	86.400, 0.647	86.400, 0.597	86.400, 0.618	86.400, -0.070
434	86.600, 0.725	86.600, 0.412	86.600, 0.647	86.600, 0.598	86.600, 0.618	86.600, -0.070
435	86.800, 0.726	86.800, 0.412	86.800, 0.647	86.800, 0.598	86.800, 0.618	86.800, -0.070
436	87.000, 0.726	87.000, 0.412	87.000, 0.647	87.000, 0.598	87.000, 0.619	87.000, -0.070
437	87.200, 0.726	87.200, 0.412	87.200, 0.646	87.200, 0.598	87.200, 0.619	87.200, -0.070
438	87.400, 0.727	87.400, 0.412	87.400, 0.646	87.400, 0.598	87.400, 0.619	87.400, -0.070
439	87.600, 0.727	87.600, 0.411	87.600, 0.646	87.600, 0.598	87.600, 0.619	87.600, -0.070
440	87.800, 0.727	87.800, 0.411	87.800, 0.646	87.800, 0.597	87.800, 0.619	87.800, -0.070
441	88.000, 0.727	88.000, 0.411	88.000, 0.645	88.000, 0.597	88.000, 0.619	88.000, -0.070
442	88.200, 0.727	88.200, 0.410	88.200, 0.646	88.200, 0.596	88.200, 0.620	88.200, -0.070
443	88.400, 0.728	88.400, 0.410	88.400, 0.646	88.400, 0.596	88.400, 0.620	88.400, -0.070
444	88.600, 0.728	88.600, 0.410	88.600, 0.646	88.600, 0.596	88.600, 0.620	88.600, -0.070
445	88.800, 0.728	88.800, 0.410	88.800, 0.646	88.800, 0.596	88.800, 0.620	88.800, -0.070
446	89.000, 0.728	89.000, 0.409	89.000, 0.646	89.000, 0.596	89.000, 0.620	89.000, -0.070
447	89.200, 0.728	89.200, 0.409	89.200, 0.646	89.200, 0.596	89.200, 0.620	89.200, -0.070
448	89.400, 0.728	89.400, 0.409	89.400, 0.645	89.400, 0.596	89.400, 0.620	89.400, -0.070
449	89.600, 0.728	89.600, 0.409	89.600, 0.645	89.600, 0.596	89.600, 0.620	89.600, -0.070
450	89.800, 0.728	89.800, 0.409	89.800, 0.645	89.800, 0.596	89.800, 0.620	89.800, -0.070
451	90.000, 0.728	90.000, 0.409	90.000, 0.645	90.000, 0.596	90.000, 0.620	90.000, -0.070
452	90.200, 0.728	90.200, 0.409	90.200, 0.645	90.200, 0.596	90.200, 0.620	90.200, -0.070
453	90.400, 0.728	90.400, 0.409	90.400, 0.646	90.400, 0.596	90.400, 0.620	90.400, -0.070
454	90.600, 0.728	90.600, 0.409	90.600, 0.646	90.600, 0.597	90.600, 0.621	90.600, -0.071
455	90.800, 0.728	90.800, 0.409	90.800, 0.646	90.800, 0.597	90.800, 0.621	90.800, -0.071
456	91.000, 0.728	91.000, 0.409	91.000, 0.647	91.000, 0.597	91.000, 0.621	91.000, -0.071
457	91.200, 0.728	91.200, 0.408	91.200, 0.647	91.200, 0.597	91.200, 0.621	91.200, -0.071
458	91.400, 0.728	91.400, 0.408	91.400, 0.647	91.400, 0.597	91.400, 0.621	91.400, -0.071
459	91.600, 0.729	91.600, 0.408	91.600, 0.648	91.600, 0.597	91.600, 0.621	91.600, -0.071
460	91.800, 0.729	91.800, 0.408	91.800, 0.648	91.800, 0.597	91.800, 0.621	91.800, -0.071
461	92.000, 0.729	92.000, 0.408	92.000, 0.648	92.000, 0.597	92.000, 0.621	92.000, -0.071
462	92.200, 0.729	92.200, 0.408	92.200, 0.648	92.200, 0.597	92.200, 0.621	92.200, -0.071
463	92.400, 0.730	92.400, 0.408	92.400, 0.648	92.400, 0.597	92.400, 0.621	92.400, -0.071
464	92.600, 0.730	92.600, 0.407	92.600, 0.648	92.600, 0.597	92.600, 0.621	92.600, -0.071
465	92.800, 0.730	92.800, 0.407	92.800, 0.648	92.800, 0.596	92.800, 0.622	92.800, -0.071
466	93.000, 0.730	93.000, 0.407	93.000, 0.648	93.000, 0.596	93.000, 0.622	93.000, -0.071
467	93.200, 0.731	93.200, 0.406	93.200, 0.648	93.200, 0.596	93.200, 0.622	93.200, -0.071
468	93.400, 0.731	93.400, 0.406	93.400, 0.647	93.400, 0.595	93.400, 0.622	93.400, -0.071
469	93.600, 0.731	93.600, 0.406	93.600, 0.647	93.600, 0.595	93.600, 0.622	93.600, -0.071
470	93.800, 0.731	93.800, 0.406	93.800, 0.648	93.800, 0.595	93.800, 0.622	93.800, -0.070
471	94.000, 0.730	94.000, 0.406	94.000, 0.648	94.000, 0.595	94.000, 0.622	94.000, -0.071
472	94.200, 0.730	94.200, 0.405	94.200, 0.648	94.200, 0.595	94.200, 0.622	94.200, -0.071
473	94.400, 0.730	94.400, 0.405	94.400, 0.649	94.400, 0.595	94.400, 0.622	94.400, -0.071
474	94.600, 0.730	94.600, 0.405	94.600, 0.649	94.600, 0.595	94.600, 0.622	94.600, -0.071
475	94.800, 0.730	94.800, 0.405	94.800, 0.649	94.800, 0.595	94.800, 0.622	94.800, -0.071
476	95.000, 0.730	95.000, 0.405	95.000, 0.650	95.000, 0.596	95.000, 0.622	95.000, -0.070
477	95.200, 0.731	95.200, 0.405	95.200, 0.650	95.200, 0.596	95.200, 0.622	95.200, -0.070
478	95.400, 0.731	95.400, 0.405	95.400, 0.650	95.400, 0.596	95.400, 0.622	95.400, -0.070
479	95.600, 0.731	95.600, 0.405	95.600, 0.650	95.600, 0.596	95.600, 0.622	95.600, -0.070
480	95.800, 0.731	95.800, 0.405	95.800, 0.649	95.800, 0.597	95.800, 0.622	95.800, -0.070
481	96.000, 0.731	96.000, 0.405	96.000, 0.649	96.000, 0.597	96.000, 0.622	96.000, -0.070
482	96.200, 0.732	96.200, 0.404	96.200, 0.648	96.200, 0.597	96.200, 0.622	96.200, -0.070
483	96.400, 0.732	96.400, 0.404	96.400, 0.648	96.400, 0.596	96.400, 0.622	96.400, -0.070
484	96.600, 0.732	96.600, 0.404	96.600, 0.648	96.600, 0.596	96.600, 0.622	96.600, -0.070
485	96.800, 0.732	96.800, 0.404	96.800, 0.648	96.800, 0.596	96.800, 0.622	96.800, -0.070
486	97.000, 0.732	97.000, 0.403	97.000, 0.648	97.000, 0.596	97.000, 0.622	97.000, -0.070
487	97.200, 0.732	97.200, 0.403	97.200, 0.648	97.200, 0.596	97.200, 0.622	97.200, -0.069
488	97.400, 0.732	97.400, 0.403	97.400, 0.648	97.400, 0.595	97.400, 0.622	97.400, -0.069
489	97.600, 0.732	97.600, 0.403	97.600, 0.649	97.600, 0.595	97.600, 0.622	97.600, -0.069
490	97.800, 0.732	97.800, 0.403	97.800, 0.649	97.800, 0.595	97.800, 0.622	97.800, -0.069
491	98.000, 0.732	98.000, 0.403	98.000, 0.649	98.000, 0.595	98.000, 0.623	98.000, -0.069
492	98.200, 0.732	98.200, 0.403	98.200, 0.650	98.200, 0.595	98.200, 0.623	98.200, -0.069
493	98.400, 0.733	98.400, 0.403	98.400, 0.650	98.400, 0.595	98.400, 0.623	98.400, -0.069
494	98.600, 0.733	98.600, 0.403	98.600, 0.649	98.600, 0.595	98.600, 0.623	98.600, -0.069
495	98.800, 0.733	98.800, 0.403	98.800, 0.649	98.800, 0.595	98.800, 0.623	98.800, -0.069
496	99.000, 0.733	99.000, 0.403	99.000, 0.649	99.000, 0.595	99.000, 0.623	99.000, -0.069
497	99.200, 0.733	99.200, 0.403	99.200, 0.649	99.200, 0.595	99.200, 0.623	99.200, -0.069
498	99.400, 0.733	99.400, 0.403	99.400, 0.649	99.400, 0.595	99.400, 0.623	99.400, -0.069
499	99.600, 0.733	99.600, 0.403	99.600, 0.649	99.600, 0.594	99.600, 0.623	99.600, -0.068
500	99.800, 0.734	99.800, 0.403	99.800, 0.649	99.800, 0.594	99.800, 0.623	99.800, -0.068
501	100.000, 0.734	100.000, 0.403	100.000, 0.649	100.000, 0.594	100.000, 0.623	100.000, -0.068
502	100.200, 0.734	100.200, 0.402	100.200, 0.649	100.200, 0.594	100.200, 0.623	100.200, -0.068
503	100.400, 0.734	100.400, 0.402	100.400, 0.650	100.400, 0.594	100.400, 0.623	100.400, -0.068
504	100.600, 0.734	100.600, 0.402	100.600, 0.650	100.600, 0.594	100.600, 0.623	100.600, -0.068
505	100.800, 0.734	100.800, 0.401	100.800, 0.650	100.800, 0.594	100.800, 0.623	100.800, -0.068
506	101.000, 0.734	101.000, 0.401	101.000, 0.651	101.000, 0.595	101.000, 0.623	101.000, -0.068
507	101.200, 0.734	101.200, 0.401	101.200, 0.651	101.200, 0.595	101.200, 0.623	101.200, -0.068
508	101.400, 0.734	101.400, 0.400	101.400, 0.652	101.400, 0.595	101.400, 0.624	101.400, -0.068
509	101.600, 0.735	101.600, 0.400	101.600, 0.652	101.600, 0.595	101.600, 0.624	101.600, -0.068
510	101.800, 0.735	101.800, 0.400	101.800, 0.652	101.800, 0.596	101.800, 0.624	101.800, -0.068
511	102.000, 0.735	102.000, 0.400	102.000, 0.652	102.000, 0.596	102.000, 0.624	102.000, -0.069
512	102.200, 0.736	102.200, 0.400	102.200, 0.652	102.200, 0.597	102.200, 0.624	102.200, -0.069
513	102.400, 0.736	102.400, 0.400	102.400, 0.652	102.400, 0.597	102.400, 0.624	102.400, -0.069
514	102.600, 0.736	102.600, 0.400	102.600, 0.651	102.600, 0.597	102.600, 0.624	102.600, -0.069
515	102.800, 0.736	102.800, 0.400	102.800, 0.651	102.800, 0.597	102.800, 0.624	102.800, -0.070
516	103.000, 0.736	103.000, 0.401	103.000, 0.651	103.000, 0.597	103.000, 0.624	103.000, -0.070
517	103.200, 0.737	103.200, 0.401	103.200, 0.651	103.200, 0.597	103.200, 0.624	103.200, -0.070
518	103.400, 0.737	103.400, 0.401	103.400, 0.651	103.400, 0.597	103.400, 0.624	103.400, -0.070
519	103.600, 0.737	103.600, 0.400	103.600, 0.651	103.600, 0.597	103.600, 0.624	103.600, -0.069
520	103.800, 0.737	103.800, 0.400	103.800, 0.651	103.800, 0.597	103.800, 0.623	103.800, -0.069
521	104.000, 0.738	104.000, 0.400	104.000, 0.651	104.000, 0.597	104.000, 0.624	104.000, -0.069
522	104.200, 0.738	104.200, 0.399	104.200, 0.650	104.200, 0.597	104.200, 0.624	104.200, -0.069
523	104.400, 0.738	104.400, 0.399	104.400, 0.650	104.400, 0.598	104.400, 0.624	104.400, -0.069
524	104.600, 0.738	104.600, 0.398	104.600, 0.650	104.600, 0.598	104.600, 0.624	104.600, -0.069
525	104.800, 0.738	104.800, 0.398	104.800, 0.649	104.800, 0.597	104.800, 0.624	104.800, -0.068
526	105.000, 0.738	105.000, 0.398	105.000, 0.649	105.000, 0.597	105.000, 0.624	105.000, -0.068
527	105.200, 0.738	105.200, 0.397	105.200, 0.649	105.200, 0.597	105.200, 0.624	105.200, -0.068
528	105.400, 0.738	105.400, 0.397	105.400, 0.649	105.400, 0.596	105.400, 0.624	105.400, -0.068
529	105.600, 0.737	105.600, 0.396	105.600, 0.649	105.600, 0.596	105.600, 0.624	105.600, -0.068
530	105.800, 0.737	105.800, 0.396	105.800, 0.649	105.800, 0.596	105.800, 0.625	105.800, -0.067
531	106.000, 0.737	106.000, 0.396	106.000, 0.649	106.000, 0.596	106.000, 0.625	106.000, -0.068
532	106.200, 0.737	106.200, 0.396	106.200, 0.649	106.200, 0.596	106.200, 0.625	106.200, -0.068
533	106.400, 0.736	106.400, 0.396	106.400, 0.650	106.400, 0.595	106.400, 0.625	106.400, -0.068
534	106.600, 0.736	106.600, 0.396	106.600, 0.650	106.600, 0.595	106.600, 0.625	106.600, -0.068
535	106.800, 0.736	106.800, 0.397	106.800, 0.651	106.800, 0.594	106.800, 0.625	106.800, -0.068
536	107.000, 0.736	107.000, 0.397	107.000, 0.651	107.000, 0.594	107.000, 0.625	107.000, -0.068
537	107.200, 0.737	107.200, 0.397	107.200, 0.651	107.200, 0.594	107.200, 0.625	107.200, -0.068
538	107.400, 0.737	107.400, 0.398	107.400, 0.651	107.400, 0.594	107.400, 0.625	107.400, -0.069
539	107.600, 0.737	107.600, 0.398	107.600, 0.652	107.600, 0.594	107.600, 0.626	107.600, -0.069
540	107.800, 0.738	107.800, 0.397	107.800, 0.652	107.800, 0.595	107.800, 0.626	107.800, -0.069
541	108.000, 0.738	108.000, 0.397	108.000, 0.652	108.000, 0.595	108.000, 0.626	108.000, -0.069
542	108.200, 0.739	108.200, 0.397	108.200, 0.652	108.200, 0.595	108.200, 0.626	108.200, -0.069
543	108.400, 0.739	108.400, 0.397	108.400, 0.652	108.400, 0.596	108.400, 0.626	108.400, -0.069
544	108.600, 0.739	108.600, 0.398	108.600, 0.652	108.600, 0.596	108.600, 0.626	108.600, -0.069
545	108.800, 0.739	108.800, 0.398	108.800, 0.652	108.800, 0.596	108.800, 0.626	108.800, -0.068
546	109.000, 0.740	109.000, 0.397	109.000, 0.652	109.000, 0.596	109.000, 0.626	109.000, -0.068
547	109.200, 0.740	109.200, 0.397	109.200, 0.652	109.200, 0.596	109.200, 0.625	109.200, -0.068
548	109.400, 0.740	109.400, 0.397	109.400, 0.651	109.400, 0.596	109.400, 0.625	109.400, -0.068
549	109.600, 0.740	109.600, 0.397	109.600, 0.651	109.600, 0.596	109.600, 0.625	109.600, -0.068
550	109.800, 0.740	109.800, 0.397	109.800, 0.651	109.800, 0.596	109.800, 0.625	109.800, -0.067
551	110.000, 0.740	110.000, 0.397	110.000, 0.652	110.000, 0.596	110.000, 0.625	110.000, -0.067
552	110.200, 0.740	110.200, 0.398	110.200, 0.652	110.200, 0.596	110.200, 0.625	110.200, -0.067
553	110.400, 0.740	110.400, 0.397	110.400, 0.652	110.400, 0.596	110.400, 0.625	110.400, -0.067
554	110.600, 0.740	110.600, 0.397	110.600, 0.652	110.600, 0.597	110.600, 0.625	110.600, -0.067
555	110.800, 0.740	110.800, 0.397	110.800, 0.652	110.800, 0.597	110.800, 0.625	110.800, -0.067
556	111.000, 0.740	111.000, 0.397	111.000, 0.652	111.000, 0.597	111.000, 0.626	111.000, -0.066
557	111.200, 0.740	111.200, 0.396	111.200, 0.652	111.200, 0.597	111.200, 0.626	111.200, -0.066
558	111.400, 0.740	111.400, 0.396	111.400, 0.652	111.400, 0.597	111.400, 0.626	111.400, -0.067
559	111.600, 0.740	111.600, 0.395	111.600, 0.652	111.600, 0.597	111.600, 0.626	111.600, -0.067
560	111.800, 0.740	111.800, 0.394	111.800, 0.652	111.800, 0.597	111.800, 0.627	111.800, -0.067
561	112.000, 0.740	112.000, 0.394	112.000, 0.652	112.000, 0.597	112.000, 0.627	112.000, -0.066
562	112.200, 0.740	112.200, 0.394	112.200, 0.651	112.200, 0.597	112.200, 0.627	112.200, -0.066
563	112.400, 0.740	112.400, 0.393	112.400, 0.651	112.400, 0.598	112.400, 0.627	112.400, -0.066
564	112.600, 0.740	112.600, 0.393	112.600, 0.651	112.600, 0.598	112.600, 0.628	112.600, -0.066
565	112.800, 0.740	112.800, 0.393	112.800, 0.651	112.800, 0.598	112.800, 0.628	112.800, -0.066
566	113.000, 0.741	113.000, 0.393	113.000, 0.651	113.000, 0.598	113.000, 0.628	113.000, -0.066
567	113.200, 0.741	113.200, 0.394	113.200, 0.650	113.200, 0.597	113.200, 0.628	113.200, -0.066
568	113.400, 0.742	113.400, 0.394	113.400, 0.650	113.400, 0.597	113.400, 0.628	113.400, -0.065
569	113.600, 0.742	113.600, 0.394	113.600, 0.650	113.600, 0.597	113.600, 0.628	113.600, -0.065
570	113.800, 0.742	113.800, 0.395	113.800, 0.650	113.800, 0.597	113.800, 0.628	113.800, -0.065
571	114.000, 0.742	114.000, 0.395	114.000, 0.650	114.000, 0.597	114.000, 0.628	114.000, -0.065
572	114.200, 0.742	114.200, 0.395	114.200, 0.650	114.200, 0.597	114.200, 0.627	114.200, -0.065
573	114.400, 0.742	114.400, 0.395	114.400, 0.651	114.400, 0.597	114.400, 0.627	114.400, -0.065
574	114.600, 0.742	114.600, 0.395	114.600, 0.651	114.600, 0.597	114.600, 0.627	114.600, -0.065
575	114.800, 0.741	114.800, 0.395	114.800, 0.651	114.800, 0.597	114.800, 0.626	114.800, -0.065
576	115.000, 0.741	115.000, 0.395	115.000, 0.651	115.000, 0.596	115.000, 0.626	115.000, -0.065
577	115.200, 0.742	115.200, 0.395	115.200, 0.651	115.200, 0.596	115.200, 0.626	115.200, -0.065
578	115.400, 0.742	115.400, 0.395	115.400, 0.652	115.400, 0.596	115.400, 0.626	115.400, -0.065
579	115.600, 0.742	115.600, 0.394	115.600, 0.652	115.600, 0.596	115.600, 0.625	115.600, -0.065
580	115.800, 0.742	115.800, 0.394	115.800, 0.652	115.800, 0.596	115.800, 0.625	115.800, -0.064
581	116.000, 0.742	116.000, 0.394	116.000, 0.652	116.000, 0.596	116.000, 0.625	116.000, -0.064
582	116.200, 0.742	116.200, 0.394	116.200, 0.653	116.200, 0.596	116.200, 0.625	116.200, -0.063
583	116.400, 0.743	116.400, 0.394	116.400, 0.653	116.400, 0.596	116.400, 0.625	116.400, -0.063
584	116.600, 0.743	116.600, 0.394	116.600, 0.653	116.600, 0.596	116.600, 0.625	116.600, -0.063
585	116.800, 0.743	116.800, 0.394	116.800, 0.653	116.800, 0.596	116.800, 0.625	116.800, -0.063
586	117.000, 0.744	117.000, 0.394	117.000, 0.653	117.000, 0.596	117.000, 0.625	117.000, -0.063
587	117.200, 0.744	117.200, 0.394	117.200, 0.653	117.200, 0.596	117.200, 0.625	117.200, -0.063
588	117.400, 0.744	117.400, 0.394	117.400, 0.652	117.400, 0.595	117.400, 0.625	117.400, -0.063
589	117.600, 0.744	117.600, 0.394	117.600, 0.652	117.600, 0.595	117.600, 0.625	117.600, -0.063
590	117.800, 0.744	117.800, 0.394	117.800, 0.652	117.800, 0.595	117.800, 0.625	117.800, -0.064
591	118.000, 0.744	118.000, 0.393	118.000, 0.652	118.000, 0.595	118.000, 0.625	118.000, -0.064
592	118.200, 0.744	118.200, 0.393	118.200, 0.652	118.200, 0.595	118.200, 0.625	118.200, -0.065
593	118.400, 0.743	118.400, 0.392	118.400, 0.652	118.400, 0.595	118.400, 0.625	118.400, -0.065
594	118.600, 0.743	118.600, 0.392	118.600, 0.652	118.600, 0.595	118.600, 0.625	118.600, -0.065
595	118.800, 0.743	118.800, 0.391	118.800, 0.652	118.800, 0.595	118.800, 0.625	118.800, -0.065
596	119.000, 0.743	119.000, 0.391	119.000, 0.652	119.000, 0.596	119.000, 0.625	119.000, -0.065
597	119.200, 0.744	119.200, 0.391	119.200, 0.652	119.200, 0.596	119.200, 0.625	119.200, -0.065
598	119.400, 0.744	119.400, 0.390	119.400, 0.653	119.400, 0.596	119.400, 0.626	119.400, -0.065
599	119.600, 0.744	119.600, 0.390	119.600, 0.653	119.600, 0.596	119.600, 0.626	119.600, -0.064
600	119.800, 0.744	119.800, 0.390	119.800, 0.653	119.800, 0.596	119.800, 0.627	119.800, -0.064
601	120.000, 0.745	120.000, 0.390	120.000, 0.653	120.000, 0.596	120.000, 0.627	120.000, -0.064
602	120.200, 0.745	120.200, 0.390	120.200, 0.653	120.200, 0.596	120.200, 0.627	120.200, -0.063
603	120.400, 0.745	120.400, 0.391	120.400, 0.653	120.400, 0.596	120.400, 0.628	120.400, -0.064
604	120.600, 0.745	120.600, 0.391	120.600, 0.652	120.600, 0.596	120.600, 0.628	120.600, -0.064
605	120.800, 0.745	120.800, 0.391	120.800, 0.652	120.800, 0.595	120.800, 0.628	120.800, -0.064
606	121.000, 0.745	121.000, 0.391	121.000, 0.653	121.000, 0.595	121.000, 0.628	121.000, -0.063
607	121.200, 0.746	121.200, 0.392	121.200, 0.653	121.200, 0.595	121.200, 0.628	121.200, -0.064
608	121.400, 0.746	121.400, 0.392	121.400, 0.653	121.400, 0.594	121.400, 0.627	121.400, -0.063
609	121.600, 0.746	121.600, 0.393	121.600, 0.653	121.600, 0.594	121.600, 0.627	121.600, -0.063
610	121.800, 0.746	121.800, 0.393	121.800, 0.653	121.800, 0.594	121.800, 0.627	121.800, -0.063
611	122.000, 0.746	122.000, 0.393	122.000, 0.653	122.000, 0.594	122.000, 0.626	122.000, -0.063
612	122.200, 0.746	122.200, 0.393	122.200, 0.654	122.200, 0.594	122.200, 0.626	122.200, -0.063
613	122.400, 0.745	122.400, 0.392	122.400, 0.654	122.400, 0.595	122.400, 0.626	122.400, -0.063
614	122.600, 0.745	122.600, 0.392	122.600, 0.654	122.600, 0.595	122.600, 0.626	122.600, -0.063
615	122.800, 0.745	122.800, 0.392	122.800, 0.654	122.800, 0.595	122.800, 0.626	122.800, -0.063
616	123.000, 0.745	123.000, 0.391	123.000, 0.654	123.000, 0.596	123.000, 0.626	123.000, -0.063
617	123.200, 0.745	123.200, 0.391	123.200, 0.654	123.200, 0.596	123.200, 0.626	123.200, -0.063
618	123.400, 0.745	123.400, 0.390	123.400, 0.654	123.400, 0.596	123.400, 0.626	123.400, -0.062
619	123.600, 0.745	123.600, 0.390	123.600, 0.654	123.600, 0.596	123.600, 0.626	123.600, -0.063
620	123.800, 0.745	123.800, 0.389	123.800, 0.654	123.800, 0.595	123.800, 0.626	123.800, -0.063
621	124.000, 0.745	124.000, 0.388	124.000, 0.654	124.000, 0.595	124.000, 0.626	124.000, -0.062
622	124.200, 0.746	124.200, 0.387	124.200, 0.654	124.200, 0.595	124.200, 0.626	124.200, -0.063
623	124.400, 0.746	124.400, 0.387	124.400, 0.654	124.400, 0.594	124.400, 0.626	124.400, -0.063
624	124.600, 0.746	124.600, 0.386	124.600, 0.654	124.600, 0.594	124.600, 0.626	124.600, -0.062
625	124.800, 0.746	124.800, 0.386	124.800, 0.654	124.800, 0.594	124.800, 0.626	124.800, -0.062
626	125.000, 0.746	125.000, 0.386	125.000, 0.653	125.000, 0.594	125.000, 0.626	125.000, -0.062
627	125.200, 0.747	125.200, 0.386	125.200, 0.653	125.200, 0.594	125.200, 0.626	125.200, -0.062
628	125.400, 0.747	125.400, 0.386	125.400, 0.653	125.400, 0.593	125.400, 0.626	125.400, -0.062
629	125.600, 0.747	125.600, 0.386	125.600, 0.653	125.600, 0.593	125.600, 0.626	125.600, -0.062
630	125.800, 0.747	125.800, 0.386	125.800, 0.653	125.800, 0.594	125.800, 0.626	125.800, -0.062
631	126.000, 0.747	126.000, 0.386	126.000, 0.653	126.000, 0.594	126.000, 0.626	126.000, -0.062
632	126.200, 0.747	126.200, 0.386	126.200, 0.653	126.200, 0.594	126.200, 0.626	126.200, -0.062
633	126.400, 0.747	126.400, 0.386	126.400, 0.654	126.400, 0.594	126.400, 0.626	126.400, -0.062
634	126.600, 0.747	126.600, 0.386	126.600, 0.654	126.600, 0.595	126.600, 0.627	126.600, -0.062
635	126.800, 0.747	126.800, 0.386	126.800, 0.654	126.800, 0.595	126.800, 0.627	126.800, -0.062
636	127.000, 0.747	127.000, 0.386	127.000, 0.654	127.000, 0.595	127.000, 0.627	127.000, -0.062
637	127.200, 0.747	127.200, 0.386	127.200, 0.654	127.200, 0.595	127.200, 0.627	127.200, -0.062
638	127.400, 0.747	127.400, 0.386	127.400, 0.654	127.400, 0.594	127.400, 0.627	127.400, -0.062
639	127.600, 0.747	127.600, 0.385	127.600, 0.654	127.600, 0.594	127.600, 0.626	127.600, -0.062
640	127.800, 0.747	127.800, 0.385	127.800, 0.654	127.800, 0.594	127.800, 0.626	127.800, -0.062
641	128.000, 0.747	128.000, 0.385	128.000, 0.655	128.000, 0.594	128.000, 0.626	128.000, -0.062
642	128.200, 0.747	128.200, 0.385	128.200, 0.654	128.200, 0.594	128.200, 0.627	128.200, -0.062
643	128.400, 0.746	128.400, 0.385	128.400, 0.654	128.400, 0.595	128.400, 0.627	128.400, -0.061
644	128.600, 0.746	128.600, 0.385	128.600, 0.654	128.600, 0.595	128.600, 0.627	128.600, -0.061
645	128.800, 0.747	128.800, 0.386	128.800, 0.654	128.800, 0.595	128.800, 0.627	128.800, -0.061
646	129.000, 0.747	129.000, 0.386	129.000, 0.653	129.000, 0.595	129.000, 0.626	129.000, -0.062
647	129.200, 0.747	129.200, 0.387	129.200, 0.653	129.200, 0.596	129.200, 0.626	129.200, -0.062
648	129.400, 0.747	129.400, 0.387	129.400, 0.653	129.400, 0.596	129.400, 0.626	129.400, -0.062
649	129.600, 0.747	129.600, 0.387	129.600, 0.653	129.600, 0.596	129.600, 0.626	129.600, -0.062
650	129.800, 0.747	129.800, 0.387	129.800, 0.653	129.800, 0.596	129.800, 0.627	129.800, -0.062
651	130.000, 0.747	130.000, 0.387	130.000, 0.653	130.000, 0.596	130.000, 0.627	130.000, -0.062
652	130.200, 0.748	130.200, 0.387	130.200, 0.653	130.200, 0.596	130.200, 0.627	130.200, -0.061
653	130.400, 0.748	130.400, 0.387	130.400, 0.653	130.400, 0.596	130.400, 0.627	130.400, -0.061
654	130.600, 0.748	130.600, 0.387	130.600, 0.653	130.600, 0.596	130.600, 0.627	130.600, -0.061
655	130.800, 0.749	130.800, 0.387	130.800, 0.653	130.800, 0.596	130.800, 0.627	130.800, -0.061
656	131.000, 0.749	131.000, 0.387	131.000, 0.654	131.000, 0.596	131.000, 0.627	131.000, -0.061
657	131.200, 0.749	131.200, 0.387	131.200, 0.654	131.200, 0.595	131.200, 0.627	131.200, -0.061
658	131.400, 0.748	131.400, 0.386	131.400, 0.654	131.400, 0.595	131.400, 0.627	131.400, -0.061
659	131.600, 0.748	131.600, 0.386	131.600, 0.655	131.600, 0.594	131.600, 0.627	131.600, -0.061
660	131.800, 0.748	131.800, 0.386	131.800, 0.655	131.800, 0.594	131.800, 0.627	131.800, -0.061
661	132.000, 0.747	132.000, 0.385	132.000, 0.655	132.000, 0.594	132.000, 0.627	132.000, -0.061
662	132.200, 0.747	132.200, 0.385	132.200, 0.655	132.200, 0.594	132.200, 0.628	132.200, -0.061
663	132.400, 0.747	132.400, 0.385	132.400, 0.655	132.400, 0.593	132.400, 0.628	132.400, -0.061
664	132.600, 0.747	132.600, 0.384	132.600, 0.655	132.600, 0.593	132.600, 0.628	132.600, -0.061
665	132.800, 0.747	132.800, 0.384	132.800, 0.655	132.800, 0.593	132.800, 0.628	132.800, -0.061
666	133.000, 0.747	133.000, 0.383	133.000, 0.655	133.000, 0.593	133.000, 0.627	133.000, -0.061
667	133.200, 0.747	133.200, 0.383	133.200, 0.654	133.200, 0.594	133.200, 0.627	133.200, -0.061
668	133.400, 0.747	133.400, 0.383	133.400, 0.654	133.400, 0.594	133.400, 0.627	133.400, -0.061
669	133.600, 0.747	133.600, 0.382	133.600, 0.654	133.600, 0.594	133.600, 0.627	133.600, -0.061
670	133.800, 0.747	133.800, 0.382	133.800, 0.654	133.800, 0.594	133.800, 0.627	133.800, -0.061
671	134.000, 0.747	134.000, 0.382	134.000, 0.654	134.000, 0.595	134.000, 0.627	134.000, -0.061
672	134.200, 0.747	134.200, 0.382	134.200, 0.654	134.200, 0.595	134.200, 0.627	134.200, -0.060
673	134.400, 0.747	134.400, 0.382	134.400, 0.653	134.400, 0.595	134.400, 0.627	134.400, -0.060
674	134.600, 0.747	134.600, 0.382	134.600, 0.653	134.600, 0.595	134.600, 0.627	134.600, -0.060
675	134.800, 0.747	134.800, 0.382	134.800, 0.653	134.800, 0.595	134.800, 0.627	134.800, -0.060
676	135.000, 0.747	135.000, 0.382	135.000, 0.653	135.000, 0.595	135.000, 0.627	135.000, -0.059
677	135.200, 0.747	135.200, 0.383	135.200, 0.653	135.200, 0.595	135.200, 0.627	135.200, -0.059
678	135.400, 0.747	135.400, 0.383	135.400, 0.653	135.400, 0.594	135.400, 0.627	135.400, -0.059
679	135.600, 0.748	135.600, 0.382	135.600, 0.653	135.600, 0.594	135.600, 0.627	135.600, -0.058
680	135.800, 0.748	135.800, 0.382	135.800, 0.653	135.800, 0.594	135.800, 0.627	135.800, -0.058
681	136.000, 0.748	136.000, 0.382	136.000, 0.653	136.000, 0.594	136.000, 0.627	136.000, -0.058
682	136.200, 0.749	136.200, 0.382	136.200, 0.653	136.200, 0.594	136.200, 0.627	136.200, -0.058
683	136.400, 0.749	136.400, 0.382	136.400, 0.653	136.400, 0.593	136.400, 0.626	136.400, -0.058
684	136.600, 0.749	136.600, 0.382	136.600, 0.653	136.600, 0.594	136.600, 0.626	136.600, -0.058
685	136.800, 0.749	136.800, 0.382	136.800, 0.653	136.800, 0.594	136.800, 0.626	136.800, -0.058
686	137.000, 0.749	137.000, 0.382	137.000, 0.653	137.000, 0.594	137.000, 0.626	137.000, -0.058
687	137.200, 0.749	137.200, 0.382	137.200, 0.654	137.200, 0.594	137.200, 0.626	137.200, -0.058
688	137.400, 0.749	137.400, 0.382	137.400, 0.654	137.400, 0.594	137.400, 0.626	137.400, -0.058
689	137.600, 0.749	137.600, 0.382	137.600, 0.655	137.600, 0.594	137.600, 0.626	137.600, -0.058
690	137.800, 0.749	137.800, 0.382	137.800, 0.655	137.800, 0.594	137.800, 0.626	137.800, -0.059
691	138.000, 0.749	138.000, 0.382	138.000, 0.655	138.000, 0.593	138.000, 0.626	138.000, -0.059
692	138.200, 0.749	138.200, 0.382	138.200, 0.655	138.200, 0.593	138.200, 0.626	138.200, -0.059
693	138.400, 0.749	138.400, 0.382	138.400, 0.655	138.400, 0.593	138.400, 0.626	138.400, -0.059
694	138.600, 0.749	138.600, 0.382	138.600, 0.656	138.600, 0.594	138.600, 0.626	138.600, -0.059
695	138.800, 0.750	138.800, 0.382	138.800, 0.656	138.800, 0.594	138.800, 0.626	138.800, -0.059
696	139.000, 0.749	139.000, 0.381	139.000, 0.655	139.000, 0.594	139.000, 0.625	139.000, -0.059
697	139.200, 0.750	139.200, 0.381	139.200, 0.655	139.200, 0.594	139.200, 0.625	139.200, -0.059
698	139.400, 0.750	139.400, 0.381	139.400, 0.655	139.400, 0.594	139.400, 0.625	139.400, -0.059
699	139.600, 0.750	139.600, 0.380	139.600, 0.654	139.600, 0.594	139.600, 0.624	139.600, -0.059
700	139.800, 0.750	139.800, 0.380	139.800, 0.654	139.800, 0.595	139.800, 0.624	139.800, -0.059
701	140.000, 0.750	140.000, 0.379	140.000, 0.653	140.000, 0.594	140.000, 0.625	140.000, -0.059
702	140.200, 0.750	140.200, 0.379	140.200, 0.653	140.200, 0.594	140.200, 0.625	140.200, -0.059
703	140.400, 0.750	140.400, 0.379	140.400, 0.652	140.400, 0.594	140.400, 0.625	140.400, -0.060
704	140.600, 0.750	140.600, 0.378	140.600, 0.652	140.600, 0.594	140.600, 0.625	140.600, -0.060
705	140.800, 0.750	140.800, 0.378	140.800, 0.652	140.800, 0.594	140.800, 0.626	140.800, -0.060
706	141.000, 0.751	141.000, 0.378	141.000, 0.652	141.000, 0.594	141.000, 0.626	141.000, -0.060
707	141.200, 0.751	141.200, 0.378	141.200, 0.652	141.200, 0.594	141.200, 0.627	141.200, -0.060
708	141.400, 0.751	141.400, 0.378	141.400, 0.653	141.400, 0.594	141.400, 0.627	141.400, -0.059
709	141.600, 0.751	141.600, 0.378	141.600, 0.653	141.600, 0.593	141.600, 0.627	141.600, -0.059
710	141.800, 0.751	141.800, 0.377	141.800, 0.653	141.800, 0.593	141.800, 0.627	141.800, -0.059
711	142.000, 0.751	142.000, 0.377	142.000, 0.653	142.000, 0.593	142.000, 0.627	142.000, -0.059
712	142.200, 0.751	142.200, 0.377	142.200, 0.653	142.200, 0.593	142.200, 0.627	142.200, -0.059
713	142.400, 0.751	142.400, 0.377	142.400, 0.654	142.400, 0.593	142.400, 0.627	142.400, -0.059
714	142.600, 0.751	142.600, 0.377	142.600, 0.654	142.600, 0.593	142.600, 0.627	142.600, -0.058
715	142.800, 0.751	142.800, 0.377	142.800, 0.654	142.800, 0.593	142.800, 0.627	142.800, -0.058
716	143.000, 0.751	143.000, 0.377	143.000, 0.654	143.000, 0.593	143.000, 0.627	143.000, -0.058
717	143.200, 0.751	143.200, 0.377	143.200, 0.654	143.200, 0.593	143.200, 0.627	143.200, -0.057
718	143.400, 0.751	143.400, 0.377	143.400, 0.653	143.400, 0.593	143.400, 0.627	143.400, -0.057
719	143.600, 0.751	143.600, 0.377	143.600, 0.653	143.600, 0.593	143.600, 0.627	143.600, -0.057
720	143.800, 0.751	143.800, 0.377	143.800, 0.653	143.800, 0.593	143.800, 0.627	143.800, -0.057
721	144.000, 0.751	144.000, 0.377	144.000, 0.652	144.000, 0.593	144.000, 0.627	144.000, -0.057
722	144.200, 0.751	144.200, 0.377	144.200, 0.652	144.200, 0.593	144.200, 0.627	144.200, -0.057
723	144.400, 0.752	144.400, 0.377	144.400, 0.651	144.400, 0.593	144.400, 0.627	144.400, -0.057
724	144.600, 0.752	144.600, 0.377	144.600, 0.651	144.600, 0.593	144.600, 0.627	144.600, -0.057
725	144.800, 0.752	144.800, 0.377	144.800, 0.651	144.800, 0.593	144.800, 0.628	144.800, -0.057
726	145.000, 0.752	145.000, 0.377	145.000, 0.651	145.000, 0.593	145.000, 0.628	145.000, -0.057
727	145.200, 0.751	145.200, 0.377	145.200, 0.651	145.200, 0.594	145.200, 0.628	145.200, -0.057
728	145.400, 0.751	145.400, 0.377	145.400, 0.651	145.400, 0.594	145.400, 0.628	145.400, -0.057
729	145.600, 0.751	145.600, 0.376	145.600, 0.652	145.600, 0.594	145.600, 0.628	145.600, -0.057
730	145.800, 0.751	145.800, 0.376	145.800, 0.652	145.800, 0.594	145.800, 0.628	145.800, -0.057
731	146.000, 0.751	146.000, 0.375	146.000, 0.652	146.000, 0.594	146.000, 0.628	146.000, -0.057
732	146.200, 0.752	146.200, 0.375	146.200, 0.653	146.200, 0.593	146.200, 0.628	146.200, -0.057
733	146.400, 0.752	146.400, 0.374	146.400, 0.653	146.400, 0.593	146.400, 0.628	146.400, -0.057
734	146.600, 0.752	146.600, 0.374	146.600, 0.654	146.600, 0.593	146.600, 0.628	146.600, -0.057
735	146.800, 0.752	146.800, 0.373	146.800, 0.654	146.800, 0.592	146.800, 0.628	146.800, -0.056
736	147.000, 0.752	147.000, 0.373	147.000, 0.654	147.000, 0.592	147.000, 0.627	147.000, -0.056
737	147.200, 0.752	147.200, 0.372	147.200, 0.655	147.200, 0.592	147.200, 0.627	147.200, -0.056
738	147.400, 0.752	147.400, 0.372	147.400, 0.655	147.400, 0.592	147.400, 0.627	147.400, -0.056
739	147.600, 0.752	147.600, 0.371	147.600, 0.655	147.600, 0.593	147.600, 0.627	147.600, -0.056
740	147.800, 0.752	147.800, 0.371	147.800, 0.655	147.800, 0.593	147.800, 0.626	147.800, -0.056
741	148.000, 0.752	148.000, 0.371	148.000, 0.655	148.000, 0.593	148.000, 0.626	148.000, -0.056
742	148.200, 0.752	148.200, 0.371	148.200, 0.655	148.200, 0.593	148.200, 0.626	148.200, -0.056
743	148.400, 0.752	148.400, 0.371	148.400, 0.655	148.400, 0.593	148.400, 0.626	148.400, -0.057
744	148.600, 0.752	148.600, 0.371	148.600, 0.655	148.600, 0.593	148.600, 0.626	148.600, -0.057
745	148.800, 0.752	148.800, 0.371	148.800, 0.654	148.800, 0.593	148.800, 0.626	148.800, -0.057
746	149.000, 0.752	149.000, 0.371	149.000, 0.654	149.000, 0.594	149.000, 0.626	149.000, -0.057
747	149.200, 0.752	149.200, 0.371	149.200, 0.654	149.200, 0.594	149.200, 0.626	149.200, -0.057
748	149.400, 0.752	149.400, 0.371	149.400, 0.654	149.400, 0.594	149.400, 0.626	149.400, -0.058
749	149.600, 0.752	149.600, 0.371	149.600, 0.654	149.600, 0.594	149.600, 0.626	149.600, -0.058
750	149.800, 0.752	149.800, 0.371	149.800, 0.654	149.800, 0.594	149.800, 0.627	149.800, -0.058
751	150.000, 0.752	150.000, 0.371	150.000, 0.654	150.000, 0.594	150.000, 0.627	150.000, -0.058
752	150.200, 0.743	150.200, 0.369	150.200, 0.647	150.200, 0.588	150.200, 0.620	150.200, -0.058
753	150.400, 0.733	150.400, 0.366	150.400, 0.639	150.400, 0.580	150.400, 0.613	150.400, -0.058
754	150.600, 0.722	150.600, 0.363	150.600, 0.630	150.600, 0.572	150.600, 0.604	150.600, -0.058
755	150.800, 0.710	150.800, 0.360	150.800, 0.621	150.800, 0.564	150.800, 0.595	150.800, -0.057
756	151.000, 0.697	151.000, 0.357	151.000, 0.610	151.000, 0.554	151.000, 0.585	151.000, -0.057
757	151.200, 0.685	151.200, 0.354	151.200, 0.600	151.200, 0.545	151.200, 0.575	151.200, -0.056
758	151.400, 0.672	151.400, 0.350	151.400, 0.589	151.400, 0.535	151.400, 0.564	151.400, -0.056
759	151.600, 0.660	151.600, 0.347	151.600, 0.578	151.600, 0.525	151.600, 0.554	151.600, -0.056
760	151.800, 0.649	151.800, 0.344	151.800, 0.567	151.800, 0.515	151.800, 0.545	151.800, -0.055
761	152.000, 0.639	152.000, 0.342	152.000, 0.558	152.000, 0.506	152.000, 0.536	152.000, -0.055
762	152.200, 0.631	152.200, 0.339	152.200, 0.549	152.200, 0.499	152.200, 0.529	152.200, -0.055
763	152.400, 0.623	152.400, 0.337	152.400, 0.542	152.400, 0.492	152.400, 0.522	152.400, -0.055
764	152.600, 0.616	152.600, 0.335	152.600, 0.534	152.600, 0.485	152.600, 0.516	152.600, -0.054
765	152.800, 0.609	152.800, 0.333	152.800, 0.528	152.800, 0.479	152.800, 0.510	152.800, -0.054
766	153.000, 0.603	153.000, 0.331	153.000, 0.521	153.000, 0.473	153.000, 0.504	153.000, -0.054
767	153.200, 0.597	153.200, 0.329	153.200, 0.515	153.200, 0.467	153.200, 0.498	153.200, -0.054
768	153.400, 0.592	153.400, 0.328	153.400, 0.509	153.400, 0.462	153.400, 0.493	153.400, -0.053
769	153.600, 0.586	153.600, 0.326	153.600, 0.504	153.600, 0.456	153.600, 0.488	153.600, -0.053
770	153.800, 0.580	153.800, 0.324	153.800, 0.499	153.800, 0.451	153.800, 0.484	153.800, -0.053
771	154.000, 0.575	154.000, 0.323	154.000, 0.494	154.000, 0.447	154.000, 0.479	154.000, -0.053
772	154.200, 0.570	154.200, 0.321	154.200, 0.489	154.200, 0.442	154.200, 0.475	154.200, -0.052
773	154.400, 0.565	154.400, 0.320	154.400, 0.485	154.400, 0.438	154.400, 0.472	154.400, -0.052
774	154.600, 0.561	154.600, 0.318	154.600, 0.481	154.600, 0.434	154.600, 0.468	154.600, -0.052
775	154.800, 0.557	154.800, 0.316	154.800, 0.477	154.800, 0.430	154.800, 0.464	154.800, -0.052
776	155.000, 0.553	155.000, 0.315	155.000, 0.473	155.000, 0.427	155.000, 0.461	155.000, -0.052
777	155.200, 0.549	155.200, 0.313	155.200, 0.469	155.200, 0.423	155.200, 0.457	155.200, -0.051
778	155.400, 0.545	155.400, 0.312	155.400, 0.465	155.400, 0.420	155.400, 0.454	155.400, -0.051
779	155.600, 0.542	155.600, 0.310	155.600, 0.462	155.600, 0.416	155.600, 0.451	155.600, -0.051
780	155.800, 0.539	155.800, 0.309	155.800, 0.458	155.800, 0.413	155.800, 0.448	155.800, -0.051
781	156.000, 0.536	156.000, 0.308	156.000, 0.455	156.000, 0.410	156.000, 0.445	156.000, -0.051
782	156.200, 0.533	156.200, 0.306	156.200, 0.452	156.200, 0.408	156.200, 0.442	156.200, -0.051
783	156.400, 0.530	156.400, 0.305	156.400, 0.449	156.400, 0.405	156.400, 0.440	156.400, -0.051
784	156.600, 0.527	156.600, 0.304	156.600, 0.446	156.600, 0.402	156.600, 0.437	156.600, -0.051
785	156.800, 0.524	156.800, 0.303	156.800, 0.444	156.800, 0.399	156.800, 0.434	156.800, -0.050
786	157.000, 0.522	157.000, 0.302	157.000, 0.441	157.000, 0.397	157.000, 0.431	157.000, -0.050
787	157.200, 0.519	157.200, 0.301	157.200, 0.439	157.200, 0.394	157.200, 0.429	157.200, -0.050
788	157.400, 0.516	157.400, 0.300	157.400, 0.436	157.400, 0.392	157.400, 0.426	157.400, -0.050
789	157.600, 0.514	157.600, 0.299	157.600, 0.434	157.600, 0.389	157.600, 0.424	157.600, -0.050
790	157.800, 0.511	157.800, 0.298	157.800, 0.432	157.800, 0.387	157.800, 0.422	157.800, -0.049
791	158.000, 0.508	158.000, 0.296	158.000, 0.430	158.000, 0.385	158.000, 0.420	158.000, -0.049
792	158.200, 0.506	158.200, 0.295	158.200, 0.428	158.200, 0.383	158.200, 0.418	158.200, -0.049
793	158.400, 0.504	158.400, 0.294	158.400, 0.425	158.400, 0.381	158.400, 0.416	158.400, -0.049
794	158.600, 0.502	158.600, 0.293	158.600, 0.423	158.600, 0.379	158.600, 0.414	158.600, -0.049
795	158.800, 0.500	158.800, 0.291	158.800, 0.421	158.800, 0.377	158.800, 0.412	158.800, -0.049
796	159.000, 0.498	159.000, 0.290	159.000, 0.419	159.000, 0.375	159.000, 0.410	159.000, -0.049
797	159.200, 0.496	159.200, 0.289	159.200, 0.418	159.200, 0.373	159.200, 0.408	159.200, -0.048
798	159.400, 0.494	159.400, 0.288	159.400, 0.416	159.400, 0.372	159.400, 0.406	159.400, -0.048
799	159.600, 0.492	159.600, 0.287	159.600, 0.414	159.600, 0.370	159.600, 0.405	159.600, -0.048
800	159.800, 0.491	159.800, 0.286	159.800, 0.412	159.800, 0.368	159.800, 0.403	159.800, -0.048
801	160.000, 0.489	160.000, 0.285	160.000, 0.411	160.000, 0.366	160.000, 0.402	160.000, -0.048
802	160.200, 0.487	160.200, 0.285	160.200, 0.409	160.200, 0.365	160.200, 0.400	160.200, -0.048
803	160.400, 0.486	160.400, 0.284	160.400, 0.407	160.400, 0.363	160.400, 0.399	160.400, -0.048
804	160.600, 0.484	160.600, 0.283	160.600, 0.406	160.600, 0.361	160.600, 0.398	160.600, -0.048
805	160.800, 0.482	160.800, 0.283	160.800, 0.405	160.800, 0.359	160.800, 0.396	160.800, -0.048
806	161.000, 0.481	161.000, 0.282	161.000, 0.403	161.000, 0.357	161.000, 0.395	161.000, -0.048
807	161.200, 0.479	161.200, 0.282	161.200, 0.402	161.200, 0.356	161.200, 0.394	161.200, -0.049
808	161.400, 0.478	161.400, 0.281	161.400, 0.401	161.400, 0.354	161.400, 0.393	161.400, -0.049
809	161.600, 0.476	161.600, 0.281	161.600, 0.399	161.600, 0.353	161.600, 0.392	161.600, -0.049
810	161.800, 0.475	161.800, 0.280	161.800, 0.398	161.800, 0.351	161.800, 0.390	161.800, -0.049
811	162.000, 0.474	162.000, 0.279	162.000, 0.397	162.000, 0.350	162.000, 0.389	162.000, -0.049
812	162.200, 0.472	162.200, 0.279	162.200, 0.395	162.200, 0.349	162.200, 0.388	162.200, -0.048
813	162.400, 0.471	162.400, 0.278	162.400, 0.394	162.400, 0.348	162.400, 0.387	162.400, -0.048
814	162.600, 0.470	162.600, 0.277	162.600, 0.393	162.600, 0.346	162.600, 0.385	162.600, -0.048
815	162.800, 0.468	162.800, 0.276	162.800, 0.391	162.800, 0.345	162.800, 0.384	162.800, -0.047
816	163.000, 0.467	163.000, 0.275	163.000, 0.390	163.000, 0.344	163.000, 0.383	163.000, -0.047
817	163.200, 0.466	163.200, 0.274	163.200, 0.388	163.200, 0.343	163.200, 0.382	163.200, -0.046
818	163.400, 0.464	163.400, 0.274	163.400, 0.387	163.400, 0.342	163.400, 0.381	163.400, -0.046
819	163.600, 0.463	163.600, 0.273	163.600, 0.385	163.600, 0.342	163.600, 0.379	163.600, -0.046
820	163.800, 0.462	163.800, 0.272	163.800, 0.384	163.800, 0.340	163.800, 0.378	163.800, -0.045
821	164.000, 0.460	164.000, 0.272	164.000, 0.383	164.000, 0.339	164.000, 0.377	164.000, -0.045
822	164.200, 0.459	164.200, 0.271	164.200, 0.382	164.200, 0.338	164.200, 0.376	164.200, -0.045
823	164.400, 0.458	164.400, 0.270	164.400, 0.381	164.400, 0.337	164.400, 0.375	164.400, -0.045
824	164.600, 0.457	164.600, 0.270	164.600, 0.380	164.600, 0.336	164.600, 0.374	164.600, -0.045
825	164.800, 0.456	164.800, 0.270	164.800, 0.379	164.800, 0.334	164.800, 0.373	164.800, -0.045
826	165.000, 0.455	165.000, 0.269	165.000, 0.378	165.000, 0.333	165.000, 0.372	165.000, -0.045
827	165.200, 0.454	165.200, 0.269	165.200, 0.377	165.200, 0.332	165.200, 0.371	165.200, -0.045
828	165.400, 0.453	165.400, 0.268	165.400, 0.376	165.400, 0.330	165.400, 0.370	165.400, -0.045
829	165.600, 0.453	165.600, 0.268	165.600, 0.375	165.600, 0.329	165.600, 0.368	165.600, -0.045
830	165.800, 0.452	165.800, 0.268	165.800, 0.374	165.800, 0.328	165.800, 0.367	165.800, -0.045
831	166.000, 0.452	166.000, 0.267	166.000, 0.373	166.000, 0.327	166.000, 0.366	166.000, -0.045
832	166.200, 0.451	166.200, 0.267	166.200, 0.373	166.200, 0.326	166.200, 0.365	166.200, -0.045
833	166.400, 0.450	166.400, 0.266	166.400, 0.372	166.400, 0.324	166.400, 0.364	166.400, -0.045
834	166.600, 0.450	166.600, 0.266	166.600, 0.371	166.600, 0.323	166.600, 0.363	166.600, -0.044
835	166.800, 0.449	166.800, 0.265	166.800, 0.370	166.800, 0.322	166.800, 0.362	166.800, -0.044
836	167.000, 0.448	167.000, 0.265	167.000, 0.368	167.000, 0.322	167.000, 0.361	167.000, -0.044
837	167.200, 0.447	167.200, 0.264	167.200, 0.367	167.200, 0.321	167.200, 0.360	167.200, -0.044
838	167.400, 0.446	167.400, 0.263	167.400, 0.366	167.400, 0.320	167.400, 0.360	167.400, -0.044
839	167.600, 0.445	167.600, 0.263	167.600, 0.366	167.600, 0.319	167.600, 0.359	167.600, -0.044
840	167.800, 0.445	167.800, 0.262	167.800, 0.365	167.800, 0.318	167.800, 0.358	167.800, -0.044
841	168.000, 0.444	168.000, 0.261	168.000, 0.364	168.000, 0.317	168.000, 0.358	168.000, -0.044
842	168.200, 0.443	168.200, 0.261	168.200, 0.363	168.200, 0.316	168.200, 0.357	168.200, -0.044
843	168.400, 0.442	168.400, 0.260	168.400, 0.362	168.400, 0.316	168.400, 0.357	168.400, -0.043
844	168.600, 0.441	168.600, 0.260	168.600, 0.362	168.600, 0.315	168.600, 0.356	168.600, -0.043
845	168.800, 0.440	168.800, 0.259	168.800, 0.361	168.800, 0.314	168.800, 0.355	168.800, -0.043
846	169.000, 0.440	169.000, 0.258	169.000, 0.360	169.000, 0.314	169.000, 0.355	169.000, -0.043
847	169.200, 0.439	169.200, 0.258	169.200, 0.359	169.200, 0.313	169.200, 0.354	169.200, -0.043
848	169.400, 0.438	169.400, 0.257	169.400, 0.358	169.400, 0.312	169.400, 0.353	169.400, -0.043
849	169.600, 0.438	169.600, 0.256	169.600, 0.357	169.600, 0.311	169.600, 0.352	169.600, -0.042
850	169.800, 0.437	169.800, 0.256	169.800, 0.356	169.800, 0.310	169.800, 0.351	169.800, -0.042
851	170.000, 0.436	170.000, 0.255	170.000, 0.355	170.000, 0.309	170.000, 0.350	170.000, -0.042
852	170.200, 0.435	170.200, 0.255	170.200, 0.354	170.200, 0.308	170.200, 0.349	170.200, -0.042
853	170.400, 0.434	170.400, 0.255	170.400, 0.353	170.400, 0.307	170.400, 0.348	170.400, -0.041
854	170.600, 0.433	170.600, 0.254	170.600, 0.352	170.600, 0.307	170.600, 0.347	170.600, -0.041
855	170.800, 0.432	170.800, 0.254	170.800, 0.351	170.800, 0.306	170.800, 0.347	170.800, -0.041
856	171.000, 0.431	171.000, 0.253	171.000, 0.350	171.000, 0.305	171.000, 0.346	171.000, -0.040
857	171.200, 0.430	171.200, 0.253	171.200, 0.349	171.200, 0.304	171.200, 0.345	171.200, -0.040
858	171.400, 0.430	171.400, 0.252	171.400, 0.349	171.400, 0.303	171.400, 0.344	171.400, -0.040
859	171.600, 0.429	171.600, 0.252	171.600, 0.348	171.600, 0.302	171.600, 0.344	171.600, -0.040
860	171.800, 0.429	171.800, 0.251	171.800, 0.348	171.800, 0.301	171.800, 0.343	171.800, -0.040
861	172.000, 0.428	172.000, 0.251	172.000, 0.347	172.000, 0.300	172.000, 0.343	172.000, -0.040
862	172.200, 0.427	172.200, 0.251	172.200, 0.347	172.200, 0.300	172.200, 0.342	172.200, -0.040
863	172.400, 0.427	172.400, 0.251	172.400, 0.346	172.400, 0.299	172.400, 0.342	172.400, -0.040
864	172.600, 0.426	172.600, 0.250	172.600, 0.346	172.600, 0.299	172.600, 0.341	172.600, -0.040
865	172.800, 0.425	172.800, 0.250	172.800, 0.346	172.800, 0.298	172.800, 0.341	172.800, -0.040
866	173.000, 0.425	173.000, 0.249	173.000, 0.346	173.000, 0.298	173.000, 0.340	173.000, -0.040
867	173.200, 0.424	173.200, 0.249	173.200, 0.345	173.200, 0.297	173.200, 0.340	173.200, -0.040
868	173.400, 0.424	173.400, 0.248	173.400, 0.345	173.400, 0.297	173.400, 0.340	173.400, -0.041
869	173.600, 0.423	173.600, 0.248	173.600, 0.345	173.600, 0.296	173.600, 0.339	173.600, -0.041
870	173.800, 0.423	173.800, 0.248	173.800, 0.344	173.800, 0.296	173.800, 0.339	173.800, -0.041
871	174.000, 0.422	174.000, 0.247	174.000, 0.344	174.000, 0.295	174.000, 0.338	174.000, -0.041
872	174.200, 0.422	174.200, 0.247	174.200, 0.343	174.200, 0.294	174.200, 0.337	174.200, -0.041
873	174.400, 0.422	174.400, 0.246	174.400, 0.342	174.400, 0.293	174.400, 0.337	174.400, -0.041
874	174.600, 0.421	174.600, 0.246	174.600, 0.342	174.600, 0.293	174.600, 0.336	174.600, -0.041
875	174.800, 0.420	174.800, 0.245	174.800, 0.341	174.800, 0.292	174.800, 0.335	174.800, -0.041
876	175.000, 0.420	175.000, 0.245	175.000, 0.340	175.000, 0.291	175.000, 0.335	175.000, -0.041
877	175.200, 0.420	175.200, 0.245	175.200, 0.340	175.200, 0.290	175.200, 0.334	175.200, -0.040
878	175.400, 0.419	175.400, 0.244	175.400, 0.339	175.400, 0.289	175.400, 0.334	175.400, -0.040
879	175.600, 0.419	175.600, 0.244	175.600, 0.338	175.600, 0.288	175.600, 0.333	175.600, -0.040
880	175.800, 0.418	175.800, 0.244	175.800, 0.338	175.800, 0.287	175.800, 0.333	175.800, -0.040
881	176.000, 0.417	176.000, 0.243	176.000, 0.337	176.000, 0.287	176.000, 0.332	176.000, -0.040
882	176.200, 0.416	176.200, 0.243	176.200, 0.337	176.200, 0.286	176.200, 0.331	176.200, -0.040
883	176.400, 0.415	176.400, 0.242	176.400, 0.336	176.400, 0.286	176.400, 0.330	176.400, -0.039
884	176.600, 0.415	176.600, 0.242	176.600, 0.336	176.600, 0.285	176.600, 0.330	176.600, -0.039
885	176.800, 0.414	176.800, 0.241	176.800, 0.335	176.800, 0.285	176.800, 0.329	176.800, -0.039
886	177.000, 0.413	177.000, 0.240	177.000, 0.335	177.000, 0.284	177.000, 0.329	177.000, -0.039
887	177.200, 0.413	177.200, 0.240	177.200, 0.334	177.200, 0.284	177.200, 0.329	177.200, -0.038
888	177.400, 0.412	177.400, 0.239	177.400, 0.334	177.400, 0.283	177.400, 0.328	177.400, -0.038
889	177.600, 0.412	177.600, 0.239	177.600, 0.333	177.600, 0.283	177.600, 0.328	177.600, -0.038
890	177.800, 0.411	177.800, 0.238	177.800, 0.332	177.800, 0.282	177.800, 0.327	177.800, -0.039
891	178.000, 0.411	178.000, 0.238	178.000, 0.331	178.000, 0.281	178.000, 0.327	178.000, -0.039
892	178.200, 0.410	178.200, 0.238	178.200, 0.331	178.200, 0.281	178.200, 0.326	178.200, -0.039
893	178.400, 0.410	178.400, 0.237	178.400, 0.330	178.400, 0.280	178.400, 0.326	178.400, -0.039
894	178.600, 0.409	178.600, 0.237	178.600, 0.329	178.600, 0.280	178.600, 0.325	178.600, -0.039
895	178.800, 0.409	178.800, 0.237	178.800, 0.328	178.800, 0.279	178.800, 0.325	178.800, -0.039
896	179.000, 0.408	179.000, 0.237	179.000, 0.328	179.000, 0.279	179.000, 0.325	179.000, -0.039
897	179.200, 0.408	179.200, 0.237	179.200, 0.327	179.200, 0.278	179.200, 0.324	179.200, -0.039
898	179.400, 0.408	179.400, 0.237	179.400, 0.326	179.400, 0.278	179.400, 0.323	179.400, -0.038
899	179.600, 0.407	179.600, 0.237	179.600, 0.326	179.600, 0.277	179.600, 0.323	179.600, -0.038
900	179.800, 0.407	179.800, 0.237	179.800, 0.325	179.800, 0.276	179.800, 0.322	179.800, -0.038
901	180.000, 0.406	180.000, 0.237	180.000, 0.324	180.000, 0.276	180.000, 0.321	180.000, -0.037
902	180.200, 0.406	180.200, 0.237	180.200, 0.324	180.200, 0.275	180.200, 0.321	180.200, -0.037
903	180.400, 0.405	180.400, 0.236	180.400, 0.323	180.400, 0.274	180.400, 0.320	180.400, -0.037
904	180.600, 0.405	180.600, 0.236	180.600, 0.323	180.600, 0.273	180.600, 0.320	180.600, -0.036
905	180.800, 0.404	180.800, 0.236	180.800, 0.322	180.800, 0.273	180.800, 0.320	180.800, -0.036
906	181.000, 0.404	181.000, 0.235	181.000, 0.322	181.000, 0.272	181.000, 0.320	181.000, -0.036
907	181.200, 0.403	181.200, 0.235	181.200, 0.322	181.200, 0.271	181.200, 0.319	181.200, -0.036
908	181.400, 0.403	181.400, 0.235	181.400, 0.321	181.400, 0.270	181.400, 0.319	181.400, -0.036
909	181.600, 0.402	181.600, 0.234	181.600, 0.321	181.600, 0.270	181.600, 0.319	181.600, -0.036
910	181.800, 0.402	181.800, 0.234	181.800, 0.321	181.800, 0.269	181.800, 0.318	181.800, -0.036
911	182.000, 0.401	182.000, 0.234	182.000, 0.321	182.000, 0.269	182.000, 0.318	182.000, -0.036
912	182.200, 0.401	182.200, 0.234	182.200, 0.321	182.200, 0.268	182.200, 0.317	182.200, -0.037
913	182.400, 0.400	182.400, 0.233	182.400, 0.321	182.400, 0.267	182.400, 0.317	182.400, -0.037
914	182.600, 0.400	182.600, 0.233	182.600, 0.320	182.600, 0.267	182.600, 0.316	182.600, -0.037
915	182.800, 0.399	182.800, 0.233	182.800, 0.320	182.800, 0.267	182.800, 0.316	182.800, -0.037
916	183.000, 0.399	183.000, 0.232	183.000, 0.319	183.000, 0.266	183.000, 0.315	183.000, -0.037
917	183.200, 0.399	183.200, 0.232	183.200, 0.319	183.200, 0.266	183.200, 0.314	183.200, -0.037
918	183.400, 0.399	183.400, 0.231	183.400, 0.318	183.400, 0.265	183.400, 0.314	183.400, -0.037
919	183.600, 0.398	183.600, 0.231	183.600, 0.318	183.600, 0.265	183.600, 0.313	183.600, -0.037
920	183.800, 0.398	183.800, 0.230	183.800, 0.317	183.800, 0.265	183.800, 0.313	183.800, -0.037
921	184.000, 0.397	184.000, 0.230	184.000, 0.316	184.000, 0.264	184.000, 0.312	184.000, -0.037
922	184.200, 0.397	184.200, 0.230	184.200, 0.315	184.200, 0.264	184.200, 0.312	184.200, -0.037
923	184.400, 0.397	184.400, 0.229	184.400, 0.314	184.400, 0.264	184.400, 0.312	184.400, -0.037
924	184.600, 0.396	184.600, 0.229	184.600, 0.314	184.600, 0.263	184.600, 0.311	184.600, -0.037
925	184.800, 0.396	184.800, 0.229	184.800, 0.313	184.800, 0.263	184.800, 0.311	184.800, -0.037
926	185.000, 0.395	185.000, 0.228	185.000, 0.313	185.000, 0.262	185.000, 0.311	185.000, -0.037
927	185.200, 0.395	185.200, 0.228	185.200, 0.312	185.200, 0.262	185.200, 0.311	185.200, -0.037
928	185.400, 0.395	185.400, 0.228	185.400, 0.313	185.400, 0.261	185.400, 0.310	185.400, -0.037
929	185.600, 0.394	185.600, 0.228	185.600, 0.313	185.600, 0.261	185.600, 0.310	185.600, -0.037
930	185.800, 0.394	185.800, 0.227	185.800, 0.313	185.800, 0.260	185.800, 0.310	185.800, -0.037
931	186.000, 0.393	186.000, 0.227	186.000, 0.313	186.000, 0.260	186.000, 0.310	186.000, -0.037
932	186.200, 0.393	186.200, 0.227	186.200, 0.313	186.200, 0.259	186.200, 0.310	186.200, -0.037
933	186.400, 0.393	186.400, 0.227	186.400, 0.312	186.400, 0.259	186.400, 0.309	186.400, -0.037
934	186.600, 0.392	186.600, 0.227	186.600, 0.312	186.600, 0.258	186.600, 0.309	186.600, -0.037
935	186.800, 0.392	186.800, 0.227	186.800, 0.312	186.800, 0.258	186.800, 0.309	186.800, -0.037
936	187.000, 0.391	187.000, 0.226	187.000, 0.312	187.000, 0.257	187.000, 0.308	187.000, -0.037
937	187.200, 0.391	187.200, 0.226	187.200, 0.311	187.200, 0.256	187.200, 0.308	187.200, -0.037
938	187.400, 0.391	187.400, 0.227	187.400, 0.311	187.400, 0.256	187.400, 0.307	187.400, -0.037
939	187.600, 0.390	187.600, 0.227	187.600, 0.310	187.600, 0.256	187.600, 0.307	187.600, -0.037
940	187.800, 0.390	187.800, 0.227	187.800, 0.309	187.800, 0.255	187.800, 0.306	187.800, -0.037
941	188.000, 0.390	188.000, 0.227	188.000, 0.309	188.000, 0.255	188.000, 0.306	188.000, -0.036
942	188.200, 0.389	188.200, 0.227	188.200, 0.308	188.200, 0.254	188.200, 0.305	188.200, -0.036
943	188.400, 0.389	188.400, 0.226	188.400, 0.308	188.400, 0.254	188.400, 0.304	188.400, -0.036
944	188.600, 0.389	188.600, 0.226	188.600, 0.308	188.600, 0.253	188.600, 0.304	188.600, -0.035
945	188.800, 0.388	188.800, 0.226	188.800, 0.308	188.800, 0.253	188.800, 0.303	188.800, -0.035
946	189.000, 0.388	189.000, 0.226	189.000, 0.308	189.000, 0.253	189.000, 0.303	189.000, -0.035
947	189.200, 0.388	189.200, 0.225	189.200, 0.308	189.200, 0.253	189.200, 0.303	189.200, -0.035
948	189.400, 0.387	189.400, 0.225	189.400, 0.308	189.400, 0.252	189.400, 0.302	189.400, -0.035
949	189.600, 0.387	189.600, 0.225	189.600, 0.308	189.600, 0.252	189.600, 0.302	189.600, -0.035
950	189.800, 0.387	189.800, 0.225	189.800, 0.308	189.800, 0.252	189.800, 0.302	189.800, -0.035
951	190.000, 0.386	190.000, 0.225	190.000, 0.307	190.000, 0.251	190.000, 0.301	190.000, -0.035
952	190.200, 0.386	190.200, 0.224	190.200, 0.307	190.200, 0.251	190.200, 0.301	190.200, -0.035
953	190.400, 0.385	190.400, 0.224	190.400, 0.307	190.400, 0.251	190.400, 0.301	190.400, -0.036
954	190.600, 0.385	190.600, 0.224	190.600, 0.306	190.600, 0.251	190.600, 0.300	190.600, -0.036
955	190.800, 0.385	190.800, 0.223	190.800, 0.306	190.800, 0.250	190.800, 0.300	190.800, -0.036
956	191.000, 0.384	191.000, 0.223	191.000, 0.305	191.000, 0.250	191.000, 0.300	191.000, -0.036
957	191.200, 0.384	191.200, 0.222	191.200, 0.304	191.200, 0.249	191.200, 0.300	191.200, -0.036
958	191.400, 0.384	191.400, 0.222	191.400, 0.304	191.400, 0.249	191.400, 0.300	191.400, -0.036
959	191.600, 0.383	191.600, 0.222	191.600, 0.303	191.600, 0.248	191.600, 0.299	191.600, -0.036
960	191.800, 0.383	191.800, 0.221	191.800, 0.303	191.800, 0.248	191.800, 0.299	191.800, -0.036
961	192.000, 0.383	192.000, 0.221	192.000, 0.302	192.000, 0.247	192.000, 0.299	192.000, -0.036
962	192.200, 0.382	192.200, 0.220	192.200, 0.302	192.200, 0.246	192.200, 0.299	192.200, -0.036
963	192.400, 0.382	192.400, 0.220	192.400, 0.302	192.400, 0.246	192.400, 0.298	192.400, -0.036
964	192.600, 0.382	192.600, 0.220	192.600, 0.301	192.600, 0.246	192.600, 0.298	192.600, -0.036
965	192.800, 0.382	192.800, 0.219	192.800, 0.301	192.800, 0.245	192.800, 0.297	192.800, -0.036
966	193.000, 0.382	193.000, 0.219	193.000, 0.301	193.000, 0.245	193.000, 0.297	193.000, -0.036
967	193.200, 0.382	193.200, 0.219	193.200, 0.301	193.200, 0.244	193.200, 0.296	193.200, -0.036
968	193.400, 0.382	193.400, 0.219	193.400, 0.301	193.400, 0.244	193.400, 0.296	193.400, -0.036
969	193.600, 0.382	193.600, 0.219	193.600, 0.300	193.600, 0.244	193.600, 0.295	193.600, -0.036
970	193.800, 0.382	193.800, 0.219	193.800, 0.300	193.800, 0.243	193.800, 0.295	193.800, -0.036
971	194.000, 0.381	194.000, 0.219	194.000, 0.300	194.000, 0.243	194.000, 0.295	194.000, -0.036
972	194.200, 0.381	194.200, 0.219	194.200, 0.299	194.200, 0.242	194.200, 0.294	194.200, -0.036
973	194.400, 0.381	194.400, 0.219	194.400, 0.299	194.400, 0.242	194.400, 0.294	194.400, -0.035
974	194.600, 0.381	194.600, 0.218	194.600, 0.299	194.600, 0.241	194.600, 0.294	194.600, -0.035
975	194.800, 0.380	194.800, 0.218	194.800, 0.298	194.800, 0.241	194.800, 0.294	194.800, -0.034
976	195.000, 0.380	195.000, 0.218	195.000, 0.298	195.000, 0.240	195.000, 0.294	195.000, -0.034
977	195.200, 0.379	195.200, 0.218	195.200, 0.297	195.200, 0.240	195.200, 0.293	195.200, -0.034
978	195.400, 0.379	195.400, 0.217	195.400, 0.297	195.400, 0.239	195.400, 0.293	195.400, -0.034
979	195.600, 0.378	195.600, 0.217	195.600, 0.297	195.600, 0.239	195.600, 0.293	195.600, -0.034
980	195.800, 0.377	195.800, 0.217	195.800, 0.296	195.800, 0.238	195.800, 0.293	195.800, -0.034
981	196.000, 0.377	196.000, 0.217	196.000, 0.296	196.000, 0.238	196.000, 0.293	196.000, -0.034
982	196.200, 0.376	196.200, 0.216	196.200, 0.296	196.200, 0.238	196.200, 0.293	196.200, -0.034
983	196.400, 0.376	196.400, 0.216	196.400, 0.295	196.400, 0.238	196.400, 0.292	196.400, -0.034
984	196.600, 0.375	196.600, 0.215	196.600, 0.295	196.600, 0.238	196.600, 0.292	196.600, -0.034
985	196.800, 0.375	196.800, 0.215	196.800, 0.295	196.800, 0.238	196.800, 0.291	196.800, -0.034
986	197.000, 0.374	197.000, 0.215	197.000, 0.295	197.000, 0.237	197.000, 0.291	197.000, -0.035
987	197.200, 0.374	197.200, 0.215	197.200, 0.294	197.200, 0.237	197.200, 0.290	197.200, -0.035
988	197.400, 0.374	197.400, 0.215	197.400, 0.294	197.400, 0.237	197.400, 0.290	197.400, -0.035
989	197.600, 0.374	197.600, 0.215	197.600, 0.294	197.600, 0.237	197.600, 0.290	197.600, -0.035
990	197.800, 0.374	197.800, 0.214	197.800, 0.294	197.800, 0.237	197.800, 0.289	197.800, -0.035
991	198.000, 0.374	198.000, 0.214	198.000, 0.293	198.000, 0.236	198.000, 0.289	198.000, -0.035
992	198.200, 0.374	198.200, 0.214	198.200, 0.293	198.200, 0.236	198.200, 0.288	198.200, -0.034
993	198.400, 0.374	198.400, 0.214	198.400, 0.293	198.400, 0.235	198.400, 0.288	198.400, -0.034
994	198.600, 0.374	198.600, 0.213	198.600, 0.292	198.600, 0.235	198.600, 0.288	198.600, -0.034
995	198.800, 0.373	198.800, 0.213	198.800, 0.292	198.800, 0.234	198.800, 0.287	198.800, -0.034
996	199.000, 0.373	199.000, 0.213	199.000, 0.292	199.000, 0.234	199.000, 0.287	199.000, -0.034
997	199.200, 0.373	199.200, 0.213	199.200, 0.292	199.200, 0.233	199.200, 0.287	199.200, -0.034
998	199.400, 0.372	199.400, 0.212	199.400, 0.291	199.400, 0.233	199.400, 0.286	199.400, -0.034
999	199.600, 0.372	199.600, 0.212	199.600, 0.291	199.600, 0.232	199.600, 0.286	199.600, -0.034
1000	199.800, 0.372	199.800, 0.212	199.800, 0.291	199.800, 0.232	199.800, 0.286	199.800, -0.034
1001	200.000, 0.371	200.000, 0.212	200.000, 0.291	200.000, 0.232	200.000, 0.286	200.000, -0.034
1002	200.200, 0.371	200.200, 0.211	200.200, 0.291	200.200, 0.232	200.200, 0.286	200.200, -0.034
1003	200.400, 0.370	200.400, 0.211	200.400, 0.291	200.400, 0.231	200.400, 0.286	200.400, -0.034
1004	200.600, 0.370	200.600, 0.211	200.600, 0.290	200.600, 0.231	200.600, 0.286	200.600, -0.035
1005	200.800, 0.370	200.800, 0.211	200.800, 0.290	200.800, 0.231	200.800, 0.286	200.800, -0.035
1006	201.000, 0.370	201.000, 0.211	201.000, 0.290	201.000, 0.231	201.000, 0.286	201.000, -0.035
1007	201.200, 0.369	201.200, 0.211	201.200, 0.290	201.200, 0.231	201.200, 0.286	201.200, -0.035
1008	201.400, 0.369	201.400, 0.211	201.400, 0.289	201.400, 0.231	201.400, 0.286	201.400, -0.035
1009	201.600, 0.369	201.600, 0.211	201.600, 0.289	201.600, 0.231	201.600, 0.286	201.600, -0.035
1010	201.800, 0.369	201.800, 0.211	201.800, 0.289	201.800, 0.231	201.800, 0.286	201.800, -0.035
1011	202.000, 0.369	202.000, 0.211	202.000, 0.289	202.000, 0.230	202.000, 0.286	202.000, -0.035
1012	202.200, 0.368	202.200, 0.211	202.200, 0.289	202.200, 0.230	202.200, 0.286	202.200, -0.035
1013	202.400, 0.368	202.400, 0.211	202.400, 0.289	202.400, 0.230	202.400, 0.286	202.400, -0.034
1014	202.600, 0.368	202.600, 0.211	202.600, 0.289	202.600, 0.229	202.600, 0.285	202.600, -0.034
1015	202.800, 0.368	202.800, 0.211	202.800, 0.289	202.800, 0.229	202.800, 0.285	202.800, -0.034
1016	203.000, 0.367	203.000, 0.210	203.000, 0.289	203.000, 0.229	203.000, 0.285	203.000, -0.034
1017	203.200, 0.367	203.200, 0.210	203.200, 0.288	203.200, 0.228	203.200, 0.284	203.200, -0.033
1018	203.400, 0.367	203.400, 0.210	203.400, 0.288	203.400, 0.228	203.400, 0.284	203.400, -0.033
1019	203.600, 0.367	203.600, 0.211	203.600, 0.288	203.600, 0.227	203.600, 0.283	203.600, -0.033
1020	203.800, 0.367	203.800, 0.211	203.800, 0.287	203.800, 0.227	203.800, 0.283	203.800, -0.033
1021	204.000, 0.367	204.000, 0.211	204.000, 0.287	204.000, 0.226	204.000, 0.282	204.000, -0.033
1022	204.200, 0.367	204.200, 0.210	204.200, 0.287	204.200, 0.226	204.200, 0.282	204.200, -0.033
1023	204.400, 0.367	204.400, 0.210	204.400, 0.286	204.400, 0.226	204.400, 0.282	204.400, -0.033
1024	204.600, 0.367	204.600, 0.210	204.600, 0.286	204.600, 0.225	204.600, 0.282	204.600, -0.033
1025	204.800, 0.367	204.800, 0.209	204.800, 0.285	204.800, 0.225	204.800, 0.282	204.800, -0.034
1026	205.000, 0.367	205.000, 0.208	205.000, 0.285	205.000, 0.225	205.000, 0.282	205.000, -0.034
1027	205.200, 0.367	205.200, 0.208	205.200, 0.284	205.200, 0.224	205.200, 0.282	205.200, -0.034
1028	205.400, 0.366	205.400, 0.208	205.400, 0.284	205.400, 0.224	205.400, 0.281	205.400, -0.035
1029	205.600, 0.366	205.600, 0.207	205.600, 0.283	205.600, 0.224	205.600, 0.281	205.600, -0.035
1030	205.800, 0.366	205.800, 0.207	205.800, 0.283	205.800, 0.224	205.800, 0.281	205.800, -0.035
1031	206.000, 0.366	206.000, 0.207	206.000, 0.283	206.000, 0.223	206.000, 0.280	206.000, -0.035
1032	206.200, 0.366	206.200, 0.207	206.200, 0.283	206.200, 0.223	206.200, 0.280	206.200, -0.035
1033	206.400, 0.365	206.400, 0.206	206.400, 0.283	206.400, 0.222	206.400, 0.280	206.400, -0.035
1034	206.600, 0.365	206.600, 0.206	206.600, 0.283	206.600, 0.222	206.600, 0.280	206.600, -0.034
1035	206.800, 0.364	206.800, 0.206	206.800, 0.283	206.800, 0.221	206.800, 0.279	206.800, -0.034
1036	207.000, 0.364	207.000, 0.206	207.000, 0.282	207.000, 0.221	207.000, 0.279	207.000, -0.034
1037	207.200, 0.364	207.200, 0.206	207.200, 0.282	207.200, 0.220	207.200, 0.278	207.200, -0.034
1038	207.400, 0.364	207.400, 0.206	207.400, 0.282	207.400, 0.220	207.400, 0.278	207.400, -0.034
1039	207.600, 0.364	207.600, 0.207	207.600, 0.282	207.600, 0.220	207.600, 0.277	207.600, -0.034
1040	207.800, 0.363	207.800, 0.207	207.800, 0.282	207.800, 0.220	207.800, 0.277	207.800, -0.034
1041	208.000, 0.363	208.000, 0.207	208.000, 0.282	208.000, 0.220	208.000, 0.277	208.000, -0.034
1042	208.200, 0.363	208.200, 0.206	208.200, 0.282	208.200, 0.219	208.200, 0.277	208.200, -0.034
1043	208.400, 0.363	208.400, 0.206	208.400, 0.282	208.400, 0.220	208.400, 0.277	208.400, -0.034
1044	208.600, 0.362	208.600, 0.206	208.600, 0.282	208.600, 0.220	208.600, 0.277	208.600, -0.034
1045	208.800, 0.362	208.800, 0.206	208.800, 0.282	208.800, 0.220	208.800, 0.277	208.800, -0.034
1046	209.000, 0.362	209.000, 0.205	209.000, 0.282	209.000, 0.220	209.000, 0.276	209.000, -0.034
1047	209.200, 0.362	209.200, 0.205	209.200, 0.281	209.200, 0.220	209.200, 0.276	209.200, -0.034
1048	209.400, 0.362	209.400, 0.205	209.400, 0.281	209.400, 0.220	209.400, 0.276	209.400, -0.035
1049	209.600, 0.362	209.600, 0.205	209.600, 0.281	209.600, 0.220	209.600, 0.276	209.600, -0.035
1050	209.800, 0.361	209.800, 0.205	209.800, 0.281	209.800, 0.220	209.800, 0.276	209.800, -0.034
1051	210.000, 0.361	210.000, 0.204	210.000, 0.281	210.000, 0.220	210.000, 0.275	210.000, -0.034
1052	210.200, 0.361	210.200, 0.204	210.200, 0.280	210.200, 0.219	210.200, 0.276	210.200, -0.034
1053	210.400, 0.360	210.400, 0.204	210.400, 0.280	210.400, 0.219	210.400, 0.276	210.400, -0.034
1054	210.600, 0.360	210.600, 0.204	210.600, 0.280	210.600, 0.219	210.600, 0.276	210.600, -0.034
1055	210.800, 0.360	210.800, 0.204	210.800, 0.279	210.800, 0.218	210.800, 0.276	210.800, -0.033
1056	211.000, 0.359	211.000, 0.204	211.000, 0.279	211.000, 0.218	211.000, 0.276	211.000, -0.033
1057	211.200, 0.359	211.200, 0.204	211.200, 0.279	211.200, 0.218	211.200, 0.275	211.200, -0.033
1058	211.400, 0.359	211.400, 0.204	211.400, 0.279	211.400, 0.217	211.400, 0.275	211.400, -0.033
1059	211.600, 0.358	211.600, 0.204	211.600, 0.279	211.600, 0.217	211.600, 0.275	211.600, -0.032
1060	211.800, 0.358	211.800, 0.203	211.800, 0.278	211.800, 0.217	211.800, 0.275	211.800, -0.032
1061	212.000, 0.358	212.000, 0.203	212.000, 0.278	212.000, 0.216	212.000, 0.275	212.000, -0.032
1062	212.200, 0.357	212.200, 0.203	212.200, 0.278	212.200, 0.216	212.200, 0.275	212.200, -0.033
1063	212.400, 0.357	212.400, 0.202	212.400, 0.278	212.400, 0.216	212.400, 0.275	212.400, -0.033
1064	212.600, 0.357	212.600, 0.202	212.600, 0.277	212.600, 0.215	212.600, 0.274	212.600, -0.033
1065	212.800, 0.357	212.800, 0.202	212.800, 0.277	212.800, 0.215	212.800, 0.274	212.800, -0.033
1066	213.000, 0.357	213.000, 0.202	213.000, 0.277	213.000, 0.215	213.000, 0.274	213.000, -0.033
1067	213.200, 0.357	213.200, 0.201	213.200, 0.277	213.200, 0.215	213.200, 0.273	213.200, -0.033
1068	213.400, 0.357	213.400, 0.201	213.400, 0.277	213.400, 0.215	213.400, 0.273	213.400, -0.033
1069	213.600, 0.357	213.600, 0.201	213.600, 0.277	213.600, 0.214	213.600, 0.273	213.600, -0.033
1070	213.800, 0.356	213.800, 0.201	213.800, 0.277	213.800, 0.214	213.800, 0.272	213.800, -0.033
1071	214.000, 0.356	214.000, 0.201	214.000, 0.277	214.000, 0.214	214.000, 0.272	214.000, -0.034
1072	214.200, 0.356	214.200, 0.201	214.200, 0.277	214.200, 0.213	214.200, 0.272	214.200, -0.034
1073	214.400, 0.356	214.400, 0.201	214.400, 0.277	214.400, 0.213	214.400, 0.272	214.400, -0.034
1074	214.600, 0.356	214.600, 0.202	214.600, 0.277	214.600, 0.213	214.600, 0.272	214.600, -0.034
1075	214.800, 0.356	214.800, 0.202	214.800, 0.277	214.800, 0.213	214.800, 0.272	214.800, -0.034
1076	215.000, 0.356	215.000, 0.202	215.000, 0.277	215.000, 0.212	215.000, 0.272	215.000, -0.034
1077	215.200, 0.356	215.200, 0.202	215.200, 0.277	215.200, 0.212	215.200, 0.271	215.200, -0.034
1078	215.400, 0.356	215.400, 0.201	215.400, 0.276	215.400, 0.212	215.400, 0.271	215.400, -0.034
1079	215.600, 0.355	215.600, 0.201	215.600, 0.276	215.600, 0.212	215.600, 0.271	215.600, -0.034
1080	215.800, 0.355	215.800, 0.201	215.800, 0.276	215.800, 0.211	215.800, 0.271	215.800, -0.034
1081	216.000, 0.355	216.000, 0.200	216.000, 0.276	216.000, 0.211	216.000, 0.271	216.000, -0.034
1082	216.200, 0.355	216.200, 0.200	216.200, 0.275	216.200, 0.211	216.200, 0.271	216.200, -0.034
1083	216.400, 0.354	216.400, 0.199	216.400, 0.275	216.400, 0.211	216.400, 0.270	216.400, -0.034
1084	216.600, 0.354	216.600, 0.199	216.600, 0.275	216.600, 0.211	216.600, 0.270	216.600, -0.033
1085	216.800, 0.354	216.800, 0.198	216.800, 0.274	216.800, 0.211	216.800, 0.270	216.800, -0.033
1086	217.000, 0.354	217.000, 0.198	217.000, 0.274	217.000, 0.211	217.000, 0.270	217.000, -0.033
1087	217.200, 0.353	217.200, 0.198	217.200, 0.274	217.200, 0.210	217.200, 0.269	217.200, -0.033
1088	217.400, 0.353	217.400, 0.198	217.400, 0.273	217.400, 0.210	217.400, 0.269	217.400, -0.033
1089	217.600, 0.353	217.600, 0.198	217.600, 0.273	217.600, 0.210	217.600, 0.269	217.600, -0.033
1090	217.800, 0.353	217.800, 0.198	217.800, 0.273	217.800, 0.209	217.800, 0.269	217.800, -0.033
1091	218.000, 0.353	218.000, 0.198	218.000, 0.273	218.000, 0.209	218.000, 0.269	218.000, -0.033
1092	218.200, 0.352	218.200, 0.198	218.200, 0.273	218.200, 0.209	218.200, 0.268	218.200, -0.033
1093	218.400, 0.352	218.400, 0.198	218.400, 0.273	218.400, 0.209	218.400, 0.268	218.400, -0.033
1094	218.600, 0.352	218.600, 0.198	218.600, 0.273	218.600, 0.209	218.600, 0.268	218.600, -0.033
1095	218.800, 0.352	218.800, 0.198	218.800, 0.272	218.800, 0.209	218.800, 0.268	218.800, -0.033
1096	219.000, 0.352	219.000, 0.198	219.000, 0.272	219.000, 0.209	219.000, 0.268	219.000, -0.033
1097	219.200, 0.351	219.200, 0.198	219.200, 0.272	219.200, 0.208	219.200, 0.268	219.200, -0.033
1098	219.400, 0.351	219.400, 0.198	219.400, 0.272	219.400, 0.208	219.400, 0.267	219.400, -0.033
1099	219.600, 0.351	219.600, 0.199	219.600, 0.272	219.600, 0.208	219.600, 0.267	219.600, -0.033
1100	219.800, 0.351	219.800, 0.199	219.800, 0.272	219.800, 0.208	219.800, 0.267	219.800, -0.033
1101	220.000, 0.351	220.000, 0.199	220.000, 0.271	220.000, 0.208	220.000, 0.266	220.000, -0.032
1102	220.200, 0.351	220.200, 0.198	220.200, 0.271	220.200, 0.208	220.200, 0.266	220.200, -0.032
1103	220.400, 0.351	220.400, 0.198	220.400, 0.271	220.400, 0.208	220.400, 0.265	220.400, -0.032
1104	220.600, 0.351	220.600, 0.198	220.600, 0.271	220.600, 0.207	220.600, 0.265	220.600, -0.032
1105	220.800, 0.351	220.800, 0.198	220.800, 0.271	220.800, 0.207	220.800, 0.265	220.800, -0.032
1106	221.000, 0.351	221.000, 0.198	221.000, 0.271	221.000, 0.207	221.000, 0.265	221.000, -0.032
1107	221.200, 0.351	221.200, 0.197	221.200, 0.271	221.200, 0.207	221.200, 0.265	221.200, -0.032
1108	221.400, 0.350	221.400, 0.197	221.400, 0.271	221.400, 0.206	221.400, 0.265	221.400, -0.032
1109	221.600, 0.350	221.600, 0.197	221.600, 0.271	221.600, 0.206	221.600, 0.265	221.600, -0.032
1110	221.800, 0.350	221.800, 0.197	221.800, 0.271	221.800, 0.206	221.800, 0.266	221.800, -0.031
1111	222.000, 0.349	222.000, 0.197	222.000, 0.271	222.000, 0.206	222.000, 0.266	222.000, -0.031
1112	222.200, 0.349	222.200, 0.196	222.200, 0.270	222.200, 0.206	222.200, 0.266	222.200, -0.031
1113	222.400, 0.349	222.400, 0.196	222.400, 0.270	222.400, 0.206	222.400, 0.266	222.400, -0.031
1114	222.600, 0.348	222.600, 0.197	222.600, 0.269	222.600, 0.206	222.600, 0.266	222.600, -0.031
1115	222.800, 0.348	222.800, 0.197	222.800, 0.269	222.800, 0.206	222.800, 0.266	222.800, -0.032
1116	223.000, 0.348	223.000, 0.197	223.000, 0.268	223.000, 0.206	223.000, 0.266	223.000, -0.032
1117	223.200, 0.348	223.200, 0.197	223.200, 0.268	223.200, 0.206	223.200, 0.266	223.200, -0.032
1118	223.400, 0.348	223.400, 0.197	223.400, 0.268	223.400, 0.206	223.400, 0.265	223.400, -0.032
1119	223.600, 0.348	223.600, 0.197	223.600, 0.268	223.600, 0.205	223.600, 0.265	223.600, -0.032
1120	223.800, 0.348	223.800, 0.197	223.800, 0.267	223.800, 0.205	223.800, 0.264	223.800, -0.033
1121	224.000, 0.348	224.000, 0.197	224.000, 0.267	224.000, 0.205	224.000, 0.264	224.000, -0.033
1122	224.200, 0.348	224.200, 0.197	224.200, 0.267	224.200, 0.204	224.200, 0.264	224.200, -0.033
1123	224.400, 0.348	224.400, 0.197	224.400, 0.267	224.400, 0.204	224.400, 0.264	224.400, -0.033
1124	224.600, 0.348	224.600, 0.197	224.600, 0.267	224.600, 0.203	224.600, 0.263	224.600, -0.034
1125	224.800, 0.348	224.800, 0.196	224.800, 0.267	224.800, 0.203	224.800, 0.263	224.800, -0.034
1126	225.000, 0.347	225.000, 0.196	225.000, 0.268	225.000, 0.202	225.000, 0.263	225.000, -0.034
1127	225.200, 0.347	225.200, 0.196	225.200, 0.268	225.200, 0.202	225.200, 0.263	225.200, -0.034
1128	225.400, 0.347	225.400, 0.195	225.400, 0.268	225.400, 0.202	225.400, 0.262	225.400, -0.034
1129	225.600, 0.346	225.600, 0.195	225.600, 0.268	225.600, 0.201	225.600, 0.262	225.600, -0.034
1130	225.800, 0.346	225.800, 0.195	225.800, 0.268	225.800, 0.201	225.800, 0.262	225.800, -0.034
1131	226.000, 0.345	226.000, 0.194	226.000, 0.267	226.000, 0.201	226.000, 0.261	226.000, -0.034
1132	226.200, 0.345	226.200, 0.194	226.200, 0.267	226.200, 0.201	226.200, 0.261	226.200, -0.034
1133	226.400, 0.345	226.400, 0.194	226.400, 0.267	226.400, 0.201	226.400, 0.261	226.400, -0.034
1134	226.600, 0.345	226.600, 0.194	226.600, 0.266	226.600, 0.201	226.600, 0.261	226.600, -0.034
1135	226.800, 0.345	226.800, 0.194	226.800, 0.266	226.800, 0.201	226.800, 0.261	226.800, -0.034
1136	227.000, 0.344	227.000, 0.194	227.000, 0.266	227.000, 0.201	227.000, 0.261	227.000, -0.034
1137	227.200, 0.344	227.200, 0.194	227.200, 0.266	227.200, 0.201	227.200, 0.261	227.200, -0.034
1138	227.400, 0.344	227.400, 0.194	227.400, 0.266	227.400, 0.201	227.400, 0.261	227.400, -0.034
1139	227.600, 0.344	227.600, 0.194	227.600, 0.266	227.600, 0.201	227.600, 0.261	227.600, -0.033
1140	227.800, 0.344	227.800, 0.194	227.800, 0.265	227.800, 0.200	227.800, 0.261	227.800, -0.033
1141	228.000, 0.344	228.000, 0.194	228.000, 0.265	228.000, 0.200	228.000, 0.261	228.000, -0.033
1142	228.200, 0.344	228.200, 0.194	228.200, 0.265	228.200, 0.200	228.200, 0.261	228.200, -0.033
1143	228.400, 0.344	228.400, 0.194	228.400, 0.265	228.400, 0.200	228.400, 0.261	228.400, -0.033
1144	228.600, 0.344	228.600, 0.194	228.600, 0.265	228.600, 0.200	228.600, 0.261	228.600, -0.033
1145	228.800, 0.344	228.800, 0.194	228.800, 0.265	228.800, 0.200	228.800, 0.261	228.800, -0.033
1146	229.000, 0.344	229.000, 0.194	229.000, 0.264	229.000, 0.199	229.000, 0.261	229.000, -0.033
1147	229.200, 0.344	229.200, 0.194	229.200, 0.264	229.200, 0.199	229.200, 0.260	229.200, -0.033
1148	229.400, 0.344	229.400, 0.194	229.400, 0.264	229.400, 0.199	229.400, 0.260	229.400, -0.033
1149	229.600, 0.344	229.600, 0.194	229.600, 0.264	229.600, 0.198	229.600, 0.260	229.600, -0.034
1150	229.800, 0.344	229.800, 0.194	229.800, 0.264	229.800, 0.198	229.800, 0.260	229.800, -0.034
1151	230.000, 0.344	230.000, 0.193	230.000, 0.263	230.000, 0.198	230.000, 0.260	230.000, -0.034
1152	230.200, 0.344	230.200, 0.193	230.200, 0.263	230.200, 0.198	230.200, 0.260	230.200, -0.034
1153	230.400, 0.343	230.400, 0.193	230.400, 0.263	230.400, 0.197	230.400, 0.260	230.400, -0.034
1154	230.600, 0.343	230.600, 0.193	230.600, 0.263	230.600, 0.197	230.600, 0.260	230.600, -0.034
1155	230.800, 0.343	230.800, 0.193	230.800, 0.263	230.800, 0.197	230.800, 0.260	230.800, -0.033
1156	231.000, 0.343	231.000, 0.193	231.000, 0.263	231.000, 0.197	231.000, 0.259	231.000, -0.033
1157	231.200, 0.343	231.200, 0.193	231.200, 0.262	231.200, 0.197	231.200, 0.259	231.200, -0.033
1158	231.400, 0.342	231.400, 0.193	231.400, 0.262	231.400, 0.197	231.400, 0.259	231.400, -0.033
1159	231.600, 0.342	231.600, 0.193	231.600, 0.262	231.600, 0.197	231.600, 0.259	231.600, -0.033
1160	231.800, 0.342	231.800, 0.193	231.800, 0.262	231.800, 0.197	231.800, 0.258	231.800, -0.033
1161	232.000, 0.342	232.000, 0.193	232.000, 0.262	232.000, 0.197	232.000, 0.258	232.000, -0.033
1162	232.200, 0.342	232.200, 0.193	232.200, 0.263	232.200, 0.197	232.200, 0.258	232.200, -0.033
1163	232.400, 0.342	232.400, 0.193	232.400, 0.263	232.400, 0.197	232.400, 0.258	232.400, -0.032
1164	232.600, 0.342	232.600, 0.192	232.600, 0.263	232.600, 0.197	232.600, 0.258	232.600, -0.032
1165	232.800, 0.342	232.800, 0.192	232.800, 0.263	232.800, 0.197	232.800, 0.258	232.800, -0.033
1166	233.000, 0.342	233.000, 0.192	233.000, 0.263	233.000, 0.196	233.000, 0.258	233.000, -0.033
1167	233.200, 0.342	233.200, 0.192	233.200, 0.263	233.200, 0.196	233.200, 0.258	233.200, -0.033
1168	233.400, 0.342	233.400, 0.192	233.400, 0.263	233.400, 0.196	233.400, 0.258	233.400, -0.033
1169	233.600, 0.341	233.600, 0.192	233.600, 0.262	233.600, 0.196	233.600, 0.258	233.600, -0.033
1170	233.800, 0.341	233.800, 0.192	233.800, 0.262	233.800, 0.196	233.800, 0.258	233.800, -0.033
1171	234.000, 0.341	234.000, 0.192	234.000, 0.262	234.000, 0.196	234.000, 0.257	234.000, -0.033
1172	234.200, 0.340	234.200, 0.192	234.200, 0.262	234.200, 0.196	234.200, 0.257	234.200, -0.033
1173	234.400, 0.340	234.400, 0.191	234.400, 0.262	234.400, 0.195	234.400, 0.257	234.400, -0.033
1174	234.600, 0.340	234.600, 0.191	234.600, 0.261	234.600, 0.195	234.600, 0.257	234.600, -0.033
1175	234.800, 0.340	234.800, 0.191	234.800, 0.261	234.800, 0.194	234.800, 0.257	234.800, -0.033
1176	235.000, 0.340	235.000, 0.191	235.000, 0.261	235.000, 0.194	235.000, 0.257	235.000, -0.033
1177	235.200, 0.340	235.200, 0.191	235.200, 0.260	235.200, 0.194	235.200, 0.257	235.200, -0.033
1178	235.400, 0.340	235.400, 0.191	235.400, 0.260	235.400, 0.194	235.400, 0.257	235.400, -0.033
1179	235.600, 0.340	235.600, 0.191	235.600, 0.260	235.600, 0.194	235.600, 0.256	235.600, -0.033
1180	235.800, 0.340	235.800, 0.191	235.800, 0.260	235.800, 0.194	235.800, 0.256	235.800, -0.033
1181	236.000, 0.340	236.000, 0.191	236.000, 0.260	236.000, 0.194	236.000, 0.256	236.000, -0.033
1182	236.200, 0.340	236.200, 0.191	236.200, 0.260	236.200, 0.194	236.200, 0.256	236.200, -0.033
1183	236.400, 0.340	236.400, 0.191	236.400, 0.260	236.400, 0.194	236.400, 0.256	236.400, -0.033
1184	236.600, 0.339	236.600, 0.191	236.600, 0.260	236.600, 0.194	236.600, 0.256	236.600, -0.034
1185	236.800, 0.339	236.800, 0.191	236.800, 0.260	236.800, 0.194	236.800, 0.256	236.800, -0.034
1186	237.000, 0.339	237.000, 0.191	237.000, 0.260	237.000, 0.194	237.000, 0.255	237.000, -0.034
1187	237.200, 0.338	237.200, 0.190	237.200, 0.260	237.200, 0.194	237.200, 0.255	237.200, -0.034
1188	237.400, 0.338	237.400, 0.190	237.400, 0.260	237.400, 0.194	237.400, 0.255	237.400, -0.034
1189	237.600, 0.338	237.600, 0.190	237.600, 0.260	237.600, 0.194	237.600, 0.255	237.600, -0.034
1190	237.800, 0.337	237.800, 0.190	237.800, 0.260	237.800, 0.194	237.800, 0.255	237.800, -0.033
1191	238.000, 0.337	238.000, 0.190	238.000, 0.260	238.000, 0.194	238.000, 0.254	238.000, -0.033
1192	238.200, 0.337	238.200, 0.190	238.200, 0.260	238.200, 0.193	238.200, 0.254	238.200, -0.033
1193	238.400, 0.336	238.400, 0.190	238.400, 0.260	238.400, 0.193	238.400, 0.254	238.400, -0.033
1194	238.600, 0.336	238.600, 0.190	238.600, 0.260	238.600, 0.193	238.600, 0.254	238.600, -0.032
1195	238.800, 0.336	238.800, 0.190	238.800, 0.260	238.800, 0.192	238.800, 0.254	238.800, -0.032
1196	239.000, 0.336	239.000, 0.190	239.000, 0.260	239.000, 0.192	239.000, 0.254	239.000, -0.032
1197	239.200, 0.336	239.200, 0.190	239.200, 0.260	239.200, 0.192	239.200, 0.254	239.200, -0.032
1198	239.400, 0.336	239.400, 0.190	239.400, 0.260	239.400, 0.192	239.400, 0.254	239.400, -0.032
1199	239.600, 0.336	239.600, 0.190	239.600, 0.260	239.600, 0.191	239.600, 0.254	239.600, -0.032
1200	239.800, 0.337	239.800, 0.189	239.800, 0.259	239.800, 0.191	239.800, 0.254	239.800, -0.032
1201	240.000, 0.337	240.000, 0.189	240.000, 0.259	240.000, 0.191	240.000, 0.254	240.000, -0.032
1202	240.200, 0.337	240.200, 0.189	240.200, 0.259	240.200, 0.191	240.200, 0.255	240.200, -0.033
1203	240.400, 0.337	240.400, 0.188	240.400, 0.259	240.400, 0.191	240.400, 0.255	240.400, -0.033
1204	240.600, 0.336	240.600, 0.188	240.600, 0.259	240.600, 0.191	240.600, 0.255	240.600, -0.033
1205	240.800, 0.336	240.800, 0.188	240.800, 0.259	240.800, 0.191	240.800, 0.255	240.800, -0.033
1206	241.000, 0.336	241.000, 0.188	241.000, 0.259	241.000, 0.191	241.000, 0.255	241.000, -0.033
1207	241.200, 0.336	241.200, 0.188	241.200, 0.259	241.200, 0.191	241.200, 0.255	241.200, -0.033
1208	241.400, 0.336	241.400, 0.188	241.400, 0.259	241.400, 0.190	241.400, 0.254	241.400, -0.033
1209	241.600, 0.335	241.600, 0.189	241.600, 0.258	241.600, 0.190	241.600, 0.254	241.600, -0.033
1210	241.800, 0.335	241.800, 0.189	241.800, 0.258	241.800, 0.190	241.800, 0.253	241.800, -0.033
1211	242.000, 0.335	242.000, 0.189	242.000, 0.258	242.000, 0.190	242.000, 0.253	242.000, -0.033
1212	242.200, 0.334	242.200, 0.190	242.200, 0.257	242.200, 0.190	242.200, 0.252	242.200, -0.033
1213	242.400, 0.334	242.400, 0.190	242.400, 0.257	242.400, 0.190	242.400, 0.252	242.400, -0.033
1214	242.600, 0.334	242.600, 0.190	242.600, 0.257	242.600, 0.189	242.600, 0.252	242.600, -0.033
1215	242.800, 0.334	242.800, 0.191	242.800, 0.257	242.800, 0.189	242.800, 0.252	242.800, -0.033
1216	243.000, 0.334	243.000, 0.191	243.000, 0.257	243.000, 0.189	243.000, 0.252	243.000, -0.033
1217	243.200, 0.335	243.200, 0.191	243.200, 0.257	243.200, 0.189	243.200, 0.252	243.200, -0.033
1218	243.400, 0.335	243.400, 0.191	243.400, 0.257	243.400, 0.189	243.400, 0.251	243.400, -0.033
1219	243.600, 0.335	243.600, 0.190	243.600, 0.257	243.600, 0.189	243.600, 0.252	243.600, -0.033
1220	243.800, 0.335	243.800, 0.190	243.800, 0.257	243.800, 0.189	243.800, 0.252	243.800, -0.033
1221	244.000, 0.335	244.000, 0.190	244.000, 0.256	244.000, 0.189	244.000, 0.252	244.000, -0.033
1222	244.200, 0.335	244.200, 0.189	244.200, 0.256	244.200, 0.189	244.200, 0.252	244.200, -0.033
1223	244.400, 0.334	244.400, 0.189	244.400, 0.256	244.400, 0.189	244.400, 0.252	244.400, -0.033
1224	244.600, 0.334	244.600, 0.188	244.600, 0.255	244.600, 0.190	244.600, 0.252	244.600, -0.033
1225	244.800, 0.334	244.800, 0.188	244.800, 0.255	244.800, 0.190	244.800, 0.252	244.800, -0.034
1226	245.000, 0.334	245.000, 0.188	245.000, 0.255	245.000, 0.190	245.000, 0.252	245.000, -0.034
1227	245.200, 0.333	245.200, 0.188	245.200, 0.254	245.200, 0.190	245.200, 0.252	245.200, -0.034
1228	245.400, 0.333	245.400, 0.187	245.400, 0.254	245.400, 0.189	245.400, 0.252	245.400, -0.034
1229	245.600, 0.333	245.600, 0.187	245.600, 0.254	245.600, 0.189	245.600, 0.252	245.600, -0.034
1230	245.800, 0.332	245.800, 0.187	245.800, 0.254	245.800, 0.189	245.800, 0.251	245.800, -0.034
1231	246.000, 0.332	246.000, 0.187	246.000, 0.254	246.000, 0.188	246.000, 0.251	246.000, -0.034
1232	246.200, 0.332	246.200, 0.187	246.200, 0.254	246.200, 0.188	246.200, 0.251	246.200, -0.034
1233	246.400, 0.332	246.400, 0.187	246.400, 0.254	246.400, 0.188	246.400, 0.251	246.400, -0.034
1234	246.600, 0.332	246.600, 0.188	246.600, 0.254	246.600, 0.188	246.600, 0.251	246.600, -0.033
1235	246.800, 0.332	246.800, 0.188	246.800, 0.255	246.800, 0.188	246.800, 0.250	246.800, -0.033
1236	247.000, 0.332	247.000, 0.188	247.000, 0.255	247.000, 0.187	247.000, 0.250	247.000, -0.033
1237	247.200, 0.332	247.200, 0.188	247.200, 0.255	247.200, 0.187	247.200, 0.249	247.200, -0.033
1238	247.400, 0.332	247.400, 0.188	247.400, 0.256	247.400, 0.187	247.400, 0.249	247.400, -0.033
1239	247.600, 0.332	247.600, 0.188	247.600, 0.256	247.600, 0.187	247.600, 0.248	247.600, -0.033
1240	247.800, 0.332	247.800, 0.189	247.800, 0.255	247.800, 0.186	247.800, 0.248	247.800, -0.033
1241	248.000, 0.332	248.000, 0.188	248.000, 0.255	248.000, 0.186	248.000, 0.247	248.000, -0.033
1242	248.200, 0.331	248.200, 0.188	248.200, 0.255	248.200, 0.186	248.200, 0.247	248.200, -0.033
1243	248.400, 0.331	248.400, 0.188	248.400, 0.254	248.400, 0.186	248.400, 0.247	248.400, -0.034
1244	248.600, 0.331	248.600, 0.188	248.600, 0.254	248.600, 0.186	248.600, 0.247	248.600, -0.034
1245	248.800, 0.331	248.800, 0.188	248.800, 0.254	248.800, 0.186	248.800, 0.247	248.800, -0.033
1246	249.000, 0.330	249.000, 0.188	249.000, 0.253	249.000, 0.186	249.000, 0.247	249.000, -0.033
1247	249.200, 0.330	249.200, 0.188	249.200, 0.253	249.200, 0.186	249.200, 0.247	249.200, -0.033
1248	249.400, 0.330	249.400, 0.188	249.400, 0.253	249.400, 0.185	249.400, 0.247	249.400, -0.033
1249	249.600, 0.330	249.600, 0.187	249.600, 0.253	249.600, 0.185	249.600, 0.247	249.600, -0.032
1250	249.800, 0.330	249.800, 0.187	249.800, 0.252	249.800, 0.185	249.800, 0.248	249.800, -0.032
1251	250.000, 0.330	250.000, 0.187	250.000, 0.252	250.000, 0.185	250.000, 0.248	250.000, -0.032
1252	250.200, 0.330	250.200, 0.187	250.200, 0.252	250.200, 0.185	250.200, 0.248	250.200, -0.032
1253	250.400, 0.330	250.400, 0.187	250.400, 0.252	250.400, 0.185	250.400, 0.248	250.400, -0.032
1254	250.600, 0.330	250.600, 0.187	250.600, 0.252	250.600, 0.185	250.600, 0.248	250.600, -0.032
1255	250.800, 0.331	250.800, 0.187	250.800, 0.252	250.800, 0.185	250.800, 0.248	250.800, -0.032
1256	251.000, 0.331	251.000, 0.187	251.000, 0.252	251.000, 0.185	251.000, 0.248	251.000, -0.032
1257	251.200, 0.331	251.200, 0.187	251.200, 0.252	251.200, 0.185	251.200, 0.248	251.200, -0.033
1258	251.400, 0.330	251.400, 0.187	251.400, 0.252	251.400, 0.185	251.400, 0.248	251.400, -0.033
1259	251.600, 0.330	251.600, 0.187	251.600, 0.253	251.600, 0.184	251.600, 0.248	251.600, -0.033
1260	251.800, 0.330	251.800, 0.187	251.800, 0.253	251.800, 0.184	251.800, 0.248	251.800, -0.033
1261	252.000, 0.330	252.000, 0.187	252.000, 0.253	252.000, 0.184	252.000, 0.247	252.000, -0.033
1262	252.200, 0.329	252.200, 0.186	252.200, 0.253	252.200, 0.184	252.200, 0.247	252.200, -0.033
1263	252.400, 0.329	252.400, 0.186	252.400, 0.253	252.400, 0.184	252.400, 0.247	252.400, -0.033
1264	252.600, 0.329	252.600, 0.186	252.600, 0.253	252.600, 0.183	252.600, 0.247	252.600, -0.033
1265	252.800, 0.329	252.800, 0.186	252.800, 0.253	252.800, 0.183	252.800, 0.247	252.800, -0.033
1266	253.000, 0.329	253.000, 0.186	253.000, 0.253	253.000, 0.183	253.000, 0.246	253.000, -0.033
1267	253.200, 0.329	253.200, 0.186	253.200, 0.253	253.200, 0.183	253.200, 0.246	253.200, -0.033
1268	253.400, 0.329	253.400, 0.185	253.400, 0.252	253.400, 0.183	253.400, 0.246	253.400, -0.032
1269	253.600, 0.329	253.600, 0.186	253.600, 0.252	253.600, 0.184	253.600, 0.245	253.600, -0.032
1270	253.800, 0.329	253.800, 0.186	253.800, 0.252	253.800, 0.184	253.800, 0.245	253.800, -0.032
1271	254.000, 0.329	254.000, 0.186	254.000, 0.252	254.000, 0.184	254.000, 0.245	254.000, -0.032
1272	254.200, 0.328	254.200, 0.186	254.200, 0.251	254.200, 0.184	254.200, 0.244	254.200, -0.032
1273	254.400, 0.328	254.400, 0.186	254.400, 0.251	254.400, 0.184	254.400, 0.245	254.400, -0.033
1274	254.600, 0.328	254.600, 0.186	254.600, 0.251	254.600, 0.184	254.600, 0.245	254.600, -0.033
1275	254.800, 0.328	254.800, 0.186	254.800, 0.251	254.800, 0.184	254.800, 0.245	254.800, -0.033
1276	255.000, 0.328	255.000, 0.186	255.000, 0.251	255.000, 0.184	255.000, 0.245	255.000, -0.033
1277	255.200, 0.328	255.200, 0.186	255.200, 0.251	255.200, 0.183	255.200, 0.245	255.200, -0.033
1278	255.400, 0.328	255.400, 0.186	255.400, 0.251	255.400, 0.183	255.400, 0.245	255.400, -0.033
1279	255.600, 0.328	255.600, 0.186	255.600, 0.250	255.600, 0.183	255.600, 0.245	255.600, -0.033
1280	255.800, 0.327	255.800, 0.186	255.800, 0.250	255.800, 0.183	255.800, 0.245	255.800, -0.033
1281	256.000, 0.327	256.000, 0.186	256.000, 0.250	256.000, 0.182	256.000, 0.245	256.000, -0.033
1282	256.200, 0.327	256.200, 0.186	256.200, 0.250	256.200, 0.182	256.200, 0.245	256.200, -0.033
1283	256.400, 0.327	256.400, 0.186	256.400, 0.250	256.400, 0.182	256.400, 0.245	256.400, -0.033
1284	256.600, 0.327	256.600, 0.186	256.600, 0.250	256.600, 0.181	256.600, 0.244	256.600, -0.033
1285	256.800, 0.327	256.800, 0.186	256.800, 0.250	256.800, 0.181	256.800, 0.244	256.800, -0.033
1286	257.000, 0.327	257.000, 0.186	257.000, 0.250	257.000, 0.181	257.000, 0.244	257.000, -0.034
1287	257.200, 0.327	257.200, 0.186	257.200, 0.250	257.200, 0.181	257.200, 0.243	257.200, -0.034
1288	257.400, 0.327	257.400, 0.186	257.400, 0.250	257.400, 0.181	257.400, 0.243	257.400, -0.034
1289	257.600, 0.327	257.600, 0.186	257.600, 0.250	257.600, 0.181	257.600, 0.243	257.600, -0.033
1290	257.800, 0.327	257.800, 0.186	257.800, 0.250	257.800, 0.181	257.800, 0.243	257.800, -0.034
1291	258.000, 0.327	258.000, 0.186	258.000, 0.250	258.000, 0.181	258.000, 0.243	258.000, -0.034
1292	258.200, 0.326	258.200, 0.186	258.200, 0.250	258.200, 0.181	258.200, 0.243	258.200, -0.034
1293	258.400, 0.326	258.400, 0.186	258.400, 0.250	258.400, 0.181	258.400, 0.243	258.400, -0.034
1294	258.600, 0.326	258.600, 0.185	258.600, 0.249	258.600, 0.182	258.600, 0.243	258.600, -0.034
1295	258.800, 0.326	258.800, 0.185	258.800, 0.249	258.800, 0.182	258.800, 0.244	258.800, -0.034
1296	259.000, 0.326	259.000, 0.185	259.000, 0.249	259.000, 0.182	259.000, 0.244	259.000, -0.034
1297	259.200, 0.326	259.200, 0.185	259.200, 0.248	259.200, 0.182	259.200, 0.244	259.200, -0.034
1298	259.400, 0.326	259.400, 0.185	259.400, 0.248	259.400, 0.182	259.400, 0.244	259.400, -0.033
1299	259.600, 0.326	259.600, 0.184	259.600, 0.248	259.600, 0.183	259.600, 0.244	259.600, -0.033
1300	259.800, 0.326	259.800, 0.184	259.800, 0.248	259.800, 0.183	259.800, 0.244	259.800, -0.033
1301	260.000, 0.326	260.000, 0.184	260.000, 0.248	260.000, 0.183	260.000, 0.243	260.000, -0.033
1302	260.200, 0.326	260.200, 0.184	260.200, 0.248	260.200, 0.183	260.200, 0.243	260.200, -0.033
1303	260.400, 0.325	260.400, 0.184	260.400, 0.248	260.400, 0.183	260.400, 0.243	260.400, -0.033
1304	260.600, 0.325	260.600, 0.184	260.600, 0.249	260.600, 0.182	260.600, 0.243	260.600, -0.033
1305	260.800, 0.325	260.800, 0.184	260.800, 0.249	260.800, 0.182	260.800, 0.243	260.800, -0.033
1306	261.000, 0.325	261.000, 0.184	261.000, 0.249	261.000, 0.182	261.000, 0.243	261.000, -0.033
1307	261.200, 0.325	261.200, 0.184	261.200, 0.249	261.200, 0.182	261.200, 0.243	261.200, -0.033
1308	261.400, 0.325	261.400, 0.185	261.400, 0.249	261.400, 0.182	261.400, 0.242	261.400, -0.033
1309	261.600, 0.325	261.600, 0.185	261.600, 0.249	261.600, 0.182	261.600, 0.242	261.600, -0.033
1310	261.800, 0.325	261.800, 0.185	261.800, 0.249	261.800, 0.182	261.800, 0.242	261.800, -0.033
1311	262.000, 0.325	262.000, 0.185	262.000, 0.249	262.000, 0.182	262.000, 0.242	262.000, -0.033
1312	262.200, 0.324	262.200, 0.185	262.200, 0.248	262.200, 0.182	262.200, 0.241	262.200, -0.033
1313	262.400, 0.324	262.400, 0.185	262.400, 0.248	262.400, 0.182	262.400, 0.241	262.400, -0.033
1314	262.600, 0.324	262.600, 0.185	262.600, 0.247	262.600, 0.182	262.600, 0.241	262.600, -0.033
1315	262.800, 0.324	262.800, 0.185	262.800, 0.247	262.800, 0.182	262.800, 0.241	262.800, -0.033
1316	263.000, 0.324	263.000, 0.185	263.000, 0.247	263.000, 0.182	263.000, 0.240	263.000, -0.033
1317	263.200, 0.324	263.200, 0.185	263.200, 0.247	263.200, 0.182	263.200, 0.240	263.200, -0.033
1318	263.400, 0.323	263.400, 0.185	263.400, 0.247	263.400, 0.182	263.400, 0.240	263.400, -0.033
1319	263.600, 0.323	263.600, 0.185	263.600, 0.247	263.600, 0.181	263.600, 0.240	263.600, -0.033
1320	263.800, 0.323	263.800, 0.185	263.800, 0.247	263.800, 0.181	263.800, 0.241	263.800, -0.033
1321	264.000, 0.323	264.000, 0.184	264.000, 0.247	264.000, 0.181	264.000, 0.241	264.000, -0.033
1322	264.200, 0.322	264.200, 0.184	264.200, 0.247	264.200, 0.180	264.200, 0.241	264.200, -0.033
1323	264.400, 0.322	264.400, 0.184	264.400, 0.247	264.400, 0.180	264.400, 0.241	264.400, -0.033
1324	264.600, 0.322	264.600, 0.184	264.600, 0.247	264.600, 0.180	264.600, 0.241	264.600, -0.033
1325	264.800, 0.322	264.800, 0.184	264.800, 0.247	264.800, 0.179	264.800, 0.241	264.800, -0.033
1326	265.000, 0.322	265.000, 0.183	265.000, 0.247	265.000, 0.179	265.000, 0.242	265.000, -0.033
1327	265.200, 0.321	265.200, 0.183	265.200, 0.247	265.200, 0.179	265.200, 0.242	265.200, -0.033
1328	265.400, 0.321	265.400, 0.183	265.400, 0.247	265.400, 0.179	265.400, 0.242	265.400, -0.034
1329	265.600, 0.321	265.600, 0.183	265.600, 0.247	265.600, 0.179	265.600, 0.242	265.600, -0.034
1330	265.800, 0.321	265.800, 0.183	265.800, 0.246	265.800, 0.179	265.800, 0.241	265.800, -0.034
1331	266.000, 0.321	266.000, 0.183	266.000, 0.246	266.000, 0.179	266.000, 0.241	266.000, -0.034
1332	266.200, 0.321	266.200, 0.183	266.200, 0.246	266.200, 0.179	266.200, 0.241	266.200, -0.034
1333	266.400, 0.321	266.400, 0.182	266.400, 0.246	266.400, 0.179	266.400, 0.241	266.400, -0.034
1334	266.600, 0.321	266.600, 0.182	266.600, 0.246	266.600, 0.178	266.600, 0.241	266.600, -0.034
1335	266.800, 0.322	266.800, 0.182	266.800, 0.246	266.800, 0.178	266.800, 0.240	266.800, -0.033
1336	267.000, 0.321	267.000, 0.182	267.000, 0.247	267.000, 0.178	267.000, 0.240	267.000, -0.034
1337	267.200, 0.321	267.200, 0.182	267.200, 0.247	267.200, 0.178	267.200, 0.240	267.200, -0.034
1338	267.400, 0.321	267.400, 0.182	267.400, 0.247	267.400, 0.177	267.400, 0.240	267.400, -0.034
1339	267.600, 0.321	267.600, 0.182	267.600, 0.247	267.600, 0.177	267.600, 0.240	267.600, -0.034
1340	267.800, 0.321	267.800, 0.182	267.800, 0.247	267.800, 0.177	267.800, 0.240	267.800, -0.034
1341	268.000, 0.320	268.000, 0.182	268.000, 0.246	268.000, 0.177	268.000, 0.239	268.000, -0.034
1342	268.200, 0.320	268.200, 0.182	268.200, 0.246	268.200, 0.177	268.200, 0.239	268.200, -0.034
1343	268.400, 0.320	268.400, 0.182	268.400, 0.246	268.400, 0.177	268.400, 0.239	268.400, -0.034
1344	268.600, 0.320	268.600, 0.182	268.600, 0.245	268.600, 0.178	268.600, 0.239	268.600, -0.034
1345	268.800, 0.320	268.800, 0.182	268.800, 0.245	268.800, 0.178	268.800, 0.240	268.800, -0.033
1346	269.000, 0.320	269.000, 0.182	269.000, 0.245	269.000, 0.178	269.000, 0.240	269.000, -0.033
1347	269.200, 0.320	269.200, 0.182	269.200, 0.244	269.200, 0.179	269.200, 0.240	269.200, -0.033
1348	269.400, 0.319	269.400, 0.182	269.400, 0.244	269.400, 0.179	269.400, 0.240	269.400, -0.033
1349	269.600, 0.319	269.600, 0.181	269.600, 0.244	269.600, 0.180	269.600, 0.240	269.600, -0.032
1350	269.800, 0.320	269.800, 0.181	269.800, 0.243	269.800, 0.180	269.800, 0.241	269.800, -0.032
1351	,	,	,	,	,	,
1352	,	,	,	,	,	,
1353	,	,	,	,	,	,
1354	,	,	,	,	,	,
1355	,	,	,	,	,	,
1356	,	,	,	,	,	,
1357	,	,	,	,	,	,
1358	,	,	,	,	,	,
1359	,	,	,	,	,	,
1360	,	,	,	,	,	,
1361	,	,	,	,	,	,
1362	,	,	,	,	,	,
1363	,	,	,	,	,	,
1364	,	,	,	,	,	,
1365	,	,	,	,	,	,
1366	,	,	,	,	,	,
1367	,	,	,	,	,	,
1368	,	,	,	,	,	,
1369	,	,	,	,	,	,
1370	,	,	,	,	,	,
1371	,	,	,	,	,	,
1372	,	,	,	,	,	,
1373	,	,	,	,	,	,
1374	,	,	,	,	,	,
1375	,	,	,	,	,	,
1376	,	,	,	,	,	,
1377	,	,	,	,	,	,
1378	,	,	,	,	,	,
1379	,	,	,	,	,	,
1380	,	,	,	,	,	,
1381	,	,	,	,	,	,
1382	,	,	,	,	,	,
1383	,	,	,	,	,	,
1384	,	,	,	,	,	,
1385	,	,	,	,	,	,
1386	,	,	,	,	,	,
1387	,	,	,	,	,	,
1388	,	,	,	,	,	,
1389	,	,	,	,	,	,
1390	,	,	,	,	,	,
1391	,	,	,	,	,	,
1392	,	,	,	,	,	,
1393	,	,	,	,	,	,
1394	,	,	,	,	,	,
1395	,	,	,	,	,	,
1396	,	,	,	,	,	,
1397	,	,	,	,	,	,
1398	,	,	,	,	,	,
1399	,	,	,	,	,	,
1400	,	,	,	,	,	,
1401	,	,	,	,	,	,
1402	,	,	,	,	,	,
1403	,	,	,	,	,	,
1404	,	,	,	,	,	,
1405	,	,	,	,	,	,
1406	,	,	,	,	,	,
1407	,	,	,	,	,	,
1408	,	,	,	,	,	,
1409	,	,	,	,	,	,
1410	,	,	,	,	,	,
1411	,	,	,	,	,	,
1412	,	,	,	,	,	,
1413	,	,	,	,	,	,
1414	,	,	,	,	,	,
1415	,	,	,	,	,	,
1416	,	,	,	,	,	,
1417	,	,	,	,	,	,
1418	,	,	,	,	,	,
1419	,	,	,	,	,	,
1420	,	,	,	,	,	,
1421	,	,	,	,	,	,
1422	,	,	,	,	,	,
1423	,	,	,	,	,	,
1424	,	,	,	,	,	,
1425	,	,	,	,	,	,
1426	,	,	,	,	,	,
1427	,	,	,	,	,	,
1428	,	,	,	,	,	,
1429	,	,	,	,	,	,
1430	,	,	,	,	,	,
1431	,	,	,	,	,	,
1432	,	,	,	,	,	,
1433	,	,	,	,	,	,
1434	,	,	,	,	,	,
1435	,	,	,	,	,	,
1436	,	,	,	,	,	,
1437	,	,	,	,	,	,
1438	,	,	,	,	,	,
1439	,	,	,	,	,	,
1440	,	,	,	,	,	,
1441	,	,	,	,	,	,
1442	,	,	,	,	,	,
1443	,	,	,	,	,	,
1444	,	,	,	,	,	,
1445	,	,	,	,	,	,
1446	,	,	,	,	,	,
1447	,	,	,	,	,	,
1448	,	,	,	,	,	,
1449	,	,	,	,	,	,
1450	,	,	,	,	,	,
1451	,	,	,	,	,	,
1452	,	,	,	,	,	,
1453	,	,	,	,	,	,
1454	,	,	,	,	,	,
1455	,	,	,	,	,	,
1456	,	,	,	,	,	,
1457	,	,	,	,	,	,
1458	,	,	,	,	,	,
1459	,	,	,	,	,	,
1460	,	,	,	,	,	,
1461	,	,	,	,	,	,
1462	,	,	,	,	,	,
1463	,	,	,	,	,	,
1464	,	,	,	,	,	,
1465	,	,	,	,	,	,
1466	,	,	,	,	,	,
1467	,	,	,	,	,	,
1468	,	,	,	,	,	,
1469	,	,	,	,	,	,
1470	,	,	,	,	,	,
1471	,	,	,	,	,	,
1472	,	,	,	,	,	,
1473	,	,	,	,	,	,
1474	,	,	,	,	,	,
1475	,	,	,	,	,	,
1476	,	,	,	,	,	,
1477	,	,	,	,	,	,
1478	,	,	,	,	,	,
1479	,	,	,	,	,	,
1480	,	,	,	,	,	,
1481	,	,	,	,	,	,
1482	,	,	,	,	,	,
1483	,	,	,	,	,	,
1484	,	,	,	,	,	,
1485	,	,	,	,	,	,
1486	,	,	,	,	,	,
1487	,	,	,	,	,	,
1488	,	,	,	,	,	,
1489	,	,	,	,	,	,
1490	,	,	,	,	,	,
1491	,	,	,	,	,	,
1492	,	,	,	,	,	,
1493	,	,	,	,	,	,
1494	,	,	,	,	,	,
1495	,	,	,	,	,	,
1496	,	,	,	,	,	,
1497	,	,	,	,	,	,
1498	,	,	,	,	,	,
1499	,	,	,	,	,	,
1500	,	,	,	,	,	,
1501	,	,	,	,	,	,
1502	,	,	,	,	,	,
1503	,	,	,	,	,	,
1504	,	,	,	,	,	,
1505	,	,	,	,	,	,
1506	,	,	,	,	,	,
1507	,	,	,	,	,	,
1508	,	,	,	,	,	,
1509	,	,	,	,	,	,
1510	,	,	,	,	,	,
1511	,	,	,	,	,	,
1512	,	,	,	,	,	,
1513	,	,	,	,	,	,
1514	,	,	,	,	,	,
1515	,	,	,	,	,	,
1516	,	,	,	,	,	,
1517	,	,	,	,	,	,
1518	,	,	,	,	,	,
1519	,	,	,	,	,	,
1520	,	,	,	,	,	,
1521	,	,	,	,	,	,
1522	,	,	,	,	,	,
1523	,	,	,	,	,	,
1524	,	,	,	,	,	,
1525	,	,	,	,	,	,
1526	,	,	,	,	,	,
1527	,	,	,	,	,	,
1528	,	,	,	,	,	,
1529	,	,	,	,	,	,
1530	,	,	,	,	,	,
1531	,	,	,	,	,	,
1532	,	,	,	,	,	,
1533	,	,	,	,	,	,
1534	,	,	,	,	,	,
1535	,	,	,	,	,	,
1536	,	,	,	,	,	,
1537	,	,	,	,	,	,
1538	,	,	,	,	,	,
1539	,	,	,	,	,	,
1540	,	,	,	,	,	,
1541	,	,	,	,	,	,
1542	,	,	,	,	,	,
1543	,	,	,	,	,	,
1544	,	,	,	,	,	,
1545	,	,	,	,	,	,
1546	,	,	,	,	,	,
1547	,	,	,	,	,	,
1548	,	,	,	,	,	,
1549	,	,	,	,	,	,
1550	,	,	,	,	,	,
1551	,	,	,	,	,	,
1552	,	,	,	,	,	,
1553	,	,	,	,	,	,
1554	,	,	,	,	,	,
1555	,	,	,	,	,	,
1556	,	,	,	,	,	,
1557	,	,	,	,	,	,
1558	,	,	,	,	,	,
1559	,	,	,	,	,	,
1560	,	,	,	,	,	,
1561	,	,	,	,	,	,
1562	,	,	,	,	,	,
1563	,	,	,	,	,	,
1564	,	,	,	,	,	,
1565	,	,	,	,	,	,
1566	,	,	,	,	,	,
1567	,	,	,	,	,	,
1568	,	,	,	,	,	,
1569	,	,	,	,	,	,
1570	,	,	,	,	,	,
1571	,	,	,	,	,	,
1572	,	,	,	,	,	,
1573	,	,	,	,	,	,
1574	,	,	,	,	,	,
1575	,	,	,	,	,	,
1576	,	,	,	,	,	,
1577	,	,	,	,	,	,
1578	,	,	,	,	,	,
1579	,	,	,	,	,	,
1580	,	,	,	,	,	,
1581	,	,	,	,	,	,
1582	,	,	,	,	,	,
1583	,	,	,	,	,	,
1584	,	,	,	,	,	,
1585	,	,	,	,	,	,
1586	,	,	,	,	,	,
1587	,	,	,	,	,	,
1588	,	,	,	,	,	,
1589	,	,	,	,	,	,
1590	,	,	,	,	,	,
1591	,	,	,	,	,	,
1592	,	,	,	,	,	,
1593	,	,	,	,	,	,
1594	,	,	,	,	,	,
1595	,	,	,	,	,	,
1596	,	,	,	,	,	,
1597	,	,	,	,	,	,
1598	,	,	,	,	,	,
1599	,	,	,	,	,	,
1600	,	,	,	,	,	,
1601	,	,	,	,	,	,
1602	,	,	,	,	,	,
1603	,	,	,	,	,	,
1604	,	,	,	,	,	,
1605	,	,	,	,	,	,
1606	,	,	,	,	,	,
1607	,	,	,	,	,	,
1608	,	,	,	,	,	,
1609	,	,	,	,	,	,
1610	,	,	,	,	,	,
1611	,	,	,	,	,	,
1612	,	,	,	,	,	,
1613	,	,	,	,	,	,
1614	,	,	,	,	,	,
1615	,	,	,	,	,	,
1616	,	,	,	,	,	,
1617	,	,	,	,	,	,
1618	,	,	,	,	,	,
1619	,	,	,	,	,	,
1620	,	,	,	,	,	,
1621	,	,	,	,	,	,
1622	,	,	,	,	,	,
1623	,	,	,	,	,	,
1624	,	,	,	,	,	,
1625	,	,	,	,	,	,
1626	,	,	,	,	,	,
1627	,	,	,	,	,	,
1628	,	,	,	,	,	,
1629	,	,	,	,	,	,
1630	,	,	,	,	,	,
1631	,	,	,	,	,	,
1632	,	,	,	,	,	,
1633	,	,	,	,	,	,
1634	,	,	,	,	,	,
1635	,	,	,	,	,	,
1636	,	,	,	,	,	,
1637	,	,	,	,	,	,
1638	,	,	,	,	,	,
1639	,	,	,	,	,	,
1640	,	,	,	,	,	,
1641	,	,	,	,	,	,
1642	,	,	,	,	,	,
1643	,	,	,	,	,	,
1644	,	,	,	,	,	,
1645	,	,	,	,	,	,
1646	,	,	,	,	,	,
1647	,	,	,	,	,	,
1648	,	,	,	,	,	,
1649	,	,	,	,	,	,
1650	,	,	,	,	,	,
1651	,	,	,	,	,	,
1652	,	,	,	,	,	,
1653	,	,	,	,	,	,
1654	,	,	,	,	,	,
1655	,	,	,	,	,	,
1656	,	,	,	,	,	,
1657	,	,	,	,	,	,
1658	,	,	,	,	,	,
1659	,	,	,	,	,	,
1660	,	,	,	,	,	,
1661	,	,	,	,	,	,
1662	,	,	,	,	,	,
1663	,	,	,	,	,	,
1664	,	,	,	,	,	,
1665	,	,	,	,	,	,
1666	,	,	,	,	,	,
1667	,	,	,	,	,	,
1668	,	,	,	,	,	,
1669	,	,	,	,	,	,
1670	,	,	,	,	,	,
1671	,	,	,	,	,	,
1672	,	,	,	,	,	,
1673	,	,	,	,	,	,
1674	,	,	,	,	,	,
1675	,	,	,	,	,	,
1676	,	,	,	,	,	,
1677	,	,	,	,	,	,
1678	,	,	,	,	,	,
1679	,	,	,	,	,	,
1680	,	,	,	,	,	,
1681	,	,	,	,	,	,
1682	,	,	,	,	,	,
1683	,	,	,	,	,	,
1684	,	,	,	,	,	,
1685	,	,	,	,	,	,
1686	,	,	,	,	,	,
1687	,	,	,	,	,	,
1688	,	,	,	,	,	,
1689	,	,	,	,	,	,
1690	,	,	,	,	,	,
1691	,	,	,	,	,	,
1692	,	,	,	,	,	,
1693	,	,	,	,	,	,
1694	,	,	,	,	,	,
1695	,	,	,	,	,	,
1696	,	,	,	,	,	,
1697	,	,	,	,	,	,
1698	,	,	,	,	,	,
1699	,	,	,	,	,	,
1700	,	,	,	,	,	,
1701	,	,	,	,	,	,
1702	,	,	,	,	,	,
1703	,	,	,	,	,	,
1704	,	,	,	,	,	,
1705	,	,	,	,	,	,
1706	,	,	,	,	,	,
1707	,	,	,	,	,	,
1708	,	,	,	,	,	,
1709	,	,	,	,	,	,
1710	,	,	,	,	,	,
1711	,	,	,	,	,	,
1712	,	,	,	,	,	,
1713	,	,	,	,	,	,
1714	,	,	,	,	,	,
1715	,	,	,	,	,	,
1716	,	,	,	,	,	,
1717	,	,	,	,	,	,
1718	,	,	,	,	,	,
1719	,	,	,	,	,	,
1720	,	,	,	,	,	,
1721	,	,	,	,	,	,
1722	,	,	,	,	,	,
1723	,	,	,	,	,	,
1724	,	,	,	,	,	,
1725	,	,	,	,	,	,
1726	,	,	,	,	,	,
1727	,	,	,	,	,	,
1728	,	,	,	,	,	,
1729	,	,	,	,	,	,
1730	,	,	,	,	,	,
1731	,	,	,	,	,	,
1732	,	,	,	,	,	,
1733	,	,	,	,	,	,
1734	,	,	,	,	,	,
1735	,	,	,	,	,	,
1736	,	,	,	,	,	,
1737	,	,	,	,	,	,
1738	,	,	,	,	,	,
1739	,	,	,	,	,	,
1740	,	,	,	,	,	,
1741	,	,	,	,	,	,
1742	,	,	,	,	,	,
1743	,	,	,	,	,	,
1744	,	,	,	,	,	,
1745	,	,	,	,	,	,
1746	,	,	,	,	,	,
1747	,	,	,	,	,	,
1748	,	,	,	,	,	,
1749	,	,	,	,	,	,
1750	,	,	,	,	,	,
1751	,	,	,	,	,	,
1752	,	,	,	,	,	,
1753	,	,	,	,	,	,
1754	,	,	,	,	,	,
1755	,	,	,	,	,	,
1756	,	,	,	,	,	,
1757	,	,	,	,	,	,
1758	,	,	,	,	,	,
1759	,	,	,	,	,	,
1760	,	,	,	,	,	,
1761	,	,	,	,	,	,
1762	,	,	,	,	,	,
1763	,	,	,	,	,	,
1764	,	,	,	,	,	,
1765	,	,	,	,	,	,
1766	,	,	,	,	,	,
1767	,	,	,	,	,	,
1768	,	,	,	,	,	,
1769	,	,	,	,	,	,
1770	,	,	,	,	,	,
1771	,	,	,	,	,	,
1772	,	,	,	,	,	,
1773	,	,	,	,	,	,
1774	,	,	,	,	,	,
1775	,	,	,	,	,	,
1776	,	,	,	,	,	,
1777	,	,	,	,	,	,
1778	,	,	,	,	,	,
1779	,	,	,	,	,	,
1780	,	,	,	,	,	,
1781	,	,	,	,	,	,
1782	,	,	,	,	,	,
1783	,	,	,	,	,	,
1784	,	,	,	,	,	,
1785	,	,	,	,	,	,
1786	,	,	,	,	,	,
1787	,	,	,	,	,	,
1788	,	,	,	,	,	,
1789	,	,	,	,	,	,
1790	,	,	,	,	,	,
1791	,	,	,	,	,	,
1792	,	,	,	,	,	,
1793	,	,	,	,	,	,
1794	,	,	,	,	,	,
1795	,	,	,	,	,	,
1796	,	,	,	,	,	,
1797	,	,	,	,	,	,
1798	,	,	,	,	,	,
1799	,	,	,	,	,	,
1800	,	,	,	,	,	,
1801	,	,	,	,	,	,
1802	,	,	,	,	,	,
1803	,	,	,	,	,	,
1804	,	,	,	,	,	,
1805	,	,	,	,	,	,
1806	,	,	,	,	,	,
1807	,	,	,	,	,	,
1808	,	,	,	,	,	,
1809	,	,	,	,	,	,
1810	,	,	,	,	,	,
1811	,	,	,	,	,	,
1812	,	,	,	,	,	,
1813	,	,	,	,	,	,
1814	,	,	,	,	,	,
1815	,	,	,	,	,	,
1816	,	,	,	,	,	,
1817	,	,	,	,	,	,
1818	,	,	,	,	,	,
1819	,	,	,	,	,	,
1820	,	,	,	,	,	,
1821	,	,	,	,	,	,
1822	,	,	,	,	,	,
1823	,	,	,	,	,	,
1824	,	,	,	,	,	,
1825	,	,	,	,	,	,
1826	,	,	,	,	,	,
1827	,	,	,	,	,	,
1828	,	,	,	,	,	,
1829	,	,	,	,	,	,
1830	,	,	,	,	,	,
1831	,	,	,	,	,	,
1832	,	,	,	,	,	,
1833	,	,	,	,	,	,
1834	,	,	,	,	,	,
1835	,	,	,	,	,	,
1836	,	,	,	,	,	,
1837	,	,	,	,	,	,
1838	,	,	,	,	,	,
1839	,	,	,	,	,	,
1840	,	,	,	,	,	,
1841	,	,	,	,	,	,
1842	,	,	,	,	,	,
1843	,	,	,	,	,	,
1844	,	,	,	,	,	,
1845	,	,	,	,	,	,
1846	,	,	,	,	,	,
1847	,	,	,	,	,	,
1848	,	,	,	,	,	,
1849	,	,	,	,	,	,
1850	,	,	,	,	,	,
1851	,	,	,	,	,	,
1852	,	,	,	,	,	,
1853	,	,	,	,	,	,
1854	,	,	,	,	,	,
1855	,	,	,	,	,	,
1856	,	,	,	,	,	,
1857	,	,	,	,	,	,
1858	,	,	,	,	,	,
1859	,	,	,	,	,	,
1860	,	,	,	,	,	,
1861	,	,	,	,	,	,
1862	,	,	,	,	,	,
1863	,	,	,	,	,	,
1864	,	,	,	,	,	,
1865	,	,	,	,	,	,
1866	,	,	,	,	,	,
1867	,	,	,	,	,	,
1868	,	,	,	,	,	,
1869	,	,	,	,	,	,
1870	,	,	,	,	,	,
1871	,	,	,	,	,	,
1872	,	,	,	,	,	,
1873	,	,	,	,	,	,
1874	,	,	,	,	,	,
1875	,	,	,	,	,	,
1876	,	,	,	,	,	,
1877	,	,	,	,	,	,
1878	,	,	,	,	,	,
1879	,	,	,	,	,	,
1880	,	,	,	,	,	,
1881	,	,	,	,	,	,
1882	,	,	,	,	,	,
1883	,	,	,	,	,	,
1884	,	,	,	,	,	,
1885	,	,	,	,	,	,
1886	,	,	,	,	,	,
1887	,	,	,	,	,	,
1888	,	,	,	,	,	,
1889	,	,	,	,	,	,
1890	,	,	,	,	,	,
1891	,	,	,	,	,	,
1892	,	,	,	,	,	,
1893	,	,	,	,	,	,
1894	,	,	,	,	,	,
1895	,	,	,	,	,	,
1896	,	,	,	,	,	,
1897	,	,	,	,	,	,
1898	,	,	,	,	,	,
1899	,	,	,	,	,	,
1900	,	,	,	,	,	,
1901	,	,	,	,	,	,
1902	,	,	,	,	,	,
1903	,	,	,	,	,	,
1904	,	,	,	,	,	,
1905	,	,	,	,	,	,
1906	,	,	,	,	,	,
1907	,	,	,	,	,	,
1908	,	,	,	,	,	,
1909	,	,	,	,	,	,
1910	,	,	,	,	,	,
1911	,	,	,	,	,	,
1912	,	,	,	,	,	,
1913	,	,	,	,	,	,
1914	,	,	,	,	,	,
1915	,	,	,	,	,	,
1916	,	,	,	,	,	,
1917	,	,	,	,	,	,
1918	,	,	,	,	,	,
1919	,	,	,	,	,	,
1920	,	,	,	,	,	,
1921	,	,	,	,	,	,
1922	,	,	,	,	,	,
1923	,	,	,	,	,	,
1924	,	,	,	,	,	,
1925	,	,	,	,	,	,
1926	,	,	,	,	,	,
1927	,	,	,	,	,	,
1928	,	,	,	,	,	,
1929	,	,	,	,	,	,
1930	,	,	,	,	,	,
1931	,	,	,	,	,	,
1932	,	,	,	,	,	,
1933	,	,	,	,	,	,
1934	,	,	,	,	,	,
1935	,	,	,	,	,	,
1936	,	,	,	,	,	,
1937	,	,	,	,	,	,
1938	,	,	,	,	,	,
1939	,	,	,	,	,	,
1940	,	,	,	,	,	,
1941	,	,	,	,	,	,
1942	,	,	,	,	,	,
1943	,	,	,	,	,	,
1944	,	,	,	,	,	,
1945	,	,	,	,	,	,
1946	,	,	,	,	,	,
1947	,	,	,	,	,	,
1948	,	,	,	,	,	,
1949	,	,	,	,	,	,
1950	,	,	,	,	,	,
1951	,	,	,	,	,	,
1952	,	,	,	,	,	,
1953	,	,	,	,	,	,
1954	,	,	,	,	,	,
1955	,	,	,	,	,	,
1956	,	,	,	,	,	,
1957	,	,	,	,	,	,
1958	,	,	,	,	,	,
1959	,	,	,	,	,	,
1960	,	,	,	,	,	,
1961	,	,	,	,	,	,
1962	,	,	,	,	,	,
1963	,	,	,	,	,	,
1964	,	,	,	,	,	,
1965	,	,	,	,	,	,
1966	,	,	,	,	,	,
1967	,	,	,	,	,	,
1968	,	,	,	,	,	,
1969	,	,	,	,	,	,
1970	,	,	,	,	,	,
1971	,	,	,	,	,	,
1972	,	,	,	,	,	,
1973	,	,	,	,	,	,
1974	,	,	,	,	,	,
1975	,	,	,	,	,	,
1976	,	,	,	,	,	,
1977	,	,	,	,	,	,
1978	,	,	,	,	,	,
1979	,	,	,	,	,	,
1980	,	,	,	,	,	,
1981	,	,	,	,	,	,
1982	,	,	,	,	,	,
1983	,	,	,	,	,	,
1984	,	,	,	,	,	,
1985	,	,	,	,	,	,
1986	,	,	,	,	,	,
1987	,	,	,	,	,	,
1988	,	,	,	,	,	,
1989	,	,	,	,	,	,
1990	,	,	,	,	,	,
1991	,	,	,	,	,	,
1992	,	,	,	,	,	,
1993	,	,	,	,	,	,
1994	,	,	,	,	,	,
1995	,	,	,	,	,	,
1996	,	,	,	,	,	,
1997	,	,	,	,	,	,
1998	,	,	,	,	,	,
1999	,	,	,	,	,	,
[truncated: 13,001 more rows]

## Sheet: Fig1_panelB_rep2
	parS20 ParB no NTP	parS20 ParB CTP	parS20 ParB ATP	parS20 ParB GTP	parS20 ParB UTP
1	0.000, 0.071	0.000, 0.036	0.000, 0.033	0.000, 0.035	0.000, -0.029
2	0.200, 0.069	0.200, 0.036	0.200, 0.033	0.200, 0.035	0.200, -0.028
3	0.400, 0.067	0.400, 0.036	0.400, 0.033	0.400, 0.035	0.400, -0.028
4	0.600, 0.065	0.600, 0.035	0.600, 0.033	0.600, 0.034	0.600, -0.027
5	0.800, 0.062	0.800, 0.035	0.800, 0.032	0.800, 0.034	0.800, -0.026
6	1.000, 0.060	1.000, 0.034	1.000, 0.032	1.000, 0.033	1.000, -0.024
7	1.200, 0.057	1.200, 0.034	1.200, 0.032	1.200, 0.033	1.200, -0.023
8	1.400, 0.055	1.400, 0.033	1.400, 0.031	1.400, 0.032	1.400, -0.022
9	1.600, 0.052	1.600, 0.032	1.600, 0.031	1.600, 0.031	1.600, -0.020
10	1.800, 0.050	1.800, 0.031	1.800, 0.030	1.800, 0.030	1.800, -0.019
11	2.000, 0.048	2.000, 0.030	2.000, 0.030	2.000, 0.029	2.000, -0.017
12	2.200, 0.047	2.200, 0.029	2.200, 0.029	2.200, 0.028	2.200, -0.016
13	2.400, 0.046	2.400, 0.028	2.400, 0.028	2.400, 0.027	2.400, -0.015
14	2.600, 0.044	2.600, 0.028	2.600, 0.028	2.600, 0.026	2.600, -0.014
15	2.800, 0.043	2.800, 0.027	2.800, 0.027	2.800, 0.025	2.800, -0.012
16	3.000, 0.042	3.000, 0.027	3.000, 0.027	3.000, 0.024	3.000, -0.011
17	3.200, 0.041	3.200, 0.026	3.200, 0.027	3.200, 0.023	3.200, -0.011
18	3.400, 0.040	3.400, 0.026	3.400, 0.027	3.400, 0.023	3.400, -0.010
19	3.600, 0.039	3.600, 0.025	3.600, 0.027	3.600, 0.022	3.600, -0.009
20	3.800, 0.038	3.800, 0.025	3.800, 0.027	3.800, 0.022	3.800, -0.009
21	4.000, 0.037	4.000, 0.024	4.000, 0.026	4.000, 0.022	4.000, -0.008
22	4.200, 0.037	4.200, 0.024	4.200, 0.026	4.200, 0.021	4.200, -0.008
23	4.400, 0.036	4.400, 0.023	4.400, 0.026	4.400, 0.021	4.400, -0.008
24	4.600, 0.035	4.600, 0.023	4.600, 0.025	4.600, 0.020	4.600, -0.007
25	4.800, 0.034	4.800, 0.023	4.800, 0.025	4.800, 0.020	4.800, -0.007
26	5.000, 0.034	5.000, 0.022	5.000, 0.025	5.000, 0.020	5.000, -0.007
27	5.200, 0.033	5.200, 0.022	5.200, 0.024	5.200, 0.019	5.200, -0.007
28	5.400, 0.032	5.400, 0.021	5.400, 0.024	5.400, 0.019	5.400, -0.007
29	5.600, 0.032	5.600, 0.021	5.600, 0.024	5.600, 0.019	5.600, -0.007
30	5.800, 0.031	5.800, 0.020	5.800, 0.023	5.800, 0.018	5.800, -0.007
31	6.000, 0.030	6.000, 0.019	6.000, 0.022	6.000, 0.018	6.000, -0.007
32	6.200, 0.029	6.200, 0.018	6.200, 0.022	6.200, 0.017	6.200, -0.007
33	6.400, 0.028	6.400, 0.017	6.400, 0.021	6.400, 0.016	6.400, -0.007
34	6.600, 0.027	6.600, 0.016	6.600, 0.020	6.600, 0.016	6.600, -0.006
35	6.800, 0.026	6.800, 0.015	6.800, 0.020	6.800, 0.015	6.800, -0.006
36	7.000, 0.025	7.000, 0.015	7.000, 0.020	7.000, 0.015	7.000, -0.006
37	7.200, 0.024	7.200, 0.014	7.200, 0.019	7.200, 0.015	7.200, -0.006
38	7.400, 0.024	7.400, 0.013	7.400, 0.019	7.400, 0.014	7.400, -0.005
39	7.600, 0.023	7.600, 0.013	7.600, 0.019	7.600, 0.014	7.600, -0.005
40	7.800, 0.023	7.800, 0.012	7.800, 0.018	7.800, 0.013	7.800, -0.005
41	8.000, 0.023	8.000, 0.012	8.000, 0.018	8.000, 0.013	8.000, -0.005
42	8.200, 0.023	8.200, 0.012	8.200, 0.017	8.200, 0.013	8.200, -0.005
43	8.400, 0.022	8.400, 0.012	8.400, 0.017	8.400, 0.012	8.400, -0.005
44	8.600, 0.022	8.600, 0.011	8.600, 0.017	8.600, 0.012	8.600, -0.005
45	8.800, 0.022	8.800, 0.011	8.800, 0.016	8.800, 0.011	8.800, -0.004
46	9.000, 0.022	9.000, 0.011	9.000, 0.016	9.000, 0.011	9.000, -0.004
47	9.200, 0.021	9.200, 0.011	9.200, 0.016	9.200, 0.010	9.200, -0.004
48	9.400, 0.021	9.400, 0.011	9.400, 0.016	9.400, 0.010	9.400, -0.004
49	9.600, 0.020	9.600, 0.011	9.600, 0.015	9.600, 0.010	9.600, -0.004
50	9.800, 0.020	9.800, 0.010	9.800, 0.015	9.800, 0.009	9.800, -0.004
51	10.000, 0.020	10.000, 0.010	10.000, 0.015	10.000, 0.009	10.000, -0.004
52	10.200, 0.019	10.200, 0.010	10.200, 0.014	10.200, 0.008	10.200, -0.004
53	10.400, 0.019	10.400, 0.010	10.400, 0.014	10.400, 0.008	10.400, -0.003
54	10.600, 0.018	10.600, 0.009	10.600, 0.013	10.600, 0.008	10.600, -0.003
55	10.800, 0.018	10.800, 0.009	10.800, 0.013	10.800, 0.008	10.800, -0.002
56	11.000, 0.017	11.000, 0.009	11.000, 0.013	11.000, 0.007	11.000, -0.002
57	11.200, 0.017	11.200, 0.009	11.200, 0.012	11.200, 0.007	11.200, -0.002
58	11.400, 0.016	11.400, 0.009	11.400, 0.012	11.400, 0.007	11.400, -0.002
59	11.600, 0.016	11.600, 0.008	11.600, 0.011	11.600, 0.007	11.600, -0.002
60	11.800, 0.016	11.800, 0.008	11.800, 0.011	11.800, 0.007	11.800, -0.002
61	12.000, 0.015	12.000, 0.008	12.000, 0.010	12.000, 0.007	12.000, -0.002
62	12.200, 0.015	12.200, 0.007	12.200, 0.010	12.200, 0.007	12.200, -0.002
63	12.400, 0.015	12.400, 0.007	12.400, 0.010	12.400, 0.007	12.400, -0.002
64	12.600, 0.014	12.600, 0.007	12.600, 0.009	12.600, 0.007	12.600, -0.001
65	12.800, 0.014	12.800, 0.007	12.800, 0.009	12.800, 0.007	12.800, -0.001
66	13.000, 0.013	13.000, 0.007	13.000, 0.009	13.000, 0.008	13.000, -0.000
67	13.200, 0.013	13.200, 0.007	13.200, 0.009	13.200, 0.008	13.200, -0.000
68	13.400, 0.013	13.400, 0.006	13.400, 0.009	13.400, 0.008	13.400, -0.000
69	13.600, 0.013	13.600, 0.006	13.600, 0.009	13.600, 0.008	13.600, -0.000
70	13.800, 0.013	13.800, 0.006	13.800, 0.009	13.800, 0.008	13.800, -0.000
71	14.000, 0.013	14.000, 0.006	14.000, 0.009	14.000, 0.007	14.000, 0.000
72	14.200, 0.013	14.200, 0.006	14.200, 0.009	14.200, 0.007	14.200, 0.001
73	14.400, 0.012	14.400, 0.006	14.400, 0.008	14.400, 0.007	14.400, 0.001
74	14.600, 0.012	14.600, 0.006	14.600, 0.008	14.600, 0.006	14.600, 0.001
75	14.800, 0.011	14.800, 0.005	14.800, 0.008	14.800, 0.006	14.800, 0.001
76	15.000, 0.011	15.000, 0.005	15.000, 0.007	15.000, 0.006	15.000, 0.001
77	15.200, 0.011	15.200, 0.005	15.200, 0.007	15.200, 0.005	15.200, 0.001
78	15.400, 0.010	15.400, 0.005	15.400, 0.007	15.400, 0.005	15.400, 0.000
79	15.600, 0.010	15.600, 0.005	15.600, 0.006	15.600, 0.004	15.600, 0.000
80	15.800, 0.010	15.800, 0.005	15.800, 0.006	15.800, 0.004	15.800, -0.000
81	16.000, 0.010	16.000, 0.005	16.000, 0.005	16.000, 0.004	16.000, -0.000
82	16.200, 0.009	16.200, 0.005	16.200, 0.005	16.200, 0.004	16.200, -0.000
83	16.400, 0.009	16.400, 0.004	16.400, 0.005	16.400, 0.004	16.400, -0.000
84	16.600, 0.009	16.600, 0.004	16.600, 0.005	16.600, 0.004	16.600, -0.000
85	16.800, 0.009	16.800, 0.004	16.800, 0.005	16.800, 0.004	16.800, -0.000
86	17.000, 0.008	17.000, 0.004	17.000, 0.005	17.000, 0.004	17.000, -0.000
87	17.200, 0.008	17.200, 0.004	17.200, 0.004	17.200, 0.004	17.200, -0.000
88	17.400, 0.008	17.400, 0.003	17.400, 0.004	17.400, 0.004	17.400, -0.000
89	17.600, 0.008	17.600, 0.003	17.600, 0.004	17.600, 0.004	17.600, -0.000
90	17.800, 0.008	17.800, 0.003	17.800, 0.004	17.800, 0.004	17.800, -0.000
91	18.000, 0.008	18.000, 0.003	18.000, 0.004	18.000, 0.004	18.000, -0.000
92	18.200, 0.007	18.200, 0.003	18.200, 0.004	18.200, 0.004	18.200, -0.000
93	18.400, 0.007	18.400, 0.003	18.400, 0.004	18.400, 0.004	18.400, -0.000
94	18.600, 0.007	18.600, 0.003	18.600, 0.004	18.600, 0.004	18.600, -0.000
95	18.800, 0.007	18.800, 0.003	18.800, 0.004	18.800, 0.003	18.800, -0.000
96	19.000, 0.006	19.000, 0.003	19.000, 0.004	19.000, 0.003	19.000, -0.000
97	19.200, 0.006	19.200, 0.003	19.200, 0.004	19.200, 0.003	19.200, -0.001
98	19.400, 0.006	19.400, 0.003	19.400, 0.004	19.400, 0.003	19.400, -0.001
99	19.600, 0.006	19.600, 0.003	19.600, 0.004	19.600, 0.003	19.600, -0.001
100	19.800, 0.005	19.800, 0.003	19.800, 0.004	19.800, 0.003	19.800, -0.001
101	20.000, 0.005	20.000, 0.003	20.000, 0.004	20.000, 0.003	20.000, -0.001
102	20.200, 0.005	20.200, 0.003	20.200, 0.003	20.200, 0.003	20.200, -0.001
103	20.400, 0.005	20.400, 0.003	20.400, 0.003	20.400, 0.003	20.400, -0.001
104	20.600, 0.004	20.600, 0.002	20.600, 0.003	20.600, 0.003	20.600, -0.001
105	20.800, 0.004	20.800, 0.002	20.800, 0.003	20.800, 0.003	20.800, -0.001
106	21.000, 0.004	21.000, 0.002	21.000, 0.002	21.000, 0.002	21.000, -0.001
107	21.200, 0.003	21.200, 0.002	21.200, 0.002	21.200, 0.002	21.200, -0.001
108	21.400, 0.003	21.400, 0.002	21.400, 0.002	21.400, 0.002	21.400, -0.001
109	21.600, 0.003	21.600, 0.002	21.600, 0.002	21.600, 0.002	21.600, -0.001
110	21.800, 0.002	21.800, 0.002	21.800, 0.002	21.800, 0.002	21.800, -0.001
111	22.000, 0.002	22.000, 0.002	22.000, 0.002	22.000, 0.002	22.000, -0.001
112	22.200, 0.002	22.200, 0.002	22.200, 0.002	22.200, 0.002	22.200, -0.001
113	22.400, 0.002	22.400, 0.002	22.400, 0.002	22.400, 0.002	22.400, -0.001
114	22.600, 0.002	22.600, 0.002	22.600, 0.002	22.600, 0.001	22.600, -0.000
115	22.800, 0.002	22.800, 0.002	22.800, 0.002	22.800, 0.001	22.800, -0.000
116	23.000, 0.002	23.000, 0.002	23.000, 0.002	23.000, 0.001	23.000, -0.000
117	23.200, 0.002	23.200, 0.002	23.200, 0.002	23.200, 0.001	23.200, -0.000
118	23.400, 0.002	23.400, 0.002	23.400, 0.002	23.400, 0.001	23.400, -0.000
119	23.600, 0.002	23.600, 0.002	23.600, 0.002	23.600, 0.001	23.600, 0.000
120	23.800, 0.002	23.800, 0.002	23.800, 0.002	23.800, 0.001	23.800, 0.000
121	24.000, 0.002	24.000, 0.002	24.000, 0.002	24.000, 0.001	24.000, 0.000
122	24.200, 0.002	24.200, 0.002	24.200, 0.002	24.200, 0.001	24.200, 0.000
123	24.400, 0.002	24.400, 0.002	24.400, 0.001	24.400, 0.001	24.400, 0.000
124	24.600, 0.002	24.600, 0.002	24.600, 0.001	24.600, 0.001	24.600, 0.000
125	24.800, 0.002	24.800, 0.002	24.800, 0.001	24.800, 0.001	24.800, 0.000
126	25.000, 0.002	25.000, 0.002	25.000, 0.001	25.000, 0.001	25.000, 0.000
127	25.200, 0.002	25.200, 0.002	25.200, 0.001	25.200, 0.001	25.200, 0.000
128	25.400, 0.002	25.400, 0.002	25.400, 0.001	25.400, 0.001	25.400, 0.000
129	25.600, 0.002	25.600, 0.001	25.600, 0.001	25.600, 0.001	25.600, 0.000
130	25.800, 0.002	25.800, 0.001	25.800, 0.001	25.800, 0.001	25.800, 0.000
131	26.000, 0.002	26.000, 0.001	26.000, 0.001	26.000, 0.000	26.000, 0.000
132	26.200, 0.002	26.200, 0.001	26.200, 0.001	26.200, 0.000	26.200, 0.000
133	26.400, 0.002	26.400, 0.001	26.400, 0.001	26.400, 0.000	26.400, 0.000
134	26.600, 0.002	26.600, 0.001	26.600, 0.001	26.600, -0.000	26.600, 0.000
135	26.800, 0.002	26.800, 0.001	26.800, 0.000	26.800, -0.000	26.800, 0.000
136	27.000, 0.001	27.000, 0.001	27.000, 0.000	27.000, -0.000	27.000, 0.000
137	27.200, 0.001	27.200, 0.001	27.200, 0.000	27.200, -0.000	27.200, 0.000
138	27.400, 0.001	27.400, 0.001	27.400, -0.000	27.400, -0.000	27.400, -0.000
139	27.600, 0.001	27.600, 0.000	27.600, -0.000	27.600, 0.000	27.600, -0.000
140	27.800, 0.000	27.800, 0.000	27.800, -0.000	27.800, 0.000	27.800, -0.000
141	28.000, 0.000	28.000, 0.000	28.000, 0.000	28.000, 0.000	28.000, -0.000
142	28.200, 0.000	28.200, -0.000	28.200, 0.000	28.200, 0.000	28.200, -0.000
143	28.400, 0.000	28.400, -0.000	28.400, -0.000	28.400, 0.000	28.400, -0.000
144	28.600, -0.000	28.600, -0.000	28.600, 0.000	28.600, 0.000	28.600, -0.000
145	28.800, -0.000	28.800, -0.000	28.800, 0.000	28.800, 0.000	28.800, -0.000
146	29.000, -0.001	29.000, -0.000	29.000, 0.000	29.000, 0.000	29.000, 0.000
147	29.200, -0.001	29.200, -0.000	29.200, -0.000	29.200, 0.000	29.200, 0.000
148	29.400, -0.001	29.400, -0.001	29.400, -0.000	29.400, -0.000	29.400, 0.000
149	29.600, -0.001	29.600, -0.001	29.600, -0.000	29.600, -0.000	29.600, 0.000
150	29.800, -0.001	29.800, -0.001	29.800, -0.000	29.800, -0.001	29.800, 0.000
151	30.000, 0.000	30.000, 0.000	30.000, 0.000	30.000, 0.000	30.000, 0.000
152	30.200, 0.019	30.200, 0.018	30.200, 0.020	30.200, 0.018	30.200, 0.021
153	30.400, 0.043	30.400, 0.039	30.400, 0.044	30.400, 0.039	30.400, 0.046
154	30.600, 0.070	30.600, 0.063	30.600, 0.072	30.600, 0.064	30.600, 0.075
155	30.800, 0.102	30.800, 0.089	30.800, 0.104	30.800, 0.091	30.800, 0.107
156	31.000, 0.136	31.000, 0.117	31.000, 0.138	31.000, 0.121	31.000, 0.142
157	31.200, 0.172	31.200, 0.147	31.200, 0.174	31.200, 0.153	31.200, 0.179
158	31.400, 0.211	31.400, 0.177	31.400, 0.212	31.400, 0.186	31.400, 0.217
159	31.600, 0.250	31.600, 0.206	31.600, 0.250	31.600, 0.219	31.600, 0.255
160	31.800, 0.288	31.800, 0.235	31.800, 0.288	31.800, 0.251	31.800, 0.292
161	32.000, 0.325	32.000, 0.261	32.000, 0.323	32.000, 0.282	32.000, 0.326
162	32.200, 0.359	32.200, 0.283	32.200, 0.355	32.200, 0.310	32.200, 0.357
163	32.400, 0.391	32.400, 0.304	32.400, 0.385	32.400, 0.336	32.400, 0.386
164	32.600, 0.421	32.600, 0.323	32.600, 0.413	32.600, 0.360	32.600, 0.413
165	32.800, 0.449	32.800, 0.340	32.800, 0.439	32.800, 0.383	32.800, 0.438
166	33.000, 0.475	33.000, 0.355	33.000, 0.463	33.000, 0.404	33.000, 0.460
167	33.200, 0.499	33.200, 0.370	33.200, 0.486	33.200, 0.424	33.200, 0.481
168	33.400, 0.522	33.400, 0.383	33.400, 0.506	33.400, 0.442	33.400, 0.499
169	33.600, 0.544	33.600, 0.394	33.600, 0.525	33.600, 0.458	33.600, 0.516
170	33.800, 0.564	33.800, 0.405	33.800, 0.542	33.800, 0.474	33.800, 0.531
171	34.000, 0.582	34.000, 0.414	34.000, 0.558	34.000, 0.488	34.000, 0.545
172	34.200, 0.599	34.200, 0.423	34.200, 0.571	34.200, 0.501	34.200, 0.558
173	34.400, 0.615	34.400, 0.431	34.400, 0.584	34.400, 0.512	34.400, 0.569
174	34.600, 0.629	34.600, 0.438	34.600, 0.595	34.600, 0.523	34.600, 0.579
175	34.800, 0.642	34.800, 0.445	34.800, 0.605	34.800, 0.532	34.800, 0.588
176	35.000, 0.655	35.000, 0.451	35.000, 0.613	35.000, 0.540	35.000, 0.596
177	35.200, 0.666	35.200, 0.456	35.200, 0.621	35.200, 0.547	35.200, 0.603
178	35.400, 0.676	35.400, 0.461	35.400, 0.628	35.400, 0.554	35.400, 0.609
179	35.600, 0.685	35.600, 0.465	35.600, 0.634	35.600, 0.560	35.600, 0.615
180	35.800, 0.693	35.800, 0.468	35.800, 0.640	35.800, 0.565	35.800, 0.620
181	36.000, 0.701	36.000, 0.472	36.000, 0.644	36.000, 0.569	36.000, 0.624
182	36.200, 0.707	36.200, 0.475	36.200, 0.648	36.200, 0.573	36.200, 0.628
183	36.400, 0.713	36.400, 0.477	36.400, 0.652	36.400, 0.577	36.400, 0.632
184	36.600, 0.718	36.600, 0.480	36.600, 0.656	36.600, 0.579	36.600, 0.635
185	36.800, 0.723	36.800, 0.482	36.800, 0.658	36.800, 0.582	36.800, 0.637
186	37.000, 0.727	37.000, 0.484	37.000, 0.661	37.000, 0.584	37.000, 0.639
187	37.200, 0.731	37.200, 0.486	37.200, 0.664	37.200, 0.587	37.200, 0.641
188	37.400, 0.734	37.400, 0.487	37.400, 0.666	37.400, 0.588	37.400, 0.642
189	37.600, 0.738	37.600, 0.489	37.600, 0.668	37.600, 0.590	37.600, 0.643
190	37.800, 0.741	37.800, 0.490	37.800, 0.670	37.800, 0.592	37.800, 0.645
191	38.000, 0.744	38.000, 0.492	38.000, 0.671	38.000, 0.593	38.000, 0.646
192	38.200, 0.746	38.200, 0.493	38.200, 0.672	38.200, 0.594	38.200, 0.647
193	38.400, 0.749	38.400, 0.494	38.400, 0.673	38.400, 0.595	38.400, 0.647
194	38.600, 0.751	38.600, 0.495	38.600, 0.674	38.600, 0.596	38.600, 0.648
195	38.800, 0.753	38.800, 0.496	38.800, 0.675	38.800, 0.597	38.800, 0.649
196	39.000, 0.754	39.000, 0.497	39.000, 0.676	39.000, 0.598	39.000, 0.649
197	39.200, 0.756	39.200, 0.497	39.200, 0.677	39.200, 0.598	39.200, 0.650
198	39.400, 0.757	39.400, 0.498	39.400, 0.677	39.400, 0.599	39.400, 0.651
199	39.600, 0.758	39.600, 0.498	39.600, 0.678	39.600, 0.600	39.600, 0.652
200	39.800, 0.759	39.800, 0.499	39.800, 0.679	39.800, 0.600	39.800, 0.652
201	40.000, 0.759	40.000, 0.499	40.000, 0.680	40.000, 0.601	40.000, 0.653
202	40.200, 0.760	40.200, 0.499	40.200, 0.680	40.200, 0.601	40.200, 0.654
203	40.400, 0.760	40.400, 0.499	40.400, 0.681	40.400, 0.602	40.400, 0.655
204	40.600, 0.760	40.600, 0.500	40.600, 0.681	40.600, 0.602	40.600, 0.656
205	40.800, 0.761	40.800, 0.500	40.800, 0.681	40.800, 0.602	40.800, 0.656
206	41.000, 0.761	41.000, 0.500	41.000, 0.681	41.000, 0.602	41.000, 0.656
207	41.200, 0.761	41.200, 0.500	41.200, 0.682	41.200, 0.602	41.200, 0.657
208	41.400, 0.762	41.400, 0.500	41.400, 0.682	41.400, 0.602	41.400, 0.657
209	41.600, 0.763	41.600, 0.500	41.600, 0.682	41.600, 0.602	41.600, 0.657
210	41.800, 0.763	41.800, 0.500	41.800, 0.683	41.800, 0.601	41.800, 0.657
211	42.000, 0.764	42.000, 0.500	42.000, 0.683	42.000, 0.601	42.000, 0.657
212	42.200, 0.764	42.200, 0.500	42.200, 0.683	42.200, 0.601	42.200, 0.657
213	42.400, 0.765	42.400, 0.500	42.400, 0.684	42.400, 0.601	42.400, 0.657
214	42.600, 0.765	42.600, 0.500	42.600, 0.684	42.600, 0.601	42.600, 0.656
215	42.800, 0.766	42.800, 0.499	42.800, 0.684	42.800, 0.601	42.800, 0.656
216	43.000, 0.766	43.000, 0.499	43.000, 0.684	43.000, 0.601	43.000, 0.656
217	43.200, 0.767	43.200, 0.499	43.200, 0.684	43.200, 0.601	43.200, 0.656
218	43.400, 0.767	43.400, 0.498	43.400, 0.684	43.400, 0.601	43.400, 0.656
219	43.600, 0.768	43.600, 0.498	43.600, 0.685	43.600, 0.601	43.600, 0.656
220	43.800, 0.768	43.800, 0.498	43.800, 0.685	43.800, 0.601	43.800, 0.656
221	44.000, 0.768	44.000, 0.497	44.000, 0.685	44.000, 0.601	44.000, 0.656
222	44.200, 0.769	44.200, 0.497	44.200, 0.685	44.200, 0.602	44.200, 0.656
223	44.400, 0.769	44.400, 0.497	44.400, 0.685	44.400, 0.602	44.400, 0.656
224	44.600, 0.770	44.600, 0.497	44.600, 0.685	44.600, 0.602	44.600, 0.656
225	44.800, 0.771	44.800, 0.497	44.800, 0.685	44.800, 0.602	44.800, 0.656
226	45.000, 0.771	45.000, 0.497	45.000, 0.685	45.000, 0.602	45.000, 0.656
227	45.200, 0.772	45.200, 0.497	45.200, 0.684	45.200, 0.602	45.200, 0.656
228	45.400, 0.772	45.400, 0.497	45.400, 0.684	45.400, 0.601	45.400, 0.657
229	45.600, 0.772	45.600, 0.496	45.600, 0.684	45.600, 0.601	45.600, 0.657
230	45.800, 0.773	45.800, 0.496	45.800, 0.684	45.800, 0.600	45.800, 0.657
231	46.000, 0.773	46.000, 0.495	46.000, 0.684	46.000, 0.600	46.000, 0.657
232	46.200, 0.773	46.200, 0.495	46.200, 0.684	46.200, 0.599	46.200, 0.657
233	46.400, 0.773	46.400, 0.494	46.400, 0.684	46.400, 0.599	46.400, 0.657
234	46.600, 0.774	46.600, 0.494	46.600, 0.684	46.600, 0.598	46.600, 0.657
235	46.800, 0.774	46.800, 0.494	46.800, 0.683	46.800, 0.598	46.800, 0.657
236	47.000, 0.774	47.000, 0.493	47.000, 0.683	47.000, 0.598	47.000, 0.657
237	47.200, 0.774	47.200, 0.493	47.200, 0.683	47.200, 0.597	47.200, 0.657
238	47.400, 0.774	47.400, 0.493	47.400, 0.683	47.400, 0.597	47.400, 0.657
239	47.600, 0.774	47.600, 0.493	47.600, 0.683	47.600, 0.596	47.600, 0.656
240	47.800, 0.775	47.800, 0.493	47.800, 0.684	47.800, 0.596	47.800, 0.656
241	48.000, 0.775	48.000, 0.494	48.000, 0.684	48.000, 0.596	48.000, 0.656
242	48.200, 0.775	48.200, 0.494	48.200, 0.684	48.200, 0.596	48.200, 0.656
243	48.400, 0.776	48.400, 0.494	48.400, 0.684	48.400, 0.596	48.400, 0.656
244	48.600, 0.776	48.600, 0.494	48.600, 0.684	48.600, 0.596	48.600, 0.656
245	48.800, 0.777	48.800, 0.494	48.800, 0.684	48.800, 0.596	48.800, 0.656
246	49.000, 0.777	49.000, 0.494	49.000, 0.685	49.000, 0.595	49.000, 0.656
247	49.200, 0.777	49.200, 0.494	49.200, 0.685	49.200, 0.595	49.200, 0.656
248	49.400, 0.778	49.400, 0.493	49.400, 0.685	49.400, 0.595	49.400, 0.656
249	49.600, 0.778	49.600, 0.493	49.600, 0.685	49.600, 0.596	49.600, 0.657
250	49.800, 0.778	49.800, 0.492	49.800, 0.685	49.800, 0.596	49.800, 0.657
251	50.000, 0.779	50.000, 0.492	50.000, 0.685	50.000, 0.596	50.000, 0.657
252	50.200, 0.779	50.200, 0.491	50.200, 0.685	50.200, 0.596	50.200, 0.658
253	50.400, 0.779	50.400, 0.491	50.400, 0.684	50.400, 0.596	50.400, 0.658
254	50.600, 0.780	50.600, 0.490	50.600, 0.684	50.600, 0.596	50.600, 0.658
255	50.800, 0.780	50.800, 0.490	50.800, 0.684	50.800, 0.596	50.800, 0.658
256	51.000, 0.781	51.000, 0.490	51.000, 0.684	51.000, 0.596	51.000, 0.658
257	51.200, 0.781	51.200, 0.490	51.200, 0.683	51.200, 0.595	51.200, 0.658
258	51.400, 0.782	51.400, 0.489	51.400, 0.683	51.400, 0.595	51.400, 0.657
259	51.600, 0.783	51.600, 0.489	51.600, 0.683	51.600, 0.595	51.600, 0.657
260	51.800, 0.783	51.800, 0.489	51.800, 0.683	51.800, 0.595	51.800, 0.657
261	52.000, 0.784	52.000, 0.489	52.000, 0.682	52.000, 0.595	52.000, 0.656
262	52.200, 0.784	52.200, 0.489	52.200, 0.682	52.200, 0.595	52.200, 0.656
263	52.400, 0.785	52.400, 0.488	52.400, 0.682	52.400, 0.595	52.400, 0.656
264	52.600, 0.785	52.600, 0.488	52.600, 0.682	52.600, 0.594	52.600, 0.655
265	52.800, 0.785	52.800, 0.488	52.800, 0.682	52.800, 0.594	52.800, 0.655
266	53.000, 0.786	53.000, 0.487	53.000, 0.682	53.000, 0.594	53.000, 0.655
267	53.200, 0.786	53.200, 0.487	53.200, 0.682	53.200, 0.594	53.200, 0.655
268	53.400, 0.786	53.400, 0.486	53.400, 0.682	53.400, 0.594	53.400, 0.655
269	53.600, 0.786	53.600, 0.486	53.600, 0.683	53.600, 0.593	53.600, 0.656
270	53.800, 0.787	53.800, 0.486	53.800, 0.683	53.800, 0.593	53.800, 0.656
271	54.000, 0.787	54.000, 0.486	54.000, 0.684	54.000, 0.593	54.000, 0.656
272	54.200, 0.787	54.200, 0.485	54.200, 0.684	54.200, 0.592	54.200, 0.656
273	54.400, 0.787	54.400, 0.485	54.400, 0.684	54.400, 0.592	54.400, 0.657
274	54.600, 0.787	54.600, 0.485	54.600, 0.684	54.600, 0.592	54.600, 0.657
275	54.800, 0.787	54.800, 0.485	54.800, 0.684	54.800, 0.592	54.800, 0.657
276	55.000, 0.788	55.000, 0.484	55.000, 0.684	55.000, 0.591	55.000, 0.657
277	55.200, 0.788	55.200, 0.484	55.200, 0.684	55.200, 0.591	55.200, 0.658
278	55.400, 0.788	55.400, 0.484	55.400, 0.684	55.400, 0.591	55.400, 0.658
279	55.600, 0.789	55.600, 0.483	55.600, 0.683	55.600, 0.591	55.600, 0.658
280	55.800, 0.789	55.800, 0.483	55.800, 0.683	55.800, 0.590	55.800, 0.658
281	56.000, 0.790	56.000, 0.482	56.000, 0.683	56.000, 0.590	56.000, 0.658
282	56.200, 0.790	56.200, 0.482	56.200, 0.682	56.200, 0.590	56.200, 0.658
283	56.400, 0.791	56.400, 0.482	56.400, 0.682	56.400, 0.590	56.400, 0.658
284	56.600, 0.792	56.600, 0.482	56.600, 0.682	56.600, 0.590	56.600, 0.658
285	56.800, 0.792	56.800, 0.481	56.800, 0.682	56.800, 0.590	56.800, 0.658
286	57.000, 0.793	57.000, 0.481	57.000, 0.682	57.000, 0.591	57.000, 0.657
287	57.200, 0.793	57.200, 0.481	57.200, 0.682	57.200, 0.591	57.200, 0.657
288	57.400, 0.793	57.400, 0.481	57.400, 0.682	57.400, 0.590	57.400, 0.657
289	57.600, 0.794	57.600, 0.481	57.600, 0.682	57.600, 0.590	57.600, 0.657
290	57.800, 0.793	57.800, 0.481	57.800, 0.682	57.800, 0.590	57.800, 0.657
291	58.000, 0.793	58.000, 0.481	58.000, 0.683	58.000, 0.590	58.000, 0.657
292	58.200, 0.793	58.200, 0.480	58.200, 0.683	58.200, 0.590	58.200, 0.657
293	58.400, 0.793	58.400, 0.480	58.400, 0.683	58.400, 0.589	58.400, 0.657
294	58.600, 0.793	58.600, 0.480	58.600, 0.684	58.600, 0.589	58.600, 0.658
295	58.800, 0.792	58.800, 0.480	58.800, 0.684	58.800, 0.589	58.800, 0.658
296	59.000, 0.793	59.000, 0.480	59.000, 0.684	59.000, 0.588	59.000, 0.658
297	59.200, 0.793	59.200, 0.479	59.200, 0.685	59.200, 0.588	59.200, 0.658
298	59.400, 0.793	59.400, 0.479	59.400, 0.685	59.400, 0.587	59.400, 0.659
299	59.600, 0.793	59.600, 0.479	59.600, 0.685	59.600, 0.587	59.600, 0.659
300	59.800, 0.794	59.800, 0.479	59.800, 0.685	59.800, 0.587	59.800, 0.659
301	60.000, 0.794	60.000, 0.478	60.000, 0.684	60.000, 0.587	60.000, 0.659
302	60.200, 0.795	60.200, 0.478	60.200, 0.684	60.200, 0.587	60.200, 0.659
303	60.400, 0.796	60.400, 0.478	60.400, 0.684	60.400, 0.588	60.400, 0.659
304	60.600, 0.796	60.600, 0.478	60.600, 0.684	60.600, 0.588	60.600, 0.659
305	60.800, 0.797	60.800, 0.478	60.800, 0.684	60.800, 0.588	60.800, 0.659
306	61.000, 0.797	61.000, 0.478	61.000, 0.684	61.000, 0.588	61.000, 0.659
307	61.200, 0.798	61.200, 0.478	61.200, 0.684	61.200, 0.589	61.200, 0.659
308	61.400, 0.799	61.400, 0.477	61.400, 0.684	61.400, 0.589	61.400, 0.658
309	61.600, 0.799	61.600, 0.477	61.600, 0.684	61.600, 0.589	61.600, 0.658
310	61.800, 0.799	61.800, 0.477	61.800, 0.684	61.800, 0.589	61.800, 0.658
311	62.000, 0.799	62.000, 0.477	62.000, 0.684	62.000, 0.588	62.000, 0.658
312	62.200, 0.799	62.200, 0.476	62.200, 0.684	62.200, 0.588	62.200, 0.658
313	62.400, 0.799	62.400, 0.476	62.400, 0.684	62.400, 0.588	62.400, 0.658
314	62.600, 0.800	62.600, 0.476	62.600, 0.684	62.600, 0.588	62.600, 0.658
315	62.800, 0.800	62.800, 0.476	62.800, 0.684	62.800, 0.587	62.800, 0.658
316	63.000, 0.800	63.000, 0.476	63.000, 0.684	63.000, 0.587	63.000, 0.658
317	63.200, 0.801	63.200, 0.475	63.200, 0.683	63.200, 0.587	63.200, 0.658
318	63.400, 0.801	63.400, 0.475	63.400, 0.683	63.400, 0.587	63.400, 0.659
319	63.600, 0.802	63.600, 0.475	63.600, 0.683	63.600, 0.587	63.600, 0.659
320	63.800, 0.802	63.800, 0.475	63.800, 0.683	63.800, 0.587	63.800, 0.659
321	64.000, 0.802	64.000, 0.475	64.000, 0.682	64.000, 0.587	64.000, 0.659
322	64.200, 0.802	64.200, 0.475	64.200, 0.682	64.200, 0.587	64.200, 0.659
323	64.400, 0.802	64.400, 0.475	64.400, 0.682	64.400, 0.587	64.400, 0.659
324	64.600, 0.802	64.600, 0.475	64.600, 0.682	64.600, 0.587	64.600, 0.659
325	64.800, 0.803	64.800, 0.475	64.800, 0.682	64.800, 0.586	64.800, 0.659
326	65.000, 0.803	65.000, 0.474	65.000, 0.682	65.000, 0.586	65.000, 0.658
327	65.200, 0.804	65.200, 0.474	65.200, 0.683	65.200, 0.586	65.200, 0.658
328	65.400, 0.804	65.400, 0.473	65.400, 0.683	65.400, 0.586	65.400, 0.658
329	65.600, 0.804	65.600, 0.473	65.600, 0.683	65.600, 0.585	65.600, 0.658
330	65.800, 0.805	65.800, 0.472	65.800, 0.684	65.800, 0.585	65.800, 0.658
331	66.000, 0.805	66.000, 0.472	66.000, 0.684	66.000, 0.585	66.000, 0.658
332	66.200, 0.805	66.200, 0.471	66.200, 0.684	66.200, 0.585	66.200, 0.657
333	66.400, 0.805	66.400, 0.471	66.400, 0.685	66.400, 0.585	66.400, 0.657
334	66.600, 0.806	66.600, 0.470	66.600, 0.685	66.600, 0.585	66.600, 0.658
335	66.800, 0.806	66.800, 0.470	66.800, 0.685	66.800, 0.585	66.800, 0.658
336	67.000, 0.806	67.000, 0.470	67.000, 0.685	67.000, 0.585	67.000, 0.658
337	67.200, 0.806	67.200, 0.470	67.200, 0.685	67.200, 0.585	67.200, 0.658
338	67.400, 0.806	67.400, 0.470	67.400, 0.685	67.400, 0.585	67.400, 0.659
339	67.600, 0.806	67.600, 0.470	67.600, 0.685	67.600, 0.584	67.600, 0.659
340	67.800, 0.806	67.800, 0.470	67.800, 0.685	67.800, 0.584	67.800, 0.659
341	68.000, 0.806	68.000, 0.470	68.000, 0.685	68.000, 0.584	68.000, 0.659
342	68.200, 0.806	68.200, 0.470	68.200, 0.685	68.200, 0.583	68.200, 0.660
343	68.400, 0.806	68.400, 0.470	68.400, 0.684	68.400, 0.583	68.400, 0.660
344	68.600, 0.806	68.600, 0.470	68.600, 0.684	68.600, 0.583	68.600, 0.660
345	68.800, 0.806	68.800, 0.470	68.800, 0.683	68.800, 0.583	68.800, 0.660
346	69.000, 0.807	69.000, 0.470	69.000, 0.683	69.000, 0.583	69.000, 0.661
347	69.200, 0.807	69.200, 0.470	69.200, 0.683	69.200, 0.583	69.200, 0.661
348	69.400, 0.808	69.400, 0.470	69.400, 0.683	69.400, 0.583	69.400, 0.660
349	69.600, 0.808	69.600, 0.470	69.600, 0.683	69.600, 0.583	69.600, 0.660
350	69.800, 0.809	69.800, 0.470	69.800, 0.683	69.800, 0.583	69.800, 0.660
351	70.000, 0.809	70.000, 0.469	70.000, 0.684	70.000, 0.584	70.000, 0.660
352	70.200, 0.809	70.200, 0.469	70.200, 0.684	70.200, 0.584	70.200, 0.660
353	70.400, 0.810	70.400, 0.468	70.400, 0.684	70.400, 0.584	70.400, 0.660
354	70.600, 0.810	70.600, 0.468	70.600, 0.684	70.600, 0.584	70.600, 0.660
355	70.800, 0.810	70.800, 0.467	70.800, 0.684	70.800, 0.584	70.800, 0.660
356	71.000, 0.810	71.000, 0.467	71.000, 0.685	71.000, 0.583	71.000, 0.660
357	71.200, 0.811	71.200, 0.467	71.200, 0.685	71.200, 0.583	71.200, 0.659
358	71.400, 0.812	71.400, 0.467	71.400, 0.686	71.400, 0.583	71.400, 0.659
359	71.600, 0.813	71.600, 0.467	71.600, 0.686	71.600, 0.583	71.600, 0.659
360	71.800, 0.813	71.800, 0.467	71.800, 0.686	71.800, 0.583	71.800, 0.659
361	72.000, 0.814	72.000, 0.466	72.000, 0.686	72.000, 0.583	72.000, 0.660
362	72.200, 0.814	72.200, 0.466	72.200, 0.685	72.200, 0.583	72.200, 0.660
363	72.400, 0.815	72.400, 0.466	72.400, 0.685	72.400, 0.582	72.400, 0.660
364	72.600, 0.815	72.600, 0.466	72.600, 0.685	72.600, 0.582	72.600, 0.660
365	72.800, 0.816	72.800, 0.466	72.800, 0.684	72.800, 0.582	72.800, 0.661
366	73.000, 0.816	73.000, 0.466	73.000, 0.684	73.000, 0.582	73.000, 0.661
367	73.200, 0.816	73.200, 0.466	73.200, 0.684	73.200, 0.582	73.200, 0.661
368	73.400, 0.816	73.400, 0.466	73.400, 0.683	73.400, 0.582	73.400, 0.662
369	73.600, 0.816	73.600, 0.465	73.600, 0.683	73.600, 0.582	73.600, 0.662
370	73.800, 0.816	73.800, 0.465	73.800, 0.683	73.800, 0.582	73.800, 0.662
371	74.000, 0.815	74.000, 0.464	74.000, 0.683	74.000, 0.582	74.000, 0.661
372	74.200, 0.815	74.200, 0.464	74.200, 0.682	74.200, 0.582	74.200, 0.661
373	74.400, 0.815	74.400, 0.464	74.400, 0.682	74.400, 0.582	74.400, 0.661
374	74.600, 0.816	74.600, 0.464	74.600, 0.682	74.600, 0.582	74.600, 0.661
375	74.800, 0.816	74.800, 0.463	74.800, 0.683	74.800, 0.582	74.800, 0.661
376	75.000, 0.817	75.000, 0.463	75.000, 0.683	75.000, 0.582	75.000, 0.661
377	75.200, 0.818	75.200, 0.463	75.200, 0.683	75.200, 0.582	75.200, 0.661
378	75.400, 0.818	75.400, 0.463	75.400, 0.683	75.400, 0.582	75.400, 0.661
379	75.600, 0.819	75.600, 0.463	75.600, 0.683	75.600, 0.582	75.600, 0.661
380	75.800, 0.819	75.800, 0.463	75.800, 0.683	75.800, 0.582	75.800, 0.661
381	76.000, 0.820	76.000, 0.462	76.000, 0.683	76.000, 0.582	76.000, 0.661
382	76.200, 0.820	76.200, 0.462	76.200, 0.683	76.200, 0.582	76.200, 0.661
383	76.400, 0.821	76.400, 0.462	76.400, 0.683	76.400, 0.582	76.400, 0.661
384	76.600, 0.821	76.600, 0.462	76.600, 0.683	76.600, 0.582	76.600, 0.661
385	76.800, 0.821	76.800, 0.462	76.800, 0.682	76.800, 0.582	76.800, 0.662
386	77.000, 0.821	77.000, 0.462	77.000, 0.682	77.000, 0.581	77.000, 0.662
387	77.200, 0.821	77.200, 0.462	77.200, 0.683	77.200, 0.581	77.200, 0.662
388	77.400, 0.821	77.400, 0.462	77.400, 0.683	77.400, 0.581	77.400, 0.662
389	77.600, 0.821	77.600, 0.462	77.600, 0.683	77.600, 0.581	77.600, 0.662
390	77.800, 0.820	77.800, 0.462	77.800, 0.683	77.800, 0.581	77.800, 0.662
391	78.000, 0.820	78.000, 0.462	78.000, 0.684	78.000, 0.581	78.000, 0.661
392	78.200, 0.820	78.200, 0.462	78.200, 0.684	78.200, 0.581	78.200, 0.662
393	78.400, 0.821	78.400, 0.463	78.400, 0.684	78.400, 0.581	78.400, 0.661
394	78.600, 0.821	78.600, 0.463	78.600, 0.684	78.600, 0.581	78.600, 0.662
395	78.800, 0.822	78.800, 0.463	78.800, 0.684	78.800, 0.581	78.800, 0.661
396	79.000, 0.822	79.000, 0.463	79.000, 0.684	79.000, 0.581	79.000, 0.661
397	79.200, 0.823	79.200, 0.463	79.200, 0.684	79.200, 0.580	79.200, 0.661
398	79.400, 0.823	79.400, 0.463	79.400, 0.685	79.400, 0.580	79.400, 0.661
399	79.600, 0.824	79.600, 0.463	79.600, 0.685	79.600, 0.579	79.600, 0.661
400	79.800, 0.824	79.800, 0.463	79.800, 0.685	79.800, 0.578	79.800, 0.661
401	80.000, 0.824	80.000, 0.462	80.000, 0.685	80.000, 0.578	80.000, 0.661
402	80.200, 0.824	80.200, 0.462	80.200, 0.684	80.200, 0.578	80.200, 0.661
403	80.400, 0.825	80.400, 0.462	80.400, 0.684	80.400, 0.577	80.400, 0.661
404	80.600, 0.825	80.600, 0.461	80.600, 0.684	80.600, 0.577	80.600, 0.660
405	80.800, 0.825	80.800, 0.461	80.800, 0.684	80.800, 0.577	80.800, 0.660
406	81.000, 0.826	81.000, 0.461	81.000, 0.683	81.000, 0.576	81.000, 0.660
407	81.200, 0.826	81.200, 0.460	81.200, 0.684	81.200, 0.576	81.200, 0.659
408	81.400, 0.826	81.400, 0.460	81.400, 0.684	81.400, 0.576	81.400, 0.659
409	81.600, 0.825	81.600, 0.460	81.600, 0.684	81.600, 0.576	81.600, 0.659
410	81.800, 0.825	81.800, 0.460	81.800, 0.683	81.800, 0.576	81.800, 0.658
411	82.000, 0.825	82.000, 0.459	82.000, 0.683	82.000, 0.576	82.000, 0.658
412	82.200, 0.825	82.200, 0.459	82.200, 0.683	82.200, 0.576	82.200, 0.658
413	82.400, 0.826	82.400, 0.459	82.400, 0.683	82.400, 0.576	82.400, 0.658
414	82.600, 0.826	82.600, 0.459	82.600, 0.684	82.600, 0.576	82.600, 0.658
415	82.800, 0.827	82.800, 0.459	82.800, 0.684	82.800, 0.577	82.800, 0.658
416	83.000, 0.827	83.000, 0.459	83.000, 0.684	83.000, 0.577	83.000, 0.658
417	83.200, 0.828	83.200, 0.459	83.200, 0.685	83.200, 0.577	83.200, 0.658
418	83.400, 0.828	83.400, 0.458	83.400, 0.685	83.400, 0.578	83.400, 0.658
419	83.600, 0.828	83.600, 0.458	83.600, 0.685	83.600, 0.578	83.600, 0.659
420	83.800, 0.829	83.800, 0.458	83.800, 0.685	83.800, 0.578	83.800, 0.659
421	84.000, 0.830	84.000, 0.458	84.000, 0.685	84.000, 0.578	84.000, 0.659
422	84.200, 0.830	84.200, 0.458	84.200, 0.685	84.200, 0.578	84.200, 0.659
423	84.400, 0.831	84.400, 0.457	84.400, 0.685	84.400, 0.578	84.400, 0.659
424	84.600, 0.831	84.600, 0.457	84.600, 0.685	84.600, 0.578	84.600, 0.660
425	84.800, 0.832	84.800, 0.457	84.800, 0.684	84.800, 0.577	84.800, 0.660
426	85.000, 0.832	85.000, 0.457	85.000, 0.684	85.000, 0.577	85.000, 0.660
427	85.200, 0.832	85.200, 0.457	85.200, 0.684	85.200, 0.576	85.200, 0.660
428	85.400, 0.832	85.400, 0.457	85.400, 0.684	85.400, 0.576	85.400, 0.660
429	85.600, 0.832	85.600, 0.457	85.600, 0.684	85.600, 0.575	85.600, 0.660
430	85.800, 0.832	85.800, 0.457	85.800, 0.684	85.800, 0.575	85.800, 0.660
431	86.000, 0.832	86.000, 0.457	86.000, 0.684	86.000, 0.575	86.000, 0.660
432	86.200, 0.833	86.200, 0.457	86.200, 0.685	86.200, 0.575	86.200, 0.660
433	86.400, 0.833	86.400, 0.457	86.400, 0.685	86.400, 0.576	86.400, 0.660
434	86.600, 0.833	86.600, 0.457	86.600, 0.685	86.600, 0.576	86.600, 0.660
435	86.800, 0.833	86.800, 0.457	86.800, 0.686	86.800, 0.577	86.800, 0.660
436	87.000, 0.833	87.000, 0.456	87.000, 0.686	87.000, 0.577	87.000, 0.660
437	87.200, 0.833	87.200, 0.456	87.200, 0.686	87.200, 0.578	87.200, 0.660
438	87.400, 0.833	87.400, 0.456	87.400, 0.686	87.400, 0.578	87.400, 0.660
439	87.600, 0.833	87.600, 0.456	87.600, 0.686	87.600, 0.578	87.600, 0.661
440	87.800, 0.833	87.800, 0.456	87.800, 0.686	87.800, 0.578	87.800, 0.661
441	88.000, 0.833	88.000, 0.456	88.000, 0.686	88.000, 0.578	88.000, 0.661
442	88.200, 0.833	88.200, 0.456	88.200, 0.686	88.200, 0.578	88.200, 0.661
443	88.400, 0.833	88.400, 0.456	88.400, 0.685	88.400, 0.578	88.400, 0.661
444	88.600, 0.833	88.600, 0.456	88.600, 0.685	88.600, 0.578	88.600, 0.661
445	88.800, 0.833	88.800, 0.456	88.800, 0.685	88.800, 0.577	88.800, 0.661
446	89.000, 0.833	89.000, 0.455	89.000, 0.684	89.000, 0.577	89.000, 0.661
447	89.200, 0.834	89.200, 0.455	89.200, 0.684	89.200, 0.577	89.200, 0.662
448	89.400, 0.834	89.400, 0.455	89.400, 0.684	89.400, 0.577	89.400, 0.662
449	89.600, 0.834	89.600, 0.455	89.600, 0.684	89.600, 0.577	89.600, 0.662
450	89.800, 0.835	89.800, 0.454	89.800, 0.684	89.800, 0.576	89.800, 0.662
451	90.000, 0.835	90.000, 0.454	90.000, 0.684	90.000, 0.576	90.000, 0.662
452	90.200, 0.835	90.200, 0.454	90.200, 0.684	90.200, 0.576	90.200, 0.662
453	90.400, 0.836	90.400, 0.454	90.400, 0.685	90.400, 0.575	90.400, 0.662
454	90.600, 0.836	90.600, 0.453	90.600, 0.685	90.600, 0.575	90.600, 0.662
455	90.800, 0.836	90.800, 0.453	90.800, 0.685	90.800, 0.575	90.800, 0.662
456	91.000, 0.836	91.000, 0.453	91.000, 0.685	91.000, 0.575	91.000, 0.662
457	91.200, 0.836	91.200, 0.452	91.200, 0.685	91.200, 0.575	91.200, 0.662
458	91.400, 0.836	91.400, 0.452	91.400, 0.685	91.400, 0.575	91.400, 0.662
459	91.600, 0.837	91.600, 0.452	91.600, 0.686	91.600, 0.575	91.600, 0.662
460	91.800, 0.837	91.800, 0.452	91.800, 0.686	91.800, 0.575	91.800, 0.662
461	92.000, 0.837	92.000, 0.453	92.000, 0.686	92.000, 0.575	92.000, 0.662
462	92.200, 0.837	92.200, 0.453	92.200, 0.686	92.200, 0.575	92.200, 0.662
463	92.400, 0.837	92.400, 0.453	92.400, 0.686	92.400, 0.575	92.400, 0.662
464	92.600, 0.838	92.600, 0.453	92.600, 0.687	92.600, 0.576	92.600, 0.662
465	92.800, 0.838	92.800, 0.453	92.800, 0.686	92.800, 0.576	92.800, 0.662
466	93.000, 0.838	93.000, 0.453	93.000, 0.686	93.000, 0.576	93.000, 0.662
467	93.200, 0.838	93.200, 0.453	93.200, 0.686	93.200, 0.576	93.200, 0.662
468	93.400, 0.838	93.400, 0.453	93.400, 0.686	93.400, 0.576	93.400, 0.662
469	93.600, 0.838	93.600, 0.453	93.600, 0.686	93.600, 0.576	93.600, 0.663
470	93.800, 0.838	93.800, 0.453	93.800, 0.686	93.800, 0.575	93.800, 0.663
471	94.000, 0.839	94.000, 0.453	94.000, 0.686	94.000, 0.575	94.000, 0.663
472	94.200, 0.839	94.200, 0.452	94.200, 0.686	94.200, 0.575	94.200, 0.663
473	94.400, 0.839	94.400, 0.451	94.400, 0.687	94.400, 0.575	94.400, 0.663
474	94.600, 0.839	94.600, 0.451	94.600, 0.687	94.600, 0.575	94.600, 0.663
475	94.800, 0.840	94.800, 0.451	94.800, 0.687	94.800, 0.575	94.800, 0.663
476	95.000, 0.840	95.000, 0.451	95.000, 0.687	95.000, 0.575	95.000, 0.663
477	95.200, 0.840	95.200, 0.450	95.200, 0.687	95.200, 0.575	95.200, 0.663
478	95.400, 0.840	95.400, 0.451	95.400, 0.687	95.400, 0.575	95.400, 0.662
479	95.600, 0.840	95.600, 0.450	95.600, 0.687	95.600, 0.575	95.600, 0.662
480	95.800, 0.841	95.800, 0.450	95.800, 0.688	95.800, 0.575	95.800, 0.662
481	96.000, 0.841	96.000, 0.450	96.000, 0.688	96.000, 0.575	96.000, 0.662
482	96.200, 0.841	96.200, 0.450	96.200, 0.688	96.200, 0.576	96.200, 0.662
483	96.400, 0.841	96.400, 0.450	96.400, 0.688	96.400, 0.576	96.400, 0.662
484	96.600, 0.841	96.600, 0.451	96.600, 0.688	96.600, 0.576	96.600, 0.662
485	96.800, 0.841	96.800, 0.451	96.800, 0.688	96.800, 0.575	96.800, 0.662
486	97.000, 0.842	97.000, 0.451	97.000, 0.688	97.000, 0.575	97.000, 0.662
487	97.200, 0.842	97.200, 0.451	97.200, 0.687	97.200, 0.575	97.200, 0.662
488	97.400, 0.842	97.400, 0.451	97.400, 0.687	97.400, 0.575	97.400, 0.662
489	97.600, 0.842	97.600, 0.451	97.600, 0.686	97.600, 0.574	97.600, 0.662
490	97.800, 0.843	97.800, 0.450	97.800, 0.686	97.800, 0.574	97.800, 0.663
491	98.000, 0.843	98.000, 0.450	98.000, 0.686	98.000, 0.574	98.000, 0.663
492	98.200, 0.843	98.200, 0.450	98.200, 0.686	98.200, 0.574	98.200, 0.663
493	98.400, 0.843	98.400, 0.450	98.400, 0.686	98.400, 0.574	98.400, 0.663
494	98.600, 0.843	98.600, 0.450	98.600, 0.686	98.600, 0.574	98.600, 0.663
495	98.800, 0.843	98.800, 0.450	98.800, 0.686	98.800, 0.574	98.800, 0.663
496	99.000, 0.843	99.000, 0.450	99.000, 0.687	99.000, 0.573	99.000, 0.663
497	99.200, 0.843	99.200, 0.450	99.200, 0.687	99.200, 0.573	99.200, 0.663
498	99.400, 0.844	99.400, 0.449	99.400, 0.687	99.400, 0.573	99.400, 0.663
499	99.600, 0.844	99.600, 0.449	99.600, 0.688	99.600, 0.573	99.600, 0.663
500	99.800, 0.844	99.800, 0.449	99.800, 0.688	99.800, 0.573	99.800, 0.663
501	100.000, 0.845	100.000, 0.449	100.000, 0.688	100.000, 0.573	100.000, 0.663
502	100.200, 0.845	100.200, 0.449	100.200, 0.688	100.200, 0.573	100.200, 0.663
503	100.400, 0.845	100.400, 0.448	100.400, 0.689	100.400, 0.573	100.400, 0.663
504	100.600, 0.846	100.600, 0.448	100.600, 0.688	100.600, 0.572	100.600, 0.663
505	100.800, 0.846	100.800, 0.448	100.800, 0.688	100.800, 0.572	100.800, 0.663
506	101.000, 0.846	101.000, 0.448	101.000, 0.688	101.000, 0.572	101.000, 0.663
507	101.200, 0.846	101.200, 0.448	101.200, 0.688	101.200, 0.572	101.200, 0.663
508	101.400, 0.847	101.400, 0.448	101.400, 0.687	101.400, 0.572	101.400, 0.663
509	101.600, 0.847	101.600, 0.448	101.600, 0.687	101.600, 0.572	101.600, 0.663
510	101.800, 0.847	101.800, 0.448	101.800, 0.687	101.800, 0.572	101.800, 0.663
511	102.000, 0.847	102.000, 0.448	102.000, 0.688	102.000, 0.572	102.000, 0.663
512	102.200, 0.848	102.200, 0.449	102.200, 0.688	102.200, 0.572	102.200, 0.663
513	102.400, 0.848	102.400, 0.449	102.400, 0.688	102.400, 0.572	102.400, 0.663
514	102.600, 0.848	102.600, 0.449	102.600, 0.688	102.600, 0.572	102.600, 0.663
515	102.800, 0.848	102.800, 0.449	102.800, 0.688	102.800, 0.572	102.800, 0.663
516	103.000, 0.849	103.000, 0.449	103.000, 0.689	103.000, 0.572	103.000, 0.663
517	103.200, 0.849	103.200, 0.449	103.200, 0.689	103.200, 0.572	103.200, 0.663
518	103.400, 0.849	103.400, 0.449	103.400, 0.689	103.400, 0.572	103.400, 0.663
519	103.600, 0.849	103.600, 0.449	103.600, 0.689	103.600, 0.572	103.600, 0.663
520	103.800, 0.849	103.800, 0.449	103.800, 0.689	103.800, 0.572	103.800, 0.663
521	104.000, 0.849	104.000, 0.449	104.000, 0.689	104.000, 0.572	104.000, 0.663
522	104.200, 0.848	104.200, 0.449	104.200, 0.689	104.200, 0.572	104.200, 0.663
523	104.400, 0.848	104.400, 0.449	104.400, 0.689	104.400, 0.572	104.400, 0.663
524	104.600, 0.848	104.600, 0.448	104.600, 0.689	104.600, 0.572	104.600, 0.663
525	104.800, 0.848	104.800, 0.448	104.800, 0.689	104.800, 0.571	104.800, 0.663
526	105.000, 0.847	105.000, 0.448	105.000, 0.689	105.000, 0.571	105.000, 0.663
527	105.200, 0.848	105.200, 0.447	105.200, 0.689	105.200, 0.571	105.200, 0.663
528	105.400, 0.848	105.400, 0.447	105.400, 0.689	105.400, 0.571	105.400, 0.663
529	105.600, 0.848	105.600, 0.447	105.600, 0.689	105.600, 0.571	105.600, 0.664
530	105.800, 0.848	105.800, 0.447	105.800, 0.689	105.800, 0.571	105.800, 0.664
531	106.000, 0.848	106.000, 0.448	106.000, 0.689	106.000, 0.571	106.000, 0.664
532	106.200, 0.849	106.200, 0.448	106.200, 0.689	106.200, 0.571	106.200, 0.664
533	106.400, 0.849	106.400, 0.447	106.400, 0.689	106.400, 0.571	106.400, 0.664
534	106.600, 0.849	106.600, 0.447	106.600, 0.689	106.600, 0.571	106.600, 0.664
535	106.800, 0.849	106.800, 0.447	106.800, 0.688	106.800, 0.571	106.800, 0.664
536	107.000, 0.849	107.000, 0.446	107.000, 0.688	107.000, 0.571	107.000, 0.665
537	107.200, 0.849	107.200, 0.446	107.200, 0.689	107.200, 0.571	107.200, 0.664
538	107.400, 0.849	107.400, 0.445	107.400, 0.689	107.400, 0.571	107.400, 0.664
539	107.600, 0.849	107.600, 0.445	107.600, 0.689	107.600, 0.572	107.600, 0.664
540	107.800, 0.849	107.800, 0.445	107.800, 0.689	107.800, 0.572	107.800, 0.665
541	108.000, 0.849	108.000, 0.444	108.000, 0.689	108.000, 0.572	108.000, 0.665
542	108.200, 0.849	108.200, 0.444	108.200, 0.690	108.200, 0.573	108.200, 0.665
543	108.400, 0.849	108.400, 0.444	108.400, 0.690	108.400, 0.573	108.400, 0.665
544	108.600, 0.850	108.600, 0.444	108.600, 0.690	108.600, 0.573	108.600, 0.665
545	108.800, 0.850	108.800, 0.444	108.800, 0.690	108.800, 0.572	108.800, 0.664
546	109.000, 0.850	109.000, 0.444	109.000, 0.691	109.000, 0.572	109.000, 0.664
547	109.200, 0.850	109.200, 0.444	109.200, 0.691	109.200, 0.572	109.200, 0.664
548	109.400, 0.850	109.400, 0.445	109.400, 0.691	109.400, 0.572	109.400, 0.664
549	109.600, 0.851	109.600, 0.445	109.600, 0.691	109.600, 0.571	109.600, 0.664
550	109.800, 0.851	109.800, 0.445	109.800, 0.691	109.800, 0.571	109.800, 0.664
551	110.000, 0.851	110.000, 0.446	110.000, 0.691	110.000, 0.571	110.000, 0.664
552	110.200, 0.851	110.200, 0.446	110.200, 0.691	110.200, 0.571	110.200, 0.664
553	110.400, 0.851	110.400, 0.445	110.400, 0.691	110.400, 0.571	110.400, 0.664
554	110.600, 0.851	110.600, 0.445	110.600, 0.692	110.600, 0.571	110.600, 0.664
555	110.800, 0.851	110.800, 0.445	110.800, 0.692	110.800, 0.570	110.800, 0.665
556	111.000, 0.851	111.000, 0.445	111.000, 0.692	111.000, 0.570	111.000, 0.665
557	111.200, 0.851	111.200, 0.444	111.200, 0.692	111.200, 0.570	111.200, 0.665
558	111.400, 0.851	111.400, 0.444	111.400, 0.692	111.400, 0.570	111.400, 0.666
559	111.600, 0.851	111.600, 0.444	111.600, 0.692	111.600, 0.570	111.600, 0.666
560	111.800, 0.851	111.800, 0.444	111.800, 0.691	111.800, 0.570	111.800, 0.666
561	112.000, 0.851	112.000, 0.444	112.000, 0.691	112.000, 0.570	112.000, 0.666
562	112.200, 0.851	112.200, 0.443	112.200, 0.691	112.200, 0.570	112.200, 0.666
563	112.400, 0.851	112.400, 0.443	112.400, 0.690	112.400, 0.571	112.400, 0.666
564	112.600, 0.851	112.600, 0.443	112.600, 0.690	112.600, 0.571	112.600, 0.666
565	112.800, 0.851	112.800, 0.443	112.800, 0.690	112.800, 0.571	112.800, 0.665
566	113.000, 0.852	113.000, 0.443	113.000, 0.689	113.000, 0.571	113.000, 0.665
567	113.200, 0.852	113.200, 0.444	113.200, 0.689	113.200, 0.571	113.200, 0.665
568	113.400, 0.853	113.400, 0.444	113.400, 0.689	113.400, 0.571	113.400, 0.664
569	113.600, 0.853	113.600, 0.444	113.600, 0.689	113.600, 0.571	113.600, 0.664
570	113.800, 0.853	113.800, 0.444	113.800, 0.689	113.800, 0.571	113.800, 0.664
571	114.000, 0.854	114.000, 0.444	114.000, 0.689	114.000, 0.571	114.000, 0.664
572	114.200, 0.854	114.200, 0.444	114.200, 0.689	114.200, 0.571	114.200, 0.664
573	114.400, 0.854	114.400, 0.444	114.400, 0.689	114.400, 0.570	114.400, 0.664
574	114.600, 0.854	114.600, 0.443	114.600, 0.689	114.600, 0.570	114.600, 0.665
575	114.800, 0.855	114.800, 0.443	114.800, 0.689	114.800, 0.570	114.800, 0.665
576	115.000, 0.855	115.000, 0.442	115.000, 0.689	115.000, 0.570	115.000, 0.665
577	115.200, 0.855	115.200, 0.442	115.200, 0.690	115.200, 0.569	115.200, 0.665
578	115.400, 0.855	115.400, 0.441	115.400, 0.690	115.400, 0.569	115.400, 0.665
579	115.600, 0.855	115.600, 0.441	115.600, 0.690	115.600, 0.569	115.600, 0.665
580	115.800, 0.854	115.800, 0.440	115.800, 0.690	115.800, 0.569	115.800, 0.665
581	116.000, 0.854	116.000, 0.440	116.000, 0.690	116.000, 0.569	116.000, 0.665
582	116.200, 0.855	116.200, 0.439	116.200, 0.690	116.200, 0.569	116.200, 0.665
583	116.400, 0.855	116.400, 0.439	116.400, 0.691	116.400, 0.569	116.400, 0.666
584	116.600, 0.855	116.600, 0.439	116.600, 0.691	116.600, 0.569	116.600, 0.666
585	116.800, 0.856	116.800, 0.439	116.800, 0.691	116.800, 0.569	116.800, 0.666
586	117.000, 0.856	117.000, 0.439	117.000, 0.691	117.000, 0.569	117.000, 0.666
587	117.200, 0.856	117.200, 0.439	117.200, 0.691	117.200, 0.569	117.200, 0.666
588	117.400, 0.856	117.400, 0.439	117.400, 0.690	117.400, 0.569	117.400, 0.666
589	117.600, 0.856	117.600, 0.439	117.600, 0.690	117.600, 0.570	117.600, 0.666
590	117.800, 0.856	117.800, 0.439	117.800, 0.690	117.800, 0.570	117.800, 0.666
591	118.000, 0.856	118.000, 0.440	118.000, 0.690	118.000, 0.570	118.000, 0.666
592	118.200, 0.856	118.200, 0.440	118.200, 0.690	118.200, 0.570	118.200, 0.666
593	118.400, 0.857	118.400, 0.440	118.400, 0.690	118.400, 0.570	118.400, 0.665
594	118.600, 0.857	118.600, 0.440	118.600, 0.690	118.600, 0.571	118.600, 0.665
595	118.800, 0.857	118.800, 0.441	118.800, 0.690	118.800, 0.571	118.800, 0.665
596	119.000, 0.857	119.000, 0.441	119.000, 0.690	119.000, 0.571	119.000, 0.664
597	119.200, 0.858	119.200, 0.441	119.200, 0.690	119.200, 0.570	119.200, 0.664
598	119.400, 0.858	119.400, 0.441	119.400, 0.690	119.400, 0.570	119.400, 0.664
599	119.600, 0.858	119.600, 0.441	119.600, 0.690	119.600, 0.570	119.600, 0.664
600	119.800, 0.858	119.800, 0.441	119.800, 0.690	119.800, 0.569	119.800, 0.664
601	120.000, 0.858	120.000, 0.440	120.000, 0.690	120.000, 0.569	120.000, 0.664
602	120.200, 0.858	120.200, 0.440	120.200, 0.690	120.200, 0.569	120.200, 0.664
603	120.400, 0.858	120.400, 0.440	120.400, 0.691	120.400, 0.568	120.400, 0.665
604	120.600, 0.859	120.600, 0.440	120.600, 0.691	120.600, 0.568	120.600, 0.665
605	120.800, 0.859	120.800, 0.440	120.800, 0.691	120.800, 0.568	120.800, 0.665
606	121.000, 0.859	121.000, 0.440	121.000, 0.691	121.000, 0.568	121.000, 0.665
607	121.200, 0.858	121.200, 0.440	121.200, 0.691	121.200, 0.568	121.200, 0.666
608	121.400, 0.858	121.400, 0.440	121.400, 0.690	121.400, 0.568	121.400, 0.666
609	121.600, 0.858	121.600, 0.441	121.600, 0.690	121.600, 0.568	121.600, 0.666
610	121.800, 0.858	121.800, 0.441	121.800, 0.691	121.800, 0.568	121.800, 0.667
611	122.000, 0.858	122.000, 0.441	122.000, 0.691	122.000, 0.568	122.000, 0.667
612	122.200, 0.858	122.200, 0.441	122.200, 0.691	122.200, 0.568	122.200, 0.667
613	122.400, 0.858	122.400, 0.441	122.400, 0.691	122.400, 0.568	122.400, 0.666
614	122.600, 0.858	122.600, 0.441	122.600, 0.691	122.600, 0.568	122.600, 0.666
615	122.800, 0.859	122.800, 0.440	122.800, 0.691	122.800, 0.567	122.800, 0.666
616	123.000, 0.859	123.000, 0.439	123.000, 0.691	123.000, 0.567	123.000, 0.666
617	123.200, 0.859	123.200, 0.439	123.200, 0.691	123.200, 0.567	123.200, 0.666
618	123.400, 0.859	123.400, 0.438	123.400, 0.691	123.400, 0.567	123.400, 0.666
619	123.600, 0.860	123.600, 0.437	123.600, 0.691	123.600, 0.567	123.600, 0.666
620	123.800, 0.860	123.800, 0.437	123.800, 0.691	123.800, 0.567	123.800, 0.666
621	124.000, 0.860	124.000, 0.436	124.000, 0.691	124.000, 0.567	124.000, 0.665
622	124.200, 0.861	124.200, 0.436	124.200, 0.691	124.200, 0.567	124.200, 0.665
623	124.400, 0.861	124.400, 0.435	124.400, 0.691	124.400, 0.567	124.400, 0.666
624	124.600, 0.861	124.600, 0.435	124.600, 0.691	124.600, 0.567	124.600, 0.666
625	124.800, 0.862	124.800, 0.436	124.800, 0.692	124.800, 0.567	124.800, 0.666
626	125.000, 0.862	125.000, 0.436	125.000, 0.692	125.000, 0.567	125.000, 0.665
627	125.200, 0.862	125.200, 0.436	125.200, 0.692	125.200, 0.567	125.200, 0.665
628	125.400, 0.863	125.400, 0.437	125.400, 0.692	125.400, 0.567	125.400, 0.665
629	125.600, 0.863	125.600, 0.437	125.600, 0.692	125.600, 0.567	125.600, 0.665
630	125.800, 0.864	125.800, 0.437	125.800, 0.693	125.800, 0.567	125.800, 0.665
631	126.000, 0.864	126.000, 0.438	126.000, 0.693	126.000, 0.567	126.000, 0.664
632	126.200, 0.865	126.200, 0.438	126.200, 0.693	126.200, 0.567	126.200, 0.664
633	126.400, 0.865	126.400, 0.438	126.400, 0.692	126.400, 0.567	126.400, 0.664
634	126.600, 0.865	126.600, 0.437	126.600, 0.692	126.600, 0.567	126.600, 0.664
635	126.800, 0.865	126.800, 0.437	126.800, 0.692	126.800, 0.567	126.800, 0.664
636	127.000, 0.865	127.000, 0.437	127.000, 0.691	127.000, 0.567	127.000, 0.664
637	127.200, 0.864	127.200, 0.436	127.200, 0.691	127.200, 0.567	127.200, 0.664
638	127.400, 0.864	127.400, 0.435	127.400, 0.691	127.400, 0.567	127.400, 0.664
639	127.600, 0.864	127.600, 0.435	127.600, 0.690	127.600, 0.567	127.600, 0.664
640	127.800, 0.864	127.800, 0.434	127.800, 0.690	127.800, 0.566	127.800, 0.664
641	128.000, 0.864	128.000, 0.434	128.000, 0.690	128.000, 0.566	128.000, 0.664
642	128.200, 0.863	128.200, 0.434	128.200, 0.690	128.200, 0.565	128.200, 0.664
643	128.400, 0.863	128.400, 0.434	128.400, 0.690	128.400, 0.565	128.400, 0.665
644	128.600, 0.863	128.600, 0.434	128.600, 0.690	128.600, 0.565	128.600, 0.665
645	128.800, 0.863	128.800, 0.435	128.800, 0.691	128.800, 0.565	128.800, 0.665
646	129.000, 0.863	129.000, 0.435	129.000, 0.691	129.000, 0.565	129.000, 0.665
647	129.200, 0.864	129.200, 0.435	129.200, 0.691	129.200, 0.565	129.200, 0.665
648	129.400, 0.864	129.400, 0.436	129.400, 0.691	129.400, 0.565	129.400, 0.665
649	129.600, 0.864	129.600, 0.436	129.600, 0.691	129.600, 0.565	129.600, 0.665
650	129.800, 0.864	129.800, 0.436	129.800, 0.691	129.800, 0.565	129.800, 0.666
651	130.000, 0.865	130.000, 0.436	130.000, 0.691	130.000, 0.565	130.000, 0.666
652	130.200, 0.865	130.200, 0.436	130.200, 0.691	130.200, 0.565	130.200, 0.666
653	130.400, 0.865	130.400, 0.435	130.400, 0.690	130.400, 0.565	130.400, 0.666
654	130.600, 0.865	130.600, 0.435	130.600, 0.690	130.600, 0.565	130.600, 0.666
655	130.800, 0.865	130.800, 0.435	130.800, 0.690	130.800, 0.565	130.800, 0.666
656	131.000, 0.865	131.000, 0.435	131.000, 0.690	131.000, 0.565	131.000, 0.666
657	131.200, 0.865	131.200, 0.435	131.200, 0.690	131.200, 0.565	131.200, 0.665
658	131.400, 0.865	131.400, 0.434	131.400, 0.690	131.400, 0.564	131.400, 0.665
659	131.600, 0.865	131.600, 0.434	131.600, 0.690	131.600, 0.564	131.600, 0.665
660	131.800, 0.865	131.800, 0.434	131.800, 0.690	131.800, 0.563	131.800, 0.665
661	132.000, 0.865	132.000, 0.434	132.000, 0.690	132.000, 0.563	132.000, 0.665
662	132.200, 0.865	132.200, 0.434	132.200, 0.691	132.200, 0.562	132.200, 0.665
663	132.400, 0.864	132.400, 0.434	132.400, 0.691	132.400, 0.562	132.400, 0.665
664	132.600, 0.865	132.600, 0.434	132.600, 0.691	132.600, 0.562	132.600, 0.665
665	132.800, 0.865	132.800, 0.434	132.800, 0.691	132.800, 0.562	132.800, 0.666
666	133.000, 0.865	133.000, 0.434	133.000, 0.691	133.000, 0.562	133.000, 0.666
667	133.200, 0.865	133.200, 0.434	133.200, 0.691	133.200, 0.561	133.200, 0.666
668	133.400, 0.865	133.400, 0.434	133.400, 0.691	133.400, 0.562	133.400, 0.666
669	133.600, 0.865	133.600, 0.433	133.600, 0.690	133.600, 0.562	133.600, 0.666
670	133.800, 0.865	133.800, 0.433	133.800, 0.690	133.800, 0.562	133.800, 0.666
671	134.000, 0.866	134.000, 0.433	134.000, 0.690	134.000, 0.563	134.000, 0.666
672	134.200, 0.866	134.200, 0.432	134.200, 0.689	134.200, 0.563	134.200, 0.665
673	134.400, 0.866	134.400, 0.432	134.400, 0.689	134.400, 0.564	134.400, 0.665
674	134.600, 0.866	134.600, 0.432	134.600, 0.689	134.600, 0.564	134.600, 0.664
675	134.800, 0.866	134.800, 0.432	134.800, 0.690	134.800, 0.565	134.800, 0.664
676	135.000, 0.866	135.000, 0.432	135.000, 0.690	135.000, 0.565	135.000, 0.664
677	135.200, 0.866	135.200, 0.433	135.200, 0.690	135.200, 0.566	135.200, 0.664
678	135.400, 0.866	135.400, 0.433	135.400, 0.691	135.400, 0.565	135.400, 0.664
679	135.600, 0.866	135.600, 0.433	135.600, 0.691	135.600, 0.565	135.600, 0.664
680	135.800, 0.866	135.800, 0.434	135.800, 0.691	135.800, 0.565	135.800, 0.665
681	136.000, 0.866	136.000, 0.434	136.000, 0.691	136.000, 0.565	136.000, 0.665
682	136.200, 0.867	136.200, 0.434	136.200, 0.691	136.200, 0.564	136.200, 0.665
683	136.400, 0.867	136.400, 0.434	136.400, 0.692	136.400, 0.564	136.400, 0.665
684	136.600, 0.868	136.600, 0.434	136.600, 0.692	136.600, 0.564	136.600, 0.665
685	136.800, 0.868	136.800, 0.434	136.800, 0.692	136.800, 0.563	136.800, 0.665
686	137.000, 0.868	137.000, 0.434	137.000, 0.691	137.000, 0.563	137.000, 0.665
687	137.200, 0.869	137.200, 0.434	137.200, 0.691	137.200, 0.563	137.200, 0.666
688	137.400, 0.869	137.400, 0.433	137.400, 0.690	137.400, 0.562	137.400, 0.666
689	137.600, 0.869	137.600, 0.433	137.600, 0.690	137.600, 0.562	137.600, 0.666
690	137.800, 0.870	137.800, 0.433	137.800, 0.690	137.800, 0.562	137.800, 0.666
691	138.000, 0.870	138.000, 0.433	138.000, 0.690	138.000, 0.562	138.000, 0.666
692	138.200, 0.870	138.200, 0.433	138.200, 0.690	138.200, 0.562	138.200, 0.665
693	138.400, 0.870	138.400, 0.432	138.400, 0.690	138.400, 0.562	138.400, 0.665
694	138.600, 0.870	138.600, 0.432	138.600, 0.690	138.600, 0.562	138.600, 0.665
695	138.800, 0.870	138.800, 0.433	138.800, 0.690	138.800, 0.562	138.800, 0.665
696	139.000, 0.870	139.000, 0.433	139.000, 0.690	139.000, 0.562	139.000, 0.665
697	139.200, 0.870	139.200, 0.433	139.200, 0.689	139.200, 0.562	139.200, 0.665
698	139.400, 0.871	139.400, 0.433	139.400, 0.690	139.400, 0.562	139.400, 0.665
699	139.600, 0.871	139.600, 0.433	139.600, 0.690	139.600, 0.562	139.600, 0.665
700	139.800, 0.871	139.800, 0.433	139.800, 0.690	139.800, 0.562	139.800, 0.666
701	140.000, 0.871	140.000, 0.433	140.000, 0.690	140.000, 0.563	140.000, 0.666
702	140.200, 0.871	140.200, 0.433	140.200, 0.690	140.200, 0.563	140.200, 0.665
703	140.400, 0.872	140.400, 0.433	140.400, 0.690	140.400, 0.563	140.400, 0.665
704	140.600, 0.872	140.600, 0.433	140.600, 0.690	140.600, 0.563	140.600, 0.665
705	140.800, 0.872	140.800, 0.433	140.800, 0.690	140.800, 0.563	140.800, 0.665
706	141.000, 0.872	141.000, 0.433	141.000, 0.690	141.000, 0.563	141.000, 0.665
707	141.200, 0.872	141.200, 0.432	141.200, 0.690	141.200, 0.563	141.200, 0.666
708	141.400, 0.872	141.400, 0.432	141.400, 0.690	141.400, 0.562	141.400, 0.666
709	141.600, 0.872	141.600, 0.432	141.600, 0.690	141.600, 0.562	141.600, 0.666
710	141.800, 0.871	141.800, 0.431	141.800, 0.690	141.800, 0.561	141.800, 0.666
711	142.000, 0.871	142.000, 0.431	142.000, 0.690	142.000, 0.561	142.000, 0.666
712	142.200, 0.871	142.200, 0.431	142.200, 0.690	142.200, 0.561	142.200, 0.666
713	142.400, 0.871	142.400, 0.431	142.400, 0.690	142.400, 0.560	142.400, 0.665
714	142.600, 0.871	142.600, 0.431	142.600, 0.690	142.600, 0.560	142.600, 0.665
715	142.800, 0.870	142.800, 0.431	142.800, 0.690	142.800, 0.560	142.800, 0.665
716	143.000, 0.870	143.000, 0.431	143.000, 0.690	143.000, 0.560	143.000, 0.664
717	143.200, 0.870	143.200, 0.432	143.200, 0.690	143.200, 0.560	143.200, 0.664
718	143.400, 0.870	143.400, 0.432	143.400, 0.690	143.400, 0.560	143.400, 0.664
719	143.600, 0.869	143.600, 0.432	143.600, 0.691	143.600, 0.560	143.600, 0.664
720	143.800, 0.869	143.800, 0.432	143.800, 0.691	143.800, 0.560	143.800, 0.664
721	144.000, 0.869	144.000, 0.432	144.000, 0.691	144.000, 0.560	144.000, 0.663
722	144.200, 0.869	144.200, 0.432	144.200, 0.691	144.200, 0.560	144.200, 0.663
723	144.400, 0.870	144.400, 0.432	144.400, 0.691	144.400, 0.560	144.400, 0.663
724	144.600, 0.870	144.600, 0.432	144.600, 0.691	144.600, 0.560	144.600, 0.662
725	144.800, 0.870	144.800, 0.432	144.800, 0.691	144.800, 0.560	144.800, 0.662
726	145.000, 0.870	145.000, 0.432	145.000, 0.690	145.000, 0.560	145.000, 0.662
727	145.200, 0.870	145.200, 0.432	145.200, 0.690	145.200, 0.560	145.200, 0.662
728	145.400, 0.870	145.400, 0.432	145.400, 0.690	145.400, 0.560	145.400, 0.663
729	145.600, 0.871	145.600, 0.432	145.600, 0.690	145.600, 0.561	145.600, 0.663
730	145.800, 0.871	145.800, 0.432	145.800, 0.689	145.800, 0.561	145.800, 0.663
731	146.000, 0.871	146.000, 0.432	146.000, 0.689	146.000, 0.561	146.000, 0.663
732	146.200, 0.871	146.200, 0.431	146.200, 0.689	146.200, 0.561	146.200, 0.663
733	146.400, 0.871	146.400, 0.431	146.400, 0.689	146.400, 0.561	146.400, 0.663
734	146.600, 0.871	146.600, 0.431	146.600, 0.688	146.600, 0.561	146.600, 0.663
735	146.800, 0.871	146.800, 0.431	146.800, 0.688	146.800, 0.560	146.800, 0.663
736	147.000, 0.871	147.000, 0.430	147.000, 0.688	147.000, 0.560	147.000, 0.662
737	147.200, 0.871	147.200, 0.430	147.200, 0.688	147.200, 0.559	147.200, 0.662
738	147.400, 0.871	147.400, 0.430	147.400, 0.687	147.400, 0.559	147.400, 0.662
739	147.600, 0.872	147.600, 0.430	147.600, 0.687	147.600, 0.559	147.600, 0.662
740	147.800, 0.872	147.800, 0.430	147.800, 0.687	147.800, 0.559	147.800, 0.662
741	148.000, 0.872	148.000, 0.430	148.000, 0.687	148.000, 0.559	148.000, 0.662
742	148.200, 0.873	148.200, 0.429	148.200, 0.687	148.200, 0.559	148.200, 0.662
743	148.400, 0.873	148.400, 0.429	148.400, 0.687	148.400, 0.559	148.400, 0.662
744	148.600, 0.873	148.600, 0.429	148.600, 0.688	148.600, 0.559	148.600, 0.662
745	148.800, 0.873	148.800, 0.430	148.800, 0.688	148.800, 0.559	148.800, 0.662
746	149.000, 0.874	149.000, 0.430	149.000, 0.688	149.000, 0.559	149.000, 0.662
747	149.200, 0.874	149.200, 0.430	149.200, 0.688	149.200, 0.559	149.200, 0.663
748	149.400, 0.874	149.400, 0.430	149.400, 0.688	149.400, 0.559	149.400, 0.663
749	149.600, 0.874	149.600, 0.430	149.600, 0.688	149.600, 0.560	149.600, 0.664
750	149.800, 0.874	149.800, 0.430	149.800, 0.688	149.800, 0.560	149.800, 0.664
751	150.000, 0.874	150.000, 0.430	150.000, 0.688	150.000, 0.560	150.000, 0.664
752	150.200, 0.866	150.200, 0.429	150.200, 0.682	150.200, 0.555	150.200, 0.658
753	150.400, 0.857	150.400, 0.427	150.400, 0.674	150.400, 0.549	150.400, 0.651
754	150.600, 0.846	150.600, 0.424	150.600, 0.666	150.600, 0.543	150.600, 0.643
755	150.800, 0.835	150.800, 0.422	150.800, 0.657	150.800, 0.536	150.800, 0.635
756	151.000, 0.823	151.000, 0.419	151.000, 0.647	151.000, 0.529	151.000, 0.626
757	151.200, 0.811	151.200, 0.416	151.200, 0.637	151.200, 0.521	151.200, 0.616
758	151.400, 0.799	151.400, 0.413	151.400, 0.628	151.400, 0.513	151.400, 0.607
759	151.600, 0.788	151.600, 0.410	151.600, 0.618	151.600, 0.505	151.600, 0.597
760	151.800, 0.777	151.800, 0.408	151.800, 0.609	151.800, 0.498	151.800, 0.589
761	152.000, 0.767	152.000, 0.405	152.000, 0.601	152.000, 0.491	152.000, 0.580
762	152.200, 0.759	152.200, 0.403	152.200, 0.595	152.200, 0.484	152.200, 0.574
763	152.400, 0.751	152.400, 0.400	152.400, 0.589	152.400, 0.479	152.400, 0.567
764	152.600, 0.744	152.600, 0.398	152.600, 0.583	152.600, 0.474	152.600, 0.561
765	152.800, 0.737	152.800, 0.396	152.800, 0.577	152.800, 0.470	152.800, 0.555
766	153.000, 0.731	153.000, 0.394	153.000, 0.572	153.000, 0.465	153.000, 0.549
767	153.200, 0.725	153.200, 0.392	153.200, 0.567	153.200, 0.462	153.200, 0.543
768	153.400, 0.720	153.400, 0.390	153.400, 0.562	153.400, 0.458	153.400, 0.538
769	153.600, 0.714	153.600, 0.388	153.600, 0.558	153.600, 0.454	153.600, 0.533
770	153.800, 0.710	153.800, 0.386	153.800, 0.553	153.800, 0.451	153.800, 0.528
771	154.000, 0.705	154.000, 0.385	154.000, 0.549	154.000, 0.448	154.000, 0.524
772	154.200, 0.700	154.200, 0.383	154.200, 0.545	154.200, 0.445	154.200, 0.520
773	154.400, 0.696	154.400, 0.382	154.400, 0.541	154.400, 0.442	154.400, 0.516
774	154.600, 0.692	154.600, 0.380	154.600, 0.537	154.600, 0.439	154.600, 0.512
775	154.800, 0.688	154.800, 0.379	154.800, 0.533	154.800, 0.436	154.800, 0.508
776	155.000, 0.684	155.000, 0.377	155.000, 0.530	155.000, 0.433	155.000, 0.505
777	155.200, 0.681	155.200, 0.376	155.200, 0.526	155.200, 0.431	155.200, 0.501
778	155.400, 0.677	155.400, 0.374	155.400, 0.523	155.400, 0.429	155.400, 0.498
779	155.600, 0.674	155.600, 0.373	155.600, 0.520	155.600, 0.426	155.600, 0.495
780	155.800, 0.671	155.800, 0.371	155.800, 0.518	155.800, 0.424	155.800, 0.492
781	156.000, 0.667	156.000, 0.370	156.000, 0.515	156.000, 0.422	156.000, 0.489
782	156.200, 0.664	156.200, 0.368	156.200, 0.512	156.200, 0.419	156.200, 0.487
783	156.400, 0.661	156.400, 0.367	156.400, 0.510	156.400, 0.417	156.400, 0.484
784	156.600, 0.658	156.600, 0.365	156.600, 0.507	156.600, 0.414	156.600, 0.481
785	156.800, 0.655	156.800, 0.363	156.800, 0.505	156.800, 0.412	156.800, 0.478
786	157.000, 0.652	157.000, 0.362	157.000, 0.503	157.000, 0.410	157.000, 0.476
787	157.200, 0.650	157.200, 0.360	157.200, 0.501	157.200, 0.408	157.200, 0.474
788	157.400, 0.647	157.400, 0.359	157.400, 0.499	157.400, 0.406	157.400, 0.472
789	157.600, 0.645	157.600, 0.357	157.600, 0.497	157.600, 0.403	157.600, 0.470
790	157.800, 0.643	157.800, 0.356	157.800, 0.495	157.800, 0.401	157.800, 0.468
791	158.000, 0.640	158.000, 0.355	158.000, 0.494	158.000, 0.399	158.000, 0.466
792	158.200, 0.639	158.200, 0.354	158.200, 0.492	158.200, 0.397	158.200, 0.465
793	158.400, 0.637	158.400, 0.353	158.400, 0.490	158.400, 0.395	158.400, 0.463
794	158.600, 0.635	158.600, 0.352	158.600, 0.488	158.600, 0.393	158.600, 0.462
795	158.800, 0.634	158.800, 0.352	158.800, 0.486	158.800, 0.392	158.800, 0.460
796	159.000, 0.633	159.000, 0.351	159.000, 0.485	159.000, 0.390	159.000, 0.459
797	159.200, 0.631	159.200, 0.350	159.200, 0.483	159.200, 0.389	159.200, 0.457
798	159.400, 0.630	159.400, 0.349	159.400, 0.482	159.400, 0.387	159.400, 0.455
799	159.600, 0.628	159.600, 0.349	159.600, 0.480	159.600, 0.386	159.600, 0.453
800	159.800, 0.626	159.800, 0.348	159.800, 0.479	159.800, 0.385	159.800, 0.451
801	160.000, 0.624	160.000, 0.347	160.000, 0.477	160.000, 0.383	160.000, 0.449
802	160.200, 0.623	160.200, 0.346	160.200, 0.476	160.200, 0.382	160.200, 0.447
803	160.400, 0.621	160.400, 0.345	160.400, 0.474	160.400, 0.380	160.400, 0.445
804	160.600, 0.619	160.600, 0.344	160.600, 0.472	160.600, 0.379	160.600, 0.443
805	160.800, 0.618	160.800, 0.343	160.800, 0.471	160.800, 0.377	160.800, 0.441
806	161.000, 0.616	161.000, 0.342	161.000, 0.469	161.000, 0.376	161.000, 0.440
807	161.200, 0.615	161.200, 0.341	161.200, 0.467	161.200, 0.375	161.200, 0.438
808	161.400, 0.613	161.400, 0.340	161.400, 0.466	161.400, 0.374	161.400, 0.436
809	161.600, 0.612	161.600, 0.339	161.600, 0.464	161.600, 0.373	161.600, 0.435
810	161.800, 0.610	161.800, 0.339	161.800, 0.462	161.800, 0.371	161.800, 0.433
811	162.000, 0.609	162.000, 0.338	162.000, 0.461	162.000, 0.370	162.000, 0.432
812	162.200, 0.607	162.200, 0.337	162.200, 0.459	162.200, 0.369	162.200, 0.431
813	162.400, 0.606	162.400, 0.336	162.400, 0.458	162.400, 0.367	162.400, 0.430
814	162.600, 0.605	162.600, 0.335	162.600, 0.457	162.600, 0.366	162.600, 0.429
815	162.800, 0.604	162.800, 0.334	162.800, 0.455	162.800, 0.365	162.800, 0.428
816	163.000, 0.602	163.000, 0.333	163.000, 0.454	163.000, 0.364	163.000, 0.427
817	163.200, 0.601	163.200, 0.332	163.200, 0.453	163.200, 0.362	163.200, 0.426
818	163.400, 0.599	163.400, 0.331	163.400, 0.452	163.400, 0.361	163.400, 0.425
819	163.600, 0.598	163.600, 0.330	163.600, 0.451	163.600, 0.360	163.600, 0.423
820	163.800, 0.596	163.800, 0.330	163.800, 0.450	163.800, 0.359	163.800, 0.422
821	164.000, 0.595	164.000, 0.329	164.000, 0.449	164.000, 0.358	164.000, 0.421
822	164.200, 0.594	164.200, 0.328	164.200, 0.448	164.200, 0.356	164.200, 0.420
823	164.400, 0.593	164.400, 0.328	164.400, 0.447	164.400, 0.355	164.400, 0.419
824	164.600, 0.592	164.600, 0.327	164.600, 0.446	164.600, 0.354	164.600, 0.419
825	164.800, 0.591	164.800, 0.327	164.800, 0.444	164.800, 0.354	164.800, 0.418
826	165.000, 0.590	165.000, 0.326	165.000, 0.443	165.000, 0.353	165.000, 0.417
827	165.200, 0.589	165.200, 0.325	165.200, 0.442	165.200, 0.352	165.200, 0.416
828	165.400, 0.589	165.400, 0.325	165.400, 0.441	165.400, 0.351	165.400, 0.414
829	165.600, 0.588	165.600, 0.324	165.600, 0.440	165.600, 0.350	165.600, 0.413
830	165.800, 0.587	165.800, 0.324	165.800, 0.439	165.800, 0.349	165.800, 0.412
831	166.000, 0.586	166.000, 0.323	166.000, 0.438	166.000, 0.348	166.000, 0.411
832	166.200, 0.585	166.200, 0.322	166.200, 0.438	166.200, 0.347	166.200, 0.410
833	166.400, 0.585	166.400, 0.321	166.400, 0.437	166.400, 0.346	166.400, 0.409
834	166.600, 0.584	166.600, 0.321	166.600, 0.436	166.600, 0.345	166.600, 0.408
835	166.800, 0.583	166.800, 0.320	166.800, 0.435	166.800, 0.344	166.800, 0.407
836	167.000, 0.582	167.000, 0.320	167.000, 0.434	167.000, 0.343	167.000, 0.406
837	167.200, 0.581	167.200, 0.319	167.200, 0.433	167.200, 0.342	167.200, 0.405
838	167.400, 0.580	167.400, 0.319	167.400, 0.432	167.400, 0.341	167.400, 0.404
839	167.600, 0.579	167.600, 0.319	167.600, 0.431	167.600, 0.340	167.600, 0.403
840	167.800, 0.578	167.800, 0.318	167.800, 0.430	167.800, 0.339	167.800, 0.401
841	168.000, 0.578	168.000, 0.318	168.000, 0.429	168.000, 0.339	168.000, 0.400
842	168.200, 0.577	168.200, 0.317	168.200, 0.428	168.200, 0.338	168.200, 0.399
843	168.400, 0.576	168.400, 0.317	168.400, 0.427	168.400, 0.337	168.400, 0.398
844	168.600, 0.575	168.600, 0.316	168.600, 0.426	168.600, 0.336	168.600, 0.397
845	168.800, 0.575	168.800, 0.315	168.800, 0.425	168.800, 0.335	168.800, 0.396
846	169.000, 0.574	169.000, 0.315	169.000, 0.424	169.000, 0.334	169.000, 0.395
847	169.200, 0.572	169.200, 0.314	169.200, 0.423	169.200, 0.334	169.200, 0.394
848	169.400, 0.571	169.400, 0.313	169.400, 0.423	169.400, 0.333	169.400, 0.393
849	169.600, 0.570	169.600, 0.312	169.600, 0.422	169.600, 0.332	169.600, 0.392
850	169.800, 0.569	169.800, 0.311	169.800, 0.421	169.800, 0.331	169.800, 0.392
851	170.000, 0.568	170.000, 0.311	170.000, 0.420	170.000, 0.330	170.000, 0.391
852	170.200, 0.567	170.200, 0.310	170.200, 0.419	170.200, 0.329	170.200, 0.390
853	170.400, 0.566	170.400, 0.309	170.400, 0.419	170.400, 0.327	170.400, 0.390
854	170.600, 0.565	170.600, 0.309	170.600, 0.417	170.600, 0.326	170.600, 0.389
855	170.800, 0.564	170.800, 0.308	170.800, 0.417	170.800, 0.325	170.800, 0.388
856	171.000, 0.563	171.000, 0.308	171.000, 0.416	171.000, 0.324	171.000, 0.387
857	171.200, 0.562	171.200, 0.307	171.200, 0.415	171.200, 0.323	171.200, 0.387
858	171.400, 0.561	171.400, 0.307	171.400, 0.414	171.400, 0.323	171.400, 0.386
859	171.600, 0.560	171.600, 0.306	171.600, 0.413	171.600, 0.322	171.600, 0.385
860	171.800, 0.560	171.800, 0.306	171.800, 0.412	171.800, 0.321	171.800, 0.384
861	172.000, 0.559	172.000, 0.305	172.000, 0.412	172.000, 0.321	172.000, 0.383
862	172.200, 0.559	172.200, 0.305	172.200, 0.411	172.200, 0.320	172.200, 0.382
863	172.400, 0.558	172.400, 0.304	172.400, 0.411	172.400, 0.319	172.400, 0.381
864	172.600, 0.557	172.600, 0.304	172.600, 0.411	172.600, 0.319	172.600, 0.380
865	172.800, 0.557	172.800, 0.303	172.800, 0.410	172.800, 0.318	172.800, 0.380
866	173.000, 0.556	173.000, 0.302	173.000, 0.409	173.000, 0.317	173.000, 0.379
867	173.200, 0.555	173.200, 0.302	173.200, 0.409	173.200, 0.316	173.200, 0.378
868	173.400, 0.554	173.400, 0.301	173.400, 0.408	173.400, 0.316	173.400, 0.378
869	173.600, 0.553	173.600, 0.300	173.600, 0.408	173.600, 0.315	173.600, 0.377
870	173.800, 0.553	173.800, 0.300	173.800, 0.407	173.800, 0.315	173.800, 0.377
871	174.000, 0.552	174.000, 0.299	174.000, 0.406	174.000, 0.314	174.000, 0.376
872	174.200, 0.551	174.200, 0.299	174.200, 0.405	174.200, 0.313	174.200, 0.375
873	174.400, 0.551	174.400, 0.298	174.400, 0.404	174.400, 0.313	174.400, 0.375
874	174.600, 0.550	174.600, 0.298	174.600, 0.403	174.600, 0.312	174.600, 0.374
875	174.800, 0.549	174.800, 0.297	174.800, 0.402	174.800, 0.312	174.800, 0.373
876	175.000, 0.549	175.000, 0.297	175.000, 0.402	175.000, 0.311	175.000, 0.372
877	175.200, 0.548	175.200, 0.296	175.200, 0.401	175.200, 0.311	175.200, 0.371
878	175.400, 0.547	175.400, 0.295	175.400, 0.400	175.400, 0.310	175.400, 0.370
879	175.600, 0.546	175.600, 0.294	175.600, 0.399	175.600, 0.309	175.600, 0.369
880	175.800, 0.546	175.800, 0.294	175.800, 0.399	175.800, 0.308	175.800, 0.368
881	176.000, 0.545	176.000, 0.293	176.000, 0.398	176.000, 0.307	176.000, 0.368
882	176.200, 0.544	176.200, 0.292	176.200, 0.398	176.200, 0.306	176.200, 0.367
883	176.400, 0.544	176.400, 0.291	176.400, 0.397	176.400, 0.305	176.400, 0.366
884	176.600, 0.543	176.600, 0.291	176.600, 0.397	176.600, 0.304	176.600, 0.366
885	176.800, 0.542	176.800, 0.290	176.800, 0.396	176.800, 0.303	176.800, 0.365
886	177.000, 0.541	177.000, 0.290	177.000, 0.396	177.000, 0.302	177.000, 0.365
887	177.200, 0.541	177.200, 0.289	177.200, 0.395	177.200, 0.301	177.200, 0.365
888	177.400, 0.540	177.400, 0.288	177.400, 0.394	177.400, 0.301	177.400, 0.364
889	177.600, 0.540	177.600, 0.288	177.600, 0.394	177.600, 0.300	177.600, 0.364
890	177.800, 0.539	177.800, 0.287	177.800, 0.393	177.800, 0.300	177.800, 0.364
891	178.000, 0.538	178.000, 0.287	178.000, 0.392	178.000, 0.299	178.000, 0.363
892	178.200, 0.538	178.200, 0.287	178.200, 0.392	178.200, 0.299	178.200, 0.363
893	178.400, 0.537	178.400, 0.287	178.400, 0.391	178.400, 0.298	178.400, 0.362
894	178.600, 0.536	178.600, 0.287	178.600, 0.390	178.600, 0.298	178.600, 0.361
895	178.800, 0.535	178.800, 0.286	178.800, 0.389	178.800, 0.297	178.800, 0.360
896	179.000, 0.535	179.000, 0.286	179.000, 0.388	179.000, 0.297	179.000, 0.360
897	179.200, 0.534	179.200, 0.286	179.200, 0.387	179.200, 0.296	179.200, 0.359
898	179.400, 0.533	179.400, 0.285	179.400, 0.387	179.400, 0.295	179.400, 0.358
899	179.600, 0.533	179.600, 0.285	179.600, 0.386	179.600, 0.294	179.600, 0.357
900	179.800, 0.532	179.800, 0.284	179.800, 0.385	179.800, 0.294	179.800, 0.356
901	180.000, 0.531	180.000, 0.284	180.000, 0.385	180.000, 0.293	180.000, 0.355
902	180.200, 0.531	180.200, 0.284	180.200, 0.384	180.200, 0.292	180.200, 0.354
903	180.400, 0.530	180.400, 0.283	180.400, 0.383	180.400, 0.291	180.400, 0.353
904	180.600, 0.530	180.600, 0.283	180.600, 0.383	180.600, 0.291	180.600, 0.353
905	180.800, 0.530	180.800, 0.282	180.800, 0.382	180.800, 0.290	180.800, 0.352
906	181.000, 0.529	181.000, 0.281	181.000, 0.381	181.000, 0.289	181.000, 0.351
907	181.200, 0.529	181.200, 0.281	181.200, 0.381	181.200, 0.289	181.200, 0.351
908	181.400, 0.528	181.400, 0.280	181.400, 0.380	181.400, 0.288	181.400, 0.350
909	181.600, 0.528	181.600, 0.279	181.600, 0.379	181.600, 0.288	181.600, 0.350
910	181.800, 0.527	181.800, 0.279	181.800, 0.379	181.800, 0.287	181.800, 0.349
911	182.000, 0.527	182.000, 0.278	182.000, 0.378	182.000, 0.287	182.000, 0.349
912	182.200, 0.526	182.200, 0.278	182.200, 0.378	182.200, 0.286	182.200, 0.348
913	182.400, 0.525	182.400, 0.278	182.400, 0.377	182.400, 0.285	182.400, 0.347
914	182.600, 0.525	182.600, 0.277	182.600, 0.377	182.600, 0.285	182.600, 0.347
915	182.800, 0.524	182.800, 0.277	182.800, 0.376	182.800, 0.284	182.800, 0.346
916	183.000, 0.524	183.000, 0.277	183.000, 0.376	183.000, 0.283	183.000, 0.346
917	183.200, 0.523	183.200, 0.276	183.200, 0.375	183.200, 0.283	183.200, 0.345
918	183.400, 0.522	183.400, 0.276	183.400, 0.375	183.400, 0.282	183.400, 0.345
919	183.600, 0.522	183.600, 0.276	183.600, 0.374	183.600, 0.282	183.600, 0.345
920	183.800, 0.521	183.800, 0.275	183.800, 0.373	183.800, 0.281	183.800, 0.344
921	184.000, 0.520	184.000, 0.275	184.000, 0.373	184.000, 0.280	184.000, 0.344
922	184.200, 0.520	184.200, 0.275	184.200, 0.372	184.200, 0.280	184.200, 0.343
923	184.400, 0.519	184.400, 0.275	184.400, 0.371	184.400, 0.279	184.400, 0.343
924	184.600, 0.518	184.600, 0.274	184.600, 0.370	184.600, 0.279	184.600, 0.342
925	184.800, 0.518	184.800, 0.274	184.800, 0.370	184.800, 0.278	184.800, 0.342
926	185.000, 0.517	185.000, 0.273	185.000, 0.369	185.000, 0.277	185.000, 0.341
927	185.200, 0.516	185.200, 0.273	185.200, 0.368	185.200, 0.277	185.200, 0.340
928	185.400, 0.515	185.400, 0.273	185.400, 0.367	185.400, 0.276	185.400, 0.340
929	185.600, 0.515	185.600, 0.272	185.600, 0.367	185.600, 0.275	185.600, 0.339
930	185.800, 0.514	185.800, 0.271	185.800, 0.366	185.800, 0.274	185.800, 0.338
931	186.000, 0.513	186.000, 0.271	186.000, 0.365	186.000, 0.273	186.000, 0.337
932	186.200, 0.513	186.200, 0.270	186.200, 0.365	186.200, 0.272	186.200, 0.337
933	186.400, 0.512	186.400, 0.270	186.400, 0.364	186.400, 0.272	186.400, 0.336
934	186.600, 0.512	186.600, 0.269	186.600, 0.364	186.600, 0.271	186.600, 0.335
935	186.800, 0.511	186.800, 0.269	186.800, 0.363	186.800, 0.270	186.800, 0.334
936	187.000, 0.511	187.000, 0.268	187.000, 0.363	187.000, 0.270	187.000, 0.334
937	187.200, 0.510	187.200, 0.267	187.200, 0.362	187.200, 0.269	187.200, 0.333
938	187.400, 0.510	187.400, 0.267	187.400, 0.362	187.400, 0.269	187.400, 0.333
939	187.600, 0.509	187.600, 0.266	187.600, 0.362	187.600, 0.269	187.600, 0.333
940	187.800, 0.508	187.800, 0.265	187.800, 0.361	187.800, 0.268	187.800, 0.332
941	188.000, 0.508	188.000, 0.265	188.000, 0.361	188.000, 0.268	188.000, 0.332
942	188.200, 0.507	188.200, 0.264	188.200, 0.360	188.200, 0.267	188.200, 0.332
943	188.400, 0.507	188.400, 0.264	188.400, 0.360	188.400, 0.267	188.400, 0.331
944	188.600, 0.506	188.600, 0.264	188.600, 0.359	188.600, 0.266	188.600, 0.331
945	188.800, 0.506	188.800, 0.263	188.800, 0.358	188.800, 0.266	188.800, 0.330
946	189.000, 0.505	189.000, 0.263	189.000, 0.358	189.000, 0.265	189.000, 0.330
947	189.200, 0.504	189.200, 0.262	189.200, 0.357	189.200, 0.264	189.200, 0.329
948	189.400, 0.504	189.400, 0.262	189.400, 0.356	189.400, 0.264	189.400, 0.329
949	189.600, 0.504	189.600, 0.261	189.600, 0.356	189.600, 0.263	189.600, 0.328
950	189.800, 0.503	189.800, 0.261	189.800, 0.355	189.800, 0.263	189.800, 0.328
951	190.000, 0.503	190.000, 0.261	190.000, 0.355	190.000, 0.262	190.000, 0.327
952	190.200, 0.502	190.200, 0.261	190.200, 0.355	190.200, 0.262	190.200, 0.327
953	190.400, 0.502	190.400, 0.261	190.400, 0.354	190.400, 0.262	190.400, 0.326
954	190.600, 0.501	190.600, 0.261	190.600, 0.354	190.600, 0.261	190.600, 0.326
955	190.800, 0.501	190.800, 0.260	190.800, 0.354	190.800, 0.261	190.800, 0.325
956	191.000, 0.500	191.000, 0.260	191.000, 0.353	191.000, 0.261	191.000, 0.325
957	191.200, 0.500	191.200, 0.260	191.200, 0.353	191.200, 0.261	191.200, 0.324
958	191.400, 0.500	191.400, 0.260	191.400, 0.352	191.400, 0.261	191.400, 0.324
959	191.600, 0.499	191.600, 0.259	191.600, 0.352	191.600, 0.260	191.600, 0.323
960	191.800, 0.499	191.800, 0.259	191.800, 0.351	191.800, 0.260	191.800, 0.323
961	192.000, 0.499	192.000, 0.259	192.000, 0.351	192.000, 0.259	192.000, 0.322
962	192.200, 0.498	192.200, 0.258	192.200, 0.351	192.200, 0.258	192.200, 0.322
963	192.400, 0.498	192.400, 0.258	192.400, 0.350	192.400, 0.257	192.400, 0.321
964	192.600, 0.498	192.600, 0.257	192.600, 0.350	192.600, 0.257	192.600, 0.320
965	192.800, 0.498	192.800, 0.257	192.800, 0.350	192.800, 0.256	192.800, 0.320
966	193.000, 0.497	193.000, 0.256	193.000, 0.349	193.000, 0.255	193.000, 0.319
967	193.200, 0.497	193.200, 0.255	193.200, 0.349	193.200, 0.255	193.200, 0.319
968	193.400, 0.496	193.400, 0.255	193.400, 0.349	193.400, 0.254	193.400, 0.318
969	193.600, 0.496	193.600, 0.255	193.600, 0.348	193.600, 0.254	193.600, 0.318
970	193.800, 0.495	193.800, 0.255	193.800, 0.348	193.800, 0.253	193.800, 0.317
971	194.000, 0.494	194.000, 0.254	194.000, 0.347	194.000, 0.253	194.000, 0.317
972	194.200, 0.494	194.200, 0.254	194.200, 0.347	194.200, 0.252	194.200, 0.316
973	194.400, 0.493	194.400, 0.254	194.400, 0.346	194.400, 0.252	194.400, 0.316
974	194.600, 0.492	194.600, 0.253	194.600, 0.345	194.600, 0.251	194.600, 0.315
975	194.800, 0.492	194.800, 0.253	194.800, 0.345	194.800, 0.251	194.800, 0.315
976	195.000, 0.491	195.000, 0.252	195.000, 0.344	195.000, 0.250	195.000, 0.315
977	195.200, 0.491	195.200, 0.252	195.200, 0.343	195.200, 0.249	195.200, 0.314
978	195.400, 0.490	195.400, 0.251	195.400, 0.342	195.400, 0.249	195.400, 0.314
979	195.600, 0.490	195.600, 0.250	195.600, 0.341	195.600, 0.248	195.600, 0.313
980	195.800, 0.489	195.800, 0.250	195.800, 0.340	195.800, 0.248	195.800, 0.313
981	196.000, 0.489	196.000, 0.249	196.000, 0.339	196.000, 0.247	196.000, 0.313
982	196.200, 0.489	196.200, 0.249	196.200, 0.339	196.200, 0.247	196.200, 0.312
983	196.400, 0.488	196.400, 0.249	196.400, 0.338	196.400, 0.246	196.400, 0.312
984	196.600, 0.488	196.600, 0.248	196.600, 0.337	196.600, 0.246	196.600, 0.311
985	196.800, 0.488	196.800, 0.248	196.800, 0.337	196.800, 0.246	196.800, 0.311
986	197.000, 0.487	197.000, 0.248	197.000, 0.336	197.000, 0.245	197.000, 0.311
987	197.200, 0.487	197.200, 0.248	197.200, 0.336	197.200, 0.245	197.200, 0.310
988	197.400, 0.486	197.400, 0.248	197.400, 0.336	197.400, 0.245	197.400, 0.310
989	197.600, 0.486	197.600, 0.247	197.600, 0.335	197.600, 0.245	197.600, 0.309
990	197.800, 0.485	197.800, 0.247	197.800, 0.335	197.800, 0.244	197.800, 0.309
991	198.000, 0.485	198.000, 0.247	198.000, 0.334	198.000, 0.244	198.000, 0.308
992	198.200, 0.484	198.200, 0.246	198.200, 0.334	198.200, 0.244	198.200, 0.308
993	198.400, 0.484	198.400, 0.246	198.400, 0.334	198.400, 0.243	198.400, 0.308
994	198.600, 0.483	198.600, 0.245	198.600, 0.333	198.600, 0.242	198.600, 0.307
995	198.800, 0.483	198.800, 0.245	198.800, 0.333	198.800, 0.242	198.800, 0.307
996	199.000, 0.482	199.000, 0.244	199.000, 0.332	199.000, 0.241	199.000, 0.306
997	199.200, 0.482	199.200, 0.243	199.200, 0.332	199.200, 0.241	199.200, 0.306
998	199.400, 0.482	199.400, 0.243	199.400, 0.331	199.400, 0.240	199.400, 0.305
999	199.600, 0.481	199.600, 0.242	199.600, 0.331	199.600, 0.240	199.600, 0.304
1000	199.800, 0.481	199.800, 0.242	199.800, 0.331	199.800, 0.239	199.800, 0.304
1001	200.000, 0.480	200.000, 0.242	200.000, 0.331	200.000, 0.239	200.000, 0.304
1002	200.200, 0.480	200.200, 0.241	200.200, 0.331	200.200, 0.238	200.200, 0.303
1003	200.400, 0.479	200.400, 0.241	200.400, 0.331	200.400, 0.238	200.400, 0.302
1004	200.600, 0.479	200.600, 0.241	200.600, 0.330	200.600, 0.237	200.600, 0.302
1005	200.800, 0.478	200.800, 0.240	200.800, 0.330	200.800, 0.237	200.800, 0.302
1006	201.000, 0.478	201.000, 0.240	201.000, 0.330	201.000, 0.237	201.000, 0.301
1007	201.200, 0.478	201.200, 0.239	201.200, 0.330	201.200, 0.236	201.200, 0.301
1008	201.400, 0.478	201.400, 0.239	201.400, 0.329	201.400, 0.236	201.400, 0.301
1009	201.600, 0.478	201.600, 0.239	201.600, 0.329	201.600, 0.235	201.600, 0.301
1010	201.800, 0.478	201.800, 0.238	201.800, 0.328	201.800, 0.235	201.800, 0.300
1011	202.000, 0.478	202.000, 0.238	202.000, 0.328	202.000, 0.234	202.000, 0.300
1012	202.200, 0.478	202.200, 0.238	202.200, 0.328	202.200, 0.234	202.200, 0.300
1013	202.400, 0.477	202.400, 0.238	202.400, 0.327	202.400, 0.234	202.400, 0.299
1014	202.600, 0.477	202.600, 0.237	202.600, 0.327	202.600, 0.233	202.600, 0.299
1015	202.800, 0.476	202.800, 0.237	202.800, 0.326	202.800, 0.233	202.800, 0.298
1016	203.000, 0.476	203.000, 0.237	203.000, 0.325	203.000, 0.233	203.000, 0.298
1017	203.200, 0.475	203.200, 0.237	203.200, 0.325	203.200, 0.232	203.200, 0.298
1018	203.400, 0.475	203.400, 0.237	203.400, 0.324	203.400, 0.231	203.400, 0.297
1019	203.600, 0.475	203.600, 0.236	203.600, 0.324	203.600, 0.230	203.600, 0.297
1020	203.800, 0.474	203.800, 0.236	203.800, 0.323	203.800, 0.230	203.800, 0.296
1021	204.000, 0.473	204.000, 0.236	204.000, 0.323	204.000, 0.229	204.000, 0.296
1022	204.200, 0.473	204.200, 0.236	204.200, 0.323	204.200, 0.228	204.200, 0.295
1023	204.400, 0.472	204.400, 0.235	204.400, 0.322	204.400, 0.228	204.400, 0.295
1024	204.600, 0.471	204.600, 0.235	204.600, 0.322	204.600, 0.227	204.600, 0.295
1025	204.800, 0.471	204.800, 0.235	204.800, 0.322	204.800, 0.227	204.800, 0.294
1026	205.000, 0.470	205.000, 0.234	205.000, 0.321	205.000, 0.227	205.000, 0.294
1027	205.200, 0.469	205.200, 0.234	205.200, 0.321	205.200, 0.227	205.200, 0.294
1028	205.400, 0.469	205.400, 0.233	205.400, 0.321	205.400, 0.227	205.400, 0.293
1029	205.600, 0.468	205.600, 0.233	205.600, 0.320	205.600, 0.226	205.600, 0.293
1030	205.800, 0.468	205.800, 0.233	205.800, 0.320	205.800, 0.226	205.800, 0.292
1031	206.000, 0.468	206.000, 0.233	206.000, 0.319	206.000, 0.226	206.000, 0.291
1032	206.200, 0.467	206.200, 0.232	206.200, 0.319	206.200, 0.226	206.200, 0.291
1033	206.400, 0.467	206.400, 0.232	206.400, 0.318	206.400, 0.226	206.400, 0.290
1034	206.600, 0.467	206.600, 0.232	206.600, 0.317	206.600, 0.225	206.600, 0.290
1035	206.800, 0.467	206.800, 0.231	206.800, 0.317	206.800, 0.225	206.800, 0.289
1036	207.000, 0.467	207.000, 0.231	207.000, 0.316	207.000, 0.225	207.000, 0.288
1037	207.200, 0.466	207.200, 0.231	207.200, 0.316	207.200, 0.224	207.200, 0.288
1038	207.400, 0.466	207.400, 0.230	207.400, 0.315	207.400, 0.223	207.400, 0.287
1039	207.600, 0.466	207.600, 0.230	207.600, 0.315	207.600, 0.222	207.600, 0.286
1040	207.800, 0.466	207.800, 0.229	207.800, 0.314	207.800, 0.222	207.800, 0.286
1041	208.000, 0.466	208.000, 0.229	208.000, 0.314	208.000, 0.221	208.000, 0.286
1042	208.200, 0.465	208.200, 0.229	208.200, 0.314	208.200, 0.221	208.200, 0.285
1043	208.400, 0.465	208.400, 0.228	208.400, 0.314	208.400, 0.220	208.400, 0.285
1044	208.600, 0.465	208.600, 0.228	208.600, 0.313	208.600, 0.220	208.600, 0.285
1045	208.800, 0.464	208.800, 0.227	208.800, 0.313	208.800, 0.220	208.800, 0.285
1046	209.000, 0.463	209.000, 0.227	209.000, 0.313	209.000, 0.219	209.000, 0.284
1047	209.200, 0.463	209.200, 0.227	209.200, 0.313	209.200, 0.219	209.200, 0.284
1048	209.400, 0.462	209.400, 0.226	209.400, 0.313	209.400, 0.219	209.400, 0.284
1049	209.600, 0.461	209.600, 0.226	209.600, 0.313	209.600, 0.218	209.600, 0.284
1050	209.800, 0.461	209.800, 0.226	209.800, 0.312	209.800, 0.218	209.800, 0.284
1051	210.000, 0.461	210.000, 0.225	210.000, 0.312	210.000, 0.217	210.000, 0.284
1052	210.200, 0.461	210.200, 0.225	210.200, 0.312	210.200, 0.217	210.200, 0.284
1053	210.400, 0.461	210.400, 0.225	210.400, 0.311	210.400, 0.217	210.400, 0.283
1054	210.600, 0.460	210.600, 0.224	210.600, 0.311	210.600, 0.217	210.600, 0.283
1055	210.800, 0.460	210.800, 0.224	210.800, 0.311	210.800, 0.216	210.800, 0.282
1056	211.000, 0.460	211.000, 0.224	211.000, 0.311	211.000, 0.216	211.000, 0.282
1057	211.200, 0.459	211.200, 0.223	211.200, 0.311	211.200, 0.215	211.200, 0.282
1058	211.400, 0.459	211.400, 0.223	211.400, 0.310	211.400, 0.215	211.400, 0.281
1059	211.600, 0.459	211.600, 0.223	211.600, 0.310	211.600, 0.214	211.600, 0.281
1060	211.800, 0.458	211.800, 0.223	211.800, 0.309	211.800, 0.214	211.800, 0.281
1061	212.000, 0.458	212.000, 0.222	212.000, 0.309	212.000, 0.214	212.000, 0.281
1062	212.200, 0.458	212.200, 0.222	212.200, 0.308	212.200, 0.213	212.200, 0.281
1063	212.400, 0.458	212.400, 0.222	212.400, 0.308	212.400, 0.213	212.400, 0.280
1064	212.600, 0.457	212.600, 0.222	212.600, 0.308	212.600, 0.213	212.600, 0.280
1065	212.800, 0.457	212.800, 0.221	212.800, 0.307	212.800, 0.213	212.800, 0.280
1066	213.000, 0.456	213.000, 0.221	213.000, 0.307	213.000, 0.212	213.000, 0.280
1067	213.200, 0.456	213.200, 0.221	213.200, 0.306	213.200, 0.212	213.200, 0.279
1068	213.400, 0.455	213.400, 0.220	213.400, 0.306	213.400, 0.212	213.400, 0.279
1069	213.600, 0.455	213.600, 0.220	213.600, 0.305	213.600, 0.212	213.600, 0.278
1070	213.800, 0.455	213.800, 0.220	213.800, 0.305	213.800, 0.211	213.800, 0.278
1071	214.000, 0.454	214.000, 0.219	214.000, 0.304	214.000, 0.211	214.000, 0.277
1072	214.200, 0.454	214.200, 0.219	214.200, 0.304	214.200, 0.211	214.200, 0.277
1073	214.400, 0.454	214.400, 0.219	214.400, 0.304	214.400, 0.211	214.400, 0.276
1074	214.600, 0.454	214.600, 0.218	214.600, 0.303	214.600, 0.210	214.600, 0.276
1075	214.800, 0.453	214.800, 0.218	214.800, 0.303	214.800, 0.210	214.800, 0.275
1076	215.000, 0.453	215.000, 0.218	215.000, 0.302	215.000, 0.210	215.000, 0.275
1077	215.200, 0.452	215.200, 0.218	215.200, 0.302	215.200, 0.209	215.200, 0.275
1078	215.400, 0.452	215.400, 0.218	215.400, 0.301	215.400, 0.209	215.400, 0.274
1079	215.600, 0.451	215.600, 0.217	215.600, 0.301	215.600, 0.209	215.600, 0.274
1080	215.800, 0.451	215.800, 0.217	215.800, 0.301	215.800, 0.208	215.800, 0.274
1081	216.000, 0.450	216.000, 0.217	216.000, 0.301	216.000, 0.208	216.000, 0.273
1082	216.200, 0.450	216.200, 0.217	216.200, 0.301	216.200, 0.208	216.200, 0.273
1083	216.400, 0.449	216.400, 0.216	216.400, 0.301	216.400, 0.207	216.400, 0.273
1084	216.600, 0.449	216.600, 0.216	216.600, 0.301	216.600, 0.207	216.600, 0.273
1085	216.800, 0.448	216.800, 0.216	216.800, 0.300	216.800, 0.207	216.800, 0.272
1086	217.000, 0.448	217.000, 0.216	217.000, 0.300	217.000, 0.207	217.000, 0.272
1087	217.200, 0.447	217.200, 0.216	217.200, 0.300	217.200, 0.206	217.200, 0.271
1088	217.400, 0.447	217.400, 0.215	217.400, 0.299	217.400, 0.206	217.400, 0.271
1089	217.600, 0.447	217.600, 0.215	217.600, 0.299	217.600, 0.205	217.600, 0.270
1090	217.800, 0.447	217.800, 0.215	217.800, 0.299	217.800, 0.205	217.800, 0.270
1091	218.000, 0.447	218.000, 0.214	218.000, 0.298	218.000, 0.205	218.000, 0.269
1092	218.200, 0.447	218.200, 0.214	218.200, 0.298	218.200, 0.204	218.200, 0.269
1093	218.400, 0.446	218.400, 0.214	218.400, 0.297	218.400, 0.204	218.400, 0.269
1094	218.600, 0.446	218.600, 0.214	218.600, 0.297	218.600, 0.204	218.600, 0.268
1095	218.800, 0.446	218.800, 0.214	218.800, 0.297	218.800, 0.203	218.800, 0.268
1096	219.000, 0.446	219.000, 0.213	219.000, 0.297	219.000, 0.203	219.000, 0.268
1097	219.200, 0.446	219.200, 0.213	219.200, 0.297	219.200, 0.202	219.200, 0.267
1098	219.400, 0.446	219.400, 0.213	219.400, 0.297	219.400, 0.202	219.400, 0.267
1099	219.600, 0.446	219.600, 0.213	219.600, 0.296	219.600, 0.201	219.600, 0.267
1100	219.800, 0.446	219.800, 0.212	219.800, 0.296	219.800, 0.201	219.800, 0.266
1101	220.000, 0.446	220.000, 0.212	220.000, 0.296	220.000, 0.201	220.000, 0.266
1102	220.200, 0.446	220.200, 0.212	220.200, 0.295	220.200, 0.200	220.200, 0.266
1103	220.400, 0.445	220.400, 0.211	220.400, 0.295	220.400, 0.200	220.400, 0.266
1104	220.600, 0.445	220.600, 0.211	220.600, 0.295	220.600, 0.200	220.600, 0.265
1105	220.800, 0.444	220.800, 0.210	220.800, 0.294	220.800, 0.199	220.800, 0.265
1106	221.000, 0.444	221.000, 0.210	221.000, 0.294	221.000, 0.199	221.000, 0.264
1107	221.200, 0.443	221.200, 0.210	221.200, 0.294	221.200, 0.199	221.200, 0.264
1108	221.400, 0.443	221.400, 0.210	221.400, 0.293	221.400, 0.199	221.400, 0.264
1109	221.600, 0.443	221.600, 0.209	221.600, 0.293	221.600, 0.198	221.600, 0.264
1110	221.800, 0.442	221.800, 0.209	221.800, 0.293	221.800, 0.198	221.800, 0.264
1111	222.000, 0.442	222.000, 0.208	222.000, 0.292	222.000, 0.198	222.000, 0.264
1112	222.200, 0.442	222.200, 0.208	222.200, 0.292	222.200, 0.198	222.200, 0.264
1113	222.400, 0.441	222.400, 0.208	222.400, 0.292	222.400, 0.197	222.400, 0.264
1114	222.600, 0.441	222.600, 0.208	222.600, 0.291	222.600, 0.197	222.600, 0.264
1115	222.800, 0.441	222.800, 0.208	222.800, 0.291	222.800, 0.197	222.800, 0.263
1116	223.000, 0.440	223.000, 0.207	223.000, 0.291	223.000, 0.196	223.000, 0.263
1117	223.200, 0.440	223.200, 0.207	223.200, 0.290	223.200, 0.196	223.200, 0.263
1118	223.400, 0.440	223.400, 0.207	223.400, 0.290	223.400, 0.195	223.400, 0.262
1119	223.600, 0.439	223.600, 0.207	223.600, 0.290	223.600, 0.195	223.600, 0.262
1120	223.800, 0.439	223.800, 0.207	223.800, 0.289	223.800, 0.195	223.800, 0.262
1121	224.000, 0.438	224.000, 0.207	224.000, 0.289	224.000, 0.195	224.000, 0.262
1122	224.200, 0.437	224.200, 0.207	224.200, 0.288	224.200, 0.194	224.200, 0.261
1123	224.400, 0.437	224.400, 0.207	224.400, 0.288	224.400, 0.194	224.400, 0.261
1124	224.600, 0.437	224.600, 0.207	224.600, 0.288	224.600, 0.194	224.600, 0.261
1125	224.800, 0.436	224.800, 0.207	224.800, 0.288	224.800, 0.193	224.800, 0.260
1126	225.000, 0.436	225.000, 0.207	225.000, 0.287	225.000, 0.193	225.000, 0.260
1127	225.200, 0.436	225.200, 0.206	225.200, 0.287	225.200, 0.192	225.200, 0.260
1128	225.400, 0.435	225.400, 0.206	225.400, 0.287	225.400, 0.192	225.400, 0.259
1129	225.600, 0.435	225.600, 0.206	225.600, 0.287	225.600, 0.192	225.600, 0.259
1130	225.800, 0.435	225.800, 0.206	225.800, 0.286	225.800, 0.191	225.800, 0.259
1131	226.000, 0.435	226.000, 0.205	226.000, 0.286	226.000, 0.191	226.000, 0.259
1132	226.200, 0.435	226.200, 0.205	226.200, 0.285	226.200, 0.191	226.200, 0.259
1133	226.400, 0.435	226.400, 0.205	226.400, 0.285	226.400, 0.190	226.400, 0.258
1134	226.600, 0.435	226.600, 0.205	226.600, 0.284	226.600, 0.190	226.600, 0.258
1135	226.800, 0.434	226.800, 0.204	226.800, 0.284	226.800, 0.190	226.800, 0.257
1136	227.000, 0.434	227.000, 0.204	227.000, 0.284	227.000, 0.189	227.000, 0.257
1137	227.200, 0.434	227.200, 0.203	227.200, 0.283	227.200, 0.189	227.200, 0.257
1138	227.400, 0.434	227.400, 0.203	227.400, 0.283	227.400, 0.189	227.400, 0.256
1139	227.600, 0.434	227.600, 0.202	227.600, 0.283	227.600, 0.189	227.600, 0.256
1140	227.800, 0.433	227.800, 0.202	227.800, 0.282	227.800, 0.189	227.800, 0.256
1141	228.000, 0.433	228.000, 0.202	228.000, 0.282	228.000, 0.189	228.000, 0.256
1142	228.200, 0.432	228.200, 0.202	228.200, 0.282	228.200, 0.188	228.200, 0.256
1143	228.400, 0.432	228.400, 0.201	228.400, 0.281	228.400, 0.188	228.400, 0.255
1144	228.600, 0.432	228.600, 0.201	228.600, 0.281	228.600, 0.188	228.600, 0.255
1145	228.800, 0.432	228.800, 0.201	228.800, 0.281	228.800, 0.188	228.800, 0.254
1146	229.000, 0.432	229.000, 0.200	229.000, 0.281	229.000, 0.188	229.000, 0.254
1147	229.200, 0.431	229.200, 0.200	229.200, 0.281	229.200, 0.188	229.200, 0.254
1148	229.400, 0.431	229.400, 0.200	229.400, 0.280	229.400, 0.187	229.400, 0.254
1149	229.600, 0.431	229.600, 0.200	229.600, 0.280	229.600, 0.187	229.600, 0.254
1150	229.800, 0.431	229.800, 0.200	229.800, 0.280	229.800, 0.187	229.800, 0.254
1151	230.000, 0.431	230.000, 0.200	230.000, 0.279	230.000, 0.187	230.000, 0.254
1152	230.200, 0.431	230.200, 0.200	230.200, 0.279	230.200, 0.187	230.200, 0.253
1153	230.400, 0.430	230.400, 0.200	230.400, 0.278	230.400, 0.187	230.400, 0.253
1154	230.600, 0.430	230.600, 0.199	230.600, 0.278	230.600, 0.187	230.600, 0.252
1155	230.800, 0.429	230.800, 0.199	230.800, 0.278	230.800, 0.187	230.800, 0.252
1156	231.000, 0.429	231.000, 0.199	231.000, 0.278	231.000, 0.186	231.000, 0.252
1157	231.200, 0.428	231.200, 0.199	231.200, 0.278	231.200, 0.186	231.200, 0.251
1158	231.400, 0.428	231.400, 0.198	231.400, 0.277	231.400, 0.186	231.400, 0.251
1159	231.600, 0.427	231.600, 0.198	231.600, 0.277	231.600, 0.186	231.600, 0.251
1160	231.800, 0.426	231.800, 0.198	231.800, 0.277	231.800, 0.185	231.800, 0.250
1161	232.000, 0.426	232.000, 0.198	232.000, 0.277	232.000, 0.185	232.000, 0.250
1162	232.200, 0.425	232.200, 0.198	232.200, 0.277	232.200, 0.185	232.200, 0.250
1163	232.400, 0.425	232.400, 0.198	232.400, 0.277	232.400, 0.184	232.400, 0.249
1164	232.600, 0.425	232.600, 0.198	232.600, 0.277	232.600, 0.184	232.600, 0.249
1165	232.800, 0.425	232.800, 0.197	232.800, 0.277	232.800, 0.183	232.800, 0.248
1166	233.000, 0.424	233.000, 0.197	233.000, 0.277	233.000, 0.183	233.000, 0.248
1167	233.200, 0.424	233.200, 0.197	233.200, 0.277	233.200, 0.183	233.200, 0.248
1168	233.400, 0.424	233.400, 0.197	233.400, 0.276	233.400, 0.182	233.400, 0.248
1169	233.600, 0.424	233.600, 0.197	233.600, 0.276	233.600, 0.182	233.600, 0.248
1170	233.800, 0.424	233.800, 0.197	233.800, 0.275	233.800, 0.182	233.800, 0.248
1171	234.000, 0.424	234.000, 0.196	234.000, 0.275	234.000, 0.182	234.000, 0.248
1172	234.200, 0.424	234.200, 0.196	234.200, 0.275	234.200, 0.181	234.200, 0.248
1173	234.400, 0.424	234.400, 0.195	234.400, 0.274	234.400, 0.181	234.400, 0.248
1174	234.600, 0.424	234.600, 0.195	234.600, 0.274	234.600, 0.181	234.600, 0.248
1175	234.800, 0.424	234.800, 0.194	234.800, 0.274	234.800, 0.180	234.800, 0.248
1176	235.000, 0.423	235.000, 0.194	235.000, 0.273	235.000, 0.180	235.000, 0.248
1177	235.200, 0.423	235.200, 0.194	235.200, 0.273	235.200, 0.180	235.200, 0.248
1178	235.400, 0.423	235.400, 0.194	235.400, 0.272	235.400, 0.180	235.400, 0.248
1179	235.600, 0.422	235.600, 0.194	235.600, 0.272	235.600, 0.179	235.600, 0.247
1180	235.800, 0.422	235.800, 0.194	235.800, 0.272	235.800, 0.179	235.800, 0.247
1181	236.000, 0.422	236.000, 0.194	236.000, 0.271	236.000, 0.179	236.000, 0.246
1182	236.200, 0.422	236.200, 0.194	236.200, 0.271	236.200, 0.179	236.200, 0.246
1183	236.400, 0.422	236.400, 0.193	236.400, 0.271	236.400, 0.179	236.400, 0.245
1184	236.600, 0.421	236.600, 0.193	236.600, 0.271	236.600, 0.178	236.600, 0.245
1185	236.800, 0.421	236.800, 0.193	236.800, 0.271	236.800, 0.178	236.800, 0.244
1186	237.000, 0.421	237.000, 0.193	237.000, 0.270	237.000, 0.178	237.000, 0.244
1187	237.200, 0.421	237.200, 0.193	237.200, 0.270	237.200, 0.178	237.200, 0.243
1188	237.400, 0.421	237.400, 0.192	237.400, 0.271	237.400, 0.178	237.400, 0.243
1189	237.600, 0.420	237.600, 0.192	237.600, 0.271	237.600, 0.178	237.600, 0.243
1190	237.800, 0.420	237.800, 0.191	237.800, 0.271	237.800, 0.177	237.800, 0.243
1191	238.000, 0.420	238.000, 0.191	238.000, 0.271	238.000, 0.177	238.000, 0.242
1192	238.200, 0.420	238.200, 0.191	238.200, 0.271	238.200, 0.177	238.200, 0.242
1193	238.400, 0.420	238.400, 0.190	238.400, 0.271	238.400, 0.177	238.400, 0.242
1194	238.600, 0.420	238.600, 0.190	238.600, 0.271	238.600, 0.176	238.600, 0.242
1195	238.800, 0.419	238.800, 0.190	238.800, 0.271	238.800, 0.176	238.800, 0.242
1196	239.000, 0.419	239.000, 0.190	239.000, 0.270	239.000, 0.176	239.000, 0.242
1197	239.200, 0.419	239.200, 0.190	239.200, 0.270	239.200, 0.175	239.200, 0.242
1198	239.400, 0.419	239.400, 0.190	239.400, 0.269	239.400, 0.175	239.400, 0.242
1199	239.600, 0.418	239.600, 0.190	239.600, 0.269	239.600, 0.175	239.600, 0.242
1200	239.800, 0.418	239.800, 0.190	239.800, 0.268	239.800, 0.175	239.800, 0.242
1201	240.000, 0.418	240.000, 0.190	240.000, 0.268	240.000, 0.175	240.000, 0.242
1202	240.200, 0.417	240.200, 0.190	240.200, 0.268	240.200, 0.175	240.200, 0.242
1203	240.400, 0.417	240.400, 0.190	240.400, 0.267	240.400, 0.175	240.400, 0.242
1204	240.600, 0.417	240.600, 0.190	240.600, 0.267	240.600, 0.174	240.600, 0.241
1205	240.800, 0.416	240.800, 0.190	240.800, 0.267	240.800, 0.174	240.800, 0.241
1206	241.000, 0.416	241.000, 0.190	241.000, 0.267	241.000, 0.174	241.000, 0.241
1207	241.200, 0.415	241.200, 0.189	241.200, 0.267	241.200, 0.174	241.200, 0.240
1208	241.400, 0.415	241.400, 0.189	241.400, 0.267	241.400, 0.173	241.400, 0.240
1209	241.600, 0.415	241.600, 0.189	241.600, 0.267	241.600, 0.173	241.600, 0.240
1210	241.800, 0.414	241.800, 0.188	241.800, 0.267	241.800, 0.172	241.800, 0.239
1211	242.000, 0.414	242.000, 0.188	242.000, 0.266	242.000, 0.171	242.000, 0.239
1212	242.200, 0.413	242.200, 0.188	242.200, 0.266	242.200, 0.171	242.200, 0.239
1213	242.400, 0.413	242.400, 0.187	242.400, 0.266	242.400, 0.170	242.400, 0.238
1214	242.600, 0.413	242.600, 0.187	242.600, 0.265	242.600, 0.170	242.600, 0.238
1215	242.800, 0.412	242.800, 0.187	242.800, 0.265	242.800, 0.170	242.800, 0.237
1216	243.000, 0.412	243.000, 0.187	243.000, 0.264	243.000, 0.170	243.000, 0.237
1217	243.200, 0.412	243.200, 0.187	243.200, 0.264	243.200, 0.170	243.200, 0.237
1218	243.400, 0.412	243.400, 0.186	243.400, 0.264	243.400, 0.170	243.400, 0.237
1219	243.600, 0.412	243.600, 0.186	243.600, 0.263	243.600, 0.170	243.600, 0.237
1220	243.800, 0.412	243.800, 0.186	243.800, 0.263	243.800, 0.170	243.800, 0.237
1221	244.000, 0.411	244.000, 0.186	244.000, 0.263	244.000, 0.170	244.000, 0.236
1222	244.200, 0.411	244.200, 0.186	244.200, 0.263	244.200, 0.171	244.200, 0.236
1223	244.400, 0.411	244.400, 0.186	244.400, 0.263	244.400, 0.171	244.400, 0.236
1224	244.600, 0.411	244.600, 0.186	244.600, 0.263	244.600, 0.171	244.600, 0.236
1225	244.800, 0.411	244.800, 0.186	244.800, 0.263	244.800, 0.171	244.800, 0.236
1226	245.000, 0.411	245.000, 0.185	245.000, 0.263	245.000, 0.171	245.000, 0.236
1227	245.200, 0.412	245.200, 0.185	245.200, 0.263	245.200, 0.170	245.200, 0.236
1228	245.400, 0.412	245.400, 0.185	245.400, 0.262	245.400, 0.170	245.400, 0.236
1229	245.600, 0.411	245.600, 0.185	245.600, 0.262	245.600, 0.169	245.600, 0.235
1230	245.800, 0.411	245.800, 0.185	245.800, 0.262	245.800, 0.169	245.800, 0.235
1231	246.000, 0.411	246.000, 0.185	246.000, 0.262	246.000, 0.168	246.000, 0.235
1232	246.200, 0.410	246.200, 0.184	246.200, 0.262	246.200, 0.168	246.200, 0.234
1233	246.400, 0.410	246.400, 0.184	246.400, 0.262	246.400, 0.168	246.400, 0.234
1234	246.600, 0.410	246.600, 0.184	246.600, 0.262	246.600, 0.167	246.600, 0.234
1235	246.800, 0.409	246.800, 0.184	246.800, 0.262	246.800, 0.167	246.800, 0.234
1236	247.000, 0.409	247.000, 0.184	247.000, 0.262	247.000, 0.166	247.000, 0.234
1237	247.200, 0.409	247.200, 0.184	247.200, 0.261	247.200, 0.166	247.200, 0.234
1238	247.400, 0.409	247.400, 0.183	247.400, 0.261	247.400, 0.165	247.400, 0.234
1239	247.600, 0.408	247.600, 0.183	247.600, 0.261	247.600, 0.165	247.600, 0.233
1240	247.800, 0.408	247.800, 0.183	247.800, 0.261	247.800, 0.165	247.800, 0.233
1241	248.000, 0.408	248.000, 0.183	248.000, 0.260	248.000, 0.165	248.000, 0.233
1242	248.200, 0.407	248.200, 0.183	248.200, 0.260	248.200, 0.165	248.200, 0.233
1243	248.400, 0.407	248.400, 0.183	248.400, 0.260	248.400, 0.165	248.400, 0.233
1244	248.600, 0.407	248.600, 0.183	248.600, 0.259	248.600, 0.165	248.600, 0.233
1245	248.800, 0.407	248.800, 0.183	248.800, 0.259	248.800, 0.165	248.800, 0.233
1246	249.000, 0.406	249.000, 0.183	249.000, 0.258	249.000, 0.165	249.000, 0.233
1247	249.200, 0.406	249.200, 0.183	249.200, 0.258	249.200, 0.165	249.200, 0.233
1248	249.400, 0.406	249.400, 0.183	249.400, 0.258	249.400, 0.165	249.400, 0.233
1249	249.600, 0.406	249.600, 0.182	249.600, 0.257	249.600, 0.164	249.600, 0.232
1250	249.800, 0.405	249.800, 0.182	249.800, 0.257	249.800, 0.164	249.800, 0.232
1251	250.000, 0.405	250.000, 0.181	250.000, 0.257	250.000, 0.164	250.000, 0.232
1252	250.200, 0.405	250.200, 0.181	250.200, 0.257	250.200, 0.164	250.200, 0.232
1253	250.400, 0.405	250.400, 0.180	250.400, 0.257	250.400, 0.163	250.400, 0.232
1254	250.600, 0.405	250.600, 0.180	250.600, 0.257	250.600, 0.163	250.600, 0.231
1255	250.800, 0.405	250.800, 0.180	250.800, 0.257	250.800, 0.162	250.800, 0.231
1256	251.000, 0.405	251.000, 0.180	251.000, 0.257	251.000, 0.162	251.000, 0.231
1257	251.200, 0.405	251.200, 0.179	251.200, 0.257	251.200, 0.162	251.200, 0.231
1258	251.400, 0.405	251.400, 0.179	251.400, 0.257	251.400, 0.161	251.400, 0.231
1259	251.600, 0.405	251.600, 0.179	251.600, 0.256	251.600, 0.161	251.600, 0.230
1260	251.800, 0.405	251.800, 0.179	251.800, 0.256	251.800, 0.161	251.800, 0.230
1261	252.000, 0.405	252.000, 0.179	252.000, 0.256	252.000, 0.161	252.000, 0.230
1262	252.200, 0.405	252.200, 0.179	252.200, 0.255	252.200, 0.161	252.200, 0.229
1263	252.400, 0.405	252.400, 0.179	252.400, 0.255	252.400, 0.161	252.400, 0.229
1264	252.600, 0.405	252.600, 0.179	252.600, 0.255	252.600, 0.161	252.600, 0.228
1265	252.800, 0.404	252.800, 0.179	252.800, 0.254	252.800, 0.161	252.800, 0.228
1266	253.000, 0.404	253.000, 0.179	253.000, 0.254	253.000, 0.161	253.000, 0.227
1267	253.200, 0.403	253.200, 0.179	253.200, 0.254	253.200, 0.161	253.200, 0.227
1268	253.400, 0.403	253.400, 0.178	253.400, 0.254	253.400, 0.162	253.400, 0.226
1269	253.600, 0.403	253.600, 0.178	253.600, 0.254	253.600, 0.162	253.600, 0.226
1270	253.800, 0.402	253.800, 0.178	253.800, 0.253	253.800, 0.162	253.800, 0.226
1271	254.000, 0.402	254.000, 0.178	254.000, 0.253	254.000, 0.162	254.000, 0.226
1272	254.200, 0.401	254.200, 0.178	254.200, 0.253	254.200, 0.161	254.200, 0.226
1273	254.400, 0.401	254.400, 0.177	254.400, 0.253	254.400, 0.161	254.400, 0.226
1274	254.600, 0.400	254.600, 0.177	254.600, 0.253	254.600, 0.161	254.600, 0.226
1275	254.800, 0.400	254.800, 0.177	254.800, 0.253	254.800, 0.160	254.800, 0.226
1276	255.000, 0.400	255.000, 0.177	255.000, 0.253	255.000, 0.160	255.000, 0.226
1277	255.200, 0.400	255.200, 0.177	255.200, 0.253	255.200, 0.159	255.200, 0.226
1278	255.400, 0.400	255.400, 0.176	255.400, 0.252	255.400, 0.159	255.400, 0.226
1279	255.600, 0.400	255.600, 0.176	255.600, 0.252	255.600, 0.158	255.600, 0.226
1280	255.800, 0.400	255.800, 0.176	255.800, 0.252	255.800, 0.157	255.800, 0.226
1281	256.000, 0.400	256.000, 0.176	256.000, 0.252	256.000, 0.157	256.000, 0.226
1282	256.200, 0.400	256.200, 0.176	256.200, 0.252	256.200, 0.157	256.200, 0.226
1283	256.400, 0.399	256.400, 0.176	256.400, 0.252	256.400, 0.157	256.400, 0.226
1284	256.600, 0.399	256.600, 0.176	256.600, 0.252	256.600, 0.156	256.600, 0.226
1285	256.800, 0.399	256.800, 0.175	256.800, 0.252	256.800, 0.156	256.800, 0.226
1286	257.000, 0.399	257.000, 0.175	257.000, 0.252	257.000, 0.156	257.000, 0.226
1287	257.200, 0.399	257.200, 0.175	257.200, 0.251	257.200, 0.156	257.200, 0.226
1288	257.400, 0.399	257.400, 0.175	257.400, 0.251	257.400, 0.156	257.400, 0.225
1289	257.600, 0.398	257.600, 0.175	257.600, 0.251	257.600, 0.156	257.600, 0.225
1290	257.800, 0.398	257.800, 0.175	257.800, 0.251	257.800, 0.156	257.800, 0.225
1291	258.000, 0.398	258.000, 0.175	258.000, 0.251	258.000, 0.156	258.000, 0.224
1292	258.200, 0.397	258.200, 0.175	258.200, 0.251	258.200, 0.156	258.200, 0.224
1293	258.400, 0.397	258.400, 0.175	258.400, 0.250	258.400, 0.156	258.400, 0.224
1294	258.600, 0.397	258.600, 0.175	258.600, 0.250	258.600, 0.156	258.600, 0.223
1295	258.800, 0.397	258.800, 0.175	258.800, 0.249	258.800, 0.156	258.800, 0.223
1296	259.000, 0.397	259.000, 0.175	259.000, 0.249	259.000, 0.156	259.000, 0.223
1297	259.200, 0.397	259.200, 0.175	259.200, 0.248	259.200, 0.156	259.200, 0.222
1298	259.400, 0.397	259.400, 0.175	259.400, 0.248	259.400, 0.155	259.400, 0.222
1299	259.600, 0.397	259.600, 0.175	259.600, 0.248	259.600, 0.155	259.600, 0.222
1300	259.800, 0.397	259.800, 0.174	259.800, 0.247	259.800, 0.155	259.800, 0.221
1301	260.000, 0.397	260.000, 0.174	260.000, 0.247	260.000, 0.155	260.000, 0.221
1302	260.200, 0.396	260.200, 0.174	260.200, 0.247	260.200, 0.155	260.200, 0.221
1303	260.400, 0.396	260.400, 0.173	260.400, 0.247	260.400, 0.155	260.400, 0.221
1304	260.600, 0.396	260.600, 0.173	260.600, 0.247	260.600, 0.155	260.600, 0.221
1305	260.800, 0.396	260.800, 0.173	260.800, 0.247	260.800, 0.155	260.800, 0.220
1306	261.000, 0.395	261.000, 0.172	261.000, 0.247	261.000, 0.154	261.000, 0.220
1307	261.200, 0.395	261.200, 0.172	261.200, 0.247	261.200, 0.154	261.200, 0.220
1308	261.400, 0.394	261.400, 0.172	261.400, 0.247	261.400, 0.153	261.400, 0.220
1309	261.600, 0.394	261.600, 0.172	261.600, 0.247	261.600, 0.153	261.600, 0.220
1310	261.800, 0.394	261.800, 0.172	261.800, 0.247	261.800, 0.153	261.800, 0.219
1311	262.000, 0.393	262.000, 0.172	262.000, 0.247	262.000, 0.152	262.000, 0.219
1312	262.200, 0.393	262.200, 0.172	262.200, 0.247	262.200, 0.152	262.200, 0.219
1313	262.400, 0.393	262.400, 0.172	262.400, 0.247	262.400, 0.152	262.400, 0.219
1314	262.600, 0.393	262.600, 0.172	262.600, 0.247	262.600, 0.152	262.600, 0.219
1315	262.800, 0.393	262.800, 0.172	262.800, 0.247	262.800, 0.151	262.800, 0.219
1316	263.000, 0.393	263.000, 0.172	263.000, 0.246	263.000, 0.151	263.000, 0.219
1317	263.200, 0.393	263.200, 0.172	263.200, 0.246	263.200, 0.151	263.200, 0.219
1318	263.400, 0.393	263.400, 0.172	263.400, 0.246	263.400, 0.151	263.400, 0.219
1319	263.600, 0.392	263.600, 0.171	263.600, 0.246	263.600, 0.151	263.600, 0.219
1320	263.800, 0.392	263.800, 0.171	263.800, 0.245	263.800, 0.151	263.800, 0.218
1321	264.000, 0.392	264.000, 0.171	264.000, 0.245	264.000, 0.151	264.000, 0.218
1322	264.200, 0.392	264.200, 0.170	264.200, 0.245	264.200, 0.151	264.200, 0.218
1323	264.400, 0.392	264.400, 0.170	264.400, 0.245	264.400, 0.151	264.400, 0.218
1324	264.600, 0.392	264.600, 0.170	264.600, 0.245	264.600, 0.151	264.600, 0.218
1325	264.800, 0.391	264.800, 0.170	264.800, 0.245	264.800, 0.150	264.800, 0.218
1326	265.000, 0.391	265.000, 0.169	265.000, 0.245	265.000, 0.150	265.000, 0.218
1327	265.200, 0.391	265.200, 0.169	265.200, 0.244	265.200, 0.150	265.200, 0.218
1328	265.400, 0.391	265.400, 0.169	265.400, 0.244	265.400, 0.150	265.400, 0.218
1329	265.600, 0.391	265.600, 0.169	265.600, 0.244	265.600, 0.150	265.600, 0.217
1330	265.800, 0.390	265.800, 0.168	265.800, 0.244	265.800, 0.150	265.800, 0.217
1331	266.000, 0.390	266.000, 0.168	266.000, 0.244	266.000, 0.150	266.000, 0.217
1332	266.200, 0.390	266.200, 0.168	266.200, 0.244	266.200, 0.150	266.200, 0.217
1333	266.400, 0.389	266.400, 0.168	266.400, 0.243	266.400, 0.150	266.400, 0.217
1334	266.600, 0.389	266.600, 0.168	266.600, 0.243	266.600, 0.150	266.600, 0.217
1335	266.800, 0.389	266.800, 0.168	266.800, 0.243	266.800, 0.150	266.800, 0.217
1336	267.000, 0.388	267.000, 0.168	267.000, 0.242	267.000, 0.150	267.000, 0.216
1337	267.200, 0.388	267.200, 0.168	267.200, 0.242	267.200, 0.149	267.200, 0.216
1338	267.400, 0.388	267.400, 0.169	267.400, 0.242	267.400, 0.149	267.400, 0.216
1339	267.600, 0.388	267.600, 0.169	267.600, 0.242	267.600, 0.149	267.600, 0.215
1340	267.800, 0.388	267.800, 0.169	267.800, 0.242	267.800, 0.149	267.800, 0.215
1341	268.000, 0.388	268.000, 0.169	268.000, 0.242	268.000, 0.149	268.000, 0.215
1342	268.200, 0.388	268.200, 0.169	268.200, 0.241	268.200, 0.149	268.200, 0.215
1343	268.400, 0.388	268.400, 0.169	268.400, 0.241	268.400, 0.148	268.400, 0.215
1344	268.600, 0.388	268.600, 0.169	268.600, 0.241	268.600, 0.148	268.600, 0.215
1345	268.800, 0.388	268.800, 0.168	268.800, 0.240	268.800, 0.148	268.800, 0.215
1346	269.000, 0.388	269.000, 0.168	269.000, 0.240	269.000, 0.148	269.000, 0.215
1347	269.200, 0.388	269.200, 0.168	269.200, 0.240	269.200, 0.148	269.200, 0.215
1348	269.400, 0.388	269.400, 0.168	269.400, 0.239	269.400, 0.148	269.400, 0.215
1349	269.600, 0.388	269.600, 0.168	269.600, 0.239	269.600, 0.147	269.600, 0.215
1350	269.800, 0.388	269.800, 0.167	269.800, 0.239	269.800, 0.147	269.800, 0.215
1351	,	,	,	,	,
1352	,	,	,	,	,
1353	,	,	,	,	,
1354	,	,	,	,	,
1355	,	,	,	,	,
1356	,	,	,	,	,
1357	,	,	,	,	,
1358	,	,	,	,	,
1359	,	,	,	,	,
1360	,	,	,	,	,
1361	,	,	,	,	,
1362	,	,	,	,	,
1363	,	,	,	,	,
1364	,	,	,	,	,
1365	,	,	,	,	,
1366	,	,	,	,	,
1367	,	,	,	,	,
1368	,	,	,	,	,
1369	,	,	,	,	,
1370	,	,	,	,	,
1371	,	,	,	,	,
1372	,	,	,	,	,
1373	,	,	,	,	,
1374	,	,	,	,	,
1375	,	,	,	,	,
1376	,	,	,	,	,
1377	,	,	,	,	,
1378	,	,	,	,	,
1379	,	,	,	,	,
1380	,	,	,	,	,
1381	,	,	,	,	,
1382	,	,	,	,	,
1383	,	,	,	,	,
1384	,	,	,	,	,
1385	,	,	,	,	,
1386	,	,	,	,	,
1387	,	,	,	,	,
1388	,	,	,	,	,
1389	,	,	,	,	,
1390	,	,	,	,	,
1391	,	,	,	,	,
1392	,	,	,	,	,
1393	,	,	,	,	,
1394	,	,	,	,	,
1395	,	,	,	,	,
1396	,	,	,	,	,
1397	,	,	,	,	,
1398	,	,	,	,	,
1399	,	,	,	,	,
1400	,	,	,	,	,
1401	,	,	,	,	,
1402	,	,	,	,	,
1403	,	,	,	,	,
1404	,	,	,	,	,
1405	,	,	,	,	,
1406	,	,	,	,	,
1407	,	,	,	,	,
1408	,	,	,	,	,
1409	,	,	,	,	,
1410	,	,	,	,	,
1411	,	,	,	,	,
1412	,	,	,	,	,
1413	,	,	,	,	,
1414	,	,	,	,	,
1415	,	,	,	,	,
1416	,	,	,	,	,
1417	,	,	,	,	,
1418	,	,	,	,	,
1419	,	,	,	,	,
1420	,	,	,	,	,
1421	,	,	,	,	,
1422	,	,	,	,	,
1423	,	,	,	,	,
1424	,	,	,	,	,
1425	,	,	,	,	,
1426	,	,	,	,	,
1427	,	,	,	,	,
1428	,	,	,	,	,
1429	,	,	,	,	,
1430	,	,	,	,	,
1431	,	,	,	,	,
1432	,	,	,	,	,
1433	,	,	,	,	,
1434	,	,	,	,	,
1435	,	,	,	,	,
1436	,	,	,	,	,
1437	,	,	,	,	,
1438	,	,	,	,	,
1439	,	,	,	,	,
1440	,	,	,	,	,
1441	,	,	,	,	,
1442	,	,	,	,	,
1443	,	,	,	,	,
1444	,	,	,	,	,
1445	,	,	,	,	,
1446	,	,	,	,	,
1447	,	,	,	,	,
1448	,	,	,	,	,
1449	,	,	,	,	,
1450	,	,	,	,	,
1451	,	,	,	,	,
1452	,	,	,	,	,
1453	,	,	,	,	,
1454	,	,	,	,	,
1455	,	,	,	,	,
1456	,	,	,	,	,
1457	,	,	,	,	,
1458	,	,	,	,	,
1459	,	,	,	,	,
1460	,	,	,	,	,
1461	,	,	,	,	,
1462	,	,	,	,	,
1463	,	,	,	,	,
1464	,	,	,	,	,
1465	,	,	,	,	,
1466	,	,	,	,	,
1467	,	,	,	,	,
1468	,	,	,	,	,
1469	,	,	,	,	,
1470	,	,	,	,	,
1471	,	,	,	,	,
1472	,	,	,	,	,
1473	,	,	,	,	,
1474	,	,	,	,	,
1475	,	,	,	,	,
1476	,	,	,	,	,
1477	,	,	,	,	,
1478	,	,	,	,	,
1479	,	,	,	,	,
1480	,	,	,	,	,
1481	,	,	,	,	,
1482	,	,	,	,	,
1483	,	,	,	,	,
1484	,	,	,	,	,
1485	,	,	,	,	,
1486	,	,	,	,	,
1487	,	,	,	,	,
1488	,	,	,	,	,
1489	,	,	,	,	,
1490	,	,	,	,	,
1491	,	,	,	,	,
1492	,	,	,	,	,
1493	,	,	,	,	,
1494	,	,	,	,	,
1495	,	,	,	,	,
1496	,	,	,	,	,
1497	,	,	,	,	,
1498	,	,	,	,	,
1499	,	,	,	,	,
1500	,	,	,	,	,
1501	,	,	,	,	,
1502	,	,	,	,	,
1503	,	,	,	,	,
1504	,	,	,	,	,
1505	,	,	,	,	,
1506	,	,	,	,	,
1507	,	,	,	,	,
1508	,	,	,	,	,
1509	,	,	,	,	,
1510	,	,	,	,	,
1511	,	,	,	,	,
1512	,	,	,	,	,
1513	,	,	,	,	,
1514	,	,	,	,	,
1515	,	,	,	,	,
1516	,	,	,	,	,
1517	,	,	,	,	,
1518	,	,	,	,	,
1519	,	,	,	,	,
1520	,	,	,	,	,
1521	,	,	,	,	,
1522	,	,	,	,	,
1523	,	,	,	,	,
1524	,	,	,	,	,
1525	,	,	,	,	,
1526	,	,	,	,	,
1527	,	,	,	,	,
1528	,	,	,	,	,
1529	,	,	,	,	,
1530	,	,	,	,	,
1531	,	,	,	,	,
1532	,	,	,	,	,
1533	,	,	,	,	,
1534	,	,	,	,	,
1535	,	,	,	,	,
1536	,	,	,	,	,
1537	,	,	,	,	,
1538	,	,	,	,	,
1539	,	,	,	,	,
1540	,	,	,	,	,
1541	,	,	,	,	,
1542	,	,	,	,	,
1543	,	,	,	,	,
1544	,	,	,	,	,
1545	,	,	,	,	,
1546	,	,	,	,	,
1547	,	,	,	,	,
1548	,	,	,	,	,
1549	,	,	,	,	,
1550	,	,	,	,	,
1551	,	,	,	,	,
1552	,	,	,	,	,
1553	,	,	,	,	,
1554	,	,	,	,	,
1555	,	,	,	,	,
1556	,	,	,	,	,
1557	,	,	,	,	,
1558	,	,	,	,	,
1559	,	,	,	,	,
1560	,	,	,	,	,
1561	,	,	,	,	,
1562	,	,	,	,	,
1563	,	,	,	,	,
1564	,	,	,	,	,
1565	,	,	,	,	,
1566	,	,	,	,	,
1567	,	,	,	,	,
1568	,	,	,	,	,
1569	,	,	,	,	,
1570	,	,	,	,	,
1571	,	,	,	,	,
1572	,	,	,	,	,
1573	,	,	,	,	,
1574	,	,	,	,	,
1575	,	,	,	,	,
1576	,	,	,	,	,
1577	,	,	,	,	,
1578	,	,	,	,	,
1579	,	,	,	,	,
1580	,	,	,	,	,
1581	,	,	,	,	,
1582	,	,	,	,	,
1583	,	,	,	,	,
1584	,	,	,	,	,
1585	,	,	,	,	,
1586	,	,	,	,	,
1587	,	,	,	,	,
1588	,	,	,	,	,
1589	,	,	,	,	,
1590	,	,	,	,	,
1591	,	,	,	,	,
1592	,	,	,	,	,
1593	,	,	,	,	,
1594	,	,	,	,	,
1595	,	,	,	,	,
1596	,	,	,	,	,
1597	,	,	,	,	,
1598	,	,	,	,	,
1599	,	,	,	,	,
1600	,	,	,	,	,
1601	,	,	,	,	,
1602	,	,	,	,	,
1603	,	,	,	,	,
1604	,	,	,	,	,
1605	,	,	,	,	,
1606	,	,	,	,	,
1607	,	,	,	,	,
1608	,	,	,	,	,
1609	,	,	,	,	,
1610	,	,	,	,	,
1611	,	,	,	,	,
1612	,	,	,	,	,
1613	,	,	,	,	,
1614	,	,	,	,	,
1615	,	,	,	,	,
1616	,	,	,	,	,
1617	,	,	,	,	,
1618	,	,	,	,	,
1619	,	,	,	,	,
1620	,	,	,	,	,
1621	,	,	,	,	,
1622	,	,	,	,	,
1623	,	,	,	,	,
1624	,	,	,	,	,
1625	,	,	,	,	,
1626	,	,	,	,	,
1627	,	,	,	,	,
1628	,	,	,	,	,
1629	,	,	,	,	,
1630	,	,	,	,	,
1631	,	,	,	,	,
1632	,	,	,	,	,
1633	,	,	,	,	,
1634	,	,	,	,	,
1635	,	,	,	,	,
1636	,	,	,	,	,
1637	,	,	,	,	,
1638	,	,	,	,	,
1639	,	,	,	,	,
1640	,	,	,	,	,
1641	,	,	,	,	,
1642	,	,	,	,	,
1643	,	,	,	,	,
1644	,	,	,	,	,
1645	,	,	,	,	,
1646	,	,	,	,	,
1647	,	,	,	,	,
1648	,	,	,	,	,
1649	,	,	,	,	,
1650	,	,	,	,	,
1651	,	,	,	,	,
1652	,	,	,	,	,
1653	,	,	,	,	,
1654	,	,	,	,	,
1655	,	,	,	,	,
1656	,	,	,	,	,
1657	,	,	,	,	,
1658	,	,	,	,	,
1659	,	,	,	,	,
1660	,	,	,	,	,
1661	,	,	,	,	,
1662	,	,	,	,	,
1663	,	,	,	,	,
1664	,	,	,	,	,
1665	,	,	,	,	,
1666	,	,	,	,	,
1667	,	,	,	,	,
1668	,	,	,	,	,
1669	,	,	,	,	,
1670	,	,	,	,	,
1671	,	,	,	,	,
1672	,	,	,	,	,
1673	,	,	,	,	,
1674	,	,	,	,	,
1675	,	,	,	,	,
1676	,	,	,	,	,
1677	,	,	,	,	,
1678	,	,	,	,	,
1679	,	,	,	,	,
1680	,	,	,	,	,
1681	,	,	,	,	,
1682	,	,	,	,	,
1683	,	,	,	,	,
1684	,	,	,	,	,
1685	,	,	,	,	,
1686	,	,	,	,	,
1687	,	,	,	,	,
1688	,	,	,	,	,
1689	,	,	,	,	,
1690	,	,	,	,	,
1691	,	,	,	,	,
1692	,	,	,	,	,
1693	,	,	,	,	,
1694	,	,	,	,	,
1695	,	,	,	,	,
1696	,	,	,	,	,
1697	,	,	,	,	,
1698	,	,	,	,	,
1699	,	,	,	,	,
1700	,	,	,	,	,
1701	,	,	,	,	,
1702	,	,	,	,	,
1703	,	,	,	,	,
1704	,	,	,	,	,
1705	,	,	,	,	,
1706	,	,	,	,	,
1707	,	,	,	,	,
1708	,	,	,	,	,
1709	,	,	,	,	,
1710	,	,	,	,	,
1711	,	,	,	,	,
1712	,	,	,	,	,
1713	,	,	,	,	,
1714	,	,	,	,	,
1715	,	,	,	,	,
1716	,	,	,	,	,
1717	,	,	,	,	,
1718	,	,	,	,	,
1719	,	,	,	,	,
1720	,	,	,	,	,
1721	,	,	,	,	,
1722	,	,	,	,	,
1723	,	,	,	,	,
1724	,	,	,	,	,
1725	,	,	,	,	,
1726	,	,	,	,	,
1727	,	,	,	,	,
1728	,	,	,	,	,
1729	,	,	,	,	,
1730	,	,	,	,	,
1731	,	,	,	,	,
1732	,	,	,	,	,
1733	,	,	,	,	,
1734	,	,	,	,	,
1735	,	,	,	,	,
1736	,	,	,	,	,
1737	,	,	,	,	,
1738	,	,	,	,	,
1739	,	,	,	,	,
1740	,	,	,	,	,
1741	,	,	,	,	,
1742	,	,	,	,	,
1743	,	,	,	,	,
1744	,	,	,	,	,
1745	,	,	,	,	,
1746	,	,	,	,	,
1747	,	,	,	,	,
1748	,	,	,	,	,
1749	,	,	,	,	,
1750	,	,	,	,	,
1751	,	,	,	,	,
1752	,	,	,	,	,
1753	,	,	,	,	,
1754	,	,	,	,	,
1755	,	,	,	,	,
1756	,	,	,	,	,
1757	,	,	,	,	,
1758	,	,	,	,	,
1759	,	,	,	,	,
1760	,	,	,	,	,
1761	,	,	,	,	,
1762	,	,	,	,	,
1763	,	,	,	,	,
1764	,	,	,	,	,
1765	,	,	,	,	,
1766	,	,	,	,	,
1767	,	,	,	,	,
1768	,	,	,	,	,
1769	,	,	,	,	,
1770	,	,	,	,	,
1771	,	,	,	,	,
1772	,	,	,	,	,
1773	,	,	,	,	,
1774	,	,	,	,	,
1775	,	,	,	,	,
1776	,	,	,	,	,
1777	,	,	,	,	,
1778	,	,	,	,	,
1779	,	,	,	,	,
1780	,	,	,	,	,
1781	,	,	,	,	,
1782	,	,	,	,	,
1783	,	,	,	,	,
1784	,	,	,	,	,
1785	,	,	,	,	,
1786	,	,	,	,	,
1787	,	,	,	,	,
1788	,	,	,	,	,
1789	,	,	,	,	,
1790	,	,	,	,	,
1791	,	,	,	,	,
1792	,	,	,	,	,
1793	,	,	,	,	,
1794	,	,	,	,	,
1795	,	,	,	,	,
1796	,	,	,	,	,
1797	,	,	,	,	,
1798	,	,	,	,	,
1799	,	,	,	,	,
1800	,	,	,	,	,
1801	,	,	,	,	,
1802	,	,	,	,	,
1803	,	,	,	,	,
1804	,	,	,	,	,
1805	,	,	,	,	,
1806	,	,	,	,	,
1807	,	,	,	,	,
1808	,	,	,	,	,
1809	,	,	,	,	,
1810	,	,	,	,	,
1811	,	,	,	,	,
1812	,	,	,	,	,
1813	,	,	,	,	,
1814	,	,	,	,	,
1815	,	,	,	,	,
1816	,	,	,	,	,
1817	,	,	,	,	,
1818	,	,	,	,	,
1819	,	,	,	,	,
1820	,	,	,	,	,
1821	,	,	,	,	,
1822	,	,	,	,	,
1823	,	,	,	,	,
1824	,	,	,	,	,
1825	,	,	,	,	,
1826	,	,	,	,	,
1827	,	,	,	,	,
1828	,	,	,	,	,
1829	,	,	,	,	,
1830	,	,	,	,	,
1831	,	,	,	,	,
1832	,	,	,	,	,
1833	,	,	,	,	,
1834	,	,	,	,	,
1835	,	,	,	,	,
1836	,	,	,	,	,
1837	,	,	,	,	,
1838	,	,	,	,	,
1839	,	,	,	,	,
1840	,	,	,	,	,
1841	,	,	,	,	,
1842	,	,	,	,	,
1843	,	,	,	,	,
1844	,	,	,	,	,
1845	,	,	,	,	,
1846	,	,	,	,	,
1847	,	,	,	,	,
1848	,	,	,	,	,
1849	,	,	,	,	,
1850	,	,	,	,	,
1851	,	,	,	,	,
1852	,	,	,	,	,
1853	,	,	,	,	,
1854	,	,	,	,	,
1855	,	,	,	,	,
1856	,	,	,	,	,
1857	,	,	,	,	,
1858	,	,	,	,	,
1859	,	,	,	,	,
1860	,	,	,	,	,
1861	,	,	,	,	,
1862	,	,	,	,	,
1863	,	,	,	,	,
1864	,	,	,	,	,
1865	,	,	,	,	,
1866	,	,	,	,	,
1867	,	,	,	,	,
1868	,	,	,	,	,
1869	,	,	,	,	,
1870	,	,	,	,	,
1871	,	,	,	,	,
1872	,	,	,	,	,
1873	,	,	,	,	,
1874	,	,	,	,	,
1875	,	,	,	,	,
1876	,	,	,	,	,
1877	,	,	,	,	,
1878	,	,	,	,	,
1879	,	,	,	,	,
1880	,	,	,	,	,
1881	,	,	,	,	,
1882	,	,	,	,	,
1883	,	,	,	,	,
1884	,	,	,	,	,
1885	,	,	,	,	,
1886	,	,	,	,	,
1887	,	,	,	,	,
1888	,	,	,	,	,
1889	,	,	,	,	,
1890	,	,	,	,	,
1891	,	,	,	,	,
1892	,	,	,	,	,
1893	,	,	,	,	,
1894	,	,	,	,	,
1895	,	,	,	,	,
1896	,	,	,	,	,
1897	,	,	,	,	,
1898	,	,	,	,	,
1899	,	,	,	,	,
1900	,	,	,	,	,
1901	,	,	,	,	,
1902	,	,	,	,	,
1903	,	,	,	,	,
1904	,	,	,	,	,
1905	,	,	,	,	,
1906	,	,	,	,	,
1907	,	,	,	,	,
1908	,	,	,	,	,
1909	,	,	,	,	,
1910	,	,	,	,	,
1911	,	,	,	,	,
1912	,	,	,	,	,
1913	,	,	,	,	,
1914	,	,	,	,	,
1915	,	,	,	,	,
1916	,	,	,	,	,
1917	,	,	,	,	,
1918	,	,	,	,	,
1919	,	,	,	,	,
1920	,	,	,	,	,
1921	,	,	,	,	,
1922	,	,	,	,	,
1923	,	,	,	,	,
1924	,	,	,	,	,
1925	,	,	,	,	,
1926	,	,	,	,	,
1927	,	,	,	,	,
1928	,	,	,	,	,
1929	,	,	,	,	,
1930	,	,	,	,	,
1931	,	,	,	,	,
1932	,	,	,	,	,
1933	,	,	,	,	,
1934	,	,	,	,	,
1935	,	,	,	,	,
1936	,	,	,	,	,
1937	,	,	,	,	,
1938	,	,	,	,	,
1939	,	,	,	,	,
1940	,	,	,	,	,
1941	,	,	,	,	,
1942	,	,	,	,	,
1943	,	,	,	,	,
1944	,	,	,	,	,
1945	,	,	,	,	,
1946	,	,	,	,	,
1947	,	,	,	,	,
1948	,	,	,	,	,
1949	,	,	,	,	,
1950	,	,	,	,	,
1951	,	,	,	,	,
1952	,	,	,	,	,
1953	,	,	,	,	,
1954	,	,	,	,	,
1955	,	,	,	,	,
1956	,	,	,	,	,
1957	,	,	,	,	,
1958	,	,	,	,	,
1959	,	,	,	,	,
1960	,	,	,	,	,
1961	,	,	,	,	,
1962	,	,	,	,	,
1963	,	,	,	,	,
1964	,	,	,	,	,
1965	,	,	,	,	,
1966	,	,	,	,	,
1967	,	,	,	,	,
1968	,	,	,	,	,
1969	,	,	,	,	,
1970	,	,	,	,	,
1971	,	,	,	,	,
1972	,	,	,	,	,
1973	,	,	,	,	,
1974	,	,	,	,	,
1975	,	,	,	,	,
1976	,	,	,	,	,
1977	,	,	,	,	,
1978	,	,	,	,	,
1979	,	,	,	,	,
1980	,	,	,	,	,
1981	,	,	,	,	,
1982	,	,	,	,	,
1983	,	,	,	,	,
1984	,	,	,	,	,
1985	,	,	,	,	,
1986	,	,	,	,	,
1987	,	,	,	,	,
1988	,	,	,	,	,
1989	,	,	,	,	,
1990	,	,	,	,	,
1991	,	,	,	,	,
1992	,	,	,	,	,
1993	,	,	,	,	,
1994	,	,	,	,	,
1995	,	,	,	,	,
1996	,	,	,	,	,
1997	,	,	,	,	,
1998	,	,	,	,	,
1999	,	,	,	,	,
[truncated: 13,001 more rows]

## Sheet: Fig1_panelB_rep3
	parS20 ParB no NTP	parS20 ParB ATP	parS20 ParB GTP	parS20 ParB UTP	parS20 ParB CTP
1	0.000, -0.004	0.000, -0.015	0.000, -0.006	0.000, 0.002	0.000, 0.014
2	0.200, -0.004	0.200, -0.014	0.200, -0.006	0.200, 0.002	0.200, 0.014
3	0.400, -0.004	0.400, -0.014	0.400, -0.006	0.400, 0.002	0.400, 0.014
4	0.600, -0.004	0.600, -0.013	0.600, -0.005	0.600, 0.002	0.600, 0.013
5	0.800, -0.004	0.800, -0.013	0.800, -0.005	0.800, 0.002	0.800, 0.012
6	1.000, -0.005	1.000, -0.012	1.000, -0.005	1.000, 0.002	1.000, 0.012
7	1.200, -0.005	1.200, -0.012	1.200, -0.005	1.200, 0.003	1.200, 0.011
8	1.400, -0.005	1.400, -0.011	1.400, -0.005	1.400, 0.003	1.400, 0.011
9	1.600, -0.005	1.600, -0.010	1.600, -0.005	1.600, 0.003	1.600, 0.010
10	1.800, -0.005	1.800, -0.010	1.800, -0.005	1.800, 0.003	1.800, 0.009
11	2.000, -0.005	2.000, -0.010	2.000, -0.005	2.000, 0.003	2.000, 0.009
12	2.200, -0.005	2.200, -0.009	2.200, -0.005	2.200, 0.002	2.200, 0.008
13	2.400, -0.006	2.400, -0.009	2.400, -0.005	2.400, 0.002	2.400, 0.008
14	2.600, -0.006	2.600, -0.009	2.600, -0.005	2.600, 0.002	2.600, 0.008
15	2.800, -0.006	2.800, -0.009	2.800, -0.005	2.800, 0.002	2.800, 0.008
16	3.000, -0.006	3.000, -0.009	3.000, -0.005	3.000, 0.002	3.000, 0.008
17	3.200, -0.007	3.200, -0.009	3.200, -0.005	3.200, 0.002	3.200, 0.008
18	3.400, -0.007	3.400, -0.009	3.400, -0.005	3.400, 0.002	3.400, 0.007
19	3.600, -0.007	3.600, -0.008	3.600, -0.005	3.600, 0.001	3.600, 0.007
20	3.800, -0.007	3.800, -0.008	3.800, -0.005	3.800, 0.001	3.800, 0.007
21	4.000, -0.008	4.000, -0.008	4.000, -0.005	4.000, 0.001	4.000, 0.006
22	4.200, -0.008	4.200, -0.008	4.200, -0.005	4.200, 0.000	4.200, 0.006
23	4.400, -0.008	4.400, -0.008	4.400, -0.005	4.400, 0.000	4.400, 0.006
24	4.600, -0.009	4.600, -0.008	4.600, -0.006	4.600, 0.000	4.600, 0.006
25	4.800, -0.009	4.800, -0.008	4.800, -0.006	4.800, -0.000	4.800, 0.005
26	5.000, -0.009	5.000, -0.007	5.000, -0.006	5.000, -0.000	5.000, 0.005
27	5.200, -0.010	5.200, -0.007	5.200, -0.006	5.200, -0.000	5.200, 0.005
28	5.400, -0.010	5.400, -0.007	5.400, -0.006	5.400, -0.001	5.400, 0.004
29	5.600, -0.010	5.600, -0.007	5.600, -0.006	5.600, -0.001	5.600, 0.004
30	5.800, -0.010	5.800, -0.007	5.800, -0.006	5.800, -0.001	5.800, 0.004
31	6.000, -0.010	6.000, -0.007	6.000, -0.005	6.000, -0.001	6.000, 0.004
32	6.200, -0.011	6.200, -0.006	6.200, -0.005	6.200, -0.001	6.200, 0.004
33	6.400, -0.011	6.400, -0.006	6.400, -0.005	6.400, -0.001	6.400, 0.004
34	6.600, -0.011	6.600, -0.006	6.600, -0.004	6.600, -0.001	6.600, 0.004
35	6.800, -0.011	6.800, -0.005	6.800, -0.004	6.800, -0.001	6.800, 0.004
36	7.000, -0.012	7.000, -0.005	7.000, -0.004	7.000, -0.001	7.000, 0.004
37	7.200, -0.012	7.200, -0.005	7.200, -0.004	7.200, -0.001	7.200, 0.004
38	7.400, -0.012	7.400, -0.005	7.400, -0.005	7.400, -0.001	7.400, 0.004
39	7.600, -0.013	7.600, -0.005	7.600, -0.005	7.600, -0.001	7.600, 0.004
40	7.800, -0.013	7.800, -0.005	7.800, -0.005	7.800, -0.001	7.800, 0.004
41	8.000, -0.013	8.000, -0.005	8.000, -0.005	8.000, -0.001	8.000, 0.003
42	8.200, -0.013	8.200, -0.005	8.200, -0.005	8.200, -0.001	8.200, 0.003
43	8.400, -0.013	8.400, -0.005	8.400, -0.005	8.400, -0.001	8.400, 0.003
44	8.600, -0.013	8.600, -0.005	8.600, -0.006	8.600, -0.001	8.600, 0.003
45	8.800, -0.013	8.800, -0.005	8.800, -0.006	8.800, -0.000	8.800, 0.003
46	9.000, -0.013	9.000, -0.005	9.000, -0.006	9.000, -0.000	9.000, 0.003
47	9.200, -0.013	9.200, -0.005	9.200, -0.007	9.200, -0.000	9.200, 0.003
48	9.400, -0.012	9.400, -0.005	9.400, -0.007	9.400, -0.000	9.400, 0.003
49	9.600, -0.012	9.600, -0.005	9.600, -0.007	9.600, 0.000	9.600, 0.003
50	9.800, -0.012	9.800, -0.005	9.800, -0.007	9.800, 0.000	9.800, 0.003
51	10.000, -0.011	10.000, -0.005	10.000, -0.007	10.000, 0.000	10.000, 0.003
52	10.200, -0.011	10.200, -0.005	10.200, -0.007	10.200, 0.001	10.200, 0.003
53	10.400, -0.011	10.400, -0.005	10.400, -0.007	10.400, 0.001	10.400, 0.004
54	10.600, -0.011	10.600, -0.005	10.600, -0.007	10.600, 0.000	10.600, 0.004
55	10.800, -0.011	10.800, -0.005	10.800, -0.007	10.800, 0.000	10.800, 0.004
56	11.000, -0.011	11.000, -0.005	11.000, -0.007	11.000, 0.000	11.000, 0.004
57	11.200, -0.011	11.200, -0.005	11.200, -0.007	11.200, 0.000	11.200, 0.003
58	11.400, -0.011	11.400, -0.005	11.400, -0.007	11.400, 0.000	11.400, 0.003
59	11.600, -0.011	11.600, -0.005	11.600, -0.006	11.600, 0.000	11.600, 0.003
60	11.800, -0.011	11.800, -0.005	11.800, -0.006	11.800, 0.000	11.800, 0.003
61	12.000, -0.011	12.000, -0.005	12.000, -0.006	12.000, -0.000	12.000, 0.002
62	12.200, -0.011	12.200, -0.005	12.200, -0.005	12.200, -0.000	12.200, 0.002
63	12.400, -0.011	12.400, -0.005	12.400, -0.005	12.400, -0.000	12.400, 0.002
64	12.600, -0.011	12.600, -0.005	12.600, -0.004	12.600, -0.000	12.600, 0.002
65	12.800, -0.011	12.800, -0.004	12.800, -0.004	12.800, 0.000	12.800, 0.002
66	13.000, -0.010	13.000, -0.004	13.000, -0.004	13.000, 0.000	13.000, 0.002
67	13.200, -0.010	13.200, -0.004	13.200, -0.004	13.200, 0.000	13.200, 0.002
68	13.400, -0.010	13.400, -0.004	13.400, -0.004	13.400, 0.000	13.400, 0.002
69	13.600, -0.010	13.600, -0.004	13.600, -0.004	13.600, 0.000	13.600, 0.002
70	13.800, -0.010	13.800, -0.004	13.800, -0.004	13.800, 0.000	13.800, 0.002
71	14.000, -0.010	14.000, -0.004	14.000, -0.004	14.000, 0.000	14.000, 0.002
72	14.200, -0.010	14.200, -0.004	14.200, -0.004	14.200, 0.000	14.200, 0.003
73	14.400, -0.010	14.400, -0.004	14.400, -0.004	14.400, -0.000	14.400, 0.003
74	14.600, -0.010	14.600, -0.004	14.600, -0.004	14.600, -0.000	14.600, 0.003
75	14.800, -0.010	14.800, -0.004	14.800, -0.004	14.800, -0.000	14.800, 0.003
76	15.000, -0.010	15.000, -0.004	15.000, -0.004	15.000, -0.000	15.000, 0.002
77	15.200, -0.009	15.200, -0.004	15.200, -0.004	15.200, -0.000	15.200, 0.002
78	15.400, -0.009	15.400, -0.004	15.400, -0.004	15.400, -0.000	15.400, 0.002
79	15.600, -0.009	15.600, -0.004	15.600, -0.004	15.600, -0.000	15.600, 0.002
80	15.800, -0.009	15.800, -0.004	15.800, -0.004	15.800, -0.000	15.800, 0.002
81	16.000, -0.008	16.000, -0.004	16.000, -0.004	16.000, -0.000	16.000, 0.002
82	16.200, -0.008	16.200, -0.004	16.200, -0.004	16.200, -0.000	16.200, 0.002
83	16.400, -0.008	16.400, -0.004	16.400, -0.004	16.400, -0.000	16.400, 0.001
84	16.600, -0.008	16.600, -0.003	16.600, -0.004	16.600, -0.001	16.600, 0.001
85	16.800, -0.007	16.800, -0.003	16.800, -0.004	16.800, -0.001	16.800, 0.001
86	17.000, -0.007	17.000, -0.003	17.000, -0.004	17.000, -0.001	17.000, 0.001
87	17.200, -0.007	17.200, -0.003	17.200, -0.004	17.200, -0.001	17.200, 0.001
88	17.400, -0.007	17.400, -0.003	17.400, -0.004	17.400, -0.001	17.400, 0.001
89	17.600, -0.007	17.600, -0.003	17.600, -0.004	17.600, -0.001	17.600, 0.001
90	17.800, -0.007	17.800, -0.003	17.800, -0.004	17.800, -0.001	17.800, 0.001
91	18.000, -0.007	18.000, -0.003	18.000, -0.005	18.000, -0.001	18.000, 0.001
92	18.200, -0.007	18.200, -0.003	18.200, -0.005	18.200, -0.001	18.200, 0.001
93	18.400, -0.007	18.400, -0.003	18.400, -0.005	18.400, -0.001	18.400, 0.001
94	18.600, -0.007	18.600, -0.003	18.600, -0.004	18.600, -0.000	18.600, 0.001
95	18.800, -0.007	18.800, -0.002	18.800, -0.004	18.800, -0.000	18.800, 0.001
96	19.000, -0.006	19.000, -0.003	19.000, -0.004	19.000, 0.000	19.000, 0.001
97	19.200, -0.006	19.200, -0.002	19.200, -0.004	19.200, 0.000	19.200, 0.000
98	19.400, -0.006	19.400, -0.002	19.400, -0.004	19.400, 0.000	19.400, 0.000
99	19.600, -0.006	19.600, -0.002	19.600, -0.004	19.600, 0.001	19.600, 0.000
100	19.800, -0.006	19.800, -0.002	19.800, -0.004	19.800, 0.001	19.800, 0.000
101	20.000, -0.006	20.000, -0.002	20.000, -0.004	20.000, 0.001	20.000, 0.000
102	20.200, -0.006	20.200, -0.002	20.200, -0.003	20.200, 0.000	20.200, 0.000
103	20.400, -0.006	20.400, -0.002	20.400, -0.003	20.400, 0.000	20.400, 0.000
104	20.600, -0.006	20.600, -0.002	20.600, -0.003	20.600, 0.000	20.600, 0.000
105	20.800, -0.006	20.800, -0.002	20.800, -0.003	20.800, 0.001	20.800, 0.000
106	21.000, -0.006	21.000, -0.002	21.000, -0.003	21.000, 0.001	21.000, 0.000
107	21.200, -0.006	21.200, -0.002	21.200, -0.003	21.200, 0.001	21.200, 0.000
108	21.400, -0.006	21.400, -0.002	21.400, -0.003	21.400, 0.001	21.400, 0.000
109	21.600, -0.006	21.600, -0.002	21.600, -0.003	21.600, 0.001	21.600, 0.000
110	21.800, -0.005	21.800, -0.002	21.800, -0.003	21.800, 0.001	21.800, 0.000
111	22.000, -0.005	22.000, -0.002	22.000, -0.003	22.000, 0.001	22.000, 0.001
112	22.200, -0.005	22.200, -0.002	22.200, -0.003	22.200, 0.001	22.200, 0.001
113	22.400, -0.004	22.400, -0.002	22.400, -0.003	22.400, 0.001	22.400, 0.001
114	22.600, -0.004	22.600, -0.002	22.600, -0.002	22.600, 0.001	22.600, 0.001
115	22.800, -0.004	22.800, -0.002	22.800, -0.002	22.800, 0.001	22.800, 0.001
116	23.000, -0.003	23.000, -0.002	23.000, -0.002	23.000, 0.001	23.000, 0.001
117	23.200, -0.003	23.200, -0.002	23.200, -0.002	23.200, 0.001	23.200, 0.001
118	23.400, -0.003	23.400, -0.002	23.400, -0.002	23.400, 0.000	23.400, 0.001
119	23.600, -0.003	23.600, -0.002	23.600, -0.002	23.600, 0.000	23.600, 0.001
120	23.800, -0.003	23.800, -0.001	23.800, -0.003	23.800, -0.000	23.800, 0.001
121	24.000, -0.003	24.000, -0.001	24.000, -0.002	24.000, -0.000	24.000, 0.001
122	24.200, -0.003	24.200, -0.001	24.200, -0.002	24.200, -0.000	24.200, 0.001
123	24.400, -0.003	24.400, -0.001	24.400, -0.002	24.400, -0.001	24.400, 0.001
124	24.600, -0.003	24.600, -0.001	24.600, -0.002	24.600, -0.001	24.600, 0.001
125	24.800, -0.003	24.800, -0.001	24.800, -0.001	24.800, -0.001	24.800, 0.001
126	25.000, -0.003	25.000, -0.001	25.000, -0.001	25.000, -0.001	25.000, 0.001
127	25.200, -0.003	25.200, -0.001	25.200, -0.001	25.200, -0.001	25.200, 0.000
128	25.400, -0.003	25.400, -0.001	25.400, -0.000	25.400, -0.001	25.400, 0.000
129	25.600, -0.003	25.600, -0.001	25.600, -0.000	25.600, -0.001	25.600, 0.000
130	25.800, -0.003	25.800, -0.000	25.800, -0.000	25.800, -0.001	25.800, 0.000
131	26.000, -0.003	26.000, -0.000	26.000, -0.000	26.000, -0.001	26.000, 0.000
132	26.200, -0.003	26.200, -0.000	26.200, -0.000	26.200, -0.001	26.200, 0.000
133	26.400, -0.002	26.400, -0.000	26.400, -0.000	26.400, -0.001	26.400, 0.000
134	26.600, -0.002	26.600, -0.000	26.600, -0.000	26.600, -0.001	26.600, -0.000
135	26.800, -0.002	26.800, -0.000	26.800, -0.000	26.800, -0.000	26.800, -0.000
136	27.000, -0.002	27.000, -0.000	27.000, -0.000	27.000, -0.000	27.000, -0.000
137	27.200, -0.001	27.200, -0.000	27.200, -0.000	27.200, 0.000	27.200, 0.000
138	27.400, -0.001	27.400, 0.000	27.400, -0.000	27.400, 0.000	27.400, 0.000
139	27.600, -0.001	27.600, 0.000	27.600, -0.000	27.600, 0.000	27.600, 0.000
140	27.800, -0.000	27.800, 0.000	27.800, -0.000	27.800, 0.000	27.800, 0.000
141	28.000, 0.000	28.000, 0.000	28.000, 0.000	28.000, 0.000	28.000, 0.000
142	28.200, 0.000	28.200, 0.000	28.200, 0.000	28.200, 0.000	28.200, 0.000
143	28.400, 0.001	28.400, 0.000	28.400, 0.001	28.400, 0.000	28.400, 0.000
144	28.600, 0.001	28.600, 0.000	28.600, 0.001	28.600, 0.000	28.600, 0.000
145	28.800, 0.001	28.800, 0.000	28.800, 0.001	28.800, 0.000	28.800, -0.000
146	29.000, 0.001	29.000, 0.000	29.000, 0.000	29.000, -0.000	29.000, -0.000
147	29.200, 0.001	29.200, -0.000	29.200, 0.000	29.200, -0.000	29.200, -0.000
148	29.400, 0.000	29.400, -0.000	29.400, -0.000	29.400, -0.000	29.400, -0.000
149	29.600, 0.000	29.600, -0.000	29.600, -0.000	29.600, -0.000	29.600, -0.000
150	29.800, 0.000	29.800, -0.001	29.800, -0.001	29.800, -0.000	29.800, -0.000
151	30.000, 0.000	30.000, 0.000	30.000, 0.000	30.000, 0.000	30.000, 0.000
152	30.200, 0.021	30.200, 0.022	30.200, 0.020	30.200, 0.018	30.200, 0.017
153	30.400, 0.046	30.400, 0.048	30.400, 0.043	30.400, 0.041	30.400, 0.038
154	30.600, 0.075	30.600, 0.078	30.600, 0.070	30.600, 0.067	30.600, 0.061
155	30.800, 0.108	30.800, 0.112	30.800, 0.100	30.800, 0.096	30.800, 0.087
156	31.000, 0.143	31.000, 0.148	31.000, 0.133	31.000, 0.127	31.000, 0.115
157	31.200, 0.181	31.200, 0.187	31.200, 0.168	31.200, 0.161	31.200, 0.144
158	31.400, 0.221	31.400, 0.227	31.400, 0.204	31.400, 0.196	31.400, 0.174
159	31.600, 0.261	31.600, 0.267	31.600, 0.241	31.600, 0.232	31.600, 0.204
160	31.800, 0.300	31.800, 0.306	31.800, 0.276	31.800, 0.266	31.800, 0.232
161	32.000, 0.337	32.000, 0.342	32.000, 0.309	32.000, 0.299	32.000, 0.258
162	32.200, 0.371	32.200, 0.375	32.200, 0.339	32.200, 0.329	32.200, 0.281
163	32.400, 0.402	32.400, 0.404	32.400, 0.366	32.400, 0.356	32.400, 0.302
164	32.600, 0.432	32.600, 0.431	32.600, 0.392	32.600, 0.382	32.600, 0.320
165	32.800, 0.459	32.800, 0.456	32.800, 0.416	32.800, 0.405	32.800, 0.336
166	33.000, 0.484	33.000, 0.478	33.000, 0.438	33.000, 0.426	33.000, 0.351
167	33.200, 0.507	33.200, 0.498	33.200, 0.458	33.200, 0.445	33.200, 0.365
168	33.400, 0.528	33.400, 0.517	33.400, 0.476	33.400, 0.463	33.400, 0.377
169	33.600, 0.546	33.600, 0.533	33.600, 0.493	33.600, 0.478	33.600, 0.387
170	33.800, 0.562	33.800, 0.547	33.800, 0.508	33.800, 0.492	33.800, 0.397
171	34.000, 0.577	34.000, 0.560	34.000, 0.521	34.000, 0.505	34.000, 0.405
172	34.200, 0.591	34.200, 0.571	34.200, 0.533	34.200, 0.516	34.200, 0.413
173	34.400, 0.602	34.400, 0.580	34.400, 0.544	34.400, 0.526	34.400, 0.420
174	34.600, 0.613	34.600, 0.589	34.600, 0.554	34.600, 0.535	34.600, 0.426
175	34.800, 0.622	34.800, 0.596	34.800, 0.562	34.800, 0.542	34.800, 0.432
176	35.000, 0.629	35.000, 0.602	35.000, 0.570	35.000, 0.549	35.000, 0.437
177	35.200, 0.636	35.200, 0.608	35.200, 0.577	35.200, 0.555	35.200, 0.441
178	35.400, 0.642	35.400, 0.612	35.400, 0.582	35.400, 0.560	35.400, 0.445
179	35.600, 0.646	35.600, 0.616	35.600, 0.587	35.600, 0.565	35.600, 0.449
180	35.800, 0.651	35.800, 0.620	35.800, 0.592	35.800, 0.569	35.800, 0.452
181	36.000, 0.654	36.000, 0.623	36.000, 0.595	36.000, 0.572	36.000, 0.455
182	36.200, 0.658	36.200, 0.625	36.200, 0.599	36.200, 0.575	36.200, 0.457
183	36.400, 0.661	36.400, 0.627	36.400, 0.602	36.400, 0.578	36.400, 0.459
184	36.600, 0.664	36.600, 0.629	36.600, 0.604	36.600, 0.580	36.600, 0.461
185	36.800, 0.666	36.800, 0.630	36.800, 0.606	36.800, 0.582	36.800, 0.463
186	37.000, 0.668	37.000, 0.631	37.000, 0.608	37.000, 0.584	37.000, 0.465
187	37.200, 0.670	37.200, 0.633	37.200, 0.609	37.200, 0.586	37.200, 0.466
188	37.400, 0.672	37.400, 0.634	37.400, 0.610	37.400, 0.587	37.400, 0.467
189	37.600, 0.674	37.600, 0.635	37.600, 0.612	37.600, 0.589	37.600, 0.469
190	37.800, 0.676	37.800, 0.636	37.800, 0.613	37.800, 0.590	37.800, 0.470
191	38.000, 0.677	38.000, 0.638	38.000, 0.614	38.000, 0.591	38.000, 0.471
192	38.200, 0.679	38.200, 0.639	38.200, 0.615	38.200, 0.592	38.200, 0.472
193	38.400, 0.680	38.400, 0.640	38.400, 0.616	38.400, 0.592	38.400, 0.473
194	38.600, 0.681	38.600, 0.640	38.600, 0.616	38.600, 0.593	38.600, 0.474
195	38.800, 0.682	38.800, 0.641	38.800, 0.617	38.800, 0.593	38.800, 0.475
196	39.000, 0.683	39.000, 0.642	39.000, 0.618	39.000, 0.593	39.000, 0.475
197	39.200, 0.684	39.200, 0.642	39.200, 0.619	39.200, 0.594	39.200, 0.476
198	39.400, 0.684	39.400, 0.642	39.400, 0.620	39.400, 0.594	39.400, 0.476
199	39.600, 0.684	39.600, 0.642	39.600, 0.620	39.600, 0.595	39.600, 0.477
200	39.800, 0.685	39.800, 0.642	39.800, 0.621	39.800, 0.595	39.800, 0.477
201	40.000, 0.686	40.000, 0.642	40.000, 0.621	40.000, 0.596	40.000, 0.477
202	40.200, 0.686	40.200, 0.642	40.200, 0.622	40.200, 0.596	40.200, 0.477
203	40.400, 0.687	40.400, 0.641	40.400, 0.622	40.400, 0.596	40.400, 0.477
204	40.600, 0.688	40.600, 0.641	40.600, 0.622	40.600, 0.597	40.600, 0.478
205	40.800, 0.688	40.800, 0.641	40.800, 0.622	40.800, 0.597	40.800, 0.478
206	41.000, 0.688	41.000, 0.641	41.000, 0.622	41.000, 0.597	41.000, 0.478
207	41.200, 0.688	41.200, 0.642	41.200, 0.622	41.200, 0.597	41.200, 0.478
208	41.400, 0.688	41.400, 0.642	41.400, 0.622	41.400, 0.597	41.400, 0.478
209	41.600, 0.689	41.600, 0.642	41.600, 0.622	41.600, 0.597	41.600, 0.479
210	41.800, 0.689	41.800, 0.642	41.800, 0.622	41.800, 0.597	41.800, 0.479
211	42.000, 0.689	42.000, 0.642	42.000, 0.622	42.000, 0.597	42.000, 0.479
212	42.200, 0.690	42.200, 0.643	42.200, 0.622	42.200, 0.597	42.200, 0.479
213	42.400, 0.690	42.400, 0.643	42.400, 0.622	42.400, 0.597	42.400, 0.479
214	42.600, 0.690	42.600, 0.643	42.600, 0.623	42.600, 0.597	42.600, 0.479
215	42.800, 0.691	42.800, 0.643	42.800, 0.623	42.800, 0.597	42.800, 0.479
216	43.000, 0.691	43.000, 0.643	43.000, 0.623	43.000, 0.597	43.000, 0.479
217	43.200, 0.691	43.200, 0.643	43.200, 0.623	43.200, 0.597	43.200, 0.479
218	43.400, 0.692	43.400, 0.643	43.400, 0.623	43.400, 0.597	43.400, 0.479
219	43.600, 0.693	43.600, 0.643	43.600, 0.623	43.600, 0.597	43.600, 0.479
220	43.800, 0.693	43.800, 0.643	43.800, 0.622	43.800, 0.597	43.800, 0.478
221	44.000, 0.694	44.000, 0.643	44.000, 0.622	44.000, 0.597	44.000, 0.478
222	44.200, 0.694	44.200, 0.644	44.200, 0.622	44.200, 0.597	44.200, 0.478
223	44.400, 0.695	44.400, 0.644	44.400, 0.622	44.400, 0.597	44.400, 0.478
224	44.600, 0.695	44.600, 0.644	44.600, 0.622	44.600, 0.597	44.600, 0.478
225	44.800, 0.695	44.800, 0.643	44.800, 0.622	44.800, 0.597	44.800, 0.478
226	45.000, 0.695	45.000, 0.643	45.000, 0.622	45.000, 0.597	45.000, 0.477
227	45.200, 0.696	45.200, 0.643	45.200, 0.622	45.200, 0.597	45.200, 0.477
228	45.400, 0.696	45.400, 0.643	45.400, 0.621	45.400, 0.598	45.400, 0.477
229	45.600, 0.696	45.600, 0.643	45.600, 0.622	45.600, 0.598	45.600, 0.477
230	45.800, 0.696	45.800, 0.643	45.800, 0.622	45.800, 0.598	45.800, 0.477
231	46.000, 0.697	46.000, 0.643	46.000, 0.622	46.000, 0.598	46.000, 0.477
232	46.200, 0.697	46.200, 0.643	46.200, 0.622	46.200, 0.598	46.200, 0.477
233	46.400, 0.697	46.400, 0.643	46.400, 0.622	46.400, 0.598	46.400, 0.477
234	46.600, 0.697	46.600, 0.643	46.600, 0.622	46.600, 0.598	46.600, 0.477
235	46.800, 0.697	46.800, 0.644	46.800, 0.622	46.800, 0.598	46.800, 0.477
236	47.000, 0.698	47.000, 0.644	47.000, 0.621	47.000, 0.598	47.000, 0.477
237	47.200, 0.698	47.200, 0.644	47.200, 0.621	47.200, 0.597	47.200, 0.477
238	47.400, 0.698	47.400, 0.644	47.400, 0.621	47.400, 0.597	47.400, 0.477
239	47.600, 0.699	47.600, 0.644	47.600, 0.621	47.600, 0.597	47.600, 0.477
240	47.800, 0.699	47.800, 0.644	47.800, 0.621	47.800, 0.597	47.800, 0.477
241	48.000, 0.699	48.000, 0.644	48.000, 0.621	48.000, 0.598	48.000, 0.477
242	48.200, 0.700	48.200, 0.644	48.200, 0.620	48.200, 0.598	48.200, 0.477
243	48.400, 0.700	48.400, 0.644	48.400, 0.620	48.400, 0.598	48.400, 0.477
244	48.600, 0.701	48.600, 0.644	48.600, 0.620	48.600, 0.598	48.600, 0.477
245	48.800, 0.702	48.800, 0.644	48.800, 0.620	48.800, 0.598	48.800, 0.477
246	49.000, 0.702	49.000, 0.644	49.000, 0.619	49.000, 0.599	49.000, 0.477
247	49.200, 0.702	49.200, 0.644	49.200, 0.619	49.200, 0.599	49.200, 0.477
248	49.400, 0.703	49.400, 0.644	49.400, 0.619	49.400, 0.599	49.400, 0.477
249	49.600, 0.703	49.600, 0.643	49.600, 0.619	49.600, 0.599	49.600, 0.476
250	49.800, 0.703	49.800, 0.643	49.800, 0.618	49.800, 0.599	49.800, 0.476
251	50.000, 0.704	50.000, 0.643	50.000, 0.618	50.000, 0.599	50.000, 0.475
252	50.200, 0.704	50.200, 0.644	50.200, 0.618	50.200, 0.599	50.200, 0.475
253	50.400, 0.705	50.400, 0.644	50.400, 0.618	50.400, 0.599	50.400, 0.474
254	50.600, 0.705	50.600, 0.644	50.600, 0.618	50.600, 0.599	50.600, 0.473
255	50.800, 0.705	50.800, 0.644	50.800, 0.618	50.800, 0.599	50.800, 0.473
256	51.000, 0.705	51.000, 0.645	51.000, 0.618	51.000, 0.599	51.000, 0.472
257	51.200, 0.705	51.200, 0.645	51.200, 0.618	51.200, 0.599	51.200, 0.472
258	51.400, 0.705	51.400, 0.646	51.400, 0.618	51.400, 0.599	51.400, 0.471
259	51.600, 0.706	51.600, 0.647	51.600, 0.618	51.600, 0.599	51.600, 0.471
260	51.800, 0.706	51.800, 0.647	51.800, 0.618	51.800, 0.599	51.800, 0.471
261	52.000, 0.706	52.000, 0.647	52.000, 0.618	52.000, 0.600	52.000, 0.471
262	52.200, 0.707	52.200, 0.648	52.200, 0.618	52.200, 0.600	52.200, 0.471
263	52.400, 0.707	52.400, 0.648	52.400, 0.618	52.400, 0.600	52.400, 0.471
264	52.600, 0.707	52.600, 0.648	52.600, 0.618	52.600, 0.600	52.600, 0.471
265	52.800, 0.707	52.800, 0.648	52.800, 0.618	52.800, 0.600	52.800, 0.471
266	53.000, 0.708	53.000, 0.648	53.000, 0.617	53.000, 0.600	53.000, 0.471
267	53.200, 0.708	53.200, 0.648	53.200, 0.618	53.200, 0.600	53.200, 0.472
268	53.400, 0.708	53.400, 0.647	53.400, 0.618	53.400, 0.600	53.400, 0.472
269	53.600, 0.709	53.600, 0.647	53.600, 0.618	53.600, 0.600	53.600, 0.472
270	53.800, 0.710	53.800, 0.647	53.800, 0.618	53.800, 0.600	53.800, 0.472
271	54.000, 0.711	54.000, 0.647	54.000, 0.618	54.000, 0.600	54.000, 0.473
272	54.200, 0.711	54.200, 0.647	54.200, 0.618	54.200, 0.600	54.200, 0.473
273	54.400, 0.712	54.400, 0.647	54.400, 0.618	54.400, 0.600	54.400, 0.473
274	54.600, 0.712	54.600, 0.647	54.600, 0.618	54.600, 0.600	54.600, 0.473
275	54.800, 0.713	54.800, 0.646	54.800, 0.618	54.800, 0.600	54.800, 0.473
276	55.000, 0.713	55.000, 0.646	55.000, 0.618	55.000, 0.600	55.000, 0.473
277	55.200, 0.713	55.200, 0.646	55.200, 0.618	55.200, 0.600	55.200, 0.473
278	55.400, 0.713	55.400, 0.646	55.400, 0.618	55.400, 0.600	55.400, 0.472
279	55.600, 0.713	55.600, 0.646	55.600, 0.618	55.600, 0.600	55.600, 0.472
280	55.800, 0.714	55.800, 0.646	55.800, 0.618	55.800, 0.600	55.800, 0.472
281	56.000, 0.714	56.000, 0.646	56.000, 0.617	56.000, 0.600	56.000, 0.471
282	56.200, 0.714	56.200, 0.646	56.200, 0.617	56.200, 0.601	56.200, 0.471
283	56.400, 0.714	56.400, 0.646	56.400, 0.617	56.400, 0.601	56.400, 0.470
284	56.600, 0.713	56.600, 0.646	56.600, 0.617	56.600, 0.601	56.600, 0.470
285	56.800, 0.714	56.800, 0.646	56.800, 0.617	56.800, 0.601	56.800, 0.469
286	57.000, 0.714	57.000, 0.646	57.000, 0.617	57.000, 0.601	57.000, 0.469
287	57.200, 0.714	57.200, 0.646	57.200, 0.617	57.200, 0.601	57.200, 0.469
288	57.400, 0.714	57.400, 0.646	57.400, 0.617	57.400, 0.601	57.400, 0.469
289	57.600, 0.714	57.600, 0.646	57.600, 0.617	57.600, 0.601	57.600, 0.468
290	57.800, 0.715	57.800, 0.646	57.800, 0.617	57.800, 0.601	57.800, 0.468
291	58.000, 0.715	58.000, 0.647	58.000, 0.617	58.000, 0.601	58.000, 0.468
292	58.200, 0.715	58.200, 0.647	58.200, 0.617	58.200, 0.601	58.200, 0.468
293	58.400, 0.715	58.400, 0.647	58.400, 0.618	58.400, 0.601	58.400, 0.468
294	58.600, 0.715	58.600, 0.647	58.600, 0.618	58.600, 0.601	58.600, 0.468
295	58.800, 0.715	58.800, 0.647	58.800, 0.618	58.800, 0.601	58.800, 0.468
296	59.000, 0.716	59.000, 0.647	59.000, 0.618	59.000, 0.601	59.000, 0.468
297	59.200, 0.716	59.200, 0.647	59.200, 0.618	59.200, 0.602	59.200, 0.468
298	59.400, 0.716	59.400, 0.647	59.400, 0.618	59.400, 0.602	59.400, 0.468
299	59.600, 0.717	59.600, 0.647	59.600, 0.618	59.600, 0.602	59.600, 0.468
300	59.800, 0.718	59.800, 0.647	59.800, 0.618	59.800, 0.603	59.800, 0.468
301	60.000, 0.718	60.000, 0.647	60.000, 0.618	60.000, 0.603	60.000, 0.468
302	60.200, 0.719	60.200, 0.647	60.200, 0.618	60.200, 0.604	60.200, 0.468
303	60.400, 0.719	60.400, 0.648	60.400, 0.618	60.400, 0.604	60.400, 0.467
304	60.600, 0.719	60.600, 0.648	60.600, 0.619	60.600, 0.604	60.600, 0.467
305	60.800, 0.720	60.800, 0.647	60.800, 0.619	60.800, 0.604	60.800, 0.466
306	61.000, 0.720	61.000, 0.647	61.000, 0.619	61.000, 0.604	61.000, 0.466
307	61.200, 0.721	61.200, 0.647	61.200, 0.619	61.200, 0.604	61.200, 0.466
308	61.400, 0.722	61.400, 0.647	61.400, 0.619	61.400, 0.604	61.400, 0.465
309	61.600, 0.722	61.600, 0.647	61.600, 0.619	61.600, 0.604	61.600, 0.465
310	61.800, 0.723	61.800, 0.647	61.800, 0.619	61.800, 0.604	61.800, 0.465
311	62.000, 0.723	62.000, 0.647	62.000, 0.618	62.000, 0.604	62.000, 0.465
312	62.200, 0.724	62.200, 0.648	62.200, 0.618	62.200, 0.604	62.200, 0.464
313	62.400, 0.724	62.400, 0.648	62.400, 0.618	62.400, 0.604	62.400, 0.464
314	62.600, 0.725	62.600, 0.648	62.600, 0.618	62.600, 0.604	62.600, 0.464
315	62.800, 0.725	62.800, 0.648	62.800, 0.617	62.800, 0.605	62.800, 0.463
316	63.000, 0.725	63.000, 0.648	63.000, 0.617	63.000, 0.605	63.000, 0.463
317	63.200, 0.726	63.200, 0.648	63.200, 0.616	63.200, 0.605	63.200, 0.463
318	63.400, 0.726	63.400, 0.649	63.400, 0.616	63.400, 0.605	63.400, 0.462
319	63.600, 0.726	63.600, 0.649	63.600, 0.615	63.600, 0.605	63.600, 0.462
320	63.800, 0.726	63.800, 0.649	63.800, 0.615	63.800, 0.605	63.800, 0.461
321	64.000, 0.726	64.000, 0.649	64.000, 0.615	64.000, 0.605	64.000, 0.461
322	64.200, 0.726	64.200, 0.649	64.200, 0.614	64.200, 0.605	64.200, 0.461
323	64.400, 0.726	64.400, 0.649	64.400, 0.614	64.400, 0.605	64.400, 0.461
324	64.600, 0.726	64.600, 0.649	64.600, 0.615	64.600, 0.605	64.600, 0.460
325	64.800, 0.725	64.800, 0.649	64.800, 0.615	64.800, 0.605	64.800, 0.460
326	65.000, 0.725	65.000, 0.649	65.000, 0.615	65.000, 0.605	65.000, 0.460
327	65.200, 0.725	65.200, 0.649	65.200, 0.615	65.200, 0.605	65.200, 0.460
328	65.400, 0.725	65.400, 0.649	65.400, 0.615	65.400, 0.605	65.400, 0.461
329	65.600, 0.726	65.600, 0.649	65.600, 0.615	65.600, 0.605	65.600, 0.461
330	65.800, 0.726	65.800, 0.649	65.800, 0.615	65.800, 0.605	65.800, 0.461
331	66.000, 0.727	66.000, 0.649	66.000, 0.616	66.000, 0.605	66.000, 0.461
332	66.200, 0.727	66.200, 0.648	66.200, 0.616	66.200, 0.605	66.200, 0.461
333	66.400, 0.728	66.400, 0.648	66.400, 0.616	66.400, 0.605	66.400, 0.461
334	66.600, 0.728	66.600, 0.649	66.600, 0.616	66.600, 0.606	66.600, 0.462
335	66.800, 0.729	66.800, 0.649	66.800, 0.615	66.800, 0.606	66.800, 0.462
336	67.000, 0.729	67.000, 0.649	67.000, 0.615	67.000, 0.606	67.000, 0.461
337	67.200, 0.730	67.200, 0.649	67.200, 0.615	67.200, 0.606	67.200, 0.461
338	67.400, 0.730	67.400, 0.649	67.400, 0.615	67.400, 0.606	67.400, 0.461
339	67.600, 0.731	67.600, 0.649	67.600, 0.615	67.600, 0.606	67.600, 0.461
340	67.800, 0.731	67.800, 0.649	67.800, 0.615	67.800, 0.606	67.800, 0.461
341	68.000, 0.731	68.000, 0.650	68.000, 0.616	68.000, 0.607	68.000, 0.461
342	68.200, 0.731	68.200, 0.650	68.200, 0.616	68.200, 0.607	68.200, 0.461
343	68.400, 0.731	68.400, 0.650	68.400, 0.616	68.400, 0.607	68.400, 0.461
344	68.600, 0.731	68.600, 0.650	68.600, 0.616	68.600, 0.607	68.600, 0.460
345	68.800, 0.731	68.800, 0.651	68.800, 0.616	68.800, 0.607	68.800, 0.460
346	69.000, 0.731	69.000, 0.651	69.000, 0.616	69.000, 0.608	69.000, 0.460
347	69.200, 0.732	69.200, 0.651	69.200, 0.616	69.200, 0.608	69.200, 0.460
348	69.400, 0.733	69.400, 0.652	69.400, 0.616	69.400, 0.608	69.400, 0.460
349	69.600, 0.733	69.600, 0.651	69.600, 0.616	69.600, 0.609	69.600, 0.460
350	69.800, 0.734	69.800, 0.651	69.800, 0.616	69.800, 0.609	69.800, 0.460
351	70.000, 0.734	70.000, 0.651	70.000, 0.616	70.000, 0.609	70.000, 0.459
352	70.200, 0.735	70.200, 0.651	70.200, 0.616	70.200, 0.609	70.200, 0.459
353	70.400, 0.735	70.400, 0.651	70.400, 0.616	70.400, 0.609	70.400, 0.458
354	70.600, 0.736	70.600, 0.651	70.600, 0.616	70.600, 0.610	70.600, 0.458
355	70.800, 0.736	70.800, 0.651	70.800, 0.616	70.800, 0.610	70.800, 0.458
356	71.000, 0.737	71.000, 0.651	71.000, 0.616	71.000, 0.610	71.000, 0.457
357	71.200, 0.737	71.200, 0.652	71.200, 0.616	71.200, 0.610	71.200, 0.457
358	71.400, 0.737	71.400, 0.652	71.400, 0.616	71.400, 0.610	71.400, 0.457
359	71.600, 0.738	71.600, 0.652	71.600, 0.615	71.600, 0.610	71.600, 0.457
360	71.800, 0.738	71.800, 0.652	71.800, 0.615	71.800, 0.610	71.800, 0.457
361	72.000, 0.738	72.000, 0.652	72.000, 0.615	72.000, 0.610	72.000, 0.457
362	72.200, 0.738	72.200, 0.652	72.200, 0.615	72.200, 0.610	72.200, 0.457
363	72.400, 0.738	72.400, 0.652	72.400, 0.615	72.400, 0.610	72.400, 0.457
364	72.600, 0.739	72.600, 0.652	72.600, 0.615	72.600, 0.610	72.600, 0.457
365	72.800, 0.739	72.800, 0.653	72.800, 0.615	72.800, 0.610	72.800, 0.457
366	73.000, 0.739	73.000, 0.653	73.000, 0.615	73.000, 0.610	73.000, 0.457
367	73.200, 0.739	73.200, 0.653	73.200, 0.615	73.200, 0.610	73.200, 0.457
368	73.400, 0.740	73.400, 0.653	73.400, 0.615	73.400, 0.610	73.400, 0.457
369	73.600, 0.740	73.600, 0.653	73.600, 0.615	73.600, 0.610	73.600, 0.456
370	73.800, 0.740	73.800, 0.653	73.800, 0.616	73.800, 0.611	73.800, 0.456
371	74.000, 0.740	74.000, 0.653	74.000, 0.616	74.000, 0.611	74.000, 0.455
372	74.200, 0.740	74.200, 0.653	74.200, 0.616	74.200, 0.611	74.200, 0.455
373	74.400, 0.740	74.400, 0.653	74.400, 0.616	74.400, 0.611	74.400, 0.455
374	74.600, 0.740	74.600, 0.653	74.600, 0.616	74.600, 0.611	74.600, 0.454
375	74.800, 0.740	74.800, 0.653	74.800, 0.617	74.800, 0.611	74.800, 0.454
376	75.000, 0.741	75.000, 0.654	75.000, 0.617	75.000, 0.611	75.000, 0.454
377	75.200, 0.741	75.200, 0.654	75.200, 0.617	75.200, 0.611	75.200, 0.454
378	75.400, 0.742	75.400, 0.654	75.400, 0.617	75.400, 0.611	75.400, 0.454
379	75.600, 0.742	75.600, 0.654	75.600, 0.616	75.600, 0.611	75.600, 0.454
380	75.800, 0.743	75.800, 0.654	75.800, 0.616	75.800, 0.611	75.800, 0.453
381	76.000, 0.743	76.000, 0.654	76.000, 0.616	76.000, 0.611	76.000, 0.453
382	76.200, 0.743	76.200, 0.654	76.200, 0.616	76.200, 0.612	76.200, 0.453
383	76.400, 0.743	76.400, 0.654	76.400, 0.616	76.400, 0.612	76.400, 0.453
384	76.600, 0.743	76.600, 0.654	76.600, 0.616	76.600, 0.612	76.600, 0.453
385	76.800, 0.743	76.800, 0.655	76.800, 0.616	76.800, 0.612	76.800, 0.453
386	77.000, 0.743	77.000, 0.655	77.000, 0.616	77.000, 0.612	77.000, 0.452
387	77.200, 0.744	77.200, 0.655	77.200, 0.616	77.200, 0.612	77.200, 0.452
388	77.400, 0.744	77.400, 0.655	77.400, 0.616	77.400, 0.612	77.400, 0.452
389	77.600, 0.745	77.600, 0.655	77.600, 0.617	77.600, 0.613	77.600, 0.452
390	77.800, 0.745	77.800, 0.655	77.800, 0.617	77.800, 0.613	77.800, 0.452
391	78.000, 0.745	78.000, 0.655	78.000, 0.617	78.000, 0.613	78.000, 0.452
392	78.200, 0.746	78.200, 0.655	78.200, 0.617	78.200, 0.614	78.200, 0.452
393	78.400, 0.746	78.400, 0.655	78.400, 0.618	78.400, 0.614	78.400, 0.452
394	78.600, 0.747	78.600, 0.655	78.600, 0.618	78.600, 0.614	78.600, 0.452
395	78.800, 0.747	78.800, 0.655	78.800, 0.618	78.800, 0.614	78.800, 0.452
396	79.000, 0.748	79.000, 0.655	79.000, 0.618	79.000, 0.615	79.000, 0.452
397	79.200, 0.748	79.200, 0.655	79.200, 0.618	79.200, 0.615	79.200, 0.452
398	79.400, 0.749	79.400, 0.655	79.400, 0.618	79.400, 0.615	79.400, 0.452
399	79.600, 0.749	79.600, 0.655	79.600, 0.618	79.600, 0.615	79.600, 0.452
400	79.800, 0.749	79.800, 0.655	79.800, 0.618	79.800, 0.616	79.800, 0.452
401	80.000, 0.750	80.000, 0.655	80.000, 0.618	80.000, 0.616	80.000, 0.452
402	80.200, 0.750	80.200, 0.656	80.200, 0.618	80.200, 0.616	80.200, 0.451
403	80.400, 0.750	80.400, 0.656	80.400, 0.618	80.400, 0.616	80.400, 0.451
404	80.600, 0.750	80.600, 0.656	80.600, 0.617	80.600, 0.615	80.600, 0.451
405	80.800, 0.750	80.800, 0.656	80.800, 0.617	80.800, 0.615	80.800, 0.450
406	81.000, 0.750	81.000, 0.656	81.000, 0.617	81.000, 0.615	81.000, 0.450
407	81.200, 0.751	81.200, 0.656	81.200, 0.617	81.200, 0.615	81.200, 0.450
408	81.400, 0.751	81.400, 0.656	81.400, 0.617	81.400, 0.615	81.400, 0.449
409	81.600, 0.751	81.600, 0.657	81.600, 0.617	81.600, 0.615	81.600, 0.449
410	81.800, 0.751	81.800, 0.657	81.800, 0.616	81.800, 0.615	81.800, 0.449
411	82.000, 0.752	82.000, 0.657	82.000, 0.616	82.000, 0.615	82.000, 0.448
412	82.200, 0.752	82.200, 0.657	82.200, 0.616	82.200, 0.615	82.200, 0.448
413	82.400, 0.752	82.400, 0.657	82.400, 0.616	82.400, 0.615	82.400, 0.448
414	82.600, 0.752	82.600, 0.657	82.600, 0.616	82.600, 0.615	82.600, 0.448
415	82.800, 0.752	82.800, 0.657	82.800, 0.616	82.800, 0.616	82.800, 0.448
416	83.000, 0.753	83.000, 0.657	83.000, 0.616	83.000, 0.616	83.000, 0.448
417	83.200, 0.753	83.200, 0.657	83.200, 0.616	83.200, 0.616	83.200, 0.448
418	83.400, 0.754	83.400, 0.657	83.400, 0.617	83.400, 0.617	83.400, 0.448
419	83.600, 0.754	83.600, 0.657	83.600, 0.617	83.600, 0.617	83.600, 0.448
420	83.800, 0.755	83.800, 0.656	83.800, 0.617	83.800, 0.618	83.800, 0.448
421	84.000, 0.755	84.000, 0.656	84.000, 0.617	84.000, 0.618	84.000, 0.448
422	84.200, 0.755	84.200, 0.656	84.200, 0.617	84.200, 0.618	84.200, 0.448
423	84.400, 0.756	84.400, 0.656	84.400, 0.617	84.400, 0.618	84.400, 0.448
424	84.600, 0.756	84.600, 0.656	84.600, 0.617	84.600, 0.618	84.600, 0.448
425	84.800, 0.756	84.800, 0.656	84.800, 0.617	84.800, 0.618	84.800, 0.448
426	85.000, 0.756	85.000, 0.656	85.000, 0.617	85.000, 0.618	85.000, 0.448
427	85.200, 0.757	85.200, 0.656	85.200, 0.617	85.200, 0.618	85.200, 0.448
428	85.400, 0.757	85.400, 0.656	85.400, 0.617	85.400, 0.618	85.400, 0.448
429	85.600, 0.757	85.600, 0.656	85.600, 0.617	85.600, 0.618	85.600, 0.448
430	85.800, 0.757	85.800, 0.657	85.800, 0.616	85.800, 0.618	85.800, 0.448
431	86.000, 0.758	86.000, 0.657	86.000, 0.616	86.000, 0.618	86.000, 0.448
432	86.200, 0.758	86.200, 0.657	86.200, 0.616	86.200, 0.618	86.200, 0.448
433	86.400, 0.759	86.400, 0.658	86.400, 0.616	86.400, 0.618	86.400, 0.448
434	86.600, 0.759	86.600, 0.658	86.600, 0.616	86.600, 0.618	86.600, 0.447
435	86.800, 0.760	86.800, 0.658	86.800, 0.616	86.800, 0.618	86.800, 0.447
436	87.000, 0.760	87.000, 0.658	87.000, 0.616	87.000, 0.618	87.000, 0.446
437	87.200, 0.760	87.200, 0.658	87.200, 0.616	87.200, 0.619	87.200, 0.446
438	87.400, 0.760	87.400, 0.658	87.400, 0.617	87.400, 0.619	87.400, 0.446
439	87.600, 0.760	87.600, 0.658	87.600, 0.617	87.600, 0.619	87.600, 0.446
440	87.800, 0.760	87.800, 0.659	87.800, 0.617	87.800, 0.619	87.800, 0.446
441	88.000, 0.760	88.000, 0.659	88.000, 0.618	88.000, 0.620	88.000, 0.446
442	88.200, 0.760	88.200, 0.659	88.200, 0.618	88.200, 0.620	88.200, 0.446
443	88.400, 0.760	88.400, 0.659	88.400, 0.618	88.400, 0.620	88.400, 0.445
444	88.600, 0.760	88.600, 0.659	88.600, 0.618	88.600, 0.620	88.600, 0.445
445	88.800, 0.761	88.800, 0.659	88.800, 0.618	88.800, 0.621	88.800, 0.445
446	89.000, 0.761	89.000, 0.659	89.000, 0.618	89.000, 0.621	89.000, 0.444
447	89.200, 0.761	89.200, 0.659	89.200, 0.617	89.200, 0.621	89.200, 0.444
448	89.400, 0.762	89.400, 0.659	89.400, 0.617	89.400, 0.621	89.400, 0.444
449	89.600, 0.762	89.600, 0.659	89.600, 0.617	89.600, 0.621	89.600, 0.443
450	89.800, 0.763	89.800, 0.660	89.800, 0.617	89.800, 0.621	89.800, 0.443
451	90.000, 0.763	90.000, 0.660	90.000, 0.616	90.000, 0.621	90.000, 0.443
452	90.200, 0.763	90.200, 0.660	90.200, 0.616	90.200, 0.621	90.200, 0.442
453	90.400, 0.764	90.400, 0.660	90.400, 0.616	90.400, 0.621	90.400, 0.442
454	90.600, 0.764	90.600, 0.660	90.600, 0.616	90.600, 0.621	90.600, 0.442
455	90.800, 0.764	90.800, 0.660	90.800, 0.616	90.800, 0.621	90.800, 0.442
456	91.000, 0.764	91.000, 0.661	91.000, 0.616	91.000, 0.621	91.000, 0.442
457	91.200, 0.764	91.200, 0.661	91.200, 0.616	91.200, 0.621	91.200, 0.442
458	91.400, 0.764	91.400, 0.661	91.400, 0.617	91.400, 0.621	91.400, 0.442
459	91.600, 0.764	91.600, 0.661	91.600, 0.617	91.600, 0.621	91.600, 0.441
460	91.800, 0.764	91.800, 0.661	91.800, 0.618	91.800, 0.621	91.800, 0.441
461	92.000, 0.765	92.000, 0.661	92.000, 0.618	92.000, 0.622	92.000, 0.441
462	92.200, 0.765	92.200, 0.660	92.200, 0.618	92.200, 0.622	92.200, 0.441
463	92.400, 0.765	92.400, 0.660	92.400, 0.618	92.400, 0.622	92.400, 0.440
464	92.600, 0.765	92.600, 0.660	92.600, 0.618	92.600, 0.622	92.600, 0.440
465	92.800, 0.766	92.800, 0.660	92.800, 0.618	92.800, 0.622	92.800, 0.440
466	93.000, 0.766	93.000, 0.660	93.000, 0.618	93.000, 0.622	93.000, 0.440
467	93.200, 0.767	93.200, 0.661	93.200, 0.618	93.200, 0.622	93.200, 0.440
468	93.400, 0.767	93.400, 0.661	93.400, 0.618	93.400, 0.622	93.400, 0.440
469	93.600, 0.767	93.600, 0.661	93.600, 0.618	93.600, 0.622	93.600, 0.439
470	93.800, 0.768	93.800, 0.662	93.800, 0.618	93.800, 0.622	93.800, 0.440
471	94.000, 0.768	94.000, 0.662	94.000, 0.618	94.000, 0.622	94.000, 0.439
472	94.200, 0.768	94.200, 0.663	94.200, 0.618	94.200, 0.622	94.200, 0.440
473	94.400, 0.769	94.400, 0.663	94.400, 0.618	94.400, 0.622	94.400, 0.440
474	94.600, 0.769	94.600, 0.663	94.600, 0.618	94.600, 0.622	94.600, 0.440
475	94.800, 0.769	94.800, 0.664	94.800, 0.618	94.800, 0.622	94.800, 0.440
476	95.000, 0.770	95.000, 0.664	95.000, 0.618	95.000, 0.623	95.000, 0.440
477	95.200, 0.770	95.200, 0.664	95.200, 0.618	95.200, 0.623	95.200, 0.440
478	95.400, 0.770	95.400, 0.665	95.400, 0.619	95.400, 0.624	95.400, 0.440
479	95.600, 0.770	95.600, 0.665	95.600, 0.619	95.600, 0.624	95.600, 0.440
480	95.800, 0.770	95.800, 0.665	95.800, 0.619	95.800, 0.624	95.800, 0.440
481	96.000, 0.771	96.000, 0.665	96.000, 0.619	96.000, 0.624	96.000, 0.439
482	96.200, 0.771	96.200, 0.665	96.200, 0.619	96.200, 0.624	96.200, 0.439
483	96.400, 0.771	96.400, 0.665	96.400, 0.619	96.400, 0.624	96.400, 0.439
484	96.600, 0.771	96.600, 0.665	96.600, 0.619	96.600, 0.624	96.600, 0.439
485	96.800, 0.771	96.800, 0.664	96.800, 0.618	96.800, 0.625	96.800, 0.438
486	97.000, 0.771	97.000, 0.664	97.000, 0.618	97.000, 0.625	97.000, 0.438
487	97.200, 0.771	97.200, 0.664	97.200, 0.618	97.200, 0.625	97.200, 0.438
488	97.400, 0.771	97.400, 0.664	97.400, 0.618	97.400, 0.625	97.400, 0.438
489	97.600, 0.772	97.600, 0.664	97.600, 0.618	97.600, 0.625	97.600, 0.437
490	97.800, 0.772	97.800, 0.664	97.800, 0.618	97.800, 0.625	97.800, 0.437
491	98.000, 0.773	98.000, 0.664	98.000, 0.618	98.000, 0.625	98.000, 0.437
492	98.200, 0.773	98.200, 0.665	98.200, 0.618	98.200, 0.625	98.200, 0.437
493	98.400, 0.774	98.400, 0.665	98.400, 0.619	98.400, 0.625	98.400, 0.437
494	98.600, 0.774	98.600, 0.665	98.600, 0.619	98.600, 0.626	98.600, 0.437
495	98.800, 0.774	98.800, 0.666	98.800, 0.619	98.800, 0.626	98.800, 0.437
496	99.000, 0.775	99.000, 0.666	99.000, 0.620	99.000, 0.626	99.000, 0.437
497	99.200, 0.775	99.200, 0.667	99.200, 0.620	99.200, 0.626	99.200, 0.437
498	99.400, 0.775	99.400, 0.667	99.400, 0.620	99.400, 0.626	99.400, 0.437
499	99.600, 0.775	99.600, 0.667	99.600, 0.620	99.600, 0.626	99.600, 0.437
500	99.800, 0.775	99.800, 0.668	99.800, 0.620	99.800, 0.626	99.800, 0.437
501	100.000, 0.776	100.000, 0.668	100.000, 0.620	100.000, 0.626	100.000, 0.437
502	100.200, 0.776	100.200, 0.667	100.200, 0.619	100.200, 0.626	100.200, 0.437
503	100.400, 0.776	100.400, 0.667	100.400, 0.619	100.400, 0.626	100.400, 0.437
504	100.600, 0.776	100.600, 0.667	100.600, 0.619	100.600, 0.626	100.600, 0.437
505	100.800, 0.776	100.800, 0.667	100.800, 0.619	100.800, 0.626	100.800, 0.437
506	101.000, 0.776	101.000, 0.667	101.000, 0.619	101.000, 0.626	101.000, 0.437
507	101.200, 0.776	101.200, 0.667	101.200, 0.619	101.200, 0.626	101.200, 0.436
508	101.400, 0.776	101.400, 0.667	101.400, 0.619	101.400, 0.626	101.400, 0.436
509	101.600, 0.776	101.600, 0.667	101.600, 0.619	101.600, 0.626	101.600, 0.436
510	101.800, 0.776	101.800, 0.667	101.800, 0.620	101.800, 0.626	101.800, 0.435
511	102.000, 0.776	102.000, 0.667	102.000, 0.620	102.000, 0.626	102.000, 0.435
512	102.200, 0.776	102.200, 0.667	102.200, 0.620	102.200, 0.626	102.200, 0.435
513	102.400, 0.776	102.400, 0.668	102.400, 0.621	102.400, 0.626	102.400, 0.435
514	102.600, 0.776	102.600, 0.668	102.600, 0.621	102.600, 0.626	102.600, 0.435
515	102.800, 0.776	102.800, 0.668	102.800, 0.621	102.800, 0.626	102.800, 0.435
516	103.000, 0.776	103.000, 0.668	103.000, 0.621	103.000, 0.627	103.000, 0.435
517	103.200, 0.776	103.200, 0.669	103.200, 0.621	103.200, 0.627	103.200, 0.435
518	103.400, 0.776	103.400, 0.669	103.400, 0.621	103.400, 0.627	103.400, 0.435
519	103.600, 0.777	103.600, 0.669	103.600, 0.620	103.600, 0.628	103.600, 0.435
520	103.800, 0.777	103.800, 0.670	103.800, 0.620	103.800, 0.628	103.800, 0.435
521	104.000, 0.778	104.000, 0.670	104.000, 0.620	104.000, 0.628	104.000, 0.435
522	104.200, 0.778	104.200, 0.670	104.200, 0.620	104.200, 0.628	104.200, 0.435
523	104.400, 0.779	104.400, 0.671	104.400, 0.620	104.400, 0.628	104.400, 0.435
524	104.600, 0.779	104.600, 0.671	104.600, 0.621	104.600, 0.628	104.600, 0.435
525	104.800, 0.780	104.800, 0.672	104.800, 0.621	104.800, 0.627	104.800, 0.434
526	105.000, 0.780	105.000, 0.672	105.000, 0.621	105.000, 0.627	105.000, 0.434
527	105.200, 0.780	105.200, 0.673	105.200, 0.621	105.200, 0.627	105.200, 0.434
528	105.400, 0.781	105.400, 0.673	105.400, 0.621	105.400, 0.627	105.400, 0.434
529	105.600, 0.781	105.600, 0.673	105.600, 0.621	105.600, 0.627	105.600, 0.433
530	105.800, 0.781	105.800, 0.673	105.800, 0.621	105.800, 0.627	105.800, 0.433
531	106.000, 0.781	106.000, 0.673	106.000, 0.621	106.000, 0.627	106.000, 0.433
532	106.200, 0.781	106.200, 0.672	106.200, 0.620	106.200, 0.627	106.200, 0.433
533	106.400, 0.782	106.400, 0.672	106.400, 0.620	106.400, 0.627	106.400, 0.432
534	106.600, 0.782	106.600, 0.672	106.600, 0.620	106.600, 0.628	106.600, 0.432
535	106.800, 0.782	106.800, 0.672	106.800, 0.620	106.800, 0.628	106.800, 0.432
536	107.000, 0.782	107.000, 0.672	107.000, 0.620	107.000, 0.628	107.000, 0.432
537	107.200, 0.782	107.200, 0.672	107.200, 0.620	107.200, 0.628	107.200, 0.432
538	107.400, 0.782	107.400, 0.672	107.400, 0.620	107.400, 0.628	107.400, 0.432
539	107.600, 0.782	107.600, 0.672	107.600, 0.620	107.600, 0.628	107.600, 0.432
540	107.800, 0.783	107.800, 0.673	107.800, 0.620	107.800, 0.628	107.800, 0.431
541	108.000, 0.783	108.000, 0.673	108.000, 0.620	108.000, 0.628	108.000, 0.431
542	108.200, 0.783	108.200, 0.673	108.200, 0.620	108.200, 0.628	108.200, 0.431
543	108.400, 0.784	108.400, 0.673	108.400, 0.620	108.400, 0.629	108.400, 0.431
544	108.600, 0.784	108.600, 0.673	108.600, 0.620	108.600, 0.629	108.600, 0.431
545	108.800, 0.785	108.800, 0.673	108.800, 0.620	108.800, 0.629	108.800, 0.431
546	109.000, 0.785	109.000, 0.673	109.000, 0.620	109.000, 0.629	109.000, 0.431
547	109.200, 0.785	109.200, 0.673	109.200, 0.620	109.200, 0.629	109.200, 0.431
548	109.400, 0.786	109.400, 0.673	109.400, 0.621	109.400, 0.629	109.400, 0.431
549	109.600, 0.786	109.600, 0.673	109.600, 0.621	109.600, 0.629	109.600, 0.431
550	109.800, 0.786	109.800, 0.673	109.800, 0.621	109.800, 0.629	109.800, 0.431
551	110.000, 0.785	110.000, 0.673	110.000, 0.621	110.000, 0.630	110.000, 0.431
552	110.200, 0.786	110.200, 0.673	110.200, 0.622	110.200, 0.630	110.200, 0.431
553	110.400, 0.785	110.400, 0.673	110.400, 0.622	110.400, 0.630	110.400, 0.431
554	110.600, 0.786	110.600, 0.673	110.600, 0.622	110.600, 0.630	110.600, 0.432
555	110.800, 0.786	110.800, 0.673	110.800, 0.622	110.800, 0.630	110.800, 0.432
556	111.000, 0.786	111.000, 0.673	111.000, 0.622	111.000, 0.631	111.000, 0.432
557	111.200, 0.786	111.200, 0.673	111.200, 0.623	111.200, 0.631	111.200, 0.432
558	111.400, 0.786	111.400, 0.673	111.400, 0.623	111.400, 0.631	111.400, 0.432
559	111.600, 0.786	111.600, 0.673	111.600, 0.622	111.600, 0.631	111.600, 0.432
560	111.800, 0.786	111.800, 0.673	111.800, 0.622	111.800, 0.631	111.800, 0.432
561	112.000, 0.786	112.000, 0.673	112.000, 0.622	112.000, 0.632	112.000, 0.432
562	112.200, 0.786	112.200, 0.673	112.200, 0.622	112.200, 0.632	112.200, 0.432
563	112.400, 0.787	112.400, 0.673	112.400, 0.622	112.400, 0.632	112.400, 0.432
564	112.600, 0.787	112.600, 0.673	112.600, 0.622	112.600, 0.632	112.600, 0.432
565	112.800, 0.787	112.800, 0.673	112.800, 0.622	112.800, 0.632	112.800, 0.431
566	113.000, 0.787	113.000, 0.673	113.000, 0.622	113.000, 0.632	113.000, 0.431
567	113.200, 0.787	113.200, 0.674	113.200, 0.623	113.200, 0.632	113.200, 0.430
568	113.400, 0.788	113.400, 0.674	113.400, 0.623	113.400, 0.632	113.400, 0.430
569	113.600, 0.788	113.600, 0.674	113.600, 0.623	113.600, 0.631	113.600, 0.430
570	113.800, 0.788	113.800, 0.675	113.800, 0.623	113.800, 0.631	113.800, 0.429
571	114.000, 0.788	114.000, 0.675	114.000, 0.623	114.000, 0.631	114.000, 0.429
572	114.200, 0.789	114.200, 0.676	114.200, 0.623	114.200, 0.631	114.200, 0.429
573	114.400, 0.789	114.400, 0.676	114.400, 0.623	114.400, 0.631	114.400, 0.429
574	114.600, 0.789	114.600, 0.677	114.600, 0.623	114.600, 0.631	114.600, 0.429
575	114.800, 0.790	114.800, 0.677	114.800, 0.623	114.800, 0.631	114.800, 0.429
576	115.000, 0.790	115.000, 0.677	115.000, 0.623	115.000, 0.631	115.000, 0.429
577	115.200, 0.790	115.200, 0.677	115.200, 0.623	115.200, 0.631	115.200, 0.429
578	115.400, 0.790	115.400, 0.677	115.400, 0.623	115.400, 0.631	115.400, 0.429
579	115.600, 0.790	115.600, 0.677	115.600, 0.623	115.600, 0.631	115.600, 0.430
580	115.800, 0.790	115.800, 0.677	115.800, 0.623	115.800, 0.631	115.800, 0.430
581	116.000, 0.790	116.000, 0.677	116.000, 0.623	116.000, 0.632	116.000, 0.430
582	116.200, 0.790	116.200, 0.677	116.200, 0.624	116.200, 0.632	116.200, 0.430
583	116.400, 0.790	116.400, 0.677	116.400, 0.624	116.400, 0.633	116.400, 0.430
584	116.600, 0.790	116.600, 0.677	116.600, 0.624	116.600, 0.633	116.600, 0.430
585	116.800, 0.790	116.800, 0.677	116.800, 0.624	116.800, 0.633	116.800, 0.430
586	117.000, 0.790	117.000, 0.677	117.000, 0.624	117.000, 0.633	117.000, 0.429
587	117.200, 0.790	117.200, 0.677	117.200, 0.624	117.200, 0.633	117.200, 0.429
588	117.400, 0.790	117.400, 0.678	117.400, 0.623	117.400, 0.633	117.400, 0.429
589	117.600, 0.791	117.600, 0.678	117.600, 0.623	117.600, 0.633	117.600, 0.429
590	117.800, 0.791	117.800, 0.678	117.800, 0.623	117.800, 0.633	117.800, 0.429
591	118.000, 0.792	118.000, 0.678	118.000, 0.623	118.000, 0.632	118.000, 0.429
592	118.200, 0.792	118.200, 0.678	118.200, 0.622	118.200, 0.632	118.200, 0.429
593	118.400, 0.793	118.400, 0.678	118.400, 0.622	118.400, 0.632	118.400, 0.428
594	118.600, 0.793	118.600, 0.678	118.600, 0.622	118.600, 0.632	118.600, 0.428
595	118.800, 0.794	118.800, 0.679	118.800, 0.622	118.800, 0.632	118.800, 0.428
596	119.000, 0.794	119.000, 0.679	119.000, 0.622	119.000, 0.633	119.000, 0.428
597	119.200, 0.795	119.200, 0.679	119.200, 0.622	119.200, 0.633	119.200, 0.428
598	119.400, 0.795	119.400, 0.679	119.400, 0.622	119.400, 0.633	119.400, 0.428
599	119.600, 0.795	119.600, 0.679	119.600, 0.622	119.600, 0.633	119.600, 0.427
600	119.800, 0.795	119.800, 0.680	119.800, 0.623	119.800, 0.633	119.800, 0.427
601	120.000, 0.795	120.000, 0.680	120.000, 0.623	120.000, 0.633	120.000, 0.427
602	120.200, 0.795	120.200, 0.680	120.200, 0.623	120.200, 0.633	120.200, 0.428
603	120.400, 0.795	120.400, 0.680	120.400, 0.623	120.400, 0.633	120.400, 0.428
604	120.600, 0.794	120.600, 0.680	120.600, 0.623	120.600, 0.634	120.600, 0.428
605	120.800, 0.794	120.800, 0.680	120.800, 0.623	120.800, 0.634	120.800, 0.428
606	121.000, 0.794	121.000, 0.680	121.000, 0.623	121.000, 0.634	121.000, 0.429
607	121.200, 0.794	121.200, 0.680	121.200, 0.622	121.200, 0.635	121.200, 0.429
608	121.400, 0.794	121.400, 0.680	121.400, 0.622	121.400, 0.635	121.400, 0.429
609	121.600, 0.794	121.600, 0.679	121.600, 0.622	121.600, 0.635	121.600, 0.429
610	121.800, 0.795	121.800, 0.679	121.800, 0.622	121.800, 0.635	121.800, 0.429
611	122.000, 0.795	122.000, 0.679	122.000, 0.622	122.000, 0.635	122.000, 0.429
612	122.200, 0.795	122.200, 0.679	122.200, 0.622	122.200, 0.635	122.200, 0.429
613	122.400, 0.795	122.400, 0.680	122.400, 0.622	122.400, 0.635	122.400, 0.429
614	122.600, 0.795	122.600, 0.680	122.600, 0.622	122.600, 0.636	122.600, 0.429
615	122.800, 0.795	122.800, 0.680	122.800, 0.621	122.800, 0.636	122.800, 0.428
616	123.000, 0.795	123.000, 0.680	123.000, 0.621	123.000, 0.636	123.000, 0.428
617	123.200, 0.795	123.200, 0.681	123.200, 0.621	123.200, 0.636	123.200, 0.428
618	123.400, 0.796	123.400, 0.681	123.400, 0.621	123.400, 0.636	123.400, 0.427
619	123.600, 0.796	123.600, 0.681	123.600, 0.621	123.600, 0.636	123.600, 0.427
620	123.800, 0.796	123.800, 0.681	123.800, 0.621	123.800, 0.636	123.800, 0.426
621	124.000, 0.796	124.000, 0.681	124.000, 0.621	124.000, 0.636	124.000, 0.426
622	124.200, 0.796	124.200, 0.680	124.200, 0.621	124.200, 0.636	124.200, 0.426
623	124.400, 0.796	124.400, 0.680	124.400, 0.621	124.400, 0.636	124.400, 0.426
624	124.600, 0.796	124.600, 0.680	124.600, 0.621	124.600, 0.636	124.600, 0.426
625	124.800, 0.796	124.800, 0.679	124.800, 0.621	124.800, 0.636	124.800, 0.426
626	125.000, 0.796	125.000, 0.679	125.000, 0.621	125.000, 0.636	125.000, 0.426
627	125.200, 0.797	125.200, 0.679	125.200, 0.622	125.200, 0.636	125.200, 0.426
628	125.400, 0.797	125.400, 0.679	125.400, 0.622	125.400, 0.636	125.400, 0.426
629	125.600, 0.798	125.600, 0.679	125.600, 0.622	125.600, 0.636	125.600, 0.425
630	125.800, 0.798	125.800, 0.679	125.800, 0.622	125.800, 0.636	125.800, 0.426
631	126.000, 0.798	126.000, 0.680	126.000, 0.623	126.000, 0.636	126.000, 0.426
632	126.200, 0.798	126.200, 0.680	126.200, 0.623	126.200, 0.636	126.200, 0.426
633	126.400, 0.798	126.400, 0.680	126.400, 0.623	126.400, 0.636	126.400, 0.426
634	126.600, 0.799	126.600, 0.681	126.600, 0.623	126.600, 0.636	126.600, 0.426
635	126.800, 0.798	126.800, 0.681	126.800, 0.623	126.800, 0.636	126.800, 0.426
636	127.000, 0.798	127.000, 0.681	127.000, 0.623	127.000, 0.636	127.000, 0.426
637	127.200, 0.798	127.200, 0.682	127.200, 0.623	127.200, 0.636	127.200, 0.425
638	127.400, 0.798	127.400, 0.682	127.400, 0.623	127.400, 0.636	127.400, 0.425
639	127.600, 0.798	127.600, 0.682	127.600, 0.623	127.600, 0.636	127.600, 0.425
640	127.800, 0.799	127.800, 0.682	127.800, 0.623	127.800, 0.636	127.800, 0.425
641	128.000, 0.799	128.000, 0.682	128.000, 0.623	128.000, 0.636	128.000, 0.425
642	128.200, 0.799	128.200, 0.682	128.200, 0.623	128.200, 0.636	128.200, 0.425
643	128.400, 0.799	128.400, 0.682	128.400, 0.623	128.400, 0.637	128.400, 0.425
644	128.600, 0.799	128.600, 0.682	128.600, 0.623	128.600, 0.637	128.600, 0.425
645	128.800, 0.799	128.800, 0.682	128.800, 0.624	128.800, 0.637	128.800, 0.424
646	129.000, 0.799	129.000, 0.682	129.000, 0.624	129.000, 0.637	129.000, 0.424
647	129.200, 0.800	129.200, 0.682	129.200, 0.624	129.200, 0.637	129.200, 0.424
648	129.400, 0.800	129.400, 0.682	129.400, 0.624	129.400, 0.637	129.400, 0.424
649	129.600, 0.800	129.600, 0.682	129.600, 0.624	129.600, 0.637	129.600, 0.424
650	129.800, 0.800	129.800, 0.682	129.800, 0.624	129.800, 0.638	129.800, 0.424
651	130.000, 0.800	130.000, 0.682	130.000, 0.624	130.000, 0.638	130.000, 0.424
652	130.200, 0.800	130.200, 0.681	130.200, 0.624	130.200, 0.638	130.200, 0.424
653	130.400, 0.801	130.400, 0.681	130.400, 0.624	130.400, 0.638	130.400, 0.424
654	130.600, 0.801	130.600, 0.681	130.600, 0.624	130.600, 0.639	130.600, 0.424
655	130.800, 0.801	130.800, 0.681	130.800, 0.624	130.800, 0.638	130.800, 0.423
656	131.000, 0.801	131.000, 0.681	131.000, 0.623	131.000, 0.638	131.000, 0.423
657	131.200, 0.801	131.200, 0.681	131.200, 0.623	131.200, 0.638	131.200, 0.423
658	131.400, 0.801	131.400, 0.682	131.400, 0.623	131.400, 0.638	131.400, 0.423
659	131.600, 0.802	131.600, 0.682	131.600, 0.623	131.600, 0.638	131.600, 0.423
660	131.800, 0.802	131.800, 0.682	131.800, 0.623	131.800, 0.638	131.800, 0.423
661	132.000, 0.802	132.000, 0.682	132.000, 0.623	132.000, 0.638	132.000, 0.423
662	132.200, 0.803	132.200, 0.683	132.200, 0.624	132.200, 0.638	132.200, 0.423
663	132.400, 0.803	132.400, 0.683	132.400, 0.624	132.400, 0.638	132.400, 0.423
664	132.600, 0.803	132.600, 0.683	132.600, 0.624	132.600, 0.638	132.600, 0.423
665	132.800, 0.804	132.800, 0.683	132.800, 0.624	132.800, 0.639	132.800, 0.423
666	133.000, 0.804	133.000, 0.683	133.000, 0.624	133.000, 0.639	133.000, 0.423
667	133.200, 0.804	133.200, 0.683	133.200, 0.624	133.200, 0.639	133.200, 0.423
668	133.400, 0.804	133.400, 0.683	133.400, 0.624	133.400, 0.639	133.400, 0.423
669	133.600, 0.804	133.600, 0.683	133.600, 0.624	133.600, 0.639	133.600, 0.423
670	133.800, 0.804	133.800, 0.683	133.800, 0.624	133.800, 0.640	133.800, 0.423
671	134.000, 0.804	134.000, 0.683	134.000, 0.624	134.000, 0.640	134.000, 0.422
672	134.200, 0.804	134.200, 0.683	134.200, 0.624	134.200, 0.640	134.200, 0.422
673	134.400, 0.804	134.400, 0.683	134.400, 0.623	134.400, 0.639	134.400, 0.422
674	134.600, 0.804	134.600, 0.683	134.600, 0.623	134.600, 0.639	134.600, 0.422
675	134.800, 0.804	134.800, 0.683	134.800, 0.623	134.800, 0.639	134.800, 0.422
676	135.000, 0.805	135.000, 0.683	135.000, 0.624	135.000, 0.639	135.000, 0.422
677	135.200, 0.805	135.200, 0.683	135.200, 0.624	135.200, 0.639	135.200, 0.422
678	135.400, 0.805	135.400, 0.683	135.400, 0.624	135.400, 0.638	135.400, 0.422
679	135.600, 0.805	135.600, 0.683	135.600, 0.624	135.600, 0.638	135.600, 0.422
680	135.800, 0.805	135.800, 0.683	135.800, 0.624	135.800, 0.638	135.800, 0.422
681	136.000, 0.805	136.000, 0.683	136.000, 0.624	136.000, 0.638	136.000, 0.422
682	136.200, 0.805	136.200, 0.683	136.200, 0.624	136.200, 0.638	136.200, 0.422
683	136.400, 0.805	136.400, 0.683	136.400, 0.624	136.400, 0.638	136.400, 0.422
684	136.600, 0.805	136.600, 0.683	136.600, 0.624	136.600, 0.638	136.600, 0.422
685	136.800, 0.804	136.800, 0.683	136.800, 0.624	136.800, 0.638	136.800, 0.422
686	137.000, 0.804	137.000, 0.683	137.000, 0.624	137.000, 0.638	137.000, 0.422
687	137.200, 0.804	137.200, 0.684	137.200, 0.624	137.200, 0.638	137.200, 0.422
688	137.400, 0.804	137.400, 0.684	137.400, 0.624	137.400, 0.639	137.400, 0.421
689	137.600, 0.803	137.600, 0.685	137.600, 0.624	137.600, 0.639	137.600, 0.421
690	137.800, 0.803	137.800, 0.685	137.800, 0.623	137.800, 0.639	137.800, 0.421
691	138.000, 0.803	138.000, 0.685	138.000, 0.623	138.000, 0.640	138.000, 0.421
692	138.200, 0.803	138.200, 0.685	138.200, 0.623	138.200, 0.640	138.200, 0.421
693	138.400, 0.803	138.400, 0.685	138.400, 0.623	138.400, 0.640	138.400, 0.421
694	138.600, 0.803	138.600, 0.685	138.600, 0.623	138.600, 0.640	138.600, 0.421
695	138.800, 0.804	138.800, 0.685	138.800, 0.623	138.800, 0.641	138.800, 0.421
696	139.000, 0.804	139.000, 0.685	139.000, 0.623	139.000, 0.641	139.000, 0.421
697	139.200, 0.804	139.200, 0.685	139.200, 0.624	139.200, 0.641	139.200, 0.421
698	139.400, 0.804	139.400, 0.685	139.400, 0.624	139.400, 0.642	139.400, 0.421
699	139.600, 0.804	139.600, 0.684	139.600, 0.624	139.600, 0.642	139.600, 0.421
700	139.800, 0.804	139.800, 0.684	139.800, 0.624	139.800, 0.642	139.800, 0.420
701	140.000, 0.805	140.000, 0.684	140.000, 0.624	140.000, 0.641	140.000, 0.420
702	140.200, 0.805	140.200, 0.684	140.200, 0.624	140.200, 0.641	140.200, 0.420
703	140.400, 0.805	140.400, 0.684	140.400, 0.624	140.400, 0.641	140.400, 0.420
704	140.600, 0.806	140.600, 0.685	140.600, 0.624	140.600, 0.641	140.600, 0.419
705	140.800, 0.806	140.800, 0.685	140.800, 0.624	140.800, 0.641	140.800, 0.419
706	141.000, 0.806	141.000, 0.685	141.000, 0.624	141.000, 0.641	141.000, 0.419
707	141.200, 0.807	141.200, 0.685	141.200, 0.624	141.200, 0.641	141.200, 0.419
708	141.400, 0.807	141.400, 0.685	141.400, 0.624	141.400, 0.641	141.400, 0.419
709	141.600, 0.808	141.600, 0.686	141.600, 0.624	141.600, 0.641	141.600, 0.419
710	141.800, 0.808	141.800, 0.686	141.800, 0.624	141.800, 0.641	141.800, 0.420
711	142.000, 0.808	142.000, 0.686	142.000, 0.624	142.000, 0.641	142.000, 0.420
712	142.200, 0.808	142.200, 0.686	142.200, 0.624	142.200, 0.641	142.200, 0.420
713	142.400, 0.809	142.400, 0.686	142.400, 0.624	142.400, 0.641	142.400, 0.420
714	142.600, 0.809	142.600, 0.685	142.600, 0.624	142.600, 0.641	142.600, 0.420
715	142.800, 0.809	142.800, 0.685	142.800, 0.624	142.800, 0.641	142.800, 0.421
716	143.000, 0.809	143.000, 0.685	143.000, 0.624	143.000, 0.642	143.000, 0.421
717	143.200, 0.809	143.200, 0.685	143.200, 0.624	143.200, 0.642	143.200, 0.420
718	143.400, 0.809	143.400, 0.685	143.400, 0.624	143.400, 0.642	143.400, 0.420
719	143.600, 0.809	143.600, 0.685	143.600, 0.624	143.600, 0.642	143.600, 0.419
720	143.800, 0.809	143.800, 0.685	143.800, 0.624	143.800, 0.642	143.800, 0.419
721	144.000, 0.809	144.000, 0.686	144.000, 0.624	144.000, 0.642	144.000, 0.418
722	144.200, 0.809	144.200, 0.686	144.200, 0.624	144.200, 0.642	144.200, 0.418
723	144.400, 0.809	144.400, 0.686	144.400, 0.624	144.400, 0.642	144.400, 0.418
724	144.600, 0.809	144.600, 0.686	144.600, 0.624	144.600, 0.642	144.600, 0.418
725	144.800, 0.809	144.800, 0.686	144.800, 0.624	144.800, 0.642	144.800, 0.418
726	145.000, 0.809	145.000, 0.686	145.000, 0.624	145.000, 0.642	145.000, 0.418
727	145.200, 0.809	145.200, 0.687	145.200, 0.624	145.200, 0.642	145.200, 0.419
728	145.400, 0.809	145.400, 0.687	145.400, 0.624	145.400, 0.642	145.400, 0.419
729	145.600, 0.809	145.600, 0.687	145.600, 0.624	145.600, 0.642	145.600, 0.420
730	145.800, 0.809	145.800, 0.687	145.800, 0.624	145.800, 0.642	145.800, 0.420
731	146.000, 0.810	146.000, 0.687	146.000, 0.624	146.000, 0.642	146.000, 0.420
732	146.200, 0.810	146.200, 0.687	146.200, 0.624	146.200, 0.642	146.200, 0.420
733	146.400, 0.810	146.400, 0.687	146.400, 0.625	146.400, 0.642	146.400, 0.420
734	146.600, 0.810	146.600, 0.687	146.600, 0.625	146.600, 0.643	146.600, 0.420
735	146.800, 0.810	146.800, 0.687	146.800, 0.625	146.800, 0.643	146.800, 0.420
736	147.000, 0.810	147.000, 0.686	147.000, 0.625	147.000, 0.643	147.000, 0.420
737	147.200, 0.810	147.200, 0.686	147.200, 0.625	147.200, 0.643	147.200, 0.419
738	147.400, 0.810	147.400, 0.686	147.400, 0.625	147.400, 0.643	147.400, 0.419
739	147.600, 0.810	147.600, 0.686	147.600, 0.625	147.600, 0.643	147.600, 0.418
740	147.800, 0.810	147.800, 0.686	147.800, 0.626	147.800, 0.643	147.800, 0.418
741	148.000, 0.810	148.000, 0.686	148.000, 0.626	148.000, 0.643	148.000, 0.418
742	148.200, 0.810	148.200, 0.686	148.200, 0.626	148.200, 0.643	148.200, 0.417
743	148.400, 0.810	148.400, 0.686	148.400, 0.625	148.400, 0.643	148.400, 0.417
744	148.600, 0.810	148.600, 0.686	148.600, 0.625	148.600, 0.643	148.600, 0.417
745	148.800, 0.810	148.800, 0.687	148.800, 0.625	148.800, 0.643	148.800, 0.417
746	149.000, 0.810	149.000, 0.687	149.000, 0.625	149.000, 0.643	149.000, 0.417
747	149.200, 0.811	149.200, 0.687	149.200, 0.624	149.200, 0.643	149.200, 0.418
748	149.400, 0.811	149.400, 0.687	149.400, 0.624	149.400, 0.643	149.400, 0.418
749	149.600, 0.811	149.600, 0.688	149.600, 0.624	149.600, 0.643	149.600, 0.418
750	149.800, 0.812	149.800, 0.688	149.800, 0.624	149.800, 0.643	149.800, 0.418
751	150.000, 0.812	150.000, 0.688	150.000, 0.624	150.000, 0.643	150.000, 0.418
752	150.200, 0.804	150.200, 0.683	150.200, 0.619	150.200, 0.638	150.200, 0.417
753	150.400, 0.796	150.400, 0.676	150.400, 0.612	150.400, 0.631	150.400, 0.415
754	150.600, 0.786	150.600, 0.669	150.600, 0.605	150.600, 0.624	150.600, 0.414
755	150.800, 0.776	150.800, 0.661	150.800, 0.597	150.800, 0.616	150.800, 0.412
756	151.000, 0.765	151.000, 0.652	151.000, 0.588	151.000, 0.608	151.000, 0.410
757	151.200, 0.754	151.200, 0.644	151.200, 0.580	151.200, 0.600	151.200, 0.408
758	151.400, 0.743	151.400, 0.635	151.400, 0.571	151.400, 0.591	151.400, 0.406
759	151.600, 0.733	151.600, 0.626	151.600, 0.562	151.600, 0.583	151.600, 0.404
760	151.800, 0.723	151.800, 0.618	151.800, 0.554	151.800, 0.575	151.800, 0.403
761	152.000, 0.715	152.000, 0.611	152.000, 0.547	152.000, 0.568	152.000, 0.401
762	152.200, 0.708	152.200, 0.604	152.200, 0.540	152.200, 0.562	152.200, 0.400
763	152.400, 0.702	152.400, 0.599	152.400, 0.535	152.400, 0.556	152.400, 0.399
764	152.600, 0.696	152.600, 0.593	152.600, 0.530	152.600, 0.551	152.600, 0.397
765	152.800, 0.691	152.800, 0.588	152.800, 0.525	152.800, 0.546	152.800, 0.396
766	153.000, 0.687	153.000, 0.584	153.000, 0.521	153.000, 0.541	153.000, 0.395
767	153.200, 0.682	153.200, 0.580	153.200, 0.517	153.200, 0.537	153.200, 0.393
768	153.400, 0.678	153.400, 0.576	153.400, 0.513	153.400, 0.533	153.400, 0.392
769	153.600, 0.674	153.600, 0.572	153.600, 0.509	153.600, 0.530	153.600, 0.391
770	153.800, 0.670	153.800, 0.569	153.800, 0.506	153.800, 0.526	153.800, 0.389
771	154.000, 0.667	154.000, 0.565	154.000, 0.503	154.000, 0.523	154.000, 0.388
772	154.200, 0.664	154.200, 0.562	154.200, 0.499	154.200, 0.520	154.200, 0.387
773	154.400, 0.660	154.400, 0.559	154.400, 0.496	154.400, 0.518	154.400, 0.386
774	154.600, 0.657	154.600, 0.556	154.600, 0.493	154.600, 0.515	154.600, 0.386
775	154.800, 0.654	154.800, 0.554	154.800, 0.490	154.800, 0.513	154.800, 0.385
776	155.000, 0.651	155.000, 0.551	155.000, 0.488	155.000, 0.510	155.000, 0.384
777	155.200, 0.648	155.200, 0.549	155.200, 0.485	155.200, 0.508	155.200, 0.383
778	155.400, 0.646	155.400, 0.546	155.400, 0.483	155.400, 0.506	155.400, 0.382
779	155.600, 0.644	155.600, 0.544	155.600, 0.481	155.600, 0.504	155.600, 0.381
780	155.800, 0.641	155.800, 0.542	155.800, 0.479	155.800, 0.503	155.800, 0.380
781	156.000, 0.639	156.000, 0.540	156.000, 0.477	156.000, 0.501	156.000, 0.380
782	156.200, 0.638	156.200, 0.539	156.200, 0.475	156.200, 0.499	156.200, 0.379
783	156.400, 0.636	156.400, 0.537	156.400, 0.473	156.400, 0.497	156.400, 0.378
784	156.600, 0.634	156.600, 0.535	156.600, 0.472	156.600, 0.496	156.600, 0.378
785	156.800, 0.633	156.800, 0.533	156.800, 0.471	156.800, 0.494	156.800, 0.377
786	157.000, 0.631	157.000, 0.532	157.000, 0.469	157.000, 0.492	157.000, 0.376
787	157.200, 0.630	157.200, 0.530	157.200, 0.468	157.200, 0.491	157.200, 0.376
788	157.400, 0.628	157.400, 0.529	157.400, 0.467	157.400, 0.489	157.400, 0.376
789	157.600, 0.627	157.600, 0.527	157.600, 0.466	157.600, 0.488	157.600, 0.375
790	157.800, 0.626	157.800, 0.526	157.800, 0.464	157.800, 0.487	157.800, 0.375
791	158.000, 0.624	158.000, 0.525	158.000, 0.463	158.000, 0.485	158.000, 0.374
792	158.200, 0.623	158.200, 0.523	158.200, 0.462	158.200, 0.484	158.200, 0.374
793	158.400, 0.622	158.400, 0.522	158.400, 0.461	158.400, 0.483	158.400, 0.374
794	158.600, 0.621	158.600, 0.521	158.600, 0.460	158.600, 0.482	158.600, 0.373
795	158.800, 0.619	158.800, 0.520	158.800, 0.459	158.800, 0.481	158.800, 0.373
796	159.000, 0.618	159.000, 0.518	159.000, 0.457	159.000, 0.480	159.000, 0.372
797	159.200, 0.617	159.200, 0.517	159.200, 0.456	159.200, 0.480	159.200, 0.371
798	159.400, 0.616	159.400, 0.516	159.400, 0.455	159.400, 0.479	159.400, 0.370
799	159.600, 0.614	159.600, 0.515	159.600, 0.453	159.600, 0.478	159.600, 0.370
800	159.800, 0.613	159.800, 0.514	159.800, 0.452	159.800, 0.477	159.800, 0.369
801	160.000, 0.612	160.000, 0.513	160.000, 0.451	160.000, 0.476	160.000, 0.368
802	160.200, 0.611	160.200, 0.512	160.200, 0.449	160.200, 0.476	160.200, 0.368
803	160.400, 0.611	160.400, 0.511	160.400, 0.448	160.400, 0.475	160.400, 0.367
804	160.600, 0.610	160.600, 0.510	160.600, 0.447	160.600, 0.474	160.600, 0.366
805	160.800, 0.609	160.800, 0.510	160.800, 0.446	160.800, 0.473	160.800, 0.366
806	161.000, 0.609	161.000, 0.509	161.000, 0.445	161.000, 0.473	161.000, 0.365
807	161.200, 0.608	161.200, 0.509	161.200, 0.444	161.200, 0.472	161.200, 0.365
808	161.400, 0.607	161.400, 0.508	161.400, 0.443	161.400, 0.471	161.400, 0.364
809	161.600, 0.606	161.600, 0.508	161.600, 0.442	161.600, 0.470	161.600, 0.364
810	161.800, 0.605	161.800, 0.507	161.800, 0.441	161.800, 0.469	161.800, 0.364
811	162.000, 0.605	162.000, 0.506	162.000, 0.441	162.000, 0.469	162.000, 0.363
812	162.200, 0.604	162.200, 0.505	162.200, 0.440	162.200, 0.468	162.200, 0.363
813	162.400, 0.603	162.400, 0.504	162.400, 0.440	162.400, 0.467	162.400, 0.363
814	162.600, 0.602	162.600, 0.503	162.600, 0.439	162.600, 0.466	162.600, 0.362
815	162.800, 0.602	162.800, 0.502	162.800, 0.439	162.800, 0.465	162.800, 0.362
816	163.000, 0.601	163.000, 0.502	163.000, 0.438	163.000, 0.464	163.000, 0.361
817	163.200, 0.600	163.200, 0.501	163.200, 0.437	163.200, 0.464	163.200, 0.361
818	163.400, 0.599	163.400, 0.500	163.400, 0.436	163.400, 0.463	163.400, 0.361
819	163.600, 0.598	163.600, 0.499	163.600, 0.436	163.600, 0.462	163.600, 0.360
820	163.800, 0.597	163.800, 0.499	163.800, 0.435	163.800, 0.461	163.800, 0.359
821	164.000, 0.597	164.000, 0.498	164.000, 0.434	164.000, 0.461	164.000, 0.359
822	164.200, 0.596	164.200, 0.498	164.200, 0.433	164.200, 0.460	164.200, 0.358
823	164.400, 0.596	164.400, 0.497	164.400, 0.433	164.400, 0.459	164.400, 0.358
824	164.600, 0.595	164.600, 0.497	164.600, 0.432	164.600, 0.459	164.600, 0.357
825	164.800, 0.595	164.800, 0.496	164.800, 0.431	164.800, 0.458	164.800, 0.357
826	165.000, 0.594	165.000, 0.496	165.000, 0.430	165.000, 0.457	165.000, 0.356
827	165.200, 0.593	165.200, 0.495	165.200, 0.429	165.200, 0.456	165.200, 0.356
828	165.400, 0.592	165.400, 0.494	165.400, 0.428	165.400, 0.456	165.400, 0.356
829	165.600, 0.591	165.600, 0.493	165.600, 0.428	165.600, 0.455	165.600, 0.355
830	165.800, 0.591	165.800, 0.492	165.800, 0.427	165.800, 0.455	165.800, 0.355
831	166.000, 0.590	166.000, 0.491	166.000, 0.426	166.000, 0.454	166.000, 0.355
832	166.200, 0.589	166.200, 0.490	166.200, 0.425	166.200, 0.454	166.200, 0.355
833	166.400, 0.589	166.400, 0.490	166.400, 0.425	166.400, 0.453	166.400, 0.354
834	166.600, 0.588	166.600, 0.489	166.600, 0.424	166.600, 0.453	166.600, 0.354
835	166.800, 0.587	166.800, 0.488	166.800, 0.423	166.800, 0.452	166.800, 0.354
836	167.000, 0.587	167.000, 0.488	167.000, 0.422	167.000, 0.451	167.000, 0.353
837	167.200, 0.586	167.200, 0.487	167.200, 0.421	167.200, 0.451	167.200, 0.353
838	167.400, 0.586	167.400, 0.486	167.400, 0.420	167.400, 0.450	167.400, 0.352
839	167.600, 0.585	167.600, 0.486	167.600, 0.420	167.600, 0.449	167.600, 0.351
840	167.800, 0.585	167.800, 0.486	167.800, 0.419	167.800, 0.449	167.800, 0.351
841	168.000, 0.585	168.000, 0.485	168.000, 0.419	168.000, 0.448	168.000, 0.350
842	168.200, 0.585	168.200, 0.485	168.200, 0.418	168.200, 0.448	168.200, 0.350
843	168.400, 0.584	168.400, 0.485	168.400, 0.418	168.400, 0.447	168.400, 0.349
844	168.600, 0.584	168.600, 0.484	168.600, 0.417	168.600, 0.447	168.600, 0.349
845	168.800, 0.584	168.800, 0.484	168.800, 0.417	168.800, 0.447	168.800, 0.348
846	169.000, 0.583	169.000, 0.483	169.000, 0.416	169.000, 0.446	169.000, 0.348
847	169.200, 0.583	169.200, 0.483	169.200, 0.416	169.200, 0.446	169.200, 0.348
848	169.400, 0.582	169.400, 0.482	169.400, 0.415	169.400, 0.445	169.400, 0.348
849	169.600, 0.581	169.600, 0.481	169.600, 0.415	169.600, 0.445	169.600, 0.348
850	169.800, 0.581	169.800, 0.481	169.800, 0.414	169.800, 0.445	169.800, 0.347
851	170.000, 0.580	170.000, 0.480	170.000, 0.414	170.000, 0.444	170.000, 0.347
852	170.200, 0.580	170.200, 0.480	170.200, 0.413	170.200, 0.443	170.200, 0.347
853	170.400, 0.579	170.400, 0.479	170.400, 0.412	170.400, 0.443	170.400, 0.347
854	170.600, 0.578	170.600, 0.478	170.600, 0.412	170.600, 0.442	170.600, 0.347
855	170.800, 0.578	170.800, 0.477	170.800, 0.411	170.800, 0.441	170.800, 0.347
856	171.000, 0.577	171.000, 0.477	171.000, 0.410	171.000, 0.440	171.000, 0.346
857	171.200, 0.576	171.200, 0.476	171.200, 0.409	171.200, 0.439	171.200, 0.346
858	171.400, 0.576	171.400, 0.475	171.400, 0.409	171.400, 0.439	171.400, 0.345
859	171.600, 0.576	171.600, 0.474	171.600, 0.408	171.600, 0.438	171.600, 0.345
860	171.800, 0.575	171.800, 0.474	171.800, 0.408	171.800, 0.437	171.800, 0.344
861	172.000, 0.575	172.000, 0.473	172.000, 0.407	172.000, 0.437	172.000, 0.344
862	172.200, 0.574	172.200, 0.472	172.200, 0.407	172.200, 0.436	172.200, 0.343
863	172.400, 0.574	172.400, 0.472	172.400, 0.406	172.400, 0.436	172.400, 0.343
864	172.600, 0.573	172.600, 0.472	172.600, 0.406	172.600, 0.435	172.600, 0.342
865	172.800, 0.572	172.800, 0.471	172.800, 0.405	172.800, 0.435	172.800, 0.342
866	173.000, 0.572	173.000, 0.471	173.000, 0.404	173.000, 0.434	173.000, 0.341
867	173.200, 0.571	173.200, 0.470	173.200, 0.404	173.200, 0.434	173.200, 0.341
868	173.400, 0.570	173.400, 0.470	173.400, 0.403	173.400, 0.433	173.400, 0.341
869	173.600, 0.570	173.600, 0.469	173.600, 0.403	173.600, 0.433	173.600, 0.340
870	173.800, 0.569	173.800, 0.469	173.800, 0.402	173.800, 0.432	173.800, 0.340
871	174.000, 0.569	174.000, 0.468	174.000, 0.402	174.000, 0.432	174.000, 0.339
872	174.200, 0.568	174.200, 0.468	174.200, 0.401	174.200, 0.432	174.200, 0.339
873	174.400, 0.568	174.400, 0.467	174.400, 0.401	174.400, 0.431	174.400, 0.338
874	174.600, 0.567	174.600, 0.466	174.600, 0.400	174.600, 0.430	174.600, 0.338
875	174.800, 0.567	174.800, 0.465	174.800, 0.399	174.800, 0.430	174.800, 0.338
876	175.000, 0.567	175.000, 0.465	175.000, 0.399	175.000, 0.429	175.000, 0.338
877	175.200, 0.566	175.200, 0.464	175.200, 0.398	175.200, 0.429	175.200, 0.338
878	175.400, 0.566	175.400, 0.463	175.400, 0.398	175.400, 0.428	175.400, 0.338
879	175.600, 0.565	175.600, 0.462	175.600, 0.397	175.600, 0.428	175.600, 0.337
880	175.800, 0.565	175.800, 0.462	175.800, 0.397	175.800, 0.427	175.800, 0.337
881	176.000, 0.565	176.000, 0.461	176.000, 0.396	176.000, 0.426	176.000, 0.337
882	176.200, 0.565	176.200, 0.461	176.200, 0.395	176.200, 0.425	176.200, 0.337
883	176.400, 0.564	176.400, 0.461	176.400, 0.394	176.400, 0.425	176.400, 0.337
884	176.600, 0.564	176.600, 0.461	176.600, 0.393	176.600, 0.424	176.600, 0.336
885	176.800, 0.564	176.800, 0.461	176.800, 0.392	176.800, 0.424	176.800, 0.336
886	177.000, 0.564	177.000, 0.460	177.000, 0.391	177.000, 0.423	177.000, 0.336
887	177.200, 0.563	177.200, 0.460	177.200, 0.391	177.200, 0.423	177.200, 0.335
888	177.400, 0.563	177.400, 0.459	177.400, 0.390	177.400, 0.423	177.400, 0.335
889	177.600, 0.563	177.600, 0.459	177.600, 0.390	177.600, 0.422	177.600, 0.334
890	177.800, 0.562	177.800, 0.458	177.800, 0.389	177.800, 0.422	177.800, 0.334
891	178.000, 0.562	178.000, 0.458	178.000, 0.389	178.000, 0.421	178.000, 0.333
892	178.200, 0.561	178.200, 0.457	178.200, 0.388	178.200, 0.421	178.200, 0.333
893	178.400, 0.560	178.400, 0.457	178.400, 0.388	178.400, 0.420	178.400, 0.332
894	178.600, 0.559	178.600, 0.456	178.600, 0.388	178.600, 0.420	178.600, 0.332
895	178.800, 0.558	178.800, 0.456	178.800, 0.387	178.800, 0.420	178.800, 0.332
896	179.000, 0.558	179.000, 0.455	179.000, 0.387	179.000, 0.419	179.000, 0.331
897	179.200, 0.557	179.200, 0.454	179.200, 0.386	179.200, 0.418	179.200, 0.331
898	179.400, 0.556	179.400, 0.454	179.400, 0.386	179.400, 0.418	179.400, 0.331
899	179.600, 0.556	179.600, 0.453	179.600, 0.385	179.600, 0.417	179.600, 0.330
900	179.800, 0.555	179.800, 0.453	179.800, 0.385	179.800, 0.416	179.800, 0.330
901	180.000, 0.555	180.000, 0.452	180.000, 0.384	180.000, 0.416	180.000, 0.330
902	180.200, 0.555	180.200, 0.452	180.200, 0.383	180.200, 0.415	180.200, 0.330
903	180.400, 0.555	180.400, 0.452	180.400, 0.382	180.400, 0.414	180.400, 0.329
904	180.600, 0.555	180.600, 0.451	180.600, 0.381	180.600, 0.414	180.600, 0.329
905	180.800, 0.555	180.800, 0.451	180.800, 0.381	180.800, 0.413	180.800, 0.328
906	181.000, 0.555	181.000, 0.450	181.000, 0.380	181.000, 0.413	181.000, 0.328
907	181.200, 0.555	181.200, 0.450	181.200, 0.380	181.200, 0.412	181.200, 0.328
908	181.400, 0.555	181.400, 0.449	181.400, 0.379	181.400, 0.412	181.400, 0.328
909	181.600, 0.554	181.600, 0.449	181.600, 0.379	181.600, 0.411	181.600, 0.327
910	181.800, 0.554	181.800, 0.449	181.800, 0.378	181.800, 0.411	181.800, 0.327
911	182.000, 0.554	182.000, 0.448	182.000, 0.378	182.000, 0.411	182.000, 0.327
912	182.200, 0.553	182.200, 0.448	182.200, 0.377	182.200, 0.411	182.200, 0.327
913	182.400, 0.553	182.400, 0.447	182.400, 0.377	182.400, 0.410	182.400, 0.326
914	182.600, 0.552	182.600, 0.447	182.600, 0.377	182.600, 0.410	182.600, 0.326
915	182.800, 0.551	182.800, 0.446	182.800, 0.376	182.800, 0.410	182.800, 0.325
916	183.000, 0.551	183.000, 0.445	183.000, 0.376	183.000, 0.409	183.000, 0.325
917	183.200, 0.550	183.200, 0.445	183.200, 0.375	183.200, 0.409	183.200, 0.324
918	183.400, 0.550	183.400, 0.444	183.400, 0.375	183.400, 0.408	183.400, 0.324
919	183.600, 0.549	183.600, 0.444	183.600, 0.375	183.600, 0.408	183.600, 0.324
920	183.800, 0.549	183.800, 0.443	183.800, 0.374	183.800, 0.407	183.800, 0.324
921	184.000, 0.548	184.000, 0.443	184.000, 0.374	184.000, 0.406	184.000, 0.323
922	184.200, 0.548	184.200, 0.442	184.200, 0.373	184.200, 0.406	184.200, 0.323
923	184.400, 0.548	184.400, 0.442	184.400, 0.372	184.400, 0.405	184.400, 0.322
924	184.600, 0.547	184.600, 0.442	184.600, 0.372	184.600, 0.405	184.600, 0.322
925	184.800, 0.547	184.800, 0.441	184.800, 0.371	184.800, 0.404	184.800, 0.321
926	185.000, 0.547	185.000, 0.441	185.000, 0.370	185.000, 0.404	185.000, 0.321
927	185.200, 0.547	185.200, 0.441	185.200, 0.370	185.200, 0.403	185.200, 0.320
928	185.400, 0.546	185.400, 0.441	185.400, 0.369	185.400, 0.403	185.400, 0.320
929	185.600, 0.546	185.600, 0.440	185.600, 0.368	185.600, 0.403	185.600, 0.320
930	185.800, 0.545	185.800, 0.440	185.800, 0.368	185.800, 0.402	185.800, 0.320
931	186.000, 0.545	186.000, 0.440	186.000, 0.368	186.000, 0.402	186.000, 0.320
932	186.200, 0.545	186.200, 0.439	186.200, 0.367	186.200, 0.402	186.200, 0.319
933	186.400, 0.544	186.400, 0.439	186.400, 0.367	186.400, 0.401	186.400, 0.319
934	186.600, 0.544	186.600, 0.438	186.600, 0.367	186.600, 0.401	186.600, 0.319
935	186.800, 0.544	186.800, 0.438	186.800, 0.366	186.800, 0.401	186.800, 0.319
936	187.000, 0.544	187.000, 0.437	187.000, 0.366	187.000, 0.400	187.000, 0.319
937	187.200, 0.544	187.200, 0.437	187.200, 0.366	187.200, 0.400	187.200, 0.319
938	187.400, 0.543	187.400, 0.436	187.400, 0.366	187.400, 0.400	187.400, 0.318
939	187.600, 0.543	187.600, 0.435	187.600, 0.366	187.600, 0.399	187.600, 0.318
940	187.800, 0.543	187.800, 0.435	187.800, 0.365	187.800, 0.399	187.800, 0.318
941	188.000, 0.542	188.000, 0.434	188.000, 0.365	188.000, 0.398	188.000, 0.317
942	188.200, 0.542	188.200, 0.433	188.200, 0.364	188.200, 0.398	188.200, 0.317
943	188.400, 0.542	188.400, 0.433	188.400, 0.363	188.400, 0.398	188.400, 0.316
944	188.600, 0.541	188.600, 0.432	188.600, 0.363	188.600, 0.397	188.600, 0.316
945	188.800, 0.541	188.800, 0.432	188.800, 0.362	188.800, 0.397	188.800, 0.315
946	189.000, 0.541	189.000, 0.432	189.000, 0.361	189.000, 0.396	189.000, 0.314
947	189.200, 0.540	189.200, 0.431	189.200, 0.361	189.200, 0.396	189.200, 0.314
948	189.400, 0.539	189.400, 0.431	189.400, 0.360	189.400, 0.395	189.400, 0.314
949	189.600, 0.539	189.600, 0.431	189.600, 0.360	189.600, 0.395	189.600, 0.314
950	189.800, 0.538	189.800, 0.430	189.800, 0.359	189.800, 0.394	189.800, 0.314
951	190.000, 0.538	190.000, 0.430	190.000, 0.359	190.000, 0.394	190.000, 0.314
952	190.200, 0.537	190.200, 0.429	190.200, 0.359	190.200, 0.393	190.200, 0.314
953	190.400, 0.537	190.400, 0.429	190.400, 0.358	190.400, 0.393	190.400, 0.314
954	190.600, 0.537	190.600, 0.429	190.600, 0.358	190.600, 0.392	190.600, 0.314
955	190.800, 0.536	190.800, 0.428	190.800, 0.357	190.800, 0.392	190.800, 0.314
956	191.000, 0.536	191.000, 0.428	191.000, 0.357	191.000, 0.392	191.000, 0.313
957	191.200, 0.535	191.200, 0.427	191.200, 0.356	191.200, 0.391	191.200, 0.313
958	191.400, 0.535	191.400, 0.426	191.400, 0.356	191.400, 0.391	191.400, 0.313
959	191.600, 0.535	191.600, 0.426	191.600, 0.355	191.600, 0.391	191.600, 0.312
960	191.800, 0.534	191.800, 0.425	191.800, 0.354	191.800, 0.390	191.800, 0.312
961	192.000, 0.534	192.000, 0.425	192.000, 0.354	192.000, 0.390	192.000, 0.312
962	192.200, 0.534	192.200, 0.425	192.200, 0.353	192.200, 0.390	192.200, 0.311
963	192.400, 0.533	192.400, 0.424	192.400, 0.353	192.400, 0.389	192.400, 0.311
964	192.600, 0.533	192.600, 0.424	192.600, 0.352	192.600, 0.389	192.600, 0.311
965	192.800, 0.532	192.800, 0.424	192.800, 0.352	192.800, 0.388	192.800, 0.311
966	193.000, 0.531	193.000, 0.424	193.000, 0.351	193.000, 0.388	193.000, 0.311
967	193.200, 0.531	193.200, 0.423	193.200, 0.351	193.200, 0.387	193.200, 0.310
968	193.400, 0.530	193.400, 0.423	193.400, 0.351	193.400, 0.387	193.400, 0.310
969	193.600, 0.530	193.600, 0.422	193.600, 0.350	193.600, 0.386	193.600, 0.310
970	193.800, 0.530	193.800, 0.422	193.800, 0.350	193.800, 0.386	193.800, 0.310
971	194.000, 0.530	194.000, 0.421	194.000, 0.350	194.000, 0.385	194.000, 0.310
972	194.200, 0.530	194.200, 0.420	194.200, 0.349	194.200, 0.385	194.200, 0.310
973	194.400, 0.530	194.400, 0.420	194.400, 0.349	194.400, 0.385	194.400, 0.309
974	194.600, 0.530	194.600, 0.419	194.600, 0.349	194.600, 0.384	194.600, 0.308
975	194.800, 0.530	194.800, 0.419	194.800, 0.349	194.800, 0.384	194.800, 0.308
976	195.000, 0.530	195.000, 0.418	195.000, 0.348	195.000, 0.384	195.000, 0.308
977	195.200, 0.530	195.200, 0.418	195.200, 0.348	195.200, 0.383	195.200, 0.307
978	195.400, 0.530	195.400, 0.418	195.400, 0.347	195.400, 0.383	195.400, 0.307
979	195.600, 0.530	195.600, 0.417	195.600, 0.347	195.600, 0.383	195.600, 0.307
980	195.800, 0.530	195.800, 0.417	195.800, 0.347	195.800, 0.383	195.800, 0.306
981	196.000, 0.529	196.000, 0.416	196.000, 0.346	196.000, 0.382	196.000, 0.306
982	196.200, 0.529	196.200, 0.416	196.200, 0.346	196.200, 0.382	196.200, 0.306
983	196.400, 0.528	196.400, 0.416	196.400, 0.345	196.400, 0.382	196.400, 0.306
984	196.600, 0.528	196.600, 0.415	196.600, 0.345	196.600, 0.381	196.600, 0.305
985	196.800, 0.527	196.800, 0.415	196.800, 0.344	196.800, 0.381	196.800, 0.305
986	197.000, 0.526	197.000, 0.415	197.000, 0.344	197.000, 0.380	197.000, 0.305
987	197.200, 0.525	197.200, 0.414	197.200, 0.343	197.200, 0.380	197.200, 0.305
988	197.400, 0.524	197.400, 0.414	197.400, 0.343	197.400, 0.379	197.400, 0.305
989	197.600, 0.524	197.600, 0.414	197.600, 0.342	197.600, 0.379	197.600, 0.305
990	197.800, 0.523	197.800, 0.413	197.800, 0.342	197.800, 0.378	197.800, 0.305
991	198.000, 0.523	198.000, 0.413	198.000, 0.342	198.000, 0.378	198.000, 0.304
992	198.200, 0.522	198.200, 0.413	198.200, 0.341	198.200, 0.377	198.200, 0.304
993	198.400, 0.522	198.400, 0.412	198.400, 0.341	198.400, 0.376	198.400, 0.304
994	198.600, 0.521	198.600, 0.412	198.600, 0.341	198.600, 0.376	198.600, 0.304
995	198.800, 0.521	198.800, 0.412	198.800, 0.340	198.800, 0.375	198.800, 0.303
996	199.000, 0.521	199.000, 0.411	199.000, 0.340	199.000, 0.375	199.000, 0.303
997	199.200, 0.521	199.200, 0.411	199.200, 0.339	199.200, 0.374	199.200, 0.303
998	199.400, 0.520	199.400, 0.410	199.400, 0.339	199.400, 0.374	199.400, 0.302
999	199.600, 0.520	199.600, 0.409	199.600, 0.338	199.600, 0.373	199.600, 0.302
1000	199.800, 0.520	199.800, 0.409	199.800, 0.337	199.800, 0.373	199.800, 0.301
1001	200.000, 0.520	200.000, 0.409	200.000, 0.337	200.000, 0.373	200.000, 0.301
1002	200.200, 0.519	200.200, 0.408	200.200, 0.336	200.200, 0.372	200.200, 0.301
1003	200.400, 0.519	200.400, 0.408	200.400, 0.335	200.400, 0.372	200.400, 0.301
1004	200.600, 0.519	200.600, 0.407	200.600, 0.335	200.600, 0.372	200.600, 0.301
1005	200.800, 0.518	200.800, 0.407	200.800, 0.335	200.800, 0.372	200.800, 0.301
1006	201.000, 0.518	201.000, 0.407	201.000, 0.334	201.000, 0.371	201.000, 0.301
1007	201.200, 0.518	201.200, 0.406	201.200, 0.334	201.200, 0.371	201.200, 0.301
1008	201.400, 0.518	201.400, 0.406	201.400, 0.334	201.400, 0.371	201.400, 0.301
1009	201.600, 0.517	201.600, 0.406	201.600, 0.334	201.600, 0.371	201.600, 0.301
1010	201.800, 0.517	201.800, 0.405	201.800, 0.334	201.800, 0.371	201.800, 0.300
1011	202.000, 0.517	202.000, 0.405	202.000, 0.334	202.000, 0.370	202.000, 0.300
1012	202.200, 0.516	202.200, 0.405	202.200, 0.333	202.200, 0.370	202.200, 0.299
1013	202.400, 0.516	202.400, 0.405	202.400, 0.333	202.400, 0.370	202.400, 0.299
1014	202.600, 0.516	202.600, 0.404	202.600, 0.333	202.600, 0.369	202.600, 0.299
1015	202.800, 0.515	202.800, 0.404	202.800, 0.332	202.800, 0.369	202.800, 0.299
1016	203.000, 0.515	203.000, 0.404	203.000, 0.332	203.000, 0.368	203.000, 0.298
1017	203.200, 0.515	203.200, 0.403	203.200, 0.331	203.200, 0.368	203.200, 0.298
1018	203.400, 0.514	203.400, 0.403	203.400, 0.330	203.400, 0.367	203.400, 0.298
1019	203.600, 0.514	203.600, 0.402	203.600, 0.330	203.600, 0.367	203.600, 0.297
1020	203.800, 0.514	203.800, 0.402	203.800, 0.329	203.800, 0.367	203.800, 0.297
1021	204.000, 0.513	204.000, 0.402	204.000, 0.329	204.000, 0.366	204.000, 0.297
1022	204.200, 0.513	204.200, 0.401	204.200, 0.328	204.200, 0.366	204.200, 0.297
1023	204.400, 0.513	204.400, 0.401	204.400, 0.328	204.400, 0.365	204.400, 0.297
1024	204.600, 0.513	204.600, 0.400	204.600, 0.327	204.600, 0.365	204.600, 0.297
1025	204.800, 0.513	204.800, 0.400	204.800, 0.327	204.800, 0.365	204.800, 0.297
1026	205.000, 0.512	205.000, 0.400	205.000, 0.326	205.000, 0.365	205.000, 0.297
1027	205.200, 0.512	205.200, 0.399	205.200, 0.326	205.200, 0.364	205.200, 0.297
1028	205.400, 0.512	205.400, 0.399	205.400, 0.326	205.400, 0.364	205.400, 0.296
1029	205.600, 0.512	205.600, 0.399	205.600, 0.326	205.600, 0.364	205.600, 0.296
1030	205.800, 0.512	205.800, 0.398	205.800, 0.325	205.800, 0.363	205.800, 0.295
1031	206.000, 0.512	206.000, 0.398	206.000, 0.325	206.000, 0.363	206.000, 0.295
1032	206.200, 0.511	206.200, 0.398	206.200, 0.325	206.200, 0.363	206.200, 0.294
1033	206.400, 0.511	206.400, 0.398	206.400, 0.324	206.400, 0.362	206.400, 0.294
1034	206.600, 0.511	206.600, 0.398	206.600, 0.323	206.600, 0.362	206.600, 0.293
1035	206.800, 0.510	206.800, 0.397	206.800, 0.323	206.800, 0.361	206.800, 0.293
1036	207.000, 0.510	207.000, 0.397	207.000, 0.323	207.000, 0.361	207.000, 0.293
1037	207.200, 0.509	207.200, 0.397	207.200, 0.322	207.200, 0.360	207.200, 0.292
1038	207.400, 0.509	207.400, 0.396	207.400, 0.322	207.400, 0.359	207.400, 0.292
1039	207.600, 0.508	207.600, 0.396	207.600, 0.322	207.600, 0.359	207.600, 0.291
1040	207.800, 0.508	207.800, 0.396	207.800, 0.321	207.800, 0.358	207.800, 0.291
1041	208.000, 0.508	208.000, 0.395	208.000, 0.321	208.000, 0.358	208.000, 0.291
1042	208.200, 0.507	208.200, 0.395	208.200, 0.321	208.200, 0.358	208.200, 0.291
1043	208.400, 0.507	208.400, 0.394	208.400, 0.320	208.400, 0.358	208.400, 0.291
1044	208.600, 0.506	208.600, 0.394	208.600, 0.320	208.600, 0.358	208.600, 0.291
1045	208.800, 0.506	208.800, 0.393	208.800, 0.320	208.800, 0.358	208.800, 0.291
1046	209.000, 0.506	209.000, 0.393	209.000, 0.319	209.000, 0.358	209.000, 0.290
1047	209.200, 0.506	209.200, 0.392	209.200, 0.319	209.200, 0.357	209.200, 0.290
1048	209.400, 0.505	209.400, 0.392	209.400, 0.319	209.400, 0.357	209.400, 0.290
1049	209.600, 0.505	209.600, 0.392	209.600, 0.319	209.600, 0.357	209.600, 0.290
1050	209.800, 0.505	209.800, 0.392	209.800, 0.319	209.800, 0.356	209.800, 0.290
1051	210.000, 0.505	210.000, 0.391	210.000, 0.318	210.000, 0.356	210.000, 0.290
1052	210.200, 0.504	210.200, 0.391	210.200, 0.318	210.200, 0.356	210.200, 0.289
1053	210.400, 0.504	210.400, 0.391	210.400, 0.318	210.400, 0.356	210.400, 0.289
1054	210.600, 0.504	210.600, 0.391	210.600, 0.318	210.600, 0.355	210.600, 0.289
1055	210.800, 0.503	210.800, 0.391	210.800, 0.318	210.800, 0.355	210.800, 0.288
1056	211.000, 0.503	211.000, 0.390	211.000, 0.317	211.000, 0.355	211.000, 0.288
1057	211.200, 0.503	211.200, 0.390	211.200, 0.317	211.200, 0.354	211.200, 0.288
1058	211.400, 0.503	211.400, 0.389	211.400, 0.316	211.400, 0.354	211.400, 0.288
1059	211.600, 0.503	211.600, 0.389	211.600, 0.316	211.600, 0.353	211.600, 0.288
1060	211.800, 0.503	211.800, 0.388	211.800, 0.315	211.800, 0.353	211.800, 0.288
1061	212.000, 0.502	212.000, 0.388	212.000, 0.315	212.000, 0.353	212.000, 0.288
1062	212.200, 0.502	212.200, 0.387	212.200, 0.315	212.200, 0.352	212.200, 0.288
1063	212.400, 0.502	212.400, 0.387	212.400, 0.314	212.400, 0.352	212.400, 0.288
1064	212.600, 0.502	212.600, 0.387	212.600, 0.314	212.600, 0.352	212.600, 0.288
1065	212.800, 0.502	212.800, 0.386	212.800, 0.314	212.800, 0.351	212.800, 0.287
1066	213.000, 0.502	213.000, 0.386	213.000, 0.314	213.000, 0.351	213.000, 0.287
1067	213.200, 0.501	213.200, 0.386	213.200, 0.313	213.200, 0.350	213.200, 0.287
1068	213.400, 0.501	213.400, 0.386	213.400, 0.313	213.400, 0.350	213.400, 0.287
1069	213.600, 0.500	213.600, 0.385	213.600, 0.313	213.600, 0.350	213.600, 0.287
1070	213.800, 0.500	213.800, 0.385	213.800, 0.312	213.800, 0.349	213.800, 0.287
1071	214.000, 0.499	214.000, 0.385	214.000, 0.312	214.000, 0.349	214.000, 0.286
1072	214.200, 0.499	214.200, 0.384	214.200, 0.312	214.200, 0.349	214.200, 0.286
1073	214.400, 0.498	214.400, 0.384	214.400, 0.311	214.400, 0.349	214.400, 0.286
1074	214.600, 0.498	214.600, 0.383	214.600, 0.311	214.600, 0.348	214.600, 0.286
1075	214.800, 0.497	214.800, 0.383	214.800, 0.311	214.800, 0.348	214.800, 0.286
1076	215.000, 0.497	215.000, 0.383	215.000, 0.310	215.000, 0.347	215.000, 0.285
1077	215.200, 0.496	215.200, 0.382	215.200, 0.310	215.200, 0.347	215.200, 0.285
1078	215.400, 0.496	215.400, 0.382	215.400, 0.310	215.400, 0.347	215.400, 0.285
1079	215.600, 0.496	215.600, 0.382	215.600, 0.310	215.600, 0.347	215.600, 0.285
1080	215.800, 0.495	215.800, 0.381	215.800, 0.309	215.800, 0.346	215.800, 0.285
1081	216.000, 0.495	216.000, 0.381	216.000, 0.309	216.000, 0.346	216.000, 0.284
1082	216.200, 0.495	216.200, 0.381	216.200, 0.309	216.200, 0.346	216.200, 0.284
1083	216.400, 0.495	216.400, 0.381	216.400, 0.308	216.400, 0.345	216.400, 0.284
1084	216.600, 0.495	216.600, 0.381	216.600, 0.308	216.600, 0.345	216.600, 0.283
1085	216.800, 0.496	216.800, 0.381	216.800, 0.308	216.800, 0.345	216.800, 0.283
1086	217.000, 0.496	217.000, 0.380	217.000, 0.307	217.000, 0.344	217.000, 0.282
1087	217.200, 0.496	217.200, 0.380	217.200, 0.307	217.200, 0.344	217.200, 0.282
1088	217.400, 0.495	217.400, 0.380	217.400, 0.307	217.400, 0.344	217.400, 0.282
1089	217.600, 0.495	217.600, 0.379	217.600, 0.306	217.600, 0.344	217.600, 0.282
1090	217.800, 0.495	217.800, 0.379	217.800, 0.305	217.800, 0.344	217.800, 0.282
1091	218.000, 0.495	218.000, 0.379	218.000, 0.305	218.000, 0.344	218.000, 0.282
1092	218.200, 0.495	218.200, 0.378	218.200, 0.304	218.200, 0.343	218.200, 0.282
1093	218.400, 0.495	218.400, 0.378	218.400, 0.304	218.400, 0.343	218.400, 0.282
1094	218.600, 0.495	218.600, 0.377	218.600, 0.303	218.600, 0.343	218.600, 0.282
1095	218.800, 0.494	218.800, 0.377	218.800, 0.303	218.800, 0.343	218.800, 0.282
1096	219.000, 0.494	219.000, 0.377	219.000, 0.302	219.000, 0.342	219.000, 0.282
1097	219.200, 0.493	219.200, 0.377	219.200, 0.302	219.200, 0.342	219.200, 0.281
1098	219.400, 0.492	219.400, 0.376	219.400, 0.302	219.400, 0.342	219.400, 0.281
1099	219.600, 0.492	219.600, 0.376	219.600, 0.302	219.600, 0.342	219.600, 0.281
1100	219.800, 0.491	219.800, 0.376	219.800, 0.301	219.800, 0.341	219.800, 0.280
1101	220.000, 0.491	220.000, 0.376	220.000, 0.301	220.000, 0.341	220.000, 0.280
1102	220.200, 0.491	220.200, 0.375	220.200, 0.301	220.200, 0.340	220.200, 0.279
1103	220.400, 0.490	220.400, 0.375	220.400, 0.301	220.400, 0.340	220.400, 0.279
1104	220.600, 0.490	220.600, 0.375	220.600, 0.301	220.600, 0.339	220.600, 0.279
1105	220.800, 0.490	220.800, 0.374	220.800, 0.301	220.800, 0.338	220.800, 0.279
1106	221.000, 0.490	221.000, 0.374	221.000, 0.301	221.000, 0.338	221.000, 0.278
1107	221.200, 0.489	221.200, 0.374	221.200, 0.301	221.200, 0.338	221.200, 0.278
1108	221.400, 0.489	221.400, 0.373	221.400, 0.301	221.400, 0.337	221.400, 0.278
1109	221.600, 0.489	221.600, 0.373	221.600, 0.301	221.600, 0.337	221.600, 0.278
1110	221.800, 0.488	221.800, 0.373	221.800, 0.301	221.800, 0.337	221.800, 0.278
1111	222.000, 0.488	222.000, 0.372	222.000, 0.300	222.000, 0.337	222.000, 0.277
1112	222.200, 0.488	222.200, 0.372	222.200, 0.299	222.200, 0.337	222.200, 0.277
1113	222.400, 0.488	222.400, 0.372	222.400, 0.299	222.400, 0.337	222.400, 0.277
1114	222.600, 0.488	222.600, 0.371	222.600, 0.298	222.600, 0.337	222.600, 0.277
1115	222.800, 0.488	222.800, 0.371	222.800, 0.297	222.800, 0.337	222.800, 0.276
1116	223.000, 0.488	223.000, 0.371	223.000, 0.297	223.000, 0.337	223.000, 0.276
1117	223.200, 0.487	223.200, 0.371	223.200, 0.297	223.200, 0.337	223.200, 0.276
1118	223.400, 0.487	223.400, 0.371	223.400, 0.296	223.400, 0.337	223.400, 0.276
1119	223.600, 0.487	223.600, 0.371	223.600, 0.296	223.600, 0.337	223.600, 0.275
1120	223.800, 0.487	223.800, 0.371	223.800, 0.296	223.800, 0.337	223.800, 0.275
1121	224.000, 0.486	224.000, 0.371	224.000, 0.296	224.000, 0.336	224.000, 0.275
1122	224.200, 0.486	224.200, 0.371	224.200, 0.296	224.200, 0.336	224.200, 0.275
1123	224.400, 0.486	224.400, 0.371	224.400, 0.295	224.400, 0.335	224.400, 0.275
1124	224.600, 0.486	224.600, 0.370	224.600, 0.295	224.600, 0.335	224.600, 0.275
1125	224.800, 0.486	224.800, 0.370	224.800, 0.295	224.800, 0.334	224.800, 0.275
1126	225.000, 0.485	225.000, 0.370	225.000, 0.295	225.000, 0.334	225.000, 0.275
1127	225.200, 0.485	225.200, 0.369	225.200, 0.294	225.200, 0.333	225.200, 0.275
1128	225.400, 0.485	225.400, 0.369	225.400, 0.294	225.400, 0.333	225.400, 0.275
1129	225.600, 0.485	225.600, 0.368	225.600, 0.294	225.600, 0.333	225.600, 0.275
1130	225.800, 0.484	225.800, 0.368	225.800, 0.293	225.800, 0.333	225.800, 0.274
1131	226.000, 0.484	226.000, 0.367	226.000, 0.293	226.000, 0.333	226.000, 0.274
1132	226.200, 0.484	226.200, 0.367	226.200, 0.292	226.200, 0.332	226.200, 0.274
1133	226.400, 0.484	226.400, 0.366	226.400, 0.292	226.400, 0.332	226.400, 0.273
1134	226.600, 0.484	226.600, 0.366	226.600, 0.292	226.600, 0.332	226.600, 0.273
1135	226.800, 0.483	226.800, 0.366	226.800, 0.292	226.800, 0.331	226.800, 0.273
1136	227.000, 0.483	227.000, 0.365	227.000, 0.292	227.000, 0.331	227.000, 0.273
1137	227.200, 0.483	227.200, 0.365	227.200, 0.292	227.200, 0.331	227.200, 0.273
1138	227.400, 0.482	227.400, 0.365	227.400, 0.291	227.400, 0.331	227.400, 0.273
1139	227.600, 0.482	227.600, 0.364	227.600, 0.292	227.600, 0.330	227.600, 0.273
1140	227.800, 0.481	227.800, 0.364	227.800, 0.292	227.800, 0.330	227.800, 0.273
1141	228.000, 0.481	228.000, 0.364	228.000, 0.292	228.000, 0.330	228.000, 0.273
1142	228.200, 0.481	228.200, 0.364	228.200, 0.291	228.200, 0.330	228.200, 0.273
1143	228.400, 0.480	228.400, 0.364	228.400, 0.291	228.400, 0.329	228.400, 0.273
1144	228.600, 0.480	228.600, 0.364	228.600, 0.291	228.600, 0.329	228.600, 0.273
1145	228.800, 0.480	228.800, 0.364	228.800, 0.290	228.800, 0.329	228.800, 0.272
1146	229.000, 0.480	229.000, 0.363	229.000, 0.290	229.000, 0.328	229.000, 0.272
1147	229.200, 0.480	229.200, 0.363	229.200, 0.289	229.200, 0.328	229.200, 0.272
1148	229.400, 0.480	229.400, 0.363	229.400, 0.289	229.400, 0.328	229.400, 0.271
1149	229.600, 0.479	229.600, 0.363	229.600, 0.288	229.600, 0.327	229.600, 0.271
1150	229.800, 0.479	229.800, 0.363	229.800, 0.288	229.800, 0.327	229.800, 0.270
1151	230.000, 0.479	230.000, 0.363	230.000, 0.288	230.000, 0.327	230.000, 0.270
1152	230.200, 0.479	230.200, 0.362	230.200, 0.287	230.200, 0.326	230.200, 0.270
1153	230.400, 0.478	230.400, 0.362	230.400, 0.287	230.400, 0.326	230.400, 0.269
1154	230.600, 0.478	230.600, 0.362	230.600, 0.286	230.600, 0.325	230.600, 0.269
1155	230.800, 0.478	230.800, 0.362	230.800, 0.286	230.800, 0.325	230.800, 0.269
1156	231.000, 0.477	231.000, 0.361	231.000, 0.285	231.000, 0.324	231.000, 0.269
1157	231.200, 0.477	231.200, 0.361	231.200, 0.285	231.200, 0.324	231.200, 0.270
1158	231.400, 0.477	231.400, 0.361	231.400, 0.285	231.400, 0.324	231.400, 0.270
1159	231.600, 0.476	231.600, 0.361	231.600, 0.285	231.600, 0.324	231.600, 0.270
1160	231.800, 0.476	231.800, 0.360	231.800, 0.285	231.800, 0.324	231.800, 0.270
1161	232.000, 0.476	232.000, 0.360	232.000, 0.284	232.000, 0.324	232.000, 0.270
1162	232.200, 0.476	232.200, 0.360	232.200, 0.284	232.200, 0.324	232.200, 0.269
1163	232.400, 0.476	232.400, 0.360	232.400, 0.284	232.400, 0.324	232.400, 0.269
1164	232.600, 0.476	232.600, 0.360	232.600, 0.283	232.600, 0.323	232.600, 0.269
1165	232.800, 0.476	232.800, 0.360	232.800, 0.283	232.800, 0.323	232.800, 0.269
1166	233.000, 0.476	233.000, 0.359	233.000, 0.283	233.000, 0.323	233.000, 0.268
1167	233.200, 0.476	233.200, 0.359	233.200, 0.283	233.200, 0.323	233.200, 0.268
1168	233.400, 0.476	233.400, 0.359	233.400, 0.283	233.400, 0.323	233.400, 0.267
1169	233.600, 0.476	233.600, 0.358	233.600, 0.283	233.600, 0.323	233.600, 0.267
1170	233.800, 0.476	233.800, 0.358	233.800, 0.283	233.800, 0.323	233.800, 0.267
1171	234.000, 0.476	234.000, 0.357	234.000, 0.283	234.000, 0.323	234.000, 0.267
1172	234.200, 0.476	234.200, 0.357	234.200, 0.283	234.200, 0.323	234.200, 0.266
1173	234.400, 0.476	234.400, 0.357	234.400, 0.283	234.400, 0.323	234.400, 0.266
1174	234.600, 0.476	234.600, 0.357	234.600, 0.282	234.600, 0.322	234.600, 0.266
1175	234.800, 0.475	234.800, 0.356	234.800, 0.282	234.800, 0.322	234.800, 0.266
1176	235.000, 0.475	235.000, 0.356	235.000, 0.282	235.000, 0.322	235.000, 0.266
1177	235.200, 0.475	235.200, 0.356	235.200, 0.282	235.200, 0.322	235.200, 0.266
1178	235.400, 0.474	235.400, 0.355	235.400, 0.282	235.400, 0.321	235.400, 0.266
1179	235.600, 0.474	235.600, 0.355	235.600, 0.281	235.600, 0.321	235.600, 0.266
1180	235.800, 0.473	235.800, 0.355	235.800, 0.281	235.800, 0.321	235.800, 0.266
1181	236.000, 0.473	236.000, 0.354	236.000, 0.281	236.000, 0.320	236.000, 0.266
1182	236.200, 0.473	236.200, 0.354	236.200, 0.280	236.200, 0.320	236.200, 0.266
1183	236.400, 0.473	236.400, 0.354	236.400, 0.280	236.400, 0.319	236.400, 0.266
1184	236.600, 0.472	236.600, 0.354	236.600, 0.279	236.600, 0.319	236.600, 0.266
1185	236.800, 0.472	236.800, 0.353	236.800, 0.279	236.800, 0.319	236.800, 0.266
1186	237.000, 0.472	237.000, 0.353	237.000, 0.278	237.000, 0.318	237.000, 0.266
1187	237.200, 0.471	237.200, 0.353	237.200, 0.278	237.200, 0.318	237.200, 0.266
1188	237.400, 0.471	237.400, 0.353	237.400, 0.277	237.400, 0.318	237.400, 0.266
1189	237.600, 0.471	237.600, 0.353	237.600, 0.277	237.600, 0.318	237.600, 0.265
1190	237.800, 0.471	237.800, 0.353	237.800, 0.276	237.800, 0.318	237.800, 0.265
1191	238.000, 0.471	238.000, 0.353	238.000, 0.276	238.000, 0.318	238.000, 0.265
1192	238.200, 0.470	238.200, 0.353	238.200, 0.276	238.200, 0.318	238.200, 0.265
1193	238.400, 0.470	238.400, 0.353	238.400, 0.276	238.400, 0.318	238.400, 0.264
1194	238.600, 0.470	238.600, 0.353	238.600, 0.276	238.600, 0.318	238.600, 0.264
1195	238.800, 0.470	238.800, 0.352	238.800, 0.276	238.800, 0.317	238.800, 0.263
1196	239.000, 0.469	239.000, 0.352	239.000, 0.276	239.000, 0.317	239.000, 0.263
1197	239.200, 0.469	239.200, 0.352	239.200, 0.275	239.200, 0.317	239.200, 0.263
1198	239.400, 0.469	239.400, 0.352	239.400, 0.275	239.400, 0.317	239.400, 0.263
1199	239.600, 0.469	239.600, 0.352	239.600, 0.275	239.600, 0.316	239.600, 0.262
1200	239.800, 0.469	239.800, 0.352	239.800, 0.275	239.800, 0.316	239.800, 0.262
1201	240.000, 0.469	240.000, 0.352	240.000, 0.276	240.000, 0.316	240.000, 0.262
1202	240.200, 0.469	240.200, 0.351	240.200, 0.276	240.200, 0.316	240.200, 0.262
1203	240.400, 0.469	240.400, 0.351	240.400, 0.275	240.400, 0.315	240.400, 0.262
1204	240.600, 0.469	240.600, 0.351	240.600, 0.275	240.600, 0.315	240.600, 0.262
1205	240.800, 0.469	240.800, 0.351	240.800, 0.275	240.800, 0.315	240.800, 0.262
1206	241.000, 0.468	241.000, 0.350	241.000, 0.275	241.000, 0.315	241.000, 0.263
1207	241.200, 0.469	241.200, 0.350	241.200, 0.274	241.200, 0.314	241.200, 0.263
1208	241.400, 0.468	241.400, 0.350	241.400, 0.274	241.400, 0.314	241.400, 0.263
1209	241.600, 0.468	241.600, 0.349	241.600, 0.274	241.600, 0.314	241.600, 0.263
1210	241.800, 0.468	241.800, 0.349	241.800, 0.273	241.800, 0.314	241.800, 0.262
1211	242.000, 0.468	242.000, 0.349	242.000, 0.273	242.000, 0.314	242.000, 0.262
1212	242.200, 0.468	242.200, 0.348	242.200, 0.272	242.200, 0.314	242.200, 0.262
1213	242.400, 0.467	242.400, 0.348	242.400, 0.272	242.400, 0.314	242.400, 0.262
1214	242.600, 0.467	242.600, 0.348	242.600, 0.271	242.600, 0.314	242.600, 0.261
1215	242.800, 0.467	242.800, 0.347	242.800, 0.271	242.800, 0.313	242.800, 0.261
1216	243.000, 0.466	243.000, 0.347	243.000, 0.271	243.000, 0.313	243.000, 0.261
1217	243.200, 0.466	243.200, 0.347	243.200, 0.271	243.200, 0.312	243.200, 0.261
1218	243.400, 0.466	243.400, 0.346	243.400, 0.271	243.400, 0.312	243.400, 0.261
1219	243.600, 0.466	243.600, 0.346	243.600, 0.270	243.600, 0.312	243.600, 0.261
1220	243.800, 0.466	243.800, 0.346	243.800, 0.270	243.800, 0.312	243.800, 0.261
1221	244.000, 0.465	244.000, 0.346	244.000, 0.270	244.000, 0.311	244.000, 0.261
1222	244.200, 0.465	244.200, 0.346	244.200, 0.270	244.200, 0.311	244.200, 0.261
1223	244.400, 0.465	244.400, 0.345	244.400, 0.270	244.400, 0.311	244.400, 0.261
1224	244.600, 0.464	244.600, 0.345	244.600, 0.270	244.600, 0.310	244.600, 0.261
1225	244.800, 0.464	244.800, 0.344	244.800, 0.270	244.800, 0.310	244.800, 0.261
1226	245.000, 0.464	245.000, 0.344	245.000, 0.269	245.000, 0.310	245.000, 0.261
1227	245.200, 0.464	245.200, 0.343	245.200, 0.269	245.200, 0.309	245.200, 0.260
1228	245.400, 0.464	245.400, 0.343	245.400, 0.269	245.400, 0.309	245.400, 0.260
1229	245.600, 0.463	245.600, 0.343	245.600, 0.269	245.600, 0.309	245.600, 0.260
1230	245.800, 0.463	245.800, 0.343	245.800, 0.268	245.800, 0.309	245.800, 0.260
1231	246.000, 0.463	246.000, 0.342	246.000, 0.268	246.000, 0.309	246.000, 0.260
1232	246.200, 0.463	246.200, 0.342	246.200, 0.268	246.200, 0.309	246.200, 0.260
1233	246.400, 0.462	246.400, 0.342	246.400, 0.268	246.400, 0.308	246.400, 0.260
1234	246.600, 0.462	246.600, 0.342	246.600, 0.268	246.600, 0.308	246.600, 0.260
1235	246.800, 0.462	246.800, 0.342	246.800, 0.268	246.800, 0.308	246.800, 0.259
1236	247.000, 0.462	247.000, 0.341	247.000, 0.268	247.000, 0.308	247.000, 0.259
1237	247.200, 0.462	247.200, 0.341	247.200, 0.268	247.200, 0.308	247.200, 0.259
1238	247.400, 0.461	247.400, 0.341	247.400, 0.268	247.400, 0.308	247.400, 0.259
1239	247.600, 0.461	247.600, 0.341	247.600, 0.268	247.600, 0.308	247.600, 0.258
1240	247.800, 0.461	247.800, 0.341	247.800, 0.267	247.800, 0.308	247.800, 0.258
1241	248.000, 0.461	248.000, 0.341	248.000, 0.267	248.000, 0.308	248.000, 0.258
1242	248.200, 0.461	248.200, 0.340	248.200, 0.267	248.200, 0.308	248.200, 0.258
1243	248.400, 0.460	248.400, 0.340	248.400, 0.267	248.400, 0.308	248.400, 0.258
1244	248.600, 0.460	248.600, 0.340	248.600, 0.266	248.600, 0.307	248.600, 0.258
1245	248.800, 0.459	248.800, 0.340	248.800, 0.266	248.800, 0.307	248.800, 0.258
1246	249.000, 0.459	249.000, 0.339	249.000, 0.266	249.000, 0.307	249.000, 0.258
1247	249.200, 0.458	249.200, 0.339	249.200, 0.265	249.200, 0.307	249.200, 0.258
1248	249.400, 0.458	249.400, 0.339	249.400, 0.265	249.400, 0.306	249.400, 0.258
1249	249.600, 0.458	249.600, 0.339	249.600, 0.265	249.600, 0.306	249.600, 0.258
1250	249.800, 0.458	249.800, 0.339	249.800, 0.265	249.800, 0.306	249.800, 0.258
1251	250.000, 0.458	250.000, 0.339	250.000, 0.265	250.000, 0.305	250.000, 0.257
1252	250.200, 0.458	250.200, 0.339	250.200, 0.265	250.200, 0.305	250.200, 0.257
1253	250.400, 0.458	250.400, 0.339	250.400, 0.264	250.400, 0.305	250.400, 0.257
1254	250.600, 0.458	250.600, 0.338	250.600, 0.264	250.600, 0.304	250.600, 0.256
1255	250.800, 0.458	250.800, 0.338	250.800, 0.264	250.800, 0.304	250.800, 0.256
1256	251.000, 0.458	251.000, 0.338	251.000, 0.264	251.000, 0.304	251.000, 0.256
1257	251.200, 0.458	251.200, 0.338	251.200, 0.264	251.200, 0.304	251.200, 0.255
1258	251.400, 0.458	251.400, 0.338	251.400, 0.264	251.400, 0.304	251.400, 0.255
1259	251.600, 0.458	251.600, 0.338	251.600, 0.263	251.600, 0.304	251.600, 0.255
1260	251.800, 0.458	251.800, 0.338	251.800, 0.263	251.800, 0.303	251.800, 0.254
1261	252.000, 0.458	252.000, 0.338	252.000, 0.263	252.000, 0.303	252.000, 0.254
1262	252.200, 0.458	252.200, 0.338	252.200, 0.263	252.200, 0.303	252.200, 0.254
1263	252.400, 0.458	252.400, 0.338	252.400, 0.262	252.400, 0.303	252.400, 0.254
1264	252.600, 0.457	252.600, 0.338	252.600, 0.262	252.600, 0.303	252.600, 0.254
1265	252.800, 0.457	252.800, 0.338	252.800, 0.262	252.800, 0.302	252.800, 0.254
1266	253.000, 0.457	253.000, 0.338	253.000, 0.261	253.000, 0.302	253.000, 0.254
1267	253.200, 0.457	253.200, 0.337	253.200, 0.261	253.200, 0.302	253.200, 0.254
1268	253.400, 0.457	253.400, 0.337	253.400, 0.261	253.400, 0.302	253.400, 0.254
1269	253.600, 0.456	253.600, 0.337	253.600, 0.261	253.600, 0.301	253.600, 0.254
1270	253.800, 0.456	253.800, 0.337	253.800, 0.261	253.800, 0.301	253.800, 0.254
1271	254.000, 0.456	254.000, 0.337	254.000, 0.260	254.000, 0.301	254.000, 0.253
1272	254.200, 0.455	254.200, 0.337	254.200, 0.260	254.200, 0.301	254.200, 0.254
1273	254.400, 0.455	254.400, 0.336	254.400, 0.260	254.400, 0.301	254.400, 0.254
1274	254.600, 0.454	254.600, 0.336	254.600, 0.260	254.600, 0.301	254.600, 0.254
1275	254.800, 0.454	254.800, 0.336	254.800, 0.260	254.800, 0.301	254.800, 0.254
1276	255.000, 0.453	255.000, 0.336	255.000, 0.260	255.000, 0.301	255.000, 0.254
1277	255.200, 0.453	255.200, 0.336	255.200, 0.260	255.200, 0.301	255.200, 0.254
1278	255.400, 0.453	255.400, 0.336	255.400, 0.260	255.400, 0.301	255.400, 0.254
1279	255.600, 0.453	255.600, 0.335	255.600, 0.260	255.600, 0.301	255.600, 0.254
1280	255.800, 0.453	255.800, 0.335	255.800, 0.260	255.800, 0.301	255.800, 0.254
1281	256.000, 0.453	256.000, 0.335	256.000, 0.260	256.000, 0.300	256.000, 0.254
1282	256.200, 0.453	256.200, 0.334	256.200, 0.260	256.200, 0.300	256.200, 0.254
1283	256.400, 0.452	256.400, 0.334	256.400, 0.259	256.400, 0.300	256.400, 0.254
1284	256.600, 0.453	256.600, 0.334	256.600, 0.259	256.600, 0.300	256.600, 0.253
1285	256.800, 0.453	256.800, 0.334	256.800, 0.259	256.800, 0.299	256.800, 0.253
1286	257.000, 0.453	257.000, 0.333	257.000, 0.259	257.000, 0.299	257.000, 0.253
1287	257.200, 0.453	257.200, 0.333	257.200, 0.259	257.200, 0.298	257.200, 0.253
1288	257.400, 0.452	257.400, 0.332	257.400, 0.258	257.400, 0.298	257.400, 0.253
1289	257.600, 0.452	257.600, 0.332	257.600, 0.258	257.600, 0.298	257.600, 0.252
1290	257.800, 0.452	257.800, 0.332	257.800, 0.258	257.800, 0.297	257.800, 0.252
1291	258.000, 0.452	258.000, 0.331	258.000, 0.257	258.000, 0.297	258.000, 0.252
1292	258.200, 0.452	258.200, 0.331	258.200, 0.257	258.200, 0.297	258.200, 0.252
1293	258.400, 0.452	258.400, 0.331	258.400, 0.257	258.400, 0.296	258.400, 0.252
1294	258.600, 0.452	258.600, 0.331	258.600, 0.256	258.600, 0.296	258.600, 0.252
1295	258.800, 0.452	258.800, 0.330	258.800, 0.256	258.800, 0.296	258.800, 0.251
1296	259.000, 0.452	259.000, 0.330	259.000, 0.256	259.000, 0.296	259.000, 0.251
1297	259.200, 0.452	259.200, 0.330	259.200, 0.255	259.200, 0.295	259.200, 0.251
1298	259.400, 0.452	259.400, 0.330	259.400, 0.255	259.400, 0.295	259.400, 0.250
1299	259.600, 0.452	259.600, 0.330	259.600, 0.255	259.600, 0.295	259.600, 0.250
1300	259.800, 0.451	259.800, 0.330	259.800, 0.254	259.800, 0.295	259.800, 0.250
1301	260.000, 0.451	260.000, 0.330	260.000, 0.254	260.000, 0.295	260.000, 0.250
1302	260.200, 0.451	260.200, 0.330	260.200, 0.254	260.200, 0.295	260.200, 0.250
1303	260.400, 0.451	260.400, 0.330	260.400, 0.254	260.400, 0.295	260.400, 0.250
1304	260.600, 0.450	260.600, 0.330	260.600, 0.254	260.600, 0.295	260.600, 0.250
1305	260.800, 0.450	260.800, 0.330	260.800, 0.254	260.800, 0.295	260.800, 0.250
1306	261.000, 0.450	261.000, 0.330	261.000, 0.254	261.000, 0.295	261.000, 0.250
1307	261.200, 0.450	261.200, 0.329	261.200, 0.254	261.200, 0.295	261.200, 0.250
1308	261.400, 0.449	261.400, 0.329	261.400, 0.254	261.400, 0.295	261.400, 0.250
1309	261.600, 0.449	261.600, 0.329	261.600, 0.254	261.600, 0.295	261.600, 0.250
1310	261.800, 0.449	261.800, 0.329	261.800, 0.254	261.800, 0.295	261.800, 0.250
1311	262.000, 0.449	262.000, 0.329	262.000, 0.254	262.000, 0.294	262.000, 0.250
1312	262.200, 0.448	262.200, 0.329	262.200, 0.254	262.200, 0.294	262.200, 0.250
1313	262.400, 0.448	262.400, 0.328	262.400, 0.254	262.400, 0.294	262.400, 0.250
1314	262.600, 0.448	262.600, 0.328	262.600, 0.253	262.600, 0.294	262.600, 0.249
1315	262.800, 0.448	262.800, 0.327	262.800, 0.253	262.800, 0.294	262.800, 0.249
1316	263.000, 0.448	263.000, 0.327	263.000, 0.253	263.000, 0.293	263.000, 0.249
1317	263.200, 0.448	263.200, 0.327	263.200, 0.253	263.200, 0.293	263.200, 0.249
1318	263.400, 0.448	263.400, 0.326	263.400, 0.252	263.400, 0.293	263.400, 0.249
1319	263.600, 0.448	263.600, 0.326	263.600, 0.252	263.600, 0.293	263.600, 0.248
1320	263.800, 0.448	263.800, 0.326	263.800, 0.251	263.800, 0.293	263.800, 0.249
1321	264.000, 0.448	264.000, 0.326	264.000, 0.251	264.000, 0.292	264.000, 0.249
1322	264.200, 0.448	264.200, 0.325	264.200, 0.251	264.200, 0.292	264.200, 0.249
1323	264.400, 0.447	264.400, 0.325	264.400, 0.250	264.400, 0.293	264.400, 0.249
1324	264.600, 0.447	264.600, 0.325	264.600, 0.250	264.600, 0.293	264.600, 0.249
1325	264.800, 0.447	264.800, 0.325	264.800, 0.250	264.800, 0.293	264.800, 0.248
1326	265.000, 0.447	265.000, 0.325	265.000, 0.250	265.000, 0.293	265.000, 0.248
1327	265.200, 0.446	265.200, 0.325	265.200, 0.250	265.200, 0.293	265.200, 0.248
1328	265.400, 0.446	265.400, 0.325	265.400, 0.250	265.400, 0.293	265.400, 0.248
1329	265.600, 0.446	265.600, 0.325	265.600, 0.250	265.600, 0.292	265.600, 0.248
1330	265.800, 0.445	265.800, 0.325	265.800, 0.250	265.800, 0.292	265.800, 0.248
1331	266.000, 0.445	266.000, 0.325	266.000, 0.249	266.000, 0.292	266.000, 0.247
1332	266.200, 0.444	266.200, 0.325	266.200, 0.249	266.200, 0.292	266.200, 0.247
1333	266.400, 0.444	266.400, 0.324	266.400, 0.249	266.400, 0.291	266.400, 0.247
1334	266.600, 0.444	266.600, 0.324	266.600, 0.249	266.600, 0.291	266.600, 0.247
1335	266.800, 0.443	266.800, 0.324	266.800, 0.248	266.800, 0.291	266.800, 0.246
1336	,	,	,	,	,
1337	,	,	,	,	,
1338	,	,	,	,	,
1339	,	,	,	,	,
1340	,	,	,	,	,
1341	,	,	,	,	,
1342	,	,	,	,	,
1343	,	,	,	,	,
1344	,	,	,	,	,
1345	,	,	,	,	,
1346	,	,	,	,	,
1347	,	,	,	,	,
1348	,	,	,	,	,
1349	,	,	,	,	,
1350	,	,	,	,	,
1351	,	,	,	,	,
1352	,	,	,	,	,
1353	,	,	,	,	,
1354	,	,	,	,	,
1355	,	,	,	,	,
1356	,	,	,	,	,
1357	,	,	,	,	,
1358	,	,	,	,	,
1359	,	,	,	,	,
1360	,	,	,	,	,
1361	,	,	,	,	,
1362	,	,	,	,	,
1363	,	,	,	,	,
1364	,	,	,	,	,
1365	,	,	,	,	,
1366	,	,	,	,	,
1367	,	,	,	,	,
1368	,	,	,	,	,
1369	,	,	,	,	,
1370	,	,	,	,	,
1371	,	,	,	,	,
1372	,	,	,	,	,
1373	,	,	,	,	,
1374	,	,	,	,	,
1375	,	,	,	,	,
1376	,	,	,	,	,
1377	,	,	,	,	,
1378	,	,	,	,	,
1379	,	,	,	,	,
1380	,	,	,	,	,
1381	,	,	,	,	,
1382	,	,	,	,	,
1383	,	,	,	,	,
1384	,	,	,	,	,
1385	,	,	,	,	,
1386	,	,	,	,	,
1387	,	,	,	,	,
1388	,	,	,	,	,
1389	,	,	,	,	,
1390	,	,	,	,	,
1391	,	,	,	,	,
1392	,	,	,	,	,
1393	,	,	,	,	,
1394	,	,	,	,	,
1395	,	,	,	,	,
1396	,	,	,	,	,
1397	,	,	,	,	,
1398	,	,	,	,	,
1399	,	,	,	,	,
1400	,	,	,	,	,
1401	,	,	,	,	,
1402	,	,	,	,	,
1403	,	,	,	,	,
1404	,	,	,	,	,
1405	,	,	,	,	,
1406	,	,	,	,	,
1407	,	,	,	,	,
1408	,	,	,	,	,
1409	,	,	,	,	,
1410	,	,	,	,	,
1411	,	,	,	,	,
1412	,	,	,	,	,
1413	,	,	,	,	,
1414	,	,	,	,	,
1415	,	,	,	,	,
1416	,	,	,	,	,
1417	,	,	,	,	,
1418	,	,	,	,	,
1419	,	,	,	,	,
1420	,	,	,	,	,
1421	,	,	,	,	,
1422	,	,	,	,	,
1423	,	,	,	,	,
1424	,	,	,	,	,
1425	,	,	,	,	,
1426	,	,	,	,	,
1427	,	,	,	,	,
1428	,	,	,	,	,
1429	,	,	,	,	,
1430	,	,	,	,	,
1431	,	,	,	,	,
1432	,	,	,	,	,
1433	,	,	,	,	,
1434	,	,	,	,	,
1435	,	,	,	,	,
1436	,	,	,	,	,
1437	,	,	,	,	,
1438	,	,	,	,	,
1439	,	,	,	,	,
1440	,	,	,	,	,
1441	,	,	,	,	,
1442	,	,	,	,	,
1443	,	,	,	,	,
1444	,	,	,	,	,
1445	,	,	,	,	,
1446	,	,	,	,	,
1447	,	,	,	,	,
1448	,	,	,	,	,
1449	,	,	,	,	,
1450	,	,	,	,	,
1451	,	,	,	,	,
1452	,	,	,	,	,
1453	,	,	,	,	,
1454	,	,	,	,	,
1455	,	,	,	,	,
1456	,	,	,	,	,
1457	,	,	,	,	,
1458	,	,	,	,	,
1459	,	,	,	,	,
1460	,	,	,	,	,
1461	,	,	,	,	,
1462	,	,	,	,	,
1463	,	,	,	,	,
1464	,	,	,	,	,
1465	,	,	,	,	,
1466	,	,	,	,	,
1467	,	,	,	,	,
1468	,	,	,	,	,
1469	,	,	,	,	,
1470	,	,	,	,	,
1471	,	,	,	,	,
1472	,	,	,	,	,
1473	,	,	,	,	,
1474	,	,	,	,	,
1475	,	,	,	,	,
1476	,	,	,	,	,
1477	,	,	,	,	,
1478	,	,	,	,	,
1479	,	,	,	,	,
1480	,	,	,	,	,
1481	,	,	,	,	,
1482	,	,	,	,	,
1483	,	,	,	,	,
1484	,	,	,	,	,
1485	,	,	,	,	,
1486	,	,	,	,	,
1487	,	,	,	,	,
1488	,	,	,	,	,
1489	,	,	,	,	,
1490	,	,	,	,	,
1491	,	,	,	,	,
1492	,	,	,	,	,
1493	,	,	,	,	,
1494	,	,	,	,	,
1495	,	,	,	,	,
1496	,	,	,	,	,
1497	,	,	,	,	,
1498	,	,	,	,	,
1499	,	,	,	,	,
1500	,	,	,	,	,
1501	,	,	,	,	,
1502	,	,	,	,	,
1503	,	,	,	,	,
1504	,	,	,	,	,
1505	,	,	,	,	,
1506	,	,	,	,	,
1507	,	,	,	,	,
1508	,	,	,	,	,
1509	,	,	,	,	,
1510	,	,	,	,	,
1511	,	,	,	,	,
1512	,	,	,	,	,
1513	,	,	,	,	,
1514	,	,	,	,	,
1515	,	,	,	,	,
1516	,	,	,	,	,
1517	,	,	,	,	,
1518	,	,	,	,	,
1519	,	,	,	,	,
1520	,	,	,	,	,
1521	,	,	,	,	,
1522	,	,	,	,	,
1523	,	,	,	,	,
1524	,	,	,	,	,
1525	,	,	,	,	,
1526	,	,	,	,	,
1527	,	,	,	,	,
1528	,	,	,	,	,
1529	,	,	,	,	,
1530	,	,	,	,	,
1531	,	,	,	,	,
1532	,	,	,	,	,
1533	,	,	,	,	,
1534	,	,	,	,	,
1535	,	,	,	,	,
1536	,	,	,	,	,
1537	,	,	,	,	,
1538	,	,	,	,	,
1539	,	,	,	,	,
1540	,	,	,	,	,
1541	,	,	,	,	,
1542	,	,	,	,	,
1543	,	,	,	,	,
1544	,	,	,	,	,
1545	,	,	,	,	,
1546	,	,	,	,	,
1547	,	,	,	,	,
1548	,	,	,	,	,
1549	,	,	,	,	,
1550	,	,	,	,	,
1551	,	,	,	,	,
1552	,	,	,	,	,
1553	,	,	,	,	,
1554	,	,	,	,	,
1555	,	,	,	,	,
1556	,	,	,	,	,
1557	,	,	,	,	,
1558	,	,	,	,	,
1559	,	,	,	,	,
1560	,	,	,	,	,
1561	,	,	,	,	,
1562	,	,	,	,	,
1563	,	,	,	,	,
1564	,	,	,	,	,
1565	,	,	,	,	,
1566	,	,	,	,	,
1567	,	,	,	,	,
1568	,	,	,	,	,
1569	,	,	,	,	,
1570	,	,	,	,	,
1571	,	,	,	,	,
1572	,	,	,	,	,
1573	,	,	,	,	,
1574	,	,	,	,	,
1575	,	,	,	,	,
1576	,	,	,	,	,
1577	,	,	,	,	,
1578	,	,	,	,	,
1579	,	,	,	,	,
1580	,	,	,	,	,
1581	,	,	,	,	,
1582	,	,	,	,	,
1583	,	,	,	,	,
1584	,	,	,	,	,
1585	,	,	,	,	,
1586	,	,	,	,	,
1587	,	,	,	,	,
1588	,	,	,	,	,
1589	,	,	,	,	,
1590	,	,	,	,	,
1591	,	,	,	,	,
1592	,	,	,	,	,
1593	,	,	,	,	,
1594	,	,	,	,	,
1595	,	,	,	,	,
1596	,	,	,	,	,
1597	,	,	,	,	,
1598	,	,	,	,	,
1599	,	,	,	,	,
1600	,	,	,	,	,
1601	,	,	,	,	,
1602	,	,	,	,	,
1603	,	,	,	,	,
1604	,	,	,	,	,
1605	,	,	,	,	,
1606	,	,	,	,	,
1607	,	,	,	,	,
1608	,	,	,	,	,
1609	,	,	,	,	,
1610	,	,	,	,	,
1611	,	,	,	,	,
1612	,	,	,	,	,
1613	,	,	,	,	,
1614	,	,	,	,	,
1615	,	,	,	,	,
1616	,	,	,	,	,
1617	,	,	,	,	,
1618	,	,	,	,	,
1619	,	,	,	,	,
1620	,	,	,	,	,
1621	,	,	,	,	,
1622	,	,	,	,	,
1623	,	,	,	,	,
1624	,	,	,	,	,
1625	,	,	,	,	,
1626	,	,	,	,	,
1627	,	,	,	,	,
1628	,	,	,	,	,
1629	,	,	,	,	,
1630	,	,	,	,	,
1631	,	,	,	,	,
1632	,	,	,	,	,
1633	,	,	,	,	,
1634	,	,	,	,	,
1635	,	,	,	,	,
1636	,	,	,	,	,
1637	,	,	,	,	,
1638	,	,	,	,	,
1639	,	,	,	,	,
1640	,	,	,	,	,
1641	,	,	,	,	,
1642	,	,	,	,	,
1643	,	,	,	,	,
1644	,	,	,	,	,
1645	,	,	,	,	,
1646	,	,	,	,	,
1647	,	,	,	,	,
1648	,	,	,	,	,
1649	,	,	,	,	,
1650	,	,	,	,	,
1651	,	,	,	,	,
1652	,	,	,	,	,
1653	,	,	,	,	,
1654	,	,	,	,	,
1655	,	,	,	,	,
1656	,	,	,	,	,
1657	,	,	,	,	,
1658	,	,	,	,	,
1659	,	,	,	,	,
1660	,	,	,	,	,
1661	,	,	,	,	,
1662	,	,	,	,	,
1663	,	,	,	,	,
1664	,	,	,	,	,
1665	,	,	,	,	,
1666	,	,	,	,	,
1667	,	,	,	,	,
1668	,	,	,	,	,
1669	,	,	,	,	,
1670	,	,	,	,	,
1671	,	,	,	,	,
1672	,	,	,	,	,
1673	,	,	,	,	,
1674	,	,	,	,	,
1675	,	,	,	,	,
1676	,	,	,	,	,
1677	,	,	,	,	,
1678	,	,	,	,	,
1679	,	,	,	,	,
1680	,	,	,	,	,
1681	,	,	,	,	,
1682	,	,	,	,	,
1683	,	,	,	,	,
1684	,	,	,	,	,
1685	,	,	,	,	,
1686	,	,	,	,	,
1687	,	,	,	,	,
1688	,	,	,	,	,
1689	,	,	,	,	,
1690	,	,	,	,	,
1691	,	,	,	,	,
1692	,	,	,	,	,
1693	,	,	,	,	,
1694	,	,	,	,	,
1695	,	,	,	,	,
1696	,	,	,	,	,
1697	,	,	,	,	,
1698	,	,	,	,	,
1699	,	,	,	,	,
1700	,	,	,	,	,
1701	,	,	,	,	,
1702	,	,	,	,	,
1703	,	,	,	,	,
1704	,	,	,	,	,
1705	,	,	,	,	,
1706	,	,	,	,	,
1707	,	,	,	,	,
1708	,	,	,	,	,
1709	,	,	,	,	,
1710	,	,	,	,	,
1711	,	,	,	,	,
1712	,	,	,	,	,
1713	,	,	,	,	,
1714	,	,	,	,	,
1715	,	,	,	,	,
1716	,	,	,	,	,
1717	,	,	,	,	,
1718	,	,	,	,	,
1719	,	,	,	,	,
1720	,	,	,	,	,
1721	,	,	,	,	,
1722	,	,	,	,	,
1723	,	,	,	,	,
1724	,	,	,	,	,
1725	,	,	,	,	,
1726	,	,	,	,	,
1727	,	,	,	,	,
1728	,	,	,	,	,
1729	,	,	,	,	,
1730	,	,	,	,	,
1731	,	,	,	,	,
1732	,	,	,	,	,
1733	,	,	,	,	,
1734	,	,	,	,	,
1735	,	,	,	,	,
1736	,	,	,	,	,
1737	,	,	,	,	,
1738	,	,	,	,	,
1739	,	,	,	,	,
1740	,	,	,	,	,
1741	,	,	,	,	,
1742	,	,	,	,	,
1743	,	,	,	,	,
1744	,	,	,	,	,
1745	,	,	,	,	,
1746	,	,	,	,	,
1747	,	,	,	,	,
1748	,	,	,	,	,
1749	,	,	,	,	,
1750	,	,	,	,	,
1751	,	,	,	,	,
1752	,	,	,	,	,
1753	,	,	,	,	,
1754	,	,	,	,	,
1755	,	,	,	,	,
1756	,	,	,	,	,
1757	,	,	,	,	,
1758	,	,	,	,	,
1759	,	,	,	,	,
1760	,	,	,	,	,
1761	,	,	,	,	,
1762	,	,	,	,	,
1763	,	,	,	,	,
1764	,	,	,	,	,
1765	,	,	,	,	,
1766	,	,	,	,	,
1767	,	,	,	,	,
1768	,	,	,	,	,
1769	,	,	,	,	,
1770	,	,	,	,	,
1771	,	,	,	,	,
1772	,	,	,	,	,
1773	,	,	,	,	,
1774	,	,	,	,	,
1775	,	,	,	,	,
1776	,	,	,	,	,
1777	,	,	,	,	,
1778	,	,	,	,	,
1779	,	,	,	,	,
1780	,	,	,	,	,
1781	,	,	,	,	,
1782	,	,	,	,	,
1783	,	,	,	,	,
1784	,	,	,	,	,
1785	,	,	,	,	,
1786	,	,	,	,	,
1787	,	,	,	,	,
1788	,	,	,	,	,
1789	,	,	,	,	,
1790	,	,	,	,	,
1791	,	,	,	,	,
1792	,	,	,	,	,
1793	,	,	,	,	,
1794	,	,	,	,	,
1795	,	,	,	,	,
1796	,	,	,	,	,
1797	,	,	,	,	,
1798	,	,	,	,	,
1799	,	,	,	,	,
1800	,	,	,	,	,
1801	,	,	,	,	,
1802	,	,	,	,	,
1803	,	,	,	,	,
1804	,	,	,	,	,
1805	,	,	,	,	,
1806	,	,	,	,	,
1807	,	,	,	,	,
1808	,	,	,	,	,
1809	,	,	,	,	,
1810	,	,	,	,	,
1811	,	,	,	,	,
1812	,	,	,	,	,
1813	,	,	,	,	,
1814	,	,	,	,	,
1815	,	,	,	,	,
1816	,	,	,	,	,
1817	,	,	,	,	,
1818	,	,	,	,	,
1819	,	,	,	,	,
1820	,	,	,	,	,
1821	,	,	,	,	,
1822	,	,	,	,	,
1823	,	,	,	,	,
1824	,	,	,	,	,
1825	,	,	,	,	,
1826	,	,	,	,	,
1827	,	,	,	,	,
1828	,	,	,	,	,
1829	,	,	,	,	,
1830	,	,	,	,	,
1831	,	,	,	,	,
1832	,	,	,	,	,
1833	,	,	,	,	,
1834	,	,	,	,	,
1835	,	,	,	,	,
1836	,	,	,	,	,
1837	,	,	,	,	,
1838	,	,	,	,	,
1839	,	,	,	,	,
1840	,	,	,	,	,
1841	,	,	,	,	,
1842	,	,	,	,	,
1843	,	,	,	,	,
1844	,	,	,	,	,
1845	,	,	,	,	,
1846	,	,	,	,	,
1847	,	,	,	,	,
1848	,	,	,	,	,
1849	,	,	,	,	,
1850	,	,	,	,	,
1851	,	,	,	,	,
1852	,	,	,	,	,
1853	,	,	,	,	,
1854	,	,	,	,	,
1855	,	,	,	,	,
1856	,	,	,	,	,
1857	,	,	,	,	,
1858	,	,	,	,	,
1859	,	,	,	,	,
1860	,	,	,	,	,
1861	,	,	,	,	,
1862	,	,	,	,	,
1863	,	,	,	,	,
1864	,	,	,	,	,
1865	,	,	,	,	,
1866	,	,	,	,	,
1867	,	,	,	,	,
1868	,	,	,	,	,
1869	,	,	,	,	,
1870	,	,	,	,	,
1871	,	,	,	,	,
1872	,	,	,	,	,
1873	,	,	,	,	,
1874	,	,	,	,	,
1875	,	,	,	,	,
1876	,	,	,	,	,
1877	,	,	,	,	,
1878	,	,	,	,	,
1879	,	,	,	,	,
1880	,	,	,	,	,
1881	,	,	,	,	,
1882	,	,	,	,	,
1883	,	,	,	,	,
1884	,	,	,	,	,
1885	,	,	,	,	,
1886	,	,	,	,	,
1887	,	,	,	,	,
1888	,	,	,	,	,
1889	,	,	,	,	,
1890	,	,	,	,	,
1891	,	,	,	,	,
1892	,	,	,	,	,
1893	,	,	,	,	,
1894	,	,	,	,	,
1895	,	,	,	,	,
1896	,	,	,	,	,
1897	,	,	,	,	,
1898	,	,	,	,	,
1899	,	,	,	,	,
1900	,	,	,	,	,
1901	,	,	,	,	,
1902	,	,	,	,	,
1903	,	,	,	,	,
1904	,	,	,	,	,
1905	,	,	,	,	,
1906	,	,	,	,	,
1907	,	,	,	,	,
1908	,	,	,	,	,
1909	,	,	,	,	,
1910	,	,	,	,	,
1911	,	,	,	,	,
1912	,	,	,	,	,
1913	,	,	,	,	,
1914	,	,	,	,	,
1915	,	,	,	,	,
1916	,	,	,	,	,
1917	,	,	,	,	,
1918	,	,	,	,	,
1919	,	,	,	,	,
1920	,	,	,	,	,
1921	,	,	,	,	,
1922	,	,	,	,	,
1923	,	,	,	,	,
1924	,	,	,	,	,
1925	,	,	,	,	,
1926	,	,	,	,	,
1927	,	,	,	,	,
1928	,	,	,	,	,
1929	,	,	,	,	,
1930	,	,	,	,	,
1931	,	,	,	,	,
1932	,	,	,	,	,
1933	,	,	,	,	,
1934	,	,	,	,	,
1935	,	,	,	,	,
1936	,	,	,	,	,
1937	,	,	,	,	,
1938	,	,	,	,	,
1939	,	,	,	,	,
1940	,	,	,	,	,
1941	,	,	,	,	,
1942	,	,	,	,	,
1943	,	,	,	,	,
1944	,	,	,	,	,
1945	,	,	,	,	,
1946	,	,	,	,	,
1947	,	,	,	,	,
1948	,	,	,	,	,
1949	,	,	,	,	,
1950	,	,	,	,	,
1951	,	,	,	,	,
1952	,	,	,	,	,
1953	,	,	,	,	,
1954	,	,	,	,	,
1955	,	,	,	,	,
1956	,	,	,	,	,
1957	,	,	,	,	,
1958	,	,	,	,	,
1959	,	,	,	,	,
1960	,	,	,	,	,
1961	,	,	,	,	,
1962	,	,	,	,	,
1963	,	,	,	,	,
1964	,	,	,	,	,
1965	,	,	,	,	,
1966	,	,	,	,	,
1967	,	,	,	,	,
1968	,	,	,	,	,
1969	,	,	,	,	,
1970	,	,	,	,	,
1971	,	,	,	,	,
1972	,	,	,	,	,
1973	,	,	,	,	,
1974	,	,	,	,	,
1975	,	,	,	,	,
1976	,	,	,	,	,
1977	,	,	,	,	,
1978	,	,	,	,	,
1979	,	,	,	,	,
1980	,	,	,	,	,
1981	,	,	,	,	,
1982	,	,	,	,	,
1983	,	,	,	,	,
1984	,	,	,	,	,
1985	,	,	,	,	,
1986	,	,	,	,	,
1987	,	,	,	,	,
1988	,	,	,	,	,
1989	,	,	,	,	,
1990	,	,	,	,	,
1991	,	,	,	,	,
1992	,	,	,	,	,
1993	,	,	,	,	,
1994	,	,	,	,	,
1995	,	,	,	,	,
1996	,	,	,	,	,
1997	,	,	,	,	,
1998	,	,	,	,	,
1999	,	,	,	,	,
[truncated: 13,001 more rows]
