# Supplementary material for: ParB spreading on DNA requires cytidine triphosphate in vitro
Source: eLife journal article supplement (doi:10.7554/elife.53515), 2020-02-20
Supplement: fig1-data1 [file Fig1_panelC.xlsx]

## Sheet: FORMAT
	sample ID #1	sample ID #2	sample ID #3
data point	time point (sec), wavelength shift (nm)	time point (sec), wavelength shift (nm)	time point (sec), wavelength shift (nm)
1
2
3
.
.
.

## Sheet: Fig1_panelC_rep1
	tetO28 tetO28 TetR no NTP	tetO28 tetO28 TetR GTP	tetO28 TetR ATP	tetO28 TetR UTP	tetO28 TetR CTP	CTP only
1	0.000, 0.020	0.000, 0.017	0.000, -0.009	0.000, 0.026	0.000, 0.046	0.000, 0.022
2	0.200, 0.020	0.200, 0.017	0.200, -0.008	0.200, 0.025	0.200, 0.045	0.200, 0.022
3	0.400, 0.020	0.400, 0.017	0.400, -0.008	0.400, 0.024	0.400, 0.043	0.400, 0.022
4	0.600, 0.021	0.600, 0.017	0.600, -0.007	0.600, 0.023	0.600, 0.042	0.600, 0.023
5	0.800, 0.021	0.800, 0.016	0.800, -0.006	0.800, 0.022	0.800, 0.040	0.800, 0.023
6	1.000, 0.021	1.000, 0.016	1.000, -0.005	1.000, 0.021	1.000, 0.039	1.000, 0.023
7	1.200, 0.021	1.200, 0.016	1.200, -0.005	1.200, 0.020	1.200, 0.037	1.200, 0.023
8	1.400, 0.021	1.400, 0.016	1.400, -0.004	1.400, 0.019	1.400, 0.036	1.400, 0.024
9	1.600, 0.021	1.600, 0.016	1.600, -0.003	1.600, 0.018	1.600, 0.034	1.600, 0.024
10	1.800, 0.020	1.800, 0.015	1.800, -0.003	1.800, 0.018	1.800, 0.033	1.800, 0.024
11	2.000, 0.020	2.000, 0.015	2.000, -0.002	2.000, 0.017	2.000, 0.032	2.000, 0.024
12	2.200, 0.019	2.200, 0.014	2.200, -0.002	2.200, 0.016	2.200, 0.031	2.200, 0.024
13	2.400, 0.019	2.400, 0.014	2.400, -0.002	2.400, 0.016	2.400, 0.031	2.400, 0.024
14	2.600, 0.018	2.600, 0.014	2.600, -0.002	2.600, 0.016	2.600, 0.030	2.600, 0.024
15	2.800, 0.018	2.800, 0.014	2.800, -0.001	2.800, 0.015	2.800, 0.030	2.800, 0.024
16	3.000, 0.018	3.000, 0.013	3.000, -0.001	3.000, 0.015	3.000, 0.029	3.000, 0.023
17	3.200, 0.017	3.200, 0.013	3.200, -0.001	3.200, 0.015	3.200, 0.029	3.200, 0.023
18	3.400, 0.017	3.400, 0.013	3.400, -0.000	3.400, 0.014	3.400, 0.029	3.400, 0.022
19	3.600, 0.016	3.600, 0.012	3.600, -0.000	3.600, 0.014	3.600, 0.028	3.600, 0.022
20	3.800, 0.016	3.800, 0.012	3.800, -0.000	3.800, 0.014	3.800, 0.028	3.800, 0.021
21	4.000, 0.016	4.000, 0.011	4.000, -0.000	4.000, 0.013	4.000, 0.028	4.000, 0.021
22	4.200, 0.015	4.200, 0.011	4.200, -0.000	4.200, 0.013	4.200, 0.027	4.200, 0.020
23	4.400, 0.015	4.400, 0.011	4.400, -0.000	4.400, 0.013	4.400, 0.027	4.400, 0.020
24	4.600, 0.015	4.600, 0.011	4.600, 0.000	4.600, 0.012	4.600, 0.026	4.600, 0.020
25	4.800, 0.015	4.800, 0.011	4.800, 0.000	4.800, 0.012	4.800, 0.025	4.800, 0.020
26	5.000, 0.015	5.000, 0.011	5.000, 0.001	5.000, 0.012	5.000, 0.025	5.000, 0.020
27	5.200, 0.015	5.200, 0.010	5.200, 0.001	5.200, 0.012	5.200, 0.024	5.200, 0.020
28	5.400, 0.015	5.400, 0.010	5.400, 0.001	5.400, 0.012	5.400, 0.023	5.400, 0.020
29	5.600, 0.015	5.600, 0.010	5.600, 0.001	5.600, 0.012	5.600, 0.023	5.600, 0.020
30	5.800, 0.015	5.800, 0.010	5.800, 0.002	5.800, 0.012	5.800, 0.022	5.800, 0.020
31	6.000, 0.014	6.000, 0.010	6.000, 0.002	6.000, 0.012	6.000, 0.022	6.000, 0.020
32	6.200, 0.014	6.200, 0.010	6.200, 0.002	6.200, 0.012	6.200, 0.022	6.200, 0.020
33	6.400, 0.014	6.400, 0.010	6.400, 0.002	6.400, 0.012	6.400, 0.021	6.400, 0.019
34	6.600, 0.013	6.600, 0.010	6.600, 0.002	6.600, 0.012	6.600, 0.021	6.600, 0.019
35	6.800, 0.013	6.800, 0.010	6.800, 0.002	6.800, 0.012	6.800, 0.021	6.800, 0.019
36	7.000, 0.012	7.000, 0.010	7.000, 0.002	7.000, 0.012	7.000, 0.021	7.000, 0.018
37	7.200, 0.012	7.200, 0.010	7.200, 0.002	7.200, 0.012	7.200, 0.021	7.200, 0.018
38	7.400, 0.011	7.400, 0.010	7.400, 0.002	7.400, 0.012	7.400, 0.020	7.400, 0.017
39	7.600, 0.011	7.600, 0.009	7.600, 0.001	7.600, 0.012	7.600, 0.020	7.600, 0.017
40	7.800, 0.011	7.800, 0.009	7.800, 0.001	7.800, 0.012	7.800, 0.019	7.800, 0.016
41	8.000, 0.010	8.000, 0.009	8.000, 0.001	8.000, 0.012	8.000, 0.019	8.000, 0.016
42	8.200, 0.010	8.200, 0.009	8.200, 0.001	8.200, 0.012	8.200, 0.018	8.200, 0.016
43	8.400, 0.010	8.400, 0.009	8.400, 0.001	8.400, 0.012	8.400, 0.018	8.400, 0.015
44	8.600, 0.010	8.600, 0.009	8.600, 0.001	8.600, 0.011	8.600, 0.017	8.600, 0.015
45	8.800, 0.010	8.800, 0.009	8.800, 0.001	8.800, 0.011	8.800, 0.017	8.800, 0.014
46	9.000, 0.011	9.000, 0.009	9.000, 0.001	9.000, 0.011	9.000, 0.016	9.000, 0.014
47	9.200, 0.011	9.200, 0.009	9.200, 0.001	9.200, 0.011	9.200, 0.016	9.200, 0.014
48	9.400, 0.011	9.400, 0.008	9.400, 0.001	9.400, 0.010	9.400, 0.016	9.400, 0.013
49	9.600, 0.011	9.600, 0.008	9.600, 0.001	9.600, 0.010	9.600, 0.016	9.600, 0.013
50	9.800, 0.011	9.800, 0.008	9.800, 0.001	9.800, 0.010	9.800, 0.016	9.800, 0.013
51	10.000, 0.011	10.000, 0.008	10.000, 0.001	10.000, 0.009	10.000, 0.016	10.000, 0.012
52	10.200, 0.010	10.200, 0.007	10.200, 0.001	10.200, 0.009	10.200, 0.016	10.200, 0.012
53	10.400, 0.010	10.400, 0.007	10.400, 0.001	10.400, 0.009	10.400, 0.016	10.400, 0.011
54	10.600, 0.009	10.600, 0.007	10.600, 0.001	10.600, 0.009	10.600, 0.016	10.600, 0.011
55	10.800, 0.009	10.800, 0.007	10.800, 0.001	10.800, 0.009	10.800, 0.016	10.800, 0.011
56	11.000, 0.008	11.000, 0.007	11.000, 0.001	11.000, 0.009	11.000, 0.015	11.000, 0.011
57	11.200, 0.008	11.200, 0.007	11.200, 0.001	11.200, 0.009	11.200, 0.015	11.200, 0.010
58	11.400, 0.008	11.400, 0.007	11.400, 0.001	11.400, 0.008	11.400, 0.015	11.400, 0.010
59	11.600, 0.007	11.600, 0.007	11.600, 0.001	11.600, 0.008	11.600, 0.014	11.600, 0.010
60	11.800, 0.007	11.800, 0.007	11.800, 0.001	11.800, 0.008	11.800, 0.014	11.800, 0.010
61	12.000, 0.007	12.000, 0.007	12.000, 0.001	12.000, 0.007	12.000, 0.013	12.000, 0.010
62	12.200, 0.007	12.200, 0.007	12.200, 0.001	12.200, 0.007	12.200, 0.013	12.200, 0.010
63	12.400, 0.007	12.400, 0.007	12.400, 0.001	12.400, 0.007	12.400, 0.013	12.400, 0.010
64	12.600, 0.007	12.600, 0.007	12.600, 0.001	12.600, 0.007	12.600, 0.012	12.600, 0.009
65	12.800, 0.007	12.800, 0.007	12.800, 0.001	12.800, 0.007	12.800, 0.012	12.800, 0.009
66	13.000, 0.007	13.000, 0.006	13.000, 0.001	13.000, 0.007	13.000, 0.012	13.000, 0.010
67	13.200, 0.007	13.200, 0.006	13.200, 0.002	13.200, 0.007	13.200, 0.012	13.200, 0.010
68	13.400, 0.006	13.400, 0.006	13.400, 0.002	13.400, 0.007	13.400, 0.012	13.400, 0.009
69	13.600, 0.006	13.600, 0.005	13.600, 0.002	13.600, 0.007	13.600, 0.011	13.600, 0.009
70	13.800, 0.006	13.800, 0.005	13.800, 0.003	13.800, 0.007	13.800, 0.011	13.800, 0.009
71	14.000, 0.006	14.000, 0.005	14.000, 0.003	14.000, 0.007	14.000, 0.011	14.000, 0.009
72	14.200, 0.006	14.200, 0.005	14.200, 0.003	14.200, 0.007	14.200, 0.011	14.200, 0.009
73	14.400, 0.006	14.400, 0.005	14.400, 0.003	14.400, 0.008	14.400, 0.010	14.400, 0.010
74	14.600, 0.006	14.600, 0.005	14.600, 0.003	14.600, 0.008	14.600, 0.010	14.600, 0.010
75	14.800, 0.006	14.800, 0.005	14.800, 0.003	14.800, 0.008	14.800, 0.010	14.800, 0.010
76	15.000, 0.006	15.000, 0.005	15.000, 0.003	15.000, 0.007	15.000, 0.010	15.000, 0.010
77	15.200, 0.006	15.200, 0.005	15.200, 0.002	15.200, 0.007	15.200, 0.009	15.200, 0.010
78	15.400, 0.006	15.400, 0.005	15.400, 0.002	15.400, 0.006	15.400, 0.009	15.400, 0.009
79	15.600, 0.006	15.600, 0.005	15.600, 0.002	15.600, 0.006	15.600, 0.009	15.600, 0.009
80	15.800, 0.006	15.800, 0.005	15.800, 0.001	15.800, 0.005	15.800, 0.009	15.800, 0.009
81	16.000, 0.006	16.000, 0.005	16.000, 0.001	16.000, 0.005	16.000, 0.009	16.000, 0.008
82	16.200, 0.006	16.200, 0.005	16.200, 0.001	16.200, 0.005	16.200, 0.008	16.200, 0.008
83	16.400, 0.005	16.400, 0.005	16.400, 0.001	16.400, 0.005	16.400, 0.008	16.400, 0.007
84	16.600, 0.005	16.600, 0.005	16.600, 0.000	16.600, 0.005	16.600, 0.008	16.600, 0.007
85	16.800, 0.005	16.800, 0.005	16.800, 0.000	16.800, 0.005	16.800, 0.008	16.800, 0.007
86	17.000, 0.005	17.000, 0.005	17.000, 0.000	17.000, 0.005	17.000, 0.007	17.000, 0.006
87	17.200, 0.005	17.200, 0.005	17.200, 0.000	17.200, 0.005	17.200, 0.007	17.200, 0.006
88	17.400, 0.005	17.400, 0.005	17.400, 0.001	17.400, 0.004	17.400, 0.007	17.400, 0.005
89	17.600, 0.005	17.600, 0.005	17.600, 0.001	17.600, 0.004	17.600, 0.007	17.600, 0.005
90	17.800, 0.005	17.800, 0.005	17.800, 0.001	17.800, 0.004	17.800, 0.006	17.800, 0.005
91	18.000, 0.005	18.000, 0.005	18.000, 0.001	18.000, 0.004	18.000, 0.006	18.000, 0.005
92	18.200, 0.005	18.200, 0.005	18.200, 0.001	18.200, 0.004	18.200, 0.006	18.200, 0.005
93	18.400, 0.005	18.400, 0.005	18.400, 0.001	18.400, 0.004	18.400, 0.006	18.400, 0.005
94	18.600, 0.004	18.600, 0.004	18.600, 0.000	18.600, 0.004	18.600, 0.006	18.600, 0.005
95	18.800, 0.004	18.800, 0.004	18.800, 0.000	18.800, 0.004	18.800, 0.006	18.800, 0.004
96	19.000, 0.004	19.000, 0.004	19.000, 0.000	19.000, 0.004	19.000, 0.006	19.000, 0.004
97	19.200, 0.004	19.200, 0.004	19.200, 0.000	19.200, 0.004	19.200, 0.006	19.200, 0.004
98	19.400, 0.004	19.400, 0.004	19.400, 0.000	19.400, 0.003	19.400, 0.006	19.400, 0.004
99	19.600, 0.004	19.600, 0.004	19.600, 0.000	19.600, 0.003	19.600, 0.006	19.600, 0.003
100	19.800, 0.003	19.800, 0.004	19.800, 0.000	19.800, 0.003	19.800, 0.006	19.800, 0.003
101	20.000, 0.003	20.000, 0.004	20.000, -0.000	20.000, 0.003	20.000, 0.006	20.000, 0.003
102	20.200, 0.003	20.200, 0.004	20.200, -0.000	20.200, 0.003	20.200, 0.005	20.200, 0.003
103	20.400, 0.002	20.400, 0.003	20.400, -0.000	20.400, 0.003	20.400, 0.005	20.400, 0.003
104	20.600, 0.002	20.600, 0.003	20.600, -0.000	20.600, 0.003	20.600, 0.005	20.600, 0.003
105	20.800, 0.002	20.800, 0.003	20.800, -0.000	20.800, 0.003	20.800, 0.005	20.800, 0.003
106	21.000, 0.002	21.000, 0.003	21.000, -0.000	21.000, 0.003	21.000, 0.005	21.000, 0.003
107	21.200, 0.002	21.200, 0.003	21.200, 0.000	21.200, 0.004	21.200, 0.005	21.200, 0.003
108	21.400, 0.001	21.400, 0.003	21.400, 0.000	21.400, 0.004	21.400, 0.005	21.400, 0.003
109	21.600, 0.001	21.600, 0.003	21.600, 0.000	21.600, 0.004	21.600, 0.004	21.600, 0.003
110	21.800, 0.001	21.800, 0.003	21.800, 0.000	21.800, 0.004	21.800, 0.004	21.800, 0.003
111	22.000, 0.001	22.000, 0.003	22.000, 0.000	22.000, 0.004	22.000, 0.003	22.000, 0.003
112	22.200, 0.001	22.200, 0.003	22.200, 0.001	22.200, 0.003	22.200, 0.003	22.200, 0.003
113	22.400, 0.001	22.400, 0.003	22.400, 0.001	22.400, 0.003	22.400, 0.003	22.400, 0.003
114	22.600, 0.001	22.600, 0.003	22.600, 0.001	22.600, 0.003	22.600, 0.003	22.600, 0.003
115	22.800, 0.001	22.800, 0.003	22.800, 0.001	22.800, 0.003	22.800, 0.003	22.800, 0.002
116	23.000, 0.001	23.000, 0.003	23.000, 0.001	23.000, 0.002	23.000, 0.003	23.000, 0.002
117	23.200, 0.001	23.200, 0.003	23.200, 0.001	23.200, 0.002	23.200, 0.003	23.200, 0.002
118	23.400, 0.001	23.400, 0.003	23.400, 0.001	23.400, 0.002	23.400, 0.003	23.400, 0.002
119	23.600, 0.001	23.600, 0.002	23.600, 0.001	23.600, 0.002	23.600, 0.003	23.600, 0.002
120	23.800, 0.001	23.800, 0.002	23.800, 0.001	23.800, 0.003	23.800, 0.002	23.800, 0.002
121	24.000, 0.001	24.000, 0.002	24.000, 0.001	24.000, 0.003	24.000, 0.002	24.000, 0.002
122	24.200, 0.000	24.200, 0.001	24.200, 0.001	24.200, 0.003	24.200, 0.002	24.200, 0.002
123	24.400, 0.000	24.400, 0.001	24.400, 0.001	24.400, 0.002	24.400, 0.002	24.400, 0.002
124	24.600, -0.000	24.600, 0.001	24.600, 0.001	24.600, 0.002	24.600, 0.002	24.600, 0.002
125	24.800, -0.000	24.800, 0.001	24.800, 0.001	24.800, 0.002	24.800, 0.001	24.800, 0.002
126	25.000, -0.000	25.000, 0.001	25.000, 0.001	25.000, 0.002	25.000, 0.001	25.000, 0.002
127	25.200, -0.000	25.200, 0.001	25.200, 0.001	25.200, 0.003	25.200, 0.001	25.200, 0.002
128	25.400, -0.000	25.400, 0.001	25.400, 0.000	25.400, 0.003	25.400, 0.000	25.400, 0.002
129	25.600, -0.001	25.600, 0.001	25.600, -0.000	25.600, 0.003	25.600, 0.000	25.600, 0.002
130	25.800, -0.001	25.800, 0.001	25.800, -0.000	25.800, 0.002	25.800, -0.000	25.800, 0.002
131	26.000, -0.001	26.000, 0.001	26.000, -0.000	26.000, 0.002	26.000, -0.000	26.000, 0.002
132	26.200, -0.000	26.200, 0.001	26.200, -0.001	26.200, 0.002	26.200, -0.000	26.200, 0.002
133	26.400, -0.000	26.400, 0.001	26.400, -0.001	26.400, 0.002	26.400, -0.000	26.400, 0.001
134	26.600, -0.000	26.600, 0.001	26.600, -0.001	26.600, 0.002	26.600, -0.000	26.600, 0.001
135	26.800, 0.000	26.800, 0.001	26.800, -0.001	26.800, 0.002	26.800, -0.000	26.800, 0.000
136	27.000, 0.000	27.000, 0.002	27.000, -0.001	27.000, 0.002	27.000, -0.000	27.000, 0.000
137	27.200, 0.001	27.200, 0.001	27.200, -0.001	27.200, 0.002	27.200, 0.000	27.200, 0.000
138	27.400, 0.001	27.400, 0.001	27.400, -0.001	27.400, 0.002	27.400, 0.001	27.400, 0.000
139	27.600, 0.001	27.600, 0.001	27.600, -0.001	27.600, 0.001	27.600, 0.001	27.600, -0.000
140	27.800, 0.001	27.800, 0.001	27.800, -0.000	27.800, 0.001	27.800, 0.001	27.800, -0.000
141	28.000, 0.001	28.000, 0.000	28.000, -0.000	28.000, 0.001	28.000, 0.001	28.000, -0.000
142	28.200, 0.001	28.200, 0.000	28.200, 0.000	28.200, 0.000	28.200, 0.001	28.200, -0.000
143	28.400, 0.000	28.400, -0.000	28.400, 0.000	28.400, -0.000	28.400, 0.001	28.400, -0.000
144	28.600, 0.000	28.600, -0.000	28.600, 0.000	28.600, -0.000	28.600, 0.000	28.600, -0.000
145	28.800, -0.000	28.800, -0.001	28.800, 0.000	28.800, -0.001	28.800, 0.000	28.800, -0.000
146	29.000, -0.001	29.000, -0.001	29.000, 0.000	29.000, -0.001	29.000, -0.000	29.000, -0.000
147	29.200, -0.001	29.200, -0.001	29.200, 0.001	29.200, -0.001	29.200, -0.001	29.200, 0.000
148	29.400, -0.001	29.400, -0.001	29.400, 0.001	29.400, -0.001	29.400, -0.001	29.400, 0.000
149	29.600, -0.001	29.600, -0.001	29.600, 0.001	29.600, -0.002	29.600, -0.001	29.600, 0.000
150	29.800, -0.002	29.800, -0.001	29.800, 0.001	29.800, -0.002	29.800, -0.002	29.800, 0.000
151	30.000, 0.000	30.000, 0.000	30.000, 0.000	30.000, 0.000	30.000, 0.000	30.000, 0.000
152	30.200, 0.017	30.200, 0.014	30.200, 0.018	30.200, 0.017	30.200, 0.017	30.200, 0.001
153	30.400, 0.037	30.400, 0.032	30.400, 0.039	30.400, 0.037	30.400, 0.038	30.400, 0.002
154	30.600, 0.061	30.600, 0.052	30.600, 0.064	30.600, 0.060	30.600, 0.062	30.600, 0.003
155	30.800, 0.087	30.800, 0.075	30.800, 0.092	30.800, 0.087	30.800, 0.089	30.800, 0.003
156	31.000, 0.115	31.000, 0.101	31.000, 0.123	31.000, 0.115	31.000, 0.118	31.000, 0.004
157	31.200, 0.145	31.200, 0.129	31.200, 0.156	31.200, 0.147	31.200, 0.150	31.200, 0.005
158	31.400, 0.177	31.400, 0.158	31.400, 0.190	31.400, 0.179	31.400, 0.183	31.400, 0.005
159	31.600, 0.209	31.600, 0.189	31.600, 0.225	31.600, 0.212	31.600, 0.218	31.600, 0.005
160	31.800, 0.241	31.800, 0.220	31.800, 0.259	31.800, 0.246	31.800, 0.252	31.800, 0.005
161	32.000, 0.272	32.000, 0.251	32.000, 0.293	32.000, 0.279	32.000, 0.286	32.000, 0.005
162	32.200, 0.301	32.200, 0.281	32.200, 0.325	32.200, 0.310	32.200, 0.317	32.200, 0.005
163	32.400, 0.329	32.400, 0.310	32.400, 0.355	32.400, 0.339	32.400, 0.348	32.400, 0.005
164	32.600, 0.356	32.600, 0.338	32.600, 0.385	32.600, 0.368	32.600, 0.379	32.600, 0.004
165	32.800, 0.383	32.800, 0.366	32.800, 0.415	32.800, 0.397	32.800, 0.409	32.800, 0.004
166	33.000, 0.410	33.000, 0.395	33.000, 0.445	33.000, 0.426	33.000, 0.438	33.000, 0.004
167	33.200, 0.436	33.200, 0.422	33.200, 0.474	33.200, 0.454	33.200, 0.468	33.200, 0.003
168	33.400, 0.462	33.400, 0.450	33.400, 0.503	33.400, 0.481	33.400, 0.497	33.400, 0.003
169	33.600, 0.488	33.600, 0.477	33.600, 0.531	33.600, 0.509	33.600, 0.525	33.600, 0.003
170	33.800, 0.514	33.800, 0.504	33.800, 0.559	33.800, 0.535	33.800, 0.553	33.800, 0.003
171	34.000, 0.539	34.000, 0.530	34.000, 0.587	34.000, 0.562	34.000, 0.580	34.000, 0.003
172	34.200, 0.564	34.200, 0.556	34.200, 0.613	34.200, 0.588	34.200, 0.607	34.200, 0.003
173	34.400, 0.589	34.400, 0.582	34.400, 0.640	34.400, 0.613	34.400, 0.634	34.400, 0.003
174	34.600, 0.613	34.600, 0.607	34.600, 0.666	34.600, 0.638	34.600, 0.659	34.600, 0.003
175	34.800, 0.637	34.800, 0.632	34.800, 0.692	34.800, 0.663	34.800, 0.684	34.800, 0.003
176	35.000, 0.661	35.000, 0.656	35.000, 0.717	35.000, 0.687	35.000, 0.709	35.000, 0.002
177	35.200, 0.684	35.200, 0.679	35.200, 0.742	35.200, 0.711	35.200, 0.733	35.200, 0.002
178	35.400, 0.707	35.400, 0.703	35.400, 0.766	35.400, 0.734	35.400, 0.757	35.400, 0.002
179	35.600, 0.729	35.600, 0.726	35.600, 0.790	35.600, 0.757	35.600, 0.780	35.600, 0.002
180	35.800, 0.751	35.800, 0.748	35.800, 0.813	35.800, 0.780	35.800, 0.803	35.800, 0.003
181	36.000, 0.772	36.000, 0.770	36.000, 0.835	36.000, 0.801	36.000, 0.825	36.000, 0.003
182	36.200, 0.793	36.200, 0.791	36.200, 0.857	36.200, 0.823	36.200, 0.847	36.200, 0.003
183	36.400, 0.813	36.400, 0.812	36.400, 0.879	36.400, 0.843	36.400, 0.868	36.400, 0.004
184	36.600, 0.833	36.600, 0.832	36.600, 0.900	36.600, 0.863	36.600, 0.889	36.600, 0.004
185	36.800, 0.852	36.800, 0.852	36.800, 0.920	36.800, 0.883	36.800, 0.909	36.800, 0.003
186	37.000, 0.870	37.000, 0.871	37.000, 0.940	37.000, 0.902	37.000, 0.928	37.000, 0.003
187	37.200, 0.889	37.200, 0.890	37.200, 0.960	37.200, 0.921	37.200, 0.947	37.200, 0.002
188	37.400, 0.906	37.400, 0.909	37.400, 0.979	37.400, 0.940	37.400, 0.966	37.400, 0.001
189	37.600, 0.924	37.600, 0.927	37.600, 0.998	37.600, 0.958	37.600, 0.984	37.600, 0.001
190	37.800, 0.941	37.800, 0.945	37.800, 1.016	37.800, 0.975	37.800, 1.001	37.800, 0.000
191	38.000, 0.958	38.000, 0.963	38.000, 1.033	38.000, 0.992	38.000, 1.018	38.000, -0.001
192	38.200, 0.974	38.200, 0.980	38.200, 1.050	38.200, 1.008	38.200, 1.034	38.200, -0.001
193	38.400, 0.990	38.400, 0.996	38.400, 1.066	38.400, 1.024	38.400, 1.049	38.400, -0.002
194	38.600, 1.006	38.600, 1.012	38.600, 1.082	38.600, 1.040	38.600, 1.065	38.600, -0.003
195	38.800, 1.021	38.800, 1.027	38.800, 1.097	38.800, 1.055	38.800, 1.080	38.800, -0.003
196	39.000, 1.035	39.000, 1.042	39.000, 1.112	39.000, 1.070	39.000, 1.094	39.000, -0.003
197	39.200, 1.050	39.200, 1.057	39.200, 1.127	39.200, 1.085	39.200, 1.108	39.200, -0.003
198	39.400, 1.063	39.400, 1.071	39.400, 1.141	39.400, 1.099	39.400, 1.121	39.400, -0.003
199	39.600, 1.077	39.600, 1.085	39.600, 1.154	39.600, 1.112	39.600, 1.134	39.600, -0.002
200	39.800, 1.090	39.800, 1.099	39.800, 1.168	39.800, 1.125	39.800, 1.147	39.800, -0.002
201	40.000, 1.103	40.000, 1.112	40.000, 1.180	40.000, 1.137	40.000, 1.159	40.000, -0.002
202	40.200, 1.115	40.200, 1.124	40.200, 1.192	40.200, 1.149	40.200, 1.171	40.200, -0.002
203	40.400, 1.128	40.400, 1.137	40.400, 1.204	40.400, 1.161	40.400, 1.182	40.400, -0.002
204	40.600, 1.139	40.600, 1.149	40.600, 1.216	40.600, 1.172	40.600, 1.194	40.600, -0.002
205	40.800, 1.151	40.800, 1.160	40.800, 1.227	40.800, 1.184	40.800, 1.205	40.800, -0.002
206	41.000, 1.162	41.000, 1.171	41.000, 1.238	41.000, 1.195	41.000, 1.215	41.000, -0.002
207	41.200, 1.173	41.200, 1.182	41.200, 1.249	41.200, 1.205	41.200, 1.225	41.200, -0.002
208	41.400, 1.183	41.400, 1.192	41.400, 1.259	41.400, 1.216	41.400, 1.235	41.400, -0.002
209	41.600, 1.193	41.600, 1.203	41.600, 1.269	41.600, 1.226	41.600, 1.245	41.600, -0.001
210	41.800, 1.203	41.800, 1.212	41.800, 1.279	41.800, 1.235	41.800, 1.254	41.800, -0.002
211	42.000, 1.213	42.000, 1.222	42.000, 1.289	42.000, 1.245	42.000, 1.263	42.000, -0.002
212	42.200, 1.222	42.200, 1.231	42.200, 1.298	42.200, 1.253	42.200, 1.271	42.200, -0.002
213	42.400, 1.231	42.400, 1.240	42.400, 1.307	42.400, 1.262	42.400, 1.280	42.400, -0.002
214	42.600, 1.240	42.600, 1.248	42.600, 1.315	42.600, 1.270	42.600, 1.288	42.600, -0.003
215	42.800, 1.248	42.800, 1.257	42.800, 1.324	42.800, 1.279	42.800, 1.295	42.800, -0.003
216	43.000, 1.257	43.000, 1.265	43.000, 1.332	43.000, 1.287	43.000, 1.303	43.000, -0.003
217	43.200, 1.265	43.200, 1.274	43.200, 1.340	43.200, 1.295	43.200, 1.311	43.200, -0.003
218	43.400, 1.272	43.400, 1.282	43.400, 1.348	43.400, 1.303	43.400, 1.318	43.400, -0.003
219	43.600, 1.280	43.600, 1.290	43.600, 1.355	43.600, 1.310	43.600, 1.325	43.600, -0.004
220	43.800, 1.288	43.800, 1.297	43.800, 1.362	43.800, 1.317	43.800, 1.331	43.800, -0.004
221	44.000, 1.295	44.000, 1.304	44.000, 1.369	44.000, 1.324	44.000, 1.338	44.000, -0.005
222	44.200, 1.302	44.200, 1.312	44.200, 1.376	44.200, 1.331	44.200, 1.344	44.200, -0.005
223	44.400, 1.309	44.400, 1.319	44.400, 1.382	44.400, 1.337	44.400, 1.351	44.400, -0.006
224	44.600, 1.316	44.600, 1.325	44.600, 1.388	44.600, 1.343	44.600, 1.357	44.600, -0.006
225	44.800, 1.322	44.800, 1.332	44.800, 1.395	44.800, 1.350	44.800, 1.362	44.800, -0.006
226	45.000, 1.328	45.000, 1.338	45.000, 1.401	45.000, 1.356	45.000, 1.368	45.000, -0.006
227	45.200, 1.334	45.200, 1.344	45.200, 1.407	45.200, 1.362	45.200, 1.374	45.200, -0.006
228	45.400, 1.340	45.400, 1.349	45.400, 1.412	45.400, 1.368	45.400, 1.379	45.400, -0.006
229	45.600, 1.346	45.600, 1.355	45.600, 1.418	45.600, 1.373	45.600, 1.384	45.600, -0.006
230	45.800, 1.352	45.800, 1.361	45.800, 1.423	45.800, 1.379	45.800, 1.389	45.800, -0.006
231	46.000, 1.357	46.000, 1.367	46.000, 1.428	46.000, 1.384	46.000, 1.394	46.000, -0.006
232	46.200, 1.362	46.200, 1.372	46.200, 1.433	46.200, 1.389	46.200, 1.399	46.200, -0.005
233	46.400, 1.368	46.400, 1.378	46.400, 1.438	46.400, 1.394	46.400, 1.404	46.400, -0.005
234	46.600, 1.373	46.600, 1.383	46.600, 1.443	46.600, 1.399	46.600, 1.408	46.600, -0.005
235	46.800, 1.378	46.800, 1.388	46.800, 1.448	46.800, 1.404	46.800, 1.413	46.800, -0.005
236	47.000, 1.383	47.000, 1.393	47.000, 1.452	47.000, 1.409	47.000, 1.417	47.000, -0.005
237	47.200, 1.388	47.200, 1.397	47.200, 1.457	47.200, 1.414	47.200, 1.421	47.200, -0.005
238	47.400, 1.393	47.400, 1.402	47.400, 1.461	47.400, 1.419	47.400, 1.425	47.400, -0.005
239	47.600, 1.398	47.600, 1.406	47.600, 1.465	47.600, 1.423	47.600, 1.429	47.600, -0.005
240	47.800, 1.402	47.800, 1.411	47.800, 1.469	47.800, 1.427	47.800, 1.433	47.800, -0.006
241	48.000, 1.407	48.000, 1.415	48.000, 1.473	48.000, 1.431	48.000, 1.437	48.000, -0.006
242	48.200, 1.411	48.200, 1.419	48.200, 1.477	48.200, 1.435	48.200, 1.441	48.200, -0.006
243	48.400, 1.416	48.400, 1.423	48.400, 1.480	48.400, 1.439	48.400, 1.445	48.400, -0.006
244	48.600, 1.420	48.600, 1.427	48.600, 1.484	48.600, 1.442	48.600, 1.449	48.600, -0.006
245	48.800, 1.425	48.800, 1.431	48.800, 1.488	48.800, 1.446	48.800, 1.453	48.800, -0.006
246	49.000, 1.429	49.000, 1.435	49.000, 1.491	49.000, 1.450	49.000, 1.456	49.000, -0.006
247	49.200, 1.433	49.200, 1.439	49.200, 1.495	49.200, 1.453	49.200, 1.460	49.200, -0.006
248	49.400, 1.437	49.400, 1.442	49.400, 1.498	49.400, 1.457	49.400, 1.463	49.400, -0.006
249	49.600, 1.440	49.600, 1.446	49.600, 1.502	49.600, 1.461	49.600, 1.466	49.600, -0.006
250	49.800, 1.444	49.800, 1.449	49.800, 1.505	49.800, 1.465	49.800, 1.469	49.800, -0.006
251	50.000, 1.447	50.000, 1.453	50.000, 1.508	50.000, 1.468	50.000, 1.472	50.000, -0.006
252	50.200, 1.450	50.200, 1.456	50.200, 1.511	50.200, 1.472	50.200, 1.475	50.200, -0.006
253	50.400, 1.454	50.400, 1.460	50.400, 1.514	50.400, 1.475	50.400, 1.478	50.400, -0.007
254	50.600, 1.457	50.600, 1.463	50.600, 1.518	50.600, 1.478	50.600, 1.481	50.600, -0.007
255	50.800, 1.460	50.800, 1.466	50.800, 1.521	50.800, 1.481	50.800, 1.483	50.800, -0.008
256	51.000, 1.463	51.000, 1.469	51.000, 1.524	51.000, 1.483	51.000, 1.486	51.000, -0.008
257	51.200, 1.466	51.200, 1.473	51.200, 1.527	51.200, 1.486	51.200, 1.489	51.200, -0.009
258	51.400, 1.468	51.400, 1.476	51.400, 1.530	51.400, 1.489	51.400, 1.491	51.400, -0.009
259	51.600, 1.471	51.600, 1.479	51.600, 1.533	51.600, 1.491	51.600, 1.494	51.600, -0.010
260	51.800, 1.474	51.800, 1.482	51.800, 1.536	51.800, 1.494	51.800, 1.497	51.800, -0.010
261	52.000, 1.476	52.000, 1.485	52.000, 1.539	52.000, 1.496	52.000, 1.500	52.000, -0.010
262	52.200, 1.479	52.200, 1.488	52.200, 1.542	52.200, 1.498	52.200, 1.502	52.200, -0.011
263	52.400, 1.482	52.400, 1.491	52.400, 1.544	52.400, 1.501	52.400, 1.505	52.400, -0.011
264	52.600, 1.485	52.600, 1.494	52.600, 1.546	52.600, 1.504	52.600, 1.507	52.600, -0.011
265	52.800, 1.487	52.800, 1.497	52.800, 1.549	52.800, 1.506	52.800, 1.510	52.800, -0.011
266	53.000, 1.490	53.000, 1.500	53.000, 1.551	53.000, 1.509	53.000, 1.512	53.000, -0.012
267	53.200, 1.493	53.200, 1.502	53.200, 1.553	53.200, 1.511	53.200, 1.514	53.200, -0.012
268	53.400, 1.495	53.400, 1.504	53.400, 1.555	53.400, 1.514	53.400, 1.516	53.400, -0.012
269	53.600, 1.498	53.600, 1.507	53.600, 1.557	53.600, 1.516	53.600, 1.519	53.600, -0.012
270	53.800, 1.500	53.800, 1.509	53.800, 1.559	53.800, 1.518	53.800, 1.521	53.800, -0.013
271	54.000, 1.503	54.000, 1.511	54.000, 1.561	54.000, 1.520	54.000, 1.523	54.000, -0.013
272	54.200, 1.506	54.200, 1.514	54.200, 1.563	54.200, 1.522	54.200, 1.525	54.200, -0.013
273	54.400, 1.508	54.400, 1.516	54.400, 1.565	54.400, 1.524	54.400, 1.527	54.400, -0.013
274	54.600, 1.511	54.600, 1.518	54.600, 1.567	54.600, 1.526	54.600, 1.529	54.600, -0.013
275	54.800, 1.513	54.800, 1.520	54.800, 1.569	54.800, 1.528	54.800, 1.531	54.800, -0.013
276	55.000, 1.516	55.000, 1.522	55.000, 1.571	55.000, 1.530	55.000, 1.533	55.000, -0.013
277	55.200, 1.518	55.200, 1.525	55.200, 1.574	55.200, 1.532	55.200, 1.535	55.200, -0.013
278	55.400, 1.520	55.400, 1.527	55.400, 1.576	55.400, 1.534	55.400, 1.537	55.400, -0.013
279	55.600, 1.523	55.600, 1.529	55.600, 1.579	55.600, 1.536	55.600, 1.539	55.600, -0.013
280	55.800, 1.525	55.800, 1.531	55.800, 1.581	55.800, 1.538	55.800, 1.541	55.800, -0.013
281	56.000, 1.528	56.000, 1.533	56.000, 1.583	56.000, 1.541	56.000, 1.543	56.000, -0.013
282	56.200, 1.530	56.200, 1.535	56.200, 1.585	56.200, 1.543	56.200, 1.544	56.200, -0.013
283	56.400, 1.532	56.400, 1.537	56.400, 1.588	56.400, 1.546	56.400, 1.546	56.400, -0.013
284	56.600, 1.533	56.600, 1.539	56.600, 1.590	56.600, 1.548	56.600, 1.548	56.600, -0.013
285	56.800, 1.535	56.800, 1.541	56.800, 1.592	56.800, 1.550	56.800, 1.549	56.800, -0.013
286	57.000, 1.537	57.000, 1.543	57.000, 1.594	57.000, 1.551	57.000, 1.551	57.000, -0.014
287	57.200, 1.539	57.200, 1.544	57.200, 1.595	57.200, 1.553	57.200, 1.552	57.200, -0.014
288	57.400, 1.540	57.400, 1.546	57.400, 1.597	57.400, 1.554	57.400, 1.554	57.400, -0.014
289	57.600, 1.542	57.600, 1.548	57.600, 1.598	57.600, 1.556	57.600, 1.555	57.600, -0.015
290	57.800, 1.544	57.800, 1.549	57.800, 1.600	57.800, 1.557	57.800, 1.557	57.800, -0.015
291	58.000, 1.546	58.000, 1.551	58.000, 1.601	58.000, 1.559	58.000, 1.559	58.000, -0.015
292	58.200, 1.547	58.200, 1.553	58.200, 1.603	58.200, 1.560	58.200, 1.560	58.200, -0.015
293	58.400, 1.549	58.400, 1.554	58.400, 1.604	58.400, 1.561	58.400, 1.562	58.400, -0.016
294	58.600, 1.551	58.600, 1.556	58.600, 1.606	58.600, 1.562	58.600, 1.563	58.600, -0.016
295	58.800, 1.553	58.800, 1.558	58.800, 1.607	58.800, 1.563	58.800, 1.565	58.800, -0.016
296	59.000, 1.555	59.000, 1.559	59.000, 1.608	59.000, 1.565	59.000, 1.566	59.000, -0.016
297	59.200, 1.557	59.200, 1.561	59.200, 1.610	59.200, 1.566	59.200, 1.568	59.200, -0.016
298	59.400, 1.559	59.400, 1.562	59.400, 1.611	59.400, 1.568	59.400, 1.569	59.400, -0.016
299	59.600, 1.561	59.600, 1.564	59.600, 1.612	59.600, 1.569	59.600, 1.570	59.600, -0.016
300	59.800, 1.563	59.800, 1.566	59.800, 1.614	59.800, 1.571	59.800, 1.572	59.800, -0.015
301	60.000, 1.565	60.000, 1.568	60.000, 1.615	60.000, 1.572	60.000, 1.573	60.000, -0.015
302	60.200, 1.566	60.200, 1.569	60.200, 1.616	60.200, 1.573	60.200, 1.574	60.200, -0.015
303	60.400, 1.568	60.400, 1.571	60.400, 1.617	60.400, 1.575	60.400, 1.575	60.400, -0.015
304	60.600, 1.569	60.600, 1.572	60.600, 1.619	60.600, 1.576	60.600, 1.576	60.600, -0.015
305	60.800, 1.570	60.800, 1.574	60.800, 1.620	60.800, 1.577	60.800, 1.577	60.800, -0.015
306	61.000, 1.572	61.000, 1.576	61.000, 1.622	61.000, 1.578	61.000, 1.578	61.000, -0.015
307	61.200, 1.573	61.200, 1.577	61.200, 1.623	61.200, 1.580	61.200, 1.580	61.200, -0.016
308	61.400, 1.574	61.400, 1.579	61.400, 1.624	61.400, 1.581	61.400, 1.581	61.400, -0.016
309	61.600, 1.576	61.600, 1.580	61.600, 1.626	61.600, 1.583	61.600, 1.583	61.600, -0.016
310	61.800, 1.577	61.800, 1.582	61.800, 1.627	61.800, 1.584	61.800, 1.585	61.800, -0.017
311	62.000, 1.579	62.000, 1.583	62.000, 1.629	62.000, 1.585	62.000, 1.586	62.000, -0.017
312	62.200, 1.580	62.200, 1.585	62.200, 1.630	62.200, 1.586	62.200, 1.587	62.200, -0.018
313	62.400, 1.581	62.400, 1.586	62.400, 1.632	62.400, 1.588	62.400, 1.589	62.400, -0.018
314	62.600, 1.583	62.600, 1.588	62.600, 1.633	62.600, 1.589	62.600, 1.590	62.600, -0.019
315	62.800, 1.584	62.800, 1.589	62.800, 1.634	62.800, 1.591	62.800, 1.591	62.800, -0.019
316	63.000, 1.586	63.000, 1.590	63.000, 1.635	63.000, 1.592	63.000, 1.593	63.000, -0.019
317	63.200, 1.587	63.200, 1.592	63.200, 1.636	63.200, 1.594	63.200, 1.594	63.200, -0.019
318	63.400, 1.589	63.400, 1.593	63.400, 1.637	63.400, 1.595	63.400, 1.595	63.400, -0.019
319	63.600, 1.590	63.600, 1.594	63.600, 1.638	63.600, 1.597	63.600, 1.596	63.600, -0.019
320	63.800, 1.592	63.800, 1.595	63.800, 1.639	63.800, 1.598	63.800, 1.597	63.800, -0.019
321	64.000, 1.593	64.000, 1.596	64.000, 1.640	64.000, 1.599	64.000, 1.598	64.000, -0.018
322	64.200, 1.594	64.200, 1.596	64.200, 1.641	64.200, 1.600	64.200, 1.599	64.200, -0.018
323	64.400, 1.596	64.400, 1.597	64.400, 1.642	64.400, 1.601	64.400, 1.599	64.400, -0.018
324	64.600, 1.597	64.600, 1.598	64.600, 1.644	64.600, 1.602	64.600, 1.600	64.600, -0.018
325	64.800, 1.598	64.800, 1.599	64.800, 1.645	64.800, 1.603	64.800, 1.601	64.800, -0.018
326	65.000, 1.599	65.000, 1.600	65.000, 1.646	65.000, 1.604	65.000, 1.602	65.000, -0.018
327	65.200, 1.600	65.200, 1.601	65.200, 1.648	65.200, 1.605	65.200, 1.603	65.200, -0.018
328	65.400, 1.601	65.400, 1.603	65.400, 1.649	65.400, 1.606	65.400, 1.604	65.400, -0.018
329	65.600, 1.602	65.600, 1.604	65.600, 1.650	65.600, 1.607	65.600, 1.605	65.600, -0.019
330	65.800, 1.603	65.800, 1.605	65.800, 1.651	65.800, 1.608	65.800, 1.606	65.800, -0.019
331	66.000, 1.604	66.000, 1.607	66.000, 1.652	66.000, 1.609	66.000, 1.607	66.000, -0.019
332	66.200, 1.605	66.200, 1.608	66.200, 1.653	66.200, 1.610	66.200, 1.608	66.200, -0.019
333	66.400, 1.606	66.400, 1.609	66.400, 1.654	66.400, 1.612	66.400, 1.609	66.400, -0.019
334	66.600, 1.607	66.600, 1.610	66.600, 1.655	66.600, 1.613	66.600, 1.610	66.600, -0.019
335	66.800, 1.608	66.800, 1.611	66.800, 1.656	66.800, 1.614	66.800, 1.611	66.800, -0.020
336	67.000, 1.609	67.000, 1.612	67.000, 1.657	67.000, 1.615	67.000, 1.613	67.000, -0.020
337	67.200, 1.611	67.200, 1.613	67.200, 1.658	67.200, 1.616	67.200, 1.614	67.200, -0.020
338	67.400, 1.612	67.400, 1.614	67.400, 1.659	67.400, 1.617	67.400, 1.615	67.400, -0.020
339	67.600, 1.613	67.600, 1.615	67.600, 1.660	67.600, 1.618	67.600, 1.615	67.600, -0.020
340	67.800, 1.615	67.800, 1.616	67.800, 1.661	67.800, 1.619	67.800, 1.616	67.800, -0.021
341	68.000, 1.616	68.000, 1.617	68.000, 1.662	68.000, 1.620	68.000, 1.617	68.000, -0.021
342	68.200, 1.617	68.200, 1.618	68.200, 1.663	68.200, 1.620	68.200, 1.617	68.200, -0.021
343	68.400, 1.618	68.400, 1.618	68.400, 1.664	68.400, 1.621	68.400, 1.618	68.400, -0.021
344	68.600, 1.619	68.600, 1.619	68.600, 1.665	68.600, 1.622	68.600, 1.619	68.600, -0.021
345	68.800, 1.620	68.800, 1.620	68.800, 1.666	68.800, 1.623	68.800, 1.620	68.800, -0.021
346	69.000, 1.622	69.000, 1.621	69.000, 1.667	69.000, 1.624	69.000, 1.621	69.000, -0.022
347	69.200, 1.623	69.200, 1.622	69.200, 1.668	69.200, 1.625	69.200, 1.622	69.200, -0.022
348	69.400, 1.624	69.400, 1.622	69.400, 1.669	69.400, 1.625	69.400, 1.623	69.400, -0.022
349	69.600, 1.625	69.600, 1.623	69.600, 1.670	69.600, 1.626	69.600, 1.624	69.600, -0.022
350	69.800, 1.626	69.800, 1.624	69.800, 1.671	69.800, 1.627	69.800, 1.625	69.800, -0.022
351	70.000, 1.627	70.000, 1.625	70.000, 1.672	70.000, 1.628	70.000, 1.625	70.000, -0.023
352	70.200, 1.628	70.200, 1.626	70.200, 1.673	70.200, 1.629	70.200, 1.626	70.200, -0.023
353	70.400, 1.629	70.400, 1.627	70.400, 1.674	70.400, 1.629	70.400, 1.627	70.400, -0.023
354	70.600, 1.630	70.600, 1.627	70.600, 1.675	70.600, 1.630	70.600, 1.628	70.600, -0.023
355	70.800, 1.631	70.800, 1.628	70.800, 1.676	70.800, 1.631	70.800, 1.629	70.800, -0.023
356	71.000, 1.632	71.000, 1.630	71.000, 1.677	71.000, 1.632	71.000, 1.630	71.000, -0.023
357	71.200, 1.633	71.200, 1.631	71.200, 1.678	71.200, 1.634	71.200, 1.631	71.200, -0.023
358	71.400, 1.634	71.400, 1.632	71.400, 1.679	71.400, 1.635	71.400, 1.632	71.400, -0.023
359	71.600, 1.635	71.600, 1.633	71.600, 1.680	71.600, 1.636	71.600, 1.633	71.600, -0.023
360	71.800, 1.636	71.800, 1.634	71.800, 1.680	71.800, 1.637	71.800, 1.633	71.800, -0.023
361	72.000, 1.636	72.000, 1.635	72.000, 1.681	72.000, 1.638	72.000, 1.634	72.000, -0.023
362	72.200, 1.637	72.200, 1.636	72.200, 1.681	72.200, 1.639	72.200, 1.635	72.200, -0.024
363	72.400, 1.638	72.400, 1.637	72.400, 1.682	72.400, 1.640	72.400, 1.636	72.400, -0.024
364	72.600, 1.639	72.600, 1.638	72.600, 1.683	72.600, 1.641	72.600, 1.637	72.600, -0.024
365	72.800, 1.640	72.800, 1.639	72.800, 1.683	72.800, 1.642	72.800, 1.638	72.800, -0.024
366	73.000, 1.641	73.000, 1.639	73.000, 1.684	73.000, 1.643	73.000, 1.639	73.000, -0.024
367	73.200, 1.642	73.200, 1.640	73.200, 1.685	73.200, 1.644	73.200, 1.640	73.200, -0.024
368	73.400, 1.643	73.400, 1.641	73.400, 1.686	73.400, 1.644	73.400, 1.640	73.400, -0.024
369	73.600, 1.644	73.600, 1.642	73.600, 1.686	73.600, 1.645	73.600, 1.641	73.600, -0.025
370	73.800, 1.645	73.800, 1.643	73.800, 1.687	73.800, 1.646	73.800, 1.641	73.800, -0.025
371	74.000, 1.646	74.000, 1.644	74.000, 1.688	74.000, 1.646	74.000, 1.642	74.000, -0.024
372	74.200, 1.647	74.200, 1.645	74.200, 1.689	74.200, 1.647	74.200, 1.642	74.200, -0.024
373	74.400, 1.648	74.400, 1.646	74.400, 1.689	74.400, 1.647	74.400, 1.643	74.400, -0.024
374	74.600, 1.649	74.600, 1.647	74.600, 1.690	74.600, 1.648	74.600, 1.644	74.600, -0.024
375	74.800, 1.650	74.800, 1.647	74.800, 1.691	74.800, 1.649	74.800, 1.644	74.800, -0.024
376	75.000, 1.651	75.000, 1.648	75.000, 1.692	75.000, 1.650	75.000, 1.645	75.000, -0.024
377	75.200, 1.652	75.200, 1.648	75.200, 1.692	75.200, 1.650	75.200, 1.645	75.200, -0.024
378	75.400, 1.652	75.400, 1.649	75.400, 1.693	75.400, 1.651	75.400, 1.646	75.400, -0.024
379	75.600, 1.653	75.600, 1.649	75.600, 1.693	75.600, 1.652	75.600, 1.647	75.600, -0.024
380	75.800, 1.654	75.800, 1.650	75.800, 1.694	75.800, 1.652	75.800, 1.648	75.800, -0.024
381	76.000, 1.655	76.000, 1.650	76.000, 1.695	76.000, 1.653	76.000, 1.649	76.000, -0.025
382	76.200, 1.655	76.200, 1.651	76.200, 1.696	76.200, 1.653	76.200, 1.650	76.200, -0.025
383	76.400, 1.656	76.400, 1.652	76.400, 1.697	76.400, 1.654	76.400, 1.650	76.400, -0.025
384	76.600, 1.656	76.600, 1.653	76.600, 1.698	76.600, 1.654	76.600, 1.651	76.600, -0.025
385	76.800, 1.657	76.800, 1.653	76.800, 1.699	76.800, 1.655	76.800, 1.652	76.800, -0.025
386	77.000, 1.658	77.000, 1.654	77.000, 1.700	77.000, 1.656	77.000, 1.652	77.000, -0.025
387	77.200, 1.659	77.200, 1.655	77.200, 1.700	77.200, 1.657	77.200, 1.653	77.200, -0.025
388	77.400, 1.659	77.400, 1.656	77.400, 1.701	77.400, 1.657	77.400, 1.653	77.400, -0.024
389	77.600, 1.660	77.600, 1.657	77.600, 1.702	77.600, 1.658	77.600, 1.653	77.600, -0.024
390	77.800, 1.661	77.800, 1.658	77.800, 1.703	77.800, 1.658	77.800, 1.654	77.800, -0.024
391	78.000, 1.662	78.000, 1.659	78.000, 1.703	78.000, 1.658	78.000, 1.654	78.000, -0.024
392	78.200, 1.663	78.200, 1.660	78.200, 1.704	78.200, 1.659	78.200, 1.654	78.200, -0.024
393	78.400, 1.664	78.400, 1.660	78.400, 1.704	78.400, 1.659	78.400, 1.655	78.400, -0.024
394	78.600, 1.665	78.600, 1.660	78.600, 1.704	78.600, 1.660	78.600, 1.655	78.600, -0.024
395	78.800, 1.665	78.800, 1.661	78.800, 1.705	78.800, 1.660	78.800, 1.656	78.800, -0.025
396	79.000, 1.666	79.000, 1.661	79.000, 1.705	79.000, 1.661	79.000, 1.657	79.000, -0.025
397	79.200, 1.667	79.200, 1.662	79.200, 1.706	79.200, 1.662	79.200, 1.657	79.200, -0.025
398	79.400, 1.667	79.400, 1.663	79.400, 1.706	79.400, 1.662	79.400, 1.658	79.400, -0.025
399	79.600, 1.668	79.600, 1.664	79.600, 1.707	79.600, 1.662	79.600, 1.659	79.600, -0.025
400	79.800, 1.669	79.800, 1.664	79.800, 1.707	79.800, 1.663	79.800, 1.660	79.800, -0.025
401	80.000, 1.669	80.000, 1.665	80.000, 1.707	80.000, 1.663	80.000, 1.661	80.000, -0.025
402	80.200, 1.670	80.200, 1.666	80.200, 1.708	80.200, 1.664	80.200, 1.662	80.200, -0.025
403	80.400, 1.671	80.400, 1.667	80.400, 1.708	80.400, 1.664	80.400, 1.662	80.400, -0.026
404	80.600, 1.671	80.600, 1.667	80.600, 1.709	80.600, 1.665	80.600, 1.663	80.600, -0.026
405	80.800, 1.672	80.800, 1.668	80.800, 1.710	80.800, 1.666	80.800, 1.664	80.800, -0.026
406	81.000, 1.673	81.000, 1.669	81.000, 1.710	81.000, 1.667	81.000, 1.665	81.000, -0.026
407	81.200, 1.674	81.200, 1.670	81.200, 1.711	81.200, 1.668	81.200, 1.666	81.200, -0.026
408	81.400, 1.674	81.400, 1.671	81.400, 1.712	81.400, 1.669	81.400, 1.667	81.400, -0.026
409	81.600, 1.675	81.600, 1.671	81.600, 1.713	81.600, 1.669	81.600, 1.667	81.600, -0.027
410	81.800, 1.676	81.800, 1.672	81.800, 1.713	81.800, 1.670	81.800, 1.668	81.800, -0.027
411	82.000, 1.677	82.000, 1.672	82.000, 1.714	82.000, 1.670	82.000, 1.668	82.000, -0.028
412	82.200, 1.678	82.200, 1.673	82.200, 1.715	82.200, 1.671	82.200, 1.669	82.200, -0.028
413	82.400, 1.678	82.400, 1.673	82.400, 1.715	82.400, 1.672	82.400, 1.669	82.400, -0.028
414	82.600, 1.679	82.600, 1.673	82.600, 1.716	82.600, 1.673	82.600, 1.670	82.600, -0.028
415	82.800, 1.680	82.800, 1.674	82.800, 1.717	82.800, 1.674	82.800, 1.670	82.800, -0.029
416	83.000, 1.681	83.000, 1.674	83.000, 1.717	83.000, 1.674	83.000, 1.671	83.000, -0.029
417	83.200, 1.681	83.200, 1.675	83.200, 1.718	83.200, 1.675	83.200, 1.671	83.200, -0.029
418	83.400, 1.682	83.400, 1.676	83.400, 1.719	83.400, 1.675	83.400, 1.672	83.400, -0.028
419	83.600, 1.683	83.600, 1.676	83.600, 1.719	83.600, 1.675	83.600, 1.672	83.600, -0.028
420	83.800, 1.683	83.800, 1.677	83.800, 1.720	83.800, 1.676	83.800, 1.673	83.800, -0.028
421	84.000, 1.684	84.000, 1.677	84.000, 1.721	84.000, 1.676	84.000, 1.673	84.000, -0.027
422	84.200, 1.684	84.200, 1.678	84.200, 1.722	84.200, 1.676	84.200, 1.674	84.200, -0.027
423	84.400, 1.685	84.400, 1.679	84.400, 1.723	84.400, 1.677	84.400, 1.674	84.400, -0.027
424	84.600, 1.686	84.600, 1.680	84.600, 1.723	84.600, 1.677	84.600, 1.674	84.600, -0.027
425	84.800, 1.686	84.800, 1.681	84.800, 1.724	84.800, 1.678	84.800, 1.675	84.800, -0.026
426	85.000, 1.687	85.000, 1.682	85.000, 1.724	85.000, 1.678	85.000, 1.675	85.000, -0.026
427	85.200, 1.687	85.200, 1.683	85.200, 1.725	85.200, 1.679	85.200, 1.675	85.200, -0.027
428	85.400, 1.687	85.400, 1.683	85.400, 1.725	85.400, 1.679	85.400, 1.675	85.400, -0.027
429	85.600, 1.688	85.600, 1.684	85.600, 1.725	85.600, 1.680	85.600, 1.676	85.600, -0.028
430	85.800, 1.688	85.800, 1.684	85.800, 1.725	85.800, 1.680	85.800, 1.676	85.800, -0.028
431	86.000, 1.689	86.000, 1.685	86.000, 1.725	86.000, 1.681	86.000, 1.677	86.000, -0.028
432	86.200, 1.690	86.200, 1.685	86.200, 1.725	86.200, 1.681	86.200, 1.677	86.200, -0.029
433	86.400, 1.691	86.400, 1.686	86.400, 1.725	86.400, 1.682	86.400, 1.678	86.400, -0.029
434	86.600, 1.692	86.600, 1.687	86.600, 1.725	86.600, 1.683	86.600, 1.679	86.600, -0.029
435	86.800, 1.693	86.800, 1.687	86.800, 1.725	86.800, 1.684	86.800, 1.679	86.800, -0.028
436	87.000, 1.693	87.000, 1.688	87.000, 1.726	87.000, 1.685	87.000, 1.680	87.000, -0.028
437	87.200, 1.694	87.200, 1.688	87.200, 1.726	87.200, 1.685	87.200, 1.681	87.200, -0.028
438	87.400, 1.695	87.400, 1.689	87.400, 1.727	87.400, 1.686	87.400, 1.682	87.400, -0.028
439	87.600, 1.695	87.600, 1.689	87.600, 1.728	87.600, 1.687	87.600, 1.683	87.600, -0.028
440	87.800, 1.696	87.800, 1.690	87.800, 1.729	87.800, 1.687	87.800, 1.684	87.800, -0.027
441	88.000, 1.696	88.000, 1.690	88.000, 1.730	88.000, 1.688	88.000, 1.685	88.000, -0.027
442	88.200, 1.697	88.200, 1.691	88.200, 1.731	88.200, 1.689	88.200, 1.685	88.200, -0.027
443	88.400, 1.698	88.400, 1.692	88.400, 1.732	88.400, 1.689	88.400, 1.686	88.400, -0.028
444	88.600, 1.699	88.600, 1.692	88.600, 1.732	88.600, 1.690	88.600, 1.686	88.600, -0.028
445	88.800, 1.699	88.800, 1.692	88.800, 1.733	88.800, 1.691	88.800, 1.687	88.800, -0.028
446	89.000, 1.700	89.000, 1.693	89.000, 1.733	89.000, 1.691	89.000, 1.687	89.000, -0.028
447	89.200, 1.700	89.200, 1.693	89.200, 1.734	89.200, 1.691	89.200, 1.687	89.200, -0.029
448	89.400, 1.701	89.400, 1.693	89.400, 1.734	89.400, 1.691	89.400, 1.688	89.400, -0.029
449	89.600, 1.702	89.600, 1.693	89.600, 1.735	89.600, 1.691	89.600, 1.688	89.600, -0.030
450	89.800, 1.702	89.800, 1.694	89.800, 1.735	89.800, 1.691	89.800, 1.689	89.800, -0.030
451	90.000, 1.703	90.000, 1.694	90.000, 1.735	90.000, 1.691	90.000, 1.689	90.000, -0.031
452	90.200, 1.703	90.200, 1.695	90.200, 1.736	90.200, 1.691	90.200, 1.689	90.200, -0.031
453	90.400, 1.704	90.400, 1.696	90.400, 1.736	90.400, 1.691	90.400, 1.690	90.400, -0.031
454	90.600, 1.704	90.600, 1.697	90.600, 1.736	90.600, 1.692	90.600, 1.691	90.600, -0.031
455	90.800, 1.705	90.800, 1.697	90.800, 1.737	90.800, 1.692	90.800, 1.691	90.800, -0.031
456	91.000, 1.705	91.000, 1.698	91.000, 1.738	91.000, 1.693	91.000, 1.692	91.000, -0.031
457	91.200, 1.705	91.200, 1.699	91.200, 1.738	91.200, 1.693	91.200, 1.692	91.200, -0.031
458	91.400, 1.705	91.400, 1.699	91.400, 1.739	91.400, 1.693	91.400, 1.692	91.400, -0.031
459	91.600, 1.706	91.600, 1.700	91.600, 1.739	91.600, 1.694	91.600, 1.692	91.600, -0.030
460	91.800, 1.706	91.800, 1.701	91.800, 1.740	91.800, 1.694	91.800, 1.693	91.800, -0.030
461	92.000, 1.707	92.000, 1.701	92.000, 1.740	92.000, 1.695	92.000, 1.693	92.000, -0.030
462	92.200, 1.708	92.200, 1.701	92.200, 1.741	92.200, 1.695	92.200, 1.693	92.200, -0.029
463	92.400, 1.708	92.400, 1.702	92.400, 1.741	92.400, 1.695	92.400, 1.693	92.400, -0.029
464	92.600, 1.709	92.600, 1.702	92.600, 1.741	92.600, 1.696	92.600, 1.694	92.600, -0.029
465	92.800, 1.709	92.800, 1.702	92.800, 1.741	92.800, 1.696	92.800, 1.694	92.800, -0.029
466	93.000, 1.710	93.000, 1.702	93.000, 1.742	93.000, 1.696	93.000, 1.694	93.000, -0.029
467	93.200, 1.710	93.200, 1.702	93.200, 1.742	93.200, 1.697	93.200, 1.695	93.200, -0.029
468	93.400, 1.711	93.400, 1.703	93.400, 1.743	93.400, 1.697	93.400, 1.695	93.400, -0.029
469	93.600, 1.711	93.600, 1.703	93.600, 1.743	93.600, 1.698	93.600, 1.696	93.600, -0.030
470	93.800, 1.712	93.800, 1.703	93.800, 1.744	93.800, 1.698	93.800, 1.696	93.800, -0.030
471	94.000, 1.713	94.000, 1.704	94.000, 1.744	94.000, 1.699	94.000, 1.697	94.000, -0.030
472	94.200, 1.713	94.200, 1.704	94.200, 1.745	94.200, 1.699	94.200, 1.697	94.200, -0.030
473	94.400, 1.714	94.400, 1.705	94.400, 1.746	94.400, 1.700	94.400, 1.698	94.400, -0.030
474	94.600, 1.714	94.600, 1.705	94.600, 1.746	94.600, 1.701	94.600, 1.698	94.600, -0.030
475	94.800, 1.715	94.800, 1.706	94.800, 1.747	94.800, 1.701	94.800, 1.698	94.800, -0.030
476	95.000, 1.715	95.000, 1.707	95.000, 1.747	95.000, 1.702	95.000, 1.699	95.000, -0.030
477	95.200, 1.715	95.200, 1.708	95.200, 1.748	95.200, 1.703	95.200, 1.699	95.200, -0.030
478	95.400, 1.716	95.400, 1.709	95.400, 1.748	95.400, 1.703	95.400, 1.700	95.400, -0.030
479	95.600, 1.716	95.600, 1.709	95.600, 1.749	95.600, 1.704	95.600, 1.700	95.600, -0.030
480	95.800, 1.717	95.800, 1.710	95.800, 1.749	95.800, 1.704	95.800, 1.700	95.800, -0.030
481	96.000, 1.717	96.000, 1.710	96.000, 1.750	96.000, 1.704	96.000, 1.701	96.000, -0.030
482	96.200, 1.717	96.200, 1.710	96.200, 1.750	96.200, 1.704	96.200, 1.701	96.200, -0.030
483	96.400, 1.718	96.400, 1.710	96.400, 1.751	96.400, 1.704	96.400, 1.701	96.400, -0.030
484	96.600, 1.718	96.600, 1.711	96.600, 1.751	96.600, 1.704	96.600, 1.701	96.600, -0.030
485	96.800, 1.719	96.800, 1.711	96.800, 1.751	96.800, 1.704	96.800, 1.702	96.800, -0.030
486	97.000, 1.720	97.000, 1.711	97.000, 1.752	97.000, 1.705	97.000, 1.702	97.000, -0.031
487	97.200, 1.720	97.200, 1.712	97.200, 1.752	97.200, 1.706	97.200, 1.702	97.200, -0.031
488	97.400, 1.721	97.400, 1.712	97.400, 1.752	97.400, 1.707	97.400, 1.702	97.400, -0.031
489	97.600, 1.722	97.600, 1.712	97.600, 1.752	97.600, 1.707	97.600, 1.702	97.600, -0.031
490	97.800, 1.722	97.800, 1.713	97.800, 1.753	97.800, 1.708	97.800, 1.703	97.800, -0.032
491	98.000, 1.723	98.000, 1.713	98.000, 1.754	98.000, 1.709	98.000, 1.703	98.000, -0.032
492	98.200, 1.723	98.200, 1.713	98.200, 1.754	98.200, 1.709	98.200, 1.704	98.200, -0.033
493	98.400, 1.724	98.400, 1.714	98.400, 1.755	98.400, 1.710	98.400, 1.704	98.400, -0.033
494	98.600, 1.724	98.600, 1.714	98.600, 1.755	98.600, 1.711	98.600, 1.705	98.600, -0.033
495	98.800, 1.725	98.800, 1.714	98.800, 1.756	98.800, 1.711	98.800, 1.706	98.800, -0.033
496	99.000, 1.725	99.000, 1.715	99.000, 1.756	99.000, 1.712	99.000, 1.707	99.000, -0.033
497	99.200, 1.726	99.200, 1.715	99.200, 1.757	99.200, 1.712	99.200, 1.708	99.200, -0.032
498	99.400, 1.727	99.400, 1.715	99.400, 1.757	99.400, 1.713	99.400, 1.709	99.400, -0.032
499	99.600, 1.727	99.600, 1.715	99.600, 1.758	99.600, 1.713	99.600, 1.710	99.600, -0.032
500	99.800, 1.728	99.800, 1.715	99.800, 1.758	99.800, 1.713	99.800, 1.710	99.800, -0.032
501	100.000, 1.728	100.000, 1.715	100.000, 1.758	100.000, 1.713	100.000, 1.711	100.000, -0.031
502	100.200, 1.728	100.200, 1.716	100.200, 1.759	100.200, 1.713	100.200, 1.711	100.200, -0.031
503	100.400, 1.728	100.400, 1.716	100.400, 1.759	100.400, 1.713	100.400, 1.712	100.400, -0.031
504	100.600, 1.729	100.600, 1.716	100.600, 1.759	100.600, 1.714	100.600, 1.712	100.600, -0.031
505	100.800, 1.729	100.800, 1.717	100.800, 1.760	100.800, 1.714	100.800, 1.712	100.800, -0.031
506	101.000, 1.729	101.000, 1.717	101.000, 1.760	101.000, 1.715	101.000, 1.713	101.000, -0.032
507	101.200, 1.730	101.200, 1.717	101.200, 1.760	101.200, 1.716	101.200, 1.713	101.200, -0.032
508	101.400, 1.730	101.400, 1.717	101.400, 1.761	101.400, 1.716	101.400, 1.712	101.400, -0.032
509	101.600, 1.730	101.600, 1.718	101.600, 1.762	101.600, 1.716	101.600, 1.713	101.600, -0.033
510	101.800, 1.731	101.800, 1.718	101.800, 1.762	101.800, 1.717	101.800, 1.713	101.800, -0.033
511	102.000, 1.731	102.000, 1.718	102.000, 1.763	102.000, 1.717	102.000, 1.713	102.000, -0.033
512	102.200, 1.731	102.200, 1.718	102.200, 1.763	102.200, 1.717	102.200, 1.713	102.200, -0.033
513	102.400, 1.732	102.400, 1.719	102.400, 1.763	102.400, 1.717	102.400, 1.714	102.400, -0.033
514	102.600, 1.732	102.600, 1.719	102.600, 1.763	102.600, 1.717	102.600, 1.714	102.600, -0.033
515	102.800, 1.733	102.800, 1.719	102.800, 1.764	102.800, 1.717	102.800, 1.715	102.800, -0.033
516	103.000, 1.733	103.000, 1.720	103.000, 1.764	103.000, 1.717	103.000, 1.715	103.000, -0.032
517	103.200, 1.734	103.200, 1.720	103.200, 1.764	103.200, 1.718	103.200, 1.716	103.200, -0.032
518	103.400, 1.734	103.400, 1.721	103.400, 1.764	103.400, 1.718	103.400, 1.716	103.400, -0.032
519	103.600, 1.735	103.600, 1.722	103.600, 1.764	103.600, 1.718	103.600, 1.716	103.600, -0.032
520	103.800, 1.735	103.800, 1.723	103.800, 1.764	103.800, 1.719	103.800, 1.717	103.800, -0.031
521	104.000, 1.736	104.000, 1.723	104.000, 1.764	104.000, 1.719	104.000, 1.717	104.000, -0.031
522	104.200, 1.736	104.200, 1.724	104.200, 1.765	104.200, 1.720	104.200, 1.718	104.200, -0.031
523	104.400, 1.736	104.400, 1.724	104.400, 1.765	104.400, 1.720	104.400, 1.718	104.400, -0.031
524	104.600, 1.736	104.600, 1.725	104.600, 1.766	104.600, 1.721	104.600, 1.718	104.600, -0.031
525	104.800, 1.736	104.800, 1.725	104.800, 1.767	104.800, 1.722	104.800, 1.719	104.800, -0.031
526	105.000, 1.737	105.000, 1.726	105.000, 1.767	105.000, 1.722	105.000, 1.719	105.000, -0.031
527	105.200, 1.737	105.200, 1.726	105.200, 1.768	105.200, 1.723	105.200, 1.720	105.200, -0.031
528	105.400, 1.738	105.400, 1.726	105.400, 1.769	105.400, 1.723	105.400, 1.720	105.400, -0.031
529	105.600, 1.739	105.600, 1.726	105.600, 1.769	105.600, 1.724	105.600, 1.721	105.600, -0.031
530	105.800, 1.739	105.800, 1.727	105.800, 1.769	105.800, 1.724	105.800, 1.722	105.800, -0.031
531	106.000, 1.740	106.000, 1.727	106.000, 1.770	106.000, 1.724	106.000, 1.722	106.000, -0.031
532	106.200, 1.741	106.200, 1.727	106.200, 1.770	106.200, 1.724	106.200, 1.723	106.200, -0.032
533	106.400, 1.741	106.400, 1.727	106.400, 1.771	106.400, 1.724	106.400, 1.723	106.400, -0.032
534	106.600, 1.742	106.600, 1.728	106.600, 1.771	106.600, 1.724	106.600, 1.723	106.600, -0.032
535	106.800, 1.742	106.800, 1.728	106.800, 1.771	106.800, 1.724	106.800, 1.724	106.800, -0.032
536	107.000, 1.743	107.000, 1.729	107.000, 1.771	107.000, 1.725	107.000, 1.724	107.000, -0.032
537	107.200, 1.743	107.200, 1.730	107.200, 1.771	107.200, 1.725	107.200, 1.724	107.200, -0.032
538	107.400, 1.744	107.400, 1.730	107.400, 1.771	107.400, 1.725	107.400, 1.724	107.400, -0.032
539	107.600, 1.744	107.600, 1.731	107.600, 1.771	107.600, 1.725	107.600, 1.724	107.600, -0.032
540	107.800, 1.744	107.800, 1.732	107.800, 1.772	107.800, 1.725	107.800, 1.724	107.800, -0.032
541	108.000, 1.745	108.000, 1.732	108.000, 1.772	108.000, 1.725	108.000, 1.724	108.000, -0.032
542	108.200, 1.745	108.200, 1.732	108.200, 1.773	108.200, 1.726	108.200, 1.723	108.200, -0.032
543	108.400, 1.745	108.400, 1.733	108.400, 1.773	108.400, 1.726	108.400, 1.723	108.400, -0.032
544	108.600, 1.746	108.600, 1.733	108.600, 1.774	108.600, 1.726	108.600, 1.723	108.600, -0.032
545	108.800, 1.746	108.800, 1.734	108.800, 1.774	108.800, 1.726	108.800, 1.723	108.800, -0.032
546	109.000, 1.747	109.000, 1.734	109.000, 1.775	109.000, 1.726	109.000, 1.724	109.000, -0.032
547	109.200, 1.748	109.200, 1.734	109.200, 1.775	109.200, 1.727	109.200, 1.724	109.200, -0.032
548	109.400, 1.749	109.400, 1.735	109.400, 1.776	109.400, 1.727	109.400, 1.725	109.400, -0.032
549	109.600, 1.749	109.600, 1.735	109.600, 1.776	109.600, 1.728	109.600, 1.726	109.600, -0.032
550	109.800, 1.749	109.800, 1.735	109.800, 1.777	109.800, 1.729	109.800, 1.726	109.800, -0.032
551	110.000, 1.750	110.000, 1.736	110.000, 1.777	110.000, 1.729	110.000, 1.727	110.000, -0.032
552	110.200, 1.750	110.200, 1.736	110.200, 1.778	110.200, 1.730	110.200, 1.727	110.200, -0.033
553	110.400, 1.750	110.400, 1.737	110.400, 1.778	110.400, 1.731	110.400, 1.728	110.400, -0.033
554	110.600, 1.750	110.600, 1.737	110.600, 1.778	110.600, 1.732	110.600, 1.729	110.600, -0.033
555	110.800, 1.750	110.800, 1.738	110.800, 1.778	110.800, 1.732	110.800, 1.729	110.800, -0.033
556	111.000, 1.751	111.000, 1.738	111.000, 1.778	111.000, 1.732	111.000, 1.730	111.000, -0.033
557	111.200, 1.751	111.200, 1.739	111.200, 1.778	111.200, 1.733	111.200, 1.731	111.200, -0.032
558	111.400, 1.751	111.400, 1.739	111.400, 1.778	111.400, 1.733	111.400, 1.731	111.400, -0.032
559	111.600, 1.751	111.600, 1.739	111.600, 1.779	111.600, 1.733	111.600, 1.731	111.600, -0.032
560	111.800, 1.751	111.800, 1.739	111.800, 1.779	111.800, 1.733	111.800, 1.732	111.800, -0.032
561	112.000, 1.751	112.000, 1.739	112.000, 1.779	112.000, 1.734	112.000, 1.732	112.000, -0.032
562	112.200, 1.751	112.200, 1.739	112.200, 1.780	112.200, 1.734	112.200, 1.732	112.200, -0.032
563	112.400, 1.752	112.400, 1.739	112.400, 1.780	112.400, 1.734	112.400, 1.732	112.400, -0.032
564	112.600, 1.753	112.600, 1.739	112.600, 1.780	112.600, 1.734	112.600, 1.732	112.600, -0.032
565	112.800, 1.753	112.800, 1.739	112.800, 1.780	112.800, 1.734	112.800, 1.732	112.800, -0.032
566	113.000, 1.754	113.000, 1.739	113.000, 1.780	113.000, 1.734	113.000, 1.732	113.000, -0.032
567	113.200, 1.755	113.200, 1.739	113.200, 1.781	113.200, 1.735	113.200, 1.733	113.200, -0.032
568	113.400, 1.755	113.400, 1.739	113.400, 1.781	113.400, 1.735	113.400, 1.733	113.400, -0.032
569	113.600, 1.756	113.600, 1.740	113.600, 1.781	113.600, 1.736	113.600, 1.733	113.600, -0.032
570	113.800, 1.757	113.800, 1.740	113.800, 1.781	113.800, 1.736	113.800, 1.733	113.800, -0.032
571	114.000, 1.757	114.000, 1.740	114.000, 1.781	114.000, 1.737	114.000, 1.734	114.000, -0.032
572	114.200, 1.758	114.200, 1.741	114.200, 1.781	114.200, 1.737	114.200, 1.734	114.200, -0.032
573	114.400, 1.758	114.400, 1.741	114.400, 1.781	114.400, 1.737	114.400, 1.734	114.400, -0.032
574	114.600, 1.759	114.600, 1.742	114.600, 1.781	114.600, 1.738	114.600, 1.735	114.600, -0.032
575	114.800, 1.759	114.800, 1.742	114.800, 1.781	114.800, 1.738	114.800, 1.735	114.800, -0.032
576	115.000, 1.760	115.000, 1.743	115.000, 1.781	115.000, 1.738	115.000, 1.736	115.000, -0.032
577	115.200, 1.760	115.200, 1.744	115.200, 1.782	115.200, 1.739	115.200, 1.736	115.200, -0.032
578	115.400, 1.760	115.400, 1.744	115.400, 1.782	115.400, 1.739	115.400, 1.737	115.400, -0.032
579	115.600, 1.760	115.600, 1.744	115.600, 1.783	115.600, 1.740	115.600, 1.737	115.600, -0.032
580	115.800, 1.760	115.800, 1.744	115.800, 1.784	115.800, 1.740	115.800, 1.738	115.800, -0.032
581	116.000, 1.760	116.000, 1.744	116.000, 1.785	116.000, 1.741	116.000, 1.738	116.000, -0.033
582	116.200, 1.760	116.200, 1.745	116.200, 1.785	116.200, 1.741	116.200, 1.739	116.200, -0.033
583	116.400, 1.760	116.400, 1.745	116.400, 1.786	116.400, 1.742	116.400, 1.739	116.400, -0.033
584	116.600, 1.760	116.600, 1.745	116.600, 1.786	116.600, 1.742	116.600, 1.739	116.600, -0.033
585	116.800, 1.761	116.800, 1.745	116.800, 1.786	116.800, 1.743	116.800, 1.739	116.800, -0.034
586	117.000, 1.761	117.000, 1.745	117.000, 1.787	117.000, 1.743	117.000, 1.739	117.000, -0.034
587	117.200, 1.761	117.200, 1.746	117.200, 1.787	117.200, 1.744	117.200, 1.740	117.200, -0.034
588	117.400, 1.762	117.400, 1.746	117.400, 1.788	117.400, 1.744	117.400, 1.740	117.400, -0.034
589	117.600, 1.762	117.600, 1.747	117.600, 1.788	117.600, 1.744	117.600, 1.740	117.600, -0.034
590	117.800, 1.762	117.800, 1.747	117.800, 1.789	117.800, 1.744	117.800, 1.740	117.800, -0.034
591	118.000, 1.763	118.000, 1.748	118.000, 1.789	118.000, 1.744	118.000, 1.741	118.000, -0.034
592	118.200, 1.763	118.200, 1.749	118.200, 1.789	118.200, 1.744	118.200, 1.741	118.200, -0.033
593	118.400, 1.764	118.400, 1.750	118.400, 1.790	118.400, 1.744	118.400, 1.741	118.400, -0.033
594	118.600, 1.764	118.600, 1.750	118.600, 1.790	118.600, 1.744	118.600, 1.741	118.600, -0.033
595	118.800, 1.765	118.800, 1.751	118.800, 1.791	118.800, 1.744	118.800, 1.741	118.800, -0.033
596	119.000, 1.765	119.000, 1.752	119.000, 1.791	119.000, 1.744	119.000, 1.742	119.000, -0.033
597	119.200, 1.765	119.200, 1.752	119.200, 1.792	119.200, 1.744	119.200, 1.742	119.200, -0.033
598	119.400, 1.766	119.400, 1.753	119.400, 1.792	119.400, 1.744	119.400, 1.743	119.400, -0.033
599	119.600, 1.766	119.600, 1.753	119.600, 1.792	119.600, 1.744	119.600, 1.743	119.600, -0.033
600	119.800, 1.766	119.800, 1.753	119.800, 1.793	119.800, 1.744	119.800, 1.744	119.800, -0.033
601	120.000, 1.766	120.000, 1.753	120.000, 1.793	120.000, 1.744	120.000, 1.744	120.000, -0.033
602	120.200, 1.766	120.200, 1.754	120.200, 1.793	120.200, 1.744	120.200, 1.744	120.200, -0.033
603	120.400, 1.766	120.400, 1.754	120.400, 1.793	120.400, 1.744	120.400, 1.744	120.400, -0.033
604	120.600, 1.767	120.600, 1.754	120.600, 1.793	120.600, 1.745	120.600, 1.745	120.600, -0.033
605	120.800, 1.767	120.800, 1.754	120.800, 1.794	120.800, 1.745	120.800, 1.745	120.800, -0.033
606	121.000, 1.767	121.000, 1.754	121.000, 1.794	121.000, 1.746	121.000, 1.745	121.000, -0.033
607	121.200, 1.768	121.200, 1.754	121.200, 1.794	121.200, 1.746	121.200, 1.746	121.200, -0.034
608	121.400, 1.768	121.400, 1.755	121.400, 1.794	121.400, 1.746	121.400, 1.746	121.400, -0.034
609	121.600, 1.769	121.600, 1.755	121.600, 1.794	121.600, 1.746	121.600, 1.746	121.600, -0.034
610	121.800, 1.769	121.800, 1.755	121.800, 1.794	121.800, 1.746	121.800, 1.747	121.800, -0.034
611	122.000, 1.770	122.000, 1.755	122.000, 1.794	122.000, 1.747	122.000, 1.747	122.000, -0.033
612	122.200, 1.770	122.200, 1.755	122.200, 1.794	122.200, 1.747	122.200, 1.747	122.200, -0.033
613	122.400, 1.771	122.400, 1.755	122.400, 1.794	122.400, 1.748	122.400, 1.747	122.400, -0.033
614	122.600, 1.771	122.600, 1.754	122.600, 1.794	122.600, 1.748	122.600, 1.747	122.600, -0.033
615	122.800, 1.771	122.800, 1.755	122.800, 1.794	122.800, 1.749	122.800, 1.748	122.800, -0.033
616	123.000, 1.772	123.000, 1.755	123.000, 1.794	123.000, 1.749	123.000, 1.748	123.000, -0.033
617	123.200, 1.772	123.200, 1.755	123.200, 1.795	123.200, 1.750	123.200, 1.748	123.200, -0.033
618	123.400, 1.772	123.400, 1.755	123.400, 1.795	123.400, 1.750	123.400, 1.748	123.400, -0.033
619	123.600, 1.772	123.600, 1.756	123.600, 1.795	123.600, 1.751	123.600, 1.749	123.600, -0.033
620	123.800, 1.773	123.800, 1.756	123.800, 1.796	123.800, 1.751	123.800, 1.749	123.800, -0.033
621	124.000, 1.773	124.000, 1.757	124.000, 1.796	124.000, 1.752	124.000, 1.749	124.000, -0.033
622	124.200, 1.773	124.200, 1.757	124.200, 1.797	124.200, 1.752	124.200, 1.749	124.200, -0.032
623	124.400, 1.774	124.400, 1.757	124.400, 1.798	124.400, 1.753	124.400, 1.749	124.400, -0.032
624	124.600, 1.774	124.600, 1.758	124.600, 1.798	124.600, 1.753	124.600, 1.749	124.600, -0.032
625	124.800, 1.775	124.800, 1.758	124.800, 1.799	124.800, 1.753	124.800, 1.749	124.800, -0.032
626	125.000, 1.776	125.000, 1.759	125.000, 1.800	125.000, 1.753	125.000, 1.750	125.000, -0.032
627	125.200, 1.776	125.200, 1.759	125.200, 1.800	125.200, 1.753	125.200, 1.750	125.200, -0.032
628	125.400, 1.777	125.400, 1.759	125.400, 1.801	125.400, 1.753	125.400, 1.750	125.400, -0.032
629	125.600, 1.777	125.600, 1.759	125.600, 1.801	125.600, 1.753	125.600, 1.751	125.600, -0.032
630	125.800, 1.777	125.800, 1.759	125.800, 1.801	125.800, 1.754	125.800, 1.751	125.800, -0.032
631	126.000, 1.778	126.000, 1.759	126.000, 1.801	126.000, 1.754	126.000, 1.752	126.000, -0.032
632	126.200, 1.778	126.200, 1.760	126.200, 1.801	126.200, 1.754	126.200, 1.753	126.200, -0.032
633	126.400, 1.778	126.400, 1.760	126.400, 1.802	126.400, 1.754	126.400, 1.753	126.400, -0.032
634	126.600, 1.778	126.600, 1.760	126.600, 1.802	126.600, 1.754	126.600, 1.754	126.600, -0.032
635	126.800, 1.778	126.800, 1.761	126.800, 1.802	126.800, 1.755	126.800, 1.754	126.800, -0.032
636	127.000, 1.778	127.000, 1.761	127.000, 1.802	127.000, 1.755	127.000, 1.754	127.000, -0.032
637	127.200, 1.779	127.200, 1.762	127.200, 1.802	127.200, 1.755	127.200, 1.754	127.200, -0.033
638	127.400, 1.779	127.400, 1.762	127.400, 1.802	127.400, 1.756	127.400, 1.755	127.400, -0.033
639	127.600, 1.779	127.600, 1.763	127.600, 1.802	127.600, 1.756	127.600, 1.755	127.600, -0.033
640	127.800, 1.780	127.800, 1.763	127.800, 1.802	127.800, 1.756	127.800, 1.755	127.800, -0.033
641	128.000, 1.780	128.000, 1.763	128.000, 1.802	128.000, 1.757	128.000, 1.755	128.000, -0.033
642	128.200, 1.780	128.200, 1.764	128.200, 1.802	128.200, 1.757	128.200, 1.755	128.200, -0.033
643	128.400, 1.781	128.400, 1.764	128.400, 1.803	128.400, 1.757	128.400, 1.755	128.400, -0.034
644	128.600, 1.781	128.600, 1.764	128.600, 1.803	128.600, 1.758	128.600, 1.756	128.600, -0.034
645	128.800, 1.781	128.800, 1.765	128.800, 1.803	128.800, 1.758	128.800, 1.756	128.800, -0.034
646	129.000, 1.782	129.000, 1.765	129.000, 1.803	129.000, 1.758	129.000, 1.756	129.000, -0.034
647	129.200, 1.782	129.200, 1.765	129.200, 1.803	129.200, 1.759	129.200, 1.757	129.200, -0.034
648	129.400, 1.782	129.400, 1.765	129.400, 1.803	129.400, 1.759	129.400, 1.757	129.400, -0.034
649	129.600, 1.782	129.600, 1.765	129.600, 1.804	129.600, 1.759	129.600, 1.758	129.600, -0.033
650	129.800, 1.783	129.800, 1.765	129.800, 1.804	129.800, 1.760	129.800, 1.758	129.800, -0.033
651	130.000, 1.783	130.000, 1.766	130.000, 1.804	130.000, 1.760	130.000, 1.759	130.000, -0.033
652	130.200, 1.783	130.200, 1.766	130.200, 1.804	130.200, 1.760	130.200, 1.759	130.200, -0.033
653	130.400, 1.784	130.400, 1.766	130.400, 1.805	130.400, 1.760	130.400, 1.759	130.400, -0.033
654	130.600, 1.784	130.600, 1.766	130.600, 1.805	130.600, 1.760	130.600, 1.759	130.600, -0.033
655	130.800, 1.784	130.800, 1.767	130.800, 1.805	130.800, 1.760	130.800, 1.760	130.800, -0.033
656	131.000, 1.785	131.000, 1.767	131.000, 1.806	131.000, 1.761	131.000, 1.760	131.000, -0.033
657	131.200, 1.785	131.200, 1.767	131.200, 1.806	131.200, 1.761	131.200, 1.760	131.200, -0.033
658	131.400, 1.786	131.400, 1.768	131.400, 1.806	131.400, 1.761	131.400, 1.760	131.400, -0.033
659	131.600, 1.786	131.600, 1.769	131.600, 1.806	131.600, 1.761	131.600, 1.760	131.600, -0.033
660	131.800, 1.786	131.800, 1.769	131.800, 1.807	131.800, 1.762	131.800, 1.760	131.800, -0.033
661	132.000, 1.786	132.000, 1.770	132.000, 1.807	132.000, 1.762	132.000, 1.760	132.000, -0.033
662	132.200, 1.786	132.200, 1.770	132.200, 1.807	132.200, 1.762	132.200, 1.761	132.200, -0.033
663	132.400, 1.786	132.400, 1.770	132.400, 1.808	132.400, 1.762	132.400, 1.761	132.400, -0.033
664	132.600, 1.786	132.600, 1.770	132.600, 1.808	132.600, 1.763	132.600, 1.761	132.600, -0.034
665	132.800, 1.786	132.800, 1.771	132.800, 1.809	132.800, 1.763	132.800, 1.761	132.800, -0.034
666	133.000, 1.787	133.000, 1.771	133.000, 1.809	133.000, 1.763	133.000, 1.762	133.000, -0.033
667	133.200, 1.787	133.200, 1.771	133.200, 1.810	133.200, 1.764	133.200, 1.762	133.200, -0.033
668	133.400, 1.787	133.400, 1.771	133.400, 1.811	133.400, 1.764	133.400, 1.762	133.400, -0.033
669	133.600, 1.787	133.600, 1.771	133.600, 1.811	133.600, 1.764	133.600, 1.763	133.600, -0.033
670	133.800, 1.788	133.800, 1.771	133.800, 1.812	133.800, 1.764	133.800, 1.763	133.800, -0.034
671	134.000, 1.788	134.000, 1.771	134.000, 1.812	134.000, 1.764	134.000, 1.763	134.000, -0.034
672	134.200, 1.789	134.200, 1.771	134.200, 1.812	134.200, 1.764	134.200, 1.764	134.200, -0.034
673	134.400, 1.789	134.400, 1.771	134.400, 1.813	134.400, 1.764	134.400, 1.764	134.400, -0.034
674	134.600, 1.790	134.600, 1.771	134.600, 1.812	134.600, 1.764	134.600, 1.764	134.600, -0.034
675	134.800, 1.790	134.800, 1.771	134.800, 1.812	134.800, 1.764	134.800, 1.765	134.800, -0.034
676	135.000, 1.791	135.000, 1.772	135.000, 1.812	135.000, 1.764	135.000, 1.765	135.000, -0.034
677	135.200, 1.791	135.200, 1.772	135.200, 1.812	135.200, 1.764	135.200, 1.766	135.200, -0.034
678	135.400, 1.792	135.400, 1.773	135.400, 1.812	135.400, 1.764	135.400, 1.766	135.400, -0.034
679	135.600, 1.792	135.600, 1.773	135.600, 1.812	135.600, 1.765	135.600, 1.767	135.600, -0.034
680	135.800, 1.792	135.800, 1.774	135.800, 1.812	135.800, 1.765	135.800, 1.767	135.800, -0.034
681	136.000, 1.792	136.000, 1.774	136.000, 1.812	136.000, 1.765	136.000, 1.767	136.000, -0.034
682	136.200, 1.792	136.200, 1.774	136.200, 1.812	136.200, 1.765	136.200, 1.767	136.200, -0.034
683	136.400, 1.792	136.400, 1.774	136.400, 1.812	136.400, 1.766	136.400, 1.768	136.400, -0.034
684	136.600, 1.792	136.600, 1.774	136.600, 1.812	136.600, 1.766	136.600, 1.768	136.600, -0.034
685	136.800, 1.792	136.800, 1.774	136.800, 1.813	136.800, 1.767	136.800, 1.768	136.800, -0.034
686	137.000, 1.793	137.000, 1.774	137.000, 1.813	137.000, 1.767	137.000, 1.768	137.000, -0.034
687	137.200, 1.793	137.200, 1.774	137.200, 1.814	137.200, 1.767	137.200, 1.768	137.200, -0.034
688	137.400, 1.793	137.400, 1.774	137.400, 1.814	137.400, 1.768	137.400, 1.768	137.400, -0.034
689	137.600, 1.793	137.600, 1.774	137.600, 1.814	137.600, 1.768	137.600, 1.768	137.600, -0.034
690	137.800, 1.794	137.800, 1.774	137.800, 1.815	137.800, 1.768	137.800, 1.768	137.800, -0.035
691	138.000, 1.794	138.000, 1.775	138.000, 1.815	138.000, 1.769	138.000, 1.768	138.000, -0.035
692	138.200, 1.794	138.200, 1.775	138.200, 1.815	138.200, 1.769	138.200, 1.768	138.200, -0.035
693	138.400, 1.794	138.400, 1.774	138.400, 1.815	138.400, 1.769	138.400, 1.769	138.400, -0.035
694	138.600, 1.795	138.600, 1.775	138.600, 1.815	138.600, 1.770	138.600, 1.769	138.600, -0.035
695	138.800, 1.795	138.800, 1.775	138.800, 1.815	138.800, 1.770	138.800, 1.770	138.800, -0.035
696	139.000, 1.796	139.000, 1.776	139.000, 1.815	139.000, 1.771	139.000, 1.770	139.000, -0.035
697	139.200, 1.796	139.200, 1.776	139.200, 1.816	139.200, 1.771	139.200, 1.771	139.200, -0.034
698	139.400, 1.797	139.400, 1.777	139.400, 1.816	139.400, 1.772	139.400, 1.771	139.400, -0.034
699	139.600, 1.797	139.600, 1.778	139.600, 1.816	139.600, 1.772	139.600, 1.771	139.600, -0.034
700	139.800, 1.797	139.800, 1.778	139.800, 1.817	139.800, 1.772	139.800, 1.772	139.800, -0.034
701	140.000, 1.798	140.000, 1.779	140.000, 1.817	140.000, 1.772	140.000, 1.772	140.000, -0.033
702	140.200, 1.798	140.200, 1.779	140.200, 1.817	140.200, 1.773	140.200, 1.772	140.200, -0.033
703	140.400, 1.798	140.400, 1.780	140.400, 1.817	140.400, 1.773	140.400, 1.773	140.400, -0.033
704	140.600, 1.798	140.600, 1.780	140.600, 1.818	140.600, 1.773	140.600, 1.773	140.600, -0.033
705	140.800, 1.799	140.800, 1.781	140.800, 1.818	140.800, 1.773	140.800, 1.773	140.800, -0.033
706	141.000, 1.799	141.000, 1.781	141.000, 1.818	141.000, 1.773	141.000, 1.773	141.000, -0.033
707	141.200, 1.799	141.200, 1.781	141.200, 1.819	141.200, 1.773	141.200, 1.774	141.200, -0.034
708	141.400, 1.800	141.400, 1.782	141.400, 1.819	141.400, 1.773	141.400, 1.774	141.400, -0.034
709	141.600, 1.800	141.600, 1.782	141.600, 1.819	141.600, 1.773	141.600, 1.774	141.600, -0.034
710	141.800, 1.800	141.800, 1.782	141.800, 1.819	141.800, 1.774	141.800, 1.774	141.800, -0.034
711	142.000, 1.800	142.000, 1.782	142.000, 1.820	142.000, 1.774	142.000, 1.774	142.000, -0.034
712	142.200, 1.800	142.200, 1.782	142.200, 1.820	142.200, 1.775	142.200, 1.774	142.200, -0.034
713	142.400, 1.801	142.400, 1.782	142.400, 1.820	142.400, 1.775	142.400, 1.774	142.400, -0.034
714	142.600, 1.801	142.600, 1.782	142.600, 1.819	142.600, 1.775	142.600, 1.774	142.600, -0.034
715	142.800, 1.801	142.800, 1.782	142.800, 1.819	142.800, 1.775	142.800, 1.774	142.800, -0.034
716	143.000, 1.802	143.000, 1.782	143.000, 1.819	143.000, 1.775	143.000, 1.775	143.000, -0.034
717	143.200, 1.802	143.200, 1.782	143.200, 1.820	143.200, 1.775	143.200, 1.775	143.200, -0.034
718	143.400, 1.802	143.400, 1.782	143.400, 1.820	143.400, 1.775	143.400, 1.776	143.400, -0.034
719	143.600, 1.802	143.600, 1.781	143.600, 1.820	143.600, 1.776	143.600, 1.776	143.600, -0.034
720	143.800, 1.802	143.800, 1.782	143.800, 1.820	143.800, 1.776	143.800, 1.776	143.800, -0.034
721	144.000, 1.802	144.000, 1.782	144.000, 1.820	144.000, 1.776	144.000, 1.776	144.000, -0.034
722	144.200, 1.802	144.200, 1.782	144.200, 1.820	144.200, 1.776	144.200, 1.776	144.200, -0.034
723	144.400, 1.802	144.400, 1.782	144.400, 1.820	144.400, 1.776	144.400, 1.776	144.400, -0.033
724	144.600, 1.802	144.600, 1.783	144.600, 1.820	144.600, 1.776	144.600, 1.777	144.600, -0.033
725	144.800, 1.803	144.800, 1.783	144.800, 1.821	144.800, 1.777	144.800, 1.777	144.800, -0.033
726	145.000, 1.803	145.000, 1.784	145.000, 1.821	145.000, 1.777	145.000, 1.777	145.000, -0.034
727	145.200, 1.803	145.200, 1.784	145.200, 1.821	145.200, 1.778	145.200, 1.778	145.200, -0.034
728	145.400, 1.804	145.400, 1.784	145.400, 1.821	145.400, 1.779	145.400, 1.778	145.400, -0.034
729	145.600, 1.804	145.600, 1.785	145.600, 1.821	145.600, 1.779	145.600, 1.779	145.600, -0.033
730	145.800, 1.804	145.800, 1.785	145.800, 1.822	145.800, 1.780	145.800, 1.779	145.800, -0.033
731	146.000, 1.805	146.000, 1.786	146.000, 1.822	146.000, 1.780	146.000, 1.779	146.000, -0.033
732	146.200, 1.805	146.200, 1.786	146.200, 1.822	146.200, 1.780	146.200, 1.780	146.200, -0.033
733	146.400, 1.806	146.400, 1.786	146.400, 1.823	146.400, 1.780	146.400, 1.780	146.400, -0.034
734	146.600, 1.806	146.600, 1.787	146.600, 1.823	146.600, 1.779	146.600, 1.781	146.600, -0.034
735	146.800, 1.806	146.800, 1.787	146.800, 1.823	146.800, 1.779	146.800, 1.781	146.800, -0.034
736	147.000, 1.806	147.000, 1.788	147.000, 1.824	147.000, 1.779	147.000, 1.782	147.000, -0.034
737	147.200, 1.806	147.200, 1.788	147.200, 1.824	147.200, 1.779	147.200, 1.782	147.200, -0.034
738	147.400, 1.806	147.400, 1.788	147.400, 1.825	147.400, 1.780	147.400, 1.782	147.400, -0.034
739	147.600, 1.807	147.600, 1.788	147.600, 1.825	147.600, 1.780	147.600, 1.782	147.600, -0.033
740	147.800, 1.807	147.800, 1.788	147.800, 1.825	147.800, 1.780	147.800, 1.782	147.800, -0.033
741	148.000, 1.808	148.000, 1.789	148.000, 1.825	148.000, 1.780	148.000, 1.782	148.000, -0.033
742	148.200, 1.808	148.200, 1.789	148.200, 1.826	148.200, 1.781	148.200, 1.782	148.200, -0.033
743	148.400, 1.809	148.400, 1.789	148.400, 1.826	148.400, 1.781	148.400, 1.782	148.400, -0.033
744	148.600, 1.809	148.600, 1.789	148.600, 1.827	148.600, 1.782	148.600, 1.782	148.600, -0.033
745	148.800, 1.810	148.800, 1.790	148.800, 1.827	148.800, 1.782	148.800, 1.783	148.800, -0.033
746	149.000, 1.810	149.000, 1.790	149.000, 1.827	149.000, 1.782	149.000, 1.783	149.000, -0.033
747	149.200, 1.811	149.200, 1.790	149.200, 1.828	149.200, 1.782	149.200, 1.783	149.200, -0.033
748	149.400, 1.811	149.400, 1.790	149.400, 1.828	149.400, 1.783	149.400, 1.784	149.400, -0.033
749	149.600, 1.812	149.600, 1.790	149.600, 1.829	149.600, 1.783	149.600, 1.784	149.600, -0.033
750	149.800, 1.812	149.800, 1.790	149.800, 1.829	149.800, 1.782	149.800, 1.784	149.800, -0.033
751	150.000, 1.812	150.000, 1.790	150.000, 1.829	150.000, 1.782	150.000, 1.784	150.000, -0.033
752	150.200, 1.811	150.200, 1.790	150.200, 1.830	150.200, 1.781	150.200, 1.783	150.200, -0.033
753	150.400, 1.809	150.400, 1.790	150.400, 1.831	150.400, 1.780	150.400, 1.782	150.400, -0.033
754	150.600, 1.807	150.600, 1.789	150.600, 1.831	150.600, 1.779	150.600, 1.781	150.600, -0.033
755	150.800, 1.805	150.800, 1.789	150.800, 1.832	150.800, 1.777	150.800, 1.779	150.800, -0.033
756	151.000, 1.803	151.000, 1.788	151.000, 1.832	151.000, 1.776	151.000, 1.778	151.000, -0.033
757	151.200, 1.801	151.200, 1.787	151.200, 1.832	151.200, 1.774	151.200, 1.777	151.200, -0.032
758	151.400, 1.800	151.400, 1.786	151.400, 1.832	151.400, 1.772	151.400, 1.776	151.400, -0.032
759	151.600, 1.798	151.600, 1.786	151.600, 1.832	151.600, 1.771	151.600, 1.775	151.600, -0.031
760	151.800, 1.797	151.800, 1.785	151.800, 1.831	151.800, 1.770	151.800, 1.774	151.800, -0.031
761	152.000, 1.795	152.000, 1.784	152.000, 1.831	152.000, 1.768	152.000, 1.773	152.000, -0.030
762	152.200, 1.795	152.200, 1.783	152.200, 1.829	152.200, 1.767	152.200, 1.773	152.200, -0.029
763	152.400, 1.794	152.400, 1.782	152.400, 1.828	152.400, 1.766	152.400, 1.772	152.400, -0.029
764	152.600, 1.792	152.600, 1.782	152.600, 1.828	152.600, 1.765	152.600, 1.771	152.600, -0.028
765	152.800, 1.791	152.800, 1.781	152.800, 1.826	152.800, 1.764	152.800, 1.771	152.800, -0.028
766	153.000, 1.790	153.000, 1.780	153.000, 1.825	153.000, 1.763	153.000, 1.770	153.000, -0.028
767	153.200, 1.789	153.200, 1.779	153.200, 1.824	153.200, 1.762	153.200, 1.769	153.200, -0.027
768	153.400, 1.788	153.400, 1.778	153.400, 1.823	153.400, 1.760	153.400, 1.768	153.400, -0.027
769	153.600, 1.787	153.600, 1.777	153.600, 1.823	153.600, 1.759	153.600, 1.767	153.600, -0.026
770	153.800, 1.786	153.800, 1.776	153.800, 1.822	153.800, 1.758	153.800, 1.766	153.800, -0.026
771	154.000, 1.785	154.000, 1.775	154.000, 1.821	154.000, 1.757	154.000, 1.765	154.000, -0.025
772	154.200, 1.784	154.200, 1.774	154.200, 1.820	154.200, 1.755	154.200, 1.764	154.200, -0.025
773	154.400, 1.783	154.400, 1.773	154.400, 1.820	154.400, 1.754	154.400, 1.763	154.400, -0.024
774	154.600, 1.782	154.600, 1.773	154.600, 1.819	154.600, 1.753	154.600, 1.762	154.600, -0.024
775	154.800, 1.782	154.800, 1.772	154.800, 1.819	154.800, 1.753	154.800, 1.761	154.800, -0.023
776	155.000, 1.781	155.000, 1.771	155.000, 1.818	155.000, 1.752	155.000, 1.760	155.000, -0.023
777	155.200, 1.781	155.200, 1.771	155.200, 1.818	155.200, 1.751	155.200, 1.759	155.200, -0.023
778	155.400, 1.780	155.400, 1.770	155.400, 1.818	155.400, 1.750	155.400, 1.758	155.400, -0.022
779	155.600, 1.780	155.600, 1.770	155.600, 1.818	155.600, 1.750	155.600, 1.757	155.600, -0.022
780	155.800, 1.779	155.800, 1.770	155.800, 1.818	155.800, 1.749	155.800, 1.756	155.800, -0.021
781	156.000, 1.779	156.000, 1.769	156.000, 1.818	156.000, 1.748	156.000, 1.756	156.000, -0.021
782	156.200, 1.778	156.200, 1.769	156.200, 1.818	156.200, 1.748	156.200, 1.755	156.200, -0.021
783	156.400, 1.778	156.400, 1.768	156.400, 1.818	156.400, 1.747	156.400, 1.754	156.400, -0.021
784	156.600, 1.778	156.600, 1.768	156.600, 1.818	156.600, 1.747	156.600, 1.754	156.600, -0.021
785	156.800, 1.777	156.800, 1.767	156.800, 1.817	156.800, 1.746	156.800, 1.753	156.800, -0.021
786	157.000, 1.777	157.000, 1.766	157.000, 1.817	157.000, 1.746	157.000, 1.753	157.000, -0.020
787	157.200, 1.776	157.200, 1.766	157.200, 1.816	157.200, 1.745	157.200, 1.752	157.200, -0.020
788	157.400, 1.776	157.400, 1.766	157.400, 1.816	157.400, 1.744	157.400, 1.752	157.400, -0.020
789	157.600, 1.775	157.600, 1.765	157.600, 1.815	157.600, 1.744	157.600, 1.751	157.600, -0.020
790	157.800, 1.774	157.800, 1.764	157.800, 1.815	157.800, 1.743	157.800, 1.751	157.800, -0.019
791	158.000, 1.774	158.000, 1.764	158.000, 1.814	158.000, 1.743	158.000, 1.750	158.000, -0.019
792	158.200, 1.773	158.200, 1.763	158.200, 1.813	158.200, 1.742	158.200, 1.750	158.200, -0.019
793	158.400, 1.773	158.400, 1.763	158.400, 1.813	158.400, 1.742	158.400, 1.749	158.400, -0.018
794	158.600, 1.773	158.600, 1.762	158.600, 1.812	158.600, 1.742	158.600, 1.749	158.600, -0.018
795	158.800, 1.772	158.800, 1.762	158.800, 1.812	158.800, 1.741	158.800, 1.748	158.800, -0.017
796	159.000, 1.772	159.000, 1.761	159.000, 1.811	159.000, 1.741	159.000, 1.748	159.000, -0.017
797	159.200, 1.772	159.200, 1.761	159.200, 1.811	159.200, 1.740	159.200, 1.747	159.200, -0.016
798	159.400, 1.771	159.400, 1.761	159.400, 1.811	159.400, 1.739	159.400, 1.747	159.400, -0.015
799	159.600, 1.771	159.600, 1.761	159.600, 1.811	159.600, 1.739	159.600, 1.746	159.600, -0.015
800	159.800, 1.770	159.800, 1.761	159.800, 1.810	159.800, 1.738	159.800, 1.746	159.800, -0.015
801	160.000, 1.770	160.000, 1.761	160.000, 1.810	160.000, 1.737	160.000, 1.745	160.000, -0.015
802	160.200, 1.770	160.200, 1.760	160.200, 1.810	160.200, 1.737	160.200, 1.744	160.200, -0.014
803	160.400, 1.769	160.400, 1.760	160.400, 1.809	160.400, 1.737	160.400, 1.744	160.400, -0.014
804	160.600, 1.769	160.600, 1.759	160.600, 1.809	160.600, 1.737	160.600, 1.743	160.600, -0.014
805	160.800, 1.768	160.800, 1.759	160.800, 1.808	160.800, 1.736	160.800, 1.743	160.800, -0.014
806	161.000, 1.768	161.000, 1.758	161.000, 1.808	161.000, 1.736	161.000, 1.742	161.000, -0.015
807	161.200, 1.768	161.200, 1.758	161.200, 1.808	161.200, 1.736	161.200, 1.742	161.200, -0.015
808	161.400, 1.768	161.400, 1.757	161.400, 1.807	161.400, 1.735	161.400, 1.742	161.400, -0.015
809	161.600, 1.768	161.600, 1.756	161.600, 1.807	161.600, 1.735	161.600, 1.742	161.600, -0.015
810	161.800, 1.767	161.800, 1.755	161.800, 1.807	161.800, 1.735	161.800, 1.741	161.800, -0.015
811	162.000, 1.767	162.000, 1.755	162.000, 1.807	162.000, 1.734	162.000, 1.741	162.000, -0.014
812	162.200, 1.767	162.200, 1.754	162.200, 1.807	162.200, 1.734	162.200, 1.740	162.200, -0.014
813	162.400, 1.767	162.400, 1.753	162.400, 1.807	162.400, 1.734	162.400, 1.740	162.400, -0.014
814	162.600, 1.767	162.600, 1.753	162.600, 1.806	162.600, 1.733	162.600, 1.739	162.600, -0.013
815	162.800, 1.767	162.800, 1.753	162.800, 1.806	162.800, 1.733	162.800, 1.738	162.800, -0.013
816	163.000, 1.767	163.000, 1.753	163.000, 1.806	163.000, 1.732	163.000, 1.738	163.000, -0.012
817	163.200, 1.766	163.200, 1.753	163.200, 1.806	163.200, 1.731	163.200, 1.737	163.200, -0.012
818	163.400, 1.766	163.400, 1.753	163.400, 1.806	163.400, 1.731	163.400, 1.737	163.400, -0.011
819	163.600, 1.765	163.600, 1.753	163.600, 1.805	163.600, 1.731	163.600, 1.737	163.600, -0.011
820	163.800, 1.765	163.800, 1.753	163.800, 1.805	163.800, 1.730	163.800, 1.736	163.800, -0.011
821	164.000, 1.764	164.000, 1.753	164.000, 1.805	164.000, 1.730	164.000, 1.735	164.000, -0.010
822	164.200, 1.764	164.200, 1.753	164.200, 1.804	164.200, 1.730	164.200, 1.735	164.200, -0.010
823	164.400, 1.764	164.400, 1.753	164.400, 1.804	164.400, 1.730	164.400, 1.735	164.400, -0.010
824	164.600, 1.763	164.600, 1.752	164.600, 1.804	164.600, 1.729	164.600, 1.734	164.600, -0.010
825	164.800, 1.763	164.800, 1.752	164.800, 1.803	164.800, 1.729	164.800, 1.734	164.800, -0.009
826	165.000, 1.763	165.000, 1.751	165.000, 1.803	165.000, 1.729	165.000, 1.734	165.000, -0.009
827	165.200, 1.763	165.200, 1.751	165.200, 1.803	165.200, 1.728	165.200, 1.734	165.200, -0.009
828	165.400, 1.762	165.400, 1.750	165.400, 1.803	165.400, 1.728	165.400, 1.734	165.400, -0.009
829	165.600, 1.762	165.600, 1.750	165.600, 1.803	165.600, 1.728	165.600, 1.734	165.600, -0.009
830	165.800, 1.762	165.800, 1.749	165.800, 1.803	165.800, 1.728	165.800, 1.734	165.800, -0.009
831	166.000, 1.761	166.000, 1.749	166.000, 1.802	166.000, 1.728	166.000, 1.734	166.000, -0.009
832	166.200, 1.761	166.200, 1.749	166.200, 1.802	166.200, 1.727	166.200, 1.734	166.200, -0.008
833	166.400, 1.761	166.400, 1.749	166.400, 1.802	166.400, 1.727	166.400, 1.734	166.400, -0.008
834	166.600, 1.761	166.600, 1.749	166.600, 1.802	166.600, 1.726	166.600, 1.733	166.600, -0.008
835	166.800, 1.761	166.800, 1.749	166.800, 1.801	166.800, 1.726	166.800, 1.733	166.800, -0.007
836	167.000, 1.760	167.000, 1.748	167.000, 1.801	167.000, 1.726	167.000, 1.733	167.000, -0.007
837	167.200, 1.760	167.200, 1.748	167.200, 1.801	167.200, 1.725	167.200, 1.732	167.200, -0.007
838	167.400, 1.760	167.400, 1.748	167.400, 1.800	167.400, 1.725	167.400, 1.732	167.400, -0.007
839	167.600, 1.759	167.600, 1.748	167.600, 1.800	167.600, 1.725	167.600, 1.731	167.600, -0.007
840	167.800, 1.759	167.800, 1.747	167.800, 1.799	167.800, 1.725	167.800, 1.731	167.800, -0.007
841	168.000, 1.759	168.000, 1.747	168.000, 1.799	168.000, 1.725	168.000, 1.730	168.000, -0.007
842	168.200, 1.759	168.200, 1.747	168.200, 1.799	168.200, 1.725	168.200, 1.730	168.200, -0.007
843	168.400, 1.759	168.400, 1.747	168.400, 1.798	168.400, 1.725	168.400, 1.730	168.400, -0.007
844	168.600, 1.759	168.600, 1.746	168.600, 1.798	168.600, 1.725	168.600, 1.729	168.600, -0.007
845	168.800, 1.759	168.800, 1.746	168.800, 1.798	168.800, 1.725	168.800, 1.729	168.800, -0.007
846	169.000, 1.759	169.000, 1.745	169.000, 1.798	169.000, 1.725	169.000, 1.729	169.000, -0.007
847	169.200, 1.759	169.200, 1.745	169.200, 1.798	169.200, 1.725	169.200, 1.728	169.200, -0.006
848	169.400, 1.758	169.400, 1.745	169.400, 1.799	169.400, 1.725	169.400, 1.728	169.400, -0.006
849	169.600, 1.758	169.600, 1.745	169.600, 1.799	169.600, 1.725	169.600, 1.728	169.600, -0.006
850	169.800, 1.758	169.800, 1.745	169.800, 1.799	169.800, 1.724	169.800, 1.728	169.800, -0.006
851	170.000, 1.758	170.000, 1.745	170.000, 1.799	170.000, 1.724	170.000, 1.727	170.000, -0.006
852	170.200, 1.758	170.200, 1.745	170.200, 1.799	170.200, 1.724	170.200, 1.727	170.200, -0.005
853	170.400, 1.758	170.400, 1.745	170.400, 1.799	170.400, 1.723	170.400, 1.727	170.400, -0.005
854	170.600, 1.758	170.600, 1.745	170.600, 1.798	170.600, 1.723	170.600, 1.727	170.600, -0.005
855	170.800, 1.758	170.800, 1.745	170.800, 1.798	170.800, 1.723	170.800, 1.726	170.800, -0.005
856	171.000, 1.757	171.000, 1.745	171.000, 1.798	171.000, 1.723	171.000, 1.726	171.000, -0.004
857	171.200, 1.757	171.200, 1.745	171.200, 1.797	171.200, 1.723	171.200, 1.726	171.200, -0.004
858	171.400, 1.757	171.400, 1.745	171.400, 1.797	171.400, 1.722	171.400, 1.726	171.400, -0.004
859	171.600, 1.756	171.600, 1.744	171.600, 1.797	171.600, 1.722	171.600, 1.725	171.600, -0.004
860	171.800, 1.756	171.800, 1.744	171.800, 1.796	171.800, 1.722	171.800, 1.725	171.800, -0.003
861	172.000, 1.756	172.000, 1.744	172.000, 1.796	172.000, 1.722	172.000, 1.725	172.000, -0.003
862	172.200, 1.756	172.200, 1.744	172.200, 1.796	172.200, 1.722	172.200, 1.725	172.200, -0.003
863	172.400, 1.756	172.400, 1.744	172.400, 1.795	172.400, 1.722	172.400, 1.724	172.400, -0.002
864	172.600, 1.756	172.600, 1.743	172.600, 1.795	172.600, 1.721	172.600, 1.724	172.600, -0.002
865	172.800, 1.756	172.800, 1.743	172.800, 1.795	172.800, 1.721	172.800, 1.724	172.800, -0.001
866	173.000, 1.756	173.000, 1.743	173.000, 1.795	173.000, 1.721	173.000, 1.724	173.000, -0.001
867	173.200, 1.756	173.200, 1.743	173.200, 1.795	173.200, 1.721	173.200, 1.723	173.200, -0.001
868	173.400, 1.756	173.400, 1.743	173.400, 1.795	173.400, 1.721	173.400, 1.723	173.400, -0.001
869	173.600, 1.756	173.600, 1.742	173.600, 1.795	173.600, 1.721	173.600, 1.723	173.600, -0.001
870	173.800, 1.756	173.800, 1.742	173.800, 1.795	173.800, 1.720	173.800, 1.722	173.800, -0.001
871	174.000, 1.756	174.000, 1.742	174.000, 1.795	174.000, 1.720	174.000, 1.722	174.000, -0.001
872	174.200, 1.756	174.200, 1.742	174.200, 1.795	174.200, 1.720	174.200, 1.722	174.200, -0.001
873	174.400, 1.756	174.400, 1.742	174.400, 1.795	174.400, 1.720	174.400, 1.722	174.400, -0.001
874	174.600, 1.756	174.600, 1.742	174.600, 1.795	174.600, 1.719	174.600, 1.721	174.600, -0.000
875	174.800, 1.755	174.800, 1.742	174.800, 1.794	174.800, 1.719	174.800, 1.721	174.800, -0.000
876	175.000, 1.755	175.000, 1.742	175.000, 1.794	175.000, 1.719	175.000, 1.721	175.000, -0.000
877	175.200, 1.755	175.200, 1.741	175.200, 1.794	175.200, 1.718	175.200, 1.721	175.200, -0.000
878	175.400, 1.754	175.400, 1.741	175.400, 1.794	175.400, 1.718	175.400, 1.721	175.400, 0.000
879	175.600, 1.754	175.600, 1.741	175.600, 1.794	175.600, 1.718	175.600, 1.721	175.600, -0.000
880	175.800, 1.754	175.800, 1.740	175.800, 1.793	175.800, 1.717	175.800, 1.721	175.800, 0.000
881	176.000, 1.754	176.000, 1.740	176.000, 1.793	176.000, 1.717	176.000, 1.720	176.000, 0.000
882	176.200, 1.754	176.200, 1.739	176.200, 1.793	176.200, 1.717	176.200, 1.720	176.200, 0.000
883	176.400, 1.755	176.400, 1.739	176.400, 1.793	176.400, 1.717	176.400, 1.720	176.400, 0.001
884	176.600, 1.755	176.600, 1.739	176.600, 1.793	176.600, 1.716	176.600, 1.720	176.600, 0.001
885	176.800, 1.755	176.800, 1.739	176.800, 1.793	176.800, 1.716	176.800, 1.720	176.800, 0.001
886	177.000, 1.755	177.000, 1.739	177.000, 1.793	177.000, 1.716	177.000, 1.720	177.000, 0.001
887	177.200, 1.755	177.200, 1.738	177.200, 1.793	177.200, 1.716	177.200, 1.720	177.200, 0.001
888	177.400, 1.755	177.400, 1.738	177.400, 1.792	177.400, 1.716	177.400, 1.720	177.400, 0.002
889	177.600, 1.755	177.600, 1.738	177.600, 1.792	177.600, 1.716	177.600, 1.719	177.600, 0.002
890	177.800, 1.755	177.800, 1.739	177.800, 1.792	177.800, 1.716	177.800, 1.719	177.800, 0.002
891	178.000, 1.755	178.000, 1.739	178.000, 1.792	178.000, 1.716	178.000, 1.719	178.000, 0.003
892	178.200, 1.754	178.200, 1.739	178.200, 1.792	178.200, 1.716	178.200, 1.718	178.200, 0.003
893	178.400, 1.754	178.400, 1.739	178.400, 1.792	178.400, 1.716	178.400, 1.718	178.400, 0.003
894	178.600, 1.754	178.600, 1.739	178.600, 1.792	178.600, 1.716	178.600, 1.718	178.600, 0.004
895	178.800, 1.754	178.800, 1.739	178.800, 1.792	178.800, 1.716	178.800, 1.718	178.800, 0.004
896	179.000, 1.754	179.000, 1.739	179.000, 1.792	179.000, 1.716	179.000, 1.718	179.000, 0.004
897	179.200, 1.754	179.200, 1.739	179.200, 1.792	179.200, 1.716	179.200, 1.718	179.200, 0.004
898	179.400, 1.753	179.400, 1.738	179.400, 1.792	179.400, 1.716	179.400, 1.717	179.400, 0.004
899	179.600, 1.754	179.600, 1.738	179.600, 1.791	179.600, 1.715	179.600, 1.717	179.600, 0.004
900	179.800, 1.754	179.800, 1.738	179.800, 1.791	179.800, 1.715	179.800, 1.717	179.800, 0.004
901	180.000, 1.754	180.000, 1.737	180.000, 1.791	180.000, 1.715	180.000, 1.717	180.000, 0.004
902	180.200, 1.754	180.200, 1.737	180.200, 1.791	180.200, 1.715	180.200, 1.717	180.200, 0.004
903	180.400, 1.754	180.400, 1.737	180.400, 1.790	180.400, 1.714	180.400, 1.717	180.400, 0.004
904	180.600, 1.754	180.600, 1.737	180.600, 1.790	180.600, 1.714	180.600, 1.716	180.600, 0.004
905	180.800, 1.754	180.800, 1.736	180.800, 1.790	180.800, 1.714	180.800, 1.716	180.800, 0.005
906	181.000, 1.754	181.000, 1.736	181.000, 1.790	181.000, 1.714	181.000, 1.716	181.000, 0.005
907	181.200, 1.754	181.200, 1.735	181.200, 1.790	181.200, 1.713	181.200, 1.715	181.200, 0.005
908	181.400, 1.754	181.400, 1.735	181.400, 1.790	181.400, 1.713	181.400, 1.715	181.400, 0.005
909	181.600, 1.754	181.600, 1.735	181.600, 1.790	181.600, 1.713	181.600, 1.715	181.600, 0.006
910	181.800, 1.754	181.800, 1.735	181.800, 1.790	181.800, 1.713	181.800, 1.715	181.800, 0.006
911	182.000, 1.754	182.000, 1.735	182.000, 1.790	182.000, 1.713	182.000, 1.715	182.000, 0.006
912	182.200, 1.753	182.200, 1.735	182.200, 1.790	182.200, 1.713	182.200, 1.714	182.200, 0.006
913	182.400, 1.753	182.400, 1.735	182.400, 1.790	182.400, 1.713	182.400, 1.714	182.400, 0.007
914	182.600, 1.753	182.600, 1.735	182.600, 1.790	182.600, 1.713	182.600, 1.714	182.600, 0.007
915	182.800, 1.753	182.800, 1.735	182.800, 1.790	182.800, 1.713	182.800, 1.714	182.800, 0.007
916	183.000, 1.753	183.000, 1.735	183.000, 1.790	183.000, 1.713	183.000, 1.714	183.000, 0.007
917	183.200, 1.753	183.200, 1.735	183.200, 1.790	183.200, 1.712	183.200, 1.714	183.200, 0.007
918	183.400, 1.753	183.400, 1.735	183.400, 1.790	183.400, 1.712	183.400, 1.714	183.400, 0.007
919	183.600, 1.753	183.600, 1.734	183.600, 1.789	183.600, 1.712	183.600, 1.713	183.600, 0.007
920	183.800, 1.753	183.800, 1.734	183.800, 1.789	183.800, 1.711	183.800, 1.713	183.800, 0.007
921	184.000, 1.753	184.000, 1.734	184.000, 1.789	184.000, 1.711	184.000, 1.713	184.000, 0.008
922	184.200, 1.753	184.200, 1.734	184.200, 1.789	184.200, 1.711	184.200, 1.713	184.200, 0.008
923	184.400, 1.752	184.400, 1.734	184.400, 1.789	184.400, 1.711	184.400, 1.713	184.400, 0.008
924	184.600, 1.752	184.600, 1.734	184.600, 1.789	184.600, 1.711	184.600, 1.713	184.600, 0.008
925	184.800, 1.752	184.800, 1.734	184.800, 1.788	184.800, 1.711	184.800, 1.713	184.800, 0.007
926	185.000, 1.752	185.000, 1.734	185.000, 1.788	185.000, 1.711	185.000, 1.713	185.000, 0.007
927	185.200, 1.752	185.200, 1.733	185.200, 1.788	185.200, 1.711	185.200, 1.713	185.200, 0.007
928	185.400, 1.752	185.400, 1.733	185.400, 1.788	185.400, 1.711	185.400, 1.713	185.400, 0.007
929	185.600, 1.752	185.600, 1.733	185.600, 1.788	185.600, 1.710	185.600, 1.713	185.600, 0.008
930	185.800, 1.752	185.800, 1.733	185.800, 1.788	185.800, 1.710	185.800, 1.713	185.800, 0.008
931	186.000, 1.752	186.000, 1.733	186.000, 1.787	186.000, 1.710	186.000, 1.713	186.000, 0.008
932	186.200, 1.752	186.200, 1.733	186.200, 1.787	186.200, 1.710	186.200, 1.712	186.200, 0.008
933	186.400, 1.752	186.400, 1.733	186.400, 1.787	186.400, 1.710	186.400, 1.712	186.400, 0.008
934	186.600, 1.752	186.600, 1.733	186.600, 1.787	186.600, 1.710	186.600, 1.711	186.600, 0.009
935	186.800, 1.752	186.800, 1.733	186.800, 1.787	186.800, 1.710	186.800, 1.711	186.800, 0.009
936	187.000, 1.752	187.000, 1.733	187.000, 1.787	187.000, 1.710	187.000, 1.711	187.000, 0.009
937	187.200, 1.752	187.200, 1.733	187.200, 1.787	187.200, 1.709	187.200, 1.710	187.200, 0.009
938	187.400, 1.752	187.400, 1.733	187.400, 1.787	187.400, 1.709	187.400, 1.710	187.400, 0.009
939	187.600, 1.752	187.600, 1.733	187.600, 1.786	187.600, 1.709	187.600, 1.710	187.600, 0.009
940	187.800, 1.752	187.800, 1.732	187.800, 1.786	187.800, 1.709	187.800, 1.710	187.800, 0.009
941	188.000, 1.752	188.000, 1.732	188.000, 1.786	188.000, 1.709	188.000, 1.710	188.000, 0.010
942	188.200, 1.752	188.200, 1.732	188.200, 1.786	188.200, 1.709	188.200, 1.710	188.200, 0.010
943	188.400, 1.752	188.400, 1.732	188.400, 1.786	188.400, 1.709	188.400, 1.710	188.400, 0.010
944	188.600, 1.752	188.600, 1.732	188.600, 1.786	188.600, 1.709	188.600, 1.710	188.600, 0.010
945	188.800, 1.752	188.800, 1.732	188.800, 1.786	188.800, 1.709	188.800, 1.710	188.800, 0.010
946	189.000, 1.752	189.000, 1.731	189.000, 1.786	189.000, 1.709	189.000, 1.710	189.000, 0.011
947	189.200, 1.752	189.200, 1.731	189.200, 1.786	189.200, 1.709	189.200, 1.710	189.200, 0.011
948	189.400, 1.751	189.400, 1.731	189.400, 1.786	189.400, 1.709	189.400, 1.710	189.400, 0.011
949	189.600, 1.751	189.600, 1.731	189.600, 1.786	189.600, 1.708	189.600, 1.710	189.600, 0.012
950	189.800, 1.751	189.800, 1.730	189.800, 1.786	189.800, 1.708	189.800, 1.709	189.800, 0.012
951	190.000, 1.751	190.000, 1.730	190.000, 1.786	190.000, 1.708	190.000, 1.709	190.000, 0.012
952	190.200, 1.750	190.200, 1.730	190.200, 1.786	190.200, 1.708	190.200, 1.709	190.200, 0.012
953	190.400, 1.750	190.400, 1.730	190.400, 1.786	190.400, 1.707	190.400, 1.709	190.400, 0.012
954	190.600, 1.750	190.600, 1.730	190.600, 1.786	190.600, 1.707	190.600, 1.708	190.600, 0.012
955	190.800, 1.750	190.800, 1.731	190.800, 1.786	190.800, 1.707	190.800, 1.708	190.800, 0.012
956	191.000, 1.749	191.000, 1.730	191.000, 1.785	191.000, 1.707	191.000, 1.708	191.000, 0.012
957	191.200, 1.749	191.200, 1.731	191.200, 1.785	191.200, 1.706	191.200, 1.708	191.200, 0.011
958	191.400, 1.749	191.400, 1.731	191.400, 1.785	191.400, 1.706	191.400, 1.708	191.400, 0.011
959	191.600, 1.749	191.600, 1.731	191.600, 1.785	191.600, 1.706	191.600, 1.708	191.600, 0.011
960	191.800, 1.749	191.800, 1.731	191.800, 1.785	191.800, 1.706	191.800, 1.707	191.800, 0.011
961	192.000, 1.749	192.000, 1.731	192.000, 1.784	192.000, 1.706	192.000, 1.707	192.000, 0.011
962	192.200, 1.749	192.200, 1.731	192.200, 1.784	192.200, 1.706	192.200, 1.707	192.200, 0.011
963	192.400, 1.749	192.400, 1.731	192.400, 1.784	192.400, 1.706	192.400, 1.707	192.400, 0.011
964	192.600, 1.749	192.600, 1.731	192.600, 1.785	192.600, 1.706	192.600, 1.707	192.600, 0.012
965	192.800, 1.749	192.800, 1.731	192.800, 1.785	192.800, 1.707	192.800, 1.707	192.800, 0.012
966	193.000, 1.750	193.000, 1.731	193.000, 1.785	193.000, 1.707	193.000, 1.707	193.000, 0.012
967	193.200, 1.750	193.200, 1.731	193.200, 1.785	193.200, 1.707	193.200, 1.707	193.200, 0.013
968	193.400, 1.750	193.400, 1.731	193.400, 1.785	193.400, 1.707	193.400, 1.707	193.400, 0.013
969	193.600, 1.750	193.600, 1.731	193.600, 1.785	193.600, 1.707	193.600, 1.707	193.600, 0.013
970	193.800, 1.750	193.800, 1.731	193.800, 1.785	193.800, 1.707	193.800, 1.707	193.800, 0.013
971	194.000, 1.750	194.000, 1.731	194.000, 1.784	194.000, 1.707	194.000, 1.707	194.000, 0.014
972	194.200, 1.750	194.200, 1.731	194.200, 1.784	194.200, 1.707	194.200, 1.707	194.200, 0.014
973	194.400, 1.750	194.400, 1.731	194.400, 1.784	194.400, 1.707	194.400, 1.707	194.400, 0.014
974	194.600, 1.750	194.600, 1.731	194.600, 1.784	194.600, 1.707	194.600, 1.708	194.600, 0.014
975	194.800, 1.750	194.800, 1.731	194.800, 1.784	194.800, 1.707	194.800, 1.708	194.800, 0.014
976	195.000, 1.750	195.000, 1.730	195.000, 1.784	195.000, 1.707	195.000, 1.707	195.000, 0.014
977	195.200, 1.750	195.200, 1.730	195.200, 1.784	195.200, 1.707	195.200, 1.707	195.200, 0.014
978	195.400, 1.750	195.400, 1.730	195.400, 1.783	195.400, 1.706	195.400, 1.707	195.400, 0.014
979	195.600, 1.750	195.600, 1.730	195.600, 1.783	195.600, 1.706	195.600, 1.706	195.600, 0.014
980	195.800, 1.750	195.800, 1.729	195.800, 1.783	195.800, 1.706	195.800, 1.706	195.800, 0.014
981	196.000, 1.750	196.000, 1.729	196.000, 1.783	196.000, 1.706	196.000, 1.705	196.000, 0.014
982	196.200, 1.750	196.200, 1.729	196.200, 1.783	196.200, 1.706	196.200, 1.705	196.200, 0.013
983	196.400, 1.750	196.400, 1.729	196.400, 1.783	196.400, 1.706	196.400, 1.704	196.400, 0.013
984	196.600, 1.749	196.600, 1.729	196.600, 1.783	196.600, 1.705	196.600, 1.704	196.600, 0.013
985	196.800, 1.749	196.800, 1.729	196.800, 1.784	196.800, 1.705	196.800, 1.704	196.800, 0.013
986	197.000, 1.749	197.000, 1.728	197.000, 1.784	197.000, 1.705	197.000, 1.704	197.000, 0.013
987	197.200, 1.749	197.200, 1.728	197.200, 1.784	197.200, 1.704	197.200, 1.704	197.200, 0.013
988	197.400, 1.749	197.400, 1.728	197.400, 1.784	197.400, 1.704	197.400, 1.704	197.400, 0.013
989	197.600, 1.749	197.600, 1.728	197.600, 1.784	197.600, 1.704	197.600, 1.704	197.600, 0.013
990	197.800, 1.749	197.800, 1.728	197.800, 1.784	197.800, 1.703	197.800, 1.704	197.800, 0.013
991	198.000, 1.749	198.000, 1.728	198.000, 1.784	198.000, 1.703	198.000, 1.704	198.000, 0.013
992	198.200, 1.750	198.200, 1.728	198.200, 1.784	198.200, 1.703	198.200, 1.704	198.200, 0.014
993	198.400, 1.750	198.400, 1.728	198.400, 1.784	198.400, 1.703	198.400, 1.704	198.400, 0.014
994	198.600, 1.750	198.600, 1.728	198.600, 1.784	198.600, 1.703	198.600, 1.704	198.600, 0.014
995	198.800, 1.750	198.800, 1.728	198.800, 1.783	198.800, 1.703	198.800, 1.704	198.800, 0.014
996	199.000, 1.750	199.000, 1.728	199.000, 1.783	199.000, 1.703	199.000, 1.704	199.000, 0.014
997	199.200, 1.750	199.200, 1.728	199.200, 1.783	199.200, 1.703	199.200, 1.704	199.200, 0.015
998	199.400, 1.750	199.400, 1.728	199.400, 1.783	199.400, 1.703	199.400, 1.703	199.400, 0.015
999	199.600, 1.749	199.600, 1.728	199.600, 1.783	199.600, 1.704	199.600, 1.703	199.600, 0.016
1000	199.800, 1.749	199.800, 1.727	199.800, 1.783	199.800, 1.704	199.800, 1.703	199.800, 0.016
1001	200.000, 1.749	200.000, 1.727	200.000, 1.783	200.000, 1.704	200.000, 1.703	200.000, 0.016
1002	200.200, 1.749	200.200, 1.727	200.200, 1.783	200.200, 1.704	200.200, 1.702	200.200, 0.017
1003	200.400, 1.748	200.400, 1.727	200.400, 1.783	200.400, 1.703	200.400, 1.702	200.400, 0.017
1004	200.600, 1.748	200.600, 1.727	200.600, 1.783	200.600, 1.703	200.600, 1.702	200.600, 0.017
1005	200.800, 1.748	200.800, 1.727	200.800, 1.783	200.800, 1.703	200.800, 1.702	200.800, 0.017
1006	201.000, 1.748	201.000, 1.727	201.000, 1.783	201.000, 1.703	201.000, 1.702	201.000, 0.017
1007	201.200, 1.747	201.200, 1.727	201.200, 1.783	201.200, 1.703	201.200, 1.702	201.200, 0.017
1008	201.400, 1.748	201.400, 1.727	201.400, 1.782	201.400, 1.702	201.400, 1.701	201.400, 0.017
1009	201.600, 1.748	201.600, 1.727	201.600, 1.782	201.600, 1.702	201.600, 1.701	201.600, 0.017
1010	201.800, 1.748	201.800, 1.727	201.800, 1.782	201.800, 1.702	201.800, 1.701	201.800, 0.017
1011	202.000, 1.748	202.000, 1.727	202.000, 1.782	202.000, 1.702	202.000, 1.701	202.000, 0.017
1012	202.200, 1.748	202.200, 1.727	202.200, 1.783	202.200, 1.702	202.200, 1.701	202.200, 0.016
1013	202.400, 1.748	202.400, 1.727	202.400, 1.783	202.400, 1.701	202.400, 1.702	202.400, 0.016
1014	202.600, 1.748	202.600, 1.727	202.600, 1.783	202.600, 1.701	202.600, 1.702	202.600, 0.016
1015	202.800, 1.748	202.800, 1.727	202.800, 1.783	202.800, 1.701	202.800, 1.702	202.800, 0.016
1016	203.000, 1.748	203.000, 1.727	203.000, 1.783	203.000, 1.700	203.000, 1.702	203.000, 0.016
1017	203.200, 1.748	203.200, 1.727	203.200, 1.783	203.200, 1.700	203.200, 1.702	203.200, 0.016
1018	203.400, 1.748	203.400, 1.727	203.400, 1.783	203.400, 1.700	203.400, 1.702	203.400, 0.016
1019	203.600, 1.748	203.600, 1.727	203.600, 1.783	203.600, 1.700	203.600, 1.702	203.600, 0.017
1020	203.800, 1.749	203.800, 1.726	203.800, 1.783	203.800, 1.700	203.800, 1.701	203.800, 0.017
1021	204.000, 1.749	204.000, 1.726	204.000, 1.783	204.000, 1.700	204.000, 1.701	204.000, 0.017
1022	204.200, 1.749	204.200, 1.726	204.200, 1.782	204.200, 1.700	204.200, 1.701	204.200, 0.017
1023	204.400, 1.749	204.400, 1.726	204.400, 1.782	204.400, 1.700	204.400, 1.700	204.400, 0.017
1024	204.600, 1.749	204.600, 1.726	204.600, 1.782	204.600, 1.700	204.600, 1.700	204.600, 0.018
1025	204.800, 1.749	204.800, 1.725	204.800, 1.781	204.800, 1.700	204.800, 1.699	204.800, 0.018
1026	205.000, 1.749	205.000, 1.725	205.000, 1.781	205.000, 1.700	205.000, 1.699	205.000, 0.018
1027	205.200, 1.749	205.200, 1.725	205.200, 1.781	205.200, 1.700	205.200, 1.699	205.200, 0.019
1028	205.400, 1.749	205.400, 1.725	205.400, 1.781	205.400, 1.700	205.400, 1.699	205.400, 0.019
1029	205.600, 1.748	205.600, 1.725	205.600, 1.780	205.600, 1.700	205.600, 1.699	205.600, 0.020
1030	205.800, 1.748	205.800, 1.725	205.800, 1.780	205.800, 1.700	205.800, 1.699	205.800, 0.020
1031	206.000, 1.748	206.000, 1.725	206.000, 1.780	206.000, 1.700	206.000, 1.699	206.000, 0.020
1032	206.200, 1.748	206.200, 1.725	206.200, 1.780	206.200, 1.701	206.200, 1.699	206.200, 0.019
1033	206.400, 1.748	206.400, 1.725	206.400, 1.779	206.400, 1.701	206.400, 1.699	206.400, 0.019
1034	206.600, 1.748	206.600, 1.725	206.600, 1.779	206.600, 1.701	206.600, 1.699	206.600, 0.019
1035	206.800, 1.748	206.800, 1.725	206.800, 1.779	206.800, 1.701	206.800, 1.699	206.800, 0.019
1036	207.000, 1.747	207.000, 1.725	207.000, 1.779	207.000, 1.701	207.000, 1.699	207.000, 0.019
1037	207.200, 1.747	207.200, 1.725	207.200, 1.779	207.200, 1.700	207.200, 1.699	207.200, 0.019
1038	207.400, 1.748	207.400, 1.725	207.400, 1.779	207.400, 1.700	207.400, 1.699	207.400, 0.019
1039	207.600, 1.748	207.600, 1.725	207.600, 1.779	207.600, 1.700	207.600, 1.699	207.600, 0.019
1040	207.800, 1.748	207.800, 1.725	207.800, 1.779	207.800, 1.700	207.800, 1.699	207.800, 0.018
1041	208.000, 1.748	208.000, 1.725	208.000, 1.779	208.000, 1.700	208.000, 1.698	208.000, 0.018
1042	208.200, 1.748	208.200, 1.725	208.200, 1.779	208.200, 1.700	208.200, 1.698	208.200, 0.018
1043	208.400, 1.748	208.400, 1.725	208.400, 1.779	208.400, 1.700	208.400, 1.698	208.400, 0.018
1044	208.600, 1.748	208.600, 1.725	208.600, 1.779	208.600, 1.700	208.600, 1.698	208.600, 0.018
1045	208.800, 1.749	208.800, 1.725	208.800, 1.779	208.800, 1.700	208.800, 1.698	208.800, 0.019
1046	209.000, 1.749	209.000, 1.725	209.000, 1.779	209.000, 1.700	209.000, 1.697	209.000, 0.019
1047	209.200, 1.749	209.200, 1.725	209.200, 1.779	209.200, 1.700	209.200, 1.697	209.200, 0.019
1048	209.400, 1.749	209.400, 1.725	209.400, 1.779	209.400, 1.700	209.400, 1.697	209.400, 0.019
1049	209.600, 1.749	209.600, 1.725	209.600, 1.779	209.600, 1.700	209.600, 1.697	209.600, 0.019
1050	209.800, 1.748	209.800, 1.725	209.800, 1.779	209.800, 1.700	209.800, 1.697	209.800, 0.019
1051	210.000, 1.748	210.000, 1.724	210.000, 1.779	210.000, 1.700	210.000, 1.697	210.000, 0.020
1052	210.200, 1.748	210.200, 1.724	210.200, 1.779	210.200, 1.700	210.200, 1.697	210.200, 0.020
1053	210.400, 1.747	210.400, 1.724	210.400, 1.779	210.400, 1.700	210.400, 1.697	210.400, 0.020
1054	210.600, 1.747	210.600, 1.724	210.600, 1.779	210.600, 1.700	210.600, 1.697	210.600, 0.021
1055	210.800, 1.747	210.800, 1.723	210.800, 1.779	210.800, 1.700	210.800, 1.697	210.800, 0.021
1056	211.000, 1.747	211.000, 1.723	211.000, 1.779	211.000, 1.700	211.000, 1.697	211.000, 0.021
1057	211.200, 1.747	211.200, 1.723	211.200, 1.779	211.200, 1.700	211.200, 1.697	211.200, 0.021
1058	211.400, 1.747	211.400, 1.723	211.400, 1.779	211.400, 1.700	211.400, 1.697	211.400, 0.021
1059	211.600, 1.747	211.600, 1.723	211.600, 1.779	211.600, 1.699	211.600, 1.697	211.600, 0.021
1060	211.800, 1.747	211.800, 1.722	211.800, 1.779	211.800, 1.699	211.800, 1.697	211.800, 0.021
1061	212.000, 1.747	212.000, 1.722	212.000, 1.779	212.000, 1.699	212.000, 1.697	212.000, 0.020
1062	212.200, 1.747	212.200, 1.722	212.200, 1.779	212.200, 1.699	212.200, 1.697	212.200, 0.020
1063	212.400, 1.747	212.400, 1.722	212.400, 1.779	212.400, 1.699	212.400, 1.697	212.400, 0.020
1064	212.600, 1.747	212.600, 1.722	212.600, 1.779	212.600, 1.699	212.600, 1.696	212.600, 0.020
1065	212.800, 1.747	212.800, 1.723	212.800, 1.779	212.800, 1.699	212.800, 1.696	212.800, 0.019
1066	213.000, 1.748	213.000, 1.723	213.000, 1.779	213.000, 1.698	213.000, 1.696	213.000, 0.019
1067	213.200, 1.748	213.200, 1.723	213.200, 1.779	213.200, 1.698	213.200, 1.696	213.200, 0.019
1068	213.400, 1.748	213.400, 1.723	213.400, 1.779	213.400, 1.697	213.400, 1.696	213.400, 0.020
1069	213.600, 1.747	213.600, 1.723	213.600, 1.779	213.600, 1.697	213.600, 1.695	213.600, 0.020
1070	213.800, 1.747	213.800, 1.722	213.800, 1.779	213.800, 1.697	213.800, 1.695	213.800, 0.020
1071	214.000, 1.747	214.000, 1.722	214.000, 1.779	214.000, 1.697	214.000, 1.695	214.000, 0.021
1072	214.200, 1.747	214.200, 1.722	214.200, 1.779	214.200, 1.697	214.200, 1.695	214.200, 0.021
1073	214.400, 1.746	214.400, 1.722	214.400, 1.779	214.400, 1.696	214.400, 1.695	214.400, 0.021
1074	214.600, 1.746	214.600, 1.722	214.600, 1.779	214.600, 1.696	214.600, 1.695	214.600, 0.021
1075	214.800, 1.746	214.800, 1.721	214.800, 1.779	214.800, 1.696	214.800, 1.695	214.800, 0.022
1076	215.000, 1.746	215.000, 1.721	215.000, 1.779	215.000, 1.696	215.000, 1.695	215.000, 0.022
1077	215.200, 1.746	215.200, 1.721	215.200, 1.779	215.200, 1.696	215.200, 1.695	215.200, 0.022
1078	215.400, 1.747	215.400, 1.721	215.400, 1.779	215.400, 1.696	215.400, 1.696	215.400, 0.022
1079	215.600, 1.747	215.600, 1.721	215.600, 1.779	215.600, 1.697	215.600, 1.696	215.600, 0.022
1080	215.800, 1.747	215.800, 1.721	215.800, 1.780	215.800, 1.697	215.800, 1.696	215.800, 0.022
1081	216.000, 1.747	216.000, 1.721	216.000, 1.780	216.000, 1.697	216.000, 1.696	216.000, 0.022
1082	216.200, 1.747	216.200, 1.721	216.200, 1.780	216.200, 1.697	216.200, 1.696	216.200, 0.022
1083	216.400, 1.747	216.400, 1.721	216.400, 1.780	216.400, 1.698	216.400, 1.695	216.400, 0.022
1084	216.600, 1.748	216.600, 1.721	216.600, 1.780	216.600, 1.698	216.600, 1.695	216.600, 0.022
1085	216.800, 1.748	216.800, 1.722	216.800, 1.780	216.800, 1.697	216.800, 1.695	216.800, 0.022
1086	217.000, 1.748	217.000, 1.722	217.000, 1.779	217.000, 1.697	217.000, 1.695	217.000, 0.022
1087	217.200, 1.748	217.200, 1.722	217.200, 1.779	217.200, 1.697	217.200, 1.695	217.200, 0.023
1088	217.400, 1.748	217.400, 1.722	217.400, 1.779	217.400, 1.696	217.400, 1.695	217.400, 0.023
1089	217.600, 1.748	217.600, 1.722	217.600, 1.778	217.600, 1.696	217.600, 1.695	217.600, 0.023
1090	217.800, 1.748	217.800, 1.722	217.800, 1.778	217.800, 1.696	217.800, 1.695	217.800, 0.023
1091	218.000, 1.748	218.000, 1.722	218.000, 1.778	218.000, 1.696	218.000, 1.695	218.000, 0.023
1092	218.200, 1.748	218.200, 1.722	218.200, 1.778	218.200, 1.696	218.200, 1.695	218.200, 0.023
1093	218.400, 1.748	218.400, 1.721	218.400, 1.778	218.400, 1.695	218.400, 1.695	218.400, 0.024
1094	218.600, 1.748	218.600, 1.721	218.600, 1.778	218.600, 1.695	218.600, 1.695	218.600, 0.024
1095	218.800, 1.748	218.800, 1.721	218.800, 1.778	218.800, 1.695	218.800, 1.694	218.800, 0.024
1096	219.000, 1.748	219.000, 1.721	219.000, 1.778	219.000, 1.695	219.000, 1.694	219.000, 0.024
1097	219.200, 1.748	219.200, 1.721	219.200, 1.778	219.200, 1.695	219.200, 1.694	219.200, 0.024
1098	219.400, 1.747	219.400, 1.721	219.400, 1.777	219.400, 1.695	219.400, 1.694	219.400, 0.025
1099	219.600, 1.747	219.600, 1.721	219.600, 1.777	219.600, 1.695	219.600, 1.695	219.600, 0.025
1100	219.800, 1.747	219.800, 1.721	219.800, 1.777	219.800, 1.695	219.800, 1.695	219.800, 0.025
1101	220.000, 1.747	220.000, 1.720	220.000, 1.777	220.000, 1.695	220.000, 1.695	220.000, 0.025
1102	220.200, 1.747	220.200, 1.721	220.200, 1.777	220.200, 1.696	220.200, 1.694	220.200, 0.025
1103	220.400, 1.747	220.400, 1.721	220.400, 1.777	220.400, 1.696	220.400, 1.694	220.400, 0.025
1104	220.600, 1.747	220.600, 1.721	220.600, 1.776	220.600, 1.696	220.600, 1.694	220.600, 0.024
1105	220.800, 1.747	220.800, 1.721	220.800, 1.776	220.800, 1.695	220.800, 1.694	220.800, 0.024
1106	221.000, 1.747	221.000, 1.721	221.000, 1.776	221.000, 1.695	221.000, 1.694	221.000, 0.024
1107	221.200, 1.747	221.200, 1.721	221.200, 1.776	221.200, 1.695	221.200, 1.694	221.200, 0.024
1108	221.400, 1.747	221.400, 1.721	221.400, 1.776	221.400, 1.695	221.400, 1.694	221.400, 0.023
1109	221.600, 1.747	221.600, 1.721	221.600, 1.777	221.600, 1.694	221.600, 1.693	221.600, 0.023
1110	221.800, 1.747	221.800, 1.720	221.800, 1.777	221.800, 1.694	221.800, 1.693	221.800, 0.024
1111	222.000, 1.747	222.000, 1.720	222.000, 1.777	222.000, 1.693	222.000, 1.693	222.000, 0.024
1112	222.200, 1.746	222.200, 1.720	222.200, 1.777	222.200, 1.693	222.200, 1.693	222.200, 0.024
1113	222.400, 1.746	222.400, 1.720	222.400, 1.777	222.400, 1.693	222.400, 1.692	222.400, 0.024
1114	222.600, 1.746	222.600, 1.719	222.600, 1.776	222.600, 1.692	222.600, 1.692	222.600, 0.024
1115	222.800, 1.746	222.800, 1.719	222.800, 1.776	222.800, 1.692	222.800, 1.692	222.800, 0.025
1116	223.000, 1.746	223.000, 1.719	223.000, 1.776	223.000, 1.692	223.000, 1.692	223.000, 0.025
1117	223.200, 1.746	223.200, 1.719	223.200, 1.776	223.200, 1.693	223.200, 1.692	223.200, 0.025
1118	223.400, 1.746	223.400, 1.719	223.400, 1.776	223.400, 1.693	223.400, 1.692	223.400, 0.025
1119	223.600, 1.746	223.600, 1.719	223.600, 1.776	223.600, 1.693	223.600, 1.692	223.600, 0.025
1120	223.800, 1.746	223.800, 1.719	223.800, 1.776	223.800, 1.694	223.800, 1.692	223.800, 0.025
1121	224.000, 1.746	224.000, 1.719	224.000, 1.776	224.000, 1.694	224.000, 1.692	224.000, 0.025
1122	224.200, 1.746	224.200, 1.719	224.200, 1.776	224.200, 1.695	224.200, 1.692	224.200, 0.025
1123	224.400, 1.745	224.400, 1.719	224.400, 1.776	224.400, 1.695	224.400, 1.692	224.400, 0.025
1124	224.600, 1.745	224.600, 1.719	224.600, 1.775	224.600, 1.696	224.600, 1.692	224.600, 0.025
1125	224.800, 1.746	224.800, 1.719	224.800, 1.775	224.800, 1.696	224.800, 1.692	224.800, 0.025
1126	225.000, 1.746	225.000, 1.719	225.000, 1.775	225.000, 1.696	225.000, 1.692	225.000, 0.025
1127	225.200, 1.746	225.200, 1.719	225.200, 1.775	225.200, 1.696	225.200, 1.692	225.200, 0.026
1128	225.400, 1.746	225.400, 1.719	225.400, 1.775	225.400, 1.695	225.400, 1.692	225.400, 0.026
1129	225.600, 1.746	225.600, 1.719	225.600, 1.776	225.600, 1.695	225.600, 1.692	225.600, 0.026
1130	225.800, 1.746	225.800, 1.719	225.800, 1.775	225.800, 1.695	225.800, 1.692	225.800, 0.026
1131	226.000, 1.746	226.000, 1.719	226.000, 1.775	226.000, 1.694	226.000, 1.692	226.000, 0.026
1132	226.200, 1.746	226.200, 1.719	226.200, 1.775	226.200, 1.693	226.200, 1.692	226.200, 0.026
1133	226.400, 1.746	226.400, 1.719	226.400, 1.775	226.400, 1.693	226.400, 1.692	226.400, 0.026
1134	226.600, 1.746	226.600, 1.719	226.600, 1.775	226.600, 1.693	226.600, 1.692	226.600, 0.026
1135	226.800, 1.746	226.800, 1.718	226.800, 1.775	226.800, 1.693	226.800, 1.692	226.800, 0.026
1136	227.000, 1.746	227.000, 1.718	227.000, 1.776	227.000, 1.692	227.000, 1.691	227.000, 0.026
1137	227.200, 1.745	227.200, 1.718	227.200, 1.776	227.200, 1.692	227.200, 1.691	227.200, 0.026
1138	227.400, 1.745	227.400, 1.718	227.400, 1.776	227.400, 1.692	227.400, 1.691	227.400, 0.026
1139	227.600, 1.745	227.600, 1.718	227.600, 1.776	227.600, 1.692	227.600, 1.690	227.600, 0.026
1140	227.800, 1.745	227.800, 1.717	227.800, 1.776	227.800, 1.692	227.800, 1.690	227.800, 0.026
1141	228.000, 1.745	228.000, 1.717	228.000, 1.775	228.000, 1.692	228.000, 1.689	228.000, 0.026
1142	228.200, 1.745	228.200, 1.717	228.200, 1.775	228.200, 1.692	228.200, 1.689	228.200, 0.026
1143	228.400, 1.745	228.400, 1.718	228.400, 1.775	228.400, 1.692	228.400, 1.689	228.400, 0.026
1144	228.600, 1.745	228.600, 1.718	228.600, 1.775	228.600, 1.692	228.600, 1.689	228.600, 0.026
1145	228.800, 1.745	228.800, 1.718	228.800, 1.775	228.800, 1.692	228.800, 1.690	228.800, 0.026
1146	229.000, 1.745	229.000, 1.718	229.000, 1.775	229.000, 1.692	229.000, 1.690	229.000, 0.026
1147	229.200, 1.745	229.200, 1.718	229.200, 1.775	229.200, 1.692	229.200, 1.690	229.200, 0.026
1148	229.400, 1.745	229.400, 1.718	229.400, 1.775	229.400, 1.692	229.400, 1.690	229.400, 0.026
1149	229.600, 1.745	229.600, 1.718	229.600, 1.775	229.600, 1.692	229.600, 1.690	229.600, 0.026
1150	229.800, 1.745	229.800, 1.718	229.800, 1.775	229.800, 1.692	229.800, 1.691	229.800, 0.026
1151	230.000, 1.746	230.000, 1.719	230.000, 1.775	230.000, 1.692	230.000, 1.691	230.000, 0.026
1152	230.200, 1.746	230.200, 1.719	230.200, 1.775	230.200, 1.692	230.200, 1.691	230.200, 0.026
1153	230.400, 1.746	230.400, 1.718	230.400, 1.775	230.400, 1.692	230.400, 1.691	230.400, 0.026
1154	230.600, 1.746	230.600, 1.718	230.600, 1.775	230.600, 1.692	230.600, 1.691	230.600, 0.026
1155	230.800, 1.746	230.800, 1.718	230.800, 1.776	230.800, 1.692	230.800, 1.691	230.800, 0.026
1156	231.000, 1.745	231.000, 1.718	231.000, 1.776	231.000, 1.691	231.000, 1.691	231.000, 0.027
1157	231.200, 1.745	231.200, 1.717	231.200, 1.776	231.200, 1.691	231.200, 1.691	231.200, 0.027
1158	231.400, 1.745	231.400, 1.717	231.400, 1.776	231.400, 1.691	231.400, 1.691	231.400, 0.027
1159	231.600, 1.746	231.600, 1.717	231.600, 1.775	231.600, 1.691	231.600, 1.690	231.600, 0.027
1160	231.800, 1.746	231.800, 1.717	231.800, 1.775	231.800, 1.691	231.800, 1.690	231.800, 0.027
1161	232.000, 1.746	232.000, 1.717	232.000, 1.775	232.000, 1.691	232.000, 1.690	232.000, 0.027
1162	232.200, 1.745	232.200, 1.717	232.200, 1.775	232.200, 1.691	232.200, 1.690	232.200, 0.027
1163	232.400, 1.745	232.400, 1.717	232.400, 1.775	232.400, 1.691	232.400, 1.690	232.400, 0.027
1164	232.600, 1.745	232.600, 1.717	232.600, 1.774	232.600, 1.691	232.600, 1.689	232.600, 0.027
1165	232.800, 1.745	232.800, 1.717	232.800, 1.774	232.800, 1.691	232.800, 1.689	232.800, 0.027
1166	233.000, 1.744	233.000, 1.717	233.000, 1.774	233.000, 1.691	233.000, 1.689	233.000, 0.027
1167	233.200, 1.744	233.200, 1.716	233.200, 1.774	233.200, 1.690	233.200, 1.689	233.200, 0.027
1168	233.400, 1.744	233.400, 1.716	233.400, 1.774	233.400, 1.690	233.400, 1.688	233.400, 0.027
1169	233.600, 1.744	233.600, 1.716	233.600, 1.774	233.600, 1.690	233.600, 1.688	233.600, 0.028
1170	233.800, 1.743	233.800, 1.716	233.800, 1.774	233.800, 1.690	233.800, 1.688	233.800, 0.028
1171	234.000, 1.744	234.000, 1.717	234.000, 1.774	234.000, 1.690	234.000, 1.688	234.000, 0.028
1172	234.200, 1.744	234.200, 1.716	234.200, 1.774	234.200, 1.690	234.200, 1.688	234.200, 0.028
1173	234.400, 1.744	234.400, 1.716	234.400, 1.774	234.400, 1.690	234.400, 1.688	234.400, 0.028
1174	234.600, 1.744	234.600, 1.716	234.600, 1.774	234.600, 1.690	234.600, 1.688	234.600, 0.028
1175	234.800, 1.744	234.800, 1.716	234.800, 1.774	234.800, 1.690	234.800, 1.688	234.800, 0.028
1176	235.000, 1.745	235.000, 1.716	235.000, 1.774	235.000, 1.690	235.000, 1.688	235.000, 0.028
1177	235.200, 1.745	235.200, 1.716	235.200, 1.774	235.200, 1.690	235.200, 1.688	235.200, 0.028
1178	235.400, 1.745	235.400, 1.716	235.400, 1.774	235.400, 1.690	235.400, 1.688	235.400, 0.028
1179	235.600, 1.745	235.600, 1.716	235.600, 1.774	235.600, 1.690	235.600, 1.688	235.600, 0.028
1180	235.800, 1.745	235.800, 1.717	235.800, 1.774	235.800, 1.690	235.800, 1.688	235.800, 0.028
1181	236.000, 1.745	236.000, 1.717	236.000, 1.774	236.000, 1.690	236.000, 1.688	236.000, 0.029
1182	236.200, 1.745	236.200, 1.717	236.200, 1.773	236.200, 1.690	236.200, 1.687	236.200, 0.029
1183	236.400, 1.745	236.400, 1.716	236.400, 1.774	236.400, 1.690	236.400, 1.687	236.400, 0.029
1184	236.600, 1.745	236.600, 1.716	236.600, 1.773	236.600, 1.689	236.600, 1.687	236.600, 0.029
1185	236.800, 1.745	236.800, 1.716	236.800, 1.773	236.800, 1.689	236.800, 1.687	236.800, 0.029
1186	237.000, 1.745	237.000, 1.716	237.000, 1.774	237.000, 1.689	237.000, 1.687	237.000, 0.029
1187	237.200, 1.745	237.200, 1.716	237.200, 1.774	237.200, 1.689	237.200, 1.687	237.200, 0.029
1188	237.400, 1.745	237.400, 1.716	237.400, 1.774	237.400, 1.689	237.400, 1.687	237.400, 0.030
1189	237.600, 1.745	237.600, 1.716	237.600, 1.774	237.600, 1.690	237.600, 1.687	237.600, 0.030
1190	237.800, 1.745	237.800, 1.716	237.800, 1.774	237.800, 1.690	237.800, 1.687	237.800, 0.030
1191	238.000, 1.745	238.000, 1.716	238.000, 1.774	238.000, 1.690	238.000, 1.687	238.000, 0.030
1192	238.200, 1.745	238.200, 1.716	238.200, 1.774	238.200, 1.690	238.200, 1.687	238.200, 0.030
1193	238.400, 1.745	238.400, 1.716	238.400, 1.774	238.400, 1.690	238.400, 1.687	238.400, 0.030
1194	238.600, 1.745	238.600, 1.716	238.600, 1.774	238.600, 1.690	238.600, 1.687	238.600, 0.030
1195	238.800, 1.745	238.800, 1.716	238.800, 1.773	238.800, 1.690	238.800, 1.687	238.800, 0.030
1196	239.000, 1.745	239.000, 1.715	239.000, 1.773	239.000, 1.691	239.000, 1.687	239.000, 0.030
1197	239.200, 1.745	239.200, 1.715	239.200, 1.773	239.200, 1.691	239.200, 1.687	239.200, 0.030
1198	239.400, 1.745	239.400, 1.715	239.400, 1.773	239.400, 1.691	239.400, 1.687	239.400, 0.030
1199	239.600, 1.746	239.600, 1.715	239.600, 1.773	239.600, 1.690	239.600, 1.687	239.600, 0.030
1200	239.800, 1.746	239.800, 1.715	239.800, 1.772	239.800, 1.690	239.800, 1.687	239.800, 0.030
1201	240.000, 1.746	240.000, 1.714	240.000, 1.772	240.000, 1.690	240.000, 1.687	240.000, 0.030
1202	240.200, 1.746	240.200, 1.714	240.200, 1.772	240.200, 1.689	240.200, 1.686	240.200, 0.030
1203	240.400, 1.746	240.400, 1.714	240.400, 1.772	240.400, 1.689	240.400, 1.686	240.400, 0.030
1204	240.600, 1.745	240.600, 1.714	240.600, 1.772	240.600, 1.689	240.600, 1.686	240.600, 0.030
1205	240.800, 1.745	240.800, 1.714	240.800, 1.772	240.800, 1.688	240.800, 1.686	240.800, 0.030
1206	241.000, 1.745	241.000, 1.715	241.000, 1.773	241.000, 1.688	241.000, 1.685	241.000, 0.030
1207	241.200, 1.745	241.200, 1.715	241.200, 1.773	241.200, 1.688	241.200, 1.685	241.200, 0.030
1208	241.400, 1.744	241.400, 1.715	241.400, 1.773	241.400, 1.688	241.400, 1.685	241.400, 0.031
1209	241.600, 1.744	241.600, 1.715	241.600, 1.773	241.600, 1.688	241.600, 1.685	241.600, 0.031
1210	241.800, 1.744	241.800, 1.715	241.800, 1.773	241.800, 1.688	241.800, 1.685	241.800, 0.031
1211	242.000, 1.744	242.000, 1.715	242.000, 1.774	242.000, 1.687	242.000, 1.685	242.000, 0.031
1212	242.200, 1.744	242.200, 1.715	242.200, 1.774	242.200, 1.687	242.200, 1.685	242.200, 0.031
1213	242.400, 1.744	242.400, 1.715	242.400, 1.774	242.400, 1.687	242.400, 1.685	242.400, 0.031
1214	242.600, 1.743	242.600, 1.715	242.600, 1.774	242.600, 1.687	242.600, 1.685	242.600, 0.031
1215	242.800, 1.744	242.800, 1.714	242.800, 1.774	242.800, 1.687	242.800, 1.685	242.800, 0.031
1216	243.000, 1.744	243.000, 1.714	243.000, 1.774	243.000, 1.686	243.000, 1.685	243.000, 0.031
1217	243.200, 1.744	243.200, 1.714	243.200, 1.774	243.200, 1.686	243.200, 1.685	243.200, 0.031
1218	243.400, 1.744	243.400, 1.714	243.400, 1.774	243.400, 1.686	243.400, 1.685	243.400, 0.031
1219	243.600, 1.745	243.600, 1.714	243.600, 1.774	243.600, 1.686	243.600, 1.685	243.600, 0.031
1220	243.800, 1.745	243.800, 1.714	243.800, 1.773	243.800, 1.686	243.800, 1.685	243.800, 0.031
1221	244.000, 1.745	244.000, 1.714	244.000, 1.773	244.000, 1.686	244.000, 1.685	244.000, 0.031
1222	244.200, 1.745	244.200, 1.714	244.200, 1.773	244.200, 1.687	244.200, 1.684	244.200, 0.031
1223	244.400, 1.745	244.400, 1.714	244.400, 1.773	244.400, 1.687	244.400, 1.684	244.400, 0.031
1224	244.600, 1.745	244.600, 1.714	244.600, 1.773	244.600, 1.687	244.600, 1.684	244.600, 0.031
1225	244.800, 1.745	244.800, 1.714	244.800, 1.773	244.800, 1.688	244.800, 1.684	244.800, 0.031
1226	245.000, 1.745	245.000, 1.714	245.000, 1.773	245.000, 1.688	245.000, 1.684	245.000, 0.031
1227	245.200, 1.745	245.200, 1.714	245.200, 1.773	245.200, 1.688	245.200, 1.684	245.200, 0.031
1228	245.400, 1.745	245.400, 1.714	245.400, 1.773	245.400, 1.688	245.400, 1.684	245.400, 0.031
1229	245.600, 1.745	245.600, 1.714	245.600, 1.773	245.600, 1.688	245.600, 1.684	245.600, 0.031
1230	245.800, 1.744	245.800, 1.714	245.800, 1.773	245.800, 1.688	245.800, 1.684	245.800, 0.031
1231	246.000, 1.744	246.000, 1.714	246.000, 1.772	246.000, 1.688	246.000, 1.684	246.000, 0.031
1232	246.200, 1.744	246.200, 1.714	246.200, 1.772	246.200, 1.687	246.200, 1.684	246.200, 0.031
1233	246.400, 1.744	246.400, 1.714	246.400, 1.772	246.400, 1.687	246.400, 1.684	246.400, 0.031
1234	246.600, 1.743	246.600, 1.714	246.600, 1.772	246.600, 1.687	246.600, 1.683	246.600, 0.031
1235	246.800, 1.743	246.800, 1.714	246.800, 1.771	246.800, 1.686	246.800, 1.683	246.800, 0.031
1236	247.000, 1.743	247.000, 1.714	247.000, 1.771	247.000, 1.686	247.000, 1.683	247.000, 0.030
1237	247.200, 1.743	247.200, 1.714	247.200, 1.771	247.200, 1.686	247.200, 1.683	247.200, 0.030
1238	247.400, 1.743	247.400, 1.714	247.400, 1.771	247.400, 1.686	247.400, 1.683	247.400, 0.030
1239	247.600, 1.743	247.600, 1.714	247.600, 1.770	247.600, 1.686	247.600, 1.683	247.600, 0.030
1240	247.800, 1.743	247.800, 1.714	247.800, 1.770	247.800, 1.686	247.800, 1.684	247.800, 0.030
1241	248.000, 1.743	248.000, 1.714	248.000, 1.770	248.000, 1.686	248.000, 1.684	248.000, 0.030
1242	248.200, 1.743	248.200, 1.713	248.200, 1.770	248.200, 1.686	248.200, 1.684	248.200, 0.030
1243	248.400, 1.743	248.400, 1.713	248.400, 1.769	248.400, 1.686	248.400, 1.684	248.400, 0.031
1244	248.600, 1.743	248.600, 1.713	248.600, 1.769	248.600, 1.687	248.600, 1.684	248.600, 0.031
1245	248.800, 1.743	248.800, 1.713	248.800, 1.769	248.800, 1.687	248.800, 1.684	248.800, 0.031
1246	249.000, 1.743	249.000, 1.713	249.000, 1.769	249.000, 1.687	249.000, 1.684	249.000, 0.031
1247	249.200, 1.743	249.200, 1.713	249.200, 1.769	249.200, 1.687	249.200, 1.684	249.200, 0.031
1248	249.400, 1.744	249.400, 1.712	249.400, 1.769	249.400, 1.687	249.400, 1.684	249.400, 0.032
1249	249.600, 1.744	249.600, 1.712	249.600, 1.769	249.600, 1.687	249.600, 1.684	249.600, 0.032
1250	249.800, 1.744	249.800, 1.712	249.800, 1.770	249.800, 1.687	249.800, 1.684	249.800, 0.032
1251	250.000, 1.744	250.000, 1.712	250.000, 1.770	250.000, 1.687	250.000, 1.683	250.000, 0.032
1252	250.200, 1.744	250.200, 1.712	250.200, 1.770	250.200, 1.687	250.200, 1.683	250.200, 0.032
1253	250.400, 1.744	250.400, 1.712	250.400, 1.770	250.400, 1.687	250.400, 1.683	250.400, 0.033
1254	250.600, 1.744	250.600, 1.712	250.600, 1.770	250.600, 1.686	250.600, 1.683	250.600, 0.033
1255	250.800, 1.744	250.800, 1.712	250.800, 1.771	250.800, 1.686	250.800, 1.683	250.800, 0.033
1256	251.000, 1.744	251.000, 1.712	251.000, 1.771	251.000, 1.686	251.000, 1.683	251.000, 0.033
1257	251.200, 1.744	251.200, 1.712	251.200, 1.770	251.200, 1.686	251.200, 1.682	251.200, 0.033
1258	251.400, 1.745	251.400, 1.713	251.400, 1.770	251.400, 1.686	251.400, 1.682	251.400, 0.033
1259	251.600, 1.745	251.600, 1.713	251.600, 1.770	251.600, 1.686	251.600, 1.682	251.600, 0.033
1260	251.800, 1.745	251.800, 1.713	251.800, 1.770	251.800, 1.685	251.800, 1.682	251.800, 0.033
1261	252.000, 1.745	252.000, 1.714	252.000, 1.770	252.000, 1.685	252.000, 1.682	252.000, 0.034
1262	252.200, 1.744	252.200, 1.714	252.200, 1.770	252.200, 1.685	252.200, 1.682	252.200, 0.034
1263	252.400, 1.744	252.400, 1.714	252.400, 1.769	252.400, 1.685	252.400, 1.682	252.400, 0.034
1264	252.600, 1.744	252.600, 1.714	252.600, 1.769	252.600, 1.685	252.600, 1.681	252.600, 0.034
1265	252.800, 1.744	252.800, 1.714	252.800, 1.769	252.800, 1.685	252.800, 1.681	252.800, 0.034
1266	253.000, 1.743	253.000, 1.713	253.000, 1.769	253.000, 1.685	253.000, 1.681	253.000, 0.033
1267	253.200, 1.743	253.200, 1.713	253.200, 1.769	253.200, 1.685	253.200, 1.681	253.200, 0.033
1268	253.400, 1.743	253.400, 1.713	253.400, 1.769	253.400, 1.684	253.400, 1.681	253.400, 0.033
1269	253.600, 1.744	253.600, 1.713	253.600, 1.769	253.600, 1.684	253.600, 1.681	253.600, 0.033
1270	253.800, 1.744	253.800, 1.712	253.800, 1.769	253.800, 1.684	253.800, 1.681	253.800, 0.033
1271	254.000, 1.744	254.000, 1.712	254.000, 1.769	254.000, 1.684	254.000, 1.681	254.000, 0.033
1272	254.200, 1.744	254.200, 1.712	254.200, 1.769	254.200, 1.684	254.200, 1.681	254.200, 0.033
1273	254.400, 1.744	254.400, 1.711	254.400, 1.769	254.400, 1.685	254.400, 1.681	254.400, 0.033
1274	254.600, 1.744	254.600, 1.711	254.600, 1.769	254.600, 1.685	254.600, 1.681	254.600, 0.033
1275	254.800, 1.744	254.800, 1.711	254.800, 1.769	254.800, 1.685	254.800, 1.681	254.800, 0.033
1276	255.000, 1.744	255.000, 1.711	255.000, 1.769	255.000, 1.685	255.000, 1.681	255.000, 0.033
1277	255.200, 1.744	255.200, 1.711	255.200, 1.769	255.200, 1.685	255.200, 1.680	255.200, 0.033
1278	255.400, 1.744	255.400, 1.711	255.400, 1.768	255.400, 1.685	255.400, 1.680	255.400, 0.033
1279	255.600, 1.744	255.600, 1.711	255.600, 1.768	255.600, 1.684	255.600, 1.680	255.600, 0.034
1280	255.800, 1.744	255.800, 1.711	255.800, 1.768	255.800, 1.684	255.800, 1.680	255.800, 0.034
1281	256.000, 1.744	256.000, 1.711	256.000, 1.768	256.000, 1.684	256.000, 1.680	256.000, 0.034
1282	256.200, 1.744	256.200, 1.711	256.200, 1.768	256.200, 1.683	256.200, 1.680	256.200, 0.035
1283	256.400, 1.744	256.400, 1.710	256.400, 1.768	256.400, 1.683	256.400, 1.680	256.400, 0.035
1284	256.600, 1.744	256.600, 1.710	256.600, 1.768	256.600, 1.683	256.600, 1.680	256.600, 0.035
1285	256.800, 1.744	256.800, 1.710	256.800, 1.768	256.800, 1.683	256.800, 1.680	256.800, 0.035
1286	257.000, 1.744	257.000, 1.710	257.000, 1.768	257.000, 1.683	257.000, 1.680	257.000, 0.035
1287	257.200, 1.744	257.200, 1.710	257.200, 1.768	257.200, 1.683	257.200, 1.680	257.200, 0.035
1288	257.400, 1.744	257.400, 1.710	257.400, 1.769	257.400, 1.683	257.400, 1.680	257.400, 0.035
1289	257.600, 1.744	257.600, 1.710	257.600, 1.769	257.600, 1.684	257.600, 1.680	257.600, 0.035
1290	257.800, 1.743	257.800, 1.710	257.800, 1.769	257.800, 1.684	257.800, 1.680	257.800, 0.035
1291	258.000, 1.743	258.000, 1.710	258.000, 1.769	258.000, 1.684	258.000, 1.680	258.000, 0.035
1292	258.200, 1.743	258.200, 1.710	258.200, 1.768	258.200, 1.684	258.200, 1.679	258.200, 0.035
1293	258.400, 1.743	258.400, 1.710	258.400, 1.768	258.400, 1.684	258.400, 1.679	258.400, 0.035
1294	258.600, 1.743	258.600, 1.710	258.600, 1.768	258.600, 1.684	258.600, 1.679	258.600, 0.035
1295	258.800, 1.743	258.800, 1.710	258.800, 1.768	258.800, 1.684	258.800, 1.678	258.800, 0.035
1296	259.000, 1.743	259.000, 1.711	259.000, 1.767	259.000, 1.683	259.000, 1.678	259.000, 0.035
1297	259.200, 1.743	259.200, 1.711	259.200, 1.767	259.200, 1.683	259.200, 1.678	259.200, 0.035
1298	259.400, 1.742	259.400, 1.711	259.400, 1.767	259.400, 1.683	259.400, 1.678	259.400, 0.035
1299	259.600, 1.742	259.600, 1.711	259.600, 1.767	259.600, 1.683	259.600, 1.678	259.600, 0.035
1300	259.800, 1.742	259.800, 1.711	259.800, 1.767	259.800, 1.682	259.800, 1.678	259.800, 0.035
1301	260.000, 1.742	260.000, 1.710	260.000, 1.766	260.000, 1.682	260.000, 1.678	260.000, 0.035
1302	260.200, 1.742	260.200, 1.710	260.200, 1.766	260.200, 1.682	260.200, 1.678	260.200, 0.035
1303	260.400, 1.742	260.400, 1.710	260.400, 1.766	260.400, 1.682	260.400, 1.678	260.400, 0.035
1304	260.600, 1.742	260.600, 1.710	260.600, 1.766	260.600, 1.681	260.600, 1.678	260.600, 0.035
1305	260.800, 1.742	260.800, 1.710	260.800, 1.766	260.800, 1.681	260.800, 1.678	260.800, 0.035
1306	261.000, 1.742	261.000, 1.710	261.000, 1.765	261.000, 1.681	261.000, 1.678	261.000, 0.035
1307	261.200, 1.742	261.200, 1.710	261.200, 1.765	261.200, 1.681	261.200, 1.678	261.200, 0.035
1308	261.400, 1.742	261.400, 1.709	261.400, 1.765	261.400, 1.681	261.400, 1.678	261.400, 0.035
1309	261.600, 1.742	261.600, 1.709	261.600, 1.765	261.600, 1.681	261.600, 1.678	261.600, 0.035
1310	261.800, 1.742	261.800, 1.709	261.800, 1.765	261.800, 1.681	261.800, 1.678	261.800, 0.035
1311	262.000, 1.742	262.000, 1.709	262.000, 1.765	262.000, 1.681	262.000, 1.678	262.000, 0.035
1312	262.200, 1.742	262.200, 1.709	262.200, 1.765	262.200, 1.681	262.200, 1.678	262.200, 0.035
1313	262.400, 1.742	262.400, 1.709	262.400, 1.766	262.400, 1.681	262.400, 1.678	262.400, 0.035
1314	262.600, 1.742	262.600, 1.709	262.600, 1.766	262.600, 1.681	262.600, 1.678	262.600, 0.035
1315	262.800, 1.742	262.800, 1.710	262.800, 1.766	262.800, 1.681	262.800, 1.678	262.800, 0.035
1316	263.000, 1.742	263.000, 1.710	263.000, 1.766	263.000, 1.681	263.000, 1.678	263.000, 0.035
1317	263.200, 1.742	263.200, 1.710	263.200, 1.766	263.200, 1.681	263.200, 1.678	263.200, 0.036
1318	263.400, 1.742	263.400, 1.710	263.400, 1.767	263.400, 1.681	263.400, 1.678	263.400, 0.036
1319	263.600, 1.742	263.600, 1.710	263.600, 1.766	263.600, 1.681	263.600, 1.678	263.600, 0.036
1320	263.800, 1.742	263.800, 1.710	263.800, 1.767	263.800, 1.681	263.800, 1.677	263.800, 0.036
1321	264.000, 1.742	264.000, 1.710	264.000, 1.767	264.000, 1.681	264.000, 1.677	264.000, 0.036
1322	264.200, 1.741	264.200, 1.710	264.200, 1.767	264.200, 1.680	264.200, 1.677	264.200, 0.036
1323	264.400, 1.741	264.400, 1.710	264.400, 1.767	264.400, 1.680	264.400, 1.677	264.400, 0.036
1324	264.600, 1.741	264.600, 1.710	264.600, 1.767	264.600, 1.680	264.600, 1.677	264.600, 0.036
1325	264.800, 1.740	264.800, 1.710	264.800, 1.766	264.800, 1.681	264.800, 1.677	264.800, 0.036
1326	265.000, 1.740	265.000, 1.710	265.000, 1.766	265.000, 1.681	265.000, 1.677	265.000, 0.036
1327	265.200, 1.740	265.200, 1.710	265.200, 1.766	265.200, 1.681	265.200, 1.677	265.200, 0.036
1328	265.400, 1.740	265.400, 1.709	265.400, 1.766	265.400, 1.681	265.400, 1.677	265.400, 0.036
1329	265.600, 1.740	265.600, 1.709	265.600, 1.766	265.600, 1.681	265.600, 1.677	265.600, 0.036
1330	265.800, 1.740	265.800, 1.709	265.800, 1.766	265.800, 1.680	265.800, 1.678	265.800, 0.036
1331	266.000, 1.740	266.000, 1.709	266.000, 1.766	266.000, 1.680	266.000, 1.678	266.000, 0.036
1332	266.200, 1.740	266.200, 1.709	266.200, 1.766	266.200, 1.680	266.200, 1.678	266.200, 0.035
1333	266.400, 1.740	266.400, 1.708	266.400, 1.766	266.400, 1.680	266.400, 1.678	266.400, 0.035
1334	266.600, 1.740	266.600, 1.708	266.600, 1.766	266.600, 1.680	266.600, 1.678	266.600, 0.035
1335	266.800, 1.740	266.800, 1.708	266.800, 1.766	266.800, 1.680	266.800, 1.678	266.800, 0.035
1336	267.000, 1.741	267.000, 1.708	267.000, 1.766	267.000, 1.680	267.000, 1.678	267.000, 0.035
1337	267.200, 1.741	267.200, 1.708	267.200, 1.766	267.200, 1.680	267.200, 1.678	267.200, 0.035
1338	267.400, 1.741	267.400, 1.708	267.400, 1.766	267.400, 1.680	267.400, 1.677	267.400, 0.035
1339	267.600, 1.741	267.600, 1.708	267.600, 1.766	267.600, 1.680	267.600, 1.677	267.600, 0.035
1340	267.800, 1.741	267.800, 1.708	267.800, 1.766	267.800, 1.680	267.800, 1.677	267.800, 0.035
1341	268.000, 1.741	268.000, 1.708	268.000, 1.766	268.000, 1.680	268.000, 1.677	268.000, 0.036
1342	268.200, 1.741	268.200, 1.708	268.200, 1.766	268.200, 1.680	268.200, 1.677	268.200, 0.036
1343	268.400, 1.741	268.400, 1.708	268.400, 1.766	268.400, 1.680	268.400, 1.676	268.400, 0.036
1344	268.600, 1.741	268.600, 1.708	268.600, 1.765	268.600, 1.680	268.600, 1.676	268.600, 0.037
1345	268.800, 1.740	268.800, 1.708	268.800, 1.765	268.800, 1.680	268.800, 1.677	268.800, 0.037
1346	269.000, 1.740	269.000, 1.707	269.000, 1.765	269.000, 1.680	269.000, 1.677	269.000, 0.037
1347	269.200, 1.740	269.200, 1.707	269.200, 1.764	269.200, 1.680	269.200, 1.677	269.200, 0.038
1348	269.400, 1.739	269.400, 1.707	269.400, 1.764	269.400, 1.679	269.400, 1.677	269.400, 0.038
1349	269.600, 1.739	269.600, 1.707	269.600, 1.764	269.600, 1.679	269.600, 1.677	269.600, 0.038
1350	269.800, 1.739	269.800, 1.707	269.800, 1.763	269.800, 1.679	269.800, 1.677	269.800, 0.038
1351	,	,	,	,	,	,
1352	,	,	,	,	,	,
1353	,	,	,	,	,	,
1354	,	,	,	,	,	,
1355	,	,	,	,	,	,
1356	,	,	,	,	,	,
1357	,	,	,	,	,	,
1358	,	,	,	,	,	,
1359	,	,	,	,	,	,
1360	,	,	,	,	,	,
1361	,	,	,	,	,	,
1362	,	,	,	,	,	,
1363	,	,	,	,	,	,
1364	,	,	,	,	,	,
1365	,	,	,	,	,	,
1366	,	,	,	,	,	,
1367	,	,	,	,	,	,
1368	,	,	,	,	,	,
1369	,	,	,	,	,	,
1370	,	,	,	,	,	,
1371	,	,	,	,	,	,
1372	,	,	,	,	,	,
1373	,	,	,	,	,	,
1374	,	,	,	,	,	,
1375	,	,	,	,	,	,
1376	,	,	,	,	,	,
1377	,	,	,	,	,	,
1378	,	,	,	,	,	,
1379	,	,	,	,	,	,
1380	,	,	,	,	,	,
1381	,	,	,	,	,	,
1382	,	,	,	,	,	,
1383	,	,	,	,	,	,
1384	,	,	,	,	,	,
1385	,	,	,	,	,	,
1386	,	,	,	,	,	,
1387	,	,	,	,	,	,
1388	,	,	,	,	,	,
1389	,	,	,	,	,	,
1390	,	,	,	,	,	,
1391	,	,	,	,	,	,
1392	,	,	,	,	,	,
1393	,	,	,	,	,	,
1394	,	,	,	,	,	,
1395	,	,	,	,	,	,
1396	,	,	,	,	,	,
1397	,	,	,	,	,	,
1398	,	,	,	,	,	,
1399	,	,	,	,	,	,
1400	,	,	,	,	,	,
1401	,	,	,	,	,	,
1402	,	,	,	,	,	,
1403	,	,	,	,	,	,
1404	,	,	,	,	,	,
1405	,	,	,	,	,	,
1406	,	,	,	,	,	,
1407	,	,	,	,	,	,
1408	,	,	,	,	,	,
1409	,	,	,	,	,	,
1410	,	,	,	,	,	,
1411	,	,	,	,	,	,
1412	,	,	,	,	,	,
1413	,	,	,	,	,	,
1414	,	,	,	,	,	,
1415	,	,	,	,	,	,
1416	,	,	,	,	,	,
1417	,	,	,	,	,	,
1418	,	,	,	,	,	,
1419	,	,	,	,	,	,
1420	,	,	,	,	,	,
1421	,	,	,	,	,	,
1422	,	,	,	,	,	,
1423	,	,	,	,	,	,
1424	,	,	,	,	,	,
1425	,	,	,	,	,	,
1426	,	,	,	,	,	,
1427	,	,	,	,	,	,
1428	,	,	,	,	,	,
1429	,	,	,	,	,	,
1430	,	,	,	,	,	,
1431	,	,	,	,	,	,
1432	,	,	,	,	,	,
1433	,	,	,	,	,	,
1434	,	,	,	,	,	,
1435	,	,	,	,	,	,
1436	,	,	,	,	,	,
1437	,	,	,	,	,	,
1438	,	,	,	,	,	,
1439	,	,	,	,	,	,
1440	,	,	,	,	,	,
1441	,	,	,	,	,	,
1442	,	,	,	,	,	,
1443	,	,	,	,	,	,
1444	,	,	,	,	,	,
1445	,	,	,	,	,	,
1446	,	,	,	,	,	,
1447	,	,	,	,	,	,
1448	,	,	,	,	,	,
1449	,	,	,	,	,	,
1450	,	,	,	,	,	,
1451	,	,	,	,	,	,
1452	,	,	,	,	,	,
1453	,	,	,	,	,	,
1454	,	,	,	,	,	,
1455	,	,	,	,	,	,
1456	,	,	,	,	,	,
1457	,	,	,	,	,	,
1458	,	,	,	,	,	,
1459	,	,	,	,	,	,
1460	,	,	,	,	,	,
1461	,	,	,	,	,	,
1462	,	,	,	,	,	,
1463	,	,	,	,	,	,
1464	,	,	,	,	,	,
1465	,	,	,	,	,	,
1466	,	,	,	,	,	,
1467	,	,	,	,	,	,
1468	,	,	,	,	,	,
1469	,	,	,	,	,	,
1470	,	,	,	,	,	,
1471	,	,	,	,	,	,
1472	,	,	,	,	,	,
1473	,	,	,	,	,	,
1474	,	,	,	,	,	,
1475	,	,	,	,	,	,
1476	,	,	,	,	,	,
1477	,	,	,	,	,	,
1478	,	,	,	,	,	,
1479	,	,	,	,	,	,
1480	,	,	,	,	,	,
1481	,	,	,	,	,	,
1482	,	,	,	,	,	,
1483	,	,	,	,	,	,
1484	,	,	,	,	,	,
1485	,	,	,	,	,	,
1486	,	,	,	,	,	,
1487	,	,	,	,	,	,
1488	,	,	,	,	,	,
1489	,	,	,	,	,	,
1490	,	,	,	,	,	,
1491	,	,	,	,	,	,
1492	,	,	,	,	,	,
1493	,	,	,	,	,	,
1494	,	,	,	,	,	,
1495	,	,	,	,	,	,
1496	,	,	,	,	,	,
1497	,	,	,	,	,	,
1498	,	,	,	,	,	,
1499	,	,	,	,	,	,
1500	,	,	,	,	,	,
1501	,	,	,	,	,	,
1502	,	,	,	,	,	,
1503	,	,	,	,	,	,
1504	,	,	,	,	,	,
1505	,	,	,	,	,	,
1506	,	,	,	,	,	,
1507	,	,	,	,	,	,
1508	,	,	,	,	,	,
1509	,	,	,	,	,	,
1510	,	,	,	,	,	,
1511	,	,	,	,	,	,
1512	,	,	,	,	,	,
1513	,	,	,	,	,	,
1514	,	,	,	,	,	,
1515	,	,	,	,	,	,
1516	,	,	,	,	,	,
1517	,	,	,	,	,	,
1518	,	,	,	,	,	,
1519	,	,	,	,	,	,
1520	,	,	,	,	,	,
1521	,	,	,	,	,	,
1522	,	,	,	,	,	,
1523	,	,	,	,	,	,
1524	,	,	,	,	,	,
1525	,	,	,	,	,	,
1526	,	,	,	,	,	,
1527	,	,	,	,	,	,
1528	,	,	,	,	,	,
1529	,	,	,	,	,	,
1530	,	,	,	,	,	,
1531	,	,	,	,	,	,
1532	,	,	,	,	,	,
1533	,	,	,	,	,	,
1534	,	,	,	,	,	,
1535	,	,	,	,	,	,
1536	,	,	,	,	,	,
1537	,	,	,	,	,	,
1538	,	,	,	,	,	,
1539	,	,	,	,	,	,
1540	,	,	,	,	,	,
1541	,	,	,	,	,	,
1542	,	,	,	,	,	,
1543	,	,	,	,	,	,
1544	,	,	,	,	,	,
1545	,	,	,	,	,	,
1546	,	,	,	,	,	,
1547	,	,	,	,	,	,
1548	,	,	,	,	,	,
1549	,	,	,	,	,	,
1550	,	,	,	,	,	,
1551	,	,	,	,	,	,
1552	,	,	,	,	,	,
1553	,	,	,	,	,	,
1554	,	,	,	,	,	,
1555	,	,	,	,	,	,
1556	,	,	,	,	,	,
1557	,	,	,	,	,	,
1558	,	,	,	,	,	,
1559	,	,	,	,	,	,
1560	,	,	,	,	,	,
1561	,	,	,	,	,	,
1562	,	,	,	,	,	,
1563	,	,	,	,	,	,
1564	,	,	,	,	,	,
1565	,	,	,	,	,	,
1566	,	,	,	,	,	,
1567	,	,	,	,	,	,
1568	,	,	,	,	,	,
1569	,	,	,	,	,	,
1570	,	,	,	,	,	,
1571	,	,	,	,	,	,
1572	,	,	,	,	,	,
1573	,	,	,	,	,	,
1574	,	,	,	,	,	,
1575	,	,	,	,	,	,
1576	,	,	,	,	,	,
1577	,	,	,	,	,	,
1578	,	,	,	,	,	,
1579	,	,	,	,	,	,
1580	,	,	,	,	,	,
1581	,	,	,	,	,	,
1582	,	,	,	,	,	,
1583	,	,	,	,	,	,
1584	,	,	,	,	,	,
1585	,	,	,	,	,	,
1586	,	,	,	,	,	,
1587	,	,	,	,	,	,
1588	,	,	,	,	,	,
1589	,	,	,	,	,	,
1590	,	,	,	,	,	,
1591	,	,	,	,	,	,
1592	,	,	,	,	,	,
1593	,	,	,	,	,	,
1594	,	,	,	,	,	,
1595	,	,	,	,	,	,
1596	,	,	,	,	,	,
1597	,	,	,	,	,	,
1598	,	,	,	,	,	,
1599	,	,	,	,	,	,
1600	,	,	,	,	,	,
1601	,	,	,	,	,	,
1602	,	,	,	,	,	,
1603	,	,	,	,	,	,
1604	,	,	,	,	,	,
1605	,	,	,	,	,	,
1606	,	,	,	,	,	,
1607	,	,	,	,	,	,
1608	,	,	,	,	,	,
1609	,	,	,	,	,	,
1610	,	,	,	,	,	,
1611	,	,	,	,	,	,
1612	,	,	,	,	,	,
1613	,	,	,	,	,	,
1614	,	,	,	,	,	,
1615	,	,	,	,	,	,
1616	,	,	,	,	,	,
1617	,	,	,	,	,	,
1618	,	,	,	,	,	,
1619	,	,	,	,	,	,
1620	,	,	,	,	,	,
1621	,	,	,	,	,	,
1622	,	,	,	,	,	,
1623	,	,	,	,	,	,
1624	,	,	,	,	,	,
1625	,	,	,	,	,	,
1626	,	,	,	,	,	,
1627	,	,	,	,	,	,
1628	,	,	,	,	,	,
1629	,	,	,	,	,	,
1630	,	,	,	,	,	,
1631	,	,	,	,	,	,
1632	,	,	,	,	,	,
1633	,	,	,	,	,	,
1634	,	,	,	,	,	,
1635	,	,	,	,	,	,
1636	,	,	,	,	,	,
1637	,	,	,	,	,	,
1638	,	,	,	,	,	,
1639	,	,	,	,	,	,
1640	,	,	,	,	,	,
1641	,	,	,	,	,	,
1642	,	,	,	,	,	,
1643	,	,	,	,	,	,
1644	,	,	,	,	,	,
1645	,	,	,	,	,	,
1646	,	,	,	,	,	,
1647	,	,	,	,	,	,
1648	,	,	,	,	,	,
1649	,	,	,	,	,	,
1650	,	,	,	,	,	,
1651	,	,	,	,	,	,
1652	,	,	,	,	,	,
1653	,	,	,	,	,	,
1654	,	,	,	,	,	,
1655	,	,	,	,	,	,
1656	,	,	,	,	,	,
1657	,	,	,	,	,	,
1658	,	,	,	,	,	,
1659	,	,	,	,	,	,
1660	,	,	,	,	,	,
1661	,	,	,	,	,	,
1662	,	,	,	,	,	,
1663	,	,	,	,	,	,
1664	,	,	,	,	,	,
1665	,	,	,	,	,	,
1666	,	,	,	,	,	,
1667	,	,	,	,	,	,
1668	,	,	,	,	,	,
1669	,	,	,	,	,	,
1670	,	,	,	,	,	,
1671	,	,	,	,	,	,
1672	,	,	,	,	,	,
1673	,	,	,	,	,	,
1674	,	,	,	,	,	,
1675	,	,	,	,	,	,
1676	,	,	,	,	,	,
1677	,	,	,	,	,	,
1678	,	,	,	,	,	,
1679	,	,	,	,	,	,
1680	,	,	,	,	,	,
1681	,	,	,	,	,	,
1682	,	,	,	,	,	,
1683	,	,	,	,	,	,
1684	,	,	,	,	,	,
1685	,	,	,	,	,	,
1686	,	,	,	,	,	,
1687	,	,	,	,	,	,
1688	,	,	,	,	,	,
1689	,	,	,	,	,	,
1690	,	,	,	,	,	,
1691	,	,	,	,	,	,
1692	,	,	,	,	,	,
1693	,	,	,	,	,	,
1694	,	,	,	,	,	,
1695	,	,	,	,	,	,
1696	,	,	,	,	,	,
1697	,	,	,	,	,	,
1698	,	,	,	,	,	,
1699	,	,	,	,	,	,
1700	,	,	,	,	,	,
1701	,	,	,	,	,	,
1702	,	,	,	,	,	,
1703	,	,	,	,	,	,
1704	,	,	,	,	,	,
1705	,	,	,	,	,	,
1706	,	,	,	,	,	,
1707	,	,	,	,	,	,
1708	,	,	,	,	,	,
1709	,	,	,	,	,	,
1710	,	,	,	,	,	,
1711	,	,	,	,	,	,
1712	,	,	,	,	,	,
1713	,	,	,	,	,	,
1714	,	,	,	,	,	,
1715	,	,	,	,	,	,
1716	,	,	,	,	,	,
1717	,	,	,	,	,	,
1718	,	,	,	,	,	,
1719	,	,	,	,	,	,
1720	,	,	,	,	,	,
1721	,	,	,	,	,	,
1722	,	,	,	,	,	,
1723	,	,	,	,	,	,
1724	,	,	,	,	,	,
1725	,	,	,	,	,	,
1726	,	,	,	,	,	,
1727	,	,	,	,	,	,
1728	,	,	,	,	,	,
1729	,	,	,	,	,	,
1730	,	,	,	,	,	,
1731	,	,	,	,	,	,
1732	,	,	,	,	,	,
1733	,	,	,	,	,	,
1734	,	,	,	,	,	,
1735	,	,	,	,	,	,
1736	,	,	,	,	,	,
1737	,	,	,	,	,	,
1738	,	,	,	,	,	,
1739	,	,	,	,	,	,
1740	,	,	,	,	,	,
1741	,	,	,	,	,	,
1742	,	,	,	,	,	,
1743	,	,	,	,	,	,
1744	,	,	,	,	,	,
1745	,	,	,	,	,	,
1746	,	,	,	,	,	,
1747	,	,	,	,	,	,
1748	,	,	,	,	,	,
1749	,	,	,	,	,	,
1750	,	,	,	,	,	,
1751	,	,	,	,	,	,
1752	,	,	,	,	,	,
1753	,	,	,	,	,	,
1754	,	,	,	,	,	,
1755	,	,	,	,	,	,
1756	,	,	,	,	,	,
1757	,	,	,	,	,	,
1758	,	,	,	,	,	,
1759	,	,	,	,	,	,
1760	,	,	,	,	,	,
1761	,	,	,	,	,	,
1762	,	,	,	,	,	,
1763	,	,	,	,	,	,
1764	,	,	,	,	,	,
1765	,	,	,	,	,	,
1766	,	,	,	,	,	,
1767	,	,	,	,	,	,
1768	,	,	,	,	,	,
1769	,	,	,	,	,	,
1770	,	,	,	,	,	,
1771	,	,	,	,	,	,
1772	,	,	,	,	,	,
1773	,	,	,	,	,	,
1774	,	,	,	,	,	,
1775	,	,	,	,	,	,
1776	,	,	,	,	,	,
1777	,	,	,	,	,	,
1778	,	,	,	,	,	,
1779	,	,	,	,	,	,
1780	,	,	,	,	,	,
1781	,	,	,	,	,	,
1782	,	,	,	,	,	,
1783	,	,	,	,	,	,
1784	,	,	,	,	,	,
1785	,	,	,	,	,	,
1786	,	,	,	,	,	,
1787	,	,	,	,	,	,
1788	,	,	,	,	,	,
1789	,	,	,	,	,	,
1790	,	,	,	,	,	,
1791	,	,	,	,	,	,
1792	,	,	,	,	,	,
1793	,	,	,	,	,	,
1794	,	,	,	,	,	,
1795	,	,	,	,	,	,
1796	,	,	,	,	,	,
1797	,	,	,	,	,	,
1798	,	,	,	,	,	,
1799	,	,	,	,	,	,
1800	,	,	,	,	,	,
1801	,	,	,	,	,	,
1802	,	,	,	,	,	,
1803	,	,	,	,	,	,
1804	,	,	,	,	,	,
1805	,	,	,	,	,	,
1806	,	,	,	,	,	,
1807	,	,	,	,	,	,
1808	,	,	,	,	,	,
1809	,	,	,	,	,	,
1810	,	,	,	,	,	,
1811	,	,	,	,	,	,
1812	,	,	,	,	,	,
1813	,	,	,	,	,	,
1814	,	,	,	,	,	,
1815	,	,	,	,	,	,
1816	,	,	,	,	,	,
1817	,	,	,	,	,	,
1818	,	,	,	,	,	,
1819	,	,	,	,	,	,
1820	,	,	,	,	,	,
1821	,	,	,	,	,	,
1822	,	,	,	,	,	,
1823	,	,	,	,	,	,
1824	,	,	,	,	,	,
1825	,	,	,	,	,	,
1826	,	,	,	,	,	,
1827	,	,	,	,	,	,
1828	,	,	,	,	,	,
1829	,	,	,	,	,	,
1830	,	,	,	,	,	,
1831	,	,	,	,	,	,
1832	,	,	,	,	,	,
1833	,	,	,	,	,	,
1834	,	,	,	,	,	,
1835	,	,	,	,	,	,
1836	,	,	,	,	,	,
1837	,	,	,	,	,	,
1838	,	,	,	,	,	,
1839	,	,	,	,	,	,
1840	,	,	,	,	,	,
1841	,	,	,	,	,	,
1842	,	,	,	,	,	,
1843	,	,	,	,	,	,
1844	,	,	,	,	,	,
1845	,	,	,	,	,	,
1846	,	,	,	,	,	,
1847	,	,	,	,	,	,
1848	,	,	,	,	,	,
1849	,	,	,	,	,	,
1850	,	,	,	,	,	,
1851	,	,	,	,	,	,
1852	,	,	,	,	,	,
1853	,	,	,	,	,	,
1854	,	,	,	,	,	,
1855	,	,	,	,	,	,
1856	,	,	,	,	,	,
1857	,	,	,	,	,	,
1858	,	,	,	,	,	,
1859	,	,	,	,	,	,
1860	,	,	,	,	,	,
1861	,	,	,	,	,	,
1862	,	,	,	,	,	,
1863	,	,	,	,	,	,
1864	,	,	,	,	,	,
1865	,	,	,	,	,	,
1866	,	,	,	,	,	,
1867	,	,	,	,	,	,
1868	,	,	,	,	,	,
1869	,	,	,	,	,	,
1870	,	,	,	,	,	,
1871	,	,	,	,	,	,
1872	,	,	,	,	,	,
1873	,	,	,	,	,	,
1874	,	,	,	,	,	,
1875	,	,	,	,	,	,
1876	,	,	,	,	,	,
1877	,	,	,	,	,	,
1878	,	,	,	,	,	,
1879	,	,	,	,	,	,
1880	,	,	,	,	,	,
1881	,	,	,	,	,	,
1882	,	,	,	,	,	,
1883	,	,	,	,	,	,
1884	,	,	,	,	,	,
1885	,	,	,	,	,	,
1886	,	,	,	,	,	,
1887	,	,	,	,	,	,
1888	,	,	,	,	,	,
1889	,	,	,	,	,	,
1890	,	,	,	,	,	,
1891	,	,	,	,	,	,
1892	,	,	,	,	,	,
1893	,	,	,	,	,	,
1894	,	,	,	,	,	,
1895	,	,	,	,	,	,
1896	,	,	,	,	,	,
1897	,	,	,	,	,	,
1898	,	,	,	,	,	,
1899	,	,	,	,	,	,
1900	,	,	,	,	,	,
1901	,	,	,	,	,	,
1902	,	,	,	,	,	,
1903	,	,	,	,	,	,
1904	,	,	,	,	,	,
1905	,	,	,	,	,	,
1906	,	,	,	,	,	,
1907	,	,	,	,	,	,
1908	,	,	,	,	,	,
1909	,	,	,	,	,	,
1910	,	,	,	,	,	,
1911	,	,	,	,	,	,
1912	,	,	,	,	,	,
1913	,	,	,	,	,	,
1914	,	,	,	,	,	,
1915	,	,	,	,	,	,
1916	,	,	,	,	,	,
1917	,	,	,	,	,	,
1918	,	,	,	,	,	,
1919	,	,	,	,	,	,
1920	,	,	,	,	,	,
1921	,	,	,	,	,	,
1922	,	,	,	,	,	,
1923	,	,	,	,	,	,
1924	,	,	,	,	,	,
1925	,	,	,	,	,	,
1926	,	,	,	,	,	,
1927	,	,	,	,	,	,
1928	,	,	,	,	,	,
1929	,	,	,	,	,	,
1930	,	,	,	,	,	,
1931	,	,	,	,	,	,
1932	,	,	,	,	,	,
1933	,	,	,	,	,	,
1934	,	,	,	,	,	,
1935	,	,	,	,	,	,
1936	,	,	,	,	,	,
1937	,	,	,	,	,	,
1938	,	,	,	,	,	,
1939	,	,	,	,	,	,
1940	,	,	,	,	,	,
1941	,	,	,	,	,	,
1942	,	,	,	,	,	,
1943	,	,	,	,	,	,
1944	,	,	,	,	,	,
1945	,	,	,	,	,	,
1946	,	,	,	,	,	,
1947	,	,	,	,	,	,
1948	,	,	,	,	,	,
1949	,	,	,	,	,	,
1950	,	,	,	,	,	,
1951	,	,	,	,	,	,
1952	,	,	,	,	,	,
1953	,	,	,	,	,	,
1954	,	,	,	,	,	,
1955	,	,	,	,	,	,
1956	,	,	,	,	,	,
1957	,	,	,	,	,	,
1958	,	,	,	,	,	,
1959	,	,	,	,	,	,
1960	,	,	,	,	,	,
1961	,	,	,	,	,	,
1962	,	,	,	,	,	,
1963	,	,	,	,	,	,
1964	,	,	,	,	,	,
1965	,	,	,	,	,	,
1966	,	,	,	,	,	,
1967	,	,	,	,	,	,
1968	,	,	,	,	,	,
1969	,	,	,	,	,	,
1970	,	,	,	,	,	,
1971	,	,	,	,	,	,
1972	,	,	,	,	,	,
1973	,	,	,	,	,	,
1974	,	,	,	,	,	,
1975	,	,	,	,	,	,
1976	,	,	,	,	,	,
1977	,	,	,	,	,	,
1978	,	,	,	,	,	,
1979	,	,	,	,	,	,
1980	,	,	,	,	,	,
1981	,	,	,	,	,	,
1982	,	,	,	,	,	,
1983	,	,	,	,	,	,
1984	,	,	,	,	,	,
1985	,	,	,	,	,	,
1986	,	,	,	,	,	,
1987	,	,	,	,	,	,
1988	,	,	,	,	,	,
1989	,	,	,	,	,	,
1990	,	,	,	,	,	,
1991	,	,	,	,	,	,
1992	,	,	,	,	,	,
1993	,	,	,	,	,	,
1994	,	,	,	,	,	,
1995	,	,	,	,	,	,
1996	,	,	,	,	,	,
1997	,	,	,	,	,	,
1998	,	,	,	,	,	,
1999	,	,	,	,	,	,
[truncated: 13,001 more rows]

## Sheet: Fig1_panelC_rep2
	tetO28 TetR no NTP	tetO28 TetR ATP	tetO28 TetR CTP	tetO28 TetR GTP	tetO28 TetR UTP
1	0.000, 0.011	0.000, 0.028	0.000, 0.001	0.000, -0.004	0.000, 0.011
2	0.200, 0.010	0.200, 0.027	0.200, 0.001	0.200, -0.003	0.200, 0.010
3	0.400, 0.009	0.400, 0.026	0.400, 0.002	0.400, -0.003	0.400, 0.009
4	0.600, 0.008	0.600, 0.025	0.600, 0.002	0.600, -0.003	0.600, 0.009
5	0.800, 0.008	0.800, 0.024	0.800, 0.003	0.800, -0.002	0.800, 0.008
6	1.000, 0.007	1.000, 0.022	1.000, 0.003	1.000, -0.002	1.000, 0.007
7	1.200, 0.006	1.200, 0.021	1.200, 0.003	1.200, -0.002	1.200, 0.007
8	1.400, 0.005	1.400, 0.020	1.400, 0.003	1.400, -0.002	1.400, 0.006
9	1.600, 0.005	1.600, 0.019	1.600, 0.004	1.600, -0.002	1.600, 0.006
10	1.800, 0.005	1.800, 0.017	1.800, 0.004	1.800, -0.002	1.800, 0.006
11	2.000, 0.005	2.000, 0.016	2.000, 0.004	2.000, -0.001	2.000, 0.006
12	2.200, 0.006	2.200, 0.016	2.200, 0.004	2.200, -0.001	2.200, 0.007
13	2.400, 0.006	2.400, 0.015	2.400, 0.004	2.400, -0.001	2.400, 0.007
14	2.600, 0.006	2.600, 0.014	2.600, 0.003	2.600, -0.001	2.600, 0.007
15	2.800, 0.006	2.800, 0.014	2.800, 0.003	2.800, -0.001	2.800, 0.007
16	3.000, 0.006	3.000, 0.013	3.000, 0.003	3.000, -0.001	3.000, 0.007
17	3.200, 0.006	3.200, 0.013	3.200, 0.003	3.200, -0.001	3.200, 0.007
18	3.400, 0.006	3.400, 0.012	3.400, 0.002	3.400, -0.001	3.400, 0.006
19	3.600, 0.006	3.600, 0.012	3.600, 0.002	3.600, -0.000	3.600, 0.006
20	3.800, 0.006	3.800, 0.012	3.800, 0.002	3.800, -0.000	3.800, 0.006
21	4.000, 0.006	4.000, 0.012	4.000, 0.003	4.000, 0.000	4.000, 0.005
22	4.200, 0.007	4.200, 0.011	4.200, 0.003	4.200, 0.000	4.200, 0.005
23	4.400, 0.007	4.400, 0.011	4.400, 0.003	4.400, 0.000	4.400, 0.005
24	4.600, 0.007	4.600, 0.011	4.600, 0.003	4.600, 0.000	4.600, 0.005
25	4.800, 0.007	4.800, 0.011	4.800, 0.003	4.800, 0.000	4.800, 0.005
26	5.000, 0.007	5.000, 0.010	5.000, 0.003	5.000, 0.000	5.000, 0.004
27	5.200, 0.007	5.200, 0.010	5.200, 0.004	5.200, 0.000	5.200, 0.004
28	5.400, 0.008	5.400, 0.010	5.400, 0.004	5.400, 0.000	5.400, 0.004
29	5.600, 0.008	5.600, 0.009	5.600, 0.004	5.600, 0.000	5.600, 0.004
30	5.800, 0.008	5.800, 0.009	5.800, 0.004	5.800, -0.000	5.800, 0.004
31	6.000, 0.008	6.000, 0.009	6.000, 0.004	6.000, 0.000	6.000, 0.005
32	6.200, 0.008	6.200, 0.009	6.200, 0.003	6.200, 0.000	6.200, 0.005
33	6.400, 0.008	6.400, 0.009	6.400, 0.003	6.400, 0.000	6.400, 0.005
34	6.600, 0.008	6.600, 0.009	6.600, 0.003	6.600, 0.000	6.600, 0.005
35	6.800, 0.008	6.800, 0.009	6.800, 0.002	6.800, 0.001	6.800, 0.005
36	7.000, 0.008	7.000, 0.009	7.000, 0.002	7.000, 0.001	7.000, 0.004
37	7.200, 0.008	7.200, 0.008	7.200, 0.002	7.200, 0.001	7.200, 0.004
38	7.400, 0.008	7.400, 0.008	7.400, 0.002	7.400, 0.001	7.400, 0.004
39	7.600, 0.008	7.600, 0.008	7.600, 0.002	7.600, 0.001	7.600, 0.004
40	7.800, 0.008	7.800, 0.007	7.800, 0.002	7.800, 0.001	7.800, 0.004
41	8.000, 0.007	8.000, 0.007	8.000, 0.002	8.000, 0.001	8.000, 0.004
42	8.200, 0.007	8.200, 0.007	8.200, 0.002	8.200, 0.001	8.200, 0.004
43	8.400, 0.007	8.400, 0.006	8.400, 0.003	8.400, 0.001	8.400, 0.004
44	8.600, 0.008	8.600, 0.006	8.600, 0.003	8.600, 0.001	8.600, 0.004
45	8.800, 0.008	8.800, 0.006	8.800, 0.003	8.800, 0.001	8.800, 0.004
46	9.000, 0.008	9.000, 0.006	9.000, 0.003	9.000, 0.001	9.000, 0.004
47	9.200, 0.008	9.200, 0.005	9.200, 0.003	9.200, 0.001	9.200, 0.004
48	9.400, 0.008	9.400, 0.005	9.400, 0.003	9.400, 0.001	9.400, 0.004
49	9.600, 0.008	9.600, 0.005	9.600, 0.003	9.600, 0.000	9.600, 0.004
50	9.800, 0.008	9.800, 0.006	9.800, 0.002	9.800, 0.000	9.800, 0.004
51	10.000, 0.008	10.000, 0.006	10.000, 0.002	10.000, 0.000	10.000, 0.003
52	10.200, 0.008	10.200, 0.006	10.200, 0.002	10.200, 0.000	10.200, 0.003
53	10.400, 0.007	10.400, 0.007	10.400, 0.002	10.400, 0.000	10.400, 0.003
54	10.600, 0.007	10.600, 0.007	10.600, 0.002	10.600, 0.001	10.600, 0.003
55	10.800, 0.007	10.800, 0.007	10.800, 0.002	10.800, 0.001	10.800, 0.003
56	11.000, 0.007	11.000, 0.007	11.000, 0.003	11.000, 0.001	11.000, 0.002
57	11.200, 0.007	11.200, 0.006	11.200, 0.003	11.200, 0.001	11.200, 0.002
58	11.400, 0.006	11.400, 0.006	11.400, 0.003	11.400, 0.001	11.400, 0.002
59	11.600, 0.006	11.600, 0.006	11.600, 0.003	11.600, 0.001	11.600, 0.002
60	11.800, 0.006	11.800, 0.005	11.800, 0.003	11.800, 0.002	11.800, 0.002
61	12.000, 0.006	12.000, 0.005	12.000, 0.003	12.000, 0.002	12.000, 0.002
62	12.200, 0.006	12.200, 0.005	12.200, 0.002	12.200, 0.002	12.200, 0.002
63	12.400, 0.006	12.400, 0.005	12.400, 0.002	12.400, 0.002	12.400, 0.002
64	12.600, 0.006	12.600, 0.004	12.600, 0.002	12.600, 0.002	12.600, 0.002
65	12.800, 0.006	12.800, 0.004	12.800, 0.001	12.800, 0.002	12.800, 0.002
66	13.000, 0.006	13.000, 0.004	13.000, 0.001	13.000, 0.002	13.000, 0.002
67	13.200, 0.006	13.200, 0.004	13.200, 0.001	13.200, 0.002	13.200, 0.002
68	13.400, 0.006	13.400, 0.004	13.400, 0.000	13.400, 0.002	13.400, 0.002
69	13.600, 0.006	13.600, 0.004	13.600, -0.000	13.600, 0.002	13.600, 0.002
70	13.800, 0.006	13.800, 0.004	13.800, -0.000	13.800, 0.002	13.800, 0.002
71	14.000, 0.006	14.000, 0.004	14.000, -0.001	14.000, 0.002	14.000, 0.002
72	14.200, 0.006	14.200, 0.004	14.200, -0.001	14.200, 0.002	14.200, 0.002
73	14.400, 0.006	14.400, 0.004	14.400, -0.001	14.400, 0.002	14.400, 0.002
74	14.600, 0.006	14.600, 0.004	14.600, -0.001	14.600, 0.002	14.600, 0.002
75	14.800, 0.006	14.800, 0.004	14.800, -0.001	14.800, 0.002	14.800, 0.002
76	15.000, 0.005	15.000, 0.004	15.000, -0.001	15.000, 0.002	15.000, 0.002
77	15.200, 0.005	15.200, 0.003	15.200, -0.001	15.200, 0.002	15.200, 0.002
78	15.400, 0.005	15.400, 0.003	15.400, -0.001	15.400, 0.002	15.400, 0.002
79	15.600, 0.005	15.600, 0.003	15.600, -0.001	15.600, 0.002	15.600, 0.001
80	15.800, 0.005	15.800, 0.003	15.800, -0.001	15.800, 0.002	15.800, 0.001
81	16.000, 0.005	16.000, 0.003	16.000, -0.001	16.000, 0.002	16.000, 0.001
82	16.200, 0.005	16.200, 0.003	16.200, -0.000	16.200, 0.002	16.200, 0.001
83	16.400, 0.006	16.400, 0.003	16.400, -0.000	16.400, 0.002	16.400, 0.001
84	16.600, 0.006	16.600, 0.003	16.600, -0.000	16.600, 0.002	16.600, 0.001
85	16.800, 0.006	16.800, 0.003	16.800, -0.000	16.800, 0.002	16.800, 0.001
86	17.000, 0.006	17.000, 0.003	17.000, -0.000	17.000, 0.001	17.000, 0.001
87	17.200, 0.006	17.200, 0.004	17.200, -0.000	17.200, 0.001	17.200, 0.001
88	17.400, 0.006	17.400, 0.004	17.400, 0.000	17.400, 0.001	17.400, 0.001
89	17.600, 0.005	17.600, 0.003	17.600, 0.001	17.600, 0.001	17.600, 0.001
90	17.800, 0.005	17.800, 0.003	17.800, 0.001	17.800, 0.001	17.800, 0.001
91	18.000, 0.005	18.000, 0.003	18.000, 0.001	18.000, 0.001	18.000, 0.001
92	18.200, 0.005	18.200, 0.003	18.200, 0.002	18.200, 0.001	18.200, 0.001
93	18.400, 0.005	18.400, 0.002	18.400, 0.002	18.400, 0.001	18.400, 0.001
94	18.600, 0.005	18.600, 0.002	18.600, 0.002	18.600, 0.001	18.600, 0.001
95	18.800, 0.005	18.800, 0.002	18.800, 0.002	18.800, 0.001	18.800, 0.001
96	19.000, 0.005	19.000, 0.001	19.000, 0.002	19.000, 0.001	19.000, 0.001
97	19.200, 0.005	19.200, 0.001	19.200, 0.002	19.200, 0.000	19.200, 0.001
98	19.400, 0.005	19.400, 0.000	19.400, 0.002	19.400, 0.000	19.400, 0.000
99	19.600, 0.005	19.600, 0.000	19.600, 0.002	19.600, 0.001	19.600, 0.000
100	19.800, 0.004	19.800, 0.000	19.800, 0.002	19.800, 0.001	19.800, 0.000
101	20.000, 0.004	20.000, 0.001	20.000, 0.002	20.000, 0.001	20.000, 0.000
102	20.200, 0.004	20.200, 0.001	20.200, 0.002	20.200, 0.001	20.200, 0.000
103	20.400, 0.004	20.400, 0.001	20.400, 0.002	20.400, 0.001	20.400, 0.000
104	20.600, 0.004	20.600, 0.001	20.600, 0.002	20.600, 0.001	20.600, 0.000
105	20.800, 0.004	20.800, 0.002	20.800, 0.002	20.800, 0.001	20.800, 0.000
106	21.000, 0.003	21.000, 0.002	21.000, 0.002	21.000, 0.001	21.000, 0.000
107	21.200, 0.003	21.200, 0.003	21.200, 0.001	21.200, 0.001	21.200, 0.001
108	21.400, 0.003	21.400, 0.003	21.400, 0.001	21.400, 0.001	21.400, 0.001
109	21.600, 0.003	21.600, 0.002	21.600, 0.001	21.600, 0.001	21.600, 0.001
110	21.800, 0.003	21.800, 0.002	21.800, 0.001	21.800, 0.001	21.800, 0.001
111	22.000, 0.003	22.000, 0.002	22.000, 0.000	22.000, 0.001	22.000, 0.001
112	22.200, 0.003	22.200, 0.001	22.200, 0.000	22.200, 0.001	22.200, 0.001
113	22.400, 0.003	22.400, 0.001	22.400, 0.000	22.400, 0.001	22.400, 0.001
114	22.600, 0.003	22.600, 0.001	22.600, 0.000	22.600, 0.001	22.600, 0.000
115	22.800, 0.003	22.800, 0.001	22.800, 0.000	22.800, 0.001	22.800, 0.000
116	23.000, 0.003	23.000, 0.001	23.000, 0.000	23.000, 0.001	23.000, -0.000
117	23.200, 0.002	23.200, 0.001	23.200, 0.000	23.200, 0.001	23.200, -0.000
118	23.400, 0.002	23.400, 0.000	23.400, 0.001	23.400, 0.001	23.400, -0.001
119	23.600, 0.002	23.600, 0.000	23.600, 0.001	23.600, 0.001	23.600, -0.001
120	23.800, 0.001	23.800, 0.000	23.800, 0.001	23.800, 0.001	23.800, -0.001
121	24.000, 0.001	24.000, 0.000	24.000, 0.001	24.000, 0.001	24.000, -0.001
122	24.200, 0.001	24.200, 0.000	24.200, 0.001	24.200, 0.001	24.200, -0.001
123	24.400, 0.001	24.400, -0.000	24.400, 0.001	24.400, 0.001	24.400, -0.001
124	24.600, 0.001	24.600, -0.000	24.600, 0.001	24.600, 0.000	24.600, -0.001
125	24.800, 0.000	24.800, -0.000	24.800, 0.001	24.800, 0.000	24.800, -0.001
126	25.000, 0.000	25.000, -0.000	25.000, 0.001	25.000, 0.000	25.000, -0.000
127	25.200, 0.000	25.200, -0.000	25.200, 0.001	25.200, 0.000	25.200, 0.000
128	25.400, 0.000	25.400, -0.000	25.400, 0.001	25.400, 0.000	25.400, 0.000
129	25.600, 0.000	25.600, 0.000	25.600, 0.001	25.600, 0.000	25.600, 0.001
130	25.800, 0.000	25.800, 0.000	25.800, 0.001	25.800, 0.000	25.800, 0.001
131	26.000, 0.000	26.000, 0.000	26.000, 0.000	26.000, 0.001	26.000, 0.001
132	26.200, 0.000	26.200, 0.000	26.200, 0.000	26.200, 0.001	26.200, 0.002
133	26.400, 0.000	26.400, 0.000	26.400, 0.000	26.400, 0.001	26.400, 0.002
134	26.600, 0.001	26.600, 0.000	26.600, 0.000	26.600, 0.001	26.600, 0.002
135	26.800, 0.001	26.800, 0.000	26.800, -0.000	26.800, 0.001	26.800, 0.001
136	27.000, 0.001	27.000, 0.000	27.000, -0.000	27.000, 0.001	27.000, 0.001
137	27.200, 0.000	27.200, 0.000	27.200, -0.001	27.200, 0.001	27.200, 0.000
138	27.400, 0.000	27.400, 0.000	27.400, -0.001	27.400, 0.001	27.400, -0.000
139	27.600, 0.000	27.600, 0.000	27.600, -0.001	27.600, 0.001	27.600, -0.001
140	27.800, 0.000	27.800, 0.000	27.800, -0.001	27.800, 0.001	27.800, -0.001
141	28.000, 0.000	28.000, 0.000	28.000, -0.001	28.000, 0.000	28.000, -0.001
142	28.200, -0.000	28.200, 0.000	28.200, -0.001	28.200, 0.000	28.200, -0.001
143	28.400, -0.000	28.400, -0.000	28.400, -0.001	28.400, -0.000	28.400, -0.001
144	28.600, -0.000	28.600, -0.000	28.600, -0.000	28.600, -0.000	28.600, -0.001
145	28.800, -0.000	28.800, -0.000	28.800, 0.000	28.800, -0.000	28.800, -0.000
146	29.000, -0.000	29.000, -0.000	29.000, 0.001	29.000, -0.001	29.000, -0.000
147	29.200, -0.000	29.200, -0.000	29.200, 0.001	29.200, -0.001	29.200, 0.000
148	29.400, -0.000	29.400, -0.000	29.400, 0.001	29.400, -0.001	29.400, 0.001
149	29.600, -0.000	29.600, -0.000	29.600, 0.002	29.600, -0.001	29.600, 0.002
150	29.800, -0.000	29.800, -0.000	29.800, 0.002	29.800, -0.001	29.800, 0.002
151	30.000, 0.000	30.000, 0.000	30.000, 0.000	30.000, 0.000	30.000, 0.000
152	30.200, 0.006	30.200, 0.009	30.200, 0.009	30.200, 0.009	30.200, 0.009
153	30.400, 0.015	30.400, 0.020	30.400, 0.020	30.400, 0.019	30.400, 0.020
154	30.600, 0.024	30.600, 0.033	30.600, 0.034	30.600, 0.032	30.600, 0.032
155	30.800, 0.036	30.800, 0.048	30.800, 0.049	30.800, 0.046	30.800, 0.047
156	31.000, 0.049	31.000, 0.064	31.000, 0.066	31.000, 0.062	31.000, 0.063
157	31.200, 0.063	31.200, 0.081	31.200, 0.085	31.200, 0.079	31.200, 0.081
158	31.400, 0.079	31.400, 0.099	31.400, 0.104	31.400, 0.098	31.400, 0.100
159	31.600, 0.095	31.600, 0.118	31.600, 0.125	31.600, 0.117	31.600, 0.120
160	31.800, 0.112	31.800, 0.137	31.800, 0.146	31.800, 0.137	31.800, 0.140
161	32.000, 0.130	32.000, 0.156	32.000, 0.168	32.000, 0.157	32.000, 0.160
162	32.200, 0.148	32.200, 0.174	32.200, 0.189	32.200, 0.176	32.200, 0.180
163	32.400, 0.165	32.400, 0.192	32.400, 0.209	32.400, 0.195	32.400, 0.200
164	32.600, 0.182	32.600, 0.210	32.600, 0.229	32.600, 0.214	32.600, 0.219
165	32.800, 0.199	32.800, 0.228	32.800, 0.249	32.800, 0.233	32.800, 0.239
166	33.000, 0.216	33.000, 0.247	33.000, 0.269	33.000, 0.253	33.000, 0.259
167	33.200, 0.233	33.200, 0.265	33.200, 0.289	33.200, 0.271	33.200, 0.278
168	33.400, 0.250	33.400, 0.283	33.400, 0.309	33.400, 0.290	33.400, 0.298
169	33.600, 0.267	33.600, 0.302	33.600, 0.329	33.600, 0.309	33.600, 0.317
170	33.800, 0.284	33.800, 0.320	33.800, 0.349	33.800, 0.328	33.800, 0.337
171	34.000, 0.301	34.000, 0.338	34.000, 0.369	34.000, 0.347	34.000, 0.357
172	34.200, 0.318	34.200, 0.357	34.200, 0.389	34.200, 0.367	34.200, 0.376
173	34.400, 0.335	34.400, 0.375	34.400, 0.408	34.400, 0.386	34.400, 0.395
174	34.600, 0.353	34.600, 0.393	34.600, 0.428	34.600, 0.405	34.600, 0.415
175	34.800, 0.370	34.800, 0.411	34.800, 0.447	34.800, 0.425	34.800, 0.434
176	35.000, 0.387	35.000, 0.429	35.000, 0.467	35.000, 0.444	35.000, 0.453
177	35.200, 0.404	35.200, 0.447	35.200, 0.486	35.200, 0.463	35.200, 0.472
178	35.400, 0.421	35.400, 0.466	35.400, 0.505	35.400, 0.482	35.400, 0.491
179	35.600, 0.438	35.600, 0.484	35.600, 0.524	35.600, 0.501	35.600, 0.510
180	35.800, 0.455	35.800, 0.502	35.800, 0.543	35.800, 0.520	35.800, 0.529
181	36.000, 0.472	36.000, 0.520	36.000, 0.562	36.000, 0.539	36.000, 0.547
182	36.200, 0.488	36.200, 0.538	36.200, 0.582	36.200, 0.557	36.200, 0.566
183	36.400, 0.505	36.400, 0.556	36.400, 0.601	36.400, 0.576	36.400, 0.584
184	36.600, 0.522	36.600, 0.573	36.600, 0.620	36.600, 0.595	36.600, 0.602
185	36.800, 0.538	36.800, 0.590	36.800, 0.638	36.800, 0.613	36.800, 0.620
186	37.000, 0.554	37.000, 0.607	37.000, 0.657	37.000, 0.631	37.000, 0.638
187	37.200, 0.570	37.200, 0.624	37.200, 0.675	37.200, 0.649	37.200, 0.656
188	37.400, 0.587	37.400, 0.641	37.400, 0.693	37.400, 0.666	37.400, 0.673
189	37.600, 0.602	37.600, 0.657	37.600, 0.710	37.600, 0.684	37.600, 0.691
190	37.800, 0.618	37.800, 0.674	37.800, 0.727	37.800, 0.701	37.800, 0.708
191	38.000, 0.634	38.000, 0.690	38.000, 0.745	38.000, 0.718	38.000, 0.725
192	38.200, 0.650	38.200, 0.706	38.200, 0.762	38.200, 0.735	38.200, 0.742
193	38.400, 0.665	38.400, 0.723	38.400, 0.779	38.400, 0.751	38.400, 0.758
194	38.600, 0.681	38.600, 0.738	38.600, 0.795	38.600, 0.768	38.600, 0.775
195	38.800, 0.697	38.800, 0.754	38.800, 0.811	38.800, 0.784	38.800, 0.791
196	39.000, 0.712	39.000, 0.770	39.000, 0.828	39.000, 0.801	39.000, 0.808
197	39.200, 0.728	39.200, 0.787	39.200, 0.844	39.200, 0.817	39.200, 0.824
198	39.400, 0.743	39.400, 0.803	39.400, 0.860	39.400, 0.832	39.400, 0.840
199	39.600, 0.758	39.600, 0.819	39.600, 0.876	39.600, 0.848	39.600, 0.856
200	39.800, 0.773	39.800, 0.834	39.800, 0.892	39.800, 0.864	39.800, 0.871
201	40.000, 0.788	40.000, 0.849	40.000, 0.907	40.000, 0.879	40.000, 0.886
202	40.200, 0.803	40.200, 0.865	40.200, 0.923	40.200, 0.895	40.200, 0.901
203	40.400, 0.817	40.400, 0.880	40.400, 0.938	40.400, 0.910	40.400, 0.916
204	40.600, 0.832	40.600, 0.894	40.600, 0.954	40.600, 0.925	40.600, 0.930
205	40.800, 0.847	40.800, 0.909	40.800, 0.969	40.800, 0.940	40.800, 0.945
206	41.000, 0.861	41.000, 0.923	41.000, 0.983	41.000, 0.954	41.000, 0.959
207	41.200, 0.875	41.200, 0.937	41.200, 0.998	41.200, 0.969	41.200, 0.973
208	41.400, 0.890	41.400, 0.951	41.400, 1.012	41.400, 0.983	41.400, 0.987
209	41.600, 0.904	41.600, 0.965	41.600, 1.026	41.600, 0.997	41.600, 1.000
210	41.800, 0.918	41.800, 0.978	41.800, 1.039	41.800, 1.010	41.800, 1.013
211	42.000, 0.932	42.000, 0.992	42.000, 1.053	42.000, 1.024	42.000, 1.026
212	42.200, 0.945	42.200, 1.005	42.200, 1.066	42.200, 1.037	42.200, 1.039
213	42.400, 0.959	42.400, 1.018	42.400, 1.079	42.400, 1.049	42.400, 1.052
214	42.600, 0.972	42.600, 1.030	42.600, 1.092	42.600, 1.062	42.600, 1.064
215	42.800, 0.985	42.800, 1.043	42.800, 1.104	42.800, 1.074	42.800, 1.076
216	43.000, 0.997	43.000, 1.055	43.000, 1.116	43.000, 1.086	43.000, 1.088
217	43.200, 1.010	43.200, 1.067	43.200, 1.128	43.200, 1.098	43.200, 1.100
218	43.400, 1.022	43.400, 1.079	43.400, 1.140	43.400, 1.109	43.400, 1.112
219	43.600, 1.034	43.600, 1.091	43.600, 1.152	43.600, 1.121	43.600, 1.123
220	43.800, 1.045	43.800, 1.102	43.800, 1.164	43.800, 1.132	43.800, 1.135
221	44.000, 1.056	44.000, 1.113	44.000, 1.175	44.000, 1.143	44.000, 1.146
222	44.200, 1.067	44.200, 1.124	44.200, 1.186	44.200, 1.154	44.200, 1.157
223	44.400, 1.078	44.400, 1.135	44.400, 1.198	44.400, 1.165	44.400, 1.167
224	44.600, 1.089	44.600, 1.145	44.600, 1.208	44.600, 1.175	44.600, 1.178
225	44.800, 1.100	44.800, 1.156	44.800, 1.219	44.800, 1.186	44.800, 1.188
226	45.000, 1.111	45.000, 1.167	45.000, 1.229	45.000, 1.196	45.000, 1.199
227	45.200, 1.122	45.200, 1.177	45.200, 1.239	45.200, 1.206	45.200, 1.209
228	45.400, 1.133	45.400, 1.188	45.400, 1.249	45.400, 1.216	45.400, 1.219
229	45.600, 1.143	45.600, 1.198	45.600, 1.259	45.600, 1.226	45.600, 1.229
230	45.800, 1.154	45.800, 1.208	45.800, 1.268	45.800, 1.236	45.800, 1.239
231	46.000, 1.164	46.000, 1.218	46.000, 1.277	46.000, 1.246	46.000, 1.249
232	46.200, 1.174	46.200, 1.228	46.200, 1.287	46.200, 1.256	46.200, 1.258
233	46.400, 1.184	46.400, 1.237	46.400, 1.296	46.400, 1.265	46.400, 1.267
234	46.600, 1.193	46.600, 1.246	46.600, 1.305	46.600, 1.274	46.600, 1.276
235	46.800, 1.203	46.800, 1.255	46.800, 1.314	46.800, 1.283	46.800, 1.285
236	47.000, 1.212	47.000, 1.264	47.000, 1.322	47.000, 1.292	47.000, 1.293
237	47.200, 1.221	47.200, 1.273	47.200, 1.331	47.200, 1.301	47.200, 1.302
238	47.400, 1.230	47.400, 1.281	47.400, 1.340	47.400, 1.309	47.400, 1.310
239	47.600, 1.239	47.600, 1.290	47.600, 1.348	47.600, 1.317	47.600, 1.318
240	47.800, 1.248	47.800, 1.298	47.800, 1.357	47.800, 1.326	47.800, 1.325
241	48.000, 1.256	48.000, 1.306	48.000, 1.365	48.000, 1.333	48.000, 1.333
242	48.200, 1.265	48.200, 1.314	48.200, 1.373	48.200, 1.341	48.200, 1.340
243	48.400, 1.273	48.400, 1.322	48.400, 1.381	48.400, 1.349	48.400, 1.348
244	48.600, 1.281	48.600, 1.330	48.600, 1.389	48.600, 1.356	48.600, 1.355
245	48.800, 1.290	48.800, 1.337	48.800, 1.397	48.800, 1.364	48.800, 1.362
246	49.000, 1.298	49.000, 1.345	49.000, 1.404	49.000, 1.371	49.000, 1.370
247	49.200, 1.306	49.200, 1.352	49.200, 1.412	49.200, 1.378	49.200, 1.377
248	49.400, 1.315	49.400, 1.359	49.400, 1.419	49.400, 1.385	49.400, 1.384
249	49.600, 1.323	49.600, 1.366	49.600, 1.426	49.600, 1.392	49.600, 1.392
250	49.800, 1.331	49.800, 1.373	49.800, 1.433	49.800, 1.399	49.800, 1.399
251	50.000, 1.338	50.000, 1.380	50.000, 1.439	50.000, 1.406	50.000, 1.406
252	50.200, 1.346	50.200, 1.387	50.200, 1.446	50.200, 1.413	50.200, 1.412
253	50.400, 1.353	50.400, 1.393	50.400, 1.452	50.400, 1.420	50.400, 1.419
254	50.600, 1.361	50.600, 1.400	50.600, 1.459	50.600, 1.427	50.600, 1.425
255	50.800, 1.368	50.800, 1.407	50.800, 1.465	50.800, 1.433	50.800, 1.432
256	51.000, 1.375	51.000, 1.413	51.000, 1.472	51.000, 1.440	51.000, 1.438
257	51.200, 1.382	51.200, 1.420	51.200, 1.478	51.200, 1.446	51.200, 1.444
258	51.400, 1.389	51.400, 1.426	51.400, 1.484	51.400, 1.452	51.400, 1.450
259	51.600, 1.396	51.600, 1.433	51.600, 1.490	51.600, 1.458	51.600, 1.455
260	51.800, 1.402	51.800, 1.439	51.800, 1.496	51.800, 1.464	51.800, 1.461
261	52.000, 1.409	52.000, 1.445	52.000, 1.502	52.000, 1.470	52.000, 1.466
262	52.200, 1.415	52.200, 1.451	52.200, 1.508	52.200, 1.476	52.200, 1.472
263	52.400, 1.421	52.400, 1.456	52.400, 1.514	52.400, 1.482	52.400, 1.477
264	52.600, 1.427	52.600, 1.461	52.600, 1.519	52.600, 1.488	52.600, 1.482
265	52.800, 1.433	52.800, 1.467	52.800, 1.525	52.800, 1.493	52.800, 1.488
266	53.000, 1.439	53.000, 1.472	53.000, 1.530	53.000, 1.498	53.000, 1.493
267	53.200, 1.445	53.200, 1.477	53.200, 1.536	53.200, 1.504	53.200, 1.498
268	53.400, 1.451	53.400, 1.482	53.400, 1.541	53.400, 1.509	53.400, 1.503
269	53.600, 1.457	53.600, 1.487	53.600, 1.546	53.600, 1.514	53.600, 1.508
270	53.800, 1.463	53.800, 1.493	53.800, 1.551	53.800, 1.519	53.800, 1.513
271	54.000, 1.469	54.000, 1.498	54.000, 1.556	54.000, 1.524	54.000, 1.518
272	54.200, 1.475	54.200, 1.503	54.200, 1.561	54.200, 1.529	54.200, 1.523
273	54.400, 1.480	54.400, 1.508	54.400, 1.566	54.400, 1.534	54.400, 1.528
274	54.600, 1.486	54.600, 1.513	54.600, 1.570	54.600, 1.539	54.600, 1.532
275	54.800, 1.491	54.800, 1.518	54.800, 1.575	54.800, 1.544	54.800, 1.537
276	55.000, 1.496	55.000, 1.524	55.000, 1.579	55.000, 1.548	55.000, 1.541
277	55.200, 1.501	55.200, 1.529	55.200, 1.584	55.200, 1.553	55.200, 1.546
278	55.400, 1.506	55.400, 1.534	55.400, 1.588	55.400, 1.557	55.400, 1.551
279	55.600, 1.511	55.600, 1.539	55.600, 1.593	55.600, 1.561	55.600, 1.555
280	55.800, 1.516	55.800, 1.544	55.800, 1.597	55.800, 1.566	55.800, 1.560
281	56.000, 1.521	56.000, 1.548	56.000, 1.601	56.000, 1.570	56.000, 1.564
282	56.200, 1.525	56.200, 1.553	56.200, 1.605	56.200, 1.575	56.200, 1.568
283	56.400, 1.530	56.400, 1.557	56.400, 1.610	56.400, 1.579	56.400, 1.573
284	56.600, 1.534	56.600, 1.561	56.600, 1.614	56.600, 1.584	56.600, 1.577
285	56.800, 1.539	56.800, 1.565	56.800, 1.618	56.800, 1.588	56.800, 1.581
286	57.000, 1.544	57.000, 1.569	57.000, 1.622	57.000, 1.592	57.000, 1.585
287	57.200, 1.548	57.200, 1.572	57.200, 1.626	57.200, 1.596	57.200, 1.589
288	57.400, 1.553	57.400, 1.576	57.400, 1.630	57.400, 1.600	57.400, 1.593
289	57.600, 1.557	57.600, 1.579	57.600, 1.634	57.600, 1.604	57.600, 1.596
290	57.800, 1.562	57.800, 1.583	57.800, 1.638	57.800, 1.608	57.800, 1.600
291	58.000, 1.566	58.000, 1.587	58.000, 1.642	58.000, 1.612	58.000, 1.604
292	58.200, 1.570	58.200, 1.590	58.200, 1.646	58.200, 1.616	58.200, 1.608
293	58.400, 1.574	58.400, 1.594	58.400, 1.649	58.400, 1.619	58.400, 1.611
294	58.600, 1.579	58.600, 1.598	58.600, 1.653	58.600, 1.622	58.600, 1.615
295	58.800, 1.582	58.800, 1.602	58.800, 1.657	58.800, 1.625	58.800, 1.619
296	59.000, 1.587	59.000, 1.605	59.000, 1.661	59.000, 1.629	59.000, 1.622
297	59.200, 1.591	59.200, 1.609	59.200, 1.664	59.200, 1.632	59.200, 1.626
298	59.400, 1.595	59.400, 1.613	59.400, 1.668	59.400, 1.635	59.400, 1.629
299	59.600, 1.599	59.600, 1.617	59.600, 1.672	59.600, 1.638	59.600, 1.633
300	59.800, 1.604	59.800, 1.621	59.800, 1.675	59.800, 1.642	59.800, 1.636
301	60.000, 1.608	60.000, 1.625	60.000, 1.678	60.000, 1.645	60.000, 1.639
302	60.200, 1.612	60.200, 1.628	60.200, 1.682	60.200, 1.648	60.200, 1.642
303	60.400, 1.616	60.400, 1.632	60.400, 1.685	60.400, 1.652	60.400, 1.645
304	60.600, 1.619	60.600, 1.635	60.600, 1.688	60.600, 1.655	60.600, 1.648
305	60.800, 1.623	60.800, 1.638	60.800, 1.692	60.800, 1.659	60.800, 1.651
306	61.000, 1.627	61.000, 1.641	61.000, 1.695	61.000, 1.662	61.000, 1.653
307	61.200, 1.630	61.200, 1.644	61.200, 1.698	61.200, 1.665	61.200, 1.656
308	61.400, 1.633	61.400, 1.647	61.400, 1.701	61.400, 1.669	61.400, 1.659
309	61.600, 1.637	61.600, 1.650	61.600, 1.704	61.600, 1.672	61.600, 1.662
310	61.800, 1.640	61.800, 1.653	61.800, 1.707	61.800, 1.675	61.800, 1.665
311	62.000, 1.643	62.000, 1.656	62.000, 1.710	62.000, 1.678	62.000, 1.668
312	62.200, 1.647	62.200, 1.659	62.200, 1.713	62.200, 1.681	62.200, 1.671
313	62.400, 1.650	62.400, 1.662	62.400, 1.716	62.400, 1.684	62.400, 1.674
314	62.600, 1.653	62.600, 1.665	62.600, 1.719	62.600, 1.687	62.600, 1.677
315	62.800, 1.655	62.800, 1.668	62.800, 1.722	62.800, 1.689	62.800, 1.680
316	63.000, 1.658	63.000, 1.671	63.000, 1.725	63.000, 1.692	63.000, 1.683
317	63.200, 1.661	63.200, 1.674	63.200, 1.727	63.200, 1.695	63.200, 1.686
318	63.400, 1.664	63.400, 1.677	63.400, 1.730	63.400, 1.698	63.400, 1.689
319	63.600, 1.667	63.600, 1.679	63.600, 1.733	63.600, 1.701	63.600, 1.692
320	63.800, 1.670	63.800, 1.682	63.800, 1.736	63.800, 1.705	63.800, 1.694
321	64.000, 1.673	64.000, 1.685	64.000, 1.738	64.000, 1.708	64.000, 1.697
322	64.200, 1.676	64.200, 1.688	64.200, 1.741	64.200, 1.711	64.200, 1.700
323	64.400, 1.679	64.400, 1.691	64.400, 1.744	64.400, 1.714	64.400, 1.702
324	64.600, 1.681	64.600, 1.693	64.600, 1.746	64.600, 1.716	64.600, 1.705
325	64.800, 1.684	64.800, 1.696	64.800, 1.749	64.800, 1.719	64.800, 1.707
326	65.000, 1.687	65.000, 1.699	65.000, 1.751	65.000, 1.722	65.000, 1.710
327	65.200, 1.689	65.200, 1.702	65.200, 1.754	65.200, 1.724	65.200, 1.712
328	65.400, 1.692	65.400, 1.705	65.400, 1.756	65.400, 1.727	65.400, 1.715
329	65.600, 1.694	65.600, 1.707	65.600, 1.759	65.600, 1.729	65.600, 1.717
330	65.800, 1.697	65.800, 1.710	65.800, 1.761	65.800, 1.732	65.800, 1.719
331	66.000, 1.700	66.000, 1.712	66.000, 1.764	66.000, 1.734	66.000, 1.722
332	66.200, 1.702	66.200, 1.715	66.200, 1.766	66.200, 1.737	66.200, 1.724
333	66.400, 1.705	66.400, 1.717	66.400, 1.769	66.400, 1.739	66.400, 1.727
334	66.600, 1.708	66.600, 1.720	66.600, 1.771	66.600, 1.741	66.600, 1.729
335	66.800, 1.711	66.800, 1.722	66.800, 1.774	66.800, 1.743	66.800, 1.732
336	67.000, 1.714	67.000, 1.724	67.000, 1.776	67.000, 1.745	67.000, 1.734
337	67.200, 1.717	67.200, 1.727	67.200, 1.779	67.200, 1.748	67.200, 1.737
338	67.400, 1.720	67.400, 1.729	67.400, 1.781	67.400, 1.750	67.400, 1.739
339	67.600, 1.723	67.600, 1.731	67.600, 1.784	67.600, 1.752	67.600, 1.741
340	67.800, 1.726	67.800, 1.733	67.800, 1.786	67.800, 1.755	67.800, 1.743
341	68.000, 1.729	68.000, 1.735	68.000, 1.788	68.000, 1.757	68.000, 1.745
342	68.200, 1.731	68.200, 1.737	68.200, 1.790	68.200, 1.759	68.200, 1.747
343	68.400, 1.734	68.400, 1.739	68.400, 1.792	68.400, 1.761	68.400, 1.749
344	68.600, 1.736	68.600, 1.742	68.600, 1.795	68.600, 1.764	68.600, 1.751
345	68.800, 1.738	68.800, 1.744	68.800, 1.797	68.800, 1.766	68.800, 1.753
346	69.000, 1.740	69.000, 1.746	69.000, 1.799	69.000, 1.768	69.000, 1.755
347	69.200, 1.742	69.200, 1.748	69.200, 1.801	69.200, 1.770	69.200, 1.757
348	69.400, 1.744	69.400, 1.750	69.400, 1.803	69.400, 1.772	69.400, 1.758
349	69.600, 1.746	69.600, 1.752	69.600, 1.805	69.600, 1.775	69.600, 1.760
350	69.800, 1.748	69.800, 1.754	69.800, 1.807	69.800, 1.777	69.800, 1.762
351	70.000, 1.750	70.000, 1.756	70.000, 1.809	70.000, 1.780	70.000, 1.764
352	70.200, 1.752	70.200, 1.758	70.200, 1.810	70.200, 1.782	70.200, 1.766
353	70.400, 1.754	70.400, 1.760	70.400, 1.812	70.400, 1.784	70.400, 1.768
354	70.600, 1.756	70.600, 1.762	70.600, 1.814	70.600, 1.786	70.600, 1.771
355	70.800, 1.758	70.800, 1.764	70.800, 1.816	70.800, 1.788	70.800, 1.773
356	71.000, 1.761	71.000, 1.766	71.000, 1.818	71.000, 1.790	71.000, 1.775
357	71.200, 1.763	71.200, 1.768	71.200, 1.820	71.200, 1.792	71.200, 1.777
358	71.400, 1.766	71.400, 1.769	71.400, 1.822	71.400, 1.793	71.400, 1.779
359	71.600, 1.768	71.600, 1.771	71.600, 1.824	71.600, 1.795	71.600, 1.781
360	71.800, 1.770	71.800, 1.773	71.800, 1.826	71.800, 1.797	71.800, 1.783
361	72.000, 1.772	72.000, 1.775	72.000, 1.828	72.000, 1.798	72.000, 1.785
362	72.200, 1.774	72.200, 1.776	72.200, 1.830	72.200, 1.800	72.200, 1.787
363	72.400, 1.776	72.400, 1.778	72.400, 1.832	72.400, 1.802	72.400, 1.789
364	72.600, 1.778	72.600, 1.780	72.600, 1.834	72.600, 1.803	72.600, 1.790
365	72.800, 1.780	72.800, 1.782	72.800, 1.836	72.800, 1.805	72.800, 1.792
366	73.000, 1.782	73.000, 1.784	73.000, 1.838	73.000, 1.807	73.000, 1.794
367	73.200, 1.785	73.200, 1.785	73.200, 1.840	73.200, 1.809	73.200, 1.795
368	73.400, 1.787	73.400, 1.787	73.400, 1.841	73.400, 1.811	73.400, 1.797
369	73.600, 1.789	73.600, 1.789	73.600, 1.843	73.600, 1.813	73.600, 1.798
370	73.800, 1.791	73.800, 1.791	73.800, 1.844	73.800, 1.815	73.800, 1.800
371	74.000, 1.793	74.000, 1.792	74.000, 1.846	74.000, 1.817	74.000, 1.802
372	74.200, 1.795	74.200, 1.794	74.200, 1.847	74.200, 1.819	74.200, 1.803
373	74.400, 1.797	74.400, 1.796	74.400, 1.849	74.400, 1.821	74.400, 1.805
374	74.600, 1.799	74.600, 1.798	74.600, 1.851	74.600, 1.823	74.600, 1.807
375	74.800, 1.801	74.800, 1.800	74.800, 1.853	74.800, 1.824	74.800, 1.809
376	75.000, 1.803	75.000, 1.802	75.000, 1.854	75.000, 1.826	75.000, 1.810
377	75.200, 1.804	75.200, 1.803	75.200, 1.856	75.200, 1.827	75.200, 1.812
378	75.400, 1.806	75.400, 1.805	75.400, 1.858	75.400, 1.829	75.400, 1.813
379	75.600, 1.808	75.600, 1.807	75.600, 1.860	75.600, 1.830	75.600, 1.815
380	75.800, 1.809	75.800, 1.808	75.800, 1.862	75.800, 1.831	75.800, 1.816
381	76.000, 1.811	76.000, 1.810	76.000, 1.864	76.000, 1.833	76.000, 1.818
382	76.200, 1.813	76.200, 1.811	76.200, 1.866	76.200, 1.834	76.200, 1.819
383	76.400, 1.814	76.400, 1.813	76.400, 1.867	76.400, 1.835	76.400, 1.821
384	76.600, 1.816	76.600, 1.815	76.600, 1.869	76.600, 1.837	76.600, 1.822
385	76.800, 1.817	76.800, 1.816	76.800, 1.870	76.800, 1.838	76.800, 1.824
386	77.000, 1.818	77.000, 1.818	77.000, 1.872	77.000, 1.839	77.000, 1.825
387	77.200, 1.820	77.200, 1.820	77.200, 1.873	77.200, 1.841	77.200, 1.827
388	77.400, 1.822	77.400, 1.821	77.400, 1.875	77.400, 1.843	77.400, 1.828
389	77.600, 1.823	77.600, 1.822	77.600, 1.876	77.600, 1.844	77.600, 1.829
390	77.800, 1.825	77.800, 1.823	77.800, 1.877	77.800, 1.846	77.800, 1.831
391	78.000, 1.827	78.000, 1.825	78.000, 1.878	78.000, 1.848	78.000, 1.833
392	78.200, 1.829	78.200, 1.826	78.200, 1.879	78.200, 1.849	78.200, 1.834
393	78.400, 1.831	78.400, 1.827	78.400, 1.880	78.400, 1.851	78.400, 1.836
394	78.600, 1.832	78.600, 1.829	78.600, 1.882	78.600, 1.853	78.600, 1.837
395	78.800, 1.834	78.800, 1.830	78.800, 1.883	78.800, 1.854	78.800, 1.839
396	79.000, 1.836	79.000, 1.832	79.000, 1.884	79.000, 1.856	79.000, 1.840
397	79.200, 1.838	79.200, 1.833	79.200, 1.885	79.200, 1.857	79.200, 1.841
398	79.400, 1.839	79.400, 1.835	79.400, 1.887	79.400, 1.859	79.400, 1.842
399	79.600, 1.841	79.600, 1.836	79.600, 1.888	79.600, 1.861	79.600, 1.843
400	79.800, 1.842	79.800, 1.837	79.800, 1.890	79.800, 1.862	79.800, 1.845
401	80.000, 1.844	80.000, 1.839	80.000, 1.891	80.000, 1.864	80.000, 1.846
402	80.200, 1.845	80.200, 1.840	80.200, 1.893	80.200, 1.866	80.200, 1.847
403	80.400, 1.846	80.400, 1.842	80.400, 1.894	80.400, 1.867	80.400, 1.848
404	80.600, 1.847	80.600, 1.843	80.600, 1.896	80.600, 1.868	80.600, 1.849
405	80.800, 1.848	80.800, 1.845	80.800, 1.897	80.800, 1.870	80.800, 1.851
406	81.000, 1.850	81.000, 1.846	81.000, 1.898	81.000, 1.871	81.000, 1.852
407	81.200, 1.851	81.200, 1.848	81.200, 1.900	81.200, 1.873	81.200, 1.853
408	81.400, 1.852	81.400, 1.849	81.400, 1.901	81.400, 1.874	81.400, 1.855
409	81.600, 1.853	81.600, 1.850	81.600, 1.902	81.600, 1.875	81.600, 1.856
410	81.800, 1.855	81.800, 1.852	81.800, 1.904	81.800, 1.876	81.800, 1.858
411	82.000, 1.857	82.000, 1.853	82.000, 1.905	82.000, 1.878	82.000, 1.860
412	82.200, 1.858	82.200, 1.854	82.200, 1.906	82.200, 1.879	82.200, 1.862
413	82.400, 1.860	82.400, 1.855	82.400, 1.907	82.400, 1.881	82.400, 1.863
414	82.600, 1.861	82.600, 1.857	82.600, 1.909	82.600, 1.882	82.600, 1.865
415	82.800, 1.863	82.800, 1.858	82.800, 1.910	82.800, 1.883	82.800, 1.866
416	83.000, 1.864	83.000, 1.859	83.000, 1.912	83.000, 1.885	83.000, 1.868
417	83.200, 1.866	83.200, 1.860	83.200, 1.913	83.200, 1.886	83.200, 1.869
418	83.400, 1.867	83.400, 1.861	83.400, 1.915	83.400, 1.888	83.400, 1.870
419	83.600, 1.869	83.600, 1.862	83.600, 1.916	83.600, 1.889	83.600, 1.871
420	83.800, 1.870	83.800, 1.863	83.800, 1.918	83.800, 1.890	83.800, 1.872
421	84.000, 1.872	84.000, 1.864	84.000, 1.919	84.000, 1.891	84.000, 1.873
422	84.200, 1.873	84.200, 1.866	84.200, 1.920	84.200, 1.892	84.200, 1.874
423	84.400, 1.875	84.400, 1.867	84.400, 1.921	84.400, 1.893	84.400, 1.875
424	84.600, 1.876	84.600, 1.868	84.600, 1.922	84.600, 1.894	84.600, 1.876
425	84.800, 1.877	84.800, 1.870	84.800, 1.923	84.800, 1.895	84.800, 1.877
426	85.000, 1.879	85.000, 1.871	85.000, 1.924	85.000, 1.896	85.000, 1.877
427	85.200, 1.880	85.200, 1.873	85.200, 1.925	85.200, 1.897	85.200, 1.878
428	85.400, 1.881	85.400, 1.874	85.400, 1.925	85.400, 1.898	85.400, 1.879
429	85.600, 1.882	85.600, 1.876	85.600, 1.927	85.600, 1.899	85.600, 1.880
430	85.800, 1.883	85.800, 1.877	85.800, 1.928	85.800, 1.900	85.800, 1.882
431	86.000, 1.885	86.000, 1.878	86.000, 1.929	86.000, 1.902	86.000, 1.883
432	86.200, 1.886	86.200, 1.879	86.200, 1.930	86.200, 1.903	86.200, 1.884
433	86.400, 1.887	86.400, 1.880	86.400, 1.931	86.400, 1.904	86.400, 1.886
434	86.600, 1.888	86.600, 1.881	86.600, 1.933	86.600, 1.905	86.600, 1.887
435	86.800, 1.889	86.800, 1.882	86.800, 1.934	86.800, 1.906	86.800, 1.888
436	87.000, 1.890	87.000, 1.883	87.000, 1.935	87.000, 1.907	87.000, 1.889
437	87.200, 1.891	87.200, 1.884	87.200, 1.936	87.200, 1.908	87.200, 1.890
438	87.400, 1.892	87.400, 1.885	87.400, 1.938	87.400, 1.910	87.400, 1.891
439	87.600, 1.894	87.600, 1.885	87.600, 1.939	87.600, 1.911	87.600, 1.892
440	87.800, 1.895	87.800, 1.886	87.800, 1.941	87.800, 1.912	87.800, 1.893
441	88.000, 1.897	88.000, 1.887	88.000, 1.942	88.000, 1.913	88.000, 1.894
442	88.200, 1.898	88.200, 1.888	88.200, 1.943	88.200, 1.914	88.200, 1.894
443	88.400, 1.900	88.400, 1.890	88.400, 1.944	88.400, 1.915	88.400, 1.895
444	88.600, 1.901	88.600, 1.891	88.600, 1.946	88.600, 1.916	88.600, 1.896
445	88.800, 1.903	88.800, 1.892	88.800, 1.947	88.800, 1.918	88.800, 1.896
446	89.000, 1.904	89.000, 1.894	89.000, 1.948	89.000, 1.919	89.000, 1.897
447	89.200, 1.905	89.200, 1.895	89.200, 1.949	89.200, 1.920	89.200, 1.897
448	89.400, 1.907	89.400, 1.896	89.400, 1.951	89.400, 1.921	89.400, 1.898
449	89.600, 1.908	89.600, 1.897	89.600, 1.952	89.600, 1.922	89.600, 1.900
450	89.800, 1.909	89.800, 1.898	89.800, 1.953	89.800, 1.922	89.800, 1.901
451	90.000, 1.910	90.000, 1.899	90.000, 1.954	90.000, 1.923	90.000, 1.902
452	90.200, 1.910	90.200, 1.900	90.200, 1.955	90.200, 1.924	90.200, 1.903
453	90.400, 1.911	90.400, 1.901	90.400, 1.956	90.400, 1.926	90.400, 1.905
454	90.600, 1.912	90.600, 1.902	90.600, 1.957	90.600, 1.927	90.600, 1.906
455	90.800, 1.912	90.800, 1.902	90.800, 1.958	90.800, 1.928	90.800, 1.907
456	91.000, 1.913	91.000, 1.903	91.000, 1.958	91.000, 1.930	91.000, 1.909
457	91.200, 1.914	91.200, 1.904	91.200, 1.959	91.200, 1.931	91.200, 1.910
458	91.400, 1.914	91.400, 1.905	91.400, 1.960	91.400, 1.932	91.400, 1.911
459	91.600, 1.915	91.600, 1.906	91.600, 1.961	91.600, 1.933	91.600, 1.912
460	91.800, 1.916	91.800, 1.907	91.800, 1.961	91.800, 1.933	91.800, 1.913
461	92.000, 1.916	92.000, 1.908	92.000, 1.962	92.000, 1.934	92.000, 1.914
462	92.200, 1.917	92.200, 1.909	92.200, 1.963	92.200, 1.935	92.200, 1.915
463	92.400, 1.918	92.400, 1.911	92.400, 1.964	92.400, 1.935	92.400, 1.915
464	92.600, 1.919	92.600, 1.912	92.600, 1.965	92.600, 1.936	92.600, 1.916
465	92.800, 1.920	92.800, 1.913	92.800, 1.965	92.800, 1.937	92.800, 1.917
466	93.000, 1.921	93.000, 1.915	93.000, 1.966	93.000, 1.938	93.000, 1.917
467	93.200, 1.922	93.200, 1.915	93.200, 1.967	93.200, 1.939	93.200, 1.918
468	93.400, 1.923	93.400, 1.916	93.400, 1.968	93.400, 1.939	93.400, 1.919
469	93.600, 1.924	93.600, 1.917	93.600, 1.969	93.600, 1.940	93.600, 1.920
470	93.800, 1.925	93.800, 1.917	93.800, 1.970	93.800, 1.941	93.800, 1.920
471	94.000, 1.927	94.000, 1.918	94.000, 1.971	94.000, 1.942	94.000, 1.921
472	94.200, 1.928	94.200, 1.918	94.200, 1.972	94.200, 1.943	94.200, 1.922
473	94.400, 1.929	94.400, 1.919	94.400, 1.972	94.400, 1.944	94.400, 1.923
474	94.600, 1.931	94.600, 1.920	94.600, 1.973	94.600, 1.945	94.600, 1.924
475	94.800, 1.932	94.800, 1.920	94.800, 1.974	94.800, 1.946	94.800, 1.925
476	95.000, 1.933	95.000, 1.921	95.000, 1.975	95.000, 1.946	95.000, 1.926
477	95.200, 1.934	95.200, 1.922	95.200, 1.976	95.200, 1.947	95.200, 1.927
478	95.400, 1.936	95.400, 1.923	95.400, 1.977	95.400, 1.948	95.400, 1.928
479	95.600, 1.937	95.600, 1.924	95.600, 1.978	95.600, 1.949	95.600, 1.929
480	95.800, 1.938	95.800, 1.925	95.800, 1.978	95.800, 1.950	95.800, 1.930
481	96.000, 1.939	96.000, 1.926	96.000, 1.980	96.000, 1.951	96.000, 1.930
482	96.200, 1.940	96.200, 1.927	96.200, 1.980	96.200, 1.953	96.200, 1.931
483	96.400, 1.940	96.400, 1.928	96.400, 1.981	96.400, 1.954	96.400, 1.932
484	96.600, 1.941	96.600, 1.929	96.600, 1.982	96.600, 1.955	96.600, 1.933
485	96.800, 1.942	96.800, 1.930	96.800, 1.983	96.800, 1.956	96.800, 1.934
486	97.000, 1.943	97.000, 1.931	97.000, 1.984	97.000, 1.957	97.000, 1.935
487	97.200, 1.944	97.200, 1.931	97.200, 1.985	97.200, 1.958	97.200, 1.936
488	97.400, 1.945	97.400, 1.932	97.400, 1.986	97.400, 1.958	97.400, 1.937
489	97.600, 1.946	97.600, 1.933	97.600, 1.986	97.600, 1.959	97.600, 1.938
490	97.800, 1.947	97.800, 1.933	97.800, 1.987	97.800, 1.959	97.800, 1.939
491	98.000, 1.948	98.000, 1.934	98.000, 1.988	98.000, 1.960	98.000, 1.939
492	98.200, 1.949	98.200, 1.935	98.200, 1.989	98.200, 1.960	98.200, 1.940
493	98.400, 1.950	98.400, 1.936	98.400, 1.991	98.400, 1.961	98.400, 1.941
494	98.600, 1.951	98.600, 1.937	98.600, 1.992	98.600, 1.961	98.600, 1.942
495	98.800, 1.952	98.800, 1.938	98.800, 1.993	98.800, 1.962	98.800, 1.942
496	99.000, 1.953	99.000, 1.940	99.000, 1.994	99.000, 1.963	99.000, 1.943
497	99.200, 1.954	99.200, 1.941	99.200, 1.995	99.200, 1.964	99.200, 1.944
498	99.400, 1.955	99.400, 1.942	99.400, 1.996	99.400, 1.965	99.400, 1.944
499	99.600, 1.956	99.600, 1.943	99.600, 1.997	99.600, 1.966	99.600, 1.945
500	99.800, 1.956	99.800, 1.944	99.800, 1.998	99.800, 1.967	99.800, 1.945
501	100.000, 1.957	100.000, 1.944	100.000, 1.999	100.000, 1.968	100.000, 1.946
502	100.200, 1.957	100.200, 1.945	100.200, 2.000	100.200, 1.969	100.200, 1.947
503	100.400, 1.957	100.400, 1.945	100.400, 2.001	100.400, 1.970	100.400, 1.948
504	100.600, 1.958	100.600, 1.946	100.600, 2.002	100.600, 1.971	100.600, 1.949
505	100.800, 1.959	100.800, 1.946	100.800, 2.003	100.800, 1.972	100.800, 1.950
506	101.000, 1.959	101.000, 1.947	101.000, 2.004	101.000, 1.973	101.000, 1.951
507	101.200, 1.960	101.200, 1.947	101.200, 2.005	101.200, 1.974	101.200, 1.952
508	101.400, 1.961	101.400, 1.948	101.400, 2.005	101.400, 1.975	101.400, 1.952
509	101.600, 1.962	101.600, 1.949	101.600, 2.006	101.600, 1.976	101.600, 1.953
510	101.800, 1.963	101.800, 1.950	101.800, 2.007	101.800, 1.976	101.800, 1.954
511	102.000, 1.964	102.000, 1.951	102.000, 2.007	102.000, 1.977	102.000, 1.955
512	102.200, 1.965	102.200, 1.952	102.200, 2.008	102.200, 1.977	102.200, 1.955
513	102.400, 1.967	102.400, 1.953	102.400, 2.009	102.400, 1.977	102.400, 1.956
514	102.600, 1.968	102.600, 1.954	102.600, 2.009	102.600, 1.978	102.600, 1.957
515	102.800, 1.969	102.800, 1.955	102.800, 2.009	102.800, 1.979	102.800, 1.957
516	103.000, 1.970	103.000, 1.956	103.000, 2.010	103.000, 1.979	103.000, 1.958
517	103.200, 1.971	103.200, 1.957	103.200, 2.011	103.200, 1.980	103.200, 1.958
518	103.400, 1.972	103.400, 1.958	103.400, 2.011	103.400, 1.981	103.400, 1.959
519	103.600, 1.972	103.600, 1.959	103.600, 2.012	103.600, 1.982	103.600, 1.960
520	103.800, 1.973	103.800, 1.960	103.800, 2.013	103.800, 1.982	103.800, 1.960
521	104.000, 1.973	104.000, 1.961	104.000, 2.013	104.000, 1.983	104.000, 1.961
522	104.200, 1.974	104.200, 1.961	104.200, 2.014	104.200, 1.983	104.200, 1.962
523	104.400, 1.975	104.400, 1.962	104.400, 2.015	104.400, 1.984	104.400, 1.963
524	104.600, 1.975	104.600, 1.963	104.600, 2.016	104.600, 1.985	104.600, 1.964
525	104.800, 1.976	104.800, 1.964	104.800, 2.017	104.800, 1.985	104.800, 1.965
526	105.000, 1.976	105.000, 1.964	105.000, 2.018	105.000, 1.986	105.000, 1.965
527	105.200, 1.977	105.200, 1.965	105.200, 2.019	105.200, 1.986	105.200, 1.966
528	105.400, 1.977	105.400, 1.966	105.400, 2.019	105.400, 1.987	105.400, 1.966
529	105.600, 1.978	105.600, 1.966	105.600, 2.020	105.600, 1.987	105.600, 1.967
530	105.800, 1.979	105.800, 1.967	105.800, 2.021	105.800, 1.988	105.800, 1.967
531	106.000, 1.980	106.000, 1.967	106.000, 2.022	106.000, 1.988	106.000, 1.968
532	106.200, 1.980	106.200, 1.968	106.200, 2.022	106.200, 1.989	106.200, 1.968
533	106.400, 1.981	106.400, 1.968	106.400, 2.023	106.400, 1.990	106.400, 1.969
534	106.600, 1.982	106.600, 1.968	106.600, 2.023	106.600, 1.991	106.600, 1.969
535	106.800, 1.982	106.800, 1.969	106.800, 2.024	106.800, 1.992	106.800, 1.970
536	107.000, 1.983	107.000, 1.969	107.000, 2.024	107.000, 1.993	107.000, 1.971
537	107.200, 1.984	107.200, 1.970	107.200, 2.025	107.200, 1.994	107.200, 1.972
538	107.400, 1.984	107.400, 1.970	107.400, 2.026	107.400, 1.995	107.400, 1.973
539	107.600, 1.985	107.600, 1.971	107.600, 2.026	107.600, 1.995	107.600, 1.973
540	107.800, 1.985	107.800, 1.971	107.800, 2.027	107.800, 1.996	107.800, 1.974
541	108.000, 1.986	108.000, 1.972	108.000, 2.028	108.000, 1.997	108.000, 1.975
542	108.200, 1.987	108.200, 1.973	108.200, 2.029	108.200, 1.997	108.200, 1.976
543	108.400, 1.988	108.400, 1.974	108.400, 2.029	108.400, 1.998	108.400, 1.976
544	108.600, 1.989	108.600, 1.975	108.600, 2.030	108.600, 1.998	108.600, 1.977
545	108.800, 1.989	108.800, 1.976	108.800, 2.031	108.800, 1.999	108.800, 1.978
546	109.000, 1.990	109.000, 1.977	109.000, 2.032	109.000, 1.999	109.000, 1.978
547	109.200, 1.991	109.200, 1.978	109.200, 2.032	109.200, 2.000	109.200, 1.979
548	109.400, 1.992	109.400, 1.979	109.400, 2.033	109.400, 2.001	109.400, 1.979
549	109.600, 1.993	109.600, 1.979	109.600, 2.034	109.600, 2.002	109.600, 1.980
550	109.800, 1.994	109.800, 1.980	109.800, 2.035	109.800, 2.003	109.800, 1.981
551	110.000, 1.994	110.000, 1.980	110.000, 2.035	110.000, 2.003	110.000, 1.981
552	110.200, 1.995	110.200, 1.980	110.200, 2.036	110.200, 2.004	110.200, 1.982
553	110.400, 1.995	110.400, 1.981	110.400, 2.037	110.400, 2.005	110.400, 1.983
554	110.600, 1.996	110.600, 1.982	110.600, 2.037	110.600, 2.005	110.600, 1.984
555	110.800, 1.996	110.800, 1.982	110.800, 2.038	110.800, 2.006	110.800, 1.984
556	111.000, 1.996	111.000, 1.983	111.000, 2.039	111.000, 2.006	111.000, 1.985
557	111.200, 1.997	111.200, 1.983	111.200, 2.039	111.200, 2.007	111.200, 1.986
558	111.400, 1.997	111.400, 1.984	111.400, 2.040	111.400, 2.008	111.400, 1.987
559	111.600, 1.998	111.600, 1.984	111.600, 2.041	111.600, 2.008	111.600, 1.988
560	111.800, 1.998	111.800, 1.985	111.800, 2.041	111.800, 2.009	111.800, 1.988
561	112.000, 1.999	112.000, 1.986	112.000, 2.042	112.000, 2.010	112.000, 1.989
562	112.200, 2.000	112.200, 1.986	112.200, 2.043	112.200, 2.010	112.200, 1.989
563	112.400, 2.001	112.400, 1.987	112.400, 2.044	112.400, 2.011	112.400, 1.990
564	112.600, 2.002	112.600, 1.988	112.600, 2.044	112.600, 2.011	112.600, 1.990
565	112.800, 2.003	112.800, 1.988	112.800, 2.045	112.800, 2.012	112.800, 1.991
566	113.000, 2.004	113.000, 1.988	113.000, 2.046	113.000, 2.013	113.000, 1.992
567	113.200, 2.005	113.200, 1.989	113.200, 2.046	113.200, 2.013	113.200, 1.993
568	113.400, 2.005	113.400, 1.989	113.400, 2.047	113.400, 2.014	113.400, 1.993
569	113.600, 2.006	113.600, 1.989	113.600, 2.048	113.600, 2.015	113.600, 1.994
570	113.800, 2.006	113.800, 1.990	113.800, 2.048	113.800, 2.015	113.800, 1.994
571	114.000, 2.007	114.000, 1.990	114.000, 2.049	114.000, 2.016	114.000, 1.995
572	114.200, 2.007	114.200, 1.991	114.200, 2.049	114.200, 2.016	114.200, 1.995
573	114.400, 2.007	114.400, 1.992	114.400, 2.050	114.400, 2.017	114.400, 1.996
574	114.600, 2.007	114.600, 1.992	114.600, 2.050	114.600, 2.017	114.600, 1.996
575	114.800, 2.006	114.800, 1.993	114.800, 2.050	114.800, 2.018	114.800, 1.997
576	115.000, 2.006	115.000, 1.994	115.000, 2.050	115.000, 2.019	115.000, 1.997
577	115.200, 2.006	115.200, 1.995	115.200, 2.050	115.200, 2.019	115.200, 1.998
578	115.400, 2.006	115.400, 1.996	115.400, 2.051	115.400, 2.020	115.400, 1.998
579	115.600, 2.007	115.600, 1.997	115.600, 2.051	115.600, 2.021	115.600, 1.999
580	115.800, 2.007	115.800, 1.998	115.800, 2.052	115.800, 2.021	115.800, 1.999
581	116.000, 2.008	116.000, 1.998	116.000, 2.053	116.000, 2.022	116.000, 1.999
582	116.200, 2.009	116.200, 1.999	116.200, 2.053	116.200, 2.022	116.200, 2.000
583	116.400, 2.010	116.400, 2.000	116.400, 2.054	116.400, 2.023	116.400, 2.000
584	116.600, 2.011	116.600, 2.000	116.600, 2.055	116.600, 2.023	116.600, 2.000
585	116.800, 2.012	116.800, 2.001	116.800, 2.056	116.800, 2.024	116.800, 2.001
586	117.000, 2.013	117.000, 2.001	117.000, 2.057	117.000, 2.024	117.000, 2.001
587	117.200, 2.014	117.200, 2.002	117.200, 2.057	117.200, 2.025	117.200, 2.002
588	117.400, 2.014	117.400, 2.002	117.400, 2.058	117.400, 2.025	117.400, 2.003
589	117.600, 2.015	117.600, 2.003	117.600, 2.059	117.600, 2.026	117.600, 2.003
590	117.800, 2.015	117.800, 2.004	117.800, 2.060	117.800, 2.027	117.800, 2.004
591	118.000, 2.015	118.000, 2.004	118.000, 2.060	118.000, 2.027	118.000, 2.004
592	118.200, 2.015	118.200, 2.005	118.200, 2.061	118.200, 2.028	118.200, 2.005
593	118.400, 2.016	118.400, 2.006	118.400, 2.061	118.400, 2.029	118.400, 2.005
594	118.600, 2.016	118.600, 2.007	118.600, 2.062	118.600, 2.029	118.600, 2.006
595	118.800, 2.016	118.800, 2.007	118.800, 2.062	118.800, 2.029	118.800, 2.007
596	119.000, 2.016	119.000, 2.008	119.000, 2.062	119.000, 2.030	119.000, 2.008
597	119.200, 2.017	119.200, 2.008	119.200, 2.063	119.200, 2.030	119.200, 2.008
598	119.400, 2.018	119.400, 2.008	119.400, 2.063	119.400, 2.031	119.400, 2.009
599	119.600, 2.019	119.600, 2.009	119.600, 2.064	119.600, 2.032	119.600, 2.010
600	119.800, 2.020	119.800, 2.009	119.800, 2.064	119.800, 2.032	119.800, 2.010
601	120.000, 2.021	120.000, 2.009	120.000, 2.065	120.000, 2.033	120.000, 2.011
602	120.200, 2.022	120.200, 2.009	120.200, 2.065	120.200, 2.033	120.200, 2.011
603	120.400, 2.023	120.400, 2.009	120.400, 2.066	120.400, 2.033	120.400, 2.012
604	120.600, 2.024	120.600, 2.010	120.600, 2.066	120.600, 2.034	120.600, 2.012
605	120.800, 2.025	120.800, 2.010	120.800, 2.067	120.800, 2.035	120.800, 2.013
606	121.000, 2.025	121.000, 2.010	121.000, 2.068	121.000, 2.035	121.000, 2.014
607	121.200, 2.025	121.200, 2.011	121.200, 2.068	121.200, 2.036	121.200, 2.014
608	121.400, 2.026	121.400, 2.012	121.400, 2.069	121.400, 2.036	121.400, 2.015
609	121.600, 2.026	121.600, 2.012	121.600, 2.070	121.600, 2.037	121.600, 2.015
610	121.800, 2.027	121.800, 2.013	121.800, 2.070	121.800, 2.037	121.800, 2.016
611	122.000, 2.027	122.000, 2.014	122.000, 2.071	122.000, 2.038	122.000, 2.016
612	122.200, 2.028	122.200, 2.015	122.200, 2.071	122.200, 2.038	122.200, 2.017
613	122.400, 2.028	122.400, 2.015	122.400, 2.072	122.400, 2.039	122.400, 2.017
614	122.600, 2.029	122.600, 2.016	122.600, 2.073	122.600, 2.039	122.600, 2.017
615	122.800, 2.030	122.800, 2.017	122.800, 2.073	122.800, 2.039	122.800, 2.018
616	123.000, 2.030	123.000, 2.018	123.000, 2.073	123.000, 2.040	123.000, 2.018
617	123.200, 2.031	123.200, 2.018	123.200, 2.074	123.200, 2.041	123.200, 2.019
618	123.400, 2.032	123.400, 2.018	123.400, 2.074	123.400, 2.041	123.400, 2.019
619	123.600, 2.032	123.600, 2.019	123.600, 2.074	123.600, 2.042	123.600, 2.019
620	123.800, 2.033	123.800, 2.019	123.800, 2.074	123.800, 2.042	123.800, 2.020
621	124.000, 2.034	124.000, 2.020	124.000, 2.074	124.000, 2.043	124.000, 2.020
622	124.200, 2.035	124.200, 2.020	124.200, 2.075	124.200, 2.043	124.200, 2.021
623	124.400, 2.035	124.400, 2.021	124.400, 2.075	124.400, 2.044	124.400, 2.022
624	124.600, 2.036	124.600, 2.021	124.600, 2.075	124.600, 2.044	124.600, 2.022
625	124.800, 2.036	124.800, 2.021	124.800, 2.076	124.800, 2.045	124.800, 2.022
626	125.000, 2.036	125.000, 2.022	125.000, 2.076	125.000, 2.045	125.000, 2.023
627	125.200, 2.037	125.200, 2.022	125.200, 2.077	125.200, 2.045	125.200, 2.024
628	125.400, 2.038	125.400, 2.023	125.400, 2.078	125.400, 2.046	125.400, 2.024
629	125.600, 2.038	125.600, 2.023	125.600, 2.079	125.600, 2.046	125.600, 2.025
630	125.800, 2.039	125.800, 2.024	125.800, 2.080	125.800, 2.046	125.800, 2.026
631	126.000, 2.039	126.000, 2.024	126.000, 2.081	126.000, 2.046	126.000, 2.026
632	126.200, 2.039	126.200, 2.025	126.200, 2.081	126.200, 2.046	126.200, 2.026
633	126.400, 2.040	126.400, 2.025	126.400, 2.082	126.400, 2.047	126.400, 2.027
634	126.600, 2.040	126.600, 2.026	126.600, 2.083	126.600, 2.047	126.600, 2.027
635	126.800, 2.041	126.800, 2.026	126.800, 2.083	126.800, 2.047	126.800, 2.028
636	127.000, 2.041	127.000, 2.027	127.000, 2.084	127.000, 2.048	127.000, 2.028
637	127.200, 2.042	127.200, 2.028	127.200, 2.084	127.200, 2.048	127.200, 2.029
638	127.400, 2.042	127.400, 2.028	127.400, 2.084	127.400, 2.049	127.400, 2.029
639	127.600, 2.043	127.600, 2.029	127.600, 2.084	127.600, 2.049	127.600, 2.030
640	127.800, 2.044	127.800, 2.029	127.800, 2.085	127.800, 2.049	127.800, 2.030
641	128.000, 2.044	128.000, 2.030	128.000, 2.085	128.000, 2.050	128.000, 2.030
642	128.200, 2.045	128.200, 2.030	128.200, 2.085	128.200, 2.050	128.200, 2.030
643	128.400, 2.046	128.400, 2.030	128.400, 2.086	128.400, 2.050	128.400, 2.031
644	128.600, 2.047	128.600, 2.031	128.600, 2.086	128.600, 2.051	128.600, 2.031
645	128.800, 2.047	128.800, 2.032	128.800, 2.086	128.800, 2.051	128.800, 2.032
646	129.000, 2.048	129.000, 2.032	129.000, 2.087	129.000, 2.051	129.000, 2.032
647	129.200, 2.049	129.200, 2.033	129.200, 2.087	129.200, 2.052	129.200, 2.033
648	129.400, 2.049	129.400, 2.033	129.400, 2.088	129.400, 2.053	129.400, 2.033
649	129.600, 2.049	129.600, 2.034	129.600, 2.088	129.600, 2.053	129.600, 2.034
650	129.800, 2.049	129.800, 2.034	129.800, 2.089	129.800, 2.054	129.800, 2.034
651	130.000, 2.050	130.000, 2.034	130.000, 2.090	130.000, 2.055	130.000, 2.035
652	130.200, 2.050	130.200, 2.034	130.200, 2.090	130.200, 2.056	130.200, 2.035
653	130.400, 2.050	130.400, 2.035	130.400, 2.091	130.400, 2.057	130.400, 2.036
654	130.600, 2.050	130.600, 2.036	130.600, 2.091	130.600, 2.058	130.600, 2.036
655	130.800, 2.051	130.800, 2.036	130.800, 2.092	130.800, 2.058	130.800, 2.037
656	131.000, 2.051	131.000, 2.037	131.000, 2.092	131.000, 2.059	131.000, 2.038
657	131.200, 2.051	131.200, 2.037	131.200, 2.093	131.200, 2.060	131.200, 2.038
658	131.400, 2.052	131.400, 2.038	131.400, 2.093	131.400, 2.061	131.400, 2.039
659	131.600, 2.052	131.600, 2.038	131.600, 2.094	131.600, 2.061	131.600, 2.039
660	131.800, 2.053	131.800, 2.039	131.800, 2.095	131.800, 2.062	131.800, 2.040
661	132.000, 2.053	132.000, 2.039	132.000, 2.095	132.000, 2.062	132.000, 2.040
662	132.200, 2.054	132.200, 2.040	132.200, 2.095	132.200, 2.062	132.200, 2.041
663	132.400, 2.054	132.400, 2.040	132.400, 2.096	132.400, 2.062	132.400, 2.041
664	132.600, 2.055	132.600, 2.041	132.600, 2.096	132.600, 2.062	132.600, 2.042
665	132.800, 2.055	132.800, 2.041	132.800, 2.097	132.800, 2.062	132.800, 2.042
666	133.000, 2.055	133.000, 2.041	133.000, 2.097	133.000, 2.062	133.000, 2.043
667	133.200, 2.056	133.200, 2.041	133.200, 2.098	133.200, 2.063	133.200, 2.043
668	133.400, 2.056	133.400, 2.041	133.400, 2.098	133.400, 2.063	133.400, 2.044
669	133.600, 2.056	133.600, 2.041	133.600, 2.099	133.600, 2.063	133.600, 2.044
670	133.800, 2.057	133.800, 2.041	133.800, 2.099	133.800, 2.063	133.800, 2.045
671	134.000, 2.057	134.000, 2.041	134.000, 2.099	134.000, 2.063	134.000, 2.045
672	134.200, 2.058	134.200, 2.042	134.200, 2.100	134.200, 2.063	134.200, 2.045
673	134.400, 2.059	134.400, 2.042	134.400, 2.100	134.400, 2.064	134.400, 2.045
674	134.600, 2.060	134.600, 2.043	134.600, 2.100	134.600, 2.064	134.600, 2.045
675	134.800, 2.061	134.800, 2.044	134.800, 2.101	134.800, 2.065	134.800, 2.046
676	135.000, 2.062	135.000, 2.044	135.000, 2.102	135.000, 2.065	135.000, 2.046
677	135.200, 2.062	135.200, 2.045	135.200, 2.103	135.200, 2.066	135.200, 2.046
678	135.400, 2.063	135.400, 2.046	135.400, 2.103	135.400, 2.067	135.400, 2.046
679	135.600, 2.064	135.600, 2.047	135.600, 2.104	135.600, 2.068	135.600, 2.046
680	135.800, 2.064	135.800, 2.048	135.800, 2.104	135.800, 2.068	135.800, 2.047
681	136.000, 2.065	136.000, 2.049	136.000, 2.105	136.000, 2.069	136.000, 2.047
682	136.200, 2.065	136.200, 2.050	136.200, 2.105	136.200, 2.069	136.200, 2.048
683	136.400, 2.066	136.400, 2.050	136.400, 2.106	136.400, 2.070	136.400, 2.048
684	136.600, 2.066	136.600, 2.051	136.600, 2.106	136.600, 2.071	136.600, 2.049
685	136.800, 2.067	136.800, 2.051	136.800, 2.107	136.800, 2.071	136.800, 2.049
686	137.000, 2.067	137.000, 2.052	137.000, 2.107	137.000, 2.072	137.000, 2.050
687	137.200, 2.068	137.200, 2.052	137.200, 2.108	137.200, 2.072	137.200, 2.051
688	137.400, 2.069	137.400, 2.053	137.400, 2.108	137.400, 2.072	137.400, 2.051
689	137.600, 2.069	137.600, 2.053	137.600, 2.108	137.600, 2.073	137.600, 2.052
690	137.800, 2.070	137.800, 2.053	137.800, 2.108	137.800, 2.073	137.800, 2.053
691	138.000, 2.070	138.000, 2.053	138.000, 2.108	138.000, 2.073	138.000, 2.053
692	138.200, 2.071	138.200, 2.054	138.200, 2.109	138.200, 2.073	138.200, 2.054
693	138.400, 2.071	138.400, 2.054	138.400, 2.109	138.400, 2.074	138.400, 2.054
694	138.600, 2.072	138.600, 2.054	138.600, 2.109	138.600, 2.074	138.600, 2.054
695	138.800, 2.072	138.800, 2.055	138.800, 2.109	138.800, 2.074	138.800, 2.055
696	139.000, 2.072	139.000, 2.055	139.000, 2.110	139.000, 2.075	139.000, 2.055
697	139.200, 2.072	139.200, 2.056	139.200, 2.110	139.200, 2.075	139.200, 2.055
698	139.400, 2.073	139.400, 2.056	139.400, 2.110	139.400, 2.076	139.400, 2.055
699	139.600, 2.073	139.600, 2.056	139.600, 2.110	139.600, 2.076	139.600, 2.056
700	139.800, 2.073	139.800, 2.057	139.800, 2.111	139.800, 2.077	139.800, 2.057
701	140.000, 2.073	140.000, 2.057	140.000, 2.111	140.000, 2.077	140.000, 2.057
702	140.200, 2.074	140.200, 2.057	140.200, 2.112	140.200, 2.078	140.200, 2.058
703	140.400, 2.074	140.400, 2.058	140.400, 2.112	140.400, 2.078	140.400, 2.058
704	140.600, 2.075	140.600, 2.058	140.600, 2.113	140.600, 2.078	140.600, 2.058
705	140.800, 2.076	140.800, 2.058	140.800, 2.113	140.800, 2.079	140.800, 2.058
706	141.000, 2.076	141.000, 2.059	141.000, 2.114	141.000, 2.080	141.000, 2.059
707	141.200, 2.077	141.200, 2.059	141.200, 2.114	141.200, 2.080	141.200, 2.059
708	141.400, 2.077	141.400, 2.059	141.400, 2.115	141.400, 2.081	141.400, 2.060
709	141.600, 2.077	141.600, 2.059	141.600, 2.116	141.600, 2.082	141.600, 2.060
710	141.800, 2.078	141.800, 2.059	141.800, 2.116	141.800, 2.082	141.800, 2.061
711	142.000, 2.078	142.000, 2.059	142.000, 2.117	142.000, 2.083	142.000, 2.061
712	142.200, 2.079	142.200, 2.059	142.200, 2.117	142.200, 2.084	142.200, 2.061
713	142.400, 2.079	142.400, 2.060	142.400, 2.117	142.400, 2.084	142.400, 2.062
714	142.600, 2.080	142.600, 2.060	142.600, 2.117	142.600, 2.085	142.600, 2.062
715	142.800, 2.081	142.800, 2.060	142.800, 2.117	142.800, 2.085	142.800, 2.062
716	143.000, 2.081	143.000, 2.060	143.000, 2.118	143.000, 2.085	143.000, 2.063
717	143.200, 2.082	143.200, 2.061	143.200, 2.118	143.200, 2.086	143.200, 2.063
718	143.400, 2.083	143.400, 2.061	143.400, 2.118	143.400, 2.086	143.400, 2.064
719	143.600, 2.083	143.600, 2.061	143.600, 2.119	143.600, 2.086	143.600, 2.064
720	143.800, 2.084	143.800, 2.062	143.800, 2.119	143.800, 2.086	143.800, 2.064
721	144.000, 2.085	144.000, 2.062	144.000, 2.120	144.000, 2.086	144.000, 2.064
722	144.200, 2.085	144.200, 2.063	144.200, 2.120	144.200, 2.086	144.200, 2.065
723	144.400, 2.086	144.400, 2.063	144.400, 2.120	144.400, 2.086	144.400, 2.065
724	144.600, 2.086	144.600, 2.064	144.600, 2.121	144.600, 2.087	144.600, 2.065
725	144.800, 2.086	144.800, 2.065	144.800, 2.121	144.800, 2.087	144.800, 2.066
726	145.000, 2.086	145.000, 2.065	145.000, 2.122	145.000, 2.087	145.000, 2.066
727	145.200, 2.087	145.200, 2.066	145.200, 2.122	145.200, 2.087	145.200, 2.067
728	145.400, 2.087	145.400, 2.067	145.400, 2.123	145.400, 2.088	145.400, 2.067
729	145.600, 2.087	145.600, 2.067	145.600, 2.123	145.600, 2.088	145.600, 2.067
730	145.800, 2.087	145.800, 2.067	145.800, 2.124	145.800, 2.088	145.800, 2.068
731	146.000, 2.087	146.000, 2.068	146.000, 2.124	146.000, 2.088	146.000, 2.068
732	146.200, 2.087	146.200, 2.068	146.200, 2.125	146.200, 2.089	146.200, 2.069
733	146.400, 2.087	146.400, 2.068	146.400, 2.125	146.400, 2.089	146.400, 2.069
734	146.600, 2.088	146.600, 2.069	146.600, 2.126	146.600, 2.089	146.600, 2.069
735	146.800, 2.088	146.800, 2.069	146.800, 2.126	146.800, 2.090	146.800, 2.070
736	147.000, 2.089	147.000, 2.069	147.000, 2.127	147.000, 2.090	147.000, 2.070
737	147.200, 2.089	147.200, 2.070	147.200, 2.127	147.200, 2.090	147.200, 2.071
738	147.400, 2.090	147.400, 2.070	147.400, 2.128	147.400, 2.090	147.400, 2.071
739	147.600, 2.091	147.600, 2.070	147.600, 2.128	147.600, 2.091	147.600, 2.072
740	147.800, 2.091	147.800, 2.071	147.800, 2.128	147.800, 2.091	147.800, 2.072
741	148.000, 2.091	148.000, 2.071	148.000, 2.129	148.000, 2.091	148.000, 2.073
742	148.200, 2.092	148.200, 2.072	148.200, 2.129	148.200, 2.091	148.200, 2.073
743	148.400, 2.092	148.400, 2.072	148.400, 2.130	148.400, 2.092	148.400, 2.074
744	148.600, 2.093	148.600, 2.072	148.600, 2.130	148.600, 2.092	148.600, 2.074
745	148.800, 2.093	148.800, 2.073	148.800, 2.130	148.800, 2.093	148.800, 2.075
746	149.000, 2.093	149.000, 2.073	149.000, 2.131	149.000, 2.094	149.000, 2.075
747	149.200, 2.093	149.200, 2.073	149.200, 2.131	149.200, 2.094	149.200, 2.075
748	149.400, 2.093	149.400, 2.073	149.400, 2.131	149.400, 2.095	149.400, 2.074
749	149.600, 2.093	149.600, 2.073	149.600, 2.132	149.600, 2.095	149.600, 2.074
750	149.800, 2.094	149.800, 2.073	149.800, 2.132	149.800, 2.096	149.800, 2.074
751	150.000, 2.094	150.000, 2.073	150.000, 2.132	150.000, 2.096	150.000, 2.074
752	150.200, 2.093	150.200, 2.071	150.200, 2.131	150.200, 2.095	150.200, 2.073
753	150.400, 2.091	150.400, 2.068	150.400, 2.130	150.400, 2.095	150.400, 2.073
754	150.600, 2.090	150.600, 2.065	150.600, 2.129	150.600, 2.094	150.600, 2.072
755	150.800, 2.088	150.800, 2.062	150.800, 2.128	150.800, 2.094	150.800, 2.070
756	151.000, 2.087	151.000, 2.059	151.000, 2.126	151.000, 2.093	151.000, 2.069
757	151.200, 2.085	151.200, 2.056	151.200, 2.125	151.200, 2.093	151.200, 2.068
758	151.400, 2.084	151.400, 2.053	151.400, 2.124	151.400, 2.092	151.400, 2.067
759	151.600, 2.082	151.600, 2.050	151.600, 2.123	151.600, 2.091	151.600, 2.065
760	151.800, 2.081	151.800, 2.047	151.800, 2.122	151.800, 2.091	151.800, 2.064
761	152.000, 2.080	152.000, 2.045	152.000, 2.121	152.000, 2.090	152.000, 2.063
762	152.200, 2.079	152.200, 2.043	152.200, 2.121	152.200, 2.090	152.200, 2.062
763	152.400, 2.078	152.400, 2.041	152.400, 2.121	152.400, 2.089	152.400, 2.062
764	152.600, 2.077	152.600, 2.040	152.600, 2.120	152.600, 2.089	152.600, 2.061
765	152.800, 2.076	152.800, 2.038	152.800, 2.120	152.800, 2.089	152.800, 2.061
766	153.000, 2.075	153.000, 2.037	153.000, 2.119	153.000, 2.088	153.000, 2.060
767	153.200, 2.074	153.200, 2.035	153.200, 2.119	153.200, 2.088	153.200, 2.060
768	153.400, 2.074	153.400, 2.034	153.400, 2.118	153.400, 2.087	153.400, 2.059
769	153.600, 2.073	153.600, 2.033	153.600, 2.118	153.600, 2.086	153.600, 2.059
770	153.800, 2.072	153.800, 2.032	153.800, 2.117	153.800, 2.085	153.800, 2.058
771	154.000, 2.072	154.000, 2.030	154.000, 2.117	154.000, 2.085	154.000, 2.058
772	154.200, 2.071	154.200, 2.029	154.200, 2.117	154.200, 2.084	154.200, 2.057
773	154.400, 2.070	154.400, 2.028	154.400, 2.117	154.400, 2.083	154.400, 2.056
774	154.600, 2.070	154.600, 2.027	154.600, 2.117	154.600, 2.083	154.600, 2.055
775	154.800, 2.069	154.800, 2.026	154.800, 2.116	154.800, 2.083	154.800, 2.055
776	155.000, 2.069	155.000, 2.025	155.000, 2.116	155.000, 2.082	155.000, 2.054
777	155.200, 2.068	155.200, 2.024	155.200, 2.115	155.200, 2.082	155.200, 2.053
778	155.400, 2.068	155.400, 2.023	155.400, 2.115	155.400, 2.081	155.400, 2.053
779	155.600, 2.067	155.600, 2.023	155.600, 2.114	155.600, 2.081	155.600, 2.052
780	155.800, 2.067	155.800, 2.022	155.800, 2.114	155.800, 2.080	155.800, 2.052
781	156.000, 2.066	156.000, 2.021	156.000, 2.113	156.000, 2.080	156.000, 2.051
782	156.200, 2.066	156.200, 2.021	156.200, 2.113	156.200, 2.079	156.200, 2.051
783	156.400, 2.066	156.400, 2.020	156.400, 2.112	156.400, 2.079	156.400, 2.051
784	156.600, 2.066	156.600, 2.019	156.600, 2.112	156.600, 2.079	156.600, 2.051
785	156.800, 2.065	156.800, 2.019	156.800, 2.112	156.800, 2.078	156.800, 2.050
786	157.000, 2.065	157.000, 2.018	157.000, 2.111	157.000, 2.077	157.000, 2.050
787	157.200, 2.065	157.200, 2.017	157.200, 2.111	157.200, 2.077	157.200, 2.050
788	157.400, 2.065	157.400, 2.017	157.400, 2.110	157.400, 2.076	157.400, 2.050
789	157.600, 2.064	157.600, 2.016	157.600, 2.110	157.600, 2.076	157.600, 2.049
790	157.800, 2.064	157.800, 2.016	157.800, 2.110	157.800, 2.075	157.800, 2.049
791	158.000, 2.063	158.000, 2.015	158.000, 2.110	158.000, 2.075	158.000, 2.048
792	158.200, 2.063	158.200, 2.015	158.200, 2.110	158.200, 2.074	158.200, 2.047
793	158.400, 2.062	158.400, 2.015	158.400, 2.109	158.400, 2.073	158.400, 2.047
794	158.600, 2.062	158.600, 2.014	158.600, 2.109	158.600, 2.073	158.600, 2.046
795	158.800, 2.062	158.800, 2.014	158.800, 2.109	158.800, 2.073	158.800, 2.046
796	159.000, 2.061	159.000, 2.014	159.000, 2.109	159.000, 2.072	159.000, 2.045
797	159.200, 2.061	159.200, 2.014	159.200, 2.109	159.200, 2.072	159.200, 2.045
798	159.400, 2.061	159.400, 2.013	159.400, 2.109	159.400, 2.071	159.400, 2.045
799	159.600, 2.061	159.600, 2.013	159.600, 2.109	159.600, 2.071	159.600, 2.045
800	159.800, 2.061	159.800, 2.013	159.800, 2.109	159.800, 2.070	159.800, 2.044
801	160.000, 2.061	160.000, 2.012	160.000, 2.109	160.000, 2.070	160.000, 2.044
802	160.200, 2.061	160.200, 2.012	160.200, 2.108	160.200, 2.070	160.200, 2.044
803	160.400, 2.060	160.400, 2.011	160.400, 2.108	160.400, 2.069	160.400, 2.044
804	160.600, 2.060	160.600, 2.011	160.600, 2.108	160.600, 2.069	160.600, 2.044
805	160.800, 2.060	160.800, 2.010	160.800, 2.108	160.800, 2.069	160.800, 2.044
806	161.000, 2.059	161.000, 2.010	161.000, 2.107	161.000, 2.069	161.000, 2.044
807	161.200, 2.059	161.200, 2.010	161.200, 2.107	161.200, 2.069	161.200, 2.044
808	161.400, 2.058	161.400, 2.009	161.400, 2.107	161.400, 2.069	161.400, 2.044
809	161.600, 2.058	161.600, 2.009	161.600, 2.107	161.600, 2.069	161.600, 2.044
810	161.800, 2.057	161.800, 2.009	161.800, 2.106	161.800, 2.068	161.800, 2.043
811	162.000, 2.057	162.000, 2.009	162.000, 2.106	162.000, 2.068	162.000, 2.043
812	162.200, 2.056	162.200, 2.009	162.200, 2.106	162.200, 2.068	162.200, 2.043
813	162.400, 2.056	162.400, 2.008	162.400, 2.105	162.400, 2.068	162.400, 2.043
814	162.600, 2.056	162.600, 2.008	162.600, 2.105	162.600, 2.067	162.600, 2.043
815	162.800, 2.056	162.800, 2.008	162.800, 2.104	162.800, 2.067	162.800, 2.042
816	163.000, 2.056	163.000, 2.008	163.000, 2.104	163.000, 2.067	163.000, 2.042
817	163.200, 2.056	163.200, 2.008	163.200, 2.104	163.200, 2.066	163.200, 2.042
818	163.400, 2.056	163.400, 2.008	163.400, 2.103	163.400, 2.066	163.400, 2.042
819	163.600, 2.056	163.600, 2.008	163.600, 2.103	163.600, 2.066	163.600, 2.042
820	163.800, 2.056	163.800, 2.008	163.800, 2.103	163.800, 2.066	163.800, 2.042
821	164.000, 2.056	164.000, 2.008	164.000, 2.103	164.000, 2.066	164.000, 2.041
822	164.200, 2.055	164.200, 2.007	164.200, 2.103	164.200, 2.065	164.200, 2.041
823	164.400, 2.055	164.400, 2.007	164.400, 2.103	164.400, 2.065	164.400, 2.040
824	164.600, 2.055	164.600, 2.007	164.600, 2.103	164.600, 2.065	164.600, 2.040
825	164.800, 2.054	164.800, 2.007	164.800, 2.102	164.800, 2.064	164.800, 2.040
826	165.000, 2.054	165.000, 2.006	165.000, 2.102	165.000, 2.064	165.000, 2.040
827	165.200, 2.054	165.200, 2.006	165.200, 2.102	165.200, 2.064	165.200, 2.040
828	165.400, 2.054	165.400, 2.006	165.400, 2.102	165.400, 2.064	165.400, 2.039
829	165.600, 2.053	165.600, 2.005	165.600, 2.102	165.600, 2.063	165.600, 2.039
830	165.800, 2.053	165.800, 2.005	165.800, 2.102	165.800, 2.063	165.800, 2.039
831	166.000, 2.053	166.000, 2.005	166.000, 2.102	166.000, 2.063	166.000, 2.038
832	166.200, 2.053	166.200, 2.004	166.200, 2.102	166.200, 2.062	166.200, 2.038
833	166.400, 2.053	166.400, 2.004	166.400, 2.102	166.400, 2.062	166.400, 2.037
834	166.600, 2.053	166.600, 2.004	166.600, 2.101	166.600, 2.061	166.600, 2.037
835	166.800, 2.053	166.800, 2.004	166.800, 2.101	166.800, 2.061	166.800, 2.036
836	167.000, 2.053	167.000, 2.004	167.000, 2.101	167.000, 2.060	167.000, 2.036
837	167.200, 2.053	167.200, 2.004	167.200, 2.101	167.200, 2.060	167.200, 2.036
838	167.400, 2.053	167.400, 2.004	167.400, 2.101	167.400, 2.059	167.400, 2.036
839	167.600, 2.053	167.600, 2.004	167.600, 2.101	167.600, 2.059	167.600, 2.036
840	167.800, 2.053	167.800, 2.004	167.800, 2.101	167.800, 2.059	167.800, 2.036
841	168.000, 2.053	168.000, 2.003	168.000, 2.101	168.000, 2.058	168.000, 2.035
842	168.200, 2.053	168.200, 2.003	168.200, 2.101	168.200, 2.058	168.200, 2.035
843	168.400, 2.053	168.400, 2.003	168.400, 2.101	168.400, 2.058	168.400, 2.035
844	168.600, 2.053	168.600, 2.003	168.600, 2.101	168.600, 2.058	168.600, 2.035
845	168.800, 2.052	168.800, 2.003	168.800, 2.101	168.800, 2.058	168.800, 2.035
846	169.000, 2.052	169.000, 2.003	169.000, 2.101	169.000, 2.058	169.000, 2.034
847	169.200, 2.052	169.200, 2.003	169.200, 2.101	169.200, 2.057	169.200, 2.034
848	169.400, 2.052	169.400, 2.002	169.400, 2.101	169.400, 2.057	169.400, 2.034
849	169.600, 2.052	169.600, 2.002	169.600, 2.101	169.600, 2.057	169.600, 2.033
850	169.800, 2.051	169.800, 2.002	169.800, 2.101	169.800, 2.057	169.800, 2.033
851	170.000, 2.051	170.000, 2.002	170.000, 2.101	170.000, 2.057	170.000, 2.033
852	170.200, 2.051	170.200, 2.002	170.200, 2.101	170.200, 2.057	170.200, 2.032
853	170.400, 2.051	170.400, 2.002	170.400, 2.101	170.400, 2.057	170.400, 2.032
854	170.600, 2.051	170.600, 2.002	170.600, 2.100	170.600, 2.057	170.600, 2.031
855	170.800, 2.051	170.800, 2.002	170.800, 2.100	170.800, 2.057	170.800, 2.031
856	171.000, 2.051	171.000, 2.002	171.000, 2.100	171.000, 2.057	171.000, 2.031
857	171.200, 2.051	171.200, 2.002	171.200, 2.100	171.200, 2.057	171.200, 2.031
858	171.400, 2.051	171.400, 2.002	171.400, 2.100	171.400, 2.057	171.400, 2.030
859	171.600, 2.051	171.600, 2.002	171.600, 2.099	171.600, 2.056	171.600, 2.030
860	171.800, 2.051	171.800, 2.001	171.800, 2.099	171.800, 2.056	171.800, 2.030
861	172.000, 2.051	172.000, 2.001	172.000, 2.099	172.000, 2.056	172.000, 2.030
862	172.200, 2.051	172.200, 2.001	172.200, 2.099	172.200, 2.056	172.200, 2.030
863	172.400, 2.051	172.400, 2.001	172.400, 2.099	172.400, 2.056	172.400, 2.029
864	172.600, 2.051	172.600, 2.001	172.600, 2.099	172.600, 2.056	172.600, 2.029
865	172.800, 2.050	172.800, 2.000	172.800, 2.099	172.800, 2.056	172.800, 2.029
866	173.000, 2.050	173.000, 2.000	173.000, 2.099	173.000, 2.055	173.000, 2.029
867	173.200, 2.050	173.200, 2.000	173.200, 2.099	173.200, 2.055	173.200, 2.029
868	173.400, 2.050	173.400, 2.000	173.400, 2.099	173.400, 2.054	173.400, 2.029
869	173.600, 2.050	173.600, 1.999	173.600, 2.099	173.600, 2.054	173.600, 2.029
870	173.800, 2.049	173.800, 1.999	173.800, 2.099	173.800, 2.054	173.800, 2.029
871	174.000, 2.049	174.000, 1.999	174.000, 2.099	174.000, 2.053	174.000, 2.029
872	174.200, 2.049	174.200, 1.999	174.200, 2.099	174.200, 2.053	174.200, 2.029
873	174.400, 2.049	174.400, 1.999	174.400, 2.098	174.400, 2.053	174.400, 2.029
874	174.600, 2.049	174.600, 1.998	174.600, 2.098	174.600, 2.052	174.600, 2.028
875	174.800, 2.049	174.800, 1.998	174.800, 2.098	174.800, 2.052	174.800, 2.028
876	175.000, 2.049	175.000, 1.999	175.000, 2.098	175.000, 2.051	175.000, 2.028
877	175.200, 2.049	175.200, 1.999	175.200, 2.098	175.200, 2.051	175.200, 2.028
878	175.400, 2.049	175.400, 1.999	175.400, 2.098	175.400, 2.052	175.400, 2.027
879	175.600, 2.049	175.600, 1.999	175.600, 2.098	175.600, 2.052	175.600, 2.027
880	175.800, 2.049	175.800, 1.999	175.800, 2.098	175.800, 2.052	175.800, 2.026
881	176.000, 2.048	176.000, 1.999	176.000, 2.098	176.000, 2.052	176.000, 2.026
882	176.200, 2.048	176.200, 1.999	176.200, 2.098	176.200, 2.052	176.200, 2.026
883	176.400, 2.048	176.400, 2.000	176.400, 2.098	176.400, 2.052	176.400, 2.026
884	176.600, 2.048	176.600, 2.000	176.600, 2.098	176.600, 2.051	176.600, 2.026
885	176.800, 2.048	176.800, 2.000	176.800, 2.098	176.800, 2.051	176.800, 2.026
886	177.000, 2.048	177.000, 2.000	177.000, 2.098	177.000, 2.051	177.000, 2.026
887	177.200, 2.048	177.200, 2.000	177.200, 2.097	177.200, 2.051	177.200, 2.025
888	177.400, 2.048	177.400, 2.000	177.400, 2.097	177.400, 2.050	177.400, 2.025
889	177.600, 2.048	177.600, 2.000	177.600, 2.097	177.600, 2.050	177.600, 2.025
890	177.800, 2.048	177.800, 1.999	177.800, 2.096	177.800, 2.050	177.800, 2.025
891	178.000, 2.048	178.000, 1.999	178.000, 2.096	178.000, 2.049	178.000, 2.024
892	178.200, 2.047	178.200, 1.999	178.200, 2.096	178.200, 2.049	178.200, 2.024
893	178.400, 2.047	178.400, 1.999	178.400, 2.096	178.400, 2.048	178.400, 2.024
894	178.600, 2.047	178.600, 1.999	178.600, 2.096	178.600, 2.048	178.600, 2.024
895	178.800, 2.047	178.800, 1.999	178.800, 2.096	178.800, 2.048	178.800, 2.024
896	179.000, 2.047	179.000, 1.998	179.000, 2.096	179.000, 2.048	179.000, 2.024
897	179.200, 2.046	179.200, 1.998	179.200, 2.097	179.200, 2.047	179.200, 2.024
898	179.400, 2.046	179.400, 1.998	179.400, 2.097	179.400, 2.047	179.400, 2.023
899	179.600, 2.046	179.600, 1.998	179.600, 2.097	179.600, 2.047	179.600, 2.023
900	179.800, 2.046	179.800, 1.998	179.800, 2.098	179.800, 2.047	179.800, 2.023
901	180.000, 2.046	180.000, 1.998	180.000, 2.098	180.000, 2.047	180.000, 2.023
902	180.200, 2.046	180.200, 1.998	180.200, 2.098	180.200, 2.046	180.200, 2.023
903	180.400, 2.046	180.400, 1.998	180.400, 2.098	180.400, 2.047	180.400, 2.023
904	180.600, 2.046	180.600, 1.998	180.600, 2.098	180.600, 2.047	180.600, 2.023
905	180.800, 2.047	180.800, 1.998	180.800, 2.098	180.800, 2.047	180.800, 2.023
906	181.000, 2.047	181.000, 1.997	181.000, 2.097	181.000, 2.047	181.000, 2.022
907	181.200, 2.047	181.200, 1.997	181.200, 2.097	181.200, 2.047	181.200, 2.022
908	181.400, 2.047	181.400, 1.997	181.400, 2.097	181.400, 2.047	181.400, 2.022
909	181.600, 2.047	181.600, 1.997	181.600, 2.097	181.600, 2.047	181.600, 2.021
910	181.800, 2.046	181.800, 1.997	181.800, 2.096	181.800, 2.047	181.800, 2.021
911	182.000, 2.046	182.000, 1.997	182.000, 2.096	182.000, 2.047	182.000, 2.021
912	182.200, 2.046	182.200, 1.997	182.200, 2.096	182.200, 2.046	182.200, 2.021
913	182.400, 2.046	182.400, 1.997	182.400, 2.095	182.400, 2.046	182.400, 2.021
914	182.600, 2.045	182.600, 1.997	182.600, 2.095	182.600, 2.046	182.600, 2.021
915	182.800, 2.045	182.800, 1.997	182.800, 2.095	182.800, 2.046	182.800, 2.021
916	183.000, 2.045	183.000, 1.997	183.000, 2.095	183.000, 2.045	183.000, 2.021
917	183.200, 2.045	183.200, 1.997	183.200, 2.095	183.200, 2.045	183.200, 2.021
918	183.400, 2.045	183.400, 1.998	183.400, 2.095	183.400, 2.045	183.400, 2.021
919	183.600, 2.046	183.600, 1.998	183.600, 2.095	183.600, 2.044	183.600, 2.021
920	183.800, 2.046	183.800, 1.998	183.800, 2.095	183.800, 2.044	183.800, 2.021
921	184.000, 2.046	184.000, 1.998	184.000, 2.096	184.000, 2.044	184.000, 2.021
922	184.200, 2.046	184.200, 1.998	184.200, 2.096	184.200, 2.044	184.200, 2.021
923	184.400, 2.047	184.400, 1.998	184.400, 2.096	184.400, 2.044	184.400, 2.021
924	184.600, 2.047	184.600, 1.998	184.600, 2.096	184.600, 2.043	184.600, 2.021
925	184.800, 2.047	184.800, 1.998	184.800, 2.096	184.800, 2.043	184.800, 2.020
926	185.000, 2.047	185.000, 1.998	185.000, 2.096	185.000, 2.043	185.000, 2.020
927	185.200, 2.047	185.200, 1.998	185.200, 2.096	185.200, 2.043	185.200, 2.020
928	185.400, 2.047	185.400, 1.998	185.400, 2.096	185.400, 2.042	185.400, 2.020
929	185.600, 2.046	185.600, 1.998	185.600, 2.096	185.600, 2.042	185.600, 2.020
930	185.800, 2.046	185.800, 1.998	185.800, 2.096	185.800, 2.042	185.800, 2.020
931	186.000, 2.046	186.000, 1.998	186.000, 2.096	186.000, 2.042	186.000, 2.019
932	186.200, 2.046	186.200, 1.998	186.200, 2.096	186.200, 2.042	186.200, 2.019
933	186.400, 2.046	186.400, 1.999	186.400, 2.096	186.400, 2.042	186.400, 2.019
934	186.600, 2.046	186.600, 1.999	186.600, 2.096	186.600, 2.042	186.600, 2.018
935	186.800, 2.046	186.800, 1.999	186.800, 2.096	186.800, 2.041	186.800, 2.018
936	187.000, 2.046	187.000, 1.999	187.000, 2.095	187.000, 2.042	187.000, 2.017
937	187.200, 2.046	187.200, 1.999	187.200, 2.095	187.200, 2.042	187.200, 2.017
938	187.400, 2.046	187.400, 1.999	187.400, 2.095	187.400, 2.042	187.400, 2.016
939	187.600, 2.046	187.600, 1.999	187.600, 2.095	187.600, 2.042	187.600, 2.016
940	187.800, 2.046	187.800, 1.999	187.800, 2.096	187.800, 2.042	187.800, 2.016
941	188.000, 2.046	188.000, 1.998	188.000, 2.096	188.000, 2.042	188.000, 2.016
942	188.200, 2.046	188.200, 1.998	188.200, 2.096	188.200, 2.042	188.200, 2.016
943	188.400, 2.046	188.400, 1.998	188.400, 2.096	188.400, 2.042	188.400, 2.016
944	188.600, 2.045	188.600, 1.998	188.600, 2.096	188.600, 2.042	188.600, 2.015
945	188.800, 2.045	188.800, 1.998	188.800, 2.096	188.800, 2.042	188.800, 2.015
946	189.000, 2.045	189.000, 1.997	189.000, 2.096	189.000, 2.041	189.000, 2.015
947	189.200, 2.045	189.200, 1.997	189.200, 2.096	189.200, 2.041	189.200, 2.015
948	189.400, 2.045	189.400, 1.997	189.400, 2.096	189.400, 2.041	189.400, 2.015
949	189.600, 2.045	189.600, 1.997	189.600, 2.096	189.600, 2.041	189.600, 2.015
950	189.800, 2.045	189.800, 1.997	189.800, 2.096	189.800, 2.041	189.800, 2.015
951	190.000, 2.045	190.000, 1.997	190.000, 2.096	190.000, 2.040	190.000, 2.015
952	190.200, 2.045	190.200, 1.997	190.200, 2.095	190.200, 2.040	190.200, 2.015
953	190.400, 2.045	190.400, 1.997	190.400, 2.095	190.400, 2.040	190.400, 2.015
954	190.600, 2.045	190.600, 1.997	190.600, 2.095	190.600, 2.040	190.600, 2.015
955	190.800, 2.045	190.800, 1.997	190.800, 2.094	190.800, 2.040	190.800, 2.015
956	191.000, 2.045	191.000, 1.997	191.000, 2.094	191.000, 2.040	191.000, 2.015
957	191.200, 2.045	191.200, 1.997	191.200, 2.094	191.200, 2.040	191.200, 2.014
958	191.400, 2.045	191.400, 1.997	191.400, 2.094	191.400, 2.040	191.400, 2.014
959	191.600, 2.045	191.600, 1.997	191.600, 2.094	191.600, 2.040	191.600, 2.014
960	191.800, 2.045	191.800, 1.997	191.800, 2.095	191.800, 2.040	191.800, 2.013
961	192.000, 2.045	192.000, 1.997	192.000, 2.095	192.000, 2.039	192.000, 2.013
962	192.200, 2.044	192.200, 1.997	192.200, 2.095	192.200, 2.039	192.200, 2.013
963	192.400, 2.044	192.400, 1.998	192.400, 2.095	192.400, 2.038	192.400, 2.013
964	192.600, 2.044	192.600, 1.998	192.600, 2.095	192.600, 2.038	192.600, 2.013
965	192.800, 2.044	192.800, 1.998	192.800, 2.095	192.800, 2.038	192.800, 2.012
966	193.000, 2.044	193.000, 1.998	193.000, 2.095	193.000, 2.038	193.000, 2.012
967	193.200, 2.044	193.200, 1.998	193.200, 2.095	193.200, 2.037	193.200, 2.012
968	193.400, 2.044	193.400, 1.998	193.400, 2.095	193.400, 2.037	193.400, 2.012
969	193.600, 2.044	193.600, 1.998	193.600, 2.095	193.600, 2.037	193.600, 2.012
970	193.800, 2.044	193.800, 1.998	193.800, 2.095	193.800, 2.037	193.800, 2.013
971	194.000, 2.044	194.000, 1.998	194.000, 2.095	194.000, 2.037	194.000, 2.013
972	194.200, 2.044	194.200, 1.998	194.200, 2.095	194.200, 2.037	194.200, 2.013
973	194.400, 2.044	194.400, 1.997	194.400, 2.096	194.400, 2.037	194.400, 2.013
974	194.600, 2.044	194.600, 1.997	194.600, 2.096	194.600, 2.037	194.600, 2.013
975	194.800, 2.044	194.800, 1.997	194.800, 2.096	194.800, 2.037	194.800, 2.013
976	195.000, 2.044	195.000, 1.997	195.000, 2.095	195.000, 2.037	195.000, 2.012
977	195.200, 2.044	195.200, 1.997	195.200, 2.095	195.200, 2.037	195.200, 2.012
978	195.400, 2.044	195.400, 1.997	195.400, 2.095	195.400, 2.037	195.400, 2.012
979	195.600, 2.044	195.600, 1.997	195.600, 2.094	195.600, 2.037	195.600, 2.011
980	195.800, 2.044	195.800, 1.997	195.800, 2.094	195.800, 2.037	195.800, 2.011
981	196.000, 2.044	196.000, 1.997	196.000, 2.094	196.000, 2.037	196.000, 2.011
982	196.200, 2.044	196.200, 1.997	196.200, 2.094	196.200, 2.036	196.200, 2.011
983	196.400, 2.044	196.400, 1.997	196.400, 2.093	196.400, 2.036	196.400, 2.010
984	196.600, 2.044	196.600, 1.997	196.600, 2.093	196.600, 2.036	196.600, 2.010
985	196.800, 2.044	196.800, 1.997	196.800, 2.093	196.800, 2.036	196.800, 2.010
986	197.000, 2.044	197.000, 1.997	197.000, 2.094	197.000, 2.036	197.000, 2.010
987	197.200, 2.043	197.200, 1.997	197.200, 2.094	197.200, 2.035	197.200, 2.010
988	197.400, 2.043	197.400, 1.997	197.400, 2.094	197.400, 2.035	197.400, 2.010
989	197.600, 2.043	197.600, 1.997	197.600, 2.094	197.600, 2.034	197.600, 2.010
990	197.800, 2.043	197.800, 1.997	197.800, 2.094	197.800, 2.034	197.800, 2.010
991	198.000, 2.043	198.000, 1.997	198.000, 2.094	198.000, 2.034	198.000, 2.010
992	198.200, 2.043	198.200, 1.997	198.200, 2.095	198.200, 2.034	198.200, 2.010
993	198.400, 2.043	198.400, 1.997	198.400, 2.095	198.400, 2.034	198.400, 2.010
994	198.600, 2.043	198.600, 1.997	198.600, 2.095	198.600, 2.034	198.600, 2.011
995	198.800, 2.043	198.800, 1.997	198.800, 2.095	198.800, 2.034	198.800, 2.011
996	199.000, 2.044	199.000, 1.997	199.000, 2.095	199.000, 2.034	199.000, 2.011
997	199.200, 2.044	199.200, 1.997	199.200, 2.095	199.200, 2.034	199.200, 2.011
998	199.400, 2.044	199.400, 1.996	199.400, 2.095	199.400, 2.034	199.400, 2.011
999	199.600, 2.044	199.600, 1.996	199.600, 2.095	199.600, 2.034	199.600, 2.011
1000	199.800, 2.044	199.800, 1.996	199.800, 2.095	199.800, 2.034	199.800, 2.011
1001	200.000, 2.045	200.000, 1.996	200.000, 2.095	200.000, 2.034	200.000, 2.011
1002	200.200, 2.045	200.200, 1.997	200.200, 2.095	200.200, 2.034	200.200, 2.011
1003	200.400, 2.045	200.400, 1.997	200.400, 2.095	200.400, 2.034	200.400, 2.011
1004	200.600, 2.045	200.600, 1.997	200.600, 2.095	200.600, 2.034	200.600, 2.010
1005	200.800, 2.045	200.800, 1.997	200.800, 2.095	200.800, 2.034	200.800, 2.010
1006	201.000, 2.045	201.000, 1.996	201.000, 2.095	201.000, 2.033	201.000, 2.010
1007	201.200, 2.045	201.200, 1.996	201.200, 2.095	201.200, 2.033	201.200, 2.010
1008	201.400, 2.045	201.400, 1.996	201.400, 2.095	201.400, 2.032	201.400, 2.009
1009	201.600, 2.045	201.600, 1.996	201.600, 2.095	201.600, 2.032	201.600, 2.009
1010	201.800, 2.044	201.800, 1.996	201.800, 2.095	201.800, 2.032	201.800, 2.009
1011	202.000, 2.044	202.000, 1.996	202.000, 2.094	202.000, 2.031	202.000, 2.009
1012	202.200, 2.044	202.200, 1.996	202.200, 2.094	202.200, 2.031	202.200, 2.008
1013	202.400, 2.044	202.400, 1.997	202.400, 2.094	202.400, 2.031	202.400, 2.008
1014	202.600, 2.044	202.600, 1.997	202.600, 2.094	202.600, 2.031	202.600, 2.008
1015	202.800, 2.044	202.800, 1.997	202.800, 2.094	202.800, 2.031	202.800, 2.008
1016	203.000, 2.044	203.000, 1.997	203.000, 2.095	203.000, 2.031	203.000, 2.008
1017	203.200, 2.044	203.200, 1.997	203.200, 2.095	203.200, 2.031	203.200, 2.008
1018	203.400, 2.044	203.400, 1.997	203.400, 2.095	203.400, 2.031	203.400, 2.007
1019	203.600, 2.044	203.600, 1.997	203.600, 2.095	203.600, 2.031	203.600, 2.007
1020	203.800, 2.044	203.800, 1.998	203.800, 2.095	203.800, 2.031	203.800, 2.007
1021	204.000, 2.044	204.000, 1.998	204.000, 2.095	204.000, 2.031	204.000, 2.007
1022	204.200, 2.044	204.200, 1.997	204.200, 2.095	204.200, 2.031	204.200, 2.007
1023	204.400, 2.044	204.400, 1.997	204.400, 2.096	204.400, 2.031	204.400, 2.007
1024	204.600, 2.044	204.600, 1.997	204.600, 2.096	204.600, 2.032	204.600, 2.007
1025	204.800, 2.044	204.800, 1.997	204.800, 2.096	204.800, 2.032	204.800, 2.007
1026	205.000, 2.044	205.000, 1.997	205.000, 2.096	205.000, 2.032	205.000, 2.007
1027	205.200, 2.044	205.200, 1.997	205.200, 2.096	205.200, 2.032	205.200, 2.006
1028	205.400, 2.044	205.400, 1.997	205.400, 2.095	205.400, 2.032	205.400, 2.006
1029	205.600, 2.044	205.600, 1.997	205.600, 2.095	205.600, 2.032	205.600, 2.006
1030	205.800, 2.044	205.800, 1.997	205.800, 2.095	205.800, 2.031	205.800, 2.006
1031	206.000, 2.044	206.000, 1.997	206.000, 2.095	206.000, 2.031	206.000, 2.006
1032	206.200, 2.044	206.200, 1.998	206.200, 2.095	206.200, 2.031	206.200, 2.006
1033	206.400, 2.045	206.400, 1.998	206.400, 2.094	206.400, 2.031	206.400, 2.006
1034	206.600, 2.045	206.600, 1.998	206.600, 2.094	206.600, 2.030	206.600, 2.005
1035	206.800, 2.045	206.800, 1.998	206.800, 2.094	206.800, 2.030	206.800, 2.005
1036	207.000, 2.045	207.000, 1.999	207.000, 2.094	207.000, 2.030	207.000, 2.005
1037	207.200, 2.045	207.200, 1.999	207.200, 2.094	207.200, 2.029	207.200, 2.005
1038	207.400, 2.045	207.400, 1.999	207.400, 2.094	207.400, 2.029	207.400, 2.005
1039	207.600, 2.045	207.600, 1.999	207.600, 2.094	207.600, 2.029	207.600, 2.005
1040	207.800, 2.045	207.800, 1.999	207.800, 2.094	207.800, 2.029	207.800, 2.005
1041	208.000, 2.045	208.000, 1.999	208.000, 2.095	208.000, 2.029	208.000, 2.005
1042	208.200, 2.045	208.200, 1.999	208.200, 2.095	208.200, 2.029	208.200, 2.005
1043	208.400, 2.045	208.400, 1.999	208.400, 2.095	208.400, 2.029	208.400, 2.005
1044	208.600, 2.045	208.600, 1.999	208.600, 2.095	208.600, 2.029	208.600, 2.004
1045	208.800, 2.045	208.800, 1.999	208.800, 2.095	208.800, 2.028	208.800, 2.004
1046	209.000, 2.045	209.000, 1.999	209.000, 2.096	209.000, 2.028	209.000, 2.004
1047	209.200, 2.045	209.200, 1.999	209.200, 2.096	209.200, 2.028	209.200, 2.005
1048	209.400, 2.045	209.400, 1.999	209.400, 2.096	209.400, 2.028	209.400, 2.005
1049	209.600, 2.045	209.600, 1.999	209.600, 2.096	209.600, 2.027	209.600, 2.005
1050	209.800, 2.045	209.800, 1.999	209.800, 2.096	209.800, 2.027	209.800, 2.005
1051	210.000, 2.045	210.000, 1.999	210.000, 2.096	210.000, 2.027	210.000, 2.005
1052	210.200, 2.045	210.200, 1.999	210.200, 2.096	210.200, 2.027	210.200, 2.005
1053	210.400, 2.045	210.400, 1.999	210.400, 2.096	210.400, 2.027	210.400, 2.005
1054	210.600, 2.045	210.600, 1.999	210.600, 2.096	210.600, 2.026	210.600, 2.004
1055	210.800, 2.045	210.800, 1.999	210.800, 2.096	210.800, 2.026	210.800, 2.004
1056	211.000, 2.045	211.000, 1.999	211.000, 2.096	211.000, 2.027	211.000, 2.004
1057	211.200, 2.045	211.200, 1.999	211.200, 2.095	211.200, 2.027	211.200, 2.004
1058	211.400, 2.045	211.400, 2.000	211.400, 2.095	211.400, 2.027	211.400, 2.004
1059	211.600, 2.045	211.600, 2.000	211.600, 2.095	211.600, 2.027	211.600, 2.004
1060	211.800, 2.045	211.800, 2.000	211.800, 2.095	211.800, 2.028	211.800, 2.003
1061	212.000, 2.045	212.000, 2.000	212.000, 2.095	212.000, 2.028	212.000, 2.003
1062	212.200, 2.044	212.200, 2.000	212.200, 2.095	212.200, 2.028	212.200, 2.003
1063	212.400, 2.044	212.400, 2.000	212.400, 2.095	212.400, 2.028	212.400, 2.002
1064	212.600, 2.044	212.600, 2.000	212.600, 2.095	212.600, 2.027	212.600, 2.002
1065	212.800, 2.044	212.800, 2.000	212.800, 2.095	212.800, 2.027	212.800, 2.002
1066	213.000, 2.045	213.000, 2.000	213.000, 2.095	213.000, 2.027	213.000, 2.002
1067	213.200, 2.045	213.200, 2.000	213.200, 2.095	213.200, 2.027	213.200, 2.002
1068	213.400, 2.045	213.400, 2.000	213.400, 2.096	213.400, 2.026	213.400, 2.002
1069	213.600, 2.045	213.600, 1.999	213.600, 2.096	213.600, 2.026	213.600, 2.003
1070	213.800, 2.045	213.800, 1.999	213.800, 2.096	213.800, 2.026	213.800, 2.003
1071	214.000, 2.045	214.000, 1.999	214.000, 2.096	214.000, 2.025	214.000, 2.003
1072	214.200, 2.045	214.200, 1.998	214.200, 2.097	214.200, 2.025	214.200, 2.003
1073	214.400, 2.045	214.400, 1.998	214.400, 2.097	214.400, 2.025	214.400, 2.002
1074	214.600, 2.045	214.600, 1.998	214.600, 2.097	214.600, 2.025	214.600, 2.002
1075	214.800, 2.045	214.800, 1.998	214.800, 2.097	214.800, 2.025	214.800, 2.002
1076	215.000, 2.045	215.000, 1.998	215.000, 2.097	215.000, 2.025	215.000, 2.002
1077	215.200, 2.046	215.200, 1.998	215.200, 2.097	215.200, 2.025	215.200, 2.002
1078	215.400, 2.046	215.400, 1.998	215.400, 2.097	215.400, 2.025	215.400, 2.002
1079	215.600, 2.046	215.600, 1.998	215.600, 2.097	215.600, 2.026	215.600, 2.002
1080	215.800, 2.046	215.800, 1.998	215.800, 2.097	215.800, 2.026	215.800, 2.001
1081	216.000, 2.046	216.000, 1.998	216.000, 2.097	216.000, 2.026	216.000, 2.001
1082	216.200, 2.046	216.200, 1.998	216.200, 2.096	216.200, 2.026	216.200, 2.001
1083	216.400, 2.046	216.400, 1.998	216.400, 2.096	216.400, 2.026	216.400, 2.001
1084	216.600, 2.046	216.600, 1.999	216.600, 2.096	216.600, 2.026	216.600, 2.001
1085	216.800, 2.045	216.800, 1.999	216.800, 2.096	216.800, 2.026	216.800, 2.001
1086	217.000, 2.045	217.000, 1.999	217.000, 2.096	217.000, 2.026	217.000, 2.001
1087	217.200, 2.045	217.200, 1.999	217.200, 2.096	217.200, 2.026	217.200, 2.001
1088	217.400, 2.045	217.400, 1.999	217.400, 2.096	217.400, 2.025	217.400, 2.001
1089	217.600, 2.045	217.600, 1.999	217.600, 2.096	217.600, 2.025	217.600, 2.001
1090	217.800, 2.045	217.800, 2.000	217.800, 2.096	217.800, 2.025	217.800, 2.000
1091	218.000, 2.045	218.000, 2.000	218.000, 2.096	218.000, 2.025	218.000, 2.000
1092	218.200, 2.045	218.200, 2.000	218.200, 2.096	218.200, 2.025	218.200, 2.000
1093	218.400, 2.045	218.400, 2.001	218.400, 2.096	218.400, 2.025	218.400, 2.000
1094	218.600, 2.045	218.600, 2.001	218.600, 2.096	218.600, 2.025	218.600, 1.999
1095	218.800, 2.045	218.800, 2.001	218.800, 2.097	218.800, 2.025	218.800, 1.999
1096	219.000, 2.045	219.000, 2.001	219.000, 2.097	219.000, 2.025	219.000, 1.999
1097	219.200, 2.045	219.200, 2.001	219.200, 2.097	219.200, 2.025	219.200, 1.999
1098	219.400, 2.045	219.400, 2.001	219.400, 2.097	219.400, 2.025	219.400, 1.999
1099	219.600, 2.045	219.600, 2.001	219.600, 2.097	219.600, 2.025	219.600, 1.999
1100	219.800, 2.045	219.800, 2.001	219.800, 2.097	219.800, 2.025	219.800, 1.999
1101	220.000, 2.046	220.000, 2.000	220.000, 2.098	220.000, 2.025	220.000, 1.999
1102	220.200, 2.046	220.200, 2.000	220.200, 2.098	220.200, 2.025	220.200, 1.999
1103	220.400, 2.046	220.400, 2.000	220.400, 2.098	220.400, 2.025	220.400, 1.999
1104	220.600, 2.046	220.600, 2.000	220.600, 2.098	220.600, 2.025	220.600, 1.999
1105	220.800, 2.046	220.800, 2.000	220.800, 2.098	220.800, 2.024	220.800, 1.999
1106	221.000, 2.046	221.000, 2.000	221.000, 2.098	221.000, 2.024	221.000, 1.999
1107	221.200, 2.046	221.200, 2.000	221.200, 2.098	221.200, 2.024	221.200, 1.999
1108	221.400, 2.047	221.400, 2.001	221.400, 2.097	221.400, 2.024	221.400, 1.999
1109	221.600, 2.047	221.600, 2.001	221.600, 2.097	221.600, 2.024	221.600, 2.000
1110	221.800, 2.047	221.800, 2.001	221.800, 2.097	221.800, 2.024	221.800, 2.000
1111	222.000, 2.047	222.000, 2.001	222.000, 2.097	222.000, 2.024	222.000, 2.000
1112	222.200, 2.047	222.200, 2.001	222.200, 2.097	222.200, 2.024	222.200, 1.999
1113	222.400, 2.047	222.400, 2.002	222.400, 2.097	222.400, 2.024	222.400, 1.999
1114	222.600, 2.047	222.600, 2.002	222.600, 2.097	222.600, 2.024	222.600, 1.999
1115	222.800, 2.046	222.800, 2.002	222.800, 2.097	222.800, 2.024	222.800, 1.999
1116	223.000, 2.046	223.000, 2.002	223.000, 2.097	223.000, 2.024	223.000, 1.999
1117	223.200, 2.046	223.200, 2.003	223.200, 2.098	223.200, 2.024	223.200, 1.998
1118	223.400, 2.046	223.400, 2.003	223.400, 2.098	223.400, 2.024	223.400, 1.998
1119	223.600, 2.046	223.600, 2.003	223.600, 2.098	223.600, 2.024	223.600, 1.998
1120	223.800, 2.045	223.800, 2.003	223.800, 2.098	223.800, 2.024	223.800, 1.998
1121	224.000, 2.045	224.000, 2.003	224.000, 2.098	224.000, 2.023	224.000, 1.998
1122	224.200, 2.045	224.200, 2.003	224.200, 2.098	224.200, 2.023	224.200, 1.998
1123	224.400, 2.045	224.400, 2.003	224.400, 2.098	224.400, 2.023	224.400, 1.997
1124	224.600, 2.045	224.600, 2.003	224.600, 2.098	224.600, 2.023	224.600, 1.997
1125	224.800, 2.045	224.800, 2.003	224.800, 2.098	224.800, 2.023	224.800, 1.998
1126	225.000, 2.045	225.000, 2.003	225.000, 2.098	225.000, 2.023	225.000, 1.998
1127	225.200, 2.046	225.200, 2.003	225.200, 2.098	225.200, 2.023	225.200, 1.998
1128	225.400, 2.046	225.400, 2.003	225.400, 2.098	225.400, 2.023	225.400, 1.998
1129	225.600, 2.046	225.600, 2.002	225.600, 2.098	225.600, 2.023	225.600, 1.999
1130	225.800, 2.046	225.800, 2.002	225.800, 2.098	225.800, 2.023	225.800, 1.999
1131	226.000, 2.047	226.000, 2.002	226.000, 2.099	226.000, 2.023	226.000, 1.999
1132	226.200, 2.047	226.200, 2.001	226.200, 2.099	226.200, 2.023	226.200, 1.999
1133	226.400, 2.047	226.400, 2.001	226.400, 2.099	226.400, 2.023	226.400, 1.999
1134	226.600, 2.047	226.600, 2.001	226.600, 2.099	226.600, 2.023	226.600, 1.998
1135	226.800, 2.047	226.800, 2.000	226.800, 2.099	226.800, 2.022	226.800, 1.998
1136	227.000, 2.046	227.000, 2.000	227.000, 2.099	227.000, 2.022	227.000, 1.998
1137	227.200, 2.046	227.200, 2.000	227.200, 2.100	227.200, 2.022	227.200, 1.998
1138	227.400, 2.046	227.400, 2.000	227.400, 2.100	227.400, 2.022	227.400, 1.997
1139	227.600, 2.046	227.600, 2.000	227.600, 2.100	227.600, 2.022	227.600, 1.997
1140	227.800, 2.046	227.800, 2.000	227.800, 2.100	227.800, 2.022	227.800, 1.997
1141	228.000, 2.046	228.000, 2.000	228.000, 2.100	228.000, 2.022	228.000, 1.997
1142	228.200, 2.046	228.200, 2.000	228.200, 2.100	228.200, 2.022	228.200, 1.997
1143	228.400, 2.046	228.400, 2.000	228.400, 2.099	228.400, 2.022	228.400, 1.997
1144	228.600, 2.046	228.600, 2.000	228.600, 2.099	228.600, 2.022	228.600, 1.997
1145	228.800, 2.046	228.800, 2.000	228.800, 2.099	228.800, 2.022	228.800, 1.996
1146	229.000, 2.046	229.000, 2.000	229.000, 2.099	229.000, 2.022	229.000, 1.996
1147	229.200, 2.047	229.200, 2.001	229.200, 2.098	229.200, 2.022	229.200, 1.996
1148	229.400, 2.047	229.400, 2.001	229.400, 2.098	229.400, 2.022	229.400, 1.996
1149	229.600, 2.047	229.600, 2.001	229.600, 2.098	229.600, 2.022	229.600, 1.996
1150	229.800, 2.047	229.800, 2.001	229.800, 2.098	229.800, 2.022	229.800, 1.996
1151	230.000, 2.047	230.000, 2.001	230.000, 2.098	230.000, 2.021	230.000, 1.996
1152	230.200, 2.048	230.200, 2.001	230.200, 2.097	230.200, 2.021	230.200, 1.996
1153	230.400, 2.048	230.400, 2.001	230.400, 2.097	230.400, 2.021	230.400, 1.996
1154	230.600, 2.047	230.600, 2.001	230.600, 2.097	230.600, 2.021	230.600, 1.996
1155	230.800, 2.048	230.800, 2.001	230.800, 2.097	230.800, 2.020	230.800, 1.996
1156	231.000, 2.048	231.000, 2.002	231.000, 2.097	231.000, 2.020	231.000, 1.996
1157	231.200, 2.048	231.200, 2.002	231.200, 2.097	231.200, 2.020	231.200, 1.996
1158	231.400, 2.048	231.400, 2.002	231.400, 2.097	231.400, 2.020	231.400, 1.995
1159	231.600, 2.048	231.600, 2.002	231.600, 2.097	231.600, 2.020	231.600, 1.995
1160	231.800, 2.048	231.800, 2.002	231.800, 2.097	231.800, 2.020	231.800, 1.995
1161	232.000, 2.047	232.000, 2.002	232.000, 2.097	232.000, 2.019	232.000, 1.995
1162	232.200, 2.047	232.200, 2.002	232.200, 2.097	232.200, 2.019	232.200, 1.995
1163	232.400, 2.047	232.400, 2.002	232.400, 2.098	232.400, 2.018	232.400, 1.994
1164	232.600, 2.047	232.600, 2.002	232.600, 2.098	232.600, 2.018	232.600, 1.994
1165	232.800, 2.047	232.800, 2.002	232.800, 2.098	232.800, 2.018	232.800, 1.994
1166	233.000, 2.047	233.000, 2.002	233.000, 2.098	233.000, 2.018	233.000, 1.994
1167	233.200, 2.047	233.200, 2.002	233.200, 2.099	233.200, 2.018	233.200, 1.994
1168	233.400, 2.047	233.400, 2.002	233.400, 2.099	233.400, 2.018	233.400, 1.994
1169	233.600, 2.047	233.600, 2.002	233.600, 2.099	233.600, 2.018	233.600, 1.994
1170	233.800, 2.047	233.800, 2.002	233.800, 2.099	233.800, 2.018	233.800, 1.995
1171	234.000, 2.047	234.000, 2.002	234.000, 2.099	234.000, 2.018	234.000, 1.995
1172	234.200, 2.047	234.200, 2.002	234.200, 2.099	234.200, 2.018	234.200, 1.995
1173	234.400, 2.047	234.400, 2.003	234.400, 2.099	234.400, 2.019	234.400, 1.995
1174	234.600, 2.047	234.600, 2.003	234.600, 2.099	234.600, 2.019	234.600, 1.995
1175	234.800, 2.047	234.800, 2.003	234.800, 2.099	234.800, 2.019	234.800, 1.995
1176	235.000, 2.047	235.000, 2.003	235.000, 2.099	235.000, 2.019	235.000, 1.995
1177	235.200, 2.047	235.200, 2.003	235.200, 2.098	235.200, 2.020	235.200, 1.995
1178	235.400, 2.047	235.400, 2.003	235.400, 2.098	235.400, 2.020	235.400, 1.995
1179	235.600, 2.047	235.600, 2.002	235.600, 2.098	235.600, 2.020	235.600, 1.995
1180	235.800, 2.046	235.800, 2.002	235.800, 2.098	235.800, 2.020	235.800, 1.994
1181	236.000, 2.046	236.000, 2.002	236.000, 2.097	236.000, 2.020	236.000, 1.994
1182	236.200, 2.046	236.200, 2.002	236.200, 2.097	236.200, 2.020	236.200, 1.994
1183	236.400, 2.046	236.400, 2.002	236.400, 2.097	236.400, 2.020	236.400, 1.994
1184	236.600, 2.046	236.600, 2.002	236.600, 2.097	236.600, 2.020	236.600, 1.994
1185	236.800, 2.046	236.800, 2.002	236.800, 2.096	236.800, 2.020	236.800, 1.994
1186	237.000, 2.047	237.000, 2.002	237.000, 2.096	237.000, 2.020	237.000, 1.994
1187	237.200, 2.047	237.200, 2.002	237.200, 2.096	237.200, 2.020	237.200, 1.994
1188	237.400, 2.047	237.400, 2.002	237.400, 2.096	237.400, 2.020	237.400, 1.994
1189	237.600, 2.047	237.600, 2.002	237.600, 2.096	237.600, 2.020	237.600, 1.994
1190	237.800, 2.047	237.800, 2.002	237.800, 2.097	237.800, 2.020	237.800, 1.994
1191	238.000, 2.047	238.000, 2.002	238.000, 2.097	238.000, 2.020	238.000, 1.994
1192	238.200, 2.047	238.200, 2.003	238.200, 2.097	238.200, 2.019	238.200, 1.994
1193	238.400, 2.047	238.400, 2.003	238.400, 2.097	238.400, 2.019	238.400, 1.994
1194	238.600, 2.048	238.600, 2.003	238.600, 2.098	238.600, 2.019	238.600, 1.994
1195	238.800, 2.048	238.800, 2.003	238.800, 2.098	238.800, 2.019	238.800, 1.994
1196	239.000, 2.048	239.000, 2.003	239.000, 2.098	239.000, 2.019	239.000, 1.994
1197	239.200, 2.048	239.200, 2.003	239.200, 2.098	239.200, 2.018	239.200, 1.994
1198	239.400, 2.048	239.400, 2.002	239.400, 2.099	239.400, 2.018	239.400, 1.993
1199	239.600, 2.048	239.600, 2.002	239.600, 2.099	239.600, 2.018	239.600, 1.993
1200	239.800, 2.048	239.800, 2.002	239.800, 2.099	239.800, 2.018	239.800, 1.993
1201	240.000, 2.048	240.000, 2.002	240.000, 2.099	240.000, 2.018	240.000, 1.994
1202	240.200, 2.048	240.200, 2.003	240.200, 2.099	240.200, 2.017	240.200, 1.994
1203	240.400, 2.048	240.400, 2.003	240.400, 2.099	240.400, 2.017	240.400, 1.994
1204	240.600, 2.048	240.600, 2.003	240.600, 2.099	240.600, 2.017	240.600, 1.993
1205	240.800, 2.048	240.800, 2.003	240.800, 2.100	240.800, 2.017	240.800, 1.993
1206	241.000, 2.048	241.000, 2.003	241.000, 2.099	241.000, 2.017	241.000, 1.993
1207	241.200, 2.049	241.200, 2.003	241.200, 2.099	241.200, 2.017	241.200, 1.993
1208	241.400, 2.049	241.400, 2.003	241.400, 2.099	241.400, 2.017	241.400, 1.992
1209	241.600, 2.049	241.600, 2.003	241.600, 2.099	241.600, 2.017	241.600, 1.992
1210	241.800, 2.049	241.800, 2.003	241.800, 2.099	241.800, 2.017	241.800, 1.992
1211	242.000, 2.049	242.000, 2.003	242.000, 2.099	242.000, 2.016	242.000, 1.992
1212	242.200, 2.049	242.200, 2.003	242.200, 2.099	242.200, 2.016	242.200, 1.992
1213	242.400, 2.049	242.400, 2.003	242.400, 2.099	242.400, 2.016	242.400, 1.992
1214	242.600, 2.048	242.600, 2.003	242.600, 2.099	242.600, 2.016	242.600, 1.992
1215	242.800, 2.048	242.800, 2.003	242.800, 2.099	242.800, 2.017	242.800, 1.993
1216	243.000, 2.048	243.000, 2.003	243.000, 2.099	243.000, 2.017	243.000, 1.993
1217	243.200, 2.047	243.200, 2.003	243.200, 2.099	243.200, 2.017	243.200, 1.993
1218	243.400, 2.047	243.400, 2.004	243.400, 2.099	243.400, 2.017	243.400, 1.993
1219	243.600, 2.047	243.600, 2.004	243.600, 2.099	243.600, 2.017	243.600, 1.993
1220	243.800, 2.047	243.800, 2.004	243.800, 2.099	243.800, 2.017	243.800, 1.993
1221	244.000, 2.047	244.000, 2.004	244.000, 2.099	244.000, 2.017	244.000, 1.993
1222	244.200, 2.048	244.200, 2.004	244.200, 2.099	244.200, 2.017	244.200, 1.993
1223	244.400, 2.048	244.400, 2.004	244.400, 2.099	244.400, 2.017	244.400, 1.993
1224	244.600, 2.048	244.600, 2.004	244.600, 2.099	244.600, 2.017	244.600, 1.993
1225	244.800, 2.048	244.800, 2.004	244.800, 2.099	244.800, 2.017	244.800, 1.992
1226	245.000, 2.048	245.000, 2.004	245.000, 2.099	245.000, 2.017	245.000, 1.992
1227	245.200, 2.048	245.200, 2.004	245.200, 2.099	245.200, 2.017	245.200, 1.992
1228	245.400, 2.048	245.400, 2.004	245.400, 2.099	245.400, 2.017	245.400, 1.991
1229	245.600, 2.048	245.600, 2.004	245.600, 2.099	245.600, 2.017	245.600, 1.991
1230	245.800, 2.048	245.800, 2.004	245.800, 2.100	245.800, 2.017	245.800, 1.991
1231	246.000, 2.048	246.000, 2.004	246.000, 2.100	246.000, 2.017	246.000, 1.991
1232	246.200, 2.048	246.200, 2.004	246.200, 2.100	246.200, 2.017	246.200, 1.990
1233	246.400, 2.049	246.400, 2.004	246.400, 2.100	246.400, 2.017	246.400, 1.990
1234	246.600, 2.049	246.600, 2.004	246.600, 2.100	246.600, 2.017	246.600, 1.991
1235	246.800, 2.049	246.800, 2.004	246.800, 2.100	246.800, 2.017	246.800, 1.991
1236	247.000, 2.049	247.000, 2.004	247.000, 2.100	247.000, 2.017	247.000, 1.991
1237	247.200, 2.049	247.200, 2.004	247.200, 2.100	247.200, 2.017	247.200, 1.991
1238	247.400, 2.049	247.400, 2.004	247.400, 2.100	247.400, 2.017	247.400, 1.991
1239	247.600, 2.050	247.600, 2.004	247.600, 2.100	247.600, 2.017	247.600, 1.991
1240	247.800, 2.050	247.800, 2.004	247.800, 2.100	247.800, 2.016	247.800, 1.991
1241	248.000, 2.050	248.000, 2.004	248.000, 2.100	248.000, 2.016	248.000, 1.991
1242	248.200, 2.050	248.200, 2.004	248.200, 2.100	248.200, 2.016	248.200, 1.991
1243	248.400, 2.050	248.400, 2.003	248.400, 2.100	248.400, 2.016	248.400, 1.991
1244	248.600, 2.050	248.600, 2.003	248.600, 2.100	248.600, 2.015	248.600, 1.991
1245	248.800, 2.050	248.800, 2.003	248.800, 2.100	248.800, 2.015	248.800, 1.990
1246	249.000, 2.050	249.000, 2.002	249.000, 2.100	249.000, 2.015	249.000, 1.990
1247	249.200, 2.050	249.200, 2.002	249.200, 2.100	249.200, 2.015	249.200, 1.990
1248	249.400, 2.049	249.400, 2.002	249.400, 2.100	249.400, 2.015	249.400, 1.990
1249	249.600, 2.049	249.600, 2.002	249.600, 2.099	249.600, 2.015	249.600, 1.990
1250	249.800, 2.049	249.800, 2.002	249.800, 2.099	249.800, 2.015	249.800, 1.990
1251	250.000, 2.049	250.000, 2.002	250.000, 2.099	250.000, 2.015	250.000, 1.990
1252	250.200, 2.049	250.200, 2.003	250.200, 2.099	250.200, 2.015	250.200, 1.990
1253	250.400, 2.049	250.400, 2.003	250.400, 2.099	250.400, 2.015	250.400, 1.990
1254	250.600, 2.049	250.600, 2.003	250.600, 2.099	250.600, 2.015	250.600, 1.990
1255	250.800, 2.049	250.800, 2.003	250.800, 2.099	250.800, 2.015	250.800, 1.990
1256	251.000, 2.049	251.000, 2.004	251.000, 2.099	251.000, 2.015	251.000, 1.991
1257	251.200, 2.048	251.200, 2.004	251.200, 2.099	251.200, 2.015	251.200, 1.991
1258	251.400, 2.048	251.400, 2.004	251.400, 2.099	251.400, 2.014	251.400, 1.991
1259	251.600, 2.048	251.600, 2.005	251.600, 2.099	251.600, 2.014	251.600, 1.990
1260	251.800, 2.048	251.800, 2.005	251.800, 2.099	251.800, 2.014	251.800, 1.990
1261	252.000, 2.048	252.000, 2.005	252.000, 2.099	252.000, 2.014	252.000, 1.990
1262	252.200, 2.048	252.200, 2.004	252.200, 2.098	252.200, 2.014	252.200, 1.990
1263	252.400, 2.048	252.400, 2.004	252.400, 2.098	252.400, 2.014	252.400, 1.990
1264	252.600, 2.048	252.600, 2.004	252.600, 2.098	252.600, 2.014	252.600, 1.990
1265	252.800, 2.048	252.800, 2.004	252.800, 2.099	252.800, 2.014	252.800, 1.990
1266	253.000, 2.048	253.000, 2.003	253.000, 2.099	253.000, 2.014	253.000, 1.990
1267	253.200, 2.048	253.200, 2.003	253.200, 2.099	253.200, 2.014	253.200, 1.990
1268	253.400, 2.048	253.400, 2.003	253.400, 2.099	253.400, 2.014	253.400, 1.990
1269	253.600, 2.049	253.600, 2.003	253.600, 2.099	253.600, 2.014	253.600, 1.990
1270	253.800, 2.049	253.800, 2.002	253.800, 2.099	253.800, 2.014	253.800, 1.989
1271	254.000, 2.049	254.000, 2.002	254.000, 2.100	254.000, 2.014	254.000, 1.989
1272	254.200, 2.049	254.200, 2.002	254.200, 2.100	254.200, 2.014	254.200, 1.989
1273	254.400, 2.049	254.400, 2.002	254.400, 2.100	254.400, 2.014	254.400, 1.988
1274	254.600, 2.048	254.600, 2.002	254.600, 2.100	254.600, 2.014	254.600, 1.988
1275	254.800, 2.048	254.800, 2.003	254.800, 2.100	254.800, 2.014	254.800, 1.988
1276	255.000, 2.048	255.000, 2.003	255.000, 2.100	255.000, 2.014	255.000, 1.987
1277	255.200, 2.048	255.200, 2.003	255.200, 2.100	255.200, 2.014	255.200, 1.987
1278	255.400, 2.048	255.400, 2.003	255.400, 2.100	255.400, 2.014	255.400, 1.987
1279	255.600, 2.048	255.600, 2.003	255.600, 2.100	255.600, 2.014	255.600, 1.987
1280	255.800, 2.048	255.800, 2.003	255.800, 2.100	255.800, 2.014	255.800, 1.987
1281	256.000, 2.048	256.000, 2.003	256.000, 2.100	256.000, 2.014	256.000, 1.987
1282	256.200, 2.048	256.200, 2.004	256.200, 2.100	256.200, 2.014	256.200, 1.987
1283	256.400, 2.048	256.400, 2.004	256.400, 2.100	256.400, 2.014	256.400, 1.988
1284	256.600, 2.048	256.600, 2.004	256.600, 2.100	256.600, 2.014	256.600, 1.988
1285	256.800, 2.048	256.800, 2.004	256.800, 2.100	256.800, 2.014	256.800, 1.988
1286	257.000, 2.048	257.000, 2.004	257.000, 2.100	257.000, 2.014	257.000, 1.988
1287	257.200, 2.048	257.200, 2.004	257.200, 2.100	257.200, 2.014	257.200, 1.988
1288	257.400, 2.048	257.400, 2.004	257.400, 2.100	257.400, 2.014	257.400, 1.988
1289	257.600, 2.048	257.600, 2.004	257.600, 2.100	257.600, 2.013	257.600, 1.988
1290	257.800, 2.049	257.800, 2.004	257.800, 2.100	257.800, 2.013	257.800, 1.988
1291	258.000, 2.049	258.000, 2.004	258.000, 2.100	258.000, 2.013	258.000, 1.988
1292	258.200, 2.049	258.200, 2.004	258.200, 2.099	258.200, 2.013	258.200, 1.988
1293	258.400, 2.049	258.400, 2.003	258.400, 2.100	258.400, 2.013	258.400, 1.988
1294	258.600, 2.049	258.600, 2.003	258.600, 2.100	258.600, 2.013	258.600, 1.988
1295	258.800, 2.049	258.800, 2.003	258.800, 2.100	258.800, 2.013	258.800, 1.988
1296	259.000, 2.049	259.000, 2.003	259.000, 2.100	259.000, 2.013	259.000, 1.988
1297	259.200, 2.049	259.200, 2.003	259.200, 2.100	259.200, 2.013	259.200, 1.988
1298	259.400, 2.049	259.400, 2.003	259.400, 2.099	259.400, 2.012	259.400, 1.988
1299	259.600, 2.049	259.600, 2.003	259.600, 2.099	259.600, 2.012	259.600, 1.988
1300	259.800, 2.049	259.800, 2.003	259.800, 2.099	259.800, 2.012	259.800, 1.988
1301	260.000, 2.049	260.000, 2.003	260.000, 2.099	260.000, 2.012	260.000, 1.988
1302	260.200, 2.049	260.200, 2.003	260.200, 2.099	260.200, 2.012	260.200, 1.989
1303	260.400, 2.049	260.400, 2.003	260.400, 2.099	260.400, 2.012	260.400, 1.989
1304	260.600, 2.049	260.600, 2.003	260.600, 2.098	260.600, 2.012	260.600, 1.989
1305	260.800, 2.049	260.800, 2.003	260.800, 2.098	260.800, 2.012	260.800, 1.989
1306	261.000, 2.048	261.000, 2.003	261.000, 2.098	261.000, 2.012	261.000, 1.989
1307	261.200, 2.048	261.200, 2.003	261.200, 2.098	261.200, 2.012	261.200, 1.989
1308	261.400, 2.048	261.400, 2.003	261.400, 2.099	261.400, 2.012	261.400, 1.988
1309	261.600, 2.048	261.600, 2.002	261.600, 2.099	261.600, 2.012	261.600, 1.988
1310	261.800, 2.048	261.800, 2.002	261.800, 2.099	261.800, 2.012	261.800, 1.988
1311	262.000, 2.048	262.000, 2.002	262.000, 2.099	262.000, 2.012	262.000, 1.988
1312	262.200, 2.048	262.200, 2.002	262.200, 2.099	262.200, 2.012	262.200, 1.988
1313	262.400, 2.048	262.400, 2.002	262.400, 2.099	262.400, 2.012	262.400, 1.988
1314	262.600, 2.047	262.600, 2.003	262.600, 2.099	262.600, 2.012	262.600, 1.987
1315	262.800, 2.047	262.800, 2.003	262.800, 2.099	262.800, 2.012	262.800, 1.987
1316	263.000, 2.047	263.000, 2.003	263.000, 2.099	263.000, 2.012	263.000, 1.987
1317	263.200, 2.047	263.200, 2.004	263.200, 2.099	263.200, 2.012	263.200, 1.987
1318	263.400, 2.047	263.400, 2.004	263.400, 2.099	263.400, 2.011	263.400, 1.987
1319	263.600, 2.047	263.600, 2.004	263.600, 2.099	263.600, 2.011	263.600, 1.986
1320	263.800, 2.047	263.800, 2.004	263.800, 2.099	263.800, 2.011	263.800, 1.986
1321	264.000, 2.047	264.000, 2.004	264.000, 2.099	264.000, 2.011	264.000, 1.986
1322	264.200, 2.047	264.200, 2.004	264.200, 2.099	264.200, 2.011	264.200, 1.986
1323	264.400, 2.047	264.400, 2.004	264.400, 2.099	264.400, 2.011	264.400, 1.986
1324	264.600, 2.047	264.600, 2.004	264.600, 2.099	264.600, 2.011	264.600, 1.986
1325	264.800, 2.047	264.800, 2.004	264.800, 2.099	264.800, 2.010	264.800, 1.986
1326	265.000, 2.047	265.000, 2.003	265.000, 2.099	265.000, 2.010	265.000, 1.986
1327	265.200, 2.047	265.200, 2.003	265.200, 2.099	265.200, 2.010	265.200, 1.985
1328	265.400, 2.047	265.400, 2.003	265.400, 2.099	265.400, 2.010	265.400, 1.985
1329	265.600, 2.047	265.600, 2.003	265.600, 2.099	265.600, 2.010	265.600, 1.985
1330	265.800, 2.047	265.800, 2.003	265.800, 2.099	265.800, 2.011	265.800, 1.985
1331	266.000, 2.047	266.000, 2.003	266.000, 2.099	266.000, 2.011	266.000, 1.985
1332	266.200, 2.047	266.200, 2.003	266.200, 2.099	266.200, 2.011	266.200, 1.985
1333	266.400, 2.047	266.400, 2.003	266.400, 2.099	266.400, 2.012	266.400, 1.985
1334	266.600, 2.047	266.600, 2.003	266.600, 2.098	266.600, 2.012	266.600, 1.985
1335	266.800, 2.047	266.800, 2.003	266.800, 2.098	266.800, 2.012	266.800, 1.985
1336	267.000, 2.047	267.000, 2.003	267.000, 2.099	267.000, 2.013	267.000, 1.984
1337	267.200, 2.047	267.200, 2.004	267.200, 2.099	267.200, 2.013	267.200, 1.984
1338	267.400, 2.047	267.400, 2.004	267.400, 2.099	267.400, 2.013	267.400, 1.984
1339	267.600, 2.047	267.600, 2.004	267.600, 2.099	267.600, 2.013	267.600, 1.984
1340	267.800, 2.047	267.800, 2.004	267.800, 2.099	267.800, 2.013	267.800, 1.984
1341	268.000, 2.047	268.000, 2.004	268.000, 2.099	268.000, 2.012	268.000, 1.984
1342	268.200, 2.047	268.200, 2.004	268.200, 2.098	268.200, 2.012	268.200, 1.984
1343	268.400, 2.047	268.400, 2.004	268.400, 2.098	268.400, 2.012	268.400, 1.984
1344	268.600, 2.047	268.600, 2.004	268.600, 2.098	268.600, 2.011	268.600, 1.984
1345	268.800, 2.048	268.800, 2.004	268.800, 2.098	268.800, 2.011	268.800, 1.984
1346	269.000, 2.048	269.000, 2.004	269.000, 2.098	269.000, 2.011	269.000, 1.984
1347	269.200, 2.048	269.200, 2.004	269.200, 2.098	269.200, 2.010	269.200, 1.984
1348	269.400, 2.048	269.400, 2.004	269.400, 2.098	269.400, 2.010	269.400, 1.984
1349	269.600, 2.048	269.600, 2.003	269.600, 2.098	269.600, 2.010	269.600, 1.984
1350	269.800, 2.048	269.800, 2.003	269.800, 2.097	269.800, 2.010	269.800, 1.984
1351	,	,	,	,	,
1352	,	,	,	,	,
1353	,	,	,	,	,
1354	,	,	,	,	,
1355	,	,	,	,	,
1356	,	,	,	,	,
1357	,	,	,	,	,
1358	,	,	,	,	,
1359	,	,	,	,	,
1360	,	,	,	,	,
1361	,	,	,	,	,
1362	,	,	,	,	,
1363	,	,	,	,	,
1364	,	,	,	,	,
1365	,	,	,	,	,
1366	,	,	,	,	,
1367	,	,	,	,	,
1368	,	,	,	,	,
1369	,	,	,	,	,
1370	,	,	,	,	,
1371	,	,	,	,	,
1372	,	,	,	,	,
1373	,	,	,	,	,
1374	,	,	,	,	,
1375	,	,	,	,	,
1376	,	,	,	,	,
1377	,	,	,	,	,
1378	,	,	,	,	,
1379	,	,	,	,	,
1380	,	,	,	,	,
1381	,	,	,	,	,
1382	,	,	,	,	,
1383	,	,	,	,	,
1384	,	,	,	,	,
1385	,	,	,	,	,
1386	,	,	,	,	,
1387	,	,	,	,	,
1388	,	,	,	,	,
1389	,	,	,	,	,
1390	,	,	,	,	,
1391	,	,	,	,	,
1392	,	,	,	,	,
1393	,	,	,	,	,
1394	,	,	,	,	,
1395	,	,	,	,	,
1396	,	,	,	,	,
1397	,	,	,	,	,
1398	,	,	,	,	,
1399	,	,	,	,	,
1400	,	,	,	,	,
1401	,	,	,	,	,
1402	,	,	,	,	,
1403	,	,	,	,	,
1404	,	,	,	,	,
1405	,	,	,	,	,
1406	,	,	,	,	,
1407	,	,	,	,	,
1408	,	,	,	,	,
1409	,	,	,	,	,
1410	,	,	,	,	,
1411	,	,	,	,	,
1412	,	,	,	,	,
1413	,	,	,	,	,
1414	,	,	,	,	,
1415	,	,	,	,	,
1416	,	,	,	,	,
1417	,	,	,	,	,
1418	,	,	,	,	,
1419	,	,	,	,	,
1420	,	,	,	,	,
1421	,	,	,	,	,
1422	,	,	,	,	,
1423	,	,	,	,	,
1424	,	,	,	,	,
1425	,	,	,	,	,
1426	,	,	,	,	,
1427	,	,	,	,	,
1428	,	,	,	,	,
1429	,	,	,	,	,
1430	,	,	,	,	,
1431	,	,	,	,	,
1432	,	,	,	,	,
1433	,	,	,	,	,
1434	,	,	,	,	,
1435	,	,	,	,	,
1436	,	,	,	,	,
1437	,	,	,	,	,
1438	,	,	,	,	,
1439	,	,	,	,	,
1440	,	,	,	,	,
1441	,	,	,	,	,
1442	,	,	,	,	,
1443	,	,	,	,	,
1444	,	,	,	,	,
1445	,	,	,	,	,
1446	,	,	,	,	,
1447	,	,	,	,	,
1448	,	,	,	,	,
1449	,	,	,	,	,
1450	,	,	,	,	,
1451	,	,	,	,	,
1452	,	,	,	,	,
1453	,	,	,	,	,
1454	,	,	,	,	,
1455	,	,	,	,	,
1456	,	,	,	,	,
1457	,	,	,	,	,
1458	,	,	,	,	,
1459	,	,	,	,	,
1460	,	,	,	,	,
1461	,	,	,	,	,
1462	,	,	,	,	,
1463	,	,	,	,	,
1464	,	,	,	,	,
1465	,	,	,	,	,
1466	,	,	,	,	,
1467	,	,	,	,	,
1468	,	,	,	,	,
1469	,	,	,	,	,
1470	,	,	,	,	,
1471	,	,	,	,	,
1472	,	,	,	,	,
1473	,	,	,	,	,
1474	,	,	,	,	,
1475	,	,	,	,	,
1476	,	,	,	,	,
1477	,	,	,	,	,
1478	,	,	,	,	,
1479	,	,	,	,	,
1480	,	,	,	,	,
1481	,	,	,	,	,
1482	,	,	,	,	,
1483	,	,	,	,	,
1484	,	,	,	,	,
1485	,	,	,	,	,
1486	,	,	,	,	,
1487	,	,	,	,	,
1488	,	,	,	,	,
1489	,	,	,	,	,
1490	,	,	,	,	,
1491	,	,	,	,	,
1492	,	,	,	,	,
1493	,	,	,	,	,
1494	,	,	,	,	,
1495	,	,	,	,	,
1496	,	,	,	,	,
1497	,	,	,	,	,
1498	,	,	,	,	,
1499	,	,	,	,	,
1500	,	,	,	,	,
1501	,	,	,	,	,
1502	,	,	,	,	,
1503	,	,	,	,	,
1504	,	,	,	,	,
1505	,	,	,	,	,
1506	,	,	,	,	,
1507	,	,	,	,	,
1508	,	,	,	,	,
1509	,	,	,	,	,
1510	,	,	,	,	,
1511	,	,	,	,	,
1512	,	,	,	,	,
1513	,	,	,	,	,
1514	,	,	,	,	,
1515	,	,	,	,	,
1516	,	,	,	,	,
1517	,	,	,	,	,
1518	,	,	,	,	,
1519	,	,	,	,	,
1520	,	,	,	,	,
1521	,	,	,	,	,
1522	,	,	,	,	,
1523	,	,	,	,	,
1524	,	,	,	,	,
1525	,	,	,	,	,
1526	,	,	,	,	,
1527	,	,	,	,	,
1528	,	,	,	,	,
1529	,	,	,	,	,
1530	,	,	,	,	,
1531	,	,	,	,	,
1532	,	,	,	,	,
1533	,	,	,	,	,
1534	,	,	,	,	,
1535	,	,	,	,	,
1536	,	,	,	,	,
1537	,	,	,	,	,
1538	,	,	,	,	,
1539	,	,	,	,	,
1540	,	,	,	,	,
1541	,	,	,	,	,
1542	,	,	,	,	,
1543	,	,	,	,	,
1544	,	,	,	,	,
1545	,	,	,	,	,
1546	,	,	,	,	,
1547	,	,	,	,	,
1548	,	,	,	,	,
1549	,	,	,	,	,
1550	,	,	,	,	,
1551	,	,	,	,	,
1552	,	,	,	,	,
1553	,	,	,	,	,
1554	,	,	,	,	,
1555	,	,	,	,	,
1556	,	,	,	,	,
1557	,	,	,	,	,
1558	,	,	,	,	,
1559	,	,	,	,	,
1560	,	,	,	,	,
1561	,	,	,	,	,
1562	,	,	,	,	,
1563	,	,	,	,	,
1564	,	,	,	,	,
1565	,	,	,	,	,
1566	,	,	,	,	,
1567	,	,	,	,	,
1568	,	,	,	,	,
1569	,	,	,	,	,
1570	,	,	,	,	,
1571	,	,	,	,	,
1572	,	,	,	,	,
1573	,	,	,	,	,
1574	,	,	,	,	,
1575	,	,	,	,	,
1576	,	,	,	,	,
1577	,	,	,	,	,
1578	,	,	,	,	,
1579	,	,	,	,	,
1580	,	,	,	,	,
1581	,	,	,	,	,
1582	,	,	,	,	,
1583	,	,	,	,	,
1584	,	,	,	,	,
1585	,	,	,	,	,
1586	,	,	,	,	,
1587	,	,	,	,	,
1588	,	,	,	,	,
1589	,	,	,	,	,
1590	,	,	,	,	,
1591	,	,	,	,	,
1592	,	,	,	,	,
1593	,	,	,	,	,
1594	,	,	,	,	,
1595	,	,	,	,	,
1596	,	,	,	,	,
1597	,	,	,	,	,
1598	,	,	,	,	,
1599	,	,	,	,	,
1600	,	,	,	,	,
1601	,	,	,	,	,
1602	,	,	,	,	,
1603	,	,	,	,	,
1604	,	,	,	,	,
1605	,	,	,	,	,
1606	,	,	,	,	,
1607	,	,	,	,	,
1608	,	,	,	,	,
1609	,	,	,	,	,
1610	,	,	,	,	,
1611	,	,	,	,	,
1612	,	,	,	,	,
1613	,	,	,	,	,
1614	,	,	,	,	,
1615	,	,	,	,	,
1616	,	,	,	,	,
1617	,	,	,	,	,
1618	,	,	,	,	,
1619	,	,	,	,	,
1620	,	,	,	,	,
1621	,	,	,	,	,
1622	,	,	,	,	,
1623	,	,	,	,	,
1624	,	,	,	,	,
1625	,	,	,	,	,
1626	,	,	,	,	,
1627	,	,	,	,	,
1628	,	,	,	,	,
1629	,	,	,	,	,
1630	,	,	,	,	,
1631	,	,	,	,	,
1632	,	,	,	,	,
1633	,	,	,	,	,
1634	,	,	,	,	,
1635	,	,	,	,	,
1636	,	,	,	,	,
1637	,	,	,	,	,
1638	,	,	,	,	,
1639	,	,	,	,	,
1640	,	,	,	,	,
1641	,	,	,	,	,
1642	,	,	,	,	,
1643	,	,	,	,	,
1644	,	,	,	,	,
1645	,	,	,	,	,
1646	,	,	,	,	,
1647	,	,	,	,	,
1648	,	,	,	,	,
1649	,	,	,	,	,
1650	,	,	,	,	,
1651	,	,	,	,	,
1652	,	,	,	,	,
1653	,	,	,	,	,
1654	,	,	,	,	,
1655	,	,	,	,	,
1656	,	,	,	,	,
1657	,	,	,	,	,
1658	,	,	,	,	,
1659	,	,	,	,	,
1660	,	,	,	,	,
1661	,	,	,	,	,
1662	,	,	,	,	,
1663	,	,	,	,	,
1664	,	,	,	,	,
1665	,	,	,	,	,
1666	,	,	,	,	,
1667	,	,	,	,	,
1668	,	,	,	,	,
1669	,	,	,	,	,
1670	,	,	,	,	,
1671	,	,	,	,	,
1672	,	,	,	,	,
1673	,	,	,	,	,
1674	,	,	,	,	,
1675	,	,	,	,	,
1676	,	,	,	,	,
1677	,	,	,	,	,
1678	,	,	,	,	,
1679	,	,	,	,	,
1680	,	,	,	,	,
1681	,	,	,	,	,
1682	,	,	,	,	,
1683	,	,	,	,	,
1684	,	,	,	,	,
1685	,	,	,	,	,
1686	,	,	,	,	,
1687	,	,	,	,	,
1688	,	,	,	,	,
1689	,	,	,	,	,
1690	,	,	,	,	,
1691	,	,	,	,	,
1692	,	,	,	,	,
1693	,	,	,	,	,
1694	,	,	,	,	,
1695	,	,	,	,	,
1696	,	,	,	,	,
1697	,	,	,	,	,
1698	,	,	,	,	,
1699	,	,	,	,	,
1700	,	,	,	,	,
1701	,	,	,	,	,
1702	,	,	,	,	,
1703	,	,	,	,	,
1704	,	,	,	,	,
1705	,	,	,	,	,
1706	,	,	,	,	,
1707	,	,	,	,	,
1708	,	,	,	,	,
1709	,	,	,	,	,
1710	,	,	,	,	,
1711	,	,	,	,	,
1712	,	,	,	,	,
1713	,	,	,	,	,
1714	,	,	,	,	,
1715	,	,	,	,	,
1716	,	,	,	,	,
1717	,	,	,	,	,
1718	,	,	,	,	,
1719	,	,	,	,	,
1720	,	,	,	,	,
1721	,	,	,	,	,
1722	,	,	,	,	,
1723	,	,	,	,	,
1724	,	,	,	,	,
1725	,	,	,	,	,
1726	,	,	,	,	,
1727	,	,	,	,	,
1728	,	,	,	,	,
1729	,	,	,	,	,
1730	,	,	,	,	,
1731	,	,	,	,	,
1732	,	,	,	,	,
1733	,	,	,	,	,
1734	,	,	,	,	,
1735	,	,	,	,	,
1736	,	,	,	,	,
1737	,	,	,	,	,
1738	,	,	,	,	,
1739	,	,	,	,	,
1740	,	,	,	,	,
1741	,	,	,	,	,
1742	,	,	,	,	,
1743	,	,	,	,	,
1744	,	,	,	,	,
1745	,	,	,	,	,
1746	,	,	,	,	,
1747	,	,	,	,	,
1748	,	,	,	,	,
1749	,	,	,	,	,
1750	,	,	,	,	,
1751	,	,	,	,	,
1752	,	,	,	,	,
1753	,	,	,	,	,
1754	,	,	,	,	,
1755	,	,	,	,	,
1756	,	,	,	,	,
1757	,	,	,	,	,
1758	,	,	,	,	,
1759	,	,	,	,	,
1760	,	,	,	,	,
1761	,	,	,	,	,
1762	,	,	,	,	,
1763	,	,	,	,	,
1764	,	,	,	,	,
1765	,	,	,	,	,
1766	,	,	,	,	,
1767	,	,	,	,	,
1768	,	,	,	,	,
1769	,	,	,	,	,
1770	,	,	,	,	,
1771	,	,	,	,	,
1772	,	,	,	,	,
1773	,	,	,	,	,
1774	,	,	,	,	,
1775	,	,	,	,	,
1776	,	,	,	,	,
1777	,	,	,	,	,
1778	,	,	,	,	,
1779	,	,	,	,	,
1780	,	,	,	,	,
1781	,	,	,	,	,
1782	,	,	,	,	,
1783	,	,	,	,	,
1784	,	,	,	,	,
1785	,	,	,	,	,
1786	,	,	,	,	,
1787	,	,	,	,	,
1788	,	,	,	,	,
1789	,	,	,	,	,
1790	,	,	,	,	,
1791	,	,	,	,	,
1792	,	,	,	,	,
1793	,	,	,	,	,
1794	,	,	,	,	,
1795	,	,	,	,	,
1796	,	,	,	,	,
1797	,	,	,	,	,
1798	,	,	,	,	,
1799	,	,	,	,	,
1800	,	,	,	,	,
1801	,	,	,	,	,
1802	,	,	,	,	,
1803	,	,	,	,	,
1804	,	,	,	,	,
1805	,	,	,	,	,
1806	,	,	,	,	,
1807	,	,	,	,	,
1808	,	,	,	,	,
1809	,	,	,	,	,
1810	,	,	,	,	,
1811	,	,	,	,	,
1812	,	,	,	,	,
1813	,	,	,	,	,
1814	,	,	,	,	,
1815	,	,	,	,	,
1816	,	,	,	,	,
1817	,	,	,	,	,
1818	,	,	,	,	,
1819	,	,	,	,	,
1820	,	,	,	,	,
1821	,	,	,	,	,
1822	,	,	,	,	,
1823	,	,	,	,	,
1824	,	,	,	,	,
1825	,	,	,	,	,
1826	,	,	,	,	,
1827	,	,	,	,	,
1828	,	,	,	,	,
1829	,	,	,	,	,
1830	,	,	,	,	,
1831	,	,	,	,	,
1832	,	,	,	,	,
1833	,	,	,	,	,
1834	,	,	,	,	,
1835	,	,	,	,	,
1836	,	,	,	,	,
1837	,	,	,	,	,
1838	,	,	,	,	,
1839	,	,	,	,	,
1840	,	,	,	,	,
1841	,	,	,	,	,
1842	,	,	,	,	,
1843	,	,	,	,	,
1844	,	,	,	,	,
1845	,	,	,	,	,
1846	,	,	,	,	,
1847	,	,	,	,	,
1848	,	,	,	,	,
1849	,	,	,	,	,
1850	,	,	,	,	,
1851	,	,	,	,	,
1852	,	,	,	,	,
1853	,	,	,	,	,
1854	,	,	,	,	,
1855	,	,	,	,	,
1856	,	,	,	,	,
1857	,	,	,	,	,
1858	,	,	,	,	,
1859	,	,	,	,	,
1860	,	,	,	,	,
1861	,	,	,	,	,
1862	,	,	,	,	,
1863	,	,	,	,	,
1864	,	,	,	,	,
1865	,	,	,	,	,
1866	,	,	,	,	,
1867	,	,	,	,	,
1868	,	,	,	,	,
1869	,	,	,	,	,
1870	,	,	,	,	,
1871	,	,	,	,	,
1872	,	,	,	,	,
1873	,	,	,	,	,
1874	,	,	,	,	,
1875	,	,	,	,	,
1876	,	,	,	,	,
1877	,	,	,	,	,
1878	,	,	,	,	,
1879	,	,	,	,	,
1880	,	,	,	,	,
1881	,	,	,	,	,
1882	,	,	,	,	,
1883	,	,	,	,	,
1884	,	,	,	,	,
1885	,	,	,	,	,
1886	,	,	,	,	,
1887	,	,	,	,	,
1888	,	,	,	,	,
1889	,	,	,	,	,
1890	,	,	,	,	,
1891	,	,	,	,	,
1892	,	,	,	,	,
1893	,	,	,	,	,
1894	,	,	,	,	,
1895	,	,	,	,	,
1896	,	,	,	,	,
1897	,	,	,	,	,
1898	,	,	,	,	,
1899	,	,	,	,	,
1900	,	,	,	,	,
1901	,	,	,	,	,
1902	,	,	,	,	,
1903	,	,	,	,	,
1904	,	,	,	,	,
1905	,	,	,	,	,
1906	,	,	,	,	,
1907	,	,	,	,	,
1908	,	,	,	,	,
1909	,	,	,	,	,
1910	,	,	,	,	,
1911	,	,	,	,	,
1912	,	,	,	,	,
1913	,	,	,	,	,
1914	,	,	,	,	,
1915	,	,	,	,	,
1916	,	,	,	,	,
1917	,	,	,	,	,
1918	,	,	,	,	,
1919	,	,	,	,	,
1920	,	,	,	,	,
1921	,	,	,	,	,
1922	,	,	,	,	,
1923	,	,	,	,	,
1924	,	,	,	,	,
1925	,	,	,	,	,
1926	,	,	,	,	,
1927	,	,	,	,	,
1928	,	,	,	,	,
1929	,	,	,	,	,
1930	,	,	,	,	,
1931	,	,	,	,	,
1932	,	,	,	,	,
1933	,	,	,	,	,
1934	,	,	,	,	,
1935	,	,	,	,	,
1936	,	,	,	,	,
1937	,	,	,	,	,
1938	,	,	,	,	,
1939	,	,	,	,	,
1940	,	,	,	,	,
1941	,	,	,	,	,
1942	,	,	,	,	,
1943	,	,	,	,	,
1944	,	,	,	,	,
1945	,	,	,	,	,
1946	,	,	,	,	,
1947	,	,	,	,	,
1948	,	,	,	,	,
1949	,	,	,	,	,
1950	,	,	,	,	,
1951	,	,	,	,	,
1952	,	,	,	,	,
1953	,	,	,	,	,
1954	,	,	,	,	,
1955	,	,	,	,	,
1956	,	,	,	,	,
1957	,	,	,	,	,
1958	,	,	,	,	,
1959	,	,	,	,	,
1960	,	,	,	,	,
1961	,	,	,	,	,
1962	,	,	,	,	,
1963	,	,	,	,	,
1964	,	,	,	,	,
1965	,	,	,	,	,
1966	,	,	,	,	,
1967	,	,	,	,	,
1968	,	,	,	,	,
1969	,	,	,	,	,
1970	,	,	,	,	,
1971	,	,	,	,	,
1972	,	,	,	,	,
1973	,	,	,	,	,
1974	,	,	,	,	,
1975	,	,	,	,	,
1976	,	,	,	,	,
1977	,	,	,	,	,
1978	,	,	,	,	,
1979	,	,	,	,	,
1980	,	,	,	,	,
1981	,	,	,	,	,
1982	,	,	,	,	,
1983	,	,	,	,	,
1984	,	,	,	,	,
1985	,	,	,	,	,
1986	,	,	,	,	,
1987	,	,	,	,	,
1988	,	,	,	,	,
1989	,	,	,	,	,
1990	,	,	,	,	,
1991	,	,	,	,	,
1992	,	,	,	,	,
1993	,	,	,	,	,
1994	,	,	,	,	,
1995	,	,	,	,	,
1996	,	,	,	,	,
1997	,	,	,	,	,
1998	,	,	,	,	,
1999	,	,	,	,	,
[truncated: 13,001 more rows]

## Sheet: Fig1_panelC_rep3
	tetO28 TetR no NTP	tetO28 TetR ATP	tetO28 TetR CTP	tetO28 TetR GTP	tetO28 TetR UTP
1	0.000, 0.064	0.000, 0.026	0.000, 0.038	0.000, 0.055	0.000, 0.027
2	0.200, 0.064	0.200, 0.026	0.200, 0.038	0.200, 0.054	0.200, 0.027
3	0.400, 0.063	0.400, 0.026	0.400, 0.038	0.400, 0.054	0.400, 0.026
4	0.600, 0.062	0.600, 0.026	0.600, 0.038	0.600, 0.053	0.600, 0.026
5	0.800, 0.061	0.800, 0.026	0.800, 0.037	0.800, 0.052	0.800, 0.025
6	1.000, 0.060	1.000, 0.026	1.000, 0.037	1.000, 0.051	1.000, 0.024
7	1.200, 0.059	1.200, 0.026	1.200, 0.037	1.200, 0.050	1.200, 0.024
8	1.400, 0.058	1.400, 0.026	1.400, 0.036	1.400, 0.049	1.400, 0.023
9	1.600, 0.057	1.600, 0.026	1.600, 0.036	1.600, 0.048	1.600, 0.022
10	1.800, 0.056	1.800, 0.026	1.800, 0.035	1.800, 0.047	1.800, 0.022
11	2.000, 0.055	2.000, 0.025	2.000, 0.035	2.000, 0.046	2.000, 0.021
12	2.200, 0.054	2.200, 0.025	2.200, 0.034	2.200, 0.045	2.200, 0.021
13	2.400, 0.053	2.400, 0.024	2.400, 0.033	2.400, 0.044	2.400, 0.020
14	2.600, 0.052	2.600, 0.024	2.600, 0.032	2.600, 0.043	2.600, 0.020
15	2.800, 0.051	2.800, 0.023	2.800, 0.031	2.800, 0.042	2.800, 0.020
16	3.000, 0.050	3.000, 0.023	3.000, 0.030	3.000, 0.041	3.000, 0.019
17	3.200, 0.049	3.200, 0.022	3.200, 0.030	3.200, 0.041	3.200, 0.019
18	3.400, 0.048	3.400, 0.022	3.400, 0.029	3.400, 0.040	3.400, 0.018
19	3.600, 0.048	3.600, 0.022	3.600, 0.028	3.600, 0.040	3.600, 0.018
20	3.800, 0.047	3.800, 0.022	3.800, 0.028	3.800, 0.039	3.800, 0.017
21	4.000, 0.047	4.000, 0.022	4.000, 0.027	4.000, 0.038	4.000, 0.017
22	4.200, 0.046	4.200, 0.021	4.200, 0.027	4.200, 0.038	4.200, 0.017
23	4.400, 0.046	4.400, 0.021	4.400, 0.026	4.400, 0.037	4.400, 0.016
24	4.600, 0.045	4.600, 0.021	4.600, 0.026	4.600, 0.036	4.600, 0.016
25	4.800, 0.045	4.800, 0.021	4.800, 0.026	4.800, 0.035	4.800, 0.015
26	5.000, 0.044	5.000, 0.021	5.000, 0.025	5.000, 0.035	5.000, 0.015
27	5.200, 0.044	5.200, 0.021	5.200, 0.025	5.200, 0.034	5.200, 0.014
28	5.400, 0.043	5.400, 0.021	5.400, 0.024	5.400, 0.033	5.400, 0.014
29	5.600, 0.042	5.600, 0.021	5.600, 0.024	5.600, 0.033	5.600, 0.013
30	5.800, 0.042	5.800, 0.021	5.800, 0.024	5.800, 0.032	5.800, 0.013
31	6.000, 0.041	6.000, 0.020	6.000, 0.023	6.000, 0.032	6.000, 0.012
32	6.200, 0.041	6.200, 0.020	6.200, 0.022	6.200, 0.031	6.200, 0.012
33	6.400, 0.040	6.400, 0.020	6.400, 0.021	6.400, 0.030	6.400, 0.011
34	6.600, 0.040	6.600, 0.019	6.600, 0.021	6.600, 0.030	6.600, 0.011
35	6.800, 0.039	6.800, 0.019	6.800, 0.020	6.800, 0.029	6.800, 0.011
36	7.000, 0.038	7.000, 0.019	7.000, 0.020	7.000, 0.029	7.000, 0.011
37	7.200, 0.037	7.200, 0.018	7.200, 0.020	7.200, 0.028	7.200, 0.011
38	7.400, 0.037	7.400, 0.018	7.400, 0.019	7.400, 0.027	7.400, 0.011
39	7.600, 0.036	7.600, 0.018	7.600, 0.019	7.600, 0.027	7.600, 0.010
40	7.800, 0.036	7.800, 0.018	7.800, 0.019	7.800, 0.026	7.800, 0.010
41	8.000, 0.035	8.000, 0.018	8.000, 0.018	8.000, 0.026	8.000, 0.010
42	8.200, 0.035	8.200, 0.017	8.200, 0.018	8.200, 0.025	8.200, 0.010
43	8.400, 0.034	8.400, 0.017	8.400, 0.018	8.400, 0.025	8.400, 0.009
44	8.600, 0.034	8.600, 0.017	8.600, 0.017	8.600, 0.024	8.600, 0.009
45	8.800, 0.034	8.800, 0.017	8.800, 0.017	8.800, 0.024	8.800, 0.009
46	9.000, 0.034	9.000, 0.017	9.000, 0.016	9.000, 0.023	9.000, 0.008
47	9.200, 0.033	9.200, 0.017	9.200, 0.016	9.200, 0.023	9.200, 0.008
48	9.400, 0.033	9.400, 0.017	9.400, 0.015	9.400, 0.022	9.400, 0.008
49	9.600, 0.033	9.600, 0.016	9.600, 0.015	9.600, 0.022	9.600, 0.008
50	9.800, 0.033	9.800, 0.016	9.800, 0.014	9.800, 0.021	9.800, 0.008
51	10.000, 0.032	10.000, 0.016	10.000, 0.014	10.000, 0.021	10.000, 0.007
52	10.200, 0.032	10.200, 0.015	10.200, 0.013	10.200, 0.020	10.200, 0.007
53	10.400, 0.031	10.400, 0.015	10.400, 0.013	10.400, 0.020	10.400, 0.007
54	10.600, 0.031	10.600, 0.015	10.600, 0.013	10.600, 0.020	10.600, 0.007
55	10.800, 0.030	10.800, 0.015	10.800, 0.012	10.800, 0.019	10.800, 0.006
56	11.000, 0.029	11.000, 0.014	11.000, 0.012	11.000, 0.019	11.000, 0.006
57	11.200, 0.028	11.200, 0.014	11.200, 0.012	11.200, 0.019	11.200, 0.006
58	11.400, 0.027	11.400, 0.014	11.400, 0.012	11.400, 0.019	11.400, 0.005
59	11.600, 0.027	11.600, 0.014	11.600, 0.012	11.600, 0.018	11.600, 0.005
60	11.800, 0.026	11.800, 0.014	11.800, 0.012	11.800, 0.018	11.800, 0.005
61	12.000, 0.026	12.000, 0.014	12.000, 0.011	12.000, 0.018	12.000, 0.004
62	12.200, 0.025	12.200, 0.014	12.200, 0.011	12.200, 0.018	12.200, 0.004
63	12.400, 0.025	12.400, 0.014	12.400, 0.011	12.400, 0.018	12.400, 0.004
64	12.600, 0.025	12.600, 0.014	12.600, 0.011	12.600, 0.018	12.600, 0.004
65	12.800, 0.025	12.800, 0.014	12.800, 0.011	12.800, 0.017	12.800, 0.004
66	13.000, 0.025	13.000, 0.014	13.000, 0.011	13.000, 0.017	13.000, 0.004
67	13.200, 0.024	13.200, 0.014	13.200, 0.011	13.200, 0.017	13.200, 0.005
68	13.400, 0.024	13.400, 0.014	13.400, 0.011	13.400, 0.016	13.400, 0.005
69	13.600, 0.024	13.600, 0.014	13.600, 0.011	13.600, 0.016	13.600, 0.005
70	13.800, 0.024	13.800, 0.013	13.800, 0.011	13.800, 0.016	13.800, 0.005
71	14.000, 0.024	14.000, 0.013	14.000, 0.011	14.000, 0.016	14.000, 0.005
72	14.200, 0.023	14.200, 0.012	14.200, 0.011	14.200, 0.015	14.200, 0.005
73	14.400, 0.023	14.400, 0.012	14.400, 0.011	14.400, 0.015	14.400, 0.005
74	14.600, 0.022	14.600, 0.012	14.600, 0.011	14.600, 0.015	14.600, 0.005
75	14.800, 0.021	14.800, 0.012	14.800, 0.011	14.800, 0.014	14.800, 0.005
76	15.000, 0.021	15.000, 0.012	15.000, 0.011	15.000, 0.014	15.000, 0.005
77	15.200, 0.020	15.200, 0.011	15.200, 0.010	15.200, 0.013	15.200, 0.004
78	15.400, 0.020	15.400, 0.011	15.400, 0.010	15.400, 0.013	15.400, 0.004
79	15.600, 0.019	15.600, 0.011	15.600, 0.010	15.600, 0.012	15.600, 0.004
80	15.800, 0.019	15.800, 0.011	15.800, 0.009	15.800, 0.012	15.800, 0.003
81	16.000, 0.018	16.000, 0.011	16.000, 0.009	16.000, 0.012	16.000, 0.003
82	16.200, 0.018	16.200, 0.011	16.200, 0.008	16.200, 0.012	16.200, 0.003
83	16.400, 0.018	16.400, 0.011	16.400, 0.008	16.400, 0.011	16.400, 0.003
84	16.600, 0.017	16.600, 0.011	16.600, 0.007	16.600, 0.011	16.600, 0.003
85	16.800, 0.017	16.800, 0.011	16.800, 0.007	16.800, 0.011	16.800, 0.003
86	17.000, 0.017	17.000, 0.011	17.000, 0.007	17.000, 0.010	17.000, 0.003
87	17.200, 0.017	17.200, 0.010	17.200, 0.007	17.200, 0.010	17.200, 0.003
88	17.400, 0.016	17.400, 0.010	17.400, 0.006	17.400, 0.010	17.400, 0.002
89	17.600, 0.016	17.600, 0.010	17.600, 0.006	17.600, 0.010	17.600, 0.002
90	17.800, 0.016	17.800, 0.009	17.800, 0.006	17.800, 0.010	17.800, 0.003
91	18.000, 0.016	18.000, 0.009	18.000, 0.006	18.000, 0.009	18.000, 0.003
92	18.200, 0.015	18.200, 0.008	18.200, 0.006	18.200, 0.009	18.200, 0.003
93	18.400, 0.015	18.400, 0.008	18.400, 0.006	18.400, 0.009	18.400, 0.003
94	18.600, 0.014	18.600, 0.008	18.600, 0.006	18.600, 0.008	18.600, 0.003
95	18.800, 0.014	18.800, 0.007	18.800, 0.006	18.800, 0.008	18.800, 0.003
96	19.000, 0.014	19.000, 0.007	19.000, 0.006	19.000, 0.008	19.000, 0.002
97	19.200, 0.014	19.200, 0.007	19.200, 0.005	19.200, 0.008	19.200, 0.002
98	19.400, 0.013	19.400, 0.006	19.400, 0.005	19.400, 0.007	19.400, 0.002
99	19.600, 0.013	19.600, 0.006	19.600, 0.005	19.600, 0.007	19.600, 0.002
100	19.800, 0.013	19.800, 0.006	19.800, 0.006	19.800, 0.007	19.800, 0.001
101	20.000, 0.013	20.000, 0.006	20.000, 0.006	20.000, 0.007	20.000, 0.002
102	20.200, 0.012	20.200, 0.006	20.200, 0.006	20.200, 0.007	20.200, 0.002
103	20.400, 0.012	20.400, 0.006	20.400, 0.006	20.400, 0.007	20.400, 0.002
104	20.600, 0.012	20.600, 0.006	20.600, 0.006	20.600, 0.007	20.600, 0.002
105	20.800, 0.011	20.800, 0.006	20.800, 0.006	20.800, 0.007	20.800, 0.002
106	21.000, 0.011	21.000, 0.006	21.000, 0.006	21.000, 0.007	21.000, 0.002
107	21.200, 0.010	21.200, 0.006	21.200, 0.006	21.200, 0.007	21.200, 0.002
108	21.400, 0.010	21.400, 0.006	21.400, 0.006	21.400, 0.007	21.400, 0.002
109	21.600, 0.009	21.600, 0.006	21.600, 0.006	21.600, 0.007	21.600, 0.002
110	21.800, 0.009	21.800, 0.006	21.800, 0.005	21.800, 0.007	21.800, 0.002
111	22.000, 0.009	22.000, 0.006	22.000, 0.005	22.000, 0.006	22.000, 0.002
112	22.200, 0.009	22.200, 0.006	22.200, 0.005	22.200, 0.006	22.200, 0.002
113	22.400, 0.008	22.400, 0.006	22.400, 0.005	22.400, 0.005	22.400, 0.002
114	22.600, 0.008	22.600, 0.006	22.600, 0.004	22.600, 0.005	22.600, 0.002
115	22.800, 0.008	22.800, 0.005	22.800, 0.004	22.800, 0.005	22.800, 0.001
116	23.000, 0.007	23.000, 0.005	23.000, 0.003	23.000, 0.004	23.000, 0.001
117	23.200, 0.007	23.200, 0.005	23.200, 0.003	23.200, 0.004	23.200, 0.000
118	23.400, 0.007	23.400, 0.005	23.400, 0.002	23.400, 0.004	23.400, 0.000
119	23.600, 0.007	23.600, 0.004	23.600, 0.002	23.600, 0.004	23.600, -0.000
120	23.800, 0.006	23.800, 0.004	23.800, 0.002	23.800, 0.004	23.800, -0.000
121	24.000, 0.006	24.000, 0.004	24.000, 0.001	24.000, 0.004	24.000, -0.000
122	24.200, 0.006	24.200, 0.004	24.200, 0.001	24.200, 0.004	24.200, -0.000
123	24.400, 0.006	24.400, 0.004	24.400, 0.001	24.400, 0.004	24.400, -0.000
124	24.600, 0.005	24.600, 0.004	24.600, 0.001	24.600, 0.004	24.600, -0.000
125	24.800, 0.005	24.800, 0.004	24.800, 0.001	24.800, 0.004	24.800, -0.000
126	25.000, 0.005	25.000, 0.004	25.000, 0.001	25.000, 0.004	25.000, -0.000
127	25.200, 0.004	25.200, 0.003	25.200, 0.001	25.200, 0.004	25.200, -0.000
128	25.400, 0.004	25.400, 0.003	25.400, 0.001	25.400, 0.003	25.400, -0.000
129	25.600, 0.004	25.600, 0.003	25.600, 0.001	25.600, 0.003	25.600, -0.000
130	25.800, 0.004	25.800, 0.003	25.800, 0.001	25.800, 0.003	25.800, -0.000
131	26.000, 0.004	26.000, 0.003	26.000, 0.001	26.000, 0.003	26.000, -0.000
132	26.200, 0.003	26.200, 0.003	26.200, 0.001	26.200, 0.003	26.200, -0.000
133	26.400, 0.003	26.400, 0.003	26.400, 0.001	26.400, 0.002	26.400, 0.000
134	26.600, 0.003	26.600, 0.003	26.600, 0.001	26.600, 0.002	26.600, 0.000
135	26.800, 0.002	26.800, 0.002	26.800, 0.001	26.800, 0.001	26.800, 0.000
136	27.000, 0.002	27.000, 0.002	27.000, 0.001	27.000, 0.001	27.000, 0.000
137	27.200, 0.002	27.200, 0.002	27.200, 0.001	27.200, 0.001	27.200, 0.000
138	27.400, 0.002	27.400, 0.001	27.400, 0.001	27.400, 0.001	27.400, 0.001
139	27.600, 0.001	27.600, 0.001	27.600, 0.000	27.600, 0.001	27.600, 0.001
140	27.800, 0.001	27.800, 0.001	27.800, 0.000	27.800, 0.001	27.800, 0.001
141	28.000, 0.001	28.000, 0.000	28.000, -0.000	28.000, 0.000	28.000, 0.001
142	28.200, 0.000	28.200, -0.000	28.200, -0.000	28.200, 0.000	28.200, 0.001
143	28.400, -0.000	28.400, -0.000	28.400, -0.000	28.400, -0.000	28.400, 0.001
144	28.600, -0.000	28.600, -0.001	28.600, -0.000	28.600, -0.000	28.600, 0.000
145	28.800, -0.001	28.800, -0.001	28.800, -0.000	28.800, -0.000	28.800, 0.000
146	29.000, -0.001	29.000, -0.001	29.000, -0.000	29.000, -0.001	29.000, -0.000
147	29.200, -0.001	29.200, -0.001	29.200, -0.000	29.200, -0.001	29.200, -0.001
148	29.400, -0.001	29.400, -0.001	29.400, -0.000	29.400, -0.001	29.400, -0.001
149	29.600, -0.002	29.600, -0.001	29.600, -0.000	29.600, -0.001	29.600, -0.001
150	29.800, -0.002	29.800, -0.001	29.800, -0.000	29.800, -0.001	29.800, -0.002
151	30.000, 0.000	30.000, 0.000	30.000, 0.000	30.000, 0.000	30.000, 0.000
152	30.200, 0.007	30.200, 0.008	30.200, 0.008	30.200, 0.006	30.200, 0.009
153	30.400, 0.016	30.400, 0.018	30.400, 0.018	30.400, 0.012	30.400, 0.020
154	30.600, 0.027	30.600, 0.030	30.600, 0.030	30.600, 0.021	30.600, 0.033
155	30.800, 0.039	30.800, 0.043	30.800, 0.044	30.800, 0.031	30.800, 0.047
156	31.000, 0.053	31.000, 0.058	31.000, 0.060	31.000, 0.042	31.000, 0.064
157	31.200, 0.067	31.200, 0.075	31.200, 0.077	31.200, 0.055	31.200, 0.082
158	31.400, 0.083	31.400, 0.093	31.400, 0.095	31.400, 0.068	31.400, 0.100
159	31.600, 0.100	31.600, 0.111	31.600, 0.114	31.600, 0.083	31.600, 0.120
160	31.800, 0.117	31.800, 0.130	31.800, 0.134	31.800, 0.098	31.800, 0.140
161	32.000, 0.133	32.000, 0.149	32.000, 0.154	32.000, 0.114	32.000, 0.159
162	32.200, 0.150	32.200, 0.167	32.200, 0.174	32.200, 0.130	32.200, 0.179
163	32.400, 0.166	32.400, 0.184	32.400, 0.192	32.400, 0.146	32.400, 0.198
164	32.600, 0.182	32.600, 0.202	32.600, 0.211	32.600, 0.162	32.600, 0.216
165	32.800, 0.198	32.800, 0.220	32.800, 0.231	32.800, 0.178	32.800, 0.235
166	33.000, 0.215	33.000, 0.237	33.000, 0.250	33.000, 0.194	33.000, 0.253
167	33.200, 0.232	33.200, 0.254	33.200, 0.269	33.200, 0.211	33.200, 0.271
168	33.400, 0.249	33.400, 0.272	33.400, 0.289	33.400, 0.227	33.400, 0.289
169	33.600, 0.266	33.600, 0.290	33.600, 0.308	33.600, 0.243	33.600, 0.308
170	33.800, 0.283	33.800, 0.307	33.800, 0.327	33.800, 0.260	33.800, 0.326
171	34.000, 0.300	34.000, 0.325	34.000, 0.347	34.000, 0.276	34.000, 0.345
172	34.200, 0.317	34.200, 0.343	34.200, 0.366	34.200, 0.293	34.200, 0.364
173	34.400, 0.335	34.400, 0.361	34.400, 0.385	34.400, 0.310	34.400, 0.382
174	34.600, 0.352	34.600, 0.379	34.600, 0.404	34.600, 0.327	34.600, 0.401
175	34.800, 0.369	34.800, 0.398	34.800, 0.423	34.800, 0.343	34.800, 0.420
176	35.000, 0.387	35.000, 0.415	35.000, 0.442	35.000, 0.360	35.000, 0.438
177	35.200, 0.404	35.200, 0.433	35.200, 0.461	35.200, 0.377	35.200, 0.456
178	35.400, 0.422	35.400, 0.451	35.400, 0.480	35.400, 0.394	35.400, 0.474
179	35.600, 0.439	35.600, 0.469	35.600, 0.498	35.600, 0.411	35.600, 0.492
180	35.800, 0.456	35.800, 0.486	35.800, 0.517	35.800, 0.428	35.800, 0.509
181	36.000, 0.473	36.000, 0.503	36.000, 0.535	36.000, 0.444	36.000, 0.527
182	36.200, 0.490	36.200, 0.521	36.200, 0.553	36.200, 0.461	36.200, 0.545
183	36.400, 0.506	36.400, 0.537	36.400, 0.570	36.400, 0.478	36.400, 0.562
184	36.600, 0.523	36.600, 0.554	36.600, 0.588	36.600, 0.494	36.600, 0.579
185	36.800, 0.540	36.800, 0.571	36.800, 0.605	36.800, 0.511	36.800, 0.597
186	37.000, 0.556	37.000, 0.587	37.000, 0.622	37.000, 0.527	37.000, 0.614
187	37.200, 0.573	37.200, 0.604	37.200, 0.639	37.200, 0.544	37.200, 0.631
188	37.400, 0.589	37.400, 0.620	37.400, 0.656	37.400, 0.560	37.400, 0.648
189	37.600, 0.606	37.600, 0.636	37.600, 0.674	37.600, 0.576	37.600, 0.665
190	37.800, 0.622	37.800, 0.653	37.800, 0.691	37.800, 0.593	37.800, 0.682
191	38.000, 0.639	38.000, 0.669	38.000, 0.707	38.000, 0.609	38.000, 0.699
192	38.200, 0.655	38.200, 0.685	38.200, 0.724	38.200, 0.625	38.200, 0.716
193	38.400, 0.672	38.400, 0.701	38.400, 0.741	38.400, 0.641	38.400, 0.732
194	38.600, 0.688	38.600, 0.717	38.600, 0.757	38.600, 0.657	38.600, 0.748
195	38.800, 0.704	38.800, 0.733	38.800, 0.773	38.800, 0.673	38.800, 0.764
196	39.000, 0.720	39.000, 0.748	39.000, 0.789	39.000, 0.689	39.000, 0.780
197	39.200, 0.736	39.200, 0.764	39.200, 0.805	39.200, 0.705	39.200, 0.796
198	39.400, 0.752	39.400, 0.779	39.400, 0.821	39.400, 0.720	39.400, 0.812
199	39.600, 0.767	39.600, 0.794	39.600, 0.836	39.600, 0.735	39.600, 0.827
200	39.800, 0.783	39.800, 0.809	39.800, 0.852	39.800, 0.750	39.800, 0.842
201	40.000, 0.798	40.000, 0.824	40.000, 0.866	40.000, 0.765	40.000, 0.857
202	40.200, 0.813	40.200, 0.838	40.200, 0.881	40.200, 0.779	40.200, 0.871
203	40.400, 0.827	40.400, 0.853	40.400, 0.896	40.400, 0.794	40.400, 0.886
204	40.600, 0.842	40.600, 0.867	40.600, 0.910	40.600, 0.808	40.600, 0.900
205	40.800, 0.856	40.800, 0.881	40.800, 0.924	40.800, 0.822	40.800, 0.915
206	41.000, 0.870	41.000, 0.895	41.000, 0.938	41.000, 0.836	41.000, 0.929
207	41.200, 0.884	41.200, 0.908	41.200, 0.951	41.200, 0.850	41.200, 0.943
208	41.400, 0.898	41.400, 0.922	41.400, 0.965	41.400, 0.864	41.400, 0.956
209	41.600, 0.912	41.600, 0.936	41.600, 0.979	41.600, 0.877	41.600, 0.970
210	41.800, 0.926	41.800, 0.949	41.800, 0.992	41.800, 0.891	41.800, 0.983
211	42.000, 0.939	42.000, 0.962	42.000, 1.005	42.000, 0.905	42.000, 0.995
212	42.200, 0.953	42.200, 0.974	42.200, 1.018	42.200, 0.918	42.200, 1.008
213	42.400, 0.966	42.400, 0.987	42.400, 1.030	42.400, 0.931	42.400, 1.020
214	42.600, 0.979	42.600, 0.999	42.600, 1.043	42.600, 0.943	42.600, 1.032
215	42.800, 0.992	42.800, 1.011	42.800, 1.055	42.800, 0.956	42.800, 1.044
216	43.000, 1.005	43.000, 1.022	43.000, 1.067	43.000, 0.968	43.000, 1.056
217	43.200, 1.018	43.200, 1.034	43.200, 1.079	43.200, 0.980	43.200, 1.067
218	43.400, 1.030	43.400, 1.045	43.400, 1.090	43.400, 0.992	43.400, 1.079
219	43.600, 1.042	43.600, 1.056	43.600, 1.102	43.600, 1.004	43.600, 1.090
220	43.800, 1.054	43.800, 1.067	43.800, 1.113	43.800, 1.016	43.800, 1.100
221	44.000, 1.065	44.000, 1.078	44.000, 1.125	44.000, 1.028	44.000, 1.111
222	44.200, 1.077	44.200, 1.088	44.200, 1.135	44.200, 1.039	44.200, 1.121
223	44.400, 1.088	44.400, 1.099	44.400, 1.146	44.400, 1.050	44.400, 1.131
224	44.600, 1.099	44.600, 1.109	44.600, 1.156	44.600, 1.062	44.600, 1.141
225	44.800, 1.110	44.800, 1.120	44.800, 1.166	44.800, 1.073	44.800, 1.151
226	45.000, 1.121	45.000, 1.130	45.000, 1.176	45.000, 1.084	45.000, 1.161
227	45.200, 1.132	45.200, 1.140	45.200, 1.186	45.200, 1.094	45.200, 1.170
228	45.400, 1.142	45.400, 1.150	45.400, 1.196	45.400, 1.105	45.400, 1.179
229	45.600, 1.153	45.600, 1.160	45.600, 1.206	45.600, 1.116	45.600, 1.189
230	45.800, 1.163	45.800, 1.169	45.800, 1.215	45.800, 1.126	45.800, 1.198
231	46.000, 1.174	46.000, 1.179	46.000, 1.224	46.000, 1.136	46.000, 1.207
232	46.200, 1.184	46.200, 1.188	46.200, 1.233	46.200, 1.145	46.200, 1.216
233	46.400, 1.194	46.400, 1.197	46.400, 1.242	46.400, 1.155	46.400, 1.225
234	46.600, 1.203	46.600, 1.206	46.600, 1.251	46.600, 1.164	46.600, 1.234
235	46.800, 1.213	46.800, 1.215	46.800, 1.260	46.800, 1.173	46.800, 1.243
236	47.000, 1.222	47.000, 1.223	47.000, 1.268	47.000, 1.182	47.000, 1.251
237	47.200, 1.231	47.200, 1.231	47.200, 1.277	47.200, 1.192	47.200, 1.260
238	47.400, 1.240	47.400, 1.239	47.400, 1.285	47.400, 1.200	47.400, 1.268
239	47.600, 1.248	47.600, 1.247	47.600, 1.293	47.600, 1.209	47.600, 1.276
240	47.800, 1.257	47.800, 1.255	47.800, 1.301	47.800, 1.218	47.800, 1.284
241	48.000, 1.266	48.000, 1.263	48.000, 1.309	48.000, 1.227	48.000, 1.292
242	48.200, 1.274	48.200, 1.270	48.200, 1.316	48.200, 1.235	48.200, 1.300
243	48.400, 1.283	48.400, 1.278	48.400, 1.324	48.400, 1.244	48.400, 1.308
244	48.600, 1.291	48.600, 1.285	48.600, 1.331	48.600, 1.252	48.600, 1.315
245	48.800, 1.299	48.800, 1.292	48.800, 1.338	48.800, 1.260	48.800, 1.323
246	49.000, 1.307	49.000, 1.299	49.000, 1.345	49.000, 1.268	49.000, 1.330
247	49.200, 1.315	49.200, 1.306	49.200, 1.352	49.200, 1.275	49.200, 1.337
248	49.400, 1.323	49.400, 1.313	49.400, 1.358	49.400, 1.283	49.400, 1.344
249	49.600, 1.331	49.600, 1.320	49.600, 1.365	49.600, 1.291	49.600, 1.351
250	49.800, 1.338	49.800, 1.327	49.800, 1.372	49.800, 1.298	49.800, 1.357
251	50.000, 1.346	50.000, 1.334	50.000, 1.378	50.000, 1.306	50.000, 1.364
252	50.200, 1.353	50.200, 1.341	50.200, 1.385	50.200, 1.313	50.200, 1.370
253	50.400, 1.360	50.400, 1.348	50.400, 1.391	50.400, 1.320	50.400, 1.376
254	50.600, 1.367	50.600, 1.354	50.600, 1.398	50.600, 1.327	50.600, 1.382
255	50.800, 1.373	50.800, 1.361	50.800, 1.404	50.800, 1.334	50.800, 1.388
256	51.000, 1.379	51.000, 1.367	51.000, 1.410	51.000, 1.341	51.000, 1.394
257	51.200, 1.386	51.200, 1.373	51.200, 1.416	51.200, 1.348	51.200, 1.400
258	51.400, 1.392	51.400, 1.379	51.400, 1.422	51.400, 1.355	51.400, 1.405
259	51.600, 1.398	51.600, 1.385	51.600, 1.428	51.600, 1.361	51.600, 1.411
260	51.800, 1.404	51.800, 1.390	51.800, 1.433	51.800, 1.368	51.800, 1.416
261	52.000, 1.411	52.000, 1.396	52.000, 1.439	52.000, 1.374	52.000, 1.422
262	52.200, 1.417	52.200, 1.401	52.200, 1.444	52.200, 1.380	52.200, 1.427
263	52.400, 1.423	52.400, 1.406	52.400, 1.449	52.400, 1.386	52.400, 1.432
264	52.600, 1.429	52.600, 1.411	52.600, 1.455	52.600, 1.392	52.600, 1.438
265	52.800, 1.435	52.800, 1.416	52.800, 1.460	52.800, 1.398	52.800, 1.443
266	53.000, 1.440	53.000, 1.421	53.000, 1.465	53.000, 1.404	53.000, 1.448
267	53.200, 1.446	53.200, 1.426	53.200, 1.470	53.200, 1.410	53.200, 1.453
268	53.400, 1.452	53.400, 1.431	53.400, 1.475	53.400, 1.416	53.400, 1.458
269	53.600, 1.457	53.600, 1.436	53.600, 1.480	53.600, 1.421	53.600, 1.463
270	53.800, 1.463	53.800, 1.441	53.800, 1.485	53.800, 1.427	53.800, 1.467
271	54.000, 1.468	54.000, 1.446	54.000, 1.490	54.000, 1.432	54.000, 1.472
272	54.200, 1.473	54.200, 1.451	54.200, 1.495	54.200, 1.437	54.200, 1.477
273	54.400, 1.478	54.400, 1.456	54.400, 1.500	54.400, 1.442	54.400, 1.481
274	54.600, 1.483	54.600, 1.461	54.600, 1.505	54.600, 1.448	54.600, 1.486
275	54.800, 1.488	54.800, 1.465	54.800, 1.510	54.800, 1.453	54.800, 1.490
276	55.000, 1.493	55.000, 1.470	55.000, 1.514	55.000, 1.458	55.000, 1.495
277	55.200, 1.498	55.200, 1.474	55.200, 1.519	55.200, 1.463	55.200, 1.499
278	55.400, 1.503	55.400, 1.478	55.400, 1.523	55.400, 1.468	55.400, 1.503
279	55.600, 1.508	55.600, 1.482	55.600, 1.528	55.600, 1.473	55.600, 1.507
280	55.800, 1.513	55.800, 1.486	55.800, 1.532	55.800, 1.478	55.800, 1.511
281	56.000, 1.517	56.000, 1.491	56.000, 1.536	56.000, 1.482	56.000, 1.515
282	56.200, 1.522	56.200, 1.495	56.200, 1.540	56.200, 1.487	56.200, 1.519
283	56.400, 1.527	56.400, 1.499	56.400, 1.544	56.400, 1.492	56.400, 1.523
284	56.600, 1.531	56.600, 1.503	56.600, 1.548	56.600, 1.497	56.600, 1.527
285	56.800, 1.536	56.800, 1.507	56.800, 1.552	56.800, 1.501	56.800, 1.531
286	57.000, 1.540	57.000, 1.511	57.000, 1.556	57.000, 1.506	57.000, 1.535
287	57.200, 1.544	57.200, 1.515	57.200, 1.560	57.200, 1.510	57.200, 1.538
288	57.400, 1.548	57.400, 1.519	57.400, 1.563	57.400, 1.514	57.400, 1.542
289	57.600, 1.552	57.600, 1.523	57.600, 1.567	57.600, 1.518	57.600, 1.546
290	57.800, 1.555	57.800, 1.527	57.800, 1.570	57.800, 1.522	57.800, 1.550
291	58.000, 1.559	58.000, 1.530	58.000, 1.574	58.000, 1.526	58.000, 1.554
292	58.200, 1.563	58.200, 1.534	58.200, 1.577	58.200, 1.530	58.200, 1.558
293	58.400, 1.567	58.400, 1.538	58.400, 1.580	58.400, 1.534	58.400, 1.561
294	58.600, 1.571	58.600, 1.541	58.600, 1.584	58.600, 1.539	58.600, 1.565
295	58.800, 1.575	58.800, 1.544	58.800, 1.587	58.800, 1.542	58.800, 1.569
296	59.000, 1.579	59.000, 1.548	59.000, 1.590	59.000, 1.546	59.000, 1.573
297	59.200, 1.583	59.200, 1.551	59.200, 1.593	59.200, 1.550	59.200, 1.576
298	59.400, 1.587	59.400, 1.554	59.400, 1.597	59.400, 1.554	59.400, 1.579
299	59.600, 1.590	59.600, 1.557	59.600, 1.600	59.600, 1.557	59.600, 1.583
300	59.800, 1.594	59.800, 1.561	59.800, 1.603	59.800, 1.561	59.800, 1.586
301	60.000, 1.598	60.000, 1.564	60.000, 1.606	60.000, 1.565	60.000, 1.589
302	60.200, 1.601	60.200, 1.567	60.200, 1.610	60.200, 1.568	60.200, 1.592
303	60.400, 1.605	60.400, 1.570	60.400, 1.613	60.400, 1.572	60.400, 1.594
304	60.600, 1.608	60.600, 1.573	60.600, 1.616	60.600, 1.576	60.600, 1.597
305	60.800, 1.611	60.800, 1.576	60.800, 1.619	60.800, 1.579	60.800, 1.600
306	61.000, 1.614	61.000, 1.579	61.000, 1.623	61.000, 1.582	61.000, 1.603
307	61.200, 1.618	61.200, 1.582	61.200, 1.626	61.200, 1.586	61.200, 1.605
308	61.400, 1.621	61.400, 1.585	61.400, 1.629	61.400, 1.589	61.400, 1.608
309	61.600, 1.624	61.600, 1.587	61.600, 1.631	61.600, 1.592	61.600, 1.611
310	61.800, 1.628	61.800, 1.590	61.800, 1.634	61.800, 1.595	61.800, 1.614
311	62.000, 1.631	62.000, 1.593	62.000, 1.637	62.000, 1.599	62.000, 1.617
312	62.200, 1.634	62.200, 1.596	62.200, 1.640	62.200, 1.602	62.200, 1.620
313	62.400, 1.637	62.400, 1.598	62.400, 1.643	62.400, 1.605	62.400, 1.623
314	62.600, 1.640	62.600, 1.601	62.600, 1.646	62.600, 1.608	62.600, 1.626
315	62.800, 1.642	62.800, 1.604	62.800, 1.648	62.800, 1.610	62.800, 1.629
316	63.000, 1.645	63.000, 1.607	63.000, 1.651	63.000, 1.613	63.000, 1.632
317	63.200, 1.648	63.200, 1.610	63.200, 1.654	63.200, 1.616	63.200, 1.635
318	63.400, 1.651	63.400, 1.613	63.400, 1.656	63.400, 1.619	63.400, 1.637
319	63.600, 1.654	63.600, 1.616	63.600, 1.659	63.600, 1.622	63.600, 1.640
320	63.800, 1.657	63.800, 1.619	63.800, 1.661	63.800, 1.625	63.800, 1.642
321	64.000, 1.660	64.000, 1.621	64.000, 1.664	64.000, 1.628	64.000, 1.644
322	64.200, 1.663	64.200, 1.624	64.200, 1.667	64.200, 1.631	64.200, 1.647
323	64.400, 1.665	64.400, 1.627	64.400, 1.669	64.400, 1.634	64.400, 1.649
324	64.600, 1.668	64.600, 1.629	64.600, 1.672	64.600, 1.637	64.600, 1.651
325	64.800, 1.671	64.800, 1.632	64.800, 1.674	64.800, 1.640	64.800, 1.654
326	65.000, 1.673	65.000, 1.634	65.000, 1.676	65.000, 1.643	65.000, 1.656
327	65.200, 1.676	65.200, 1.636	65.200, 1.679	65.200, 1.646	65.200, 1.658
328	65.400, 1.678	65.400, 1.639	65.400, 1.681	65.400, 1.649	65.400, 1.661
329	65.600, 1.681	65.600, 1.641	65.600, 1.683	65.600, 1.652	65.600, 1.663
330	65.800, 1.683	65.800, 1.643	65.800, 1.686	65.800, 1.655	65.800, 1.665
331	66.000, 1.686	66.000, 1.645	66.000, 1.688	66.000, 1.658	66.000, 1.668
332	66.200, 1.688	66.200, 1.647	66.200, 1.690	66.200, 1.660	66.200, 1.670
333	66.400, 1.690	66.400, 1.649	66.400, 1.692	66.400, 1.663	66.400, 1.672
334	66.600, 1.692	66.600, 1.651	66.600, 1.695	66.600, 1.665	66.600, 1.675
335	66.800, 1.695	66.800, 1.653	66.800, 1.697	66.800, 1.667	66.800, 1.677
336	67.000, 1.697	67.000, 1.655	67.000, 1.699	67.000, 1.669	67.000, 1.679
337	67.200, 1.699	67.200, 1.657	67.200, 1.701	67.200, 1.672	67.200, 1.681
338	67.400, 1.701	67.400, 1.659	67.400, 1.703	67.400, 1.674	67.400, 1.683
339	67.600, 1.704	67.600, 1.661	67.600, 1.705	67.600, 1.676	67.600, 1.685
340	67.800, 1.706	67.800, 1.663	67.800, 1.707	67.800, 1.678	67.800, 1.687
341	68.000, 1.709	68.000, 1.665	68.000, 1.710	68.000, 1.680	68.000, 1.689
342	68.200, 1.711	68.200, 1.667	68.200, 1.712	68.200, 1.682	68.200, 1.691
343	68.400, 1.714	68.400, 1.669	68.400, 1.714	68.400, 1.685	68.400, 1.694
344	68.600, 1.716	68.600, 1.671	68.600, 1.716	68.600, 1.687	68.600, 1.696
345	68.800, 1.718	68.800, 1.673	68.800, 1.719	68.800, 1.690	68.800, 1.698
346	69.000, 1.720	69.000, 1.675	69.000, 1.721	69.000, 1.692	69.000, 1.700
347	69.200, 1.722	69.200, 1.677	69.200, 1.723	69.200, 1.695	69.200, 1.702
348	69.400, 1.724	69.400, 1.679	69.400, 1.726	69.400, 1.697	69.400, 1.704
349	69.600, 1.726	69.600, 1.681	69.600, 1.728	69.600, 1.699	69.600, 1.706
350	69.800, 1.728	69.800, 1.683	69.800, 1.730	69.800, 1.701	69.800, 1.708
351	70.000, 1.730	70.000, 1.686	70.000, 1.732	70.000, 1.703	70.000, 1.710
352	70.200, 1.732	70.200, 1.688	70.200, 1.733	70.200, 1.706	70.200, 1.712
353	70.400, 1.734	70.400, 1.690	70.400, 1.735	70.400, 1.708	70.400, 1.715
354	70.600, 1.736	70.600, 1.692	70.600, 1.737	70.600, 1.710	70.600, 1.717
355	70.800, 1.738	70.800, 1.694	70.800, 1.739	70.800, 1.713	70.800, 1.719
356	71.000, 1.740	71.000, 1.696	71.000, 1.740	71.000, 1.715	71.000, 1.720
357	71.200, 1.742	71.200, 1.698	71.200, 1.742	71.200, 1.717	71.200, 1.722
358	71.400, 1.744	71.400, 1.700	71.400, 1.744	71.400, 1.719	71.400, 1.724
359	71.600, 1.746	71.600, 1.701	71.600, 1.746	71.600, 1.721	71.600, 1.725
360	71.800, 1.749	71.800, 1.703	71.800, 1.748	71.800, 1.723	71.800, 1.727
361	72.000, 1.751	72.000, 1.704	72.000, 1.750	72.000, 1.725	72.000, 1.729
362	72.200, 1.752	72.200, 1.706	72.200, 1.752	72.200, 1.727	72.200, 1.731
363	72.400, 1.754	72.400, 1.707	72.400, 1.754	72.400, 1.729	72.400, 1.733
364	72.600, 1.756	72.600, 1.708	72.600, 1.756	72.600, 1.731	72.600, 1.735
365	72.800, 1.758	72.800, 1.709	72.800, 1.757	72.800, 1.733	72.800, 1.737
366	73.000, 1.759	73.000, 1.711	73.000, 1.759	73.000, 1.735	73.000, 1.738
367	73.200, 1.761	73.200, 1.712	73.200, 1.761	73.200, 1.737	73.200, 1.740
368	73.400, 1.763	73.400, 1.714	73.400, 1.762	73.400, 1.739	73.400, 1.742
369	73.600, 1.765	73.600, 1.715	73.600, 1.764	73.600, 1.740	73.600, 1.744
370	73.800, 1.766	73.800, 1.717	73.800, 1.765	73.800, 1.742	73.800, 1.746
371	74.000, 1.768	74.000, 1.718	74.000, 1.767	74.000, 1.744	74.000, 1.748
372	74.200, 1.770	74.200, 1.720	74.200, 1.768	74.200, 1.746	74.200, 1.750
373	74.400, 1.772	74.400, 1.722	74.400, 1.769	74.400, 1.748	74.400, 1.751
374	74.600, 1.773	74.600, 1.723	74.600, 1.771	74.600, 1.750	74.600, 1.752
375	74.800, 1.775	74.800, 1.725	74.800, 1.772	74.800, 1.751	74.800, 1.753
376	75.000, 1.777	75.000, 1.727	75.000, 1.773	75.000, 1.753	75.000, 1.755
377	75.200, 1.778	75.200, 1.729	75.200, 1.775	75.200, 1.754	75.200, 1.756
378	75.400, 1.780	75.400, 1.730	75.400, 1.776	75.400, 1.755	75.400, 1.757
379	75.600, 1.781	75.600, 1.732	75.600, 1.778	75.600, 1.757	75.600, 1.758
380	75.800, 1.783	75.800, 1.733	75.800, 1.779	75.800, 1.758	75.800, 1.759
381	76.000, 1.784	76.000, 1.735	76.000, 1.781	76.000, 1.759	76.000, 1.760
382	76.200, 1.786	76.200, 1.736	76.200, 1.782	76.200, 1.761	76.200, 1.761
383	76.400, 1.787	76.400, 1.738	76.400, 1.783	76.400, 1.763	76.400, 1.763
384	76.600, 1.788	76.600, 1.739	76.600, 1.785	76.600, 1.764	76.600, 1.764
385	76.800, 1.789	76.800, 1.741	76.800, 1.786	76.800, 1.766	76.800, 1.765
386	77.000, 1.791	77.000, 1.742	77.000, 1.788	77.000, 1.768	77.000, 1.766
387	77.200, 1.792	77.200, 1.744	77.200, 1.789	77.200, 1.770	77.200, 1.768
388	77.400, 1.794	77.400, 1.745	77.400, 1.791	77.400, 1.772	77.400, 1.769
389	77.600, 1.796	77.600, 1.747	77.600, 1.792	77.600, 1.774	77.600, 1.770
390	77.800, 1.797	77.800, 1.748	77.800, 1.794	77.800, 1.776	77.800, 1.772
391	78.000, 1.799	78.000, 1.749	78.000, 1.795	78.000, 1.778	78.000, 1.773
392	78.200, 1.800	78.200, 1.750	78.200, 1.797	78.200, 1.779	78.200, 1.775
393	78.400, 1.802	78.400, 1.751	78.400, 1.798	78.400, 1.781	78.400, 1.776
394	78.600, 1.804	78.600, 1.752	78.600, 1.799	78.600, 1.783	78.600, 1.778
395	78.800, 1.805	78.800, 1.753	78.800, 1.800	78.800, 1.784	78.800, 1.779
396	79.000, 1.807	79.000, 1.755	79.000, 1.801	79.000, 1.786	79.000, 1.781
397	79.200, 1.808	79.200, 1.756	79.200, 1.803	79.200, 1.787	79.200, 1.782
398	79.400, 1.810	79.400, 1.757	79.400, 1.804	79.400, 1.788	79.400, 1.784
399	79.600, 1.811	79.600, 1.758	79.600, 1.805	79.600, 1.790	79.600, 1.785
400	79.800, 1.813	79.800, 1.759	79.800, 1.806	79.800, 1.791	79.800, 1.787
401	80.000, 1.814	80.000, 1.761	80.000, 1.807	80.000, 1.792	80.000, 1.788
402	80.200, 1.815	80.200, 1.762	80.200, 1.809	80.200, 1.793	80.200, 1.790
403	80.400, 1.817	80.400, 1.763	80.400, 1.810	80.400, 1.795	80.400, 1.792
404	80.600, 1.818	80.600, 1.764	80.600, 1.811	80.600, 1.796	80.600, 1.793
405	80.800, 1.819	80.800, 1.766	80.800, 1.812	80.800, 1.797	80.800, 1.795
406	81.000, 1.821	81.000, 1.767	81.000, 1.813	81.000, 1.799	81.000, 1.796
407	81.200, 1.822	81.200, 1.769	81.200, 1.815	81.200, 1.800	81.200, 1.797
408	81.400, 1.823	81.400, 1.770	81.400, 1.816	81.400, 1.802	81.400, 1.798
409	81.600, 1.824	81.600, 1.771	81.600, 1.817	81.600, 1.803	81.600, 1.800
410	81.800, 1.826	81.800, 1.772	81.800, 1.818	81.800, 1.805	81.800, 1.801
411	82.000, 1.827	82.000, 1.773	82.000, 1.819	82.000, 1.806	82.000, 1.802
412	82.200, 1.828	82.200, 1.774	82.200, 1.820	82.200, 1.807	82.200, 1.802
413	82.400, 1.829	82.400, 1.775	82.400, 1.821	82.400, 1.808	82.400, 1.803
414	82.600, 1.831	82.600, 1.776	82.600, 1.822	82.600, 1.810	82.600, 1.804
415	82.800, 1.832	82.800, 1.778	82.800, 1.823	82.800, 1.811	82.800, 1.805
416	83.000, 1.833	83.000, 1.779	83.000, 1.825	83.000, 1.812	83.000, 1.806
417	83.200, 1.835	83.200, 1.780	83.200, 1.826	83.200, 1.813	83.200, 1.807
418	83.400, 1.836	83.400, 1.781	83.400, 1.827	83.400, 1.815	83.400, 1.808
419	83.600, 1.837	83.600, 1.782	83.600, 1.829	83.600, 1.816	83.600, 1.810
420	83.800, 1.838	83.800, 1.783	83.800, 1.830	83.800, 1.817	83.800, 1.811
421	84.000, 1.839	84.000, 1.784	84.000, 1.831	84.000, 1.818	84.000, 1.812
422	84.200, 1.840	84.200, 1.785	84.200, 1.833	84.200, 1.819	84.200, 1.813
423	84.400, 1.841	84.400, 1.786	84.400, 1.834	84.400, 1.820	84.400, 1.814
424	84.600, 1.842	84.600, 1.787	84.600, 1.835	84.600, 1.821	84.600, 1.816
425	84.800, 1.844	84.800, 1.788	84.800, 1.837	84.800, 1.823	84.800, 1.817
426	85.000, 1.845	85.000, 1.790	85.000, 1.838	85.000, 1.824	85.000, 1.818
427	85.200, 1.846	85.200, 1.791	85.200, 1.840	85.200, 1.826	85.200, 1.819
428	85.400, 1.847	85.400, 1.792	85.400, 1.841	85.400, 1.828	85.400, 1.820
429	85.600, 1.848	85.600, 1.793	85.600, 1.842	85.600, 1.829	85.600, 1.821
430	85.800, 1.849	85.800, 1.794	85.800, 1.843	85.800, 1.831	85.800, 1.822
431	86.000, 1.850	86.000, 1.795	86.000, 1.843	86.000, 1.832	86.000, 1.823
432	86.200, 1.851	86.200, 1.796	86.200, 1.844	86.200, 1.833	86.200, 1.824
433	86.400, 1.852	86.400, 1.797	86.400, 1.845	86.400, 1.835	86.400, 1.825
434	86.600, 1.854	86.600, 1.798	86.600, 1.846	86.600, 1.836	86.600, 1.826
435	86.800, 1.855	86.800, 1.799	86.800, 1.847	86.800, 1.837	86.800, 1.827
436	87.000, 1.856	87.000, 1.801	87.000, 1.847	87.000, 1.838	87.000, 1.828
437	87.200, 1.857	87.200, 1.802	87.200, 1.848	87.200, 1.839	87.200, 1.829
438	87.400, 1.859	87.400, 1.802	87.400, 1.849	87.400, 1.839	87.400, 1.830
439	87.600, 1.860	87.600, 1.803	87.600, 1.850	87.600, 1.840	87.600, 1.831
440	87.800, 1.861	87.800, 1.804	87.800, 1.851	87.800, 1.841	87.800, 1.833
441	88.000, 1.862	88.000, 1.805	88.000, 1.851	88.000, 1.842	88.000, 1.834
442	88.200, 1.863	88.200, 1.806	88.200, 1.852	88.200, 1.843	88.200, 1.835
443	88.400, 1.864	88.400, 1.807	88.400, 1.853	88.400, 1.844	88.400, 1.836
444	88.600, 1.866	88.600, 1.808	88.600, 1.854	88.600, 1.845	88.600, 1.837
445	88.800, 1.867	88.800, 1.809	88.800, 1.855	88.800, 1.846	88.800, 1.837
446	89.000, 1.869	89.000, 1.810	89.000, 1.856	89.000, 1.848	89.000, 1.838
447	89.200, 1.870	89.200, 1.811	89.200, 1.857	89.200, 1.849	89.200, 1.839
448	89.400, 1.871	89.400, 1.811	89.400, 1.859	89.400, 1.850	89.400, 1.840
449	89.600, 1.872	89.600, 1.812	89.600, 1.860	89.600, 1.851	89.600, 1.841
450	89.800, 1.873	89.800, 1.813	89.800, 1.861	89.800, 1.852	89.800, 1.842
451	90.000, 1.873	90.000, 1.813	90.000, 1.862	90.000, 1.853	90.000, 1.843
452	90.200, 1.874	90.200, 1.814	90.200, 1.863	90.200, 1.854	90.200, 1.843
453	90.400, 1.875	90.400, 1.815	90.400, 1.864	90.400, 1.855	90.400, 1.844
454	90.600, 1.875	90.600, 1.816	90.600, 1.865	90.600, 1.857	90.600, 1.845
455	90.800, 1.876	90.800, 1.816	90.800, 1.866	90.800, 1.858	90.800, 1.846
456	91.000, 1.877	91.000, 1.817	91.000, 1.867	91.000, 1.859	91.000, 1.847
457	91.200, 1.877	91.200, 1.818	91.200, 1.868	91.200, 1.860	91.200, 1.848
458	91.400, 1.878	91.400, 1.819	91.400, 1.869	91.400, 1.861	91.400, 1.849
459	91.600, 1.879	91.600, 1.820	91.600, 1.870	91.600, 1.862	91.600, 1.850
460	91.800, 1.880	91.800, 1.821	91.800, 1.871	91.800, 1.863	91.800, 1.851
461	92.000, 1.881	92.000, 1.822	92.000, 1.872	92.000, 1.864	92.000, 1.852
462	92.200, 1.882	92.200, 1.823	92.200, 1.872	92.200, 1.866	92.200, 1.853
463	92.400, 1.882	92.400, 1.824	92.400, 1.873	92.400, 1.867	92.400, 1.854
464	92.600, 1.883	92.600, 1.825	92.600, 1.874	92.600, 1.868	92.600, 1.854
465	92.800, 1.884	92.800, 1.826	92.800, 1.875	92.800, 1.869	92.800, 1.855
466	93.000, 1.885	93.000, 1.827	93.000, 1.876	93.000, 1.870	93.000, 1.856
467	93.200, 1.886	93.200, 1.828	93.200, 1.877	93.200, 1.871	93.200, 1.856
468	93.400, 1.887	93.400, 1.828	93.400, 1.878	93.400, 1.872	93.400, 1.857
469	93.600, 1.888	93.600, 1.829	93.600, 1.879	93.600, 1.873	93.600, 1.858
470	93.800, 1.888	93.800, 1.829	93.800, 1.880	93.800, 1.874	93.800, 1.859
471	94.000, 1.889	94.000, 1.830	94.000, 1.881	94.000, 1.875	94.000, 1.860
472	94.200, 1.890	94.200, 1.831	94.200, 1.882	94.200, 1.876	94.200, 1.861
473	94.400, 1.891	94.400, 1.831	94.400, 1.882	94.400, 1.877	94.400, 1.862
474	94.600, 1.891	94.600, 1.832	94.600, 1.883	94.600, 1.878	94.600, 1.862
475	94.800, 1.892	94.800, 1.833	94.800, 1.884	94.800, 1.879	94.800, 1.863
476	95.000, 1.894	95.000, 1.834	95.000, 1.885	95.000, 1.879	95.000, 1.864
477	95.200, 1.895	95.200, 1.834	95.200, 1.886	95.200, 1.880	95.200, 1.865
478	95.400, 1.896	95.400, 1.835	95.400, 1.887	95.400, 1.881	95.400, 1.866
479	95.600, 1.897	95.600, 1.837	95.600, 1.888	95.600, 1.882	95.600, 1.867
480	95.800, 1.897	95.800, 1.838	95.800, 1.889	95.800, 1.883	95.800, 1.868
481	96.000, 1.898	96.000, 1.839	96.000, 1.889	96.000, 1.884	96.000, 1.870
482	96.200, 1.898	96.200, 1.840	96.200, 1.890	96.200, 1.885	96.200, 1.871
483	96.400, 1.899	96.400, 1.841	96.400, 1.890	96.400, 1.886	96.400, 1.872
484	96.600, 1.900	96.600, 1.841	96.600, 1.891	96.600, 1.887	96.600, 1.873
485	96.800, 1.901	96.800, 1.842	96.800, 1.892	96.800, 1.887	96.800, 1.874
486	97.000, 1.902	97.000, 1.843	97.000, 1.893	97.000, 1.888	97.000, 1.875
487	97.200, 1.903	97.200, 1.844	97.200, 1.894	97.200, 1.889	97.200, 1.875
488	97.400, 1.904	97.400, 1.844	97.400, 1.895	97.400, 1.890	97.400, 1.876
489	97.600, 1.905	97.600, 1.845	97.600, 1.896	97.600, 1.891	97.600, 1.877
490	97.800, 1.906	97.800, 1.846	97.800, 1.897	97.800, 1.892	97.800, 1.877
491	98.000, 1.906	98.000, 1.847	98.000, 1.898	98.000, 1.892	98.000, 1.878
492	98.200, 1.907	98.200, 1.848	98.200, 1.899	98.200, 1.893	98.200, 1.878
493	98.400, 1.909	98.400, 1.849	98.400, 1.900	98.400, 1.893	98.400, 1.879
494	98.600, 1.909	98.600, 1.849	98.600, 1.900	98.600, 1.894	98.600, 1.879
495	98.800, 1.910	98.800, 1.850	98.800, 1.901	98.800, 1.895	98.800, 1.879
496	99.000, 1.911	99.000, 1.851	99.000, 1.902	99.000, 1.896	99.000, 1.880
497	99.200, 1.912	99.200, 1.852	99.200, 1.902	99.200, 1.896	99.200, 1.880
498	99.400, 1.912	99.400, 1.853	99.400, 1.903	99.400, 1.897	99.400, 1.881
499	99.600, 1.913	99.600, 1.853	99.600, 1.904	99.600, 1.898	99.600, 1.882
500	99.800, 1.914	99.800, 1.854	99.800, 1.904	99.800, 1.899	99.800, 1.883
501	100.000, 1.914	100.000, 1.855	100.000, 1.904	100.000, 1.900	100.000, 1.884
502	100.200, 1.915	100.200, 1.856	100.200, 1.905	100.200, 1.901	100.200, 1.885
503	100.400, 1.915	100.400, 1.856	100.400, 1.906	100.400, 1.901	100.400, 1.886
504	100.600, 1.916	100.600, 1.857	100.600, 1.907	100.600, 1.902	100.600, 1.886
505	100.800, 1.917	100.800, 1.857	100.800, 1.908	100.800, 1.903	100.800, 1.887
506	101.000, 1.918	101.000, 1.858	101.000, 1.909	101.000, 1.904	101.000, 1.888
507	101.200, 1.919	101.200, 1.859	101.200, 1.910	101.200, 1.904	101.200, 1.889
508	101.400, 1.920	101.400, 1.859	101.400, 1.910	101.400, 1.905	101.400, 1.890
509	101.600, 1.921	101.600, 1.859	101.600, 1.911	101.600, 1.906	101.600, 1.890
510	101.800, 1.921	101.800, 1.860	101.800, 1.912	101.800, 1.906	101.800, 1.891
511	102.000, 1.922	102.000, 1.860	102.000, 1.913	102.000, 1.907	102.000, 1.892
512	102.200, 1.922	102.200, 1.860	102.200, 1.913	102.200, 1.908	102.200, 1.892
513	102.400, 1.923	102.400, 1.861	102.400, 1.914	102.400, 1.909	102.400, 1.893
514	102.600, 1.923	102.600, 1.861	102.600, 1.914	102.600, 1.909	102.600, 1.894
515	102.800, 1.923	102.800, 1.862	102.800, 1.915	102.800, 1.910	102.800, 1.894
516	103.000, 1.923	103.000, 1.863	103.000, 1.916	103.000, 1.911	103.000, 1.895
517	103.200, 1.924	103.200, 1.863	103.200, 1.916	103.200, 1.911	103.200, 1.896
518	103.400, 1.924	103.400, 1.864	103.400, 1.917	103.400, 1.912	103.400, 1.897
519	103.600, 1.925	103.600, 1.864	103.600, 1.917	103.600, 1.913	103.600, 1.898
520	103.800, 1.925	103.800, 1.865	103.800, 1.917	103.800, 1.914	103.800, 1.899
521	104.000, 1.925	104.000, 1.865	104.000, 1.918	104.000, 1.915	104.000, 1.900
522	104.200, 1.926	104.200, 1.866	104.200, 1.918	104.200, 1.916	104.200, 1.900
523	104.400, 1.927	104.400, 1.866	104.400, 1.919	104.400, 1.916	104.400, 1.901
524	104.600, 1.927	104.600, 1.867	104.600, 1.920	104.600, 1.917	104.600, 1.901
525	104.800, 1.928	104.800, 1.867	104.800, 1.921	104.800, 1.917	104.800, 1.902
526	105.000, 1.930	105.000, 1.868	105.000, 1.921	105.000, 1.918	105.000, 1.902
527	105.200, 1.931	105.200, 1.869	105.200, 1.922	105.200, 1.919	105.200, 1.903
528	105.400, 1.932	105.400, 1.870	105.400, 1.923	105.400, 1.919	105.400, 1.903
529	105.600, 1.933	105.600, 1.871	105.600, 1.924	105.600, 1.920	105.600, 1.904
530	105.800, 1.934	105.800, 1.871	105.800, 1.925	105.800, 1.921	105.800, 1.905
531	106.000, 1.935	106.000, 1.872	106.000, 1.926	106.000, 1.922	106.000, 1.905
532	106.200, 1.935	106.200, 1.874	106.200, 1.927	106.200, 1.923	106.200, 1.906
533	106.400, 1.936	106.400, 1.874	106.400, 1.928	106.400, 1.923	106.400, 1.907
534	106.600, 1.937	106.600, 1.875	106.600, 1.928	106.600, 1.924	106.600, 1.908
535	106.800, 1.938	106.800, 1.876	106.800, 1.929	106.800, 1.925	106.800, 1.908
536	107.000, 1.938	107.000, 1.877	107.000, 1.929	107.000, 1.925	107.000, 1.909
537	107.200, 1.939	107.200, 1.877	107.200, 1.929	107.200, 1.926	107.200, 1.910
538	107.400, 1.940	107.400, 1.878	107.400, 1.930	107.400, 1.927	107.400, 1.911
539	107.600, 1.940	107.600, 1.878	107.600, 1.930	107.600, 1.927	107.600, 1.911
540	107.800, 1.941	107.800, 1.879	107.800, 1.930	107.800, 1.928	107.800, 1.912
541	108.000, 1.941	108.000, 1.879	108.000, 1.931	108.000, 1.928	108.000, 1.912
542	108.200, 1.942	108.200, 1.880	108.200, 1.931	108.200, 1.929	108.200, 1.912
543	108.400, 1.942	108.400, 1.880	108.400, 1.932	108.400, 1.930	108.400, 1.913
544	108.600, 1.942	108.600, 1.881	108.600, 1.932	108.600, 1.930	108.600, 1.913
545	108.800, 1.943	108.800, 1.882	108.800, 1.933	108.800, 1.931	108.800, 1.914
546	109.000, 1.943	109.000, 1.883	109.000, 1.933	109.000, 1.931	109.000, 1.914
547	109.200, 1.944	109.200, 1.883	109.200, 1.934	109.200, 1.932	109.200, 1.915
548	109.400, 1.944	109.400, 1.884	109.400, 1.934	109.400, 1.933	109.400, 1.915
549	109.600, 1.945	109.600, 1.885	109.600, 1.935	109.600, 1.934	109.600, 1.916
550	109.800, 1.945	109.800, 1.885	109.800, 1.936	109.800, 1.934	109.800, 1.916
551	110.000, 1.946	110.000, 1.886	110.000, 1.937	110.000, 1.935	110.000, 1.917
552	110.200, 1.946	110.200, 1.887	110.200, 1.938	110.200, 1.936	110.200, 1.917
553	110.400, 1.947	110.400, 1.887	110.400, 1.939	110.400, 1.936	110.400, 1.918
554	110.600, 1.948	110.600, 1.887	110.600, 1.939	110.600, 1.937	110.600, 1.919
555	110.800, 1.949	110.800, 1.888	110.800, 1.940	110.800, 1.938	110.800, 1.919
556	111.000, 1.949	111.000, 1.888	111.000, 1.940	111.000, 1.938	111.000, 1.920
557	111.200, 1.950	111.200, 1.888	111.200, 1.941	111.200, 1.939	111.200, 1.921
558	111.400, 1.951	111.400, 1.889	111.400, 1.942	111.400, 1.940	111.400, 1.922
559	111.600, 1.951	111.600, 1.889	111.600, 1.942	111.600, 1.940	111.600, 1.922
560	111.800, 1.952	111.800, 1.890	111.800, 1.943	111.800, 1.941	111.800, 1.922
561	112.000, 1.953	112.000, 1.890	112.000, 1.943	112.000, 1.942	112.000, 1.923
562	112.200, 1.953	112.200, 1.891	112.200, 1.944	112.200, 1.942	112.200, 1.923
563	112.400, 1.954	112.400, 1.891	112.400, 1.944	112.400, 1.943	112.400, 1.924
564	112.600, 1.955	112.600, 1.892	112.600, 1.945	112.600, 1.943	112.600, 1.924
565	112.800, 1.956	112.800, 1.892	112.800, 1.945	112.800, 1.944	112.800, 1.925
566	113.000, 1.956	113.000, 1.893	113.000, 1.945	113.000, 1.945	113.000, 1.925
567	113.200, 1.957	113.200, 1.893	113.200, 1.946	113.200, 1.945	113.200, 1.926
568	113.400, 1.957	113.400, 1.894	113.400, 1.946	113.400, 1.946	113.400, 1.926
569	113.600, 1.958	113.600, 1.894	113.600, 1.947	113.600, 1.947	113.600, 1.927
570	113.800, 1.958	113.800, 1.895	113.800, 1.947	113.800, 1.947	113.800, 1.928
571	114.000, 1.959	114.000, 1.895	114.000, 1.948	114.000, 1.948	114.000, 1.929
572	114.200, 1.959	114.200, 1.896	114.200, 1.948	114.200, 1.949	114.200, 1.930
573	114.400, 1.959	114.400, 1.896	114.400, 1.949	114.400, 1.950	114.400, 1.931
574	114.600, 1.960	114.600, 1.897	114.600, 1.950	114.600, 1.950	114.600, 1.931
575	114.800, 1.960	114.800, 1.897	114.800, 1.950	114.800, 1.951	114.800, 1.932
576	115.000, 1.960	115.000, 1.898	115.000, 1.951	115.000, 1.951	115.000, 1.933
577	115.200, 1.960	115.200, 1.898	115.200, 1.952	115.200, 1.952	115.200, 1.933
578	115.400, 1.960	115.400, 1.899	115.400, 1.953	115.400, 1.952	115.400, 1.933
579	115.600, 1.961	115.600, 1.899	115.600, 1.953	115.600, 1.953	115.600, 1.934
580	115.800, 1.961	115.800, 1.900	115.800, 1.954	115.800, 1.954	115.800, 1.934
581	116.000, 1.961	116.000, 1.900	116.000, 1.955	116.000, 1.954	116.000, 1.934
582	116.200, 1.962	116.200, 1.901	116.200, 1.955	116.200, 1.955	116.200, 1.935
583	116.400, 1.963	116.400, 1.901	116.400, 1.955	116.400, 1.955	116.400, 1.935
584	116.600, 1.963	116.600, 1.902	116.600, 1.956	116.600, 1.955	116.600, 1.936
585	116.800, 1.964	116.800, 1.902	116.800, 1.956	116.800, 1.956	116.800, 1.937
586	117.000, 1.965	117.000, 1.902	117.000, 1.957	117.000, 1.956	117.000, 1.938
587	117.200, 1.965	117.200, 1.903	117.200, 1.957	117.200, 1.957	117.200, 1.939
588	117.400, 1.966	117.400, 1.903	117.400, 1.957	117.400, 1.957	117.400, 1.939
589	117.600, 1.967	117.600, 1.903	117.600, 1.958	117.600, 1.958	117.600, 1.940
590	117.800, 1.967	117.800, 1.904	117.800, 1.959	117.800, 1.958	117.800, 1.941
591	118.000, 1.968	118.000, 1.904	118.000, 1.959	118.000, 1.959	118.000, 1.942
592	118.200, 1.968	118.200, 1.905	118.200, 1.960	118.200, 1.959	118.200, 1.942
593	118.400, 1.968	118.400, 1.906	118.400, 1.960	118.400, 1.960	118.400, 1.943
594	118.600, 1.969	118.600, 1.907	118.600, 1.961	118.600, 1.960	118.600, 1.943
595	118.800, 1.969	118.800, 1.908	118.800, 1.961	118.800, 1.960	118.800, 1.943
596	119.000, 1.969	119.000, 1.908	119.000, 1.962	119.000, 1.960	119.000, 1.944
597	119.200, 1.970	119.200, 1.909	119.200, 1.962	119.200, 1.961	119.200, 1.944
598	119.400, 1.970	119.400, 1.910	119.400, 1.962	119.400, 1.962	119.400, 1.944
599	119.600, 1.971	119.600, 1.910	119.600, 1.963	119.600, 1.962	119.600, 1.945
600	119.800, 1.971	119.800, 1.911	119.800, 1.963	119.800, 1.963	119.800, 1.945
601	120.000, 1.971	120.000, 1.911	120.000, 1.963	120.000, 1.964	120.000, 1.945
602	120.200, 1.972	120.200, 1.912	120.200, 1.964	120.200, 1.964	120.200, 1.945
603	120.400, 1.973	120.400, 1.912	120.400, 1.964	120.400, 1.965	120.400, 1.945
604	120.600, 1.973	120.600, 1.913	120.600, 1.964	120.600, 1.965	120.600, 1.946
605	120.800, 1.974	120.800, 1.913	120.800, 1.965	120.800, 1.966	120.800, 1.947
606	121.000, 1.975	121.000, 1.913	121.000, 1.965	121.000, 1.966	121.000, 1.947
607	121.200, 1.976	121.200, 1.913	121.200, 1.966	121.200, 1.967	121.200, 1.948
608	121.400, 1.977	121.400, 1.914	121.400, 1.967	121.400, 1.968	121.400, 1.949
609	121.600, 1.978	121.600, 1.914	121.600, 1.967	121.600, 1.968	121.600, 1.950
610	121.800, 1.978	121.800, 1.914	121.800, 1.968	121.800, 1.969	121.800, 1.950
611	122.000, 1.979	122.000, 1.915	122.000, 1.969	122.000, 1.969	122.000, 1.950
612	122.200, 1.980	122.200, 1.915	122.200, 1.969	122.200, 1.970	122.200, 1.951
613	122.400, 1.981	122.400, 1.915	122.400, 1.970	122.400, 1.970	122.400, 1.951
614	122.600, 1.981	122.600, 1.915	122.600, 1.970	122.600, 1.970	122.600, 1.951
615	122.800, 1.981	122.800, 1.916	122.800, 1.970	122.800, 1.971	122.800, 1.952
616	123.000, 1.982	123.000, 1.916	123.000, 1.971	123.000, 1.971	123.000, 1.952
617	123.200, 1.982	123.200, 1.916	123.200, 1.971	123.200, 1.972	123.200, 1.952
618	123.400, 1.982	123.400, 1.917	123.400, 1.972	123.400, 1.972	123.400, 1.952
619	123.600, 1.982	123.600, 1.917	123.600, 1.972	123.600, 1.973	123.600, 1.952
620	123.800, 1.982	123.800, 1.918	123.800, 1.972	123.800, 1.974	123.800, 1.953
621	124.000, 1.982	124.000, 1.918	124.000, 1.973	124.000, 1.974	124.000, 1.953
622	124.200, 1.983	124.200, 1.919	124.200, 1.974	124.200, 1.975	124.200, 1.954
623	124.400, 1.983	124.400, 1.919	124.400, 1.974	124.400, 1.975	124.400, 1.954
624	124.600, 1.984	124.600, 1.920	124.600, 1.975	124.600, 1.976	124.600, 1.955
625	124.800, 1.984	124.800, 1.920	124.800, 1.976	124.800, 1.976	124.800, 1.956
626	125.000, 1.985	125.000, 1.921	125.000, 1.976	125.000, 1.977	125.000, 1.957
627	125.200, 1.986	125.200, 1.921	125.200, 1.977	125.200, 1.977	125.200, 1.957
628	125.400, 1.987	125.400, 1.922	125.400, 1.977	125.400, 1.978	125.400, 1.958
629	125.600, 1.988	125.600, 1.922	125.600, 1.978	125.600, 1.978	125.600, 1.958
630	125.800, 1.989	125.800, 1.923	125.800, 1.978	125.800, 1.979	125.800, 1.958
631	126.000, 1.990	126.000, 1.923	126.000, 1.979	126.000, 1.979	126.000, 1.959
632	126.200, 1.990	126.200, 1.923	126.200, 1.979	126.200, 1.980	126.200, 1.959
633	126.400, 1.991	126.400, 1.924	126.400, 1.980	126.400, 1.980	126.400, 1.960
634	126.600, 1.992	126.600, 1.924	126.600, 1.980	126.600, 1.980	126.600, 1.961
635	126.800, 1.992	126.800, 1.924	126.800, 1.980	126.800, 1.981	126.800, 1.961
636	127.000, 1.992	127.000, 1.925	127.000, 1.980	127.000, 1.981	127.000, 1.962
637	127.200, 1.993	127.200, 1.925	127.200, 1.980	127.200, 1.981	127.200, 1.962
638	127.400, 1.993	127.400, 1.926	127.400, 1.981	127.400, 1.982	127.400, 1.962
639	127.600, 1.993	127.600, 1.926	127.600, 1.981	127.600, 1.982	127.600, 1.963
640	127.800, 1.993	127.800, 1.926	127.800, 1.982	127.800, 1.983	127.800, 1.963
641	128.000, 1.994	128.000, 1.926	128.000, 1.982	128.000, 1.983	128.000, 1.964
642	128.200, 1.994	128.200, 1.927	128.200, 1.983	128.200, 1.984	128.200, 1.965
643	128.400, 1.994	128.400, 1.927	128.400, 1.984	128.400, 1.985	128.400, 1.965
644	128.600, 1.994	128.600, 1.927	128.600, 1.984	128.600, 1.985	128.600, 1.965
645	128.800, 1.995	128.800, 1.928	128.800, 1.985	128.800, 1.986	128.800, 1.965
646	129.000, 1.995	129.000, 1.928	129.000, 1.986	129.000, 1.986	129.000, 1.966
647	129.200, 1.995	129.200, 1.929	129.200, 1.986	129.200, 1.987	129.200, 1.966
648	129.400, 1.995	129.400, 1.929	129.400, 1.986	129.400, 1.987	129.400, 1.967
649	129.600, 1.996	129.600, 1.930	129.600, 1.987	129.600, 1.988	129.600, 1.967
650	129.800, 1.996	129.800, 1.930	129.800, 1.987	129.800, 1.988	129.800, 1.968
651	130.000, 1.997	130.000, 1.931	130.000, 1.987	130.000, 1.989	130.000, 1.969
652	130.200, 1.997	130.200, 1.931	130.200, 1.987	130.200, 1.989	130.200, 1.969
653	130.400, 1.997	130.400, 1.932	130.400, 1.988	130.400, 1.990	130.400, 1.970
654	130.600, 1.997	130.600, 1.932	130.600, 1.988	130.600, 1.990	130.600, 1.971
655	130.800, 1.998	130.800, 1.933	130.800, 1.988	130.800, 1.991	130.800, 1.971
656	131.000, 1.998	131.000, 1.934	131.000, 1.988	131.000, 1.991	131.000, 1.972
657	131.200, 1.998	131.200, 1.934	131.200, 1.989	131.200, 1.991	131.200, 1.972
658	131.400, 1.998	131.400, 1.935	131.400, 1.989	131.400, 1.992	131.400, 1.972
659	131.600, 1.999	131.600, 1.935	131.600, 1.990	131.600, 1.992	131.600, 1.972
660	131.800, 1.999	131.800, 1.936	131.800, 1.990	131.800, 1.993	131.800, 1.973
661	132.000, 2.000	132.000, 1.937	132.000, 1.991	132.000, 1.994	132.000, 1.973
662	132.200, 2.000	132.200, 1.937	132.200, 1.992	132.200, 1.994	132.200, 1.973
663	132.400, 2.001	132.400, 1.937	132.400, 1.992	132.400, 1.995	132.400, 1.974
664	132.600, 2.001	132.600, 1.938	132.600, 1.993	132.600, 1.995	132.600, 1.974
665	132.800, 2.002	132.800, 1.938	132.800, 1.993	132.800, 1.996	132.800, 1.974
666	133.000, 2.002	133.000, 1.938	133.000, 1.993	133.000, 1.996	133.000, 1.975
667	133.200, 2.002	133.200, 1.939	133.200, 1.994	133.200, 1.997	133.200, 1.975
668	133.400, 2.003	133.400, 1.939	133.400, 1.994	133.400, 1.997	133.400, 1.975
669	133.600, 2.003	133.600, 1.939	133.600, 1.994	133.600, 1.998	133.600, 1.976
670	133.800, 2.004	133.800, 1.939	133.800, 1.995	133.800, 1.998	133.800, 1.976
671	134.000, 2.004	134.000, 1.940	134.000, 1.996	134.000, 1.998	134.000, 1.977
672	134.200, 2.005	134.200, 1.940	134.200, 1.996	134.200, 1.999	134.200, 1.977
673	134.400, 2.005	134.400, 1.940	134.400, 1.997	134.400, 1.999	134.400, 1.977
674	134.600, 2.005	134.600, 1.941	134.600, 1.998	134.600, 1.999	134.600, 1.977
675	134.800, 2.006	134.800, 1.941	134.800, 1.999	134.800, 1.999	134.800, 1.977
676	135.000, 2.006	135.000, 1.941	135.000, 2.000	135.000, 2.000	135.000, 1.977
677	135.200, 2.006	135.200, 1.942	135.200, 2.000	135.200, 2.000	135.200, 1.977
678	135.400, 2.006	135.400, 1.942	135.400, 2.001	135.400, 2.000	135.400, 1.978
679	135.600, 2.007	135.600, 1.942	135.600, 2.001	135.600, 2.000	135.600, 1.978
680	135.800, 2.007	135.800, 1.943	135.800, 2.002	135.800, 2.000	135.800, 1.978
681	136.000, 2.008	136.000, 1.943	136.000, 2.002	136.000, 2.001	136.000, 1.979
682	136.200, 2.008	136.200, 1.943	136.200, 2.002	136.200, 2.001	136.200, 1.979
683	136.400, 2.009	136.400, 1.944	136.400, 2.002	136.400, 2.001	136.400, 1.980
684	136.600, 2.009	136.600, 1.944	136.600, 2.002	136.600, 2.002	136.600, 1.980
685	136.800, 2.009	136.800, 1.944	136.800, 2.002	136.800, 2.002	136.800, 1.981
686	137.000, 2.010	137.000, 1.945	137.000, 2.001	137.000, 2.003	137.000, 1.982
687	137.200, 2.010	137.200, 1.945	137.200, 2.001	137.200, 2.004	137.200, 1.982
688	137.400, 2.010	137.400, 1.946	137.400, 2.001	137.400, 2.005	137.400, 1.983
689	137.600, 2.011	137.600, 1.946	137.600, 2.001	137.600, 2.005	137.600, 1.983
690	137.800, 2.011	137.800, 1.946	137.800, 2.001	137.800, 2.006	137.800, 1.984
691	138.000, 2.012	138.000, 1.947	138.000, 2.002	138.000, 2.007	138.000, 1.984
692	138.200, 2.013	138.200, 1.947	138.200, 2.002	138.200, 2.007	138.200, 1.985
693	138.400, 2.014	138.400, 1.948	138.400, 2.003	138.400, 2.008	138.400, 1.985
694	138.600, 2.015	138.600, 1.948	138.600, 2.003	138.600, 2.008	138.600, 1.986
695	138.800, 2.015	138.800, 1.949	138.800, 2.004	138.800, 2.009	138.800, 1.986
696	139.000, 2.015	139.000, 1.949	139.000, 2.004	139.000, 2.009	139.000, 1.987
697	139.200, 2.016	139.200, 1.949	139.200, 2.005	139.200, 2.010	139.200, 1.987
698	139.400, 2.016	139.400, 1.949	139.400, 2.005	139.400, 2.010	139.400, 1.988
699	139.600, 2.017	139.600, 1.950	139.600, 2.006	139.600, 2.011	139.600, 1.988
700	139.800, 2.017	139.800, 1.950	139.800, 2.006	139.800, 2.011	139.800, 1.988
701	140.000, 2.017	140.000, 1.951	140.000, 2.007	140.000, 2.011	140.000, 1.989
702	140.200, 2.018	140.200, 1.951	140.200, 2.007	140.200, 2.011	140.200, 1.989
703	140.400, 2.018	140.400, 1.952	140.400, 2.007	140.400, 2.011	140.400, 1.989
704	140.600, 2.018	140.600, 1.952	140.600, 2.007	140.600, 2.011	140.600, 1.989
705	140.800, 2.018	140.800, 1.953	140.800, 2.007	140.800, 2.011	140.800, 1.989
706	141.000, 2.018	141.000, 1.954	141.000, 2.008	141.000, 2.011	141.000, 1.989
707	141.200, 2.018	141.200, 1.954	141.200, 2.008	141.200, 2.011	141.200, 1.989
708	141.400, 2.018	141.400, 1.955	141.400, 2.009	141.400, 2.012	141.400, 1.990
709	141.600, 2.019	141.600, 1.955	141.600, 2.009	141.600, 2.012	141.600, 1.990
710	141.800, 2.019	141.800, 1.956	141.800, 2.010	141.800, 2.012	141.800, 1.990
711	142.000, 2.020	142.000, 1.956	142.000, 2.010	142.000, 2.012	142.000, 1.990
712	142.200, 2.020	142.200, 1.956	142.200, 2.011	142.200, 2.012	142.200, 1.991
713	142.400, 2.021	142.400, 1.957	142.400, 2.011	142.400, 2.012	142.400, 1.992
714	142.600, 2.021	142.600, 1.957	142.600, 2.011	142.600, 2.013	142.600, 1.992
715	142.800, 2.022	142.800, 1.957	142.800, 2.012	142.800, 2.014	142.800, 1.993
716	143.000, 2.022	143.000, 1.957	143.000, 2.012	143.000, 2.014	143.000, 1.993
717	143.200, 2.023	143.200, 1.957	143.200, 2.013	143.200, 2.015	143.200, 1.994
718	143.400, 2.023	143.400, 1.957	143.400, 2.013	143.400, 2.015	143.400, 1.995
719	143.600, 2.024	143.600, 1.957	143.600, 2.014	143.600, 2.016	143.600, 1.995
720	143.800, 2.024	143.800, 1.957	143.800, 2.015	143.800, 2.016	143.800, 1.996
721	144.000, 2.025	144.000, 1.957	144.000, 2.015	144.000, 2.017	144.000, 1.996
722	144.200, 2.025	144.200, 1.957	144.200, 2.016	144.200, 2.018	144.200, 1.997
723	144.400, 2.026	144.400, 1.957	144.400, 2.016	144.400, 2.018	144.400, 1.997
724	144.600, 2.026	144.600, 1.957	144.600, 2.016	144.600, 2.019	144.600, 1.998
725	144.800, 2.026	144.800, 1.957	144.800, 2.017	144.800, 2.019	144.800, 1.998
726	145.000, 2.027	145.000, 1.957	145.000, 2.017	145.000, 2.020	145.000, 1.998
727	145.200, 2.027	145.200, 1.957	145.200, 2.018	145.200, 2.020	145.200, 1.998
728	145.400, 2.027	145.400, 1.958	145.400, 2.018	145.400, 2.020	145.400, 1.999
729	145.600, 2.027	145.600, 1.958	145.600, 2.019	145.600, 2.020	145.600, 1.999
730	145.800, 2.027	145.800, 1.958	145.800, 2.019	145.800, 2.020	145.800, 1.999
731	146.000, 2.028	146.000, 1.959	146.000, 2.020	146.000, 2.020	146.000, 2.000
732	146.200, 2.028	146.200, 1.959	146.200, 2.020	146.200, 2.020	146.200, 2.000
733	146.400, 2.028	146.400, 1.960	146.400, 2.020	146.400, 2.021	146.400, 2.000
734	146.600, 2.029	146.600, 1.960	146.600, 2.020	146.600, 2.021	146.600, 2.000
735	146.800, 2.029	146.800, 1.961	146.800, 2.020	146.800, 2.021	146.800, 2.001
736	147.000, 2.030	147.000, 1.961	147.000, 2.020	147.000, 2.021	147.000, 2.001
737	147.200, 2.030	147.200, 1.962	147.200, 2.021	147.200, 2.022	147.200, 2.001
738	147.400, 2.031	147.400, 1.962	147.400, 2.021	147.400, 2.022	147.400, 2.002
739	147.600, 2.031	147.600, 1.963	147.600, 2.021	147.600, 2.023	147.600, 2.003
740	147.800, 2.032	147.800, 1.963	147.800, 2.021	147.800, 2.023	147.800, 2.003
741	148.000, 2.032	148.000, 1.963	148.000, 2.022	148.000, 2.024	148.000, 2.004
742	148.200, 2.032	148.200, 1.964	148.200, 2.022	148.200, 2.024	148.200, 2.005
743	148.400, 2.033	148.400, 1.964	148.400, 2.022	148.400, 2.025	148.400, 2.005
744	148.600, 2.033	148.600, 1.964	148.600, 2.022	148.600, 2.025	148.600, 2.005
745	148.800, 2.033	148.800, 1.964	148.800, 2.023	148.800, 2.026	148.800, 2.006
746	149.000, 2.034	149.000, 1.964	149.000, 2.023	149.000, 2.026	149.000, 2.006
747	149.200, 2.034	149.200, 1.964	149.200, 2.024	149.200, 2.026	149.200, 2.007
748	149.400, 2.034	149.400, 1.964	149.400, 2.025	149.400, 2.026	149.400, 2.007
749	149.600, 2.034	149.600, 1.964	149.600, 2.025	149.600, 2.026	149.600, 2.007
750	149.800, 2.034	149.800, 1.964	149.800, 2.026	149.800, 2.026	149.800, 2.007
751	150.000, 2.034	150.000, 1.964	150.000, 2.026	150.000, 2.026	150.000, 2.007
752	150.200, 2.033	150.200, 1.963	150.200, 2.025	150.200, 2.026	150.200, 2.006
753	150.400, 2.033	150.400, 1.962	150.400, 2.024	150.400, 2.025	150.400, 2.006
754	150.600, 2.032	150.600, 1.961	150.600, 2.023	150.600, 2.025	150.600, 2.005
755	150.800, 2.031	150.800, 1.960	150.800, 2.022	150.800, 2.024	150.800, 2.004
756	151.000, 2.030	151.000, 1.959	151.000, 2.021	151.000, 2.023	151.000, 2.003
757	151.200, 2.028	151.200, 1.958	151.200, 2.019	151.200, 2.022	151.200, 2.002
758	151.400, 2.027	151.400, 1.957	151.400, 2.018	151.400, 2.021	151.400, 2.001
759	151.600, 2.026	151.600, 1.955	151.600, 2.017	151.600, 2.019	151.600, 2.000
760	151.800, 2.025	151.800, 1.954	151.800, 2.015	151.800, 2.018	151.800, 1.999
761	152.000, 2.024	152.000, 1.953	152.000, 2.014	152.000, 2.017	152.000, 1.999
762	152.200, 2.023	152.200, 1.952	152.200, 2.013	152.200, 2.015	152.200, 1.999
763	152.400, 2.022	152.400, 1.950	152.400, 2.011	152.400, 2.014	152.400, 1.998
764	152.600, 2.021	152.600, 1.949	152.600, 2.009	152.600, 2.012	152.600, 1.997
765	152.800, 2.020	152.800, 1.948	152.800, 2.008	152.800, 2.011	152.800, 1.997
766	153.000, 2.019	153.000, 1.948	153.000, 2.006	153.000, 2.009	153.000, 1.996
767	153.200, 2.018	153.200, 1.947	153.200, 2.005	153.200, 2.007	153.200, 1.996
768	153.400, 2.017	153.400, 1.946	153.400, 2.004	153.400, 2.006	153.400, 1.995
769	153.600, 2.017	153.600, 1.946	153.600, 2.002	153.600, 2.005	153.600, 1.994
770	153.800, 2.016	153.800, 1.945	153.800, 2.001	153.800, 2.003	153.800, 1.993
771	154.000, 2.016	154.000, 1.944	154.000, 2.000	154.000, 2.002	154.000, 1.992
772	154.200, 2.015	154.200, 1.944	154.200, 1.999	154.200, 2.001	154.200, 1.992
773	154.400, 2.014	154.400, 1.943	154.400, 1.998	154.400, 2.000	154.400, 1.991
774	154.600, 2.013	154.600, 1.942	154.600, 1.996	154.600, 1.999	154.600, 1.990
775	154.800, 2.012	154.800, 1.941	154.800, 1.995	154.800, 1.998	154.800, 1.990
776	155.000, 2.011	155.000, 1.941	155.000, 1.994	155.000, 1.997	155.000, 1.989
777	155.200, 2.010	155.200, 1.940	155.200, 1.993	155.200, 1.996	155.200, 1.988
778	155.400, 2.009	155.400, 1.939	155.400, 1.992	155.400, 1.995	155.400, 1.987
779	155.600, 2.009	155.600, 1.938	155.600, 1.992	155.600, 1.994	155.600, 1.987
780	155.800, 2.008	155.800, 1.938	155.800, 1.991	155.800, 1.993	155.800, 1.986
781	156.000, 2.007	156.000, 1.937	156.000, 1.990	156.000, 1.993	156.000, 1.985
782	156.200, 2.006	156.200, 1.936	156.200, 1.989	156.200, 1.992	156.200, 1.985
783	156.400, 2.005	156.400, 1.936	156.400, 1.988	156.400, 1.991	156.400, 1.984
784	156.600, 2.004	156.600, 1.935	156.600, 1.987	156.600, 1.991	156.600, 1.984
785	156.800, 2.004	156.800, 1.934	156.800, 1.987	156.800, 1.990	156.800, 1.983
786	157.000, 2.003	157.000, 1.934	157.000, 1.986	157.000, 1.989	157.000, 1.982
787	157.200, 2.003	157.200, 1.934	157.200, 1.985	157.200, 1.988	157.200, 1.981
788	157.400, 2.002	157.400, 1.933	157.400, 1.984	157.400, 1.988	157.400, 1.980
789	157.600, 2.002	157.600, 1.933	157.600, 1.983	157.600, 1.987	157.600, 1.980
790	157.800, 2.001	157.800, 1.932	157.800, 1.982	157.800, 1.986	157.800, 1.979
791	158.000, 2.001	158.000, 1.932	158.000, 1.981	158.000, 1.986	158.000, 1.979
792	158.200, 2.000	158.200, 1.931	158.200, 1.981	158.200, 1.985	158.200, 1.978
793	158.400, 2.000	158.400, 1.930	158.400, 1.980	158.400, 1.984	158.400, 1.977
794	158.600, 1.999	158.600, 1.930	158.600, 1.979	158.600, 1.983	158.600, 1.977
795	158.800, 1.999	158.800, 1.929	158.800, 1.979	158.800, 1.982	158.800, 1.976
796	159.000, 1.998	159.000, 1.929	159.000, 1.978	159.000, 1.982	159.000, 1.975
797	159.200, 1.997	159.200, 1.928	159.200, 1.977	159.200, 1.980	159.200, 1.974
798	159.400, 1.997	159.400, 1.928	159.400, 1.977	159.400, 1.980	159.400, 1.974
799	159.600, 1.996	159.600, 1.928	159.600, 1.976	159.600, 1.978	159.600, 1.973
800	159.800, 1.995	159.800, 1.927	159.800, 1.975	159.800, 1.978	159.800, 1.973
801	160.000, 1.994	160.000, 1.927	160.000, 1.974	160.000, 1.977	160.000, 1.972
802	160.200, 1.994	160.200, 1.927	160.200, 1.973	160.200, 1.976	160.200, 1.971
803	160.400, 1.993	160.400, 1.927	160.400, 1.972	160.400, 1.975	160.400, 1.971
804	160.600, 1.992	160.600, 1.926	160.600, 1.971	160.600, 1.974	160.600, 1.970
805	160.800, 1.991	160.800, 1.926	160.800, 1.971	160.800, 1.973	160.800, 1.969
806	161.000, 1.991	161.000, 1.925	161.000, 1.970	161.000, 1.972	161.000, 1.969
807	161.200, 1.990	161.200, 1.924	161.200, 1.970	161.200, 1.971	161.200, 1.968
808	161.400, 1.990	161.400, 1.924	161.400, 1.969	161.400, 1.971	161.400, 1.967
809	161.600, 1.990	161.600, 1.923	161.600, 1.968	161.600, 1.970	161.600, 1.967
810	161.800, 1.989	161.800, 1.922	161.800, 1.968	161.800, 1.969	161.800, 1.966
811	162.000, 1.989	162.000, 1.922	162.000, 1.967	162.000, 1.969	162.000, 1.966
812	162.200, 1.988	162.200, 1.921	162.200, 1.967	162.200, 1.968	162.200, 1.965
813	162.400, 1.988	162.400, 1.921	162.400, 1.966	162.400, 1.968	162.400, 1.965
814	162.600, 1.988	162.600, 1.920	162.600, 1.966	162.600, 1.967	162.600, 1.964
815	162.800, 1.987	162.800, 1.920	162.800, 1.965	162.800, 1.967	162.800, 1.963
816	163.000, 1.987	163.000, 1.920	163.000, 1.965	163.000, 1.966	163.000, 1.962
817	163.200, 1.987	163.200, 1.920	163.200, 1.964	163.200, 1.965	163.200, 1.961
818	163.400, 1.987	163.400, 1.920	163.400, 1.963	163.400, 1.965	163.400, 1.961
819	163.600, 1.986	163.600, 1.920	163.600, 1.962	163.600, 1.964	163.600, 1.960
820	163.800, 1.986	163.800, 1.919	163.800, 1.962	163.800, 1.963	163.800, 1.959
821	164.000, 1.985	164.000, 1.919	164.000, 1.961	164.000, 1.961	164.000, 1.958
822	164.200, 1.985	164.200, 1.919	164.200, 1.961	164.200, 1.960	164.200, 1.958
823	164.400, 1.984	164.400, 1.918	164.400, 1.960	164.400, 1.959	164.400, 1.957
824	164.600, 1.984	164.600, 1.918	164.600, 1.960	164.600, 1.958	164.600, 1.957
825	164.800, 1.984	164.800, 1.917	164.800, 1.959	164.800, 1.957	164.800, 1.956
826	165.000, 1.983	165.000, 1.917	165.000, 1.958	165.000, 1.957	165.000, 1.955
827	165.200, 1.983	165.200, 1.916	165.200, 1.957	165.200, 1.956	165.200, 1.955
828	165.400, 1.983	165.400, 1.916	165.400, 1.957	165.400, 1.955	165.400, 1.954
829	165.600, 1.983	165.600, 1.915	165.600, 1.956	165.600, 1.955	165.600, 1.953
830	165.800, 1.982	165.800, 1.915	165.800, 1.955	165.800, 1.954	165.800, 1.953
831	166.000, 1.981	166.000, 1.914	166.000, 1.955	166.000, 1.954	166.000, 1.952
832	166.200, 1.981	166.200, 1.914	166.200, 1.954	166.200, 1.953	166.200, 1.951
833	166.400, 1.980	166.400, 1.914	166.400, 1.953	166.400, 1.953	166.400, 1.951
834	166.600, 1.980	166.600, 1.913	166.600, 1.953	166.600, 1.953	166.600, 1.950
835	166.800, 1.979	166.800, 1.913	166.800, 1.952	166.800, 1.952	166.800, 1.949
836	167.000, 1.979	167.000, 1.913	167.000, 1.952	167.000, 1.952	167.000, 1.948
837	167.200, 1.978	167.200, 1.913	167.200, 1.951	167.200, 1.951	167.200, 1.947
838	167.400, 1.978	167.400, 1.912	167.400, 1.951	167.400, 1.950	167.400, 1.947
839	167.600, 1.977	167.600, 1.912	167.600, 1.951	167.600, 1.949	167.600, 1.947
840	167.800, 1.977	167.800, 1.912	167.800, 1.950	167.800, 1.948	167.800, 1.946
841	168.000, 1.976	168.000, 1.911	168.000, 1.950	168.000, 1.947	168.000, 1.946
842	168.200, 1.975	168.200, 1.911	168.200, 1.949	168.200, 1.946	168.200, 1.946
843	168.400, 1.974	168.400, 1.911	168.400, 1.949	168.400, 1.945	168.400, 1.945
844	168.600, 1.974	168.600, 1.910	168.600, 1.949	168.600, 1.945	168.600, 1.945
845	168.800, 1.973	168.800, 1.910	168.800, 1.948	168.800, 1.944	168.800, 1.944
846	169.000, 1.973	169.000, 1.910	169.000, 1.947	169.000, 1.944	169.000, 1.943
847	169.200, 1.972	169.200, 1.910	169.200, 1.947	169.200, 1.943	169.200, 1.942
848	169.400, 1.972	169.400, 1.909	169.400, 1.946	169.400, 1.942	169.400, 1.941
849	169.600, 1.971	169.600, 1.909	169.600, 1.945	169.600, 1.942	169.600, 1.940
850	169.800, 1.970	169.800, 1.909	169.800, 1.945	169.800, 1.941	169.800, 1.939
851	170.000, 1.970	170.000, 1.908	170.000, 1.944	170.000, 1.941	170.000, 1.939
852	170.200, 1.969	170.200, 1.908	170.200, 1.943	170.200, 1.941	170.200, 1.938
853	170.400, 1.969	170.400, 1.908	170.400, 1.943	170.400, 1.941	170.400, 1.937
854	170.600, 1.969	170.600, 1.908	170.600, 1.942	170.600, 1.940	170.600, 1.937
855	170.800, 1.969	170.800, 1.908	170.800, 1.942	170.800, 1.940	170.800, 1.936
856	171.000, 1.968	171.000, 1.907	171.000, 1.941	171.000, 1.940	171.000, 1.935
857	171.200, 1.968	171.200, 1.907	171.200, 1.941	171.200, 1.939	171.200, 1.935
858	171.400, 1.968	171.400, 1.907	171.400, 1.941	171.400, 1.938	171.400, 1.934
859	171.600, 1.968	171.600, 1.906	171.600, 1.940	171.600, 1.938	171.600, 1.934
860	171.800, 1.967	171.800, 1.906	171.800, 1.940	171.800, 1.937	171.800, 1.933
861	172.000, 1.967	172.000, 1.905	172.000, 1.940	172.000, 1.936	172.000, 1.933
862	172.200, 1.966	172.200, 1.905	172.200, 1.939	172.200, 1.935	172.200, 1.932
863	172.400, 1.966	172.400, 1.904	172.400, 1.939	172.400, 1.934	172.400, 1.932
864	172.600, 1.966	172.600, 1.904	172.600, 1.938	172.600, 1.933	172.600, 1.931
865	172.800, 1.966	172.800, 1.903	172.800, 1.938	172.800, 1.932	172.800, 1.931
866	173.000, 1.965	173.000, 1.903	173.000, 1.937	173.000, 1.931	173.000, 1.931
867	173.200, 1.965	173.200, 1.903	173.200, 1.937	173.200, 1.931	173.200, 1.930
868	173.400, 1.964	173.400, 1.902	173.400, 1.936	173.400, 1.930	173.400, 1.930
869	173.600, 1.964	173.600, 1.902	173.600, 1.936	173.600, 1.930	173.600, 1.930
870	173.800, 1.963	173.800, 1.902	173.800, 1.936	173.800, 1.929	173.800, 1.929
871	174.000, 1.962	174.000, 1.902	174.000, 1.935	174.000, 1.929	174.000, 1.929
872	174.200, 1.962	174.200, 1.902	174.200, 1.935	174.200, 1.928	174.200, 1.928
873	174.400, 1.961	174.400, 1.902	174.400, 1.934	174.400, 1.928	174.400, 1.927
874	174.600, 1.960	174.600, 1.902	174.600, 1.933	174.600, 1.928	174.600, 1.926
875	174.800, 1.960	174.800, 1.902	174.800, 1.933	174.800, 1.928	174.800, 1.926
876	175.000, 1.959	175.000, 1.902	175.000, 1.932	175.000, 1.928	175.000, 1.925
877	175.200, 1.959	175.200, 1.902	175.200, 1.932	175.200, 1.927	175.200, 1.924
878	175.400, 1.958	175.400, 1.902	175.400, 1.932	175.400, 1.927	175.400, 1.923
879	175.600, 1.958	175.600, 1.901	175.600, 1.931	175.600, 1.926	175.600, 1.922
880	175.800, 1.957	175.800, 1.901	175.800, 1.931	175.800, 1.926	175.800, 1.922
881	176.000, 1.957	176.000, 1.901	176.000, 1.931	176.000, 1.925	176.000, 1.921
882	176.200, 1.957	176.200, 1.900	176.200, 1.930	176.200, 1.924	176.200, 1.920
883	176.400, 1.957	176.400, 1.900	176.400, 1.930	176.400, 1.924	176.400, 1.919
884	176.600, 1.957	176.600, 1.900	176.600, 1.930	176.600, 1.923	176.600, 1.919
885	176.800, 1.957	176.800, 1.899	176.800, 1.929	176.800, 1.922	176.800, 1.918
886	177.000, 1.956	177.000, 1.899	177.000, 1.929	177.000, 1.921	177.000, 1.918
887	177.200, 1.956	177.200, 1.898	177.200, 1.929	177.200, 1.921	177.200, 1.917
888	177.400, 1.956	177.400, 1.898	177.400, 1.929	177.400, 1.920	177.400, 1.916
889	177.600, 1.955	177.600, 1.897	177.600, 1.928	177.600, 1.919	177.600, 1.916
890	177.800, 1.955	177.800, 1.897	177.800, 1.928	177.800, 1.918	177.800, 1.915
891	178.000, 1.955	178.000, 1.897	178.000, 1.927	178.000, 1.917	178.000, 1.914
892	178.200, 1.954	178.200, 1.896	178.200, 1.926	178.200, 1.916	178.200, 1.914
893	178.400, 1.954	178.400, 1.896	178.400, 1.926	178.400, 1.916	178.400, 1.913
894	178.600, 1.954	178.600, 1.896	178.600, 1.925	178.600, 1.915	178.600, 1.913
895	178.800, 1.953	178.800, 1.895	178.800, 1.925	178.800, 1.915	178.800, 1.912
896	179.000, 1.953	179.000, 1.895	179.000, 1.925	179.000, 1.914	179.000, 1.911
897	179.200, 1.953	179.200, 1.895	179.200, 1.925	179.200, 1.914	179.200, 1.911
898	179.400, 1.952	179.400, 1.894	179.400, 1.924	179.400, 1.913	179.400, 1.911
899	179.600, 1.952	179.600, 1.894	179.600, 1.924	179.600, 1.913	179.600, 1.910
900	179.800, 1.952	179.800, 1.894	179.800, 1.923	179.800, 1.913	179.800, 1.910
901	180.000, 1.951	180.000, 1.893	180.000, 1.923	180.000, 1.912	180.000, 1.909
902	180.200, 1.951	180.200, 1.893	180.200, 1.922	180.200, 1.912	180.200, 1.909
903	180.400, 1.950	180.400, 1.893	180.400, 1.922	180.400, 1.912	180.400, 1.908
904	180.600, 1.950	180.600, 1.893	180.600, 1.921	180.600, 1.911	180.600, 1.908
905	180.800, 1.949	180.800, 1.892	180.800, 1.921	180.800, 1.911	180.800, 1.907
906	181.000, 1.949	181.000, 1.892	181.000, 1.920	181.000, 1.910	181.000, 1.907
907	181.200, 1.948	181.200, 1.892	181.200, 1.920	181.200, 1.910	181.200, 1.907
908	181.400, 1.948	181.400, 1.892	181.400, 1.919	181.400, 1.909	181.400, 1.906
909	181.600, 1.947	181.600, 1.892	181.600, 1.919	181.600, 1.908	181.600, 1.905
910	181.800, 1.947	181.800, 1.892	181.800, 1.918	181.800, 1.907	181.800, 1.904
911	182.000, 1.947	182.000, 1.891	182.000, 1.918	182.000, 1.907	182.000, 1.903
912	182.200, 1.947	182.200, 1.891	182.200, 1.917	182.200, 1.906	182.200, 1.902
913	182.400, 1.947	182.400, 1.891	182.400, 1.917	182.400, 1.905	182.400, 1.902
914	182.600, 1.947	182.600, 1.890	182.600, 1.917	182.600, 1.905	182.600, 1.901
915	182.800, 1.947	182.800, 1.890	182.800, 1.917	182.800, 1.904	182.800, 1.900
916	183.000, 1.947	183.000, 1.890	183.000, 1.917	183.000, 1.903	183.000, 1.900
917	183.200, 1.946	183.200, 1.889	183.200, 1.917	183.200, 1.903	183.200, 1.899
918	183.400, 1.946	183.400, 1.889	183.400, 1.916	183.400, 1.903	183.400, 1.898
919	183.600, 1.946	183.600, 1.888	183.600, 1.916	183.600, 1.902	183.600, 1.898
920	183.800, 1.946	183.800, 1.888	183.800, 1.915	183.800, 1.902	183.800, 1.897
921	184.000, 1.945	184.000, 1.888	184.000, 1.915	184.000, 1.901	184.000, 1.897
922	184.200, 1.945	184.200, 1.888	184.200, 1.914	184.200, 1.901	184.200, 1.896
923	184.400, 1.944	184.400, 1.888	184.400, 1.914	184.400, 1.900	184.400, 1.896
924	184.600, 1.944	184.600, 1.888	184.600, 1.913	184.600, 1.899	184.600, 1.896
925	184.800, 1.944	184.800, 1.887	184.800, 1.913	184.800, 1.898	184.800, 1.895
926	185.000, 1.943	185.000, 1.887	185.000, 1.912	185.000, 1.898	185.000, 1.895
927	185.200, 1.943	185.200, 1.887	185.200, 1.912	185.200, 1.897	185.200, 1.895
928	185.400, 1.942	185.400, 1.887	185.400, 1.911	185.400, 1.896	185.400, 1.894
929	185.600, 1.942	185.600, 1.887	185.600, 1.911	185.600, 1.896	185.600, 1.893
930	185.800, 1.941	185.800, 1.886	185.800, 1.910	185.800, 1.895	185.800, 1.893
931	186.000, 1.941	186.000, 1.886	186.000, 1.910	186.000, 1.895	186.000, 1.892
932	186.200, 1.941	186.200, 1.886	186.200, 1.910	186.200, 1.895	186.200, 1.891
933	186.400, 1.940	186.400, 1.885	186.400, 1.910	186.400, 1.894	186.400, 1.891
934	186.600, 1.939	186.600, 1.885	186.600, 1.909	186.600, 1.894	186.600, 1.890
935	186.800, 1.939	186.800, 1.885	186.800, 1.909	186.800, 1.894	186.800, 1.889
936	187.000, 1.938	187.000, 1.885	187.000, 1.909	187.000, 1.893	187.000, 1.889
937	187.200, 1.937	187.200, 1.885	187.200, 1.909	187.200, 1.893	187.200, 1.888
938	187.400, 1.937	187.400, 1.885	187.400, 1.908	187.400, 1.893	187.400, 1.887
939	187.600, 1.937	187.600, 1.885	187.600, 1.908	187.600, 1.893	187.600, 1.887
940	187.800, 1.937	187.800, 1.885	187.800, 1.907	187.800, 1.893	187.800, 1.886
941	188.000, 1.937	188.000, 1.885	188.000, 1.907	188.000, 1.893	188.000, 1.886
942	188.200, 1.936	188.200, 1.885	188.200, 1.907	188.200, 1.892	188.200, 1.885
943	188.400, 1.936	188.400, 1.885	188.400, 1.906	188.400, 1.892	188.400, 1.885
944	188.600, 1.936	188.600, 1.885	188.600, 1.906	188.600, 1.891	188.600, 1.884
945	188.800, 1.935	188.800, 1.885	188.800, 1.906	188.800, 1.890	188.800, 1.884
946	189.000, 1.935	189.000, 1.884	189.000, 1.905	189.000, 1.889	189.000, 1.884
947	189.200, 1.935	189.200, 1.884	189.200, 1.905	189.200, 1.889	189.200, 1.883
948	189.400, 1.935	189.400, 1.883	189.400, 1.904	189.400, 1.888	189.400, 1.883
949	189.600, 1.934	189.600, 1.883	189.600, 1.904	189.600, 1.887	189.600, 1.883
950	189.800, 1.934	189.800, 1.883	189.800, 1.904	189.800, 1.887	189.800, 1.882
951	190.000, 1.934	190.000, 1.883	190.000, 1.903	190.000, 1.887	190.000, 1.881
952	190.200, 1.934	190.200, 1.883	190.200, 1.903	190.200, 1.886	190.200, 1.881
953	190.400, 1.933	190.400, 1.882	190.400, 1.903	190.400, 1.886	190.400, 1.880
954	190.600, 1.933	190.600, 1.882	190.600, 1.902	190.600, 1.885	190.600, 1.880
955	190.800, 1.933	190.800, 1.882	190.800, 1.902	190.800, 1.885	190.800, 1.879
956	191.000, 1.932	191.000, 1.882	191.000, 1.902	191.000, 1.884	191.000, 1.879
957	191.200, 1.932	191.200, 1.881	191.200, 1.902	191.200, 1.884	191.200, 1.878
958	191.400, 1.932	191.400, 1.881	191.400, 1.901	191.400, 1.883	191.400, 1.877
959	191.600, 1.932	191.600, 1.881	191.600, 1.901	191.600, 1.883	191.600, 1.877
960	191.800, 1.931	191.800, 1.880	191.800, 1.900	191.800, 1.882	191.800, 1.876
961	192.000, 1.931	192.000, 1.880	192.000, 1.900	192.000, 1.882	192.000, 1.876
962	192.200, 1.931	192.200, 1.880	192.200, 1.900	192.200, 1.881	192.200, 1.875
963	192.400, 1.930	192.400, 1.879	192.400, 1.899	192.400, 1.880	192.400, 1.875
964	192.600, 1.930	192.600, 1.879	192.600, 1.899	192.600, 1.880	192.600, 1.875
965	192.800, 1.930	192.800, 1.879	192.800, 1.899	192.800, 1.879	192.800, 1.874
966	193.000, 1.929	193.000, 1.878	193.000, 1.899	193.000, 1.879	193.000, 1.874
967	193.200, 1.929	193.200, 1.878	193.200, 1.898	193.200, 1.878	193.200, 1.873
968	193.400, 1.929	193.400, 1.877	193.400, 1.898	193.400, 1.878	193.400, 1.873
969	193.600, 1.929	193.600, 1.877	193.600, 1.898	193.600, 1.877	193.600, 1.872
970	193.800, 1.928	193.800, 1.877	193.800, 1.897	193.800, 1.877	193.800, 1.871
971	194.000, 1.928	194.000, 1.877	194.000, 1.897	194.000, 1.876	194.000, 1.871
972	194.200, 1.927	194.200, 1.877	194.200, 1.896	194.200, 1.876	194.200, 1.870
973	194.400, 1.927	194.400, 1.877	194.400, 1.896	194.400, 1.875	194.400, 1.870
974	194.600, 1.926	194.600, 1.877	194.600, 1.895	194.600, 1.875	194.600, 1.869
975	194.800, 1.926	194.800, 1.877	194.800, 1.895	194.800, 1.874	194.800, 1.868
976	195.000, 1.925	195.000, 1.877	195.000, 1.894	195.000, 1.874	195.000, 1.867
977	195.200, 1.925	195.200, 1.877	195.200, 1.894	195.200, 1.873	195.200, 1.867
978	195.400, 1.924	195.400, 1.877	195.400, 1.893	195.400, 1.872	195.400, 1.866
979	195.600, 1.924	195.600, 1.877	195.600, 1.893	195.600, 1.872	195.600, 1.866
980	195.800, 1.924	195.800, 1.877	195.800, 1.892	195.800, 1.871	195.800, 1.865
981	196.000, 1.923	196.000, 1.877	196.000, 1.892	196.000, 1.871	196.000, 1.865
982	196.200, 1.923	196.200, 1.877	196.200, 1.892	196.200, 1.870	196.200, 1.864
983	196.400, 1.923	196.400, 1.877	196.400, 1.892	196.400, 1.870	196.400, 1.864
984	196.600, 1.923	196.600, 1.876	196.600, 1.892	196.600, 1.870	196.600, 1.863
985	196.800, 1.923	196.800, 1.876	196.800, 1.892	196.800, 1.869	196.800, 1.863
986	197.000, 1.923	197.000, 1.875	197.000, 1.891	197.000, 1.869	197.000, 1.863
987	197.200, 1.923	197.200, 1.875	197.200, 1.891	197.200, 1.869	197.200, 1.862
988	197.400, 1.923	197.400, 1.874	197.400, 1.891	197.400, 1.869	197.400, 1.862
989	197.600, 1.923	197.600, 1.874	197.600, 1.891	197.600, 1.868	197.600, 1.862
990	197.800, 1.922	197.800, 1.873	197.800, 1.891	197.800, 1.868	197.800, 1.861
991	198.000, 1.922	198.000, 1.873	198.000, 1.890	198.000, 1.868	198.000, 1.861
992	198.200, 1.921	198.200, 1.873	198.200, 1.890	198.200, 1.867	198.200, 1.860
993	198.400, 1.920	198.400, 1.873	198.400, 1.890	198.400, 1.867	198.400, 1.860
994	198.600, 1.920	198.600, 1.872	198.600, 1.889	198.600, 1.866	198.600, 1.859
995	198.800, 1.919	198.800, 1.872	198.800, 1.889	198.800, 1.865	198.800, 1.858
996	199.000, 1.919	199.000, 1.872	199.000, 1.889	199.000, 1.865	199.000, 1.857
997	199.200, 1.919	199.200, 1.872	199.200, 1.888	199.200, 1.864	199.200, 1.857
998	199.400, 1.918	199.400, 1.872	199.400, 1.888	199.400, 1.864	199.400, 1.856
999	199.600, 1.918	199.600, 1.872	199.600, 1.888	199.600, 1.863	199.600, 1.856
1000	199.800, 1.918	199.800, 1.872	199.800, 1.887	199.800, 1.862	199.800, 1.855
1001	200.000, 1.917	200.000, 1.872	200.000, 1.887	200.000, 1.862	200.000, 1.854
1002	200.200, 1.917	200.200, 1.872	200.200, 1.886	200.200, 1.862	200.200, 1.854
1003	200.400, 1.917	200.400, 1.872	200.400, 1.886	200.400, 1.861	200.400, 1.853
1004	200.600, 1.917	200.600, 1.871	200.600, 1.886	200.600, 1.861	200.600, 1.853
1005	200.800, 1.917	200.800, 1.871	200.800, 1.885	200.800, 1.860	200.800, 1.852
1006	201.000, 1.917	201.000, 1.871	201.000, 1.885	201.000, 1.860	201.000, 1.852
1007	201.200, 1.917	201.200, 1.871	201.200, 1.884	201.200, 1.860	201.200, 1.851
1008	201.400, 1.917	201.400, 1.871	201.400, 1.884	201.400, 1.860	201.400, 1.851
1009	201.600, 1.916	201.600, 1.871	201.600, 1.883	201.600, 1.859	201.600, 1.850
1010	201.800, 1.916	201.800, 1.871	201.800, 1.883	201.800, 1.859	201.800, 1.850
1011	202.000, 1.916	202.000, 1.870	202.000, 1.883	202.000, 1.858	202.000, 1.849
1012	202.200, 1.915	202.200, 1.870	202.200, 1.882	202.200, 1.858	202.200, 1.849
1013	202.400, 1.915	202.400, 1.870	202.400, 1.882	202.400, 1.858	202.400, 1.848
1014	202.600, 1.914	202.600, 1.869	202.600, 1.882	202.600, 1.857	202.600, 1.847
1015	202.800, 1.914	202.800, 1.869	202.800, 1.881	202.800, 1.857	202.800, 1.847
1016	203.000, 1.913	203.000, 1.869	203.000, 1.881	203.000, 1.856	203.000, 1.847
1017	203.200, 1.913	203.200, 1.869	203.200, 1.880	203.200, 1.856	203.200, 1.846
1018	203.400, 1.912	203.400, 1.869	203.400, 1.880	203.400, 1.856	203.400, 1.846
1019	203.600, 1.912	203.600, 1.869	203.600, 1.880	203.600, 1.855	203.600, 1.845
1020	203.800, 1.912	203.800, 1.869	203.800, 1.880	203.800, 1.854	203.800, 1.845
1021	204.000, 1.912	204.000, 1.869	204.000, 1.880	204.000, 1.854	204.000, 1.844
1022	204.200, 1.912	204.200, 1.868	204.200, 1.880	204.200, 1.853	204.200, 1.844
1023	204.400, 1.912	204.400, 1.868	204.400, 1.879	204.400, 1.852	204.400, 1.843
1024	204.600, 1.912	204.600, 1.868	204.600, 1.879	204.600, 1.852	204.600, 1.843
1025	204.800, 1.912	204.800, 1.868	204.800, 1.879	204.800, 1.851	204.800, 1.842
1026	205.000, 1.912	205.000, 1.868	205.000, 1.879	205.000, 1.851	205.000, 1.842
1027	205.200, 1.912	205.200, 1.868	205.200, 1.879	205.200, 1.850	205.200, 1.841
1028	205.400, 1.912	205.400, 1.868	205.400, 1.878	205.400, 1.850	205.400, 1.840
1029	205.600, 1.912	205.600, 1.868	205.600, 1.878	205.600, 1.849	205.600, 1.839
1030	205.800, 1.912	205.800, 1.867	205.800, 1.877	205.800, 1.848	205.800, 1.839
1031	206.000, 1.911	206.000, 1.867	206.000, 1.877	206.000, 1.848	206.000, 1.838
1032	206.200, 1.911	206.200, 1.866	206.200, 1.876	206.200, 1.847	206.200, 1.837
1033	206.400, 1.910	206.400, 1.866	206.400, 1.876	206.400, 1.847	206.400, 1.837
1034	206.600, 1.910	206.600, 1.865	206.600, 1.876	206.600, 1.847	206.600, 1.836
1035	206.800, 1.909	206.800, 1.865	206.800, 1.875	206.800, 1.846	206.800, 1.836
1036	207.000, 1.908	207.000, 1.865	207.000, 1.875	207.000, 1.846	207.000, 1.836
1037	207.200, 1.908	207.200, 1.865	207.200, 1.875	207.200, 1.845	207.200, 1.835
1038	207.400, 1.908	207.400, 1.865	207.400, 1.874	207.400, 1.845	207.400, 1.835
1039	207.600, 1.907	207.600, 1.864	207.600, 1.874	207.600, 1.844	207.600, 1.835
1040	207.800, 1.907	207.800, 1.864	207.800, 1.874	207.800, 1.844	207.800, 1.835
1041	208.000, 1.906	208.000, 1.864	208.000, 1.874	208.000, 1.844	208.000, 1.834
1042	208.200, 1.906	208.200, 1.864	208.200, 1.874	208.200, 1.843	208.200, 1.834
1043	208.400, 1.905	208.400, 1.863	208.400, 1.874	208.400, 1.843	208.400, 1.834
1044	208.600, 1.905	208.600, 1.863	208.600, 1.874	208.600, 1.843	208.600, 1.834
1045	208.800, 1.905	208.800, 1.863	208.800, 1.873	208.800, 1.843	208.800, 1.833
1046	209.000, 1.904	209.000, 1.863	209.000, 1.873	209.000, 1.842	209.000, 1.833
1047	209.200, 1.904	209.200, 1.863	209.200, 1.873	209.200, 1.842	209.200, 1.832
1048	209.400, 1.904	209.400, 1.863	209.400, 1.873	209.400, 1.842	209.400, 1.831
1049	209.600, 1.904	209.600, 1.863	209.600, 1.872	209.600, 1.841	209.600, 1.831
1050	209.800, 1.903	209.800, 1.863	209.800, 1.872	209.800, 1.841	209.800, 1.830
1051	210.000, 1.903	210.000, 1.863	210.000, 1.871	210.000, 1.840	210.000, 1.829
1052	210.200, 1.903	210.200, 1.863	210.200, 1.871	210.200, 1.839	210.200, 1.829
1053	210.400, 1.903	210.400, 1.863	210.400, 1.870	210.400, 1.839	210.400, 1.828
1054	210.600, 1.902	210.600, 1.863	210.600, 1.870	210.600, 1.838	210.600, 1.828
1055	210.800, 1.902	210.800, 1.863	210.800, 1.870	210.800, 1.837	210.800, 1.827
1056	211.000, 1.902	211.000, 1.863	211.000, 1.870	211.000, 1.837	211.000, 1.826
1057	211.200, 1.902	211.200, 1.862	211.200, 1.869	211.200, 1.836	211.200, 1.826
1058	211.400, 1.901	211.400, 1.862	211.400, 1.869	211.400, 1.836	211.400, 1.825
1059	211.600, 1.901	211.600, 1.862	211.600, 1.869	211.600, 1.836	211.600, 1.825
1060	211.800, 1.900	211.800, 1.861	211.800, 1.869	211.800, 1.836	211.800, 1.825
1061	212.000, 1.900	212.000, 1.861	212.000, 1.868	212.000, 1.835	212.000, 1.825
1062	212.200, 1.899	212.200, 1.860	212.200, 1.868	212.200, 1.835	212.200, 1.824
1063	212.400, 1.899	212.400, 1.860	212.400, 1.867	212.400, 1.835	212.400, 1.824
1064	212.600, 1.899	212.600, 1.860	212.600, 1.867	212.600, 1.834	212.600, 1.823
1065	212.800, 1.899	212.800, 1.859	212.800, 1.866	212.800, 1.834	212.800, 1.823
1066	213.000, 1.899	213.000, 1.859	213.000, 1.866	213.000, 1.834	213.000, 1.823
1067	213.200, 1.899	213.200, 1.859	213.200, 1.866	213.200, 1.834	213.200, 1.822
1068	213.400, 1.899	213.400, 1.859	213.400, 1.865	213.400, 1.833	213.400, 1.822
1069	213.600, 1.899	213.600, 1.860	213.600, 1.865	213.600, 1.833	213.600, 1.821
1070	213.800, 1.899	213.800, 1.860	213.800, 1.865	213.800, 1.832	213.800, 1.821
1071	214.000, 1.899	214.000, 1.860	214.000, 1.864	214.000, 1.832	214.000, 1.820
1072	214.200, 1.899	214.200, 1.860	214.200, 1.864	214.200, 1.831	214.200, 1.820
1073	214.400, 1.900	214.400, 1.860	214.400, 1.864	214.400, 1.830	214.400, 1.819
1074	214.600, 1.899	214.600, 1.860	214.600, 1.864	214.600, 1.830	214.600, 1.818
1075	214.800, 1.899	214.800, 1.860	214.800, 1.863	214.800, 1.829	214.800, 1.818
1076	215.000, 1.899	215.000, 1.860	215.000, 1.863	215.000, 1.828	215.000, 1.817
1077	215.200, 1.899	215.200, 1.860	215.200, 1.863	215.200, 1.828	215.200, 1.817
1078	215.400, 1.899	215.400, 1.859	215.400, 1.863	215.400, 1.827	215.400, 1.816
1079	215.600, 1.899	215.600, 1.859	215.600, 1.863	215.600, 1.826	215.600, 1.816
1080	215.800, 1.898	215.800, 1.859	215.800, 1.863	215.800, 1.826	215.800, 1.816
1081	216.000, 1.898	216.000, 1.858	216.000, 1.862	216.000, 1.825	216.000, 1.816
1082	216.200, 1.897	216.200, 1.858	216.200, 1.862	216.200, 1.825	216.200, 1.815
1083	216.400, 1.897	216.400, 1.858	216.400, 1.861	216.400, 1.825	216.400, 1.815
1084	216.600, 1.896	216.600, 1.857	216.600, 1.861	216.600, 1.825	216.600, 1.815
1085	216.800, 1.896	216.800, 1.857	216.800, 1.861	216.800, 1.824	216.800, 1.814
1086	217.000, 1.896	217.000, 1.857	217.000, 1.860	217.000, 1.824	217.000, 1.814
1087	217.200, 1.895	217.200, 1.856	217.200, 1.860	217.200, 1.824	217.200, 1.813
1088	217.400, 1.895	217.400, 1.856	217.400, 1.859	217.400, 1.824	217.400, 1.813
1089	217.600, 1.894	217.600, 1.856	217.600, 1.859	217.600, 1.823	217.600, 1.812
1090	217.800, 1.894	217.800, 1.856	217.800, 1.858	217.800, 1.823	217.800, 1.811
1091	218.000, 1.893	218.000, 1.855	218.000, 1.858	218.000, 1.822	218.000, 1.811
1092	218.200, 1.893	218.200, 1.855	218.200, 1.858	218.200, 1.821	218.200, 1.810
1093	218.400, 1.893	218.400, 1.855	218.400, 1.857	218.400, 1.820	218.400, 1.809
1094	218.600, 1.893	218.600, 1.855	218.600, 1.857	218.600, 1.820	218.600, 1.809
1095	218.800, 1.892	218.800, 1.855	218.800, 1.857	218.800, 1.819	218.800, 1.809
1096	219.000, 1.892	219.000, 1.855	219.000, 1.857	219.000, 1.818	219.000, 1.808
1097	219.200, 1.892	219.200, 1.855	219.200, 1.857	219.200, 1.818	219.200, 1.808
1098	219.400, 1.892	219.400, 1.855	219.400, 1.857	219.400, 1.817	219.400, 1.808
1099	219.600, 1.891	219.600, 1.855	219.600, 1.857	219.600, 1.817	219.600, 1.808
1100	219.800, 1.891	219.800, 1.854	219.800, 1.856	219.800, 1.817	219.800, 1.807
1101	220.000, 1.891	220.000, 1.854	220.000, 1.856	220.000, 1.816	220.000, 1.807
1102	220.200, 1.890	220.200, 1.854	220.200, 1.855	220.200, 1.816	220.200, 1.807
1103	220.400, 1.890	220.400, 1.854	220.400, 1.855	220.400, 1.816	220.400, 1.806
1104	220.600, 1.890	220.600, 1.854	220.600, 1.854	220.600, 1.816	220.600, 1.806
1105	220.800, 1.889	220.800, 1.853	220.800, 1.854	220.800, 1.815	220.800, 1.805
1106	221.000, 1.889	221.000, 1.853	221.000, 1.853	221.000, 1.815	221.000, 1.804
1107	221.200, 1.889	221.200, 1.853	221.200, 1.853	221.200, 1.814	221.200, 1.803
1108	221.400, 1.888	221.400, 1.853	221.400, 1.853	221.400, 1.814	221.400, 1.802
1109	221.600, 1.888	221.600, 1.852	221.600, 1.852	221.600, 1.813	221.600, 1.802
1110	221.800, 1.888	221.800, 1.852	221.800, 1.852	221.800, 1.812	221.800, 1.801
1111	222.000, 1.887	222.000, 1.852	222.000, 1.851	222.000, 1.812	222.000, 1.800
1112	222.200, 1.887	222.200, 1.852	222.200, 1.851	222.200, 1.811	222.200, 1.800
1113	222.400, 1.887	222.400, 1.852	222.400, 1.851	222.400, 1.811	222.400, 1.799
1114	222.600, 1.886	222.600, 1.852	222.600, 1.851	222.600, 1.811	222.600, 1.799
1115	222.800, 1.886	222.800, 1.851	222.800, 1.850	222.800, 1.811	222.800, 1.798
1116	223.000, 1.886	223.000, 1.851	223.000, 1.850	223.000, 1.810	223.000, 1.798
1117	223.200, 1.886	223.200, 1.851	223.200, 1.850	223.200, 1.810	223.200, 1.797
1118	223.400, 1.885	223.400, 1.851	223.400, 1.850	223.400, 1.810	223.400, 1.797
1119	223.600, 1.885	223.600, 1.851	223.600, 1.850	223.600, 1.809	223.600, 1.797
1120	223.800, 1.885	223.800, 1.851	223.800, 1.849	223.800, 1.809	223.800, 1.797
1121	224.000, 1.884	224.000, 1.851	224.000, 1.849	224.000, 1.808	224.000, 1.797
1122	224.200, 1.884	224.200, 1.851	224.200, 1.849	224.200, 1.808	224.200, 1.796
1123	224.400, 1.884	224.400, 1.851	224.400, 1.849	224.400, 1.807	224.400, 1.796
1124	224.600, 1.884	224.600, 1.851	224.600, 1.849	224.600, 1.807	224.600, 1.796
1125	224.800, 1.884	224.800, 1.851	224.800, 1.849	224.800, 1.807	224.800, 1.795
1126	225.000, 1.884	225.000, 1.850	225.000, 1.849	225.000, 1.806	225.000, 1.795
1127	225.200, 1.883	225.200, 1.850	225.200, 1.849	225.200, 1.806	225.200, 1.794
1128	225.400, 1.883	225.400, 1.850	225.400, 1.849	225.400, 1.806	225.400, 1.794
1129	225.600, 1.883	225.600, 1.849	225.600, 1.849	225.600, 1.806	225.600, 1.793
1130	225.800, 1.882	225.800, 1.849	225.800, 1.848	225.800, 1.805	225.800, 1.793
1131	226.000, 1.882	226.000, 1.849	226.000, 1.848	226.000, 1.805	226.000, 1.793
1132	226.200, 1.882	226.200, 1.849	226.200, 1.847	226.200, 1.805	226.200, 1.792
1133	226.400, 1.881	226.400, 1.848	226.400, 1.847	226.400, 1.805	226.400, 1.792
1134	226.600, 1.881	226.600, 1.848	226.600, 1.846	226.600, 1.805	226.600, 1.792
1135	226.800, 1.881	226.800, 1.848	226.800, 1.845	226.800, 1.804	226.800, 1.792
1136	227.000, 1.881	227.000, 1.848	227.000, 1.845	227.000, 1.804	227.000, 1.791
1137	227.200, 1.880	227.200, 1.847	227.200, 1.845	227.200, 1.804	227.200, 1.791
1138	227.400, 1.880	227.400, 1.847	227.400, 1.844	227.400, 1.803	227.400, 1.791
1139	227.600, 1.880	227.600, 1.847	227.600, 1.844	227.600, 1.803	227.600, 1.791
1140	227.800, 1.879	227.800, 1.847	227.800, 1.843	227.800, 1.802	227.800, 1.790
1141	228.000, 1.879	228.000, 1.847	228.000, 1.843	228.000, 1.801	228.000, 1.790
1142	228.200, 1.879	228.200, 1.847	228.200, 1.843	228.200, 1.801	228.200, 1.789
1143	228.400, 1.879	228.400, 1.847	228.400, 1.843	228.400, 1.800	228.400, 1.789
1144	228.600, 1.879	228.600, 1.846	228.600, 1.843	228.600, 1.800	228.600, 1.788
1145	228.800, 1.879	228.800, 1.846	228.800, 1.843	228.800, 1.799	228.800, 1.787
1146	229.000, 1.879	229.000, 1.846	229.000, 1.843	229.000, 1.799	229.000, 1.786
1147	229.200, 1.878	229.200, 1.846	229.200, 1.843	229.200, 1.799	229.200, 1.785
1148	229.400, 1.878	229.400, 1.846	229.400, 1.843	229.400, 1.798	229.400, 1.785
1149	229.600, 1.878	229.600, 1.846	229.600, 1.843	229.600, 1.798	229.600, 1.784
1150	229.800, 1.878	229.800, 1.846	229.800, 1.843	229.800, 1.798	229.800, 1.784
1151	230.000, 1.877	230.000, 1.845	230.000, 1.843	230.000, 1.797	230.000, 1.783
1152	230.200, 1.877	230.200, 1.845	230.200, 1.843	230.200, 1.797	230.200, 1.783
1153	230.400, 1.877	230.400, 1.845	230.400, 1.842	230.400, 1.797	230.400, 1.783
1154	230.600, 1.876	230.600, 1.845	230.600, 1.842	230.600, 1.796	230.600, 1.783
1155	230.800, 1.876	230.800, 1.845	230.800, 1.842	230.800, 1.796	230.800, 1.782
1156	231.000, 1.876	231.000, 1.845	231.000, 1.842	231.000, 1.795	231.000, 1.782
1157	231.200, 1.875	231.200, 1.845	231.200, 1.841	231.200, 1.795	231.200, 1.781
1158	231.400, 1.875	231.400, 1.845	231.400, 1.841	231.400, 1.794	231.400, 1.781
1159	231.600, 1.875	231.600, 1.845	231.600, 1.840	231.600, 1.794	231.600, 1.780
1160	231.800, 1.875	231.800, 1.845	231.800, 1.840	231.800, 1.793	231.800, 1.780
1161	232.000, 1.874	232.000, 1.845	232.000, 1.839	232.000, 1.792	232.000, 1.779
1162	232.200, 1.874	232.200, 1.844	232.200, 1.839	232.200, 1.792	232.200, 1.779
1163	232.400, 1.874	232.400, 1.844	232.400, 1.838	232.400, 1.791	232.400, 1.778
1164	232.600, 1.874	232.600, 1.844	232.600, 1.838	232.600, 1.790	232.600, 1.778
1165	232.800, 1.873	232.800, 1.844	232.800, 1.838	232.800, 1.790	232.800, 1.777
1166	233.000, 1.873	233.000, 1.844	233.000, 1.838	233.000, 1.789	233.000, 1.777
1167	233.200, 1.873	233.200, 1.843	233.200, 1.837	233.200, 1.789	233.200, 1.777
1168	233.400, 1.873	233.400, 1.843	233.400, 1.837	233.400, 1.788	233.400, 1.777
1169	233.600, 1.872	233.600, 1.843	233.600, 1.837	233.600, 1.788	233.600, 1.777
1170	233.800, 1.872	233.800, 1.842	233.800, 1.836	233.800, 1.788	233.800, 1.777
1171	234.000, 1.871	234.000, 1.842	234.000, 1.836	234.000, 1.787	234.000, 1.776
1172	234.200, 1.871	234.200, 1.841	234.200, 1.835	234.200, 1.787	234.200, 1.776
1173	234.400, 1.871	234.400, 1.840	234.400, 1.835	234.400, 1.786	234.400, 1.776
1174	234.600, 1.870	234.600, 1.840	234.600, 1.835	234.600, 1.786	234.600, 1.775
1175	234.800, 1.870	234.800, 1.840	234.800, 1.834	234.800, 1.785	234.800, 1.775
1176	235.000, 1.869	235.000, 1.839	235.000, 1.834	235.000, 1.785	235.000, 1.774
1177	235.200, 1.869	235.200, 1.839	235.200, 1.834	235.200, 1.784	235.200, 1.773
1178	235.400, 1.868	235.400, 1.839	235.400, 1.833	235.400, 1.784	235.400, 1.773
1179	235.600, 1.868	235.600, 1.839	235.600, 1.833	235.600, 1.784	235.600, 1.772
1180	235.800, 1.868	235.800, 1.839	235.800, 1.833	235.800, 1.783	235.800, 1.771
1181	236.000, 1.868	236.000, 1.839	236.000, 1.833	236.000, 1.783	236.000, 1.771
1182	236.200, 1.867	236.200, 1.839	236.200, 1.832	236.200, 1.783	236.200, 1.770
1183	236.400, 1.867	236.400, 1.838	236.400, 1.832	236.400, 1.782	236.400, 1.770
1184	236.600, 1.867	236.600, 1.838	236.600, 1.832	236.600, 1.782	236.600, 1.769
1185	236.800, 1.866	236.800, 1.838	236.800, 1.832	236.800, 1.782	236.800, 1.769
1186	237.000, 1.866	237.000, 1.838	237.000, 1.832	237.000, 1.782	237.000, 1.768
1187	237.200, 1.866	237.200, 1.838	237.200, 1.832	237.200, 1.782	237.200, 1.768
1188	237.400, 1.866	237.400, 1.838	237.400, 1.831	237.400, 1.782	237.400, 1.768
1189	237.600, 1.865	237.600, 1.838	237.600, 1.831	237.600, 1.781	237.600, 1.767
1190	237.800, 1.865	237.800, 1.838	237.800, 1.831	237.800, 1.781	237.800, 1.767
1191	238.000, 1.865	238.000, 1.838	238.000, 1.830	238.000, 1.781	238.000, 1.766
1192	238.200, 1.864	238.200, 1.837	238.200, 1.830	238.200, 1.780	238.200, 1.766
1193	238.400, 1.864	238.400, 1.837	238.400, 1.830	238.400, 1.780	238.400, 1.766
1194	238.600, 1.864	238.600, 1.837	238.600, 1.830	238.600, 1.779	238.600, 1.765
1195	238.800, 1.863	238.800, 1.837	238.800, 1.829	238.800, 1.779	238.800, 1.765
1196	239.000, 1.863	239.000, 1.837	239.000, 1.829	239.000, 1.778	239.000, 1.764
1197	239.200, 1.863	239.200, 1.837	239.200, 1.829	239.200, 1.777	239.200, 1.764
1198	239.400, 1.862	239.400, 1.837	239.400, 1.829	239.400, 1.777	239.400, 1.763
1199	239.600, 1.862	239.600, 1.837	239.600, 1.829	239.600, 1.776	239.600, 1.763
1200	239.800, 1.862	239.800, 1.837	239.800, 1.829	239.800, 1.775	239.800, 1.762
1201	240.000, 1.862	240.000, 1.837	240.000, 1.829	240.000, 1.775	240.000, 1.762
1202	240.200, 1.863	240.200, 1.836	240.200, 1.829	240.200, 1.774	240.200, 1.761
1203	240.400, 1.863	240.400, 1.836	240.400, 1.828	240.400, 1.774	240.400, 1.761
1204	240.600, 1.863	240.600, 1.836	240.600, 1.828	240.600, 1.774	240.600, 1.761
1205	240.800, 1.863	240.800, 1.836	240.800, 1.828	240.800, 1.773	240.800, 1.760
1206	241.000, 1.863	241.000, 1.835	241.000, 1.828	241.000, 1.773	241.000, 1.760
1207	241.200, 1.863	241.200, 1.835	241.200, 1.827	241.200, 1.773	241.200, 1.760
1208	241.400, 1.863	241.400, 1.834	241.400, 1.827	241.400, 1.773	241.400, 1.759
1209	241.600, 1.862	241.600, 1.834	241.600, 1.826	241.600, 1.772	241.600, 1.759
1210	241.800, 1.862	241.800, 1.833	241.800, 1.826	241.800, 1.772	241.800, 1.758
1211	242.000, 1.862	242.000, 1.833	242.000, 1.825	242.000, 1.772	242.000, 1.757
1212	242.200, 1.861	242.200, 1.832	242.200, 1.825	242.200, 1.772	242.200, 1.757
1213	242.400, 1.861	242.400, 1.832	242.400, 1.825	242.400, 1.772	242.400, 1.756
1214	242.600, 1.860	242.600, 1.832	242.600, 1.825	242.600, 1.771	242.600, 1.756
1215	242.800, 1.860	242.800, 1.832	242.800, 1.825	242.800, 1.771	242.800, 1.755
1216	243.000, 1.859	243.000, 1.831	243.000, 1.824	243.000, 1.770	243.000, 1.755
1217	243.200, 1.859	243.200, 1.831	243.200, 1.824	243.200, 1.770	243.200, 1.755
1218	243.400, 1.858	243.400, 1.831	243.400, 1.824	243.400, 1.769	243.400, 1.754
1219	243.600, 1.858	243.600, 1.831	243.600, 1.824	243.600, 1.768	243.600, 1.754
1220	243.800, 1.858	243.800, 1.830	243.800, 1.823	243.800, 1.768	243.800, 1.753
1221	244.000, 1.857	244.000, 1.830	244.000, 1.823	244.000, 1.767	244.000, 1.753
1222	244.200, 1.857	244.200, 1.830	244.200, 1.823	244.200, 1.767	244.200, 1.752
1223	244.400, 1.857	244.400, 1.830	244.400, 1.822	244.400, 1.767	244.400, 1.752
1224	244.600, 1.857	244.600, 1.831	244.600, 1.822	244.600, 1.766	244.600, 1.752
1225	244.800, 1.857	244.800, 1.831	244.800, 1.821	244.800, 1.766	244.800, 1.751
1226	245.000, 1.857	245.000, 1.831	245.000, 1.821	245.000, 1.766	245.000, 1.751
1227	245.200, 1.857	245.200, 1.830	245.200, 1.820	245.200, 1.765	245.200, 1.751
1228	245.400, 1.857	245.400, 1.830	245.400, 1.820	245.400, 1.765	245.400, 1.750
1229	245.600, 1.857	245.600, 1.830	245.600, 1.820	245.600, 1.765	245.600, 1.750
1230	245.800, 1.856	245.800, 1.830	245.800, 1.820	245.800, 1.765	245.800, 1.749
1231	246.000, 1.856	246.000, 1.830	246.000, 1.819	246.000, 1.764	246.000, 1.749
1232	246.200, 1.856	246.200, 1.829	246.200, 1.819	246.200, 1.764	246.200, 1.748
1233	246.400, 1.855	246.400, 1.829	246.400, 1.819	246.400, 1.763	246.400, 1.748
1234	246.600, 1.855	246.600, 1.829	246.600, 1.819	246.600, 1.763	246.600, 1.748
1235	246.800, 1.855	246.800, 1.829	246.800, 1.819	246.800, 1.762	246.800, 1.747
1236	247.000, 1.854	247.000, 1.828	247.000, 1.819	247.000, 1.761	247.000, 1.747
1237	247.200, 1.854	247.200, 1.828	247.200, 1.819	247.200, 1.761	247.200, 1.746
1238	247.400, 1.853	247.400, 1.827	247.400, 1.818	247.400, 1.760	247.400, 1.746
1239	247.600, 1.853	247.600, 1.827	247.600, 1.818	247.600, 1.759	247.600, 1.745
1240	247.800, 1.852	247.800, 1.826	247.800, 1.818	247.800, 1.759	247.800, 1.745
1241	248.000, 1.852	248.000, 1.826	248.000, 1.817	248.000, 1.758	248.000, 1.744
1242	248.200, 1.851	248.200, 1.826	248.200, 1.817	248.200, 1.758	248.200, 1.744
1243	248.400, 1.851	248.400, 1.826	248.400, 1.817	248.400, 1.757	248.400, 1.743
1244	248.600, 1.851	248.600, 1.826	248.600, 1.817	248.600, 1.757	248.600, 1.743
1245	248.800, 1.850	248.800, 1.826	248.800, 1.816	248.800, 1.757	248.800, 1.743
1246	249.000, 1.850	249.000, 1.826	249.000, 1.816	249.000, 1.756	249.000, 1.742
1247	249.200, 1.849	249.200, 1.826	249.200, 1.816	249.200, 1.756	249.200, 1.742
1248	249.400, 1.849	249.400, 1.826	249.400, 1.816	249.400, 1.756	249.400, 1.741
1249	249.600, 1.849	249.600, 1.826	249.600, 1.816	249.600, 1.755	249.600, 1.741
1250	249.800, 1.848	249.800, 1.826	249.800, 1.816	249.800, 1.755	249.800, 1.740
1251	250.000, 1.848	250.000, 1.826	250.000, 1.815	250.000, 1.755	250.000, 1.739
1252	250.200, 1.848	250.200, 1.825	250.200, 1.815	250.200, 1.754	250.200, 1.739
1253	250.400, 1.848	250.400, 1.825	250.400, 1.815	250.400, 1.754	250.400, 1.738
1254	250.600, 1.847	250.600, 1.825	250.600, 1.815	250.600, 1.754	250.600, 1.738
1255	250.800, 1.847	250.800, 1.825	250.800, 1.815	250.800, 1.753	250.800, 1.737
1256	251.000, 1.847	251.000, 1.825	251.000, 1.814	251.000, 1.753	251.000, 1.737
1257	251.200, 1.847	251.200, 1.824	251.200, 1.814	251.200, 1.752	251.200, 1.737
1258	251.400, 1.846	251.400, 1.824	251.400, 1.813	251.400, 1.752	251.400, 1.736
1259	251.600, 1.846	251.600, 1.824	251.600, 1.813	251.600, 1.751	251.600, 1.736
1260	251.800, 1.846	251.800, 1.823	251.800, 1.812	251.800, 1.751	251.800, 1.736
1261	252.000, 1.846	252.000, 1.824	252.000, 1.812	252.000, 1.751	252.000, 1.736
1262	252.200, 1.846	252.200, 1.824	252.200, 1.811	252.200, 1.750	252.200, 1.736
1263	252.400, 1.845	252.400, 1.824	252.400, 1.811	252.400, 1.750	252.400, 1.736
1264	252.600, 1.845	252.600, 1.824	252.600, 1.811	252.600, 1.750	252.600, 1.736
1265	252.800, 1.844	252.800, 1.824	252.800, 1.811	252.800, 1.750	252.800, 1.735
1266	253.000, 1.844	253.000, 1.824	253.000, 1.810	253.000, 1.750	253.000, 1.735
1267	253.200, 1.844	253.200, 1.823	253.200, 1.810	253.200, 1.749	253.200, 1.734
1268	253.400, 1.843	253.400, 1.823	253.400, 1.810	253.400, 1.749	253.400, 1.734
1269	253.600, 1.843	253.600, 1.823	253.600, 1.810	253.600, 1.749	253.600, 1.734
1270	253.800, 1.843	253.800, 1.823	253.800, 1.810	253.800, 1.748	253.800, 1.733
1271	254.000, 1.843	254.000, 1.823	254.000, 1.810	254.000, 1.748	254.000, 1.732
1272	254.200, 1.842	254.200, 1.823	254.200, 1.809	254.200, 1.747	254.200, 1.732
1273	254.400, 1.842	254.400, 1.823	254.400, 1.809	254.400, 1.747	254.400, 1.731
1274	254.600, 1.842	254.600, 1.822	254.600, 1.809	254.600, 1.747	254.600, 1.731
1275	254.800, 1.842	254.800, 1.822	254.800, 1.808	254.800, 1.746	254.800, 1.730
1276	255.000, 1.841	255.000, 1.822	255.000, 1.808	255.000, 1.745	255.000, 1.730
1277	255.200, 1.841	255.200, 1.821	255.200, 1.807	255.200, 1.745	255.200, 1.729
1278	255.400, 1.841	255.400, 1.821	255.400, 1.807	255.400, 1.744	255.400, 1.728
1279	255.600, 1.840	255.600, 1.820	255.600, 1.806	255.600, 1.744	255.600, 1.728
1280	255.800, 1.840	255.800, 1.820	255.800, 1.806	255.800, 1.743	255.800, 1.727
1281	256.000, 1.840	256.000, 1.820	256.000, 1.805	256.000, 1.743	256.000, 1.727
1282	256.200, 1.839	256.200, 1.819	256.200, 1.804	256.200, 1.742	256.200, 1.727
1283	256.400, 1.839	256.400, 1.819	256.400, 1.804	256.400, 1.742	256.400, 1.727
1284	256.600, 1.838	256.600, 1.819	256.600, 1.803	256.600, 1.742	256.600, 1.726
1285	256.800, 1.838	256.800, 1.818	256.800, 1.803	256.800, 1.741	256.800, 1.726
1286	257.000, 1.838	257.000, 1.818	257.000, 1.803	257.000, 1.741	257.000, 1.725
1287	257.200, 1.837	257.200, 1.817	257.200, 1.803	257.200, 1.741	257.200, 1.725
1288	257.400, 1.837	257.400, 1.817	257.400, 1.803	257.400, 1.741	257.400, 1.724
1289	257.600, 1.837	257.600, 1.817	257.600, 1.803	257.600, 1.740	257.600, 1.724
1290	257.800, 1.836	257.800, 1.817	257.800, 1.803	257.800, 1.740	257.800, 1.724
1291	258.000, 1.836	258.000, 1.817	258.000, 1.803	258.000, 1.740	258.000, 1.723
1292	258.200, 1.836	258.200, 1.817	258.200, 1.803	258.200, 1.739	258.200, 1.723
1293	258.400, 1.836	258.400, 1.817	258.400, 1.803	258.400, 1.739	258.400, 1.722
1294	258.600, 1.835	258.600, 1.817	258.600, 1.802	258.600, 1.738	258.600, 1.721
1295	258.800, 1.835	258.800, 1.817	258.800, 1.802	258.800, 1.738	258.800, 1.721
1296	259.000, 1.835	259.000, 1.817	259.000, 1.802	259.000, 1.737	259.000, 1.720
1297	259.200, 1.834	259.200, 1.817	259.200, 1.802	259.200, 1.736	259.200, 1.720
1298	259.400, 1.834	259.400, 1.817	259.400, 1.801	259.400, 1.736	259.400, 1.719
1299	259.600, 1.834	259.600, 1.817	259.600, 1.800	259.600, 1.735	259.600, 1.719
1300	259.800, 1.834	259.800, 1.817	259.800, 1.800	259.800, 1.735	259.800, 1.719
1301	260.000, 1.833	260.000, 1.816	260.000, 1.799	260.000, 1.735	260.000, 1.718
1302	260.200, 1.833	260.200, 1.816	260.200, 1.798	260.200, 1.734	260.200, 1.718
1303	260.400, 1.833	260.400, 1.816	260.400, 1.798	260.400, 1.734	260.400, 1.718
1304	260.600, 1.833	260.600, 1.815	260.600, 1.797	260.600, 1.734	260.600, 1.717
1305	260.800, 1.832	260.800, 1.815	260.800, 1.797	260.800, 1.733	260.800, 1.717
1306	261.000, 1.832	261.000, 1.814	261.000, 1.796	261.000, 1.733	261.000, 1.716
1307	261.200, 1.832	261.200, 1.814	261.200, 1.796	261.200, 1.732	261.200, 1.716
1308	261.400, 1.831	261.400, 1.813	261.400, 1.796	261.400, 1.732	261.400, 1.715
1309	261.600, 1.831	261.600, 1.813	261.600, 1.796	261.600, 1.731	261.600, 1.715
1310	261.800, 1.831	261.800, 1.813	261.800, 1.795	261.800, 1.730	261.800, 1.714
1311	262.000, 1.830	262.000, 1.813	262.000, 1.795	262.000, 1.730	262.000, 1.714
1312	262.200, 1.830	262.200, 1.813	262.200, 1.795	262.200, 1.729	262.200, 1.713
1313	262.400, 1.830	262.400, 1.813	262.400, 1.795	262.400, 1.729	262.400, 1.713
1314	262.600, 1.830	262.600, 1.812	262.600, 1.794	262.600, 1.728	262.600, 1.712
1315	262.800, 1.830	262.800, 1.812	262.800, 1.794	262.800, 1.728	262.800, 1.712
1316	263.000, 1.830	263.000, 1.812	263.000, 1.794	263.000, 1.728	263.000, 1.711
1317	263.200, 1.830	263.200, 1.812	263.200, 1.794	263.200, 1.727	263.200, 1.711
1318	263.400, 1.829	263.400, 1.812	263.400, 1.794	263.400, 1.727	263.400, 1.711
1319	263.600, 1.829	263.600, 1.812	263.600, 1.793	263.600, 1.727	263.600, 1.710
1320	263.800, 1.829	263.800, 1.812	263.800, 1.793	263.800, 1.726	263.800, 1.710
1321	264.000, 1.829	264.000, 1.812	264.000, 1.792	264.000, 1.726	264.000, 1.709
1322	264.200, 1.829	264.200, 1.811	264.200, 1.792	264.200, 1.726	264.200, 1.709
1323	264.400, 1.828	264.400, 1.811	264.400, 1.792	264.400, 1.725	264.400, 1.709
1324	264.600, 1.828	264.600, 1.811	264.600, 1.791	264.600, 1.725	264.600, 1.709
1325	264.800, 1.828	264.800, 1.810	264.800, 1.791	264.800, 1.724	264.800, 1.708
1326	265.000, 1.827	265.000, 1.810	265.000, 1.791	265.000, 1.724	265.000, 1.708
1327	265.200, 1.827	265.200, 1.810	265.200, 1.790	265.200, 1.723	265.200, 1.707
1328	265.400, 1.826	265.400, 1.810	265.400, 1.790	265.400, 1.723	265.400, 1.707
1329	265.600, 1.826	265.600, 1.810	265.600, 1.790	265.600, 1.723	265.600, 1.706
1330	265.800, 1.825	265.800, 1.809	265.800, 1.790	265.800, 1.722	265.800, 1.706
1331	266.000, 1.825	266.000, 1.809	266.000, 1.789	266.000, 1.722	266.000, 1.706
1332	266.200, 1.825	266.200, 1.809	266.200, 1.789	266.200, 1.722	266.200, 1.705
1333	266.400, 1.824	266.400, 1.809	266.400, 1.789	266.400, 1.721	266.400, 1.705
1334	266.600, 1.824	266.600, 1.809	266.600, 1.789	266.600, 1.721	266.600, 1.705
1335	266.800, 1.823	266.800, 1.809	266.800, 1.788	266.800, 1.721	266.800, 1.705
1336	267.000, 1.823	267.000, 1.809	267.000, 1.788	267.000, 1.720	267.000, 1.704
1337	267.200, 1.822	267.200, 1.809	267.200, 1.788	267.200, 1.720	267.200, 1.704
1338	267.400, 1.822	267.400, 1.809	267.400, 1.788	267.400, 1.719	267.400, 1.703
1339	267.600, 1.822	267.600, 1.808	267.600, 1.788	267.600, 1.718	267.600, 1.703
1340	267.800, 1.821	267.800, 1.808	267.800, 1.788	267.800, 1.718	267.800, 1.702
1341	268.000, 1.821	268.000, 1.808	268.000, 1.788	268.000, 1.717	268.000, 1.702
1342	268.200, 1.820	268.200, 1.807	268.200, 1.787	268.200, 1.716	268.200, 1.701
1343	268.400, 1.820	268.400, 1.807	268.400, 1.787	268.400, 1.716	268.400, 1.701
1344	268.600, 1.820	268.600, 1.807	268.600, 1.787	268.600, 1.715	268.600, 1.700
1345	268.800, 1.819	268.800, 1.807	268.800, 1.787	268.800, 1.715	268.800, 1.700
1346	269.000, 1.819	269.000, 1.807	269.000, 1.787	269.000, 1.715	269.000, 1.699
1347	269.200, 1.819	269.200, 1.806	269.200, 1.787	269.200, 1.714	269.200, 1.699
1348	269.400, 1.818	269.400, 1.806	269.400, 1.786	269.400, 1.714	269.400, 1.698
1349	269.600, 1.818	269.600, 1.806	269.600, 1.786	269.600, 1.714	269.600, 1.698
1350	269.800, 1.818	269.800, 1.806	269.800, 1.786	269.800, 1.714	269.800, 1.698
1351	,	,	,	,	,
1352	,	,	,	,	,
1353	,	,	,	,	,
1354	,	,	,	,	,
1355	,	,	,	,	,
1356	,	,	,	,	,
1357	,	,	,	,	,
1358	,	,	,	,	,
1359	,	,	,	,	,
1360	,	,	,	,	,
1361	,	,	,	,	,
1362	,	,	,	,	,
1363	,	,	,	,	,
1364	,	,	,	,	,
1365	,	,	,	,	,
1366	,	,	,	,	,
1367	,	,	,	,	,
1368	,	,	,	,	,
1369	,	,	,	,	,
1370	,	,	,	,	,
1371	,	,	,	,	,
1372	,	,	,	,	,
1373	,	,	,	,	,
1374	,	,	,	,	,
1375	,	,	,	,	,
1376	,	,	,	,	,
1377	,	,	,	,	,
1378	,	,	,	,	,
1379	,	,	,	,	,
1380	,	,	,	,	,
1381	,	,	,	,	,
1382	,	,	,	,	,
1383	,	,	,	,	,
1384	,	,	,	,	,
1385	,	,	,	,	,
1386	,	,	,	,	,
1387	,	,	,	,	,
1388	,	,	,	,	,
1389	,	,	,	,	,
1390	,	,	,	,	,
1391	,	,	,	,	,
1392	,	,	,	,	,
1393	,	,	,	,	,
1394	,	,	,	,	,
1395	,	,	,	,	,
1396	,	,	,	,	,
1397	,	,	,	,	,
1398	,	,	,	,	,
1399	,	,	,	,	,
1400	,	,	,	,	,
1401	,	,	,	,	,
1402	,	,	,	,	,
1403	,	,	,	,	,
1404	,	,	,	,	,
1405	,	,	,	,	,
1406	,	,	,	,	,
1407	,	,	,	,	,
1408	,	,	,	,	,
1409	,	,	,	,	,
1410	,	,	,	,	,
1411	,	,	,	,	,
1412	,	,	,	,	,
1413	,	,	,	,	,
1414	,	,	,	,	,
1415	,	,	,	,	,
1416	,	,	,	,	,
1417	,	,	,	,	,
1418	,	,	,	,	,
1419	,	,	,	,	,
1420	,	,	,	,	,
1421	,	,	,	,	,
1422	,	,	,	,	,
1423	,	,	,	,	,
1424	,	,	,	,	,
1425	,	,	,	,	,
1426	,	,	,	,	,
1427	,	,	,	,	,
1428	,	,	,	,	,
1429	,	,	,	,	,
1430	,	,	,	,	,
1431	,	,	,	,	,
1432	,	,	,	,	,
1433	,	,	,	,	,
1434	,	,	,	,	,
1435	,	,	,	,	,
1436	,	,	,	,	,
1437	,	,	,	,	,
1438	,	,	,	,	,
1439	,	,	,	,	,
1440	,	,	,	,	,
1441	,	,	,	,	,
1442	,	,	,	,	,
1443	,	,	,	,	,
1444	,	,	,	,	,
1445	,	,	,	,	,
1446	,	,	,	,	,
1447	,	,	,	,	,
1448	,	,	,	,	,
1449	,	,	,	,	,
1450	,	,	,	,	,
1451	,	,	,	,	,
1452	,	,	,	,	,
1453	,	,	,	,	,
1454	,	,	,	,	,
1455	,	,	,	,	,
1456	,	,	,	,	,
1457	,	,	,	,	,
1458	,	,	,	,	,
1459	,	,	,	,	,
1460	,	,	,	,	,
1461	,	,	,	,	,
1462	,	,	,	,	,
1463	,	,	,	,	,
1464	,	,	,	,	,
1465	,	,	,	,	,
1466	,	,	,	,	,
1467	,	,	,	,	,
1468	,	,	,	,	,
1469	,	,	,	,	,
1470	,	,	,	,	,
1471	,	,	,	,	,
1472	,	,	,	,	,
1473	,	,	,	,	,
1474	,	,	,	,	,
1475	,	,	,	,	,
1476	,	,	,	,	,
1477	,	,	,	,	,
1478	,	,	,	,	,
1479	,	,	,	,	,
1480	,	,	,	,	,
1481	,	,	,	,	,
1482	,	,	,	,	,
1483	,	,	,	,	,
1484	,	,	,	,	,
1485	,	,	,	,	,
1486	,	,	,	,	,
1487	,	,	,	,	,
1488	,	,	,	,	,
1489	,	,	,	,	,
1490	,	,	,	,	,
1491	,	,	,	,	,
1492	,	,	,	,	,
1493	,	,	,	,	,
1494	,	,	,	,	,
1495	,	,	,	,	,
1496	,	,	,	,	,
1497	,	,	,	,	,
1498	,	,	,	,	,
1499	,	,	,	,	,
1500	,	,	,	,	,
1501	,	,	,	,	,
1502	,	,	,	,	,
1503	,	,	,	,	,
1504	,	,	,	,	,
1505	,	,	,	,	,
1506	,	,	,	,	,
1507	,	,	,	,	,
1508	,	,	,	,	,
1509	,	,	,	,	,
1510	,	,	,	,	,
1511	,	,	,	,	,
1512	,	,	,	,	,
1513	,	,	,	,	,
1514	,	,	,	,	,
1515	,	,	,	,	,
1516	,	,	,	,	,
1517	,	,	,	,	,
1518	,	,	,	,	,
1519	,	,	,	,	,
1520	,	,	,	,	,
1521	,	,	,	,	,
1522	,	,	,	,	,
1523	,	,	,	,	,
1524	,	,	,	,	,
1525	,	,	,	,	,
1526	,	,	,	,	,
1527	,	,	,	,	,
1528	,	,	,	,	,
1529	,	,	,	,	,
1530	,	,	,	,	,
1531	,	,	,	,	,
1532	,	,	,	,	,
1533	,	,	,	,	,
1534	,	,	,	,	,
1535	,	,	,	,	,
1536	,	,	,	,	,
1537	,	,	,	,	,
1538	,	,	,	,	,
1539	,	,	,	,	,
1540	,	,	,	,	,
1541	,	,	,	,	,
1542	,	,	,	,	,
1543	,	,	,	,	,
1544	,	,	,	,	,
1545	,	,	,	,	,
1546	,	,	,	,	,
1547	,	,	,	,	,
1548	,	,	,	,	,
1549	,	,	,	,	,
1550	,	,	,	,	,
1551	,	,	,	,	,
1552	,	,	,	,	,
1553	,	,	,	,	,
1554	,	,	,	,	,
1555	,	,	,	,	,
1556	,	,	,	,	,
1557	,	,	,	,	,
1558	,	,	,	,	,
1559	,	,	,	,	,
1560	,	,	,	,	,
1561	,	,	,	,	,
1562	,	,	,	,	,
1563	,	,	,	,	,
1564	,	,	,	,	,
1565	,	,	,	,	,
1566	,	,	,	,	,
1567	,	,	,	,	,
1568	,	,	,	,	,
1569	,	,	,	,	,
1570	,	,	,	,	,
1571	,	,	,	,	,
1572	,	,	,	,	,
1573	,	,	,	,	,
1574	,	,	,	,	,
1575	,	,	,	,	,
1576	,	,	,	,	,
1577	,	,	,	,	,
1578	,	,	,	,	,
1579	,	,	,	,	,
1580	,	,	,	,	,
1581	,	,	,	,	,
1582	,	,	,	,	,
1583	,	,	,	,	,
1584	,	,	,	,	,
1585	,	,	,	,	,
1586	,	,	,	,	,
1587	,	,	,	,	,
1588	,	,	,	,	,
1589	,	,	,	,	,
1590	,	,	,	,	,
1591	,	,	,	,	,
1592	,	,	,	,	,
1593	,	,	,	,	,
1594	,	,	,	,	,
1595	,	,	,	,	,
1596	,	,	,	,	,
1597	,	,	,	,	,
1598	,	,	,	,	,
1599	,	,	,	,	,
1600	,	,	,	,	,
1601	,	,	,	,	,
1602	,	,	,	,	,
1603	,	,	,	,	,
1604	,	,	,	,	,
1605	,	,	,	,	,
1606	,	,	,	,	,
1607	,	,	,	,	,
1608	,	,	,	,	,
1609	,	,	,	,	,
1610	,	,	,	,	,
1611	,	,	,	,	,
1612	,	,	,	,	,
1613	,	,	,	,	,
1614	,	,	,	,	,
1615	,	,	,	,	,
1616	,	,	,	,	,
1617	,	,	,	,	,
1618	,	,	,	,	,
1619	,	,	,	,	,
1620	,	,	,	,	,
1621	,	,	,	,	,
1622	,	,	,	,	,
1623	,	,	,	,	,
1624	,	,	,	,	,
1625	,	,	,	,	,
1626	,	,	,	,	,
1627	,	,	,	,	,
1628	,	,	,	,	,
1629	,	,	,	,	,
1630	,	,	,	,	,
1631	,	,	,	,	,
1632	,	,	,	,	,
1633	,	,	,	,	,
1634	,	,	,	,	,
1635	,	,	,	,	,
1636	,	,	,	,	,
1637	,	,	,	,	,
1638	,	,	,	,	,
1639	,	,	,	,	,
1640	,	,	,	,	,
1641	,	,	,	,	,
1642	,	,	,	,	,
1643	,	,	,	,	,
1644	,	,	,	,	,
1645	,	,	,	,	,
1646	,	,	,	,	,
1647	,	,	,	,	,
1648	,	,	,	,	,
1649	,	,	,	,	,
1650	,	,	,	,	,
1651	,	,	,	,	,
1652	,	,	,	,	,
1653	,	,	,	,	,
1654	,	,	,	,	,
1655	,	,	,	,	,
1656	,	,	,	,	,
1657	,	,	,	,	,
1658	,	,	,	,	,
1659	,	,	,	,	,
1660	,	,	,	,	,
1661	,	,	,	,	,
1662	,	,	,	,	,
1663	,	,	,	,	,
1664	,	,	,	,	,
1665	,	,	,	,	,
1666	,	,	,	,	,
1667	,	,	,	,	,
1668	,	,	,	,	,
1669	,	,	,	,	,
1670	,	,	,	,	,
1671	,	,	,	,	,
1672	,	,	,	,	,
1673	,	,	,	,	,
1674	,	,	,	,	,
1675	,	,	,	,	,
1676	,	,	,	,	,
1677	,	,	,	,	,
1678	,	,	,	,	,
1679	,	,	,	,	,
1680	,	,	,	,	,
1681	,	,	,	,	,
1682	,	,	,	,	,
1683	,	,	,	,	,
1684	,	,	,	,	,
1685	,	,	,	,	,
1686	,	,	,	,	,
1687	,	,	,	,	,
1688	,	,	,	,	,
1689	,	,	,	,	,
1690	,	,	,	,	,
1691	,	,	,	,	,
1692	,	,	,	,	,
1693	,	,	,	,	,
1694	,	,	,	,	,
1695	,	,	,	,	,
1696	,	,	,	,	,
1697	,	,	,	,	,
1698	,	,	,	,	,
1699	,	,	,	,	,
1700	,	,	,	,	,
1701	,	,	,	,	,
1702	,	,	,	,	,
1703	,	,	,	,	,
1704	,	,	,	,	,
1705	,	,	,	,	,
1706	,	,	,	,	,
1707	,	,	,	,	,
1708	,	,	,	,	,
1709	,	,	,	,	,
1710	,	,	,	,	,
1711	,	,	,	,	,
1712	,	,	,	,	,
1713	,	,	,	,	,
1714	,	,	,	,	,
1715	,	,	,	,	,
1716	,	,	,	,	,
1717	,	,	,	,	,
1718	,	,	,	,	,
1719	,	,	,	,	,
1720	,	,	,	,	,
1721	,	,	,	,	,
1722	,	,	,	,	,
1723	,	,	,	,	,
1724	,	,	,	,	,
1725	,	,	,	,	,
1726	,	,	,	,	,
1727	,	,	,	,	,
1728	,	,	,	,	,
1729	,	,	,	,	,
1730	,	,	,	,	,
1731	,	,	,	,	,
1732	,	,	,	,	,
1733	,	,	,	,	,
1734	,	,	,	,	,
1735	,	,	,	,	,
1736	,	,	,	,	,
1737	,	,	,	,	,
1738	,	,	,	,	,
1739	,	,	,	,	,
1740	,	,	,	,	,
1741	,	,	,	,	,
1742	,	,	,	,	,
1743	,	,	,	,	,
1744	,	,	,	,	,
1745	,	,	,	,	,
1746	,	,	,	,	,
1747	,	,	,	,	,
1748	,	,	,	,	,
1749	,	,	,	,	,
1750	,	,	,	,	,
1751	,	,	,	,	,
1752	,	,	,	,	,
1753	,	,	,	,	,
1754	,	,	,	,	,
1755	,	,	,	,	,
1756	,	,	,	,	,
1757	,	,	,	,	,
1758	,	,	,	,	,
1759	,	,	,	,	,
1760	,	,	,	,	,
1761	,	,	,	,	,
1762	,	,	,	,	,
1763	,	,	,	,	,
1764	,	,	,	,	,
1765	,	,	,	,	,
1766	,	,	,	,	,
1767	,	,	,	,	,
1768	,	,	,	,	,
1769	,	,	,	,	,
1770	,	,	,	,	,
1771	,	,	,	,	,
1772	,	,	,	,	,
1773	,	,	,	,	,
1774	,	,	,	,	,
1775	,	,	,	,	,
1776	,	,	,	,	,
1777	,	,	,	,	,
1778	,	,	,	,	,
1779	,	,	,	,	,
1780	,	,	,	,	,
1781	,	,	,	,	,
1782	,	,	,	,	,
1783	,	,	,	,	,
1784	,	,	,	,	,
1785	,	,	,	,	,
1786	,	,	,	,	,
1787	,	,	,	,	,
1788	,	,	,	,	,
1789	,	,	,	,	,
1790	,	,	,	,	,
1791	,	,	,	,	,
1792	,	,	,	,	,
1793	,	,	,	,	,
1794	,	,	,	,	,
1795	,	,	,	,	,
1796	,	,	,	,	,
1797	,	,	,	,	,
1798	,	,	,	,	,
1799	,	,	,	,	,
1800	,	,	,	,	,
1801	,	,	,	,	,
1802	,	,	,	,	,
1803	,	,	,	,	,
1804	,	,	,	,	,
1805	,	,	,	,	,
1806	,	,	,	,	,
1807	,	,	,	,	,
1808	,	,	,	,	,
1809	,	,	,	,	,
1810	,	,	,	,	,
1811	,	,	,	,	,
1812	,	,	,	,	,
1813	,	,	,	,	,
1814	,	,	,	,	,
1815	,	,	,	,	,
1816	,	,	,	,	,
1817	,	,	,	,	,
1818	,	,	,	,	,
1819	,	,	,	,	,
1820	,	,	,	,	,
1821	,	,	,	,	,
1822	,	,	,	,	,
1823	,	,	,	,	,
1824	,	,	,	,	,
1825	,	,	,	,	,
1826	,	,	,	,	,
1827	,	,	,	,	,
1828	,	,	,	,	,
1829	,	,	,	,	,
1830	,	,	,	,	,
1831	,	,	,	,	,
1832	,	,	,	,	,
1833	,	,	,	,	,
1834	,	,	,	,	,
1835	,	,	,	,	,
1836	,	,	,	,	,
1837	,	,	,	,	,
1838	,	,	,	,	,
1839	,	,	,	,	,
1840	,	,	,	,	,
1841	,	,	,	,	,
1842	,	,	,	,	,
1843	,	,	,	,	,
1844	,	,	,	,	,
1845	,	,	,	,	,
1846	,	,	,	,	,
1847	,	,	,	,	,
1848	,	,	,	,	,
1849	,	,	,	,	,
1850	,	,	,	,	,
1851	,	,	,	,	,
1852	,	,	,	,	,
1853	,	,	,	,	,
1854	,	,	,	,	,
1855	,	,	,	,	,
1856	,	,	,	,	,
1857	,	,	,	,	,
1858	,	,	,	,	,
1859	,	,	,	,	,
1860	,	,	,	,	,
1861	,	,	,	,	,
1862	,	,	,	,	,
1863	,	,	,	,	,
1864	,	,	,	,	,
1865	,	,	,	,	,
1866	,	,	,	,	,
1867	,	,	,	,	,
1868	,	,	,	,	,
1869	,	,	,	,	,
1870	,	,	,	,	,
1871	,	,	,	,	,
1872	,	,	,	,	,
1873	,	,	,	,	,
1874	,	,	,	,	,
1875	,	,	,	,	,
1876	,	,	,	,	,
1877	,	,	,	,	,
1878	,	,	,	,	,
1879	,	,	,	,	,
1880	,	,	,	,	,
1881	,	,	,	,	,
1882	,	,	,	,	,
1883	,	,	,	,	,
1884	,	,	,	,	,
1885	,	,	,	,	,
1886	,	,	,	,	,
1887	,	,	,	,	,
1888	,	,	,	,	,
1889	,	,	,	,	,
1890	,	,	,	,	,
1891	,	,	,	,	,
1892	,	,	,	,	,
1893	,	,	,	,	,
1894	,	,	,	,	,
1895	,	,	,	,	,
1896	,	,	,	,	,
1897	,	,	,	,	,
1898	,	,	,	,	,
1899	,	,	,	,	,
1900	,	,	,	,	,
1901	,	,	,	,	,
1902	,	,	,	,	,
1903	,	,	,	,	,
1904	,	,	,	,	,
1905	,	,	,	,	,
1906	,	,	,	,	,
1907	,	,	,	,	,
1908	,	,	,	,	,
1909	,	,	,	,	,
1910	,	,	,	,	,
1911	,	,	,	,	,
1912	,	,	,	,	,
1913	,	,	,	,	,
1914	,	,	,	,	,
1915	,	,	,	,	,
1916	,	,	,	,	,
1917	,	,	,	,	,
1918	,	,	,	,	,
1919	,	,	,	,	,
1920	,	,	,	,	,
1921	,	,	,	,	,
1922	,	,	,	,	,
1923	,	,	,	,	,
1924	,	,	,	,	,
1925	,	,	,	,	,
1926	,	,	,	,	,
1927	,	,	,	,	,
1928	,	,	,	,	,
1929	,	,	,	,	,
1930	,	,	,	,	,
1931	,	,	,	,	,
1932	,	,	,	,	,
1933	,	,	,	,	,
1934	,	,	,	,	,
1935	,	,	,	,	,
1936	,	,	,	,	,
1937	,	,	,	,	,
1938	,	,	,	,	,
1939	,	,	,	,	,
1940	,	,	,	,	,
1941	,	,	,	,	,
1942	,	,	,	,	,
1943	,	,	,	,	,
1944	,	,	,	,	,
1945	,	,	,	,	,
1946	,	,	,	,	,
1947	,	,	,	,	,
1948	,	,	,	,	,
1949	,	,	,	,	,
1950	,	,	,	,	,
1951	,	,	,	,	,
1952	,	,	,	,	,
1953	,	,	,	,	,
1954	,	,	,	,	,
1955	,	,	,	,	,
1956	,	,	,	,	,
1957	,	,	,	,	,
1958	,	,	,	,	,
1959	,	,	,	,	,
1960	,	,	,	,	,
1961	,	,	,	,	,
1962	,	,	,	,	,
1963	,	,	,	,	,
1964	,	,	,	,	,
1965	,	,	,	,	,
1966	,	,	,	,	,
1967	,	,	,	,	,
1968	,	,	,	,	,
1969	,	,	,	,	,
1970	,	,	,	,	,
1971	,	,	,	,	,
1972	,	,	,	,	,
1973	,	,	,	,	,
1974	,	,	,	,	,
1975	,	,	,	,	,
1976	,	,	,	,	,
1977	,	,	,	,	,
1978	,	,	,	,	,
1979	,	,	,	,	,
1980	,	,	,	,	,
1981	,	,	,	,	,
1982	,	,	,	,	,
1983	,	,	,	,	,
1984	,	,	,	,	,
1985	,	,	,	,	,
1986	,	,	,	,	,
1987	,	,	,	,	,
1988	,	,	,	,	,
1989	,	,	,	,	,
1990	,	,	,	,	,
1991	,	,	,	,	,
1992	,	,	,	,	,
1993	,	,	,	,	,
1994	,	,	,	,	,
1995	,	,	,	,	,
1996	,	,	,	,	,
1997	,	,	,	,	,
1998	,	,	,	,	,
1999	,	,	,	,	,
[truncated: 13,001 more rows]
