# Supplementary material for: ParB spreading on DNA requires cytidine triphosphate in vitro
Source: eLife journal article supplement (doi:10.7554/elife.53515), 2020-02-20
Supplement: fig1-data1 [file Figure1_panelD.xlsx]

## Sheet: FORMAT
	sample ID #1	sample ID #2	sample ID #3
data point	time point (sec), wavelength shift (nm)	time point (sec), wavelength shift (nm)	time point (sec), wavelength shift (nm)
1
2
3
.
.
.

## Sheet: Figure1_panelD_rep1
	parS20 ParB-dissociation to buffer only	parS20 ParB-dissociation to buffer with CTP
1	0.000, 0.000	0.000, -0.021
2	0.200, 0.001	0.200, -0.020
3	0.400, 0.001	0.400, -0.019
4	0.600, 0.002	0.600, -0.018
5	0.800, 0.002	0.800, -0.017
6	1.000, 0.002	1.000, -0.016
7	1.200, 0.003	1.200, -0.014
8	1.400, 0.003	1.400, -0.013
9	1.600, 0.003	1.600, -0.012
10	1.800, 0.003	1.800, -0.011
11	2.000, 0.003	2.000, -0.009
12	2.200, 0.003	2.200, -0.008
13	2.400, 0.003	2.400, -0.008
14	2.600, 0.003	2.600, -0.007
15	2.800, 0.004	2.800, -0.006
16	3.000, 0.004	3.000, -0.005
17	3.200, 0.004	3.200, -0.004
18	3.400, 0.004	3.400, -0.004
19	3.600, 0.004	3.600, -0.003
20	3.800, 0.004	3.800, -0.003
21	4.000, 0.004	4.000, -0.003
22	4.200, 0.004	4.200, -0.002
23	4.400, 0.004	4.400, -0.002
24	4.600, 0.005	4.600, -0.002
25	4.800, 0.005	4.800, -0.002
26	5.000, 0.005	5.000, -0.002
27	5.200, 0.005	5.200, -0.002
28	5.400, 0.005	5.400, -0.002
29	5.600, 0.005	5.600, -0.002
30	5.800, 0.005	5.800, -0.002
31	6.000, 0.005	6.000, -0.002
32	6.200, 0.005	6.200, -0.002
33	6.400, 0.005	6.400, -0.002
34	6.600, 0.005	6.600, -0.002
35	6.800, 0.005	6.800, -0.002
36	7.000, 0.005	7.000, -0.003
37	7.200, 0.005	7.200, -0.003
38	7.400, 0.005	7.400, -0.003
39	7.600, 0.005	7.600, -0.003
40	7.800, 0.005	7.800, -0.003
41	8.000, 0.005	8.000, -0.003
42	8.200, 0.004	8.200, -0.003
43	8.400, 0.004	8.400, -0.002
44	8.600, 0.004	8.600, -0.002
45	8.800, 0.004	8.800, -0.002
46	9.000, 0.003	9.000, -0.002
47	9.200, 0.003	9.200, -0.001
48	9.400, 0.003	9.400, -0.001
49	9.600, 0.003	9.600, -0.001
50	9.800, 0.002	9.800, -0.001
51	10.000, 0.002	10.000, -0.000
52	10.200, 0.002	10.200, -0.000
53	10.400, 0.002	10.400, 0.000
54	10.600, 0.001	10.600, 0.000
55	10.800, 0.001	10.800, 0.000
56	11.000, 0.001	11.000, 0.000
57	11.200, 0.001	11.200, 0.000
58	11.400, 0.001	11.400, -0.000
59	11.600, 0.000	11.600, -0.000
60	11.800, 0.000	11.800, -0.000
61	12.000, 0.000	12.000, -0.001
62	12.200, -0.000	12.200, -0.001
63	12.400, -0.000	12.400, -0.001
64	12.600, -0.000	12.600, -0.001
65	12.800, -0.001	12.800, -0.001
66	13.000, -0.001	13.000, -0.001
67	13.200, -0.000	13.200, -0.001
68	13.400, -0.000	13.400, -0.001
69	13.600, -0.000	13.600, -0.001
70	13.800, -0.000	13.800, -0.001
71	14.000, -0.000	14.000, -0.001
72	14.200, -0.001	14.200, -0.001
73	14.400, -0.001	14.400, -0.000
74	14.600, -0.000	14.600, -0.000
75	14.800, -0.000	14.800, -0.000
76	15.000, -0.000	15.000, -0.000
77	15.200, -0.000	15.200, -0.000
78	15.400, -0.000	15.400, -0.000
79	15.600, 0.000	15.600, -0.000
80	15.800, 0.000	15.800, -0.001
81	16.000, 0.000	16.000, -0.000
82	16.200, 0.000	16.200, -0.000
83	16.400, 0.001	16.400, -0.000
84	16.600, 0.001	16.600, -0.000
85	16.800, 0.001	16.800, 0.000
86	17.000, 0.001	17.000, 0.000
87	17.200, 0.002	17.200, 0.000
88	17.400, 0.002	17.400, 0.000
89	17.600, 0.002	17.600, -0.000
90	17.800, 0.002	17.800, -0.000
91	18.000, 0.001	18.000, -0.000
92	18.200, 0.001	18.200, -0.001
93	18.400, 0.001	18.400, -0.001
94	18.600, 0.001	18.600, -0.001
95	18.800, 0.000	18.800, -0.001
96	19.000, 0.000	19.000, -0.001
97	19.200, -0.000	19.200, -0.002
98	19.400, -0.000	19.400, -0.002
99	19.600, -0.001	19.600, -0.002
100	19.800, -0.001	19.800, -0.002
101	20.000, -0.001	20.000, -0.001
102	20.200, -0.001	20.200, -0.001
103	20.400, -0.001	20.400, -0.001
104	20.600, -0.001	20.600, -0.000
105	20.800, -0.000	20.800, 0.000
106	21.000, -0.000	21.000, 0.000
107	21.200, 0.000	21.200, 0.000
108	21.400, 0.000	21.400, 0.001
109	21.600, 0.000	21.600, 0.001
110	21.800, 0.001	21.800, 0.001
111	22.000, 0.001	22.000, 0.001
112	22.200, 0.001	22.200, 0.001
113	22.400, 0.000	22.400, 0.001
114	22.600, 0.000	22.600, 0.001
115	22.800, 0.000	22.800, 0.001
116	23.000, 0.000	23.000, 0.000
117	23.200, 0.000	23.200, 0.000
118	23.400, 0.000	23.400, 0.000
119	23.600, 0.000	23.600, 0.000
120	23.800, 0.000	23.800, -0.000
121	24.000, 0.000	24.000, 0.000
122	24.200, 0.000	24.200, 0.000
123	24.400, 0.000	24.400, 0.000
124	24.600, 0.000	24.600, 0.000
125	24.800, 0.000	24.800, 0.000
126	25.000, 0.000	25.000, 0.000
127	25.200, 0.000	25.200, 0.000
128	25.400, 0.000	25.400, 0.000
129	25.600, -0.000	25.600, 0.000
130	25.800, -0.000	25.800, 0.000
131	26.000, -0.000	26.000, 0.001
132	26.200, -0.001	26.200, 0.001
133	26.400, -0.001	26.400, 0.001
134	26.600, -0.001	26.600, 0.001
135	26.800, -0.001	26.800, 0.001
136	27.000, -0.000	27.000, 0.001
137	27.200, -0.000	27.200, 0.000
138	27.400, -0.000	27.400, 0.000
139	27.600, -0.000	27.600, 0.001
140	27.800, 0.000	27.800, 0.000
141	28.000, 0.000	28.000, 0.000
142	28.200, 0.000	28.200, 0.000
143	28.400, 0.000	28.400, 0.000
144	28.600, 0.000	28.600, 0.000
145	28.800, 0.000	28.800, -0.000
146	29.000, 0.000	29.000, -0.000
147	29.200, 0.000	29.200, -0.001
148	29.400, -0.000	29.400, -0.001
149	29.600, -0.000	29.600, -0.001
150	29.800, -0.000	29.800, -0.001
151	30.000, 0.000	30.000, 0.000
152	30.200, 0.023	30.200, 0.023
153	30.400, 0.051	30.400, 0.050
154	30.600, 0.082	30.600, 0.081
155	30.800, 0.118	30.800, 0.117
156	31.000, 0.157	31.000, 0.155
157	31.200, 0.198	31.200, 0.197
158	31.400, 0.240	31.400, 0.239
159	31.600, 0.283	31.600, 0.283
160	31.800, 0.324	31.800, 0.326
161	32.000, 0.364	32.000, 0.366
162	32.200, 0.400	32.200, 0.403
163	32.400, 0.434	32.400, 0.437
164	32.600, 0.465	32.600, 0.470
165	32.800, 0.495	32.800, 0.501
166	33.000, 0.524	33.000, 0.530
167	33.200, 0.549	33.200, 0.556
168	33.400, 0.573	33.400, 0.581
169	33.600, 0.596	33.600, 0.604
170	33.800, 0.616	33.800, 0.625
171	34.000, 0.635	34.000, 0.644
172	34.200, 0.652	34.200, 0.661
173	34.400, 0.667	34.400, 0.676
174	34.600, 0.681	34.600, 0.690
175	34.800, 0.693	34.800, 0.703
176	35.000, 0.704	35.000, 0.714
177	35.200, 0.714	35.200, 0.725
178	35.400, 0.723	35.400, 0.733
179	35.600, 0.731	35.600, 0.741
180	35.800, 0.738	35.800, 0.748
181	36.000, 0.744	36.000, 0.754
182	36.200, 0.750	36.200, 0.759
183	36.400, 0.755	36.400, 0.764
184	36.600, 0.759	36.600, 0.768
185	36.800, 0.763	36.800, 0.772
186	37.000, 0.766	37.000, 0.775
187	37.200, 0.769	37.200, 0.778
188	37.400, 0.772	37.400, 0.780
189	37.600, 0.774	37.600, 0.782
190	37.800, 0.777	37.800, 0.784
191	38.000, 0.779	38.000, 0.786
192	38.200, 0.780	38.200, 0.788
193	38.400, 0.782	38.400, 0.789
194	38.600, 0.783	38.600, 0.790
195	38.800, 0.784	38.800, 0.792
196	39.000, 0.785	39.000, 0.792
197	39.200, 0.786	39.200, 0.793
198	39.400, 0.787	39.400, 0.794
199	39.600, 0.788	39.600, 0.794
200	39.800, 0.789	39.800, 0.795
201	40.000, 0.789	40.000, 0.795
202	40.200, 0.790	40.200, 0.796
203	40.400, 0.790	40.400, 0.796
204	40.600, 0.790	40.600, 0.797
205	40.800, 0.790	40.800, 0.797
206	41.000, 0.790	41.000, 0.797
207	41.200, 0.790	41.200, 0.798
208	41.400, 0.790	41.400, 0.798
209	41.600, 0.791	41.600, 0.798
210	41.800, 0.791	41.800, 0.798
211	42.000, 0.791	42.000, 0.798
212	42.200, 0.792	42.200, 0.798
213	42.400, 0.792	42.400, 0.798
214	42.600, 0.792	42.600, 0.798
215	42.800, 0.793	42.800, 0.798
216	43.000, 0.793	43.000, 0.798
217	43.200, 0.793	43.200, 0.798
218	43.400, 0.793	43.400, 0.798
219	43.600, 0.794	43.600, 0.798
220	43.800, 0.794	43.800, 0.799
221	44.000, 0.794	44.000, 0.799
222	44.200, 0.794	44.200, 0.800
223	44.400, 0.794	44.400, 0.800
224	44.600, 0.794	44.600, 0.801
225	44.800, 0.794	44.800, 0.801
226	45.000, 0.794	45.000, 0.801
227	45.200, 0.794	45.200, 0.801
228	45.400, 0.794	45.400, 0.801
229	45.600, 0.795	45.600, 0.801
230	45.800, 0.795	45.800, 0.801
231	46.000, 0.795	46.000, 0.801
232	46.200, 0.795	46.200, 0.800
233	46.400, 0.794	46.400, 0.800
234	46.600, 0.794	46.600, 0.800
235	46.800, 0.794	46.800, 0.800
236	47.000, 0.794	47.000, 0.800
237	47.200, 0.793	47.200, 0.800
238	47.400, 0.793	47.400, 0.800
239	47.600, 0.793	47.600, 0.800
240	47.800, 0.793	47.800, 0.801
241	48.000, 0.793	48.000, 0.801
242	48.200, 0.793	48.200, 0.801
243	48.400, 0.793	48.400, 0.802
244	48.600, 0.793	48.600, 0.802
245	48.800, 0.793	48.800, 0.802
246	49.000, 0.793	49.000, 0.802
247	49.200, 0.793	49.200, 0.802
248	49.400, 0.793	49.400, 0.802
249	49.600, 0.794	49.600, 0.802
250	49.800, 0.794	49.800, 0.802
251	50.000, 0.794	50.000, 0.802
252	50.200, 0.794	50.200, 0.802
253	50.400, 0.795	50.400, 0.802
254	50.600, 0.795	50.600, 0.802
255	50.800, 0.795	50.800, 0.801
256	51.000, 0.796	51.000, 0.801
257	51.200, 0.796	51.200, 0.801
258	51.400, 0.796	51.400, 0.801
259	51.600, 0.796	51.600, 0.801
260	51.800, 0.796	51.800, 0.801
261	52.000, 0.796	52.000, 0.802
262	52.200, 0.796	52.200, 0.802
263	52.400, 0.796	52.400, 0.802
264	52.600, 0.796	52.600, 0.801
265	52.800, 0.796	52.800, 0.801
266	53.000, 0.795	53.000, 0.801
267	53.200, 0.795	53.200, 0.801
268	53.400, 0.794	53.400, 0.801
269	53.600, 0.794	53.600, 0.801
270	53.800, 0.794	53.800, 0.800
271	54.000, 0.793	54.000, 0.800
272	54.200, 0.793	54.200, 0.800
273	54.400, 0.793	54.400, 0.800
274	54.600, 0.794	54.600, 0.800
275	54.800, 0.794	54.800, 0.800
276	55.000, 0.794	55.000, 0.800
277	55.200, 0.794	55.200, 0.800
278	55.400, 0.795	55.400, 0.800
279	55.600, 0.795	55.600, 0.801
280	55.800, 0.796	55.800, 0.801
281	56.000, 0.797	56.000, 0.801
282	56.200, 0.798	56.200, 0.801
283	56.400, 0.799	56.400, 0.802
284	56.600, 0.799	56.600, 0.802
285	56.800, 0.800	56.800, 0.802
286	57.000, 0.800	57.000, 0.802
287	57.200, 0.800	57.200, 0.802
288	57.400, 0.800	57.400, 0.802
289	57.600, 0.800	57.600, 0.802
290	57.800, 0.800	57.800, 0.802
291	58.000, 0.799	58.000, 0.802
292	58.200, 0.799	58.200, 0.802
293	58.400, 0.799	58.400, 0.802
294	58.600, 0.799	58.600, 0.802
295	58.800, 0.799	58.800, 0.802
296	59.000, 0.799	59.000, 0.802
297	59.200, 0.799	59.200, 0.802
298	59.400, 0.799	59.400, 0.802
299	59.600, 0.799	59.600, 0.801
300	59.800, 0.799	59.800, 0.801
301	60.000, 0.799	60.000, 0.801
302	60.200, 0.799	60.200, 0.801
303	60.400, 0.799	60.400, 0.801
304	60.600, 0.800	60.600, 0.800
305	60.800, 0.800	60.800, 0.800
306	61.000, 0.800	61.000, 0.800
307	61.200, 0.801	61.200, 0.800
308	61.400, 0.801	61.400, 0.800
309	61.600, 0.801	61.600, 0.801
310	61.800, 0.801	61.800, 0.801
311	62.000, 0.802	62.000, 0.801
312	62.200, 0.802	62.200, 0.802
313	62.400, 0.802	62.400, 0.802
314	62.600, 0.802	62.600, 0.802
315	62.800, 0.802	62.800, 0.802
316	63.000, 0.803	63.000, 0.802
317	63.200, 0.803	63.200, 0.803
318	63.400, 0.803	63.400, 0.803
319	63.600, 0.803	63.600, 0.803
320	63.800, 0.803	63.800, 0.803
321	64.000, 0.803	64.000, 0.803
322	64.200, 0.803	64.200, 0.803
323	64.400, 0.803	64.400, 0.803
324	64.600, 0.803	64.600, 0.803
325	64.800, 0.803	64.800, 0.802
326	65.000, 0.803	65.000, 0.802
327	65.200, 0.803	65.200, 0.802
328	65.400, 0.804	65.400, 0.802
329	65.600, 0.804	65.600, 0.802
330	65.800, 0.803	65.800, 0.802
331	66.000, 0.803	66.000, 0.801
332	66.200, 0.803	66.200, 0.801
333	66.400, 0.803	66.400, 0.801
334	66.600, 0.803	66.600, 0.801
335	66.800, 0.803	66.800, 0.801
336	67.000, 0.803	67.000, 0.801
337	67.200, 0.804	67.200, 0.801
338	67.400, 0.804	67.400, 0.801
339	67.600, 0.804	67.600, 0.801
340	67.800, 0.804	67.800, 0.801
341	68.000, 0.804	68.000, 0.801
342	68.200, 0.805	68.200, 0.801
343	68.400, 0.805	68.400, 0.801
344	68.600, 0.805	68.600, 0.801
345	68.800, 0.805	68.800, 0.800
346	69.000, 0.805	69.000, 0.800
347	69.200, 0.804	69.200, 0.800
348	69.400, 0.804	69.400, 0.800
349	69.600, 0.804	69.600, 0.800
350	69.800, 0.804	69.800, 0.800
351	70.000, 0.805	70.000, 0.800
352	70.200, 0.805	70.200, 0.799
353	70.400, 0.805	70.400, 0.800
354	70.600, 0.805	70.600, 0.800
355	70.800, 0.805	70.800, 0.800
356	71.000, 0.805	71.000, 0.800
357	71.200, 0.805	71.200, 0.800
358	71.400, 0.806	71.400, 0.801
359	71.600, 0.806	71.600, 0.801
360	71.800, 0.806	71.800, 0.801
361	72.000, 0.806	72.000, 0.801
362	72.200, 0.806	72.200, 0.801
363	72.400, 0.806	72.400, 0.801
364	72.600, 0.806	72.600, 0.801
365	72.800, 0.806	72.800, 0.801
366	73.000, 0.806	73.000, 0.801
367	73.200, 0.806	73.200, 0.801
368	73.400, 0.806	73.400, 0.801
369	73.600, 0.806	73.600, 0.801
370	73.800, 0.807	73.800, 0.802
371	74.000, 0.807	74.000, 0.802
372	74.200, 0.807	74.200, 0.802
373	74.400, 0.807	74.400, 0.802
374	74.600, 0.808	74.600, 0.802
375	74.800, 0.808	74.800, 0.802
376	75.000, 0.808	75.000, 0.803
377	75.200, 0.808	75.200, 0.803
378	75.400, 0.808	75.400, 0.803
379	75.600, 0.808	75.600, 0.803
380	75.800, 0.808	75.800, 0.803
381	76.000, 0.808	76.000, 0.803
382	76.200, 0.808	76.200, 0.803
383	76.400, 0.808	76.400, 0.803
384	76.600, 0.808	76.600, 0.803
385	76.800, 0.808	76.800, 0.803
386	77.000, 0.808	77.000, 0.803
387	77.200, 0.808	77.200, 0.804
388	77.400, 0.808	77.400, 0.804
389	77.600, 0.808	77.600, 0.804
390	77.800, 0.809	77.800, 0.804
391	78.000, 0.809	78.000, 0.804
392	78.200, 0.809	78.200, 0.805
393	78.400, 0.810	78.400, 0.805
394	78.600, 0.810	78.600, 0.805
395	78.800, 0.810	78.800, 0.805
396	79.000, 0.810	79.000, 0.806
397	79.200, 0.810	79.200, 0.806
398	79.400, 0.811	79.400, 0.806
399	79.600, 0.811	79.600, 0.806
400	79.800, 0.811	79.800, 0.806
401	80.000, 0.811	80.000, 0.806
402	80.200, 0.812	80.200, 0.806
403	80.400, 0.812	80.400, 0.805
404	80.600, 0.812	80.600, 0.805
405	80.800, 0.812	80.800, 0.805
406	81.000, 0.812	81.000, 0.804
407	81.200, 0.812	81.200, 0.804
408	81.400, 0.812	81.400, 0.804
409	81.600, 0.811	81.600, 0.804
410	81.800, 0.811	81.800, 0.804
411	82.000, 0.811	82.000, 0.804
412	82.200, 0.811	82.200, 0.804
413	82.400, 0.811	82.400, 0.804
414	82.600, 0.811	82.600, 0.805
415	82.800, 0.811	82.800, 0.805
416	83.000, 0.811	83.000, 0.805
417	83.200, 0.811	83.200, 0.805
418	83.400, 0.812	83.400, 0.806
419	83.600, 0.812	83.600, 0.806
420	83.800, 0.812	83.800, 0.806
421	84.000, 0.812	84.000, 0.806
422	84.200, 0.812	84.200, 0.806
423	84.400, 0.813	84.400, 0.806
424	84.600, 0.813	84.600, 0.806
425	84.800, 0.813	84.800, 0.806
426	85.000, 0.813	85.000, 0.807
427	85.200, 0.813	85.200, 0.807
428	85.400, 0.814	85.400, 0.807
429	85.600, 0.814	85.600, 0.807
430	85.800, 0.814	85.800, 0.807
431	86.000, 0.814	86.000, 0.807
432	86.200, 0.814	86.200, 0.807
433	86.400, 0.814	86.400, 0.807
434	86.600, 0.815	86.600, 0.807
435	86.800, 0.815	86.800, 0.808
436	87.000, 0.815	87.000, 0.808
437	87.200, 0.814	87.200, 0.808
438	87.400, 0.814	87.400, 0.808
439	87.600, 0.814	87.600, 0.808
440	87.800, 0.814	87.800, 0.808
441	88.000, 0.814	88.000, 0.809
442	88.200, 0.814	88.200, 0.809
443	88.400, 0.814	88.400, 0.809
444	88.600, 0.814	88.600, 0.809
445	88.800, 0.814	88.800, 0.809
446	89.000, 0.814	89.000, 0.809
447	89.200, 0.814	89.200, 0.809
448	89.400, 0.814	89.400, 0.809
449	89.600, 0.815	89.600, 0.809
450	89.800, 0.815	89.800, 0.810
451	90.000, 0.815	90.000, 0.810
452	90.200, 0.815	90.200, 0.810
453	90.400, 0.815	90.400, 0.811
454	90.600, 0.815	90.600, 0.811
455	90.800, 0.816	90.800, 0.811
456	91.000, 0.816	91.000, 0.811
457	91.200, 0.816	91.200, 0.811
458	91.400, 0.817	91.400, 0.811
459	91.600, 0.817	91.600, 0.811
460	91.800, 0.817	91.800, 0.810
461	92.000, 0.818	92.000, 0.810
462	92.200, 0.818	92.200, 0.810
463	92.400, 0.819	92.400, 0.810
464	92.600, 0.819	92.600, 0.809
465	92.800, 0.819	92.800, 0.809
466	93.000, 0.820	93.000, 0.809
467	93.200, 0.820	93.200, 0.810
468	93.400, 0.820	93.400, 0.810
469	93.600, 0.820	93.600, 0.810
470	93.800, 0.820	93.800, 0.811
471	94.000, 0.820	94.000, 0.811
472	94.200, 0.821	94.200, 0.812
473	94.400, 0.821	94.400, 0.812
474	94.600, 0.820	94.600, 0.813
475	94.800, 0.821	94.800, 0.813
476	95.000, 0.820	95.000, 0.813
477	95.200, 0.820	95.200, 0.813
478	95.400, 0.820	95.400, 0.813
479	95.600, 0.820	95.600, 0.813
480	95.800, 0.820	95.800, 0.813
481	96.000, 0.820	96.000, 0.812
482	96.200, 0.820	96.200, 0.812
483	96.400, 0.820	96.400, 0.812
484	96.600, 0.820	96.600, 0.812
485	96.800, 0.820	96.800, 0.812
486	97.000, 0.820	97.000, 0.812
487	97.200, 0.820	97.200, 0.812
488	97.400, 0.821	97.400, 0.812
489	97.600, 0.821	97.600, 0.812
490	97.800, 0.821	97.800, 0.812
491	98.000, 0.822	98.000, 0.812
492	98.200, 0.822	98.200, 0.813
493	98.400, 0.822	98.400, 0.813
494	98.600, 0.822	98.600, 0.813
495	98.800, 0.823	98.800, 0.813
496	99.000, 0.823	99.000, 0.813
497	99.200, 0.822	99.200, 0.812
498	99.400, 0.822	99.400, 0.812
499	99.600, 0.822	99.600, 0.812
500	99.800, 0.822	99.800, 0.812
501	100.000, 0.822	100.000, 0.812
502	100.200, 0.822	100.200, 0.812
503	100.400, 0.822	100.400, 0.813
504	100.600, 0.822	100.600, 0.813
505	100.800, 0.823	100.800, 0.813
506	101.000, 0.823	101.000, 0.813
507	101.200, 0.823	101.200, 0.814
508	101.400, 0.823	101.400, 0.814
509	101.600, 0.824	101.600, 0.814
510	101.800, 0.824	101.800, 0.815
511	102.000, 0.824	102.000, 0.815
512	102.200, 0.824	102.200, 0.815
513	102.400, 0.824	102.400, 0.816
514	102.600, 0.824	102.600, 0.816
515	102.800, 0.825	102.800, 0.815
516	103.000, 0.824	103.000, 0.815
517	103.200, 0.824	103.200, 0.815
518	103.400, 0.824	103.400, 0.814
519	103.600, 0.824	103.600, 0.814
520	103.800, 0.824	103.800, 0.814
521	104.000, 0.825	104.000, 0.813
522	104.200, 0.825	104.200, 0.813
523	104.400, 0.825	104.400, 0.813
524	104.600, 0.825	104.600, 0.813
525	104.800, 0.826	104.800, 0.813
526	105.000, 0.826	105.000, 0.813
527	105.200, 0.827	105.200, 0.813
528	105.400, 0.827	105.400, 0.814
529	105.600, 0.827	105.600, 0.814
530	105.800, 0.827	105.800, 0.814
531	106.000, 0.827	106.000, 0.815
532	106.200, 0.828	106.200, 0.815
533	106.400, 0.828	106.400, 0.815
534	106.600, 0.828	106.600, 0.815
535	106.800, 0.828	106.800, 0.815
536	107.000, 0.827	107.000, 0.815
537	107.200, 0.827	107.200, 0.815
538	107.400, 0.827	107.400, 0.816
539	107.600, 0.827	107.600, 0.816
540	107.800, 0.827	107.800, 0.816
541	108.000, 0.827	108.000, 0.817
542	108.200, 0.827	108.200, 0.817
543	108.400, 0.828	108.400, 0.817
544	108.600, 0.828	108.600, 0.817
545	108.800, 0.829	108.800, 0.817
546	109.000, 0.829	109.000, 0.817
547	109.200, 0.830	109.200, 0.817
548	109.400, 0.830	109.400, 0.817
549	109.600, 0.830	109.600, 0.817
550	109.800, 0.830	109.800, 0.817
551	110.000, 0.830	110.000, 0.817
552	110.200, 0.830	110.200, 0.817
553	110.400, 0.830	110.400, 0.818
554	110.600, 0.830	110.600, 0.818
555	110.800, 0.830	110.800, 0.818
556	111.000, 0.830	111.000, 0.818
557	111.200, 0.830	111.200, 0.819
558	111.400, 0.830	111.400, 0.819
559	111.600, 0.830	111.600, 0.819
560	111.800, 0.830	111.800, 0.819
561	112.000, 0.830	112.000, 0.819
562	112.200, 0.831	112.200, 0.819
563	112.400, 0.831	112.400, 0.819
564	112.600, 0.832	112.600, 0.819
565	112.800, 0.832	112.800, 0.819
566	113.000, 0.832	113.000, 0.819
567	113.200, 0.832	113.200, 0.819
568	113.400, 0.832	113.400, 0.819
569	113.600, 0.832	113.600, 0.818
570	113.800, 0.832	113.800, 0.818
571	114.000, 0.832	114.000, 0.818
572	114.200, 0.832	114.200, 0.818
573	114.400, 0.832	114.400, 0.818
574	114.600, 0.832	114.600, 0.818
575	114.800, 0.832	114.800, 0.818
576	115.000, 0.832	115.000, 0.818
577	115.200, 0.832	115.200, 0.818
578	115.400, 0.832	115.400, 0.818
579	115.600, 0.833	115.600, 0.818
580	115.800, 0.832	115.800, 0.818
581	116.000, 0.832	116.000, 0.819
582	116.200, 0.832	116.200, 0.819
583	116.400, 0.833	116.400, 0.819
584	116.600, 0.833	116.600, 0.819
585	116.800, 0.833	116.800, 0.820
586	117.000, 0.833	117.000, 0.820
587	117.200, 0.834	117.200, 0.820
588	117.400, 0.834	117.400, 0.820
589	117.600, 0.834	117.600, 0.820
590	117.800, 0.834	117.800, 0.820
591	118.000, 0.834	118.000, 0.821
592	118.200, 0.834	118.200, 0.821
593	118.400, 0.834	118.400, 0.821
594	118.600, 0.835	118.600, 0.821
595	118.800, 0.834	118.800, 0.820
596	119.000, 0.834	119.000, 0.820
597	119.200, 0.834	119.200, 0.820
598	119.400, 0.834	119.400, 0.820
599	119.600, 0.834	119.600, 0.820
600	119.800, 0.834	119.800, 0.819
601	120.000, 0.834	120.000, 0.819
602	120.200, 0.834	120.200, 0.819
603	120.400, 0.834	120.400, 0.818
604	120.600, 0.834	120.600, 0.818
605	120.800, 0.834	120.800, 0.818
606	121.000, 0.834	121.000, 0.818
607	121.200, 0.834	121.200, 0.819
608	121.400, 0.835	121.400, 0.819
609	121.600, 0.835	121.600, 0.819
610	121.800, 0.835	121.800, 0.819
611	122.000, 0.835	122.000, 0.819
612	122.200, 0.835	122.200, 0.820
613	122.400, 0.834	122.400, 0.820
614	122.600, 0.834	122.600, 0.820
615	122.800, 0.834	122.800, 0.820
616	123.000, 0.834	123.000, 0.820
617	123.200, 0.834	123.200, 0.820
618	123.400, 0.834	123.400, 0.820
619	123.600, 0.834	123.600, 0.820
620	123.800, 0.835	123.800, 0.820
621	124.000, 0.835	124.000, 0.820
622	124.200, 0.835	124.200, 0.820
623	124.400, 0.836	124.400, 0.820
624	124.600, 0.836	124.600, 0.821
625	124.800, 0.837	124.800, 0.821
626	125.000, 0.837	125.000, 0.821
627	125.200, 0.838	125.200, 0.821
628	125.400, 0.838	125.400, 0.822
629	125.600, 0.838	125.600, 0.822
630	125.800, 0.838	125.800, 0.822
631	126.000, 0.838	126.000, 0.822
632	126.200, 0.839	126.200, 0.822
633	126.400, 0.839	126.400, 0.822
634	126.600, 0.839	126.600, 0.822
635	126.800, 0.839	126.800, 0.822
636	127.000, 0.839	127.000, 0.822
637	127.200, 0.839	127.200, 0.822
638	127.400, 0.839	127.400, 0.822
639	127.600, 0.839	127.600, 0.823
640	127.800, 0.839	127.800, 0.823
641	128.000, 0.839	128.000, 0.822
642	128.200, 0.839	128.200, 0.822
643	128.400, 0.839	128.400, 0.823
644	128.600, 0.839	128.600, 0.823
645	128.800, 0.839	128.800, 0.823
646	129.000, 0.839	129.000, 0.823
647	129.200, 0.839	129.200, 0.824
648	129.400, 0.840	129.400, 0.824
649	129.600, 0.840	129.600, 0.824
650	129.800, 0.840	129.800, 0.824
651	130.000, 0.840	130.000, 0.824
652	130.200, 0.840	130.200, 0.824
653	130.400, 0.840	130.400, 0.824
654	130.600, 0.841	130.600, 0.824
655	130.800, 0.841	130.800, 0.824
656	131.000, 0.841	131.000, 0.824
657	131.200, 0.841	131.200, 0.824
658	131.400, 0.841	131.400, 0.824
659	131.600, 0.841	131.600, 0.824
660	131.800, 0.841	131.800, 0.824
661	132.000, 0.840	132.000, 0.824
662	132.200, 0.840	132.200, 0.824
663	132.400, 0.840	132.400, 0.824
664	132.600, 0.841	132.600, 0.824
665	132.800, 0.841	132.800, 0.824
666	133.000, 0.841	133.000, 0.824
667	133.200, 0.842	133.200, 0.824
668	133.400, 0.842	133.400, 0.824
669	133.600, 0.842	133.600, 0.824
670	133.800, 0.843	133.800, 0.824
671	134.000, 0.843	134.000, 0.823
672	134.200, 0.843	134.200, 0.823
673	134.400, 0.844	134.400, 0.823
674	134.600, 0.844	134.600, 0.823
675	134.800, 0.844	134.800, 0.823
676	135.000, 0.845	135.000, 0.823
677	135.200, 0.845	135.200, 0.823
678	135.400, 0.844	135.400, 0.824
679	135.600, 0.844	135.600, 0.824
680	135.800, 0.844	135.800, 0.825
681	136.000, 0.843	136.000, 0.825
682	136.200, 0.843	136.200, 0.825
683	136.400, 0.843	136.400, 0.825
684	136.600, 0.843	136.600, 0.825
685	136.800, 0.843	136.800, 0.825
686	137.000, 0.843	137.000, 0.825
687	137.200, 0.843	137.200, 0.825
688	137.400, 0.843	137.400, 0.825
689	137.600, 0.843	137.600, 0.825
690	137.800, 0.843	137.800, 0.825
691	138.000, 0.843	138.000, 0.825
692	138.200, 0.843	138.200, 0.825
693	138.400, 0.843	138.400, 0.825
694	138.600, 0.843	138.600, 0.825
695	138.800, 0.843	138.800, 0.825
696	139.000, 0.843	139.000, 0.826
697	139.200, 0.844	139.200, 0.826
698	139.400, 0.844	139.400, 0.827
699	139.600, 0.844	139.600, 0.827
700	139.800, 0.844	139.800, 0.827
701	140.000, 0.845	140.000, 0.828
702	140.200, 0.845	140.200, 0.828
703	140.400, 0.846	140.400, 0.828
704	140.600, 0.846	140.600, 0.828
705	140.800, 0.847	140.800, 0.828
706	141.000, 0.847	141.000, 0.828
707	141.200, 0.847	141.200, 0.828
708	141.400, 0.847	141.400, 0.828
709	141.600, 0.847	141.600, 0.828
710	141.800, 0.847	141.800, 0.828
711	142.000, 0.847	142.000, 0.829
712	142.200, 0.847	142.200, 0.829
713	142.400, 0.847	142.400, 0.829
714	142.600, 0.847	142.600, 0.829
715	142.800, 0.847	142.800, 0.829
716	143.000, 0.847	143.000, 0.829
717	143.200, 0.847	143.200, 0.828
718	143.400, 0.847	143.400, 0.828
719	143.600, 0.847	143.600, 0.827
720	143.800, 0.847	143.800, 0.827
721	144.000, 0.847	144.000, 0.827
722	144.200, 0.848	144.200, 0.826
723	144.400, 0.848	144.400, 0.826
724	144.600, 0.848	144.600, 0.826
725	144.800, 0.848	144.800, 0.826
726	145.000, 0.848	145.000, 0.826
727	145.200, 0.848	145.200, 0.826
728	145.400, 0.848	145.400, 0.826
729	145.600, 0.848	145.600, 0.826
730	145.800, 0.848	145.800, 0.827
731	146.000, 0.848	146.000, 0.827
732	146.200, 0.848	146.200, 0.828
733	146.400, 0.848	146.400, 0.829
734	146.600, 0.847	146.600, 0.829
735	146.800, 0.847	146.800, 0.829
736	147.000, 0.847	147.000, 0.829
737	147.200, 0.848	147.200, 0.829
738	147.400, 0.848	147.400, 0.829
739	147.600, 0.848	147.600, 0.829
740	147.800, 0.849	147.800, 0.829
741	148.000, 0.849	148.000, 0.830
742	148.200, 0.849	148.200, 0.830
743	148.400, 0.850	148.400, 0.830
744	148.600, 0.850	148.600, 0.830
745	148.800, 0.850	148.800, 0.830
746	149.000, 0.850	149.000, 0.830
747	149.200, 0.851	149.200, 0.830
748	149.400, 0.851	149.400, 0.830
749	149.600, 0.851	149.600, 0.830
750	149.800, 0.850	149.800, 0.830
751	150.000, 0.850	150.000, 0.830
752	150.200, 0.841	150.200, 0.808
753	150.400, 0.830	150.400, 0.782
754	150.600, 0.818	150.600, 0.753
755	150.800, 0.805	150.800, 0.722
756	151.000, 0.792	151.000, 0.689
757	151.200, 0.778	151.200, 0.655
758	151.400, 0.765	151.400, 0.621
759	151.600, 0.752	151.600, 0.589
760	151.800, 0.739	151.800, 0.559
761	152.000, 0.729	152.000, 0.532
762	152.200, 0.720	152.200, 0.510
763	152.400, 0.711	152.400, 0.490
764	152.600, 0.703	152.600, 0.471
765	152.800, 0.696	152.800, 0.454
766	153.000, 0.689	153.000, 0.439
767	153.200, 0.683	153.200, 0.425
768	153.400, 0.676	153.400, 0.411
769	153.600, 0.671	153.600, 0.399
770	153.800, 0.665	153.800, 0.388
771	154.000, 0.660	154.000, 0.377
772	154.200, 0.654	154.200, 0.367
773	154.400, 0.649	154.400, 0.357
774	154.600, 0.644	154.600, 0.348
775	154.800, 0.640	154.800, 0.340
776	155.000, 0.635	155.000, 0.332
777	155.200, 0.631	155.200, 0.324
778	155.400, 0.626	155.400, 0.316
779	155.600, 0.622	155.600, 0.310
780	155.800, 0.618	155.800, 0.303
781	156.000, 0.615	156.000, 0.296
782	156.200, 0.611	156.200, 0.290
783	156.400, 0.608	156.400, 0.284
784	156.600, 0.605	156.600, 0.278
785	156.800, 0.602	156.800, 0.272
786	157.000, 0.600	157.000, 0.267
787	157.200, 0.597	157.200, 0.262
788	157.400, 0.595	157.400, 0.257
789	157.600, 0.592	157.600, 0.253
790	157.800, 0.590	157.800, 0.249
791	158.000, 0.588	158.000, 0.245
792	158.200, 0.586	158.200, 0.241
793	158.400, 0.584	158.400, 0.237
794	158.600, 0.582	158.600, 0.233
795	158.800, 0.579	158.800, 0.230
796	159.000, 0.577	159.000, 0.227
797	159.200, 0.575	159.200, 0.224
798	159.400, 0.573	159.400, 0.221
799	159.600, 0.570	159.600, 0.219
800	159.800, 0.568	159.800, 0.216
801	160.000, 0.566	160.000, 0.213
802	160.200, 0.564	160.200, 0.211
803	160.400, 0.562	160.400, 0.208
804	160.600, 0.560	160.600, 0.206
805	160.800, 0.558	160.800, 0.203
806	161.000, 0.557	161.000, 0.201
807	161.200, 0.555	161.200, 0.199
808	161.400, 0.554	161.400, 0.197
809	161.600, 0.553	161.600, 0.195
810	161.800, 0.551	161.800, 0.193
811	162.000, 0.550	162.000, 0.191
812	162.200, 0.549	162.200, 0.189
813	162.400, 0.547	162.400, 0.187
814	162.600, 0.546	162.600, 0.185
815	162.800, 0.545	162.800, 0.184
816	163.000, 0.543	163.000, 0.182
817	163.200, 0.542	163.200, 0.181
818	163.400, 0.541	163.400, 0.180
819	163.600, 0.539	163.600, 0.178
820	163.800, 0.538	163.800, 0.177
821	164.000, 0.537	164.000, 0.176
822	164.200, 0.536	164.200, 0.175
823	164.400, 0.534	164.400, 0.173
824	164.600, 0.533	164.600, 0.172
825	164.800, 0.531	164.800, 0.171
826	165.000, 0.530	165.000, 0.170
827	165.200, 0.529	165.200, 0.168
828	165.400, 0.527	165.400, 0.167
829	165.600, 0.526	165.600, 0.166
830	165.800, 0.525	165.800, 0.165
831	166.000, 0.523	166.000, 0.164
832	166.200, 0.522	166.200, 0.162
833	166.400, 0.521	166.400, 0.161
834	166.600, 0.520	166.600, 0.161
835	166.800, 0.519	166.800, 0.160
836	167.000, 0.518	167.000, 0.159
837	167.200, 0.517	167.200, 0.158
838	167.400, 0.516	167.400, 0.157
839	167.600, 0.515	167.600, 0.156
840	167.800, 0.514	167.800, 0.156
841	168.000, 0.514	168.000, 0.155
842	168.200, 0.513	168.200, 0.155
843	168.400, 0.512	168.400, 0.154
844	168.600, 0.510	168.600, 0.154
845	168.800, 0.509	168.800, 0.154
846	169.000, 0.508	169.000, 0.154
847	169.200, 0.507	169.200, 0.153
848	169.400, 0.507	169.400, 0.153
849	169.600, 0.506	169.600, 0.152
850	169.800, 0.504	169.800, 0.151
851	170.000, 0.503	170.000, 0.150
852	170.200, 0.502	170.200, 0.150
853	170.400, 0.501	170.400, 0.149
854	170.600, 0.500	170.600, 0.148
855	170.800, 0.499	170.800, 0.148
856	171.000, 0.498	171.000, 0.147
857	171.200, 0.498	171.200, 0.146
858	171.400, 0.497	171.400, 0.145
859	171.600, 0.496	171.600, 0.145
860	171.800, 0.495	171.800, 0.144
861	172.000, 0.494	172.000, 0.144
862	172.200, 0.493	172.200, 0.143
863	172.400, 0.492	172.400, 0.143
864	172.600, 0.491	172.600, 0.143
865	172.800, 0.491	172.800, 0.143
866	173.000, 0.490	173.000, 0.143
867	173.200, 0.489	173.200, 0.143
868	173.400, 0.489	173.400, 0.142
869	173.600, 0.488	173.600, 0.142
870	173.800, 0.487	173.800, 0.142
871	174.000, 0.486	174.000, 0.142
872	174.200, 0.485	174.200, 0.141
873	174.400, 0.485	174.400, 0.141
874	174.600, 0.484	174.600, 0.140
875	174.800, 0.483	174.800, 0.140
876	175.000, 0.482	175.000, 0.140
877	175.200, 0.481	175.200, 0.139
878	175.400, 0.480	175.400, 0.139
879	175.600, 0.479	175.600, 0.139
880	175.800, 0.478	175.800, 0.138
881	176.000, 0.478	176.000, 0.138
882	176.200, 0.477	176.200, 0.138
883	176.400, 0.476	176.400, 0.137
884	176.600, 0.476	176.600, 0.137
885	176.800, 0.475	176.800, 0.136
886	177.000, 0.475	177.000, 0.136
887	177.200, 0.474	177.200, 0.135
888	177.400, 0.473	177.400, 0.135
889	177.600, 0.473	177.600, 0.135
890	177.800, 0.472	177.800, 0.134
891	178.000, 0.471	178.000, 0.134
892	178.200, 0.471	178.200, 0.134
893	178.400, 0.470	178.400, 0.134
894	178.600, 0.469	178.600, 0.134
895	178.800, 0.468	178.800, 0.134
896	179.000, 0.467	179.000, 0.134
897	179.200, 0.466	179.200, 0.134
898	179.400, 0.465	179.400, 0.134
899	179.600, 0.464	179.600, 0.134
900	179.800, 0.463	179.800, 0.134
901	180.000, 0.462	180.000, 0.133
902	180.200, 0.462	180.200, 0.133
903	180.400, 0.461	180.400, 0.133
904	180.600, 0.460	180.600, 0.133
905	180.800, 0.459	180.800, 0.132
906	181.000, 0.459	181.000, 0.132
907	181.200, 0.458	181.200, 0.132
908	181.400, 0.458	181.400, 0.132
909	181.600, 0.457	181.600, 0.132
910	181.800, 0.457	181.800, 0.132
911	182.000, 0.456	182.000, 0.132
912	182.200, 0.456	182.200, 0.132
913	182.400, 0.455	182.400, 0.132
914	182.600, 0.454	182.600, 0.132
915	182.800, 0.453	182.800, 0.132
916	183.000, 0.453	183.000, 0.131
917	183.200, 0.452	183.200, 0.131
918	183.400, 0.451	183.400, 0.131
919	183.600, 0.450	183.600, 0.131
920	183.800, 0.450	183.800, 0.131
921	184.000, 0.449	184.000, 0.130
922	184.200, 0.448	184.200, 0.130
923	184.400, 0.447	184.400, 0.129
924	184.600, 0.447	184.600, 0.129
925	184.800, 0.446	184.800, 0.129
926	185.000, 0.445	185.000, 0.129
927	185.200, 0.444	185.200, 0.128
928	185.400, 0.444	185.400, 0.128
929	185.600, 0.443	185.600, 0.128
930	185.800, 0.443	185.800, 0.128
931	186.000, 0.442	186.000, 0.128
932	186.200, 0.442	186.200, 0.128
933	186.400, 0.441	186.400, 0.128
934	186.600, 0.441	186.600, 0.128
935	186.800, 0.440	186.800, 0.128
936	187.000, 0.440	187.000, 0.128
937	187.200, 0.440	187.200, 0.128
938	187.400, 0.439	187.400, 0.128
939	187.600, 0.439	187.600, 0.128
940	187.800, 0.438	187.800, 0.128
941	188.000, 0.438	188.000, 0.128
942	188.200, 0.437	188.200, 0.127
943	188.400, 0.436	188.400, 0.127
944	188.600, 0.436	188.600, 0.127
945	188.800, 0.435	188.800, 0.127
946	189.000, 0.434	189.000, 0.126
947	189.200, 0.434	189.200, 0.126
948	189.400, 0.433	189.400, 0.126
949	189.600, 0.432	189.600, 0.126
950	189.800, 0.431	189.800, 0.126
951	190.000, 0.430	190.000, 0.126
952	190.200, 0.429	190.200, 0.126
953	190.400, 0.429	190.400, 0.126
954	190.600, 0.428	190.600, 0.126
955	190.800, 0.428	190.800, 0.126
956	191.000, 0.427	191.000, 0.126
957	191.200, 0.427	191.200, 0.126
958	191.400, 0.427	191.400, 0.126
959	191.600, 0.426	191.600, 0.126
960	191.800, 0.426	191.800, 0.126
961	192.000, 0.426	192.000, 0.126
962	192.200, 0.425	192.200, 0.126
963	192.400, 0.425	192.400, 0.126
964	192.600, 0.425	192.600, 0.126
965	192.800, 0.424	192.800, 0.125
966	193.000, 0.423	193.000, 0.125
967	193.200, 0.423	193.200, 0.125
968	193.400, 0.422	193.400, 0.125
969	193.600, 0.421	193.600, 0.124
970	193.800, 0.420	193.800, 0.124
971	194.000, 0.419	194.000, 0.124
972	194.200, 0.419	194.200, 0.124
973	194.400, 0.418	194.400, 0.123
974	194.600, 0.418	194.600, 0.123
975	194.800, 0.417	194.800, 0.123
976	195.000, 0.417	195.000, 0.123
977	195.200, 0.416	195.200, 0.123
978	195.400, 0.416	195.400, 0.123
979	195.600, 0.415	195.600, 0.123
980	195.800, 0.415	195.800, 0.123
981	196.000, 0.414	196.000, 0.123
982	196.200, 0.413	196.200, 0.123
983	196.400, 0.412	196.400, 0.122
984	196.600, 0.412	196.600, 0.122
985	196.800, 0.411	196.800, 0.122
986	197.000, 0.410	197.000, 0.122
987	197.200, 0.410	197.200, 0.122
988	197.400, 0.409	197.400, 0.122
989	197.600, 0.409	197.600, 0.122
990	197.800, 0.408	197.800, 0.122
991	198.000, 0.408	198.000, 0.122
992	198.200, 0.407	198.200, 0.122
993	198.400, 0.407	198.400, 0.122
994	198.600, 0.406	198.600, 0.122
995	198.800, 0.406	198.800, 0.122
996	199.000, 0.406	199.000, 0.122
997	199.200, 0.405	199.200, 0.122
998	199.400, 0.405	199.400, 0.122
999	199.600, 0.405	199.600, 0.122
1000	199.800, 0.404	199.800, 0.122
1001	200.000, 0.403	200.000, 0.122
1002	200.200, 0.403	200.200, 0.122
1003	200.400, 0.402	200.400, 0.122
1004	200.600, 0.402	200.600, 0.122
1005	200.800, 0.401	200.800, 0.122
1006	201.000, 0.401	201.000, 0.122
1007	201.200, 0.401	201.200, 0.121
1008	201.400, 0.400	201.400, 0.121
1009	201.600, 0.399	201.600, 0.121
1010	201.800, 0.399	201.800, 0.121
1011	202.000, 0.398	202.000, 0.121
1012	202.200, 0.398	202.200, 0.121
1013	202.400, 0.397	202.400, 0.120
1014	202.600, 0.397	202.600, 0.120
1015	202.800, 0.396	202.800, 0.120
1016	203.000, 0.396	203.000, 0.120
1017	203.200, 0.396	203.200, 0.120
1018	203.400, 0.395	203.400, 0.120
1019	203.600, 0.395	203.600, 0.120
1020	203.800, 0.395	203.800, 0.120
1021	204.000, 0.394	204.000, 0.120
1022	204.200, 0.394	204.200, 0.121
1023	204.400, 0.393	204.400, 0.121
1024	204.600, 0.393	204.600, 0.121
1025	204.800, 0.393	204.800, 0.121
1026	205.000, 0.392	205.000, 0.121
1027	205.200, 0.392	205.200, 0.121
1028	205.400, 0.391	205.400, 0.121
1029	205.600, 0.391	205.600, 0.121
1030	205.800, 0.390	205.800, 0.121
1031	206.000, 0.390	206.000, 0.121
1032	206.200, 0.389	206.200, 0.121
1033	206.400, 0.389	206.400, 0.120
1034	206.600, 0.389	206.600, 0.120
1035	206.800, 0.388	206.800, 0.120
1036	207.000, 0.388	207.000, 0.119
1037	207.200, 0.388	207.200, 0.119
1038	207.400, 0.387	207.400, 0.119
1039	207.600, 0.387	207.600, 0.118
1040	207.800, 0.386	207.800, 0.118
1041	208.000, 0.386	208.000, 0.118
1042	208.200, 0.386	208.200, 0.118
1043	208.400, 0.385	208.400, 0.118
1044	208.600, 0.385	208.600, 0.118
1045	208.800, 0.385	208.800, 0.118
1046	209.000, 0.384	209.000, 0.118
1047	209.200, 0.384	209.200, 0.118
1048	209.400, 0.384	209.400, 0.119
1049	209.600, 0.384	209.600, 0.119
1050	209.800, 0.383	209.800, 0.119
1051	210.000, 0.383	210.000, 0.119
1052	210.200, 0.382	210.200, 0.119
1053	210.400, 0.382	210.400, 0.119
1054	210.600, 0.381	210.600, 0.119
1055	210.800, 0.380	210.800, 0.118
1056	211.000, 0.380	211.000, 0.118
1057	211.200, 0.379	211.200, 0.118
1058	211.400, 0.379	211.400, 0.118
1059	211.600, 0.378	211.600, 0.117
1060	211.800, 0.378	211.800, 0.117
1061	212.000, 0.377	212.000, 0.117
1062	212.200, 0.377	212.200, 0.118
1063	212.400, 0.376	212.400, 0.118
1064	212.600, 0.376	212.600, 0.118
1065	212.800, 0.376	212.800, 0.118
1066	213.000, 0.375	213.000, 0.118
1067	213.200, 0.375	213.200, 0.118
1068	213.400, 0.375	213.400, 0.118
1069	213.600, 0.374	213.600, 0.118
1070	213.800, 0.374	213.800, 0.118
1071	214.000, 0.373	214.000, 0.118
1072	214.200, 0.372	214.200, 0.117
1073	214.400, 0.372	214.400, 0.117
1074	214.600, 0.371	214.600, 0.117
1075	214.800, 0.371	214.800, 0.117
1076	215.000, 0.370	215.000, 0.117
1077	215.200, 0.370	215.200, 0.117
1078	215.400, 0.369	215.400, 0.117
1079	215.600, 0.369	215.600, 0.117
1080	215.800, 0.369	215.800, 0.117
1081	216.000, 0.368	216.000, 0.117
1082	216.200, 0.368	216.200, 0.117
1083	216.400, 0.367	216.400, 0.117
1084	216.600, 0.367	216.600, 0.117
1085	216.800, 0.366	216.800, 0.117
1086	217.000, 0.366	217.000, 0.116
1087	217.200, 0.365	217.200, 0.116
1088	217.400, 0.365	217.400, 0.116
1089	217.600, 0.364	217.600, 0.115
1090	217.800, 0.364	217.800, 0.115
1091	218.000, 0.363	218.000, 0.115
1092	218.200, 0.363	218.200, 0.115
1093	218.400, 0.363	218.400, 0.115
1094	218.600, 0.363	218.600, 0.115
1095	218.800, 0.362	218.800, 0.115
1096	219.000, 0.362	219.000, 0.115
1097	219.200, 0.362	219.200, 0.115
1098	219.400, 0.362	219.400, 0.116
1099	219.600, 0.362	219.600, 0.116
1100	219.800, 0.361	219.800, 0.116
1101	220.000, 0.361	220.000, 0.116
1102	220.200, 0.361	220.200, 0.116
1103	220.400, 0.360	220.400, 0.116
1104	220.600, 0.360	220.600, 0.115
1105	220.800, 0.360	220.800, 0.115
1106	221.000, 0.360	221.000, 0.115
1107	221.200, 0.359	221.200, 0.115
1108	221.400, 0.359	221.400, 0.115
1109	221.600, 0.359	221.600, 0.115
1110	221.800, 0.359	221.800, 0.114
1111	222.000, 0.359	222.000, 0.114
1112	222.200, 0.358	222.200, 0.115
1113	222.400, 0.358	222.400, 0.115
1114	222.600, 0.358	222.600, 0.115
1115	222.800, 0.357	222.800, 0.115
1116	223.000, 0.356	223.000, 0.115
1117	223.200, 0.356	223.200, 0.116
1118	223.400, 0.355	223.400, 0.116
1119	223.600, 0.354	223.600, 0.116
1120	223.800, 0.353	223.800, 0.116
1121	224.000, 0.353	224.000, 0.116
1122	224.200, 0.352	224.200, 0.116
1123	224.400, 0.352	224.400, 0.116
1124	224.600, 0.352	224.600, 0.116
1125	224.800, 0.352	224.800, 0.116
1126	225.000, 0.352	225.000, 0.115
1127	225.200, 0.352	225.200, 0.115
1128	225.400, 0.352	225.400, 0.115
1129	225.600, 0.352	225.600, 0.115
1130	225.800, 0.352	225.800, 0.115
1131	226.000, 0.352	226.000, 0.115
1132	226.200, 0.351	226.200, 0.115
1133	226.400, 0.351	226.400, 0.115
1134	226.600, 0.351	226.600, 0.115
1135	226.800, 0.350	226.800, 0.115
1136	227.000, 0.350	227.000, 0.115
1137	227.200, 0.349	227.200, 0.115
1138	227.400, 0.349	227.400, 0.115
1139	227.600, 0.348	227.600, 0.115
1140	227.800, 0.348	227.800, 0.115
1141	228.000, 0.348	228.000, 0.115
1142	228.200, 0.347	228.200, 0.115
1143	228.400, 0.347	228.400, 0.114
1144	228.600, 0.347	228.600, 0.114
1145	228.800, 0.347	228.800, 0.114
1146	229.000, 0.347	229.000, 0.113
1147	229.200, 0.346	229.200, 0.113
1148	229.400, 0.346	229.400, 0.113
1149	229.600, 0.346	229.600, 0.114
1150	229.800, 0.345	229.800, 0.114
1151	230.000, 0.345	230.000, 0.114
1152	230.200, 0.344	230.200, 0.114
1153	230.400, 0.344	230.400, 0.114
1154	230.600, 0.343	230.600, 0.114
1155	230.800, 0.343	230.800, 0.113
1156	231.000, 0.343	231.000, 0.113
1157	231.200, 0.342	231.200, 0.113
1158	231.400, 0.342	231.400, 0.113
1159	231.600, 0.342	231.600, 0.113
1160	231.800, 0.341	231.800, 0.113
1161	232.000, 0.341	232.000, 0.112
1162	232.200, 0.341	232.200, 0.112
1163	232.400, 0.341	232.400, 0.112
1164	232.600, 0.340	232.600, 0.112
1165	232.800, 0.340	232.800, 0.112
1166	233.000, 0.340	233.000, 0.112
1167	233.200, 0.340	233.200, 0.112
1168	233.400, 0.339	233.400, 0.113
1169	233.600, 0.339	233.600, 0.113
1170	233.800, 0.339	233.800, 0.113
1171	234.000, 0.338	234.000, 0.113
1172	234.200, 0.338	234.200, 0.113
1173	234.400, 0.338	234.400, 0.113
1174	234.600, 0.338	234.600, 0.113
1175	234.800, 0.337	234.800, 0.112
1176	235.000, 0.337	235.000, 0.112
1177	235.200, 0.337	235.200, 0.112
1178	235.400, 0.336	235.400, 0.111
1179	235.600, 0.336	235.600, 0.111
1180	235.800, 0.336	235.800, 0.111
1181	236.000, 0.335	236.000, 0.111
1182	236.200, 0.335	236.200, 0.111
1183	236.400, 0.334	236.400, 0.111
1184	236.600, 0.334	236.600, 0.111
1185	236.800, 0.333	236.800, 0.111
1186	237.000, 0.333	237.000, 0.112
1187	237.200, 0.333	237.200, 0.112
1188	237.400, 0.333	237.400, 0.112
1189	237.600, 0.332	237.600, 0.113
1190	237.800, 0.332	237.800, 0.113
1191	238.000, 0.332	238.000, 0.113
1192	238.200, 0.331	238.200, 0.113
1193	238.400, 0.331	238.400, 0.113
1194	238.600, 0.331	238.600, 0.113
1195	238.800, 0.331	238.800, 0.113
1196	239.000, 0.330	239.000, 0.112
1197	239.200, 0.330	239.200, 0.112
1198	239.400, 0.330	239.400, 0.112
1199	239.600, 0.329	239.600, 0.112
1200	239.800, 0.329	239.800, 0.111
1201	240.000, 0.329	240.000, 0.111
1202	240.200, 0.329	240.200, 0.111
1203	240.400, 0.328	240.400, 0.111
1204	240.600, 0.328	240.600, 0.111
1205	240.800, 0.328	240.800, 0.111
1206	241.000, 0.328	241.000, 0.111
1207	241.200, 0.328	241.200, 0.111
1208	241.400, 0.328	241.400, 0.111
1209	241.600, 0.328	241.600, 0.111
1210	241.800, 0.327	241.800, 0.112
1211	242.000, 0.327	242.000, 0.112
1212	242.200, 0.327	242.200, 0.112
1213	242.400, 0.326	242.400, 0.112
1214	242.600, 0.326	242.600, 0.112
1215	242.800, 0.326	242.800, 0.112
1216	243.000, 0.325	243.000, 0.112
1217	243.200, 0.325	243.200, 0.111
1218	243.400, 0.325	243.400, 0.111
1219	243.600, 0.325	243.600, 0.111
1220	243.800, 0.325	243.800, 0.111
1221	244.000, 0.324	244.000, 0.110
1222	244.200, 0.324	244.200, 0.110
1223	244.400, 0.324	244.400, 0.110
1224	244.600, 0.324	244.600, 0.110
1225	244.800, 0.324	244.800, 0.109
1226	245.000, 0.323	245.000, 0.109
1227	245.200, 0.323	245.200, 0.109
1228	245.400, 0.322	245.400, 0.109
1229	245.600, 0.322	245.600, 0.110
1230	245.800, 0.321	245.800, 0.110
1231	246.000, 0.321	246.000, 0.110
1232	246.200, 0.321	246.200, 0.110
1233	246.400, 0.320	246.400, 0.110
1234	246.600, 0.320	246.600, 0.111
1235	246.800, 0.320	246.800, 0.111
1236	247.000, 0.320	247.000, 0.111
1237	247.200, 0.320	247.200, 0.111
1238	247.400, 0.320	247.400, 0.111
1239	247.600, 0.320	247.600, 0.111
1240	247.800, 0.320	247.800, 0.111
1241	248.000, 0.319	248.000, 0.111
1242	248.200, 0.319	248.200, 0.111
1243	248.400, 0.319	248.400, 0.111
1244	248.600, 0.319	248.600, 0.111
1245	248.800, 0.319	248.800, 0.110
1246	249.000, 0.319	249.000, 0.110
1247	249.200, 0.319	249.200, 0.110
1248	249.400, 0.318	249.400, 0.110
1249	249.600, 0.318	249.600, 0.110
1250	249.800, 0.318	249.800, 0.109
1251	250.000, 0.317	250.000, 0.109
1252	250.200, 0.317	250.200, 0.109
1253	250.400, 0.317	250.400, 0.109
1254	250.600, 0.317	250.600, 0.109
1255	250.800, 0.316	250.800, 0.109
1256	251.000, 0.316	251.000, 0.109
1257	251.200, 0.316	251.200, 0.109
1258	251.400, 0.316	251.400, 0.110
1259	251.600, 0.316	251.600, 0.110
1260	251.800, 0.316	251.800, 0.110
1261	252.000, 0.316	252.000, 0.110
1262	252.200, 0.316	252.200, 0.110
1263	252.400, 0.315	252.400, 0.110
1264	252.600, 0.315	252.600, 0.111
1265	252.800, 0.314	252.800, 0.111
1266	253.000, 0.313	253.000, 0.111
1267	253.200, 0.313	253.200, 0.111
1268	253.400, 0.312	253.400, 0.111
1269	253.600, 0.312	253.600, 0.110
1270	253.800, 0.312	253.800, 0.110
1271	254.000, 0.312	254.000, 0.110
1272	254.200, 0.312	254.200, 0.110
1273	254.400, 0.312	254.400, 0.109
1274	254.600, 0.312	254.600, 0.109
1275	254.800, 0.312	254.800, 0.109
1276	255.000, 0.311	255.000, 0.109
1277	255.200, 0.311	255.200, 0.109
1278	255.400, 0.311	255.400, 0.109
1279	255.600, 0.311	255.600, 0.109
1280	255.800, 0.312	255.800, 0.109
1281	256.000, 0.312	256.000, 0.109
1282	256.200, 0.312	256.200, 0.109
1283	256.400, 0.311	256.400, 0.109
1284	256.600, 0.311	256.600, 0.110
1285	256.800, 0.310	256.800, 0.110
1286	257.000, 0.310	257.000, 0.110
1287	257.200, 0.310	257.200, 0.110
1288	257.400, 0.310	257.400, 0.110
1289	257.600, 0.309	257.600, 0.110
1290	257.800, 0.309	257.800, 0.110
1291	258.000, 0.308	258.000, 0.110
1292	258.200, 0.308	258.200, 0.110
1293	258.400, 0.307	258.400, 0.110
1294	258.600, 0.307	258.600, 0.110
1295	258.800, 0.306	258.800, 0.110
1296	259.000, 0.306	259.000, 0.110
1297	259.200, 0.306	259.200, 0.111
1298	259.400, 0.306	259.400, 0.111
1299	259.600, 0.306	259.600, 0.111
1300	259.800, 0.306	259.800, 0.111
1301	260.000, 0.306	260.000, 0.111
1302	260.200, 0.306	260.200, 0.110
1303	260.400, 0.306	260.400, 0.110
1304	260.600, 0.305	260.600, 0.110
1305	260.800, 0.305	260.800, 0.110
1306	261.000, 0.305	261.000, 0.110
1307	261.200, 0.305	261.200, 0.110
1308	261.400, 0.304	261.400, 0.110
1309	261.600, 0.304	261.600, 0.110
1310	261.800, 0.304	261.800, 0.110
1311	262.000, 0.304	262.000, 0.110
1312	262.200, 0.304	262.200, 0.110
1313	262.400, 0.304	262.400, 0.110
1314	262.600, 0.303	262.600, 0.110
1315	262.800, 0.303	262.800, 0.110
1316	263.000, 0.303	263.000, 0.109
1317	263.200, 0.303	263.200, 0.109
1318	263.400, 0.303	263.400, 0.109
1319	263.600, 0.303	263.600, 0.109
1320	263.800, 0.302	263.800, 0.109
1321	264.000, 0.302	264.000, 0.109
1322	264.200, 0.302	264.200, 0.109
1323	264.400, 0.302	264.400, 0.109
1324	264.600, 0.302	264.600, 0.109
1325	264.800, 0.302	264.800, 0.109
1326	265.000, 0.301	265.000, 0.109
1327	265.200, 0.301	265.200, 0.109
1328	265.400, 0.301	265.400, 0.109
1329	265.600, 0.301	265.600, 0.109
1330	265.800, 0.301	265.800, 0.109
1331	266.000, 0.301	266.000, 0.109
1332	266.200, 0.301	266.200, 0.108
1333	266.400, 0.300	266.400, 0.108
1334	266.600, 0.300	266.600, 0.108
1335	266.800, 0.300	266.800, 0.108
1336	267.000, 0.300	267.000, 0.108
1337	267.200, 0.299	267.200, 0.108
1338	267.400, 0.299	267.400, 0.108
1339	267.600, 0.299	267.600, 0.108
1340	267.800, 0.299	267.800, 0.108
1341	268.000, 0.298	268.000, 0.108
1342	268.200, 0.298	268.200, 0.108
1343	268.400, 0.298	268.400, 0.109
1344	268.600, 0.298	268.600, 0.109
1345	268.800, 0.298	268.800, 0.109
1346	269.000, 0.298	269.000, 0.109
1347	269.200, 0.297	269.200, 0.109
1348	269.400, 0.297	269.400, 0.109
1349	269.600, 0.297	269.600, 0.109
1350	269.800, 0.297	269.800, 0.109
1351	,	,
1352	,	,
1353	,	,
1354	,	,
1355	,	,
1356	,	,
1357	,	,
1358	,	,
1359	,	,
1360	,	,
1361	,	,
1362	,	,
1363	,	,
1364	,	,
1365	,	,
1366	,	,
1367	,	,
1368	,	,
1369	,	,
1370	,	,
1371	,	,
1372	,	,
1373	,	,
1374	,	,
1375	,	,
1376	,	,
1377	,	,
1378	,	,
1379	,	,
1380	,	,
1381	,	,
1382	,	,
1383	,	,
1384	,	,
1385	,	,
1386	,	,
1387	,	,
1388	,	,
1389	,	,
1390	,	,
1391	,	,
1392	,	,
1393	,	,
1394	,	,
1395	,	,
1396	,	,
1397	,	,
1398	,	,
1399	,	,
1400	,	,
1401	,	,
1402	,	,
1403	,	,
1404	,	,
1405	,	,
1406	,	,
1407	,	,
1408	,	,
1409	,	,
1410	,	,
1411	,	,
1412	,	,
1413	,	,
1414	,	,
1415	,	,
1416	,	,
1417	,	,
1418	,	,
1419	,	,
1420	,	,
1421	,	,
1422	,	,
1423	,	,
1424	,	,
1425	,	,
1426	,	,
1427	,	,
1428	,	,
1429	,	,
1430	,	,
1431	,	,
1432	,	,
1433	,	,
1434	,	,
1435	,	,
1436	,	,
1437	,	,
1438	,	,
1439	,	,
1440	,	,
1441	,	,
1442	,	,
1443	,	,
1444	,	,
1445	,	,
1446	,	,
1447	,	,
1448	,	,
1449	,	,
1450	,	,
1451	,	,
1452	,	,
1453	,	,
1454	,	,
1455	,	,
1456	,	,
1457	,	,
1458	,	,
1459	,	,
1460	,	,
1461	,	,
1462	,	,
1463	,	,
1464	,	,
1465	,	,
1466	,	,
1467	,	,
1468	,	,
1469	,	,
1470	,	,
1471	,	,
1472	,	,
1473	,	,
1474	,	,
1475	,	,
1476	,	,
1477	,	,
1478	,	,
1479	,	,
1480	,	,
1481	,	,
1482	,	,
1483	,	,
1484	,	,
1485	,	,
1486	,	,
1487	,	,
1488	,	,
1489	,	,
1490	,	,
1491	,	,
1492	,	,
1493	,	,
1494	,	,
1495	,	,
1496	,	,
1497	,	,
1498	,	,
1499	,	,
1500	,	,
1501	,	,
1502	,	,
1503	,	,
1504	,	,
1505	,	,
1506	,	,
1507	,	,
1508	,	,
1509	,	,
1510	,	,
1511	,	,
1512	,	,
1513	,	,
1514	,	,
1515	,	,
1516	,	,
1517	,	,
1518	,	,
1519	,	,
1520	,	,
1521	,	,
1522	,	,
1523	,	,
1524	,	,
1525	,	,
1526	,	,
1527	,	,
1528	,	,
1529	,	,
1530	,	,
1531	,	,
1532	,	,
1533	,	,
1534	,	,
1535	,	,
1536	,	,
1537	,	,
1538	,	,
1539	,	,
1540	,	,
1541	,	,
1542	,	,
1543	,	,
1544	,	,
1545	,	,
1546	,	,
1547	,	,
1548	,	,
1549	,	,
1550	,	,
1551	,	,
1552	,	,
1553	,	,
1554	,	,
1555	,	,
1556	,	,
1557	,	,
1558	,	,
1559	,	,
1560	,	,
1561	,	,
1562	,	,
1563	,	,
1564	,	,
1565	,	,
1566	,	,
1567	,	,
1568	,	,
1569	,	,
1570	,	,
1571	,	,
1572	,	,
1573	,	,
1574	,	,
1575	,	,
1576	,	,
1577	,	,
1578	,	,
1579	,	,
1580	,	,
1581	,	,
1582	,	,
1583	,	,
1584	,	,
1585	,	,
1586	,	,
1587	,	,
1588	,	,
1589	,	,
1590	,	,
1591	,	,
1592	,	,
1593	,	,
1594	,	,
1595	,	,
1596	,	,
1597	,	,
1598	,	,
1599	,	,
1600	,	,
1601	,	,
1602	,	,
1603	,	,
1604	,	,
1605	,	,
1606	,	,
1607	,	,
1608	,	,
1609	,	,
1610	,	,
1611	,	,
1612	,	,
1613	,	,
1614	,	,
1615	,	,
1616	,	,
1617	,	,
1618	,	,
1619	,	,
1620	,	,
1621	,	,
1622	,	,
1623	,	,
1624	,	,
1625	,	,
1626	,	,
1627	,	,
1628	,	,
1629	,	,
1630	,	,
1631	,	,
1632	,	,
1633	,	,
1634	,	,
1635	,	,
1636	,	,
1637	,	,
1638	,	,
1639	,	,
1640	,	,
1641	,	,
1642	,	,
1643	,	,
1644	,	,
1645	,	,
1646	,	,
1647	,	,
1648	,	,
1649	,	,
1650	,	,
1651	,	,
1652	,	,
1653	,	,
1654	,	,
1655	,	,
1656	,	,
1657	,	,
1658	,	,
1659	,	,
1660	,	,
1661	,	,
1662	,	,
1663	,	,
1664	,	,
1665	,	,
1666	,	,
1667	,	,
1668	,	,
1669	,	,
1670	,	,
1671	,	,
1672	,	,
1673	,	,
1674	,	,
1675	,	,
1676	,	,
1677	,	,
1678	,	,
1679	,	,
1680	,	,
1681	,	,
1682	,	,
1683	,	,
1684	,	,
1685	,	,
1686	,	,
1687	,	,
1688	,	,
1689	,	,
1690	,	,
1691	,	,
1692	,	,
1693	,	,
1694	,	,
1695	,	,
1696	,	,
1697	,	,
1698	,	,
1699	,	,
1700	,	,
1701	,	,
1702	,	,
1703	,	,
1704	,	,
1705	,	,
1706	,	,
1707	,	,
1708	,	,
1709	,	,
1710	,	,
1711	,	,
1712	,	,
1713	,	,
1714	,	,
1715	,	,
1716	,	,
1717	,	,
1718	,	,
1719	,	,
1720	,	,
1721	,	,
1722	,	,
1723	,	,
1724	,	,
1725	,	,
1726	,	,
1727	,	,
1728	,	,
1729	,	,
1730	,	,
1731	,	,
1732	,	,
1733	,	,
1734	,	,
1735	,	,
1736	,	,
1737	,	,
1738	,	,
1739	,	,
1740	,	,
1741	,	,
1742	,	,
1743	,	,
1744	,	,
1745	,	,
1746	,	,
1747	,	,
1748	,	,
1749	,	,
1750	,	,
1751	,	,
1752	,	,
1753	,	,
1754	,	,
1755	,	,
1756	,	,
1757	,	,
1758	,	,
1759	,	,
1760	,	,
1761	,	,
1762	,	,
1763	,	,
1764	,	,
1765	,	,
1766	,	,
1767	,	,
1768	,	,
1769	,	,
1770	,	,
1771	,	,
1772	,	,
1773	,	,
1774	,	,
1775	,	,
1776	,	,
1777	,	,
1778	,	,
1779	,	,
1780	,	,
1781	,	,
1782	,	,
1783	,	,
1784	,	,
1785	,	,
1786	,	,
1787	,	,
1788	,	,
1789	,	,
1790	,	,
1791	,	,
1792	,	,
1793	,	,
1794	,	,
1795	,	,
1796	,	,
1797	,	,
1798	,	,
1799	,	,
1800	,	,
1801	,	,
1802	,	,
1803	,	,
1804	,	,
1805	,	,
1806	,	,
1807	,	,
1808	,	,
1809	,	,
1810	,	,
1811	,	,
1812	,	,
1813	,	,
1814	,	,
1815	,	,
1816	,	,
1817	,	,
1818	,	,
1819	,	,
1820	,	,
1821	,	,
1822	,	,
1823	,	,
1824	,	,
1825	,	,
1826	,	,
1827	,	,
1828	,	,
1829	,	,
1830	,	,
1831	,	,
1832	,	,
1833	,	,
1834	,	,
1835	,	,
1836	,	,
1837	,	,
1838	,	,
1839	,	,
1840	,	,
1841	,	,
1842	,	,
1843	,	,
1844	,	,
1845	,	,
1846	,	,
1847	,	,
1848	,	,
1849	,	,
1850	,	,
1851	,	,
1852	,	,
1853	,	,
1854	,	,
1855	,	,
1856	,	,
1857	,	,
1858	,	,
1859	,	,
1860	,	,
1861	,	,
1862	,	,
1863	,	,
1864	,	,
1865	,	,
1866	,	,
1867	,	,
1868	,	,
1869	,	,
1870	,	,
1871	,	,
1872	,	,
1873	,	,
1874	,	,
1875	,	,
1876	,	,
1877	,	,
1878	,	,
1879	,	,
1880	,	,
1881	,	,
1882	,	,
1883	,	,
1884	,	,
1885	,	,
1886	,	,
1887	,	,
1888	,	,
1889	,	,
1890	,	,
1891	,	,
1892	,	,
1893	,	,
1894	,	,
1895	,	,
1896	,	,
1897	,	,
1898	,	,
1899	,	,
1900	,	,
1901	,	,
1902	,	,
1903	,	,
1904	,	,
1905	,	,
1906	,	,
1907	,	,
1908	,	,
1909	,	,
1910	,	,
1911	,	,
1912	,	,
1913	,	,
1914	,	,
1915	,	,
1916	,	,
1917	,	,
1918	,	,
1919	,	,
1920	,	,
1921	,	,
1922	,	,
1923	,	,
1924	,	,
1925	,	,
1926	,	,
1927	,	,
1928	,	,
1929	,	,
1930	,	,
1931	,	,
1932	,	,
1933	,	,
1934	,	,
1935	,	,
1936	,	,
1937	,	,
1938	,	,
1939	,	,
1940	,	,
1941	,	,
1942	,	,
1943	,	,
1944	,	,
1945	,	,
1946	,	,
1947	,	,
1948	,	,
1949	,	,
1950	,	,
1951	,	,
1952	,	,
1953	,	,
1954	,	,
1955	,	,
1956	,	,
1957	,	,
1958	,	,
1959	,	,
1960	,	,
1961	,	,
1962	,	,
1963	,	,
1964	,	,
1965	,	,
1966	,	,
1967	,	,
1968	,	,
1969	,	,
1970	,	,
1971	,	,
1972	,	,
1973	,	,
1974	,	,
1975	,	,
1976	,	,
1977	,	,
1978	,	,
1979	,	,
1980	,	,
1981	,	,
1982	,	,
1983	,	,
1984	,	,
1985	,	,
1986	,	,
1987	,	,
1988	,	,
1989	,	,
1990	,	,
1991	,	,
1992	,	,
1993	,	,
1994	,	,
1995	,	,
1996	,	,
1997	,	,
1998	,	,
1999	,	,
[truncated: 13,001 more rows]

## Sheet: Figure1_panelD_rep2
	parS20 ParB-dissociation to buffer only	parS20 ParB-dissociation to buffer with CTP
1	0.000, 0.023	0.000, 0.028
2	0.200, 0.023	0.200, 0.026
3	0.400, 0.022	0.400, 0.024
4	0.600, 0.021	0.600, 0.023
5	0.800, 0.020	0.800, 0.021
6	1.000, 0.020	1.000, 0.019
7	1.200, 0.019	1.200, 0.018
8	1.400, 0.019	1.400, 0.017
9	1.600, 0.018	1.600, 0.016
10	1.800, 0.017	1.800, 0.016
11	2.000, 0.017	2.000, 0.015
12	2.200, 0.017	2.200, 0.015
13	2.400, 0.017	2.400, 0.016
14	2.600, 0.017	2.600, 0.016
15	2.800, 0.017	2.800, 0.015
16	3.000, 0.016	3.000, 0.015
17	3.200, 0.016	3.200, 0.015
18	3.400, 0.016	3.400, 0.015
19	3.600, 0.016	3.600, 0.014
20	3.800, 0.016	3.800, 0.014
21	4.000, 0.016	4.000, 0.013
22	4.200, 0.016	4.200, 0.013
23	4.400, 0.016	4.400, 0.012
24	4.600, 0.016	4.600, 0.012
25	4.800, 0.016	4.800, 0.012
26	5.000, 0.016	5.000, 0.012
27	5.200, 0.016	5.200, 0.011
28	5.400, 0.017	5.400, 0.011
29	5.600, 0.017	5.600, 0.011
30	5.800, 0.017	5.800, 0.011
31	6.000, 0.018	6.000, 0.011
32	6.200, 0.018	6.200, 0.011
33	6.400, 0.018	6.400, 0.011
34	6.600, 0.018	6.600, 0.011
35	6.800, 0.018	6.800, 0.011
36	7.000, 0.018	7.000, 0.011
37	7.200, 0.017	7.200, 0.011
38	7.400, 0.017	7.400, 0.011
39	7.600, 0.016	7.600, 0.010
40	7.800, 0.016	7.800, 0.010
41	8.000, 0.015	8.000, 0.010
42	8.200, 0.015	8.200, 0.009
43	8.400, 0.014	8.400, 0.009
44	8.600, 0.013	8.600, 0.009
45	8.800, 0.013	8.800, 0.008
46	9.000, 0.013	9.000, 0.008
47	9.200, 0.012	9.200, 0.008
48	9.400, 0.012	9.400, 0.007
49	9.600, 0.012	9.600, 0.007
50	9.800, 0.012	9.800, 0.007
51	10.000, 0.012	10.000, 0.007
52	10.200, 0.012	10.200, 0.006
53	10.400, 0.012	10.400, 0.006
54	10.600, 0.012	10.600, 0.006
55	10.800, 0.012	10.800, 0.006
56	11.000, 0.012	11.000, 0.006
57	11.200, 0.012	11.200, 0.006
58	11.400, 0.012	11.400, 0.005
59	11.600, 0.012	11.600, 0.005
60	11.800, 0.012	11.800, 0.005
61	12.000, 0.012	12.000, 0.004
62	12.200, 0.012	12.200, 0.004
63	12.400, 0.011	12.400, 0.004
64	12.600, 0.011	12.600, 0.004
65	12.800, 0.011	12.800, 0.004
66	13.000, 0.010	13.000, 0.004
67	13.200, 0.010	13.200, 0.004
68	13.400, 0.010	13.400, 0.004
69	13.600, 0.010	13.600, 0.004
70	13.800, 0.009	13.800, 0.004
71	14.000, 0.009	14.000, 0.005
72	14.200, 0.009	14.200, 0.005
73	14.400, 0.009	14.400, 0.005
74	14.600, 0.009	14.600, 0.005
75	14.800, 0.009	14.800, 0.005
76	15.000, 0.009	15.000, 0.005
77	15.200, 0.009	15.200, 0.005
78	15.400, 0.009	15.400, 0.005
79	15.600, 0.009	15.600, 0.004
80	15.800, 0.009	15.800, 0.004
81	16.000, 0.009	16.000, 0.004
82	16.200, 0.008	16.200, 0.004
83	16.400, 0.008	16.400, 0.004
84	16.600, 0.008	16.600, 0.004
85	16.800, 0.008	16.800, 0.004
86	17.000, 0.007	17.000, 0.003
87	17.200, 0.007	17.200, 0.003
88	17.400, 0.007	17.400, 0.003
89	17.600, 0.007	17.600, 0.003
90	17.800, 0.007	17.800, 0.003
91	18.000, 0.006	18.000, 0.003
92	18.200, 0.006	18.200, 0.003
93	18.400, 0.006	18.400, 0.003
94	18.600, 0.006	18.600, 0.003
95	18.800, 0.006	18.800, 0.003
96	19.000, 0.006	19.000, 0.003
97	19.200, 0.005	19.200, 0.003
98	19.400, 0.005	19.400, 0.003
99	19.600, 0.005	19.600, 0.003
100	19.800, 0.005	19.800, 0.003
101	20.000, 0.005	20.000, 0.003
102	20.200, 0.005	20.200, 0.003
103	20.400, 0.005	20.400, 0.003
104	20.600, 0.005	20.600, 0.003
105	20.800, 0.005	20.800, 0.003
106	21.000, 0.004	21.000, 0.003
107	21.200, 0.004	21.200, 0.003
108	21.400, 0.004	21.400, 0.003
109	21.600, 0.004	21.600, 0.003
110	21.800, 0.004	21.800, 0.002
111	22.000, 0.004	22.000, 0.002
112	22.200, 0.004	22.200, 0.002
113	22.400, 0.004	22.400, 0.002
114	22.600, 0.004	22.600, 0.002
115	22.800, 0.003	22.800, 0.002
116	23.000, 0.003	23.000, 0.001
117	23.200, 0.003	23.200, 0.001
118	23.400, 0.003	23.400, 0.001
119	23.600, 0.003	23.600, 0.001
120	23.800, 0.003	23.800, 0.001
121	24.000, 0.002	24.000, 0.001
122	24.200, 0.002	24.200, 0.001
123	24.400, 0.002	24.400, 0.001
124	24.600, 0.002	24.600, 0.001
125	24.800, 0.002	24.800, 0.001
126	25.000, 0.002	25.000, 0.001
127	25.200, 0.002	25.200, 0.001
128	25.400, 0.002	25.400, 0.001
129	25.600, 0.002	25.600, 0.001
130	25.800, 0.001	25.800, 0.001
131	26.000, 0.001	26.000, 0.001
132	26.200, 0.001	26.200, 0.001
133	26.400, 0.001	26.400, 0.001
134	26.600, 0.001	26.600, 0.001
135	26.800, 0.001	26.800, 0.000
136	27.000, 0.000	27.000, -0.000
137	27.200, 0.000	27.200, -0.000
138	27.400, 0.000	27.400, -0.000
139	27.600, 0.000	27.600, -0.001
140	27.800, 0.000	27.800, -0.001
141	28.000, 0.000	28.000, -0.001
142	28.200, 0.000	28.200, -0.001
143	28.400, 0.000	28.400, -0.000
144	28.600, -0.000	28.600, -0.000
145	28.800, -0.000	28.800, -0.000
146	29.000, -0.000	29.000, 0.000
147	29.200, -0.000	29.200, 0.000
148	29.400, -0.001	29.400, 0.001
149	29.600, -0.001	29.600, 0.001
150	29.800, -0.001	29.800, 0.001
151	30.000, 0.000	30.000, 0.000
152	30.200, 0.015	30.200, 0.016
153	30.400, 0.033	30.400, 0.036
154	30.600, 0.054	30.600, 0.059
155	30.800, 0.078	30.800, 0.084
156	31.000, 0.104	31.000, 0.112
157	31.200, 0.132	31.200, 0.142
158	31.400, 0.162	31.400, 0.172
159	31.600, 0.193	31.600, 0.204
160	31.800, 0.223	31.800, 0.234
161	32.000, 0.253	32.000, 0.264
162	32.200, 0.281	32.200, 0.290
163	32.400, 0.308	32.400, 0.316
164	32.600, 0.334	32.600, 0.341
165	32.800, 0.360	32.800, 0.364
166	33.000, 0.384	33.000, 0.387
167	33.200, 0.407	33.200, 0.408
168	33.400, 0.429	33.400, 0.428
169	33.600, 0.450	33.600, 0.447
170	33.800, 0.470	33.800, 0.465
171	34.000, 0.489	34.000, 0.482
172	34.200, 0.507	34.200, 0.497
173	34.400, 0.524	34.400, 0.512
174	34.600, 0.539	34.600, 0.526
175	34.800, 0.553	34.800, 0.538
176	35.000, 0.566	35.000, 0.550
177	35.200, 0.579	35.200, 0.561
178	35.400, 0.590	35.400, 0.570
179	35.600, 0.600	35.600, 0.580
180	35.800, 0.610	35.800, 0.588
181	36.000, 0.618	36.000, 0.595
182	36.200, 0.626	36.200, 0.602
183	36.400, 0.633	36.400, 0.608
184	36.600, 0.640	36.600, 0.614
185	36.800, 0.646	36.800, 0.619
186	37.000, 0.652	37.000, 0.624
187	37.200, 0.657	37.200, 0.628
188	37.400, 0.661	37.400, 0.632
189	37.600, 0.665	37.600, 0.635
190	37.800, 0.669	37.800, 0.638
191	38.000, 0.672	38.000, 0.641
192	38.200, 0.675	38.200, 0.644
193	38.400, 0.678	38.400, 0.647
194	38.600, 0.681	38.600, 0.649
195	38.800, 0.683	38.800, 0.651
196	39.000, 0.685	39.000, 0.652
197	39.200, 0.687	39.200, 0.654
198	39.400, 0.689	39.400, 0.655
199	39.600, 0.690	39.600, 0.657
200	39.800, 0.691	39.800, 0.658
201	40.000, 0.692	40.000, 0.659
202	40.200, 0.693	40.200, 0.660
203	40.400, 0.694	40.400, 0.661
204	40.600, 0.695	40.600, 0.662
205	40.800, 0.696	40.800, 0.663
206	41.000, 0.697	41.000, 0.664
207	41.200, 0.698	41.200, 0.665
208	41.400, 0.699	41.400, 0.666
209	41.600, 0.700	41.600, 0.667
210	41.800, 0.700	41.800, 0.668
211	42.000, 0.701	42.000, 0.669
212	42.200, 0.702	42.200, 0.669
213	42.400, 0.702	42.400, 0.670
214	42.600, 0.703	42.600, 0.671
215	42.800, 0.703	42.800, 0.671
216	43.000, 0.704	43.000, 0.671
217	43.200, 0.704	43.200, 0.672
218	43.400, 0.705	43.400, 0.672
219	43.600, 0.705	43.600, 0.672
220	43.800, 0.705	43.800, 0.672
221	44.000, 0.705	44.000, 0.672
222	44.200, 0.706	44.200, 0.672
223	44.400, 0.706	44.400, 0.673
224	44.600, 0.706	44.600, 0.673
225	44.800, 0.707	44.800, 0.674
226	45.000, 0.707	45.000, 0.674
227	45.200, 0.707	45.200, 0.674
228	45.400, 0.708	45.400, 0.675
229	45.600, 0.708	45.600, 0.675
230	45.800, 0.709	45.800, 0.675
231	46.000, 0.709	46.000, 0.676
232	46.200, 0.710	46.200, 0.677
233	46.400, 0.710	46.400, 0.677
234	46.600, 0.710	46.600, 0.678
235	46.800, 0.710	46.800, 0.678
236	47.000, 0.710	47.000, 0.678
237	47.200, 0.710	47.200, 0.678
238	47.400, 0.710	47.400, 0.678
239	47.600, 0.710	47.600, 0.679
240	47.800, 0.710	47.800, 0.679
241	48.000, 0.710	48.000, 0.679
242	48.200, 0.710	48.200, 0.680
243	48.400, 0.710	48.400, 0.680
244	48.600, 0.710	48.600, 0.680
245	48.800, 0.710	48.800, 0.681
246	49.000, 0.710	49.000, 0.681
247	49.200, 0.711	49.200, 0.682
248	49.400, 0.711	49.400, 0.682
249	49.600, 0.712	49.600, 0.683
250	49.800, 0.712	49.800, 0.683
251	50.000, 0.713	50.000, 0.683
252	50.200, 0.713	50.200, 0.684
253	50.400, 0.714	50.400, 0.684
254	50.600, 0.714	50.600, 0.684
255	50.800, 0.714	50.800, 0.684
256	51.000, 0.715	51.000, 0.684
257	51.200, 0.715	51.200, 0.684
258	51.400, 0.715	51.400, 0.684
259	51.600, 0.715	51.600, 0.684
260	51.800, 0.716	51.800, 0.684
261	52.000, 0.716	52.000, 0.685
262	52.200, 0.716	52.200, 0.685
263	52.400, 0.716	52.400, 0.685
264	52.600, 0.716	52.600, 0.685
265	52.800, 0.716	52.800, 0.685
266	53.000, 0.716	53.000, 0.686
267	53.200, 0.716	53.200, 0.686
268	53.400, 0.716	53.400, 0.686
269	53.600, 0.717	53.600, 0.686
270	53.800, 0.717	53.800, 0.687
271	54.000, 0.718	54.000, 0.687
272	54.200, 0.718	54.200, 0.687
273	54.400, 0.718	54.400, 0.687
274	54.600, 0.718	54.600, 0.687
275	54.800, 0.718	54.800, 0.688
276	55.000, 0.718	55.000, 0.688
277	55.200, 0.718	55.200, 0.688
278	55.400, 0.719	55.400, 0.689
279	55.600, 0.719	55.600, 0.689
280	55.800, 0.719	55.800, 0.689
281	56.000, 0.719	56.000, 0.690
282	56.200, 0.719	56.200, 0.690
283	56.400, 0.719	56.400, 0.691
284	56.600, 0.719	56.600, 0.691
285	56.800, 0.720	56.800, 0.692
286	57.000, 0.720	57.000, 0.692
287	57.200, 0.720	57.200, 0.692
288	57.400, 0.721	57.400, 0.692
289	57.600, 0.721	57.600, 0.692
290	57.800, 0.722	57.800, 0.692
291	58.000, 0.722	58.000, 0.693
292	58.200, 0.722	58.200, 0.693
293	58.400, 0.722	58.400, 0.693
294	58.600, 0.722	58.600, 0.693
295	58.800, 0.722	58.800, 0.693
296	59.000, 0.723	59.000, 0.694
297	59.200, 0.723	59.200, 0.694
298	59.400, 0.723	59.400, 0.694
299	59.600, 0.723	59.600, 0.694
300	59.800, 0.724	59.800, 0.695
301	60.000, 0.724	60.000, 0.695
302	60.200, 0.724	60.200, 0.695
303	60.400, 0.724	60.400, 0.696
304	60.600, 0.724	60.600, 0.696
305	60.800, 0.725	60.800, 0.696
306	61.000, 0.725	61.000, 0.696
307	61.200, 0.726	61.200, 0.696
308	61.400, 0.726	61.400, 0.696
309	61.600, 0.726	61.600, 0.696
310	61.800, 0.726	61.800, 0.696
311	62.000, 0.726	62.000, 0.696
312	62.200, 0.726	62.200, 0.697
313	62.400, 0.726	62.400, 0.697
314	62.600, 0.727	62.600, 0.698
315	62.800, 0.727	62.800, 0.698
316	63.000, 0.727	63.000, 0.699
317	63.200, 0.727	63.200, 0.699
318	63.400, 0.727	63.400, 0.700
319	63.600, 0.727	63.600, 0.700
320	63.800, 0.728	63.800, 0.700
321	64.000, 0.728	64.000, 0.700
322	64.200, 0.728	64.200, 0.700
323	64.400, 0.729	64.400, 0.700
324	64.600, 0.730	64.600, 0.699
325	64.800, 0.730	64.800, 0.699
326	65.000, 0.730	65.000, 0.700
327	65.200, 0.731	65.200, 0.700
328	65.400, 0.731	65.400, 0.701
329	65.600, 0.731	65.600, 0.701
330	65.800, 0.731	65.800, 0.702
331	66.000, 0.731	66.000, 0.702
332	66.200, 0.732	66.200, 0.703
333	66.400, 0.732	66.400, 0.704
334	66.600, 0.732	66.600, 0.704
335	66.800, 0.733	66.800, 0.704
336	67.000, 0.733	67.000, 0.705
337	67.200, 0.733	67.200, 0.705
338	67.400, 0.734	67.400, 0.705
339	67.600, 0.734	67.600, 0.705
340	67.800, 0.734	67.800, 0.705
341	68.000, 0.734	68.000, 0.705
342	68.200, 0.735	68.200, 0.705
343	68.400, 0.735	68.400, 0.706
344	68.600, 0.736	68.600, 0.706
345	68.800, 0.736	68.800, 0.707
346	69.000, 0.736	69.000, 0.707
347	69.200, 0.736	69.200, 0.707
348	69.400, 0.737	69.400, 0.708
349	69.600, 0.737	69.600, 0.708
350	69.800, 0.737	69.800, 0.708
351	70.000, 0.737	70.000, 0.708
352	70.200, 0.737	70.200, 0.708
353	70.400, 0.737	70.400, 0.708
354	70.600, 0.737	70.600, 0.708
355	70.800, 0.737	70.800, 0.708
356	71.000, 0.737	71.000, 0.708
357	71.200, 0.738	71.200, 0.708
358	71.400, 0.738	71.400, 0.708
359	71.600, 0.738	71.600, 0.709
360	71.800, 0.738	71.800, 0.709
361	72.000, 0.739	72.000, 0.709
362	72.200, 0.739	72.200, 0.710
363	72.400, 0.739	72.400, 0.711
364	72.600, 0.740	72.600, 0.711
365	72.800, 0.740	72.800, 0.711
366	73.000, 0.741	73.000, 0.712
367	73.200, 0.741	73.200, 0.712
368	73.400, 0.741	73.400, 0.712
369	73.600, 0.741	73.600, 0.713
370	73.800, 0.742	73.800, 0.713
371	74.000, 0.742	74.000, 0.713
372	74.200, 0.742	74.200, 0.713
373	74.400, 0.742	74.400, 0.713
374	74.600, 0.742	74.600, 0.713
375	74.800, 0.742	74.800, 0.713
376	75.000, 0.742	75.000, 0.713
377	75.200, 0.742	75.200, 0.714
378	75.400, 0.742	75.400, 0.714
379	75.600, 0.743	75.600, 0.714
380	75.800, 0.743	75.800, 0.714
381	76.000, 0.743	76.000, 0.714
382	76.200, 0.744	76.200, 0.715
383	76.400, 0.744	76.400, 0.715
384	76.600, 0.745	76.600, 0.715
385	76.800, 0.745	76.800, 0.715
386	77.000, 0.745	77.000, 0.716
387	77.200, 0.745	77.200, 0.716
388	77.400, 0.745	77.400, 0.716
389	77.600, 0.745	77.600, 0.716
390	77.800, 0.746	77.800, 0.716
391	78.000, 0.746	78.000, 0.717
392	78.200, 0.746	78.200, 0.717
393	78.400, 0.746	78.400, 0.717
394	78.600, 0.746	78.600, 0.717
395	78.800, 0.746	78.800, 0.718
396	79.000, 0.747	79.000, 0.718
397	79.200, 0.747	79.200, 0.718
398	79.400, 0.747	79.400, 0.719
399	79.600, 0.747	79.600, 0.719
400	79.800, 0.748	79.800, 0.719
401	80.000, 0.749	80.000, 0.719
402	80.200, 0.749	80.200, 0.720
403	80.400, 0.750	80.400, 0.720
404	80.600, 0.750	80.600, 0.720
405	80.800, 0.750	80.800, 0.720
406	81.000, 0.750	81.000, 0.720
407	81.200, 0.750	81.200, 0.720
408	81.400, 0.751	81.400, 0.720
409	81.600, 0.751	81.600, 0.720
410	81.800, 0.751	81.800, 0.720
411	82.000, 0.752	82.000, 0.721
412	82.200, 0.752	82.200, 0.721
413	82.400, 0.752	82.400, 0.721
414	82.600, 0.752	82.600, 0.721
415	82.800, 0.752	82.800, 0.722
416	83.000, 0.752	83.000, 0.722
417	83.200, 0.752	83.200, 0.722
418	83.400, 0.752	83.400, 0.722
419	83.600, 0.752	83.600, 0.723
420	83.800, 0.752	83.800, 0.723
421	84.000, 0.753	84.000, 0.723
422	84.200, 0.753	84.200, 0.723
423	84.400, 0.753	84.400, 0.723
424	84.600, 0.753	84.600, 0.724
425	84.800, 0.753	84.800, 0.724
426	85.000, 0.753	85.000, 0.724
427	85.200, 0.754	85.200, 0.724
428	85.400, 0.754	85.400, 0.724
429	85.600, 0.755	85.600, 0.724
430	85.800, 0.755	85.800, 0.725
431	86.000, 0.755	86.000, 0.725
432	86.200, 0.756	86.200, 0.725
433	86.400, 0.756	86.400, 0.726
434	86.600, 0.756	86.600, 0.726
435	86.800, 0.756	86.800, 0.725
436	87.000, 0.756	87.000, 0.725
437	87.200, 0.756	87.200, 0.725
438	87.400, 0.757	87.400, 0.725
439	87.600, 0.757	87.600, 0.725
440	87.800, 0.757	87.800, 0.725
441	88.000, 0.757	88.000, 0.726
442	88.200, 0.757	88.200, 0.726
443	88.400, 0.758	88.400, 0.726
444	88.600, 0.758	88.600, 0.727
445	88.800, 0.758	88.800, 0.727
446	89.000, 0.759	89.000, 0.728
447	89.200, 0.759	89.200, 0.728
448	89.400, 0.759	89.400, 0.729
449	89.600, 0.760	89.600, 0.730
450	89.800, 0.760	89.800, 0.730
451	90.000, 0.760	90.000, 0.731
452	90.200, 0.761	90.200, 0.731
453	90.400, 0.761	90.400, 0.731
454	90.600, 0.761	90.600, 0.731
455	90.800, 0.762	90.800, 0.731
456	91.000, 0.762	91.000, 0.731
457	91.200, 0.762	91.200, 0.731
458	91.400, 0.762	91.400, 0.732
459	91.600, 0.763	91.600, 0.732
460	91.800, 0.763	91.800, 0.732
461	92.000, 0.763	92.000, 0.732
462	92.200, 0.763	92.200, 0.732
463	92.400, 0.763	92.400, 0.732
464	92.600, 0.763	92.600, 0.732
465	92.800, 0.763	92.800, 0.733
466	93.000, 0.763	93.000, 0.733
467	93.200, 0.763	93.200, 0.733
468	93.400, 0.763	93.400, 0.733
469	93.600, 0.764	93.600, 0.733
470	93.800, 0.764	93.800, 0.734
471	94.000, 0.764	94.000, 0.734
472	94.200, 0.764	94.200, 0.735
473	94.400, 0.764	94.400, 0.735
474	94.600, 0.764	94.600, 0.736
475	94.800, 0.765	94.800, 0.736
476	95.000, 0.765	95.000, 0.736
477	95.200, 0.766	95.200, 0.737
478	95.400, 0.766	95.400, 0.737
479	95.600, 0.767	95.600, 0.737
480	95.800, 0.767	95.800, 0.737
481	96.000, 0.767	96.000, 0.738
482	96.200, 0.767	96.200, 0.738
483	96.400, 0.767	96.400, 0.738
484	96.600, 0.767	96.600, 0.738
485	96.800, 0.767	96.800, 0.738
486	97.000, 0.767	97.000, 0.738
487	97.200, 0.768	97.200, 0.738
488	97.400, 0.768	97.400, 0.738
489	97.600, 0.768	97.600, 0.738
490	97.800, 0.768	97.800, 0.739
491	98.000, 0.768	98.000, 0.739
492	98.200, 0.769	98.200, 0.739
493	98.400, 0.769	98.400, 0.739
494	98.600, 0.769	98.600, 0.739
495	98.800, 0.770	98.800, 0.740
496	99.000, 0.770	99.000, 0.740
497	99.200, 0.770	99.200, 0.740
498	99.400, 0.771	99.400, 0.740
499	99.600, 0.771	99.600, 0.740
500	99.800, 0.771	99.800, 0.740
501	100.000, 0.771	100.000, 0.740
502	100.200, 0.771	100.200, 0.740
503	100.400, 0.771	100.400, 0.740
504	100.600, 0.771	100.600, 0.739
505	100.800, 0.771	100.800, 0.739
506	101.000, 0.771	101.000, 0.739
507	101.200, 0.771	101.200, 0.739
508	101.400, 0.771	101.400, 0.739
509	101.600, 0.772	101.600, 0.740
510	101.800, 0.772	101.800, 0.740
511	102.000, 0.772	102.000, 0.740
512	102.200, 0.773	102.200, 0.740
513	102.400, 0.773	102.400, 0.740
514	102.600, 0.774	102.600, 0.741
515	102.800, 0.774	102.800, 0.741
516	103.000, 0.774	103.000, 0.741
517	103.200, 0.775	103.200, 0.742
518	103.400, 0.775	103.400, 0.742
519	103.600, 0.775	103.600, 0.742
520	103.800, 0.776	103.800, 0.742
521	104.000, 0.776	104.000, 0.742
522	104.200, 0.776	104.200, 0.743
523	104.400, 0.776	104.400, 0.743
524	104.600, 0.776	104.600, 0.743
525	104.800, 0.776	104.800, 0.743
526	105.000, 0.776	105.000, 0.744
527	105.200, 0.776	105.200, 0.744
528	105.400, 0.776	105.400, 0.744
529	105.600, 0.776	105.600, 0.745
530	105.800, 0.776	105.800, 0.745
531	106.000, 0.776	106.000, 0.745
532	106.200, 0.777	106.200, 0.745
533	106.400, 0.777	106.400, 0.745
534	106.600, 0.777	106.600, 0.745
535	106.800, 0.777	106.800, 0.745
536	107.000, 0.777	107.000, 0.745
537	107.200, 0.778	107.200, 0.745
538	107.400, 0.778	107.400, 0.745
539	107.600, 0.778	107.600, 0.745
540	107.800, 0.778	107.800, 0.745
541	108.000, 0.778	108.000, 0.746
542	108.200, 0.779	108.200, 0.746
543	108.400, 0.779	108.400, 0.746
544	108.600, 0.779	108.600, 0.746
545	108.800, 0.780	108.800, 0.747
546	109.000, 0.779	109.000, 0.747
547	109.200, 0.779	109.200, 0.747
548	109.400, 0.780	109.400, 0.747
549	109.600, 0.780	109.600, 0.747
550	109.800, 0.780	109.800, 0.747
551	110.000, 0.780	110.000, 0.748
552	110.200, 0.780	110.200, 0.748
553	110.400, 0.781	110.400, 0.748
554	110.600, 0.781	110.600, 0.748
555	110.800, 0.781	110.800, 0.749
556	111.000, 0.781	111.000, 0.749
557	111.200, 0.781	111.200, 0.749
558	111.400, 0.781	111.400, 0.749
559	111.600, 0.782	111.600, 0.750
560	111.800, 0.782	111.800, 0.750
561	112.000, 0.782	112.000, 0.750
562	112.200, 0.783	112.200, 0.751
563	112.400, 0.783	112.400, 0.751
564	112.600, 0.783	112.600, 0.751
565	112.800, 0.784	112.800, 0.751
566	113.000, 0.784	113.000, 0.751
567	113.200, 0.784	113.200, 0.751
568	113.400, 0.785	113.400, 0.750
569	113.600, 0.785	113.600, 0.750
570	113.800, 0.785	113.800, 0.750
571	114.000, 0.786	114.000, 0.750
572	114.200, 0.786	114.200, 0.749
573	114.400, 0.786	114.400, 0.750
574	114.600, 0.786	114.600, 0.750
575	114.800, 0.786	114.800, 0.750
576	115.000, 0.786	115.000, 0.750
577	115.200, 0.786	115.200, 0.751
578	115.400, 0.786	115.400, 0.751
579	115.600, 0.786	115.600, 0.752
580	115.800, 0.786	115.800, 0.752
581	116.000, 0.786	116.000, 0.752
582	116.200, 0.786	116.200, 0.753
583	116.400, 0.786	116.400, 0.753
584	116.600, 0.787	116.600, 0.753
585	116.800, 0.787	116.800, 0.753
586	117.000, 0.787	117.000, 0.753
587	117.200, 0.787	117.200, 0.753
588	117.400, 0.787	117.400, 0.752
589	117.600, 0.788	117.600, 0.752
590	117.800, 0.788	117.800, 0.752
591	118.000, 0.788	118.000, 0.752
592	118.200, 0.788	118.200, 0.752
593	118.400, 0.788	118.400, 0.753
594	118.600, 0.788	118.600, 0.753
595	118.800, 0.788	118.800, 0.753
596	119.000, 0.789	119.000, 0.753
597	119.200, 0.789	119.200, 0.754
598	119.400, 0.789	119.400, 0.754
599	119.600, 0.789	119.600, 0.755
600	119.800, 0.789	119.800, 0.755
601	120.000, 0.790	120.000, 0.755
602	120.200, 0.790	120.200, 0.755
603	120.400, 0.790	120.400, 0.756
604	120.600, 0.790	120.600, 0.756
605	120.800, 0.790	120.800, 0.755
606	121.000, 0.790	121.000, 0.755
607	121.200, 0.790	121.200, 0.755
608	121.400, 0.790	121.400, 0.755
609	121.600, 0.789	121.600, 0.755
610	121.800, 0.789	121.800, 0.756
611	122.000, 0.790	122.000, 0.756
612	122.200, 0.790	122.200, 0.756
613	122.400, 0.791	122.400, 0.756
614	122.600, 0.791	122.600, 0.756
615	122.800, 0.792	122.800, 0.756
616	123.000, 0.792	123.000, 0.757
617	123.200, 0.793	123.200, 0.757
618	123.400, 0.793	123.400, 0.757
619	123.600, 0.793	123.600, 0.758
620	123.800, 0.794	123.800, 0.758
621	124.000, 0.794	124.000, 0.758
622	124.200, 0.794	124.200, 0.758
623	124.400, 0.794	124.400, 0.758
624	124.600, 0.794	124.600, 0.758
625	124.800, 0.794	124.800, 0.758
626	125.000, 0.793	125.000, 0.758
627	125.200, 0.793	125.200, 0.758
628	125.400, 0.793	125.400, 0.758
629	125.600, 0.793	125.600, 0.758
630	125.800, 0.794	125.800, 0.758
631	126.000, 0.794	126.000, 0.758
632	126.200, 0.794	126.200, 0.758
633	126.400, 0.794	126.400, 0.758
634	126.600, 0.794	126.600, 0.758
635	126.800, 0.795	126.800, 0.758
636	127.000, 0.794	127.000, 0.758
637	127.200, 0.794	127.200, 0.758
638	127.400, 0.794	127.400, 0.759
639	127.600, 0.794	127.600, 0.759
640	127.800, 0.794	127.800, 0.759
641	128.000, 0.794	128.000, 0.758
642	128.200, 0.794	128.200, 0.759
643	128.400, 0.793	128.400, 0.759
644	128.600, 0.793	128.600, 0.759
645	128.800, 0.793	128.800, 0.759
646	129.000, 0.794	129.000, 0.759
647	129.200, 0.794	129.200, 0.759
648	129.400, 0.795	129.400, 0.759
649	129.600, 0.795	129.600, 0.759
650	129.800, 0.795	129.800, 0.759
651	130.000, 0.796	130.000, 0.759
652	130.200, 0.796	130.200, 0.759
653	130.400, 0.796	130.400, 0.759
654	130.600, 0.796	130.600, 0.759
655	130.800, 0.796	130.800, 0.760
656	131.000, 0.796	131.000, 0.760
657	131.200, 0.796	131.200, 0.760
658	131.400, 0.797	131.400, 0.760
659	131.600, 0.797	131.600, 0.760
660	131.800, 0.797	131.800, 0.760
661	132.000, 0.797	132.000, 0.760
662	132.200, 0.797	132.200, 0.760
663	132.400, 0.797	132.400, 0.760
664	132.600, 0.797	132.600, 0.760
665	132.800, 0.797	132.800, 0.760
666	133.000, 0.797	133.000, 0.761
667	133.200, 0.798	133.200, 0.761
668	133.400, 0.798	133.400, 0.761
669	133.600, 0.798	133.600, 0.761
670	133.800, 0.798	133.800, 0.761
671	134.000, 0.798	134.000, 0.761
672	134.200, 0.798	134.200, 0.761
673	134.400, 0.798	134.400, 0.761
674	134.600, 0.798	134.600, 0.761
675	134.800, 0.798	134.800, 0.761
676	135.000, 0.799	135.000, 0.762
677	135.200, 0.799	135.200, 0.762
678	135.400, 0.799	135.400, 0.762
679	135.600, 0.800	135.600, 0.762
680	135.800, 0.800	135.800, 0.762
681	136.000, 0.800	136.000, 0.762
682	136.200, 0.801	136.200, 0.762
683	136.400, 0.801	136.400, 0.762
684	136.600, 0.802	136.600, 0.762
685	136.800, 0.802	136.800, 0.762
686	137.000, 0.802	137.000, 0.762
687	137.200, 0.802	137.200, 0.762
688	137.400, 0.802	137.400, 0.762
689	137.600, 0.803	137.600, 0.762
690	137.800, 0.802	137.800, 0.761
691	138.000, 0.802	138.000, 0.761
692	138.200, 0.802	138.200, 0.761
693	138.400, 0.802	138.400, 0.762
694	138.600, 0.801	138.600, 0.762
695	138.800, 0.801	138.800, 0.762
696	139.000, 0.801	139.000, 0.762
697	139.200, 0.801	139.200, 0.762
698	139.400, 0.801	139.400, 0.762
699	139.600, 0.802	139.600, 0.763
700	139.800, 0.802	139.800, 0.763
701	140.000, 0.802	140.000, 0.763
702	140.200, 0.802	140.200, 0.763
703	140.400, 0.803	140.400, 0.763
704	140.600, 0.803	140.600, 0.763
705	140.800, 0.803	140.800, 0.763
706	141.000, 0.803	141.000, 0.764
707	141.200, 0.803	141.200, 0.764
708	141.400, 0.804	141.400, 0.764
709	141.600, 0.804	141.600, 0.764
710	141.800, 0.804	141.800, 0.764
711	142.000, 0.804	142.000, 0.764
712	142.200, 0.804	142.200, 0.764
713	142.400, 0.805	142.400, 0.764
714	142.600, 0.805	142.600, 0.764
715	142.800, 0.805	142.800, 0.765
716	143.000, 0.805	143.000, 0.765
717	143.200, 0.805	143.200, 0.765
718	143.400, 0.805	143.400, 0.765
719	143.600, 0.805	143.600, 0.765
720	143.800, 0.805	143.800, 0.764
721	144.000, 0.805	144.000, 0.764
722	144.200, 0.805	144.200, 0.764
723	144.400, 0.805	144.400, 0.764
724	144.600, 0.805	144.600, 0.764
725	144.800, 0.806	144.800, 0.764
726	145.000, 0.806	145.000, 0.764
727	145.200, 0.806	145.200, 0.764
728	145.400, 0.806	145.400, 0.764
729	145.600, 0.807	145.600, 0.764
730	145.800, 0.807	145.800, 0.764
731	146.000, 0.807	146.000, 0.764
732	146.200, 0.807	146.200, 0.764
733	146.400, 0.807	146.400, 0.764
734	146.600, 0.807	146.600, 0.765
735	146.800, 0.807	146.800, 0.765
736	147.000, 0.807	147.000, 0.765
737	147.200, 0.808	147.200, 0.765
738	147.400, 0.808	147.400, 0.765
739	147.600, 0.808	147.600, 0.765
740	147.800, 0.808	147.800, 0.765
741	148.000, 0.808	148.000, 0.765
742	148.200, 0.808	148.200, 0.766
743	148.400, 0.808	148.400, 0.766
744	148.600, 0.808	148.600, 0.766
745	148.800, 0.808	148.800, 0.766
746	149.000, 0.808	149.000, 0.766
747	149.200, 0.808	149.200, 0.766
748	149.400, 0.808	149.400, 0.766
749	149.600, 0.808	149.600, 0.766
750	149.800, 0.808	149.800, 0.766
751	150.000, 0.808	150.000, 0.766
752	150.200, 0.801	150.200, 0.744
753	150.400, 0.794	150.400, 0.718
754	150.600, 0.787	150.600, 0.690
755	150.800, 0.778	150.800, 0.659
756	151.000, 0.770	151.000, 0.627
757	151.200, 0.761	151.200, 0.594
758	151.400, 0.752	151.400, 0.562
759	151.600, 0.743	151.600, 0.531
760	151.800, 0.735	151.800, 0.503
761	152.000, 0.727	152.000, 0.477
762	152.200, 0.721	152.200, 0.456
763	152.400, 0.715	152.400, 0.437
764	152.600, 0.710	152.600, 0.420
765	152.800, 0.705	152.800, 0.404
766	153.000, 0.701	153.000, 0.389
767	153.200, 0.697	153.200, 0.376
768	153.400, 0.693	153.400, 0.363
769	153.600, 0.689	153.600, 0.351
770	153.800, 0.686	153.800, 0.339
771	154.000, 0.683	154.000, 0.329
772	154.200, 0.680	154.200, 0.319
773	154.400, 0.677	154.400, 0.309
774	154.600, 0.674	154.600, 0.301
775	154.800, 0.672	154.800, 0.293
776	155.000, 0.669	155.000, 0.285
777	155.200, 0.667	155.200, 0.278
778	155.400, 0.665	155.400, 0.272
779	155.600, 0.663	155.600, 0.265
780	155.800, 0.661	155.800, 0.259
781	156.000, 0.659	156.000, 0.253
782	156.200, 0.657	156.200, 0.248
783	156.400, 0.655	156.400, 0.242
784	156.600, 0.653	156.600, 0.237
785	156.800, 0.651	156.800, 0.232
786	157.000, 0.650	157.000, 0.228
787	157.200, 0.648	157.200, 0.223
788	157.400, 0.647	157.400, 0.219
789	157.600, 0.646	157.600, 0.215
790	157.800, 0.645	157.800, 0.211
791	158.000, 0.643	158.000, 0.208
792	158.200, 0.642	158.200, 0.204
793	158.400, 0.640	158.400, 0.201
794	158.600, 0.639	158.600, 0.198
795	158.800, 0.637	158.800, 0.195
796	159.000, 0.636	159.000, 0.192
797	159.200, 0.635	159.200, 0.190
798	159.400, 0.635	159.400, 0.187
799	159.600, 0.634	159.600, 0.185
800	159.800, 0.633	159.800, 0.182
801	160.000, 0.632	160.000, 0.180
802	160.200, 0.631	160.200, 0.178
803	160.400, 0.630	160.400, 0.175
804	160.600, 0.629	160.600, 0.173
805	160.800, 0.628	160.800, 0.171
806	161.000, 0.627	161.000, 0.168
807	161.200, 0.626	161.200, 0.166
808	161.400, 0.625	161.400, 0.165
809	161.600, 0.624	161.600, 0.163
810	161.800, 0.623	161.800, 0.161
811	162.000, 0.622	162.000, 0.160
812	162.200, 0.621	162.200, 0.158
813	162.400, 0.620	162.400, 0.156
814	162.600, 0.619	162.600, 0.155
815	162.800, 0.618	162.800, 0.154
816	163.000, 0.618	163.000, 0.152
817	163.200, 0.617	163.200, 0.151
818	163.400, 0.617	163.400, 0.150
819	163.600, 0.616	163.600, 0.149
820	163.800, 0.616	163.800, 0.148
821	164.000, 0.615	164.000, 0.146
822	164.200, 0.615	164.200, 0.145
823	164.400, 0.614	164.400, 0.144
824	164.600, 0.613	164.600, 0.143
825	164.800, 0.613	164.800, 0.143
826	165.000, 0.612	165.000, 0.142
827	165.200, 0.612	165.200, 0.141
828	165.400, 0.611	165.400, 0.141
829	165.600, 0.611	165.600, 0.140
830	165.800, 0.610	165.800, 0.139
831	166.000, 0.610	166.000, 0.138
832	166.200, 0.609	166.200, 0.138
833	166.400, 0.608	166.400, 0.137
834	166.600, 0.608	166.600, 0.136
835	166.800, 0.607	166.800, 0.135
836	167.000, 0.606	167.000, 0.134
837	167.200, 0.605	167.200, 0.133
838	167.400, 0.605	167.400, 0.132
839	167.600, 0.604	167.600, 0.131
840	167.800, 0.604	167.800, 0.131
841	168.000, 0.603	168.000, 0.130
842	168.200, 0.602	168.200, 0.129
843	168.400, 0.602	168.400, 0.129
844	168.600, 0.601	168.600, 0.128
845	168.800, 0.600	168.800, 0.128
846	169.000, 0.600	169.000, 0.127
847	169.200, 0.599	169.200, 0.127
848	169.400, 0.599	169.400, 0.127
849	169.600, 0.598	169.600, 0.127
850	169.800, 0.598	169.800, 0.126
851	170.000, 0.597	170.000, 0.126
852	170.200, 0.597	170.200, 0.125
853	170.400, 0.596	170.400, 0.125
854	170.600, 0.595	170.600, 0.124
855	170.800, 0.594	170.800, 0.124
856	171.000, 0.594	171.000, 0.123
857	171.200, 0.593	171.200, 0.123
858	171.400, 0.592	171.400, 0.123
859	171.600, 0.592	171.600, 0.122
860	171.800, 0.591	171.800, 0.122
861	172.000, 0.590	172.000, 0.122
862	172.200, 0.589	172.200, 0.122
863	172.400, 0.589	172.400, 0.122
864	172.600, 0.588	172.600, 0.122
865	172.800, 0.587	172.800, 0.122
866	173.000, 0.587	173.000, 0.122
867	173.200, 0.586	173.200, 0.122
868	173.400, 0.586	173.400, 0.121
869	173.600, 0.585	173.600, 0.121
870	173.800, 0.585	173.800, 0.120
871	174.000, 0.584	174.000, 0.120
872	174.200, 0.584	174.200, 0.120
873	174.400, 0.583	174.400, 0.119
874	174.600, 0.583	174.600, 0.119
875	174.800, 0.582	174.800, 0.119
876	175.000, 0.582	175.000, 0.118
877	175.200, 0.581	175.200, 0.118
878	175.400, 0.581	175.400, 0.118
879	175.600, 0.580	175.600, 0.118
880	175.800, 0.580	175.800, 0.118
881	176.000, 0.579	176.000, 0.118
882	176.200, 0.578	176.200, 0.118
883	176.400, 0.578	176.400, 0.118
884	176.600, 0.577	176.600, 0.118
885	176.800, 0.576	176.800, 0.118
886	177.000, 0.576	177.000, 0.117
887	177.200, 0.575	177.200, 0.117
888	177.400, 0.575	177.400, 0.116
889	177.600, 0.574	177.600, 0.116
890	177.800, 0.574	177.800, 0.116
891	178.000, 0.574	178.000, 0.115
892	178.200, 0.574	178.200, 0.115
893	178.400, 0.574	178.400, 0.115
894	178.600, 0.573	178.600, 0.115
895	178.800, 0.573	178.800, 0.115
896	179.000, 0.573	179.000, 0.114
897	179.200, 0.573	179.200, 0.114
898	179.400, 0.572	179.400, 0.114
899	179.600, 0.571	179.600, 0.114
900	179.800, 0.570	179.800, 0.114
901	180.000, 0.569	180.000, 0.114
902	180.200, 0.568	180.200, 0.114
903	180.400, 0.567	180.400, 0.114
904	180.600, 0.566	180.600, 0.114
905	180.800, 0.566	180.800, 0.114
906	181.000, 0.565	181.000, 0.114
907	181.200, 0.564	181.200, 0.113
908	181.400, 0.564	181.400, 0.113
909	181.600, 0.564	181.600, 0.113
910	181.800, 0.563	181.800, 0.113
911	182.000, 0.563	182.000, 0.113
912	182.200, 0.563	182.200, 0.113
913	182.400, 0.563	182.400, 0.113
914	182.600, 0.562	182.600, 0.113
915	182.800, 0.562	182.800, 0.112
916	183.000, 0.561	183.000, 0.112
917	183.200, 0.561	183.200, 0.112
918	183.400, 0.560	183.400, 0.112
919	183.600, 0.560	183.600, 0.111
920	183.800, 0.559	183.800, 0.111
921	184.000, 0.559	184.000, 0.111
922	184.200, 0.558	184.200, 0.111
923	184.400, 0.557	184.400, 0.111
924	184.600, 0.557	184.600, 0.110
925	184.800, 0.556	184.800, 0.110
926	185.000, 0.555	185.000, 0.110
927	185.200, 0.555	185.200, 0.110
928	185.400, 0.554	185.400, 0.110
929	185.600, 0.554	185.600, 0.110
930	185.800, 0.553	185.800, 0.110
931	186.000, 0.553	186.000, 0.110
932	186.200, 0.552	186.200, 0.110
933	186.400, 0.552	186.400, 0.110
934	186.600, 0.551	186.600, 0.110
935	186.800, 0.551	186.800, 0.110
936	187.000, 0.550	187.000, 0.110
937	187.200, 0.550	187.200, 0.110
938	187.400, 0.550	187.400, 0.110
939	187.600, 0.549	187.600, 0.111
940	187.800, 0.549	187.800, 0.111
941	188.000, 0.549	188.000, 0.111
942	188.200, 0.548	188.200, 0.111
943	188.400, 0.548	188.400, 0.111
944	188.600, 0.547	188.600, 0.111
945	188.800, 0.547	188.800, 0.111
946	189.000, 0.546	189.000, 0.111
947	189.200, 0.546	189.200, 0.111
948	189.400, 0.545	189.400, 0.111
949	189.600, 0.544	189.600, 0.111
950	189.800, 0.544	189.800, 0.111
951	190.000, 0.543	190.000, 0.110
952	190.200, 0.543	190.200, 0.110
953	190.400, 0.543	190.400, 0.110
954	190.600, 0.542	190.600, 0.109
955	190.800, 0.542	190.800, 0.109
956	191.000, 0.542	191.000, 0.109
957	191.200, 0.541	191.200, 0.108
958	191.400, 0.541	191.400, 0.108
959	191.600, 0.541	191.600, 0.108
960	191.800, 0.540	191.800, 0.108
961	192.000, 0.540	192.000, 0.108
962	192.200, 0.540	192.200, 0.108
963	192.400, 0.540	192.400, 0.108
964	192.600, 0.539	192.600, 0.108
965	192.800, 0.539	192.800, 0.108
966	193.000, 0.538	193.000, 0.108
967	193.200, 0.538	193.200, 0.109
968	193.400, 0.537	193.400, 0.109
969	193.600, 0.537	193.600, 0.109
970	193.800, 0.536	193.800, 0.109
971	194.000, 0.536	194.000, 0.109
972	194.200, 0.535	194.200, 0.108
973	194.400, 0.535	194.400, 0.108
974	194.600, 0.534	194.600, 0.108
975	194.800, 0.533	194.800, 0.107
976	195.000, 0.533	195.000, 0.107
977	195.200, 0.532	195.200, 0.107
978	195.400, 0.531	195.400, 0.107
979	195.600, 0.531	195.600, 0.106
980	195.800, 0.530	195.800, 0.106
981	196.000, 0.530	196.000, 0.106
982	196.200, 0.529	196.200, 0.106
983	196.400, 0.529	196.400, 0.106
984	196.600, 0.528	196.600, 0.106
985	196.800, 0.528	196.800, 0.106
986	197.000, 0.527	197.000, 0.106
987	197.200, 0.527	197.200, 0.106
988	197.400, 0.527	197.400, 0.106
989	197.600, 0.527	197.600, 0.106
990	197.800, 0.526	197.800, 0.106
991	198.000, 0.526	198.000, 0.106
992	198.200, 0.526	198.200, 0.106
993	198.400, 0.525	198.400, 0.106
994	198.600, 0.524	198.600, 0.106
995	198.800, 0.524	198.800, 0.106
996	199.000, 0.523	199.000, 0.105
997	199.200, 0.523	199.200, 0.105
998	199.400, 0.522	199.400, 0.105
999	199.600, 0.522	199.600, 0.105
1000	199.800, 0.521	199.800, 0.105
1001	200.000, 0.521	200.000, 0.105
1002	200.200, 0.520	200.200, 0.105
1003	200.400, 0.520	200.400, 0.104
1004	200.600, 0.520	200.600, 0.104
1005	200.800, 0.519	200.800, 0.104
1006	201.000, 0.519	201.000, 0.104
1007	201.200, 0.519	201.200, 0.104
1008	201.400, 0.519	201.400, 0.104
1009	201.600, 0.518	201.600, 0.105
1010	201.800, 0.518	201.800, 0.105
1011	202.000, 0.517	202.000, 0.105
1012	202.200, 0.517	202.200, 0.105
1013	202.400, 0.516	202.400, 0.105
1014	202.600, 0.516	202.600, 0.104
1015	202.800, 0.516	202.800, 0.104
1016	203.000, 0.516	203.000, 0.104
1017	203.200, 0.515	203.200, 0.104
1018	203.400, 0.515	203.400, 0.104
1019	203.600, 0.514	203.600, 0.104
1020	203.800, 0.514	203.800, 0.104
1021	204.000, 0.513	204.000, 0.104
1022	204.200, 0.513	204.200, 0.104
1023	204.400, 0.513	204.400, 0.104
1024	204.600, 0.513	204.600, 0.104
1025	204.800, 0.512	204.800, 0.104
1026	205.000, 0.512	205.000, 0.104
1027	205.200, 0.511	205.200, 0.105
1028	205.400, 0.511	205.400, 0.105
1029	205.600, 0.510	205.600, 0.105
1030	205.800, 0.510	205.800, 0.105
1031	206.000, 0.509	206.000, 0.104
1032	206.200, 0.509	206.200, 0.104
1033	206.400, 0.508	206.400, 0.104
1034	206.600, 0.508	206.600, 0.104
1035	206.800, 0.507	206.800, 0.103
1036	207.000, 0.507	207.000, 0.103
1037	207.200, 0.506	207.200, 0.103
1038	207.400, 0.506	207.400, 0.103
1039	207.600, 0.506	207.600, 0.103
1040	207.800, 0.505	207.800, 0.103
1041	208.000, 0.505	208.000, 0.103
1042	208.200, 0.505	208.200, 0.103
1043	208.400, 0.504	208.400, 0.103
1044	208.600, 0.504	208.600, 0.103
1045	208.800, 0.503	208.800, 0.103
1046	209.000, 0.503	209.000, 0.103
1047	209.200, 0.502	209.200, 0.103
1048	209.400, 0.501	209.400, 0.102
1049	209.600, 0.501	209.600, 0.102
1050	209.800, 0.500	209.800, 0.102
1051	210.000, 0.500	210.000, 0.102
1052	210.200, 0.499	210.200, 0.102
1053	210.400, 0.499	210.400, 0.101
1054	210.600, 0.498	210.600, 0.101
1055	210.800, 0.498	210.800, 0.101
1056	211.000, 0.498	211.000, 0.101
1057	211.200, 0.497	211.200, 0.101
1058	211.400, 0.497	211.400, 0.101
1059	211.600, 0.497	211.600, 0.101
1060	211.800, 0.497	211.800, 0.101
1061	212.000, 0.497	212.000, 0.101
1062	212.200, 0.497	212.200, 0.100
1063	212.400, 0.497	212.400, 0.100
1064	212.600, 0.497	212.600, 0.100
1065	212.800, 0.497	212.800, 0.100
1066	213.000, 0.497	213.000, 0.100
1067	213.200, 0.497	213.200, 0.100
1068	213.400, 0.497	213.400, 0.100
1069	213.600, 0.496	213.600, 0.100
1070	213.800, 0.496	213.800, 0.100
1071	214.000, 0.495	214.000, 0.100
1072	214.200, 0.495	214.200, 0.100
1073	214.400, 0.494	214.400, 0.100
1074	214.600, 0.493	214.600, 0.100
1075	214.800, 0.493	214.800, 0.100
1076	215.000, 0.492	215.000, 0.100
1077	215.200, 0.492	215.200, 0.100
1078	215.400, 0.491	215.400, 0.100
1079	215.600, 0.491	215.600, 0.100
1080	215.800, 0.491	215.800, 0.100
1081	216.000, 0.491	216.000, 0.100
1082	216.200, 0.491	216.200, 0.100
1083	216.400, 0.490	216.400, 0.100
1084	216.600, 0.490	216.600, 0.100
1085	216.800, 0.490	216.800, 0.100
1086	217.000, 0.490	217.000, 0.100
1087	217.200, 0.489	217.200, 0.100
1088	217.400, 0.489	217.400, 0.099
1089	217.600, 0.488	217.600, 0.099
1090	217.800, 0.488	217.800, 0.099
1091	218.000, 0.487	218.000, 0.099
1092	218.200, 0.487	218.200, 0.099
1093	218.400, 0.486	218.400, 0.099
1094	218.600, 0.486	218.600, 0.099
1095	218.800, 0.485	218.800, 0.100
1096	219.000, 0.485	219.000, 0.100
1097	219.200, 0.485	219.200, 0.100
1098	219.400, 0.484	219.400, 0.100
1099	219.600, 0.484	219.600, 0.100
1100	219.800, 0.484	219.800, 0.100
1101	220.000, 0.483	220.000, 0.100
1102	220.200, 0.483	220.200, 0.100
1103	220.400, 0.483	220.400, 0.100
1104	220.600, 0.483	220.600, 0.100
1105	220.800, 0.482	220.800, 0.100
1106	221.000, 0.482	221.000, 0.100
1107	221.200, 0.482	221.200, 0.100
1108	221.400, 0.482	221.400, 0.100
1109	221.600, 0.481	221.600, 0.100
1110	221.800, 0.481	221.800, 0.100
1111	222.000, 0.481	222.000, 0.099
1112	222.200, 0.481	222.200, 0.099
1113	222.400, 0.480	222.400, 0.099
1114	222.600, 0.480	222.600, 0.098
1115	222.800, 0.480	222.800, 0.098
1116	223.000, 0.480	223.000, 0.098
1117	223.200, 0.479	223.200, 0.098
1118	223.400, 0.479	223.400, 0.097
1119	223.600, 0.479	223.600, 0.097
1120	223.800, 0.478	223.800, 0.097
1121	224.000, 0.478	224.000, 0.097
1122	224.200, 0.478	224.200, 0.097
1123	224.400, 0.477	224.400, 0.097
1124	224.600, 0.477	224.600, 0.098
1125	224.800, 0.476	224.800, 0.098
1126	225.000, 0.476	225.000, 0.098
1127	225.200, 0.476	225.200, 0.098
1128	225.400, 0.475	225.400, 0.098
1129	225.600, 0.475	225.600, 0.098
1130	225.800, 0.475	225.800, 0.098
1131	226.000, 0.474	226.000, 0.098
1132	226.200, 0.474	226.200, 0.098
1133	226.400, 0.474	226.400, 0.098
1134	226.600, 0.473	226.600, 0.097
1135	226.800, 0.473	226.800, 0.097
1136	227.000, 0.473	227.000, 0.097
1137	227.200, 0.472	227.200, 0.097
1138	227.400, 0.472	227.400, 0.097
1139	227.600, 0.471	227.600, 0.097
1140	227.800, 0.471	227.800, 0.097
1141	228.000, 0.470	228.000, 0.097
1142	228.200, 0.470	228.200, 0.097
1143	228.400, 0.470	228.400, 0.097
1144	228.600, 0.469	228.600, 0.096
1145	228.800, 0.469	228.800, 0.096
1146	229.000, 0.469	229.000, 0.096
1147	229.200, 0.469	229.200, 0.096
1148	229.400, 0.469	229.400, 0.097
1149	229.600, 0.469	229.600, 0.097
1150	229.800, 0.469	229.800, 0.097
1151	230.000, 0.469	230.000, 0.097
1152	230.200, 0.469	230.200, 0.097
1153	230.400, 0.469	230.400, 0.097
1154	230.600, 0.468	230.600, 0.097
1155	230.800, 0.467	230.800, 0.097
1156	231.000, 0.467	231.000, 0.097
1157	231.200, 0.466	231.200, 0.097
1158	231.400, 0.466	231.400, 0.097
1159	231.600, 0.465	231.600, 0.097
1160	231.800, 0.465	231.800, 0.096
1161	232.000, 0.464	232.000, 0.096
1162	232.200, 0.464	232.200, 0.096
1163	232.400, 0.464	232.400, 0.096
1164	232.600, 0.464	232.600, 0.096
1165	232.800, 0.464	232.800, 0.096
1166	233.000, 0.464	233.000, 0.096
1167	233.200, 0.464	233.200, 0.096
1168	233.400, 0.464	233.400, 0.096
1169	233.600, 0.464	233.600, 0.097
1170	233.800, 0.464	233.800, 0.097
1171	234.000, 0.463	234.000, 0.097
1172	234.200, 0.463	234.200, 0.097
1173	234.400, 0.463	234.400, 0.096
1174	234.600, 0.462	234.600, 0.096
1175	234.800, 0.462	234.800, 0.095
1176	235.000, 0.461	235.000, 0.095
1177	235.200, 0.461	235.200, 0.095
1178	235.400, 0.460	235.400, 0.094
1179	235.600, 0.460	235.600, 0.094
1180	235.800, 0.459	235.800, 0.094
1181	236.000, 0.459	236.000, 0.094
1182	236.200, 0.459	236.200, 0.094
1183	236.400, 0.458	236.400, 0.094
1184	236.600, 0.458	236.600, 0.094
1185	236.800, 0.458	236.800, 0.094
1186	237.000, 0.458	237.000, 0.094
1187	237.200, 0.458	237.200, 0.094
1188	237.400, 0.458	237.400, 0.094
1189	237.600, 0.458	237.600, 0.094
1190	237.800, 0.457	237.800, 0.094
1191	238.000, 0.457	238.000, 0.094
1192	238.200, 0.457	238.200, 0.094
1193	238.400, 0.457	238.400, 0.093
1194	238.600, 0.456	238.600, 0.093
1195	238.800, 0.456	238.800, 0.093
1196	239.000, 0.456	239.000, 0.093
1197	239.200, 0.456	239.200, 0.094
1198	239.400, 0.455	239.400, 0.094
1199	239.600, 0.455	239.600, 0.094
1200	239.800, 0.455	239.800, 0.095
1201	240.000, 0.454	240.000, 0.095
1202	240.200, 0.454	240.200, 0.095
1203	240.400, 0.454	240.400, 0.095
1204	240.600, 0.453	240.600, 0.095
1205	240.800, 0.453	240.800, 0.095
1206	241.000, 0.453	241.000, 0.095
1207	241.200, 0.452	241.200, 0.094
1208	241.400, 0.452	241.400, 0.094
1209	241.600, 0.452	241.600, 0.094
1210	241.800, 0.451	241.800, 0.093
1211	242.000, 0.451	242.000, 0.093
1212	242.200, 0.451	242.200, 0.093
1213	242.400, 0.451	242.400, 0.093
1214	242.600, 0.451	242.600, 0.092
1215	242.800, 0.451	242.800, 0.092
1216	243.000, 0.450	243.000, 0.092
1217	243.200, 0.450	243.200, 0.092
1218	243.400, 0.449	243.400, 0.092
1219	243.600, 0.449	243.600, 0.092
1220	243.800, 0.448	243.800, 0.092
1221	244.000, 0.448	244.000, 0.092
1222	244.200, 0.447	244.200, 0.092
1223	244.400, 0.447	244.400, 0.093
1224	244.600, 0.447	244.600, 0.093
1225	244.800, 0.447	244.800, 0.093
1226	245.000, 0.446	245.000, 0.093
1227	245.200, 0.446	245.200, 0.093
1228	245.400, 0.446	245.400, 0.093
1229	245.600, 0.446	245.600, 0.093
1230	245.800, 0.446	245.800, 0.093
1231	246.000, 0.445	246.000, 0.093
1232	246.200, 0.445	246.200, 0.092
1233	246.400, 0.445	246.400, 0.092
1234	246.600, 0.445	246.600, 0.092
1235	246.800, 0.444	246.800, 0.092
1236	247.000, 0.444	247.000, 0.092
1237	247.200, 0.444	247.200, 0.092
1238	247.400, 0.443	247.400, 0.092
1239	247.600, 0.443	247.600, 0.092
1240	247.800, 0.443	247.800, 0.092
1241	248.000, 0.443	248.000, 0.092
1242	248.200, 0.443	248.200, 0.092
1243	248.400, 0.443	248.400, 0.092
1244	248.600, 0.443	248.600, 0.092
1245	248.800, 0.442	248.800, 0.092
1246	249.000, 0.442	249.000, 0.092
1247	249.200, 0.442	249.200, 0.092
1248	249.400, 0.442	249.400, 0.092
1249	249.600, 0.442	249.600, 0.092
1250	249.800, 0.442	249.800, 0.092
1251	250.000, 0.442	250.000, 0.091
1252	250.200, 0.442	250.200, 0.091
1253	250.400, 0.441	250.400, 0.091
1254	250.600, 0.441	250.600, 0.091
1255	250.800, 0.441	250.800, 0.091
1256	251.000, 0.441	251.000, 0.091
1257	251.200, 0.441	251.200, 0.091
1258	251.400, 0.440	251.400, 0.091
1259	251.600, 0.440	251.600, 0.091
1260	251.800, 0.440	251.800, 0.091
1261	252.000, 0.440	252.000, 0.091
1262	252.200, 0.440	252.200, 0.090
1263	252.400, 0.439	252.400, 0.090
1264	252.600, 0.439	252.600, 0.090
1265	252.800, 0.439	252.800, 0.090
1266	253.000, 0.438	253.000, 0.090
1267	253.200, 0.438	253.200, 0.090
1268	253.400, 0.438	253.400, 0.090
1269	253.600, 0.437	253.600, 0.090
1270	253.800, 0.437	253.800, 0.089
1271	254.000, 0.437	254.000, 0.090
1272	254.200, 0.436	254.200, 0.090
1273	254.400, 0.436	254.400, 0.090
1274	254.600, 0.436	254.600, 0.090
1275	254.800, 0.436	254.800, 0.090
1276	255.000, 0.436	255.000, 0.090
1277	255.200, 0.436	255.200, 0.090
1278	255.400, 0.436	255.400, 0.090
1279	255.600, 0.436	255.600, 0.090
1280	255.800, 0.436	255.800, 0.090
1281	256.000, 0.435	256.000, 0.090
1282	256.200, 0.435	256.200, 0.090
1283	256.400, 0.435	256.400, 0.090
1284	256.600, 0.435	256.600, 0.090
1285	256.800, 0.434	256.800, 0.090
1286	257.000, 0.434	257.000, 0.090
1287	257.200, 0.433	257.200, 0.090
1288	257.400, 0.433	257.400, 0.090
1289	257.600, 0.432	257.600, 0.090
1290	257.800, 0.432	257.800, 0.089
1291	258.000, 0.432	258.000, 0.089
1292	258.200, 0.431	258.200, 0.089
1293	258.400, 0.431	258.400, 0.089
1294	258.600, 0.431	258.600, 0.089
1295	258.800, 0.431	258.800, 0.089
1296	259.000, 0.430	259.000, 0.089
1297	259.200, 0.430	259.200, 0.089
1298	259.400, 0.430	259.400, 0.089
1299	259.600, 0.430	259.600, 0.089
1300	259.800, 0.429	259.800, 0.089
1301	260.000, 0.429	260.000, 0.089
1302	260.200, 0.428	260.200, 0.089
1303	260.400, 0.428	260.400, 0.090
1304	260.600, 0.428	260.600, 0.090
1305	260.800, 0.428	260.800, 0.090
1306	261.000, 0.428	261.000, 0.091
1307	261.200, 0.428	261.200, 0.091
1308	261.400, 0.428	261.400, 0.091
1309	261.600, 0.428	261.600, 0.091
1310	261.800, 0.428	261.800, 0.091
1311	262.000, 0.428	262.000, 0.090
1312	262.200, 0.428	262.200, 0.090
1313	262.400, 0.428	262.400, 0.090
1314	262.600, 0.428	262.600, 0.090
1315	262.800, 0.427	262.800, 0.090
1316	263.000, 0.427	263.000, 0.090
1317	263.200, 0.427	263.200, 0.089
1318	263.400, 0.426	263.400, 0.089
1319	263.600, 0.426	263.600, 0.089
1320	263.800, 0.425	263.800, 0.089
1321	264.000, 0.425	264.000, 0.089
1322	264.200, 0.425	264.200, 0.089
1323	264.400, 0.425	264.400, 0.089
1324	264.600, 0.425	264.600, 0.089
1325	264.800, 0.424	264.800, 0.089
1326	265.000, 0.424	265.000, 0.089
1327	265.200, 0.424	265.200, 0.089
1328	265.400, 0.424	265.400, 0.089
1329	265.600, 0.424	265.600, 0.089
1330	265.800, 0.424	265.800, 0.089
1331	266.000, 0.424	266.000, 0.089
1332	266.200, 0.423	266.200, 0.088
1333	266.400, 0.423	266.400, 0.088
1334	266.600, 0.423	266.600, 0.088
1335	266.800, 0.423	266.800, 0.088
1336	267.000, 0.422	267.000, 0.088
1337	267.200, 0.422	267.200, 0.088
1338	267.400, 0.422	267.400, 0.088
1339	267.600, 0.422	267.600, 0.088
1340	267.800, 0.421	267.800, 0.088
1341	268.000, 0.421	268.000, 0.088
1342	268.200, 0.421	268.200, 0.088
1343	268.400, 0.421	268.400, 0.088
1344	268.600, 0.421	268.600, 0.088
1345	268.800, 0.420	268.800, 0.089
1346	269.000, 0.420	269.000, 0.089
1347	269.200, 0.420	269.200, 0.089
1348	269.400, 0.420	269.400, 0.089
1349	269.600, 0.420	269.600, 0.090
1350	269.800, 0.420	269.800, 0.090
1351	,	,
1352	,	,
1353	,	,
1354	,	,
1355	,	,
1356	,	,
1357	,	,
1358	,	,
1359	,	,
1360	,	,
1361	,	,
1362	,	,
1363	,	,
1364	,	,
1365	,	,
1366	,	,
1367	,	,
1368	,	,
1369	,	,
1370	,	,
1371	,	,
1372	,	,
1373	,	,
1374	,	,
1375	,	,
1376	,	,
1377	,	,
1378	,	,
1379	,	,
1380	,	,
1381	,	,
1382	,	,
1383	,	,
1384	,	,
1385	,	,
1386	,	,
1387	,	,
1388	,	,
1389	,	,
1390	,	,
1391	,	,
1392	,	,
1393	,	,
1394	,	,
1395	,	,
1396	,	,
1397	,	,
1398	,	,
1399	,	,
1400	,	,
1401	,	,
1402	,	,
1403	,	,
1404	,	,
1405	,	,
1406	,	,
1407	,	,
1408	,	,
1409	,	,
1410	,	,
1411	,	,
1412	,	,
1413	,	,
1414	,	,
1415	,	,
1416	,	,
1417	,	,
1418	,	,
1419	,	,
1420	,	,
1421	,	,
1422	,	,
1423	,	,
1424	,	,
1425	,	,
1426	,	,
1427	,	,
1428	,	,
1429	,	,
1430	,	,
1431	,	,
1432	,	,
1433	,	,
1434	,	,
1435	,	,
1436	,	,
1437	,	,
1438	,	,
1439	,	,
1440	,	,
1441	,	,
1442	,	,
1443	,	,
1444	,	,
1445	,	,
1446	,	,
1447	,	,
1448	,	,
1449	,	,
1450	,	,
1451	,	,
1452	,	,
1453	,	,
1454	,	,
1455	,	,
1456	,	,
1457	,	,
1458	,	,
1459	,	,
1460	,	,
1461	,	,
1462	,	,
1463	,	,
1464	,	,
1465	,	,
1466	,	,
1467	,	,
1468	,	,
1469	,	,
1470	,	,
1471	,	,
1472	,	,
1473	,	,
1474	,	,
1475	,	,
1476	,	,
1477	,	,
1478	,	,
1479	,	,
1480	,	,
1481	,	,
1482	,	,
1483	,	,
1484	,	,
1485	,	,
1486	,	,
1487	,	,
1488	,	,
1489	,	,
1490	,	,
1491	,	,
1492	,	,
1493	,	,
1494	,	,
1495	,	,
1496	,	,
1497	,	,
1498	,	,
1499	,	,
1500	,	,
1501	,	,
1502	,	,
1503	,	,
1504	,	,
1505	,	,
1506	,	,
1507	,	,
1508	,	,
1509	,	,
1510	,	,
1511	,	,
1512	,	,
1513	,	,
1514	,	,
1515	,	,
1516	,	,
1517	,	,
1518	,	,
1519	,	,
1520	,	,
1521	,	,
1522	,	,
1523	,	,
1524	,	,
1525	,	,
1526	,	,
1527	,	,
1528	,	,
1529	,	,
1530	,	,
1531	,	,
1532	,	,
1533	,	,
1534	,	,
1535	,	,
1536	,	,
1537	,	,
1538	,	,
1539	,	,
1540	,	,
1541	,	,
1542	,	,
1543	,	,
1544	,	,
1545	,	,
1546	,	,
1547	,	,
1548	,	,
1549	,	,
1550	,	,
1551	,	,
1552	,	,
1553	,	,
1554	,	,
1555	,	,
1556	,	,
1557	,	,
1558	,	,
1559	,	,
1560	,	,
1561	,	,
1562	,	,
1563	,	,
1564	,	,
1565	,	,
1566	,	,
1567	,	,
1568	,	,
1569	,	,
1570	,	,
1571	,	,
1572	,	,
1573	,	,
1574	,	,
1575	,	,
1576	,	,
1577	,	,
1578	,	,
1579	,	,
1580	,	,
1581	,	,
1582	,	,
1583	,	,
1584	,	,
1585	,	,
1586	,	,
1587	,	,
1588	,	,
1589	,	,
1590	,	,
1591	,	,
1592	,	,
1593	,	,
1594	,	,
1595	,	,
1596	,	,
1597	,	,
1598	,	,
1599	,	,
1600	,	,
1601	,	,
1602	,	,
1603	,	,
1604	,	,
1605	,	,
1606	,	,
1607	,	,
1608	,	,
1609	,	,
1610	,	,
1611	,	,
1612	,	,
1613	,	,
1614	,	,
1615	,	,
1616	,	,
1617	,	,
1618	,	,
1619	,	,
1620	,	,
1621	,	,
1622	,	,
1623	,	,
1624	,	,
1625	,	,
1626	,	,
1627	,	,
1628	,	,
1629	,	,
1630	,	,
1631	,	,
1632	,	,
1633	,	,
1634	,	,
1635	,	,
1636	,	,
1637	,	,
1638	,	,
1639	,	,
1640	,	,
1641	,	,
1642	,	,
1643	,	,
1644	,	,
1645	,	,
1646	,	,
1647	,	,
1648	,	,
1649	,	,
1650	,	,
1651	,	,
1652	,	,
1653	,	,
1654	,	,
1655	,	,
1656	,	,
1657	,	,
1658	,	,
1659	,	,
1660	,	,
1661	,	,
1662	,	,
1663	,	,
1664	,	,
1665	,	,
1666	,	,
1667	,	,
1668	,	,
1669	,	,
1670	,	,
1671	,	,
1672	,	,
1673	,	,
1674	,	,
1675	,	,
1676	,	,
1677	,	,
1678	,	,
1679	,	,
1680	,	,
1681	,	,
1682	,	,
1683	,	,
1684	,	,
1685	,	,
1686	,	,
1687	,	,
1688	,	,
1689	,	,
1690	,	,
1691	,	,
1692	,	,
1693	,	,
1694	,	,
1695	,	,
1696	,	,
1697	,	,
1698	,	,
1699	,	,
1700	,	,
1701	,	,
1702	,	,
1703	,	,
1704	,	,
1705	,	,
1706	,	,
1707	,	,
1708	,	,
1709	,	,
1710	,	,
1711	,	,
1712	,	,
1713	,	,
1714	,	,
1715	,	,
1716	,	,
1717	,	,
1718	,	,
1719	,	,
1720	,	,
1721	,	,
1722	,	,
1723	,	,
1724	,	,
1725	,	,
1726	,	,
1727	,	,
1728	,	,
1729	,	,
1730	,	,
1731	,	,
1732	,	,
1733	,	,
1734	,	,
1735	,	,
1736	,	,
1737	,	,
1738	,	,
1739	,	,
1740	,	,
1741	,	,
1742	,	,
1743	,	,
1744	,	,
1745	,	,
1746	,	,
1747	,	,
1748	,	,
1749	,	,
1750	,	,
1751	,	,
1752	,	,
1753	,	,
1754	,	,
1755	,	,
1756	,	,
1757	,	,
1758	,	,
1759	,	,
1760	,	,
1761	,	,
1762	,	,
1763	,	,
1764	,	,
1765	,	,
1766	,	,
1767	,	,
1768	,	,
1769	,	,
1770	,	,
1771	,	,
1772	,	,
1773	,	,
1774	,	,
1775	,	,
1776	,	,
1777	,	,
1778	,	,
1779	,	,
1780	,	,
1781	,	,
1782	,	,
1783	,	,
1784	,	,
1785	,	,
1786	,	,
1787	,	,
1788	,	,
1789	,	,
1790	,	,
1791	,	,
1792	,	,
1793	,	,
1794	,	,
1795	,	,
1796	,	,
1797	,	,
1798	,	,
1799	,	,
1800	,	,
1801	,	,
1802	,	,
1803	,	,
1804	,	,
1805	,	,
1806	,	,
1807	,	,
1808	,	,
1809	,	,
1810	,	,
1811	,	,
1812	,	,
1813	,	,
1814	,	,
1815	,	,
1816	,	,
1817	,	,
1818	,	,
1819	,	,
1820	,	,
1821	,	,
1822	,	,
1823	,	,
1824	,	,
1825	,	,
1826	,	,
1827	,	,
1828	,	,
1829	,	,
1830	,	,
1831	,	,
1832	,	,
1833	,	,
1834	,	,
1835	,	,
1836	,	,
1837	,	,
1838	,	,
1839	,	,
1840	,	,
1841	,	,
1842	,	,
1843	,	,
1844	,	,
1845	,	,
1846	,	,
1847	,	,
1848	,	,
1849	,	,
1850	,	,
1851	,	,
1852	,	,
1853	,	,
1854	,	,
1855	,	,
1856	,	,
1857	,	,
1858	,	,
1859	,	,
1860	,	,
1861	,	,
1862	,	,
1863	,	,
1864	,	,
1865	,	,
1866	,	,
1867	,	,
1868	,	,
1869	,	,
1870	,	,
1871	,	,
1872	,	,
1873	,	,
1874	,	,
1875	,	,
1876	,	,
1877	,	,
1878	,	,
1879	,	,
1880	,	,
1881	,	,
1882	,	,
1883	,	,
1884	,	,
1885	,	,
1886	,	,
1887	,	,
1888	,	,
1889	,	,
1890	,	,
1891	,	,
1892	,	,
1893	,	,
1894	,	,
1895	,	,
1896	,	,
1897	,	,
1898	,	,
1899	,	,
1900	,	,
1901	,	,
1902	,	,
1903	,	,
1904	,	,
1905	,	,
1906	,	,
1907	,	,
1908	,	,
1909	,	,
1910	,	,
1911	,	,
1912	,	,
1913	,	,
1914	,	,
1915	,	,
1916	,	,
1917	,	,
1918	,	,
1919	,	,
1920	,	,
1921	,	,
1922	,	,
1923	,	,
1924	,	,
1925	,	,
1926	,	,
1927	,	,
1928	,	,
1929	,	,
1930	,	,
1931	,	,
1932	,	,
1933	,	,
1934	,	,
1935	,	,
1936	,	,
1937	,	,
1938	,	,
1939	,	,
1940	,	,
1941	,	,
1942	,	,
1943	,	,
1944	,	,
1945	,	,
1946	,	,
1947	,	,
1948	,	,
1949	,	,
1950	,	,
1951	,	,
1952	,	,
1953	,	,
1954	,	,
1955	,	,
1956	,	,
1957	,	,
1958	,	,
1959	,	,
1960	,	,
1961	,	,
1962	,	,
1963	,	,
1964	,	,
1965	,	,
1966	,	,
1967	,	,
1968	,	,
1969	,	,
1970	,	,
1971	,	,
1972	,	,
1973	,	,
1974	,	,
1975	,	,
1976	,	,
1977	,	,
1978	,	,
1979	,	,
1980	,	,
1981	,	,
1982	,	,
1983	,	,
1984	,	,
1985	,	,
1986	,	,
1987	,	,
1988	,	,
1989	,	,
1990	,	,
1991	,	,
1992	,	,
1993	,	,
1994	,	,
1995	,	,
1996	,	,
1997	,	,
1998	,	,
1999	,	,
[truncated: 13,001 more rows]

## Sheet: Figure1_panelD_rep3
	parS20 ParB-dissociation to buffer only	parS20 ParB-dissociation to buffer with CTP
1	0.000, 0.012	0.000, 0.045
2	0.200, 0.012	0.200, 0.045
3	0.400, 0.013	0.400, 0.045
4	0.600, 0.014	0.600, 0.045
5	0.800, 0.014	0.800, 0.045
6	1.000, 0.015	1.000, 0.045
7	1.200, 0.015	1.200, 0.044
8	1.400, 0.016	1.400, 0.044
9	1.600, 0.016	1.600, 0.043
10	1.800, 0.016	1.800, 0.042
11	2.000, 0.016	2.000, 0.041
12	2.200, 0.016	2.200, 0.041
13	2.400, 0.016	2.400, 0.040
14	2.600, 0.016	2.600, 0.039
15	2.800, 0.015	2.800, 0.038
16	3.000, 0.015	3.000, 0.038
17	3.200, 0.015	3.200, 0.037
18	3.400, 0.015	3.400, 0.036
19	3.600, 0.015	3.600, 0.035
20	3.800, 0.015	3.800, 0.034
21	4.000, 0.015	4.000, 0.034
22	4.200, 0.014	4.200, 0.033
23	4.400, 0.014	4.400, 0.033
24	4.600, 0.014	4.600, 0.032
25	4.800, 0.014	4.800, 0.032
26	5.000, 0.014	5.000, 0.031
27	5.200, 0.014	5.200, 0.030
28	5.400, 0.014	5.400, 0.030
29	5.600, 0.013	5.600, 0.029
30	5.800, 0.013	5.800, 0.029
31	6.000, 0.013	6.000, 0.029
32	6.200, 0.013	6.200, 0.028
33	6.400, 0.013	6.400, 0.028
34	6.600, 0.013	6.600, 0.027
35	6.800, 0.013	6.800, 0.027
36	7.000, 0.013	7.000, 0.026
37	7.200, 0.013	7.200, 0.025
38	7.400, 0.013	7.400, 0.025
39	7.600, 0.013	7.600, 0.024
40	7.800, 0.013	7.800, 0.024
41	8.000, 0.013	8.000, 0.023
42	8.200, 0.012	8.200, 0.023
43	8.400, 0.012	8.400, 0.023
44	8.600, 0.012	8.600, 0.022
45	8.800, 0.012	8.800, 0.022
46	9.000, 0.012	9.000, 0.021
47	9.200, 0.012	9.200, 0.021
48	9.400, 0.011	9.400, 0.021
49	9.600, 0.011	9.600, 0.021
50	9.800, 0.011	9.800, 0.020
51	10.000, 0.011	10.000, 0.020
52	10.200, 0.011	10.200, 0.020
53	10.400, 0.011	10.400, 0.019
54	10.600, 0.011	10.600, 0.019
55	10.800, 0.011	10.800, 0.018
56	11.000, 0.011	11.000, 0.018
57	11.200, 0.011	11.200, 0.017
58	11.400, 0.010	11.400, 0.017
59	11.600, 0.011	11.600, 0.017
60	11.800, 0.010	11.800, 0.016
61	12.000, 0.010	12.000, 0.016
62	12.200, 0.010	12.200, 0.015
63	12.400, 0.010	12.400, 0.015
64	12.600, 0.009	12.600, 0.014
65	12.800, 0.009	12.800, 0.014
66	13.000, 0.009	13.000, 0.014
67	13.200, 0.009	13.200, 0.014
68	13.400, 0.009	13.400, 0.014
69	13.600, 0.009	13.600, 0.013
70	13.800, 0.009	13.800, 0.013
71	14.000, 0.009	14.000, 0.013
72	14.200, 0.009	14.200, 0.012
73	14.400, 0.009	14.400, 0.012
74	14.600, 0.009	14.600, 0.012
75	14.800, 0.009	14.800, 0.011
76	15.000, 0.009	15.000, 0.011
77	15.200, 0.009	15.200, 0.010
78	15.400, 0.009	15.400, 0.010
79	15.600, 0.009	15.600, 0.009
80	15.800, 0.009	15.800, 0.009
81	16.000, 0.009	16.000, 0.009
82	16.200, 0.009	16.200, 0.008
83	16.400, 0.009	16.400, 0.008
84	16.600, 0.008	16.600, 0.008
85	16.800, 0.008	16.800, 0.008
86	17.000, 0.008	17.000, 0.008
87	17.200, 0.007	17.200, 0.009
88	17.400, 0.007	17.400, 0.009
89	17.600, 0.008	17.600, 0.009
90	17.800, 0.008	17.800, 0.009
91	18.000, 0.008	18.000, 0.009
92	18.200, 0.008	18.200, 0.008
93	18.400, 0.008	18.400, 0.008
94	18.600, 0.008	18.600, 0.008
95	18.800, 0.008	18.800, 0.008
96	19.000, 0.008	19.000, 0.007
97	19.200, 0.008	19.200, 0.007
98	19.400, 0.008	19.400, 0.007
99	19.600, 0.008	19.600, 0.007
100	19.800, 0.007	19.800, 0.006
101	20.000, 0.007	20.000, 0.006
102	20.200, 0.006	20.200, 0.006
103	20.400, 0.006	20.400, 0.006
104	20.600, 0.006	20.600, 0.006
105	20.800, 0.005	20.800, 0.006
106	21.000, 0.005	21.000, 0.006
107	21.200, 0.005	21.200, 0.006
108	21.400, 0.005	21.400, 0.006
109	21.600, 0.005	21.600, 0.006
110	21.800, 0.005	21.800, 0.006
111	22.000, 0.004	22.000, 0.005
112	22.200, 0.004	22.200, 0.005
113	22.400, 0.004	22.400, 0.004
114	22.600, 0.003	22.600, 0.004
115	22.800, 0.003	22.800, 0.003
116	23.000, 0.003	23.000, 0.003
117	23.200, 0.003	23.200, 0.003
118	23.400, 0.003	23.400, 0.003
119	23.600, 0.003	23.600, 0.003
120	23.800, 0.003	23.800, 0.003
121	24.000, 0.003	24.000, 0.003
122	24.200, 0.003	24.200, 0.002
123	24.400, 0.003	24.400, 0.002
124	24.600, 0.003	24.600, 0.002
125	24.800, 0.003	24.800, 0.002
126	25.000, 0.003	25.000, 0.002
127	25.200, 0.003	25.200, 0.002
128	25.400, 0.002	25.400, 0.002
129	25.600, 0.002	25.600, 0.002
130	25.800, 0.002	25.800, 0.001
131	26.000, 0.001	26.000, 0.001
132	26.200, 0.001	26.200, 0.001
133	26.400, 0.001	26.400, 0.001
134	26.600, 0.001	26.600, 0.000
135	26.800, 0.001	26.800, 0.000
136	27.000, 0.001	27.000, 0.000
137	27.200, 0.000	27.200, 0.000
138	27.400, 0.000	27.400, 0.000
139	27.600, 0.000	27.600, 0.000
140	27.800, -0.000	27.800, 0.000
141	28.000, -0.000	28.000, 0.000
142	28.200, -0.000	28.200, 0.000
143	28.400, -0.000	28.400, 0.000
144	28.600, -0.000	28.600, 0.000
145	28.800, -0.000	28.800, 0.000
146	29.000, -0.000	29.000, -0.000
147	29.200, -0.000	29.200, -0.000
148	29.400, -0.000	29.400, -0.000
149	29.600, 0.000	29.600, -0.000
150	29.800, 0.000	29.800, -0.001
151	30.000, 0.000	30.000, 0.000
152	30.200, 0.015	30.200, 0.016
153	30.400, 0.033	30.400, 0.036
154	30.600, 0.054	30.600, 0.058
155	30.800, 0.078	30.800, 0.084
156	31.000, 0.104	31.000, 0.112
157	31.200, 0.133	31.200, 0.143
158	31.400, 0.162	31.400, 0.174
159	31.600, 0.193	31.600, 0.207
160	31.800, 0.223	31.800, 0.239
161	32.000, 0.253	32.000, 0.270
162	32.200, 0.281	32.200, 0.298
163	32.400, 0.308	32.400, 0.325
164	32.600, 0.334	32.600, 0.351
165	32.800, 0.360	32.800, 0.376
166	33.000, 0.384	33.000, 0.399
167	33.200, 0.408	33.200, 0.421
168	33.400, 0.431	33.400, 0.442
169	33.600, 0.452	33.600, 0.461
170	33.800, 0.473	33.800, 0.479
171	34.000, 0.492	34.000, 0.495
172	34.200, 0.510	34.200, 0.511
173	34.400, 0.527	34.400, 0.525
174	34.600, 0.544	34.600, 0.538
175	34.800, 0.559	34.800, 0.550
176	35.000, 0.573	35.000, 0.561
177	35.200, 0.586	35.200, 0.571
178	35.400, 0.598	35.400, 0.580
179	35.600, 0.609	35.600, 0.588
180	35.800, 0.619	35.800, 0.595
181	36.000, 0.628	36.000, 0.601
182	36.200, 0.637	36.200, 0.607
183	36.400, 0.644	36.400, 0.612
184	36.600, 0.651	36.600, 0.617
185	36.800, 0.658	36.800, 0.621
186	37.000, 0.664	37.000, 0.625
187	37.200, 0.669	37.200, 0.629
188	37.400, 0.674	37.400, 0.632
189	37.600, 0.679	37.600, 0.634
190	37.800, 0.683	37.800, 0.637
191	38.000, 0.687	38.000, 0.639
192	38.200, 0.690	38.200, 0.641
193	38.400, 0.694	38.400, 0.643
194	38.600, 0.697	38.600, 0.644
195	38.800, 0.700	38.800, 0.646
196	39.000, 0.702	39.000, 0.647
197	39.200, 0.705	39.200, 0.649
198	39.400, 0.707	39.400, 0.650
199	39.600, 0.709	39.600, 0.650
200	39.800, 0.710	39.800, 0.651
201	40.000, 0.712	40.000, 0.652
202	40.200, 0.714	40.200, 0.652
203	40.400, 0.715	40.400, 0.653
204	40.600, 0.717	40.600, 0.653
205	40.800, 0.718	40.800, 0.654
206	41.000, 0.720	41.000, 0.654
207	41.200, 0.721	41.200, 0.655
208	41.400, 0.722	41.400, 0.655
209	41.600, 0.723	41.600, 0.655
210	41.800, 0.724	41.800, 0.656
211	42.000, 0.725	42.000, 0.656
212	42.200, 0.725	42.200, 0.657
213	42.400, 0.726	42.400, 0.657
214	42.600, 0.726	42.600, 0.658
215	42.800, 0.726	42.800, 0.658
216	43.000, 0.726	43.000, 0.658
217	43.200, 0.727	43.200, 0.659
218	43.400, 0.727	43.400, 0.659
219	43.600, 0.727	43.600, 0.659
220	43.800, 0.728	43.800, 0.659
221	44.000, 0.728	44.000, 0.659
222	44.200, 0.729	44.200, 0.659
223	44.400, 0.730	44.400, 0.659
224	44.600, 0.730	44.600, 0.660
225	44.800, 0.731	44.800, 0.660
226	45.000, 0.732	45.000, 0.660
227	45.200, 0.732	45.200, 0.660
228	45.400, 0.733	45.400, 0.660
229	45.600, 0.733	45.600, 0.660
230	45.800, 0.733	45.800, 0.661
231	46.000, 0.733	46.000, 0.661
232	46.200, 0.734	46.200, 0.661
233	46.400, 0.734	46.400, 0.661
234	46.600, 0.734	46.600, 0.661
235	46.800, 0.734	46.800, 0.661
236	47.000, 0.735	47.000, 0.661
237	47.200, 0.735	47.200, 0.661
238	47.400, 0.735	47.400, 0.661
239	47.600, 0.736	47.600, 0.661
240	47.800, 0.736	47.800, 0.661
241	48.000, 0.736	48.000, 0.661
242	48.200, 0.737	48.200, 0.661
243	48.400, 0.737	48.400, 0.662
244	48.600, 0.737	48.600, 0.662
245	48.800, 0.738	48.800, 0.662
246	49.000, 0.738	49.000, 0.662
247	49.200, 0.738	49.200, 0.662
248	49.400, 0.739	49.400, 0.663
249	49.600, 0.739	49.600, 0.663
250	49.800, 0.740	49.800, 0.663
251	50.000, 0.740	50.000, 0.663
252	50.200, 0.741	50.200, 0.663
253	50.400, 0.741	50.400, 0.664
254	50.600, 0.742	50.600, 0.664
255	50.800, 0.742	50.800, 0.664
256	51.000, 0.743	51.000, 0.664
257	51.200, 0.743	51.200, 0.664
258	51.400, 0.743	51.400, 0.664
259	51.600, 0.744	51.600, 0.664
260	51.800, 0.744	51.800, 0.664
261	52.000, 0.744	52.000, 0.664
262	52.200, 0.744	52.200, 0.664
263	52.400, 0.744	52.400, 0.665
264	52.600, 0.744	52.600, 0.665
265	52.800, 0.744	52.800, 0.665
266	53.000, 0.745	53.000, 0.665
267	53.200, 0.745	53.200, 0.666
268	53.400, 0.745	53.400, 0.666
269	53.600, 0.746	53.600, 0.666
270	53.800, 0.746	53.800, 0.666
271	54.000, 0.747	54.000, 0.666
272	54.200, 0.747	54.200, 0.666
273	54.400, 0.747	54.400, 0.667
274	54.600, 0.748	54.600, 0.667
275	54.800, 0.748	54.800, 0.667
276	55.000, 0.749	55.000, 0.667
277	55.200, 0.749	55.200, 0.667
278	55.400, 0.750	55.400, 0.667
279	55.600, 0.750	55.600, 0.667
280	55.800, 0.750	55.800, 0.667
281	56.000, 0.751	56.000, 0.667
282	56.200, 0.751	56.200, 0.667
283	56.400, 0.751	56.400, 0.667
284	56.600, 0.752	56.600, 0.667
285	56.800, 0.752	56.800, 0.668
286	57.000, 0.752	57.000, 0.668
287	57.200, 0.752	57.200, 0.668
288	57.400, 0.752	57.400, 0.668
289	57.600, 0.752	57.600, 0.668
290	57.800, 0.752	57.800, 0.668
291	58.000, 0.753	58.000, 0.668
292	58.200, 0.753	58.200, 0.669
293	58.400, 0.753	58.400, 0.669
294	58.600, 0.754	58.600, 0.670
295	58.800, 0.754	58.800, 0.670
296	59.000, 0.754	59.000, 0.670
297	59.200, 0.755	59.200, 0.671
298	59.400, 0.755	59.400, 0.671
299	59.600, 0.756	59.600, 0.671
300	59.800, 0.756	59.800, 0.671
301	60.000, 0.756	60.000, 0.672
302	60.200, 0.756	60.200, 0.672
303	60.400, 0.757	60.400, 0.672
304	60.600, 0.757	60.600, 0.672
305	60.800, 0.757	60.800, 0.672
306	61.000, 0.757	61.000, 0.672
307	61.200, 0.758	61.200, 0.672
308	61.400, 0.758	61.400, 0.672
309	61.600, 0.759	61.600, 0.672
310	61.800, 0.759	61.800, 0.672
311	62.000, 0.760	62.000, 0.672
312	62.200, 0.760	62.200, 0.673
313	62.400, 0.760	62.400, 0.673
314	62.600, 0.761	62.600, 0.673
315	62.800, 0.761	62.800, 0.673
316	63.000, 0.761	63.000, 0.673
317	63.200, 0.762	63.200, 0.674
318	63.400, 0.762	63.400, 0.674
319	63.600, 0.762	63.600, 0.674
320	63.800, 0.763	63.800, 0.674
321	64.000, 0.763	64.000, 0.674
322	64.200, 0.763	64.200, 0.674
323	64.400, 0.763	64.400, 0.674
324	64.600, 0.764	64.600, 0.674
325	64.800, 0.764	64.800, 0.674
326	65.000, 0.764	65.000, 0.674
327	65.200, 0.765	65.200, 0.674
328	65.400, 0.765	65.400, 0.674
329	65.600, 0.765	65.600, 0.674
330	65.800, 0.765	65.800, 0.675
331	66.000, 0.766	66.000, 0.675
332	66.200, 0.766	66.200, 0.675
333	66.400, 0.766	66.400, 0.676
334	66.600, 0.766	66.600, 0.677
335	66.800, 0.767	66.800, 0.677
336	67.000, 0.767	67.000, 0.678
337	67.200, 0.767	67.200, 0.678
338	67.400, 0.767	67.400, 0.679
339	67.600, 0.768	67.600, 0.679
340	67.800, 0.768	67.800, 0.679
341	68.000, 0.768	68.000, 0.679
342	68.200, 0.768	68.200, 0.679
343	68.400, 0.769	68.400, 0.679
344	68.600, 0.769	68.600, 0.679
345	68.800, 0.769	68.800, 0.678
346	69.000, 0.769	69.000, 0.678
347	69.200, 0.770	69.200, 0.678
348	69.400, 0.770	69.400, 0.678
349	69.600, 0.770	69.600, 0.678
350	69.800, 0.771	69.800, 0.678
351	70.000, 0.771	70.000, 0.678
352	70.200, 0.771	70.200, 0.678
353	70.400, 0.772	70.400, 0.679
354	70.600, 0.772	70.600, 0.679
355	70.800, 0.773	70.800, 0.679
356	71.000, 0.773	71.000, 0.680
357	71.200, 0.773	71.200, 0.680
358	71.400, 0.773	71.400, 0.680
359	71.600, 0.774	71.600, 0.681
360	71.800, 0.774	71.800, 0.681
361	72.000, 0.775	72.000, 0.681
362	72.200, 0.775	72.200, 0.681
363	72.400, 0.775	72.400, 0.681
364	72.600, 0.776	72.600, 0.681
365	72.800, 0.776	72.800, 0.682
366	73.000, 0.776	73.000, 0.682
367	73.200, 0.776	73.200, 0.682
368	73.400, 0.776	73.400, 0.682
369	73.600, 0.777	73.600, 0.682
370	73.800, 0.777	73.800, 0.682
371	74.000, 0.777	74.000, 0.681
372	74.200, 0.778	74.200, 0.681
373	74.400, 0.778	74.400, 0.681
374	74.600, 0.779	74.600, 0.681
375	74.800, 0.779	74.800, 0.681
376	75.000, 0.779	75.000, 0.681
377	75.200, 0.779	75.200, 0.682
378	75.400, 0.780	75.400, 0.682
379	75.600, 0.780	75.600, 0.682
380	75.800, 0.781	75.800, 0.683
381	76.000, 0.781	76.000, 0.683
382	76.200, 0.781	76.200, 0.684
383	76.400, 0.781	76.400, 0.684
384	76.600, 0.781	76.600, 0.685
385	76.800, 0.781	76.800, 0.685
386	77.000, 0.782	77.000, 0.685
387	77.200, 0.782	77.200, 0.685
388	77.400, 0.782	77.400, 0.685
389	77.600, 0.783	77.600, 0.686
390	77.800, 0.783	77.800, 0.686
391	78.000, 0.784	78.000, 0.686
392	78.200, 0.784	78.200, 0.687
393	78.400, 0.785	78.400, 0.687
394	78.600, 0.785	78.600, 0.688
395	78.800, 0.785	78.800, 0.688
396	79.000, 0.785	79.000, 0.688
397	79.200, 0.786	79.200, 0.688
398	79.400, 0.786	79.400, 0.689
399	79.600, 0.786	79.600, 0.689
400	79.800, 0.786	79.800, 0.689
401	80.000, 0.786	80.000, 0.689
402	80.200, 0.787	80.200, 0.689
403	80.400, 0.787	80.400, 0.689
404	80.600, 0.787	80.600, 0.689
405	80.800, 0.787	80.800, 0.689
406	81.000, 0.787	81.000, 0.689
407	81.200, 0.788	81.200, 0.689
408	81.400, 0.788	81.400, 0.689
409	81.600, 0.788	81.600, 0.689
410	81.800, 0.789	81.800, 0.690
411	82.000, 0.789	82.000, 0.690
412	82.200, 0.789	82.200, 0.690
413	82.400, 0.790	82.400, 0.690
414	82.600, 0.790	82.600, 0.691
415	82.800, 0.791	82.800, 0.691
416	83.000, 0.791	83.000, 0.690
417	83.200, 0.792	83.200, 0.690
418	83.400, 0.792	83.400, 0.691
419	83.600, 0.793	83.600, 0.691
420	83.800, 0.793	83.800, 0.691
421	84.000, 0.793	84.000, 0.691
422	84.200, 0.794	84.200, 0.692
423	84.400, 0.794	84.400, 0.692
424	84.600, 0.794	84.600, 0.692
425	84.800, 0.795	84.800, 0.692
426	85.000, 0.795	85.000, 0.692
427	85.200, 0.795	85.200, 0.692
428	85.400, 0.795	85.400, 0.692
429	85.600, 0.795	85.600, 0.692
430	85.800, 0.796	85.800, 0.692
431	86.000, 0.796	86.000, 0.692
432	86.200, 0.797	86.200, 0.692
433	86.400, 0.797	86.400, 0.693
434	86.600, 0.797	86.600, 0.693
435	86.800, 0.797	86.800, 0.693
436	87.000, 0.797	87.000, 0.694
437	87.200, 0.797	87.200, 0.694
438	87.400, 0.797	87.400, 0.694
439	87.600, 0.798	87.600, 0.695
440	87.800, 0.798	87.800, 0.695
441	88.000, 0.798	88.000, 0.695
442	88.200, 0.798	88.200, 0.695
443	88.400, 0.798	88.400, 0.695
444	88.600, 0.799	88.600, 0.695
445	88.800, 0.799	88.800, 0.695
446	89.000, 0.800	89.000, 0.696
447	89.200, 0.801	89.200, 0.696
448	89.400, 0.801	89.400, 0.696
449	89.600, 0.802	89.600, 0.696
450	89.800, 0.802	89.800, 0.697
451	90.000, 0.802	90.000, 0.697
452	90.200, 0.802	90.200, 0.697
453	90.400, 0.802	90.400, 0.697
454	90.600, 0.802	90.600, 0.698
455	90.800, 0.802	90.800, 0.698
456	91.000, 0.802	91.000, 0.698
457	91.200, 0.802	91.200, 0.698
458	91.400, 0.802	91.400, 0.699
459	91.600, 0.802	91.600, 0.698
460	91.800, 0.802	91.800, 0.698
461	92.000, 0.803	92.000, 0.698
462	92.200, 0.803	92.200, 0.698
463	92.400, 0.804	92.400, 0.698
464	92.600, 0.805	92.600, 0.699
465	92.800, 0.805	92.800, 0.699
466	93.000, 0.806	93.000, 0.699
467	93.200, 0.807	93.200, 0.699
468	93.400, 0.807	93.400, 0.699
469	93.600, 0.807	93.600, 0.699
470	93.800, 0.808	93.800, 0.699
471	94.000, 0.808	94.000, 0.699
472	94.200, 0.808	94.200, 0.699
473	94.400, 0.809	94.400, 0.699
474	94.600, 0.809	94.600, 0.699
475	94.800, 0.809	94.800, 0.699
476	95.000, 0.809	95.000, 0.699
477	95.200, 0.809	95.200, 0.699
478	95.400, 0.809	95.400, 0.699
479	95.600, 0.810	95.600, 0.699
480	95.800, 0.810	95.800, 0.700
481	96.000, 0.811	96.000, 0.700
482	96.200, 0.811	96.200, 0.700
483	96.400, 0.812	96.400, 0.701
484	96.600, 0.812	96.600, 0.701
485	96.800, 0.813	96.800, 0.701
486	97.000, 0.813	97.000, 0.702
487	97.200, 0.813	97.200, 0.702
488	97.400, 0.813	97.400, 0.702
489	97.600, 0.813	97.600, 0.702
490	97.800, 0.814	97.800, 0.702
491	98.000, 0.814	98.000, 0.703
492	98.200, 0.814	98.200, 0.703
493	98.400, 0.814	98.400, 0.703
494	98.600, 0.815	98.600, 0.703
495	98.800, 0.815	98.800, 0.703
496	99.000, 0.815	99.000, 0.703
497	99.200, 0.815	99.200, 0.703
498	99.400, 0.815	99.400, 0.704
499	99.600, 0.815	99.600, 0.704
500	99.800, 0.815	99.800, 0.705
501	100.000, 0.816	100.000, 0.705
502	100.200, 0.816	100.200, 0.706
503	100.400, 0.816	100.400, 0.706
504	100.600, 0.817	100.600, 0.706
505	100.800, 0.817	100.800, 0.707
506	101.000, 0.817	101.000, 0.707
507	101.200, 0.818	101.200, 0.706
508	101.400, 0.818	101.400, 0.706
509	101.600, 0.818	101.600, 0.706
510	101.800, 0.819	101.800, 0.706
511	102.000, 0.819	102.000, 0.706
512	102.200, 0.819	102.200, 0.705
513	102.400, 0.819	102.400, 0.705
514	102.600, 0.820	102.600, 0.705
515	102.800, 0.820	102.800, 0.705
516	103.000, 0.820	103.000, 0.706
517	103.200, 0.820	103.200, 0.706
518	103.400, 0.820	103.400, 0.707
519	103.600, 0.821	103.600, 0.707
520	103.800, 0.821	103.800, 0.708
521	104.000, 0.821	104.000, 0.709
522	104.200, 0.822	104.200, 0.709
523	104.400, 0.822	104.400, 0.710
524	104.600, 0.822	104.600, 0.710
525	104.800, 0.823	104.800, 0.711
526	105.000, 0.823	105.000, 0.711
527	105.200, 0.823	105.200, 0.711
528	105.400, 0.824	105.400, 0.711
529	105.600, 0.824	105.600, 0.711
530	105.800, 0.824	105.800, 0.711
531	106.000, 0.824	106.000, 0.710
532	106.200, 0.824	106.200, 0.710
533	106.400, 0.824	106.400, 0.710
534	106.600, 0.825	106.600, 0.710
535	106.800, 0.825	106.800, 0.710
536	107.000, 0.825	107.000, 0.711
537	107.200, 0.825	107.200, 0.711
538	107.400, 0.825	107.400, 0.711
539	107.600, 0.825	107.600, 0.711
540	107.800, 0.825	107.800, 0.712
541	108.000, 0.825	108.000, 0.712
542	108.200, 0.825	108.200, 0.712
543	108.400, 0.825	108.400, 0.712
544	108.600, 0.826	108.600, 0.713
545	108.800, 0.826	108.800, 0.713
546	109.000, 0.827	109.000, 0.713
547	109.200, 0.827	109.200, 0.713
548	109.400, 0.828	109.400, 0.713
549	109.600, 0.828	109.600, 0.713
550	109.800, 0.828	109.800, 0.713
551	110.000, 0.828	110.000, 0.713
552	110.200, 0.828	110.200, 0.714
553	110.400, 0.829	110.400, 0.714
554	110.600, 0.829	110.600, 0.714
555	110.800, 0.829	110.800, 0.715
556	111.000, 0.829	111.000, 0.715
557	111.200, 0.829	111.200, 0.715
558	111.400, 0.830	111.400, 0.715
559	111.600, 0.830	111.600, 0.716
560	111.800, 0.830	111.800, 0.716
561	112.000, 0.831	112.000, 0.716
562	112.200, 0.831	112.200, 0.716
563	112.400, 0.831	112.400, 0.716
564	112.600, 0.832	112.600, 0.716
565	112.800, 0.832	112.800, 0.716
566	113.000, 0.833	113.000, 0.716
567	113.200, 0.833	113.200, 0.716
568	113.400, 0.833	113.400, 0.716
569	113.600, 0.833	113.600, 0.716
570	113.800, 0.834	113.800, 0.716
571	114.000, 0.834	114.000, 0.716
572	114.200, 0.834	114.200, 0.716
573	114.400, 0.834	114.400, 0.716
574	114.600, 0.834	114.600, 0.716
575	114.800, 0.834	114.800, 0.716
576	115.000, 0.835	115.000, 0.717
577	115.200, 0.835	115.200, 0.717
578	115.400, 0.835	115.400, 0.717
579	115.600, 0.835	115.600, 0.718
580	115.800, 0.835	115.800, 0.718
581	116.000, 0.834	116.000, 0.719
582	116.200, 0.834	116.200, 0.719
583	116.400, 0.834	116.400, 0.719
584	116.600, 0.835	116.600, 0.719
585	116.800, 0.835	116.800, 0.719
586	117.000, 0.835	117.000, 0.720
587	117.200, 0.835	117.200, 0.720
588	117.400, 0.836	117.400, 0.720
589	117.600, 0.836	117.600, 0.720
590	117.800, 0.837	117.800, 0.720
591	118.000, 0.837	118.000, 0.719
592	118.200, 0.837	118.200, 0.719
593	118.400, 0.838	118.400, 0.720
594	118.600, 0.838	118.600, 0.719
595	118.800, 0.839	118.800, 0.719
596	119.000, 0.839	119.000, 0.720
597	119.200, 0.839	119.200, 0.720
598	119.400, 0.839	119.400, 0.720
599	119.600, 0.839	119.600, 0.720
600	119.800, 0.839	119.800, 0.720
601	120.000, 0.840	120.000, 0.721
602	120.200, 0.840	120.200, 0.721
603	120.400, 0.840	120.400, 0.721
604	120.600, 0.841	120.600, 0.721
605	120.800, 0.841	120.800, 0.721
606	121.000, 0.841	121.000, 0.721
607	121.200, 0.841	121.200, 0.721
608	121.400, 0.842	121.400, 0.722
609	121.600, 0.842	121.600, 0.722
610	121.800, 0.842	121.800, 0.722
611	122.000, 0.842	122.000, 0.722
612	122.200, 0.842	122.200, 0.722
613	122.400, 0.843	122.400, 0.722
614	122.600, 0.843	122.600, 0.722
615	122.800, 0.843	122.800, 0.722
616	123.000, 0.843	123.000, 0.722
617	123.200, 0.843	123.200, 0.722
618	123.400, 0.843	123.400, 0.722
619	123.600, 0.843	123.600, 0.722
620	123.800, 0.844	123.800, 0.722
621	124.000, 0.844	124.000, 0.722
622	124.200, 0.844	124.200, 0.722
623	124.400, 0.844	124.400, 0.723
624	124.600, 0.844	124.600, 0.723
625	124.800, 0.845	124.800, 0.723
626	125.000, 0.845	125.000, 0.723
627	125.200, 0.845	125.200, 0.723
628	125.400, 0.846	125.400, 0.724
629	125.600, 0.846	125.600, 0.724
630	125.800, 0.846	125.800, 0.724
631	126.000, 0.847	126.000, 0.724
632	126.200, 0.847	126.200, 0.724
633	126.400, 0.847	126.400, 0.724
634	126.600, 0.847	126.600, 0.724
635	126.800, 0.847	126.800, 0.724
636	127.000, 0.847	127.000, 0.724
637	127.200, 0.848	127.200, 0.724
638	127.400, 0.848	127.400, 0.724
639	127.600, 0.848	127.600, 0.725
640	127.800, 0.848	127.800, 0.725
641	128.000, 0.849	128.000, 0.725
642	128.200, 0.849	128.200, 0.725
643	128.400, 0.849	128.400, 0.725
644	128.600, 0.850	128.600, 0.725
645	128.800, 0.850	128.800, 0.726
646	129.000, 0.850	129.000, 0.726
647	129.200, 0.850	129.200, 0.726
648	129.400, 0.851	129.400, 0.726
649	129.600, 0.851	129.600, 0.726
650	129.800, 0.851	129.800, 0.726
651	130.000, 0.851	130.000, 0.726
652	130.200, 0.851	130.200, 0.727
653	130.400, 0.850	130.400, 0.727
654	130.600, 0.851	130.600, 0.727
655	130.800, 0.851	130.800, 0.728
656	131.000, 0.851	131.000, 0.728
657	131.200, 0.851	131.200, 0.728
658	131.400, 0.851	131.400, 0.728
659	131.600, 0.852	131.600, 0.729
660	131.800, 0.852	131.800, 0.729
661	132.000, 0.852	132.000, 0.729
662	132.200, 0.852	132.200, 0.729
663	132.400, 0.853	132.400, 0.729
664	132.600, 0.853	132.600, 0.729
665	132.800, 0.853	132.800, 0.729
666	133.000, 0.853	133.000, 0.729
667	133.200, 0.853	133.200, 0.730
668	133.400, 0.853	133.400, 0.730
669	133.600, 0.853	133.600, 0.730
670	133.800, 0.854	133.800, 0.730
671	134.000, 0.854	134.000, 0.730
672	134.200, 0.854	134.200, 0.730
673	134.400, 0.854	134.400, 0.730
674	134.600, 0.854	134.600, 0.730
675	134.800, 0.854	134.800, 0.730
676	135.000, 0.854	135.000, 0.730
677	135.200, 0.854	135.200, 0.731
678	135.400, 0.854	135.400, 0.731
679	135.600, 0.854	135.600, 0.731
680	135.800, 0.855	135.800, 0.731
681	136.000, 0.855	136.000, 0.731
682	136.200, 0.855	136.200, 0.731
683	136.400, 0.855	136.400, 0.731
684	136.600, 0.855	136.600, 0.730
685	136.800, 0.856	136.800, 0.730
686	137.000, 0.856	137.000, 0.730
687	137.200, 0.857	137.200, 0.730
688	137.400, 0.857	137.400, 0.730
689	137.600, 0.858	137.600, 0.730
690	137.800, 0.858	137.800, 0.730
691	138.000, 0.858	138.000, 0.730
692	138.200, 0.859	138.200, 0.729
693	138.400, 0.859	138.400, 0.729
694	138.600, 0.859	138.600, 0.729
695	138.800, 0.860	138.800, 0.729
696	139.000, 0.860	139.000, 0.729
697	139.200, 0.860	139.200, 0.729
698	139.400, 0.860	139.400, 0.729
699	139.600, 0.860	139.600, 0.730
700	139.800, 0.859	139.800, 0.730
701	140.000, 0.859	140.000, 0.730
702	140.200, 0.859	140.200, 0.730
703	140.400, 0.858	140.400, 0.731
704	140.600, 0.858	140.600, 0.731
705	140.800, 0.858	140.800, 0.731
706	141.000, 0.858	141.000, 0.732
707	141.200, 0.859	141.200, 0.732
708	141.400, 0.859	141.400, 0.732
709	141.600, 0.860	141.600, 0.732
710	141.800, 0.860	141.800, 0.732
711	142.000, 0.861	142.000, 0.732
712	142.200, 0.861	142.200, 0.732
713	142.400, 0.862	142.400, 0.732
714	142.600, 0.863	142.600, 0.732
715	142.800, 0.863	142.800, 0.732
716	143.000, 0.863	143.000, 0.732
717	143.200, 0.863	143.200, 0.732
718	143.400, 0.863	143.400, 0.732
719	143.600, 0.863	143.600, 0.732
720	143.800, 0.863	143.800, 0.733
721	144.000, 0.862	144.000, 0.733
722	144.200, 0.862	144.200, 0.733
723	144.400, 0.862	144.400, 0.734
724	144.600, 0.862	144.600, 0.734
725	144.800, 0.862	144.800, 0.734
726	145.000, 0.862	145.000, 0.734
727	145.200, 0.862	145.200, 0.734
728	145.400, 0.863	145.400, 0.734
729	145.600, 0.863	145.600, 0.734
730	145.800, 0.863	145.800, 0.734
731	146.000, 0.864	146.000, 0.734
732	146.200, 0.864	146.200, 0.734
733	146.400, 0.865	146.400, 0.734
734	146.600, 0.865	146.600, 0.733
735	146.800, 0.866	146.800, 0.733
736	147.000, 0.866	147.000, 0.733
737	147.200, 0.866	147.200, 0.734
738	147.400, 0.866	147.400, 0.734
739	147.600, 0.866	147.600, 0.734
740	147.800, 0.866	147.800, 0.735
741	148.000, 0.866	148.000, 0.735
742	148.200, 0.866	148.200, 0.735
743	148.400, 0.866	148.400, 0.736
744	148.600, 0.866	148.600, 0.736
745	148.800, 0.866	148.800, 0.736
746	149.000, 0.866	149.000, 0.736
747	149.200, 0.866	149.200, 0.737
748	149.400, 0.866	149.400, 0.737
749	149.600, 0.867	149.600, 0.737
750	149.800, 0.867	149.800, 0.737
751	150.000, 0.867	150.000, 0.737
752	150.200, 0.860	150.200, 0.716
753	150.400, 0.852	150.400, 0.692
754	150.600, 0.843	150.600, 0.666
755	150.800, 0.833	150.800, 0.637
756	151.000, 0.824	151.000, 0.607
757	151.200, 0.814	151.200, 0.577
758	151.400, 0.805	151.400, 0.547
759	151.600, 0.795	151.600, 0.517
760	151.800, 0.787	151.800, 0.490
761	152.000, 0.780	152.000, 0.466
762	152.200, 0.774	152.200, 0.446
763	152.400, 0.768	152.400, 0.428
764	152.600, 0.763	152.600, 0.411
765	152.800, 0.758	152.800, 0.395
766	153.000, 0.753	153.000, 0.381
767	153.200, 0.749	153.200, 0.368
768	153.400, 0.745	153.400, 0.355
769	153.600, 0.741	153.600, 0.343
770	153.800, 0.737	153.800, 0.332
771	154.000, 0.733	154.000, 0.322
772	154.200, 0.730	154.200, 0.312
773	154.400, 0.726	154.400, 0.303
774	154.600, 0.723	154.600, 0.294
775	154.800, 0.720	154.800, 0.285
776	155.000, 0.717	155.000, 0.277
777	155.200, 0.715	155.200, 0.270
778	155.400, 0.712	155.400, 0.263
779	155.600, 0.710	155.600, 0.256
780	155.800, 0.707	155.800, 0.250
781	156.000, 0.705	156.000, 0.244
782	156.200, 0.703	156.200, 0.238
783	156.400, 0.701	156.400, 0.232
784	156.600, 0.699	156.600, 0.227
785	156.800, 0.697	156.800, 0.221
786	157.000, 0.695	157.000, 0.216
787	157.200, 0.694	157.200, 0.212
788	157.400, 0.692	157.400, 0.207
789	157.600, 0.691	157.600, 0.203
790	157.800, 0.689	157.800, 0.199
791	158.000, 0.688	158.000, 0.195
792	158.200, 0.687	158.200, 0.192
793	158.400, 0.686	158.400, 0.188
794	158.600, 0.684	158.600, 0.185
795	158.800, 0.683	158.800, 0.181
796	159.000, 0.682	159.000, 0.178
797	159.200, 0.681	159.200, 0.175
798	159.400, 0.680	159.400, 0.172
799	159.600, 0.679	159.600, 0.170
800	159.800, 0.678	159.800, 0.167
801	160.000, 0.676	160.000, 0.165
802	160.200, 0.675	160.200, 0.162
803	160.400, 0.674	160.400, 0.160
804	160.600, 0.673	160.600, 0.158
805	160.800, 0.672	160.800, 0.155
806	161.000, 0.671	161.000, 0.153
807	161.200, 0.671	161.200, 0.151
808	161.400, 0.670	161.400, 0.150
809	161.600, 0.669	161.600, 0.148
810	161.800, 0.669	161.800, 0.146
811	162.000, 0.668	162.000, 0.144
812	162.200, 0.667	162.200, 0.143
813	162.400, 0.667	162.400, 0.141
814	162.600, 0.666	162.600, 0.140
815	162.800, 0.665	162.800, 0.138
816	163.000, 0.664	163.000, 0.137
817	163.200, 0.663	163.200, 0.135
818	163.400, 0.662	163.400, 0.134
819	163.600, 0.661	163.600, 0.132
820	163.800, 0.660	163.800, 0.131
821	164.000, 0.659	164.000, 0.130
822	164.200, 0.658	164.200, 0.129
823	164.400, 0.657	164.400, 0.128
824	164.600, 0.656	164.600, 0.126
825	164.800, 0.655	164.800, 0.125
826	165.000, 0.655	165.000, 0.124
827	165.200, 0.654	165.200, 0.123
828	165.400, 0.653	165.400, 0.122
829	165.600, 0.653	165.600, 0.121
830	165.800, 0.652	165.800, 0.121
831	166.000, 0.652	166.000, 0.120
832	166.200, 0.651	166.200, 0.119
833	166.400, 0.650	166.400, 0.118
834	166.600, 0.650	166.600, 0.118
835	166.800, 0.649	166.800, 0.117
836	167.000, 0.648	167.000, 0.116
837	167.200, 0.647	167.200, 0.116
838	167.400, 0.647	167.400, 0.115
839	167.600, 0.646	167.600, 0.114
840	167.800, 0.646	167.800, 0.114
841	168.000, 0.645	168.000, 0.113
842	168.200, 0.645	168.200, 0.113
843	168.400, 0.644	168.400, 0.112
844	168.600, 0.644	168.600, 0.112
845	168.800, 0.643	168.800, 0.111
846	169.000, 0.643	169.000, 0.111
847	169.200, 0.642	169.200, 0.110
848	169.400, 0.642	169.400, 0.110
849	169.600, 0.641	169.600, 0.109
850	169.800, 0.641	169.800, 0.108
851	170.000, 0.640	170.000, 0.108
852	170.200, 0.639	170.200, 0.107
853	170.400, 0.638	170.400, 0.107
854	170.600, 0.638	170.600, 0.106
855	170.800, 0.637	170.800, 0.106
856	171.000, 0.636	171.000, 0.105
857	171.200, 0.635	171.200, 0.105
858	171.400, 0.634	171.400, 0.105
859	171.600, 0.634	171.600, 0.105
860	171.800, 0.633	171.800, 0.104
861	172.000, 0.633	172.000, 0.104
862	172.200, 0.632	172.200, 0.104
863	172.400, 0.631	172.400, 0.103
864	172.600, 0.630	172.600, 0.103
865	172.800, 0.630	172.800, 0.102
866	173.000, 0.629	173.000, 0.102
867	173.200, 0.629	173.200, 0.102
868	173.400, 0.628	173.400, 0.101
869	173.600, 0.627	173.600, 0.101
870	173.800, 0.627	173.800, 0.101
871	174.000, 0.626	174.000, 0.100
872	174.200, 0.626	174.200, 0.100
873	174.400, 0.625	174.400, 0.100
874	174.600, 0.625	174.600, 0.099
875	174.800, 0.624	174.800, 0.099
876	175.000, 0.624	175.000, 0.099
877	175.200, 0.623	175.200, 0.099
878	175.400, 0.623	175.400, 0.098
879	175.600, 0.622	175.600, 0.098
880	175.800, 0.622	175.800, 0.098
881	176.000, 0.621	176.000, 0.098
882	176.200, 0.621	176.200, 0.098
883	176.400, 0.620	176.400, 0.098
884	176.600, 0.619	176.600, 0.098
885	176.800, 0.619	176.800, 0.097
886	177.000, 0.618	177.000, 0.097
887	177.200, 0.617	177.200, 0.097
888	177.400, 0.617	177.400, 0.097
889	177.600, 0.616	177.600, 0.097
890	177.800, 0.616	177.800, 0.097
891	178.000, 0.615	178.000, 0.096
892	178.200, 0.615	178.200, 0.096
893	178.400, 0.614	178.400, 0.096
894	178.600, 0.614	178.600, 0.095
895	178.800, 0.613	178.800, 0.095
896	179.000, 0.613	179.000, 0.094
897	179.200, 0.612	179.200, 0.094
898	179.400, 0.612	179.400, 0.094
899	179.600, 0.611	179.600, 0.093
900	179.800, 0.611	179.800, 0.093
901	180.000, 0.610	180.000, 0.093
902	180.200, 0.610	180.200, 0.093
903	180.400, 0.610	180.400, 0.093
904	180.600, 0.609	180.600, 0.093
905	180.800, 0.609	180.800, 0.093
906	181.000, 0.608	181.000, 0.093
907	181.200, 0.607	181.200, 0.093
908	181.400, 0.607	181.400, 0.093
909	181.600, 0.606	181.600, 0.093
910	181.800, 0.606	181.800, 0.092
911	182.000, 0.605	182.000, 0.092
912	182.200, 0.605	182.200, 0.092
913	182.400, 0.604	182.400, 0.091
914	182.600, 0.604	182.600, 0.091
915	182.800, 0.603	182.800, 0.091
916	183.000, 0.602	183.000, 0.091
917	183.200, 0.602	183.200, 0.091
918	183.400, 0.602	183.400, 0.091
919	183.600, 0.601	183.600, 0.090
920	183.800, 0.601	183.800, 0.090
921	184.000, 0.601	184.000, 0.090
922	184.200, 0.600	184.200, 0.090
923	184.400, 0.600	184.400, 0.090
924	184.600, 0.599	184.600, 0.090
925	184.800, 0.599	184.800, 0.090
926	185.000, 0.598	185.000, 0.090
927	185.200, 0.598	185.200, 0.090
928	185.400, 0.597	185.400, 0.090
929	185.600, 0.596	185.600, 0.090
930	185.800, 0.596	185.800, 0.090
931	186.000, 0.595	186.000, 0.089
932	186.200, 0.594	186.200, 0.089
933	186.400, 0.594	186.400, 0.089
934	186.600, 0.593	186.600, 0.089
935	186.800, 0.592	186.800, 0.089
936	187.000, 0.592	187.000, 0.089
937	187.200, 0.591	187.200, 0.089
938	187.400, 0.591	187.400, 0.089
939	187.600, 0.591	187.600, 0.089
940	187.800, 0.590	187.800, 0.089
941	188.000, 0.590	188.000, 0.089
942	188.200, 0.589	188.200, 0.088
943	188.400, 0.589	188.400, 0.088
944	188.600, 0.588	188.600, 0.088
945	188.800, 0.588	188.800, 0.088
946	189.000, 0.587	189.000, 0.088
947	189.200, 0.587	189.200, 0.088
948	189.400, 0.586	189.400, 0.088
949	189.600, 0.586	189.600, 0.088
950	189.800, 0.585	189.800, 0.088
951	190.000, 0.585	190.000, 0.088
952	190.200, 0.584	190.200, 0.088
953	190.400, 0.584	190.400, 0.087
954	190.600, 0.583	190.600, 0.087
955	190.800, 0.582	190.800, 0.087
956	191.000, 0.582	191.000, 0.087
957	191.200, 0.582	191.200, 0.086
958	191.400, 0.582	191.400, 0.086
959	191.600, 0.581	191.600, 0.086
960	191.800, 0.581	191.800, 0.086
961	192.000, 0.580	192.000, 0.086
962	192.200, 0.580	192.200, 0.086
963	192.400, 0.579	192.400, 0.085
964	192.600, 0.579	192.600, 0.085
965	192.800, 0.579	192.800, 0.085
966	193.000, 0.578	193.000, 0.085
967	193.200, 0.578	193.200, 0.085
968	193.400, 0.578	193.400, 0.085
969	193.600, 0.578	193.600, 0.085
970	193.800, 0.577	193.800, 0.085
971	194.000, 0.577	194.000, 0.085
972	194.200, 0.577	194.200, 0.085
973	194.400, 0.576	194.400, 0.085
974	194.600, 0.575	194.600, 0.085
975	194.800, 0.575	194.800, 0.085
976	195.000, 0.575	195.000, 0.085
977	195.200, 0.574	195.200, 0.086
978	195.400, 0.574	195.400, 0.086
979	195.600, 0.573	195.600, 0.086
980	195.800, 0.573	195.800, 0.086
981	196.000, 0.572	196.000, 0.086
982	196.200, 0.572	196.200, 0.086
983	196.400, 0.572	196.400, 0.086
984	196.600, 0.571	196.600, 0.085
985	196.800, 0.571	196.800, 0.085
986	197.000, 0.571	197.000, 0.085
987	197.200, 0.570	197.200, 0.085
988	197.400, 0.570	197.400, 0.085
989	197.600, 0.569	197.600, 0.085
990	197.800, 0.568	197.800, 0.085
991	198.000, 0.568	198.000, 0.085
992	198.200, 0.567	198.200, 0.084
993	198.400, 0.566	198.400, 0.084
994	198.600, 0.566	198.600, 0.084
995	198.800, 0.565	198.800, 0.084
996	199.000, 0.565	199.000, 0.084
997	199.200, 0.564	199.200, 0.084
998	199.400, 0.564	199.400, 0.084
999	199.600, 0.564	199.600, 0.084
1000	199.800, 0.564	199.800, 0.084
1001	200.000, 0.563	200.000, 0.084
1002	200.200, 0.563	200.200, 0.084
1003	200.400, 0.563	200.400, 0.084
1004	200.600, 0.563	200.600, 0.084
1005	200.800, 0.563	200.800, 0.083
1006	201.000, 0.562	201.000, 0.083
1007	201.200, 0.562	201.200, 0.083
1008	201.400, 0.561	201.400, 0.083
1009	201.600, 0.561	201.600, 0.083
1010	201.800, 0.560	201.800, 0.083
1011	202.000, 0.560	202.000, 0.083
1012	202.200, 0.559	202.200, 0.083
1013	202.400, 0.559	202.400, 0.083
1014	202.600, 0.558	202.600, 0.083
1015	202.800, 0.558	202.800, 0.083
1016	203.000, 0.557	203.000, 0.083
1017	203.200, 0.556	203.200, 0.083
1018	203.400, 0.556	203.400, 0.083
1019	203.600, 0.556	203.600, 0.083
1020	203.800, 0.555	203.800, 0.083
1021	204.000, 0.554	204.000, 0.083
1022	204.200, 0.554	204.200, 0.082
1023	204.400, 0.553	204.400, 0.082
1024	204.600, 0.553	204.600, 0.082
1025	204.800, 0.552	204.800, 0.082
1026	205.000, 0.552	205.000, 0.082
1027	205.200, 0.551	205.200, 0.081
1028	205.400, 0.551	205.400, 0.081
1029	205.600, 0.551	205.600, 0.081
1030	205.800, 0.551	205.800, 0.081
1031	206.000, 0.550	206.000, 0.081
1032	206.200, 0.550	206.200, 0.081
1033	206.400, 0.550	206.400, 0.081
1034	206.600, 0.549	206.600, 0.081
1035	206.800, 0.549	206.800, 0.080
1036	207.000, 0.549	207.000, 0.080
1037	207.200, 0.548	207.200, 0.080
1038	207.400, 0.548	207.400, 0.079
1039	207.600, 0.548	207.600, 0.079
1040	207.800, 0.548	207.800, 0.079
1041	208.000, 0.548	208.000, 0.079
1042	208.200, 0.547	208.200, 0.079
1043	208.400, 0.547	208.400, 0.079
1044	208.600, 0.547	208.600, 0.079
1045	208.800, 0.546	208.800, 0.079
1046	209.000, 0.546	209.000, 0.079
1047	209.200, 0.545	209.200, 0.079
1048	209.400, 0.545	209.400, 0.079
1049	209.600, 0.544	209.600, 0.080
1050	209.800, 0.544	209.800, 0.080
1051	210.000, 0.543	210.000, 0.080
1052	210.200, 0.543	210.200, 0.080
1053	210.400, 0.542	210.400, 0.080
1054	210.600, 0.542	210.600, 0.080
1055	210.800, 0.542	210.800, 0.080
1056	211.000, 0.542	211.000, 0.081
1057	211.200, 0.541	211.200, 0.081
1058	211.400, 0.541	211.400, 0.081
1059	211.600, 0.541	211.600, 0.081
1060	211.800, 0.541	211.800, 0.081
1061	212.000, 0.540	212.000, 0.080
1062	212.200, 0.540	212.200, 0.080
1063	212.400, 0.540	212.400, 0.080
1064	212.600, 0.539	212.600, 0.080
1065	212.800, 0.539	212.800, 0.080
1066	213.000, 0.538	213.000, 0.080
1067	213.200, 0.538	213.200, 0.080
1068	213.400, 0.537	213.400, 0.080
1069	213.600, 0.536	213.600, 0.079
1070	213.800, 0.536	213.800, 0.079
1071	214.000, 0.535	214.000, 0.079
1072	214.200, 0.535	214.200, 0.079
1073	214.400, 0.534	214.400, 0.079
1074	214.600, 0.534	214.600, 0.079
1075	214.800, 0.533	214.800, 0.079
1076	215.000, 0.533	215.000, 0.078
1077	215.200, 0.533	215.200, 0.078
1078	215.400, 0.533	215.400, 0.078
1079	215.600, 0.532	215.600, 0.078
1080	215.800, 0.532	215.800, 0.078
1081	216.000, 0.532	216.000, 0.078
1082	216.200, 0.532	216.200, 0.078
1083	216.400, 0.531	216.400, 0.078
1084	216.600, 0.531	216.600, 0.078
1085	216.800, 0.531	216.800, 0.078
1086	217.000, 0.530	217.000, 0.078
1087	217.200, 0.530	217.200, 0.078
1088	217.400, 0.530	217.400, 0.078
1089	217.600, 0.529	217.600, 0.077
1090	217.800, 0.529	217.800, 0.077
1091	218.000, 0.529	218.000, 0.077
1092	218.200, 0.528	218.200, 0.077
1093	218.400, 0.528	218.400, 0.077
1094	218.600, 0.527	218.600, 0.076
1095	218.800, 0.527	218.800, 0.076
1096	219.000, 0.527	219.000, 0.077
1097	219.200, 0.526	219.200, 0.077
1098	219.400, 0.526	219.400, 0.077
1099	219.600, 0.526	219.600, 0.077
1100	219.800, 0.525	219.800, 0.077
1101	220.000, 0.525	220.000, 0.077
1102	220.200, 0.525	220.200, 0.077
1103	220.400, 0.524	220.400, 0.077
1104	220.600, 0.524	220.600, 0.077
1105	220.800, 0.524	220.800, 0.077
1106	221.000, 0.524	221.000, 0.077
1107	221.200, 0.524	221.200, 0.076
1108	221.400, 0.524	221.400, 0.076
1109	221.600, 0.523	221.600, 0.076
1110	221.800, 0.523	221.800, 0.076
1111	222.000, 0.523	222.000, 0.076
1112	222.200, 0.523	222.200, 0.076
1113	222.400, 0.522	222.400, 0.075
1114	222.600, 0.522	222.600, 0.075
1115	222.800, 0.522	222.800, 0.075
1116	223.000, 0.522	223.000, 0.075
1117	223.200, 0.521	223.200, 0.075
1118	223.400, 0.521	223.400, 0.075
1119	223.600, 0.521	223.600, 0.075
1120	223.800, 0.520	223.800, 0.075
1121	224.000, 0.520	224.000, 0.075
1122	224.200, 0.520	224.200, 0.075
1123	224.400, 0.520	224.400, 0.075
1124	224.600, 0.520	224.600, 0.075
1125	224.800, 0.519	224.800, 0.075
1126	225.000, 0.519	225.000, 0.075
1127	225.200, 0.518	225.200, 0.075
1128	225.400, 0.518	225.400, 0.075
1129	225.600, 0.517	225.600, 0.075
1130	225.800, 0.516	225.800, 0.075
1131	226.000, 0.516	226.000, 0.075
1132	226.200, 0.515	226.200, 0.074
1133	226.400, 0.515	226.400, 0.074
1134	226.600, 0.515	226.600, 0.074
1135	226.800, 0.514	226.800, 0.074
1136	227.000, 0.514	227.000, 0.074
1137	227.200, 0.514	227.200, 0.074
1138	227.400, 0.513	227.400, 0.074
1139	227.600, 0.513	227.600, 0.074
1140	227.800, 0.513	227.800, 0.074
1141	228.000, 0.513	228.000, 0.074
1142	228.200, 0.513	228.200, 0.074
1143	228.400, 0.512	228.400, 0.074
1144	228.600, 0.512	228.600, 0.074
1145	228.800, 0.512	228.800, 0.074
1146	229.000, 0.512	229.000, 0.074
1147	229.200, 0.511	229.200, 0.074
1148	229.400, 0.511	229.400, 0.074
1149	229.600, 0.511	229.600, 0.074
1150	229.800, 0.511	229.800, 0.074
1151	230.000, 0.511	230.000, 0.075
1152	230.200, 0.510	230.200, 0.075
1153	230.400, 0.510	230.400, 0.075
1154	230.600, 0.510	230.600, 0.075
1155	230.800, 0.510	230.800, 0.075
1156	231.000, 0.509	231.000, 0.075
1157	231.200, 0.509	231.200, 0.075
1158	231.400, 0.508	231.400, 0.075
1159	231.600, 0.507	231.600, 0.075
1160	231.800, 0.507	231.800, 0.075
1161	232.000, 0.506	232.000, 0.075
1162	232.200, 0.505	232.200, 0.074
1163	232.400, 0.505	232.400, 0.074
1164	232.600, 0.504	232.600, 0.074
1165	232.800, 0.504	232.800, 0.074
1166	233.000, 0.504	233.000, 0.074
1167	233.200, 0.504	233.200, 0.073
1168	233.400, 0.504	233.400, 0.073
1169	233.600, 0.504	233.600, 0.073
1170	233.800, 0.504	233.800, 0.073
1171	234.000, 0.504	234.000, 0.072
1172	234.200, 0.504	234.200, 0.072
1173	234.400, 0.503	234.400, 0.072
1174	234.600, 0.503	234.600, 0.072
1175	234.800, 0.503	234.800, 0.071
1176	235.000, 0.503	235.000, 0.071
1177	235.200, 0.503	235.200, 0.071
1178	235.400, 0.502	235.400, 0.071
1179	235.600, 0.502	235.600, 0.071
1180	235.800, 0.501	235.800, 0.071
1181	236.000, 0.501	236.000, 0.071
1182	236.200, 0.500	236.200, 0.071
1183	236.400, 0.500	236.400, 0.071
1184	236.600, 0.499	236.600, 0.071
1185	236.800, 0.499	236.800, 0.072
1186	237.000, 0.499	237.000, 0.072
1187	237.200, 0.499	237.200, 0.072
1188	237.400, 0.499	237.400, 0.072
1189	237.600, 0.498	237.600, 0.071
1190	237.800, 0.498	237.800, 0.071
1191	238.000, 0.498	238.000, 0.071
1192	238.200, 0.498	238.200, 0.071
1193	238.400, 0.498	238.400, 0.071
1194	238.600, 0.498	238.600, 0.072
1195	238.800, 0.498	238.800, 0.071
1196	239.000, 0.498	239.000, 0.071
1197	239.200, 0.497	239.200, 0.071
1198	239.400, 0.497	239.400, 0.071
1199	239.600, 0.497	239.600, 0.071
1200	239.800, 0.497	239.800, 0.071
1201	240.000, 0.497	240.000, 0.071
1202	240.200, 0.496	240.200, 0.071
1203	240.400, 0.496	240.400, 0.071
1204	240.600, 0.496	240.600, 0.071
1205	240.800, 0.496	240.800, 0.071
1206	241.000, 0.495	241.000, 0.071
1207	241.200, 0.495	241.200, 0.071
1208	241.400, 0.494	241.400, 0.071
1209	241.600, 0.494	241.600, 0.071
1210	241.800, 0.493	241.800, 0.070
1211	242.000, 0.493	242.000, 0.070
1212	242.200, 0.492	242.200, 0.070
1213	242.400, 0.492	242.400, 0.070
1214	242.600, 0.492	242.600, 0.070
1215	242.800, 0.491	242.800, 0.070
1216	243.000, 0.491	243.000, 0.070
1217	243.200, 0.491	243.200, 0.070
1218	243.400, 0.491	243.400, 0.069
1219	243.600, 0.490	243.600, 0.069
1220	243.800, 0.490	243.800, 0.069
1221	244.000, 0.490	244.000, 0.069
1222	244.200, 0.489	244.200, 0.069
1223	244.400, 0.489	244.400, 0.069
1224	244.600, 0.489	244.600, 0.069
1225	244.800, 0.489	244.800, 0.069
1226	245.000, 0.489	245.000, 0.069
1227	245.200, 0.488	245.200, 0.069
1228	245.400, 0.488	245.400, 0.069
1229	245.600, 0.488	245.600, 0.069
1230	245.800, 0.488	245.800, 0.069
1231	246.000, 0.489	246.000, 0.069
1232	246.200, 0.489	246.200, 0.069
1233	246.400, 0.489	246.400, 0.069
1234	246.600, 0.488	246.600, 0.069
1235	246.800, 0.488	246.800, 0.069
1236	247.000, 0.488	247.000, 0.068
1237	247.200, 0.488	247.200, 0.068
1238	247.400, 0.487	247.400, 0.068
1239	247.600, 0.487	247.600, 0.068
1240	247.800, 0.486	247.800, 0.068
1241	248.000, 0.486	248.000, 0.068
1242	248.200, 0.485	248.200, 0.068
1243	248.400, 0.485	248.400, 0.068
1244	248.600, 0.485	248.600, 0.068
1245	248.800, 0.484	248.800, 0.068
1246	249.000, 0.484	249.000, 0.068
1247	249.200, 0.484	249.200, 0.068
1248	249.400, 0.484	249.400, 0.068
1249	249.600, 0.483	249.600, 0.068
1250	249.800, 0.483	249.800, 0.068
1251	250.000, 0.483	250.000, 0.068
1252	250.200, 0.483	250.200, 0.068
1253	250.400, 0.483	250.400, 0.068
1254	250.600, 0.483	250.600, 0.068
1255	250.800, 0.482	250.800, 0.068
1256	251.000, 0.482	251.000, 0.068
1257	251.200, 0.482	251.200, 0.068
1258	251.400, 0.482	251.400, 0.068
1259	251.600, 0.482	251.600, 0.068
1260	251.800, 0.481	251.800, 0.068
1261	252.000, 0.481	252.000, 0.068
1262	252.200, 0.481	252.200, 0.067
1263	252.400, 0.480	252.400, 0.067
1264	252.600, 0.480	252.600, 0.067
1265	252.800, 0.480	252.800, 0.067
1266	253.000, 0.479	253.000, 0.067
1267	253.200, 0.479	253.200, 0.067
1268	253.400, 0.479	253.400, 0.068
1269	253.600, 0.478	253.600, 0.068
1270	253.800, 0.478	253.800, 0.068
1271	254.000, 0.478	254.000, 0.068
1272	254.200, 0.478	254.200, 0.068
1273	254.400, 0.477	254.400, 0.068
1274	254.600, 0.477	254.600, 0.068
1275	254.800, 0.477	254.800, 0.068
1276	255.000, 0.477	255.000, 0.068
1277	255.200, 0.477	255.200, 0.068
1278	255.400, 0.477	255.400, 0.068
1279	255.600, 0.477	255.600, 0.068
1280	255.800, 0.477	255.800, 0.068
1281	256.000, 0.477	256.000, 0.068
1282	256.200, 0.477	256.200, 0.067
1283	256.400, 0.476	256.400, 0.067
1284	256.600, 0.476	256.600, 0.067
1285	256.800, 0.476	256.800, 0.067
1286	257.000, 0.476	257.000, 0.067
1287	257.200, 0.475	257.200, 0.067
1288	257.400, 0.475	257.400, 0.067
1289	257.600, 0.475	257.600, 0.067
1290	257.800, 0.474	257.800, 0.067
1291	258.000, 0.474	258.000, 0.067
1292	258.200, 0.473	258.200, 0.067
1293	258.400, 0.473	258.400, 0.067
1294	258.600, 0.473	258.600, 0.067
1295	258.800, 0.473	258.800, 0.067
1296	259.000, 0.473	259.000, 0.066
1297	259.200, 0.472	259.200, 0.066
1298	259.400, 0.472	259.400, 0.066
1299	259.600, 0.472	259.600, 0.066
1300	259.800, 0.472	259.800, 0.066
1301	260.000, 0.472	260.000, 0.066
1302	260.200, 0.472	260.200, 0.066
1303	260.400, 0.472	260.400, 0.066
1304	260.600, 0.471	260.600, 0.066
1305	260.800, 0.471	260.800, 0.066
1306	261.000, 0.471	261.000, 0.066
1307	261.200, 0.470	261.200, 0.066
1308	261.400, 0.470	261.400, 0.066
1309	261.600, 0.470	261.600, 0.066
1310	261.800, 0.470	261.800, 0.066
1311	262.000, 0.470	262.000, 0.066
1312	262.200, 0.470	262.200, 0.066
1313	262.400, 0.470	262.400, 0.065
1314	262.600, 0.470	262.600, 0.065
1315	262.800, 0.470	262.800, 0.065
1316	263.000, 0.469	263.000, 0.064
1317	263.200, 0.469	263.200, 0.064
1318	263.400, 0.469	263.400, 0.064
1319	263.600, 0.468	263.600, 0.064
1320	263.800, 0.468	263.800, 0.064
1321	264.000, 0.468	264.000, 0.065
1322	264.200, 0.468	264.200, 0.065
1323	264.400, 0.467	264.400, 0.065
1324	264.600, 0.467	264.600, 0.065
1325	264.800, 0.466	264.800, 0.065
1326	265.000, 0.466	265.000, 0.065
1327	265.200, 0.465	265.200, 0.065
1328	265.400, 0.465	265.400, 0.065
1329	265.600, 0.465	265.600, 0.065
1330	265.800, 0.464	265.800, 0.065
1331	266.000, 0.464	266.000, 0.065
1332	266.200, 0.464	266.200, 0.066
1333	266.400, 0.464	266.400, 0.066
1334	266.600, 0.464	266.600, 0.066
1335	266.800, 0.464	266.800, 0.066
1336	267.000, 0.464	267.000, 0.066
1337	267.200, 0.464	267.200, 0.066
1338	267.400, 0.464	267.400, 0.065
1339	267.600, 0.464	267.600, 0.065
1340	267.800, 0.464	267.800, 0.065
1341	268.000, 0.463	268.000, 0.065
1342	268.200, 0.463	268.200, 0.065
1343	268.400, 0.463	268.400, 0.065
1344	268.600, 0.463	268.600, 0.065
1345	268.800, 0.463	268.800, 0.064
1346	269.000, 0.462	269.000, 0.064
1347	269.200, 0.462	269.200, 0.064
1348	269.400, 0.462	269.400, 0.064
1349	269.600, 0.462	269.600, 0.064
1350	269.800, 0.462	269.800, 0.064
1351	,	,
1352	,	,
1353	,	,
1354	,	,
1355	,	,
1356	,	,
1357	,	,
1358	,	,
1359	,	,
1360	,	,
1361	,	,
1362	,	,
1363	,	,
1364	,	,
1365	,	,
1366	,	,
1367	,	,
1368	,	,
1369	,	,
1370	,	,
1371	,	,
1372	,	,
1373	,	,
1374	,	,
1375	,	,
1376	,	,
1377	,	,
1378	,	,
1379	,	,
1380	,	,
1381	,	,
1382	,	,
1383	,	,
1384	,	,
1385	,	,
1386	,	,
1387	,	,
1388	,	,
1389	,	,
1390	,	,
1391	,	,
1392	,	,
1393	,	,
1394	,	,
1395	,	,
1396	,	,
1397	,	,
1398	,	,
1399	,	,
1400	,	,
1401	,	,
1402	,	,
1403	,	,
1404	,	,
1405	,	,
1406	,	,
1407	,	,
1408	,	,
1409	,	,
1410	,	,
1411	,	,
1412	,	,
1413	,	,
1414	,	,
1415	,	,
1416	,	,
1417	,	,
1418	,	,
1419	,	,
1420	,	,
1421	,	,
1422	,	,
1423	,	,
1424	,	,
1425	,	,
1426	,	,
1427	,	,
1428	,	,
1429	,	,
1430	,	,
1431	,	,
1432	,	,
1433	,	,
1434	,	,
1435	,	,
1436	,	,
1437	,	,
1438	,	,
1439	,	,
1440	,	,
1441	,	,
1442	,	,
1443	,	,
1444	,	,
1445	,	,
1446	,	,
1447	,	,
1448	,	,
1449	,	,
1450	,	,
1451	,	,
1452	,	,
1453	,	,
1454	,	,
1455	,	,
1456	,	,
1457	,	,
1458	,	,
1459	,	,
1460	,	,
1461	,	,
1462	,	,
1463	,	,
1464	,	,
1465	,	,
1466	,	,
1467	,	,
1468	,	,
1469	,	,
1470	,	,
1471	,	,
1472	,	,
1473	,	,
1474	,	,
1475	,	,
1476	,	,
1477	,	,
1478	,	,
1479	,	,
1480	,	,
1481	,	,
1482	,	,
1483	,	,
1484	,	,
1485	,	,
1486	,	,
1487	,	,
1488	,	,
1489	,	,
1490	,	,
1491	,	,
1492	,	,
1493	,	,
1494	,	,
1495	,	,
1496	,	,
1497	,	,
1498	,	,
1499	,	,
1500	,	,
1501	,	,
1502	,	,
1503	,	,
1504	,	,
1505	,	,
1506	,	,
1507	,	,
1508	,	,
1509	,	,
1510	,	,
1511	,	,
1512	,	,
1513	,	,
1514	,	,
1515	,	,
1516	,	,
1517	,	,
1518	,	,
1519	,	,
1520	,	,
1521	,	,
1522	,	,
1523	,	,
1524	,	,
1525	,	,
1526	,	,
1527	,	,
1528	,	,
1529	,	,
1530	,	,
1531	,	,
1532	,	,
1533	,	,
1534	,	,
1535	,	,
1536	,	,
1537	,	,
1538	,	,
1539	,	,
1540	,	,
1541	,	,
1542	,	,
1543	,	,
1544	,	,
1545	,	,
1546	,	,
1547	,	,
1548	,	,
1549	,	,
1550	,	,
1551	,	,
1552	,	,
1553	,	,
1554	,	,
1555	,	,
1556	,	,
1557	,	,
1558	,	,
1559	,	,
1560	,	,
1561	,	,
1562	,	,
1563	,	,
1564	,	,
1565	,	,
1566	,	,
1567	,	,
1568	,	,
1569	,	,
1570	,	,
1571	,	,
1572	,	,
1573	,	,
1574	,	,
1575	,	,
1576	,	,
1577	,	,
1578	,	,
1579	,	,
1580	,	,
1581	,	,
1582	,	,
1583	,	,
1584	,	,
1585	,	,
1586	,	,
1587	,	,
1588	,	,
1589	,	,
1590	,	,
1591	,	,
1592	,	,
1593	,	,
1594	,	,
1595	,	,
1596	,	,
1597	,	,
1598	,	,
1599	,	,
1600	,	,
1601	,	,
1602	,	,
1603	,	,
1604	,	,
1605	,	,
1606	,	,
1607	,	,
1608	,	,
1609	,	,
1610	,	,
1611	,	,
1612	,	,
1613	,	,
1614	,	,
1615	,	,
1616	,	,
1617	,	,
1618	,	,
1619	,	,
1620	,	,
1621	,	,
1622	,	,
1623	,	,
1624	,	,
1625	,	,
1626	,	,
1627	,	,
1628	,	,
1629	,	,
1630	,	,
1631	,	,
1632	,	,
1633	,	,
1634	,	,
1635	,	,
1636	,	,
1637	,	,
1638	,	,
1639	,	,
1640	,	,
1641	,	,
1642	,	,
1643	,	,
1644	,	,
1645	,	,
1646	,	,
1647	,	,
1648	,	,
1649	,	,
1650	,	,
1651	,	,
1652	,	,
1653	,	,
1654	,	,
1655	,	,
1656	,	,
1657	,	,
1658	,	,
1659	,	,
1660	,	,
1661	,	,
1662	,	,
1663	,	,
1664	,	,
1665	,	,
1666	,	,
1667	,	,
1668	,	,
1669	,	,
1670	,	,
1671	,	,
1672	,	,
1673	,	,
1674	,	,
1675	,	,
1676	,	,
1677	,	,
1678	,	,
1679	,	,
1680	,	,
1681	,	,
1682	,	,
1683	,	,
1684	,	,
1685	,	,
1686	,	,
1687	,	,
1688	,	,
1689	,	,
1690	,	,
1691	,	,
1692	,	,
1693	,	,
1694	,	,
1695	,	,
1696	,	,
1697	,	,
1698	,	,
1699	,	,
1700	,	,
1701	,	,
1702	,	,
1703	,	,
1704	,	,
1705	,	,
1706	,	,
1707	,	,
1708	,	,
1709	,	,
1710	,	,
1711	,	,
1712	,	,
1713	,	,
1714	,	,
1715	,	,
1716	,	,
1717	,	,
1718	,	,
1719	,	,
1720	,	,
1721	,	,
1722	,	,
1723	,	,
1724	,	,
1725	,	,
1726	,	,
1727	,	,
1728	,	,
1729	,	,
1730	,	,
1731	,	,
1732	,	,
1733	,	,
1734	,	,
1735	,	,
1736	,	,
1737	,	,
1738	,	,
1739	,	,
1740	,	,
1741	,	,
1742	,	,
1743	,	,
1744	,	,
1745	,	,
1746	,	,
1747	,	,
1748	,	,
1749	,	,
1750	,	,
1751	,	,
1752	,	,
1753	,	,
1754	,	,
1755	,	,
1756	,	,
1757	,	,
1758	,	,
1759	,	,
1760	,	,
1761	,	,
1762	,	,
1763	,	,
1764	,	,
1765	,	,
1766	,	,
1767	,	,
1768	,	,
1769	,	,
1770	,	,
1771	,	,
1772	,	,
1773	,	,
1774	,	,
1775	,	,
1776	,	,
1777	,	,
1778	,	,
1779	,	,
1780	,	,
1781	,	,
1782	,	,
1783	,	,
1784	,	,
1785	,	,
1786	,	,
1787	,	,
1788	,	,
1789	,	,
1790	,	,
1791	,	,
1792	,	,
1793	,	,
1794	,	,
1795	,	,
1796	,	,
1797	,	,
1798	,	,
1799	,	,
1800	,	,
1801	,	,
1802	,	,
1803	,	,
1804	,	,
1805	,	,
1806	,	,
1807	,	,
1808	,	,
1809	,	,
1810	,	,
1811	,	,
1812	,	,
1813	,	,
1814	,	,
1815	,	,
1816	,	,
1817	,	,
1818	,	,
1819	,	,
1820	,	,
1821	,	,
1822	,	,
1823	,	,
1824	,	,
1825	,	,
1826	,	,
1827	,	,
1828	,	,
1829	,	,
1830	,	,
1831	,	,
1832	,	,
1833	,	,
1834	,	,
1835	,	,
1836	,	,
1837	,	,
1838	,	,
1839	,	,
1840	,	,
1841	,	,
1842	,	,
1843	,	,
1844	,	,
1845	,	,
1846	,	,
1847	,	,
1848	,	,
1849	,	,
1850	,	,
1851	,	,
1852	,	,
1853	,	,
1854	,	,
1855	,	,
1856	,	,
1857	,	,
1858	,	,
1859	,	,
1860	,	,
1861	,	,
1862	,	,
1863	,	,
1864	,	,
1865	,	,
1866	,	,
1867	,	,
1868	,	,
1869	,	,
1870	,	,
1871	,	,
1872	,	,
1873	,	,
1874	,	,
1875	,	,
1876	,	,
1877	,	,
1878	,	,
1879	,	,
1880	,	,
1881	,	,
1882	,	,
1883	,	,
1884	,	,
1885	,	,
1886	,	,
1887	,	,
1888	,	,
1889	,	,
1890	,	,
1891	,	,
1892	,	,
1893	,	,
1894	,	,
1895	,	,
1896	,	,
1897	,	,
1898	,	,
1899	,	,
1900	,	,
1901	,	,
1902	,	,
1903	,	,
1904	,	,
1905	,	,
1906	,	,
1907	,	,
1908	,	,
1909	,	,
1910	,	,
1911	,	,
1912	,	,
1913	,	,
1914	,	,
1915	,	,
1916	,	,
1917	,	,
1918	,	,
1919	,	,
1920	,	,
1921	,	,
1922	,	,
1923	,	,
1924	,	,
1925	,	,
1926	,	,
1927	,	,
1928	,	,
1929	,	,
1930	,	,
1931	,	,
1932	,	,
1933	,	,
1934	,	,
1935	,	,
1936	,	,
1937	,	,
1938	,	,
1939	,	,
1940	,	,
1941	,	,
1942	,	,
1943	,	,
1944	,	,
1945	,	,
1946	,	,
1947	,	,
1948	,	,
1949	,	,
1950	,	,
1951	,	,
1952	,	,
1953	,	,
1954	,	,
1955	,	,
1956	,	,
1957	,	,
1958	,	,
1959	,	,
1960	,	,
1961	,	,
1962	,	,
1963	,	,
1964	,	,
1965	,	,
1966	,	,
1967	,	,
1968	,	,
1969	,	,
1970	,	,
1971	,	,
1972	,	,
1973	,	,
1974	,	,
1975	,	,
1976	,	,
1977	,	,
1978	,	,
1979	,	,
1980	,	,
1981	,	,
1982	,	,
1983	,	,
1984	,	,
1985	,	,
1986	,	,
1987	,	,
1988	,	,
1989	,	,
1990	,	,
1991	,	,
1992	,	,
1993	,	,
1994	,	,
1995	,	,
1996	,	,
1997	,	,
1998	,	,
1999	,	,
[truncated: 13,001 more rows]
