# Supplementary material for: ParB spreading on DNA requires cytidine triphosphate in vitro
Source: eLife journal article supplement (doi:10.7554/elife.53515), 2020-02-20
Supplement: fig1-figsupp1-data1 [file Fig1_supp1_panelA.xlsx]

## Sheet: FORMAT
	sample ID #1	sample ID #2	sample ID #3
data point	time point (sec), wavelength shift (nm)	time point (sec), wavelength shift (nm)	time point (sec), wavelength shift (nm)
1
2
3
.
.
.

## Sheet: Fig1_supp1_panelA_rep1
	parS20 B 0.125uM	parS20 B 0.25uM	parS20 B 0.5uM	parS20 B 1.0uM	parS20 B 2.0uM	parS20 B 0uM	tetO28 B 0 uM	tetO28 B 0.125 uM	tetO28 B 0.25 uM	tetO28 B 0.5 uM	tetO28 B 1.0 uM	tetO28 B 2.0 uM
1	0.000, -0.002	0.000, -0.002	0.000, -0.003	0.000, -0.000	0.000, -0.004	0.000, -0.002	0.000, 0.059	0.000, 0.046	0.000, 0.033	0.000, 0.050	0.000, 0.045	0.000, 0.028
2	0.200, -0.003	0.200, -0.002	0.200, -0.003	0.200, -0.000	0.200, -0.004	0.200, -0.002	0.200, 0.057	0.200, 0.045	0.200, 0.033	0.200, 0.048	0.200, 0.044	0.200, 0.027
3	0.400, -0.003	0.400, -0.003	0.400, -0.004	0.400, -0.000	0.400, -0.004	0.400, -0.002	0.400, 0.056	0.400, 0.044	0.400, 0.032	0.400, 0.046	0.400, 0.043	0.400, 0.026
4	0.600, -0.004	0.600, -0.003	0.600, -0.005	0.600, -0.001	0.600, -0.004	0.600, -0.002	0.600, 0.054	0.600, 0.042	0.600, 0.031	0.600, 0.044	0.600, 0.041	0.600, 0.026
5	0.800, -0.005	0.800, -0.004	0.800, -0.005	0.800, -0.001	0.800, -0.005	0.800, -0.002	0.800, 0.053	0.800, 0.041	0.800, 0.030	0.800, 0.042	0.800, 0.039	0.800, 0.025
6	1.000, -0.005	1.000, -0.005	1.000, -0.006	1.000, -0.001	1.000, -0.005	1.000, -0.003	1.000, 0.051	1.000, 0.039	1.000, 0.029	1.000, 0.040	1.000, 0.037	1.000, 0.023
7	1.200, -0.006	1.200, -0.005	1.200, -0.006	1.200, -0.001	1.200, -0.005	1.200, -0.003	1.200, 0.049	1.200, 0.038	1.200, 0.028	1.200, 0.038	1.200, 0.035	1.200, 0.022
8	1.400, -0.006	1.400, -0.006	1.400, -0.006	1.400, -0.002	1.400, -0.005	1.400, -0.003	1.400, 0.048	1.400, 0.036	1.400, 0.027	1.400, 0.036	1.400, 0.033	1.400, 0.021
9	1.600, -0.006	1.600, -0.007	1.600, -0.007	1.600, -0.002	1.600, -0.005	1.600, -0.003	1.600, 0.046	1.600, 0.035	1.600, 0.026	1.600, 0.034	1.600, 0.032	1.600, 0.020
10	1.800, -0.006	1.800, -0.007	1.800, -0.007	1.800, -0.003	1.800, -0.005	1.800, -0.003	1.800, 0.044	1.800, 0.034	1.800, 0.025	1.800, 0.032	1.800, 0.030	1.800, 0.019
11	2.000, -0.006	2.000, -0.007	2.000, -0.007	2.000, -0.003	2.000, -0.004	2.000, -0.003	2.000, 0.043	2.000, 0.033	2.000, 0.024	2.000, 0.030	2.000, 0.029	2.000, 0.018
12	2.200, -0.006	2.200, -0.007	2.200, -0.007	2.200, -0.003	2.200, -0.004	2.200, -0.003	2.200, 0.041	2.200, 0.032	2.200, 0.023	2.200, 0.029	2.200, 0.028	2.200, 0.018
13	2.400, -0.006	2.400, -0.007	2.400, -0.007	2.400, -0.004	2.400, -0.003	2.400, -0.003	2.400, 0.040	2.400, 0.031	2.400, 0.023	2.400, 0.028	2.400, 0.027	2.400, 0.017
14	2.600, -0.007	2.600, -0.007	2.600, -0.007	2.600, -0.004	2.600, -0.003	2.600, -0.003	2.600, 0.038	2.600, 0.030	2.600, 0.022	2.600, 0.027	2.600, 0.026	2.600, 0.017
15	2.800, -0.007	2.800, -0.007	2.800, -0.007	2.800, -0.004	2.800, -0.002	2.800, -0.003	2.800, 0.037	2.800, 0.030	2.800, 0.021	2.800, 0.025	2.800, 0.025	2.800, 0.016
16	3.000, -0.007	3.000, -0.007	3.000, -0.007	3.000, -0.004	3.000, -0.002	3.000, -0.003	3.000, 0.035	3.000, 0.029	3.000, 0.021	3.000, 0.024	3.000, 0.024	3.000, 0.016
17	3.200, -0.007	3.200, -0.007	3.200, -0.007	3.200, -0.004	3.200, -0.002	3.200, -0.003	3.200, 0.034	3.200, 0.028	3.200, 0.020	3.200, 0.023	3.200, 0.023	3.200, 0.015
18	3.400, -0.008	3.400, -0.006	3.400, -0.007	3.400, -0.005	3.400, -0.002	3.400, -0.003	3.400, 0.033	3.400, 0.027	3.400, 0.020	3.400, 0.022	3.400, 0.022	3.400, 0.015
19	3.600, -0.008	3.600, -0.006	3.600, -0.008	3.600, -0.005	3.600, -0.002	3.600, -0.003	3.600, 0.032	3.600, 0.026	3.600, 0.019	3.600, 0.021	3.600, 0.022	3.600, 0.014
20	3.800, -0.008	3.800, -0.006	3.800, -0.008	3.800, -0.005	3.800, -0.002	3.800, -0.003	3.800, 0.032	3.800, 0.025	3.800, 0.018	3.800, 0.020	3.800, 0.021	3.800, 0.014
21	4.000, -0.009	4.000, -0.005	4.000, -0.008	4.000, -0.005	4.000, -0.002	4.000, -0.003	4.000, 0.031	4.000, 0.024	4.000, 0.018	4.000, 0.019	4.000, 0.020	4.000, 0.013
22	4.200, -0.009	4.200, -0.005	4.200, -0.008	4.200, -0.005	4.200, -0.002	4.200, -0.003	4.200, 0.030	4.200, 0.023	4.200, 0.017	4.200, 0.018	4.200, 0.019	4.200, 0.012
23	4.400, -0.009	4.400, -0.004	4.400, -0.008	4.400, -0.005	4.400, -0.002	4.400, -0.003	4.400, 0.029	4.400, 0.023	4.400, 0.017	4.400, 0.018	4.400, 0.019	4.400, 0.012
24	4.600, -0.009	4.600, -0.004	4.600, -0.008	4.600, -0.005	4.600, -0.002	4.600, -0.003	4.600, 0.029	4.600, 0.022	4.600, 0.016	4.600, 0.018	4.600, 0.018	4.600, 0.011
25	4.800, -0.009	4.800, -0.004	4.800, -0.008	4.800, -0.005	4.800, -0.002	4.800, -0.004	4.800, 0.028	4.800, 0.022	4.800, 0.016	4.800, 0.018	4.800, 0.017	4.800, 0.011
26	5.000, -0.009	5.000, -0.004	5.000, -0.008	5.000, -0.005	5.000, -0.002	5.000, -0.004	5.000, 0.027	5.000, 0.022	5.000, 0.015	5.000, 0.017	5.000, 0.017	5.000, 0.010
27	5.200, -0.009	5.200, -0.003	5.200, -0.008	5.200, -0.006	5.200, -0.002	5.200, -0.005	5.200, 0.027	5.200, 0.021	5.200, 0.014	5.200, 0.017	5.200, 0.017	5.200, 0.010
28	5.400, -0.009	5.400, -0.003	5.400, -0.008	5.400, -0.006	5.400, -0.002	5.400, -0.005	5.400, 0.026	5.400, 0.021	5.400, 0.014	5.400, 0.017	5.400, 0.016	5.400, 0.010
29	5.600, -0.008	5.600, -0.003	5.600, -0.008	5.600, -0.006	5.600, -0.001	5.600, -0.005	5.600, 0.025	5.600, 0.021	5.600, 0.014	5.600, 0.017	5.600, 0.016	5.600, 0.009
30	5.800, -0.008	5.800, -0.003	5.800, -0.007	5.800, -0.006	5.800, -0.001	5.800, -0.005	5.800, 0.025	5.800, 0.021	5.800, 0.013	5.800, 0.017	5.800, 0.016	5.800, 0.009
31	6.000, -0.008	6.000, -0.002	6.000, -0.007	6.000, -0.006	6.000, -0.001	6.000, -0.005	6.000, 0.024	6.000, 0.020	6.000, 0.013	6.000, 0.017	6.000, 0.015	6.000, 0.009
32	6.200, -0.008	6.200, -0.002	6.200, -0.007	6.200, -0.005	6.200, -0.001	6.200, -0.005	6.200, 0.024	6.200, 0.020	6.200, 0.013	6.200, 0.017	6.200, 0.015	6.200, 0.008
33	6.400, -0.008	6.400, -0.002	6.400, -0.007	6.400, -0.005	6.400, -0.000	6.400, -0.005	6.400, 0.023	6.400, 0.020	6.400, 0.013	6.400, 0.017	6.400, 0.014	6.400, 0.008
34	6.600, -0.008	6.600, -0.002	6.600, -0.006	6.600, -0.005	6.600, -0.000	6.600, -0.005	6.600, 0.023	6.600, 0.020	6.600, 0.013	6.600, 0.017	6.600, 0.013	6.600, 0.008
35	6.800, -0.008	6.800, -0.002	6.800, -0.006	6.800, -0.005	6.800, -0.000	6.800, -0.004	6.800, 0.022	6.800, 0.019	6.800, 0.013	6.800, 0.017	6.800, 0.013	6.800, 0.007
36	7.000, -0.008	7.000, -0.002	7.000, -0.006	7.000, -0.005	7.000, -0.000	7.000, -0.004	7.000, 0.022	7.000, 0.019	7.000, 0.013	7.000, 0.016	7.000, 0.012	7.000, 0.007
37	7.200, -0.008	7.200, -0.002	7.200, -0.006	7.200, -0.005	7.200, -0.000	7.200, -0.004	7.200, 0.022	7.200, 0.018	7.200, 0.013	7.200, 0.016	7.200, 0.012	7.200, 0.007
38	7.400, -0.008	7.400, -0.002	7.400, -0.006	7.400, -0.004	7.400, -0.000	7.400, -0.004	7.400, 0.021	7.400, 0.018	7.400, 0.013	7.400, 0.015	7.400, 0.011	7.400, 0.006
39	7.600, -0.008	7.600, -0.002	7.600, -0.006	7.600, -0.004	7.600, -0.000	7.600, -0.004	7.600, 0.021	7.600, 0.017	7.600, 0.013	7.600, 0.014	7.600, 0.011	7.600, 0.006
40	7.800, -0.008	7.800, -0.002	7.800, -0.005	7.800, -0.004	7.800, -0.000	7.800, -0.003	7.800, 0.021	7.800, 0.017	7.800, 0.012	7.800, 0.014	7.800, 0.010	7.800, 0.006
41	8.000, -0.008	8.000, -0.002	8.000, -0.005	8.000, -0.003	8.000, -0.001	8.000, -0.003	8.000, 0.021	8.000, 0.016	8.000, 0.012	8.000, 0.013	8.000, 0.010	8.000, 0.005
42	8.200, -0.008	8.200, -0.002	8.200, -0.005	8.200, -0.003	8.200, -0.001	8.200, -0.003	8.200, 0.021	8.200, 0.016	8.200, 0.011	8.200, 0.012	8.200, 0.010	8.200, 0.005
43	8.400, -0.008	8.400, -0.002	8.400, -0.005	8.400, -0.003	8.400, -0.001	8.400, -0.003	8.400, 0.021	8.400, 0.015	8.400, 0.011	8.400, 0.011	8.400, 0.009	8.400, 0.005
44	8.600, -0.008	8.600, -0.002	8.600, -0.004	8.600, -0.003	8.600, -0.001	8.600, -0.003	8.600, 0.020	8.600, 0.015	8.600, 0.010	8.600, 0.011	8.600, 0.009	8.600, 0.004
45	8.800, -0.008	8.800, -0.003	8.800, -0.004	8.800, -0.003	8.800, -0.001	8.800, -0.003	8.800, 0.020	8.800, 0.014	8.800, 0.010	8.800, 0.010	8.800, 0.009	8.800, 0.004
46	9.000, -0.008	9.000, -0.003	9.000, -0.004	9.000, -0.003	9.000, -0.001	9.000, -0.003	9.000, 0.019	9.000, 0.014	9.000, 0.009	9.000, 0.010	9.000, 0.009	9.000, 0.004
47	9.200, -0.008	9.200, -0.002	9.200, -0.004	9.200, -0.004	9.200, -0.001	9.200, -0.003	9.200, 0.018	9.200, 0.014	9.200, 0.009	9.200, 0.009	9.200, 0.009	9.200, 0.003
48	9.400, -0.008	9.400, -0.002	9.400, -0.004	9.400, -0.004	9.400, -0.001	9.400, -0.003	9.400, 0.018	9.400, 0.013	9.400, 0.009	9.400, 0.009	9.400, 0.009	9.400, 0.003
49	9.600, -0.008	9.600, -0.002	9.600, -0.004	9.600, -0.004	9.600, -0.001	9.600, -0.003	9.600, 0.018	9.600, 0.013	9.600, 0.008	9.600, 0.009	9.600, 0.009	9.600, 0.003
50	9.800, -0.008	9.800, -0.002	9.800, -0.004	9.800, -0.004	9.800, -0.000	9.800, -0.003	9.800, 0.017	9.800, 0.013	9.800, 0.008	9.800, 0.008	9.800, 0.009	9.800, 0.003
51	10.000, -0.008	10.000, -0.001	10.000, -0.004	10.000, -0.004	10.000, -0.000	10.000, -0.003	10.000, 0.017	10.000, 0.013	10.000, 0.008	10.000, 0.008	10.000, 0.009	10.000, 0.003
52	10.200, -0.008	10.200, -0.001	10.200, -0.005	10.200, -0.004	10.200, -0.000	10.200, -0.003	10.200, 0.016	10.200, 0.013	10.200, 0.008	10.200, 0.008	10.200, 0.009	10.200, 0.003
53	10.400, -0.008	10.400, -0.001	10.400, -0.005	10.400, -0.004	10.400, 0.000	10.400, -0.003	10.400, 0.016	10.400, 0.013	10.400, 0.008	10.400, 0.008	10.400, 0.009	10.400, 0.003
54	10.600, -0.007	10.600, -0.001	10.600, -0.005	10.600, -0.004	10.600, 0.000	10.600, -0.003	10.600, 0.016	10.600, 0.012	10.600, 0.008	10.600, 0.008	10.600, 0.009	10.600, 0.004
55	10.800, -0.008	10.800, -0.001	10.800, -0.005	10.800, -0.004	10.800, 0.000	10.800, -0.003	10.800, 0.015	10.800, 0.012	10.800, 0.008	10.800, 0.008	10.800, 0.009	10.800, 0.004
56	11.000, -0.007	11.000, -0.001	11.000, -0.005	11.000, -0.004	11.000, 0.001	11.000, -0.003	11.000, 0.015	11.000, 0.012	11.000, 0.008	11.000, 0.008	11.000, 0.009	11.000, 0.004
57	11.200, -0.007	11.200, -0.001	11.200, -0.005	11.200, -0.004	11.200, 0.001	11.200, -0.003	11.200, 0.015	11.200, 0.011	11.200, 0.008	11.200, 0.008	11.200, 0.008	11.200, 0.004
58	11.400, -0.007	11.400, -0.001	11.400, -0.004	11.400, -0.004	11.400, 0.001	11.400, -0.003	11.400, 0.014	11.400, 0.011	11.400, 0.008	11.400, 0.007	11.400, 0.008	11.400, 0.004
59	11.600, -0.007	11.600, -0.000	11.600, -0.004	11.600, -0.003	11.600, 0.001	11.600, -0.003	11.600, 0.014	11.600, 0.011	11.600, 0.008	11.600, 0.007	11.600, 0.008	11.600, 0.004
60	11.800, -0.007	11.800, -0.000	11.800, -0.004	11.800, -0.003	11.800, 0.001	11.800, -0.003	11.800, 0.014	11.800, 0.011	11.800, 0.007	11.800, 0.007	11.800, 0.008	11.800, 0.004
61	12.000, -0.007	12.000, -0.000	12.000, -0.004	12.000, -0.003	12.000, 0.002	12.000, -0.003	12.000, 0.014	12.000, 0.010	12.000, 0.007	12.000, 0.007	12.000, 0.008	12.000, 0.003
62	12.200, -0.007	12.200, -0.000	12.200, -0.003	12.200, -0.002	12.200, 0.002	12.200, -0.004	12.200, 0.014	12.200, 0.010	12.200, 0.007	12.200, 0.007	12.200, 0.007	12.200, 0.003
63	12.400, -0.006	12.400, -0.000	12.400, -0.003	12.400, -0.002	12.400, 0.002	12.400, -0.003	12.400, 0.014	12.400, 0.010	12.400, 0.007	12.400, 0.007	12.400, 0.007	12.400, 0.003
64	12.600, -0.006	12.600, -0.000	12.600, -0.002	12.600, -0.002	12.600, 0.002	12.600, -0.003	12.600, 0.013	12.600, 0.009	12.600, 0.007	12.600, 0.006	12.600, 0.007	12.600, 0.002
65	12.800, -0.006	12.800, -0.000	12.800, -0.002	12.800, -0.002	12.800, 0.002	12.800, -0.003	12.800, 0.013	12.800, 0.009	12.800, 0.007	12.800, 0.006	12.800, 0.007	12.800, 0.002
66	13.000, -0.006	13.000, -0.000	13.000, -0.002	13.000, -0.002	13.000, 0.002	13.000, -0.003	13.000, 0.013	13.000, 0.009	13.000, 0.007	13.000, 0.006	13.000, 0.006	13.000, 0.002
67	13.200, -0.006	13.200, -0.000	13.200, -0.002	13.200, -0.002	13.200, 0.002	13.200, -0.003	13.200, 0.012	13.200, 0.009	13.200, 0.006	13.200, 0.006	13.200, 0.006	13.200, 0.002
68	13.400, -0.006	13.400, -0.000	13.400, -0.002	13.400, -0.002	13.400, 0.002	13.400, -0.003	13.400, 0.012	13.400, 0.009	13.400, 0.006	13.400, 0.006	13.400, 0.006	13.400, 0.002
69	13.600, -0.006	13.600, -0.000	13.600, -0.002	13.600, -0.002	13.600, 0.002	13.600, -0.003	13.600, 0.012	13.600, 0.009	13.600, 0.006	13.600, 0.006	13.600, 0.006	13.600, 0.002
70	13.800, -0.006	13.800, -0.000	13.800, -0.001	13.800, -0.002	13.800, 0.002	13.800, -0.002	13.800, 0.011	13.800, 0.009	13.800, 0.006	13.800, 0.006	13.800, 0.006	13.800, 0.002
71	14.000, -0.005	14.000, -0.000	14.000, -0.002	14.000, -0.003	14.000, 0.002	14.000, -0.002	14.000, 0.011	14.000, 0.009	14.000, 0.006	14.000, 0.006	14.000, 0.005	14.000, 0.003
72	14.200, -0.005	14.200, -0.000	14.200, -0.001	14.200, -0.003	14.200, 0.002	14.200, -0.002	14.200, 0.011	14.200, 0.009	14.200, 0.006	14.200, 0.006	14.200, 0.005	14.200, 0.003
73	14.400, -0.005	14.400, -0.001	14.400, -0.001	14.400, -0.003	14.400, 0.002	14.400, -0.002	14.400, 0.011	14.400, 0.008	14.400, 0.006	14.400, 0.006	14.400, 0.005	14.400, 0.002
74	14.600, -0.005	14.600, -0.001	14.600, -0.001	14.600, -0.003	14.600, 0.001	14.600, -0.001	14.600, 0.010	14.600, 0.008	14.600, 0.006	14.600, 0.005	14.600, 0.005	14.600, 0.002
75	14.800, -0.005	14.800, -0.001	14.800, -0.001	14.800, -0.003	14.800, 0.001	14.800, -0.001	14.800, 0.010	14.800, 0.008	14.800, 0.006	14.800, 0.005	14.800, 0.005	14.800, 0.002
76	15.000, -0.005	15.000, -0.001	15.000, -0.001	15.000, -0.003	15.000, 0.001	15.000, -0.001	15.000, 0.010	15.000, 0.008	15.000, 0.006	15.000, 0.005	15.000, 0.005	15.000, 0.002
77	15.200, -0.004	15.200, -0.001	15.200, -0.001	15.200, -0.003	15.200, 0.001	15.200, -0.001	15.200, 0.010	15.200, 0.008	15.200, 0.006	15.200, 0.005	15.200, 0.005	15.200, 0.002
78	15.400, -0.004	15.400, -0.001	15.400, -0.001	15.400, -0.003	15.400, 0.001	15.400, -0.001	15.400, 0.010	15.400, 0.008	15.400, 0.006	15.400, 0.005	15.400, 0.004	15.400, 0.002
79	15.600, -0.004	15.600, -0.001	15.600, -0.001	15.600, -0.003	15.600, 0.001	15.600, -0.001	15.600, 0.010	15.600, 0.008	15.600, 0.006	15.600, 0.005	15.600, 0.004	15.600, 0.001
80	15.800, -0.004	15.800, -0.001	15.800, -0.001	15.800, -0.003	15.800, 0.001	15.800, -0.001	15.800, 0.010	15.800, 0.008	15.800, 0.006	15.800, 0.004	15.800, 0.004	15.800, 0.001
81	16.000, -0.004	16.000, -0.001	16.000, -0.001	16.000, -0.003	16.000, 0.001	16.000, -0.001	16.000, 0.009	16.000, 0.008	16.000, 0.006	16.000, 0.004	16.000, 0.004	16.000, 0.001
82	16.200, -0.004	16.200, -0.001	16.200, -0.000	16.200, -0.003	16.200, 0.001	16.200, -0.001	16.200, 0.009	16.200, 0.008	16.200, 0.005	16.200, 0.004	16.200, 0.004	16.200, 0.001
83	16.400, -0.004	16.400, -0.001	16.400, -0.000	16.400, -0.002	16.400, 0.000	16.400, -0.002	16.400, 0.009	16.400, 0.008	16.400, 0.005	16.400, 0.003	16.400, 0.004	16.400, 0.000
84	16.600, -0.004	16.600, -0.001	16.600, -0.000	16.600, -0.002	16.600, 0.000	16.600, -0.002	16.600, 0.009	16.600, 0.008	16.600, 0.005	16.600, 0.003	16.600, 0.004	16.600, 0.000
85	16.800, -0.004	16.800, -0.001	16.800, -0.000	16.800, -0.002	16.800, -0.000	16.800, -0.002	16.800, 0.009	16.800, 0.009	16.800, 0.004	16.800, 0.003	16.800, 0.003	16.800, 0.000
86	17.000, -0.004	17.000, -0.000	17.000, -0.001	17.000, -0.002	17.000, -0.000	17.000, -0.002	17.000, 0.009	17.000, 0.009	17.000, 0.003	17.000, 0.003	17.000, 0.003	17.000, 0.000
87	17.200, -0.004	17.200, -0.000	17.200, -0.001	17.200, -0.002	17.200, -0.000	17.200, -0.002	17.200, 0.009	17.200, 0.008	17.200, 0.003	17.200, 0.003	17.200, 0.003	17.200, 0.000
88	17.400, -0.003	17.400, 0.000	17.400, -0.001	17.400, -0.002	17.400, -0.000	17.400, -0.002	17.400, 0.009	17.400, 0.008	17.400, 0.002	17.400, 0.003	17.400, 0.003	17.400, 0.001
89	17.600, -0.003	17.600, 0.000	17.600, -0.001	17.600, -0.002	17.600, -0.000	17.600, -0.002	17.600, 0.009	17.600, 0.008	17.600, 0.002	17.600, 0.003	17.600, 0.003	17.600, 0.001
90	17.800, -0.003	17.800, 0.001	17.800, -0.001	17.800, -0.002	17.800, -0.000	17.800, -0.003	17.800, 0.009	17.800, 0.008	17.800, 0.001	17.800, 0.003	17.800, 0.003	17.800, 0.001
91	18.000, -0.003	18.000, 0.001	18.000, -0.001	18.000, -0.001	18.000, -0.000	18.000, -0.003	18.000, 0.009	18.000, 0.007	18.000, 0.001	18.000, 0.003	18.000, 0.003	18.000, 0.001
92	18.200, -0.003	18.200, 0.001	18.200, -0.001	18.200, -0.001	18.200, -0.000	18.200, -0.003	18.200, 0.009	18.200, 0.007	18.200, 0.001	18.200, 0.003	18.200, 0.003	18.200, 0.000
93	18.400, -0.003	18.400, 0.000	18.400, -0.001	18.400, -0.001	18.400, -0.000	18.400, -0.003	18.400, 0.009	18.400, 0.006	18.400, 0.000	18.400, 0.004	18.400, 0.003	18.400, 0.000
94	18.600, -0.003	18.600, 0.000	18.600, -0.001	18.600, -0.001	18.600, -0.000	18.600, -0.003	18.600, 0.008	18.600, 0.006	18.600, 0.000	18.600, 0.004	18.600, 0.003	18.600, 0.000
95	18.800, -0.002	18.800, 0.000	18.800, -0.001	18.800, -0.001	18.800, -0.000	18.800, -0.003	18.800, 0.008	18.800, 0.006	18.800, 0.000	18.800, 0.004	18.800, 0.002	18.800, 0.000
96	19.000, -0.002	19.000, 0.000	19.000, -0.001	19.000, -0.001	19.000, -0.000	19.000, -0.002	19.000, 0.008	19.000, 0.006	19.000, 0.000	19.000, 0.004	19.000, 0.002	19.000, 0.000
97	19.200, -0.002	19.200, 0.000	19.200, -0.001	19.200, -0.001	19.200, -0.000	19.200, -0.002	19.200, 0.008	19.200, 0.005	19.200, 0.001	19.200, 0.004	19.200, 0.002	19.200, 0.000
98	19.400, -0.002	19.400, 0.000	19.400, -0.001	19.400, -0.001	19.400, 0.000	19.400, -0.002	19.400, 0.008	19.400, 0.005	19.400, 0.001	19.400, 0.004	19.400, 0.002	19.400, -0.000
99	19.600, -0.002	19.600, -0.000	19.600, -0.001	19.600, -0.001	19.600, 0.000	19.600, -0.002	19.600, 0.007	19.600, 0.005	19.600, 0.001	19.600, 0.003	19.600, 0.003	19.600, -0.000
100	19.800, -0.002	19.800, -0.000	19.800, -0.001	19.800, -0.002	19.800, 0.000	19.800, -0.002	19.800, 0.007	19.800, 0.004	19.800, 0.002	19.800, 0.003	19.800, 0.003	19.800, -0.000
101	20.000, -0.002	20.000, -0.000	20.000, -0.001	20.000, -0.002	20.000, 0.000	20.000, -0.002	20.000, 0.007	20.000, 0.004	20.000, 0.002	20.000, 0.003	20.000, 0.003	20.000, -0.000
102	20.200, -0.002	20.200, -0.000	20.200, -0.001	20.200, -0.002	20.200, 0.001	20.200, -0.002	20.200, 0.007	20.200, 0.004	20.200, 0.002	20.200, 0.003	20.200, 0.003	20.200, -0.000
103	20.400, -0.002	20.400, -0.000	20.400, -0.001	20.400, -0.002	20.400, 0.001	20.400, -0.001	20.400, 0.007	20.400, 0.004	20.400, 0.002	20.400, 0.003	20.400, 0.003	20.400, -0.001
104	20.600, -0.002	20.600, -0.000	20.600, -0.001	20.600, -0.002	20.600, 0.001	20.600, -0.001	20.600, 0.007	20.600, 0.003	20.600, 0.002	20.600, 0.002	20.600, 0.003	20.600, -0.001
105	20.800, -0.002	20.800, -0.000	20.800, -0.001	20.800, -0.002	20.800, 0.001	20.800, -0.001	20.800, 0.007	20.800, 0.003	20.800, 0.002	20.800, 0.002	20.800, 0.003	20.800, -0.001
106	21.000, -0.002	21.000, -0.000	21.000, -0.001	21.000, -0.002	21.000, 0.001	21.000, -0.001	21.000, 0.007	21.000, 0.003	21.000, 0.002	21.000, 0.002	21.000, 0.003	21.000, -0.002
107	21.200, -0.002	21.200, -0.000	21.200, -0.001	21.200, -0.003	21.200, 0.001	21.200, -0.001	21.200, 0.007	21.200, 0.002	21.200, 0.002	21.200, 0.002	21.200, 0.003	21.200, -0.002
108	21.400, -0.001	21.400, -0.001	21.400, -0.001	21.400, -0.003	21.400, 0.001	21.400, -0.001	21.400, 0.006	21.400, 0.002	21.400, 0.002	21.400, 0.001	21.400, 0.003	21.400, -0.002
109	21.600, -0.001	21.600, -0.001	21.600, -0.001	21.600, -0.003	21.600, 0.000	21.600, -0.001	21.600, 0.006	21.600, 0.002	21.600, 0.002	21.600, 0.001	21.600, 0.003	21.600, -0.002
110	21.800, -0.001	21.800, -0.001	21.800, -0.001	21.800, -0.003	21.800, 0.000	21.800, -0.001	21.800, 0.006	21.800, 0.002	21.800, 0.002	21.800, 0.001	21.800, 0.003	21.800, -0.002
111	22.000, -0.001	22.000, -0.001	22.000, -0.001	22.000, -0.003	22.000, -0.000	22.000, -0.001	22.000, 0.006	22.000, 0.002	22.000, 0.002	22.000, 0.001	22.000, 0.002	22.000, -0.002
112	22.200, -0.001	22.200, -0.001	22.200, -0.001	22.200, -0.003	22.200, -0.000	22.200, -0.001	22.200, 0.005	22.200, 0.003	22.200, 0.002	22.200, 0.002	22.200, 0.002	22.200, -0.001
113	22.400, -0.001	22.400, -0.001	22.400, -0.001	22.400, -0.002	22.400, -0.001	22.400, -0.001	22.400, 0.005	22.400, 0.003	22.400, 0.001	22.400, 0.002	22.400, 0.002	22.400, -0.001
114	22.600, -0.001	22.600, -0.001	22.600, -0.001	22.600, -0.002	22.600, -0.001	22.600, -0.001	22.600, 0.005	22.600, 0.003	22.600, 0.001	22.600, 0.002	22.600, 0.002	22.600, -0.001
115	22.800, -0.001	22.800, -0.001	22.800, -0.001	22.800, -0.002	22.800, -0.001	22.800, -0.001	22.800, 0.004	22.800, 0.003	22.800, 0.001	22.800, 0.002	22.800, 0.002	22.800, -0.001
116	23.000, -0.001	23.000, -0.001	23.000, -0.001	23.000, -0.002	23.000, -0.001	23.000, -0.000	23.000, 0.004	23.000, 0.003	23.000, 0.001	23.000, 0.002	23.000, 0.002	23.000, -0.000
117	23.200, -0.001	23.200, -0.001	23.200, -0.001	23.200, -0.002	23.200, -0.001	23.200, -0.000	23.200, 0.003	23.200, 0.003	23.200, 0.001	23.200, 0.001	23.200, 0.002	23.200, 0.000
118	23.400, -0.001	23.400, -0.001	23.400, -0.001	23.400, -0.002	23.400, -0.001	23.400, -0.000	23.400, 0.003	23.400, 0.002	23.400, 0.001	23.400, 0.001	23.400, 0.002	23.400, 0.001
119	23.600, -0.001	23.600, -0.001	23.600, -0.001	23.600, -0.002	23.600, -0.001	23.600, -0.001	23.600, 0.003	23.600, 0.002	23.600, 0.000	23.600, 0.001	23.600, 0.002	23.600, 0.001
120	23.800, -0.000	23.800, -0.001	23.800, -0.001	23.800, -0.002	23.800, -0.001	23.800, -0.001	23.800, 0.003	23.800, 0.002	23.800, 0.000	23.800, 0.001	23.800, 0.002	23.800, 0.002
121	24.000, 0.000	24.000, -0.000	24.000, -0.001	24.000, -0.002	24.000, -0.001	24.000, -0.001	24.000, 0.003	24.000, 0.002	24.000, 0.000	24.000, 0.001	24.000, 0.002	24.000, 0.002
122	24.200, 0.000	24.200, -0.000	24.200, -0.001	24.200, -0.001	24.200, -0.000	24.200, -0.001	24.200, 0.003	24.200, 0.001	24.200, 0.000	24.200, 0.001	24.200, 0.002	24.200, 0.002
123	24.400, 0.001	24.400, -0.000	24.400, -0.000	24.400, -0.001	24.400, -0.000	24.400, -0.001	24.400, 0.003	24.400, 0.001	24.400, -0.000	24.400, 0.001	24.400, 0.002	24.400, 0.002
124	24.600, 0.001	24.600, -0.000	24.600, -0.000	24.600, -0.001	24.600, -0.000	24.600, -0.001	24.600, 0.003	24.600, 0.001	24.600, -0.000	24.600, 0.001	24.600, 0.002	24.600, 0.002
125	24.800, 0.001	24.800, -0.000	24.800, -0.000	24.800, -0.001	24.800, -0.000	24.800, -0.001	24.800, 0.003	24.800, 0.001	24.800, 0.000	24.800, 0.001	24.800, 0.002	24.800, 0.002
126	25.000, 0.002	25.000, -0.000	25.000, 0.000	25.000, -0.001	25.000, -0.000	25.000, -0.002	25.000, 0.003	25.000, 0.001	25.000, 0.000	25.000, 0.000	25.000, 0.002	25.000, 0.002
127	25.200, 0.002	25.200, -0.000	25.200, 0.000	25.200, -0.001	25.200, -0.000	25.200, -0.002	25.200, 0.003	25.200, 0.001	25.200, 0.000	25.200, 0.000	25.200, 0.002	25.200, 0.002
128	25.400, 0.002	25.400, -0.000	25.400, 0.000	25.400, -0.001	25.400, -0.000	25.400, -0.002	25.400, 0.003	25.400, 0.001	25.400, 0.001	25.400, 0.000	25.400, 0.001	25.400, 0.002
129	25.600, 0.002	25.600, -0.000	25.600, 0.000	25.600, -0.002	25.600, -0.000	25.600, -0.002	25.600, 0.003	25.600, 0.001	25.600, 0.001	25.600, 0.000	25.600, 0.001	25.600, 0.002
130	25.800, 0.002	25.800, -0.000	25.800, 0.000	25.800, -0.002	25.800, -0.001	25.800, -0.002	25.800, 0.003	25.800, 0.001	25.800, 0.001	25.800, 0.000	25.800, 0.001	25.800, 0.002
131	26.000, 0.001	26.000, -0.000	26.000, 0.000	26.000, -0.002	26.000, -0.001	26.000, -0.001	26.000, 0.002	26.000, 0.001	26.000, 0.001	26.000, 0.000	26.000, 0.001	26.000, 0.001
132	26.200, 0.001	26.200, -0.000	26.200, 0.000	26.200, -0.002	26.200, -0.001	26.200, -0.001	26.200, 0.002	26.200, 0.001	26.200, 0.001	26.200, 0.000	26.200, 0.001	26.200, 0.001
133	26.400, 0.000	26.400, -0.000	26.400, -0.000	26.400, -0.001	26.400, -0.001	26.400, -0.001	26.400, 0.002	26.400, 0.001	26.400, 0.001	26.400, 0.000	26.400, 0.001	26.400, 0.001
134	26.600, -0.000	26.600, -0.000	26.600, -0.000	26.600, -0.001	26.600, -0.001	26.600, -0.000	26.600, 0.002	26.600, 0.001	26.600, 0.001	26.600, 0.000	26.600, 0.001	26.600, 0.000
135	26.800, -0.000	26.800, -0.000	26.800, -0.000	26.800, -0.001	26.800, -0.001	26.800, 0.000	26.800, 0.002	26.800, 0.001	26.800, 0.001	26.800, 0.000	26.800, 0.000	26.800, 0.000
136	27.000, -0.001	27.000, -0.000	27.000, -0.001	27.000, -0.001	27.000, -0.001	27.000, 0.000	27.000, 0.002	27.000, 0.001	27.000, 0.001	27.000, 0.000	27.000, 0.000	27.000, 0.000
137	27.200, -0.001	27.200, -0.000	27.200, -0.001	27.200, -0.000	27.200, -0.001	27.200, 0.000	27.200, 0.002	27.200, 0.001	27.200, 0.001	27.200, 0.000	27.200, 0.000	27.200, 0.000
138	27.400, -0.001	27.400, -0.000	27.400, -0.001	27.400, -0.000	27.400, -0.001	27.400, 0.000	27.400, 0.001	27.400, 0.001	27.400, 0.000	27.400, 0.000	27.400, 0.000	27.400, 0.000
139	27.600, -0.001	27.600, -0.000	27.600, -0.001	27.600, 0.000	27.600, -0.001	27.600, 0.000	27.600, 0.001	27.600, 0.001	27.600, 0.000	27.600, -0.000	27.600, 0.000	27.600, 0.000
140	27.800, -0.001	27.800, -0.000	27.800, -0.001	27.800, 0.000	27.800, -0.000	27.800, 0.000	27.800, 0.001	27.800, 0.001	27.800, 0.000	27.800, -0.000	27.800, 0.000	27.800, 0.000
141	28.000, -0.000	28.000, -0.000	28.000, -0.001	28.000, 0.000	28.000, -0.000	28.000, 0.000	28.000, 0.000	28.000, 0.000	28.000, -0.000	28.000, -0.000	28.000, 0.000	28.000, 0.000
142	28.200, -0.000	28.200, -0.000	28.200, -0.000	28.200, 0.001	28.200, -0.000	28.200, 0.000	28.200, 0.000	28.200, 0.000	28.200, -0.000	28.200, -0.000	28.200, 0.000	28.200, 0.000
143	28.400, -0.000	28.400, -0.000	28.400, -0.000	28.400, 0.001	28.400, 0.000	28.400, -0.000	28.400, -0.000	28.400, 0.000	28.400, -0.000	28.400, -0.000	28.400, 0.000	28.400, 0.000
144	28.600, 0.000	28.600, -0.000	28.600, 0.000	28.600, 0.000	28.600, 0.000	28.600, -0.000	28.600, -0.000	28.600, -0.000	28.600, -0.000	28.600, -0.000	28.600, 0.000	28.600, 0.000
145	28.800, 0.000	28.800, 0.000	28.800, 0.000	28.800, 0.000	28.800, 0.000	28.800, -0.000	28.800, -0.001	28.800, -0.000	28.800, -0.000	28.800, -0.000	28.800, 0.000	28.800, 0.000
146	29.000, 0.001	29.000, 0.000	29.000, 0.001	29.000, 0.000	29.000, 0.000	29.000, -0.000	29.000, -0.001	29.000, -0.001	29.000, -0.000	29.000, -0.000	29.000, -0.000	29.000, 0.000
147	29.200, 0.001	29.200, 0.000	29.200, 0.001	29.200, -0.000	29.200, 0.000	29.200, -0.000	29.200, -0.001	29.200, -0.001	29.200, -0.000	29.200, 0.000	29.200, -0.000	29.200, -0.000
148	29.400, 0.001	29.400, 0.000	29.400, 0.001	29.400, -0.000	29.400, 0.001	29.400, -0.000	29.400, -0.001	29.400, -0.001	29.400, -0.000	29.400, 0.000	29.400, -0.000	29.400, -0.000
149	29.600, 0.001	29.600, 0.000	29.600, 0.001	29.600, -0.000	29.600, 0.001	29.600, -0.000	29.600, -0.001	29.600, -0.001	29.600, -0.000	29.600, 0.000	29.600, -0.000	29.600, -0.001
150	29.800, 0.001	29.800, 0.000	29.800, 0.001	29.800, -0.000	29.800, 0.001	29.800, -0.000	29.800, -0.001	29.800, -0.001	29.800, -0.000	29.800, 0.001	29.800, -0.000	29.800, -0.001
151	30.000, 0.000	30.000, 0.000	30.000, 0.000	30.000, 0.000	30.000, 0.000	30.000, 0.000	30.000, 0.000	30.000, 0.000	30.000, 0.000	30.000, 0.000	30.000, 0.000	30.000, 0.000
152	30.200, 0.001	30.200, 0.001	30.200, 0.008	30.200, 0.019	30.200, 0.040	30.200, -0.001	30.200, -0.000	30.200, -0.001	30.200, 0.000	30.200, -0.002	30.200, 0.000	30.200, -0.002
153	30.400, 0.003	30.400, 0.003	30.400, 0.017	30.400, 0.041	30.400, 0.087	30.400, -0.001	30.400, -0.001	30.400, -0.002	30.400, 0.000	30.400, -0.005	30.400, 0.001	30.400, -0.004
154	30.600, 0.004	30.600, 0.006	30.600, 0.028	30.600, 0.068	30.600, 0.140	30.600, -0.002	30.600, -0.001	30.600, -0.003	30.600, 0.000	30.600, -0.007	30.600, 0.001	30.600, -0.006
155	30.800, 0.007	30.800, 0.009	30.800, 0.041	30.800, 0.097	30.800, 0.198	30.800, -0.003	30.800, -0.001	30.800, -0.004	30.800, -0.000	30.800, -0.010	30.800, 0.000	30.800, -0.008
156	31.000, 0.009	31.000, 0.013	31.000, 0.055	31.000, 0.129	31.000, 0.261	31.000, -0.003	31.000, -0.002	31.000, -0.006	31.000, -0.001	31.000, -0.012	31.000, -0.000	31.000, -0.010
157	31.200, 0.012	31.200, 0.017	31.200, 0.071	31.200, 0.163	31.200, 0.325	31.200, -0.004	31.200, -0.002	31.200, -0.007	31.200, -0.001	31.200, -0.015	31.200, -0.001	31.200, -0.012
158	31.400, 0.016	31.400, 0.022	31.400, 0.087	31.400, 0.199	31.400, 0.390	31.400, -0.004	31.400, -0.003	31.400, -0.008	31.400, -0.002	31.400, -0.017	31.400, -0.002	31.400, -0.014
159	31.600, 0.019	31.600, 0.028	31.600, 0.104	31.600, 0.235	31.600, 0.452	31.600, -0.004	31.600, -0.003	31.600, -0.009	31.600, -0.002	31.600, -0.019	31.600, -0.003	31.600, -0.015
160	31.800, 0.023	31.800, 0.035	31.800, 0.121	31.800, 0.271	31.800, 0.511	31.800, -0.004	31.800, -0.003	31.800, -0.010	31.800, -0.003	31.800, -0.020	31.800, -0.005	31.800, -0.016
161	32.000, 0.027	32.000, 0.041	32.000, 0.138	32.000, 0.305	32.000, 0.563	32.000, -0.003	32.000, -0.003	32.000, -0.011	32.000, -0.004	32.000, -0.021	32.000, -0.006	32.000, -0.017
162	32.200, 0.030	32.200, 0.048	32.200, 0.153	32.200, 0.337	32.200, 0.606	32.200, -0.003	32.200, -0.004	32.200, -0.012	32.200, -0.005	32.200, -0.021	32.200, -0.008	32.200, -0.016
163	32.400, 0.034	32.400, 0.055	32.400, 0.169	32.400, 0.366	32.400, 0.642	32.400, -0.003	32.400, -0.004	32.400, -0.012	32.400, -0.005	32.400, -0.023	32.400, -0.009	32.400, -0.017
164	32.600, 0.038	32.600, 0.062	32.600, 0.184	32.600, 0.394	32.600, 0.674	32.600, -0.002	32.600, -0.004	32.600, -0.013	32.600, -0.005	32.600, -0.023	32.600, -0.010	32.600, -0.018
165	32.800, 0.042	32.800, 0.069	32.800, 0.199	32.800, 0.420	32.800, 0.700	32.800, -0.002	32.800, -0.004	32.800, -0.013	32.800, -0.006	32.800, -0.024	32.800, -0.011	32.800, -0.018
166	33.000, 0.046	33.000, 0.076	33.000, 0.214	33.000, 0.445	33.000, 0.722	33.000, -0.002	33.000, -0.004	33.000, -0.014	33.000, -0.006	33.000, -0.025	33.000, -0.012	33.000, -0.019
167	33.200, 0.049	33.200, 0.082	33.200, 0.229	33.200, 0.468	33.200, 0.739	33.200, -0.002	33.200, -0.004	33.200, -0.015	33.200, -0.006	33.200, -0.026	33.200, -0.013	33.200, -0.019
168	33.400, 0.053	33.400, 0.089	33.400, 0.243	33.400, 0.489	33.400, 0.753	33.400, -0.002	33.400, -0.004	33.400, -0.015	33.400, -0.006	33.400, -0.027	33.400, -0.014	33.400, -0.020
169	33.600, 0.056	33.600, 0.096	33.600, 0.257	33.600, 0.508	33.600, 0.764	33.600, -0.002	33.600, -0.004	33.600, -0.016	33.600, -0.006	33.600, -0.028	33.600, -0.015	33.600, -0.020
170	33.800, 0.059	33.800, 0.102	33.800, 0.271	33.800, 0.526	33.800, 0.773	33.800, -0.002	33.800, -0.004	33.800, -0.016	33.800, -0.006	33.800, -0.029	33.800, -0.015	33.800, -0.020
171	34.000, 0.062	34.000, 0.109	34.000, 0.284	34.000, 0.543	34.000, 0.780	34.000, -0.002	34.000, -0.005	34.000, -0.017	34.000, -0.006	34.000, -0.030	34.000, -0.016	34.000, -0.021
172	34.200, 0.066	34.200, 0.115	34.200, 0.297	34.200, 0.558	34.200, 0.786	34.200, -0.002	34.200, -0.005	34.200, -0.017	34.200, -0.006	34.200, -0.031	34.200, -0.017	34.200, -0.021
173	34.400, 0.069	34.400, 0.122	34.400, 0.310	34.400, 0.572	34.400, 0.790	34.400, -0.002	34.400, -0.005	34.400, -0.017	34.400, -0.007	34.400, -0.032	34.400, -0.017	34.400, -0.022
174	34.600, 0.072	34.600, 0.128	34.600, 0.322	34.600, 0.584	34.600, 0.794	34.600, -0.002	34.600, -0.006	34.600, -0.018	34.600, -0.007	34.600, -0.033	34.600, -0.018	34.600, -0.023
175	34.800, 0.075	34.800, 0.134	34.800, 0.334	34.800, 0.596	34.800, 0.797	34.800, -0.002	34.800, -0.006	34.800, -0.018	34.800, -0.007	34.800, -0.034	34.800, -0.019	34.800, -0.024
176	35.000, 0.078	35.000, 0.140	35.000, 0.345	35.000, 0.606	35.000, 0.799	35.000, -0.001	35.000, -0.006	35.000, -0.019	35.000, -0.008	35.000, -0.035	35.000, -0.019	35.000, -0.025
177	35.200, 0.081	35.200, 0.146	35.200, 0.357	35.200, 0.615	35.200, 0.801	35.200, -0.001	35.200, -0.007	35.200, -0.019	35.200, -0.008	35.200, -0.035	35.200, -0.020	35.200, -0.025
178	35.400, 0.083	35.400, 0.152	35.400, 0.368	35.400, 0.624	35.400, 0.802	35.400, -0.000	35.400, -0.007	35.400, -0.020	35.400, -0.009	35.400, -0.036	35.400, -0.020	35.400, -0.026
179	35.600, 0.086	35.600, 0.159	35.600, 0.378	35.600, 0.631	35.600, 0.804	35.600, 0.000	35.600, -0.007	35.600, -0.020	35.600, -0.009	35.600, -0.037	35.600, -0.021	35.600, -0.026
180	35.800, 0.090	35.800, 0.165	35.800, 0.388	35.800, 0.638	35.800, 0.804	35.800, 0.001	35.800, -0.008	35.800, -0.021	35.800, -0.010	35.800, -0.038	35.800, -0.021	35.800, -0.027
181	36.000, 0.093	36.000, 0.171	36.000, 0.397	36.000, 0.644	36.000, 0.805	36.000, 0.001	36.000, -0.008	36.000, -0.022	36.000, -0.011	36.000, -0.039	36.000, -0.021	36.000, -0.027
182	36.200, 0.096	36.200, 0.177	36.200, 0.406	36.200, 0.649	36.200, 0.806	36.200, 0.001	36.200, -0.008	36.200, -0.022	36.200, -0.011	36.200, -0.040	36.200, -0.021	36.200, -0.027
183	36.400, 0.099	36.400, 0.183	36.400, 0.415	36.400, 0.654	36.400, 0.807	36.400, 0.002	36.400, -0.008	36.400, -0.023	36.400, -0.012	36.400, -0.040	36.400, -0.021	36.400, -0.027
184	36.600, 0.102	36.600, 0.189	36.600, 0.423	36.600, 0.658	36.600, 0.807	36.600, 0.002	36.600, -0.008	36.600, -0.024	36.600, -0.013	36.600, -0.041	36.600, -0.021	36.600, -0.027
185	36.800, 0.105	36.800, 0.195	36.800, 0.430	36.800, 0.662	36.800, 0.808	36.800, 0.002	36.800, -0.009	36.800, -0.024	36.800, -0.013	36.800, -0.042	36.800, -0.022	36.800, -0.027
186	37.000, 0.107	37.000, 0.200	37.000, 0.438	37.000, 0.665	37.000, 0.808	37.000, 0.002	37.000, -0.009	37.000, -0.025	37.000, -0.013	37.000, -0.042	37.000, -0.022	37.000, -0.027
187	37.200, 0.110	37.200, 0.206	37.200, 0.445	37.200, 0.668	37.200, 0.809	37.200, 0.001	37.200, -0.009	37.200, -0.025	37.200, -0.013	37.200, -0.042	37.200, -0.023	37.200, -0.027
188	37.400, 0.112	37.400, 0.212	37.400, 0.451	37.400, 0.671	37.400, 0.809	37.400, 0.001	37.400, -0.009	37.400, -0.025	37.400, -0.013	37.400, -0.043	37.400, -0.023	37.400, -0.027
189	37.600, 0.115	37.600, 0.217	37.600, 0.458	37.600, 0.673	37.600, 0.809	37.600, 0.001	37.600, -0.009	37.600, -0.025	37.600, -0.013	37.600, -0.043	37.600, -0.024	37.600, -0.027
190	37.800, 0.118	37.800, 0.223	37.800, 0.464	37.800, 0.675	37.800, 0.809	37.800, 0.001	37.800, -0.009	37.800, -0.025	37.800, -0.013	37.800, -0.043	37.800, -0.024	37.800, -0.027
191	38.000, 0.120	38.000, 0.229	38.000, 0.470	38.000, 0.677	38.000, 0.809	38.000, 0.001	38.000, -0.010	38.000, -0.025	38.000, -0.013	38.000, -0.043	38.000, -0.024	38.000, -0.027
192	38.200, 0.123	38.200, 0.234	38.200, 0.475	38.200, 0.678	38.200, 0.809	38.200, 0.001	38.200, -0.010	38.200, -0.025	38.200, -0.012	38.200, -0.042	38.200, -0.024	38.200, -0.027
193	38.400, 0.125	38.400, 0.239	38.400, 0.481	38.400, 0.680	38.400, 0.810	38.400, 0.001	38.400, -0.010	38.400, -0.025	38.400, -0.012	38.400, -0.042	38.400, -0.025	38.400, -0.027
194	38.600, 0.128	38.600, 0.244	38.600, 0.486	38.600, 0.681	38.600, 0.810	38.600, 0.001	38.600, -0.010	38.600, -0.025	38.600, -0.011	38.600, -0.042	38.600, -0.025	38.600, -0.028
195	38.800, 0.130	38.800, 0.249	38.800, 0.491	38.800, 0.683	38.800, 0.810	38.800, 0.001	38.800, -0.010	38.800, -0.025	38.800, -0.011	38.800, -0.042	38.800, -0.025	38.800, -0.028
196	39.000, 0.132	39.000, 0.254	39.000, 0.495	39.000, 0.684	39.000, 0.810	39.000, 0.001	39.000, -0.011	39.000, -0.025	39.000, -0.011	39.000, -0.042	39.000, -0.026	39.000, -0.028
197	39.200, 0.135	39.200, 0.258	39.200, 0.500	39.200, 0.686	39.200, 0.810	39.200, 0.001	39.200, -0.011	39.200, -0.025	39.200, -0.011	39.200, -0.042	39.200, -0.026	39.200, -0.028
198	39.400, 0.138	39.400, 0.263	39.400, 0.504	39.400, 0.687	39.400, 0.810	39.400, 0.001	39.400, -0.012	39.400, -0.025	39.400, -0.011	39.400, -0.043	39.400, -0.026	39.400, -0.029
199	39.600, 0.140	39.600, 0.268	39.600, 0.508	39.600, 0.688	39.600, 0.811	39.600, 0.001	39.600, -0.012	39.600, -0.025	39.600, -0.011	39.600, -0.043	39.600, -0.026	39.600, -0.029
200	39.800, 0.143	39.800, 0.273	39.800, 0.512	39.800, 0.689	39.800, 0.811	39.800, 0.001	39.800, -0.013	39.800, -0.026	39.800, -0.011	39.800, -0.044	39.800, -0.027	39.800, -0.029
201	40.000, 0.146	40.000, 0.277	40.000, 0.515	40.000, 0.690	40.000, 0.811	40.000, 0.001	40.000, -0.013	40.000, -0.026	40.000, -0.012	40.000, -0.045	40.000, -0.027	40.000, -0.029
202	40.200, 0.148	40.200, 0.282	40.200, 0.519	40.200, 0.691	40.200, 0.812	40.200, 0.002	40.200, -0.014	40.200, -0.026	40.200, -0.012	40.200, -0.046	40.200, -0.027	40.200, -0.029
203	40.400, 0.151	40.400, 0.286	40.400, 0.522	40.400, 0.692	40.400, 0.812	40.400, 0.002	40.400, -0.014	40.400, -0.026	40.400, -0.013	40.400, -0.047	40.400, -0.027	40.400, -0.029
204	40.600, 0.153	40.600, 0.290	40.600, 0.524	40.600, 0.692	40.600, 0.813	40.600, 0.002	40.600, -0.015	40.600, -0.026	40.600, -0.013	40.600, -0.047	40.600, -0.028	40.600, -0.029
205	40.800, 0.155	40.800, 0.294	40.800, 0.527	40.800, 0.693	40.800, 0.813	40.800, 0.001	40.800, -0.016	40.800, -0.026	40.800, -0.014	40.800, -0.047	40.800, -0.028	40.800, -0.030
206	41.000, 0.158	41.000, 0.298	41.000, 0.530	41.000, 0.694	41.000, 0.813	41.000, 0.001	41.000, -0.016	41.000, -0.026	41.000, -0.014	41.000, -0.048	41.000, -0.028	41.000, -0.030
207	41.200, 0.160	41.200, 0.302	41.200, 0.532	41.200, 0.694	41.200, 0.813	41.200, 0.001	41.200, -0.017	41.200, -0.026	41.200, -0.014	41.200, -0.048	41.200, -0.029	41.200, -0.030
208	41.400, 0.162	41.400, 0.306	41.400, 0.535	41.400, 0.695	41.400, 0.813	41.400, 0.001	41.400, -0.017	41.400, -0.026	41.400, -0.015	41.400, -0.048	41.400, -0.029	41.400, -0.030
209	41.600, 0.164	41.600, 0.310	41.600, 0.537	41.600, 0.695	41.600, 0.813	41.600, 0.000	41.600, -0.018	41.600, -0.026	41.600, -0.015	41.600, -0.048	41.600, -0.029	41.600, -0.030
210	41.800, 0.166	41.800, 0.314	41.800, 0.539	41.800, 0.695	41.800, 0.813	41.800, -0.000	41.800, -0.018	41.800, -0.025	41.800, -0.016	41.800, -0.048	41.800, -0.029	41.800, -0.030
211	42.000, 0.168	42.000, 0.318	42.000, 0.542	42.000, 0.695	42.000, 0.813	42.000, -0.000	42.000, -0.018	42.000, -0.025	42.000, -0.016	42.000, -0.048	42.000, -0.029	42.000, -0.029
212	42.200, 0.170	42.200, 0.321	42.200, 0.544	42.200, 0.695	42.200, 0.813	42.200, -0.001	42.200, -0.018	42.200, -0.025	42.200, -0.016	42.200, -0.048	42.200, -0.029	42.200, -0.030
213	42.400, 0.172	42.400, 0.325	42.400, 0.546	42.400, 0.695	42.400, 0.814	42.400, -0.001	42.400, -0.018	42.400, -0.025	42.400, -0.016	42.400, -0.048	42.400, -0.029	42.400, -0.030
214	42.600, 0.174	42.600, 0.328	42.600, 0.548	42.600, 0.695	42.600, 0.814	42.600, -0.002	42.600, -0.018	42.600, -0.026	42.600, -0.016	42.600, -0.049	42.600, -0.030	42.600, -0.030
215	42.800, 0.176	42.800, 0.331	42.800, 0.549	42.800, 0.696	42.800, 0.814	42.800, -0.002	42.800, -0.018	42.800, -0.026	42.800, -0.016	42.800, -0.049	42.800, -0.030	42.800, -0.029
216	43.000, 0.178	43.000, 0.334	43.000, 0.551	43.000, 0.696	43.000, 0.815	43.000, -0.002	43.000, -0.018	43.000, -0.026	43.000, -0.016	43.000, -0.049	43.000, -0.030	43.000, -0.029
217	43.200, 0.180	43.200, 0.338	43.200, 0.552	43.200, 0.697	43.200, 0.815	43.200, -0.002	43.200, -0.018	43.200, -0.026	43.200, -0.016	43.200, -0.050	43.200, -0.030	43.200, -0.029
218	43.400, 0.182	43.400, 0.341	43.400, 0.554	43.400, 0.697	43.400, 0.816	43.400, -0.002	43.400, -0.018	43.400, -0.027	43.400, -0.016	43.400, -0.051	43.400, -0.030	43.400, -0.029
219	43.600, 0.184	43.600, 0.344	43.600, 0.555	43.600, 0.698	43.600, 0.816	43.600, -0.002	43.600, -0.018	43.600, -0.027	43.600, -0.016	43.600, -0.051	43.600, -0.031	43.600, -0.029
220	43.800, 0.186	43.800, 0.348	43.800, 0.556	43.800, 0.698	43.800, 0.817	43.800, -0.001	43.800, -0.018	43.800, -0.028	43.800, -0.016	43.800, -0.052	43.800, -0.031	43.800, -0.029
221	44.000, 0.188	44.000, 0.351	44.000, 0.557	44.000, 0.698	44.000, 0.817	44.000, -0.001	44.000, -0.019	44.000, -0.028	44.000, -0.017	44.000, -0.053	44.000, -0.031	44.000, -0.029
222	44.200, 0.189	44.200, 0.354	44.200, 0.558	44.200, 0.699	44.200, 0.817	44.200, -0.001	44.200, -0.019	44.200, -0.029	44.200, -0.017	44.200, -0.053	44.200, -0.031	44.200, -0.029
223	44.400, 0.191	44.400, 0.356	44.400, 0.558	44.400, 0.699	44.400, 0.818	44.400, -0.001	44.400, -0.019	44.400, -0.029	44.400, -0.017	44.400, -0.053	44.400, -0.031	44.400, -0.029
224	44.600, 0.193	44.600, 0.359	44.600, 0.559	44.600, 0.700	44.600, 0.818	44.600, -0.001	44.600, -0.019	44.600, -0.029	44.600, -0.018	44.600, -0.054	44.600, -0.031	44.600, -0.028
225	44.800, 0.195	44.800, 0.362	44.800, 0.560	44.800, 0.701	44.800, 0.818	44.800, -0.001	44.800, -0.019	44.800, -0.029	44.800, -0.018	44.800, -0.054	44.800, -0.031	44.800, -0.028
226	45.000, 0.196	45.000, 0.365	45.000, 0.561	45.000, 0.702	45.000, 0.819	45.000, -0.001	45.000, -0.019	45.000, -0.030	45.000, -0.018	45.000, -0.054	45.000, -0.032	45.000, -0.028
227	45.200, 0.198	45.200, 0.368	45.200, 0.562	45.200, 0.702	45.200, 0.819	45.200, -0.001	45.200, -0.020	45.200, -0.030	45.200, -0.019	45.200, -0.055	45.200, -0.032	45.200, -0.028
228	45.400, 0.200	45.400, 0.370	45.400, 0.563	45.400, 0.702	45.400, 0.819	45.400, -0.001	45.400, -0.020	45.400, -0.030	45.400, -0.019	45.400, -0.055	45.400, -0.032	45.400, -0.027
229	45.600, 0.201	45.600, 0.372	45.600, 0.564	45.600, 0.703	45.600, 0.819	45.600, -0.001	45.600, -0.020	45.600, -0.030	45.600, -0.020	45.600, -0.055	45.600, -0.032	45.600, -0.027
230	45.800, 0.203	45.800, 0.374	45.800, 0.566	45.800, 0.703	45.800, 0.819	45.800, -0.002	45.800, -0.021	45.800, -0.030	45.800, -0.021	45.800, -0.055	45.800, -0.032	45.800, -0.027
231	46.000, 0.205	46.000, 0.377	46.000, 0.567	46.000, 0.703	46.000, 0.819	46.000, -0.002	46.000, -0.022	46.000, -0.030	46.000, -0.021	46.000, -0.056	46.000, -0.032	46.000, -0.027
232	46.200, 0.206	46.200, 0.379	46.200, 0.568	46.200, 0.703	46.200, 0.819	46.200, -0.003	46.200, -0.022	46.200, -0.030	46.200, -0.022	46.200, -0.056	46.200, -0.033	46.200, -0.028
233	46.400, 0.207	46.400, 0.381	46.400, 0.569	46.400, 0.704	46.400, 0.819	46.400, -0.003	46.400, -0.023	46.400, -0.030	46.400, -0.022	46.400, -0.056	46.400, -0.034	46.400, -0.028
234	46.600, 0.209	46.600, 0.383	46.600, 0.570	46.600, 0.704	46.600, 0.819	46.600, -0.003	46.600, -0.024	46.600, -0.029	46.600, -0.022	46.600, -0.056	46.600, -0.034	46.600, -0.028
235	46.800, 0.210	46.800, 0.385	46.800, 0.571	46.800, 0.705	46.800, 0.819	46.800, -0.004	46.800, -0.024	46.800, -0.029	46.800, -0.022	46.800, -0.056	46.800, -0.035	46.800, -0.028
236	47.000, 0.212	47.000, 0.387	47.000, 0.571	47.000, 0.705	47.000, 0.820	47.000, -0.004	47.000, -0.025	47.000, -0.029	47.000, -0.023	47.000, -0.056	47.000, -0.035	47.000, -0.028
237	47.200, 0.213	47.200, 0.388	47.200, 0.572	47.200, 0.705	47.200, 0.820	47.200, -0.004	47.200, -0.025	47.200, -0.029	47.200, -0.022	47.200, -0.056	47.200, -0.036	47.200, -0.028
238	47.400, 0.215	47.400, 0.390	47.400, 0.573	47.400, 0.705	47.400, 0.820	47.400, -0.004	47.400, -0.025	47.400, -0.029	47.400, -0.023	47.400, -0.056	47.400, -0.036	47.400, -0.028
239	47.600, 0.216	47.600, 0.392	47.600, 0.573	47.600, 0.706	47.600, 0.820	47.600, -0.004	47.600, -0.026	47.600, -0.029	47.600, -0.023	47.600, -0.057	47.600, -0.036	47.600, -0.028
240	47.800, 0.218	47.800, 0.393	47.800, 0.574	47.800, 0.706	47.800, 0.820	47.800, -0.005	47.800, -0.026	47.800, -0.030	47.800, -0.023	47.800, -0.057	47.800, -0.036	47.800, -0.028
241	48.000, 0.219	48.000, 0.394	48.000, 0.574	48.000, 0.706	48.000, 0.820	48.000, -0.005	48.000, -0.026	48.000, -0.030	48.000, -0.023	48.000, -0.057	48.000, -0.037	48.000, -0.028
242	48.200, 0.220	48.200, 0.395	48.200, 0.575	48.200, 0.707	48.200, 0.820	48.200, -0.005	48.200, -0.026	48.200, -0.030	48.200, -0.023	48.200, -0.057	48.200, -0.037	48.200, -0.028
243	48.400, 0.222	48.400, 0.396	48.400, 0.575	48.400, 0.707	48.400, 0.820	48.400, -0.005	48.400, -0.026	48.400, -0.030	48.400, -0.023	48.400, -0.058	48.400, -0.037	48.400, -0.028
244	48.600, 0.223	48.600, 0.398	48.600, 0.576	48.600, 0.707	48.600, 0.820	48.600, -0.005	48.600, -0.026	48.600, -0.030	48.600, -0.023	48.600, -0.058	48.600, -0.038	48.600, -0.027
245	48.800, 0.224	48.800, 0.399	48.800, 0.577	48.800, 0.707	48.800, 0.821	48.800, -0.005	48.800, -0.026	48.800, -0.031	48.800, -0.023	48.800, -0.058	48.800, -0.038	48.800, -0.027
246	49.000, 0.226	49.000, 0.400	49.000, 0.578	49.000, 0.707	49.000, 0.821	49.000, -0.005	49.000, -0.026	49.000, -0.031	49.000, -0.023	49.000, -0.059	49.000, -0.038	49.000, -0.027
247	49.200, 0.227	49.200, 0.401	49.200, 0.579	49.200, 0.707	49.200, 0.821	49.200, -0.005	49.200, -0.027	49.200, -0.031	49.200, -0.023	49.200, -0.059	49.200, -0.038	49.200, -0.028
248	49.400, 0.228	49.400, 0.403	49.400, 0.580	49.400, 0.707	49.400, 0.821	49.400, -0.005	49.400, -0.027	49.400, -0.032	49.400, -0.023	49.400, -0.059	49.400, -0.038	49.400, -0.028
249	49.600, 0.229	49.600, 0.404	49.600, 0.581	49.600, 0.707	49.600, 0.821	49.600, -0.006	49.600, -0.027	49.600, -0.032	49.600, -0.023	49.600, -0.060	49.600, -0.038	49.600, -0.028
250	49.800, 0.230	49.800, 0.406	49.800, 0.582	49.800, 0.707	49.800, 0.821	49.800, -0.006	49.800, -0.028	49.800, -0.032	49.800, -0.023	49.800, -0.060	49.800, -0.038	49.800, -0.028
251	50.000, 0.231	50.000, 0.407	50.000, 0.583	50.000, 0.707	50.000, 0.822	50.000, -0.006	50.000, -0.028	50.000, -0.033	50.000, -0.023	50.000, -0.060	50.000, -0.038	50.000, -0.028
252	50.200, 0.232	50.200, 0.409	50.200, 0.583	50.200, 0.707	50.200, 0.822	50.200, -0.006	50.200, -0.028	50.200, -0.033	50.200, -0.023	50.200, -0.061	50.200, -0.038	50.200, -0.028
253	50.400, 0.233	50.400, 0.410	50.400, 0.584	50.400, 0.708	50.400, 0.822	50.400, -0.006	50.400, -0.029	50.400, -0.033	50.400, -0.023	50.400, -0.061	50.400, -0.038	50.400, -0.029
254	50.600, 0.234	50.600, 0.412	50.600, 0.585	50.600, 0.708	50.600, 0.822	50.600, -0.006	50.600, -0.029	50.600, -0.033	50.600, -0.023	50.600, -0.061	50.600, -0.038	50.600, -0.029
255	50.800, 0.235	50.800, 0.413	50.800, 0.585	50.800, 0.709	50.800, 0.822	50.800, -0.006	50.800, -0.029	50.800, -0.033	50.800, -0.023	50.800, -0.061	50.800, -0.039	50.800, -0.029
256	51.000, 0.236	51.000, 0.415	51.000, 0.585	51.000, 0.709	51.000, 0.823	51.000, -0.006	51.000, -0.029	51.000, -0.032	51.000, -0.023	51.000, -0.061	51.000, -0.039	51.000, -0.029
257	51.200, 0.237	51.200, 0.416	51.200, 0.585	51.200, 0.710	51.200, 0.823	51.200, -0.006	51.200, -0.029	51.200, -0.032	51.200, -0.023	51.200, -0.061	51.200, -0.039	51.200, -0.030
258	51.400, 0.238	51.400, 0.417	51.400, 0.585	51.400, 0.710	51.400, 0.823	51.400, -0.006	51.400, -0.030	51.400, -0.032	51.400, -0.023	51.400, -0.061	51.400, -0.039	51.400, -0.029
259	51.600, 0.239	51.600, 0.418	51.600, 0.585	51.600, 0.710	51.600, 0.823	51.600, -0.006	51.600, -0.030	51.600, -0.032	51.600, -0.023	51.600, -0.062	51.600, -0.039	51.600, -0.029
260	51.800, 0.240	51.800, 0.419	51.800, 0.586	51.800, 0.710	51.800, 0.823	51.800, -0.006	51.800, -0.030	51.800, -0.032	51.800, -0.024	51.800, -0.062	51.800, -0.039	51.800, -0.029
261	52.000, 0.241	52.000, 0.420	52.000, 0.586	52.000, 0.710	52.000, 0.824	52.000, -0.006	52.000, -0.030	52.000, -0.032	52.000, -0.024	52.000, -0.062	52.000, -0.039	52.000, -0.029
262	52.200, 0.242	52.200, 0.421	52.200, 0.586	52.200, 0.710	52.200, 0.824	52.200, -0.006	52.200, -0.030	52.200, -0.032	52.200, -0.025	52.200, -0.062	52.200, -0.039	52.200, -0.029
263	52.400, 0.243	52.400, 0.421	52.400, 0.586	52.400, 0.711	52.400, 0.824	52.400, -0.007	52.400, -0.031	52.400, -0.032	52.400, -0.026	52.400, -0.062	52.400, -0.039	52.400, -0.029
264	52.600, 0.244	52.600, 0.422	52.600, 0.587	52.600, 0.711	52.600, 0.824	52.600, -0.007	52.600, -0.031	52.600, -0.032	52.600, -0.026	52.600, -0.062	52.600, -0.038	52.600, -0.029
265	52.800, 0.245	52.800, 0.423	52.800, 0.587	52.800, 0.711	52.800, 0.825	52.800, -0.007	52.800, -0.031	52.800, -0.032	52.800, -0.027	52.800, -0.062	52.800, -0.038	52.800, -0.030
266	53.000, 0.246	53.000, 0.424	53.000, 0.588	53.000, 0.711	53.000, 0.825	53.000, -0.007	53.000, -0.032	53.000, -0.032	53.000, -0.027	53.000, -0.062	53.000, -0.038	53.000, -0.030
267	53.200, 0.248	53.200, 0.425	53.200, 0.588	53.200, 0.711	53.200, 0.826	53.200, -0.007	53.200, -0.032	53.200, -0.033	53.200, -0.028	53.200, -0.062	53.200, -0.038	53.200, -0.030
268	53.400, 0.249	53.400, 0.426	53.400, 0.589	53.400, 0.711	53.400, 0.826	53.400, -0.007	53.400, -0.033	53.400, -0.033	53.400, -0.028	53.400, -0.062	53.400, -0.038	53.400, -0.030
269	53.600, 0.250	53.600, 0.426	53.600, 0.590	53.600, 0.712	53.600, 0.826	53.600, -0.007	53.600, -0.033	53.600, -0.034	53.600, -0.028	53.600, -0.063	53.600, -0.038	53.600, -0.031
270	53.800, 0.250	53.800, 0.427	53.800, 0.590	53.800, 0.713	53.800, 0.827	53.800, -0.008	53.800, -0.034	53.800, -0.034	53.800, -0.028	53.800, -0.063	53.800, -0.038	53.800, -0.031
271	54.000, 0.251	54.000, 0.427	54.000, 0.591	54.000, 0.713	54.000, 0.827	54.000, -0.008	54.000, -0.034	54.000, -0.035	54.000, -0.028	54.000, -0.063	54.000, -0.038	54.000, -0.031
272	54.200, 0.252	54.200, 0.428	54.200, 0.592	54.200, 0.714	54.200, 0.827	54.200, -0.008	54.200, -0.034	54.200, -0.035	54.200, -0.028	54.200, -0.064	54.200, -0.038	54.200, -0.031
273	54.400, 0.253	54.400, 0.429	54.400, 0.592	54.400, 0.715	54.400, 0.827	54.400, -0.008	54.400, -0.034	54.400, -0.035	54.400, -0.028	54.400, -0.064	54.400, -0.038	54.400, -0.031
274	54.600, 0.253	54.600, 0.429	54.600, 0.593	54.600, 0.715	54.600, 0.827	54.600, -0.008	54.600, -0.034	54.600, -0.036	54.600, -0.028	54.600, -0.064	54.600, -0.039	54.600, -0.031
275	54.800, 0.254	54.800, 0.430	54.800, 0.593	54.800, 0.716	54.800, 0.827	54.800, -0.008	54.800, -0.034	54.800, -0.036	54.800, -0.028	54.800, -0.064	54.800, -0.039	54.800, -0.031
276	55.000, 0.254	55.000, 0.431	55.000, 0.593	55.000, 0.716	55.000, 0.827	55.000, -0.008	55.000, -0.035	55.000, -0.036	55.000, -0.028	55.000, -0.065	55.000, -0.039	55.000, -0.031
277	55.200, 0.254	55.200, 0.432	55.200, 0.594	55.200, 0.717	55.200, 0.827	55.200, -0.008	55.200, -0.035	55.200, -0.036	55.200, -0.028	55.200, -0.065	55.200, -0.040	55.200, -0.030
278	55.400, 0.255	55.400, 0.433	55.400, 0.594	55.400, 0.717	55.400, 0.827	55.400, -0.008	55.400, -0.035	55.400, -0.036	55.400, -0.027	55.400, -0.065	55.400, -0.040	55.400, -0.030
279	55.600, 0.255	55.600, 0.434	55.600, 0.594	55.600, 0.717	55.600, 0.827	55.600, -0.008	55.600, -0.035	55.600, -0.036	55.600, -0.027	55.600, -0.065	55.600, -0.041	55.600, -0.030
280	55.800, 0.256	55.800, 0.435	55.800, 0.595	55.800, 0.717	55.800, 0.828	55.800, -0.008	55.800, -0.035	55.800, -0.036	55.800, -0.028	55.800, -0.065	55.800, -0.041	55.800, -0.030
281	56.000, 0.257	56.000, 0.436	56.000, 0.595	56.000, 0.717	56.000, 0.828	56.000, -0.009	56.000, -0.036	56.000, -0.036	56.000, -0.028	56.000, -0.065	56.000, -0.041	56.000, -0.030
282	56.200, 0.258	56.200, 0.437	56.200, 0.596	56.200, 0.717	56.200, 0.828	56.200, -0.009	56.200, -0.036	56.200, -0.036	56.200, -0.028	56.200, -0.065	56.200, -0.042	56.200, -0.030
283	56.400, 0.259	56.400, 0.438	56.400, 0.596	56.400, 0.717	56.400, 0.829	56.400, -0.009	56.400, -0.036	56.400, -0.036	56.400, -0.029	56.400, -0.065	56.400, -0.042	56.400, -0.030
284	56.600, 0.260	56.600, 0.439	56.600, 0.597	56.600, 0.717	56.600, 0.829	56.600, -0.009	56.600, -0.037	56.600, -0.036	56.600, -0.029	56.600, -0.064	56.600, -0.042	56.600, -0.030
285	56.800, 0.261	56.800, 0.439	56.800, 0.597	56.800, 0.717	56.800, 0.829	56.800, -0.009	56.800, -0.037	56.800, -0.036	56.800, -0.030	56.800, -0.064	56.800, -0.043	56.800, -0.030
286	57.000, 0.261	57.000, 0.440	57.000, 0.597	57.000, 0.717	57.000, 0.829	57.000, -0.010	57.000, -0.038	57.000, -0.036	57.000, -0.030	57.000, -0.064	57.000, -0.043	57.000, -0.031
287	57.200, 0.262	57.200, 0.441	57.200, 0.598	57.200, 0.717	57.200, 0.829	57.200, -0.010	57.200, -0.038	57.200, -0.036	57.200, -0.030	57.200, -0.065	57.200, -0.044	57.200, -0.031
288	57.400, 0.263	57.400, 0.441	57.400, 0.598	57.400, 0.717	57.400, 0.829	57.400, -0.010	57.400, -0.038	57.400, -0.036	57.400, -0.030	57.400, -0.065	57.400, -0.044	57.400, -0.031
289	57.600, 0.263	57.600, 0.442	57.600, 0.599	57.600, 0.717	57.600, 0.829	57.600, -0.010	57.600, -0.039	57.600, -0.037	57.600, -0.030	57.600, -0.065	57.600, -0.045	57.600, -0.032
290	57.800, 0.264	57.800, 0.442	57.800, 0.599	57.800, 0.717	57.800, 0.829	57.800, -0.010	57.800, -0.039	57.800, -0.037	57.800, -0.030	57.800, -0.065	57.800, -0.045	57.800, -0.032
291	58.000, 0.264	58.000, 0.443	58.000, 0.600	58.000, 0.717	58.000, 0.829	58.000, -0.011	58.000, -0.040	58.000, -0.037	58.000, -0.030	58.000, -0.065	58.000, -0.045	58.000, -0.032
292	58.200, 0.264	58.200, 0.443	58.200, 0.600	58.200, 0.717	58.200, 0.829	58.200, -0.011	58.200, -0.040	58.200, -0.037	58.200, -0.029	58.200, -0.065	58.200, -0.044	58.200, -0.032
293	58.400, 0.265	58.400, 0.443	58.400, 0.600	58.400, 0.718	58.400, 0.829	58.400, -0.011	58.400, -0.040	58.400, -0.037	58.400, -0.029	58.400, -0.066	58.400, -0.044	58.400, -0.032
294	58.600, 0.265	58.600, 0.444	58.600, 0.600	58.600, 0.718	58.600, 0.829	58.600, -0.011	58.600, -0.040	58.600, -0.037	58.600, -0.029	58.600, -0.066	58.600, -0.043	58.600, -0.032
295	58.800, 0.265	58.800, 0.444	58.800, 0.600	58.800, 0.718	58.800, 0.829	58.800, -0.011	58.800, -0.041	58.800, -0.037	58.800, -0.029	58.800, -0.067	58.800, -0.043	58.800, -0.032
296	59.000, 0.266	59.000, 0.444	59.000, 0.600	59.000, 0.719	59.000, 0.830	59.000, -0.012	59.000, -0.041	59.000, -0.037	59.000, -0.029	59.000, -0.067	59.000, -0.043	59.000, -0.032
297	59.200, 0.266	59.200, 0.445	59.200, 0.600	59.200, 0.719	59.200, 0.830	59.200, -0.012	59.200, -0.041	59.200, -0.037	59.200, -0.029	59.200, -0.068	59.200, -0.042	59.200, -0.032
298	59.400, 0.267	59.400, 0.445	59.400, 0.600	59.400, 0.719	59.400, 0.830	59.400, -0.012	59.400, -0.042	59.400, -0.037	59.400, -0.030	59.400, -0.068	59.400, -0.042	59.400, -0.032
299	59.600, 0.267	59.600, 0.446	59.600, 0.600	59.600, 0.720	59.600, 0.831	59.600, -0.012	59.600, -0.042	59.600, -0.038	59.600, -0.030	59.600, -0.069	59.600, -0.042	59.600, -0.033
300	59.800, 0.268	59.800, 0.447	59.800, 0.599	59.800, 0.720	59.800, 0.832	59.800, -0.012	59.800, -0.043	59.800, -0.038	59.800, -0.030	59.800, -0.069	59.800, -0.042	59.800, -0.033
301	60.000, 0.269	60.000, 0.447	60.000, 0.599	60.000, 0.721	60.000, 0.832	60.000, -0.012	60.000, -0.043	60.000, -0.038	60.000, -0.031	60.000, -0.069	60.000, -0.042	60.000, -0.033
302	60.200, 0.270	60.200, 0.448	60.200, 0.599	60.200, 0.721	60.200, 0.832	60.200, -0.012	60.200, -0.043	60.200, -0.038	60.200, -0.032	60.200, -0.070	60.200, -0.042	60.200, -0.033
303	60.400, 0.270	60.400, 0.449	60.400, 0.600	60.400, 0.722	60.400, 0.833	60.400, -0.012	60.400, -0.044	60.400, -0.038	60.400, -0.032	60.400, -0.070	60.400, -0.043	60.400, -0.033
304	60.600, 0.271	60.600, 0.449	60.600, 0.600	60.600, 0.722	60.600, 0.833	60.600, -0.012	60.600, -0.044	60.600, -0.038	60.600, -0.032	60.600, -0.070	60.600, -0.043	60.600, -0.033
305	60.800, 0.272	60.800, 0.450	60.800, 0.601	60.800, 0.723	60.800, 0.833	60.800, -0.012	60.800, -0.044	60.800, -0.039	60.800, -0.032	60.800, -0.070	60.800, -0.043	60.800, -0.033
306	61.000, 0.272	61.000, 0.450	61.000, 0.601	61.000, 0.723	61.000, 0.833	61.000, -0.012	61.000, -0.044	61.000, -0.039	61.000, -0.032	61.000, -0.071	61.000, -0.044	61.000, -0.033
307	61.200, 0.272	61.200, 0.451	61.200, 0.602	61.200, 0.723	61.200, 0.833	61.200, -0.013	61.200, -0.044	61.200, -0.039	61.200, -0.032	61.200, -0.071	61.200, -0.044	61.200, -0.033
308	61.400, 0.273	61.400, 0.451	61.400, 0.602	61.400, 0.723	61.400, 0.833	61.400, -0.013	61.400, -0.045	61.400, -0.039	61.400, -0.032	61.400, -0.071	61.400, -0.044	61.400, -0.033
309	61.600, 0.273	61.600, 0.451	61.600, 0.603	61.600, 0.723	61.600, 0.833	61.600, -0.013	61.600, -0.045	61.600, -0.040	61.600, -0.032	61.600, -0.071	61.600, -0.044	61.600, -0.033
310	61.800, 0.274	61.800, 0.451	61.800, 0.603	61.800, 0.724	61.800, 0.833	61.800, -0.013	61.800, -0.045	61.800, -0.040	61.800, -0.032	61.800, -0.070	61.800, -0.044	61.800, -0.033
311	62.000, 0.274	62.000, 0.452	62.000, 0.604	62.000, 0.724	62.000, 0.833	62.000, -0.013	62.000, -0.045	62.000, -0.040	62.000, -0.032	62.000, -0.070	62.000, -0.045	62.000, -0.033
312	62.200, 0.274	62.200, 0.452	62.200, 0.604	62.200, 0.724	62.200, 0.833	62.200, -0.013	62.200, -0.045	62.200, -0.040	62.200, -0.031	62.200, -0.070	62.200, -0.045	62.200, -0.033
313	62.400, 0.275	62.400, 0.452	62.400, 0.605	62.400, 0.724	62.400, 0.833	62.400, -0.014	62.400, -0.046	62.400, -0.041	62.400, -0.031	62.400, -0.071	62.400, -0.045	62.400, -0.033
314	62.600, 0.275	62.600, 0.453	62.600, 0.605	62.600, 0.724	62.600, 0.833	62.600, -0.014	62.600, -0.046	62.600, -0.041	62.600, -0.031	62.600, -0.071	62.600, -0.045	62.600, -0.033
315	62.800, 0.275	62.800, 0.453	62.800, 0.606	62.800, 0.724	62.800, 0.833	62.800, -0.014	62.800, -0.047	62.800, -0.041	62.800, -0.031	62.800, -0.071	62.800, -0.045	62.800, -0.033
316	63.000, 0.275	63.000, 0.453	63.000, 0.606	63.000, 0.724	63.000, 0.833	63.000, -0.014	63.000, -0.047	63.000, -0.041	63.000, -0.032	63.000, -0.071	63.000, -0.045	63.000, -0.033
317	63.200, 0.276	63.200, 0.453	63.200, 0.607	63.200, 0.724	63.200, 0.834	63.200, -0.014	63.200, -0.048	63.200, -0.041	63.200, -0.032	63.200, -0.070	63.200, -0.045	63.200, -0.033
318	63.400, 0.276	63.400, 0.454	63.400, 0.607	63.400, 0.724	63.400, 0.834	63.400, -0.014	63.400, -0.048	63.400, -0.041	63.400, -0.032	63.400, -0.070	63.400, -0.045	63.400, -0.033
319	63.600, 0.277	63.600, 0.454	63.600, 0.607	63.600, 0.725	63.600, 0.835	63.600, -0.014	63.600, -0.049	63.600, -0.041	63.600, -0.032	63.600, -0.070	63.600, -0.045	63.600, -0.033
320	63.800, 0.277	63.800, 0.454	63.800, 0.608	63.800, 0.725	63.800, 0.835	63.800, -0.014	63.800, -0.049	63.800, -0.041	63.800, -0.032	63.800, -0.070	63.800, -0.046	63.800, -0.033
321	64.000, 0.278	64.000, 0.455	64.000, 0.608	64.000, 0.726	64.000, 0.835	64.000, -0.014	64.000, -0.049	64.000, -0.041	64.000, -0.033	64.000, -0.071	64.000, -0.046	64.000, -0.033
322	64.200, 0.278	64.200, 0.455	64.200, 0.608	64.200, 0.726	64.200, 0.836	64.200, -0.014	64.200, -0.049	64.200, -0.041	64.200, -0.033	64.200, -0.071	64.200, -0.046	64.200, -0.033
323	64.400, 0.278	64.400, 0.456	64.400, 0.609	64.400, 0.726	64.400, 0.836	64.400, -0.014	64.400, -0.049	64.400, -0.041	64.400, -0.033	64.400, -0.071	64.400, -0.046	64.400, -0.033
324	64.600, 0.279	64.600, 0.456	64.600, 0.609	64.600, 0.727	64.600, 0.837	64.600, -0.014	64.600, -0.049	64.600, -0.041	64.600, -0.034	64.600, -0.071	64.600, -0.046	64.600, -0.032
325	64.800, 0.279	64.800, 0.456	64.800, 0.609	64.800, 0.727	64.800, 0.837	64.800, -0.014	64.800, -0.049	64.800, -0.041	64.800, -0.034	64.800, -0.072	64.800, -0.046	64.800, -0.032
326	65.000, 0.280	65.000, 0.456	65.000, 0.609	65.000, 0.727	65.000, 0.837	65.000, -0.014	65.000, -0.049	65.000, -0.041	65.000, -0.034	65.000, -0.072	65.000, -0.045	65.000, -0.032
327	65.200, 0.280	65.200, 0.456	65.200, 0.609	65.200, 0.727	65.200, 0.837	65.200, -0.014	65.200, -0.049	65.200, -0.041	65.200, -0.034	65.200, -0.072	65.200, -0.046	65.200, -0.032
328	65.400, 0.281	65.400, 0.456	65.400, 0.609	65.400, 0.728	65.400, 0.838	65.400, -0.014	65.400, -0.049	65.400, -0.042	65.400, -0.034	65.400, -0.072	65.400, -0.046	65.400, -0.032
329	65.600, 0.281	65.600, 0.456	65.600, 0.609	65.600, 0.728	65.600, 0.838	65.600, -0.014	65.600, -0.049	65.600, -0.042	65.600, -0.034	65.600, -0.072	65.600, -0.046	65.600, -0.032
330	65.800, 0.281	65.800, 0.456	65.800, 0.609	65.800, 0.728	65.800, 0.838	65.800, -0.014	65.800, -0.049	65.800, -0.042	65.800, -0.034	65.800, -0.072	65.800, -0.046	65.800, -0.032
331	66.000, 0.282	66.000, 0.456	66.000, 0.610	66.000, 0.729	66.000, 0.838	66.000, -0.014	66.000, -0.050	66.000, -0.042	66.000, -0.034	66.000, -0.072	66.000, -0.047	66.000, -0.032
332	66.200, 0.282	66.200, 0.457	66.200, 0.610	66.200, 0.729	66.200, 0.838	66.200, -0.014	66.200, -0.050	66.200, -0.043	66.200, -0.035	66.200, -0.072	66.200, -0.047	66.200, -0.032
333	66.400, 0.282	66.400, 0.457	66.400, 0.611	66.400, 0.729	66.400, 0.838	66.400, -0.015	66.400, -0.050	66.400, -0.043	66.400, -0.035	66.400, -0.072	66.400, -0.047	66.400, -0.032
334	66.600, 0.282	66.600, 0.458	66.600, 0.611	66.600, 0.729	66.600, 0.838	66.600, -0.015	66.600, -0.051	66.600, -0.042	66.600, -0.036	66.600, -0.072	66.600, -0.048	66.600, -0.032
335	66.800, 0.283	66.800, 0.458	66.800, 0.611	66.800, 0.729	66.800, 0.838	66.800, -0.015	66.800, -0.051	66.800, -0.042	66.800, -0.036	66.800, -0.073	66.800, -0.048	66.800, -0.032
336	67.000, 0.283	67.000, 0.458	67.000, 0.612	67.000, 0.729	67.000, 0.838	67.000, -0.015	67.000, -0.051	67.000, -0.042	67.000, -0.036	67.000, -0.073	67.000, -0.049	67.000, -0.032
337	67.200, 0.283	67.200, 0.459	67.200, 0.612	67.200, 0.730	67.200, 0.839	67.200, -0.016	67.200, -0.052	67.200, -0.041	67.200, -0.037	67.200, -0.073	67.200, -0.049	67.200, -0.032
338	67.400, 0.283	67.400, 0.459	67.400, 0.613	67.400, 0.730	67.400, 0.839	67.400, -0.016	67.400, -0.052	67.400, -0.041	67.400, -0.037	67.400, -0.073	67.400, -0.049	67.400, -0.033
339	67.600, 0.283	67.600, 0.459	67.600, 0.613	67.600, 0.730	67.600, 0.839	67.600, -0.016	67.600, -0.052	67.600, -0.041	67.600, -0.037	67.600, -0.074	67.600, -0.050	67.600, -0.033
340	67.800, 0.283	67.800, 0.460	67.800, 0.613	67.800, 0.730	67.800, 0.840	67.800, -0.016	67.800, -0.052	67.800, -0.041	67.800, -0.037	67.800, -0.074	67.800, -0.050	67.800, -0.033
341	68.000, 0.283	68.000, 0.460	68.000, 0.614	68.000, 0.731	68.000, 0.840	68.000, -0.016	68.000, -0.052	68.000, -0.041	68.000, -0.037	68.000, -0.075	68.000, -0.050	68.000, -0.033
342	68.200, 0.283	68.200, 0.460	68.200, 0.614	68.200, 0.731	68.200, 0.840	68.200, -0.016	68.200, -0.052	68.200, -0.041	68.200, -0.037	68.200, -0.075	68.200, -0.049	68.200, -0.033
343	68.400, 0.284	68.400, 0.460	68.400, 0.614	68.400, 0.732	68.400, 0.840	68.400, -0.016	68.400, -0.052	68.400, -0.042	68.400, -0.037	68.400, -0.075	68.400, -0.049	68.400, -0.034
344	68.600, 0.284	68.600, 0.461	68.600, 0.615	68.600, 0.732	68.600, 0.840	68.600, -0.017	68.600, -0.052	68.600, -0.042	68.600, -0.037	68.600, -0.075	68.600, -0.049	68.600, -0.034
345	68.800, 0.284	68.800, 0.461	68.800, 0.615	68.800, 0.733	68.800, 0.840	68.800, -0.017	68.800, -0.052	68.800, -0.042	68.800, -0.037	68.800, -0.076	68.800, -0.049	68.800, -0.034
346	69.000, 0.284	69.000, 0.461	69.000, 0.615	69.000, 0.733	69.000, 0.840	69.000, -0.017	69.000, -0.052	69.000, -0.042	69.000, -0.037	69.000, -0.076	69.000, -0.049	69.000, -0.034
347	69.200, 0.285	69.200, 0.462	69.200, 0.616	69.200, 0.734	69.200, 0.841	69.200, -0.017	69.200, -0.052	69.200, -0.043	69.200, -0.037	69.200, -0.076	69.200, -0.049	69.200, -0.034
348	69.400, 0.285	69.400, 0.462	69.400, 0.616	69.400, 0.735	69.400, 0.841	69.400, -0.017	69.400, -0.052	69.400, -0.043	69.400, -0.037	69.400, -0.076	69.400, -0.049	69.400, -0.034
349	69.600, 0.285	69.600, 0.462	69.600, 0.617	69.600, 0.735	69.600, 0.841	69.600, -0.016	69.600, -0.052	69.600, -0.044	69.600, -0.038	69.600, -0.076	69.600, -0.049	69.600, -0.034
350	69.800, 0.286	69.800, 0.463	69.800, 0.617	69.800, 0.736	69.800, 0.841	69.800, -0.016	69.800, -0.053	69.800, -0.044	69.800, -0.037	69.800, -0.076	69.800, -0.049	69.800, -0.034
351	70.000, 0.286	70.000, 0.463	70.000, 0.618	70.000, 0.736	70.000, 0.841	70.000, -0.016	70.000, -0.053	70.000, -0.044	70.000, -0.038	70.000, -0.075	70.000, -0.049	70.000, -0.034
352	70.200, 0.287	70.200, 0.464	70.200, 0.619	70.200, 0.737	70.200, 0.841	70.200, -0.016	70.200, -0.053	70.200, -0.044	70.200, -0.038	70.200, -0.075	70.200, -0.049	70.200, -0.034
353	70.400, 0.287	70.400, 0.464	70.400, 0.619	70.400, 0.737	70.400, 0.841	70.400, -0.016	70.400, -0.053	70.400, -0.044	70.400, -0.038	70.400, -0.076	70.400, -0.049	70.400, -0.034
354	70.600, 0.287	70.600, 0.465	70.600, 0.619	70.600, 0.737	70.600, 0.841	70.600, -0.016	70.600, -0.053	70.600, -0.044	70.600, -0.038	70.600, -0.076	70.600, -0.049	70.600, -0.034
355	70.800, 0.287	70.800, 0.465	70.800, 0.620	70.800, 0.737	70.800, 0.841	70.800, -0.017	70.800, -0.053	70.800, -0.044	70.800, -0.038	70.800, -0.076	70.800, -0.049	70.800, -0.034
356	71.000, 0.287	71.000, 0.466	71.000, 0.620	71.000, 0.737	71.000, 0.842	71.000, -0.017	71.000, -0.054	71.000, -0.044	71.000, -0.038	71.000, -0.076	71.000, -0.049	71.000, -0.034
357	71.200, 0.287	71.200, 0.466	71.200, 0.620	71.200, 0.737	71.200, 0.842	71.200, -0.017	71.200, -0.054	71.200, -0.045	71.200, -0.038	71.200, -0.077	71.200, -0.049	71.200, -0.034
358	71.400, 0.287	71.400, 0.466	71.400, 0.620	71.400, 0.737	71.400, 0.842	71.400, -0.017	71.400, -0.054	71.400, -0.045	71.400, -0.038	71.400, -0.077	71.400, -0.049	71.400, -0.034
359	71.600, 0.287	71.600, 0.467	71.600, 0.621	71.600, 0.737	71.600, 0.843	71.600, -0.017	71.600, -0.054	71.600, -0.045	71.600, -0.037	71.600, -0.077	71.600, -0.049	71.600, -0.034
360	71.800, 0.287	71.800, 0.467	71.800, 0.621	71.800, 0.737	71.800, 0.843	71.800, -0.017	71.800, -0.055	71.800, -0.045	71.800, -0.037	71.800, -0.077	71.800, -0.049	71.800, -0.034
361	72.000, 0.287	72.000, 0.467	72.000, 0.621	72.000, 0.737	72.000, 0.843	72.000, -0.018	72.000, -0.055	72.000, -0.045	72.000, -0.037	72.000, -0.077	72.000, -0.050	72.000, -0.034
362	72.200, 0.287	72.200, 0.467	72.200, 0.621	72.200, 0.737	72.200, 0.843	72.200, -0.018	72.200, -0.055	72.200, -0.045	72.200, -0.037	72.200, -0.077	72.200, -0.050	72.200, -0.034
363	72.400, 0.287	72.400, 0.468	72.400, 0.621	72.400, 0.737	72.400, 0.843	72.400, -0.018	72.400, -0.056	72.400, -0.045	72.400, -0.037	72.400, -0.077	72.400, -0.050	72.400, -0.034
364	72.600, 0.287	72.600, 0.468	72.600, 0.621	72.600, 0.736	72.600, 0.843	72.600, -0.018	72.600, -0.056	72.600, -0.045	72.600, -0.037	72.600, -0.077	72.600, -0.051	72.600, -0.034
365	72.800, 0.287	72.800, 0.468	72.800, 0.621	72.800, 0.736	72.800, 0.843	72.800, -0.018	72.800, -0.056	72.800, -0.044	72.800, -0.038	72.800, -0.077	72.800, -0.051	72.800, -0.034
366	73.000, 0.288	73.000, 0.467	73.000, 0.622	73.000, 0.736	73.000, 0.843	73.000, -0.018	73.000, -0.056	73.000, -0.044	73.000, -0.038	73.000, -0.077	73.000, -0.051	73.000, -0.034
367	73.200, 0.288	73.200, 0.468	73.200, 0.622	73.200, 0.736	73.200, 0.843	73.200, -0.018	73.200, -0.057	73.200, -0.044	73.200, -0.038	73.200, -0.077	73.200, -0.052	73.200, -0.034
368	73.400, 0.288	73.400, 0.468	73.400, 0.623	73.400, 0.737	73.400, 0.844	73.400, -0.018	73.400, -0.057	73.400, -0.044	73.400, -0.038	73.400, -0.077	73.400, -0.052	73.400, -0.034
369	73.600, 0.289	73.600, 0.468	73.600, 0.623	73.600, 0.737	73.600, 0.844	73.600, -0.018	73.600, -0.057	73.600, -0.044	73.600, -0.038	73.600, -0.077	73.600, -0.052	73.600, -0.034
370	73.800, 0.289	73.800, 0.468	73.800, 0.624	73.800, 0.737	73.800, 0.844	73.800, -0.018	73.800, -0.057	73.800, -0.044	73.800, -0.039	73.800, -0.076	73.800, -0.052	73.800, -0.034
371	74.000, 0.290	74.000, 0.468	74.000, 0.624	74.000, 0.738	74.000, 0.844	74.000, -0.018	74.000, -0.058	74.000, -0.044	74.000, -0.039	74.000, -0.076	74.000, -0.052	74.000, -0.034
372	74.200, 0.291	74.200, 0.468	74.200, 0.624	74.200, 0.738	74.200, 0.845	74.200, -0.018	74.200, -0.058	74.200, -0.045	74.200, -0.039	74.200, -0.076	74.200, -0.052	74.200, -0.034
373	74.400, 0.291	74.400, 0.468	74.400, 0.625	74.400, 0.738	74.400, 0.845	74.400, -0.018	74.400, -0.058	74.400, -0.045	74.400, -0.040	74.400, -0.076	74.400, -0.052	74.400, -0.034
374	74.600, 0.292	74.600, 0.468	74.600, 0.625	74.600, 0.739	74.600, 0.845	74.600, -0.018	74.600, -0.058	74.600, -0.045	74.600, -0.040	74.600, -0.077	74.600, -0.053	74.600, -0.034
375	74.800, 0.292	74.800, 0.468	74.800, 0.625	74.800, 0.739	74.800, 0.846	74.800, -0.018	74.800, -0.058	74.800, -0.045	74.800, -0.040	74.800, -0.077	74.800, -0.053	74.800, -0.034
376	75.000, 0.292	75.000, 0.469	75.000, 0.625	75.000, 0.740	75.000, 0.846	75.000, -0.018	75.000, -0.058	75.000, -0.046	75.000, -0.040	75.000, -0.077	75.000, -0.053	75.000, -0.035
377	75.200, 0.292	75.200, 0.469	75.200, 0.625	75.200, 0.740	75.200, 0.846	75.200, -0.018	75.200, -0.058	75.200, -0.046	75.200, -0.041	75.200, -0.077	75.200, -0.054	75.200, -0.035
378	75.400, 0.292	75.400, 0.469	75.400, 0.625	75.400, 0.741	75.400, 0.846	75.400, -0.018	75.400, -0.058	75.400, -0.047	75.400, -0.041	75.400, -0.077	75.400, -0.054	75.400, -0.035
379	75.600, 0.292	75.600, 0.470	75.600, 0.625	75.600, 0.741	75.600, 0.846	75.600, -0.018	75.600, -0.059	75.600, -0.047	75.600, -0.041	75.600, -0.077	75.600, -0.054	75.600, -0.036
380	75.800, 0.292	75.800, 0.470	75.800, 0.625	75.800, 0.742	75.800, 0.846	75.800, -0.018	75.800, -0.059	75.800, -0.047	75.800, -0.041	75.800, -0.077	75.800, -0.054	75.800, -0.036
381	76.000, 0.293	76.000, 0.470	76.000, 0.625	76.000, 0.742	76.000, 0.846	76.000, -0.018	76.000, -0.059	76.000, -0.047	76.000, -0.042	76.000, -0.077	76.000, -0.054	76.000, -0.036
382	76.200, 0.293	76.200, 0.470	76.200, 0.625	76.200, 0.742	76.200, 0.846	76.200, -0.018	76.200, -0.059	76.200, -0.047	76.200, -0.042	76.200, -0.077	76.200, -0.054	76.200, -0.036
383	76.400, 0.292	76.400, 0.470	76.400, 0.625	76.400, 0.742	76.400, 0.846	76.400, -0.019	76.400, -0.059	76.400, -0.047	76.400, -0.042	76.400, -0.077	76.400, -0.054	76.400, -0.036
384	76.600, 0.292	76.600, 0.470	76.600, 0.626	76.600, 0.742	76.600, 0.845	76.600, -0.018	76.600, -0.059	76.600, -0.046	76.600, -0.042	76.600, -0.077	76.600, -0.054	76.600, -0.036
385	76.800, 0.292	76.800, 0.470	76.800, 0.626	76.800, 0.742	76.800, 0.845	76.800, -0.019	76.800, -0.059	76.800, -0.046	76.800, -0.042	76.800, -0.077	76.800, -0.054	76.800, -0.035
386	77.000, 0.292	77.000, 0.470	77.000, 0.627	77.000, 0.742	77.000, 0.846	77.000, -0.019	77.000, -0.059	77.000, -0.045	77.000, -0.042	77.000, -0.077	77.000, -0.054	77.000, -0.035
387	77.200, 0.292	77.200, 0.471	77.200, 0.627	77.200, 0.742	77.200, 0.846	77.200, -0.019	77.200, -0.059	77.200, -0.045	77.200, -0.042	77.200, -0.077	77.200, -0.055	77.200, -0.035
388	77.400, 0.293	77.400, 0.471	77.400, 0.628	77.400, 0.743	77.400, 0.846	77.400, -0.018	77.400, -0.060	77.400, -0.045	77.400, -0.042	77.400, -0.077	77.400, -0.054	77.400, -0.035
389	77.600, 0.293	77.600, 0.472	77.600, 0.628	77.600, 0.743	77.600, 0.846	77.600, -0.019	77.600, -0.060	77.600, -0.045	77.600, -0.042	77.600, -0.077	77.600, -0.054	77.600, -0.035
390	77.800, 0.293	77.800, 0.472	77.800, 0.629	77.800, 0.743	77.800, 0.846	77.800, -0.019	77.800, -0.060	77.800, -0.045	77.800, -0.042	77.800, -0.077	77.800, -0.054	77.800, -0.036
391	78.000, 0.293	78.000, 0.473	78.000, 0.629	78.000, 0.744	78.000, 0.846	78.000, -0.019	78.000, -0.060	78.000, -0.045	78.000, -0.042	78.000, -0.078	78.000, -0.054	78.000, -0.036
392	78.200, 0.294	78.200, 0.473	78.200, 0.629	78.200, 0.744	78.200, 0.846	78.200, -0.019	78.200, -0.060	78.200, -0.045	78.200, -0.041	78.200, -0.078	78.200, -0.054	78.200, -0.036
393	78.400, 0.294	78.400, 0.474	78.400, 0.629	78.400, 0.744	78.400, 0.846	78.400, -0.019	78.400, -0.060	78.400, -0.045	78.400, -0.041	78.400, -0.078	78.400, -0.055	78.400, -0.036
394	78.600, 0.294	78.600, 0.474	78.600, 0.630	78.600, 0.744	78.600, 0.847	78.600, -0.019	78.600, -0.061	78.600, -0.045	78.600, -0.041	78.600, -0.078	78.600, -0.055	78.600, -0.036
395	78.800, 0.294	78.800, 0.475	78.800, 0.630	78.800, 0.745	78.800, 0.847	78.800, -0.019	78.800, -0.061	78.800, -0.046	78.800, -0.041	78.800, -0.078	78.800, -0.055	78.800, -0.036
396	79.000, 0.294	79.000, 0.475	79.000, 0.630	79.000, 0.745	79.000, 0.847	79.000, -0.018	79.000, -0.062	79.000, -0.047	79.000, -0.041	79.000, -0.078	79.000, -0.055	79.000, -0.036
397	79.200, 0.294	79.200, 0.475	79.200, 0.630	79.200, 0.745	79.200, 0.848	79.200, -0.018	79.200, -0.062	79.200, -0.047	79.200, -0.041	79.200, -0.079	79.200, -0.055	79.200, -0.036
398	79.400, 0.294	79.400, 0.475	79.400, 0.630	79.400, 0.746	79.400, 0.848	79.400, -0.018	79.400, -0.062	79.400, -0.048	79.400, -0.041	79.400, -0.079	79.400, -0.055	79.400, -0.037
399	79.600, 0.295	79.600, 0.475	79.600, 0.630	79.600, 0.746	79.600, 0.849	79.600, -0.018	79.600, -0.062	79.600, -0.049	79.600, -0.041	79.600, -0.080	79.600, -0.055	79.600, -0.037
400	79.800, 0.295	79.800, 0.475	79.800, 0.631	79.800, 0.746	79.800, 0.849	79.800, -0.018	79.800, -0.063	79.800, -0.049	79.800, -0.040	79.800, -0.080	79.800, -0.055	79.800, -0.036
401	80.000, 0.295	80.000, 0.475	80.000, 0.631	80.000, 0.746	80.000, 0.850	80.000, -0.018	80.000, -0.063	80.000, -0.049	80.000, -0.040	80.000, -0.080	80.000, -0.055	80.000, -0.036
402	80.200, 0.295	80.200, 0.475	80.200, 0.631	80.200, 0.746	80.200, 0.850	80.200, -0.018	80.200, -0.063	80.200, -0.049	80.200, -0.041	80.200, -0.080	80.200, -0.055	80.200, -0.036
403	80.400, 0.295	80.400, 0.475	80.400, 0.632	80.400, 0.746	80.400, 0.850	80.400, -0.018	80.400, -0.063	80.400, -0.049	80.400, -0.041	80.400, -0.081	80.400, -0.055	80.400, -0.036
404	80.600, 0.295	80.600, 0.475	80.600, 0.632	80.600, 0.746	80.600, 0.851	80.600, -0.018	80.600, -0.063	80.600, -0.049	80.600, -0.041	80.600, -0.081	80.600, -0.055	80.600, -0.036
405	80.800, 0.295	80.800, 0.475	80.800, 0.633	80.800, 0.746	80.800, 0.851	80.800, -0.018	80.800, -0.062	80.800, -0.048	80.800, -0.041	80.800, -0.081	80.800, -0.055	80.800, -0.035
406	81.000, 0.295	81.000, 0.475	81.000, 0.633	81.000, 0.746	81.000, 0.851	81.000, -0.018	81.000, -0.062	81.000, -0.048	81.000, -0.041	81.000, -0.082	81.000, -0.055	81.000, -0.035
407	81.200, 0.295	81.200, 0.475	81.200, 0.634	81.200, 0.746	81.200, 0.852	81.200, -0.018	81.200, -0.062	81.200, -0.048	81.200, -0.041	81.200, -0.082	81.200, -0.054	81.200, -0.035
408	81.400, 0.295	81.400, 0.475	81.400, 0.634	81.400, 0.746	81.400, 0.852	81.400, -0.018	81.400, -0.062	81.400, -0.048	81.400, -0.042	81.400, -0.082	81.400, -0.054	81.400, -0.035
409	81.600, 0.296	81.600, 0.476	81.600, 0.634	81.600, 0.746	81.600, 0.852	81.600, -0.019	81.600, -0.062	81.600, -0.047	81.600, -0.042	81.600, -0.082	81.600, -0.054	81.600, -0.035
410	81.800, 0.296	81.800, 0.476	81.800, 0.634	81.800, 0.746	81.800, 0.852	81.800, -0.019	81.800, -0.062	81.800, -0.047	81.800, -0.042	81.800, -0.081	81.800, -0.054	81.800, -0.035
411	82.000, 0.296	82.000, 0.476	82.000, 0.634	82.000, 0.747	82.000, 0.852	82.000, -0.019	82.000, -0.063	82.000, -0.047	82.000, -0.043	82.000, -0.081	82.000, -0.054	82.000, -0.035
412	82.200, 0.295	82.200, 0.477	82.200, 0.634	82.200, 0.747	82.200, 0.852	82.200, -0.019	82.200, -0.063	82.200, -0.047	82.200, -0.043	82.200, -0.080	82.200, -0.053	82.200, -0.035
413	82.400, 0.296	82.400, 0.477	82.400, 0.634	82.400, 0.747	82.400, 0.852	82.400, -0.020	82.400, -0.063	82.400, -0.047	82.400, -0.043	82.400, -0.080	82.400, -0.053	82.400, -0.036
414	82.600, 0.296	82.600, 0.477	82.600, 0.634	82.600, 0.748	82.600, 0.852	82.600, -0.020	82.600, -0.064	82.600, -0.047	82.600, -0.043	82.600, -0.080	82.600, -0.053	82.600, -0.036
415	82.800, 0.296	82.800, 0.478	82.800, 0.635	82.800, 0.749	82.800, 0.852	82.800, -0.020	82.800, -0.064	82.800, -0.047	82.800, -0.043	82.800, -0.080	82.800, -0.053	82.800, -0.036
416	83.000, 0.296	83.000, 0.478	83.000, 0.635	83.000, 0.749	83.000, 0.852	83.000, -0.020	83.000, -0.065	83.000, -0.048	83.000, -0.043	83.000, -0.079	83.000, -0.053	83.000, -0.036
417	83.200, 0.296	83.200, 0.478	83.200, 0.635	83.200, 0.750	83.200, 0.852	83.200, -0.020	83.200, -0.065	83.200, -0.048	83.200, -0.042	83.200, -0.080	83.200, -0.052	83.200, -0.036
418	83.400, 0.296	83.400, 0.478	83.400, 0.635	83.400, 0.750	83.400, 0.852	83.400, -0.020	83.400, -0.065	83.400, -0.048	83.400, -0.042	83.400, -0.080	83.400, -0.052	83.400, -0.036
419	83.600, 0.296	83.600, 0.478	83.600, 0.635	83.600, 0.751	83.600, 0.852	83.600, -0.020	83.600, -0.065	83.600, -0.049	83.600, -0.041	83.600, -0.080	83.600, -0.052	83.600, -0.036
420	83.800, 0.296	83.800, 0.477	83.800, 0.635	83.800, 0.751	83.800, 0.852	83.800, -0.020	83.800, -0.065	83.800, -0.049	83.800, -0.041	83.800, -0.080	83.800, -0.052	83.800, -0.036
421	84.000, 0.296	84.000, 0.477	84.000, 0.635	84.000, 0.751	84.000, 0.852	84.000, -0.020	84.000, -0.065	84.000, -0.049	84.000, -0.041	84.000, -0.081	84.000, -0.052	84.000, -0.036
422	84.200, 0.296	84.200, 0.477	84.200, 0.635	84.200, 0.752	84.200, 0.853	84.200, -0.020	84.200, -0.065	84.200, -0.049	84.200, -0.041	84.200, -0.081	84.200, -0.052	84.200, -0.036
423	84.400, 0.297	84.400, 0.477	84.400, 0.635	84.400, 0.752	84.400, 0.853	84.400, -0.020	84.400, -0.066	84.400, -0.049	84.400, -0.041	84.400, -0.081	84.400, -0.052	84.400, -0.036
424	84.600, 0.297	84.600, 0.477	84.600, 0.635	84.600, 0.752	84.600, 0.853	84.600, -0.020	84.600, -0.066	84.600, -0.049	84.600, -0.041	84.600, -0.082	84.600, -0.052	84.600, -0.036
425	84.800, 0.297	84.800, 0.476	84.800, 0.636	84.800, 0.751	84.800, 0.854	84.800, -0.020	84.800, -0.066	84.800, -0.049	84.800, -0.041	84.800, -0.082	84.800, -0.052	84.800, -0.036
426	85.000, 0.297	85.000, 0.476	85.000, 0.636	85.000, 0.751	85.000, 0.854	85.000, -0.021	85.000, -0.066	85.000, -0.049	85.000, -0.041	85.000, -0.082	85.000, -0.052	85.000, -0.036
427	85.200, 0.298	85.200, 0.477	85.200, 0.637	85.200, 0.751	85.200, 0.854	85.200, -0.021	85.200, -0.067	85.200, -0.049	85.200, -0.041	85.200, -0.082	85.200, -0.052	85.200, -0.036
428	85.400, 0.298	85.400, 0.477	85.400, 0.637	85.400, 0.751	85.400, 0.854	85.400, -0.021	85.400, -0.067	85.400, -0.049	85.400, -0.042	85.400, -0.082	85.400, -0.052	85.400, -0.035
429	85.600, 0.298	85.600, 0.477	85.600, 0.637	85.600, 0.751	85.600, 0.855	85.600, -0.021	85.600, -0.067	85.600, -0.049	85.600, -0.042	85.600, -0.082	85.600, -0.052	85.600, -0.035
430	85.800, 0.298	85.800, 0.478	85.800, 0.638	85.800, 0.751	85.800, 0.855	85.800, -0.021	85.800, -0.068	85.800, -0.049	85.800, -0.042	85.800, -0.082	85.800, -0.052	85.800, -0.035
431	86.000, 0.298	86.000, 0.478	86.000, 0.638	86.000, 0.751	86.000, 0.855	86.000, -0.021	86.000, -0.068	86.000, -0.049	86.000, -0.043	86.000, -0.082	86.000, -0.052	86.000, -0.034
432	86.200, 0.299	86.200, 0.478	86.200, 0.639	86.200, 0.751	86.200, 0.856	86.200, -0.022	86.200, -0.068	86.200, -0.049	86.200, -0.043	86.200, -0.081	86.200, -0.052	86.200, -0.034
433	86.400, 0.299	86.400, 0.478	86.400, 0.639	86.400, 0.752	86.400, 0.856	86.400, -0.022	86.400, -0.068	86.400, -0.049	86.400, -0.043	86.400, -0.081	86.400, -0.053	86.400, -0.034
434	86.600, 0.299	86.600, 0.479	86.600, 0.640	86.600, 0.752	86.600, 0.856	86.600, -0.022	86.600, -0.069	86.600, -0.050	86.600, -0.044	86.600, -0.081	86.600, -0.053	86.600, -0.034
435	86.800, 0.299	86.800, 0.479	86.800, 0.640	86.800, 0.753	86.800, 0.856	86.800, -0.022	86.800, -0.068	86.800, -0.050	86.800, -0.044	86.800, -0.081	86.800, -0.053	86.800, -0.034
436	87.000, 0.299	87.000, 0.479	87.000, 0.640	87.000, 0.753	87.000, 0.856	87.000, -0.022	87.000, -0.068	87.000, -0.050	87.000, -0.043	87.000, -0.081	87.000, -0.054	87.000, -0.034
437	87.200, 0.299	87.200, 0.480	87.200, 0.640	87.200, 0.754	87.200, 0.856	87.200, -0.022	87.200, -0.068	87.200, -0.051	87.200, -0.043	87.200, -0.081	87.200, -0.054	87.200, -0.034
438	87.400, 0.300	87.400, 0.480	87.400, 0.641	87.400, 0.755	87.400, 0.856	87.400, -0.022	87.400, -0.068	87.400, -0.051	87.400, -0.043	87.400, -0.081	87.400, -0.054	87.400, -0.034
439	87.600, 0.300	87.600, 0.480	87.600, 0.641	87.600, 0.755	87.600, 0.857	87.600, -0.022	87.600, -0.067	87.600, -0.052	87.600, -0.043	87.600, -0.081	87.600, -0.055	87.600, -0.035
440	87.800, 0.300	87.800, 0.481	87.800, 0.641	87.800, 0.755	87.800, 0.857	87.800, -0.022	87.800, -0.067	87.800, -0.052	87.800, -0.042	87.800, -0.081	87.800, -0.055	87.800, -0.035
441	88.000, 0.300	88.000, 0.481	88.000, 0.641	88.000, 0.755	88.000, 0.857	88.000, -0.022	88.000, -0.067	88.000, -0.052	88.000, -0.042	88.000, -0.082	88.000, -0.055	88.000, -0.036
442	88.200, 0.300	88.200, 0.481	88.200, 0.641	88.200, 0.755	88.200, 0.858	88.200, -0.022	88.200, -0.067	88.200, -0.052	88.200, -0.043	88.200, -0.082	88.200, -0.055	88.200, -0.036
443	88.400, 0.300	88.400, 0.482	88.400, 0.641	88.400, 0.755	88.400, 0.858	88.400, -0.022	88.400, -0.067	88.400, -0.052	88.400, -0.043	88.400, -0.082	88.400, -0.055	88.400, -0.037
444	88.600, 0.300	88.600, 0.482	88.600, 0.641	88.600, 0.755	88.600, 0.858	88.600, -0.022	88.600, -0.067	88.600, -0.052	88.600, -0.043	88.600, -0.082	88.600, -0.055	88.600, -0.037
445	88.800, 0.301	88.800, 0.482	88.800, 0.641	88.800, 0.755	88.800, 0.858	88.800, -0.022	88.800, -0.067	88.800, -0.052	88.800, -0.043	88.800, -0.082	88.800, -0.055	88.800, -0.037
446	89.000, 0.301	89.000, 0.482	89.000, 0.641	89.000, 0.755	89.000, 0.858	89.000, -0.021	89.000, -0.068	89.000, -0.052	89.000, -0.043	89.000, -0.082	89.000, -0.055	89.000, -0.037
447	89.200, 0.301	89.200, 0.483	89.200, 0.642	89.200, 0.755	89.200, 0.858	89.200, -0.021	89.200, -0.068	89.200, -0.051	89.200, -0.044	89.200, -0.082	89.200, -0.055	89.200, -0.037
448	89.400, 0.301	89.400, 0.483	89.400, 0.642	89.400, 0.755	89.400, 0.858	89.400, -0.021	89.400, -0.068	89.400, -0.051	89.400, -0.044	89.400, -0.082	89.400, -0.055	89.400, -0.037
449	89.600, 0.301	89.600, 0.483	89.600, 0.643	89.600, 0.755	89.600, 0.858	89.600, -0.021	89.600, -0.068	89.600, -0.051	89.600, -0.044	89.600, -0.082	89.600, -0.055	89.600, -0.037
450	89.800, 0.301	89.800, 0.483	89.800, 0.643	89.800, 0.755	89.800, 0.858	89.800, -0.022	89.800, -0.069	89.800, -0.051	89.800, -0.045	89.800, -0.082	89.800, -0.055	89.800, -0.036
451	90.000, 0.301	90.000, 0.483	90.000, 0.643	90.000, 0.755	90.000, 0.858	90.000, -0.022	90.000, -0.069	90.000, -0.051	90.000, -0.045	90.000, -0.082	90.000, -0.055	90.000, -0.036
452	90.200, 0.302	90.200, 0.483	90.200, 0.644	90.200, 0.755	90.200, 0.858	90.200, -0.022	90.200, -0.069	90.200, -0.051	90.200, -0.045	90.200, -0.082	90.200, -0.055	90.200, -0.036
453	90.400, 0.302	90.400, 0.483	90.400, 0.644	90.400, 0.756	90.400, 0.858	90.400, -0.022	90.400, -0.069	90.400, -0.051	90.400, -0.045	90.400, -0.082	90.400, -0.055	90.400, -0.035
454	90.600, 0.302	90.600, 0.483	90.600, 0.644	90.600, 0.756	90.600, 0.858	90.600, -0.023	90.600, -0.069	90.600, -0.051	90.600, -0.045	90.600, -0.082	90.600, -0.055	90.600, -0.035
455	90.800, 0.302	90.800, 0.483	90.800, 0.644	90.800, 0.757	90.800, 0.857	90.800, -0.023	90.800, -0.069	90.800, -0.051	90.800, -0.045	90.800, -0.082	90.800, -0.056	90.800, -0.035
456	91.000, 0.302	91.000, 0.483	91.000, 0.644	91.000, 0.757	91.000, 0.858	91.000, -0.023	91.000, -0.070	91.000, -0.051	91.000, -0.045	91.000, -0.082	91.000, -0.056	91.000, -0.035
457	91.200, 0.302	91.200, 0.483	91.200, 0.644	91.200, 0.758	91.200, 0.858	91.200, -0.023	91.200, -0.070	91.200, -0.051	91.200, -0.044	91.200, -0.082	91.200, -0.056	91.200, -0.035
458	91.400, 0.302	91.400, 0.483	91.400, 0.645	91.400, 0.758	91.400, 0.858	91.400, -0.023	91.400, -0.070	91.400, -0.051	91.400, -0.044	91.400, -0.082	91.400, -0.056	91.400, -0.035
459	91.600, 0.302	91.600, 0.484	91.600, 0.644	91.600, 0.758	91.600, 0.859	91.600, -0.023	91.600, -0.070	91.600, -0.051	91.600, -0.044	91.600, -0.083	91.600, -0.057	91.600, -0.036
460	91.800, 0.302	91.800, 0.484	91.800, 0.644	91.800, 0.758	91.800, 0.859	91.800, -0.023	91.800, -0.071	91.800, -0.051	91.800, -0.044	91.800, -0.083	91.800, -0.057	91.800, -0.036
461	92.000, 0.302	92.000, 0.484	92.000, 0.644	92.000, 0.758	92.000, 0.859	92.000, -0.023	92.000, -0.071	92.000, -0.051	92.000, -0.045	92.000, -0.084	92.000, -0.057	92.000, -0.036
462	92.200, 0.302	92.200, 0.484	92.200, 0.644	92.200, 0.759	92.200, 0.860	92.200, -0.023	92.200, -0.071	92.200, -0.050	92.200, -0.045	92.200, -0.084	92.200, -0.057	92.200, -0.036
463	92.400, 0.303	92.400, 0.484	92.400, 0.644	92.400, 0.759	92.400, 0.860	92.400, -0.022	92.400, -0.071	92.400, -0.050	92.400, -0.045	92.400, -0.085	92.400, -0.057	92.400, -0.037
464	92.600, 0.303	92.600, 0.484	92.600, 0.645	92.600, 0.759	92.600, 0.860	92.600, -0.022	92.600, -0.071	92.600, -0.050	92.600, -0.045	92.600, -0.085	92.600, -0.057	92.600, -0.037
465	92.800, 0.302	92.800, 0.484	92.800, 0.645	92.800, 0.758	92.800, 0.860	92.800, -0.022	92.800, -0.071	92.800, -0.050	92.800, -0.045	92.800, -0.085	92.800, -0.057	92.800, -0.036
466	93.000, 0.302	93.000, 0.485	93.000, 0.645	93.000, 0.758	93.000, 0.860	93.000, -0.022	93.000, -0.071	93.000, -0.050	93.000, -0.045	93.000, -0.085	93.000, -0.057	93.000, -0.036
467	93.200, 0.302	93.200, 0.485	93.200, 0.645	93.200, 0.758	93.200, 0.861	93.200, -0.021	93.200, -0.071	93.200, -0.050	93.200, -0.045	93.200, -0.085	93.200, -0.057	93.200, -0.036
468	93.400, 0.302	93.400, 0.485	93.400, 0.646	93.400, 0.758	93.400, 0.861	93.400, -0.021	93.400, -0.071	93.400, -0.050	93.400, -0.045	93.400, -0.085	93.400, -0.057	93.400, -0.036
469	93.600, 0.302	93.600, 0.485	93.600, 0.646	93.600, 0.758	93.600, 0.862	93.600, -0.021	93.600, -0.071	93.600, -0.050	93.600, -0.045	93.600, -0.085	93.600, -0.057	93.600, -0.035
470	93.800, 0.302	93.800, 0.485	93.800, 0.646	93.800, 0.759	93.800, 0.862	93.800, -0.021	93.800, -0.071	93.800, -0.050	93.800, -0.045	93.800, -0.085	93.800, -0.057	93.800, -0.035
471	94.000, 0.302	94.000, 0.485	94.000, 0.646	94.000, 0.759	94.000, 0.862	94.000, -0.021	94.000, -0.071	94.000, -0.050	94.000, -0.045	94.000, -0.084	94.000, -0.056	94.000, -0.034
472	94.200, 0.302	94.200, 0.484	94.200, 0.647	94.200, 0.759	94.200, 0.862	94.200, -0.021	94.200, -0.071	94.200, -0.050	94.200, -0.045	94.200, -0.084	94.200, -0.056	94.200, -0.034
473	94.400, 0.303	94.400, 0.484	94.400, 0.647	94.400, 0.760	94.400, 0.862	94.400, -0.021	94.400, -0.071	94.400, -0.050	94.400, -0.045	94.400, -0.084	94.400, -0.056	94.400, -0.034
474	94.600, 0.303	94.600, 0.484	94.600, 0.647	94.600, 0.760	94.600, 0.862	94.600, -0.021	94.600, -0.071	94.600, -0.051	94.600, -0.045	94.600, -0.083	94.600, -0.056	94.600, -0.034
475	94.800, 0.303	94.800, 0.484	94.800, 0.647	94.800, 0.760	94.800, 0.862	94.800, -0.021	94.800, -0.071	94.800, -0.051	94.800, -0.045	94.800, -0.083	94.800, -0.056	94.800, -0.034
476	95.000, 0.303	95.000, 0.485	95.000, 0.648	95.000, 0.760	95.000, 0.862	95.000, -0.021	95.000, -0.071	95.000, -0.051	95.000, -0.046	95.000, -0.084	95.000, -0.056	95.000, -0.034
477	95.200, 0.303	95.200, 0.485	95.200, 0.648	95.200, 0.760	95.200, 0.863	95.200, -0.022	95.200, -0.071	95.200, -0.051	95.200, -0.046	95.200, -0.084	95.200, -0.056	95.200, -0.035
478	95.400, 0.303	95.400, 0.485	95.400, 0.648	95.400, 0.760	95.400, 0.863	95.400, -0.022	95.400, -0.071	95.400, -0.052	95.400, -0.046	95.400, -0.084	95.400, -0.056	95.400, -0.035
479	95.600, 0.303	95.600, 0.486	95.600, 0.649	95.600, 0.760	95.600, 0.863	95.600, -0.023	95.600, -0.072	95.600, -0.052	95.600, -0.046	95.600, -0.084	95.600, -0.056	95.600, -0.036
480	95.800, 0.303	95.800, 0.486	95.800, 0.649	95.800, 0.760	95.800, 0.863	95.800, -0.023	95.800, -0.072	95.800, -0.052	95.800, -0.046	95.800, -0.084	95.800, -0.056	95.800, -0.036
481	96.000, 0.303	96.000, 0.486	96.000, 0.649	96.000, 0.760	96.000, 0.863	96.000, -0.023	96.000, -0.072	96.000, -0.052	96.000, -0.046	96.000, -0.084	96.000, -0.056	96.000, -0.037
482	96.200, 0.304	96.200, 0.487	96.200, 0.649	96.200, 0.761	96.200, 0.863	96.200, -0.023	96.200, -0.072	96.200, -0.052	96.200, -0.046	96.200, -0.084	96.200, -0.055	96.200, -0.037
483	96.400, 0.304	96.400, 0.487	96.400, 0.649	96.400, 0.761	96.400, 0.863	96.400, -0.023	96.400, -0.072	96.400, -0.052	96.400, -0.046	96.400, -0.084	96.400, -0.055	96.400, -0.037
484	96.600, 0.304	96.600, 0.487	96.600, 0.649	96.600, 0.761	96.600, 0.863	96.600, -0.023	96.600, -0.072	96.600, -0.052	96.600, -0.046	96.600, -0.084	96.600, -0.055	96.600, -0.037
485	96.800, 0.304	96.800, 0.487	96.800, 0.649	96.800, 0.762	96.800, 0.863	96.800, -0.023	96.800, -0.072	96.800, -0.052	96.800, -0.045	96.800, -0.084	96.800, -0.055	96.800, -0.037
486	97.000, 0.304	97.000, 0.487	97.000, 0.649	97.000, 0.763	97.000, 0.863	97.000, -0.023	97.000, -0.072	97.000, -0.052	97.000, -0.045	97.000, -0.084	97.000, -0.055	97.000, -0.037
487	97.200, 0.304	97.200, 0.486	97.200, 0.649	97.200, 0.763	97.200, 0.864	97.200, -0.023	97.200, -0.073	97.200, -0.052	97.200, -0.045	97.200, -0.084	97.200, -0.054	97.200, -0.037
488	97.400, 0.304	97.400, 0.486	97.400, 0.649	97.400, 0.764	97.400, 0.864	97.400, -0.023	97.400, -0.073	97.400, -0.052	97.400, -0.045	97.400, -0.084	97.400, -0.054	97.400, -0.036
489	97.600, 0.304	97.600, 0.486	97.600, 0.649	97.600, 0.764	97.600, 0.864	97.600, -0.024	97.600, -0.073	97.600, -0.052	97.600, -0.045	97.600, -0.084	97.600, -0.054	97.600, -0.036
490	97.800, 0.305	97.800, 0.486	97.800, 0.649	97.800, 0.764	97.800, 0.864	97.800, -0.024	97.800, -0.073	97.800, -0.052	97.800, -0.045	97.800, -0.084	97.800, -0.054	97.800, -0.036
491	98.000, 0.305	98.000, 0.486	98.000, 0.649	98.000, 0.764	98.000, 0.864	98.000, -0.024	98.000, -0.073	98.000, -0.052	98.000, -0.045	98.000, -0.084	98.000, -0.054	98.000, -0.036
492	98.200, 0.305	98.200, 0.486	98.200, 0.650	98.200, 0.764	98.200, 0.865	98.200, -0.024	98.200, -0.073	98.200, -0.053	98.200, -0.045	98.200, -0.084	98.200, -0.054	98.200, -0.036
493	98.400, 0.305	98.400, 0.487	98.400, 0.650	98.400, 0.764	98.400, 0.865	98.400, -0.024	98.400, -0.074	98.400, -0.053	98.400, -0.045	98.400, -0.084	98.400, -0.054	98.400, -0.036
494	98.600, 0.305	98.600, 0.487	98.600, 0.651	98.600, 0.764	98.600, 0.865	98.600, -0.024	98.600, -0.074	98.600, -0.053	98.600, -0.045	98.600, -0.084	98.600, -0.054	98.600, -0.036
495	98.800, 0.306	98.800, 0.488	98.800, 0.651	98.800, 0.764	98.800, 0.865	98.800, -0.024	98.800, -0.074	98.800, -0.052	98.800, -0.046	98.800, -0.085	98.800, -0.055	98.800, -0.036
496	99.000, 0.306	99.000, 0.488	99.000, 0.652	99.000, 0.764	99.000, 0.865	99.000, -0.024	99.000, -0.074	99.000, -0.052	99.000, -0.046	99.000, -0.085	99.000, -0.055	99.000, -0.036
497	99.200, 0.306	99.200, 0.488	99.200, 0.652	99.200, 0.764	99.200, 0.865	99.200, -0.024	99.200, -0.074	99.200, -0.052	99.200, -0.046	99.200, -0.085	99.200, -0.055	99.200, -0.037
498	99.400, 0.306	99.400, 0.489	99.400, 0.653	99.400, 0.763	99.400, 0.865	99.400, -0.024	99.400, -0.074	99.400, -0.052	99.400, -0.046	99.400, -0.086	99.400, -0.055	99.400, -0.037
499	99.600, 0.306	99.600, 0.489	99.600, 0.653	99.600, 0.763	99.600, 0.865	99.600, -0.024	99.600, -0.074	99.600, -0.053	99.600, -0.046	99.600, -0.086	99.600, -0.055	99.600, -0.038
500	99.800, 0.306	99.800, 0.489	99.800, 0.653	99.800, 0.763	99.800, 0.865	99.800, -0.024	99.800, -0.074	99.800, -0.053	99.800, -0.046	99.800, -0.086	99.800, -0.055	99.800, -0.038
501	100.000, 0.307	100.000, 0.489	100.000, 0.653	100.000, 0.763	100.000, 0.865	100.000, -0.024	100.000, -0.074	100.000, -0.053	100.000, -0.046	100.000, -0.086	100.000, -0.055	100.000, -0.038
502	100.200, 0.307	100.200, 0.489	100.200, 0.654	100.200, 0.763	100.200, 0.866	100.200, -0.024	100.200, -0.074	100.200, -0.053	100.200, -0.047	100.200, -0.086	100.200, -0.055	100.200, -0.038
503	100.400, 0.307	100.400, 0.489	100.400, 0.654	100.400, 0.764	100.400, 0.866	100.400, -0.024	100.400, -0.074	100.400, -0.053	100.400, -0.046	100.400, -0.085	100.400, -0.055	100.400, -0.038
504	100.600, 0.307	100.600, 0.489	100.600, 0.654	100.600, 0.764	100.600, 0.866	100.600, -0.024	100.600, -0.074	100.600, -0.053	100.600, -0.046	100.600, -0.085	100.600, -0.055	100.600, -0.037
505	100.800, 0.307	100.800, 0.489	100.800, 0.654	100.800, 0.764	100.800, 0.867	100.800, -0.023	100.800, -0.074	100.800, -0.053	100.800, -0.046	100.800, -0.085	100.800, -0.055	100.800, -0.037
506	101.000, 0.307	101.000, 0.489	101.000, 0.654	101.000, 0.765	101.000, 0.867	101.000, -0.023	101.000, -0.074	101.000, -0.053	101.000, -0.045	101.000, -0.084	101.000, -0.055	101.000, -0.037
507	101.200, 0.307	101.200, 0.489	101.200, 0.654	101.200, 0.765	101.200, 0.868	101.200, -0.023	101.200, -0.074	101.200, -0.053	101.200, -0.045	101.200, -0.084	101.200, -0.055	101.200, -0.036
508	101.400, 0.307	101.400, 0.489	101.400, 0.654	101.400, 0.765	101.400, 0.868	101.400, -0.023	101.400, -0.074	101.400, -0.053	101.400, -0.045	101.400, -0.084	101.400, -0.055	101.400, -0.036
509	101.600, 0.307	101.600, 0.490	101.600, 0.654	101.600, 0.765	101.600, 0.868	101.600, -0.022	101.600, -0.075	101.600, -0.053	101.600, -0.045	101.600, -0.084	101.600, -0.056	101.600, -0.036
510	101.800, 0.307	101.800, 0.490	101.800, 0.653	101.800, 0.765	101.800, 0.869	101.800, -0.022	101.800, -0.075	101.800, -0.053	101.800, -0.045	101.800, -0.084	101.800, -0.056	101.800, -0.036
511	102.000, 0.307	102.000, 0.490	102.000, 0.653	102.000, 0.765	102.000, 0.869	102.000, -0.022	102.000, -0.076	102.000, -0.053	102.000, -0.045	102.000, -0.084	102.000, -0.056	102.000, -0.035
512	102.200, 0.307	102.200, 0.491	102.200, 0.653	102.200, 0.766	102.200, 0.869	102.200, -0.022	102.200, -0.076	102.200, -0.053	102.200, -0.045	102.200, -0.084	102.200, -0.056	102.200, -0.035
513	102.400, 0.307	102.400, 0.491	102.400, 0.652	102.400, 0.766	102.400, 0.869	102.400, -0.022	102.400, -0.076	102.400, -0.053	102.400, -0.045	102.400, -0.084	102.400, -0.056	102.400, -0.035
514	102.600, 0.307	102.600, 0.491	102.600, 0.652	102.600, 0.766	102.600, 0.869	102.600, -0.022	102.600, -0.077	102.600, -0.053	102.600, -0.045	102.600, -0.085	102.600, -0.056	102.600, -0.035
515	102.800, 0.307	102.800, 0.491	102.800, 0.652	102.800, 0.766	102.800, 0.869	102.800, -0.022	102.800, -0.077	102.800, -0.052	102.800, -0.045	102.800, -0.086	102.800, -0.056	102.800, -0.035
516	103.000, 0.307	103.000, 0.491	103.000, 0.652	103.000, 0.767	103.000, 0.869	103.000, -0.023	103.000, -0.077	103.000, -0.053	103.000, -0.046	103.000, -0.086	103.000, -0.055	103.000, -0.035
517	103.200, 0.307	103.200, 0.491	103.200, 0.652	103.200, 0.767	103.200, 0.869	103.200, -0.023	103.200, -0.077	103.200, -0.053	103.200, -0.046	103.200, -0.087	103.200, -0.055	103.200, -0.035
518	103.400, 0.307	103.400, 0.491	103.400, 0.652	103.400, 0.767	103.400, 0.869	103.400, -0.023	103.400, -0.077	103.400, -0.053	103.400, -0.046	103.400, -0.087	103.400, -0.055	103.400, -0.035
519	103.600, 0.307	103.600, 0.491	103.600, 0.652	103.600, 0.767	103.600, 0.869	103.600, -0.024	103.600, -0.077	103.600, -0.054	103.600, -0.046	103.600, -0.087	103.600, -0.054	103.600, -0.035
520	103.800, 0.307	103.800, 0.491	103.800, 0.652	103.800, 0.768	103.800, 0.869	103.800, -0.024	103.800, -0.077	103.800, -0.054	103.800, -0.046	103.800, -0.088	103.800, -0.054	103.800, -0.035
521	104.000, 0.307	104.000, 0.491	104.000, 0.652	104.000, 0.768	104.000, 0.869	104.000, -0.025	104.000, -0.076	104.000, -0.054	104.000, -0.047	104.000, -0.088	104.000, -0.054	104.000, -0.035
522	104.200, 0.307	104.200, 0.491	104.200, 0.652	104.200, 0.768	104.200, 0.869	104.200, -0.025	104.200, -0.076	104.200, -0.054	104.200, -0.046	104.200, -0.088	104.200, -0.054	104.200, -0.035
523	104.400, 0.308	104.400, 0.491	104.400, 0.653	104.400, 0.768	104.400, 0.869	104.400, -0.025	104.400, -0.076	104.400, -0.054	104.400, -0.046	104.400, -0.087	104.400, -0.054	104.400, -0.036
524	104.600, 0.308	104.600, 0.491	104.600, 0.653	104.600, 0.768	104.600, 0.869	104.600, -0.025	104.600, -0.076	104.600, -0.054	104.600, -0.046	104.600, -0.087	104.600, -0.055	104.600, -0.036
525	104.800, 0.308	104.800, 0.491	104.800, 0.654	104.800, 0.768	104.800, 0.869	104.800, -0.025	104.800, -0.075	104.800, -0.053	104.800, -0.046	104.800, -0.088	104.800, -0.055	104.800, -0.036
526	105.000, 0.309	105.000, 0.492	105.000, 0.655	105.000, 0.768	105.000, 0.869	105.000, -0.025	105.000, -0.075	105.000, -0.053	105.000, -0.046	105.000, -0.087	105.000, -0.055	105.000, -0.036
527	105.200, 0.309	105.200, 0.492	105.200, 0.655	105.200, 0.768	105.200, 0.869	105.200, -0.025	105.200, -0.076	105.200, -0.053	105.200, -0.046	105.200, -0.088	105.200, -0.055	105.200, -0.036
528	105.400, 0.309	105.400, 0.492	105.400, 0.656	105.400, 0.768	105.400, 0.869	105.400, -0.025	105.400, -0.076	105.400, -0.053	105.400, -0.046	105.400, -0.087	105.400, -0.056	105.400, -0.037
529	105.600, 0.309	105.600, 0.492	105.600, 0.656	105.600, 0.768	105.600, 0.869	105.600, -0.025	105.600, -0.076	105.600, -0.053	105.600, -0.046	105.600, -0.087	105.600, -0.056	105.600, -0.037
530	105.800, 0.309	105.800, 0.492	105.800, 0.657	105.800, 0.768	105.800, 0.869	105.800, -0.025	105.800, -0.076	105.800, -0.053	105.800, -0.046	105.800, -0.087	105.800, -0.056	105.800, -0.037
531	106.000, 0.309	106.000, 0.493	106.000, 0.657	106.000, 0.768	106.000, 0.870	106.000, -0.025	106.000, -0.076	106.000, -0.052	106.000, -0.046	106.000, -0.087	106.000, -0.056	106.000, -0.037
532	106.200, 0.309	106.200, 0.493	106.200, 0.658	106.200, 0.768	106.200, 0.870	106.200, -0.024	106.200, -0.076	106.200, -0.053	106.200, -0.046	106.200, -0.087	106.200, -0.056	106.200, -0.037
533	106.400, 0.309	106.400, 0.493	106.400, 0.658	106.400, 0.768	106.400, 0.870	106.400, -0.024	106.400, -0.076	106.400, -0.053	106.400, -0.046	106.400, -0.087	106.400, -0.056	106.400, -0.037
534	106.600, 0.309	106.600, 0.493	106.600, 0.658	106.600, 0.768	106.600, 0.870	106.600, -0.024	106.600, -0.076	106.600, -0.053	106.600, -0.046	106.600, -0.087	106.600, -0.056	106.600, -0.036
535	106.800, 0.309	106.800, 0.493	106.800, 0.658	106.800, 0.768	106.800, 0.870	106.800, -0.024	106.800, -0.076	106.800, -0.053	106.800, -0.046	106.800, -0.087	106.800, -0.056	106.800, -0.036
536	107.000, 0.309	107.000, 0.493	107.000, 0.658	107.000, 0.769	107.000, 0.870	107.000, -0.023	107.000, -0.077	107.000, -0.053	107.000, -0.046	107.000, -0.087	107.000, -0.056	107.000, -0.036
537	107.200, 0.309	107.200, 0.493	107.200, 0.657	107.200, 0.769	107.200, 0.870	107.200, -0.023	107.200, -0.077	107.200, -0.054	107.200, -0.045	107.200, -0.087	107.200, -0.056	107.200, -0.036
538	107.400, 0.309	107.400, 0.493	107.400, 0.657	107.400, 0.769	107.400, 0.871	107.400, -0.023	107.400, -0.077	107.400, -0.054	107.400, -0.045	107.400, -0.087	107.400, -0.056	107.400, -0.036
539	107.600, 0.309	107.600, 0.493	107.600, 0.657	107.600, 0.770	107.600, 0.871	107.600, -0.023	107.600, -0.077	107.600, -0.054	107.600, -0.045	107.600, -0.087	107.600, -0.055	107.600, -0.036
540	107.800, 0.309	107.800, 0.493	107.800, 0.657	107.800, 0.770	107.800, 0.871	107.800, -0.023	107.800, -0.077	107.800, -0.054	107.800, -0.044	107.800, -0.087	107.800, -0.055	107.800, -0.036
541	108.000, 0.309	108.000, 0.493	108.000, 0.657	108.000, 0.770	108.000, 0.872	108.000, -0.023	108.000, -0.077	108.000, -0.054	108.000, -0.044	108.000, -0.087	108.000, -0.055	108.000, -0.036
542	108.200, 0.310	108.200, 0.494	108.200, 0.657	108.200, 0.771	108.200, 0.872	108.200, -0.023	108.200, -0.077	108.200, -0.054	108.200, -0.043	108.200, -0.087	108.200, -0.055	108.200, -0.035
543	108.400, 0.310	108.400, 0.494	108.400, 0.657	108.400, 0.771	108.400, 0.872	108.400, -0.024	108.400, -0.077	108.400, -0.054	108.400, -0.043	108.400, -0.087	108.400, -0.055	108.400, -0.035
544	108.600, 0.310	108.600, 0.494	108.600, 0.657	108.600, 0.771	108.600, 0.873	108.600, -0.024	108.600, -0.077	108.600, -0.054	108.600, -0.043	108.600, -0.087	108.600, -0.055	108.600, -0.035
545	108.800, 0.310	108.800, 0.494	108.800, 0.657	108.800, 0.772	108.800, 0.873	108.800, -0.024	108.800, -0.077	108.800, -0.054	108.800, -0.043	108.800, -0.087	108.800, -0.055	108.800, -0.035
546	109.000, 0.310	109.000, 0.494	109.000, 0.657	109.000, 0.772	109.000, 0.873	109.000, -0.024	109.000, -0.077	109.000, -0.054	109.000, -0.043	109.000, -0.087	109.000, -0.055	109.000, -0.035
547	109.200, 0.310	109.200, 0.495	109.200, 0.657	109.200, 0.772	109.200, 0.874	109.200, -0.024	109.200, -0.077	109.200, -0.054	109.200, -0.043	109.200, -0.087	109.200, -0.055	109.200, -0.035
548	109.400, 0.310	109.400, 0.495	109.400, 0.658	109.400, 0.773	109.400, 0.874	109.400, -0.024	109.400, -0.077	109.400, -0.054	109.400, -0.044	109.400, -0.086	109.400, -0.055	109.400, -0.036
549	109.600, 0.310	109.600, 0.495	109.600, 0.658	109.600, 0.773	109.600, 0.874	109.600, -0.024	109.600, -0.077	109.600, -0.054	109.600, -0.044	109.600, -0.086	109.600, -0.056	109.600, -0.036
550	109.800, 0.310	109.800, 0.495	109.800, 0.658	109.800, 0.773	109.800, 0.873	109.800, -0.024	109.800, -0.077	109.800, -0.054	109.800, -0.045	109.800, -0.086	109.800, -0.056	109.800, -0.035
551	110.000, 0.310	110.000, 0.495	110.000, 0.658	110.000, 0.773	110.000, 0.873	110.000, -0.024	110.000, -0.077	110.000, -0.054	110.000, -0.045	110.000, -0.086	110.000, -0.056	110.000, -0.035
552	110.200, 0.310	110.200, 0.495	110.200, 0.658	110.200, 0.773	110.200, 0.873	110.200, -0.024	110.200, -0.077	110.200, -0.055	110.200, -0.046	110.200, -0.087	110.200, -0.056	110.200, -0.035
553	110.400, 0.311	110.400, 0.494	110.400, 0.657	110.400, 0.773	110.400, 0.872	110.400, -0.025	110.400, -0.077	110.400, -0.055	110.400, -0.046	110.400, -0.087	110.400, -0.056	110.400, -0.035
554	110.600, 0.311	110.600, 0.494	110.600, 0.657	110.600, 0.773	110.600, 0.872	110.600, -0.025	110.600, -0.078	110.600, -0.055	110.600, -0.046	110.600, -0.087	110.600, -0.057	110.600, -0.035
555	110.800, 0.311	110.800, 0.494	110.800, 0.657	110.800, 0.773	110.800, 0.872	110.800, -0.024	110.800, -0.078	110.800, -0.055	110.800, -0.047	110.800, -0.087	110.800, -0.057	110.800, -0.035
556	111.000, 0.311	111.000, 0.494	111.000, 0.657	111.000, 0.773	111.000, 0.872	111.000, -0.024	111.000, -0.079	111.000, -0.056	111.000, -0.047	111.000, -0.088	111.000, -0.057	111.000, -0.035
557	111.200, 0.311	111.200, 0.494	111.200, 0.657	111.200, 0.772	111.200, 0.872	111.200, -0.024	111.200, -0.079	111.200, -0.056	111.200, -0.047	111.200, -0.088	111.200, -0.057	111.200, -0.035
558	111.400, 0.311	111.400, 0.494	111.400, 0.656	111.400, 0.772	111.400, 0.872	111.400, -0.024	111.400, -0.079	111.400, -0.056	111.400, -0.047	111.400, -0.088	111.400, -0.057	111.400, -0.035
559	111.600, 0.311	111.600, 0.494	111.600, 0.656	111.600, 0.772	111.600, 0.873	111.600, -0.024	111.600, -0.080	111.600, -0.056	111.600, -0.047	111.600, -0.088	111.600, -0.057	111.600, -0.035
560	111.800, 0.311	111.800, 0.494	111.800, 0.656	111.800, 0.772	111.800, 0.873	111.800, -0.024	111.800, -0.080	111.800, -0.056	111.800, -0.047	111.800, -0.088	111.800, -0.057	111.800, -0.036
561	112.000, 0.311	112.000, 0.494	112.000, 0.656	112.000, 0.773	112.000, 0.873	112.000, -0.024	112.000, -0.080	112.000, -0.056	112.000, -0.047	112.000, -0.088	112.000, -0.057	112.000, -0.036
562	112.200, 0.311	112.200, 0.494	112.200, 0.656	112.200, 0.773	112.200, 0.874	112.200, -0.024	112.200, -0.080	112.200, -0.055	112.200, -0.048	112.200, -0.088	112.200, -0.057	112.200, -0.036
563	112.400, 0.311	112.400, 0.494	112.400, 0.656	112.400, 0.773	112.400, 0.875	112.400, -0.024	112.400, -0.080	112.400, -0.055	112.400, -0.048	112.400, -0.087	112.400, -0.057	112.400, -0.036
564	112.600, 0.311	112.600, 0.494	112.600, 0.656	112.600, 0.773	112.600, 0.875	112.600, -0.024	112.600, -0.080	112.600, -0.055	112.600, -0.048	112.600, -0.087	112.600, -0.057	112.600, -0.036
565	112.800, 0.311	112.800, 0.495	112.800, 0.656	112.800, 0.773	112.800, 0.876	112.800, -0.024	112.800, -0.080	112.800, -0.055	112.800, -0.048	112.800, -0.087	112.800, -0.057	112.800, -0.036
566	113.000, 0.311	113.000, 0.495	113.000, 0.656	113.000, 0.774	113.000, 0.876	113.000, -0.024	113.000, -0.080	113.000, -0.055	113.000, -0.048	113.000, -0.087	113.000, -0.057	113.000, -0.036
567	113.200, 0.311	113.200, 0.495	113.200, 0.656	113.200, 0.774	113.200, 0.876	113.200, -0.024	113.200, -0.080	113.200, -0.055	113.200, -0.048	113.200, -0.087	113.200, -0.057	113.200, -0.036
568	113.400, 0.311	113.400, 0.495	113.400, 0.656	113.400, 0.774	113.400, 0.876	113.400, -0.024	113.400, -0.080	113.400, -0.054	113.400, -0.048	113.400, -0.087	113.400, -0.057	113.400, -0.036
569	113.600, 0.312	113.600, 0.495	113.600, 0.657	113.600, 0.774	113.600, 0.876	113.600, -0.024	113.600, -0.080	113.600, -0.054	113.600, -0.048	113.600, -0.087	113.600, -0.057	113.600, -0.036
570	113.800, 0.312	113.800, 0.495	113.800, 0.657	113.800, 0.775	113.800, 0.875	113.800, -0.024	113.800, -0.080	113.800, -0.054	113.800, -0.047	113.800, -0.087	113.800, -0.057	113.800, -0.035
571	114.000, 0.312	114.000, 0.495	114.000, 0.657	114.000, 0.775	114.000, 0.875	114.000, -0.024	114.000, -0.079	114.000, -0.054	114.000, -0.047	114.000, -0.088	114.000, -0.057	114.000, -0.035
572	114.200, 0.312	114.200, 0.495	114.200, 0.658	114.200, 0.775	114.200, 0.875	114.200, -0.024	114.200, -0.079	114.200, -0.054	114.200, -0.047	114.200, -0.088	114.200, -0.057	114.200, -0.034
573	114.400, 0.312	114.400, 0.496	114.400, 0.658	114.400, 0.775	114.400, 0.875	114.400, -0.024	114.400, -0.079	114.400, -0.054	114.400, -0.047	114.400, -0.088	114.400, -0.057	114.400, -0.034
574	114.600, 0.312	114.600, 0.496	114.600, 0.659	114.600, 0.776	114.600, 0.875	114.600, -0.024	114.600, -0.080	114.600, -0.054	114.600, -0.047	114.600, -0.088	114.600, -0.057	114.600, -0.034
575	114.800, 0.312	114.800, 0.496	114.800, 0.659	114.800, 0.776	114.800, 0.875	114.800, -0.024	114.800, -0.080	114.800, -0.055	114.800, -0.047	114.800, -0.088	114.800, -0.057	114.800, -0.033
576	115.000, 0.312	115.000, 0.496	115.000, 0.659	115.000, 0.776	115.000, 0.875	115.000, -0.024	115.000, -0.080	115.000, -0.055	115.000, -0.048	115.000, -0.089	115.000, -0.057	115.000, -0.033
577	115.200, 0.312	115.200, 0.496	115.200, 0.659	115.200, 0.776	115.200, 0.875	115.200, -0.024	115.200, -0.080	115.200, -0.055	115.200, -0.047	115.200, -0.089	115.200, -0.057	115.200, -0.033
578	115.400, 0.312	115.400, 0.497	115.400, 0.660	115.400, 0.777	115.400, 0.875	115.400, -0.024	115.400, -0.080	115.400, -0.055	115.400, -0.048	115.400, -0.089	115.400, -0.057	115.400, -0.034
579	115.600, 0.313	115.600, 0.497	115.600, 0.660	115.600, 0.776	115.600, 0.875	115.600, -0.024	115.600, -0.081	115.600, -0.055	115.600, -0.048	115.600, -0.090	115.600, -0.057	115.600, -0.034
580	115.800, 0.313	115.800, 0.497	115.800, 0.660	115.800, 0.776	115.800, 0.875	115.800, -0.024	115.800, -0.081	115.800, -0.055	115.800, -0.048	115.800, -0.090	115.800, -0.057	115.800, -0.035
581	116.000, 0.313	116.000, 0.497	116.000, 0.661	116.000, 0.776	116.000, 0.876	116.000, -0.024	116.000, -0.081	116.000, -0.056	116.000, -0.047	116.000, -0.090	116.000, -0.056	116.000, -0.035
582	116.200, 0.313	116.200, 0.497	116.200, 0.661	116.200, 0.776	116.200, 0.876	116.200, -0.024	116.200, -0.081	116.200, -0.056	116.200, -0.048	116.200, -0.090	116.200, -0.056	116.200, -0.036
583	116.400, 0.313	116.400, 0.497	116.400, 0.661	116.400, 0.776	116.400, 0.876	116.400, -0.024	116.400, -0.081	116.400, -0.056	116.400, -0.047	116.400, -0.089	116.400, -0.056	116.400, -0.036
584	116.600, 0.313	116.600, 0.497	116.600, 0.661	116.600, 0.776	116.600, 0.876	116.600, -0.024	116.600, -0.081	116.600, -0.056	116.600, -0.048	116.600, -0.089	116.600, -0.056	116.600, -0.036
585	116.800, 0.313	116.800, 0.497	116.800, 0.661	116.800, 0.776	116.800, 0.877	116.800, -0.023	116.800, -0.081	116.800, -0.056	116.800, -0.048	116.800, -0.089	116.800, -0.056	116.800, -0.036
586	117.000, 0.313	117.000, 0.497	117.000, 0.661	117.000, 0.776	117.000, 0.877	117.000, -0.023	117.000, -0.081	117.000, -0.056	117.000, -0.048	117.000, -0.089	117.000, -0.056	117.000, -0.036
587	117.200, 0.312	117.200, 0.497	117.200, 0.661	117.200, 0.776	117.200, 0.877	117.200, -0.023	117.200, -0.081	117.200, -0.056	117.200, -0.048	117.200, -0.089	117.200, -0.056	117.200, -0.035
588	117.400, 0.312	117.400, 0.497	117.400, 0.661	117.400, 0.777	117.400, 0.878	117.400, -0.023	117.400, -0.081	117.400, -0.055	117.400, -0.048	117.400, -0.089	117.400, -0.056	117.400, -0.035
589	117.600, 0.312	117.600, 0.497	117.600, 0.661	117.600, 0.777	117.600, 0.878	117.600, -0.023	117.600, -0.081	117.600, -0.055	117.600, -0.048	117.600, -0.088	117.600, -0.056	117.600, -0.035
590	117.800, 0.312	117.800, 0.496	117.800, 0.661	117.800, 0.777	117.800, 0.878	117.800, -0.022	117.800, -0.081	117.800, -0.055	117.800, -0.047	117.800, -0.088	117.800, -0.056	117.800, -0.034
591	118.000, 0.312	118.000, 0.496	118.000, 0.661	118.000, 0.778	118.000, 0.878	118.000, -0.022	118.000, -0.081	118.000, -0.055	118.000, -0.047	118.000, -0.088	118.000, -0.056	118.000, -0.034
592	118.200, 0.312	118.200, 0.496	118.200, 0.660	118.200, 0.778	118.200, 0.878	118.200, -0.022	118.200, -0.081	118.200, -0.055	118.200, -0.047	118.200, -0.087	118.200, -0.057	118.200, -0.034
593	118.400, 0.312	118.400, 0.496	118.400, 0.660	118.400, 0.778	118.400, 0.879	118.400, -0.022	118.400, -0.081	118.400, -0.055	118.400, -0.047	118.400, -0.087	118.400, -0.057	118.400, -0.034
594	118.600, 0.312	118.600, 0.496	118.600, 0.660	118.600, 0.779	118.600, 0.879	118.600, -0.022	118.600, -0.081	118.600, -0.054	118.600, -0.046	118.600, -0.088	118.600, -0.057	118.600, -0.033
595	118.800, 0.312	118.800, 0.496	118.800, 0.660	118.800, 0.779	118.800, 0.879	118.800, -0.022	118.800, -0.082	118.800, -0.054	118.800, -0.046	118.800, -0.088	118.800, -0.057	118.800, -0.033
596	119.000, 0.312	119.000, 0.497	119.000, 0.660	119.000, 0.778	119.000, 0.879	119.000, -0.022	119.000, -0.082	119.000, -0.054	119.000, -0.045	119.000, -0.088	119.000, -0.057	119.000, -0.033
597	119.200, 0.312	119.200, 0.497	119.200, 0.660	119.200, 0.778	119.200, 0.879	119.200, -0.023	119.200, -0.082	119.200, -0.054	119.200, -0.045	119.200, -0.088	119.200, -0.057	119.200, -0.033
598	119.400, 0.312	119.400, 0.497	119.400, 0.660	119.400, 0.778	119.400, 0.879	119.400, -0.023	119.400, -0.082	119.400, -0.054	119.400, -0.045	119.400, -0.089	119.400, -0.057	119.400, -0.033
599	119.600, 0.312	119.600, 0.498	119.600, 0.661	119.600, 0.777	119.600, 0.879	119.600, -0.023	119.600, -0.082	119.600, -0.055	119.600, -0.045	119.600, -0.089	119.600, -0.057	119.600, -0.033
600	119.800, 0.312	119.800, 0.498	119.800, 0.661	119.800, 0.777	119.800, 0.879	119.800, -0.023	119.800, -0.082	119.800, -0.055	119.800, -0.045	119.800, -0.089	119.800, -0.057	119.800, -0.033
601	120.000, 0.313	120.000, 0.498	120.000, 0.661	120.000, 0.777	120.000, 0.879	120.000, -0.023	120.000, -0.082	120.000, -0.055	120.000, -0.045	120.000, -0.089	120.000, -0.057	120.000, -0.033
602	120.200, 0.313	120.200, 0.498	120.200, 0.661	120.200, 0.777	120.200, 0.880	120.200, -0.023	120.200, -0.082	120.200, -0.055	120.200, -0.045	120.200, -0.088	120.200, -0.057	120.200, -0.033
603	120.400, 0.313	120.400, 0.499	120.400, 0.662	120.400, 0.777	120.400, 0.880	120.400, -0.023	120.400, -0.082	120.400, -0.055	120.400, -0.046	120.400, -0.088	120.400, -0.057	120.400, -0.034
604	120.600, 0.313	120.600, 0.499	120.600, 0.662	120.600, 0.777	120.600, 0.880	120.600, -0.023	120.600, -0.082	120.600, -0.055	120.600, -0.046	120.600, -0.088	120.600, -0.057	120.600, -0.034
605	120.800, 0.313	120.800, 0.499	120.800, 0.662	120.800, 0.778	120.800, 0.880	120.800, -0.023	120.800, -0.081	120.800, -0.055	120.800, -0.047	120.800, -0.088	120.800, -0.057	120.800, -0.034
606	121.000, 0.313	121.000, 0.499	121.000, 0.663	121.000, 0.778	121.000, 0.880	121.000, -0.024	121.000, -0.082	121.000, -0.054	121.000, -0.048	121.000, -0.088	121.000, -0.057	121.000, -0.034
607	121.200, 0.313	121.200, 0.499	121.200, 0.663	121.200, 0.778	121.200, 0.880	121.200, -0.024	121.200, -0.081	121.200, -0.054	121.200, -0.048	121.200, -0.088	121.200, -0.057	121.200, -0.034
608	121.400, 0.313	121.400, 0.499	121.400, 0.662	121.400, 0.779	121.400, 0.880	121.400, -0.024	121.400, -0.081	121.400, -0.054	121.400, -0.049	121.400, -0.088	121.400, -0.056	121.400, -0.035
609	121.600, 0.313	121.600, 0.500	121.600, 0.662	121.600, 0.779	121.600, 0.880	121.600, -0.024	121.600, -0.081	121.600, -0.054	121.600, -0.049	121.600, -0.088	121.600, -0.056	121.600, -0.035
610	121.800, 0.313	121.800, 0.500	121.800, 0.662	121.800, 0.779	121.800, 0.880	121.800, -0.024	121.800, -0.081	121.800, -0.054	121.800, -0.049	121.800, -0.087	121.800, -0.056	121.800, -0.035
611	122.000, 0.313	122.000, 0.500	122.000, 0.662	122.000, 0.780	122.000, 0.880	122.000, -0.024	122.000, -0.081	122.000, -0.054	122.000, -0.049	122.000, -0.087	122.000, -0.056	122.000, -0.036
612	122.200, 0.313	122.200, 0.500	122.200, 0.663	122.200, 0.780	122.200, 0.880	122.200, -0.024	122.200, -0.081	122.200, -0.054	122.200, -0.049	122.200, -0.087	122.200, -0.056	122.200, -0.036
613	122.400, 0.314	122.400, 0.499	122.400, 0.663	122.400, 0.780	122.400, 0.879	122.400, -0.025	122.400, -0.082	122.400, -0.054	122.400, -0.049	122.400, -0.087	122.400, -0.056	122.400, -0.036
614	122.600, 0.313	122.600, 0.499	122.600, 0.663	122.600, 0.780	122.600, 0.879	122.600, -0.025	122.600, -0.082	122.600, -0.055	122.600, -0.048	122.600, -0.087	122.600, -0.056	122.600, -0.036
615	122.800, 0.313	122.800, 0.499	122.800, 0.663	122.800, 0.780	122.800, 0.880	122.800, -0.025	122.800, -0.082	122.800, -0.055	122.800, -0.048	122.800, -0.088	122.800, -0.056	122.800, -0.036
616	123.000, 0.313	123.000, 0.499	123.000, 0.663	123.000, 0.780	123.000, 0.880	123.000, -0.024	123.000, -0.082	123.000, -0.055	123.000, -0.048	123.000, -0.088	123.000, -0.056	123.000, -0.036
617	123.200, 0.313	123.200, 0.499	123.200, 0.663	123.200, 0.780	123.200, 0.880	123.200, -0.024	123.200, -0.083	123.200, -0.055	123.200, -0.048	123.200, -0.088	123.200, -0.056	123.200, -0.036
618	123.400, 0.313	123.400, 0.499	123.400, 0.663	123.400, 0.780	123.400, 0.880	123.400, -0.024	123.400, -0.083	123.400, -0.056	123.400, -0.048	123.400, -0.088	123.400, -0.056	123.400, -0.036
619	123.600, 0.313	123.600, 0.499	123.600, 0.663	123.600, 0.781	123.600, 0.881	123.600, -0.024	123.600, -0.083	123.600, -0.056	123.600, -0.048	123.600, -0.088	123.600, -0.056	123.600, -0.036
620	123.800, 0.313	123.800, 0.499	123.800, 0.663	123.800, 0.781	123.800, 0.881	123.800, -0.024	123.800, -0.084	123.800, -0.056	123.800, -0.048	123.800, -0.088	123.800, -0.056	123.800, -0.036
621	124.000, 0.314	124.000, 0.499	124.000, 0.663	124.000, 0.781	124.000, 0.882	124.000, -0.023	124.000, -0.084	124.000, -0.056	124.000, -0.048	124.000, -0.088	124.000, -0.056	124.000, -0.035
622	124.200, 0.314	124.200, 0.499	124.200, 0.663	124.200, 0.781	124.200, 0.883	124.200, -0.023	124.200, -0.084	124.200, -0.056	124.200, -0.047	124.200, -0.089	124.200, -0.056	124.200, -0.035
623	124.400, 0.314	124.400, 0.499	124.400, 0.663	124.400, 0.781	124.400, 0.883	124.400, -0.023	124.400, -0.084	124.400, -0.056	124.400, -0.047	124.400, -0.089	124.400, -0.056	124.400, -0.035
624	124.600, 0.315	124.600, 0.499	124.600, 0.663	124.600, 0.781	124.600, 0.884	124.600, -0.023	124.600, -0.084	124.600, -0.055	124.600, -0.047	124.600, -0.089	124.600, -0.056	124.600, -0.035
625	124.800, 0.315	124.800, 0.499	124.800, 0.663	124.800, 0.781	124.800, 0.884	124.800, -0.023	124.800, -0.083	124.800, -0.055	124.800, -0.047	124.800, -0.089	124.800, -0.056	124.800, -0.035
626	125.000, 0.315	125.000, 0.499	125.000, 0.663	125.000, 0.781	125.000, 0.884	125.000, -0.023	125.000, -0.083	125.000, -0.055	125.000, -0.047	125.000, -0.089	125.000, -0.056	125.000, -0.035
627	125.200, 0.315	125.200, 0.499	125.200, 0.663	125.200, 0.781	125.200, 0.884	125.200, -0.024	125.200, -0.083	125.200, -0.055	125.200, -0.047	125.200, -0.089	125.200, -0.056	125.200, -0.036
628	125.400, 0.315	125.400, 0.500	125.400, 0.663	125.400, 0.782	125.400, 0.884	125.400, -0.024	125.400, -0.083	125.400, -0.055	125.400, -0.047	125.400, -0.089	125.400, -0.056	125.400, -0.036
629	125.600, 0.315	125.600, 0.500	125.600, 0.663	125.600, 0.782	125.600, 0.884	125.600, -0.024	125.600, -0.083	125.600, -0.055	125.600, -0.047	125.600, -0.089	125.600, -0.057	125.600, -0.035
630	125.800, 0.315	125.800, 0.500	125.800, 0.663	125.800, 0.781	125.800, 0.884	125.800, -0.024	125.800, -0.083	125.800, -0.055	125.800, -0.047	125.800, -0.089	125.800, -0.057	125.800, -0.035
631	126.000, 0.315	126.000, 0.500	126.000, 0.664	126.000, 0.781	126.000, 0.883	126.000, -0.024	126.000, -0.083	126.000, -0.055	126.000, -0.047	126.000, -0.089	126.000, -0.057	126.000, -0.035
632	126.200, 0.315	126.200, 0.500	126.200, 0.663	126.200, 0.781	126.200, 0.883	126.200, -0.025	126.200, -0.084	126.200, -0.055	126.200, -0.047	126.200, -0.089	126.200, -0.057	126.200, -0.035
633	126.400, 0.315	126.400, 0.500	126.400, 0.663	126.400, 0.781	126.400, 0.883	126.400, -0.025	126.400, -0.084	126.400, -0.055	126.400, -0.047	126.400, -0.089	126.400, -0.057	126.400, -0.035
634	126.600, 0.315	126.600, 0.501	126.600, 0.663	126.600, 0.781	126.600, 0.883	126.600, -0.025	126.600, -0.084	126.600, -0.055	126.600, -0.048	126.600, -0.089	126.600, -0.056	126.600, -0.035
635	126.800, 0.315	126.800, 0.501	126.800, 0.663	126.800, 0.781	126.800, 0.883	126.800, -0.025	126.800, -0.084	126.800, -0.055	126.800, -0.048	126.800, -0.089	126.800, -0.056	126.800, -0.035
636	127.000, 0.315	127.000, 0.501	127.000, 0.663	127.000, 0.781	127.000, 0.883	127.000, -0.025	127.000, -0.084	127.000, -0.055	127.000, -0.048	127.000, -0.089	127.000, -0.056	127.000, -0.035
637	127.200, 0.315	127.200, 0.501	127.200, 0.664	127.200, 0.781	127.200, 0.883	127.200, -0.024	127.200, -0.085	127.200, -0.055	127.200, -0.048	127.200, -0.089	127.200, -0.056	127.200, -0.035
638	127.400, 0.315	127.400, 0.501	127.400, 0.664	127.400, 0.781	127.400, 0.883	127.400, -0.024	127.400, -0.085	127.400, -0.055	127.400, -0.048	127.400, -0.089	127.400, -0.056	127.400, -0.035
639	127.600, 0.315	127.600, 0.501	127.600, 0.664	127.600, 0.782	127.600, 0.883	127.600, -0.024	127.600, -0.085	127.600, -0.054	127.600, -0.049	127.600, -0.089	127.600, -0.056	127.600, -0.035
640	127.800, 0.316	127.800, 0.501	127.800, 0.664	127.800, 0.782	127.800, 0.883	127.800, -0.023	127.800, -0.085	127.800, -0.054	127.800, -0.048	127.800, -0.090	127.800, -0.056	127.800, -0.035
641	128.000, 0.316	128.000, 0.501	128.000, 0.665	128.000, 0.782	128.000, 0.883	128.000, -0.023	128.000, -0.086	128.000, -0.054	128.000, -0.049	128.000, -0.090	128.000, -0.056	128.000, -0.035
642	128.200, 0.316	128.200, 0.501	128.200, 0.665	128.200, 0.782	128.200, 0.884	128.200, -0.023	128.200, -0.086	128.200, -0.054	128.200, -0.049	128.200, -0.090	128.200, -0.056	128.200, -0.035
643	128.400, 0.316	128.400, 0.501	128.400, 0.665	128.400, 0.783	128.400, 0.884	128.400, -0.023	128.400, -0.085	128.400, -0.054	128.400, -0.049	128.400, -0.090	128.400, -0.056	128.400, -0.035
644	128.600, 0.316	128.600, 0.500	128.600, 0.665	128.600, 0.783	128.600, 0.884	128.600, -0.023	128.600, -0.085	128.600, -0.054	128.600, -0.049	128.600, -0.089	128.600, -0.056	128.600, -0.036
645	128.800, 0.316	128.800, 0.500	128.800, 0.666	128.800, 0.783	128.800, 0.884	128.800, -0.023	128.800, -0.085	128.800, -0.054	128.800, -0.049	128.800, -0.089	128.800, -0.056	128.800, -0.036
646	129.000, 0.316	129.000, 0.500	129.000, 0.666	129.000, 0.783	129.000, 0.885	129.000, -0.023	129.000, -0.085	129.000, -0.054	129.000, -0.049	129.000, -0.089	129.000, -0.056	129.000, -0.036
647	129.200, 0.316	129.200, 0.500	129.200, 0.666	129.200, 0.783	129.200, 0.885	129.200, -0.023	129.200, -0.085	129.200, -0.054	129.200, -0.048	129.200, -0.089	129.200, -0.056	129.200, -0.036
648	129.400, 0.316	129.400, 0.499	129.400, 0.666	129.400, 0.784	129.400, 0.885	129.400, -0.023	129.400, -0.085	129.400, -0.054	129.400, -0.048	129.400, -0.090	129.400, -0.056	129.400, -0.036
649	129.600, 0.315	129.600, 0.499	129.600, 0.666	129.600, 0.784	129.600, 0.885	129.600, -0.023	129.600, -0.085	129.600, -0.054	129.600, -0.048	129.600, -0.090	129.600, -0.056	129.600, -0.036
650	129.800, 0.315	129.800, 0.499	129.800, 0.666	129.800, 0.784	129.800, 0.885	129.800, -0.024	129.800, -0.085	129.800, -0.054	129.800, -0.048	129.800, -0.090	129.800, -0.056	129.800, -0.036
651	130.000, 0.315	130.000, 0.499	130.000, 0.666	130.000, 0.784	130.000, 0.885	130.000, -0.024	130.000, -0.085	130.000, -0.054	130.000, -0.048	130.000, -0.090	130.000, -0.056	130.000, -0.035
652	130.200, 0.315	130.200, 0.499	130.200, 0.666	130.200, 0.784	130.200, 0.885	130.200, -0.024	130.200, -0.085	130.200, -0.054	130.200, -0.048	130.200, -0.089	130.200, -0.056	130.200, -0.035
653	130.400, 0.315	130.400, 0.500	130.400, 0.666	130.400, 0.784	130.400, 0.885	130.400, -0.025	130.400, -0.085	130.400, -0.054	130.400, -0.048	130.400, -0.089	130.400, -0.057	130.400, -0.035
654	130.600, 0.315	130.600, 0.500	130.600, 0.666	130.600, 0.784	130.600, 0.885	130.600, -0.025	130.600, -0.085	130.600, -0.055	130.600, -0.048	130.600, -0.089	130.600, -0.057	130.600, -0.034
655	130.800, 0.315	130.800, 0.500	130.800, 0.666	130.800, 0.784	130.800, 0.885	130.800, -0.025	130.800, -0.086	130.800, -0.055	130.800, -0.048	130.800, -0.089	130.800, -0.057	130.800, -0.034
656	131.000, 0.315	131.000, 0.500	131.000, 0.665	131.000, 0.784	131.000, 0.886	131.000, -0.026	131.000, -0.086	131.000, -0.055	131.000, -0.049	131.000, -0.089	131.000, -0.057	131.000, -0.033
657	131.200, 0.315	131.200, 0.500	131.200, 0.665	131.200, 0.784	131.200, 0.886	131.200, -0.026	131.200, -0.085	131.200, -0.056	131.200, -0.049	131.200, -0.089	131.200, -0.057	131.200, -0.033
658	131.400, 0.316	131.400, 0.501	131.400, 0.665	131.400, 0.784	131.400, 0.886	131.400, -0.026	131.400, -0.085	131.400, -0.056	131.400, -0.049	131.400, -0.090	131.400, -0.058	131.400, -0.032
659	131.600, 0.316	131.600, 0.501	131.600, 0.665	131.600, 0.784	131.600, 0.886	131.600, -0.026	131.600, -0.085	131.600, -0.056	131.600, -0.049	131.600, -0.090	131.600, -0.058	131.600, -0.032
660	131.800, 0.316	131.800, 0.501	131.800, 0.665	131.800, 0.784	131.800, 0.886	131.800, -0.027	131.800, -0.085	131.800, -0.056	131.800, -0.049	131.800, -0.090	131.800, -0.058	131.800, -0.032
661	132.000, 0.316	132.000, 0.501	132.000, 0.665	132.000, 0.785	132.000, 0.887	132.000, -0.027	132.000, -0.085	132.000, -0.056	132.000, -0.050	132.000, -0.090	132.000, -0.058	132.000, -0.032
662	132.200, 0.317	132.200, 0.501	132.200, 0.665	132.200, 0.785	132.200, 0.887	132.200, -0.027	132.200, -0.085	132.200, -0.056	132.200, -0.050	132.200, -0.090	132.200, -0.058	132.200, -0.032
663	132.400, 0.317	132.400, 0.501	132.400, 0.665	132.400, 0.785	132.400, 0.887	132.400, -0.027	132.400, -0.085	132.400, -0.056	132.400, -0.050	132.400, -0.090	132.400, -0.058	132.400, -0.032
664	132.600, 0.317	132.600, 0.500	132.600, 0.665	132.600, 0.784	132.600, 0.888	132.600, -0.027	132.600, -0.085	132.600, -0.056	132.600, -0.050	132.600, -0.090	132.600, -0.058	132.600, -0.032
665	132.800, 0.317	132.800, 0.500	132.800, 0.666	132.800, 0.785	132.800, 0.888	132.800, -0.027	132.800, -0.085	132.800, -0.056	132.800, -0.049	132.800, -0.089	132.800, -0.058	132.800, -0.032
666	133.000, 0.317	133.000, 0.500	133.000, 0.666	133.000, 0.785	133.000, 0.888	133.000, -0.026	133.000, -0.085	133.000, -0.056	133.000, -0.049	133.000, -0.089	133.000, -0.058	133.000, -0.032
667	133.200, 0.317	133.200, 0.500	133.200, 0.666	133.200, 0.785	133.200, 0.888	133.200, -0.026	133.200, -0.085	133.200, -0.056	133.200, -0.048	133.200, -0.089	133.200, -0.058	133.200, -0.033
668	133.400, 0.318	133.400, 0.500	133.400, 0.667	133.400, 0.785	133.400, 0.888	133.400, -0.026	133.400, -0.085	133.400, -0.055	133.400, -0.048	133.400, -0.089	133.400, -0.058	133.400, -0.034
669	133.600, 0.318	133.600, 0.500	133.600, 0.667	133.600, 0.785	133.600, 0.888	133.600, -0.026	133.600, -0.085	133.600, -0.055	133.600, -0.047	133.600, -0.089	133.600, -0.058	133.600, -0.034
670	133.800, 0.318	133.800, 0.500	133.800, 0.668	133.800, 0.785	133.800, 0.888	133.800, -0.026	133.800, -0.085	133.800, -0.055	133.800, -0.047	133.800, -0.089	133.800, -0.057	133.800, -0.035
671	134.000, 0.318	134.000, 0.500	134.000, 0.668	134.000, 0.785	134.000, 0.888	134.000, -0.026	134.000, -0.085	134.000, -0.055	134.000, -0.047	134.000, -0.089	134.000, -0.057	134.000, -0.035
672	134.200, 0.318	134.200, 0.500	134.200, 0.668	134.200, 0.785	134.200, 0.888	134.200, -0.026	134.200, -0.085	134.200, -0.055	134.200, -0.047	134.200, -0.089	134.200, -0.057	134.200, -0.035
673	134.400, 0.318	134.400, 0.500	134.400, 0.669	134.400, 0.785	134.400, 0.888	134.400, -0.026	134.400, -0.085	134.400, -0.055	134.400, -0.047	134.400, -0.089	134.400, -0.057	134.400, -0.036
674	134.600, 0.317	134.600, 0.501	134.600, 0.669	134.600, 0.786	134.600, 0.888	134.600, -0.025	134.600, -0.085	134.600, -0.056	134.600, -0.047	134.600, -0.089	134.600, -0.057	134.600, -0.036
675	134.800, 0.317	134.800, 0.501	134.800, 0.669	134.800, 0.786	134.800, 0.888	134.800, -0.025	134.800, -0.085	134.800, -0.056	134.800, -0.047	134.800, -0.089	134.800, -0.058	134.800, -0.036
676	135.000, 0.317	135.000, 0.501	135.000, 0.669	135.000, 0.787	135.000, 0.888	135.000, -0.025	135.000, -0.085	135.000, -0.057	135.000, -0.047	135.000, -0.089	135.000, -0.057	135.000, -0.036
677	135.200, 0.317	135.200, 0.502	135.200, 0.669	135.200, 0.787	135.200, 0.888	135.200, -0.025	135.200, -0.085	135.200, -0.057	135.200, -0.047	135.200, -0.089	135.200, -0.057	135.200, -0.035
678	135.400, 0.317	135.400, 0.502	135.400, 0.669	135.400, 0.787	135.400, 0.888	135.400, -0.025	135.400, -0.085	135.400, -0.057	135.400, -0.047	135.400, -0.090	135.400, -0.057	135.400, -0.035
679	135.600, 0.317	135.600, 0.502	135.600, 0.669	135.600, 0.788	135.600, 0.889	135.600, -0.025	135.600, -0.085	135.600, -0.057	135.600, -0.047	135.600, -0.090	135.600, -0.057	135.600, -0.035
680	135.800, 0.317	135.800, 0.503	135.800, 0.669	135.800, 0.788	135.800, 0.889	135.800, -0.025	135.800, -0.085	135.800, -0.056	135.800, -0.047	135.800, -0.090	135.800, -0.057	135.800, -0.034
681	136.000, 0.317	136.000, 0.502	136.000, 0.668	136.000, 0.788	136.000, 0.889	136.000, -0.025	136.000, -0.086	136.000, -0.056	136.000, -0.047	136.000, -0.090	136.000, -0.057	136.000, -0.034
682	136.200, 0.317	136.200, 0.502	136.200, 0.668	136.200, 0.788	136.200, 0.889	136.200, -0.025	136.200, -0.086	136.200, -0.056	136.200, -0.047	136.200, -0.090	136.200, -0.058	136.200, -0.033
683	136.400, 0.317	136.400, 0.502	136.400, 0.668	136.400, 0.788	136.400, 0.890	136.400, -0.024	136.400, -0.086	136.400, -0.056	136.400, -0.047	136.400, -0.090	136.400, -0.058	136.400, -0.033
684	136.600, 0.317	136.600, 0.502	136.600, 0.668	136.600, 0.788	136.600, 0.890	136.600, -0.024	136.600, -0.086	136.600, -0.056	136.600, -0.047	136.600, -0.090	136.600, -0.058	136.600, -0.033
685	136.800, 0.318	136.800, 0.502	136.800, 0.668	136.800, 0.788	136.800, 0.890	136.800, -0.024	136.800, -0.087	136.800, -0.055	136.800, -0.047	136.800, -0.090	136.800, -0.058	136.800, -0.033
686	137.000, 0.318	137.000, 0.502	137.000, 0.668	137.000, 0.787	137.000, 0.890	137.000, -0.024	137.000, -0.087	137.000, -0.055	137.000, -0.046	137.000, -0.090	137.000, -0.059	137.000, -0.033
687	137.200, 0.318	137.200, 0.502	137.200, 0.668	137.200, 0.787	137.200, 0.891	137.200, -0.024	137.200, -0.087	137.200, -0.055	137.200, -0.046	137.200, -0.090	137.200, -0.059	137.200, -0.033
688	137.400, 0.318	137.400, 0.502	137.400, 0.668	137.400, 0.787	137.400, 0.891	137.400, -0.024	137.400, -0.087	137.400, -0.055	137.400, -0.045	137.400, -0.089	137.400, -0.059	137.400, -0.033
689	137.600, 0.318	137.600, 0.502	137.600, 0.668	137.600, 0.787	137.600, 0.891	137.600, -0.024	137.600, -0.087	137.600, -0.055	137.600, -0.045	137.600, -0.089	137.600, -0.059	137.600, -0.033
690	137.800, 0.318	137.800, 0.502	137.800, 0.669	137.800, 0.787	137.800, 0.891	137.800, -0.024	137.800, -0.087	137.800, -0.055	137.800, -0.045	137.800, -0.089	137.800, -0.059	137.800, -0.033
691	138.000, 0.317	138.000, 0.502	138.000, 0.669	138.000, 0.787	138.000, 0.891	138.000, -0.024	138.000, -0.087	138.000, -0.055	138.000, -0.044	138.000, -0.089	138.000, -0.059	138.000, -0.033
692	138.200, 0.317	138.200, 0.501	138.200, 0.669	138.200, 0.787	138.200, 0.891	138.200, -0.024	138.200, -0.086	138.200, -0.055	138.200, -0.044	138.200, -0.089	138.200, -0.058	138.200, -0.033
693	138.400, 0.317	138.400, 0.501	138.400, 0.670	138.400, 0.787	138.400, 0.891	138.400, -0.024	138.400, -0.086	138.400, -0.056	138.400, -0.044	138.400, -0.089	138.400, -0.058	138.400, -0.033
694	138.600, 0.317	138.600, 0.501	138.600, 0.670	138.600, 0.787	138.600, 0.891	138.600, -0.024	138.600, -0.086	138.600, -0.056	138.600, -0.044	138.600, -0.089	138.600, -0.058	138.600, -0.033
695	138.800, 0.317	138.800, 0.501	138.800, 0.670	138.800, 0.788	138.800, 0.891	138.800, -0.024	138.800, -0.086	138.800, -0.056	138.800, -0.044	138.800, -0.090	138.800, -0.058	138.800, -0.033
696	139.000, 0.317	139.000, 0.501	139.000, 0.670	139.000, 0.788	139.000, 0.891	139.000, -0.024	139.000, -0.085	139.000, -0.056	139.000, -0.044	139.000, -0.090	139.000, -0.057	139.000, -0.033
697	139.200, 0.317	139.200, 0.501	139.200, 0.670	139.200, 0.788	139.200, 0.891	139.200, -0.024	139.200, -0.085	139.200, -0.056	139.200, -0.045	139.200, -0.090	139.200, -0.057	139.200, -0.033
698	139.400, 0.317	139.400, 0.501	139.400, 0.671	139.400, 0.789	139.400, 0.892	139.400, -0.024	139.400, -0.085	139.400, -0.056	139.400, -0.045	139.400, -0.090	139.400, -0.057	139.400, -0.033
699	139.600, 0.317	139.600, 0.501	139.600, 0.671	139.600, 0.789	139.600, 0.892	139.600, -0.024	139.600, -0.085	139.600, -0.056	139.600, -0.046	139.600, -0.090	139.600, -0.057	139.600, -0.033
700	139.800, 0.317	139.800, 0.501	139.800, 0.671	139.800, 0.789	139.800, 0.892	139.800, -0.025	139.800, -0.085	139.800, -0.057	139.800, -0.046	139.800, -0.090	139.800, -0.057	139.800, -0.032
701	140.000, 0.318	140.000, 0.502	140.000, 0.671	140.000, 0.789	140.000, 0.892	140.000, -0.025	140.000, -0.085	140.000, -0.057	140.000, -0.047	140.000, -0.091	140.000, -0.057	140.000, -0.032
702	140.200, 0.318	140.200, 0.502	140.200, 0.671	140.200, 0.789	140.200, 0.893	140.200, -0.025	140.200, -0.085	140.200, -0.057	140.200, -0.048	140.200, -0.091	140.200, -0.057	140.200, -0.032
703	140.400, 0.318	140.400, 0.502	140.400, 0.671	140.400, 0.789	140.400, 0.893	140.400, -0.025	140.400, -0.085	140.400, -0.057	140.400, -0.048	140.400, -0.091	140.400, -0.057	140.400, -0.033
704	140.600, 0.318	140.600, 0.502	140.600, 0.671	140.600, 0.789	140.600, 0.893	140.600, -0.025	140.600, -0.085	140.600, -0.057	140.600, -0.048	140.600, -0.090	140.600, -0.058	140.600, -0.033
705	140.800, 0.318	140.800, 0.503	140.800, 0.671	140.800, 0.788	140.800, 0.893	140.800, -0.025	140.800, -0.085	140.800, -0.057	140.800, -0.048	140.800, -0.090	140.800, -0.058	140.800, -0.033
706	141.000, 0.318	141.000, 0.503	141.000, 0.671	141.000, 0.788	141.000, 0.893	141.000, -0.025	141.000, -0.085	141.000, -0.058	141.000, -0.048	141.000, -0.089	141.000, -0.058	141.000, -0.033
707	141.200, 0.319	141.200, 0.504	141.200, 0.671	141.200, 0.788	141.200, 0.893	141.200, -0.025	141.200, -0.085	141.200, -0.058	141.200, -0.047	141.200, -0.089	141.200, -0.058	141.200, -0.033
708	141.400, 0.319	141.400, 0.504	141.400, 0.671	141.400, 0.788	141.400, 0.893	141.400, -0.025	141.400, -0.085	141.400, -0.058	141.400, -0.047	141.400, -0.089	141.400, -0.058	141.400, -0.033
709	141.600, 0.319	141.600, 0.505	141.600, 0.671	141.600, 0.787	141.600, 0.892	141.600, -0.025	141.600, -0.085	141.600, -0.058	141.600, -0.047	141.600, -0.088	141.600, -0.058	141.600, -0.033
710	141.800, 0.319	141.800, 0.505	141.800, 0.671	141.800, 0.787	141.800, 0.892	141.800, -0.025	141.800, -0.085	141.800, -0.058	141.800, -0.047	141.800, -0.088	141.800, -0.058	141.800, -0.033
711	142.000, 0.320	142.000, 0.506	142.000, 0.671	142.000, 0.787	142.000, 0.892	142.000, -0.025	142.000, -0.085	142.000, -0.058	142.000, -0.047	142.000, -0.088	142.000, -0.057	142.000, -0.033
712	142.200, 0.320	142.200, 0.506	142.200, 0.671	142.200, 0.787	142.200, 0.892	142.200, -0.025	142.200, -0.085	142.200, -0.058	142.200, -0.047	142.200, -0.089	142.200, -0.057	142.200, -0.033
713	142.400, 0.320	142.400, 0.506	142.400, 0.671	142.400, 0.787	142.400, 0.892	142.400, -0.025	142.400, -0.085	142.400, -0.058	142.400, -0.047	142.400, -0.089	142.400, -0.057	142.400, -0.033
714	142.600, 0.321	142.600, 0.505	142.600, 0.671	142.600, 0.787	142.600, 0.892	142.600, -0.025	142.600, -0.085	142.600, -0.058	142.600, -0.047	142.600, -0.089	142.600, -0.056	142.600, -0.033
715	142.800, 0.321	142.800, 0.505	142.800, 0.671	142.800, 0.787	142.800, 0.892	142.800, -0.025	142.800, -0.085	142.800, -0.058	142.800, -0.047	142.800, -0.089	142.800, -0.056	142.800, -0.033
716	143.000, 0.321	143.000, 0.504	143.000, 0.671	143.000, 0.787	143.000, 0.892	143.000, -0.025	143.000, -0.086	143.000, -0.058	143.000, -0.047	143.000, -0.089	143.000, -0.056	143.000, -0.033
717	143.200, 0.321	143.200, 0.504	143.200, 0.670	143.200, 0.788	143.200, 0.892	143.200, -0.025	143.200, -0.086	143.200, -0.058	143.200, -0.047	143.200, -0.090	143.200, -0.056	143.200, -0.033
718	143.400, 0.321	143.400, 0.504	143.400, 0.670	143.400, 0.788	143.400, 0.892	143.400, -0.025	143.400, -0.086	143.400, -0.058	143.400, -0.047	143.400, -0.090	143.400, -0.056	143.400, -0.033
719	143.600, 0.321	143.600, 0.503	143.600, 0.670	143.600, 0.788	143.600, 0.893	143.600, -0.025	143.600, -0.086	143.600, -0.058	143.600, -0.047	143.600, -0.090	143.600, -0.056	143.600, -0.033
720	143.800, 0.321	143.800, 0.503	143.800, 0.670	143.800, 0.788	143.800, 0.893	143.800, -0.025	143.800, -0.086	143.800, -0.058	143.800, -0.047	143.800, -0.091	143.800, -0.056	143.800, -0.033
721	144.000, 0.320	144.000, 0.503	144.000, 0.670	144.000, 0.788	144.000, 0.893	144.000, -0.026	144.000, -0.087	144.000, -0.057	144.000, -0.046	144.000, -0.091	144.000, -0.056	144.000, -0.033
722	144.200, 0.320	144.200, 0.503	144.200, 0.670	144.200, 0.788	144.200, 0.893	144.200, -0.026	144.200, -0.087	144.200, -0.057	144.200, -0.046	144.200, -0.091	144.200, -0.056	144.200, -0.033
723	144.400, 0.320	144.400, 0.503	144.400, 0.671	144.400, 0.788	144.400, 0.894	144.400, -0.026	144.400, -0.087	144.400, -0.057	144.400, -0.046	144.400, -0.091	144.400, -0.056	144.400, -0.033
724	144.600, 0.319	144.600, 0.503	144.600, 0.671	144.600, 0.788	144.600, 0.894	144.600, -0.026	144.600, -0.088	144.600, -0.057	144.600, -0.046	144.600, -0.090	144.600, -0.056	144.600, -0.033
725	144.800, 0.319	144.800, 0.503	144.800, 0.671	144.800, 0.788	144.800, 0.894	144.800, -0.026	144.800, -0.088	144.800, -0.057	144.800, -0.045	144.800, -0.090	144.800, -0.057	144.800, -0.032
726	145.000, 0.318	145.000, 0.503	145.000, 0.671	145.000, 0.788	145.000, 0.894	145.000, -0.026	145.000, -0.088	145.000, -0.057	145.000, -0.045	145.000, -0.090	145.000, -0.056	145.000, -0.032
727	145.200, 0.318	145.200, 0.504	145.200, 0.672	145.200, 0.788	145.200, 0.894	145.200, -0.026	145.200, -0.088	145.200, -0.057	145.200, -0.045	145.200, -0.090	145.200, -0.056	145.200, -0.032
728	145.400, 0.317	145.400, 0.504	145.400, 0.672	145.400, 0.788	145.400, 0.894	145.400, -0.025	145.400, -0.088	145.400, -0.056	145.400, -0.045	145.400, -0.090	145.400, -0.056	145.400, -0.031
729	145.600, 0.317	145.600, 0.504	145.600, 0.672	145.600, 0.788	145.600, 0.894	145.600, -0.025	145.600, -0.088	145.600, -0.056	145.600, -0.045	145.600, -0.090	145.600, -0.056	145.600, -0.031
730	145.800, 0.317	145.800, 0.504	145.800, 0.672	145.800, 0.788	145.800, 0.895	145.800, -0.025	145.800, -0.088	145.800, -0.056	145.800, -0.045	145.800, -0.090	145.800, -0.056	145.800, -0.030
731	146.000, 0.317	146.000, 0.504	146.000, 0.673	146.000, 0.788	146.000, 0.895	146.000, -0.024	146.000, -0.088	146.000, -0.056	146.000, -0.045	146.000, -0.090	146.000, -0.056	146.000, -0.030
732	146.200, 0.317	146.200, 0.504	146.200, 0.673	146.200, 0.788	146.200, 0.895	146.200, -0.024	146.200, -0.088	146.200, -0.056	146.200, -0.045	146.200, -0.090	146.200, -0.056	146.200, -0.029
733	146.400, 0.318	146.400, 0.504	146.400, 0.673	146.400, 0.789	146.400, 0.895	146.400, -0.024	146.400, -0.088	146.400, -0.056	146.400, -0.045	146.400, -0.090	146.400, -0.055	146.400, -0.029
734	146.600, 0.318	146.600, 0.503	146.600, 0.673	146.600, 0.789	146.600, 0.895	146.600, -0.024	146.600, -0.089	146.600, -0.057	146.600, -0.046	146.600, -0.090	146.600, -0.055	146.600, -0.029
735	146.800, 0.319	146.800, 0.503	146.800, 0.673	146.800, 0.789	146.800, 0.894	146.800, -0.024	146.800, -0.088	146.800, -0.057	146.800, -0.046	146.800, -0.090	146.800, -0.055	146.800, -0.029
736	147.000, 0.319	147.000, 0.503	147.000, 0.673	147.000, 0.789	147.000, 0.894	147.000, -0.024	147.000, -0.089	147.000, -0.057	147.000, -0.047	147.000, -0.090	147.000, -0.055	147.000, -0.029
737	147.200, 0.319	147.200, 0.503	147.200, 0.672	147.200, 0.790	147.200, 0.894	147.200, -0.024	147.200, -0.088	147.200, -0.058	147.200, -0.047	147.200, -0.090	147.200, -0.055	147.200, -0.029
738	147.400, 0.320	147.400, 0.503	147.400, 0.672	147.400, 0.790	147.400, 0.894	147.400, -0.024	147.400, -0.088	147.400, -0.058	147.400, -0.047	147.400, -0.090	147.400, -0.055	147.400, -0.029
739	147.600, 0.320	147.600, 0.503	147.600, 0.672	147.600, 0.790	147.600, 0.894	147.600, -0.025	147.600, -0.088	147.600, -0.059	147.600, -0.047	147.600, -0.090	147.600, -0.055	147.600, -0.030
740	147.800, 0.320	147.800, 0.504	147.800, 0.672	147.800, 0.790	147.800, 0.895	147.800, -0.025	147.800, -0.088	147.800, -0.059	147.800, -0.048	147.800, -0.090	147.800, -0.055	147.800, -0.030
741	148.000, 0.320	148.000, 0.504	148.000, 0.672	148.000, 0.790	148.000, 0.895	148.000, -0.025	148.000, -0.088	148.000, -0.059	148.000, -0.048	148.000, -0.089	148.000, -0.055	148.000, -0.031
742	148.200, 0.320	148.200, 0.504	148.200, 0.672	148.200, 0.790	148.200, 0.895	148.200, -0.025	148.200, -0.087	148.200, -0.059	148.200, -0.048	148.200, -0.089	148.200, -0.055	148.200, -0.031
743	148.400, 0.320	148.400, 0.505	148.400, 0.671	148.400, 0.790	148.400, 0.895	148.400, -0.025	148.400, -0.087	148.400, -0.059	148.400, -0.048	148.400, -0.089	148.400, -0.055	148.400, -0.032
744	148.600, 0.320	148.600, 0.505	148.600, 0.671	148.600, 0.790	148.600, 0.895	148.600, -0.025	148.600, -0.087	148.600, -0.059	148.600, -0.048	148.600, -0.089	148.600, -0.055	148.600, -0.032
745	148.800, 0.320	148.800, 0.505	148.800, 0.671	148.800, 0.791	148.800, 0.895	148.800, -0.025	148.800, -0.087	148.800, -0.059	148.800, -0.048	148.800, -0.090	148.800, -0.055	148.800, -0.032
746	149.000, 0.320	149.000, 0.506	149.000, 0.671	149.000, 0.791	149.000, 0.895	149.000, -0.025	149.000, -0.086	149.000, -0.059	149.000, -0.048	149.000, -0.090	149.000, -0.055	149.000, -0.032
747	149.200, 0.320	149.200, 0.506	149.200, 0.671	149.200, 0.791	149.200, 0.895	149.200, -0.025	149.200, -0.086	149.200, -0.059	149.200, -0.048	149.200, -0.090	149.200, -0.055	149.200, -0.032
748	149.400, 0.320	149.400, 0.506	149.400, 0.672	149.400, 0.791	149.400, 0.895	149.400, -0.025	149.400, -0.086	149.400, -0.058	149.400, -0.048	149.400, -0.090	149.400, -0.055	149.400, -0.032
749	149.600, 0.320	149.600, 0.506	149.600, 0.672	149.600, 0.792	149.600, 0.895	149.600, -0.025	149.600, -0.086	149.600, -0.058	149.600, -0.048	149.600, -0.091	149.600, -0.055	149.600, -0.032
750	149.800, 0.320	149.800, 0.506	149.800, 0.672	149.800, 0.792	149.800, 0.895	149.800, -0.024	149.800, -0.086	149.800, -0.058	149.800, -0.048	149.800, -0.091	149.800, -0.055	149.800, -0.031
751	150.000, 0.320	150.000, 0.506	150.000, 0.672	150.000, 0.792	150.000, 0.895	150.000, -0.024	150.000, -0.086	150.000, -0.058	150.000, -0.048	150.000, -0.091	150.000, -0.055	150.000, -0.031
752	150.200, 0.320	150.200, 0.502	150.200, 0.668	150.200, 0.786	150.200, 0.884	150.200, -0.025	150.200, -0.087	150.200, -0.058	150.200, -0.049	150.200, -0.091	150.200, -0.054	150.200, -0.033
753	150.400, 0.319	150.400, 0.498	150.400, 0.663	150.400, 0.779	150.400, 0.871	150.400, -0.025	150.400, -0.087	150.400, -0.058	150.400, -0.049	150.400, -0.092	150.400, -0.054	150.400, -0.034
754	150.600, 0.318	150.600, 0.494	150.600, 0.658	150.600, 0.771	150.600, 0.857	150.600, -0.025	150.600, -0.087	150.600, -0.058	150.600, -0.050	150.600, -0.092	150.600, -0.053	150.600, -0.035
755	150.800, 0.317	150.800, 0.489	150.800, 0.652	150.800, 0.762	150.800, 0.842	150.800, -0.025	150.800, -0.087	150.800, -0.058	150.800, -0.050	150.800, -0.092	150.800, -0.052	150.800, -0.035
756	151.000, 0.317	151.000, 0.483	151.000, 0.646	151.000, 0.753	151.000, 0.826	151.000, -0.024	151.000, -0.086	151.000, -0.058	151.000, -0.050	151.000, -0.092	151.000, -0.052	151.000, -0.036
757	151.200, 0.316	151.200, 0.478	151.200, 0.640	151.200, 0.744	151.200, 0.810	151.200, -0.024	151.200, -0.085	151.200, -0.057	151.200, -0.050	151.200, -0.091	151.200, -0.051	151.200, -0.036
758	151.400, 0.316	151.400, 0.473	151.400, 0.634	151.400, 0.735	151.400, 0.794	151.400, -0.023	151.400, -0.085	151.400, -0.057	151.400, -0.050	151.400, -0.091	151.400, -0.051	151.400, -0.037
759	151.600, 0.316	151.600, 0.469	151.600, 0.629	151.600, 0.726	151.600, 0.779	151.600, -0.022	151.600, -0.084	151.600, -0.056	151.600, -0.049	151.600, -0.090	151.600, -0.050	151.600, -0.037
760	151.800, 0.316	151.800, 0.465	151.800, 0.624	151.800, 0.717	151.800, 0.765	151.800, -0.021	151.800, -0.082	151.800, -0.055	151.800, -0.049	151.800, -0.089	151.800, -0.050	151.800, -0.036
761	152.000, 0.316	152.000, 0.461	152.000, 0.619	152.000, 0.709	152.000, 0.753	152.000, -0.020	152.000, -0.081	152.000, -0.054	152.000, -0.048	152.000, -0.088	152.000, -0.049	152.000, -0.036
762	152.200, 0.316	152.200, 0.458	152.200, 0.616	152.200, 0.703	152.200, 0.743	152.200, -0.019	152.200, -0.079	152.200, -0.053	152.200, -0.046	152.200, -0.086	152.200, -0.049	152.200, -0.035
763	152.400, 0.317	152.400, 0.456	152.400, 0.612	152.400, 0.697	152.400, 0.734	152.400, -0.018	152.400, -0.078	152.400, -0.052	152.400, -0.045	152.400, -0.085	152.400, -0.048	152.400, -0.034
764	152.600, 0.317	152.600, 0.453	152.600, 0.609	152.600, 0.692	152.600, 0.724	152.600, -0.017	152.600, -0.076	152.600, -0.051	152.600, -0.045	152.600, -0.084	152.600, -0.048	152.600, -0.033
765	152.800, 0.317	152.800, 0.451	152.800, 0.606	152.800, 0.687	152.800, 0.717	152.800, -0.016	152.800, -0.075	152.800, -0.050	152.800, -0.044	152.800, -0.083	152.800, -0.048	152.800, -0.033
766	153.000, 0.317	153.000, 0.448	153.000, 0.603	153.000, 0.683	153.000, 0.709	153.000, -0.015	153.000, -0.073	153.000, -0.049	153.000, -0.043	153.000, -0.082	153.000, -0.047	153.000, -0.032
767	153.200, 0.318	153.200, 0.446	153.200, 0.600	153.200, 0.679	153.200, 0.702	153.200, -0.015	153.200, -0.072	153.200, -0.049	153.200, -0.042	153.200, -0.081	153.200, -0.046	153.200, -0.031
768	153.400, 0.318	153.400, 0.444	153.400, 0.597	153.400, 0.675	153.400, 0.696	153.400, -0.014	153.400, -0.071	153.400, -0.048	153.400, -0.041	153.400, -0.080	153.400, -0.044	153.400, -0.031
769	153.600, 0.318	153.600, 0.442	153.600, 0.595	153.600, 0.671	153.600, 0.690	153.600, -0.014	153.600, -0.070	153.600, -0.047	153.600, -0.041	153.600, -0.078	153.600, -0.043	153.600, -0.030
770	153.800, 0.318	153.800, 0.440	153.800, 0.593	153.800, 0.667	153.800, 0.685	153.800, -0.013	153.800, -0.069	153.800, -0.046	153.800, -0.040	153.800, -0.077	153.800, -0.041	153.800, -0.029
771	154.000, 0.318	154.000, 0.439	154.000, 0.590	154.000, 0.664	154.000, 0.680	154.000, -0.013	154.000, -0.068	154.000, -0.046	154.000, -0.039	154.000, -0.076	154.000, -0.040	154.000, -0.029
772	154.200, 0.318	154.200, 0.437	154.200, 0.588	154.200, 0.661	154.200, 0.675	154.200, -0.012	154.200, -0.067	154.200, -0.045	154.200, -0.039	154.200, -0.075	154.200, -0.039	154.200, -0.028
773	154.400, 0.318	154.400, 0.436	154.400, 0.587	154.400, 0.658	154.400, 0.671	154.400, -0.012	154.400, -0.066	154.400, -0.044	154.400, -0.038	154.400, -0.074	154.400, -0.038	154.400, -0.028
774	154.600, 0.318	154.600, 0.434	154.600, 0.585	154.600, 0.655	154.600, 0.667	154.600, -0.011	154.600, -0.065	154.600, -0.043	154.600, -0.037	154.600, -0.073	154.600, -0.036	154.600, -0.027
775	154.800, 0.318	154.800, 0.432	154.800, 0.583	154.800, 0.652	154.800, 0.663	154.800, -0.011	154.800, -0.065	154.800, -0.042	154.800, -0.036	154.800, -0.072	154.800, -0.035	154.800, -0.026
776	155.000, 0.318	155.000, 0.431	155.000, 0.582	155.000, 0.649	155.000, 0.660	155.000, -0.011	155.000, -0.064	155.000, -0.042	155.000, -0.035	155.000, -0.071	155.000, -0.034	155.000, -0.025
777	155.200, 0.319	155.200, 0.430	155.200, 0.580	155.200, 0.647	155.200, 0.656	155.200, -0.010	155.200, -0.063	155.200, -0.041	155.200, -0.034	155.200, -0.070	155.200, -0.033	155.200, -0.024
778	155.400, 0.319	155.400, 0.429	155.400, 0.579	155.400, 0.645	155.400, 0.653	155.400, -0.010	155.400, -0.062	155.400, -0.040	155.400, -0.034	155.400, -0.069	155.400, -0.033	155.400, -0.023
779	155.600, 0.319	155.600, 0.429	155.600, 0.577	155.600, 0.643	155.600, 0.650	155.600, -0.010	155.600, -0.061	155.600, -0.039	155.600, -0.033	155.600, -0.068	155.600, -0.032	155.600, -0.023
780	155.800, 0.319	155.800, 0.428	155.800, 0.576	155.800, 0.640	155.800, 0.647	155.800, -0.009	155.800, -0.061	155.800, -0.038	155.800, -0.032	155.800, -0.068	155.800, -0.032	155.800, -0.022
781	156.000, 0.320	156.000, 0.428	156.000, 0.575	156.000, 0.638	156.000, 0.644	156.000, -0.009	156.000, -0.060	156.000, -0.037	156.000, -0.032	156.000, -0.067	156.000, -0.031	156.000, -0.022
782	156.200, 0.320	156.200, 0.427	156.200, 0.574	156.200, 0.637	156.200, 0.641	156.200, -0.008	156.200, -0.059	156.200, -0.037	156.200, -0.031	156.200, -0.066	156.200, -0.031	156.200, -0.021
783	156.400, 0.320	156.400, 0.426	156.400, 0.572	156.400, 0.635	156.400, 0.638	156.400, -0.008	156.400, -0.058	156.400, -0.036	156.400, -0.031	156.400, -0.066	156.400, -0.030	156.400, -0.021
784	156.600, 0.320	156.600, 0.425	156.600, 0.571	156.600, 0.633	156.600, 0.635	156.600, -0.007	156.600, -0.058	156.600, -0.035	156.600, -0.030	156.600, -0.065	156.600, -0.030	156.600, -0.021
785	156.800, 0.320	156.800, 0.424	156.800, 0.570	156.800, 0.632	156.800, 0.633	156.800, -0.007	156.800, -0.057	156.800, -0.034	156.800, -0.030	156.800, -0.065	156.800, -0.029	156.800, -0.020
786	157.000, 0.321	157.000, 0.423	157.000, 0.569	157.000, 0.631	157.000, 0.631	157.000, -0.006	157.000, -0.056	157.000, -0.033	157.000, -0.029	157.000, -0.064	157.000, -0.029	157.000, -0.020
787	157.200, 0.321	157.200, 0.422	157.200, 0.568	157.200, 0.629	157.200, 0.629	157.200, -0.006	157.200, -0.055	157.200, -0.033	157.200, -0.029	157.200, -0.063	157.200, -0.028	157.200, -0.019
788	157.400, 0.321	157.400, 0.421	157.400, 0.567	157.400, 0.628	157.400, 0.627	157.400, -0.005	157.400, -0.055	157.400, -0.032	157.400, -0.029	157.400, -0.063	157.400, -0.027	157.400, -0.019
789	157.600, 0.321	157.600, 0.420	157.600, 0.566	157.600, 0.627	157.600, 0.625	157.600, -0.005	157.600, -0.054	157.600, -0.032	157.600, -0.028	157.600, -0.062	157.600, -0.026	157.600, -0.018
790	157.800, 0.321	157.800, 0.420	157.800, 0.565	157.800, 0.625	157.800, 0.623	157.800, -0.004	157.800, -0.053	157.800, -0.031	157.800, -0.028	157.800, -0.061	157.800, -0.026	157.800, -0.018
791	158.000, 0.321	158.000, 0.419	158.000, 0.564	158.000, 0.624	158.000, 0.621	158.000, -0.004	158.000, -0.052	158.000, -0.031	158.000, -0.027	158.000, -0.060	158.000, -0.025	158.000, -0.017
792	158.200, 0.321	158.200, 0.418	158.200, 0.563	158.200, 0.623	158.200, 0.619	158.200, -0.003	158.200, -0.051	158.200, -0.031	158.200, -0.027	158.200, -0.060	158.200, -0.024	158.200, -0.017
793	158.400, 0.320	158.400, 0.417	158.400, 0.562	158.400, 0.622	158.400, 0.618	158.400, -0.003	158.400, -0.051	158.400, -0.030	158.400, -0.026	158.400, -0.059	158.400, -0.024	158.400, -0.016
794	158.600, 0.320	158.600, 0.416	158.600, 0.561	158.600, 0.621	158.600, 0.616	158.600, -0.002	158.600, -0.050	158.600, -0.030	158.600, -0.026	158.600, -0.058	158.600, -0.023	158.600, -0.016
795	158.800, 0.320	158.800, 0.416	158.800, 0.561	158.800, 0.620	158.800, 0.615	158.800, -0.002	158.800, -0.049	158.800, -0.029	158.800, -0.025	158.800, -0.058	158.800, -0.022	158.800, -0.015
796	159.000, 0.320	159.000, 0.415	159.000, 0.560	159.000, 0.619	159.000, 0.613	159.000, -0.001	159.000, -0.049	159.000, -0.029	159.000, -0.025	159.000, -0.057	159.000, -0.021	159.000, -0.015
797	159.200, 0.320	159.200, 0.414	159.200, 0.559	159.200, 0.618	159.200, 0.611	159.200, -0.001	159.200, -0.048	159.200, -0.029	159.200, -0.025	159.200, -0.056	159.200, -0.021	159.200, -0.015
798	159.400, 0.320	159.400, 0.414	159.400, 0.558	159.400, 0.617	159.400, 0.609	159.400, -0.001	159.400, -0.048	159.400, -0.028	159.400, -0.024	159.400, -0.056	159.400, -0.020	159.400, -0.014
799	159.600, 0.320	159.600, 0.413	159.600, 0.557	159.600, 0.615	159.600, 0.608	159.600, -0.000	159.600, -0.047	159.600, -0.027	159.600, -0.024	159.600, -0.055	159.600, -0.020	159.600, -0.014
800	159.800, 0.320	159.800, 0.413	159.800, 0.557	159.800, 0.614	159.800, 0.606	159.800, 0.001	159.800, -0.047	159.800, -0.027	159.800, -0.024	159.800, -0.054	159.800, -0.019	159.800, -0.013
801	160.000, 0.320	160.000, 0.413	160.000, 0.556	160.000, 0.612	160.000, 0.604	160.000, 0.001	160.000, -0.046	160.000, -0.026	160.000, -0.023	160.000, -0.053	160.000, -0.019	160.000, -0.013
802	160.200, 0.320	160.200, 0.412	160.200, 0.555	160.200, 0.611	160.200, 0.603	160.200, 0.002	160.200, -0.046	160.200, -0.025	160.200, -0.022	160.200, -0.053	160.200, -0.018	160.200, -0.012
803	160.400, 0.320	160.400, 0.412	160.400, 0.555	160.400, 0.610	160.400, 0.601	160.400, 0.002	160.400, -0.046	160.400, -0.024	160.400, -0.022	160.400, -0.052	160.400, -0.018	160.400, -0.012
804	160.600, 0.320	160.600, 0.411	160.600, 0.554	160.600, 0.609	160.600, 0.600	160.600, 0.003	160.600, -0.045	160.600, -0.023	160.600, -0.021	160.600, -0.052	160.600, -0.017	160.600, -0.011
805	160.800, 0.320	160.800, 0.411	160.800, 0.554	160.800, 0.608	160.800, 0.599	160.800, 0.003	160.800, -0.044	160.800, -0.022	160.800, -0.021	160.800, -0.051	160.800, -0.017	160.800, -0.011
806	161.000, 0.320	161.000, 0.410	161.000, 0.553	161.000, 0.607	161.000, 0.598	161.000, 0.004	161.000, -0.044	161.000, -0.022	161.000, -0.020	161.000, -0.050	161.000, -0.017	161.000, -0.010
807	161.200, 0.320	161.200, 0.410	161.200, 0.553	161.200, 0.606	161.200, 0.597	161.200, 0.004	161.200, -0.043	161.200, -0.021	161.200, -0.020	161.200, -0.050	161.200, -0.017	161.200, -0.010
808	161.400, 0.320	161.400, 0.409	161.400, 0.552	161.400, 0.606	161.400, 0.596	161.400, 0.004	161.400, -0.042	161.400, -0.021	161.400, -0.019	161.400, -0.049	161.400, -0.016	161.400, -0.009
809	161.600, 0.320	161.600, 0.409	161.600, 0.552	161.600, 0.605	161.600, 0.595	161.600, 0.004	161.600, -0.042	161.600, -0.021	161.600, -0.019	161.600, -0.048	161.600, -0.016	161.600, -0.009
810	161.800, 0.319	161.800, 0.408	161.800, 0.551	161.800, 0.604	161.800, 0.595	161.800, 0.005	161.800, -0.041	161.800, -0.020	161.800, -0.018	161.800, -0.048	161.800, -0.015	161.800, -0.008
811	162.000, 0.319	162.000, 0.408	162.000, 0.550	162.000, 0.604	162.000, 0.594	162.000, 0.005	162.000, -0.040	162.000, -0.020	162.000, -0.018	162.000, -0.047	162.000, -0.015	162.000, -0.008
812	162.200, 0.319	162.200, 0.407	162.200, 0.550	162.200, 0.604	162.200, 0.593	162.200, 0.005	162.200, -0.039	162.200, -0.020	162.200, -0.017	162.200, -0.046	162.200, -0.015	162.200, -0.007
813	162.400, 0.319	162.400, 0.407	162.400, 0.549	162.400, 0.603	162.400, 0.593	162.400, 0.005	162.400, -0.039	162.400, -0.020	162.400, -0.017	162.400, -0.046	162.400, -0.014	162.400, -0.007
814	162.600, 0.319	162.600, 0.406	162.600, 0.548	162.600, 0.603	162.600, 0.592	162.600, 0.005	162.600, -0.038	162.600, -0.019	162.600, -0.016	162.600, -0.045	162.600, -0.014	162.600, -0.007
815	162.800, 0.319	162.800, 0.406	162.800, 0.548	162.800, 0.603	162.800, 0.591	162.800, 0.005	162.800, -0.038	162.800, -0.019	162.800, -0.016	162.800, -0.044	162.800, -0.013	162.800, -0.007
816	163.000, 0.319	163.000, 0.405	163.000, 0.547	163.000, 0.602	163.000, 0.590	163.000, 0.005	163.000, -0.038	163.000, -0.019	163.000, -0.016	163.000, -0.044	163.000, -0.012	163.000, -0.007
817	163.200, 0.319	163.200, 0.404	163.200, 0.546	163.200, 0.601	163.200, 0.589	163.200, 0.005	163.200, -0.037	163.200, -0.019	163.200, -0.016	163.200, -0.043	163.200, -0.012	163.200, -0.006
818	163.400, 0.319	163.400, 0.404	163.400, 0.545	163.400, 0.600	163.400, 0.588	163.400, 0.005	163.400, -0.037	163.400, -0.018	163.400, -0.015	163.400, -0.042	163.400, -0.011	163.400, -0.006
819	163.600, 0.318	163.600, 0.403	163.600, 0.545	163.600, 0.600	163.600, 0.587	163.600, 0.005	163.600, -0.037	163.600, -0.017	163.600, -0.015	163.600, -0.042	163.600, -0.011	163.600, -0.005
820	163.800, 0.318	163.800, 0.402	163.800, 0.544	163.800, 0.599	163.800, 0.586	163.800, 0.006	163.800, -0.037	163.800, -0.017	163.800, -0.015	163.800, -0.041	163.800, -0.010	163.800, -0.005
821	164.000, 0.318	164.000, 0.402	164.000, 0.544	164.000, 0.599	164.000, 0.584	164.000, 0.006	164.000, -0.036	164.000, -0.016	164.000, -0.014	164.000, -0.041	164.000, -0.010	164.000, -0.004
822	164.200, 0.318	164.200, 0.402	164.200, 0.543	164.200, 0.598	164.200, 0.583	164.200, 0.006	164.200, -0.036	164.200, -0.016	164.200, -0.014	164.200, -0.041	164.200, -0.009	164.200, -0.004
823	164.400, 0.318	164.400, 0.401	164.400, 0.543	164.400, 0.597	164.400, 0.582	164.400, 0.007	164.400, -0.036	164.400, -0.015	164.400, -0.014	164.400, -0.040	164.400, -0.009	164.400, -0.004
824	164.600, 0.317	164.600, 0.401	164.600, 0.542	164.600, 0.597	164.600, 0.581	164.600, 0.007	164.600, -0.035	164.600, -0.015	164.600, -0.013	164.600, -0.040	164.600, -0.008	164.600, -0.003
825	164.800, 0.317	164.800, 0.400	164.800, 0.542	164.800, 0.596	164.800, 0.580	164.800, 0.007	164.800, -0.035	164.800, -0.014	164.800, -0.013	164.800, -0.040	164.800, -0.008	164.800, -0.003
826	165.000, 0.317	165.000, 0.400	165.000, 0.541	165.000, 0.595	165.000, 0.580	165.000, 0.008	165.000, -0.035	165.000, -0.014	165.000, -0.013	165.000, -0.040	165.000, -0.008	165.000, -0.003
827	165.200, 0.317	165.200, 0.400	165.200, 0.541	165.200, 0.594	165.200, 0.579	165.200, 0.008	165.200, -0.034	165.200, -0.014	165.200, -0.012	165.200, -0.039	165.200, -0.007	165.200, -0.002
828	165.400, 0.317	165.400, 0.399	165.400, 0.541	165.400, 0.593	165.400, 0.578	165.400, 0.008	165.400, -0.034	165.400, -0.014	165.400, -0.012	165.400, -0.039	165.400, -0.007	165.400, -0.002
829	165.600, 0.317	165.600, 0.399	165.600, 0.540	165.600, 0.593	165.600, 0.577	165.600, 0.009	165.600, -0.033	165.600, -0.013	165.600, -0.012	165.600, -0.039	165.600, -0.006	165.600, -0.001
830	165.800, 0.317	165.800, 0.399	165.800, 0.540	165.800, 0.592	165.800, 0.577	165.800, 0.009	165.800, -0.033	165.800, -0.013	165.800, -0.012	165.800, -0.038	165.800, -0.006	165.800, -0.001
831	166.000, 0.317	166.000, 0.399	166.000, 0.539	166.000, 0.591	166.000, 0.576	166.000, 0.009	166.000, -0.033	166.000, -0.013	166.000, -0.011	166.000, -0.038	166.000, -0.006	166.000, -0.001
832	166.200, 0.316	166.200, 0.399	166.200, 0.538	166.200, 0.591	166.200, 0.575	166.200, 0.009	166.200, -0.032	166.200, -0.013	166.200, -0.011	166.200, -0.038	166.200, -0.006	166.200, -0.000
833	166.400, 0.316	166.400, 0.398	166.400, 0.538	166.400, 0.590	166.400, 0.575	166.400, 0.009	166.400, -0.032	166.400, -0.013	166.400, -0.011	166.400, -0.038	166.400, -0.005	166.400, -0.000
834	166.600, 0.316	166.600, 0.398	166.600, 0.537	166.600, 0.590	166.600, 0.574	166.600, 0.009	166.600, -0.032	166.600, -0.012	166.600, -0.010	166.600, -0.037	166.600, -0.005	166.600, -0.000
835	166.800, 0.316	166.800, 0.398	166.800, 0.536	166.800, 0.589	166.800, 0.573	166.800, 0.009	166.800, -0.032	166.800, -0.012	166.800, -0.010	166.800, -0.037	166.800, -0.004	166.800, 0.000
836	167.000, 0.316	167.000, 0.397	167.000, 0.536	167.000, 0.588	167.000, 0.572	167.000, 0.009	167.000, -0.032	167.000, -0.011	167.000, -0.009	167.000, -0.037	167.000, -0.004	167.000, 0.000
837	167.200, 0.316	167.200, 0.397	167.200, 0.535	167.200, 0.588	167.200, 0.571	167.200, 0.009	167.200, -0.031	167.200, -0.011	167.200, -0.009	167.200, -0.036	167.200, -0.003	167.200, 0.001
838	167.400, 0.316	167.400, 0.396	167.400, 0.534	167.400, 0.587	167.400, 0.570	167.400, 0.009	167.400, -0.031	167.400, -0.010	167.400, -0.009	167.400, -0.036	167.400, -0.003	167.400, 0.001
839	167.600, 0.315	167.600, 0.396	167.600, 0.534	167.600, 0.586	167.600, 0.569	167.600, 0.009	167.600, -0.030	167.600, -0.010	167.600, -0.009	167.600, -0.036	167.600, -0.002	167.600, 0.001
840	167.800, 0.315	167.800, 0.395	167.800, 0.533	167.800, 0.586	167.800, 0.568	167.800, 0.009	167.800, -0.030	167.800, -0.009	167.800, -0.008	167.800, -0.035	167.800, -0.002	167.800, 0.001
841	168.000, 0.315	168.000, 0.395	168.000, 0.533	168.000, 0.585	168.000, 0.567	168.000, 0.009	168.000, -0.030	168.000, -0.008	168.000, -0.008	168.000, -0.035	168.000, -0.002	168.000, 0.002
842	168.200, 0.315	168.200, 0.394	168.200, 0.532	168.200, 0.584	168.200, 0.567	168.200, 0.009	168.200, -0.030	168.200, -0.008	168.200, -0.008	168.200, -0.035	168.200, -0.001	168.200, 0.002
843	168.400, 0.314	168.400, 0.394	168.400, 0.532	168.400, 0.584	168.400, 0.566	168.400, 0.009	168.400, -0.030	168.400, -0.008	168.400, -0.007	168.400, -0.034	168.400, -0.001	168.400, 0.002
844	168.600, 0.314	168.600, 0.393	168.600, 0.531	168.600, 0.583	168.600, 0.565	168.600, 0.010	168.600, -0.029	168.600, -0.007	168.600, -0.007	168.600, -0.034	168.600, -0.001	168.600, 0.003
845	168.800, 0.313	168.800, 0.393	168.800, 0.531	168.800, 0.582	168.800, 0.565	168.800, 0.010	168.800, -0.029	168.800, -0.007	168.800, -0.006	168.800, -0.033	168.800, -0.001	168.800, 0.003
846	169.000, 0.313	169.000, 0.393	169.000, 0.530	169.000, 0.582	169.000, 0.564	169.000, 0.010	169.000, -0.029	169.000, -0.006	169.000, -0.006	169.000, -0.033	169.000, -0.001	169.000, 0.003
847	169.200, 0.312	169.200, 0.392	169.200, 0.530	169.200, 0.581	169.200, 0.563	169.200, 0.011	169.200, -0.028	169.200, -0.006	169.200, -0.005	169.200, -0.032	169.200, -0.000	169.200, 0.004
848	169.400, 0.312	169.400, 0.392	169.400, 0.530	169.400, 0.581	169.400, 0.563	169.400, 0.012	169.400, -0.028	169.400, -0.006	169.400, -0.005	169.400, -0.032	169.400, -0.000	169.400, 0.004
849	169.600, 0.312	169.600, 0.392	169.600, 0.530	169.600, 0.580	169.600, 0.562	169.600, 0.012	169.600, -0.027	169.600, -0.006	169.600, -0.005	169.600, -0.031	169.600, 0.000	169.600, 0.004
850	169.800, 0.312	169.800, 0.392	169.800, 0.530	169.800, 0.580	169.800, 0.562	169.800, 0.012	169.800, -0.027	169.800, -0.006	169.800, -0.004	169.800, -0.031	169.800, 0.000	169.800, 0.004
851	170.000, 0.312	170.000, 0.392	170.000, 0.529	170.000, 0.580	170.000, 0.561	170.000, 0.013	170.000, -0.027	170.000, -0.006	170.000, -0.004	170.000, -0.031	170.000, 0.001	170.000, 0.005
852	170.200, 0.312	170.200, 0.392	170.200, 0.529	170.200, 0.579	170.200, 0.561	170.200, 0.013	170.200, -0.026	170.200, -0.006	170.200, -0.004	170.200, -0.030	170.200, 0.001	170.200, 0.005
853	170.400, 0.311	170.400, 0.391	170.400, 0.528	170.400, 0.579	170.400, 0.560	170.400, 0.013	170.400, -0.026	170.400, -0.006	170.400, -0.004	170.400, -0.030	170.400, 0.001	170.400, 0.005
854	170.600, 0.311	170.600, 0.391	170.600, 0.528	170.600, 0.578	170.600, 0.559	170.600, 0.013	170.600, -0.026	170.600, -0.006	170.600, -0.003	170.600, -0.030	170.600, 0.002	170.600, 0.005
855	170.800, 0.311	170.800, 0.391	170.800, 0.528	170.800, 0.578	170.800, 0.559	170.800, 0.013	170.800, -0.026	170.800, -0.007	170.800, -0.003	170.800, -0.029	170.800, 0.002	170.800, 0.005
856	171.000, 0.311	171.000, 0.390	171.000, 0.527	171.000, 0.577	171.000, 0.558	171.000, 0.013	171.000, -0.025	171.000, -0.007	171.000, -0.003	171.000, -0.029	171.000, 0.002	171.000, 0.005
857	171.200, 0.311	171.200, 0.390	171.200, 0.527	171.200, 0.577	171.200, 0.558	171.200, 0.013	171.200, -0.025	171.200, -0.007	171.200, -0.002	171.200, -0.028	171.200, 0.003	171.200, 0.005
858	171.400, 0.311	171.400, 0.389	171.400, 0.526	171.400, 0.576	171.400, 0.557	171.400, 0.013	171.400, -0.025	171.400, -0.007	171.400, -0.002	171.400, -0.028	171.400, 0.003	171.400, 0.006
859	171.600, 0.311	171.600, 0.389	171.600, 0.526	171.600, 0.576	171.600, 0.556	171.600, 0.013	171.600, -0.024	171.600, -0.007	171.600, -0.002	171.600, -0.027	171.600, 0.003	171.600, 0.006
860	171.800, 0.311	171.800, 0.389	171.800, 0.525	171.800, 0.575	171.800, 0.556	171.800, 0.013	171.800, -0.024	171.800, -0.007	171.800, -0.002	171.800, -0.027	171.800, 0.004	171.800, 0.006
861	172.000, 0.310	172.000, 0.388	172.000, 0.524	172.000, 0.575	172.000, 0.555	172.000, 0.013	172.000, -0.024	172.000, -0.006	172.000, -0.002	172.000, -0.027	172.000, 0.004	172.000, 0.006
862	172.200, 0.310	172.200, 0.388	172.200, 0.524	172.200, 0.575	172.200, 0.555	172.200, 0.014	172.200, -0.025	172.200, -0.006	172.200, -0.002	172.200, -0.026	172.200, 0.004	172.200, 0.007
863	172.400, 0.310	172.400, 0.387	172.400, 0.523	172.400, 0.574	172.400, 0.555	172.400, 0.014	172.400, -0.025	172.400, -0.006	172.400, -0.002	172.400, -0.026	172.400, 0.004	172.400, 0.007
864	172.600, 0.309	172.600, 0.386	172.600, 0.522	172.600, 0.574	172.600, 0.554	172.600, 0.014	172.600, -0.025	172.600, -0.005	172.600, -0.002	172.600, -0.026	172.600, 0.004	172.600, 0.007
865	172.800, 0.309	172.800, 0.386	172.800, 0.522	172.800, 0.574	172.800, 0.554	172.800, 0.014	172.800, -0.025	172.800, -0.004	172.800, -0.002	172.800, -0.026	172.800, 0.004	172.800, 0.007
866	173.000, 0.309	173.000, 0.385	173.000, 0.521	173.000, 0.573	173.000, 0.553	173.000, 0.014	173.000, -0.025	173.000, -0.004	173.000, -0.002	173.000, -0.025	173.000, 0.004	173.000, 0.007
867	173.200, 0.309	173.200, 0.385	173.200, 0.521	173.200, 0.573	173.200, 0.553	173.200, 0.014	173.200, -0.025	173.200, -0.003	173.200, -0.002	173.200, -0.025	173.200, 0.005	173.200, 0.007
868	173.400, 0.308	173.400, 0.384	173.400, 0.521	173.400, 0.573	173.400, 0.553	173.400, 0.014	173.400, -0.025	173.400, -0.003	173.400, -0.002	173.400, -0.025	173.400, 0.005	173.400, 0.007
869	173.600, 0.308	173.600, 0.384	173.600, 0.520	173.600, 0.572	173.600, 0.552	173.600, 0.015	173.600, -0.024	173.600, -0.003	173.600, -0.001	173.600, -0.025	173.600, 0.005	173.600, 0.007
870	173.800, 0.308	173.800, 0.384	173.800, 0.519	173.800, 0.571	173.800, 0.552	173.800, 0.015	173.800, -0.024	173.800, -0.002	173.800, -0.001	173.800, -0.025	173.800, 0.006	173.800, 0.008
871	174.000, 0.308	174.000, 0.383	174.000, 0.519	174.000, 0.571	174.000, 0.551	174.000, 0.015	174.000, -0.024	174.000, -0.002	174.000, -0.001	174.000, -0.025	174.000, 0.006	174.000, 0.008
872	174.200, 0.308	174.200, 0.383	174.200, 0.519	174.200, 0.570	174.200, 0.551	174.200, 0.015	174.200, -0.024	174.200, -0.002	174.200, -0.001	174.200, -0.025	174.200, 0.006	174.200, 0.008
873	174.400, 0.307	174.400, 0.382	174.400, 0.518	174.400, 0.569	174.400, 0.550	174.400, 0.015	174.400, -0.024	174.400, -0.002	174.400, -0.001	174.400, -0.025	174.400, 0.006	174.400, 0.008
874	174.600, 0.307	174.600, 0.382	174.600, 0.518	174.600, 0.569	174.600, 0.549	174.600, 0.015	174.600, -0.023	174.600, -0.002	174.600, -0.000	174.600, -0.025	174.600, 0.006	174.600, 0.008
875	174.800, 0.307	174.800, 0.381	174.800, 0.518	174.800, 0.568	174.800, 0.548	174.800, 0.015	174.800, -0.023	174.800, -0.002	174.800, 0.000	174.800, -0.024	174.800, 0.006	174.800, 0.008
876	175.000, 0.306	175.000, 0.381	175.000, 0.517	175.000, 0.568	175.000, 0.548	175.000, 0.015	175.000, -0.023	175.000, -0.001	175.000, 0.000	175.000, -0.024	175.000, 0.006	175.000, 0.008
877	175.200, 0.306	175.200, 0.381	175.200, 0.516	175.200, 0.568	175.200, 0.547	175.200, 0.016	175.200, -0.023	175.200, -0.001	175.200, 0.000	175.200, -0.023	175.200, 0.007	175.200, 0.008
878	175.400, 0.306	175.400, 0.381	175.400, 0.516	175.400, 0.567	175.400, 0.546	175.400, 0.016	175.400, -0.023	175.400, -0.001	175.400, 0.001	175.400, -0.022	175.400, 0.007	175.400, 0.009
879	175.600, 0.305	175.600, 0.381	175.600, 0.516	175.600, 0.567	175.600, 0.545	175.600, 0.016	175.600, -0.022	175.600, -0.001	175.600, 0.001	175.600, -0.022	175.600, 0.007	175.600, 0.009
880	175.800, 0.305	175.800, 0.380	175.800, 0.515	175.800, 0.566	175.800, 0.545	175.800, 0.016	175.800, -0.022	175.800, -0.001	175.800, 0.001	175.800, -0.021	175.800, 0.008	175.800, 0.009
881	176.000, 0.305	176.000, 0.380	176.000, 0.515	176.000, 0.566	176.000, 0.544	176.000, 0.016	176.000, -0.022	176.000, -0.001	176.000, 0.001	176.000, -0.021	176.000, 0.008	176.000, 0.010
882	176.200, 0.305	176.200, 0.380	176.200, 0.514	176.200, 0.566	176.200, 0.544	176.200, 0.016	176.200, -0.022	176.200, -0.000	176.200, 0.002	176.200, -0.020	176.200, 0.008	176.200, 0.010
883	176.400, 0.305	176.400, 0.380	176.400, 0.514	176.400, 0.565	176.400, 0.543	176.400, 0.016	176.400, -0.022	176.400, -0.000	176.400, 0.002	176.400, -0.020	176.400, 0.008	176.400, 0.010
884	176.600, 0.304	176.600, 0.380	176.600, 0.514	176.600, 0.565	176.600, 0.543	176.600, 0.016	176.600, -0.021	176.600, -0.000	176.600, 0.002	176.600, -0.020	176.600, 0.009	176.600, 0.011
885	176.800, 0.304	176.800, 0.379	176.800, 0.513	176.800, 0.565	176.800, 0.542	176.800, 0.017	176.800, -0.021	176.800, -0.000	176.800, 0.003	176.800, -0.019	176.800, 0.009	176.800, 0.011
886	177.000, 0.304	177.000, 0.379	177.000, 0.513	177.000, 0.565	177.000, 0.542	177.000, 0.017	177.000, -0.021	177.000, -0.000	177.000, 0.003	177.000, -0.019	177.000, 0.009	177.000, 0.010
887	177.200, 0.304	177.200, 0.379	177.200, 0.512	177.200, 0.564	177.200, 0.541	177.200, 0.017	177.200, -0.021	177.200, 0.000	177.200, 0.004	177.200, -0.019	177.200, 0.010	177.200, 0.010
888	177.400, 0.304	177.400, 0.378	177.400, 0.512	177.400, 0.563	177.400, 0.541	177.400, 0.017	177.400, -0.021	177.400, 0.000	177.400, 0.004	177.400, -0.019	177.400, 0.010	177.400, 0.010
889	177.600, 0.304	177.600, 0.378	177.600, 0.511	177.600, 0.563	177.600, 0.540	177.600, 0.017	177.600, -0.020	177.600, 0.001	177.600, 0.004	177.600, -0.019	177.600, 0.011	177.600, 0.010
890	177.800, 0.304	177.800, 0.378	177.800, 0.511	177.800, 0.562	177.800, 0.540	177.800, 0.018	177.800, -0.020	177.800, 0.001	177.800, 0.004	177.800, -0.019	177.800, 0.011	177.800, 0.010
891	178.000, 0.303	178.000, 0.377	178.000, 0.511	178.000, 0.561	178.000, 0.539	178.000, 0.018	178.000, -0.020	178.000, 0.001	178.000, 0.004	178.000, -0.019	178.000, 0.011	178.000, 0.010
892	178.200, 0.303	178.200, 0.376	178.200, 0.511	178.200, 0.561	178.200, 0.539	178.200, 0.018	178.200, -0.019	178.200, 0.001	178.200, 0.004	178.200, -0.019	178.200, 0.011	178.200, 0.010
893	178.400, 0.302	178.400, 0.376	178.400, 0.510	178.400, 0.560	178.400, 0.538	178.400, 0.019	178.400, -0.019	178.400, 0.001	178.400, 0.004	178.400, -0.019	178.400, 0.011	178.400, 0.010
894	178.600, 0.302	178.600, 0.375	178.600, 0.510	178.600, 0.560	178.600, 0.538	178.600, 0.019	178.600, -0.019	178.600, 0.001	178.600, 0.004	178.600, -0.019	178.600, 0.011	178.600, 0.011
895	178.800, 0.302	178.800, 0.375	178.800, 0.509	178.800, 0.559	178.800, 0.537	178.800, 0.019	178.800, -0.019	178.800, 0.001	178.800, 0.004	178.800, -0.019	178.800, 0.011	178.800, 0.011
896	179.000, 0.301	179.000, 0.375	179.000, 0.509	179.000, 0.559	179.000, 0.537	179.000, 0.019	179.000, -0.019	179.000, 0.001	179.000, 0.004	179.000, -0.018	179.000, 0.011	179.000, 0.011
897	179.200, 0.301	179.200, 0.374	179.200, 0.508	179.200, 0.558	179.200, 0.536	179.200, 0.019	179.200, -0.019	179.200, 0.001	179.200, 0.004	179.200, -0.018	179.200, 0.011	179.200, 0.011
898	179.400, 0.301	179.400, 0.374	179.400, 0.508	179.400, 0.558	179.400, 0.535	179.400, 0.019	179.400, -0.019	179.400, 0.001	179.400, 0.004	179.400, -0.018	179.400, 0.011	179.400, 0.011
899	179.600, 0.301	179.600, 0.374	179.600, 0.508	179.600, 0.557	179.600, 0.534	179.600, 0.019	179.600, -0.019	179.600, 0.001	179.600, 0.004	179.600, -0.018	179.600, 0.011	179.600, 0.012
900	179.800, 0.301	179.800, 0.374	179.800, 0.507	179.800, 0.557	179.800, 0.533	179.800, 0.019	179.800, -0.018	179.800, 0.002	179.800, 0.004	179.800, -0.018	179.800, 0.010	179.800, 0.012
901	180.000, 0.301	180.000, 0.374	180.000, 0.507	180.000, 0.557	180.000, 0.533	180.000, 0.019	180.000, -0.018	180.000, 0.002	180.000, 0.004	180.000, -0.018	180.000, 0.010	180.000, 0.013
902	180.200, 0.301	180.200, 0.374	180.200, 0.507	180.200, 0.556	180.200, 0.532	180.200, 0.019	180.200, -0.018	180.200, 0.002	180.200, 0.004	180.200, -0.017	180.200, 0.010	180.200, 0.013
903	180.400, 0.301	180.400, 0.373	180.400, 0.506	180.400, 0.556	180.400, 0.531	180.400, 0.019	180.400, -0.018	180.400, 0.002	180.400, 0.004	180.400, -0.017	180.400, 0.010	180.400, 0.013
904	180.600, 0.301	180.600, 0.373	180.600, 0.506	180.600, 0.556	180.600, 0.531	180.600, 0.019	180.600, -0.018	180.600, 0.002	180.600, 0.005	180.600, -0.017	180.600, 0.011	180.600, 0.014
905	180.800, 0.301	180.800, 0.373	180.800, 0.505	180.800, 0.556	180.800, 0.530	180.800, 0.018	180.800, -0.018	180.800, 0.002	180.800, 0.005	180.800, -0.017	180.800, 0.011	180.800, 0.014
906	181.000, 0.300	181.000, 0.372	181.000, 0.505	181.000, 0.556	181.000, 0.530	181.000, 0.018	181.000, -0.018	181.000, 0.002	181.000, 0.005	181.000, -0.017	181.000, 0.011	181.000, 0.014
907	181.200, 0.300	181.200, 0.371	181.200, 0.504	181.200, 0.555	181.200, 0.529	181.200, 0.018	181.200, -0.019	181.200, 0.003	181.200, 0.005	181.200, -0.016	181.200, 0.012	181.200, 0.014
908	181.400, 0.299	181.400, 0.371	181.400, 0.504	181.400, 0.555	181.400, 0.529	181.400, 0.018	181.400, -0.019	181.400, 0.003	181.400, 0.005	181.400, -0.016	181.400, 0.012	181.400, 0.014
909	181.600, 0.299	181.600, 0.370	181.600, 0.504	181.600, 0.554	181.600, 0.529	181.600, 0.018	181.600, -0.019	181.600, 0.003	181.600, 0.006	181.600, -0.016	181.600, 0.012	181.600, 0.014
910	181.800, 0.298	181.800, 0.370	181.800, 0.504	181.800, 0.553	181.800, 0.529	181.800, 0.019	181.800, -0.019	181.800, 0.003	181.800, 0.006	181.800, -0.016	181.800, 0.013	181.800, 0.014
911	182.000, 0.297	182.000, 0.369	182.000, 0.503	182.000, 0.553	182.000, 0.528	182.000, 0.019	182.000, -0.019	182.000, 0.003	182.000, 0.006	182.000, -0.016	182.000, 0.013	182.000, 0.014
912	182.200, 0.297	182.200, 0.369	182.200, 0.503	182.200, 0.552	182.200, 0.528	182.200, 0.019	182.200, -0.019	182.200, 0.003	182.200, 0.006	182.200, -0.016	182.200, 0.013	182.200, 0.014
913	182.400, 0.296	182.400, 0.369	182.400, 0.503	182.400, 0.551	182.400, 0.528	182.400, 0.019	182.400, -0.019	182.400, 0.003	182.400, 0.006	182.400, -0.016	182.400, 0.013	182.400, 0.014
914	182.600, 0.295	182.600, 0.368	182.600, 0.502	182.600, 0.550	182.600, 0.528	182.600, 0.019	182.600, -0.019	182.600, 0.003	182.600, 0.007	182.600, -0.015	182.600, 0.013	182.600, 0.014
915	182.800, 0.295	182.800, 0.368	182.800, 0.502	182.800, 0.550	182.800, 0.528	182.800, 0.020	182.800, -0.018	182.800, 0.004	182.800, 0.007	182.800, -0.015	182.800, 0.013	182.800, 0.014
916	183.000, 0.295	183.000, 0.368	183.000, 0.502	183.000, 0.549	183.000, 0.527	183.000, 0.020	183.000, -0.018	183.000, 0.004	183.000, 0.007	183.000, -0.015	183.000, 0.013	183.000, 0.014
917	183.200, 0.294	183.200, 0.367	183.200, 0.502	183.200, 0.549	183.200, 0.527	183.200, 0.020	183.200, -0.018	183.200, 0.004	183.200, 0.007	183.200, -0.015	183.200, 0.013	183.200, 0.014
918	183.400, 0.294	183.400, 0.367	183.400, 0.501	183.400, 0.548	183.400, 0.526	183.400, 0.020	183.400, -0.018	183.400, 0.005	183.400, 0.007	183.400, -0.015	183.400, 0.013	183.400, 0.014
919	183.600, 0.294	183.600, 0.367	183.600, 0.501	183.600, 0.548	183.600, 0.526	183.600, 0.020	183.600, -0.018	183.600, 0.005	183.600, 0.007	183.600, -0.015	183.600, 0.013	183.600, 0.015
920	183.800, 0.295	183.800, 0.367	183.800, 0.500	183.800, 0.547	183.800, 0.525	183.800, 0.020	183.800, -0.017	183.800, 0.005	183.800, 0.007	183.800, -0.015	183.800, 0.013	183.800, 0.015
921	184.000, 0.294	184.000, 0.366	184.000, 0.500	184.000, 0.547	184.000, 0.525	184.000, 0.020	184.000, -0.017	184.000, 0.005	184.000, 0.007	184.000, -0.015	184.000, 0.013	184.000, 0.015
922	184.200, 0.294	184.200, 0.366	184.200, 0.499	184.200, 0.547	184.200, 0.524	184.200, 0.020	184.200, -0.017	184.200, 0.005	184.200, 0.008	184.200, -0.014	184.200, 0.013	184.200, 0.015
923	184.400, 0.294	184.400, 0.366	184.400, 0.499	184.400, 0.547	184.400, 0.524	184.400, 0.020	184.400, -0.017	184.400, 0.005	184.400, 0.008	184.400, -0.014	184.400, 0.014	184.400, 0.016
924	184.600, 0.294	184.600, 0.366	184.600, 0.498	184.600, 0.546	184.600, 0.523	184.600, 0.020	184.600, -0.017	184.600, 0.005	184.600, 0.008	184.600, -0.014	184.600, 0.014	184.600, 0.016
925	184.800, 0.294	184.800, 0.366	184.800, 0.498	184.800, 0.546	184.800, 0.523	184.800, 0.020	184.800, -0.016	184.800, 0.005	184.800, 0.009	184.800, -0.014	184.800, 0.015	184.800, 0.016
926	185.000, 0.294	185.000, 0.365	185.000, 0.497	185.000, 0.545	185.000, 0.522	185.000, 0.020	185.000, -0.016	185.000, 0.005	185.000, 0.009	185.000, -0.014	185.000, 0.015	185.000, 0.016
927	185.200, 0.294	185.200, 0.365	185.200, 0.497	185.200, 0.544	185.200, 0.522	185.200, 0.020	185.200, -0.016	185.200, 0.005	185.200, 0.009	185.200, -0.014	185.200, 0.015	185.200, 0.015
928	185.400, 0.293	185.400, 0.365	185.400, 0.497	185.400, 0.544	185.400, 0.522	185.400, 0.020	185.400, -0.016	185.400, 0.005	185.400, 0.009	185.400, -0.014	185.400, 0.015	185.400, 0.015
929	185.600, 0.293	185.600, 0.364	185.600, 0.496	185.600, 0.543	185.600, 0.521	185.600, 0.020	185.600, -0.016	185.600, 0.005	185.600, 0.009	185.600, -0.013	185.600, 0.015	185.600, 0.015
930	185.800, 0.293	185.800, 0.364	185.800, 0.496	185.800, 0.542	185.800, 0.520	185.800, 0.020	185.800, -0.016	185.800, 0.005	185.800, 0.009	185.800, -0.014	185.800, 0.015	185.800, 0.015
931	186.000, 0.293	186.000, 0.363	186.000, 0.495	186.000, 0.542	186.000, 0.520	186.000, 0.020	186.000, -0.016	186.000, 0.004	186.000, 0.009	186.000, -0.014	186.000, 0.015	186.000, 0.015
932	186.200, 0.292	186.200, 0.363	186.200, 0.495	186.200, 0.541	186.200, 0.519	186.200, 0.020	186.200, -0.016	186.200, 0.004	186.200, 0.009	186.200, -0.014	186.200, 0.015	186.200, 0.015
933	186.400, 0.292	186.400, 0.362	186.400, 0.495	186.400, 0.541	186.400, 0.518	186.400, 0.020	186.400, -0.016	186.400, 0.005	186.400, 0.009	186.400, -0.014	186.400, 0.015	186.400, 0.015
934	186.600, 0.292	186.600, 0.362	186.600, 0.494	186.600, 0.541	186.600, 0.518	186.600, 0.020	186.600, -0.016	186.600, 0.005	186.600, 0.009	186.600, -0.014	186.600, 0.015	186.600, 0.015
935	186.800, 0.292	186.800, 0.361	186.800, 0.494	186.800, 0.541	186.800, 0.517	186.800, 0.020	186.800, -0.016	186.800, 0.005	186.800, 0.009	186.800, -0.014	186.800, 0.015	186.800, 0.015
936	187.000, 0.291	187.000, 0.361	187.000, 0.493	187.000, 0.540	187.000, 0.516	187.000, 0.021	187.000, -0.016	187.000, 0.005	187.000, 0.009	187.000, -0.014	187.000, 0.015	187.000, 0.015
937	187.200, 0.291	187.200, 0.360	187.200, 0.493	187.200, 0.540	187.200, 0.515	187.200, 0.021	187.200, -0.016	187.200, 0.005	187.200, 0.009	187.200, -0.014	187.200, 0.015	187.200, 0.015
938	187.400, 0.291	187.400, 0.360	187.400, 0.492	187.400, 0.540	187.400, 0.515	187.400, 0.021	187.400, -0.016	187.400, 0.005	187.400, 0.009	187.400, -0.014	187.400, 0.015	187.400, 0.016
939	187.600, 0.291	187.600, 0.360	187.600, 0.492	187.600, 0.539	187.600, 0.514	187.600, 0.021	187.600, -0.016	187.600, 0.006	187.600, 0.009	187.600, -0.014	187.600, 0.015	187.600, 0.016
940	187.800, 0.290	187.800, 0.360	187.800, 0.491	187.800, 0.539	187.800, 0.514	187.800, 0.021	187.800, -0.015	187.800, 0.006	187.800, 0.009	187.800, -0.014	187.800, 0.015	187.800, 0.016
941	188.000, 0.290	188.000, 0.360	188.000, 0.491	188.000, 0.538	188.000, 0.514	188.000, 0.021	188.000, -0.015	188.000, 0.006	188.000, 0.009	188.000, -0.014	188.000, 0.015	188.000, 0.016
942	188.200, 0.290	188.200, 0.360	188.200, 0.491	188.200, 0.538	188.200, 0.513	188.200, 0.021	188.200, -0.015	188.200, 0.006	188.200, 0.009	188.200, -0.014	188.200, 0.016	188.200, 0.017
943	188.400, 0.289	188.400, 0.360	188.400, 0.490	188.400, 0.537	188.400, 0.513	188.400, 0.021	188.400, -0.015	188.400, 0.006	188.400, 0.010	188.400, -0.013	188.400, 0.016	188.400, 0.017
944	188.600, 0.289	188.600, 0.359	188.600, 0.490	188.600, 0.537	188.600, 0.513	188.600, 0.021	188.600, -0.015	188.600, 0.006	188.600, 0.010	188.600, -0.013	188.600, 0.016	188.600, 0.017
945	188.800, 0.289	188.800, 0.359	188.800, 0.490	188.800, 0.536	188.800, 0.512	188.800, 0.021	188.800, -0.015	188.800, 0.006	188.800, 0.011	188.800, -0.013	188.800, 0.016	188.800, 0.017
946	189.000, 0.289	189.000, 0.358	189.000, 0.490	189.000, 0.536	189.000, 0.512	189.000, 0.021	189.000, -0.015	189.000, 0.006	189.000, 0.011	189.000, -0.012	189.000, 0.016	189.000, 0.017
947	189.200, 0.288	189.200, 0.358	189.200, 0.489	189.200, 0.536	189.200, 0.512	189.200, 0.021	189.200, -0.015	189.200, 0.006	189.200, 0.011	189.200, -0.012	189.200, 0.017	189.200, 0.017
948	189.400, 0.288	189.400, 0.357	189.400, 0.489	189.400, 0.536	189.400, 0.511	189.400, 0.021	189.400, -0.015	189.400, 0.006	189.400, 0.012	189.400, -0.012	189.400, 0.017	189.400, 0.017
949	189.600, 0.288	189.600, 0.357	189.600, 0.489	189.600, 0.535	189.600, 0.511	189.600, 0.022	189.600, -0.015	189.600, 0.006	189.600, 0.012	189.600, -0.012	189.600, 0.017	189.600, 0.017
950	189.800, 0.287	189.800, 0.356	189.800, 0.488	189.800, 0.535	189.800, 0.510	189.800, 0.022	189.800, -0.015	189.800, 0.006	189.800, 0.012	189.800, -0.012	189.800, 0.017	189.800, 0.017
951	190.000, 0.287	190.000, 0.356	190.000, 0.488	190.000, 0.535	190.000, 0.510	190.000, 0.022	190.000, -0.015	190.000, 0.006	190.000, 0.012	190.000, -0.012	190.000, 0.017	190.000, 0.017
952	190.200, 0.287	190.200, 0.355	190.200, 0.487	190.200, 0.534	190.200, 0.509	190.200, 0.022	190.200, -0.015	190.200, 0.006	190.200, 0.011	190.200, -0.011	190.200, 0.017	190.200, 0.017
953	190.400, 0.286	190.400, 0.355	190.400, 0.487	190.400, 0.534	190.400, 0.509	190.400, 0.022	190.400, -0.015	190.400, 0.007	190.400, 0.011	190.400, -0.011	190.400, 0.018	190.400, 0.017
954	190.600, 0.286	190.600, 0.355	190.600, 0.487	190.600, 0.534	190.600, 0.508	190.600, 0.022	190.600, -0.015	190.600, 0.007	190.600, 0.011	190.600, -0.011	190.600, 0.018	190.600, 0.017
955	190.800, 0.286	190.800, 0.354	190.800, 0.486	190.800, 0.533	190.800, 0.508	190.800, 0.023	190.800, -0.015	190.800, 0.007	190.800, 0.011	190.800, -0.011	190.800, 0.018	190.800, 0.017
956	191.000, 0.286	191.000, 0.354	191.000, 0.486	191.000, 0.533	191.000, 0.507	191.000, 0.023	191.000, -0.015	191.000, 0.008	191.000, 0.011	191.000, -0.011	191.000, 0.018	191.000, 0.017
957	191.200, 0.286	191.200, 0.354	191.200, 0.486	191.200, 0.533	191.200, 0.507	191.200, 0.023	191.200, -0.015	191.200, 0.008	191.200, 0.010	191.200, -0.010	191.200, 0.018	191.200, 0.018
958	191.400, 0.286	191.400, 0.354	191.400, 0.485	191.400, 0.532	191.400, 0.507	191.400, 0.023	191.400, -0.015	191.400, 0.008	191.400, 0.010	191.400, -0.010	191.400, 0.018	191.400, 0.018
959	191.600, 0.286	191.600, 0.354	191.600, 0.485	191.600, 0.532	191.600, 0.506	191.600, 0.023	191.600, -0.015	191.600, 0.008	191.600, 0.010	191.600, -0.010	191.600, 0.018	191.600, 0.018
960	191.800, 0.285	191.800, 0.353	191.800, 0.485	191.800, 0.531	191.800, 0.506	191.800, 0.023	191.800, -0.015	191.800, 0.008	191.800, 0.010	191.800, -0.010	191.800, 0.018	191.800, 0.019
961	192.000, 0.285	192.000, 0.353	192.000, 0.484	192.000, 0.531	192.000, 0.505	192.000, 0.023	192.000, -0.015	192.000, 0.008	192.000, 0.010	192.000, -0.009	192.000, 0.018	192.000, 0.019
962	192.200, 0.285	192.200, 0.353	192.200, 0.484	192.200, 0.530	192.200, 0.505	192.200, 0.023	192.200, -0.015	192.200, 0.008	192.200, 0.011	192.200, -0.009	192.200, 0.019	192.200, 0.019
963	192.400, 0.285	192.400, 0.352	192.400, 0.483	192.400, 0.530	192.400, 0.504	192.400, 0.023	192.400, -0.015	192.400, 0.007	192.400, 0.011	192.400, -0.009	192.400, 0.019	192.400, 0.019
964	192.600, 0.285	192.600, 0.352	192.600, 0.483	192.600, 0.529	192.600, 0.503	192.600, 0.023	192.600, -0.015	192.600, 0.007	192.600, 0.011	192.600, -0.009	192.600, 0.019	192.600, 0.019
965	192.800, 0.284	192.800, 0.351	192.800, 0.482	192.800, 0.529	192.800, 0.503	192.800, 0.024	192.800, -0.015	192.800, 0.007	192.800, 0.011	192.800, -0.009	192.800, 0.019	192.800, 0.019
966	193.000, 0.284	193.000, 0.351	193.000, 0.481	193.000, 0.528	193.000, 0.502	193.000, 0.024	193.000, -0.015	193.000, 0.007	193.000, 0.012	193.000, -0.009	193.000, 0.019	193.000, 0.019
967	193.200, 0.283	193.200, 0.351	193.200, 0.481	193.200, 0.528	193.200, 0.502	193.200, 0.024	193.200, -0.015	193.200, 0.007	193.200, 0.012	193.200, -0.009	193.200, 0.019	193.200, 0.019
968	193.400, 0.283	193.400, 0.351	193.400, 0.480	193.400, 0.527	193.400, 0.501	193.400, 0.024	193.400, -0.015	193.400, 0.007	193.400, 0.012	193.400, -0.010	193.400, 0.019	193.400, 0.019
969	193.600, 0.283	193.600, 0.351	193.600, 0.480	193.600, 0.527	193.600, 0.501	193.600, 0.024	193.600, -0.015	193.600, 0.007	193.600, 0.012	193.600, -0.010	193.600, 0.019	193.600, 0.019
970	193.800, 0.282	193.800, 0.351	193.800, 0.480	193.800, 0.526	193.800, 0.501	193.800, 0.024	193.800, -0.014	193.800, 0.007	193.800, 0.012	193.800, -0.010	193.800, 0.020	193.800, 0.019
971	194.000, 0.282	194.000, 0.351	194.000, 0.480	194.000, 0.526	194.000, 0.500	194.000, 0.024	194.000, -0.014	194.000, 0.008	194.000, 0.012	194.000, -0.010	194.000, 0.020	194.000, 0.019
972	194.200, 0.281	194.200, 0.351	194.200, 0.480	194.200, 0.526	194.200, 0.500	194.200, 0.024	194.200, -0.014	194.200, 0.008	194.200, 0.012	194.200, -0.010	194.200, 0.020	194.200, 0.019
973	194.400, 0.281	194.400, 0.351	194.400, 0.480	194.400, 0.526	194.400, 0.500	194.400, 0.024	194.400, -0.014	194.400, 0.008	194.400, 0.012	194.400, -0.010	194.400, 0.020	194.400, 0.018
974	194.600, 0.280	194.600, 0.351	194.600, 0.480	194.600, 0.526	194.600, 0.499	194.600, 0.023	194.600, -0.014	194.600, 0.009	194.600, 0.012	194.600, -0.010	194.600, 0.020	194.600, 0.018
975	194.800, 0.280	194.800, 0.350	194.800, 0.479	194.800, 0.525	194.800, 0.498	194.800, 0.023	194.800, -0.014	194.800, 0.009	194.800, 0.012	194.800, -0.010	194.800, 0.019	194.800, 0.018
976	195.000, 0.280	195.000, 0.350	195.000, 0.479	195.000, 0.525	195.000, 0.498	195.000, 0.023	195.000, -0.014	195.000, 0.009	195.000, 0.012	195.000, -0.010	195.000, 0.019	195.000, 0.018
977	195.200, 0.280	195.200, 0.350	195.200, 0.478	195.200, 0.525	195.200, 0.497	195.200, 0.023	195.200, -0.015	195.200, 0.009	195.200, 0.012	195.200, -0.010	195.200, 0.019	195.200, 0.019
978	195.400, 0.280	195.400, 0.349	195.400, 0.478	195.400, 0.525	195.400, 0.497	195.400, 0.023	195.400, -0.015	195.400, 0.009	195.400, 0.012	195.400, -0.009	195.400, 0.019	195.400, 0.019
979	195.600, 0.280	195.600, 0.349	195.600, 0.478	195.600, 0.524	195.600, 0.497	195.600, 0.023	195.600, -0.015	195.600, 0.009	195.600, 0.012	195.600, -0.009	195.600, 0.019	195.600, 0.019
980	195.800, 0.280	195.800, 0.348	195.800, 0.478	195.800, 0.524	195.800, 0.496	195.800, 0.023	195.800, -0.015	195.800, 0.009	195.800, 0.013	195.800, -0.009	195.800, 0.019	195.800, 0.019
981	196.000, 0.280	196.000, 0.348	196.000, 0.478	196.000, 0.523	196.000, 0.496	196.000, 0.023	196.000, -0.015	196.000, 0.009	196.000, 0.013	196.000, -0.009	196.000, 0.019	196.000, 0.019
982	196.200, 0.279	196.200, 0.347	196.200, 0.477	196.200, 0.523	196.200, 0.496	196.200, 0.023	196.200, -0.015	196.200, 0.009	196.200, 0.013	196.200, -0.009	196.200, 0.019	196.200, 0.019
983	196.400, 0.279	196.400, 0.347	196.400, 0.477	196.400, 0.522	196.400, 0.495	196.400, 0.023	196.400, -0.015	196.400, 0.009	196.400, 0.013	196.400, -0.009	196.400, 0.019	196.400, 0.019
984	196.600, 0.279	196.600, 0.346	196.600, 0.477	196.600, 0.522	196.600, 0.495	196.600, 0.023	196.600, -0.015	196.600, 0.008	196.600, 0.013	196.600, -0.009	196.600, 0.019	196.600, 0.019
985	196.800, 0.279	196.800, 0.346	196.800, 0.476	196.800, 0.521	196.800, 0.495	196.800, 0.023	196.800, -0.015	196.800, 0.008	196.800, 0.013	196.800, -0.009	196.800, 0.019	196.800, 0.019
986	197.000, 0.279	197.000, 0.345	197.000, 0.476	197.000, 0.521	197.000, 0.494	197.000, 0.023	197.000, -0.015	197.000, 0.008	197.000, 0.013	197.000, -0.009	197.000, 0.019	197.000, 0.019
987	197.200, 0.279	197.200, 0.345	197.200, 0.476	197.200, 0.520	197.200, 0.494	197.200, 0.023	197.200, -0.014	197.200, 0.008	197.200, 0.013	197.200, -0.009	197.200, 0.020	197.200, 0.019
988	197.400, 0.278	197.400, 0.345	197.400, 0.475	197.400, 0.520	197.400, 0.493	197.400, 0.023	197.400, -0.014	197.400, 0.008	197.400, 0.013	197.400, -0.009	197.400, 0.020	197.400, 0.019
989	197.600, 0.278	197.600, 0.344	197.600, 0.475	197.600, 0.519	197.600, 0.493	197.600, 0.024	197.600, -0.014	197.600, 0.008	197.600, 0.013	197.600, -0.009	197.600, 0.020	197.600, 0.019
990	197.800, 0.278	197.800, 0.344	197.800, 0.475	197.800, 0.519	197.800, 0.492	197.800, 0.024	197.800, -0.013	197.800, 0.008	197.800, 0.013	197.800, -0.009	197.800, 0.021	197.800, 0.019
991	198.000, 0.277	198.000, 0.343	198.000, 0.474	198.000, 0.519	198.000, 0.492	198.000, 0.024	198.000, -0.013	198.000, 0.008	198.000, 0.013	198.000, -0.009	198.000, 0.021	198.000, 0.019
992	198.200, 0.277	198.200, 0.343	198.200, 0.473	198.200, 0.519	198.200, 0.491	198.200, 0.024	198.200, -0.013	198.200, 0.008	198.200, 0.013	198.200, -0.009	198.200, 0.021	198.200, 0.019
993	198.400, 0.276	198.400, 0.342	198.400, 0.473	198.400, 0.518	198.400, 0.490	198.400, 0.024	198.400, -0.012	198.400, 0.008	198.400, 0.013	198.400, -0.009	198.400, 0.021	198.400, 0.019
994	198.600, 0.276	198.600, 0.342	198.600, 0.472	198.600, 0.518	198.600, 0.490	198.600, 0.024	198.600, -0.012	198.600, 0.008	198.600, 0.013	198.600, -0.008	198.600, 0.021	198.600, 0.019
995	198.800, 0.276	198.800, 0.342	198.800, 0.471	198.800, 0.518	198.800, 0.489	198.800, 0.024	198.800, -0.012	198.800, 0.008	198.800, 0.013	198.800, -0.008	198.800, 0.021	198.800, 0.019
996	199.000, 0.275	199.000, 0.342	199.000, 0.471	199.000, 0.518	199.000, 0.489	199.000, 0.024	199.000, -0.012	199.000, 0.008	199.000, 0.013	199.000, -0.008	199.000, 0.021	199.000, 0.019
997	199.200, 0.275	199.200, 0.342	199.200, 0.470	199.200, 0.517	199.200, 0.489	199.200, 0.024	199.200, -0.012	199.200, 0.008	199.200, 0.013	199.200, -0.008	199.200, 0.021	199.200, 0.019
998	199.400, 0.275	199.400, 0.341	199.400, 0.470	199.400, 0.517	199.400, 0.488	199.400, 0.024	199.400, -0.012	199.400, 0.008	199.400, 0.013	199.400, -0.008	199.400, 0.020	199.400, 0.019
999	199.600, 0.275	199.600, 0.341	199.600, 0.470	199.600, 0.517	199.600, 0.488	199.600, 0.024	199.600, -0.012	199.600, 0.009	199.600, 0.013	199.600, -0.009	199.600, 0.020	199.600, 0.019
1000	199.800, 0.275	199.800, 0.341	199.800, 0.470	199.800, 0.517	199.800, 0.488	199.800, 0.024	199.800, -0.013	199.800, 0.009	199.800, 0.013	199.800, -0.009	199.800, 0.020	199.800, 0.019
1001	200.000, 0.274	200.000, 0.341	200.000, 0.470	200.000, 0.516	200.000, 0.488	200.000, 0.024	200.000, -0.013	200.000, 0.009	200.000, 0.013	200.000, -0.009	200.000, 0.020	200.000, 0.018
1002	200.200, 0.274	200.200, 0.341	200.200, 0.470	200.200, 0.516	200.200, 0.488	200.200, 0.024	200.200, -0.013	200.200, 0.009	200.200, 0.014	200.200, -0.010	200.200, 0.021	200.200, 0.018
1003	200.400, 0.274	200.400, 0.341	200.400, 0.469	200.400, 0.516	200.400, 0.488	200.400, 0.024	200.400, -0.013	200.400, 0.009	200.400, 0.014	200.400, -0.010	200.400, 0.021	200.400, 0.018
1004	200.600, 0.274	200.600, 0.340	200.600, 0.469	200.600, 0.515	200.600, 0.487	200.600, 0.024	200.600, -0.013	200.600, 0.008	200.600, 0.014	200.600, -0.009	200.600, 0.021	200.600, 0.018
1005	200.800, 0.274	200.800, 0.340	200.800, 0.469	200.800, 0.515	200.800, 0.487	200.800, 0.024	200.800, -0.013	200.800, 0.008	200.800, 0.014	200.800, -0.009	200.800, 0.021	200.800, 0.018
1006	201.000, 0.273	201.000, 0.339	201.000, 0.469	201.000, 0.515	201.000, 0.487	201.000, 0.024	201.000, -0.013	201.000, 0.008	201.000, 0.014	201.000, -0.009	201.000, 0.021	201.000, 0.018
1007	201.200, 0.273	201.200, 0.339	201.200, 0.469	201.200, 0.514	201.200, 0.487	201.200, 0.024	201.200, -0.013	201.200, 0.008	201.200, 0.014	201.200, -0.009	201.200, 0.022	201.200, 0.019
1008	201.400, 0.273	201.400, 0.339	201.400, 0.468	201.400, 0.514	201.400, 0.486	201.400, 0.023	201.400, -0.013	201.400, 0.009	201.400, 0.014	201.400, -0.009	201.400, 0.022	201.400, 0.019
1009	201.600, 0.273	201.600, 0.338	201.600, 0.468	201.600, 0.514	201.600, 0.486	201.600, 0.023	201.600, -0.013	201.600, 0.009	201.600, 0.015	201.600, -0.009	201.600, 0.022	201.600, 0.019
1010	201.800, 0.273	201.800, 0.338	201.800, 0.467	201.800, 0.513	201.800, 0.486	201.800, 0.023	201.800, -0.013	201.800, 0.009	201.800, 0.015	201.800, -0.008	201.800, 0.022	201.800, 0.020
1011	202.000, 0.272	202.000, 0.338	202.000, 0.467	202.000, 0.513	202.000, 0.486	202.000, 0.023	202.000, -0.013	202.000, 0.009	202.000, 0.015	202.000, -0.008	202.000, 0.022	202.000, 0.020
1012	202.200, 0.272	202.200, 0.338	202.200, 0.467	202.200, 0.512	202.200, 0.485	202.200, 0.023	202.200, -0.013	202.200, 0.009	202.200, 0.015	202.200, -0.008	202.200, 0.022	202.200, 0.020
1013	202.400, 0.272	202.400, 0.337	202.400, 0.466	202.400, 0.512	202.400, 0.484	202.400, 0.023	202.400, -0.012	202.400, 0.009	202.400, 0.015	202.400, -0.008	202.400, 0.022	202.400, 0.020
1014	202.600, 0.272	202.600, 0.337	202.600, 0.466	202.600, 0.511	202.600, 0.484	202.600, 0.023	202.600, -0.012	202.600, 0.009	202.600, 0.015	202.600, -0.007	202.600, 0.022	202.600, 0.020
1015	202.800, 0.272	202.800, 0.337	202.800, 0.466	202.800, 0.511	202.800, 0.483	202.800, 0.023	202.800, -0.012	202.800, 0.009	202.800, 0.016	202.800, -0.007	202.800, 0.022	202.800, 0.020
1016	203.000, 0.272	203.000, 0.337	203.000, 0.466	203.000, 0.510	203.000, 0.482	203.000, 0.023	203.000, -0.012	203.000, 0.009	203.000, 0.016	203.000, -0.007	203.000, 0.022	203.000, 0.020
1017	203.200, 0.272	203.200, 0.337	203.200, 0.466	203.200, 0.510	203.200, 0.482	203.200, 0.023	203.200, -0.012	203.200, 0.009	203.200, 0.016	203.200, -0.007	203.200, 0.022	203.200, 0.020
1018	203.400, 0.272	203.400, 0.337	203.400, 0.465	203.400, 0.509	203.400, 0.481	203.400, 0.023	203.400, -0.012	203.400, 0.009	203.400, 0.016	203.400, -0.007	203.400, 0.022	203.400, 0.020
1019	203.600, 0.272	203.600, 0.337	203.600, 0.465	203.600, 0.509	203.600, 0.481	203.600, 0.023	203.600, -0.013	203.600, 0.009	203.600, 0.016	203.600, -0.007	203.600, 0.022	203.600, 0.020
1020	203.800, 0.271	203.800, 0.337	203.800, 0.465	203.800, 0.509	203.800, 0.480	203.800, 0.023	203.800, -0.013	203.800, 0.009	203.800, 0.016	203.800, -0.007	203.800, 0.022	203.800, 0.020
1021	204.000, 0.271	204.000, 0.336	204.000, 0.464	204.000, 0.508	204.000, 0.480	204.000, 0.023	204.000, -0.013	204.000, 0.009	204.000, 0.015	204.000, -0.007	204.000, 0.022	204.000, 0.020
1022	204.200, 0.270	204.200, 0.336	204.200, 0.464	204.200, 0.508	204.200, 0.479	204.200, 0.024	204.200, -0.013	204.200, 0.009	204.200, 0.015	204.200, -0.007	204.200, 0.022	204.200, 0.019
1023	204.400, 0.270	204.400, 0.336	204.400, 0.464	204.400, 0.507	204.400, 0.479	204.400, 0.024	204.400, -0.013	204.400, 0.009	204.400, 0.015	204.400, -0.007	204.400, 0.022	204.400, 0.019
1024	204.600, 0.269	204.600, 0.335	204.600, 0.463	204.600, 0.507	204.600, 0.479	204.600, 0.024	204.600, -0.013	204.600, 0.009	204.600, 0.015	204.600, -0.007	204.600, 0.022	204.600, 0.019
1025	204.800, 0.269	204.800, 0.335	204.800, 0.463	204.800, 0.506	204.800, 0.479	204.800, 0.024	204.800, -0.013	204.800, 0.009	204.800, 0.015	204.800, -0.007	204.800, 0.022	204.800, 0.019
1026	205.000, 0.269	205.000, 0.334	205.000, 0.463	205.000, 0.506	205.000, 0.478	205.000, 0.025	205.000, -0.013	205.000, 0.009	205.000, 0.015	205.000, -0.007	205.000, 0.021	205.000, 0.019
1027	205.200, 0.269	205.200, 0.334	205.200, 0.462	205.200, 0.506	205.200, 0.478	205.200, 0.025	205.200, -0.013	205.200, 0.009	205.200, 0.015	205.200, -0.007	205.200, 0.021	205.200, 0.019
1028	205.400, 0.268	205.400, 0.333	205.400, 0.462	205.400, 0.505	205.400, 0.478	205.400, 0.025	205.400, -0.013	205.400, 0.009	205.400, 0.015	205.400, -0.007	205.400, 0.021	205.400, 0.019
1029	205.600, 0.268	205.600, 0.333	205.600, 0.462	205.600, 0.505	205.600, 0.478	205.600, 0.025	205.600, -0.013	205.600, 0.009	205.600, 0.015	205.600, -0.008	205.600, 0.021	205.600, 0.019
1030	205.800, 0.268	205.800, 0.332	205.800, 0.461	205.800, 0.505	205.800, 0.477	205.800, 0.025	205.800, -0.013	205.800, 0.010	205.800, 0.015	205.800, -0.008	205.800, 0.021	205.800, 0.020
1031	206.000, 0.268	206.000, 0.332	206.000, 0.461	206.000, 0.504	206.000, 0.477	206.000, 0.025	206.000, -0.013	206.000, 0.010	206.000, 0.015	206.000, -0.008	206.000, 0.020	206.000, 0.020
1032	206.200, 0.268	206.200, 0.332	206.200, 0.461	206.200, 0.504	206.200, 0.477	206.200, 0.024	206.200, -0.013	206.200, 0.010	206.200, 0.015	206.200, -0.008	206.200, 0.020	206.200, 0.020
1033	206.400, 0.268	206.400, 0.332	206.400, 0.460	206.400, 0.504	206.400, 0.476	206.400, 0.025	206.400, -0.013	206.400, 0.010	206.400, 0.015	206.400, -0.009	206.400, 0.020	206.400, 0.020
1034	206.600, 0.267	206.600, 0.332	206.600, 0.460	206.600, 0.503	206.600, 0.476	206.600, 0.024	206.600, -0.013	206.600, 0.011	206.600, 0.015	206.600, -0.009	206.600, 0.020	206.600, 0.020
1035	206.800, 0.267	206.800, 0.332	206.800, 0.460	206.800, 0.503	206.800, 0.475	206.800, 0.025	206.800, -0.012	206.800, 0.010	206.800, 0.015	206.800, -0.009	206.800, 0.020	206.800, 0.020
1036	207.000, 0.267	207.000, 0.332	207.000, 0.460	207.000, 0.502	207.000, 0.474	207.000, 0.025	207.000, -0.013	207.000, 0.010	207.000, 0.015	207.000, -0.009	207.000, 0.020	207.000, 0.021
1037	207.200, 0.266	207.200, 0.332	207.200, 0.459	207.200, 0.502	207.200, 0.474	207.200, 0.025	207.200, -0.012	207.200, 0.010	207.200, 0.015	207.200, -0.009	207.200, 0.021	207.200, 0.021
1038	207.400, 0.266	207.400, 0.332	207.400, 0.459	207.400, 0.501	207.400, 0.473	207.400, 0.025	207.400, -0.013	207.400, 0.010	207.400, 0.015	207.400, -0.009	207.400, 0.021	207.400, 0.021
1039	207.600, 0.265	207.600, 0.331	207.600, 0.459	207.600, 0.501	207.600, 0.473	207.600, 0.025	207.600, -0.013	207.600, 0.010	207.600, 0.014	207.600, -0.009	207.600, 0.021	207.600, 0.021
1040	207.800, 0.264	207.800, 0.331	207.800, 0.458	207.800, 0.500	207.800, 0.472	207.800, 0.025	207.800, -0.013	207.800, 0.010	207.800, 0.014	207.800, -0.009	207.800, 0.021	207.800, 0.021
1041	208.000, 0.264	208.000, 0.331	208.000, 0.458	208.000, 0.500	208.000, 0.472	208.000, 0.025	208.000, -0.012	208.000, 0.010	208.000, 0.014	208.000, -0.009	208.000, 0.022	208.000, 0.021
1042	208.200, 0.264	208.200, 0.330	208.200, 0.458	208.200, 0.500	208.200, 0.472	208.200, 0.025	208.200, -0.012	208.200, 0.010	208.200, 0.014	208.200, -0.009	208.200, 0.022	208.200, 0.021
1043	208.400, 0.263	208.400, 0.330	208.400, 0.457	208.400, 0.499	208.400, 0.472	208.400, 0.025	208.400, -0.012	208.400, 0.009	208.400, 0.014	208.400, -0.008	208.400, 0.022	208.400, 0.021
1044	208.600, 0.263	208.600, 0.329	208.600, 0.457	208.600, 0.499	208.600, 0.471	208.600, 0.025	208.600, -0.012	208.600, 0.009	208.600, 0.014	208.600, -0.008	208.600, 0.022	208.600, 0.021
1045	208.800, 0.263	208.800, 0.329	208.800, 0.456	208.800, 0.498	208.800, 0.471	208.800, 0.025	208.800, -0.011	208.800, 0.009	208.800, 0.014	208.800, -0.007	208.800, 0.022	208.800, 0.021
1046	209.000, 0.263	209.000, 0.328	209.000, 0.456	209.000, 0.498	209.000, 0.470	209.000, 0.025	209.000, -0.011	209.000, 0.009	209.000, 0.014	209.000, -0.007	209.000, 0.022	209.000, 0.020
1047	209.200, 0.263	209.200, 0.328	209.200, 0.455	209.200, 0.498	209.200, 0.470	209.200, 0.026	209.200, -0.011	209.200, 0.009	209.200, 0.014	209.200, -0.007	209.200, 0.022	209.200, 0.020
1048	209.400, 0.263	209.400, 0.328	209.400, 0.455	209.400, 0.498	209.400, 0.470	209.400, 0.026	209.400, -0.011	209.400, 0.009	209.400, 0.014	209.400, -0.007	209.400, 0.022	209.400, 0.020
1049	209.600, 0.263	209.600, 0.328	209.600, 0.454	209.600, 0.497	209.600, 0.470	209.600, 0.026	209.600, -0.012	209.600, 0.010	209.600, 0.015	209.600, -0.007	209.600, 0.023	209.600, 0.020
1050	209.800, 0.263	209.800, 0.328	209.800, 0.454	209.800, 0.497	209.800, 0.470	209.800, 0.026	209.800, -0.012	209.800, 0.010	209.800, 0.015	209.800, -0.007	209.800, 0.023	209.800, 0.020
1051	210.000, 0.263	210.000, 0.328	210.000, 0.453	210.000, 0.497	210.000, 0.469	210.000, 0.026	210.000, -0.012	210.000, 0.010	210.000, 0.015	210.000, -0.007	210.000, 0.023	210.000, 0.020
1052	210.200, 0.263	210.200, 0.328	210.200, 0.453	210.200, 0.497	210.200, 0.469	210.200, 0.026	210.200, -0.012	210.200, 0.010	210.200, 0.016	210.200, -0.007	210.200, 0.022	210.200, 0.020
1053	210.400, 0.263	210.400, 0.328	210.400, 0.452	210.400, 0.497	210.400, 0.468	210.400, 0.026	210.400, -0.012	210.400, 0.010	210.400, 0.016	210.400, -0.007	210.400, 0.022	210.400, 0.020
1054	210.600, 0.262	210.600, 0.327	210.600, 0.452	210.600, 0.496	210.600, 0.467	210.600, 0.025	210.600, -0.013	210.600, 0.010	210.600, 0.016	210.600, -0.007	210.600, 0.022	210.600, 0.021
1055	210.800, 0.262	210.800, 0.327	210.800, 0.452	210.800, 0.496	210.800, 0.467	210.800, 0.025	210.800, -0.013	210.800, 0.010	210.800, 0.016	210.800, -0.007	210.800, 0.022	210.800, 0.021
1056	211.000, 0.261	211.000, 0.327	211.000, 0.451	211.000, 0.495	211.000, 0.466	211.000, 0.025	211.000, -0.013	211.000, 0.009	211.000, 0.016	211.000, -0.007	211.000, 0.022	211.000, 0.021
1057	211.200, 0.261	211.200, 0.326	211.200, 0.451	211.200, 0.495	211.200, 0.466	211.200, 0.025	211.200, -0.013	211.200, 0.009	211.200, 0.017	211.200, -0.007	211.200, 0.022	211.200, 0.021
1058	211.400, 0.260	211.400, 0.326	211.400, 0.451	211.400, 0.494	211.400, 0.466	211.400, 0.025	211.400, -0.013	211.400, 0.009	211.400, 0.016	211.400, -0.007	211.400, 0.022	211.400, 0.021
1059	211.600, 0.260	211.600, 0.325	211.600, 0.451	211.600, 0.494	211.600, 0.466	211.600, 0.025	211.600, -0.013	211.600, 0.009	211.600, 0.016	211.600, -0.007	211.600, 0.022	211.600, 0.021
1060	211.800, 0.260	211.800, 0.325	211.800, 0.450	211.800, 0.494	211.800, 0.465	211.800, 0.025	211.800, -0.012	211.800, 0.009	211.800, 0.016	211.800, -0.007	211.800, 0.022	211.800, 0.021
1061	212.000, 0.259	212.000, 0.324	212.000, 0.450	212.000, 0.493	212.000, 0.465	212.000, 0.025	212.000, -0.012	212.000, 0.009	212.000, 0.016	212.000, -0.007	212.000, 0.022	212.000, 0.021
1062	212.200, 0.259	212.200, 0.324	212.200, 0.450	212.200, 0.493	212.200, 0.465	212.200, 0.025	212.200, -0.012	212.200, 0.009	212.200, 0.016	212.200, -0.007	212.200, 0.022	212.200, 0.021
1063	212.400, 0.259	212.400, 0.323	212.400, 0.450	212.400, 0.493	212.400, 0.465	212.400, 0.025	212.400, -0.011	212.400, 0.009	212.400, 0.015	212.400, -0.007	212.400, 0.022	212.400, 0.021
1064	212.600, 0.258	212.600, 0.323	212.600, 0.450	212.600, 0.492	212.600, 0.464	212.600, 0.025	212.600, -0.011	212.600, 0.010	212.600, 0.015	212.600, -0.007	212.600, 0.023	212.600, 0.021
1065	212.800, 0.258	212.800, 0.323	212.800, 0.450	212.800, 0.492	212.800, 0.464	212.800, 0.025	212.800, -0.011	212.800, 0.010	212.800, 0.015	212.800, -0.007	212.800, 0.023	212.800, 0.021
1066	213.000, 0.258	213.000, 0.323	213.000, 0.450	213.000, 0.492	213.000, 0.464	213.000, 0.025	213.000, -0.011	213.000, 0.010	213.000, 0.015	213.000, -0.007	213.000, 0.023	213.000, 0.022
1067	213.200, 0.258	213.200, 0.323	213.200, 0.450	213.200, 0.491	213.200, 0.464	213.200, 0.026	213.200, -0.011	213.200, 0.010	213.200, 0.014	213.200, -0.007	213.200, 0.024	213.200, 0.022
1068	213.400, 0.258	213.400, 0.323	213.400, 0.449	213.400, 0.491	213.400, 0.463	213.400, 0.026	213.400, -0.011	213.400, 0.010	213.400, 0.014	213.400, -0.007	213.400, 0.024	213.400, 0.022
1069	213.600, 0.258	213.600, 0.323	213.600, 0.449	213.600, 0.491	213.600, 0.463	213.600, 0.026	213.600, -0.011	213.600, 0.011	213.600, 0.014	213.600, -0.007	213.600, 0.023	213.600, 0.022
1070	213.800, 0.258	213.800, 0.322	213.800, 0.449	213.800, 0.491	213.800, 0.462	213.800, 0.026	213.800, -0.011	213.800, 0.011	213.800, 0.015	213.800, -0.007	213.800, 0.023	213.800, 0.022
1071	214.000, 0.259	214.000, 0.322	214.000, 0.449	214.000, 0.490	214.000, 0.462	214.000, 0.025	214.000, -0.011	214.000, 0.011	214.000, 0.015	214.000, -0.007	214.000, 0.023	214.000, 0.022
1072	214.200, 0.259	214.200, 0.322	214.200, 0.449	214.200, 0.490	214.200, 0.461	214.200, 0.025	214.200, -0.011	214.200, 0.011	214.200, 0.015	214.200, -0.007	214.200, 0.023	214.200, 0.022
1073	214.400, 0.258	214.400, 0.321	214.400, 0.448	214.400, 0.490	214.400, 0.461	214.400, 0.025	214.400, -0.011	214.400, 0.011	214.400, 0.015	214.400, -0.007	214.400, 0.023	214.400, 0.022
1074	214.600, 0.258	214.600, 0.321	214.600, 0.448	214.600, 0.490	214.600, 0.460	214.600, 0.025	214.600, -0.011	214.600, 0.011	214.600, 0.015	214.600, -0.007	214.600, 0.023	214.600, 0.022
1075	214.800, 0.258	214.800, 0.321	214.800, 0.448	214.800, 0.489	214.800, 0.460	214.800, 0.026	214.800, -0.012	214.800, 0.011	214.800, 0.015	214.800, -0.007	214.800, 0.022	214.800, 0.022
1076	215.000, 0.258	215.000, 0.321	215.000, 0.447	215.000, 0.489	215.000, 0.459	215.000, 0.026	215.000, -0.012	215.000, 0.011	215.000, 0.015	215.000, -0.006	215.000, 0.022	215.000, 0.022
1077	215.200, 0.258	215.200, 0.320	215.200, 0.447	215.200, 0.489	215.200, 0.459	215.200, 0.026	215.200, -0.012	215.200, 0.011	215.200, 0.015	215.200, -0.006	215.200, 0.022	215.200, 0.021
1078	215.400, 0.257	215.400, 0.320	215.400, 0.447	215.400, 0.489	215.400, 0.458	215.400, 0.027	215.400, -0.013	215.400, 0.011	215.400, 0.015	215.400, -0.006	215.400, 0.022	215.400, 0.021
1079	215.600, 0.257	215.600, 0.320	215.600, 0.447	215.600, 0.488	215.600, 0.458	215.600, 0.027	215.600, -0.013	215.600, 0.011	215.600, 0.015	215.600, -0.006	215.600, 0.022	215.600, 0.021
1080	215.800, 0.256	215.800, 0.320	215.800, 0.446	215.800, 0.488	215.800, 0.458	215.800, 0.027	215.800, -0.013	215.800, 0.011	215.800, 0.015	215.800, -0.005	215.800, 0.023	215.800, 0.021
1081	216.000, 0.256	216.000, 0.319	216.000, 0.446	216.000, 0.488	216.000, 0.457	216.000, 0.027	216.000, -0.013	216.000, 0.011	216.000, 0.015	216.000, -0.005	216.000, 0.023	216.000, 0.021
1082	216.200, 0.256	216.200, 0.319	216.200, 0.446	216.200, 0.488	216.200, 0.457	216.200, 0.027	216.200, -0.013	216.200, 0.011	216.200, 0.015	216.200, -0.005	216.200, 0.023	216.200, 0.021
1083	216.400, 0.256	216.400, 0.318	216.400, 0.445	216.400, 0.487	216.400, 0.457	216.400, 0.027	216.400, -0.013	216.400, 0.011	216.400, 0.015	216.400, -0.005	216.400, 0.024	216.400, 0.021
1084	216.600, 0.255	216.600, 0.318	216.600, 0.445	216.600, 0.487	216.600, 0.456	216.600, 0.027	216.600, -0.014	216.600, 0.011	216.600, 0.015	216.600, -0.004	216.600, 0.024	216.600, 0.021
1085	216.800, 0.255	216.800, 0.318	216.800, 0.445	216.800, 0.486	216.800, 0.456	216.800, 0.027	216.800, -0.014	216.800, 0.010	216.800, 0.015	216.800, -0.004	216.800, 0.024	216.800, 0.022
1086	217.000, 0.255	217.000, 0.317	217.000, 0.445	217.000, 0.486	217.000, 0.456	217.000, 0.027	217.000, -0.014	217.000, 0.010	217.000, 0.015	217.000, -0.004	217.000, 0.024	217.000, 0.022
1087	217.200, 0.255	217.200, 0.317	217.200, 0.444	217.200, 0.486	217.200, 0.455	217.200, 0.027	217.200, -0.014	217.200, 0.010	217.200, 0.015	217.200, -0.004	217.200, 0.024	217.200, 0.022
1088	217.400, 0.255	217.400, 0.316	217.400, 0.444	217.400, 0.485	217.400, 0.455	217.400, 0.027	217.400, -0.014	217.400, 0.010	217.400, 0.016	217.400, -0.005	217.400, 0.024	217.400, 0.022
1089	217.600, 0.255	217.600, 0.316	217.600, 0.444	217.600, 0.485	217.600, 0.455	217.600, 0.026	217.600, -0.013	217.600, 0.010	217.600, 0.016	217.600, -0.005	217.600, 0.024	217.600, 0.022
1090	217.800, 0.255	217.800, 0.315	217.800, 0.444	217.800, 0.485	217.800, 0.455	217.800, 0.026	217.800, -0.013	217.800, 0.009	217.800, 0.016	217.800, -0.006	217.800, 0.024	217.800, 0.022
1091	218.000, 0.255	218.000, 0.315	218.000, 0.444	218.000, 0.485	218.000, 0.455	218.000, 0.026	218.000, -0.013	218.000, 0.009	218.000, 0.016	218.000, -0.006	218.000, 0.024	218.000, 0.022
1092	218.200, 0.255	218.200, 0.315	218.200, 0.443	218.200, 0.484	218.200, 0.455	218.200, 0.026	218.200, -0.012	218.200, 0.009	218.200, 0.016	218.200, -0.006	218.200, 0.023	218.200, 0.022
1093	218.400, 0.255	218.400, 0.315	218.400, 0.443	218.400, 0.484	218.400, 0.455	218.400, 0.026	218.400, -0.012	218.400, 0.009	218.400, 0.016	218.400, -0.007	218.400, 0.023	218.400, 0.022
1094	218.600, 0.254	218.600, 0.315	218.600, 0.443	218.600, 0.484	218.600, 0.454	218.600, 0.026	218.600, -0.012	218.600, 0.009	218.600, 0.016	218.600, -0.007	218.600, 0.023	218.600, 0.022
1095	218.800, 0.254	218.800, 0.315	218.800, 0.443	218.800, 0.483	218.800, 0.454	218.800, 0.026	218.800, -0.012	218.800, 0.009	218.800, 0.016	218.800, -0.007	218.800, 0.023	218.800, 0.021
1096	219.000, 0.253	219.000, 0.315	219.000, 0.443	219.000, 0.483	219.000, 0.453	219.000, 0.027	219.000, -0.012	219.000, 0.009	219.000, 0.016	219.000, -0.007	219.000, 0.023	219.000, 0.021
1097	219.200, 0.253	219.200, 0.315	219.200, 0.443	219.200, 0.483	219.200, 0.453	219.200, 0.027	219.200, -0.012	219.200, 0.009	219.200, 0.016	219.200, -0.007	219.200, 0.023	219.200, 0.021
1098	219.400, 0.252	219.400, 0.315	219.400, 0.442	219.400, 0.483	219.400, 0.453	219.400, 0.027	219.400, -0.012	219.400, 0.009	219.400, 0.017	219.400, -0.007	219.400, 0.023	219.400, 0.021
1099	219.600, 0.252	219.600, 0.315	219.600, 0.442	219.600, 0.483	219.600, 0.452	219.600, 0.027	219.600, -0.012	219.600, 0.009	219.600, 0.017	219.600, -0.007	219.600, 0.023	219.600, 0.020
1100	219.800, 0.252	219.800, 0.315	219.800, 0.442	219.800, 0.483	219.800, 0.452	219.800, 0.027	219.800, -0.012	219.800, 0.009	219.800, 0.017	219.800, -0.007	219.800, 0.022	219.800, 0.020
1101	220.000, 0.251	220.000, 0.314	220.000, 0.442	220.000, 0.482	220.000, 0.452	220.000, 0.026	220.000, -0.012	220.000, 0.009	220.000, 0.016	220.000, -0.007	220.000, 0.022	220.000, 0.020
1102	220.200, 0.251	220.200, 0.314	220.200, 0.441	220.200, 0.482	220.200, 0.451	220.200, 0.026	220.200, -0.012	220.200, 0.009	220.200, 0.016	220.200, -0.007	220.200, 0.022	220.200, 0.020
1103	220.400, 0.251	220.400, 0.313	220.400, 0.441	220.400, 0.482	220.400, 0.451	220.400, 0.026	220.400, -0.012	220.400, 0.009	220.400, 0.016	220.400, -0.007	220.400, 0.022	220.400, 0.020
1104	220.600, 0.251	220.600, 0.313	220.600, 0.441	220.600, 0.481	220.600, 0.451	220.600, 0.026	220.600, -0.012	220.600, 0.009	220.600, 0.016	220.600, -0.007	220.600, 0.022	220.600, 0.020
1105	220.800, 0.251	220.800, 0.313	220.800, 0.441	220.800, 0.481	220.800, 0.450	220.800, 0.026	220.800, -0.012	220.800, 0.009	220.800, 0.016	220.800, -0.007	220.800, 0.022	220.800, 0.020
1106	221.000, 0.251	221.000, 0.312	221.000, 0.440	221.000, 0.481	221.000, 0.450	221.000, 0.026	221.000, -0.012	221.000, 0.010	221.000, 0.015	221.000, -0.007	221.000, 0.023	221.000, 0.020
1107	221.200, 0.251	221.200, 0.312	221.200, 0.440	221.200, 0.481	221.200, 0.449	221.200, 0.026	221.200, -0.012	221.200, 0.010	221.200, 0.015	221.200, -0.007	221.200, 0.023	221.200, 0.020
1108	221.400, 0.251	221.400, 0.312	221.400, 0.439	221.400, 0.480	221.400, 0.449	221.400, 0.026	221.400, -0.012	221.400, 0.010	221.400, 0.015	221.400, -0.007	221.400, 0.023	221.400, 0.020
1109	221.600, 0.252	221.600, 0.312	221.600, 0.439	221.600, 0.480	221.600, 0.449	221.600, 0.026	221.600, -0.012	221.600, 0.010	221.600, 0.014	221.600, -0.007	221.600, 0.023	221.600, 0.021
1110	221.800, 0.252	221.800, 0.312	221.800, 0.438	221.800, 0.479	221.800, 0.448	221.800, 0.026	221.800, -0.012	221.800, 0.011	221.800, 0.014	221.800, -0.007	221.800, 0.023	221.800, 0.021
1111	222.000, 0.252	222.000, 0.312	222.000, 0.438	222.000, 0.479	222.000, 0.448	222.000, 0.026	222.000, -0.012	222.000, 0.011	222.000, 0.014	222.000, -0.007	222.000, 0.023	222.000, 0.021
1112	222.200, 0.251	222.200, 0.311	222.200, 0.437	222.200, 0.478	222.200, 0.448	222.200, 0.026	222.200, -0.012	222.200, 0.011	222.200, 0.014	222.200, -0.007	222.200, 0.023	222.200, 0.021
1113	222.400, 0.251	222.400, 0.311	222.400, 0.437	222.400, 0.478	222.400, 0.448	222.400, 0.027	222.400, -0.012	222.400, 0.011	222.400, 0.014	222.400, -0.006	222.400, 0.023	222.400, 0.021
1114	222.600, 0.251	222.600, 0.311	222.600, 0.437	222.600, 0.477	222.600, 0.448	222.600, 0.027	222.600, -0.012	222.600, 0.011	222.600, 0.015	222.600, -0.006	222.600, 0.023	222.600, 0.021
1115	222.800, 0.250	222.800, 0.311	222.800, 0.437	222.800, 0.477	222.800, 0.448	222.800, 0.027	222.800, -0.012	222.800, 0.011	222.800, 0.015	222.800, -0.006	222.800, 0.023	222.800, 0.021
1116	223.000, 0.250	223.000, 0.310	223.000, 0.436	223.000, 0.477	223.000, 0.447	223.000, 0.027	223.000, -0.013	223.000, 0.011	223.000, 0.015	223.000, -0.006	223.000, 0.023	223.000, 0.021
1117	223.200, 0.250	223.200, 0.310	223.200, 0.436	223.200, 0.477	223.200, 0.447	223.200, 0.027	223.200, -0.013	223.200, 0.011	223.200, 0.015	223.200, -0.006	223.200, 0.023	223.200, 0.020
1118	223.400, 0.249	223.400, 0.310	223.400, 0.436	223.400, 0.477	223.400, 0.447	223.400, 0.027	223.400, -0.013	223.400, 0.011	223.400, 0.016	223.400, -0.006	223.400, 0.024	223.400, 0.020
1119	223.600, 0.248	223.600, 0.310	223.600, 0.435	223.600, 0.477	223.600, 0.447	223.600, 0.027	223.600, -0.013	223.600, 0.011	223.600, 0.016	223.600, -0.006	223.600, 0.024	223.600, 0.020
1120	223.800, 0.248	223.800, 0.310	223.800, 0.435	223.800, 0.477	223.800, 0.447	223.800, 0.027	223.800, -0.013	223.800, 0.010	223.800, 0.016	223.800, -0.006	223.800, 0.024	223.800, 0.020
1121	224.000, 0.248	224.000, 0.310	224.000, 0.435	224.000, 0.476	224.000, 0.447	224.000, 0.027	224.000, -0.013	224.000, 0.010	224.000, 0.017	224.000, -0.006	224.000, 0.024	224.000, 0.020
1122	224.200, 0.247	224.200, 0.309	224.200, 0.435	224.200, 0.476	224.200, 0.447	224.200, 0.027	224.200, -0.012	224.200, 0.010	224.200, 0.017	224.200, -0.006	224.200, 0.024	224.200, 0.020
1123	224.400, 0.247	224.400, 0.309	224.400, 0.435	224.400, 0.476	224.400, 0.447	224.400, 0.027	224.400, -0.012	224.400, 0.009	224.400, 0.017	224.400, -0.006	224.400, 0.025	224.400, 0.020
1124	224.600, 0.247	224.600, 0.309	224.600, 0.434	224.600, 0.475	224.600, 0.446	224.600, 0.027	224.600, -0.012	224.600, 0.009	224.600, 0.017	224.600, -0.006	224.600, 0.025	224.600, 0.020
1125	224.800, 0.247	224.800, 0.309	224.800, 0.434	224.800, 0.475	224.800, 0.446	224.800, 0.027	224.800, -0.011	224.800, 0.009	224.800, 0.017	224.800, -0.006	224.800, 0.025	224.800, 0.020
1126	225.000, 0.247	225.000, 0.309	225.000, 0.434	225.000, 0.475	225.000, 0.445	225.000, 0.027	225.000, -0.011	225.000, 0.009	225.000, 0.017	225.000, -0.006	225.000, 0.024	225.000, 0.020
1127	225.200, 0.247	225.200, 0.309	225.200, 0.434	225.200, 0.475	225.200, 0.445	225.200, 0.027	225.200, -0.011	225.200, 0.009	225.200, 0.017	225.200, -0.006	225.200, 0.024	225.200, 0.020
1128	225.400, 0.247	225.400, 0.309	225.400, 0.434	225.400, 0.474	225.400, 0.444	225.400, 0.027	225.400, -0.011	225.400, 0.009	225.400, 0.017	225.400, -0.006	225.400, 0.024	225.400, 0.020
1129	225.600, 0.247	225.600, 0.308	225.600, 0.434	225.600, 0.474	225.600, 0.444	225.600, 0.027	225.600, -0.011	225.600, 0.010	225.600, 0.017	225.600, -0.006	225.600, 0.024	225.600, 0.021
1130	225.800, 0.247	225.800, 0.308	225.800, 0.433	225.800, 0.473	225.800, 0.443	225.800, 0.027	225.800, -0.011	225.800, 0.010	225.800, 0.017	225.800, -0.006	225.800, 0.024	225.800, 0.021
1131	226.000, 0.247	226.000, 0.308	226.000, 0.433	226.000, 0.473	226.000, 0.443	226.000, 0.027	226.000, -0.011	226.000, 0.010	226.000, 0.017	226.000, -0.006	226.000, 0.023	226.000, 0.021
1132	226.200, 0.247	226.200, 0.307	226.200, 0.433	226.200, 0.473	226.200, 0.443	226.200, 0.027	226.200, -0.011	226.200, 0.010	226.200, 0.017	226.200, -0.006	226.200, 0.023	226.200, 0.022
1133	226.400, 0.247	226.400, 0.307	226.400, 0.432	226.400, 0.473	226.400, 0.442	226.400, 0.027	226.400, -0.011	226.400, 0.010	226.400, 0.017	226.400, -0.006	226.400, 0.023	226.400, 0.022
1134	226.600, 0.247	226.600, 0.306	226.600, 0.432	226.600, 0.472	226.600, 0.442	226.600, 0.027	226.600, -0.012	226.600, 0.010	226.600, 0.017	226.600, -0.006	226.600, 0.023	226.600, 0.022
1135	226.800, 0.246	226.800, 0.306	226.800, 0.431	226.800, 0.472	226.800, 0.442	226.800, 0.027	226.800, -0.012	226.800, 0.010	226.800, 0.016	226.800, -0.006	226.800, 0.023	226.800, 0.022
1136	227.000, 0.246	227.000, 0.306	227.000, 0.431	227.000, 0.472	227.000, 0.442	227.000, 0.027	227.000, -0.013	227.000, 0.010	227.000, 0.016	227.000, -0.006	227.000, 0.023	227.000, 0.021
1137	227.200, 0.245	227.200, 0.305	227.200, 0.431	227.200, 0.472	227.200, 0.441	227.200, 0.027	227.200, -0.013	227.200, 0.009	227.200, 0.016	227.200, -0.006	227.200, 0.023	227.200, 0.021
1138	227.400, 0.245	227.400, 0.305	227.400, 0.430	227.400, 0.472	227.400, 0.441	227.400, 0.027	227.400, -0.013	227.400, 0.009	227.400, 0.016	227.400, -0.006	227.400, 0.024	227.400, 0.021
1139	227.600, 0.244	227.600, 0.305	227.600, 0.430	227.600, 0.472	227.600, 0.441	227.600, 0.027	227.600, -0.013	227.600, 0.009	227.600, 0.016	227.600, -0.005	227.600, 0.024	227.600, 0.020
1140	227.800, 0.244	227.800, 0.305	227.800, 0.429	227.800, 0.471	227.800, 0.441	227.800, 0.027	227.800, -0.013	227.800, 0.008	227.800, 0.016	227.800, -0.005	227.800, 0.024	227.800, 0.020
1141	228.000, 0.243	228.000, 0.305	228.000, 0.429	228.000, 0.471	228.000, 0.441	228.000, 0.027	228.000, -0.013	228.000, 0.008	228.000, 0.016	228.000, -0.005	228.000, 0.024	228.000, 0.020
1142	228.200, 0.243	228.200, 0.305	228.200, 0.429	228.200, 0.470	228.200, 0.441	228.200, 0.027	228.200, -0.013	228.200, 0.008	228.200, 0.016	228.200, -0.005	228.200, 0.024	228.200, 0.020
1143	228.400, 0.243	228.400, 0.304	228.400, 0.429	228.400, 0.470	228.400, 0.441	228.400, 0.026	228.400, -0.013	228.400, 0.008	228.400, 0.016	228.400, -0.005	228.400, 0.024	228.400, 0.019
1144	228.600, 0.242	228.600, 0.304	228.600, 0.429	228.600, 0.469	228.600, 0.440	228.600, 0.027	228.600, -0.013	228.600, 0.008	228.600, 0.016	228.600, -0.005	228.600, 0.023	228.600, 0.019
1145	228.800, 0.242	228.800, 0.304	228.800, 0.429	228.800, 0.469	228.800, 0.440	228.800, 0.027	228.800, -0.013	228.800, 0.008	228.800, 0.016	228.800, -0.005	228.800, 0.023	228.800, 0.019
1146	229.000, 0.242	229.000, 0.304	229.000, 0.429	229.000, 0.469	229.000, 0.440	229.000, 0.027	229.000, -0.013	229.000, 0.009	229.000, 0.016	229.000, -0.005	229.000, 0.023	229.000, 0.019
1147	229.200, 0.241	229.200, 0.303	229.200, 0.429	229.200, 0.468	229.200, 0.439	229.200, 0.027	229.200, -0.013	229.200, 0.009	229.200, 0.016	229.200, -0.006	229.200, 0.023	229.200, 0.019
1148	229.400, 0.241	229.400, 0.303	229.400, 0.428	229.400, 0.468	229.400, 0.439	229.400, 0.027	229.400, -0.013	229.400, 0.009	229.400, 0.017	229.400, -0.006	229.400, 0.023	229.400, 0.020
1149	229.600, 0.241	229.600, 0.303	229.600, 0.428	229.600, 0.467	229.600, 0.439	229.600, 0.027	229.600, -0.013	229.600, 0.010	229.600, 0.017	229.600, -0.006	229.600, 0.023	229.600, 0.020
1150	229.800, 0.241	229.800, 0.302	229.800, 0.428	229.800, 0.467	229.800, 0.438	229.800, 0.027	229.800, -0.013	229.800, 0.010	229.800, 0.017	229.800, -0.006	229.800, 0.024	229.800, 0.020
1151	230.000, 0.240	230.000, 0.302	230.000, 0.428	230.000, 0.467	230.000, 0.438	230.000, 0.027	230.000, -0.013	230.000, 0.011	230.000, 0.017	230.000, -0.006	230.000, 0.024	230.000, 0.020
1152	230.200, 0.240	230.200, 0.302	230.200, 0.427	230.200, 0.466	230.200, 0.437	230.200, 0.027	230.200, -0.013	230.200, 0.011	230.200, 0.017	230.200, -0.006	230.200, 0.024	230.200, 0.020
1153	230.400, 0.240	230.400, 0.302	230.400, 0.427	230.400, 0.466	230.400, 0.437	230.400, 0.027	230.400, -0.013	230.400, 0.011	230.400, 0.017	230.400, -0.006	230.400, 0.024	230.400, 0.020
1154	230.600, 0.240	230.600, 0.301	230.600, 0.427	230.600, 0.466	230.600, 0.436	230.600, 0.027	230.600, -0.014	230.600, 0.011	230.600, 0.017	230.600, -0.006	230.600, 0.024	230.600, 0.020
1155	230.800, 0.240	230.800, 0.301	230.800, 0.427	230.800, 0.466	230.800, 0.436	230.800, 0.027	230.800, -0.013	230.800, 0.011	230.800, 0.017	230.800, -0.006	230.800, 0.024	230.800, 0.020
1156	231.000, 0.240	231.000, 0.301	231.000, 0.427	231.000, 0.466	231.000, 0.435	231.000, 0.027	231.000, -0.013	231.000, 0.011	231.000, 0.017	231.000, -0.006	231.000, 0.024	231.000, 0.020
1157	231.200, 0.240	231.200, 0.300	231.200, 0.427	231.200, 0.466	231.200, 0.435	231.200, 0.027	231.200, -0.013	231.200, 0.011	231.200, 0.017	231.200, -0.006	231.200, 0.024	231.200, 0.020
1158	231.400, 0.240	231.400, 0.300	231.400, 0.426	231.400, 0.466	231.400, 0.435	231.400, 0.027	231.400, -0.013	231.400, 0.011	231.400, 0.017	231.400, -0.006	231.400, 0.024	231.400, 0.020
1159	231.600, 0.240	231.600, 0.300	231.600, 0.426	231.600, 0.466	231.600, 0.434	231.600, 0.027	231.600, -0.012	231.600, 0.010	231.600, 0.017	231.600, -0.006	231.600, 0.023	231.600, 0.020
1160	231.800, 0.240	231.800, 0.300	231.800, 0.426	231.800, 0.466	231.800, 0.434	231.800, 0.027	231.800, -0.012	231.800, 0.010	231.800, 0.017	231.800, -0.006	231.800, 0.023	231.800, 0.020
1161	232.000, 0.240	232.000, 0.300	232.000, 0.426	232.000, 0.466	232.000, 0.434	232.000, 0.027	232.000, -0.012	232.000, 0.010	232.000, 0.017	232.000, -0.006	232.000, 0.023	232.000, 0.020
1162	232.200, 0.240	232.200, 0.300	232.200, 0.426	232.200, 0.465	232.200, 0.433	232.200, 0.027	232.200, -0.012	232.200, 0.010	232.200, 0.017	232.200, -0.006	232.200, 0.022	232.200, 0.020
1163	232.400, 0.240	232.400, 0.300	232.400, 0.425	232.400, 0.465	232.400, 0.433	232.400, 0.027	232.400, -0.012	232.400, 0.010	232.400, 0.017	232.400, -0.006	232.400, 0.022	232.400, 0.021
1164	232.600, 0.240	232.600, 0.300	232.600, 0.425	232.600, 0.465	232.600, 0.433	232.600, 0.028	232.600, -0.012	232.600, 0.009	232.600, 0.017	232.600, -0.006	232.600, 0.022	232.600, 0.021
1165	232.800, 0.240	232.800, 0.299	232.800, 0.425	232.800, 0.465	232.800, 0.433	232.800, 0.028	232.800, -0.012	232.800, 0.009	232.800, 0.017	232.800, -0.005	232.800, 0.022	232.800, 0.021
1166	233.000, 0.239	233.000, 0.299	233.000, 0.424	233.000, 0.465	233.000, 0.432	233.000, 0.028	233.000, -0.012	233.000, 0.009	233.000, 0.017	233.000, -0.005	233.000, 0.022	233.000, 0.021
1167	233.200, 0.239	233.200, 0.299	233.200, 0.424	233.200, 0.464	233.200, 0.432	233.200, 0.028	233.200, -0.012	233.200, 0.009	233.200, 0.017	233.200, -0.005	233.200, 0.022	233.200, 0.021
1168	233.400, 0.239	233.400, 0.299	233.400, 0.424	233.400, 0.464	233.400, 0.432	233.400, 0.028	233.400, -0.012	233.400, 0.008	233.400, 0.017	233.400, -0.005	233.400, 0.022	233.400, 0.021
1169	233.600, 0.238	233.600, 0.299	233.600, 0.423	233.600, 0.463	233.600, 0.432	233.600, 0.027	233.600, -0.012	233.600, 0.008	233.600, 0.017	233.600, -0.005	233.600, 0.022	233.600, 0.021
1170	233.800, 0.238	233.800, 0.298	233.800, 0.423	233.800, 0.463	233.800, 0.432	233.800, 0.027	233.800, -0.013	233.800, 0.008	233.800, 0.017	233.800, -0.005	233.800, 0.022	233.800, 0.021
1171	234.000, 0.237	234.000, 0.298	234.000, 0.423	234.000, 0.462	234.000, 0.432	234.000, 0.027	234.000, -0.013	234.000, 0.008	234.000, 0.017	234.000, -0.005	234.000, 0.022	234.000, 0.021
1172	234.200, 0.237	234.200, 0.298	234.200, 0.422	234.200, 0.462	234.200, 0.432	234.200, 0.027	234.200, -0.013	234.200, 0.008	234.200, 0.017	234.200, -0.005	234.200, 0.022	234.200, 0.021
1173	234.400, 0.237	234.400, 0.298	234.400, 0.422	234.400, 0.462	234.400, 0.432	234.400, 0.027	234.400, -0.013	234.400, 0.008	234.400, 0.017	234.400, -0.005	234.400, 0.022	234.400, 0.021
1174	234.600, 0.236	234.600, 0.298	234.600, 0.421	234.600, 0.462	234.600, 0.432	234.600, 0.027	234.600, -0.013	234.600, 0.008	234.600, 0.017	234.600, -0.006	234.600, 0.022	234.600, 0.021
1175	234.800, 0.236	234.800, 0.297	234.800, 0.421	234.800, 0.461	234.800, 0.432	234.800, 0.027	234.800, -0.013	234.800, 0.008	234.800, 0.016	234.800, -0.006	234.800, 0.022	234.800, 0.020
1176	235.000, 0.236	235.000, 0.297	235.000, 0.421	235.000, 0.461	235.000, 0.432	235.000, 0.027	235.000, -0.013	235.000, 0.008	235.000, 0.016	235.000, -0.006	235.000, 0.022	235.000, 0.020
1177	235.200, 0.236	235.200, 0.297	235.200, 0.421	235.200, 0.461	235.200, 0.432	235.200, 0.027	235.200, -0.013	235.200, 0.008	235.200, 0.016	235.200, -0.007	235.200, 0.022	235.200, 0.020
1178	235.400, 0.236	235.400, 0.297	235.400, 0.421	235.400, 0.461	235.400, 0.432	235.400, 0.027	235.400, -0.013	235.400, 0.009	235.400, 0.016	235.400, -0.007	235.400, 0.022	235.400, 0.020
1179	235.600, 0.235	235.600, 0.297	235.600, 0.421	235.600, 0.461	235.600, 0.431	235.600, 0.026	235.600, -0.013	235.600, 0.009	235.600, 0.016	235.600, -0.007	235.600, 0.023	235.600, 0.020
1180	235.800, 0.235	235.800, 0.297	235.800, 0.421	235.800, 0.461	235.800, 0.431	235.800, 0.026	235.800, -0.013	235.800, 0.009	235.800, 0.016	235.800, -0.007	235.800, 0.023	235.800, 0.020
1181	236.000, 0.235	236.000, 0.297	236.000, 0.421	236.000, 0.461	236.000, 0.430	236.000, 0.026	236.000, -0.013	236.000, 0.009	236.000, 0.017	236.000, -0.007	236.000, 0.023	236.000, 0.020
1182	236.200, 0.235	236.200, 0.297	236.200, 0.421	236.200, 0.460	236.200, 0.429	236.200, 0.026	236.200, -0.013	236.200, 0.009	236.200, 0.017	236.200, -0.007	236.200, 0.023	236.200, 0.020
1183	236.400, 0.235	236.400, 0.296	236.400, 0.421	236.400, 0.460	236.400, 0.429	236.400, 0.027	236.400, -0.013	236.400, 0.009	236.400, 0.017	236.400, -0.006	236.400, 0.024	236.400, 0.020
1184	236.600, 0.235	236.600, 0.296	236.600, 0.421	236.600, 0.460	236.600, 0.428	236.600, 0.026	236.600, -0.013	236.600, 0.009	236.600, 0.017	236.600, -0.006	236.600, 0.024	236.600, 0.020
1185	236.800, 0.235	236.800, 0.296	236.800, 0.420	236.800, 0.460	236.800, 0.428	236.800, 0.026	236.800, -0.013	236.800, 0.009	236.800, 0.017	236.800, -0.006	236.800, 0.024	236.800, 0.020
1186	237.000, 0.235	237.000, 0.295	237.000, 0.420	237.000, 0.460	237.000, 0.427	237.000, 0.026	237.000, -0.014	237.000, 0.009	237.000, 0.018	237.000, -0.005	237.000, 0.024	237.000, 0.020
1187	237.200, 0.235	237.200, 0.295	237.200, 0.420	237.200, 0.460	237.200, 0.427	237.200, 0.026	237.200, -0.014	237.200, 0.009	237.200, 0.018	237.200, -0.005	237.200, 0.024	237.200, 0.020
1188	237.400, 0.235	237.400, 0.294	237.400, 0.420	237.400, 0.460	237.400, 0.427	237.400, 0.026	237.400, -0.014	237.400, 0.008	237.400, 0.018	237.400, -0.005	237.400, 0.024	237.400, 0.019
1189	237.600, 0.235	237.600, 0.294	237.600, 0.420	237.600, 0.459	237.600, 0.427	237.600, 0.026	237.600, -0.014	237.600, 0.008	237.600, 0.018	237.600, -0.005	237.600, 0.023	237.600, 0.019
1190	237.800, 0.235	237.800, 0.294	237.800, 0.420	237.800, 0.459	237.800, 0.426	237.800, 0.026	237.800, -0.014	237.800, 0.008	237.800, 0.018	237.800, -0.005	237.800, 0.023	237.800, 0.020
1191	238.000, 0.235	238.000, 0.294	238.000, 0.419	238.000, 0.459	238.000, 0.426	238.000, 0.026	238.000, -0.014	238.000, 0.008	238.000, 0.018	238.000, -0.005	238.000, 0.023	238.000, 0.020
1192	238.200, 0.235	238.200, 0.293	238.200, 0.419	238.200, 0.458	238.200, 0.426	238.200, 0.026	238.200, -0.014	238.200, 0.008	238.200, 0.017	238.200, -0.005	238.200, 0.023	238.200, 0.020
1193	238.400, 0.234	238.400, 0.293	238.400, 0.418	238.400, 0.458	238.400, 0.426	238.400, 0.027	238.400, -0.014	238.400, 0.008	238.400, 0.017	238.400, -0.006	238.400, 0.023	238.400, 0.020
1194	238.600, 0.234	238.600, 0.293	238.600, 0.418	238.600, 0.458	238.600, 0.426	238.600, 0.027	238.600, -0.014	238.600, 0.008	238.600, 0.017	238.600, -0.006	238.600, 0.022	238.600, 0.020
1195	238.800, 0.234	238.800, 0.293	238.800, 0.417	238.800, 0.457	238.800, 0.426	238.800, 0.027	238.800, -0.014	238.800, 0.008	238.800, 0.017	238.800, -0.006	238.800, 0.022	238.800, 0.020
1196	239.000, 0.234	239.000, 0.293	239.000, 0.417	239.000, 0.456	239.000, 0.426	239.000, 0.027	239.000, -0.014	239.000, 0.008	239.000, 0.016	239.000, -0.007	239.000, 0.022	239.000, 0.020
1197	239.200, 0.234	239.200, 0.293	239.200, 0.417	239.200, 0.456	239.200, 0.426	239.200, 0.028	239.200, -0.013	239.200, 0.008	239.200, 0.016	239.200, -0.007	239.200, 0.022	239.200, 0.020
1198	239.400, 0.234	239.400, 0.293	239.400, 0.417	239.400, 0.455	239.400, 0.426	239.400, 0.028	239.400, -0.013	239.400, 0.008	239.400, 0.016	239.400, -0.007	239.400, 0.022	239.400, 0.020
1199	239.600, 0.234	239.600, 0.293	239.600, 0.416	239.600, 0.454	239.600, 0.425	239.600, 0.028	239.600, -0.013	239.600, 0.008	239.600, 0.016	239.600, -0.006	239.600, 0.022	239.600, 0.020
1200	239.800, 0.234	239.800, 0.293	239.800, 0.416	239.800, 0.454	239.800, 0.425	239.800, 0.028	239.800, -0.013	239.800, 0.008	239.800, 0.016	239.800, -0.006	239.800, 0.022	239.800, 0.020
1201	240.000, 0.233	240.000, 0.293	240.000, 0.416	240.000, 0.453	240.000, 0.425	240.000, 0.028	240.000, -0.013	240.000, 0.008	240.000, 0.016	240.000, -0.006	240.000, 0.022	240.000, 0.021
1202	240.200, 0.233	240.200, 0.292	240.200, 0.415	240.200, 0.453	240.200, 0.425	240.200, 0.029	240.200, -0.014	240.200, 0.008	240.200, 0.016	240.200, -0.006	240.200, 0.022	240.200, 0.021
1203	240.400, 0.233	240.400, 0.292	240.400, 0.415	240.400, 0.453	240.400, 0.424	240.400, 0.029	240.400, -0.014	240.400, 0.008	240.400, 0.016	240.400, -0.006	240.400, 0.023	240.400, 0.021
1204	240.600, 0.232	240.600, 0.292	240.600, 0.415	240.600, 0.453	240.600, 0.424	240.600, 0.029	240.600, -0.014	240.600, 0.008	240.600, 0.016	240.600, -0.006	240.600, 0.023	240.600, 0.021
1205	240.800, 0.232	240.800, 0.292	240.800, 0.415	240.800, 0.453	240.800, 0.424	240.800, 0.029	240.800, -0.014	240.800, 0.008	240.800, 0.017	240.800, -0.006	240.800, 0.023	240.800, 0.021
1206	241.000, 0.232	241.000, 0.291	241.000, 0.415	241.000, 0.453	241.000, 0.424	241.000, 0.029	241.000, -0.014	241.000, 0.008	241.000, 0.017	241.000, -0.006	241.000, 0.023	241.000, 0.021
1207	241.200, 0.232	241.200, 0.291	241.200, 0.415	241.200, 0.453	241.200, 0.423	241.200, 0.029	241.200, -0.014	241.200, 0.008	241.200, 0.017	241.200, -0.006	241.200, 0.023	241.200, 0.020
1208	241.400, 0.231	241.400, 0.291	241.400, 0.415	241.400, 0.453	241.400, 0.423	241.400, 0.029	241.400, -0.014	241.400, 0.008	241.400, 0.017	241.400, -0.007	241.400, 0.023	241.400, 0.020
1209	241.600, 0.231	241.600, 0.291	241.600, 0.414	241.600, 0.453	241.600, 0.422	241.600, 0.029	241.600, -0.014	241.600, 0.008	241.600, 0.016	241.600, -0.007	241.600, 0.023	241.600, 0.020
1210	241.800, 0.231	241.800, 0.291	241.800, 0.414	241.800, 0.453	241.800, 0.422	241.800, 0.029	241.800, -0.014	241.800, 0.008	241.800, 0.016	241.800, -0.007	241.800, 0.023	241.800, 0.020
1211	242.000, 0.230	242.000, 0.291	242.000, 0.414	242.000, 0.453	242.000, 0.422	242.000, 0.029	242.000, -0.014	242.000, 0.008	242.000, 0.016	242.000, -0.007	242.000, 0.023	242.000, 0.020
1212	242.200, 0.230	242.200, 0.291	242.200, 0.413	242.200, 0.452	242.200, 0.421	242.200, 0.029	242.200, -0.014	242.200, 0.009	242.200, 0.016	242.200, -0.007	242.200, 0.023	242.200, 0.020
1213	242.400, 0.230	242.400, 0.291	242.400, 0.413	242.400, 0.452	242.400, 0.421	242.400, 0.029	242.400, -0.014	242.400, 0.009	242.400, 0.016	242.400, -0.007	242.400, 0.023	242.400, 0.020
1214	242.600, 0.229	242.600, 0.291	242.600, 0.413	242.600, 0.452	242.600, 0.421	242.600, 0.029	242.600, -0.014	242.600, 0.009	242.600, 0.015	242.600, -0.007	242.600, 0.023	242.600, 0.020
1215	242.800, 0.229	242.800, 0.291	242.800, 0.413	242.800, 0.452	242.800, 0.421	242.800, 0.028	242.800, -0.014	242.800, 0.009	242.800, 0.015	242.800, -0.007	242.800, 0.023	242.800, 0.020
1216	243.000, 0.229	243.000, 0.291	243.000, 0.413	243.000, 0.452	243.000, 0.420	243.000, 0.028	243.000, -0.014	243.000, 0.009	243.000, 0.015	243.000, -0.006	243.000, 0.022	243.000, 0.020
1217	243.200, 0.229	243.200, 0.290	243.200, 0.413	243.200, 0.451	243.200, 0.420	243.200, 0.028	243.200, -0.014	243.200, 0.009	243.200, 0.015	243.200, -0.006	243.200, 0.022	243.200, 0.020
1218	243.400, 0.229	243.400, 0.290	243.400, 0.412	243.400, 0.451	243.400, 0.419	243.400, 0.028	243.400, -0.014	243.400, 0.009	243.400, 0.014	243.400, -0.006	243.400, 0.022	243.400, 0.020
1219	243.600, 0.229	243.600, 0.290	243.600, 0.412	243.600, 0.451	243.600, 0.419	243.600, 0.028	243.600, -0.014	243.600, 0.009	243.600, 0.014	243.600, -0.006	243.600, 0.022	243.600, 0.019
1220	243.800, 0.229	243.800, 0.289	243.800, 0.412	243.800, 0.451	243.800, 0.419	243.800, 0.028	243.800, -0.014	243.800, 0.009	243.800, 0.014	243.800, -0.006	243.800, 0.022	243.800, 0.019
1221	244.000, 0.228	244.000, 0.289	244.000, 0.411	244.000, 0.451	244.000, 0.418	244.000, 0.028	244.000, -0.014	244.000, 0.009	244.000, 0.014	244.000, -0.006	244.000, 0.022	244.000, 0.019
1222	244.200, 0.228	244.200, 0.288	244.200, 0.411	244.200, 0.450	244.200, 0.418	244.200, 0.028	244.200, -0.014	244.200, 0.009	244.200, 0.014	244.200, -0.006	244.200, 0.022	244.200, 0.019
1223	244.400, 0.228	244.400, 0.288	244.400, 0.411	244.400, 0.450	244.400, 0.418	244.400, 0.028	244.400, -0.014	244.400, 0.009	244.400, 0.014	244.400, -0.006	244.400, 0.022	244.400, 0.019
1224	244.600, 0.228	244.600, 0.287	244.600, 0.411	244.600, 0.450	244.600, 0.418	244.600, 0.028	244.600, -0.014	244.600, 0.009	244.600, 0.015	244.600, -0.006	244.600, 0.023	244.600, 0.019
1225	244.800, 0.227	244.800, 0.287	244.800, 0.411	244.800, 0.450	244.800, 0.417	244.800, 0.028	244.800, -0.014	244.800, 0.008	244.800, 0.015	244.800, -0.006	244.800, 0.023	244.800, 0.019
1226	245.000, 0.227	245.000, 0.287	245.000, 0.411	245.000, 0.450	245.000, 0.417	245.000, 0.028	245.000, -0.014	245.000, 0.008	245.000, 0.015	245.000, -0.006	245.000, 0.023	245.000, 0.019
1227	245.200, 0.227	245.200, 0.287	245.200, 0.411	245.200, 0.449	245.200, 0.417	245.200, 0.028	245.200, -0.014	245.200, 0.008	245.200, 0.015	245.200, -0.006	245.200, 0.023	245.200, 0.019
1228	245.400, 0.227	245.400, 0.286	245.400, 0.411	245.400, 0.449	245.400, 0.416	245.400, 0.028	245.400, -0.014	245.400, 0.007	245.400, 0.015	245.400, -0.006	245.400, 0.023	245.400, 0.019
1229	245.600, 0.227	245.600, 0.286	245.600, 0.411	245.600, 0.449	245.600, 0.416	245.600, 0.028	245.600, -0.015	245.600, 0.007	245.600, 0.016	245.600, -0.006	245.600, 0.023	245.600, 0.019
1230	245.800, 0.227	245.800, 0.286	245.800, 0.410	245.800, 0.448	245.800, 0.416	245.800, 0.028	245.800, -0.015	245.800, 0.007	245.800, 0.016	245.800, -0.006	245.800, 0.023	245.800, 0.020
1231	246.000, 0.226	246.000, 0.286	246.000, 0.410	246.000, 0.448	246.000, 0.416	246.000, 0.028	246.000, -0.015	246.000, 0.007	246.000, 0.016	246.000, -0.006	246.000, 0.023	246.000, 0.020
1232	246.200, 0.226	246.200, 0.286	246.200, 0.410	246.200, 0.448	246.200, 0.416	246.200, 0.028	246.200, -0.015	246.200, 0.007	246.200, 0.016	246.200, -0.006	246.200, 0.023	246.200, 0.020
1233	246.400, 0.225	246.400, 0.285	246.400, 0.410	246.400, 0.447	246.400, 0.416	246.400, 0.028	246.400, -0.014	246.400, 0.007	246.400, 0.016	246.400, -0.006	246.400, 0.023	246.400, 0.020
1234	246.600, 0.225	246.600, 0.285	246.600, 0.410	246.600, 0.447	246.600, 0.416	246.600, 0.028	246.600, -0.014	246.600, 0.007	246.600, 0.017	246.600, -0.006	246.600, 0.023	246.600, 0.020
1235	246.800, 0.225	246.800, 0.285	246.800, 0.409	246.800, 0.447	246.800, 0.416	246.800, 0.028	246.800, -0.014	246.800, 0.007	246.800, 0.017	246.800, -0.006	246.800, 0.023	246.800, 0.020
1236	247.000, 0.225	247.000, 0.285	247.000, 0.409	247.000, 0.447	247.000, 0.416	247.000, 0.028	247.000, -0.014	247.000, 0.007	247.000, 0.017	247.000, -0.006	247.000, 0.023	247.000, 0.020
1237	247.200, 0.224	247.200, 0.284	247.200, 0.409	247.200, 0.447	247.200, 0.416	247.200, 0.028	247.200, -0.014	247.200, 0.007	247.200, 0.017	247.200, -0.006	247.200, 0.023	247.200, 0.020
1238	247.400, 0.224	247.400, 0.284	247.400, 0.408	247.400, 0.447	247.400, 0.416	247.400, 0.028	247.400, -0.014	247.400, 0.007	247.400, 0.017	247.400, -0.006	247.400, 0.023	247.400, 0.020
1239	247.600, 0.224	247.600, 0.283	247.600, 0.408	247.600, 0.447	247.600, 0.416	247.600, 0.028	247.600, -0.014	247.600, 0.007	247.600, 0.017	247.600, -0.006	247.600, 0.023	247.600, 0.020
1240	247.800, 0.224	247.800, 0.283	247.800, 0.408	247.800, 0.446	247.800, 0.415	247.800, 0.028	247.800, -0.014	247.800, 0.007	247.800, 0.017	247.800, -0.007	247.800, 0.022	247.800, 0.020
1241	248.000, 0.224	248.000, 0.283	248.000, 0.408	248.000, 0.446	248.000, 0.415	248.000, 0.028	248.000, -0.014	248.000, 0.008	248.000, 0.017	248.000, -0.007	248.000, 0.022	248.000, 0.019
1242	248.200, 0.224	248.200, 0.283	248.200, 0.408	248.200, 0.446	248.200, 0.415	248.200, 0.028	248.200, -0.014	248.200, 0.008	248.200, 0.017	248.200, -0.007	248.200, 0.022	248.200, 0.019
1243	248.400, 0.224	248.400, 0.283	248.400, 0.408	248.400, 0.446	248.400, 0.415	248.400, 0.028	248.400, -0.015	248.400, 0.008	248.400, 0.017	248.400, -0.007	248.400, 0.022	248.400, 0.019
1244	248.600, 0.224	248.600, 0.283	248.600, 0.408	248.600, 0.446	248.600, 0.415	248.600, 0.028	248.600, -0.015	248.600, 0.008	248.600, 0.017	248.600, -0.006	248.600, 0.022	248.600, 0.019
1245	248.800, 0.224	248.800, 0.283	248.800, 0.408	248.800, 0.445	248.800, 0.414	248.800, 0.028	248.800, -0.015	248.800, 0.008	248.800, 0.017	248.800, -0.006	248.800, 0.022	248.800, 0.019
1246	249.000, 0.224	249.000, 0.283	249.000, 0.408	249.000, 0.445	249.000, 0.414	249.000, 0.028	249.000, -0.015	249.000, 0.008	249.000, 0.016	249.000, -0.006	249.000, 0.022	249.000, 0.019
1247	249.200, 0.224	249.200, 0.283	249.200, 0.408	249.200, 0.444	249.200, 0.414	249.200, 0.028	249.200, -0.016	249.200, 0.008	249.200, 0.016	249.200, -0.006	249.200, 0.022	249.200, 0.019
1248	249.400, 0.224	249.400, 0.283	249.400, 0.408	249.400, 0.444	249.400, 0.414	249.400, 0.028	249.400, -0.016	249.400, 0.008	249.400, 0.016	249.400, -0.006	249.400, 0.022	249.400, 0.019
1249	249.600, 0.225	249.600, 0.283	249.600, 0.408	249.600, 0.444	249.600, 0.413	249.600, 0.029	249.600, -0.016	249.600, 0.008	249.600, 0.015	249.600, -0.006	249.600, 0.022	249.600, 0.019
1250	249.800, 0.225	249.800, 0.283	249.800, 0.407	249.800, 0.444	249.800, 0.413	249.800, 0.029	249.800, -0.016	249.800, 0.008	249.800, 0.015	249.800, -0.006	249.800, 0.022	249.800, 0.019
1251	250.000, 0.225	250.000, 0.283	250.000, 0.407	250.000, 0.444	250.000, 0.413	250.000, 0.029	250.000, -0.016	250.000, 0.008	250.000, 0.015	250.000, -0.006	250.000, 0.022	250.000, 0.019
1252	250.200, 0.225	250.200, 0.283	250.200, 0.407	250.200, 0.444	250.200, 0.413	250.200, 0.029	250.200, -0.015	250.200, 0.008	250.200, 0.015	250.200, -0.006	250.200, 0.022	250.200, 0.019
1253	250.400, 0.225	250.400, 0.283	250.400, 0.406	250.400, 0.444	250.400, 0.413	250.400, 0.030	250.400, -0.015	250.400, 0.008	250.400, 0.015	250.400, -0.006	250.400, 0.022	250.400, 0.019
1254	250.600, 0.225	250.600, 0.283	250.600, 0.406	250.600, 0.444	250.600, 0.413	250.600, 0.030	250.600, -0.015	250.600, 0.008	250.600, 0.015	250.600, -0.006	250.600, 0.022	250.600, 0.019
1255	250.800, 0.225	250.800, 0.283	250.800, 0.405	250.800, 0.444	250.800, 0.413	250.800, 0.030	250.800, -0.015	250.800, 0.007	250.800, 0.015	250.800, -0.006	250.800, 0.022	250.800, 0.019
1256	251.000, 0.225	251.000, 0.282	251.000, 0.405	251.000, 0.444	251.000, 0.412	251.000, 0.030	251.000, -0.015	251.000, 0.007	251.000, 0.015	251.000, -0.006	251.000, 0.022	251.000, 0.019
1257	251.200, 0.224	251.200, 0.282	251.200, 0.405	251.200, 0.444	251.200, 0.412	251.200, 0.029	251.200, -0.015	251.200, 0.007	251.200, 0.014	251.200, -0.006	251.200, 0.022	251.200, 0.019
1258	251.400, 0.224	251.400, 0.282	251.400, 0.404	251.400, 0.443	251.400, 0.412	251.400, 0.029	251.400, -0.015	251.400, 0.007	251.400, 0.015	251.400, -0.006	251.400, 0.022	251.400, 0.020
1259	251.600, 0.224	251.600, 0.282	251.600, 0.404	251.600, 0.443	251.600, 0.412	251.600, 0.029	251.600, -0.016	251.600, 0.007	251.600, 0.015	251.600, -0.006	251.600, 0.022	251.600, 0.020
1260	251.800, 0.224	251.800, 0.282	251.800, 0.404	251.800, 0.443	251.800, 0.411	251.800, 0.029	251.800, -0.016	251.800, 0.007	251.800, 0.015	251.800, -0.006	251.800, 0.022	251.800, 0.020
1261	252.000, 0.223	252.000, 0.282	252.000, 0.404	252.000, 0.443	252.000, 0.411	252.000, 0.029	252.000, -0.016	252.000, 0.006	252.000, 0.015	252.000, -0.006	252.000, 0.022	252.000, 0.020
1262	252.200, 0.223	252.200, 0.281	252.200, 0.404	252.200, 0.442	252.200, 0.410	252.200, 0.029	252.200, -0.017	252.200, 0.006	252.200, 0.015	252.200, -0.006	252.200, 0.022	252.200, 0.020
1263	252.400, 0.223	252.400, 0.281	252.400, 0.404	252.400, 0.442	252.400, 0.410	252.400, 0.029	252.400, -0.017	252.400, 0.006	252.400, 0.015	252.400, -0.006	252.400, 0.022	252.400, 0.019
1264	252.600, 0.222	252.600, 0.281	252.600, 0.404	252.600, 0.442	252.600, 0.410	252.600, 0.029	252.600, -0.017	252.600, 0.006	252.600, 0.015	252.600, -0.006	252.600, 0.021	252.600, 0.019
1265	252.800, 0.222	252.800, 0.281	252.800, 0.404	252.800, 0.441	252.800, 0.409	252.800, 0.029	252.800, -0.016	252.800, 0.006	252.800, 0.015	252.800, -0.006	252.800, 0.022	252.800, 0.019
1266	253.000, 0.222	253.000, 0.281	253.000, 0.404	253.000, 0.441	253.000, 0.409	253.000, 0.028	253.000, -0.016	253.000, 0.006	253.000, 0.015	253.000, -0.006	253.000, 0.022	253.000, 0.019
1267	253.200, 0.222	253.200, 0.281	253.200, 0.404	253.200, 0.441	253.200, 0.408	253.200, 0.028	253.200, -0.016	253.200, 0.006	253.200, 0.015	253.200, -0.006	253.200, 0.022	253.200, 0.019
1268	253.400, 0.222	253.400, 0.280	253.400, 0.403	253.400, 0.440	253.400, 0.408	253.400, 0.028	253.400, -0.016	253.400, 0.006	253.400, 0.015	253.400, -0.006	253.400, 0.022	253.400, 0.019
1269	253.600, 0.221	253.600, 0.280	253.600, 0.403	253.600, 0.440	253.600, 0.407	253.600, 0.028	253.600, -0.015	253.600, 0.007	253.600, 0.016	253.600, -0.006	253.600, 0.022	253.600, 0.019
1270	253.800, 0.221	253.800, 0.280	253.800, 0.403	253.800, 0.440	253.800, 0.407	253.800, 0.028	253.800, -0.015	253.800, 0.007	253.800, 0.016	253.800, -0.006	253.800, 0.023	253.800, 0.019
1271	254.000, 0.221	254.000, 0.280	254.000, 0.403	254.000, 0.440	254.000, 0.407	254.000, 0.028	254.000, -0.015	254.000, 0.007	254.000, 0.016	254.000, -0.006	254.000, 0.023	254.000, 0.019
1272	254.200, 0.221	254.200, 0.279	254.200, 0.403	254.200, 0.440	254.200, 0.407	254.200, 0.028	254.200, -0.014	254.200, 0.007	254.200, 0.015	254.200, -0.007	254.200, 0.023	254.200, 0.019
1273	254.400, 0.220	254.400, 0.279	254.400, 0.402	254.400, 0.440	254.400, 0.407	254.400, 0.028	254.400, -0.014	254.400, 0.007	254.400, 0.015	254.400, -0.007	254.400, 0.023	254.400, 0.019
1274	254.600, 0.220	254.600, 0.278	254.600, 0.402	254.600, 0.439	254.600, 0.407	254.600, 0.029	254.600, -0.014	254.600, 0.007	254.600, 0.015	254.600, -0.007	254.600, 0.023	254.600, 0.019
1275	254.800, 0.220	254.800, 0.278	254.800, 0.402	254.800, 0.439	254.800, 0.407	254.800, 0.029	254.800, -0.014	254.800, 0.007	254.800, 0.015	254.800, -0.007	254.800, 0.023	254.800, 0.019
1276	255.000, 0.219	255.000, 0.278	255.000, 0.401	255.000, 0.439	255.000, 0.406	255.000, 0.029	255.000, -0.014	255.000, 0.007	255.000, 0.015	255.000, -0.007	255.000, 0.023	255.000, 0.019
1277	255.200, 0.219	255.200, 0.278	255.200, 0.401	255.200, 0.439	255.200, 0.406	255.200, 0.029	255.200, -0.014	255.200, 0.007	255.200, 0.015	255.200, -0.007	255.200, 0.023	255.200, 0.019
1278	255.400, 0.220	255.400, 0.277	255.400, 0.401	255.400, 0.439	255.400, 0.406	255.400, 0.029	255.400, -0.015	255.400, 0.007	255.400, 0.015	255.400, -0.007	255.400, 0.022	255.400, 0.019
1279	255.600, 0.219	255.600, 0.277	255.600, 0.400	255.600, 0.439	255.600, 0.405	255.600, 0.029	255.600, -0.015	255.600, 0.008	255.600, 0.015	255.600, -0.007	255.600, 0.022	255.600, 0.019
1280	255.800, 0.219	255.800, 0.277	255.800, 0.400	255.800, 0.439	255.800, 0.405	255.800, 0.029	255.800, -0.016	255.800, 0.008	255.800, 0.015	255.800, -0.007	255.800, 0.022	255.800, 0.019
1281	256.000, 0.219	256.000, 0.277	256.000, 0.400	256.000, 0.439	256.000, 0.405	256.000, 0.029	256.000, -0.016	256.000, 0.008	256.000, 0.015	256.000, -0.007	256.000, 0.021	256.000, 0.019
1282	256.200, 0.219	256.200, 0.277	256.200, 0.400	256.200, 0.439	256.200, 0.405	256.200, 0.029	256.200, -0.016	256.200, 0.008	256.200, 0.015	256.200, -0.007	256.200, 0.021	256.200, 0.019
1283	256.400, 0.219	256.400, 0.277	256.400, 0.400	256.400, 0.439	256.400, 0.404	256.400, 0.029	256.400, -0.016	256.400, 0.008	256.400, 0.015	256.400, -0.006	256.400, 0.021	256.400, 0.019
1284	256.600, 0.219	256.600, 0.276	256.600, 0.400	256.600, 0.438	256.600, 0.404	256.600, 0.029	256.600, -0.016	256.600, 0.008	256.600, 0.015	256.600, -0.006	256.600, 0.022	256.600, 0.019
1285	256.800, 0.219	256.800, 0.276	256.800, 0.400	256.800, 0.438	256.800, 0.404	256.800, 0.029	256.800, -0.016	256.800, 0.008	256.800, 0.015	256.800, -0.006	256.800, 0.022	256.800, 0.019
1286	257.000, 0.219	257.000, 0.276	257.000, 0.400	257.000, 0.438	257.000, 0.403	257.000, 0.029	257.000, -0.016	257.000, 0.008	257.000, 0.015	257.000, -0.006	257.000, 0.022	257.000, 0.018
1287	257.200, 0.219	257.200, 0.276	257.200, 0.400	257.200, 0.438	257.200, 0.403	257.200, 0.029	257.200, -0.016	257.200, 0.008	257.200, 0.016	257.200, -0.006	257.200, 0.022	257.200, 0.018
1288	257.400, 0.219	257.400, 0.276	257.400, 0.400	257.400, 0.437	257.400, 0.403	257.400, 0.028	257.400, -0.017	257.400, 0.008	257.400, 0.016	257.400, -0.006	257.400, 0.022	257.400, 0.018
1289	257.600, 0.219	257.600, 0.275	257.600, 0.400	257.600, 0.437	257.600, 0.403	257.600, 0.028	257.600, -0.017	257.600, 0.008	257.600, 0.016	257.600, -0.006	257.600, 0.023	257.600, 0.018
1290	257.800, 0.219	257.800, 0.275	257.800, 0.400	257.800, 0.437	257.800, 0.403	257.800, 0.029	257.800, -0.017	257.800, 0.007	257.800, 0.016	257.800, -0.006	257.800, 0.023	257.800, 0.019
1291	258.000, 0.218	258.000, 0.275	258.000, 0.400	258.000, 0.436	258.000, 0.403	258.000, 0.029	258.000, -0.017	258.000, 0.007	258.000, 0.016	258.000, -0.006	258.000, 0.023	258.000, 0.019
1292	258.200, 0.218	258.200, 0.275	258.200, 0.400	258.200, 0.436	258.200, 0.403	258.200, 0.029	258.200, -0.017	258.200, 0.007	258.200, 0.016	258.200, -0.006	258.200, 0.023	258.200, 0.019
1293	258.400, 0.218	258.400, 0.274	258.400, 0.399	258.400, 0.435	258.400, 0.403	258.400, 0.029	258.400, -0.016	258.400, 0.007	258.400, 0.016	258.400, -0.007	258.400, 0.023	258.400, 0.019
1294	258.600, 0.218	258.600, 0.274	258.600, 0.399	258.600, 0.435	258.600, 0.403	258.600, 0.030	258.600, -0.016	258.600, 0.007	258.600, 0.015	258.600, -0.007	258.600, 0.024	258.600, 0.019
1295	258.800, 0.218	258.800, 0.274	258.800, 0.399	258.800, 0.435	258.800, 0.402	258.800, 0.030	258.800, -0.016	258.800, 0.006	258.800, 0.015	258.800, -0.007	258.800, 0.024	258.800, 0.019
1296	259.000, 0.218	259.000, 0.274	259.000, 0.398	259.000, 0.434	259.000, 0.402	259.000, 0.030	259.000, -0.016	259.000, 0.007	259.000, 0.015	259.000, -0.007	259.000, 0.024	259.000, 0.019
1297	259.200, 0.218	259.200, 0.273	259.200, 0.398	259.200, 0.434	259.200, 0.402	259.200, 0.030	259.200, -0.016	259.200, 0.006	259.200, 0.015	259.200, -0.007	259.200, 0.024	259.200, 0.019
1298	259.400, 0.218	259.400, 0.273	259.400, 0.397	259.400, 0.434	259.400, 0.402	259.400, 0.030	259.400, -0.016	259.400, 0.006	259.400, 0.015	259.400, -0.007	259.400, 0.023	259.400, 0.019
1299	259.600, 0.218	259.600, 0.274	259.600, 0.397	259.600, 0.434	259.600, 0.402	259.600, 0.030	259.600, -0.016	259.600, 0.006	259.600, 0.015	259.600, -0.007	259.600, 0.023	259.600, 0.019
1300	259.800, 0.218	259.800, 0.274	259.800, 0.397	259.800, 0.434	259.800, 0.402	259.800, 0.030	259.800, -0.016	259.800, 0.006	259.800, 0.014	259.800, -0.007	259.800, 0.023	259.800, 0.019
1301	260.000, 0.218	260.000, 0.274	260.000, 0.396	260.000, 0.434	260.000, 0.402	260.000, 0.030	260.000, -0.015	260.000, 0.006	260.000, 0.014	260.000, -0.007	260.000, 0.023	260.000, 0.019
1302	260.200, 0.217	260.200, 0.274	260.200, 0.396	260.200, 0.434	260.200, 0.401	260.200, 0.030	260.200, -0.015	260.200, 0.006	260.200, 0.014	260.200, -0.007	260.200, 0.023	260.200, 0.019
1303	260.400, 0.217	260.400, 0.274	260.400, 0.396	260.400, 0.434	260.400, 0.401	260.400, 0.030	260.400, -0.015	260.400, 0.006	260.400, 0.014	260.400, -0.007	260.400, 0.023	260.400, 0.019
1304	260.600, 0.216	260.600, 0.274	260.600, 0.395	260.600, 0.434	260.600, 0.401	260.600, 0.030	260.600, -0.015	260.600, 0.006	260.600, 0.014	260.600, -0.007	260.600, 0.023	260.600, 0.019
1305	260.800, 0.216	260.800, 0.274	260.800, 0.395	260.800, 0.433	260.800, 0.400	260.800, 0.029	260.800, -0.016	260.800, 0.006	260.800, 0.015	260.800, -0.007	260.800, 0.023	260.800, 0.019
1306	261.000, 0.215	261.000, 0.274	261.000, 0.395	261.000, 0.433	261.000, 0.400	261.000, 0.029	261.000, -0.016	261.000, 0.006	261.000, 0.015	261.000, -0.007	261.000, 0.023	261.000, 0.019
1307	261.200, 0.215	261.200, 0.274	261.200, 0.395	261.200, 0.433	261.200, 0.400	261.200, 0.029	261.200, -0.016	261.200, 0.006	261.200, 0.015	261.200, -0.007	261.200, 0.023	261.200, 0.019
1308	261.400, 0.215	261.400, 0.274	261.400, 0.394	261.400, 0.432	261.400, 0.399	261.400, 0.029	261.400, -0.016	261.400, 0.006	261.400, 0.015	261.400, -0.007	261.400, 0.023	261.400, 0.019
1309	261.600, 0.215	261.600, 0.274	261.600, 0.394	261.600, 0.432	261.600, 0.399	261.600, 0.029	261.600, -0.016	261.600, 0.007	261.600, 0.015	261.600, -0.007	261.600, 0.023	261.600, 0.019
1310	261.800, 0.215	261.800, 0.274	261.800, 0.394	261.800, 0.432	261.800, 0.399	261.800, 0.030	261.800, -0.017	261.800, 0.007	261.800, 0.015	261.800, -0.007	261.800, 0.022	261.800, 0.019
1311	262.000, 0.215	262.000, 0.274	262.000, 0.394	262.000, 0.431	262.000, 0.399	262.000, 0.030	262.000, -0.017	262.000, 0.007	262.000, 0.015	262.000, -0.007	262.000, 0.022	262.000, 0.019
1312	262.200, 0.214	262.200, 0.274	262.200, 0.394	262.200, 0.431	262.200, 0.399	262.200, 0.030	262.200, -0.017	262.200, 0.007	262.200, 0.015	262.200, -0.007	262.200, 0.022	262.200, 0.019
1313	262.400, 0.214	262.400, 0.273	262.400, 0.394	262.400, 0.431	262.400, 0.399	262.400, 0.030	262.400, -0.017	262.400, 0.007	262.400, 0.015	262.400, -0.007	262.400, 0.023	262.400, 0.019
1314	262.600, 0.214	262.600, 0.273	262.600, 0.394	262.600, 0.431	262.600, 0.399	262.600, 0.030	262.600, -0.017	262.600, 0.007	262.600, 0.015	262.600, -0.008	262.600, 0.023	262.600, 0.019
1315	262.800, 0.214	262.800, 0.272	262.800, 0.394	262.800, 0.431	262.800, 0.398	262.800, 0.029	262.800, -0.017	262.800, 0.007	262.800, 0.015	262.800, -0.008	262.800, 0.023	262.800, 0.019
1316	263.000, 0.214	263.000, 0.272	263.000, 0.394	263.000, 0.431	263.000, 0.398	263.000, 0.029	263.000, -0.017	263.000, 0.007	263.000, 0.015	263.000, -0.008	263.000, 0.023	263.000, 0.019
1317	263.200, 0.214	263.200, 0.272	263.200, 0.394	263.200, 0.430	263.200, 0.398	263.200, 0.029	263.200, -0.017	263.200, 0.008	263.200, 0.015	263.200, -0.008	263.200, 0.023	263.200, 0.018
1318	263.400, 0.214	263.400, 0.271	263.400, 0.394	263.400, 0.430	263.400, 0.398	263.400, 0.029	263.400, -0.017	263.400, 0.008	263.400, 0.015	263.400, -0.008	263.400, 0.023	263.400, 0.018
1319	263.600, 0.213	263.600, 0.271	263.600, 0.395	263.600, 0.430	263.600, 0.397	263.600, 0.029	263.600, -0.017	263.600, 0.008	263.600, 0.015	263.600, -0.008	263.600, 0.023	263.600, 0.018
1320	263.800, 0.213	263.800, 0.271	263.800, 0.395	263.800, 0.430	263.800, 0.397	263.800, 0.029	263.800, -0.017	263.800, 0.008	263.800, 0.015	263.800, -0.008	263.800, 0.023	263.800, 0.017
1321	264.000, 0.213	264.000, 0.271	264.000, 0.394	264.000, 0.430	264.000, 0.396	264.000, 0.029	264.000, -0.017	264.000, 0.008	264.000, 0.015	264.000, -0.007	264.000, 0.022	264.000, 0.017
1322	264.200, 0.212	264.200, 0.271	264.200, 0.394	264.200, 0.430	264.200, 0.396	264.200, 0.029	264.200, -0.017	264.200, 0.008	264.200, 0.016	264.200, -0.007	264.200, 0.022	264.200, 0.017
1323	264.400, 0.212	264.400, 0.270	264.400, 0.394	264.400, 0.430	264.400, 0.395	264.400, 0.029	264.400, -0.017	264.400, 0.008	264.400, 0.016	264.400, -0.006	264.400, 0.022	264.400, 0.017
1324	264.600, 0.211	264.600, 0.270	264.600, 0.394	264.600, 0.429	264.600, 0.394	264.600, 0.029	264.600, -0.016	264.600, 0.008	264.600, 0.015	264.600, -0.006	264.600, 0.022	264.600, 0.017
1325	264.800, 0.211	264.800, 0.270	264.800, 0.393	264.800, 0.429	264.800, 0.394	264.800, 0.029	264.800, -0.016	264.800, 0.008	264.800, 0.015	264.800, -0.005	264.800, 0.022	264.800, 0.018
1326	265.000, 0.211	265.000, 0.270	265.000, 0.393	265.000, 0.429	265.000, 0.393	265.000, 0.029	265.000, -0.016	265.000, 0.008	265.000, 0.015	265.000, -0.005	265.000, 0.022	265.000, 0.018
1327	265.200, 0.211	265.200, 0.270	265.200, 0.392	265.200, 0.429	265.200, 0.393	265.200, 0.029	265.200, -0.016	265.200, 0.008	265.200, 0.015	265.200, -0.005	265.200, 0.022	265.200, 0.018
1328	265.400, 0.211	265.400, 0.270	265.400, 0.392	265.400, 0.429	265.400, 0.393	265.400, 0.029	265.400, -0.016	265.400, 0.007	265.400, 0.014	265.400, -0.004	265.400, 0.022	265.400, 0.018
1329	265.600, 0.211	265.600, 0.269	265.600, 0.392	265.600, 0.428	265.600, 0.393	265.600, 0.030	265.600, -0.016	265.600, 0.007	265.600, 0.014	265.600, -0.005	265.600, 0.022	265.600, 0.018
1330	265.800, 0.211	265.800, 0.269	265.800, 0.391	265.800, 0.428	265.800, 0.393	265.800, 0.030	265.800, -0.016	265.800, 0.007	265.800, 0.014	265.800, -0.004	265.800, 0.022	265.800, 0.018
1331	266.000, 0.211	266.000, 0.269	266.000, 0.391	266.000, 0.428	266.000, 0.393	266.000, 0.030	266.000, -0.016	266.000, 0.007	266.000, 0.013	266.000, -0.005	266.000, 0.022	266.000, 0.018
1332	266.200, 0.211	266.200, 0.269	266.200, 0.391	266.200, 0.428	266.200, 0.394	266.200, 0.029	266.200, -0.016	266.200, 0.006	266.200, 0.013	266.200, -0.005	266.200, 0.022	266.200, 0.018
1333	266.400, 0.211	266.400, 0.269	266.400, 0.391	266.400, 0.428	266.400, 0.394	266.400, 0.029	266.400, -0.017	266.400, 0.006	266.400, 0.013	266.400, -0.005	266.400, 0.023	266.400, 0.018
1334	266.600, 0.211	266.600, 0.269	266.600, 0.391	266.600, 0.427	266.600, 0.394	266.600, 0.029	266.600, -0.017	266.600, 0.006	266.600, 0.013	266.600, -0.005	266.600, 0.023	266.600, 0.018
1335	266.800, 0.210	266.800, 0.269	266.800, 0.391	266.800, 0.427	266.800, 0.394	266.800, 0.029	266.800, -0.017	266.800, 0.006	266.800, 0.013	266.800, -0.006	266.800, 0.022	266.800, 0.018
1336	267.000, 0.210	267.000, 0.268	267.000, 0.391	267.000, 0.427	267.000, 0.395	267.000, 0.029	267.000, -0.017	267.000, 0.006	267.000, 0.013	267.000, -0.006	267.000, 0.022	267.000, 0.018
1337	267.200, 0.210	267.200, 0.268	267.200, 0.391	267.200, 0.427	267.200, 0.395	267.200, 0.029	267.200, -0.017	267.200, 0.006	267.200, 0.013	267.200, -0.006	267.200, 0.022	267.200, 0.018
1338	267.400, 0.210	267.400, 0.268	267.400, 0.391	267.400, 0.427	267.400, 0.395	267.400, 0.029	267.400, -0.018	267.400, 0.006	267.400, 0.013	267.400, -0.007	267.400, 0.022	267.400, 0.018
1339	267.600, 0.210	267.600, 0.268	267.600, 0.391	267.600, 0.426	267.600, 0.394	267.600, 0.029	267.600, -0.018	267.600, 0.006	267.600, 0.013	267.600, -0.007	267.600, 0.021	267.600, 0.018
1340	267.800, 0.210	267.800, 0.268	267.800, 0.391	267.800, 0.426	267.800, 0.394	267.800, 0.029	267.800, -0.018	267.800, 0.006	267.800, 0.013	267.800, -0.007	267.800, 0.021	267.800, 0.018
1341	268.000, 0.209	268.000, 0.268	268.000, 0.391	268.000, 0.426	268.000, 0.394	268.000, 0.029	268.000, -0.018	268.000, 0.006	268.000, 0.013	268.000, -0.007	268.000, 0.021	268.000, 0.018
1342	268.200, 0.209	268.200, 0.267	268.200, 0.391	268.200, 0.426	268.200, 0.393	268.200, 0.029	268.200, -0.018	268.200, 0.006	268.200, 0.013	268.200, -0.007	268.200, 0.021	268.200, 0.018
1343	268.400, 0.209	268.400, 0.267	268.400, 0.391	268.400, 0.426	268.400, 0.393	268.400, 0.029	268.400, -0.017	268.400, 0.006	268.400, 0.013	268.400, -0.007	268.400, 0.021	268.400, 0.019
1344	268.600, 0.209	268.600, 0.267	268.600, 0.391	268.600, 0.426	268.600, 0.392	268.600, 0.029	268.600, -0.017	268.600, 0.006	268.600, 0.013	268.600, -0.007	268.600, 0.021	268.600, 0.019
1345	268.800, 0.209	268.800, 0.267	268.800, 0.391	268.800, 0.425	268.800, 0.392	268.800, 0.029	268.800, -0.017	268.800, 0.006	268.800, 0.013	268.800, -0.007	268.800, 0.021	268.800, 0.019
1346	269.000, 0.209	269.000, 0.266	269.000, 0.391	269.000, 0.425	269.000, 0.391	269.000, 0.029	269.000, -0.017	269.000, 0.006	269.000, 0.013	269.000, -0.008	269.000, 0.021	269.000, 0.019
1347	269.200, 0.209	269.200, 0.266	269.200, 0.391	269.200, 0.425	269.200, 0.391	269.200, 0.029	269.200, -0.017	269.200, 0.006	269.200, 0.013	269.200, -0.008	269.200, 0.020	269.200, 0.019
1348	269.400, 0.209	269.400, 0.266	269.400, 0.390	269.400, 0.425	269.400, 0.391	269.400, 0.029	269.400, -0.016	269.400, 0.006	269.400, 0.013	269.400, -0.008	269.400, 0.020	269.400, 0.019
1349	269.600, 0.209	269.600, 0.266	269.600, 0.390	269.600, 0.425	269.600, 0.390	269.600, 0.029	269.600, -0.016	269.600, 0.006	269.600, 0.013	269.600, -0.008	269.600, 0.021	269.600, 0.019
1350	269.800, 0.210	269.800, 0.266	269.800, 0.390	269.800, 0.425	269.800, 0.390	269.800, 0.029	269.800, -0.016	269.800, 0.006	269.800, 0.013	269.800, -0.008	269.800, 0.021	269.800, 0.018
1351	,	,	,	,	,	,	,	,	,	,	,	,
1352	,	,	,	,	,	,	,	,	,	,	,	,
1353	,	,	,	,	,	,	,	,	,	,	,	,
1354	,	,	,	,	,	,	,	,	,	,	,	,
1355	,	,	,	,	,	,	,	,	,	,	,	,
1356	,	,	,	,	,	,	,	,	,	,	,	,
1357	,	,	,	,	,	,	,	,	,	,	,	,
1358	,	,	,	,	,	,	,	,	,	,	,	,
1359	,	,	,	,	,	,	,	,	,	,	,	,
1360	,	,	,	,	,	,	,	,	,	,	,	,
1361	,	,	,	,	,	,	,	,	,	,	,	,
1362	,	,	,	,	,	,	,	,	,	,	,	,
1363	,	,	,	,	,	,	,	,	,	,	,	,
1364	,	,	,	,	,	,	,	,	,	,	,	,
1365	,	,	,	,	,	,	,	,	,	,	,	,
1366	,	,	,	,	,	,	,	,	,	,	,	,
1367	,	,	,	,	,	,	,	,	,	,	,	,
1368	,	,	,	,	,	,	,	,	,	,	,	,
1369	,	,	,	,	,	,	,	,	,	,	,	,
1370	,	,	,	,	,	,	,	,	,	,	,	,
1371	,	,	,	,	,	,	,	,	,	,	,	,
1372	,	,	,	,	,	,	,	,	,	,	,	,
1373	,	,	,	,	,	,	,	,	,	,	,	,
1374	,	,	,	,	,	,	,	,	,	,	,	,
1375	,	,	,	,	,	,	,	,	,	,	,	,
1376	,	,	,	,	,	,	,	,	,	,	,	,
1377	,	,	,	,	,	,	,	,	,	,	,	,
1378	,	,	,	,	,	,	,	,	,	,	,	,
1379	,	,	,	,	,	,	,	,	,	,	,	,
1380	,	,	,	,	,	,	,	,	,	,	,	,
1381	,	,	,	,	,	,	,	,	,	,	,	,
1382	,	,	,	,	,	,	,	,	,	,	,	,
1383	,	,	,	,	,	,	,	,	,	,	,	,
1384	,	,	,	,	,	,	,	,	,	,	,	,
1385	,	,	,	,	,	,	,	,	,	,	,	,
1386	,	,	,	,	,	,	,	,	,	,	,	,
1387	,	,	,	,	,	,	,	,	,	,	,	,
1388	,	,	,	,	,	,	,	,	,	,	,	,
1389	,	,	,	,	,	,	,	,	,	,	,	,
1390	,	,	,	,	,	,	,	,	,	,	,	,
1391	,	,	,	,	,	,	,	,	,	,	,	,
1392	,	,	,	,	,	,	,	,	,	,	,	,
1393	,	,	,	,	,	,	,	,	,	,	,	,
1394	,	,	,	,	,	,	,	,	,	,	,	,
1395	,	,	,	,	,	,	,	,	,	,	,	,
1396	,	,	,	,	,	,	,	,	,	,	,	,
1397	,	,	,	,	,	,	,	,	,	,	,	,
1398	,	,	,	,	,	,	,	,	,	,	,	,
1399	,	,	,	,	,	,	,	,	,	,	,	,
1400	,	,	,	,	,	,	,	,	,	,	,	,
1401	,	,	,	,	,	,	,	,	,	,	,	,
1402	,	,	,	,	,	,	,	,	,	,	,	,
1403	,	,	,	,	,	,	,	,	,	,	,	,
1404	,	,	,	,	,	,	,	,	,	,	,	,
1405	,	,	,	,	,	,	,	,	,	,	,	,
1406	,	,	,	,	,	,	,	,	,	,	,	,
1407	,	,	,	,	,	,	,	,	,	,	,	,
1408	,	,	,	,	,	,	,	,	,	,	,	,
1409	,	,	,	,	,	,	,	,	,	,	,	,
1410	,	,	,	,	,	,	,	,	,	,	,	,
1411	,	,	,	,	,	,	,	,	,	,	,	,
1412	,	,	,	,	,	,	,	,	,	,	,	,
1413	,	,	,	,	,	,	,	,	,	,	,	,
1414	,	,	,	,	,	,	,	,	,	,	,	,
1415	,	,	,	,	,	,	,	,	,	,	,	,
1416	,	,	,	,	,	,	,	,	,	,	,	,
1417	,	,	,	,	,	,	,	,	,	,	,	,
1418	,	,	,	,	,	,	,	,	,	,	,	,
1419	,	,	,	,	,	,	,	,	,	,	,	,
1420	,	,	,	,	,	,	,	,	,	,	,	,
1421	,	,	,	,	,	,	,	,	,	,	,	,
1422	,	,	,	,	,	,	,	,	,	,	,	,
1423	,	,	,	,	,	,	,	,	,	,	,	,
1424	,	,	,	,	,	,	,	,	,	,	,	,
1425	,	,	,	,	,	,	,	,	,	,	,	,
1426	,	,	,	,	,	,	,	,	,	,	,	,
1427	,	,	,	,	,	,	,	,	,	,	,	,
1428	,	,	,	,	,	,	,	,	,	,	,	,
1429	,	,	,	,	,	,	,	,	,	,	,	,
1430	,	,	,	,	,	,	,	,	,	,	,	,
1431	,	,	,	,	,	,	,	,	,	,	,	,
1432	,	,	,	,	,	,	,	,	,	,	,	,
1433	,	,	,	,	,	,	,	,	,	,	,	,
1434	,	,	,	,	,	,	,	,	,	,	,	,
1435	,	,	,	,	,	,	,	,	,	,	,	,
1436	,	,	,	,	,	,	,	,	,	,	,	,
1437	,	,	,	,	,	,	,	,	,	,	,	,
1438	,	,	,	,	,	,	,	,	,	,	,	,
1439	,	,	,	,	,	,	,	,	,	,	,	,
1440	,	,	,	,	,	,	,	,	,	,	,	,
1441	,	,	,	,	,	,	,	,	,	,	,	,
1442	,	,	,	,	,	,	,	,	,	,	,	,
1443	,	,	,	,	,	,	,	,	,	,	,	,
1444	,	,	,	,	,	,	,	,	,	,	,	,
1445	,	,	,	,	,	,	,	,	,	,	,	,
1446	,	,	,	,	,	,	,	,	,	,	,	,
1447	,	,	,	,	,	,	,	,	,	,	,	,
1448	,	,	,	,	,	,	,	,	,	,	,	,
1449	,	,	,	,	,	,	,	,	,	,	,	,
1450	,	,	,	,	,	,	,	,	,	,	,	,
1451	,	,	,	,	,	,	,	,	,	,	,	,
1452	,	,	,	,	,	,	,	,	,	,	,	,
1453	,	,	,	,	,	,	,	,	,	,	,	,
1454	,	,	,	,	,	,	,	,	,	,	,	,
1455	,	,	,	,	,	,	,	,	,	,	,	,
1456	,	,	,	,	,	,	,	,	,	,	,	,
1457	,	,	,	,	,	,	,	,	,	,	,	,
1458	,	,	,	,	,	,	,	,	,	,	,	,
1459	,	,	,	,	,	,	,	,	,	,	,	,
1460	,	,	,	,	,	,	,	,	,	,	,	,
1461	,	,	,	,	,	,	,	,	,	,	,	,
1462	,	,	,	,	,	,	,	,	,	,	,	,
1463	,	,	,	,	,	,	,	,	,	,	,	,
1464	,	,	,	,	,	,	,	,	,	,	,	,
1465	,	,	,	,	,	,	,	,	,	,	,	,
1466	,	,	,	,	,	,	,	,	,	,	,	,
1467	,	,	,	,	,	,	,	,	,	,	,	,
1468	,	,	,	,	,	,	,	,	,	,	,	,
1469	,	,	,	,	,	,	,	,	,	,	,	,
1470	,	,	,	,	,	,	,	,	,	,	,	,
1471	,	,	,	,	,	,	,	,	,	,	,	,
1472	,	,	,	,	,	,	,	,	,	,	,	,
1473	,	,	,	,	,	,	,	,	,	,	,	,
1474	,	,	,	,	,	,	,	,	,	,	,	,
1475	,	,	,	,	,	,	,	,	,	,	,	,
1476	,	,	,	,	,	,	,	,	,	,	,	,
1477	,	,	,	,	,	,	,	,	,	,	,	,
1478	,	,	,	,	,	,	,	,	,	,	,	,
1479	,	,	,	,	,	,	,	,	,	,	,	,
1480	,	,	,	,	,	,	,	,	,	,	,	,
1481	,	,	,	,	,	,	,	,	,	,	,	,
1482	,	,	,	,	,	,	,	,	,	,	,	,
1483	,	,	,	,	,	,	,	,	,	,	,	,
1484	,	,	,	,	,	,	,	,	,	,	,	,
1485	,	,	,	,	,	,	,	,	,	,	,	,
1486	,	,	,	,	,	,	,	,	,	,	,	,
1487	,	,	,	,	,	,	,	,	,	,	,	,
1488	,	,	,	,	,	,	,	,	,	,	,	,
1489	,	,	,	,	,	,	,	,	,	,	,	,
1490	,	,	,	,	,	,	,	,	,	,	,	,
1491	,	,	,	,	,	,	,	,	,	,	,	,
1492	,	,	,	,	,	,	,	,	,	,	,	,
1493	,	,	,	,	,	,	,	,	,	,	,	,
1494	,	,	,	,	,	,	,	,	,	,	,	,
1495	,	,	,	,	,	,	,	,	,	,	,	,
1496	,	,	,	,	,	,	,	,	,	,	,	,
1497	,	,	,	,	,	,	,	,	,	,	,	,
1498	,	,	,	,	,	,	,	,	,	,	,	,
1499	,	,	,	,	,	,	,	,	,	,	,	,
1500	,	,	,	,	,	,	,	,	,	,	,	,
1501	,	,	,	,	,	,	,	,	,	,	,	,
1502	,	,	,	,	,	,	,	,	,	,	,	,
1503	,	,	,	,	,	,	,	,	,	,	,	,
1504	,	,	,	,	,	,	,	,	,	,	,	,
1505	,	,	,	,	,	,	,	,	,	,	,	,
1506	,	,	,	,	,	,	,	,	,	,	,	,
1507	,	,	,	,	,	,	,	,	,	,	,	,
1508	,	,	,	,	,	,	,	,	,	,	,	,
1509	,	,	,	,	,	,	,	,	,	,	,	,
1510	,	,	,	,	,	,	,	,	,	,	,	,
1511	,	,	,	,	,	,	,	,	,	,	,	,
1512	,	,	,	,	,	,	,	,	,	,	,	,
1513	,	,	,	,	,	,	,	,	,	,	,	,
1514	,	,	,	,	,	,	,	,	,	,	,	,
1515	,	,	,	,	,	,	,	,	,	,	,	,
1516	,	,	,	,	,	,	,	,	,	,	,	,
1517	,	,	,	,	,	,	,	,	,	,	,	,
1518	,	,	,	,	,	,	,	,	,	,	,	,
1519	,	,	,	,	,	,	,	,	,	,	,	,
1520	,	,	,	,	,	,	,	,	,	,	,	,
1521	,	,	,	,	,	,	,	,	,	,	,	,
1522	,	,	,	,	,	,	,	,	,	,	,	,
1523	,	,	,	,	,	,	,	,	,	,	,	,
1524	,	,	,	,	,	,	,	,	,	,	,	,
1525	,	,	,	,	,	,	,	,	,	,	,	,
1526	,	,	,	,	,	,	,	,	,	,	,	,
1527	,	,	,	,	,	,	,	,	,	,	,	,
1528	,	,	,	,	,	,	,	,	,	,	,	,
1529	,	,	,	,	,	,	,	,	,	,	,	,
1530	,	,	,	,	,	,	,	,	,	,	,	,
1531	,	,	,	,	,	,	,	,	,	,	,	,
1532	,	,	,	,	,	,	,	,	,	,	,	,
1533	,	,	,	,	,	,	,	,	,	,	,	,
1534	,	,	,	,	,	,	,	,	,	,	,	,
1535	,	,	,	,	,	,	,	,	,	,	,	,
1536	,	,	,	,	,	,	,	,	,	,	,	,
1537	,	,	,	,	,	,	,	,	,	,	,	,
1538	,	,	,	,	,	,	,	,	,	,	,	,
1539	,	,	,	,	,	,	,	,	,	,	,	,
1540	,	,	,	,	,	,	,	,	,	,	,	,
1541	,	,	,	,	,	,	,	,	,	,	,	,
1542	,	,	,	,	,	,	,	,	,	,	,	,
1543	,	,	,	,	,	,	,	,	,	,	,	,
1544	,	,	,	,	,	,	,	,	,	,	,	,
1545	,	,	,	,	,	,	,	,	,	,	,	,
1546	,	,	,	,	,	,	,	,	,	,	,	,
1547	,	,	,	,	,	,	,	,	,	,	,	,
1548	,	,	,	,	,	,	,	,	,	,	,	,
1549	,	,	,	,	,	,	,	,	,	,	,	,
1550	,	,	,	,	,	,	,	,	,	,	,	,
1551	,	,	,	,	,	,	,	,	,	,	,	,
1552	,	,	,	,	,	,	,	,	,	,	,	,
1553	,	,	,	,	,	,	,	,	,	,	,	,
1554	,	,	,	,	,	,	,	,	,	,	,	,
1555	,	,	,	,	,	,	,	,	,	,	,	,
1556	,	,	,	,	,	,	,	,	,	,	,	,
1557	,	,	,	,	,	,	,	,	,	,	,	,
1558	,	,	,	,	,	,	,	,	,	,	,	,
1559	,	,	,	,	,	,	,	,	,	,	,	,
1560	,	,	,	,	,	,	,	,	,	,	,	,
1561	,	,	,	,	,	,	,	,	,	,	,	,
1562	,	,	,	,	,	,	,	,	,	,	,	,
1563	,	,	,	,	,	,	,	,	,	,	,	,
1564	,	,	,	,	,	,	,	,	,	,	,	,
1565	,	,	,	,	,	,	,	,	,	,	,	,
1566	,	,	,	,	,	,	,	,	,	,	,	,
1567	,	,	,	,	,	,	,	,	,	,	,	,
1568	,	,	,	,	,	,	,	,	,	,	,	,
1569	,	,	,	,	,	,	,	,	,	,	,	,
1570	,	,	,	,	,	,	,	,	,	,	,	,
1571	,	,	,	,	,	,	,	,	,	,	,	,
1572	,	,	,	,	,	,	,	,	,	,	,	,
1573	,	,	,	,	,	,	,	,	,	,	,	,
1574	,	,	,	,	,	,	,	,	,	,	,	,
1575	,	,	,	,	,	,	,	,	,	,	,	,
1576	,	,	,	,	,	,	,	,	,	,	,	,
1577	,	,	,	,	,	,	,	,	,	,	,	,
1578	,	,	,	,	,	,	,	,	,	,	,	,
1579	,	,	,	,	,	,	,	,	,	,	,	,
1580	,	,	,	,	,	,	,	,	,	,	,	,
1581	,	,	,	,	,	,	,	,	,	,	,	,
1582	,	,	,	,	,	,	,	,	,	,	,	,
1583	,	,	,	,	,	,	,	,	,	,	,	,
1584	,	,	,	,	,	,	,	,	,	,	,	,
1585	,	,	,	,	,	,	,	,	,	,	,	,
1586	,	,	,	,	,	,	,	,	,	,	,	,
1587	,	,	,	,	,	,	,	,	,	,	,	,
1588	,	,	,	,	,	,	,	,	,	,	,	,
1589	,	,	,	,	,	,	,	,	,	,	,	,
1590	,	,	,	,	,	,	,	,	,	,	,	,
1591	,	,	,	,	,	,	,	,	,	,	,	,
1592	,	,	,	,	,	,	,	,	,	,	,	,
1593	,	,	,	,	,	,	,	,	,	,	,	,
1594	,	,	,	,	,	,	,	,	,	,	,	,
1595	,	,	,	,	,	,	,	,	,	,	,	,
1596	,	,	,	,	,	,	,	,	,	,	,	,
1597	,	,	,	,	,	,	,	,	,	,	,	,
1598	,	,	,	,	,	,	,	,	,	,	,	,
1599	,	,	,	,	,	,	,	,	,	,	,	,
1600	,	,	,	,	,	,	,	,	,	,	,	,
1601	,	,	,	,	,	,	,	,	,	,	,	,
1602	,	,	,	,	,	,	,	,	,	,	,	,
1603	,	,	,	,	,	,	,	,	,	,	,	,
1604	,	,	,	,	,	,	,	,	,	,	,	,
1605	,	,	,	,	,	,	,	,	,	,	,	,
1606	,	,	,	,	,	,	,	,	,	,	,	,
1607	,	,	,	,	,	,	,	,	,	,	,	,
1608	,	,	,	,	,	,	,	,	,	,	,	,
1609	,	,	,	,	,	,	,	,	,	,	,	,
1610	,	,	,	,	,	,	,	,	,	,	,	,
1611	,	,	,	,	,	,	,	,	,	,	,	,
1612	,	,	,	,	,	,	,	,	,	,	,	,
1613	,	,	,	,	,	,	,	,	,	,	,	,
1614	,	,	,	,	,	,	,	,	,	,	,	,
1615	,	,	,	,	,	,	,	,	,	,	,	,
1616	,	,	,	,	,	,	,	,	,	,	,	,
1617	,	,	,	,	,	,	,	,	,	,	,	,
1618	,	,	,	,	,	,	,	,	,	,	,	,
1619	,	,	,	,	,	,	,	,	,	,	,	,
1620	,	,	,	,	,	,	,	,	,	,	,	,
1621	,	,	,	,	,	,	,	,	,	,	,	,
1622	,	,	,	,	,	,	,	,	,	,	,	,
1623	,	,	,	,	,	,	,	,	,	,	,	,
1624	,	,	,	,	,	,	,	,	,	,	,	,
1625	,	,	,	,	,	,	,	,	,	,	,	,
1626	,	,	,	,	,	,	,	,	,	,	,	,
1627	,	,	,	,	,	,	,	,	,	,	,	,
1628	,	,	,	,	,	,	,	,	,	,	,	,
1629	,	,	,	,	,	,	,	,	,	,	,	,
1630	,	,	,	,	,	,	,	,	,	,	,	,
1631	,	,	,	,	,	,	,	,	,	,	,	,
1632	,	,	,	,	,	,	,	,	,	,	,	,
1633	,	,	,	,	,	,	,	,	,	,	,	,
1634	,	,	,	,	,	,	,	,	,	,	,	,
1635	,	,	,	,	,	,	,	,	,	,	,	,
1636	,	,	,	,	,	,	,	,	,	,	,	,
1637	,	,	,	,	,	,	,	,	,	,	,	,
1638	,	,	,	,	,	,	,	,	,	,	,	,
1639	,	,	,	,	,	,	,	,	,	,	,	,
1640	,	,	,	,	,	,	,	,	,	,	,	,
1641	,	,	,	,	,	,	,	,	,	,	,	,
1642	,	,	,	,	,	,	,	,	,	,	,	,
1643	,	,	,	,	,	,	,	,	,	,	,	,
1644	,	,	,	,	,	,	,	,	,	,	,	,
1645	,	,	,	,	,	,	,	,	,	,	,	,
1646	,	,	,	,	,	,	,	,	,	,	,	,
1647	,	,	,	,	,	,	,	,	,	,	,	,
1648	,	,	,	,	,	,	,	,	,	,	,	,
1649	,	,	,	,	,	,	,	,	,	,	,	,
1650	,	,	,	,	,	,	,	,	,	,	,	,
1651	,	,	,	,	,	,	,	,	,	,	,	,
1652	,	,	,	,	,	,	,	,	,	,	,	,
1653	,	,	,	,	,	,	,	,	,	,	,	,
1654	,	,	,	,	,	,	,	,	,	,	,	,
1655	,	,	,	,	,	,	,	,	,	,	,	,
1656	,	,	,	,	,	,	,	,	,	,	,	,
1657	,	,	,	,	,	,	,	,	,	,	,	,
1658	,	,	,	,	,	,	,	,	,	,	,	,
1659	,	,	,	,	,	,	,	,	,	,	,	,
1660	,	,	,	,	,	,	,	,	,	,	,	,
1661	,	,	,	,	,	,	,	,	,	,	,	,
1662	,	,	,	,	,	,	,	,	,	,	,	,
1663	,	,	,	,	,	,	,	,	,	,	,	,
1664	,	,	,	,	,	,	,	,	,	,	,	,
1665	,	,	,	,	,	,	,	,	,	,	,	,
1666	,	,	,	,	,	,	,	,	,	,	,	,
1667	,	,	,	,	,	,	,	,	,	,	,	,
1668	,	,	,	,	,	,	,	,	,	,	,	,
1669	,	,	,	,	,	,	,	,	,	,	,	,
1670	,	,	,	,	,	,	,	,	,	,	,	,
1671	,	,	,	,	,	,	,	,	,	,	,	,
1672	,	,	,	,	,	,	,	,	,	,	,	,
1673	,	,	,	,	,	,	,	,	,	,	,	,
1674	,	,	,	,	,	,	,	,	,	,	,	,
1675	,	,	,	,	,	,	,	,	,	,	,	,
1676	,	,	,	,	,	,	,	,	,	,	,	,
1677	,	,	,	,	,	,	,	,	,	,	,	,
1678	,	,	,	,	,	,	,	,	,	,	,	,
1679	,	,	,	,	,	,	,	,	,	,	,	,
1680	,	,	,	,	,	,	,	,	,	,	,	,
1681	,	,	,	,	,	,	,	,	,	,	,	,
1682	,	,	,	,	,	,	,	,	,	,	,	,
1683	,	,	,	,	,	,	,	,	,	,	,	,
1684	,	,	,	,	,	,	,	,	,	,	,	,
1685	,	,	,	,	,	,	,	,	,	,	,	,
1686	,	,	,	,	,	,	,	,	,	,	,	,
1687	,	,	,	,	,	,	,	,	,	,	,	,
1688	,	,	,	,	,	,	,	,	,	,	,	,
1689	,	,	,	,	,	,	,	,	,	,	,	,
1690	,	,	,	,	,	,	,	,	,	,	,	,
1691	,	,	,	,	,	,	,	,	,	,	,	,
1692	,	,	,	,	,	,	,	,	,	,	,	,
1693	,	,	,	,	,	,	,	,	,	,	,	,
1694	,	,	,	,	,	,	,	,	,	,	,	,
1695	,	,	,	,	,	,	,	,	,	,	,	,
1696	,	,	,	,	,	,	,	,	,	,	,	,
1697	,	,	,	,	,	,	,	,	,	,	,	,
1698	,	,	,	,	,	,	,	,	,	,	,	,
1699	,	,	,	,	,	,	,	,	,	,	,	,
1700	,	,	,	,	,	,	,	,	,	,	,	,
1701	,	,	,	,	,	,	,	,	,	,	,	,
1702	,	,	,	,	,	,	,	,	,	,	,	,
1703	,	,	,	,	,	,	,	,	,	,	,	,
1704	,	,	,	,	,	,	,	,	,	,	,	,
1705	,	,	,	,	,	,	,	,	,	,	,	,
1706	,	,	,	,	,	,	,	,	,	,	,	,
1707	,	,	,	,	,	,	,	,	,	,	,	,
1708	,	,	,	,	,	,	,	,	,	,	,	,
1709	,	,	,	,	,	,	,	,	,	,	,	,
1710	,	,	,	,	,	,	,	,	,	,	,	,
1711	,	,	,	,	,	,	,	,	,	,	,	,
1712	,	,	,	,	,	,	,	,	,	,	,	,
1713	,	,	,	,	,	,	,	,	,	,	,	,
1714	,	,	,	,	,	,	,	,	,	,	,	,
1715	,	,	,	,	,	,	,	,	,	,	,	,
1716	,	,	,	,	,	,	,	,	,	,	,	,
1717	,	,	,	,	,	,	,	,	,	,	,	,
1718	,	,	,	,	,	,	,	,	,	,	,	,
1719	,	,	,	,	,	,	,	,	,	,	,	,
1720	,	,	,	,	,	,	,	,	,	,	,	,
1721	,	,	,	,	,	,	,	,	,	,	,	,
1722	,	,	,	,	,	,	,	,	,	,	,	,
1723	,	,	,	,	,	,	,	,	,	,	,	,
1724	,	,	,	,	,	,	,	,	,	,	,	,
1725	,	,	,	,	,	,	,	,	,	,	,	,
1726	,	,	,	,	,	,	,	,	,	,	,	,
1727	,	,	,	,	,	,	,	,	,	,	,	,
1728	,	,	,	,	,	,	,	,	,	,	,	,
1729	,	,	,	,	,	,	,	,	,	,	,	,
1730	,	,	,	,	,	,	,	,	,	,	,	,
1731	,	,	,	,	,	,	,	,	,	,	,	,
1732	,	,	,	,	,	,	,	,	,	,	,	,
1733	,	,	,	,	,	,	,	,	,	,	,	,
1734	,	,	,	,	,	,	,	,	,	,	,	,
1735	,	,	,	,	,	,	,	,	,	,	,	,
1736	,	,	,	,	,	,	,	,	,	,	,	,
1737	,	,	,	,	,	,	,	,	,	,	,	,
1738	,	,	,	,	,	,	,	,	,	,	,	,
1739	,	,	,	,	,	,	,	,	,	,	,	,
1740	,	,	,	,	,	,	,	,	,	,	,	,
1741	,	,	,	,	,	,	,	,	,	,	,	,
1742	,	,	,	,	,	,	,	,	,	,	,	,
1743	,	,	,	,	,	,	,	,	,	,	,	,
1744	,	,	,	,	,	,	,	,	,	,	,	,
1745	,	,	,	,	,	,	,	,	,	,	,	,
1746	,	,	,	,	,	,	,	,	,	,	,	,
1747	,	,	,	,	,	,	,	,	,	,	,	,
1748	,	,	,	,	,	,	,	,	,	,	,	,
1749	,	,	,	,	,	,	,	,	,	,	,	,
1750	,	,	,	,	,	,	,	,	,	,	,	,
1751	,	,	,	,	,	,	,	,	,	,	,	,
1752	,	,	,	,	,	,	,	,	,	,	,	,
1753	,	,	,	,	,	,	,	,	,	,	,	,
1754	,	,	,	,	,	,	,	,	,	,	,	,
1755	,	,	,	,	,	,	,	,	,	,	,	,
1756	,	,	,	,	,	,	,	,	,	,	,	,
1757	,	,	,	,	,	,	,	,	,	,	,	,
1758	,	,	,	,	,	,	,	,	,	,	,	,
1759	,	,	,	,	,	,	,	,	,	,	,	,
1760	,	,	,	,	,	,	,	,	,	,	,	,
1761	,	,	,	,	,	,	,	,	,	,	,	,
1762	,	,	,	,	,	,	,	,	,	,	,	,
1763	,	,	,	,	,	,	,	,	,	,	,	,
1764	,	,	,	,	,	,	,	,	,	,	,	,
1765	,	,	,	,	,	,	,	,	,	,	,	,
1766	,	,	,	,	,	,	,	,	,	,	,	,
1767	,	,	,	,	,	,	,	,	,	,	,	,
1768	,	,	,	,	,	,	,	,	,	,	,	,
1769	,	,	,	,	,	,	,	,	,	,	,	,
1770	,	,	,	,	,	,	,	,	,	,	,	,
1771	,	,	,	,	,	,	,	,	,	,	,	,
1772	,	,	,	,	,	,	,	,	,	,	,	,
1773	,	,	,	,	,	,	,	,	,	,	,	,
1774	,	,	,	,	,	,	,	,	,	,	,	,
1775	,	,	,	,	,	,	,	,	,	,	,	,
1776	,	,	,	,	,	,	,	,	,	,	,	,
1777	,	,	,	,	,	,	,	,	,	,	,	,
1778	,	,	,	,	,	,	,	,	,	,	,	,
1779	,	,	,	,	,	,	,	,	,	,	,	,
1780	,	,	,	,	,	,	,	,	,	,	,	,
1781	,	,	,	,	,	,	,	,	,	,	,	,
1782	,	,	,	,	,	,	,	,	,	,	,	,
1783	,	,	,	,	,	,	,	,	,	,	,	,
1784	,	,	,	,	,	,	,	,	,	,	,	,
1785	,	,	,	,	,	,	,	,	,	,	,	,
1786	,	,	,	,	,	,	,	,	,	,	,	,
1787	,	,	,	,	,	,	,	,	,	,	,	,
1788	,	,	,	,	,	,	,	,	,	,	,	,
1789	,	,	,	,	,	,	,	,	,	,	,	,
1790	,	,	,	,	,	,	,	,	,	,	,	,
1791	,	,	,	,	,	,	,	,	,	,	,	,
1792	,	,	,	,	,	,	,	,	,	,	,	,
1793	,	,	,	,	,	,	,	,	,	,	,	,
1794	,	,	,	,	,	,	,	,	,	,	,	,
1795	,	,	,	,	,	,	,	,	,	,	,	,
1796	,	,	,	,	,	,	,	,	,	,	,	,
1797	,	,	,	,	,	,	,	,	,	,	,	,
1798	,	,	,	,	,	,	,	,	,	,	,	,
1799	,	,	,	,	,	,	,	,	,	,	,	,
1800	,	,	,	,	,	,	,	,	,	,	,	,
1801	,	,	,	,	,	,	,	,	,	,	,	,
1802	,	,	,	,	,	,	,	,	,	,	,	,
1803	,	,	,	,	,	,	,	,	,	,	,	,
1804	,	,	,	,	,	,	,	,	,	,	,	,
1805	,	,	,	,	,	,	,	,	,	,	,	,
1806	,	,	,	,	,	,	,	,	,	,	,	,
1807	,	,	,	,	,	,	,	,	,	,	,	,
1808	,	,	,	,	,	,	,	,	,	,	,	,
1809	,	,	,	,	,	,	,	,	,	,	,	,
1810	,	,	,	,	,	,	,	,	,	,	,	,
1811	,	,	,	,	,	,	,	,	,	,	,	,
1812	,	,	,	,	,	,	,	,	,	,	,	,
1813	,	,	,	,	,	,	,	,	,	,	,	,
1814	,	,	,	,	,	,	,	,	,	,	,	,
1815	,	,	,	,	,	,	,	,	,	,	,	,
1816	,	,	,	,	,	,	,	,	,	,	,	,
1817	,	,	,	,	,	,	,	,	,	,	,	,
1818	,	,	,	,	,	,	,	,	,	,	,	,
1819	,	,	,	,	,	,	,	,	,	,	,	,
1820	,	,	,	,	,	,	,	,	,	,	,	,
1821	,	,	,	,	,	,	,	,	,	,	,	,
1822	,	,	,	,	,	,	,	,	,	,	,	,
1823	,	,	,	,	,	,	,	,	,	,	,	,
1824	,	,	,	,	,	,	,	,	,	,	,	,
1825	,	,	,	,	,	,	,	,	,	,	,	,
1826	,	,	,	,	,	,	,	,	,	,	,	,
1827	,	,	,	,	,	,	,	,	,	,	,	,
1828	,	,	,	,	,	,	,	,	,	,	,	,
1829	,	,	,	,	,	,	,	,	,	,	,	,
1830	,	,	,	,	,	,	,	,	,	,	,	,
1831	,	,	,	,	,	,	,	,	,	,	,	,
1832	,	,	,	,	,	,	,	,	,	,	,	,
1833	,	,	,	,	,	,	,	,	,	,	,	,
1834	,	,	,	,	,	,	,	,	,	,	,	,
1835	,	,	,	,	,	,	,	,	,	,	,	,
1836	,	,	,	,	,	,	,	,	,	,	,	,
1837	,	,	,	,	,	,	,	,	,	,	,	,
1838	,	,	,	,	,	,	,	,	,	,	,	,
1839	,	,	,	,	,	,	,	,	,	,	,	,
1840	,	,	,	,	,	,	,	,	,	,	,	,
1841	,	,	,	,	,	,	,	,	,	,	,	,
1842	,	,	,	,	,	,	,	,	,	,	,	,
1843	,	,	,	,	,	,	,	,	,	,	,	,
1844	,	,	,	,	,	,	,	,	,	,	,	,
1845	,	,	,	,	,	,	,	,	,	,	,	,
1846	,	,	,	,	,	,	,	,	,	,	,	,
1847	,	,	,	,	,	,	,	,	,	,	,	,
1848	,	,	,	,	,	,	,	,	,	,	,	,
1849	,	,	,	,	,	,	,	,	,	,	,	,
1850	,	,	,	,	,	,	,	,	,	,	,	,
1851	,	,	,	,	,	,	,	,	,	,	,	,
1852	,	,	,	,	,	,	,	,	,	,	,	,
1853	,	,	,	,	,	,	,	,	,	,	,	,
1854	,	,	,	,	,	,	,	,	,	,	,	,
1855	,	,	,	,	,	,	,	,	,	,	,	,
1856	,	,	,	,	,	,	,	,	,	,	,	,
1857	,	,	,	,	,	,	,	,	,	,	,	,
1858	,	,	,	,	,	,	,	,	,	,	,	,
1859	,	,	,	,	,	,	,	,	,	,	,	,
1860	,	,	,	,	,	,	,	,	,	,	,	,
1861	,	,	,	,	,	,	,	,	,	,	,	,
1862	,	,	,	,	,	,	,	,	,	,	,	,
1863	,	,	,	,	,	,	,	,	,	,	,	,
1864	,	,	,	,	,	,	,	,	,	,	,	,
1865	,	,	,	,	,	,	,	,	,	,	,	,
1866	,	,	,	,	,	,	,	,	,	,	,	,
1867	,	,	,	,	,	,	,	,	,	,	,	,
1868	,	,	,	,	,	,	,	,	,	,	,	,
1869	,	,	,	,	,	,	,	,	,	,	,	,
1870	,	,	,	,	,	,	,	,	,	,	,	,
1871	,	,	,	,	,	,	,	,	,	,	,	,
1872	,	,	,	,	,	,	,	,	,	,	,	,
1873	,	,	,	,	,	,	,	,	,	,	,	,
1874	,	,	,	,	,	,	,	,	,	,	,	,
1875	,	,	,	,	,	,	,	,	,	,	,	,
1876	,	,	,	,	,	,	,	,	,	,	,	,
1877	,	,	,	,	,	,	,	,	,	,	,	,
1878	,	,	,	,	,	,	,	,	,	,	,	,
1879	,	,	,	,	,	,	,	,	,	,	,	,
1880	,	,	,	,	,	,	,	,	,	,	,	,
1881	,	,	,	,	,	,	,	,	,	,	,	,
1882	,	,	,	,	,	,	,	,	,	,	,	,
1883	,	,	,	,	,	,	,	,	,	,	,	,
1884	,	,	,	,	,	,	,	,	,	,	,	,
1885	,	,	,	,	,	,	,	,	,	,	,	,
1886	,	,	,	,	,	,	,	,	,	,	,	,
1887	,	,	,	,	,	,	,	,	,	,	,	,
1888	,	,	,	,	,	,	,	,	,	,	,	,
1889	,	,	,	,	,	,	,	,	,	,	,	,
1890	,	,	,	,	,	,	,	,	,	,	,	,
1891	,	,	,	,	,	,	,	,	,	,	,	,
1892	,	,	,	,	,	,	,	,	,	,	,	,
1893	,	,	,	,	,	,	,	,	,	,	,	,
1894	,	,	,	,	,	,	,	,	,	,	,	,
1895	,	,	,	,	,	,	,	,	,	,	,	,
1896	,	,	,	,	,	,	,	,	,	,	,	,
1897	,	,	,	,	,	,	,	,	,	,	,	,
1898	,	,	,	,	,	,	,	,	,	,	,	,
1899	,	,	,	,	,	,	,	,	,	,	,	,
1900	,	,	,	,	,	,	,	,	,	,	,	,
1901	,	,	,	,	,	,	,	,	,	,	,	,
1902	,	,	,	,	,	,	,	,	,	,	,	,
1903	,	,	,	,	,	,	,	,	,	,	,	,
1904	,	,	,	,	,	,	,	,	,	,	,	,
1905	,	,	,	,	,	,	,	,	,	,	,	,
1906	,	,	,	,	,	,	,	,	,	,	,	,
1907	,	,	,	,	,	,	,	,	,	,	,	,
1908	,	,	,	,	,	,	,	,	,	,	,	,
1909	,	,	,	,	,	,	,	,	,	,	,	,
1910	,	,	,	,	,	,	,	,	,	,	,	,
1911	,	,	,	,	,	,	,	,	,	,	,	,
1912	,	,	,	,	,	,	,	,	,	,	,	,
1913	,	,	,	,	,	,	,	,	,	,	,	,
1914	,	,	,	,	,	,	,	,	,	,	,	,
1915	,	,	,	,	,	,	,	,	,	,	,	,
1916	,	,	,	,	,	,	,	,	,	,	,	,
1917	,	,	,	,	,	,	,	,	,	,	,	,
1918	,	,	,	,	,	,	,	,	,	,	,	,
1919	,	,	,	,	,	,	,	,	,	,	,	,
1920	,	,	,	,	,	,	,	,	,	,	,	,
1921	,	,	,	,	,	,	,	,	,	,	,	,
1922	,	,	,	,	,	,	,	,	,	,	,	,
1923	,	,	,	,	,	,	,	,	,	,	,	,
1924	,	,	,	,	,	,	,	,	,	,	,	,
1925	,	,	,	,	,	,	,	,	,	,	,	,
1926	,	,	,	,	,	,	,	,	,	,	,	,
1927	,	,	,	,	,	,	,	,	,	,	,	,
1928	,	,	,	,	,	,	,	,	,	,	,	,
1929	,	,	,	,	,	,	,	,	,	,	,	,
1930	,	,	,	,	,	,	,	,	,	,	,	,
1931	,	,	,	,	,	,	,	,	,	,	,	,
1932	,	,	,	,	,	,	,	,	,	,	,	,
1933	,	,	,	,	,	,	,	,	,	,	,	,
1934	,	,	,	,	,	,	,	,	,	,	,	,
1935	,	,	,	,	,	,	,	,	,	,	,	,
1936	,	,	,	,	,	,	,	,	,	,	,	,
1937	,	,	,	,	,	,	,	,	,	,	,	,
1938	,	,	,	,	,	,	,	,	,	,	,	,
1939	,	,	,	,	,	,	,	,	,	,	,	,
1940	,	,	,	,	,	,	,	,	,	,	,	,
1941	,	,	,	,	,	,	,	,	,	,	,	,
1942	,	,	,	,	,	,	,	,	,	,	,	,
1943	,	,	,	,	,	,	,	,	,	,	,	,
1944	,	,	,	,	,	,	,	,	,	,	,	,
1945	,	,	,	,	,	,	,	,	,	,	,	,
1946	,	,	,	,	,	,	,	,	,	,	,	,
1947	,	,	,	,	,	,	,	,	,	,	,	,
1948	,	,	,	,	,	,	,	,	,	,	,	,
1949	,	,	,	,	,	,	,	,	,	,	,	,
1950	,	,	,	,	,	,	,	,	,	,	,	,
1951	,	,	,	,	,	,	,	,	,	,	,	,
1952	,	,	,	,	,	,	,	,	,	,	,	,
1953	,	,	,	,	,	,	,	,	,	,	,	,
1954	,	,	,	,	,	,	,	,	,	,	,	,
1955	,	,	,	,	,	,	,	,	,	,	,	,
1956	,	,	,	,	,	,	,	,	,	,	,	,
1957	,	,	,	,	,	,	,	,	,	,	,	,
1958	,	,	,	,	,	,	,	,	,	,	,	,
1959	,	,	,	,	,	,	,	,	,	,	,	,
1960	,	,	,	,	,	,	,	,	,	,	,	,
1961	,	,	,	,	,	,	,	,	,	,	,	,
1962	,	,	,	,	,	,	,	,	,	,	,	,
1963	,	,	,	,	,	,	,	,	,	,	,	,
1964	,	,	,	,	,	,	,	,	,	,	,	,
1965	,	,	,	,	,	,	,	,	,	,	,	,
1966	,	,	,	,	,	,	,	,	,	,	,	,
1967	,	,	,	,	,	,	,	,	,	,	,	,
1968	,	,	,	,	,	,	,	,	,	,	,	,
1969	,	,	,	,	,	,	,	,	,	,	,	,
1970	,	,	,	,	,	,	,	,	,	,	,	,
1971	,	,	,	,	,	,	,	,	,	,	,	,
1972	,	,	,	,	,	,	,	,	,	,	,	,
1973	,	,	,	,	,	,	,	,	,	,	,	,
1974	,	,	,	,	,	,	,	,	,	,	,	,
1975	,	,	,	,	,	,	,	,	,	,	,	,
1976	,	,	,	,	,	,	,	,	,	,	,	,
1977	,	,	,	,	,	,	,	,	,	,	,	,
1978	,	,	,	,	,	,	,	,	,	,	,	,
1979	,	,	,	,	,	,	,	,	,	,	,	,
1980	,	,	,	,	,	,	,	,	,	,	,	,
1981	,	,	,	,	,	,	,	,	,	,	,	,
1982	,	,	,	,	,	,	,	,	,	,	,	,
1983	,	,	,	,	,	,	,	,	,	,	,	,
1984	,	,	,	,	,	,	,	,	,	,	,	,
1985	,	,	,	,	,	,	,	,	,	,	,	,
1986	,	,	,	,	,	,	,	,	,	,	,	,
1987	,	,	,	,	,	,	,	,	,	,	,	,
1988	,	,	,	,	,	,	,	,	,	,	,	,
1989	,	,	,	,	,	,	,	,	,	,	,	,
1990	,	,	,	,	,	,	,	,	,	,	,	,
1991	,	,	,	,	,	,	,	,	,	,	,	,
1992	,	,	,	,	,	,	,	,	,	,	,	,
1993	,	,	,	,	,	,	,	,	,	,	,	,
1994	,	,	,	,	,	,	,	,	,	,	,	,
1995	,	,	,	,	,	,	,	,	,	,	,	,
1996	,	,	,	,	,	,	,	,	,	,	,	,
1997	,	,	,	,	,	,	,	,	,	,	,	,
1998	,	,	,	,	,	,	,	,	,	,	,	,
1999	,	,	,	,	,	,	,	,	,	,	,	,
[truncated: 13,001 more rows]

## Sheet: Fig1_supp1_panelA_rep2
	parS20 B 0.125uM	parS20 B 0.25uM	parS20 B 0.5uM	parS20 B 1.0uM	parS20 B 2.0uM	parS20 B 0uM	tetO28 B 0 uM	tetO28 B 0.125 uM	tetO28 B 0.25 uM	tetO28 B 0.5 uM	tetO28 B 1.0 uM	tetO28 B 2.0 uM
1	0.000, 0.013	0.000, 0.010	0.000, -0.005	0.000, 0.007	0.000, 0.000	0.000, 0.009	0.000, 0.070	0.000, 0.044	0.000, 0.056	0.000, 0.047	0.000, 0.036	0.000, 0.044
2	0.200, 0.013	0.200, 0.009	0.200, -0.005	0.200, 0.007	0.200, -0.000	0.200, 0.008	0.200, 0.069	0.200, 0.043	0.200, 0.054	0.200, 0.047	0.200, 0.036	0.200, 0.043
3	0.400, 0.012	0.400, 0.009	0.400, -0.005	0.400, 0.007	0.400, -0.001	0.400, 0.008	0.400, 0.068	0.400, 0.042	0.400, 0.052	0.400, 0.046	0.400, 0.035	0.400, 0.042
4	0.600, 0.011	0.600, 0.008	0.600, -0.004	0.600, 0.007	0.600, -0.002	0.600, 0.008	0.600, 0.067	0.600, 0.041	0.600, 0.049	0.600, 0.045	0.600, 0.035	0.600, 0.040
5	0.800, 0.010	0.800, 0.007	0.800, -0.004	0.800, 0.006	0.800, -0.002	0.800, 0.008	0.800, 0.065	0.800, 0.041	0.800, 0.047	0.800, 0.044	0.800, 0.035	0.800, 0.039
6	1.000, 0.009	1.000, 0.006	1.000, -0.004	1.000, 0.006	1.000, -0.003	1.000, 0.007	1.000, 0.063	1.000, 0.040	1.000, 0.045	1.000, 0.043	1.000, 0.034	1.000, 0.038
7	1.200, 0.008	1.200, 0.005	1.200, -0.003	1.200, 0.006	1.200, -0.003	1.200, 0.007	1.200, 0.062	1.200, 0.039	1.200, 0.042	1.200, 0.041	1.200, 0.033	1.200, 0.036
8	1.400, 0.007	1.400, 0.004	1.400, -0.003	1.400, 0.006	1.400, -0.004	1.400, 0.007	1.400, 0.060	1.400, 0.037	1.400, 0.040	1.400, 0.040	1.400, 0.032	1.400, 0.034
9	1.600, 0.006	1.600, 0.002	1.600, -0.002	1.600, 0.006	1.600, -0.004	1.600, 0.008	1.600, 0.058	1.600, 0.036	1.600, 0.038	1.600, 0.039	1.600, 0.031	1.600, 0.033
10	1.800, 0.006	1.800, 0.001	1.800, -0.002	1.800, 0.005	1.800, -0.005	1.800, 0.008	1.800, 0.056	1.800, 0.035	1.800, 0.036	1.800, 0.037	1.800, 0.030	1.800, 0.032
11	2.000, 0.005	2.000, 0.001	2.000, -0.002	2.000, 0.005	2.000, -0.005	2.000, 0.008	2.000, 0.054	2.000, 0.034	2.000, 0.035	2.000, 0.036	2.000, 0.029	2.000, 0.030
12	2.200, 0.005	2.200, -0.000	2.200, -0.001	2.200, 0.005	2.200, -0.005	2.200, 0.008	2.200, 0.052	2.200, 0.033	2.200, 0.034	2.200, 0.034	2.200, 0.027	2.200, 0.030
13	2.400, 0.004	2.400, -0.001	2.400, -0.001	2.400, 0.005	2.400, -0.005	2.400, 0.008	2.400, 0.050	2.400, 0.031	2.400, 0.033	2.400, 0.033	2.400, 0.026	2.400, 0.029
14	2.600, 0.004	2.600, -0.002	2.600, -0.001	2.600, 0.004	2.600, -0.004	2.600, 0.008	2.600, 0.049	2.600, 0.030	2.600, 0.032	2.600, 0.032	2.600, 0.026	2.600, 0.028
15	2.800, 0.003	2.800, -0.002	2.800, -0.001	2.800, 0.004	2.800, -0.004	2.800, 0.008	2.800, 0.047	2.800, 0.029	2.800, 0.031	2.800, 0.031	2.800, 0.025	2.800, 0.027
16	3.000, 0.003	3.000, -0.003	3.000, -0.001	3.000, 0.004	3.000, -0.004	3.000, 0.008	3.000, 0.046	3.000, 0.028	3.000, 0.030	3.000, 0.030	3.000, 0.024	3.000, 0.026
17	3.200, 0.003	3.200, -0.003	3.200, -0.001	3.200, 0.004	3.200, -0.003	3.200, 0.007	3.200, 0.044	3.200, 0.027	3.200, 0.029	3.200, 0.029	3.200, 0.023	3.200, 0.025
18	3.400, 0.002	3.400, -0.003	3.400, -0.001	3.400, 0.004	3.400, -0.003	3.400, 0.007	3.400, 0.043	3.400, 0.025	3.400, 0.028	3.400, 0.028	3.400, 0.022	3.400, 0.024
19	3.600, 0.002	3.600, -0.003	3.600, -0.001	3.600, 0.003	3.600, -0.003	3.600, 0.007	3.600, 0.042	3.600, 0.024	3.600, 0.027	3.600, 0.027	3.600, 0.022	3.600, 0.023
20	3.800, 0.002	3.800, -0.003	3.800, -0.001	3.800, 0.003	3.800, -0.003	3.800, 0.006	3.800, 0.041	3.800, 0.023	3.800, 0.026	3.800, 0.027	3.800, 0.021	3.800, 0.022
21	4.000, 0.001	4.000, -0.003	4.000, -0.001	4.000, 0.002	4.000, -0.003	4.000, 0.006	4.000, 0.040	4.000, 0.022	4.000, 0.026	4.000, 0.026	4.000, 0.021	4.000, 0.021
22	4.200, 0.001	4.200, -0.003	4.200, -0.001	4.200, 0.002	4.200, -0.003	4.200, 0.006	4.200, 0.039	4.200, 0.022	4.200, 0.025	4.200, 0.025	4.200, 0.020	4.200, 0.020
23	4.400, 0.001	4.400, -0.003	4.400, -0.001	4.400, 0.002	4.400, -0.003	4.400, 0.005	4.400, 0.038	4.400, 0.021	4.400, 0.025	4.400, 0.024	4.400, 0.019	4.400, 0.019
24	4.600, 0.000	4.600, -0.003	4.600, -0.001	4.600, 0.001	4.600, -0.003	4.600, 0.005	4.600, 0.037	4.600, 0.021	4.600, 0.024	4.600, 0.023	4.600, 0.019	4.600, 0.018
25	4.800, -0.000	4.800, -0.003	4.800, -0.001	4.800, 0.001	4.800, -0.003	4.800, 0.005	4.800, 0.036	4.800, 0.021	4.800, 0.024	4.800, 0.023	4.800, 0.018	4.800, 0.018
26	5.000, -0.001	5.000, -0.003	5.000, -0.001	5.000, 0.001	5.000, -0.003	5.000, 0.005	5.000, 0.036	5.000, 0.020	5.000, 0.023	5.000, 0.022	5.000, 0.018	5.000, 0.017
27	5.200, -0.001	5.200, -0.004	5.200, -0.001	5.200, 0.000	5.200, -0.003	5.200, 0.005	5.200, 0.035	5.200, 0.020	5.200, 0.022	5.200, 0.022	5.200, 0.017	5.200, 0.016
28	5.400, -0.001	5.400, -0.004	5.400, -0.001	5.400, 0.000	5.400, -0.003	5.400, 0.005	5.400, 0.034	5.400, 0.020	5.400, 0.022	5.400, 0.021	5.400, 0.017	5.400, 0.015
29	5.600, -0.001	5.600, -0.004	5.600, -0.001	5.600, 0.000	5.600, -0.003	5.600, 0.005	5.600, 0.034	5.600, 0.019	5.600, 0.021	5.600, 0.020	5.600, 0.017	5.600, 0.015
30	5.800, -0.001	5.800, -0.004	5.800, -0.001	5.800, 0.000	5.800, -0.003	5.800, 0.005	5.800, 0.033	5.800, 0.019	5.800, 0.021	5.800, 0.019	5.800, 0.016	5.800, 0.014
31	6.000, -0.002	6.000, -0.004	6.000, -0.001	6.000, -0.000	6.000, -0.003	6.000, 0.006	6.000, 0.032	6.000, 0.019	6.000, 0.020	6.000, 0.019	6.000, 0.016	6.000, 0.014
32	6.200, -0.002	6.200, -0.004	6.200, -0.000	6.200, -0.000	6.200, -0.004	6.200, 0.006	6.200, 0.031	6.200, 0.018	6.200, 0.019	6.200, 0.018	6.200, 0.016	6.200, 0.014
33	6.400, -0.002	6.400, -0.005	6.400, -0.000	6.400, -0.000	6.400, -0.004	6.400, 0.006	6.400, 0.030	6.400, 0.018	6.400, 0.019	6.400, 0.017	6.400, 0.016	6.400, 0.014
34	6.600, -0.002	6.600, -0.005	6.600, -0.000	6.600, -0.000	6.600, -0.004	6.600, 0.006	6.600, 0.029	6.600, 0.018	6.600, 0.018	6.600, 0.017	6.600, 0.016	6.600, 0.013
35	6.800, -0.002	6.800, -0.004	6.800, -0.001	6.800, -0.000	6.800, -0.003	6.800, 0.006	6.800, 0.027	6.800, 0.018	6.800, 0.018	6.800, 0.016	6.800, 0.015	6.800, 0.013
36	7.000, -0.002	7.000, -0.004	7.000, -0.001	7.000, -0.001	7.000, -0.003	7.000, 0.006	7.000, 0.027	7.000, 0.017	7.000, 0.017	7.000, 0.016	7.000, 0.015	7.000, 0.013
37	7.200, -0.002	7.200, -0.004	7.200, -0.001	7.200, -0.001	7.200, -0.003	7.200, 0.006	7.200, 0.026	7.200, 0.016	7.200, 0.017	7.200, 0.015	7.200, 0.014	7.200, 0.012
38	7.400, -0.002	7.400, -0.004	7.400, -0.001	7.400, -0.001	7.400, -0.003	7.400, 0.006	7.400, 0.025	7.400, 0.016	7.400, 0.016	7.400, 0.015	7.400, 0.014	7.400, 0.012
39	7.600, -0.002	7.600, -0.004	7.600, -0.001	7.600, -0.001	7.600, -0.003	7.600, 0.006	7.600, 0.025	7.600, 0.015	7.600, 0.016	7.600, 0.015	7.600, 0.013	7.600, 0.012
40	7.800, -0.002	7.800, -0.004	7.800, -0.001	7.800, -0.001	7.800, -0.003	7.800, 0.006	7.800, 0.025	7.800, 0.014	7.800, 0.015	7.800, 0.014	7.800, 0.013	7.800, 0.011
41	8.000, -0.002	8.000, -0.004	8.000, -0.001	8.000, -0.002	8.000, -0.003	8.000, 0.006	8.000, 0.024	8.000, 0.014	8.000, 0.015	8.000, 0.014	8.000, 0.013	8.000, 0.011
42	8.200, -0.002	8.200, -0.004	8.200, -0.001	8.200, -0.002	8.200, -0.002	8.200, 0.006	8.200, 0.024	8.200, 0.013	8.200, 0.015	8.200, 0.014	8.200, 0.012	8.200, 0.010
43	8.400, -0.002	8.400, -0.003	8.400, -0.001	8.400, -0.002	8.400, -0.002	8.400, 0.006	8.400, 0.024	8.400, 0.013	8.400, 0.014	8.400, 0.013	8.400, 0.012	8.400, 0.010
44	8.600, -0.002	8.600, -0.003	8.600, -0.001	8.600, -0.002	8.600, -0.002	8.600, 0.005	8.600, 0.024	8.600, 0.012	8.600, 0.014	8.600, 0.013	8.600, 0.012	8.600, 0.010
45	8.800, -0.002	8.800, -0.003	8.800, -0.002	8.800, -0.002	8.800, -0.002	8.800, 0.005	8.800, 0.023	8.800, 0.012	8.800, 0.014	8.800, 0.013	8.800, 0.012	8.800, 0.009
46	9.000, -0.001	9.000, -0.004	9.000, -0.002	9.000, -0.002	9.000, -0.002	9.000, 0.005	9.000, 0.023	9.000, 0.012	9.000, 0.013	9.000, 0.012	9.000, 0.011	9.000, 0.009
47	9.200, -0.001	9.200, -0.004	9.200, -0.002	9.200, -0.002	9.200, -0.002	9.200, 0.005	9.200, 0.022	9.200, 0.011	9.200, 0.013	9.200, 0.012	9.200, 0.011	9.200, 0.009
48	9.400, -0.002	9.400, -0.004	9.400, -0.002	9.400, -0.002	9.400, -0.002	9.400, 0.005	9.400, 0.022	9.400, 0.011	9.400, 0.013	9.400, 0.011	9.400, 0.011	9.400, 0.008
49	9.600, -0.002	9.600, -0.004	9.600, -0.002	9.600, -0.002	9.600, -0.002	9.600, 0.005	9.600, 0.021	9.600, 0.011	9.600, 0.012	9.600, 0.010	9.600, 0.011	9.600, 0.008
50	9.800, -0.002	9.800, -0.004	9.800, -0.002	9.800, -0.002	9.800, -0.002	9.800, 0.005	9.800, 0.020	9.800, 0.011	9.800, 0.012	9.800, 0.010	9.800, 0.011	9.800, 0.008
51	10.000, -0.002	10.000, -0.004	10.000, -0.002	10.000, -0.002	10.000, -0.002	10.000, 0.005	10.000, 0.020	10.000, 0.011	10.000, 0.012	10.000, 0.010	10.000, 0.011	10.000, 0.008
52	10.200, -0.002	10.200, -0.004	10.200, -0.002	10.200, -0.002	10.200, -0.002	10.200, 0.005	10.200, 0.019	10.200, 0.011	10.200, 0.011	10.200, 0.009	10.200, 0.011	10.200, 0.008
53	10.400, -0.002	10.400, -0.004	10.400, -0.003	10.400, -0.002	10.400, -0.003	10.400, 0.005	10.400, 0.019	10.400, 0.011	10.400, 0.011	10.400, 0.009	10.400, 0.010	10.400, 0.008
54	10.600, -0.002	10.600, -0.004	10.600, -0.002	10.600, -0.002	10.600, -0.003	10.600, 0.005	10.600, 0.018	10.600, 0.011	10.600, 0.011	10.600, 0.009	10.600, 0.010	10.600, 0.008
55	10.800, -0.002	10.800, -0.004	10.800, -0.002	10.800, -0.002	10.800, -0.003	10.800, 0.005	10.800, 0.018	10.800, 0.011	10.800, 0.010	10.800, 0.009	10.800, 0.010	10.800, 0.008
56	11.000, -0.002	11.000, -0.004	11.000, -0.002	11.000, -0.002	11.000, -0.003	11.000, 0.005	11.000, 0.017	11.000, 0.011	11.000, 0.010	11.000, 0.010	11.000, 0.009	11.000, 0.007
57	11.200, -0.002	11.200, -0.004	11.200, -0.002	11.200, -0.003	11.200, -0.003	11.200, 0.005	11.200, 0.017	11.200, 0.011	11.200, 0.010	11.200, 0.010	11.200, 0.009	11.200, 0.007
58	11.400, -0.002	11.400, -0.004	11.400, -0.002	11.400, -0.003	11.400, -0.003	11.400, 0.005	11.400, 0.017	11.400, 0.011	11.400, 0.010	11.400, 0.010	11.400, 0.008	11.400, 0.007
59	11.600, -0.002	11.600, -0.004	11.600, -0.002	11.600, -0.003	11.600, -0.003	11.600, 0.005	11.600, 0.017	11.600, 0.010	11.600, 0.010	11.600, 0.010	11.600, 0.008	11.600, 0.006
60	11.800, -0.002	11.800, -0.004	11.800, -0.002	11.800, -0.003	11.800, -0.003	11.800, 0.005	11.800, 0.017	11.800, 0.010	11.800, 0.010	11.800, 0.010	11.800, 0.008	11.800, 0.006
61	12.000, -0.002	12.000, -0.004	12.000, -0.001	12.000, -0.003	12.000, -0.003	12.000, 0.005	12.000, 0.016	12.000, 0.010	12.000, 0.010	12.000, 0.010	12.000, 0.007	12.000, 0.006
62	12.200, -0.002	12.200, -0.004	12.200, -0.001	12.200, -0.003	12.200, -0.003	12.200, 0.005	12.200, 0.016	12.200, 0.009	12.200, 0.010	12.200, 0.010	12.200, 0.007	12.200, 0.006
63	12.400, -0.002	12.400, -0.004	12.400, -0.001	12.400, -0.002	12.400, -0.003	12.400, 0.005	12.400, 0.016	12.400, 0.009	12.400, 0.009	12.400, 0.010	12.400, 0.007	12.400, 0.005
64	12.600, -0.002	12.600, -0.004	12.600, -0.001	12.600, -0.002	12.600, -0.003	12.600, 0.004	12.600, 0.016	12.600, 0.009	12.600, 0.009	12.600, 0.009	12.600, 0.007	12.600, 0.005
65	12.800, -0.002	12.800, -0.003	12.800, -0.001	12.800, -0.002	12.800, -0.003	12.800, 0.004	12.800, 0.015	12.800, 0.009	12.800, 0.009	12.800, 0.009	12.800, 0.006	12.800, 0.004
66	13.000, -0.003	13.000, -0.003	13.000, -0.001	13.000, -0.002	13.000, -0.003	13.000, 0.004	13.000, 0.015	13.000, 0.008	13.000, 0.009	13.000, 0.008	13.000, 0.006	13.000, 0.004
67	13.200, -0.003	13.200, -0.003	13.200, -0.002	13.200, -0.002	13.200, -0.003	13.200, 0.004	13.200, 0.014	13.200, 0.008	13.200, 0.008	13.200, 0.008	13.200, 0.005	13.200, 0.004
68	13.400, -0.003	13.400, -0.003	13.400, -0.002	13.400, -0.002	13.400, -0.003	13.400, 0.004	13.400, 0.014	13.400, 0.008	13.400, 0.008	13.400, 0.007	13.400, 0.005	13.400, 0.004
69	13.600, -0.002	13.600, -0.003	13.600, -0.002	13.600, -0.002	13.600, -0.003	13.600, 0.004	13.600, 0.014	13.600, 0.008	13.600, 0.007	13.600, 0.007	13.600, 0.005	13.600, 0.004
70	13.800, -0.002	13.800, -0.003	13.800, -0.002	13.800, -0.002	13.800, -0.003	13.800, 0.004	13.800, 0.013	13.800, 0.007	13.800, 0.007	13.800, 0.006	13.800, 0.004	13.800, 0.004
71	14.000, -0.002	14.000, -0.003	14.000, -0.002	14.000, -0.002	14.000, -0.004	14.000, 0.004	14.000, 0.013	14.000, 0.007	14.000, 0.006	14.000, 0.006	14.000, 0.004	14.000, 0.004
72	14.200, -0.002	14.200, -0.003	14.200, -0.002	14.200, -0.002	14.200, -0.004	14.200, 0.004	14.200, 0.013	14.200, 0.007	14.200, 0.006	14.200, 0.006	14.200, 0.004	14.200, 0.004
73	14.400, -0.002	14.400, -0.003	14.400, -0.002	14.400, -0.002	14.400, -0.004	14.400, 0.003	14.400, 0.013	14.400, 0.007	14.400, 0.006	14.400, 0.005	14.400, 0.003	14.400, 0.004
74	14.600, -0.002	14.600, -0.003	14.600, -0.002	14.600, -0.003	14.600, -0.004	14.600, 0.003	14.600, 0.013	14.600, 0.007	14.600, 0.005	14.600, 0.005	14.600, 0.003	14.600, 0.004
75	14.800, -0.002	14.800, -0.003	14.800, -0.002	14.800, -0.003	14.800, -0.004	14.800, 0.003	14.800, 0.012	14.800, 0.006	14.800, 0.005	14.800, 0.005	14.800, 0.003	14.800, 0.003
76	15.000, -0.002	15.000, -0.003	15.000, -0.002	15.000, -0.003	15.000, -0.004	15.000, 0.003	15.000, 0.012	15.000, 0.006	15.000, 0.005	15.000, 0.005	15.000, 0.003	15.000, 0.003
77	15.200, -0.002	15.200, -0.003	15.200, -0.002	15.200, -0.003	15.200, -0.004	15.200, 0.003	15.200, 0.011	15.200, 0.006	15.200, 0.005	15.200, 0.005	15.200, 0.004	15.200, 0.003
78	15.400, -0.002	15.400, -0.003	15.400, -0.002	15.400, -0.003	15.400, -0.004	15.400, 0.003	15.400, 0.011	15.400, 0.006	15.400, 0.005	15.400, 0.005	15.400, 0.004	15.400, 0.002
79	15.600, -0.002	15.600, -0.003	15.600, -0.001	15.600, -0.003	15.600, -0.004	15.600, 0.003	15.600, 0.011	15.600, 0.006	15.600, 0.005	15.600, 0.005	15.600, 0.004	15.600, 0.002
80	15.800, -0.002	15.800, -0.003	15.800, -0.001	15.800, -0.003	15.800, -0.004	15.800, 0.003	15.800, 0.011	15.800, 0.005	15.800, 0.005	15.800, 0.005	15.800, 0.004	15.800, 0.002
81	16.000, -0.002	16.000, -0.003	16.000, -0.001	16.000, -0.003	16.000, -0.004	16.000, 0.003	16.000, 0.011	16.000, 0.005	16.000, 0.004	16.000, 0.005	16.000, 0.004	16.000, 0.001
82	16.200, -0.002	16.200, -0.003	16.200, -0.001	16.200, -0.003	16.200, -0.003	16.200, 0.003	16.200, 0.010	16.200, 0.005	16.200, 0.004	16.200, 0.005	16.200, 0.004	16.200, 0.001
83	16.400, -0.002	16.400, -0.003	16.400, -0.000	16.400, -0.003	16.400, -0.003	16.400, 0.003	16.400, 0.010	16.400, 0.005	16.400, 0.004	16.400, 0.005	16.400, 0.004	16.400, 0.001
84	16.600, -0.001	16.600, -0.003	16.600, -0.000	16.600, -0.003	16.600, -0.003	16.600, 0.003	16.600, 0.010	16.600, 0.005	16.600, 0.004	16.600, 0.005	16.600, 0.004	16.600, 0.001
85	16.800, -0.001	16.800, -0.002	16.800, -0.000	16.800, -0.003	16.800, -0.002	16.800, 0.003	16.800, 0.010	16.800, 0.005	16.800, 0.004	16.800, 0.005	16.800, 0.003	16.800, 0.001
86	17.000, -0.001	17.000, -0.002	17.000, -0.000	17.000, -0.003	17.000, -0.002	17.000, 0.003	17.000, 0.010	17.000, 0.005	17.000, 0.004	17.000, 0.005	17.000, 0.003	17.000, 0.001
87	17.200, -0.001	17.200, -0.002	17.200, -0.000	17.200, -0.003	17.200, -0.002	17.200, 0.003	17.200, 0.009	17.200, 0.006	17.200, 0.004	17.200, 0.005	17.200, 0.003	17.200, 0.001
88	17.400, -0.001	17.400, -0.002	17.400, -0.000	17.400, -0.003	17.400, -0.002	17.400, 0.003	17.400, 0.009	17.400, 0.006	17.400, 0.004	17.400, 0.005	17.400, 0.003	17.400, 0.002
89	17.600, -0.001	17.600, -0.002	17.600, -0.000	17.600, -0.003	17.600, -0.002	17.600, 0.003	17.600, 0.009	17.600, 0.006	17.600, 0.004	17.600, 0.005	17.600, 0.002	17.600, 0.002
90	17.800, -0.001	17.800, -0.002	17.800, -0.000	17.800, -0.003	17.800, -0.002	17.800, 0.003	17.800, 0.009	17.800, 0.006	17.800, 0.004	17.800, 0.005	17.800, 0.002	17.800, 0.002
91	18.000, -0.001	18.000, -0.002	18.000, -0.000	18.000, -0.003	18.000, -0.003	18.000, 0.003	18.000, 0.009	18.000, 0.005	18.000, 0.004	18.000, 0.004	18.000, 0.002	18.000, 0.002
92	18.200, -0.001	18.200, -0.002	18.200, -0.000	18.200, -0.003	18.200, -0.003	18.200, 0.003	18.200, 0.008	18.200, 0.005	18.200, 0.004	18.200, 0.004	18.200, 0.002	18.200, 0.002
93	18.400, -0.001	18.400, -0.002	18.400, -0.000	18.400, -0.003	18.400, -0.003	18.400, 0.003	18.400, 0.008	18.400, 0.005	18.400, 0.004	18.400, 0.004	18.400, 0.002	18.400, 0.002
94	18.600, -0.001	18.600, -0.002	18.600, -0.000	18.600, -0.003	18.600, -0.003	18.600, 0.002	18.600, 0.007	18.600, 0.005	18.600, 0.004	18.600, 0.003	18.600, 0.001	18.600, 0.002
95	18.800, -0.001	18.800, -0.002	18.800, -0.000	18.800, -0.003	18.800, -0.003	18.800, 0.002	18.800, 0.007	18.800, 0.004	18.800, 0.004	18.800, 0.003	18.800, 0.001	18.800, 0.002
96	19.000, -0.001	19.000, -0.002	19.000, -0.000	19.000, -0.003	19.000, -0.003	19.000, 0.002	19.000, 0.007	19.000, 0.004	19.000, 0.003	19.000, 0.003	19.000, 0.001	19.000, 0.002
97	19.200, -0.001	19.200, -0.002	19.200, -0.000	19.200, -0.003	19.200, -0.003	19.200, 0.002	19.200, 0.007	19.200, 0.004	19.200, 0.003	19.200, 0.003	19.200, 0.001	19.200, 0.002
98	19.400, -0.001	19.400, -0.002	19.400, -0.000	19.400, -0.003	19.400, -0.003	19.400, 0.002	19.400, 0.006	19.400, 0.004	19.400, 0.003	19.400, 0.003	19.400, 0.001	19.400, 0.001
99	19.600, -0.001	19.600, -0.002	19.600, -0.000	19.600, -0.003	19.600, -0.003	19.600, 0.002	19.600, 0.006	19.600, 0.003	19.600, 0.003	19.600, 0.003	19.600, 0.001	19.600, 0.001
100	19.800, -0.000	19.800, -0.002	19.800, -0.001	19.800, -0.003	19.800, -0.003	19.800, 0.002	19.800, 0.006	19.800, 0.003	19.800, 0.003	19.800, 0.003	19.800, 0.001	19.800, 0.001
101	20.000, -0.000	20.000, -0.002	20.000, -0.001	20.000, -0.003	20.000, -0.003	20.000, 0.001	20.000, 0.005	20.000, 0.003	20.000, 0.003	20.000, 0.003	20.000, 0.000	20.000, 0.001
102	20.200, 0.000	20.200, -0.002	20.200, -0.000	20.200, -0.003	20.200, -0.003	20.200, 0.001	20.200, 0.005	20.200, 0.003	20.200, 0.003	20.200, 0.003	20.200, 0.000	20.200, 0.001
103	20.400, 0.000	20.400, -0.002	20.400, -0.000	20.400, -0.002	20.400, -0.003	20.400, 0.001	20.400, 0.005	20.400, 0.004	20.400, 0.003	20.400, 0.003	20.400, 0.000	20.400, 0.001
104	20.600, 0.000	20.600, -0.002	20.600, -0.000	20.600, -0.002	20.600, -0.003	20.600, 0.001	20.600, 0.005	20.600, 0.004	20.600, 0.003	20.600, 0.003	20.600, 0.000	20.600, 0.001
105	20.800, 0.000	20.800, -0.002	20.800, -0.000	20.800, -0.002	20.800, -0.002	20.800, 0.001	20.800, 0.004	20.800, 0.004	20.800, 0.003	20.800, 0.003	20.800, 0.000	20.800, 0.001
106	21.000, -0.000	21.000, -0.002	21.000, -0.001	21.000, -0.002	21.000, -0.002	21.000, 0.001	21.000, 0.004	21.000, 0.005	21.000, 0.004	21.000, 0.003	21.000, 0.000	21.000, 0.001
107	21.200, -0.000	21.200, -0.001	21.200, -0.001	21.200, -0.002	21.200, -0.002	21.200, 0.001	21.200, 0.004	21.200, 0.005	21.200, 0.004	21.200, 0.003	21.200, 0.001	21.200, 0.001
108	21.400, -0.000	21.400, -0.001	21.400, -0.001	21.400, -0.002	21.400, -0.002	21.400, 0.001	21.400, 0.004	21.400, 0.005	21.400, 0.004	21.400, 0.003	21.400, 0.001	21.400, 0.001
109	21.600, -0.001	21.600, -0.001	21.600, -0.001	21.600, -0.001	21.600, -0.002	21.600, 0.001	21.600, 0.004	21.600, 0.005	21.600, 0.004	21.600, 0.003	21.600, 0.001	21.600, 0.001
110	21.800, -0.001	21.800, -0.001	21.800, -0.001	21.800, -0.001	21.800, -0.002	21.800, 0.001	21.800, 0.004	21.800, 0.004	21.800, 0.004	21.800, 0.003	21.800, 0.001	21.800, 0.001
111	22.000, -0.001	22.000, -0.001	22.000, -0.001	22.000, -0.001	22.000, -0.002	22.000, 0.001	22.000, 0.004	22.000, 0.004	22.000, 0.003	22.000, 0.003	22.000, 0.002	22.000, 0.000
112	22.200, -0.001	22.200, -0.001	22.200, -0.001	22.200, -0.001	22.200, -0.002	22.200, 0.001	22.200, 0.004	22.200, 0.004	22.200, 0.003	22.200, 0.003	22.200, 0.002	22.200, -0.000
113	22.400, -0.001	22.400, -0.001	22.400, -0.002	22.400, -0.001	22.400, -0.001	22.400, 0.001	22.400, 0.004	22.400, 0.003	22.400, 0.002	22.400, 0.003	22.400, 0.002	22.400, -0.001
114	22.600, -0.001	22.600, -0.001	22.600, -0.002	22.600, -0.001	22.600, -0.001	22.600, 0.002	22.600, 0.004	22.600, 0.003	22.600, 0.002	22.600, 0.003	22.600, 0.002	22.600, -0.001
115	22.800, -0.001	22.800, -0.001	22.800, -0.002	22.800, -0.002	22.800, -0.001	22.800, 0.002	22.800, 0.004	22.800, 0.002	22.800, 0.001	22.800, 0.003	22.800, 0.002	22.800, -0.001
116	23.000, -0.001	23.000, -0.001	23.000, -0.002	23.000, -0.002	23.000, -0.001	23.000, 0.002	23.000, 0.004	23.000, 0.002	23.000, 0.001	23.000, 0.003	23.000, 0.002	23.000, -0.002
117	23.200, -0.001	23.200, -0.001	23.200, -0.002	23.200, -0.002	23.200, -0.001	23.200, 0.002	23.200, 0.004	23.200, 0.001	23.200, 0.001	23.200, 0.003	23.200, 0.002	23.200, -0.002
118	23.400, -0.001	23.400, -0.001	23.400, -0.002	23.400, -0.002	23.400, -0.001	23.400, 0.001	23.400, 0.003	23.400, 0.001	23.400, 0.000	23.400, 0.004	23.400, 0.002	23.400, -0.002
119	23.600, -0.001	23.600, -0.001	23.600, -0.002	23.600, -0.002	23.600, -0.001	23.600, 0.001	23.600, 0.003	23.600, 0.000	23.600, 0.000	23.600, 0.004	23.600, 0.002	23.600, -0.002
120	23.800, -0.001	23.800, -0.002	23.800, -0.002	23.800, -0.002	23.800, -0.000	23.800, 0.001	23.800, 0.003	23.800, -0.000	23.800, 0.000	23.800, 0.004	23.800, 0.002	23.800, -0.002
121	24.000, -0.001	24.000, -0.002	24.000, -0.001	24.000, -0.001	24.000, -0.000	24.000, 0.001	24.000, 0.003	24.000, -0.000	24.000, -0.000	24.000, 0.004	24.000, 0.002	24.000, -0.001
122	24.200, -0.001	24.200, -0.002	24.200, -0.001	24.200, -0.001	24.200, -0.000	24.200, 0.001	24.200, 0.003	24.200, -0.000	24.200, 0.000	24.200, 0.004	24.200, 0.002	24.200, -0.001
123	24.400, -0.001	24.400, -0.002	24.400, -0.001	24.400, -0.001	24.400, -0.000	24.400, 0.001	24.400, 0.003	24.400, -0.000	24.400, 0.000	24.400, 0.004	24.400, 0.002	24.400, -0.001
124	24.600, -0.002	24.600, -0.002	24.600, -0.000	24.600, -0.001	24.600, -0.000	24.600, 0.001	24.600, 0.003	24.600, -0.000	24.600, 0.000	24.600, 0.003	24.600, 0.002	24.600, -0.001
125	24.800, -0.002	24.800, -0.001	24.800, -0.000	24.800, -0.001	24.800, -0.001	24.800, 0.001	24.800, 0.003	24.800, -0.000	24.800, 0.001	24.800, 0.003	24.800, 0.002	24.800, -0.001
126	25.000, -0.002	25.000, -0.001	25.000, -0.000	25.000, -0.001	25.000, -0.001	25.000, 0.001	25.000, 0.003	25.000, -0.000	25.000, 0.001	25.000, 0.002	25.000, 0.002	25.000, -0.001
127	25.200, -0.002	25.200, -0.001	25.200, -0.000	25.200, -0.001	25.200, -0.001	25.200, 0.000	25.200, 0.003	25.200, -0.000	25.200, 0.001	25.200, 0.002	25.200, 0.002	25.200, -0.001
128	25.400, -0.002	25.400, -0.000	25.400, -0.000	25.400, -0.001	25.400, -0.001	25.400, 0.000	25.400, 0.003	25.400, -0.000	25.400, 0.001	25.400, 0.002	25.400, 0.002	25.400, -0.001
129	25.600, -0.002	25.600, -0.000	25.600, -0.001	25.600, -0.001	25.600, -0.001	25.600, 0.000	25.600, 0.002	25.600, -0.000	25.600, 0.001	25.600, 0.001	25.600, 0.001	25.600, -0.001
130	25.800, -0.002	25.800, 0.000	25.800, -0.001	25.800, -0.001	25.800, -0.001	25.800, 0.000	25.800, 0.002	25.800, -0.000	25.800, 0.001	25.800, 0.000	25.800, 0.001	25.800, -0.001
131	26.000, -0.003	26.000, 0.000	26.000, -0.001	26.000, -0.001	26.000, -0.001	26.000, 0.000	26.000, 0.002	26.000, 0.000	26.000, 0.000	26.000, -0.000	26.000, 0.001	26.000, -0.001
132	26.200, -0.003	26.200, 0.000	26.200, -0.001	26.200, -0.001	26.200, -0.001	26.200, 0.000	26.200, 0.002	26.200, 0.000	26.200, 0.000	26.200, -0.001	26.200, 0.000	26.200, -0.001
133	26.400, -0.002	26.400, 0.000	26.400, -0.001	26.400, -0.001	26.400, -0.001	26.400, 0.000	26.400, 0.002	26.400, 0.000	26.400, 0.000	26.400, -0.001	26.400, 0.000	26.400, -0.001
134	26.600, -0.002	26.600, 0.000	26.600, -0.001	26.600, -0.000	26.600, -0.001	26.600, -0.000	26.600, 0.001	26.600, 0.000	26.600, -0.000	26.600, -0.001	26.600, -0.000	26.600, -0.001
135	26.800, -0.002	26.800, 0.000	26.800, -0.001	26.800, -0.000	26.800, -0.001	26.800, -0.000	26.800, 0.001	26.800, 0.000	26.800, -0.000	26.800, -0.001	26.800, -0.000	26.800, -0.000
136	27.000, -0.002	27.000, 0.000	27.000, -0.001	27.000, 0.000	27.000, -0.001	27.000, -0.000	27.000, 0.001	27.000, 0.000	27.000, -0.000	27.000, -0.001	27.000, -0.001	27.000, -0.000
137	27.200, -0.001	27.200, 0.000	27.200, -0.000	27.200, 0.000	27.200, -0.001	27.200, -0.000	27.200, 0.000	27.200, 0.000	27.200, -0.000	27.200, -0.001	27.200, -0.001	27.200, -0.000
138	27.400, -0.001	27.400, 0.000	27.400, -0.000	27.400, 0.000	27.400, -0.001	27.400, 0.000	27.400, 0.000	27.400, -0.000	27.400, -0.000	27.400, -0.001	27.400, -0.000	27.400, -0.000
139	27.600, -0.001	27.600, 0.000	27.600, -0.000	27.600, 0.000	27.600, -0.000	27.600, 0.000	27.600, -0.000	27.600, -0.000	27.600, -0.000	27.600, -0.001	27.600, -0.000	27.600, 0.000
140	27.800, -0.001	27.800, 0.000	27.800, -0.000	27.800, 0.000	27.800, -0.000	27.800, 0.000	27.800, -0.000	27.800, -0.000	27.800, -0.000	27.800, -0.000	27.800, -0.000	27.800, 0.000
141	28.000, -0.001	28.000, 0.000	28.000, 0.000	28.000, 0.000	28.000, 0.000	28.000, 0.000	28.000, -0.001	28.000, -0.000	28.000, -0.000	28.000, -0.000	28.000, -0.000	28.000, 0.000
142	28.200, -0.000	28.200, -0.000	28.200, 0.000	28.200, 0.000	28.200, 0.000	28.200, 0.000	28.200, -0.001	28.200, -0.000	28.200, -0.000	28.200, 0.000	28.200, 0.000	28.200, 0.000
143	28.400, -0.000	28.400, -0.000	28.400, 0.000	28.400, 0.000	28.400, 0.000	28.400, 0.000	28.400, -0.001	28.400, -0.000	28.400, 0.000	28.400, 0.000	28.400, 0.000	28.400, 0.000
144	28.600, 0.000	28.600, -0.000	28.600, 0.000	28.600, -0.000	28.600, 0.000	28.600, 0.000	28.600, -0.000	28.600, -0.000	28.600, 0.000	28.600, 0.000	28.600, 0.000	28.600, 0.000
145	28.800, 0.001	28.800, -0.000	28.800, 0.000	28.800, -0.000	28.800, 0.000	28.800, -0.000	28.800, -0.000	28.800, -0.000	28.800, 0.000	28.800, 0.001	28.800, 0.000	28.800, 0.000
146	29.000, 0.001	29.000, -0.000	29.000, 0.000	29.000, -0.000	29.000, 0.000	29.000, -0.000	29.000, -0.000	29.000, -0.000	29.000, 0.000	29.000, 0.001	29.000, 0.000	29.000, -0.000
147	29.200, 0.001	29.200, -0.000	29.200, 0.000	29.200, -0.000	29.200, 0.000	29.200, -0.000	29.200, 0.000	29.200, -0.000	29.200, 0.000	29.200, 0.001	29.200, 0.000	29.200, -0.000
148	29.400, 0.001	29.400, -0.000	29.400, 0.000	29.400, -0.000	29.400, 0.000	29.400, -0.000	29.400, 0.000	29.400, 0.000	29.400, 0.000	29.400, 0.001	29.400, 0.000	29.400, -0.000
149	29.600, 0.001	29.600, -0.000	29.600, -0.000	29.600, -0.000	29.600, 0.000	29.600, -0.000	29.600, 0.001	29.600, 0.000	29.600, 0.000	29.600, 0.001	29.600, 0.000	29.600, -0.000
150	29.800, 0.002	29.800, -0.000	29.800, -0.000	29.800, -0.000	29.800, 0.000	29.800, -0.000	29.800, 0.001	29.800, 0.001	29.800, -0.000	29.800, 0.001	29.800, 0.001	29.800, -0.000
151	30.000, 0.000	30.000, 0.000	30.000, 0.000	30.000, 0.000	30.000, 0.000	30.000, 0.000	30.000, 0.000	30.000, 0.000	30.000, 0.000	30.000, 0.000	30.000, 0.000	30.000, 0.000
152	30.200, 0.001	30.200, 0.004	30.200, 0.009	30.200, 0.024	30.200, 0.037	30.200, -0.002	30.200, -0.006	30.200, -0.000	30.200, -0.001	30.200, -0.001	30.200, 0.001	30.200, -0.000
153	30.400, 0.003	30.400, 0.008	30.400, 0.020	30.400, 0.051	30.400, 0.080	30.400, -0.003	30.400, -0.013	30.400, -0.001	30.400, -0.002	30.400, -0.003	30.400, 0.001	30.400, -0.001
154	30.600, 0.005	30.600, 0.013	30.600, 0.033	30.600, 0.083	30.600, 0.131	30.600, -0.005	30.600, -0.020	30.600, -0.001	30.600, -0.003	30.600, -0.004	30.600, 0.001	30.600, -0.001
155	30.800, 0.007	30.800, 0.020	30.800, 0.047	30.800, 0.118	30.800, 0.186	30.800, -0.007	30.800, -0.027	30.800, -0.002	30.800, -0.004	30.800, -0.005	30.800, 0.002	30.800, -0.002
156	31.000, 0.009	31.000, 0.027	31.000, 0.063	31.000, 0.155	31.000, 0.246	31.000, -0.008	31.000, -0.034	31.000, -0.003	31.000, -0.005	31.000, -0.007	31.000, 0.002	31.000, -0.003
157	31.200, 0.012	31.200, 0.034	31.200, 0.080	31.200, 0.195	31.200, 0.308	31.200, -0.010	31.200, -0.041	31.200, -0.004	31.200, -0.006	31.200, -0.009	31.200, 0.002	31.200, -0.003
158	31.400, 0.015	31.400, 0.042	31.400, 0.098	31.400, 0.235	31.400, 0.371	31.400, -0.012	31.400, -0.047	31.400, -0.004	31.400, -0.007	31.400, -0.010	31.400, 0.002	31.400, -0.004
159	31.600, 0.019	31.600, 0.051	31.600, 0.116	31.600, 0.274	31.600, 0.432	31.600, -0.013	31.600, -0.052	31.600, -0.005	31.600, -0.008	31.600, -0.012	31.600, 0.002	31.600, -0.005
160	31.800, 0.022	31.800, 0.060	31.800, 0.134	31.800, 0.312	31.800, 0.490	31.800, -0.014	31.800, -0.057	31.800, -0.006	31.800, -0.008	31.800, -0.014	31.800, 0.002	31.800, -0.005
161	32.000, 0.026	32.000, 0.069	32.000, 0.152	32.000, 0.347	32.000, 0.542	32.000, -0.016	32.000, -0.060	32.000, -0.007	32.000, -0.009	32.000, -0.016	32.000, 0.002	32.000, -0.005
162	32.200, 0.030	32.200, 0.077	32.200, 0.169	32.200, 0.378	32.200, 0.586	32.200, -0.016	32.200, -0.062	32.200, -0.008	32.200, -0.010	32.200, -0.017	32.200, 0.001	32.200, -0.006
163	32.400, 0.034	32.400, 0.086	32.400, 0.185	32.400, 0.407	32.400, 0.623	32.400, -0.017	32.400, -0.064	32.400, -0.009	32.400, -0.011	32.400, -0.018	32.400, 0.000	32.400, -0.006
164	32.600, 0.037	32.600, 0.095	32.600, 0.202	32.600, 0.436	32.600, 0.655	32.600, -0.017	32.600, -0.066	32.600, -0.010	32.600, -0.012	32.600, -0.018	32.600, -0.001	32.600, -0.006
165	32.800, 0.041	32.800, 0.103	32.800, 0.218	32.800, 0.462	32.800, 0.683	32.800, -0.017	32.800, -0.067	32.800, -0.011	32.800, -0.013	32.800, -0.018	32.800, -0.001	32.800, -0.006
166	33.000, 0.045	33.000, 0.111	33.000, 0.233	33.000, 0.485	33.000, 0.706	33.000, -0.018	33.000, -0.069	33.000, -0.012	33.000, -0.013	33.000, -0.019	33.000, -0.002	33.000, -0.006
167	33.200, 0.048	33.200, 0.119	33.200, 0.248	33.200, 0.506	33.200, 0.724	33.200, -0.018	33.200, -0.070	33.200, -0.013	33.200, -0.014	33.200, -0.020	33.200, -0.003	33.200, -0.006
168	33.400, 0.052	33.400, 0.126	33.400, 0.263	33.400, 0.525	33.400, 0.739	33.400, -0.018	33.400, -0.071	33.400, -0.013	33.400, -0.015	33.400, -0.020	33.400, -0.003	33.400, -0.006
169	33.600, 0.056	33.600, 0.134	33.600, 0.278	33.600, 0.542	33.600, 0.751	33.600, -0.019	33.600, -0.072	33.600, -0.014	33.600, -0.016	33.600, -0.021	33.600, -0.004	33.600, -0.006
170	33.800, 0.060	33.800, 0.141	33.800, 0.291	33.800, 0.557	33.800, 0.760	33.800, -0.019	33.800, -0.073	33.800, -0.014	33.800, -0.017	33.800, -0.022	33.800, -0.004	33.800, -0.006
171	34.000, 0.063	34.000, 0.148	34.000, 0.305	34.000, 0.570	34.000, 0.767	34.000, -0.020	34.000, -0.074	34.000, -0.015	34.000, -0.018	34.000, -0.022	34.000, -0.005	34.000, -0.006
172	34.200, 0.067	34.200, 0.155	34.200, 0.318	34.200, 0.582	34.200, 0.772	34.200, -0.020	34.200, -0.075	34.200, -0.015	34.200, -0.019	34.200, -0.022	34.200, -0.005	34.200, -0.006
173	34.400, 0.070	34.400, 0.162	34.400, 0.330	34.400, 0.592	34.400, 0.777	34.400, -0.020	34.400, -0.077	34.400, -0.015	34.400, -0.020	34.400, -0.022	34.400, -0.005	34.400, -0.006
174	34.600, 0.074	34.600, 0.169	34.600, 0.341	34.600, 0.602	34.600, 0.780	34.600, -0.020	34.600, -0.078	34.600, -0.016	34.600, -0.020	34.600, -0.023	34.600, -0.005	34.600, -0.006
175	34.800, 0.077	34.800, 0.176	34.800, 0.353	34.800, 0.610	34.800, 0.783	34.800, -0.020	34.800, -0.079	34.800, -0.016	34.800, -0.021	34.800, -0.023	34.800, -0.006	34.800, -0.007
176	35.000, 0.080	35.000, 0.183	35.000, 0.363	35.000, 0.617	35.000, 0.786	35.000, -0.020	35.000, -0.080	35.000, -0.017	35.000, -0.022	35.000, -0.023	35.000, -0.006	35.000, -0.007
177	35.200, 0.084	35.200, 0.189	35.200, 0.373	35.200, 0.623	35.200, 0.788	35.200, -0.021	35.200, -0.081	35.200, -0.017	35.200, -0.022	35.200, -0.024	35.200, -0.006	35.200, -0.007
178	35.400, 0.087	35.400, 0.196	35.400, 0.383	35.400, 0.629	35.400, 0.790	35.400, -0.021	35.400, -0.082	35.400, -0.018	35.400, -0.023	35.400, -0.024	35.400, -0.006	35.400, -0.007
179	35.600, 0.090	35.600, 0.202	35.600, 0.393	35.600, 0.634	35.600, 0.791	35.600, -0.021	35.600, -0.083	35.600, -0.018	35.600, -0.024	35.600, -0.025	35.600, -0.007	35.600, -0.008
180	35.800, 0.094	35.800, 0.209	35.800, 0.402	35.800, 0.638	35.800, 0.792	35.800, -0.022	35.800, -0.084	35.800, -0.019	35.800, -0.024	35.800, -0.025	35.800, -0.007	35.800, -0.008
181	36.000, 0.097	36.000, 0.215	36.000, 0.411	36.000, 0.642	36.000, 0.793	36.000, -0.022	36.000, -0.085	36.000, -0.020	36.000, -0.025	36.000, -0.026	36.000, -0.007	36.000, -0.008
182	36.200, 0.100	36.200, 0.221	36.200, 0.419	36.200, 0.645	36.200, 0.794	36.200, -0.022	36.200, -0.085	36.200, -0.020	36.200, -0.025	36.200, -0.027	36.200, -0.007	36.200, -0.009
183	36.400, 0.103	36.400, 0.227	36.400, 0.427	36.400, 0.648	36.400, 0.795	36.400, -0.022	36.400, -0.086	36.400, -0.021	36.400, -0.026	36.400, -0.028	36.400, -0.008	36.400, -0.009
184	36.600, 0.106	36.600, 0.232	36.600, 0.435	36.600, 0.650	36.600, 0.795	36.600, -0.022	36.600, -0.087	36.600, -0.022	36.600, -0.026	36.600, -0.028	36.600, -0.008	36.600, -0.009
185	36.800, 0.109	36.800, 0.237	36.800, 0.442	36.800, 0.652	36.800, 0.796	36.800, -0.021	36.800, -0.088	36.800, -0.022	36.800, -0.026	36.800, -0.029	36.800, -0.008	36.800, -0.010
186	37.000, 0.112	37.000, 0.243	37.000, 0.448	37.000, 0.654	37.000, 0.797	37.000, -0.021	37.000, -0.088	37.000, -0.023	37.000, -0.026	37.000, -0.030	37.000, -0.009	37.000, -0.010
187	37.200, 0.116	37.200, 0.247	37.200, 0.455	37.200, 0.656	37.200, 0.797	37.200, -0.021	37.200, -0.089	37.200, -0.023	37.200, -0.026	37.200, -0.030	37.200, -0.010	37.200, -0.011
188	37.400, 0.119	37.400, 0.252	37.400, 0.461	37.400, 0.657	37.400, 0.797	37.400, -0.021	37.400, -0.089	37.400, -0.023	37.400, -0.026	37.400, -0.030	37.400, -0.010	37.400, -0.011
189	37.600, 0.122	37.600, 0.257	37.600, 0.466	37.600, 0.658	37.600, 0.797	37.600, -0.021	37.600, -0.089	37.600, -0.023	37.600, -0.026	37.600, -0.031	37.600, -0.010	37.600, -0.011
190	37.800, 0.125	37.800, 0.261	37.800, 0.472	37.800, 0.660	37.800, 0.797	37.800, -0.021	37.800, -0.089	37.800, -0.023	37.800, -0.026	37.800, -0.031	37.800, -0.011	37.800, -0.012
191	38.000, 0.128	38.000, 0.266	38.000, 0.477	38.000, 0.661	38.000, 0.797	38.000, -0.021	38.000, -0.090	38.000, -0.023	38.000, -0.027	38.000, -0.031	38.000, -0.012	38.000, -0.012
192	38.200, 0.131	38.200, 0.270	38.200, 0.482	38.200, 0.661	38.200, 0.797	38.200, -0.021	38.200, -0.090	38.200, -0.023	38.200, -0.027	38.200, -0.032	38.200, -0.012	38.200, -0.012
193	38.400, 0.134	38.400, 0.274	38.400, 0.486	38.400, 0.662	38.400, 0.797	38.400, -0.021	38.400, -0.091	38.400, -0.023	38.400, -0.027	38.400, -0.032	38.400, -0.013	38.400, -0.012
194	38.600, 0.137	38.600, 0.279	38.600, 0.490	38.600, 0.663	38.600, 0.798	38.600, -0.022	38.600, -0.091	38.600, -0.023	38.600, -0.028	38.600, -0.032	38.600, -0.013	38.600, -0.012
195	38.800, 0.140	38.800, 0.283	38.800, 0.494	38.800, 0.664	38.800, 0.798	38.800, -0.022	38.800, -0.091	38.800, -0.023	38.800, -0.028	38.800, -0.032	38.800, -0.014	38.800, -0.012
196	39.000, 0.143	39.000, 0.288	39.000, 0.497	39.000, 0.664	39.000, 0.798	39.000, -0.022	39.000, -0.092	39.000, -0.024	39.000, -0.029	39.000, -0.032	39.000, -0.014	39.000, -0.012
197	39.200, 0.146	39.200, 0.292	39.200, 0.500	39.200, 0.665	39.200, 0.799	39.200, -0.023	39.200, -0.092	39.200, -0.024	39.200, -0.029	39.200, -0.032	39.200, -0.015	39.200, -0.012
198	39.400, 0.148	39.400, 0.296	39.400, 0.504	39.400, 0.666	39.400, 0.799	39.400, -0.023	39.400, -0.092	39.400, -0.024	39.400, -0.030	39.400, -0.032	39.400, -0.015	39.400, -0.011
199	39.600, 0.151	39.600, 0.300	39.600, 0.507	39.600, 0.666	39.600, 0.800	39.600, -0.023	39.600, -0.093	39.600, -0.024	39.600, -0.031	39.600, -0.032	39.600, -0.014	39.600, -0.011
200	39.800, 0.154	39.800, 0.304	39.800, 0.510	39.800, 0.667	39.800, 0.800	39.800, -0.023	39.800, -0.093	39.800, -0.024	39.800, -0.031	39.800, -0.033	39.800, -0.014	39.800, -0.011
201	40.000, 0.156	40.000, 0.307	40.000, 0.512	40.000, 0.668	40.000, 0.800	40.000, -0.024	40.000, -0.093	40.000, -0.024	40.000, -0.032	40.000, -0.033	40.000, -0.014	40.000, -0.011
202	40.200, 0.158	40.200, 0.311	40.200, 0.515	40.200, 0.668	40.200, 0.801	40.200, -0.024	40.200, -0.093	40.200, -0.025	40.200, -0.032	40.200, -0.033	40.200, -0.013	40.200, -0.011
203	40.400, 0.160	40.400, 0.314	40.400, 0.517	40.400, 0.669	40.400, 0.801	40.400, -0.024	40.400, -0.094	40.400, -0.025	40.400, -0.032	40.400, -0.034	40.400, -0.013	40.400, -0.011
204	40.600, 0.162	40.600, 0.317	40.600, 0.519	40.600, 0.669	40.600, 0.802	40.600, -0.024	40.600, -0.094	40.600, -0.025	40.600, -0.033	40.600, -0.034	40.600, -0.013	40.600, -0.011
205	40.800, 0.164	40.800, 0.320	40.800, 0.521	40.800, 0.669	40.800, 0.802	40.800, -0.023	40.800, -0.094	40.800, -0.025	40.800, -0.033	40.800, -0.034	40.800, -0.014	40.800, -0.011
206	41.000, 0.167	41.000, 0.323	41.000, 0.522	41.000, 0.670	41.000, 0.802	41.000, -0.023	41.000, -0.094	41.000, -0.025	41.000, -0.033	41.000, -0.034	41.000, -0.014	41.000, -0.012
207	41.200, 0.169	41.200, 0.326	41.200, 0.524	41.200, 0.670	41.200, 0.802	41.200, -0.023	41.200, -0.095	41.200, -0.025	41.200, -0.033	41.200, -0.034	41.200, -0.014	41.200, -0.012
208	41.400, 0.171	41.400, 0.329	41.400, 0.526	41.400, 0.670	41.400, 0.802	41.400, -0.023	41.400, -0.095	41.400, -0.025	41.400, -0.033	41.400, -0.035	41.400, -0.015	41.400, -0.012
209	41.600, 0.174	41.600, 0.331	41.600, 0.527	41.600, 0.670	41.600, 0.802	41.600, -0.023	41.600, -0.095	41.600, -0.025	41.600, -0.033	41.600, -0.035	41.600, -0.015	41.600, -0.012
210	41.800, 0.176	41.800, 0.334	41.800, 0.529	41.800, 0.670	41.800, 0.802	41.800, -0.022	41.800, -0.095	41.800, -0.026	41.800, -0.032	41.800, -0.035	41.800, -0.016	41.800, -0.012
211	42.000, 0.179	42.000, 0.336	42.000, 0.530	42.000, 0.670	42.000, 0.802	42.000, -0.022	42.000, -0.096	42.000, -0.026	42.000, -0.032	42.000, -0.036	42.000, -0.016	42.000, -0.012
212	42.200, 0.181	42.200, 0.339	42.200, 0.531	42.200, 0.670	42.200, 0.803	42.200, -0.022	42.200, -0.096	42.200, -0.026	42.200, -0.033	42.200, -0.036	42.200, -0.016	42.200, -0.012
213	42.400, 0.183	42.400, 0.342	42.400, 0.532	42.400, 0.671	42.400, 0.803	42.400, -0.022	42.400, -0.096	42.400, -0.026	42.400, -0.033	42.400, -0.036	42.400, -0.017	42.400, -0.012
214	42.600, 0.185	42.600, 0.344	42.600, 0.533	42.600, 0.671	42.600, 0.803	42.600, -0.022	42.600, -0.096	42.600, -0.026	42.600, -0.033	42.600, -0.036	42.600, -0.017	42.600, -0.012
215	42.800, 0.188	42.800, 0.347	42.800, 0.534	42.800, 0.671	42.800, 0.803	42.800, -0.023	42.800, -0.096	42.800, -0.026	42.800, -0.033	42.800, -0.036	42.800, -0.017	42.800, -0.012
216	43.000, 0.190	43.000, 0.350	43.000, 0.535	43.000, 0.671	43.000, 0.804	43.000, -0.023	43.000, -0.097	43.000, -0.026	43.000, -0.034	43.000, -0.037	43.000, -0.018	43.000, -0.012
217	43.200, 0.192	43.200, 0.352	43.200, 0.536	43.200, 0.671	43.200, 0.804	43.200, -0.023	43.200, -0.097	43.200, -0.026	43.200, -0.034	43.200, -0.037	43.200, -0.018	43.200, -0.012
218	43.400, 0.194	43.400, 0.355	43.400, 0.537	43.400, 0.671	43.400, 0.804	43.400, -0.023	43.400, -0.098	43.400, -0.026	43.400, -0.034	43.400, -0.037	43.400, -0.017	43.400, -0.011
219	43.600, 0.196	43.600, 0.357	43.600, 0.538	43.600, 0.672	43.600, 0.804	43.600, -0.024	43.600, -0.098	43.600, -0.027	43.600, -0.035	43.600, -0.037	43.600, -0.017	43.600, -0.011
220	43.800, 0.198	43.800, 0.359	43.800, 0.540	43.800, 0.672	43.800, 0.805	43.800, -0.024	43.800, -0.098	43.800, -0.027	43.800, -0.035	43.800, -0.037	43.800, -0.017	43.800, -0.011
221	44.000, 0.200	44.000, 0.362	44.000, 0.541	44.000, 0.672	44.000, 0.806	44.000, -0.024	44.000, -0.099	44.000, -0.026	44.000, -0.035	44.000, -0.038	44.000, -0.017	44.000, -0.011
222	44.200, 0.202	44.200, 0.364	44.200, 0.542	44.200, 0.673	44.200, 0.806	44.200, -0.024	44.200, -0.099	44.200, -0.026	44.200, -0.036	44.200, -0.038	44.200, -0.017	44.200, -0.011
223	44.400, 0.204	44.400, 0.366	44.400, 0.543	44.400, 0.673	44.400, 0.806	44.400, -0.024	44.400, -0.099	44.400, -0.026	44.400, -0.036	44.400, -0.038	44.400, -0.017	44.400, -0.011
224	44.600, 0.206	44.600, 0.368	44.600, 0.544	44.600, 0.674	44.600, 0.807	44.600, -0.024	44.600, -0.099	44.600, -0.026	44.600, -0.037	44.600, -0.039	44.600, -0.017	44.600, -0.011
225	44.800, 0.208	44.800, 0.370	44.800, 0.544	44.800, 0.674	44.800, 0.807	44.800, -0.025	44.800, -0.099	44.800, -0.026	44.800, -0.037	44.800, -0.039	44.800, -0.017	44.800, -0.011
226	45.000, 0.209	45.000, 0.371	45.000, 0.545	45.000, 0.674	45.000, 0.807	45.000, -0.025	45.000, -0.099	45.000, -0.026	45.000, -0.037	45.000, -0.039	45.000, -0.017	45.000, -0.011
227	45.200, 0.211	45.200, 0.373	45.200, 0.545	45.200, 0.674	45.200, 0.807	45.200, -0.025	45.200, -0.099	45.200, -0.026	45.200, -0.037	45.200, -0.039	45.200, -0.017	45.200, -0.012
228	45.400, 0.213	45.400, 0.375	45.400, 0.546	45.400, 0.674	45.400, 0.807	45.400, -0.025	45.400, -0.099	45.400, -0.027	45.400, -0.037	45.400, -0.040	45.400, -0.017	45.400, -0.012
229	45.600, 0.214	45.600, 0.376	45.600, 0.546	45.600, 0.674	45.600, 0.807	45.600, -0.026	45.600, -0.099	45.600, -0.027	45.600, -0.037	45.600, -0.040	45.600, -0.018	45.600, -0.012
230	45.800, 0.216	45.800, 0.378	45.800, 0.546	45.800, 0.674	45.800, 0.807	45.800, -0.026	45.800, -0.099	45.800, -0.027	45.800, -0.037	45.800, -0.040	45.800, -0.018	45.800, -0.013
231	46.000, 0.217	46.000, 0.379	46.000, 0.547	46.000, 0.674	46.000, 0.808	46.000, -0.026	46.000, -0.099	46.000, -0.027	46.000, -0.037	46.000, -0.040	46.000, -0.018	46.000, -0.014
232	46.200, 0.219	46.200, 0.381	46.200, 0.547	46.200, 0.674	46.200, 0.808	46.200, -0.026	46.200, -0.099	46.200, -0.028	46.200, -0.038	46.200, -0.041	46.200, -0.018	46.200, -0.014
233	46.400, 0.221	46.400, 0.382	46.400, 0.547	46.400, 0.674	46.400, 0.808	46.400, -0.026	46.400, -0.099	46.400, -0.028	46.400, -0.038	46.400, -0.041	46.400, -0.019	46.400, -0.014
234	46.600, 0.222	46.600, 0.383	46.600, 0.547	46.600, 0.674	46.600, 0.809	46.600, -0.026	46.600, -0.100	46.600, -0.028	46.600, -0.038	46.600, -0.042	46.600, -0.019	46.600, -0.015
235	46.800, 0.224	46.800, 0.384	46.800, 0.547	46.800, 0.673	46.800, 0.809	46.800, -0.026	46.800, -0.101	46.800, -0.028	46.800, -0.039	46.800, -0.042	46.800, -0.019	46.800, -0.015
236	47.000, 0.226	47.000, 0.385	47.000, 0.547	47.000, 0.673	47.000, 0.810	47.000, -0.026	47.000, -0.101	47.000, -0.028	47.000, -0.039	47.000, -0.042	47.000, -0.020	47.000, -0.015
237	47.200, 0.227	47.200, 0.386	47.200, 0.548	47.200, 0.673	47.200, 0.810	47.200, -0.025	47.200, -0.102	47.200, -0.028	47.200, -0.039	47.200, -0.042	47.200, -0.020	47.200, -0.016
238	47.400, 0.229	47.400, 0.387	47.400, 0.548	47.400, 0.673	47.400, 0.811	47.400, -0.025	47.400, -0.102	47.400, -0.029	47.400, -0.040	47.400, -0.042	47.400, -0.020	47.400, -0.016
239	47.600, 0.230	47.600, 0.388	47.600, 0.549	47.600, 0.673	47.600, 0.811	47.600, -0.025	47.600, -0.103	47.600, -0.029	47.600, -0.040	47.600, -0.042	47.600, -0.021	47.600, -0.016
240	47.800, 0.231	47.800, 0.390	47.800, 0.549	47.800, 0.674	47.800, 0.812	47.800, -0.025	47.800, -0.103	47.800, -0.029	47.800, -0.040	47.800, -0.043	47.800, -0.021	47.800, -0.016
241	48.000, 0.233	48.000, 0.391	48.000, 0.550	48.000, 0.674	48.000, 0.812	48.000, -0.025	48.000, -0.104	48.000, -0.029	48.000, -0.040	48.000, -0.043	48.000, -0.021	48.000, -0.016
242	48.200, 0.234	48.200, 0.392	48.200, 0.550	48.200, 0.674	48.200, 0.812	48.200, -0.025	48.200, -0.104	48.200, -0.029	48.200, -0.040	48.200, -0.043	48.200, -0.021	48.200, -0.016
243	48.400, 0.235	48.400, 0.393	48.400, 0.550	48.400, 0.675	48.400, 0.812	48.400, -0.025	48.400, -0.104	48.400, -0.030	48.400, -0.039	48.400, -0.043	48.400, -0.021	48.400, -0.016
244	48.600, 0.236	48.600, 0.394	48.600, 0.551	48.600, 0.675	48.600, 0.812	48.600, -0.025	48.600, -0.104	48.600, -0.030	48.600, -0.039	48.600, -0.043	48.600, -0.021	48.600, -0.016
245	48.800, 0.237	48.800, 0.395	48.800, 0.551	48.800, 0.675	48.800, 0.812	48.800, -0.025	48.800, -0.104	48.800, -0.030	48.800, -0.039	48.800, -0.043	48.800, -0.021	48.800, -0.016
246	49.000, 0.238	49.000, 0.396	49.000, 0.551	49.000, 0.675	49.000, 0.812	49.000, -0.026	49.000, -0.104	49.000, -0.030	49.000, -0.039	49.000, -0.044	49.000, -0.021	49.000, -0.016
247	49.200, 0.239	49.200, 0.397	49.200, 0.552	49.200, 0.675	49.200, 0.812	49.200, -0.026	49.200, -0.104	49.200, -0.030	49.200, -0.039	49.200, -0.044	49.200, -0.021	49.200, -0.016
248	49.400, 0.240	49.400, 0.398	49.400, 0.552	49.400, 0.675	49.400, 0.812	49.400, -0.026	49.400, -0.104	49.400, -0.030	49.400, -0.039	49.400, -0.044	49.400, -0.020	49.400, -0.016
249	49.600, 0.241	49.600, 0.399	49.600, 0.552	49.600, 0.675	49.600, 0.812	49.600, -0.027	49.600, -0.105	49.600, -0.030	49.600, -0.039	49.600, -0.045	49.600, -0.021	49.600, -0.016
250	49.800, 0.243	49.800, 0.400	49.800, 0.553	49.800, 0.675	49.800, 0.813	49.800, -0.027	49.800, -0.105	49.800, -0.031	49.800, -0.040	49.800, -0.045	49.800, -0.020	49.800, -0.016
251	50.000, 0.244	50.000, 0.401	50.000, 0.553	50.000, 0.676	50.000, 0.813	50.000, -0.027	50.000, -0.105	50.000, -0.031	50.000, -0.040	50.000, -0.045	50.000, -0.021	50.000, -0.016
252	50.200, 0.245	50.200, 0.401	50.200, 0.553	50.200, 0.676	50.200, 0.813	50.200, -0.027	50.200, -0.106	50.200, -0.031	50.200, -0.040	50.200, -0.046	50.200, -0.021	50.200, -0.016
253	50.400, 0.247	50.400, 0.402	50.400, 0.553	50.400, 0.676	50.400, 0.813	50.400, -0.027	50.400, -0.106	50.400, -0.031	50.400, -0.041	50.400, -0.046	50.400, -0.021	50.400, -0.016
254	50.600, 0.248	50.600, 0.403	50.600, 0.553	50.600, 0.676	50.600, 0.814	50.600, -0.027	50.600, -0.107	50.600, -0.031	50.600, -0.041	50.600, -0.046	50.600, -0.021	50.600, -0.017
255	50.800, 0.249	50.800, 0.403	50.800, 0.554	50.800, 0.676	50.800, 0.814	50.800, -0.027	50.800, -0.107	50.800, -0.031	50.800, -0.042	50.800, -0.046	50.800, -0.021	50.800, -0.017
256	51.000, 0.251	51.000, 0.404	51.000, 0.554	51.000, 0.676	51.000, 0.814	51.000, -0.027	51.000, -0.107	51.000, -0.032	51.000, -0.042	51.000, -0.046	51.000, -0.022	51.000, -0.017
257	51.200, 0.252	51.200, 0.405	51.200, 0.554	51.200, 0.676	51.200, 0.814	51.200, -0.027	51.200, -0.108	51.200, -0.032	51.200, -0.042	51.200, -0.046	51.200, -0.022	51.200, -0.017
258	51.400, 0.253	51.400, 0.405	51.400, 0.554	51.400, 0.676	51.400, 0.814	51.400, -0.027	51.400, -0.108	51.400, -0.032	51.400, -0.042	51.400, -0.046	51.400, -0.022	51.400, -0.017
259	51.600, 0.254	51.600, 0.406	51.600, 0.555	51.600, 0.676	51.600, 0.814	51.600, -0.027	51.600, -0.109	51.600, -0.033	51.600, -0.042	51.600, -0.046	51.600, -0.022	51.600, -0.017
260	51.800, 0.256	51.800, 0.407	51.800, 0.555	51.800, 0.677	51.800, 0.814	51.800, -0.027	51.800, -0.109	51.800, -0.033	51.800, -0.042	51.800, -0.045	51.800, -0.023	51.800, -0.017
261	52.000, 0.257	52.000, 0.407	52.000, 0.555	52.000, 0.677	52.000, 0.814	52.000, -0.027	52.000, -0.109	52.000, -0.033	52.000, -0.042	52.000, -0.045	52.000, -0.023	52.000, -0.017
262	52.200, 0.258	52.200, 0.408	52.200, 0.556	52.200, 0.677	52.200, 0.815	52.200, -0.027	52.200, -0.109	52.200, -0.033	52.200, -0.042	52.200, -0.046	52.200, -0.023	52.200, -0.018
263	52.400, 0.259	52.400, 0.409	52.400, 0.556	52.400, 0.677	52.400, 0.815	52.400, -0.027	52.400, -0.109	52.400, -0.033	52.400, -0.042	52.400, -0.046	52.400, -0.023	52.400, -0.018
264	52.600, 0.260	52.600, 0.409	52.600, 0.556	52.600, 0.677	52.600, 0.815	52.600, -0.027	52.600, -0.109	52.600, -0.033	52.600, -0.042	52.600, -0.047	52.600, -0.023	52.600, -0.018
265	52.800, 0.261	52.800, 0.410	52.800, 0.557	52.800, 0.677	52.800, 0.815	52.800, -0.027	52.800, -0.109	52.800, -0.034	52.800, -0.042	52.800, -0.047	52.800, -0.023	52.800, -0.018
266	53.000, 0.262	53.000, 0.410	53.000, 0.557	53.000, 0.677	53.000, 0.816	53.000, -0.028	53.000, -0.109	53.000, -0.034	53.000, -0.042	53.000, -0.048	53.000, -0.023	53.000, -0.018
267	53.200, 0.263	53.200, 0.411	53.200, 0.557	53.200, 0.678	53.200, 0.816	53.200, -0.028	53.200, -0.109	53.200, -0.034	53.200, -0.042	53.200, -0.048	53.200, -0.024	53.200, -0.019
268	53.400, 0.264	53.400, 0.411	53.400, 0.557	53.400, 0.678	53.400, 0.816	53.400, -0.028	53.400, -0.110	53.400, -0.034	53.400, -0.043	53.400, -0.048	53.400, -0.024	53.400, -0.019
269	53.600, 0.265	53.600, 0.412	53.600, 0.558	53.600, 0.678	53.600, 0.817	53.600, -0.028	53.600, -0.110	53.600, -0.034	53.600, -0.043	53.600, -0.049	53.600, -0.024	53.600, -0.020
270	53.800, 0.266	53.800, 0.413	53.800, 0.558	53.800, 0.679	53.800, 0.817	53.800, -0.028	53.800, -0.110	53.800, -0.034	53.800, -0.043	53.800, -0.049	53.800, -0.025	53.800, -0.021
271	54.000, 0.267	54.000, 0.413	54.000, 0.558	54.000, 0.679	54.000, 0.817	54.000, -0.028	54.000, -0.110	54.000, -0.034	54.000, -0.043	54.000, -0.049	54.000, -0.025	54.000, -0.021
272	54.200, 0.268	54.200, 0.413	54.200, 0.558	54.200, 0.679	54.200, 0.818	54.200, -0.028	54.200, -0.110	54.200, -0.034	54.200, -0.044	54.200, -0.049	54.200, -0.025	54.200, -0.022
273	54.400, 0.269	54.400, 0.414	54.400, 0.558	54.400, 0.679	54.400, 0.818	54.400, -0.028	54.400, -0.110	54.400, -0.034	54.400, -0.044	54.400, -0.050	54.400, -0.025	54.400, -0.022
274	54.600, 0.270	54.600, 0.414	54.600, 0.558	54.600, 0.679	54.600, 0.819	54.600, -0.028	54.600, -0.111	54.600, -0.034	54.600, -0.044	54.600, -0.050	54.600, -0.026	54.600, -0.022
275	54.800, 0.270	54.800, 0.415	54.800, 0.558	54.800, 0.679	54.800, 0.819	54.800, -0.028	54.800, -0.111	54.800, -0.034	54.800, -0.044	54.800, -0.050	54.800, -0.026	54.800, -0.022
276	55.000, 0.271	55.000, 0.415	55.000, 0.558	55.000, 0.679	55.000, 0.820	55.000, -0.028	55.000, -0.112	55.000, -0.035	55.000, -0.044	55.000, -0.050	55.000, -0.026	55.000, -0.021
277	55.200, 0.272	55.200, 0.415	55.200, 0.558	55.200, 0.679	55.200, 0.820	55.200, -0.028	55.200, -0.112	55.200, -0.035	55.200, -0.044	55.200, -0.051	55.200, -0.026	55.200, -0.021
278	55.400, 0.272	55.400, 0.416	55.400, 0.558	55.400, 0.679	55.400, 0.821	55.400, -0.028	55.400, -0.112	55.400, -0.035	55.400, -0.045	55.400, -0.051	55.400, -0.026	55.400, -0.021
279	55.600, 0.272	55.600, 0.416	55.600, 0.558	55.600, 0.679	55.600, 0.821	55.600, -0.028	55.600, -0.113	55.600, -0.035	55.600, -0.045	55.600, -0.051	55.600, -0.026	55.600, -0.021
280	55.800, 0.273	55.800, 0.416	55.800, 0.558	55.800, 0.679	55.800, 0.821	55.800, -0.028	55.800, -0.113	55.800, -0.035	55.800, -0.045	55.800, -0.051	55.800, -0.026	55.800, -0.021
281	56.000, 0.273	56.000, 0.416	56.000, 0.559	56.000, 0.680	56.000, 0.822	56.000, -0.028	56.000, -0.114	56.000, -0.035	56.000, -0.045	56.000, -0.052	56.000, -0.026	56.000, -0.020
282	56.200, 0.273	56.200, 0.416	56.200, 0.559	56.200, 0.680	56.200, 0.822	56.200, -0.028	56.200, -0.114	56.200, -0.035	56.200, -0.045	56.200, -0.052	56.200, -0.026	56.200, -0.020
283	56.400, 0.274	56.400, 0.417	56.400, 0.560	56.400, 0.680	56.400, 0.822	56.400, -0.029	56.400, -0.114	56.400, -0.035	56.400, -0.046	56.400, -0.051	56.400, -0.026	56.400, -0.020
284	56.600, 0.274	56.600, 0.417	56.600, 0.560	56.600, 0.680	56.600, 0.822	56.600, -0.029	56.600, -0.115	56.600, -0.035	56.600, -0.046	56.600, -0.051	56.600, -0.026	56.600, -0.020
285	56.800, 0.275	56.800, 0.417	56.800, 0.560	56.800, 0.680	56.800, 0.822	56.800, -0.029	56.800, -0.115	56.800, -0.035	56.800, -0.046	56.800, -0.051	56.800, -0.026	56.800, -0.020
286	57.000, 0.276	57.000, 0.417	57.000, 0.561	57.000, 0.680	57.000, 0.822	57.000, -0.029	57.000, -0.115	57.000, -0.036	57.000, -0.047	57.000, -0.051	57.000, -0.026	57.000, -0.021
287	57.200, 0.277	57.200, 0.418	57.200, 0.560	57.200, 0.680	57.200, 0.822	57.200, -0.029	57.200, -0.115	57.200, -0.036	57.200, -0.047	57.200, -0.051	57.200, -0.026	57.200, -0.021
288	57.400, 0.278	57.400, 0.418	57.400, 0.561	57.400, 0.680	57.400, 0.822	57.400, -0.029	57.400, -0.115	57.400, -0.036	57.400, -0.047	57.400, -0.051	57.400, -0.027	57.400, -0.021
289	57.600, 0.279	57.600, 0.418	57.600, 0.560	57.600, 0.680	57.600, 0.822	57.600, -0.029	57.600, -0.115	57.600, -0.036	57.600, -0.047	57.600, -0.051	57.600, -0.027	57.600, -0.022
290	57.800, 0.280	57.800, 0.419	57.800, 0.560	57.800, 0.680	57.800, 0.822	57.800, -0.029	57.800, -0.115	57.800, -0.036	57.800, -0.047	57.800, -0.051	57.800, -0.027	57.800, -0.022
291	58.000, 0.281	58.000, 0.419	58.000, 0.560	58.000, 0.680	58.000, 0.822	58.000, -0.029	58.000, -0.115	58.000, -0.036	58.000, -0.047	58.000, -0.052	58.000, -0.027	58.000, -0.022
292	58.200, 0.282	58.200, 0.420	58.200, 0.560	58.200, 0.680	58.200, 0.822	58.200, -0.029	58.200, -0.115	58.200, -0.036	58.200, -0.047	58.200, -0.052	58.200, -0.027	58.200, -0.021
293	58.400, 0.283	58.400, 0.420	58.400, 0.560	58.400, 0.680	58.400, 0.822	58.400, -0.029	58.400, -0.115	58.400, -0.036	58.400, -0.047	58.400, -0.052	58.400, -0.027	58.400, -0.021
294	58.600, 0.284	58.600, 0.421	58.600, 0.560	58.600, 0.680	58.600, 0.822	58.600, -0.030	58.600, -0.116	58.600, -0.036	58.600, -0.047	58.600, -0.053	58.600, -0.028	58.600, -0.021
295	58.800, 0.285	58.800, 0.421	58.800, 0.560	58.800, 0.681	58.800, 0.822	58.800, -0.030	58.800, -0.116	58.800, -0.037	58.800, -0.046	58.800, -0.053	58.800, -0.028	58.800, -0.021
296	59.000, 0.285	59.000, 0.422	59.000, 0.560	59.000, 0.681	59.000, 0.823	59.000, -0.030	59.000, -0.117	59.000, -0.037	59.000, -0.046	59.000, -0.053	59.000, -0.028	59.000, -0.021
297	59.200, 0.286	59.200, 0.422	59.200, 0.561	59.200, 0.681	59.200, 0.823	59.200, -0.031	59.200, -0.118	59.200, -0.037	59.200, -0.046	59.200, -0.054	59.200, -0.028	59.200, -0.021
298	59.400, 0.286	59.400, 0.423	59.400, 0.561	59.400, 0.681	59.400, 0.823	59.400, -0.031	59.400, -0.118	59.400, -0.038	59.400, -0.047	59.400, -0.054	59.400, -0.028	59.400, -0.021
299	59.600, 0.286	59.600, 0.423	59.600, 0.561	59.600, 0.682	59.600, 0.823	59.600, -0.031	59.600, -0.119	59.600, -0.038	59.600, -0.047	59.600, -0.054	59.600, -0.028	59.600, -0.022
300	59.800, 0.286	59.800, 0.423	59.800, 0.562	59.800, 0.682	59.800, 0.823	59.800, -0.031	59.800, -0.120	59.800, -0.038	59.800, -0.047	59.800, -0.054	59.800, -0.028	59.800, -0.022
301	60.000, 0.286	60.000, 0.424	60.000, 0.562	60.000, 0.682	60.000, 0.823	60.000, -0.032	60.000, -0.120	60.000, -0.038	60.000, -0.047	60.000, -0.054	60.000, -0.028	60.000, -0.023
302	60.200, 0.287	60.200, 0.424	60.200, 0.562	60.200, 0.683	60.200, 0.824	60.200, -0.032	60.200, -0.120	60.200, -0.039	60.200, -0.047	60.200, -0.054	60.200, -0.028	60.200, -0.023
303	60.400, 0.287	60.400, 0.424	60.400, 0.563	60.400, 0.683	60.400, 0.824	60.400, -0.032	60.400, -0.121	60.400, -0.039	60.400, -0.048	60.400, -0.054	60.400, -0.028	60.400, -0.024
304	60.600, 0.288	60.600, 0.423	60.600, 0.563	60.600, 0.683	60.600, 0.824	60.600, -0.032	60.600, -0.121	60.600, -0.040	60.600, -0.048	60.600, -0.053	60.600, -0.029	60.600, -0.024
305	60.800, 0.288	60.800, 0.423	60.800, 0.563	60.800, 0.684	60.800, 0.825	60.800, -0.032	60.800, -0.121	60.800, -0.040	60.800, -0.048	60.800, -0.054	60.800, -0.029	60.800, -0.024
306	61.000, 0.289	61.000, 0.423	61.000, 0.563	61.000, 0.684	61.000, 0.825	61.000, -0.032	61.000, -0.121	61.000, -0.040	61.000, -0.049	61.000, -0.054	61.000, -0.029	61.000, -0.025
307	61.200, 0.289	61.200, 0.423	61.200, 0.563	61.200, 0.684	61.200, 0.825	61.200, -0.031	61.200, -0.121	61.200, -0.040	61.200, -0.049	61.200, -0.054	61.200, -0.029	61.200, -0.025
308	61.400, 0.290	61.400, 0.423	61.400, 0.563	61.400, 0.684	61.400, 0.825	61.400, -0.031	61.400, -0.121	61.400, -0.040	61.400, -0.049	61.400, -0.054	61.400, -0.029	61.400, -0.024
309	61.600, 0.291	61.600, 0.423	61.600, 0.563	61.600, 0.684	61.600, 0.826	61.600, -0.031	61.600, -0.121	61.600, -0.040	61.600, -0.050	61.600, -0.054	61.600, -0.030	61.600, -0.024
310	61.800, 0.291	61.800, 0.423	61.800, 0.563	61.800, 0.684	61.800, 0.826	61.800, -0.031	61.800, -0.121	61.800, -0.040	61.800, -0.050	61.800, -0.055	61.800, -0.030	61.800, -0.024
311	62.000, 0.292	62.000, 0.423	62.000, 0.563	62.000, 0.684	62.000, 0.826	62.000, -0.031	62.000, -0.122	62.000, -0.041	62.000, -0.050	62.000, -0.055	62.000, -0.030	62.000, -0.024
312	62.200, 0.292	62.200, 0.423	62.200, 0.563	62.200, 0.684	62.200, 0.826	62.200, -0.031	62.200, -0.122	62.200, -0.041	62.200, -0.051	62.200, -0.055	62.200, -0.030	62.200, -0.024
313	62.400, 0.292	62.400, 0.423	62.400, 0.563	62.400, 0.684	62.400, 0.827	62.400, -0.031	62.400, -0.122	62.400, -0.041	62.400, -0.051	62.400, -0.055	62.400, -0.031	62.400, -0.023
314	62.600, 0.293	62.600, 0.423	62.600, 0.563	62.600, 0.684	62.600, 0.827	62.600, -0.032	62.600, -0.123	62.600, -0.041	62.600, -0.051	62.600, -0.056	62.600, -0.031	62.600, -0.023
315	62.800, 0.293	62.800, 0.424	62.800, 0.563	62.800, 0.683	62.800, 0.827	62.800, -0.032	62.800, -0.123	62.800, -0.041	62.800, -0.052	62.800, -0.056	62.800, -0.031	62.800, -0.023
316	63.000, 0.293	63.000, 0.424	63.000, 0.563	63.000, 0.683	63.000, 0.827	63.000, -0.033	63.000, -0.124	63.000, -0.041	63.000, -0.052	63.000, -0.056	63.000, -0.031	63.000, -0.023
317	63.200, 0.293	63.200, 0.424	63.200, 0.563	63.200, 0.683	63.200, 0.828	63.200, -0.033	63.200, -0.124	63.200, -0.041	63.200, -0.052	63.200, -0.056	63.200, -0.031	63.200, -0.023
318	63.400, 0.293	63.400, 0.425	63.400, 0.563	63.400, 0.683	63.400, 0.828	63.400, -0.033	63.400, -0.124	63.400, -0.040	63.400, -0.052	63.400, -0.056	63.400, -0.030	63.400, -0.023
319	63.600, 0.294	63.600, 0.425	63.600, 0.563	63.600, 0.683	63.600, 0.828	63.600, -0.034	63.600, -0.124	63.600, -0.040	63.600, -0.052	63.600, -0.056	63.600, -0.030	63.600, -0.024
320	63.800, 0.294	63.800, 0.425	63.800, 0.563	63.800, 0.683	63.800, 0.829	63.800, -0.034	63.800, -0.124	63.800, -0.040	63.800, -0.052	63.800, -0.057	63.800, -0.030	63.800, -0.024
321	64.000, 0.295	64.000, 0.425	64.000, 0.563	64.000, 0.683	64.000, 0.829	64.000, -0.034	64.000, -0.124	64.000, -0.041	64.000, -0.052	64.000, -0.057	64.000, -0.030	64.000, -0.025
322	64.200, 0.295	64.200, 0.425	64.200, 0.563	64.200, 0.683	64.200, 0.830	64.200, -0.034	64.200, -0.124	64.200, -0.041	64.200, -0.052	64.200, -0.057	64.200, -0.030	64.200, -0.025
323	64.400, 0.296	64.400, 0.425	64.400, 0.564	64.400, 0.684	64.400, 0.830	64.400, -0.034	64.400, -0.124	64.400, -0.041	64.400, -0.051	64.400, -0.057	64.400, -0.030	64.400, -0.026
324	64.600, 0.297	64.600, 0.426	64.600, 0.564	64.600, 0.684	64.600, 0.830	64.600, -0.034	64.600, -0.124	64.600, -0.041	64.600, -0.051	64.600, -0.057	64.600, -0.030	64.600, -0.026
325	64.800, 0.297	64.800, 0.426	64.800, 0.564	64.800, 0.684	64.800, 0.831	64.800, -0.034	64.800, -0.124	64.800, -0.041	64.800, -0.051	64.800, -0.058	64.800, -0.030	64.800, -0.027
326	65.000, 0.298	65.000, 0.426	65.000, 0.565	65.000, 0.684	65.000, 0.831	65.000, -0.034	65.000, -0.124	65.000, -0.041	65.000, -0.050	65.000, -0.058	65.000, -0.030	65.000, -0.027
327	65.200, 0.298	65.200, 0.426	65.200, 0.565	65.200, 0.685	65.200, 0.831	65.200, -0.034	65.200, -0.124	65.200, -0.041	65.200, -0.050	65.200, -0.058	65.200, -0.030	65.200, -0.027
328	65.400, 0.299	65.400, 0.426	65.400, 0.565	65.400, 0.685	65.400, 0.831	65.400, -0.034	65.400, -0.124	65.400, -0.041	65.400, -0.050	65.400, -0.059	65.400, -0.030	65.400, -0.027
329	65.600, 0.299	65.600, 0.427	65.600, 0.565	65.600, 0.685	65.600, 0.831	65.600, -0.034	65.600, -0.124	65.600, -0.041	65.600, -0.051	65.600, -0.059	65.600, -0.030	65.600, -0.027
330	65.800, 0.300	65.800, 0.427	65.800, 0.566	65.800, 0.685	65.800, 0.830	65.800, -0.034	65.800, -0.125	65.800, -0.041	65.800, -0.051	65.800, -0.059	65.800, -0.031	65.800, -0.027
331	66.000, 0.300	66.000, 0.427	66.000, 0.566	66.000, 0.686	66.000, 0.830	66.000, -0.034	66.000, -0.125	66.000, -0.041	66.000, -0.051	66.000, -0.060	66.000, -0.031	66.000, -0.027
332	66.200, 0.300	66.200, 0.428	66.200, 0.566	66.200, 0.686	66.200, 0.830	66.200, -0.034	66.200, -0.125	66.200, -0.042	66.200, -0.051	66.200, -0.060	66.200, -0.031	66.200, -0.026
333	66.400, 0.300	66.400, 0.428	66.400, 0.566	66.400, 0.686	66.400, 0.831	66.400, -0.034	66.400, -0.125	66.400, -0.042	66.400, -0.052	66.400, -0.060	66.400, -0.032	66.400, -0.026
334	66.600, 0.300	66.600, 0.428	66.600, 0.566	66.600, 0.687	66.600, 0.831	66.600, -0.034	66.600, -0.125	66.600, -0.042	66.600, -0.052	66.600, -0.060	66.600, -0.032	66.600, -0.026
335	66.800, 0.300	66.800, 0.429	66.800, 0.567	66.800, 0.687	66.800, 0.831	66.800, -0.034	66.800, -0.125	66.800, -0.042	66.800, -0.053	66.800, -0.060	66.800, -0.032	66.800, -0.025
336	67.000, 0.300	67.000, 0.429	67.000, 0.567	67.000, 0.687	67.000, 0.831	67.000, -0.034	67.000, -0.126	67.000, -0.043	67.000, -0.053	67.000, -0.061	67.000, -0.032	67.000, -0.025
337	67.200, 0.300	67.200, 0.429	67.200, 0.567	67.200, 0.687	67.200, 0.831	67.200, -0.034	67.200, -0.126	67.200, -0.043	67.200, -0.054	67.200, -0.061	67.200, -0.032	67.200, -0.025
338	67.400, 0.300	67.400, 0.429	67.400, 0.567	67.400, 0.687	67.400, 0.832	67.400, -0.034	67.400, -0.126	67.400, -0.043	67.400, -0.054	67.400, -0.061	67.400, -0.032	67.400, -0.025
339	67.600, 0.300	67.600, 0.429	67.600, 0.567	67.600, 0.687	67.600, 0.832	67.600, -0.034	67.600, -0.126	67.600, -0.044	67.600, -0.054	67.600, -0.061	67.600, -0.032	67.600, -0.025
340	67.800, 0.301	67.800, 0.429	67.800, 0.567	67.800, 0.687	67.800, 0.833	67.800, -0.034	67.800, -0.127	67.800, -0.044	67.800, -0.053	67.800, -0.061	67.800, -0.033	67.800, -0.025
341	68.000, 0.301	68.000, 0.429	68.000, 0.568	68.000, 0.688	68.000, 0.833	68.000, -0.034	68.000, -0.127	68.000, -0.044	68.000, -0.054	68.000, -0.060	68.000, -0.033	68.000, -0.025
342	68.200, 0.301	68.200, 0.429	68.200, 0.568	68.200, 0.688	68.200, 0.833	68.200, -0.034	68.200, -0.127	68.200, -0.044	68.200, -0.054	68.200, -0.060	68.200, -0.033	68.200, -0.026
343	68.400, 0.302	68.400, 0.430	68.400, 0.568	68.400, 0.688	68.400, 0.834	68.400, -0.035	68.400, -0.128	68.400, -0.045	68.400, -0.054	68.400, -0.060	68.400, -0.033	68.400, -0.026
344	68.600, 0.302	68.600, 0.430	68.600, 0.568	68.600, 0.688	68.600, 0.834	68.600, -0.035	68.600, -0.128	68.600, -0.045	68.600, -0.054	68.600, -0.060	68.600, -0.032	68.600, -0.027
345	68.800, 0.302	68.800, 0.430	68.800, 0.568	68.800, 0.688	68.800, 0.834	68.800, -0.035	68.800, -0.128	68.800, -0.045	68.800, -0.054	68.800, -0.060	68.800, -0.032	68.800, -0.027
346	69.000, 0.303	69.000, 0.431	69.000, 0.569	69.000, 0.688	69.000, 0.834	69.000, -0.035	69.000, -0.128	69.000, -0.045	69.000, -0.054	69.000, -0.060	69.000, -0.032	69.000, -0.028
347	69.200, 0.303	69.200, 0.431	69.200, 0.569	69.200, 0.688	69.200, 0.835	69.200, -0.036	69.200, -0.128	69.200, -0.045	69.200, -0.054	69.200, -0.060	69.200, -0.032	69.200, -0.028
348	69.400, 0.303	69.400, 0.431	69.400, 0.569	69.400, 0.688	69.400, 0.835	69.400, -0.036	69.400, -0.128	69.400, -0.044	69.400, -0.054	69.400, -0.061	69.400, -0.032	69.400, -0.028
349	69.600, 0.303	69.600, 0.431	69.600, 0.570	69.600, 0.688	69.600, 0.835	69.600, -0.036	69.600, -0.128	69.600, -0.044	69.600, -0.054	69.600, -0.061	69.600, -0.032	69.600, -0.028
350	69.800, 0.304	69.800, 0.431	69.800, 0.570	69.800, 0.688	69.800, 0.836	69.800, -0.036	69.800, -0.128	69.800, -0.044	69.800, -0.054	69.800, -0.061	69.800, -0.032	69.800, -0.028
351	70.000, 0.304	70.000, 0.431	70.000, 0.570	70.000, 0.688	70.000, 0.836	70.000, -0.036	70.000, -0.129	70.000, -0.044	70.000, -0.054	70.000, -0.061	70.000, -0.032	70.000, -0.028
352	70.200, 0.304	70.200, 0.431	70.200, 0.570	70.200, 0.689	70.200, 0.836	70.200, -0.036	70.200, -0.129	70.200, -0.044	70.200, -0.054	70.200, -0.061	70.200, -0.032	70.200, -0.028
353	70.400, 0.304	70.400, 0.431	70.400, 0.570	70.400, 0.689	70.400, 0.836	70.400, -0.036	70.400, -0.129	70.400, -0.044	70.400, -0.054	70.400, -0.061	70.400, -0.032	70.400, -0.028
354	70.600, 0.304	70.600, 0.431	70.600, 0.570	70.600, 0.689	70.600, 0.836	70.600, -0.036	70.600, -0.130	70.600, -0.044	70.600, -0.054	70.600, -0.061	70.600, -0.033	70.600, -0.027
355	70.800, 0.304	70.800, 0.431	70.800, 0.570	70.800, 0.689	70.800, 0.836	70.800, -0.036	70.800, -0.130	70.800, -0.044	70.800, -0.053	70.800, -0.062	70.800, -0.033	70.800, -0.027
356	71.000, 0.304	71.000, 0.431	71.000, 0.570	71.000, 0.689	71.000, 0.836	71.000, -0.036	71.000, -0.130	71.000, -0.044	71.000, -0.053	71.000, -0.062	71.000, -0.033	71.000, -0.027
357	71.200, 0.304	71.200, 0.431	71.200, 0.570	71.200, 0.689	71.200, 0.836	71.200, -0.036	71.200, -0.130	71.200, -0.044	71.200, -0.054	71.200, -0.062	71.200, -0.034	71.200, -0.027
358	71.400, 0.305	71.400, 0.431	71.400, 0.570	71.400, 0.689	71.400, 0.837	71.400, -0.036	71.400, -0.130	71.400, -0.044	71.400, -0.054	71.400, -0.062	71.400, -0.034	71.400, -0.027
359	71.600, 0.305	71.600, 0.432	71.600, 0.571	71.600, 0.689	71.600, 0.837	71.600, -0.036	71.600, -0.130	71.600, -0.045	71.600, -0.054	71.600, -0.062	71.600, -0.034	71.600, -0.027
360	71.800, 0.305	71.800, 0.432	71.800, 0.571	71.800, 0.689	71.800, 0.837	71.800, -0.036	71.800, -0.131	71.800, -0.045	71.800, -0.054	71.800, -0.063	71.800, -0.034	71.800, -0.027
361	72.000, 0.306	72.000, 0.433	72.000, 0.571	72.000, 0.690	72.000, 0.837	72.000, -0.036	72.000, -0.131	72.000, -0.045	72.000, -0.054	72.000, -0.063	72.000, -0.034	72.000, -0.027
362	72.200, 0.306	72.200, 0.433	72.200, 0.571	72.200, 0.690	72.200, 0.837	72.200, -0.036	72.200, -0.131	72.200, -0.046	72.200, -0.055	72.200, -0.064	72.200, -0.034	72.200, -0.028
363	72.400, 0.307	72.400, 0.434	72.400, 0.571	72.400, 0.690	72.400, 0.837	72.400, -0.036	72.400, -0.131	72.400, -0.046	72.400, -0.055	72.400, -0.064	72.400, -0.034	72.400, -0.028
364	72.600, 0.307	72.600, 0.434	72.600, 0.572	72.600, 0.690	72.600, 0.837	72.600, -0.036	72.600, -0.132	72.600, -0.046	72.600, -0.055	72.600, -0.065	72.600, -0.034	72.600, -0.029
365	72.800, 0.308	72.800, 0.435	72.800, 0.572	72.800, 0.690	72.800, 0.838	72.800, -0.036	72.800, -0.132	72.800, -0.047	72.800, -0.056	72.800, -0.065	72.800, -0.034	72.800, -0.029
366	73.000, 0.308	73.000, 0.435	73.000, 0.573	73.000, 0.691	73.000, 0.838	73.000, -0.036	73.000, -0.132	73.000, -0.047	73.000, -0.056	73.000, -0.065	73.000, -0.034	73.000, -0.029
367	73.200, 0.309	73.200, 0.435	73.200, 0.573	73.200, 0.691	73.200, 0.838	73.200, -0.036	73.200, -0.132	73.200, -0.047	73.200, -0.056	73.200, -0.065	73.200, -0.034	73.200, -0.030
368	73.400, 0.309	73.400, 0.435	73.400, 0.573	73.400, 0.691	73.400, 0.838	73.400, -0.036	73.400, -0.132	73.400, -0.047	73.400, -0.056	73.400, -0.065	73.400, -0.034	73.400, -0.030
369	73.600, 0.309	73.600, 0.435	73.600, 0.573	73.600, 0.691	73.600, 0.839	73.600, -0.036	73.600, -0.132	73.600, -0.047	73.600, -0.056	73.600, -0.065	73.600, -0.034	73.600, -0.030
370	73.800, 0.310	73.800, 0.435	73.800, 0.573	73.800, 0.691	73.800, 0.839	73.800, -0.036	73.800, -0.132	73.800, -0.046	73.800, -0.056	73.800, -0.065	73.800, -0.035	73.800, -0.030
371	74.000, 0.310	74.000, 0.434	74.000, 0.573	74.000, 0.691	74.000, 0.839	74.000, -0.036	74.000, -0.132	74.000, -0.046	74.000, -0.056	74.000, -0.065	74.000, -0.035	74.000, -0.030
372	74.200, 0.310	74.200, 0.434	74.200, 0.572	74.200, 0.692	74.200, 0.839	74.200, -0.035	74.200, -0.133	74.200, -0.046	74.200, -0.056	74.200, -0.065	74.200, -0.035	74.200, -0.030
373	74.400, 0.310	74.400, 0.434	74.400, 0.572	74.400, 0.692	74.400, 0.839	74.400, -0.036	74.400, -0.133	74.400, -0.046	74.400, -0.056	74.400, -0.064	74.400, -0.035	74.400, -0.030
374	74.600, 0.311	74.600, 0.434	74.600, 0.572	74.600, 0.692	74.600, 0.840	74.600, -0.036	74.600, -0.134	74.600, -0.046	74.600, -0.056	74.600, -0.064	74.600, -0.035	74.600, -0.030
375	74.800, 0.311	74.800, 0.434	74.800, 0.572	74.800, 0.692	74.800, 0.840	74.800, -0.036	74.800, -0.134	74.800, -0.046	74.800, -0.056	74.800, -0.064	74.800, -0.034	74.800, -0.030
376	75.000, 0.311	75.000, 0.433	75.000, 0.572	75.000, 0.692	75.000, 0.840	75.000, -0.036	75.000, -0.134	75.000, -0.045	75.000, -0.056	75.000, -0.064	75.000, -0.034	75.000, -0.030
377	75.200, 0.311	75.200, 0.433	75.200, 0.572	75.200, 0.692	75.200, 0.840	75.200, -0.036	75.200, -0.134	75.200, -0.045	75.200, -0.056	75.200, -0.064	75.200, -0.034	75.200, -0.030
378	75.400, 0.311	75.400, 0.433	75.400, 0.572	75.400, 0.692	75.400, 0.840	75.400, -0.036	75.400, -0.134	75.400, -0.045	75.400, -0.057	75.400, -0.064	75.400, -0.034	75.400, -0.030
379	75.600, 0.311	75.600, 0.434	75.600, 0.572	75.600, 0.692	75.600, 0.840	75.600, -0.036	75.600, -0.134	75.600, -0.045	75.600, -0.057	75.600, -0.064	75.600, -0.033	75.600, -0.030
380	75.800, 0.311	75.800, 0.434	75.800, 0.573	75.800, 0.692	75.800, 0.840	75.800, -0.036	75.800, -0.134	75.800, -0.045	75.800, -0.058	75.800, -0.065	75.800, -0.033	75.800, -0.030
381	76.000, 0.311	76.000, 0.434	76.000, 0.573	76.000, 0.692	76.000, 0.840	76.000, -0.036	76.000, -0.134	76.000, -0.045	76.000, -0.058	76.000, -0.065	76.000, -0.033	76.000, -0.030
382	76.200, 0.312	76.200, 0.434	76.200, 0.574	76.200, 0.692	76.200, 0.840	76.200, -0.037	76.200, -0.134	76.200, -0.045	76.200, -0.059	76.200, -0.065	76.200, -0.033	76.200, -0.029
383	76.400, 0.312	76.400, 0.434	76.400, 0.574	76.400, 0.693	76.400, 0.840	76.400, -0.037	76.400, -0.134	76.400, -0.046	76.400, -0.059	76.400, -0.065	76.400, -0.033	76.400, -0.029
384	76.600, 0.312	76.600, 0.434	76.600, 0.575	76.600, 0.693	76.600, 0.840	76.600, -0.037	76.600, -0.134	76.600, -0.046	76.600, -0.059	76.600, -0.065	76.600, -0.033	76.600, -0.029
385	76.800, 0.312	76.800, 0.434	76.800, 0.575	76.800, 0.693	76.800, 0.840	76.800, -0.037	76.800, -0.134	76.800, -0.046	76.800, -0.059	76.800, -0.065	76.800, -0.033	76.800, -0.029
386	77.000, 0.312	77.000, 0.435	77.000, 0.575	77.000, 0.693	77.000, 0.841	77.000, -0.038	77.000, -0.134	77.000, -0.047	77.000, -0.059	77.000, -0.065	77.000, -0.033	77.000, -0.028
387	77.200, 0.312	77.200, 0.435	77.200, 0.575	77.200, 0.694	77.200, 0.841	77.200, -0.038	77.200, -0.134	77.200, -0.047	77.200, -0.059	77.200, -0.065	77.200, -0.034	77.200, -0.028
388	77.400, 0.312	77.400, 0.435	77.400, 0.576	77.400, 0.694	77.400, 0.841	77.400, -0.038	77.400, -0.134	77.400, -0.048	77.400, -0.059	77.400, -0.065	77.400, -0.034	77.400, -0.028
389	77.600, 0.313	77.600, 0.435	77.600, 0.576	77.600, 0.694	77.600, 0.842	77.600, -0.038	77.600, -0.134	77.600, -0.048	77.600, -0.059	77.600, -0.065	77.600, -0.035	77.600, -0.029
390	77.800, 0.313	77.800, 0.436	77.800, 0.575	77.800, 0.694	77.800, 0.842	77.800, -0.038	77.800, -0.135	77.800, -0.048	77.800, -0.059	77.800, -0.065	77.800, -0.035	77.800, -0.029
391	78.000, 0.313	78.000, 0.436	78.000, 0.575	78.000, 0.695	78.000, 0.843	78.000, -0.038	78.000, -0.135	78.000, -0.048	78.000, -0.059	78.000, -0.066	78.000, -0.035	78.000, -0.029
392	78.200, 0.313	78.200, 0.436	78.200, 0.575	78.200, 0.695	78.200, 0.843	78.200, -0.038	78.200, -0.135	78.200, -0.049	78.200, -0.059	78.200, -0.066	78.200, -0.036	78.200, -0.029
393	78.400, 0.314	78.400, 0.437	78.400, 0.575	78.400, 0.695	78.400, 0.844	78.400, -0.038	78.400, -0.136	78.400, -0.049	78.400, -0.059	78.400, -0.066	78.400, -0.036	78.400, -0.030
394	78.600, 0.314	78.600, 0.437	78.600, 0.575	78.600, 0.695	78.600, 0.845	78.600, -0.038	78.600, -0.136	78.600, -0.049	78.600, -0.059	78.600, -0.066	78.600, -0.036	78.600, -0.030
395	78.800, 0.314	78.800, 0.437	78.800, 0.575	78.800, 0.695	78.800, 0.845	78.800, -0.038	78.800, -0.136	78.800, -0.049	78.800, -0.059	78.800, -0.066	78.800, -0.036	78.800, -0.030
396	79.000, 0.314	79.000, 0.438	79.000, 0.575	79.000, 0.695	79.000, 0.846	79.000, -0.037	79.000, -0.136	79.000, -0.049	79.000, -0.059	79.000, -0.066	79.000, -0.036	79.000, -0.031
397	79.200, 0.314	79.200, 0.438	79.200, 0.576	79.200, 0.695	79.200, 0.846	79.200, -0.038	79.200, -0.136	79.200, -0.049	79.200, -0.059	79.200, -0.066	79.200, -0.036	79.200, -0.031
398	79.400, 0.314	79.400, 0.438	79.400, 0.576	79.400, 0.695	79.400, 0.846	79.400, -0.038	79.400, -0.136	79.400, -0.049	79.400, -0.059	79.400, -0.066	79.400, -0.036	79.400, -0.031
399	79.600, 0.315	79.600, 0.437	79.600, 0.576	79.600, 0.695	79.600, 0.847	79.600, -0.038	79.600, -0.136	79.600, -0.048	79.600, -0.059	79.600, -0.066	79.600, -0.036	79.600, -0.031
400	79.800, 0.315	79.800, 0.437	79.800, 0.576	79.800, 0.695	79.800, 0.847	79.800, -0.038	79.800, -0.136	79.800, -0.048	79.800, -0.059	79.800, -0.066	79.800, -0.036	79.800, -0.030
401	80.000, 0.315	80.000, 0.437	80.000, 0.576	80.000, 0.695	80.000, 0.847	80.000, -0.038	80.000, -0.136	80.000, -0.048	80.000, -0.059	80.000, -0.065	80.000, -0.037	80.000, -0.030
402	80.200, 0.315	80.200, 0.437	80.200, 0.576	80.200, 0.695	80.200, 0.846	80.200, -0.038	80.200, -0.136	80.200, -0.048	80.200, -0.059	80.200, -0.065	80.200, -0.037	80.200, -0.030
403	80.400, 0.316	80.400, 0.437	80.400, 0.577	80.400, 0.695	80.400, 0.846	80.400, -0.038	80.400, -0.136	80.400, -0.048	80.400, -0.059	80.400, -0.066	80.400, -0.037	80.400, -0.030
404	80.600, 0.316	80.600, 0.437	80.600, 0.577	80.600, 0.695	80.600, 0.846	80.600, -0.038	80.600, -0.137	80.600, -0.048	80.600, -0.059	80.600, -0.066	80.600, -0.037	80.600, -0.030
405	80.800, 0.316	80.800, 0.437	80.800, 0.577	80.800, 0.695	80.800, 0.846	80.800, -0.039	80.800, -0.137	80.800, -0.048	80.800, -0.059	80.800, -0.066	80.800, -0.037	80.800, -0.030
406	81.000, 0.316	81.000, 0.437	81.000, 0.578	81.000, 0.696	81.000, 0.846	81.000, -0.039	81.000, -0.137	81.000, -0.048	81.000, -0.059	81.000, -0.066	81.000, -0.037	81.000, -0.030
407	81.200, 0.317	81.200, 0.438	81.200, 0.578	81.200, 0.696	81.200, 0.846	81.200, -0.039	81.200, -0.137	81.200, -0.048	81.200, -0.059	81.200, -0.066	81.200, -0.037	81.200, -0.029
408	81.400, 0.317	81.400, 0.438	81.400, 0.578	81.400, 0.696	81.400, 0.846	81.400, -0.039	81.400, -0.138	81.400, -0.048	81.400, -0.059	81.400, -0.066	81.400, -0.037	81.400, -0.029
409	81.600, 0.317	81.600, 0.438	81.600, 0.579	81.600, 0.696	81.600, 0.847	81.600, -0.039	81.600, -0.138	81.600, -0.048	81.600, -0.060	81.600, -0.066	81.600, -0.037	81.600, -0.030
410	81.800, 0.317	81.800, 0.439	81.800, 0.579	81.800, 0.696	81.800, 0.847	81.800, -0.039	81.800, -0.139	81.800, -0.048	81.800, -0.060	81.800, -0.066	81.800, -0.037	81.800, -0.030
411	82.000, 0.317	82.000, 0.439	82.000, 0.579	82.000, 0.696	82.000, 0.847	82.000, -0.039	82.000, -0.139	82.000, -0.048	82.000, -0.060	82.000, -0.066	82.000, -0.037	82.000, -0.030
412	82.200, 0.317	82.200, 0.439	82.200, 0.579	82.200, 0.696	82.200, 0.847	82.200, -0.039	82.200, -0.139	82.200, -0.049	82.200, -0.060	82.200, -0.066	82.200, -0.037	82.200, -0.031
413	82.400, 0.317	82.400, 0.439	82.400, 0.579	82.400, 0.697	82.400, 0.848	82.400, -0.039	82.400, -0.139	82.400, -0.049	82.400, -0.060	82.400, -0.065	82.400, -0.037	82.400, -0.031
414	82.600, 0.317	82.600, 0.439	82.600, 0.579	82.600, 0.697	82.600, 0.848	82.600, -0.039	82.600, -0.139	82.600, -0.049	82.600, -0.060	82.600, -0.065	82.600, -0.037	82.600, -0.031
415	82.800, 0.317	82.800, 0.439	82.800, 0.579	82.800, 0.697	82.800, 0.848	82.800, -0.039	82.800, -0.139	82.800, -0.050	82.800, -0.060	82.800, -0.065	82.800, -0.037	82.800, -0.032
416	83.000, 0.318	83.000, 0.439	83.000, 0.580	83.000, 0.698	83.000, 0.848	83.000, -0.039	83.000, -0.139	83.000, -0.050	83.000, -0.060	83.000, -0.065	83.000, -0.037	83.000, -0.032
417	83.200, 0.318	83.200, 0.440	83.200, 0.580	83.200, 0.698	83.200, 0.848	83.200, -0.039	83.200, -0.139	83.200, -0.050	83.200, -0.060	83.200, -0.066	83.200, -0.037	83.200, -0.032
418	83.400, 0.318	83.400, 0.440	83.400, 0.580	83.400, 0.698	83.400, 0.848	83.400, -0.039	83.400, -0.139	83.400, -0.050	83.400, -0.060	83.400, -0.066	83.400, -0.037	83.400, -0.032
419	83.600, 0.319	83.600, 0.440	83.600, 0.580	83.600, 0.699	83.600, 0.848	83.600, -0.038	83.600, -0.139	83.600, -0.050	83.600, -0.060	83.600, -0.066	83.600, -0.037	83.600, -0.031
420	83.800, 0.319	83.800, 0.440	83.800, 0.580	83.800, 0.699	83.800, 0.849	83.800, -0.038	83.800, -0.139	83.800, -0.050	83.800, -0.060	83.800, -0.067	83.800, -0.037	83.800, -0.031
421	84.000, 0.319	84.000, 0.440	84.000, 0.580	84.000, 0.699	84.000, 0.849	84.000, -0.038	84.000, -0.140	84.000, -0.050	84.000, -0.060	84.000, -0.067	84.000, -0.037	84.000, -0.030
422	84.200, 0.320	84.200, 0.440	84.200, 0.581	84.200, 0.699	84.200, 0.849	84.200, -0.038	84.200, -0.140	84.200, -0.050	84.200, -0.061	84.200, -0.068	84.200, -0.037	84.200, -0.030
423	84.400, 0.320	84.400, 0.441	84.400, 0.581	84.400, 0.700	84.400, 0.849	84.400, -0.038	84.400, -0.140	84.400, -0.050	84.400, -0.061	84.400, -0.068	84.400, -0.037	84.400, -0.030
424	84.600, 0.320	84.600, 0.441	84.600, 0.581	84.600, 0.700	84.600, 0.849	84.600, -0.038	84.600, -0.140	84.600, -0.051	84.600, -0.061	84.600, -0.069	84.600, -0.037	84.600, -0.030
425	84.800, 0.321	84.800, 0.441	84.800, 0.581	84.800, 0.700	84.800, 0.850	84.800, -0.038	84.800, -0.140	84.800, -0.051	84.800, -0.061	84.800, -0.069	84.800, -0.037	84.800, -0.030
426	85.000, 0.321	85.000, 0.441	85.000, 0.581	85.000, 0.700	85.000, 0.850	85.000, -0.039	85.000, -0.140	85.000, -0.051	85.000, -0.061	85.000, -0.069	85.000, -0.037	85.000, -0.030
427	85.200, 0.321	85.200, 0.442	85.200, 0.581	85.200, 0.700	85.200, 0.850	85.200, -0.039	85.200, -0.141	85.200, -0.051	85.200, -0.061	85.200, -0.069	85.200, -0.037	85.200, -0.030
428	85.400, 0.321	85.400, 0.442	85.400, 0.581	85.400, 0.700	85.400, 0.850	85.400, -0.039	85.400, -0.141	85.400, -0.050	85.400, -0.061	85.400, -0.070	85.400, -0.037	85.400, -0.030
429	85.600, 0.321	85.600, 0.442	85.600, 0.581	85.600, 0.700	85.600, 0.850	85.600, -0.039	85.600, -0.141	85.600, -0.050	85.600, -0.061	85.600, -0.070	85.600, -0.037	85.600, -0.029
430	85.800, 0.321	85.800, 0.442	85.800, 0.580	85.800, 0.701	85.800, 0.851	85.800, -0.039	85.800, -0.141	85.800, -0.050	85.800, -0.062	85.800, -0.070	85.800, -0.037	85.800, -0.029
431	86.000, 0.321	86.000, 0.442	86.000, 0.580	86.000, 0.701	86.000, 0.851	86.000, -0.039	86.000, -0.141	86.000, -0.050	86.000, -0.062	86.000, -0.070	86.000, -0.037	86.000, -0.030
432	86.200, 0.321	86.200, 0.442	86.200, 0.580	86.200, 0.701	86.200, 0.851	86.200, -0.040	86.200, -0.141	86.200, -0.050	86.200, -0.062	86.200, -0.070	86.200, -0.037	86.200, -0.030
433	86.400, 0.321	86.400, 0.441	86.400, 0.580	86.400, 0.701	86.400, 0.851	86.400, -0.040	86.400, -0.140	86.400, -0.051	86.400, -0.062	86.400, -0.069	86.400, -0.037	86.400, -0.030
434	86.600, 0.321	86.600, 0.441	86.600, 0.580	86.600, 0.701	86.600, 0.852	86.600, -0.040	86.600, -0.140	86.600, -0.051	86.600, -0.062	86.600, -0.069	86.600, -0.037	86.600, -0.030
435	86.800, 0.321	86.800, 0.441	86.800, 0.580	86.800, 0.701	86.800, 0.852	86.800, -0.041	86.800, -0.140	86.800, -0.051	86.800, -0.062	86.800, -0.069	86.800, -0.037	86.800, -0.030
436	87.000, 0.322	87.000, 0.441	87.000, 0.580	87.000, 0.701	87.000, 0.852	87.000, -0.041	87.000, -0.140	87.000, -0.051	87.000, -0.062	87.000, -0.068	87.000, -0.037	87.000, -0.030
437	87.200, 0.322	87.200, 0.442	87.200, 0.580	87.200, 0.702	87.200, 0.852	87.200, -0.041	87.200, -0.140	87.200, -0.051	87.200, -0.062	87.200, -0.068	87.200, -0.037	87.200, -0.030
438	87.400, 0.323	87.400, 0.442	87.400, 0.581	87.400, 0.702	87.400, 0.852	87.400, -0.041	87.400, -0.140	87.400, -0.051	87.400, -0.062	87.400, -0.068	87.400, -0.037	87.400, -0.029
439	87.600, 0.323	87.600, 0.442	87.600, 0.581	87.600, 0.702	87.600, 0.853	87.600, -0.041	87.600, -0.140	87.600, -0.051	87.600, -0.061	87.600, -0.067	87.600, -0.037	87.600, -0.029
440	87.800, 0.324	87.800, 0.441	87.800, 0.581	87.800, 0.702	87.800, 0.853	87.800, -0.041	87.800, -0.140	87.800, -0.051	87.800, -0.061	87.800, -0.067	87.800, -0.037	87.800, -0.029
441	88.000, 0.324	88.000, 0.441	88.000, 0.581	88.000, 0.702	88.000, 0.853	88.000, -0.041	88.000, -0.141	88.000, -0.051	88.000, -0.061	88.000, -0.066	88.000, -0.037	88.000, -0.029
442	88.200, 0.324	88.200, 0.441	88.200, 0.581	88.200, 0.702	88.200, 0.854	88.200, -0.041	88.200, -0.141	88.200, -0.051	88.200, -0.061	88.200, -0.066	88.200, -0.037	88.200, -0.030
443	88.400, 0.325	88.400, 0.442	88.400, 0.582	88.400, 0.702	88.400, 0.854	88.400, -0.041	88.400, -0.142	88.400, -0.051	88.400, -0.060	88.400, -0.066	88.400, -0.038	88.400, -0.030
444	88.600, 0.325	88.600, 0.442	88.600, 0.582	88.600, 0.702	88.600, 0.854	88.600, -0.041	88.600, -0.142	88.600, -0.051	88.600, -0.060	88.600, -0.066	88.600, -0.038	88.600, -0.030
445	88.800, 0.326	88.800, 0.442	88.800, 0.582	88.800, 0.703	88.800, 0.854	88.800, -0.041	88.800, -0.143	88.800, -0.051	88.800, -0.060	88.800, -0.065	88.800, -0.038	88.800, -0.030
446	89.000, 0.326	89.000, 0.443	89.000, 0.583	89.000, 0.703	89.000, 0.854	89.000, -0.041	89.000, -0.143	89.000, -0.051	89.000, -0.060	89.000, -0.065	89.000, -0.038	89.000, -0.030
447	89.200, 0.326	89.200, 0.443	89.200, 0.583	89.200, 0.703	89.200, 0.854	89.200, -0.041	89.200, -0.144	89.200, -0.051	89.200, -0.060	89.200, -0.065	89.200, -0.038	89.200, -0.030
448	89.400, 0.326	89.400, 0.443	89.400, 0.583	89.400, 0.703	89.400, 0.854	89.400, -0.041	89.400, -0.143	89.400, -0.050	89.400, -0.060	89.400, -0.066	89.400, -0.038	89.400, -0.030
449	89.600, 0.326	89.600, 0.443	89.600, 0.584	89.600, 0.703	89.600, 0.855	89.600, -0.041	89.600, -0.143	89.600, -0.050	89.600, -0.060	89.600, -0.066	89.600, -0.038	89.600, -0.029
450	89.800, 0.326	89.800, 0.443	89.800, 0.584	89.800, 0.703	89.800, 0.855	89.800, -0.041	89.800, -0.142	89.800, -0.050	89.800, -0.060	89.800, -0.066	89.800, -0.039	89.800, -0.029
451	90.000, 0.326	90.000, 0.443	90.000, 0.584	90.000, 0.703	90.000, 0.855	90.000, -0.041	90.000, -0.142	90.000, -0.050	90.000, -0.061	90.000, -0.066	90.000, -0.039	90.000, -0.029
452	90.200, 0.326	90.200, 0.443	90.200, 0.584	90.200, 0.703	90.200, 0.855	90.200, -0.041	90.200, -0.141	90.200, -0.050	90.200, -0.061	90.200, -0.067	90.200, -0.039	90.200, -0.030
453	90.400, 0.325	90.400, 0.443	90.400, 0.584	90.400, 0.703	90.400, 0.855	90.400, -0.041	90.400, -0.141	90.400, -0.049	90.400, -0.061	90.400, -0.067	90.400, -0.040	90.400, -0.030
454	90.600, 0.325	90.600, 0.443	90.600, 0.584	90.600, 0.703	90.600, 0.855	90.600, -0.041	90.600, -0.140	90.600, -0.050	90.600, -0.061	90.600, -0.067	90.600, -0.040	90.600, -0.031
455	90.800, 0.325	90.800, 0.443	90.800, 0.584	90.800, 0.703	90.800, 0.855	90.800, -0.041	90.800, -0.140	90.800, -0.050	90.800, -0.062	90.800, -0.067	90.800, -0.040	90.800, -0.031
456	91.000, 0.325	91.000, 0.443	91.000, 0.584	91.000, 0.703	91.000, 0.856	91.000, -0.041	91.000, -0.140	91.000, -0.050	91.000, -0.062	91.000, -0.067	91.000, -0.040	91.000, -0.032
457	91.200, 0.325	91.200, 0.443	91.200, 0.584	91.200, 0.703	91.200, 0.856	91.200, -0.041	91.200, -0.140	91.200, -0.051	91.200, -0.062	91.200, -0.068	91.200, -0.040	91.200, -0.032
458	91.400, 0.325	91.400, 0.443	91.400, 0.584	91.400, 0.703	91.400, 0.856	91.400, -0.040	91.400, -0.140	91.400, -0.051	91.400, -0.061	91.400, -0.068	91.400, -0.040	91.400, -0.032
459	91.600, 0.324	91.600, 0.443	91.600, 0.584	91.600, 0.704	91.600, 0.856	91.600, -0.040	91.600, -0.141	91.600, -0.051	91.600, -0.061	91.600, -0.069	91.600, -0.039	91.600, -0.032
460	91.800, 0.324	91.800, 0.443	91.800, 0.584	91.800, 0.704	91.800, 0.856	91.800, -0.040	91.800, -0.141	91.800, -0.052	91.800, -0.061	91.800, -0.069	91.800, -0.039	91.800, -0.033
461	92.000, 0.325	92.000, 0.443	92.000, 0.584	92.000, 0.704	92.000, 0.856	92.000, -0.040	92.000, -0.141	92.000, -0.052	92.000, -0.061	92.000, -0.070	92.000, -0.039	92.000, -0.033
462	92.200, 0.325	92.200, 0.443	92.200, 0.585	92.200, 0.704	92.200, 0.856	92.200, -0.040	92.200, -0.142	92.200, -0.052	92.200, -0.061	92.200, -0.070	92.200, -0.039	92.200, -0.033
463	92.400, 0.326	92.400, 0.444	92.400, 0.585	92.400, 0.704	92.400, 0.856	92.400, -0.040	92.400, -0.143	92.400, -0.052	92.400, -0.061	92.400, -0.070	92.400, -0.038	92.400, -0.032
464	92.600, 0.326	92.600, 0.444	92.600, 0.585	92.600, 0.705	92.600, 0.856	92.600, -0.041	92.600, -0.144	92.600, -0.052	92.600, -0.062	92.600, -0.070	92.600, -0.038	92.600, -0.032
465	92.800, 0.327	92.800, 0.444	92.800, 0.585	92.800, 0.705	92.800, 0.856	92.800, -0.041	92.800, -0.144	92.800, -0.052	92.800, -0.062	92.800, -0.070	92.800, -0.038	92.800, -0.031
466	93.000, 0.327	93.000, 0.444	93.000, 0.585	93.000, 0.705	93.000, 0.856	93.000, -0.041	93.000, -0.144	93.000, -0.052	93.000, -0.062	93.000, -0.070	93.000, -0.038	93.000, -0.031
467	93.200, 0.327	93.200, 0.444	93.200, 0.585	93.200, 0.705	93.200, 0.856	93.200, -0.041	93.200, -0.144	93.200, -0.052	93.200, -0.062	93.200, -0.070	93.200, -0.038	93.200, -0.030
468	93.400, 0.328	93.400, 0.444	93.400, 0.585	93.400, 0.705	93.400, 0.857	93.400, -0.041	93.400, -0.144	93.400, -0.052	93.400, -0.062	93.400, -0.070	93.400, -0.038	93.400, -0.029
469	93.600, 0.328	93.600, 0.445	93.600, 0.585	93.600, 0.705	93.600, 0.857	93.600, -0.041	93.600, -0.144	93.600, -0.052	93.600, -0.063	93.600, -0.070	93.600, -0.038	93.600, -0.029
470	93.800, 0.328	93.800, 0.445	93.800, 0.585	93.800, 0.706	93.800, 0.857	93.800, -0.041	93.800, -0.144	93.800, -0.052	93.800, -0.063	93.800, -0.070	93.800, -0.038	93.800, -0.028
471	94.000, 0.329	94.000, 0.445	94.000, 0.585	94.000, 0.706	94.000, 0.857	94.000, -0.042	94.000, -0.144	94.000, -0.052	94.000, -0.063	94.000, -0.070	94.000, -0.039	94.000, -0.028
472	94.200, 0.329	94.200, 0.445	94.200, 0.585	94.200, 0.706	94.200, 0.858	94.200, -0.042	94.200, -0.144	94.200, -0.052	94.200, -0.064	94.200, -0.069	94.200, -0.039	94.200, -0.028
473	94.400, 0.329	94.400, 0.445	94.400, 0.585	94.400, 0.706	94.400, 0.858	94.400, -0.042	94.400, -0.143	94.400, -0.052	94.400, -0.064	94.400, -0.069	94.400, -0.039	94.400, -0.028
474	94.600, 0.329	94.600, 0.446	94.600, 0.586	94.600, 0.706	94.600, 0.858	94.600, -0.041	94.600, -0.143	94.600, -0.052	94.600, -0.064	94.600, -0.069	94.600, -0.039	94.600, -0.028
475	94.800, 0.329	94.800, 0.446	94.800, 0.586	94.800, 0.706	94.800, 0.858	94.800, -0.041	94.800, -0.143	94.800, -0.052	94.800, -0.064	94.800, -0.069	94.800, -0.039	94.800, -0.028
476	95.000, 0.329	95.000, 0.446	95.000, 0.586	95.000, 0.706	95.000, 0.859	95.000, -0.041	95.000, -0.144	95.000, -0.052	95.000, -0.063	95.000, -0.069	95.000, -0.040	95.000, -0.028
477	95.200, 0.329	95.200, 0.447	95.200, 0.586	95.200, 0.707	95.200, 0.859	95.200, -0.042	95.200, -0.144	95.200, -0.053	95.200, -0.063	95.200, -0.069	95.200, -0.040	95.200, -0.028
478	95.400, 0.329	95.400, 0.447	95.400, 0.586	95.400, 0.707	95.400, 0.859	95.400, -0.042	95.400, -0.144	95.400, -0.053	95.400, -0.062	95.400, -0.069	95.400, -0.040	95.400, -0.029
479	95.600, 0.329	95.600, 0.447	95.600, 0.587	95.600, 0.707	95.600, 0.859	95.600, -0.042	95.600, -0.144	95.600, -0.053	95.600, -0.062	95.600, -0.069	95.600, -0.040	95.600, -0.029
480	95.800, 0.330	95.800, 0.448	95.800, 0.587	95.800, 0.707	95.800, 0.859	95.800, -0.042	95.800, -0.144	95.800, -0.054	95.800, -0.062	95.800, -0.069	95.800, -0.040	95.800, -0.030
481	96.000, 0.330	96.000, 0.448	96.000, 0.587	96.000, 0.707	96.000, 0.860	96.000, -0.042	96.000, -0.144	96.000, -0.054	96.000, -0.062	96.000, -0.069	96.000, -0.039	96.000, -0.031
482	96.200, 0.330	96.200, 0.448	96.200, 0.587	96.200, 0.707	96.200, 0.860	96.200, -0.042	96.200, -0.144	96.200, -0.054	96.200, -0.062	96.200, -0.069	96.200, -0.039	96.200, -0.031
483	96.400, 0.330	96.400, 0.448	96.400, 0.587	96.400, 0.707	96.400, 0.860	96.400, -0.042	96.400, -0.144	96.400, -0.054	96.400, -0.062	96.400, -0.070	96.400, -0.038	96.400, -0.031
484	96.600, 0.330	96.600, 0.448	96.600, 0.587	96.600, 0.708	96.600, 0.860	96.600, -0.042	96.600, -0.144	96.600, -0.054	96.600, -0.062	96.600, -0.070	96.600, -0.038	96.600, -0.032
485	96.800, 0.330	96.800, 0.448	96.800, 0.587	96.800, 0.708	96.800, 0.861	96.800, -0.042	96.800, -0.144	96.800, -0.054	96.800, -0.062	96.800, -0.070	96.800, -0.038	96.800, -0.032
486	97.000, 0.331	97.000, 0.448	97.000, 0.587	97.000, 0.708	97.000, 0.861	97.000, -0.042	97.000, -0.144	97.000, -0.054	97.000, -0.062	97.000, -0.070	97.000, -0.038	97.000, -0.032
487	97.200, 0.331	97.200, 0.448	97.200, 0.588	97.200, 0.708	97.200, 0.861	97.200, -0.042	97.200, -0.144	97.200, -0.054	97.200, -0.062	97.200, -0.070	97.200, -0.038	97.200, -0.032
488	97.400, 0.331	97.400, 0.448	97.400, 0.588	97.400, 0.708	97.400, 0.862	97.400, -0.042	97.400, -0.144	97.400, -0.055	97.400, -0.062	97.400, -0.070	97.400, -0.038	97.400, -0.032
489	97.600, 0.331	97.600, 0.448	97.600, 0.588	97.600, 0.708	97.600, 0.861	97.600, -0.042	97.600, -0.144	97.600, -0.055	97.600, -0.062	97.600, -0.070	97.600, -0.038	97.600, -0.032
490	97.800, 0.331	97.800, 0.447	97.800, 0.588	97.800, 0.709	97.800, 0.861	97.800, -0.042	97.800, -0.145	97.800, -0.055	97.800, -0.062	97.800, -0.070	97.800, -0.039	97.800, -0.032
491	98.000, 0.331	98.000, 0.447	98.000, 0.588	98.000, 0.709	98.000, 0.861	98.000, -0.042	98.000, -0.145	98.000, -0.055	98.000, -0.062	98.000, -0.070	98.000, -0.039	98.000, -0.032
492	98.200, 0.331	98.200, 0.447	98.200, 0.588	98.200, 0.708	98.200, 0.861	98.200, -0.042	98.200, -0.145	98.200, -0.055	98.200, -0.062	98.200, -0.070	98.200, -0.039	98.200, -0.031
493	98.400, 0.331	98.400, 0.447	98.400, 0.588	98.400, 0.708	98.400, 0.862	98.400, -0.042	98.400, -0.146	98.400, -0.055	98.400, -0.062	98.400, -0.070	98.400, -0.040	98.400, -0.031
494	98.600, 0.331	98.600, 0.447	98.600, 0.588	98.600, 0.708	98.600, 0.862	98.600, -0.042	98.600, -0.146	98.600, -0.055	98.600, -0.062	98.600, -0.070	98.600, -0.040	98.600, -0.031
495	98.800, 0.331	98.800, 0.448	98.800, 0.589	98.800, 0.709	98.800, 0.862	98.800, -0.042	98.800, -0.146	98.800, -0.055	98.800, -0.062	98.800, -0.070	98.800, -0.041	98.800, -0.031
496	99.000, 0.331	99.000, 0.448	99.000, 0.589	99.000, 0.709	99.000, 0.862	99.000, -0.042	99.000, -0.147	99.000, -0.055	99.000, -0.062	99.000, -0.070	99.000, -0.041	99.000, -0.032
497	99.200, 0.331	99.200, 0.449	99.200, 0.589	99.200, 0.709	99.200, 0.863	99.200, -0.042	99.200, -0.147	99.200, -0.055	99.200, -0.062	99.200, -0.070	99.200, -0.041	99.200, -0.032
498	99.400, 0.331	99.400, 0.449	99.400, 0.590	99.400, 0.709	99.400, 0.863	99.400, -0.042	99.400, -0.147	99.400, -0.055	99.400, -0.062	99.400, -0.070	99.400, -0.041	99.400, -0.032
499	99.600, 0.331	99.600, 0.449	99.600, 0.590	99.600, 0.709	99.600, 0.863	99.600, -0.043	99.600, -0.147	99.600, -0.055	99.600, -0.062	99.600, -0.069	99.600, -0.041	99.600, -0.033
500	99.800, 0.331	99.800, 0.449	99.800, 0.590	99.800, 0.709	99.800, 0.863	99.800, -0.043	99.800, -0.147	99.800, -0.055	99.800, -0.062	99.800, -0.069	99.800, -0.041	99.800, -0.033
501	100.000, 0.331	100.000, 0.449	100.000, 0.591	100.000, 0.709	100.000, 0.864	100.000, -0.043	100.000, -0.148	100.000, -0.055	100.000, -0.063	100.000, -0.069	100.000, -0.041	100.000, -0.033
502	100.200, 0.331	100.200, 0.449	100.200, 0.591	100.200, 0.710	100.200, 0.864	100.200, -0.043	100.200, -0.148	100.200, -0.054	100.200, -0.063	100.200, -0.069	100.200, -0.041	100.200, -0.033
503	100.400, 0.331	100.400, 0.449	100.400, 0.591	100.400, 0.710	100.400, 0.864	100.400, -0.043	100.400, -0.148	100.400, -0.054	100.400, -0.063	100.400, -0.069	100.400, -0.040	100.400, -0.033
504	100.600, 0.331	100.600, 0.449	100.600, 0.591	100.600, 0.710	100.600, 0.864	100.600, -0.044	100.600, -0.147	100.600, -0.054	100.600, -0.064	100.600, -0.070	100.600, -0.040	100.600, -0.033
505	100.800, 0.331	100.800, 0.449	100.800, 0.591	100.800, 0.710	100.800, 0.864	100.800, -0.043	100.800, -0.147	100.800, -0.054	100.800, -0.064	100.800, -0.070	100.800, -0.040	100.800, -0.033
506	101.000, 0.331	101.000, 0.449	101.000, 0.591	101.000, 0.711	101.000, 0.864	101.000, -0.043	101.000, -0.147	101.000, -0.053	101.000, -0.064	101.000, -0.070	101.000, -0.040	101.000, -0.033
507	101.200, 0.331	101.200, 0.449	101.200, 0.591	101.200, 0.711	101.200, 0.864	101.200, -0.043	101.200, -0.147	101.200, -0.054	101.200, -0.065	101.200, -0.070	101.200, -0.040	101.200, -0.033
508	101.400, 0.331	101.400, 0.449	101.400, 0.591	101.400, 0.711	101.400, 0.864	101.400, -0.043	101.400, -0.147	101.400, -0.054	101.400, -0.065	101.400, -0.070	101.400, -0.040	101.400, -0.033
509	101.600, 0.331	101.600, 0.450	101.600, 0.591	101.600, 0.711	101.600, 0.864	101.600, -0.044	101.600, -0.147	101.600, -0.054	101.600, -0.065	101.600, -0.071	101.600, -0.040	101.600, -0.033
510	101.800, 0.331	101.800, 0.450	101.800, 0.591	101.800, 0.711	101.800, 0.864	101.800, -0.044	101.800, -0.147	101.800, -0.054	101.800, -0.065	101.800, -0.071	101.800, -0.040	101.800, -0.033
511	102.000, 0.331	102.000, 0.450	102.000, 0.591	102.000, 0.712	102.000, 0.864	102.000, -0.044	102.000, -0.146	102.000, -0.054	102.000, -0.064	102.000, -0.072	102.000, -0.040	102.000, -0.033
512	102.200, 0.332	102.200, 0.450	102.200, 0.591	102.200, 0.712	102.200, 0.865	102.200, -0.044	102.200, -0.146	102.200, -0.055	102.200, -0.064	102.200, -0.072	102.200, -0.040	102.200, -0.033
513	102.400, 0.332	102.400, 0.450	102.400, 0.591	102.400, 0.712	102.400, 0.865	102.400, -0.043	102.400, -0.146	102.400, -0.055	102.400, -0.064	102.400, -0.072	102.400, -0.040	102.400, -0.033
514	102.600, 0.333	102.600, 0.450	102.600, 0.592	102.600, 0.712	102.600, 0.865	102.600, -0.043	102.600, -0.146	102.600, -0.055	102.600, -0.064	102.600, -0.073	102.600, -0.041	102.600, -0.034
515	102.800, 0.333	102.800, 0.450	102.800, 0.592	102.800, 0.712	102.800, 0.866	102.800, -0.043	102.800, -0.146	102.800, -0.055	102.800, -0.064	102.800, -0.073	102.800, -0.041	102.800, -0.034
516	103.000, 0.333	103.000, 0.450	103.000, 0.592	103.000, 0.712	103.000, 0.866	103.000, -0.043	103.000, -0.147	103.000, -0.055	103.000, -0.064	103.000, -0.073	103.000, -0.041	103.000, -0.034
517	103.200, 0.334	103.200, 0.450	103.200, 0.592	103.200, 0.712	103.200, 0.866	103.200, -0.043	103.200, -0.147	103.200, -0.055	103.200, -0.064	103.200, -0.073	103.200, -0.040	103.200, -0.035
518	103.400, 0.334	103.400, 0.450	103.400, 0.592	103.400, 0.712	103.400, 0.866	103.400, -0.043	103.400, -0.147	103.400, -0.056	103.400, -0.064	103.400, -0.073	103.400, -0.040	103.400, -0.035
519	103.600, 0.334	103.600, 0.449	103.600, 0.592	103.600, 0.712	103.600, 0.866	103.600, -0.043	103.600, -0.148	103.600, -0.056	103.600, -0.064	103.600, -0.073	103.600, -0.040	103.600, -0.035
520	103.800, 0.334	103.800, 0.449	103.800, 0.592	103.800, 0.712	103.800, 0.866	103.800, -0.043	103.800, -0.148	103.800, -0.056	103.800, -0.064	103.800, -0.073	103.800, -0.040	103.800, -0.035
521	104.000, 0.334	104.000, 0.449	104.000, 0.592	104.000, 0.712	104.000, 0.866	104.000, -0.043	104.000, -0.148	104.000, -0.056	104.000, -0.065	104.000, -0.073	104.000, -0.040	104.000, -0.035
522	104.200, 0.334	104.200, 0.448	104.200, 0.592	104.200, 0.712	104.200, 0.866	104.200, -0.043	104.200, -0.149	104.200, -0.056	104.200, -0.065	104.200, -0.073	104.200, -0.040	104.200, -0.035
523	104.400, 0.334	104.400, 0.448	104.400, 0.592	104.400, 0.712	104.400, 0.866	104.400, -0.044	104.400, -0.149	104.400, -0.055	104.400, -0.065	104.400, -0.072	104.400, -0.040	104.400, -0.035
524	104.600, 0.334	104.600, 0.448	104.600, 0.591	104.600, 0.712	104.600, 0.867	104.600, -0.044	104.600, -0.149	104.600, -0.055	104.600, -0.065	104.600, -0.072	104.600, -0.040	104.600, -0.035
525	104.800, 0.334	104.800, 0.448	104.800, 0.591	104.800, 0.712	104.800, 0.867	104.800, -0.044	104.800, -0.149	104.800, -0.055	104.800, -0.065	104.800, -0.072	104.800, -0.040	104.800, -0.034
526	105.000, 0.335	105.000, 0.449	105.000, 0.591	105.000, 0.712	105.000, 0.867	105.000, -0.045	105.000, -0.149	105.000, -0.054	105.000, -0.065	105.000, -0.072	105.000, -0.040	105.000, -0.034
527	105.200, 0.335	105.200, 0.449	105.200, 0.592	105.200, 0.712	105.200, 0.867	105.200, -0.045	105.200, -0.149	105.200, -0.054	105.200, -0.065	105.200, -0.072	105.200, -0.040	105.200, -0.034
528	105.400, 0.335	105.400, 0.449	105.400, 0.592	105.400, 0.712	105.400, 0.867	105.400, -0.045	105.400, -0.149	105.400, -0.054	105.400, -0.065	105.400, -0.072	105.400, -0.040	105.400, -0.033
529	105.600, 0.335	105.600, 0.450	105.600, 0.592	105.600, 0.713	105.600, 0.867	105.600, -0.045	105.600, -0.149	105.600, -0.054	105.600, -0.064	105.600, -0.072	105.600, -0.041	105.600, -0.033
530	105.800, 0.335	105.800, 0.450	105.800, 0.592	105.800, 0.713	105.800, 0.867	105.800, -0.045	105.800, -0.148	105.800, -0.054	105.800, -0.064	105.800, -0.072	105.800, -0.041	105.800, -0.033
531	106.000, 0.335	106.000, 0.451	106.000, 0.593	106.000, 0.713	106.000, 0.867	106.000, -0.045	106.000, -0.148	106.000, -0.054	106.000, -0.064	106.000, -0.072	106.000, -0.041	106.000, -0.032
532	106.200, 0.335	106.200, 0.451	106.200, 0.593	106.200, 0.713	106.200, 0.868	106.200, -0.045	106.200, -0.149	106.200, -0.054	106.200, -0.064	106.200, -0.072	106.200, -0.041	106.200, -0.032
533	106.400, 0.335	106.400, 0.451	106.400, 0.594	106.400, 0.713	106.400, 0.868	106.400, -0.045	106.400, -0.149	106.400, -0.054	106.400, -0.064	106.400, -0.072	106.400, -0.041	106.400, -0.032
534	106.600, 0.335	106.600, 0.451	106.600, 0.594	106.600, 0.713	106.600, 0.869	106.600, -0.045	106.600, -0.149	106.600, -0.055	106.600, -0.064	106.600, -0.072	106.600, -0.041	106.600, -0.032
535	106.800, 0.336	106.800, 0.451	106.800, 0.594	106.800, 0.713	106.800, 0.869	106.800, -0.045	106.800, -0.149	106.800, -0.055	106.800, -0.064	106.800, -0.072	106.800, -0.040	106.800, -0.032
536	107.000, 0.336	107.000, 0.451	107.000, 0.594	107.000, 0.713	107.000, 0.869	107.000, -0.045	107.000, -0.148	107.000, -0.055	107.000, -0.064	107.000, -0.072	107.000, -0.040	107.000, -0.033
537	107.200, 0.336	107.200, 0.452	107.200, 0.594	107.200, 0.713	107.200, 0.869	107.200, -0.044	107.200, -0.148	107.200, -0.055	107.200, -0.065	107.200, -0.071	107.200, -0.040	107.200, -0.033
538	107.400, 0.336	107.400, 0.452	107.400, 0.594	107.400, 0.713	107.400, 0.869	107.400, -0.044	107.400, -0.148	107.400, -0.055	107.400, -0.065	107.400, -0.071	107.400, -0.040	107.400, -0.033
539	107.600, 0.336	107.600, 0.451	107.600, 0.594	107.600, 0.713	107.600, 0.869	107.600, -0.044	107.600, -0.148	107.600, -0.055	107.600, -0.065	107.600, -0.071	107.600, -0.040	107.600, -0.032
540	107.800, 0.336	107.800, 0.451	107.800, 0.594	107.800, 0.714	107.800, 0.869	107.800, -0.044	107.800, -0.148	107.800, -0.055	107.800, -0.065	107.800, -0.071	107.800, -0.040	107.800, -0.033
541	108.000, 0.336	108.000, 0.451	108.000, 0.594	108.000, 0.714	108.000, 0.869	108.000, -0.043	108.000, -0.148	108.000, -0.055	108.000, -0.065	108.000, -0.071	108.000, -0.040	108.000, -0.032
542	108.200, 0.336	108.200, 0.451	108.200, 0.594	108.200, 0.715	108.200, 0.870	108.200, -0.043	108.200, -0.148	108.200, -0.055	108.200, -0.065	108.200, -0.071	108.200, -0.040	108.200, -0.032
543	108.400, 0.336	108.400, 0.451	108.400, 0.594	108.400, 0.715	108.400, 0.870	108.400, -0.043	108.400, -0.148	108.400, -0.055	108.400, -0.065	108.400, -0.071	108.400, -0.040	108.400, -0.032
544	108.600, 0.336	108.600, 0.451	108.600, 0.594	108.600, 0.715	108.600, 0.870	108.600, -0.043	108.600, -0.148	108.600, -0.055	108.600, -0.065	108.600, -0.071	108.600, -0.040	108.600, -0.032
545	108.800, 0.337	108.800, 0.451	108.800, 0.594	108.800, 0.716	108.800, 0.870	108.800, -0.043	108.800, -0.149	108.800, -0.055	108.800, -0.065	108.800, -0.071	108.800, -0.041	108.800, -0.031
546	109.000, 0.337	109.000, 0.451	109.000, 0.595	109.000, 0.716	109.000, 0.870	109.000, -0.043	109.000, -0.149	109.000, -0.055	109.000, -0.065	109.000, -0.071	109.000, -0.041	109.000, -0.031
547	109.200, 0.337	109.200, 0.451	109.200, 0.595	109.200, 0.716	109.200, 0.871	109.200, -0.043	109.200, -0.149	109.200, -0.056	109.200, -0.065	109.200, -0.071	109.200, -0.041	109.200, -0.030
548	109.400, 0.337	109.400, 0.451	109.400, 0.595	109.400, 0.716	109.400, 0.871	109.400, -0.043	109.400, -0.149	109.400, -0.056	109.400, -0.065	109.400, -0.071	109.400, -0.041	109.400, -0.030
549	109.600, 0.336	109.600, 0.451	109.600, 0.595	109.600, 0.717	109.600, 0.871	109.600, -0.044	109.600, -0.149	109.600, -0.057	109.600, -0.065	109.600, -0.071	109.600, -0.041	109.600, -0.030
550	109.800, 0.336	109.800, 0.451	109.800, 0.595	109.800, 0.717	109.800, 0.872	109.800, -0.044	109.800, -0.150	109.800, -0.057	109.800, -0.065	109.800, -0.071	109.800, -0.041	109.800, -0.030
551	110.000, 0.336	110.000, 0.452	110.000, 0.596	110.000, 0.717	110.000, 0.872	110.000, -0.044	110.000, -0.150	110.000, -0.058	110.000, -0.065	110.000, -0.071	110.000, -0.041	110.000, -0.030
552	110.200, 0.336	110.200, 0.452	110.200, 0.596	110.200, 0.716	110.200, 0.872	110.200, -0.044	110.200, -0.150	110.200, -0.058	110.200, -0.065	110.200, -0.071	110.200, -0.041	110.200, -0.031
553	110.400, 0.336	110.400, 0.452	110.400, 0.596	110.400, 0.716	110.400, 0.872	110.400, -0.045	110.400, -0.149	110.400, -0.058	110.400, -0.065	110.400, -0.072	110.400, -0.040	110.400, -0.031
554	110.600, 0.336	110.600, 0.452	110.600, 0.596	110.600, 0.716	110.600, 0.872	110.600, -0.045	110.600, -0.149	110.600, -0.058	110.600, -0.065	110.600, -0.072	110.600, -0.040	110.600, -0.031
555	110.800, 0.337	110.800, 0.453	110.800, 0.597	110.800, 0.716	110.800, 0.872	110.800, -0.045	110.800, -0.149	110.800, -0.058	110.800, -0.065	110.800, -0.072	110.800, -0.040	110.800, -0.032
556	111.000, 0.337	111.000, 0.453	111.000, 0.596	111.000, 0.716	111.000, 0.872	111.000, -0.045	111.000, -0.149	111.000, -0.057	111.000, -0.065	111.000, -0.073	111.000, -0.040	111.000, -0.032
557	111.200, 0.337	111.200, 0.453	111.200, 0.596	111.200, 0.716	111.200, 0.873	111.200, -0.045	111.200, -0.149	111.200, -0.057	111.200, -0.065	111.200, -0.073	111.200, -0.039	111.200, -0.032
558	111.400, 0.337	111.400, 0.453	111.400, 0.596	111.400, 0.716	111.400, 0.873	111.400, -0.045	111.400, -0.149	111.400, -0.057	111.400, -0.065	111.400, -0.073	111.400, -0.039	111.400, -0.033
559	111.600, 0.337	111.600, 0.454	111.600, 0.596	111.600, 0.717	111.600, 0.873	111.600, -0.045	111.600, -0.149	111.600, -0.057	111.600, -0.066	111.600, -0.074	111.600, -0.039	111.600, -0.033
560	111.800, 0.338	111.800, 0.454	111.800, 0.596	111.800, 0.717	111.800, 0.873	111.800, -0.045	111.800, -0.150	111.800, -0.057	111.800, -0.066	111.800, -0.074	111.800, -0.039	111.800, -0.033
561	112.000, 0.338	112.000, 0.454	112.000, 0.596	112.000, 0.717	112.000, 0.874	112.000, -0.045	112.000, -0.150	112.000, -0.057	112.000, -0.066	112.000, -0.074	112.000, -0.039	112.000, -0.033
562	112.200, 0.338	112.200, 0.454	112.200, 0.597	112.200, 0.717	112.200, 0.874	112.200, -0.045	112.200, -0.151	112.200, -0.057	112.200, -0.066	112.200, -0.074	112.200, -0.039	112.200, -0.033
563	112.400, 0.338	112.400, 0.454	112.400, 0.597	112.400, 0.717	112.400, 0.874	112.400, -0.045	112.400, -0.152	112.400, -0.057	112.400, -0.067	112.400, -0.075	112.400, -0.038	112.400, -0.033
564	112.600, 0.339	112.600, 0.454	112.600, 0.597	112.600, 0.717	112.600, 0.874	112.600, -0.045	112.600, -0.152	112.600, -0.057	112.600, -0.067	112.600, -0.075	112.600, -0.038	112.600, -0.033
565	112.800, 0.339	112.800, 0.454	112.800, 0.598	112.800, 0.717	112.800, 0.874	112.800, -0.045	112.800, -0.153	112.800, -0.057	112.800, -0.067	112.800, -0.074	112.800, -0.038	112.800, -0.033
566	113.000, 0.339	113.000, 0.454	113.000, 0.598	113.000, 0.717	113.000, 0.874	113.000, -0.044	113.000, -0.153	113.000, -0.057	113.000, -0.066	113.000, -0.074	113.000, -0.039	113.000, -0.033
567	113.200, 0.339	113.200, 0.454	113.200, 0.598	113.200, 0.717	113.200, 0.874	113.200, -0.044	113.200, -0.153	113.200, -0.057	113.200, -0.066	113.200, -0.074	113.200, -0.039	113.200, -0.033
568	113.400, 0.339	113.400, 0.453	113.400, 0.599	113.400, 0.717	113.400, 0.875	113.400, -0.044	113.400, -0.153	113.400, -0.057	113.400, -0.066	113.400, -0.074	113.400, -0.039	113.400, -0.033
569	113.600, 0.339	113.600, 0.453	113.600, 0.599	113.600, 0.718	113.600, 0.875	113.600, -0.044	113.600, -0.153	113.600, -0.057	113.600, -0.066	113.600, -0.073	113.600, -0.039	113.600, -0.033
570	113.800, 0.339	113.800, 0.453	113.800, 0.599	113.800, 0.718	113.800, 0.875	113.800, -0.044	113.800, -0.153	113.800, -0.057	113.800, -0.065	113.800, -0.072	113.800, -0.040	113.800, -0.033
571	114.000, 0.339	114.000, 0.453	114.000, 0.599	114.000, 0.718	114.000, 0.875	114.000, -0.044	114.000, -0.153	114.000, -0.057	114.000, -0.065	114.000, -0.072	114.000, -0.040	114.000, -0.033
572	114.200, 0.339	114.200, 0.454	114.200, 0.599	114.200, 0.718	114.200, 0.875	114.200, -0.044	114.200, -0.152	114.200, -0.056	114.200, -0.065	114.200, -0.071	114.200, -0.041	114.200, -0.033
573	114.400, 0.339	114.400, 0.454	114.400, 0.599	114.400, 0.718	114.400, 0.875	114.400, -0.044	114.400, -0.152	114.400, -0.056	114.400, -0.065	114.400, -0.071	114.400, -0.041	114.400, -0.032
574	114.600, 0.339	114.600, 0.454	114.600, 0.600	114.600, 0.718	114.600, 0.875	114.600, -0.044	114.600, -0.152	114.600, -0.056	114.600, -0.065	114.600, -0.071	114.600, -0.041	114.600, -0.032
575	114.800, 0.339	114.800, 0.454	114.800, 0.599	114.800, 0.718	114.800, 0.875	114.800, -0.044	114.800, -0.152	114.800, -0.056	114.800, -0.066	114.800, -0.071	114.800, -0.042	114.800, -0.032
576	115.000, 0.339	115.000, 0.454	115.000, 0.599	115.000, 0.718	115.000, 0.875	115.000, -0.044	115.000, -0.153	115.000, -0.056	115.000, -0.066	115.000, -0.071	115.000, -0.042	115.000, -0.032
577	115.200, 0.339	115.200, 0.454	115.200, 0.599	115.200, 0.718	115.200, 0.876	115.200, -0.045	115.200, -0.153	115.200, -0.056	115.200, -0.066	115.200, -0.072	115.200, -0.042	115.200, -0.033
578	115.400, 0.338	115.400, 0.455	115.400, 0.599	115.400, 0.718	115.400, 0.876	115.400, -0.045	115.400, -0.153	115.400, -0.055	115.400, -0.066	115.400, -0.072	115.400, -0.042	115.400, -0.033
579	115.600, 0.338	115.600, 0.455	115.600, 0.599	115.600, 0.718	115.600, 0.876	115.600, -0.045	115.600, -0.153	115.600, -0.055	115.600, -0.066	115.600, -0.073	115.600, -0.041	115.600, -0.033
580	115.800, 0.338	115.800, 0.455	115.800, 0.599	115.800, 0.719	115.800, 0.876	115.800, -0.045	115.800, -0.153	115.800, -0.056	115.800, -0.066	115.800, -0.073	115.800, -0.041	115.800, -0.033
581	116.000, 0.338	116.000, 0.455	116.000, 0.599	116.000, 0.719	116.000, 0.877	116.000, -0.045	116.000, -0.153	116.000, -0.056	116.000, -0.066	116.000, -0.074	116.000, -0.040	116.000, -0.033
582	116.200, 0.339	116.200, 0.455	116.200, 0.599	116.200, 0.719	116.200, 0.877	116.200, -0.046	116.200, -0.153	116.200, -0.056	116.200, -0.066	116.200, -0.074	116.200, -0.040	116.200, -0.033
583	116.400, 0.339	116.400, 0.456	116.400, 0.599	116.400, 0.718	116.400, 0.877	116.400, -0.046	116.400, -0.153	116.400, -0.057	116.400, -0.067	116.400, -0.075	116.400, -0.040	116.400, -0.033
584	116.600, 0.339	116.600, 0.456	116.600, 0.599	116.600, 0.719	116.600, 0.877	116.600, -0.046	116.600, -0.153	116.600, -0.057	116.600, -0.067	116.600, -0.075	116.600, -0.040	116.600, -0.033
585	116.800, 0.339	116.800, 0.456	116.800, 0.599	116.800, 0.719	116.800, 0.877	116.800, -0.046	116.800, -0.153	116.800, -0.057	116.800, -0.067	116.800, -0.076	116.800, -0.040	116.800, -0.033
586	117.000, 0.340	117.000, 0.456	117.000, 0.599	117.000, 0.719	117.000, 0.877	117.000, -0.047	117.000, -0.153	117.000, -0.058	117.000, -0.067	117.000, -0.076	117.000, -0.040	117.000, -0.032
587	117.200, 0.340	117.200, 0.456	117.200, 0.599	117.200, 0.719	117.200, 0.877	117.200, -0.047	117.200, -0.153	117.200, -0.057	117.200, -0.067	117.200, -0.075	117.200, -0.040	117.200, -0.032
588	117.400, 0.340	117.400, 0.456	117.400, 0.599	117.400, 0.719	117.400, 0.878	117.400, -0.047	117.400, -0.153	117.400, -0.058	117.400, -0.067	117.400, -0.075	117.400, -0.040	117.400, -0.032
589	117.600, 0.340	117.600, 0.456	117.600, 0.599	117.600, 0.720	117.600, 0.878	117.600, -0.047	117.600, -0.153	117.600, -0.057	117.600, -0.066	117.600, -0.074	117.600, -0.041	117.600, -0.031
590	117.800, 0.340	117.800, 0.456	117.800, 0.599	117.800, 0.720	117.800, 0.878	117.800, -0.047	117.800, -0.154	117.800, -0.057	117.800, -0.066	117.800, -0.074	117.800, -0.041	117.800, -0.031
591	118.000, 0.340	118.000, 0.456	118.000, 0.599	118.000, 0.720	118.000, 0.878	118.000, -0.047	118.000, -0.154	118.000, -0.057	118.000, -0.066	118.000, -0.073	118.000, -0.041	118.000, -0.031
592	118.200, 0.340	118.200, 0.456	118.200, 0.600	118.200, 0.720	118.200, 0.878	118.200, -0.047	118.200, -0.155	118.200, -0.057	118.200, -0.066	118.200, -0.073	118.200, -0.041	118.200, -0.031
593	118.400, 0.340	118.400, 0.456	118.400, 0.600	118.400, 0.720	118.400, 0.878	118.400, -0.047	118.400, -0.155	118.400, -0.057	118.400, -0.066	118.400, -0.072	118.400, -0.042	118.400, -0.031
594	118.600, 0.340	118.600, 0.456	118.600, 0.600	118.600, 0.720	118.600, 0.878	118.600, -0.047	118.600, -0.155	118.600, -0.057	118.600, -0.066	118.600, -0.072	118.600, -0.042	118.600, -0.031
595	118.800, 0.340	118.800, 0.456	118.800, 0.601	118.800, 0.720	118.800, 0.878	118.800, -0.047	118.800, -0.156	118.800, -0.057	118.800, -0.066	118.800, -0.071	118.800, -0.042	118.800, -0.032
596	119.000, 0.340	119.000, 0.456	119.000, 0.601	119.000, 0.720	119.000, 0.878	119.000, -0.047	119.000, -0.156	119.000, -0.056	119.000, -0.065	119.000, -0.071	119.000, -0.042	119.000, -0.032
597	119.200, 0.340	119.200, 0.456	119.200, 0.601	119.200, 0.720	119.200, 0.878	119.200, -0.047	119.200, -0.156	119.200, -0.056	119.200, -0.066	119.200, -0.071	119.200, -0.042	119.200, -0.032
598	119.400, 0.340	119.400, 0.456	119.400, 0.601	119.400, 0.720	119.400, 0.879	119.400, -0.047	119.400, -0.155	119.400, -0.056	119.400, -0.066	119.400, -0.071	119.400, -0.042	119.400, -0.033
599	119.600, 0.341	119.600, 0.456	119.600, 0.601	119.600, 0.720	119.600, 0.879	119.600, -0.047	119.600, -0.155	119.600, -0.056	119.600, -0.066	119.600, -0.071	119.600, -0.041	119.600, -0.033
600	119.800, 0.341	119.800, 0.456	119.800, 0.601	119.800, 0.720	119.800, 0.879	119.800, -0.047	119.800, -0.155	119.800, -0.056	119.800, -0.066	119.800, -0.072	119.800, -0.041	119.800, -0.033
601	120.000, 0.341	120.000, 0.456	120.000, 0.600	120.000, 0.720	120.000, 0.879	120.000, -0.047	120.000, -0.155	120.000, -0.056	120.000, -0.066	120.000, -0.072	120.000, -0.041	120.000, -0.034
602	120.200, 0.341	120.200, 0.456	120.200, 0.600	120.200, 0.720	120.200, 0.879	120.200, -0.047	120.200, -0.155	120.200, -0.057	120.200, -0.066	120.200, -0.073	120.200, -0.041	120.200, -0.034
603	120.400, 0.341	120.400, 0.456	120.400, 0.600	120.400, 0.720	120.400, 0.879	120.400, -0.047	120.400, -0.155	120.400, -0.057	120.400, -0.066	120.400, -0.073	120.400, -0.041	120.400, -0.034
604	120.600, 0.341	120.600, 0.456	120.600, 0.600	120.600, 0.721	120.600, 0.879	120.600, -0.047	120.600, -0.155	120.600, -0.057	120.600, -0.067	120.600, -0.074	120.600, -0.041	120.600, -0.034
605	120.800, 0.341	120.800, 0.456	120.800, 0.600	120.800, 0.721	120.800, 0.880	120.800, -0.047	120.800, -0.155	120.800, -0.058	120.800, -0.067	120.800, -0.075	120.800, -0.041	120.800, -0.034
606	121.000, 0.341	121.000, 0.456	121.000, 0.600	121.000, 0.721	121.000, 0.880	121.000, -0.047	121.000, -0.155	121.000, -0.058	121.000, -0.067	121.000, -0.075	121.000, -0.041	121.000, -0.034
607	121.200, 0.341	121.200, 0.456	121.200, 0.599	121.200, 0.721	121.200, 0.881	121.200, -0.047	121.200, -0.156	121.200, -0.058	121.200, -0.067	121.200, -0.075	121.200, -0.041	121.200, -0.034
608	121.400, 0.341	121.400, 0.456	121.400, 0.599	121.400, 0.721	121.400, 0.881	121.400, -0.047	121.400, -0.156	121.400, -0.058	121.400, -0.067	121.400, -0.076	121.400, -0.041	121.400, -0.034
609	121.600, 0.340	121.600, 0.456	121.600, 0.599	121.600, 0.721	121.600, 0.881	121.600, -0.047	121.600, -0.156	121.600, -0.058	121.600, -0.067	121.600, -0.076	121.600, -0.041	121.600, -0.034
610	121.800, 0.340	121.800, 0.456	121.800, 0.599	121.800, 0.721	121.800, 0.881	121.800, -0.047	121.800, -0.157	121.800, -0.058	121.800, -0.067	121.800, -0.077	121.800, -0.041	121.800, -0.034
611	122.000, 0.340	122.000, 0.456	122.000, 0.600	122.000, 0.721	122.000, 0.881	122.000, -0.047	122.000, -0.157	122.000, -0.058	122.000, -0.068	122.000, -0.077	122.000, -0.041	122.000, -0.034
612	122.200, 0.340	122.200, 0.456	122.200, 0.600	122.200, 0.721	122.200, 0.881	122.200, -0.046	122.200, -0.157	122.200, -0.058	122.200, -0.068	122.200, -0.077	122.200, -0.041	122.200, -0.034
613	122.400, 0.340	122.400, 0.456	122.400, 0.600	122.400, 0.721	122.400, 0.881	122.400, -0.046	122.400, -0.157	122.400, -0.058	122.400, -0.068	122.400, -0.077	122.400, -0.041	122.400, -0.034
614	122.600, 0.341	122.600, 0.457	122.600, 0.600	122.600, 0.721	122.600, 0.881	122.600, -0.046	122.600, -0.157	122.600, -0.059	122.600, -0.068	122.600, -0.077	122.600, -0.040	122.600, -0.034
615	122.800, 0.341	122.800, 0.457	122.800, 0.601	122.800, 0.721	122.800, 0.881	122.800, -0.046	122.800, -0.156	122.800, -0.059	122.800, -0.068	122.800, -0.077	122.800, -0.041	122.800, -0.034
616	123.000, 0.341	123.000, 0.457	123.000, 0.601	123.000, 0.721	123.000, 0.881	123.000, -0.045	123.000, -0.156	123.000, -0.059	123.000, -0.067	123.000, -0.077	123.000, -0.041	123.000, -0.034
617	123.200, 0.341	123.200, 0.457	123.200, 0.601	123.200, 0.721	123.200, 0.881	123.200, -0.045	123.200, -0.156	123.200, -0.059	123.200, -0.067	123.200, -0.077	123.200, -0.041	123.200, -0.034
618	123.400, 0.342	123.400, 0.457	123.400, 0.601	123.400, 0.721	123.400, 0.881	123.400, -0.045	123.400, -0.156	123.400, -0.059	123.400, -0.067	123.400, -0.077	123.400, -0.041	123.400, -0.034
619	123.600, 0.342	123.600, 0.457	123.600, 0.601	123.600, 0.721	123.600, 0.881	123.600, -0.045	123.600, -0.156	123.600, -0.059	123.600, -0.067	123.600, -0.077	123.600, -0.041	123.600, -0.034
620	123.800, 0.342	123.800, 0.457	123.800, 0.602	123.800, 0.722	123.800, 0.880	123.800, -0.045	123.800, -0.156	123.800, -0.059	123.800, -0.067	123.800, -0.077	123.800, -0.041	123.800, -0.034
621	124.000, 0.343	124.000, 0.457	124.000, 0.602	124.000, 0.722	124.000, 0.880	124.000, -0.045	124.000, -0.156	124.000, -0.059	124.000, -0.066	124.000, -0.077	124.000, -0.041	124.000, -0.034
622	124.200, 0.343	124.200, 0.457	124.200, 0.602	124.200, 0.722	124.200, 0.880	124.200, -0.045	124.200, -0.156	124.200, -0.059	124.200, -0.066	124.200, -0.077	124.200, -0.041	124.200, -0.034
623	124.400, 0.343	124.400, 0.457	124.400, 0.602	124.400, 0.722	124.400, 0.881	124.400, -0.045	124.400, -0.155	124.400, -0.059	124.400, -0.066	124.400, -0.076	124.400, -0.041	124.400, -0.034
624	124.600, 0.343	124.600, 0.457	124.600, 0.603	124.600, 0.722	124.600, 0.881	124.600, -0.046	124.600, -0.155	124.600, -0.059	124.600, -0.066	124.600, -0.076	124.600, -0.041	124.600, -0.034
625	124.800, 0.343	124.800, 0.458	124.800, 0.603	124.800, 0.722	124.800, 0.881	124.800, -0.046	124.800, -0.155	124.800, -0.059	124.800, -0.066	124.800, -0.076	124.800, -0.040	124.800, -0.034
626	125.000, 0.343	125.000, 0.458	125.000, 0.603	125.000, 0.722	125.000, 0.882	125.000, -0.046	125.000, -0.155	125.000, -0.060	125.000, -0.066	125.000, -0.076	125.000, -0.040	125.000, -0.033
627	125.200, 0.343	125.200, 0.458	125.200, 0.603	125.200, 0.722	125.200, 0.882	125.200, -0.046	125.200, -0.155	125.200, -0.060	125.200, -0.066	125.200, -0.076	125.200, -0.040	125.200, -0.033
628	125.400, 0.343	125.400, 0.458	125.400, 0.603	125.400, 0.722	125.400, 0.882	125.400, -0.047	125.400, -0.156	125.400, -0.059	125.400, -0.066	125.400, -0.076	125.400, -0.040	125.400, -0.033
629	125.600, 0.343	125.600, 0.458	125.600, 0.603	125.600, 0.722	125.600, 0.883	125.600, -0.047	125.600, -0.156	125.600, -0.059	125.600, -0.066	125.600, -0.076	125.600, -0.041	125.600, -0.033
630	125.800, 0.343	125.800, 0.458	125.800, 0.604	125.800, 0.723	125.800, 0.883	125.800, -0.047	125.800, -0.156	125.800, -0.060	125.800, -0.066	125.800, -0.076	125.800, -0.041	125.800, -0.033
631	126.000, 0.343	126.000, 0.458	126.000, 0.604	126.000, 0.723	126.000, 0.883	126.000, -0.047	126.000, -0.156	126.000, -0.059	126.000, -0.067	126.000, -0.076	126.000, -0.041	126.000, -0.033
632	126.200, 0.343	126.200, 0.458	126.200, 0.604	126.200, 0.723	126.200, 0.883	126.200, -0.048	126.200, -0.156	126.200, -0.060	126.200, -0.067	126.200, -0.076	126.200, -0.041	126.200, -0.032
633	126.400, 0.343	126.400, 0.458	126.400, 0.604	126.400, 0.723	126.400, 0.883	126.400, -0.048	126.400, -0.156	126.400, -0.060	126.400, -0.067	126.400, -0.076	126.400, -0.042	126.400, -0.032
634	126.600, 0.343	126.600, 0.458	126.600, 0.604	126.600, 0.723	126.600, 0.883	126.600, -0.048	126.600, -0.156	126.600, -0.060	126.600, -0.067	126.600, -0.076	126.600, -0.042	126.600, -0.032
635	126.800, 0.343	126.800, 0.458	126.800, 0.604	126.800, 0.723	126.800, 0.884	126.800, -0.048	126.800, -0.157	126.800, -0.060	126.800, -0.067	126.800, -0.076	126.800, -0.042	126.800, -0.032
636	127.000, 0.343	127.000, 0.458	127.000, 0.604	127.000, 0.723	127.000, 0.884	127.000, -0.048	127.000, -0.157	127.000, -0.060	127.000, -0.067	127.000, -0.077	127.000, -0.042	127.000, -0.032
637	127.200, 0.343	127.200, 0.458	127.200, 0.604	127.200, 0.724	127.200, 0.884	127.200, -0.048	127.200, -0.157	127.200, -0.060	127.200, -0.068	127.200, -0.077	127.200, -0.042	127.200, -0.031
638	127.400, 0.343	127.400, 0.459	127.400, 0.603	127.400, 0.724	127.400, 0.884	127.400, -0.048	127.400, -0.157	127.400, -0.060	127.400, -0.068	127.400, -0.077	127.400, -0.042	127.400, -0.031
639	127.600, 0.343	127.600, 0.459	127.600, 0.603	127.600, 0.724	127.600, 0.884	127.600, -0.048	127.600, -0.158	127.600, -0.060	127.600, -0.068	127.600, -0.078	127.600, -0.041	127.600, -0.031
640	127.800, 0.343	127.800, 0.459	127.800, 0.603	127.800, 0.724	127.800, 0.884	127.800, -0.048	127.800, -0.158	127.800, -0.059	127.800, -0.068	127.800, -0.078	127.800, -0.041	127.800, -0.031
641	128.000, 0.343	128.000, 0.459	128.000, 0.603	128.000, 0.725	128.000, 0.884	128.000, -0.048	128.000, -0.158	128.000, -0.059	128.000, -0.068	128.000, -0.078	128.000, -0.041	128.000, -0.031
642	128.200, 0.343	128.200, 0.459	128.200, 0.603	128.200, 0.725	128.200, 0.884	128.200, -0.048	128.200, -0.159	128.200, -0.059	128.200, -0.068	128.200, -0.078	128.200, -0.040	128.200, -0.031
643	128.400, 0.343	128.400, 0.459	128.400, 0.602	128.400, 0.725	128.400, 0.885	128.400, -0.048	128.400, -0.159	128.400, -0.059	128.400, -0.068	128.400, -0.078	128.400, -0.040	128.400, -0.031
644	128.600, 0.344	128.600, 0.459	128.600, 0.602	128.600, 0.725	128.600, 0.885	128.600, -0.048	128.600, -0.159	128.600, -0.058	128.600, -0.068	128.600, -0.078	128.600, -0.040	128.600, -0.031
645	128.800, 0.344	128.800, 0.459	128.800, 0.602	128.800, 0.726	128.800, 0.885	128.800, -0.048	128.800, -0.160	128.800, -0.058	128.800, -0.068	128.800, -0.077	128.800, -0.039	128.800, -0.031
646	129.000, 0.344	129.000, 0.459	129.000, 0.602	129.000, 0.726	129.000, 0.884	129.000, -0.048	129.000, -0.160	129.000, -0.058	129.000, -0.068	129.000, -0.077	129.000, -0.039	129.000, -0.031
647	129.200, 0.344	129.200, 0.459	129.200, 0.602	129.200, 0.726	129.200, 0.884	129.200, -0.048	129.200, -0.160	129.200, -0.057	129.200, -0.068	129.200, -0.077	129.200, -0.039	129.200, -0.031
648	129.400, 0.344	129.400, 0.459	129.400, 0.602	129.400, 0.726	129.400, 0.884	129.400, -0.048	129.400, -0.160	129.400, -0.057	129.400, -0.068	129.400, -0.077	129.400, -0.039	129.400, -0.031
649	129.600, 0.344	129.600, 0.459	129.600, 0.602	129.600, 0.726	129.600, 0.884	129.600, -0.048	129.600, -0.160	129.600, -0.057	129.600, -0.068	129.600, -0.076	129.600, -0.039	129.600, -0.031
650	129.800, 0.344	129.800, 0.459	129.800, 0.603	129.800, 0.726	129.800, 0.884	129.800, -0.048	129.800, -0.160	129.800, -0.057	129.800, -0.068	129.800, -0.076	129.800, -0.039	129.800, -0.031
651	130.000, 0.344	130.000, 0.459	130.000, 0.603	130.000, 0.726	130.000, 0.885	130.000, -0.048	130.000, -0.160	130.000, -0.057	130.000, -0.068	130.000, -0.076	130.000, -0.040	130.000, -0.032
652	130.200, 0.345	130.200, 0.458	130.200, 0.604	130.200, 0.726	130.200, 0.885	130.200, -0.048	130.200, -0.159	130.200, -0.057	130.200, -0.068	130.200, -0.076	130.200, -0.040	130.200, -0.032
653	130.400, 0.345	130.400, 0.458	130.400, 0.604	130.400, 0.726	130.400, 0.885	130.400, -0.048	130.400, -0.159	130.400, -0.058	130.400, -0.068	130.400, -0.076	130.400, -0.040	130.400, -0.032
654	130.600, 0.345	130.600, 0.458	130.600, 0.605	130.600, 0.726	130.600, 0.886	130.600, -0.048	130.600, -0.159	130.600, -0.058	130.600, -0.068	130.600, -0.075	130.600, -0.040	130.600, -0.032
655	130.800, 0.345	130.800, 0.458	130.800, 0.605	130.800, 0.726	130.800, 0.886	130.800, -0.048	130.800, -0.159	130.800, -0.058	130.800, -0.068	130.800, -0.075	130.800, -0.040	130.800, -0.032
656	131.000, 0.344	131.000, 0.458	131.000, 0.605	131.000, 0.725	131.000, 0.886	131.000, -0.047	131.000, -0.158	131.000, -0.058	131.000, -0.068	131.000, -0.075	131.000, -0.040	131.000, -0.032
657	131.200, 0.344	131.200, 0.458	131.200, 0.605	131.200, 0.725	131.200, 0.887	131.200, -0.047	131.200, -0.158	131.200, -0.059	131.200, -0.069	131.200, -0.075	131.200, -0.040	131.200, -0.032
658	131.400, 0.344	131.400, 0.458	131.400, 0.606	131.400, 0.725	131.400, 0.887	131.400, -0.047	131.400, -0.158	131.400, -0.059	131.400, -0.069	131.400, -0.074	131.400, -0.040	131.400, -0.031
659	131.600, 0.344	131.600, 0.458	131.600, 0.606	131.600, 0.726	131.600, 0.887	131.600, -0.048	131.600, -0.158	131.600, -0.059	131.600, -0.069	131.600, -0.074	131.600, -0.040	131.600, -0.031
660	131.800, 0.344	131.800, 0.458	131.800, 0.606	131.800, 0.726	131.800, 0.887	131.800, -0.048	131.800, -0.158	131.800, -0.060	131.800, -0.069	131.800, -0.074	131.800, -0.041	131.800, -0.031
661	132.000, 0.343	132.000, 0.458	132.000, 0.606	132.000, 0.726	132.000, 0.887	132.000, -0.048	132.000, -0.158	132.000, -0.060	132.000, -0.068	132.000, -0.073	132.000, -0.041	132.000, -0.031
662	132.200, 0.344	132.200, 0.458	132.200, 0.606	132.200, 0.726	132.200, 0.887	132.200, -0.048	132.200, -0.158	132.200, -0.060	132.200, -0.068	132.200, -0.073	132.200, -0.041	132.200, -0.031
663	132.400, 0.344	132.400, 0.458	132.400, 0.606	132.400, 0.726	132.400, 0.887	132.400, -0.048	132.400, -0.158	132.400, -0.060	132.400, -0.069	132.400, -0.072	132.400, -0.041	132.400, -0.031
664	132.600, 0.344	132.600, 0.458	132.600, 0.607	132.600, 0.727	132.600, 0.888	132.600, -0.049	132.600, -0.158	132.600, -0.060	132.600, -0.069	132.600, -0.072	132.600, -0.041	132.600, -0.031
665	132.800, 0.344	132.800, 0.458	132.800, 0.607	132.800, 0.727	132.800, 0.887	132.800, -0.049	132.800, -0.158	132.800, -0.060	132.800, -0.069	132.800, -0.072	132.800, -0.041	132.800, -0.031
666	133.000, 0.344	133.000, 0.458	133.000, 0.607	133.000, 0.727	133.000, 0.887	133.000, -0.049	133.000, -0.158	133.000, -0.060	133.000, -0.069	133.000, -0.072	133.000, -0.041	133.000, -0.031
667	133.200, 0.344	133.200, 0.458	133.200, 0.608	133.200, 0.727	133.200, 0.887	133.200, -0.049	133.200, -0.159	133.200, -0.061	133.200, -0.069	133.200, -0.072	133.200, -0.041	133.200, -0.032
668	133.400, 0.345	133.400, 0.458	133.400, 0.608	133.400, 0.727	133.400, 0.887	133.400, -0.049	133.400, -0.159	133.400, -0.061	133.400, -0.068	133.400, -0.072	133.400, -0.041	133.400, -0.032
669	133.600, 0.345	133.600, 0.458	133.600, 0.608	133.600, 0.727	133.600, 0.887	133.600, -0.049	133.600, -0.160	133.600, -0.061	133.600, -0.068	133.600, -0.072	133.600, -0.041	133.600, -0.032
670	133.800, 0.345	133.800, 0.458	133.800, 0.609	133.800, 0.727	133.800, 0.888	133.800, -0.049	133.800, -0.160	133.800, -0.061	133.800, -0.068	133.800, -0.073	133.800, -0.040	133.800, -0.032
671	134.000, 0.345	134.000, 0.458	134.000, 0.609	134.000, 0.727	134.000, 0.888	134.000, -0.048	134.000, -0.160	134.000, -0.061	134.000, -0.067	134.000, -0.073	134.000, -0.040	134.000, -0.032
672	134.200, 0.345	134.200, 0.458	134.200, 0.609	134.200, 0.727	134.200, 0.888	134.200, -0.048	134.200, -0.160	134.200, -0.061	134.200, -0.067	134.200, -0.073	134.200, -0.039	134.200, -0.033
673	134.400, 0.345	134.400, 0.458	134.400, 0.609	134.400, 0.727	134.400, 0.888	134.400, -0.048	134.400, -0.160	134.400, -0.060	134.400, -0.066	134.400, -0.073	134.400, -0.039	134.400, -0.033
674	134.600, 0.345	134.600, 0.458	134.600, 0.609	134.600, 0.727	134.600, 0.888	134.600, -0.048	134.600, -0.160	134.600, -0.060	134.600, -0.066	134.600, -0.073	134.600, -0.039	134.600, -0.033
675	134.800, 0.345	134.800, 0.458	134.800, 0.609	134.800, 0.727	134.800, 0.888	134.800, -0.048	134.800, -0.160	134.800, -0.060	134.800, -0.066	134.800, -0.074	134.800, -0.038	134.800, -0.033
676	135.000, 0.345	135.000, 0.458	135.000, 0.609	135.000, 0.728	135.000, 0.888	135.000, -0.048	135.000, -0.161	135.000, -0.060	135.000, -0.066	135.000, -0.074	135.000, -0.039	135.000, -0.033
677	135.200, 0.345	135.200, 0.458	135.200, 0.609	135.200, 0.728	135.200, 0.888	135.200, -0.048	135.200, -0.161	135.200, -0.059	135.200, -0.066	135.200, -0.074	135.200, -0.039	135.200, -0.033
678	135.400, 0.345	135.400, 0.458	135.400, 0.608	135.400, 0.728	135.400, 0.888	135.400, -0.048	135.400, -0.161	135.400, -0.059	135.400, -0.066	135.400, -0.074	135.400, -0.039	135.400, -0.033
679	135.600, 0.345	135.600, 0.458	135.600, 0.608	135.600, 0.729	135.600, 0.888	135.600, -0.048	135.600, -0.161	135.600, -0.059	135.600, -0.066	135.600, -0.074	135.600, -0.039	135.600, -0.033
680	135.800, 0.345	135.800, 0.458	135.800, 0.608	135.800, 0.729	135.800, 0.888	135.800, -0.049	135.800, -0.161	135.800, -0.059	135.800, -0.065	135.800, -0.074	135.800, -0.040	135.800, -0.033
681	136.000, 0.346	136.000, 0.458	136.000, 0.608	136.000, 0.730	136.000, 0.888	136.000, -0.049	136.000, -0.160	136.000, -0.059	136.000, -0.065	136.000, -0.074	136.000, -0.040	136.000, -0.033
682	136.200, 0.346	136.200, 0.458	136.200, 0.608	136.200, 0.730	136.200, 0.888	136.200, -0.049	136.200, -0.160	136.200, -0.058	136.200, -0.065	136.200, -0.074	136.200, -0.040	136.200, -0.033
683	136.400, 0.347	136.400, 0.458	136.400, 0.608	136.400, 0.730	136.400, 0.889	136.400, -0.049	136.400, -0.160	136.400, -0.058	136.400, -0.065	136.400, -0.074	136.400, -0.040	136.400, -0.033
684	136.600, 0.347	136.600, 0.458	136.600, 0.609	136.600, 0.730	136.600, 0.889	136.600, -0.049	136.600, -0.160	136.600, -0.058	136.600, -0.065	136.600, -0.074	136.600, -0.040	136.600, -0.033
685	136.800, 0.347	136.800, 0.458	136.800, 0.609	136.800, 0.730	136.800, 0.889	136.800, -0.049	136.800, -0.160	136.800, -0.058	136.800, -0.066	136.800, -0.074	136.800, -0.040	136.800, -0.033
686	137.000, 0.347	137.000, 0.458	137.000, 0.609	137.000, 0.730	137.000, 0.890	137.000, -0.049	137.000, -0.160	137.000, -0.058	137.000, -0.066	137.000, -0.074	137.000, -0.040	137.000, -0.033
687	137.200, 0.347	137.200, 0.458	137.200, 0.608	137.200, 0.730	137.200, 0.890	137.200, -0.049	137.200, -0.160	137.200, -0.059	137.200, -0.066	137.200, -0.074	137.200, -0.040	137.200, -0.033
688	137.400, 0.347	137.400, 0.458	137.400, 0.608	137.400, 0.730	137.400, 0.891	137.400, -0.049	137.400, -0.160	137.400, -0.059	137.400, -0.066	137.400, -0.075	137.400, -0.040	137.400, -0.033
689	137.600, 0.347	137.600, 0.458	137.600, 0.608	137.600, 0.730	137.600, 0.891	137.600, -0.049	137.600, -0.160	137.600, -0.059	137.600, -0.066	137.600, -0.075	137.600, -0.040	137.600, -0.033
690	137.800, 0.347	137.800, 0.459	137.800, 0.608	137.800, 0.730	137.800, 0.891	137.800, -0.049	137.800, -0.159	137.800, -0.060	137.800, -0.066	137.800, -0.075	137.800, -0.040	137.800, -0.033
691	138.000, 0.347	138.000, 0.459	138.000, 0.608	138.000, 0.730	138.000, 0.891	138.000, -0.049	138.000, -0.159	138.000, -0.060	138.000, -0.066	138.000, -0.075	138.000, -0.040	138.000, -0.033
692	138.200, 0.346	138.200, 0.459	138.200, 0.608	138.200, 0.729	138.200, 0.891	138.200, -0.049	138.200, -0.159	138.200, -0.059	138.200, -0.066	138.200, -0.075	138.200, -0.040	138.200, -0.033
693	138.400, 0.347	138.400, 0.459	138.400, 0.608	138.400, 0.729	138.400, 0.891	138.400, -0.048	138.400, -0.159	138.400, -0.059	138.400, -0.066	138.400, -0.076	138.400, -0.040	138.400, -0.033
694	138.600, 0.347	138.600, 0.459	138.600, 0.608	138.600, 0.729	138.600, 0.890	138.600, -0.048	138.600, -0.159	138.600, -0.059	138.600, -0.066	138.600, -0.076	138.600, -0.040	138.600, -0.033
695	138.800, 0.347	138.800, 0.459	138.800, 0.608	138.800, 0.729	138.800, 0.890	138.800, -0.048	138.800, -0.159	138.800, -0.060	138.800, -0.067	138.800, -0.077	138.800, -0.040	138.800, -0.032
696	139.000, 0.347	139.000, 0.459	139.000, 0.608	139.000, 0.729	139.000, 0.890	139.000, -0.048	139.000, -0.159	139.000, -0.060	139.000, -0.067	139.000, -0.077	139.000, -0.040	139.000, -0.032
697	139.200, 0.347	139.200, 0.459	139.200, 0.608	139.200, 0.729	139.200, 0.890	139.200, -0.048	139.200, -0.159	139.200, -0.060	139.200, -0.067	139.200, -0.077	139.200, -0.040	139.200, -0.032
698	139.400, 0.347	139.400, 0.460	139.400, 0.607	139.400, 0.729	139.400, 0.889	139.400, -0.048	139.400, -0.159	139.400, -0.060	139.400, -0.067	139.400, -0.077	139.400, -0.040	139.400, -0.032
699	139.600, 0.347	139.600, 0.460	139.600, 0.608	139.600, 0.729	139.600, 0.889	139.600, -0.049	139.600, -0.158	139.600, -0.060	139.600, -0.066	139.600, -0.077	139.600, -0.041	139.600, -0.032
700	139.800, 0.347	139.800, 0.460	139.800, 0.608	139.800, 0.730	139.800, 0.889	139.800, -0.049	139.800, -0.158	139.800, -0.059	139.800, -0.066	139.800, -0.076	139.800, -0.041	139.800, -0.032
701	140.000, 0.347	140.000, 0.460	140.000, 0.608	140.000, 0.730	140.000, 0.889	140.000, -0.048	140.000, -0.158	140.000, -0.059	140.000, -0.066	140.000, -0.076	140.000, -0.041	140.000, -0.032
702	140.200, 0.347	140.200, 0.460	140.200, 0.608	140.200, 0.730	140.200, 0.889	140.200, -0.048	140.200, -0.158	140.200, -0.059	140.200, -0.066	140.200, -0.076	140.200, -0.041	140.200, -0.032
703	140.400, 0.347	140.400, 0.460	140.400, 0.608	140.400, 0.730	140.400, 0.890	140.400, -0.048	140.400, -0.158	140.400, -0.058	140.400, -0.067	140.400, -0.075	140.400, -0.041	140.400, -0.032
704	140.600, 0.347	140.600, 0.460	140.600, 0.609	140.600, 0.731	140.600, 0.890	140.600, -0.048	140.600, -0.158	140.600, -0.058	140.600, -0.067	140.600, -0.075	140.600, -0.041	140.600, -0.032
705	140.800, 0.347	140.800, 0.460	140.800, 0.609	140.800, 0.731	140.800, 0.891	140.800, -0.048	140.800, -0.158	140.800, -0.058	140.800, -0.067	140.800, -0.074	140.800, -0.041	140.800, -0.032
[truncated: 14,295 more rows]

## Sheet: Fig1_supp1_panelA_rep3
	parS20 B 0uM	tetO28 B 0uM	parS20 B 0.25uM	tetO28 B 0.25uM	parS20 B 0.5uM	tetO28 B 0.5uM	parS20 B 1.0uM	tetO28 B 1.0uM	parS20 B 2.0uM	tetO28 B 2.0uM	parS20 B 0.125uM
[truncated: 15,000 more rows]
