# Supplementary material for: ParB spreading on DNA requires cytidine triphosphate in vitro
Source: eLife journal article supplement (doi:10.7554/elife.53515), 2020-02-20
Supplement: fig1-figsupp1-data1 [file Fig1_supp1_panelB.xlsx]

## Sheet: FORMAT
	sample ID #1	sample ID #2	sample ID #3
data point	time point (sec), wavelength shift (nm)	time point (sec), wavelength shift (nm)	time point (sec), wavelength shift (nm)
1
2
3
.
.
.

## Sheet: Fig1_supp1_panelB_rep1
	tetO28 TetR 0.125uM	tetO28 TetR 0.25uM	tetO28 TetR 0.5uM	tetO28 TetR 1.0uM	tetO28 TetR 2.0uM	tetO28 TetR 0uM	parS20 TetR 0uM	parS20 TetR 0.125uM	parS20 TetR 0.25uM	parS20 TetR 0.5uM	parS20 TetR 1.0uM	parS20 TetR 2.0uM
1	0.000, 0.003	0.000, -0.019	0.000, -0.007	0.000, -0.003	0.000, 0.007	0.000, 0.013	0.000, 0.047	0.000, 0.054	0.000, 0.043	0.000, 0.058	0.000, 0.039	0.000, 0.035
2	0.200, 0.003	0.200, -0.018	0.200, -0.007	0.200, -0.004	0.200, 0.006	0.200, 0.013	0.200, 0.045	0.200, 0.054	0.200, 0.041	0.200, 0.056	0.200, 0.039	0.200, 0.034
3	0.400, 0.002	0.400, -0.017	0.400, -0.007	0.400, -0.005	0.400, 0.006	0.400, 0.013	0.400, 0.044	0.400, 0.053	0.400, 0.038	0.400, 0.053	0.400, 0.038	0.400, 0.033
4	0.600, 0.002	0.600, -0.017	0.600, -0.007	0.600, -0.005	0.600, 0.005	0.600, 0.013	0.600, 0.042	0.600, 0.053	0.600, 0.036	0.600, 0.051	0.600, 0.037	0.600, 0.032
5	0.800, 0.001	0.800, -0.016	0.800, -0.007	0.800, -0.005	0.800, 0.005	0.800, 0.013	0.800, 0.040	0.800, 0.052	0.800, 0.034	0.800, 0.049	0.800, 0.036	0.800, 0.030
6	1.000, 0.001	1.000, -0.015	1.000, -0.008	1.000, -0.005	1.000, 0.005	1.000, 0.013	1.000, 0.038	1.000, 0.051	1.000, 0.032	1.000, 0.047	1.000, 0.036	1.000, 0.029
7	1.200, 0.001	1.200, -0.014	1.200, -0.008	1.200, -0.006	1.200, 0.005	1.200, 0.013	1.200, 0.036	1.200, 0.050	1.200, 0.030	1.200, 0.044	1.200, 0.035	1.200, 0.027
8	1.400, 0.000	1.400, -0.014	1.400, -0.008	1.400, -0.005	1.400, 0.005	1.400, 0.013	1.400, 0.034	1.400, 0.049	1.400, 0.028	1.400, 0.042	1.400, 0.033	1.400, 0.026
9	1.600, 0.000	1.600, -0.013	1.600, -0.008	1.600, -0.005	1.600, 0.005	1.600, 0.013	1.600, 0.033	1.600, 0.048	1.600, 0.026	1.600, 0.040	1.600, 0.032	1.600, 0.025
10	1.800, 0.000	1.800, -0.012	1.800, -0.008	1.800, -0.005	1.800, 0.005	1.800, 0.014	1.800, 0.031	1.800, 0.047	1.800, 0.025	1.800, 0.039	1.800, 0.031	1.800, 0.024
11	2.000, 0.000	2.000, -0.012	2.000, -0.008	2.000, -0.004	2.000, 0.005	2.000, 0.014	2.000, 0.030	2.000, 0.045	2.000, 0.024	2.000, 0.037	2.000, 0.030	2.000, 0.023
12	2.200, 0.001	2.200, -0.012	2.200, -0.008	2.200, -0.003	2.200, 0.005	2.200, 0.014	2.200, 0.030	2.200, 0.044	2.200, 0.023	2.200, 0.036	2.200, 0.029	2.200, 0.022
13	2.400, 0.001	2.400, -0.011	2.400, -0.008	2.400, -0.003	2.400, 0.005	2.400, 0.013	2.400, 0.029	2.400, 0.043	2.400, 0.023	2.400, 0.035	2.400, 0.028	2.400, 0.021
14	2.600, 0.002	2.600, -0.011	2.600, -0.008	2.600, -0.002	2.600, 0.005	2.600, 0.013	2.600, 0.028	2.600, 0.041	2.600, 0.022	2.600, 0.034	2.600, 0.027	2.600, 0.021
15	2.800, 0.002	2.800, -0.011	2.800, -0.008	2.800, -0.002	2.800, 0.005	2.800, 0.013	2.800, 0.027	2.800, 0.040	2.800, 0.022	2.800, 0.033	2.800, 0.026	2.800, 0.020
16	3.000, 0.002	3.000, -0.011	3.000, -0.008	3.000, -0.002	3.000, 0.005	3.000, 0.013	3.000, 0.027	3.000, 0.039	3.000, 0.021	3.000, 0.032	3.000, 0.026	3.000, 0.019
17	3.200, 0.002	3.200, -0.011	3.200, -0.008	3.200, -0.002	3.200, 0.005	3.200, 0.012	3.200, 0.026	3.200, 0.037	3.200, 0.021	3.200, 0.030	3.200, 0.025	3.200, 0.018
18	3.400, 0.002	3.400, -0.010	3.400, -0.008	3.400, -0.002	3.400, 0.005	3.400, 0.012	3.400, 0.025	3.400, 0.036	3.400, 0.020	3.400, 0.029	3.400, 0.024	3.400, 0.018
19	3.600, 0.002	3.600, -0.010	3.600, -0.008	3.600, -0.003	3.600, 0.005	3.600, 0.012	3.600, 0.025	3.600, 0.035	3.600, 0.020	3.600, 0.028	3.600, 0.024	3.600, 0.017
20	3.800, 0.001	3.800, -0.010	3.800, -0.008	3.800, -0.003	3.800, 0.005	3.800, 0.012	3.800, 0.024	3.800, 0.034	3.800, 0.019	3.800, 0.027	3.800, 0.023	3.800, 0.017
21	4.000, 0.001	4.000, -0.010	4.000, -0.008	4.000, -0.003	4.000, 0.005	4.000, 0.012	4.000, 0.024	4.000, 0.034	4.000, 0.019	4.000, 0.026	4.000, 0.023	4.000, 0.016
22	4.200, 0.001	4.200, -0.010	4.200, -0.008	4.200, -0.003	4.200, 0.005	4.200, 0.012	4.200, 0.023	4.200, 0.033	4.200, 0.018	4.200, 0.026	4.200, 0.022	4.200, 0.016
23	4.400, 0.001	4.400, -0.010	4.400, -0.007	4.400, -0.003	4.400, 0.005	4.400, 0.012	4.400, 0.023	4.400, 0.032	4.400, 0.018	4.400, 0.025	4.400, 0.022	4.400, 0.015
24	4.600, 0.001	4.600, -0.010	4.600, -0.007	4.600, -0.003	4.600, 0.005	4.600, 0.011	4.600, 0.022	4.600, 0.031	4.600, 0.018	4.600, 0.024	4.600, 0.022	4.600, 0.015
25	4.800, 0.000	4.800, -0.010	4.800, -0.007	4.800, -0.003	4.800, 0.005	4.800, 0.011	4.800, 0.021	4.800, 0.031	4.800, 0.017	4.800, 0.024	4.800, 0.021	4.800, 0.014
26	5.000, 0.000	5.000, -0.010	5.000, -0.007	5.000, -0.002	5.000, 0.005	5.000, 0.011	5.000, 0.021	5.000, 0.030	5.000, 0.017	5.000, 0.023	5.000, 0.020	5.000, 0.013
27	5.200, -0.000	5.200, -0.010	5.200, -0.006	5.200, -0.002	5.200, 0.005	5.200, 0.010	5.200, 0.020	5.200, 0.029	5.200, 0.016	5.200, 0.023	5.200, 0.020	5.200, 0.013
28	5.400, -0.000	5.400, -0.009	5.400, -0.006	5.400, -0.002	5.400, 0.005	5.400, 0.010	5.400, 0.019	5.400, 0.028	5.400, 0.016	5.400, 0.022	5.400, 0.019	5.400, 0.012
29	5.600, -0.000	5.600, -0.009	5.600, -0.005	5.600, -0.002	5.600, 0.005	5.600, 0.010	5.600, 0.019	5.600, 0.027	5.600, 0.015	5.600, 0.021	5.600, 0.018	5.600, 0.012
30	5.800, -0.000	5.800, -0.009	5.800, -0.005	5.800, -0.001	5.800, 0.005	5.800, 0.010	5.800, 0.018	5.800, 0.027	5.800, 0.014	5.800, 0.021	5.800, 0.018	5.800, 0.012
31	6.000, -0.000	6.000, -0.008	6.000, -0.005	6.000, -0.001	6.000, 0.005	6.000, 0.010	6.000, 0.018	6.000, 0.026	6.000, 0.014	6.000, 0.020	6.000, 0.017	6.000, 0.012
32	6.200, -0.000	6.200, -0.008	6.200, -0.005	6.200, -0.001	6.200, 0.005	6.200, 0.010	6.200, 0.018	6.200, 0.025	6.200, 0.013	6.200, 0.019	6.200, 0.017	6.200, 0.011
33	6.400, -0.000	6.400, -0.008	6.400, -0.005	6.400, -0.000	6.400, 0.005	6.400, 0.009	6.400, 0.017	6.400, 0.025	6.400, 0.013	6.400, 0.019	6.400, 0.016	6.400, 0.011
34	6.600, -0.000	6.600, -0.007	6.600, -0.005	6.600, -0.000	6.600, 0.005	6.600, 0.009	6.600, 0.017	6.600, 0.024	6.600, 0.013	6.600, 0.018	6.600, 0.015	6.600, 0.011
35	6.800, -0.001	6.800, -0.007	6.800, -0.005	6.800, -0.000	6.800, 0.005	6.800, 0.008	6.800, 0.017	6.800, 0.023	6.800, 0.013	6.800, 0.017	6.800, 0.015	6.800, 0.010
36	7.000, -0.001	7.000, -0.007	7.000, -0.006	7.000, -0.000	7.000, 0.005	7.000, 0.008	7.000, 0.016	7.000, 0.023	7.000, 0.012	7.000, 0.016	7.000, 0.014	7.000, 0.010
37	7.200, -0.001	7.200, -0.006	7.200, -0.006	7.200, -0.000	7.200, 0.005	7.200, 0.007	7.200, 0.016	7.200, 0.023	7.200, 0.012	7.200, 0.016	7.200, 0.014	7.200, 0.009
38	7.400, -0.001	7.400, -0.006	7.400, -0.006	7.400, 0.000	7.400, 0.005	7.400, 0.007	7.400, 0.016	7.400, 0.022	7.400, 0.012	7.400, 0.015	7.400, 0.014	7.400, 0.009
39	7.600, -0.001	7.600, -0.006	7.600, -0.006	7.600, 0.000	7.600, 0.005	7.600, 0.007	7.600, 0.015	7.600, 0.022	7.600, 0.012	7.600, 0.015	7.600, 0.013	7.600, 0.008
40	7.800, -0.002	7.800, -0.006	7.800, -0.006	7.800, 0.001	7.800, 0.005	7.800, 0.007	7.800, 0.015	7.800, 0.022	7.800, 0.012	7.800, 0.014	7.800, 0.013	7.800, 0.008
41	8.000, -0.002	8.000, -0.006	8.000, -0.006	8.000, 0.001	8.000, 0.005	8.000, 0.007	8.000, 0.015	8.000, 0.021	8.000, 0.012	8.000, 0.014	8.000, 0.013	8.000, 0.007
42	8.200, -0.002	8.200, -0.005	8.200, -0.005	8.200, 0.001	8.200, 0.004	8.200, 0.006	8.200, 0.014	8.200, 0.021	8.200, 0.012	8.200, 0.014	8.200, 0.012	8.200, 0.007
43	8.400, -0.002	8.400, -0.005	8.400, -0.005	8.400, 0.001	8.400, 0.004	8.400, 0.006	8.400, 0.014	8.400, 0.021	8.400, 0.012	8.400, 0.013	8.400, 0.012	8.400, 0.006
44	8.600, -0.002	8.600, -0.005	8.600, -0.005	8.600, 0.001	8.600, 0.004	8.600, 0.006	8.600, 0.013	8.600, 0.021	8.600, 0.012	8.600, 0.013	8.600, 0.012	8.600, 0.006
45	8.800, -0.002	8.800, -0.005	8.800, -0.005	8.800, 0.001	8.800, 0.004	8.800, 0.005	8.800, 0.012	8.800, 0.020	8.800, 0.012	8.800, 0.013	8.800, 0.011	8.800, 0.006
46	9.000, -0.002	9.000, -0.005	9.000, -0.005	9.000, 0.000	9.000, 0.004	9.000, 0.005	9.000, 0.012	9.000, 0.020	9.000, 0.011	9.000, 0.013	9.000, 0.011	9.000, 0.006
47	9.200, -0.001	9.200, -0.005	9.200, -0.004	9.200, 0.000	9.200, 0.004	9.200, 0.005	9.200, 0.011	9.200, 0.020	9.200, 0.011	9.200, 0.013	9.200, 0.011	9.200, 0.006
48	9.400, -0.001	9.400, -0.005	9.400, -0.004	9.400, 0.000	9.400, 0.004	9.400, 0.005	9.400, 0.011	9.400, 0.019	9.400, 0.010	9.400, 0.013	9.400, 0.011	9.400, 0.006
49	9.600, -0.001	9.600, -0.004	9.600, -0.004	9.600, 0.000	9.600, 0.004	9.600, 0.004	9.600, 0.011	9.600, 0.018	9.600, 0.010	9.600, 0.013	9.600, 0.011	9.600, 0.006
50	9.800, -0.001	9.800, -0.004	9.800, -0.004	9.800, 0.000	9.800, 0.004	9.800, 0.004	9.800, 0.010	9.800, 0.018	9.800, 0.010	9.800, 0.012	9.800, 0.011	9.800, 0.006
51	10.000, -0.001	10.000, -0.004	10.000, -0.004	10.000, 0.000	10.000, 0.004	10.000, 0.004	10.000, 0.010	10.000, 0.017	10.000, 0.010	10.000, 0.012	10.000, 0.011	10.000, 0.006
52	10.200, -0.000	10.200, -0.004	10.200, -0.004	10.200, 0.000	10.200, 0.004	10.200, 0.004	10.200, 0.010	10.200, 0.016	10.200, 0.010	10.200, 0.012	10.200, 0.011	10.200, 0.005
53	10.400, -0.000	10.400, -0.004	10.400, -0.004	10.400, 0.000	10.400, 0.004	10.400, 0.004	10.400, 0.010	10.400, 0.015	10.400, 0.010	10.400, 0.011	10.400, 0.011	10.400, 0.005
54	10.600, -0.000	10.600, -0.003	10.600, -0.004	10.600, 0.000	10.600, 0.004	10.600, 0.004	10.600, 0.009	10.600, 0.015	10.600, 0.010	10.600, 0.011	10.600, 0.010	10.600, 0.005
55	10.800, -0.000	10.800, -0.003	10.800, -0.003	10.800, 0.000	10.800, 0.004	10.800, 0.004	10.800, 0.009	10.800, 0.014	10.800, 0.010	10.800, 0.011	10.800, 0.010	10.800, 0.005
56	11.000, 0.000	11.000, -0.003	11.000, -0.003	11.000, 0.001	11.000, 0.004	11.000, 0.004	11.000, 0.009	11.000, 0.014	11.000, 0.010	11.000, 0.010	11.000, 0.010	11.000, 0.005
57	11.200, 0.000	11.200, -0.003	11.200, -0.003	11.200, 0.001	11.200, 0.004	11.200, 0.004	11.200, 0.009	11.200, 0.013	11.200, 0.010	11.200, 0.010	11.200, 0.010	11.200, 0.004
58	11.400, 0.000	11.400, -0.003	11.400, -0.003	11.400, 0.001	11.400, 0.004	11.400, 0.004	11.400, 0.009	11.400, 0.013	11.400, 0.010	11.400, 0.009	11.400, 0.010	11.400, 0.004
59	11.600, 0.000	11.600, -0.003	11.600, -0.003	11.600, 0.001	11.600, 0.004	11.600, 0.004	11.600, 0.009	11.600, 0.013	11.600, 0.010	11.600, 0.009	11.600, 0.010	11.600, 0.003
60	11.800, 0.000	11.800, -0.003	11.800, -0.003	11.800, 0.001	11.800, 0.004	11.800, 0.005	11.800, 0.009	11.800, 0.013	11.800, 0.010	11.800, 0.009	11.800, 0.009	11.800, 0.003
61	12.000, 0.000	12.000, -0.004	12.000, -0.003	12.000, 0.000	12.000, 0.004	12.000, 0.005	12.000, 0.009	12.000, 0.012	12.000, 0.009	12.000, 0.009	12.000, 0.008	12.000, 0.002
62	12.200, 0.001	12.200, -0.004	12.200, -0.003	12.200, 0.000	12.200, 0.004	12.200, 0.004	12.200, 0.009	12.200, 0.012	12.200, 0.009	12.200, 0.009	12.200, 0.008	12.200, 0.002
63	12.400, 0.001	12.400, -0.004	12.400, -0.003	12.400, -0.000	12.400, 0.004	12.400, 0.004	12.400, 0.009	12.400, 0.013	12.400, 0.009	12.400, 0.009	12.400, 0.007	12.400, 0.002
64	12.600, 0.001	12.600, -0.004	12.600, -0.003	12.600, -0.000	12.600, 0.004	12.600, 0.004	12.600, 0.009	12.600, 0.012	12.600, 0.008	12.600, 0.009	12.600, 0.007	12.600, 0.001
65	12.800, 0.001	12.800, -0.004	12.800, -0.003	12.800, -0.000	12.800, 0.004	12.800, 0.004	12.800, 0.009	12.800, 0.012	12.800, 0.008	12.800, 0.009	12.800, 0.007	12.800, 0.001
66	13.000, 0.001	13.000, -0.004	13.000, -0.003	13.000, -0.000	13.000, 0.004	13.000, 0.004	13.000, 0.009	13.000, 0.012	13.000, 0.008	13.000, 0.009	13.000, 0.006	13.000, 0.001
67	13.200, 0.001	13.200, -0.004	13.200, -0.003	13.200, -0.000	13.200, 0.004	13.200, 0.004	13.200, 0.009	13.200, 0.012	13.200, 0.008	13.200, 0.009	13.200, 0.006	13.200, 0.001
68	13.400, 0.001	13.400, -0.003	13.400, -0.003	13.400, -0.000	13.400, 0.004	13.400, 0.003	13.400, 0.009	13.400, 0.012	13.400, 0.007	13.400, 0.009	13.400, 0.006	13.400, 0.001
69	13.600, 0.001	13.600, -0.003	13.600, -0.003	13.600, -0.001	13.600, 0.004	13.600, 0.003	13.600, 0.009	13.600, 0.011	13.600, 0.007	13.600, 0.009	13.600, 0.006	13.600, 0.001
70	13.800, 0.001	13.800, -0.003	13.800, -0.003	13.800, -0.001	13.800, 0.004	13.800, 0.003	13.800, 0.009	13.800, 0.010	13.800, 0.007	13.800, 0.009	13.800, 0.006	13.800, 0.001
71	14.000, 0.001	14.000, -0.003	14.000, -0.003	14.000, -0.001	14.000, 0.004	14.000, 0.003	14.000, 0.009	14.000, 0.010	14.000, 0.007	14.000, 0.008	14.000, 0.005	14.000, 0.001
72	14.200, 0.001	14.200, -0.002	14.200, -0.003	14.200, -0.000	14.200, 0.004	14.200, 0.003	14.200, 0.009	14.200, 0.010	14.200, 0.007	14.200, 0.008	14.200, 0.005	14.200, 0.001
73	14.400, 0.001	14.400, -0.002	14.400, -0.003	14.400, 0.000	14.400, 0.004	14.400, 0.003	14.400, 0.009	14.400, 0.009	14.400, 0.006	14.400, 0.008	14.400, 0.005	14.400, 0.001
74	14.600, 0.001	14.600, -0.002	14.600, -0.002	14.600, 0.000	14.600, 0.004	14.600, 0.003	14.600, 0.009	14.600, 0.009	14.600, 0.007	14.600, 0.007	14.600, 0.005	14.600, 0.002
75	14.800, 0.001	14.800, -0.002	14.800, -0.002	14.800, 0.001	14.800, 0.003	14.800, 0.003	14.800, 0.009	14.800, 0.009	14.800, 0.007	14.800, 0.007	14.800, 0.005	14.800, 0.002
76	15.000, 0.001	15.000, -0.001	15.000, -0.002	15.000, 0.001	15.000, 0.003	15.000, 0.003	15.000, 0.009	15.000, 0.009	15.000, 0.007	15.000, 0.007	15.000, 0.005	15.000, 0.002
77	15.200, 0.000	15.200, -0.001	15.200, -0.002	15.200, 0.001	15.200, 0.003	15.200, 0.003	15.200, 0.008	15.200, 0.009	15.200, 0.007	15.200, 0.006	15.200, 0.005	15.200, 0.002
78	15.400, 0.000	15.400, -0.001	15.400, -0.002	15.400, 0.001	15.400, 0.002	15.400, 0.003	15.400, 0.008	15.400, 0.009	15.400, 0.007	15.400, 0.006	15.400, 0.005	15.400, 0.002
79	15.600, 0.000	15.600, -0.001	15.600, -0.002	15.600, 0.001	15.600, 0.002	15.600, 0.003	15.600, 0.008	15.600, 0.009	15.600, 0.007	15.600, 0.005	15.600, 0.005	15.600, 0.002
80	15.800, 0.001	15.800, -0.001	15.800, -0.002	15.800, 0.001	15.800, 0.002	15.800, 0.003	15.800, 0.007	15.800, 0.009	15.800, 0.006	15.800, 0.005	15.800, 0.005	15.800, 0.002
81	16.000, 0.001	16.000, -0.001	16.000, -0.002	16.000, 0.001	16.000, 0.002	16.000, 0.002	16.000, 0.007	16.000, 0.009	16.000, 0.006	16.000, 0.005	16.000, 0.005	16.000, 0.002
82	16.200, 0.001	16.200, -0.001	16.200, -0.002	16.200, 0.000	16.200, 0.002	16.200, 0.002	16.200, 0.007	16.200, 0.009	16.200, 0.006	16.200, 0.004	16.200, 0.005	16.200, 0.002
83	16.400, 0.001	16.400, -0.001	16.400, -0.001	16.400, 0.000	16.400, 0.002	16.400, 0.002	16.400, 0.007	16.400, 0.009	16.400, 0.006	16.400, 0.004	16.400, 0.005	16.400, 0.002
84	16.600, 0.001	16.600, -0.001	16.600, -0.001	16.600, 0.000	16.600, 0.002	16.600, 0.002	16.600, 0.007	16.600, 0.009	16.600, 0.006	16.600, 0.004	16.600, 0.005	16.600, 0.002
85	16.800, 0.001	16.800, -0.001	16.800, -0.001	16.800, 0.000	16.800, 0.002	16.800, 0.002	16.800, 0.006	16.800, 0.009	16.800, 0.006	16.800, 0.004	16.800, 0.004	16.800, 0.002
86	17.000, 0.000	17.000, -0.001	17.000, -0.001	17.000, -0.000	17.000, 0.002	17.000, 0.002	17.000, 0.006	17.000, 0.009	17.000, 0.005	17.000, 0.004	17.000, 0.004	17.000, 0.002
87	17.200, 0.000	17.200, -0.002	17.200, -0.001	17.200, -0.000	17.200, 0.002	17.200, 0.002	17.200, 0.006	17.200, 0.008	17.200, 0.005	17.200, 0.004	17.200, 0.004	17.200, 0.002
88	17.400, 0.000	17.400, -0.002	17.400, -0.001	17.400, -0.001	17.400, 0.003	17.400, 0.002	17.400, 0.007	17.400, 0.008	17.400, 0.005	17.400, 0.004	17.400, 0.003	17.400, 0.002
89	17.600, 0.000	17.600, -0.002	17.600, -0.001	17.600, -0.001	17.600, 0.003	17.600, 0.002	17.600, 0.007	17.600, 0.008	17.600, 0.005	17.600, 0.004	17.600, 0.003	17.600, 0.002
90	17.800, 0.001	17.800, -0.001	17.800, -0.001	17.800, -0.001	17.800, 0.003	17.800, 0.002	17.800, 0.006	17.800, 0.007	17.800, 0.005	17.800, 0.004	17.800, 0.003	17.800, 0.002
91	18.000, 0.001	18.000, -0.001	18.000, -0.001	18.000, -0.001	18.000, 0.003	18.000, 0.002	18.000, 0.006	18.000, 0.007	18.000, 0.005	18.000, 0.004	18.000, 0.002	18.000, 0.002
92	18.200, 0.001	18.200, -0.001	18.200, -0.001	18.200, -0.001	18.200, 0.003	18.200, 0.002	18.200, 0.006	18.200, 0.007	18.200, 0.005	18.200, 0.004	18.200, 0.002	18.200, 0.002
93	18.400, 0.001	18.400, -0.001	18.400, -0.001	18.400, -0.000	18.400, 0.003	18.400, 0.002	18.400, 0.006	18.400, 0.007	18.400, 0.005	18.400, 0.004	18.400, 0.002	18.400, 0.001
94	18.600, 0.001	18.600, -0.001	18.600, -0.001	18.600, 0.000	18.600, 0.003	18.600, 0.002	18.600, 0.006	18.600, 0.007	18.600, 0.005	18.600, 0.004	18.600, 0.002	18.600, 0.001
95	18.800, 0.001	18.800, -0.000	18.800, -0.002	18.800, 0.000	18.800, 0.002	18.800, 0.001	18.800, 0.006	18.800, 0.007	18.800, 0.005	18.800, 0.004	18.800, 0.002	18.800, 0.001
96	19.000, 0.002	19.000, -0.000	19.000, -0.002	19.000, 0.000	19.000, 0.002	19.000, 0.001	19.000, 0.006	19.000, 0.006	19.000, 0.005	19.000, 0.004	19.000, 0.002	19.000, 0.001
97	19.200, 0.002	19.200, -0.000	19.200, -0.002	19.200, 0.001	19.200, 0.002	19.200, 0.001	19.200, 0.006	19.200, 0.006	19.200, 0.005	19.200, 0.003	19.200, 0.002	19.200, 0.000
98	19.400, 0.002	19.400, -0.000	19.400, -0.002	19.400, 0.001	19.400, 0.002	19.400, 0.001	19.400, 0.006	19.400, 0.007	19.400, 0.004	19.400, 0.003	19.400, 0.002	19.400, 0.000
99	19.600, 0.002	19.600, -0.000	19.600, -0.002	19.600, 0.001	19.600, 0.002	19.600, 0.001	19.600, 0.006	19.600, 0.007	19.600, 0.004	19.600, 0.003	19.600, 0.002	19.600, -0.000
100	19.800, 0.002	19.800, -0.000	19.800, -0.002	19.800, 0.001	19.800, 0.002	19.800, 0.001	19.800, 0.005	19.800, 0.007	19.800, 0.004	19.800, 0.002	19.800, 0.002	19.800, -0.001
101	20.000, 0.002	20.000, -0.000	20.000, -0.003	20.000, 0.001	20.000, 0.002	20.000, 0.001	20.000, 0.005	20.000, 0.007	20.000, 0.004	20.000, 0.002	20.000, 0.002	20.000, -0.001
102	20.200, 0.002	20.200, -0.000	20.200, -0.003	20.200, 0.001	20.200, 0.002	20.200, 0.001	20.200, 0.005	20.200, 0.007	20.200, 0.003	20.200, 0.002	20.200, 0.002	20.200, -0.001
103	20.400, 0.001	20.400, -0.000	20.400, -0.003	20.400, 0.001	20.400, 0.002	20.400, 0.001	20.400, 0.004	20.400, 0.007	20.400, 0.003	20.400, 0.001	20.400, 0.002	20.400, -0.001
104	20.600, 0.001	20.600, -0.001	20.600, -0.003	20.600, 0.001	20.600, 0.002	20.600, 0.001	20.600, 0.004	20.600, 0.007	20.600, 0.003	20.600, 0.001	20.600, 0.002	20.600, -0.001
105	20.800, 0.000	20.800, -0.001	20.800, -0.003	20.800, 0.001	20.800, 0.002	20.800, 0.001	20.800, 0.004	20.800, 0.007	20.800, 0.002	20.800, 0.001	20.800, 0.002	20.800, -0.000
106	21.000, -0.000	21.000, -0.001	21.000, -0.003	21.000, 0.000	21.000, 0.002	21.000, 0.001	21.000, 0.003	21.000, 0.007	21.000, 0.002	21.000, 0.001	21.000, 0.002	21.000, -0.000
107	21.200, -0.001	21.200, -0.001	21.200, -0.003	21.200, 0.000	21.200, 0.002	21.200, 0.002	21.200, 0.003	21.200, 0.007	21.200, 0.002	21.200, 0.002	21.200, 0.002	21.200, -0.000
108	21.400, -0.001	21.400, -0.001	21.400, -0.003	21.400, 0.000	21.400, 0.002	21.400, 0.002	21.400, 0.003	21.400, 0.007	21.400, 0.001	21.400, 0.002	21.400, 0.002	21.400, 0.000
109	21.600, -0.001	21.600, -0.001	21.600, -0.003	21.600, 0.000	21.600, 0.001	21.600, 0.002	21.600, 0.003	21.600, 0.006	21.600, 0.001	21.600, 0.002	21.600, 0.002	21.600, 0.000
110	21.800, -0.001	21.800, -0.001	21.800, -0.003	21.800, 0.000	21.800, 0.001	21.800, 0.002	21.800, 0.002	21.800, 0.006	21.800, 0.001	21.800, 0.002	21.800, 0.002	21.800, 0.000
111	22.000, -0.001	22.000, -0.001	22.000, -0.003	22.000, 0.001	22.000, 0.001	22.000, 0.002	22.000, 0.002	22.000, 0.006	22.000, 0.001	22.000, 0.002	22.000, 0.002	22.000, 0.000
112	22.200, -0.001	22.200, -0.001	22.200, -0.003	22.200, 0.001	22.200, 0.001	22.200, 0.002	22.200, 0.002	22.200, 0.005	22.200, 0.001	22.200, 0.003	22.200, 0.002	22.200, 0.000
113	22.400, -0.001	22.400, -0.001	22.400, -0.003	22.400, 0.001	22.400, 0.001	22.400, 0.002	22.400, 0.002	22.400, 0.005	22.400, 0.001	22.400, 0.003	22.400, 0.002	22.400, 0.000
114	22.600, -0.001	22.600, -0.001	22.600, -0.003	22.600, 0.001	22.600, 0.001	22.600, 0.002	22.600, 0.002	22.600, 0.005	22.600, 0.001	22.600, 0.003	22.600, 0.002	22.600, -0.000
115	22.800, -0.000	22.800, -0.000	22.800, -0.003	22.800, 0.001	22.800, 0.001	22.800, 0.002	22.800, 0.002	22.800, 0.004	22.800, 0.001	22.800, 0.002	22.800, 0.002	22.800, -0.000
116	23.000, -0.000	23.000, -0.000	23.000, -0.003	23.000, 0.000	23.000, 0.001	23.000, 0.002	23.000, 0.002	23.000, 0.004	23.000, 0.001	23.000, 0.002	23.000, 0.002	23.000, -0.001
117	23.200, -0.000	23.200, -0.000	23.200, -0.003	23.200, 0.000	23.200, 0.001	23.200, 0.002	23.200, 0.002	23.200, 0.004	23.200, 0.001	23.200, 0.002	23.200, 0.001	23.200, -0.001
118	23.400, 0.000	23.400, -0.000	23.400, -0.003	23.400, 0.000	23.400, 0.001	23.400, 0.002	23.400, 0.002	23.400, 0.004	23.400, 0.002	23.400, 0.002	23.400, 0.001	23.400, -0.001
119	23.600, 0.001	23.600, 0.000	23.600, -0.002	23.600, -0.000	23.600, 0.001	23.600, 0.002	23.600, 0.002	23.600, 0.004	23.600, 0.002	23.600, 0.002	23.600, 0.001	23.600, -0.001
120	23.800, 0.001	23.800, 0.000	23.800, -0.002	23.800, -0.001	23.800, 0.001	23.800, 0.002	23.800, 0.002	23.800, 0.004	23.800, 0.002	23.800, 0.001	23.800, 0.001	23.800, -0.001
121	24.000, 0.001	24.000, 0.000	24.000, -0.002	24.000, -0.001	24.000, 0.001	24.000, 0.002	24.000, 0.002	24.000, 0.004	24.000, 0.002	24.000, 0.001	24.000, 0.001	24.000, -0.001
122	24.200, 0.001	24.200, 0.000	24.200, -0.002	24.200, -0.001	24.200, 0.001	24.200, 0.002	24.200, 0.002	24.200, 0.004	24.200, 0.002	24.200, 0.001	24.200, 0.001	24.200, -0.002
123	24.400, 0.001	24.400, 0.000	24.400, -0.002	24.400, -0.001	24.400, 0.001	24.400, 0.002	24.400, 0.001	24.400, 0.004	24.400, 0.002	24.400, 0.001	24.400, 0.001	24.400, -0.002
124	24.600, 0.001	24.600, 0.000	24.600, -0.001	24.600, -0.001	24.600, 0.001	24.600, 0.002	24.600, 0.001	24.600, 0.004	24.600, 0.002	24.600, 0.001	24.600, 0.001	24.600, -0.002
125	24.800, 0.001	24.800, 0.000	24.800, -0.001	24.800, -0.002	24.800, 0.001	24.800, 0.001	24.800, 0.001	24.800, 0.004	24.800, 0.002	24.800, 0.001	24.800, 0.001	24.800, -0.002
126	25.000, 0.001	25.000, -0.000	25.000, -0.001	25.000, -0.002	25.000, 0.001	25.000, 0.001	25.000, 0.001	25.000, 0.004	25.000, 0.002	25.000, 0.001	25.000, 0.001	25.000, -0.002
127	25.200, 0.001	25.200, -0.000	25.200, -0.001	25.200, -0.002	25.200, 0.001	25.200, 0.001	25.200, 0.000	25.200, 0.004	25.200, 0.002	25.200, 0.001	25.200, 0.001	25.200, -0.002
128	25.400, 0.001	25.400, -0.000	25.400, -0.001	25.400, -0.002	25.400, 0.000	25.400, 0.000	25.400, 0.000	25.400, 0.004	25.400, 0.002	25.400, 0.001	25.400, 0.001	25.400, -0.001
129	25.600, 0.001	25.600, -0.000	25.600, -0.000	25.600, -0.001	25.600, 0.000	25.600, -0.000	25.600, -0.000	25.600, 0.003	25.600, 0.002	25.600, 0.001	25.600, 0.001	25.600, -0.001
130	25.800, 0.001	25.800, -0.000	25.800, -0.000	25.800, -0.001	25.800, 0.000	25.800, -0.000	25.800, -0.000	25.800, 0.003	25.800, 0.002	25.800, 0.001	25.800, 0.001	25.800, -0.001
131	26.000, 0.000	26.000, -0.000	26.000, 0.000	26.000, -0.001	26.000, 0.000	26.000, -0.001	26.000, -0.001	26.000, 0.003	26.000, 0.002	26.000, 0.001	26.000, 0.001	26.000, -0.000
132	26.200, 0.000	26.200, -0.000	26.200, 0.000	26.200, -0.001	26.200, 0.000	26.200, -0.001	26.200, -0.001	26.200, 0.002	26.200, 0.001	26.200, 0.001	26.200, 0.001	26.200, -0.000
133	26.400, -0.000	26.400, -0.001	26.400, 0.000	26.400, -0.001	26.400, 0.001	26.400, -0.001	26.400, -0.001	26.400, 0.002	26.400, 0.001	26.400, 0.000	26.400, 0.001	26.400, -0.000
134	26.600, -0.001	26.600, -0.001	26.600, 0.001	26.600, -0.000	26.600, 0.001	26.600, -0.001	26.600, -0.000	26.600, 0.002	26.600, 0.001	26.600, 0.000	26.600, 0.001	26.600, 0.000
135	26.800, -0.001	26.800, -0.001	26.800, 0.001	26.800, -0.000	26.800, 0.001	26.800, -0.000	26.800, -0.000	26.800, 0.002	26.800, 0.001	26.800, 0.000	26.800, 0.001	26.800, 0.000
136	27.000, -0.001	27.000, -0.001	27.000, 0.001	27.000, -0.000	27.000, 0.001	27.000, -0.000	27.000, -0.000	27.000, 0.001	27.000, 0.001	27.000, 0.000	27.000, 0.001	27.000, 0.001
137	27.200, -0.001	27.200, -0.000	27.200, 0.001	27.200, -0.000	27.200, 0.001	27.200, 0.000	27.200, 0.000	27.200, 0.001	27.200, 0.001	27.200, 0.000	27.200, 0.001	27.200, 0.001
138	27.400, -0.001	27.400, -0.000	27.400, 0.001	27.400, -0.000	27.400, 0.001	27.400, 0.000	27.400, 0.000	27.400, 0.001	27.400, 0.001	27.400, 0.000	27.400, 0.001	27.400, 0.001
139	27.600, -0.001	27.600, -0.000	27.600, 0.001	27.600, -0.000	27.600, 0.000	27.600, 0.000	27.600, 0.000	27.600, 0.000	27.600, 0.000	27.600, 0.000	27.600, 0.001	27.600, 0.001
140	27.800, -0.000	27.800, 0.000	27.800, 0.001	27.800, -0.000	27.800, 0.000	27.800, 0.000	27.800, 0.001	27.800, -0.000	27.800, 0.000	27.800, 0.000	27.800, 0.001	27.800, 0.001
141	28.000, -0.000	28.000, 0.000	28.000, 0.000	28.000, -0.000	28.000, 0.000	28.000, 0.000	28.000, 0.001	28.000, -0.000	28.000, -0.000	28.000, 0.000	28.000, 0.001	28.000, 0.001
142	28.200, -0.000	28.200, 0.000	28.200, 0.000	28.200, -0.000	28.200, 0.000	28.200, 0.000	28.200, 0.001	28.200, -0.000	28.200, -0.000	28.200, 0.000	28.200, 0.000	28.200, 0.001
143	28.400, -0.000	28.400, 0.000	28.400, -0.000	28.400, -0.000	28.400, -0.000	28.400, 0.000	28.400, 0.001	28.400, -0.000	28.400, -0.000	28.400, 0.000	28.400, 0.000	28.400, 0.000
144	28.600, 0.000	28.600, 0.000	28.600, -0.000	28.600, 0.000	28.600, -0.000	28.600, 0.000	28.600, 0.001	28.600, -0.000	28.600, -0.000	28.600, 0.000	28.600, -0.000	28.600, -0.000
145	28.800, 0.000	28.800, 0.000	28.800, -0.000	28.800, 0.000	28.800, -0.000	28.800, -0.000	28.800, 0.000	28.800, -0.000	28.800, -0.000	28.800, -0.000	28.800, -0.000	28.800, -0.000
146	29.000, 0.001	29.000, 0.000	29.000, -0.001	29.000, 0.000	29.000, -0.000	29.000, -0.000	29.000, -0.000	29.000, -0.000	29.000, -0.000	29.000, -0.000	29.000, -0.001	29.000, -0.001
147	29.200, 0.001	29.200, 0.000	29.200, -0.001	29.200, 0.000	29.200, -0.000	29.200, -0.000	29.200, -0.000	29.200, -0.000	29.200, -0.000	29.200, -0.000	29.200, -0.001	29.200, -0.001
148	29.400, 0.001	29.400, 0.000	29.400, -0.001	29.400, 0.000	29.400, -0.000	29.400, -0.000	29.400, -0.001	29.400, -0.000	29.400, -0.000	29.400, -0.000	29.400, -0.001	29.400, -0.001
149	29.600, 0.001	29.600, 0.000	29.600, -0.001	29.600, 0.000	29.600, -0.000	29.600, -0.001	29.600, -0.001	29.600, -0.000	29.600, -0.000	29.600, -0.001	29.600, -0.002	29.600, -0.002
150	29.800, 0.001	29.800, -0.000	29.800, -0.001	29.800, 0.000	29.800, -0.000	29.800, -0.000	29.800, -0.002	29.800, -0.000	29.800, 0.000	29.800, -0.001	29.800, -0.002	29.800, -0.002
151	30.000, 0.000	30.000, 0.000	30.000, 0.000	30.000, 0.000	30.000, 0.000	30.000, 0.000	30.000, 0.000	30.000, 0.000	30.000, 0.000	30.000, 0.000	30.000, 0.000	30.000, 0.000
152	30.200, 0.001	30.200, 0.002	30.200, 0.005	30.200, 0.014	30.200, 0.029	30.200, -0.000	30.200, 0.000	30.200, -0.002	30.200, 0.000	30.200, -0.001	30.200, -0.001	30.200, -0.002
153	30.400, 0.002	30.400, 0.005	30.400, 0.012	30.400, 0.031	30.400, 0.063	30.400, -0.001	30.400, 0.000	30.400, -0.003	30.400, 0.000	30.400, -0.002	30.400, -0.001	30.400, -0.004
154	30.600, 0.003	30.600, 0.009	30.600, 0.020	30.600, 0.050	30.600, 0.103	30.600, -0.001	30.600, 0.000	30.600, -0.005	30.600, 0.000	30.600, -0.003	30.600, -0.002	30.600, -0.007
155	30.800, 0.005	30.800, 0.014	30.800, 0.029	30.800, 0.071	30.800, 0.147	30.800, -0.002	30.800, -0.000	30.800, -0.006	30.800, 0.001	30.800, -0.004	30.800, -0.003	30.800, -0.010
156	31.000, 0.006	31.000, 0.019	31.000, 0.039	31.000, 0.095	31.000, 0.196	31.000, -0.002	31.000, -0.000	31.000, -0.008	31.000, 0.000	31.000, -0.005	31.000, -0.005	31.000, -0.012
157	31.200, 0.008	31.200, 0.024	31.200, 0.050	31.200, 0.120	31.200, 0.247	31.200, -0.002	31.200, -0.001	31.200, -0.009	31.200, 0.000	31.200, -0.006	31.200, -0.006	31.200, -0.015
158	31.400, 0.010	31.400, 0.031	31.400, 0.062	31.400, 0.146	31.400, 0.301	31.400, -0.003	31.400, -0.002	31.400, -0.010	31.400, -0.000	31.400, -0.007	31.400, -0.007	31.400, -0.018
159	31.600, 0.012	31.600, 0.037	31.600, 0.074	31.600, 0.173	31.600, 0.355	31.600, -0.003	31.600, -0.002	31.600, -0.010	31.600, -0.001	31.600, -0.008	31.600, -0.009	31.600, -0.020
160	31.800, 0.014	31.800, 0.044	31.800, 0.087	31.800, 0.200	31.800, 0.408	31.800, -0.003	31.800, -0.003	31.800, -0.010	31.800, -0.001	31.800, -0.009	31.800, -0.010	31.800, -0.022
161	32.000, 0.016	32.000, 0.050	32.000, 0.100	32.000, 0.226	32.000, 0.459	32.000, -0.003	32.000, -0.004	32.000, -0.009	32.000, -0.002	32.000, -0.009	32.000, -0.012	32.000, -0.024
162	32.200, 0.018	32.200, 0.057	32.200, 0.113	32.200, 0.251	32.200, 0.505	32.200, -0.003	32.200, -0.005	32.200, -0.008	32.200, -0.002	32.200, -0.009	32.200, -0.013	32.200, -0.025
163	32.400, 0.020	32.400, 0.063	32.400, 0.125	32.400, 0.275	32.400, 0.549	32.400, -0.003	32.400, -0.006	32.400, -0.007	32.400, -0.003	32.400, -0.010	32.400, -0.014	32.400, -0.026
164	32.600, 0.022	32.600, 0.069	32.600, 0.137	32.600, 0.298	32.600, 0.591	32.600, -0.003	32.600, -0.007	32.600, -0.006	32.600, -0.003	32.600, -0.011	32.600, -0.015	32.600, -0.027
165	32.800, 0.024	32.800, 0.076	32.800, 0.149	32.800, 0.322	32.800, 0.631	32.800, -0.003	32.800, -0.008	32.800, -0.005	32.800, -0.004	32.800, -0.012	32.800, -0.016	32.800, -0.028
166	33.000, 0.026	33.000, 0.082	33.000, 0.161	33.000, 0.345	33.000, 0.669	33.000, -0.003	33.000, -0.008	33.000, -0.004	33.000, -0.005	33.000, -0.012	33.000, -0.016	33.000, -0.028
167	33.200, 0.028	33.200, 0.088	33.200, 0.172	33.200, 0.368	33.200, 0.704	33.200, -0.002	33.200, -0.009	33.200, -0.004	33.200, -0.006	33.200, -0.013	33.200, -0.017	33.200, -0.029
168	33.400, 0.031	33.400, 0.094	33.400, 0.184	33.400, 0.390	33.400, 0.737	33.400, -0.002	33.400, -0.010	33.400, -0.004	33.400, -0.006	33.400, -0.014	33.400, -0.017	33.400, -0.030
169	33.600, 0.034	33.600, 0.101	33.600, 0.195	33.600, 0.412	33.600, 0.768	33.600, -0.002	33.600, -0.011	33.600, -0.004	33.600, -0.007	33.600, -0.015	33.600, -0.018	33.600, -0.031
170	33.800, 0.036	33.800, 0.107	33.800, 0.206	33.800, 0.434	33.800, 0.797	33.800, -0.002	33.800, -0.011	33.800, -0.004	33.800, -0.007	33.800, -0.015	33.800, -0.018	33.800, -0.032
171	34.000, 0.039	34.000, 0.114	34.000, 0.218	34.000, 0.455	34.000, 0.824	34.000, -0.001	34.000, -0.012	34.000, -0.004	34.000, -0.008	34.000, -0.016	34.000, -0.019	34.000, -0.033
172	34.200, 0.042	34.200, 0.120	34.200, 0.229	34.200, 0.476	34.200, 0.850	34.200, -0.001	34.200, -0.013	34.200, -0.004	34.200, -0.008	34.200, -0.017	34.200, -0.019	34.200, -0.033
173	34.400, 0.045	34.400, 0.126	34.400, 0.240	34.400, 0.496	34.400, 0.873	34.400, -0.001	34.400, -0.013	34.400, -0.004	34.400, -0.008	34.400, -0.017	34.400, -0.020	34.400, -0.033
174	34.600, 0.048	34.600, 0.133	34.600, 0.251	34.600, 0.516	34.600, 0.896	34.600, -0.001	34.600, -0.014	34.600, -0.005	34.600, -0.008	34.600, -0.017	34.600, -0.020	34.600, -0.034
175	34.800, 0.050	34.800, 0.139	34.800, 0.263	34.800, 0.536	34.800, 0.916	34.800, -0.001	34.800, -0.014	34.800, -0.005	34.800, -0.008	34.800, -0.018	34.800, -0.020	34.800, -0.034
176	35.000, 0.053	35.000, 0.146	35.000, 0.274	35.000, 0.555	35.000, 0.935	35.000, -0.001	35.000, -0.015	35.000, -0.006	35.000, -0.009	35.000, -0.018	35.000, -0.021	35.000, -0.035
177	35.200, 0.056	35.200, 0.152	35.200, 0.285	35.200, 0.574	35.200, 0.953	35.200, -0.001	35.200, -0.015	35.200, -0.006	35.200, -0.009	35.200, -0.018	35.200, -0.021	35.200, -0.036
178	35.400, 0.058	35.400, 0.159	35.400, 0.297	35.400, 0.592	35.400, 0.969	35.400, -0.001	35.400, -0.015	35.400, -0.006	35.400, -0.009	35.400, -0.018	35.400, -0.022	35.400, -0.037
179	35.600, 0.061	35.600, 0.165	35.600, 0.308	35.600, 0.610	35.600, 0.984	35.600, -0.001	35.600, -0.015	35.600, -0.006	35.600, -0.009	35.600, -0.018	35.600, -0.022	35.600, -0.037
180	35.800, 0.063	35.800, 0.172	35.800, 0.320	35.800, 0.628	35.800, 0.998	35.800, -0.001	35.800, -0.015	35.800, -0.007	35.800, -0.009	35.800, -0.019	35.800, -0.023	35.800, -0.037
181	36.000, 0.065	36.000, 0.178	36.000, 0.331	36.000, 0.645	36.000, 1.011	36.000, -0.001	36.000, -0.016	36.000, -0.007	36.000, -0.009	36.000, -0.019	36.000, -0.023	36.000, -0.038
182	36.200, 0.068	36.200, 0.184	36.200, 0.342	36.200, 0.662	36.200, 1.023	36.200, -0.001	36.200, -0.016	36.200, -0.007	36.200, -0.010	36.200, -0.020	36.200, -0.024	36.200, -0.038
183	36.400, 0.070	36.400, 0.190	36.400, 0.353	36.400, 0.678	36.400, 1.034	36.400, -0.002	36.400, -0.016	36.400, -0.007	36.400, -0.010	36.400, -0.020	36.400, -0.024	36.400, -0.039
184	36.600, 0.072	36.600, 0.197	36.600, 0.364	36.600, 0.694	36.600, 1.044	36.600, -0.002	36.600, -0.017	36.600, -0.007	36.600, -0.011	36.600, -0.020	36.600, -0.025	36.600, -0.039
185	36.800, 0.075	36.800, 0.203	36.800, 0.375	36.800, 0.709	36.800, 1.053	36.800, -0.002	36.800, -0.017	36.800, -0.007	36.800, -0.011	36.800, -0.021	36.800, -0.025	36.800, -0.040
186	37.000, 0.077	37.000, 0.209	37.000, 0.386	37.000, 0.724	37.000, 1.062	37.000, -0.002	37.000, -0.017	37.000, -0.007	37.000, -0.012	37.000, -0.021	37.000, -0.026	37.000, -0.040
187	37.200, 0.080	37.200, 0.215	37.200, 0.397	37.200, 0.739	37.200, 1.069	37.200, -0.002	37.200, -0.018	37.200, -0.007	37.200, -0.012	37.200, -0.021	37.200, -0.027	37.200, -0.041
188	37.400, 0.083	37.400, 0.221	37.400, 0.407	37.400, 0.753	37.400, 1.077	37.400, -0.002	37.400, -0.018	37.400, -0.007	37.400, -0.012	37.400, -0.021	37.400, -0.027	37.400, -0.041
189	37.600, 0.086	37.600, 0.227	37.600, 0.418	37.600, 0.766	37.600, 1.084	37.600, -0.002	37.600, -0.019	37.600, -0.007	37.600, -0.013	37.600, -0.022	37.600, -0.028	37.600, -0.041
190	37.800, 0.089	37.800, 0.234	37.800, 0.428	37.800, 0.780	37.800, 1.090	37.800, -0.002	37.800, -0.019	37.800, -0.007	37.800, -0.013	37.800, -0.022	37.800, -0.029	37.800, -0.042
191	38.000, 0.092	38.000, 0.240	38.000, 0.438	38.000, 0.792	38.000, 1.096	38.000, -0.002	38.000, -0.019	38.000, -0.007	38.000, -0.013	38.000, -0.023	38.000, -0.029	38.000, -0.042
192	38.200, 0.096	38.200, 0.246	38.200, 0.448	38.200, 0.805	38.200, 1.102	38.200, -0.002	38.200, -0.020	38.200, -0.008	38.200, -0.014	38.200, -0.023	38.200, -0.030	38.200, -0.042
193	38.400, 0.099	38.400, 0.252	38.400, 0.458	38.400, 0.817	38.400, 1.107	38.400, -0.002	38.400, -0.020	38.400, -0.008	38.400, -0.014	38.400, -0.024	38.400, -0.030	38.400, -0.042
194	38.600, 0.102	38.600, 0.259	38.600, 0.468	38.600, 0.828	38.600, 1.113	38.600, -0.002	38.600, -0.021	38.600, -0.008	38.600, -0.014	38.600, -0.024	38.600, -0.030	38.600, -0.042
195	38.800, 0.105	38.800, 0.265	38.800, 0.478	38.800, 0.840	38.800, 1.118	38.800, -0.002	38.800, -0.021	38.800, -0.008	38.800, -0.014	38.800, -0.025	38.800, -0.030	38.800, -0.042
196	39.000, 0.108	39.000, 0.272	39.000, 0.488	39.000, 0.851	39.000, 1.122	39.000, -0.002	39.000, -0.021	39.000, -0.008	39.000, -0.014	39.000, -0.025	39.000, -0.030	39.000, -0.043
197	39.200, 0.111	39.200, 0.278	39.200, 0.498	39.200, 0.861	39.200, 1.127	39.200, -0.002	39.200, -0.022	39.200, -0.008	39.200, -0.014	39.200, -0.026	39.200, -0.030	39.200, -0.043
198	39.400, 0.114	39.400, 0.285	39.400, 0.508	39.400, 0.871	39.400, 1.132	39.400, -0.002	39.400, -0.022	39.400, -0.008	39.400, -0.014	39.400, -0.026	39.400, -0.030	39.400, -0.043
199	39.600, 0.117	39.600, 0.291	39.600, 0.517	39.600, 0.881	39.600, 1.136	39.600, -0.002	39.600, -0.022	39.600, -0.009	39.600, -0.014	39.600, -0.026	39.600, -0.030	39.600, -0.043
200	39.800, 0.120	39.800, 0.297	39.800, 0.527	39.800, 0.890	39.800, 1.140	39.800, -0.002	39.800, -0.022	39.800, -0.009	39.800, -0.014	39.800, -0.026	39.800, -0.030	39.800, -0.043
201	40.000, 0.123	40.000, 0.303	40.000, 0.536	40.000, 0.899	40.000, 1.144	40.000, -0.002	40.000, -0.022	40.000, -0.009	40.000, -0.014	40.000, -0.026	40.000, -0.030	40.000, -0.044
202	40.200, 0.126	40.200, 0.309	40.200, 0.545	40.200, 0.908	40.200, 1.148	40.200, -0.002	40.200, -0.023	40.200, -0.010	40.200, -0.015	40.200, -0.027	40.200, -0.030	40.200, -0.044
203	40.400, 0.129	40.400, 0.315	40.400, 0.554	40.400, 0.916	40.400, 1.151	40.400, -0.002	40.400, -0.023	40.400, -0.010	40.400, -0.015	40.400, -0.027	40.400, -0.030	40.400, -0.044
204	40.600, 0.132	40.600, 0.321	40.600, 0.563	40.600, 0.924	40.600, 1.154	40.600, -0.002	40.600, -0.023	40.600, -0.010	40.600, -0.015	40.600, -0.027	40.600, -0.030	40.600, -0.044
205	40.800, 0.134	40.800, 0.326	40.800, 0.572	40.800, 0.931	40.800, 1.157	40.800, -0.002	40.800, -0.023	40.800, -0.010	40.800, -0.015	40.800, -0.027	40.800, -0.031	40.800, -0.044
206	41.000, 0.137	41.000, 0.332	41.000, 0.581	41.000, 0.938	41.000, 1.160	41.000, -0.002	41.000, -0.024	41.000, -0.010	41.000, -0.015	41.000, -0.027	41.000, -0.031	41.000, -0.044
207	41.200, 0.140	41.200, 0.338	41.200, 0.590	41.200, 0.945	41.200, 1.163	41.200, -0.002	41.200, -0.024	41.200, -0.010	41.200, -0.015	41.200, -0.027	41.200, -0.032	41.200, -0.045
208	41.400, 0.143	41.400, 0.343	41.400, 0.599	41.400, 0.952	41.400, 1.166	41.400, -0.002	41.400, -0.024	41.400, -0.009	41.400, -0.015	41.400, -0.027	41.400, -0.032	41.400, -0.045
209	41.600, 0.146	41.600, 0.349	41.600, 0.607	41.600, 0.959	41.600, 1.168	41.600, -0.002	41.600, -0.024	41.600, -0.009	41.600, -0.015	41.600, -0.028	41.600, -0.033	41.600, -0.045
210	41.800, 0.150	41.800, 0.355	41.800, 0.616	41.800, 0.966	41.800, 1.171	41.800, -0.003	41.800, -0.024	41.800, -0.009	41.800, -0.015	41.800, -0.028	41.800, -0.033	41.800, -0.045
211	42.000, 0.153	42.000, 0.361	42.000, 0.624	42.000, 0.972	42.000, 1.173	42.000, -0.003	42.000, -0.024	42.000, -0.009	42.000, -0.016	42.000, -0.029	42.000, -0.033	42.000, -0.046
212	42.200, 0.156	42.200, 0.367	42.200, 0.632	42.200, 0.978	42.200, 1.175	42.200, -0.003	42.200, -0.025	42.200, -0.009	42.200, -0.016	42.200, -0.029	42.200, -0.033	42.200, -0.046
213	42.400, 0.159	42.400, 0.373	42.400, 0.639	42.400, 0.984	42.400, 1.177	42.400, -0.003	42.400, -0.025	42.400, -0.009	42.400, -0.016	42.400, -0.030	42.400, -0.033	42.400, -0.046
214	42.600, 0.162	42.600, 0.379	42.600, 0.647	42.600, 0.990	42.600, 1.179	42.600, -0.003	42.600, -0.026	42.600, -0.009	42.600, -0.017	42.600, -0.030	42.600, -0.034	42.600, -0.046
215	42.800, 0.165	42.800, 0.384	42.800, 0.655	42.800, 0.995	42.800, 1.181	42.800, -0.002	42.800, -0.026	42.800, -0.009	42.800, -0.017	42.800, -0.030	42.800, -0.034	42.800, -0.046
216	43.000, 0.167	43.000, 0.390	43.000, 0.662	43.000, 1.001	43.000, 1.183	43.000, -0.002	43.000, -0.027	43.000, -0.010	43.000, -0.017	43.000, -0.031	43.000, -0.034	43.000, -0.046
217	43.200, 0.170	43.200, 0.396	43.200, 0.670	43.200, 1.006	43.200, 1.184	43.200, -0.002	43.200, -0.027	43.200, -0.010	43.200, -0.017	43.200, -0.031	43.200, -0.034	43.200, -0.045
218	43.400, 0.173	43.400, 0.402	43.400, 0.677	43.400, 1.011	43.400, 1.186	43.400, -0.002	43.400, -0.028	43.400, -0.010	43.400, -0.017	43.400, -0.031	43.400, -0.035	43.400, -0.045
219	43.600, 0.176	43.600, 0.407	43.600, 0.685	43.600, 1.015	43.600, 1.188	43.600, -0.002	43.600, -0.028	43.600, -0.010	43.600, -0.017	43.600, -0.031	43.600, -0.035	43.600, -0.045
220	43.800, 0.179	43.800, 0.412	43.800, 0.692	43.800, 1.020	43.800, 1.190	43.800, -0.003	43.800, -0.028	43.800, -0.011	43.800, -0.018	43.800, -0.031	43.800, -0.035	43.800, -0.044
221	44.000, 0.181	44.000, 0.418	44.000, 0.699	44.000, 1.024	44.000, 1.192	44.000, -0.003	44.000, -0.028	44.000, -0.011	44.000, -0.018	44.000, -0.031	44.000, -0.035	44.000, -0.044
222	44.200, 0.184	44.200, 0.423	44.200, 0.706	44.200, 1.028	44.200, 1.194	44.200, -0.003	44.200, -0.028	44.200, -0.011	44.200, -0.018	44.200, -0.031	44.200, -0.036	44.200, -0.044
223	44.400, 0.187	44.400, 0.429	44.400, 0.713	44.400, 1.032	44.400, 1.195	44.400, -0.003	44.400, -0.028	44.400, -0.011	44.400, -0.018	44.400, -0.031	44.400, -0.036	44.400, -0.044
224	44.600, 0.190	44.600, 0.434	44.600, 0.720	44.600, 1.036	44.600, 1.197	44.600, -0.004	44.600, -0.028	44.600, -0.011	44.600, -0.018	44.600, -0.032	44.600, -0.036	44.600, -0.044
225	44.800, 0.193	44.800, 0.440	44.800, 0.727	44.800, 1.040	44.800, 1.198	44.800, -0.004	44.800, -0.028	44.800, -0.011	44.800, -0.018	44.800, -0.032	44.800, -0.037	44.800, -0.044
226	45.000, 0.197	45.000, 0.445	45.000, 0.734	45.000, 1.043	45.000, 1.199	45.000, -0.004	45.000, -0.028	45.000, -0.011	45.000, -0.018	45.000, -0.032	45.000, -0.037	45.000, -0.044
227	45.200, 0.200	45.200, 0.451	45.200, 0.741	45.200, 1.047	45.200, 1.201	45.200, -0.004	45.200, -0.028	45.200, -0.011	45.200, -0.019	45.200, -0.032	45.200, -0.038	45.200, -0.044
228	45.400, 0.203	45.400, 0.457	45.400, 0.748	45.400, 1.051	45.400, 1.202	45.400, -0.004	45.400, -0.028	45.400, -0.011	45.400, -0.019	45.400, -0.032	45.400, -0.038	45.400, -0.044
229	45.600, 0.205	45.600, 0.462	45.600, 0.755	45.600, 1.054	45.600, 1.203	45.600, -0.004	45.600, -0.029	45.600, -0.011	45.600, -0.019	45.600, -0.032	45.600, -0.038	45.600, -0.044
230	45.800, 0.208	45.800, 0.468	45.800, 0.761	45.800, 1.057	45.800, 1.205	45.800, -0.004	45.800, -0.029	45.800, -0.011	45.800, -0.019	45.800, -0.032	45.800, -0.038	45.800, -0.045
231	46.000, 0.211	46.000, 0.473	46.000, 0.767	46.000, 1.060	46.000, 1.206	46.000, -0.004	46.000, -0.030	46.000, -0.011	46.000, -0.019	46.000, -0.033	46.000, -0.038	46.000, -0.045
232	46.200, 0.214	46.200, 0.479	46.200, 0.774	46.200, 1.064	46.200, 1.207	46.200, -0.004	46.200, -0.030	46.200, -0.011	46.200, -0.020	46.200, -0.033	46.200, -0.038	46.200, -0.045
233	46.400, 0.216	46.400, 0.484	46.400, 0.779	46.400, 1.067	46.400, 1.208	46.400, -0.003	46.400, -0.031	46.400, -0.011	46.400, -0.020	46.400, -0.033	46.400, -0.038	46.400, -0.045
234	46.600, 0.219	46.600, 0.489	46.600, 0.785	46.600, 1.070	46.600, 1.209	46.600, -0.003	46.600, -0.032	46.600, -0.012	46.600, -0.020	46.600, -0.033	46.600, -0.037	46.600, -0.045
235	46.800, 0.221	46.800, 0.494	46.800, 0.791	46.800, 1.072	46.800, 1.210	46.800, -0.003	46.800, -0.032	46.800, -0.012	46.800, -0.020	46.800, -0.033	46.800, -0.037	46.800, -0.046
236	47.000, 0.224	47.000, 0.499	47.000, 0.797	47.000, 1.075	47.000, 1.211	47.000, -0.003	47.000, -0.033	47.000, -0.012	47.000, -0.020	47.000, -0.033	47.000, -0.037	47.000, -0.046
237	47.200, 0.227	47.200, 0.504	47.200, 0.802	47.200, 1.078	47.200, 1.212	47.200, -0.003	47.200, -0.034	47.200, -0.012	47.200, -0.021	47.200, -0.033	47.200, -0.037	47.200, -0.046
238	47.400, 0.229	47.400, 0.509	47.400, 0.808	47.400, 1.081	47.400, 1.213	47.400, -0.003	47.400, -0.034	47.400, -0.012	47.400, -0.021	47.400, -0.033	47.400, -0.037	47.400, -0.047
239	47.600, 0.232	47.600, 0.513	47.600, 0.813	47.600, 1.083	47.600, 1.215	47.600, -0.004	47.600, -0.034	47.600, -0.012	47.600, -0.022	47.600, -0.033	47.600, -0.037	47.600, -0.047
240	47.800, 0.235	47.800, 0.518	47.800, 0.818	47.800, 1.086	47.800, 1.216	47.800, -0.004	47.800, -0.035	47.800, -0.012	47.800, -0.022	47.800, -0.033	47.800, -0.036	47.800, -0.047
241	48.000, 0.238	48.000, 0.523	48.000, 0.824	48.000, 1.088	48.000, 1.217	48.000, -0.004	48.000, -0.035	48.000, -0.012	48.000, -0.022	48.000, -0.033	48.000, -0.036	48.000, -0.047
242	48.200, 0.240	48.200, 0.528	48.200, 0.829	48.200, 1.090	48.200, 1.218	48.200, -0.005	48.200, -0.035	48.200, -0.013	48.200, -0.022	48.200, -0.033	48.200, -0.036	48.200, -0.047
243	48.400, 0.243	48.400, 0.533	48.400, 0.834	48.400, 1.092	48.400, 1.220	48.400, -0.005	48.400, -0.035	48.400, -0.013	48.400, -0.022	48.400, -0.033	48.400, -0.036	48.400, -0.046
244	48.600, 0.246	48.600, 0.537	48.600, 0.839	48.600, 1.094	48.600, 1.221	48.600, -0.006	48.600, -0.034	48.600, -0.013	48.600, -0.022	48.600, -0.033	48.600, -0.037	48.600, -0.046
245	48.800, 0.249	48.800, 0.542	48.800, 0.844	48.800, 1.096	48.800, 1.222	48.800, -0.006	48.800, -0.034	48.800, -0.013	48.800, -0.021	48.800, -0.033	48.800, -0.037	48.800, -0.046
246	49.000, 0.252	49.000, 0.547	49.000, 0.849	49.000, 1.098	49.000, 1.223	49.000, -0.006	49.000, -0.034	49.000, -0.013	49.000, -0.021	49.000, -0.033	49.000, -0.037	49.000, -0.046
247	49.200, 0.254	49.200, 0.552	49.200, 0.854	49.200, 1.100	49.200, 1.224	49.200, -0.006	49.200, -0.034	49.200, -0.013	49.200, -0.021	49.200, -0.034	49.200, -0.037	49.200, -0.046
248	49.400, 0.257	49.400, 0.557	49.400, 0.859	49.400, 1.102	49.400, 1.225	49.400, -0.006	49.400, -0.034	49.400, -0.013	49.400, -0.021	49.400, -0.034	49.400, -0.037	49.400, -0.045
249	49.600, 0.260	49.600, 0.562	49.600, 0.864	49.600, 1.104	49.600, 1.227	49.600, -0.006	49.600, -0.035	49.600, -0.013	49.600, -0.021	49.600, -0.034	49.600, -0.038	49.600, -0.045
250	49.800, 0.263	49.800, 0.567	49.800, 0.869	49.800, 1.106	49.800, 1.228	49.800, -0.007	49.800, -0.035	49.800, -0.013	49.800, -0.021	49.800, -0.034	49.800, -0.038	49.800, -0.045
251	50.000, 0.265	50.000, 0.571	50.000, 0.873	50.000, 1.108	50.000, 1.228	50.000, -0.007	50.000, -0.036	50.000, -0.013	50.000, -0.021	50.000, -0.034	50.000, -0.038	50.000, -0.045
252	50.200, 0.268	50.200, 0.576	50.200, 0.877	50.200, 1.110	50.200, 1.229	50.200, -0.007	50.200, -0.036	50.200, -0.013	50.200, -0.022	50.200, -0.034	50.200, -0.038	50.200, -0.045
253	50.400, 0.271	50.400, 0.581	50.400, 0.882	50.400, 1.112	50.400, 1.230	50.400, -0.007	50.400, -0.037	50.400, -0.013	50.400, -0.022	50.400, -0.034	50.400, -0.038	50.400, -0.045
254	50.600, 0.274	50.600, 0.586	50.600, 0.886	50.600, 1.114	50.600, 1.230	50.600, -0.008	50.600, -0.037	50.600, -0.013	50.600, -0.022	50.600, -0.034	50.600, -0.038	50.600, -0.045
255	50.800, 0.277	50.800, 0.591	50.800, 0.890	50.800, 1.116	50.800, 1.231	50.800, -0.008	50.800, -0.038	50.800, -0.013	50.800, -0.023	50.800, -0.035	50.800, -0.038	50.800, -0.045
256	51.000, 0.280	51.000, 0.596	51.000, 0.894	51.000, 1.118	51.000, 1.232	51.000, -0.009	51.000, -0.038	51.000, -0.013	51.000, -0.023	51.000, -0.035	51.000, -0.038	51.000, -0.045
257	51.200, 0.282	51.200, 0.601	51.200, 0.898	51.200, 1.120	51.200, 1.232	51.200, -0.009	51.200, -0.038	51.200, -0.014	51.200, -0.023	51.200, -0.035	51.200, -0.038	51.200, -0.045
258	51.400, 0.285	51.400, 0.605	51.400, 0.902	51.400, 1.122	51.400, 1.233	51.400, -0.009	51.400, -0.039	51.400, -0.014	51.400, -0.023	51.400, -0.036	51.400, -0.038	51.400, -0.045
259	51.600, 0.288	51.600, 0.610	51.600, 0.906	51.600, 1.124	51.600, 1.233	51.600, -0.009	51.600, -0.039	51.600, -0.014	51.600, -0.023	51.600, -0.036	51.600, -0.038	51.600, -0.045
260	51.800, 0.291	51.800, 0.615	51.800, 0.909	51.800, 1.125	51.800, 1.234	51.800, -0.010	51.800, -0.039	51.800, -0.014	51.800, -0.023	51.800, -0.036	51.800, -0.038	51.800, -0.045
261	52.000, 0.293	52.000, 0.620	52.000, 0.913	52.000, 1.127	52.000, 1.235	52.000, -0.010	52.000, -0.039	52.000, -0.015	52.000, -0.023	52.000, -0.037	52.000, -0.038	52.000, -0.045
262	52.200, 0.296	52.200, 0.624	52.200, 0.917	52.200, 1.128	52.200, 1.236	52.200, -0.010	52.200, -0.039	52.200, -0.015	52.200, -0.023	52.200, -0.037	52.200, -0.038	52.200, -0.045
263	52.400, 0.299	52.400, 0.629	52.400, 0.921	52.400, 1.129	52.400, 1.236	52.400, -0.010	52.400, -0.039	52.400, -0.015	52.400, -0.023	52.400, -0.037	52.400, -0.039	52.400, -0.046
264	52.600, 0.302	52.600, 0.633	52.600, 0.925	52.600, 1.130	52.600, 1.237	52.600, -0.009	52.600, -0.039	52.600, -0.015	52.600, -0.023	52.600, -0.037	52.600, -0.039	52.600, -0.046
265	52.800, 0.304	52.800, 0.638	52.800, 0.928	52.800, 1.131	52.800, 1.238	52.800, -0.009	52.800, -0.039	52.800, -0.015	52.800, -0.023	52.800, -0.038	52.800, -0.039	52.800, -0.045
266	53.000, 0.307	53.000, 0.642	53.000, 0.932	53.000, 1.132	53.000, 1.238	53.000, -0.009	53.000, -0.039	53.000, -0.015	53.000, -0.024	53.000, -0.038	53.000, -0.039	53.000, -0.045
267	53.200, 0.310	53.200, 0.645	53.200, 0.936	53.200, 1.134	53.200, 1.239	53.200, -0.009	53.200, -0.038	53.200, -0.015	53.200, -0.024	53.200, -0.038	53.200, -0.039	53.200, -0.045
268	53.400, 0.313	53.400, 0.649	53.400, 0.939	53.400, 1.135	53.400, 1.241	53.400, -0.009	53.400, -0.038	53.400, -0.015	53.400, -0.025	53.400, -0.038	53.400, -0.040	53.400, -0.045
269	53.600, 0.315	53.600, 0.653	53.600, 0.942	53.600, 1.136	53.600, 1.242	53.600, -0.008	53.600, -0.038	53.600, -0.015	53.600, -0.025	53.600, -0.038	53.600, -0.040	53.600, -0.045
270	53.800, 0.318	53.800, 0.657	53.800, 0.946	53.800, 1.137	53.800, 1.242	53.800, -0.008	53.800, -0.038	53.800, -0.015	53.800, -0.026	53.800, -0.038	53.800, -0.041	53.800, -0.045
271	54.000, 0.321	54.000, 0.661	54.000, 0.949	54.000, 1.138	54.000, 1.243	54.000, -0.009	54.000, -0.038	54.000, -0.015	54.000, -0.026	54.000, -0.038	54.000, -0.041	54.000, -0.045
272	54.200, 0.324	54.200, 0.666	54.200, 0.952	54.200, 1.140	54.200, 1.244	54.200, -0.009	54.200, -0.039	54.200, -0.015	54.200, -0.026	54.200, -0.038	54.200, -0.041	54.200, -0.045
273	54.400, 0.326	54.400, 0.670	54.400, 0.955	54.400, 1.141	54.400, 1.244	54.400, -0.009	54.400, -0.039	54.400, -0.016	54.400, -0.027	54.400, -0.038	54.400, -0.041	54.400, -0.045
274	54.600, 0.329	54.600, 0.674	54.600, 0.958	54.600, 1.142	54.600, 1.245	54.600, -0.009	54.600, -0.039	54.600, -0.016	54.600, -0.027	54.600, -0.038	54.600, -0.041	54.600, -0.045
275	54.800, 0.331	54.800, 0.678	54.800, 0.960	54.800, 1.144	54.800, 1.245	54.800, -0.010	54.800, -0.040	54.800, -0.016	54.800, -0.027	54.800, -0.038	54.800, -0.041	54.800, -0.045
276	55.000, 0.334	55.000, 0.682	55.000, 0.963	55.000, 1.145	55.000, 1.245	55.000, -0.010	55.000, -0.040	55.000, -0.016	55.000, -0.027	55.000, -0.038	55.000, -0.042	55.000, -0.045
277	55.200, 0.337	55.200, 0.686	55.200, 0.966	55.200, 1.147	55.200, 1.246	55.200, -0.010	55.200, -0.041	55.200, -0.016	55.200, -0.027	55.200, -0.039	55.200, -0.042	55.200, -0.045
278	55.400, 0.339	55.400, 0.690	55.400, 0.969	55.400, 1.148	55.400, 1.246	55.400, -0.010	55.400, -0.041	55.400, -0.016	55.400, -0.027	55.400, -0.039	55.400, -0.042	55.400, -0.045
279	55.600, 0.342	55.600, 0.694	55.600, 0.971	55.600, 1.149	55.600, 1.247	55.600, -0.011	55.600, -0.041	55.600, -0.016	55.600, -0.027	55.600, -0.039	55.600, -0.042	55.600, -0.046
280	55.800, 0.344	55.800, 0.698	55.800, 0.974	55.800, 1.150	55.800, 1.248	55.800, -0.011	55.800, -0.042	55.800, -0.016	55.800, -0.027	55.800, -0.040	55.800, -0.042	55.800, -0.046
281	56.000, 0.347	56.000, 0.702	56.000, 0.977	56.000, 1.151	56.000, 1.249	56.000, -0.011	56.000, -0.042	56.000, -0.016	56.000, -0.027	56.000, -0.040	56.000, -0.042	56.000, -0.046
282	56.200, 0.350	56.200, 0.706	56.200, 0.980	56.200, 1.153	56.200, 1.249	56.200, -0.011	56.200, -0.042	56.200, -0.016	56.200, -0.027	56.200, -0.040	56.200, -0.043	56.200, -0.046
283	56.400, 0.352	56.400, 0.710	56.400, 0.983	56.400, 1.154	56.400, 1.250	56.400, -0.011	56.400, -0.043	56.400, -0.016	56.400, -0.027	56.400, -0.041	56.400, -0.043	56.400, -0.046
284	56.600, 0.355	56.600, 0.713	56.600, 0.985	56.600, 1.155	56.600, 1.251	56.600, -0.010	56.600, -0.043	56.600, -0.016	56.600, -0.027	56.600, -0.041	56.600, -0.043	56.600, -0.045
285	56.800, 0.357	56.800, 0.717	56.800, 0.988	56.800, 1.156	56.800, 1.252	56.800, -0.010	56.800, -0.043	56.800, -0.016	56.800, -0.027	56.800, -0.041	56.800, -0.043	56.800, -0.045
286	57.000, 0.360	57.000, 0.720	57.000, 0.991	57.000, 1.157	57.000, 1.252	57.000, -0.010	57.000, -0.044	57.000, -0.016	57.000, -0.027	57.000, -0.042	57.000, -0.043	57.000, -0.045
287	57.200, 0.362	57.200, 0.724	57.200, 0.993	57.200, 1.158	57.200, 1.253	57.200, -0.010	57.200, -0.044	57.200, -0.015	57.200, -0.027	57.200, -0.042	57.200, -0.044	57.200, -0.045
288	57.400, 0.365	57.400, 0.727	57.400, 0.996	57.400, 1.159	57.400, 1.254	57.400, -0.010	57.400, -0.044	57.400, -0.015	57.400, -0.027	57.400, -0.042	57.400, -0.044	57.400, -0.045
289	57.600, 0.367	57.600, 0.731	57.600, 0.998	57.600, 1.160	57.600, 1.254	57.600, -0.010	57.600, -0.044	57.600, -0.016	57.600, -0.027	57.600, -0.042	57.600, -0.044	57.600, -0.045
290	57.800, 0.370	57.800, 0.735	57.800, 1.001	57.800, 1.161	57.800, 1.255	57.800, -0.010	57.800, -0.044	57.800, -0.016	57.800, -0.028	57.800, -0.041	57.800, -0.044	57.800, -0.045
291	58.000, 0.373	58.000, 0.738	58.000, 1.003	58.000, 1.161	58.000, 1.255	58.000, -0.011	58.000, -0.044	58.000, -0.016	58.000, -0.028	58.000, -0.041	58.000, -0.043	58.000, -0.045
292	58.200, 0.375	58.200, 0.742	58.200, 1.005	58.200, 1.162	58.200, 1.256	58.200, -0.011	58.200, -0.045	58.200, -0.016	58.200, -0.029	58.200, -0.041	58.200, -0.043	58.200, -0.045
293	58.400, 0.378	58.400, 0.745	58.400, 1.007	58.400, 1.163	58.400, 1.256	58.400, -0.011	58.400, -0.045	58.400, -0.017	58.400, -0.029	58.400, -0.041	58.400, -0.043	58.400, -0.045
294	58.600, 0.380	58.600, 0.749	58.600, 1.009	58.600, 1.164	58.600, 1.256	58.600, -0.011	58.600, -0.046	58.600, -0.017	58.600, -0.029	58.600, -0.041	58.600, -0.043	58.600, -0.045
295	58.800, 0.383	58.800, 0.752	58.800, 1.011	58.800, 1.165	58.800, 1.256	58.800, -0.011	58.800, -0.046	58.800, -0.017	58.800, -0.029	58.800, -0.041	58.800, -0.043	58.800, -0.044
296	59.000, 0.386	59.000, 0.756	59.000, 1.013	59.000, 1.166	59.000, 1.257	59.000, -0.011	59.000, -0.047	59.000, -0.018	59.000, -0.030	59.000, -0.041	59.000, -0.043	59.000, -0.044
297	59.200, 0.388	59.200, 0.759	59.200, 1.015	59.200, 1.167	59.200, 1.257	59.200, -0.012	59.200, -0.047	59.200, -0.018	59.200, -0.030	59.200, -0.041	59.200, -0.042	59.200, -0.044
298	59.400, 0.391	59.400, 0.763	59.400, 1.017	59.400, 1.168	59.400, 1.258	59.400, -0.012	59.400, -0.047	59.400, -0.018	59.400, -0.030	59.400, -0.041	59.400, -0.042	59.400, -0.044
299	59.600, 0.393	59.600, 0.766	59.600, 1.019	59.600, 1.168	59.600, 1.258	59.600, -0.012	59.600, -0.048	59.600, -0.019	59.600, -0.030	59.600, -0.042	59.600, -0.042	59.600, -0.044
300	59.800, 0.396	59.800, 0.769	59.800, 1.020	59.800, 1.169	59.800, 1.259	59.800, -0.012	59.800, -0.048	59.800, -0.019	59.800, -0.030	59.800, -0.042	59.800, -0.043	59.800, -0.044
301	60.000, 0.398	60.000, 0.772	60.000, 1.022	60.000, 1.170	60.000, 1.259	60.000, -0.013	60.000, -0.048	60.000, -0.019	60.000, -0.030	60.000, -0.042	60.000, -0.043	60.000, -0.044
302	60.200, 0.401	60.200, 0.775	60.200, 1.025	60.200, 1.170	60.200, 1.260	60.200, -0.013	60.200, -0.048	60.200, -0.019	60.200, -0.029	60.200, -0.042	60.200, -0.043	60.200, -0.044
303	60.400, 0.403	60.400, 0.778	60.400, 1.026	60.400, 1.171	60.400, 1.260	60.400, -0.013	60.400, -0.048	60.400, -0.020	60.400, -0.029	60.400, -0.042	60.400, -0.044	60.400, -0.044
304	60.600, 0.405	60.600, 0.781	60.600, 1.029	60.600, 1.172	60.600, 1.260	60.600, -0.013	60.600, -0.048	60.600, -0.020	60.600, -0.029	60.600, -0.042	60.600, -0.044	60.600, -0.044
305	60.800, 0.408	60.800, 0.784	60.800, 1.030	60.800, 1.173	60.800, 1.261	60.800, -0.012	60.800, -0.048	60.800, -0.020	60.800, -0.029	60.800, -0.042	60.800, -0.044	60.800, -0.044
306	61.000, 0.410	61.000, 0.787	61.000, 1.032	61.000, 1.173	61.000, 1.261	61.000, -0.012	61.000, -0.048	61.000, -0.020	61.000, -0.030	61.000, -0.042	61.000, -0.045	61.000, -0.045
307	61.200, 0.413	61.200, 0.790	61.200, 1.034	61.200, 1.174	61.200, 1.261	61.200, -0.012	61.200, -0.047	61.200, -0.020	61.200, -0.030	61.200, -0.042	61.200, -0.045	61.200, -0.045
308	61.400, 0.415	61.400, 0.793	61.400, 1.036	61.400, 1.175	61.400, 1.262	61.400, -0.012	61.400, -0.047	61.400, -0.020	61.400, -0.030	61.400, -0.042	61.400, -0.045	61.400, -0.045
309	61.600, 0.418	61.600, 0.796	61.600, 1.038	61.600, 1.176	61.600, 1.262	61.600, -0.012	61.600, -0.047	61.600, -0.020	61.600, -0.031	61.600, -0.042	61.600, -0.045	61.600, -0.045
310	61.800, 0.420	61.800, 0.799	61.800, 1.040	61.800, 1.177	61.800, 1.263	61.800, -0.013	61.800, -0.047	61.800, -0.020	61.800, -0.031	61.800, -0.042	61.800, -0.045	61.800, -0.045
311	62.000, 0.423	62.000, 0.803	62.000, 1.041	62.000, 1.178	62.000, 1.264	62.000, -0.013	62.000, -0.047	62.000, -0.020	62.000, -0.031	62.000, -0.042	62.000, -0.045	62.000, -0.045
312	62.200, 0.425	62.200, 0.806	62.200, 1.043	62.200, 1.179	62.200, 1.264	62.200, -0.013	62.200, -0.047	62.200, -0.020	62.200, -0.032	62.200, -0.042	62.200, -0.045	62.200, -0.045
313	62.400, 0.428	62.400, 0.809	62.400, 1.045	62.400, 1.179	62.400, 1.265	62.400, -0.013	62.400, -0.048	62.400, -0.019	62.400, -0.032	62.400, -0.043	62.400, -0.045	62.400, -0.045
314	62.600, 0.431	62.600, 0.812	62.600, 1.046	62.600, 1.180	62.600, 1.265	62.600, -0.013	62.600, -0.048	62.600, -0.019	62.600, -0.032	62.600, -0.043	62.600, -0.045	62.600, -0.046
315	62.800, 0.433	62.800, 0.814	62.800, 1.048	62.800, 1.181	62.800, 1.266	62.800, -0.013	62.800, -0.049	62.800, -0.019	62.800, -0.032	62.800, -0.044	62.800, -0.045	62.800, -0.046
316	63.000, 0.436	63.000, 0.817	63.000, 1.049	63.000, 1.182	63.000, 1.266	63.000, -0.013	63.000, -0.050	63.000, -0.019	63.000, -0.032	63.000, -0.044	63.000, -0.045	63.000, -0.046
317	63.200, 0.438	63.200, 0.820	63.200, 1.051	63.200, 1.182	63.200, 1.267	63.200, -0.014	63.200, -0.050	63.200, -0.019	63.200, -0.032	63.200, -0.045	63.200, -0.045	63.200, -0.045
318	63.400, 0.440	63.400, 0.823	63.400, 1.053	63.400, 1.183	63.400, 1.267	63.400, -0.014	63.400, -0.050	63.400, -0.019	63.400, -0.032	63.400, -0.045	63.400, -0.045	63.400, -0.045
319	63.600, 0.442	63.600, 0.826	63.600, 1.054	63.600, 1.184	63.600, 1.268	63.600, -0.014	63.600, -0.051	63.600, -0.019	63.600, -0.032	63.600, -0.045	63.600, -0.045	63.600, -0.045
320	63.800, 0.445	63.800, 0.829	63.800, 1.056	63.800, 1.184	63.800, 1.268	63.800, -0.015	63.800, -0.051	63.800, -0.019	63.800, -0.032	63.800, -0.046	63.800, -0.045	63.800, -0.044
321	64.000, 0.447	64.000, 0.831	64.000, 1.058	64.000, 1.185	64.000, 1.269	64.000, -0.015	64.000, -0.051	64.000, -0.019	64.000, -0.032	64.000, -0.046	64.000, -0.045	64.000, -0.044
322	64.200, 0.450	64.200, 0.834	64.200, 1.059	64.200, 1.185	64.200, 1.269	64.200, -0.015	64.200, -0.051	64.200, -0.019	64.200, -0.032	64.200, -0.046	64.200, -0.045	64.200, -0.044
323	64.400, 0.453	64.400, 0.837	64.400, 1.061	64.400, 1.186	64.400, 1.270	64.400, -0.015	64.400, -0.051	64.400, -0.019	64.400, -0.032	64.400, -0.046	64.400, -0.045	64.400, -0.044
324	64.600, 0.455	64.600, 0.840	64.600, 1.062	64.600, 1.187	64.600, 1.270	64.600, -0.015	64.600, -0.051	64.600, -0.019	64.600, -0.032	64.600, -0.046	64.600, -0.045	64.600, -0.044
325	64.800, 0.458	64.800, 0.842	64.800, 1.063	64.800, 1.188	64.800, 1.271	64.800, -0.015	64.800, -0.051	64.800, -0.020	64.800, -0.032	64.800, -0.046	64.800, -0.045	64.800, -0.044
326	65.000, 0.460	65.000, 0.845	65.000, 1.065	65.000, 1.188	65.000, 1.271	65.000, -0.015	65.000, -0.051	65.000, -0.020	65.000, -0.033	65.000, -0.046	65.000, -0.045	65.000, -0.044
327	65.200, 0.463	65.200, 0.848	65.200, 1.066	65.200, 1.189	65.200, 1.271	65.200, -0.015	65.200, -0.051	65.200, -0.021	65.200, -0.033	65.200, -0.045	65.200, -0.045	65.200, -0.044
328	65.400, 0.465	65.400, 0.850	65.400, 1.067	65.400, 1.189	65.400, 1.272	65.400, -0.015	65.400, -0.052	65.400, -0.022	65.400, -0.033	65.400, -0.045	65.400, -0.044	65.400, -0.044
329	65.600, 0.467	65.600, 0.853	65.600, 1.068	65.600, 1.190	65.600, 1.272	65.600, -0.015	65.600, -0.052	65.600, -0.022	65.600, -0.033	65.600, -0.045	65.600, -0.044	65.600, -0.044
330	65.800, 0.470	65.800, 0.856	65.800, 1.070	65.800, 1.191	65.800, 1.273	65.800, -0.015	65.800, -0.052	65.800, -0.023	65.800, -0.033	65.800, -0.045	65.800, -0.044	65.800, -0.043
331	66.000, 0.472	66.000, 0.858	66.000, 1.071	66.000, 1.191	66.000, 1.274	66.000, -0.015	66.000, -0.052	66.000, -0.023	66.000, -0.033	66.000, -0.045	66.000, -0.044	66.000, -0.043
332	66.200, 0.475	66.200, 0.861	66.200, 1.072	66.200, 1.192	66.200, 1.274	66.200, -0.015	66.200, -0.052	66.200, -0.023	66.200, -0.032	66.200, -0.045	66.200, -0.043	66.200, -0.044
333	66.400, 0.477	66.400, 0.864	66.400, 1.074	66.400, 1.193	66.400, 1.274	66.400, -0.015	66.400, -0.053	66.400, -0.023	66.400, -0.032	66.400, -0.045	66.400, -0.043	66.400, -0.044
334	66.600, 0.479	66.600, 0.866	66.600, 1.075	66.600, 1.193	66.600, 1.275	66.600, -0.015	66.600, -0.053	66.600, -0.023	66.600, -0.032	66.600, -0.045	66.600, -0.043	66.600, -0.044
335	66.800, 0.482	66.800, 0.869	66.800, 1.077	66.800, 1.194	66.800, 1.275	66.800, -0.015	66.800, -0.053	66.800, -0.024	66.800, -0.032	66.800, -0.045	66.800, -0.043	66.800, -0.044
336	67.000, 0.484	67.000, 0.871	67.000, 1.078	67.000, 1.194	67.000, 1.276	67.000, -0.015	67.000, -0.053	67.000, -0.024	67.000, -0.032	67.000, -0.045	67.000, -0.043	67.000, -0.044
337	67.200, 0.486	67.200, 0.873	67.200, 1.079	67.200, 1.194	67.200, 1.276	67.200, -0.015	67.200, -0.053	67.200, -0.024	67.200, -0.032	67.200, -0.045	67.200, -0.043	67.200, -0.043
338	67.400, 0.489	67.400, 0.875	67.400, 1.081	67.400, 1.195	67.400, 1.276	67.400, -0.016	67.400, -0.053	67.400, -0.023	67.400, -0.032	67.400, -0.046	67.400, -0.044	67.400, -0.043
339	67.600, 0.491	67.600, 0.877	67.600, 1.082	67.600, 1.196	67.600, 1.277	67.600, -0.016	67.600, -0.053	67.600, -0.023	67.600, -0.033	67.600, -0.046	67.600, -0.044	67.600, -0.043
340	67.800, 0.493	67.800, 0.879	67.800, 1.084	67.800, 1.196	67.800, 1.277	67.800, -0.016	67.800, -0.053	67.800, -0.023	67.800, -0.033	67.800, -0.046	67.800, -0.044	67.800, -0.043
341	68.000, 0.496	68.000, 0.881	68.000, 1.085	68.000, 1.197	68.000, 1.278	68.000, -0.016	68.000, -0.053	68.000, -0.023	68.000, -0.033	68.000, -0.046	68.000, -0.044	68.000, -0.043
342	68.200, 0.498	68.200, 0.883	68.200, 1.086	68.200, 1.197	68.200, 1.278	68.200, -0.016	68.200, -0.053	68.200, -0.022	68.200, -0.033	68.200, -0.047	68.200, -0.045	68.200, -0.043
343	68.400, 0.501	68.400, 0.886	68.400, 1.087	68.400, 1.198	68.400, 1.279	68.400, -0.016	68.400, -0.053	68.400, -0.022	68.400, -0.034	68.400, -0.047	68.400, -0.045	68.400, -0.042
344	68.600, 0.503	68.600, 0.888	68.600, 1.088	68.600, 1.199	68.600, 1.279	68.600, -0.016	68.600, -0.054	68.600, -0.022	68.600, -0.034	68.600, -0.047	68.600, -0.045	68.600, -0.042
345	68.800, 0.506	68.800, 0.890	68.800, 1.088	68.800, 1.199	68.800, 1.280	68.800, -0.016	68.800, -0.054	68.800, -0.022	68.800, -0.034	68.800, -0.047	68.800, -0.045	68.800, -0.042
346	69.000, 0.508	69.000, 0.892	69.000, 1.089	69.000, 1.200	69.000, 1.280	69.000, -0.015	69.000, -0.054	69.000, -0.022	69.000, -0.035	69.000, -0.047	69.000, -0.046	69.000, -0.041
347	69.200, 0.510	69.200, 0.894	69.200, 1.090	69.200, 1.201	69.200, 1.280	69.200, -0.015	69.200, -0.054	69.200, -0.022	69.200, -0.035	69.200, -0.047	69.200, -0.046	69.200, -0.041
348	69.400, 0.513	69.400, 0.896	69.400, 1.091	69.400, 1.202	69.400, 1.281	69.400, -0.015	69.400, -0.054	69.400, -0.022	69.400, -0.035	69.400, -0.047	69.400, -0.046	69.400, -0.041
349	69.600, 0.515	69.600, 0.898	69.600, 1.092	69.600, 1.203	69.600, 1.281	69.600, -0.016	69.600, -0.054	69.600, -0.022	69.600, -0.035	69.600, -0.047	69.600, -0.046	69.600, -0.041
350	69.800, 0.517	69.800, 0.900	69.800, 1.093	69.800, 1.204	69.800, 1.282	69.800, -0.016	69.800, -0.054	69.800, -0.022	69.800, -0.034	69.800, -0.047	69.800, -0.046	69.800, -0.040
351	70.000, 0.520	70.000, 0.903	70.000, 1.094	70.000, 1.205	70.000, 1.282	70.000, -0.016	70.000, -0.054	70.000, -0.022	70.000, -0.034	70.000, -0.047	70.000, -0.047	70.000, -0.040
352	70.200, 0.522	70.200, 0.905	70.200, 1.096	70.200, 1.206	70.200, 1.282	70.200, -0.016	70.200, -0.054	70.200, -0.022	70.200, -0.034	70.200, -0.047	70.200, -0.047	70.200, -0.040
353	70.400, 0.524	70.400, 0.908	70.400, 1.097	70.400, 1.206	70.400, 1.282	70.400, -0.017	70.400, -0.054	70.400, -0.022	70.400, -0.034	70.400, -0.047	70.400, -0.047	70.400, -0.040
354	70.600, 0.526	70.600, 0.910	70.600, 1.098	70.600, 1.207	70.600, 1.283	70.600, -0.017	70.600, -0.055	70.600, -0.022	70.600, -0.034	70.600, -0.047	70.600, -0.046	70.600, -0.040
355	70.800, 0.529	70.800, 0.913	70.800, 1.099	70.800, 1.207	70.800, 1.283	70.800, -0.017	70.800, -0.055	70.800, -0.023	70.800, -0.034	70.800, -0.047	70.800, -0.046	70.800, -0.040
356	71.000, 0.531	71.000, 0.915	71.000, 1.101	71.000, 1.207	71.000, 1.283	71.000, -0.018	71.000, -0.055	71.000, -0.023	71.000, -0.034	71.000, -0.048	71.000, -0.046	71.000, -0.040
357	71.200, 0.533	71.200, 0.917	71.200, 1.102	71.200, 1.207	71.200, 1.283	71.200, -0.018	71.200, -0.055	71.200, -0.023	71.200, -0.034	71.200, -0.048	71.200, -0.046	71.200, -0.040
358	71.400, 0.535	71.400, 0.919	71.400, 1.103	71.400, 1.208	71.400, 1.283	71.400, -0.019	71.400, -0.056	71.400, -0.023	71.400, -0.035	71.400, -0.048	71.400, -0.046	71.400, -0.040
359	71.600, 0.537	71.600, 0.921	71.600, 1.104	71.600, 1.208	71.600, 1.283	71.600, -0.019	71.600, -0.056	71.600, -0.023	71.600, -0.035	71.600, -0.048	71.600, -0.046	71.600, -0.040
360	71.800, 0.539	71.800, 0.923	71.800, 1.106	71.800, 1.208	71.800, 1.284	71.800, -0.020	71.800, -0.057	71.800, -0.023	71.800, -0.035	71.800, -0.049	71.800, -0.045	71.800, -0.040
361	72.000, 0.541	72.000, 0.924	72.000, 1.107	72.000, 1.209	72.000, 1.284	72.000, -0.020	72.000, -0.057	72.000, -0.023	72.000, -0.035	72.000, -0.049	72.000, -0.045	72.000, -0.040
362	72.200, 0.543	72.200, 0.926	72.200, 1.108	72.200, 1.209	72.200, 1.284	72.200, -0.020	72.200, -0.057	72.200, -0.023	72.200, -0.036	72.200, -0.049	72.200, -0.046	72.200, -0.040
363	72.400, 0.545	72.400, 0.928	72.400, 1.109	72.400, 1.209	72.400, 1.285	72.400, -0.019	72.400, -0.057	72.400, -0.023	72.400, -0.036	72.400, -0.049	72.400, -0.046	72.400, -0.040
364	72.600, 0.547	72.600, 0.930	72.600, 1.110	72.600, 1.210	72.600, 1.285	72.600, -0.019	72.600, -0.057	72.600, -0.024	72.600, -0.036	72.600, -0.049	72.600, -0.046	72.600, -0.040
365	72.800, 0.550	72.800, 0.932	72.800, 1.110	72.800, 1.210	72.800, 1.285	72.800, -0.019	72.800, -0.057	72.800, -0.024	72.800, -0.037	72.800, -0.049	72.800, -0.046	72.800, -0.040
366	73.000, 0.552	73.000, 0.934	73.000, 1.111	73.000, 1.210	73.000, 1.286	73.000, -0.019	73.000, -0.057	73.000, -0.024	73.000, -0.037	73.000, -0.049	73.000, -0.045	73.000, -0.040
367	73.200, 0.554	73.200, 0.935	73.200, 1.112	73.200, 1.211	73.200, 1.287	73.200, -0.018	73.200, -0.057	73.200, -0.025	73.200, -0.037	73.200, -0.049	73.200, -0.045	73.200, -0.040
368	73.400, 0.556	73.400, 0.937	73.400, 1.113	73.400, 1.211	73.400, 1.287	73.400, -0.019	73.400, -0.057	73.400, -0.025	73.400, -0.037	73.400, -0.049	73.400, -0.045	73.400, -0.041
369	73.600, 0.558	73.600, 0.938	73.600, 1.113	73.600, 1.212	73.600, 1.288	73.600, -0.019	73.600, -0.056	73.600, -0.025	73.600, -0.036	73.600, -0.049	73.600, -0.045	73.600, -0.041
370	73.800, 0.560	73.800, 0.940	73.800, 1.114	73.800, 1.212	73.800, 1.288	73.800, -0.019	73.800, -0.057	73.800, -0.025	73.800, -0.036	73.800, -0.048	73.800, -0.045	73.800, -0.041
371	74.000, 0.562	74.000, 0.942	74.000, 1.115	74.000, 1.212	74.000, 1.289	74.000, -0.019	74.000, -0.057	74.000, -0.025	74.000, -0.036	74.000, -0.048	74.000, -0.045	74.000, -0.041
372	74.200, 0.565	74.200, 0.944	74.200, 1.116	74.200, 1.212	74.200, 1.289	74.200, -0.019	74.200, -0.057	74.200, -0.024	74.200, -0.036	74.200, -0.048	74.200, -0.045	74.200, -0.042
373	74.400, 0.567	74.400, 0.945	74.400, 1.116	74.400, 1.213	74.400, 1.290	74.400, -0.019	74.400, -0.057	74.400, -0.024	74.400, -0.036	74.400, -0.048	74.400, -0.045	74.400, -0.042
374	74.600, 0.569	74.600, 0.947	74.600, 1.118	74.600, 1.213	74.600, 1.291	74.600, -0.019	74.600, -0.058	74.600, -0.024	74.600, -0.036	74.600, -0.048	74.600, -0.045	74.600, -0.042
375	74.800, 0.572	74.800, 0.949	74.800, 1.119	74.800, 1.213	74.800, 1.291	74.800, -0.020	74.800, -0.058	74.800, -0.024	74.800, -0.036	74.800, -0.048	74.800, -0.045	74.800, -0.042
376	75.000, 0.574	75.000, 0.950	75.000, 1.120	75.000, 1.214	75.000, 1.292	75.000, -0.020	75.000, -0.059	75.000, -0.024	75.000, -0.036	75.000, -0.048	75.000, -0.045	75.000, -0.042
377	75.200, 0.576	75.200, 0.952	75.200, 1.121	75.200, 1.214	75.200, 1.292	75.200, -0.020	75.200, -0.059	75.200, -0.024	75.200, -0.036	75.200, -0.048	75.200, -0.046	75.200, -0.042
378	75.400, 0.579	75.400, 0.954	75.400, 1.121	75.400, 1.215	75.400, 1.292	75.400, -0.021	75.400, -0.059	75.400, -0.024	75.400, -0.036	75.400, -0.049	75.400, -0.046	75.400, -0.042
379	75.600, 0.581	75.600, 0.955	75.600, 1.122	75.600, 1.216	75.600, 1.293	75.600, -0.021	75.600, -0.060	75.600, -0.024	75.600, -0.036	75.600, -0.049	75.600, -0.046	75.600, -0.042
380	75.800, 0.583	75.800, 0.957	75.800, 1.122	75.800, 1.216	75.800, 1.293	75.800, -0.021	75.800, -0.060	75.800, -0.024	75.800, -0.037	75.800, -0.049	75.800, -0.046	75.800, -0.042
381	76.000, 0.585	76.000, 0.958	76.000, 1.123	76.000, 1.217	76.000, 1.293	76.000, -0.021	76.000, -0.060	76.000, -0.024	76.000, -0.037	76.000, -0.050	76.000, -0.046	76.000, -0.042
382	76.200, 0.587	76.200, 0.960	76.200, 1.123	76.200, 1.217	76.200, 1.293	76.200, -0.021	76.200, -0.059	76.200, -0.024	76.200, -0.037	76.200, -0.050	76.200, -0.046	76.200, -0.042
383	76.400, 0.589	76.400, 0.962	76.400, 1.123	76.400, 1.218	76.400, 1.293	76.400, -0.021	76.400, -0.059	76.400, -0.025	76.400, -0.038	76.400, -0.050	76.400, -0.046	76.400, -0.042
384	76.600, 0.591	76.600, 0.964	76.600, 1.123	76.600, 1.219	76.600, 1.294	76.600, -0.020	76.600, -0.059	76.600, -0.025	76.600, -0.038	76.600, -0.051	76.600, -0.046	76.600, -0.042
385	76.800, 0.593	76.800, 0.966	76.800, 1.124	76.800, 1.219	76.800, 1.294	76.800, -0.020	76.800, -0.058	76.800, -0.025	76.800, -0.038	76.800, -0.051	76.800, -0.046	76.800, -0.042
386	77.000, 0.595	77.000, 0.967	77.000, 1.124	77.000, 1.219	77.000, 1.294	77.000, -0.020	77.000, -0.058	77.000, -0.025	77.000, -0.038	77.000, -0.051	77.000, -0.046	77.000, -0.042
387	77.200, 0.597	77.200, 0.969	77.200, 1.124	77.200, 1.220	77.200, 1.294	77.200, -0.020	77.200, -0.058	77.200, -0.025	77.200, -0.038	77.200, -0.051	77.200, -0.046	77.200, -0.042
388	77.400, 0.599	77.400, 0.971	77.400, 1.124	77.400, 1.220	77.400, 1.294	77.400, -0.019	77.400, -0.057	77.400, -0.025	77.400, -0.037	77.400, -0.051	77.400, -0.046	77.400, -0.042
389	77.600, 0.601	77.600, 0.972	77.600, 1.124	77.600, 1.220	77.600, 1.295	77.600, -0.019	77.600, -0.057	77.600, -0.025	77.600, -0.037	77.600, -0.051	77.600, -0.046	77.600, -0.042
390	77.800, 0.603	77.800, 0.974	77.800, 1.124	77.800, 1.221	77.800, 1.295	77.800, -0.019	77.800, -0.057	77.800, -0.025	77.800, -0.038	77.800, -0.051	77.800, -0.046	77.800, -0.041
391	78.000, 0.605	78.000, 0.975	78.000, 1.125	78.000, 1.221	78.000, 1.295	78.000, -0.019	78.000, -0.058	78.000, -0.025	78.000, -0.037	78.000, -0.051	78.000, -0.046	78.000, -0.041
392	78.200, 0.607	78.200, 0.977	78.200, 1.126	78.200, 1.222	78.200, 1.295	78.200, -0.019	78.200, -0.058	78.200, -0.025	78.200, -0.038	78.200, -0.051	78.200, -0.046	78.200, -0.040
393	78.400, 0.609	78.400, 0.978	78.400, 1.127	78.400, 1.222	78.400, 1.296	78.400, -0.020	78.400, -0.058	78.400, -0.025	78.400, -0.038	78.400, -0.051	78.400, -0.046	78.400, -0.040
394	78.600, 0.611	78.600, 0.980	78.600, 1.128	78.600, 1.223	78.600, 1.296	78.600, -0.020	78.600, -0.059	78.600, -0.025	78.600, -0.038	78.600, -0.051	78.600, -0.046	78.600, -0.039
395	78.800, 0.613	78.800, 0.981	78.800, 1.129	78.800, 1.223	78.800, 1.297	78.800, -0.020	78.800, -0.060	78.800, -0.025	78.800, -0.038	78.800, -0.051	78.800, -0.047	78.800, -0.039
396	79.000, 0.615	79.000, 0.982	79.000, 1.129	79.000, 1.224	79.000, 1.297	79.000, -0.020	79.000, -0.060	79.000, -0.025	79.000, -0.038	79.000, -0.051	79.000, -0.047	79.000, -0.039
397	79.200, 0.617	79.200, 0.983	79.200, 1.130	79.200, 1.224	79.200, 1.298	79.200, -0.020	79.200, -0.061	79.200, -0.026	79.200, -0.038	79.200, -0.051	79.200, -0.047	79.200, -0.038
398	79.400, 0.619	79.400, 0.985	79.400, 1.131	79.400, 1.224	79.400, 1.298	79.400, -0.020	79.400, -0.061	79.400, -0.026	79.400, -0.038	79.400, -0.052	79.400, -0.047	79.400, -0.038
399	79.600, 0.621	79.600, 0.986	79.600, 1.131	79.600, 1.225	79.600, 1.298	79.600, -0.020	79.600, -0.061	79.600, -0.026	79.600, -0.038	79.600, -0.052	79.600, -0.047	79.600, -0.038
400	79.800, 0.624	79.800, 0.987	79.800, 1.132	79.800, 1.225	79.800, 1.298	79.800, -0.020	79.800, -0.061	79.800, -0.026	79.800, -0.037	79.800, -0.052	79.800, -0.047	79.800, -0.038
401	80.000, 0.626	80.000, 0.989	80.000, 1.133	80.000, 1.226	80.000, 1.298	80.000, -0.021	80.000, -0.061	80.000, -0.026	80.000, -0.037	80.000, -0.052	80.000, -0.047	80.000, -0.038
402	80.200, 0.628	80.200, 0.990	80.200, 1.134	80.200, 1.226	80.200, 1.298	80.200, -0.021	80.200, -0.061	80.200, -0.026	80.200, -0.037	80.200, -0.052	80.200, -0.047	80.200, -0.038
403	80.400, 0.630	80.400, 0.992	80.400, 1.135	80.400, 1.227	80.400, 1.299	80.400, -0.021	80.400, -0.061	80.400, -0.027	80.400, -0.037	80.400, -0.052	80.400, -0.047	80.400, -0.037
404	80.600, 0.632	80.600, 0.993	80.600, 1.135	80.600, 1.227	80.600, 1.299	80.600, -0.021	80.600, -0.061	80.600, -0.027	80.600, -0.037	80.600, -0.052	80.600, -0.047	80.600, -0.038
405	80.800, 0.635	80.800, 0.994	80.800, 1.135	80.800, 1.228	80.800, 1.299	80.800, -0.021	80.800, -0.061	80.800, -0.027	80.800, -0.037	80.800, -0.052	80.800, -0.047	80.800, -0.038
406	81.000, 0.637	81.000, 0.996	81.000, 1.136	81.000, 1.228	81.000, 1.300	81.000, -0.021	81.000, -0.061	81.000, -0.027	81.000, -0.037	81.000, -0.052	81.000, -0.047	81.000, -0.038
407	81.200, 0.639	81.200, 0.997	81.200, 1.136	81.200, 1.228	81.200, 1.300	81.200, -0.021	81.200, -0.061	81.200, -0.027	81.200, -0.037	81.200, -0.051	81.200, -0.047	81.200, -0.038
408	81.400, 0.641	81.400, 0.999	81.400, 1.137	81.400, 1.229	81.400, 1.300	81.400, -0.021	81.400, -0.061	81.400, -0.027	81.400, -0.037	81.400, -0.051	81.400, -0.046	81.400, -0.038
409	81.600, 0.642	81.600, 1.000	81.600, 1.137	81.600, 1.229	81.600, 1.300	81.600, -0.021	81.600, -0.061	81.600, -0.027	81.600, -0.037	81.600, -0.050	81.600, -0.046	81.600, -0.038
410	81.800, 0.644	81.800, 1.002	81.800, 1.138	81.800, 1.229	81.800, 1.301	81.800, -0.021	81.800, -0.061	81.800, -0.027	81.800, -0.037	81.800, -0.050	81.800, -0.046	81.800, -0.038
411	82.000, 0.646	82.000, 1.003	82.000, 1.139	82.000, 1.230	82.000, 1.301	82.000, -0.022	82.000, -0.060	82.000, -0.027	82.000, -0.037	82.000, -0.050	82.000, -0.046	82.000, -0.038
412	82.200, 0.648	82.200, 1.004	82.200, 1.140	82.200, 1.230	82.200, 1.301	82.200, -0.022	82.200, -0.060	82.200, -0.026	82.200, -0.037	82.200, -0.049	82.200, -0.045	82.200, -0.038
413	82.400, 0.650	82.400, 1.006	82.400, 1.140	82.400, 1.231	82.400, 1.301	82.400, -0.022	82.400, -0.061	82.400, -0.026	82.400, -0.037	82.400, -0.049	82.400, -0.045	82.400, -0.038
414	82.600, 0.652	82.600, 1.007	82.600, 1.141	82.600, 1.231	82.600, 1.301	82.600, -0.022	82.600, -0.061	82.600, -0.026	82.600, -0.037	82.600, -0.049	82.600, -0.045	82.600, -0.038
415	82.800, 0.654	82.800, 1.008	82.800, 1.141	82.800, 1.232	82.800, 1.301	82.800, -0.023	82.800, -0.061	82.800, -0.026	82.800, -0.037	82.800, -0.049	82.800, -0.045	82.800, -0.038
416	83.000, 0.656	83.000, 1.009	83.000, 1.142	83.000, 1.232	83.000, 1.301	83.000, -0.023	83.000, -0.061	83.000, -0.026	83.000, -0.037	83.000, -0.050	83.000, -0.045	83.000, -0.038
417	83.200, 0.658	83.200, 1.011	83.200, 1.143	83.200, 1.232	83.200, 1.301	83.200, -0.023	83.200, -0.061	83.200, -0.026	83.200, -0.037	83.200, -0.050	83.200, -0.044	83.200, -0.038
418	83.400, 0.660	83.400, 1.012	83.400, 1.144	83.400, 1.233	83.400, 1.302	83.400, -0.023	83.400, -0.061	83.400, -0.026	83.400, -0.037	83.400, -0.050	83.400, -0.044	83.400, -0.038
419	83.600, 0.662	83.600, 1.013	83.600, 1.144	83.600, 1.233	83.600, 1.302	83.600, -0.022	83.600, -0.061	83.600, -0.026	83.600, -0.036	83.600, -0.050	83.600, -0.045	83.600, -0.038
420	83.800, 0.664	83.800, 1.014	83.800, 1.145	83.800, 1.234	83.800, 1.302	83.800, -0.022	83.800, -0.062	83.800, -0.027	83.800, -0.036	83.800, -0.051	83.800, -0.045	83.800, -0.038
421	84.000, 0.666	84.000, 1.015	84.000, 1.146	84.000, 1.234	84.000, 1.302	84.000, -0.022	84.000, -0.062	84.000, -0.027	84.000, -0.036	84.000, -0.051	84.000, -0.045	84.000, -0.038
422	84.200, 0.668	84.200, 1.015	84.200, 1.147	84.200, 1.235	84.200, 1.303	84.200, -0.022	84.200, -0.063	84.200, -0.027	84.200, -0.036	84.200, -0.052	84.200, -0.045	84.200, -0.038
423	84.400, 0.670	84.400, 1.016	84.400, 1.147	84.400, 1.235	84.400, 1.303	84.400, -0.022	84.400, -0.063	84.400, -0.027	84.400, -0.036	84.400, -0.052	84.400, -0.045	84.400, -0.037
424	84.600, 0.671	84.600, 1.017	84.600, 1.148	84.600, 1.235	84.600, 1.304	84.600, -0.022	84.600, -0.064	84.600, -0.026	84.600, -0.036	84.600, -0.052	84.600, -0.045	84.600, -0.037
425	84.800, 0.673	84.800, 1.018	84.800, 1.149	84.800, 1.235	84.800, 1.304	84.800, -0.022	84.800, -0.064	84.800, -0.026	84.800, -0.036	84.800, -0.053	84.800, -0.045	84.800, -0.037
426	85.000, 0.674	85.000, 1.019	85.000, 1.149	85.000, 1.235	85.000, 1.305	85.000, -0.022	85.000, -0.064	85.000, -0.026	85.000, -0.036	85.000, -0.053	85.000, -0.045	85.000, -0.037
427	85.200, 0.675	85.200, 1.020	85.200, 1.150	85.200, 1.235	85.200, 1.305	85.200, -0.022	85.200, -0.063	85.200, -0.026	85.200, -0.037	85.200, -0.053	85.200, -0.045	85.200, -0.037
428	85.400, 0.677	85.400, 1.021	85.400, 1.151	85.400, 1.236	85.400, 1.305	85.400, -0.022	85.400, -0.063	85.400, -0.026	85.400, -0.037	85.400, -0.053	85.400, -0.045	85.400, -0.036
429	85.600, 0.678	85.600, 1.023	85.600, 1.151	85.600, 1.236	85.600, 1.305	85.600, -0.023	85.600, -0.063	85.600, -0.026	85.600, -0.037	85.600, -0.053	85.600, -0.045	85.600, -0.036
430	85.800, 0.680	85.800, 1.024	85.800, 1.152	85.800, 1.236	85.800, 1.306	85.800, -0.023	85.800, -0.063	85.800, -0.026	85.800, -0.038	85.800, -0.053	85.800, -0.045	85.800, -0.036
431	86.000, 0.681	86.000, 1.024	86.000, 1.152	86.000, 1.236	86.000, 1.306	86.000, -0.024	86.000, -0.062	86.000, -0.025	86.000, -0.038	86.000, -0.053	86.000, -0.045	86.000, -0.035
432	86.200, 0.683	86.200, 1.025	86.200, 1.153	86.200, 1.237	86.200, 1.306	86.200, -0.024	86.200, -0.062	86.200, -0.025	86.200, -0.038	86.200, -0.053	86.200, -0.045	86.200, -0.035
433	86.400, 0.685	86.400, 1.026	86.400, 1.153	86.400, 1.237	86.400, 1.307	86.400, -0.024	86.400, -0.062	86.400, -0.025	86.400, -0.039	86.400, -0.053	86.400, -0.045	86.400, -0.035
434	86.600, 0.686	86.600, 1.027	86.600, 1.154	86.600, 1.238	86.600, 1.307	86.600, -0.024	86.600, -0.062	86.600, -0.025	86.600, -0.039	86.600, -0.053	86.600, -0.045	86.600, -0.035
435	86.800, 0.688	86.800, 1.028	86.800, 1.154	86.800, 1.238	86.800, 1.308	86.800, -0.024	86.800, -0.062	86.800, -0.025	86.800, -0.039	86.800, -0.053	86.800, -0.045	86.800, -0.034
436	87.000, 0.690	87.000, 1.029	87.000, 1.155	87.000, 1.239	87.000, 1.308	87.000, -0.024	87.000, -0.062	87.000, -0.025	87.000, -0.039	87.000, -0.052	87.000, -0.045	87.000, -0.035
437	87.200, 0.692	87.200, 1.030	87.200, 1.155	87.200, 1.239	87.200, 1.308	87.200, -0.024	87.200, -0.063	87.200, -0.025	87.200, -0.039	87.200, -0.052	87.200, -0.045	87.200, -0.034
438	87.400, 0.694	87.400, 1.031	87.400, 1.155	87.400, 1.240	87.400, 1.308	87.400, -0.024	87.400, -0.063	87.400, -0.025	87.400, -0.039	87.400, -0.052	87.400, -0.045	87.400, -0.034
439	87.600, 0.696	87.600, 1.032	87.600, 1.156	87.600, 1.240	87.600, 1.309	87.600, -0.024	87.600, -0.063	87.600, -0.025	87.600, -0.038	87.600, -0.052	87.600, -0.046	87.600, -0.034
440	87.800, 0.698	87.800, 1.033	87.800, 1.156	87.800, 1.240	87.800, 1.309	87.800, -0.024	87.800, -0.063	87.800, -0.025	87.800, -0.038	87.800, -0.052	87.800, -0.046	87.800, -0.034
441	88.000, 0.700	88.000, 1.034	88.000, 1.157	88.000, 1.240	88.000, 1.310	88.000, -0.024	88.000, -0.064	88.000, -0.025	88.000, -0.037	88.000, -0.053	88.000, -0.046	88.000, -0.034
442	88.200, 0.703	88.200, 1.035	88.200, 1.157	88.200, 1.240	88.200, 1.310	88.200, -0.024	88.200, -0.064	88.200, -0.025	88.200, -0.037	88.200, -0.053	88.200, -0.046	88.200, -0.035
443	88.400, 0.705	88.400, 1.036	88.400, 1.158	88.400, 1.241	88.400, 1.310	88.400, -0.024	88.400, -0.064	88.400, -0.025	88.400, -0.037	88.400, -0.053	88.400, -0.046	88.400, -0.035
444	88.600, 0.707	88.600, 1.037	88.600, 1.158	88.600, 1.241	88.600, 1.311	88.600, -0.024	88.600, -0.064	88.600, -0.025	88.600, -0.037	88.600, -0.053	88.600, -0.046	88.600, -0.036
445	88.800, 0.709	88.800, 1.038	88.800, 1.159	88.800, 1.241	88.800, 1.311	88.800, -0.024	88.800, -0.064	88.800, -0.025	88.800, -0.037	88.800, -0.053	88.800, -0.046	88.800, -0.036
446	89.000, 0.711	89.000, 1.039	89.000, 1.159	89.000, 1.241	89.000, 1.311	89.000, -0.024	89.000, -0.064	89.000, -0.025	89.000, -0.036	89.000, -0.053	89.000, -0.046	89.000, -0.036
447	89.200, 0.712	89.200, 1.040	89.200, 1.160	89.200, 1.242	89.200, 1.311	89.200, -0.024	89.200, -0.063	89.200, -0.026	89.200, -0.036	89.200, -0.053	89.200, -0.046	89.200, -0.036
448	89.400, 0.714	89.400, 1.041	89.400, 1.161	89.400, 1.242	89.400, 1.311	89.400, -0.024	89.400, -0.063	89.400, -0.026	89.400, -0.037	89.400, -0.053	89.400, -0.046	89.400, -0.036
449	89.600, 0.715	89.600, 1.042	89.600, 1.161	89.600, 1.242	89.600, 1.311	89.600, -0.024	89.600, -0.063	89.600, -0.026	89.600, -0.037	89.600, -0.052	89.600, -0.046	89.600, -0.036
450	89.800, 0.717	89.800, 1.043	89.800, 1.161	89.800, 1.243	89.800, 1.311	89.800, -0.024	89.800, -0.064	89.800, -0.027	89.800, -0.037	89.800, -0.052	89.800, -0.046	89.800, -0.035
451	90.000, 0.719	90.000, 1.044	90.000, 1.162	90.000, 1.243	90.000, 1.311	90.000, -0.024	90.000, -0.064	90.000, -0.027	90.000, -0.037	90.000, -0.052	90.000, -0.046	90.000, -0.035
452	90.200, 0.721	90.200, 1.045	90.200, 1.162	90.200, 1.244	90.200, 1.311	90.200, -0.024	90.200, -0.064	90.200, -0.027	90.200, -0.037	90.200, -0.052	90.200, -0.046	90.200, -0.035
453	90.400, 0.722	90.400, 1.047	90.400, 1.163	90.400, 1.244	90.400, 1.311	90.400, -0.024	90.400, -0.064	90.400, -0.026	90.400, -0.038	90.400, -0.051	90.400, -0.046	90.400, -0.035
454	90.600, 0.724	90.600, 1.048	90.600, 1.163	90.600, 1.245	90.600, 1.311	90.600, -0.024	90.600, -0.064	90.600, -0.026	90.600, -0.038	90.600, -0.051	90.600, -0.046	90.600, -0.035
455	90.800, 0.726	90.800, 1.049	90.800, 1.164	90.800, 1.245	90.800, 1.311	90.800, -0.024	90.800, -0.065	90.800, -0.026	90.800, -0.038	90.800, -0.051	90.800, -0.045	90.800, -0.034
456	91.000, 0.727	91.000, 1.050	91.000, 1.164	91.000, 1.245	91.000, 1.311	91.000, -0.024	91.000, -0.065	91.000, -0.026	91.000, -0.039	91.000, -0.051	91.000, -0.045	91.000, -0.034
457	91.200, 0.729	91.200, 1.050	91.200, 1.165	91.200, 1.245	91.200, 1.311	91.200, -0.024	91.200, -0.065	91.200, -0.026	91.200, -0.039	91.200, -0.051	91.200, -0.045	91.200, -0.034
458	91.400, 0.730	91.400, 1.051	91.400, 1.166	91.400, 1.245	91.400, 1.312	91.400, -0.024	91.400, -0.065	91.400, -0.025	91.400, -0.039	91.400, -0.051	91.400, -0.045	91.400, -0.033
459	91.600, 0.732	91.600, 1.052	91.600, 1.166	91.600, 1.245	91.600, 1.312	91.600, -0.024	91.600, -0.065	91.600, -0.025	91.600, -0.039	91.600, -0.051	91.600, -0.044	91.600, -0.033
460	91.800, 0.733	91.800, 1.053	91.800, 1.167	91.800, 1.246	91.800, 1.313	91.800, -0.024	91.800, -0.065	91.800, -0.025	91.800, -0.040	91.800, -0.051	91.800, -0.044	91.800, -0.033
461	92.000, 0.735	92.000, 1.054	92.000, 1.167	92.000, 1.246	92.000, 1.313	92.000, -0.024	92.000, -0.065	92.000, -0.025	92.000, -0.040	92.000, -0.051	92.000, -0.044	92.000, -0.033
462	92.200, 0.736	92.200, 1.055	92.200, 1.168	92.200, 1.246	92.200, 1.314	92.200, -0.024	92.200, -0.065	92.200, -0.025	92.200, -0.040	92.200, -0.051	92.200, -0.044	92.200, -0.032
463	92.400, 0.738	92.400, 1.055	92.400, 1.168	92.400, 1.246	92.400, 1.314	92.400, -0.025	92.400, -0.065	92.400, -0.025	92.400, -0.039	92.400, -0.051	92.400, -0.044	92.400, -0.032
464	92.600, 0.739	92.600, 1.056	92.600, 1.169	92.600, 1.246	92.600, 1.315	92.600, -0.025	92.600, -0.065	92.600, -0.025	92.600, -0.039	92.600, -0.051	92.600, -0.044	92.600, -0.032
465	92.800, 0.740	92.800, 1.056	92.800, 1.169	92.800, 1.246	92.800, 1.316	92.800, -0.025	92.800, -0.064	92.800, -0.025	92.800, -0.039	92.800, -0.051	92.800, -0.044	92.800, -0.032
466	93.000, 0.742	93.000, 1.057	93.000, 1.169	93.000, 1.247	93.000, 1.316	93.000, -0.025	93.000, -0.064	93.000, -0.025	93.000, -0.038	93.000, -0.051	93.000, -0.044	93.000, -0.032
467	93.200, 0.743	93.200, 1.057	93.200, 1.170	93.200, 1.247	93.200, 1.316	93.200, -0.025	93.200, -0.064	93.200, -0.025	93.200, -0.038	93.200, -0.051	93.200, -0.044	93.200, -0.031
468	93.400, 0.744	93.400, 1.058	93.400, 1.170	93.400, 1.247	93.400, 1.317	93.400, -0.025	93.400, -0.064	93.400, -0.025	93.400, -0.038	93.400, -0.051	93.400, -0.044	93.400, -0.031
469	93.600, 0.746	93.600, 1.059	93.600, 1.170	93.600, 1.248	93.600, 1.317	93.600, -0.025	93.600, -0.064	93.600, -0.025	93.600, -0.038	93.600, -0.051	93.600, -0.044	93.600, -0.032
470	93.800, 0.748	93.800, 1.060	93.800, 1.170	93.800, 1.248	93.800, 1.317	93.800, -0.025	93.800, -0.064	93.800, -0.025	93.800, -0.038	93.800, -0.051	93.800, -0.044	93.800, -0.032
471	94.000, 0.749	94.000, 1.061	94.000, 1.171	94.000, 1.248	94.000, 1.317	94.000, -0.025	94.000, -0.064	94.000, -0.025	94.000, -0.038	94.000, -0.051	94.000, -0.045	94.000, -0.032
472	94.200, 0.751	94.200, 1.062	94.200, 1.171	94.200, 1.248	94.200, 1.317	94.200, -0.026	94.200, -0.065	94.200, -0.025	94.200, -0.038	94.200, -0.051	94.200, -0.045	94.200, -0.032
473	94.400, 0.753	94.400, 1.063	94.400, 1.172	94.400, 1.249	94.400, 1.317	94.400, -0.026	94.400, -0.065	94.400, -0.024	94.400, -0.038	94.400, -0.051	94.400, -0.045	94.400, -0.032
474	94.600, 0.755	94.600, 1.064	94.600, 1.172	94.600, 1.249	94.600, 1.317	94.600, -0.026	94.600, -0.065	94.600, -0.024	94.600, -0.038	94.600, -0.052	94.600, -0.045	94.600, -0.032
475	94.800, 0.756	94.800, 1.065	94.800, 1.173	94.800, 1.249	94.800, 1.317	94.800, -0.026	94.800, -0.066	94.800, -0.024	94.800, -0.038	94.800, -0.052	94.800, -0.044	94.800, -0.032
476	95.000, 0.758	95.000, 1.065	95.000, 1.173	95.000, 1.249	95.000, 1.318	95.000, -0.026	95.000, -0.066	95.000, -0.024	95.000, -0.038	95.000, -0.052	95.000, -0.044	95.000, -0.032
477	95.200, 0.759	95.200, 1.066	95.200, 1.173	95.200, 1.250	95.200, 1.318	95.200, -0.026	95.200, -0.066	95.200, -0.024	95.200, -0.038	95.200, -0.052	95.200, -0.044	95.200, -0.032
478	95.400, 0.761	95.400, 1.068	95.400, 1.174	95.400, 1.250	95.400, 1.319	95.400, -0.026	95.400, -0.067	95.400, -0.024	95.400, -0.038	95.400, -0.052	95.400, -0.044	95.400, -0.032
479	95.600, 0.762	95.600, 1.069	95.600, 1.174	95.600, 1.251	95.600, 1.319	95.600, -0.025	95.600, -0.067	95.600, -0.024	95.600, -0.038	95.600, -0.052	95.600, -0.044	95.600, -0.032
480	95.800, 0.764	95.800, 1.070	95.800, 1.174	95.800, 1.251	95.800, 1.319	95.800, -0.025	95.800, -0.067	95.800, -0.024	95.800, -0.038	95.800, -0.052	95.800, -0.044	95.800, -0.032
481	96.000, 0.765	96.000, 1.070	96.000, 1.175	96.000, 1.251	96.000, 1.319	96.000, -0.025	96.000, -0.067	96.000, -0.024	96.000, -0.038	96.000, -0.052	96.000, -0.044	96.000, -0.032
482	96.200, 0.766	96.200, 1.071	96.200, 1.175	96.200, 1.252	96.200, 1.319	96.200, -0.025	96.200, -0.067	96.200, -0.025	96.200, -0.038	96.200, -0.052	96.200, -0.043	96.200, -0.032
483	96.400, 0.768	96.400, 1.072	96.400, 1.175	96.400, 1.252	96.400, 1.319	96.400, -0.025	96.400, -0.067	96.400, -0.025	96.400, -0.037	96.400, -0.052	96.400, -0.043	96.400, -0.032
484	96.600, 0.769	96.600, 1.072	96.600, 1.175	96.600, 1.253	96.600, 1.319	96.600, -0.025	96.600, -0.067	96.600, -0.025	96.600, -0.037	96.600, -0.052	96.600, -0.043	96.600, -0.032
485	96.800, 0.770	96.800, 1.073	96.800, 1.176	96.800, 1.253	96.800, 1.319	96.800, -0.025	96.800, -0.067	96.800, -0.025	96.800, -0.037	96.800, -0.052	96.800, -0.043	96.800, -0.032
486	97.000, 0.772	97.000, 1.074	97.000, 1.176	97.000, 1.254	97.000, 1.320	97.000, -0.025	97.000, -0.067	97.000, -0.025	97.000, -0.037	97.000, -0.052	97.000, -0.043	97.000, -0.032
487	97.200, 0.773	97.200, 1.074	97.200, 1.176	97.200, 1.254	97.200, 1.320	97.200, -0.025	97.200, -0.067	97.200, -0.025	97.200, -0.038	97.200, -0.052	97.200, -0.043	97.200, -0.032
488	97.400, 0.775	97.400, 1.075	97.400, 1.177	97.400, 1.254	97.400, 1.320	97.400, -0.025	97.400, -0.067	97.400, -0.025	97.400, -0.038	97.400, -0.052	97.400, -0.043	97.400, -0.032
489	97.600, 0.776	97.600, 1.076	97.600, 1.178	97.600, 1.254	97.600, 1.320	97.600, -0.025	97.600, -0.067	97.600, -0.026	97.600, -0.039	97.600, -0.052	97.600, -0.043	97.600, -0.032
490	97.800, 0.778	97.800, 1.076	97.800, 1.178	97.800, 1.255	97.800, 1.320	97.800, -0.025	97.800, -0.067	97.800, -0.025	97.800, -0.039	97.800, -0.052	97.800, -0.043	97.800, -0.032
491	98.000, 0.779	98.000, 1.077	98.000, 1.179	98.000, 1.255	98.000, 1.320	98.000, -0.025	98.000, -0.067	98.000, -0.025	98.000, -0.039	98.000, -0.052	98.000, -0.043	98.000, -0.031
492	98.200, 0.781	98.200, 1.077	98.200, 1.179	98.200, 1.255	98.200, 1.321	98.200, -0.026	98.200, -0.067	98.200, -0.025	98.200, -0.040	98.200, -0.052	98.200, -0.043	98.200, -0.031
493	98.400, 0.782	98.400, 1.078	98.400, 1.180	98.400, 1.255	98.400, 1.321	98.400, -0.026	98.400, -0.067	98.400, -0.025	98.400, -0.040	98.400, -0.051	98.400, -0.043	98.400, -0.031
494	98.600, 0.784	98.600, 1.079	98.600, 1.181	98.600, 1.255	98.600, 1.321	98.600, -0.026	98.600, -0.067	98.600, -0.025	98.600, -0.040	98.600, -0.052	98.600, -0.043	98.600, -0.031
495	98.800, 0.785	98.800, 1.079	98.800, 1.181	98.800, 1.255	98.800, 1.322	98.800, -0.026	98.800, -0.067	98.800, -0.025	98.800, -0.040	98.800, -0.052	98.800, -0.043	98.800, -0.030
496	99.000, 0.786	99.000, 1.080	99.000, 1.181	99.000, 1.255	99.000, 1.322	99.000, -0.027	99.000, -0.067	99.000, -0.025	99.000, -0.040	99.000, -0.052	99.000, -0.044	99.000, -0.030
497	99.200, 0.787	99.200, 1.081	99.200, 1.182	99.200, 1.255	99.200, 1.322	99.200, -0.027	99.200, -0.067	99.200, -0.025	99.200, -0.040	99.200, -0.052	99.200, -0.044	99.200, -0.030
498	99.400, 0.789	99.400, 1.082	99.400, 1.182	99.400, 1.255	99.400, 1.322	99.400, -0.027	99.400, -0.067	99.400, -0.025	99.400, -0.040	99.400, -0.052	99.400, -0.044	99.400, -0.030
499	99.600, 0.790	99.600, 1.082	99.600, 1.183	99.600, 1.256	99.600, 1.323	99.600, -0.027	99.600, -0.067	99.600, -0.025	99.600, -0.039	99.600, -0.052	99.600, -0.043	99.600, -0.030
500	99.800, 0.791	99.800, 1.083	99.800, 1.183	99.800, 1.256	99.800, 1.323	99.800, -0.027	99.800, -0.067	99.800, -0.025	99.800, -0.039	99.800, -0.052	99.800, -0.043	99.800, -0.030
501	100.000, 0.792	100.000, 1.084	100.000, 1.184	100.000, 1.256	100.000, 1.323	100.000, -0.027	100.000, -0.068	100.000, -0.026	100.000, -0.039	100.000, -0.051	100.000, -0.043	100.000, -0.030
502	100.200, 0.794	100.200, 1.084	100.200, 1.184	100.200, 1.256	100.200, 1.323	100.200, -0.027	100.200, -0.068	100.200, -0.026	100.200, -0.039	100.200, -0.051	100.200, -0.042	100.200, -0.030
503	100.400, 0.795	100.400, 1.085	100.400, 1.185	100.400, 1.257	100.400, 1.324	100.400, -0.027	100.400, -0.068	100.400, -0.026	100.400, -0.039	100.400, -0.051	100.400, -0.042	100.400, -0.030
504	100.600, 0.797	100.600, 1.085	100.600, 1.185	100.600, 1.257	100.600, 1.324	100.600, -0.027	100.600, -0.068	100.600, -0.026	100.600, -0.039	100.600, -0.051	100.600, -0.042	100.600, -0.030
505	100.800, 0.799	100.800, 1.086	100.800, 1.185	100.800, 1.257	100.800, 1.325	100.800, -0.028	100.800, -0.068	100.800, -0.026	100.800, -0.038	100.800, -0.051	100.800, -0.042	100.800, -0.031
506	101.000, 0.800	101.000, 1.086	101.000, 1.186	101.000, 1.257	101.000, 1.325	101.000, -0.028	101.000, -0.068	101.000, -0.026	101.000, -0.038	101.000, -0.050	101.000, -0.042	101.000, -0.031
507	101.200, 0.802	101.200, 1.086	101.200, 1.186	101.200, 1.258	101.200, 1.326	101.200, -0.028	101.200, -0.068	101.200, -0.026	101.200, -0.038	101.200, -0.050	101.200, -0.042	101.200, -0.031
508	101.400, 0.804	101.400, 1.087	101.400, 1.187	101.400, 1.258	101.400, 1.326	101.400, -0.028	101.400, -0.069	101.400, -0.026	101.400, -0.038	101.400, -0.051	101.400, -0.042	101.400, -0.030
509	101.600, 0.805	101.600, 1.087	101.600, 1.187	101.600, 1.259	101.600, 1.326	101.600, -0.028	101.600, -0.069	101.600, -0.027	101.600, -0.038	101.600, -0.051	101.600, -0.042	101.600, -0.030
510	101.800, 0.807	101.800, 1.088	101.800, 1.188	101.800, 1.259	101.800, 1.326	101.800, -0.028	101.800, -0.069	101.800, -0.027	101.800, -0.038	101.800, -0.051	101.800, -0.042	101.800, -0.030
511	102.000, 0.808	102.000, 1.089	102.000, 1.188	102.000, 1.259	102.000, 1.326	102.000, -0.028	102.000, -0.068	102.000, -0.027	102.000, -0.038	102.000, -0.051	102.000, -0.042	102.000, -0.030
512	102.200, 0.809	102.200, 1.090	102.200, 1.189	102.200, 1.260	102.200, 1.326	102.200, -0.028	102.200, -0.068	102.200, -0.027	102.200, -0.038	102.200, -0.051	102.200, -0.042	102.200, -0.029
513	102.400, 0.811	102.400, 1.090	102.400, 1.189	102.400, 1.260	102.400, 1.326	102.400, -0.028	102.400, -0.068	102.400, -0.027	102.400, -0.038	102.400, -0.051	102.400, -0.043	102.400, -0.029
514	102.600, 0.812	102.600, 1.091	102.600, 1.189	102.600, 1.260	102.600, 1.326	102.600, -0.028	102.600, -0.068	102.600, -0.027	102.600, -0.039	102.600, -0.052	102.600, -0.043	102.600, -0.029
515	102.800, 0.813	102.800, 1.092	102.800, 1.189	102.800, 1.260	102.800, 1.326	102.800, -0.028	102.800, -0.068	102.800, -0.027	102.800, -0.039	102.800, -0.052	102.800, -0.043	102.800, -0.029
516	103.000, 0.814	103.000, 1.092	103.000, 1.190	103.000, 1.260	103.000, 1.326	103.000, -0.028	103.000, -0.068	103.000, -0.027	103.000, -0.039	103.000, -0.052	103.000, -0.043	103.000, -0.029
517	103.200, 0.815	103.200, 1.093	103.200, 1.190	103.200, 1.260	103.200, 1.326	103.200, -0.028	103.200, -0.068	103.200, -0.027	103.200, -0.039	103.200, -0.052	103.200, -0.043	103.200, -0.029
518	103.400, 0.816	103.400, 1.094	103.400, 1.190	103.400, 1.260	103.400, 1.327	103.400, -0.028	103.400, -0.067	103.400, -0.026	103.400, -0.039	103.400, -0.052	103.400, -0.043	103.400, -0.029
519	103.600, 0.817	103.600, 1.094	103.600, 1.191	103.600, 1.260	103.600, 1.327	103.600, -0.028	103.600, -0.067	103.600, -0.026	103.600, -0.039	103.600, -0.052	103.600, -0.043	103.600, -0.029
520	103.800, 0.819	103.800, 1.095	103.800, 1.191	103.800, 1.260	103.800, 1.327	103.800, -0.027	103.800, -0.067	103.800, -0.026	103.800, -0.040	103.800, -0.052	103.800, -0.043	103.800, -0.029
521	104.000, 0.820	104.000, 1.096	104.000, 1.191	104.000, 1.260	104.000, 1.328	104.000, -0.027	104.000, -0.067	104.000, -0.025	104.000, -0.040	104.000, -0.052	104.000, -0.042	104.000, -0.030
522	104.200, 0.821	104.200, 1.096	104.200, 1.192	104.200, 1.261	104.200, 1.328	104.200, -0.027	104.200, -0.067	104.200, -0.025	104.200, -0.040	104.200, -0.051	104.200, -0.042	104.200, -0.030
523	104.400, 0.822	104.400, 1.097	104.400, 1.192	104.400, 1.261	104.400, 1.329	104.400, -0.027	104.400, -0.067	104.400, -0.024	104.400, -0.040	104.400, -0.051	104.400, -0.042	104.400, -0.030
524	104.600, 0.823	104.600, 1.098	104.600, 1.192	104.600, 1.261	104.600, 1.329	104.600, -0.027	104.600, -0.067	104.600, -0.024	104.600, -0.040	104.600, -0.051	104.600, -0.042	104.600, -0.030
525	104.800, 0.825	104.800, 1.098	104.800, 1.193	104.800, 1.262	104.800, 1.330	104.800, -0.027	104.800, -0.067	104.800, -0.024	104.800, -0.039	104.800, -0.051	104.800, -0.042	104.800, -0.030
526	105.000, 0.826	105.000, 1.099	105.000, 1.193	105.000, 1.262	105.000, 1.330	105.000, -0.027	105.000, -0.067	105.000, -0.023	105.000, -0.039	105.000, -0.051	105.000, -0.042	105.000, -0.030
527	105.200, 0.827	105.200, 1.099	105.200, 1.193	105.200, 1.263	105.200, 1.330	105.200, -0.027	105.200, -0.067	105.200, -0.024	105.200, -0.039	105.200, -0.051	105.200, -0.042	105.200, -0.029
528	105.400, 0.828	105.400, 1.100	105.400, 1.194	105.400, 1.263	105.400, 1.330	105.400, -0.027	105.400, -0.068	105.400, -0.024	105.400, -0.039	105.400, -0.051	105.400, -0.042	105.400, -0.029
529	105.600, 0.829	105.600, 1.100	105.600, 1.194	105.600, 1.264	105.600, 1.330	105.600, -0.027	105.600, -0.068	105.600, -0.024	105.600, -0.039	105.600, -0.051	105.600, -0.043	105.600, -0.029
530	105.800, 0.831	105.800, 1.101	105.800, 1.194	105.800, 1.264	105.800, 1.331	105.800, -0.027	105.800, -0.068	105.800, -0.024	105.800, -0.039	105.800, -0.051	105.800, -0.043	105.800, -0.028
531	106.000, 0.832	106.000, 1.101	106.000, 1.194	106.000, 1.265	106.000, 1.331	106.000, -0.027	106.000, -0.068	106.000, -0.024	106.000, -0.039	106.000, -0.051	106.000, -0.043	106.000, -0.028
532	106.200, 0.833	106.200, 1.102	106.200, 1.195	106.200, 1.265	106.200, 1.331	106.200, -0.027	106.200, -0.068	106.200, -0.024	106.200, -0.039	106.200, -0.051	106.200, -0.043	106.200, -0.028
533	106.400, 0.835	106.400, 1.102	106.400, 1.195	106.400, 1.265	106.400, 1.331	106.400, -0.028	106.400, -0.068	106.400, -0.024	106.400, -0.039	106.400, -0.051	106.400, -0.042	106.400, -0.028
534	106.600, 0.836	106.600, 1.103	106.600, 1.195	106.600, 1.266	106.600, 1.332	106.600, -0.028	106.600, -0.069	106.600, -0.025	106.600, -0.040	106.600, -0.051	106.600, -0.042	106.600, -0.028
535	106.800, 0.837	106.800, 1.104	106.800, 1.195	106.800, 1.266	106.800, 1.332	106.800, -0.028	106.800, -0.069	106.800, -0.025	106.800, -0.040	106.800, -0.051	106.800, -0.042	106.800, -0.028
536	107.000, 0.839	107.000, 1.104	107.000, 1.195	107.000, 1.266	107.000, 1.332	107.000, -0.028	107.000, -0.068	107.000, -0.025	107.000, -0.040	107.000, -0.051	107.000, -0.042	107.000, -0.028
537	107.200, 0.840	107.200, 1.105	107.200, 1.195	107.200, 1.266	107.200, 1.332	107.200, -0.028	107.200, -0.068	107.200, -0.026	107.200, -0.040	107.200, -0.051	107.200, -0.042	107.200, -0.028
538	107.400, 0.841	107.400, 1.106	107.400, 1.196	107.400, 1.266	107.400, 1.332	107.400, -0.028	107.400, -0.068	107.400, -0.026	107.400, -0.040	107.400, -0.051	107.400, -0.042	107.400, -0.028
539	107.600, 0.843	107.600, 1.107	107.600, 1.196	107.600, 1.265	107.600, 1.333	107.600, -0.028	107.600, -0.068	107.600, -0.026	107.600, -0.040	107.600, -0.051	107.600, -0.042	107.600, -0.028
540	107.800, 0.844	107.800, 1.108	107.800, 1.196	107.800, 1.265	107.800, 1.333	107.800, -0.028	107.800, -0.068	107.800, -0.026	107.800, -0.040	107.800, -0.051	107.800, -0.042	107.800, -0.028
541	108.000, 0.845	108.000, 1.109	108.000, 1.197	108.000, 1.265	108.000, 1.334	108.000, -0.028	108.000, -0.068	108.000, -0.026	108.000, -0.040	108.000, -0.052	108.000, -0.042	108.000, -0.028
542	108.200, 0.847	108.200, 1.110	108.200, 1.197	108.200, 1.265	108.200, 1.334	108.200, -0.028	108.200, -0.068	108.200, -0.026	108.200, -0.040	108.200, -0.052	108.200, -0.042	108.200, -0.028
543	108.400, 0.848	108.400, 1.111	108.400, 1.197	108.400, 1.265	108.400, 1.334	108.400, -0.028	108.400, -0.067	108.400, -0.026	108.400, -0.040	108.400, -0.052	108.400, -0.042	108.400, -0.028
544	108.600, 0.849	108.600, 1.111	108.600, 1.197	108.600, 1.265	108.600, 1.334	108.600, -0.028	108.600, -0.067	108.600, -0.026	108.600, -0.040	108.600, -0.052	108.600, -0.041	108.600, -0.028
545	108.800, 0.850	108.800, 1.111	108.800, 1.197	108.800, 1.265	108.800, 1.334	108.800, -0.028	108.800, -0.067	108.800, -0.026	108.800, -0.039	108.800, -0.052	108.800, -0.041	108.800, -0.028
546	109.000, 0.851	109.000, 1.112	109.000, 1.198	109.000, 1.266	109.000, 1.335	109.000, -0.028	109.000, -0.067	109.000, -0.025	109.000, -0.039	109.000, -0.052	109.000, -0.041	109.000, -0.027
547	109.200, 0.853	109.200, 1.112	109.200, 1.198	109.200, 1.266	109.200, 1.335	109.200, -0.027	109.200, -0.067	109.200, -0.025	109.200, -0.039	109.200, -0.052	109.200, -0.041	109.200, -0.027
548	109.400, 0.854	109.400, 1.112	109.400, 1.198	109.400, 1.266	109.400, 1.335	109.400, -0.027	109.400, -0.067	109.400, -0.025	109.400, -0.038	109.400, -0.052	109.400, -0.041	109.400, -0.027
549	109.600, 0.855	109.600, 1.113	109.600, 1.199	109.600, 1.267	109.600, 1.335	109.600, -0.027	109.600, -0.068	109.600, -0.025	109.600, -0.038	109.600, -0.052	109.600, -0.041	109.600, -0.027
550	109.800, 0.856	109.800, 1.113	109.800, 1.199	109.800, 1.267	109.800, 1.335	109.800, -0.027	109.800, -0.068	109.800, -0.025	109.800, -0.037	109.800, -0.052	109.800, -0.041	109.800, -0.027
551	110.000, 0.857	110.000, 1.113	110.000, 1.200	110.000, 1.267	110.000, 1.335	110.000, -0.027	110.000, -0.068	110.000, -0.025	110.000, -0.037	110.000, -0.052	110.000, -0.041	110.000, -0.027
552	110.200, 0.858	110.200, 1.113	110.200, 1.200	110.200, 1.268	110.200, 1.335	110.200, -0.027	110.200, -0.068	110.200, -0.025	110.200, -0.037	110.200, -0.052	110.200, -0.040	110.200, -0.026
553	110.400, 0.859	110.400, 1.113	110.400, 1.200	110.400, 1.268	110.400, 1.335	110.400, -0.027	110.400, -0.068	110.400, -0.026	110.400, -0.038	110.400, -0.052	110.400, -0.040	110.400, -0.026
554	110.600, 0.860	110.600, 1.113	110.600, 1.201	110.600, 1.269	110.600, 1.335	110.600, -0.027	110.600, -0.068	110.600, -0.026	110.600, -0.038	110.600, -0.051	110.600, -0.041	110.600, -0.027
555	110.800, 0.862	110.800, 1.114	110.800, 1.202	110.800, 1.269	110.800, 1.335	110.800, -0.027	110.800, -0.068	110.800, -0.026	110.800, -0.038	110.800, -0.051	110.800, -0.041	110.800, -0.026
556	111.000, 0.863	111.000, 1.114	111.000, 1.202	111.000, 1.269	111.000, 1.335	111.000, -0.027	111.000, -0.069	111.000, -0.026	111.000, -0.038	111.000, -0.050	111.000, -0.041	111.000, -0.026
557	111.200, 0.864	111.200, 1.114	111.200, 1.203	111.200, 1.270	111.200, 1.335	111.200, -0.027	111.200, -0.069	111.200, -0.026	111.200, -0.038	111.200, -0.050	111.200, -0.042	111.200, -0.026
558	111.400, 0.865	111.400, 1.114	111.400, 1.203	111.400, 1.270	111.400, 1.336	111.400, -0.027	111.400, -0.069	111.400, -0.026	111.400, -0.038	111.400, -0.050	111.400, -0.042	111.400, -0.026
559	111.600, 0.866	111.600, 1.115	111.600, 1.204	111.600, 1.270	111.600, 1.336	111.600, -0.027	111.600, -0.069	111.600, -0.026	111.600, -0.038	111.600, -0.050	111.600, -0.042	111.600, -0.026
560	111.800, 0.867	111.800, 1.115	111.800, 1.204	111.800, 1.270	111.800, 1.336	111.800, -0.028	111.800, -0.069	111.800, -0.026	111.800, -0.038	111.800, -0.050	111.800, -0.043	111.800, -0.026
561	112.000, 0.868	112.000, 1.116	112.000, 1.204	112.000, 1.270	112.000, 1.336	112.000, -0.028	112.000, -0.070	112.000, -0.026	112.000, -0.039	112.000, -0.050	112.000, -0.043	112.000, -0.026
562	112.200, 0.869	112.200, 1.117	112.200, 1.205	112.200, 1.270	112.200, 1.336	112.200, -0.028	112.200, -0.070	112.200, -0.026	112.200, -0.039	112.200, -0.050	112.200, -0.043	112.200, -0.026
563	112.400, 0.870	112.400, 1.117	112.400, 1.205	112.400, 1.270	112.400, 1.336	112.400, -0.028	112.400, -0.070	112.400, -0.026	112.400, -0.039	112.400, -0.051	112.400, -0.043	112.400, -0.026
564	112.600, 0.871	112.600, 1.118	112.600, 1.205	112.600, 1.270	112.600, 1.337	112.600, -0.028	112.600, -0.070	112.600, -0.026	112.600, -0.039	112.600, -0.051	112.600, -0.043	112.600, -0.026
565	112.800, 0.872	112.800, 1.118	112.800, 1.205	112.800, 1.270	112.800, 1.337	112.800, -0.028	112.800, -0.071	112.800, -0.027	112.800, -0.039	112.800, -0.051	112.800, -0.042	112.800, -0.026
566	113.000, 0.873	113.000, 1.119	113.000, 1.205	113.000, 1.270	113.000, 1.337	113.000, -0.028	113.000, -0.070	113.000, -0.027	113.000, -0.039	113.000, -0.051	113.000, -0.042	113.000, -0.026
567	113.200, 0.874	113.200, 1.120	113.200, 1.205	113.200, 1.271	113.200, 1.338	113.200, -0.028	113.200, -0.070	113.200, -0.026	113.200, -0.039	113.200, -0.052	113.200, -0.042	113.200, -0.026
568	113.400, 0.875	113.400, 1.121	113.400, 1.206	113.400, 1.271	113.400, 1.338	113.400, -0.028	113.400, -0.070	113.400, -0.026	113.400, -0.039	113.400, -0.052	113.400, -0.042	113.400, -0.026
569	113.600, 0.876	113.600, 1.122	113.600, 1.206	113.600, 1.271	113.600, 1.338	113.600, -0.028	113.600, -0.070	113.600, -0.026	113.600, -0.039	113.600, -0.052	113.600, -0.041	113.600, -0.026
570	113.800, 0.877	113.800, 1.122	113.800, 1.206	113.800, 1.271	113.800, 1.338	113.800, -0.028	113.800, -0.070	113.800, -0.026	113.800, -0.039	113.800, -0.052	113.800, -0.041	113.800, -0.026
571	114.000, 0.878	114.000, 1.123	114.000, 1.207	114.000, 1.271	114.000, 1.338	114.000, -0.028	114.000, -0.070	114.000, -0.026	114.000, -0.039	114.000, -0.052	114.000, -0.041	114.000, -0.025
572	114.200, 0.879	114.200, 1.123	114.200, 1.207	114.200, 1.271	114.200, 1.338	114.200, -0.028	114.200, -0.071	114.200, -0.026	114.200, -0.038	114.200, -0.051	114.200, -0.041	114.200, -0.025
573	114.400, 0.880	114.400, 1.124	114.400, 1.207	114.400, 1.272	114.400, 1.338	114.400, -0.029	114.400, -0.071	114.400, -0.026	114.400, -0.038	114.400, -0.051	114.400, -0.040	114.400, -0.025
574	114.600, 0.881	114.600, 1.124	114.600, 1.207	114.600, 1.272	114.600, 1.338	114.600, -0.029	114.600, -0.071	114.600, -0.026	114.600, -0.038	114.600, -0.050	114.600, -0.040	114.600, -0.025
575	114.800, 0.882	114.800, 1.125	114.800, 1.207	114.800, 1.272	114.800, 1.339	114.800, -0.029	114.800, -0.071	114.800, -0.026	114.800, -0.038	114.800, -0.050	114.800, -0.040	114.800, -0.024
576	115.000, 0.883	115.000, 1.125	115.000, 1.208	115.000, 1.273	115.000, 1.339	115.000, -0.029	115.000, -0.071	115.000, -0.026	115.000, -0.037	115.000, -0.050	115.000, -0.041	115.000, -0.024
577	115.200, 0.884	115.200, 1.125	115.200, 1.208	115.200, 1.273	115.200, 1.339	115.200, -0.029	115.200, -0.070	115.200, -0.026	115.200, -0.037	115.200, -0.050	115.200, -0.041	115.200, -0.023
578	115.400, 0.885	115.400, 1.126	115.400, 1.208	115.400, 1.273	115.400, 1.339	115.400, -0.029	115.400, -0.070	115.400, -0.025	115.400, -0.037	115.400, -0.049	115.400, -0.041	115.400, -0.023
579	115.600, 0.886	115.600, 1.126	115.600, 1.209	115.600, 1.274	115.600, 1.339	115.600, -0.029	115.600, -0.070	115.600, -0.025	115.600, -0.037	115.600, -0.049	115.600, -0.041	115.600, -0.023
580	115.800, 0.887	115.800, 1.126	115.800, 1.209	115.800, 1.274	115.800, 1.339	115.800, -0.029	115.800, -0.069	115.800, -0.025	115.800, -0.037	115.800, -0.049	115.800, -0.041	115.800, -0.023
581	116.000, 0.888	116.000, 1.127	116.000, 1.209	116.000, 1.275	116.000, 1.340	116.000, -0.029	116.000, -0.069	116.000, -0.025	116.000, -0.037	116.000, -0.049	116.000, -0.041	116.000, -0.023
582	116.200, 0.889	116.200, 1.127	116.200, 1.210	116.200, 1.275	116.200, 1.340	116.200, -0.029	116.200, -0.069	116.200, -0.025	116.200, -0.037	116.200, -0.049	116.200, -0.040	116.200, -0.023
583	116.400, 0.890	116.400, 1.127	116.400, 1.210	116.400, 1.276	116.400, 1.341	116.400, -0.029	116.400, -0.068	116.400, -0.025	116.400, -0.038	116.400, -0.049	116.400, -0.040	116.400, -0.023
584	116.600, 0.892	116.600, 1.127	116.600, 1.210	116.600, 1.276	116.600, 1.341	116.600, -0.029	116.600, -0.068	116.600, -0.025	116.600, -0.038	116.600, -0.048	116.600, -0.040	116.600, -0.023
585	116.800, 0.893	116.800, 1.128	116.800, 1.210	116.800, 1.277	116.800, 1.341	116.800, -0.029	116.800, -0.068	116.800, -0.025	116.800, -0.038	116.800, -0.049	116.800, -0.040	116.800, -0.023
586	117.000, 0.894	117.000, 1.128	117.000, 1.210	117.000, 1.277	117.000, 1.341	117.000, -0.029	117.000, -0.068	117.000, -0.025	117.000, -0.038	117.000, -0.049	117.000, -0.039	117.000, -0.024
587	117.200, 0.895	117.200, 1.129	117.200, 1.211	117.200, 1.277	117.200, 1.342	117.200, -0.029	117.200, -0.068	117.200, -0.025	117.200, -0.038	117.200, -0.048	117.200, -0.039	117.200, -0.024
588	117.400, 0.896	117.400, 1.129	117.400, 1.211	117.400, 1.277	117.400, 1.342	117.400, -0.029	117.400, -0.068	117.400, -0.025	117.400, -0.038	117.400, -0.048	117.400, -0.039	117.400, -0.024
589	117.600, 0.897	117.600, 1.129	117.600, 1.211	117.600, 1.277	117.600, 1.342	117.600, -0.029	117.600, -0.069	117.600, -0.025	117.600, -0.038	117.600, -0.049	117.600, -0.039	117.600, -0.024
590	117.800, 0.898	117.800, 1.130	117.800, 1.211	117.800, 1.277	117.800, 1.342	117.800, -0.029	117.800, -0.069	117.800, -0.025	117.800, -0.037	117.800, -0.049	117.800, -0.039	117.800, -0.024
591	118.000, 0.899	118.000, 1.130	118.000, 1.211	118.000, 1.277	118.000, 1.343	118.000, -0.029	118.000, -0.070	118.000, -0.026	118.000, -0.037	118.000, -0.049	118.000, -0.039	118.000, -0.024
592	118.200, 0.900	118.200, 1.131	118.200, 1.211	118.200, 1.277	118.200, 1.343	118.200, -0.029	118.200, -0.070	118.200, -0.025	118.200, -0.037	118.200, -0.050	118.200, -0.038	118.200, -0.024
593	118.400, 0.901	118.400, 1.131	118.400, 1.211	118.400, 1.277	118.400, 1.343	118.400, -0.029	118.400, -0.071	118.400, -0.025	118.400, -0.037	118.400, -0.050	118.400, -0.038	118.400, -0.024
594	118.600, 0.902	118.600, 1.132	118.600, 1.211	118.600, 1.277	118.600, 1.343	118.600, -0.029	118.600, -0.071	118.600, -0.025	118.600, -0.038	118.600, -0.050	118.600, -0.038	118.600, -0.024
595	118.800, 0.903	118.800, 1.132	118.800, 1.212	118.800, 1.277	118.800, 1.343	118.800, -0.029	118.800, -0.072	118.800, -0.025	118.800, -0.037	118.800, -0.051	118.800, -0.038	118.800, -0.024
596	119.000, 0.904	119.000, 1.133	119.000, 1.212	119.000, 1.277	119.000, 1.343	119.000, -0.029	119.000, -0.072	119.000, -0.025	119.000, -0.037	119.000, -0.051	119.000, -0.038	119.000, -0.023
597	119.200, 0.904	119.200, 1.133	119.200, 1.212	119.200, 1.277	119.200, 1.344	119.200, -0.029	119.200, -0.072	119.200, -0.025	119.200, -0.037	119.200, -0.051	119.200, -0.038	119.200, -0.023
598	119.400, 0.905	119.400, 1.134	119.400, 1.213	119.400, 1.277	119.400, 1.344	119.400, -0.029	119.400, -0.072	119.400, -0.024	119.400, -0.037	119.400, -0.051	119.400, -0.038	119.400, -0.023
599	119.600, 0.906	119.600, 1.134	119.600, 1.213	119.600, 1.277	119.600, 1.344	119.600, -0.029	119.600, -0.072	119.600, -0.024	119.600, -0.037	119.600, -0.051	119.600, -0.038	119.600, -0.022
600	119.800, 0.907	119.800, 1.135	119.800, 1.214	119.800, 1.278	119.800, 1.344	119.800, -0.029	119.800, -0.072	119.800, -0.024	119.800, -0.037	119.800, -0.051	119.800, -0.037	119.800, -0.022
601	120.000, 0.907	120.000, 1.135	120.000, 1.214	120.000, 1.278	120.000, 1.344	120.000, -0.029	120.000, -0.072	120.000, -0.024	120.000, -0.037	120.000, -0.051	120.000, -0.037	120.000, -0.021
602	120.200, 0.908	120.200, 1.136	120.200, 1.214	120.200, 1.279	120.200, 1.344	120.200, -0.029	120.200, -0.072	120.200, -0.024	120.200, -0.037	120.200, -0.051	120.200, -0.037	120.200, -0.021
603	120.400, 0.909	120.400, 1.136	120.400, 1.215	120.400, 1.279	120.400, 1.344	120.400, -0.029	120.400, -0.072	120.400, -0.024	120.400, -0.037	120.400, -0.051	120.400, -0.037	120.400, -0.021
604	120.600, 0.910	120.600, 1.136	120.600, 1.215	120.600, 1.279	120.600, 1.343	120.600, -0.029	120.600, -0.072	120.600, -0.024	120.600, -0.037	120.600, -0.051	120.600, -0.037	120.600, -0.021
605	120.800, 0.911	120.800, 1.136	120.800, 1.216	120.800, 1.279	120.800, 1.343	120.800, -0.029	120.800, -0.072	120.800, -0.024	120.800, -0.038	120.800, -0.050	120.800, -0.038	120.800, -0.021
606	121.000, 0.912	121.000, 1.137	121.000, 1.216	121.000, 1.280	121.000, 1.343	121.000, -0.029	121.000, -0.071	121.000, -0.024	121.000, -0.038	121.000, -0.050	121.000, -0.038	121.000, -0.021
607	121.200, 0.913	121.200, 1.137	121.200, 1.217	121.200, 1.280	121.200, 1.342	121.200, -0.029	121.200, -0.072	121.200, -0.025	121.200, -0.038	121.200, -0.050	121.200, -0.038	121.200, -0.021
608	121.400, 0.914	121.400, 1.137	121.400, 1.217	121.400, 1.280	121.400, 1.342	121.400, -0.029	121.400, -0.071	121.400, -0.025	121.400, -0.038	121.400, -0.050	121.400, -0.038	121.400, -0.021
609	121.600, 0.915	121.600, 1.137	121.600, 1.217	121.600, 1.280	121.600, 1.343	121.600, -0.028	121.600, -0.071	121.600, -0.025	121.600, -0.038	121.600, -0.050	121.600, -0.038	121.600, -0.021
610	121.800, 0.916	121.800, 1.138	121.800, 1.217	121.800, 1.279	121.800, 1.343	121.800, -0.028	121.800, -0.071	121.800, -0.025	121.800, -0.038	121.800, -0.050	121.800, -0.038	121.800, -0.021
611	122.000, 0.917	122.000, 1.138	122.000, 1.218	122.000, 1.279	122.000, 1.344	122.000, -0.029	122.000, -0.071	122.000, -0.025	122.000, -0.039	122.000, -0.050	122.000, -0.038	122.000, -0.021
612	122.200, 0.918	122.200, 1.138	122.200, 1.218	122.200, 1.279	122.200, 1.344	122.200, -0.029	122.200, -0.070	122.200, -0.026	122.200, -0.039	122.200, -0.050	122.200, -0.038	122.200, -0.021
613	122.400, 0.919	122.400, 1.138	122.400, 1.218	122.400, 1.280	122.400, 1.345	122.400, -0.029	122.400, -0.070	122.400, -0.026	122.400, -0.039	122.400, -0.049	122.400, -0.038	122.400, -0.021
614	122.600, 0.920	122.600, 1.139	122.600, 1.218	122.600, 1.280	122.600, 1.345	122.600, -0.030	122.600, -0.070	122.600, -0.026	122.600, -0.039	122.600, -0.049	122.600, -0.038	122.600, -0.021
615	122.800, 0.920	122.800, 1.140	122.800, 1.218	122.800, 1.280	122.800, 1.346	122.800, -0.030	122.800, -0.070	122.800, -0.027	122.800, -0.039	122.800, -0.049	122.800, -0.038	122.800, -0.021
616	123.000, 0.921	123.000, 1.141	123.000, 1.218	123.000, 1.280	123.000, 1.347	123.000, -0.030	123.000, -0.071	123.000, -0.027	123.000, -0.039	123.000, -0.049	123.000, -0.038	123.000, -0.021
617	123.200, 0.922	123.200, 1.141	123.200, 1.218	123.200, 1.281	123.200, 1.347	123.200, -0.030	123.200, -0.071	123.200, -0.027	123.200, -0.038	123.200, -0.049	123.200, -0.038	123.200, -0.021
618	123.400, 0.923	123.400, 1.142	123.400, 1.218	123.400, 1.281	123.400, 1.348	123.400, -0.031	123.400, -0.071	123.400, -0.027	123.400, -0.038	123.400, -0.049	123.400, -0.038	123.400, -0.021
619	123.600, 0.924	123.600, 1.143	123.600, 1.219	123.600, 1.282	123.600, 1.348	123.600, -0.030	123.600, -0.072	123.600, -0.026	123.600, -0.037	123.600, -0.049	123.600, -0.038	123.600, -0.021
620	123.800, 0.925	123.800, 1.143	123.800, 1.219	123.800, 1.283	123.800, 1.349	123.800, -0.030	123.800, -0.072	123.800, -0.026	123.800, -0.037	123.800, -0.049	123.800, -0.038	123.800, -0.021
621	124.000, 0.926	124.000, 1.144	124.000, 1.219	124.000, 1.283	124.000, 1.349	124.000, -0.030	124.000, -0.072	124.000, -0.026	124.000, -0.037	124.000, -0.049	124.000, -0.038	124.000, -0.021
622	124.200, 0.927	124.200, 1.144	124.200, 1.220	124.200, 1.284	124.200, 1.349	124.200, -0.030	124.200, -0.072	124.200, -0.026	124.200, -0.036	124.200, -0.050	124.200, -0.038	124.200, -0.021
623	124.400, 0.928	124.400, 1.144	124.400, 1.220	124.400, 1.284	124.400, 1.349	124.400, -0.030	124.400, -0.072	124.400, -0.025	124.400, -0.036	124.400, -0.050	124.400, -0.037	124.400, -0.021
624	124.600, 0.929	124.600, 1.144	124.600, 1.220	124.600, 1.285	124.600, 1.349	124.600, -0.030	124.600, -0.072	124.600, -0.025	124.600, -0.036	124.600, -0.050	124.600, -0.037	124.600, -0.021
625	124.800, 0.930	124.800, 1.145	124.800, 1.220	124.800, 1.285	124.800, 1.349	124.800, -0.030	124.800, -0.072	124.800, -0.025	124.800, -0.036	124.800, -0.050	124.800, -0.037	124.800, -0.021
626	125.000, 0.931	125.000, 1.145	125.000, 1.221	125.000, 1.285	125.000, 1.349	125.000, -0.030	125.000, -0.073	125.000, -0.025	125.000, -0.036	125.000, -0.050	125.000, -0.037	125.000, -0.021
627	125.200, 0.931	125.200, 1.145	125.200, 1.221	125.200, 1.285	125.200, 1.349	125.200, -0.030	125.200, -0.073	125.200, -0.025	125.200, -0.036	125.200, -0.050	125.200, -0.037	125.200, -0.021
628	125.400, 0.932	125.400, 1.146	125.400, 1.221	125.400, 1.285	125.400, 1.349	125.400, -0.030	125.400, -0.073	125.400, -0.025	125.400, -0.036	125.400, -0.050	125.400, -0.037	125.400, -0.021
629	125.600, 0.933	125.600, 1.146	125.600, 1.222	125.600, 1.285	125.600, 1.349	125.600, -0.029	125.600, -0.073	125.600, -0.025	125.600, -0.036	125.600, -0.050	125.600, -0.037	125.600, -0.021
630	125.800, 0.934	125.800, 1.146	125.800, 1.222	125.800, 1.285	125.800, 1.349	125.800, -0.029	125.800, -0.073	125.800, -0.025	125.800, -0.036	125.800, -0.050	125.800, -0.037	125.800, -0.021
631	126.000, 0.934	126.000, 1.146	126.000, 1.222	126.000, 1.285	126.000, 1.350	126.000, -0.029	126.000, -0.073	126.000, -0.025	126.000, -0.036	126.000, -0.050	126.000, -0.037	126.000, -0.020
632	126.200, 0.935	126.200, 1.146	126.200, 1.223	126.200, 1.285	126.200, 1.350	126.200, -0.029	126.200, -0.073	126.200, -0.026	126.200, -0.036	126.200, -0.050	126.200, -0.036	126.200, -0.020
633	126.400, 0.936	126.400, 1.146	126.400, 1.223	126.400, 1.285	126.400, 1.350	126.400, -0.029	126.400, -0.073	126.400, -0.026	126.400, -0.036	126.400, -0.050	126.400, -0.036	126.400, -0.020
634	126.600, 0.936	126.600, 1.147	126.600, 1.223	126.600, 1.285	126.600, 1.351	126.600, -0.029	126.600, -0.073	126.600, -0.026	126.600, -0.036	126.600, -0.050	126.600, -0.036	126.600, -0.020
635	126.800, 0.937	126.800, 1.147	126.800, 1.223	126.800, 1.285	126.800, 1.351	126.800, -0.029	126.800, -0.073	126.800, -0.026	126.800, -0.036	126.800, -0.050	126.800, -0.036	126.800, -0.020
636	127.000, 0.937	127.000, 1.148	127.000, 1.224	127.000, 1.285	127.000, 1.351	127.000, -0.029	127.000, -0.073	127.000, -0.026	127.000, -0.036	127.000, -0.049	127.000, -0.036	127.000, -0.020
637	127.200, 0.938	127.200, 1.149	127.200, 1.224	127.200, 1.285	127.200, 1.351	127.200, -0.030	127.200, -0.073	127.200, -0.026	127.200, -0.036	127.200, -0.049	127.200, -0.036	127.200, -0.020
638	127.400, 0.939	127.400, 1.149	127.400, 1.224	127.400, 1.286	127.400, 1.351	127.400, -0.030	127.400, -0.073	127.400, -0.026	127.400, -0.036	127.400, -0.049	127.400, -0.036	127.400, -0.020
639	127.600, 0.940	127.600, 1.150	127.600, 1.224	127.600, 1.286	127.600, 1.351	127.600, -0.030	127.600, -0.073	127.600, -0.025	127.600, -0.035	127.600, -0.049	127.600, -0.037	127.600, -0.020
640	127.800, 0.941	127.800, 1.150	127.800, 1.224	127.800, 1.286	127.800, 1.351	127.800, -0.030	127.800, -0.073	127.800, -0.025	127.800, -0.035	127.800, -0.049	127.800, -0.036	127.800, -0.019
641	128.000, 0.941	128.000, 1.151	128.000, 1.224	128.000, 1.287	128.000, 1.351	128.000, -0.030	128.000, -0.073	128.000, -0.024	128.000, -0.035	128.000, -0.049	128.000, -0.036	128.000, -0.020
642	128.200, 0.942	128.200, 1.151	128.200, 1.224	128.200, 1.287	128.200, 1.351	128.200, -0.030	128.200, -0.072	128.200, -0.024	128.200, -0.035	128.200, -0.050	128.200, -0.036	128.200, -0.019
643	128.400, 0.943	128.400, 1.152	128.400, 1.224	128.400, 1.287	128.400, 1.352	128.400, -0.029	128.400, -0.072	128.400, -0.023	128.400, -0.035	128.400, -0.050	128.400, -0.036	128.400, -0.019
644	128.600, 0.944	128.600, 1.152	128.600, 1.224	128.600, 1.287	128.600, 1.352	128.600, -0.029	128.600, -0.072	128.600, -0.023	128.600, -0.035	128.600, -0.050	128.600, -0.036	128.600, -0.019
645	128.800, 0.944	128.800, 1.153	128.800, 1.224	128.800, 1.287	128.800, 1.352	128.800, -0.029	128.800, -0.072	128.800, -0.023	128.800, -0.035	128.800, -0.050	128.800, -0.037	128.800, -0.020
646	129.000, 0.945	129.000, 1.153	129.000, 1.225	129.000, 1.288	129.000, 1.353	129.000, -0.028	129.000, -0.072	129.000, -0.023	129.000, -0.035	129.000, -0.050	129.000, -0.037	129.000, -0.020
647	129.200, 0.946	129.200, 1.154	129.200, 1.225	129.200, 1.288	129.200, 1.353	129.200, -0.028	129.200, -0.072	129.200, -0.023	129.200, -0.035	129.200, -0.050	129.200, -0.036	129.200, -0.019
648	129.400, 0.947	129.400, 1.154	129.400, 1.226	129.400, 1.288	129.400, 1.353	129.400, -0.028	129.400, -0.072	129.400, -0.023	129.400, -0.035	129.400, -0.050	129.400, -0.036	129.400, -0.019
649	129.600, 0.948	129.600, 1.154	129.600, 1.226	129.600, 1.288	129.600, 1.353	129.600, -0.028	129.600, -0.072	129.600, -0.023	129.600, -0.035	129.600, -0.050	129.600, -0.036	129.600, -0.019
650	129.800, 0.949	129.800, 1.154	129.800, 1.227	129.800, 1.288	129.800, 1.353	129.800, -0.028	129.800, -0.072	129.800, -0.024	129.800, -0.035	129.800, -0.050	129.800, -0.036	129.800, -0.019
651	130.000, 0.950	130.000, 1.154	130.000, 1.227	130.000, 1.288	130.000, 1.354	130.000, -0.028	130.000, -0.073	130.000, -0.024	130.000, -0.035	130.000, -0.050	130.000, -0.036	130.000, -0.018
652	130.200, 0.951	130.200, 1.154	130.200, 1.228	130.200, 1.289	130.200, 1.354	130.200, -0.029	130.200, -0.073	130.200, -0.024	130.200, -0.035	130.200, -0.050	130.200, -0.036	130.200, -0.018
653	130.400, 0.952	130.400, 1.154	130.400, 1.228	130.400, 1.289	130.400, 1.354	130.400, -0.029	130.400, -0.073	130.400, -0.024	130.400, -0.035	130.400, -0.050	130.400, -0.037	130.400, -0.018
654	130.600, 0.952	130.600, 1.154	130.600, 1.229	130.600, 1.289	130.600, 1.354	130.600, -0.029	130.600, -0.073	130.600, -0.024	130.600, -0.035	130.600, -0.050	130.600, -0.037	130.600, -0.018
655	130.800, 0.953	130.800, 1.154	130.800, 1.229	130.800, 1.289	130.800, 1.354	130.800, -0.029	130.800, -0.073	130.800, -0.024	130.800, -0.035	130.800, -0.049	130.800, -0.037	130.800, -0.018
656	131.000, 0.954	131.000, 1.154	131.000, 1.230	131.000, 1.289	131.000, 1.354	131.000, -0.030	131.000, -0.072	131.000, -0.024	131.000, -0.035	131.000, -0.048	131.000, -0.037	131.000, -0.018
657	131.200, 0.954	131.200, 1.154	131.200, 1.230	131.200, 1.289	131.200, 1.354	131.200, -0.030	131.200, -0.072	131.200, -0.023	131.200, -0.035	131.200, -0.048	131.200, -0.037	131.200, -0.018
658	131.400, 0.955	131.400, 1.154	131.400, 1.230	131.400, 1.289	131.400, 1.354	131.400, -0.030	131.400, -0.072	131.400, -0.023	131.400, -0.035	131.400, -0.047	131.400, -0.037	131.400, -0.018
659	131.600, 0.956	131.600, 1.155	131.600, 1.230	131.600, 1.289	131.600, 1.354	131.600, -0.030	131.600, -0.072	131.600, -0.022	131.600, -0.035	131.600, -0.047	131.600, -0.036	131.600, -0.017
660	131.800, 0.956	131.800, 1.155	131.800, 1.230	131.800, 1.289	131.800, 1.355	131.800, -0.031	131.800, -0.071	131.800, -0.022	131.800, -0.035	131.800, -0.047	131.800, -0.036	131.800, -0.017
661	132.000, 0.957	132.000, 1.155	132.000, 1.230	132.000, 1.290	132.000, 1.355	132.000, -0.030	132.000, -0.071	132.000, -0.022	132.000, -0.036	132.000, -0.047	132.000, -0.036	132.000, -0.017
662	132.200, 0.957	132.200, 1.156	132.200, 1.230	132.200, 1.290	132.200, 1.355	132.200, -0.030	132.200, -0.071	132.200, -0.022	132.200, -0.036	132.200, -0.047	132.200, -0.035	132.200, -0.017
663	132.400, 0.957	132.400, 1.156	132.400, 1.230	132.400, 1.290	132.400, 1.355	132.400, -0.030	132.400, -0.071	132.400, -0.022	132.400, -0.036	132.400, -0.047	132.400, -0.035	132.400, -0.017
664	132.600, 0.958	132.600, 1.156	132.600, 1.231	132.600, 1.291	132.600, 1.355	132.600, -0.030	132.600, -0.072	132.600, -0.022	132.600, -0.036	132.600, -0.047	132.600, -0.035	132.600, -0.017
665	132.800, 0.958	132.800, 1.157	132.800, 1.231	132.800, 1.291	132.800, 1.355	132.800, -0.030	132.800, -0.072	132.800, -0.022	132.800, -0.036	132.800, -0.047	132.800, -0.035	132.800, -0.017
666	133.000, 0.959	133.000, 1.157	133.000, 1.231	133.000, 1.292	133.000, 1.356	133.000, -0.029	133.000, -0.072	133.000, -0.022	133.000, -0.036	133.000, -0.047	133.000, -0.035	133.000, -0.017
667	133.200, 0.959	133.200, 1.157	133.200, 1.231	133.200, 1.292	133.200, 1.356	133.200, -0.029	133.200, -0.072	133.200, -0.023	133.200, -0.036	133.200, -0.047	133.200, -0.034	133.200, -0.017
668	133.400, 0.960	133.400, 1.158	133.400, 1.231	133.400, 1.292	133.400, 1.356	133.400, -0.030	133.400, -0.072	133.400, -0.023	133.400, -0.036	133.400, -0.047	133.400, -0.034	133.400, -0.017
669	133.600, 0.961	133.600, 1.158	133.600, 1.231	133.600, 1.292	133.600, 1.356	133.600, -0.030	133.600, -0.073	133.600, -0.023	133.600, -0.036	133.600, -0.048	133.600, -0.034	133.600, -0.016
670	133.800, 0.962	133.800, 1.158	133.800, 1.231	133.800, 1.292	133.800, 1.357	133.800, -0.030	133.800, -0.073	133.800, -0.023	133.800, -0.036	133.800, -0.048	133.800, -0.034	133.800, -0.016
671	134.000, 0.963	134.000, 1.158	134.000, 1.232	134.000, 1.292	134.000, 1.357	134.000, -0.030	134.000, -0.073	134.000, -0.023	134.000, -0.036	134.000, -0.048	134.000, -0.035	134.000, -0.016
672	134.200, 0.964	134.200, 1.158	134.200, 1.232	134.200, 1.292	134.200, 1.357	134.200, -0.030	134.200, -0.073	134.200, -0.023	134.200, -0.036	134.200, -0.048	134.200, -0.035	134.200, -0.016
673	134.400, 0.964	134.400, 1.159	134.400, 1.232	134.400, 1.292	134.400, 1.358	134.400, -0.029	134.400, -0.073	134.400, -0.023	134.400, -0.036	134.400, -0.048	134.400, -0.035	134.400, -0.016
674	134.600, 0.965	134.600, 1.159	134.600, 1.232	134.600, 1.292	134.600, 1.358	134.600, -0.029	134.600, -0.073	134.600, -0.023	134.600, -0.036	134.600, -0.048	134.600, -0.036	134.600, -0.016
675	134.800, 0.966	134.800, 1.160	134.800, 1.232	134.800, 1.292	134.800, 1.358	134.800, -0.029	134.800, -0.073	134.800, -0.023	134.800, -0.036	134.800, -0.047	134.800, -0.036	134.800, -0.016
676	135.000, 0.967	135.000, 1.160	135.000, 1.232	135.000, 1.293	135.000, 1.358	135.000, -0.029	135.000, -0.072	135.000, -0.023	135.000, -0.035	135.000, -0.047	135.000, -0.036	135.000, -0.016
677	135.200, 0.967	135.200, 1.160	135.200, 1.232	135.200, 1.293	135.200, 1.358	135.200, -0.029	135.200, -0.072	135.200, -0.023	135.200, -0.035	135.200, -0.047	135.200, -0.036	135.200, -0.016
678	135.400, 0.968	135.400, 1.161	135.400, 1.233	135.400, 1.293	135.400, 1.358	135.400, -0.029	135.400, -0.072	135.400, -0.023	135.400, -0.035	135.400, -0.047	135.400, -0.036	135.400, -0.016
679	135.600, 0.969	135.600, 1.161	135.600, 1.233	135.600, 1.293	135.600, 1.358	135.600, -0.029	135.600, -0.072	135.600, -0.023	135.600, -0.035	135.600, -0.047	135.600, -0.036	135.600, -0.015
680	135.800, 0.970	135.800, 1.162	135.800, 1.233	135.800, 1.293	135.800, 1.358	135.800, -0.029	135.800, -0.071	135.800, -0.023	135.800, -0.035	135.800, -0.047	135.800, -0.036	135.800, -0.016
681	136.000, 0.970	136.000, 1.162	136.000, 1.233	136.000, 1.293	136.000, 1.358	136.000, -0.029	136.000, -0.071	136.000, -0.023	136.000, -0.035	136.000, -0.047	136.000, -0.035	136.000, -0.016
682	136.200, 0.971	136.200, 1.163	136.200, 1.233	136.200, 1.293	136.200, 1.358	136.200, -0.030	136.200, -0.071	136.200, -0.023	136.200, -0.035	136.200, -0.047	136.200, -0.035	136.200, -0.016
683	136.400, 0.972	136.400, 1.163	136.400, 1.234	136.400, 1.294	136.400, 1.358	136.400, -0.030	136.400, -0.071	136.400, -0.024	136.400, -0.034	136.400, -0.047	136.400, -0.035	136.400, -0.016
684	136.600, 0.973	136.600, 1.163	136.600, 1.234	136.600, 1.294	136.600, 1.358	136.600, -0.030	136.600, -0.071	136.600, -0.024	136.600, -0.034	136.600, -0.047	136.600, -0.035	136.600, -0.016
685	136.800, 0.973	136.800, 1.164	136.800, 1.234	136.800, 1.294	136.800, 1.358	136.800, -0.030	136.800, -0.071	136.800, -0.024	136.800, -0.034	136.800, -0.047	136.800, -0.035	136.800, -0.016
686	137.000, 0.974	137.000, 1.164	137.000, 1.234	137.000, 1.295	137.000, 1.358	137.000, -0.030	137.000, -0.071	137.000, -0.023	137.000, -0.034	137.000, -0.047	137.000, -0.035	137.000, -0.016
687	137.200, 0.974	137.200, 1.164	137.200, 1.235	137.200, 1.295	137.200, 1.359	137.200, -0.030	137.200, -0.071	137.200, -0.023	137.200, -0.034	137.200, -0.046	137.200, -0.035	137.200, -0.016
688	137.400, 0.975	137.400, 1.165	137.400, 1.235	137.400, 1.295	137.400, 1.359	137.400, -0.030	137.400, -0.071	137.400, -0.023	137.400, -0.034	137.400, -0.046	137.400, -0.034	137.400, -0.015
689	137.600, 0.976	137.600, 1.165	137.600, 1.235	137.600, 1.295	137.600, 1.359	137.600, -0.030	137.600, -0.071	137.600, -0.022	137.600, -0.034	137.600, -0.046	137.600, -0.034	137.600, -0.015
690	137.800, 0.976	137.800, 1.165	137.800, 1.236	137.800, 1.295	137.800, 1.359	137.800, -0.030	137.800, -0.071	137.800, -0.022	137.800, -0.034	137.800, -0.046	137.800, -0.034	137.800, -0.015
691	138.000, 0.977	138.000, 1.165	138.000, 1.236	138.000, 1.295	138.000, 1.360	138.000, -0.030	138.000, -0.071	138.000, -0.022	138.000, -0.034	138.000, -0.046	138.000, -0.035	138.000, -0.014
692	138.200, 0.977	138.200, 1.165	138.200, 1.237	138.200, 1.296	138.200, 1.360	138.200, -0.029	138.200, -0.071	138.200, -0.022	138.200, -0.034	138.200, -0.046	138.200, -0.035	138.200, -0.014
693	138.400, 0.978	138.400, 1.165	138.400, 1.237	138.400, 1.296	138.400, 1.360	138.400, -0.029	138.400, -0.071	138.400, -0.021	138.400, -0.034	138.400, -0.045	138.400, -0.035	138.400, -0.014
694	138.600, 0.978	138.600, 1.166	138.600, 1.237	138.600, 1.296	138.600, 1.360	138.600, -0.029	138.600, -0.071	138.600, -0.021	138.600, -0.034	138.600, -0.045	138.600, -0.035	138.600, -0.014
695	138.800, 0.979	138.800, 1.166	138.800, 1.238	138.800, 1.296	138.800, 1.361	138.800, -0.029	138.800, -0.071	138.800, -0.021	138.800, -0.034	138.800, -0.046	138.800, -0.035	138.800, -0.014
696	139.000, 0.979	139.000, 1.166	139.000, 1.238	139.000, 1.297	139.000, 1.361	139.000, -0.029	139.000, -0.071	139.000, -0.021	139.000, -0.034	139.000, -0.046	139.000, -0.035	139.000, -0.014
697	139.200, 0.980	139.200, 1.166	139.200, 1.238	139.200, 1.297	139.200, 1.361	139.200, -0.029	139.200, -0.071	139.200, -0.021	139.200, -0.034	139.200, -0.046	139.200, -0.035	139.200, -0.014
698	139.400, 0.981	139.400, 1.166	139.400, 1.238	139.400, 1.297	139.400, 1.361	139.400, -0.029	139.400, -0.071	139.400, -0.022	139.400, -0.034	139.400, -0.046	139.400, -0.035	139.400, -0.014
699	139.600, 0.981	139.600, 1.166	139.600, 1.238	139.600, 1.297	139.600, 1.361	139.600, -0.029	139.600, -0.071	139.600, -0.022	139.600, -0.034	139.600, -0.047	139.600, -0.034	139.600, -0.014
700	139.800, 0.982	139.800, 1.167	139.800, 1.238	139.800, 1.297	139.800, 1.362	139.800, -0.029	139.800, -0.071	139.800, -0.022	139.800, -0.034	139.800, -0.047	139.800, -0.034	139.800, -0.014
701	140.000, 0.983	140.000, 1.167	140.000, 1.238	140.000, 1.297	140.000, 1.362	140.000, -0.029	140.000, -0.071	140.000, -0.022	140.000, -0.034	140.000, -0.047	140.000, -0.034	140.000, -0.014
702	140.200, 0.984	140.200, 1.168	140.200, 1.238	140.200, 1.297	140.200, 1.362	140.200, -0.029	140.200, -0.072	140.200, -0.022	140.200, -0.034	140.200, -0.047	140.200, -0.033	140.200, -0.014
703	140.400, 0.984	140.400, 1.168	140.400, 1.238	140.400, 1.297	140.400, 1.362	140.400, -0.029	140.400, -0.072	140.400, -0.023	140.400, -0.033	140.400, -0.047	140.400, -0.033	140.400, -0.014
704	140.600, 0.985	140.600, 1.168	140.600, 1.238	140.600, 1.298	140.600, 1.362	140.600, -0.029	140.600, -0.072	140.600, -0.023	140.600, -0.034	140.600, -0.047	140.600, -0.033	140.600, -0.014
705	140.800, 0.986	140.800, 1.168	140.800, 1.238	140.800, 1.298	140.800, 1.363	140.800, -0.029	140.800, -0.072	140.800, -0.023	140.800, -0.034	140.800, -0.047	140.800, -0.033	140.800, -0.013
706	141.000, 0.986	141.000, 1.168	141.000, 1.238	141.000, 1.298	141.000, 1.363	141.000, -0.029	141.000, -0.072	141.000, -0.023	141.000, -0.034	141.000, -0.046	141.000, -0.032	141.000, -0.013
707	141.200, 0.987	141.200, 1.168	141.200, 1.238	141.200, 1.298	141.200, 1.363	141.200, -0.029	141.200, -0.072	141.200, -0.023	141.200, -0.034	141.200, -0.046	141.200, -0.032	141.200, -0.012
708	141.400, 0.988	141.400, 1.168	141.400, 1.238	141.400, 1.298	141.400, 1.364	141.400, -0.029	141.400, -0.073	141.400, -0.023	141.400, -0.034	141.400, -0.045	141.400, -0.032	141.400, -0.012
709	141.600, 0.988	141.600, 1.169	141.600, 1.238	141.600, 1.298	141.600, 1.364	141.600, -0.029	141.600, -0.073	141.600, -0.023	141.600, -0.034	141.600, -0.045	141.600, -0.032	141.600, -0.011
710	141.800, 0.989	141.800, 1.169	141.800, 1.239	141.800, 1.298	141.800, 1.364	141.800, -0.029	141.800, -0.073	141.800, -0.023	141.800, -0.035	141.800, -0.045	141.800, -0.032	141.800, -0.011
711	142.000, 0.990	142.000, 1.169	142.000, 1.239	142.000, 1.299	142.000, 1.364	142.000, -0.029	142.000, -0.073	142.000, -0.022	142.000, -0.035	142.000, -0.045	142.000, -0.033	142.000, -0.011
712	142.200, 0.990	142.200, 1.169	142.200, 1.240	142.200, 1.299	142.200, 1.364	142.200, -0.029	142.200, -0.074	142.200, -0.022	142.200, -0.035	142.200, -0.045	142.200, -0.033	142.200, -0.011
713	142.400, 0.991	142.400, 1.170	142.400, 1.240	142.400, 1.299	142.400, 1.364	142.400, -0.029	142.400, -0.074	142.400, -0.022	142.400, -0.035	142.400, -0.045	142.400, -0.033	142.400, -0.011
714	142.600, 0.992	142.600, 1.170	142.600, 1.241	142.600, 1.299	142.600, 1.365	142.600, -0.029	142.600, -0.074	142.600, -0.021	142.600, -0.035	142.600, -0.045	142.600, -0.033	142.600, -0.012
715	142.800, 0.992	142.800, 1.171	142.800, 1.241	142.800, 1.299	142.800, 1.365	142.800, -0.029	142.800, -0.073	142.800, -0.021	142.800, -0.036	142.800, -0.045	142.800, -0.033	142.800, -0.012
716	143.000, 0.993	143.000, 1.171	143.000, 1.241	143.000, 1.299	143.000, 1.365	143.000, -0.030	143.000, -0.073	143.000, -0.021	143.000, -0.036	143.000, -0.046	143.000, -0.033	143.000, -0.012
717	143.200, 0.993	143.200, 1.172	143.200, 1.242	143.200, 1.299	143.200, 1.365	143.200, -0.030	143.200, -0.073	143.200, -0.021	143.200, -0.036	143.200, -0.046	143.200, -0.033	143.200, -0.012
718	143.400, 0.994	143.400, 1.173	143.400, 1.242	143.400, 1.300	143.400, 1.365	143.400, -0.030	143.400, -0.073	143.400, -0.021	143.400, -0.036	143.400, -0.047	143.400, -0.033	143.400, -0.012
719	143.600, 0.994	143.600, 1.174	143.600, 1.243	143.600, 1.300	143.600, 1.365	143.600, -0.030	143.600, -0.073	143.600, -0.021	143.600, -0.036	143.600, -0.047	143.600, -0.033	143.600, -0.012
720	143.800, 0.995	143.800, 1.174	143.800, 1.243	143.800, 1.300	143.800, 1.365	143.800, -0.030	143.800, -0.072	143.800, -0.022	143.800, -0.036	143.800, -0.047	143.800, -0.032	143.800, -0.012
721	144.000, 0.995	144.000, 1.175	144.000, 1.243	144.000, 1.301	144.000, 1.365	144.000, -0.030	144.000, -0.072	144.000, -0.022	144.000, -0.036	144.000, -0.047	144.000, -0.032	144.000, -0.013
722	144.200, 0.995	144.200, 1.175	144.200, 1.244	144.200, 1.301	144.200, 1.365	144.200, -0.030	144.200, -0.072	144.200, -0.022	144.200, -0.035	144.200, -0.047	144.200, -0.032	144.200, -0.013
723	144.400, 0.996	144.400, 1.176	144.400, 1.244	144.400, 1.301	144.400, 1.365	144.400, -0.030	144.400, -0.072	144.400, -0.022	144.400, -0.035	144.400, -0.047	144.400, -0.031	144.400, -0.012
724	144.600, 0.996	144.600, 1.176	144.600, 1.244	144.600, 1.302	144.600, 1.365	144.600, -0.030	144.600, -0.072	144.600, -0.022	144.600, -0.035	144.600, -0.047	144.600, -0.031	144.600, -0.012
725	144.800, 0.997	144.800, 1.177	144.800, 1.244	144.800, 1.302	144.800, 1.365	144.800, -0.030	144.800, -0.072	144.800, -0.022	144.800, -0.034	144.800, -0.047	144.800, -0.031	144.800, -0.012
726	145.000, 0.997	145.000, 1.177	145.000, 1.244	145.000, 1.302	145.000, 1.365	145.000, -0.030	145.000, -0.073	145.000, -0.023	145.000, -0.034	145.000, -0.046	145.000, -0.031	145.000, -0.012
727	145.200, 0.997	145.200, 1.177	145.200, 1.244	145.200, 1.302	145.200, 1.365	145.200, -0.029	145.200, -0.073	145.200, -0.023	145.200, -0.034	145.200, -0.046	145.200, -0.031	145.200, -0.011
728	145.400, 0.998	145.400, 1.177	145.400, 1.244	145.400, 1.303	145.400, 1.366	145.400, -0.029	145.400, -0.073	145.400, -0.023	145.400, -0.034	145.400, -0.046	145.400, -0.031	145.400, -0.011
729	145.600, 0.998	145.600, 1.177	145.600, 1.244	145.600, 1.303	145.600, 1.366	145.600, -0.029	145.600, -0.073	145.600, -0.023	145.600, -0.033	145.600, -0.045	145.600, -0.032	145.600, -0.011
730	145.800, 0.999	145.800, 1.177	145.800, 1.244	145.800, 1.303	145.800, 1.366	145.800, -0.029	145.800, -0.074	145.800, -0.023	145.800, -0.033	145.800, -0.045	145.800, -0.032	145.800, -0.010
731	146.000, 0.999	146.000, 1.178	146.000, 1.244	146.000, 1.304	146.000, 1.366	146.000, -0.029	146.000, -0.074	146.000, -0.022	146.000, -0.033	146.000, -0.045	146.000, -0.031	146.000, -0.010
732	146.200, 1.000	146.200, 1.178	146.200, 1.245	146.200, 1.304	146.200, 1.367	146.200, -0.029	146.200, -0.074	146.200, -0.022	146.200, -0.033	146.200, -0.045	146.200, -0.031	146.200, -0.010
733	146.400, 1.001	146.400, 1.178	146.400, 1.245	146.400, 1.304	146.400, 1.367	146.400, -0.029	146.400, -0.074	146.400, -0.022	146.400, -0.033	146.400, -0.044	146.400, -0.031	146.400, -0.010
734	146.600, 1.001	146.600, 1.178	146.600, 1.245	146.600, 1.304	146.600, 1.368	146.600, -0.029	146.600, -0.074	146.600, -0.021	146.600, -0.033	146.600, -0.044	146.600, -0.031	146.600, -0.010
735	146.800, 1.002	146.800, 1.178	146.800, 1.245	146.800, 1.304	146.800, 1.368	146.800, -0.029	146.800, -0.074	146.800, -0.021	146.800, -0.034	146.800, -0.044	146.800, -0.031	146.800, -0.010
736	147.000, 1.002	147.000, 1.178	147.000, 1.246	147.000, 1.304	147.000, 1.369	147.000, -0.029	147.000, -0.074	147.000, -0.021	147.000, -0.034	147.000, -0.044	147.000, -0.032	147.000, -0.009
737	147.200, 1.003	147.200, 1.178	147.200, 1.246	147.200, 1.304	147.200, 1.369	147.200, -0.029	147.200, -0.074	147.200, -0.020	147.200, -0.034	147.200, -0.044	147.200, -0.032	147.200, -0.010
738	147.400, 1.004	147.400, 1.179	147.400, 1.246	147.400, 1.304	147.400, 1.369	147.400, -0.029	147.400, -0.074	147.400, -0.020	147.400, -0.034	147.400, -0.044	147.400, -0.032	147.400, -0.010
739	147.600, 1.005	147.600, 1.179	147.600, 1.246	147.600, 1.305	147.600, 1.369	147.600, -0.030	147.600, -0.074	147.600, -0.020	147.600, -0.034	147.600, -0.044	147.600, -0.032	147.600, -0.009
740	147.800, 1.005	147.800, 1.179	147.800, 1.247	147.800, 1.305	147.800, 1.369	147.800, -0.030	147.800, -0.074	147.800, -0.020	147.800, -0.034	147.800, -0.044	147.800, -0.032	147.800, -0.009
741	148.000, 1.006	148.000, 1.180	148.000, 1.247	148.000, 1.305	148.000, 1.369	148.000, -0.030	148.000, -0.073	148.000, -0.019	148.000, -0.034	148.000, -0.044	148.000, -0.032	148.000, -0.010
742	148.200, 1.007	148.200, 1.180	148.200, 1.247	148.200, 1.305	148.200, 1.369	148.200, -0.030	148.200, -0.073	148.200, -0.019	148.200, -0.033	148.200, -0.044	148.200, -0.032	148.200, -0.009
743	148.400, 1.007	148.400, 1.180	148.400, 1.247	148.400, 1.305	148.400, 1.369	148.400, -0.030	148.400, -0.073	148.400, -0.019	148.400, -0.033	148.400, -0.043	148.400, -0.032	148.400, -0.009
744	148.600, 1.008	148.600, 1.180	148.600, 1.247	148.600, 1.305	148.600, 1.370	148.600, -0.030	148.600, -0.073	148.600, -0.019	148.600, -0.033	148.600, -0.043	148.600, -0.032	148.600, -0.010
745	148.800, 1.009	148.800, 1.181	148.800, 1.247	148.800, 1.305	148.800, 1.370	148.800, -0.029	148.800, -0.073	148.800, -0.020	148.800, -0.032	148.800, -0.043	148.800, -0.032	148.800, -0.009
746	149.000, 1.009	149.000, 1.181	149.000, 1.247	149.000, 1.305	149.000, 1.370	149.000, -0.029	149.000, -0.073	149.000, -0.020	149.000, -0.032	149.000, -0.043	149.000, -0.032	149.000, -0.009
747	149.200, 1.010	149.200, 1.181	149.200, 1.247	149.200, 1.306	149.200, 1.370	149.200, -0.029	149.200, -0.073	149.200, -0.020	149.200, -0.032	149.200, -0.043	149.200, -0.031	149.200, -0.009
748	149.400, 1.010	149.400, 1.181	149.400, 1.247	149.400, 1.306	149.400, 1.370	149.400, -0.029	149.400, -0.073	149.400, -0.020	149.400, -0.031	149.400, -0.042	149.400, -0.031	149.400, -0.009
749	149.600, 1.011	149.600, 1.181	149.600, 1.247	149.600, 1.306	149.600, 1.371	149.600, -0.029	149.600, -0.073	149.600, -0.020	149.600, -0.031	149.600, -0.042	149.600, -0.031	149.600, -0.009
750	149.800, 1.011	149.800, 1.181	149.800, 1.247	149.800, 1.306	149.800, 1.371	149.800, -0.029	149.800, -0.073	149.800, -0.021	149.800, -0.031	149.800, -0.042	149.800, -0.031	149.800, -0.009
751	150.000, 1.011	150.000, 1.181	150.000, 1.247	150.000, 1.306	150.000, 1.371	150.000, -0.029	150.000, -0.073	150.000, -0.021	150.000, -0.031	150.000, -0.042	150.000, -0.031	150.000, -0.009
752	150.200, 1.012	150.200, 1.181	150.200, 1.247	150.200, 1.305	150.200, 1.370	150.200, -0.029	150.200, -0.073	150.200, -0.022	150.200, -0.032	150.200, -0.043	150.200, -0.032	150.200, -0.009
753	150.400, 1.012	150.400, 1.181	150.400, 1.246	150.400, 1.304	150.400, 1.369	150.400, -0.030	150.400, -0.072	150.400, -0.022	150.400, -0.032	150.400, -0.043	150.400, -0.032	150.400, -0.009
754	150.600, 1.013	150.600, 1.181	150.600, 1.246	150.600, 1.303	150.600, 1.367	150.600, -0.030	150.600, -0.071	150.600, -0.023	150.600, -0.032	150.600, -0.044	150.600, -0.032	150.600, -0.009
755	150.800, 1.014	150.800, 1.181	150.800, 1.245	150.800, 1.302	150.800, 1.366	150.800, -0.030	150.800, -0.070	150.800, -0.024	150.800, -0.032	150.800, -0.044	150.800, -0.032	150.800, -0.009
756	151.000, 1.015	151.000, 1.181	151.000, 1.245	151.000, 1.300	151.000, 1.365	151.000, -0.030	151.000, -0.069	151.000, -0.024	151.000, -0.032	151.000, -0.043	151.000, -0.032	151.000, -0.009
757	151.200, 1.015	151.200, 1.180	151.200, 1.245	151.200, 1.299	151.200, 1.363	151.200, -0.030	151.200, -0.068	151.200, -0.024	151.200, -0.031	151.200, -0.043	151.200, -0.032	151.200, -0.009
758	151.400, 1.016	151.400, 1.180	151.400, 1.245	151.400, 1.298	151.400, 1.362	151.400, -0.029	151.400, -0.067	151.400, -0.024	151.400, -0.031	151.400, -0.042	151.400, -0.031	151.400, -0.008
759	151.600, 1.017	151.600, 1.180	151.600, 1.245	151.600, 1.297	151.600, 1.360	151.600, -0.029	151.600, -0.066	151.600, -0.024	151.600, -0.030	151.600, -0.040	151.600, -0.030	151.600, -0.007
760	151.800, 1.018	151.800, 1.181	151.800, 1.245	151.800, 1.296	151.800, 1.359	151.800, -0.029	151.800, -0.064	151.800, -0.023	151.800, -0.028	151.800, -0.039	151.800, -0.028	151.800, -0.006
761	152.000, 1.018	152.000, 1.181	152.000, 1.246	152.000, 1.296	152.000, 1.358	152.000, -0.028	152.000, -0.062	152.000, -0.022	152.000, -0.026	152.000, -0.037	152.000, -0.027	152.000, -0.005
762	152.200, 1.019	152.200, 1.182	152.200, 1.246	152.200, 1.295	152.200, 1.358	152.200, -0.028	152.200, -0.061	152.200, -0.021	152.200, -0.024	152.200, -0.035	152.200, -0.025	152.200, -0.003
763	152.400, 1.019	152.400, 1.183	152.400, 1.247	152.400, 1.295	152.400, 1.357	152.400, -0.027	152.400, -0.060	152.400, -0.020	152.400, -0.023	152.400, -0.033	152.400, -0.023	152.400, -0.002
764	152.600, 1.020	152.600, 1.183	152.600, 1.247	152.600, 1.295	152.600, 1.356	152.600, -0.026	152.600, -0.058	152.600, -0.019	152.600, -0.022	152.600, -0.031	152.600, -0.021	152.600, -0.001
765	152.800, 1.021	152.800, 1.184	152.800, 1.247	152.800, 1.295	152.800, 1.355	152.800, -0.026	152.800, -0.057	152.800, -0.017	152.800, -0.020	152.800, -0.030	152.800, -0.020	152.800, 0.000
766	153.000, 1.021	153.000, 1.185	153.000, 1.247	153.000, 1.295	153.000, 1.355	153.000, -0.025	153.000, -0.056	153.000, -0.016	153.000, -0.019	153.000, -0.028	153.000, -0.018	153.000, 0.002
767	153.200, 1.022	153.200, 1.185	153.200, 1.248	153.200, 1.295	153.200, 1.355	153.200, -0.025	153.200, -0.055	153.200, -0.015	153.200, -0.018	153.200, -0.027	153.200, -0.017	153.200, 0.003
768	153.400, 1.023	153.400, 1.186	153.400, 1.248	153.400, 1.296	153.400, 1.355	153.400, -0.024	153.400, -0.053	153.400, -0.014	153.400, -0.017	153.400, -0.026	153.400, -0.015	153.400, 0.004
769	153.600, 1.024	153.600, 1.187	153.600, 1.248	153.600, 1.295	153.600, 1.355	153.600, -0.024	153.600, -0.052	153.600, -0.013	153.600, -0.016	153.600, -0.025	153.600, -0.014	153.600, 0.005
770	153.800, 1.024	153.800, 1.188	153.800, 1.249	153.800, 1.295	153.800, 1.355	153.800, -0.024	153.800, -0.050	153.800, -0.012	153.800, -0.016	153.800, -0.023	153.800, -0.013	153.800, 0.006
771	154.000, 1.025	154.000, 1.188	154.000, 1.249	154.000, 1.295	154.000, 1.355	154.000, -0.023	154.000, -0.049	154.000, -0.011	154.000, -0.015	154.000, -0.022	154.000, -0.012	154.000, 0.007
772	154.200, 1.026	154.200, 1.189	154.200, 1.250	154.200, 1.295	154.200, 1.355	154.200, -0.023	154.200, -0.047	154.200, -0.009	154.200, -0.014	154.200, -0.021	154.200, -0.011	154.200, 0.008
773	154.400, 1.027	154.400, 1.190	154.400, 1.250	154.400, 1.295	154.400, 1.355	154.400, -0.022	154.400, -0.046	154.400, -0.008	154.400, -0.013	154.400, -0.020	154.400, -0.010	154.400, 0.010
774	154.600, 1.028	154.600, 1.190	154.600, 1.251	154.600, 1.295	154.600, 1.355	154.600, -0.022	154.600, -0.045	154.600, -0.007	154.600, -0.012	154.600, -0.019	154.600, -0.009	154.600, 0.011
775	154.800, 1.028	154.800, 1.190	154.800, 1.251	154.800, 1.294	154.800, 1.354	154.800, -0.021	154.800, -0.044	154.800, -0.007	154.800, -0.011	154.800, -0.018	154.800, -0.008	154.800, 0.012
776	155.000, 1.029	155.000, 1.190	155.000, 1.252	155.000, 1.294	155.000, 1.354	155.000, -0.021	155.000, -0.043	155.000, -0.006	155.000, -0.010	155.000, -0.018	155.000, -0.007	155.000, 0.013
777	155.200, 1.029	155.200, 1.190	155.200, 1.253	155.200, 1.294	155.200, 1.354	155.200, -0.020	155.200, -0.042	155.200, -0.006	155.200, -0.009	155.200, -0.017	155.200, -0.006	155.200, 0.015
778	155.400, 1.030	155.400, 1.190	155.400, 1.253	155.400, 1.293	155.400, 1.353	155.400, -0.020	155.400, -0.041	155.400, -0.005	155.400, -0.008	155.400, -0.016	155.400, -0.005	155.400, 0.016
779	155.600, 1.030	155.600, 1.191	155.600, 1.253	155.600, 1.293	155.600, 1.353	155.600, -0.019	155.600, -0.040	155.600, -0.005	155.600, -0.007	155.600, -0.015	155.600, -0.004	155.600, 0.017
780	155.800, 1.031	155.800, 1.191	155.800, 1.254	155.800, 1.293	155.800, 1.353	155.800, -0.019	155.800, -0.040	155.800, -0.004	155.800, -0.006	155.800, -0.014	155.800, -0.003	155.800, 0.018
781	156.000, 1.031	156.000, 1.191	156.000, 1.254	156.000, 1.293	156.000, 1.352	156.000, -0.019	156.000, -0.039	156.000, -0.004	156.000, -0.005	156.000, -0.013	156.000, -0.002	156.000, 0.019
782	156.200, 1.031	156.200, 1.191	156.200, 1.254	156.200, 1.293	156.200, 1.352	156.200, -0.018	156.200, -0.038	156.200, -0.003	156.200, -0.003	156.200, -0.013	156.200, -0.002	156.200, 0.020
783	156.400, 1.032	156.400, 1.191	156.400, 1.254	156.400, 1.293	156.400, 1.352	156.400, -0.018	156.400, -0.037	156.400, -0.003	156.400, -0.002	156.400, -0.012	156.400, -0.001	156.400, 0.021
784	156.600, 1.032	156.600, 1.192	156.600, 1.254	156.600, 1.293	156.600, 1.352	156.600, -0.018	156.600, -0.037	156.600, -0.002	156.600, -0.001	156.600, -0.011	156.600, -0.001	156.600, 0.022
785	156.800, 1.032	156.800, 1.192	156.800, 1.254	156.800, 1.293	156.800, 1.351	156.800, -0.017	156.800, -0.036	156.800, -0.002	156.800, 0.000	156.800, -0.009	156.800, -0.000	156.800, 0.023
786	157.000, 1.032	157.000, 1.192	157.000, 1.254	157.000, 1.294	157.000, 1.351	157.000, -0.017	157.000, -0.035	157.000, -0.001	157.000, 0.001	157.000, -0.008	157.000, 0.000	157.000, 0.024
787	157.200, 1.033	157.200, 1.192	157.200, 1.255	157.200, 1.294	157.200, 1.351	157.200, -0.017	157.200, -0.034	157.200, -0.001	157.200, 0.002	157.200, -0.008	157.200, 0.001	157.200, 0.025
788	157.400, 1.033	157.400, 1.192	157.400, 1.255	157.400, 1.294	157.400, 1.351	157.400, -0.017	157.400, -0.033	157.400, 0.000	157.400, 0.003	157.400, -0.007	157.400, 0.002	157.400, 0.025
789	157.600, 1.033	157.600, 1.192	157.600, 1.256	157.600, 1.294	157.600, 1.350	157.600, -0.016	157.600, -0.032	157.600, 0.001	157.600, 0.003	157.600, -0.006	157.600, 0.002	157.600, 0.026
790	157.800, 1.033	157.800, 1.193	157.800, 1.256	157.800, 1.294	157.800, 1.350	157.800, -0.016	157.800, -0.032	157.800, 0.001	157.800, 0.004	157.800, -0.005	157.800, 0.003	157.800, 0.026
791	158.000, 1.033	158.000, 1.193	158.000, 1.257	158.000, 1.294	158.000, 1.350	158.000, -0.016	158.000, -0.031	158.000, 0.002	158.000, 0.004	158.000, -0.004	158.000, 0.004	158.000, 0.027
792	158.200, 1.033	158.200, 1.193	158.200, 1.257	158.200, 1.294	158.200, 1.349	158.200, -0.015	158.200, -0.030	158.200, 0.002	158.200, 0.004	158.200, -0.003	158.200, 0.004	158.200, 0.027
793	158.400, 1.034	158.400, 1.193	158.400, 1.257	158.400, 1.294	158.400, 1.349	158.400, -0.015	158.400, -0.029	158.400, 0.002	158.400, 0.004	158.400, -0.003	158.400, 0.005	158.400, 0.028
794	158.600, 1.034	158.600, 1.193	158.600, 1.258	158.600, 1.294	158.600, 1.349	158.600, -0.015	158.600, -0.029	158.600, 0.002	158.600, 0.005	158.600, -0.002	158.600, 0.006	158.600, 0.028
795	158.800, 1.034	158.800, 1.193	158.800, 1.258	158.800, 1.293	158.800, 1.349	158.800, -0.015	158.800, -0.029	158.800, 0.003	158.800, 0.005	158.800, -0.001	158.800, 0.007	158.800, 0.029
796	159.000, 1.034	159.000, 1.194	159.000, 1.258	159.000, 1.293	159.000, 1.349	159.000, -0.015	159.000, -0.029	159.000, 0.003	159.000, 0.006	159.000, -0.001	159.000, 0.007	159.000, 0.030
797	159.200, 1.035	159.200, 1.194	159.200, 1.259	159.200, 1.293	159.200, 1.349	159.200, -0.014	159.200, -0.028	159.200, 0.004	159.200, 0.007	159.200, -0.000	159.200, 0.008	159.200, 0.030
798	159.400, 1.035	159.400, 1.194	159.400, 1.259	159.400, 1.293	159.400, 1.349	159.400, -0.014	159.400, -0.028	159.400, 0.004	159.400, 0.008	159.400, 0.000	159.400, 0.009	159.400, 0.031
799	159.600, 1.035	159.600, 1.194	159.600, 1.259	159.600, 1.293	159.600, 1.349	159.600, -0.014	159.600, -0.028	159.600, 0.005	159.600, 0.010	159.600, 0.001	159.600, 0.010	159.600, 0.032
800	159.800, 1.035	159.800, 1.194	159.800, 1.259	159.800, 1.293	159.800, 1.349	159.800, -0.013	159.800, -0.027	159.800, 0.005	159.800, 0.010	159.800, 0.001	159.800, 0.010	159.800, 0.033
801	160.000, 1.036	160.000, 1.195	160.000, 1.259	160.000, 1.293	160.000, 1.349	160.000, -0.013	160.000, -0.026	160.000, 0.006	160.000, 0.011	160.000, 0.002	160.000, 0.010	160.000, 0.034
802	160.200, 1.036	160.200, 1.195	160.200, 1.260	160.200, 1.293	160.200, 1.349	160.200, -0.012	160.200, -0.026	160.200, 0.006	160.200, 0.012	160.200, 0.002	160.200, 0.011	160.200, 0.034
803	160.400, 1.036	160.400, 1.195	160.400, 1.260	160.400, 1.294	160.400, 1.349	160.400, -0.011	160.400, -0.025	160.400, 0.007	160.400, 0.012	160.400, 0.003	160.400, 0.011	160.400, 0.035
804	160.600, 1.037	160.600, 1.196	160.600, 1.260	160.600, 1.294	160.600, 1.350	160.600, -0.011	160.600, -0.024	160.600, 0.007	160.600, 0.013	160.600, 0.003	160.600, 0.012	160.600, 0.036
805	160.800, 1.037	160.800, 1.196	160.800, 1.260	160.800, 1.294	160.800, 1.350	160.800, -0.010	160.800, -0.024	160.800, 0.008	160.800, 0.013	160.800, 0.004	160.800, 0.012	160.800, 0.036
806	161.000, 1.037	161.000, 1.196	161.000, 1.260	161.000, 1.295	161.000, 1.350	161.000, -0.010	161.000, -0.023	161.000, 0.009	161.000, 0.014	161.000, 0.004	161.000, 0.012	161.000, 0.037
807	161.200, 1.038	161.200, 1.196	161.200, 1.261	161.200, 1.295	161.200, 1.350	161.200, -0.009	161.200, -0.022	161.200, 0.009	161.200, 0.014	161.200, 0.005	161.200, 0.013	161.200, 0.037
808	161.400, 1.038	161.400, 1.196	161.400, 1.261	161.400, 1.295	161.400, 1.350	161.400, -0.009	161.400, -0.022	161.400, 0.010	161.400, 0.015	161.400, 0.005	161.400, 0.013	161.400, 0.038
809	161.600, 1.039	161.600, 1.196	161.600, 1.261	161.600, 1.295	161.600, 1.350	161.600, -0.008	161.600, -0.021	161.600, 0.010	161.600, 0.015	161.600, 0.005	161.600, 0.014	161.600, 0.038
810	161.800, 1.039	161.800, 1.196	161.800, 1.262	161.800, 1.295	161.800, 1.349	161.800, -0.008	161.800, -0.020	161.800, 0.010	161.800, 0.015	161.800, 0.006	161.800, 0.014	161.800, 0.039
811	162.000, 1.040	162.000, 1.196	162.000, 1.262	162.000, 1.295	162.000, 1.349	162.000, -0.008	162.000, -0.020	162.000, 0.010	162.000, 0.016	162.000, 0.006	162.000, 0.015	162.000, 0.039
812	162.200, 1.040	162.200, 1.196	162.200, 1.262	162.200, 1.295	162.200, 1.349	162.200, -0.007	162.200, -0.020	162.200, 0.011	162.200, 0.016	162.200, 0.006	162.200, 0.015	162.200, 0.040
813	162.400, 1.040	162.400, 1.196	162.400, 1.262	162.400, 1.295	162.400, 1.349	162.400, -0.007	162.400, -0.019	162.400, 0.011	162.400, 0.016	162.400, 0.007	162.400, 0.015	162.400, 0.040
814	162.600, 1.040	162.600, 1.196	162.600, 1.262	162.600, 1.295	162.600, 1.349	162.600, -0.007	162.600, -0.019	162.600, 0.012	162.600, 0.017	162.600, 0.008	162.600, 0.016	162.600, 0.040
815	162.800, 1.041	162.800, 1.196	162.800, 1.262	162.800, 1.294	162.800, 1.349	162.800, -0.007	162.800, -0.018	162.800, 0.012	162.800, 0.017	162.800, 0.008	162.800, 0.016	162.800, 0.041
816	163.000, 1.041	163.000, 1.196	163.000, 1.262	163.000, 1.294	163.000, 1.349	163.000, -0.007	163.000, -0.018	163.000, 0.013	163.000, 0.018	163.000, 0.009	163.000, 0.016	163.000, 0.041
817	163.200, 1.041	163.200, 1.195	163.200, 1.262	163.200, 1.294	163.200, 1.348	163.200, -0.007	163.200, -0.017	163.200, 0.013	163.200, 0.018	163.200, 0.010	163.200, 0.017	163.200, 0.041
818	163.400, 1.041	163.400, 1.195	163.400, 1.262	163.400, 1.294	163.400, 1.348	163.400, -0.007	163.400, -0.017	163.400, 0.013	163.400, 0.019	163.400, 0.010	163.400, 0.017	163.400, 0.042
819	163.600, 1.041	163.600, 1.195	163.600, 1.262	163.600, 1.294	163.600, 1.348	163.600, -0.007	163.600, -0.016	163.600, 0.014	163.600, 0.019	163.600, 0.011	163.600, 0.017	163.600, 0.042
820	163.800, 1.041	163.800, 1.196	163.800, 1.262	163.800, 1.294	163.800, 1.348	163.800, -0.006	163.800, -0.016	163.800, 0.014	163.800, 0.020	163.800, 0.012	163.800, 0.018	163.800, 0.042
821	164.000, 1.041	164.000, 1.196	164.000, 1.262	164.000, 1.294	164.000, 1.348	164.000, -0.006	164.000, -0.015	164.000, 0.014	164.000, 0.020	164.000, 0.012	164.000, 0.018	164.000, 0.042
822	164.200, 1.041	164.200, 1.196	164.200, 1.263	164.200, 1.294	164.200, 1.348	164.200, -0.006	164.200, -0.014	164.200, 0.015	164.200, 0.020	164.200, 0.013	164.200, 0.018	164.200, 0.043
823	164.400, 1.041	164.400, 1.197	164.400, 1.263	164.400, 1.294	164.400, 1.348	164.400, -0.005	164.400, -0.013	164.400, 0.015	164.400, 0.021	164.400, 0.013	164.400, 0.018	164.400, 0.043
824	164.600, 1.041	164.600, 1.197	164.600, 1.263	164.600, 1.294	164.600, 1.348	164.600, -0.005	164.600, -0.013	164.600, 0.016	164.600, 0.021	164.600, 0.014	164.600, 0.018	164.600, 0.043
825	164.800, 1.041	164.800, 1.198	164.800, 1.263	164.800, 1.294	164.800, 1.348	164.800, -0.005	164.800, -0.012	164.800, 0.016	164.800, 0.022	164.800, 0.014	164.800, 0.019	164.800, 0.044
826	165.000, 1.042	165.000, 1.198	165.000, 1.264	165.000, 1.294	165.000, 1.348	165.000, -0.005	165.000, -0.011	165.000, 0.017	165.000, 0.022	165.000, 0.015	165.000, 0.019	165.000, 0.044
827	165.200, 1.042	165.200, 1.198	165.200, 1.264	165.200, 1.295	165.200, 1.348	165.200, -0.005	165.200, -0.011	165.200, 0.017	165.200, 0.023	165.200, 0.015	165.200, 0.020	165.200, 0.044
828	165.400, 1.042	165.400, 1.198	165.400, 1.264	165.400, 1.295	165.400, 1.348	165.400, -0.005	165.400, -0.011	165.400, 0.017	165.400, 0.024	165.400, 0.015	165.400, 0.020	165.400, 0.045
829	165.600, 1.042	165.600, 1.199	165.600, 1.264	165.600, 1.295	165.600, 1.348	165.600, -0.005	165.600, -0.011	165.600, 0.017	165.600, 0.024	165.600, 0.015	165.600, 0.021	165.600, 0.046
830	165.800, 1.043	165.800, 1.199	165.800, 1.264	165.800, 1.296	165.800, 1.348	165.800, -0.005	165.800, -0.010	165.800, 0.018	165.800, 0.024	165.800, 0.016	165.800, 0.021	165.800, 0.046
831	166.000, 1.043	166.000, 1.199	166.000, 1.264	166.000, 1.296	166.000, 1.348	166.000, -0.004	166.000, -0.010	166.000, 0.018	166.000, 0.025	166.000, 0.016	166.000, 0.022	166.000, 0.047
832	166.200, 1.043	166.200, 1.200	166.200, 1.264	166.200, 1.296	166.200, 1.348	166.200, -0.004	166.200, -0.010	166.200, 0.018	166.200, 0.025	166.200, 0.016	166.200, 0.022	166.200, 0.047
833	166.400, 1.043	166.400, 1.200	166.400, 1.264	166.400, 1.296	166.400, 1.348	166.400, -0.004	166.400, -0.010	166.400, 0.018	166.400, 0.025	166.400, 0.017	166.400, 0.023	166.400, 0.047
834	166.600, 1.044	166.600, 1.200	166.600, 1.265	166.600, 1.296	166.600, 1.348	166.600, -0.004	166.600, -0.010	166.600, 0.018	166.600, 0.026	166.600, 0.018	166.600, 0.024	166.600, 0.047
835	166.800, 1.044	166.800, 1.200	166.800, 1.265	166.800, 1.296	166.800, 1.348	166.800, -0.004	166.800, -0.010	166.800, 0.018	166.800, 0.026	166.800, 0.018	166.800, 0.024	166.800, 0.047
836	167.000, 1.044	167.000, 1.200	167.000, 1.265	167.000, 1.296	167.000, 1.348	167.000, -0.004	167.000, -0.010	167.000, 0.018	167.000, 0.026	167.000, 0.019	167.000, 0.025	167.000, 0.048
837	167.200, 1.044	167.200, 1.201	167.200, 1.265	167.200, 1.296	167.200, 1.348	167.200, -0.003	167.200, -0.010	167.200, 0.018	167.200, 0.027	167.200, 0.019	167.200, 0.025	167.200, 0.048
838	167.400, 1.045	167.400, 1.201	167.400, 1.265	167.400, 1.296	167.400, 1.347	167.400, -0.003	167.400, -0.010	167.400, 0.019	167.400, 0.027	167.400, 0.019	167.400, 0.025	167.400, 0.048
839	167.600, 1.045	167.600, 1.201	167.600, 1.265	167.600, 1.296	167.600, 1.347	167.600, -0.003	167.600, -0.009	167.600, 0.019	167.600, 0.027	167.600, 0.020	167.600, 0.025	167.600, 0.048
840	167.800, 1.045	167.800, 1.201	167.800, 1.265	167.800, 1.296	167.800, 1.347	167.800, -0.002	167.800, -0.009	167.800, 0.019	167.800, 0.028	167.800, 0.020	167.800, 0.025	167.800, 0.049
841	168.000, 1.045	168.000, 1.202	168.000, 1.266	168.000, 1.296	168.000, 1.347	168.000, -0.002	168.000, -0.008	168.000, 0.019	168.000, 0.028	168.000, 0.021	168.000, 0.025	168.000, 0.049
842	168.200, 1.045	168.200, 1.202	168.200, 1.266	168.200, 1.295	168.200, 1.347	168.200, -0.002	168.200, -0.008	168.200, 0.020	168.200, 0.028	168.200, 0.021	168.200, 0.026	168.200, 0.049
843	168.400, 1.046	168.400, 1.202	168.400, 1.266	168.400, 1.295	168.400, 1.347	168.400, -0.002	168.400, -0.007	168.400, 0.020	168.400, 0.029	168.400, 0.021	168.400, 0.026	168.400, 0.049
844	168.600, 1.046	168.600, 1.202	168.600, 1.266	168.600, 1.295	168.600, 1.348	168.600, -0.001	168.600, -0.007	168.600, 0.021	168.600, 0.029	168.600, 0.021	168.600, 0.026	168.600, 0.049
845	168.800, 1.046	168.800, 1.202	168.800, 1.266	168.800, 1.296	168.800, 1.348	168.800, -0.001	168.800, -0.007	168.800, 0.021	168.800, 0.029	168.800, 0.021	168.800, 0.026	168.800, 0.049
846	169.000, 1.047	169.000, 1.202	169.000, 1.266	169.000, 1.296	169.000, 1.348	169.000, -0.001	169.000, -0.006	169.000, 0.021	169.000, 0.030	169.000, 0.021	169.000, 0.026	169.000, 0.049
847	169.200, 1.047	169.200, 1.202	169.200, 1.266	169.200, 1.296	169.200, 1.348	169.200, -0.001	169.200, -0.006	169.200, 0.022	169.200, 0.030	169.200, 0.021	169.200, 0.026	169.200, 0.050
848	169.400, 1.047	169.400, 1.202	169.400, 1.266	169.400, 1.296	169.400, 1.348	169.400, -0.000	169.400, -0.006	169.400, 0.022	169.400, 0.030	169.400, 0.021	169.400, 0.027	169.400, 0.050
849	169.600, 1.047	169.600, 1.202	169.600, 1.266	169.600, 1.296	169.600, 1.348	169.600, -0.000	169.600, -0.006	169.600, 0.022	169.600, 0.030	169.600, 0.021	169.600, 0.027	169.600, 0.050
850	169.800, 1.048	169.800, 1.202	169.800, 1.267	169.800, 1.296	169.800, 1.349	169.800, 0.000	169.800, -0.005	169.800, 0.023	169.800, 0.031	169.800, 0.022	169.800, 0.027	169.800, 0.050
851	170.000, 1.048	170.000, 1.202	170.000, 1.267	170.000, 1.296	170.000, 1.349	170.000, 0.000	170.000, -0.005	170.000, 0.023	170.000, 0.031	170.000, 0.022	170.000, 0.028	170.000, 0.050
852	170.200, 1.048	170.200, 1.202	170.200, 1.267	170.200, 1.296	170.200, 1.349	170.200, 0.001	170.200, -0.005	170.200, 0.023	170.200, 0.032	170.200, 0.023	170.200, 0.028	170.200, 0.051
853	170.400, 1.048	170.400, 1.202	170.400, 1.267	170.400, 1.296	170.400, 1.348	170.400, 0.001	170.400, -0.005	170.400, 0.023	170.400, 0.032	170.400, 0.024	170.400, 0.028	170.400, 0.051
854	170.600, 1.049	170.600, 1.202	170.600, 1.267	170.600, 1.297	170.600, 1.348	170.600, 0.001	170.600, -0.004	170.600, 0.023	170.600, 0.032	170.600, 0.024	170.600, 0.029	170.600, 0.051
855	170.800, 1.049	170.800, 1.202	170.800, 1.267	170.800, 1.297	170.800, 1.348	170.800, 0.001	170.800, -0.004	170.800, 0.024	170.800, 0.032	170.800, 0.024	170.800, 0.029	170.800, 0.051
856	171.000, 1.049	171.000, 1.202	171.000, 1.267	171.000, 1.297	171.000, 1.348	171.000, 0.001	171.000, -0.004	171.000, 0.024	171.000, 0.033	171.000, 0.024	171.000, 0.029	171.000, 0.051
857	171.200, 1.049	171.200, 1.203	171.200, 1.267	171.200, 1.297	171.200, 1.348	171.200, 0.000	171.200, -0.004	171.200, 0.024	171.200, 0.033	171.200, 0.024	171.200, 0.030	171.200, 0.052
858	171.400, 1.049	171.400, 1.203	171.400, 1.267	171.400, 1.297	171.400, 1.347	171.400, 0.000	171.400, -0.003	171.400, 0.024	171.400, 0.034	171.400, 0.025	171.400, 0.030	171.400, 0.052
859	171.600, 1.048	171.600, 1.203	171.600, 1.268	171.600, 1.297	171.600, 1.347	171.600, 0.000	171.600, -0.003	171.600, 0.025	171.600, 0.034	171.600, 0.025	171.600, 0.031	171.600, 0.053
860	171.800, 1.049	171.800, 1.204	171.800, 1.268	171.800, 1.298	171.800, 1.347	171.800, 0.000	171.800, -0.003	171.800, 0.025	171.800, 0.035	171.800, 0.025	171.800, 0.031	171.800, 0.053
861	172.000, 1.049	172.000, 1.204	172.000, 1.268	172.000, 1.298	172.000, 1.347	172.000, -0.000	172.000, -0.002	172.000, 0.025	172.000, 0.035	172.000, 0.025	172.000, 0.032	172.000, 0.053
862	172.200, 1.049	172.200, 1.204	172.200, 1.268	172.200, 1.298	172.200, 1.347	172.200, -0.000	172.200, -0.002	172.200, 0.025	172.200, 0.035	172.200, 0.025	172.200, 0.032	172.200, 0.054
863	172.400, 1.049	172.400, 1.204	172.400, 1.268	172.400, 1.298	172.400, 1.347	172.400, -0.000	172.400, -0.002	172.400, 0.026	172.400, 0.035	172.400, 0.025	172.400, 0.032	172.400, 0.054
864	172.600, 1.049	172.600, 1.205	172.600, 1.268	172.600, 1.298	172.600, 1.347	172.600, -0.000	172.600, -0.001	172.600, 0.026	172.600, 0.035	172.600, 0.025	172.600, 0.032	172.600, 0.054
865	172.800, 1.050	172.800, 1.205	172.800, 1.268	172.800, 1.297	172.800, 1.347	172.800, -0.000	172.800, -0.001	172.800, 0.026	172.800, 0.035	172.800, 0.025	172.800, 0.032	172.800, 0.054
866	173.000, 1.050	173.000, 1.205	173.000, 1.268	173.000, 1.297	173.000, 1.347	173.000, -0.000	173.000, -0.001	173.000, 0.026	173.000, 0.035	173.000, 0.025	173.000, 0.033	173.000, 0.054
867	173.200, 1.050	173.200, 1.205	173.200, 1.268	173.200, 1.297	173.200, 1.347	173.200, 0.000	173.200, -0.001	173.200, 0.026	173.200, 0.035	173.200, 0.025	173.200, 0.033	173.200, 0.055
868	173.400, 1.050	173.400, 1.205	173.400, 1.269	173.400, 1.297	173.400, 1.347	173.400, 0.000	173.400, -0.000	173.400, 0.026	173.400, 0.035	173.400, 0.026	173.400, 0.033	173.400, 0.055
869	173.600, 1.050	173.600, 1.205	173.600, 1.269	173.600, 1.297	173.600, 1.347	173.600, 0.001	173.600, -0.000	173.600, 0.027	173.600, 0.036	173.600, 0.026	173.600, 0.033	173.600, 0.055
870	173.800, 1.050	173.800, 1.205	173.800, 1.269	173.800, 1.297	173.800, 1.347	173.800, 0.001	173.800, 0.000	173.800, 0.027	173.800, 0.036	173.800, 0.027	173.800, 0.033	173.800, 0.055
871	174.000, 1.051	174.000, 1.205	174.000, 1.269	174.000, 1.297	174.000, 1.347	174.000, 0.002	174.000, 0.000	174.000, 0.027	174.000, 0.036	174.000, 0.027	174.000, 0.033	174.000, 0.056
872	174.200, 1.051	174.200, 1.205	174.200, 1.269	174.200, 1.297	174.200, 1.347	174.200, 0.002	174.200, 0.000	174.200, 0.027	174.200, 0.036	174.200, 0.028	174.200, 0.033	174.200, 0.056
873	174.400, 1.052	174.400, 1.205	174.400, 1.269	174.400, 1.297	174.400, 1.347	174.400, 0.003	174.400, 0.000	174.400, 0.027	174.400, 0.036	174.400, 0.028	174.400, 0.033	174.400, 0.056
874	174.600, 1.052	174.600, 1.205	174.600, 1.269	174.600, 1.297	174.600, 1.347	174.600, 0.003	174.600, 0.000	174.600, 0.027	174.600, 0.036	174.600, 0.028	174.600, 0.033	174.600, 0.057
875	174.800, 1.052	174.800, 1.205	174.800, 1.270	174.800, 1.298	174.800, 1.347	174.800, 0.004	174.800, 0.000	174.800, 0.027	174.800, 0.036	174.800, 0.028	174.800, 0.033	174.800, 0.057
876	175.000, 1.052	175.000, 1.206	175.000, 1.270	175.000, 1.298	175.000, 1.347	175.000, 0.004	175.000, 0.000	175.000, 0.027	175.000, 0.036	175.000, 0.028	175.000, 0.033	175.000, 0.057
877	175.200, 1.052	175.200, 1.206	175.200, 1.270	175.200, 1.298	175.200, 1.347	175.200, 0.005	175.200, 0.000	175.200, 0.027	175.200, 0.037	175.200, 0.029	175.200, 0.033	175.200, 0.057
878	175.400, 1.052	175.400, 1.206	175.400, 1.270	175.400, 1.298	175.400, 1.347	175.400, 0.005	175.400, 0.000	175.400, 0.027	175.400, 0.037	175.400, 0.029	175.400, 0.034	175.400, 0.057
879	175.600, 1.052	175.600, 1.206	175.600, 1.270	175.600, 1.298	175.600, 1.347	175.600, 0.005	175.600, 0.001	175.600, 0.027	175.600, 0.037	175.600, 0.029	175.600, 0.034	175.600, 0.058
880	175.800, 1.052	175.800, 1.206	175.800, 1.271	175.800, 1.298	175.800, 1.347	175.800, 0.005	175.800, 0.001	175.800, 0.028	175.800, 0.037	175.800, 0.029	175.800, 0.034	175.800, 0.058
881	176.000, 1.053	176.000, 1.206	176.000, 1.271	176.000, 1.298	176.000, 1.347	176.000, 0.005	176.000, 0.001	176.000, 0.028	176.000, 0.037	176.000, 0.030	176.000, 0.034	176.000, 0.059
882	176.200, 1.053	176.200, 1.206	176.200, 1.271	176.200, 1.298	176.200, 1.347	176.200, 0.005	176.200, 0.001	176.200, 0.028	176.200, 0.037	176.200, 0.030	176.200, 0.034	176.200, 0.059
883	176.400, 1.053	176.400, 1.206	176.400, 1.271	176.400, 1.298	176.400, 1.348	176.400, 0.005	176.400, 0.002	176.400, 0.028	176.400, 0.037	176.400, 0.030	176.400, 0.034	176.400, 0.059
884	176.600, 1.053	176.600, 1.206	176.600, 1.272	176.600, 1.298	176.600, 1.348	176.600, 0.005	176.600, 0.002	176.600, 0.029	176.600, 0.037	176.600, 0.030	176.600, 0.034	176.600, 0.059
885	176.800, 1.053	176.800, 1.206	176.800, 1.272	176.800, 1.298	176.800, 1.348	176.800, 0.004	176.800, 0.002	176.800, 0.029	176.800, 0.038	176.800, 0.031	176.800, 0.034	176.800, 0.059
886	177.000, 1.053	177.000, 1.207	177.000, 1.272	177.000, 1.298	177.000, 1.348	177.000, 0.004	177.000, 0.003	177.000, 0.029	177.000, 0.038	177.000, 0.031	177.000, 0.034	177.000, 0.059
887	177.200, 1.053	177.200, 1.207	177.200, 1.272	177.200, 1.298	177.200, 1.348	177.200, 0.004	177.200, 0.003	177.200, 0.030	177.200, 0.038	177.200, 0.031	177.200, 0.034	177.200, 0.059
888	177.400, 1.053	177.400, 1.207	177.400, 1.272	177.400, 1.298	177.400, 1.348	177.400, 0.004	177.400, 0.004	177.400, 0.030	177.400, 0.038	177.400, 0.031	177.400, 0.034	177.400, 0.059
889	177.600, 1.054	177.600, 1.207	177.600, 1.272	177.600, 1.298	177.600, 1.348	177.600, 0.004	177.600, 0.004	177.600, 0.030	177.600, 0.038	177.600, 0.032	177.600, 0.034	177.600, 0.058
890	177.800, 1.054	177.800, 1.207	177.800, 1.272	177.800, 1.299	177.800, 1.348	177.800, 0.004	177.800, 0.005	177.800, 0.031	177.800, 0.039	177.800, 0.032	177.800, 0.035	177.800, 0.058
891	178.000, 1.054	178.000, 1.207	178.000, 1.272	178.000, 1.299	178.000, 1.348	178.000, 0.005	178.000, 0.005	178.000, 0.031	178.000, 0.039	178.000, 0.032	178.000, 0.035	178.000, 0.058
892	178.200, 1.055	178.200, 1.207	178.200, 1.272	178.200, 1.299	178.200, 1.348	178.200, 0.005	178.200, 0.006	178.200, 0.031	178.200, 0.039	178.200, 0.031	178.200, 0.035	178.200, 0.057
893	178.400, 1.055	178.400, 1.207	178.400, 1.273	178.400, 1.299	178.400, 1.349	178.400, 0.005	178.400, 0.006	178.400, 0.031	178.400, 0.040	178.400, 0.031	178.400, 0.036	178.400, 0.057
894	178.600, 1.055	178.600, 1.207	178.600, 1.273	178.600, 1.299	178.600, 1.349	178.600, 0.005	178.600, 0.006	178.600, 0.031	178.600, 0.040	178.600, 0.031	178.600, 0.036	178.600, 0.057
895	178.800, 1.055	178.800, 1.207	178.800, 1.273	178.800, 1.299	178.800, 1.349	178.800, 0.006	178.800, 0.007	178.800, 0.031	178.800, 0.040	178.800, 0.031	178.800, 0.037	178.800, 0.057
896	179.000, 1.055	179.000, 1.207	179.000, 1.273	179.000, 1.300	179.000, 1.349	179.000, 0.006	179.000, 0.007	179.000, 0.031	179.000, 0.040	179.000, 0.031	179.000, 0.037	179.000, 0.057
897	179.200, 1.055	179.200, 1.207	179.200, 1.273	179.200, 1.300	179.200, 1.349	179.200, 0.006	179.200, 0.007	179.200, 0.031	179.200, 0.040	179.200, 0.031	179.200, 0.038	179.200, 0.057
898	179.400, 1.055	179.400, 1.207	179.400, 1.273	179.400, 1.300	179.400, 1.349	179.400, 0.006	179.400, 0.007	179.400, 0.031	179.400, 0.040	179.400, 0.031	179.400, 0.038	179.400, 0.057
899	179.600, 1.055	179.600, 1.207	179.600, 1.273	179.600, 1.300	179.600, 1.349	179.600, 0.006	179.600, 0.007	179.600, 0.031	179.600, 0.040	179.600, 0.031	179.600, 0.038	179.600, 0.058
900	179.800, 1.055	179.800, 1.207	179.800, 1.272	179.800, 1.300	179.800, 1.349	179.800, 0.006	179.800, 0.007	179.800, 0.031	179.800, 0.041	179.800, 0.032	179.800, 0.038	179.800, 0.058
901	180.000, 1.055	180.000, 1.207	180.000, 1.273	180.000, 1.299	180.000, 1.349	180.000, 0.006	180.000, 0.007	180.000, 0.031	180.000, 0.041	180.000, 0.032	180.000, 0.038	180.000, 0.058
902	180.200, 1.055	180.200, 1.207	180.200, 1.273	180.200, 1.299	180.200, 1.349	180.200, 0.007	180.200, 0.007	180.200, 0.031	180.200, 0.041	180.200, 0.032	180.200, 0.038	180.200, 0.059
903	180.400, 1.055	180.400, 1.208	180.400, 1.273	180.400, 1.299	180.400, 1.349	180.400, 0.007	180.400, 0.007	180.400, 0.031	180.400, 0.041	180.400, 0.032	180.400, 0.038	180.400, 0.059
904	180.600, 1.054	180.600, 1.208	180.600, 1.273	180.600, 1.299	180.600, 1.349	180.600, 0.007	180.600, 0.007	180.600, 0.031	180.600, 0.041	180.600, 0.032	180.600, 0.038	180.600, 0.059
905	180.800, 1.055	180.800, 1.208	180.800, 1.273	180.800, 1.299	180.800, 1.349	180.800, 0.007	180.800, 0.006	180.800, 0.031	180.800, 0.041	180.800, 0.032	180.800, 0.038	180.800, 0.059
906	181.000, 1.055	181.000, 1.209	181.000, 1.273	181.000, 1.299	181.000, 1.349	181.000, 0.007	181.000, 0.006	181.000, 0.032	181.000, 0.042	181.000, 0.033	181.000, 0.038	181.000, 0.059
907	181.200, 1.055	181.200, 1.209	181.200, 1.274	181.200, 1.299	181.200, 1.348	181.200, 0.007	181.200, 0.006	181.200, 0.032	181.200, 0.042	181.200, 0.033	181.200, 0.038	181.200, 0.059
908	181.400, 1.055	181.400, 1.210	181.400, 1.274	181.400, 1.299	181.400, 1.348	181.400, 0.007	181.400, 0.005	181.400, 0.032	181.400, 0.042	181.400, 0.033	181.400, 0.038	181.400, 0.059
909	181.600, 1.056	181.600, 1.210	181.600, 1.274	181.600, 1.299	181.600, 1.348	181.600, 0.007	181.600, 0.005	181.600, 0.032	181.600, 0.042	181.600, 0.033	181.600, 0.038	181.600, 0.059
910	181.800, 1.056	181.800, 1.210	181.800, 1.274	181.800, 1.299	181.800, 1.348	181.800, 0.007	181.800, 0.005	181.800, 0.033	181.800, 0.042	181.800, 0.033	181.800, 0.038	181.800, 0.060
911	182.000, 1.056	182.000, 1.211	182.000, 1.274	182.000, 1.299	182.000, 1.348	182.000, 0.007	182.000, 0.005	182.000, 0.033	182.000, 0.043	182.000, 0.033	182.000, 0.038	182.000, 0.060
912	182.200, 1.057	182.200, 1.211	182.200, 1.274	182.200, 1.299	182.200, 1.348	182.200, 0.007	182.200, 0.005	182.200, 0.033	182.200, 0.043	182.200, 0.033	182.200, 0.038	182.200, 0.060
913	182.400, 1.057	182.400, 1.211	182.400, 1.275	182.400, 1.299	182.400, 1.348	182.400, 0.007	182.400, 0.005	182.400, 0.033	182.400, 0.044	182.400, 0.033	182.400, 0.039	182.400, 0.060
914	182.600, 1.057	182.600, 1.211	182.600, 1.275	182.600, 1.299	182.600, 1.348	182.600, 0.006	182.600, 0.005	182.600, 0.033	182.600, 0.044	182.600, 0.034	182.600, 0.039	182.600, 0.061
915	182.800, 1.057	182.800, 1.211	182.800, 1.275	182.800, 1.300	182.800, 1.348	182.800, 0.006	182.800, 0.005	182.800, 0.033	182.800, 0.045	182.800, 0.034	182.800, 0.039	182.800, 0.061
916	183.000, 1.058	183.000, 1.211	183.000, 1.276	183.000, 1.300	183.000, 1.348	183.000, 0.006	183.000, 0.006	183.000, 0.033	183.000, 0.045	183.000, 0.034	183.000, 0.039	183.000, 0.062
917	183.200, 1.058	183.200, 1.210	183.200, 1.276	183.200, 1.300	183.200, 1.348	183.200, 0.006	183.200, 0.006	183.200, 0.033	183.200, 0.045	183.200, 0.034	183.200, 0.039	183.200, 0.062
918	183.400, 1.058	183.400, 1.210	183.400, 1.276	183.400, 1.300	183.400, 1.348	183.400, 0.007	183.400, 0.006	183.400, 0.033	183.400, 0.045	183.400, 0.034	183.400, 0.039	183.400, 0.062
919	183.600, 1.059	183.600, 1.210	183.600, 1.276	183.600, 1.300	183.600, 1.349	183.600, 0.007	183.600, 0.007	183.600, 0.034	183.600, 0.045	183.600, 0.035	183.600, 0.039	183.600, 0.063
920	183.800, 1.059	183.800, 1.210	183.800, 1.276	183.800, 1.301	183.800, 1.349	183.800, 0.008	183.800, 0.007	183.800, 0.034	183.800, 0.045	183.800, 0.035	183.800, 0.039	183.800, 0.063
921	184.000, 1.059	184.000, 1.210	184.000, 1.275	184.000, 1.300	184.000, 1.349	184.000, 0.008	184.000, 0.008	184.000, 0.034	184.000, 0.045	184.000, 0.035	184.000, 0.039	184.000, 0.063
922	184.200, 1.059	184.200, 1.210	184.200, 1.275	184.200, 1.300	184.200, 1.349	184.200, 0.008	184.200, 0.008	184.200, 0.034	184.200, 0.045	184.200, 0.035	184.200, 0.039	184.200, 0.063
923	184.400, 1.060	184.400, 1.210	184.400, 1.275	184.400, 1.300	184.400, 1.349	184.400, 0.009	184.400, 0.009	184.400, 0.034	184.400, 0.045	184.400, 0.035	184.400, 0.039	184.400, 0.063
924	184.600, 1.060	184.600, 1.210	184.600, 1.275	184.600, 1.300	184.600, 1.349	184.600, 0.009	184.600, 0.009	184.600, 0.034	184.600, 0.045	184.600, 0.036	184.600, 0.040	184.600, 0.063
925	184.800, 1.060	184.800, 1.210	184.800, 1.275	184.800, 1.301	184.800, 1.349	184.800, 0.009	184.800, 0.009	184.800, 0.034	184.800, 0.045	184.800, 0.036	184.800, 0.040	184.800, 0.063
926	185.000, 1.060	185.000, 1.210	185.000, 1.275	185.000, 1.301	185.000, 1.349	185.000, 0.009	185.000, 0.009	185.000, 0.034	185.000, 0.045	185.000, 0.036	185.000, 0.040	185.000, 0.063
927	185.200, 1.060	185.200, 1.210	185.200, 1.275	185.200, 1.301	185.200, 1.349	185.200, 0.009	185.200, 0.008	185.200, 0.034	185.200, 0.045	185.200, 0.036	185.200, 0.040	185.200, 0.063
928	185.400, 1.060	185.400, 1.210	185.400, 1.275	185.400, 1.301	185.400, 1.349	185.400, 0.009	185.400, 0.008	185.400, 0.034	185.400, 0.045	185.400, 0.036	185.400, 0.040	185.400, 0.062
929	185.600, 1.060	185.600, 1.210	185.600, 1.275	185.600, 1.301	185.600, 1.349	185.600, 0.009	185.600, 0.008	185.600, 0.034	185.600, 0.045	185.600, 0.036	185.600, 0.040	185.600, 0.062
930	185.800, 1.061	185.800, 1.211	185.800, 1.275	185.800, 1.301	185.800, 1.349	185.800, 0.009	185.800, 0.008	185.800, 0.034	185.800, 0.045	185.800, 0.036	185.800, 0.040	185.800, 0.062
931	186.000, 1.061	186.000, 1.211	186.000, 1.275	186.000, 1.301	186.000, 1.349	186.000, 0.009	186.000, 0.008	186.000, 0.034	186.000, 0.045	186.000, 0.036	186.000, 0.040	186.000, 0.062
932	186.200, 1.061	186.200, 1.211	186.200, 1.276	186.200, 1.301	186.200, 1.349	186.200, 0.009	186.200, 0.008	186.200, 0.034	186.200, 0.044	186.200, 0.037	186.200, 0.041	186.200, 0.062
933	186.400, 1.061	186.400, 1.211	186.400, 1.276	186.400, 1.301	186.400, 1.349	186.400, 0.009	186.400, 0.008	186.400, 0.034	186.400, 0.044	186.400, 0.037	186.400, 0.041	186.400, 0.061
934	186.600, 1.061	186.600, 1.211	186.600, 1.277	186.600, 1.301	186.600, 1.349	186.600, 0.008	186.600, 0.008	186.600, 0.035	186.600, 0.044	186.600, 0.037	186.600, 0.041	186.600, 0.061
935	186.800, 1.061	186.800, 1.211	186.800, 1.277	186.800, 1.301	186.800, 1.349	186.800, 0.008	186.800, 0.008	186.800, 0.035	186.800, 0.044	186.800, 0.037	186.800, 0.041	186.800, 0.061
936	187.000, 1.062	187.000, 1.211	187.000, 1.278	187.000, 1.301	187.000, 1.349	187.000, 0.008	187.000, 0.009	187.000, 0.035	187.000, 0.044	187.000, 0.037	187.000, 0.041	187.000, 0.062
937	187.200, 1.062	187.200, 1.211	187.200, 1.278	187.200, 1.302	187.200, 1.349	187.200, 0.008	187.200, 0.009	187.200, 0.035	187.200, 0.044	187.200, 0.037	187.200, 0.042	187.200, 0.062
938	187.400, 1.063	187.400, 1.212	187.400, 1.278	187.400, 1.302	187.400, 1.349	187.400, 0.008	187.400, 0.009	187.400, 0.035	187.400, 0.044	187.400, 0.037	187.400, 0.042	187.400, 0.062
939	187.600, 1.063	187.600, 1.212	187.600, 1.278	187.600, 1.302	187.600, 1.349	187.600, 0.008	187.600, 0.009	187.600, 0.036	187.600, 0.044	187.600, 0.037	187.600, 0.042	187.600, 0.062
940	187.800, 1.063	187.800, 1.212	187.800, 1.278	187.800, 1.302	187.800, 1.350	187.800, 0.009	187.800, 0.010	187.800, 0.036	187.800, 0.044	187.800, 0.037	187.800, 0.042	187.800, 0.063
941	188.000, 1.063	188.000, 1.212	188.000, 1.278	188.000, 1.302	188.000, 1.350	188.000, 0.008	188.000, 0.010	188.000, 0.036	188.000, 0.044	188.000, 0.037	188.000, 0.043	188.000, 0.063
942	188.200, 1.063	188.200, 1.212	188.200, 1.278	188.200, 1.302	188.200, 1.350	188.200, 0.009	188.200, 0.010	188.200, 0.036	188.200, 0.045	188.200, 0.037	188.200, 0.043	188.200, 0.063
943	188.400, 1.063	188.400, 1.212	188.400, 1.278	188.400, 1.302	188.400, 1.350	188.400, 0.009	188.400, 0.009	188.400, 0.036	188.400, 0.045	188.400, 0.037	188.400, 0.043	188.400, 0.063
944	188.600, 1.062	188.600, 1.212	188.600, 1.278	188.600, 1.302	188.600, 1.350	188.600, 0.008	188.600, 0.009	188.600, 0.036	188.600, 0.045	188.600, 0.037	188.600, 0.043	188.600, 0.063
945	188.800, 1.062	188.800, 1.212	188.800, 1.278	188.800, 1.302	188.800, 1.350	188.800, 0.008	188.800, 0.009	188.800, 0.036	188.800, 0.046	188.800, 0.037	188.800, 0.043	188.800, 0.063
946	189.000, 1.062	189.000, 1.213	189.000, 1.278	189.000, 1.302	189.000, 1.350	189.000, 0.008	189.000, 0.009	189.000, 0.036	189.000, 0.046	189.000, 0.037	189.000, 0.043	189.000, 0.064
947	189.200, 1.062	189.200, 1.213	189.200, 1.278	189.200, 1.301	189.200, 1.350	189.200, 0.008	189.200, 0.009	189.200, 0.036	189.200, 0.046	189.200, 0.036	189.200, 0.043	189.200, 0.064
948	189.400, 1.062	189.400, 1.213	189.400, 1.278	189.400, 1.301	189.400, 1.350	189.400, 0.008	189.400, 0.009	189.400, 0.036	189.400, 0.047	189.400, 0.036	189.400, 0.043	189.400, 0.064
949	189.600, 1.062	189.600, 1.213	189.600, 1.278	189.600, 1.301	189.600, 1.350	189.600, 0.008	189.600, 0.009	189.600, 0.036	189.600, 0.047	189.600, 0.036	189.600, 0.042	189.600, 0.064
950	189.800, 1.062	189.800, 1.214	189.800, 1.278	189.800, 1.301	189.800, 1.350	189.800, 0.008	189.800, 0.009	189.800, 0.036	189.800, 0.047	189.800, 0.036	189.800, 0.042	189.800, 0.064
951	190.000, 1.062	190.000, 1.214	190.000, 1.278	190.000, 1.301	190.000, 1.350	190.000, 0.008	190.000, 0.009	190.000, 0.036	190.000, 0.047	190.000, 0.036	190.000, 0.042	190.000, 0.064
952	190.200, 1.062	190.200, 1.214	190.200, 1.278	190.200, 1.302	190.200, 1.350	190.200, 0.008	190.200, 0.010	190.200, 0.036	190.200, 0.047	190.200, 0.036	190.200, 0.042	190.200, 0.064
953	190.400, 1.062	190.400, 1.214	190.400, 1.278	190.400, 1.302	190.400, 1.350	190.400, 0.009	190.400, 0.010	190.400, 0.036	190.400, 0.048	190.400, 0.036	190.400, 0.042	190.400, 0.064
954	190.600, 1.062	190.600, 1.213	190.600, 1.278	190.600, 1.303	190.600, 1.349	190.600, 0.009	190.600, 0.010	190.600, 0.036	190.600, 0.048	190.600, 0.036	190.600, 0.042	190.600, 0.065
955	190.800, 1.062	190.800, 1.213	190.800, 1.278	190.800, 1.303	190.800, 1.349	190.800, 0.009	190.800, 0.011	190.800, 0.036	190.800, 0.047	190.800, 0.036	190.800, 0.041	190.800, 0.065
956	191.000, 1.062	191.000, 1.213	191.000, 1.278	191.000, 1.304	191.000, 1.349	191.000, 0.010	191.000, 0.011	191.000, 0.036	191.000, 0.047	191.000, 0.036	191.000, 0.041	191.000, 0.065
957	191.200, 1.062	191.200, 1.213	191.200, 1.278	191.200, 1.304	191.200, 1.349	191.200, 0.010	191.200, 0.011	191.200, 0.036	191.200, 0.047	191.200, 0.036	191.200, 0.041	191.200, 0.065
958	191.400, 1.062	191.400, 1.213	191.400, 1.278	191.400, 1.304	191.400, 1.349	191.400, 0.010	191.400, 0.011	191.400, 0.035	191.400, 0.047	191.400, 0.036	191.400, 0.041	191.400, 0.065
959	191.600, 1.062	191.600, 1.213	191.600, 1.278	191.600, 1.304	191.600, 1.349	191.600, 0.010	191.600, 0.011	191.600, 0.035	191.600, 0.047	191.600, 0.036	191.600, 0.041	191.600, 0.065
960	191.800, 1.062	191.800, 1.213	191.800, 1.278	191.800, 1.304	191.800, 1.349	191.800, 0.010	191.800, 0.011	191.800, 0.035	191.800, 0.046	191.800, 0.036	191.800, 0.041	191.800, 0.065
961	192.000, 1.062	192.000, 1.213	192.000, 1.278	192.000, 1.304	192.000, 1.349	192.000, 0.010	192.000, 0.011	192.000, 0.035	192.000, 0.046	192.000, 0.037	192.000, 0.042	192.000, 0.065
962	192.200, 1.062	192.200, 1.213	192.200, 1.278	192.200, 1.303	192.200, 1.349	192.200, 0.010	192.200, 0.011	192.200, 0.035	192.200, 0.046	192.200, 0.037	192.200, 0.042	192.200, 0.065
963	192.400, 1.062	192.400, 1.213	192.400, 1.279	192.400, 1.303	192.400, 1.349	192.400, 0.010	192.400, 0.011	192.400, 0.035	192.400, 0.046	192.400, 0.037	192.400, 0.042	192.400, 0.065
964	192.600, 1.062	192.600, 1.213	192.600, 1.279	192.600, 1.303	192.600, 1.350	192.600, 0.010	192.600, 0.011	192.600, 0.035	192.600, 0.046	192.600, 0.037	192.600, 0.042	192.600, 0.065
965	192.800, 1.062	192.800, 1.213	192.800, 1.279	192.800, 1.302	192.800, 1.350	192.800, 0.010	192.800, 0.010	192.800, 0.035	192.800, 0.046	192.800, 0.038	192.800, 0.042	192.800, 0.065
966	193.000, 1.062	193.000, 1.213	193.000, 1.279	193.000, 1.302	193.000, 1.350	193.000, 0.010	193.000, 0.010	193.000, 0.035	193.000, 0.047	193.000, 0.038	193.000, 0.043	193.000, 0.065
967	193.200, 1.063	193.200, 1.213	193.200, 1.279	193.200, 1.302	193.200, 1.350	193.200, 0.009	193.200, 0.010	193.200, 0.035	193.200, 0.047	193.200, 0.038	193.200, 0.043	193.200, 0.065
968	193.400, 1.063	193.400, 1.213	193.400, 1.279	193.400, 1.301	193.400, 1.350	193.400, 0.009	193.400, 0.010	193.400, 0.035	193.400, 0.047	193.400, 0.039	193.400, 0.043	193.400, 0.065
969	193.600, 1.063	193.600, 1.213	193.600, 1.279	193.600, 1.301	193.600, 1.350	193.600, 0.009	193.600, 0.010	193.600, 0.036	193.600, 0.047	193.600, 0.039	193.600, 0.044	193.600, 0.065
970	193.800, 1.063	193.800, 1.214	193.800, 1.279	193.800, 1.302	193.800, 1.350	193.800, 0.009	193.800, 0.010	193.800, 0.036	193.800, 0.048	193.800, 0.039	193.800, 0.044	193.800, 0.065
971	194.000, 1.063	194.000, 1.214	194.000, 1.279	194.000, 1.302	194.000, 1.350	194.000, 0.010	194.000, 0.010	194.000, 0.036	194.000, 0.048	194.000, 0.039	194.000, 0.044	194.000, 0.065
972	194.200, 1.063	194.200, 1.214	194.200, 1.279	194.200, 1.302	194.200, 1.350	194.200, 0.010	194.200, 0.010	194.200, 0.036	194.200, 0.048	194.200, 0.039	194.200, 0.044	194.200, 0.065
973	194.400, 1.063	194.400, 1.214	194.400, 1.280	194.400, 1.303	194.400, 1.350	194.400, 0.010	194.400, 0.011	194.400, 0.036	194.400, 0.048	194.400, 0.039	194.400, 0.044	194.400, 0.065
974	194.600, 1.063	194.600, 1.214	194.600, 1.280	194.600, 1.303	194.600, 1.350	194.600, 0.010	194.600, 0.011	194.600, 0.035	194.600, 0.048	194.600, 0.039	194.600, 0.044	194.600, 0.066
975	194.800, 1.063	194.800, 1.214	194.800, 1.280	194.800, 1.303	194.800, 1.350	194.800, 0.010	194.800, 0.011	194.800, 0.035	194.800, 0.048	194.800, 0.039	194.800, 0.044	194.800, 0.066
976	195.000, 1.063	195.000, 1.214	195.000, 1.280	195.000, 1.303	195.000, 1.351	195.000, 0.010	195.000, 0.011	195.000, 0.035	195.000, 0.048	195.000, 0.039	195.000, 0.044	195.000, 0.065
977	195.200, 1.064	195.200, 1.215	195.200, 1.280	195.200, 1.303	195.200, 1.351	195.200, 0.010	195.200, 0.011	195.200, 0.036	195.200, 0.048	195.200, 0.039	195.200, 0.044	195.200, 0.065
978	195.400, 1.064	195.400, 1.215	195.400, 1.280	195.400, 1.304	195.400, 1.351	195.400, 0.010	195.400, 0.011	195.400, 0.036	195.400, 0.048	195.400, 0.039	195.400, 0.044	195.400, 0.065
979	195.600, 1.064	195.600, 1.215	195.600, 1.280	195.600, 1.304	195.600, 1.351	195.600, 0.010	195.600, 0.011	195.600, 0.036	195.600, 0.048	195.600, 0.039	195.600, 0.044	195.600, 0.065
980	195.800, 1.064	195.800, 1.215	195.800, 1.280	195.800, 1.304	195.800, 1.351	195.800, 0.009	195.800, 0.011	195.800, 0.036	195.800, 0.048	195.800, 0.039	195.800, 0.044	195.800, 0.065
981	196.000, 1.064	196.000, 1.215	196.000, 1.280	196.000, 1.304	196.000, 1.351	196.000, 0.009	196.000, 0.011	196.000, 0.037	196.000, 0.048	196.000, 0.039	196.000, 0.044	196.000, 0.065
982	196.200, 1.064	196.200, 1.215	196.200, 1.281	196.200, 1.304	196.200, 1.351	196.200, 0.009	196.200, 0.011	196.200, 0.037	196.200, 0.048	196.200, 0.039	196.200, 0.044	196.200, 0.065
983	196.400, 1.064	196.400, 1.215	196.400, 1.281	196.400, 1.303	196.400, 1.351	196.400, 0.009	196.400, 0.011	196.400, 0.037	196.400, 0.048	196.400, 0.039	196.400, 0.044	196.400, 0.065
984	196.600, 1.065	196.600, 1.215	196.600, 1.281	196.600, 1.303	196.600, 1.351	196.600, 0.009	196.600, 0.011	196.600, 0.037	196.600, 0.048	196.600, 0.039	196.600, 0.044	196.600, 0.065
985	196.800, 1.065	196.800, 1.215	196.800, 1.281	196.800, 1.303	196.800, 1.351	196.800, 0.009	196.800, 0.010	196.800, 0.037	196.800, 0.048	196.800, 0.039	196.800, 0.044	196.800, 0.065
986	197.000, 1.065	197.000, 1.214	197.000, 1.281	197.000, 1.302	197.000, 1.351	197.000, 0.009	197.000, 0.010	197.000, 0.037	197.000, 0.048	197.000, 0.039	197.000, 0.044	197.000, 0.065
987	197.200, 1.065	197.200, 1.214	197.200, 1.281	197.200, 1.302	197.200, 1.351	197.200, 0.009	197.200, 0.010	197.200, 0.037	197.200, 0.049	197.200, 0.039	197.200, 0.044	197.200, 0.065
988	197.400, 1.065	197.400, 1.214	197.400, 1.281	197.400, 1.302	197.400, 1.351	197.400, 0.009	197.400, 0.011	197.400, 0.037	197.400, 0.049	197.400, 0.039	197.400, 0.044	197.400, 0.065
989	197.600, 1.065	197.600, 1.214	197.600, 1.281	197.600, 1.302	197.600, 1.351	197.600, 0.009	197.600, 0.011	197.600, 0.037	197.600, 0.049	197.600, 0.039	197.600, 0.044	197.600, 0.065
990	197.800, 1.065	197.800, 1.214	197.800, 1.281	197.800, 1.303	197.800, 1.351	197.800, 0.009	197.800, 0.011	197.800, 0.037	197.800, 0.049	197.800, 0.039	197.800, 0.044	197.800, 0.065
991	198.000, 1.066	198.000, 1.214	198.000, 1.282	198.000, 1.303	198.000, 1.351	198.000, 0.009	198.000, 0.012	198.000, 0.037	198.000, 0.049	198.000, 0.039	198.000, 0.044	198.000, 0.066
992	198.200, 1.066	198.200, 1.215	198.200, 1.282	198.200, 1.304	198.200, 1.351	198.200, 0.009	198.200, 0.012	198.200, 0.037	198.200, 0.049	198.200, 0.038	198.200, 0.044	198.200, 0.066
993	198.400, 1.066	198.400, 1.215	198.400, 1.282	198.400, 1.304	198.400, 1.351	198.400, 0.010	198.400, 0.012	198.400, 0.036	198.400, 0.049	198.400, 0.038	198.400, 0.045	198.400, 0.066
994	198.600, 1.066	198.600, 1.216	198.600, 1.282	198.600, 1.304	198.600, 1.351	198.600, 0.010	198.600, 0.013	198.600, 0.036	198.600, 0.050	198.600, 0.038	198.600, 0.045	198.600, 0.066
995	198.800, 1.065	198.800, 1.216	198.800, 1.283	198.800, 1.305	198.800, 1.351	198.800, 0.010	198.800, 0.013	198.800, 0.036	198.800, 0.050	198.800, 0.038	198.800, 0.045	198.800, 0.066
996	199.000, 1.065	199.000, 1.216	199.000, 1.283	199.000, 1.305	199.000, 1.351	199.000, 0.011	199.000, 0.013	199.000, 0.036	199.000, 0.050	199.000, 0.038	199.000, 0.046	199.000, 0.066
997	199.200, 1.065	199.200, 1.217	199.200, 1.283	199.200, 1.305	199.200, 1.351	199.200, 0.011	199.200, 0.013	199.200, 0.036	199.200, 0.050	199.200, 0.038	199.200, 0.046	199.200, 0.066
998	199.400, 1.065	199.400, 1.217	199.400, 1.283	199.400, 1.305	199.400, 1.351	199.400, 0.011	199.400, 0.013	199.400, 0.036	199.400, 0.050	199.400, 0.038	199.400, 0.046	199.400, 0.066
999	199.600, 1.065	199.600, 1.216	199.600, 1.283	199.600, 1.305	199.600, 1.350	199.600, 0.012	199.600, 0.012	199.600, 0.037	199.600, 0.050	199.600, 0.039	199.600, 0.046	199.600, 0.066
1000	199.800, 1.065	199.800, 1.217	199.800, 1.283	199.800, 1.305	199.800, 1.350	199.800, 0.012	199.800, 0.012	199.800, 0.037	199.800, 0.050	199.800, 0.039	199.800, 0.046	199.800, 0.066
1001	200.000, 1.066	200.000, 1.217	200.000, 1.283	200.000, 1.305	200.000, 1.350	200.000, 0.012	200.000, 0.012	200.000, 0.037	200.000, 0.050	200.000, 0.040	200.000, 0.046	200.000, 0.066
1002	200.200, 1.066	200.200, 1.217	200.200, 1.284	200.200, 1.305	200.200, 1.350	200.200, 0.012	200.200, 0.011	200.200, 0.037	200.200, 0.049	200.200, 0.040	200.200, 0.046	200.200, 0.066
1003	200.400, 1.066	200.400, 1.217	200.400, 1.284	200.400, 1.305	200.400, 1.350	200.400, 0.012	200.400, 0.011	200.400, 0.037	200.400, 0.049	200.400, 0.041	200.400, 0.045	200.400, 0.066
1004	200.600, 1.066	200.600, 1.216	200.600, 1.284	200.600, 1.305	200.600, 1.350	200.600, 0.012	200.600, 0.011	200.600, 0.037	200.600, 0.049	200.600, 0.041	200.600, 0.045	200.600, 0.066
1005	200.800, 1.067	200.800, 1.216	200.800, 1.284	200.800, 1.305	200.800, 1.350	200.800, 0.012	200.800, 0.011	200.800, 0.037	200.800, 0.049	200.800, 0.041	200.800, 0.044	200.800, 0.066
1006	201.000, 1.067	201.000, 1.216	201.000, 1.284	201.000, 1.304	201.000, 1.350	201.000, 0.012	201.000, 0.011	201.000, 0.038	201.000, 0.049	201.000, 0.040	201.000, 0.044	201.000, 0.066
1007	201.200, 1.067	201.200, 1.216	201.200, 1.284	201.200, 1.304	201.200, 1.351	201.200, 0.012	201.200, 0.011	201.200, 0.038	201.200, 0.049	201.200, 0.040	201.200, 0.044	201.200, 0.065
1008	201.400, 1.067	201.400, 1.216	201.400, 1.284	201.400, 1.304	201.400, 1.351	201.400, 0.012	201.400, 0.011	201.400, 0.038	201.400, 0.049	201.400, 0.040	201.400, 0.043	201.400, 0.065
1009	201.600, 1.068	201.600, 1.216	201.600, 1.284	201.600, 1.304	201.600, 1.351	201.600, 0.012	201.600, 0.012	201.600, 0.038	201.600, 0.048	201.600, 0.040	201.600, 0.043	201.600, 0.065
1010	201.800, 1.068	201.800, 1.216	201.800, 1.284	201.800, 1.305	201.800, 1.351	201.800, 0.012	201.800, 0.012	201.800, 0.038	201.800, 0.048	201.800, 0.040	201.800, 0.044	201.800, 0.065
1011	202.000, 1.068	202.000, 1.216	202.000, 1.283	202.000, 1.305	202.000, 1.351	202.000, 0.012	202.000, 0.012	202.000, 0.037	202.000, 0.048	202.000, 0.040	202.000, 0.044	202.000, 0.065
1012	202.200, 1.068	202.200, 1.216	202.200, 1.283	202.200, 1.305	202.200, 1.351	202.200, 0.012	202.200, 0.012	202.200, 0.037	202.200, 0.048	202.200, 0.040	202.200, 0.044	202.200, 0.065
1013	202.400, 1.068	202.400, 1.217	202.400, 1.283	202.400, 1.305	202.400, 1.351	202.400, 0.012	202.400, 0.013	202.400, 0.037	202.400, 0.048	202.400, 0.040	202.400, 0.045	202.400, 0.065
1014	202.600, 1.068	202.600, 1.217	202.600, 1.283	202.600, 1.305	202.600, 1.351	202.600, 0.012	202.600, 0.013	202.600, 0.037	202.600, 0.048	202.600, 0.040	202.600, 0.045	202.600, 0.066
1015	202.800, 1.068	202.800, 1.217	202.800, 1.283	202.800, 1.305	202.800, 1.351	202.800, 0.012	202.800, 0.013	202.800, 0.037	202.800, 0.048	202.800, 0.039	202.800, 0.045	202.800, 0.066
1016	203.000, 1.068	203.000, 1.218	203.000, 1.283	203.000, 1.305	203.000, 1.351	203.000, 0.012	203.000, 0.013	203.000, 0.038	203.000, 0.048	203.000, 0.039	203.000, 0.045	203.000, 0.066
1017	203.200, 1.068	203.200, 1.218	203.200, 1.283	203.200, 1.305	203.200, 1.352	203.200, 0.012	203.200, 0.013	203.200, 0.038	203.200, 0.049	203.200, 0.039	203.200, 0.045	203.200, 0.066
1018	203.400, 1.068	203.400, 1.218	203.400, 1.283	203.400, 1.305	203.400, 1.352	203.400, 0.011	203.400, 0.014	203.400, 0.038	203.400, 0.049	203.400, 0.039	203.400, 0.046	203.400, 0.067
1019	203.600, 1.068	203.600, 1.218	203.600, 1.283	203.600, 1.304	203.600, 1.352	203.600, 0.011	203.600, 0.014	203.600, 0.039	203.600, 0.049	203.600, 0.039	203.600, 0.046	203.600, 0.067
1020	203.800, 1.068	203.800, 1.218	203.800, 1.283	203.800, 1.304	203.800, 1.352	203.800, 0.011	203.800, 0.014	203.800, 0.039	203.800, 0.049	203.800, 0.039	203.800, 0.046	203.800, 0.067
1021	204.000, 1.068	204.000, 1.219	204.000, 1.282	204.000, 1.304	204.000, 1.352	204.000, 0.011	204.000, 0.014	204.000, 0.039	204.000, 0.049	204.000, 0.040	204.000, 0.046	204.000, 0.067
1022	204.200, 1.067	204.200, 1.219	204.200, 1.282	204.200, 1.304	204.200, 1.353	204.200, 0.011	204.200, 0.014	204.200, 0.040	204.200, 0.049	204.200, 0.040	204.200, 0.047	204.200, 0.066
1023	204.400, 1.067	204.400, 1.219	204.400, 1.282	204.400, 1.304	204.400, 1.353	204.400, 0.011	204.400, 0.014	204.400, 0.040	204.400, 0.049	204.400, 0.040	204.400, 0.047	204.400, 0.066
1024	204.600, 1.067	204.600, 1.219	204.600, 1.282	204.600, 1.304	204.600, 1.353	204.600, 0.011	204.600, 0.014	204.600, 0.040	204.600, 0.049	204.600, 0.040	204.600, 0.046	204.600, 0.066
1025	204.800, 1.067	204.800, 1.219	204.800, 1.282	204.800, 1.304	204.800, 1.353	204.800, 0.011	204.800, 0.014	204.800, 0.040	204.800, 0.050	204.800, 0.040	204.800, 0.046	204.800, 0.066
1026	205.000, 1.067	205.000, 1.218	205.000, 1.282	205.000, 1.304	205.000, 1.354	205.000, 0.011	205.000, 0.014	205.000, 0.040	205.000, 0.050	205.000, 0.040	205.000, 0.046	205.000, 0.066
1027	205.200, 1.067	205.200, 1.218	205.200, 1.283	205.200, 1.304	205.200, 1.354	205.200, 0.011	205.200, 0.014	205.200, 0.040	205.200, 0.050	205.200, 0.040	205.200, 0.046	205.200, 0.066
1028	205.400, 1.067	205.400, 1.218	205.400, 1.283	205.400, 1.305	205.400, 1.354	205.400, 0.011	205.400, 0.014	205.400, 0.039	205.400, 0.050	205.400, 0.041	205.400, 0.046	205.400, 0.065
1029	205.600, 1.067	205.600, 1.218	205.600, 1.283	205.600, 1.305	205.600, 1.354	205.600, 0.012	205.600, 0.014	205.600, 0.039	205.600, 0.050	205.600, 0.041	205.600, 0.046	205.600, 0.065
1030	205.800, 1.067	205.800, 1.218	205.800, 1.283	205.800, 1.305	205.800, 1.354	205.800, 0.012	205.800, 0.014	205.800, 0.039	205.800, 0.050	205.800, 0.041	205.800, 0.046	205.800, 0.065
1031	206.000, 1.068	206.000, 1.218	206.000, 1.283	206.000, 1.306	206.000, 1.354	206.000, 0.012	206.000, 0.014	206.000, 0.038	206.000, 0.050	206.000, 0.041	206.000, 0.046	206.000, 0.065
1032	206.200, 1.068	206.200, 1.219	206.200, 1.283	206.200, 1.306	206.200, 1.354	206.200, 0.012	206.200, 0.014	206.200, 0.038	206.200, 0.050	206.200, 0.042	206.200, 0.046	206.200, 0.065
1033	206.400, 1.068	206.400, 1.219	206.400, 1.283	206.400, 1.306	206.400, 1.354	206.400, 0.012	206.400, 0.014	206.400, 0.038	206.400, 0.050	206.400, 0.042	206.400, 0.046	206.400, 0.065
1034	206.600, 1.068	206.600, 1.219	206.600, 1.283	206.600, 1.306	206.600, 1.354	206.600, 0.012	206.600, 0.014	206.600, 0.038	206.600, 0.050	206.600, 0.042	206.600, 0.046	206.600, 0.066
1035	206.800, 1.068	206.800, 1.219	206.800, 1.283	206.800, 1.306	206.800, 1.353	206.800, 0.012	206.800, 0.014	206.800, 0.037	206.800, 0.050	206.800, 0.042	206.800, 0.046	206.800, 0.066
1036	207.000, 1.068	207.000, 1.220	207.000, 1.283	207.000, 1.306	207.000, 1.353	207.000, 0.012	207.000, 0.014	207.000, 0.037	207.000, 0.050	207.000, 0.042	207.000, 0.046	207.000, 0.066
1037	207.200, 1.068	207.200, 1.220	207.200, 1.283	207.200, 1.306	207.200, 1.353	207.200, 0.012	207.200, 0.014	207.200, 0.038	207.200, 0.050	207.200, 0.042	207.200, 0.046	207.200, 0.066
1038	207.400, 1.069	207.400, 1.220	207.400, 1.283	207.400, 1.306	207.400, 1.352	207.400, 0.012	207.400, 0.014	207.400, 0.038	207.400, 0.050	207.400, 0.042	207.400, 0.047	207.400, 0.067
1039	207.600, 1.069	207.600, 1.220	207.600, 1.283	207.600, 1.306	207.600, 1.352	207.600, 0.012	207.600, 0.014	207.600, 0.038	207.600, 0.050	207.600, 0.042	207.600, 0.047	207.600, 0.067
1040	207.800, 1.069	207.800, 1.220	207.800, 1.283	207.800, 1.306	207.800, 1.352	207.800, 0.012	207.800, 0.014	207.800, 0.038	207.800, 0.050	207.800, 0.042	207.800, 0.047	207.800, 0.067
1041	208.000, 1.069	208.000, 1.220	208.000, 1.283	208.000, 1.306	208.000, 1.352	208.000, 0.011	208.000, 0.014	208.000, 0.039	208.000, 0.050	208.000, 0.042	208.000, 0.047	208.000, 0.067
1042	208.200, 1.069	208.200, 1.220	208.200, 1.283	208.200, 1.306	208.200, 1.352	208.200, 0.011	208.200, 0.014	208.200, 0.039	208.200, 0.050	208.200, 0.041	208.200, 0.047	208.200, 0.067
1043	208.400, 1.069	208.400, 1.220	208.400, 1.284	208.400, 1.306	208.400, 1.352	208.400, 0.011	208.400, 0.014	208.400, 0.039	208.400, 0.050	208.400, 0.041	208.400, 0.047	208.400, 0.067
1044	208.600, 1.069	208.600, 1.220	208.600, 1.284	208.600, 1.306	208.600, 1.352	208.600, 0.011	208.600, 0.014	208.600, 0.039	208.600, 0.050	208.600, 0.041	208.600, 0.047	208.600, 0.067
1045	208.800, 1.069	208.800, 1.220	208.800, 1.284	208.800, 1.306	208.800, 1.352	208.800, 0.011	208.800, 0.014	208.800, 0.039	208.800, 0.050	208.800, 0.041	208.800, 0.047	208.800, 0.067
1046	209.000, 1.069	209.000, 1.220	209.000, 1.284	209.000, 1.306	209.000, 1.352	209.000, 0.011	209.000, 0.014	209.000, 0.039	209.000, 0.050	209.000, 0.041	209.000, 0.047	209.000, 0.067
1047	209.200, 1.069	209.200, 1.220	209.200, 1.284	209.200, 1.305	209.200, 1.352	209.200, 0.011	209.200, 0.013	209.200, 0.039	209.200, 0.050	209.200, 0.041	209.200, 0.047	209.200, 0.067
1048	209.400, 1.069	209.400, 1.220	209.400, 1.284	209.400, 1.305	209.400, 1.352	209.400, 0.012	209.400, 0.013	209.400, 0.039	209.400, 0.050	209.400, 0.041	209.400, 0.047	209.400, 0.067
1049	209.600, 1.069	209.600, 1.220	209.600, 1.284	209.600, 1.305	209.600, 1.352	209.600, 0.012	209.600, 0.013	209.600, 0.039	209.600, 0.050	209.600, 0.041	209.600, 0.046	209.600, 0.067
1050	209.800, 1.069	209.800, 1.220	209.800, 1.284	209.800, 1.305	209.800, 1.352	209.800, 0.012	209.800, 0.013	209.800, 0.039	209.800, 0.050	209.800, 0.041	209.800, 0.046	209.800, 0.067
1051	210.000, 1.069	210.000, 1.220	210.000, 1.284	210.000, 1.305	210.000, 1.352	210.000, 0.012	210.000, 0.013	210.000, 0.039	210.000, 0.050	210.000, 0.040	210.000, 0.046	210.000, 0.067
1052	210.200, 1.068	210.200, 1.220	210.200, 1.285	210.200, 1.305	210.200, 1.352	210.200, 0.012	210.200, 0.013	210.200, 0.038	210.200, 0.050	210.200, 0.040	210.200, 0.046	210.200, 0.067
1053	210.400, 1.068	210.400, 1.220	210.400, 1.285	210.400, 1.305	210.400, 1.352	210.400, 0.013	210.400, 0.013	210.400, 0.038	210.400, 0.050	210.400, 0.040	210.400, 0.046	210.400, 0.067
1054	210.600, 1.068	210.600, 1.220	210.600, 1.285	210.600, 1.305	210.600, 1.352	210.600, 0.013	210.600, 0.013	210.600, 0.038	210.600, 0.051	210.600, 0.040	210.600, 0.047	210.600, 0.067
1055	210.800, 1.068	210.800, 1.220	210.800, 1.285	210.800, 1.305	210.800, 1.352	210.800, 0.013	210.800, 0.014	210.800, 0.038	210.800, 0.051	210.800, 0.040	210.800, 0.047	210.800, 0.067
1056	211.000, 1.068	211.000, 1.220	211.000, 1.285	211.000, 1.305	211.000, 1.352	211.000, 0.013	211.000, 0.014	211.000, 0.038	211.000, 0.051	211.000, 0.040	211.000, 0.047	211.000, 0.067
1057	211.200, 1.068	211.200, 1.220	211.200, 1.285	211.200, 1.305	211.200, 1.352	211.200, 0.013	211.200, 0.015	211.200, 0.038	211.200, 0.051	211.200, 0.041	211.200, 0.047	211.200, 0.066
1058	211.400, 1.068	211.400, 1.220	211.400, 1.285	211.400, 1.306	211.400, 1.352	211.400, 0.013	211.400, 0.015	211.400, 0.038	211.400, 0.051	211.400, 0.041	211.400, 0.048	211.400, 0.066
1059	211.600, 1.068	211.600, 1.219	211.600, 1.285	211.600, 1.306	211.600, 1.352	211.600, 0.013	211.600, 0.016	211.600, 0.038	211.600, 0.051	211.600, 0.041	211.600, 0.048	211.600, 0.066
1060	211.800, 1.068	211.800, 1.219	211.800, 1.285	211.800, 1.306	211.800, 1.352	211.800, 0.013	211.800, 0.016	211.800, 0.038	211.800, 0.051	211.800, 0.041	211.800, 0.048	211.800, 0.066
1061	212.000, 1.068	212.000, 1.219	212.000, 1.285	212.000, 1.306	212.000, 1.352	212.000, 0.013	212.000, 0.016	212.000, 0.038	212.000, 0.051	212.000, 0.041	212.000, 0.048	212.000, 0.066
1062	212.200, 1.068	212.200, 1.219	212.200, 1.285	212.200, 1.306	212.200, 1.352	212.200, 0.014	212.200, 0.016	212.200, 0.039	212.200, 0.051	212.200, 0.042	212.200, 0.048	212.200, 0.066
1063	212.400, 1.068	212.400, 1.219	212.400, 1.285	212.400, 1.306	212.400, 1.353	212.400, 0.013	212.400, 0.016	212.400, 0.039	212.400, 0.050	212.400, 0.042	212.400, 0.048	212.400, 0.066
1064	212.600, 1.068	212.600, 1.219	212.600, 1.285	212.600, 1.306	212.600, 1.353	212.600, 0.013	212.600, 0.016	212.600, 0.039	212.600, 0.050	212.600, 0.042	212.600, 0.048	212.600, 0.066
1065	212.800, 1.068	212.800, 1.219	212.800, 1.285	212.800, 1.306	212.800, 1.353	212.800, 0.013	212.800, 0.016	212.800, 0.039	212.800, 0.050	212.800, 0.042	212.800, 0.047	212.800, 0.066
1066	213.000, 1.068	213.000, 1.219	213.000, 1.285	213.000, 1.306	213.000, 1.353	213.000, 0.013	213.000, 0.015	213.000, 0.039	213.000, 0.050	213.000, 0.042	213.000, 0.047	213.000, 0.066
1067	213.200, 1.069	213.200, 1.218	213.200, 1.285	213.200, 1.306	213.200, 1.353	213.200, 0.013	213.200, 0.015	213.200, 0.039	213.200, 0.050	213.200, 0.042	213.200, 0.047	213.200, 0.066
1068	213.400, 1.069	213.400, 1.218	213.400, 1.285	213.400, 1.306	213.400, 1.353	213.400, 0.013	213.400, 0.014	213.400, 0.039	213.400, 0.050	213.400, 0.042	213.400, 0.046	213.400, 0.066
1069	213.600, 1.069	213.600, 1.218	213.600, 1.285	213.600, 1.306	213.600, 1.353	213.600, 0.013	213.600, 0.013	213.600, 0.040	213.600, 0.050	213.600, 0.042	213.600, 0.046	213.600, 0.066
1070	213.800, 1.069	213.800, 1.218	213.800, 1.285	213.800, 1.306	213.800, 1.353	213.800, 0.013	213.800, 0.013	213.800, 0.040	213.800, 0.050	213.800, 0.042	213.800, 0.046	213.800, 0.066
1071	214.000, 1.069	214.000, 1.219	214.000, 1.285	214.000, 1.306	214.000, 1.353	214.000, 0.013	214.000, 0.012	214.000, 0.040	214.000, 0.050	214.000, 0.042	214.000, 0.046	214.000, 0.066
1072	214.200, 1.070	214.200, 1.219	214.200, 1.285	214.200, 1.306	214.200, 1.353	214.200, 0.013	214.200, 0.012	214.200, 0.040	214.200, 0.050	214.200, 0.041	214.200, 0.046	214.200, 0.066
1073	214.400, 1.070	214.400, 1.219	214.400, 1.286	214.400, 1.306	214.400, 1.353	214.400, 0.013	214.400, 0.012	214.400, 0.040	214.400, 0.050	214.400, 0.041	214.400, 0.047	214.400, 0.067
1074	214.600, 1.070	214.600, 1.219	214.600, 1.286	214.600, 1.306	214.600, 1.352	214.600, 0.013	214.600, 0.012	214.600, 0.040	214.600, 0.050	214.600, 0.042	214.600, 0.047	214.600, 0.067
1075	214.800, 1.070	214.800, 1.219	214.800, 1.286	214.800, 1.307	214.800, 1.352	214.800, 0.013	214.800, 0.012	214.800, 0.040	214.800, 0.050	214.800, 0.041	214.800, 0.047	214.800, 0.067
1076	215.000, 1.069	215.000, 1.219	215.000, 1.286	215.000, 1.307	215.000, 1.352	215.000, 0.013	215.000, 0.013	215.000, 0.040	215.000, 0.050	215.000, 0.041	215.000, 0.047	215.000, 0.067
1077	215.200, 1.069	215.200, 1.219	215.200, 1.286	215.200, 1.307	215.200, 1.352	215.200, 0.013	215.200, 0.013	215.200, 0.039	215.200, 0.050	215.200, 0.041	215.200, 0.047	215.200, 0.067
1078	215.400, 1.069	215.400, 1.219	215.400, 1.286	215.400, 1.307	215.400, 1.352	215.400, 0.013	215.400, 0.013	215.400, 0.039	215.400, 0.051	215.400, 0.041	215.400, 0.048	215.400, 0.067
1079	215.600, 1.069	215.600, 1.219	215.600, 1.286	215.600, 1.307	215.600, 1.352	215.600, 0.013	215.600, 0.014	215.600, 0.039	215.600, 0.051	215.600, 0.040	215.600, 0.048	215.600, 0.067
1080	215.800, 1.069	215.800, 1.219	215.800, 1.287	215.800, 1.307	215.800, 1.352	215.800, 0.013	215.800, 0.014	215.800, 0.039	215.800, 0.051	215.800, 0.040	215.800, 0.048	215.800, 0.067
1081	216.000, 1.069	216.000, 1.219	216.000, 1.287	216.000, 1.307	216.000, 1.352	216.000, 0.013	216.000, 0.014	216.000, 0.039	216.000, 0.051	216.000, 0.040	216.000, 0.048	216.000, 0.067
1082	216.200, 1.069	216.200, 1.219	216.200, 1.287	216.200, 1.307	216.200, 1.352	216.200, 0.013	216.200, 0.014	216.200, 0.039	216.200, 0.051	216.200, 0.040	216.200, 0.048	216.200, 0.067
1083	216.400, 1.069	216.400, 1.219	216.400, 1.287	216.400, 1.307	216.400, 1.352	216.400, 0.013	216.400, 0.015	216.400, 0.039	216.400, 0.051	216.400, 0.040	216.400, 0.047	216.400, 0.066
1084	216.600, 1.069	216.600, 1.219	216.600, 1.287	216.600, 1.307	216.600, 1.352	216.600, 0.013	216.600, 0.015	216.600, 0.039	216.600, 0.051	216.600, 0.040	216.600, 0.047	216.600, 0.066
1085	216.800, 1.069	216.800, 1.218	216.800, 1.287	216.800, 1.307	216.800, 1.353	216.800, 0.013	216.800, 0.015	216.800, 0.039	216.800, 0.051	216.800, 0.040	216.800, 0.047	216.800, 0.066
1086	217.000, 1.069	217.000, 1.218	217.000, 1.287	217.000, 1.306	217.000, 1.353	217.000, 0.013	217.000, 0.014	217.000, 0.039	217.000, 0.051	217.000, 0.040	217.000, 0.047	217.000, 0.066
1087	217.200, 1.069	217.200, 1.218	217.200, 1.287	217.200, 1.306	217.200, 1.353	217.200, 0.013	217.200, 0.014	217.200, 0.039	217.200, 0.050	217.200, 0.040	217.200, 0.047	217.200, 0.066
1088	217.400, 1.069	217.400, 1.218	217.400, 1.287	217.400, 1.306	217.400, 1.353	217.400, 0.014	217.400, 0.014	217.400, 0.039	217.400, 0.050	217.400, 0.040	217.400, 0.047	217.400, 0.066
1089	217.600, 1.069	217.600, 1.218	217.600, 1.286	217.600, 1.306	217.600, 1.353	217.600, 0.013	217.600, 0.014	217.600, 0.039	217.600, 0.050	217.600, 0.040	217.600, 0.046	217.600, 0.067
1090	217.800, 1.069	217.800, 1.218	217.800, 1.286	217.800, 1.306	217.800, 1.353	217.800, 0.014	217.800, 0.014	217.800, 0.039	217.800, 0.050	217.800, 0.041	217.800, 0.046	217.800, 0.067
1091	218.000, 1.069	218.000, 1.219	218.000, 1.286	218.000, 1.306	218.000, 1.353	218.000, 0.014	218.000, 0.014	218.000, 0.039	218.000, 0.050	218.000, 0.041	218.000, 0.046	218.000, 0.067
1092	218.200, 1.069	218.200, 1.219	218.200, 1.286	218.200, 1.306	218.200, 1.353	218.200, 0.014	218.200, 0.015	218.200, 0.039	218.200, 0.050	218.200, 0.041	218.200, 0.047	218.200, 0.067
1093	218.400, 1.069	218.400, 1.219	218.400, 1.286	218.400, 1.306	218.400, 1.353	218.400, 0.014	218.400, 0.015	218.400, 0.039	218.400, 0.050	218.400, 0.041	218.400, 0.047	218.400, 0.067
1094	218.600, 1.070	218.600, 1.219	218.600, 1.286	218.600, 1.306	218.600, 1.354	218.600, 0.014	218.600, 0.015	218.600, 0.039	218.600, 0.050	218.600, 0.042	218.600, 0.047	218.600, 0.067
1095	218.800, 1.070	218.800, 1.219	218.800, 1.286	218.800, 1.306	218.800, 1.354	218.800, 0.013	218.800, 0.015	218.800, 0.039	218.800, 0.050	218.800, 0.042	218.800, 0.047	218.800, 0.068
1096	219.000, 1.070	219.000, 1.219	219.000, 1.286	219.000, 1.306	219.000, 1.354	219.000, 0.013	219.000, 0.015	219.000, 0.039	219.000, 0.050	219.000, 0.042	219.000, 0.047	219.000, 0.068
1097	219.200, 1.070	219.200, 1.219	219.200, 1.286	219.200, 1.305	219.200, 1.353	219.200, 0.013	219.200, 0.015	219.200, 0.039	219.200, 0.050	219.200, 0.041	219.200, 0.047	219.200, 0.068
1098	219.400, 1.070	219.400, 1.219	219.400, 1.286	219.400, 1.305	219.400, 1.353	219.400, 0.013	219.400, 0.015	219.400, 0.039	219.400, 0.050	219.400, 0.041	219.400, 0.047	219.400, 0.068
1099	219.600, 1.070	219.600, 1.218	219.600, 1.286	219.600, 1.305	219.600, 1.353	219.600, 0.013	219.600, 0.016	219.600, 0.039	219.600, 0.050	219.600, 0.041	219.600, 0.047	219.600, 0.068
1100	219.800, 1.070	219.800, 1.218	219.800, 1.286	219.800, 1.305	219.800, 1.353	219.800, 0.013	219.800, 0.016	219.800, 0.039	219.800, 0.050	219.800, 0.041	219.800, 0.047	219.800, 0.068
1101	220.000, 1.070	220.000, 1.218	220.000, 1.286	220.000, 1.305	220.000, 1.353	220.000, 0.013	220.000, 0.016	220.000, 0.039	220.000, 0.050	220.000, 0.041	220.000, 0.047	220.000, 0.068
1102	220.200, 1.070	220.200, 1.218	220.200, 1.285	220.200, 1.306	220.200, 1.353	220.200, 0.013	220.200, 0.016	220.200, 0.039	220.200, 0.050	220.200, 0.041	220.200, 0.047	220.200, 0.068
1103	220.400, 1.070	220.400, 1.218	220.400, 1.285	220.400, 1.306	220.400, 1.353	220.400, 0.013	220.400, 0.016	220.400, 0.039	220.400, 0.050	220.400, 0.041	220.400, 0.047	220.400, 0.068
1104	220.600, 1.070	220.600, 1.218	220.600, 1.285	220.600, 1.306	220.600, 1.353	220.600, 0.013	220.600, 0.016	220.600, 0.039	220.600, 0.050	220.600, 0.041	220.600, 0.048	220.600, 0.068
1105	220.800, 1.070	220.800, 1.218	220.800, 1.285	220.800, 1.306	220.800, 1.353	220.800, 0.013	220.800, 0.016	220.800, 0.039	220.800, 0.051	220.800, 0.041	220.800, 0.048	220.800, 0.068
1106	221.000, 1.070	221.000, 1.218	221.000, 1.285	221.000, 1.306	221.000, 1.353	221.000, 0.013	221.000, 0.016	221.000, 0.039	221.000, 0.051	221.000, 0.042	221.000, 0.048	221.000, 0.068
1107	221.200, 1.069	221.200, 1.219	221.200, 1.285	221.200, 1.307	221.200, 1.352	221.200, 0.013	221.200, 0.016	221.200, 0.039	221.200, 0.052	221.200, 0.042	221.200, 0.048	221.200, 0.068
1108	221.400, 1.069	221.400, 1.219	221.400, 1.285	221.400, 1.307	221.400, 1.352	221.400, 0.013	221.400, 0.016	221.400, 0.039	221.400, 0.052	221.400, 0.042	221.400, 0.048	221.400, 0.067
1109	221.600, 1.069	221.600, 1.219	221.600, 1.285	221.600, 1.308	221.600, 1.352	221.600, 0.013	221.600, 0.016	221.600, 0.040	221.600, 0.053	221.600, 0.042	221.600, 0.048	221.600, 0.067
1110	221.800, 1.069	221.800, 1.219	221.800, 1.285	221.800, 1.308	221.800, 1.352	221.800, 0.013	221.800, 0.016	221.800, 0.040	221.800, 0.053	221.800, 0.043	221.800, 0.048	221.800, 0.067
1111	222.000, 1.069	222.000, 1.219	222.000, 1.285	222.000, 1.308	222.000, 1.352	222.000, 0.013	222.000, 0.015	222.000, 0.040	222.000, 0.053	222.000, 0.043	222.000, 0.048	222.000, 0.067
1112	222.200, 1.069	222.200, 1.219	222.200, 1.286	222.200, 1.308	222.200, 1.352	222.200, 0.013	222.200, 0.015	222.200, 0.040	222.200, 0.053	222.200, 0.043	222.200, 0.048	222.200, 0.067
1113	222.400, 1.069	222.400, 1.219	222.400, 1.286	222.400, 1.308	222.400, 1.352	222.400, 0.013	222.400, 0.015	222.400, 0.040	222.400, 0.053	222.400, 0.043	222.400, 0.048	222.400, 0.067
1114	222.600, 1.069	222.600, 1.219	222.600, 1.286	222.600, 1.307	222.600, 1.352	222.600, 0.013	222.600, 0.014	222.600, 0.040	222.600, 0.052	222.600, 0.043	222.600, 0.048	222.600, 0.066
1115	222.800, 1.069	222.800, 1.219	222.800, 1.286	222.800, 1.307	222.800, 1.352	222.800, 0.013	222.800, 0.014	222.800, 0.040	222.800, 0.052	222.800, 0.042	222.800, 0.048	222.800, 0.066
1116	223.000, 1.069	223.000, 1.219	223.000, 1.286	223.000, 1.306	223.000, 1.352	223.000, 0.013	223.000, 0.014	223.000, 0.040	223.000, 0.052	223.000, 0.042	223.000, 0.047	223.000, 0.066
1117	223.200, 1.069	223.200, 1.219	223.200, 1.286	223.200, 1.306	223.200, 1.352	223.200, 0.013	223.200, 0.014	223.200, 0.040	223.200, 0.052	223.200, 0.042	223.200, 0.047	223.200, 0.066
1118	223.400, 1.069	223.400, 1.219	223.400, 1.286	223.400, 1.306	223.400, 1.353	223.400, 0.013	223.400, 0.014	223.400, 0.040	223.400, 0.052	223.400, 0.043	223.400, 0.047	223.400, 0.066
1119	223.600, 1.069	223.600, 1.219	223.600, 1.286	223.600, 1.306	223.600, 1.353	223.600, 0.012	223.600, 0.014	223.600, 0.040	223.600, 0.051	223.600, 0.043	223.600, 0.047	223.600, 0.066
1120	223.800, 1.069	223.800, 1.219	223.800, 1.286	223.800, 1.306	223.800, 1.353	223.800, 0.013	223.800, 0.014	223.800, 0.040	223.800, 0.051	223.800, 0.043	223.800, 0.047	223.800, 0.066
1121	224.000, 1.069	224.000, 1.219	224.000, 1.286	224.000, 1.306	224.000, 1.354	224.000, 0.013	224.000, 0.014	224.000, 0.040	224.000, 0.051	224.000, 0.043	224.000, 0.046	224.000, 0.066
1122	224.200, 1.068	224.200, 1.219	224.200, 1.286	224.200, 1.306	224.200, 1.354	224.200, 0.013	224.200, 0.014	224.200, 0.039	224.200, 0.051	224.200, 0.043	224.200, 0.046	224.200, 0.066
1123	224.400, 1.068	224.400, 1.219	224.400, 1.286	224.400, 1.306	224.400, 1.354	224.400, 0.013	224.400, 0.015	224.400, 0.039	224.400, 0.051	224.400, 0.043	224.400, 0.046	224.400, 0.066
1124	224.600, 1.068	224.600, 1.219	224.600, 1.286	224.600, 1.306	224.600, 1.353	224.600, 0.013	224.600, 0.015	224.600, 0.039	224.600, 0.051	224.600, 0.043	224.600, 0.046	224.600, 0.066
1125	224.800, 1.068	224.800, 1.219	224.800, 1.286	224.800, 1.306	224.800, 1.353	224.800, 0.013	224.800, 0.015	224.800, 0.039	224.800, 0.051	224.800, 0.043	224.800, 0.046	224.800, 0.066
1126	225.000, 1.067	225.000, 1.219	225.000, 1.286	225.000, 1.306	225.000, 1.353	225.000, 0.013	225.000, 0.015	225.000, 0.039	225.000, 0.051	225.000, 0.043	225.000, 0.046	225.000, 0.066
1127	225.200, 1.067	225.200, 1.219	225.200, 1.287	225.200, 1.306	225.200, 1.353	225.200, 0.013	225.200, 0.016	225.200, 0.039	225.200, 0.051	225.200, 0.043	225.200, 0.046	225.200, 0.066
1128	225.400, 1.067	225.400, 1.218	225.400, 1.286	225.400, 1.306	225.400, 1.353	225.400, 0.013	225.400, 0.016	225.400, 0.040	225.400, 0.051	225.400, 0.043	225.400, 0.046	225.400, 0.066
1129	225.600, 1.067	225.600, 1.218	225.600, 1.286	225.600, 1.306	225.600, 1.353	225.600, 0.013	225.600, 0.015	225.600, 0.040	225.600, 0.051	225.600, 0.043	225.600, 0.046	225.600, 0.067
1130	225.800, 1.067	225.800, 1.218	225.800, 1.286	225.800, 1.306	225.800, 1.352	225.800, 0.014	225.800, 0.015	225.800, 0.040	225.800, 0.051	225.800, 0.043	225.800, 0.047	225.800, 0.067
1131	226.000, 1.068	226.000, 1.218	226.000, 1.286	226.000, 1.306	226.000, 1.352	226.000, 0.014	226.000, 0.015	226.000, 0.040	226.000, 0.051	226.000, 0.043	226.000, 0.047	226.000, 0.067
1132	226.200, 1.068	226.200, 1.217	226.200, 1.286	226.200, 1.306	226.200, 1.352	226.200, 0.013	226.200, 0.015	226.200, 0.040	226.200, 0.050	226.200, 0.043	226.200, 0.047	226.200, 0.067
1133	226.400, 1.068	226.400, 1.217	226.400, 1.286	226.400, 1.306	226.400, 1.352	226.400, 0.013	226.400, 0.014	226.400, 0.040	226.400, 0.050	226.400, 0.042	226.400, 0.047	226.400, 0.067
1134	226.600, 1.068	226.600, 1.217	226.600, 1.285	226.600, 1.306	226.600, 1.352	226.600, 0.013	226.600, 0.014	226.600, 0.040	226.600, 0.051	226.600, 0.042	226.600, 0.047	226.600, 0.067
1135	226.800, 1.068	226.800, 1.217	226.800, 1.285	226.800, 1.306	226.800, 1.352	226.800, 0.013	226.800, 0.014	226.800, 0.040	226.800, 0.051	226.800, 0.042	226.800, 0.046	226.800, 0.067
1136	227.000, 1.068	227.000, 1.217	227.000, 1.285	227.000, 1.306	227.000, 1.352	227.000, 0.013	227.000, 0.014	227.000, 0.040	227.000, 0.051	227.000, 0.043	227.000, 0.046	227.000, 0.067
1137	227.200, 1.069	227.200, 1.217	227.200, 1.285	227.200, 1.306	227.200, 1.352	227.200, 0.013	227.200, 0.014	227.200, 0.040	227.200, 0.051	227.200, 0.043	227.200, 0.046	227.200, 0.067
1138	227.400, 1.069	227.400, 1.217	227.400, 1.285	227.400, 1.306	227.400, 1.352	227.400, 0.013	227.400, 0.014	227.400, 0.040	227.400, 0.051	227.400, 0.043	227.400, 0.046	227.400, 0.067
1139	227.600, 1.069	227.600, 1.217	227.600, 1.285	227.600, 1.306	227.600, 1.352	227.600, 0.013	227.600, 0.014	227.600, 0.040	227.600, 0.051	227.600, 0.043	227.600, 0.046	227.600, 0.067
1140	227.800, 1.069	227.800, 1.217	227.800, 1.286	227.800, 1.306	227.800, 1.352	227.800, 0.013	227.800, 0.015	227.800, 0.040	227.800, 0.051	227.800, 0.043	227.800, 0.046	227.800, 0.067
1141	228.000, 1.069	228.000, 1.217	228.000, 1.286	228.000, 1.306	228.000, 1.352	228.000, 0.013	228.000, 0.015	228.000, 0.039	228.000, 0.051	228.000, 0.043	228.000, 0.046	228.000, 0.067
1142	228.200, 1.069	228.200, 1.217	228.200, 1.286	228.200, 1.305	228.200, 1.352	228.200, 0.013	228.200, 0.015	228.200, 0.039	228.200, 0.051	228.200, 0.042	228.200, 0.046	228.200, 0.066
1143	228.400, 1.069	228.400, 1.217	228.400, 1.286	228.400, 1.306	228.400, 1.352	228.400, 0.013	228.400, 0.015	228.400, 0.039	228.400, 0.051	228.400, 0.042	228.400, 0.047	228.400, 0.066
1144	228.600, 1.069	228.600, 1.217	228.600, 1.286	228.600, 1.306	228.600, 1.352	228.600, 0.013	228.600, 0.016	228.600, 0.039	228.600, 0.052	228.600, 0.042	228.600, 0.047	228.600, 0.066
1145	228.800, 1.069	228.800, 1.217	228.800, 1.286	228.800, 1.305	228.800, 1.352	228.800, 0.013	228.800, 0.016	228.800, 0.039	228.800, 0.052	228.800, 0.042	228.800, 0.047	228.800, 0.066
1146	229.000, 1.068	229.000, 1.217	229.000, 1.286	229.000, 1.305	229.000, 1.352	229.000, 0.013	229.000, 0.016	229.000, 0.039	229.000, 0.052	229.000, 0.041	229.000, 0.047	229.000, 0.066
1147	229.200, 1.068	229.200, 1.217	229.200, 1.286	229.200, 1.305	229.200, 1.353	229.200, 0.014	229.200, 0.016	229.200, 0.039	229.200, 0.052	229.200, 0.041	229.200, 0.047	229.200, 0.066
1148	229.400, 1.068	229.400, 1.217	229.400, 1.286	229.400, 1.305	229.400, 1.353	229.400, 0.014	229.400, 0.016	229.400, 0.038	229.400, 0.051	229.400, 0.041	229.400, 0.048	229.400, 0.066
1149	229.600, 1.067	229.600, 1.216	229.600, 1.286	229.600, 1.306	229.600, 1.353	229.600, 0.014	229.600, 0.016	229.600, 0.038	229.600, 0.051	229.600, 0.041	229.600, 0.048	229.600, 0.066
1150	229.800, 1.067	229.800, 1.216	229.800, 1.286	229.800, 1.306	229.800, 1.353	229.800, 0.014	229.800, 0.016	229.800, 0.038	229.800, 0.051	229.800, 0.040	229.800, 0.048	229.800, 0.066
1151	230.000, 1.067	230.000, 1.216	230.000, 1.286	230.000, 1.306	230.000, 1.353	230.000, 0.014	230.000, 0.015	230.000, 0.038	230.000, 0.050	230.000, 0.040	230.000, 0.048	230.000, 0.066
1152	230.200, 1.067	230.200, 1.216	230.200, 1.286	230.200, 1.306	230.200, 1.352	230.200, 0.014	230.200, 0.015	230.200, 0.038	230.200, 0.050	230.200, 0.040	230.200, 0.048	230.200, 0.066
1153	230.400, 1.066	230.400, 1.216	230.400, 1.286	230.400, 1.306	230.400, 1.352	230.400, 0.014	230.400, 0.015	230.400, 0.038	230.400, 0.050	230.400, 0.039	230.400, 0.048	230.400, 0.066
1154	230.600, 1.066	230.600, 1.216	230.600, 1.286	230.600, 1.306	230.600, 1.352	230.600, 0.014	230.600, 0.015	230.600, 0.038	230.600, 0.050	230.600, 0.039	230.600, 0.049	230.600, 0.066
1155	230.800, 1.066	230.800, 1.216	230.800, 1.286	230.800, 1.306	230.800, 1.352	230.800, 0.014	230.800, 0.015	230.800, 0.038	230.800, 0.050	230.800, 0.039	230.800, 0.049	230.800, 0.066
1156	231.000, 1.066	231.000, 1.216	231.000, 1.286	231.000, 1.306	231.000, 1.352	231.000, 0.014	231.000, 0.015	231.000, 0.038	231.000, 0.050	231.000, 0.040	231.000, 0.049	231.000, 0.066
1157	231.200, 1.067	231.200, 1.216	231.200, 1.286	231.200, 1.306	231.200, 1.352	231.200, 0.014	231.200, 0.015	231.200, 0.038	231.200, 0.050	231.200, 0.040	231.200, 0.049	231.200, 0.065
1158	231.400, 1.067	231.400, 1.216	231.400, 1.286	231.400, 1.305	231.400, 1.352	231.400, 0.013	231.400, 0.015	231.400, 0.038	231.400, 0.050	231.400, 0.040	231.400, 0.049	231.400, 0.065
1159	231.600, 1.067	231.600, 1.216	231.600, 1.286	231.600, 1.305	231.600, 1.351	231.600, 0.013	231.600, 0.015	231.600, 0.038	231.600, 0.050	231.600, 0.040	231.600, 0.049	231.600, 0.065
1160	231.800, 1.067	231.800, 1.216	231.800, 1.286	231.800, 1.305	231.800, 1.351	231.800, 0.013	231.800, 0.015	231.800, 0.038	231.800, 0.050	231.800, 0.040	231.800, 0.049	231.800, 0.065
1161	232.000, 1.067	232.000, 1.217	232.000, 1.286	232.000, 1.305	232.000, 1.352	232.000, 0.013	232.000, 0.015	232.000, 0.038	232.000, 0.050	232.000, 0.041	232.000, 0.048	232.000, 0.065
1162	232.200, 1.067	232.200, 1.217	232.200, 1.286	232.200, 1.305	232.200, 1.352	232.200, 0.013	232.200, 0.015	232.200, 0.038	232.200, 0.050	232.200, 0.041	232.200, 0.048	232.200, 0.065
1163	232.400, 1.068	232.400, 1.217	232.400, 1.285	232.400, 1.305	232.400, 1.352	232.400, 0.013	232.400, 0.015	232.400, 0.038	232.400, 0.051	232.400, 0.041	232.400, 0.048	232.400, 0.065
1164	232.600, 1.068	232.600, 1.217	232.600, 1.285	232.600, 1.305	232.600, 1.352	232.600, 0.014	232.600, 0.015	232.600, 0.038	232.600, 0.051	232.600, 0.041	232.600, 0.048	232.600, 0.065
1165	232.800, 1.068	232.800, 1.217	232.800, 1.285	232.800, 1.305	232.800, 1.352	232.800, 0.014	232.800, 0.015	232.800, 0.038	232.800, 0.051	232.800, 0.042	232.800, 0.047	232.800, 0.065
1166	233.000, 1.069	233.000, 1.217	233.000, 1.284	233.000, 1.305	233.000, 1.352	233.000, 0.014	233.000, 0.015	233.000, 0.038	233.000, 0.051	233.000, 0.042	233.000, 0.047	233.000, 0.066
1167	233.200, 1.069	233.200, 1.217	233.200, 1.284	233.200, 1.305	233.200, 1.352	233.200, 0.014	233.200, 0.015	233.200, 0.038	233.200, 0.050	233.200, 0.042	233.200, 0.047	233.200, 0.066
1168	233.400, 1.069	233.400, 1.217	233.400, 1.284	233.400, 1.305	233.400, 1.351	233.400, 0.014	233.400, 0.015	233.400, 0.038	233.400, 0.050	233.400, 0.042	233.400, 0.046	233.400, 0.066
1169	233.600, 1.069	233.600, 1.217	233.600, 1.283	233.600, 1.305	233.600, 1.351	233.600, 0.014	233.600, 0.015	233.600, 0.038	233.600, 0.050	233.600, 0.042	233.600, 0.046	233.600, 0.066
1170	233.800, 1.069	233.800, 1.217	233.800, 1.283	233.800, 1.305	233.800, 1.351	233.800, 0.014	233.800, 0.015	233.800, 0.038	233.800, 0.050	233.800, 0.042	233.800, 0.046	233.800, 0.067
1171	234.000, 1.070	234.000, 1.217	234.000, 1.283	234.000, 1.305	234.000, 1.350	234.000, 0.015	234.000, 0.015	234.000, 0.038	234.000, 0.049	234.000, 0.042	234.000, 0.046	234.000, 0.066
1172	234.200, 1.070	234.200, 1.217	234.200, 1.283	234.200, 1.305	234.200, 1.350	234.200, 0.015	234.200, 0.015	234.200, 0.037	234.200, 0.049	234.200, 0.042	234.200, 0.046	234.200, 0.067
1173	234.400, 1.070	234.400, 1.217	234.400, 1.283	234.400, 1.305	234.400, 1.350	234.400, 0.014	234.400, 0.015	234.400, 0.038	234.400, 0.049	234.400, 0.042	234.400, 0.046	234.400, 0.066
1174	234.600, 1.069	234.600, 1.217	234.600, 1.284	234.600, 1.305	234.600, 1.350	234.600, 0.014	234.600, 0.016	234.600, 0.038	234.600, 0.049	234.600, 0.042	234.600, 0.047	234.600, 0.066
1175	234.800, 1.069	234.800, 1.218	234.800, 1.284	234.800, 1.305	234.800, 1.350	234.800, 0.014	234.800, 0.016	234.800, 0.038	234.800, 0.049	234.800, 0.042	234.800, 0.047	234.800, 0.066
1176	235.000, 1.069	235.000, 1.218	235.000, 1.284	235.000, 1.305	235.000, 1.350	235.000, 0.014	235.000, 0.016	235.000, 0.038	235.000, 0.049	235.000, 0.042	235.000, 0.047	235.000, 0.066
1177	235.200, 1.069	235.200, 1.218	235.200, 1.284	235.200, 1.305	235.200, 1.350	235.200, 0.013	235.200, 0.016	235.200, 0.038	235.200, 0.049	235.200, 0.043	235.200, 0.047	235.200, 0.066
1178	235.400, 1.068	235.400, 1.218	235.400, 1.284	235.400, 1.305	235.400, 1.350	235.400, 0.013	235.400, 0.016	235.400, 0.038	235.400, 0.049	235.400, 0.043	235.400, 0.047	235.400, 0.066
1179	235.600, 1.068	235.600, 1.218	235.600, 1.284	235.600, 1.304	235.600, 1.351	235.600, 0.013	235.600, 0.016	235.600, 0.038	235.600, 0.049	235.600, 0.043	235.600, 0.047	235.600, 0.065
1180	235.800, 1.068	235.800, 1.218	235.800, 1.285	235.800, 1.304	235.800, 1.351	235.800, 0.013	235.800, 0.016	235.800, 0.039	235.800, 0.049	235.800, 0.043	235.800, 0.047	235.800, 0.065
1181	236.000, 1.068	236.000, 1.218	236.000, 1.284	236.000, 1.304	236.000, 1.351	236.000, 0.013	236.000, 0.016	236.000, 0.039	236.000, 0.049	236.000, 0.042	236.000, 0.047	236.000, 0.065
1182	236.200, 1.067	236.200, 1.218	236.200, 1.284	236.200, 1.304	236.200, 1.351	236.200, 0.013	236.200, 0.016	236.200, 0.039	236.200, 0.050	236.200, 0.042	236.200, 0.047	236.200, 0.065
1183	236.400, 1.067	236.400, 1.217	236.400, 1.284	236.400, 1.304	236.400, 1.351	236.400, 0.013	236.400, 0.015	236.400, 0.039	236.400, 0.050	236.400, 0.042	236.400, 0.047	236.400, 0.065
1184	236.600, 1.067	236.600, 1.217	236.600, 1.284	236.600, 1.304	236.600, 1.352	236.600, 0.013	236.600, 0.015	236.600, 0.039	236.600, 0.050	236.600, 0.042	236.600, 0.047	236.600, 0.065
1185	236.800, 1.066	236.800, 1.217	236.800, 1.284	236.800, 1.304	236.800, 1.351	236.800, 0.013	236.800, 0.015	236.800, 0.039	236.800, 0.051	236.800, 0.042	236.800, 0.047	236.800, 0.065
1186	237.000, 1.066	237.000, 1.217	237.000, 1.284	237.000, 1.303	237.000, 1.351	237.000, 0.013	237.000, 0.015	237.000, 0.039	237.000, 0.051	237.000, 0.042	237.000, 0.047	237.000, 0.065
1187	237.200, 1.066	237.200, 1.216	237.200, 1.284	237.200, 1.303	237.200, 1.351	237.200, 0.013	237.200, 0.015	237.200, 0.039	237.200, 0.051	237.200, 0.042	237.200, 0.047	237.200, 0.065
1188	237.400, 1.066	237.400, 1.216	237.400, 1.284	237.400, 1.303	237.400, 1.350	237.400, 0.013	237.400, 0.015	237.400, 0.038	237.400, 0.051	237.400, 0.042	237.400, 0.047	237.400, 0.066
1189	237.600, 1.066	237.600, 1.216	237.600, 1.284	237.600, 1.303	237.600, 1.350	237.600, 0.013	237.600, 0.016	237.600, 0.038	237.600, 0.051	237.600, 0.042	237.600, 0.047	237.600, 0.066
1190	237.800, 1.066	237.800, 1.216	237.800, 1.284	237.800, 1.303	237.800, 1.350	237.800, 0.013	237.800, 0.016	237.800, 0.038	237.800, 0.051	237.800, 0.042	237.800, 0.047	237.800, 0.066
1191	238.000, 1.066	238.000, 1.216	238.000, 1.284	238.000, 1.303	238.000, 1.350	238.000, 0.013	238.000, 0.016	238.000, 0.038	238.000, 0.051	238.000, 0.042	238.000, 0.047	238.000, 0.066
1192	238.200, 1.066	238.200, 1.215	238.200, 1.284	238.200, 1.304	238.200, 1.350	238.200, 0.013	238.200, 0.016	238.200, 0.038	238.200, 0.051	238.200, 0.042	238.200, 0.047	238.200, 0.066
1193	238.400, 1.066	238.400, 1.215	238.400, 1.284	238.400, 1.304	238.400, 1.350	238.400, 0.013	238.400, 0.016	238.400, 0.039	238.400, 0.051	238.400, 0.041	238.400, 0.048	238.400, 0.066
1194	238.600, 1.067	238.600, 1.215	238.600, 1.284	238.600, 1.304	238.600, 1.350	238.600, 0.013	238.600, 0.016	238.600, 0.039	238.600, 0.051	238.600, 0.041	238.600, 0.048	238.600, 0.066
1195	238.800, 1.067	238.800, 1.215	238.800, 1.284	238.800, 1.304	238.800, 1.350	238.800, 0.013	238.800, 0.016	238.800, 0.039	238.800, 0.051	238.800, 0.042	238.800, 0.048	238.800, 0.066
1196	239.000, 1.067	239.000, 1.215	239.000, 1.284	239.000, 1.304	239.000, 1.350	239.000, 0.013	239.000, 0.016	239.000, 0.039	239.000, 0.051	239.000, 0.042	239.000, 0.048	239.000, 0.066
1197	239.200, 1.067	239.200, 1.215	239.200, 1.283	239.200, 1.304	239.200, 1.350	239.200, 0.013	239.200, 0.016	239.200, 0.039	239.200, 0.051	239.200, 0.042	239.200, 0.047	239.200, 0.066
1198	239.400, 1.067	239.400, 1.215	239.400, 1.283	239.400, 1.304	239.400, 1.350	239.400, 0.013	239.400, 0.016	239.400, 0.039	239.400, 0.051	239.400, 0.042	239.400, 0.047	239.400, 0.066
1199	239.600, 1.067	239.600, 1.215	239.600, 1.283	239.600, 1.304	239.600, 1.350	239.600, 0.013	239.600, 0.016	239.600, 0.039	239.600, 0.051	239.600, 0.042	239.600, 0.047	239.600, 0.066
1200	239.800, 1.066	239.800, 1.214	239.800, 1.283	239.800, 1.304	239.800, 1.350	239.800, 0.013	239.800, 0.016	239.800, 0.039	239.800, 0.050	239.800, 0.042	239.800, 0.047	239.800, 0.065
1201	240.000, 1.066	240.000, 1.214	240.000, 1.283	240.000, 1.304	240.000, 1.350	240.000, 0.013	240.000, 0.016	240.000, 0.039	240.000, 0.050	240.000, 0.042	240.000, 0.047	240.000, 0.065
1202	240.200, 1.065	240.200, 1.214	240.200, 1.283	240.200, 1.304	240.200, 1.350	240.200, 0.013	240.200, 0.016	240.200, 0.039	240.200, 0.050	240.200, 0.042	240.200, 0.047	240.200, 0.065
1203	240.400, 1.065	240.400, 1.214	240.400, 1.283	240.400, 1.303	240.400, 1.350	240.400, 0.013	240.400, 0.015	240.400, 0.039	240.400, 0.050	240.400, 0.042	240.400, 0.047	240.400, 0.065
1204	240.600, 1.064	240.600, 1.214	240.600, 1.283	240.600, 1.303	240.600, 1.350	240.600, 0.013	240.600, 0.015	240.600, 0.039	240.600, 0.049	240.600, 0.042	240.600, 0.047	240.600, 0.065
1205	240.800, 1.064	240.800, 1.214	240.800, 1.283	240.800, 1.303	240.800, 1.350	240.800, 0.014	240.800, 0.015	240.800, 0.039	240.800, 0.049	240.800, 0.042	240.800, 0.047	240.800, 0.065
1206	241.000, 1.064	241.000, 1.214	241.000, 1.283	241.000, 1.303	241.000, 1.350	241.000, 0.014	241.000, 0.015	241.000, 0.039	241.000, 0.049	241.000, 0.042	241.000, 0.047	241.000, 0.065
1207	241.200, 1.064	241.200, 1.214	241.200, 1.283	241.200, 1.303	241.200, 1.350	241.200, 0.014	241.200, 0.015	241.200, 0.038	241.200, 0.049	241.200, 0.042	241.200, 0.047	241.200, 0.065
1208	241.400, 1.064	241.400, 1.214	241.400, 1.283	241.400, 1.303	241.400, 1.350	241.400, 0.014	241.400, 0.015	241.400, 0.038	241.400, 0.049	241.400, 0.042	241.400, 0.047	241.400, 0.065
1209	241.600, 1.064	241.600, 1.214	241.600, 1.283	241.600, 1.303	241.600, 1.350	241.600, 0.014	241.600, 0.015	241.600, 0.038	241.600, 0.049	241.600, 0.042	241.600, 0.048	241.600, 0.065
1210	241.800, 1.064	241.800, 1.214	241.800, 1.284	241.800, 1.303	241.800, 1.350	241.800, 0.014	241.800, 0.015	241.800, 0.038	241.800, 0.050	241.800, 0.042	241.800, 0.048	241.800, 0.065
1211	242.000, 1.064	242.000, 1.214	242.000, 1.284	242.000, 1.303	242.000, 1.350	242.000, 0.014	242.000, 0.015	242.000, 0.038	242.000, 0.050	242.000, 0.042	242.000, 0.048	242.000, 0.066
1212	242.200, 1.065	242.200, 1.214	242.200, 1.284	242.200, 1.303	242.200, 1.350	242.200, 0.014	242.200, 0.015	242.200, 0.038	242.200, 0.050	242.200, 0.042	242.200, 0.048	242.200, 0.066
1213	242.400, 1.065	242.400, 1.214	242.400, 1.284	242.400, 1.304	242.400, 1.350	242.400, 0.014	242.400, 0.015	242.400, 0.038	242.400, 0.051	242.400, 0.042	242.400, 0.048	242.400, 0.066
1214	242.600, 1.065	242.600, 1.214	242.600, 1.284	242.600, 1.304	242.600, 1.350	242.600, 0.013	242.600, 0.015	242.600, 0.038	242.600, 0.051	242.600, 0.042	242.600, 0.048	242.600, 0.066
1215	242.800, 1.066	242.800, 1.214	242.800, 1.284	242.800, 1.304	242.800, 1.350	242.800, 0.013	242.800, 0.015	242.800, 0.038	242.800, 0.051	242.800, 0.042	242.800, 0.048	242.800, 0.067
1216	243.000, 1.066	243.000, 1.214	243.000, 1.284	243.000, 1.304	243.000, 1.350	243.000, 0.013	243.000, 0.015	243.000, 0.038	243.000, 0.051	243.000, 0.042	243.000, 0.048	243.000, 0.067
1217	243.200, 1.066	243.200, 1.214	243.200, 1.284	243.200, 1.303	243.200, 1.349	243.200, 0.013	243.200, 0.015	243.200, 0.039	243.200, 0.051	243.200, 0.043	243.200, 0.048	243.200, 0.067
1218	243.400, 1.066	243.400, 1.214	243.400, 1.284	243.400, 1.303	243.400, 1.349	243.400, 0.013	243.400, 0.015	243.400, 0.039	243.400, 0.051	243.400, 0.043	243.400, 0.048	243.400, 0.067
1219	243.600, 1.066	243.600, 1.214	243.600, 1.283	243.600, 1.303	243.600, 1.349	243.600, 0.013	243.600, 0.015	243.600, 0.038	243.600, 0.051	243.600, 0.043	243.600, 0.047	243.600, 0.067
1220	243.800, 1.066	243.800, 1.213	243.800, 1.283	243.800, 1.302	243.800, 1.349	243.800, 0.013	243.800, 0.015	243.800, 0.038	243.800, 0.050	243.800, 0.042	243.800, 0.047	243.800, 0.066
1221	244.000, 1.065	244.000, 1.213	244.000, 1.283	244.000, 1.302	244.000, 1.348	244.000, 0.013	244.000, 0.015	244.000, 0.038	244.000, 0.051	244.000, 0.042	244.000, 0.047	244.000, 0.066
1222	244.200, 1.065	244.200, 1.213	244.200, 1.283	244.200, 1.302	244.200, 1.348	244.200, 0.013	244.200, 0.015	244.200, 0.038	244.200, 0.051	244.200, 0.042	244.200, 0.047	244.200, 0.066
1223	244.400, 1.065	244.400, 1.214	244.400, 1.283	244.400, 1.301	244.400, 1.348	244.400, 0.013	244.400, 0.015	244.400, 0.038	244.400, 0.050	244.400, 0.041	244.400, 0.047	244.400, 0.066
1224	244.600, 1.065	244.600, 1.214	244.600, 1.282	244.600, 1.301	244.600, 1.348	244.600, 0.013	244.600, 0.015	244.600, 0.038	244.600, 0.050	244.600, 0.041	244.600, 0.047	244.600, 0.066
1225	244.800, 1.065	244.800, 1.214	244.800, 1.282	244.800, 1.301	244.800, 1.348	244.800, 0.013	244.800, 0.016	244.800, 0.038	244.800, 0.050	244.800, 0.041	244.800, 0.047	244.800, 0.065
1226	245.000, 1.064	245.000, 1.214	245.000, 1.282	245.000, 1.301	245.000, 1.347	245.000, 0.013	245.000, 0.015	245.000, 0.038	245.000, 0.050	245.000, 0.041	245.000, 0.047	245.000, 0.065
1227	245.200, 1.064	245.200, 1.214	245.200, 1.282	245.200, 1.301	245.200, 1.347	245.200, 0.013	245.200, 0.015	245.200, 0.038	245.200, 0.049	245.200, 0.041	245.200, 0.047	245.200, 0.065
1228	245.400, 1.064	245.400, 1.214	245.400, 1.282	245.400, 1.301	245.400, 1.347	245.400, 0.013	245.400, 0.015	245.400, 0.038	245.400, 0.049	245.400, 0.041	245.400, 0.047	245.400, 0.065
1229	245.600, 1.064	245.600, 1.214	245.600, 1.282	245.600, 1.301	245.600, 1.347	245.600, 0.013	245.600, 0.015	245.600, 0.038	245.600, 0.049	245.600, 0.041	245.600, 0.048	245.600, 0.064
1230	245.800, 1.064	245.800, 1.214	245.800, 1.282	245.800, 1.301	245.800, 1.347	245.800, 0.014	245.800, 0.014	245.800, 0.038	245.800, 0.049	245.800, 0.041	245.800, 0.048	245.800, 0.064
1231	246.000, 1.063	246.000, 1.214	246.000, 1.282	246.000, 1.301	246.000, 1.347	246.000, 0.014	246.000, 0.014	246.000, 0.038	246.000, 0.049	246.000, 0.041	246.000, 0.048	246.000, 0.064
1232	246.200, 1.063	246.200, 1.214	246.200, 1.282	246.200, 1.301	246.200, 1.347	246.200, 0.014	246.200, 0.013	246.200, 0.038	246.200, 0.049	246.200, 0.041	246.200, 0.048	246.200, 0.064
1233	246.400, 1.063	246.400, 1.213	246.400, 1.282	246.400, 1.301	246.400, 1.347	246.400, 0.014	246.400, 0.013	246.400, 0.038	246.400, 0.049	246.400, 0.041	246.400, 0.048	246.400, 0.064
1234	246.600, 1.063	246.600, 1.213	246.600, 1.282	246.600, 1.302	246.600, 1.347	246.600, 0.014	246.600, 0.013	246.600, 0.038	246.600, 0.049	246.600, 0.042	246.600, 0.048	246.600, 0.064
1235	246.800, 1.063	246.800, 1.213	246.800, 1.282	246.800, 1.302	246.800, 1.347	246.800, 0.014	246.800, 0.012	246.800, 0.038	246.800, 0.049	246.800, 0.042	246.800, 0.048	246.800, 0.065
1236	247.000, 1.063	247.000, 1.213	247.000, 1.283	247.000, 1.302	247.000, 1.347	247.000, 0.014	247.000, 0.012	247.000, 0.038	247.000, 0.049	247.000, 0.042	247.000, 0.048	247.000, 0.065
1237	247.200, 1.063	247.200, 1.212	247.200, 1.283	247.200, 1.302	247.200, 1.347	247.200, 0.014	247.200, 0.012	247.200, 0.038	247.200, 0.049	247.200, 0.042	247.200, 0.048	247.200, 0.065
1238	247.400, 1.063	247.400, 1.212	247.400, 1.283	247.400, 1.302	247.400, 1.347	247.400, 0.014	247.400, 0.012	247.400, 0.038	247.400, 0.050	247.400, 0.042	247.400, 0.047	247.400, 0.065
1239	247.600, 1.063	247.600, 1.212	247.600, 1.283	247.600, 1.302	247.600, 1.346	247.600, 0.014	247.600, 0.013	247.600, 0.038	247.600, 0.050	247.600, 0.041	247.600, 0.047	247.600, 0.065
1240	247.800, 1.063	247.800, 1.212	247.800, 1.283	247.800, 1.302	247.800, 1.346	247.800, 0.014	247.800, 0.013	247.800, 0.038	247.800, 0.050	247.800, 0.041	247.800, 0.047	247.800, 0.065
1241	248.000, 1.063	248.000, 1.212	248.000, 1.283	248.000, 1.302	248.000, 1.346	248.000, 0.014	248.000, 0.013	248.000, 0.038	248.000, 0.050	248.000, 0.041	248.000, 0.047	248.000, 0.066
1242	248.200, 1.063	248.200, 1.212	248.200, 1.283	248.200, 1.302	248.200, 1.346	248.200, 0.014	248.200, 0.013	248.200, 0.038	248.200, 0.050	248.200, 0.041	248.200, 0.046	248.200, 0.066
1243	248.400, 1.063	248.400, 1.212	248.400, 1.282	248.400, 1.302	248.400, 1.346	248.400, 0.014	248.400, 0.014	248.400, 0.038	248.400, 0.049	248.400, 0.040	248.400, 0.046	248.400, 0.066
1244	248.600, 1.063	248.600, 1.211	248.600, 1.282	248.600, 1.302	248.600, 1.346	248.600, 0.014	248.600, 0.014	248.600, 0.038	248.600, 0.049	248.600, 0.040	248.600, 0.046	248.600, 0.066
1245	248.800, 1.063	248.800, 1.211	248.800, 1.282	248.800, 1.302	248.800, 1.346	248.800, 0.014	248.800, 0.014	248.800, 0.038	248.800, 0.049	248.800, 0.040	248.800, 0.045	248.800, 0.066
1246	249.000, 1.063	249.000, 1.211	249.000, 1.281	249.000, 1.302	249.000, 1.346	249.000, 0.014	249.000, 0.014	249.000, 0.038	249.000, 0.049	249.000, 0.040	249.000, 0.045	249.000, 0.065
1247	249.200, 1.063	249.200, 1.211	249.200, 1.281	249.200, 1.302	249.200, 1.347	249.200, 0.014	249.200, 0.015	249.200, 0.038	249.200, 0.048	249.200, 0.039	249.200, 0.045	249.200, 0.065
1248	249.400, 1.063	249.400, 1.211	249.400, 1.281	249.400, 1.302	249.400, 1.347	249.400, 0.014	249.400, 0.015	249.400, 0.038	249.400, 0.048	249.400, 0.039	249.400, 0.046	249.400, 0.065
1249	249.600, 1.063	249.600, 1.211	249.600, 1.281	249.600, 1.301	249.600, 1.347	249.600, 0.014	249.600, 0.015	249.600, 0.038	249.600, 0.048	249.600, 0.039	249.600, 0.046	249.600, 0.065
1250	249.800, 1.062	249.800, 1.211	249.800, 1.281	249.800, 1.301	249.800, 1.347	249.800, 0.014	249.800, 0.015	249.800, 0.037	249.800, 0.048	249.800, 0.039	249.800, 0.046	249.800, 0.065
1251	250.000, 1.062	250.000, 1.211	250.000, 1.281	250.000, 1.301	250.000, 1.347	250.000, 0.014	250.000, 0.015	250.000, 0.037	250.000, 0.048	250.000, 0.039	250.000, 0.046	250.000, 0.065
1252	250.200, 1.062	250.200, 1.211	250.200, 1.281	250.200, 1.301	250.200, 1.347	250.200, 0.014	250.200, 0.015	250.200, 0.037	250.200, 0.048	250.200, 0.040	250.200, 0.046	250.200, 0.065
1253	250.400, 1.062	250.400, 1.211	250.400, 1.281	250.400, 1.301	250.400, 1.347	250.400, 0.014	250.400, 0.015	250.400, 0.038	250.400, 0.048	250.400, 0.040	250.400, 0.046	250.400, 0.065
1254	250.600, 1.062	250.600, 1.211	250.600, 1.281	250.600, 1.301	250.600, 1.347	250.600, 0.014	250.600, 0.014	250.600, 0.038	250.600, 0.049	250.600, 0.040	250.600, 0.046	250.600, 0.065
1255	250.800, 1.062	250.800, 1.211	250.800, 1.281	250.800, 1.300	250.800, 1.347	250.800, 0.014	250.800, 0.014	250.800, 0.038	250.800, 0.049	250.800, 0.040	250.800, 0.046	250.800, 0.065
1256	251.000, 1.062	251.000, 1.211	251.000, 1.281	251.000, 1.300	251.000, 1.347	251.000, 0.014	251.000, 0.014	251.000, 0.039	251.000, 0.049	251.000, 0.040	251.000, 0.047	251.000, 0.065
1257	251.200, 1.061	251.200, 1.211	251.200, 1.281	251.200, 1.300	251.200, 1.347	251.200, 0.014	251.200, 0.014	251.200, 0.039	251.200, 0.049	251.200, 0.040	251.200, 0.047	251.200, 0.065
1258	251.400, 1.061	251.400, 1.211	251.400, 1.281	251.400, 1.300	251.400, 1.347	251.400, 0.014	251.400, 0.013	251.400, 0.039	251.400, 0.049	251.400, 0.040	251.400, 0.047	251.400, 0.065
1259	251.600, 1.061	251.600, 1.211	251.600, 1.281	251.600, 1.299	251.600, 1.347	251.600, 0.015	251.600, 0.013	251.600, 0.039	251.600, 0.049	251.600, 0.040	251.600, 0.047	251.600, 0.065
1260	251.800, 1.061	251.800, 1.211	251.800, 1.281	251.800, 1.299	251.800, 1.347	251.800, 0.014	251.800, 0.013	251.800, 0.039	251.800, 0.049	251.800, 0.040	251.800, 0.047	251.800, 0.064
1261	252.000, 1.061	252.000, 1.211	252.000, 1.281	252.000, 1.299	252.000, 1.347	252.000, 0.014	252.000, 0.013	252.000, 0.039	252.000, 0.049	252.000, 0.041	252.000, 0.047	252.000, 0.064
1262	252.200, 1.061	252.200, 1.211	252.200, 1.281	252.200, 1.299	252.200, 1.347	252.200, 0.014	252.200, 0.013	252.200, 0.038	252.200, 0.049	252.200, 0.041	252.200, 0.047	252.200, 0.064
1263	252.400, 1.061	252.400, 1.211	252.400, 1.281	252.400, 1.299	252.400, 1.347	252.400, 0.014	252.400, 0.013	252.400, 0.038	252.400, 0.049	252.400, 0.040	252.400, 0.047	252.400, 0.064
1264	252.600, 1.061	252.600, 1.211	252.600, 1.281	252.600, 1.299	252.600, 1.347	252.600, 0.014	252.600, 0.013	252.600, 0.038	252.600, 0.049	252.600, 0.040	252.600, 0.047	252.600, 0.064
1265	252.800, 1.061	252.800, 1.211	252.800, 1.281	252.800, 1.299	252.800, 1.346	252.800, 0.014	252.800, 0.013	252.800, 0.038	252.800, 0.049	252.800, 0.040	252.800, 0.047	252.800, 0.065
1266	253.000, 1.061	253.000, 1.211	253.000, 1.281	253.000, 1.299	253.000, 1.346	253.000, 0.014	253.000, 0.012	253.000, 0.038	253.000, 0.049	253.000, 0.040	253.000, 0.047	253.000, 0.065
1267	253.200, 1.061	253.200, 1.210	253.200, 1.281	253.200, 1.299	253.200, 1.346	253.200, 0.014	253.200, 0.012	253.200, 0.038	253.200, 0.049	253.200, 0.040	253.200, 0.047	253.200, 0.065
1268	253.400, 1.061	253.400, 1.210	253.400, 1.281	253.400, 1.299	253.400, 1.346	253.400, 0.014	253.400, 0.013	253.400, 0.037	253.400, 0.049	253.400, 0.040	253.400, 0.047	253.400, 0.065
1269	253.600, 1.061	253.600, 1.210	253.600, 1.281	253.600, 1.299	253.600, 1.346	253.600, 0.014	253.600, 0.013	253.600, 0.037	253.600, 0.050	253.600, 0.040	253.600, 0.047	253.600, 0.064
1270	253.800, 1.061	253.800, 1.210	253.800, 1.281	253.800, 1.299	253.800, 1.346	253.800, 0.013	253.800, 0.013	253.800, 0.037	253.800, 0.050	253.800, 0.040	253.800, 0.047	253.800, 0.064
1271	254.000, 1.061	254.000, 1.210	254.000, 1.281	254.000, 1.299	254.000, 1.346	254.000, 0.013	254.000, 0.013	254.000, 0.038	254.000, 0.050	254.000, 0.040	254.000, 0.047	254.000, 0.064
1272	254.200, 1.061	254.200, 1.210	254.200, 1.281	254.200, 1.299	254.200, 1.346	254.200, 0.013	254.200, 0.013	254.200, 0.038	254.200, 0.050	254.200, 0.040	254.200, 0.047	254.200, 0.064
1273	254.400, 1.061	254.400, 1.210	254.400, 1.281	254.400, 1.299	254.400, 1.346	254.400, 0.013	254.400, 0.014	254.400, 0.038	254.400, 0.050	254.400, 0.041	254.400, 0.046	254.400, 0.064
1274	254.600, 1.061	254.600, 1.210	254.600, 1.281	254.600, 1.299	254.600, 1.346	254.600, 0.013	254.600, 0.014	254.600, 0.038	254.600, 0.050	254.600, 0.041	254.600, 0.046	254.600, 0.064
1275	254.800, 1.061	254.800, 1.210	254.800, 1.280	254.800, 1.299	254.800, 1.345	254.800, 0.013	254.800, 0.014	254.800, 0.039	254.800, 0.050	254.800, 0.041	254.800, 0.046	254.800, 0.064
1276	255.000, 1.061	255.000, 1.209	255.000, 1.280	255.000, 1.299	255.000, 1.345	255.000, 0.014	255.000, 0.014	255.000, 0.039	255.000, 0.050	255.000, 0.041	255.000, 0.046	255.000, 0.064
1277	255.200, 1.061	255.200, 1.209	255.200, 1.280	255.200, 1.299	255.200, 1.345	255.200, 0.014	255.200, 0.015	255.200, 0.039	255.200, 0.050	255.200, 0.041	255.200, 0.047	255.200, 0.064
1278	255.400, 1.061	255.400, 1.209	255.400, 1.280	255.400, 1.299	255.400, 1.345	255.400, 0.014	255.400, 0.015	255.400, 0.039	255.400, 0.050	255.400, 0.041	255.400, 0.047	255.400, 0.064
1279	255.600, 1.061	255.600, 1.209	255.600, 1.280	255.600, 1.299	255.600, 1.345	255.600, 0.014	255.600, 0.015	255.600, 0.039	255.600, 0.050	255.600, 0.041	255.600, 0.047	255.600, 0.064
1280	255.800, 1.061	255.800, 1.208	255.800, 1.280	255.800, 1.298	255.800, 1.345	255.800, 0.014	255.800, 0.015	255.800, 0.038	255.800, 0.050	255.800, 0.041	255.800, 0.047	255.800, 0.064
1281	256.000, 1.061	256.000, 1.208	256.000, 1.280	256.000, 1.298	256.000, 1.344	256.000, 0.014	256.000, 0.015	256.000, 0.038	256.000, 0.049	256.000, 0.041	256.000, 0.047	256.000, 0.065
1282	256.200, 1.061	256.200, 1.208	256.200, 1.279	256.200, 1.298	256.200, 1.344	256.200, 0.015	256.200, 0.015	256.200, 0.038	256.200, 0.049	256.200, 0.041	256.200, 0.047	256.200, 0.065
1283	256.400, 1.061	256.400, 1.208	256.400, 1.279	256.400, 1.298	256.400, 1.344	256.400, 0.015	256.400, 0.015	256.400, 0.038	256.400, 0.049	256.400, 0.041	256.400, 0.046	256.400, 0.065
1284	256.600, 1.061	256.600, 1.208	256.600, 1.279	256.600, 1.298	256.600, 1.344	256.600, 0.015	256.600, 0.015	256.600, 0.038	256.600, 0.049	256.600, 0.040	256.600, 0.046	256.600, 0.065
1285	256.800, 1.061	256.800, 1.208	256.800, 1.279	256.800, 1.297	256.800, 1.344	256.800, 0.015	256.800, 0.015	256.800, 0.038	256.800, 0.049	256.800, 0.040	256.800, 0.046	256.800, 0.065
1286	257.000, 1.061	257.000, 1.207	257.000, 1.279	257.000, 1.297	257.000, 1.344	257.000, 0.015	257.000, 0.014	257.000, 0.037	257.000, 0.049	257.000, 0.040	257.000, 0.046	257.000, 0.065
1287	257.200, 1.061	257.200, 1.207	257.200, 1.278	257.200, 1.297	257.200, 1.345	257.200, 0.015	257.200, 0.014	257.200, 0.037	257.200, 0.049	257.200, 0.040	257.200, 0.047	257.200, 0.065
1288	257.400, 1.060	257.400, 1.208	257.400, 1.278	257.400, 1.296	257.400, 1.345	257.400, 0.015	257.400, 0.014	257.400, 0.037	257.400, 0.049	257.400, 0.040	257.400, 0.047	257.400, 0.065
1289	257.600, 1.060	257.600, 1.208	257.600, 1.278	257.600, 1.296	257.600, 1.345	257.600, 0.014	257.600, 0.015	257.600, 0.037	257.600, 0.049	257.600, 0.040	257.600, 0.047	257.600, 0.065
1290	257.800, 1.060	257.800, 1.208	257.800, 1.278	257.800, 1.296	257.800, 1.345	257.800, 0.014	257.800, 0.015	257.800, 0.037	257.800, 0.049	257.800, 0.040	257.800, 0.047	257.800, 0.065
1291	258.000, 1.060	258.000, 1.208	258.000, 1.278	258.000, 1.296	258.000, 1.345	258.000, 0.014	258.000, 0.015	258.000, 0.037	258.000, 0.049	258.000, 0.040	258.000, 0.047	258.000, 0.065
1292	258.200, 1.060	258.200, 1.208	258.200, 1.278	258.200, 1.296	258.200, 1.345	258.200, 0.014	258.200, 0.015	258.200, 0.037	258.200, 0.049	258.200, 0.040	258.200, 0.047	258.200, 0.065
1293	258.400, 1.060	258.400, 1.208	258.400, 1.278	258.400, 1.296	258.400, 1.345	258.400, 0.014	258.400, 0.015	258.400, 0.037	258.400, 0.049	258.400, 0.040	258.400, 0.047	258.400, 0.065
1294	258.600, 1.061	258.600, 1.208	258.600, 1.278	258.600, 1.296	258.600, 1.345	258.600, 0.014	258.600, 0.015	258.600, 0.037	258.600, 0.049	258.600, 0.040	258.600, 0.047	258.600, 0.065
1295	258.800, 1.061	258.800, 1.207	258.800, 1.278	258.800, 1.296	258.800, 1.345	258.800, 0.014	258.800, 0.015	258.800, 0.037	258.800, 0.049	258.800, 0.040	258.800, 0.047	258.800, 0.065
1296	259.000, 1.061	259.000, 1.207	259.000, 1.278	259.000, 1.297	259.000, 1.345	259.000, 0.014	259.000, 0.015	259.000, 0.037	259.000, 0.049	259.000, 0.040	259.000, 0.047	259.000, 0.065
1297	259.200, 1.061	259.200, 1.207	259.200, 1.278	259.200, 1.297	259.200, 1.345	259.200, 0.014	259.200, 0.015	259.200, 0.037	259.200, 0.049	259.200, 0.040	259.200, 0.047	259.200, 0.065
1298	259.400, 1.060	259.400, 1.207	259.400, 1.278	259.400, 1.297	259.400, 1.345	259.400, 0.014	259.400, 0.015	259.400, 0.037	259.400, 0.049	259.400, 0.040	259.400, 0.047	259.400, 0.065
1299	259.600, 1.060	259.600, 1.207	259.600, 1.278	259.600, 1.297	259.600, 1.345	259.600, 0.014	259.600, 0.015	259.600, 0.037	259.600, 0.048	259.600, 0.039	259.600, 0.047	259.600, 0.065
1300	259.800, 1.060	259.800, 1.206	259.800, 1.278	259.800, 1.297	259.800, 1.344	259.800, 0.014	259.800, 0.015	259.800, 0.037	259.800, 0.048	259.800, 0.039	259.800, 0.047	259.800, 0.065
1301	260.000, 1.059	260.000, 1.206	260.000, 1.278	260.000, 1.297	260.000, 1.344	260.000, 0.015	260.000, 0.014	260.000, 0.037	260.000, 0.048	260.000, 0.039	260.000, 0.047	260.000, 0.065
1302	260.200, 1.059	260.200, 1.206	260.200, 1.278	260.200, 1.297	260.200, 1.344	260.200, 0.015	260.200, 0.014	260.200, 0.037	260.200, 0.048	260.200, 0.039	260.200, 0.047	260.200, 0.065
1303	260.400, 1.059	260.400, 1.205	260.400, 1.277	260.400, 1.297	260.400, 1.344	260.400, 0.015	260.400, 0.014	260.400, 0.037	260.400, 0.048	260.400, 0.039	260.400, 0.047	260.400, 0.065
1304	260.600, 1.059	260.600, 1.205	260.600, 1.277	260.600, 1.297	260.600, 1.344	260.600, 0.015	260.600, 0.014	260.600, 0.037	260.600, 0.048	260.600, 0.039	260.600, 0.047	260.600, 0.065
1305	260.800, 1.058	260.800, 1.205	260.800, 1.277	260.800, 1.297	260.800, 1.344	260.800, 0.015	260.800, 0.013	260.800, 0.036	260.800, 0.048	260.800, 0.039	260.800, 0.047	260.800, 0.065
1306	261.000, 1.058	261.000, 1.205	261.000, 1.276	261.000, 1.297	261.000, 1.344	261.000, 0.015	261.000, 0.013	261.000, 0.036	261.000, 0.049	261.000, 0.039	261.000, 0.047	261.000, 0.065
1307	261.200, 1.058	261.200, 1.205	261.200, 1.276	261.200, 1.297	261.200, 1.344	261.200, 0.015	261.200, 0.013	261.200, 0.036	261.200, 0.049	261.200, 0.040	261.200, 0.047	261.200, 0.064
1308	261.400, 1.058	261.400, 1.205	261.400, 1.276	261.400, 1.296	261.400, 1.344	261.400, 0.014	261.400, 0.013	261.400, 0.036	261.400, 0.049	261.400, 0.040	261.400, 0.047	261.400, 0.064
1309	261.600, 1.058	261.600, 1.205	261.600, 1.276	261.600, 1.296	261.600, 1.344	261.600, 0.014	261.600, 0.013	261.600, 0.036	261.600, 0.049	261.600, 0.040	261.600, 0.047	261.600, 0.064
1310	261.800, 1.058	261.800, 1.206	261.800, 1.276	261.800, 1.296	261.800, 1.344	261.800, 0.014	261.800, 0.013	261.800, 0.036	261.800, 0.049	261.800, 0.040	261.800, 0.047	261.800, 0.064
1311	262.000, 1.058	262.000, 1.206	262.000, 1.276	262.000, 1.296	262.000, 1.344	262.000, 0.013	262.000, 0.013	262.000, 0.036	262.000, 0.049	262.000, 0.040	262.000, 0.047	262.000, 0.063
1312	262.200, 1.058	262.200, 1.206	262.200, 1.276	262.200, 1.296	262.200, 1.343	262.200, 0.013	262.200, 0.013	262.200, 0.037	262.200, 0.049	262.200, 0.040	262.200, 0.047	262.200, 0.063
1313	262.400, 1.058	262.400, 1.206	262.400, 1.276	262.400, 1.296	262.400, 1.343	262.400, 0.013	262.400, 0.013	262.400, 0.036	262.400, 0.049	262.400, 0.040	262.400, 0.046	262.400, 0.063
1314	262.600, 1.058	262.600, 1.206	262.600, 1.276	262.600, 1.296	262.600, 1.343	262.600, 0.013	262.600, 0.014	262.600, 0.036	262.600, 0.049	262.600, 0.040	262.600, 0.046	262.600, 0.063
1315	262.800, 1.057	262.800, 1.206	262.800, 1.275	262.800, 1.295	262.800, 1.343	262.800, 0.013	262.800, 0.014	262.800, 0.036	262.800, 0.049	262.800, 0.041	262.800, 0.046	262.800, 0.063
1316	263.000, 1.057	263.000, 1.206	263.000, 1.275	263.000, 1.295	263.000, 1.343	263.000, 0.012	263.000, 0.014	263.000, 0.036	263.000, 0.049	263.000, 0.041	263.000, 0.045	263.000, 0.063
1317	263.200, 1.057	263.200, 1.206	263.200, 1.275	263.200, 1.295	263.200, 1.343	263.200, 0.013	263.200, 0.014	263.200, 0.036	263.200, 0.048	263.200, 0.041	263.200, 0.045	263.200, 0.063
1318	263.400, 1.057	263.400, 1.206	263.400, 1.275	263.400, 1.295	263.400, 1.343	263.400, 0.013	263.400, 0.014	263.400, 0.036	263.400, 0.048	263.400, 0.041	263.400, 0.045	263.400, 0.064
1319	263.600, 1.057	263.600, 1.205	263.600, 1.275	263.600, 1.295	263.600, 1.343	263.600, 0.013	263.600, 0.014	263.600, 0.035	263.600, 0.048	263.600, 0.041	263.600, 0.045	263.600, 0.064
1320	263.800, 1.056	263.800, 1.205	263.800, 1.275	263.800, 1.295	263.800, 1.343	263.800, 0.013	263.800, 0.014	263.800, 0.035	263.800, 0.048	263.800, 0.041	263.800, 0.045	263.800, 0.064
1321	264.000, 1.056	264.000, 1.205	264.000, 1.275	264.000, 1.295	264.000, 1.342	264.000, 0.013	264.000, 0.014	264.000, 0.035	264.000, 0.048	264.000, 0.041	264.000, 0.045	264.000, 0.064
1322	264.200, 1.056	264.200, 1.204	264.200, 1.275	264.200, 1.295	264.200, 1.342	264.200, 0.014	264.200, 0.014	264.200, 0.035	264.200, 0.048	264.200, 0.041	264.200, 0.045	264.200, 0.064
1323	264.400, 1.056	264.400, 1.204	264.400, 1.275	264.400, 1.295	264.400, 1.342	264.400, 0.014	264.400, 0.013	264.400, 0.035	264.400, 0.048	264.400, 0.041	264.400, 0.046	264.400, 0.064
1324	264.600, 1.056	264.600, 1.204	264.600, 1.275	264.600, 1.295	264.600, 1.341	264.600, 0.014	264.600, 0.013	264.600, 0.035	264.600, 0.048	264.600, 0.041	264.600, 0.046	264.600, 0.064
1325	264.800, 1.056	264.800, 1.203	264.800, 1.275	264.800, 1.295	264.800, 1.341	264.800, 0.014	264.800, 0.013	264.800, 0.035	264.800, 0.048	264.800, 0.040	264.800, 0.046	264.800, 0.064
1326	265.000, 1.056	265.000, 1.203	265.000, 1.276	265.000, 1.295	265.000, 1.341	265.000, 0.014	265.000, 0.014	265.000, 0.035	265.000, 0.048	265.000, 0.040	265.000, 0.046	265.000, 0.064
1327	265.200, 1.056	265.200, 1.203	265.200, 1.276	265.200, 1.295	265.200, 1.341	265.200, 0.014	265.200, 0.014	265.200, 0.035	265.200, 0.048	265.200, 0.040	265.200, 0.046	265.200, 0.063
1328	265.400, 1.056	265.400, 1.203	265.400, 1.276	265.400, 1.295	265.400, 1.341	265.400, 0.014	265.400, 0.014	265.400, 0.035	265.400, 0.049	265.400, 0.040	265.400, 0.047	265.400, 0.063
1329	265.600, 1.056	265.600, 1.203	265.600, 1.276	265.600, 1.294	265.600, 1.341	265.600, 0.014	265.600, 0.014	265.600, 0.036	265.600, 0.049	265.600, 0.040	265.600, 0.047	265.600, 0.062
1330	265.800, 1.056	265.800, 1.203	265.800, 1.276	265.800, 1.294	265.800, 1.340	265.800, 0.013	265.800, 0.014	265.800, 0.036	265.800, 0.049	265.800, 0.039	265.800, 0.047	265.800, 0.062
1331	266.000, 1.056	266.000, 1.203	266.000, 1.276	266.000, 1.294	266.000, 1.340	266.000, 0.013	266.000, 0.015	266.000, 0.036	266.000, 0.049	266.000, 0.039	266.000, 0.047	266.000, 0.062
1332	266.200, 1.056	266.200, 1.203	266.200, 1.276	266.200, 1.294	266.200, 1.340	266.200, 0.013	266.200, 0.015	266.200, 0.036	266.200, 0.049	266.200, 0.039	266.200, 0.046	266.200, 0.061
1333	266.400, 1.056	266.400, 1.204	266.400, 1.276	266.400, 1.294	266.400, 1.340	266.400, 0.013	266.400, 0.015	266.400, 0.036	266.400, 0.049	266.400, 0.039	266.400, 0.046	266.400, 0.061
1334	266.600, 1.056	266.600, 1.204	266.600, 1.276	266.600, 1.294	266.600, 1.340	266.600, 0.013	266.600, 0.015	266.600, 0.036	266.600, 0.050	266.600, 0.039	266.600, 0.046	266.600, 0.061
1335	266.800, 1.056	266.800, 1.204	266.800, 1.275	266.800, 1.293	266.800, 1.340	266.800, 0.013	266.800, 0.015	266.800, 0.036	266.800, 0.050	266.800, 0.039	266.800, 0.045	266.800, 0.061
1336	,	,	,	,	,	,	,	,	,	,	,	,
1337	,	,	,	,	,	,	,	,	,	,	,	,
1338	,	,	,	,	,	,	,	,	,	,	,	,
1339	,	,	,	,	,	,	,	,	,	,	,	,
1340	,	,	,	,	,	,	,	,	,	,	,	,
1341	,	,	,	,	,	,	,	,	,	,	,	,
1342	,	,	,	,	,	,	,	,	,	,	,	,
1343	,	,	,	,	,	,	,	,	,	,	,	,
1344	,	,	,	,	,	,	,	,	,	,	,	,
1345	,	,	,	,	,	,	,	,	,	,	,	,
1346	,	,	,	,	,	,	,	,	,	,	,	,
1347	,	,	,	,	,	,	,	,	,	,	,	,
1348	,	,	,	,	,	,	,	,	,	,	,	,
1349	,	,	,	,	,	,	,	,	,	,	,	,
1350	,	,	,	,	,	,	,	,	,	,	,	,
1351	,	,	,	,	,	,	,	,	,	,	,	,
1352	,	,	,	,	,	,	,	,	,	,	,	,
1353	,	,	,	,	,	,	,	,	,	,	,	,
1354	,	,	,	,	,	,	,	,	,	,	,	,
1355	,	,	,	,	,	,	,	,	,	,	,	,
1356	,	,	,	,	,	,	,	,	,	,	,	,
1357	,	,	,	,	,	,	,	,	,	,	,	,
1358	,	,	,	,	,	,	,	,	,	,	,	,
1359	,	,	,	,	,	,	,	,	,	,	,	,
1360	,	,	,	,	,	,	,	,	,	,	,	,
1361	,	,	,	,	,	,	,	,	,	,	,	,
1362	,	,	,	,	,	,	,	,	,	,	,	,
1363	,	,	,	,	,	,	,	,	,	,	,	,
1364	,	,	,	,	,	,	,	,	,	,	,	,
1365	,	,	,	,	,	,	,	,	,	,	,	,
1366	,	,	,	,	,	,	,	,	,	,	,	,
1367	,	,	,	,	,	,	,	,	,	,	,	,
1368	,	,	,	,	,	,	,	,	,	,	,	,
1369	,	,	,	,	,	,	,	,	,	,	,	,
1370	,	,	,	,	,	,	,	,	,	,	,	,
1371	,	,	,	,	,	,	,	,	,	,	,	,
1372	,	,	,	,	,	,	,	,	,	,	,	,
1373	,	,	,	,	,	,	,	,	,	,	,	,
1374	,	,	,	,	,	,	,	,	,	,	,	,
1375	,	,	,	,	,	,	,	,	,	,	,	,
1376	,	,	,	,	,	,	,	,	,	,	,	,
1377	,	,	,	,	,	,	,	,	,	,	,	,
1378	,	,	,	,	,	,	,	,	,	,	,	,
1379	,	,	,	,	,	,	,	,	,	,	,	,
1380	,	,	,	,	,	,	,	,	,	,	,	,
1381	,	,	,	,	,	,	,	,	,	,	,	,
1382	,	,	,	,	,	,	,	,	,	,	,	,
1383	,	,	,	,	,	,	,	,	,	,	,	,
1384	,	,	,	,	,	,	,	,	,	,	,	,
1385	,	,	,	,	,	,	,	,	,	,	,	,
1386	,	,	,	,	,	,	,	,	,	,	,	,
1387	,	,	,	,	,	,	,	,	,	,	,	,
1388	,	,	,	,	,	,	,	,	,	,	,	,
1389	,	,	,	,	,	,	,	,	,	,	,	,
1390	,	,	,	,	,	,	,	,	,	,	,	,
1391	,	,	,	,	,	,	,	,	,	,	,	,
1392	,	,	,	,	,	,	,	,	,	,	,	,
1393	,	,	,	,	,	,	,	,	,	,	,	,
1394	,	,	,	,	,	,	,	,	,	,	,	,
1395	,	,	,	,	,	,	,	,	,	,	,	,
1396	,	,	,	,	,	,	,	,	,	,	,	,
1397	,	,	,	,	,	,	,	,	,	,	,	,
1398	,	,	,	,	,	,	,	,	,	,	,	,
1399	,	,	,	,	,	,	,	,	,	,	,	,
1400	,	,	,	,	,	,	,	,	,	,	,	,
1401	,	,	,	,	,	,	,	,	,	,	,	,
1402	,	,	,	,	,	,	,	,	,	,	,	,
1403	,	,	,	,	,	,	,	,	,	,	,	,
1404	,	,	,	,	,	,	,	,	,	,	,	,
1405	,	,	,	,	,	,	,	,	,	,	,	,
1406	,	,	,	,	,	,	,	,	,	,	,	,
1407	,	,	,	,	,	,	,	,	,	,	,	,
1408	,	,	,	,	,	,	,	,	,	,	,	,
1409	,	,	,	,	,	,	,	,	,	,	,	,
1410	,	,	,	,	,	,	,	,	,	,	,	,
1411	,	,	,	,	,	,	,	,	,	,	,	,
1412	,	,	,	,	,	,	,	,	,	,	,	,
1413	,	,	,	,	,	,	,	,	,	,	,	,
1414	,	,	,	,	,	,	,	,	,	,	,	,
1415	,	,	,	,	,	,	,	,	,	,	,	,
1416	,	,	,	,	,	,	,	,	,	,	,	,
1417	,	,	,	,	,	,	,	,	,	,	,	,
1418	,	,	,	,	,	,	,	,	,	,	,	,
1419	,	,	,	,	,	,	,	,	,	,	,	,
1420	,	,	,	,	,	,	,	,	,	,	,	,
1421	,	,	,	,	,	,	,	,	,	,	,	,
1422	,	,	,	,	,	,	,	,	,	,	,	,
1423	,	,	,	,	,	,	,	,	,	,	,	,
1424	,	,	,	,	,	,	,	,	,	,	,	,
1425	,	,	,	,	,	,	,	,	,	,	,	,
1426	,	,	,	,	,	,	,	,	,	,	,	,
1427	,	,	,	,	,	,	,	,	,	,	,	,
1428	,	,	,	,	,	,	,	,	,	,	,	,
1429	,	,	,	,	,	,	,	,	,	,	,	,
1430	,	,	,	,	,	,	,	,	,	,	,	,
1431	,	,	,	,	,	,	,	,	,	,	,	,
1432	,	,	,	,	,	,	,	,	,	,	,	,
1433	,	,	,	,	,	,	,	,	,	,	,	,
1434	,	,	,	,	,	,	,	,	,	,	,	,
1435	,	,	,	,	,	,	,	,	,	,	,	,
1436	,	,	,	,	,	,	,	,	,	,	,	,
1437	,	,	,	,	,	,	,	,	,	,	,	,
1438	,	,	,	,	,	,	,	,	,	,	,	,
1439	,	,	,	,	,	,	,	,	,	,	,	,
1440	,	,	,	,	,	,	,	,	,	,	,	,
1441	,	,	,	,	,	,	,	,	,	,	,	,
1442	,	,	,	,	,	,	,	,	,	,	,	,
1443	,	,	,	,	,	,	,	,	,	,	,	,
1444	,	,	,	,	,	,	,	,	,	,	,	,
1445	,	,	,	,	,	,	,	,	,	,	,	,
1446	,	,	,	,	,	,	,	,	,	,	,	,
1447	,	,	,	,	,	,	,	,	,	,	,	,
1448	,	,	,	,	,	,	,	,	,	,	,	,
1449	,	,	,	,	,	,	,	,	,	,	,	,
1450	,	,	,	,	,	,	,	,	,	,	,	,
1451	,	,	,	,	,	,	,	,	,	,	,	,
1452	,	,	,	,	,	,	,	,	,	,	,	,
1453	,	,	,	,	,	,	,	,	,	,	,	,
1454	,	,	,	,	,	,	,	,	,	,	,	,
1455	,	,	,	,	,	,	,	,	,	,	,	,
1456	,	,	,	,	,	,	,	,	,	,	,	,
1457	,	,	,	,	,	,	,	,	,	,	,	,
1458	,	,	,	,	,	,	,	,	,	,	,	,
1459	,	,	,	,	,	,	,	,	,	,	,	,
1460	,	,	,	,	,	,	,	,	,	,	,	,
1461	,	,	,	,	,	,	,	,	,	,	,	,
1462	,	,	,	,	,	,	,	,	,	,	,	,
1463	,	,	,	,	,	,	,	,	,	,	,	,
1464	,	,	,	,	,	,	,	,	,	,	,	,
1465	,	,	,	,	,	,	,	,	,	,	,	,
1466	,	,	,	,	,	,	,	,	,	,	,	,
1467	,	,	,	,	,	,	,	,	,	,	,	,
1468	,	,	,	,	,	,	,	,	,	,	,	,
1469	,	,	,	,	,	,	,	,	,	,	,	,
1470	,	,	,	,	,	,	,	,	,	,	,	,
1471	,	,	,	,	,	,	,	,	,	,	,	,
1472	,	,	,	,	,	,	,	,	,	,	,	,
1473	,	,	,	,	,	,	,	,	,	,	,	,
1474	,	,	,	,	,	,	,	,	,	,	,	,
1475	,	,	,	,	,	,	,	,	,	,	,	,
1476	,	,	,	,	,	,	,	,	,	,	,	,
1477	,	,	,	,	,	,	,	,	,	,	,	,
1478	,	,	,	,	,	,	,	,	,	,	,	,
1479	,	,	,	,	,	,	,	,	,	,	,	,
1480	,	,	,	,	,	,	,	,	,	,	,	,
1481	,	,	,	,	,	,	,	,	,	,	,	,
1482	,	,	,	,	,	,	,	,	,	,	,	,
1483	,	,	,	,	,	,	,	,	,	,	,	,
1484	,	,	,	,	,	,	,	,	,	,	,	,
1485	,	,	,	,	,	,	,	,	,	,	,	,
1486	,	,	,	,	,	,	,	,	,	,	,	,
1487	,	,	,	,	,	,	,	,	,	,	,	,
1488	,	,	,	,	,	,	,	,	,	,	,	,
1489	,	,	,	,	,	,	,	,	,	,	,	,
1490	,	,	,	,	,	,	,	,	,	,	,	,
1491	,	,	,	,	,	,	,	,	,	,	,	,
1492	,	,	,	,	,	,	,	,	,	,	,	,
1493	,	,	,	,	,	,	,	,	,	,	,	,
1494	,	,	,	,	,	,	,	,	,	,	,	,
1495	,	,	,	,	,	,	,	,	,	,	,	,
1496	,	,	,	,	,	,	,	,	,	,	,	,
1497	,	,	,	,	,	,	,	,	,	,	,	,
1498	,	,	,	,	,	,	,	,	,	,	,	,
1499	,	,	,	,	,	,	,	,	,	,	,	,
1500	,	,	,	,	,	,	,	,	,	,	,	,
1501	,	,	,	,	,	,	,	,	,	,	,	,
1502	,	,	,	,	,	,	,	,	,	,	,	,
1503	,	,	,	,	,	,	,	,	,	,	,	,
1504	,	,	,	,	,	,	,	,	,	,	,	,
1505	,	,	,	,	,	,	,	,	,	,	,	,
1506	,	,	,	,	,	,	,	,	,	,	,	,
1507	,	,	,	,	,	,	,	,	,	,	,	,
1508	,	,	,	,	,	,	,	,	,	,	,	,
1509	,	,	,	,	,	,	,	,	,	,	,	,
1510	,	,	,	,	,	,	,	,	,	,	,	,
1511	,	,	,	,	,	,	,	,	,	,	,	,
1512	,	,	,	,	,	,	,	,	,	,	,	,
1513	,	,	,	,	,	,	,	,	,	,	,	,
1514	,	,	,	,	,	,	,	,	,	,	,	,
1515	,	,	,	,	,	,	,	,	,	,	,	,
1516	,	,	,	,	,	,	,	,	,	,	,	,
1517	,	,	,	,	,	,	,	,	,	,	,	,
1518	,	,	,	,	,	,	,	,	,	,	,	,
1519	,	,	,	,	,	,	,	,	,	,	,	,
1520	,	,	,	,	,	,	,	,	,	,	,	,
1521	,	,	,	,	,	,	,	,	,	,	,	,
1522	,	,	,	,	,	,	,	,	,	,	,	,
1523	,	,	,	,	,	,	,	,	,	,	,	,
1524	,	,	,	,	,	,	,	,	,	,	,	,
1525	,	,	,	,	,	,	,	,	,	,	,	,
1526	,	,	,	,	,	,	,	,	,	,	,	,
1527	,	,	,	,	,	,	,	,	,	,	,	,
1528	,	,	,	,	,	,	,	,	,	,	,	,
1529	,	,	,	,	,	,	,	,	,	,	,	,
1530	,	,	,	,	,	,	,	,	,	,	,	,
1531	,	,	,	,	,	,	,	,	,	,	,	,
1532	,	,	,	,	,	,	,	,	,	,	,	,
1533	,	,	,	,	,	,	,	,	,	,	,	,
1534	,	,	,	,	,	,	,	,	,	,	,	,
1535	,	,	,	,	,	,	,	,	,	,	,	,
1536	,	,	,	,	,	,	,	,	,	,	,	,
1537	,	,	,	,	,	,	,	,	,	,	,	,
1538	,	,	,	,	,	,	,	,	,	,	,	,
1539	,	,	,	,	,	,	,	,	,	,	,	,
1540	,	,	,	,	,	,	,	,	,	,	,	,
1541	,	,	,	,	,	,	,	,	,	,	,	,
1542	,	,	,	,	,	,	,	,	,	,	,	,
1543	,	,	,	,	,	,	,	,	,	,	,	,
1544	,	,	,	,	,	,	,	,	,	,	,	,
1545	,	,	,	,	,	,	,	,	,	,	,	,
1546	,	,	,	,	,	,	,	,	,	,	,	,
1547	,	,	,	,	,	,	,	,	,	,	,	,
1548	,	,	,	,	,	,	,	,	,	,	,	,
1549	,	,	,	,	,	,	,	,	,	,	,	,
1550	,	,	,	,	,	,	,	,	,	,	,	,
1551	,	,	,	,	,	,	,	,	,	,	,	,
1552	,	,	,	,	,	,	,	,	,	,	,	,
1553	,	,	,	,	,	,	,	,	,	,	,	,
1554	,	,	,	,	,	,	,	,	,	,	,	,
1555	,	,	,	,	,	,	,	,	,	,	,	,
1556	,	,	,	,	,	,	,	,	,	,	,	,
1557	,	,	,	,	,	,	,	,	,	,	,	,
1558	,	,	,	,	,	,	,	,	,	,	,	,
1559	,	,	,	,	,	,	,	,	,	,	,	,
1560	,	,	,	,	,	,	,	,	,	,	,	,
1561	,	,	,	,	,	,	,	,	,	,	,	,
1562	,	,	,	,	,	,	,	,	,	,	,	,
1563	,	,	,	,	,	,	,	,	,	,	,	,
1564	,	,	,	,	,	,	,	,	,	,	,	,
1565	,	,	,	,	,	,	,	,	,	,	,	,
1566	,	,	,	,	,	,	,	,	,	,	,	,
1567	,	,	,	,	,	,	,	,	,	,	,	,
1568	,	,	,	,	,	,	,	,	,	,	,	,
1569	,	,	,	,	,	,	,	,	,	,	,	,
1570	,	,	,	,	,	,	,	,	,	,	,	,
1571	,	,	,	,	,	,	,	,	,	,	,	,
1572	,	,	,	,	,	,	,	,	,	,	,	,
1573	,	,	,	,	,	,	,	,	,	,	,	,
1574	,	,	,	,	,	,	,	,	,	,	,	,
1575	,	,	,	,	,	,	,	,	,	,	,	,
1576	,	,	,	,	,	,	,	,	,	,	,	,
1577	,	,	,	,	,	,	,	,	,	,	,	,
1578	,	,	,	,	,	,	,	,	,	,	,	,
1579	,	,	,	,	,	,	,	,	,	,	,	,
1580	,	,	,	,	,	,	,	,	,	,	,	,
1581	,	,	,	,	,	,	,	,	,	,	,	,
1582	,	,	,	,	,	,	,	,	,	,	,	,
1583	,	,	,	,	,	,	,	,	,	,	,	,
1584	,	,	,	,	,	,	,	,	,	,	,	,
1585	,	,	,	,	,	,	,	,	,	,	,	,
1586	,	,	,	,	,	,	,	,	,	,	,	,
1587	,	,	,	,	,	,	,	,	,	,	,	,
1588	,	,	,	,	,	,	,	,	,	,	,	,
1589	,	,	,	,	,	,	,	,	,	,	,	,
1590	,	,	,	,	,	,	,	,	,	,	,	,
1591	,	,	,	,	,	,	,	,	,	,	,	,
1592	,	,	,	,	,	,	,	,	,	,	,	,
1593	,	,	,	,	,	,	,	,	,	,	,	,
1594	,	,	,	,	,	,	,	,	,	,	,	,
1595	,	,	,	,	,	,	,	,	,	,	,	,
1596	,	,	,	,	,	,	,	,	,	,	,	,
1597	,	,	,	,	,	,	,	,	,	,	,	,
1598	,	,	,	,	,	,	,	,	,	,	,	,
1599	,	,	,	,	,	,	,	,	,	,	,	,
1600	,	,	,	,	,	,	,	,	,	,	,	,
1601	,	,	,	,	,	,	,	,	,	,	,	,
1602	,	,	,	,	,	,	,	,	,	,	,	,
1603	,	,	,	,	,	,	,	,	,	,	,	,
1604	,	,	,	,	,	,	,	,	,	,	,	,
1605	,	,	,	,	,	,	,	,	,	,	,	,
1606	,	,	,	,	,	,	,	,	,	,	,	,
1607	,	,	,	,	,	,	,	,	,	,	,	,
1608	,	,	,	,	,	,	,	,	,	,	,	,
1609	,	,	,	,	,	,	,	,	,	,	,	,
1610	,	,	,	,	,	,	,	,	,	,	,	,
1611	,	,	,	,	,	,	,	,	,	,	,	,
1612	,	,	,	,	,	,	,	,	,	,	,	,
1613	,	,	,	,	,	,	,	,	,	,	,	,
1614	,	,	,	,	,	,	,	,	,	,	,	,
1615	,	,	,	,	,	,	,	,	,	,	,	,
1616	,	,	,	,	,	,	,	,	,	,	,	,
1617	,	,	,	,	,	,	,	,	,	,	,	,
1618	,	,	,	,	,	,	,	,	,	,	,	,
1619	,	,	,	,	,	,	,	,	,	,	,	,
1620	,	,	,	,	,	,	,	,	,	,	,	,
1621	,	,	,	,	,	,	,	,	,	,	,	,
1622	,	,	,	,	,	,	,	,	,	,	,	,
1623	,	,	,	,	,	,	,	,	,	,	,	,
1624	,	,	,	,	,	,	,	,	,	,	,	,
1625	,	,	,	,	,	,	,	,	,	,	,	,
1626	,	,	,	,	,	,	,	,	,	,	,	,
1627	,	,	,	,	,	,	,	,	,	,	,	,
1628	,	,	,	,	,	,	,	,	,	,	,	,
1629	,	,	,	,	,	,	,	,	,	,	,	,
1630	,	,	,	,	,	,	,	,	,	,	,	,
1631	,	,	,	,	,	,	,	,	,	,	,	,
1632	,	,	,	,	,	,	,	,	,	,	,	,
1633	,	,	,	,	,	,	,	,	,	,	,	,
1634	,	,	,	,	,	,	,	,	,	,	,	,
1635	,	,	,	,	,	,	,	,	,	,	,	,
1636	,	,	,	,	,	,	,	,	,	,	,	,
1637	,	,	,	,	,	,	,	,	,	,	,	,
1638	,	,	,	,	,	,	,	,	,	,	,	,
1639	,	,	,	,	,	,	,	,	,	,	,	,
1640	,	,	,	,	,	,	,	,	,	,	,	,
1641	,	,	,	,	,	,	,	,	,	,	,	,
1642	,	,	,	,	,	,	,	,	,	,	,	,
1643	,	,	,	,	,	,	,	,	,	,	,	,
1644	,	,	,	,	,	,	,	,	,	,	,	,
1645	,	,	,	,	,	,	,	,	,	,	,	,
1646	,	,	,	,	,	,	,	,	,	,	,	,
1647	,	,	,	,	,	,	,	,	,	,	,	,
1648	,	,	,	,	,	,	,	,	,	,	,	,
1649	,	,	,	,	,	,	,	,	,	,	,	,
1650	,	,	,	,	,	,	,	,	,	,	,	,
1651	,	,	,	,	,	,	,	,	,	,	,	,
1652	,	,	,	,	,	,	,	,	,	,	,	,
1653	,	,	,	,	,	,	,	,	,	,	,	,
1654	,	,	,	,	,	,	,	,	,	,	,	,
1655	,	,	,	,	,	,	,	,	,	,	,	,
1656	,	,	,	,	,	,	,	,	,	,	,	,
1657	,	,	,	,	,	,	,	,	,	,	,	,
1658	,	,	,	,	,	,	,	,	,	,	,	,
1659	,	,	,	,	,	,	,	,	,	,	,	,
1660	,	,	,	,	,	,	,	,	,	,	,	,
1661	,	,	,	,	,	,	,	,	,	,	,	,
1662	,	,	,	,	,	,	,	,	,	,	,	,
1663	,	,	,	,	,	,	,	,	,	,	,	,
1664	,	,	,	,	,	,	,	,	,	,	,	,
1665	,	,	,	,	,	,	,	,	,	,	,	,
1666	,	,	,	,	,	,	,	,	,	,	,	,
1667	,	,	,	,	,	,	,	,	,	,	,	,
1668	,	,	,	,	,	,	,	,	,	,	,	,
1669	,	,	,	,	,	,	,	,	,	,	,	,
1670	,	,	,	,	,	,	,	,	,	,	,	,
1671	,	,	,	,	,	,	,	,	,	,	,	,
1672	,	,	,	,	,	,	,	,	,	,	,	,
1673	,	,	,	,	,	,	,	,	,	,	,	,
1674	,	,	,	,	,	,	,	,	,	,	,	,
1675	,	,	,	,	,	,	,	,	,	,	,	,
1676	,	,	,	,	,	,	,	,	,	,	,	,
1677	,	,	,	,	,	,	,	,	,	,	,	,
1678	,	,	,	,	,	,	,	,	,	,	,	,
1679	,	,	,	,	,	,	,	,	,	,	,	,
1680	,	,	,	,	,	,	,	,	,	,	,	,
1681	,	,	,	,	,	,	,	,	,	,	,	,
1682	,	,	,	,	,	,	,	,	,	,	,	,
1683	,	,	,	,	,	,	,	,	,	,	,	,
1684	,	,	,	,	,	,	,	,	,	,	,	,
1685	,	,	,	,	,	,	,	,	,	,	,	,
1686	,	,	,	,	,	,	,	,	,	,	,	,
1687	,	,	,	,	,	,	,	,	,	,	,	,
1688	,	,	,	,	,	,	,	,	,	,	,	,
1689	,	,	,	,	,	,	,	,	,	,	,	,
1690	,	,	,	,	,	,	,	,	,	,	,	,
1691	,	,	,	,	,	,	,	,	,	,	,	,
1692	,	,	,	,	,	,	,	,	,	,	,	,
1693	,	,	,	,	,	,	,	,	,	,	,	,
1694	,	,	,	,	,	,	,	,	,	,	,	,
1695	,	,	,	,	,	,	,	,	,	,	,	,
1696	,	,	,	,	,	,	,	,	,	,	,	,
1697	,	,	,	,	,	,	,	,	,	,	,	,
1698	,	,	,	,	,	,	,	,	,	,	,	,
1699	,	,	,	,	,	,	,	,	,	,	,	,
1700	,	,	,	,	,	,	,	,	,	,	,	,
1701	,	,	,	,	,	,	,	,	,	,	,	,
1702	,	,	,	,	,	,	,	,	,	,	,	,
1703	,	,	,	,	,	,	,	,	,	,	,	,
1704	,	,	,	,	,	,	,	,	,	,	,	,
1705	,	,	,	,	,	,	,	,	,	,	,	,
1706	,	,	,	,	,	,	,	,	,	,	,	,
1707	,	,	,	,	,	,	,	,	,	,	,	,
1708	,	,	,	,	,	,	,	,	,	,	,	,
1709	,	,	,	,	,	,	,	,	,	,	,	,
1710	,	,	,	,	,	,	,	,	,	,	,	,
1711	,	,	,	,	,	,	,	,	,	,	,	,
1712	,	,	,	,	,	,	,	,	,	,	,	,
1713	,	,	,	,	,	,	,	,	,	,	,	,
1714	,	,	,	,	,	,	,	,	,	,	,	,
1715	,	,	,	,	,	,	,	,	,	,	,	,
1716	,	,	,	,	,	,	,	,	,	,	,	,
1717	,	,	,	,	,	,	,	,	,	,	,	,
1718	,	,	,	,	,	,	,	,	,	,	,	,
1719	,	,	,	,	,	,	,	,	,	,	,	,
1720	,	,	,	,	,	,	,	,	,	,	,	,
1721	,	,	,	,	,	,	,	,	,	,	,	,
1722	,	,	,	,	,	,	,	,	,	,	,	,
1723	,	,	,	,	,	,	,	,	,	,	,	,
1724	,	,	,	,	,	,	,	,	,	,	,	,
1725	,	,	,	,	,	,	,	,	,	,	,	,
1726	,	,	,	,	,	,	,	,	,	,	,	,
1727	,	,	,	,	,	,	,	,	,	,	,	,
1728	,	,	,	,	,	,	,	,	,	,	,	,
1729	,	,	,	,	,	,	,	,	,	,	,	,
1730	,	,	,	,	,	,	,	,	,	,	,	,
1731	,	,	,	,	,	,	,	,	,	,	,	,
1732	,	,	,	,	,	,	,	,	,	,	,	,
1733	,	,	,	,	,	,	,	,	,	,	,	,
1734	,	,	,	,	,	,	,	,	,	,	,	,
1735	,	,	,	,	,	,	,	,	,	,	,	,
1736	,	,	,	,	,	,	,	,	,	,	,	,
1737	,	,	,	,	,	,	,	,	,	,	,	,
1738	,	,	,	,	,	,	,	,	,	,	,	,
1739	,	,	,	,	,	,	,	,	,	,	,	,
1740	,	,	,	,	,	,	,	,	,	,	,	,
1741	,	,	,	,	,	,	,	,	,	,	,	,
1742	,	,	,	,	,	,	,	,	,	,	,	,
1743	,	,	,	,	,	,	,	,	,	,	,	,
1744	,	,	,	,	,	,	,	,	,	,	,	,
1745	,	,	,	,	,	,	,	,	,	,	,	,
1746	,	,	,	,	,	,	,	,	,	,	,	,
1747	,	,	,	,	,	,	,	,	,	,	,	,
1748	,	,	,	,	,	,	,	,	,	,	,	,
1749	,	,	,	,	,	,	,	,	,	,	,	,
1750	,	,	,	,	,	,	,	,	,	,	,	,
1751	,	,	,	,	,	,	,	,	,	,	,	,
1752	,	,	,	,	,	,	,	,	,	,	,	,
1753	,	,	,	,	,	,	,	,	,	,	,	,
1754	,	,	,	,	,	,	,	,	,	,	,	,
1755	,	,	,	,	,	,	,	,	,	,	,	,
1756	,	,	,	,	,	,	,	,	,	,	,	,
1757	,	,	,	,	,	,	,	,	,	,	,	,
1758	,	,	,	,	,	,	,	,	,	,	,	,
1759	,	,	,	,	,	,	,	,	,	,	,	,
1760	,	,	,	,	,	,	,	,	,	,	,	,
1761	,	,	,	,	,	,	,	,	,	,	,	,
1762	,	,	,	,	,	,	,	,	,	,	,	,
1763	,	,	,	,	,	,	,	,	,	,	,	,
1764	,	,	,	,	,	,	,	,	,	,	,	,
1765	,	,	,	,	,	,	,	,	,	,	,	,
1766	,	,	,	,	,	,	,	,	,	,	,	,
1767	,	,	,	,	,	,	,	,	,	,	,	,
1768	,	,	,	,	,	,	,	,	,	,	,	,
1769	,	,	,	,	,	,	,	,	,	,	,	,
1770	,	,	,	,	,	,	,	,	,	,	,	,
1771	,	,	,	,	,	,	,	,	,	,	,	,
1772	,	,	,	,	,	,	,	,	,	,	,	,
1773	,	,	,	,	,	,	,	,	,	,	,	,
1774	,	,	,	,	,	,	,	,	,	,	,	,
1775	,	,	,	,	,	,	,	,	,	,	,	,
1776	,	,	,	,	,	,	,	,	,	,	,	,
1777	,	,	,	,	,	,	,	,	,	,	,	,
1778	,	,	,	,	,	,	,	,	,	,	,	,
1779	,	,	,	,	,	,	,	,	,	,	,	,
1780	,	,	,	,	,	,	,	,	,	,	,	,
1781	,	,	,	,	,	,	,	,	,	,	,	,
1782	,	,	,	,	,	,	,	,	,	,	,	,
1783	,	,	,	,	,	,	,	,	,	,	,	,
1784	,	,	,	,	,	,	,	,	,	,	,	,
1785	,	,	,	,	,	,	,	,	,	,	,	,
1786	,	,	,	,	,	,	,	,	,	,	,	,
1787	,	,	,	,	,	,	,	,	,	,	,	,
1788	,	,	,	,	,	,	,	,	,	,	,	,
1789	,	,	,	,	,	,	,	,	,	,	,	,
1790	,	,	,	,	,	,	,	,	,	,	,	,
1791	,	,	,	,	,	,	,	,	,	,	,	,
1792	,	,	,	,	,	,	,	,	,	,	,	,
1793	,	,	,	,	,	,	,	,	,	,	,	,
1794	,	,	,	,	,	,	,	,	,	,	,	,
1795	,	,	,	,	,	,	,	,	,	,	,	,
1796	,	,	,	,	,	,	,	,	,	,	,	,
1797	,	,	,	,	,	,	,	,	,	,	,	,
1798	,	,	,	,	,	,	,	,	,	,	,	,
1799	,	,	,	,	,	,	,	,	,	,	,	,
1800	,	,	,	,	,	,	,	,	,	,	,	,
1801	,	,	,	,	,	,	,	,	,	,	,	,
1802	,	,	,	,	,	,	,	,	,	,	,	,
1803	,	,	,	,	,	,	,	,	,	,	,	,
1804	,	,	,	,	,	,	,	,	,	,	,	,
1805	,	,	,	,	,	,	,	,	,	,	,	,
1806	,	,	,	,	,	,	,	,	,	,	,	,
1807	,	,	,	,	,	,	,	,	,	,	,	,
1808	,	,	,	,	,	,	,	,	,	,	,	,
1809	,	,	,	,	,	,	,	,	,	,	,	,
1810	,	,	,	,	,	,	,	,	,	,	,	,
1811	,	,	,	,	,	,	,	,	,	,	,	,
1812	,	,	,	,	,	,	,	,	,	,	,	,
1813	,	,	,	,	,	,	,	,	,	,	,	,
1814	,	,	,	,	,	,	,	,	,	,	,	,
1815	,	,	,	,	,	,	,	,	,	,	,	,
1816	,	,	,	,	,	,	,	,	,	,	,	,
1817	,	,	,	,	,	,	,	,	,	,	,	,
1818	,	,	,	,	,	,	,	,	,	,	,	,
1819	,	,	,	,	,	,	,	,	,	,	,	,
1820	,	,	,	,	,	,	,	,	,	,	,	,
1821	,	,	,	,	,	,	,	,	,	,	,	,
1822	,	,	,	,	,	,	,	,	,	,	,	,
1823	,	,	,	,	,	,	,	,	,	,	,	,
1824	,	,	,	,	,	,	,	,	,	,	,	,
1825	,	,	,	,	,	,	,	,	,	,	,	,
1826	,	,	,	,	,	,	,	,	,	,	,	,
1827	,	,	,	,	,	,	,	,	,	,	,	,
1828	,	,	,	,	,	,	,	,	,	,	,	,
1829	,	,	,	,	,	,	,	,	,	,	,	,
1830	,	,	,	,	,	,	,	,	,	,	,	,
1831	,	,	,	,	,	,	,	,	,	,	,	,
1832	,	,	,	,	,	,	,	,	,	,	,	,
1833	,	,	,	,	,	,	,	,	,	,	,	,
1834	,	,	,	,	,	,	,	,	,	,	,	,
1835	,	,	,	,	,	,	,	,	,	,	,	,
1836	,	,	,	,	,	,	,	,	,	,	,	,
1837	,	,	,	,	,	,	,	,	,	,	,	,
1838	,	,	,	,	,	,	,	,	,	,	,	,
1839	,	,	,	,	,	,	,	,	,	,	,	,
1840	,	,	,	,	,	,	,	,	,	,	,	,
1841	,	,	,	,	,	,	,	,	,	,	,	,
1842	,	,	,	,	,	,	,	,	,	,	,	,
1843	,	,	,	,	,	,	,	,	,	,	,	,
1844	,	,	,	,	,	,	,	,	,	,	,	,
1845	,	,	,	,	,	,	,	,	,	,	,	,
1846	,	,	,	,	,	,	,	,	,	,	,	,
1847	,	,	,	,	,	,	,	,	,	,	,	,
1848	,	,	,	,	,	,	,	,	,	,	,	,
1849	,	,	,	,	,	,	,	,	,	,	,	,
1850	,	,	,	,	,	,	,	,	,	,	,	,
1851	,	,	,	,	,	,	,	,	,	,	,	,
1852	,	,	,	,	,	,	,	,	,	,	,	,
1853	,	,	,	,	,	,	,	,	,	,	,	,
1854	,	,	,	,	,	,	,	,	,	,	,	,
1855	,	,	,	,	,	,	,	,	,	,	,	,
1856	,	,	,	,	,	,	,	,	,	,	,	,
1857	,	,	,	,	,	,	,	,	,	,	,	,
1858	,	,	,	,	,	,	,	,	,	,	,	,
1859	,	,	,	,	,	,	,	,	,	,	,	,
1860	,	,	,	,	,	,	,	,	,	,	,	,
1861	,	,	,	,	,	,	,	,	,	,	,	,
1862	,	,	,	,	,	,	,	,	,	,	,	,
1863	,	,	,	,	,	,	,	,	,	,	,	,
1864	,	,	,	,	,	,	,	,	,	,	,	,
1865	,	,	,	,	,	,	,	,	,	,	,	,
1866	,	,	,	,	,	,	,	,	,	,	,	,
1867	,	,	,	,	,	,	,	,	,	,	,	,
1868	,	,	,	,	,	,	,	,	,	,	,	,
1869	,	,	,	,	,	,	,	,	,	,	,	,
1870	,	,	,	,	,	,	,	,	,	,	,	,
1871	,	,	,	,	,	,	,	,	,	,	,	,
1872	,	,	,	,	,	,	,	,	,	,	,	,
1873	,	,	,	,	,	,	,	,	,	,	,	,
1874	,	,	,	,	,	,	,	,	,	,	,	,
1875	,	,	,	,	,	,	,	,	,	,	,	,
1876	,	,	,	,	,	,	,	,	,	,	,	,
1877	,	,	,	,	,	,	,	,	,	,	,	,
1878	,	,	,	,	,	,	,	,	,	,	,	,
1879	,	,	,	,	,	,	,	,	,	,	,	,
1880	,	,	,	,	,	,	,	,	,	,	,	,
1881	,	,	,	,	,	,	,	,	,	,	,	,
1882	,	,	,	,	,	,	,	,	,	,	,	,
1883	,	,	,	,	,	,	,	,	,	,	,	,
1884	,	,	,	,	,	,	,	,	,	,	,	,
1885	,	,	,	,	,	,	,	,	,	,	,	,
1886	,	,	,	,	,	,	,	,	,	,	,	,
1887	,	,	,	,	,	,	,	,	,	,	,	,
1888	,	,	,	,	,	,	,	,	,	,	,	,
1889	,	,	,	,	,	,	,	,	,	,	,	,
1890	,	,	,	,	,	,	,	,	,	,	,	,
1891	,	,	,	,	,	,	,	,	,	,	,	,
1892	,	,	,	,	,	,	,	,	,	,	,	,
1893	,	,	,	,	,	,	,	,	,	,	,	,
1894	,	,	,	,	,	,	,	,	,	,	,	,
1895	,	,	,	,	,	,	,	,	,	,	,	,
1896	,	,	,	,	,	,	,	,	,	,	,	,
1897	,	,	,	,	,	,	,	,	,	,	,	,
1898	,	,	,	,	,	,	,	,	,	,	,	,
1899	,	,	,	,	,	,	,	,	,	,	,	,
1900	,	,	,	,	,	,	,	,	,	,	,	,
1901	,	,	,	,	,	,	,	,	,	,	,	,
1902	,	,	,	,	,	,	,	,	,	,	,	,
1903	,	,	,	,	,	,	,	,	,	,	,	,
1904	,	,	,	,	,	,	,	,	,	,	,	,
1905	,	,	,	,	,	,	,	,	,	,	,	,
1906	,	,	,	,	,	,	,	,	,	,	,	,
1907	,	,	,	,	,	,	,	,	,	,	,	,
1908	,	,	,	,	,	,	,	,	,	,	,	,
1909	,	,	,	,	,	,	,	,	,	,	,	,
1910	,	,	,	,	,	,	,	,	,	,	,	,
1911	,	,	,	,	,	,	,	,	,	,	,	,
1912	,	,	,	,	,	,	,	,	,	,	,	,
1913	,	,	,	,	,	,	,	,	,	,	,	,
1914	,	,	,	,	,	,	,	,	,	,	,	,
1915	,	,	,	,	,	,	,	,	,	,	,	,
1916	,	,	,	,	,	,	,	,	,	,	,	,
1917	,	,	,	,	,	,	,	,	,	,	,	,
1918	,	,	,	,	,	,	,	,	,	,	,	,
1919	,	,	,	,	,	,	,	,	,	,	,	,
1920	,	,	,	,	,	,	,	,	,	,	,	,
1921	,	,	,	,	,	,	,	,	,	,	,	,
1922	,	,	,	,	,	,	,	,	,	,	,	,
1923	,	,	,	,	,	,	,	,	,	,	,	,
1924	,	,	,	,	,	,	,	,	,	,	,	,
1925	,	,	,	,	,	,	,	,	,	,	,	,
1926	,	,	,	,	,	,	,	,	,	,	,	,
1927	,	,	,	,	,	,	,	,	,	,	,	,
1928	,	,	,	,	,	,	,	,	,	,	,	,
1929	,	,	,	,	,	,	,	,	,	,	,	,
1930	,	,	,	,	,	,	,	,	,	,	,	,
1931	,	,	,	,	,	,	,	,	,	,	,	,
1932	,	,	,	,	,	,	,	,	,	,	,	,
1933	,	,	,	,	,	,	,	,	,	,	,	,
1934	,	,	,	,	,	,	,	,	,	,	,	,
1935	,	,	,	,	,	,	,	,	,	,	,	,
1936	,	,	,	,	,	,	,	,	,	,	,	,
1937	,	,	,	,	,	,	,	,	,	,	,	,
1938	,	,	,	,	,	,	,	,	,	,	,	,
1939	,	,	,	,	,	,	,	,	,	,	,	,
1940	,	,	,	,	,	,	,	,	,	,	,	,
1941	,	,	,	,	,	,	,	,	,	,	,	,
1942	,	,	,	,	,	,	,	,	,	,	,	,
1943	,	,	,	,	,	,	,	,	,	,	,	,
1944	,	,	,	,	,	,	,	,	,	,	,	,
1945	,	,	,	,	,	,	,	,	,	,	,	,
1946	,	,	,	,	,	,	,	,	,	,	,	,
1947	,	,	,	,	,	,	,	,	,	,	,	,
1948	,	,	,	,	,	,	,	,	,	,	,	,
1949	,	,	,	,	,	,	,	,	,	,	,	,
1950	,	,	,	,	,	,	,	,	,	,	,	,
1951	,	,	,	,	,	,	,	,	,	,	,	,
1952	,	,	,	,	,	,	,	,	,	,	,	,
1953	,	,	,	,	,	,	,	,	,	,	,	,
1954	,	,	,	,	,	,	,	,	,	,	,	,
1955	,	,	,	,	,	,	,	,	,	,	,	,
1956	,	,	,	,	,	,	,	,	,	,	,	,
1957	,	,	,	,	,	,	,	,	,	,	,	,
1958	,	,	,	,	,	,	,	,	,	,	,	,
1959	,	,	,	,	,	,	,	,	,	,	,	,
1960	,	,	,	,	,	,	,	,	,	,	,	,
1961	,	,	,	,	,	,	,	,	,	,	,	,
1962	,	,	,	,	,	,	,	,	,	,	,	,
1963	,	,	,	,	,	,	,	,	,	,	,	,
1964	,	,	,	,	,	,	,	,	,	,	,	,
1965	,	,	,	,	,	,	,	,	,	,	,	,
1966	,	,	,	,	,	,	,	,	,	,	,	,
1967	,	,	,	,	,	,	,	,	,	,	,	,
1968	,	,	,	,	,	,	,	,	,	,	,	,
1969	,	,	,	,	,	,	,	,	,	,	,	,
1970	,	,	,	,	,	,	,	,	,	,	,	,
1971	,	,	,	,	,	,	,	,	,	,	,	,
1972	,	,	,	,	,	,	,	,	,	,	,	,
1973	,	,	,	,	,	,	,	,	,	,	,	,
1974	,	,	,	,	,	,	,	,	,	,	,	,
1975	,	,	,	,	,	,	,	,	,	,	,	,
1976	,	,	,	,	,	,	,	,	,	,	,	,
1977	,	,	,	,	,	,	,	,	,	,	,	,
1978	,	,	,	,	,	,	,	,	,	,	,	,
1979	,	,	,	,	,	,	,	,	,	,	,	,
1980	,	,	,	,	,	,	,	,	,	,	,	,
1981	,	,	,	,	,	,	,	,	,	,	,	,
1982	,	,	,	,	,	,	,	,	,	,	,	,
1983	,	,	,	,	,	,	,	,	,	,	,	,
1984	,	,	,	,	,	,	,	,	,	,	,	,
1985	,	,	,	,	,	,	,	,	,	,	,	,
1986	,	,	,	,	,	,	,	,	,	,	,	,
1987	,	,	,	,	,	,	,	,	,	,	,	,
1988	,	,	,	,	,	,	,	,	,	,	,	,
1989	,	,	,	,	,	,	,	,	,	,	,	,
1990	,	,	,	,	,	,	,	,	,	,	,	,
1991	,	,	,	,	,	,	,	,	,	,	,	,
1992	,	,	,	,	,	,	,	,	,	,	,	,
1993	,	,	,	,	,	,	,	,	,	,	,	,
1994	,	,	,	,	,	,	,	,	,	,	,	,
1995	,	,	,	,	,	,	,	,	,	,	,	,
1996	,	,	,	,	,	,	,	,	,	,	,	,
1997	,	,	,	,	,	,	,	,	,	,	,	,
1998	,	,	,	,	,	,	,	,	,	,	,	,
1999	,	,	,	,	,	,	,	,	,	,	,	,
[truncated: 13,001 more rows]

## Sheet: Fig1_supp1_panelB_rep2
	tetO28 TetR 0.125uM	tetO28 TetR 0.25uM	tetO28 TetR 0.5uM	tetO28 TetR 1.0uM	tetO28 TetR 2.0uM	tetO28 TetR 0uM	parS20 TetR 0uM	parS20 TetR 0.125uM	parS20 TetR 0.5uM	parS20 TetR 1.0uM	parS20 TetR 2.0uM	parS20 TetR 0.25uM
1	0.000, 0.034	0.000, -0.001	0.000, 0.004	0.000, 0.003	0.000, -0.001	0.000, 0.014	0.000, 0.051	0.000, 0.060	0.000, 0.036	0.000, 0.041	0.000, 0.029	0.000, 0.028
2	0.200, 0.032	0.200, -0.001	0.200, 0.004	0.200, 0.003	0.200, -0.001	0.200, 0.013	0.200, 0.050	0.200, 0.058	0.200, 0.035	0.200, 0.039	0.200, 0.028	0.200, 0.027
3	0.400, 0.030	0.400, -0.001	0.400, 0.003	0.400, 0.002	0.400, -0.001	0.400, 0.013	0.400, 0.049	0.400, 0.057	0.400, 0.035	0.400, 0.038	0.400, 0.027	0.400, 0.027
4	0.600, 0.028	0.600, -0.001	0.600, 0.003	0.600, 0.002	0.600, -0.001	0.600, 0.012	0.600, 0.048	0.600, 0.055	0.600, 0.034	0.600, 0.037	0.600, 0.026	0.600, 0.026
5	0.800, 0.026	0.800, -0.002	0.800, 0.003	0.800, 0.002	0.800, -0.002	0.800, 0.011	0.800, 0.047	0.800, 0.053	0.800, 0.033	0.800, 0.035	0.800, 0.025	0.800, 0.025
6	1.000, 0.023	1.000, -0.002	1.000, 0.003	1.000, 0.002	1.000, -0.002	1.000, 0.011	1.000, 0.046	1.000, 0.052	1.000, 0.032	1.000, 0.034	1.000, 0.024	1.000, 0.024
7	1.200, 0.021	1.200, -0.002	1.200, 0.002	1.200, 0.001	1.200, -0.002	1.200, 0.010	1.200, 0.045	1.200, 0.050	1.200, 0.031	1.200, 0.032	1.200, 0.023	1.200, 0.023
8	1.400, 0.019	1.400, -0.002	1.400, 0.002	1.400, 0.001	1.400, -0.003	1.400, 0.009	1.400, 0.044	1.400, 0.048	1.400, 0.030	1.400, 0.031	1.400, 0.021	1.400, 0.022
9	1.600, 0.017	1.600, -0.002	1.600, 0.002	1.600, 0.001	1.600, -0.003	1.600, 0.009	1.600, 0.042	1.600, 0.046	1.600, 0.029	1.600, 0.029	1.600, 0.020	1.600, 0.020
10	1.800, 0.016	1.800, -0.002	1.800, 0.002	1.800, 0.001	1.800, -0.003	1.800, 0.008	1.800, 0.041	1.800, 0.045	1.800, 0.027	1.800, 0.028	1.800, 0.019	1.800, 0.019
11	2.000, 0.015	2.000, -0.002	2.000, 0.002	2.000, 0.001	2.000, -0.003	2.000, 0.008	2.000, 0.040	2.000, 0.043	2.000, 0.026	2.000, 0.027	2.000, 0.017	2.000, 0.018
12	2.200, 0.014	2.200, -0.002	2.200, 0.002	2.200, 0.001	2.200, -0.004	2.200, 0.007	2.200, 0.038	2.200, 0.042	2.200, 0.025	2.200, 0.026	2.200, 0.016	2.200, 0.017
13	2.400, 0.013	2.400, -0.002	2.400, 0.002	2.400, 0.001	2.400, -0.004	2.400, 0.007	2.400, 0.037	2.400, 0.041	2.400, 0.023	2.400, 0.025	2.400, 0.015	2.400, 0.017
14	2.600, 0.012	2.600, -0.002	2.600, 0.001	2.600, 0.001	2.600, -0.003	2.600, 0.007	2.600, 0.036	2.600, 0.040	2.600, 0.022	2.600, 0.024	2.600, 0.014	2.600, 0.016
15	2.800, 0.012	2.800, -0.001	2.800, 0.001	2.800, 0.001	2.800, -0.003	2.800, 0.007	2.800, 0.035	2.800, 0.038	2.800, 0.021	2.800, 0.022	2.800, 0.013	2.800, 0.015
16	3.000, 0.011	3.000, -0.001	3.000, 0.001	3.000, 0.001	3.000, -0.003	3.000, 0.007	3.000, 0.034	3.000, 0.037	3.000, 0.020	3.000, 0.021	3.000, 0.012	3.000, 0.015
17	3.200, 0.010	3.200, -0.001	3.200, 0.001	3.200, 0.000	3.200, -0.003	3.200, 0.007	3.200, 0.033	3.200, 0.036	3.200, 0.019	3.200, 0.020	3.200, 0.012	3.200, 0.014
18	3.400, 0.009	3.400, -0.001	3.400, 0.001	3.400, 0.001	3.400, -0.003	3.400, 0.007	3.400, 0.032	3.400, 0.035	3.400, 0.019	3.400, 0.019	3.400, 0.011	3.400, 0.014
19	3.600, 0.009	3.600, -0.001	3.600, 0.001	3.600, 0.001	3.600, -0.003	3.600, 0.006	3.600, 0.031	3.600, 0.034	3.600, 0.018	3.600, 0.018	3.600, 0.011	3.600, 0.013
20	3.800, 0.008	3.800, -0.001	3.800, 0.002	3.800, 0.001	3.800, -0.003	3.800, 0.006	3.800, 0.030	3.800, 0.033	3.800, 0.017	3.800, 0.017	3.800, 0.011	3.800, 0.012
21	4.000, 0.007	4.000, -0.001	4.000, 0.002	4.000, 0.001	4.000, -0.003	4.000, 0.006	4.000, 0.030	4.000, 0.032	4.000, 0.017	4.000, 0.016	4.000, 0.011	4.000, 0.012
22	4.200, 0.007	4.200, -0.001	4.200, 0.002	4.200, 0.001	4.200, -0.003	4.200, 0.006	4.200, 0.029	4.200, 0.032	4.200, 0.017	4.200, 0.016	4.200, 0.011	4.200, 0.012
23	4.400, 0.006	4.400, -0.001	4.400, 0.002	4.400, 0.001	4.400, -0.003	4.400, 0.006	4.400, 0.028	4.400, 0.031	4.400, 0.016	4.400, 0.016	4.400, 0.010	4.400, 0.011
24	4.600, 0.005	4.600, -0.001	4.600, 0.002	4.600, 0.001	4.600, -0.003	4.600, 0.006	4.600, 0.028	4.600, 0.031	4.600, 0.016	4.600, 0.015	4.600, 0.010	4.600, 0.011
25	4.800, 0.005	4.800, -0.001	4.800, 0.002	4.800, 0.001	4.800, -0.003	4.800, 0.005	4.800, 0.028	4.800, 0.031	4.800, 0.016	4.800, 0.015	4.800, 0.010	4.800, 0.011
26	5.000, 0.004	5.000, -0.001	5.000, 0.002	5.000, 0.001	5.000, -0.004	5.000, 0.005	5.000, 0.027	5.000, 0.030	5.000, 0.016	5.000, 0.015	5.000, 0.010	5.000, 0.010
27	5.200, 0.004	5.200, -0.001	5.200, 0.002	5.200, 0.001	5.200, -0.004	5.200, 0.005	5.200, 0.027	5.200, 0.030	5.200, 0.015	5.200, 0.014	5.200, 0.009	5.200, 0.010
28	5.400, 0.003	5.400, -0.001	5.400, 0.002	5.400, 0.001	5.400, -0.004	5.400, 0.005	5.400, 0.026	5.400, 0.029	5.400, 0.015	5.400, 0.014	5.400, 0.009	5.400, 0.009
29	5.600, 0.003	5.600, -0.001	5.600, 0.002	5.600, 0.001	5.600, -0.004	5.600, 0.004	5.600, 0.026	5.600, 0.029	5.600, 0.015	5.600, 0.014	5.600, 0.008	5.600, 0.009
30	5.800, 0.003	5.800, -0.001	5.800, 0.002	5.800, 0.001	5.800, -0.004	5.800, 0.004	5.800, 0.025	5.800, 0.028	5.800, 0.014	5.800, 0.013	5.800, 0.008	5.800, 0.009
31	6.000, 0.003	6.000, -0.001	6.000, 0.002	6.000, 0.001	6.000, -0.004	6.000, 0.003	6.000, 0.025	6.000, 0.027	6.000, 0.014	6.000, 0.013	6.000, 0.007	6.000, 0.008
32	6.200, 0.003	6.200, -0.001	6.200, 0.002	6.200, 0.000	6.200, -0.004	6.200, 0.003	6.200, 0.024	6.200, 0.027	6.200, 0.014	6.200, 0.013	6.200, 0.007	6.200, 0.008
33	6.400, 0.003	6.400, -0.001	6.400, 0.002	6.400, 0.000	6.400, -0.004	6.400, 0.003	6.400, 0.024	6.400, 0.026	6.400, 0.013	6.400, 0.013	6.400, 0.006	6.400, 0.008
34	6.600, 0.002	6.600, -0.001	6.600, 0.001	6.600, 0.000	6.600, -0.004	6.600, 0.003	6.600, 0.023	6.600, 0.026	6.600, 0.013	6.600, 0.012	6.600, 0.006	6.600, 0.008
35	6.800, 0.002	6.800, -0.001	6.800, 0.001	6.800, 0.000	6.800, -0.003	6.800, 0.003	6.800, 0.023	6.800, 0.025	6.800, 0.013	6.800, 0.012	6.800, 0.006	6.800, 0.007
36	7.000, 0.002	7.000, -0.001	7.000, 0.001	7.000, 0.000	7.000, -0.003	7.000, 0.003	7.000, 0.022	7.000, 0.024	7.000, 0.012	7.000, 0.012	7.000, 0.006	7.000, 0.007
37	7.200, 0.002	7.200, -0.001	7.200, 0.001	7.200, -0.000	7.200, -0.004	7.200, 0.003	7.200, 0.021	7.200, 0.024	7.200, 0.012	7.200, 0.011	7.200, 0.005	7.200, 0.007
38	7.400, 0.002	7.400, -0.001	7.400, 0.001	7.400, -0.000	7.400, -0.004	7.400, 0.003	7.400, 0.020	7.400, 0.023	7.400, 0.011	7.400, 0.011	7.400, 0.005	7.400, 0.007
39	7.600, 0.002	7.600, -0.001	7.600, 0.001	7.600, -0.000	7.600, -0.004	7.600, 0.003	7.600, 0.019	7.600, 0.022	7.600, 0.011	7.600, 0.010	7.600, 0.005	7.600, 0.006
40	7.800, 0.001	7.800, -0.001	7.800, 0.000	7.800, -0.000	7.800, -0.004	7.800, 0.003	7.800, 0.019	7.800, 0.022	7.800, 0.011	7.800, 0.010	7.800, 0.005	7.800, 0.006
41	8.000, 0.001	8.000, -0.001	8.000, 0.000	8.000, -0.000	8.000, -0.004	8.000, 0.003	8.000, 0.018	8.000, 0.021	8.000, 0.010	8.000, 0.010	8.000, 0.005	8.000, 0.006
42	8.200, 0.001	8.200, -0.001	8.200, -0.000	8.200, -0.000	8.200, -0.005	8.200, 0.002	8.200, 0.018	8.200, 0.021	8.200, 0.010	8.200, 0.010	8.200, 0.004	8.200, 0.006
43	8.400, 0.001	8.400, -0.001	8.400, -0.000	8.400, -0.000	8.400, -0.005	8.400, 0.002	8.400, 0.017	8.400, 0.020	8.400, 0.009	8.400, 0.010	8.400, 0.004	8.400, 0.006
44	8.600, 0.001	8.600, -0.001	8.600, -0.000	8.600, -0.000	8.600, -0.005	8.600, 0.003	8.600, 0.017	8.600, 0.020	8.600, 0.009	8.600, 0.009	8.600, 0.004	8.600, 0.006
45	8.800, 0.001	8.800, -0.001	8.800, -0.000	8.800, -0.000	8.800, -0.005	8.800, 0.003	8.800, 0.016	8.800, 0.019	8.800, 0.009	8.800, 0.009	8.800, 0.004	8.800, 0.006
46	9.000, 0.001	9.000, -0.000	9.000, 0.000	9.000, -0.000	9.000, -0.005	9.000, 0.003	9.000, 0.016	9.000, 0.019	9.000, 0.008	9.000, 0.009	9.000, 0.004	9.000, 0.005
47	9.200, 0.000	9.200, -0.000	9.200, 0.000	9.200, -0.000	9.200, -0.005	9.200, 0.003	9.200, 0.016	9.200, 0.018	9.200, 0.008	9.200, 0.008	9.200, 0.004	9.200, 0.005
48	9.400, 0.001	9.400, -0.000	9.400, 0.001	9.400, -0.001	9.400, -0.005	9.400, 0.003	9.400, 0.016	9.400, 0.017	9.400, 0.008	9.400, 0.008	9.400, 0.003	9.400, 0.005
49	9.600, 0.001	9.600, 0.000	9.600, 0.001	9.600, -0.001	9.600, -0.005	9.600, 0.003	9.600, 0.015	9.600, 0.017	9.600, 0.007	9.600, 0.008	9.600, 0.003	9.600, 0.005
50	9.800, 0.001	9.800, 0.000	9.800, 0.000	9.800, -0.001	9.800, -0.005	9.800, 0.003	9.800, 0.015	9.800, 0.016	9.800, 0.007	9.800, 0.007	9.800, 0.002	9.800, 0.005
51	10.000, 0.001	10.000, 0.000	10.000, 0.000	10.000, -0.001	10.000, -0.005	10.000, 0.003	10.000, 0.015	10.000, 0.016	10.000, 0.007	10.000, 0.007	10.000, 0.002	10.000, 0.004
52	10.200, 0.001	10.200, 0.000	10.200, 0.000	10.200, -0.001	10.200, -0.005	10.200, 0.002	10.200, 0.015	10.200, 0.016	10.200, 0.007	10.200, 0.007	10.200, 0.002	10.200, 0.004
53	10.400, 0.001	10.400, 0.001	10.400, 0.000	10.400, -0.001	10.400, -0.005	10.400, 0.002	10.400, 0.014	10.400, 0.016	10.400, 0.006	10.400, 0.007	10.400, 0.002	10.400, 0.003
54	10.600, 0.001	10.600, 0.001	10.600, 0.001	10.600, -0.001	10.600, -0.004	10.600, 0.003	10.600, 0.014	10.600, 0.015	10.600, 0.006	10.600, 0.007	10.600, 0.001	10.600, 0.003
55	10.800, 0.001	10.800, 0.001	10.800, 0.000	10.800, -0.001	10.800, -0.004	10.800, 0.003	10.800, 0.013	10.800, 0.015	10.800, 0.006	10.800, 0.007	10.800, 0.001	10.800, 0.003
56	11.000, 0.000	11.000, 0.001	11.000, 0.000	11.000, -0.001	11.000, -0.004	11.000, 0.003	11.000, 0.013	11.000, 0.015	11.000, 0.006	11.000, 0.006	11.000, 0.001	11.000, 0.003
57	11.200, 0.000	11.200, 0.001	11.200, 0.000	11.200, -0.001	11.200, -0.004	11.200, 0.003	11.200, 0.013	11.200, 0.015	11.200, 0.005	11.200, 0.006	11.200, 0.001	11.200, 0.003
58	11.400, -0.000	11.400, 0.001	11.400, 0.000	11.400, -0.002	11.400, -0.004	11.400, 0.003	11.400, 0.012	11.400, 0.015	11.400, 0.005	11.400, 0.006	11.400, 0.001	11.400, 0.003
59	11.600, -0.000	11.600, 0.001	11.600, -0.000	11.600, -0.002	11.600, -0.004	11.600, 0.002	11.600, 0.012	11.600, 0.014	11.600, 0.005	11.600, 0.006	11.600, 0.000	11.600, 0.003
60	11.800, -0.000	11.800, 0.000	11.800, -0.000	11.800, -0.002	11.800, -0.004	11.800, 0.002	11.800, 0.011	11.800, 0.014	11.800, 0.005	11.800, 0.006	11.800, 0.000	11.800, 0.003
61	12.000, -0.001	12.000, -0.000	12.000, -0.001	12.000, -0.002	12.000, -0.004	12.000, 0.002	12.000, 0.011	12.000, 0.014	12.000, 0.004	12.000, 0.006	12.000, 0.000	12.000, 0.003
62	12.200, -0.001	12.200, -0.000	12.200, -0.001	12.200, -0.002	12.200, -0.004	12.200, 0.002	12.200, 0.011	12.200, 0.013	12.200, 0.004	12.200, 0.005	12.200, 0.000	12.200, 0.003
63	12.400, -0.001	12.400, -0.000	12.400, -0.001	12.400, -0.002	12.400, -0.004	12.400, 0.002	12.400, 0.011	12.400, 0.013	12.400, 0.004	12.400, 0.005	12.400, 0.000	12.400, 0.003
64	12.600, -0.001	12.600, -0.000	12.600, -0.001	12.600, -0.002	12.600, -0.004	12.600, 0.003	12.600, 0.011	12.600, 0.013	12.600, 0.004	12.600, 0.005	12.600, 0.000	12.600, 0.003
65	12.800, -0.001	12.800, -0.000	12.800, -0.001	12.800, -0.002	12.800, -0.004	12.800, 0.003	12.800, 0.011	12.800, 0.013	12.800, 0.004	12.800, 0.004	12.800, -0.000	12.800, 0.003
66	13.000, -0.001	13.000, -0.000	13.000, -0.001	13.000, -0.002	13.000, -0.004	13.000, 0.003	13.000, 0.011	13.000, 0.012	13.000, 0.004	13.000, 0.004	13.000, -0.000	13.000, 0.003
67	13.200, -0.001	13.200, -0.000	13.200, -0.001	13.200, -0.003	13.200, -0.004	13.200, 0.002	13.200, 0.011	13.200, 0.012	13.200, 0.004	13.200, 0.004	13.200, -0.000	13.200, 0.002
68	13.400, -0.001	13.400, -0.000	13.400, -0.001	13.400, -0.003	13.400, -0.004	13.400, 0.002	13.400, 0.011	13.400, 0.012	13.400, 0.004	13.400, 0.003	13.400, -0.000	13.400, 0.002
69	13.600, -0.001	13.600, -0.000	13.600, -0.001	13.600, -0.002	13.600, -0.004	13.600, 0.002	13.600, 0.011	13.600, 0.012	13.600, 0.004	13.600, 0.003	13.600, -0.000	13.600, 0.002
70	13.800, -0.001	13.800, -0.000	13.800, -0.001	13.800, -0.002	13.800, -0.004	13.800, 0.002	13.800, 0.010	13.800, 0.012	13.800, 0.004	13.800, 0.002	13.800, 0.000	13.800, 0.001
71	14.000, -0.001	14.000, -0.000	14.000, -0.001	14.000, -0.002	14.000, -0.004	14.000, 0.002	14.000, 0.010	14.000, 0.012	14.000, 0.004	14.000, 0.002	14.000, 0.000	14.000, 0.001
72	14.200, -0.001	14.200, -0.000	14.200, -0.000	14.200, -0.002	14.200, -0.004	14.200, 0.001	14.200, 0.010	14.200, 0.012	14.200, 0.004	14.200, 0.002	14.200, 0.001	14.200, 0.001
73	14.400, -0.001	14.400, 0.000	14.400, -0.000	14.400, -0.002	14.400, -0.004	14.400, 0.001	14.400, 0.010	14.400, 0.012	14.400, 0.003	14.400, 0.002	14.400, 0.001	14.400, 0.001
74	14.600, -0.001	14.600, 0.000	14.600, 0.000	14.600, -0.002	14.600, -0.004	14.600, 0.001	14.600, 0.009	14.600, 0.011	14.600, 0.003	14.600, 0.002	14.600, 0.001	14.600, 0.001
75	14.800, -0.001	14.800, 0.001	14.800, 0.000	14.800, -0.002	14.800, -0.003	14.800, 0.001	14.800, 0.009	14.800, 0.011	14.800, 0.003	14.800, 0.002	14.800, 0.001	14.800, 0.000
76	15.000, -0.001	15.000, 0.001	15.000, 0.000	15.000, -0.002	15.000, -0.003	15.000, 0.001	15.000, 0.009	15.000, 0.011	15.000, 0.003	15.000, 0.002	15.000, 0.001	15.000, 0.001
77	15.200, -0.001	15.200, 0.001	15.200, 0.001	15.200, -0.002	15.200, -0.003	15.200, 0.001	15.200, 0.009	15.200, 0.011	15.200, 0.003	15.200, 0.002	15.200, 0.001	15.200, 0.000
78	15.400, -0.001	15.400, 0.001	15.400, 0.001	15.400, -0.002	15.400, -0.003	15.400, 0.001	15.400, 0.009	15.400, 0.011	15.400, 0.003	15.400, 0.003	15.400, 0.001	15.400, 0.000
79	15.600, -0.001	15.600, 0.001	15.600, 0.001	15.600, -0.002	15.600, -0.003	15.600, 0.001	15.600, 0.008	15.600, 0.011	15.600, 0.002	15.600, 0.003	15.600, 0.001	15.600, 0.000
80	15.800, -0.000	15.800, 0.001	15.800, 0.001	15.800, -0.002	15.800, -0.003	15.800, 0.001	15.800, 0.008	15.800, 0.011	15.800, 0.002	15.800, 0.003	15.800, 0.001	15.800, 0.000
81	16.000, -0.000	16.000, 0.001	16.000, 0.002	16.000, -0.002	16.000, -0.003	16.000, 0.001	16.000, 0.008	16.000, 0.011	16.000, 0.002	16.000, 0.003	16.000, 0.001	16.000, 0.000
82	16.200, -0.000	16.200, 0.001	16.200, 0.001	16.200, -0.002	16.200, -0.003	16.200, 0.001	16.200, 0.008	16.200, 0.010	16.200, 0.002	16.200, 0.003	16.200, 0.001	16.200, -0.000
83	16.400, 0.000	16.400, 0.001	16.400, 0.001	16.400, -0.002	16.400, -0.003	16.400, 0.001	16.400, 0.008	16.400, 0.010	16.400, 0.002	16.400, 0.003	16.400, 0.000	16.400, -0.000
84	16.600, 0.000	16.600, 0.001	16.600, 0.001	16.600, -0.002	16.600, -0.004	16.600, 0.001	16.600, 0.008	16.600, 0.010	16.600, 0.002	16.600, 0.003	16.600, 0.000	16.600, -0.000
85	16.800, 0.000	16.800, 0.001	16.800, 0.001	16.800, -0.002	16.800, -0.004	16.800, 0.001	16.800, 0.008	16.800, 0.009	16.800, 0.003	16.800, 0.003	16.800, 0.000	16.800, -0.000
86	17.000, 0.000	17.000, 0.000	17.000, 0.001	17.000, -0.002	17.000, -0.004	17.000, 0.001	17.000, 0.007	17.000, 0.009	17.000, 0.003	17.000, 0.002	17.000, 0.000	17.000, -0.000
87	17.200, 0.001	17.200, 0.000	17.200, 0.001	17.200, -0.002	17.200, -0.004	17.200, 0.001	17.200, 0.007	17.200, 0.008	17.200, 0.003	17.200, 0.002	17.200, 0.000	17.200, -0.000
88	17.400, 0.001	17.400, 0.000	17.400, 0.001	17.400, -0.002	17.400, -0.004	17.400, 0.001	17.400, 0.007	17.400, 0.008	17.400, 0.003	17.400, 0.002	17.400, 0.000	17.400, -0.000
89	17.600, 0.001	17.600, 0.000	17.600, 0.000	17.600, -0.001	17.600, -0.004	17.600, 0.001	17.600, 0.007	17.600, 0.008	17.600, 0.003	17.600, 0.001	17.600, -0.000	17.600, -0.000
90	17.800, 0.000	17.800, 0.000	17.800, 0.000	17.800, -0.001	17.800, -0.004	17.800, 0.001	17.800, 0.006	17.800, 0.007	17.800, 0.003	17.800, 0.001	17.800, -0.000	17.800, -0.000
91	18.000, 0.000	18.000, 0.000	18.000, -0.000	18.000, -0.002	18.000, -0.004	18.000, 0.001	18.000, 0.006	18.000, 0.007	18.000, 0.003	18.000, 0.001	18.000, -0.000	18.000, -0.000
92	18.200, 0.000	18.200, 0.000	18.200, -0.000	18.200, -0.001	18.200, -0.004	18.200, 0.001	18.200, 0.006	18.200, 0.006	18.200, 0.003	18.200, 0.001	18.200, -0.000	18.200, 0.000
93	18.400, -0.000	18.400, 0.000	18.400, -0.001	18.400, -0.002	18.400, -0.004	18.400, 0.001	18.400, 0.006	18.400, 0.006	18.400, 0.003	18.400, 0.002	18.400, -0.001	18.400, 0.000
94	18.600, -0.000	18.600, 0.001	18.600, -0.001	18.600, -0.002	18.600, -0.004	18.600, 0.001	18.600, 0.006	18.600, 0.006	18.600, 0.003	18.600, 0.002	18.600, -0.001	18.600, 0.000
95	18.800, -0.000	18.800, 0.001	18.800, -0.001	18.800, -0.002	18.800, -0.004	18.800, 0.001	18.800, 0.005	18.800, 0.006	18.800, 0.003	18.800, 0.002	18.800, -0.001	18.800, 0.001
96	19.000, -0.000	19.000, 0.001	19.000, -0.001	19.000, -0.002	19.000, -0.004	19.000, 0.001	19.000, 0.005	19.000, 0.006	19.000, 0.003	19.000, 0.002	19.000, -0.001	19.000, 0.001
97	19.200, -0.000	19.200, 0.001	19.200, -0.001	19.200, -0.002	19.200, -0.004	19.200, 0.001	19.200, 0.005	19.200, 0.006	19.200, 0.003	19.200, 0.002	19.200, -0.001	19.200, 0.001
98	19.400, -0.000	19.400, 0.000	19.400, -0.001	19.400, -0.002	19.400, -0.003	19.400, 0.000	19.400, 0.004	19.400, 0.006	19.400, 0.003	19.400, 0.002	19.400, -0.001	19.400, 0.001
99	19.600, -0.000	19.600, 0.000	19.600, -0.001	19.600, -0.002	19.600, -0.003	19.600, 0.000	19.600, 0.004	19.600, 0.006	19.600, 0.003	19.600, 0.002	19.600, -0.001	19.600, 0.001
100	19.800, -0.000	19.800, 0.000	19.800, -0.000	19.800, -0.001	19.800, -0.003	19.800, 0.000	19.800, 0.004	19.800, 0.006	19.800, 0.003	19.800, 0.003	19.800, -0.001	19.800, 0.000
101	20.000, -0.000	20.000, -0.000	20.000, -0.000	20.000, -0.001	20.000, -0.003	20.000, 0.000	20.000, 0.004	20.000, 0.006	20.000, 0.003	20.000, 0.003	20.000, -0.000	20.000, 0.000
102	20.200, -0.000	20.200, -0.000	20.200, 0.000	20.200, -0.001	20.200, -0.003	20.200, 0.000	20.200, 0.004	20.200, 0.006	20.200, 0.003	20.200, 0.003	20.200, -0.000	20.200, -0.000
103	20.400, -0.000	20.400, -0.000	20.400, 0.001	20.400, -0.001	20.400, -0.002	20.400, 0.000	20.400, 0.004	20.400, 0.005	20.400, 0.003	20.400, 0.003	20.400, -0.000	20.400, -0.000
104	20.600, -0.000	20.600, -0.000	20.600, 0.001	20.600, -0.001	20.600, -0.002	20.600, 0.000	20.600, 0.004	20.600, 0.005	20.600, 0.003	20.600, 0.003	20.600, -0.000	20.600, -0.001
105	20.800, -0.000	20.800, -0.001	20.800, 0.001	20.800, -0.001	20.800, -0.003	20.800, 0.000	20.800, 0.003	20.800, 0.005	20.800, 0.003	20.800, 0.003	20.800, -0.000	20.800, -0.001
106	21.000, -0.000	21.000, -0.001	21.000, 0.001	21.000, -0.001	21.000, -0.003	21.000, 0.000	21.000, 0.003	21.000, 0.005	21.000, 0.003	21.000, 0.003	21.000, -0.000	21.000, -0.001
107	21.200, -0.000	21.200, -0.001	21.200, 0.001	21.200, -0.001	21.200, -0.003	21.200, 0.000	21.200, 0.003	21.200, 0.004	21.200, 0.003	21.200, 0.003	21.200, -0.000	21.200, -0.001
108	21.400, -0.001	21.400, -0.001	21.400, 0.001	21.400, -0.001	21.400, -0.003	21.400, 0.000	21.400, 0.003	21.400, 0.004	21.400, 0.003	21.400, 0.003	21.400, 0.000	21.400, -0.000
109	21.600, -0.001	21.600, -0.001	21.600, 0.001	21.600, -0.001	21.600, -0.003	21.600, 0.000	21.600, 0.003	21.600, 0.004	21.600, 0.003	21.600, 0.003	21.600, 0.000	21.600, -0.000
110	21.800, -0.001	21.800, -0.002	21.800, 0.001	21.800, -0.001	21.800, -0.003	21.800, 0.000	21.800, 0.003	21.800, 0.004	21.800, 0.002	21.800, 0.003	21.800, 0.000	21.800, -0.000
111	22.000, -0.001	22.000, -0.002	22.000, 0.001	22.000, -0.001	22.000, -0.003	22.000, -0.000	22.000, 0.004	22.000, 0.004	22.000, 0.002	22.000, 0.003	22.000, 0.000	22.000, 0.000
112	22.200, -0.001	22.200, -0.002	22.200, 0.001	22.200, -0.001	22.200, -0.003	22.200, -0.000	22.200, 0.004	22.200, 0.003	22.200, 0.002	22.200, 0.003	22.200, 0.001	22.200, 0.000
113	22.400, -0.001	22.400, -0.001	22.400, 0.000	22.400, -0.001	22.400, -0.003	22.400, -0.000	22.400, 0.004	22.400, 0.003	22.400, 0.002	22.400, 0.003	22.400, 0.001	22.400, 0.000
114	22.600, -0.001	22.600, -0.001	22.600, 0.000	22.600, -0.001	22.600, -0.003	22.600, -0.001	22.600, 0.004	22.600, 0.003	22.600, 0.002	22.600, 0.002	22.600, 0.001	22.600, 0.001
115	22.800, -0.001	22.800, -0.001	22.800, 0.000	22.800, -0.001	22.800, -0.003	22.800, -0.001	22.800, 0.004	22.800, 0.004	22.800, 0.002	22.800, 0.002	22.800, 0.001	22.800, 0.001
116	23.000, -0.001	23.000, -0.001	23.000, -0.000	23.000, -0.001	23.000, -0.003	23.000, -0.001	23.000, 0.003	23.000, 0.004	23.000, 0.002	23.000, 0.002	23.000, 0.001	23.000, 0.000
117	23.200, -0.001	23.200, -0.001	23.200, -0.000	23.200, -0.001	23.200, -0.003	23.200, -0.001	23.200, 0.003	23.200, 0.004	23.200, 0.002	23.200, 0.002	23.200, 0.001	23.200, 0.000
118	23.400, -0.001	23.400, -0.001	23.400, -0.000	23.400, -0.001	23.400, -0.002	23.400, -0.002	23.400, 0.003	23.400, 0.004	23.400, 0.002	23.400, 0.001	23.400, 0.001	23.400, 0.000
119	23.600, -0.001	23.600, -0.001	23.600, -0.000	23.600, -0.000	23.600, -0.002	23.600, -0.001	23.600, 0.003	23.600, 0.004	23.600, 0.002	23.600, 0.001	23.600, 0.001	23.600, 0.000
120	23.800, -0.001	23.800, -0.001	23.800, -0.000	23.800, -0.000	23.800, -0.002	23.800, -0.001	23.800, 0.003	23.800, 0.004	23.800, 0.003	23.800, 0.001	23.800, 0.001	23.800, 0.000
121	24.000, -0.001	24.000, -0.001	24.000, -0.000	24.000, -0.001	24.000, -0.001	24.000, -0.001	24.000, 0.003	24.000, 0.004	24.000, 0.003	24.000, 0.001	24.000, 0.001	24.000, 0.000
122	24.200, -0.001	24.200, -0.000	24.200, -0.000	24.200, -0.001	24.200, -0.001	24.200, -0.001	24.200, 0.003	24.200, 0.004	24.200, 0.003	24.200, 0.001	24.200, 0.001	24.200, 0.000
123	24.400, -0.001	24.400, 0.000	24.400, -0.000	24.400, -0.001	24.400, -0.001	24.400, -0.001	24.400, 0.003	24.400, 0.004	24.400, 0.003	24.400, 0.001	24.400, 0.001	24.400, 0.001
124	24.600, -0.001	24.600, 0.000	24.600, -0.000	24.600, -0.001	24.600, -0.001	24.600, -0.001	24.600, 0.003	24.600, 0.004	24.600, 0.003	24.600, 0.001	24.600, 0.000	24.600, 0.001
125	24.800, -0.001	24.800, 0.000	24.800, -0.000	24.800, -0.001	24.800, -0.000	24.800, -0.001	24.800, 0.002	24.800, 0.004	24.800, 0.003	24.800, 0.002	24.800, 0.000	24.800, 0.001
126	25.000, -0.001	25.000, 0.001	25.000, -0.000	25.000, -0.001	25.000, -0.000	25.000, -0.001	25.000, 0.002	25.000, 0.004	25.000, 0.003	25.000, 0.002	25.000, 0.000	25.000, 0.001
127	25.200, -0.000	25.200, 0.001	25.200, -0.000	25.200, -0.001	25.200, -0.000	25.200, -0.001	25.200, 0.002	25.200, 0.003	25.200, 0.002	25.200, 0.002	25.200, -0.000	25.200, 0.001
128	25.400, -0.000	25.400, 0.001	25.400, -0.000	25.400, -0.001	25.400, -0.001	25.400, -0.000	25.400, 0.002	25.400, 0.003	25.400, 0.002	25.400, 0.002	25.400, -0.000	25.400, 0.001
129	25.600, -0.000	25.600, 0.001	25.600, -0.000	25.600, -0.001	25.600, -0.001	25.600, -0.000	25.600, 0.002	25.600, 0.003	25.600, 0.001	25.600, 0.002	25.600, -0.000	25.600, 0.002
130	25.800, -0.000	25.800, 0.001	25.800, -0.000	25.800, -0.001	25.800, -0.001	25.800, -0.000	25.800, 0.002	25.800, 0.003	25.800, 0.001	25.800, 0.002	25.800, -0.001	25.800, 0.002
131	26.000, -0.000	26.000, 0.001	26.000, -0.000	26.000, -0.001	26.000, -0.001	26.000, -0.000	26.000, 0.002	26.000, 0.003	26.000, 0.000	26.000, 0.001	26.000, -0.001	26.000, 0.002
132	26.200, -0.000	26.200, 0.001	26.200, -0.000	26.200, -0.001	26.200, -0.001	26.200, -0.000	26.200, 0.002	26.200, 0.003	26.200, -0.000	26.200, 0.001	26.200, -0.001	26.200, 0.002
133	26.400, -0.000	26.400, 0.001	26.400, -0.000	26.400, -0.001	26.400, -0.001	26.400, -0.000	26.400, 0.002	26.400, 0.002	26.400, -0.000	26.400, 0.000	26.400, -0.001	26.400, 0.002
134	26.600, -0.000	26.600, 0.001	26.600, -0.000	26.600, -0.001	26.600, -0.001	26.600, -0.000	26.600, 0.001	26.600, 0.002	26.600, -0.000	26.600, -0.000	26.600, -0.001	26.600, 0.002
135	26.800, -0.000	26.800, 0.001	26.800, -0.000	26.800, -0.000	26.800, -0.001	26.800, -0.000	26.800, 0.001	26.800, 0.002	26.800, -0.000	26.800, -0.000	26.800, -0.001	26.800, 0.001
136	27.000, -0.000	27.000, 0.001	27.000, -0.001	27.000, -0.000	27.000, -0.001	27.000, 0.000	27.000, 0.000	27.000, 0.002	27.000, -0.000	27.000, -0.001	27.000, -0.001	27.000, 0.001
137	27.200, -0.000	27.200, 0.000	27.200, -0.000	27.200, -0.000	27.200, -0.001	27.200, 0.000	27.200, 0.000	27.200, 0.002	27.200, -0.000	27.200, -0.001	27.200, -0.001	27.200, 0.001
138	27.400, -0.000	27.400, 0.000	27.400, -0.000	27.400, -0.000	27.400, -0.001	27.400, 0.000	27.400, -0.000	27.400, 0.001	27.400, 0.000	27.400, -0.001	27.400, -0.001	27.400, 0.001
139	27.600, -0.000	27.600, 0.000	27.600, -0.000	27.600, 0.000	27.600, -0.001	27.600, 0.000	27.600, -0.000	27.600, 0.001	27.600, 0.000	27.600, -0.001	27.600, -0.001	27.600, 0.001
140	27.800, -0.000	27.800, 0.000	27.800, -0.000	27.800, 0.000	27.800, -0.000	27.800, 0.000	27.800, -0.000	27.800, 0.001	27.800, 0.000	27.800, -0.001	27.800, -0.001	27.800, 0.001
141	28.000, -0.000	28.000, 0.000	28.000, -0.000	28.000, 0.000	28.000, -0.000	28.000, 0.000	28.000, -0.000	28.000, 0.001	28.000, 0.000	28.000, -0.001	28.000, -0.001	28.000, 0.001
142	28.200, 0.000	28.200, 0.000	28.200, -0.000	28.200, 0.000	28.200, 0.000	28.200, 0.000	28.200, -0.000	28.200, 0.000	28.200, 0.000	28.200, -0.001	28.200, -0.001	28.200, 0.000
143	28.400, 0.000	28.400, 0.000	28.400, 0.000	28.400, 0.000	28.400, 0.000	28.400, 0.000	28.400, -0.000	28.400, -0.000	28.400, 0.000	28.400, -0.000	28.400, -0.000	28.400, 0.000
144	28.600, 0.000	28.600, -0.000	28.600, 0.000	28.600, 0.000	28.600, 0.001	28.600, -0.000	28.600, -0.000	28.600, -0.001	28.600, 0.000	28.600, -0.000	28.600, 0.000	28.600, -0.000
145	28.800, 0.000	28.800, -0.000	28.800, 0.000	28.800, 0.000	28.800, 0.001	28.800, -0.000	28.800, 0.000	28.800, -0.001	28.800, 0.000	28.800, 0.000	28.800, 0.000	28.800, -0.000
146	29.000, 0.000	29.000, -0.000	29.000, 0.000	29.000, 0.000	29.000, 0.001	29.000, -0.000	29.000, 0.000	29.000, -0.001	29.000, 0.000	29.000, 0.001	29.000, 0.001	29.000, -0.001
147	29.200, 0.000	29.200, -0.000	29.200, 0.000	29.200, 0.000	29.200, 0.001	29.200, -0.000	29.200, 0.000	29.200, -0.001	29.200, -0.000	29.200, 0.001	29.200, 0.001	29.200, -0.001
148	29.400, 0.000	29.400, -0.000	29.400, 0.000	29.400, -0.000	29.400, 0.001	29.400, -0.000	29.400, 0.000	29.400, -0.001	29.400, -0.000	29.400, 0.001	29.400, 0.001	29.400, -0.001
149	29.600, 0.000	29.600, -0.001	29.600, 0.001	29.600, -0.000	29.600, 0.000	29.600, -0.000	29.600, -0.000	29.600, -0.001	29.600, -0.001	29.600, 0.001	29.600, 0.001	29.600, -0.001
150	29.800, -0.000	29.800, -0.001	29.800, 0.001	29.800, -0.000	29.800, 0.000	29.800, -0.000	29.800, -0.000	29.800, -0.001	29.800, -0.001	29.800, 0.001	29.800, 0.002	29.800, -0.002
151	30.000, 0.000	30.000, 0.000	30.000, 0.000	30.000, 0.000	30.000, 0.000	30.000, 0.000	30.000, 0.000	30.000, 0.000	30.000, 0.000	30.000, 0.000	30.000, 0.000	30.000, 0.000
152	30.200, -0.001	30.200, 0.003	30.200, 0.006	30.200, 0.014	30.200, 0.029	30.200, 0.000	30.200, -0.000	30.200, -0.001	30.200, -0.002	30.200, -0.001	30.200, -0.001	30.200, -0.001
153	30.400, -0.002	30.400, 0.006	30.400, 0.014	30.400, 0.030	30.400, 0.064	30.400, 0.000	30.400, -0.001	30.400, -0.001	30.400, -0.004	30.400, -0.003	30.400, -0.002	30.400, -0.001
154	30.600, -0.002	30.600, 0.010	30.600, 0.023	30.600, 0.049	30.600, 0.105	30.600, 0.000	30.600, -0.001	30.600, -0.002	30.600, -0.006	30.600, -0.004	30.600, -0.003	30.600, -0.002
155	30.800, -0.003	30.800, 0.015	30.800, 0.033	30.800, 0.071	30.800, 0.150	30.800, 0.000	30.800, -0.001	30.800, -0.003	30.800, -0.008	30.800, -0.005	30.800, -0.005	30.800, -0.002
156	31.000, -0.003	31.000, 0.021	31.000, 0.045	31.000, 0.095	31.000, 0.200	31.000, 0.000	31.000, -0.002	31.000, -0.003	31.000, -0.010	31.000, -0.007	31.000, -0.006	31.000, -0.003
157	31.200, -0.003	31.200, 0.027	31.200, 0.057	31.200, 0.121	31.200, 0.252	31.200, 0.000	31.200, -0.002	31.200, -0.004	31.200, -0.012	31.200, -0.008	31.200, -0.008	31.200, -0.003
158	31.400, -0.003	31.400, 0.033	31.400, 0.071	31.400, 0.148	31.400, 0.306	31.400, 0.000	31.400, -0.002	31.400, -0.004	31.400, -0.014	31.400, -0.010	31.400, -0.010	31.400, -0.004
159	31.600, -0.003	31.600, 0.041	31.600, 0.085	31.600, 0.176	31.600, 0.361	31.600, 0.000	31.600, -0.001	31.600, -0.005	31.600, -0.016	31.600, -0.011	31.600, -0.011	31.600, -0.004
160	31.800, -0.002	31.800, 0.048	31.800, 0.099	31.800, 0.205	31.800, 0.416	31.800, 0.000	31.800, -0.001	31.800, -0.005	31.800, -0.017	31.800, -0.013	31.800, -0.012	31.800, -0.004
161	32.000, -0.001	32.000, 0.056	32.000, 0.113	32.000, 0.233	32.000, 0.468	32.000, 0.000	32.000, -0.000	32.000, -0.005	32.000, -0.019	32.000, -0.014	32.000, -0.014	32.000, -0.005
162	32.200, -0.000	32.200, 0.063	32.200, 0.127	32.200, 0.260	32.200, 0.515	32.200, 0.001	32.200, 0.000	32.200, -0.005	32.200, -0.019	32.200, -0.015	32.200, -0.014	32.200, -0.005
163	32.400, 0.001	32.400, 0.070	32.400, 0.140	32.400, 0.286	32.400, 0.560	32.400, 0.001	32.400, 0.000	32.400, -0.005	32.400, -0.021	32.400, -0.016	32.400, -0.015	32.400, -0.006
164	32.600, 0.002	32.600, 0.077	32.600, 0.153	32.600, 0.312	32.600, 0.602	32.600, 0.001	32.600, -0.000	32.600, -0.005	32.600, -0.021	32.600, -0.017	32.600, -0.016	32.600, -0.007
165	32.800, 0.004	32.800, 0.085	32.800, 0.166	32.800, 0.337	32.800, 0.643	32.800, 0.001	32.800, -0.000	32.800, -0.005	32.800, -0.022	32.800, -0.018	32.800, -0.017	32.800, -0.007
166	33.000, 0.006	33.000, 0.092	33.000, 0.179	33.000, 0.362	33.000, 0.681	33.000, 0.001	33.000, -0.001	33.000, -0.006	33.000, -0.023	33.000, -0.019	33.000, -0.018	33.000, -0.008
167	33.200, 0.007	33.200, 0.099	33.200, 0.191	33.200, 0.386	33.200, 0.716	33.200, 0.001	33.200, -0.001	33.200, -0.006	33.200, -0.024	33.200, -0.019	33.200, -0.019	33.200, -0.009
168	33.400, 0.009	33.400, 0.106	33.400, 0.204	33.400, 0.410	33.400, 0.750	33.400, 0.001	33.400, -0.002	33.400, -0.006	33.400, -0.024	33.400, -0.020	33.400, -0.019	33.400, -0.009
169	33.600, 0.011	33.600, 0.113	33.600, 0.216	33.600, 0.433	33.600, 0.782	33.600, 0.001	33.600, -0.002	33.600, -0.007	33.600, -0.025	33.600, -0.021	33.600, -0.020	33.600, -0.010
170	33.800, 0.013	33.800, 0.120	33.800, 0.228	33.800, 0.456	33.800, 0.811	33.800, 0.001	33.800, -0.003	33.800, -0.007	33.800, -0.025	33.800, -0.021	33.800, -0.020	33.800, -0.011
171	34.000, 0.015	34.000, 0.127	34.000, 0.241	34.000, 0.479	34.000, 0.839	34.000, 0.001	34.000, -0.004	34.000, -0.008	34.000, -0.026	34.000, -0.022	34.000, -0.021	34.000, -0.011
172	34.200, 0.017	34.200, 0.134	34.200, 0.253	34.200, 0.501	34.200, 0.864	34.200, 0.001	34.200, -0.004	34.200, -0.009	34.200, -0.027	34.200, -0.023	34.200, -0.021	34.200, -0.012
173	34.400, 0.019	34.400, 0.141	34.400, 0.265	34.400, 0.523	34.400, 0.887	34.400, 0.001	34.400, -0.004	34.400, -0.009	34.400, -0.027	34.400, -0.023	34.400, -0.022	34.400, -0.012
174	34.600, 0.020	34.600, 0.147	34.600, 0.278	34.600, 0.544	34.600, 0.909	34.600, 0.001	34.600, -0.005	34.600, -0.010	34.600, -0.028	34.600, -0.024	34.600, -0.022	34.600, -0.013
175	34.800, 0.022	34.800, 0.154	34.800, 0.290	34.800, 0.565	34.800, 0.928	34.800, 0.001	34.800, -0.005	34.800, -0.010	34.800, -0.028	34.800, -0.024	34.800, -0.023	34.800, -0.013
176	35.000, 0.024	35.000, 0.161	35.000, 0.303	35.000, 0.585	35.000, 0.946	35.000, 0.001	35.000, -0.005	35.000, -0.011	35.000, -0.029	35.000, -0.025	35.000, -0.024	35.000, -0.013
177	35.200, 0.027	35.200, 0.168	35.200, 0.315	35.200, 0.605	35.200, 0.963	35.200, 0.001	35.200, -0.005	35.200, -0.011	35.200, -0.029	35.200, -0.025	35.200, -0.024	35.200, -0.014
178	35.400, 0.029	35.400, 0.174	35.400, 0.327	35.400, 0.624	35.400, 0.978	35.400, 0.001	35.400, -0.005	35.400, -0.012	35.400, -0.030	35.400, -0.026	35.400, -0.025	35.400, -0.014
179	35.600, 0.031	35.600, 0.181	35.600, 0.339	35.600, 0.643	35.600, 0.991	35.600, 0.002	35.600, -0.005	35.600, -0.013	35.600, -0.031	35.600, -0.027	35.600, -0.026	35.600, -0.014
180	35.800, 0.033	35.800, 0.188	35.800, 0.351	35.800, 0.661	35.800, 1.004	35.800, 0.002	35.800, -0.004	35.800, -0.013	35.800, -0.031	35.800, -0.027	35.800, -0.026	35.800, -0.015
181	36.000, 0.035	36.000, 0.195	36.000, 0.363	36.000, 0.679	36.000, 1.016	36.000, 0.003	36.000, -0.005	36.000, -0.013	36.000, -0.032	36.000, -0.027	36.000, -0.027	36.000, -0.015
182	36.200, 0.038	36.200, 0.201	36.200, 0.375	36.200, 0.696	36.200, 1.027	36.200, 0.003	36.200, -0.005	36.200, -0.013	36.200, -0.032	36.200, -0.028	36.200, -0.027	36.200, -0.015
183	36.400, 0.040	36.400, 0.208	36.400, 0.386	36.400, 0.713	36.400, 1.037	36.400, 0.004	36.400, -0.005	36.400, -0.013	36.400, -0.032	36.400, -0.028	36.400, -0.028	36.400, -0.016
184	36.600, 0.043	36.600, 0.214	36.600, 0.398	36.600, 0.729	36.600, 1.046	36.600, 0.005	36.600, -0.006	36.600, -0.013	36.600, -0.032	36.600, -0.028	36.600, -0.028	36.600, -0.016
185	36.800, 0.046	36.800, 0.221	36.800, 0.409	36.800, 0.744	36.800, 1.055	36.800, 0.005	36.800, -0.006	36.800, -0.014	36.800, -0.033	36.800, -0.028	36.800, -0.028	36.800, -0.016
186	37.000, 0.049	37.000, 0.227	37.000, 0.420	37.000, 0.759	37.000, 1.063	37.000, 0.005	37.000, -0.007	37.000, -0.014	37.000, -0.033	37.000, -0.028	37.000, -0.028	37.000, -0.016
187	37.200, 0.052	37.200, 0.234	37.200, 0.431	37.200, 0.773	37.200, 1.070	37.200, 0.005	37.200, -0.007	37.200, -0.014	37.200, -0.033	37.200, -0.028	37.200, -0.028	37.200, -0.016
188	37.400, 0.054	37.400, 0.241	37.400, 0.442	37.400, 0.786	37.400, 1.077	37.400, 0.005	37.400, -0.007	37.400, -0.015	37.400, -0.033	37.400, -0.028	37.400, -0.029	37.400, -0.016
189	37.600, 0.057	37.600, 0.247	37.600, 0.452	37.600, 0.799	37.600, 1.084	37.600, 0.005	37.600, -0.008	37.600, -0.015	37.600, -0.033	37.600, -0.028	37.600, -0.029	37.600, -0.017
190	37.800, 0.060	37.800, 0.254	37.800, 0.463	37.800, 0.812	37.800, 1.090	37.800, 0.005	37.800, -0.008	37.800, -0.015	37.800, -0.033	37.800, -0.029	37.800, -0.029	37.800, -0.017
191	38.000, 0.063	38.000, 0.261	38.000, 0.473	38.000, 0.825	38.000, 1.096	38.000, 0.005	38.000, -0.008	38.000, -0.016	38.000, -0.033	38.000, -0.029	38.000, -0.029	38.000, -0.017
192	38.200, 0.066	38.200, 0.267	38.200, 0.484	38.200, 0.837	38.200, 1.102	38.200, 0.005	38.200, -0.009	38.200, -0.016	38.200, -0.033	38.200, -0.029	38.200, -0.029	38.200, -0.018
193	38.400, 0.068	38.400, 0.273	38.400, 0.494	38.400, 0.848	38.400, 1.107	38.400, 0.005	38.400, -0.009	38.400, -0.017	38.400, -0.033	38.400, -0.029	38.400, -0.028	38.400, -0.018
194	38.600, 0.071	38.600, 0.280	38.600, 0.505	38.600, 0.860	38.600, 1.112	38.600, 0.005	38.600, -0.009	38.600, -0.017	38.600, -0.034	38.600, -0.030	38.600, -0.028	38.600, -0.019
195	38.800, 0.073	38.800, 0.286	38.800, 0.515	38.800, 0.871	38.800, 1.117	38.800, 0.005	38.800, -0.009	38.800, -0.018	38.800, -0.035	38.800, -0.030	38.800, -0.028	38.800, -0.019
196	39.000, 0.075	39.000, 0.292	39.000, 0.525	39.000, 0.881	39.000, 1.122	39.000, 0.005	39.000, -0.008	39.000, -0.018	39.000, -0.035	39.000, -0.030	39.000, -0.028	39.000, -0.020
197	39.200, 0.078	39.200, 0.299	39.200, 0.535	39.200, 0.892	39.200, 1.126	39.200, 0.005	39.200, -0.008	39.200, -0.018	39.200, -0.036	39.200, -0.031	39.200, -0.027	39.200, -0.020
198	39.400, 0.080	39.400, 0.305	39.400, 0.545	39.400, 0.901	39.400, 1.129	39.400, 0.005	39.400, -0.008	39.400, -0.019	39.400, -0.036	39.400, -0.031	39.400, -0.027	39.400, -0.021
199	39.600, 0.083	39.600, 0.312	39.600, 0.555	39.600, 0.911	39.600, 1.133	39.600, 0.005	39.600, -0.008	39.600, -0.019	39.600, -0.037	39.600, -0.032	39.600, -0.028	39.600, -0.021
200	39.800, 0.085	39.800, 0.318	39.800, 0.564	39.800, 0.920	39.800, 1.136	39.800, 0.005	39.800, -0.008	39.800, -0.019	39.800, -0.037	39.800, -0.032	39.800, -0.028	39.800, -0.022
201	40.000, 0.088	40.000, 0.324	40.000, 0.574	40.000, 0.929	40.000, 1.139	40.000, 0.005	40.000, -0.009	40.000, -0.019	40.000, -0.037	40.000, -0.032	40.000, -0.028	40.000, -0.022
202	40.200, 0.090	40.200, 0.330	40.200, 0.583	40.200, 0.937	40.200, 1.142	40.200, 0.005	40.200, -0.009	40.200, -0.019	40.200, -0.038	40.200, -0.033	40.200, -0.028	40.200, -0.022
203	40.400, 0.093	40.400, 0.336	40.400, 0.592	40.400, 0.945	40.400, 1.146	40.400, 0.005	40.400, -0.009	40.400, -0.020	40.400, -0.038	40.400, -0.033	40.400, -0.028	40.400, -0.023
204	40.600, 0.096	40.600, 0.342	40.600, 0.601	40.600, 0.952	40.600, 1.148	40.600, 0.005	40.600, -0.010	40.600, -0.020	40.600, -0.039	40.600, -0.033	40.600, -0.029	40.600, -0.023
205	40.800, 0.099	40.800, 0.348	40.800, 0.610	40.800, 0.959	40.800, 1.151	40.800, 0.005	40.800, -0.010	40.800, -0.020	40.800, -0.039	40.800, -0.033	40.800, -0.029	40.800, -0.022
206	41.000, 0.102	41.000, 0.354	41.000, 0.619	41.000, 0.966	41.000, 1.154	41.000, 0.005	41.000, -0.010	41.000, -0.021	41.000, -0.039	41.000, -0.033	41.000, -0.029	41.000, -0.022
207	41.200, 0.105	41.200, 0.360	41.200, 0.627	41.200, 0.972	41.200, 1.156	41.200, 0.005	41.200, -0.010	41.200, -0.021	41.200, -0.039	41.200, -0.033	41.200, -0.030	41.200, -0.022
208	41.400, 0.108	41.400, 0.367	41.400, 0.636	41.400, 0.978	41.400, 1.158	41.400, 0.005	41.400, -0.011	41.400, -0.022	41.400, -0.039	41.400, -0.033	41.400, -0.030	41.400, -0.022
209	41.600, 0.111	41.600, 0.373	41.600, 0.644	41.600, 0.984	41.600, 1.161	41.600, 0.005	41.600, -0.011	41.600, -0.022	41.600, -0.040	41.600, -0.032	41.600, -0.031	41.600, -0.022
210	41.800, 0.114	41.800, 0.379	41.800, 0.653	41.800, 0.990	41.800, 1.163	41.800, 0.005	41.800, -0.012	41.800, -0.023	41.800, -0.040	41.800, -0.032	41.800, -0.031	41.800, -0.022
211	42.000, 0.117	42.000, 0.385	42.000, 0.661	42.000, 0.995	42.000, 1.166	42.000, 0.005	42.000, -0.012	42.000, -0.024	42.000, -0.040	42.000, -0.031	42.000, -0.031	42.000, -0.023
212	42.200, 0.120	42.200, 0.391	42.200, 0.669	42.200, 1.001	42.200, 1.168	42.200, 0.005	42.200, -0.012	42.200, -0.024	42.200, -0.040	42.200, -0.031	42.200, -0.031	42.200, -0.023
213	42.400, 0.122	42.400, 0.397	42.400, 0.677	42.400, 1.006	42.400, 1.170	42.400, 0.006	42.400, -0.012	42.400, -0.025	42.400, -0.041	42.400, -0.031	42.400, -0.031	42.400, -0.023
214	42.600, 0.125	42.600, 0.403	42.600, 0.686	42.600, 1.011	42.600, 1.172	42.600, 0.006	42.600, -0.012	42.600, -0.025	42.600, -0.041	42.600, -0.031	42.600, -0.030	42.600, -0.023
215	42.800, 0.128	42.800, 0.409	42.800, 0.694	42.800, 1.016	42.800, 1.174	42.800, 0.006	42.800, -0.012	42.800, -0.026	42.800, -0.041	42.800, -0.031	42.800, -0.030	42.800, -0.023
216	43.000, 0.131	43.000, 0.415	43.000, 0.702	43.000, 1.021	43.000, 1.175	43.000, 0.006	43.000, -0.012	43.000, -0.026	43.000, -0.041	43.000, -0.032	43.000, -0.030	43.000, -0.023
217	43.200, 0.133	43.200, 0.421	43.200, 0.710	43.200, 1.025	43.200, 1.177	43.200, 0.006	43.200, -0.012	43.200, -0.026	43.200, -0.041	43.200, -0.033	43.200, -0.030	43.200, -0.024
218	43.400, 0.136	43.400, 0.427	43.400, 0.717	43.400, 1.030	43.400, 1.179	43.400, 0.006	43.400, -0.012	43.400, -0.026	43.400, -0.041	43.400, -0.034	43.400, -0.030	43.400, -0.024
219	43.600, 0.139	43.600, 0.433	43.600, 0.725	43.600, 1.034	43.600, 1.180	43.600, 0.006	43.600, -0.012	43.600, -0.026	43.600, -0.041	43.600, -0.034	43.600, -0.030	43.600, -0.025
220	43.800, 0.142	43.800, 0.438	43.800, 0.732	43.800, 1.038	43.800, 1.182	43.800, 0.006	43.800, -0.013	43.800, -0.026	43.800, -0.041	43.800, -0.035	43.800, -0.030	43.800, -0.025
221	44.000, 0.146	44.000, 0.444	44.000, 0.739	44.000, 1.042	44.000, 1.184	44.000, 0.006	44.000, -0.013	44.000, -0.026	44.000, -0.041	44.000, -0.036	44.000, -0.030	44.000, -0.026
222	44.200, 0.149	44.200, 0.450	44.200, 0.746	44.200, 1.046	44.200, 1.185	44.200, 0.006	44.200, -0.013	44.200, -0.026	44.200, -0.041	44.200, -0.037	44.200, -0.029	44.200, -0.026
223	44.400, 0.152	44.400, 0.455	44.400, 0.752	44.400, 1.050	44.400, 1.187	44.400, 0.006	44.400, -0.013	44.400, -0.026	44.400, -0.041	44.400, -0.038	44.400, -0.029	44.400, -0.027
224	44.600, 0.155	44.600, 0.461	44.600, 0.759	44.600, 1.054	44.600, 1.189	44.600, 0.006	44.600, -0.013	44.600, -0.026	44.600, -0.041	44.600, -0.038	44.600, -0.029	44.600, -0.027
225	44.800, 0.159	44.800, 0.466	44.800, 0.765	44.800, 1.057	44.800, 1.190	44.800, 0.006	44.800, -0.014	44.800, -0.026	44.800, -0.041	44.800, -0.038	44.800, -0.029	44.800, -0.027
226	45.000, 0.162	45.000, 0.472	45.000, 0.772	45.000, 1.061	45.000, 1.192	45.000, 0.006	45.000, -0.014	45.000, -0.027	45.000, -0.041	45.000, -0.038	45.000, -0.029	45.000, -0.028
227	45.200, 0.165	45.200, 0.477	45.200, 0.778	45.200, 1.064	45.200, 1.194	45.200, 0.006	45.200, -0.015	45.200, -0.027	45.200, -0.041	45.200, -0.038	45.200, -0.029	45.200, -0.028
228	45.400, 0.168	45.400, 0.483	45.400, 0.784	45.400, 1.067	45.400, 1.195	45.400, 0.006	45.400, -0.015	45.400, -0.027	45.400, -0.041	45.400, -0.038	45.400, -0.029	45.400, -0.028
229	45.600, 0.171	45.600, 0.488	45.600, 0.791	45.600, 1.070	45.600, 1.196	45.600, 0.006	45.600, -0.015	45.600, -0.027	45.600, -0.042	45.600, -0.037	45.600, -0.029	45.600, -0.028
230	45.800, 0.174	45.800, 0.494	45.800, 0.797	45.800, 1.072	45.800, 1.198	45.800, 0.006	45.800, -0.015	45.800, -0.027	45.800, -0.042	45.800, -0.037	45.800, -0.029	45.800, -0.028
231	46.000, 0.177	46.000, 0.499	46.000, 0.803	46.000, 1.075	46.000, 1.199	46.000, 0.006	46.000, -0.016	46.000, -0.027	46.000, -0.043	46.000, -0.037	46.000, -0.029	46.000, -0.029
232	46.200, 0.179	46.200, 0.505	46.200, 0.810	46.200, 1.078	46.200, 1.200	46.200, 0.006	46.200, -0.016	46.200, -0.027	46.200, -0.043	46.200, -0.036	46.200, -0.029	46.200, -0.029
233	46.400, 0.182	46.400, 0.510	46.400, 0.816	46.400, 1.080	46.400, 1.200	46.400, 0.006	46.400, -0.016	46.400, -0.027	46.400, -0.044	46.400, -0.036	46.400, -0.029	46.400, -0.029
234	46.600, 0.185	46.600, 0.515	46.600, 0.821	46.600, 1.083	46.600, 1.201	46.600, 0.006	46.600, -0.017	46.600, -0.028	46.600, -0.044	46.600, -0.036	46.600, -0.029	46.600, -0.029
235	46.800, 0.188	46.800, 0.520	46.800, 0.827	46.800, 1.085	46.800, 1.202	46.800, 0.006	46.800, -0.017	46.800, -0.028	46.800, -0.045	46.800, -0.036	46.800, -0.029	46.800, -0.029
236	47.000, 0.191	47.000, 0.525	47.000, 0.833	47.000, 1.088	47.000, 1.202	47.000, 0.006	47.000, -0.017	47.000, -0.028	47.000, -0.045	47.000, -0.036	47.000, -0.030	47.000, -0.030
237	47.200, 0.194	47.200, 0.530	47.200, 0.838	47.200, 1.090	47.200, 1.203	47.200, 0.006	47.200, -0.018	47.200, -0.029	47.200, -0.045	47.200, -0.036	47.200, -0.030	47.200, -0.030
238	47.400, 0.197	47.400, 0.536	47.400, 0.843	47.400, 1.093	47.400, 1.204	47.400, 0.006	47.400, -0.018	47.400, -0.029	47.400, -0.046	47.400, -0.036	47.400, -0.030	47.400, -0.030
239	47.600, 0.200	47.600, 0.541	47.600, 0.849	47.600, 1.095	47.600, 1.205	47.600, 0.006	47.600, -0.018	47.600, -0.030	47.600, -0.046	47.600, -0.037	47.600, -0.031	47.600, -0.030
240	47.800, 0.203	47.800, 0.546	47.800, 0.853	47.800, 1.098	47.800, 1.206	47.800, 0.006	47.800, -0.018	47.800, -0.031	47.800, -0.046	47.800, -0.037	47.800, -0.031	47.800, -0.031
241	48.000, 0.206	48.000, 0.551	48.000, 0.858	48.000, 1.100	48.000, 1.207	48.000, 0.006	48.000, -0.018	48.000, -0.032	48.000, -0.046	48.000, -0.037	48.000, -0.031	48.000, -0.031
242	48.200, 0.209	48.200, 0.556	48.200, 0.863	48.200, 1.103	48.200, 1.208	48.200, 0.006	48.200, -0.018	48.200, -0.033	48.200, -0.045	48.200, -0.038	48.200, -0.031	48.200, -0.031
243	48.400, 0.212	48.400, 0.561	48.400, 0.868	48.400, 1.105	48.400, 1.209	48.400, 0.006	48.400, -0.018	48.400, -0.033	48.400, -0.045	48.400, -0.038	48.400, -0.031	48.400, -0.031
244	48.600, 0.215	48.600, 0.566	48.600, 0.872	48.600, 1.108	48.600, 1.210	48.600, 0.006	48.600, -0.018	48.600, -0.034	48.600, -0.045	48.600, -0.039	48.600, -0.031	48.600, -0.031
245	48.800, 0.218	48.800, 0.571	48.800, 0.877	48.800, 1.110	48.800, 1.211	48.800, 0.006	48.800, -0.018	48.800, -0.034	48.800, -0.045	48.800, -0.039	48.800, -0.030	48.800, -0.031
246	49.000, 0.221	49.000, 0.575	49.000, 0.881	49.000, 1.112	49.000, 1.213	49.000, 0.006	49.000, -0.018	49.000, -0.034	49.000, -0.045	49.000, -0.040	49.000, -0.030	49.000, -0.031
247	49.200, 0.224	49.200, 0.580	49.200, 0.886	49.200, 1.113	49.200, 1.214	49.200, 0.006	49.200, -0.019	49.200, -0.034	49.200, -0.046	49.200, -0.040	49.200, -0.029	49.200, -0.031
248	49.400, 0.227	49.400, 0.585	49.400, 0.890	49.400, 1.115	49.400, 1.215	49.400, 0.006	49.400, -0.019	49.400, -0.034	49.400, -0.046	49.400, -0.040	49.400, -0.029	49.400, -0.032
249	49.600, 0.230	49.600, 0.590	49.600, 0.894	49.600, 1.117	49.600, 1.216	49.600, 0.006	49.600, -0.019	49.600, -0.034	49.600, -0.046	49.600, -0.040	49.600, -0.028	49.600, -0.032
250	49.800, 0.233	49.800, 0.595	49.800, 0.899	49.800, 1.118	49.800, 1.217	49.800, 0.006	49.800, -0.019	49.800, -0.035	49.800, -0.047	49.800, -0.041	49.800, -0.028	49.800, -0.033
251	50.000, 0.236	50.000, 0.600	50.000, 0.903	50.000, 1.120	50.000, 1.217	50.000, 0.006	50.000, -0.019	50.000, -0.035	50.000, -0.047	50.000, -0.041	50.000, -0.028	50.000, -0.033
252	50.200, 0.239	50.200, 0.605	50.200, 0.907	50.200, 1.121	50.200, 1.218	50.200, 0.006	50.200, -0.019	50.200, -0.035	50.200, -0.047	50.200, -0.041	50.200, -0.028	50.200, -0.034
253	50.400, 0.242	50.400, 0.609	50.400, 0.911	50.400, 1.123	50.400, 1.219	50.400, 0.006	50.400, -0.020	50.400, -0.035	50.400, -0.048	50.400, -0.041	50.400, -0.028	50.400, -0.034
254	50.600, 0.245	50.600, 0.614	50.600, 0.915	50.600, 1.124	50.600, 1.219	50.600, 0.006	50.600, -0.020	50.600, -0.035	50.600, -0.048	50.600, -0.041	50.600, -0.028	50.600, -0.034
255	50.800, 0.248	50.800, 0.619	50.800, 0.919	50.800, 1.126	50.800, 1.220	50.800, 0.006	50.800, -0.020	50.800, -0.035	50.800, -0.047	50.800, -0.041	50.800, -0.028	50.800, -0.035
256	51.000, 0.251	51.000, 0.624	51.000, 0.922	51.000, 1.127	51.000, 1.220	51.000, 0.005	51.000, -0.020	51.000, -0.035	51.000, -0.047	51.000, -0.041	51.000, -0.029	51.000, -0.035
257	51.200, 0.254	51.200, 0.628	51.200, 0.926	51.200, 1.128	51.200, 1.221	51.200, 0.005	51.200, -0.021	51.200, -0.035	51.200, -0.047	51.200, -0.040	51.200, -0.029	51.200, -0.035
258	51.400, 0.257	51.400, 0.633	51.400, 0.930	51.400, 1.130	51.400, 1.222	51.400, 0.005	51.400, -0.021	51.400, -0.035	51.400, -0.047	51.400, -0.040	51.400, -0.029	51.400, -0.035
259	51.600, 0.260	51.600, 0.638	51.600, 0.933	51.600, 1.131	51.600, 1.222	51.600, 0.005	51.600, -0.021	51.600, -0.035	51.600, -0.047	51.600, -0.040	51.600, -0.030	51.600, -0.035
260	51.800, 0.263	51.800, 0.642	51.800, 0.936	51.800, 1.133	51.800, 1.223	51.800, 0.005	51.800, -0.022	51.800, -0.035	51.800, -0.047	51.800, -0.040	51.800, -0.030	51.800, -0.035
261	52.000, 0.265	52.000, 0.647	52.000, 0.940	52.000, 1.134	52.000, 1.224	52.000, 0.005	52.000, -0.022	52.000, -0.035	52.000, -0.047	52.000, -0.040	52.000, -0.030	52.000, -0.036
262	52.200, 0.268	52.200, 0.651	52.200, 0.943	52.200, 1.136	52.200, 1.225	52.200, 0.004	52.200, -0.022	52.200, -0.036	52.200, -0.047	52.200, -0.040	52.200, -0.030	52.200, -0.036
263	52.400, 0.271	52.400, 0.655	52.400, 0.946	52.400, 1.137	52.400, 1.226	52.400, 0.004	52.400, -0.022	52.400, -0.036	52.400, -0.047	52.400, -0.040	52.400, -0.031	52.400, -0.036
264	52.600, 0.273	52.600, 0.659	52.600, 0.949	52.600, 1.138	52.600, 1.227	52.600, 0.004	52.600, -0.023	52.600, -0.035	52.600, -0.047	52.600, -0.041	52.600, -0.030	52.600, -0.036
265	52.800, 0.276	52.800, 0.663	52.800, 0.953	52.800, 1.139	52.800, 1.228	52.800, 0.004	52.800, -0.023	52.800, -0.035	52.800, -0.047	52.800, -0.041	52.800, -0.030	52.800, -0.036
266	53.000, 0.278	53.000, 0.667	53.000, 0.956	53.000, 1.140	53.000, 1.229	53.000, 0.004	53.000, -0.024	53.000, -0.035	53.000, -0.047	53.000, -0.041	53.000, -0.030	53.000, -0.036
267	53.200, 0.281	53.200, 0.671	53.200, 0.959	53.200, 1.142	53.200, 1.230	53.200, 0.003	53.200, -0.024	53.200, -0.035	53.200, -0.048	53.200, -0.042	53.200, -0.030	53.200, -0.037
268	53.400, 0.284	53.400, 0.675	53.400, 0.962	53.400, 1.142	53.400, 1.230	53.400, 0.004	53.400, -0.024	53.400, -0.035	53.400, -0.048	53.400, -0.042	53.400, -0.030	53.400, -0.037
269	53.600, 0.287	53.600, 0.679	53.600, 0.965	53.600, 1.144	53.600, 1.231	53.600, 0.004	53.600, -0.024	53.600, -0.036	53.600, -0.048	53.600, -0.042	53.600, -0.030	53.600, -0.037
270	53.800, 0.289	53.800, 0.683	53.800, 0.968	53.800, 1.145	53.800, 1.232	53.800, 0.004	53.800, -0.025	53.800, -0.036	53.800, -0.049	53.800, -0.042	53.800, -0.030	53.800, -0.037
271	54.000, 0.292	54.000, 0.687	54.000, 0.971	54.000, 1.146	54.000, 1.232	54.000, 0.004	54.000, -0.025	54.000, -0.036	54.000, -0.049	54.000, -0.043	54.000, -0.030	54.000, -0.037
272	54.200, 0.296	54.200, 0.691	54.200, 0.974	54.200, 1.147	54.200, 1.233	54.200, 0.004	54.200, -0.025	54.200, -0.036	54.200, -0.050	54.200, -0.042	54.200, -0.029	54.200, -0.037
273	54.400, 0.299	54.400, 0.695	54.400, 0.977	54.400, 1.149	54.400, 1.233	54.400, 0.004	54.400, -0.025	54.400, -0.036	54.400, -0.050	54.400, -0.042	54.400, -0.029	54.400, -0.037
274	54.600, 0.302	54.600, 0.699	54.600, 0.980	54.600, 1.150	54.600, 1.234	54.600, 0.004	54.600, -0.025	54.600, -0.036	54.600, -0.051	54.600, -0.042	54.600, -0.029	54.600, -0.037
275	54.800, 0.305	54.800, 0.703	54.800, 0.982	54.800, 1.151	54.800, 1.234	54.800, 0.004	54.800, -0.025	54.800, -0.036	54.800, -0.051	54.800, -0.042	54.800, -0.029	54.800, -0.037
276	55.000, 0.308	55.000, 0.707	55.000, 0.985	55.000, 1.153	55.000, 1.235	55.000, 0.005	55.000, -0.025	55.000, -0.037	55.000, -0.051	55.000, -0.042	55.000, -0.029	55.000, -0.037
277	55.200, 0.311	55.200, 0.711	55.200, 0.987	55.200, 1.154	55.200, 1.235	55.200, 0.005	55.200, -0.025	55.200, -0.037	55.200, -0.051	55.200, -0.042	55.200, -0.029	55.200, -0.037
278	55.400, 0.314	55.400, 0.715	55.400, 0.990	55.400, 1.155	55.400, 1.235	55.400, 0.005	55.400, -0.025	55.400, -0.038	55.400, -0.052	55.400, -0.042	55.400, -0.030	55.400, -0.037
279	55.600, 0.317	55.600, 0.719	55.600, 0.992	55.600, 1.156	55.600, 1.236	55.600, 0.005	55.600, -0.025	55.600, -0.038	55.600, -0.052	55.600, -0.042	55.600, -0.030	55.600, -0.037
280	55.800, 0.320	55.800, 0.723	55.800, 0.995	55.800, 1.157	55.800, 1.236	55.800, 0.004	55.800, -0.025	55.800, -0.039	55.800, -0.052	55.800, -0.042	55.800, -0.030	55.800, -0.038
281	56.000, 0.323	56.000, 0.727	56.000, 0.998	56.000, 1.158	56.000, 1.236	56.000, 0.004	56.000, -0.025	56.000, -0.039	56.000, -0.053	56.000, -0.042	56.000, -0.030	56.000, -0.038
282	56.200, 0.325	56.200, 0.731	56.200, 1.000	56.200, 1.160	56.200, 1.237	56.200, 0.004	56.200, -0.025	56.200, -0.040	56.200, -0.053	56.200, -0.042	56.200, -0.030	56.200, -0.039
283	56.400, 0.328	56.400, 0.735	56.400, 1.003	56.400, 1.161	56.400, 1.237	56.400, 0.004	56.400, -0.026	56.400, -0.040	56.400, -0.053	56.400, -0.043	56.400, -0.029	56.400, -0.039
284	56.600, 0.330	56.600, 0.738	56.600, 1.005	56.600, 1.162	56.600, 1.238	56.600, 0.003	56.600, -0.026	56.600, -0.040	56.600, -0.052	56.600, -0.043	56.600, -0.029	56.600, -0.040
285	56.800, 0.332	56.800, 0.742	56.800, 1.008	56.800, 1.162	56.800, 1.239	56.800, 0.003	56.800, -0.026	56.800, -0.041	56.800, -0.052	56.800, -0.043	56.800, -0.029	56.800, -0.040
286	57.000, 0.335	57.000, 0.746	57.000, 1.010	57.000, 1.163	57.000, 1.239	57.000, 0.003	57.000, -0.027	57.000, -0.041	57.000, -0.051	57.000, -0.044	57.000, -0.028	57.000, -0.041
287	57.200, 0.337	57.200, 0.749	57.200, 1.012	57.200, 1.164	57.200, 1.240	57.200, 0.003	57.200, -0.027	57.200, -0.041	57.200, -0.051	57.200, -0.044	57.200, -0.028	57.200, -0.041
288	57.400, 0.340	57.400, 0.753	57.400, 1.015	57.400, 1.164	57.400, 1.241	57.400, 0.003	57.400, -0.027	57.400, -0.041	57.400, -0.051	57.400, -0.044	57.400, -0.028	57.400, -0.041
289	57.600, 0.343	57.600, 0.756	57.600, 1.017	57.600, 1.165	57.600, 1.241	57.600, 0.003	57.600, -0.027	57.600, -0.041	57.600, -0.051	57.600, -0.044	57.600, -0.028	57.600, -0.041
290	57.800, 0.346	57.800, 0.760	57.800, 1.019	57.800, 1.166	57.800, 1.242	57.800, 0.003	57.800, -0.028	57.800, -0.041	57.800, -0.051	57.800, -0.044	57.800, -0.027	57.800, -0.041
291	58.000, 0.348	58.000, 0.763	58.000, 1.021	58.000, 1.166	58.000, 1.242	58.000, 0.003	58.000, -0.028	58.000, -0.041	58.000, -0.051	58.000, -0.044	58.000, -0.027	58.000, -0.041
292	58.200, 0.351	58.200, 0.767	58.200, 1.023	58.200, 1.167	58.200, 1.243	58.200, 0.003	58.200, -0.028	58.200, -0.042	58.200, -0.051	58.200, -0.044	58.200, -0.027	58.200, -0.042
293	58.400, 0.354	58.400, 0.770	58.400, 1.025	58.400, 1.168	58.400, 1.243	58.400, 0.003	58.400, -0.029	58.400, -0.042	58.400, -0.052	58.400, -0.044	58.400, -0.027	58.400, -0.042
294	58.600, 0.357	58.600, 0.774	58.600, 1.027	58.600, 1.168	58.600, 1.244	58.600, 0.003	58.600, -0.029	58.600, -0.043	58.600, -0.052	58.600, -0.044	58.600, -0.027	58.600, -0.042
295	58.800, 0.360	58.800, 0.777	58.800, 1.028	58.800, 1.169	58.800, 1.244	58.800, 0.003	58.800, -0.029	58.800, -0.043	58.800, -0.052	58.800, -0.045	58.800, -0.027	58.800, -0.042
296	59.000, 0.363	59.000, 0.780	59.000, 1.030	59.000, 1.170	59.000, 1.245	59.000, 0.003	59.000, -0.030	59.000, -0.043	59.000, -0.052	59.000, -0.045	59.000, -0.027	59.000, -0.041
297	59.200, 0.366	59.200, 0.784	59.200, 1.031	59.200, 1.170	59.200, 1.245	59.200, 0.003	59.200, -0.030	59.200, -0.043	59.200, -0.052	59.200, -0.045	59.200, -0.027	59.200, -0.041
298	59.400, 0.369	59.400, 0.787	59.400, 1.033	59.400, 1.171	59.400, 1.245	59.400, 0.003	59.400, -0.030	59.400, -0.043	59.400, -0.052	59.400, -0.045	59.400, -0.027	59.400, -0.041
299	59.600, 0.372	59.600, 0.790	59.600, 1.035	59.600, 1.172	59.600, 1.245	59.600, 0.004	59.600, -0.030	59.600, -0.043	59.600, -0.052	59.600, -0.045	59.600, -0.027	59.600, -0.041
300	59.800, 0.374	59.800, 0.794	59.800, 1.036	59.800, 1.173	59.800, 1.245	59.800, 0.004	59.800, -0.030	59.800, -0.043	59.800, -0.052	59.800, -0.045	59.800, -0.027	59.800, -0.041
301	60.000, 0.377	60.000, 0.797	60.000, 1.038	60.000, 1.174	60.000, 1.246	60.000, 0.004	60.000, -0.030	60.000, -0.043	60.000, -0.052	60.000, -0.046	60.000, -0.027	60.000, -0.041
302	60.200, 0.380	60.200, 0.800	60.200, 1.039	60.200, 1.175	60.200, 1.246	60.200, 0.004	60.200, -0.030	60.200, -0.043	60.200, -0.053	60.200, -0.046	60.200, -0.027	60.200, -0.042
303	60.400, 0.382	60.400, 0.803	60.400, 1.041	60.400, 1.175	60.400, 1.247	60.400, 0.003	60.400, -0.030	60.400, -0.044	60.400, -0.053	60.400, -0.046	60.400, -0.027	60.400, -0.042
304	60.600, 0.385	60.600, 0.806	60.600, 1.042	60.600, 1.176	60.600, 1.247	60.600, 0.003	60.600, -0.030	60.600, -0.044	60.600, -0.053	60.600, -0.046	60.600, -0.027	60.600, -0.042
305	60.800, 0.388	60.800, 0.809	60.800, 1.044	60.800, 1.177	60.800, 1.248	60.800, 0.003	60.800, -0.030	60.800, -0.044	60.800, -0.054	60.800, -0.046	60.800, -0.027	60.800, -0.042
306	61.000, 0.390	61.000, 0.812	61.000, 1.045	61.000, 1.178	61.000, 1.249	61.000, 0.003	61.000, -0.030	61.000, -0.044	61.000, -0.054	61.000, -0.046	61.000, -0.027	61.000, -0.043
307	61.200, 0.393	61.200, 0.815	61.200, 1.047	61.200, 1.178	61.200, 1.249	61.200, 0.003	61.200, -0.030	61.200, -0.044	61.200, -0.055	61.200, -0.046	61.200, -0.027	61.200, -0.043
308	61.400, 0.396	61.400, 0.818	61.400, 1.048	61.400, 1.179	61.400, 1.250	61.400, 0.003	61.400, -0.030	61.400, -0.044	61.400, -0.055	61.400, -0.045	61.400, -0.027	61.400, -0.044
309	61.600, 0.398	61.600, 0.821	61.600, 1.049	61.600, 1.179	61.600, 1.250	61.600, 0.003	61.600, -0.030	61.600, -0.045	61.600, -0.056	61.600, -0.045	61.600, -0.028	61.600, -0.044
310	61.800, 0.401	61.800, 0.824	61.800, 1.051	61.800, 1.180	61.800, 1.251	61.800, 0.003	61.800, -0.031	61.800, -0.045	61.800, -0.056	61.800, -0.046	61.800, -0.028	61.800, -0.045
311	62.000, 0.404	62.000, 0.827	62.000, 1.052	62.000, 1.181	62.000, 1.251	62.000, 0.003	62.000, -0.031	62.000, -0.045	62.000, -0.056	62.000, -0.046	62.000, -0.028	62.000, -0.045
312	62.200, 0.407	62.200, 0.830	62.200, 1.054	62.200, 1.181	62.200, 1.252	62.200, 0.003	62.200, -0.031	62.200, -0.046	62.200, -0.056	62.200, -0.046	62.200, -0.028	62.200, -0.046
313	62.400, 0.410	62.400, 0.833	62.400, 1.055	62.400, 1.182	62.400, 1.252	62.400, 0.003	62.400, -0.031	62.400, -0.046	62.400, -0.056	62.400, -0.046	62.400, -0.028	62.400, -0.046
314	62.600, 0.412	62.600, 0.836	62.600, 1.056	62.600, 1.183	62.600, 1.252	62.600, 0.003	62.600, -0.031	62.600, -0.046	62.600, -0.056	62.600, -0.046	62.600, -0.028	62.600, -0.046
315	62.800, 0.415	62.800, 0.839	62.800, 1.058	62.800, 1.183	62.800, 1.253	62.800, 0.003	62.800, -0.031	62.800, -0.045	62.800, -0.056	62.800, -0.046	62.800, -0.028	62.800, -0.046
316	63.000, 0.418	63.000, 0.842	63.000, 1.059	63.000, 1.184	63.000, 1.253	63.000, 0.003	63.000, -0.032	63.000, -0.045	63.000, -0.056	63.000, -0.046	63.000, -0.028	63.000, -0.046
317	63.200, 0.421	63.200, 0.845	63.200, 1.061	63.200, 1.185	63.200, 1.253	63.200, 0.003	63.200, -0.032	63.200, -0.045	63.200, -0.056	63.200, -0.046	63.200, -0.028	63.200, -0.046
318	63.400, 0.424	63.400, 0.848	63.400, 1.063	63.400, 1.186	63.400, 1.253	63.400, 0.002	63.400, -0.033	63.400, -0.045	63.400, -0.056	63.400, -0.045	63.400, -0.028	63.400, -0.046
319	63.600, 0.427	63.600, 0.851	63.600, 1.065	63.600, 1.186	63.600, 1.253	63.600, 0.002	63.600, -0.033	63.600, -0.045	63.600, -0.056	63.600, -0.045	63.600, -0.028	63.600, -0.046
320	63.800, 0.429	63.800, 0.853	63.800, 1.066	63.800, 1.187	63.800, 1.253	63.800, 0.002	63.800, -0.033	63.800, -0.045	63.800, -0.056	63.800, -0.045	63.800, -0.027	63.800, -0.046
321	64.000, 0.432	64.000, 0.856	64.000, 1.068	64.000, 1.187	64.000, 1.254	64.000, 0.001	64.000, -0.034	64.000, -0.045	64.000, -0.056	64.000, -0.045	64.000, -0.027	64.000, -0.046
322	64.200, 0.435	64.200, 0.859	64.200, 1.069	64.200, 1.188	64.200, 1.255	64.200, 0.001	64.200, -0.034	64.200, -0.045	64.200, -0.056	64.200, -0.045	64.200, -0.026	64.200, -0.046
323	64.400, 0.437	64.400, 0.861	64.400, 1.071	64.400, 1.188	64.400, 1.255	64.400, 0.001	64.400, -0.035	64.400, -0.045	64.400, -0.057	64.400, -0.045	64.400, -0.026	64.400, -0.045
324	64.600, 0.440	64.600, 0.863	64.600, 1.072	64.600, 1.189	64.600, 1.256	64.600, 0.001	64.600, -0.035	64.600, -0.045	64.600, -0.057	64.600, -0.046	64.600, -0.026	64.600, -0.046
325	64.800, 0.442	64.800, 0.865	64.800, 1.073	64.800, 1.189	64.800, 1.256	64.800, 0.001	64.800, -0.035	64.800, -0.045	64.800, -0.057	64.800, -0.046	64.800, -0.025	64.800, -0.046
326	65.000, 0.445	65.000, 0.868	65.000, 1.075	65.000, 1.190	65.000, 1.257	65.000, 0.001	65.000, -0.035	65.000, -0.046	65.000, -0.057	65.000, -0.046	65.000, -0.025	65.000, -0.046
327	65.200, 0.447	65.200, 0.870	65.200, 1.076	65.200, 1.190	65.200, 1.257	65.200, 0.001	65.200, -0.035	65.200, -0.046	65.200, -0.057	65.200, -0.046	65.200, -0.025	65.200, -0.047
328	65.400, 0.450	65.400, 0.872	65.400, 1.078	65.400, 1.191	65.400, 1.257	65.400, 0.001	65.400, -0.035	65.400, -0.046	65.400, -0.057	65.400, -0.047	65.400, -0.025	65.400, -0.047
329	65.600, 0.452	65.600, 0.875	65.600, 1.079	65.600, 1.191	65.600, 1.257	65.600, 0.001	65.600, -0.035	65.600, -0.047	65.600, -0.057	65.600, -0.047	65.600, -0.025	65.600, -0.047
330	65.800, 0.455	65.800, 0.877	65.800, 1.080	65.800, 1.192	65.800, 1.258	65.800, 0.001	65.800, -0.036	65.800, -0.047	65.800, -0.056	65.800, -0.047	65.800, -0.025	65.800, -0.048
331	66.000, 0.457	66.000, 0.879	66.000, 1.082	66.000, 1.192	66.000, 1.258	66.000, 0.001	66.000, -0.036	66.000, -0.048	66.000, -0.056	66.000, -0.048	66.000, -0.025	66.000, -0.048
332	66.200, 0.460	66.200, 0.882	66.200, 1.083	66.200, 1.193	66.200, 1.258	66.200, 0.000	66.200, -0.036	66.200, -0.048	66.200, -0.057	66.200, -0.048	66.200, -0.025	66.200, -0.048
333	66.400, 0.463	66.400, 0.885	66.400, 1.083	66.400, 1.194	66.400, 1.259	66.400, 0.000	66.400, -0.036	66.400, -0.049	66.400, -0.057	66.400, -0.048	66.400, -0.025	66.400, -0.048
334	66.600, 0.465	66.600, 0.887	66.600, 1.084	66.600, 1.194	66.600, 1.259	66.600, -0.000	66.600, -0.036	66.600, -0.049	66.600, -0.057	66.600, -0.048	66.600, -0.025	66.600, -0.048
335	66.800, 0.468	66.800, 0.889	66.800, 1.086	66.800, 1.195	66.800, 1.259	66.800, -0.001	66.800, -0.036	66.800, -0.049	66.800, -0.058	66.800, -0.048	66.800, -0.025	66.800, -0.048
336	67.000, 0.471	67.000, 0.892	67.000, 1.086	67.000, 1.196	67.000, 1.260	67.000, -0.001	67.000, -0.037	67.000, -0.050	67.000, -0.058	67.000, -0.048	67.000, -0.026	67.000, -0.048
337	67.200, 0.474	67.200, 0.894	67.200, 1.087	67.200, 1.196	67.200, 1.260	67.200, -0.002	67.200, -0.037	67.200, -0.050	67.200, -0.058	67.200, -0.047	67.200, -0.026	67.200, -0.047
338	67.400, 0.476	67.400, 0.896	67.400, 1.088	67.400, 1.197	67.400, 1.261	67.400, -0.002	67.400, -0.037	67.400, -0.050	67.400, -0.058	67.400, -0.047	67.400, -0.026	67.400, -0.047
339	67.600, 0.479	67.600, 0.899	67.600, 1.089	67.600, 1.198	67.600, 1.261	67.600, -0.002	67.600, -0.037	67.600, -0.050	67.600, -0.058	67.600, -0.048	67.600, -0.027	67.600, -0.047
340	67.800, 0.482	67.800, 0.901	67.800, 1.090	67.800, 1.198	67.800, 1.262	67.800, -0.002	67.800, -0.038	67.800, -0.050	67.800, -0.058	67.800, -0.048	67.800, -0.027	67.800, -0.047
341	68.000, 0.484	68.000, 0.903	68.000, 1.091	68.000, 1.198	68.000, 1.263	68.000, -0.002	68.000, -0.038	68.000, -0.050	68.000, -0.059	68.000, -0.048	68.000, -0.027	68.000, -0.048
342	68.200, 0.487	68.200, 0.905	68.200, 1.091	68.200, 1.199	68.200, 1.264	68.200, -0.002	68.200, -0.038	68.200, -0.050	68.200, -0.059	68.200, -0.048	68.200, -0.027	68.200, -0.048
343	68.400, 0.489	68.400, 0.908	68.400, 1.092	68.400, 1.199	68.400, 1.264	68.400, -0.002	68.400, -0.039	68.400, -0.050	68.400, -0.059	68.400, -0.048	68.400, -0.027	68.400, -0.048
344	68.600, 0.491	68.600, 0.910	68.600, 1.093	68.600, 1.200	68.600, 1.265	68.600, -0.002	68.600, -0.039	68.600, -0.050	68.600, -0.059	68.600, -0.048	68.600, -0.027	68.600, -0.049
345	68.800, 0.494	68.800, 0.912	68.800, 1.094	68.800, 1.200	68.800, 1.265	68.800, -0.001	68.800, -0.039	68.800, -0.050	68.800, -0.058	68.800, -0.048	68.800, -0.027	68.800, -0.050
346	69.000, 0.496	69.000, 0.915	69.000, 1.095	69.000, 1.200	69.000, 1.265	69.000, -0.001	69.000, -0.039	69.000, -0.050	69.000, -0.058	69.000, -0.048	69.000, -0.027	69.000, -0.050
347	69.200, 0.498	69.200, 0.917	69.200, 1.097	69.200, 1.201	69.200, 1.266	69.200, -0.001	69.200, -0.039	69.200, -0.051	69.200, -0.058	69.200, -0.048	69.200, -0.027	69.200, -0.051
348	69.400, 0.501	69.400, 0.919	69.400, 1.098	69.400, 1.201	69.400, 1.266	69.400, -0.001	69.400, -0.039	69.400, -0.051	69.400, -0.057	69.400, -0.048	69.400, -0.027	69.400, -0.051
349	69.600, 0.503	69.600, 0.921	69.600, 1.099	69.600, 1.202	69.600, 1.266	69.600, -0.001	69.600, -0.039	69.600, -0.051	69.600, -0.057	69.600, -0.048	69.600, -0.026	69.600, -0.051
350	69.800, 0.506	69.800, 0.923	69.800, 1.100	69.800, 1.202	69.800, 1.266	69.800, -0.001	69.800, -0.039	69.800, -0.050	69.800, -0.057	69.800, -0.048	69.800, -0.026	69.800, -0.051
351	70.000, 0.509	70.000, 0.925	70.000, 1.101	70.000, 1.203	70.000, 1.267	70.000, -0.002	70.000, -0.040	70.000, -0.050	70.000, -0.057	70.000, -0.048	70.000, -0.026	70.000, -0.052
352	70.200, 0.511	70.200, 0.928	70.200, 1.101	70.200, 1.203	70.200, 1.267	70.200, -0.002	70.200, -0.040	70.200, -0.050	70.200, -0.058	70.200, -0.048	70.200, -0.025	70.200, -0.051
353	70.400, 0.514	70.400, 0.930	70.400, 1.102	70.400, 1.204	70.400, 1.267	70.400, -0.002	70.400, -0.040	70.400, -0.051	70.400, -0.058	70.400, -0.048	70.400, -0.025	70.400, -0.051
354	70.600, 0.516	70.600, 0.932	70.600, 1.103	70.600, 1.204	70.600, 1.267	70.600, -0.002	70.600, -0.040	70.600, -0.051	70.600, -0.058	70.600, -0.048	70.600, -0.025	70.600, -0.051
355	70.800, 0.519	70.800, 0.933	70.800, 1.104	70.800, 1.205	70.800, 1.267	70.800, -0.003	70.800, -0.040	70.800, -0.051	70.800, -0.058	70.800, -0.047	70.800, -0.025	70.800, -0.050
356	71.000, 0.521	71.000, 0.935	71.000, 1.105	71.000, 1.205	71.000, 1.267	71.000, -0.003	71.000, -0.041	71.000, -0.052	71.000, -0.058	71.000, -0.047	71.000, -0.025	71.000, -0.050
357	71.200, 0.524	71.200, 0.937	71.200, 1.106	71.200, 1.205	71.200, 1.267	71.200, -0.003	71.200, -0.041	71.200, -0.052	71.200, -0.058	71.200, -0.047	71.200, -0.025	71.200, -0.050
358	71.400, 0.526	71.400, 0.939	71.400, 1.106	71.400, 1.206	71.400, 1.267	71.400, -0.003	71.400, -0.041	71.400, -0.052	71.400, -0.058	71.400, -0.047	71.400, -0.025	71.400, -0.049
359	71.600, 0.529	71.600, 0.941	71.600, 1.107	71.600, 1.206	71.600, 1.267	71.600, -0.003	71.600, -0.041	71.600, -0.052	71.600, -0.058	71.600, -0.047	71.600, -0.025	71.600, -0.049
360	71.800, 0.531	71.800, 0.943	71.800, 1.108	71.800, 1.206	71.800, 1.267	71.800, -0.002	71.800, -0.041	71.800, -0.052	71.800, -0.059	71.800, -0.047	71.800, -0.025	71.800, -0.050
361	72.000, 0.533	72.000, 0.945	72.000, 1.109	72.000, 1.206	72.000, 1.267	72.000, -0.002	72.000, -0.041	72.000, -0.052	72.000, -0.059	72.000, -0.047	72.000, -0.025	72.000, -0.050
362	72.200, 0.536	72.200, 0.946	72.200, 1.110	72.200, 1.207	72.200, 1.268	72.200, -0.002	72.200, -0.041	72.200, -0.053	72.200, -0.059	72.200, -0.048	72.200, -0.025	72.200, -0.050
363	72.400, 0.538	72.400, 0.948	72.400, 1.111	72.400, 1.207	72.400, 1.268	72.400, -0.002	72.400, -0.041	72.400, -0.053	72.400, -0.059	72.400, -0.048	72.400, -0.025	72.400, -0.051
364	72.600, 0.540	72.600, 0.950	72.600, 1.112	72.600, 1.208	72.600, 1.269	72.600, -0.002	72.600, -0.040	72.600, -0.053	72.600, -0.059	72.600, -0.048	72.600, -0.025	72.600, -0.051
365	72.800, 0.542	72.800, 0.952	72.800, 1.112	72.800, 1.208	72.800, 1.269	72.800, -0.002	72.800, -0.040	72.800, -0.053	72.800, -0.059	72.800, -0.049	72.800, -0.025	72.800, -0.051
366	73.000, 0.544	73.000, 0.953	73.000, 1.113	73.000, 1.209	73.000, 1.269	73.000, -0.002	73.000, -0.040	73.000, -0.053	73.000, -0.059	73.000, -0.049	73.000, -0.025	73.000, -0.052
367	73.200, 0.546	73.200, 0.955	73.200, 1.114	73.200, 1.209	73.200, 1.270	73.200, -0.002	73.200, -0.041	73.200, -0.053	73.200, -0.059	73.200, -0.049	73.200, -0.025	73.200, -0.052
368	73.400, 0.548	73.400, 0.957	73.400, 1.115	73.400, 1.210	73.400, 1.271	73.400, -0.002	73.400, -0.041	73.400, -0.053	73.400, -0.059	73.400, -0.050	73.400, -0.025	73.400, -0.052
369	73.600, 0.551	73.600, 0.958	73.600, 1.116	73.600, 1.211	73.600, 1.271	73.600, -0.002	73.600, -0.041	73.600, -0.053	73.600, -0.059	73.600, -0.050	73.600, -0.025	73.600, -0.052
370	73.800, 0.553	73.800, 0.960	73.800, 1.117	73.800, 1.211	73.800, 1.272	73.800, -0.002	73.800, -0.041	73.800, -0.053	73.800, -0.059	73.800, -0.050	73.800, -0.025	73.800, -0.052
371	74.000, 0.556	74.000, 0.961	74.000, 1.118	74.000, 1.212	74.000, 1.272	74.000, -0.002	74.000, -0.042	74.000, -0.053	74.000, -0.059	74.000, -0.049	74.000, -0.025	74.000, -0.052
372	74.200, 0.558	74.200, 0.963	74.200, 1.119	74.200, 1.212	74.200, 1.273	74.200, -0.002	74.200, -0.042	74.200, -0.053	74.200, -0.059	74.200, -0.049	74.200, -0.025	74.200, -0.052
373	74.400, 0.561	74.400, 0.965	74.400, 1.120	74.400, 1.213	74.400, 1.274	74.400, -0.002	74.400, -0.042	74.400, -0.054	74.400, -0.059	74.400, -0.049	74.400, -0.025	74.400, -0.052
374	74.600, 0.563	74.600, 0.966	74.600, 1.121	74.600, 1.213	74.600, 1.274	74.600, -0.002	74.600, -0.041	74.600, -0.054	74.600, -0.059	74.600, -0.048	74.600, -0.025	74.600, -0.052
375	74.800, 0.566	74.800, 0.968	74.800, 1.122	74.800, 1.213	74.800, 1.275	74.800, -0.002	74.800, -0.041	74.800, -0.055	74.800, -0.059	74.800, -0.048	74.800, -0.025	74.800, -0.052
376	75.000, 0.568	75.000, 0.970	75.000, 1.123	75.000, 1.213	75.000, 1.275	75.000, -0.002	75.000, -0.041	75.000, -0.055	75.000, -0.059	75.000, -0.048	75.000, -0.025	75.000, -0.052
377	75.200, 0.571	75.200, 0.971	75.200, 1.123	75.200, 1.213	75.200, 1.276	75.200, -0.002	75.200, -0.041	75.200, -0.055	75.200, -0.059	75.200, -0.047	75.200, -0.025	75.200, -0.052
378	75.400, 0.573	75.400, 0.973	75.400, 1.124	75.400, 1.213	75.400, 1.276	75.400, -0.002	75.400, -0.041	75.400, -0.055	75.400, -0.059	75.400, -0.047	75.400, -0.025	75.400, -0.052
379	75.600, 0.576	75.600, 0.975	75.600, 1.125	75.600, 1.214	75.600, 1.277	75.600, -0.002	75.600, -0.041	75.600, -0.056	75.600, -0.059	75.600, -0.047	75.600, -0.025	75.600, -0.052
380	75.800, 0.578	75.800, 0.976	75.800, 1.126	75.800, 1.214	75.800, 1.278	75.800, -0.003	75.800, -0.041	75.800, -0.056	75.800, -0.059	75.800, -0.047	75.800, -0.025	75.800, -0.052
381	76.000, 0.580	76.000, 0.978	76.000, 1.126	76.000, 1.214	76.000, 1.278	76.000, -0.003	76.000, -0.041	76.000, -0.056	76.000, -0.060	76.000, -0.048	76.000, -0.025	76.000, -0.052
382	76.200, 0.583	76.200, 0.979	76.200, 1.127	76.200, 1.215	76.200, 1.278	76.200, -0.003	76.200, -0.040	76.200, -0.056	76.200, -0.060	76.200, -0.048	76.200, -0.024	76.200, -0.052
383	76.400, 0.585	76.400, 0.981	76.400, 1.128	76.400, 1.215	76.400, 1.279	76.400, -0.003	76.400, -0.041	76.400, -0.055	76.400, -0.059	76.400, -0.048	76.400, -0.024	76.400, -0.053
384	76.600, 0.587	76.600, 0.983	76.600, 1.128	76.600, 1.216	76.600, 1.279	76.600, -0.003	76.600, -0.041	76.600, -0.055	76.600, -0.060	76.600, -0.049	76.600, -0.024	76.600, -0.053
385	76.800, 0.590	76.800, 0.985	76.800, 1.129	76.800, 1.216	76.800, 1.279	76.800, -0.004	76.800, -0.042	76.800, -0.055	76.800, -0.060	76.800, -0.049	76.800, -0.023	76.800, -0.053
386	77.000, 0.592	77.000, 0.986	77.000, 1.129	77.000, 1.217	77.000, 1.279	77.000, -0.004	77.000, -0.042	77.000, -0.054	77.000, -0.060	77.000, -0.049	77.000, -0.023	77.000, -0.054
387	77.200, 0.595	77.200, 0.987	77.200, 1.130	77.200, 1.217	77.200, 1.279	77.200, -0.004	77.200, -0.042	77.200, -0.054	77.200, -0.060	77.200, -0.049	77.200, -0.023	77.200, -0.054
388	77.400, 0.597	77.400, 0.989	77.400, 1.131	77.400, 1.218	77.400, 1.279	77.400, -0.004	77.400, -0.043	77.400, -0.053	77.400, -0.060	77.400, -0.049	77.400, -0.023	77.400, -0.054
389	77.600, 0.600	77.600, 0.990	77.600, 1.131	77.600, 1.218	77.600, 1.279	77.600, -0.004	77.600, -0.043	77.600, -0.053	77.600, -0.060	77.600, -0.049	77.600, -0.023	77.600, -0.054
390	77.800, 0.602	77.800, 0.991	77.800, 1.132	77.800, 1.219	77.800, 1.279	77.800, -0.004	77.800, -0.043	77.800, -0.053	77.800, -0.060	77.800, -0.050	77.800, -0.023	77.800, -0.054
391	78.000, 0.604	78.000, 0.992	78.000, 1.132	78.000, 1.220	78.000, 1.279	78.000, -0.005	78.000, -0.043	78.000, -0.053	78.000, -0.060	78.000, -0.050	78.000, -0.023	78.000, -0.054
392	78.200, 0.607	78.200, 0.994	78.200, 1.133	78.200, 1.220	78.200, 1.279	78.200, -0.005	78.200, -0.043	78.200, -0.053	78.200, -0.060	78.200, -0.050	78.200, -0.023	78.200, -0.055
393	78.400, 0.609	78.400, 0.995	78.400, 1.133	78.400, 1.221	78.400, 1.279	78.400, -0.005	78.400, -0.043	78.400, -0.054	78.400, -0.060	78.400, -0.050	78.400, -0.023	78.400, -0.055
394	78.600, 0.611	78.600, 0.996	78.600, 1.134	78.600, 1.221	78.600, 1.278	78.600, -0.005	78.600, -0.043	78.600, -0.054	78.600, -0.060	78.600, -0.050	78.600, -0.023	78.600, -0.054
395	78.800, 0.614	78.800, 0.998	78.800, 1.134	78.800, 1.221	78.800, 1.278	78.800, -0.005	78.800, -0.043	78.800, -0.055	78.800, -0.059	78.800, -0.050	78.800, -0.023	78.800, -0.054
396	79.000, 0.616	79.000, 0.999	79.000, 1.135	79.000, 1.222	79.000, 1.278	79.000, -0.005	79.000, -0.043	79.000, -0.055	79.000, -0.059	79.000, -0.050	79.000, -0.023	79.000, -0.054
397	79.200, 0.618	79.200, 1.001	79.200, 1.135	79.200, 1.222	79.200, 1.279	79.200, -0.005	79.200, -0.043	79.200, -0.056	79.200, -0.059	79.200, -0.050	79.200, -0.022	79.200, -0.054
398	79.400, 0.621	79.400, 1.002	79.400, 1.136	79.400, 1.222	79.400, 1.279	79.400, -0.005	79.400, -0.043	79.400, -0.056	79.400, -0.059	79.400, -0.050	79.400, -0.022	79.400, -0.055
399	79.600, 0.623	79.600, 1.004	79.600, 1.137	79.600, 1.223	79.600, 1.280	79.600, -0.005	79.600, -0.043	79.600, -0.057	79.600, -0.059	79.600, -0.049	79.600, -0.022	79.600, -0.055
400	79.800, 0.625	79.800, 1.006	79.800, 1.137	79.800, 1.223	79.800, 1.280	79.800, -0.006	79.800, -0.043	79.800, -0.057	79.800, -0.059	79.800, -0.049	79.800, -0.022	79.800, -0.055
401	80.000, 0.627	80.000, 1.007	80.000, 1.138	80.000, 1.224	80.000, 1.281	80.000, -0.006	80.000, -0.044	80.000, -0.057	80.000, -0.060	80.000, -0.049	80.000, -0.022	80.000, -0.055
402	80.200, 0.629	80.200, 1.009	80.200, 1.138	80.200, 1.224	80.200, 1.281	80.200, -0.006	80.200, -0.044	80.200, -0.058	80.200, -0.060	80.200, -0.048	80.200, -0.021	80.200, -0.056
403	80.400, 0.631	80.400, 1.010	80.400, 1.139	80.400, 1.225	80.400, 1.281	80.400, -0.006	80.400, -0.044	80.400, -0.058	80.400, -0.060	80.400, -0.048	80.400, -0.021	80.400, -0.056
404	80.600, 0.633	80.600, 1.012	80.600, 1.140	80.600, 1.226	80.600, 1.282	80.600, -0.006	80.600, -0.045	80.600, -0.058	80.600, -0.061	80.600, -0.048	80.600, -0.021	80.600, -0.056
405	80.800, 0.634	80.800, 1.013	80.800, 1.140	80.800, 1.226	80.800, 1.282	80.800, -0.006	80.800, -0.045	80.800, -0.058	80.800, -0.061	80.800, -0.048	80.800, -0.021	80.800, -0.056
406	81.000, 0.636	81.000, 1.013	81.000, 1.141	81.000, 1.227	81.000, 1.283	81.000, -0.006	81.000, -0.046	81.000, -0.058	81.000, -0.062	81.000, -0.047	81.000, -0.021	81.000, -0.056
407	81.200, 0.638	81.200, 1.014	81.200, 1.142	81.200, 1.227	81.200, 1.283	81.200, -0.006	81.200, -0.046	81.200, -0.058	81.200, -0.062	81.200, -0.047	81.200, -0.022	81.200, -0.056
408	81.400, 0.640	81.400, 1.015	81.400, 1.142	81.400, 1.228	81.400, 1.283	81.400, -0.006	81.400, -0.047	81.400, -0.058	81.400, -0.063	81.400, -0.047	81.400, -0.022	81.400, -0.056
409	81.600, 0.642	81.600, 1.016	81.600, 1.142	81.600, 1.228	81.600, 1.283	81.600, -0.006	81.600, -0.047	81.600, -0.058	81.600, -0.063	81.600, -0.047	81.600, -0.022	81.600, -0.056
410	81.800, 0.644	81.800, 1.017	81.800, 1.143	81.800, 1.228	81.800, 1.283	81.800, -0.005	81.800, -0.047	81.800, -0.058	81.800, -0.063	81.800, -0.047	81.800, -0.023	81.800, -0.055
411	82.000, 0.646	82.000, 1.018	82.000, 1.143	82.000, 1.229	82.000, 1.283	82.000, -0.005	82.000, -0.048	82.000, -0.058	82.000, -0.063	82.000, -0.048	82.000, -0.023	82.000, -0.055
412	82.200, 0.648	82.200, 1.019	82.200, 1.144	82.200, 1.229	82.200, 1.283	82.200, -0.005	82.200, -0.048	82.200, -0.058	82.200, -0.063	82.200, -0.048	82.200, -0.022	82.200, -0.055
413	82.400, 0.651	82.400, 1.020	82.400, 1.144	82.400, 1.230	82.400, 1.283	82.400, -0.005	82.400, -0.048	82.400, -0.058	82.400, -0.063	82.400, -0.048	82.400, -0.022	82.400, -0.055
414	82.600, 0.653	82.600, 1.021	82.600, 1.145	82.600, 1.230	82.600, 1.283	82.600, -0.005	82.600, -0.048	82.600, -0.058	82.600, -0.063	82.600, -0.049	82.600, -0.022	82.600, -0.055
415	82.800, 0.655	82.800, 1.022	82.800, 1.145	82.800, 1.230	82.800, 1.283	82.800, -0.005	82.800, -0.048	82.800, -0.058	82.800, -0.062	82.800, -0.049	82.800, -0.022	82.800, -0.056
416	83.000, 0.658	83.000, 1.024	83.000, 1.146	83.000, 1.230	83.000, 1.283	83.000, -0.005	83.000, -0.048	83.000, -0.058	83.000, -0.062	83.000, -0.050	83.000, -0.022	83.000, -0.056
417	83.200, 0.660	83.200, 1.025	83.200, 1.146	83.200, 1.230	83.200, 1.284	83.200, -0.006	83.200, -0.047	83.200, -0.058	83.200, -0.062	83.200, -0.050	83.200, -0.022	83.200, -0.056
418	83.400, 0.663	83.400, 1.026	83.400, 1.147	83.400, 1.230	83.400, 1.284	83.400, -0.006	83.400, -0.047	83.400, -0.058	83.400, -0.061	83.400, -0.050	83.400, -0.021	83.400, -0.056
419	83.600, 0.665	83.600, 1.027	83.600, 1.147	83.600, 1.230	83.600, 1.284	83.600, -0.006	83.600, -0.047	83.600, -0.058	83.600, -0.061	83.600, -0.050	83.600, -0.021	83.600, -0.057
420	83.800, 0.667	83.800, 1.029	83.800, 1.148	83.800, 1.231	83.800, 1.284	83.800, -0.006	83.800, -0.047	83.800, -0.057	83.800, -0.061	83.800, -0.050	83.800, -0.021	83.800, -0.057
421	84.000, 0.669	84.000, 1.030	84.000, 1.148	84.000, 1.231	84.000, 1.284	84.000, -0.006	84.000, -0.047	84.000, -0.057	84.000, -0.061	84.000, -0.049	84.000, -0.020	84.000, -0.058
422	84.200, 0.672	84.200, 1.031	84.200, 1.149	84.200, 1.232	84.200, 1.284	84.200, -0.006	84.200, -0.047	84.200, -0.057	84.200, -0.061	84.200, -0.049	84.200, -0.020	84.200, -0.058
423	84.400, 0.674	84.400, 1.033	84.400, 1.150	84.400, 1.232	84.400, 1.285	84.400, -0.006	84.400, -0.047	84.400, -0.057	84.400, -0.061	84.400, -0.049	84.400, -0.020	84.400, -0.058
424	84.600, 0.675	84.600, 1.034	84.600, 1.150	84.600, 1.232	84.600, 1.286	84.600, -0.006	84.600, -0.047	84.600, -0.057	84.600, -0.061	84.600, -0.049	84.600, -0.019	84.600, -0.059
425	84.800, 0.677	84.800, 1.035	84.800, 1.151	84.800, 1.232	84.800, 1.287	84.800, -0.006	84.800, -0.047	84.800, -0.057	84.800, -0.061	84.800, -0.049	84.800, -0.019	84.800, -0.059
426	85.000, 0.679	85.000, 1.036	85.000, 1.151	85.000, 1.232	85.000, 1.287	85.000, -0.006	85.000, -0.047	85.000, -0.057	85.000, -0.061	85.000, -0.048	85.000, -0.018	85.000, -0.059
427	85.200, 0.681	85.200, 1.037	85.200, 1.152	85.200, 1.232	85.200, 1.288	85.200, -0.006	85.200, -0.047	85.200, -0.057	85.200, -0.061	85.200, -0.048	85.200, -0.018	85.200, -0.058
428	85.400, 0.682	85.400, 1.038	85.400, 1.152	85.400, 1.233	85.400, 1.288	85.400, -0.006	85.400, -0.047	85.400, -0.057	85.400, -0.061	85.400, -0.048	85.400, -0.018	85.400, -0.058
429	85.600, 0.684	85.600, 1.039	85.600, 1.152	85.600, 1.233	85.600, 1.289	85.600, -0.006	85.600, -0.047	85.600, -0.058	85.600, -0.061	85.600, -0.047	85.600, -0.018	85.600, -0.058
430	85.800, 0.686	85.800, 1.040	85.800, 1.153	85.800, 1.233	85.800, 1.289	85.800, -0.006	85.800, -0.047	85.800, -0.058	85.800, -0.061	85.800, -0.047	85.800, -0.018	85.800, -0.058
431	86.000, 0.688	86.000, 1.041	86.000, 1.153	86.000, 1.233	86.000, 1.290	86.000, -0.006	86.000, -0.047	86.000, -0.058	86.000, -0.061	86.000, -0.047	86.000, -0.018	86.000, -0.058
432	86.200, 0.690	86.200, 1.042	86.200, 1.154	86.200, 1.234	86.200, 1.290	86.200, -0.006	86.200, -0.047	86.200, -0.058	86.200, -0.061	86.200, -0.047	86.200, -0.018	86.200, -0.058
433	86.400, 0.691	86.400, 1.043	86.400, 1.155	86.400, 1.234	86.400, 1.291	86.400, -0.006	86.400, -0.047	86.400, -0.059	86.400, -0.061	86.400, -0.047	86.400, -0.018	86.400, -0.058
434	86.600, 0.693	86.600, 1.044	86.600, 1.155	86.600, 1.234	86.600, 1.291	86.600, -0.006	86.600, -0.047	86.600, -0.059	86.600, -0.061	86.600, -0.047	86.600, -0.018	86.600, -0.058
435	86.800, 0.695	86.800, 1.045	86.800, 1.156	86.800, 1.234	86.800, 1.291	86.800, -0.006	86.800, -0.047	86.800, -0.059	86.800, -0.061	86.800, -0.047	86.800, -0.019	86.800, -0.058
436	87.000, 0.697	87.000, 1.046	87.000, 1.156	87.000, 1.235	87.000, 1.291	87.000, -0.006	87.000, -0.047	87.000, -0.059	87.000, -0.061	87.000, -0.047	87.000, -0.019	87.000, -0.058
437	87.200, 0.699	87.200, 1.046	87.200, 1.157	87.200, 1.235	87.200, 1.291	87.200, -0.006	87.200, -0.047	87.200, -0.059	87.200, -0.061	87.200, -0.047	87.200, -0.019	87.200, -0.058
438	87.400, 0.701	87.400, 1.047	87.400, 1.158	87.400, 1.235	87.400, 1.291	87.400, -0.006	87.400, -0.047	87.400, -0.059	87.400, -0.061	87.400, -0.047	87.400, -0.019	87.400, -0.058
439	87.600, 0.703	87.600, 1.048	87.600, 1.158	87.600, 1.236	87.600, 1.291	87.600, -0.007	87.600, -0.047	87.600, -0.059	87.600, -0.061	87.600, -0.047	87.600, -0.019	87.600, -0.058
440	87.800, 0.706	87.800, 1.049	87.800, 1.159	87.800, 1.236	87.800, 1.291	87.800, -0.007	87.800, -0.047	87.800, -0.059	87.800, -0.062	87.800, -0.047	87.800, -0.019	87.800, -0.059
441	88.000, 0.708	88.000, 1.050	88.000, 1.160	88.000, 1.236	88.000, 1.292	88.000, -0.007	88.000, -0.047	88.000, -0.059	88.000, -0.062	88.000, -0.047	88.000, -0.019	88.000, -0.059
442	88.200, 0.710	88.200, 1.051	88.200, 1.161	88.200, 1.237	88.200, 1.293	88.200, -0.007	88.200, -0.048	88.200, -0.059	88.200, -0.062	88.200, -0.047	88.200, -0.019	88.200, -0.059
443	88.400, 0.712	88.400, 1.052	88.400, 1.161	88.400, 1.237	88.400, 1.293	88.400, -0.007	88.400, -0.048	88.400, -0.059	88.400, -0.063	88.400, -0.047	88.400, -0.019	88.400, -0.060
444	88.600, 0.714	88.600, 1.053	88.600, 1.162	88.600, 1.237	88.600, 1.294	88.600, -0.008	88.600, -0.048	88.600, -0.059	88.600, -0.063	88.600, -0.047	88.600, -0.018	88.600, -0.059
445	88.800, 0.716	88.800, 1.055	88.800, 1.162	88.800, 1.238	88.800, 1.294	88.800, -0.008	88.800, -0.048	88.800, -0.059	88.800, -0.063	88.800, -0.048	88.800, -0.018	88.800, -0.059
446	89.000, 0.718	89.000, 1.056	89.000, 1.163	89.000, 1.238	89.000, 1.294	89.000, -0.008	89.000, -0.049	89.000, -0.058	89.000, -0.063	89.000, -0.048	89.000, -0.018	89.000, -0.059
447	89.200, 0.720	89.200, 1.057	89.200, 1.163	89.200, 1.238	89.200, 1.294	89.200, -0.008	89.200, -0.049	89.200, -0.058	89.200, -0.063	89.200, -0.048	89.200, -0.018	89.200, -0.059
448	89.400, 0.721	89.400, 1.058	89.400, 1.163	89.400, 1.238	89.400, 1.294	89.400, -0.008	89.400, -0.050	89.400, -0.058	89.400, -0.063	89.400, -0.048	89.400, -0.018	89.400, -0.059
449	89.600, 0.723	89.600, 1.059	89.600, 1.164	89.600, 1.239	89.600, 1.294	89.600, -0.008	89.600, -0.050	89.600, -0.058	89.600, -0.063	89.600, -0.048	89.600, -0.018	89.600, -0.060
450	89.800, 0.725	89.800, 1.060	89.800, 1.164	89.800, 1.239	89.800, 1.294	89.800, -0.008	89.800, -0.050	89.800, -0.058	89.800, -0.063	89.800, -0.048	89.800, -0.018	89.800, -0.060
451	90.000, 0.726	90.000, 1.060	90.000, 1.165	90.000, 1.239	90.000, 1.293	90.000, -0.008	90.000, -0.051	90.000, -0.058	90.000, -0.063	90.000, -0.048	90.000, -0.018	90.000, -0.060
452	90.200, 0.728	90.200, 1.061	90.200, 1.165	90.200, 1.240	90.200, 1.293	90.200, -0.008	90.200, -0.051	90.200, -0.058	90.200, -0.063	90.200, -0.049	90.200, -0.018	90.200, -0.061
453	90.400, 0.730	90.400, 1.062	90.400, 1.165	90.400, 1.240	90.400, 1.293	90.400, -0.008	90.400, -0.051	90.400, -0.058	90.400, -0.063	90.400, -0.048	90.400, -0.018	90.400, -0.061
454	90.600, 0.731	90.600, 1.063	90.600, 1.166	90.600, 1.240	90.600, 1.293	90.600, -0.008	90.600, -0.051	90.600, -0.058	90.600, -0.063	90.600, -0.048	90.600, -0.017	90.600, -0.061
455	90.800, 0.733	90.800, 1.063	90.800, 1.166	90.800, 1.240	90.800, 1.293	90.800, -0.008	90.800, -0.052	90.800, -0.058	90.800, -0.063	90.800, -0.048	90.800, -0.017	90.800, -0.061
456	91.000, 0.735	91.000, 1.064	91.000, 1.166	91.000, 1.240	91.000, 1.293	91.000, -0.008	91.000, -0.052	91.000, -0.059	91.000, -0.063	91.000, -0.048	91.000, -0.017	91.000, -0.062
457	91.200, 0.737	91.200, 1.065	91.200, 1.166	91.200, 1.241	91.200, 1.293	91.200, -0.008	91.200, -0.052	91.200, -0.059	91.200, -0.063	91.200, -0.047	91.200, -0.017	91.200, -0.062
458	91.400, 0.739	91.400, 1.066	91.400, 1.166	91.400, 1.241	91.400, 1.294	91.400, -0.008	91.400, -0.052	91.400, -0.059	91.400, -0.063	91.400, -0.047	91.400, -0.017	91.400, -0.062
459	91.600, 0.740	91.600, 1.066	91.600, 1.166	91.600, 1.241	91.600, 1.294	91.600, -0.009	91.600, -0.052	91.600, -0.060	91.600, -0.064	91.600, -0.047	91.600, -0.017	91.600, -0.062
460	91.800, 0.742	91.800, 1.067	91.800, 1.166	91.800, 1.241	91.800, 1.295	91.800, -0.009	91.800, -0.052	91.800, -0.060	91.800, -0.064	91.800, -0.047	91.800, -0.017	91.800, -0.062
461	92.000, 0.744	92.000, 1.068	92.000, 1.166	92.000, 1.242	92.000, 1.295	92.000, -0.009	92.000, -0.051	92.000, -0.060	92.000, -0.064	92.000, -0.047	92.000, -0.017	92.000, -0.062
462	92.200, 0.746	92.200, 1.069	92.200, 1.167	92.200, 1.242	92.200, 1.296	92.200, -0.009	92.200, -0.051	92.200, -0.060	92.200, -0.064	92.200, -0.047	92.200, -0.018	92.200, -0.062
463	92.400, 0.747	92.400, 1.070	92.400, 1.167	92.400, 1.243	92.400, 1.296	92.400, -0.009	92.400, -0.051	92.400, -0.060	92.400, -0.064	92.400, -0.047	92.400, -0.018	92.400, -0.062
464	92.600, 0.749	92.600, 1.071	92.600, 1.168	92.600, 1.243	92.600, 1.297	92.600, -0.009	92.600, -0.050	92.600, -0.060	92.600, -0.064	92.600, -0.047	92.600, -0.017	92.600, -0.061
465	92.800, 0.750	92.800, 1.072	92.800, 1.168	92.800, 1.244	92.800, 1.297	92.800, -0.008	92.800, -0.050	92.800, -0.060	92.800, -0.064	92.800, -0.047	92.800, -0.017	92.800, -0.061
466	93.000, 0.752	93.000, 1.072	93.000, 1.168	93.000, 1.244	93.000, 1.297	93.000, -0.009	93.000, -0.050	93.000, -0.060	93.000, -0.064	93.000, -0.047	93.000, -0.017	93.000, -0.061
467	93.200, 0.753	93.200, 1.073	93.200, 1.169	93.200, 1.244	93.200, 1.297	93.200, -0.009	93.200, -0.050	93.200, -0.060	93.200, -0.064	93.200, -0.047	93.200, -0.017	93.200, -0.062
468	93.400, 0.755	93.400, 1.074	93.400, 1.169	93.400, 1.245	93.400, 1.298	93.400, -0.009	93.400, -0.050	93.400, -0.060	93.400, -0.064	93.400, -0.048	93.400, -0.017	93.400, -0.062
469	93.600, 0.756	93.600, 1.075	93.600, 1.169	93.600, 1.245	93.600, 1.298	93.600, -0.009	93.600, -0.050	93.600, -0.060	93.600, -0.063	93.600, -0.048	93.600, -0.017	93.600, -0.062
470	93.800, 0.758	93.800, 1.076	93.800, 1.170	93.800, 1.246	93.800, 1.299	93.800, -0.009	93.800, -0.050	93.800, -0.060	93.800, -0.063	93.800, -0.049	93.800, -0.017	93.800, -0.062
471	94.000, 0.760	94.000, 1.077	94.000, 1.171	94.000, 1.247	94.000, 1.299	94.000, -0.009	94.000, -0.050	94.000, -0.060	94.000, -0.063	94.000, -0.049	94.000, -0.017	94.000, -0.062
472	94.200, 0.762	94.200, 1.077	94.200, 1.171	94.200, 1.247	94.200, 1.300	94.200, -0.009	94.200, -0.051	94.200, -0.060	94.200, -0.063	94.200, -0.049	94.200, -0.017	94.200, -0.062
473	94.400, 0.763	94.400, 1.078	94.400, 1.172	94.400, 1.247	94.400, 1.300	94.400, -0.009	94.400, -0.051	94.400, -0.061	94.400, -0.062	94.400, -0.049	94.400, -0.016	94.400, -0.061
474	94.600, 0.765	94.600, 1.079	94.600, 1.172	94.600, 1.248	94.600, 1.300	94.600, -0.009	94.600, -0.052	94.600, -0.061	94.600, -0.062	94.600, -0.049	94.600, -0.016	94.600, -0.061
475	94.800, 0.767	94.800, 1.080	94.800, 1.172	94.800, 1.248	94.800, 1.300	94.800, -0.009	94.800, -0.052	94.800, -0.061	94.800, -0.062	94.800, -0.049	94.800, -0.016	94.800, -0.061
476	95.000, 0.769	95.000, 1.080	95.000, 1.173	95.000, 1.248	95.000, 1.300	95.000, -0.008	95.000, -0.053	95.000, -0.061	95.000, -0.062	95.000, -0.049	95.000, -0.016	95.000, -0.061
477	95.200, 0.771	95.200, 1.081	95.200, 1.173	95.200, 1.248	95.200, 1.301	95.200, -0.008	95.200, -0.053	95.200, -0.062	95.200, -0.062	95.200, -0.049	95.200, -0.017	95.200, -0.061
478	95.400, 0.772	95.400, 1.081	95.400, 1.173	95.400, 1.248	95.400, 1.301	95.400, -0.008	95.400, -0.053	95.400, -0.062	95.400, -0.062	95.400, -0.049	95.400, -0.017	95.400, -0.061
479	95.600, 0.774	95.600, 1.082	95.600, 1.173	95.600, 1.248	95.600, 1.301	95.600, -0.008	95.600, -0.053	95.600, -0.062	95.600, -0.062	95.600, -0.049	95.600, -0.017	95.600, -0.061
480	95.800, 0.776	95.800, 1.082	95.800, 1.174	95.800, 1.248	95.800, 1.302	95.800, -0.008	95.800, -0.053	95.800, -0.062	95.800, -0.062	95.800, -0.049	95.800, -0.017	95.800, -0.061
481	96.000, 0.778	96.000, 1.083	96.000, 1.175	96.000, 1.248	96.000, 1.302	96.000, -0.008	96.000, -0.053	96.000, -0.062	96.000, -0.062	96.000, -0.049	96.000, -0.017	96.000, -0.061
482	96.200, 0.780	96.200, 1.083	96.200, 1.175	96.200, 1.248	96.200, 1.302	96.200, -0.008	96.200, -0.053	96.200, -0.062	96.200, -0.062	96.200, -0.049	96.200, -0.016	96.200, -0.061
483	96.400, 0.782	96.400, 1.084	96.400, 1.176	96.400, 1.248	96.400, 1.303	96.400, -0.008	96.400, -0.053	96.400, -0.062	96.400, -0.062	96.400, -0.048	96.400, -0.016	96.400, -0.061
484	96.600, 0.784	96.600, 1.084	96.600, 1.176	96.600, 1.248	96.600, 1.303	96.600, -0.008	96.600, -0.053	96.600, -0.062	96.600, -0.062	96.600, -0.048	96.600, -0.016	96.600, -0.061
485	96.800, 0.785	96.800, 1.085	96.800, 1.177	96.800, 1.248	96.800, 1.303	96.800, -0.008	96.800, -0.052	96.800, -0.063	96.800, -0.062	96.800, -0.048	96.800, -0.015	96.800, -0.061
486	97.000, 0.787	97.000, 1.085	97.000, 1.177	97.000, 1.248	97.000, 1.303	97.000, -0.008	97.000, -0.052	97.000, -0.063	97.000, -0.062	97.000, -0.048	97.000, -0.015	97.000, -0.061
487	97.200, 0.788	97.200, 1.086	97.200, 1.178	97.200, 1.248	97.200, 1.302	97.200, -0.009	97.200, -0.052	97.200, -0.062	97.200, -0.062	97.200, -0.048	97.200, -0.015	97.200, -0.061
488	97.400, 0.790	97.400, 1.087	97.400, 1.178	97.400, 1.248	97.400, 1.302	97.400, -0.009	97.400, -0.052	97.400, -0.062	97.400, -0.062	97.400, -0.048	97.400, -0.015	97.400, -0.062
489	97.600, 0.791	97.600, 1.087	97.600, 1.179	97.600, 1.249	97.600, 1.302	97.600, -0.009	97.600, -0.052	97.600, -0.062	97.600, -0.062	97.600, -0.048	97.600, -0.015	97.600, -0.062
490	97.800, 0.793	97.800, 1.088	97.800, 1.179	97.800, 1.250	97.800, 1.302	97.800, -0.009	97.800, -0.052	97.800, -0.062	97.800, -0.062	97.800, -0.048	97.800, -0.015	97.800, -0.062
491	98.000, 0.794	98.000, 1.089	98.000, 1.180	98.000, 1.250	98.000, 1.302	98.000, -0.009	98.000, -0.051	98.000, -0.062	98.000, -0.062	98.000, -0.048	98.000, -0.014	98.000, -0.063
492	98.200, 0.796	98.200, 1.090	98.200, 1.180	98.200, 1.251	98.200, 1.302	98.200, -0.010	98.200, -0.051	98.200, -0.061	98.200, -0.062	98.200, -0.048	98.200, -0.014	98.200, -0.063
493	98.400, 0.797	98.400, 1.091	98.400, 1.181	98.400, 1.252	98.400, 1.302	98.400, -0.010	98.400, -0.052	98.400, -0.061	98.400, -0.062	98.400, -0.048	98.400, -0.014	98.400, -0.063
494	98.600, 0.799	98.600, 1.093	98.600, 1.181	98.600, 1.253	98.600, 1.302	98.600, -0.010	98.600, -0.052	98.600, -0.061	98.600, -0.062	98.600, -0.048	98.600, -0.014	98.600, -0.064
495	98.800, 0.800	98.800, 1.094	98.800, 1.181	98.800, 1.253	98.800, 1.302	98.800, -0.010	98.800, -0.052	98.800, -0.061	98.800, -0.062	98.800, -0.048	98.800, -0.014	98.800, -0.064
496	99.000, 0.801	99.000, 1.094	99.000, 1.181	99.000, 1.254	99.000, 1.303	99.000, -0.010	99.000, -0.052	99.000, -0.060	99.000, -0.062	99.000, -0.048	99.000, -0.014	99.000, -0.064
497	99.200, 0.803	99.200, 1.095	99.200, 1.182	99.200, 1.254	99.200, 1.303	99.200, -0.010	99.200, -0.052	99.200, -0.060	99.200, -0.062	99.200, -0.048	99.200, -0.014	99.200, -0.064
498	99.400, 0.804	99.400, 1.096	99.400, 1.182	99.400, 1.255	99.400, 1.304	99.400, -0.010	99.400, -0.052	99.400, -0.059	99.400, -0.063	99.400, -0.048	99.400, -0.014	99.400, -0.064
499	99.600, 0.806	99.600, 1.096	99.600, 1.182	99.600, 1.255	99.600, 1.305	99.600, -0.010	99.600, -0.053	99.600, -0.059	99.600, -0.063	99.600, -0.047	99.600, -0.014	99.600, -0.064
500	99.800, 0.807	99.800, 1.097	99.800, 1.182	99.800, 1.255	99.800, 1.305	99.800, -0.010	99.800, -0.053	99.800, -0.059	99.800, -0.063	99.800, -0.047	99.800, -0.014	99.800, -0.064
501	100.000, 0.809	100.000, 1.097	100.000, 1.182	100.000, 1.256	100.000, 1.306	100.000, -0.010	100.000, -0.053	100.000, -0.058	100.000, -0.063	100.000, -0.047	100.000, -0.014	100.000, -0.064
502	100.200, 0.811	100.200, 1.098	100.200, 1.183	100.200, 1.256	100.200, 1.306	100.200, -0.010	100.200, -0.054	100.200, -0.059	100.200, -0.063	100.200, -0.047	100.200, -0.014	100.200, -0.063
503	100.400, 0.812	100.400, 1.098	100.400, 1.183	100.400, 1.256	100.400, 1.307	100.400, -0.010	100.400, -0.054	100.400, -0.059	100.400, -0.063	100.400, -0.047	100.400, -0.015	100.400, -0.063
504	100.600, 0.814	100.600, 1.098	100.600, 1.184	100.600, 1.256	100.600, 1.307	100.600, -0.010	100.600, -0.054	100.600, -0.059	100.600, -0.063	100.600, -0.046	100.600, -0.015	100.600, -0.063
505	100.800, 0.816	100.800, 1.098	100.800, 1.184	100.800, 1.256	100.800, 1.307	100.800, -0.010	100.800, -0.055	100.800, -0.060	100.800, -0.064	100.800, -0.046	100.800, -0.014	100.800, -0.062
506	101.000, 0.817	101.000, 1.099	101.000, 1.184	101.000, 1.256	101.000, 1.307	101.000, -0.009	101.000, -0.056	101.000, -0.060	101.000, -0.064	101.000, -0.046	101.000, -0.014	101.000, -0.062
507	101.200, 0.819	101.200, 1.099	101.200, 1.185	101.200, 1.256	101.200, 1.307	101.200, -0.009	101.200, -0.056	101.200, -0.060	101.200, -0.064	101.200, -0.046	101.200, -0.014	101.200, -0.062
508	101.400, 0.820	101.400, 1.100	101.400, 1.185	101.400, 1.256	101.400, 1.307	101.400, -0.009	101.400, -0.057	101.400, -0.060	101.400, -0.064	101.400, -0.047	101.400, -0.014	101.400, -0.061
509	101.600, 0.822	101.600, 1.101	101.600, 1.186	101.600, 1.256	101.600, 1.307	101.600, -0.009	101.600, -0.057	101.600, -0.061	101.600, -0.063	101.600, -0.047	101.600, -0.014	101.600, -0.062
510	101.800, 0.823	101.800, 1.103	101.800, 1.186	101.800, 1.256	101.800, 1.307	101.800, -0.009	101.800, -0.057	101.800, -0.061	101.800, -0.063	101.800, -0.047	101.800, -0.013	101.800, -0.062
511	102.000, 0.825	102.000, 1.104	102.000, 1.187	102.000, 1.256	102.000, 1.307	102.000, -0.010	102.000, -0.057	102.000, -0.061	102.000, -0.063	102.000, -0.047	102.000, -0.013	102.000, -0.062
512	102.200, 0.826	102.200, 1.105	102.200, 1.187	102.200, 1.256	102.200, 1.307	102.200, -0.010	102.200, -0.057	102.200, -0.062	102.200, -0.063	102.200, -0.047	102.200, -0.013	102.200, -0.062
513	102.400, 0.828	102.400, 1.106	102.400, 1.188	102.400, 1.256	102.400, 1.307	102.400, -0.010	102.400, -0.056	102.400, -0.062	102.400, -0.063	102.400, -0.047	102.400, -0.013	102.400, -0.063
514	102.600, 0.829	102.600, 1.107	102.600, 1.188	102.600, 1.256	102.600, 1.307	102.600, -0.010	102.600, -0.056	102.600, -0.062	102.600, -0.062	102.600, -0.047	102.600, -0.013	102.600, -0.063
515	102.800, 0.830	102.800, 1.108	102.800, 1.188	102.800, 1.257	102.800, 1.307	102.800, -0.010	102.800, -0.055	102.800, -0.061	102.800, -0.062	102.800, -0.046	102.800, -0.013	102.800, -0.064
516	103.000, 0.832	103.000, 1.108	103.000, 1.189	103.000, 1.257	103.000, 1.307	103.000, -0.010	103.000, -0.055	103.000, -0.061	103.000, -0.062	103.000, -0.046	103.000, -0.013	103.000, -0.064
517	103.200, 0.833	103.200, 1.109	103.200, 1.189	103.200, 1.257	103.200, 1.307	103.200, -0.010	103.200, -0.054	103.200, -0.060	103.200, -0.062	103.200, -0.046	103.200, -0.013	103.200, -0.065
518	103.400, 0.834	103.400, 1.109	103.400, 1.190	103.400, 1.257	103.400, 1.308	103.400, -0.010	103.400, -0.053	103.400, -0.060	103.400, -0.062	103.400, -0.046	103.400, -0.013	103.400, -0.065
519	103.600, 0.836	103.600, 1.110	103.600, 1.190	103.600, 1.257	103.600, 1.308	103.600, -0.010	103.600, -0.053	103.600, -0.060	103.600, -0.062	103.600, -0.047	103.600, -0.013	103.600, -0.066
520	103.800, 0.837	103.800, 1.110	103.800, 1.190	103.800, 1.258	103.800, 1.308	103.800, -0.010	103.800, -0.053	103.800, -0.060	103.800, -0.062	103.800, -0.046	103.800, -0.013	103.800, -0.066
521	104.000, 0.838	104.000, 1.110	104.000, 1.191	104.000, 1.258	104.000, 1.308	104.000, -0.010	104.000, -0.053	104.000, -0.060	104.000, -0.062	104.000, -0.046	104.000, -0.013	104.000, -0.067
522	104.200, 0.840	104.200, 1.111	104.200, 1.191	104.200, 1.258	104.200, 1.309	104.200, -0.010	104.200, -0.053	104.200, -0.060	104.200, -0.062	104.200, -0.046	104.200, -0.013	104.200, -0.067
523	104.400, 0.841	104.400, 1.111	104.400, 1.191	104.400, 1.259	104.400, 1.309	104.400, -0.011	104.400, -0.053	104.400, -0.060	104.400, -0.062	104.400, -0.046	104.400, -0.013	104.400, -0.067
524	104.600, 0.843	104.600, 1.111	104.600, 1.191	104.600, 1.259	104.600, 1.309	104.600, -0.011	104.600, -0.053	104.600, -0.060	104.600, -0.063	104.600, -0.046	104.600, -0.013	104.600, -0.067
525	104.800, 0.844	104.800, 1.111	104.800, 1.192	104.800, 1.259	104.800, 1.309	104.800, -0.011	104.800, -0.054	104.800, -0.060	104.800, -0.063	104.800, -0.046	104.800, -0.013	104.800, -0.067
526	105.000, 0.845	105.000, 1.112	105.000, 1.192	105.000, 1.260	105.000, 1.309	105.000, -0.011	105.000, -0.054	105.000, -0.060	105.000, -0.063	105.000, -0.046	105.000, -0.013	105.000, -0.067
527	105.200, 0.846	105.200, 1.113	105.200, 1.192	105.200, 1.260	105.200, 1.309	105.200, -0.011	105.200, -0.054	105.200, -0.061	105.200, -0.063	105.200, -0.046	105.200, -0.013	105.200, -0.067
528	105.400, 0.847	105.400, 1.113	105.400, 1.192	105.400, 1.261	105.400, 1.310	105.400, -0.011	105.400, -0.054	105.400, -0.061	105.400, -0.063	105.400, -0.046	105.400, -0.013	105.400, -0.067
529	105.600, 0.848	105.600, 1.114	105.600, 1.192	105.600, 1.261	105.600, 1.310	105.600, -0.011	105.600, -0.055	105.600, -0.062	105.600, -0.063	105.600, -0.046	105.600, -0.012	105.600, -0.067
530	105.800, 0.850	105.800, 1.115	105.800, 1.192	105.800, 1.261	105.800, 1.310	105.800, -0.011	105.800, -0.055	105.800, -0.062	105.800, -0.063	105.800, -0.046	105.800, -0.012	105.800, -0.067
531	106.000, 0.851	106.000, 1.115	106.000, 1.192	106.000, 1.261	106.000, 1.311	106.000, -0.011	106.000, -0.055	106.000, -0.062	106.000, -0.063	106.000, -0.045	106.000, -0.012	106.000, -0.067
532	106.200, 0.853	106.200, 1.116	106.200, 1.192	106.200, 1.262	106.200, 1.311	106.200, -0.011	106.200, -0.055	106.200, -0.062	106.200, -0.063	106.200, -0.045	106.200, -0.012	106.200, -0.067
533	106.400, 0.854	106.400, 1.117	106.400, 1.192	106.400, 1.262	106.400, 1.311	106.400, -0.011	106.400, -0.056	106.400, -0.062	106.400, -0.063	106.400, -0.045	106.400, -0.012	106.400, -0.067
534	106.600, 0.856	106.600, 1.117	106.600, 1.193	106.600, 1.262	106.600, 1.311	106.600, -0.011	106.600, -0.055	106.600, -0.062	106.600, -0.062	106.600, -0.045	106.600, -0.012	106.600, -0.067
535	106.800, 0.857	106.800, 1.118	106.800, 1.193	106.800, 1.262	106.800, 1.312	106.800, -0.011	106.800, -0.055	106.800, -0.062	106.800, -0.062	106.800, -0.045	106.800, -0.012	106.800, -0.067
536	107.000, 0.859	107.000, 1.119	107.000, 1.193	107.000, 1.262	107.000, 1.312	107.000, -0.011	107.000, -0.055	107.000, -0.062	107.000, -0.062	107.000, -0.046	107.000, -0.012	107.000, -0.067
537	107.200, 0.860	107.200, 1.119	107.200, 1.193	107.200, 1.263	107.200, 1.312	107.200, -0.011	107.200, -0.055	107.200, -0.062	107.200, -0.062	107.200, -0.046	107.200, -0.012	107.200, -0.066
538	107.400, 0.862	107.400, 1.120	107.400, 1.193	107.400, 1.263	107.400, 1.312	107.400, -0.011	107.400, -0.055	107.400, -0.062	107.400, -0.062	107.400, -0.046	107.400, -0.011	107.400, -0.066
539	107.600, 0.863	107.600, 1.120	107.600, 1.194	107.600, 1.263	107.600, 1.312	107.600, -0.012	107.600, -0.055	107.600, -0.062	107.600, -0.062	107.600, -0.046	107.600, -0.011	107.600, -0.066
540	107.800, 0.865	107.800, 1.121	107.800, 1.194	107.800, 1.263	107.800, 1.312	107.800, -0.012	107.800, -0.055	107.800, -0.062	107.800, -0.062	107.800, -0.046	107.800, -0.011	107.800, -0.066
541	108.000, 0.866	108.000, 1.122	108.000, 1.195	108.000, 1.264	108.000, 1.312	108.000, -0.012	108.000, -0.055	108.000, -0.062	108.000, -0.062	108.000, -0.046	108.000, -0.011	108.000, -0.066
542	108.200, 0.868	108.200, 1.122	108.200, 1.195	108.200, 1.264	108.200, 1.312	108.200, -0.012	108.200, -0.055	108.200, -0.062	108.200, -0.062	108.200, -0.046	108.200, -0.011	108.200, -0.066
543	108.400, 0.869	108.400, 1.123	108.400, 1.196	108.400, 1.264	108.400, 1.312	108.400, -0.012	108.400, -0.055	108.400, -0.063	108.400, -0.062	108.400, -0.046	108.400, -0.011	108.400, -0.066
544	108.600, 0.871	108.600, 1.123	108.600, 1.196	108.600, 1.264	108.600, 1.312	108.600, -0.012	108.600, -0.055	108.600, -0.063	108.600, -0.062	108.600, -0.046	108.600, -0.011	108.600, -0.066
545	108.800, 0.872	108.800, 1.123	108.800, 1.196	108.800, 1.265	108.800, 1.312	108.800, -0.011	108.800, -0.055	108.800, -0.063	108.800, -0.062	108.800, -0.046	108.800, -0.010	108.800, -0.066
546	109.000, 0.873	109.000, 1.124	109.000, 1.197	109.000, 1.265	109.000, 1.312	109.000, -0.011	109.000, -0.055	109.000, -0.063	109.000, -0.062	109.000, -0.046	109.000, -0.010	109.000, -0.066
547	109.200, 0.875	109.200, 1.124	109.200, 1.197	109.200, 1.266	109.200, 1.312	109.200, -0.011	109.200, -0.055	109.200, -0.064	109.200, -0.062	109.200, -0.045	109.200, -0.010	109.200, -0.066
548	109.400, 0.876	109.400, 1.124	109.400, 1.198	109.400, 1.266	109.400, 1.312	109.400, -0.011	109.400, -0.056	109.400, -0.064	109.400, -0.062	109.400, -0.045	109.400, -0.009	109.400, -0.066
549	109.600, 0.877	109.600, 1.124	109.600, 1.198	109.600, 1.267	109.600, 1.313	109.600, -0.011	109.600, -0.056	109.600, -0.064	109.600, -0.062	109.600, -0.045	109.600, -0.009	109.600, -0.066
550	109.800, 0.878	109.800, 1.124	109.800, 1.199	109.800, 1.267	109.800, 1.313	109.800, -0.011	109.800, -0.056	109.800, -0.064	109.800, -0.061	109.800, -0.045	109.800, -0.009	109.800, -0.066
551	110.000, 0.879	110.000, 1.125	110.000, 1.199	110.000, 1.267	110.000, 1.314	110.000, -0.011	110.000, -0.057	110.000, -0.064	110.000, -0.061	110.000, -0.045	110.000, -0.009	110.000, -0.066
552	110.200, 0.880	110.200, 1.125	110.200, 1.199	110.200, 1.267	110.200, 1.314	110.200, -0.011	110.200, -0.057	110.200, -0.064	110.200, -0.061	110.200, -0.045	110.200, -0.009	110.200, -0.066
553	110.400, 0.881	110.400, 1.125	110.400, 1.199	110.400, 1.268	110.400, 1.315	110.400, -0.011	110.400, -0.057	110.400, -0.064	110.400, -0.061	110.400, -0.045	110.400, -0.009	110.400, -0.066
554	110.600, 0.882	110.600, 1.126	110.600, 1.200	110.600, 1.268	110.600, 1.316	110.600, -0.011	110.600, -0.057	110.600, -0.064	110.600, -0.061	110.600, -0.045	110.600, -0.009	110.600, -0.066
555	110.800, 0.883	110.800, 1.126	110.800, 1.200	110.800, 1.268	110.800, 1.316	110.800, -0.011	110.800, -0.057	110.800, -0.063	110.800, -0.060	110.800, -0.045	110.800, -0.009	110.800, -0.066
556	111.000, 0.884	111.000, 1.126	111.000, 1.200	111.000, 1.268	111.000, 1.317	111.000, -0.011	111.000, -0.057	111.000, -0.063	111.000, -0.060	111.000, -0.045	111.000, -0.009	111.000, -0.066
557	111.200, 0.885	111.200, 1.127	111.200, 1.200	111.200, 1.268	111.200, 1.318	111.200, -0.011	111.200, -0.057	111.200, -0.062	111.200, -0.060	111.200, -0.045	111.200, -0.009	111.200, -0.066
558	111.400, 0.886	111.400, 1.127	111.400, 1.200	111.400, 1.268	111.400, 1.318	111.400, -0.012	111.400, -0.057	111.400, -0.062	111.400, -0.060	111.400, -0.045	111.400, -0.009	111.400, -0.066
559	111.600, 0.887	111.600, 1.128	111.600, 1.200	111.600, 1.268	111.600, 1.319	111.600, -0.012	111.600, -0.057	111.600, -0.062	111.600, -0.060	111.600, -0.045	111.600, -0.008	111.600, -0.066
560	111.800, 0.888	111.800, 1.128	111.800, 1.201	111.800, 1.268	111.800, 1.319	111.800, -0.012	111.800, -0.057	111.800, -0.061	111.800, -0.060	111.800, -0.045	111.800, -0.008	111.800, -0.066
561	112.000, 0.890	112.000, 1.129	112.000, 1.201	112.000, 1.268	112.000, 1.319	112.000, -0.012	112.000, -0.056	112.000, -0.061	112.000, -0.061	112.000, -0.044	112.000, -0.008	112.000, -0.066
562	112.200, 0.891	112.200, 1.130	112.200, 1.201	112.200, 1.268	112.200, 1.319	112.200, -0.012	112.200, -0.056	112.200, -0.061	112.200, -0.061	112.200, -0.044	112.200, -0.008	112.200, -0.066
563	112.400, 0.892	112.400, 1.130	112.400, 1.201	112.400, 1.268	112.400, 1.319	112.400, -0.012	112.400, -0.056	112.400, -0.061	112.400, -0.061	112.400, -0.044	112.400, -0.008	112.400, -0.066
564	112.600, 0.894	112.600, 1.131	112.600, 1.201	112.600, 1.268	112.600, 1.319	112.600, -0.012	112.600, -0.056	112.600, -0.062	112.600, -0.062	112.600, -0.043	112.600, -0.007	112.600, -0.066
565	112.800, 0.895	112.800, 1.132	112.800, 1.202	112.800, 1.268	112.800, 1.319	112.800, -0.012	112.800, -0.056	112.800, -0.062	112.800, -0.062	112.800, -0.043	112.800, -0.007	112.800, -0.067
566	113.000, 0.896	113.000, 1.132	113.000, 1.202	113.000, 1.268	113.000, 1.319	113.000, -0.013	113.000, -0.055	113.000, -0.062	113.000, -0.063	113.000, -0.042	113.000, -0.007	113.000, -0.067
567	113.200, 0.897	113.200, 1.133	113.200, 1.202	113.200, 1.268	113.200, 1.319	113.200, -0.013	113.200, -0.056	113.200, -0.062	113.200, -0.063	113.200, -0.042	113.200, -0.007	113.200, -0.067
568	113.400, 0.898	113.400, 1.134	113.400, 1.202	113.400, 1.268	113.400, 1.319	113.400, -0.013	113.400, -0.056	113.400, -0.062	113.400, -0.062	113.400, -0.042	113.400, -0.007	113.400, -0.067
569	113.600, 0.900	113.600, 1.134	113.600, 1.202	113.600, 1.269	113.600, 1.318	113.600, -0.013	113.600, -0.055	113.600, -0.062	113.600, -0.062	113.600, -0.042	113.600, -0.007	113.600, -0.067
570	113.800, 0.901	113.800, 1.135	113.800, 1.203	113.800, 1.269	113.800, 1.318	113.800, -0.013	113.800, -0.055	113.800, -0.062	113.800, -0.062	113.800, -0.042	113.800, -0.007	113.800, -0.068
571	114.000, 0.902	114.000, 1.135	114.000, 1.203	114.000, 1.269	114.000, 1.318	114.000, -0.013	114.000, -0.055	114.000, -0.062	114.000, -0.062	114.000, -0.042	114.000, -0.007	114.000, -0.068
572	114.200, 0.904	114.200, 1.135	114.200, 1.203	114.200, 1.269	114.200, 1.318	114.200, -0.012	114.200, -0.056	114.200, -0.062	114.200, -0.061	114.200, -0.042	114.200, -0.007	114.200, -0.068
573	114.400, 0.905	114.400, 1.136	114.400, 1.203	114.400, 1.269	114.400, 1.318	114.400, -0.012	114.400, -0.056	114.400, -0.062	114.400, -0.061	114.400, -0.043	114.400, -0.007	114.400, -0.068
574	114.600, 0.906	114.600, 1.136	114.600, 1.203	114.600, 1.269	114.600, 1.319	114.600, -0.012	114.600, -0.056	114.600, -0.062	114.600, -0.061	114.600, -0.043	114.600, -0.007	114.600, -0.068
575	114.800, 0.907	114.800, 1.136	114.800, 1.204	114.800, 1.269	114.800, 1.319	114.800, -0.012	114.800, -0.056	114.800, -0.062	114.800, -0.060	114.800, -0.043	114.800, -0.008	114.800, -0.068
576	115.000, 0.908	115.000, 1.136	115.000, 1.204	115.000, 1.269	115.000, 1.319	115.000, -0.012	115.000, -0.057	115.000, -0.062	115.000, -0.060	115.000, -0.043	115.000, -0.008	115.000, -0.068
577	115.200, 0.909	115.200, 1.136	115.200, 1.204	115.200, 1.269	115.200, 1.320	115.200, -0.012	115.200, -0.057	115.200, -0.061	115.200, -0.060	115.200, -0.043	115.200, -0.008	115.200, -0.068
578	115.400, 0.911	115.400, 1.137	115.400, 1.204	115.400, 1.270	115.400, 1.320	115.400, -0.012	115.400, -0.057	115.400, -0.061	115.400, -0.061	115.400, -0.043	115.400, -0.008	115.400, -0.068
579	115.600, 0.912	115.600, 1.137	115.600, 1.205	115.600, 1.270	115.600, 1.320	115.600, -0.012	115.600, -0.057	115.600, -0.061	115.600, -0.061	115.600, -0.043	115.600, -0.008	115.600, -0.068
580	115.800, 0.913	115.800, 1.138	115.800, 1.205	115.800, 1.270	115.800, 1.320	115.800, -0.013	115.800, -0.057	115.800, -0.062	115.800, -0.061	115.800, -0.043	115.800, -0.008	115.800, -0.069
581	116.000, 0.913	116.000, 1.139	116.000, 1.205	116.000, 1.271	116.000, 1.320	116.000, -0.013	116.000, -0.057	116.000, -0.062	116.000, -0.062	116.000, -0.043	116.000, -0.008	116.000, -0.069
582	116.200, 0.914	116.200, 1.139	116.200, 1.206	116.200, 1.271	116.200, 1.320	116.200, -0.013	116.200, -0.057	116.200, -0.062	116.200, -0.062	116.200, -0.043	116.200, -0.008	116.200, -0.069
583	116.400, 0.915	116.400, 1.140	116.400, 1.206	116.400, 1.271	116.400, 1.320	116.400, -0.013	116.400, -0.057	116.400, -0.062	116.400, -0.062	116.400, -0.043	116.400, -0.008	116.400, -0.069
584	116.600, 0.916	116.600, 1.140	116.600, 1.207	116.600, 1.272	116.600, 1.321	116.600, -0.013	116.600, -0.057	116.600, -0.062	116.600, -0.063	116.600, -0.043	116.600, -0.008	116.600, -0.069
585	116.800, 0.917	116.800, 1.141	116.800, 1.207	116.800, 1.272	116.800, 1.321	116.800, -0.013	116.800, -0.057	116.800, -0.062	116.800, -0.063	116.800, -0.043	116.800, -0.008	116.800, -0.068
586	117.000, 0.918	117.000, 1.141	117.000, 1.208	117.000, 1.273	117.000, 1.321	117.000, -0.013	117.000, -0.057	117.000, -0.062	117.000, -0.063	117.000, -0.043	117.000, -0.008	117.000, -0.068
587	117.200, 0.919	117.200, 1.142	117.200, 1.208	117.200, 1.273	117.200, 1.321	117.200, -0.013	117.200, -0.057	117.200, -0.062	117.200, -0.063	117.200, -0.043	117.200, -0.008	117.200, -0.068
588	117.400, 0.920	117.400, 1.142	117.400, 1.209	117.400, 1.273	117.400, 1.322	117.400, -0.013	117.400, -0.057	117.400, -0.062	117.400, -0.063	117.400, -0.043	117.400, -0.008	117.400, -0.067
589	117.600, 0.921	117.600, 1.142	117.600, 1.209	117.600, 1.273	117.600, 1.322	117.600, -0.013	117.600, -0.056	117.600, -0.061	117.600, -0.063	117.600, -0.043	117.600, -0.007	117.600, -0.067
590	117.800, 0.922	117.800, 1.142	117.800, 1.210	117.800, 1.273	117.800, 1.322	117.800, -0.013	117.800, -0.057	117.800, -0.061	117.800, -0.063	117.800, -0.043	117.800, -0.007	117.800, -0.067
591	118.000, 0.924	118.000, 1.142	118.000, 1.210	118.000, 1.274	118.000, 1.323	118.000, -0.013	118.000, -0.057	118.000, -0.061	118.000, -0.063	118.000, -0.043	118.000, -0.007	118.000, -0.066
592	118.200, 0.925	118.200, 1.143	118.200, 1.210	118.200, 1.274	118.200, 1.323	118.200, -0.013	118.200, -0.057	118.200, -0.061	118.200, -0.063	118.200, -0.043	118.200, -0.006	118.200, -0.066
593	118.400, 0.926	118.400, 1.143	118.400, 1.210	118.400, 1.274	118.400, 1.324	118.400, -0.013	118.400, -0.057	118.400, -0.061	118.400, -0.063	118.400, -0.043	118.400, -0.006	118.400, -0.066
594	118.600, 0.927	118.600, 1.143	118.600, 1.211	118.600, 1.274	118.600, 1.324	118.600, -0.013	118.600, -0.058	118.600, -0.062	118.600, -0.062	118.600, -0.042	118.600, -0.006	118.600, -0.067
595	118.800, 0.929	118.800, 1.143	118.800, 1.211	118.800, 1.275	118.800, 1.324	118.800, -0.013	118.800, -0.058	118.800, -0.062	118.800, -0.062	118.800, -0.042	118.800, -0.006	118.800, -0.067
596	119.000, 0.930	119.000, 1.143	119.000, 1.211	119.000, 1.275	119.000, 1.324	119.000, -0.013	119.000, -0.058	119.000, -0.062	119.000, -0.062	119.000, -0.042	119.000, -0.006	119.000, -0.067
597	119.200, 0.931	119.200, 1.144	119.200, 1.211	119.200, 1.276	119.200, 1.324	119.200, -0.013	119.200, -0.058	119.200, -0.062	119.200, -0.062	119.200, -0.042	119.200, -0.005	119.200, -0.067
598	119.400, 0.932	119.400, 1.144	119.400, 1.211	119.400, 1.276	119.400, 1.324	119.400, -0.013	119.400, -0.058	119.400, -0.062	119.400, -0.061	119.400, -0.042	119.400, -0.005	119.400, -0.068
599	119.600, 0.932	119.600, 1.145	119.600, 1.211	119.600, 1.276	119.600, 1.323	119.600, -0.013	119.600, -0.058	119.600, -0.062	119.600, -0.061	119.600, -0.042	119.600, -0.005	119.600, -0.068
600	119.800, 0.933	119.800, 1.145	119.800, 1.211	119.800, 1.276	119.800, 1.324	119.800, -0.013	119.800, -0.059	119.800, -0.062	119.800, -0.061	119.800, -0.042	119.800, -0.005	119.800, -0.068
601	120.000, 0.934	120.000, 1.146	120.000, 1.212	120.000, 1.276	120.000, 1.324	120.000, -0.013	120.000, -0.058	120.000, -0.062	120.000, -0.060	120.000, -0.042	120.000, -0.005	120.000, -0.068
602	120.200, 0.935	120.200, 1.146	120.200, 1.212	120.200, 1.276	120.200, 1.324	120.200, -0.013	120.200, -0.058	120.200, -0.062	120.200, -0.060	120.200, -0.041	120.200, -0.005	120.200, -0.068
603	120.400, 0.935	120.400, 1.147	120.400, 1.212	120.400, 1.276	120.400, 1.324	120.400, -0.013	120.400, -0.058	120.400, -0.062	120.400, -0.060	120.400, -0.041	120.400, -0.005	120.400, -0.068
604	120.600, 0.936	120.600, 1.147	120.600, 1.212	120.600, 1.277	120.600, 1.324	120.600, -0.013	120.600, -0.058	120.600, -0.062	120.600, -0.059	120.600, -0.041	120.600, -0.005	120.600, -0.069
605	120.800, 0.937	120.800, 1.148	120.800, 1.212	120.800, 1.277	120.800, 1.323	120.800, -0.012	120.800, -0.058	120.800, -0.062	120.800, -0.059	120.800, -0.041	120.800, -0.005	120.800, -0.068
606	121.000, 0.938	121.000, 1.148	121.000, 1.212	121.000, 1.277	121.000, 1.324	121.000, -0.012	121.000, -0.057	121.000, -0.062	121.000, -0.059	121.000, -0.041	121.000, -0.005	121.000, -0.069
607	121.200, 0.939	121.200, 1.149	121.200, 1.212	121.200, 1.277	121.200, 1.324	121.200, -0.012	121.200, -0.057	121.200, -0.062	121.200, -0.059	121.200, -0.041	121.200, -0.005	121.200, -0.069
608	121.400, 0.940	121.400, 1.149	121.400, 1.212	121.400, 1.277	121.400, 1.324	121.400, -0.012	121.400, -0.057	121.400, -0.063	121.400, -0.060	121.400, -0.041	121.400, -0.005	121.400, -0.069
609	121.600, 0.941	121.600, 1.149	121.600, 1.212	121.600, 1.277	121.600, 1.325	121.600, -0.012	121.600, -0.058	121.600, -0.063	121.600, -0.060	121.600, -0.042	121.600, -0.005	121.600, -0.069
610	121.800, 0.942	121.800, 1.150	121.800, 1.212	121.800, 1.278	121.800, 1.325	121.800, -0.012	121.800, -0.058	121.800, -0.063	121.800, -0.060	121.800, -0.042	121.800, -0.005	121.800, -0.069
611	122.000, 0.944	122.000, 1.150	122.000, 1.212	122.000, 1.278	122.000, 1.325	122.000, -0.012	122.000, -0.058	122.000, -0.063	122.000, -0.060	122.000, -0.042	122.000, -0.005	122.000, -0.068
612	122.200, 0.945	122.200, 1.151	122.200, 1.213	122.200, 1.278	122.200, 1.326	122.200, -0.012	122.200, -0.058	122.200, -0.064	122.200, -0.060	122.200, -0.041	122.200, -0.005	122.200, -0.068
613	122.400, 0.946	122.400, 1.151	122.400, 1.213	122.400, 1.278	122.400, 1.326	122.400, -0.013	122.400, -0.058	122.400, -0.064	122.400, -0.060	122.400, -0.042	122.400, -0.005	122.400, -0.069
614	122.600, 0.947	122.600, 1.152	122.600, 1.213	122.600, 1.278	122.600, 1.325	122.600, -0.012	122.600, -0.058	122.600, -0.064	122.600, -0.060	122.600, -0.042	122.600, -0.005	122.600, -0.069
615	122.800, 0.948	122.800, 1.152	122.800, 1.214	122.800, 1.278	122.800, 1.326	122.800, -0.012	122.800, -0.058	122.800, -0.064	122.800, -0.061	122.800, -0.042	122.800, -0.005	122.800, -0.069
616	123.000, 0.949	123.000, 1.153	123.000, 1.214	123.000, 1.278	123.000, 1.326	123.000, -0.013	123.000, -0.058	123.000, -0.064	123.000, -0.061	123.000, -0.042	123.000, -0.005	123.000, -0.069
617	123.200, 0.950	123.200, 1.153	123.200, 1.215	123.200, 1.278	123.200, 1.326	123.200, -0.013	123.200, -0.058	123.200, -0.064	123.200, -0.060	123.200, -0.042	123.200, -0.005	123.200, -0.069
618	123.400, 0.951	123.400, 1.153	123.400, 1.216	123.400, 1.278	123.400, 1.326	123.400, -0.013	123.400, -0.058	123.400, -0.064	123.400, -0.060	123.400, -0.042	123.400, -0.005	123.400, -0.069
619	123.600, 0.952	123.600, 1.153	123.600, 1.216	123.600, 1.278	123.600, 1.326	123.600, -0.013	123.600, -0.058	123.600, -0.064	123.600, -0.060	123.600, -0.042	123.600, -0.005	123.600, -0.068
620	123.800, 0.953	123.800, 1.153	123.800, 1.217	123.800, 1.278	123.800, 1.326	123.800, -0.013	123.800, -0.058	123.800, -0.064	123.800, -0.059	123.800, -0.041	123.800, -0.005	123.800, -0.068
621	124.000, 0.954	124.000, 1.153	124.000, 1.217	124.000, 1.278	124.000, 1.326	124.000, -0.013	124.000, -0.058	124.000, -0.064	124.000, -0.059	124.000, -0.041	124.000, -0.005	124.000, -0.068
622	124.200, 0.955	124.200, 1.154	124.200, 1.217	124.200, 1.279	124.200, 1.325	124.200, -0.013	124.200, -0.058	124.200, -0.064	124.200, -0.059	124.200, -0.041	124.200, -0.004	124.200, -0.067
623	124.400, 0.955	124.400, 1.154	124.400, 1.217	124.400, 1.279	124.400, 1.325	124.400, -0.013	124.400, -0.058	124.400, -0.064	124.400, -0.059	124.400, -0.041	124.400, -0.004	124.400, -0.067
624	124.600, 0.956	124.600, 1.154	124.600, 1.217	124.600, 1.280	124.600, 1.326	124.600, -0.012	124.600, -0.058	124.600, -0.063	124.600, -0.059	124.600, -0.041	124.600, -0.004	124.600, -0.067
625	124.800, 0.957	124.800, 1.155	124.800, 1.217	124.800, 1.280	124.800, 1.326	124.800, -0.012	124.800, -0.059	124.800, -0.063	124.800, -0.059	124.800, -0.041	124.800, -0.003	124.800, -0.067
626	125.000, 0.958	125.000, 1.155	125.000, 1.217	125.000, 1.281	125.000, 1.327	125.000, -0.013	125.000, -0.059	125.000, -0.063	125.000, -0.059	125.000, -0.041	125.000, -0.003	125.000, -0.067
627	125.200, 0.958	125.200, 1.156	125.200, 1.217	125.200, 1.281	125.200, 1.328	125.200, -0.013	125.200, -0.059	125.200, -0.063	125.200, -0.060	125.200, -0.040	125.200, -0.003	125.200, -0.067
628	125.400, 0.959	125.400, 1.156	125.400, 1.217	125.400, 1.282	125.400, 1.328	125.400, -0.013	125.400, -0.060	125.400, -0.063	125.400, -0.060	125.400, -0.040	125.400, -0.003	125.400, -0.067
629	125.600, 0.959	125.600, 1.156	125.600, 1.217	125.600, 1.282	125.600, 1.329	125.600, -0.013	125.600, -0.060	125.600, -0.063	125.600, -0.060	125.600, -0.040	125.600, -0.003	125.600, -0.067
630	125.800, 0.960	125.800, 1.157	125.800, 1.217	125.800, 1.282	125.800, 1.329	125.800, -0.013	125.800, -0.060	125.800, -0.062	125.800, -0.060	125.800, -0.040	125.800, -0.003	125.800, -0.067
631	126.000, 0.961	126.000, 1.157	126.000, 1.217	126.000, 1.282	126.000, 1.329	126.000, -0.013	126.000, -0.059	126.000, -0.062	126.000, -0.060	126.000, -0.040	126.000, -0.003	126.000, -0.067
632	126.200, 0.962	126.200, 1.157	126.200, 1.217	126.200, 1.282	126.200, 1.329	126.200, -0.013	126.200, -0.059	126.200, -0.061	126.200, -0.060	126.200, -0.040	126.200, -0.003	126.200, -0.068
633	126.400, 0.963	126.400, 1.158	126.400, 1.217	126.400, 1.282	126.400, 1.330	126.400, -0.013	126.400, -0.059	126.400, -0.061	126.400, -0.060	126.400, -0.040	126.400, -0.003	126.400, -0.068
634	126.600, 0.963	126.600, 1.158	126.600, 1.218	126.600, 1.282	126.600, 1.330	126.600, -0.013	126.600, -0.059	126.600, -0.061	126.600, -0.060	126.600, -0.040	126.600, -0.003	126.600, -0.068
635	126.800, 0.964	126.800, 1.158	126.800, 1.218	126.800, 1.282	126.800, 1.330	126.800, -0.014	126.800, -0.058	126.800, -0.060	126.800, -0.060	126.800, -0.040	126.800, -0.003	126.800, -0.068
636	127.000, 0.965	127.000, 1.158	127.000, 1.219	127.000, 1.282	127.000, 1.330	127.000, -0.014	127.000, -0.058	127.000, -0.060	127.000, -0.060	127.000, -0.040	127.000, -0.003	127.000, -0.068
637	127.200, 0.966	127.200, 1.158	127.200, 1.219	127.200, 1.282	127.200, 1.329	127.200, -0.014	127.200, -0.058	127.200, -0.061	127.200, -0.059	127.200, -0.040	127.200, -0.003	127.200, -0.068
638	127.400, 0.967	127.400, 1.159	127.400, 1.220	127.400, 1.282	127.400, 1.329	127.400, -0.014	127.400, -0.057	127.400, -0.061	127.400, -0.059	127.400, -0.040	127.400, -0.003	127.400, -0.068
639	127.600, 0.968	127.600, 1.159	127.600, 1.221	127.600, 1.282	127.600, 1.329	127.600, -0.014	127.600, -0.057	127.600, -0.061	127.600, -0.059	127.600, -0.040	127.600, -0.003	127.600, -0.068
640	127.800, 0.969	127.800, 1.160	127.800, 1.221	127.800, 1.282	127.800, 1.329	127.800, -0.014	127.800, -0.057	127.800, -0.060	127.800, -0.059	127.800, -0.041	127.800, -0.003	127.800, -0.068
641	128.000, 0.969	128.000, 1.160	128.000, 1.222	128.000, 1.283	128.000, 1.329	128.000, -0.014	128.000, -0.057	128.000, -0.061	128.000, -0.059	128.000, -0.041	128.000, -0.003	128.000, -0.068
642	128.200, 0.970	128.200, 1.160	128.200, 1.222	128.200, 1.283	128.200, 1.329	128.200, -0.014	128.200, -0.057	128.200, -0.061	128.200, -0.059	128.200, -0.041	128.200, -0.003	128.200, -0.068
643	128.400, 0.971	128.400, 1.160	128.400, 1.222	128.400, 1.284	128.400, 1.329	128.400, -0.014	128.400, -0.057	128.400, -0.061	128.400, -0.059	128.400, -0.041	128.400, -0.003	128.400, -0.068
644	128.600, 0.972	128.600, 1.161	128.600, 1.222	128.600, 1.284	128.600, 1.329	128.600, -0.014	128.600, -0.057	128.600, -0.061	128.600, -0.059	128.600, -0.041	128.600, -0.003	128.600, -0.068
645	128.800, 0.973	128.800, 1.161	128.800, 1.222	128.800, 1.284	128.800, 1.330	128.800, -0.014	128.800, -0.058	128.800, -0.062	128.800, -0.059	128.800, -0.041	128.800, -0.003	128.800, -0.068
646	129.000, 0.974	129.000, 1.161	129.000, 1.222	129.000, 1.285	129.000, 1.331	129.000, -0.014	129.000, -0.058	129.000, -0.062	129.000, -0.059	129.000, -0.041	129.000, -0.003	129.000, -0.068
647	129.200, 0.975	129.200, 1.161	129.200, 1.222	129.200, 1.285	129.200, 1.331	129.200, -0.014	129.200, -0.058	129.200, -0.063	129.200, -0.060	129.200, -0.041	129.200, -0.003	129.200, -0.068
648	129.400, 0.976	129.400, 1.162	129.400, 1.221	129.400, 1.285	129.400, 1.331	129.400, -0.014	129.400, -0.059	129.400, -0.063	129.400, -0.060	129.400, -0.041	129.400, -0.004	129.400, -0.068
649	129.600, 0.976	129.600, 1.162	129.600, 1.221	129.600, 1.285	129.600, 1.332	129.600, -0.013	129.600, -0.059	129.600, -0.063	129.600, -0.060	129.600, -0.041	129.600, -0.004	129.600, -0.068
650	129.800, 0.977	129.800, 1.162	129.800, 1.221	129.800, 1.285	129.800, 1.332	129.800, -0.013	129.800, -0.058	129.800, -0.063	129.800, -0.060	129.800, -0.040	129.800, -0.004	129.800, -0.069
651	130.000, 0.978	130.000, 1.163	130.000, 1.221	130.000, 1.285	130.000, 1.333	130.000, -0.013	130.000, -0.058	130.000, -0.063	130.000, -0.060	130.000, -0.040	130.000, -0.004	130.000, -0.069
652	130.200, 0.979	130.200, 1.163	130.200, 1.221	130.200, 1.285	130.200, 1.333	130.200, -0.012	130.200, -0.058	130.200, -0.063	130.200, -0.060	130.200, -0.040	130.200, -0.004	130.200, -0.069
653	130.400, 0.980	130.400, 1.164	130.400, 1.221	130.400, 1.286	130.400, 1.333	130.400, -0.012	130.400, -0.058	130.400, -0.063	130.400, -0.060	130.400, -0.040	130.400, -0.004	130.400, -0.069
654	130.600, 0.981	130.600, 1.165	130.600, 1.221	130.600, 1.286	130.600, 1.334	130.600, -0.012	130.600, -0.058	130.600, -0.063	130.600, -0.060	130.600, -0.040	130.600, -0.004	130.600, -0.069
655	130.800, 0.982	130.800, 1.165	130.800, 1.221	130.800, 1.286	130.800, 1.334	130.800, -0.013	130.800, -0.058	130.800, -0.064	130.800, -0.060	130.800, -0.040	130.800, -0.003	130.800, -0.069
656	131.000, 0.983	131.000, 1.166	131.000, 1.222	131.000, 1.286	131.000, 1.334	131.000, -0.013	131.000, -0.058	131.000, -0.064	131.000, -0.060	131.000, -0.040	131.000, -0.003	131.000, -0.069
657	131.200, 0.983	131.200, 1.167	131.200, 1.222	131.200, 1.286	131.200, 1.334	131.200, -0.014	131.200, -0.058	131.200, -0.064	131.200, -0.059	131.200, -0.039	131.200, -0.003	131.200, -0.069
658	131.400, 0.984	131.400, 1.167	131.400, 1.222	131.400, 1.287	131.400, 1.335	131.400, -0.014	131.400, -0.058	131.400, -0.063	131.400, -0.059	131.400, -0.040	131.400, -0.003	131.400, -0.069
659	131.600, 0.985	131.600, 1.167	131.600, 1.223	131.600, 1.287	131.600, 1.335	131.600, -0.014	131.600, -0.058	131.600, -0.063	131.600, -0.059	131.600, -0.040	131.600, -0.002	131.600, -0.069
660	131.800, 0.986	131.800, 1.167	131.800, 1.223	131.800, 1.287	131.800, 1.335	131.800, -0.014	131.800, -0.057	131.800, -0.062	131.800, -0.059	131.800, -0.040	131.800, -0.002	131.800, -0.069
661	132.000, 0.986	132.000, 1.168	132.000, 1.224	132.000, 1.287	132.000, 1.335	132.000, -0.015	132.000, -0.057	132.000, -0.061	132.000, -0.059	132.000, -0.039	132.000, -0.002	132.000, -0.069
662	132.200, 0.987	132.200, 1.168	132.200, 1.224	132.200, 1.288	132.200, 1.335	132.200, -0.015	132.200, -0.058	132.200, -0.061	132.200, -0.059	132.200, -0.039	132.200, -0.001	132.200, -0.069
663	132.400, 0.988	132.400, 1.168	132.400, 1.225	132.400, 1.288	132.400, 1.335	132.400, -0.015	132.400, -0.058	132.400, -0.060	132.400, -0.059	132.400, -0.039	132.400, -0.001	132.400, -0.069
664	132.600, 0.988	132.600, 1.168	132.600, 1.225	132.600, 1.288	132.600, 1.335	132.600, -0.015	132.600, -0.058	132.600, -0.060	132.600, -0.059	132.600, -0.039	132.600, -0.001	132.600, -0.069
665	132.800, 0.989	132.800, 1.168	132.800, 1.225	132.800, 1.289	132.800, 1.335	132.800, -0.015	132.800, -0.058	132.800, -0.060	132.800, -0.059	132.800, -0.039	132.800, -0.001	132.800, -0.069
666	133.000, 0.990	133.000, 1.168	133.000, 1.225	133.000, 1.289	133.000, 1.335	133.000, -0.015	133.000, -0.058	133.000, -0.059	133.000, -0.059	133.000, -0.038	133.000, -0.001	133.000, -0.069
667	133.200, 0.990	133.200, 1.168	133.200, 1.225	133.200, 1.289	133.200, 1.335	133.200, -0.015	133.200, -0.058	133.200, -0.059	133.200, -0.060	133.200, -0.038	133.200, -0.001	133.200, -0.070
668	133.400, 0.991	133.400, 1.168	133.400, 1.225	133.400, 1.290	133.400, 1.335	133.400, -0.015	133.400, -0.058	133.400, -0.059	133.400, -0.060	133.400, -0.038	133.400, -0.000	133.400, -0.070
669	133.600, 0.992	133.600, 1.168	133.600, 1.226	133.600, 1.290	133.600, 1.335	133.600, -0.015	133.600, -0.058	133.600, -0.060	133.600, -0.060	133.600, -0.038	133.600, -0.000	133.600, -0.070
670	133.800, 0.993	133.800, 1.168	133.800, 1.226	133.800, 1.290	133.800, 1.335	133.800, -0.015	133.800, -0.058	133.800, -0.060	133.800, -0.060	133.800, -0.038	133.800, -0.000	133.800, -0.070
671	134.000, 0.994	134.000, 1.169	134.000, 1.226	134.000, 1.290	134.000, 1.335	134.000, -0.015	134.000, -0.058	134.000, -0.060	134.000, -0.060	134.000, -0.038	134.000, 0.000	134.000, -0.070
672	134.200, 0.994	134.200, 1.169	134.200, 1.226	134.200, 1.290	134.200, 1.335	134.200, -0.015	134.200, -0.058	134.200, -0.060	134.200, -0.060	134.200, -0.038	134.200, 0.000	134.200, -0.070
673	134.400, 0.995	134.400, 1.170	134.400, 1.227	134.400, 1.291	134.400, 1.335	134.400, -0.015	134.400, -0.058	134.400, -0.061	134.400, -0.060	134.400, -0.038	134.400, 0.000	134.400, -0.070
674	134.600, 0.996	134.600, 1.170	134.600, 1.227	134.600, 1.291	134.600, 1.334	134.600, -0.015	134.600, -0.058	134.600, -0.061	134.600, -0.060	134.600, -0.038	134.600, 0.000	134.600, -0.070
675	134.800, 0.997	134.800, 1.170	134.800, 1.227	134.800, 1.291	134.800, 1.334	134.800, -0.015	134.800, -0.059	134.800, -0.062	134.800, -0.060	134.800, -0.038	134.800, 0.001	134.800, -0.070
676	135.000, 0.999	135.000, 1.171	135.000, 1.227	135.000, 1.291	135.000, 1.334	135.000, -0.015	135.000, -0.059	135.000, -0.062	135.000, -0.060	135.000, -0.038	135.000, 0.001	135.000, -0.070
677	135.200, 0.999	135.200, 1.171	135.200, 1.227	135.200, 1.291	135.200, 1.335	135.200, -0.015	135.200, -0.060	135.200, -0.063	135.200, -0.060	135.200, -0.038	135.200, 0.001	135.200, -0.070
678	135.400, 1.000	135.400, 1.171	135.400, 1.227	135.400, 1.291	135.400, 1.335	135.400, -0.015	135.400, -0.060	135.400, -0.063	135.400, -0.060	135.400, -0.038	135.400, 0.001	135.400, -0.070
679	135.600, 1.001	135.600, 1.171	135.600, 1.227	135.600, 1.291	135.600, 1.335	135.600, -0.014	135.600, -0.060	135.600, -0.063	135.600, -0.059	135.600, -0.037	135.600, 0.001	135.600, -0.070
680	135.800, 1.002	135.800, 1.172	135.800, 1.227	135.800, 1.291	135.800, 1.335	135.800, -0.014	135.800, -0.061	135.800, -0.062	135.800, -0.059	135.800, -0.037	135.800, 0.001	135.800, -0.069
681	136.000, 1.002	136.000, 1.172	136.000, 1.228	136.000, 1.291	136.000, 1.335	136.000, -0.014	136.000, -0.061	136.000, -0.062	136.000, -0.059	136.000, -0.037	136.000, 0.001	136.000, -0.069
682	136.200, 1.003	136.200, 1.173	136.200, 1.228	136.200, 1.291	136.200, 1.335	136.200, -0.014	136.200, -0.061	136.200, -0.061	136.200, -0.059	136.200, -0.037	136.200, 0.001	136.200, -0.069
683	136.400, 1.004	136.400, 1.173	136.400, 1.228	136.400, 1.291	136.400, 1.336	136.400, -0.014	136.400, -0.061	136.400, -0.061	136.400, -0.059	136.400, -0.037	136.400, 0.001	136.400, -0.069
684	136.600, 1.004	136.600, 1.173	136.600, 1.228	136.600, 1.291	136.600, 1.336	136.600, -0.014	136.600, -0.061	136.600, -0.061	136.600, -0.059	136.600, -0.037	136.600, 0.001	136.600, -0.069
685	136.800, 1.005	136.800, 1.173	136.800, 1.228	136.800, 1.290	136.800, 1.337	136.800, -0.014	136.800, -0.061	136.800, -0.060	136.800, -0.059	136.800, -0.036	136.800, 0.001	136.800, -0.068
686	137.000, 1.006	137.000, 1.173	137.000, 1.229	137.000, 1.290	137.000, 1.337	137.000, -0.014	137.000, -0.061	137.000, -0.060	137.000, -0.058	137.000, -0.036	137.000, 0.001	137.000, -0.069
687	137.200, 1.007	137.200, 1.174	137.200, 1.229	137.200, 1.290	137.200, 1.338	137.200, -0.014	137.200, -0.060	137.200, -0.060	137.200, -0.058	137.200, -0.036	137.200, 0.002	137.200, -0.069
688	137.400, 1.008	137.400, 1.174	137.400, 1.229	137.400, 1.289	137.400, 1.338	137.400, -0.014	137.400, -0.060	137.400, -0.060	137.400, -0.058	137.400, -0.036	137.400, 0.002	137.400, -0.069
689	137.600, 1.009	137.600, 1.174	137.600, 1.230	137.600, 1.289	137.600, 1.338	137.600, -0.014	137.600, -0.060	137.600, -0.060	137.600, -0.057	137.600, -0.036	137.600, 0.002	137.600, -0.069
690	137.800, 1.010	137.800, 1.175	137.800, 1.230	137.800, 1.289	137.800, 1.338	137.800, -0.014	137.800, -0.060	137.800, -0.061	137.800, -0.057	137.800, -0.036	137.800, 0.002	137.800, -0.069
691	138.000, 1.011	138.000, 1.176	138.000, 1.230	138.000, 1.290	138.000, 1.338	138.000, -0.014	138.000, -0.059	138.000, -0.061	138.000, -0.057	138.000, -0.036	138.000, 0.002	138.000, -0.069
692	138.200, 1.011	138.200, 1.177	138.200, 1.231	138.200, 1.290	138.200, 1.338	138.200, -0.014	138.200, -0.059	138.200, -0.061	138.200, -0.057	138.200, -0.036	138.200, 0.002	138.200, -0.069
693	138.400, 1.012	138.400, 1.177	138.400, 1.231	138.400, 1.290	138.400, 1.338	138.400, -0.014	138.400, -0.059	138.400, -0.061	138.400, -0.057	138.400, -0.036	138.400, 0.003	138.400, -0.069
694	138.600, 1.013	138.600, 1.178	138.600, 1.231	138.600, 1.291	138.600, 1.339	138.600, -0.014	138.600, -0.059	138.600, -0.061	138.600, -0.057	138.600, -0.036	138.600, 0.003	138.600, -0.069
695	138.800, 1.014	138.800, 1.179	138.800, 1.231	138.800, 1.291	138.800, 1.339	138.800, -0.014	138.800, -0.059	138.800, -0.061	138.800, -0.057	138.800, -0.036	138.800, 0.004	138.800, -0.069
696	139.000, 1.015	139.000, 1.179	139.000, 1.231	139.000, 1.292	139.000, 1.339	139.000, -0.014	139.000, -0.059	139.000, -0.061	139.000, -0.057	139.000, -0.035	139.000, 0.004	139.000, -0.069
697	139.200, 1.015	139.200, 1.179	139.200, 1.232	139.200, 1.292	139.200, 1.340	139.200, -0.014	139.200, -0.059	139.200, -0.061	139.200, -0.057	139.200, -0.036	139.200, 0.004	139.200, -0.069
698	139.400, 1.016	139.400, 1.180	139.400, 1.232	139.400, 1.293	139.400, 1.340	139.400, -0.014	139.400, -0.059	139.400, -0.062	139.400, -0.058	139.400, -0.036	139.400, 0.004	139.400, -0.069
699	139.600, 1.017	139.600, 1.180	139.600, 1.232	139.600, 1.293	139.600, 1.340	139.600, -0.014	139.600, -0.059	139.600, -0.062	139.600, -0.058	139.600, -0.036	139.600, 0.004	139.600, -0.070
700	139.800, 1.017	139.800, 1.180	139.800, 1.233	139.800, 1.294	139.800, 1.341	139.800, -0.014	139.800, -0.059	139.800, -0.062	139.800, -0.058	139.800, -0.036	139.800, 0.003	139.800, -0.069
701	140.000, 1.017	140.000, 1.179	140.000, 1.233	140.000, 1.294	140.000, 1.341	140.000, -0.014	140.000, -0.059	140.000, -0.062	140.000, -0.058	140.000, -0.037	140.000, 0.003	140.000, -0.069
702	140.200, 1.018	140.200, 1.179	140.200, 1.233	140.200, 1.294	140.200, 1.342	140.200, -0.014	140.200, -0.059	140.200, -0.062	140.200, -0.058	140.200, -0.037	140.200, 0.003	140.200, -0.069
703	140.400, 1.018	140.400, 1.179	140.400, 1.233	140.400, 1.294	140.400, 1.342	140.400, -0.015	140.400, -0.059	140.400, -0.061	140.400, -0.058	140.400, -0.037	140.400, 0.003	140.400, -0.069
704	140.600, 1.019	140.600, 1.179	140.600, 1.233	140.600, 1.294	140.600, 1.343	140.600, -0.015	140.600, -0.060	140.600, -0.061	140.600, -0.058	140.600, -0.037	140.600, 0.003	140.600, -0.069
705	140.800, 1.019	140.800, 1.179	140.800, 1.234	140.800, 1.293	140.800, 1.343	140.800, -0.015	140.800, -0.060	140.800, -0.061	140.800, -0.058	140.800, -0.037	140.800, 0.003	140.800, -0.069
706	141.000, 1.020	141.000, 1.179	141.000, 1.234	141.000, 1.293	141.000, 1.343	141.000, -0.015	141.000, -0.060	141.000, -0.061	141.000, -0.058	141.000, -0.037	141.000, 0.003	141.000, -0.069
707	141.200, 1.020	141.200, 1.179	141.200, 1.234	141.200, 1.293	141.200, 1.343	141.200, -0.015	141.200, -0.060	141.200, -0.061	141.200, -0.058	141.200, -0.037	141.200, 0.003	141.200, -0.069
708	141.400, 1.020	141.400, 1.180	141.400, 1.234	141.400, 1.293	141.400, 1.343	141.400, -0.016	141.400, -0.060	141.400, -0.061	141.400, -0.058	141.400, -0.037	141.400, 0.003	141.400, -0.069
709	141.600, 1.021	141.600, 1.180	141.600, 1.235	141.600, 1.294	141.600, 1.343	141.600, -0.016	141.600, -0.060	141.600, -0.061	141.600, -0.057	141.600, -0.037	141.600, 0.003	141.600, -0.069
710	141.800, 1.021	141.800, 1.180	141.800, 1.235	141.800, 1.294	141.800, 1.343	141.800, -0.016	141.800, -0.060	141.800, -0.060	141.800, -0.058	141.800, -0.037	141.800, 0.003	141.800, -0.068
711	142.000, 1.022	142.000, 1.181	142.000, 1.235	142.000, 1.295	142.000, 1.343	142.000, -0.016	142.000, -0.060	142.000, -0.060	142.000, -0.058	142.000, -0.037	142.000, 0.003	142.000, -0.068
712	142.200, 1.022	142.200, 1.181	142.200, 1.236	142.200, 1.295	142.200, 1.343	142.200, -0.016	142.200, -0.060	142.200, -0.059	142.200, -0.058	142.200, -0.037	142.200, 0.003	142.200, -0.068
713	142.400, 1.023	142.400, 1.182	142.400, 1.236	142.400, 1.295	142.400, 1.343	142.400, -0.015	142.400, -0.060	142.400, -0.059	142.400, -0.058	142.400, -0.036	142.400, 0.003	142.400, -0.068
714	142.600, 1.024	142.600, 1.183	142.600, 1.236	142.600, 1.296	142.600, 1.343	142.600, -0.015	142.600, -0.059	142.600, -0.059	142.600, -0.058	142.600, -0.036	142.600, 0.004	142.600, -0.067
715	142.800, 1.024	142.800, 1.183	142.800, 1.236	142.800, 1.296	142.800, 1.343	142.800, -0.015	142.800, -0.059	142.800, -0.059	142.800, -0.058	142.800, -0.036	142.800, 0.004	142.800, -0.067
716	143.000, 1.025	143.000, 1.183	143.000, 1.237	143.000, 1.297	143.000, 1.343	143.000, -0.015	143.000, -0.059	143.000, -0.059	143.000, -0.058	143.000, -0.036	143.000, 0.004	143.000, -0.068
717	143.200, 1.026	143.200, 1.184	143.200, 1.237	143.200, 1.297	143.200, 1.343	143.200, -0.015	143.200, -0.059	143.200, -0.059	143.200, -0.058	143.200, -0.036	143.200, 0.005	143.200, -0.068
718	143.400, 1.026	143.400, 1.184	143.400, 1.237	143.400, 1.297	143.400, 1.343	143.400, -0.015	143.400, -0.059	143.400, -0.060	143.400, -0.058	143.400, -0.035	143.400, 0.005	143.400, -0.068
719	143.600, 1.027	143.600, 1.184	143.600, 1.237	143.600, 1.297	143.600, 1.343	143.600, -0.015	143.600, -0.059	143.600, -0.060	143.600, -0.058	143.600, -0.035	143.600, 0.005	143.600, -0.068
720	143.800, 1.028	143.800, 1.185	143.800, 1.237	143.800, 1.298	143.800, 1.343	143.800, -0.015	143.800, -0.060	143.800, -0.059	143.800, -0.057	143.800, -0.035	143.800, 0.005	143.800, -0.068
721	144.000, 1.029	144.000, 1.185	144.000, 1.237	144.000, 1.298	144.000, 1.343	144.000, -0.015	144.000, -0.060	144.000, -0.060	144.000, -0.057	144.000, -0.035	144.000, 0.005	144.000, -0.068
722	144.200, 1.029	144.200, 1.186	144.200, 1.237	144.200, 1.298	144.200, 1.343	144.200, -0.015	144.200, -0.060	144.200, -0.060	144.200, -0.057	144.200, -0.035	144.200, 0.005	144.200, -0.069
723	144.400, 1.030	144.400, 1.186	144.400, 1.237	144.400, 1.298	144.400, 1.343	144.400, -0.015	144.400, -0.060	144.400, -0.060	144.400, -0.057	144.400, -0.035	144.400, 0.006	144.400, -0.069
724	144.600, 1.031	144.600, 1.187	144.600, 1.237	144.600, 1.298	144.600, 1.344	144.600, -0.015	144.600, -0.061	144.600, -0.060	144.600, -0.057	144.600, -0.035	144.600, 0.006	144.600, -0.069
725	144.800, 1.032	144.800, 1.187	144.800, 1.237	144.800, 1.297	144.800, 1.344	144.800, -0.015	144.800, -0.061	144.800, -0.060	144.800, -0.057	144.800, -0.035	144.800, 0.006	144.800, -0.070
726	145.000, 1.032	145.000, 1.187	145.000, 1.237	145.000, 1.298	145.000, 1.344	145.000, -0.014	145.000, -0.060	145.000, -0.060	145.000, -0.057	145.000, -0.035	145.000, 0.006	145.000, -0.070
727	145.200, 1.033	145.200, 1.188	145.200, 1.237	145.200, 1.298	145.200, 1.345	145.200, -0.014	145.200, -0.060	145.200, -0.060	145.200, -0.057	145.200, -0.035	145.200, 0.006	145.200, -0.070
728	145.400, 1.034	145.400, 1.188	145.400, 1.237	145.400, 1.298	145.400, 1.345	145.400, -0.014	145.400, -0.060	145.400, -0.060	145.400, -0.056	145.400, -0.035	145.400, 0.006	145.400, -0.070
[truncated: 14,272 more rows]

## Sheet: Fig1_supp1_panelB_rep3
	parS20 TetR 0uM	tetO28 TetR 0uM	parS20 TetR 0.25uM	tetO28 TetR 0.25uM	parS20 TetR 0.5uM	parS20 TetR 1.0uM	tetO28 TetR 1.0uM	parS20 TetR 2.0uM	tetO28 TetR 2.0uM	tetO28 TetR 0.5uM	tetO28 TetR 0.125uM
[truncated: 15,000 more rows]
