# Supplementary material for: ParB spreading on DNA requires cytidine triphosphate in vitro
Source: eLife journal article supplement (doi:10.7554/elife.53515), 2020-02-20
Supplement: fig1-figsupp2-data1 [file elife-53515-fig1-figsupp2-data1-v2.zip]

## Sheet: FORMAT
	sample ID #1	sample ID #2	sample ID #3
data point	time point (sec), wavelength shift (nm)	time point (sec), wavelength shift (nm)	time point (sec), wavelength shift (nm)
1
2
3
.
.
.

## Sheet: Fig1_supp2_rep1
	parS20 ParB no Mg	parS20 ParB no Mg + ATP	parS20 ParB no Mg + GTP	parS20 ParB no Mg + UTP	parS20 ParB no Mg +CTP
1	0.000, -0.033	0.000, -0.030	0.000, -0.025	0.000, -0.008	0.000, -0.018
2	0.200, -0.033	0.200, -0.030	0.200, -0.025	0.200, -0.009	0.200, -0.017
3	0.400, -0.033	0.400, -0.029	0.400, -0.025	0.400, -0.009	0.400, -0.016
4	0.600, -0.032	0.600, -0.029	0.600, -0.025	0.600, -0.010	0.600, -0.015
5	0.800, -0.032	0.800, -0.029	0.800, -0.024	0.800, -0.010	0.800, -0.014
6	1.000, -0.031	1.000, -0.029	1.000, -0.024	1.000, -0.010	1.000, -0.013
7	1.200, -0.031	1.200, -0.028	1.200, -0.023	1.200, -0.010	1.200, -0.012
8	1.400, -0.030	1.400, -0.028	1.400, -0.023	1.400, -0.010	1.400, -0.011
9	1.600, -0.029	1.600, -0.027	1.600, -0.022	1.600, -0.010	1.600, -0.010
10	1.800, -0.028	1.800, -0.026	1.800, -0.022	1.800, -0.009	1.800, -0.010
11	2.000, -0.027	2.000, -0.025	2.000, -0.021	2.000, -0.009	2.000, -0.009
12	2.200, -0.026	2.200, -0.025	2.200, -0.020	2.200, -0.008	2.200, -0.009
13	2.400, -0.025	2.400, -0.024	2.400, -0.019	2.400, -0.008	2.400, -0.009
14	2.600, -0.024	2.600, -0.023	2.600, -0.018	2.600, -0.007	2.600, -0.009
15	2.800, -0.023	2.800, -0.022	2.800, -0.018	2.800, -0.007	2.800, -0.008
16	3.000, -0.022	3.000, -0.021	3.000, -0.017	3.000, -0.007	3.000, -0.008
17	3.200, -0.022	3.200, -0.021	3.200, -0.016	3.200, -0.007	3.200, -0.007
18	3.400, -0.021	3.400, -0.020	3.400, -0.015	3.400, -0.006	3.400, -0.007
19	3.600, -0.021	3.600, -0.020	3.600, -0.015	3.600, -0.007	3.600, -0.007
20	3.800, -0.020	3.800, -0.019	3.800, -0.014	3.800, -0.007	3.800, -0.006
21	4.000, -0.020	4.000, -0.019	4.000, -0.013	4.000, -0.007	4.000, -0.006
22	4.200, -0.020	4.200, -0.018	4.200, -0.013	4.200, -0.007	4.200, -0.006
23	4.400, -0.020	4.400, -0.018	4.400, -0.012	4.400, -0.007	4.400, -0.006
24	4.600, -0.019	4.600, -0.017	4.600, -0.012	4.600, -0.007	4.600, -0.006
25	4.800, -0.019	4.800, -0.017	4.800, -0.011	4.800, -0.007	4.800, -0.006
26	5.000, -0.018	5.000, -0.016	5.000, -0.011	5.000, -0.007	5.000, -0.006
27	5.200, -0.018	5.200, -0.016	5.200, -0.010	5.200, -0.006	5.200, -0.006
28	5.400, -0.017	5.400, -0.015	5.400, -0.010	5.400, -0.006	5.400, -0.006
29	5.600, -0.017	5.600, -0.014	5.600, -0.010	5.600, -0.006	5.600, -0.005
30	5.800, -0.016	5.800, -0.014	5.800, -0.010	5.800, -0.006	5.800, -0.005
31	6.000, -0.016	6.000, -0.013	6.000, -0.010	6.000, -0.006	6.000, -0.005
32	6.200, -0.015	6.200, -0.013	6.200, -0.009	6.200, -0.005	6.200, -0.005
33	6.400, -0.014	6.400, -0.012	6.400, -0.009	6.400, -0.005	6.400, -0.005
34	6.600, -0.014	6.600, -0.012	6.600, -0.009	6.600, -0.005	6.600, -0.005
35	6.800, -0.013	6.800, -0.011	6.800, -0.009	6.800, -0.005	6.800, -0.006
36	7.000, -0.013	7.000, -0.011	7.000, -0.009	7.000, -0.005	7.000, -0.006
37	7.200, -0.012	7.200, -0.011	7.200, -0.008	7.200, -0.005	7.200, -0.006
38	7.400, -0.012	7.400, -0.011	7.400, -0.008	7.400, -0.005	7.400, -0.006
39	7.600, -0.012	7.600, -0.011	7.600, -0.008	7.600, -0.004	7.600, -0.006
40	7.800, -0.011	7.800, -0.011	7.800, -0.007	7.800, -0.004	7.800, -0.006
41	8.000, -0.011	8.000, -0.011	8.000, -0.007	8.000, -0.004	8.000, -0.006
42	8.200, -0.011	8.200, -0.010	8.200, -0.006	8.200, -0.004	8.200, -0.006
43	8.400, -0.010	8.400, -0.010	8.400, -0.006	8.400, -0.004	8.400, -0.006
44	8.600, -0.010	8.600, -0.010	8.600, -0.006	8.600, -0.004	8.600, -0.006
45	8.800, -0.010	8.800, -0.010	8.800, -0.005	8.800, -0.004	8.800, -0.006
46	9.000, -0.010	9.000, -0.009	9.000, -0.005	9.000, -0.004	9.000, -0.006
47	9.200, -0.010	9.200, -0.009	9.200, -0.005	9.200, -0.004	9.200, -0.006
48	9.400, -0.010	9.400, -0.008	9.400, -0.005	9.400, -0.004	9.400, -0.006
49	9.600, -0.010	9.600, -0.008	9.600, -0.005	9.600, -0.004	9.600, -0.005
50	9.800, -0.009	9.800, -0.008	9.800, -0.005	9.800, -0.004	9.800, -0.005
51	10.000, -0.009	10.000, -0.008	10.000, -0.004	10.000, -0.004	10.000, -0.006
52	10.200, -0.008	10.200, -0.008	10.200, -0.004	10.200, -0.004	10.200, -0.006
53	10.400, -0.008	10.400, -0.008	10.400, -0.004	10.400, -0.004	10.400, -0.006
54	10.600, -0.008	10.600, -0.007	10.600, -0.004	10.600, -0.004	10.600, -0.006
55	10.800, -0.007	10.800, -0.007	10.800, -0.004	10.800, -0.004	10.800, -0.006
56	11.000, -0.007	11.000, -0.007	11.000, -0.004	11.000, -0.003	11.000, -0.006
57	11.200, -0.007	11.200, -0.007	11.200, -0.004	11.200, -0.003	11.200, -0.006
58	11.400, -0.007	11.400, -0.007	11.400, -0.004	11.400, -0.003	11.400, -0.006
59	11.600, -0.007	11.600, -0.006	11.600, -0.004	11.600, -0.003	11.600, -0.006
60	11.800, -0.007	11.800, -0.006	11.800, -0.004	11.800, -0.002	11.800, -0.006
61	12.000, -0.007	12.000, -0.006	12.000, -0.004	12.000, -0.002	12.000, -0.005
62	12.200, -0.006	12.200, -0.005	12.200, -0.004	12.200, -0.002	12.200, -0.005
63	12.400, -0.006	12.400, -0.005	12.400, -0.004	12.400, -0.002	12.400, -0.005
64	12.600, -0.006	12.600, -0.004	12.600, -0.004	12.600, -0.002	12.600, -0.005
65	12.800, -0.006	12.800, -0.004	12.800, -0.003	12.800, -0.002	12.800, -0.005
66	13.000, -0.006	13.000, -0.004	13.000, -0.003	13.000, -0.002	13.000, -0.005
67	13.200, -0.005	13.200, -0.004	13.200, -0.003	13.200, -0.002	13.200, -0.005
68	13.400, -0.005	13.400, -0.004	13.400, -0.003	13.400, -0.002	13.400, -0.004
69	13.600, -0.005	13.600, -0.004	13.600, -0.003	13.600, -0.002	13.600, -0.004
70	13.800, -0.005	13.800, -0.004	13.800, -0.003	13.800, -0.002	13.800, -0.004
71	14.000, -0.004	14.000, -0.004	14.000, -0.003	14.000, -0.002	14.000, -0.004
72	14.200, -0.004	14.200, -0.004	14.200, -0.003	14.200, -0.002	14.200, -0.004
73	14.400, -0.004	14.400, -0.004	14.400, -0.002	14.400, -0.002	14.400, -0.004
74	14.600, -0.004	14.600, -0.004	14.600, -0.002	14.600, -0.002	14.600, -0.004
75	14.800, -0.004	14.800, -0.004	14.800, -0.002	14.800, -0.002	14.800, -0.004
76	15.000, -0.004	15.000, -0.003	15.000, -0.002	15.000, -0.002	15.000, -0.004
77	15.200, -0.004	15.200, -0.003	15.200, -0.002	15.200, -0.003	15.200, -0.004
78	15.400, -0.004	15.400, -0.003	15.400, -0.002	15.400, -0.003	15.400, -0.004
79	15.600, -0.003	15.600, -0.003	15.600, -0.002	15.600, -0.003	15.600, -0.004
80	15.800, -0.003	15.800, -0.003	15.800, -0.002	15.800, -0.003	15.800, -0.004
81	16.000, -0.003	16.000, -0.002	16.000, -0.002	16.000, -0.003	16.000, -0.004
82	16.200, -0.003	16.200, -0.002	16.200, -0.003	16.200, -0.003	16.200, -0.004
83	16.400, -0.003	16.400, -0.002	16.400, -0.003	16.400, -0.003	16.400, -0.004
84	16.600, -0.003	16.600, -0.002	16.600, -0.003	16.600, -0.004	16.600, -0.004
85	16.800, -0.003	16.800, -0.002	16.800, -0.003	16.800, -0.004	16.800, -0.004
86	17.000, -0.003	17.000, -0.002	17.000, -0.003	17.000, -0.004	17.000, -0.003
87	17.200, -0.003	17.200, -0.002	17.200, -0.003	17.200, -0.004	17.200, -0.003
88	17.400, -0.003	17.400, -0.002	17.400, -0.003	17.400, -0.004	17.400, -0.003
89	17.600, -0.004	17.600, -0.002	17.600, -0.003	17.600, -0.003	17.600, -0.003
90	17.800, -0.004	17.800, -0.002	17.800, -0.003	17.800, -0.003	17.800, -0.003
91	18.000, -0.004	18.000, -0.002	18.000, -0.003	18.000, -0.003	18.000, -0.003
92	18.200, -0.004	18.200, -0.002	18.200, -0.003	18.200, -0.003	18.200, -0.002
93	18.400, -0.004	18.400, -0.002	18.400, -0.002	18.400, -0.003	18.400, -0.002
94	18.600, -0.004	18.600, -0.002	18.600, -0.002	18.600, -0.003	18.600, -0.002
95	18.800, -0.004	18.800, -0.001	18.800, -0.002	18.800, -0.004	18.800, -0.002
96	19.000, -0.003	19.000, -0.001	19.000, -0.001	19.000, -0.004	19.000, -0.002
97	19.200, -0.003	19.200, -0.001	19.200, -0.001	19.200, -0.004	19.200, -0.003
98	19.400, -0.003	19.400, -0.001	19.400, -0.001	19.400, -0.003	19.400, -0.003
99	19.600, -0.002	19.600, -0.001	19.600, -0.001	19.600, -0.003	19.600, -0.003
100	19.800, -0.002	19.800, -0.000	19.800, -0.001	19.800, -0.003	19.800, -0.003
101	20.000, -0.002	20.000, -0.000	20.000, -0.001	20.000, -0.003	20.000, -0.003
102	20.200, -0.002	20.200, -0.001	20.200, -0.002	20.200, -0.002	20.200, -0.003
103	20.400, -0.001	20.400, -0.001	20.400, -0.002	20.400, -0.002	20.400, -0.003
104	20.600, -0.001	20.600, -0.001	20.600, -0.002	20.600, -0.002	20.600, -0.003
105	20.800, -0.001	20.800, -0.001	20.800, -0.002	20.800, -0.002	20.800, -0.003
106	21.000, -0.001	21.000, -0.001	21.000, -0.002	21.000, -0.002	21.000, -0.003
107	21.200, -0.001	21.200, -0.001	21.200, -0.002	21.200, -0.002	21.200, -0.003
108	21.400, -0.001	21.400, -0.001	21.400, -0.002	21.400, -0.001	21.400, -0.003
109	21.600, -0.000	21.600, -0.001	21.600, -0.002	21.600, -0.001	21.600, -0.002
110	21.800, -0.000	21.800, -0.001	21.800, -0.002	21.800, -0.001	21.800, -0.002
111	22.000, -0.000	22.000, -0.001	22.000, -0.002	22.000, -0.001	22.000, -0.002
112	22.200, -0.000	22.200, -0.001	22.200, -0.002	22.200, -0.000	22.200, -0.002
113	22.400, -0.000	22.400, -0.001	22.400, -0.002	22.400, -0.000	22.400, -0.001
114	22.600, -0.000	22.600, -0.001	22.600, -0.001	22.600, 0.000	22.600, -0.001
115	22.800, -0.000	22.800, -0.001	22.800, -0.001	22.800, 0.000	22.800, -0.001
116	23.000, -0.001	23.000, -0.001	23.000, -0.001	23.000, 0.000	23.000, -0.001
117	23.200, -0.001	23.200, -0.001	23.200, -0.001	23.200, 0.000	23.200, -0.001
118	23.400, -0.001	23.400, -0.001	23.400, -0.001	23.400, 0.000	23.400, -0.001
119	23.600, -0.001	23.600, -0.001	23.600, -0.001	23.600, 0.000	23.600, -0.000
120	23.800, -0.001	23.800, -0.000	23.800, -0.001	23.800, -0.000	23.800, -0.000
121	24.000, -0.002	24.000, -0.000	24.000, -0.001	24.000, -0.000	24.000, -0.001
122	24.200, -0.002	24.200, 0.000	24.200, -0.001	24.200, -0.000	24.200, -0.001
123	24.400, -0.002	24.400, 0.000	24.400, -0.001	24.400, -0.000	24.400, -0.001
124	24.600, -0.002	24.600, 0.000	24.600, -0.001	24.600, -0.001	24.600, -0.001
125	24.800, -0.002	24.800, 0.000	24.800, -0.001	24.800, -0.001	24.800, -0.001
126	25.000, -0.002	25.000, 0.000	25.000, -0.002	25.000, -0.001	25.000, -0.001
127	25.200, -0.002	25.200, 0.000	25.200, -0.002	25.200, -0.001	25.200, -0.001
128	25.400, -0.001	25.400, 0.000	25.400, -0.002	25.400, -0.001	25.400, -0.002
129	25.600, -0.001	25.600, 0.000	25.600, -0.002	25.600, -0.001	25.600, -0.002
130	25.800, -0.001	25.800, 0.000	25.800, -0.001	25.800, -0.001	25.800, -0.002
131	26.000, -0.001	26.000, 0.000	26.000, -0.001	26.000, -0.001	26.000, -0.002
132	26.200, -0.000	26.200, -0.000	26.200, -0.001	26.200, -0.001	26.200, -0.002
133	26.400, -0.000	26.400, -0.000	26.400, -0.001	26.400, -0.001	26.400, -0.002
134	26.600, -0.000	26.600, -0.000	26.600, -0.000	26.600, -0.001	26.600, -0.002
135	26.800, -0.000	26.800, -0.000	26.800, 0.000	26.800, -0.001	26.800, -0.001
136	27.000, -0.001	27.000, -0.000	27.000, 0.001	27.000, -0.001	27.000, -0.001
137	27.200, -0.001	27.200, -0.000	27.200, 0.001	27.200, -0.001	27.200, -0.001
138	27.400, -0.001	27.400, -0.000	27.400, 0.001	27.400, -0.001	27.400, -0.000
139	27.600, -0.001	27.600, -0.000	27.600, 0.001	27.600, -0.001	27.600, -0.000
140	27.800, -0.001	27.800, -0.000	27.800, 0.001	27.800, -0.001	27.800, -0.000
141	28.000, -0.001	28.000, -0.000	28.000, 0.001	28.000, -0.000	28.000, -0.000
142	28.200, -0.001	28.200, -0.000	28.200, 0.001	28.200, -0.000	28.200, 0.000
143	28.400, -0.001	28.400, -0.000	28.400, 0.001	28.400, 0.000	28.400, 0.000
144	28.600, -0.000	28.600, -0.000	28.600, 0.000	28.600, 0.000	28.600, 0.000
145	28.800, 0.000	28.800, 0.000	28.800, -0.000	28.800, 0.000	28.800, 0.000
146	29.000, 0.000	29.000, 0.000	29.000, -0.001	29.000, 0.001	29.000, 0.000
147	29.200, 0.001	29.200, 0.000	29.200, -0.001	29.200, 0.001	29.200, 0.000
148	29.400, 0.002	29.400, 0.001	29.400, -0.001	29.400, 0.001	29.400, 0.000
149	29.600, 0.002	29.600, 0.001	29.600, -0.002	29.600, 0.001	29.600, 0.000
150	29.800, 0.002	29.800, 0.001	29.800, -0.002	29.800, 0.001	29.800, 0.000
151	30.000, 0.000	30.000, 0.000	30.000, 0.000	30.000, 0.000	30.000, 0.000
152	30.200, 0.018	30.200, 0.018	30.200, 0.018	30.200, 0.020	30.200, 0.019
153	30.400, 0.039	30.400, 0.039	30.400, 0.041	30.400, 0.044	30.400, 0.041
154	30.600, 0.064	30.600, 0.064	30.600, 0.067	30.600, 0.072	30.600, 0.067
155	30.800, 0.093	30.800, 0.093	30.800, 0.096	30.800, 0.103	30.800, 0.096
156	31.000, 0.124	31.000, 0.125	31.000, 0.128	31.000, 0.138	31.000, 0.128
157	31.200, 0.158	31.200, 0.158	31.200, 0.163	31.200, 0.174	31.200, 0.162
158	31.400, 0.193	31.400, 0.194	31.400, 0.198	31.400, 0.211	31.400, 0.197
159	31.600, 0.230	31.600, 0.231	31.600, 0.235	31.600, 0.249	31.600, 0.233
160	31.800, 0.266	31.800, 0.267	31.800, 0.271	31.800, 0.286	31.800, 0.269
161	32.000, 0.301	32.000, 0.302	32.000, 0.305	32.000, 0.322	32.000, 0.302
162	32.200, 0.333	32.200, 0.335	32.200, 0.337	32.200, 0.354	32.200, 0.333
163	32.400, 0.364	32.400, 0.365	32.400, 0.367	32.400, 0.384	32.400, 0.362
164	32.600, 0.393	32.600, 0.395	32.600, 0.395	32.600, 0.412	32.600, 0.390
165	32.800, 0.422	32.800, 0.423	32.800, 0.421	32.800, 0.439	32.800, 0.416
166	33.000, 0.449	33.000, 0.449	33.000, 0.445	33.000, 0.463	33.000, 0.441
167	33.200, 0.474	33.200, 0.473	33.200, 0.468	33.200, 0.486	33.200, 0.464
168	33.400, 0.498	33.400, 0.496	33.400, 0.489	33.400, 0.507	33.400, 0.485
169	33.600, 0.520	33.600, 0.517	33.600, 0.509	33.600, 0.526	33.600, 0.504
170	33.800, 0.541	33.800, 0.537	33.800, 0.526	33.800, 0.544	33.800, 0.522
171	34.000, 0.561	34.000, 0.554	34.000, 0.543	34.000, 0.559	34.000, 0.539
172	34.200, 0.579	34.200, 0.570	34.200, 0.557	34.200, 0.574	34.200, 0.554
173	34.400, 0.595	34.400, 0.585	34.400, 0.571	34.400, 0.587	34.400, 0.568
174	34.600, 0.611	34.600, 0.599	34.600, 0.583	34.600, 0.599	34.600, 0.580
175	34.800, 0.625	34.800, 0.611	34.800, 0.594	34.800, 0.610	34.800, 0.592
176	35.000, 0.638	35.000, 0.622	35.000, 0.604	35.000, 0.619	35.000, 0.602
177	35.200, 0.649	35.200, 0.631	35.200, 0.613	35.200, 0.627	35.200, 0.612
178	35.400, 0.660	35.400, 0.640	35.400, 0.620	35.400, 0.634	35.400, 0.620
179	35.600, 0.669	35.600, 0.648	35.600, 0.627	35.600, 0.640	35.600, 0.628
180	35.800, 0.678	35.800, 0.655	35.800, 0.633	35.800, 0.645	35.800, 0.635
181	36.000, 0.686	36.000, 0.661	36.000, 0.638	36.000, 0.650	36.000, 0.642
182	36.200, 0.693	36.200, 0.666	36.200, 0.643	36.200, 0.654	36.200, 0.648
183	36.400, 0.699	36.400, 0.671	36.400, 0.647	36.400, 0.658	36.400, 0.653
184	36.600, 0.705	36.600, 0.675	36.600, 0.650	36.600, 0.661	36.600, 0.658
185	36.800, 0.710	36.800, 0.679	36.800, 0.653	36.800, 0.663	36.800, 0.662
186	37.000, 0.715	37.000, 0.682	37.000, 0.656	37.000, 0.665	37.000, 0.666
187	37.200, 0.719	37.200, 0.685	37.200, 0.659	37.200, 0.667	37.200, 0.670
188	37.400, 0.723	37.400, 0.687	37.400, 0.662	37.400, 0.669	37.400, 0.672
189	37.600, 0.726	37.600, 0.689	37.600, 0.665	37.600, 0.671	37.600, 0.675
190	37.800, 0.729	37.800, 0.691	37.800, 0.667	37.800, 0.672	37.800, 0.677
191	38.000, 0.732	38.000, 0.693	38.000, 0.668	38.000, 0.674	38.000, 0.679
192	38.200, 0.735	38.200, 0.694	38.200, 0.670	38.200, 0.674	38.200, 0.680
193	38.400, 0.737	38.400, 0.695	38.400, 0.671	38.400, 0.675	38.400, 0.682
194	38.600, 0.739	38.600, 0.697	38.600, 0.673	38.600, 0.676	38.600, 0.683
195	38.800, 0.741	38.800, 0.697	38.800, 0.674	38.800, 0.676	38.800, 0.684
196	39.000, 0.743	39.000, 0.698	39.000, 0.675	39.000, 0.677	39.000, 0.685
197	39.200, 0.744	39.200, 0.699	39.200, 0.676	39.200, 0.677	39.200, 0.686
198	39.400, 0.745	39.400, 0.700	39.400, 0.676	39.400, 0.678	39.400, 0.687
199	39.600, 0.746	39.600, 0.700	39.600, 0.677	39.600, 0.678	39.600, 0.688
200	39.800, 0.747	39.800, 0.701	39.800, 0.678	39.800, 0.678	39.800, 0.689
201	40.000, 0.748	40.000, 0.701	40.000, 0.678	40.000, 0.678	40.000, 0.689
202	40.200, 0.749	40.200, 0.702	40.200, 0.678	40.200, 0.678	40.200, 0.690
203	40.400, 0.749	40.400, 0.702	40.400, 0.679	40.400, 0.679	40.400, 0.691
204	40.600, 0.750	40.600, 0.703	40.600, 0.679	40.600, 0.679	40.600, 0.691
205	40.800, 0.750	40.800, 0.703	40.800, 0.680	40.800, 0.679	40.800, 0.692
206	41.000, 0.751	41.000, 0.703	41.000, 0.680	41.000, 0.679	41.000, 0.692
207	41.200, 0.751	41.200, 0.703	41.200, 0.680	41.200, 0.679	41.200, 0.693
208	41.400, 0.752	41.400, 0.703	41.400, 0.680	41.400, 0.679	41.400, 0.693
209	41.600, 0.752	41.600, 0.703	41.600, 0.680	41.600, 0.679	41.600, 0.694
210	41.800, 0.753	41.800, 0.703	41.800, 0.680	41.800, 0.679	41.800, 0.694
211	42.000, 0.753	42.000, 0.703	42.000, 0.680	42.000, 0.679	42.000, 0.694
212	42.200, 0.753	42.200, 0.703	42.200, 0.680	42.200, 0.678	42.200, 0.695
213	42.400, 0.753	42.400, 0.703	42.400, 0.680	42.400, 0.678	42.400, 0.695
214	42.600, 0.754	42.600, 0.703	42.600, 0.680	42.600, 0.678	42.600, 0.696
215	42.800, 0.754	42.800, 0.703	42.800, 0.680	42.800, 0.678	42.800, 0.697
216	43.000, 0.754	43.000, 0.702	43.000, 0.679	43.000, 0.678	43.000, 0.697
217	43.200, 0.754	43.200, 0.702	43.200, 0.679	43.200, 0.678	43.200, 0.697
218	43.400, 0.755	43.400, 0.702	43.400, 0.679	43.400, 0.678	43.400, 0.698
219	43.600, 0.755	43.600, 0.703	43.600, 0.679	43.600, 0.678	43.600, 0.698
220	43.800, 0.755	43.800, 0.703	43.800, 0.679	43.800, 0.678	43.800, 0.697
221	44.000, 0.755	44.000, 0.703	44.000, 0.680	44.000, 0.678	44.000, 0.697
222	44.200, 0.755	44.200, 0.703	44.200, 0.680	44.200, 0.677	44.200, 0.697
223	44.400, 0.756	44.400, 0.704	44.400, 0.680	44.400, 0.677	44.400, 0.696
224	44.600, 0.756	44.600, 0.704	44.600, 0.680	44.600, 0.677	44.600, 0.696
225	44.800, 0.756	44.800, 0.704	44.800, 0.680	44.800, 0.677	44.800, 0.695
226	45.000, 0.756	45.000, 0.704	45.000, 0.680	45.000, 0.677	45.000, 0.695
227	45.200, 0.756	45.200, 0.704	45.200, 0.680	45.200, 0.677	45.200, 0.695
228	45.400, 0.756	45.400, 0.704	45.400, 0.680	45.400, 0.677	45.400, 0.696
229	45.600, 0.756	45.600, 0.704	45.600, 0.680	45.600, 0.677	45.600, 0.696
230	45.800, 0.756	45.800, 0.704	45.800, 0.680	45.800, 0.677	45.800, 0.696
231	46.000, 0.756	46.000, 0.704	46.000, 0.679	46.000, 0.677	46.000, 0.696
232	46.200, 0.757	46.200, 0.704	46.200, 0.679	46.200, 0.677	46.200, 0.696
233	46.400, 0.757	46.400, 0.703	46.400, 0.679	46.400, 0.677	46.400, 0.696
234	46.600, 0.757	46.600, 0.703	46.600, 0.678	46.600, 0.677	46.600, 0.697
235	46.800, 0.758	46.800, 0.702	46.800, 0.678	46.800, 0.676	46.800, 0.697
236	47.000, 0.758	47.000, 0.702	47.000, 0.677	47.000, 0.676	47.000, 0.697
237	47.200, 0.758	47.200, 0.702	47.200, 0.677	47.200, 0.676	47.200, 0.697
238	47.400, 0.759	47.400, 0.701	47.400, 0.676	47.400, 0.675	47.400, 0.697
239	47.600, 0.759	47.600, 0.701	47.600, 0.676	47.600, 0.675	47.600, 0.697
240	47.800, 0.760	47.800, 0.701	47.800, 0.676	47.800, 0.675	47.800, 0.697
241	48.000, 0.760	48.000, 0.701	48.000, 0.676	48.000, 0.674	48.000, 0.696
242	48.200, 0.760	48.200, 0.700	48.200, 0.676	48.200, 0.674	48.200, 0.696
243	48.400, 0.761	48.400, 0.700	48.400, 0.676	48.400, 0.674	48.400, 0.696
244	48.600, 0.761	48.600, 0.700	48.600, 0.677	48.600, 0.674	48.600, 0.696
245	48.800, 0.761	48.800, 0.700	48.800, 0.677	48.800, 0.674	48.800, 0.696
246	49.000, 0.761	49.000, 0.699	49.000, 0.677	49.000, 0.674	49.000, 0.696
247	49.200, 0.761	49.200, 0.699	49.200, 0.677	49.200, 0.674	49.200, 0.696
248	49.400, 0.760	49.400, 0.699	49.400, 0.677	49.400, 0.674	49.400, 0.695
249	49.600, 0.760	49.600, 0.699	49.600, 0.677	49.600, 0.674	49.600, 0.695
250	49.800, 0.760	49.800, 0.699	49.800, 0.677	49.800, 0.674	49.800, 0.695
251	50.000, 0.760	50.000, 0.699	50.000, 0.676	50.000, 0.674	50.000, 0.696
252	50.200, 0.760	50.200, 0.699	50.200, 0.676	50.200, 0.673	50.200, 0.696
253	50.400, 0.760	50.400, 0.699	50.400, 0.676	50.400, 0.673	50.400, 0.696
254	50.600, 0.760	50.600, 0.699	50.600, 0.676	50.600, 0.673	50.600, 0.696
255	50.800, 0.760	50.800, 0.699	50.800, 0.675	50.800, 0.673	50.800, 0.696
256	51.000, 0.760	51.000, 0.699	51.000, 0.675	51.000, 0.673	51.000, 0.696
257	51.200, 0.760	51.200, 0.699	51.200, 0.675	51.200, 0.673	51.200, 0.696
258	51.400, 0.760	51.400, 0.699	51.400, 0.675	51.400, 0.673	51.400, 0.696
259	51.600, 0.760	51.600, 0.699	51.600, 0.675	51.600, 0.672	51.600, 0.697
260	51.800, 0.760	51.800, 0.699	51.800, 0.675	51.800, 0.672	51.800, 0.697
261	52.000, 0.760	52.000, 0.699	52.000, 0.675	52.000, 0.672	52.000, 0.697
262	52.200, 0.760	52.200, 0.699	52.200, 0.675	52.200, 0.672	52.200, 0.696
263	52.400, 0.760	52.400, 0.699	52.400, 0.675	52.400, 0.671	52.400, 0.696
264	52.600, 0.759	52.600, 0.699	52.600, 0.674	52.600, 0.671	52.600, 0.695
265	52.800, 0.759	52.800, 0.698	52.800, 0.674	52.800, 0.671	52.800, 0.695
266	53.000, 0.759	53.000, 0.698	53.000, 0.674	53.000, 0.671	53.000, 0.694
267	53.200, 0.759	53.200, 0.698	53.200, 0.673	53.200, 0.671	53.200, 0.694
268	53.400, 0.759	53.400, 0.698	53.400, 0.673	53.400, 0.670	53.400, 0.694
269	53.600, 0.758	53.600, 0.698	53.600, 0.673	53.600, 0.670	53.600, 0.694
270	53.800, 0.758	53.800, 0.697	53.800, 0.672	53.800, 0.670	53.800, 0.693
271	54.000, 0.758	54.000, 0.697	54.000, 0.672	54.000, 0.670	54.000, 0.693
272	54.200, 0.758	54.200, 0.697	54.200, 0.671	54.200, 0.670	54.200, 0.693
273	54.400, 0.758	54.400, 0.697	54.400, 0.671	54.400, 0.670	54.400, 0.694
274	54.600, 0.758	54.600, 0.697	54.600, 0.671	54.600, 0.670	54.600, 0.694
275	54.800, 0.758	54.800, 0.697	54.800, 0.670	54.800, 0.670	54.800, 0.694
276	55.000, 0.758	55.000, 0.697	55.000, 0.670	55.000, 0.670	55.000, 0.694
277	55.200, 0.758	55.200, 0.697	55.200, 0.670	55.200, 0.670	55.200, 0.694
278	55.400, 0.758	55.400, 0.696	55.400, 0.670	55.400, 0.669	55.400, 0.695
279	55.600, 0.758	55.600, 0.696	55.600, 0.670	55.600, 0.669	55.600, 0.695
280	55.800, 0.759	55.800, 0.696	55.800, 0.670	55.800, 0.669	55.800, 0.695
281	56.000, 0.759	56.000, 0.696	56.000, 0.670	56.000, 0.669	56.000, 0.695
282	56.200, 0.759	56.200, 0.696	56.200, 0.670	56.200, 0.669	56.200, 0.695
283	56.400, 0.759	56.400, 0.695	56.400, 0.670	56.400, 0.668	56.400, 0.695
284	56.600, 0.759	56.600, 0.695	56.600, 0.670	56.600, 0.668	56.600, 0.695
285	56.800, 0.759	56.800, 0.695	56.800, 0.670	56.800, 0.668	56.800, 0.695
286	57.000, 0.759	57.000, 0.695	57.000, 0.670	57.000, 0.667	57.000, 0.694
287	57.200, 0.759	57.200, 0.695	57.200, 0.670	57.200, 0.667	57.200, 0.694
288	57.400, 0.759	57.400, 0.695	57.400, 0.670	57.400, 0.667	57.400, 0.694
289	57.600, 0.758	57.600, 0.695	57.600, 0.670	57.600, 0.667	57.600, 0.694
290	57.800, 0.758	57.800, 0.695	57.800, 0.670	57.800, 0.667	57.800, 0.693
291	58.000, 0.758	58.000, 0.695	58.000, 0.670	58.000, 0.667	58.000, 0.693
292	58.200, 0.758	58.200, 0.695	58.200, 0.670	58.200, 0.667	58.200, 0.693
293	58.400, 0.758	58.400, 0.695	58.400, 0.669	58.400, 0.667	58.400, 0.693
294	58.600, 0.758	58.600, 0.695	58.600, 0.669	58.600, 0.666	58.600, 0.693
295	58.800, 0.758	58.800, 0.695	58.800, 0.668	58.800, 0.666	58.800, 0.693
296	59.000, 0.758	59.000, 0.695	59.000, 0.668	59.000, 0.666	59.000, 0.693
297	59.200, 0.758	59.200, 0.695	59.200, 0.668	59.200, 0.666	59.200, 0.694
298	59.400, 0.758	59.400, 0.695	59.400, 0.668	59.400, 0.666	59.400, 0.694
299	59.600, 0.757	59.600, 0.695	59.600, 0.668	59.600, 0.666	59.600, 0.694
300	59.800, 0.757	59.800, 0.695	59.800, 0.668	59.800, 0.666	59.800, 0.694
301	60.000, 0.757	60.000, 0.695	60.000, 0.668	60.000, 0.666	60.000, 0.694
302	60.200, 0.757	60.200, 0.694	60.200, 0.668	60.200, 0.666	60.200, 0.694
303	60.400, 0.757	60.400, 0.695	60.400, 0.669	60.400, 0.665	60.400, 0.694
304	60.600, 0.757	60.600, 0.695	60.600, 0.669	60.600, 0.665	60.600, 0.694
305	60.800, 0.757	60.800, 0.695	60.800, 0.669	60.800, 0.665	60.800, 0.695
306	61.000, 0.757	61.000, 0.695	61.000, 0.669	61.000, 0.664	61.000, 0.694
307	61.200, 0.757	61.200, 0.695	61.200, 0.669	61.200, 0.664	61.200, 0.694
308	61.400, 0.757	61.400, 0.695	61.400, 0.669	61.400, 0.664	61.400, 0.694
309	61.600, 0.757	61.600, 0.695	61.600, 0.668	61.600, 0.664	61.600, 0.694
310	61.800, 0.757	61.800, 0.695	61.800, 0.668	61.800, 0.663	61.800, 0.694
311	62.000, 0.757	62.000, 0.695	62.000, 0.668	62.000, 0.663	62.000, 0.693
312	62.200, 0.757	62.200, 0.695	62.200, 0.667	62.200, 0.663	62.200, 0.693
313	62.400, 0.757	62.400, 0.695	62.400, 0.667	62.400, 0.663	62.400, 0.693
314	62.600, 0.757	62.600, 0.694	62.600, 0.667	62.600, 0.662	62.600, 0.693
315	62.800, 0.757	62.800, 0.694	62.800, 0.667	62.800, 0.662	62.800, 0.693
316	63.000, 0.757	63.000, 0.694	63.000, 0.666	63.000, 0.662	63.000, 0.693
317	63.200, 0.757	63.200, 0.694	63.200, 0.666	63.200, 0.662	63.200, 0.693
318	63.400, 0.757	63.400, 0.693	63.400, 0.666	63.400, 0.662	63.400, 0.693
319	63.600, 0.757	63.600, 0.693	63.600, 0.666	63.600, 0.662	63.600, 0.693
320	63.800, 0.757	63.800, 0.693	63.800, 0.666	63.800, 0.662	63.800, 0.693
321	64.000, 0.757	64.000, 0.693	64.000, 0.666	64.000, 0.662	64.000, 0.693
322	64.200, 0.757	64.200, 0.692	64.200, 0.666	64.200, 0.662	64.200, 0.693
323	64.400, 0.757	64.400, 0.692	64.400, 0.665	64.400, 0.662	64.400, 0.693
324	64.600, 0.757	64.600, 0.692	64.600, 0.665	64.600, 0.662	64.600, 0.693
325	64.800, 0.757	64.800, 0.692	64.800, 0.664	64.800, 0.662	64.800, 0.693
326	65.000, 0.756	65.000, 0.692	65.000, 0.664	65.000, 0.662	65.000, 0.693
327	65.200, 0.756	65.200, 0.692	65.200, 0.663	65.200, 0.662	65.200, 0.693
328	65.400, 0.756	65.400, 0.692	65.400, 0.662	65.400, 0.662	65.400, 0.693
329	65.600, 0.756	65.600, 0.692	65.600, 0.662	65.600, 0.662	65.600, 0.692
330	65.800, 0.756	65.800, 0.692	65.800, 0.662	65.800, 0.663	65.800, 0.692
331	66.000, 0.756	66.000, 0.692	66.000, 0.662	66.000, 0.663	66.000, 0.692
332	66.200, 0.756	66.200, 0.692	66.200, 0.662	66.200, 0.663	66.200, 0.692
333	66.400, 0.756	66.400, 0.692	66.400, 0.662	66.400, 0.663	66.400, 0.692
334	66.600, 0.756	66.600, 0.692	66.600, 0.662	66.600, 0.662	66.600, 0.692
335	66.800, 0.756	66.800, 0.691	66.800, 0.662	66.800, 0.662	66.800, 0.692
336	67.000, 0.756	67.000, 0.691	67.000, 0.662	67.000, 0.662	67.000, 0.692
337	67.200, 0.756	67.200, 0.691	67.200, 0.662	67.200, 0.662	67.200, 0.692
338	67.400, 0.756	67.400, 0.691	67.400, 0.662	67.400, 0.662	67.400, 0.691
339	67.600, 0.756	67.600, 0.691	67.600, 0.662	67.600, 0.662	67.600, 0.691
340	67.800, 0.757	67.800, 0.691	67.800, 0.662	67.800, 0.662	67.800, 0.691
341	68.000, 0.757	68.000, 0.690	68.000, 0.662	68.000, 0.662	68.000, 0.690
342	68.200, 0.757	68.200, 0.690	68.200, 0.662	68.200, 0.662	68.200, 0.690
343	68.400, 0.757	68.400, 0.690	68.400, 0.661	68.400, 0.662	68.400, 0.690
344	68.600, 0.757	68.600, 0.689	68.600, 0.661	68.600, 0.661	68.600, 0.690
345	68.800, 0.757	68.800, 0.689	68.800, 0.661	68.800, 0.661	68.800, 0.690
346	69.000, 0.757	69.000, 0.689	69.000, 0.660	69.000, 0.661	69.000, 0.690
347	69.200, 0.757	69.200, 0.689	69.200, 0.660	69.200, 0.661	69.200, 0.690
348	69.400, 0.757	69.400, 0.688	69.400, 0.660	69.400, 0.661	69.400, 0.690
349	69.600, 0.757	69.600, 0.688	69.600, 0.660	69.600, 0.661	69.600, 0.690
350	69.800, 0.757	69.800, 0.688	69.800, 0.660	69.800, 0.662	69.800, 0.690
351	70.000, 0.756	70.000, 0.688	70.000, 0.660	70.000, 0.662	70.000, 0.690
352	70.200, 0.756	70.200, 0.688	70.200, 0.660	70.200, 0.662	70.200, 0.690
353	70.400, 0.756	70.400, 0.688	70.400, 0.660	70.400, 0.662	70.400, 0.690
354	70.600, 0.756	70.600, 0.688	70.600, 0.660	70.600, 0.662	70.600, 0.690
355	70.800, 0.756	70.800, 0.688	70.800, 0.660	70.800, 0.661	70.800, 0.690
356	71.000, 0.756	71.000, 0.688	71.000, 0.661	71.000, 0.661	71.000, 0.690
357	71.200, 0.756	71.200, 0.689	71.200, 0.661	71.200, 0.661	71.200, 0.690
358	71.400, 0.756	71.400, 0.689	71.400, 0.661	71.400, 0.661	71.400, 0.690
359	71.600, 0.756	71.600, 0.690	71.600, 0.661	71.600, 0.661	71.600, 0.690
360	71.800, 0.756	71.800, 0.690	71.800, 0.661	71.800, 0.660	71.800, 0.690
361	72.000, 0.756	72.000, 0.690	72.000, 0.661	72.000, 0.660	72.000, 0.690
362	72.200, 0.756	72.200, 0.690	72.200, 0.660	72.200, 0.659	72.200, 0.689
363	72.400, 0.756	72.400, 0.690	72.400, 0.660	72.400, 0.659	72.400, 0.689
364	72.600, 0.756	72.600, 0.690	72.600, 0.659	72.600, 0.659	72.600, 0.689
365	72.800, 0.756	72.800, 0.690	72.800, 0.659	72.800, 0.659	72.800, 0.688
366	73.000, 0.756	73.000, 0.691	73.000, 0.658	73.000, 0.659	73.000, 0.688
367	73.200, 0.756	73.200, 0.691	73.200, 0.657	73.200, 0.659	73.200, 0.688
368	73.400, 0.756	73.400, 0.690	73.400, 0.657	73.400, 0.659	73.400, 0.688
369	73.600, 0.756	73.600, 0.690	73.600, 0.656	73.600, 0.659	73.600, 0.688
370	73.800, 0.756	73.800, 0.690	73.800, 0.656	73.800, 0.659	73.800, 0.688
371	74.000, 0.756	74.000, 0.689	74.000, 0.655	74.000, 0.659	74.000, 0.688
372	74.200, 0.756	74.200, 0.689	74.200, 0.655	74.200, 0.659	74.200, 0.688
373	74.400, 0.756	74.400, 0.688	74.400, 0.655	74.400, 0.659	74.400, 0.688
374	74.600, 0.756	74.600, 0.688	74.600, 0.655	74.600, 0.659	74.600, 0.688
375	74.800, 0.755	74.800, 0.688	74.800, 0.655	74.800, 0.659	74.800, 0.688
376	75.000, 0.755	75.000, 0.688	75.000, 0.655	75.000, 0.659	75.000, 0.688
377	75.200, 0.755	75.200, 0.689	75.200, 0.655	75.200, 0.659	75.200, 0.688
378	75.400, 0.755	75.400, 0.689	75.400, 0.655	75.400, 0.659	75.400, 0.689
379	75.600, 0.755	75.600, 0.689	75.600, 0.655	75.600, 0.659	75.600, 0.689
380	75.800, 0.755	75.800, 0.689	75.800, 0.655	75.800, 0.659	75.800, 0.689
381	76.000, 0.755	76.000, 0.689	76.000, 0.655	76.000, 0.659	76.000, 0.689
382	76.200, 0.755	76.200, 0.689	76.200, 0.655	76.200, 0.659	76.200, 0.689
383	76.400, 0.755	76.400, 0.689	76.400, 0.655	76.400, 0.659	76.400, 0.689
384	76.600, 0.755	76.600, 0.689	76.600, 0.655	76.600, 0.659	76.600, 0.688
385	76.800, 0.755	76.800, 0.689	76.800, 0.655	76.800, 0.659	76.800, 0.688
386	77.000, 0.755	77.000, 0.689	77.000, 0.655	77.000, 0.659	77.000, 0.688
387	77.200, 0.756	77.200, 0.688	77.200, 0.654	77.200, 0.659	77.200, 0.688
388	77.400, 0.756	77.400, 0.688	77.400, 0.654	77.400, 0.659	77.400, 0.688
389	77.600, 0.756	77.600, 0.687	77.600, 0.654	77.600, 0.659	77.600, 0.688
390	77.800, 0.756	77.800, 0.687	77.800, 0.654	77.800, 0.659	77.800, 0.688
391	78.000, 0.756	78.000, 0.686	78.000, 0.653	78.000, 0.659	78.000, 0.688
392	78.200, 0.756	78.200, 0.686	78.200, 0.653	78.200, 0.658	78.200, 0.688
393	78.400, 0.756	78.400, 0.686	78.400, 0.653	78.400, 0.658	78.400, 0.688
394	78.600, 0.755	78.600, 0.687	78.600, 0.653	78.600, 0.659	78.600, 0.687
395	78.800, 0.755	78.800, 0.687	78.800, 0.652	78.800, 0.659	78.800, 0.687
396	79.000, 0.755	79.000, 0.687	79.000, 0.652	79.000, 0.659	79.000, 0.687
397	79.200, 0.754	79.200, 0.688	79.200, 0.652	79.200, 0.659	79.200, 0.687
398	79.400, 0.754	79.400, 0.688	79.400, 0.651	79.400, 0.659	79.400, 0.687
399	79.600, 0.754	79.600, 0.688	79.600, 0.651	79.600, 0.659	79.600, 0.687
400	79.800, 0.753	79.800, 0.688	79.800, 0.651	79.800, 0.659	79.800, 0.687
401	80.000, 0.753	80.000, 0.689	80.000, 0.651	80.000, 0.659	80.000, 0.686
402	80.200, 0.753	80.200, 0.689	80.200, 0.651	80.200, 0.659	80.200, 0.686
403	80.400, 0.752	80.400, 0.689	80.400, 0.651	80.400, 0.659	80.400, 0.686
404	80.600, 0.752	80.600, 0.689	80.600, 0.651	80.600, 0.659	80.600, 0.686
405	80.800, 0.753	80.800, 0.689	80.800, 0.651	80.800, 0.659	80.800, 0.686
406	81.000, 0.753	81.000, 0.688	81.000, 0.651	81.000, 0.659	81.000, 0.686
407	81.200, 0.753	81.200, 0.688	81.200, 0.651	81.200, 0.659	81.200, 0.686
408	81.400, 0.753	81.400, 0.687	81.400, 0.651	81.400, 0.659	81.400, 0.686
409	81.600, 0.754	81.600, 0.687	81.600, 0.651	81.600, 0.658	81.600, 0.686
410	81.800, 0.754	81.800, 0.687	81.800, 0.651	81.800, 0.658	81.800, 0.686
411	82.000, 0.754	82.000, 0.686	82.000, 0.651	82.000, 0.659	82.000, 0.687
412	82.200, 0.754	82.200, 0.686	82.200, 0.651	82.200, 0.659	82.200, 0.687
413	82.400, 0.754	82.400, 0.686	82.400, 0.651	82.400, 0.659	82.400, 0.687
414	82.600, 0.753	82.600, 0.686	82.600, 0.650	82.600, 0.659	82.600, 0.687
415	82.800, 0.753	82.800, 0.686	82.800, 0.650	82.800, 0.659	82.800, 0.686
416	83.000, 0.753	83.000, 0.686	83.000, 0.650	83.000, 0.659	83.000, 0.686
417	83.200, 0.753	83.200, 0.686	83.200, 0.650	83.200, 0.659	83.200, 0.686
418	83.400, 0.753	83.400, 0.687	83.400, 0.649	83.400, 0.659	83.400, 0.686
419	83.600, 0.753	83.600, 0.687	83.600, 0.649	83.600, 0.659	83.600, 0.686
420	83.800, 0.753	83.800, 0.687	83.800, 0.649	83.800, 0.659	83.800, 0.686
421	84.000, 0.753	84.000, 0.687	84.000, 0.649	84.000, 0.659	84.000, 0.686
422	84.200, 0.753	84.200, 0.687	84.200, 0.649	84.200, 0.659	84.200, 0.686
423	84.400, 0.753	84.400, 0.688	84.400, 0.649	84.400, 0.658	84.400, 0.686
424	84.600, 0.753	84.600, 0.687	84.600, 0.649	84.600, 0.658	84.600, 0.686
425	84.800, 0.753	84.800, 0.687	84.800, 0.649	84.800, 0.658	84.800, 0.686
426	85.000, 0.753	85.000, 0.687	85.000, 0.649	85.000, 0.657	85.000, 0.686
427	85.200, 0.753	85.200, 0.687	85.200, 0.649	85.200, 0.657	85.200, 0.686
428	85.400, 0.753	85.400, 0.686	85.400, 0.649	85.400, 0.657	85.400, 0.685
429	85.600, 0.753	85.600, 0.686	85.600, 0.649	85.600, 0.657	85.600, 0.685
430	85.800, 0.753	85.800, 0.686	85.800, 0.649	85.800, 0.657	85.800, 0.685
431	86.000, 0.753	86.000, 0.686	86.000, 0.649	86.000, 0.657	86.000, 0.685
432	86.200, 0.752	86.200, 0.686	86.200, 0.649	86.200, 0.657	86.200, 0.685
433	86.400, 0.752	86.400, 0.686	86.400, 0.649	86.400, 0.657	86.400, 0.684
434	86.600, 0.752	86.600, 0.686	86.600, 0.649	86.600, 0.657	86.600, 0.684
435	86.800, 0.752	86.800, 0.686	86.800, 0.649	86.800, 0.657	86.800, 0.684
436	87.000, 0.752	87.000, 0.686	87.000, 0.649	87.000, 0.657	87.000, 0.684
437	87.200, 0.752	87.200, 0.686	87.200, 0.648	87.200, 0.657	87.200, 0.684
438	87.400, 0.752	87.400, 0.686	87.400, 0.648	87.400, 0.657	87.400, 0.684
439	87.600, 0.752	87.600, 0.686	87.600, 0.648	87.600, 0.657	87.600, 0.684
440	87.800, 0.752	87.800, 0.686	87.800, 0.648	87.800, 0.657	87.800, 0.684
441	88.000, 0.752	88.000, 0.686	88.000, 0.648	88.000, 0.657	88.000, 0.684
442	88.200, 0.752	88.200, 0.686	88.200, 0.648	88.200, 0.657	88.200, 0.684
443	88.400, 0.752	88.400, 0.686	88.400, 0.648	88.400, 0.657	88.400, 0.684
444	88.600, 0.752	88.600, 0.686	88.600, 0.648	88.600, 0.657	88.600, 0.684
445	88.800, 0.752	88.800, 0.685	88.800, 0.648	88.800, 0.657	88.800, 0.684
446	89.000, 0.752	89.000, 0.685	89.000, 0.648	89.000, 0.657	89.000, 0.685
447	89.200, 0.752	89.200, 0.685	89.200, 0.648	89.200, 0.657	89.200, 0.685
448	89.400, 0.752	89.400, 0.684	89.400, 0.648	89.400, 0.657	89.400, 0.685
449	89.600, 0.752	89.600, 0.684	89.600, 0.648	89.600, 0.657	89.600, 0.685
450	89.800, 0.752	89.800, 0.684	89.800, 0.648	89.800, 0.656	89.800, 0.684
451	90.000, 0.752	90.000, 0.684	90.000, 0.648	90.000, 0.656	90.000, 0.684
452	90.200, 0.752	90.200, 0.684	90.200, 0.648	90.200, 0.656	90.200, 0.684
453	90.400, 0.752	90.400, 0.684	90.400, 0.648	90.400, 0.656	90.400, 0.684
454	90.600, 0.752	90.600, 0.684	90.600, 0.647	90.600, 0.656	90.600, 0.684
455	90.800, 0.752	90.800, 0.684	90.800, 0.647	90.800, 0.656	90.800, 0.684
456	91.000, 0.753	91.000, 0.684	91.000, 0.647	91.000, 0.656	91.000, 0.684
457	91.200, 0.753	91.200, 0.683	91.200, 0.646	91.200, 0.656	91.200, 0.684
458	91.400, 0.753	91.400, 0.683	91.400, 0.646	91.400, 0.656	91.400, 0.684
459	91.600, 0.752	91.600, 0.682	91.600, 0.646	91.600, 0.656	91.600, 0.684
460	91.800, 0.752	91.800, 0.682	91.800, 0.646	91.800, 0.656	91.800, 0.684
461	92.000, 0.752	92.000, 0.682	92.000, 0.646	92.000, 0.656	92.000, 0.684
462	92.200, 0.752	92.200, 0.682	92.200, 0.646	92.200, 0.656	92.200, 0.684
463	92.400, 0.752	92.400, 0.682	92.400, 0.645	92.400, 0.656	92.400, 0.684
464	92.600, 0.751	92.600, 0.682	92.600, 0.645	92.600, 0.656	92.600, 0.684
465	92.800, 0.751	92.800, 0.682	92.800, 0.645	92.800, 0.656	92.800, 0.684
466	93.000, 0.751	93.000, 0.682	93.000, 0.645	93.000, 0.655	93.000, 0.684
467	93.200, 0.751	93.200, 0.682	93.200, 0.645	93.200, 0.655	93.200, 0.684
468	93.400, 0.751	93.400, 0.682	93.400, 0.645	93.400, 0.655	93.400, 0.684
469	93.600, 0.751	93.600, 0.682	93.600, 0.645	93.600, 0.655	93.600, 0.684
470	93.800, 0.751	93.800, 0.682	93.800, 0.645	93.800, 0.654	93.800, 0.684
471	94.000, 0.751	94.000, 0.682	94.000, 0.645	94.000, 0.654	94.000, 0.684
472	94.200, 0.751	94.200, 0.682	94.200, 0.645	94.200, 0.654	94.200, 0.684
473	94.400, 0.751	94.400, 0.682	94.400, 0.644	94.400, 0.654	94.400, 0.684
474	94.600, 0.751	94.600, 0.682	94.600, 0.644	94.600, 0.654	94.600, 0.684
475	94.800, 0.751	94.800, 0.682	94.800, 0.644	94.800, 0.655	94.800, 0.684
476	95.000, 0.751	95.000, 0.682	95.000, 0.644	95.000, 0.655	95.000, 0.684
477	95.200, 0.751	95.200, 0.681	95.200, 0.644	95.200, 0.655	95.200, 0.683
478	95.400, 0.751	95.400, 0.681	95.400, 0.644	95.400, 0.655	95.400, 0.683
479	95.600, 0.751	95.600, 0.681	95.600, 0.644	95.600, 0.655	95.600, 0.683
480	95.800, 0.751	95.800, 0.681	95.800, 0.644	95.800, 0.655	95.800, 0.683
481	96.000, 0.751	96.000, 0.681	96.000, 0.644	96.000, 0.655	96.000, 0.683
482	96.200, 0.751	96.200, 0.681	96.200, 0.644	96.200, 0.655	96.200, 0.683
483	96.400, 0.751	96.400, 0.681	96.400, 0.644	96.400, 0.655	96.400, 0.683
484	96.600, 0.750	96.600, 0.681	96.600, 0.644	96.600, 0.655	96.600, 0.682
485	96.800, 0.750	96.800, 0.681	96.800, 0.644	96.800, 0.655	96.800, 0.682
486	97.000, 0.750	97.000, 0.681	97.000, 0.644	97.000, 0.655	97.000, 0.682
487	97.200, 0.750	97.200, 0.681	97.200, 0.644	97.200, 0.655	97.200, 0.682
488	97.400, 0.750	97.400, 0.681	97.400, 0.644	97.400, 0.655	97.400, 0.682
489	97.600, 0.750	97.600, 0.681	97.600, 0.644	97.600, 0.655	97.600, 0.682
490	97.800, 0.750	97.800, 0.681	97.800, 0.644	97.800, 0.655	97.800, 0.682
491	98.000, 0.750	98.000, 0.681	98.000, 0.644	98.000, 0.654	98.000, 0.682
492	98.200, 0.750	98.200, 0.681	98.200, 0.644	98.200, 0.654	98.200, 0.682
493	98.400, 0.750	98.400, 0.681	98.400, 0.644	98.400, 0.654	98.400, 0.682
494	98.600, 0.750	98.600, 0.681	98.600, 0.644	98.600, 0.654	98.600, 0.681
495	98.800, 0.750	98.800, 0.680	98.800, 0.644	98.800, 0.654	98.800, 0.681
496	99.000, 0.750	99.000, 0.680	99.000, 0.644	99.000, 0.654	99.000, 0.681
497	99.200, 0.750	99.200, 0.680	99.200, 0.645	99.200, 0.654	99.200, 0.681
498	99.400, 0.750	99.400, 0.680	99.400, 0.645	99.400, 0.654	99.400, 0.681
499	99.600, 0.749	99.600, 0.680	99.600, 0.645	99.600, 0.654	99.600, 0.680
500	99.800, 0.749	99.800, 0.680	99.800, 0.645	99.800, 0.654	99.800, 0.680
501	100.000, 0.749	100.000, 0.680	100.000, 0.645	100.000, 0.654	100.000, 0.680
502	100.200, 0.749	100.200, 0.680	100.200, 0.645	100.200, 0.654	100.200, 0.680
503	100.400, 0.749	100.400, 0.679	100.400, 0.645	100.400, 0.654	100.400, 0.680
504	100.600, 0.749	100.600, 0.679	100.600, 0.645	100.600, 0.655	100.600, 0.680
505	100.800, 0.749	100.800, 0.679	100.800, 0.645	100.800, 0.655	100.800, 0.680
506	101.000, 0.749	101.000, 0.679	101.000, 0.645	101.000, 0.655	101.000, 0.680
507	101.200, 0.749	101.200, 0.679	101.200, 0.645	101.200, 0.655	101.200, 0.680
508	101.400, 0.750	101.400, 0.679	101.400, 0.644	101.400, 0.655	101.400, 0.680
509	101.600, 0.750	101.600, 0.679	101.600, 0.644	101.600, 0.655	101.600, 0.680
510	101.800, 0.751	101.800, 0.679	101.800, 0.644	101.800, 0.655	101.800, 0.680
511	102.000, 0.751	102.000, 0.679	102.000, 0.644	102.000, 0.655	102.000, 0.680
512	102.200, 0.751	102.200, 0.679	102.200, 0.643	102.200, 0.655	102.200, 0.680
513	102.400, 0.751	102.400, 0.679	102.400, 0.643	102.400, 0.655	102.400, 0.680
514	102.600, 0.751	102.600, 0.679	102.600, 0.643	102.600, 0.655	102.600, 0.680
515	102.800, 0.751	102.800, 0.678	102.800, 0.643	102.800, 0.654	102.800, 0.680
516	103.000, 0.751	103.000, 0.678	103.000, 0.643	103.000, 0.654	103.000, 0.679
517	103.200, 0.751	103.200, 0.678	103.200, 0.643	103.200, 0.653	103.200, 0.679
518	103.400, 0.751	103.400, 0.678	103.400, 0.643	103.400, 0.653	103.400, 0.679
519	103.600, 0.750	103.600, 0.678	103.600, 0.643	103.600, 0.652	103.600, 0.679
520	103.800, 0.750	103.800, 0.678	103.800, 0.643	103.800, 0.652	103.800, 0.679
521	104.000, 0.750	104.000, 0.678	104.000, 0.643	104.000, 0.651	104.000, 0.679
522	104.200, 0.750	104.200, 0.678	104.200, 0.643	104.200, 0.651	104.200, 0.679
523	104.400, 0.749	104.400, 0.678	104.400, 0.642	104.400, 0.651	104.400, 0.680
524	104.600, 0.749	104.600, 0.678	104.600, 0.642	104.600, 0.651	104.600, 0.680
525	104.800, 0.749	104.800, 0.678	104.800, 0.642	104.800, 0.651	104.800, 0.680
526	105.000, 0.749	105.000, 0.678	105.000, 0.642	105.000, 0.652	105.000, 0.680
527	105.200, 0.748	105.200, 0.678	105.200, 0.642	105.200, 0.652	105.200, 0.680
528	105.400, 0.748	105.400, 0.678	105.400, 0.642	105.400, 0.652	105.400, 0.680
529	105.600, 0.748	105.600, 0.678	105.600, 0.642	105.600, 0.652	105.600, 0.679
530	105.800, 0.748	105.800, 0.678	105.800, 0.642	105.800, 0.652	105.800, 0.679
531	106.000, 0.748	106.000, 0.678	106.000, 0.643	106.000, 0.652	106.000, 0.679
532	106.200, 0.748	106.200, 0.678	106.200, 0.642	106.200, 0.653	106.200, 0.679
533	106.400, 0.748	106.400, 0.678	106.400, 0.643	106.400, 0.653	106.400, 0.678
534	106.600, 0.748	106.600, 0.678	106.600, 0.643	106.600, 0.653	106.600, 0.678
535	106.800, 0.748	106.800, 0.677	106.800, 0.642	106.800, 0.653	106.800, 0.678
536	107.000, 0.748	107.000, 0.677	107.000, 0.642	107.000, 0.653	107.000, 0.677
537	107.200, 0.749	107.200, 0.677	107.200, 0.642	107.200, 0.653	107.200, 0.678
538	107.400, 0.749	107.400, 0.677	107.400, 0.642	107.400, 0.652	107.400, 0.678
539	107.600, 0.749	107.600, 0.677	107.600, 0.642	107.600, 0.652	107.600, 0.678
540	107.800, 0.749	107.800, 0.677	107.800, 0.642	107.800, 0.651	107.800, 0.678
541	108.000, 0.749	108.000, 0.677	108.000, 0.641	108.000, 0.651	108.000, 0.678
542	108.200, 0.749	108.200, 0.677	108.200, 0.641	108.200, 0.651	108.200, 0.678
543	108.400, 0.749	108.400, 0.677	108.400, 0.640	108.400, 0.651	108.400, 0.678
544	108.600, 0.749	108.600, 0.677	108.600, 0.640	108.600, 0.651	108.600, 0.678
545	108.800, 0.749	108.800, 0.677	108.800, 0.640	108.800, 0.650	108.800, 0.679
546	109.000, 0.749	109.000, 0.677	109.000, 0.640	109.000, 0.650	109.000, 0.678
547	109.200, 0.749	109.200, 0.677	109.200, 0.640	109.200, 0.650	109.200, 0.678
548	109.400, 0.749	109.400, 0.677	109.400, 0.640	109.400, 0.650	109.400, 0.678
549	109.600, 0.749	109.600, 0.677	109.600, 0.640	109.600, 0.650	109.600, 0.678
550	109.800, 0.749	109.800, 0.677	109.800, 0.640	109.800, 0.651	109.800, 0.678
551	110.000, 0.749	110.000, 0.677	110.000, 0.640	110.000, 0.651	110.000, 0.677
552	110.200, 0.749	110.200, 0.676	110.200, 0.640	110.200, 0.651	110.200, 0.677
553	110.400, 0.749	110.400, 0.676	110.400, 0.640	110.400, 0.651	110.400, 0.677
554	110.600, 0.748	110.600, 0.676	110.600, 0.640	110.600, 0.652	110.600, 0.677
555	110.800, 0.748	110.800, 0.676	110.800, 0.640	110.800, 0.652	110.800, 0.677
556	111.000, 0.748	111.000, 0.676	111.000, 0.640	111.000, 0.652	111.000, 0.677
557	111.200, 0.748	111.200, 0.676	111.200, 0.640	111.200, 0.652	111.200, 0.677
558	111.400, 0.748	111.400, 0.676	111.400, 0.639	111.400, 0.652	111.400, 0.677
559	111.600, 0.747	111.600, 0.676	111.600, 0.639	111.600, 0.652	111.600, 0.677
560	111.800, 0.747	111.800, 0.676	111.800, 0.639	111.800, 0.652	111.800, 0.678
561	112.000, 0.747	112.000, 0.676	112.000, 0.639	112.000, 0.652	112.000, 0.678
562	112.200, 0.747	112.200, 0.676	112.200, 0.639	112.200, 0.652	112.200, 0.677
563	112.400, 0.747	112.400, 0.676	112.400, 0.639	112.400, 0.651	112.400, 0.677
564	112.600, 0.747	112.600, 0.676	112.600, 0.639	112.600, 0.651	112.600, 0.677
565	112.800, 0.747	112.800, 0.676	112.800, 0.638	112.800, 0.651	112.800, 0.676
566	113.000, 0.746	113.000, 0.676	113.000, 0.639	113.000, 0.651	113.000, 0.676
567	113.200, 0.746	113.200, 0.675	113.200, 0.639	113.200, 0.651	113.200, 0.676
568	113.400, 0.746	113.400, 0.675	113.400, 0.639	113.400, 0.651	113.400, 0.676
569	113.600, 0.746	113.600, 0.675	113.600, 0.639	113.600, 0.651	113.600, 0.676
570	113.800, 0.746	113.800, 0.675	113.800, 0.639	113.800, 0.651	113.800, 0.676
571	114.000, 0.746	114.000, 0.675	114.000, 0.639	114.000, 0.651	114.000, 0.676
572	114.200, 0.746	114.200, 0.675	114.200, 0.639	114.200, 0.651	114.200, 0.676
573	114.400, 0.747	114.400, 0.674	114.400, 0.638	114.400, 0.652	114.400, 0.676
574	114.600, 0.747	114.600, 0.674	114.600, 0.638	114.600, 0.652	114.600, 0.676
575	114.800, 0.747	114.800, 0.674	114.800, 0.638	114.800, 0.652	114.800, 0.677
576	115.000, 0.747	115.000, 0.674	115.000, 0.637	115.000, 0.652	115.000, 0.677
577	115.200, 0.747	115.200, 0.674	115.200, 0.637	115.200, 0.652	115.200, 0.677
578	115.400, 0.747	115.400, 0.674	115.400, 0.637	115.400, 0.652	115.400, 0.677
579	115.600, 0.748	115.600, 0.674	115.600, 0.636	115.600, 0.652	115.600, 0.677
580	115.800, 0.748	115.800, 0.674	115.800, 0.636	115.800, 0.652	115.800, 0.677
581	116.000, 0.748	116.000, 0.674	116.000, 0.636	116.000, 0.651	116.000, 0.677
582	116.200, 0.748	116.200, 0.674	116.200, 0.636	116.200, 0.651	116.200, 0.676
583	116.400, 0.748	116.400, 0.674	116.400, 0.636	116.400, 0.651	116.400, 0.676
584	116.600, 0.748	116.600, 0.674	116.600, 0.636	116.600, 0.651	116.600, 0.675
585	116.800, 0.747	116.800, 0.674	116.800, 0.636	116.800, 0.651	116.800, 0.675
586	117.000, 0.747	117.000, 0.674	117.000, 0.636	117.000, 0.650	117.000, 0.675
587	117.200, 0.747	117.200, 0.674	117.200, 0.636	117.200, 0.650	117.200, 0.674
588	117.400, 0.748	117.400, 0.674	117.400, 0.636	117.400, 0.650	117.400, 0.674
589	117.600, 0.748	117.600, 0.674	117.600, 0.636	117.600, 0.649	117.600, 0.674
590	117.800, 0.748	117.800, 0.674	117.800, 0.636	117.800, 0.649	117.800, 0.673
591	118.000, 0.748	118.000, 0.673	118.000, 0.636	118.000, 0.649	118.000, 0.673
592	118.200, 0.748	118.200, 0.673	118.200, 0.636	118.200, 0.649	118.200, 0.673
593	118.400, 0.748	118.400, 0.673	118.400, 0.636	118.400, 0.649	118.400, 0.673
594	118.600, 0.748	118.600, 0.673	118.600, 0.636	118.600, 0.648	118.600, 0.673
595	118.800, 0.748	118.800, 0.673	118.800, 0.635	118.800, 0.648	118.800, 0.673
596	119.000, 0.748	119.000, 0.673	119.000, 0.635	119.000, 0.648	119.000, 0.674
597	119.200, 0.748	119.200, 0.672	119.200, 0.635	119.200, 0.648	119.200, 0.674
598	119.400, 0.748	119.400, 0.672	119.400, 0.635	119.400, 0.648	119.400, 0.674
599	119.600, 0.748	119.600, 0.672	119.600, 0.634	119.600, 0.648	119.600, 0.674
600	119.800, 0.748	119.800, 0.672	119.800, 0.634	119.800, 0.648	119.800, 0.674
601	120.000, 0.747	120.000, 0.672	120.000, 0.634	120.000, 0.649	120.000, 0.674
602	120.200, 0.747	120.200, 0.671	120.200, 0.634	120.200, 0.649	120.200, 0.675
603	120.400, 0.747	120.400, 0.671	120.400, 0.634	120.400, 0.649	120.400, 0.675
604	120.600, 0.747	120.600, 0.671	120.600, 0.634	120.600, 0.649	120.600, 0.675
605	120.800, 0.747	120.800, 0.671	120.800, 0.634	120.800, 0.649	120.800, 0.675
606	121.000, 0.747	121.000, 0.671	121.000, 0.634	121.000, 0.649	121.000, 0.676
607	121.200, 0.747	121.200, 0.671	121.200, 0.634	121.200, 0.649	121.200, 0.675
608	121.400, 0.747	121.400, 0.672	121.400, 0.635	121.400, 0.649	121.400, 0.675
609	121.600, 0.747	121.600, 0.672	121.600, 0.635	121.600, 0.649	121.600, 0.675
610	121.800, 0.747	121.800, 0.672	121.800, 0.635	121.800, 0.649	121.800, 0.675
611	122.000, 0.747	122.000, 0.672	122.000, 0.635	122.000, 0.649	122.000, 0.675
612	122.200, 0.747	122.200, 0.672	122.200, 0.635	122.200, 0.649	122.200, 0.675
613	122.400, 0.747	122.400, 0.672	122.400, 0.635	122.400, 0.649	122.400, 0.675
614	122.600, 0.747	122.600, 0.672	122.600, 0.635	122.600, 0.649	122.600, 0.675
615	122.800, 0.747	122.800, 0.672	122.800, 0.635	122.800, 0.648	122.800, 0.675
616	123.000, 0.747	123.000, 0.672	123.000, 0.634	123.000, 0.648	123.000, 0.674
617	123.200, 0.747	123.200, 0.672	123.200, 0.634	123.200, 0.648	123.200, 0.674
618	123.400, 0.747	123.400, 0.672	123.400, 0.634	123.400, 0.648	123.400, 0.674
619	123.600, 0.747	123.600, 0.672	123.600, 0.633	123.600, 0.647	123.600, 0.674
620	123.800, 0.747	123.800, 0.672	123.800, 0.633	123.800, 0.647	123.800, 0.674
621	124.000, 0.746	124.000, 0.672	124.000, 0.632	124.000, 0.647	124.000, 0.673
622	124.200, 0.746	124.200, 0.672	124.200, 0.632	124.200, 0.647	124.200, 0.673
623	124.400, 0.746	124.400, 0.672	124.400, 0.632	124.400, 0.646	124.400, 0.673
624	124.600, 0.746	124.600, 0.672	124.600, 0.632	124.600, 0.646	124.600, 0.673
625	124.800, 0.746	124.800, 0.672	124.800, 0.632	124.800, 0.646	124.800, 0.673
626	125.000, 0.746	125.000, 0.672	125.000, 0.632	125.000, 0.645	125.000, 0.673
627	125.200, 0.746	125.200, 0.672	125.200, 0.632	125.200, 0.645	125.200, 0.673
628	125.400, 0.746	125.400, 0.671	125.400, 0.632	125.400, 0.645	125.400, 0.673
629	125.600, 0.746	125.600, 0.671	125.600, 0.633	125.600, 0.645	125.600, 0.673
630	125.800, 0.746	125.800, 0.671	125.800, 0.633	125.800, 0.645	125.800, 0.673
631	126.000, 0.746	126.000, 0.670	126.000, 0.633	126.000, 0.645	126.000, 0.673
632	126.200, 0.746	126.200, 0.670	126.200, 0.633	126.200, 0.645	126.200, 0.673
633	126.400, 0.746	126.400, 0.670	126.400, 0.633	126.400, 0.645	126.400, 0.673
634	126.600, 0.747	126.600, 0.670	126.600, 0.632	126.600, 0.645	126.600, 0.673
635	126.800, 0.747	126.800, 0.670	126.800, 0.632	126.800, 0.645	126.800, 0.673
636	127.000, 0.747	127.000, 0.670	127.000, 0.632	127.000, 0.645	127.000, 0.673
637	127.200, 0.747	127.200, 0.670	127.200, 0.632	127.200, 0.645	127.200, 0.673
638	127.400, 0.747	127.400, 0.670	127.400, 0.631	127.400, 0.645	127.400, 0.673
639	127.600, 0.747	127.600, 0.670	127.600, 0.631	127.600, 0.645	127.600, 0.673
640	127.800, 0.747	127.800, 0.670	127.800, 0.631	127.800, 0.646	127.800, 0.673
641	128.000, 0.747	128.000, 0.670	128.000, 0.630	128.000, 0.646	128.000, 0.673
642	128.200, 0.746	128.200, 0.670	128.200, 0.630	128.200, 0.646	128.200, 0.672
643	128.400, 0.746	128.400, 0.670	128.400, 0.630	128.400, 0.646	128.400, 0.672
644	128.600, 0.746	128.600, 0.670	128.600, 0.630	128.600, 0.646	128.600, 0.672
645	128.800, 0.745	128.800, 0.670	128.800, 0.630	128.800, 0.646	128.800, 0.671
646	129.000, 0.745	129.000, 0.670	129.000, 0.630	129.000, 0.645	129.000, 0.671
647	129.200, 0.745	129.200, 0.670	129.200, 0.630	129.200, 0.646	129.200, 0.671
648	129.400, 0.745	129.400, 0.670	129.400, 0.630	129.400, 0.645	129.400, 0.671
649	129.600, 0.745	129.600, 0.670	129.600, 0.630	129.600, 0.645	129.600, 0.671
650	129.800, 0.745	129.800, 0.669	129.800, 0.630	129.800, 0.645	129.800, 0.671
651	130.000, 0.745	130.000, 0.669	130.000, 0.630	130.000, 0.645	130.000, 0.671
652	130.200, 0.744	130.200, 0.669	130.200, 0.630	130.200, 0.644	130.200, 0.670
653	130.400, 0.744	130.400, 0.668	130.400, 0.631	130.400, 0.644	130.400, 0.670
654	130.600, 0.744	130.600, 0.668	130.600, 0.631	130.600, 0.644	130.600, 0.670
655	130.800, 0.745	130.800, 0.668	130.800, 0.631	130.800, 0.644	130.800, 0.670
656	131.000, 0.745	131.000, 0.668	131.000, 0.631	131.000, 0.643	131.000, 0.670
657	131.200, 0.745	131.200, 0.667	131.200, 0.631	131.200, 0.643	131.200, 0.671
658	131.400, 0.745	131.400, 0.667	131.400, 0.631	131.400, 0.643	131.400, 0.671
659	131.600, 0.745	131.600, 0.667	131.600, 0.630	131.600, 0.643	131.600, 0.671
660	131.800, 0.745	131.800, 0.667	131.800, 0.630	131.800, 0.643	131.800, 0.671
661	132.000, 0.745	132.000, 0.667	132.000, 0.630	132.000, 0.643	132.000, 0.671
662	132.200, 0.745	132.200, 0.667	132.200, 0.630	132.200, 0.643	132.200, 0.671
663	132.400, 0.745	132.400, 0.667	132.400, 0.629	132.400, 0.643	132.400, 0.671
664	132.600, 0.746	132.600, 0.667	132.600, 0.629	132.600, 0.643	132.600, 0.671
665	132.800, 0.746	132.800, 0.668	132.800, 0.629	132.800, 0.643	132.800, 0.671
666	133.000, 0.746	133.000, 0.668	133.000, 0.629	133.000, 0.643	133.000, 0.671
667	133.200, 0.746	133.200, 0.668	133.200, 0.629	133.200, 0.644	133.200, 0.671
668	133.400, 0.745	133.400, 0.669	133.400, 0.629	133.400, 0.644	133.400, 0.671
669	133.600, 0.745	133.600, 0.669	133.600, 0.629	133.600, 0.644	133.600, 0.671
670	133.800, 0.745	133.800, 0.669	133.800, 0.629	133.800, 0.645	133.800, 0.670
671	134.000, 0.745	134.000, 0.669	134.000, 0.629	134.000, 0.645	134.000, 0.670
672	134.200, 0.745	134.200, 0.669	134.200, 0.629	134.200, 0.645	134.200, 0.670
673	134.400, 0.745	134.400, 0.668	134.400, 0.629	134.400, 0.646	134.400, 0.670
674	134.600, 0.745	134.600, 0.668	134.600, 0.629	134.600, 0.646	134.600, 0.670
675	134.800, 0.744	134.800, 0.668	134.800, 0.629	134.800, 0.646	134.800, 0.670
676	135.000, 0.744	135.000, 0.667	135.000, 0.629	135.000, 0.646	135.000, 0.670
677	135.200, 0.744	135.200, 0.667	135.200, 0.629	135.200, 0.645	135.200, 0.670
678	135.400, 0.744	135.400, 0.667	135.400, 0.629	135.400, 0.645	135.400, 0.670
679	135.600, 0.743	135.600, 0.666	135.600, 0.629	135.600, 0.645	135.600, 0.670
680	135.800, 0.743	135.800, 0.666	135.800, 0.629	135.800, 0.645	135.800, 0.670
681	136.000, 0.743	136.000, 0.666	136.000, 0.629	136.000, 0.644	136.000, 0.670
682	136.200, 0.743	136.200, 0.666	136.200, 0.628	136.200, 0.644	136.200, 0.670
683	136.400, 0.744	136.400, 0.665	136.400, 0.628	136.400, 0.644	136.400, 0.670
684	136.600, 0.744	136.600, 0.665	136.600, 0.628	136.600, 0.644	136.600, 0.670
685	136.800, 0.744	136.800, 0.665	136.800, 0.628	136.800, 0.644	136.800, 0.670
686	137.000, 0.744	137.000, 0.665	137.000, 0.627	137.000, 0.644	137.000, 0.670
687	137.200, 0.744	137.200, 0.665	137.200, 0.627	137.200, 0.644	137.200, 0.669
688	137.400, 0.744	137.400, 0.665	137.400, 0.627	137.400, 0.644	137.400, 0.669
689	137.600, 0.744	137.600, 0.665	137.600, 0.627	137.600, 0.644	137.600, 0.669
690	137.800, 0.745	137.800, 0.664	137.800, 0.627	137.800, 0.644	137.800, 0.668
691	138.000, 0.745	138.000, 0.665	138.000, 0.627	138.000, 0.644	138.000, 0.668
692	138.200, 0.744	138.200, 0.665	138.200, 0.627	138.200, 0.644	138.200, 0.668
693	138.400, 0.744	138.400, 0.665	138.400, 0.627	138.400, 0.644	138.400, 0.668
694	138.600, 0.744	138.600, 0.665	138.600, 0.627	138.600, 0.644	138.600, 0.668
695	138.800, 0.744	138.800, 0.665	138.800, 0.627	138.800, 0.644	138.800, 0.668
696	139.000, 0.745	139.000, 0.665	139.000, 0.627	139.000, 0.644	139.000, 0.668
697	139.200, 0.745	139.200, 0.665	139.200, 0.627	139.200, 0.644	139.200, 0.668
698	139.400, 0.745	139.400, 0.665	139.400, 0.627	139.400, 0.644	139.400, 0.668
699	139.600, 0.745	139.600, 0.665	139.600, 0.627	139.600, 0.644	139.600, 0.668
700	139.800, 0.745	139.800, 0.665	139.800, 0.627	139.800, 0.644	139.800, 0.668
701	140.000, 0.745	140.000, 0.665	140.000, 0.627	140.000, 0.644	140.000, 0.668
702	140.200, 0.745	140.200, 0.665	140.200, 0.627	140.200, 0.644	140.200, 0.668
703	140.400, 0.745	140.400, 0.665	140.400, 0.626	140.400, 0.644	140.400, 0.668
704	140.600, 0.746	140.600, 0.664	140.600, 0.626	140.600, 0.643	140.600, 0.668
705	140.800, 0.746	140.800, 0.664	140.800, 0.626	140.800, 0.643	140.800, 0.668
706	141.000, 0.746	141.000, 0.663	141.000, 0.626	141.000, 0.643	141.000, 0.668
707	141.200, 0.745	141.200, 0.663	141.200, 0.626	141.200, 0.643	141.200, 0.668
708	141.400, 0.745	141.400, 0.663	141.400, 0.625	141.400, 0.643	141.400, 0.668
709	141.600, 0.745	141.600, 0.662	141.600, 0.625	141.600, 0.643	141.600, 0.668
710	141.800, 0.744	141.800, 0.662	141.800, 0.625	141.800, 0.642	141.800, 0.668
711	142.000, 0.744	142.000, 0.662	142.000, 0.625	142.000, 0.642	142.000, 0.668
712	142.200, 0.743	142.200, 0.662	142.200, 0.625	142.200, 0.642	142.200, 0.668
713	142.400, 0.743	142.400, 0.662	142.400, 0.624	142.400, 0.642	142.400, 0.668
714	142.600, 0.743	142.600, 0.662	142.600, 0.624	142.600, 0.642	142.600, 0.668
715	142.800, 0.743	142.800, 0.662	142.800, 0.624	142.800, 0.641	142.800, 0.668
716	143.000, 0.743	143.000, 0.662	143.000, 0.624	143.000, 0.641	143.000, 0.668
717	143.200, 0.743	143.200, 0.662	143.200, 0.624	143.200, 0.641	143.200, 0.668
718	143.400, 0.743	143.400, 0.662	143.400, 0.624	143.400, 0.641	143.400, 0.668
719	143.600, 0.743	143.600, 0.662	143.600, 0.624	143.600, 0.641	143.600, 0.668
720	143.800, 0.743	143.800, 0.662	143.800, 0.625	143.800, 0.641	143.800, 0.668
721	144.000, 0.743	144.000, 0.663	144.000, 0.625	144.000, 0.641	144.000, 0.668
722	144.200, 0.743	144.200, 0.663	144.200, 0.625	144.200, 0.641	144.200, 0.668
723	144.400, 0.743	144.400, 0.663	144.400, 0.625	144.400, 0.641	144.400, 0.668
724	144.600, 0.743	144.600, 0.663	144.600, 0.625	144.600, 0.641	144.600, 0.668
725	144.800, 0.743	144.800, 0.663	144.800, 0.625	144.800, 0.641	144.800, 0.667
726	145.000, 0.743	145.000, 0.663	145.000, 0.625	145.000, 0.641	145.000, 0.667
727	145.200, 0.743	145.200, 0.663	145.200, 0.625	145.200, 0.641	145.200, 0.667
728	145.400, 0.743	145.400, 0.663	145.400, 0.625	145.400, 0.641	145.400, 0.667
729	145.600, 0.743	145.600, 0.663	145.600, 0.625	145.600, 0.642	145.600, 0.666
730	145.800, 0.744	145.800, 0.663	145.800, 0.625	145.800, 0.642	145.800, 0.666
731	146.000, 0.744	146.000, 0.662	146.000, 0.625	146.000, 0.642	146.000, 0.666
732	146.200, 0.744	146.200, 0.662	146.200, 0.624	146.200, 0.641	146.200, 0.666
733	146.400, 0.744	146.400, 0.662	146.400, 0.624	146.400, 0.641	146.400, 0.666
734	146.600, 0.744	146.600, 0.662	146.600, 0.624	146.600, 0.641	146.600, 0.666
735	146.800, 0.744	146.800, 0.662	146.800, 0.624	146.800, 0.640	146.800, 0.666
736	147.000, 0.744	147.000, 0.662	147.000, 0.624	147.000, 0.640	147.000, 0.666
737	147.200, 0.744	147.200, 0.662	147.200, 0.623	147.200, 0.640	147.200, 0.666
738	147.400, 0.744	147.400, 0.662	147.400, 0.623	147.400, 0.640	147.400, 0.666
739	147.600, 0.744	147.600, 0.662	147.600, 0.623	147.600, 0.640	147.600, 0.666
740	147.800, 0.744	147.800, 0.662	147.800, 0.623	147.800, 0.640	147.800, 0.666
741	148.000, 0.744	148.000, 0.662	148.000, 0.623	148.000, 0.640	148.000, 0.666
742	148.200, 0.743	148.200, 0.662	148.200, 0.623	148.200, 0.640	148.200, 0.665
743	148.400, 0.743	148.400, 0.662	148.400, 0.623	148.400, 0.640	148.400, 0.665
744	148.600, 0.743	148.600, 0.662	148.600, 0.623	148.600, 0.640	148.600, 0.665
745	148.800, 0.743	148.800, 0.662	148.800, 0.623	148.800, 0.641	148.800, 0.664
746	149.000, 0.742	149.000, 0.662	149.000, 0.622	149.000, 0.641	149.000, 0.664
747	149.200, 0.742	149.200, 0.663	149.200, 0.622	149.200, 0.641	149.200, 0.664
748	149.400, 0.742	149.400, 0.663	149.400, 0.622	149.400, 0.641	149.400, 0.663
749	149.600, 0.742	149.600, 0.663	149.600, 0.622	149.600, 0.641	149.600, 0.663
750	149.800, 0.741	149.800, 0.663	149.800, 0.621	149.800, 0.641	149.800, 0.663
751	150.000, 0.741	150.000, 0.663	150.000, 0.621	150.000, 0.641	150.000, 0.663
752	150.200, 0.735	150.200, 0.658	150.200, 0.617	150.200, 0.637	150.200, 0.657
753	150.400, 0.728	150.400, 0.653	150.400, 0.612	150.400, 0.632	150.400, 0.650
754	150.600, 0.720	150.600, 0.647	150.600, 0.606	150.600, 0.626	150.600, 0.642
755	150.800, 0.712	150.800, 0.641	150.800, 0.600	150.800, 0.620	150.800, 0.633
756	151.000, 0.703	151.000, 0.634	151.000, 0.594	151.000, 0.614	151.000, 0.624
757	151.200, 0.694	151.200, 0.628	151.200, 0.588	151.200, 0.607	151.200, 0.616
758	151.400, 0.685	151.400, 0.621	151.400, 0.581	151.400, 0.601	151.400, 0.607
759	151.600, 0.677	151.600, 0.614	151.600, 0.575	151.600, 0.595	151.600, 0.598
760	151.800, 0.669	151.800, 0.608	151.800, 0.569	151.800, 0.589	151.800, 0.591
761	152.000, 0.662	152.000, 0.602	152.000, 0.564	152.000, 0.584	152.000, 0.584
762	152.200, 0.656	152.200, 0.597	152.200, 0.560	152.200, 0.580	152.200, 0.579
763	152.400, 0.651	152.400, 0.593	152.400, 0.556	152.400, 0.575	152.400, 0.574
764	152.600, 0.647	152.600, 0.589	152.600, 0.553	152.600, 0.572	152.600, 0.569
765	152.800, 0.642	152.800, 0.585	152.800, 0.550	152.800, 0.568	152.800, 0.564
766	153.000, 0.639	153.000, 0.582	153.000, 0.547	153.000, 0.566	153.000, 0.560
767	153.200, 0.635	153.200, 0.579	153.200, 0.544	153.200, 0.563	153.200, 0.556
768	153.400, 0.632	153.400, 0.577	153.400, 0.542	153.400, 0.560	153.400, 0.552
769	153.600, 0.629	153.600, 0.574	153.600, 0.539	153.600, 0.558	153.600, 0.549
770	153.800, 0.627	153.800, 0.572	153.800, 0.537	153.800, 0.556	153.800, 0.546
771	154.000, 0.624	154.000, 0.570	154.000, 0.536	154.000, 0.555	154.000, 0.543
772	154.200, 0.622	154.200, 0.568	154.200, 0.534	154.200, 0.553	154.200, 0.540
773	154.400, 0.620	154.400, 0.567	154.400, 0.533	154.400, 0.551	154.400, 0.537
774	154.600, 0.618	154.600, 0.565	154.600, 0.531	154.600, 0.550	154.600, 0.535
775	154.800, 0.616	154.800, 0.564	154.800, 0.530	154.800, 0.549	154.800, 0.532
776	155.000, 0.614	155.000, 0.563	155.000, 0.529	155.000, 0.548	155.000, 0.530
777	155.200, 0.612	155.200, 0.561	155.200, 0.528	155.200, 0.547	155.200, 0.528
778	155.400, 0.610	155.400, 0.560	155.400, 0.526	155.400, 0.546	155.400, 0.525
779	155.600, 0.608	155.600, 0.559	155.600, 0.525	155.600, 0.545	155.600, 0.523
780	155.800, 0.607	155.800, 0.558	155.800, 0.524	155.800, 0.544	155.800, 0.522
781	156.000, 0.605	156.000, 0.557	156.000, 0.523	156.000, 0.543	156.000, 0.520
782	156.200, 0.604	156.200, 0.556	156.200, 0.522	156.200, 0.542	156.200, 0.518
783	156.400, 0.603	156.400, 0.555	156.400, 0.521	156.400, 0.541	156.400, 0.517
784	156.600, 0.602	156.600, 0.554	156.600, 0.520	156.600, 0.541	156.600, 0.515
785	156.800, 0.601	156.800, 0.553	156.800, 0.520	156.800, 0.540	156.800, 0.513
786	157.000, 0.600	157.000, 0.552	157.000, 0.519	157.000, 0.540	157.000, 0.512
787	157.200, 0.599	157.200, 0.552	157.200, 0.519	157.200, 0.539	157.200, 0.511
788	157.400, 0.598	157.400, 0.551	157.400, 0.518	157.400, 0.539	157.400, 0.509
789	157.600, 0.597	157.600, 0.550	157.600, 0.518	157.600, 0.538	157.600, 0.508
790	157.800, 0.596	157.800, 0.550	157.800, 0.517	157.800, 0.538	157.800, 0.507
791	158.000, 0.595	158.000, 0.549	158.000, 0.517	158.000, 0.537	158.000, 0.506
792	158.200, 0.594	158.200, 0.549	158.200, 0.517	158.200, 0.537	158.200, 0.505
793	158.400, 0.594	158.400, 0.549	158.400, 0.516	158.400, 0.537	158.400, 0.504
794	158.600, 0.593	158.600, 0.548	158.600, 0.516	158.600, 0.537	158.600, 0.502
795	158.800, 0.592	158.800, 0.548	158.800, 0.515	158.800, 0.537	158.800, 0.501
796	159.000, 0.592	159.000, 0.548	159.000, 0.515	159.000, 0.536	159.000, 0.499
797	159.200, 0.591	159.200, 0.547	159.200, 0.514	159.200, 0.536	159.200, 0.498
798	159.400, 0.591	159.400, 0.547	159.400, 0.513	159.400, 0.536	159.400, 0.497
799	159.600, 0.591	159.600, 0.546	159.600, 0.513	159.600, 0.536	159.600, 0.495
800	159.800, 0.590	159.800, 0.546	159.800, 0.512	159.800, 0.535	159.800, 0.494
801	160.000, 0.590	160.000, 0.545	160.000, 0.512	160.000, 0.535	160.000, 0.494
802	160.200, 0.590	160.200, 0.545	160.200, 0.511	160.200, 0.534	160.200, 0.493
803	160.400, 0.589	160.400, 0.544	160.400, 0.511	160.400, 0.534	160.400, 0.492
804	160.600, 0.589	160.600, 0.544	160.600, 0.511	160.600, 0.534	160.600, 0.491
805	160.800, 0.588	160.800, 0.543	160.800, 0.511	160.800, 0.533	160.800, 0.491
806	161.000, 0.588	161.000, 0.543	161.000, 0.510	161.000, 0.533	161.000, 0.490
807	161.200, 0.587	161.200, 0.542	161.200, 0.510	161.200, 0.533	161.200, 0.490
808	161.400, 0.586	161.400, 0.542	161.400, 0.509	161.400, 0.532	161.400, 0.489
809	161.600, 0.586	161.600, 0.541	161.600, 0.509	161.600, 0.532	161.600, 0.489
810	161.800, 0.585	161.800, 0.541	161.800, 0.508	161.800, 0.532	161.800, 0.488
811	162.000, 0.585	162.000, 0.541	162.000, 0.508	162.000, 0.532	162.000, 0.488
812	162.200, 0.584	162.200, 0.541	162.200, 0.507	162.200, 0.531	162.200, 0.487
813	162.400, 0.584	162.400, 0.541	162.400, 0.507	162.400, 0.531	162.400, 0.487
814	162.600, 0.584	162.600, 0.542	162.600, 0.506	162.600, 0.531	162.600, 0.486
815	162.800, 0.583	162.800, 0.542	162.800, 0.506	162.800, 0.531	162.800, 0.485
816	163.000, 0.583	163.000, 0.542	163.000, 0.506	163.000, 0.531	163.000, 0.484
817	163.200, 0.583	163.200, 0.541	163.200, 0.505	163.200, 0.531	163.200, 0.483
818	163.400, 0.583	163.400, 0.541	163.400, 0.505	163.400, 0.531	163.400, 0.483
819	163.600, 0.583	163.600, 0.541	163.600, 0.505	163.600, 0.530	163.600, 0.482
820	163.800, 0.583	163.800, 0.540	163.800, 0.505	163.800, 0.530	163.800, 0.481
821	164.000, 0.582	164.000, 0.540	164.000, 0.504	164.000, 0.529	164.000, 0.481
822	164.200, 0.582	164.200, 0.539	164.200, 0.504	164.200, 0.529	164.200, 0.480
823	164.400, 0.582	164.400, 0.539	164.400, 0.504	164.400, 0.529	164.400, 0.479
824	164.600, 0.581	164.600, 0.539	164.600, 0.504	164.600, 0.528	164.600, 0.479
825	164.800, 0.581	164.800, 0.538	164.800, 0.503	164.800, 0.528	164.800, 0.478
826	165.000, 0.581	165.000, 0.538	165.000, 0.503	165.000, 0.528	165.000, 0.478
827	165.200, 0.580	165.200, 0.537	165.200, 0.503	165.200, 0.528	165.200, 0.477
828	165.400, 0.580	165.400, 0.537	165.400, 0.502	165.400, 0.528	165.400, 0.476
829	165.600, 0.580	165.600, 0.537	165.600, 0.501	165.600, 0.527	165.600, 0.476
830	165.800, 0.579	165.800, 0.537	165.800, 0.501	165.800, 0.527	165.800, 0.475
831	166.000, 0.579	166.000, 0.537	166.000, 0.501	166.000, 0.527	166.000, 0.475
832	166.200, 0.578	166.200, 0.537	166.200, 0.500	166.200, 0.527	166.200, 0.475
833	166.400, 0.578	166.400, 0.536	166.400, 0.500	166.400, 0.527	166.400, 0.474
834	166.600, 0.578	166.600, 0.536	166.600, 0.500	166.600, 0.527	166.600, 0.474
835	166.800, 0.577	166.800, 0.536	166.800, 0.500	166.800, 0.527	166.800, 0.473
836	167.000, 0.577	167.000, 0.535	167.000, 0.500	167.000, 0.526	167.000, 0.473
837	167.200, 0.577	167.200, 0.535	167.200, 0.500	167.200, 0.526	167.200, 0.472
838	167.400, 0.576	167.400, 0.535	167.400, 0.500	167.400, 0.525	167.400, 0.472
839	167.600, 0.576	167.600, 0.535	167.600, 0.500	167.600, 0.525	167.600, 0.471
840	167.800, 0.575	167.800, 0.534	167.800, 0.500	167.800, 0.525	167.800, 0.471
841	168.000, 0.575	168.000, 0.534	168.000, 0.500	168.000, 0.524	168.000, 0.470
842	168.200, 0.575	168.200, 0.534	168.200, 0.500	168.200, 0.524	168.200, 0.470
843	168.400, 0.575	168.400, 0.534	168.400, 0.499	168.400, 0.524	168.400, 0.469
844	168.600, 0.575	168.600, 0.534	168.600, 0.499	168.600, 0.524	168.600, 0.469
845	168.800, 0.575	168.800, 0.534	168.800, 0.499	168.800, 0.524	168.800, 0.468
846	169.000, 0.575	169.000, 0.533	169.000, 0.498	169.000, 0.524	169.000, 0.467
847	169.200, 0.575	169.200, 0.533	169.200, 0.498	169.200, 0.524	169.200, 0.467
848	169.400, 0.575	169.400, 0.533	169.400, 0.497	169.400, 0.524	169.400, 0.466
849	169.600, 0.574	169.600, 0.532	169.600, 0.497	169.600, 0.524	169.600, 0.466
850	169.800, 0.574	169.800, 0.532	169.800, 0.496	169.800, 0.524	169.800, 0.465
851	170.000, 0.574	170.000, 0.531	170.000, 0.495	170.000, 0.524	170.000, 0.465
852	170.200, 0.574	170.200, 0.531	170.200, 0.495	170.200, 0.523	170.200, 0.465
853	170.400, 0.573	170.400, 0.530	170.400, 0.494	170.400, 0.523	170.400, 0.464
854	170.600, 0.573	170.600, 0.530	170.600, 0.494	170.600, 0.523	170.600, 0.464
855	170.800, 0.572	170.800, 0.529	170.800, 0.494	170.800, 0.522	170.800, 0.464
856	171.000, 0.572	171.000, 0.529	171.000, 0.494	171.000, 0.522	171.000, 0.463
857	171.200, 0.571	171.200, 0.528	171.200, 0.493	171.200, 0.522	171.200, 0.463
858	171.400, 0.571	171.400, 0.528	171.400, 0.493	171.400, 0.521	171.400, 0.463
859	171.600, 0.570	171.600, 0.528	171.600, 0.493	171.600, 0.521	171.600, 0.462
860	171.800, 0.570	171.800, 0.528	171.800, 0.493	171.800, 0.521	171.800, 0.462
861	172.000, 0.569	172.000, 0.528	172.000, 0.492	172.000, 0.520	172.000, 0.462
862	172.200, 0.569	172.200, 0.528	172.200, 0.492	172.200, 0.520	172.200, 0.461
863	172.400, 0.569	172.400, 0.527	172.400, 0.491	172.400, 0.520	172.400, 0.461
864	172.600, 0.569	172.600, 0.527	172.600, 0.491	172.600, 0.519	172.600, 0.460
865	172.800, 0.568	172.800, 0.527	172.800, 0.491	172.800, 0.519	172.800, 0.459
866	173.000, 0.568	173.000, 0.526	173.000, 0.490	173.000, 0.518	173.000, 0.459
867	173.200, 0.568	173.200, 0.526	173.200, 0.490	173.200, 0.518	173.200, 0.458
868	173.400, 0.567	173.400, 0.526	173.400, 0.489	173.400, 0.517	173.400, 0.458
869	173.600, 0.567	173.600, 0.525	173.600, 0.489	173.600, 0.517	173.600, 0.458
870	173.800, 0.567	173.800, 0.525	173.800, 0.489	173.800, 0.517	173.800, 0.457
871	174.000, 0.567	174.000, 0.525	174.000, 0.488	174.000, 0.516	174.000, 0.457
872	174.200, 0.567	174.200, 0.524	174.200, 0.488	174.200, 0.516	174.200, 0.457
873	174.400, 0.567	174.400, 0.524	174.400, 0.488	174.400, 0.516	174.400, 0.456
874	174.600, 0.566	174.600, 0.524	174.600, 0.488	174.600, 0.516	174.600, 0.456
875	174.800, 0.566	174.800, 0.523	174.800, 0.487	174.800, 0.516	174.800, 0.456
876	175.000, 0.566	175.000, 0.523	175.000, 0.487	175.000, 0.516	175.000, 0.456
877	175.200, 0.566	175.200, 0.523	175.200, 0.487	175.200, 0.516	175.200, 0.456
878	175.400, 0.566	175.400, 0.522	175.400, 0.486	175.400, 0.515	175.400, 0.456
879	175.600, 0.566	175.600, 0.522	175.600, 0.486	175.600, 0.515	175.600, 0.456
880	175.800, 0.565	175.800, 0.522	175.800, 0.486	175.800, 0.515	175.800, 0.456
881	176.000, 0.565	176.000, 0.522	176.000, 0.485	176.000, 0.515	176.000, 0.455
882	176.200, 0.565	176.200, 0.522	176.200, 0.485	176.200, 0.515	176.200, 0.455
883	176.400, 0.565	176.400, 0.521	176.400, 0.485	176.400, 0.515	176.400, 0.455
884	176.600, 0.565	176.600, 0.521	176.600, 0.485	176.600, 0.514	176.600, 0.455
885	176.800, 0.564	176.800, 0.521	176.800, 0.484	176.800, 0.514	176.800, 0.454
886	177.000, 0.564	177.000, 0.521	177.000, 0.484	177.000, 0.514	177.000, 0.454
887	177.200, 0.564	177.200, 0.520	177.200, 0.484	177.200, 0.514	177.200, 0.453
888	177.400, 0.563	177.400, 0.520	177.400, 0.483	177.400, 0.514	177.400, 0.453
889	177.600, 0.563	177.600, 0.520	177.600, 0.483	177.600, 0.514	177.600, 0.453
890	177.800, 0.562	177.800, 0.520	177.800, 0.483	177.800, 0.513	177.800, 0.453
891	178.000, 0.562	178.000, 0.520	178.000, 0.483	178.000, 0.513	178.000, 0.452
892	178.200, 0.562	178.200, 0.520	178.200, 0.483	178.200, 0.513	178.200, 0.452
893	178.400, 0.561	178.400, 0.520	178.400, 0.483	178.400, 0.513	178.400, 0.451
894	178.600, 0.561	178.600, 0.519	178.600, 0.482	178.600, 0.512	178.600, 0.451
895	178.800, 0.561	178.800, 0.519	178.800, 0.482	178.800, 0.512	178.800, 0.451
896	179.000, 0.560	179.000, 0.518	179.000, 0.482	179.000, 0.512	179.000, 0.450
897	179.200, 0.560	179.200, 0.518	179.200, 0.482	179.200, 0.511	179.200, 0.450
898	179.400, 0.560	179.400, 0.517	179.400, 0.482	179.400, 0.511	179.400, 0.450
899	179.600, 0.560	179.600, 0.517	179.600, 0.482	179.600, 0.511	179.600, 0.450
900	179.800, 0.559	179.800, 0.517	179.800, 0.481	179.800, 0.511	179.800, 0.449
901	180.000, 0.559	180.000, 0.516	180.000, 0.481	180.000, 0.510	180.000, 0.449
902	180.200, 0.559	180.200, 0.516	180.200, 0.481	180.200, 0.510	180.200, 0.448
903	180.400, 0.559	180.400, 0.516	180.400, 0.480	180.400, 0.510	180.400, 0.448
904	180.600, 0.558	180.600, 0.516	180.600, 0.480	180.600, 0.510	180.600, 0.447
905	180.800, 0.558	180.800, 0.516	180.800, 0.479	180.800, 0.509	180.800, 0.447
906	181.000, 0.558	181.000, 0.516	181.000, 0.479	181.000, 0.509	181.000, 0.447
907	181.200, 0.558	181.200, 0.516	181.200, 0.479	181.200, 0.509	181.200, 0.447
908	181.400, 0.557	181.400, 0.516	181.400, 0.478	181.400, 0.509	181.400, 0.447
909	181.600, 0.557	181.600, 0.516	181.600, 0.478	181.600, 0.509	181.600, 0.447
910	181.800, 0.557	181.800, 0.515	181.800, 0.478	181.800, 0.508	181.800, 0.447
911	182.000, 0.557	182.000, 0.515	182.000, 0.478	182.000, 0.508	182.000, 0.446
912	182.200, 0.557	182.200, 0.515	182.200, 0.478	182.200, 0.508	182.200, 0.447
913	182.400, 0.557	182.400, 0.515	182.400, 0.478	182.400, 0.507	182.400, 0.447
914	182.600, 0.557	182.600, 0.515	182.600, 0.478	182.600, 0.507	182.600, 0.447
915	182.800, 0.557	182.800, 0.515	182.800, 0.478	182.800, 0.507	182.800, 0.447
916	183.000, 0.556	183.000, 0.514	183.000, 0.478	183.000, 0.507	183.000, 0.447
917	183.200, 0.556	183.200, 0.514	183.200, 0.478	183.200, 0.506	183.200, 0.447
918	183.400, 0.556	183.400, 0.513	183.400, 0.477	183.400, 0.506	183.400, 0.446
919	183.600, 0.556	183.600, 0.513	183.600, 0.477	183.600, 0.506	183.600, 0.446
920	183.800, 0.555	183.800, 0.513	183.800, 0.476	183.800, 0.506	183.800, 0.446
921	184.000, 0.555	184.000, 0.512	184.000, 0.476	184.000, 0.506	184.000, 0.445
922	184.200, 0.554	184.200, 0.512	184.200, 0.476	184.200, 0.506	184.200, 0.444
923	184.400, 0.554	184.400, 0.512	184.400, 0.475	184.400, 0.505	184.400, 0.444
924	184.600, 0.554	184.600, 0.511	184.600, 0.475	184.600, 0.505	184.600, 0.443
925	184.800, 0.554	184.800, 0.511	184.800, 0.474	184.800, 0.505	184.800, 0.443
926	185.000, 0.554	185.000, 0.511	185.000, 0.474	185.000, 0.505	185.000, 0.442
927	185.200, 0.554	185.200, 0.511	185.200, 0.474	185.200, 0.505	185.200, 0.442
928	185.400, 0.554	185.400, 0.510	185.400, 0.474	185.400, 0.504	185.400, 0.441
929	185.600, 0.553	185.600, 0.510	185.600, 0.473	185.600, 0.504	185.600, 0.441
930	185.800, 0.553	185.800, 0.510	185.800, 0.473	185.800, 0.504	185.800, 0.441
931	186.000, 0.553	186.000, 0.510	186.000, 0.473	186.000, 0.504	186.000, 0.441
932	186.200, 0.553	186.200, 0.510	186.200, 0.473	186.200, 0.504	186.200, 0.441
933	186.400, 0.553	186.400, 0.509	186.400, 0.473	186.400, 0.504	186.400, 0.441
934	186.600, 0.553	186.600, 0.509	186.600, 0.473	186.600, 0.504	186.600, 0.440
935	186.800, 0.553	186.800, 0.509	186.800, 0.472	186.800, 0.504	186.800, 0.440
936	187.000, 0.552	187.000, 0.508	187.000, 0.472	187.000, 0.503	187.000, 0.440
937	187.200, 0.552	187.200, 0.508	187.200, 0.471	187.200, 0.503	187.200, 0.440
938	187.400, 0.551	187.400, 0.508	187.400, 0.471	187.400, 0.503	187.400, 0.440
939	187.600, 0.551	187.600, 0.508	187.600, 0.471	187.600, 0.502	187.600, 0.440
940	187.800, 0.551	187.800, 0.508	187.800, 0.471	187.800, 0.502	187.800, 0.440
941	188.000, 0.550	188.000, 0.508	188.000, 0.470	188.000, 0.501	188.000, 0.440
942	188.200, 0.550	188.200, 0.508	188.200, 0.470	188.200, 0.501	188.200, 0.439
943	188.400, 0.550	188.400, 0.508	188.400, 0.470	188.400, 0.501	188.400, 0.439
944	188.600, 0.550	188.600, 0.508	188.600, 0.470	188.600, 0.500	188.600, 0.439
945	188.800, 0.549	188.800, 0.508	188.800, 0.470	188.800, 0.500	188.800, 0.439
946	189.000, 0.549	189.000, 0.507	189.000, 0.470	189.000, 0.499	189.000, 0.439
947	189.200, 0.548	189.200, 0.507	189.200, 0.470	189.200, 0.499	189.200, 0.439
948	189.400, 0.548	189.400, 0.507	189.400, 0.470	189.400, 0.499	189.400, 0.438
949	189.600, 0.548	189.600, 0.506	189.600, 0.470	189.600, 0.499	189.600, 0.438
950	189.800, 0.548	189.800, 0.506	189.800, 0.470	189.800, 0.499	189.800, 0.438
951	190.000, 0.548	190.000, 0.506	190.000, 0.470	190.000, 0.499	190.000, 0.438
952	190.200, 0.547	190.200, 0.505	190.200, 0.469	190.200, 0.499	190.200, 0.438
953	190.400, 0.547	190.400, 0.505	190.400, 0.469	190.400, 0.499	190.400, 0.437
954	190.600, 0.547	190.600, 0.505	190.600, 0.469	190.600, 0.499	190.600, 0.437
955	190.800, 0.547	190.800, 0.504	190.800, 0.469	190.800, 0.499	190.800, 0.436
956	191.000, 0.547	191.000, 0.504	191.000, 0.469	191.000, 0.499	191.000, 0.436
957	191.200, 0.547	191.200, 0.504	191.200, 0.468	191.200, 0.499	191.200, 0.435
958	191.400, 0.547	191.400, 0.504	191.400, 0.468	191.400, 0.499	191.400, 0.435
959	191.600, 0.547	191.600, 0.504	191.600, 0.468	191.600, 0.498	191.600, 0.435
960	191.800, 0.547	191.800, 0.504	191.800, 0.468	191.800, 0.498	191.800, 0.435
961	192.000, 0.547	192.000, 0.504	192.000, 0.467	192.000, 0.498	192.000, 0.435
962	192.200, 0.547	192.200, 0.504	192.200, 0.467	192.200, 0.498	192.200, 0.434
963	192.400, 0.546	192.400, 0.504	192.400, 0.467	192.400, 0.498	192.400, 0.434
964	192.600, 0.546	192.600, 0.503	192.600, 0.466	192.600, 0.497	192.600, 0.434
965	192.800, 0.546	192.800, 0.503	192.800, 0.466	192.800, 0.497	192.800, 0.433
966	193.000, 0.546	193.000, 0.502	193.000, 0.465	193.000, 0.497	193.000, 0.433
967	193.200, 0.545	193.200, 0.502	193.200, 0.465	193.200, 0.497	193.200, 0.433
968	193.400, 0.545	193.400, 0.502	193.400, 0.465	193.400, 0.496	193.400, 0.433
969	193.600, 0.545	193.600, 0.501	193.600, 0.464	193.600, 0.496	193.600, 0.433
970	193.800, 0.545	193.800, 0.501	193.800, 0.464	193.800, 0.496	193.800, 0.433
971	194.000, 0.544	194.000, 0.500	194.000, 0.463	194.000, 0.495	194.000, 0.433
972	194.200, 0.544	194.200, 0.500	194.200, 0.463	194.200, 0.495	194.200, 0.433
973	194.400, 0.543	194.400, 0.499	194.400, 0.463	194.400, 0.495	194.400, 0.433
974	194.600, 0.543	194.600, 0.499	194.600, 0.463	194.600, 0.495	194.600, 0.433
975	194.800, 0.543	194.800, 0.499	194.800, 0.463	194.800, 0.495	194.800, 0.432
976	195.000, 0.543	195.000, 0.498	195.000, 0.463	195.000, 0.495	195.000, 0.432
977	195.200, 0.543	195.200, 0.498	195.200, 0.462	195.200, 0.495	195.200, 0.432
978	195.400, 0.543	195.400, 0.498	195.400, 0.462	195.400, 0.495	195.400, 0.432
979	195.600, 0.543	195.600, 0.498	195.600, 0.462	195.600, 0.495	195.600, 0.432
980	195.800, 0.542	195.800, 0.498	195.800, 0.462	195.800, 0.495	195.800, 0.432
981	196.000, 0.542	196.000, 0.498	196.000, 0.462	196.000, 0.495	196.000, 0.432
982	196.200, 0.542	196.200, 0.498	196.200, 0.462	196.200, 0.495	196.200, 0.431
983	196.400, 0.542	196.400, 0.497	196.400, 0.462	196.400, 0.495	196.400, 0.431
984	196.600, 0.542	196.600, 0.497	196.600, 0.461	196.600, 0.494	196.600, 0.431
985	196.800, 0.542	196.800, 0.497	196.800, 0.461	196.800, 0.494	196.800, 0.431
986	197.000, 0.542	197.000, 0.497	197.000, 0.461	197.000, 0.494	197.000, 0.430
987	197.200, 0.541	197.200, 0.497	197.200, 0.461	197.200, 0.493	197.200, 0.430
988	197.400, 0.541	197.400, 0.497	197.400, 0.461	197.400, 0.493	197.400, 0.430
989	197.600, 0.541	197.600, 0.497	197.600, 0.461	197.600, 0.492	197.600, 0.430
990	197.800, 0.541	197.800, 0.496	197.800, 0.460	197.800, 0.492	197.800, 0.430
991	198.000, 0.540	198.000, 0.496	198.000, 0.460	198.000, 0.492	198.000, 0.430
992	198.200, 0.540	198.200, 0.496	198.200, 0.460	198.200, 0.491	198.200, 0.430
993	198.400, 0.540	198.400, 0.495	198.400, 0.460	198.400, 0.491	198.400, 0.430
994	198.600, 0.540	198.600, 0.495	198.600, 0.459	198.600, 0.491	198.600, 0.430
995	198.800, 0.540	198.800, 0.494	198.800, 0.459	198.800, 0.491	198.800, 0.429
996	199.000, 0.540	199.000, 0.494	199.000, 0.459	199.000, 0.491	199.000, 0.429
997	199.200, 0.540	199.200, 0.493	199.200, 0.459	199.200, 0.491	199.200, 0.429
998	199.400, 0.540	199.400, 0.493	199.400, 0.458	199.400, 0.491	199.400, 0.429
999	199.600, 0.540	199.600, 0.493	199.600, 0.459	199.600, 0.491	199.600, 0.429
1000	199.800, 0.540	199.800, 0.493	199.800, 0.459	199.800, 0.490	199.800, 0.428
1001	200.000, 0.540	200.000, 0.493	200.000, 0.459	200.000, 0.491	200.000, 0.428
1002	200.200, 0.540	200.200, 0.493	200.200, 0.458	200.200, 0.491	200.200, 0.428
1003	200.400, 0.539	200.400, 0.493	200.400, 0.458	200.400, 0.491	200.400, 0.428
1004	200.600, 0.539	200.600, 0.493	200.600, 0.458	200.600, 0.491	200.600, 0.427
1005	200.800, 0.539	200.800, 0.493	200.800, 0.458	200.800, 0.491	200.800, 0.427
1006	201.000, 0.538	201.000, 0.493	201.000, 0.458	201.000, 0.490	201.000, 0.427
1007	201.200, 0.538	201.200, 0.493	201.200, 0.458	201.200, 0.490	201.200, 0.427
1008	201.400, 0.537	201.400, 0.493	201.400, 0.458	201.400, 0.489	201.400, 0.427
1009	201.600, 0.537	201.600, 0.493	201.600, 0.458	201.600, 0.489	201.600, 0.427
1010	201.800, 0.537	201.800, 0.493	201.800, 0.457	201.800, 0.488	201.800, 0.427
1011	202.000, 0.536	202.000, 0.493	202.000, 0.457	202.000, 0.488	202.000, 0.426
1012	202.200, 0.536	202.200, 0.493	202.200, 0.457	202.200, 0.487	202.200, 0.426
1013	202.400, 0.536	202.400, 0.492	202.400, 0.456	202.400, 0.487	202.400, 0.426
1014	202.600, 0.536	202.600, 0.492	202.600, 0.456	202.600, 0.487	202.600, 0.425
1015	202.800, 0.536	202.800, 0.492	202.800, 0.456	202.800, 0.486	202.800, 0.425
1016	203.000, 0.536	203.000, 0.492	203.000, 0.456	203.000, 0.486	203.000, 0.425
1017	203.200, 0.536	203.200, 0.492	203.200, 0.455	203.200, 0.486	203.200, 0.424
1018	203.400, 0.536	203.400, 0.492	203.400, 0.455	203.400, 0.486	203.400, 0.424
1019	203.600, 0.536	203.600, 0.492	203.600, 0.455	203.600, 0.486	203.600, 0.424
1020	203.800, 0.535	203.800, 0.492	203.800, 0.454	203.800, 0.486	203.800, 0.424
1021	204.000, 0.535	204.000, 0.492	204.000, 0.454	204.000, 0.487	204.000, 0.424
1022	204.200, 0.535	204.200, 0.491	204.200, 0.454	204.200, 0.487	204.200, 0.424
1023	204.400, 0.535	204.400, 0.491	204.400, 0.454	204.400, 0.487	204.400, 0.424
1024	204.600, 0.534	204.600, 0.490	204.600, 0.454	204.600, 0.487	204.600, 0.424
1025	204.800, 0.534	204.800, 0.490	204.800, 0.454	204.800, 0.487	204.800, 0.424
1026	205.000, 0.534	205.000, 0.489	205.000, 0.454	205.000, 0.486	205.000, 0.424
1027	205.200, 0.534	205.200, 0.489	205.200, 0.454	205.200, 0.486	205.200, 0.424
1028	205.400, 0.534	205.400, 0.488	205.400, 0.453	205.400, 0.486	205.400, 0.423
1029	205.600, 0.534	205.600, 0.488	205.600, 0.453	205.600, 0.486	205.600, 0.423
1030	205.800, 0.534	205.800, 0.488	205.800, 0.453	205.800, 0.486	205.800, 0.423
1031	206.000, 0.534	206.000, 0.487	206.000, 0.453	206.000, 0.485	206.000, 0.423
1032	206.200, 0.534	206.200, 0.487	206.200, 0.453	206.200, 0.485	206.200, 0.422
1033	206.400, 0.533	206.400, 0.487	206.400, 0.453	206.400, 0.484	206.400, 0.422
1034	206.600, 0.533	206.600, 0.487	206.600, 0.453	206.600, 0.484	206.600, 0.422
1035	206.800, 0.532	206.800, 0.487	206.800, 0.452	206.800, 0.484	206.800, 0.422
1036	207.000, 0.532	207.000, 0.488	207.000, 0.452	207.000, 0.483	207.000, 0.422
1037	207.200, 0.531	207.200, 0.488	207.200, 0.451	207.200, 0.483	207.200, 0.422
1038	207.400, 0.531	207.400, 0.488	207.400, 0.451	207.400, 0.483	207.400, 0.422
1039	207.600, 0.530	207.600, 0.488	207.600, 0.450	207.600, 0.483	207.600, 0.422
1040	207.800, 0.530	207.800, 0.488	207.800, 0.450	207.800, 0.483	207.800, 0.422
1041	208.000, 0.530	208.000, 0.488	208.000, 0.450	208.000, 0.483	208.000, 0.422
1042	208.200, 0.530	208.200, 0.487	208.200, 0.449	208.200, 0.483	208.200, 0.422
1043	208.400, 0.530	208.400, 0.487	208.400, 0.449	208.400, 0.483	208.400, 0.422
1044	208.600, 0.530	208.600, 0.487	208.600, 0.449	208.600, 0.483	208.600, 0.422
1045	208.800, 0.530	208.800, 0.487	208.800, 0.449	208.800, 0.483	208.800, 0.422
1046	209.000, 0.530	209.000, 0.486	209.000, 0.449	209.000, 0.482	209.000, 0.421
1047	209.200, 0.530	209.200, 0.486	209.200, 0.448	209.200, 0.482	209.200, 0.421
1048	209.400, 0.530	209.400, 0.486	209.400, 0.449	209.400, 0.482	209.400, 0.421
1049	209.600, 0.530	209.600, 0.486	209.600, 0.449	209.600, 0.482	209.600, 0.420
1050	209.800, 0.530	209.800, 0.485	209.800, 0.449	209.800, 0.482	209.800, 0.420
1051	210.000, 0.530	210.000, 0.485	210.000, 0.449	210.000, 0.481	210.000, 0.420
1052	210.200, 0.530	210.200, 0.485	210.200, 0.449	210.200, 0.481	210.200, 0.419
1053	210.400, 0.530	210.400, 0.485	210.400, 0.448	210.400, 0.480	210.400, 0.419
1054	210.600, 0.530	210.600, 0.485	210.600, 0.448	210.600, 0.480	210.600, 0.419
1055	210.800, 0.530	210.800, 0.485	210.800, 0.448	210.800, 0.479	210.800, 0.419
1056	211.000, 0.529	211.000, 0.485	211.000, 0.448	211.000, 0.479	211.000, 0.419
1057	211.200, 0.529	211.200, 0.485	211.200, 0.448	211.200, 0.479	211.200, 0.419
1058	211.400, 0.529	211.400, 0.485	211.400, 0.448	211.400, 0.479	211.400, 0.419
1059	211.600, 0.529	211.600, 0.484	211.600, 0.448	211.600, 0.479	211.600, 0.419
1060	211.800, 0.529	211.800, 0.484	211.800, 0.448	211.800, 0.479	211.800, 0.419
1061	212.000, 0.529	212.000, 0.484	212.000, 0.448	212.000, 0.479	212.000, 0.419
1062	212.200, 0.529	212.200, 0.484	212.200, 0.447	212.200, 0.479	212.200, 0.419
1063	212.400, 0.529	212.400, 0.484	212.400, 0.447	212.400, 0.479	212.400, 0.419
1064	212.600, 0.529	212.600, 0.484	212.600, 0.447	212.600, 0.479	212.600, 0.419
1065	212.800, 0.529	212.800, 0.484	212.800, 0.447	212.800, 0.479	212.800, 0.419
1066	213.000, 0.529	213.000, 0.484	213.000, 0.447	213.000, 0.478	213.000, 0.419
1067	213.200, 0.529	213.200, 0.484	213.200, 0.447	213.200, 0.478	213.200, 0.419
1068	213.400, 0.528	213.400, 0.483	213.400, 0.446	213.400, 0.478	213.400, 0.419
1069	213.600, 0.528	213.600, 0.483	213.600, 0.446	213.600, 0.478	213.600, 0.418
1070	213.800, 0.527	213.800, 0.483	213.800, 0.446	213.800, 0.478	213.800, 0.418
1071	214.000, 0.527	214.000, 0.483	214.000, 0.446	214.000, 0.478	214.000, 0.418
1072	214.200, 0.527	214.200, 0.483	214.200, 0.445	214.200, 0.478	214.200, 0.417
1073	214.400, 0.526	214.400, 0.482	214.400, 0.445	214.400, 0.478	214.400, 0.417
1074	214.600, 0.526	214.600, 0.482	214.600, 0.445	214.600, 0.478	214.600, 0.417
1075	214.800, 0.526	214.800, 0.482	214.800, 0.445	214.800, 0.478	214.800, 0.417
1076	215.000, 0.525	215.000, 0.481	215.000, 0.445	215.000, 0.477	215.000, 0.417
1077	215.200, 0.525	215.200, 0.481	215.200, 0.445	215.200, 0.477	215.200, 0.417
1078	215.400, 0.525	215.400, 0.481	215.400, 0.445	215.400, 0.477	215.400, 0.417
1079	215.600, 0.525	215.600, 0.481	215.600, 0.445	215.600, 0.477	215.600, 0.417
1080	215.800, 0.525	215.800, 0.480	215.800, 0.444	215.800, 0.476	215.800, 0.417
1081	216.000, 0.525	216.000, 0.480	216.000, 0.444	216.000, 0.476	216.000, 0.417
1082	216.200, 0.525	216.200, 0.480	216.200, 0.444	216.200, 0.476	216.200, 0.417
1083	216.400, 0.525	216.400, 0.480	216.400, 0.444	216.400, 0.476	216.400, 0.417
1084	216.600, 0.525	216.600, 0.480	216.600, 0.443	216.600, 0.476	216.600, 0.417
1085	216.800, 0.525	216.800, 0.479	216.800, 0.443	216.800, 0.476	216.800, 0.417
1086	217.000, 0.525	217.000, 0.479	217.000, 0.443	217.000, 0.476	217.000, 0.417
1087	217.200, 0.524	217.200, 0.479	217.200, 0.443	217.200, 0.475	217.200, 0.417
1088	217.400, 0.524	217.400, 0.479	217.400, 0.442	217.400, 0.475	217.400, 0.417
1089	217.600, 0.524	217.600, 0.479	217.600, 0.442	217.600, 0.475	217.600, 0.416
1090	217.800, 0.524	217.800, 0.479	217.800, 0.442	217.800, 0.475	217.800, 0.416
1091	218.000, 0.524	218.000, 0.479	218.000, 0.442	218.000, 0.474	218.000, 0.416
1092	218.200, 0.524	218.200, 0.478	218.200, 0.442	218.200, 0.474	218.200, 0.416
1093	218.400, 0.523	218.400, 0.478	218.400, 0.441	218.400, 0.474	218.400, 0.415
1094	218.600, 0.523	218.600, 0.478	218.600, 0.441	218.600, 0.474	218.600, 0.415
1095	218.800, 0.523	218.800, 0.477	218.800, 0.441	218.800, 0.474	218.800, 0.415
1096	219.000, 0.523	219.000, 0.477	219.000, 0.441	219.000, 0.474	219.000, 0.415
1097	219.200, 0.523	219.200, 0.477	219.200, 0.441	219.200, 0.474	219.200, 0.414
1098	219.400, 0.523	219.400, 0.476	219.400, 0.441	219.400, 0.474	219.400, 0.415
1099	219.600, 0.523	219.600, 0.476	219.600, 0.441	219.600, 0.473	219.600, 0.415
1100	219.800, 0.523	219.800, 0.476	219.800, 0.441	219.800, 0.473	219.800, 0.415
1101	220.000, 0.523	220.000, 0.476	220.000, 0.441	220.000, 0.473	220.000, 0.415
1102	220.200, 0.522	220.200, 0.475	220.200, 0.441	220.200, 0.473	220.200, 0.415
1103	220.400, 0.522	220.400, 0.475	220.400, 0.441	220.400, 0.473	220.400, 0.414
1104	220.600, 0.522	220.600, 0.475	220.600, 0.441	220.600, 0.473	220.600, 0.414
1105	220.800, 0.522	220.800, 0.475	220.800, 0.441	220.800, 0.473	220.800, 0.415
1106	221.000, 0.521	221.000, 0.475	221.000, 0.441	221.000, 0.472	221.000, 0.415
1107	221.200, 0.521	221.200, 0.476	221.200, 0.440	221.200, 0.472	221.200, 0.415
1108	221.400, 0.521	221.400, 0.476	221.400, 0.440	221.400, 0.472	221.400, 0.415
1109	221.600, 0.521	221.600, 0.476	221.600, 0.440	221.600, 0.472	221.600, 0.415
1110	221.800, 0.521	221.800, 0.476	221.800, 0.440	221.800, 0.472	221.800, 0.414
1111	222.000, 0.521	222.000, 0.476	222.000, 0.440	222.000, 0.472	222.000, 0.414
1112	222.200, 0.521	222.200, 0.475	222.200, 0.439	222.200, 0.472	222.200, 0.414
1113	222.400, 0.520	222.400, 0.475	222.400, 0.439	222.400, 0.472	222.400, 0.414
1114	222.600, 0.520	222.600, 0.475	222.600, 0.439	222.600, 0.472	222.600, 0.413
1115	222.800, 0.520	222.800, 0.475	222.800, 0.439	222.800, 0.471	222.800, 0.413
1116	223.000, 0.520	223.000, 0.475	223.000, 0.438	223.000, 0.471	223.000, 0.413
1117	223.200, 0.520	223.200, 0.474	223.200, 0.438	223.200, 0.471	223.200, 0.412
1118	223.400, 0.520	223.400, 0.474	223.400, 0.437	223.400, 0.471	223.400, 0.412
1119	223.600, 0.519	223.600, 0.474	223.600, 0.437	223.600, 0.471	223.600, 0.412
1120	223.800, 0.519	223.800, 0.474	223.800, 0.437	223.800, 0.470	223.800, 0.411
1121	224.000, 0.519	224.000, 0.474	224.000, 0.437	224.000, 0.470	224.000, 0.411
1122	224.200, 0.519	224.200, 0.474	224.200, 0.437	224.200, 0.470	224.200, 0.411
1123	224.400, 0.519	224.400, 0.474	224.400, 0.437	224.400, 0.469	224.400, 0.410
1124	224.600, 0.519	224.600, 0.474	224.600, 0.437	224.600, 0.469	224.600, 0.410
1125	224.800, 0.518	224.800, 0.474	224.800, 0.437	224.800, 0.469	224.800, 0.410
1126	225.000, 0.518	225.000, 0.474	225.000, 0.437	225.000, 0.469	225.000, 0.410
1127	225.200, 0.518	225.200, 0.474	225.200, 0.437	225.200, 0.469	225.200, 0.409
1128	225.400, 0.518	225.400, 0.474	225.400, 0.437	225.400, 0.469	225.400, 0.410
1129	225.600, 0.519	225.600, 0.474	225.600, 0.437	225.600, 0.469	225.600, 0.410
1130	225.800, 0.519	225.800, 0.474	225.800, 0.437	225.800, 0.469	225.800, 0.409
1131	226.000, 0.519	226.000, 0.473	226.000, 0.437	226.000, 0.469	226.000, 0.409
1132	226.200, 0.519	226.200, 0.473	226.200, 0.437	226.200, 0.469	226.200, 0.409
1133	226.400, 0.519	226.400, 0.473	226.400, 0.437	226.400, 0.469	226.400, 0.409
1134	226.600, 0.519	226.600, 0.473	226.600, 0.437	226.600, 0.470	226.600, 0.409
1135	226.800, 0.519	226.800, 0.473	226.800, 0.437	226.800, 0.470	226.800, 0.409
1136	227.000, 0.519	227.000, 0.473	227.000, 0.437	227.000, 0.470	227.000, 0.409
1137	227.200, 0.518	227.200, 0.472	227.200, 0.437	227.200, 0.470	227.200, 0.409
1138	227.400, 0.518	227.400, 0.472	227.400, 0.437	227.400, 0.470	227.400, 0.409
1139	227.600, 0.517	227.600, 0.472	227.600, 0.437	227.600, 0.469	227.600, 0.409
1140	227.800, 0.517	227.800, 0.472	227.800, 0.437	227.800, 0.469	227.800, 0.409
1141	228.000, 0.517	228.000, 0.472	228.000, 0.437	228.000, 0.469	228.000, 0.409
1142	228.200, 0.516	228.200, 0.471	228.200, 0.437	228.200, 0.469	228.200, 0.409
1143	228.400, 0.516	228.400, 0.471	228.400, 0.437	228.400, 0.468	228.400, 0.409
1144	228.600, 0.516	228.600, 0.471	228.600, 0.436	228.600, 0.468	228.600, 0.409
1145	228.800, 0.515	228.800, 0.471	228.800, 0.436	228.800, 0.468	228.800, 0.409
1146	229.000, 0.515	229.000, 0.470	229.000, 0.436	229.000, 0.467	229.000, 0.409
1147	229.200, 0.515	229.200, 0.470	229.200, 0.435	229.200, 0.467	229.200, 0.409
1148	229.400, 0.515	229.400, 0.469	229.400, 0.435	229.400, 0.467	229.400, 0.409
1149	229.600, 0.516	229.600, 0.469	229.600, 0.435	229.600, 0.467	229.600, 0.409
1150	229.800, 0.516	229.800, 0.469	229.800, 0.434	229.800, 0.466	229.800, 0.409
1151	230.000, 0.516	230.000, 0.468	230.000, 0.434	230.000, 0.466	230.000, 0.408
1152	230.200, 0.516	230.200, 0.468	230.200, 0.433	230.200, 0.466	230.200, 0.408
1153	230.400, 0.516	230.400, 0.468	230.400, 0.433	230.400, 0.467	230.400, 0.408
1154	230.600, 0.516	230.600, 0.468	230.600, 0.433	230.600, 0.467	230.600, 0.408
1155	230.800, 0.516	230.800, 0.468	230.800, 0.432	230.800, 0.467	230.800, 0.408
1156	231.000, 0.515	231.000, 0.469	231.000, 0.432	231.000, 0.467	231.000, 0.408
1157	231.200, 0.515	231.200, 0.469	231.200, 0.432	231.200, 0.467	231.200, 0.408
1158	231.400, 0.515	231.400, 0.469	231.400, 0.432	231.400, 0.467	231.400, 0.408
1159	231.600, 0.514	231.600, 0.469	231.600, 0.433	231.600, 0.467	231.600, 0.408
1160	231.800, 0.514	231.800, 0.469	231.800, 0.433	231.800, 0.467	231.800, 0.408
1161	232.000, 0.514	232.000, 0.469	232.000, 0.433	232.000, 0.467	232.000, 0.408
1162	232.200, 0.514	232.200, 0.469	232.200, 0.433	232.200, 0.467	232.200, 0.408
1163	232.400, 0.514	232.400, 0.469	232.400, 0.433	232.400, 0.466	232.400, 0.408
1164	232.600, 0.514	232.600, 0.469	232.600, 0.432	232.600, 0.466	232.600, 0.408
1165	232.800, 0.514	232.800, 0.469	232.800, 0.432	232.800, 0.466	232.800, 0.408
1166	233.000, 0.514	233.000, 0.469	233.000, 0.432	233.000, 0.466	233.000, 0.408
1167	233.200, 0.513	233.200, 0.469	233.200, 0.432	233.200, 0.465	233.200, 0.407
1168	233.400, 0.513	233.400, 0.469	233.400, 0.432	233.400, 0.465	233.400, 0.407
1169	233.600, 0.513	233.600, 0.468	233.600, 0.431	233.600, 0.465	233.600, 0.407
1170	233.800, 0.513	233.800, 0.468	233.800, 0.431	233.800, 0.465	233.800, 0.407
1171	234.000, 0.512	234.000, 0.468	234.000, 0.431	234.000, 0.465	234.000, 0.406
1172	234.200, 0.512	234.200, 0.468	234.200, 0.431	234.200, 0.464	234.200, 0.406
1173	234.400, 0.512	234.400, 0.467	234.400, 0.431	234.400, 0.464	234.400, 0.406
1174	234.600, 0.512	234.600, 0.467	234.600, 0.431	234.600, 0.464	234.600, 0.406
1175	234.800, 0.512	234.800, 0.467	234.800, 0.431	234.800, 0.464	234.800, 0.406
1176	235.000, 0.512	235.000, 0.467	235.000, 0.431	235.000, 0.463	235.000, 0.406
1177	235.200, 0.512	235.200, 0.467	235.200, 0.431	235.200, 0.463	235.200, 0.406
1178	235.400, 0.512	235.400, 0.467	235.400, 0.431	235.400, 0.463	235.400, 0.406
1179	235.600, 0.512	235.600, 0.467	235.600, 0.431	235.600, 0.462	235.600, 0.407
1180	235.800, 0.512	235.800, 0.467	235.800, 0.431	235.800, 0.462	235.800, 0.407
1181	236.000, 0.512	236.000, 0.467	236.000, 0.430	236.000, 0.462	236.000, 0.407
1182	236.200, 0.512	236.200, 0.467	236.200, 0.430	236.200, 0.462	236.200, 0.407
1183	236.400, 0.512	236.400, 0.467	236.400, 0.430	236.400, 0.462	236.400, 0.407
1184	236.600, 0.512	236.600, 0.466	236.600, 0.430	236.600, 0.461	236.600, 0.406
1185	236.800, 0.512	236.800, 0.466	236.800, 0.429	236.800, 0.461	236.800, 0.406
1186	237.000, 0.511	237.000, 0.466	237.000, 0.429	237.000, 0.461	237.000, 0.406
1187	237.200, 0.511	237.200, 0.466	237.200, 0.429	237.200, 0.461	237.200, 0.405
1188	237.400, 0.511	237.400, 0.465	237.400, 0.428	237.400, 0.461	237.400, 0.405
1189	237.600, 0.511	237.600, 0.465	237.600, 0.428	237.600, 0.461	237.600, 0.405
1190	237.800, 0.511	237.800, 0.464	237.800, 0.428	237.800, 0.461	237.800, 0.405
1191	238.000, 0.511	238.000, 0.464	238.000, 0.428	238.000, 0.461	238.000, 0.404
1192	238.200, 0.511	238.200, 0.464	238.200, 0.428	238.200, 0.461	238.200, 0.404
1193	238.400, 0.511	238.400, 0.463	238.400, 0.427	238.400, 0.461	238.400, 0.404
1194	238.600, 0.511	238.600, 0.463	238.600, 0.427	238.600, 0.461	238.600, 0.404
1195	238.800, 0.511	238.800, 0.463	238.800, 0.427	238.800, 0.460	238.800, 0.403
1196	239.000, 0.511	239.000, 0.463	239.000, 0.427	239.000, 0.460	239.000, 0.403
1197	239.200, 0.511	239.200, 0.463	239.200, 0.427	239.200, 0.460	239.200, 0.404
1198	239.400, 0.511	239.400, 0.463	239.400, 0.427	239.400, 0.460	239.400, 0.403
1199	239.600, 0.511	239.600, 0.463	239.600, 0.427	239.600, 0.460	239.600, 0.403
1200	239.800, 0.511	239.800, 0.463	239.800, 0.427	239.800, 0.460	239.800, 0.403
1201	240.000, 0.511	240.000, 0.463	240.000, 0.427	240.000, 0.460	240.000, 0.403
1202	240.200, 0.511	240.200, 0.463	240.200, 0.427	240.200, 0.459	240.200, 0.403
1203	240.400, 0.511	240.400, 0.463	240.400, 0.427	240.400, 0.459	240.400, 0.403
1204	240.600, 0.510	240.600, 0.463	240.600, 0.427	240.600, 0.459	240.600, 0.402
1205	240.800, 0.510	240.800, 0.463	240.800, 0.427	240.800, 0.459	240.800, 0.402
1206	241.000, 0.510	241.000, 0.463	241.000, 0.427	241.000, 0.459	241.000, 0.403
1207	241.200, 0.510	241.200, 0.463	241.200, 0.427	241.200, 0.459	241.200, 0.403
1208	241.400, 0.509	241.400, 0.463	241.400, 0.428	241.400, 0.459	241.400, 0.403
1209	241.600, 0.509	241.600, 0.463	241.600, 0.428	241.600, 0.459	241.600, 0.403
1210	241.800, 0.508	241.800, 0.463	241.800, 0.428	241.800, 0.459	241.800, 0.403
1211	242.000, 0.508	242.000, 0.463	242.000, 0.428	242.000, 0.459	242.000, 0.403
1212	242.200, 0.508	242.200, 0.463	242.200, 0.428	242.200, 0.459	242.200, 0.403
1213	242.400, 0.507	242.400, 0.463	242.400, 0.428	242.400, 0.459	242.400, 0.403
1214	242.600, 0.507	242.600, 0.463	242.600, 0.428	242.600, 0.459	242.600, 0.403
1215	242.800, 0.507	242.800, 0.463	242.800, 0.428	242.800, 0.459	242.800, 0.403
1216	243.000, 0.507	243.000, 0.463	243.000, 0.428	243.000, 0.459	243.000, 0.402
1217	243.200, 0.506	243.200, 0.463	243.200, 0.427	243.200, 0.459	243.200, 0.402
1218	243.400, 0.506	243.400, 0.463	243.400, 0.427	243.400, 0.459	243.400, 0.402
1219	243.600, 0.506	243.600, 0.463	243.600, 0.427	243.600, 0.459	243.600, 0.402
1220	243.800, 0.506	243.800, 0.463	243.800, 0.427	243.800, 0.459	243.800, 0.402
1221	244.000, 0.506	244.000, 0.463	244.000, 0.426	244.000, 0.458	244.000, 0.402
1222	244.200, 0.507	244.200, 0.462	244.200, 0.426	244.200, 0.458	244.200, 0.402
1223	244.400, 0.507	244.400, 0.462	244.400, 0.426	244.400, 0.458	244.400, 0.401
1224	244.600, 0.507	244.600, 0.461	244.600, 0.426	244.600, 0.458	244.600, 0.401
1225	244.800, 0.507	244.800, 0.461	244.800, 0.426	244.800, 0.457	244.800, 0.401
1226	245.000, 0.507	245.000, 0.460	245.000, 0.426	245.000, 0.457	245.000, 0.401
1227	245.200, 0.507	245.200, 0.460	245.200, 0.426	245.200, 0.457	245.200, 0.401
1228	245.400, 0.507	245.400, 0.460	245.400, 0.425	245.400, 0.457	245.400, 0.401
1229	245.600, 0.507	245.600, 0.460	245.600, 0.425	245.600, 0.457	245.600, 0.401
1230	245.800, 0.507	245.800, 0.459	245.800, 0.425	245.800, 0.457	245.800, 0.401
1231	246.000, 0.507	246.000, 0.459	246.000, 0.425	246.000, 0.457	246.000, 0.401
1232	246.200, 0.506	246.200, 0.459	246.200, 0.425	246.200, 0.456	246.200, 0.401
1233	246.400, 0.506	246.400, 0.459	246.400, 0.425	246.400, 0.456	246.400, 0.400
1234	246.600, 0.506	246.600, 0.459	246.600, 0.425	246.600, 0.456	246.600, 0.400
1235	246.800, 0.505	246.800, 0.459	246.800, 0.425	246.800, 0.456	246.800, 0.400
1236	247.000, 0.505	247.000, 0.460	247.000, 0.424	247.000, 0.456	247.000, 0.401
1237	247.200, 0.505	247.200, 0.460	247.200, 0.424	247.200, 0.456	247.200, 0.401
1238	247.400, 0.505	247.400, 0.460	247.400, 0.424	247.400, 0.456	247.400, 0.401
1239	247.600, 0.505	247.600, 0.460	247.600, 0.424	247.600, 0.456	247.600, 0.401
1240	247.800, 0.504	247.800, 0.460	247.800, 0.423	247.800, 0.456	247.800, 0.401
1241	248.000, 0.504	248.000, 0.460	248.000, 0.423	248.000, 0.456	248.000, 0.401
1242	248.200, 0.504	248.200, 0.460	248.200, 0.423	248.200, 0.456	248.200, 0.401
1243	248.400, 0.505	248.400, 0.460	248.400, 0.423	248.400, 0.456	248.400, 0.401
1244	248.600, 0.504	248.600, 0.460	248.600, 0.423	248.600, 0.456	248.600, 0.400
1245	248.800, 0.505	248.800, 0.460	248.800, 0.423	248.800, 0.456	248.800, 0.400
1246	249.000, 0.505	249.000, 0.460	249.000, 0.422	249.000, 0.456	249.000, 0.400
1247	249.200, 0.505	249.200, 0.460	249.200, 0.422	249.200, 0.456	249.200, 0.400
1248	249.400, 0.505	249.400, 0.459	249.400, 0.422	249.400, 0.456	249.400, 0.399
1249	249.600, 0.505	249.600, 0.459	249.600, 0.423	249.600, 0.455	249.600, 0.399
1250	249.800, 0.505	249.800, 0.459	249.800, 0.423	249.800, 0.455	249.800, 0.399
1251	250.000, 0.505	250.000, 0.459	250.000, 0.423	250.000, 0.455	250.000, 0.399
1252	250.200, 0.504	250.200, 0.459	250.200, 0.423	250.200, 0.454	250.200, 0.399
1253	250.400, 0.504	250.400, 0.458	250.400, 0.422	250.400, 0.454	250.400, 0.399
1254	250.600, 0.504	250.600, 0.458	250.600, 0.422	250.600, 0.454	250.600, 0.399
1255	250.800, 0.504	250.800, 0.458	250.800, 0.422	250.800, 0.454	250.800, 0.399
1256	251.000, 0.504	251.000, 0.458	251.000, 0.422	251.000, 0.454	251.000, 0.399
1257	251.200, 0.503	251.200, 0.457	251.200, 0.422	251.200, 0.454	251.200, 0.399
1258	251.400, 0.503	251.400, 0.457	251.400, 0.422	251.400, 0.454	251.400, 0.399
1259	251.600, 0.503	251.600, 0.457	251.600, 0.422	251.600, 0.454	251.600, 0.399
1260	251.800, 0.503	251.800, 0.456	251.800, 0.422	251.800, 0.454	251.800, 0.399
1261	252.000, 0.503	252.000, 0.456	252.000, 0.422	252.000, 0.454	252.000, 0.399
1262	252.200, 0.503	252.200, 0.456	252.200, 0.422	252.200, 0.454	252.200, 0.399
1263	252.400, 0.503	252.400, 0.456	252.400, 0.422	252.400, 0.454	252.400, 0.399
1264	252.600, 0.503	252.600, 0.456	252.600, 0.421	252.600, 0.454	252.600, 0.399
1265	252.800, 0.504	252.800, 0.456	252.800, 0.421	252.800, 0.453	252.800, 0.398
1266	253.000, 0.504	253.000, 0.456	253.000, 0.421	253.000, 0.453	253.000, 0.399
1267	253.200, 0.504	253.200, 0.456	253.200, 0.421	253.200, 0.452	253.200, 0.399
1268	253.400, 0.504	253.400, 0.456	253.400, 0.421	253.400, 0.452	253.400, 0.399
1269	253.600, 0.503	253.600, 0.457	253.600, 0.422	253.600, 0.452	253.600, 0.399
1270	253.800, 0.503	253.800, 0.457	253.800, 0.421	253.800, 0.451	253.800, 0.399
1271	254.000, 0.503	254.000, 0.457	254.000, 0.421	254.000, 0.451	254.000, 0.398
1272	254.200, 0.503	254.200, 0.457	254.200, 0.421	254.200, 0.451	254.200, 0.398
1273	254.400, 0.503	254.400, 0.457	254.400, 0.421	254.400, 0.452	254.400, 0.398
1274	254.600, 0.502	254.600, 0.457	254.600, 0.421	254.600, 0.452	254.600, 0.398
1275	254.800, 0.502	254.800, 0.457	254.800, 0.421	254.800, 0.452	254.800, 0.398
1276	255.000, 0.502	255.000, 0.457	255.000, 0.421	255.000, 0.452	255.000, 0.398
1277	255.200, 0.502	255.200, 0.457	255.200, 0.421	255.200, 0.452	255.200, 0.398
1278	255.400, 0.501	255.400, 0.457	255.400, 0.421	255.400, 0.452	255.400, 0.398
1279	255.600, 0.501	255.600, 0.456	255.600, 0.420	255.600, 0.452	255.600, 0.397
1280	255.800, 0.501	255.800, 0.456	255.800, 0.420	255.800, 0.451	255.800, 0.397
1281	256.000, 0.501	256.000, 0.456	256.000, 0.420	256.000, 0.451	256.000, 0.397
1282	256.200, 0.501	256.200, 0.456	256.200, 0.420	256.200, 0.451	256.200, 0.397
1283	256.400, 0.501	256.400, 0.456	256.400, 0.419	256.400, 0.451	256.400, 0.397
1284	256.600, 0.501	256.600, 0.455	256.600, 0.419	256.600, 0.451	256.600, 0.397
1285	256.800, 0.501	256.800, 0.455	256.800, 0.419	256.800, 0.451	256.800, 0.397
1286	257.000, 0.501	257.000, 0.455	257.000, 0.419	257.000, 0.451	257.000, 0.397
1287	257.200, 0.501	257.200, 0.455	257.200, 0.419	257.200, 0.451	257.200, 0.397
1288	257.400, 0.501	257.400, 0.455	257.400, 0.419	257.400, 0.451	257.400, 0.397
1289	257.600, 0.501	257.600, 0.454	257.600, 0.419	257.600, 0.451	257.600, 0.397
1290	257.800, 0.500	257.800, 0.454	257.800, 0.419	257.800, 0.451	257.800, 0.397
1291	258.000, 0.500	258.000, 0.454	258.000, 0.419	258.000, 0.451	258.000, 0.397
1292	258.200, 0.500	258.200, 0.454	258.200, 0.419	258.200, 0.451	258.200, 0.396
1293	258.400, 0.500	258.400, 0.454	258.400, 0.419	258.400, 0.451	258.400, 0.396
1294	258.600, 0.499	258.600, 0.453	258.600, 0.419	258.600, 0.451	258.600, 0.396
1295	258.800, 0.499	258.800, 0.453	258.800, 0.419	258.800, 0.451	258.800, 0.396
1296	259.000, 0.499	259.000, 0.453	259.000, 0.419	259.000, 0.451	259.000, 0.396
1297	259.200, 0.499	259.200, 0.453	259.200, 0.419	259.200, 0.451	259.200, 0.396
1298	259.400, 0.499	259.400, 0.453	259.400, 0.419	259.400, 0.451	259.400, 0.396
1299	259.600, 0.499	259.600, 0.453	259.600, 0.419	259.600, 0.451	259.600, 0.397
1300	259.800, 0.499	259.800, 0.453	259.800, 0.418	259.800, 0.451	259.800, 0.397
1301	260.000, 0.499	260.000, 0.453	260.000, 0.418	260.000, 0.451	260.000, 0.397
1302	260.200, 0.499	260.200, 0.453	260.200, 0.418	260.200, 0.450	260.200, 0.397
1303	260.400, 0.499	260.400, 0.453	260.400, 0.418	260.400, 0.450	260.400, 0.396
1304	260.600, 0.499	260.600, 0.453	260.600, 0.418	260.600, 0.450	260.600, 0.396
1305	260.800, 0.499	260.800, 0.453	260.800, 0.417	260.800, 0.450	260.800, 0.396
1306	261.000, 0.499	261.000, 0.453	261.000, 0.417	261.000, 0.449	261.000, 0.397
1307	261.200, 0.499	261.200, 0.453	261.200, 0.417	261.200, 0.449	261.200, 0.396
1308	261.400, 0.499	261.400, 0.453	261.400, 0.417	261.400, 0.448	261.400, 0.396
1309	261.600, 0.499	261.600, 0.453	261.600, 0.417	261.600, 0.448	261.600, 0.396
1310	261.800, 0.498	261.800, 0.453	261.800, 0.417	261.800, 0.447	261.800, 0.396
1311	262.000, 0.498	262.000, 0.453	262.000, 0.417	262.000, 0.447	262.000, 0.396
1312	262.200, 0.498	262.200, 0.453	262.200, 0.417	262.200, 0.447	262.200, 0.396
1313	262.400, 0.498	262.400, 0.452	262.400, 0.416	262.400, 0.447	262.400, 0.396
1314	262.600, 0.498	262.600, 0.452	262.600, 0.416	262.600, 0.447	262.600, 0.396
1315	262.800, 0.498	262.800, 0.452	262.800, 0.416	262.800, 0.448	262.800, 0.396
1316	263.000, 0.498	263.000, 0.452	263.000, 0.416	263.000, 0.448	263.000, 0.396
1317	263.200, 0.498	263.200, 0.451	263.200, 0.416	263.200, 0.448	263.200, 0.396
1318	263.400, 0.498	263.400, 0.451	263.400, 0.415	263.400, 0.448	263.400, 0.396
1319	263.600, 0.498	263.600, 0.451	263.600, 0.415	263.600, 0.448	263.600, 0.395
1320	263.800, 0.498	263.800, 0.451	263.800, 0.415	263.800, 0.448	263.800, 0.395
1321	264.000, 0.497	264.000, 0.451	264.000, 0.415	264.000, 0.448	264.000, 0.394
1322	264.200, 0.497	264.200, 0.451	264.200, 0.415	264.200, 0.448	264.200, 0.394
1323	264.400, 0.497	264.400, 0.451	264.400, 0.415	264.400, 0.448	264.400, 0.393
1324	264.600, 0.497	264.600, 0.451	264.600, 0.415	264.600, 0.448	264.600, 0.393
1325	264.800, 0.497	264.800, 0.451	264.800, 0.415	264.800, 0.447	264.800, 0.392
1326	265.000, 0.497	265.000, 0.451	265.000, 0.415	265.000, 0.447	265.000, 0.392
1327	265.200, 0.497	265.200, 0.451	265.200, 0.415	265.200, 0.447	265.200, 0.392
1328	265.400, 0.497	265.400, 0.451	265.400, 0.415	265.400, 0.447	265.400, 0.392
1329	265.600, 0.497	265.600, 0.451	265.600, 0.415	265.600, 0.447	265.600, 0.392
1330	265.800, 0.497	265.800, 0.451	265.800, 0.415	265.800, 0.447	265.800, 0.392
1331	266.000, 0.497	266.000, 0.451	266.000, 0.415	266.000, 0.447	266.000, 0.392
1332	266.200, 0.496	266.200, 0.451	266.200, 0.415	266.200, 0.447	266.200, 0.392
1333	266.400, 0.496	266.400, 0.451	266.400, 0.415	266.400, 0.447	266.400, 0.392
1334	266.600, 0.496	266.600, 0.451	266.600, 0.415	266.600, 0.447	266.600, 0.393
1335	266.800, 0.496	266.800, 0.451	266.800, 0.415	266.800, 0.447	266.800, 0.393
1336	267.000, 0.496	267.000, 0.451	267.000, 0.415	267.000, 0.447	267.000, 0.393
1337	267.200, 0.496	267.200, 0.451	267.200, 0.415	267.200, 0.447	267.200, 0.393
1338	267.400, 0.496	267.400, 0.451	267.400, 0.415	267.400, 0.447	267.400, 0.393
1339	267.600, 0.495	267.600, 0.451	267.600, 0.415	267.600, 0.447	267.600, 0.393
1340	267.800, 0.495	267.800, 0.451	267.800, 0.415	267.800, 0.447	267.800, 0.393
1341	268.000, 0.495	268.000, 0.451	268.000, 0.415	268.000, 0.447	268.000, 0.393
1342	268.200, 0.495	268.200, 0.451	268.200, 0.415	268.200, 0.446	268.200, 0.393
1343	268.400, 0.495	268.400, 0.451	268.400, 0.415	268.400, 0.446	268.400, 0.393
1344	268.600, 0.495	268.600, 0.451	268.600, 0.415	268.600, 0.446	268.600, 0.393
1345	268.800, 0.495	268.800, 0.451	268.800, 0.415	268.800, 0.446	268.800, 0.393
1346	269.000, 0.495	269.000, 0.451	269.000, 0.414	269.000, 0.446	269.000, 0.393
1347	269.200, 0.496	269.200, 0.450	269.200, 0.414	269.200, 0.445	269.200, 0.393
1348	269.400, 0.496	269.400, 0.450	269.400, 0.414	269.400, 0.445	269.400, 0.393
1349	269.600, 0.496	269.600, 0.450	269.600, 0.413	269.600, 0.445	269.600, 0.393
1350	269.800, 0.496	269.800, 0.450	269.800, 0.413	269.800, 0.445	269.800, 0.394
1351	,	,	,	,	,
1352	,	,	,	,	,
1353	,	,	,	,	,
1354	,	,	,	,	,
1355	,	,	,	,	,
1356	,	,	,	,	,
1357	,	,	,	,	,
1358	,	,	,	,	,
1359	,	,	,	,	,
1360	,	,	,	,	,
1361	,	,	,	,	,
1362	,	,	,	,	,
1363	,	,	,	,	,
1364	,	,	,	,	,
1365	,	,	,	,	,
1366	,	,	,	,	,
1367	,	,	,	,	,
1368	,	,	,	,	,
1369	,	,	,	,	,
1370	,	,	,	,	,
1371	,	,	,	,	,
1372	,	,	,	,	,
1373	,	,	,	,	,
1374	,	,	,	,	,
1375	,	,	,	,	,
1376	,	,	,	,	,
1377	,	,	,	,	,
1378	,	,	,	,	,
1379	,	,	,	,	,
1380	,	,	,	,	,
1381	,	,	,	,	,
1382	,	,	,	,	,
1383	,	,	,	,	,
1384	,	,	,	,	,
1385	,	,	,	,	,
1386	,	,	,	,	,
1387	,	,	,	,	,
1388	,	,	,	,	,
1389	,	,	,	,	,
1390	,	,	,	,	,
1391	,	,	,	,	,
1392	,	,	,	,	,
1393	,	,	,	,	,
1394	,	,	,	,	,
1395	,	,	,	,	,
1396	,	,	,	,	,
1397	,	,	,	,	,
1398	,	,	,	,	,
1399	,	,	,	,	,
1400	,	,	,	,	,
1401	,	,	,	,	,
1402	,	,	,	,	,
1403	,	,	,	,	,
1404	,	,	,	,	,
1405	,	,	,	,	,
1406	,	,	,	,	,
1407	,	,	,	,	,
1408	,	,	,	,	,
1409	,	,	,	,	,
1410	,	,	,	,	,
1411	,	,	,	,	,
1412	,	,	,	,	,
1413	,	,	,	,	,
1414	,	,	,	,	,
1415	,	,	,	,	,
1416	,	,	,	,	,
1417	,	,	,	,	,
1418	,	,	,	,	,
1419	,	,	,	,	,
1420	,	,	,	,	,
1421	,	,	,	,	,
1422	,	,	,	,	,
1423	,	,	,	,	,
1424	,	,	,	,	,
1425	,	,	,	,	,
1426	,	,	,	,	,
1427	,	,	,	,	,
1428	,	,	,	,	,
1429	,	,	,	,	,
1430	,	,	,	,	,
1431	,	,	,	,	,
1432	,	,	,	,	,
1433	,	,	,	,	,
1434	,	,	,	,	,
1435	,	,	,	,	,
1436	,	,	,	,	,
1437	,	,	,	,	,
1438	,	,	,	,	,
1439	,	,	,	,	,
1440	,	,	,	,	,
1441	,	,	,	,	,
1442	,	,	,	,	,
1443	,	,	,	,	,
1444	,	,	,	,	,
1445	,	,	,	,	,
1446	,	,	,	,	,
1447	,	,	,	,	,
1448	,	,	,	,	,
1449	,	,	,	,	,
1450	,	,	,	,	,
1451	,	,	,	,	,
1452	,	,	,	,	,
1453	,	,	,	,	,
1454	,	,	,	,	,
1455	,	,	,	,	,
1456	,	,	,	,	,
1457	,	,	,	,	,
1458	,	,	,	,	,
1459	,	,	,	,	,
1460	,	,	,	,	,
1461	,	,	,	,	,
1462	,	,	,	,	,
1463	,	,	,	,	,
1464	,	,	,	,	,
1465	,	,	,	,	,
1466	,	,	,	,	,
1467	,	,	,	,	,
1468	,	,	,	,	,
1469	,	,	,	,	,
1470	,	,	,	,	,
1471	,	,	,	,	,
1472	,	,	,	,	,
1473	,	,	,	,	,
1474	,	,	,	,	,
1475	,	,	,	,	,
1476	,	,	,	,	,
1477	,	,	,	,	,
1478	,	,	,	,	,
1479	,	,	,	,	,
1480	,	,	,	,	,
1481	,	,	,	,	,
1482	,	,	,	,	,
1483	,	,	,	,	,
1484	,	,	,	,	,
1485	,	,	,	,	,
1486	,	,	,	,	,
1487	,	,	,	,	,
1488	,	,	,	,	,
1489	,	,	,	,	,
1490	,	,	,	,	,
1491	,	,	,	,	,
1492	,	,	,	,	,
1493	,	,	,	,	,
1494	,	,	,	,	,
1495	,	,	,	,	,
1496	,	,	,	,	,
1497	,	,	,	,	,
1498	,	,	,	,	,
1499	,	,	,	,	,
1500	,	,	,	,	,
1501	,	,	,	,	,
1502	,	,	,	,	,
1503	,	,	,	,	,
1504	,	,	,	,	,
1505	,	,	,	,	,
1506	,	,	,	,	,
1507	,	,	,	,	,
1508	,	,	,	,	,
1509	,	,	,	,	,
1510	,	,	,	,	,
1511	,	,	,	,	,
1512	,	,	,	,	,
1513	,	,	,	,	,
1514	,	,	,	,	,
1515	,	,	,	,	,
1516	,	,	,	,	,
1517	,	,	,	,	,
1518	,	,	,	,	,
1519	,	,	,	,	,
1520	,	,	,	,	,
1521	,	,	,	,	,
1522	,	,	,	,	,
1523	,	,	,	,	,
1524	,	,	,	,	,
1525	,	,	,	,	,
1526	,	,	,	,	,
1527	,	,	,	,	,
1528	,	,	,	,	,
1529	,	,	,	,	,
1530	,	,	,	,	,
1531	,	,	,	,	,
1532	,	,	,	,	,
1533	,	,	,	,	,
1534	,	,	,	,	,
1535	,	,	,	,	,
1536	,	,	,	,	,
1537	,	,	,	,	,
1538	,	,	,	,	,
1539	,	,	,	,	,
1540	,	,	,	,	,
1541	,	,	,	,	,
1542	,	,	,	,	,
1543	,	,	,	,	,
1544	,	,	,	,	,
1545	,	,	,	,	,
1546	,	,	,	,	,
1547	,	,	,	,	,
1548	,	,	,	,	,
1549	,	,	,	,	,
1550	,	,	,	,	,
1551	,	,	,	,	,
1552	,	,	,	,	,
1553	,	,	,	,	,
1554	,	,	,	,	,
1555	,	,	,	,	,
1556	,	,	,	,	,
1557	,	,	,	,	,
1558	,	,	,	,	,
1559	,	,	,	,	,
1560	,	,	,	,	,
1561	,	,	,	,	,
1562	,	,	,	,	,
1563	,	,	,	,	,
1564	,	,	,	,	,
1565	,	,	,	,	,
1566	,	,	,	,	,
1567	,	,	,	,	,
1568	,	,	,	,	,
1569	,	,	,	,	,
1570	,	,	,	,	,
1571	,	,	,	,	,
1572	,	,	,	,	,
1573	,	,	,	,	,
1574	,	,	,	,	,
1575	,	,	,	,	,
1576	,	,	,	,	,
1577	,	,	,	,	,
1578	,	,	,	,	,
1579	,	,	,	,	,
1580	,	,	,	,	,
1581	,	,	,	,	,
1582	,	,	,	,	,
1583	,	,	,	,	,
1584	,	,	,	,	,
1585	,	,	,	,	,
1586	,	,	,	,	,
1587	,	,	,	,	,
1588	,	,	,	,	,
1589	,	,	,	,	,
1590	,	,	,	,	,
1591	,	,	,	,	,
1592	,	,	,	,	,
1593	,	,	,	,	,
1594	,	,	,	,	,
1595	,	,	,	,	,
1596	,	,	,	,	,
1597	,	,	,	,	,
1598	,	,	,	,	,
1599	,	,	,	,	,
1600	,	,	,	,	,
1601	,	,	,	,	,
1602	,	,	,	,	,
1603	,	,	,	,	,
1604	,	,	,	,	,
1605	,	,	,	,	,
1606	,	,	,	,	,
1607	,	,	,	,	,
1608	,	,	,	,	,
1609	,	,	,	,	,
1610	,	,	,	,	,
1611	,	,	,	,	,
1612	,	,	,	,	,
1613	,	,	,	,	,
1614	,	,	,	,	,
1615	,	,	,	,	,
1616	,	,	,	,	,
1617	,	,	,	,	,
1618	,	,	,	,	,
1619	,	,	,	,	,
1620	,	,	,	,	,
1621	,	,	,	,	,
1622	,	,	,	,	,
1623	,	,	,	,	,
1624	,	,	,	,	,
1625	,	,	,	,	,
1626	,	,	,	,	,
1627	,	,	,	,	,
1628	,	,	,	,	,
1629	,	,	,	,	,
1630	,	,	,	,	,
1631	,	,	,	,	,
1632	,	,	,	,	,
1633	,	,	,	,	,
1634	,	,	,	,	,
1635	,	,	,	,	,
1636	,	,	,	,	,
1637	,	,	,	,	,
1638	,	,	,	,	,
1639	,	,	,	,	,
1640	,	,	,	,	,
1641	,	,	,	,	,
1642	,	,	,	,	,
1643	,	,	,	,	,
1644	,	,	,	,	,
1645	,	,	,	,	,
1646	,	,	,	,	,
1647	,	,	,	,	,
1648	,	,	,	,	,
1649	,	,	,	,	,
1650	,	,	,	,	,
1651	,	,	,	,	,
1652	,	,	,	,	,
1653	,	,	,	,	,
1654	,	,	,	,	,
1655	,	,	,	,	,
1656	,	,	,	,	,
1657	,	,	,	,	,
1658	,	,	,	,	,
1659	,	,	,	,	,
1660	,	,	,	,	,
1661	,	,	,	,	,
1662	,	,	,	,	,
1663	,	,	,	,	,
1664	,	,	,	,	,
1665	,	,	,	,	,
1666	,	,	,	,	,
1667	,	,	,	,	,
1668	,	,	,	,	,
1669	,	,	,	,	,
1670	,	,	,	,	,
1671	,	,	,	,	,
1672	,	,	,	,	,
1673	,	,	,	,	,
1674	,	,	,	,	,
1675	,	,	,	,	,
1676	,	,	,	,	,
1677	,	,	,	,	,
1678	,	,	,	,	,
1679	,	,	,	,	,
1680	,	,	,	,	,
1681	,	,	,	,	,
1682	,	,	,	,	,
1683	,	,	,	,	,
1684	,	,	,	,	,
1685	,	,	,	,	,
1686	,	,	,	,	,
1687	,	,	,	,	,
1688	,	,	,	,	,
1689	,	,	,	,	,
1690	,	,	,	,	,
1691	,	,	,	,	,
1692	,	,	,	,	,
1693	,	,	,	,	,
1694	,	,	,	,	,
1695	,	,	,	,	,
1696	,	,	,	,	,
1697	,	,	,	,	,
1698	,	,	,	,	,
1699	,	,	,	,	,
1700	,	,	,	,	,
1701	,	,	,	,	,
1702	,	,	,	,	,
1703	,	,	,	,	,
1704	,	,	,	,	,
1705	,	,	,	,	,
1706	,	,	,	,	,
1707	,	,	,	,	,
1708	,	,	,	,	,
1709	,	,	,	,	,
1710	,	,	,	,	,
1711	,	,	,	,	,
1712	,	,	,	,	,
1713	,	,	,	,	,
1714	,	,	,	,	,
1715	,	,	,	,	,
1716	,	,	,	,	,
1717	,	,	,	,	,
1718	,	,	,	,	,
1719	,	,	,	,	,
1720	,	,	,	,	,
1721	,	,	,	,	,
1722	,	,	,	,	,
1723	,	,	,	,	,
1724	,	,	,	,	,
1725	,	,	,	,	,
1726	,	,	,	,	,
1727	,	,	,	,	,
1728	,	,	,	,	,
1729	,	,	,	,	,
1730	,	,	,	,	,
1731	,	,	,	,	,
1732	,	,	,	,	,
1733	,	,	,	,	,
1734	,	,	,	,	,
1735	,	,	,	,	,
1736	,	,	,	,	,
1737	,	,	,	,	,
1738	,	,	,	,	,
1739	,	,	,	,	,
1740	,	,	,	,	,
1741	,	,	,	,	,
1742	,	,	,	,	,
1743	,	,	,	,	,
1744	,	,	,	,	,
1745	,	,	,	,	,
1746	,	,	,	,	,
1747	,	,	,	,	,
1748	,	,	,	,	,
1749	,	,	,	,	,
1750	,	,	,	,	,
1751	,	,	,	,	,
1752	,	,	,	,	,
1753	,	,	,	,	,
1754	,	,	,	,	,
1755	,	,	,	,	,
1756	,	,	,	,	,
1757	,	,	,	,	,
1758	,	,	,	,	,
1759	,	,	,	,	,
1760	,	,	,	,	,
1761	,	,	,	,	,
1762	,	,	,	,	,
1763	,	,	,	,	,
1764	,	,	,	,	,
1765	,	,	,	,	,
1766	,	,	,	,	,
1767	,	,	,	,	,
1768	,	,	,	,	,
1769	,	,	,	,	,
1770	,	,	,	,	,
1771	,	,	,	,	,
1772	,	,	,	,	,
1773	,	,	,	,	,
1774	,	,	,	,	,
1775	,	,	,	,	,
1776	,	,	,	,	,
1777	,	,	,	,	,
1778	,	,	,	,	,
1779	,	,	,	,	,
1780	,	,	,	,	,
1781	,	,	,	,	,
1782	,	,	,	,	,
1783	,	,	,	,	,
1784	,	,	,	,	,
1785	,	,	,	,	,
1786	,	,	,	,	,
1787	,	,	,	,	,
1788	,	,	,	,	,
1789	,	,	,	,	,
1790	,	,	,	,	,
1791	,	,	,	,	,
1792	,	,	,	,	,
1793	,	,	,	,	,
1794	,	,	,	,	,
1795	,	,	,	,	,
1796	,	,	,	,	,
1797	,	,	,	,	,
1798	,	,	,	,	,
1799	,	,	,	,	,
1800	,	,	,	,	,
1801	,	,	,	,	,
1802	,	,	,	,	,
1803	,	,	,	,	,
1804	,	,	,	,	,
1805	,	,	,	,	,
1806	,	,	,	,	,
1807	,	,	,	,	,
1808	,	,	,	,	,
1809	,	,	,	,	,
1810	,	,	,	,	,
1811	,	,	,	,	,
1812	,	,	,	,	,
1813	,	,	,	,	,
1814	,	,	,	,	,
1815	,	,	,	,	,
1816	,	,	,	,	,
1817	,	,	,	,	,
1818	,	,	,	,	,
1819	,	,	,	,	,
1820	,	,	,	,	,
1821	,	,	,	,	,
1822	,	,	,	,	,
1823	,	,	,	,	,
1824	,	,	,	,	,
1825	,	,	,	,	,
1826	,	,	,	,	,
1827	,	,	,	,	,
1828	,	,	,	,	,
1829	,	,	,	,	,
1830	,	,	,	,	,
1831	,	,	,	,	,
1832	,	,	,	,	,
1833	,	,	,	,	,
1834	,	,	,	,	,
1835	,	,	,	,	,
1836	,	,	,	,	,
1837	,	,	,	,	,
1838	,	,	,	,	,
1839	,	,	,	,	,
1840	,	,	,	,	,
1841	,	,	,	,	,
1842	,	,	,	,	,
1843	,	,	,	,	,
1844	,	,	,	,	,
1845	,	,	,	,	,
1846	,	,	,	,	,
1847	,	,	,	,	,
1848	,	,	,	,	,
1849	,	,	,	,	,
1850	,	,	,	,	,
1851	,	,	,	,	,
1852	,	,	,	,	,
1853	,	,	,	,	,
1854	,	,	,	,	,
1855	,	,	,	,	,
1856	,	,	,	,	,
1857	,	,	,	,	,
1858	,	,	,	,	,
1859	,	,	,	,	,
1860	,	,	,	,	,
1861	,	,	,	,	,
1862	,	,	,	,	,
1863	,	,	,	,	,
1864	,	,	,	,	,
1865	,	,	,	,	,
1866	,	,	,	,	,
1867	,	,	,	,	,
1868	,	,	,	,	,
1869	,	,	,	,	,
1870	,	,	,	,	,
1871	,	,	,	,	,
1872	,	,	,	,	,
1873	,	,	,	,	,
1874	,	,	,	,	,
1875	,	,	,	,	,
1876	,	,	,	,	,
1877	,	,	,	,	,
1878	,	,	,	,	,
1879	,	,	,	,	,
1880	,	,	,	,	,
1881	,	,	,	,	,
1882	,	,	,	,	,
1883	,	,	,	,	,
1884	,	,	,	,	,
1885	,	,	,	,	,
1886	,	,	,	,	,
1887	,	,	,	,	,
1888	,	,	,	,	,
1889	,	,	,	,	,
1890	,	,	,	,	,
1891	,	,	,	,	,
1892	,	,	,	,	,
1893	,	,	,	,	,
1894	,	,	,	,	,
1895	,	,	,	,	,
1896	,	,	,	,	,
1897	,	,	,	,	,
1898	,	,	,	,	,
1899	,	,	,	,	,
1900	,	,	,	,	,
1901	,	,	,	,	,
1902	,	,	,	,	,
1903	,	,	,	,	,
1904	,	,	,	,	,
1905	,	,	,	,	,
1906	,	,	,	,	,
1907	,	,	,	,	,
1908	,	,	,	,	,
1909	,	,	,	,	,
1910	,	,	,	,	,
1911	,	,	,	,	,
1912	,	,	,	,	,
1913	,	,	,	,	,
1914	,	,	,	,	,
1915	,	,	,	,	,
1916	,	,	,	,	,
1917	,	,	,	,	,
1918	,	,	,	,	,
1919	,	,	,	,	,
1920	,	,	,	,	,
1921	,	,	,	,	,
1922	,	,	,	,	,
1923	,	,	,	,	,
1924	,	,	,	,	,
1925	,	,	,	,	,
1926	,	,	,	,	,
1927	,	,	,	,	,
1928	,	,	,	,	,
1929	,	,	,	,	,
1930	,	,	,	,	,
1931	,	,	,	,	,
1932	,	,	,	,	,
1933	,	,	,	,	,
1934	,	,	,	,	,
1935	,	,	,	,	,
1936	,	,	,	,	,
1937	,	,	,	,	,
1938	,	,	,	,	,
1939	,	,	,	,	,
1940	,	,	,	,	,
1941	,	,	,	,	,
1942	,	,	,	,	,
1943	,	,	,	,	,
1944	,	,	,	,	,
1945	,	,	,	,	,
1946	,	,	,	,	,
1947	,	,	,	,	,
1948	,	,	,	,	,
1949	,	,	,	,	,
1950	,	,	,	,	,
1951	,	,	,	,	,
1952	,	,	,	,	,
1953	,	,	,	,	,
1954	,	,	,	,	,
1955	,	,	,	,	,
1956	,	,	,	,	,
1957	,	,	,	,	,
1958	,	,	,	,	,
1959	,	,	,	,	,
1960	,	,	,	,	,
1961	,	,	,	,	,
1962	,	,	,	,	,
1963	,	,	,	,	,
1964	,	,	,	,	,
1965	,	,	,	,	,
1966	,	,	,	,	,
1967	,	,	,	,	,
1968	,	,	,	,	,
1969	,	,	,	,	,
1970	,	,	,	,	,
1971	,	,	,	,	,
1972	,	,	,	,	,
1973	,	,	,	,	,
1974	,	,	,	,	,
1975	,	,	,	,	,
1976	,	,	,	,	,
1977	,	,	,	,	,
1978	,	,	,	,	,
1979	,	,	,	,	,
1980	,	,	,	,	,
1981	,	,	,	,	,
1982	,	,	,	,	,
1983	,	,	,	,	,
1984	,	,	,	,	,
1985	,	,	,	,	,
1986	,	,	,	,	,
1987	,	,	,	,	,
1988	,	,	,	,	,
1989	,	,	,	,	,
1990	,	,	,	,	,
1991	,	,	,	,	,
1992	,	,	,	,	,
1993	,	,	,	,	,
1994	,	,	,	,	,
1995	,	,	,	,	,
1996	,	,	,	,	,
1997	,	,	,	,	,
1998	,	,	,	,	,
1999	,	,	,	,	,
[truncated: 13,001 more rows]

## Sheet: Fig1_supp2_rep2
	parS20 ParB no Mg	parS20 ParB no Mg +ATP	parS20 ParB no Mg +GTP	parS20 ParB no Mg +UTP	parS20 ParB no Mg +CTP
1	0.000, -0.029	0.000, -0.030	0.000, -0.030	0.000, -0.022	0.000, -0.021
2	0.200, -0.029	0.200, -0.030	0.200, -0.029	0.200, -0.021	0.200, -0.021
3	0.400, -0.029	0.400, -0.030	0.400, -0.029	0.400, -0.021	0.400, -0.021
4	0.600, -0.029	0.600, -0.030	0.600, -0.029	0.600, -0.020	0.600, -0.020
5	0.800, -0.029	0.800, -0.030	0.800, -0.029	0.800, -0.020	0.800, -0.020
6	1.000, -0.029	1.000, -0.029	1.000, -0.028	1.000, -0.019	1.000, -0.020
7	1.200, -0.028	1.200, -0.028	1.200, -0.028	1.200, -0.018	1.200, -0.020
8	1.400, -0.028	1.400, -0.028	1.400, -0.027	1.400, -0.018	1.400, -0.019
9	1.600, -0.028	1.600, -0.027	1.600, -0.026	1.600, -0.017	1.600, -0.019
10	1.800, -0.027	1.800, -0.026	1.800, -0.026	1.800, -0.016	1.800, -0.019
11	2.000, -0.027	2.000, -0.025	2.000, -0.025	2.000, -0.016	2.000, -0.019
12	2.200, -0.026	2.200, -0.024	2.200, -0.024	2.200, -0.015	2.200, -0.019
13	2.400, -0.026	2.400, -0.023	2.400, -0.024	2.400, -0.015	2.400, -0.019
14	2.600, -0.026	2.600, -0.023	2.600, -0.023	2.600, -0.014	2.600, -0.018
15	2.800, -0.025	2.800, -0.022	2.800, -0.023	2.800, -0.014	2.800, -0.018
16	3.000, -0.025	3.000, -0.021	3.000, -0.022	3.000, -0.014	3.000, -0.018
17	3.200, -0.024	3.200, -0.021	3.200, -0.022	3.200, -0.014	3.200, -0.018
18	3.400, -0.024	3.400, -0.021	3.400, -0.021	3.400, -0.014	3.400, -0.018
19	3.600, -0.023	3.600, -0.021	3.600, -0.021	3.600, -0.014	3.600, -0.017
20	3.800, -0.023	3.800, -0.021	3.800, -0.020	3.800, -0.014	3.800, -0.017
21	4.000, -0.022	4.000, -0.021	4.000, -0.020	4.000, -0.014	4.000, -0.017
22	4.200, -0.022	4.200, -0.020	4.200, -0.020	4.200, -0.013	4.200, -0.016
23	4.400, -0.021	4.400, -0.020	4.400, -0.019	4.400, -0.013	4.400, -0.016
24	4.600, -0.021	4.600, -0.020	4.600, -0.019	4.600, -0.013	4.600, -0.016
25	4.800, -0.020	4.800, -0.019	4.800, -0.019	4.800, -0.013	4.800, -0.015
26	5.000, -0.020	5.000, -0.019	5.000, -0.019	5.000, -0.013	5.000, -0.015
27	5.200, -0.019	5.200, -0.018	5.200, -0.018	5.200, -0.012	5.200, -0.015
28	5.400, -0.019	5.400, -0.018	5.400, -0.018	5.400, -0.012	5.400, -0.014
29	5.600, -0.018	5.600, -0.018	5.600, -0.018	5.600, -0.012	5.600, -0.014
30	5.800, -0.017	5.800, -0.017	5.800, -0.017	5.800, -0.012	5.800, -0.013
31	6.000, -0.017	6.000, -0.017	6.000, -0.017	6.000, -0.011	6.000, -0.013
32	6.200, -0.016	6.200, -0.017	6.200, -0.017	6.200, -0.011	6.200, -0.012
33	6.400, -0.016	6.400, -0.017	6.400, -0.016	6.400, -0.011	6.400, -0.012
34	6.600, -0.015	6.600, -0.017	6.600, -0.016	6.600, -0.010	6.600, -0.011
35	6.800, -0.014	6.800, -0.017	6.800, -0.015	6.800, -0.010	6.800, -0.011
36	7.000, -0.013	7.000, -0.016	7.000, -0.015	7.000, -0.010	7.000, -0.011
37	7.200, -0.013	7.200, -0.016	7.200, -0.014	7.200, -0.009	7.200, -0.010
38	7.400, -0.012	7.400, -0.016	7.400, -0.014	7.400, -0.009	7.400, -0.010
39	7.600, -0.012	7.600, -0.016	7.600, -0.013	7.600, -0.009	7.600, -0.009
40	7.800, -0.011	7.800, -0.016	7.800, -0.013	7.800, -0.008	7.800, -0.009
41	8.000, -0.011	8.000, -0.016	8.000, -0.012	8.000, -0.008	8.000, -0.009
42	8.200, -0.011	8.200, -0.015	8.200, -0.012	8.200, -0.008	8.200, -0.009
43	8.400, -0.011	8.400, -0.015	8.400, -0.011	8.400, -0.007	8.400, -0.009
44	8.600, -0.010	8.600, -0.014	8.600, -0.011	8.600, -0.007	8.600, -0.009
45	8.800, -0.010	8.800, -0.013	8.800, -0.011	8.800, -0.007	8.800, -0.009
46	9.000, -0.010	9.000, -0.013	9.000, -0.010	9.000, -0.007	9.000, -0.008
47	9.200, -0.009	9.200, -0.012	9.200, -0.010	9.200, -0.007	9.200, -0.008
48	9.400, -0.009	9.400, -0.012	9.400, -0.010	9.400, -0.007	9.400, -0.008
49	9.600, -0.009	9.600, -0.011	9.600, -0.009	9.600, -0.007	9.600, -0.008
50	9.800, -0.009	9.800, -0.011	9.800, -0.009	9.800, -0.007	9.800, -0.007
51	10.000, -0.008	10.000, -0.010	10.000, -0.008	10.000, -0.007	10.000, -0.007
52	10.200, -0.008	10.200, -0.010	10.200, -0.008	10.200, -0.006	10.200, -0.006
53	10.400, -0.008	10.400, -0.009	10.400, -0.008	10.400, -0.006	10.400, -0.006
54	10.600, -0.007	10.600, -0.009	10.600, -0.008	10.600, -0.006	10.600, -0.006
55	10.800, -0.007	10.800, -0.009	10.800, -0.007	10.800, -0.006	10.800, -0.005
56	11.000, -0.006	11.000, -0.009	11.000, -0.008	11.000, -0.006	11.000, -0.005
57	11.200, -0.006	11.200, -0.008	11.200, -0.007	11.200, -0.006	11.200, -0.005
58	11.400, -0.006	11.400, -0.008	11.400, -0.008	11.400, -0.006	11.400, -0.005
59	11.600, -0.006	11.600, -0.008	11.600, -0.008	11.600, -0.005	11.600, -0.005
60	11.800, -0.006	11.800, -0.008	11.800, -0.007	11.800, -0.005	11.800, -0.005
61	12.000, -0.006	12.000, -0.008	12.000, -0.007	12.000, -0.005	12.000, -0.006
62	12.200, -0.006	12.200, -0.008	12.200, -0.007	12.200, -0.004	12.200, -0.006
63	12.400, -0.006	12.400, -0.007	12.400, -0.007	12.400, -0.004	12.400, -0.006
64	12.600, -0.006	12.600, -0.007	12.600, -0.006	12.600, -0.003	12.600, -0.006
65	12.800, -0.005	12.800, -0.007	12.800, -0.006	12.800, -0.003	12.800, -0.006
66	13.000, -0.005	13.000, -0.007	13.000, -0.006	13.000, -0.003	13.000, -0.006
67	13.200, -0.005	13.200, -0.006	13.200, -0.006	13.200, -0.003	13.200, -0.006
68	13.400, -0.005	13.400, -0.006	13.400, -0.006	13.400, -0.003	13.400, -0.005
69	13.600, -0.004	13.600, -0.006	13.600, -0.005	13.600, -0.003	13.600, -0.005
70	13.800, -0.004	13.800, -0.006	13.800, -0.005	13.800, -0.003	13.800, -0.005
71	14.000, -0.004	14.000, -0.005	14.000, -0.005	14.000, -0.003	14.000, -0.004
72	14.200, -0.004	14.200, -0.005	14.200, -0.005	14.200, -0.003	14.200, -0.004
73	14.400, -0.004	14.400, -0.005	14.400, -0.005	14.400, -0.004	14.400, -0.004
74	14.600, -0.004	14.600, -0.005	14.600, -0.005	14.600, -0.004	14.600, -0.004
75	14.800, -0.004	14.800, -0.005	14.800, -0.006	14.800, -0.004	14.800, -0.004
76	15.000, -0.004	15.000, -0.005	15.000, -0.006	15.000, -0.004	15.000, -0.004
77	15.200, -0.004	15.200, -0.004	15.200, -0.006	15.200, -0.004	15.200, -0.004
78	15.400, -0.003	15.400, -0.004	15.400, -0.006	15.400, -0.004	15.400, -0.004
79	15.600, -0.003	15.600, -0.004	15.600, -0.006	15.600, -0.004	15.600, -0.003
80	15.800, -0.003	15.800, -0.004	15.800, -0.005	15.800, -0.004	15.800, -0.003
81	16.000, -0.003	16.000, -0.004	16.000, -0.005	16.000, -0.003	16.000, -0.003
82	16.200, -0.004	16.200, -0.004	16.200, -0.005	16.200, -0.003	16.200, -0.003
83	16.400, -0.004	16.400, -0.004	16.400, -0.005	16.400, -0.003	16.400, -0.003
84	16.600, -0.004	16.600, -0.003	16.600, -0.004	16.600, -0.002	16.600, -0.003
85	16.800, -0.004	16.800, -0.003	16.800, -0.004	16.800, -0.002	16.800, -0.003
86	17.000, -0.004	17.000, -0.003	17.000, -0.004	17.000, -0.002	17.000, -0.003
87	17.200, -0.004	17.200, -0.003	17.200, -0.003	17.200, -0.002	17.200, -0.003
88	17.400, -0.003	17.400, -0.003	17.400, -0.003	17.400, -0.002	17.400, -0.003
89	17.600, -0.003	17.600, -0.002	17.600, -0.003	17.600, -0.001	17.600, -0.003
90	17.800, -0.003	17.800, -0.002	17.800, -0.003	17.800, -0.001	17.800, -0.003
91	18.000, -0.003	18.000, -0.002	18.000, -0.002	18.000, -0.001	18.000, -0.004
92	18.200, -0.003	18.200, -0.002	18.200, -0.002	18.200, -0.001	18.200, -0.004
93	18.400, -0.003	18.400, -0.002	18.400, -0.002	18.400, -0.002	18.400, -0.004
94	18.600, -0.003	18.600, -0.002	18.600, -0.002	18.600, -0.002	18.600, -0.004
95	18.800, -0.003	18.800, -0.002	18.800, -0.002	18.800, -0.002	18.800, -0.004
96	19.000, -0.002	19.000, -0.002	19.000, -0.002	19.000, -0.003	19.000, -0.003
97	19.200, -0.002	19.200, -0.002	19.200, -0.002	19.200, -0.003	19.200, -0.003
98	19.400, -0.002	19.400, -0.002	19.400, -0.002	19.400, -0.003	19.400, -0.003
99	19.600, -0.002	19.600, -0.002	19.600, -0.001	19.600, -0.003	19.600, -0.003
100	19.800, -0.001	19.800, -0.002	19.800, -0.001	19.800, -0.003	19.800, -0.002
101	20.000, -0.001	20.000, -0.002	20.000, -0.001	20.000, -0.003	20.000, -0.002
102	20.200, -0.001	20.200, -0.002	20.200, -0.001	20.200, -0.002	20.200, -0.002
103	20.400, -0.001	20.400, -0.001	20.400, -0.001	20.400, -0.002	20.400, -0.001
104	20.600, -0.002	20.600, -0.001	20.600, -0.001	20.600, -0.001	20.600, -0.001
105	20.800, -0.002	20.800, -0.001	20.800, -0.001	20.800, -0.001	20.800, -0.001
106	21.000, -0.002	21.000, -0.001	21.000, -0.001	21.000, -0.001	21.000, -0.000
107	21.200, -0.002	21.200, -0.000	21.200, -0.001	21.200, -0.000	21.200, -0.000
108	21.400, -0.002	21.400, -0.000	21.400, -0.001	21.400, 0.000	21.400, 0.000
109	21.600, -0.001	21.600, -0.000	21.600, -0.001	21.600, 0.001	21.600, 0.000
110	21.800, -0.001	21.800, -0.000	21.800, -0.001	21.800, 0.001	21.800, 0.001
111	22.000, -0.001	22.000, -0.000	22.000, -0.001	22.000, 0.001	22.000, 0.001
112	22.200, -0.001	22.200, -0.000	22.200, -0.001	22.200, 0.001	22.200, 0.001
113	22.400, -0.000	22.400, -0.001	22.400, -0.001	22.400, 0.000	22.400, 0.001
114	22.600, -0.000	22.600, -0.001	22.600, -0.001	22.600, -0.000	22.600, 0.000
115	22.800, -0.000	22.800, -0.001	22.800, -0.001	22.800, -0.001	22.800, 0.000
116	23.000, -0.000	23.000, -0.001	23.000, -0.001	23.000, -0.001	23.000, 0.000
117	23.200, -0.000	23.200, -0.001	23.200, -0.001	23.200, -0.002	23.200, 0.000
118	23.400, 0.000	23.400, -0.000	23.400, -0.000	23.400, -0.002	23.400, 0.000
119	23.600, 0.000	23.600, -0.000	23.600, -0.000	23.600, -0.002	23.600, 0.000
120	23.800, 0.000	23.800, -0.000	23.800, -0.000	23.800, -0.002	23.800, -0.000
121	24.000, 0.000	24.000, -0.000	24.000, -0.000	24.000, -0.002	24.000, -0.000
122	24.200, 0.000	24.200, -0.000	24.200, -0.000	24.200, -0.002	24.200, -0.000
123	24.400, 0.000	24.400, 0.000	24.400, -0.001	24.400, -0.002	24.400, -0.000
124	24.600, -0.000	24.600, 0.000	24.600, -0.001	24.600, -0.001	24.600, -0.000
125	24.800, -0.000	24.800, 0.001	24.800, -0.001	24.800, -0.001	24.800, -0.001
126	25.000, -0.001	25.000, 0.001	25.000, -0.001	25.000, -0.001	25.000, -0.000
127	25.200, -0.001	25.200, 0.001	25.200, -0.001	25.200, -0.000	25.200, -0.000
128	25.400, -0.001	25.400, 0.000	25.400, -0.002	25.400, 0.000	25.400, -0.000
129	25.600, -0.001	25.600, 0.000	25.600, -0.002	25.600, 0.001	25.600, -0.000
130	25.800, -0.000	25.800, 0.000	25.800, -0.002	25.800, 0.001	25.800, -0.000
131	26.000, -0.000	26.000, 0.000	26.000, -0.002	26.000, 0.001	26.000, -0.001
132	26.200, -0.000	26.200, 0.000	26.200, -0.002	26.200, 0.001	26.200, -0.001
133	26.400, -0.000	26.400, 0.000	26.400, -0.002	26.400, 0.001	26.400, -0.001
134	26.600, -0.000	26.600, 0.000	26.600, -0.001	26.600, 0.001	26.600, -0.001
135	26.800, -0.000	26.800, 0.000	26.800, -0.001	26.800, 0.001	26.800, -0.001
136	27.000, -0.000	27.000, 0.000	27.000, -0.001	27.000, 0.001	27.000, -0.001
137	27.200, -0.000	27.200, 0.000	27.200, -0.000	27.200, 0.000	27.200, -0.001
138	27.400, 0.000	27.400, 0.000	27.400, -0.000	27.400, 0.000	27.400, -0.001
139	27.600, 0.000	27.600, -0.000	27.600, -0.000	27.600, -0.000	27.600, -0.001
140	27.800, 0.000	27.800, -0.000	27.800, 0.000	27.800, -0.000	27.800, -0.001
141	28.000, 0.000	28.000, -0.000	28.000, 0.000	28.000, -0.001	28.000, -0.000
142	28.200, 0.000	28.200, -0.000	28.200, 0.000	28.200, -0.001	28.200, -0.000
143	28.400, 0.000	28.400, -0.000	28.400, 0.000	28.400, -0.001	28.400, -0.000
144	28.600, -0.000	28.600, -0.000	28.600, 0.000	28.600, -0.000	28.600, 0.000
145	28.800, -0.000	28.800, -0.000	28.800, 0.000	28.800, -0.000	28.800, 0.000
146	29.000, -0.000	29.000, 0.000	29.000, 0.000	29.000, -0.000	29.000, 0.001
147	29.200, -0.000	29.200, 0.000	29.200, 0.000	29.200, 0.000	29.200, 0.001
148	29.400, -0.000	29.400, 0.000	29.400, 0.000	29.400, 0.000	29.400, 0.001
149	29.600, -0.000	29.600, 0.000	29.600, 0.000	29.600, 0.001	29.600, 0.001
150	29.800, -0.000	29.800, 0.001	29.800, 0.000	29.800, 0.001	29.800, 0.001
151	30.000, 0.000	30.000, 0.000	30.000, 0.000	30.000, 0.000	30.000, 0.000
152	30.200, 0.022	30.200, 0.018	30.200, 0.017	30.200, 0.016	30.200, 0.018
153	30.400, 0.049	30.400, 0.040	30.400, 0.038	30.400, 0.035	30.400, 0.039
154	30.600, 0.079	30.600, 0.065	30.600, 0.062	30.600, 0.058	30.600, 0.064
155	30.800, 0.113	30.800, 0.094	30.800, 0.090	30.800, 0.083	30.800, 0.093
156	31.000, 0.150	31.000, 0.125	31.000, 0.120	31.000, 0.111	31.000, 0.124
157	31.200, 0.189	31.200, 0.158	31.200, 0.152	31.200, 0.140	31.200, 0.157
158	31.400, 0.230	31.400, 0.192	31.400, 0.185	31.400, 0.171	31.400, 0.191
159	31.600, 0.271	31.600, 0.227	31.600, 0.219	31.600, 0.202	31.600, 0.226
160	31.800, 0.311	31.800, 0.262	31.800, 0.253	31.800, 0.233	31.800, 0.261
161	32.000, 0.349	32.000, 0.295	32.000, 0.286	32.000, 0.262	32.000, 0.294
162	32.200, 0.383	32.200, 0.325	32.200, 0.315	32.200, 0.289	32.200, 0.324
163	32.400, 0.415	32.400, 0.353	32.400, 0.343	32.400, 0.314	32.400, 0.353
164	32.600, 0.444	32.600, 0.379	32.600, 0.369	32.600, 0.339	32.600, 0.379
165	32.800, 0.472	32.800, 0.404	32.800, 0.394	32.800, 0.362	32.800, 0.404
166	33.000, 0.497	33.000, 0.427	33.000, 0.417	33.000, 0.383	33.000, 0.427
167	33.200, 0.520	33.200, 0.448	33.200, 0.438	33.200, 0.403	33.200, 0.449
168	33.400, 0.541	33.400, 0.468	33.400, 0.458	33.400, 0.421	33.400, 0.469
169	33.600, 0.560	33.600, 0.486	33.600, 0.476	33.600, 0.438	33.600, 0.488
170	33.800, 0.577	33.800, 0.502	33.800, 0.493	33.800, 0.453	33.800, 0.505
171	34.000, 0.592	34.000, 0.516	34.000, 0.508	34.000, 0.467	34.000, 0.521
172	34.200, 0.605	34.200, 0.529	34.200, 0.521	34.200, 0.480	34.200, 0.536
173	34.400, 0.617	34.400, 0.541	34.400, 0.534	34.400, 0.492	34.400, 0.550
174	34.600, 0.628	34.600, 0.552	34.600, 0.545	34.600, 0.502	34.600, 0.563
175	34.800, 0.637	34.800, 0.561	34.800, 0.554	34.800, 0.511	34.800, 0.574
176	35.000, 0.645	35.000, 0.569	35.000, 0.563	35.000, 0.520	35.000, 0.584
177	35.200, 0.653	35.200, 0.576	35.200, 0.570	35.200, 0.527	35.200, 0.593
178	35.400, 0.659	35.400, 0.583	35.400, 0.577	35.400, 0.533	35.400, 0.602
179	35.600, 0.665	35.600, 0.588	35.600, 0.583	35.600, 0.539	35.600, 0.609
180	35.800, 0.670	35.800, 0.593	35.800, 0.589	35.800, 0.544	35.800, 0.616
181	36.000, 0.674	36.000, 0.597	36.000, 0.594	36.000, 0.549	36.000, 0.622
182	36.200, 0.678	36.200, 0.601	36.200, 0.598	36.200, 0.553	36.200, 0.627
183	36.400, 0.682	36.400, 0.604	36.400, 0.602	36.400, 0.557	36.400, 0.631
184	36.600, 0.684	36.600, 0.606	36.600, 0.605	36.600, 0.560	36.600, 0.635
185	36.800, 0.687	36.800, 0.609	36.800, 0.608	36.800, 0.563	36.800, 0.638
186	37.000, 0.689	37.000, 0.611	37.000, 0.611	37.000, 0.566	37.000, 0.641
187	37.200, 0.691	37.200, 0.613	37.200, 0.613	37.200, 0.567	37.200, 0.644
188	37.400, 0.692	37.400, 0.614	37.400, 0.616	37.400, 0.569	37.400, 0.647
189	37.600, 0.694	37.600, 0.616	37.600, 0.618	37.600, 0.570	37.600, 0.650
190	37.800, 0.695	37.800, 0.617	37.800, 0.619	37.800, 0.571	37.800, 0.652
191	38.000, 0.695	38.000, 0.618	38.000, 0.621	38.000, 0.573	38.000, 0.655
192	38.200, 0.696	38.200, 0.619	38.200, 0.622	38.200, 0.574	38.200, 0.656
193	38.400, 0.697	38.400, 0.620	38.400, 0.623	38.400, 0.575	38.400, 0.658
194	38.600, 0.698	38.600, 0.621	38.600, 0.623	38.600, 0.576	38.600, 0.660
195	38.800, 0.698	38.800, 0.622	38.800, 0.624	38.800, 0.576	38.800, 0.661
196	39.000, 0.699	39.000, 0.623	39.000, 0.624	39.000, 0.577	39.000, 0.662
197	39.200, 0.699	39.200, 0.623	39.200, 0.625	39.200, 0.578	39.200, 0.663
198	39.400, 0.700	39.400, 0.624	39.400, 0.625	39.400, 0.578	39.400, 0.664
199	39.600, 0.701	39.600, 0.625	39.600, 0.626	39.600, 0.579	39.600, 0.665
200	39.800, 0.701	39.800, 0.625	39.800, 0.627	39.800, 0.579	39.800, 0.666
201	40.000, 0.701	40.000, 0.626	40.000, 0.627	40.000, 0.580	40.000, 0.666
202	40.200, 0.702	40.200, 0.626	40.200, 0.627	40.200, 0.580	40.200, 0.667
203	40.400, 0.702	40.400, 0.626	40.400, 0.628	40.400, 0.581	40.400, 0.667
204	40.600, 0.702	40.600, 0.627	40.600, 0.628	40.600, 0.581	40.600, 0.667
205	40.800, 0.702	40.800, 0.627	40.800, 0.628	40.800, 0.582	40.800, 0.667
206	41.000, 0.702	41.000, 0.627	41.000, 0.629	41.000, 0.582	41.000, 0.668
207	41.200, 0.702	41.200, 0.628	41.200, 0.629	41.200, 0.582	41.200, 0.669
208	41.400, 0.702	41.400, 0.628	41.400, 0.630	41.400, 0.582	41.400, 0.669
209	41.600, 0.702	41.600, 0.628	41.600, 0.631	41.600, 0.583	41.600, 0.670
210	41.800, 0.702	41.800, 0.629	41.800, 0.631	41.800, 0.583	41.800, 0.670
211	42.000, 0.702	42.000, 0.629	42.000, 0.632	42.000, 0.583	42.000, 0.670
212	42.200, 0.702	42.200, 0.630	42.200, 0.632	42.200, 0.584	42.200, 0.671
213	42.400, 0.702	42.400, 0.630	42.400, 0.632	42.400, 0.584	42.400, 0.671
214	42.600, 0.702	42.600, 0.631	42.600, 0.631	42.600, 0.583	42.600, 0.672
215	42.800, 0.702	42.800, 0.631	42.800, 0.631	42.800, 0.583	42.800, 0.672
216	43.000, 0.702	43.000, 0.631	43.000, 0.631	43.000, 0.583	43.000, 0.672
217	43.200, 0.703	43.200, 0.631	43.200, 0.631	43.200, 0.583	43.200, 0.673
218	43.400, 0.703	43.400, 0.631	43.400, 0.631	43.400, 0.582	43.400, 0.673
219	43.600, 0.703	43.600, 0.631	43.600, 0.631	43.600, 0.582	43.600, 0.673
220	43.800, 0.703	43.800, 0.631	43.800, 0.631	43.800, 0.581	43.800, 0.673
221	44.000, 0.703	44.000, 0.631	44.000, 0.631	44.000, 0.581	44.000, 0.672
222	44.200, 0.703	44.200, 0.631	44.200, 0.631	44.200, 0.581	44.200, 0.673
223	44.400, 0.703	44.400, 0.630	44.400, 0.631	44.400, 0.581	44.400, 0.673
224	44.600, 0.702	44.600, 0.630	44.600, 0.631	44.600, 0.581	44.600, 0.673
225	44.800, 0.702	44.800, 0.629	44.800, 0.632	44.800, 0.582	44.800, 0.674
226	45.000, 0.702	45.000, 0.629	45.000, 0.632	45.000, 0.582	45.000, 0.674
227	45.200, 0.702	45.200, 0.629	45.200, 0.632	45.200, 0.582	45.200, 0.674
228	45.400, 0.702	45.400, 0.629	45.400, 0.633	45.400, 0.583	45.400, 0.674
229	45.600, 0.702	45.600, 0.629	45.600, 0.633	45.600, 0.583	45.600, 0.674
230	45.800, 0.702	45.800, 0.629	45.800, 0.633	45.800, 0.583	45.800, 0.674
231	46.000, 0.702	46.000, 0.629	46.000, 0.633	46.000, 0.583	46.000, 0.675
232	46.200, 0.702	46.200, 0.629	46.200, 0.633	46.200, 0.583	46.200, 0.675
233	46.400, 0.702	46.400, 0.629	46.400, 0.633	46.400, 0.583	46.400, 0.675
234	46.600, 0.702	46.600, 0.629	46.600, 0.633	46.600, 0.583	46.600, 0.675
235	46.800, 0.702	46.800, 0.629	46.800, 0.633	46.800, 0.583	46.800, 0.675
236	47.000, 0.701	47.000, 0.629	47.000, 0.633	47.000, 0.583	47.000, 0.675
237	47.200, 0.701	47.200, 0.630	47.200, 0.633	47.200, 0.582	47.200, 0.675
238	47.400, 0.701	47.400, 0.630	47.400, 0.633	47.400, 0.582	47.400, 0.674
239	47.600, 0.701	47.600, 0.630	47.600, 0.633	47.600, 0.582	47.600, 0.674
240	47.800, 0.701	47.800, 0.630	47.800, 0.633	47.800, 0.582	47.800, 0.674
241	48.000, 0.701	48.000, 0.630	48.000, 0.633	48.000, 0.582	48.000, 0.674
242	48.200, 0.701	48.200, 0.630	48.200, 0.633	48.200, 0.582	48.200, 0.674
243	48.400, 0.700	48.400, 0.630	48.400, 0.633	48.400, 0.582	48.400, 0.674
244	48.600, 0.700	48.600, 0.629	48.600, 0.633	48.600, 0.582	48.600, 0.674
245	48.800, 0.701	48.800, 0.629	48.800, 0.633	48.800, 0.583	48.800, 0.674
246	49.000, 0.701	49.000, 0.629	49.000, 0.633	49.000, 0.583	49.000, 0.674
247	49.200, 0.701	49.200, 0.629	49.200, 0.633	49.200, 0.583	49.200, 0.674
248	49.400, 0.702	49.400, 0.628	49.400, 0.633	49.400, 0.583	49.400, 0.675
249	49.600, 0.702	49.600, 0.628	49.600, 0.633	49.600, 0.583	49.600, 0.675
250	49.800, 0.702	49.800, 0.628	49.800, 0.634	49.800, 0.583	49.800, 0.675
251	50.000, 0.702	50.000, 0.627	50.000, 0.634	50.000, 0.583	50.000, 0.676
252	50.200, 0.702	50.200, 0.627	50.200, 0.634	50.200, 0.583	50.200, 0.676
253	50.400, 0.702	50.400, 0.627	50.400, 0.634	50.400, 0.583	50.400, 0.676
254	50.600, 0.702	50.600, 0.627	50.600, 0.634	50.600, 0.583	50.600, 0.677
255	50.800, 0.702	50.800, 0.627	50.800, 0.634	50.800, 0.583	50.800, 0.677
256	51.000, 0.702	51.000, 0.627	51.000, 0.634	51.000, 0.583	51.000, 0.677
257	51.200, 0.701	51.200, 0.627	51.200, 0.634	51.200, 0.583	51.200, 0.677
258	51.400, 0.701	51.400, 0.627	51.400, 0.634	51.400, 0.583	51.400, 0.677
259	51.600, 0.701	51.600, 0.627	51.600, 0.634	51.600, 0.583	51.600, 0.677
260	51.800, 0.701	51.800, 0.627	51.800, 0.634	51.800, 0.582	51.800, 0.677
261	52.000, 0.701	52.000, 0.627	52.000, 0.634	52.000, 0.582	52.000, 0.677
262	52.200, 0.701	52.200, 0.627	52.200, 0.634	52.200, 0.582	52.200, 0.677
263	52.400, 0.700	52.400, 0.627	52.400, 0.634	52.400, 0.582	52.400, 0.677
264	52.600, 0.700	52.600, 0.627	52.600, 0.634	52.600, 0.582	52.600, 0.677
265	52.800, 0.700	52.800, 0.627	52.800, 0.634	52.800, 0.582	52.800, 0.677
266	53.000, 0.701	53.000, 0.627	53.000, 0.634	53.000, 0.582	53.000, 0.677
267	53.200, 0.701	53.200, 0.626	53.200, 0.633	53.200, 0.582	53.200, 0.677
268	53.400, 0.700	53.400, 0.626	53.400, 0.634	53.400, 0.582	53.400, 0.677
269	53.600, 0.700	53.600, 0.626	53.600, 0.634	53.600, 0.583	53.600, 0.677
270	53.800, 0.700	53.800, 0.627	53.800, 0.634	53.800, 0.583	53.800, 0.677
271	54.000, 0.700	54.000, 0.627	54.000, 0.634	54.000, 0.583	54.000, 0.677
272	54.200, 0.700	54.200, 0.627	54.200, 0.634	54.200, 0.583	54.200, 0.678
273	54.400, 0.699	54.400, 0.627	54.400, 0.634	54.400, 0.583	54.400, 0.678
274	54.600, 0.699	54.600, 0.627	54.600, 0.633	54.600, 0.583	54.600, 0.678
275	54.800, 0.699	54.800, 0.627	54.800, 0.633	54.800, 0.584	54.800, 0.678
276	55.000, 0.699	55.000, 0.627	55.000, 0.633	55.000, 0.584	55.000, 0.678
277	55.200, 0.699	55.200, 0.626	55.200, 0.633	55.200, 0.584	55.200, 0.678
278	55.400, 0.699	55.400, 0.626	55.400, 0.633	55.400, 0.584	55.400, 0.678
279	55.600, 0.698	55.600, 0.626	55.600, 0.633	55.600, 0.583	55.600, 0.678
280	55.800, 0.698	55.800, 0.626	55.800, 0.633	55.800, 0.583	55.800, 0.678
281	56.000, 0.698	56.000, 0.625	56.000, 0.633	56.000, 0.583	56.000, 0.678
282	56.200, 0.698	56.200, 0.625	56.200, 0.633	56.200, 0.583	56.200, 0.678
283	56.400, 0.698	56.400, 0.625	56.400, 0.633	56.400, 0.582	56.400, 0.677
284	56.600, 0.698	56.600, 0.625	56.600, 0.633	56.600, 0.582	56.600, 0.677
285	56.800, 0.698	56.800, 0.625	56.800, 0.633	56.800, 0.582	56.800, 0.677
286	57.000, 0.698	57.000, 0.625	57.000, 0.633	57.000, 0.582	57.000, 0.676
287	57.200, 0.698	57.200, 0.624	57.200, 0.633	57.200, 0.582	57.200, 0.676
288	57.400, 0.698	57.400, 0.624	57.400, 0.633	57.400, 0.582	57.400, 0.676
289	57.600, 0.698	57.600, 0.624	57.600, 0.633	57.600, 0.583	57.600, 0.676
290	57.800, 0.698	57.800, 0.624	57.800, 0.633	57.800, 0.583	57.800, 0.676
291	58.000, 0.697	58.000, 0.623	58.000, 0.633	58.000, 0.583	58.000, 0.676
292	58.200, 0.697	58.200, 0.623	58.200, 0.633	58.200, 0.583	58.200, 0.676
293	58.400, 0.697	58.400, 0.623	58.400, 0.633	58.400, 0.583	58.400, 0.677
294	58.600, 0.697	58.600, 0.623	58.600, 0.632	58.600, 0.583	58.600, 0.677
295	58.800, 0.697	58.800, 0.623	58.800, 0.632	58.800, 0.583	58.800, 0.677
296	59.000, 0.696	59.000, 0.623	59.000, 0.632	59.000, 0.583	59.000, 0.677
297	59.200, 0.697	59.200, 0.623	59.200, 0.632	59.200, 0.582	59.200, 0.677
298	59.400, 0.697	59.400, 0.622	59.400, 0.632	59.400, 0.582	59.400, 0.677
299	59.600, 0.697	59.600, 0.622	59.600, 0.632	59.600, 0.582	59.600, 0.677
300	59.800, 0.697	59.800, 0.622	59.800, 0.632	59.800, 0.582	59.800, 0.678
301	60.000, 0.697	60.000, 0.622	60.000, 0.632	60.000, 0.581	60.000, 0.678
302	60.200, 0.698	60.200, 0.622	60.200, 0.632	60.200, 0.581	60.200, 0.678
303	60.400, 0.698	60.400, 0.622	60.400, 0.632	60.400, 0.581	60.400, 0.678
304	60.600, 0.698	60.600, 0.622	60.600, 0.631	60.600, 0.581	60.600, 0.678
305	60.800, 0.698	60.800, 0.622	60.800, 0.631	60.800, 0.581	60.800, 0.679
306	61.000, 0.698	61.000, 0.622	61.000, 0.631	61.000, 0.582	61.000, 0.679
307	61.200, 0.698	61.200, 0.622	61.200, 0.631	61.200, 0.582	61.200, 0.679
308	61.400, 0.698	61.400, 0.622	61.400, 0.631	61.400, 0.582	61.400, 0.679
309	61.600, 0.698	61.600, 0.622	61.600, 0.631	61.600, 0.583	61.600, 0.679
310	61.800, 0.698	61.800, 0.623	61.800, 0.631	61.800, 0.583	61.800, 0.679
311	62.000, 0.698	62.000, 0.622	62.000, 0.631	62.000, 0.583	62.000, 0.678
312	62.200, 0.697	62.200, 0.622	62.200, 0.631	62.200, 0.583	62.200, 0.678
313	62.400, 0.697	62.400, 0.622	62.400, 0.631	62.400, 0.583	62.400, 0.678
314	62.600, 0.697	62.600, 0.622	62.600, 0.631	62.600, 0.583	62.600, 0.677
315	62.800, 0.697	62.800, 0.622	62.800, 0.631	62.800, 0.583	62.800, 0.677
316	63.000, 0.697	63.000, 0.622	63.000, 0.631	63.000, 0.584	63.000, 0.677
317	63.200, 0.697	63.200, 0.621	63.200, 0.632	63.200, 0.584	63.200, 0.676
318	63.400, 0.697	63.400, 0.621	63.400, 0.632	63.400, 0.584	63.400, 0.676
319	63.600, 0.697	63.600, 0.620	63.600, 0.632	63.600, 0.584	63.600, 0.676
320	63.800, 0.697	63.800, 0.620	63.800, 0.632	63.800, 0.583	63.800, 0.676
321	64.000, 0.697	64.000, 0.620	64.000, 0.632	64.000, 0.583	64.000, 0.676
322	64.200, 0.697	64.200, 0.619	64.200, 0.632	64.200, 0.583	64.200, 0.677
323	64.400, 0.697	64.400, 0.619	64.400, 0.632	64.400, 0.582	64.400, 0.677
324	64.600, 0.697	64.600, 0.619	64.600, 0.632	64.600, 0.582	64.600, 0.677
325	64.800, 0.697	64.800, 0.619	64.800, 0.632	64.800, 0.582	64.800, 0.678
326	65.000, 0.696	65.000, 0.619	65.000, 0.632	65.000, 0.581	65.000, 0.678
327	65.200, 0.696	65.200, 0.619	65.200, 0.632	65.200, 0.581	65.200, 0.678
328	65.400, 0.696	65.400, 0.619	65.400, 0.631	65.400, 0.581	65.400, 0.678
329	65.600, 0.696	65.600, 0.619	65.600, 0.631	65.600, 0.580	65.600, 0.679
330	65.800, 0.696	65.800, 0.619	65.800, 0.631	65.800, 0.580	65.800, 0.679
331	66.000, 0.696	66.000, 0.619	66.000, 0.631	66.000, 0.580	66.000, 0.679
332	66.200, 0.696	66.200, 0.619	66.200, 0.631	66.200, 0.580	66.200, 0.679
333	66.400, 0.696	66.400, 0.619	66.400, 0.631	66.400, 0.580	66.400, 0.678
334	66.600, 0.696	66.600, 0.619	66.600, 0.631	66.600, 0.580	66.600, 0.678
335	66.800, 0.697	66.800, 0.619	66.800, 0.631	66.800, 0.580	66.800, 0.678
336	67.000, 0.697	67.000, 0.620	67.000, 0.631	67.000, 0.580	67.000, 0.678
337	67.200, 0.697	67.200, 0.620	67.200, 0.631	67.200, 0.580	67.200, 0.678
338	67.400, 0.697	67.400, 0.620	67.400, 0.630	67.400, 0.580	67.400, 0.678
339	67.600, 0.697	67.600, 0.620	67.600, 0.630	67.600, 0.581	67.600, 0.678
340	67.800, 0.697	67.800, 0.620	67.800, 0.630	67.800, 0.581	67.800, 0.678
341	68.000, 0.697	68.000, 0.620	68.000, 0.629	68.000, 0.581	68.000, 0.678
342	68.200, 0.697	68.200, 0.620	68.200, 0.629	68.200, 0.580	68.200, 0.678
343	68.400, 0.697	68.400, 0.620	68.400, 0.629	68.400, 0.580	68.400, 0.678
344	68.600, 0.696	68.600, 0.620	68.600, 0.629	68.600, 0.580	68.600, 0.679
345	68.800, 0.696	68.800, 0.620	68.800, 0.629	68.800, 0.581	68.800, 0.679
346	69.000, 0.696	69.000, 0.620	69.000, 0.629	69.000, 0.581	69.000, 0.678
347	69.200, 0.696	69.200, 0.620	69.200, 0.629	69.200, 0.581	69.200, 0.679
348	69.400, 0.696	69.400, 0.620	69.400, 0.630	69.400, 0.581	69.400, 0.679
349	69.600, 0.696	69.600, 0.620	69.600, 0.630	69.600, 0.581	69.600, 0.679
350	69.800, 0.696	69.800, 0.620	69.800, 0.630	69.800, 0.581	69.800, 0.679
351	70.000, 0.696	70.000, 0.620	70.000, 0.630	70.000, 0.581	70.000, 0.679
352	70.200, 0.696	70.200, 0.619	70.200, 0.630	70.200, 0.581	70.200, 0.679
353	70.400, 0.696	70.400, 0.620	70.400, 0.630	70.400, 0.581	70.400, 0.679
354	70.600, 0.696	70.600, 0.620	70.600, 0.630	70.600, 0.581	70.600, 0.678
355	70.800, 0.696	70.800, 0.620	70.800, 0.630	70.800, 0.581	70.800, 0.678
356	71.000, 0.696	71.000, 0.620	71.000, 0.630	71.000, 0.581	71.000, 0.678
357	71.200, 0.696	71.200, 0.620	71.200, 0.630	71.200, 0.581	71.200, 0.677
358	71.400, 0.697	71.400, 0.620	71.400, 0.630	71.400, 0.581	71.400, 0.677
359	71.600, 0.696	71.600, 0.620	71.600, 0.630	71.600, 0.581	71.600, 0.677
360	71.800, 0.696	71.800, 0.620	71.800, 0.630	71.800, 0.581	71.800, 0.677
361	72.000, 0.696	72.000, 0.620	72.000, 0.629	72.000, 0.580	72.000, 0.677
362	72.200, 0.696	72.200, 0.620	72.200, 0.629	72.200, 0.580	72.200, 0.677
363	72.400, 0.696	72.400, 0.619	72.400, 0.629	72.400, 0.580	72.400, 0.677
364	72.600, 0.696	72.600, 0.619	72.600, 0.629	72.600, 0.580	72.600, 0.677
365	72.800, 0.696	72.800, 0.618	72.800, 0.629	72.800, 0.580	72.800, 0.677
366	73.000, 0.696	73.000, 0.618	73.000, 0.630	73.000, 0.580	73.000, 0.677
367	73.200, 0.695	73.200, 0.617	73.200, 0.630	73.200, 0.580	73.200, 0.677
368	73.400, 0.695	73.400, 0.617	73.400, 0.630	73.400, 0.580	73.400, 0.677
369	73.600, 0.695	73.600, 0.616	73.600, 0.630	73.600, 0.580	73.600, 0.677
370	73.800, 0.695	73.800, 0.616	73.800, 0.630	73.800, 0.580	73.800, 0.677
371	74.000, 0.695	74.000, 0.616	74.000, 0.631	74.000, 0.580	74.000, 0.678
372	74.200, 0.695	74.200, 0.616	74.200, 0.631	74.200, 0.580	74.200, 0.678
373	74.400, 0.695	74.400, 0.616	74.400, 0.631	74.400, 0.580	74.400, 0.678
374	74.600, 0.695	74.600, 0.616	74.600, 0.630	74.600, 0.580	74.600, 0.678
375	74.800, 0.695	74.800, 0.617	74.800, 0.630	74.800, 0.580	74.800, 0.678
376	75.000, 0.696	75.000, 0.617	75.000, 0.630	75.000, 0.580	75.000, 0.677
377	75.200, 0.696	75.200, 0.617	75.200, 0.630	75.200, 0.580	75.200, 0.678
378	75.400, 0.696	75.400, 0.617	75.400, 0.630	75.400, 0.579	75.400, 0.678
379	75.600, 0.696	75.600, 0.617	75.600, 0.629	75.600, 0.579	75.600, 0.678
380	75.800, 0.696	75.800, 0.617	75.800, 0.629	75.800, 0.579	75.800, 0.678
381	76.000, 0.695	76.000, 0.617	76.000, 0.629	76.000, 0.579	76.000, 0.678
382	76.200, 0.695	76.200, 0.616	76.200, 0.628	76.200, 0.579	76.200, 0.678
383	76.400, 0.695	76.400, 0.616	76.400, 0.628	76.400, 0.579	76.400, 0.678
384	76.600, 0.695	76.600, 0.616	76.600, 0.628	76.600, 0.579	76.600, 0.678
385	76.800, 0.695	76.800, 0.616	76.800, 0.628	76.800, 0.579	76.800, 0.678
386	77.000, 0.695	77.000, 0.615	77.000, 0.628	77.000, 0.580	77.000, 0.677
387	77.200, 0.694	77.200, 0.615	77.200, 0.628	77.200, 0.580	77.200, 0.677
388	77.400, 0.694	77.400, 0.615	77.400, 0.628	77.400, 0.580	77.400, 0.677
389	77.600, 0.694	77.600, 0.615	77.600, 0.629	77.600, 0.581	77.600, 0.677
390	77.800, 0.694	77.800, 0.615	77.800, 0.628	77.800, 0.581	77.800, 0.677
391	78.000, 0.694	78.000, 0.615	78.000, 0.629	78.000, 0.581	78.000, 0.677
392	78.200, 0.694	78.200, 0.616	78.200, 0.629	78.200, 0.581	78.200, 0.677
393	78.400, 0.694	78.400, 0.616	78.400, 0.629	78.400, 0.581	78.400, 0.677
394	78.600, 0.695	78.600, 0.616	78.600, 0.629	78.600, 0.581	78.600, 0.678
395	78.800, 0.695	78.800, 0.616	78.800, 0.629	78.800, 0.581	78.800, 0.678
396	79.000, 0.695	79.000, 0.616	79.000, 0.629	79.000, 0.581	79.000, 0.678
397	79.200, 0.696	79.200, 0.615	79.200, 0.629	79.200, 0.580	79.200, 0.679
398	79.400, 0.696	79.400, 0.615	79.400, 0.629	79.400, 0.580	79.400, 0.679
399	79.600, 0.696	79.600, 0.615	79.600, 0.629	79.600, 0.580	79.600, 0.679
400	79.800, 0.696	79.800, 0.615	79.800, 0.629	79.800, 0.580	79.800, 0.679
401	80.000, 0.695	80.000, 0.615	80.000, 0.629	80.000, 0.580	80.000, 0.678
402	80.200, 0.695	80.200, 0.615	80.200, 0.629	80.200, 0.580	80.200, 0.678
403	80.400, 0.695	80.400, 0.615	80.400, 0.630	80.400, 0.580	80.400, 0.678
404	80.600, 0.694	80.600, 0.615	80.600, 0.630	80.600, 0.580	80.600, 0.678
405	80.800, 0.694	80.800, 0.615	80.800, 0.630	80.800, 0.580	80.800, 0.677
406	81.000, 0.694	81.000, 0.615	81.000, 0.630	81.000, 0.580	81.000, 0.677
407	81.200, 0.694	81.200, 0.615	81.200, 0.630	81.200, 0.580	81.200, 0.677
408	81.400, 0.693	81.400, 0.615	81.400, 0.630	81.400, 0.580	81.400, 0.676
409	81.600, 0.693	81.600, 0.615	81.600, 0.629	81.600, 0.580	81.600, 0.676
410	81.800, 0.693	81.800, 0.615	81.800, 0.629	81.800, 0.580	81.800, 0.676
411	82.000, 0.693	82.000, 0.615	82.000, 0.629	82.000, 0.580	82.000, 0.677
412	82.200, 0.694	82.200, 0.615	82.200, 0.629	82.200, 0.580	82.200, 0.677
413	82.400, 0.694	82.400, 0.615	82.400, 0.629	82.400, 0.580	82.400, 0.677
414	82.600, 0.694	82.600, 0.614	82.600, 0.628	82.600, 0.580	82.600, 0.677
415	82.800, 0.694	82.800, 0.614	82.800, 0.628	82.800, 0.579	82.800, 0.677
416	83.000, 0.694	83.000, 0.614	83.000, 0.628	83.000, 0.579	83.000, 0.677
417	83.200, 0.694	83.200, 0.614	83.200, 0.628	83.200, 0.579	83.200, 0.677
418	83.400, 0.694	83.400, 0.614	83.400, 0.628	83.400, 0.579	83.400, 0.677
419	83.600, 0.694	83.600, 0.614	83.600, 0.628	83.600, 0.580	83.600, 0.677
420	83.800, 0.693	83.800, 0.615	83.800, 0.628	83.800, 0.580	83.800, 0.677
421	84.000, 0.693	84.000, 0.615	84.000, 0.628	84.000, 0.580	84.000, 0.677
422	84.200, 0.693	84.200, 0.616	84.200, 0.628	84.200, 0.580	84.200, 0.677
423	84.400, 0.693	84.400, 0.616	84.400, 0.628	84.400, 0.580	84.400, 0.677
424	84.600, 0.693	84.600, 0.617	84.600, 0.628	84.600, 0.580	84.600, 0.677
425	84.800, 0.693	84.800, 0.617	84.800, 0.628	84.800, 0.580	84.800, 0.677
426	85.000, 0.693	85.000, 0.618	85.000, 0.628	85.000, 0.580	85.000, 0.677
427	85.200, 0.693	85.200, 0.618	85.200, 0.628	85.200, 0.580	85.200, 0.677
428	85.400, 0.693	85.400, 0.618	85.400, 0.628	85.400, 0.580	85.400, 0.677
429	85.600, 0.694	85.600, 0.619	85.600, 0.628	85.600, 0.579	85.600, 0.677
430	85.800, 0.694	85.800, 0.618	85.800, 0.628	85.800, 0.579	85.800, 0.677
431	86.000, 0.695	86.000, 0.618	86.000, 0.628	86.000, 0.579	86.000, 0.677
432	86.200, 0.695	86.200, 0.618	86.200, 0.628	86.200, 0.579	86.200, 0.677
433	86.400, 0.695	86.400, 0.617	86.400, 0.628	86.400, 0.579	86.400, 0.677
434	86.600, 0.696	86.600, 0.617	86.600, 0.628	86.600, 0.579	86.600, 0.677
435	86.800, 0.696	86.800, 0.616	86.800, 0.628	86.800, 0.579	86.800, 0.677
436	87.000, 0.696	87.000, 0.616	87.000, 0.627	87.000, 0.579	87.000, 0.677
437	87.200, 0.696	87.200, 0.615	87.200, 0.627	87.200, 0.579	87.200, 0.677
438	87.400, 0.696	87.400, 0.615	87.400, 0.627	87.400, 0.579	87.400, 0.677
439	87.600, 0.695	87.600, 0.615	87.600, 0.627	87.600, 0.579	87.600, 0.677
440	87.800, 0.695	87.800, 0.614	87.800, 0.626	87.800, 0.579	87.800, 0.677
441	88.000, 0.694	88.000, 0.614	88.000, 0.626	88.000, 0.580	88.000, 0.677
442	88.200, 0.694	88.200, 0.614	88.200, 0.626	88.200, 0.580	88.200, 0.677
443	88.400, 0.693	88.400, 0.614	88.400, 0.627	88.400, 0.580	88.400, 0.677
444	88.600, 0.693	88.600, 0.614	88.600, 0.627	88.600, 0.580	88.600, 0.677
445	88.800, 0.693	88.800, 0.614	88.800, 0.627	88.800, 0.580	88.800, 0.677
446	89.000, 0.693	89.000, 0.615	89.000, 0.627	89.000, 0.580	89.000, 0.677
447	89.200, 0.693	89.200, 0.615	89.200, 0.627	89.200, 0.580	89.200, 0.677
448	89.400, 0.692	89.400, 0.616	89.400, 0.626	89.400, 0.580	89.400, 0.678
449	89.600, 0.692	89.600, 0.617	89.600, 0.627	89.600, 0.580	89.600, 0.678
450	89.800, 0.692	89.800, 0.617	89.800, 0.627	89.800, 0.579	89.800, 0.678
451	90.000, 0.692	90.000, 0.617	90.000, 0.627	90.000, 0.579	90.000, 0.679
452	90.200, 0.692	90.200, 0.617	90.200, 0.627	90.200, 0.579	90.200, 0.679
453	90.400, 0.692	90.400, 0.617	90.400, 0.627	90.400, 0.579	90.400, 0.680
454	90.600, 0.692	90.600, 0.616	90.600, 0.628	90.600, 0.579	90.600, 0.680
455	90.800, 0.693	90.800, 0.616	90.800, 0.628	90.800, 0.579	90.800, 0.680
456	91.000, 0.693	91.000, 0.615	91.000, 0.628	91.000, 0.579	91.000, 0.680
457	91.200, 0.693	91.200, 0.614	91.200, 0.628	91.200, 0.579	91.200, 0.680
458	91.400, 0.693	91.400, 0.614	91.400, 0.627	91.400, 0.579	91.400, 0.680
459	91.600, 0.693	91.600, 0.613	91.600, 0.627	91.600, 0.579	91.600, 0.680
460	91.800, 0.693	91.800, 0.613	91.800, 0.627	91.800, 0.579	91.800, 0.679
461	92.000, 0.693	92.000, 0.613	92.000, 0.627	92.000, 0.579	92.000, 0.679
462	92.200, 0.693	92.200, 0.612	92.200, 0.627	92.200, 0.579	92.200, 0.679
463	92.400, 0.693	92.400, 0.612	92.400, 0.626	92.400, 0.579	92.400, 0.678
464	92.600, 0.693	92.600, 0.613	92.600, 0.626	92.600, 0.579	92.600, 0.678
465	92.800, 0.693	92.800, 0.613	92.800, 0.626	92.800, 0.579	92.800, 0.678
466	93.000, 0.692	93.000, 0.613	93.000, 0.626	93.000, 0.580	93.000, 0.678
467	93.200, 0.692	93.200, 0.613	93.200, 0.626	93.200, 0.580	93.200, 0.678
468	93.400, 0.693	93.400, 0.613	93.400, 0.626	93.400, 0.580	93.400, 0.678
469	93.600, 0.693	93.600, 0.613	93.600, 0.626	93.600, 0.580	93.600, 0.678
470	93.800, 0.693	93.800, 0.612	93.800, 0.626	93.800, 0.580	93.800, 0.678
471	94.000, 0.693	94.000, 0.612	94.000, 0.626	94.000, 0.580	94.000, 0.678
472	94.200, 0.693	94.200, 0.612	94.200, 0.626	94.200, 0.580	94.200, 0.678
473	94.400, 0.693	94.400, 0.611	94.400, 0.626	94.400, 0.580	94.400, 0.678
474	94.600, 0.693	94.600, 0.611	94.600, 0.626	94.600, 0.580	94.600, 0.678
475	94.800, 0.694	94.800, 0.611	94.800, 0.627	94.800, 0.580	94.800, 0.678
476	95.000, 0.694	95.000, 0.610	95.000, 0.627	95.000, 0.579	95.000, 0.677
477	95.200, 0.694	95.200, 0.610	95.200, 0.626	95.200, 0.579	95.200, 0.677
478	95.400, 0.694	95.400, 0.610	95.400, 0.626	95.400, 0.579	95.400, 0.677
479	95.600, 0.694	95.600, 0.611	95.600, 0.626	95.600, 0.579	95.600, 0.677
480	95.800, 0.694	95.800, 0.611	95.800, 0.625	95.800, 0.579	95.800, 0.676
481	96.000, 0.694	96.000, 0.611	96.000, 0.625	96.000, 0.578	96.000, 0.676
482	96.200, 0.694	96.200, 0.612	96.200, 0.624	96.200, 0.578	96.200, 0.676
483	96.400, 0.694	96.400, 0.612	96.400, 0.624	96.400, 0.578	96.400, 0.676
484	96.600, 0.694	96.600, 0.612	96.600, 0.624	96.600, 0.578	96.600, 0.676
485	96.800, 0.693	96.800, 0.613	96.800, 0.624	96.800, 0.578	96.800, 0.676
486	97.000, 0.693	97.000, 0.613	97.000, 0.624	97.000, 0.578	97.000, 0.676
487	97.200, 0.693	97.200, 0.613	97.200, 0.624	97.200, 0.578	97.200, 0.677
488	97.400, 0.693	97.400, 0.613	97.400, 0.624	97.400, 0.578	97.400, 0.677
489	97.600, 0.693	97.600, 0.613	97.600, 0.624	97.600, 0.578	97.600, 0.677
490	97.800, 0.693	97.800, 0.613	97.800, 0.624	97.800, 0.578	97.800, 0.677
491	98.000, 0.692	98.000, 0.613	98.000, 0.624	98.000, 0.578	98.000, 0.677
492	98.200, 0.692	98.200, 0.613	98.200, 0.624	98.200, 0.577	98.200, 0.677
493	98.400, 0.692	98.400, 0.613	98.400, 0.624	98.400, 0.578	98.400, 0.677
494	98.600, 0.692	98.600, 0.613	98.600, 0.625	98.600, 0.578	98.600, 0.677
495	98.800, 0.692	98.800, 0.613	98.800, 0.625	98.800, 0.578	98.800, 0.677
496	99.000, 0.692	99.000, 0.613	99.000, 0.625	99.000, 0.578	99.000, 0.677
497	99.200, 0.693	99.200, 0.613	99.200, 0.625	99.200, 0.578	99.200, 0.677
498	99.400, 0.693	99.400, 0.613	99.400, 0.625	99.400, 0.578	99.400, 0.676
499	99.600, 0.693	99.600, 0.612	99.600, 0.625	99.600, 0.578	99.600, 0.676
500	99.800, 0.693	99.800, 0.612	99.800, 0.625	99.800, 0.578	99.800, 0.676
501	100.000, 0.693	100.000, 0.612	100.000, 0.625	100.000, 0.579	100.000, 0.676
502	100.200, 0.693	100.200, 0.611	100.200, 0.625	100.200, 0.579	100.200, 0.676
503	100.400, 0.694	100.400, 0.611	100.400, 0.625	100.400, 0.579	100.400, 0.676
504	100.600, 0.694	100.600, 0.611	100.600, 0.626	100.600, 0.578	100.600, 0.676
505	100.800, 0.694	100.800, 0.611	100.800, 0.626	100.800, 0.578	100.800, 0.676
506	101.000, 0.693	101.000, 0.610	101.000, 0.626	101.000, 0.578	101.000, 0.676
507	101.200, 0.693	101.200, 0.610	101.200, 0.626	101.200, 0.578	101.200, 0.676
508	101.400, 0.693	101.400, 0.610	101.400, 0.626	101.400, 0.577	101.400, 0.676
509	101.600, 0.693	101.600, 0.610	101.600, 0.626	101.600, 0.577	101.600, 0.676
510	101.800, 0.693	101.800, 0.610	101.800, 0.626	101.800, 0.577	101.800, 0.677
511	102.000, 0.693	102.000, 0.610	102.000, 0.626	102.000, 0.576	102.000, 0.678
512	102.200, 0.693	102.200, 0.609	102.200, 0.625	102.200, 0.576	102.200, 0.678
513	102.400, 0.693	102.400, 0.609	102.400, 0.625	102.400, 0.575	102.400, 0.679
514	102.600, 0.693	102.600, 0.609	102.600, 0.625	102.600, 0.575	102.600, 0.679
515	102.800, 0.693	102.800, 0.610	102.800, 0.625	102.800, 0.575	102.800, 0.679
516	103.000, 0.693	103.000, 0.610	103.000, 0.625	103.000, 0.575	103.000, 0.680
517	103.200, 0.693	103.200, 0.610	103.200, 0.624	103.200, 0.575	103.200, 0.680
518	103.400, 0.693	103.400, 0.611	103.400, 0.624	103.400, 0.575	103.400, 0.680
519	103.600, 0.693	103.600, 0.611	103.600, 0.624	103.600, 0.575	103.600, 0.680
520	103.800, 0.694	103.800, 0.611	103.800, 0.624	103.800, 0.576	103.800, 0.680
521	104.000, 0.694	104.000, 0.611	104.000, 0.624	104.000, 0.576	104.000, 0.680
522	104.200, 0.694	104.200, 0.611	104.200, 0.624	104.200, 0.576	104.200, 0.680
523	104.400, 0.694	104.400, 0.611	104.400, 0.625	104.400, 0.576	104.400, 0.680
524	104.600, 0.694	104.600, 0.611	104.600, 0.625	104.600, 0.577	104.600, 0.679
525	104.800, 0.694	104.800, 0.611	104.800, 0.625	104.800, 0.577	104.800, 0.679
526	105.000, 0.693	105.000, 0.611	105.000, 0.625	105.000, 0.577	105.000, 0.679
527	105.200, 0.693	105.200, 0.611	105.200, 0.625	105.200, 0.577	105.200, 0.679
528	105.400, 0.693	105.400, 0.611	105.400, 0.625	105.400, 0.578	105.400, 0.679
529	105.600, 0.693	105.600, 0.611	105.600, 0.625	105.600, 0.578	105.600, 0.679
530	105.800, 0.693	105.800, 0.611	105.800, 0.625	105.800, 0.577	105.800, 0.679
531	106.000, 0.693	106.000, 0.611	106.000, 0.625	106.000, 0.577	106.000, 0.678
532	106.200, 0.693	106.200, 0.610	106.200, 0.625	106.200, 0.577	106.200, 0.678
533	106.400, 0.693	106.400, 0.610	106.400, 0.625	106.400, 0.577	106.400, 0.678
534	106.600, 0.693	106.600, 0.610	106.600, 0.625	106.600, 0.577	106.600, 0.678
535	106.800, 0.693	106.800, 0.610	106.800, 0.625	106.800, 0.577	106.800, 0.678
536	107.000, 0.693	107.000, 0.610	107.000, 0.625	107.000, 0.577	107.000, 0.678
537	107.200, 0.693	107.200, 0.610	107.200, 0.625	107.200, 0.577	107.200, 0.678
538	107.400, 0.693	107.400, 0.610	107.400, 0.625	107.400, 0.577	107.400, 0.678
539	107.600, 0.693	107.600, 0.610	107.600, 0.625	107.600, 0.577	107.600, 0.678
540	107.800, 0.693	107.800, 0.610	107.800, 0.625	107.800, 0.577	107.800, 0.678
541	108.000, 0.693	108.000, 0.609	108.000, 0.625	108.000, 0.576	108.000, 0.678
542	108.200, 0.693	108.200, 0.609	108.200, 0.625	108.200, 0.576	108.200, 0.678
543	108.400, 0.693	108.400, 0.609	108.400, 0.624	108.400, 0.576	108.400, 0.678
544	108.600, 0.693	108.600, 0.610	108.600, 0.624	108.600, 0.576	108.600, 0.678
545	108.800, 0.693	108.800, 0.610	108.800, 0.624	108.800, 0.576	108.800, 0.678
546	109.000, 0.693	109.000, 0.610	109.000, 0.624	109.000, 0.576	109.000, 0.678
547	109.200, 0.693	109.200, 0.610	109.200, 0.624	109.200, 0.576	109.200, 0.678
548	109.400, 0.693	109.400, 0.610	109.400, 0.624	109.400, 0.576	109.400, 0.678
549	109.600, 0.693	109.600, 0.610	109.600, 0.624	109.600, 0.575	109.600, 0.678
550	109.800, 0.693	109.800, 0.610	109.800, 0.623	109.800, 0.575	109.800, 0.678
551	110.000, 0.693	110.000, 0.610	110.000, 0.623	110.000, 0.575	110.000, 0.678
552	110.200, 0.693	110.200, 0.610	110.200, 0.623	110.200, 0.575	110.200, 0.678
553	110.400, 0.693	110.400, 0.610	110.400, 0.623	110.400, 0.575	110.400, 0.677
554	110.600, 0.693	110.600, 0.610	110.600, 0.623	110.600, 0.575	110.600, 0.677
555	110.800, 0.693	110.800, 0.610	110.800, 0.623	110.800, 0.575	110.800, 0.677
556	111.000, 0.693	111.000, 0.610	111.000, 0.623	111.000, 0.575	111.000, 0.677
557	111.200, 0.693	111.200, 0.610	111.200, 0.623	111.200, 0.575	111.200, 0.677
558	111.400, 0.693	111.400, 0.610	111.400, 0.623	111.400, 0.575	111.400, 0.677
559	111.600, 0.693	111.600, 0.610	111.600, 0.623	111.600, 0.575	111.600, 0.677
560	111.800, 0.693	111.800, 0.610	111.800, 0.623	111.800, 0.575	111.800, 0.677
561	112.000, 0.693	112.000, 0.610	112.000, 0.623	112.000, 0.575	112.000, 0.677
562	112.200, 0.693	112.200, 0.610	112.200, 0.623	112.200, 0.575	112.200, 0.676
563	112.400, 0.693	112.400, 0.611	112.400, 0.623	112.400, 0.575	112.400, 0.676
564	112.600, 0.693	112.600, 0.611	112.600, 0.623	112.600, 0.575	112.600, 0.677
565	112.800, 0.693	112.800, 0.611	112.800, 0.623	112.800, 0.575	112.800, 0.677
566	113.000, 0.693	113.000, 0.611	113.000, 0.623	113.000, 0.575	113.000, 0.677
567	113.200, 0.693	113.200, 0.611	113.200, 0.623	113.200, 0.575	113.200, 0.677
568	113.400, 0.694	113.400, 0.611	113.400, 0.623	113.400, 0.575	113.400, 0.677
569	113.600, 0.694	113.600, 0.610	113.600, 0.623	113.600, 0.575	113.600, 0.678
570	113.800, 0.694	113.800, 0.610	113.800, 0.623	113.800, 0.575	113.800, 0.678
571	114.000, 0.694	114.000, 0.610	114.000, 0.623	114.000, 0.575	114.000, 0.678
572	114.200, 0.694	114.200, 0.609	114.200, 0.623	114.200, 0.575	114.200, 0.679
573	114.400, 0.694	114.400, 0.609	114.400, 0.623	114.400, 0.575	114.400, 0.679
574	114.600, 0.694	114.600, 0.608	114.600, 0.623	114.600, 0.575	114.600, 0.679
575	114.800, 0.694	114.800, 0.608	114.800, 0.623	114.800, 0.575	114.800, 0.679
576	115.000, 0.693	115.000, 0.607	115.000, 0.623	115.000, 0.575	115.000, 0.679
577	115.200, 0.693	115.200, 0.607	115.200, 0.623	115.200, 0.575	115.200, 0.678
578	115.400, 0.693	115.400, 0.607	115.400, 0.623	115.400, 0.575	115.400, 0.678
579	115.600, 0.693	115.600, 0.607	115.600, 0.623	115.600, 0.576	115.600, 0.678
580	115.800, 0.693	115.800, 0.607	115.800, 0.623	115.800, 0.576	115.800, 0.678
581	116.000, 0.693	116.000, 0.607	116.000, 0.623	116.000, 0.576	116.000, 0.677
582	116.200, 0.693	116.200, 0.608	116.200, 0.623	116.200, 0.577	116.200, 0.677
583	116.400, 0.693	116.400, 0.608	116.400, 0.623	116.400, 0.577	116.400, 0.677
584	116.600, 0.693	116.600, 0.608	116.600, 0.623	116.600, 0.577	116.600, 0.676
585	116.800, 0.693	116.800, 0.608	116.800, 0.623	116.800, 0.577	116.800, 0.676
586	117.000, 0.693	117.000, 0.608	117.000, 0.622	117.000, 0.577	117.000, 0.676
587	117.200, 0.693	117.200, 0.608	117.200, 0.622	117.200, 0.577	117.200, 0.676
588	117.400, 0.693	117.400, 0.608	117.400, 0.622	117.400, 0.577	117.400, 0.677
589	117.600, 0.693	117.600, 0.608	117.600, 0.622	117.600, 0.578	117.600, 0.677
590	117.800, 0.693	117.800, 0.609	117.800, 0.622	117.800, 0.578	117.800, 0.677
591	118.000, 0.693	118.000, 0.609	118.000, 0.621	118.000, 0.578	118.000, 0.677
592	118.200, 0.693	118.200, 0.609	118.200, 0.621	118.200, 0.578	118.200, 0.678
593	118.400, 0.693	118.400, 0.609	118.400, 0.621	118.400, 0.578	118.400, 0.678
594	118.600, 0.692	118.600, 0.609	118.600, 0.620	118.600, 0.577	118.600, 0.678
595	118.800, 0.692	118.800, 0.608	118.800, 0.621	118.800, 0.577	118.800, 0.678
596	119.000, 0.692	119.000, 0.608	119.000, 0.621	119.000, 0.577	119.000, 0.678
597	119.200, 0.692	119.200, 0.607	119.200, 0.621	119.200, 0.577	119.200, 0.678
598	119.400, 0.692	119.400, 0.607	119.400, 0.621	119.400, 0.577	119.400, 0.678
599	119.600, 0.692	119.600, 0.607	119.600, 0.621	119.600, 0.576	119.600, 0.678
600	119.800, 0.692	119.800, 0.607	119.800, 0.621	119.800, 0.576	119.800, 0.678
601	120.000, 0.693	120.000, 0.606	120.000, 0.621	120.000, 0.576	120.000, 0.678
602	120.200, 0.692	120.200, 0.606	120.200, 0.622	120.200, 0.575	120.200, 0.678
603	120.400, 0.692	120.400, 0.606	120.400, 0.622	120.400, 0.575	120.400, 0.678
604	120.600, 0.692	120.600, 0.606	120.600, 0.622	120.600, 0.575	120.600, 0.677
605	120.800, 0.692	120.800, 0.606	120.800, 0.622	120.800, 0.575	120.800, 0.677
606	121.000, 0.692	121.000, 0.606	121.000, 0.622	121.000, 0.575	121.000, 0.677
607	121.200, 0.692	121.200, 0.607	121.200, 0.622	121.200, 0.576	121.200, 0.677
608	121.400, 0.692	121.400, 0.607	121.400, 0.622	121.400, 0.576	121.400, 0.676
609	121.600, 0.692	121.600, 0.608	121.600, 0.622	121.600, 0.576	121.600, 0.676
610	121.800, 0.692	121.800, 0.608	121.800, 0.622	121.800, 0.576	121.800, 0.676
611	122.000, 0.692	122.000, 0.608	122.000, 0.621	122.000, 0.576	122.000, 0.676
612	122.200, 0.692	122.200, 0.608	122.200, 0.621	122.200, 0.576	122.200, 0.676
613	122.400, 0.692	122.400, 0.608	122.400, 0.621	122.400, 0.576	122.400, 0.676
614	122.600, 0.692	122.600, 0.608	122.600, 0.621	122.600, 0.576	122.600, 0.676
615	122.800, 0.691	122.800, 0.607	122.800, 0.621	122.800, 0.576	122.800, 0.677
616	123.000, 0.691	123.000, 0.607	123.000, 0.621	123.000, 0.575	123.000, 0.677
617	123.200, 0.692	123.200, 0.607	123.200, 0.621	123.200, 0.575	123.200, 0.677
618	123.400, 0.692	123.400, 0.606	123.400, 0.620	123.400, 0.575	123.400, 0.677
619	123.600, 0.692	123.600, 0.606	123.600, 0.620	123.600, 0.574	123.600, 0.677
620	123.800, 0.692	123.800, 0.606	123.800, 0.620	123.800, 0.574	123.800, 0.677
621	124.000, 0.692	124.000, 0.606	124.000, 0.620	124.000, 0.574	124.000, 0.676
622	124.200, 0.692	124.200, 0.606	124.200, 0.620	124.200, 0.574	124.200, 0.676
623	124.400, 0.692	124.400, 0.606	124.400, 0.621	124.400, 0.574	124.400, 0.677
624	124.600, 0.692	124.600, 0.606	124.600, 0.621	124.600, 0.574	124.600, 0.677
625	124.800, 0.692	124.800, 0.606	124.800, 0.621	124.800, 0.575	124.800, 0.677
626	125.000, 0.692	125.000, 0.606	125.000, 0.621	125.000, 0.575	125.000, 0.677
627	125.200, 0.692	125.200, 0.606	125.200, 0.621	125.200, 0.575	125.200, 0.677
628	125.400, 0.692	125.400, 0.605	125.400, 0.621	125.400, 0.575	125.400, 0.677
629	125.600, 0.692	125.600, 0.605	125.600, 0.621	125.600, 0.575	125.600, 0.676
630	125.800, 0.692	125.800, 0.605	125.800, 0.621	125.800, 0.576	125.800, 0.676
631	126.000, 0.692	126.000, 0.605	126.000, 0.621	126.000, 0.576	126.000, 0.676
632	126.200, 0.692	126.200, 0.605	126.200, 0.621	126.200, 0.576	126.200, 0.676
633	126.400, 0.692	126.400, 0.605	126.400, 0.621	126.400, 0.576	126.400, 0.676
634	126.600, 0.692	126.600, 0.605	126.600, 0.621	126.600, 0.576	126.600, 0.676
635	126.800, 0.692	126.800, 0.605	126.800, 0.621	126.800, 0.576	126.800, 0.676
636	127.000, 0.692	127.000, 0.605	127.000, 0.621	127.000, 0.576	127.000, 0.676
637	127.200, 0.693	127.200, 0.605	127.200, 0.621	127.200, 0.576	127.200, 0.676
638	127.400, 0.693	127.400, 0.605	127.400, 0.621	127.400, 0.576	127.400, 0.676
639	127.600, 0.693	127.600, 0.605	127.600, 0.620	127.600, 0.576	127.600, 0.676
640	127.800, 0.693	127.800, 0.606	127.800, 0.620	127.800, 0.576	127.800, 0.676
641	128.000, 0.692	128.000, 0.606	128.000, 0.620	128.000, 0.576	128.000, 0.677
642	128.200, 0.692	128.200, 0.606	128.200, 0.620	128.200, 0.576	128.200, 0.677
643	128.400, 0.692	128.400, 0.606	128.400, 0.620	128.400, 0.576	128.400, 0.677
644	128.600, 0.692	128.600, 0.606	128.600, 0.619	128.600, 0.576	128.600, 0.677
645	128.800, 0.692	128.800, 0.606	128.800, 0.619	128.800, 0.576	128.800, 0.677
646	129.000, 0.692	129.000, 0.606	129.000, 0.619	129.000, 0.576	129.000, 0.677
647	129.200, 0.692	129.200, 0.606	129.200, 0.619	129.200, 0.576	129.200, 0.677
648	129.400, 0.692	129.400, 0.606	129.400, 0.619	129.400, 0.576	129.400, 0.677
649	129.600, 0.692	129.600, 0.606	129.600, 0.619	129.600, 0.576	129.600, 0.677
650	129.800, 0.692	129.800, 0.606	129.800, 0.619	129.800, 0.576	129.800, 0.677
651	130.000, 0.693	130.000, 0.606	130.000, 0.619	130.000, 0.576	130.000, 0.677
652	130.200, 0.693	130.200, 0.606	130.200, 0.619	130.200, 0.576	130.200, 0.677
653	130.400, 0.693	130.400, 0.606	130.400, 0.619	130.400, 0.576	130.400, 0.678
654	130.600, 0.694	130.600, 0.605	130.600, 0.619	130.600, 0.576	130.600, 0.678
655	130.800, 0.694	130.800, 0.605	130.800, 0.619	130.800, 0.576	130.800, 0.678
656	131.000, 0.694	131.000, 0.605	131.000, 0.619	131.000, 0.576	131.000, 0.678
657	131.200, 0.694	131.200, 0.605	131.200, 0.619	131.200, 0.575	131.200, 0.678
658	131.400, 0.694	131.400, 0.605	131.400, 0.619	131.400, 0.575	131.400, 0.678
659	131.600, 0.694	131.600, 0.605	131.600, 0.619	131.600, 0.575	131.600, 0.678
660	131.800, 0.694	131.800, 0.605	131.800, 0.619	131.800, 0.574	131.800, 0.678
661	132.000, 0.694	132.000, 0.604	132.000, 0.619	132.000, 0.573	132.000, 0.677
662	132.200, 0.694	132.200, 0.604	132.200, 0.619	132.200, 0.573	132.200, 0.677
663	132.400, 0.694	132.400, 0.604	132.400, 0.619	132.400, 0.573	132.400, 0.677
664	132.600, 0.694	132.600, 0.604	132.600, 0.619	132.600, 0.572	132.600, 0.677
665	132.800, 0.693	132.800, 0.604	132.800, 0.619	132.800, 0.572	132.800, 0.677
666	133.000, 0.693	133.000, 0.605	133.000, 0.619	133.000, 0.572	133.000, 0.677
667	133.200, 0.692	133.200, 0.605	133.200, 0.619	133.200, 0.572	133.200, 0.677
668	133.400, 0.692	133.400, 0.605	133.400, 0.619	133.400, 0.573	133.400, 0.678
669	133.600, 0.692	133.600, 0.605	133.600, 0.619	133.600, 0.573	133.600, 0.678
670	133.800, 0.692	133.800, 0.605	133.800, 0.619	133.800, 0.574	133.800, 0.678
671	134.000, 0.692	134.000, 0.605	134.000, 0.619	134.000, 0.574	134.000, 0.678
672	134.200, 0.692	134.200, 0.605	134.200, 0.619	134.200, 0.575	134.200, 0.678
673	134.400, 0.692	134.400, 0.605	134.400, 0.619	134.400, 0.575	134.400, 0.678
674	134.600, 0.692	134.600, 0.605	134.600, 0.620	134.600, 0.575	134.600, 0.678
675	134.800, 0.692	134.800, 0.605	134.800, 0.620	134.800, 0.576	134.800, 0.677
676	135.000, 0.692	135.000, 0.605	135.000, 0.620	135.000, 0.576	135.000, 0.677
677	135.200, 0.692	135.200, 0.605	135.200, 0.621	135.200, 0.576	135.200, 0.677
678	135.400, 0.693	135.400, 0.604	135.400, 0.621	135.400, 0.575	135.400, 0.677
679	135.600, 0.693	135.600, 0.604	135.600, 0.621	135.600, 0.575	135.600, 0.677
680	135.800, 0.693	135.800, 0.604	135.800, 0.621	135.800, 0.575	135.800, 0.677
681	136.000, 0.693	136.000, 0.604	136.000, 0.621	136.000, 0.575	136.000, 0.677
682	136.200, 0.693	136.200, 0.604	136.200, 0.621	136.200, 0.575	136.200, 0.676
683	136.400, 0.693	136.400, 0.604	136.400, 0.621	136.400, 0.574	136.400, 0.676
684	136.600, 0.693	136.600, 0.604	136.600, 0.621	136.600, 0.574	136.600, 0.676
685	136.800, 0.693	136.800, 0.604	136.800, 0.621	136.800, 0.574	136.800, 0.676
686	137.000, 0.693	137.000, 0.604	137.000, 0.620	137.000, 0.575	137.000, 0.676
687	137.200, 0.693	137.200, 0.604	137.200, 0.620	137.200, 0.575	137.200, 0.676
688	137.400, 0.693	137.400, 0.604	137.400, 0.620	137.400, 0.575	137.400, 0.676
689	137.600, 0.693	137.600, 0.604	137.600, 0.620	137.600, 0.575	137.600, 0.676
690	137.800, 0.693	137.800, 0.604	137.800, 0.619	137.800, 0.575	137.800, 0.676
691	138.000, 0.693	138.000, 0.604	138.000, 0.619	138.000, 0.575	138.000, 0.676
692	138.200, 0.693	138.200, 0.604	138.200, 0.619	138.200, 0.575	138.200, 0.676
693	138.400, 0.693	138.400, 0.604	138.400, 0.620	138.400, 0.575	138.400, 0.676
694	138.600, 0.693	138.600, 0.604	138.600, 0.620	138.600, 0.575	138.600, 0.676
695	138.800, 0.693	138.800, 0.604	138.800, 0.620	138.800, 0.574	138.800, 0.677
696	139.000, 0.693	139.000, 0.605	139.000, 0.620	139.000, 0.574	139.000, 0.677
697	139.200, 0.693	139.200, 0.604	139.200, 0.620	139.200, 0.574	139.200, 0.677
698	139.400, 0.693	139.400, 0.604	139.400, 0.620	139.400, 0.573	139.400, 0.677
699	139.600, 0.693	139.600, 0.605	139.600, 0.620	139.600, 0.573	139.600, 0.678
700	139.800, 0.694	139.800, 0.605	139.800, 0.620	139.800, 0.574	139.800, 0.678
701	140.000, 0.694	140.000, 0.604	140.000, 0.620	140.000, 0.574	140.000, 0.678
702	140.200, 0.694	140.200, 0.604	140.200, 0.619	140.200, 0.574	140.200, 0.678
703	140.400, 0.694	140.400, 0.604	140.400, 0.619	140.400, 0.575	140.400, 0.678
704	140.600, 0.694	140.600, 0.604	140.600, 0.619	140.600, 0.575	140.600, 0.678
705	140.800, 0.694	140.800, 0.604	140.800, 0.620	140.800, 0.575	140.800, 0.679
706	141.000, 0.694	141.000, 0.604	141.000, 0.620	141.000, 0.575	141.000, 0.679
707	141.200, 0.694	141.200, 0.604	141.200, 0.620	141.200, 0.576	141.200, 0.679
708	141.400, 0.694	141.400, 0.604	141.400, 0.620	141.400, 0.576	141.400, 0.679
709	141.600, 0.694	141.600, 0.604	141.600, 0.620	141.600, 0.576	141.600, 0.679
710	141.800, 0.693	141.800, 0.604	141.800, 0.620	141.800, 0.576	141.800, 0.679
711	142.000, 0.693	142.000, 0.604	142.000, 0.620	142.000, 0.576	142.000, 0.678
712	142.200, 0.693	142.200, 0.604	142.200, 0.620	142.200, 0.576	142.200, 0.678
713	142.400, 0.693	142.400, 0.604	142.400, 0.620	142.400, 0.575	142.400, 0.678
714	142.600, 0.693	142.600, 0.604	142.600, 0.619	142.600, 0.575	142.600, 0.678
715	142.800, 0.693	142.800, 0.603	142.800, 0.619	142.800, 0.575	142.800, 0.678
716	143.000, 0.693	143.000, 0.603	143.000, 0.619	143.000, 0.574	143.000, 0.678
717	143.200, 0.693	143.200, 0.603	143.200, 0.619	143.200, 0.574	143.200, 0.678
718	143.400, 0.693	143.400, 0.603	143.400, 0.619	143.400, 0.574	143.400, 0.678
719	143.600, 0.693	143.600, 0.603	143.600, 0.618	143.600, 0.573	143.600, 0.678
720	143.800, 0.693	143.800, 0.603	143.800, 0.618	143.800, 0.573	143.800, 0.678
721	144.000, 0.693	144.000, 0.603	144.000, 0.618	144.000, 0.573	144.000, 0.678
722	144.200, 0.693	144.200, 0.603	144.200, 0.618	144.200, 0.573	144.200, 0.678
723	144.400, 0.693	144.400, 0.603	144.400, 0.618	144.400, 0.573	144.400, 0.678
724	144.600, 0.693	144.600, 0.603	144.600, 0.618	144.600, 0.572	144.600, 0.678
725	144.800, 0.693	144.800, 0.604	144.800, 0.619	144.800, 0.572	144.800, 0.678
726	145.000, 0.694	145.000, 0.604	145.000, 0.619	145.000, 0.572	145.000, 0.678
727	145.200, 0.694	145.200, 0.605	145.200, 0.619	145.200, 0.572	145.200, 0.677
728	145.400, 0.694	145.400, 0.605	145.400, 0.619	145.400, 0.573	145.400, 0.677
729	145.600, 0.694	145.600, 0.605	145.600, 0.619	145.600, 0.573	145.600, 0.676
730	145.800, 0.694	145.800, 0.605	145.800, 0.619	145.800, 0.573	145.800, 0.676
731	146.000, 0.694	146.000, 0.605	146.000, 0.619	146.000, 0.574	146.000, 0.676
732	146.200, 0.694	146.200, 0.605	146.200, 0.619	146.200, 0.574	146.200, 0.676
733	146.400, 0.694	146.400, 0.605	146.400, 0.619	146.400, 0.574	146.400, 0.676
734	146.600, 0.694	146.600, 0.604	146.600, 0.619	146.600, 0.574	146.600, 0.676
735	146.800, 0.694	146.800, 0.604	146.800, 0.619	146.800, 0.574	146.800, 0.676
736	147.000, 0.694	147.000, 0.604	147.000, 0.619	147.000, 0.574	147.000, 0.676
737	147.200, 0.693	147.200, 0.604	147.200, 0.619	147.200, 0.574	147.200, 0.676
738	147.400, 0.693	147.400, 0.604	147.400, 0.619	147.400, 0.574	147.400, 0.676
739	147.600, 0.693	147.600, 0.604	147.600, 0.619	147.600, 0.574	147.600, 0.676
740	147.800, 0.693	147.800, 0.604	147.800, 0.619	147.800, 0.574	147.800, 0.675
741	148.000, 0.693	148.000, 0.604	148.000, 0.619	148.000, 0.574	148.000, 0.675
742	148.200, 0.693	148.200, 0.604	148.200, 0.619	148.200, 0.574	148.200, 0.675
743	148.400, 0.693	148.400, 0.604	148.400, 0.619	148.400, 0.574	148.400, 0.675
744	148.600, 0.693	148.600, 0.605	148.600, 0.619	148.600, 0.574	148.600, 0.675
745	148.800, 0.693	148.800, 0.605	148.800, 0.618	148.800, 0.574	148.800, 0.675
746	149.000, 0.694	149.000, 0.605	149.000, 0.618	149.000, 0.574	149.000, 0.675
747	149.200, 0.694	149.200, 0.605	149.200, 0.618	149.200, 0.574	149.200, 0.674
748	149.400, 0.694	149.400, 0.605	149.400, 0.618	149.400, 0.574	149.400, 0.674
749	149.600, 0.694	149.600, 0.605	149.600, 0.618	149.600, 0.574	149.600, 0.674
750	149.800, 0.694	149.800, 0.605	149.800, 0.618	149.800, 0.574	149.800, 0.675
751	150.000, 0.694	150.000, 0.605	150.000, 0.618	150.000, 0.574	150.000, 0.675
752	150.200, 0.688	150.200, 0.600	150.200, 0.612	150.200, 0.570	150.200, 0.667
753	150.400, 0.681	150.400, 0.595	150.400, 0.605	150.400, 0.565	150.400, 0.659
754	150.600, 0.674	150.600, 0.590	150.600, 0.598	150.600, 0.560	150.600, 0.650
755	150.800, 0.665	150.800, 0.583	150.800, 0.590	150.800, 0.554	150.800, 0.639
756	151.000, 0.656	151.000, 0.577	151.000, 0.581	151.000, 0.548	151.000, 0.629
757	151.200, 0.647	151.200, 0.570	151.200, 0.573	151.200, 0.542	151.200, 0.618
758	151.400, 0.638	151.400, 0.563	151.400, 0.564	151.400, 0.535	151.400, 0.607
759	151.600, 0.630	151.600, 0.556	151.600, 0.555	151.600, 0.529	151.600, 0.597
760	151.800, 0.621	151.800, 0.550	151.800, 0.547	151.800, 0.524	151.800, 0.587
761	152.000, 0.614	152.000, 0.544	152.000, 0.540	152.000, 0.519	152.000, 0.579
762	152.200, 0.608	152.200, 0.540	152.200, 0.533	152.200, 0.515	152.200, 0.572
763	152.400, 0.603	152.400, 0.535	152.400, 0.528	152.400, 0.511	152.400, 0.565
764	152.600, 0.599	152.600, 0.531	152.600, 0.522	152.600, 0.507	152.600, 0.560
765	152.800, 0.594	152.800, 0.527	152.800, 0.517	152.800, 0.504	152.800, 0.555
766	153.000, 0.590	153.000, 0.523	153.000, 0.512	153.000, 0.501	153.000, 0.550
767	153.200, 0.586	153.200, 0.520	153.200, 0.508	153.200, 0.499	153.200, 0.546
768	153.400, 0.583	153.400, 0.516	153.400, 0.504	153.400, 0.496	153.400, 0.542
769	153.600, 0.580	153.600, 0.514	153.600, 0.501	153.600, 0.494	153.600, 0.538
770	153.800, 0.577	153.800, 0.511	153.800, 0.497	153.800, 0.492	153.800, 0.535
771	154.000, 0.574	154.000, 0.509	154.000, 0.495	154.000, 0.490	154.000, 0.533
772	154.200, 0.571	154.200, 0.506	154.200, 0.492	154.200, 0.488	154.200, 0.530
773	154.400, 0.569	154.400, 0.504	154.400, 0.490	154.400, 0.486	154.400, 0.527
774	154.600, 0.567	154.600, 0.502	154.600, 0.488	154.600, 0.484	154.600, 0.525
775	154.800, 0.564	154.800, 0.500	154.800, 0.487	154.800, 0.483	154.800, 0.523
776	155.000, 0.562	155.000, 0.499	155.000, 0.485	155.000, 0.481	155.000, 0.520
777	155.200, 0.561	155.200, 0.497	155.200, 0.483	155.200, 0.480	155.200, 0.518
778	155.400, 0.559	155.400, 0.495	155.400, 0.482	155.400, 0.479	155.400, 0.517
779	155.600, 0.557	155.600, 0.494	155.600, 0.480	155.600, 0.477	155.600, 0.515
780	155.800, 0.556	155.800, 0.493	155.800, 0.478	155.800, 0.476	155.800, 0.514
781	156.000, 0.554	156.000, 0.491	156.000, 0.476	156.000, 0.475	156.000, 0.512
782	156.200, 0.553	156.200, 0.490	156.200, 0.475	156.200, 0.474	156.200, 0.511
783	156.400, 0.551	156.400, 0.489	156.400, 0.473	156.400, 0.473	156.400, 0.509
784	156.600, 0.550	156.600, 0.487	156.600, 0.471	156.600, 0.472	156.600, 0.508
785	156.800, 0.548	156.800, 0.486	156.800, 0.469	156.800, 0.471	156.800, 0.506
786	157.000, 0.547	157.000, 0.485	157.000, 0.468	157.000, 0.470	157.000, 0.505
787	157.200, 0.545	157.200, 0.484	157.200, 0.466	157.200, 0.469	157.200, 0.503
788	157.400, 0.544	157.400, 0.483	157.400, 0.465	157.400, 0.469	157.400, 0.502
789	157.600, 0.543	157.600, 0.482	157.600, 0.464	157.600, 0.468	157.600, 0.501
790	157.800, 0.543	157.800, 0.481	157.800, 0.463	157.800, 0.467	157.800, 0.499
791	158.000, 0.542	158.000, 0.480	158.000, 0.462	158.000, 0.467	158.000, 0.498
792	158.200, 0.541	158.200, 0.480	158.200, 0.461	158.200, 0.466	158.200, 0.497
793	158.400, 0.540	158.400, 0.479	158.400, 0.460	158.400, 0.466	158.400, 0.496
794	158.600, 0.539	158.600, 0.478	158.600, 0.460	158.600, 0.465	158.600, 0.495
795	158.800, 0.538	158.800, 0.477	158.800, 0.459	158.800, 0.465	158.800, 0.494
796	159.000, 0.537	159.000, 0.477	159.000, 0.458	159.000, 0.465	159.000, 0.494
797	159.200, 0.536	159.200, 0.476	159.200, 0.458	159.200, 0.464	159.200, 0.493
798	159.400, 0.535	159.400, 0.475	159.400, 0.457	159.400, 0.464	159.400, 0.493
799	159.600, 0.534	159.600, 0.475	159.600, 0.456	159.600, 0.463	159.600, 0.493
800	159.800, 0.533	159.800, 0.474	159.800, 0.456	159.800, 0.463	159.800, 0.493
801	160.000, 0.533	160.000, 0.473	160.000, 0.455	160.000, 0.462	160.000, 0.492
802	160.200, 0.532	160.200, 0.473	160.200, 0.455	160.200, 0.462	160.200, 0.492
803	160.400, 0.532	160.400, 0.472	160.400, 0.454	160.400, 0.462	160.400, 0.491
804	160.600, 0.531	160.600, 0.471	160.600, 0.454	160.600, 0.461	160.600, 0.491
805	160.800, 0.531	160.800, 0.471	160.800, 0.453	160.800, 0.461	160.800, 0.490
806	161.000, 0.531	161.000, 0.470	161.000, 0.453	161.000, 0.461	161.000, 0.490
807	161.200, 0.530	161.200, 0.470	161.200, 0.453	161.200, 0.461	161.200, 0.489
808	161.400, 0.530	161.400, 0.469	161.400, 0.452	161.400, 0.461	161.400, 0.489
809	161.600, 0.530	161.600, 0.468	161.600, 0.452	161.600, 0.461	161.600, 0.488
810	161.800, 0.529	161.800, 0.468	161.800, 0.452	161.800, 0.461	161.800, 0.488
811	162.000, 0.529	162.000, 0.467	162.000, 0.451	162.000, 0.460	162.000, 0.487
812	162.200, 0.528	162.200, 0.467	162.200, 0.451	162.200, 0.460	162.200, 0.487
813	162.400, 0.527	162.400, 0.466	162.400, 0.451	162.400, 0.460	162.400, 0.486
814	162.600, 0.527	162.600, 0.466	162.600, 0.450	162.600, 0.459	162.600, 0.486
815	162.800, 0.526	162.800, 0.465	162.800, 0.450	162.800, 0.459	162.800, 0.486
816	163.000, 0.525	163.000, 0.465	163.000, 0.449	163.000, 0.458	163.000, 0.485
817	163.200, 0.525	163.200, 0.464	163.200, 0.448	163.200, 0.458	163.200, 0.485
818	163.400, 0.524	163.400, 0.464	163.400, 0.448	163.400, 0.457	163.400, 0.484
819	163.600, 0.524	163.600, 0.463	163.600, 0.447	163.600, 0.456	163.600, 0.484
820	163.800, 0.523	163.800, 0.463	163.800, 0.446	163.800, 0.456	163.800, 0.483
821	164.000, 0.523	164.000, 0.463	164.000, 0.446	164.000, 0.455	164.000, 0.483
822	164.200, 0.523	164.200, 0.463	164.200, 0.445	164.200, 0.455	164.200, 0.482
823	164.400, 0.522	164.400, 0.462	164.400, 0.445	164.400, 0.455	164.400, 0.482
824	164.600, 0.522	164.600, 0.462	164.600, 0.444	164.600, 0.455	164.600, 0.482
825	164.800, 0.522	164.800, 0.462	164.800, 0.444	164.800, 0.454	164.800, 0.481
826	165.000, 0.521	165.000, 0.462	165.000, 0.444	165.000, 0.454	165.000, 0.481
827	165.200, 0.521	165.200, 0.462	165.200, 0.443	165.200, 0.454	165.200, 0.480
828	165.400, 0.521	165.400, 0.461	165.400, 0.443	165.400, 0.454	165.400, 0.480
829	165.600, 0.520	165.600, 0.461	165.600, 0.442	165.600, 0.453	165.600, 0.480
830	165.800, 0.520	165.800, 0.461	165.800, 0.442	165.800, 0.453	165.800, 0.480
831	166.000, 0.520	166.000, 0.461	166.000, 0.442	166.000, 0.453	166.000, 0.479
832	166.200, 0.519	166.200, 0.460	166.200, 0.441	166.200, 0.453	166.200, 0.479
833	166.400, 0.519	166.400, 0.460	166.400, 0.441	166.400, 0.453	166.400, 0.479
834	166.600, 0.518	166.600, 0.460	166.600, 0.441	166.600, 0.453	166.600, 0.478
835	166.800, 0.518	166.800, 0.459	166.800, 0.440	166.800, 0.452	166.800, 0.478
836	167.000, 0.517	167.000, 0.459	167.000, 0.440	167.000, 0.452	167.000, 0.477
837	167.200, 0.517	167.200, 0.458	167.200, 0.440	167.200, 0.452	167.200, 0.477
838	167.400, 0.517	167.400, 0.458	167.400, 0.440	167.400, 0.451	167.400, 0.476
839	167.600, 0.516	167.600, 0.458	167.600, 0.439	167.600, 0.451	167.600, 0.476
840	167.800, 0.516	167.800, 0.457	167.800, 0.439	167.800, 0.450	167.800, 0.476
841	168.000, 0.516	168.000, 0.457	168.000, 0.439	168.000, 0.450	168.000, 0.475
842	168.200, 0.515	168.200, 0.456	168.200, 0.439	168.200, 0.450	168.200, 0.475
843	168.400, 0.515	168.400, 0.456	168.400, 0.438	168.400, 0.450	168.400, 0.475
844	168.600, 0.515	168.600, 0.456	168.600, 0.438	168.600, 0.449	168.600, 0.475
845	168.800, 0.515	168.800, 0.456	168.800, 0.438	168.800, 0.449	168.800, 0.475
846	169.000, 0.515	169.000, 0.456	169.000, 0.437	169.000, 0.449	169.000, 0.474
847	169.200, 0.514	169.200, 0.455	169.200, 0.437	169.200, 0.449	169.200, 0.474
848	169.400, 0.514	169.400, 0.455	169.400, 0.436	169.400, 0.449	169.400, 0.474
849	169.600, 0.514	169.600, 0.455	169.600, 0.436	169.600, 0.449	169.600, 0.474
850	169.800, 0.513	169.800, 0.455	169.800, 0.436	169.800, 0.449	169.800, 0.473
851	170.000, 0.513	170.000, 0.455	170.000, 0.436	170.000, 0.448	170.000, 0.473
852	170.200, 0.512	170.200, 0.454	170.200, 0.436	170.200, 0.448	170.200, 0.472
853	170.400, 0.512	170.400, 0.454	170.400, 0.436	170.400, 0.448	170.400, 0.471
854	170.600, 0.511	170.600, 0.454	170.600, 0.436	170.600, 0.448	170.600, 0.471
855	170.800, 0.510	170.800, 0.453	170.800, 0.435	170.800, 0.448	170.800, 0.470
856	171.000, 0.510	171.000, 0.453	171.000, 0.435	171.000, 0.448	171.000, 0.470
857	171.200, 0.509	171.200, 0.453	171.200, 0.435	171.200, 0.447	171.200, 0.469
858	171.400, 0.509	171.400, 0.452	171.400, 0.434	171.400, 0.447	171.400, 0.469
859	171.600, 0.508	171.600, 0.452	171.600, 0.434	171.600, 0.447	171.600, 0.468
860	171.800, 0.508	171.800, 0.451	171.800, 0.434	171.800, 0.447	171.800, 0.468
861	172.000, 0.508	172.000, 0.451	172.000, 0.433	172.000, 0.447	172.000, 0.468
862	172.200, 0.508	172.200, 0.450	172.200, 0.433	172.200, 0.447	172.200, 0.468
863	172.400, 0.508	172.400, 0.450	172.400, 0.433	172.400, 0.447	172.400, 0.468
864	172.600, 0.508	172.600, 0.450	172.600, 0.432	172.600, 0.446	172.600, 0.468
865	172.800, 0.508	172.800, 0.449	172.800, 0.432	172.800, 0.446	172.800, 0.468
866	173.000, 0.508	173.000, 0.449	173.000, 0.432	173.000, 0.446	173.000, 0.468
867	173.200, 0.508	173.200, 0.449	173.200, 0.431	173.200, 0.446	173.200, 0.468
868	173.400, 0.509	173.400, 0.449	173.400, 0.431	173.400, 0.445	173.400, 0.468
869	173.600, 0.508	173.600, 0.448	173.600, 0.431	173.600, 0.445	173.600, 0.468
870	173.800, 0.508	173.800, 0.448	173.800, 0.430	173.800, 0.444	173.800, 0.468
871	174.000, 0.508	174.000, 0.448	174.000, 0.430	174.000, 0.443	174.000, 0.467
872	174.200, 0.507	174.200, 0.448	174.200, 0.430	174.200, 0.443	174.200, 0.467
873	174.400, 0.506	174.400, 0.448	174.400, 0.430	174.400, 0.442	174.400, 0.466
874	174.600, 0.506	174.600, 0.448	174.600, 0.430	174.600, 0.442	174.600, 0.466
875	174.800, 0.505	174.800, 0.447	174.800, 0.429	174.800, 0.442	174.800, 0.466
876	175.000, 0.505	175.000, 0.447	175.000, 0.429	175.000, 0.441	175.000, 0.465
877	175.200, 0.504	175.200, 0.447	175.200, 0.429	175.200, 0.441	175.200, 0.465
878	175.400, 0.504	175.400, 0.447	175.400, 0.428	175.400, 0.441	175.400, 0.465
879	175.600, 0.504	175.600, 0.447	175.600, 0.428	175.600, 0.441	175.600, 0.465
880	175.800, 0.503	175.800, 0.446	175.800, 0.428	175.800, 0.440	175.800, 0.465
881	176.000, 0.503	176.000, 0.446	176.000, 0.428	176.000, 0.440	176.000, 0.464
882	176.200, 0.503	176.200, 0.446	176.200, 0.427	176.200, 0.439	176.200, 0.464
883	176.400, 0.503	176.400, 0.445	176.400, 0.427	176.400, 0.439	176.400, 0.464
884	176.600, 0.502	176.600, 0.445	176.600, 0.427	176.600, 0.439	176.600, 0.463
885	176.800, 0.502	176.800, 0.445	176.800, 0.426	176.800, 0.439	176.800, 0.463
886	177.000, 0.502	177.000, 0.445	177.000, 0.426	177.000, 0.439	177.000, 0.462
887	177.200, 0.502	177.200, 0.444	177.200, 0.426	177.200, 0.438	177.200, 0.462
888	177.400, 0.502	177.400, 0.444	177.400, 0.426	177.400, 0.438	177.400, 0.462
889	177.600, 0.501	177.600, 0.444	177.600, 0.425	177.600, 0.438	177.600, 0.461
890	177.800, 0.501	177.800, 0.443	177.800, 0.425	177.800, 0.438	177.800, 0.461
891	178.000, 0.500	178.000, 0.443	178.000, 0.425	178.000, 0.438	178.000, 0.461
892	178.200, 0.500	178.200, 0.443	178.200, 0.425	178.200, 0.438	178.200, 0.460
893	178.400, 0.499	178.400, 0.442	178.400, 0.425	178.400, 0.438	178.400, 0.460
894	178.600, 0.498	178.600, 0.442	178.600, 0.425	178.600, 0.438	178.600, 0.460
895	178.800, 0.498	178.800, 0.442	178.800, 0.425	178.800, 0.438	178.800, 0.460
896	179.000, 0.497	179.000, 0.442	179.000, 0.424	179.000, 0.438	179.000, 0.460
897	179.200, 0.497	179.200, 0.442	179.200, 0.424	179.200, 0.438	179.200, 0.460
898	179.400, 0.496	179.400, 0.442	179.400, 0.424	179.400, 0.438	179.400, 0.460
899	179.600, 0.496	179.600, 0.441	179.600, 0.424	179.600, 0.437	179.600, 0.459
900	179.800, 0.495	179.800, 0.441	179.800, 0.423	179.800, 0.437	179.800, 0.459
901	180.000, 0.495	180.000, 0.441	180.000, 0.423	180.000, 0.436	180.000, 0.459
902	180.200, 0.495	180.200, 0.441	180.200, 0.422	180.200, 0.436	180.200, 0.459
903	180.400, 0.495	180.400, 0.441	180.400, 0.422	180.400, 0.435	180.400, 0.459
904	180.600, 0.494	180.600, 0.440	180.600, 0.422	180.600, 0.435	180.600, 0.458
905	180.800, 0.494	180.800, 0.440	180.800, 0.421	180.800, 0.435	180.800, 0.458
906	181.000, 0.494	181.000, 0.439	181.000, 0.421	181.000, 0.434	181.000, 0.457
907	181.200, 0.494	181.200, 0.439	181.200, 0.420	181.200, 0.434	181.200, 0.457
908	181.400, 0.494	181.400, 0.438	181.400, 0.420	181.400, 0.434	181.400, 0.457
909	181.600, 0.494	181.600, 0.438	181.600, 0.420	181.600, 0.433	181.600, 0.456
910	181.800, 0.494	181.800, 0.437	181.800, 0.420	181.800, 0.433	181.800, 0.456
911	182.000, 0.494	182.000, 0.437	182.000, 0.419	182.000, 0.432	182.000, 0.455
912	182.200, 0.494	182.200, 0.436	182.200, 0.419	182.200, 0.432	182.200, 0.455
913	182.400, 0.494	182.400, 0.436	182.400, 0.419	182.400, 0.432	182.400, 0.455
914	182.600, 0.494	182.600, 0.436	182.600, 0.419	182.600, 0.432	182.600, 0.454
915	182.800, 0.493	182.800, 0.436	182.800, 0.419	182.800, 0.432	182.800, 0.454
916	183.000, 0.493	183.000, 0.436	183.000, 0.419	183.000, 0.432	183.000, 0.454
917	183.200, 0.492	183.200, 0.436	183.200, 0.419	183.200, 0.432	183.200, 0.454
918	183.400, 0.492	183.400, 0.436	183.400, 0.419	183.400, 0.431	183.400, 0.454
919	183.600, 0.492	183.600, 0.436	183.600, 0.419	183.600, 0.431	183.600, 0.454
920	183.800, 0.491	183.800, 0.436	183.800, 0.418	183.800, 0.431	183.800, 0.454
921	184.000, 0.491	184.000, 0.436	184.000, 0.418	184.000, 0.431	184.000, 0.454
922	184.200, 0.491	184.200, 0.436	184.200, 0.418	184.200, 0.430	184.200, 0.454
923	184.400, 0.490	184.400, 0.436	184.400, 0.418	184.400, 0.430	184.400, 0.454
924	184.600, 0.490	184.600, 0.436	184.600, 0.417	184.600, 0.430	184.600, 0.454
925	184.800, 0.490	184.800, 0.436	184.800, 0.417	184.800, 0.430	184.800, 0.454
926	185.000, 0.489	185.000, 0.436	185.000, 0.417	185.000, 0.430	185.000, 0.454
927	185.200, 0.489	185.200, 0.435	185.200, 0.416	185.200, 0.429	185.200, 0.454
928	185.400, 0.489	185.400, 0.435	185.400, 0.416	185.400, 0.429	185.400, 0.453
929	185.600, 0.489	185.600, 0.435	185.600, 0.416	185.600, 0.429	185.600, 0.453
930	185.800, 0.489	185.800, 0.435	185.800, 0.416	185.800, 0.428	185.800, 0.453
931	186.000, 0.488	186.000, 0.434	186.000, 0.416	186.000, 0.428	186.000, 0.453
932	186.200, 0.488	186.200, 0.434	186.200, 0.416	186.200, 0.428	186.200, 0.453
933	186.400, 0.488	186.400, 0.434	186.400, 0.416	186.400, 0.428	186.400, 0.453
934	186.600, 0.488	186.600, 0.433	186.600, 0.416	186.600, 0.428	186.600, 0.453
935	186.800, 0.488	186.800, 0.433	186.800, 0.416	186.800, 0.427	186.800, 0.452
936	187.000, 0.487	187.000, 0.433	187.000, 0.416	187.000, 0.427	187.000, 0.452
937	187.200, 0.488	187.200, 0.432	187.200, 0.416	187.200, 0.427	187.200, 0.452
938	187.400, 0.488	187.400, 0.432	187.400, 0.415	187.400, 0.426	187.400, 0.451
939	187.600, 0.488	187.600, 0.431	187.600, 0.415	187.600, 0.426	187.600, 0.451
940	187.800, 0.488	187.800, 0.431	187.800, 0.415	187.800, 0.426	187.800, 0.450
941	188.000, 0.488	188.000, 0.430	188.000, 0.415	188.000, 0.425	188.000, 0.449
942	188.200, 0.488	188.200, 0.430	188.200, 0.415	188.200, 0.425	188.200, 0.449
943	188.400, 0.487	188.400, 0.430	188.400, 0.414	188.400, 0.425	188.400, 0.448
944	188.600, 0.487	188.600, 0.430	188.600, 0.414	188.600, 0.425	188.600, 0.448
945	188.800, 0.486	188.800, 0.429	188.800, 0.414	188.800, 0.425	188.800, 0.448
946	189.000, 0.486	189.000, 0.429	189.000, 0.414	189.000, 0.424	189.000, 0.448
947	189.200, 0.486	189.200, 0.429	189.200, 0.414	189.200, 0.424	189.200, 0.448
948	189.400, 0.485	189.400, 0.429	189.400, 0.414	189.400, 0.424	189.400, 0.447
949	189.600, 0.485	189.600, 0.428	189.600, 0.413	189.600, 0.424	189.600, 0.448
950	189.800, 0.485	189.800, 0.428	189.800, 0.413	189.800, 0.423	189.800, 0.448
951	190.000, 0.484	190.000, 0.428	190.000, 0.413	190.000, 0.423	190.000, 0.448
952	190.200, 0.484	190.200, 0.428	190.200, 0.413	190.200, 0.423	190.200, 0.448
953	190.400, 0.484	190.400, 0.428	190.400, 0.413	190.400, 0.422	190.400, 0.447
954	190.600, 0.483	190.600, 0.428	190.600, 0.412	190.600, 0.422	190.600, 0.447
955	190.800, 0.483	190.800, 0.428	190.800, 0.412	190.800, 0.422	190.800, 0.447
956	191.000, 0.483	191.000, 0.427	191.000, 0.411	191.000, 0.422	191.000, 0.447
957	191.200, 0.483	191.200, 0.427	191.200, 0.411	191.200, 0.422	191.200, 0.447
958	191.400, 0.483	191.400, 0.427	191.400, 0.410	191.400, 0.422	191.400, 0.446
959	191.600, 0.483	191.600, 0.427	191.600, 0.410	191.600, 0.423	191.600, 0.446
960	191.800, 0.482	191.800, 0.426	191.800, 0.410	191.800, 0.423	191.800, 0.445
961	192.000, 0.482	192.000, 0.426	192.000, 0.409	192.000, 0.423	192.000, 0.445
962	192.200, 0.482	192.200, 0.426	192.200, 0.409	192.200, 0.423	192.200, 0.445
963	192.400, 0.482	192.400, 0.426	192.400, 0.409	192.400, 0.422	192.400, 0.445
964	192.600, 0.481	192.600, 0.426	192.600, 0.409	192.600, 0.422	192.600, 0.445
965	192.800, 0.481	192.800, 0.425	192.800, 0.408	192.800, 0.422	192.800, 0.445
966	193.000, 0.481	193.000, 0.425	193.000, 0.408	193.000, 0.422	193.000, 0.445
967	193.200, 0.480	193.200, 0.425	193.200, 0.408	193.200, 0.422	193.200, 0.445
968	193.400, 0.480	193.400, 0.425	193.400, 0.407	193.400, 0.422	193.400, 0.445
969	193.600, 0.480	193.600, 0.425	193.600, 0.407	193.600, 0.421	193.600, 0.445
970	193.800, 0.479	193.800, 0.425	193.800, 0.407	193.800, 0.421	193.800, 0.444
971	194.000, 0.479	194.000, 0.425	194.000, 0.407	194.000, 0.421	194.000, 0.444
972	194.200, 0.479	194.200, 0.424	194.200, 0.407	194.200, 0.421	194.200, 0.444
973	194.400, 0.479	194.400, 0.424	194.400, 0.406	194.400, 0.420	194.400, 0.443
974	194.600, 0.478	194.600, 0.424	194.600, 0.406	194.600, 0.420	194.600, 0.443
975	194.800, 0.478	194.800, 0.424	194.800, 0.406	194.800, 0.420	194.800, 0.443
976	195.000, 0.478	195.000, 0.424	195.000, 0.406	195.000, 0.420	195.000, 0.443
977	195.200, 0.478	195.200, 0.424	195.200, 0.405	195.200, 0.420	195.200, 0.442
978	195.400, 0.477	195.400, 0.424	195.400, 0.406	195.400, 0.420	195.400, 0.442
979	195.600, 0.477	195.600, 0.424	195.600, 0.406	195.600, 0.420	195.600, 0.442
980	195.800, 0.477	195.800, 0.424	195.800, 0.406	195.800, 0.419	195.800, 0.442
981	196.000, 0.477	196.000, 0.423	196.000, 0.406	196.000, 0.419	196.000, 0.442
982	196.200, 0.477	196.200, 0.423	196.200, 0.406	196.200, 0.419	196.200, 0.441
983	196.400, 0.476	196.400, 0.423	196.400, 0.405	196.400, 0.419	196.400, 0.441
984	196.600, 0.476	196.600, 0.423	196.600, 0.405	196.600, 0.418	196.600, 0.441
985	196.800, 0.476	196.800, 0.422	196.800, 0.405	196.800, 0.418	196.800, 0.441
986	197.000, 0.476	197.000, 0.422	197.000, 0.405	197.000, 0.418	197.000, 0.440
987	197.200, 0.476	197.200, 0.422	197.200, 0.405	197.200, 0.418	197.200, 0.440
988	197.400, 0.476	197.400, 0.422	197.400, 0.405	197.400, 0.417	197.400, 0.440
989	197.600, 0.476	197.600, 0.421	197.600, 0.405	197.600, 0.417	197.600, 0.439
990	197.800, 0.476	197.800, 0.421	197.800, 0.404	197.800, 0.417	197.800, 0.439
991	198.000, 0.476	198.000, 0.421	198.000, 0.404	198.000, 0.417	198.000, 0.439
992	198.200, 0.476	198.200, 0.421	198.200, 0.404	198.200, 0.417	198.200, 0.439
993	198.400, 0.476	198.400, 0.420	198.400, 0.403	198.400, 0.416	198.400, 0.438
994	198.600, 0.476	198.600, 0.420	198.600, 0.403	198.600, 0.416	198.600, 0.438
995	198.800, 0.476	198.800, 0.420	198.800, 0.403	198.800, 0.416	198.800, 0.438
996	199.000, 0.476	199.000, 0.420	199.000, 0.403	199.000, 0.416	199.000, 0.438
997	199.200, 0.476	199.200, 0.420	199.200, 0.403	199.200, 0.416	199.200, 0.438
998	199.400, 0.476	199.400, 0.420	199.400, 0.403	199.400, 0.416	199.400, 0.438
999	199.600, 0.475	199.600, 0.420	199.600, 0.403	199.600, 0.416	199.600, 0.438
1000	199.800, 0.475	199.800, 0.420	199.800, 0.403	199.800, 0.416	199.800, 0.438
1001	200.000, 0.475	200.000, 0.420	200.000, 0.403	200.000, 0.416	200.000, 0.438
1002	200.200, 0.475	200.200, 0.420	200.200, 0.402	200.200, 0.415	200.200, 0.438
1003	200.400, 0.475	200.400, 0.419	200.400, 0.402	200.400, 0.415	200.400, 0.438
1004	200.600, 0.475	200.600, 0.419	200.600, 0.402	200.600, 0.415	200.600, 0.438
1005	200.800, 0.474	200.800, 0.419	200.800, 0.401	200.800, 0.415	200.800, 0.437
1006	201.000, 0.474	201.000, 0.419	201.000, 0.401	201.000, 0.414	201.000, 0.437
1007	201.200, 0.474	201.200, 0.419	201.200, 0.401	201.200, 0.414	201.200, 0.437
1008	201.400, 0.474	201.400, 0.419	201.400, 0.400	201.400, 0.414	201.400, 0.437
1009	201.600, 0.473	201.600, 0.418	201.600, 0.400	201.600, 0.414	201.600, 0.436
1010	201.800, 0.473	201.800, 0.418	201.800, 0.400	201.800, 0.414	201.800, 0.436
1011	202.000, 0.473	202.000, 0.418	202.000, 0.399	202.000, 0.414	202.000, 0.436
1012	202.200, 0.472	202.200, 0.418	202.200, 0.399	202.200, 0.414	202.200, 0.435
1013	202.400, 0.472	202.400, 0.417	202.400, 0.399	202.400, 0.414	202.400, 0.435
1014	202.600, 0.472	202.600, 0.417	202.600, 0.399	202.600, 0.413	202.600, 0.435
1015	202.800, 0.472	202.800, 0.417	202.800, 0.399	202.800, 0.413	202.800, 0.435
1016	203.000, 0.471	203.000, 0.417	203.000, 0.399	203.000, 0.413	203.000, 0.435
1017	203.200, 0.471	203.200, 0.417	203.200, 0.399	203.200, 0.413	203.200, 0.435
1018	203.400, 0.471	203.400, 0.417	203.400, 0.399	203.400, 0.413	203.400, 0.435
1019	203.600, 0.471	203.600, 0.417	203.600, 0.399	203.600, 0.412	203.600, 0.435
1020	203.800, 0.471	203.800, 0.416	203.800, 0.399	203.800, 0.412	203.800, 0.435
1021	204.000, 0.471	204.000, 0.416	204.000, 0.399	204.000, 0.412	204.000, 0.435
1022	204.200, 0.471	204.200, 0.416	204.200, 0.399	204.200, 0.411	204.200, 0.435
1023	204.400, 0.470	204.400, 0.416	204.400, 0.399	204.400, 0.411	204.400, 0.435
1024	204.600, 0.470	204.600, 0.415	204.600, 0.398	204.600, 0.411	204.600, 0.434
1025	204.800, 0.470	204.800, 0.415	204.800, 0.398	204.800, 0.411	204.800, 0.434
1026	205.000, 0.470	205.000, 0.415	205.000, 0.398	205.000, 0.411	205.000, 0.434
1027	205.200, 0.470	205.200, 0.414	205.200, 0.398	205.200, 0.411	205.200, 0.433
1028	205.400, 0.470	205.400, 0.414	205.400, 0.398	205.400, 0.411	205.400, 0.433
1029	205.600, 0.470	205.600, 0.414	205.600, 0.398	205.600, 0.411	205.600, 0.433
1030	205.800, 0.470	205.800, 0.414	205.800, 0.398	205.800, 0.411	205.800, 0.432
1031	206.000, 0.469	206.000, 0.414	206.000, 0.398	206.000, 0.411	206.000, 0.432
1032	206.200, 0.469	206.200, 0.414	206.200, 0.398	206.200, 0.410	206.200, 0.432
1033	206.400, 0.469	206.400, 0.414	206.400, 0.398	206.400, 0.410	206.400, 0.432
1034	206.600, 0.468	206.600, 0.414	206.600, 0.397	206.600, 0.410	206.600, 0.432
1035	206.800, 0.468	206.800, 0.414	206.800, 0.397	206.800, 0.410	206.800, 0.431
1036	207.000, 0.468	207.000, 0.414	207.000, 0.397	207.000, 0.409	207.000, 0.431
1037	207.200, 0.468	207.200, 0.414	207.200, 0.396	207.200, 0.409	207.200, 0.431
1038	207.400, 0.468	207.400, 0.414	207.400, 0.396	207.400, 0.409	207.400, 0.431
1039	207.600, 0.467	207.600, 0.414	207.600, 0.396	207.600, 0.408	207.600, 0.431
1040	207.800, 0.467	207.800, 0.413	207.800, 0.395	207.800, 0.408	207.800, 0.431
1041	208.000, 0.467	208.000, 0.413	208.000, 0.395	208.000, 0.408	208.000, 0.430
1042	208.200, 0.467	208.200, 0.413	208.200, 0.395	208.200, 0.407	208.200, 0.430
1043	208.400, 0.466	208.400, 0.412	208.400, 0.395	208.400, 0.407	208.400, 0.430
1044	208.600, 0.466	208.600, 0.412	208.600, 0.394	208.600, 0.407	208.600, 0.430
1045	208.800, 0.466	208.800, 0.412	208.800, 0.394	208.800, 0.407	208.800, 0.430
1046	209.000, 0.466	209.000, 0.412	209.000, 0.394	209.000, 0.407	209.000, 0.431
1047	209.200, 0.466	209.200, 0.411	209.200, 0.394	209.200, 0.407	209.200, 0.431
1048	209.400, 0.466	209.400, 0.411	209.400, 0.394	209.400, 0.407	209.400, 0.431
1049	209.600, 0.466	209.600, 0.411	209.600, 0.393	209.600, 0.407	209.600, 0.431
1050	209.800, 0.465	209.800, 0.411	209.800, 0.393	209.800, 0.407	209.800, 0.431
1051	210.000, 0.465	210.000, 0.411	210.000, 0.393	210.000, 0.407	210.000, 0.430
1052	210.200, 0.465	210.200, 0.411	210.200, 0.393	210.200, 0.406	210.200, 0.430
1053	210.400, 0.465	210.400, 0.411	210.400, 0.393	210.400, 0.406	210.400, 0.430
1054	210.600, 0.465	210.600, 0.411	210.600, 0.393	210.600, 0.406	210.600, 0.430
1055	210.800, 0.466	210.800, 0.411	210.800, 0.393	210.800, 0.406	210.800, 0.429
1056	211.000, 0.466	211.000, 0.411	211.000, 0.393	211.000, 0.406	211.000, 0.429
1057	211.200, 0.466	211.200, 0.411	211.200, 0.393	211.200, 0.406	211.200, 0.429
1058	211.400, 0.465	211.400, 0.411	211.400, 0.393	211.400, 0.406	211.400, 0.428
1059	211.600, 0.465	211.600, 0.410	211.600, 0.393	211.600, 0.406	211.600, 0.428
1060	211.800, 0.465	211.800, 0.410	211.800, 0.393	211.800, 0.405	211.800, 0.428
1061	212.000, 0.465	212.000, 0.410	212.000, 0.393	212.000, 0.405	212.000, 0.428
1062	212.200, 0.464	212.200, 0.410	212.200, 0.393	212.200, 0.405	212.200, 0.428
1063	212.400, 0.464	212.400, 0.410	212.400, 0.393	212.400, 0.405	212.400, 0.427
1064	212.600, 0.463	212.600, 0.410	212.600, 0.392	212.600, 0.405	212.600, 0.427
1065	212.800, 0.463	212.800, 0.409	212.800, 0.392	212.800, 0.405	212.800, 0.427
1066	213.000, 0.462	213.000, 0.409	213.000, 0.392	213.000, 0.405	213.000, 0.427
1067	213.200, 0.462	213.200, 0.409	213.200, 0.391	213.200, 0.405	213.200, 0.427
1068	213.400, 0.462	213.400, 0.409	213.400, 0.391	213.400, 0.404	213.400, 0.427
1069	213.600, 0.461	213.600, 0.409	213.600, 0.391	213.600, 0.404	213.600, 0.427
1070	213.800, 0.461	213.800, 0.409	213.800, 0.391	213.800, 0.404	213.800, 0.427
1071	214.000, 0.461	214.000, 0.409	214.000, 0.391	214.000, 0.404	214.000, 0.427
1072	214.200, 0.461	214.200, 0.409	214.200, 0.391	214.200, 0.404	214.200, 0.427
1073	214.400, 0.461	214.400, 0.409	214.400, 0.390	214.400, 0.404	214.400, 0.427
1074	214.600, 0.461	214.600, 0.409	214.600, 0.390	214.600, 0.404	214.600, 0.426
1075	214.800, 0.461	214.800, 0.409	214.800, 0.390	214.800, 0.404	214.800, 0.426
1076	215.000, 0.461	215.000, 0.409	215.000, 0.390	215.000, 0.404	215.000, 0.426
1077	215.200, 0.461	215.200, 0.409	215.200, 0.390	215.200, 0.404	215.200, 0.425
1078	215.400, 0.461	215.400, 0.409	215.400, 0.390	215.400, 0.404	215.400, 0.425
1079	215.600, 0.461	215.600, 0.408	215.600, 0.390	215.600, 0.403	215.600, 0.425
1080	215.800, 0.461	215.800, 0.408	215.800, 0.390	215.800, 0.403	215.800, 0.424
1081	216.000, 0.461	216.000, 0.407	216.000, 0.390	216.000, 0.403	216.000, 0.424
1082	216.200, 0.460	216.200, 0.407	216.200, 0.390	216.200, 0.403	216.200, 0.424
1083	216.400, 0.460	216.400, 0.407	216.400, 0.390	216.400, 0.402	216.400, 0.424
1084	216.600, 0.460	216.600, 0.406	216.600, 0.389	216.600, 0.402	216.600, 0.424
1085	216.800, 0.460	216.800, 0.406	216.800, 0.389	216.800, 0.402	216.800, 0.424
1086	217.000, 0.460	217.000, 0.406	217.000, 0.389	217.000, 0.401	217.000, 0.424
1087	217.200, 0.459	217.200, 0.406	217.200, 0.389	217.200, 0.401	217.200, 0.424
1088	217.400, 0.459	217.400, 0.406	217.400, 0.389	217.400, 0.401	217.400, 0.424
1089	217.600, 0.459	217.600, 0.405	217.600, 0.389	217.600, 0.401	217.600, 0.423
1090	217.800, 0.458	217.800, 0.405	217.800, 0.389	217.800, 0.401	217.800, 0.423
1091	218.000, 0.458	218.000, 0.405	218.000, 0.389	218.000, 0.401	218.000, 0.423
1092	218.200, 0.458	218.200, 0.405	218.200, 0.389	218.200, 0.401	218.200, 0.423
1093	218.400, 0.458	218.400, 0.405	218.400, 0.388	218.400, 0.401	218.400, 0.423
1094	218.600, 0.458	218.600, 0.405	218.600, 0.388	218.600, 0.400	218.600, 0.422
1095	218.800, 0.458	218.800, 0.405	218.800, 0.388	218.800, 0.400	218.800, 0.422
1096	219.000, 0.458	219.000, 0.405	219.000, 0.388	219.000, 0.400	219.000, 0.422
1097	219.200, 0.458	219.200, 0.404	219.200, 0.388	219.200, 0.400	219.200, 0.422
1098	219.400, 0.458	219.400, 0.404	219.400, 0.388	219.400, 0.400	219.400, 0.422
1099	219.600, 0.458	219.600, 0.404	219.600, 0.387	219.600, 0.400	219.600, 0.422
1100	219.800, 0.457	219.800, 0.404	219.800, 0.387	219.800, 0.400	219.800, 0.422
1101	220.000, 0.457	220.000, 0.404	220.000, 0.387	220.000, 0.399	220.000, 0.422
1102	220.200, 0.457	220.200, 0.404	220.200, 0.387	220.200, 0.399	220.200, 0.422
1103	220.400, 0.457	220.400, 0.404	220.400, 0.387	220.400, 0.399	220.400, 0.421
1104	220.600, 0.456	220.600, 0.404	220.600, 0.387	220.600, 0.399	220.600, 0.421
1105	220.800, 0.456	220.800, 0.404	220.800, 0.387	220.800, 0.399	220.800, 0.421
1106	221.000, 0.456	221.000, 0.404	221.000, 0.387	221.000, 0.398	221.000, 0.421
1107	221.200, 0.456	221.200, 0.404	221.200, 0.387	221.200, 0.398	221.200, 0.421
1108	221.400, 0.456	221.400, 0.404	221.400, 0.387	221.400, 0.398	221.400, 0.421
1109	221.600, 0.456	221.600, 0.404	221.600, 0.387	221.600, 0.398	221.600, 0.421
1110	221.800, 0.456	221.800, 0.403	221.800, 0.387	221.800, 0.398	221.800, 0.420
1111	222.000, 0.456	222.000, 0.403	222.000, 0.386	222.000, 0.398	222.000, 0.420
1112	222.200, 0.456	222.200, 0.403	222.200, 0.386	222.200, 0.398	222.200, 0.420
1113	222.400, 0.457	222.400, 0.402	222.400, 0.386	222.400, 0.398	222.400, 0.420
1114	222.600, 0.457	222.600, 0.402	222.600, 0.386	222.600, 0.399	222.600, 0.419
1115	222.800, 0.457	222.800, 0.402	222.800, 0.386	222.800, 0.399	222.800, 0.419
1116	223.000, 0.456	223.000, 0.402	223.000, 0.385	223.000, 0.399	223.000, 0.419
1117	223.200, 0.456	223.200, 0.402	223.200, 0.385	223.200, 0.398	223.200, 0.419
1118	223.400, 0.456	223.400, 0.402	223.400, 0.385	223.400, 0.398	223.400, 0.419
1119	223.600, 0.456	223.600, 0.402	223.600, 0.385	223.600, 0.398	223.600, 0.419
1120	223.800, 0.455	223.800, 0.402	223.800, 0.385	223.800, 0.398	223.800, 0.419
1121	224.000, 0.455	224.000, 0.402	224.000, 0.385	224.000, 0.398	224.000, 0.418
1122	224.200, 0.455	224.200, 0.402	224.200, 0.384	224.200, 0.398	224.200, 0.418
1123	224.400, 0.455	224.400, 0.402	224.400, 0.384	224.400, 0.398	224.400, 0.418
1124	224.600, 0.455	224.600, 0.402	224.600, 0.384	224.600, 0.398	224.600, 0.418
1125	224.800, 0.455	224.800, 0.402	224.800, 0.384	224.800, 0.398	224.800, 0.419
1126	225.000, 0.454	225.000, 0.402	225.000, 0.384	225.000, 0.398	225.000, 0.419
1127	225.200, 0.454	225.200, 0.402	225.200, 0.384	225.200, 0.397	225.200, 0.419
1128	225.400, 0.454	225.400, 0.402	225.400, 0.384	225.400, 0.397	225.400, 0.419
1129	225.600, 0.454	225.600, 0.401	225.600, 0.384	225.600, 0.397	225.600, 0.419
1130	225.800, 0.454	225.800, 0.401	225.800, 0.384	225.800, 0.397	225.800, 0.419
1131	226.000, 0.453	226.000, 0.401	226.000, 0.384	226.000, 0.397	226.000, 0.418
1132	226.200, 0.453	226.200, 0.401	226.200, 0.383	226.200, 0.397	226.200, 0.418
1133	226.400, 0.453	226.400, 0.401	226.400, 0.383	226.400, 0.397	226.400, 0.418
1134	226.600, 0.453	226.600, 0.400	226.600, 0.383	226.600, 0.398	226.600, 0.418
1135	226.800, 0.453	226.800, 0.400	226.800, 0.383	226.800, 0.398	226.800, 0.418
1136	227.000, 0.452	227.000, 0.400	227.000, 0.383	227.000, 0.398	227.000, 0.417
1137	227.200, 0.452	227.200, 0.400	227.200, 0.383	227.200, 0.398	227.200, 0.417
1138	227.400, 0.452	227.400, 0.400	227.400, 0.383	227.400, 0.398	227.400, 0.417
1139	227.600, 0.452	227.600, 0.399	227.600, 0.383	227.600, 0.398	227.600, 0.416
1140	227.800, 0.452	227.800, 0.399	227.800, 0.382	227.800, 0.398	227.800, 0.416
1141	228.000, 0.452	228.000, 0.399	228.000, 0.382	228.000, 0.398	228.000, 0.416
1142	228.200, 0.452	228.200, 0.398	228.200, 0.382	228.200, 0.397	228.200, 0.416
1143	228.400, 0.452	228.400, 0.398	228.400, 0.382	228.400, 0.397	228.400, 0.416
1144	228.600, 0.452	228.600, 0.398	228.600, 0.381	228.600, 0.396	228.600, 0.417
1145	228.800, 0.451	228.800, 0.397	228.800, 0.381	228.800, 0.396	228.800, 0.417
1146	229.000, 0.451	229.000, 0.397	229.000, 0.381	229.000, 0.395	229.000, 0.417
1147	229.200, 0.451	229.200, 0.397	229.200, 0.381	229.200, 0.395	229.200, 0.417
1148	229.400, 0.450	229.400, 0.397	229.400, 0.381	229.400, 0.394	229.400, 0.417
1149	229.600, 0.450	229.600, 0.397	229.600, 0.382	229.600, 0.394	229.600, 0.417
1150	229.800, 0.450	229.800, 0.397	229.800, 0.382	229.800, 0.393	229.800, 0.417
1151	230.000, 0.450	230.000, 0.397	230.000, 0.382	230.000, 0.393	230.000, 0.417
1152	230.200, 0.450	230.200, 0.397	230.200, 0.382	230.200, 0.392	230.200, 0.416
1153	230.400, 0.450	230.400, 0.397	230.400, 0.382	230.400, 0.392	230.400, 0.416
1154	230.600, 0.450	230.600, 0.397	230.600, 0.382	230.600, 0.392	230.600, 0.415
1155	230.800, 0.450	230.800, 0.398	230.800, 0.382	230.800, 0.392	230.800, 0.415
1156	231.000, 0.450	231.000, 0.398	231.000, 0.381	231.000, 0.392	231.000, 0.414
1157	231.200, 0.450	231.200, 0.398	231.200, 0.381	231.200, 0.392	231.200, 0.414
1158	231.400, 0.450	231.400, 0.398	231.400, 0.380	231.400, 0.392	231.400, 0.414
1159	231.600, 0.450	231.600, 0.398	231.600, 0.380	231.600, 0.392	231.600, 0.413
1160	231.800, 0.450	231.800, 0.398	231.800, 0.380	231.800, 0.392	231.800, 0.413
1161	232.000, 0.450	232.000, 0.398	232.000, 0.380	232.000, 0.392	232.000, 0.413
1162	232.200, 0.450	232.200, 0.398	232.200, 0.380	232.200, 0.392	232.200, 0.413
1163	232.400, 0.450	232.400, 0.398	232.400, 0.379	232.400, 0.392	232.400, 0.413
1164	232.600, 0.450	232.600, 0.398	232.600, 0.379	232.600, 0.392	232.600, 0.413
1165	232.800, 0.450	232.800, 0.397	232.800, 0.379	232.800, 0.392	232.800, 0.413
1166	233.000, 0.449	233.000, 0.397	233.000, 0.379	233.000, 0.392	233.000, 0.413
1167	233.200, 0.449	233.200, 0.397	233.200, 0.379	233.200, 0.392	233.200, 0.413
1168	233.400, 0.449	233.400, 0.397	233.400, 0.379	233.400, 0.392	233.400, 0.413
1169	233.600, 0.449	233.600, 0.396	233.600, 0.379	233.600, 0.392	233.600, 0.413
1170	233.800, 0.449	233.800, 0.396	233.800, 0.379	233.800, 0.392	233.800, 0.413
1171	234.000, 0.449	234.000, 0.396	234.000, 0.379	234.000, 0.392	234.000, 0.413
1172	234.200, 0.448	234.200, 0.396	234.200, 0.379	234.200, 0.391	234.200, 0.413
1173	234.400, 0.448	234.400, 0.396	234.400, 0.379	234.400, 0.391	234.400, 0.413
1174	234.600, 0.448	234.600, 0.396	234.600, 0.379	234.600, 0.391	234.600, 0.412
1175	234.800, 0.448	234.800, 0.396	234.800, 0.378	234.800, 0.391	234.800, 0.412
1176	235.000, 0.448	235.000, 0.396	235.000, 0.378	235.000, 0.391	235.000, 0.412
1177	235.200, 0.448	235.200, 0.396	235.200, 0.378	235.200, 0.391	235.200, 0.412
1178	235.400, 0.448	235.400, 0.395	235.400, 0.378	235.400, 0.391	235.400, 0.411
1179	235.600, 0.448	235.600, 0.395	235.600, 0.378	235.600, 0.391	235.600, 0.411
1180	235.800, 0.447	235.800, 0.395	235.800, 0.378	235.800, 0.391	235.800, 0.411
1181	236.000, 0.448	236.000, 0.395	236.000, 0.377	236.000, 0.390	236.000, 0.411
1182	236.200, 0.447	236.200, 0.395	236.200, 0.377	236.200, 0.390	236.200, 0.411
1183	236.400, 0.447	236.400, 0.395	236.400, 0.377	236.400, 0.390	236.400, 0.411
1184	236.600, 0.447	236.600, 0.394	236.600, 0.377	236.600, 0.390	236.600, 0.411
1185	236.800, 0.446	236.800, 0.394	236.800, 0.376	236.800, 0.390	236.800, 0.411
1186	237.000, 0.446	237.000, 0.394	237.000, 0.376	237.000, 0.390	237.000, 0.411
1187	237.200, 0.446	237.200, 0.394	237.200, 0.376	237.200, 0.390	237.200, 0.411
1188	237.400, 0.445	237.400, 0.394	237.400, 0.376	237.400, 0.390	237.400, 0.411
1189	237.600, 0.446	237.600, 0.394	237.600, 0.376	237.600, 0.390	237.600, 0.411
1190	237.800, 0.446	237.800, 0.394	237.800, 0.377	237.800, 0.390	237.800, 0.411
1191	238.000, 0.446	238.000, 0.394	238.000, 0.377	238.000, 0.390	238.000, 0.411
1192	238.200, 0.446	238.200, 0.394	238.200, 0.377	238.200, 0.390	238.200, 0.411
1193	238.400, 0.446	238.400, 0.394	238.400, 0.377	238.400, 0.390	238.400, 0.410
1194	238.600, 0.446	238.600, 0.394	238.600, 0.377	238.600, 0.389	238.600, 0.410
1195	238.800, 0.446	238.800, 0.394	238.800, 0.377	238.800, 0.389	238.800, 0.410
1196	239.000, 0.445	239.000, 0.394	239.000, 0.377	239.000, 0.389	239.000, 0.410
1197	239.200, 0.445	239.200, 0.393	239.200, 0.377	239.200, 0.389	239.200, 0.409
1198	239.400, 0.446	239.400, 0.393	239.400, 0.377	239.400, 0.389	239.400, 0.409
1199	239.600, 0.446	239.600, 0.393	239.600, 0.377	239.600, 0.389	239.600, 0.409
1200	239.800, 0.446	239.800, 0.392	239.800, 0.377	239.800, 0.389	239.800, 0.409
1201	240.000, 0.446	240.000, 0.392	240.000, 0.377	240.000, 0.389	240.000, 0.409
1202	240.200, 0.445	240.200, 0.392	240.200, 0.376	240.200, 0.388	240.200, 0.409
1203	240.400, 0.445	240.400, 0.392	240.400, 0.376	240.400, 0.388	240.400, 0.409
1204	240.600, 0.445	240.600, 0.392	240.600, 0.376	240.600, 0.388	240.600, 0.409
1205	240.800, 0.445	240.800, 0.392	240.800, 0.376	240.800, 0.388	240.800, 0.409
1206	241.000, 0.445	241.000, 0.392	241.000, 0.375	241.000, 0.388	241.000, 0.409
1207	241.200, 0.445	241.200, 0.392	241.200, 0.375	241.200, 0.387	241.200, 0.409
1208	241.400, 0.445	241.400, 0.392	241.400, 0.375	241.400, 0.387	241.400, 0.409
1209	241.600, 0.445	241.600, 0.392	241.600, 0.375	241.600, 0.387	241.600, 0.409
1210	241.800, 0.445	241.800, 0.393	241.800, 0.375	241.800, 0.387	241.800, 0.408
1211	242.000, 0.445	242.000, 0.393	242.000, 0.375	242.000, 0.387	242.000, 0.408
1212	242.200, 0.445	242.200, 0.393	242.200, 0.375	242.200, 0.387	242.200, 0.408
1213	242.400, 0.444	242.400, 0.393	242.400, 0.375	242.400, 0.387	242.400, 0.408
1214	242.600, 0.444	242.600, 0.393	242.600, 0.375	242.600, 0.387	242.600, 0.407
1215	242.800, 0.444	242.800, 0.393	242.800, 0.375	242.800, 0.387	242.800, 0.407
1216	243.000, 0.444	243.000, 0.393	243.000, 0.374	243.000, 0.387	243.000, 0.407
1217	243.200, 0.444	243.200, 0.393	243.200, 0.374	243.200, 0.387	243.200, 0.407
1218	243.400, 0.444	243.400, 0.392	243.400, 0.374	243.400, 0.387	243.400, 0.407
1219	243.600, 0.444	243.600, 0.392	243.600, 0.374	243.600, 0.387	243.600, 0.407
1220	243.800, 0.444	243.800, 0.392	243.800, 0.374	243.800, 0.387	243.800, 0.407
1221	244.000, 0.444	244.000, 0.392	244.000, 0.374	244.000, 0.387	244.000, 0.407
1222	244.200, 0.444	244.200, 0.391	244.200, 0.374	244.200, 0.387	244.200, 0.407
1223	244.400, 0.444	244.400, 0.391	244.400, 0.373	244.400, 0.387	244.400, 0.407
1224	244.600, 0.443	244.600, 0.391	244.600, 0.373	244.600, 0.387	244.600, 0.407
1225	244.800, 0.443	244.800, 0.391	244.800, 0.373	244.800, 0.386	244.800, 0.406
1226	245.000, 0.443	245.000, 0.391	245.000, 0.373	245.000, 0.386	245.000, 0.406
1227	245.200, 0.443	245.200, 0.391	245.200, 0.373	245.200, 0.386	245.200, 0.406
1228	245.400, 0.443	245.400, 0.391	245.400, 0.373	245.400, 0.386	245.400, 0.406
1229	245.600, 0.443	245.600, 0.390	245.600, 0.373	245.600, 0.386	245.600, 0.406
1230	245.800, 0.443	245.800, 0.390	245.800, 0.373	245.800, 0.386	245.800, 0.406
1231	246.000, 0.443	246.000, 0.390	246.000, 0.373	246.000, 0.386	246.000, 0.406
1232	246.200, 0.443	246.200, 0.390	246.200, 0.373	246.200, 0.386	246.200, 0.406
1233	246.400, 0.443	246.400, 0.390	246.400, 0.373	246.400, 0.386	246.400, 0.406
1234	246.600, 0.443	246.600, 0.390	246.600, 0.374	246.600, 0.386	246.600, 0.406
1235	246.800, 0.443	246.800, 0.390	246.800, 0.374	246.800, 0.386	246.800, 0.406
1236	247.000, 0.443	247.000, 0.390	247.000, 0.374	247.000, 0.386	247.000, 0.406
1237	247.200, 0.442	247.200, 0.389	247.200, 0.374	247.200, 0.386	247.200, 0.406
1238	247.400, 0.442	247.400, 0.389	247.400, 0.374	247.400, 0.386	247.400, 0.406
1239	247.600, 0.442	247.600, 0.389	247.600, 0.374	247.600, 0.386	247.600, 0.406
1240	247.800, 0.442	247.800, 0.389	247.800, 0.374	247.800, 0.386	247.800, 0.406
1241	248.000, 0.441	248.000, 0.388	248.000, 0.374	248.000, 0.386	248.000, 0.406
1242	248.200, 0.441	248.200, 0.388	248.200, 0.374	248.200, 0.386	248.200, 0.405
1243	248.400, 0.441	248.400, 0.388	248.400, 0.373	248.400, 0.385	248.400, 0.405
1244	248.600, 0.441	248.600, 0.387	248.600, 0.373	248.600, 0.385	248.600, 0.405
1245	248.800, 0.441	248.800, 0.387	248.800, 0.373	248.800, 0.385	248.800, 0.405
1246	249.000, 0.441	249.000, 0.387	249.000, 0.372	249.000, 0.384	249.000, 0.405
1247	249.200, 0.441	249.200, 0.387	249.200, 0.372	249.200, 0.384	249.200, 0.405
1248	249.400, 0.441	249.400, 0.387	249.400, 0.372	249.400, 0.384	249.400, 0.405
1249	249.600, 0.441	249.600, 0.387	249.600, 0.371	249.600, 0.384	249.600, 0.405
1250	249.800, 0.441	249.800, 0.387	249.800, 0.371	249.800, 0.384	249.800, 0.405
1251	250.000, 0.441	250.000, 0.387	250.000, 0.371	250.000, 0.383	250.000, 0.404
1252	250.200, 0.441	250.200, 0.387	250.200, 0.370	250.200, 0.383	250.200, 0.404
1253	250.400, 0.441	250.400, 0.387	250.400, 0.370	250.400, 0.383	250.400, 0.404
1254	250.600, 0.441	250.600, 0.388	250.600, 0.370	250.600, 0.383	250.600, 0.404
1255	250.800, 0.441	250.800, 0.388	250.800, 0.370	250.800, 0.383	250.800, 0.404
1256	251.000, 0.441	251.000, 0.388	251.000, 0.370	251.000, 0.383	251.000, 0.404
1257	251.200, 0.440	251.200, 0.388	251.200, 0.370	251.200, 0.383	251.200, 0.404
1258	251.400, 0.440	251.400, 0.388	251.400, 0.370	251.400, 0.384	251.400, 0.404
1259	251.600, 0.440	251.600, 0.388	251.600, 0.370	251.600, 0.384	251.600, 0.404
1260	251.800, 0.440	251.800, 0.388	251.800, 0.370	251.800, 0.384	251.800, 0.404
1261	252.000, 0.440	252.000, 0.388	252.000, 0.371	252.000, 0.384	252.000, 0.404
1262	252.200, 0.439	252.200, 0.387	252.200, 0.371	252.200, 0.383	252.200, 0.403
1263	252.400, 0.439	252.400, 0.387	252.400, 0.371	252.400, 0.383	252.400, 0.403
1264	252.600, 0.439	252.600, 0.387	252.600, 0.371	252.600, 0.383	252.600, 0.403
1265	252.800, 0.439	252.800, 0.387	252.800, 0.371	252.800, 0.383	252.800, 0.403
1266	253.000, 0.439	253.000, 0.387	253.000, 0.371	253.000, 0.383	253.000, 0.403
1267	253.200, 0.439	253.200, 0.387	253.200, 0.371	253.200, 0.383	253.200, 0.402
1268	253.400, 0.439	253.400, 0.387	253.400, 0.371	253.400, 0.383	253.400, 0.402
1269	253.600, 0.439	253.600, 0.387	253.600, 0.370	253.600, 0.383	253.600, 0.402
1270	253.800, 0.438	253.800, 0.387	253.800, 0.370	253.800, 0.383	253.800, 0.402
1271	254.000, 0.438	254.000, 0.387	254.000, 0.370	254.000, 0.383	254.000, 0.402
1272	254.200, 0.438	254.200, 0.387	254.200, 0.370	254.200, 0.383	254.200, 0.402
1273	254.400, 0.438	254.400, 0.386	254.400, 0.370	254.400, 0.382	254.400, 0.402
1274	254.600, 0.437	254.600, 0.386	254.600, 0.370	254.600, 0.382	254.600, 0.402
1275	254.800, 0.437	254.800, 0.387	254.800, 0.370	254.800, 0.382	254.800, 0.402
1276	255.000, 0.437	255.000, 0.387	255.000, 0.370	255.000, 0.382	255.000, 0.402
1277	255.200, 0.438	255.200, 0.387	255.200, 0.370	255.200, 0.381	255.200, 0.402
1278	255.400, 0.437	255.400, 0.387	255.400, 0.370	255.400, 0.381	255.400, 0.402
1279	255.600, 0.437	255.600, 0.387	255.600, 0.370	255.600, 0.381	255.600, 0.402
1280	255.800, 0.437	255.800, 0.387	255.800, 0.370	255.800, 0.381	255.800, 0.402
1281	256.000, 0.437	256.000, 0.387	256.000, 0.369	256.000, 0.380	256.000, 0.401
1282	256.200, 0.437	256.200, 0.386	256.200, 0.369	256.200, 0.380	256.200, 0.401
1283	256.400, 0.438	256.400, 0.386	256.400, 0.369	256.400, 0.380	256.400, 0.401
1284	256.600, 0.438	256.600, 0.386	256.600, 0.369	256.600, 0.380	256.600, 0.401
1285	256.800, 0.438	256.800, 0.386	256.800, 0.369	256.800, 0.380	256.800, 0.401
1286	257.000, 0.438	257.000, 0.386	257.000, 0.369	257.000, 0.381	257.000, 0.401
1287	257.200, 0.438	257.200, 0.386	257.200, 0.369	257.200, 0.381	257.200, 0.401
1288	257.400, 0.437	257.400, 0.385	257.400, 0.369	257.400, 0.381	257.400, 0.401
1289	257.600, 0.437	257.600, 0.385	257.600, 0.370	257.600, 0.381	257.600, 0.401
1290	257.800, 0.437	257.800, 0.385	257.800, 0.370	257.800, 0.381	257.800, 0.401
1291	258.000, 0.437	258.000, 0.385	258.000, 0.370	258.000, 0.381	258.000, 0.401
1292	258.200, 0.437	258.200, 0.385	258.200, 0.370	258.200, 0.380	258.200, 0.401
1293	258.400, 0.437	258.400, 0.385	258.400, 0.370	258.400, 0.380	258.400, 0.401
1294	258.600, 0.437	258.600, 0.385	258.600, 0.369	258.600, 0.380	258.600, 0.402
1295	258.800, 0.438	258.800, 0.385	258.800, 0.369	258.800, 0.380	258.800, 0.402
1296	259.000, 0.438	259.000, 0.385	259.000, 0.369	259.000, 0.380	259.000, 0.402
1297	259.200, 0.437	259.200, 0.385	259.200, 0.369	259.200, 0.380	259.200, 0.402
1298	259.400, 0.437	259.400, 0.385	259.400, 0.369	259.400, 0.380	259.400, 0.402
1299	259.600, 0.437	259.600, 0.385	259.600, 0.368	259.600, 0.380	259.600, 0.403
1300	259.800, 0.436	259.800, 0.385	259.800, 0.368	259.800, 0.380	259.800, 0.403
1301	260.000, 0.436	260.000, 0.385	260.000, 0.368	260.000, 0.380	260.000, 0.403
1302	260.200, 0.436	260.200, 0.385	260.200, 0.367	260.200, 0.380	260.200, 0.402
1303	260.400, 0.436	260.400, 0.385	260.400, 0.367	260.400, 0.380	260.400, 0.402
1304	260.600, 0.435	260.600, 0.385	260.600, 0.367	260.600, 0.380	260.600, 0.402
1305	260.800, 0.435	260.800, 0.384	260.800, 0.367	260.800, 0.380	260.800, 0.401
1306	261.000, 0.435	261.000, 0.384	261.000, 0.367	261.000, 0.380	261.000, 0.401
1307	261.200, 0.435	261.200, 0.384	261.200, 0.367	261.200, 0.380	261.200, 0.401
1308	261.400, 0.435	261.400, 0.384	261.400, 0.366	261.400, 0.380	261.400, 0.401
1309	261.600, 0.435	261.600, 0.384	261.600, 0.366	261.600, 0.380	261.600, 0.401
1310	261.800, 0.435	261.800, 0.384	261.800, 0.367	261.800, 0.379	261.800, 0.401
1311	262.000, 0.435	262.000, 0.384	262.000, 0.367	262.000, 0.380	262.000, 0.400
1312	262.200, 0.435	262.200, 0.383	262.200, 0.367	262.200, 0.379	262.200, 0.400
1313	262.400, 0.435	262.400, 0.383	262.400, 0.367	262.400, 0.379	262.400, 0.400
1314	262.600, 0.435	262.600, 0.383	262.600, 0.367	262.600, 0.379	262.600, 0.400
1315	262.800, 0.436	262.800, 0.383	262.800, 0.367	262.800, 0.379	262.800, 0.400
1316	263.000, 0.436	263.000, 0.383	263.000, 0.367	263.000, 0.379	263.000, 0.399
1317	263.200, 0.436	263.200, 0.383	263.200, 0.367	263.200, 0.379	263.200, 0.399
1318	263.400, 0.436	263.400, 0.383	263.400, 0.367	263.400, 0.379	263.400, 0.399
1319	263.600, 0.436	263.600, 0.383	263.600, 0.367	263.600, 0.378	263.600, 0.399
1320	263.800, 0.436	263.800, 0.383	263.800, 0.367	263.800, 0.378	263.800, 0.399
1321	264.000, 0.436	264.000, 0.383	264.000, 0.367	264.000, 0.378	264.000, 0.399
1322	264.200, 0.436	264.200, 0.383	264.200, 0.367	264.200, 0.378	264.200, 0.399
1323	264.400, 0.436	264.400, 0.382	264.400, 0.367	264.400, 0.378	264.400, 0.399
1324	264.600, 0.436	264.600, 0.382	264.600, 0.366	264.600, 0.378	264.600, 0.399
1325	264.800, 0.436	264.800, 0.382	264.800, 0.366	264.800, 0.378	264.800, 0.399
1326	265.000, 0.436	265.000, 0.382	265.000, 0.366	265.000, 0.378	265.000, 0.399
1327	265.200, 0.435	265.200, 0.382	265.200, 0.366	265.200, 0.378	265.200, 0.399
1328	265.400, 0.435	265.400, 0.382	265.400, 0.366	265.400, 0.378	265.400, 0.399
1329	265.600, 0.435	265.600, 0.382	265.600, 0.366	265.600, 0.378	265.600, 0.399
1330	265.800, 0.435	265.800, 0.382	265.800, 0.366	265.800, 0.378	265.800, 0.399
1331	266.000, 0.435	266.000, 0.382	266.000, 0.366	266.000, 0.378	266.000, 0.399
1332	266.200, 0.435	266.200, 0.382	266.200, 0.366	266.200, 0.378	266.200, 0.399
1333	266.400, 0.435	266.400, 0.382	266.400, 0.366	266.400, 0.378	266.400, 0.398
1334	266.600, 0.435	266.600, 0.382	266.600, 0.366	266.600, 0.378	266.600, 0.398
1335	266.800, 0.435	266.800, 0.382	266.800, 0.365	266.800, 0.378	266.800, 0.398
1336	,	,	,	,	,
1337	,	,	,	,	,
1338	,	,	,	,	,
1339	,	,	,	,	,
1340	,	,	,	,	,
1341	,	,	,	,	,
1342	,	,	,	,	,
1343	,	,	,	,	,
1344	,	,	,	,	,
1345	,	,	,	,	,
1346	,	,	,	,	,
1347	,	,	,	,	,
1348	,	,	,	,	,
1349	,	,	,	,	,
1350	,	,	,	,	,
1351	,	,	,	,	,
1352	,	,	,	,	,
1353	,	,	,	,	,
1354	,	,	,	,	,
1355	,	,	,	,	,
1356	,	,	,	,	,
1357	,	,	,	,	,
1358	,	,	,	,	,
1359	,	,	,	,	,
1360	,	,	,	,	,
1361	,	,	,	,	,
1362	,	,	,	,	,
1363	,	,	,	,	,
1364	,	,	,	,	,
1365	,	,	,	,	,
1366	,	,	,	,	,
1367	,	,	,	,	,
1368	,	,	,	,	,
1369	,	,	,	,	,
1370	,	,	,	,	,
1371	,	,	,	,	,
1372	,	,	,	,	,
1373	,	,	,	,	,
1374	,	,	,	,	,
1375	,	,	,	,	,
1376	,	,	,	,	,
1377	,	,	,	,	,
1378	,	,	,	,	,
1379	,	,	,	,	,
1380	,	,	,	,	,
1381	,	,	,	,	,
1382	,	,	,	,	,
1383	,	,	,	,	,
1384	,	,	,	,	,
1385	,	,	,	,	,
1386	,	,	,	,	,
1387	,	,	,	,	,
1388	,	,	,	,	,
1389	,	,	,	,	,
1390	,	,	,	,	,
1391	,	,	,	,	,
1392	,	,	,	,	,
1393	,	,	,	,	,
1394	,	,	,	,	,
1395	,	,	,	,	,
1396	,	,	,	,	,
1397	,	,	,	,	,
1398	,	,	,	,	,
1399	,	,	,	,	,
1400	,	,	,	,	,
1401	,	,	,	,	,
1402	,	,	,	,	,
1403	,	,	,	,	,
1404	,	,	,	,	,
1405	,	,	,	,	,
1406	,	,	,	,	,
1407	,	,	,	,	,
1408	,	,	,	,	,
1409	,	,	,	,	,
1410	,	,	,	,	,
1411	,	,	,	,	,
1412	,	,	,	,	,
1413	,	,	,	,	,
1414	,	,	,	,	,
1415	,	,	,	,	,
1416	,	,	,	,	,
1417	,	,	,	,	,
1418	,	,	,	,	,
1419	,	,	,	,	,
1420	,	,	,	,	,
1421	,	,	,	,	,
1422	,	,	,	,	,
1423	,	,	,	,	,
1424	,	,	,	,	,
1425	,	,	,	,	,
1426	,	,	,	,	,
1427	,	,	,	,	,
1428	,	,	,	,	,
1429	,	,	,	,	,
1430	,	,	,	,	,
1431	,	,	,	,	,
1432	,	,	,	,	,
1433	,	,	,	,	,
1434	,	,	,	,	,
1435	,	,	,	,	,
1436	,	,	,	,	,
1437	,	,	,	,	,
1438	,	,	,	,	,
1439	,	,	,	,	,
1440	,	,	,	,	,
1441	,	,	,	,	,
1442	,	,	,	,	,
1443	,	,	,	,	,
1444	,	,	,	,	,
1445	,	,	,	,	,
1446	,	,	,	,	,
1447	,	,	,	,	,
1448	,	,	,	,	,
1449	,	,	,	,	,
1450	,	,	,	,	,
1451	,	,	,	,	,
1452	,	,	,	,	,
1453	,	,	,	,	,
1454	,	,	,	,	,
1455	,	,	,	,	,
1456	,	,	,	,	,
1457	,	,	,	,	,
1458	,	,	,	,	,
1459	,	,	,	,	,
1460	,	,	,	,	,
1461	,	,	,	,	,
1462	,	,	,	,	,
1463	,	,	,	,	,
1464	,	,	,	,	,
1465	,	,	,	,	,
1466	,	,	,	,	,
1467	,	,	,	,	,
1468	,	,	,	,	,
1469	,	,	,	,	,
1470	,	,	,	,	,
1471	,	,	,	,	,
1472	,	,	,	,	,
1473	,	,	,	,	,
1474	,	,	,	,	,
1475	,	,	,	,	,
1476	,	,	,	,	,
1477	,	,	,	,	,
1478	,	,	,	,	,
1479	,	,	,	,	,
1480	,	,	,	,	,
1481	,	,	,	,	,
1482	,	,	,	,	,
1483	,	,	,	,	,
1484	,	,	,	,	,
1485	,	,	,	,	,
1486	,	,	,	,	,
1487	,	,	,	,	,
1488	,	,	,	,	,
1489	,	,	,	,	,
1490	,	,	,	,	,
1491	,	,	,	,	,
1492	,	,	,	,	,
1493	,	,	,	,	,
1494	,	,	,	,	,
1495	,	,	,	,	,
1496	,	,	,	,	,
1497	,	,	,	,	,
1498	,	,	,	,	,
1499	,	,	,	,	,
1500	,	,	,	,	,
1501	,	,	,	,	,
1502	,	,	,	,	,
1503	,	,	,	,	,
1504	,	,	,	,	,
1505	,	,	,	,	,
1506	,	,	,	,	,
1507	,	,	,	,	,
1508	,	,	,	,	,
1509	,	,	,	,	,
1510	,	,	,	,	,
1511	,	,	,	,	,
1512	,	,	,	,	,
1513	,	,	,	,	,
1514	,	,	,	,	,
1515	,	,	,	,	,
1516	,	,	,	,	,
1517	,	,	,	,	,
1518	,	,	,	,	,
1519	,	,	,	,	,
1520	,	,	,	,	,
1521	,	,	,	,	,
1522	,	,	,	,	,
1523	,	,	,	,	,
1524	,	,	,	,	,
1525	,	,	,	,	,
1526	,	,	,	,	,
1527	,	,	,	,	,
1528	,	,	,	,	,
1529	,	,	,	,	,
1530	,	,	,	,	,
1531	,	,	,	,	,
1532	,	,	,	,	,
1533	,	,	,	,	,
1534	,	,	,	,	,
1535	,	,	,	,	,
1536	,	,	,	,	,
1537	,	,	,	,	,
1538	,	,	,	,	,
1539	,	,	,	,	,
1540	,	,	,	,	,
1541	,	,	,	,	,
1542	,	,	,	,	,
1543	,	,	,	,	,
1544	,	,	,	,	,
1545	,	,	,	,	,
1546	,	,	,	,	,
1547	,	,	,	,	,
1548	,	,	,	,	,
1549	,	,	,	,	,
1550	,	,	,	,	,
1551	,	,	,	,	,
1552	,	,	,	,	,
1553	,	,	,	,	,
1554	,	,	,	,	,
1555	,	,	,	,	,
1556	,	,	,	,	,
1557	,	,	,	,	,
1558	,	,	,	,	,
1559	,	,	,	,	,
1560	,	,	,	,	,
1561	,	,	,	,	,
1562	,	,	,	,	,
1563	,	,	,	,	,
1564	,	,	,	,	,
1565	,	,	,	,	,
1566	,	,	,	,	,
1567	,	,	,	,	,
1568	,	,	,	,	,
1569	,	,	,	,	,
1570	,	,	,	,	,
1571	,	,	,	,	,
1572	,	,	,	,	,
1573	,	,	,	,	,
1574	,	,	,	,	,
1575	,	,	,	,	,
1576	,	,	,	,	,
1577	,	,	,	,	,
1578	,	,	,	,	,
1579	,	,	,	,	,
1580	,	,	,	,	,
1581	,	,	,	,	,
1582	,	,	,	,	,
1583	,	,	,	,	,
1584	,	,	,	,	,
1585	,	,	,	,	,
1586	,	,	,	,	,
1587	,	,	,	,	,
1588	,	,	,	,	,
1589	,	,	,	,	,
1590	,	,	,	,	,
1591	,	,	,	,	,
1592	,	,	,	,	,
1593	,	,	,	,	,
1594	,	,	,	,	,
1595	,	,	,	,	,
1596	,	,	,	,	,
1597	,	,	,	,	,
1598	,	,	,	,	,
1599	,	,	,	,	,
1600	,	,	,	,	,
1601	,	,	,	,	,
1602	,	,	,	,	,
1603	,	,	,	,	,
1604	,	,	,	,	,
1605	,	,	,	,	,
1606	,	,	,	,	,
1607	,	,	,	,	,
1608	,	,	,	,	,
1609	,	,	,	,	,
1610	,	,	,	,	,
1611	,	,	,	,	,
1612	,	,	,	,	,
1613	,	,	,	,	,
1614	,	,	,	,	,
1615	,	,	,	,	,
1616	,	,	,	,	,
1617	,	,	,	,	,
1618	,	,	,	,	,
1619	,	,	,	,	,
1620	,	,	,	,	,
1621	,	,	,	,	,
1622	,	,	,	,	,
1623	,	,	,	,	,
1624	,	,	,	,	,
1625	,	,	,	,	,
1626	,	,	,	,	,
1627	,	,	,	,	,
1628	,	,	,	,	,
1629	,	,	,	,	,
1630	,	,	,	,	,
1631	,	,	,	,	,
1632	,	,	,	,	,
1633	,	,	,	,	,
1634	,	,	,	,	,
1635	,	,	,	,	,
1636	,	,	,	,	,
1637	,	,	,	,	,
1638	,	,	,	,	,
1639	,	,	,	,	,
1640	,	,	,	,	,
1641	,	,	,	,	,
1642	,	,	,	,	,
1643	,	,	,	,	,
1644	,	,	,	,	,
1645	,	,	,	,	,
1646	,	,	,	,	,
1647	,	,	,	,	,
1648	,	,	,	,	,
1649	,	,	,	,	,
1650	,	,	,	,	,
1651	,	,	,	,	,
1652	,	,	,	,	,
1653	,	,	,	,	,
1654	,	,	,	,	,
1655	,	,	,	,	,
1656	,	,	,	,	,
1657	,	,	,	,	,
1658	,	,	,	,	,
1659	,	,	,	,	,
1660	,	,	,	,	,
1661	,	,	,	,	,
1662	,	,	,	,	,
1663	,	,	,	,	,
1664	,	,	,	,	,
1665	,	,	,	,	,
1666	,	,	,	,	,
1667	,	,	,	,	,
1668	,	,	,	,	,
1669	,	,	,	,	,
1670	,	,	,	,	,
1671	,	,	,	,	,
1672	,	,	,	,	,
1673	,	,	,	,	,
1674	,	,	,	,	,
1675	,	,	,	,	,
1676	,	,	,	,	,
1677	,	,	,	,	,
1678	,	,	,	,	,
1679	,	,	,	,	,
1680	,	,	,	,	,
1681	,	,	,	,	,
1682	,	,	,	,	,
1683	,	,	,	,	,
1684	,	,	,	,	,
1685	,	,	,	,	,
1686	,	,	,	,	,
1687	,	,	,	,	,
1688	,	,	,	,	,
1689	,	,	,	,	,
1690	,	,	,	,	,
1691	,	,	,	,	,
1692	,	,	,	,	,
1693	,	,	,	,	,
1694	,	,	,	,	,
1695	,	,	,	,	,
1696	,	,	,	,	,
1697	,	,	,	,	,
1698	,	,	,	,	,
1699	,	,	,	,	,
1700	,	,	,	,	,
1701	,	,	,	,	,
1702	,	,	,	,	,
1703	,	,	,	,	,
1704	,	,	,	,	,
1705	,	,	,	,	,
1706	,	,	,	,	,
1707	,	,	,	,	,
1708	,	,	,	,	,
1709	,	,	,	,	,
1710	,	,	,	,	,
1711	,	,	,	,	,
1712	,	,	,	,	,
1713	,	,	,	,	,
1714	,	,	,	,	,
1715	,	,	,	,	,
1716	,	,	,	,	,
1717	,	,	,	,	,
1718	,	,	,	,	,
1719	,	,	,	,	,
1720	,	,	,	,	,
1721	,	,	,	,	,
1722	,	,	,	,	,
1723	,	,	,	,	,
1724	,	,	,	,	,
1725	,	,	,	,	,
1726	,	,	,	,	,
1727	,	,	,	,	,
1728	,	,	,	,	,
1729	,	,	,	,	,
1730	,	,	,	,	,
1731	,	,	,	,	,
1732	,	,	,	,	,
1733	,	,	,	,	,
1734	,	,	,	,	,
1735	,	,	,	,	,
1736	,	,	,	,	,
1737	,	,	,	,	,
1738	,	,	,	,	,
1739	,	,	,	,	,
1740	,	,	,	,	,
1741	,	,	,	,	,
1742	,	,	,	,	,
1743	,	,	,	,	,
1744	,	,	,	,	,
1745	,	,	,	,	,
1746	,	,	,	,	,
1747	,	,	,	,	,
1748	,	,	,	,	,
1749	,	,	,	,	,
1750	,	,	,	,	,
1751	,	,	,	,	,
1752	,	,	,	,	,
1753	,	,	,	,	,
1754	,	,	,	,	,
1755	,	,	,	,	,
1756	,	,	,	,	,
1757	,	,	,	,	,
1758	,	,	,	,	,
1759	,	,	,	,	,
1760	,	,	,	,	,
1761	,	,	,	,	,
1762	,	,	,	,	,
1763	,	,	,	,	,
1764	,	,	,	,	,
1765	,	,	,	,	,
1766	,	,	,	,	,
1767	,	,	,	,	,
1768	,	,	,	,	,
1769	,	,	,	,	,
1770	,	,	,	,	,
1771	,	,	,	,	,
1772	,	,	,	,	,
1773	,	,	,	,	,
1774	,	,	,	,	,
1775	,	,	,	,	,
1776	,	,	,	,	,
1777	,	,	,	,	,
1778	,	,	,	,	,
1779	,	,	,	,	,
1780	,	,	,	,	,
1781	,	,	,	,	,
1782	,	,	,	,	,
1783	,	,	,	,	,
1784	,	,	,	,	,
1785	,	,	,	,	,
1786	,	,	,	,	,
1787	,	,	,	,	,
1788	,	,	,	,	,
1789	,	,	,	,	,
1790	,	,	,	,	,
1791	,	,	,	,	,
1792	,	,	,	,	,
1793	,	,	,	,	,
1794	,	,	,	,	,
1795	,	,	,	,	,
1796	,	,	,	,	,
1797	,	,	,	,	,
1798	,	,	,	,	,
1799	,	,	,	,	,
1800	,	,	,	,	,
1801	,	,	,	,	,
1802	,	,	,	,	,
1803	,	,	,	,	,
1804	,	,	,	,	,
1805	,	,	,	,	,
1806	,	,	,	,	,
1807	,	,	,	,	,
1808	,	,	,	,	,
1809	,	,	,	,	,
1810	,	,	,	,	,
1811	,	,	,	,	,
1812	,	,	,	,	,
1813	,	,	,	,	,
1814	,	,	,	,	,
1815	,	,	,	,	,
1816	,	,	,	,	,
1817	,	,	,	,	,
1818	,	,	,	,	,
1819	,	,	,	,	,
1820	,	,	,	,	,
1821	,	,	,	,	,
1822	,	,	,	,	,
1823	,	,	,	,	,
1824	,	,	,	,	,
1825	,	,	,	,	,
1826	,	,	,	,	,
1827	,	,	,	,	,
1828	,	,	,	,	,
1829	,	,	,	,	,
1830	,	,	,	,	,
1831	,	,	,	,	,
1832	,	,	,	,	,
1833	,	,	,	,	,
1834	,	,	,	,	,
1835	,	,	,	,	,
1836	,	,	,	,	,
1837	,	,	,	,	,
1838	,	,	,	,	,
1839	,	,	,	,	,
1840	,	,	,	,	,
1841	,	,	,	,	,
1842	,	,	,	,	,
1843	,	,	,	,	,
1844	,	,	,	,	,
1845	,	,	,	,	,
1846	,	,	,	,	,
1847	,	,	,	,	,
1848	,	,	,	,	,
1849	,	,	,	,	,
1850	,	,	,	,	,
1851	,	,	,	,	,
1852	,	,	,	,	,
1853	,	,	,	,	,
1854	,	,	,	,	,
1855	,	,	,	,	,
1856	,	,	,	,	,
1857	,	,	,	,	,
1858	,	,	,	,	,
1859	,	,	,	,	,
1860	,	,	,	,	,
1861	,	,	,	,	,
1862	,	,	,	,	,
1863	,	,	,	,	,
1864	,	,	,	,	,
1865	,	,	,	,	,
1866	,	,	,	,	,
1867	,	,	,	,	,
1868	,	,	,	,	,
1869	,	,	,	,	,
1870	,	,	,	,	,
1871	,	,	,	,	,
1872	,	,	,	,	,
1873	,	,	,	,	,
1874	,	,	,	,	,
1875	,	,	,	,	,
1876	,	,	,	,	,
1877	,	,	,	,	,
1878	,	,	,	,	,
1879	,	,	,	,	,
1880	,	,	,	,	,
1881	,	,	,	,	,
1882	,	,	,	,	,
1883	,	,	,	,	,
1884	,	,	,	,	,
1885	,	,	,	,	,
1886	,	,	,	,	,
1887	,	,	,	,	,
1888	,	,	,	,	,
1889	,	,	,	,	,
1890	,	,	,	,	,
1891	,	,	,	,	,
1892	,	,	,	,	,
1893	,	,	,	,	,
1894	,	,	,	,	,
1895	,	,	,	,	,
1896	,	,	,	,	,
1897	,	,	,	,	,
1898	,	,	,	,	,
1899	,	,	,	,	,
1900	,	,	,	,	,
1901	,	,	,	,	,
1902	,	,	,	,	,
1903	,	,	,	,	,
1904	,	,	,	,	,
1905	,	,	,	,	,
1906	,	,	,	,	,
1907	,	,	,	,	,
1908	,	,	,	,	,
1909	,	,	,	,	,
1910	,	,	,	,	,
1911	,	,	,	,	,
1912	,	,	,	,	,
1913	,	,	,	,	,
1914	,	,	,	,	,
1915	,	,	,	,	,
1916	,	,	,	,	,
1917	,	,	,	,	,
1918	,	,	,	,	,
1919	,	,	,	,	,
1920	,	,	,	,	,
1921	,	,	,	,	,
1922	,	,	,	,	,
1923	,	,	,	,	,
1924	,	,	,	,	,
1925	,	,	,	,	,
1926	,	,	,	,	,
1927	,	,	,	,	,
1928	,	,	,	,	,
1929	,	,	,	,	,
1930	,	,	,	,	,
1931	,	,	,	,	,
1932	,	,	,	,	,
1933	,	,	,	,	,
1934	,	,	,	,	,
1935	,	,	,	,	,
1936	,	,	,	,	,
1937	,	,	,	,	,
1938	,	,	,	,	,
1939	,	,	,	,	,
1940	,	,	,	,	,
1941	,	,	,	,	,
1942	,	,	,	,	,
1943	,	,	,	,	,
1944	,	,	,	,	,
1945	,	,	,	,	,
1946	,	,	,	,	,
1947	,	,	,	,	,
1948	,	,	,	,	,
1949	,	,	,	,	,
1950	,	,	,	,	,
1951	,	,	,	,	,
1952	,	,	,	,	,
1953	,	,	,	,	,
1954	,	,	,	,	,
1955	,	,	,	,	,
1956	,	,	,	,	,
1957	,	,	,	,	,
1958	,	,	,	,	,
1959	,	,	,	,	,
1960	,	,	,	,	,
1961	,	,	,	,	,
1962	,	,	,	,	,
1963	,	,	,	,	,
1964	,	,	,	,	,
1965	,	,	,	,	,
1966	,	,	,	,	,
1967	,	,	,	,	,
1968	,	,	,	,	,
1969	,	,	,	,	,
1970	,	,	,	,	,
1971	,	,	,	,	,
1972	,	,	,	,	,
1973	,	,	,	,	,
1974	,	,	,	,	,
1975	,	,	,	,	,
1976	,	,	,	,	,
1977	,	,	,	,	,
1978	,	,	,	,	,
1979	,	,	,	,	,
1980	,	,	,	,	,
1981	,	,	,	,	,
1982	,	,	,	,	,
1983	,	,	,	,	,
1984	,	,	,	,	,
1985	,	,	,	,	,
1986	,	,	,	,	,
1987	,	,	,	,	,
1988	,	,	,	,	,
1989	,	,	,	,	,
1990	,	,	,	,	,
1991	,	,	,	,	,
1992	,	,	,	,	,
1993	,	,	,	,	,
1994	,	,	,	,	,
1995	,	,	,	,	,
1996	,	,	,	,	,
1997	,	,	,	,	,
1998	,	,	,	,	,
1999	,	,	,	,	,
[truncated: 13,001 more rows]

## Sheet: Fig1_supp2_rep3
	parS20 ParB no Mg	parS20 ParB no Mg +ATP	parS20 ParBno Mg +GTP	parS20 ParB no Mg +UTP	parS20 ParB no Mg +CTP
1	0.000, -0.009	0.000, 0.000	0.000, -0.004	0.000, -0.009	0.000, -0.027
2	0.200, -0.010	0.200, 0.000	0.200, -0.004	0.200, -0.010	0.200, -0.027
3	0.400, -0.010	0.400, 0.000	0.400, -0.004	0.400, -0.011	0.400, -0.028
4	0.600, -0.010	0.600, 0.001	0.600, -0.005	0.600, -0.011	0.600, -0.029
5	0.800, -0.010	0.800, 0.000	0.800, -0.005	0.800, -0.012	0.800, -0.029
6	1.000, -0.010	1.000, 0.000	1.000, -0.005	1.000, -0.012	1.000, -0.029
7	1.200, -0.010	1.200, 0.000	1.200, -0.006	1.200, -0.013	1.200, -0.030
8	1.400, -0.010	1.400, 0.000	1.400, -0.006	1.400, -0.013	1.400, -0.030
9	1.600, -0.009	1.600, 0.000	1.600, -0.006	1.600, -0.013	1.600, -0.030
10	1.800, -0.009	1.800, 0.000	1.800, -0.006	1.800, -0.013	1.800, -0.030
11	2.000, -0.008	2.000, -0.000	2.000, -0.006	2.000, -0.013	2.000, -0.029
12	2.200, -0.008	2.200, -0.000	2.200, -0.006	2.200, -0.012	2.200, -0.028
13	2.400, -0.007	2.400, -0.001	2.400, -0.006	2.400, -0.012	2.400, -0.028
14	2.600, -0.006	2.600, -0.001	2.600, -0.006	2.600, -0.012	2.600, -0.027
15	2.800, -0.006	2.800, -0.001	2.800, -0.006	2.800, -0.011	2.800, -0.027
16	3.000, -0.005	3.000, -0.001	3.000, -0.005	3.000, -0.011	3.000, -0.026
17	3.200, -0.004	3.200, -0.001	3.200, -0.005	3.200, -0.010	3.200, -0.026
18	3.400, -0.004	3.400, -0.001	3.400, -0.005	3.400, -0.010	3.400, -0.025
19	3.600, -0.003	3.600, -0.001	3.600, -0.005	3.600, -0.010	3.600, -0.025
20	3.800, -0.003	3.800, -0.001	3.800, -0.004	3.800, -0.010	3.800, -0.025
21	4.000, -0.003	4.000, -0.001	4.000, -0.004	4.000, -0.010	4.000, -0.024
22	4.200, -0.003	4.200, -0.001	4.200, -0.004	4.200, -0.010	4.200, -0.024
23	4.400, -0.002	4.400, -0.001	4.400, -0.004	4.400, -0.010	4.400, -0.023
24	4.600, -0.002	4.600, -0.001	4.600, -0.004	4.600, -0.010	4.600, -0.023
25	4.800, -0.002	4.800, -0.001	4.800, -0.004	4.800, -0.010	4.800, -0.022
26	5.000, -0.002	5.000, -0.001	5.000, -0.004	5.000, -0.010	5.000, -0.022
27	5.200, -0.002	5.200, -0.001	5.200, -0.004	5.200, -0.009	5.200, -0.022
28	5.400, -0.001	5.400, -0.001	5.400, -0.004	5.400, -0.009	5.400, -0.021
29	5.600, -0.001	5.600, -0.001	5.600, -0.004	5.600, -0.009	5.600, -0.021
30	5.800, -0.001	5.800, -0.001	5.800, -0.005	5.800, -0.008	5.800, -0.021
31	6.000, -0.001	6.000, -0.001	6.000, -0.005	6.000, -0.008	6.000, -0.020
32	6.200, -0.001	6.200, -0.001	6.200, -0.005	6.200, -0.008	6.200, -0.020
33	6.400, -0.001	6.400, -0.001	6.400, -0.005	6.400, -0.008	6.400, -0.020
34	6.600, -0.001	6.600, -0.001	6.600, -0.005	6.600, -0.008	6.600, -0.019
35	6.800, -0.000	6.800, -0.001	6.800, -0.005	6.800, -0.007	6.800, -0.019
36	7.000, -0.000	7.000, -0.000	7.000, -0.005	7.000, -0.007	7.000, -0.018
37	7.200, -0.000	7.200, -0.000	7.200, -0.005	7.200, -0.008	7.200, -0.018
38	7.400, -0.000	7.400, 0.000	7.400, -0.005	7.400, -0.008	7.400, -0.018
39	7.600, -0.000	7.600, -0.000	7.600, -0.005	7.600, -0.008	7.600, -0.018
40	7.800, -0.000	7.800, -0.000	7.800, -0.005	7.800, -0.008	7.800, -0.017
41	8.000, -0.000	8.000, -0.000	8.000, -0.005	8.000, -0.008	8.000, -0.017
42	8.200, -0.000	8.200, -0.000	8.200, -0.005	8.200, -0.008	8.200, -0.017
43	8.400, -0.000	8.400, -0.000	8.400, -0.005	8.400, -0.008	8.400, -0.016
44	8.600, -0.000	8.600, -0.000	8.600, -0.005	8.600, -0.008	8.600, -0.016
45	8.800, -0.000	8.800, -0.000	8.800, -0.005	8.800, -0.008	8.800, -0.016
46	9.000, 0.000	9.000, -0.001	9.000, -0.005	9.000, -0.008	9.000, -0.016
47	9.200, 0.000	9.200, -0.001	9.200, -0.005	9.200, -0.008	9.200, -0.015
48	9.400, 0.000	9.400, -0.001	9.400, -0.005	9.400, -0.008	9.400, -0.015
49	9.600, 0.000	9.600, -0.002	9.600, -0.005	9.600, -0.008	9.600, -0.015
50	9.800, 0.001	9.800, -0.002	9.800, -0.005	9.800, -0.008	9.800, -0.014
51	10.000, 0.001	10.000, -0.002	10.000, -0.005	10.000, -0.008	10.000, -0.014
52	10.200, 0.001	10.200, -0.002	10.200, -0.005	10.200, -0.008	10.200, -0.014
53	10.400, 0.001	10.400, -0.002	10.400, -0.005	10.400, -0.008	10.400, -0.014
54	10.600, 0.001	10.600, -0.002	10.600, -0.005	10.600, -0.008	10.600, -0.013
55	10.800, 0.001	10.800, -0.002	10.800, -0.005	10.800, -0.008	10.800, -0.013
56	11.000, 0.001	11.000, -0.002	11.000, -0.005	11.000, -0.008	11.000, -0.013
57	11.200, 0.001	11.200, -0.002	11.200, -0.004	11.200, -0.008	11.200, -0.013
58	11.400, 0.001	11.400, -0.002	11.400, -0.004	11.400, -0.007	11.400, -0.012
59	11.600, 0.002	11.600, -0.002	11.600, -0.004	11.600, -0.007	11.600, -0.012
60	11.800, 0.002	11.800, -0.002	11.800, -0.004	11.800, -0.007	11.800, -0.012
61	12.000, 0.002	12.000, -0.001	12.000, -0.004	12.000, -0.007	12.000, -0.012
62	12.200, 0.002	12.200, -0.001	12.200, -0.004	12.200, -0.007	12.200, -0.011
63	12.400, 0.002	12.400, -0.001	12.400, -0.004	12.400, -0.007	12.400, -0.011
64	12.600, 0.002	12.600, -0.001	12.600, -0.004	12.600, -0.006	12.600, -0.010
65	12.800, 0.002	12.800, -0.001	12.800, -0.004	12.800, -0.006	12.800, -0.010
66	13.000, 0.002	13.000, -0.001	13.000, -0.004	13.000, -0.006	13.000, -0.010
67	13.200, 0.002	13.200, -0.002	13.200, -0.004	13.200, -0.006	13.200, -0.009
68	13.400, 0.002	13.400, -0.002	13.400, -0.004	13.400, -0.006	13.400, -0.009
69	13.600, 0.002	13.600, -0.002	13.600, -0.004	13.600, -0.006	13.600, -0.009
70	13.800, 0.002	13.800, -0.002	13.800, -0.004	13.800, -0.006	13.800, -0.009
71	14.000, 0.002	14.000, -0.002	14.000, -0.004	14.000, -0.006	14.000, -0.009
72	14.200, 0.002	14.200, -0.002	14.200, -0.004	14.200, -0.006	14.200, -0.009
73	14.400, 0.001	14.400, -0.002	14.400, -0.004	14.400, -0.006	14.400, -0.009
74	14.600, 0.001	14.600, -0.002	14.600, -0.004	14.600, -0.007	14.600, -0.009
75	14.800, 0.001	14.800, -0.002	14.800, -0.004	14.800, -0.007	14.800, -0.009
76	15.000, 0.001	15.000, -0.002	15.000, -0.004	15.000, -0.007	15.000, -0.009
77	15.200, 0.001	15.200, -0.003	15.200, -0.003	15.200, -0.007	15.200, -0.009
78	15.400, 0.001	15.400, -0.003	15.400, -0.003	15.400, -0.007	15.400, -0.009
79	15.600, 0.001	15.600, -0.003	15.600, -0.003	15.600, -0.006	15.600, -0.008
80	15.800, 0.001	15.800, -0.003	15.800, -0.003	15.800, -0.006	15.800, -0.008
81	16.000, 0.001	16.000, -0.003	16.000, -0.003	16.000, -0.006	16.000, -0.008
82	16.200, 0.001	16.200, -0.003	16.200, -0.003	16.200, -0.006	16.200, -0.008
83	16.400, 0.001	16.400, -0.003	16.400, -0.003	16.400, -0.005	16.400, -0.007
84	16.600, 0.001	16.600, -0.003	16.600, -0.003	16.600, -0.005	16.600, -0.007
85	16.800, 0.001	16.800, -0.002	16.800, -0.003	16.800, -0.005	16.800, -0.007
86	17.000, 0.002	17.000, -0.002	17.000, -0.003	17.000, -0.005	17.000, -0.007
87	17.200, 0.002	17.200, -0.002	17.200, -0.002	17.200, -0.005	17.200, -0.007
88	17.400, 0.002	17.400, -0.002	17.400, -0.002	17.400, -0.005	17.400, -0.007
89	17.600, 0.002	17.600, -0.001	17.600, -0.002	17.600, -0.005	17.600, -0.006
90	17.800, 0.003	17.800, -0.001	17.800, -0.002	17.800, -0.005	17.800, -0.006
91	18.000, 0.003	18.000, -0.001	18.000, -0.002	18.000, -0.004	18.000, -0.006
92	18.200, 0.003	18.200, -0.001	18.200, -0.002	18.200, -0.004	18.200, -0.006
93	18.400, 0.003	18.400, -0.001	18.400, -0.002	18.400, -0.004	18.400, -0.005
94	18.600, 0.003	18.600, -0.001	18.600, -0.002	18.600, -0.004	18.600, -0.005
95	18.800, 0.003	18.800, -0.001	18.800, -0.002	18.800, -0.003	18.800, -0.005
96	19.000, 0.003	19.000, -0.001	19.000, -0.002	19.000, -0.003	19.000, -0.005
97	19.200, 0.004	19.200, -0.001	19.200, -0.002	19.200, -0.002	19.200, -0.005
98	19.400, 0.004	19.400, -0.001	19.400, -0.001	19.400, -0.002	19.400, -0.005
99	19.600, 0.004	19.600, -0.001	19.600, -0.001	19.600, -0.002	19.600, -0.005
100	19.800, 0.003	19.800, -0.001	19.800, -0.001	19.800, -0.002	19.800, -0.005
101	20.000, 0.003	20.000, -0.001	20.000, -0.001	20.000, -0.001	20.000, -0.005
102	20.200, 0.003	20.200, -0.001	20.200, -0.001	20.200, -0.001	20.200, -0.005
103	20.400, 0.003	20.400, -0.001	20.400, -0.001	20.400, -0.001	20.400, -0.005
104	20.600, 0.002	20.600, -0.001	20.600, -0.001	20.600, -0.001	20.600, -0.005
105	20.800, 0.001	20.800, -0.001	20.800, -0.001	20.800, -0.001	20.800, -0.005
106	21.000, 0.001	21.000, -0.001	21.000, -0.002	21.000, -0.001	21.000, -0.005
107	21.200, 0.000	21.200, -0.001	21.200, -0.002	21.200, -0.001	21.200, -0.005
108	21.400, 0.000	21.400, -0.001	21.400, -0.002	21.400, -0.001	21.400, -0.005
109	21.600, -0.000	21.600, -0.001	21.600, -0.002	21.600, -0.001	21.600, -0.004
110	21.800, -0.000	21.800, -0.001	21.800, -0.002	21.800, -0.001	21.800, -0.004
111	22.000, -0.000	22.000, -0.001	22.000, -0.002	22.000, -0.001	22.000, -0.004
112	22.200, -0.000	22.200, -0.001	22.200, -0.002	22.200, -0.001	22.200, -0.004
113	22.400, -0.000	22.400, -0.001	22.400, -0.002	22.400, -0.001	22.400, -0.004
114	22.600, -0.000	22.600, -0.001	22.600, -0.002	22.600, -0.001	22.600, -0.004
115	22.800, -0.000	22.800, -0.001	22.800, -0.002	22.800, -0.001	22.800, -0.004
116	23.000, 0.000	23.000, -0.001	23.000, -0.001	23.000, -0.001	23.000, -0.003
117	23.200, 0.000	23.200, -0.000	23.200, -0.001	23.200, -0.001	23.200, -0.003
118	23.400, 0.000	23.400, -0.000	23.400, -0.001	23.400, -0.001	23.400, -0.003
119	23.600, 0.000	23.600, -0.000	23.600, -0.001	23.600, -0.001	23.600, -0.003
120	23.800, 0.000	23.800, -0.000	23.800, -0.001	23.800, -0.001	23.800, -0.003
121	24.000, 0.000	24.000, -0.000	24.000, -0.000	24.000, -0.001	24.000, -0.003
122	24.200, 0.001	24.200, 0.000	24.200, -0.000	24.200, -0.001	24.200, -0.002
123	24.400, 0.001	24.400, 0.000	24.400, 0.000	24.400, -0.001	24.400, -0.002
124	24.600, 0.001	24.600, 0.000	24.600, 0.000	24.600, -0.001	24.600, -0.002
125	24.800, 0.001	24.800, 0.000	24.800, 0.001	24.800, -0.002	24.800, -0.002
126	25.000, 0.001	25.000, 0.000	25.000, 0.001	25.000, -0.002	25.000, -0.002
127	25.200, 0.001	25.200, 0.000	25.200, 0.001	25.200, -0.002	25.200, -0.002
128	25.400, 0.000	25.400, -0.000	25.400, 0.001	25.400, -0.002	25.400, -0.002
129	25.600, 0.000	25.600, -0.000	25.600, 0.001	25.600, -0.002	25.600, -0.002
130	25.800, 0.000	25.800, -0.000	25.800, 0.002	25.800, -0.002	25.800, -0.001
131	26.000, 0.000	26.000, -0.000	26.000, 0.002	26.000, -0.002	26.000, -0.001
132	26.200, 0.000	26.200, -0.000	26.200, 0.002	26.200, -0.003	26.200, -0.001
133	26.400, -0.000	26.400, -0.000	26.400, 0.001	26.400, -0.003	26.400, -0.001
134	26.600, -0.000	26.600, -0.000	26.600, 0.001	26.600, -0.002	26.600, -0.001
135	26.800, -0.000	26.800, -0.001	26.800, 0.001	26.800, -0.002	26.800, -0.000
136	27.000, -0.001	27.000, -0.001	27.000, 0.001	27.000, -0.002	27.000, -0.000
137	27.200, -0.001	27.200, -0.001	27.200, 0.001	27.200, -0.002	27.200, -0.000
138	27.400, -0.001	27.400, -0.001	27.400, 0.001	27.400, -0.001	27.400, -0.000
139	27.600, -0.000	27.600, -0.001	27.600, 0.000	27.600, -0.001	27.600, 0.000
140	27.800, -0.000	27.800, -0.000	27.800, 0.000	27.800, -0.001	27.800, 0.000
141	28.000, -0.000	28.000, -0.000	28.000, 0.000	28.000, -0.000	28.000, 0.000
142	28.200, -0.000	28.200, 0.000	28.200, 0.000	28.200, -0.000	28.200, 0.000
143	28.400, 0.000	28.400, 0.000	28.400, -0.000	28.400, 0.000	28.400, 0.000
144	28.600, 0.000	28.600, 0.000	28.600, -0.000	28.600, 0.000	28.600, 0.000
145	28.800, 0.000	28.800, 0.000	28.800, -0.000	28.800, 0.001	28.800, -0.000
146	29.000, 0.000	29.000, 0.000	29.000, -0.000	29.000, 0.001	29.000, -0.000
147	29.200, 0.000	29.200, 0.000	29.200, -0.000	29.200, 0.001	29.200, -0.000
148	29.400, 0.000	29.400, 0.000	29.400, -0.001	29.400, 0.001	29.400, -0.000
149	29.600, 0.000	29.600, 0.001	29.600, -0.001	29.600, 0.001	29.600, -0.000
150	29.800, 0.000	29.800, 0.001	29.800, -0.001	29.800, 0.001	29.800, -0.000
151	30.000, 0.000	30.000, 0.000	30.000, 0.000	30.000, 0.000	30.000, 0.000
152	30.200, 0.018	30.200, 0.020	30.200, 0.021	30.200, 0.021	30.200, 0.022
153	30.400, 0.041	30.400, 0.043	30.400, 0.045	30.400, 0.045	30.400, 0.049
154	30.600, 0.067	30.600, 0.070	30.600, 0.073	30.600, 0.074	30.600, 0.080
155	30.800, 0.097	30.800, 0.100	30.800, 0.104	30.800, 0.106	30.800, 0.115
156	31.000, 0.131	31.000, 0.133	31.000, 0.138	31.000, 0.141	31.000, 0.152
157	31.200, 0.167	31.200, 0.168	31.200, 0.173	31.200, 0.178	31.200, 0.192
158	31.400, 0.204	31.400, 0.204	31.400, 0.210	31.400, 0.217	31.400, 0.233
159	31.600, 0.242	31.600, 0.241	31.600, 0.246	31.600, 0.256	31.600, 0.274
160	31.800, 0.281	31.800, 0.277	31.800, 0.282	31.800, 0.293	31.800, 0.314
161	32.000, 0.317	32.000, 0.311	32.000, 0.315	32.000, 0.329	32.000, 0.351
162	32.200, 0.351	32.200, 0.342	32.200, 0.345	32.200, 0.361	32.200, 0.385
163	32.400, 0.383	32.400, 0.370	32.400, 0.373	32.400, 0.392	32.400, 0.415
164	32.600, 0.412	32.600, 0.396	32.600, 0.400	32.600, 0.420	32.600, 0.443
165	32.800, 0.440	32.800, 0.420	32.800, 0.424	32.800, 0.446	32.800, 0.469
166	33.000, 0.466	33.000, 0.443	33.000, 0.446	33.000, 0.471	33.000, 0.493
167	33.200, 0.490	33.200, 0.464	33.200, 0.467	33.200, 0.493	33.200, 0.513
168	33.400, 0.512	33.400, 0.483	33.400, 0.485	33.400, 0.513	33.400, 0.532
169	33.600, 0.532	33.600, 0.500	33.600, 0.502	33.600, 0.531	33.600, 0.549
170	33.800, 0.550	33.800, 0.516	33.800, 0.517	33.800, 0.548	33.800, 0.564
171	34.000, 0.566	34.000, 0.530	34.000, 0.531	34.000, 0.562	34.000, 0.578
172	34.200, 0.580	34.200, 0.542	34.200, 0.544	34.200, 0.576	34.200, 0.589
173	34.400, 0.593	34.400, 0.553	34.400, 0.555	34.400, 0.587	34.400, 0.600
174	34.600, 0.605	34.600, 0.562	34.600, 0.565	34.600, 0.598	34.600, 0.609
175	34.800, 0.615	34.800, 0.570	34.800, 0.574	34.800, 0.607	34.800, 0.617
176	35.000, 0.624	35.000, 0.577	35.000, 0.582	35.000, 0.615	35.000, 0.623
177	35.200, 0.632	35.200, 0.584	35.200, 0.589	35.200, 0.622	35.200, 0.629
178	35.400, 0.639	35.400, 0.589	35.400, 0.596	35.400, 0.628	35.400, 0.634
179	35.600, 0.645	35.600, 0.594	35.600, 0.601	35.600, 0.634	35.600, 0.639
180	35.800, 0.650	35.800, 0.598	35.800, 0.606	35.800, 0.639	35.800, 0.642
181	36.000, 0.655	36.000, 0.602	36.000, 0.611	36.000, 0.643	36.000, 0.646
182	36.200, 0.659	36.200, 0.605	36.200, 0.615	36.200, 0.646	36.200, 0.649
183	36.400, 0.663	36.400, 0.608	36.400, 0.619	36.400, 0.649	36.400, 0.651
184	36.600, 0.666	36.600, 0.610	36.600, 0.622	36.600, 0.652	36.600, 0.653
185	36.800, 0.669	36.800, 0.613	36.800, 0.625	36.800, 0.654	36.800, 0.655
186	37.000, 0.672	37.000, 0.615	37.000, 0.627	37.000, 0.657	37.000, 0.657
187	37.200, 0.674	37.200, 0.617	37.200, 0.629	37.200, 0.658	37.200, 0.658
188	37.400, 0.676	37.400, 0.618	37.400, 0.631	37.400, 0.660	37.400, 0.660
189	37.600, 0.678	37.600, 0.619	37.600, 0.632	37.600, 0.661	37.600, 0.661
190	37.800, 0.679	37.800, 0.620	37.800, 0.634	37.800, 0.662	37.800, 0.663
191	38.000, 0.681	38.000, 0.621	38.000, 0.636	38.000, 0.663	38.000, 0.664
192	38.200, 0.682	38.200, 0.621	38.200, 0.637	38.200, 0.664	38.200, 0.665
193	38.400, 0.683	38.400, 0.622	38.400, 0.638	38.400, 0.665	38.400, 0.666
194	38.600, 0.684	38.600, 0.622	38.600, 0.640	38.600, 0.665	38.600, 0.666
195	38.800, 0.685	38.800, 0.623	38.800, 0.641	38.800, 0.665	38.800, 0.667
196	39.000, 0.685	39.000, 0.623	39.000, 0.641	39.000, 0.666	39.000, 0.667
197	39.200, 0.686	39.200, 0.623	39.200, 0.642	39.200, 0.666	39.200, 0.668
198	39.400, 0.687	39.400, 0.624	39.400, 0.642	39.400, 0.667	39.400, 0.668
199	39.600, 0.687	39.600, 0.624	39.600, 0.643	39.600, 0.667	39.600, 0.668
200	39.800, 0.688	39.800, 0.624	39.800, 0.643	39.800, 0.668	39.800, 0.668
201	40.000, 0.689	40.000, 0.625	40.000, 0.643	40.000, 0.668	40.000, 0.669
202	40.200, 0.689	40.200, 0.626	40.200, 0.644	40.200, 0.668	40.200, 0.669
203	40.400, 0.690	40.400, 0.626	40.400, 0.644	40.400, 0.669	40.400, 0.669
204	40.600, 0.690	40.600, 0.627	40.600, 0.645	40.600, 0.669	40.600, 0.669
205	40.800, 0.690	40.800, 0.627	40.800, 0.645	40.800, 0.669	40.800, 0.669
206	41.000, 0.691	41.000, 0.628	41.000, 0.645	41.000, 0.670	41.000, 0.669
207	41.200, 0.691	41.200, 0.628	41.200, 0.645	41.200, 0.670	41.200, 0.669
208	41.400, 0.691	41.400, 0.628	41.400, 0.645	41.400, 0.670	41.400, 0.670
209	41.600, 0.691	41.600, 0.628	41.600, 0.645	41.600, 0.671	41.600, 0.670
210	41.800, 0.691	41.800, 0.628	41.800, 0.645	41.800, 0.671	41.800, 0.670
211	42.000, 0.691	42.000, 0.628	42.000, 0.646	42.000, 0.671	42.000, 0.671
212	42.200, 0.691	42.200, 0.628	42.200, 0.646	42.200, 0.671	42.200, 0.671
213	42.400, 0.691	42.400, 0.628	42.400, 0.647	42.400, 0.671	42.400, 0.671
214	42.600, 0.691	42.600, 0.628	42.600, 0.647	42.600, 0.672	42.600, 0.671
215	42.800, 0.692	42.800, 0.628	42.800, 0.648	42.800, 0.672	42.800, 0.671
216	43.000, 0.692	43.000, 0.627	43.000, 0.648	43.000, 0.672	43.000, 0.671
217	43.200, 0.692	43.200, 0.627	43.200, 0.648	43.200, 0.672	43.200, 0.671
218	43.400, 0.692	43.400, 0.627	43.400, 0.648	43.400, 0.671	43.400, 0.670
219	43.600, 0.692	43.600, 0.627	43.600, 0.648	43.600, 0.671	43.600, 0.670
220	43.800, 0.692	43.800, 0.627	43.800, 0.649	43.800, 0.671	43.800, 0.670
221	44.000, 0.693	44.000, 0.627	44.000, 0.649	44.000, 0.670	44.000, 0.671
222	44.200, 0.693	44.200, 0.627	44.200, 0.650	44.200, 0.670	44.200, 0.670
223	44.400, 0.693	44.400, 0.627	44.400, 0.650	44.400, 0.669	44.400, 0.670
224	44.600, 0.693	44.600, 0.627	44.600, 0.651	44.600, 0.669	44.600, 0.670
225	44.800, 0.693	44.800, 0.626	44.800, 0.651	44.800, 0.668	44.800, 0.670
226	45.000, 0.693	45.000, 0.626	45.000, 0.651	45.000, 0.667	45.000, 0.670
227	45.200, 0.693	45.200, 0.626	45.200, 0.651	45.200, 0.667	45.200, 0.670
228	45.400, 0.693	45.400, 0.626	45.400, 0.651	45.400, 0.667	45.400, 0.671
229	45.600, 0.693	45.600, 0.626	45.600, 0.651	45.600, 0.667	45.600, 0.671
230	45.800, 0.693	45.800, 0.626	45.800, 0.651	45.800, 0.667	45.800, 0.671
231	46.000, 0.693	46.000, 0.626	46.000, 0.651	46.000, 0.667	46.000, 0.671
232	46.200, 0.693	46.200, 0.626	46.200, 0.650	46.200, 0.667	46.200, 0.671
233	46.400, 0.693	46.400, 0.626	46.400, 0.650	46.400, 0.668	46.400, 0.671
234	46.600, 0.693	46.600, 0.626	46.600, 0.650	46.600, 0.668	46.600, 0.670
235	46.800, 0.693	46.800, 0.626	46.800, 0.650	46.800, 0.668	46.800, 0.670
236	47.000, 0.693	47.000, 0.626	47.000, 0.650	47.000, 0.668	47.000, 0.670
237	47.200, 0.694	47.200, 0.626	47.200, 0.650	47.200, 0.668	47.200, 0.670
238	47.400, 0.694	47.400, 0.626	47.400, 0.650	47.400, 0.668	47.400, 0.670
239	47.600, 0.694	47.600, 0.627	47.600, 0.650	47.600, 0.668	47.600, 0.670
240	47.800, 0.695	47.800, 0.627	47.800, 0.650	47.800, 0.668	47.800, 0.670
241	48.000, 0.695	48.000, 0.627	48.000, 0.650	48.000, 0.668	48.000, 0.670
242	48.200, 0.695	48.200, 0.626	48.200, 0.650	48.200, 0.668	48.200, 0.670
243	48.400, 0.695	48.400, 0.626	48.400, 0.651	48.400, 0.668	48.400, 0.670
244	48.600, 0.695	48.600, 0.626	48.600, 0.651	48.600, 0.667	48.600, 0.670
245	48.800, 0.695	48.800, 0.626	48.800, 0.651	48.800, 0.667	48.800, 0.671
246	49.000, 0.695	49.000, 0.626	49.000, 0.651	49.000, 0.667	49.000, 0.671
247	49.200, 0.695	49.200, 0.625	49.200, 0.651	49.200, 0.667	49.200, 0.671
248	49.400, 0.695	49.400, 0.625	49.400, 0.650	49.400, 0.667	49.400, 0.671
249	49.600, 0.695	49.600, 0.625	49.600, 0.650	49.600, 0.667	49.600, 0.671
250	49.800, 0.696	49.800, 0.625	49.800, 0.650	49.800, 0.667	49.800, 0.671
251	50.000, 0.696	50.000, 0.624	50.000, 0.650	50.000, 0.667	50.000, 0.671
252	50.200, 0.695	50.200, 0.624	50.200, 0.649	50.200, 0.667	50.200, 0.671
253	50.400, 0.695	50.400, 0.624	50.400, 0.649	50.400, 0.667	50.400, 0.671
254	50.600, 0.695	50.600, 0.624	50.600, 0.649	50.600, 0.667	50.600, 0.671
255	50.800, 0.695	50.800, 0.624	50.800, 0.649	50.800, 0.667	50.800, 0.671
256	51.000, 0.695	51.000, 0.624	51.000, 0.649	51.000, 0.667	51.000, 0.671
257	51.200, 0.695	51.200, 0.624	51.200, 0.649	51.200, 0.667	51.200, 0.670
258	51.400, 0.695	51.400, 0.624	51.400, 0.649	51.400, 0.667	51.400, 0.670
259	51.600, 0.695	51.600, 0.624	51.600, 0.649	51.600, 0.667	51.600, 0.670
260	51.800, 0.695	51.800, 0.624	51.800, 0.649	51.800, 0.666	51.800, 0.670
261	52.000, 0.695	52.000, 0.624	52.000, 0.650	52.000, 0.666	52.000, 0.669
262	52.200, 0.694	52.200, 0.624	52.200, 0.650	52.200, 0.666	52.200, 0.669
263	52.400, 0.694	52.400, 0.624	52.400, 0.650	52.400, 0.666	52.400, 0.669
264	52.600, 0.695	52.600, 0.624	52.600, 0.650	52.600, 0.666	52.600, 0.670
265	52.800, 0.695	52.800, 0.624	52.800, 0.649	52.800, 0.665	52.800, 0.670
266	53.000, 0.695	53.000, 0.624	53.000, 0.649	53.000, 0.665	53.000, 0.670
267	53.200, 0.695	53.200, 0.624	53.200, 0.649	53.200, 0.666	53.200, 0.670
268	53.400, 0.696	53.400, 0.624	53.400, 0.648	53.400, 0.666	53.400, 0.670
269	53.600, 0.696	53.600, 0.624	53.600, 0.648	53.600, 0.666	53.600, 0.669
270	53.800, 0.696	53.800, 0.624	53.800, 0.648	53.800, 0.667	53.800, 0.669
271	54.000, 0.696	54.000, 0.624	54.000, 0.648	54.000, 0.667	54.000, 0.669
272	54.200, 0.696	54.200, 0.624	54.200, 0.648	54.200, 0.667	54.200, 0.669
273	54.400, 0.695	54.400, 0.624	54.400, 0.648	54.400, 0.667	54.400, 0.669
274	54.600, 0.695	54.600, 0.624	54.600, 0.648	54.600, 0.667	54.600, 0.668
275	54.800, 0.695	54.800, 0.624	54.800, 0.649	54.800, 0.667	54.800, 0.668
276	55.000, 0.695	55.000, 0.624	55.000, 0.649	55.000, 0.667	55.000, 0.668
277	55.200, 0.695	55.200, 0.624	55.200, 0.649	55.200, 0.666	55.200, 0.667
278	55.400, 0.695	55.400, 0.624	55.400, 0.649	55.400, 0.666	55.400, 0.667
279	55.600, 0.695	55.600, 0.624	55.600, 0.649	55.600, 0.666	55.600, 0.666
280	55.800, 0.695	55.800, 0.623	55.800, 0.649	55.800, 0.666	55.800, 0.666
281	56.000, 0.695	56.000, 0.623	56.000, 0.649	56.000, 0.665	56.000, 0.666
282	56.200, 0.695	56.200, 0.623	56.200, 0.648	56.200, 0.665	56.200, 0.666
283	56.400, 0.696	56.400, 0.623	56.400, 0.648	56.400, 0.664	56.400, 0.666
284	56.600, 0.696	56.600, 0.622	56.600, 0.647	56.600, 0.664	56.600, 0.666
285	56.800, 0.696	56.800, 0.622	56.800, 0.647	56.800, 0.663	56.800, 0.666
286	57.000, 0.696	57.000, 0.622	57.000, 0.647	57.000, 0.663	57.000, 0.666
287	57.200, 0.696	57.200, 0.622	57.200, 0.647	57.200, 0.663	57.200, 0.666
288	57.400, 0.696	57.400, 0.622	57.400, 0.648	57.400, 0.663	57.400, 0.666
289	57.600, 0.696	57.600, 0.622	57.600, 0.648	57.600, 0.662	57.600, 0.666
290	57.800, 0.696	57.800, 0.623	57.800, 0.648	57.800, 0.662	57.800, 0.667
291	58.000, 0.696	58.000, 0.623	58.000, 0.649	58.000, 0.662	58.000, 0.667
292	58.200, 0.696	58.200, 0.623	58.200, 0.649	58.200, 0.662	58.200, 0.667
293	58.400, 0.695	58.400, 0.623	58.400, 0.649	58.400, 0.662	58.400, 0.667
294	58.600, 0.695	58.600, 0.623	58.600, 0.649	58.600, 0.662	58.600, 0.667
295	58.800, 0.695	58.800, 0.623	58.800, 0.649	58.800, 0.662	58.800, 0.667
296	59.000, 0.695	59.000, 0.623	59.000, 0.650	59.000, 0.662	59.000, 0.667
297	59.200, 0.695	59.200, 0.622	59.200, 0.650	59.200, 0.663	59.200, 0.667
298	59.400, 0.695	59.400, 0.622	59.400, 0.650	59.400, 0.663	59.400, 0.667
299	59.600, 0.695	59.600, 0.622	59.600, 0.649	59.600, 0.663	59.600, 0.667
300	59.800, 0.695	59.800, 0.622	59.800, 0.649	59.800, 0.663	59.800, 0.666
301	60.000, 0.695	60.000, 0.622	60.000, 0.649	60.000, 0.663	60.000, 0.666
302	60.200, 0.695	60.200, 0.622	60.200, 0.648	60.200, 0.663	60.200, 0.666
303	60.400, 0.695	60.400, 0.621	60.400, 0.648	60.400, 0.663	60.400, 0.666
304	60.600, 0.695	60.600, 0.621	60.600, 0.648	60.600, 0.663	60.600, 0.665
305	60.800, 0.695	60.800, 0.621	60.800, 0.648	60.800, 0.663	60.800, 0.665
306	61.000, 0.695	61.000, 0.621	61.000, 0.648	61.000, 0.662	61.000, 0.665
307	61.200, 0.695	61.200, 0.621	61.200, 0.648	61.200, 0.662	61.200, 0.666
308	61.400, 0.695	61.400, 0.621	61.400, 0.648	61.400, 0.662	61.400, 0.666
309	61.600, 0.695	61.600, 0.622	61.600, 0.648	61.600, 0.661	61.600, 0.666
310	61.800, 0.695	61.800, 0.621	61.800, 0.648	61.800, 0.661	61.800, 0.666
311	62.000, 0.695	62.000, 0.621	62.000, 0.648	62.000, 0.661	62.000, 0.666
312	62.200, 0.694	62.200, 0.621	62.200, 0.648	62.200, 0.660	62.200, 0.666
313	62.400, 0.694	62.400, 0.621	62.400, 0.648	62.400, 0.660	62.400, 0.666
314	62.600, 0.694	62.600, 0.621	62.600, 0.648	62.600, 0.660	62.600, 0.666
315	62.800, 0.695	62.800, 0.621	62.800, 0.648	62.800, 0.660	62.800, 0.666
316	63.000, 0.695	63.000, 0.621	63.000, 0.648	63.000, 0.660	63.000, 0.666
317	63.200, 0.695	63.200, 0.621	63.200, 0.648	63.200, 0.660	63.200, 0.666
318	63.400, 0.695	63.400, 0.621	63.400, 0.648	63.400, 0.660	63.400, 0.666
319	63.600, 0.694	63.600, 0.621	63.600, 0.648	63.600, 0.661	63.600, 0.666
320	63.800, 0.694	63.800, 0.621	63.800, 0.648	63.800, 0.661	63.800, 0.666
321	64.000, 0.695	64.000, 0.621	64.000, 0.648	64.000, 0.661	64.000, 0.666
322	64.200, 0.695	64.200, 0.621	64.200, 0.648	64.200, 0.662	64.200, 0.666
323	64.400, 0.695	64.400, 0.621	64.400, 0.648	64.400, 0.662	64.400, 0.665
324	64.600, 0.695	64.600, 0.621	64.600, 0.648	64.600, 0.662	64.600, 0.665
325	64.800, 0.695	64.800, 0.621	64.800, 0.648	64.800, 0.662	64.800, 0.665
326	65.000, 0.694	65.000, 0.621	65.000, 0.648	65.000, 0.662	65.000, 0.666
327	65.200, 0.694	65.200, 0.621	65.200, 0.648	65.200, 0.662	65.200, 0.666
328	65.400, 0.694	65.400, 0.621	65.400, 0.648	65.400, 0.662	65.400, 0.666
329	65.600, 0.694	65.600, 0.621	65.600, 0.647	65.600, 0.662	65.600, 0.666
330	65.800, 0.694	65.800, 0.621	65.800, 0.647	65.800, 0.661	65.800, 0.667
331	66.000, 0.694	66.000, 0.621	66.000, 0.647	66.000, 0.661	66.000, 0.667
332	66.200, 0.694	66.200, 0.620	66.200, 0.647	66.200, 0.661	66.200, 0.667
333	66.400, 0.694	66.400, 0.620	66.400, 0.647	66.400, 0.660	66.400, 0.667
334	66.600, 0.694	66.600, 0.620	66.600, 0.646	66.600, 0.660	66.600, 0.667
335	66.800, 0.693	66.800, 0.620	66.800, 0.646	66.800, 0.660	66.800, 0.667
336	67.000, 0.693	67.000, 0.620	67.000, 0.646	67.000, 0.659	67.000, 0.667
337	67.200, 0.693	67.200, 0.620	67.200, 0.646	67.200, 0.659	67.200, 0.666
338	67.400, 0.692	67.400, 0.620	67.400, 0.647	67.400, 0.659	67.400, 0.666
339	67.600, 0.692	67.600, 0.620	67.600, 0.647	67.600, 0.659	67.600, 0.666
340	67.800, 0.692	67.800, 0.620	67.800, 0.647	67.800, 0.659	67.800, 0.666
341	68.000, 0.692	68.000, 0.619	68.000, 0.647	68.000, 0.659	68.000, 0.666
342	68.200, 0.692	68.200, 0.619	68.200, 0.647	68.200, 0.660	68.200, 0.665
343	68.400, 0.692	68.400, 0.619	68.400, 0.647	68.400, 0.660	68.400, 0.665
344	68.600, 0.692	68.600, 0.619	68.600, 0.647	68.600, 0.661	68.600, 0.665
345	68.800, 0.692	68.800, 0.619	68.800, 0.647	68.800, 0.661	68.800, 0.665
346	69.000, 0.693	69.000, 0.619	69.000, 0.647	69.000, 0.661	69.000, 0.665
347	69.200, 0.693	69.200, 0.620	69.200, 0.647	69.200, 0.661	69.200, 0.665
348	69.400, 0.693	69.400, 0.620	69.400, 0.647	69.400, 0.661	69.400, 0.665
349	69.600, 0.694	69.600, 0.620	69.600, 0.647	69.600, 0.660	69.600, 0.665
350	69.800, 0.694	69.800, 0.620	69.800, 0.647	69.800, 0.660	69.800, 0.665
351	70.000, 0.694	70.000, 0.620	70.000, 0.647	70.000, 0.660	70.000, 0.665
352	70.200, 0.694	70.200, 0.620	70.200, 0.646	70.200, 0.660	70.200, 0.665
353	70.400, 0.693	70.400, 0.620	70.400, 0.646	70.400, 0.660	70.400, 0.665
354	70.600, 0.693	70.600, 0.620	70.600, 0.646	70.600, 0.659	70.600, 0.665
355	70.800, 0.693	70.800, 0.620	70.800, 0.646	70.800, 0.659	70.800, 0.665
356	71.000, 0.693	71.000, 0.620	71.000, 0.646	71.000, 0.659	71.000, 0.665
357	71.200, 0.693	71.200, 0.620	71.200, 0.646	71.200, 0.659	71.200, 0.665
358	71.400, 0.693	71.400, 0.619	71.400, 0.646	71.400, 0.659	71.400, 0.665
359	71.600, 0.693	71.600, 0.619	71.600, 0.645	71.600, 0.659	71.600, 0.665
360	71.800, 0.693	71.800, 0.619	71.800, 0.645	71.800, 0.659	71.800, 0.665
361	72.000, 0.693	72.000, 0.619	72.000, 0.645	72.000, 0.659	72.000, 0.665
362	72.200, 0.693	72.200, 0.619	72.200, 0.645	72.200, 0.659	72.200, 0.665
363	72.400, 0.693	72.400, 0.619	72.400, 0.645	72.400, 0.659	72.400, 0.665
364	72.600, 0.693	72.600, 0.620	72.600, 0.645	72.600, 0.659	72.600, 0.665
365	72.800, 0.693	72.800, 0.620	72.800, 0.645	72.800, 0.659	72.800, 0.665
366	73.000, 0.693	73.000, 0.620	73.000, 0.645	73.000, 0.658	73.000, 0.664
367	73.200, 0.693	73.200, 0.620	73.200, 0.645	73.200, 0.658	73.200, 0.664
368	73.400, 0.693	73.400, 0.620	73.400, 0.645	73.400, 0.658	73.400, 0.664
369	73.600, 0.693	73.600, 0.620	73.600, 0.645	73.600, 0.657	73.600, 0.663
370	73.800, 0.693	73.800, 0.620	73.800, 0.645	73.800, 0.657	73.800, 0.663
371	74.000, 0.693	74.000, 0.620	74.000, 0.645	74.000, 0.656	74.000, 0.663
372	74.200, 0.693	74.200, 0.620	74.200, 0.645	74.200, 0.656	74.200, 0.663
373	74.400, 0.693	74.400, 0.620	74.400, 0.645	74.400, 0.656	74.400, 0.662
374	74.600, 0.693	74.600, 0.619	74.600, 0.645	74.600, 0.655	74.600, 0.662
375	74.800, 0.692	74.800, 0.619	74.800, 0.645	74.800, 0.655	74.800, 0.663
376	75.000, 0.692	75.000, 0.618	75.000, 0.645	75.000, 0.655	75.000, 0.663
377	75.200, 0.692	75.200, 0.618	75.200, 0.645	75.200, 0.655	75.200, 0.663
378	75.400, 0.692	75.400, 0.618	75.400, 0.645	75.400, 0.655	75.400, 0.663
379	75.600, 0.692	75.600, 0.617	75.600, 0.645	75.600, 0.655	75.600, 0.663
380	75.800, 0.692	75.800, 0.618	75.800, 0.644	75.800, 0.655	75.800, 0.663
381	76.000, 0.691	76.000, 0.618	76.000, 0.644	76.000, 0.654	76.000, 0.663
382	76.200, 0.691	76.200, 0.618	76.200, 0.644	76.200, 0.655	76.200, 0.663
383	76.400, 0.691	76.400, 0.618	76.400, 0.644	76.400, 0.655	76.400, 0.663
384	76.600, 0.691	76.600, 0.619	76.600, 0.644	76.600, 0.655	76.600, 0.663
385	76.800, 0.691	76.800, 0.619	76.800, 0.644	76.800, 0.655	76.800, 0.663
386	77.000, 0.691	77.000, 0.619	77.000, 0.643	77.000, 0.655	77.000, 0.663
387	77.200, 0.691	77.200, 0.619	77.200, 0.643	77.200, 0.655	77.200, 0.663
388	77.400, 0.691	77.400, 0.619	77.400, 0.643	77.400, 0.655	77.400, 0.663
389	77.600, 0.691	77.600, 0.619	77.600, 0.643	77.600, 0.655	77.600, 0.663
390	77.800, 0.691	77.800, 0.619	77.800, 0.643	77.800, 0.655	77.800, 0.663
391	78.000, 0.691	78.000, 0.619	78.000, 0.643	78.000, 0.656	78.000, 0.662
392	78.200, 0.692	78.200, 0.619	78.200, 0.643	78.200, 0.656	78.200, 0.662
393	78.400, 0.692	78.400, 0.618	78.400, 0.644	78.400, 0.656	78.400, 0.662
394	78.600, 0.692	78.600, 0.618	78.600, 0.644	78.600, 0.655	78.600, 0.663
395	78.800, 0.692	78.800, 0.618	78.800, 0.643	78.800, 0.655	78.800, 0.663
396	79.000, 0.692	79.000, 0.617	79.000, 0.643	79.000, 0.655	79.000, 0.663
397	79.200, 0.692	79.200, 0.617	79.200, 0.643	79.200, 0.654	79.200, 0.663
398	79.400, 0.692	79.400, 0.617	79.400, 0.643	79.400, 0.654	79.400, 0.663
399	79.600, 0.692	79.600, 0.617	79.600, 0.643	79.600, 0.653	79.600, 0.663
400	79.800, 0.692	79.800, 0.617	79.800, 0.643	79.800, 0.652	79.800, 0.663
401	80.000, 0.692	80.000, 0.617	80.000, 0.643	80.000, 0.652	80.000, 0.662
402	80.200, 0.692	80.200, 0.617	80.200, 0.643	80.200, 0.652	80.200, 0.662
403	80.400, 0.692	80.400, 0.618	80.400, 0.643	80.400, 0.651	80.400, 0.662
404	80.600, 0.692	80.600, 0.618	80.600, 0.643	80.600, 0.651	80.600, 0.662
405	80.800, 0.692	80.800, 0.618	80.800, 0.644	80.800, 0.651	80.800, 0.661
406	81.000, 0.692	81.000, 0.617	81.000, 0.643	81.000, 0.651	81.000, 0.661
407	81.200, 0.692	81.200, 0.617	81.200, 0.643	81.200, 0.652	81.200, 0.660
408	81.400, 0.691	81.400, 0.617	81.400, 0.643	81.400, 0.652	81.400, 0.660
409	81.600, 0.691	81.600, 0.617	81.600, 0.644	81.600, 0.652	81.600, 0.660
410	81.800, 0.691	81.800, 0.617	81.800, 0.644	81.800, 0.652	81.800, 0.659
411	82.000, 0.691	82.000, 0.617	82.000, 0.644	82.000, 0.652	82.000, 0.659
412	82.200, 0.692	82.200, 0.617	82.200, 0.644	82.200, 0.652	82.200, 0.659
413	82.400, 0.692	82.400, 0.617	82.400, 0.644	82.400, 0.652	82.400, 0.659
414	82.600, 0.691	82.600, 0.617	82.600, 0.643	82.600, 0.652	82.600, 0.658
415	82.800, 0.691	82.800, 0.618	82.800, 0.643	82.800, 0.652	82.800, 0.658
416	83.000, 0.691	83.000, 0.618	83.000, 0.643	83.000, 0.652	83.000, 0.658
417	83.200, 0.690	83.200, 0.618	83.200, 0.643	83.200, 0.651	83.200, 0.658
418	83.400, 0.690	83.400, 0.618	83.400, 0.643	83.400, 0.651	83.400, 0.658
419	83.600, 0.689	83.600, 0.618	83.600, 0.643	83.600, 0.650	83.600, 0.658
420	83.800, 0.689	83.800, 0.619	83.800, 0.643	83.800, 0.650	83.800, 0.658
421	84.000, 0.689	84.000, 0.619	84.000, 0.643	84.000, 0.650	84.000, 0.658
422	84.200, 0.689	84.200, 0.618	84.200, 0.643	84.200, 0.650	84.200, 0.658
423	84.400, 0.689	84.400, 0.618	84.400, 0.642	84.400, 0.650	84.400, 0.658
424	84.600, 0.689	84.600, 0.618	84.600, 0.642	84.600, 0.650	84.600, 0.658
425	84.800, 0.689	84.800, 0.618	84.800, 0.642	84.800, 0.650	84.800, 0.659
426	85.000, 0.690	85.000, 0.618	85.000, 0.642	85.000, 0.650	85.000, 0.659
427	85.200, 0.690	85.200, 0.617	85.200, 0.642	85.200, 0.650	85.200, 0.659
428	85.400, 0.690	85.400, 0.617	85.400, 0.643	85.400, 0.650	85.400, 0.659
429	85.600, 0.691	85.600, 0.617	85.600, 0.643	85.600, 0.649	85.600, 0.659
430	85.800, 0.691	85.800, 0.616	85.800, 0.643	85.800, 0.649	85.800, 0.659
431	86.000, 0.691	86.000, 0.616	86.000, 0.643	86.000, 0.649	86.000, 0.659
432	86.200, 0.691	86.200, 0.616	86.200, 0.643	86.200, 0.649	86.200, 0.659
433	86.400, 0.691	86.400, 0.617	86.400, 0.643	86.400, 0.649	86.400, 0.659
434	86.600, 0.691	86.600, 0.617	86.600, 0.643	86.600, 0.649	86.600, 0.659
435	86.800, 0.690	86.800, 0.617	86.800, 0.643	86.800, 0.649	86.800, 0.659
436	87.000, 0.690	87.000, 0.617	87.000, 0.643	87.000, 0.649	87.000, 0.659
437	87.200, 0.689	87.200, 0.617	87.200, 0.643	87.200, 0.649	87.200, 0.659
438	87.400, 0.689	87.400, 0.617	87.400, 0.643	87.400, 0.648	87.400, 0.658
439	87.600, 0.688	87.600, 0.617	87.600, 0.643	87.600, 0.648	87.600, 0.658
440	87.800, 0.688	87.800, 0.617	87.800, 0.643	87.800, 0.648	87.800, 0.658
441	88.000, 0.688	88.000, 0.617	88.000, 0.643	88.000, 0.648	88.000, 0.658
442	88.200, 0.688	88.200, 0.617	88.200, 0.643	88.200, 0.648	88.200, 0.658
443	88.400, 0.688	88.400, 0.617	88.400, 0.643	88.400, 0.648	88.400, 0.658
444	88.600, 0.688	88.600, 0.617	88.600, 0.643	88.600, 0.649	88.600, 0.658
445	88.800, 0.688	88.800, 0.617	88.800, 0.643	88.800, 0.649	88.800, 0.658
446	89.000, 0.689	89.000, 0.617	89.000, 0.643	89.000, 0.649	89.000, 0.658
447	89.200, 0.689	89.200, 0.617	89.200, 0.643	89.200, 0.649	89.200, 0.658
448	89.400, 0.689	89.400, 0.616	89.400, 0.642	89.400, 0.649	89.400, 0.657
449	89.600, 0.690	89.600, 0.616	89.600, 0.642	89.600, 0.649	89.600, 0.657
450	89.800, 0.690	89.800, 0.616	89.800, 0.642	89.800, 0.649	89.800, 0.657
451	90.000, 0.690	90.000, 0.616	90.000, 0.642	90.000, 0.649	90.000, 0.657
452	90.200, 0.690	90.200, 0.616	90.200, 0.641	90.200, 0.649	90.200, 0.657
453	90.400, 0.689	90.400, 0.616	90.400, 0.641	90.400, 0.649	90.400, 0.657
454	90.600, 0.689	90.600, 0.616	90.600, 0.641	90.600, 0.649	90.600, 0.656
455	90.800, 0.689	90.800, 0.616	90.800, 0.641	90.800, 0.649	90.800, 0.656
456	91.000, 0.689	91.000, 0.616	91.000, 0.641	91.000, 0.649	91.000, 0.656
457	91.200, 0.688	91.200, 0.616	91.200, 0.641	91.200, 0.649	91.200, 0.655
458	91.400, 0.688	91.400, 0.616	91.400, 0.641	91.400, 0.649	91.400, 0.655
459	91.600, 0.688	91.600, 0.616	91.600, 0.641	91.600, 0.648	91.600, 0.655
460	91.800, 0.688	91.800, 0.616	91.800, 0.641	91.800, 0.648	91.800, 0.654
461	92.000, 0.688	92.000, 0.616	92.000, 0.641	92.000, 0.648	92.000, 0.654
462	92.200, 0.688	92.200, 0.616	92.200, 0.641	92.200, 0.647	92.200, 0.653
463	92.400, 0.688	92.400, 0.616	92.400, 0.641	92.400, 0.647	92.400, 0.653
464	92.600, 0.688	92.600, 0.615	92.600, 0.641	92.600, 0.647	92.600, 0.653
465	92.800, 0.689	92.800, 0.615	92.800, 0.641	92.800, 0.647	92.800, 0.653
466	93.000, 0.689	93.000, 0.615	93.000, 0.641	93.000, 0.647	93.000, 0.654
467	93.200, 0.689	93.200, 0.615	93.200, 0.641	93.200, 0.647	93.200, 0.654
468	93.400, 0.689	93.400, 0.614	93.400, 0.641	93.400, 0.647	93.400, 0.655
469	93.600, 0.688	93.600, 0.614	93.600, 0.641	93.600, 0.647	93.600, 0.655
470	93.800, 0.688	93.800, 0.614	93.800, 0.641	93.800, 0.648	93.800, 0.656
471	94.000, 0.688	94.000, 0.614	94.000, 0.641	94.000, 0.648	94.000, 0.656
472	94.200, 0.688	94.200, 0.614	94.200, 0.640	94.200, 0.648	94.200, 0.656
473	94.400, 0.688	94.400, 0.614	94.400, 0.640	94.400, 0.649	94.400, 0.656
474	94.600, 0.688	94.600, 0.614	94.600, 0.640	94.600, 0.649	94.600, 0.656
475	94.800, 0.688	94.800, 0.614	94.800, 0.640	94.800, 0.649	94.800, 0.656
476	95.000, 0.688	95.000, 0.614	95.000, 0.639	95.000, 0.649	95.000, 0.656
477	95.200, 0.688	95.200, 0.614	95.200, 0.639	95.200, 0.648	95.200, 0.656
478	95.400, 0.688	95.400, 0.614	95.400, 0.639	95.400, 0.648	95.400, 0.656
479	95.600, 0.688	95.600, 0.614	95.600, 0.639	95.600, 0.648	95.600, 0.656
480	95.800, 0.688	95.800, 0.615	95.800, 0.639	95.800, 0.648	95.800, 0.655
481	96.000, 0.688	96.000, 0.615	96.000, 0.639	96.000, 0.647	96.000, 0.655
482	96.200, 0.688	96.200, 0.615	96.200, 0.638	96.200, 0.647	96.200, 0.655
483	96.400, 0.688	96.400, 0.615	96.400, 0.638	96.400, 0.647	96.400, 0.655
484	96.600, 0.688	96.600, 0.615	96.600, 0.638	96.600, 0.647	96.600, 0.655
485	96.800, 0.688	96.800, 0.615	96.800, 0.639	96.800, 0.647	96.800, 0.655
486	97.000, 0.688	97.000, 0.615	97.000, 0.639	97.000, 0.647	97.000, 0.655
487	97.200, 0.688	97.200, 0.615	97.200, 0.639	97.200, 0.647	97.200, 0.656
488	97.400, 0.688	97.400, 0.615	97.400, 0.639	97.400, 0.647	97.400, 0.656
489	97.600, 0.688	97.600, 0.615	97.600, 0.639	97.600, 0.647	97.600, 0.656
490	97.800, 0.687	97.800, 0.615	97.800, 0.639	97.800, 0.646	97.800, 0.655
491	98.000, 0.687	98.000, 0.615	98.000, 0.639	98.000, 0.646	98.000, 0.655
492	98.200, 0.687	98.200, 0.615	98.200, 0.639	98.200, 0.646	98.200, 0.655
493	98.400, 0.687	98.400, 0.615	98.400, 0.639	98.400, 0.646	98.400, 0.654
494	98.600, 0.687	98.600, 0.615	98.600, 0.639	98.600, 0.645	98.600, 0.654
495	98.800, 0.687	98.800, 0.615	98.800, 0.639	98.800, 0.645	98.800, 0.654
496	99.000, 0.688	99.000, 0.615	99.000, 0.639	99.000, 0.645	99.000, 0.654
497	99.200, 0.688	99.200, 0.615	99.200, 0.639	99.200, 0.645	99.200, 0.654
498	99.400, 0.688	99.400, 0.615	99.400, 0.639	99.400, 0.645	99.400, 0.654
499	99.600, 0.688	99.600, 0.615	99.600, 0.639	99.600, 0.644	99.600, 0.654
500	99.800, 0.688	99.800, 0.616	99.800, 0.639	99.800, 0.644	99.800, 0.654
501	100.000, 0.688	100.000, 0.616	100.000, 0.639	100.000, 0.644	100.000, 0.654
502	100.200, 0.688	100.200, 0.616	100.200, 0.639	100.200, 0.644	100.200, 0.654
503	100.400, 0.688	100.400, 0.616	100.400, 0.639	100.400, 0.644	100.400, 0.654
504	100.600, 0.688	100.600, 0.616	100.600, 0.639	100.600, 0.645	100.600, 0.654
505	100.800, 0.688	100.800, 0.615	100.800, 0.639	100.800, 0.645	100.800, 0.654
506	101.000, 0.687	101.000, 0.616	101.000, 0.639	101.000, 0.645	101.000, 0.654
507	101.200, 0.687	101.200, 0.616	101.200, 0.639	101.200, 0.646	101.200, 0.654
508	101.400, 0.687	101.400, 0.615	101.400, 0.639	101.400, 0.646	101.400, 0.654
509	101.600, 0.686	101.600, 0.615	101.600, 0.639	101.600, 0.646	101.600, 0.654
510	101.800, 0.686	101.800, 0.615	101.800, 0.639	101.800, 0.646	101.800, 0.653
511	102.000, 0.686	102.000, 0.615	102.000, 0.640	102.000, 0.645	102.000, 0.653
512	102.200, 0.686	102.200, 0.615	102.200, 0.640	102.200, 0.645	102.200, 0.653
513	102.400, 0.686	102.400, 0.615	102.400, 0.640	102.400, 0.645	102.400, 0.653
514	102.600, 0.686	102.600, 0.615	102.600, 0.640	102.600, 0.644	102.600, 0.652
515	102.800, 0.686	102.800, 0.615	102.800, 0.640	102.800, 0.644	102.800, 0.652
516	103.000, 0.686	103.000, 0.615	103.000, 0.640	103.000, 0.644	103.000, 0.652
517	103.200, 0.686	103.200, 0.614	103.200, 0.639	103.200, 0.643	103.200, 0.652
518	103.400, 0.686	103.400, 0.614	103.400, 0.639	103.400, 0.643	103.400, 0.652
519	103.600, 0.687	103.600, 0.614	103.600, 0.639	103.600, 0.643	103.600, 0.652
520	103.800, 0.687	103.800, 0.614	103.800, 0.639	103.800, 0.642	103.800, 0.652
521	104.000, 0.687	104.000, 0.614	104.000, 0.639	104.000, 0.642	104.000, 0.652
522	104.200, 0.687	104.200, 0.614	104.200, 0.638	104.200, 0.642	104.200, 0.652
523	104.400, 0.687	104.400, 0.614	104.400, 0.638	104.400, 0.642	104.400, 0.652
524	104.600, 0.687	104.600, 0.614	104.600, 0.638	104.600, 0.642	104.600, 0.652
525	104.800, 0.687	104.800, 0.614	104.800, 0.637	104.800, 0.642	104.800, 0.652
526	105.000, 0.687	105.000, 0.614	105.000, 0.637	105.000, 0.642	105.000, 0.651
527	105.200, 0.687	105.200, 0.614	105.200, 0.637	105.200, 0.642	105.200, 0.651
528	105.400, 0.687	105.400, 0.614	105.400, 0.637	105.400, 0.641	105.400, 0.651
529	105.600, 0.686	105.600, 0.614	105.600, 0.637	105.600, 0.641	105.600, 0.651
530	105.800, 0.686	105.800, 0.614	105.800, 0.637	105.800, 0.641	105.800, 0.651
531	106.000, 0.686	106.000, 0.614	106.000, 0.637	106.000, 0.640	106.000, 0.651
532	106.200, 0.687	106.200, 0.614	106.200, 0.638	106.200, 0.640	106.200, 0.651
533	106.400, 0.687	106.400, 0.614	106.400, 0.638	106.400, 0.640	106.400, 0.651
534	106.600, 0.686	106.600, 0.614	106.600, 0.638	106.600, 0.641	106.600, 0.651
535	106.800, 0.686	106.800, 0.614	106.800, 0.638	106.800, 0.641	106.800, 0.651
536	107.000, 0.686	107.000, 0.614	107.000, 0.638	107.000, 0.641	107.000, 0.651
537	107.200, 0.686	107.200, 0.614	107.200, 0.638	107.200, 0.641	107.200, 0.651
538	107.400, 0.685	107.400, 0.613	107.400, 0.639	107.400, 0.641	107.400, 0.651
539	107.600, 0.685	107.600, 0.613	107.600, 0.639	107.600, 0.640	107.600, 0.651
540	107.800, 0.685	107.800, 0.613	107.800, 0.639	107.800, 0.640	107.800, 0.651
541	108.000, 0.685	108.000, 0.614	108.000, 0.639	108.000, 0.640	108.000, 0.651
542	108.200, 0.685	108.200, 0.614	108.200, 0.639	108.200, 0.639	108.200, 0.651
543	108.400, 0.685	108.400, 0.614	108.400, 0.639	108.400, 0.639	108.400, 0.651
544	108.600, 0.685	108.600, 0.614	108.600, 0.639	108.600, 0.639	108.600, 0.651
545	108.800, 0.685	108.800, 0.613	108.800, 0.638	108.800, 0.639	108.800, 0.651
546	109.000, 0.685	109.000, 0.613	109.000, 0.638	109.000, 0.639	109.000, 0.651
547	109.200, 0.685	109.200, 0.613	109.200, 0.638	109.200, 0.639	109.200, 0.651
548	109.400, 0.685	109.400, 0.613	109.400, 0.637	109.400, 0.639	109.400, 0.651
549	109.600, 0.686	109.600, 0.613	109.600, 0.637	109.600, 0.639	109.600, 0.651
550	109.800, 0.686	109.800, 0.613	109.800, 0.637	109.800, 0.639	109.800, 0.651
551	110.000, 0.686	110.000, 0.613	110.000, 0.637	110.000, 0.640	110.000, 0.651
552	110.200, 0.686	110.200, 0.613	110.200, 0.636	110.200, 0.640	110.200, 0.650
553	110.400, 0.686	110.400, 0.613	110.400, 0.636	110.400, 0.640	110.400, 0.650
554	110.600, 0.686	110.600, 0.613	110.600, 0.636	110.600, 0.641	110.600, 0.650
555	110.800, 0.686	110.800, 0.613	110.800, 0.636	110.800, 0.641	110.800, 0.650
556	111.000, 0.686	111.000, 0.613	111.000, 0.636	111.000, 0.641	111.000, 0.650
557	111.200, 0.686	111.200, 0.613	111.200, 0.636	111.200, 0.640	111.200, 0.650
558	111.400, 0.686	111.400, 0.613	111.400, 0.636	111.400, 0.640	111.400, 0.650
559	111.600, 0.686	111.600, 0.613	111.600, 0.636	111.600, 0.640	111.600, 0.651
560	111.800, 0.686	111.800, 0.613	111.800, 0.636	111.800, 0.640	111.800, 0.651
561	112.000, 0.685	112.000, 0.613	112.000, 0.636	112.000, 0.639	112.000, 0.651
562	112.200, 0.685	112.200, 0.613	112.200, 0.636	112.200, 0.639	112.200, 0.650
563	112.400, 0.685	112.400, 0.613	112.400, 0.636	112.400, 0.639	112.400, 0.650
564	112.600, 0.685	112.600, 0.613	112.600, 0.636	112.600, 0.639	112.600, 0.650
565	112.800, 0.685	112.800, 0.613	112.800, 0.636	112.800, 0.638	112.800, 0.650
566	113.000, 0.685	113.000, 0.613	113.000, 0.636	113.000, 0.638	113.000, 0.649
567	113.200, 0.685	113.200, 0.612	113.200, 0.635	113.200, 0.638	113.200, 0.649
568	113.400, 0.685	113.400, 0.612	113.400, 0.635	113.400, 0.638	113.400, 0.649
569	113.600, 0.685	113.600, 0.612	113.600, 0.635	113.600, 0.638	113.600, 0.649
570	113.800, 0.684	113.800, 0.612	113.800, 0.635	113.800, 0.638	113.800, 0.649
571	114.000, 0.684	114.000, 0.613	114.000, 0.635	114.000, 0.637	114.000, 0.649
572	114.200, 0.684	114.200, 0.613	114.200, 0.636	114.200, 0.637	114.200, 0.649
573	114.400, 0.684	114.400, 0.613	114.400, 0.636	114.400, 0.637	114.400, 0.649
574	114.600, 0.684	114.600, 0.613	114.600, 0.636	114.600, 0.637	114.600, 0.649
575	114.800, 0.684	114.800, 0.613	114.800, 0.636	114.800, 0.637	114.800, 0.649
576	115.000, 0.684	115.000, 0.613	115.000, 0.636	115.000, 0.637	115.000, 0.649
577	115.200, 0.684	115.200, 0.613	115.200, 0.636	115.200, 0.637	115.200, 0.650
578	115.400, 0.684	115.400, 0.612	115.400, 0.636	115.400, 0.637	115.400, 0.650
579	115.600, 0.684	115.600, 0.612	115.600, 0.636	115.600, 0.637	115.600, 0.650
580	115.800, 0.684	115.800, 0.612	115.800, 0.636	115.800, 0.637	115.800, 0.650
581	116.000, 0.684	116.000, 0.612	116.000, 0.636	116.000, 0.636	116.000, 0.650
582	116.200, 0.684	116.200, 0.611	116.200, 0.635	116.200, 0.636	116.200, 0.650
583	116.400, 0.684	116.400, 0.611	116.400, 0.635	116.400, 0.636	116.400, 0.650
584	116.600, 0.684	116.600, 0.611	116.600, 0.635	116.600, 0.635	116.600, 0.650
585	116.800, 0.684	116.800, 0.610	116.800, 0.634	116.800, 0.635	116.800, 0.650
586	117.000, 0.684	117.000, 0.610	117.000, 0.634	117.000, 0.635	117.000, 0.650
587	117.200, 0.684	117.200, 0.610	117.200, 0.634	117.200, 0.634	117.200, 0.650
588	117.400, 0.684	117.400, 0.610	117.400, 0.634	117.400, 0.634	117.400, 0.650
589	117.600, 0.684	117.600, 0.610	117.600, 0.634	117.600, 0.634	117.600, 0.649
590	117.800, 0.684	117.800, 0.610	117.800, 0.634	117.800, 0.633	117.800, 0.650
591	118.000, 0.684	118.000, 0.610	118.000, 0.634	118.000, 0.633	118.000, 0.650
592	118.200, 0.684	118.200, 0.611	118.200, 0.635	118.200, 0.633	118.200, 0.649
593	118.400, 0.684	118.400, 0.611	118.400, 0.635	118.400, 0.634	118.400, 0.649
594	118.600, 0.684	118.600, 0.611	118.600, 0.635	118.600, 0.634	118.600, 0.649
595	118.800, 0.685	118.800, 0.611	118.800, 0.635	118.800, 0.634	118.800, 0.649
596	119.000, 0.684	119.000, 0.611	119.000, 0.635	119.000, 0.634	119.000, 0.649
597	119.200, 0.684	119.200, 0.611	119.200, 0.635	119.200, 0.634	119.200, 0.649
598	119.400, 0.684	119.400, 0.611	119.400, 0.635	119.400, 0.634	119.400, 0.649
599	119.600, 0.684	119.600, 0.611	119.600, 0.635	119.600, 0.634	119.600, 0.649
600	119.800, 0.684	119.800, 0.611	119.800, 0.635	119.800, 0.634	119.800, 0.648
601	120.000, 0.684	120.000, 0.612	120.000, 0.635	120.000, 0.634	120.000, 0.648
602	120.200, 0.684	120.200, 0.612	120.200, 0.635	120.200, 0.634	120.200, 0.649
603	120.400, 0.684	120.400, 0.612	120.400, 0.635	120.400, 0.634	120.400, 0.649
604	120.600, 0.685	120.600, 0.612	120.600, 0.635	120.600, 0.634	120.600, 0.649
605	120.800, 0.685	120.800, 0.612	120.800, 0.635	120.800, 0.634	120.800, 0.649
606	121.000, 0.685	121.000, 0.612	121.000, 0.635	121.000, 0.634	121.000, 0.649
607	121.200, 0.685	121.200, 0.612	121.200, 0.635	121.200, 0.633	121.200, 0.648
608	121.400, 0.685	121.400, 0.612	121.400, 0.635	121.400, 0.633	121.400, 0.648
609	121.600, 0.685	121.600, 0.612	121.600, 0.635	121.600, 0.633	121.600, 0.648
610	121.800, 0.685	121.800, 0.612	121.800, 0.635	121.800, 0.634	121.800, 0.648
611	122.000, 0.685	122.000, 0.612	122.000, 0.635	122.000, 0.634	122.000, 0.648
612	122.200, 0.685	122.200, 0.612	122.200, 0.635	122.200, 0.634	122.200, 0.648
613	122.400, 0.685	122.400, 0.612	122.400, 0.635	122.400, 0.635	122.400, 0.648
614	122.600, 0.685	122.600, 0.612	122.600, 0.634	122.600, 0.635	122.600, 0.648
615	122.800, 0.685	122.800, 0.612	122.800, 0.634	122.800, 0.635	122.800, 0.648
616	123.000, 0.684	123.000, 0.612	123.000, 0.634	123.000, 0.635	123.000, 0.648
617	123.200, 0.684	123.200, 0.612	123.200, 0.634	123.200, 0.635	123.200, 0.648
618	123.400, 0.684	123.400, 0.612	123.400, 0.634	123.400, 0.635	123.400, 0.648
619	123.600, 0.684	123.600, 0.612	123.600, 0.634	123.600, 0.635	123.600, 0.648
620	123.800, 0.684	123.800, 0.611	123.800, 0.634	123.800, 0.635	123.800, 0.648
621	124.000, 0.684	124.000, 0.611	124.000, 0.634	124.000, 0.634	124.000, 0.648
622	124.200, 0.684	124.200, 0.611	124.200, 0.634	124.200, 0.634	124.200, 0.648
623	124.400, 0.684	124.400, 0.611	124.400, 0.634	124.400, 0.634	124.400, 0.648
624	124.600, 0.684	124.600, 0.610	124.600, 0.635	124.600, 0.634	124.600, 0.648
625	124.800, 0.684	124.800, 0.610	124.800, 0.635	124.800, 0.634	124.800, 0.648
626	125.000, 0.684	125.000, 0.610	125.000, 0.635	125.000, 0.634	125.000, 0.647
627	125.200, 0.683	125.200, 0.610	125.200, 0.635	125.200, 0.634	125.200, 0.647
628	125.400, 0.683	125.400, 0.609	125.400, 0.635	125.400, 0.634	125.400, 0.647
629	125.600, 0.683	125.600, 0.609	125.600, 0.634	125.600, 0.634	125.600, 0.647
630	125.800, 0.683	125.800, 0.609	125.800, 0.634	125.800, 0.635	125.800, 0.647
631	126.000, 0.683	126.000, 0.609	126.000, 0.634	126.000, 0.635	126.000, 0.647
632	126.200, 0.682	126.200, 0.609	126.200, 0.634	126.200, 0.636	126.200, 0.648
633	126.400, 0.682	126.400, 0.609	126.400, 0.634	126.400, 0.636	126.400, 0.648
634	126.600, 0.682	126.600, 0.610	126.600, 0.634	126.600, 0.636	126.600, 0.648
635	126.800, 0.682	126.800, 0.610	126.800, 0.634	126.800, 0.635	126.800, 0.648
636	127.000, 0.683	127.000, 0.610	127.000, 0.634	127.000, 0.635	127.000, 0.648
637	127.200, 0.683	127.200, 0.611	127.200, 0.634	127.200, 0.635	127.200, 0.648
638	127.400, 0.683	127.400, 0.611	127.400, 0.633	127.400, 0.635	127.400, 0.648
639	127.600, 0.683	127.600, 0.611	127.600, 0.633	127.600, 0.634	127.600, 0.648
640	127.800, 0.683	127.800, 0.611	127.800, 0.633	127.800, 0.634	127.800, 0.647
641	128.000, 0.683	128.000, 0.611	128.000, 0.633	128.000, 0.634	128.000, 0.647
642	128.200, 0.683	128.200, 0.611	128.200, 0.633	128.200, 0.634	128.200, 0.647
643	128.400, 0.683	128.400, 0.611	128.400, 0.633	128.400, 0.634	128.400, 0.647
644	128.600, 0.683	128.600, 0.611	128.600, 0.633	128.600, 0.634	128.600, 0.647
645	128.800, 0.683	128.800, 0.611	128.800, 0.633	128.800, 0.634	128.800, 0.646
646	129.000, 0.683	129.000, 0.610	129.000, 0.632	129.000, 0.634	129.000, 0.646
647	129.200, 0.682	129.200, 0.610	129.200, 0.632	129.200, 0.635	129.200, 0.646
648	129.400, 0.682	129.400, 0.610	129.400, 0.631	129.400, 0.635	129.400, 0.646
649	129.600, 0.682	129.600, 0.610	129.600, 0.631	129.600, 0.635	129.600, 0.646
650	129.800, 0.682	129.800, 0.610	129.800, 0.631	129.800, 0.635	129.800, 0.646
651	130.000, 0.682	130.000, 0.610	130.000, 0.631	130.000, 0.635	130.000, 0.647
652	130.200, 0.682	130.200, 0.610	130.200, 0.631	130.200, 0.634	130.200, 0.647
653	130.400, 0.681	130.400, 0.610	130.400, 0.631	130.400, 0.634	130.400, 0.647
654	130.600, 0.681	130.600, 0.610	130.600, 0.631	130.600, 0.634	130.600, 0.647
655	130.800, 0.682	130.800, 0.610	130.800, 0.631	130.800, 0.634	130.800, 0.647
656	131.000, 0.682	131.000, 0.610	131.000, 0.631	131.000, 0.633	131.000, 0.648
657	131.200, 0.682	131.200, 0.610	131.200, 0.631	131.200, 0.633	131.200, 0.648
658	131.400, 0.682	131.400, 0.610	131.400, 0.631	131.400, 0.633	131.400, 0.648
659	131.600, 0.682	131.600, 0.610	131.600, 0.631	131.600, 0.632	131.600, 0.648
660	131.800, 0.682	131.800, 0.610	131.800, 0.632	131.800, 0.632	131.800, 0.649
661	132.000, 0.682	132.000, 0.610	132.000, 0.632	132.000, 0.632	132.000, 0.649
662	132.200, 0.682	132.200, 0.610	132.200, 0.632	132.200, 0.632	132.200, 0.649
663	132.400, 0.682	132.400, 0.610	132.400, 0.632	132.400, 0.632	132.400, 0.649
664	132.600, 0.682	132.600, 0.610	132.600, 0.632	132.600, 0.632	132.600, 0.649
665	132.800, 0.682	132.800, 0.610	132.800, 0.632	132.800, 0.632	132.800, 0.649
666	133.000, 0.682	133.000, 0.610	133.000, 0.631	133.000, 0.632	133.000, 0.649
667	133.200, 0.682	133.200, 0.610	133.200, 0.631	133.200, 0.632	133.200, 0.649
668	133.400, 0.682	133.400, 0.610	133.400, 0.631	133.400, 0.632	133.400, 0.648
669	133.600, 0.682	133.600, 0.610	133.600, 0.631	133.600, 0.632	133.600, 0.648
670	133.800, 0.682	133.800, 0.611	133.800, 0.631	133.800, 0.632	133.800, 0.648
671	134.000, 0.682	134.000, 0.611	134.000, 0.631	134.000, 0.632	134.000, 0.648
672	134.200, 0.682	134.200, 0.611	134.200, 0.631	134.200, 0.632	134.200, 0.648
673	134.400, 0.682	134.400, 0.611	134.400, 0.631	134.400, 0.632	134.400, 0.648
674	134.600, 0.682	134.600, 0.611	134.600, 0.631	134.600, 0.632	134.600, 0.647
675	134.800, 0.682	134.800, 0.611	134.800, 0.631	134.800, 0.631	134.800, 0.647
676	135.000, 0.682	135.000, 0.611	135.000, 0.631	135.000, 0.631	135.000, 0.647
677	135.200, 0.682	135.200, 0.611	135.200, 0.631	135.200, 0.631	135.200, 0.647
678	135.400, 0.682	135.400, 0.611	135.400, 0.631	135.400, 0.631	135.400, 0.647
679	135.600, 0.682	135.600, 0.611	135.600, 0.631	135.600, 0.631	135.600, 0.647
680	135.800, 0.683	135.800, 0.611	135.800, 0.631	135.800, 0.630	135.800, 0.647
681	136.000, 0.683	136.000, 0.611	136.000, 0.631	136.000, 0.630	136.000, 0.647
682	136.200, 0.683	136.200, 0.611	136.200, 0.631	136.200, 0.630	136.200, 0.647
683	136.400, 0.683	136.400, 0.611	136.400, 0.631	136.400, 0.630	136.400, 0.647
684	136.600, 0.683	136.600, 0.610	136.600, 0.630	136.600, 0.631	136.600, 0.647
685	136.800, 0.683	136.800, 0.610	136.800, 0.630	136.800, 0.631	136.800, 0.647
686	137.000, 0.683	137.000, 0.609	137.000, 0.630	137.000, 0.631	137.000, 0.647
687	137.200, 0.683	137.200, 0.609	137.200, 0.630	137.200, 0.631	137.200, 0.646
688	137.400, 0.683	137.400, 0.609	137.400, 0.629	137.400, 0.631	137.400, 0.646
689	137.600, 0.683	137.600, 0.609	137.600, 0.629	137.600, 0.631	137.600, 0.646
690	137.800, 0.683	137.800, 0.609	137.800, 0.629	137.800, 0.630	137.800, 0.646
691	138.000, 0.682	138.000, 0.609	138.000, 0.629	138.000, 0.630	138.000, 0.646
692	138.200, 0.682	138.200, 0.609	138.200, 0.629	138.200, 0.629	138.200, 0.646
693	138.400, 0.682	138.400, 0.609	138.400, 0.629	138.400, 0.629	138.400, 0.646
694	138.600, 0.682	138.600, 0.608	138.600, 0.630	138.600, 0.629	138.600, 0.646
695	138.800, 0.681	138.800, 0.608	138.800, 0.630	138.800, 0.628	138.800, 0.646
696	139.000, 0.681	139.000, 0.608	139.000, 0.629	139.000, 0.628	139.000, 0.646
697	139.200, 0.681	139.200, 0.608	139.200, 0.630	139.200, 0.629	139.200, 0.647
698	139.400, 0.681	139.400, 0.609	139.400, 0.630	139.400, 0.629	139.400, 0.647
699	139.600, 0.681	139.600, 0.609	139.600, 0.629	139.600, 0.629	139.600, 0.647
700	139.800, 0.681	139.800, 0.609	139.800, 0.629	139.800, 0.629	139.800, 0.648
701	140.000, 0.681	140.000, 0.609	140.000, 0.629	140.000, 0.630	140.000, 0.648
702	140.200, 0.681	140.200, 0.608	140.200, 0.629	140.200, 0.631	140.200, 0.648
703	140.400, 0.681	140.400, 0.608	140.400, 0.629	140.400, 0.631	140.400, 0.648
704	140.600, 0.681	140.600, 0.608	140.600, 0.628	140.600, 0.631	140.600, 0.648
705	140.800, 0.681	140.800, 0.608	140.800, 0.628	140.800, 0.632	140.800, 0.648
706	141.000, 0.681	141.000, 0.608	141.000, 0.628	141.000, 0.631	141.000, 0.648
707	141.200, 0.681	141.200, 0.608	141.200, 0.628	141.200, 0.631	141.200, 0.647
708	141.400, 0.681	141.400, 0.608	141.400, 0.628	141.400, 0.631	141.400, 0.647
709	141.600, 0.681	141.600, 0.608	141.600, 0.628	141.600, 0.631	141.600, 0.647
710	141.800, 0.681	141.800, 0.608	141.800, 0.628	141.800, 0.630	141.800, 0.647
711	142.000, 0.681	142.000, 0.608	142.000, 0.628	142.000, 0.630	142.000, 0.646
712	142.200, 0.681	142.200, 0.608	142.200, 0.629	142.200, 0.630	142.200, 0.646
713	142.400, 0.681	142.400, 0.609	142.400, 0.629	142.400, 0.630	142.400, 0.646
714	142.600, 0.681	142.600, 0.609	142.600, 0.628	142.600, 0.630	142.600, 0.646
715	142.800, 0.681	142.800, 0.609	142.800, 0.628	142.800, 0.630	142.800, 0.646
716	143.000, 0.681	143.000, 0.609	143.000, 0.628	143.000, 0.630	143.000, 0.646
717	143.200, 0.681	143.200, 0.609	143.200, 0.628	143.200, 0.630	143.200, 0.646
718	143.400, 0.681	143.400, 0.609	143.400, 0.628	143.400, 0.630	143.400, 0.646
719	143.600, 0.681	143.600, 0.609	143.600, 0.628	143.600, 0.630	143.600, 0.646
720	143.800, 0.681	143.800, 0.609	143.800, 0.628	143.800, 0.630	143.800, 0.646
721	144.000, 0.681	144.000, 0.608	144.000, 0.627	144.000, 0.630	144.000, 0.647
722	144.200, 0.682	144.200, 0.608	144.200, 0.627	144.200, 0.630	144.200, 0.647
723	144.400, 0.682	144.400, 0.608	144.400, 0.627	144.400, 0.630	144.400, 0.647
724	144.600, 0.682	144.600, 0.608	144.600, 0.627	144.600, 0.630	144.600, 0.647
725	144.800, 0.682	144.800, 0.608	144.800, 0.627	144.800, 0.630	144.800, 0.647
726	145.000, 0.682	145.000, 0.608	145.000, 0.627	145.000, 0.630	145.000, 0.647
727	145.200, 0.682	145.200, 0.608	145.200, 0.628	145.200, 0.630	145.200, 0.647
728	145.400, 0.682	145.400, 0.608	145.400, 0.627	145.400, 0.631	145.400, 0.647
729	145.600, 0.682	145.600, 0.608	145.600, 0.627	145.600, 0.631	145.600, 0.646
730	145.800, 0.681	145.800, 0.608	145.800, 0.627	145.800, 0.631	145.800, 0.646
731	146.000, 0.681	146.000, 0.609	146.000, 0.627	146.000, 0.631	146.000, 0.646
732	146.200, 0.681	146.200, 0.609	146.200, 0.627	146.200, 0.631	146.200, 0.646
733	146.400, 0.681	146.400, 0.609	146.400, 0.627	146.400, 0.630	146.400, 0.646
734	146.600, 0.681	146.600, 0.609	146.600, 0.627	146.600, 0.630	146.600, 0.646
735	146.800, 0.681	146.800, 0.609	146.800, 0.627	146.800, 0.630	146.800, 0.646
736	147.000, 0.680	147.000, 0.609	147.000, 0.626	147.000, 0.630	147.000, 0.646
737	147.200, 0.680	147.200, 0.609	147.200, 0.626	147.200, 0.630	147.200, 0.646
738	147.400, 0.680	147.400, 0.609	147.400, 0.625	147.400, 0.629	147.400, 0.646
739	147.600, 0.680	147.600, 0.609	147.600, 0.625	147.600, 0.629	147.600, 0.646
740	147.800, 0.680	147.800, 0.609	147.800, 0.625	147.800, 0.629	147.800, 0.646
741	148.000, 0.680	148.000, 0.609	148.000, 0.624	148.000, 0.629	148.000, 0.646
742	148.200, 0.681	148.200, 0.609	148.200, 0.624	148.200, 0.629	148.200, 0.646
743	148.400, 0.681	148.400, 0.608	148.400, 0.624	148.400, 0.629	148.400, 0.646
744	148.600, 0.681	148.600, 0.608	148.600, 0.624	148.600, 0.629	148.600, 0.646
745	148.800, 0.681	148.800, 0.608	148.800, 0.623	148.800, 0.629	148.800, 0.646
746	149.000, 0.681	149.000, 0.608	149.000, 0.623	149.000, 0.629	149.000, 0.646
747	149.200, 0.681	149.200, 0.608	149.200, 0.623	149.200, 0.629	149.200, 0.646
748	149.400, 0.681	149.400, 0.608	149.400, 0.623	149.400, 0.629	149.400, 0.646
749	149.600, 0.681	149.600, 0.608	149.600, 0.623	149.600, 0.629	149.600, 0.646
750	149.800, 0.681	149.800, 0.608	149.800, 0.623	149.800, 0.629	149.800, 0.646
751	150.000, 0.681	150.000, 0.608	150.000, 0.623	150.000, 0.629	150.000, 0.646
752	150.200, 0.674	150.200, 0.603	150.200, 0.616	150.200, 0.622	150.200, 0.639
753	150.400, 0.666	150.400, 0.597	150.400, 0.608	150.400, 0.614	150.400, 0.631
754	150.600, 0.657	150.600, 0.590	150.600, 0.598	150.600, 0.606	150.600, 0.622
755	150.800, 0.647	150.800, 0.582	150.800, 0.589	150.800, 0.597	150.800, 0.612
756	151.000, 0.637	151.000, 0.574	151.000, 0.578	151.000, 0.587	151.000, 0.602
757	151.200, 0.626	151.200, 0.566	151.200, 0.568	151.200, 0.577	151.200, 0.591
758	151.400, 0.616	151.400, 0.558	151.400, 0.558	151.400, 0.568	151.400, 0.581
759	151.600, 0.606	151.600, 0.550	151.600, 0.548	151.600, 0.559	151.600, 0.570
760	151.800, 0.597	151.800, 0.542	151.800, 0.539	151.800, 0.550	151.800, 0.561
761	152.000, 0.590	152.000, 0.536	152.000, 0.532	152.000, 0.543	152.000, 0.552
762	152.200, 0.583	152.200, 0.530	152.200, 0.525	152.200, 0.537	152.200, 0.545
763	152.400, 0.577	152.400, 0.525	152.400, 0.520	152.400, 0.531	152.400, 0.539
764	152.600, 0.572	152.600, 0.519	152.600, 0.515	152.600, 0.526	152.600, 0.533
765	152.800, 0.567	152.800, 0.515	152.800, 0.510	152.800, 0.521	152.800, 0.527
766	153.000, 0.563	153.000, 0.511	153.000, 0.506	153.000, 0.517	153.000, 0.522
767	153.200, 0.559	153.200, 0.507	153.200, 0.501	153.200, 0.513	153.200, 0.518
768	153.400, 0.555	153.400, 0.503	153.400, 0.498	153.400, 0.509	153.400, 0.514
769	153.600, 0.551	153.600, 0.500	153.600, 0.494	153.600, 0.505	153.600, 0.510
770	153.800, 0.548	153.800, 0.497	153.800, 0.491	153.800, 0.501	153.800, 0.506
771	154.000, 0.545	154.000, 0.493	154.000, 0.488	154.000, 0.498	154.000, 0.503
772	154.200, 0.542	154.200, 0.490	154.200, 0.485	154.200, 0.495	154.200, 0.500
773	154.400, 0.539	154.400, 0.488	154.400, 0.482	154.400, 0.492	154.400, 0.497
774	154.600, 0.537	154.600, 0.485	154.600, 0.479	154.600, 0.489	154.600, 0.494
775	154.800, 0.534	154.800, 0.482	154.800, 0.477	154.800, 0.487	154.800, 0.491
776	155.000, 0.532	155.000, 0.480	155.000, 0.474	155.000, 0.484	155.000, 0.488
777	155.200, 0.530	155.200, 0.477	155.200, 0.472	155.200, 0.482	155.200, 0.486
778	155.400, 0.528	155.400, 0.475	155.400, 0.470	155.400, 0.479	155.400, 0.483
779	155.600, 0.527	155.600, 0.473	155.600, 0.467	155.600, 0.477	155.600, 0.481
780	155.800, 0.525	155.800, 0.472	155.800, 0.465	155.800, 0.475	155.800, 0.479
781	156.000, 0.524	156.000, 0.470	156.000, 0.463	156.000, 0.473	156.000, 0.477
782	156.200, 0.523	156.200, 0.468	156.200, 0.461	156.200, 0.471	156.200, 0.475
783	156.400, 0.522	156.400, 0.467	156.400, 0.460	156.400, 0.469	156.400, 0.473
784	156.600, 0.521	156.600, 0.465	156.600, 0.458	156.600, 0.468	156.600, 0.471
785	156.800, 0.519	156.800, 0.464	156.800, 0.456	156.800, 0.466	156.800, 0.469
786	157.000, 0.518	157.000, 0.462	157.000, 0.455	157.000, 0.464	157.000, 0.467
787	157.200, 0.517	157.200, 0.461	157.200, 0.453	157.200, 0.463	157.200, 0.466
788	157.400, 0.516	157.400, 0.460	157.400, 0.452	157.400, 0.461	157.400, 0.464
789	157.600, 0.514	157.600, 0.459	157.600, 0.450	157.600, 0.460	157.600, 0.462
790	157.800, 0.513	157.800, 0.458	157.800, 0.449	157.800, 0.459	157.800, 0.461
791	158.000, 0.512	158.000, 0.456	158.000, 0.447	158.000, 0.458	158.000, 0.459
792	158.200, 0.511	158.200, 0.455	158.200, 0.446	158.200, 0.457	158.200, 0.458
793	158.400, 0.510	158.400, 0.454	158.400, 0.444	158.400, 0.455	158.400, 0.456
794	158.600, 0.509	158.600, 0.452	158.600, 0.443	158.600, 0.454	158.600, 0.455
795	158.800, 0.508	158.800, 0.451	158.800, 0.442	158.800, 0.453	158.800, 0.454
796	159.000, 0.507	159.000, 0.450	159.000, 0.441	159.000, 0.452	159.000, 0.452
797	159.200, 0.506	159.200, 0.449	159.200, 0.440	159.200, 0.451	159.200, 0.451
798	159.400, 0.505	159.400, 0.448	159.400, 0.439	159.400, 0.450	159.400, 0.450
799	159.600, 0.505	159.600, 0.447	159.600, 0.438	159.600, 0.449	159.600, 0.449
800	159.800, 0.504	159.800, 0.446	159.800, 0.437	159.800, 0.448	159.800, 0.448
801	160.000, 0.504	160.000, 0.446	160.000, 0.436	160.000, 0.447	160.000, 0.448
802	160.200, 0.503	160.200, 0.445	160.200, 0.435	160.200, 0.446	160.200, 0.447
803	160.400, 0.502	160.400, 0.444	160.400, 0.434	160.400, 0.446	160.400, 0.446
804	160.600, 0.502	160.600, 0.444	160.600, 0.433	160.600, 0.445	160.600, 0.445
805	160.800, 0.501	160.800, 0.443	160.800, 0.432	160.800, 0.444	160.800, 0.445
806	161.000, 0.500	161.000, 0.442	161.000, 0.432	161.000, 0.443	161.000, 0.444
807	161.200, 0.499	161.200, 0.442	161.200, 0.431	161.200, 0.442	161.200, 0.444
808	161.400, 0.498	161.400, 0.441	161.400, 0.430	161.400, 0.442	161.400, 0.443
809	161.600, 0.498	161.600, 0.440	161.600, 0.429	161.600, 0.441	161.600, 0.442
810	161.800, 0.497	161.800, 0.440	161.800, 0.428	161.800, 0.440	161.800, 0.441
811	162.000, 0.496	162.000, 0.439	162.000, 0.427	162.000, 0.439	162.000, 0.441
812	162.200, 0.496	162.200, 0.439	162.200, 0.427	162.200, 0.438	162.200, 0.440
813	162.400, 0.495	162.400, 0.438	162.400, 0.426	162.400, 0.437	162.400, 0.439
814	162.600, 0.495	162.600, 0.437	162.600, 0.425	162.600, 0.436	162.600, 0.438
815	162.800, 0.494	162.800, 0.437	162.800, 0.425	162.800, 0.435	162.800, 0.437
816	163.000, 0.494	163.000, 0.436	163.000, 0.424	163.000, 0.434	163.000, 0.436
817	163.200, 0.493	163.200, 0.435	163.200, 0.423	163.200, 0.433	163.200, 0.435
818	163.400, 0.493	163.400, 0.435	163.400, 0.422	163.400, 0.433	163.400, 0.434
819	163.600, 0.493	163.600, 0.434	163.600, 0.421	163.600, 0.432	163.600, 0.434
820	163.800, 0.493	163.800, 0.433	163.800, 0.421	163.800, 0.431	163.800, 0.433
821	164.000, 0.492	164.000, 0.432	164.000, 0.420	164.000, 0.430	164.000, 0.432
822	164.200, 0.492	164.200, 0.432	164.200, 0.419	164.200, 0.430	164.200, 0.432
823	164.400, 0.492	164.400, 0.431	164.400, 0.419	164.400, 0.429	164.400, 0.432
824	164.600, 0.491	164.600, 0.431	164.600, 0.418	164.600, 0.428	164.600, 0.431
825	164.800, 0.491	164.800, 0.430	164.800, 0.418	164.800, 0.428	164.800, 0.431
826	165.000, 0.491	165.000, 0.430	165.000, 0.417	165.000, 0.427	165.000, 0.430
827	165.200, 0.490	165.200, 0.430	165.200, 0.417	165.200, 0.427	165.200, 0.430
828	165.400, 0.489	165.400, 0.429	165.400, 0.416	165.400, 0.426	165.400, 0.430
829	165.600, 0.489	165.600, 0.429	165.600, 0.416	165.600, 0.426	165.600, 0.429
830	165.800, 0.488	165.800, 0.428	165.800, 0.415	165.800, 0.425	165.800, 0.429
831	166.000, 0.487	166.000, 0.428	166.000, 0.415	166.000, 0.425	166.000, 0.428
832	166.200, 0.487	166.200, 0.427	166.200, 0.414	166.200, 0.424	166.200, 0.427
833	166.400, 0.486	166.400, 0.426	166.400, 0.414	166.400, 0.424	166.400, 0.427
834	166.600, 0.486	166.600, 0.426	166.600, 0.414	166.600, 0.424	166.600, 0.426
835	166.800, 0.485	166.800, 0.425	166.800, 0.413	166.800, 0.423	166.800, 0.426
836	167.000, 0.485	167.000, 0.425	167.000, 0.413	167.000, 0.423	167.000, 0.425
837	167.200, 0.485	167.200, 0.424	167.200, 0.413	167.200, 0.423	167.200, 0.424
838	167.400, 0.484	167.400, 0.424	167.400, 0.412	167.400, 0.423	167.400, 0.424
839	167.600, 0.484	167.600, 0.423	167.600, 0.412	167.600, 0.422	167.600, 0.423
840	167.800, 0.483	167.800, 0.423	167.800, 0.412	167.800, 0.422	167.800, 0.422
841	168.000, 0.483	168.000, 0.423	168.000, 0.411	168.000, 0.422	168.000, 0.422
842	168.200, 0.483	168.200, 0.423	168.200, 0.411	168.200, 0.421	168.200, 0.421
843	168.400, 0.483	168.400, 0.422	168.400, 0.411	168.400, 0.421	168.400, 0.420
844	168.600, 0.483	168.600, 0.422	168.600, 0.411	168.600, 0.420	168.600, 0.420
845	168.800, 0.482	168.800, 0.422	168.800, 0.410	168.800, 0.420	168.800, 0.419
846	169.000, 0.482	169.000, 0.422	169.000, 0.410	169.000, 0.419	169.000, 0.419
847	169.200, 0.482	169.200, 0.422	169.200, 0.409	169.200, 0.418	169.200, 0.419
848	169.400, 0.482	169.400, 0.422	169.400, 0.408	169.400, 0.418	169.400, 0.419
849	169.600, 0.481	169.600, 0.421	169.600, 0.408	169.600, 0.417	169.600, 0.419
850	169.800, 0.480	169.800, 0.421	169.800, 0.407	169.800, 0.416	169.800, 0.418
851	170.000, 0.480	170.000, 0.420	170.000, 0.407	170.000, 0.416	170.000, 0.419
852	170.200, 0.480	170.200, 0.420	170.200, 0.406	170.200, 0.416	170.200, 0.419
853	170.400, 0.479	170.400, 0.419	170.400, 0.406	170.400, 0.415	170.400, 0.419
854	170.600, 0.478	170.600, 0.419	170.600, 0.406	170.600, 0.415	170.600, 0.419
855	170.800, 0.478	170.800, 0.418	170.800, 0.405	170.800, 0.414	170.800, 0.418
856	171.000, 0.477	171.000, 0.418	171.000, 0.405	171.000, 0.414	171.000, 0.418
857	171.200, 0.477	171.200, 0.417	171.200, 0.405	171.200, 0.413	171.200, 0.418
858	171.400, 0.476	171.400, 0.417	171.400, 0.404	171.400, 0.413	171.400, 0.417
859	171.600, 0.476	171.600, 0.416	171.600, 0.404	171.600, 0.413	171.600, 0.417
860	171.800, 0.476	171.800, 0.416	171.800, 0.404	171.800, 0.412	171.800, 0.416
861	172.000, 0.476	172.000, 0.416	172.000, 0.404	172.000, 0.412	172.000, 0.416
862	172.200, 0.476	172.200, 0.416	172.200, 0.404	172.200, 0.412	172.200, 0.415
863	172.400, 0.476	172.400, 0.415	172.400, 0.404	172.400, 0.411	172.400, 0.414
864	172.600, 0.476	172.600, 0.415	172.600, 0.403	172.600, 0.411	172.600, 0.414
865	172.800, 0.475	172.800, 0.414	172.800, 0.403	172.800, 0.411	172.800, 0.413
866	173.000, 0.475	173.000, 0.414	173.000, 0.403	173.000, 0.411	173.000, 0.413
867	173.200, 0.475	173.200, 0.414	173.200, 0.402	173.200, 0.411	173.200, 0.412
868	173.400, 0.475	173.400, 0.413	173.400, 0.402	173.400, 0.410	173.400, 0.412
869	173.600, 0.474	173.600, 0.413	173.600, 0.402	173.600, 0.410	173.600, 0.412
870	173.800, 0.474	173.800, 0.413	173.800, 0.402	173.800, 0.410	173.800, 0.411
871	174.000, 0.474	174.000, 0.412	174.000, 0.401	174.000, 0.410	174.000, 0.411
872	174.200, 0.474	174.200, 0.412	174.200, 0.401	174.200, 0.410	174.200, 0.410
873	174.400, 0.473	174.400, 0.412	174.400, 0.400	174.400, 0.410	174.400, 0.410
874	174.600, 0.473	174.600, 0.411	174.600, 0.400	174.600, 0.410	174.600, 0.410
875	174.800, 0.473	174.800, 0.411	174.800, 0.399	174.800, 0.409	174.800, 0.410
876	175.000, 0.472	175.000, 0.411	175.000, 0.399	175.000, 0.409	175.000, 0.409
877	175.200, 0.472	175.200, 0.411	175.200, 0.398	175.200, 0.409	175.200, 0.409
878	175.400, 0.472	175.400, 0.410	175.400, 0.398	175.400, 0.408	175.400, 0.409
879	175.600, 0.472	175.600, 0.410	175.600, 0.398	175.600, 0.408	175.600, 0.408
880	175.800, 0.471	175.800, 0.410	175.800, 0.398	175.800, 0.408	175.800, 0.408
881	176.000, 0.471	176.000, 0.410	176.000, 0.397	176.000, 0.407	176.000, 0.408
882	176.200, 0.471	176.200, 0.410	176.200, 0.397	176.200, 0.407	176.200, 0.408
883	176.400, 0.471	176.400, 0.409	176.400, 0.397	176.400, 0.407	176.400, 0.407
884	176.600, 0.470	176.600, 0.409	176.600, 0.396	176.600, 0.407	176.600, 0.407
885	176.800, 0.470	176.800, 0.409	176.800, 0.396	176.800, 0.406	176.800, 0.407
886	177.000, 0.469	177.000, 0.408	177.000, 0.396	177.000, 0.406	177.000, 0.407
887	177.200, 0.469	177.200, 0.408	177.200, 0.395	177.200, 0.405	177.200, 0.407
888	177.400, 0.469	177.400, 0.408	177.400, 0.395	177.400, 0.405	177.400, 0.407
889	177.600, 0.468	177.600, 0.407	177.600, 0.395	177.600, 0.404	177.600, 0.407
890	177.800, 0.468	177.800, 0.407	177.800, 0.394	177.800, 0.404	177.800, 0.407
891	178.000, 0.468	178.000, 0.407	178.000, 0.394	178.000, 0.404	178.000, 0.407
892	178.200, 0.467	178.200, 0.407	178.200, 0.393	178.200, 0.404	178.200, 0.407
893	178.400, 0.467	178.400, 0.406	178.400, 0.393	178.400, 0.404	178.400, 0.406
894	178.600, 0.466	178.600, 0.406	178.600, 0.392	178.600, 0.403	178.600, 0.406
895	178.800, 0.466	178.800, 0.406	178.800, 0.392	178.800, 0.403	178.800, 0.405
896	179.000, 0.466	179.000, 0.405	179.000, 0.392	179.000, 0.403	179.000, 0.405
897	179.200, 0.466	179.200, 0.405	179.200, 0.392	179.200, 0.402	179.200, 0.404
898	179.400, 0.465	179.400, 0.405	179.400, 0.392	179.400, 0.402	179.400, 0.404
899	179.600, 0.465	179.600, 0.405	179.600, 0.392	179.600, 0.402	179.600, 0.404
900	179.800, 0.465	179.800, 0.405	179.800, 0.392	179.800, 0.402	179.800, 0.403
901	180.000, 0.465	180.000, 0.405	180.000, 0.392	180.000, 0.402	180.000, 0.403
902	180.200, 0.465	180.200, 0.405	180.200, 0.392	180.200, 0.402	180.200, 0.403
903	180.400, 0.464	180.400, 0.405	180.400, 0.392	180.400, 0.402	180.400, 0.403
904	180.600, 0.464	180.600, 0.404	180.600, 0.391	180.600, 0.402	180.600, 0.403
905	180.800, 0.464	180.800, 0.404	180.800, 0.391	180.800, 0.401	180.800, 0.403
906	181.000, 0.464	181.000, 0.404	181.000, 0.391	181.000, 0.401	181.000, 0.403
907	181.200, 0.463	181.200, 0.404	181.200, 0.390	181.200, 0.401	181.200, 0.403
908	181.400, 0.463	181.400, 0.404	181.400, 0.390	181.400, 0.401	181.400, 0.403
909	181.600, 0.462	181.600, 0.403	181.600, 0.389	181.600, 0.401	181.600, 0.402
910	181.800, 0.462	181.800, 0.403	181.800, 0.389	181.800, 0.400	181.800, 0.402
911	182.000, 0.462	182.000, 0.403	182.000, 0.388	182.000, 0.400	182.000, 0.402
912	182.200, 0.462	182.200, 0.402	182.200, 0.388	182.200, 0.400	182.200, 0.401
913	182.400, 0.462	182.400, 0.402	182.400, 0.388	182.400, 0.400	182.400, 0.401
914	182.600, 0.462	182.600, 0.402	182.600, 0.388	182.600, 0.399	182.600, 0.400
915	182.800, 0.462	182.800, 0.402	182.800, 0.387	182.800, 0.399	182.800, 0.400
916	183.000, 0.461	183.000, 0.402	183.000, 0.387	183.000, 0.399	183.000, 0.400
917	183.200, 0.461	183.200, 0.402	183.200, 0.387	183.200, 0.398	183.200, 0.400
918	183.400, 0.461	183.400, 0.401	183.400, 0.387	183.400, 0.398	183.400, 0.400
919	183.600, 0.460	183.600, 0.401	183.600, 0.387	183.600, 0.398	183.600, 0.400
920	183.800, 0.460	183.800, 0.401	183.800, 0.387	183.800, 0.398	183.800, 0.399
921	184.000, 0.460	184.000, 0.401	184.000, 0.387	184.000, 0.398	184.000, 0.399
922	184.200, 0.460	184.200, 0.401	184.200, 0.387	184.200, 0.398	184.200, 0.399
923	184.400, 0.459	184.400, 0.401	184.400, 0.387	184.400, 0.398	184.400, 0.399
924	184.600, 0.459	184.600, 0.400	184.600, 0.387	184.600, 0.398	184.600, 0.399
925	184.800, 0.459	184.800, 0.400	184.800, 0.386	184.800, 0.398	184.800, 0.399
926	185.000, 0.458	185.000, 0.400	185.000, 0.386	185.000, 0.397	185.000, 0.399
927	185.200, 0.458	185.200, 0.400	185.200, 0.386	185.200, 0.397	185.200, 0.399
928	185.400, 0.458	185.400, 0.400	185.400, 0.386	185.400, 0.397	185.400, 0.399
929	185.600, 0.458	185.600, 0.400	185.600, 0.385	185.600, 0.397	185.600, 0.399
930	185.800, 0.458	185.800, 0.400	185.800, 0.385	185.800, 0.397	185.800, 0.399
931	186.000, 0.458	186.000, 0.399	186.000, 0.384	186.000, 0.396	186.000, 0.398
932	186.200, 0.458	186.200, 0.399	186.200, 0.384	186.200, 0.396	186.200, 0.398
933	186.400, 0.458	186.400, 0.399	186.400, 0.384	186.400, 0.395	186.400, 0.397
934	186.600, 0.457	186.600, 0.398	186.600, 0.384	186.600, 0.395	186.600, 0.397
935	186.800, 0.457	186.800, 0.398	186.800, 0.384	186.800, 0.395	186.800, 0.397
936	187.000, 0.457	187.000, 0.397	187.000, 0.384	187.000, 0.394	187.000, 0.397
937	187.200, 0.457	187.200, 0.397	187.200, 0.384	187.200, 0.394	187.200, 0.396
938	187.400, 0.456	187.400, 0.396	187.400, 0.384	187.400, 0.393	187.400, 0.396
939	187.600, 0.456	187.600, 0.396	187.600, 0.384	187.600, 0.393	187.600, 0.396
940	187.800, 0.456	187.800, 0.396	187.800, 0.384	187.800, 0.393	187.800, 0.396
941	188.000, 0.456	188.000, 0.396	188.000, 0.384	188.000, 0.392	188.000, 0.395
942	188.200, 0.456	188.200, 0.396	188.200, 0.383	188.200, 0.392	188.200, 0.395
943	188.400, 0.455	188.400, 0.396	188.400, 0.383	188.400, 0.392	188.400, 0.395
944	188.600, 0.455	188.600, 0.396	188.600, 0.383	188.600, 0.392	188.600, 0.395
945	188.800, 0.455	188.800, 0.396	188.800, 0.382	188.800, 0.392	188.800, 0.395
946	189.000, 0.454	189.000, 0.396	189.000, 0.382	189.000, 0.391	189.000, 0.395
947	189.200, 0.454	189.200, 0.395	189.200, 0.382	189.200, 0.391	189.200, 0.395
948	189.400, 0.454	189.400, 0.395	189.400, 0.381	189.400, 0.391	189.400, 0.395
949	189.600, 0.453	189.600, 0.395	189.600, 0.381	189.600, 0.391	189.600, 0.395
950	189.800, 0.453	189.800, 0.395	189.800, 0.381	189.800, 0.390	189.800, 0.395
951	190.000, 0.453	190.000, 0.395	190.000, 0.381	190.000, 0.390	190.000, 0.394
952	190.200, 0.453	190.200, 0.395	190.200, 0.381	190.200, 0.390	190.200, 0.394
953	190.400, 0.452	190.400, 0.395	190.400, 0.380	190.400, 0.390	190.400, 0.394
954	190.600, 0.452	190.600, 0.395	190.600, 0.380	190.600, 0.389	190.600, 0.394
955	190.800, 0.452	190.800, 0.395	190.800, 0.380	190.800, 0.389	190.800, 0.394
956	191.000, 0.452	191.000, 0.394	191.000, 0.380	191.000, 0.389	191.000, 0.394
957	191.200, 0.452	191.200, 0.394	191.200, 0.380	191.200, 0.389	191.200, 0.393
958	191.400, 0.452	191.400, 0.394	191.400, 0.380	191.400, 0.389	191.400, 0.393
959	191.600, 0.452	191.600, 0.394	191.600, 0.380	191.600, 0.389	191.600, 0.393
960	191.800, 0.452	191.800, 0.394	191.800, 0.380	191.800, 0.390	191.800, 0.393
961	192.000, 0.451	192.000, 0.394	192.000, 0.379	192.000, 0.390	192.000, 0.393
962	192.200, 0.451	192.200, 0.393	192.200, 0.379	192.200, 0.389	192.200, 0.393
963	192.400, 0.451	192.400, 0.393	192.400, 0.379	192.400, 0.390	192.400, 0.393
964	192.600, 0.450	192.600, 0.393	192.600, 0.378	192.600, 0.390	192.600, 0.393
965	192.800, 0.450	192.800, 0.392	192.800, 0.378	192.800, 0.390	192.800, 0.392
966	193.000, 0.450	193.000, 0.392	193.000, 0.378	193.000, 0.389	193.000, 0.392
967	193.200, 0.449	193.200, 0.391	193.200, 0.378	193.200, 0.389	193.200, 0.392
968	193.400, 0.449	193.400, 0.391	193.400, 0.378	193.400, 0.389	193.400, 0.392
969	193.600, 0.449	193.600, 0.391	193.600, 0.377	193.600, 0.389	193.600, 0.391
970	193.800, 0.449	193.800, 0.390	193.800, 0.377	193.800, 0.388	193.800, 0.391
971	194.000, 0.448	194.000, 0.390	194.000, 0.377	194.000, 0.388	194.000, 0.391
972	194.200, 0.448	194.200, 0.390	194.200, 0.377	194.200, 0.388	194.200, 0.391
973	194.400, 0.448	194.400, 0.390	194.400, 0.376	194.400, 0.388	194.400, 0.392
974	194.600, 0.447	194.600, 0.390	194.600, 0.376	194.600, 0.388	194.600, 0.392
975	194.800, 0.447	194.800, 0.390	194.800, 0.376	194.800, 0.388	194.800, 0.392
976	195.000, 0.447	195.000, 0.389	195.000, 0.375	195.000, 0.388	195.000, 0.392
977	195.200, 0.447	195.200, 0.389	195.200, 0.375	195.200, 0.388	195.200, 0.392
978	195.400, 0.446	195.400, 0.389	195.400, 0.375	195.400, 0.388	195.400, 0.391
979	195.600, 0.446	195.600, 0.389	195.600, 0.375	195.600, 0.388	195.600, 0.392
980	195.800, 0.446	195.800, 0.390	195.800, 0.375	195.800, 0.388	195.800, 0.391
981	196.000, 0.446	196.000, 0.390	196.000, 0.375	196.000, 0.388	196.000, 0.391
982	196.200, 0.446	196.200, 0.390	196.200, 0.375	196.200, 0.388	196.200, 0.391
983	196.400, 0.446	196.400, 0.389	196.400, 0.376	196.400, 0.387	196.400, 0.390
984	196.600, 0.446	196.600, 0.389	196.600, 0.376	196.600, 0.387	196.600, 0.390
985	196.800, 0.446	196.800, 0.389	196.800, 0.376	196.800, 0.387	196.800, 0.389
986	197.000, 0.446	197.000, 0.389	197.000, 0.376	197.000, 0.387	197.000, 0.389
987	197.200, 0.446	197.200, 0.389	197.200, 0.376	197.200, 0.386	197.200, 0.388
988	197.400, 0.446	197.400, 0.389	197.400, 0.376	197.400, 0.386	197.400, 0.388
989	197.600, 0.446	197.600, 0.389	197.600, 0.375	197.600, 0.386	197.600, 0.388
990	197.800, 0.446	197.800, 0.388	197.800, 0.375	197.800, 0.386	197.800, 0.387
991	198.000, 0.446	198.000, 0.388	198.000, 0.375	198.000, 0.385	198.000, 0.387
992	198.200, 0.446	198.200, 0.388	198.200, 0.375	198.200, 0.385	198.200, 0.387
993	198.400, 0.446	198.400, 0.388	198.400, 0.374	198.400, 0.385	198.400, 0.387
994	198.600, 0.446	198.600, 0.388	198.600, 0.374	198.600, 0.385	198.600, 0.387
995	198.800, 0.445	198.800, 0.388	198.800, 0.374	198.800, 0.385	198.800, 0.387
996	199.000, 0.445	199.000, 0.387	199.000, 0.374	199.000, 0.385	199.000, 0.387
997	199.200, 0.445	199.200, 0.387	199.200, 0.374	199.200, 0.384	199.200, 0.387
998	199.400, 0.445	199.400, 0.387	199.400, 0.374	199.400, 0.384	199.400, 0.388
999	199.600, 0.444	199.600, 0.387	199.600, 0.374	199.600, 0.384	199.600, 0.388
1000	199.800, 0.444	199.800, 0.387	199.800, 0.374	199.800, 0.384	199.800, 0.388
1001	200.000, 0.444	200.000, 0.387	200.000, 0.374	200.000, 0.384	200.000, 0.388
1002	200.200, 0.444	200.200, 0.387	200.200, 0.374	200.200, 0.384	200.200, 0.388
1003	200.400, 0.443	200.400, 0.387	200.400, 0.373	200.400, 0.384	200.400, 0.389
1004	200.600, 0.443	200.600, 0.387	200.600, 0.373	200.600, 0.384	200.600, 0.388
1005	200.800, 0.443	200.800, 0.387	200.800, 0.373	200.800, 0.384	200.800, 0.388
1006	201.000, 0.443	201.000, 0.387	201.000, 0.373	201.000, 0.384	201.000, 0.388
1007	201.200, 0.443	201.200, 0.387	201.200, 0.373	201.200, 0.383	201.200, 0.388
1008	201.400, 0.442	201.400, 0.386	201.400, 0.373	201.400, 0.383	201.400, 0.388
1009	201.600, 0.442	201.600, 0.386	201.600, 0.373	201.600, 0.383	201.600, 0.387
1010	201.800, 0.442	201.800, 0.386	201.800, 0.373	201.800, 0.383	201.800, 0.387
1011	202.000, 0.442	202.000, 0.385	202.000, 0.373	202.000, 0.383	202.000, 0.386
1012	202.200, 0.442	202.200, 0.385	202.200, 0.373	202.200, 0.383	202.200, 0.386
1013	202.400, 0.441	202.400, 0.385	202.400, 0.372	202.400, 0.383	202.400, 0.385
1014	202.600, 0.441	202.600, 0.384	202.600, 0.372	202.600, 0.383	202.600, 0.385
1015	202.800, 0.441	202.800, 0.384	202.800, 0.372	202.800, 0.383	202.800, 0.385
1016	203.000, 0.440	203.000, 0.384	203.000, 0.372	203.000, 0.383	203.000, 0.385
1017	203.200, 0.440	203.200, 0.383	203.200, 0.372	203.200, 0.384	203.200, 0.385
1018	203.400, 0.440	203.400, 0.383	203.400, 0.371	203.400, 0.384	203.400, 0.385
1019	203.600, 0.439	203.600, 0.383	203.600, 0.371	203.600, 0.384	203.600, 0.385
1020	203.800, 0.439	203.800, 0.383	203.800, 0.371	203.800, 0.384	203.800, 0.385
1021	204.000, 0.439	204.000, 0.383	204.000, 0.370	204.000, 0.383	204.000, 0.384
1022	204.200, 0.438	204.200, 0.383	204.200, 0.370	204.200, 0.383	204.200, 0.385
1023	204.400, 0.438	204.400, 0.383	204.400, 0.370	204.400, 0.383	204.400, 0.385
1024	204.600, 0.438	204.600, 0.383	204.600, 0.369	204.600, 0.383	204.600, 0.384
1025	204.800, 0.438	204.800, 0.383	204.800, 0.369	204.800, 0.383	204.800, 0.384
1026	205.000, 0.438	205.000, 0.383	205.000, 0.369	205.000, 0.382	205.000, 0.384
1027	205.200, 0.439	205.200, 0.383	205.200, 0.369	205.200, 0.382	205.200, 0.384
1028	205.400, 0.439	205.400, 0.383	205.400, 0.369	205.400, 0.382	205.400, 0.384
1029	205.600, 0.439	205.600, 0.383	205.600, 0.369	205.600, 0.381	205.600, 0.384
1030	205.800, 0.439	205.800, 0.382	205.800, 0.369	205.800, 0.381	205.800, 0.384
1031	206.000, 0.439	206.000, 0.382	206.000, 0.369	206.000, 0.380	206.000, 0.384
1032	206.200, 0.439	206.200, 0.382	206.200, 0.369	206.200, 0.380	206.200, 0.384
1033	206.400, 0.439	206.400, 0.382	206.400, 0.369	206.400, 0.379	206.400, 0.384
1034	206.600, 0.439	206.600, 0.382	206.600, 0.369	206.600, 0.379	206.600, 0.383
1035	206.800, 0.439	206.800, 0.382	206.800, 0.369	206.800, 0.379	206.800, 0.383
1036	207.000, 0.438	207.000, 0.382	207.000, 0.369	207.000, 0.379	207.000, 0.383
1037	207.200, 0.438	207.200, 0.382	207.200, 0.369	207.200, 0.379	207.200, 0.383
1038	207.400, 0.438	207.400, 0.382	207.400, 0.369	207.400, 0.379	207.400, 0.383
1039	207.600, 0.438	207.600, 0.381	207.600, 0.369	207.600, 0.379	207.600, 0.382
1040	207.800, 0.437	207.800, 0.381	207.800, 0.369	207.800, 0.379	207.800, 0.382
1041	208.000, 0.437	208.000, 0.381	208.000, 0.369	208.000, 0.378	208.000, 0.382
1042	208.200, 0.436	208.200, 0.381	208.200, 0.368	208.200, 0.378	208.200, 0.382
1043	208.400, 0.436	208.400, 0.381	208.400, 0.368	208.400, 0.378	208.400, 0.382
1044	208.600, 0.436	208.600, 0.381	208.600, 0.368	208.600, 0.378	208.600, 0.382
1045	208.800, 0.436	208.800, 0.380	208.800, 0.368	208.800, 0.378	208.800, 0.381
1046	209.000, 0.435	209.000, 0.380	209.000, 0.367	209.000, 0.378	209.000, 0.381
1047	209.200, 0.435	209.200, 0.380	209.200, 0.367	209.200, 0.378	209.200, 0.381
1048	209.400, 0.435	209.400, 0.380	209.400, 0.367	209.400, 0.378	209.400, 0.381
1049	209.600, 0.435	209.600, 0.380	209.600, 0.366	209.600, 0.378	209.600, 0.381
1050	209.800, 0.435	209.800, 0.380	209.800, 0.366	209.800, 0.378	209.800, 0.381
1051	210.000, 0.435	210.000, 0.380	210.000, 0.366	210.000, 0.378	210.000, 0.381
1052	210.200, 0.436	210.200, 0.380	210.200, 0.366	210.200, 0.378	210.200, 0.381
1053	210.400, 0.435	210.400, 0.380	210.400, 0.366	210.400, 0.377	210.400, 0.380
1054	210.600, 0.435	210.600, 0.380	210.600, 0.366	210.600, 0.377	210.600, 0.380
1055	210.800, 0.435	210.800, 0.380	210.800, 0.366	210.800, 0.377	210.800, 0.380
1056	211.000, 0.435	211.000, 0.379	211.000, 0.366	211.000, 0.377	211.000, 0.380
1057	211.200, 0.435	211.200, 0.379	211.200, 0.366	211.200, 0.377	211.200, 0.380
1058	211.400, 0.435	211.400, 0.379	211.400, 0.366	211.400, 0.377	211.400, 0.380
1059	211.600, 0.434	211.600, 0.379	211.600, 0.366	211.600, 0.377	211.600, 0.380
1060	211.800, 0.434	211.800, 0.379	211.800, 0.367	211.800, 0.377	211.800, 0.380
1061	212.000, 0.434	212.000, 0.379	212.000, 0.367	212.000, 0.377	212.000, 0.380
1062	212.200, 0.433	212.200, 0.378	212.200, 0.367	212.200, 0.378	212.200, 0.380
1063	212.400, 0.433	212.400, 0.378	212.400, 0.367	212.400, 0.378	212.400, 0.380
1064	212.600, 0.433	212.600, 0.378	212.600, 0.367	212.600, 0.378	212.600, 0.380
1065	212.800, 0.432	212.800, 0.378	212.800, 0.367	212.800, 0.378	212.800, 0.380
1066	213.000, 0.432	213.000, 0.378	213.000, 0.367	213.000, 0.378	213.000, 0.380
1067	213.200, 0.432	213.200, 0.378	213.200, 0.366	213.200, 0.377	213.200, 0.380
1068	213.400, 0.432	213.400, 0.379	213.400, 0.366	213.400, 0.377	213.400, 0.380
1069	213.600, 0.431	213.600, 0.379	213.600, 0.366	213.600, 0.377	213.600, 0.380
1070	213.800, 0.431	213.800, 0.379	213.800, 0.366	213.800, 0.376	213.800, 0.380
1071	214.000, 0.431	214.000, 0.379	214.000, 0.365	214.000, 0.376	214.000, 0.380
1072	214.200, 0.431	214.200, 0.378	214.200, 0.365	214.200, 0.376	214.200, 0.380
1073	214.400, 0.431	214.400, 0.378	214.400, 0.365	214.400, 0.375	214.400, 0.380
1074	214.600, 0.431	214.600, 0.378	214.600, 0.364	214.600, 0.375	214.600, 0.380
1075	214.800, 0.431	214.800, 0.378	214.800, 0.364	214.800, 0.375	214.800, 0.380
1076	215.000, 0.431	215.000, 0.378	215.000, 0.364	215.000, 0.374	215.000, 0.380
1077	215.200, 0.431	215.200, 0.378	215.200, 0.363	215.200, 0.374	215.200, 0.380
1078	215.400, 0.431	215.400, 0.378	215.400, 0.363	215.400, 0.374	215.400, 0.379
1079	215.600, 0.431	215.600, 0.378	215.600, 0.363	215.600, 0.374	215.600, 0.379
1080	215.800, 0.431	215.800, 0.378	215.800, 0.363	215.800, 0.374	215.800, 0.379
1081	216.000, 0.431	216.000, 0.378	216.000, 0.362	216.000, 0.374	216.000, 0.379
1082	216.200, 0.431	216.200, 0.378	216.200, 0.362	216.200, 0.374	216.200, 0.379
1083	216.400, 0.431	216.400, 0.377	216.400, 0.362	216.400, 0.374	216.400, 0.379
1084	216.600, 0.431	216.600, 0.377	216.600, 0.362	216.600, 0.374	216.600, 0.379
1085	216.800, 0.431	216.800, 0.377	216.800, 0.362	216.800, 0.374	216.800, 0.379
1086	217.000, 0.431	217.000, 0.377	217.000, 0.362	217.000, 0.374	217.000, 0.379
1087	217.200, 0.430	217.200, 0.377	217.200, 0.362	217.200, 0.374	217.200, 0.378
1088	217.400, 0.430	217.400, 0.376	217.400, 0.363	217.400, 0.374	217.400, 0.378
1089	217.600, 0.430	217.600, 0.376	217.600, 0.363	217.600, 0.374	217.600, 0.378
1090	217.800, 0.430	217.800, 0.376	217.800, 0.363	217.800, 0.374	217.800, 0.377
1091	218.000, 0.429	218.000, 0.376	218.000, 0.363	218.000, 0.374	218.000, 0.377
1092	218.200, 0.429	218.200, 0.376	218.200, 0.363	218.200, 0.374	218.200, 0.377
1093	218.400, 0.429	218.400, 0.376	218.400, 0.364	218.400, 0.373	218.400, 0.377
1094	218.600, 0.429	218.600, 0.376	218.600, 0.364	218.600, 0.373	218.600, 0.377
1095	218.800, 0.429	218.800, 0.376	218.800, 0.364	218.800, 0.373	218.800, 0.376
1096	219.000, 0.428	219.000, 0.376	219.000, 0.364	219.000, 0.373	219.000, 0.376
1097	219.200, 0.428	219.200, 0.376	219.200, 0.364	219.200, 0.373	219.200, 0.376
1098	219.400, 0.428	219.400, 0.376	219.400, 0.364	219.400, 0.373	219.400, 0.376
1099	219.600, 0.428	219.600, 0.376	219.600, 0.364	219.600, 0.372	219.600, 0.376
1100	219.800, 0.428	219.800, 0.376	219.800, 0.363	219.800, 0.372	219.800, 0.376
1101	220.000, 0.428	220.000, 0.376	220.000, 0.363	220.000, 0.372	220.000, 0.376
1102	220.200, 0.427	220.200, 0.375	220.200, 0.363	220.200, 0.372	220.200, 0.376
1103	220.400, 0.427	220.400, 0.375	220.400, 0.363	220.400, 0.372	220.400, 0.376
1104	220.600, 0.427	220.600, 0.375	220.600, 0.363	220.600, 0.371	220.600, 0.376
1105	220.800, 0.427	220.800, 0.375	220.800, 0.362	220.800, 0.371	220.800, 0.376
1106	221.000, 0.427	221.000, 0.375	221.000, 0.362	221.000, 0.371	221.000, 0.376
1107	221.200, 0.427	221.200, 0.375	221.200, 0.362	221.200, 0.371	221.200, 0.375
1108	221.400, 0.426	221.400, 0.375	221.400, 0.361	221.400, 0.371	221.400, 0.375
1109	221.600, 0.426	221.600, 0.375	221.600, 0.361	221.600, 0.371	221.600, 0.375
1110	221.800, 0.426	221.800, 0.375	221.800, 0.361	221.800, 0.371	221.800, 0.375
1111	222.000, 0.426	222.000, 0.375	222.000, 0.361	222.000, 0.371	222.000, 0.375
1112	222.200, 0.426	222.200, 0.375	222.200, 0.361	222.200, 0.371	222.200, 0.375
1113	222.400, 0.426	222.400, 0.375	222.400, 0.360	222.400, 0.371	222.400, 0.375
1114	222.600, 0.426	222.600, 0.375	222.600, 0.360	222.600, 0.371	222.600, 0.375
1115	222.800, 0.425	222.800, 0.375	222.800, 0.360	222.800, 0.370	222.800, 0.375
1116	223.000, 0.425	223.000, 0.376	223.000, 0.360	223.000, 0.370	223.000, 0.376
1117	223.200, 0.425	223.200, 0.375	223.200, 0.360	223.200, 0.370	223.200, 0.376
1118	223.400, 0.425	223.400, 0.375	223.400, 0.360	223.400, 0.370	223.400, 0.376
1119	223.600, 0.425	223.600, 0.375	223.600, 0.360	223.600, 0.370	223.600, 0.376
1120	223.800, 0.425	223.800, 0.375	223.800, 0.360	223.800, 0.369	223.800, 0.376
1121	224.000, 0.425	224.000, 0.374	224.000, 0.360	224.000, 0.369	224.000, 0.376
1122	224.200, 0.425	224.200, 0.374	224.200, 0.360	224.200, 0.369	224.200, 0.375
1123	224.400, 0.425	224.400, 0.373	224.400, 0.360	224.400, 0.369	224.400, 0.375
1124	224.600, 0.424	224.600, 0.373	224.600, 0.360	224.600, 0.369	224.600, 0.375
1125	224.800, 0.424	224.800, 0.373	224.800, 0.360	224.800, 0.369	224.800, 0.375
1126	225.000, 0.424	225.000, 0.373	225.000, 0.360	225.000, 0.369	225.000, 0.374
1127	225.200, 0.424	225.200, 0.373	225.200, 0.360	225.200, 0.369	225.200, 0.374
1128	225.400, 0.424	225.400, 0.372	225.400, 0.360	225.400, 0.369	225.400, 0.374
1129	225.600, 0.424	225.600, 0.372	225.600, 0.360	225.600, 0.370	225.600, 0.374
1130	225.800, 0.424	225.800, 0.372	225.800, 0.360	225.800, 0.370	225.800, 0.374
1131	226.000, 0.424	226.000, 0.372	226.000, 0.360	226.000, 0.370	226.000, 0.373
1132	226.200, 0.424	226.200, 0.372	226.200, 0.359	226.200, 0.370	226.200, 0.373
1133	226.400, 0.424	226.400, 0.372	226.400, 0.359	226.400, 0.370	226.400, 0.373
1134	226.600, 0.424	226.600, 0.372	226.600, 0.359	226.600, 0.370	226.600, 0.373
1135	226.800, 0.424	226.800, 0.372	226.800, 0.359	226.800, 0.370	226.800, 0.373
1136	227.000, 0.424	227.000, 0.371	227.000, 0.359	227.000, 0.371	227.000, 0.373
1137	227.200, 0.424	227.200, 0.371	227.200, 0.359	227.200, 0.371	227.200, 0.373
1138	227.400, 0.423	227.400, 0.371	227.400, 0.359	227.400, 0.371	227.400, 0.373
1139	227.600, 0.423	227.600, 0.371	227.600, 0.358	227.600, 0.371	227.600, 0.373
1140	227.800, 0.423	227.800, 0.371	227.800, 0.358	227.800, 0.371	227.800, 0.373
1141	228.000, 0.423	228.000, 0.370	228.000, 0.358	228.000, 0.371	228.000, 0.373
1142	228.200, 0.423	228.200, 0.370	228.200, 0.358	228.200, 0.371	228.200, 0.373
1143	228.400, 0.422	228.400, 0.370	228.400, 0.358	228.400, 0.371	228.400, 0.373
1144	228.600, 0.422	228.600, 0.370	228.600, 0.358	228.600, 0.371	228.600, 0.373
1145	228.800, 0.422	228.800, 0.370	228.800, 0.358	228.800, 0.371	228.800, 0.373
1146	229.000, 0.422	229.000, 0.370	229.000, 0.358	229.000, 0.371	229.000, 0.373
1147	229.200, 0.421	229.200, 0.370	229.200, 0.358	229.200, 0.371	229.200, 0.373
1148	229.400, 0.421	229.400, 0.370	229.400, 0.358	229.400, 0.370	229.400, 0.373
1149	229.600, 0.421	229.600, 0.370	229.600, 0.358	229.600, 0.370	229.600, 0.373
1150	229.800, 0.421	229.800, 0.370	229.800, 0.358	229.800, 0.370	229.800, 0.373
1151	230.000, 0.421	230.000, 0.370	230.000, 0.358	230.000, 0.369	230.000, 0.373
1152	230.200, 0.421	230.200, 0.369	230.200, 0.357	230.200, 0.369	230.200, 0.373
1153	230.400, 0.421	230.400, 0.369	230.400, 0.357	230.400, 0.369	230.400, 0.373
1154	230.600, 0.421	230.600, 0.370	230.600, 0.357	230.600, 0.369	230.600, 0.373
1155	230.800, 0.421	230.800, 0.370	230.800, 0.357	230.800, 0.369	230.800, 0.373
1156	231.000, 0.421	231.000, 0.370	231.000, 0.357	231.000, 0.369	231.000, 0.372
1157	231.200, 0.421	231.200, 0.370	231.200, 0.357	231.200, 0.369	231.200, 0.372
1158	231.400, 0.420	231.400, 0.370	231.400, 0.357	231.400, 0.368	231.400, 0.372
1159	231.600, 0.420	231.600, 0.371	231.600, 0.357	231.600, 0.368	231.600, 0.372
1160	231.800, 0.420	231.800, 0.371	231.800, 0.357	231.800, 0.368	231.800, 0.372
1161	232.000, 0.420	232.000, 0.371	232.000, 0.357	232.000, 0.368	232.000, 0.372
1162	232.200, 0.420	232.200, 0.371	232.200, 0.357	232.200, 0.368	232.200, 0.372
1163	232.400, 0.420	232.400, 0.371	232.400, 0.356	232.400, 0.367	232.400, 0.372
1164	232.600, 0.419	232.600, 0.370	232.600, 0.356	232.600, 0.367	232.600, 0.373
1165	232.800, 0.419	232.800, 0.370	232.800, 0.356	232.800, 0.367	232.800, 0.373
1166	233.000, 0.419	233.000, 0.370	233.000, 0.356	233.000, 0.367	233.000, 0.373
1167	233.200, 0.419	233.200, 0.370	233.200, 0.356	233.200, 0.367	233.200, 0.374
1168	233.400, 0.419	233.400, 0.370	233.400, 0.356	233.400, 0.367	233.400, 0.373
1169	233.600, 0.419	233.600, 0.370	233.600, 0.356	233.600, 0.367	233.600, 0.373
1170	233.800, 0.420	233.800, 0.370	233.800, 0.356	233.800, 0.368	233.800, 0.373
1171	234.000, 0.420	234.000, 0.370	234.000, 0.355	234.000, 0.368	234.000, 0.372
1172	234.200, 0.420	234.200, 0.370	234.200, 0.355	234.200, 0.368	234.200, 0.372
1173	234.400, 0.420	234.400, 0.370	234.400, 0.355	234.400, 0.367	234.400, 0.372
1174	234.600, 0.420	234.600, 0.370	234.600, 0.355	234.600, 0.367	234.600, 0.371
1175	234.800, 0.420	234.800, 0.370	234.800, 0.356	234.800, 0.367	234.800, 0.371
1176	235.000, 0.419	235.000, 0.370	235.000, 0.356	235.000, 0.367	235.000, 0.370
1177	235.200, 0.419	235.200, 0.370	235.200, 0.356	235.200, 0.367	235.200, 0.370
1178	235.400, 0.419	235.400, 0.370	235.400, 0.356	235.400, 0.367	235.400, 0.370
1179	235.600, 0.419	235.600, 0.370	235.600, 0.356	235.600, 0.367	235.600, 0.370
1180	235.800, 0.419	235.800, 0.369	235.800, 0.356	235.800, 0.367	235.800, 0.370
1181	236.000, 0.418	236.000, 0.369	236.000, 0.356	236.000, 0.367	236.000, 0.370
1182	236.200, 0.418	236.200, 0.369	236.200, 0.356	236.200, 0.366	236.200, 0.370
1183	236.400, 0.418	236.400, 0.369	236.400, 0.355	236.400, 0.366	236.400, 0.370
1184	236.600, 0.418	236.600, 0.369	236.600, 0.355	236.600, 0.366	236.600, 0.370
1185	236.800, 0.418	236.800, 0.369	236.800, 0.355	236.800, 0.366	236.800, 0.370
1186	237.000, 0.418	237.000, 0.369	237.000, 0.355	237.000, 0.366	237.000, 0.370
1187	237.200, 0.417	237.200, 0.369	237.200, 0.355	237.200, 0.366	237.200, 0.370
1188	237.400, 0.417	237.400, 0.369	237.400, 0.355	237.400, 0.366	237.400, 0.370
1189	237.600, 0.417	237.600, 0.369	237.600, 0.355	237.600, 0.366	237.600, 0.370
1190	237.800, 0.417	237.800, 0.368	237.800, 0.355	237.800, 0.366	237.800, 0.370
1191	238.000, 0.417	238.000, 0.368	238.000, 0.356	238.000, 0.366	238.000, 0.370
1192	238.200, 0.417	238.200, 0.368	238.200, 0.356	238.200, 0.366	238.200, 0.370
1193	238.400, 0.417	238.400, 0.368	238.400, 0.356	238.400, 0.365	238.400, 0.370
1194	238.600, 0.417	238.600, 0.368	238.600, 0.356	238.600, 0.365	238.600, 0.370
1195	238.800, 0.417	238.800, 0.368	238.800, 0.356	238.800, 0.365	238.800, 0.370
1196	239.000, 0.417	239.000, 0.368	239.000, 0.355	239.000, 0.365	239.000, 0.370
1197	239.200, 0.417	239.200, 0.367	239.200, 0.355	239.200, 0.365	239.200, 0.370
1198	239.400, 0.417	239.400, 0.367	239.400, 0.355	239.400, 0.365	239.400, 0.370
1199	239.600, 0.417	239.600, 0.367	239.600, 0.355	239.600, 0.365	239.600, 0.370
1200	239.800, 0.417	239.800, 0.367	239.800, 0.354	239.800, 0.364	239.800, 0.370
1201	240.000, 0.417	240.000, 0.367	240.000, 0.354	240.000, 0.364	240.000, 0.370
1202	240.200, 0.417	240.200, 0.367	240.200, 0.353	240.200, 0.364	240.200, 0.370
1203	240.400, 0.417	240.400, 0.367	240.400, 0.353	240.400, 0.364	240.400, 0.369
1204	240.600, 0.417	240.600, 0.367	240.600, 0.353	240.600, 0.363	240.600, 0.369
1205	240.800, 0.417	240.800, 0.367	240.800, 0.352	240.800, 0.363	240.800, 0.369
1206	241.000, 0.417	241.000, 0.367	241.000, 0.352	241.000, 0.363	241.000, 0.369
1207	241.200, 0.416	241.200, 0.366	241.200, 0.352	241.200, 0.363	241.200, 0.369
1208	241.400, 0.416	241.400, 0.366	241.400, 0.352	241.400, 0.363	241.400, 0.369
1209	241.600, 0.416	241.600, 0.366	241.600, 0.352	241.600, 0.363	241.600, 0.369
1210	241.800, 0.416	241.800, 0.366	241.800, 0.353	241.800, 0.364	241.800, 0.369
1211	242.000, 0.416	242.000, 0.366	242.000, 0.353	242.000, 0.364	242.000, 0.369
1212	242.200, 0.416	242.200, 0.366	242.200, 0.353	242.200, 0.364	242.200, 0.369
1213	242.400, 0.416	242.400, 0.366	242.400, 0.353	242.400, 0.364	242.400, 0.369
1214	242.600, 0.416	242.600, 0.366	242.600, 0.353	242.600, 0.365	242.600, 0.370
1215	242.800, 0.417	242.800, 0.366	242.800, 0.353	242.800, 0.365	242.800, 0.370
1216	243.000, 0.417	243.000, 0.366	243.000, 0.353	243.000, 0.365	243.000, 0.370
1217	243.200, 0.417	243.200, 0.367	243.200, 0.353	243.200, 0.365	243.200, 0.370
1218	243.400, 0.416	243.400, 0.367	243.400, 0.353	243.400, 0.365	243.400, 0.370
1219	243.600, 0.416	243.600, 0.366	243.600, 0.353	243.600, 0.365	243.600, 0.370
1220	243.800, 0.416	243.800, 0.366	243.800, 0.353	243.800, 0.365	243.800, 0.369
1221	244.000, 0.415	244.000, 0.366	244.000, 0.353	244.000, 0.365	244.000, 0.369
1222	244.200, 0.415	244.200, 0.366	244.200, 0.353	244.200, 0.364	244.200, 0.369
1223	244.400, 0.415	244.400, 0.366	244.400, 0.353	244.400, 0.364	244.400, 0.368
1224	244.600, 0.415	244.600, 0.366	244.600, 0.353	244.600, 0.364	244.600, 0.368
1225	244.800, 0.415	244.800, 0.366	244.800, 0.353	244.800, 0.364	244.800, 0.367
1226	245.000, 0.414	245.000, 0.366	245.000, 0.353	245.000, 0.364	245.000, 0.367
1227	245.200, 0.414	245.200, 0.365	245.200, 0.353	245.200, 0.364	245.200, 0.367
1228	245.400, 0.414	245.400, 0.365	245.400, 0.353	245.400, 0.364	245.400, 0.367
1229	245.600, 0.414	245.600, 0.365	245.600, 0.353	245.600, 0.364	245.600, 0.367
1230	245.800, 0.414	245.800, 0.365	245.800, 0.353	245.800, 0.364	245.800, 0.367
1231	246.000, 0.414	246.000, 0.365	246.000, 0.353	246.000, 0.364	246.000, 0.367
1232	246.200, 0.414	246.200, 0.365	246.200, 0.353	246.200, 0.364	246.200, 0.367
1233	246.400, 0.414	246.400, 0.365	246.400, 0.353	246.400, 0.364	246.400, 0.367
1234	246.600, 0.414	246.600, 0.364	246.600, 0.353	246.600, 0.365	246.600, 0.368
1235	246.800, 0.414	246.800, 0.364	246.800, 0.353	246.800, 0.365	246.800, 0.368
1236	247.000, 0.414	247.000, 0.364	247.000, 0.352	247.000, 0.365	247.000, 0.368
1237	247.200, 0.414	247.200, 0.364	247.200, 0.352	247.200, 0.365	247.200, 0.368
1238	247.400, 0.414	247.400, 0.364	247.400, 0.352	247.400, 0.364	247.400, 0.368
1239	247.600, 0.414	247.600, 0.363	247.600, 0.352	247.600, 0.364	247.600, 0.368
1240	247.800, 0.414	247.800, 0.363	247.800, 0.352	247.800, 0.364	247.800, 0.368
1241	248.000, 0.413	248.000, 0.363	248.000, 0.351	248.000, 0.363	248.000, 0.368
1242	248.200, 0.413	248.200, 0.363	248.200, 0.351	248.200, 0.363	248.200, 0.368
1243	248.400, 0.413	248.400, 0.363	248.400, 0.351	248.400, 0.363	248.400, 0.367
1244	248.600, 0.413	248.600, 0.364	248.600, 0.351	248.600, 0.362	248.600, 0.367
1245	248.800, 0.413	248.800, 0.364	248.800, 0.351	248.800, 0.362	248.800, 0.367
1246	249.000, 0.413	249.000, 0.364	249.000, 0.350	249.000, 0.362	249.000, 0.367
1247	249.200, 0.413	249.200, 0.364	249.200, 0.350	249.200, 0.362	249.200, 0.367
1248	249.400, 0.413	249.400, 0.364	249.400, 0.351	249.400, 0.362	249.400, 0.367
1249	249.600, 0.413	249.600, 0.364	249.600, 0.351	249.600, 0.362	249.600, 0.367
1250	249.800, 0.413	249.800, 0.364	249.800, 0.351	249.800, 0.362	249.800, 0.367
1251	250.000, 0.413	250.000, 0.365	250.000, 0.350	250.000, 0.361	250.000, 0.367
1252	250.200, 0.413	250.200, 0.365	250.200, 0.350	250.200, 0.361	250.200, 0.367
1253	250.400, 0.413	250.400, 0.365	250.400, 0.350	250.400, 0.361	250.400, 0.367
1254	250.600, 0.413	250.600, 0.364	250.600, 0.350	250.600, 0.361	250.600, 0.367
1255	250.800, 0.413	250.800, 0.364	250.800, 0.350	250.800, 0.361	250.800, 0.367
1256	251.000, 0.412	251.000, 0.364	251.000, 0.350	251.000, 0.361	251.000, 0.367
1257	251.200, 0.412	251.200, 0.364	251.200, 0.350	251.200, 0.361	251.200, 0.366
1258	251.400, 0.412	251.400, 0.364	251.400, 0.350	251.400, 0.362	251.400, 0.366
1259	251.600, 0.411	251.600, 0.365	251.600, 0.351	251.600, 0.362	251.600, 0.366
1260	251.800, 0.411	251.800, 0.365	251.800, 0.350	251.800, 0.362	251.800, 0.366
1261	252.000, 0.411	252.000, 0.365	252.000, 0.350	252.000, 0.362	252.000, 0.366
1262	252.200, 0.410	252.200, 0.365	252.200, 0.350	252.200, 0.362	252.200, 0.366
1263	252.400, 0.410	252.400, 0.365	252.400, 0.350	252.400, 0.362	252.400, 0.365
1264	252.600, 0.410	252.600, 0.365	252.600, 0.349	252.600, 0.362	252.600, 0.365
1265	252.800, 0.410	252.800, 0.365	252.800, 0.349	252.800, 0.362	252.800, 0.365
1266	253.000, 0.410	253.000, 0.365	253.000, 0.349	253.000, 0.362	253.000, 0.365
1267	253.200, 0.410	253.200, 0.364	253.200, 0.349	253.200, 0.362	253.200, 0.365
1268	253.400, 0.410	253.400, 0.364	253.400, 0.349	253.400, 0.362	253.400, 0.365
1269	253.600, 0.410	253.600, 0.364	253.600, 0.349	253.600, 0.362	253.600, 0.365
1270	253.800, 0.410	253.800, 0.364	253.800, 0.349	253.800, 0.362	253.800, 0.364
1271	254.000, 0.410	254.000, 0.363	254.000, 0.349	254.000, 0.361	254.000, 0.364
1272	254.200, 0.410	254.200, 0.363	254.200, 0.349	254.200, 0.361	254.200, 0.364
1273	254.400, 0.410	254.400, 0.362	254.400, 0.349	254.400, 0.361	254.400, 0.364
1274	254.600, 0.410	254.600, 0.362	254.600, 0.349	254.600, 0.361	254.600, 0.364
1275	254.800, 0.410	254.800, 0.362	254.800, 0.350	254.800, 0.361	254.800, 0.364
1276	255.000, 0.410	255.000, 0.361	255.000, 0.350	255.000, 0.361	255.000, 0.364
1277	255.200, 0.409	255.200, 0.361	255.200, 0.350	255.200, 0.361	255.200, 0.364
1278	255.400, 0.409	255.400, 0.361	255.400, 0.351	255.400, 0.361	255.400, 0.364
1279	255.600, 0.409	255.600, 0.361	255.600, 0.351	255.600, 0.361	255.600, 0.364
1280	255.800, 0.408	255.800, 0.361	255.800, 0.351	255.800, 0.361	255.800, 0.364
1281	256.000, 0.408	256.000, 0.361	256.000, 0.351	256.000, 0.361	256.000, 0.365
1282	256.200, 0.408	256.200, 0.361	256.200, 0.351	256.200, 0.361	256.200, 0.365
1283	256.400, 0.408	256.400, 0.361	256.400, 0.350	256.400, 0.361	256.400, 0.365
1284	256.600, 0.408	256.600, 0.362	256.600, 0.350	256.600, 0.361	256.600, 0.365
1285	256.800, 0.408	256.800, 0.362	256.800, 0.350	256.800, 0.361	256.800, 0.365
1286	257.000, 0.409	257.000, 0.362	257.000, 0.350	257.000, 0.361	257.000, 0.365
1287	257.200, 0.409	257.200, 0.362	257.200, 0.349	257.200, 0.361	257.200, 0.365
1288	257.400, 0.409	257.400, 0.362	257.400, 0.349	257.400, 0.360	257.400, 0.365
1289	257.600, 0.410	257.600, 0.362	257.600, 0.349	257.600, 0.360	257.600, 0.365
1290	257.800, 0.410	257.800, 0.362	257.800, 0.349	257.800, 0.360	257.800, 0.365
1291	258.000, 0.410	258.000, 0.362	258.000, 0.349	258.000, 0.360	258.000, 0.365
1292	258.200, 0.410	258.200, 0.362	258.200, 0.349	258.200, 0.360	258.200, 0.365
1293	258.400, 0.410	258.400, 0.362	258.400, 0.349	258.400, 0.359	258.400, 0.365
1294	258.600, 0.410	258.600, 0.361	258.600, 0.349	258.600, 0.359	258.600, 0.365
1295	258.800, 0.410	258.800, 0.361	258.800, 0.350	258.800, 0.359	258.800, 0.365
1296	259.000, 0.410	259.000, 0.360	259.000, 0.350	259.000, 0.359	259.000, 0.365
1297	259.200, 0.409	259.200, 0.360	259.200, 0.350	259.200, 0.359	259.200, 0.365
1298	259.400, 0.409	259.400, 0.360	259.400, 0.350	259.400, 0.359	259.400, 0.365
1299	259.600, 0.409	259.600, 0.359	259.600, 0.350	259.600, 0.360	259.600, 0.365
1300	259.800, 0.408	259.800, 0.359	259.800, 0.350	259.800, 0.360	259.800, 0.365
1301	260.000, 0.408	260.000, 0.359	260.000, 0.350	260.000, 0.360	260.000, 0.365
1302	260.200, 0.408	260.200, 0.359	260.200, 0.349	260.200, 0.360	260.200, 0.365
1303	260.400, 0.408	260.400, 0.359	260.400, 0.349	260.400, 0.360	260.400, 0.365
1304	260.600, 0.407	260.600, 0.359	260.600, 0.349	260.600, 0.361	260.600, 0.365
1305	260.800, 0.407	260.800, 0.359	260.800, 0.348	260.800, 0.361	260.800, 0.365
1306	261.000, 0.407	261.000, 0.360	261.000, 0.348	261.000, 0.361	261.000, 0.365
1307	261.200, 0.406	261.200, 0.360	261.200, 0.348	261.200, 0.361	261.200, 0.364
1308	261.400, 0.406	261.400, 0.360	261.400, 0.347	261.400, 0.361	261.400, 0.364
1309	261.600, 0.406	261.600, 0.360	261.600, 0.347	261.600, 0.360	261.600, 0.364
1310	261.800, 0.406	261.800, 0.360	261.800, 0.347	261.800, 0.360	261.800, 0.364
1311	262.000, 0.406	262.000, 0.360	262.000, 0.347	262.000, 0.360	262.000, 0.364
1312	262.200, 0.406	262.200, 0.360	262.200, 0.347	262.200, 0.359	262.200, 0.364
1313	262.400, 0.406	262.400, 0.360	262.400, 0.347	262.400, 0.359	262.400, 0.363
1314	262.600, 0.406	262.600, 0.359	262.600, 0.347	262.600, 0.359	262.600, 0.363
1315	262.800, 0.406	262.800, 0.359	262.800, 0.347	262.800, 0.359	262.800, 0.363
1316	263.000, 0.406	263.000, 0.359	263.000, 0.347	263.000, 0.358	263.000, 0.363
1317	263.200, 0.406	263.200, 0.359	263.200, 0.348	263.200, 0.358	263.200, 0.363
1318	263.400, 0.405	263.400, 0.359	263.400, 0.348	263.400, 0.358	263.400, 0.363
1319	263.600, 0.405	263.600, 0.359	263.600, 0.348	263.600, 0.358	263.600, 0.363
1320	263.800, 0.405	263.800, 0.359	263.800, 0.348	263.800, 0.358	263.800, 0.363
1321	264.000, 0.405	264.000, 0.360	264.000, 0.349	264.000, 0.358	264.000, 0.363
1322	264.200, 0.405	264.200, 0.360	264.200, 0.349	264.200, 0.358	264.200, 0.363
1323	264.400, 0.405	264.400, 0.360	264.400, 0.349	264.400, 0.358	264.400, 0.363
1324	264.600, 0.405	264.600, 0.360	264.600, 0.349	264.600, 0.358	264.600, 0.363
1325	264.800, 0.405	264.800, 0.360	264.800, 0.349	264.800, 0.358	264.800, 0.363
1326	265.000, 0.405	265.000, 0.360	265.000, 0.349	265.000, 0.358	265.000, 0.363
1327	265.200, 0.405	265.200, 0.360	265.200, 0.349	265.200, 0.358	265.200, 0.362
1328	265.400, 0.405	265.400, 0.360	265.400, 0.349	265.400, 0.358	265.400, 0.362
1329	265.600, 0.405	265.600, 0.360	265.600, 0.349	265.600, 0.358	265.600, 0.363
1330	265.800, 0.405	265.800, 0.360	265.800, 0.349	265.800, 0.358	265.800, 0.363
1331	266.000, 0.404	266.000, 0.359	266.000, 0.348	266.000, 0.358	266.000, 0.363
1332	266.200, 0.404	266.200, 0.359	266.200, 0.348	266.200, 0.358	266.200, 0.363
1333	266.400, 0.404	266.400, 0.359	266.400, 0.348	266.400, 0.359	266.400, 0.363
1334	266.600, 0.404	266.600, 0.359	266.600, 0.347	266.600, 0.359	266.600, 0.363
1335	266.800, 0.404	266.800, 0.359	266.800, 0.347	266.800, 0.359	266.800, 0.362
1336	267.000, 0.404	267.000, 0.359	267.000, 0.347	267.000, 0.359	267.000, 0.362
1337	267.200, 0.404	267.200, 0.359	267.200, 0.346	267.200, 0.359	267.200, 0.363
1338	267.400, 0.404	267.400, 0.359	267.400, 0.346	267.400, 0.358	267.400, 0.363
1339	267.600, 0.404	267.600, 0.359	267.600, 0.346	267.600, 0.358	267.600, 0.363
1340	267.800, 0.405	267.800, 0.358	267.800, 0.346	267.800, 0.358	267.800, 0.363
1341	268.000, 0.405	268.000, 0.358	268.000, 0.346	268.000, 0.358	268.000, 0.363
1342	268.200, 0.405	268.200, 0.358	268.200, 0.346	268.200, 0.359	268.200, 0.363
1343	268.400, 0.405	268.400, 0.358	268.400, 0.346	268.400, 0.359	268.400, 0.363
1344	268.600, 0.405	268.600, 0.358	268.600, 0.346	268.600, 0.359	268.600, 0.363
1345	268.800, 0.405	268.800, 0.358	268.800, 0.346	268.800, 0.359	268.800, 0.363
1346	269.000, 0.405	269.000, 0.358	269.000, 0.346	269.000, 0.359	269.000, 0.363
1347	269.200, 0.405	269.200, 0.358	269.200, 0.346	269.200, 0.359	269.200, 0.363
1348	269.400, 0.405	269.400, 0.358	269.400, 0.346	269.400, 0.359	269.400, 0.364
1349	269.600, 0.405	269.600, 0.358	269.600, 0.346	269.600, 0.359	269.600, 0.364
1350	269.800, 0.405	269.800, 0.358	269.800, 0.346	269.800, 0.359	269.800, 0.364
1351	,	,	,	,	,
1352	,	,	,	,	,
1353	,	,	,	,	,
1354	,	,	,	,	,
1355	,	,	,	,	,
1356	,	,	,	,	,
1357	,	,	,	,	,
1358	,	,	,	,	,
1359	,	,	,	,	,
1360	,	,	,	,	,
1361	,	,	,	,	,
1362	,	,	,	,	,
1363	,	,	,	,	,
1364	,	,	,	,	,
1365	,	,	,	,	,
1366	,	,	,	,	,
1367	,	,	,	,	,
1368	,	,	,	,	,
1369	,	,	,	,	,
1370	,	,	,	,	,
1371	,	,	,	,	,
1372	,	,	,	,	,
1373	,	,	,	,	,
1374	,	,	,	,	,
1375	,	,	,	,	,
1376	,	,	,	,	,
1377	,	,	,	,	,
1378	,	,	,	,	,
1379	,	,	,	,	,
1380	,	,	,	,	,
1381	,	,	,	,	,
1382	,	,	,	,	,
1383	,	,	,	,	,
1384	,	,	,	,	,
1385	,	,	,	,	,
1386	,	,	,	,	,
1387	,	,	,	,	,
1388	,	,	,	,	,
1389	,	,	,	,	,
1390	,	,	,	,	,
1391	,	,	,	,	,
1392	,	,	,	,	,
1393	,	,	,	,	,
1394	,	,	,	,	,
1395	,	,	,	,	,
1396	,	,	,	,	,
1397	,	,	,	,	,
1398	,	,	,	,	,
1399	,	,	,	,	,
1400	,	,	,	,	,
1401	,	,	,	,	,
1402	,	,	,	,	,
1403	,	,	,	,	,
1404	,	,	,	,	,
1405	,	,	,	,	,
1406	,	,	,	,	,
1407	,	,	,	,	,
1408	,	,	,	,	,
1409	,	,	,	,	,
1410	,	,	,	,	,
1411	,	,	,	,	,
1412	,	,	,	,	,
1413	,	,	,	,	,
1414	,	,	,	,	,
1415	,	,	,	,	,
1416	,	,	,	,	,
1417	,	,	,	,	,
1418	,	,	,	,	,
1419	,	,	,	,	,
1420	,	,	,	,	,
1421	,	,	,	,	,
1422	,	,	,	,	,
1423	,	,	,	,	,
1424	,	,	,	,	,
1425	,	,	,	,	,
1426	,	,	,	,	,
1427	,	,	,	,	,
1428	,	,	,	,	,
1429	,	,	,	,	,
1430	,	,	,	,	,
1431	,	,	,	,	,
1432	,	,	,	,	,
1433	,	,	,	,	,
1434	,	,	,	,	,
1435	,	,	,	,	,
1436	,	,	,	,	,
1437	,	,	,	,	,
1438	,	,	,	,	,
1439	,	,	,	,	,
1440	,	,	,	,	,
1441	,	,	,	,	,
1442	,	,	,	,	,
1443	,	,	,	,	,
1444	,	,	,	,	,
1445	,	,	,	,	,
1446	,	,	,	,	,
1447	,	,	,	,	,
1448	,	,	,	,	,
1449	,	,	,	,	,
1450	,	,	,	,	,
1451	,	,	,	,	,
1452	,	,	,	,	,
1453	,	,	,	,	,
1454	,	,	,	,	,
1455	,	,	,	,	,
1456	,	,	,	,	,
1457	,	,	,	,	,
1458	,	,	,	,	,
1459	,	,	,	,	,
1460	,	,	,	,	,
1461	,	,	,	,	,
1462	,	,	,	,	,
1463	,	,	,	,	,
1464	,	,	,	,	,
1465	,	,	,	,	,
1466	,	,	,	,	,
1467	,	,	,	,	,
1468	,	,	,	,	,
1469	,	,	,	,	,
1470	,	,	,	,	,
1471	,	,	,	,	,
1472	,	,	,	,	,
1473	,	,	,	,	,
1474	,	,	,	,	,
1475	,	,	,	,	,
1476	,	,	,	,	,
1477	,	,	,	,	,
1478	,	,	,	,	,
1479	,	,	,	,	,
1480	,	,	,	,	,
1481	,	,	,	,	,
1482	,	,	,	,	,
1483	,	,	,	,	,
1484	,	,	,	,	,
1485	,	,	,	,	,
1486	,	,	,	,	,
1487	,	,	,	,	,
1488	,	,	,	,	,
1489	,	,	,	,	,
1490	,	,	,	,	,
1491	,	,	,	,	,
1492	,	,	,	,	,
1493	,	,	,	,	,
1494	,	,	,	,	,
1495	,	,	,	,	,
1496	,	,	,	,	,
1497	,	,	,	,	,
1498	,	,	,	,	,
1499	,	,	,	,	,
1500	,	,	,	,	,
1501	,	,	,	,	,
1502	,	,	,	,	,
1503	,	,	,	,	,
1504	,	,	,	,	,
1505	,	,	,	,	,
1506	,	,	,	,	,
1507	,	,	,	,	,
1508	,	,	,	,	,
1509	,	,	,	,	,
1510	,	,	,	,	,
1511	,	,	,	,	,
1512	,	,	,	,	,
1513	,	,	,	,	,
1514	,	,	,	,	,
1515	,	,	,	,	,
1516	,	,	,	,	,
1517	,	,	,	,	,
1518	,	,	,	,	,
1519	,	,	,	,	,
1520	,	,	,	,	,
1521	,	,	,	,	,
1522	,	,	,	,	,
1523	,	,	,	,	,
1524	,	,	,	,	,
1525	,	,	,	,	,
1526	,	,	,	,	,
1527	,	,	,	,	,
1528	,	,	,	,	,
1529	,	,	,	,	,
1530	,	,	,	,	,
1531	,	,	,	,	,
1532	,	,	,	,	,
1533	,	,	,	,	,
1534	,	,	,	,	,
1535	,	,	,	,	,
1536	,	,	,	,	,
1537	,	,	,	,	,
1538	,	,	,	,	,
1539	,	,	,	,	,
1540	,	,	,	,	,
1541	,	,	,	,	,
1542	,	,	,	,	,
1543	,	,	,	,	,
1544	,	,	,	,	,
1545	,	,	,	,	,
1546	,	,	,	,	,
1547	,	,	,	,	,
1548	,	,	,	,	,
1549	,	,	,	,	,
1550	,	,	,	,	,
1551	,	,	,	,	,
1552	,	,	,	,	,
1553	,	,	,	,	,
1554	,	,	,	,	,
1555	,	,	,	,	,
1556	,	,	,	,	,
1557	,	,	,	,	,
1558	,	,	,	,	,
1559	,	,	,	,	,
1560	,	,	,	,	,
1561	,	,	,	,	,
1562	,	,	,	,	,
1563	,	,	,	,	,
1564	,	,	,	,	,
1565	,	,	,	,	,
1566	,	,	,	,	,
1567	,	,	,	,	,
1568	,	,	,	,	,
1569	,	,	,	,	,
1570	,	,	,	,	,
1571	,	,	,	,	,
1572	,	,	,	,	,
1573	,	,	,	,	,
1574	,	,	,	,	,
1575	,	,	,	,	,
1576	,	,	,	,	,
1577	,	,	,	,	,
1578	,	,	,	,	,
1579	,	,	,	,	,
1580	,	,	,	,	,
1581	,	,	,	,	,
1582	,	,	,	,	,
1583	,	,	,	,	,
1584	,	,	,	,	,
1585	,	,	,	,	,
1586	,	,	,	,	,
1587	,	,	,	,	,
1588	,	,	,	,	,
1589	,	,	,	,	,
1590	,	,	,	,	,
1591	,	,	,	,	,
1592	,	,	,	,	,
1593	,	,	,	,	,
1594	,	,	,	,	,
1595	,	,	,	,	,
1596	,	,	,	,	,
1597	,	,	,	,	,
1598	,	,	,	,	,
1599	,	,	,	,	,
1600	,	,	,	,	,
1601	,	,	,	,	,
1602	,	,	,	,	,
1603	,	,	,	,	,
1604	,	,	,	,	,
1605	,	,	,	,	,
1606	,	,	,	,	,
1607	,	,	,	,	,
1608	,	,	,	,	,
1609	,	,	,	,	,
1610	,	,	,	,	,
1611	,	,	,	,	,
1612	,	,	,	,	,
1613	,	,	,	,	,
1614	,	,	,	,	,
1615	,	,	,	,	,
1616	,	,	,	,	,
1617	,	,	,	,	,
1618	,	,	,	,	,
1619	,	,	,	,	,
1620	,	,	,	,	,
1621	,	,	,	,	,
1622	,	,	,	,	,
1623	,	,	,	,	,
1624	,	,	,	,	,
1625	,	,	,	,	,
1626	,	,	,	,	,
1627	,	,	,	,	,
1628	,	,	,	,	,
1629	,	,	,	,	,
1630	,	,	,	,	,
1631	,	,	,	,	,
1632	,	,	,	,	,
1633	,	,	,	,	,
1634	,	,	,	,	,
1635	,	,	,	,	,
1636	,	,	,	,	,
1637	,	,	,	,	,
1638	,	,	,	,	,
1639	,	,	,	,	,
1640	,	,	,	,	,
1641	,	,	,	,	,
1642	,	,	,	,	,
1643	,	,	,	,	,
1644	,	,	,	,	,
1645	,	,	,	,	,
1646	,	,	,	,	,
1647	,	,	,	,	,
1648	,	,	,	,	,
1649	,	,	,	,	,
1650	,	,	,	,	,
1651	,	,	,	,	,
1652	,	,	,	,	,
1653	,	,	,	,	,
1654	,	,	,	,	,
1655	,	,	,	,	,
1656	,	,	,	,	,
1657	,	,	,	,	,
1658	,	,	,	,	,
1659	,	,	,	,	,
1660	,	,	,	,	,
1661	,	,	,	,	,
1662	,	,	,	,	,
1663	,	,	,	,	,
1664	,	,	,	,	,
1665	,	,	,	,	,
1666	,	,	,	,	,
1667	,	,	,	,	,
1668	,	,	,	,	,
1669	,	,	,	,	,
1670	,	,	,	,	,
1671	,	,	,	,	,
1672	,	,	,	,	,
1673	,	,	,	,	,
1674	,	,	,	,	,
1675	,	,	,	,	,
1676	,	,	,	,	,
1677	,	,	,	,	,
1678	,	,	,	,	,
1679	,	,	,	,	,
1680	,	,	,	,	,
1681	,	,	,	,	,
1682	,	,	,	,	,
1683	,	,	,	,	,
1684	,	,	,	,	,
1685	,	,	,	,	,
1686	,	,	,	,	,
1687	,	,	,	,	,
1688	,	,	,	,	,
1689	,	,	,	,	,
1690	,	,	,	,	,
1691	,	,	,	,	,
1692	,	,	,	,	,
1693	,	,	,	,	,
1694	,	,	,	,	,
1695	,	,	,	,	,
1696	,	,	,	,	,
1697	,	,	,	,	,
1698	,	,	,	,	,
1699	,	,	,	,	,
1700	,	,	,	,	,
1701	,	,	,	,	,
1702	,	,	,	,	,
1703	,	,	,	,	,
1704	,	,	,	,	,
1705	,	,	,	,	,
1706	,	,	,	,	,
1707	,	,	,	,	,
1708	,	,	,	,	,
1709	,	,	,	,	,
1710	,	,	,	,	,
1711	,	,	,	,	,
1712	,	,	,	,	,
1713	,	,	,	,	,
1714	,	,	,	,	,
1715	,	,	,	,	,
1716	,	,	,	,	,
1717	,	,	,	,	,
1718	,	,	,	,	,
1719	,	,	,	,	,
1720	,	,	,	,	,
1721	,	,	,	,	,
1722	,	,	,	,	,
1723	,	,	,	,	,
1724	,	,	,	,	,
1725	,	,	,	,	,
1726	,	,	,	,	,
1727	,	,	,	,	,
1728	,	,	,	,	,
1729	,	,	,	,	,
1730	,	,	,	,	,
1731	,	,	,	,	,
1732	,	,	,	,	,
1733	,	,	,	,	,
1734	,	,	,	,	,
1735	,	,	,	,	,
1736	,	,	,	,	,
1737	,	,	,	,	,
1738	,	,	,	,	,
1739	,	,	,	,	,
1740	,	,	,	,	,
1741	,	,	,	,	,
1742	,	,	,	,	,
1743	,	,	,	,	,
1744	,	,	,	,	,
1745	,	,	,	,	,
1746	,	,	,	,	,
1747	,	,	,	,	,
1748	,	,	,	,	,
1749	,	,	,	,	,
1750	,	,	,	,	,
1751	,	,	,	,	,
1752	,	,	,	,	,
1753	,	,	,	,	,
1754	,	,	,	,	,
1755	,	,	,	,	,
1756	,	,	,	,	,
1757	,	,	,	,	,
1758	,	,	,	,	,
1759	,	,	,	,	,
1760	,	,	,	,	,
1761	,	,	,	,	,
1762	,	,	,	,	,
1763	,	,	,	,	,
1764	,	,	,	,	,
1765	,	,	,	,	,
1766	,	,	,	,	,
1767	,	,	,	,	,
1768	,	,	,	,	,
1769	,	,	,	,	,
1770	,	,	,	,	,
1771	,	,	,	,	,
1772	,	,	,	,	,
1773	,	,	,	,	,
1774	,	,	,	,	,
1775	,	,	,	,	,
1776	,	,	,	,	,
1777	,	,	,	,	,
1778	,	,	,	,	,
1779	,	,	,	,	,
1780	,	,	,	,	,
1781	,	,	,	,	,
1782	,	,	,	,	,
1783	,	,	,	,	,
1784	,	,	,	,	,
1785	,	,	,	,	,
1786	,	,	,	,	,
1787	,	,	,	,	,
1788	,	,	,	,	,
1789	,	,	,	,	,
1790	,	,	,	,	,
1791	,	,	,	,	,
1792	,	,	,	,	,
1793	,	,	,	,	,
1794	,	,	,	,	,
1795	,	,	,	,	,
1796	,	,	,	,	,
1797	,	,	,	,	,
1798	,	,	,	,	,
1799	,	,	,	,	,
1800	,	,	,	,	,
1801	,	,	,	,	,
1802	,	,	,	,	,
1803	,	,	,	,	,
1804	,	,	,	,	,
1805	,	,	,	,	,
1806	,	,	,	,	,
1807	,	,	,	,	,
1808	,	,	,	,	,
1809	,	,	,	,	,
1810	,	,	,	,	,
1811	,	,	,	,	,
1812	,	,	,	,	,
1813	,	,	,	,	,
1814	,	,	,	,	,
1815	,	,	,	,	,
1816	,	,	,	,	,
1817	,	,	,	,	,
1818	,	,	,	,	,
1819	,	,	,	,	,
1820	,	,	,	,	,
1821	,	,	,	,	,
1822	,	,	,	,	,
1823	,	,	,	,	,
1824	,	,	,	,	,
1825	,	,	,	,	,
1826	,	,	,	,	,
1827	,	,	,	,	,
1828	,	,	,	,	,
1829	,	,	,	,	,
1830	,	,	,	,	,
1831	,	,	,	,	,
1832	,	,	,	,	,
1833	,	,	,	,	,
1834	,	,	,	,	,
1835	,	,	,	,	,
1836	,	,	,	,	,
1837	,	,	,	,	,
1838	,	,	,	,	,
1839	,	,	,	,	,
1840	,	,	,	,	,
1841	,	,	,	,	,
1842	,	,	,	,	,
1843	,	,	,	,	,
1844	,	,	,	,	,
1845	,	,	,	,	,
1846	,	,	,	,	,
1847	,	,	,	,	,
1848	,	,	,	,	,
1849	,	,	,	,	,
1850	,	,	,	,	,
1851	,	,	,	,	,
1852	,	,	,	,	,
1853	,	,	,	,	,
1854	,	,	,	,	,
1855	,	,	,	,	,
1856	,	,	,	,	,
1857	,	,	,	,	,
1858	,	,	,	,	,
1859	,	,	,	,	,
1860	,	,	,	,	,
1861	,	,	,	,	,
1862	,	,	,	,	,
1863	,	,	,	,	,
1864	,	,	,	,	,
1865	,	,	,	,	,
1866	,	,	,	,	,
1867	,	,	,	,	,
1868	,	,	,	,	,
1869	,	,	,	,	,
1870	,	,	,	,	,
1871	,	,	,	,	,
1872	,	,	,	,	,
1873	,	,	,	,	,
1874	,	,	,	,	,
1875	,	,	,	,	,
1876	,	,	,	,	,
1877	,	,	,	,	,
1878	,	,	,	,	,
1879	,	,	,	,	,
1880	,	,	,	,	,
1881	,	,	,	,	,
1882	,	,	,	,	,
1883	,	,	,	,	,
1884	,	,	,	,	,
1885	,	,	,	,	,
1886	,	,	,	,	,
1887	,	,	,	,	,
1888	,	,	,	,	,
1889	,	,	,	,	,
1890	,	,	,	,	,
1891	,	,	,	,	,
1892	,	,	,	,	,
1893	,	,	,	,	,
1894	,	,	,	,	,
1895	,	,	,	,	,
1896	,	,	,	,	,
1897	,	,	,	,	,
1898	,	,	,	,	,
1899	,	,	,	,	,
1900	,	,	,	,	,
1901	,	,	,	,	,
1902	,	,	,	,	,
1903	,	,	,	,	,
1904	,	,	,	,	,
1905	,	,	,	,	,
1906	,	,	,	,	,
1907	,	,	,	,	,
1908	,	,	,	,	,
1909	,	,	,	,	,
1910	,	,	,	,	,
1911	,	,	,	,	,
1912	,	,	,	,	,
1913	,	,	,	,	,
1914	,	,	,	,	,
1915	,	,	,	,	,
1916	,	,	,	,	,
1917	,	,	,	,	,
1918	,	,	,	,	,
1919	,	,	,	,	,
1920	,	,	,	,	,
1921	,	,	,	,	,
1922	,	,	,	,	,
1923	,	,	,	,	,
1924	,	,	,	,	,
1925	,	,	,	,	,
1926	,	,	,	,	,
1927	,	,	,	,	,
1928	,	,	,	,	,
1929	,	,	,	,	,
1930	,	,	,	,	,
1931	,	,	,	,	,
1932	,	,	,	,	,
1933	,	,	,	,	,
1934	,	,	,	,	,
1935	,	,	,	,	,
1936	,	,	,	,	,
1937	,	,	,	,	,
1938	,	,	,	,	,
1939	,	,	,	,	,
1940	,	,	,	,	,
1941	,	,	,	,	,
1942	,	,	,	,	,
1943	,	,	,	,	,
1944	,	,	,	,	,
1945	,	,	,	,	,
1946	,	,	,	,	,
1947	,	,	,	,	,
1948	,	,	,	,	,
1949	,	,	,	,	,
1950	,	,	,	,	,
1951	,	,	,	,	,
1952	,	,	,	,	,
1953	,	,	,	,	,
1954	,	,	,	,	,
1955	,	,	,	,	,
1956	,	,	,	,	,
1957	,	,	,	,	,
1958	,	,	,	,	,
1959	,	,	,	,	,
1960	,	,	,	,	,
1961	,	,	,	,	,
1962	,	,	,	,	,
1963	,	,	,	,	,
1964	,	,	,	,	,
1965	,	,	,	,	,
1966	,	,	,	,	,
1967	,	,	,	,	,
1968	,	,	,	,	,
1969	,	,	,	,	,
1970	,	,	,	,	,
1971	,	,	,	,	,
1972	,	,	,	,	,
1973	,	,	,	,	,
1974	,	,	,	,	,
1975	,	,	,	,	,
1976	,	,	,	,	,
1977	,	,	,	,	,
1978	,	,	,	,	,
1979	,	,	,	,	,
1980	,	,	,	,	,
1981	,	,	,	,	,
1982	,	,	,	,	,
1983	,	,	,	,	,
1984	,	,	,	,	,
1985	,	,	,	,	,
1986	,	,	,	,	,
1987	,	,	,	,	,
1988	,	,	,	,	,
1989	,	,	,	,	,
1990	,	,	,	,	,
1991	,	,	,	,	,
1992	,	,	,	,	,
1993	,	,	,	,	,
1994	,	,	,	,	,
1995	,	,	,	,	,
1996	,	,	,	,	,
1997	,	,	,	,	,
1998	,	,	,	,	,
1999	,	,	,	,	,
[truncated: 13,001 more rows]
