# Supplementary material for: ParB spreading on DNA requires cytidine triphosphate in vitro
Source: eLife journal article supplement (doi:10.7554/elife.53515), 2020-02-20
Supplement: fig1-figsupp3-data1 [file Fig1_supp3_panelA.xlsx]

## Sheet: FORMAT
	sample ID #1	sample ID #2	sample ID #3
data point	time point (sec), wavelength shift (nm)	time point (sec), wavelength shift (nm)	time point (sec), wavelength shift (nm)
1
2
3
.
.
.

## Sheet: Fig1_supp3_panelA_rep1
	parS20 ParB CTP 0uM	parS20 ParB CTP 1uM	parS20 ParB CTP 10uM	parS20 ParB CTP 100uM	parS20 ParB CTP 1000uM	parS20 ParB CTP 10000uM	parS20 ParB CTP 5000uM
1	0.000, 0.006	0.000, 0.006	0.000, 0.002	0.000, 0.013	0.000, 0.007	0.000, 0.010	0.000, 0.016
2	0.200, 0.006	0.200, 0.006	0.200, 0.002	0.200, 0.013	0.200, 0.007	0.200, 0.009	0.200, 0.016
3	0.400, 0.005	0.400, 0.006	0.400, 0.001	0.400, 0.012	0.400, 0.006	0.400, 0.009	0.400, 0.015
4	0.600, 0.004	0.600, 0.006	0.600, 0.001	0.600, 0.012	0.600, 0.006	0.600, 0.008	0.600, 0.015
5	0.800, 0.004	0.800, 0.006	0.800, 0.001	0.800, 0.011	0.800, 0.005	0.800, 0.007	0.800, 0.014
6	1.000, 0.003	1.000, 0.005	1.000, 0.001	1.000, 0.011	1.000, 0.004	1.000, 0.007	1.000, 0.014
7	1.200, 0.003	1.200, 0.005	1.200, 0.001	1.200, 0.011	1.200, 0.004	1.200, 0.006	1.200, 0.013
8	1.400, 0.002	1.400, 0.005	1.400, 0.001	1.400, 0.010	1.400, 0.003	1.400, 0.006	1.400, 0.013
9	1.600, 0.002	1.600, 0.005	1.600, 0.001	1.600, 0.010	1.600, 0.003	1.600, 0.005	1.600, 0.013
10	1.800, 0.001	1.800, 0.005	1.800, 0.001	1.800, 0.010	1.800, 0.002	1.800, 0.005	1.800, 0.012
11	2.000, 0.001	2.000, 0.005	2.000, 0.002	2.000, 0.010	2.000, 0.002	2.000, 0.005	2.000, 0.012
12	2.200, 0.001	2.200, 0.005	2.200, 0.002	2.200, 0.010	2.200, 0.002	2.200, 0.005	2.200, 0.012
13	2.400, 0.001	2.400, 0.005	2.400, 0.002	2.400, 0.010	2.400, 0.002	2.400, 0.004	2.400, 0.012
14	2.600, 0.000	2.600, 0.005	2.600, 0.002	2.600, 0.009	2.600, 0.002	2.600, 0.004	2.600, 0.012
15	2.800, 0.000	2.800, 0.005	2.800, 0.002	2.800, 0.009	2.800, 0.002	2.800, 0.004	2.800, 0.012
16	3.000, -0.000	3.000, 0.005	3.000, 0.002	3.000, 0.009	3.000, 0.002	3.000, 0.004	3.000, 0.011
17	3.200, -0.000	3.200, 0.004	3.200, 0.002	3.200, 0.008	3.200, 0.002	3.200, 0.004	3.200, 0.011
18	3.400, 0.000	3.400, 0.004	3.400, 0.002	3.400, 0.008	3.400, 0.002	3.400, 0.004	3.400, 0.010
19	3.600, 0.000	3.600, 0.003	3.600, 0.002	3.600, 0.008	3.600, 0.002	3.600, 0.003	3.600, 0.010
20	3.800, 0.000	3.800, 0.003	3.800, 0.002	3.800, 0.007	3.800, 0.002	3.800, 0.003	3.800, 0.010
21	4.000, 0.001	4.000, 0.003	4.000, 0.002	4.000, 0.006	4.000, 0.002	4.000, 0.003	4.000, 0.009
22	4.200, 0.001	4.200, 0.002	4.200, 0.002	4.200, 0.006	4.200, 0.002	4.200, 0.003	4.200, 0.009
23	4.400, 0.001	4.400, 0.002	4.400, 0.002	4.400, 0.005	4.400, 0.002	4.400, 0.002	4.400, 0.008
24	4.600, 0.001	4.600, 0.002	4.600, 0.002	4.600, 0.005	4.600, 0.002	4.600, 0.002	4.600, 0.008
25	4.800, 0.001	4.800, 0.001	4.800, 0.002	4.800, 0.005	4.800, 0.002	4.800, 0.002	4.800, 0.008
26	5.000, 0.001	5.000, 0.001	5.000, 0.002	5.000, 0.005	5.000, 0.001	5.000, 0.002	5.000, 0.008
27	5.200, 0.001	5.200, 0.001	5.200, 0.002	5.200, 0.004	5.200, 0.001	5.200, 0.001	5.200, 0.007
28	5.400, 0.000	5.400, 0.001	5.400, 0.003	5.400, 0.004	5.400, 0.001	5.400, 0.001	5.400, 0.007
29	5.600, 0.000	5.600, 0.001	5.600, 0.003	5.600, 0.004	5.600, 0.001	5.600, 0.001	5.600, 0.007
30	5.800, -0.000	5.800, 0.001	5.800, 0.003	5.800, 0.004	5.800, 0.001	5.800, 0.000	5.800, 0.007
31	6.000, -0.000	6.000, 0.001	6.000, 0.003	6.000, 0.004	6.000, 0.001	6.000, 0.000	6.000, 0.007
32	6.200, -0.001	6.200, 0.001	6.200, 0.003	6.200, 0.004	6.200, 0.001	6.200, 0.000	6.200, 0.007
33	6.400, -0.001	6.400, 0.001	6.400, 0.003	6.400, 0.003	6.400, 0.001	6.400, 0.000	6.400, 0.006
34	6.600, -0.001	6.600, 0.002	6.600, 0.003	6.600, 0.003	6.600, 0.001	6.600, 0.000	6.600, 0.006
35	6.800, -0.001	6.800, 0.002	6.800, 0.003	6.800, 0.003	6.800, 0.001	6.800, 0.000	6.800, 0.005
36	7.000, -0.001	7.000, 0.002	7.000, 0.003	7.000, 0.003	7.000, 0.000	7.000, 0.000	7.000, 0.005
37	7.200, -0.001	7.200, 0.001	7.200, 0.003	7.200, 0.003	7.200, 0.000	7.200, 0.001	7.200, 0.005
38	7.400, -0.001	7.400, 0.001	7.400, 0.003	7.400, 0.002	7.400, 0.000	7.400, 0.001	7.400, 0.004
39	7.600, -0.001	7.600, 0.001	7.600, 0.003	7.600, 0.002	7.600, 0.000	7.600, 0.001	7.600, 0.004
40	7.800, -0.001	7.800, 0.001	7.800, 0.003	7.800, 0.002	7.800, -0.000	7.800, 0.001	7.800, 0.004
41	8.000, -0.000	8.000, 0.001	8.000, 0.002	8.000, 0.002	8.000, -0.000	8.000, 0.001	8.000, 0.004
42	8.200, -0.000	8.200, 0.000	8.200, 0.002	8.200, 0.002	8.200, -0.000	8.200, 0.000	8.200, 0.004
43	8.400, -0.000	8.400, 0.000	8.400, 0.002	8.400, 0.002	8.400, -0.000	8.400, 0.000	8.400, 0.004
44	8.600, -0.001	8.600, -0.000	8.600, 0.002	8.600, 0.002	8.600, -0.000	8.600, 0.000	8.600, 0.004
45	8.800, -0.001	8.800, -0.000	8.800, 0.002	8.800, 0.002	8.800, -0.000	8.800, -0.000	8.800, 0.004
46	9.000, -0.001	9.000, -0.001	9.000, 0.002	9.000, 0.002	9.000, -0.000	9.000, -0.000	9.000, 0.004
47	9.200, -0.001	9.200, -0.001	9.200, 0.002	9.200, 0.002	9.200, -0.000	9.200, -0.000	9.200, 0.004
48	9.400, -0.001	9.400, -0.001	9.400, 0.002	9.400, 0.002	9.400, 0.000	9.400, -0.000	9.400, 0.005
49	9.600, -0.001	9.600, -0.001	9.600, 0.002	9.600, 0.002	9.600, 0.000	9.600, -0.000	9.600, 0.005
50	9.800, -0.001	9.800, -0.001	9.800, 0.002	9.800, 0.002	9.800, 0.000	9.800, -0.000	9.800, 0.005
51	10.000, -0.000	10.000, -0.001	10.000, 0.002	10.000, 0.002	10.000, 0.000	10.000, -0.000	10.000, 0.005
52	10.200, -0.000	10.200, -0.001	10.200, 0.002	10.200, 0.002	10.200, 0.000	10.200, -0.000	10.200, 0.005
53	10.400, -0.000	10.400, -0.001	10.400, 0.002	10.400, 0.002	10.400, 0.000	10.400, -0.000	10.400, 0.005
54	10.600, -0.000	10.600, -0.001	10.600, 0.002	10.600, 0.002	10.600, 0.000	10.600, -0.000	10.600, 0.005
55	10.800, -0.000	10.800, -0.001	10.800, 0.002	10.800, 0.002	10.800, 0.000	10.800, -0.000	10.800, 0.005
56	11.000, -0.000	11.000, -0.001	11.000, 0.002	11.000, 0.002	11.000, 0.000	11.000, -0.000	11.000, 0.005
57	11.200, 0.000	11.200, -0.001	11.200, 0.002	11.200, 0.002	11.200, 0.000	11.200, -0.000	11.200, 0.004
58	11.400, 0.000	11.400, -0.001	11.400, 0.002	11.400, 0.002	11.400, -0.000	11.400, -0.000	11.400, 0.004
59	11.600, 0.000	11.600, -0.001	11.600, 0.002	11.600, 0.001	11.600, -0.000	11.600, -0.001	11.600, 0.004
60	11.800, 0.001	11.800, -0.001	11.800, 0.002	11.800, 0.001	11.800, -0.000	11.800, -0.001	11.800, 0.003
61	12.000, 0.000	12.000, -0.001	12.000, 0.002	12.000, 0.001	12.000, -0.000	12.000, -0.001	12.000, 0.003
62	12.200, 0.000	12.200, -0.001	12.200, 0.002	12.200, 0.001	12.200, -0.000	12.200, -0.001	12.200, 0.003
63	12.400, 0.000	12.400, -0.001	12.400, 0.002	12.400, 0.001	12.400, -0.000	12.400, -0.001	12.400, 0.003
64	12.600, 0.000	12.600, -0.001	12.600, 0.002	12.600, 0.001	12.600, -0.000	12.600, -0.001	12.600, 0.003
65	12.800, 0.000	12.800, -0.001	12.800, 0.002	12.800, 0.001	12.800, -0.000	12.800, -0.001	12.800, 0.003
66	13.000, 0.000	13.000, -0.001	13.000, 0.002	13.000, 0.001	13.000, -0.000	13.000, -0.001	13.000, 0.003
67	13.200, 0.000	13.200, -0.001	13.200, 0.002	13.200, 0.001	13.200, -0.000	13.200, -0.001	13.200, 0.003
68	13.400, -0.000	13.400, -0.001	13.400, 0.002	13.400, 0.001	13.400, 0.000	13.400, -0.001	13.400, 0.003
69	13.600, -0.000	13.600, -0.001	13.600, 0.002	13.600, 0.001	13.600, 0.000	13.600, -0.001	13.600, 0.004
70	13.800, -0.000	13.800, -0.001	13.800, 0.002	13.800, 0.002	13.800, 0.000	13.800, -0.001	13.800, 0.004
71	14.000, -0.000	14.000, -0.001	14.000, 0.002	14.000, 0.002	14.000, 0.001	14.000, -0.001	14.000, 0.004
72	14.200, -0.000	14.200, -0.001	14.200, 0.002	14.200, 0.002	14.200, 0.001	14.200, -0.001	14.200, 0.005
73	14.400, -0.001	14.400, -0.001	14.400, 0.002	14.400, 0.001	14.400, 0.001	14.400, -0.000	14.400, 0.005
74	14.600, -0.001	14.600, -0.000	14.600, 0.003	14.600, 0.001	14.600, 0.001	14.600, -0.000	14.600, 0.005
75	14.800, -0.001	14.800, -0.000	14.800, 0.003	14.800, 0.001	14.800, 0.000	14.800, -0.000	14.800, 0.005
76	15.000, -0.001	15.000, -0.000	15.000, 0.003	15.000, 0.001	15.000, 0.000	15.000, 0.000	15.000, 0.005
77	15.200, -0.001	15.200, -0.000	15.200, 0.003	15.200, 0.001	15.200, -0.000	15.200, 0.000	15.200, 0.005
78	15.400, -0.001	15.400, -0.000	15.400, 0.003	15.400, 0.000	15.400, -0.001	15.400, 0.000	15.400, 0.005
79	15.600, -0.001	15.600, -0.000	15.600, 0.003	15.600, 0.000	15.600, -0.001	15.600, -0.000	15.600, 0.005
80	15.800, -0.001	15.800, -0.000	15.800, 0.002	15.800, 0.000	15.800, -0.001	15.800, -0.000	15.800, 0.005
81	16.000, -0.002	16.000, -0.000	16.000, 0.002	16.000, -0.000	16.000, -0.001	16.000, 0.000	16.000, 0.005
82	16.200, -0.002	16.200, -0.000	16.200, 0.002	16.200, -0.000	16.200, -0.001	16.200, -0.000	16.200, 0.005
83	16.400, -0.002	16.400, -0.001	16.400, 0.001	16.400, 0.000	16.400, -0.001	16.400, -0.000	16.400, 0.005
84	16.600, -0.002	16.600, -0.001	16.600, 0.001	16.600, 0.000	16.600, -0.001	16.600, -0.000	16.600, 0.005
85	16.800, -0.002	16.800, -0.001	16.800, 0.001	16.800, 0.000	16.800, -0.001	16.800, -0.000	16.800, 0.005
86	17.000, -0.002	17.000, -0.001	17.000, 0.001	17.000, 0.001	17.000, -0.001	17.000, -0.001	17.000, 0.005
87	17.200, -0.002	17.200, -0.002	17.200, 0.001	17.200, 0.001	17.200, -0.001	17.200, -0.001	17.200, 0.005
88	17.400, -0.002	17.400, -0.002	17.400, 0.001	17.400, 0.001	17.400, -0.001	17.400, -0.000	17.400, 0.005
89	17.600, -0.002	17.600, -0.002	17.600, 0.001	17.600, 0.001	17.600, -0.001	17.600, -0.000	17.600, 0.005
90	17.800, -0.002	17.800, -0.002	17.800, 0.002	17.800, 0.001	17.800, -0.001	17.800, -0.000	17.800, 0.005
91	18.000, -0.002	18.000, -0.002	18.000, 0.002	18.000, 0.001	18.000, -0.001	18.000, 0.000	18.000, 0.005
92	18.200, -0.001	18.200, -0.002	18.200, 0.002	18.200, 0.001	18.200, -0.001	18.200, 0.000	18.200, 0.004
93	18.400, -0.001	18.400, -0.002	18.400, 0.002	18.400, 0.000	18.400, -0.001	18.400, 0.000	18.400, 0.004
94	18.600, -0.001	18.600, -0.002	18.600, 0.003	18.600, -0.000	18.600, -0.001	18.600, 0.000	18.600, 0.004
95	18.800, -0.001	18.800, -0.002	18.800, 0.003	18.800, -0.001	18.800, -0.001	18.800, 0.000	18.800, 0.004
96	19.000, -0.001	19.000, -0.001	19.000, 0.003	19.000, -0.001	19.000, -0.001	19.000, -0.000	19.000, 0.003
97	19.200, -0.001	19.200, -0.001	19.200, 0.003	19.200, -0.001	19.200, -0.001	19.200, -0.000	19.200, 0.003
98	19.400, -0.001	19.400, -0.001	19.400, 0.002	19.400, -0.001	19.400, -0.001	19.400, -0.000	19.400, 0.003
99	19.600, -0.000	19.600, -0.001	19.600, 0.002	19.600, -0.001	19.600, -0.001	19.600, -0.001	19.600, 0.003
100	19.800, -0.000	19.800, -0.001	19.800, 0.002	19.800, -0.001	19.800, -0.001	19.800, -0.001	19.800, 0.003
101	20.000, -0.000	20.000, -0.001	20.000, 0.002	20.000, -0.001	20.000, -0.001	20.000, -0.001	20.000, 0.002
102	20.200, -0.000	20.200, -0.001	20.200, 0.002	20.200, -0.000	20.200, -0.001	20.200, -0.001	20.200, 0.002
103	20.400, -0.000	20.400, -0.001	20.400, 0.002	20.400, -0.000	20.400, -0.001	20.400, -0.001	20.400, 0.002
104	20.600, -0.000	20.600, -0.001	20.600, 0.002	20.600, 0.000	20.600, -0.001	20.600, -0.001	20.600, 0.003
105	20.800, 0.000	20.800, -0.001	20.800, 0.002	20.800, 0.001	20.800, -0.001	20.800, -0.001	20.800, 0.003
106	21.000, -0.000	21.000, -0.001	21.000, 0.001	21.000, 0.001	21.000, -0.001	21.000, -0.001	21.000, 0.003
107	21.200, -0.000	21.200, -0.001	21.200, 0.001	21.200, 0.001	21.200, -0.001	21.200, -0.001	21.200, 0.004
108	21.400, -0.000	21.400, -0.000	21.400, 0.002	21.400, 0.001	21.400, -0.001	21.400, -0.001	21.400, 0.004
109	21.600, -0.001	21.600, -0.000	21.600, 0.002	21.600, 0.001	21.600, -0.001	21.600, -0.000	21.600, 0.004
110	21.800, -0.001	21.800, -0.000	21.800, 0.002	21.800, 0.001	21.800, -0.001	21.800, -0.000	21.800, 0.004
111	22.000, -0.001	22.000, 0.000	22.000, 0.001	22.000, 0.002	22.000, -0.001	22.000, -0.000	22.000, 0.004
112	22.200, -0.001	22.200, 0.000	22.200, 0.001	22.200, 0.002	22.200, -0.001	22.200, -0.000	22.200, 0.004
113	22.400, -0.001	22.400, 0.000	22.400, 0.001	22.400, 0.002	22.400, -0.001	22.400, -0.000	22.400, 0.004
114	22.600, -0.001	22.600, 0.000	22.600, 0.001	22.600, 0.002	22.600, -0.001	22.600, -0.000	22.600, 0.004
115	22.800, -0.001	22.800, 0.000	22.800, 0.001	22.800, 0.002	22.800, -0.001	22.800, -0.000	22.800, 0.004
116	23.000, -0.001	23.000, 0.001	23.000, 0.001	23.000, 0.002	23.000, -0.000	23.000, -0.001	23.000, 0.004
117	23.200, -0.001	23.200, 0.001	23.200, 0.001	23.200, 0.001	23.200, -0.000	23.200, -0.001	23.200, 0.004
118	23.400, -0.001	23.400, 0.001	23.400, 0.001	23.400, 0.001	23.400, -0.000	23.400, -0.001	23.400, 0.003
119	23.600, -0.001	23.600, 0.001	23.600, 0.001	23.600, 0.001	23.600, -0.000	23.600, -0.001	23.600, 0.003
120	23.800, -0.001	23.800, 0.002	23.800, 0.000	23.800, 0.000	23.800, -0.000	23.800, -0.001	23.800, 0.003
121	24.000, -0.001	24.000, 0.001	24.000, 0.000	24.000, 0.000	24.000, -0.000	24.000, -0.001	24.000, 0.003
122	24.200, -0.001	24.200, 0.001	24.200, 0.000	24.200, -0.000	24.200, 0.000	24.200, -0.001	24.200, 0.003
123	24.400, -0.001	24.400, 0.001	24.400, 0.000	24.400, -0.000	24.400, 0.000	24.400, -0.001	24.400, 0.003
124	24.600, -0.001	24.600, 0.001	24.600, -0.000	24.600, -0.000	24.600, 0.000	24.600, -0.001	24.600, 0.002
125	24.800, -0.001	24.800, 0.001	24.800, -0.000	24.800, -0.001	24.800, 0.001	24.800, -0.001	24.800, 0.002
126	25.000, -0.001	25.000, 0.000	25.000, -0.000	25.000, -0.001	25.000, 0.001	25.000, -0.001	25.000, 0.002
127	25.200, -0.001	25.200, 0.000	25.200, -0.000	25.200, -0.000	25.200, 0.001	25.200, -0.001	25.200, 0.002
128	25.400, -0.001	25.400, -0.000	25.400, -0.000	25.400, -0.000	25.400, 0.001	25.400, -0.001	25.400, 0.002
129	25.600, -0.001	25.600, -0.000	25.600, 0.000	25.600, -0.000	25.600, 0.001	25.600, -0.001	25.600, 0.002
130	25.800, -0.000	25.800, -0.000	25.800, 0.000	25.800, 0.000	25.800, 0.001	25.800, -0.001	25.800, 0.002
131	26.000, -0.000	26.000, -0.001	26.000, 0.001	26.000, 0.001	26.000, 0.000	26.000, -0.001	26.000, 0.001
132	26.200, -0.000	26.200, -0.001	26.200, 0.001	26.200, 0.001	26.200, 0.000	26.200, -0.000	26.200, 0.001
133	26.400, -0.000	26.400, -0.001	26.400, 0.001	26.400, 0.001	26.400, 0.000	26.400, -0.000	26.400, 0.001
134	26.600, -0.000	26.600, -0.001	26.600, 0.001	26.600, 0.001	26.600, 0.000	26.600, -0.000	26.600, 0.001
135	26.800, -0.000	26.800, -0.001	26.800, 0.001	26.800, 0.001	26.800, 0.000	26.800, -0.000	26.800, 0.001
136	27.000, -0.000	27.000, -0.001	27.000, 0.000	27.000, 0.001	27.000, -0.000	27.000, -0.000	27.000, 0.000
137	27.200, -0.000	27.200, -0.001	27.200, 0.000	27.200, 0.001	27.200, -0.000	27.200, -0.000	27.200, 0.000
138	27.400, -0.000	27.400, -0.001	27.400, 0.000	27.400, 0.001	27.400, -0.000	27.400, -0.000	27.400, -0.000
139	27.600, -0.001	27.600, -0.001	27.600, 0.000	27.600, 0.001	27.600, -0.000	27.600, -0.000	27.600, -0.000
140	27.800, -0.001	27.800, -0.001	27.800, 0.000	27.800, 0.000	27.800, -0.000	27.800, -0.000	27.800, -0.000
141	28.000, -0.001	28.000, -0.001	28.000, 0.000	28.000, 0.000	28.000, -0.000	28.000, -0.000	28.000, -0.000
142	28.200, -0.001	28.200, -0.001	28.200, 0.000	28.200, 0.000	28.200, -0.000	28.200, -0.000	28.200, -0.000
143	28.400, -0.001	28.400, -0.001	28.400, -0.000	28.400, 0.000	28.400, -0.000	28.400, -0.000	28.400, -0.000
144	28.600, -0.001	28.600, -0.000	28.600, -0.000	28.600, 0.000	28.600, -0.000	28.600, -0.000	28.600, -0.000
145	28.800, -0.000	28.800, 0.000	28.800, -0.000	28.800, -0.000	28.800, 0.000	28.800, 0.000	28.800, -0.000
146	29.000, 0.000	29.000, 0.001	29.000, -0.000	29.000, -0.000	29.000, 0.000	29.000, 0.000	29.000, 0.000
147	29.200, 0.001	29.200, 0.001	29.200, -0.000	29.200, -0.000	29.200, 0.000	29.200, 0.000	29.200, 0.000
148	29.400, 0.001	29.400, 0.002	29.400, -0.000	29.400, -0.001	29.400, 0.000	29.400, 0.000	29.400, 0.000
149	29.600, 0.002	29.600, 0.002	29.600, -0.000	29.600, -0.001	29.600, 0.001	29.600, 0.001	29.600, 0.000
150	29.800, 0.002	29.800, 0.002	29.800, -0.000	29.800, -0.001	29.800, 0.001	29.800, 0.001	29.800, 0.001
151	30.000, 0.000	30.000, 0.000	30.000, 0.000	30.000, 0.000	30.000, 0.000	30.000, 0.000	30.000, 0.000
152	30.200, 0.024	30.200, 0.021	30.200, 0.020	30.200, 0.021	30.200, 0.019	30.200, 0.010	30.200, 0.016
153	30.400, 0.053	30.400, 0.046	30.400, 0.045	30.400, 0.046	30.400, 0.041	30.400, 0.023	30.400, 0.034
154	30.600, 0.087	30.600, 0.076	30.600, 0.073	30.600, 0.075	30.600, 0.067	30.600, 0.037	30.600, 0.055
155	30.800, 0.125	30.800, 0.109	30.800, 0.106	30.800, 0.107	30.800, 0.096	30.800, 0.052	30.800, 0.077
156	31.000, 0.167	31.000, 0.145	31.000, 0.141	31.000, 0.143	31.000, 0.128	31.000, 0.068	31.000, 0.102
157	31.200, 0.211	31.200, 0.184	31.200, 0.179	31.200, 0.180	31.200, 0.162	31.200, 0.085	31.200, 0.127
158	31.400, 0.257	31.400, 0.225	31.400, 0.219	31.400, 0.219	31.400, 0.197	31.400, 0.102	31.400, 0.152
159	31.600, 0.303	31.600, 0.267	31.600, 0.260	31.600, 0.259	31.600, 0.232	31.600, 0.118	31.600, 0.177
160	31.800, 0.349	31.800, 0.307	31.800, 0.299	31.800, 0.297	31.800, 0.266	31.800, 0.134	31.800, 0.201
161	32.000, 0.392	32.000, 0.346	32.000, 0.338	32.000, 0.334	32.000, 0.298	32.000, 0.148	32.000, 0.222
162	32.200, 0.431	32.200, 0.382	32.200, 0.373	32.200, 0.367	32.200, 0.327	32.200, 0.160	32.200, 0.240
163	32.400, 0.466	32.400, 0.415	32.400, 0.407	32.400, 0.398	32.400, 0.354	32.400, 0.169	32.400, 0.255
164	32.600, 0.500	32.600, 0.447	32.600, 0.439	32.600, 0.427	32.600, 0.378	32.600, 0.177	32.600, 0.268
165	32.800, 0.532	32.800, 0.476	32.800, 0.469	32.800, 0.455	32.800, 0.401	32.800, 0.185	32.800, 0.280
166	33.000, 0.560	33.000, 0.504	33.000, 0.498	33.000, 0.481	33.000, 0.422	33.000, 0.191	33.000, 0.290
167	33.200, 0.586	33.200, 0.529	33.200, 0.524	33.200, 0.504	33.200, 0.441	33.200, 0.197	33.200, 0.299
168	33.400, 0.610	33.400, 0.553	33.400, 0.549	33.400, 0.527	33.400, 0.459	33.400, 0.201	33.400, 0.307
169	33.600, 0.631	33.600, 0.574	33.600, 0.571	33.600, 0.547	33.600, 0.474	33.600, 0.206	33.600, 0.314
170	33.800, 0.650	33.800, 0.594	33.800, 0.592	33.800, 0.566	33.800, 0.489	33.800, 0.209	33.800, 0.321
171	34.000, 0.667	34.000, 0.612	34.000, 0.611	34.000, 0.583	34.000, 0.501	34.000, 0.213	34.000, 0.326
172	34.200, 0.682	34.200, 0.628	34.200, 0.629	34.200, 0.598	34.200, 0.513	34.200, 0.216	34.200, 0.331
173	34.400, 0.696	34.400, 0.642	34.400, 0.645	34.400, 0.612	34.400, 0.524	34.400, 0.218	34.400, 0.335
174	34.600, 0.708	34.600, 0.655	34.600, 0.660	34.600, 0.624	34.600, 0.533	34.600, 0.220	34.600, 0.339
175	34.800, 0.718	34.800, 0.667	34.800, 0.673	34.800, 0.635	34.800, 0.542	34.800, 0.222	34.800, 0.342
176	35.000, 0.727	35.000, 0.677	35.000, 0.685	35.000, 0.645	35.000, 0.549	35.000, 0.224	35.000, 0.344
177	35.200, 0.735	35.200, 0.687	35.200, 0.696	35.200, 0.654	35.200, 0.556	35.200, 0.225	35.200, 0.347
178	35.400, 0.742	35.400, 0.695	35.400, 0.705	35.400, 0.662	35.400, 0.562	35.400, 0.227	35.400, 0.349
179	35.600, 0.748	35.600, 0.702	35.600, 0.713	35.600, 0.669	35.600, 0.568	35.600, 0.228	35.600, 0.350
180	35.800, 0.753	35.800, 0.708	35.800, 0.721	35.800, 0.676	35.800, 0.572	35.800, 0.229	35.800, 0.351
181	36.000, 0.757	36.000, 0.714	36.000, 0.727	36.000, 0.681	36.000, 0.576	36.000, 0.229	36.000, 0.352
182	36.200, 0.761	36.200, 0.719	36.200, 0.733	36.200, 0.686	36.200, 0.580	36.200, 0.230	36.200, 0.353
183	36.400, 0.765	36.400, 0.723	36.400, 0.738	36.400, 0.691	36.400, 0.583	36.400, 0.231	36.400, 0.354
184	36.600, 0.768	36.600, 0.726	36.600, 0.743	36.600, 0.695	36.600, 0.586	36.600, 0.232	36.600, 0.355
185	36.800, 0.771	36.800, 0.730	36.800, 0.747	36.800, 0.699	36.800, 0.589	36.800, 0.232	36.800, 0.355
186	37.000, 0.774	37.000, 0.732	37.000, 0.751	37.000, 0.703	37.000, 0.591	37.000, 0.233	37.000, 0.356
187	37.200, 0.776	37.200, 0.735	37.200, 0.754	37.200, 0.706	37.200, 0.593	37.200, 0.233	37.200, 0.356
188	37.400, 0.778	37.400, 0.738	37.400, 0.757	37.400, 0.708	37.400, 0.595	37.400, 0.234	37.400, 0.357
189	37.600, 0.780	37.600, 0.740	37.600, 0.760	37.600, 0.711	37.600, 0.596	37.600, 0.234	37.600, 0.357
190	37.800, 0.781	37.800, 0.742	37.800, 0.763	37.800, 0.713	37.800, 0.598	37.800, 0.234	37.800, 0.358
191	38.000, 0.783	38.000, 0.744	38.000, 0.765	38.000, 0.715	38.000, 0.599	38.000, 0.235	38.000, 0.358
192	38.200, 0.784	38.200, 0.746	38.200, 0.767	38.200, 0.716	38.200, 0.600	38.200, 0.235	38.200, 0.359
193	38.400, 0.785	38.400, 0.748	38.400, 0.769	38.400, 0.718	38.400, 0.601	38.400, 0.235	38.400, 0.359
194	38.600, 0.786	38.600, 0.749	38.600, 0.770	38.600, 0.719	38.600, 0.602	38.600, 0.234	38.600, 0.360
195	38.800, 0.787	38.800, 0.751	38.800, 0.771	38.800, 0.720	38.800, 0.603	38.800, 0.234	38.800, 0.360
196	39.000, 0.788	39.000, 0.752	39.000, 0.772	39.000, 0.721	39.000, 0.604	39.000, 0.234	39.000, 0.360
197	39.200, 0.789	39.200, 0.754	39.200, 0.773	39.200, 0.722	39.200, 0.604	39.200, 0.234	39.200, 0.360
198	39.400, 0.790	39.400, 0.755	39.400, 0.774	39.400, 0.723	39.400, 0.604	39.400, 0.233	39.400, 0.360
199	39.600, 0.791	39.600, 0.757	39.600, 0.775	39.600, 0.724	39.600, 0.604	39.600, 0.233	39.600, 0.360
200	39.800, 0.792	39.800, 0.758	39.800, 0.775	39.800, 0.725	39.800, 0.604	39.800, 0.233	39.800, 0.360
201	40.000, 0.792	40.000, 0.759	40.000, 0.776	40.000, 0.726	40.000, 0.605	40.000, 0.233	40.000, 0.359
202	40.200, 0.793	40.200, 0.760	40.200, 0.776	40.200, 0.726	40.200, 0.605	40.200, 0.232	40.200, 0.359
203	40.400, 0.794	40.400, 0.760	40.400, 0.777	40.400, 0.727	40.400, 0.605	40.400, 0.232	40.400, 0.359
204	40.600, 0.794	40.600, 0.761	40.600, 0.777	40.600, 0.727	40.600, 0.606	40.600, 0.232	40.600, 0.359
205	40.800, 0.795	40.800, 0.761	40.800, 0.778	40.800, 0.728	40.800, 0.607	40.800, 0.232	40.800, 0.358
206	41.000, 0.796	41.000, 0.762	41.000, 0.778	41.000, 0.728	41.000, 0.607	41.000, 0.232	41.000, 0.358
207	41.200, 0.796	41.200, 0.762	41.200, 0.779	41.200, 0.729	41.200, 0.608	41.200, 0.233	41.200, 0.358
208	41.400, 0.797	41.400, 0.763	41.400, 0.780	41.400, 0.729	41.400, 0.608	41.400, 0.233	41.400, 0.358
209	41.600, 0.797	41.600, 0.764	41.600, 0.781	41.600, 0.729	41.600, 0.608	41.600, 0.233	41.600, 0.358
210	41.800, 0.798	41.800, 0.764	41.800, 0.782	41.800, 0.730	41.800, 0.609	41.800, 0.233	41.800, 0.357
211	42.000, 0.798	42.000, 0.765	42.000, 0.782	42.000, 0.730	42.000, 0.609	42.000, 0.233	42.000, 0.357
212	42.200, 0.798	42.200, 0.765	42.200, 0.783	42.200, 0.730	42.200, 0.610	42.200, 0.232	42.200, 0.357
213	42.400, 0.798	42.400, 0.765	42.400, 0.783	42.400, 0.730	42.400, 0.610	42.400, 0.232	42.400, 0.357
214	42.600, 0.799	42.600, 0.766	42.600, 0.784	42.600, 0.730	42.600, 0.610	42.600, 0.232	42.600, 0.357
215	42.800, 0.799	42.800, 0.767	42.800, 0.785	42.800, 0.731	42.800, 0.610	42.800, 0.232	42.800, 0.357
216	43.000, 0.800	43.000, 0.768	43.000, 0.785	43.000, 0.731	43.000, 0.610	43.000, 0.231	43.000, 0.356
217	43.200, 0.800	43.200, 0.768	43.200, 0.785	43.200, 0.731	43.200, 0.609	43.200, 0.231	43.200, 0.356
218	43.400, 0.801	43.400, 0.769	43.400, 0.786	43.400, 0.731	43.400, 0.609	43.400, 0.231	43.400, 0.356
219	43.600, 0.801	43.600, 0.770	43.600, 0.786	43.600, 0.731	43.600, 0.609	43.600, 0.231	43.600, 0.355
220	43.800, 0.801	43.800, 0.771	43.800, 0.786	43.800, 0.731	43.800, 0.608	43.800, 0.231	43.800, 0.355
221	44.000, 0.802	44.000, 0.771	44.000, 0.787	44.000, 0.732	44.000, 0.608	44.000, 0.231	44.000, 0.355
222	44.200, 0.802	44.200, 0.771	44.200, 0.787	44.200, 0.732	44.200, 0.608	44.200, 0.231	44.200, 0.355
223	44.400, 0.803	44.400, 0.772	44.400, 0.787	44.400, 0.732	44.400, 0.608	44.400, 0.231	44.400, 0.354
224	44.600, 0.804	44.600, 0.772	44.600, 0.787	44.600, 0.732	44.600, 0.608	44.600, 0.231	44.600, 0.354
225	44.800, 0.804	44.800, 0.773	44.800, 0.788	44.800, 0.732	44.800, 0.608	44.800, 0.231	44.800, 0.354
226	45.000, 0.805	45.000, 0.773	45.000, 0.788	45.000, 0.733	45.000, 0.608	45.000, 0.231	45.000, 0.354
227	45.200, 0.805	45.200, 0.774	45.200, 0.788	45.200, 0.733	45.200, 0.608	45.200, 0.231	45.200, 0.353
228	45.400, 0.806	45.400, 0.774	45.400, 0.788	45.400, 0.734	45.400, 0.608	45.400, 0.231	45.400, 0.353
229	45.600, 0.806	45.600, 0.774	45.600, 0.788	45.600, 0.734	45.600, 0.607	45.600, 0.231	45.600, 0.353
230	45.800, 0.807	45.800, 0.775	45.800, 0.788	45.800, 0.734	45.800, 0.607	45.800, 0.232	45.800, 0.353
231	46.000, 0.807	46.000, 0.775	46.000, 0.788	46.000, 0.734	46.000, 0.607	46.000, 0.232	46.000, 0.352
232	46.200, 0.808	46.200, 0.776	46.200, 0.789	46.200, 0.734	46.200, 0.607	46.200, 0.231	46.200, 0.352
233	46.400, 0.808	46.400, 0.777	46.400, 0.789	46.400, 0.734	46.400, 0.607	46.400, 0.231	46.400, 0.352
234	46.600, 0.808	46.600, 0.777	46.600, 0.789	46.600, 0.734	46.600, 0.607	46.600, 0.231	46.600, 0.351
235	46.800, 0.808	46.800, 0.778	46.800, 0.790	46.800, 0.734	46.800, 0.607	46.800, 0.231	46.800, 0.351
236	47.000, 0.809	47.000, 0.779	47.000, 0.790	47.000, 0.734	47.000, 0.607	47.000, 0.230	47.000, 0.351
237	47.200, 0.809	47.200, 0.779	47.200, 0.790	47.200, 0.734	47.200, 0.607	47.200, 0.230	47.200, 0.351
238	47.400, 0.809	47.400, 0.779	47.400, 0.790	47.400, 0.735	47.400, 0.606	47.400, 0.229	47.400, 0.351
239	47.600, 0.810	47.600, 0.780	47.600, 0.790	47.600, 0.735	47.600, 0.606	47.600, 0.229	47.600, 0.350
240	47.800, 0.810	47.800, 0.780	47.800, 0.791	47.800, 0.735	47.800, 0.606	47.800, 0.228	47.800, 0.350
241	48.000, 0.811	48.000, 0.780	48.000, 0.791	48.000, 0.735	48.000, 0.606	48.000, 0.228	48.000, 0.350
242	48.200, 0.811	48.200, 0.780	48.200, 0.791	48.200, 0.735	48.200, 0.605	48.200, 0.227	48.200, 0.349
243	48.400, 0.812	48.400, 0.780	48.400, 0.791	48.400, 0.735	48.400, 0.605	48.400, 0.227	48.400, 0.349
244	48.600, 0.812	48.600, 0.780	48.600, 0.791	48.600, 0.735	48.600, 0.605	48.600, 0.226	48.600, 0.349
245	48.800, 0.812	48.800, 0.781	48.800, 0.792	48.800, 0.734	48.800, 0.605	48.800, 0.226	48.800, 0.349
246	49.000, 0.813	49.000, 0.781	49.000, 0.792	49.000, 0.734	49.000, 0.605	49.000, 0.226	49.000, 0.349
247	49.200, 0.813	49.200, 0.781	49.200, 0.792	49.200, 0.734	49.200, 0.605	49.200, 0.226	49.200, 0.348
248	49.400, 0.813	49.400, 0.781	49.400, 0.793	49.400, 0.734	49.400, 0.605	49.400, 0.227	49.400, 0.348
249	49.600, 0.814	49.600, 0.782	49.600, 0.793	49.600, 0.734	49.600, 0.606	49.600, 0.227	49.600, 0.348
250	49.800, 0.814	49.800, 0.782	49.800, 0.794	49.800, 0.733	49.800, 0.605	49.800, 0.227	49.800, 0.347
251	50.000, 0.815	50.000, 0.783	50.000, 0.794	50.000, 0.733	50.000, 0.605	50.000, 0.228	50.000, 0.347
252	50.200, 0.815	50.200, 0.783	50.200, 0.795	50.200, 0.733	50.200, 0.605	50.200, 0.228	50.200, 0.347
253	50.400, 0.816	50.400, 0.783	50.400, 0.795	50.400, 0.734	50.400, 0.605	50.400, 0.228	50.400, 0.346
254	50.600, 0.816	50.600, 0.784	50.600, 0.796	50.600, 0.734	50.600, 0.604	50.600, 0.228	50.600, 0.346
255	50.800, 0.817	50.800, 0.785	50.800, 0.796	50.800, 0.734	50.800, 0.604	50.800, 0.228	50.800, 0.346
256	51.000, 0.817	51.000, 0.785	51.000, 0.796	51.000, 0.734	51.000, 0.604	51.000, 0.228	51.000, 0.345
257	51.200, 0.818	51.200, 0.786	51.200, 0.796	51.200, 0.735	51.200, 0.604	51.200, 0.228	51.200, 0.345
258	51.400, 0.818	51.400, 0.787	51.400, 0.796	51.400, 0.735	51.400, 0.604	51.400, 0.228	51.400, 0.345
259	51.600, 0.819	51.600, 0.787	51.600, 0.796	51.600, 0.735	51.600, 0.604	51.600, 0.227	51.600, 0.344
260	51.800, 0.819	51.800, 0.788	51.800, 0.796	51.800, 0.736	51.800, 0.603	51.800, 0.227	51.800, 0.344
261	52.000, 0.819	52.000, 0.789	52.000, 0.796	52.000, 0.736	52.000, 0.603	52.000, 0.227	52.000, 0.344
262	52.200, 0.820	52.200, 0.789	52.200, 0.796	52.200, 0.736	52.200, 0.602	52.200, 0.226	52.200, 0.343
263	52.400, 0.820	52.400, 0.790	52.400, 0.797	52.400, 0.736	52.400, 0.602	52.400, 0.226	52.400, 0.343
264	52.600, 0.820	52.600, 0.790	52.600, 0.797	52.600, 0.736	52.600, 0.601	52.600, 0.225	52.600, 0.343
265	52.800, 0.820	52.800, 0.791	52.800, 0.798	52.800, 0.736	52.800, 0.601	52.800, 0.225	52.800, 0.342
266	53.000, 0.821	53.000, 0.791	53.000, 0.798	53.000, 0.736	53.000, 0.601	53.000, 0.224	53.000, 0.342
267	53.200, 0.821	53.200, 0.791	53.200, 0.798	53.200, 0.736	53.200, 0.601	53.200, 0.224	53.200, 0.342
268	53.400, 0.822	53.400, 0.792	53.400, 0.799	53.400, 0.736	53.400, 0.601	53.400, 0.224	53.400, 0.342
269	53.600, 0.822	53.600, 0.791	53.600, 0.799	53.600, 0.736	53.600, 0.600	53.600, 0.224	53.600, 0.341
270	53.800, 0.823	53.800, 0.791	53.800, 0.799	53.800, 0.736	53.800, 0.600	53.800, 0.224	53.800, 0.341
271	54.000, 0.824	54.000, 0.791	54.000, 0.799	54.000, 0.736	54.000, 0.599	54.000, 0.224	54.000, 0.341
272	54.200, 0.824	54.200, 0.791	54.200, 0.800	54.200, 0.737	54.200, 0.599	54.200, 0.224	54.200, 0.341
273	54.400, 0.825	54.400, 0.792	54.400, 0.800	54.400, 0.737	54.400, 0.598	54.400, 0.224	54.400, 0.341
274	54.600, 0.826	54.600, 0.792	54.600, 0.800	54.600, 0.737	54.600, 0.598	54.600, 0.224	54.600, 0.341
275	54.800, 0.827	54.800, 0.793	54.800, 0.800	54.800, 0.737	54.800, 0.598	54.800, 0.224	54.800, 0.341
276	55.000, 0.827	55.000, 0.793	55.000, 0.800	55.000, 0.737	55.000, 0.598	55.000, 0.224	55.000, 0.341
277	55.200, 0.828	55.200, 0.793	55.200, 0.800	55.200, 0.737	55.200, 0.598	55.200, 0.224	55.200, 0.341
278	55.400, 0.828	55.400, 0.794	55.400, 0.800	55.400, 0.737	55.400, 0.598	55.400, 0.224	55.400, 0.341
279	55.600, 0.828	55.600, 0.794	55.600, 0.800	55.600, 0.737	55.600, 0.598	55.600, 0.224	55.600, 0.341
280	55.800, 0.829	55.800, 0.794	55.800, 0.801	55.800, 0.737	55.800, 0.597	55.800, 0.224	55.800, 0.341
281	56.000, 0.829	56.000, 0.794	56.000, 0.801	56.000, 0.737	56.000, 0.597	56.000, 0.224	56.000, 0.340
282	56.200, 0.829	56.200, 0.795	56.200, 0.802	56.200, 0.737	56.200, 0.597	56.200, 0.224	56.200, 0.340
283	56.400, 0.829	56.400, 0.795	56.400, 0.802	56.400, 0.737	56.400, 0.597	56.400, 0.224	56.400, 0.340
284	56.600, 0.829	56.600, 0.796	56.600, 0.802	56.600, 0.737	56.600, 0.597	56.600, 0.224	56.600, 0.340
285	56.800, 0.829	56.800, 0.797	56.800, 0.802	56.800, 0.737	56.800, 0.597	56.800, 0.223	56.800, 0.339
286	57.000, 0.829	57.000, 0.797	57.000, 0.803	57.000, 0.737	57.000, 0.597	57.000, 0.223	57.000, 0.339
287	57.200, 0.829	57.200, 0.798	57.200, 0.803	57.200, 0.737	57.200, 0.597	57.200, 0.223	57.200, 0.338
288	57.400, 0.829	57.400, 0.799	57.400, 0.803	57.400, 0.737	57.400, 0.596	57.400, 0.223	57.400, 0.338
289	57.600, 0.829	57.600, 0.799	57.600, 0.803	57.600, 0.737	57.600, 0.596	57.600, 0.223	57.600, 0.338
290	57.800, 0.829	57.800, 0.800	57.800, 0.803	57.800, 0.737	57.800, 0.596	57.800, 0.222	57.800, 0.338
291	58.000, 0.829	58.000, 0.801	58.000, 0.803	58.000, 0.737	58.000, 0.595	58.000, 0.222	58.000, 0.338
292	58.200, 0.830	58.200, 0.802	58.200, 0.803	58.200, 0.737	58.200, 0.595	58.200, 0.221	58.200, 0.338
293	58.400, 0.830	58.400, 0.802	58.400, 0.803	58.400, 0.737	58.400, 0.595	58.400, 0.221	58.400, 0.338
294	58.600, 0.830	58.600, 0.802	58.600, 0.803	58.600, 0.737	58.600, 0.595	58.600, 0.221	58.600, 0.337
295	58.800, 0.831	58.800, 0.802	58.800, 0.803	58.800, 0.736	58.800, 0.594	58.800, 0.221	58.800, 0.337
296	59.000, 0.832	59.000, 0.802	59.000, 0.803	59.000, 0.736	59.000, 0.594	59.000, 0.220	59.000, 0.337
297	59.200, 0.832	59.200, 0.802	59.200, 0.804	59.200, 0.736	59.200, 0.594	59.200, 0.220	59.200, 0.337
298	59.400, 0.833	59.400, 0.802	59.400, 0.804	59.400, 0.736	59.400, 0.594	59.400, 0.221	59.400, 0.337
299	59.600, 0.834	59.600, 0.802	59.600, 0.804	59.600, 0.736	59.600, 0.594	59.600, 0.221	59.600, 0.337
300	59.800, 0.834	59.800, 0.801	59.800, 0.805	59.800, 0.736	59.800, 0.594	59.800, 0.221	59.800, 0.337
301	60.000, 0.835	60.000, 0.802	60.000, 0.805	60.000, 0.736	60.000, 0.594	60.000, 0.221	60.000, 0.337
302	60.200, 0.835	60.200, 0.802	60.200, 0.806	60.200, 0.736	60.200, 0.594	60.200, 0.221	60.200, 0.336
303	60.400, 0.836	60.400, 0.802	60.400, 0.806	60.400, 0.736	60.400, 0.594	60.400, 0.221	60.400, 0.336
304	60.600, 0.836	60.600, 0.803	60.600, 0.807	60.600, 0.736	60.600, 0.593	60.600, 0.221	60.600, 0.336
305	60.800, 0.836	60.800, 0.803	60.800, 0.807	60.800, 0.736	60.800, 0.593	60.800, 0.221	60.800, 0.336
306	61.000, 0.836	61.000, 0.804	61.000, 0.808	61.000, 0.736	61.000, 0.593	61.000, 0.221	61.000, 0.335
307	61.200, 0.837	61.200, 0.805	61.200, 0.808	61.200, 0.737	61.200, 0.593	61.200, 0.221	61.200, 0.335
308	61.400, 0.837	61.400, 0.805	61.400, 0.808	61.400, 0.737	61.400, 0.593	61.400, 0.221	61.400, 0.334
309	61.600, 0.837	61.600, 0.806	61.600, 0.808	61.600, 0.737	61.600, 0.592	61.600, 0.221	61.600, 0.334
310	61.800, 0.837	61.800, 0.806	61.800, 0.808	61.800, 0.737	61.800, 0.592	61.800, 0.220	61.800, 0.333
311	62.000, 0.837	62.000, 0.807	62.000, 0.808	62.000, 0.737	62.000, 0.592	62.000, 0.220	62.000, 0.332
312	62.200, 0.837	62.200, 0.807	62.200, 0.808	62.200, 0.737	62.200, 0.593	62.200, 0.219	62.200, 0.332
313	62.400, 0.837	62.400, 0.807	62.400, 0.808	62.400, 0.737	62.400, 0.593	62.400, 0.219	62.400, 0.331
314	62.600, 0.838	62.600, 0.807	62.600, 0.808	62.600, 0.737	62.600, 0.592	62.600, 0.218	62.600, 0.331
315	62.800, 0.838	62.800, 0.807	62.800, 0.808	62.800, 0.737	62.800, 0.592	62.800, 0.218	62.800, 0.330
316	63.000, 0.838	63.000, 0.807	63.000, 0.808	63.000, 0.737	63.000, 0.592	63.000, 0.218	63.000, 0.330
317	63.200, 0.838	63.200, 0.807	63.200, 0.808	63.200, 0.737	63.200, 0.592	63.200, 0.217	63.200, 0.330
318	63.400, 0.839	63.400, 0.807	63.400, 0.809	63.400, 0.737	63.400, 0.592	63.400, 0.217	63.400, 0.329
319	63.600, 0.839	63.600, 0.807	63.600, 0.809	63.600, 0.737	63.600, 0.592	63.600, 0.217	63.600, 0.329
320	63.800, 0.839	63.800, 0.807	63.800, 0.810	63.800, 0.737	63.800, 0.591	63.800, 0.217	63.800, 0.329
321	64.000, 0.840	64.000, 0.808	64.000, 0.810	64.000, 0.736	64.000, 0.591	64.000, 0.217	64.000, 0.329
322	64.200, 0.840	64.200, 0.808	64.200, 0.811	64.200, 0.736	64.200, 0.591	64.200, 0.217	64.200, 0.329
323	64.400, 0.840	64.400, 0.808	64.400, 0.812	64.400, 0.735	64.400, 0.590	64.400, 0.216	64.400, 0.329
324	64.600, 0.841	64.600, 0.808	64.600, 0.812	64.600, 0.735	64.600, 0.590	64.600, 0.216	64.600, 0.329
325	64.800, 0.842	64.800, 0.809	64.800, 0.812	64.800, 0.735	64.800, 0.590	64.800, 0.216	64.800, 0.329
326	65.000, 0.842	65.000, 0.809	65.000, 0.813	65.000, 0.735	65.000, 0.590	65.000, 0.216	65.000, 0.329
327	65.200, 0.843	65.200, 0.809	65.200, 0.813	65.200, 0.735	65.200, 0.589	65.200, 0.215	65.200, 0.329
328	65.400, 0.844	65.400, 0.810	65.400, 0.813	65.400, 0.734	65.400, 0.589	65.400, 0.215	65.400, 0.328
329	65.600, 0.844	65.600, 0.810	65.600, 0.813	65.600, 0.734	65.600, 0.589	65.600, 0.214	65.600, 0.328
330	65.800, 0.845	65.800, 0.810	65.800, 0.813	65.800, 0.734	65.800, 0.588	65.800, 0.214	65.800, 0.328
331	66.000, 0.845	66.000, 0.811	66.000, 0.813	66.000, 0.734	66.000, 0.588	66.000, 0.214	66.000, 0.327
332	66.200, 0.845	66.200, 0.811	66.200, 0.813	66.200, 0.734	66.200, 0.588	66.200, 0.214	66.200, 0.327
333	66.400, 0.846	66.400, 0.812	66.400, 0.813	66.400, 0.735	66.400, 0.587	66.400, 0.214	66.400, 0.326
334	66.600, 0.846	66.600, 0.812	66.600, 0.813	66.600, 0.735	66.600, 0.587	66.600, 0.214	66.600, 0.326
335	66.800, 0.846	66.800, 0.813	66.800, 0.813	66.800, 0.735	66.800, 0.587	66.800, 0.214	66.800, 0.325
336	67.000, 0.846	67.000, 0.813	67.000, 0.813	67.000, 0.735	67.000, 0.587	67.000, 0.214	67.000, 0.325
337	67.200, 0.846	67.200, 0.813	67.200, 0.813	67.200, 0.735	67.200, 0.586	67.200, 0.214	67.200, 0.324
338	67.400, 0.846	67.400, 0.814	67.400, 0.813	67.400, 0.735	67.400, 0.586	67.400, 0.214	67.400, 0.324
339	67.600, 0.846	67.600, 0.814	67.600, 0.813	67.600, 0.736	67.600, 0.586	67.600, 0.214	67.600, 0.324
340	67.800, 0.847	67.800, 0.814	67.800, 0.814	67.800, 0.736	67.800, 0.586	67.800, 0.214	67.800, 0.324
341	68.000, 0.847	68.000, 0.815	68.000, 0.814	68.000, 0.736	68.000, 0.585	68.000, 0.214	68.000, 0.324
342	68.200, 0.847	68.200, 0.815	68.200, 0.815	68.200, 0.736	68.200, 0.585	68.200, 0.214	68.200, 0.324
343	68.400, 0.848	68.400, 0.815	68.400, 0.815	68.400, 0.736	68.400, 0.585	68.400, 0.214	68.400, 0.324
344	68.600, 0.848	68.600, 0.816	68.600, 0.816	68.600, 0.736	68.600, 0.585	68.600, 0.214	68.600, 0.324
345	68.800, 0.849	68.800, 0.816	68.800, 0.816	68.800, 0.736	68.800, 0.585	68.800, 0.214	68.800, 0.324
346	69.000, 0.849	69.000, 0.817	69.000, 0.816	69.000, 0.736	69.000, 0.585	69.000, 0.214	69.000, 0.324
347	69.200, 0.850	69.200, 0.817	69.200, 0.816	69.200, 0.736	69.200, 0.585	69.200, 0.213	69.200, 0.324
348	69.400, 0.851	69.400, 0.818	69.400, 0.816	69.400, 0.736	69.400, 0.585	69.400, 0.213	69.400, 0.324
349	69.600, 0.851	69.600, 0.818	69.600, 0.816	69.600, 0.736	69.600, 0.584	69.600, 0.213	69.600, 0.324
350	69.800, 0.851	69.800, 0.819	69.800, 0.817	69.800, 0.736	69.800, 0.584	69.800, 0.212	69.800, 0.324
351	70.000, 0.852	70.000, 0.819	70.000, 0.817	70.000, 0.735	70.000, 0.583	70.000, 0.212	70.000, 0.324
352	70.200, 0.852	70.200, 0.819	70.200, 0.818	70.200, 0.735	70.200, 0.583	70.200, 0.212	70.200, 0.323
353	70.400, 0.852	70.400, 0.819	70.400, 0.818	70.400, 0.735	70.400, 0.583	70.400, 0.212	70.400, 0.323
354	70.600, 0.852	70.600, 0.819	70.600, 0.818	70.600, 0.735	70.600, 0.582	70.600, 0.212	70.600, 0.323
355	70.800, 0.852	70.800, 0.820	70.800, 0.818	70.800, 0.735	70.800, 0.582	70.800, 0.212	70.800, 0.323
356	71.000, 0.852	71.000, 0.820	71.000, 0.818	71.000, 0.735	71.000, 0.582	71.000, 0.212	71.000, 0.322
357	71.200, 0.852	71.200, 0.821	71.200, 0.818	71.200, 0.735	71.200, 0.582	71.200, 0.212	71.200, 0.322
358	71.400, 0.852	71.400, 0.821	71.400, 0.818	71.400, 0.735	71.400, 0.581	71.400, 0.212	71.400, 0.322
359	71.600, 0.853	71.600, 0.821	71.600, 0.818	71.600, 0.735	71.600, 0.581	71.600, 0.212	71.600, 0.322
360	71.800, 0.853	71.800, 0.821	71.800, 0.818	71.800, 0.735	71.800, 0.582	71.800, 0.212	71.800, 0.322
361	72.000, 0.853	72.000, 0.821	72.000, 0.819	72.000, 0.735	72.000, 0.581	72.000, 0.212	72.000, 0.322
362	72.200, 0.853	72.200, 0.821	72.200, 0.819	72.200, 0.735	72.200, 0.582	72.200, 0.211	72.200, 0.321
363	72.400, 0.853	72.400, 0.822	72.400, 0.820	72.400, 0.735	72.400, 0.582	72.400, 0.211	72.400, 0.321
364	72.600, 0.854	72.600, 0.822	72.600, 0.820	72.600, 0.735	72.600, 0.582	72.600, 0.211	72.600, 0.321
365	72.800, 0.854	72.800, 0.822	72.800, 0.820	72.800, 0.735	72.800, 0.581	72.800, 0.211	72.800, 0.321
366	73.000, 0.854	73.000, 0.823	73.000, 0.820	73.000, 0.735	73.000, 0.581	73.000, 0.211	73.000, 0.321
367	73.200, 0.854	73.200, 0.823	73.200, 0.820	73.200, 0.735	73.200, 0.581	73.200, 0.210	73.200, 0.321
368	73.400, 0.854	73.400, 0.823	73.400, 0.820	73.400, 0.735	73.400, 0.581	73.400, 0.210	73.400, 0.320
369	73.600, 0.855	73.600, 0.824	73.600, 0.820	73.600, 0.735	73.600, 0.580	73.600, 0.210	73.600, 0.320
370	73.800, 0.855	73.800, 0.824	73.800, 0.820	73.800, 0.735	73.800, 0.580	73.800, 0.209	73.800, 0.320
371	74.000, 0.856	74.000, 0.824	74.000, 0.820	74.000, 0.734	74.000, 0.579	74.000, 0.209	74.000, 0.319
372	74.200, 0.856	74.200, 0.825	74.200, 0.820	74.200, 0.734	74.200, 0.579	74.200, 0.209	74.200, 0.319
373	74.400, 0.857	74.400, 0.825	74.400, 0.820	74.400, 0.734	74.400, 0.579	74.400, 0.209	74.400, 0.319
374	74.600, 0.858	74.600, 0.825	74.600, 0.820	74.600, 0.734	74.600, 0.578	74.600, 0.210	74.600, 0.318
375	74.800, 0.858	74.800, 0.826	74.800, 0.820	74.800, 0.734	74.800, 0.578	74.800, 0.210	74.800, 0.318
376	75.000, 0.859	75.000, 0.826	75.000, 0.820	75.000, 0.734	75.000, 0.578	75.000, 0.210	75.000, 0.318
377	75.200, 0.859	75.200, 0.827	75.200, 0.820	75.200, 0.734	75.200, 0.578	75.200, 0.210	75.200, 0.317
378	75.400, 0.860	75.400, 0.827	75.400, 0.820	75.400, 0.734	75.400, 0.578	75.400, 0.209	75.400, 0.317
379	75.600, 0.860	75.600, 0.828	75.600, 0.820	75.600, 0.733	75.600, 0.578	75.600, 0.209	75.600, 0.317
380	75.800, 0.861	75.800, 0.828	75.800, 0.821	75.800, 0.733	75.800, 0.578	75.800, 0.208	75.800, 0.317
381	76.000, 0.861	76.000, 0.828	76.000, 0.821	76.000, 0.733	76.000, 0.578	76.000, 0.207	76.000, 0.316
382	76.200, 0.861	76.200, 0.828	76.200, 0.822	76.200, 0.733	76.200, 0.577	76.200, 0.207	76.200, 0.316
383	76.400, 0.862	76.400, 0.828	76.400, 0.822	76.400, 0.733	76.400, 0.577	76.400, 0.206	76.400, 0.316
384	76.600, 0.862	76.600, 0.828	76.600, 0.823	76.600, 0.734	76.600, 0.577	76.600, 0.205	76.600, 0.316
385	76.800, 0.862	76.800, 0.829	76.800, 0.823	76.800, 0.734	76.800, 0.576	76.800, 0.205	76.800, 0.316
386	77.000, 0.862	77.000, 0.829	77.000, 0.823	77.000, 0.734	77.000, 0.576	77.000, 0.204	77.000, 0.315
387	77.200, 0.862	77.200, 0.830	77.200, 0.823	77.200, 0.735	77.200, 0.576	77.200, 0.204	77.200, 0.315
388	77.400, 0.862	77.400, 0.830	77.400, 0.824	77.400, 0.735	77.400, 0.575	77.400, 0.204	77.400, 0.315
389	77.600, 0.862	77.600, 0.831	77.600, 0.824	77.600, 0.735	77.600, 0.575	77.600, 0.204	77.600, 0.315
390	77.800, 0.863	77.800, 0.831	77.800, 0.824	77.800, 0.735	77.800, 0.574	77.800, 0.204	77.800, 0.315
391	78.000, 0.863	78.000, 0.831	78.000, 0.825	78.000, 0.735	78.000, 0.574	78.000, 0.204	78.000, 0.315
392	78.200, 0.863	78.200, 0.831	78.200, 0.824	78.200, 0.735	78.200, 0.574	78.200, 0.204	78.200, 0.315
393	78.400, 0.864	78.400, 0.832	78.400, 0.824	78.400, 0.735	78.400, 0.573	78.400, 0.204	78.400, 0.315
394	78.600, 0.864	78.600, 0.832	78.600, 0.824	78.600, 0.734	78.600, 0.573	78.600, 0.205	78.600, 0.315
395	78.800, 0.865	78.800, 0.832	78.800, 0.824	78.800, 0.734	78.800, 0.573	78.800, 0.205	78.800, 0.315
396	79.000, 0.865	79.000, 0.833	79.000, 0.824	79.000, 0.734	79.000, 0.573	79.000, 0.205	79.000, 0.315
397	79.200, 0.866	79.200, 0.833	79.200, 0.825	79.200, 0.734	79.200, 0.573	79.200, 0.205	79.200, 0.314
398	79.400, 0.866	79.400, 0.833	79.400, 0.825	79.400, 0.733	79.400, 0.573	79.400, 0.205	79.400, 0.314
399	79.600, 0.867	79.600, 0.833	79.600, 0.825	79.600, 0.733	79.600, 0.572	79.600, 0.205	79.600, 0.313
400	79.800, 0.867	79.800, 0.833	79.800, 0.826	79.800, 0.732	79.800, 0.572	79.800, 0.205	79.800, 0.313
401	80.000, 0.867	80.000, 0.833	80.000, 0.826	80.000, 0.732	80.000, 0.572	80.000, 0.205	80.000, 0.312
402	80.200, 0.868	80.200, 0.833	80.200, 0.826	80.200, 0.732	80.200, 0.572	80.200, 0.205	80.200, 0.312
403	80.400, 0.868	80.400, 0.833	80.400, 0.826	80.400, 0.732	80.400, 0.572	80.400, 0.204	80.400, 0.312
404	80.600, 0.869	80.600, 0.834	80.600, 0.825	80.600, 0.732	80.600, 0.572	80.600, 0.204	80.600, 0.312
405	80.800, 0.869	80.800, 0.834	80.800, 0.825	80.800, 0.732	80.800, 0.572	80.800, 0.204	80.800, 0.312
406	81.000, 0.869	81.000, 0.835	81.000, 0.825	81.000, 0.732	81.000, 0.573	81.000, 0.204	81.000, 0.312
407	81.200, 0.870	81.200, 0.835	81.200, 0.825	81.200, 0.733	81.200, 0.573	81.200, 0.204	81.200, 0.312
408	81.400, 0.870	81.400, 0.836	81.400, 0.825	81.400, 0.733	81.400, 0.573	81.400, 0.203	81.400, 0.312
409	81.600, 0.870	81.600, 0.836	81.600, 0.825	81.600, 0.734	81.600, 0.573	81.600, 0.203	81.600, 0.311
410	81.800, 0.870	81.800, 0.837	81.800, 0.825	81.800, 0.734	81.800, 0.573	81.800, 0.203	81.800, 0.311
411	82.000, 0.871	82.000, 0.837	82.000, 0.824	82.000, 0.734	82.000, 0.573	82.000, 0.203	82.000, 0.311
412	82.200, 0.871	82.200, 0.837	82.200, 0.824	82.200, 0.735	82.200, 0.573	82.200, 0.203	82.200, 0.311
413	82.400, 0.871	82.400, 0.838	82.400, 0.824	82.400, 0.735	82.400, 0.573	82.400, 0.203	82.400, 0.311
414	82.600, 0.871	82.600, 0.838	82.600, 0.824	82.600, 0.735	82.600, 0.573	82.600, 0.202	82.600, 0.311
415	82.800, 0.871	82.800, 0.839	82.800, 0.824	82.800, 0.734	82.800, 0.573	82.800, 0.202	82.800, 0.310
416	83.000, 0.871	83.000, 0.839	83.000, 0.825	83.000, 0.734	83.000, 0.573	83.000, 0.202	83.000, 0.310
417	83.200, 0.871	83.200, 0.839	83.200, 0.825	83.200, 0.734	83.200, 0.572	83.200, 0.202	83.200, 0.309
418	83.400, 0.872	83.400, 0.839	83.400, 0.826	83.400, 0.734	83.400, 0.572	83.400, 0.202	83.400, 0.309
419	83.600, 0.872	83.600, 0.839	83.600, 0.826	83.600, 0.734	83.600, 0.572	83.600, 0.201	83.600, 0.309
420	83.800, 0.873	83.800, 0.839	83.800, 0.827	83.800, 0.733	83.800, 0.572	83.800, 0.201	83.800, 0.309
421	84.000, 0.873	84.000, 0.840	84.000, 0.827	84.000, 0.733	84.000, 0.571	84.000, 0.201	84.000, 0.309
422	84.200, 0.873	84.200, 0.840	84.200, 0.827	84.200, 0.733	84.200, 0.571	84.200, 0.201	84.200, 0.309
423	84.400, 0.874	84.400, 0.840	84.400, 0.827	84.400, 0.732	84.400, 0.571	84.400, 0.201	84.400, 0.309
424	84.600, 0.874	84.600, 0.841	84.600, 0.827	84.600, 0.732	84.600, 0.571	84.600, 0.201	84.600, 0.309
425	84.800, 0.874	84.800, 0.841	84.800, 0.828	84.800, 0.732	84.800, 0.571	84.800, 0.201	84.800, 0.309
426	85.000, 0.874	85.000, 0.841	85.000, 0.828	85.000, 0.731	85.000, 0.572	85.000, 0.201	85.000, 0.309
427	85.200, 0.874	85.200, 0.842	85.200, 0.828	85.200, 0.731	85.200, 0.571	85.200, 0.201	85.200, 0.309
428	85.400, 0.874	85.400, 0.842	85.400, 0.828	85.400, 0.732	85.400, 0.571	85.400, 0.201	85.400, 0.309
429	85.600, 0.874	85.600, 0.842	85.600, 0.828	85.600, 0.732	85.600, 0.571	85.600, 0.201	85.600, 0.308
430	85.800, 0.875	85.800, 0.842	85.800, 0.829	85.800, 0.732	85.800, 0.571	85.800, 0.201	85.800, 0.308
431	86.000, 0.875	86.000, 0.843	86.000, 0.829	86.000, 0.732	86.000, 0.572	86.000, 0.201	86.000, 0.308
432	86.200, 0.875	86.200, 0.843	86.200, 0.829	86.200, 0.732	86.200, 0.572	86.200, 0.201	86.200, 0.308
433	86.400, 0.875	86.400, 0.843	86.400, 0.829	86.400, 0.732	86.400, 0.572	86.400, 0.201	86.400, 0.308
434	86.600, 0.876	86.600, 0.844	86.600, 0.829	86.600, 0.732	86.600, 0.572	86.600, 0.201	86.600, 0.308
435	86.800, 0.876	86.800, 0.844	86.800, 0.829	86.800, 0.732	86.800, 0.572	86.800, 0.201	86.800, 0.308
436	87.000, 0.877	87.000, 0.844	87.000, 0.829	87.000, 0.732	87.000, 0.572	87.000, 0.201	87.000, 0.308
437	87.200, 0.877	87.200, 0.845	87.200, 0.829	87.200, 0.731	87.200, 0.571	87.200, 0.201	87.200, 0.308
438	87.400, 0.878	87.400, 0.845	87.400, 0.830	87.400, 0.731	87.400, 0.571	87.400, 0.201	87.400, 0.308
439	87.600, 0.879	87.600, 0.845	87.600, 0.830	87.600, 0.731	87.600, 0.571	87.600, 0.201	87.600, 0.308
440	87.800, 0.879	87.800, 0.845	87.800, 0.830	87.800, 0.731	87.800, 0.571	87.800, 0.201	87.800, 0.308
441	88.000, 0.880	88.000, 0.845	88.000, 0.830	88.000, 0.731	88.000, 0.571	88.000, 0.201	88.000, 0.308
442	88.200, 0.880	88.200, 0.845	88.200, 0.830	88.200, 0.731	88.200, 0.571	88.200, 0.201	88.200, 0.308
443	88.400, 0.881	88.400, 0.846	88.400, 0.831	88.400, 0.731	88.400, 0.571	88.400, 0.201	88.400, 0.307
444	88.600, 0.881	88.600, 0.846	88.600, 0.831	88.600, 0.730	88.600, 0.571	88.600, 0.200	88.600, 0.307
445	88.800, 0.881	88.800, 0.846	88.800, 0.831	88.800, 0.730	88.800, 0.571	88.800, 0.200	88.800, 0.307
446	89.000, 0.881	89.000, 0.846	89.000, 0.831	89.000, 0.729	89.000, 0.571	89.000, 0.200	89.000, 0.307
447	89.200, 0.881	89.200, 0.846	89.200, 0.832	89.200, 0.729	89.200, 0.571	89.200, 0.199	89.200, 0.306
448	89.400, 0.881	89.400, 0.846	89.400, 0.832	89.400, 0.729	89.400, 0.570	89.400, 0.199	89.400, 0.306
449	89.600, 0.881	89.600, 0.846	89.600, 0.832	89.600, 0.729	89.600, 0.570	89.600, 0.198	89.600, 0.306
450	89.800, 0.881	89.800, 0.847	89.800, 0.832	89.800, 0.729	89.800, 0.570	89.800, 0.198	89.800, 0.306
451	90.000, 0.881	90.000, 0.847	90.000, 0.833	90.000, 0.729	90.000, 0.570	90.000, 0.198	90.000, 0.305
452	90.200, 0.882	90.200, 0.847	90.200, 0.833	90.200, 0.729	90.200, 0.569	90.200, 0.198	90.200, 0.305
453	90.400, 0.882	90.400, 0.848	90.400, 0.833	90.400, 0.729	90.400, 0.569	90.400, 0.198	90.400, 0.305
454	90.600, 0.882	90.600, 0.849	90.600, 0.833	90.600, 0.729	90.600, 0.569	90.600, 0.198	90.600, 0.305
455	90.800, 0.882	90.800, 0.849	90.800, 0.833	90.800, 0.729	90.800, 0.569	90.800, 0.198	90.800, 0.305
456	91.000, 0.883	91.000, 0.850	91.000, 0.833	91.000, 0.730	91.000, 0.569	91.000, 0.198	91.000, 0.305
457	91.200, 0.883	91.200, 0.850	91.200, 0.833	91.200, 0.730	91.200, 0.569	91.200, 0.198	91.200, 0.305
458	91.400, 0.884	91.400, 0.850	91.400, 0.833	91.400, 0.730	91.400, 0.569	91.400, 0.198	91.400, 0.305
459	91.600, 0.884	91.600, 0.850	91.600, 0.833	91.600, 0.730	91.600, 0.569	91.600, 0.198	91.600, 0.305
460	91.800, 0.885	91.800, 0.851	91.800, 0.833	91.800, 0.730	91.800, 0.569	91.800, 0.198	91.800, 0.305
461	92.000, 0.885	92.000, 0.851	92.000, 0.833	92.000, 0.730	92.000, 0.569	92.000, 0.198	92.000, 0.305
462	92.200, 0.886	92.200, 0.851	92.200, 0.834	92.200, 0.730	92.200, 0.569	92.200, 0.198	92.200, 0.305
463	92.400, 0.886	92.400, 0.852	92.400, 0.834	92.400, 0.730	92.400, 0.569	92.400, 0.198	92.400, 0.304
464	92.600, 0.886	92.600, 0.852	92.600, 0.834	92.600, 0.729	92.600, 0.569	92.600, 0.198	92.600, 0.304
465	92.800, 0.886	92.800, 0.852	92.800, 0.834	92.800, 0.729	92.800, 0.569	92.800, 0.198	92.800, 0.304
466	93.000, 0.886	93.000, 0.851	93.000, 0.834	93.000, 0.729	93.000, 0.568	93.000, 0.198	93.000, 0.303
467	93.200, 0.886	93.200, 0.851	93.200, 0.834	93.200, 0.729	93.200, 0.568	93.200, 0.198	93.200, 0.303
468	93.400, 0.886	93.400, 0.851	93.400, 0.834	93.400, 0.729	93.400, 0.567	93.400, 0.197	93.400, 0.302
469	93.600, 0.886	93.600, 0.852	93.600, 0.835	93.600, 0.729	93.600, 0.567	93.600, 0.197	93.600, 0.302
470	93.800, 0.886	93.800, 0.852	93.800, 0.835	93.800, 0.729	93.800, 0.566	93.800, 0.197	93.800, 0.302
471	94.000, 0.886	94.000, 0.852	94.000, 0.835	94.000, 0.729	94.000, 0.566	94.000, 0.197	94.000, 0.301
472	94.200, 0.886	94.200, 0.853	94.200, 0.836	94.200, 0.729	94.200, 0.566	94.200, 0.198	94.200, 0.301
473	94.400, 0.886	94.400, 0.853	94.400, 0.836	94.400, 0.730	94.400, 0.566	94.400, 0.198	94.400, 0.301
474	94.600, 0.886	94.600, 0.853	94.600, 0.836	94.600, 0.730	94.600, 0.565	94.600, 0.198	94.600, 0.300
475	94.800, 0.886	94.800, 0.854	94.800, 0.836	94.800, 0.730	94.800, 0.565	94.800, 0.198	94.800, 0.300
476	95.000, 0.886	95.000, 0.854	95.000, 0.836	95.000, 0.731	95.000, 0.565	95.000, 0.199	95.000, 0.300
477	95.200, 0.887	95.200, 0.854	95.200, 0.836	95.200, 0.731	95.200, 0.565	95.200, 0.199	95.200, 0.300
478	95.400, 0.888	95.400, 0.854	95.400, 0.836	95.400, 0.731	95.400, 0.565	95.400, 0.199	95.400, 0.300
479	95.600, 0.888	95.600, 0.855	95.600, 0.836	95.600, 0.730	95.600, 0.565	95.600, 0.199	95.600, 0.300
480	95.800, 0.889	95.800, 0.855	95.800, 0.836	95.800, 0.730	95.800, 0.565	95.800, 0.199	95.800, 0.300
481	96.000, 0.890	96.000, 0.856	96.000, 0.836	96.000, 0.730	96.000, 0.566	96.000, 0.198	96.000, 0.301
482	96.200, 0.890	96.200, 0.856	96.200, 0.836	96.200, 0.730	96.200, 0.566	96.200, 0.198	96.200, 0.301
483	96.400, 0.891	96.400, 0.856	96.400, 0.836	96.400, 0.730	96.400, 0.566	96.400, 0.198	96.400, 0.301
484	96.600, 0.891	96.600, 0.856	96.600, 0.836	96.600, 0.730	96.600, 0.567	96.600, 0.197	96.600, 0.301
485	96.800, 0.892	96.800, 0.857	96.800, 0.835	96.800, 0.729	96.800, 0.567	96.800, 0.197	96.800, 0.301
486	97.000, 0.893	97.000, 0.856	97.000, 0.835	97.000, 0.729	97.000, 0.567	97.000, 0.196	97.000, 0.301
487	97.200, 0.893	97.200, 0.856	97.200, 0.836	97.200, 0.729	97.200, 0.566	97.200, 0.196	97.200, 0.301
488	97.400, 0.894	97.400, 0.856	97.400, 0.836	97.400, 0.728	97.400, 0.566	97.400, 0.195	97.400, 0.300
489	97.600, 0.894	97.600, 0.856	97.600, 0.836	97.600, 0.728	97.600, 0.566	97.600, 0.195	97.600, 0.300
490	97.800, 0.895	97.800, 0.856	97.800, 0.836	97.800, 0.728	97.800, 0.566	97.800, 0.195	97.800, 0.300
491	98.000, 0.895	98.000, 0.856	98.000, 0.836	98.000, 0.728	98.000, 0.566	98.000, 0.195	98.000, 0.300
492	98.200, 0.895	98.200, 0.857	98.200, 0.836	98.200, 0.728	98.200, 0.566	98.200, 0.195	98.200, 0.299
493	98.400, 0.895	98.400, 0.857	98.400, 0.837	98.400, 0.728	98.400, 0.566	98.400, 0.195	98.400, 0.299
494	98.600, 0.894	98.600, 0.857	98.600, 0.837	98.600, 0.728	98.600, 0.566	98.600, 0.195	98.600, 0.299
495	98.800, 0.894	98.800, 0.858	98.800, 0.837	98.800, 0.728	98.800, 0.565	98.800, 0.195	98.800, 0.299
496	99.000, 0.894	99.000, 0.858	99.000, 0.837	99.000, 0.728	99.000, 0.565	99.000, 0.195	99.000, 0.299
497	99.200, 0.894	99.200, 0.859	99.200, 0.837	99.200, 0.727	99.200, 0.565	99.200, 0.195	99.200, 0.299
498	99.400, 0.894	99.400, 0.859	99.400, 0.837	99.400, 0.727	99.400, 0.565	99.400, 0.195	99.400, 0.299
499	99.600, 0.894	99.600, 0.860	99.600, 0.838	99.600, 0.727	99.600, 0.565	99.600, 0.195	99.600, 0.299
500	99.800, 0.894	99.800, 0.861	99.800, 0.838	99.800, 0.727	99.800, 0.565	99.800, 0.195	99.800, 0.299
501	100.000, 0.894	100.000, 0.861	100.000, 0.839	100.000, 0.727	100.000, 0.565	100.000, 0.195	100.000, 0.299
502	100.200, 0.894	100.200, 0.861	100.200, 0.839	100.200, 0.727	100.200, 0.565	100.200, 0.195	100.200, 0.299
503	100.400, 0.894	100.400, 0.861	100.400, 0.840	100.400, 0.727	100.400, 0.565	100.400, 0.194	100.400, 0.298
504	100.600, 0.895	100.600, 0.861	100.600, 0.840	100.600, 0.727	100.600, 0.565	100.600, 0.194	100.600, 0.298
505	100.800, 0.895	100.800, 0.861	100.800, 0.840	100.800, 0.727	100.800, 0.564	100.800, 0.194	100.800, 0.298
506	101.000, 0.895	101.000, 0.861	101.000, 0.841	101.000, 0.726	101.000, 0.564	101.000, 0.193	101.000, 0.298
507	101.200, 0.896	101.200, 0.860	101.200, 0.841	101.200, 0.726	101.200, 0.564	101.200, 0.193	101.200, 0.298
508	101.400, 0.896	101.400, 0.860	101.400, 0.841	101.400, 0.726	101.400, 0.563	101.400, 0.192	101.400, 0.297
509	101.600, 0.896	101.600, 0.861	101.600, 0.840	101.600, 0.726	101.600, 0.563	101.600, 0.192	101.600, 0.297
510	101.800, 0.897	101.800, 0.861	101.800, 0.840	101.800, 0.726	101.800, 0.563	101.800, 0.192	101.800, 0.297
511	102.000, 0.897	102.000, 0.861	102.000, 0.840	102.000, 0.726	102.000, 0.563	102.000, 0.192	102.000, 0.297
512	102.200, 0.897	102.200, 0.862	102.200, 0.840	102.200, 0.726	102.200, 0.563	102.200, 0.192	102.200, 0.297
513	102.400, 0.897	102.400, 0.862	102.400, 0.840	102.400, 0.726	102.400, 0.563	102.400, 0.192	102.400, 0.297
514	102.600, 0.897	102.600, 0.862	102.600, 0.840	102.600, 0.726	102.600, 0.562	102.600, 0.192	102.600, 0.297
515	102.800, 0.897	102.800, 0.863	102.800, 0.840	102.800, 0.726	102.800, 0.562	102.800, 0.192	102.800, 0.297
516	103.000, 0.898	103.000, 0.863	103.000, 0.840	103.000, 0.726	103.000, 0.562	103.000, 0.192	103.000, 0.297
517	103.200, 0.898	103.200, 0.864	103.200, 0.840	103.200, 0.727	103.200, 0.562	103.200, 0.192	103.200, 0.297
518	103.400, 0.898	103.400, 0.864	103.400, 0.841	103.400, 0.727	103.400, 0.562	103.400, 0.192	103.400, 0.297
519	103.600, 0.898	103.600, 0.864	103.600, 0.841	103.600, 0.727	103.600, 0.562	103.600, 0.192	103.600, 0.297
520	103.800, 0.898	103.800, 0.865	103.800, 0.842	103.800, 0.727	103.800, 0.561	103.800, 0.191	103.800, 0.297
521	104.000, 0.899	104.000, 0.865	104.000, 0.842	104.000, 0.727	104.000, 0.561	104.000, 0.191	104.000, 0.297
522	104.200, 0.899	104.200, 0.865	104.200, 0.842	104.200, 0.727	104.200, 0.561	104.200, 0.191	104.200, 0.297
523	104.400, 0.899	104.400, 0.866	104.400, 0.843	104.400, 0.727	104.400, 0.561	104.400, 0.191	104.400, 0.297
524	104.600, 0.899	104.600, 0.866	104.600, 0.843	104.600, 0.727	104.600, 0.561	104.600, 0.191	104.600, 0.297
525	104.800, 0.899	104.800, 0.866	104.800, 0.843	104.800, 0.727	104.800, 0.561	104.800, 0.191	104.800, 0.297
526	105.000, 0.899	105.000, 0.866	105.000, 0.843	105.000, 0.727	105.000, 0.561	105.000, 0.191	105.000, 0.296
527	105.200, 0.899	105.200, 0.867	105.200, 0.843	105.200, 0.727	105.200, 0.561	105.200, 0.192	105.200, 0.296
528	105.400, 0.899	105.400, 0.867	105.400, 0.843	105.400, 0.726	105.400, 0.561	105.400, 0.192	105.400, 0.296
529	105.600, 0.899	105.600, 0.867	105.600, 0.843	105.600, 0.726	105.600, 0.561	105.600, 0.192	105.600, 0.296
530	105.800, 0.899	105.800, 0.867	105.800, 0.843	105.800, 0.726	105.800, 0.561	105.800, 0.193	105.800, 0.295
531	106.000, 0.900	106.000, 0.867	106.000, 0.843	106.000, 0.726	106.000, 0.561	106.000, 0.193	106.000, 0.295
532	106.200, 0.900	106.200, 0.867	106.200, 0.844	106.200, 0.725	106.200, 0.561	106.200, 0.193	106.200, 0.295
533	106.400, 0.900	106.400, 0.867	106.400, 0.844	106.400, 0.725	106.400, 0.561	106.400, 0.193	106.400, 0.294
534	106.600, 0.900	106.600, 0.867	106.600, 0.844	106.600, 0.725	106.600, 0.561	106.600, 0.193	106.600, 0.294
535	106.800, 0.900	106.800, 0.867	106.800, 0.845	106.800, 0.725	106.800, 0.561	106.800, 0.193	106.800, 0.294
536	107.000, 0.901	107.000, 0.867	107.000, 0.845	107.000, 0.725	107.000, 0.561	107.000, 0.193	107.000, 0.294
537	107.200, 0.901	107.200, 0.867	107.200, 0.845	107.200, 0.725	107.200, 0.561	107.200, 0.192	107.200, 0.294
538	107.400, 0.902	107.400, 0.867	107.400, 0.845	107.400, 0.724	107.400, 0.562	107.400, 0.192	107.400, 0.294
539	107.600, 0.902	107.600, 0.867	107.600, 0.845	107.600, 0.724	107.600, 0.562	107.600, 0.192	107.600, 0.295
540	107.800, 0.903	107.800, 0.867	107.800, 0.845	107.800, 0.724	107.800, 0.562	107.800, 0.192	107.800, 0.295
541	108.000, 0.903	108.000, 0.868	108.000, 0.845	108.000, 0.723	108.000, 0.562	108.000, 0.192	108.000, 0.295
542	108.200, 0.903	108.200, 0.868	108.200, 0.845	108.200, 0.723	108.200, 0.562	108.200, 0.192	108.200, 0.295
543	108.400, 0.904	108.400, 0.868	108.400, 0.845	108.400, 0.723	108.400, 0.562	108.400, 0.192	108.400, 0.295
544	108.600, 0.904	108.600, 0.869	108.600, 0.845	108.600, 0.723	108.600, 0.562	108.600, 0.192	108.600, 0.295
545	108.800, 0.904	108.800, 0.869	108.800, 0.845	108.800, 0.723	108.800, 0.562	108.800, 0.192	108.800, 0.295
546	109.000, 0.905	109.000, 0.869	109.000, 0.845	109.000, 0.723	109.000, 0.562	109.000, 0.192	109.000, 0.295
547	109.200, 0.905	109.200, 0.869	109.200, 0.845	109.200, 0.723	109.200, 0.562	109.200, 0.192	109.200, 0.295
548	109.400, 0.905	109.400, 0.870	109.400, 0.845	109.400, 0.723	109.400, 0.561	109.400, 0.192	109.400, 0.295
549	109.600, 0.905	109.600, 0.870	109.600, 0.845	109.600, 0.723	109.600, 0.561	109.600, 0.192	109.600, 0.295
550	109.800, 0.906	109.800, 0.870	109.800, 0.845	109.800, 0.724	109.800, 0.560	109.800, 0.192	109.800, 0.295
551	110.000, 0.906	110.000, 0.870	110.000, 0.846	110.000, 0.724	110.000, 0.560	110.000, 0.192	110.000, 0.295
552	110.200, 0.906	110.200, 0.871	110.200, 0.846	110.200, 0.724	110.200, 0.560	110.200, 0.192	110.200, 0.295
553	110.400, 0.906	110.400, 0.871	110.400, 0.846	110.400, 0.724	110.400, 0.560	110.400, 0.192	110.400, 0.294
554	110.600, 0.906	110.600, 0.871	110.600, 0.846	110.600, 0.724	110.600, 0.560	110.600, 0.192	110.600, 0.294
555	110.800, 0.906	110.800, 0.871	110.800, 0.847	110.800, 0.724	110.800, 0.560	110.800, 0.192	110.800, 0.294
556	111.000, 0.906	111.000, 0.871	111.000, 0.847	111.000, 0.724	111.000, 0.561	111.000, 0.192	111.000, 0.294
557	111.200, 0.906	111.200, 0.871	111.200, 0.847	111.200, 0.724	111.200, 0.561	111.200, 0.192	111.200, 0.294
558	111.400, 0.906	111.400, 0.871	111.400, 0.846	111.400, 0.723	111.400, 0.561	111.400, 0.192	111.400, 0.294
559	111.600, 0.906	111.600, 0.872	111.600, 0.846	111.600, 0.723	111.600, 0.561	111.600, 0.192	111.600, 0.294
560	111.800, 0.906	111.800, 0.872	111.800, 0.846	111.800, 0.723	111.800, 0.561	111.800, 0.192	111.800, 0.294
561	112.000, 0.906	112.000, 0.873	112.000, 0.846	112.000, 0.722	112.000, 0.561	112.000, 0.191	112.000, 0.294
562	112.200, 0.906	112.200, 0.873	112.200, 0.847	112.200, 0.722	112.200, 0.561	112.200, 0.191	112.200, 0.293
563	112.400, 0.907	112.400, 0.873	112.400, 0.847	112.400, 0.722	112.400, 0.560	112.400, 0.191	112.400, 0.293
564	112.600, 0.907	112.600, 0.873	112.600, 0.847	112.600, 0.722	112.600, 0.560	112.600, 0.191	112.600, 0.293
565	112.800, 0.907	112.800, 0.873	112.800, 0.848	112.800, 0.722	112.800, 0.560	112.800, 0.191	112.800, 0.293
566	113.000, 0.907	113.000, 0.873	113.000, 0.848	113.000, 0.721	113.000, 0.560	113.000, 0.190	113.000, 0.292
567	113.200, 0.908	113.200, 0.874	113.200, 0.849	113.200, 0.721	113.200, 0.560	113.200, 0.190	113.200, 0.292
568	113.400, 0.908	113.400, 0.874	113.400, 0.849	113.400, 0.721	113.400, 0.560	113.400, 0.190	113.400, 0.292
569	113.600, 0.908	113.600, 0.874	113.600, 0.850	113.600, 0.722	113.600, 0.560	113.600, 0.190	113.600, 0.292
570	113.800, 0.909	113.800, 0.875	113.800, 0.850	113.800, 0.722	113.800, 0.560	113.800, 0.191	113.800, 0.292
571	114.000, 0.909	114.000, 0.875	114.000, 0.851	114.000, 0.722	114.000, 0.560	114.000, 0.191	114.000, 0.292
572	114.200, 0.909	114.200, 0.875	114.200, 0.851	114.200, 0.722	114.200, 0.560	114.200, 0.192	114.200, 0.291
573	114.400, 0.910	114.400, 0.875	114.400, 0.851	114.400, 0.723	114.400, 0.560	114.400, 0.192	114.400, 0.291
574	114.600, 0.910	114.600, 0.875	114.600, 0.852	114.600, 0.723	114.600, 0.560	114.600, 0.192	114.600, 0.291
575	114.800, 0.910	114.800, 0.875	114.800, 0.852	114.800, 0.723	114.800, 0.560	114.800, 0.193	114.800, 0.290
576	115.000, 0.910	115.000, 0.875	115.000, 0.852	115.000, 0.724	115.000, 0.560	115.000, 0.193	115.000, 0.290
577	115.200, 0.910	115.200, 0.875	115.200, 0.852	115.200, 0.724	115.200, 0.560	115.200, 0.193	115.200, 0.290
578	115.400, 0.910	115.400, 0.876	115.400, 0.852	115.400, 0.724	115.400, 0.559	115.400, 0.192	115.400, 0.290
579	115.600, 0.910	115.600, 0.876	115.600, 0.852	115.600, 0.724	115.600, 0.559	115.600, 0.192	115.600, 0.290
580	115.800, 0.910	115.800, 0.876	115.800, 0.852	115.800, 0.725	115.800, 0.558	115.800, 0.192	115.800, 0.290
581	116.000, 0.910	116.000, 0.877	116.000, 0.852	116.000, 0.725	116.000, 0.558	116.000, 0.192	116.000, 0.290
582	116.200, 0.910	116.200, 0.877	116.200, 0.852	116.200, 0.725	116.200, 0.557	116.200, 0.192	116.200, 0.290
583	116.400, 0.910	116.400, 0.877	116.400, 0.852	116.400, 0.725	116.400, 0.557	116.400, 0.191	116.400, 0.289
584	116.600, 0.910	116.600, 0.877	116.600, 0.852	116.600, 0.725	116.600, 0.556	116.600, 0.191	116.600, 0.289
585	116.800, 0.911	116.800, 0.877	116.800, 0.852	116.800, 0.725	116.800, 0.556	116.800, 0.191	116.800, 0.289
586	117.000, 0.911	117.000, 0.877	117.000, 0.852	117.000, 0.725	117.000, 0.556	117.000, 0.190	117.000, 0.289
587	117.200, 0.911	117.200, 0.877	117.200, 0.852	117.200, 0.725	117.200, 0.556	117.200, 0.190	117.200, 0.288
588	117.400, 0.912	117.400, 0.877	117.400, 0.853	117.400, 0.725	117.400, 0.557	117.400, 0.190	117.400, 0.288
589	117.600, 0.912	117.600, 0.877	117.600, 0.853	117.600, 0.725	117.600, 0.557	117.600, 0.189	117.600, 0.288
590	117.800, 0.913	117.800, 0.877	117.800, 0.853	117.800, 0.725	117.800, 0.557	117.800, 0.189	117.800, 0.288
591	118.000, 0.913	118.000, 0.877	118.000, 0.853	118.000, 0.724	118.000, 0.557	118.000, 0.189	118.000, 0.287
592	118.200, 0.914	118.200, 0.877	118.200, 0.853	118.200, 0.724	118.200, 0.557	118.200, 0.188	118.200, 0.287
593	118.400, 0.914	118.400, 0.878	118.400, 0.853	118.400, 0.724	118.400, 0.558	118.400, 0.188	118.400, 0.287
594	118.600, 0.914	118.600, 0.878	118.600, 0.854	118.600, 0.724	118.600, 0.558	118.600, 0.188	118.600, 0.287
595	118.800, 0.914	118.800, 0.878	118.800, 0.854	118.800, 0.724	118.800, 0.558	118.800, 0.188	118.800, 0.286
596	119.000, 0.915	119.000, 0.879	119.000, 0.854	119.000, 0.723	119.000, 0.558	119.000, 0.188	119.000, 0.286
597	119.200, 0.915	119.200, 0.880	119.200, 0.855	119.200, 0.723	119.200, 0.558	119.200, 0.187	119.200, 0.286
598	119.400, 0.915	119.400, 0.881	119.400, 0.855	119.400, 0.723	119.400, 0.558	119.400, 0.187	119.400, 0.286
599	119.600, 0.915	119.600, 0.881	119.600, 0.855	119.600, 0.722	119.600, 0.557	119.600, 0.188	119.600, 0.286
600	119.800, 0.915	119.800, 0.882	119.800, 0.855	119.800, 0.722	119.800, 0.557	119.800, 0.188	119.800, 0.286
601	120.000, 0.915	120.000, 0.883	120.000, 0.855	120.000, 0.722	120.000, 0.557	120.000, 0.188	120.000, 0.286
602	120.200, 0.915	120.200, 0.883	120.200, 0.855	120.200, 0.722	120.200, 0.557	120.200, 0.188	120.200, 0.286
603	120.400, 0.915	120.400, 0.883	120.400, 0.855	120.400, 0.722	120.400, 0.557	120.400, 0.188	120.400, 0.286
604	120.600, 0.915	120.600, 0.883	120.600, 0.855	120.600, 0.722	120.600, 0.557	120.600, 0.188	120.600, 0.286
605	120.800, 0.915	120.800, 0.883	120.800, 0.855	120.800, 0.722	120.800, 0.557	120.800, 0.188	120.800, 0.286
606	121.000, 0.914	121.000, 0.883	121.000, 0.855	121.000, 0.722	121.000, 0.557	121.000, 0.188	121.000, 0.287
607	121.200, 0.914	121.200, 0.883	121.200, 0.855	121.200, 0.722	121.200, 0.557	121.200, 0.188	121.200, 0.287
608	121.400, 0.914	121.400, 0.883	121.400, 0.855	121.400, 0.721	121.400, 0.557	121.400, 0.188	121.400, 0.287
609	121.600, 0.914	121.600, 0.883	121.600, 0.855	121.600, 0.721	121.600, 0.556	121.600, 0.188	121.600, 0.287
610	121.800, 0.914	121.800, 0.883	121.800, 0.855	121.800, 0.721	121.800, 0.556	121.800, 0.188	121.800, 0.287
611	122.000, 0.914	122.000, 0.883	122.000, 0.855	122.000, 0.721	122.000, 0.556	122.000, 0.188	122.000, 0.287
612	122.200, 0.914	122.200, 0.883	122.200, 0.855	122.200, 0.720	122.200, 0.556	122.200, 0.188	122.200, 0.287
613	122.400, 0.914	122.400, 0.883	122.400, 0.855	122.400, 0.720	122.400, 0.556	122.400, 0.188	122.400, 0.287
614	122.600, 0.914	122.600, 0.883	122.600, 0.855	122.600, 0.721	122.600, 0.555	122.600, 0.188	122.600, 0.286
615	122.800, 0.914	122.800, 0.883	122.800, 0.855	122.800, 0.721	122.800, 0.556	122.800, 0.188	122.800, 0.286
616	123.000, 0.914	123.000, 0.883	123.000, 0.856	123.000, 0.721	123.000, 0.556	123.000, 0.188	123.000, 0.286
617	123.200, 0.914	123.200, 0.883	123.200, 0.856	123.200, 0.721	123.200, 0.556	123.200, 0.188	123.200, 0.286
618	123.400, 0.915	123.400, 0.883	123.400, 0.856	123.400, 0.721	123.400, 0.556	123.400, 0.187	123.400, 0.286
619	123.600, 0.915	123.600, 0.883	123.600, 0.856	123.600, 0.721	123.600, 0.556	123.600, 0.187	123.600, 0.286
620	123.800, 0.915	123.800, 0.883	123.800, 0.856	123.800, 0.721	123.800, 0.555	123.800, 0.187	123.800, 0.286
621	124.000, 0.915	124.000, 0.883	124.000, 0.856	124.000, 0.721	124.000, 0.555	124.000, 0.187	124.000, 0.286
622	124.200, 0.916	124.200, 0.884	124.200, 0.856	124.200, 0.721	124.200, 0.555	124.200, 0.187	124.200, 0.286
623	124.400, 0.916	124.400, 0.884	124.400, 0.856	124.400, 0.721	124.400, 0.555	124.400, 0.187	124.400, 0.285
624	124.600, 0.917	124.600, 0.884	124.600, 0.857	124.600, 0.721	124.600, 0.555	124.600, 0.187	124.600, 0.285
625	124.800, 0.917	124.800, 0.885	124.800, 0.857	124.800, 0.721	124.800, 0.554	124.800, 0.187	124.800, 0.285
626	125.000, 0.918	125.000, 0.885	125.000, 0.857	125.000, 0.721	125.000, 0.554	125.000, 0.187	125.000, 0.285
627	125.200, 0.918	125.200, 0.885	125.200, 0.857	125.200, 0.720	125.200, 0.554	125.200, 0.187	125.200, 0.285
628	125.400, 0.919	125.400, 0.885	125.400, 0.857	125.400, 0.720	125.400, 0.553	125.400, 0.187	125.400, 0.285
629	125.600, 0.919	125.600, 0.885	125.600, 0.857	125.600, 0.720	125.600, 0.553	125.600, 0.187	125.600, 0.284
630	125.800, 0.920	125.800, 0.885	125.800, 0.857	125.800, 0.720	125.800, 0.552	125.800, 0.187	125.800, 0.284
631	126.000, 0.920	126.000, 0.884	126.000, 0.857	126.000, 0.719	126.000, 0.552	126.000, 0.187	126.000, 0.284
632	126.200, 0.921	126.200, 0.884	126.200, 0.858	126.200, 0.719	126.200, 0.552	126.200, 0.187	126.200, 0.284
633	126.400, 0.921	126.400, 0.885	126.400, 0.858	126.400, 0.719	126.400, 0.552	126.400, 0.187	126.400, 0.284
634	126.600, 0.921	126.600, 0.885	126.600, 0.858	126.600, 0.719	126.600, 0.552	126.600, 0.187	126.600, 0.284
635	126.800, 0.922	126.800, 0.885	126.800, 0.858	126.800, 0.719	126.800, 0.552	126.800, 0.187	126.800, 0.284
636	127.000, 0.922	127.000, 0.885	127.000, 0.858	127.000, 0.719	127.000, 0.552	127.000, 0.187	127.000, 0.284
637	127.200, 0.922	127.200, 0.885	127.200, 0.858	127.200, 0.719	127.200, 0.552	127.200, 0.187	127.200, 0.284
638	127.400, 0.922	127.400, 0.886	127.400, 0.858	127.400, 0.719	127.400, 0.552	127.400, 0.187	127.400, 0.283
639	127.600, 0.923	127.600, 0.886	127.600, 0.858	127.600, 0.719	127.600, 0.552	127.600, 0.186	127.600, 0.283
640	127.800, 0.923	127.800, 0.886	127.800, 0.858	127.800, 0.719	127.800, 0.552	127.800, 0.186	127.800, 0.283
641	128.000, 0.923	128.000, 0.887	128.000, 0.858	128.000, 0.719	128.000, 0.552	128.000, 0.186	128.000, 0.283
642	128.200, 0.923	128.200, 0.887	128.200, 0.858	128.200, 0.719	128.200, 0.552	128.200, 0.186	128.200, 0.283
643	128.400, 0.923	128.400, 0.888	128.400, 0.859	128.400, 0.719	128.400, 0.552	128.400, 0.186	128.400, 0.283
644	128.600, 0.923	128.600, 0.888	128.600, 0.859	128.600, 0.719	128.600, 0.552	128.600, 0.186	128.600, 0.283
645	128.800, 0.924	128.800, 0.888	128.800, 0.860	128.800, 0.719	128.800, 0.552	128.800, 0.186	128.800, 0.283
646	129.000, 0.924	129.000, 0.888	129.000, 0.860	129.000, 0.719	129.000, 0.552	129.000, 0.186	129.000, 0.283
647	129.200, 0.924	129.200, 0.888	129.200, 0.861	129.200, 0.718	129.200, 0.552	129.200, 0.186	129.200, 0.283
648	129.400, 0.924	129.400, 0.889	129.400, 0.861	129.400, 0.718	129.400, 0.552	129.400, 0.186	129.400, 0.283
649	129.600, 0.924	129.600, 0.889	129.600, 0.861	129.600, 0.718	129.600, 0.552	129.600, 0.186	129.600, 0.283
650	129.800, 0.924	129.800, 0.889	129.800, 0.862	129.800, 0.718	129.800, 0.552	129.800, 0.186	129.800, 0.284
651	130.000, 0.924	130.000, 0.889	130.000, 0.862	130.000, 0.718	130.000, 0.551	130.000, 0.186	130.000, 0.284
652	130.200, 0.924	130.200, 0.889	130.200, 0.862	130.200, 0.718	130.200, 0.551	130.200, 0.186	130.200, 0.284
653	130.400, 0.924	130.400, 0.889	130.400, 0.862	130.400, 0.718	130.400, 0.551	130.400, 0.186	130.400, 0.284
654	130.600, 0.924	130.600, 0.889	130.600, 0.862	130.600, 0.718	130.600, 0.551	130.600, 0.186	130.600, 0.284
655	130.800, 0.924	130.800, 0.889	130.800, 0.862	130.800, 0.718	130.800, 0.551	130.800, 0.185	130.800, 0.283
656	131.000, 0.923	131.000, 0.889	131.000, 0.862	131.000, 0.718	131.000, 0.551	131.000, 0.185	131.000, 0.283
657	131.200, 0.923	131.200, 0.889	131.200, 0.862	131.200, 0.718	131.200, 0.551	131.200, 0.185	131.200, 0.283
658	131.400, 0.923	131.400, 0.889	131.400, 0.862	131.400, 0.718	131.400, 0.551	131.400, 0.185	131.400, 0.282
659	131.600, 0.923	131.600, 0.889	131.600, 0.862	131.600, 0.718	131.600, 0.551	131.600, 0.185	131.600, 0.282
660	131.800, 0.924	131.800, 0.889	131.800, 0.862	131.800, 0.718	131.800, 0.551	131.800, 0.185	131.800, 0.281
661	132.000, 0.924	132.000, 0.889	132.000, 0.862	132.000, 0.718	132.000, 0.551	132.000, 0.185	132.000, 0.281
662	132.200, 0.924	132.200, 0.889	132.200, 0.862	132.200, 0.718	132.200, 0.550	132.200, 0.185	132.200, 0.281
663	132.400, 0.924	132.400, 0.889	132.400, 0.862	132.400, 0.718	132.400, 0.550	132.400, 0.185	132.400, 0.280
664	132.600, 0.925	132.600, 0.889	132.600, 0.862	132.600, 0.718	132.600, 0.550	132.600, 0.186	132.600, 0.280
665	132.800, 0.925	132.800, 0.889	132.800, 0.862	132.800, 0.717	132.800, 0.550	132.800, 0.186	132.800, 0.280
666	133.000, 0.925	133.000, 0.890	133.000, 0.862	133.000, 0.717	133.000, 0.550	133.000, 0.186	133.000, 0.280
667	133.200, 0.926	133.200, 0.890	133.200, 0.862	133.200, 0.717	133.200, 0.550	133.200, 0.186	133.200, 0.280
668	133.400, 0.926	133.400, 0.890	133.400, 0.862	133.400, 0.717	133.400, 0.550	133.400, 0.186	133.400, 0.280
669	133.600, 0.926	133.600, 0.891	133.600, 0.862	133.600, 0.717	133.600, 0.550	133.600, 0.186	133.600, 0.280
670	133.800, 0.926	133.800, 0.891	133.800, 0.862	133.800, 0.717	133.800, 0.550	133.800, 0.185	133.800, 0.281
671	134.000, 0.926	134.000, 0.891	134.000, 0.862	134.000, 0.716	134.000, 0.550	134.000, 0.186	134.000, 0.281
672	134.200, 0.927	134.200, 0.891	134.200, 0.862	134.200, 0.716	134.200, 0.550	134.200, 0.185	134.200, 0.280
673	134.400, 0.927	134.400, 0.892	134.400, 0.863	134.400, 0.716	134.400, 0.550	134.400, 0.185	134.400, 0.280
674	134.600, 0.927	134.600, 0.892	134.600, 0.863	134.600, 0.716	134.600, 0.550	134.600, 0.185	134.600, 0.280
675	134.800, 0.927	134.800, 0.892	134.800, 0.863	134.800, 0.716	134.800, 0.551	134.800, 0.185	134.800, 0.280
676	135.000, 0.927	135.000, 0.892	135.000, 0.864	135.000, 0.716	135.000, 0.551	135.000, 0.184	135.000, 0.279
677	135.200, 0.927	135.200, 0.892	135.200, 0.864	135.200, 0.717	135.200, 0.551	135.200, 0.184	135.200, 0.279
678	135.400, 0.927	135.400, 0.892	135.400, 0.864	135.400, 0.717	135.400, 0.551	135.400, 0.184	135.400, 0.279
679	135.600, 0.928	135.600, 0.892	135.600, 0.864	135.600, 0.717	135.600, 0.551	135.600, 0.184	135.600, 0.279
680	135.800, 0.928	135.800, 0.892	135.800, 0.864	135.800, 0.717	135.800, 0.551	135.800, 0.184	135.800, 0.279
681	136.000, 0.928	136.000, 0.892	136.000, 0.864	136.000, 0.717	136.000, 0.551	136.000, 0.184	136.000, 0.279
682	136.200, 0.928	136.200, 0.892	136.200, 0.864	136.200, 0.716	136.200, 0.551	136.200, 0.184	136.200, 0.279
683	136.400, 0.927	136.400, 0.893	136.400, 0.864	136.400, 0.716	136.400, 0.551	136.400, 0.184	136.400, 0.279
684	136.600, 0.927	136.600, 0.893	136.600, 0.864	136.600, 0.716	136.600, 0.551	136.600, 0.184	136.600, 0.279
685	136.800, 0.927	136.800, 0.893	136.800, 0.863	136.800, 0.717	136.800, 0.550	136.800, 0.184	136.800, 0.279
686	137.000, 0.927	137.000, 0.894	137.000, 0.863	137.000, 0.717	137.000, 0.550	137.000, 0.184	137.000, 0.278
687	137.200, 0.927	137.200, 0.894	137.200, 0.863	137.200, 0.717	137.200, 0.550	137.200, 0.184	137.200, 0.278
688	137.400, 0.926	137.400, 0.895	137.400, 0.863	137.400, 0.717	137.400, 0.549	137.400, 0.184	137.400, 0.278
689	137.600, 0.926	137.600, 0.895	137.600, 0.864	137.600, 0.717	137.600, 0.549	137.600, 0.184	137.600, 0.278
690	137.800, 0.926	137.800, 0.896	137.800, 0.864	137.800, 0.717	137.800, 0.549	137.800, 0.184	137.800, 0.278
691	138.000, 0.926	138.000, 0.897	138.000, 0.864	138.000, 0.717	138.000, 0.548	138.000, 0.184	138.000, 0.278
692	138.200, 0.926	138.200, 0.897	138.200, 0.864	138.200, 0.716	138.200, 0.548	138.200, 0.184	138.200, 0.278
693	138.400, 0.926	138.400, 0.897	138.400, 0.865	138.400, 0.716	138.400, 0.548	138.400, 0.184	138.400, 0.277
694	138.600, 0.926	138.600, 0.897	138.600, 0.865	138.600, 0.716	138.600, 0.549	138.600, 0.184	138.600, 0.277
695	138.800, 0.927	138.800, 0.897	138.800, 0.865	138.800, 0.716	138.800, 0.549	138.800, 0.184	138.800, 0.277
696	139.000, 0.927	139.000, 0.897	139.000, 0.865	139.000, 0.716	139.000, 0.549	139.000, 0.183	139.000, 0.277
697	139.200, 0.928	139.200, 0.896	139.200, 0.866	139.200, 0.715	139.200, 0.549	139.200, 0.183	139.200, 0.277
698	139.400, 0.928	139.400, 0.896	139.400, 0.866	139.400, 0.715	139.400, 0.549	139.400, 0.183	139.400, 0.277
699	139.600, 0.928	139.600, 0.896	139.600, 0.866	139.600, 0.715	139.600, 0.550	139.600, 0.183	139.600, 0.277
700	139.800, 0.928	139.800, 0.896	139.800, 0.866	139.800, 0.715	139.800, 0.550	139.800, 0.183	139.800, 0.277
701	140.000, 0.929	140.000, 0.896	140.000, 0.866	140.000, 0.715	140.000, 0.550	140.000, 0.183	140.000, 0.277
702	140.200, 0.929	140.200, 0.896	140.200, 0.866	140.200, 0.715	140.200, 0.550	140.200, 0.182	140.200, 0.277
703	140.400, 0.930	140.400, 0.896	140.400, 0.866	140.400, 0.715	140.400, 0.550	140.400, 0.182	140.400, 0.277
704	140.600, 0.930	140.600, 0.896	140.600, 0.866	140.600, 0.716	140.600, 0.550	140.600, 0.182	140.600, 0.277
705	140.800, 0.930	140.800, 0.896	140.800, 0.866	140.800, 0.716	140.800, 0.550	140.800, 0.182	140.800, 0.277
706	141.000, 0.931	141.000, 0.896	141.000, 0.866	141.000, 0.716	141.000, 0.550	141.000, 0.182	141.000, 0.276
707	141.200, 0.931	141.200, 0.897	141.200, 0.865	141.200, 0.716	141.200, 0.549	141.200, 0.182	141.200, 0.276
708	141.400, 0.931	141.400, 0.897	141.400, 0.865	141.400, 0.716	141.400, 0.549	141.400, 0.182	141.400, 0.276
709	141.600, 0.932	141.600, 0.898	141.600, 0.865	141.600, 0.716	141.600, 0.549	141.600, 0.182	141.600, 0.276
710	141.800, 0.932	141.800, 0.898	141.800, 0.864	141.800, 0.716	141.800, 0.548	141.800, 0.182	141.800, 0.276
711	142.000, 0.932	142.000, 0.898	142.000, 0.864	142.000, 0.716	142.000, 0.548	142.000, 0.182	142.000, 0.276
712	142.200, 0.932	142.200, 0.898	142.200, 0.864	142.200, 0.716	142.200, 0.548	142.200, 0.182	142.200, 0.276
713	142.400, 0.932	142.400, 0.898	142.400, 0.864	142.400, 0.716	142.400, 0.547	142.400, 0.182	142.400, 0.276
714	142.600, 0.932	142.600, 0.898	142.600, 0.865	142.600, 0.716	142.600, 0.547	142.600, 0.182	142.600, 0.276
715	142.800, 0.931	142.800, 0.898	142.800, 0.865	142.800, 0.716	142.800, 0.547	142.800, 0.182	142.800, 0.276
716	143.000, 0.931	143.000, 0.898	143.000, 0.865	143.000, 0.716	143.000, 0.547	143.000, 0.182	143.000, 0.276
717	143.200, 0.931	143.200, 0.898	143.200, 0.865	143.200, 0.716	143.200, 0.547	143.200, 0.182	143.200, 0.276
718	143.400, 0.931	143.400, 0.898	143.400, 0.866	143.400, 0.716	143.400, 0.547	143.400, 0.182	143.400, 0.276
719	143.600, 0.931	143.600, 0.898	143.600, 0.866	143.600, 0.716	143.600, 0.547	143.600, 0.182	143.600, 0.276
720	143.800, 0.931	143.800, 0.898	143.800, 0.866	143.800, 0.715	143.800, 0.547	143.800, 0.183	143.800, 0.275
721	144.000, 0.931	144.000, 0.898	144.000, 0.867	144.000, 0.716	144.000, 0.547	144.000, 0.183	144.000, 0.275
722	144.200, 0.930	144.200, 0.898	144.200, 0.867	144.200, 0.715	144.200, 0.547	144.200, 0.183	144.200, 0.275
723	144.400, 0.930	144.400, 0.899	144.400, 0.867	144.400, 0.715	144.400, 0.547	144.400, 0.183	144.400, 0.275
724	144.600, 0.930	144.600, 0.899	144.600, 0.868	144.600, 0.715	144.600, 0.546	144.600, 0.183	144.600, 0.275
725	144.800, 0.931	144.800, 0.899	144.800, 0.868	144.800, 0.714	144.800, 0.546	144.800, 0.183	144.800, 0.274
726	145.000, 0.931	145.000, 0.899	145.000, 0.868	145.000, 0.714	145.000, 0.546	145.000, 0.183	145.000, 0.274
727	145.200, 0.931	145.200, 0.900	145.200, 0.868	145.200, 0.714	145.200, 0.545	145.200, 0.183	145.200, 0.273
728	145.400, 0.931	145.400, 0.900	145.400, 0.868	145.400, 0.714	145.400, 0.545	145.400, 0.183	145.400, 0.273
729	145.600, 0.931	145.600, 0.900	145.600, 0.868	145.600, 0.714	145.600, 0.545	145.600, 0.183	145.600, 0.273
730	145.800, 0.931	145.800, 0.900	145.800, 0.868	145.800, 0.714	145.800, 0.545	145.800, 0.183	145.800, 0.272
731	146.000, 0.931	146.000, 0.900	146.000, 0.868	146.000, 0.714	146.000, 0.545	146.000, 0.183	146.000, 0.272
732	146.200, 0.932	146.200, 0.900	146.200, 0.868	146.200, 0.715	146.200, 0.545	146.200, 0.183	146.200, 0.272
733	146.400, 0.932	146.400, 0.900	146.400, 0.868	146.400, 0.715	146.400, 0.545	146.400, 0.183	146.400, 0.272
734	146.600, 0.933	146.600, 0.901	146.600, 0.868	146.600, 0.714	146.600, 0.546	146.600, 0.182	146.600, 0.272
735	146.800, 0.933	146.800, 0.901	146.800, 0.868	146.800, 0.715	146.800, 0.546	146.800, 0.182	146.800, 0.272
736	147.000, 0.934	147.000, 0.901	147.000, 0.868	147.000, 0.715	147.000, 0.546	147.000, 0.182	147.000, 0.272
737	147.200, 0.934	147.200, 0.901	147.200, 0.867	147.200, 0.714	147.200, 0.546	147.200, 0.182	147.200, 0.272
738	147.400, 0.935	147.400, 0.901	147.400, 0.867	147.400, 0.714	147.400, 0.547	147.400, 0.182	147.400, 0.272
739	147.600, 0.935	147.600, 0.901	147.600, 0.867	147.600, 0.714	147.600, 0.547	147.600, 0.182	147.600, 0.272
740	147.800, 0.935	147.800, 0.901	147.800, 0.867	147.800, 0.714	147.800, 0.547	147.800, 0.182	147.800, 0.272
741	148.000, 0.935	148.000, 0.901	148.000, 0.867	148.000, 0.714	148.000, 0.547	148.000, 0.182	148.000, 0.272
742	148.200, 0.935	148.200, 0.901	148.200, 0.866	148.200, 0.713	148.200, 0.547	148.200, 0.182	148.200, 0.272
743	148.400, 0.935	148.400, 0.901	148.400, 0.866	148.400, 0.713	148.400, 0.547	148.400, 0.182	148.400, 0.272
744	148.600, 0.935	148.600, 0.901	148.600, 0.866	148.600, 0.713	148.600, 0.546	148.600, 0.182	148.600, 0.272
745	148.800, 0.935	148.800, 0.901	148.800, 0.866	148.800, 0.713	148.800, 0.546	148.800, 0.182	148.800, 0.272
746	149.000, 0.935	149.000, 0.901	149.000, 0.866	149.000, 0.713	149.000, 0.546	149.000, 0.182	149.000, 0.272
747	149.200, 0.936	149.200, 0.901	149.200, 0.866	149.200, 0.713	149.200, 0.545	149.200, 0.182	149.200, 0.272
748	149.400, 0.936	149.400, 0.902	149.400, 0.866	149.400, 0.713	149.400, 0.545	149.400, 0.182	149.400, 0.271
749	149.600, 0.936	149.600, 0.902	149.600, 0.866	149.600, 0.713	149.600, 0.545	149.600, 0.182	149.600, 0.271
750	149.800, 0.936	149.800, 0.902	149.800, 0.866	149.800, 0.713	149.800, 0.545	149.800, 0.182	149.800, 0.271
751	150.000, 0.936	150.000, 0.902	150.000, 0.866	150.000, 0.713	150.000, 0.545	150.000, 0.182	150.000, 0.271
752	150.200, 0.929	150.200, 0.895	150.200, 0.859	150.200, 0.709	150.200, 0.543	150.200, 0.181	150.200, 0.271
753	150.400, 0.922	150.400, 0.886	150.400, 0.850	150.400, 0.703	150.400, 0.540	150.400, 0.180	150.400, 0.271
754	150.600, 0.913	150.600, 0.877	150.600, 0.841	150.600, 0.697	150.600, 0.538	150.600, 0.180	150.600, 0.270
755	150.800, 0.904	150.800, 0.867	150.800, 0.830	150.800, 0.690	150.800, 0.535	150.800, 0.179	150.800, 0.270
756	151.000, 0.893	151.000, 0.856	151.000, 0.819	151.000, 0.682	151.000, 0.532	151.000, 0.178	151.000, 0.269
757	151.200, 0.883	151.200, 0.845	151.200, 0.808	151.200, 0.674	151.200, 0.529	151.200, 0.178	151.200, 0.269
758	151.400, 0.873	151.400, 0.835	151.400, 0.797	151.400, 0.667	151.400, 0.525	151.400, 0.177	151.400, 0.269
759	151.600, 0.862	151.600, 0.824	151.600, 0.786	151.600, 0.659	151.600, 0.522	151.600, 0.176	151.600, 0.269
760	151.800, 0.853	151.800, 0.815	151.800, 0.776	151.800, 0.652	151.800, 0.518	151.800, 0.176	151.800, 0.269
761	152.000, 0.844	152.000, 0.806	152.000, 0.767	152.000, 0.645	152.000, 0.515	152.000, 0.176	152.000, 0.269
762	152.200, 0.836	152.200, 0.799	152.200, 0.760	152.200, 0.639	152.200, 0.512	152.200, 0.176	152.200, 0.269
763	152.400, 0.829	152.400, 0.792	152.400, 0.753	152.400, 0.634	152.400, 0.509	152.400, 0.176	152.400, 0.269
764	152.600, 0.822	152.600, 0.786	152.600, 0.747	152.600, 0.629	152.600, 0.507	152.600, 0.176	152.600, 0.268
765	152.800, 0.816	152.800, 0.780	152.800, 0.740	152.800, 0.624	152.800, 0.504	152.800, 0.176	152.800, 0.268
766	153.000, 0.811	153.000, 0.775	153.000, 0.735	153.000, 0.620	153.000, 0.501	153.000, 0.176	153.000, 0.268
767	153.200, 0.806	153.200, 0.770	153.200, 0.730	153.200, 0.616	153.200, 0.498	153.200, 0.176	153.200, 0.269
768	153.400, 0.801	153.400, 0.765	153.400, 0.725	153.400, 0.612	153.400, 0.496	153.400, 0.177	153.400, 0.269
769	153.600, 0.797	153.600, 0.760	153.600, 0.720	153.600, 0.608	153.600, 0.493	153.600, 0.177	153.600, 0.269
770	153.800, 0.793	153.800, 0.755	153.800, 0.716	153.800, 0.604	153.800, 0.491	153.800, 0.177	153.800, 0.269
771	154.000, 0.789	154.000, 0.751	154.000, 0.712	154.000, 0.601	154.000, 0.489	154.000, 0.177	154.000, 0.269
772	154.200, 0.786	154.200, 0.747	154.200, 0.708	154.200, 0.598	154.200, 0.487	154.200, 0.177	154.200, 0.270
773	154.400, 0.782	154.400, 0.743	154.400, 0.705	154.400, 0.595	154.400, 0.485	154.400, 0.177	154.400, 0.270
774	154.600, 0.779	154.600, 0.739	154.600, 0.701	154.600, 0.592	154.600, 0.484	154.600, 0.177	154.600, 0.270
775	154.800, 0.776	154.800, 0.735	154.800, 0.698	154.800, 0.589	154.800, 0.482	154.800, 0.177	154.800, 0.270
776	155.000, 0.773	155.000, 0.732	155.000, 0.695	155.000, 0.586	155.000, 0.480	155.000, 0.177	155.000, 0.270
777	155.200, 0.770	155.200, 0.728	155.200, 0.692	155.200, 0.584	155.200, 0.479	155.200, 0.176	155.200, 0.270
778	155.400, 0.767	155.400, 0.725	155.400, 0.689	155.400, 0.581	155.400, 0.478	155.400, 0.176	155.400, 0.270
779	155.600, 0.765	155.600, 0.722	155.600, 0.687	155.600, 0.579	155.600, 0.476	155.600, 0.176	155.600, 0.270
780	155.800, 0.762	155.800, 0.719	155.800, 0.684	155.800, 0.576	155.800, 0.475	155.800, 0.175	155.800, 0.270
781	156.000, 0.759	156.000, 0.716	156.000, 0.682	156.000, 0.574	156.000, 0.474	156.000, 0.175	156.000, 0.270
782	156.200, 0.757	156.200, 0.713	156.200, 0.680	156.200, 0.572	156.200, 0.473	156.200, 0.175	156.200, 0.270
783	156.400, 0.754	156.400, 0.711	156.400, 0.677	156.400, 0.570	156.400, 0.472	156.400, 0.175	156.400, 0.270
784	156.600, 0.752	156.600, 0.708	156.600, 0.675	156.600, 0.568	156.600, 0.471	156.600, 0.174	156.600, 0.270
785	156.800, 0.750	156.800, 0.706	156.800, 0.673	156.800, 0.566	156.800, 0.469	156.800, 0.174	156.800, 0.270
786	157.000, 0.748	157.000, 0.704	157.000, 0.671	157.000, 0.564	157.000, 0.468	157.000, 0.174	157.000, 0.269
787	157.200, 0.747	157.200, 0.702	157.200, 0.670	157.200, 0.562	157.200, 0.467	157.200, 0.174	157.200, 0.269
788	157.400, 0.745	157.400, 0.700	157.400, 0.668	157.400, 0.560	157.400, 0.466	157.400, 0.174	157.400, 0.269
789	157.600, 0.743	157.600, 0.698	157.600, 0.666	157.600, 0.559	157.600, 0.464	157.600, 0.175	157.600, 0.269
790	157.800, 0.742	157.800, 0.696	157.800, 0.665	157.800, 0.557	157.800, 0.463	157.800, 0.175	157.800, 0.269
791	158.000, 0.741	158.000, 0.694	158.000, 0.663	158.000, 0.556	158.000, 0.462	158.000, 0.175	158.000, 0.269
792	158.200, 0.739	158.200, 0.692	158.200, 0.662	158.200, 0.554	158.200, 0.461	158.200, 0.175	158.200, 0.269
793	158.400, 0.738	158.400, 0.691	158.400, 0.660	158.400, 0.553	158.400, 0.460	158.400, 0.175	158.400, 0.269
794	158.600, 0.737	158.600, 0.689	158.600, 0.659	158.600, 0.552	158.600, 0.459	158.600, 0.175	158.600, 0.268
795	158.800, 0.736	158.800, 0.688	158.800, 0.658	158.800, 0.550	158.800, 0.458	158.800, 0.174	158.800, 0.268
796	159.000, 0.735	159.000, 0.686	159.000, 0.657	159.000, 0.549	159.000, 0.457	159.000, 0.174	159.000, 0.268
797	159.200, 0.733	159.200, 0.685	159.200, 0.656	159.200, 0.548	159.200, 0.456	159.200, 0.174	159.200, 0.268
798	159.400, 0.732	159.400, 0.683	159.400, 0.655	159.400, 0.547	159.400, 0.455	159.400, 0.173	159.400, 0.268
799	159.600, 0.731	159.600, 0.682	159.600, 0.654	159.600, 0.545	159.600, 0.454	159.600, 0.173	159.600, 0.268
800	159.800, 0.730	159.800, 0.680	159.800, 0.653	159.800, 0.544	159.800, 0.453	159.800, 0.173	159.800, 0.268
801	160.000, 0.728	160.000, 0.679	160.000, 0.652	160.000, 0.543	160.000, 0.452	160.000, 0.172	160.000, 0.268
802	160.200, 0.727	160.200, 0.678	160.200, 0.651	160.200, 0.542	160.200, 0.451	160.200, 0.172	160.200, 0.268
803	160.400, 0.726	160.400, 0.676	160.400, 0.650	160.400, 0.541	160.400, 0.450	160.400, 0.172	160.400, 0.268
804	160.600, 0.725	160.600, 0.675	160.600, 0.648	160.600, 0.540	160.600, 0.449	160.600, 0.172	160.600, 0.268
805	160.800, 0.724	160.800, 0.674	160.800, 0.647	160.800, 0.539	160.800, 0.448	160.800, 0.172	160.800, 0.268
806	161.000, 0.723	161.000, 0.673	161.000, 0.646	161.000, 0.538	161.000, 0.447	161.000, 0.172	161.000, 0.267
807	161.200, 0.722	161.200, 0.672	161.200, 0.645	161.200, 0.537	161.200, 0.446	161.200, 0.172	161.200, 0.267
808	161.400, 0.721	161.400, 0.671	161.400, 0.644	161.400, 0.536	161.400, 0.445	161.400, 0.173	161.400, 0.267
809	161.600, 0.720	161.600, 0.670	161.600, 0.643	161.600, 0.535	161.600, 0.444	161.600, 0.173	161.600, 0.267
810	161.800, 0.719	161.800, 0.669	161.800, 0.642	161.800, 0.534	161.800, 0.444	161.800, 0.173	161.800, 0.267
811	162.000, 0.718	162.000, 0.668	162.000, 0.641	162.000, 0.533	162.000, 0.443	162.000, 0.173	162.000, 0.266
812	162.200, 0.717	162.200, 0.667	162.200, 0.640	162.200, 0.532	162.200, 0.442	162.200, 0.173	162.200, 0.266
813	162.400, 0.716	162.400, 0.666	162.400, 0.639	162.400, 0.532	162.400, 0.441	162.400, 0.174	162.400, 0.266
814	162.600, 0.715	162.600, 0.665	162.600, 0.639	162.600, 0.531	162.600, 0.441	162.600, 0.174	162.600, 0.266
815	162.800, 0.715	162.800, 0.664	162.800, 0.638	162.800, 0.530	162.800, 0.440	162.800, 0.173	162.800, 0.266
816	163.000, 0.714	163.000, 0.663	163.000, 0.637	163.000, 0.529	163.000, 0.440	163.000, 0.173	163.000, 0.266
817	163.200, 0.713	163.200, 0.663	163.200, 0.636	163.200, 0.528	163.200, 0.439	163.200, 0.173	163.200, 0.266
818	163.400, 0.712	163.400, 0.662	163.400, 0.636	163.400, 0.528	163.400, 0.439	163.400, 0.173	163.400, 0.265
819	163.600, 0.712	163.600, 0.661	163.600, 0.635	163.600, 0.527	163.600, 0.438	163.600, 0.173	163.600, 0.265
820	163.800, 0.711	163.800, 0.660	163.800, 0.634	163.800, 0.526	163.800, 0.438	163.800, 0.173	163.800, 0.265
821	164.000, 0.710	164.000, 0.659	164.000, 0.634	164.000, 0.525	164.000, 0.437	164.000, 0.173	164.000, 0.265
822	164.200, 0.710	164.200, 0.658	164.200, 0.633	164.200, 0.525	164.200, 0.437	164.200, 0.173	164.200, 0.264
823	164.400, 0.709	164.400, 0.657	164.400, 0.632	164.400, 0.524	164.400, 0.436	164.400, 0.172	164.400, 0.264
824	164.600, 0.709	164.600, 0.656	164.600, 0.631	164.600, 0.523	164.600, 0.436	164.600, 0.172	164.600, 0.264
825	164.800, 0.708	164.800, 0.655	164.800, 0.631	164.800, 0.522	164.800, 0.435	164.800, 0.171	164.800, 0.264
826	165.000, 0.707	165.000, 0.655	165.000, 0.630	165.000, 0.521	165.000, 0.434	165.000, 0.171	165.000, 0.264
827	165.200, 0.707	165.200, 0.654	165.200, 0.629	165.200, 0.520	165.200, 0.434	165.200, 0.171	165.200, 0.264
828	165.400, 0.706	165.400, 0.653	165.400, 0.629	165.400, 0.519	165.400, 0.433	165.400, 0.170	165.400, 0.264
829	165.600, 0.705	165.600, 0.652	165.600, 0.628	165.600, 0.519	165.600, 0.432	165.600, 0.170	165.600, 0.264
830	165.800, 0.704	165.800, 0.651	165.800, 0.627	165.800, 0.518	165.800, 0.431	165.800, 0.170	165.800, 0.264
831	166.000, 0.704	166.000, 0.650	166.000, 0.626	166.000, 0.517	166.000, 0.430	166.000, 0.170	166.000, 0.264
832	166.200, 0.703	166.200, 0.650	166.200, 0.625	166.200, 0.516	166.200, 0.430	166.200, 0.170	166.200, 0.263
833	166.400, 0.702	166.400, 0.649	166.400, 0.625	166.400, 0.516	166.400, 0.429	166.400, 0.169	166.400, 0.263
834	166.600, 0.702	166.600, 0.648	166.600, 0.624	166.600, 0.515	166.600, 0.429	166.600, 0.169	166.600, 0.263
835	166.800, 0.701	166.800, 0.648	166.800, 0.623	166.800, 0.515	166.800, 0.428	166.800, 0.170	166.800, 0.263
836	167.000, 0.701	167.000, 0.647	167.000, 0.623	167.000, 0.514	167.000, 0.428	167.000, 0.170	167.000, 0.263
837	167.200, 0.700	167.200, 0.647	167.200, 0.622	167.200, 0.514	167.200, 0.427	167.200, 0.170	167.200, 0.263
838	167.400, 0.700	167.400, 0.646	167.400, 0.622	167.400, 0.513	167.400, 0.426	167.400, 0.170	167.400, 0.262
839	167.600, 0.699	167.600, 0.645	167.600, 0.621	167.600, 0.512	167.600, 0.425	167.600, 0.170	167.600, 0.262
840	167.800, 0.698	167.800, 0.645	167.800, 0.621	167.800, 0.512	167.800, 0.425	167.800, 0.170	167.800, 0.262
841	168.000, 0.698	168.000, 0.644	168.000, 0.620	168.000, 0.511	168.000, 0.424	168.000, 0.170	168.000, 0.262
842	168.200, 0.697	168.200, 0.643	168.200, 0.620	168.200, 0.510	168.200, 0.424	168.200, 0.170	168.200, 0.261
843	168.400, 0.696	168.400, 0.643	168.400, 0.620	168.400, 0.509	168.400, 0.423	168.400, 0.170	168.400, 0.261
844	168.600, 0.696	168.600, 0.642	168.600, 0.619	168.600, 0.509	168.600, 0.422	168.600, 0.170	168.600, 0.262
845	168.800, 0.695	168.800, 0.641	168.800, 0.619	168.800, 0.508	168.800, 0.422	168.800, 0.170	168.800, 0.262
846	169.000, 0.694	169.000, 0.641	169.000, 0.618	169.000, 0.507	169.000, 0.421	169.000, 0.170	169.000, 0.261
847	169.200, 0.694	169.200, 0.640	169.200, 0.618	169.200, 0.506	169.200, 0.420	169.200, 0.169	169.200, 0.261
848	169.400, 0.693	169.400, 0.640	169.400, 0.617	169.400, 0.505	169.400, 0.420	169.400, 0.169	169.400, 0.261
849	169.600, 0.692	169.600, 0.639	169.600, 0.617	169.600, 0.504	169.600, 0.419	169.600, 0.169	169.600, 0.261
850	169.800, 0.692	169.800, 0.638	169.800, 0.616	169.800, 0.503	169.800, 0.419	169.800, 0.168	169.800, 0.261
851	170.000, 0.691	170.000, 0.638	170.000, 0.615	170.000, 0.503	170.000, 0.418	170.000, 0.168	170.000, 0.261
852	170.200, 0.691	170.200, 0.637	170.200, 0.615	170.200, 0.502	170.200, 0.418	170.200, 0.168	170.200, 0.260
853	170.400, 0.690	170.400, 0.637	170.400, 0.614	170.400, 0.501	170.400, 0.417	170.400, 0.167	170.400, 0.260
854	170.600, 0.690	170.600, 0.636	170.600, 0.613	170.600, 0.501	170.600, 0.417	170.600, 0.167	170.600, 0.260
855	170.800, 0.690	170.800, 0.636	170.800, 0.613	170.800, 0.500	170.800, 0.416	170.800, 0.167	170.800, 0.259
856	171.000, 0.689	171.000, 0.635	171.000, 0.612	171.000, 0.499	171.000, 0.415	171.000, 0.167	171.000, 0.259
857	171.200, 0.688	171.200, 0.634	171.200, 0.612	171.200, 0.499	171.200, 0.414	171.200, 0.166	171.200, 0.259
858	171.400, 0.688	171.400, 0.633	171.400, 0.611	171.400, 0.498	171.400, 0.414	171.400, 0.166	171.400, 0.258
859	171.600, 0.687	171.600, 0.633	171.600, 0.611	171.600, 0.498	171.600, 0.413	171.600, 0.166	171.600, 0.258
860	171.800, 0.687	171.800, 0.632	171.800, 0.610	171.800, 0.498	171.800, 0.413	171.800, 0.166	171.800, 0.258
861	172.000, 0.686	172.000, 0.631	172.000, 0.610	172.000, 0.497	172.000, 0.412	172.000, 0.166	172.000, 0.258
862	172.200, 0.686	172.200, 0.630	172.200, 0.609	172.200, 0.497	172.200, 0.411	172.200, 0.166	172.200, 0.258
863	172.400, 0.685	172.400, 0.630	172.400, 0.609	172.400, 0.496	172.400, 0.411	172.400, 0.166	172.400, 0.258
864	172.600, 0.685	172.600, 0.629	172.600, 0.608	172.600, 0.496	172.600, 0.410	172.600, 0.166	172.600, 0.258
865	172.800, 0.684	172.800, 0.628	172.800, 0.608	172.800, 0.495	172.800, 0.409	172.800, 0.166	172.800, 0.258
866	173.000, 0.684	173.000, 0.628	173.000, 0.607	173.000, 0.494	173.000, 0.409	173.000, 0.166	173.000, 0.258
867	173.200, 0.683	173.200, 0.627	173.200, 0.607	173.200, 0.493	173.200, 0.408	173.200, 0.166	173.200, 0.258
868	173.400, 0.683	173.400, 0.627	173.400, 0.607	173.400, 0.492	173.400, 0.408	173.400, 0.166	173.400, 0.257
869	173.600, 0.682	173.600, 0.626	173.600, 0.606	173.600, 0.492	173.600, 0.407	173.600, 0.166	173.600, 0.257
870	173.800, 0.682	173.800, 0.626	173.800, 0.605	173.800, 0.491	173.800, 0.407	173.800, 0.166	173.800, 0.258
871	174.000, 0.681	174.000, 0.625	174.000, 0.605	174.000, 0.490	174.000, 0.406	174.000, 0.166	174.000, 0.258
872	174.200, 0.681	174.200, 0.625	174.200, 0.604	174.200, 0.490	174.200, 0.406	174.200, 0.166	174.200, 0.258
873	174.400, 0.680	174.400, 0.625	174.400, 0.603	174.400, 0.489	174.400, 0.406	174.400, 0.166	174.400, 0.257
874	174.600, 0.679	174.600, 0.624	174.600, 0.602	174.600, 0.488	174.600, 0.405	174.600, 0.166	174.600, 0.257
875	174.800, 0.678	174.800, 0.624	174.800, 0.602	174.800, 0.487	174.800, 0.405	174.800, 0.166	174.800, 0.257
876	175.000, 0.678	175.000, 0.623	175.000, 0.601	175.000, 0.486	175.000, 0.405	175.000, 0.166	175.000, 0.257
877	175.200, 0.677	175.200, 0.622	175.200, 0.601	175.200, 0.486	175.200, 0.404	175.200, 0.165	175.200, 0.256
878	175.400, 0.676	175.400, 0.621	175.400, 0.600	175.400, 0.485	175.400, 0.404	175.400, 0.165	175.400, 0.256
879	175.600, 0.676	175.600, 0.621	175.600, 0.600	175.600, 0.484	175.600, 0.403	175.600, 0.164	175.600, 0.255
880	175.800, 0.676	175.800, 0.620	175.800, 0.599	175.800, 0.484	175.800, 0.402	175.800, 0.164	175.800, 0.255
881	176.000, 0.675	176.000, 0.619	176.000, 0.598	176.000, 0.483	176.000, 0.402	176.000, 0.164	176.000, 0.255
882	176.200, 0.675	176.200, 0.618	176.200, 0.598	176.200, 0.482	176.200, 0.401	176.200, 0.163	176.200, 0.254
883	176.400, 0.675	176.400, 0.618	176.400, 0.597	176.400, 0.482	176.400, 0.400	176.400, 0.163	176.400, 0.254
884	176.600, 0.675	176.600, 0.617	176.600, 0.597	176.600, 0.481	176.600, 0.399	176.600, 0.163	176.600, 0.254
885	176.800, 0.674	176.800, 0.616	176.800, 0.596	176.800, 0.481	176.800, 0.399	176.800, 0.163	176.800, 0.253
886	177.000, 0.674	177.000, 0.616	177.000, 0.596	177.000, 0.480	177.000, 0.398	177.000, 0.163	177.000, 0.253
887	177.200, 0.674	177.200, 0.615	177.200, 0.595	177.200, 0.480	177.200, 0.397	177.200, 0.163	177.200, 0.253
888	177.400, 0.673	177.400, 0.615	177.400, 0.595	177.400, 0.479	177.400, 0.397	177.400, 0.164	177.400, 0.253
889	177.600, 0.673	177.600, 0.614	177.600, 0.595	177.600, 0.479	177.600, 0.396	177.600, 0.164	177.600, 0.252
890	177.800, 0.672	177.800, 0.614	177.800, 0.594	177.800, 0.479	177.800, 0.396	177.800, 0.164	177.800, 0.252
891	178.000, 0.672	178.000, 0.614	178.000, 0.594	178.000, 0.478	178.000, 0.396	178.000, 0.164	178.000, 0.252
892	178.200, 0.671	178.200, 0.613	178.200, 0.593	178.200, 0.477	178.200, 0.395	178.200, 0.164	178.200, 0.252
893	178.400, 0.670	178.400, 0.613	178.400, 0.592	178.400, 0.477	178.400, 0.395	178.400, 0.164	178.400, 0.252
894	178.600, 0.670	178.600, 0.612	178.600, 0.592	178.600, 0.476	178.600, 0.394	178.600, 0.163	178.600, 0.252
895	178.800, 0.669	178.800, 0.612	178.800, 0.591	178.800, 0.475	178.800, 0.394	178.800, 0.163	178.800, 0.251
896	179.000, 0.669	179.000, 0.612	179.000, 0.591	179.000, 0.475	179.000, 0.394	179.000, 0.163	179.000, 0.251
897	179.200, 0.668	179.200, 0.611	179.200, 0.590	179.200, 0.474	179.200, 0.393	179.200, 0.163	179.200, 0.251
898	179.400, 0.668	179.400, 0.611	179.400, 0.589	179.400, 0.473	179.400, 0.393	179.400, 0.162	179.400, 0.251
899	179.600, 0.667	179.600, 0.611	179.600, 0.589	179.600, 0.472	179.600, 0.393	179.600, 0.162	179.600, 0.251
900	179.800, 0.667	179.800, 0.611	179.800, 0.588	179.800, 0.472	179.800, 0.392	179.800, 0.162	179.800, 0.250
901	180.000, 0.667	180.000, 0.610	180.000, 0.588	180.000, 0.471	180.000, 0.392	180.000, 0.162	180.000, 0.250
902	180.200, 0.667	180.200, 0.610	180.200, 0.587	180.200, 0.471	180.200, 0.391	180.200, 0.162	180.200, 0.250
903	180.400, 0.666	180.400, 0.610	180.400, 0.586	180.400, 0.470	180.400, 0.391	180.400, 0.162	180.400, 0.250
904	180.600, 0.666	180.600, 0.609	180.600, 0.586	180.600, 0.470	180.600, 0.391	180.600, 0.162	180.600, 0.249
905	180.800, 0.666	180.800, 0.609	180.800, 0.585	180.800, 0.469	180.800, 0.390	180.800, 0.161	180.800, 0.249
906	181.000, 0.665	181.000, 0.609	181.000, 0.585	181.000, 0.469	181.000, 0.389	181.000, 0.161	181.000, 0.249
907	181.200, 0.665	181.200, 0.608	181.200, 0.584	181.200, 0.468	181.200, 0.389	181.200, 0.161	181.200, 0.248
908	181.400, 0.664	181.400, 0.608	181.400, 0.584	181.400, 0.468	181.400, 0.388	181.400, 0.161	181.400, 0.248
909	181.600, 0.664	181.600, 0.607	181.600, 0.584	181.600, 0.467	181.600, 0.387	181.600, 0.161	181.600, 0.248
910	181.800, 0.663	181.800, 0.606	181.800, 0.583	181.800, 0.467	181.800, 0.387	181.800, 0.160	181.800, 0.247
911	182.000, 0.663	182.000, 0.606	182.000, 0.583	182.000, 0.466	182.000, 0.386	182.000, 0.160	182.000, 0.247
912	182.200, 0.662	182.200, 0.605	182.200, 0.582	182.200, 0.466	182.200, 0.385	182.200, 0.160	182.200, 0.247
913	182.400, 0.662	182.400, 0.604	182.400, 0.582	182.400, 0.465	182.400, 0.385	182.400, 0.160	182.400, 0.247
914	182.600, 0.661	182.600, 0.604	182.600, 0.581	182.600, 0.465	182.600, 0.384	182.600, 0.159	182.600, 0.247
915	182.800, 0.661	182.800, 0.603	182.800, 0.581	182.800, 0.464	182.800, 0.384	182.800, 0.159	182.800, 0.247
916	183.000, 0.661	183.000, 0.603	183.000, 0.581	183.000, 0.464	183.000, 0.383	183.000, 0.159	183.000, 0.246
917	183.200, 0.660	183.200, 0.602	183.200, 0.580	183.200, 0.463	183.200, 0.383	183.200, 0.159	183.200, 0.246
918	183.400, 0.660	183.400, 0.601	183.400, 0.579	183.400, 0.463	183.400, 0.382	183.400, 0.159	183.400, 0.246
919	183.600, 0.659	183.600, 0.601	183.600, 0.579	183.600, 0.463	183.600, 0.382	183.600, 0.159	183.600, 0.246
920	183.800, 0.659	183.800, 0.600	183.800, 0.579	183.800, 0.462	183.800, 0.381	183.800, 0.159	183.800, 0.245
921	184.000, 0.659	184.000, 0.600	184.000, 0.578	184.000, 0.462	184.000, 0.381	184.000, 0.159	184.000, 0.245
922	184.200, 0.658	184.200, 0.599	184.200, 0.578	184.200, 0.461	184.200, 0.381	184.200, 0.159	184.200, 0.245
923	184.400, 0.658	184.400, 0.599	184.400, 0.577	184.400, 0.461	184.400, 0.381	184.400, 0.159	184.400, 0.245
924	184.600, 0.657	184.600, 0.598	184.600, 0.577	184.600, 0.460	184.600, 0.380	184.600, 0.159	184.600, 0.245
925	184.800, 0.656	184.800, 0.598	184.800, 0.576	184.800, 0.460	184.800, 0.380	184.800, 0.159	184.800, 0.244
926	185.000, 0.655	185.000, 0.597	185.000, 0.575	185.000, 0.459	185.000, 0.379	185.000, 0.159	185.000, 0.244
927	185.200, 0.655	185.200, 0.597	185.200, 0.575	185.200, 0.458	185.200, 0.379	185.200, 0.159	185.200, 0.244
928	185.400, 0.654	185.400, 0.596	185.400, 0.574	185.400, 0.458	185.400, 0.378	185.400, 0.158	185.400, 0.244
929	185.600, 0.654	185.600, 0.595	185.600, 0.573	185.600, 0.457	185.600, 0.378	185.600, 0.158	185.600, 0.243
930	185.800, 0.653	185.800, 0.595	185.800, 0.573	185.800, 0.456	185.800, 0.377	185.800, 0.157	185.800, 0.243
931	186.000, 0.653	186.000, 0.594	186.000, 0.572	186.000, 0.455	186.000, 0.377	186.000, 0.157	186.000, 0.243
932	186.200, 0.652	186.200, 0.594	186.200, 0.572	186.200, 0.455	186.200, 0.376	186.200, 0.157	186.200, 0.243
933	186.400, 0.652	186.400, 0.593	186.400, 0.571	186.400, 0.454	186.400, 0.375	186.400, 0.157	186.400, 0.243
934	186.600, 0.652	186.600, 0.593	186.600, 0.571	186.600, 0.454	186.600, 0.375	186.600, 0.156	186.600, 0.243
935	186.800, 0.651	186.800, 0.592	186.800, 0.571	186.800, 0.453	186.800, 0.375	186.800, 0.156	186.800, 0.243
936	187.000, 0.651	187.000, 0.592	187.000, 0.570	187.000, 0.453	187.000, 0.374	187.000, 0.156	187.000, 0.242
937	187.200, 0.651	187.200, 0.592	187.200, 0.570	187.200, 0.452	187.200, 0.374	187.200, 0.156	187.200, 0.242
938	187.400, 0.650	187.400, 0.591	187.400, 0.569	187.400, 0.452	187.400, 0.374	187.400, 0.156	187.400, 0.241
939	187.600, 0.650	187.600, 0.591	187.600, 0.569	187.600, 0.451	187.600, 0.373	187.600, 0.156	187.600, 0.241
940	187.800, 0.649	187.800, 0.590	187.800, 0.568	187.800, 0.451	187.800, 0.373	187.800, 0.156	187.800, 0.241
941	188.000, 0.649	188.000, 0.590	188.000, 0.568	188.000, 0.450	188.000, 0.373	188.000, 0.157	188.000, 0.241
942	188.200, 0.649	188.200, 0.590	188.200, 0.568	188.200, 0.450	188.200, 0.373	188.200, 0.157	188.200, 0.241
943	188.400, 0.648	188.400, 0.589	188.400, 0.567	188.400, 0.450	188.400, 0.372	188.400, 0.157	188.400, 0.241
944	188.600, 0.648	188.600, 0.589	188.600, 0.567	188.600, 0.449	188.600, 0.372	188.600, 0.157	188.600, 0.241
945	188.800, 0.647	188.800, 0.588	188.800, 0.566	188.800, 0.449	188.800, 0.371	188.800, 0.156	188.800, 0.241
946	189.000, 0.646	189.000, 0.588	189.000, 0.566	189.000, 0.448	189.000, 0.371	189.000, 0.156	189.000, 0.241
947	189.200, 0.646	189.200, 0.587	189.200, 0.565	189.200, 0.447	189.200, 0.370	189.200, 0.156	189.200, 0.241
948	189.400, 0.645	189.400, 0.587	189.400, 0.565	189.400, 0.447	189.400, 0.370	189.400, 0.155	189.400, 0.241
949	189.600, 0.645	189.600, 0.586	189.600, 0.564	189.600, 0.446	189.600, 0.369	189.600, 0.155	189.600, 0.241
950	189.800, 0.644	189.800, 0.586	189.800, 0.564	189.800, 0.446	189.800, 0.369	189.800, 0.154	189.800, 0.241
951	190.000, 0.644	190.000, 0.586	190.000, 0.563	190.000, 0.445	190.000, 0.368	190.000, 0.154	190.000, 0.240
952	190.200, 0.644	190.200, 0.586	190.200, 0.563	190.200, 0.445	190.200, 0.367	190.200, 0.154	190.200, 0.240
953	190.400, 0.643	190.400, 0.585	190.400, 0.562	190.400, 0.444	190.400, 0.367	190.400, 0.154	190.400, 0.239
954	190.600, 0.643	190.600, 0.585	190.600, 0.562	190.600, 0.444	190.600, 0.366	190.600, 0.154	190.600, 0.239
955	190.800, 0.643	190.800, 0.585	190.800, 0.561	190.800, 0.443	190.800, 0.366	190.800, 0.154	190.800, 0.238
956	191.000, 0.643	191.000, 0.584	191.000, 0.560	191.000, 0.443	191.000, 0.366	191.000, 0.154	191.000, 0.238
957	191.200, 0.642	191.200, 0.584	191.200, 0.560	191.200, 0.442	191.200, 0.366	191.200, 0.154	191.200, 0.237
958	191.400, 0.642	191.400, 0.584	191.400, 0.559	191.400, 0.442	191.400, 0.366	191.400, 0.154	191.400, 0.237
959	191.600, 0.642	191.600, 0.583	191.600, 0.558	191.600, 0.442	191.600, 0.366	191.600, 0.155	191.600, 0.237
960	191.800, 0.642	191.800, 0.583	191.800, 0.558	191.800, 0.441	191.800, 0.365	191.800, 0.155	191.800, 0.236
961	192.000, 0.641	192.000, 0.582	192.000, 0.557	192.000, 0.441	192.000, 0.365	192.000, 0.155	192.000, 0.236
962	192.200, 0.641	192.200, 0.582	192.200, 0.557	192.200, 0.440	192.200, 0.365	192.200, 0.154	192.200, 0.236
963	192.400, 0.640	192.400, 0.582	192.400, 0.557	192.400, 0.440	192.400, 0.364	192.400, 0.154	192.400, 0.236
964	192.600, 0.640	192.600, 0.581	192.600, 0.556	192.600, 0.439	192.600, 0.364	192.600, 0.154	192.600, 0.236
965	192.800, 0.639	192.800, 0.581	192.800, 0.556	192.800, 0.438	192.800, 0.363	192.800, 0.154	192.800, 0.236
966	193.000, 0.639	193.000, 0.580	193.000, 0.555	193.000, 0.438	193.000, 0.363	193.000, 0.153	193.000, 0.236
967	193.200, 0.638	193.200, 0.580	193.200, 0.555	193.200, 0.437	193.200, 0.363	193.200, 0.153	193.200, 0.236
968	193.400, 0.638	193.400, 0.579	193.400, 0.554	193.400, 0.436	193.400, 0.362	193.400, 0.153	193.400, 0.236
969	193.600, 0.637	193.600, 0.578	193.600, 0.553	193.600, 0.436	193.600, 0.362	193.600, 0.153	193.600, 0.236
970	193.800, 0.636	193.800, 0.578	193.800, 0.553	193.800, 0.435	193.800, 0.361	193.800, 0.152	193.800, 0.235
971	194.000, 0.636	194.000, 0.577	194.000, 0.553	194.000, 0.435	194.000, 0.361	194.000, 0.152	194.000, 0.235
972	194.200, 0.636	194.200, 0.577	194.200, 0.552	194.200, 0.434	194.200, 0.360	194.200, 0.151	194.200, 0.235
973	194.400, 0.635	194.400, 0.577	194.400, 0.552	194.400, 0.433	194.400, 0.360	194.400, 0.151	194.400, 0.235
974	194.600, 0.635	194.600, 0.576	194.600, 0.552	194.600, 0.433	194.600, 0.359	194.600, 0.151	194.600, 0.234
975	194.800, 0.635	194.800, 0.576	194.800, 0.552	194.800, 0.432	194.800, 0.359	194.800, 0.151	194.800, 0.234
976	195.000, 0.634	195.000, 0.575	195.000, 0.551	195.000, 0.432	195.000, 0.359	195.000, 0.151	195.000, 0.233
977	195.200, 0.634	195.200, 0.575	195.200, 0.551	195.200, 0.431	195.200, 0.358	195.200, 0.151	195.200, 0.233
978	195.400, 0.634	195.400, 0.575	195.400, 0.551	195.400, 0.431	195.400, 0.358	195.400, 0.151	195.400, 0.232
979	195.600, 0.634	195.600, 0.574	195.600, 0.550	195.600, 0.430	195.600, 0.358	195.600, 0.150	195.600, 0.232
980	195.800, 0.633	195.800, 0.574	195.800, 0.550	195.800, 0.430	195.800, 0.357	195.800, 0.150	195.800, 0.232
981	196.000, 0.633	196.000, 0.573	196.000, 0.550	196.000, 0.429	196.000, 0.357	196.000, 0.150	196.000, 0.232
982	196.200, 0.632	196.200, 0.573	196.200, 0.550	196.200, 0.429	196.200, 0.356	196.200, 0.150	196.200, 0.232
983	196.400, 0.632	196.400, 0.573	196.400, 0.549	196.400, 0.429	196.400, 0.356	196.400, 0.150	196.400, 0.232
984	196.600, 0.631	196.600, 0.572	196.600, 0.549	196.600, 0.428	196.600, 0.356	196.600, 0.150	196.600, 0.232
985	196.800, 0.631	196.800, 0.572	196.800, 0.549	196.800, 0.428	196.800, 0.355	196.800, 0.150	196.800, 0.232
986	197.000, 0.630	197.000, 0.572	197.000, 0.548	197.000, 0.427	197.000, 0.355	197.000, 0.150	197.000, 0.232
987	197.200, 0.629	197.200, 0.571	197.200, 0.548	197.200, 0.427	197.200, 0.355	197.200, 0.149	197.200, 0.232
988	197.400, 0.629	197.400, 0.571	197.400, 0.547	197.400, 0.426	197.400, 0.354	197.400, 0.149	197.400, 0.232
989	197.600, 0.628	197.600, 0.571	197.600, 0.546	197.600, 0.426	197.600, 0.353	197.600, 0.149	197.600, 0.231
990	197.800, 0.627	197.800, 0.570	197.800, 0.546	197.800, 0.426	197.800, 0.353	197.800, 0.149	197.800, 0.231
991	198.000, 0.627	198.000, 0.570	198.000, 0.545	198.000, 0.425	198.000, 0.352	198.000, 0.149	198.000, 0.231
992	198.200, 0.627	198.200, 0.569	198.200, 0.545	198.200, 0.425	198.200, 0.352	198.200, 0.149	198.200, 0.230
993	198.400, 0.626	198.400, 0.569	198.400, 0.545	198.400, 0.424	198.400, 0.352	198.400, 0.149	198.400, 0.230
994	198.600, 0.626	198.600, 0.568	198.600, 0.544	198.600, 0.424	198.600, 0.352	198.600, 0.149	198.600, 0.229
995	198.800, 0.626	198.800, 0.568	198.800, 0.544	198.800, 0.423	198.800, 0.351	198.800, 0.149	198.800, 0.229
996	199.000, 0.626	199.000, 0.567	199.000, 0.543	199.000, 0.422	199.000, 0.351	199.000, 0.149	199.000, 0.229
997	199.200, 0.625	199.200, 0.567	199.200, 0.543	199.200, 0.421	199.200, 0.350	199.200, 0.149	199.200, 0.228
998	199.400, 0.625	199.400, 0.566	199.400, 0.543	199.400, 0.421	199.400, 0.350	199.400, 0.148	199.400, 0.228
999	199.600, 0.625	199.600, 0.566	199.600, 0.542	199.600, 0.420	199.600, 0.350	199.600, 0.148	199.600, 0.228
1000	199.800, 0.625	199.800, 0.565	199.800, 0.542	199.800, 0.420	199.800, 0.349	199.800, 0.148	199.800, 0.228
1001	200.000, 0.625	200.000, 0.565	200.000, 0.541	200.000, 0.419	200.000, 0.349	200.000, 0.148	200.000, 0.227
1002	200.200, 0.625	200.200, 0.564	200.200, 0.541	200.200, 0.419	200.200, 0.348	200.200, 0.148	200.200, 0.227
1003	200.400, 0.625	200.400, 0.564	200.400, 0.541	200.400, 0.418	200.400, 0.348	200.400, 0.147	200.400, 0.227
1004	200.600, 0.625	200.600, 0.564	200.600, 0.540	200.600, 0.418	200.600, 0.348	200.600, 0.147	200.600, 0.227
1005	200.800, 0.624	200.800, 0.563	200.800, 0.540	200.800, 0.418	200.800, 0.347	200.800, 0.147	200.800, 0.227
1006	201.000, 0.624	201.000, 0.563	201.000, 0.539	201.000, 0.417	201.000, 0.347	201.000, 0.146	201.000, 0.227
1007	201.200, 0.623	201.200, 0.562	201.200, 0.539	201.200, 0.417	201.200, 0.346	201.200, 0.146	201.200, 0.227
1008	201.400, 0.623	201.400, 0.562	201.400, 0.538	201.400, 0.417	201.400, 0.346	201.400, 0.146	201.400, 0.227
1009	201.600, 0.622	201.600, 0.562	201.600, 0.537	201.600, 0.417	201.600, 0.345	201.600, 0.146	201.600, 0.227
1010	201.800, 0.622	201.800, 0.561	201.800, 0.537	201.800, 0.416	201.800, 0.345	201.800, 0.146	201.800, 0.227
1011	202.000, 0.621	202.000, 0.561	202.000, 0.536	202.000, 0.416	202.000, 0.345	202.000, 0.146	202.000, 0.226
1012	202.200, 0.621	202.200, 0.561	202.200, 0.536	202.200, 0.415	202.200, 0.345	202.200, 0.146	202.200, 0.226
1013	202.400, 0.620	202.400, 0.560	202.400, 0.535	202.400, 0.415	202.400, 0.344	202.400, 0.146	202.400, 0.226
1014	202.600, 0.619	202.600, 0.560	202.600, 0.535	202.600, 0.414	202.600, 0.344	202.600, 0.146	202.600, 0.226
1015	202.800, 0.619	202.800, 0.560	202.800, 0.535	202.800, 0.414	202.800, 0.344	202.800, 0.146	202.800, 0.226
1016	203.000, 0.618	203.000, 0.559	203.000, 0.534	203.000, 0.413	203.000, 0.343	203.000, 0.146	203.000, 0.226
1017	203.200, 0.618	203.200, 0.559	203.200, 0.534	203.200, 0.413	203.200, 0.343	203.200, 0.146	203.200, 0.226
1018	203.400, 0.617	203.400, 0.559	203.400, 0.533	203.400, 0.413	203.400, 0.342	203.400, 0.146	203.400, 0.225
1019	203.600, 0.617	203.600, 0.558	203.600, 0.533	203.600, 0.412	203.600, 0.342	203.600, 0.146	203.600, 0.225
1020	203.800, 0.617	203.800, 0.558	203.800, 0.532	203.800, 0.412	203.800, 0.342	203.800, 0.145	203.800, 0.225
1021	204.000, 0.616	204.000, 0.558	204.000, 0.532	204.000, 0.411	204.000, 0.341	204.000, 0.145	204.000, 0.224
1022	204.200, 0.616	204.200, 0.557	204.200, 0.532	204.200, 0.411	204.200, 0.341	204.200, 0.145	204.200, 0.224
1023	204.400, 0.616	204.400, 0.557	204.400, 0.531	204.400, 0.410	204.400, 0.340	204.400, 0.145	204.400, 0.224
1024	204.600, 0.615	204.600, 0.557	204.600, 0.531	204.600, 0.410	204.600, 0.340	204.600, 0.145	204.600, 0.224
1025	204.800, 0.615	204.800, 0.556	204.800, 0.531	204.800, 0.410	204.800, 0.340	204.800, 0.145	204.800, 0.223
1026	205.000, 0.614	205.000, 0.556	205.000, 0.530	205.000, 0.409	205.000, 0.339	205.000, 0.145	205.000, 0.223
1027	205.200, 0.614	205.200, 0.555	205.200, 0.530	205.200, 0.409	205.200, 0.339	205.200, 0.145	205.200, 0.223
1028	205.400, 0.614	205.400, 0.555	205.400, 0.529	205.400, 0.408	205.400, 0.339	205.400, 0.145	205.400, 0.222
1029	205.600, 0.613	205.600, 0.554	205.600, 0.529	205.600, 0.408	205.600, 0.339	205.600, 0.145	205.600, 0.222
1030	205.800, 0.613	205.800, 0.554	205.800, 0.528	205.800, 0.407	205.800, 0.338	205.800, 0.144	205.800, 0.222
1031	206.000, 0.613	206.000, 0.554	206.000, 0.528	206.000, 0.407	206.000, 0.338	206.000, 0.144	206.000, 0.222
1032	206.200, 0.613	206.200, 0.554	206.200, 0.527	206.200, 0.406	206.200, 0.338	206.200, 0.144	206.200, 0.222
1033	206.400, 0.613	206.400, 0.553	206.400, 0.527	206.400, 0.406	206.400, 0.338	206.400, 0.143	206.400, 0.222
1034	206.600, 0.613	206.600, 0.553	206.600, 0.526	206.600, 0.405	206.600, 0.337	206.600, 0.143	206.600, 0.222
1035	206.800, 0.613	206.800, 0.553	206.800, 0.526	206.800, 0.405	206.800, 0.337	206.800, 0.143	206.800, 0.222
1036	207.000, 0.613	207.000, 0.552	207.000, 0.526	207.000, 0.404	207.000, 0.336	207.000, 0.143	207.000, 0.222
1037	207.200, 0.613	207.200, 0.552	207.200, 0.525	207.200, 0.404	207.200, 0.336	207.200, 0.143	207.200, 0.223
1038	207.400, 0.612	207.400, 0.551	207.400, 0.525	207.400, 0.403	207.400, 0.336	207.400, 0.143	207.400, 0.223
1039	207.600, 0.612	207.600, 0.551	207.600, 0.525	207.600, 0.403	207.600, 0.335	207.600, 0.143	207.600, 0.223
1040	207.800, 0.612	207.800, 0.551	207.800, 0.525	207.800, 0.402	207.800, 0.335	207.800, 0.143	207.800, 0.223
1041	208.000, 0.611	208.000, 0.550	208.000, 0.525	208.000, 0.402	208.000, 0.334	208.000, 0.143	208.000, 0.222
1042	208.200, 0.611	208.200, 0.550	208.200, 0.525	208.200, 0.402	208.200, 0.334	208.200, 0.143	208.200, 0.222
1043	208.400, 0.610	208.400, 0.549	208.400, 0.524	208.400, 0.401	208.400, 0.333	208.400, 0.143	208.400, 0.221
1044	208.600, 0.610	208.600, 0.549	208.600, 0.524	208.600, 0.401	208.600, 0.333	208.600, 0.143	208.600, 0.221
1045	208.800, 0.610	208.800, 0.549	208.800, 0.524	208.800, 0.401	208.800, 0.332	208.800, 0.143	208.800, 0.220
1046	209.000, 0.609	209.000, 0.548	209.000, 0.523	209.000, 0.400	209.000, 0.332	209.000, 0.143	209.000, 0.220
1047	209.200, 0.609	209.200, 0.548	209.200, 0.523	209.200, 0.400	209.200, 0.331	209.200, 0.143	209.200, 0.220
1048	209.400, 0.609	209.400, 0.548	209.400, 0.522	209.400, 0.399	209.400, 0.331	209.400, 0.143	209.400, 0.219
1049	209.600, 0.608	209.600, 0.547	209.600, 0.522	209.600, 0.399	209.600, 0.331	209.600, 0.143	209.600, 0.219
1050	209.800, 0.608	209.800, 0.547	209.800, 0.521	209.800, 0.398	209.800, 0.330	209.800, 0.143	209.800, 0.219
1051	210.000, 0.608	210.000, 0.546	210.000, 0.521	210.000, 0.398	210.000, 0.330	210.000, 0.142	210.000, 0.219
1052	210.200, 0.607	210.200, 0.546	210.200, 0.521	210.200, 0.397	210.200, 0.329	210.200, 0.142	210.200, 0.219
1053	210.400, 0.607	210.400, 0.545	210.400, 0.520	210.400, 0.397	210.400, 0.329	210.400, 0.142	210.400, 0.218
1054	210.600, 0.606	210.600, 0.545	210.600, 0.520	210.600, 0.396	210.600, 0.329	210.600, 0.142	210.600, 0.218
1055	210.800, 0.606	210.800, 0.544	210.800, 0.520	210.800, 0.396	210.800, 0.328	210.800, 0.142	210.800, 0.218
1056	211.000, 0.605	211.000, 0.544	211.000, 0.520	211.000, 0.396	211.000, 0.328	211.000, 0.142	211.000, 0.218
1057	211.200, 0.605	211.200, 0.544	211.200, 0.520	211.200, 0.396	211.200, 0.328	211.200, 0.141	211.200, 0.217
1058	211.400, 0.604	211.400, 0.544	211.400, 0.519	211.400, 0.395	211.400, 0.328	211.400, 0.141	211.400, 0.217
1059	211.600, 0.604	211.600, 0.544	211.600, 0.519	211.600, 0.395	211.600, 0.328	211.600, 0.141	211.600, 0.217
1060	211.800, 0.604	211.800, 0.543	211.800, 0.519	211.800, 0.395	211.800, 0.327	211.800, 0.141	211.800, 0.217
1061	212.000, 0.604	212.000, 0.543	212.000, 0.519	212.000, 0.395	212.000, 0.327	212.000, 0.140	212.000, 0.216
1062	212.200, 0.603	212.200, 0.542	212.200, 0.518	212.200, 0.394	212.200, 0.327	212.200, 0.140	212.200, 0.216
1063	212.400, 0.603	212.400, 0.542	212.400, 0.518	212.400, 0.394	212.400, 0.327	212.400, 0.140	212.400, 0.216
1064	212.600, 0.603	212.600, 0.542	212.600, 0.517	212.600, 0.394	212.600, 0.326	212.600, 0.140	212.600, 0.216
1065	212.800, 0.602	212.800, 0.541	212.800, 0.516	212.800, 0.393	212.800, 0.326	212.800, 0.140	212.800, 0.216
1066	213.000, 0.602	213.000, 0.541	213.000, 0.516	213.000, 0.393	213.000, 0.326	213.000, 0.140	213.000, 0.216
1067	213.200, 0.602	213.200, 0.541	213.200, 0.515	213.200, 0.392	213.200, 0.325	213.200, 0.140	213.200, 0.216
1068	213.400, 0.602	213.400, 0.541	213.400, 0.514	213.400, 0.392	213.400, 0.325	213.400, 0.140	213.400, 0.216
1069	213.600, 0.602	213.600, 0.540	213.600, 0.514	213.600, 0.391	213.600, 0.325	213.600, 0.140	213.600, 0.216
1070	213.800, 0.601	213.800, 0.540	213.800, 0.513	213.800, 0.391	213.800, 0.324	213.800, 0.140	213.800, 0.216
1071	214.000, 0.601	214.000, 0.540	214.000, 0.513	214.000, 0.391	214.000, 0.324	214.000, 0.139	214.000, 0.215
1072	214.200, 0.601	214.200, 0.540	214.200, 0.512	214.200, 0.390	214.200, 0.323	214.200, 0.139	214.200, 0.215
1073	214.400, 0.601	214.400, 0.539	214.400, 0.512	214.400, 0.390	214.400, 0.323	214.400, 0.139	214.400, 0.215
1074	214.600, 0.600	214.600, 0.539	214.600, 0.511	214.600, 0.389	214.600, 0.323	214.600, 0.139	214.600, 0.214
1075	214.800, 0.600	214.800, 0.539	214.800, 0.511	214.800, 0.388	214.800, 0.322	214.800, 0.138	214.800, 0.214
1076	215.000, 0.599	215.000, 0.539	215.000, 0.511	215.000, 0.388	215.000, 0.322	215.000, 0.138	215.000, 0.214
1077	215.200, 0.598	215.200, 0.538	215.200, 0.511	215.200, 0.387	215.200, 0.322	215.200, 0.138	215.200, 0.213
1078	215.400, 0.598	215.400, 0.538	215.400, 0.511	215.400, 0.387	215.400, 0.322	215.400, 0.138	215.400, 0.213
1079	215.600, 0.598	215.600, 0.538	215.600, 0.511	215.600, 0.386	215.600, 0.322	215.600, 0.138	215.600, 0.213
1080	215.800, 0.597	215.800, 0.537	215.800, 0.511	215.800, 0.386	215.800, 0.321	215.800, 0.138	215.800, 0.212
1081	216.000, 0.597	216.000, 0.537	216.000, 0.511	216.000, 0.385	216.000, 0.321	216.000, 0.138	216.000, 0.212
1082	216.200, 0.596	216.200, 0.536	216.200, 0.510	216.200, 0.385	216.200, 0.321	216.200, 0.138	216.200, 0.212
1083	216.400, 0.595	216.400, 0.536	216.400, 0.510	216.400, 0.385	216.400, 0.320	216.400, 0.138	216.400, 0.212
1084	216.600, 0.595	216.600, 0.535	216.600, 0.510	216.600, 0.384	216.600, 0.320	216.600, 0.138	216.600, 0.212
1085	216.800, 0.595	216.800, 0.535	216.800, 0.509	216.800, 0.384	216.800, 0.320	216.800, 0.138	216.800, 0.211
1086	217.000, 0.594	217.000, 0.535	217.000, 0.509	217.000, 0.384	217.000, 0.320	217.000, 0.138	217.000, 0.211
1087	217.200, 0.594	217.200, 0.535	217.200, 0.509	217.200, 0.383	217.200, 0.319	217.200, 0.138	217.200, 0.211
1088	217.400, 0.594	217.400, 0.534	217.400, 0.508	217.400, 0.383	217.400, 0.319	217.400, 0.138	217.400, 0.211
1089	217.600, 0.594	217.600, 0.534	217.600, 0.508	217.600, 0.383	217.600, 0.319	217.600, 0.138	217.600, 0.211
1090	217.800, 0.594	217.800, 0.533	217.800, 0.507	217.800, 0.382	217.800, 0.318	217.800, 0.138	217.800, 0.211
1091	218.000, 0.594	218.000, 0.533	218.000, 0.507	218.000, 0.382	218.000, 0.318	218.000, 0.138	218.000, 0.211
1092	218.200, 0.594	218.200, 0.532	218.200, 0.506	218.200, 0.382	218.200, 0.318	218.200, 0.138	218.200, 0.210
1093	218.400, 0.593	218.400, 0.532	218.400, 0.506	218.400, 0.381	218.400, 0.317	218.400, 0.138	218.400, 0.210
1094	218.600, 0.593	218.600, 0.532	218.600, 0.505	218.600, 0.380	218.600, 0.317	218.600, 0.138	218.600, 0.210
1095	218.800, 0.592	218.800, 0.531	218.800, 0.505	218.800, 0.380	218.800, 0.317	218.800, 0.138	218.800, 0.210
1096	219.000, 0.592	219.000, 0.531	219.000, 0.504	219.000, 0.379	219.000, 0.316	219.000, 0.138	219.000, 0.210
1097	219.200, 0.592	219.200, 0.531	219.200, 0.504	219.200, 0.378	219.200, 0.316	219.200, 0.138	219.200, 0.210
1098	219.400, 0.591	219.400, 0.531	219.400, 0.504	219.400, 0.378	219.400, 0.315	219.400, 0.137	219.400, 0.210
1099	219.600, 0.591	219.600, 0.531	219.600, 0.504	219.600, 0.377	219.600, 0.315	219.600, 0.137	219.600, 0.210
1100	219.800, 0.591	219.800, 0.531	219.800, 0.504	219.800, 0.377	219.800, 0.315	219.800, 0.137	219.800, 0.210
1101	220.000, 0.591	220.000, 0.530	220.000, 0.504	220.000, 0.376	220.000, 0.314	220.000, 0.137	220.000, 0.209
1102	220.200, 0.591	220.200, 0.530	220.200, 0.504	220.200, 0.376	220.200, 0.314	220.200, 0.137	220.200, 0.209
1103	220.400, 0.590	220.400, 0.530	220.400, 0.503	220.400, 0.375	220.400, 0.314	220.400, 0.137	220.400, 0.209
1104	220.600, 0.590	220.600, 0.529	220.600, 0.503	220.600, 0.375	220.600, 0.314	220.600, 0.136	220.600, 0.209
1105	220.800, 0.590	220.800, 0.529	220.800, 0.502	220.800, 0.375	220.800, 0.314	220.800, 0.136	220.800, 0.208
1106	221.000, 0.589	221.000, 0.529	221.000, 0.502	221.000, 0.375	221.000, 0.314	221.000, 0.136	221.000, 0.208
1107	221.200, 0.589	221.200, 0.529	221.200, 0.502	221.200, 0.374	221.200, 0.314	221.200, 0.136	221.200, 0.208
1108	221.400, 0.589	221.400, 0.528	221.400, 0.501	221.400, 0.374	221.400, 0.313	221.400, 0.136	221.400, 0.208
1109	221.600, 0.588	221.600, 0.528	221.600, 0.501	221.600, 0.374	221.600, 0.313	221.600, 0.136	221.600, 0.208
1110	221.800, 0.588	221.800, 0.528	221.800, 0.500	221.800, 0.374	221.800, 0.313	221.800, 0.136	221.800, 0.208
1111	222.000, 0.587	222.000, 0.528	222.000, 0.500	222.000, 0.374	222.000, 0.313	222.000, 0.136	222.000, 0.207
1112	222.200, 0.587	222.200, 0.527	222.200, 0.499	222.200, 0.374	222.200, 0.313	222.200, 0.136	222.200, 0.207
1113	222.400, 0.586	222.400, 0.527	222.400, 0.499	222.400, 0.373	222.400, 0.312	222.400, 0.136	222.400, 0.207
1114	222.600, 0.586	222.600, 0.527	222.600, 0.498	222.600, 0.373	222.600, 0.312	222.600, 0.136	222.600, 0.207
1115	222.800, 0.585	222.800, 0.526	222.800, 0.498	222.800, 0.372	222.800, 0.311	222.800, 0.136	222.800, 0.206
1116	223.000, 0.585	223.000, 0.526	223.000, 0.498	223.000, 0.372	223.000, 0.311	223.000, 0.135	223.000, 0.206
1117	223.200, 0.585	223.200, 0.525	223.200, 0.497	223.200, 0.371	223.200, 0.311	223.200, 0.136	223.200, 0.206
1118	223.400, 0.585	223.400, 0.525	223.400, 0.497	223.400, 0.371	223.400, 0.311	223.400, 0.136	223.400, 0.206
1119	223.600, 0.585	223.600, 0.524	223.600, 0.496	223.600, 0.370	223.600, 0.310	223.600, 0.136	223.600, 0.206
1120	223.800, 0.585	223.800, 0.524	223.800, 0.496	223.800, 0.369	223.800, 0.310	223.800, 0.136	223.800, 0.206
1121	224.000, 0.585	224.000, 0.523	224.000, 0.496	224.000, 0.369	224.000, 0.309	224.000, 0.136	224.000, 0.206
1122	224.200, 0.586	224.200, 0.523	224.200, 0.496	224.200, 0.368	224.200, 0.309	224.200, 0.136	224.200, 0.206
1123	224.400, 0.586	224.400, 0.522	224.400, 0.495	224.400, 0.368	224.400, 0.309	224.400, 0.136	224.400, 0.206
1124	224.600, 0.585	224.600, 0.522	224.600, 0.495	224.600, 0.367	224.600, 0.308	224.600, 0.136	224.600, 0.206
1125	224.800, 0.585	224.800, 0.522	224.800, 0.495	224.800, 0.367	224.800, 0.308	224.800, 0.136	224.800, 0.206
1126	225.000, 0.585	225.000, 0.522	225.000, 0.495	225.000, 0.367	225.000, 0.308	225.000, 0.136	225.000, 0.206
1127	225.200, 0.584	225.200, 0.522	225.200, 0.495	225.200, 0.367	225.200, 0.307	225.200, 0.135	225.200, 0.205
1128	225.400, 0.584	225.400, 0.521	225.400, 0.494	225.400, 0.367	225.400, 0.307	225.400, 0.135	225.400, 0.205
1129	225.600, 0.583	225.600, 0.521	225.600, 0.494	225.600, 0.367	225.600, 0.307	225.600, 0.135	225.600, 0.205
1130	225.800, 0.583	225.800, 0.521	225.800, 0.494	225.800, 0.366	225.800, 0.306	225.800, 0.135	225.800, 0.205
1131	226.000, 0.582	226.000, 0.521	226.000, 0.494	226.000, 0.367	226.000, 0.306	226.000, 0.135	226.000, 0.204
1132	226.200, 0.581	226.200, 0.521	226.200, 0.493	226.200, 0.367	226.200, 0.305	226.200, 0.134	226.200, 0.204
1133	226.400, 0.581	226.400, 0.521	226.400, 0.493	226.400, 0.367	226.400, 0.305	226.400, 0.134	226.400, 0.203
1134	226.600, 0.580	226.600, 0.521	226.600, 0.493	226.600, 0.366	226.600, 0.305	226.600, 0.134	226.600, 0.203
1135	226.800, 0.580	226.800, 0.521	226.800, 0.492	226.800, 0.366	226.800, 0.305	226.800, 0.134	226.800, 0.203
1136	227.000, 0.579	227.000, 0.521	227.000, 0.491	227.000, 0.366	227.000, 0.305	227.000, 0.133	227.000, 0.203
1137	227.200, 0.579	227.200, 0.520	227.200, 0.491	227.200, 0.366	227.200, 0.305	227.200, 0.133	227.200, 0.202
1138	227.400, 0.579	227.400, 0.520	227.400, 0.490	227.400, 0.365	227.400, 0.304	227.400, 0.133	227.400, 0.202
1139	227.600, 0.579	227.600, 0.520	227.600, 0.490	227.600, 0.365	227.600, 0.304	227.600, 0.133	227.600, 0.202
1140	227.800, 0.578	227.800, 0.519	227.800, 0.489	227.800, 0.365	227.800, 0.304	227.800, 0.133	227.800, 0.202
1141	228.000, 0.578	228.000, 0.519	228.000, 0.489	228.000, 0.364	228.000, 0.304	228.000, 0.133	228.000, 0.203
1142	228.200, 0.578	228.200, 0.518	228.200, 0.489	228.200, 0.364	228.200, 0.303	228.200, 0.133	228.200, 0.203
1143	228.400, 0.578	228.400, 0.518	228.400, 0.488	228.400, 0.363	228.400, 0.303	228.400, 0.133	228.400, 0.203
1144	228.600, 0.577	228.600, 0.517	228.600, 0.488	228.600, 0.363	228.600, 0.303	228.600, 0.132	228.600, 0.203
1145	228.800, 0.577	228.800, 0.517	228.800, 0.488	228.800, 0.363	228.800, 0.303	228.800, 0.132	228.800, 0.202
1146	229.000, 0.577	229.000, 0.517	229.000, 0.488	229.000, 0.362	229.000, 0.303	229.000, 0.132	229.000, 0.202
1147	229.200, 0.577	229.200, 0.516	229.200, 0.488	229.200, 0.361	229.200, 0.302	229.200, 0.132	229.200, 0.202
1148	229.400, 0.576	229.400, 0.516	229.400, 0.487	229.400, 0.361	229.400, 0.302	229.400, 0.132	229.400, 0.202
1149	229.600, 0.576	229.600, 0.515	229.600, 0.487	229.600, 0.360	229.600, 0.302	229.600, 0.131	229.600, 0.202
1150	229.800, 0.576	229.800, 0.515	229.800, 0.487	229.800, 0.360	229.800, 0.302	229.800, 0.131	229.800, 0.202
1151	230.000, 0.575	230.000, 0.515	230.000, 0.487	230.000, 0.359	230.000, 0.301	230.000, 0.131	230.000, 0.201
1152	230.200, 0.575	230.200, 0.515	230.200, 0.487	230.200, 0.359	230.200, 0.301	230.200, 0.131	230.200, 0.201
1153	230.400, 0.574	230.400, 0.515	230.400, 0.486	230.400, 0.358	230.400, 0.301	230.400, 0.132	230.400, 0.201
1154	230.600, 0.574	230.600, 0.515	230.600, 0.486	230.600, 0.358	230.600, 0.301	230.600, 0.132	230.600, 0.201
1155	230.800, 0.574	230.800, 0.515	230.800, 0.485	230.800, 0.358	230.800, 0.301	230.800, 0.132	230.800, 0.201
1156	231.000, 0.573	231.000, 0.515	231.000, 0.485	231.000, 0.357	231.000, 0.301	231.000, 0.132	231.000, 0.201
1157	231.200, 0.573	231.200, 0.515	231.200, 0.485	231.200, 0.357	231.200, 0.301	231.200, 0.132	231.200, 0.201
1158	231.400, 0.573	231.400, 0.515	231.400, 0.484	231.400, 0.357	231.400, 0.300	231.400, 0.132	231.400, 0.201
1159	231.600, 0.573	231.600, 0.514	231.600, 0.484	231.600, 0.357	231.600, 0.300	231.600, 0.132	231.600, 0.200
1160	231.800, 0.572	231.800, 0.514	231.800, 0.483	231.800, 0.357	231.800, 0.300	231.800, 0.132	231.800, 0.200
1161	232.000, 0.572	232.000, 0.513	232.000, 0.483	232.000, 0.357	232.000, 0.300	232.000, 0.132	232.000, 0.200
1162	232.200, 0.572	232.200, 0.513	232.200, 0.482	232.200, 0.357	232.200, 0.300	232.200, 0.132	232.200, 0.199
1163	232.400, 0.572	232.400, 0.512	232.400, 0.482	232.400, 0.356	232.400, 0.300	232.400, 0.132	232.400, 0.199
1164	232.600, 0.572	232.600, 0.512	232.600, 0.482	232.600, 0.356	232.600, 0.300	232.600, 0.131	232.600, 0.199
1165	232.800, 0.572	232.800, 0.512	232.800, 0.481	232.800, 0.356	232.800, 0.300	232.800, 0.131	232.800, 0.198
1166	233.000, 0.572	233.000, 0.511	233.000, 0.481	233.000, 0.356	233.000, 0.299	233.000, 0.131	233.000, 0.198
1167	233.200, 0.571	233.200, 0.511	233.200, 0.481	233.200, 0.355	233.200, 0.299	233.200, 0.130	233.200, 0.198
1168	233.400, 0.571	233.400, 0.510	233.400, 0.481	233.400, 0.355	233.400, 0.298	233.400, 0.130	233.400, 0.198
1169	233.600, 0.570	233.600, 0.510	233.600, 0.480	233.600, 0.354	233.600, 0.297	233.600, 0.130	233.600, 0.198
1170	233.800, 0.570	233.800, 0.510	233.800, 0.480	233.800, 0.354	233.800, 0.297	233.800, 0.130	233.800, 0.198
1171	234.000, 0.569	234.000, 0.510	234.000, 0.480	234.000, 0.353	234.000, 0.296	234.000, 0.130	234.000, 0.198
1172	234.200, 0.569	234.200, 0.509	234.200, 0.479	234.200, 0.353	234.200, 0.296	234.200, 0.130	234.200, 0.197
1173	234.400, 0.568	234.400, 0.509	234.400, 0.479	234.400, 0.353	234.400, 0.295	234.400, 0.130	234.400, 0.197
1174	234.600, 0.567	234.600, 0.509	234.600, 0.478	234.600, 0.352	234.600, 0.295	234.600, 0.130	234.600, 0.197
1175	234.800, 0.567	234.800, 0.508	234.800, 0.478	234.800, 0.352	234.800, 0.294	234.800, 0.130	234.800, 0.197
1176	235.000, 0.567	235.000, 0.508	235.000, 0.477	235.000, 0.352	235.000, 0.294	235.000, 0.130	235.000, 0.197
1177	235.200, 0.567	235.200, 0.508	235.200, 0.477	235.200, 0.352	235.200, 0.294	235.200, 0.130	235.200, 0.197
1178	235.400, 0.567	235.400, 0.507	235.400, 0.477	235.400, 0.352	235.400, 0.294	235.400, 0.130	235.400, 0.197
1179	235.600, 0.567	235.600, 0.507	235.600, 0.476	235.600, 0.352	235.600, 0.294	235.600, 0.129	235.600, 0.196
1180	235.800, 0.567	235.800, 0.507	235.800, 0.476	235.800, 0.351	235.800, 0.294	235.800, 0.129	235.800, 0.196
1181	236.000, 0.567	236.000, 0.507	236.000, 0.476	236.000, 0.351	236.000, 0.294	236.000, 0.129	236.000, 0.195
1182	236.200, 0.567	236.200, 0.507	236.200, 0.475	236.200, 0.351	236.200, 0.294	236.200, 0.130	236.200, 0.195
1183	236.400, 0.567	236.400, 0.507	236.400, 0.475	236.400, 0.350	236.400, 0.294	236.400, 0.130	236.400, 0.195
1184	236.600, 0.566	236.600, 0.507	236.600, 0.475	236.600, 0.350	236.600, 0.293	236.600, 0.130	236.600, 0.195
1185	236.800, 0.566	236.800, 0.508	236.800, 0.475	236.800, 0.350	236.800, 0.293	236.800, 0.130	236.800, 0.194
1186	237.000, 0.566	237.000, 0.508	237.000, 0.475	237.000, 0.349	237.000, 0.293	237.000, 0.129	237.000, 0.194
1187	237.200, 0.566	237.200, 0.508	237.200, 0.475	237.200, 0.349	237.200, 0.293	237.200, 0.129	237.200, 0.194
1188	237.400, 0.566	237.400, 0.507	237.400, 0.475	237.400, 0.349	237.400, 0.292	237.400, 0.129	237.400, 0.194
1189	237.600, 0.565	237.600, 0.507	237.600, 0.475	237.600, 0.348	237.600, 0.292	237.600, 0.129	237.600, 0.194
1190	237.800, 0.565	237.800, 0.507	237.800, 0.475	237.800, 0.348	237.800, 0.292	237.800, 0.129	237.800, 0.194
1191	238.000, 0.565	238.000, 0.506	238.000, 0.475	238.000, 0.347	238.000, 0.292	238.000, 0.129	238.000, 0.194
1192	238.200, 0.564	238.200, 0.506	238.200, 0.475	238.200, 0.347	238.200, 0.292	238.200, 0.129	238.200, 0.194
1193	238.400, 0.564	238.400, 0.505	238.400, 0.474	238.400, 0.347	238.400, 0.292	238.400, 0.129	238.400, 0.194
1194	238.600, 0.564	238.600, 0.505	238.600, 0.474	238.600, 0.346	238.600, 0.292	238.600, 0.129	238.600, 0.194
1195	238.800, 0.563	238.800, 0.504	238.800, 0.473	238.800, 0.346	238.800, 0.292	238.800, 0.129	238.800, 0.194
1196	239.000, 0.563	239.000, 0.504	239.000, 0.473	239.000, 0.346	239.000, 0.291	239.000, 0.129	239.000, 0.193
1197	239.200, 0.563	239.200, 0.504	239.200, 0.472	239.200, 0.346	239.200, 0.291	239.200, 0.129	239.200, 0.193
1198	239.400, 0.563	239.400, 0.503	239.400, 0.472	239.400, 0.345	239.400, 0.291	239.400, 0.129	239.400, 0.193
1199	239.600, 0.563	239.600, 0.503	239.600, 0.472	239.600, 0.345	239.600, 0.291	239.600, 0.129	239.600, 0.193
1200	239.800, 0.562	239.800, 0.503	239.800, 0.471	239.800, 0.344	239.800, 0.291	239.800, 0.129	239.800, 0.193
1201	240.000, 0.562	240.000, 0.503	240.000, 0.471	240.000, 0.344	240.000, 0.291	240.000, 0.129	240.000, 0.193
1202	240.200, 0.562	240.200, 0.502	240.200, 0.471	240.200, 0.343	240.200, 0.291	240.200, 0.128	240.200, 0.193
1203	240.400, 0.561	240.400, 0.502	240.400, 0.470	240.400, 0.343	240.400, 0.290	240.400, 0.128	240.400, 0.192
1204	240.600, 0.561	240.600, 0.502	240.600, 0.470	240.600, 0.342	240.600, 0.290	240.600, 0.128	240.600, 0.192
1205	240.800, 0.561	240.800, 0.502	240.800, 0.470	240.800, 0.342	240.800, 0.290	240.800, 0.128	240.800, 0.192
1206	241.000, 0.560	241.000, 0.502	241.000, 0.470	241.000, 0.342	241.000, 0.290	241.000, 0.128	241.000, 0.192
1207	241.200, 0.560	241.200, 0.501	241.200, 0.470	241.200, 0.341	241.200, 0.290	241.200, 0.128	241.200, 0.192
1208	241.400, 0.560	241.400, 0.501	241.400, 0.469	241.400, 0.341	241.400, 0.290	241.400, 0.128	241.400, 0.192
1209	241.600, 0.560	241.600, 0.501	241.600, 0.469	241.600, 0.341	241.600, 0.290	241.600, 0.128	241.600, 0.192
1210	241.800, 0.560	241.800, 0.501	241.800, 0.468	241.800, 0.340	241.800, 0.289	241.800, 0.128	241.800, 0.191
1211	242.000, 0.560	242.000, 0.500	242.000, 0.468	242.000, 0.340	242.000, 0.289	242.000, 0.128	242.000, 0.191
1212	242.200, 0.560	242.200, 0.500	242.200, 0.468	242.200, 0.340	242.200, 0.289	242.200, 0.128	242.200, 0.191
1213	242.400, 0.560	242.400, 0.500	242.400, 0.467	242.400, 0.340	242.400, 0.288	242.400, 0.128	242.400, 0.191
1214	242.600, 0.560	242.600, 0.499	242.600, 0.467	242.600, 0.340	242.600, 0.288	242.600, 0.128	242.600, 0.190
1215	242.800, 0.560	242.800, 0.499	242.800, 0.467	242.800, 0.340	242.800, 0.288	242.800, 0.127	242.800, 0.190
1216	243.000, 0.560	243.000, 0.499	243.000, 0.467	243.000, 0.339	243.000, 0.287	243.000, 0.127	243.000, 0.190
1217	243.200, 0.559	243.200, 0.499	243.200, 0.467	243.200, 0.339	243.200, 0.287	243.200, 0.127	243.200, 0.190
1218	243.400, 0.559	243.400, 0.499	243.400, 0.466	243.400, 0.339	243.400, 0.287	243.400, 0.127	243.400, 0.190
1219	243.600, 0.559	243.600, 0.498	243.600, 0.466	243.600, 0.338	243.600, 0.286	243.600, 0.127	243.600, 0.189
1220	243.800, 0.559	243.800, 0.498	243.800, 0.466	243.800, 0.338	243.800, 0.286	243.800, 0.127	243.800, 0.189
1221	244.000, 0.559	244.000, 0.498	244.000, 0.466	244.000, 0.338	244.000, 0.285	244.000, 0.126	244.000, 0.189
1222	244.200, 0.558	244.200, 0.497	244.200, 0.466	244.200, 0.338	244.200, 0.285	244.200, 0.126	244.200, 0.189
1223	244.400, 0.558	244.400, 0.497	244.400, 0.466	244.400, 0.337	244.400, 0.285	244.400, 0.126	244.400, 0.189
1224	244.600, 0.558	244.600, 0.497	244.600, 0.466	244.600, 0.337	244.600, 0.284	244.600, 0.126	244.600, 0.189
1225	244.800, 0.557	244.800, 0.497	244.800, 0.465	244.800, 0.337	244.800, 0.284	244.800, 0.126	244.800, 0.188
1226	245.000, 0.557	245.000, 0.497	245.000, 0.465	245.000, 0.337	245.000, 0.284	245.000, 0.126	245.000, 0.188
1227	245.200, 0.556	245.200, 0.497	245.200, 0.464	245.200, 0.337	245.200, 0.284	245.200, 0.126	245.200, 0.188
1228	245.400, 0.556	245.400, 0.497	245.400, 0.464	245.400, 0.337	245.400, 0.283	245.400, 0.126	245.400, 0.188
1229	245.600, 0.556	245.600, 0.496	245.600, 0.463	245.600, 0.336	245.600, 0.283	245.600, 0.126	245.600, 0.188
1230	245.800, 0.556	245.800, 0.496	245.800, 0.463	245.800, 0.336	245.800, 0.283	245.800, 0.126	245.800, 0.188
1231	246.000, 0.556	246.000, 0.495	246.000, 0.462	246.000, 0.336	246.000, 0.283	246.000, 0.126	246.000, 0.188
1232	246.200, 0.556	246.200, 0.495	246.200, 0.462	246.200, 0.335	246.200, 0.283	246.200, 0.126	246.200, 0.188
1233	246.400, 0.556	246.400, 0.495	246.400, 0.462	246.400, 0.335	246.400, 0.283	246.400, 0.126	246.400, 0.188
1234	246.600, 0.555	246.600, 0.495	246.600, 0.462	246.600, 0.335	246.600, 0.283	246.600, 0.126	246.600, 0.187
1235	246.800, 0.555	246.800, 0.494	246.800, 0.462	246.800, 0.334	246.800, 0.283	246.800, 0.127	246.800, 0.187
1236	247.000, 0.554	247.000, 0.494	247.000, 0.462	247.000, 0.334	247.000, 0.283	247.000, 0.127	247.000, 0.187
1237	247.200, 0.554	247.200, 0.494	247.200, 0.462	247.200, 0.333	247.200, 0.283	247.200, 0.127	247.200, 0.187
1238	247.400, 0.554	247.400, 0.494	247.400, 0.462	247.400, 0.333	247.400, 0.283	247.400, 0.127	247.400, 0.186
1239	247.600, 0.553	247.600, 0.494	247.600, 0.462	247.600, 0.333	247.600, 0.283	247.600, 0.127	247.600, 0.186
1240	247.800, 0.553	247.800, 0.494	247.800, 0.462	247.800, 0.333	247.800, 0.283	247.800, 0.127	247.800, 0.186
1241	248.000, 0.552	248.000, 0.494	248.000, 0.461	248.000, 0.332	248.000, 0.282	248.000, 0.127	248.000, 0.186
1242	248.200, 0.552	248.200, 0.494	248.200, 0.461	248.200, 0.332	248.200, 0.282	248.200, 0.127	248.200, 0.186
1243	248.400, 0.552	248.400, 0.494	248.400, 0.461	248.400, 0.332	248.400, 0.282	248.400, 0.127	248.400, 0.185
1244	248.600, 0.551	248.600, 0.494	248.600, 0.460	248.600, 0.332	248.600, 0.282	248.600, 0.127	248.600, 0.185
1245	248.800, 0.551	248.800, 0.494	248.800, 0.459	248.800, 0.332	248.800, 0.281	248.800, 0.127	248.800, 0.185
1246	249.000, 0.551	249.000, 0.494	249.000, 0.459	249.000, 0.331	249.000, 0.281	249.000, 0.127	249.000, 0.185
1247	249.200, 0.550	249.200, 0.493	249.200, 0.458	249.200, 0.331	249.200, 0.281	249.200, 0.126	249.200, 0.185
1248	249.400, 0.550	249.400, 0.493	249.400, 0.457	249.400, 0.331	249.400, 0.281	249.400, 0.126	249.400, 0.185
1249	249.600, 0.550	249.600, 0.493	249.600, 0.456	249.600, 0.330	249.600, 0.280	249.600, 0.126	249.600, 0.185
1250	249.800, 0.549	249.800, 0.492	249.800, 0.456	249.800, 0.330	249.800, 0.280	249.800, 0.126	249.800, 0.185
1251	250.000, 0.549	250.000, 0.492	250.000, 0.455	250.000, 0.329	250.000, 0.280	250.000, 0.125	250.000, 0.185
1252	250.200, 0.548	250.200, 0.492	250.200, 0.455	250.200, 0.329	250.200, 0.280	250.200, 0.125	250.200, 0.185
1253	250.400, 0.548	250.400, 0.492	250.400, 0.455	250.400, 0.329	250.400, 0.279	250.400, 0.125	250.400, 0.185
1254	250.600, 0.547	250.600, 0.492	250.600, 0.455	250.600, 0.328	250.600, 0.279	250.600, 0.125	250.600, 0.185
1255	250.800, 0.547	250.800, 0.491	250.800, 0.455	250.800, 0.328	250.800, 0.279	250.800, 0.125	250.800, 0.185
1256	251.000, 0.547	251.000, 0.491	251.000, 0.455	251.000, 0.328	251.000, 0.279	251.000, 0.125	251.000, 0.185
1257	251.200, 0.547	251.200, 0.490	251.200, 0.455	251.200, 0.328	251.200, 0.278	251.200, 0.125	251.200, 0.185
1258	251.400, 0.547	251.400, 0.490	251.400, 0.456	251.400, 0.327	251.400, 0.278	251.400, 0.125	251.400, 0.185
1259	251.600, 0.547	251.600, 0.490	251.600, 0.456	251.600, 0.327	251.600, 0.278	251.600, 0.124	251.600, 0.185
1260	251.800, 0.547	251.800, 0.489	251.800, 0.456	251.800, 0.327	251.800, 0.277	251.800, 0.124	251.800, 0.185
1261	252.000, 0.548	252.000, 0.489	252.000, 0.456	252.000, 0.327	252.000, 0.277	252.000, 0.124	252.000, 0.185
1262	252.200, 0.548	252.200, 0.489	252.200, 0.455	252.200, 0.326	252.200, 0.277	252.200, 0.124	252.200, 0.185
1263	252.400, 0.547	252.400, 0.488	252.400, 0.455	252.400, 0.326	252.400, 0.277	252.400, 0.124	252.400, 0.184
1264	252.600, 0.547	252.600, 0.488	252.600, 0.455	252.600, 0.326	252.600, 0.277	252.600, 0.124	252.600, 0.184
1265	252.800, 0.547	252.800, 0.487	252.800, 0.455	252.800, 0.325	252.800, 0.276	252.800, 0.124	252.800, 0.184
1266	253.000, 0.547	253.000, 0.487	253.000, 0.455	253.000, 0.325	253.000, 0.276	253.000, 0.124	253.000, 0.184
1267	253.200, 0.547	253.200, 0.487	253.200, 0.454	253.200, 0.325	253.200, 0.275	253.200, 0.124	253.200, 0.184
1268	253.400, 0.546	253.400, 0.487	253.400, 0.454	253.400, 0.324	253.400, 0.275	253.400, 0.125	253.400, 0.184
1269	253.600, 0.546	253.600, 0.486	253.600, 0.454	253.600, 0.324	253.600, 0.275	253.600, 0.125	253.600, 0.184
1270	253.800, 0.545	253.800, 0.486	253.800, 0.453	253.800, 0.324	253.800, 0.275	253.800, 0.125	253.800, 0.184
1271	254.000, 0.545	254.000, 0.486	254.000, 0.453	254.000, 0.323	254.000, 0.275	254.000, 0.125	254.000, 0.184
1272	254.200, 0.545	254.200, 0.486	254.200, 0.453	254.200, 0.323	254.200, 0.275	254.200, 0.125	254.200, 0.184
1273	254.400, 0.545	254.400, 0.486	254.400, 0.452	254.400, 0.323	254.400, 0.275	254.400, 0.125	254.400, 0.184
1274	254.600, 0.545	254.600, 0.486	254.600, 0.452	254.600, 0.322	254.600, 0.275	254.600, 0.125	254.600, 0.183
1275	254.800, 0.545	254.800, 0.486	254.800, 0.452	254.800, 0.322	254.800, 0.275	254.800, 0.125	254.800, 0.183
1276	255.000, 0.545	255.000, 0.486	255.000, 0.451	255.000, 0.322	255.000, 0.275	255.000, 0.125	255.000, 0.183
1277	255.200, 0.545	255.200, 0.485	255.200, 0.451	255.200, 0.322	255.200, 0.275	255.200, 0.125	255.200, 0.183
1278	255.400, 0.545	255.400, 0.485	255.400, 0.451	255.400, 0.321	255.400, 0.275	255.400, 0.124	255.400, 0.183
1279	255.600, 0.545	255.600, 0.485	255.600, 0.451	255.600, 0.321	255.600, 0.274	255.600, 0.124	255.600, 0.182
1280	255.800, 0.545	255.800, 0.485	255.800, 0.450	255.800, 0.321	255.800, 0.274	255.800, 0.124	255.800, 0.182
1281	256.000, 0.544	256.000, 0.484	256.000, 0.450	256.000, 0.321	256.000, 0.274	256.000, 0.124	256.000, 0.182
1282	256.200, 0.544	256.200, 0.484	256.200, 0.450	256.200, 0.321	256.200, 0.274	256.200, 0.124	256.200, 0.181
1283	256.400, 0.543	256.400, 0.484	256.400, 0.449	256.400, 0.321	256.400, 0.274	256.400, 0.124	256.400, 0.181
1284	256.600, 0.543	256.600, 0.484	256.600, 0.449	256.600, 0.321	256.600, 0.273	256.600, 0.124	256.600, 0.181
1285	256.800, 0.542	256.800, 0.484	256.800, 0.449	256.800, 0.321	256.800, 0.273	256.800, 0.124	256.800, 0.181
1286	257.000, 0.542	257.000, 0.483	257.000, 0.449	257.000, 0.321	257.000, 0.273	257.000, 0.124	257.000, 0.181
1287	257.200, 0.542	257.200, 0.483	257.200, 0.449	257.200, 0.321	257.200, 0.272	257.200, 0.124	257.200, 0.181
1288	257.400, 0.541	257.400, 0.483	257.400, 0.448	257.400, 0.320	257.400, 0.272	257.400, 0.123	257.400, 0.181
1289	257.600, 0.541	257.600, 0.482	257.600, 0.448	257.600, 0.320	257.600, 0.272	257.600, 0.123	257.600, 0.181
1290	257.800, 0.540	257.800, 0.482	257.800, 0.447	257.800, 0.319	257.800, 0.272	257.800, 0.123	257.800, 0.181
1291	258.000, 0.540	258.000, 0.482	258.000, 0.447	258.000, 0.319	258.000, 0.271	258.000, 0.122	258.000, 0.180
1292	258.200, 0.539	258.200, 0.481	258.200, 0.447	258.200, 0.318	258.200, 0.271	258.200, 0.122	258.200, 0.180
1293	258.400, 0.539	258.400, 0.481	258.400, 0.447	258.400, 0.318	258.400, 0.271	258.400, 0.122	258.400, 0.180
1294	258.600, 0.539	258.600, 0.481	258.600, 0.447	258.600, 0.317	258.600, 0.271	258.600, 0.122	258.600, 0.180
1295	258.800, 0.538	258.800, 0.481	258.800, 0.446	258.800, 0.317	258.800, 0.271	258.800, 0.122	258.800, 0.180
1296	259.000, 0.538	259.000, 0.481	259.000, 0.446	259.000, 0.316	259.000, 0.271	259.000, 0.122	259.000, 0.179
1297	259.200, 0.538	259.200, 0.481	259.200, 0.446	259.200, 0.316	259.200, 0.270	259.200, 0.122	259.200, 0.179
1298	259.400, 0.537	259.400, 0.480	259.400, 0.446	259.400, 0.316	259.400, 0.270	259.400, 0.122	259.400, 0.179
1299	259.600, 0.537	259.600, 0.480	259.600, 0.446	259.600, 0.316	259.600, 0.270	259.600, 0.122	259.600, 0.178
1300	259.800, 0.537	259.800, 0.480	259.800, 0.445	259.800, 0.316	259.800, 0.270	259.800, 0.122	259.800, 0.178
1301	260.000, 0.536	260.000, 0.480	260.000, 0.445	260.000, 0.317	260.000, 0.270	260.000, 0.122	260.000, 0.178
1302	260.200, 0.536	260.200, 0.480	260.200, 0.445	260.200, 0.317	260.200, 0.270	260.200, 0.122	260.200, 0.177
1303	260.400, 0.536	260.400, 0.479	260.400, 0.445	260.400, 0.317	260.400, 0.270	260.400, 0.123	260.400, 0.177
1304	260.600, 0.536	260.600, 0.479	260.600, 0.444	260.600, 0.317	260.600, 0.270	260.600, 0.123	260.600, 0.177
1305	260.800, 0.536	260.800, 0.479	260.800, 0.444	260.800, 0.317	260.800, 0.270	260.800, 0.123	260.800, 0.177
1306	261.000, 0.536	261.000, 0.479	261.000, 0.444	261.000, 0.317	261.000, 0.270	261.000, 0.123	261.000, 0.177
1307	261.200, 0.536	261.200, 0.479	261.200, 0.444	261.200, 0.316	261.200, 0.270	261.200, 0.123	261.200, 0.177
1308	261.400, 0.536	261.400, 0.478	261.400, 0.444	261.400, 0.316	261.400, 0.270	261.400, 0.122	261.400, 0.177
1309	261.600, 0.536	261.600, 0.478	261.600, 0.443	261.600, 0.316	261.600, 0.270	261.600, 0.122	261.600, 0.177
1310	261.800, 0.536	261.800, 0.478	261.800, 0.443	261.800, 0.316	261.800, 0.270	261.800, 0.122	261.800, 0.177
1311	262.000, 0.536	262.000, 0.478	262.000, 0.443	262.000, 0.315	262.000, 0.270	262.000, 0.122	262.000, 0.177
1312	262.200, 0.536	262.200, 0.478	262.200, 0.443	262.200, 0.315	262.200, 0.269	262.200, 0.121	262.200, 0.176
1313	262.400, 0.536	262.400, 0.477	262.400, 0.443	262.400, 0.314	262.400, 0.269	262.400, 0.121	262.400, 0.176
1314	262.600, 0.536	262.600, 0.477	262.600, 0.443	262.600, 0.314	262.600, 0.268	262.600, 0.121	262.600, 0.176
1315	262.800, 0.536	262.800, 0.477	262.800, 0.442	262.800, 0.314	262.800, 0.268	262.800, 0.121	262.800, 0.176
1316	263.000, 0.536	263.000, 0.477	263.000, 0.442	263.000, 0.313	263.000, 0.267	263.000, 0.122	263.000, 0.176
1317	263.200, 0.536	263.200, 0.477	263.200, 0.442	263.200, 0.313	263.200, 0.267	263.200, 0.122	263.200, 0.176
1318	263.400, 0.535	263.400, 0.477	263.400, 0.441	263.400, 0.313	263.400, 0.266	263.400, 0.122	263.400, 0.176
1319	263.600, 0.535	263.600, 0.477	263.600, 0.441	263.600, 0.312	263.600, 0.266	263.600, 0.122	263.600, 0.176
1320	263.800, 0.535	263.800, 0.477	263.800, 0.441	263.800, 0.312	263.800, 0.265	263.800, 0.122	263.800, 0.176
1321	264.000, 0.534	264.000, 0.476	264.000, 0.441	264.000, 0.312	264.000, 0.265	264.000, 0.122	264.000, 0.176
1322	264.200, 0.534	264.200, 0.476	264.200, 0.440	264.200, 0.312	264.200, 0.265	264.200, 0.122	264.200, 0.176
1323	264.400, 0.534	264.400, 0.476	264.400, 0.440	264.400, 0.311	264.400, 0.265	264.400, 0.122	264.400, 0.176
1324	264.600, 0.533	264.600, 0.475	264.600, 0.439	264.600, 0.311	264.600, 0.265	264.600, 0.122	264.600, 0.176
1325	264.800, 0.533	264.800, 0.475	264.800, 0.439	264.800, 0.311	264.800, 0.265	264.800, 0.122	264.800, 0.176
1326	265.000, 0.533	265.000, 0.475	265.000, 0.439	265.000, 0.310	265.000, 0.265	265.000, 0.121	265.000, 0.175
1327	265.200, 0.533	265.200, 0.475	265.200, 0.439	265.200, 0.310	265.200, 0.265	265.200, 0.121	265.200, 0.175
1328	265.400, 0.533	265.400, 0.474	265.400, 0.439	265.400, 0.310	265.400, 0.266	265.400, 0.120	265.400, 0.175
1329	265.600, 0.532	265.600, 0.474	265.600, 0.439	265.600, 0.309	265.600, 0.266	265.600, 0.120	265.600, 0.175
1330	265.800, 0.532	265.800, 0.474	265.800, 0.439	265.800, 0.309	265.800, 0.266	265.800, 0.120	265.800, 0.174
1331	266.000, 0.532	266.000, 0.473	266.000, 0.439	266.000, 0.309	266.000, 0.266	266.000, 0.120	266.000, 0.174
1332	266.200, 0.531	266.200, 0.473	266.200, 0.439	266.200, 0.309	266.200, 0.266	266.200, 0.120	266.200, 0.174
1333	266.400, 0.531	266.400, 0.473	266.400, 0.438	266.400, 0.308	266.400, 0.266	266.400, 0.120	266.400, 0.174
1334	266.600, 0.530	266.600, 0.473	266.600, 0.438	266.600, 0.308	266.600, 0.265	266.600, 0.120	266.600, 0.174
1335	266.800, 0.530	266.800, 0.473	266.800, 0.438	266.800, 0.308	266.800, 0.265	266.800, 0.120	266.800, 0.174
1336	267.000, 0.529	267.000, 0.473	267.000, 0.438	267.000, 0.308	267.000, 0.265	267.000, 0.120	267.000, 0.174
1337	267.200, 0.529	267.200, 0.473	267.200, 0.438	267.200, 0.308	267.200, 0.265	267.200, 0.120	267.200, 0.174
1338	267.400, 0.529	267.400, 0.473	267.400, 0.437	267.400, 0.308	267.400, 0.265	267.400, 0.120	267.400, 0.173
1339	267.600, 0.528	267.600, 0.473	267.600, 0.437	267.600, 0.309	267.600, 0.264	267.600, 0.120	267.600, 0.173
1340	267.800, 0.528	267.800, 0.472	267.800, 0.437	267.800, 0.309	267.800, 0.264	267.800, 0.120	267.800, 0.173
1341	268.000, 0.528	268.000, 0.472	268.000, 0.436	268.000, 0.309	268.000, 0.264	268.000, 0.120	268.000, 0.173
1342	268.200, 0.528	268.200, 0.472	268.200, 0.436	268.200, 0.308	268.200, 0.264	268.200, 0.120	268.200, 0.173
1343	268.400, 0.528	268.400, 0.472	268.400, 0.435	268.400, 0.308	268.400, 0.263	268.400, 0.120	268.400, 0.173
1344	268.600, 0.528	268.600, 0.471	268.600, 0.435	268.600, 0.308	268.600, 0.263	268.600, 0.120	268.600, 0.173
1345	268.800, 0.528	268.800, 0.471	268.800, 0.435	268.800, 0.307	268.800, 0.263	268.800, 0.120	268.800, 0.172
1346	269.000, 0.528	269.000, 0.470	269.000, 0.434	269.000, 0.307	269.000, 0.262	269.000, 0.120	269.000, 0.172
1347	269.200, 0.528	269.200, 0.470	269.200, 0.434	269.200, 0.306	269.200, 0.262	269.200, 0.120	269.200, 0.172
1348	269.400, 0.528	269.400, 0.470	269.400, 0.433	269.400, 0.306	269.400, 0.262	269.400, 0.120	269.400, 0.172
1349	269.600, 0.528	269.600, 0.469	269.600, 0.433	269.600, 0.305	269.600, 0.262	269.600, 0.120	269.600, 0.171
1350	269.800, 0.528	269.800, 0.469	269.800, 0.433	269.800, 0.304	269.800, 0.261	269.800, 0.121	269.800, 0.171
1351	,	,	,	,	,	,	,
1352	,	,	,	,	,	,	,
1353	,	,	,	,	,	,	,
1354	,	,	,	,	,	,	,
1355	,	,	,	,	,	,	,
1356	,	,	,	,	,	,	,
1357	,	,	,	,	,	,	,
1358	,	,	,	,	,	,	,
1359	,	,	,	,	,	,	,
1360	,	,	,	,	,	,	,
1361	,	,	,	,	,	,	,
1362	,	,	,	,	,	,	,
1363	,	,	,	,	,	,	,
1364	,	,	,	,	,	,	,
1365	,	,	,	,	,	,	,
1366	,	,	,	,	,	,	,
1367	,	,	,	,	,	,	,
1368	,	,	,	,	,	,	,
1369	,	,	,	,	,	,	,
1370	,	,	,	,	,	,	,
1371	,	,	,	,	,	,	,
1372	,	,	,	,	,	,	,
1373	,	,	,	,	,	,	,
1374	,	,	,	,	,	,	,
1375	,	,	,	,	,	,	,
1376	,	,	,	,	,	,	,
1377	,	,	,	,	,	,	,
1378	,	,	,	,	,	,	,
1379	,	,	,	,	,	,	,
1380	,	,	,	,	,	,	,
1381	,	,	,	,	,	,	,
1382	,	,	,	,	,	,	,
1383	,	,	,	,	,	,	,
1384	,	,	,	,	,	,	,
1385	,	,	,	,	,	,	,
1386	,	,	,	,	,	,	,
1387	,	,	,	,	,	,	,
1388	,	,	,	,	,	,	,
1389	,	,	,	,	,	,	,
1390	,	,	,	,	,	,	,
1391	,	,	,	,	,	,	,
1392	,	,	,	,	,	,	,
1393	,	,	,	,	,	,	,
1394	,	,	,	,	,	,	,
1395	,	,	,	,	,	,	,
1396	,	,	,	,	,	,	,
1397	,	,	,	,	,	,	,
1398	,	,	,	,	,	,	,
1399	,	,	,	,	,	,	,
1400	,	,	,	,	,	,	,
1401	,	,	,	,	,	,	,
1402	,	,	,	,	,	,	,
1403	,	,	,	,	,	,	,
1404	,	,	,	,	,	,	,
1405	,	,	,	,	,	,	,
1406	,	,	,	,	,	,	,
1407	,	,	,	,	,	,	,
1408	,	,	,	,	,	,	,
1409	,	,	,	,	,	,	,
1410	,	,	,	,	,	,	,
1411	,	,	,	,	,	,	,
1412	,	,	,	,	,	,	,
1413	,	,	,	,	,	,	,
1414	,	,	,	,	,	,	,
1415	,	,	,	,	,	,	,
1416	,	,	,	,	,	,	,
1417	,	,	,	,	,	,	,
1418	,	,	,	,	,	,	,
1419	,	,	,	,	,	,	,
1420	,	,	,	,	,	,	,
1421	,	,	,	,	,	,	,
1422	,	,	,	,	,	,	,
1423	,	,	,	,	,	,	,
1424	,	,	,	,	,	,	,
1425	,	,	,	,	,	,	,
1426	,	,	,	,	,	,	,
1427	,	,	,	,	,	,	,
1428	,	,	,	,	,	,	,
1429	,	,	,	,	,	,	,
1430	,	,	,	,	,	,	,
1431	,	,	,	,	,	,	,
1432	,	,	,	,	,	,	,
1433	,	,	,	,	,	,	,
1434	,	,	,	,	,	,	,
1435	,	,	,	,	,	,	,
1436	,	,	,	,	,	,	,
1437	,	,	,	,	,	,	,
1438	,	,	,	,	,	,	,
1439	,	,	,	,	,	,	,
1440	,	,	,	,	,	,	,
1441	,	,	,	,	,	,	,
1442	,	,	,	,	,	,	,
1443	,	,	,	,	,	,	,
1444	,	,	,	,	,	,	,
1445	,	,	,	,	,	,	,
1446	,	,	,	,	,	,	,
1447	,	,	,	,	,	,	,
1448	,	,	,	,	,	,	,
1449	,	,	,	,	,	,	,
1450	,	,	,	,	,	,	,
1451	,	,	,	,	,	,	,
1452	,	,	,	,	,	,	,
1453	,	,	,	,	,	,	,
1454	,	,	,	,	,	,	,
1455	,	,	,	,	,	,	,
1456	,	,	,	,	,	,	,
1457	,	,	,	,	,	,	,
1458	,	,	,	,	,	,	,
1459	,	,	,	,	,	,	,
1460	,	,	,	,	,	,	,
1461	,	,	,	,	,	,	,
1462	,	,	,	,	,	,	,
1463	,	,	,	,	,	,	,
1464	,	,	,	,	,	,	,
1465	,	,	,	,	,	,	,
1466	,	,	,	,	,	,	,
1467	,	,	,	,	,	,	,
1468	,	,	,	,	,	,	,
1469	,	,	,	,	,	,	,
1470	,	,	,	,	,	,	,
1471	,	,	,	,	,	,	,
1472	,	,	,	,	,	,	,
1473	,	,	,	,	,	,	,
1474	,	,	,	,	,	,	,
1475	,	,	,	,	,	,	,
1476	,	,	,	,	,	,	,
1477	,	,	,	,	,	,	,
1478	,	,	,	,	,	,	,
1479	,	,	,	,	,	,	,
1480	,	,	,	,	,	,	,
1481	,	,	,	,	,	,	,
1482	,	,	,	,	,	,	,
1483	,	,	,	,	,	,	,
1484	,	,	,	,	,	,	,
1485	,	,	,	,	,	,	,
1486	,	,	,	,	,	,	,
1487	,	,	,	,	,	,	,
1488	,	,	,	,	,	,	,
1489	,	,	,	,	,	,	,
1490	,	,	,	,	,	,	,
1491	,	,	,	,	,	,	,
1492	,	,	,	,	,	,	,
1493	,	,	,	,	,	,	,
1494	,	,	,	,	,	,	,
1495	,	,	,	,	,	,	,
1496	,	,	,	,	,	,	,
1497	,	,	,	,	,	,	,
1498	,	,	,	,	,	,	,
1499	,	,	,	,	,	,	,
1500	,	,	,	,	,	,	,
1501	,	,	,	,	,	,	,
1502	,	,	,	,	,	,	,
1503	,	,	,	,	,	,	,
1504	,	,	,	,	,	,	,
1505	,	,	,	,	,	,	,
1506	,	,	,	,	,	,	,
1507	,	,	,	,	,	,	,
1508	,	,	,	,	,	,	,
1509	,	,	,	,	,	,	,
1510	,	,	,	,	,	,	,
1511	,	,	,	,	,	,	,
1512	,	,	,	,	,	,	,
1513	,	,	,	,	,	,	,
1514	,	,	,	,	,	,	,
1515	,	,	,	,	,	,	,
1516	,	,	,	,	,	,	,
1517	,	,	,	,	,	,	,
1518	,	,	,	,	,	,	,
1519	,	,	,	,	,	,	,
1520	,	,	,	,	,	,	,
1521	,	,	,	,	,	,	,
1522	,	,	,	,	,	,	,
1523	,	,	,	,	,	,	,
1524	,	,	,	,	,	,	,
1525	,	,	,	,	,	,	,
1526	,	,	,	,	,	,	,
1527	,	,	,	,	,	,	,
1528	,	,	,	,	,	,	,
1529	,	,	,	,	,	,	,
1530	,	,	,	,	,	,	,
1531	,	,	,	,	,	,	,
1532	,	,	,	,	,	,	,
1533	,	,	,	,	,	,	,
1534	,	,	,	,	,	,	,
1535	,	,	,	,	,	,	,
1536	,	,	,	,	,	,	,
1537	,	,	,	,	,	,	,
1538	,	,	,	,	,	,	,
1539	,	,	,	,	,	,	,
1540	,	,	,	,	,	,	,
1541	,	,	,	,	,	,	,
1542	,	,	,	,	,	,	,
1543	,	,	,	,	,	,	,
1544	,	,	,	,	,	,	,
1545	,	,	,	,	,	,	,
1546	,	,	,	,	,	,	,
1547	,	,	,	,	,	,	,
1548	,	,	,	,	,	,	,
1549	,	,	,	,	,	,	,
1550	,	,	,	,	,	,	,
1551	,	,	,	,	,	,	,
1552	,	,	,	,	,	,	,
1553	,	,	,	,	,	,	,
1554	,	,	,	,	,	,	,
1555	,	,	,	,	,	,	,
1556	,	,	,	,	,	,	,
1557	,	,	,	,	,	,	,
1558	,	,	,	,	,	,	,
1559	,	,	,	,	,	,	,
1560	,	,	,	,	,	,	,
1561	,	,	,	,	,	,	,
1562	,	,	,	,	,	,	,
1563	,	,	,	,	,	,	,
1564	,	,	,	,	,	,	,
1565	,	,	,	,	,	,	,
1566	,	,	,	,	,	,	,
1567	,	,	,	,	,	,	,
1568	,	,	,	,	,	,	,
1569	,	,	,	,	,	,	,
1570	,	,	,	,	,	,	,
1571	,	,	,	,	,	,	,
1572	,	,	,	,	,	,	,
1573	,	,	,	,	,	,	,
1574	,	,	,	,	,	,	,
1575	,	,	,	,	,	,	,
1576	,	,	,	,	,	,	,
1577	,	,	,	,	,	,	,
1578	,	,	,	,	,	,	,
1579	,	,	,	,	,	,	,
1580	,	,	,	,	,	,	,
1581	,	,	,	,	,	,	,
1582	,	,	,	,	,	,	,
1583	,	,	,	,	,	,	,
1584	,	,	,	,	,	,	,
1585	,	,	,	,	,	,	,
1586	,	,	,	,	,	,	,
1587	,	,	,	,	,	,	,
1588	,	,	,	,	,	,	,
1589	,	,	,	,	,	,	,
1590	,	,	,	,	,	,	,
1591	,	,	,	,	,	,	,
1592	,	,	,	,	,	,	,
1593	,	,	,	,	,	,	,
1594	,	,	,	,	,	,	,
1595	,	,	,	,	,	,	,
1596	,	,	,	,	,	,	,
1597	,	,	,	,	,	,	,
1598	,	,	,	,	,	,	,
1599	,	,	,	,	,	,	,
1600	,	,	,	,	,	,	,
1601	,	,	,	,	,	,	,
1602	,	,	,	,	,	,	,
1603	,	,	,	,	,	,	,
1604	,	,	,	,	,	,	,
1605	,	,	,	,	,	,	,
1606	,	,	,	,	,	,	,
1607	,	,	,	,	,	,	,
1608	,	,	,	,	,	,	,
1609	,	,	,	,	,	,	,
1610	,	,	,	,	,	,	,
1611	,	,	,	,	,	,	,
1612	,	,	,	,	,	,	,
1613	,	,	,	,	,	,	,
1614	,	,	,	,	,	,	,
1615	,	,	,	,	,	,	,
1616	,	,	,	,	,	,	,
1617	,	,	,	,	,	,	,
1618	,	,	,	,	,	,	,
1619	,	,	,	,	,	,	,
1620	,	,	,	,	,	,	,
1621	,	,	,	,	,	,	,
1622	,	,	,	,	,	,	,
1623	,	,	,	,	,	,	,
1624	,	,	,	,	,	,	,
1625	,	,	,	,	,	,	,
1626	,	,	,	,	,	,	,
1627	,	,	,	,	,	,	,
1628	,	,	,	,	,	,	,
1629	,	,	,	,	,	,	,
1630	,	,	,	,	,	,	,
1631	,	,	,	,	,	,	,
1632	,	,	,	,	,	,	,
1633	,	,	,	,	,	,	,
1634	,	,	,	,	,	,	,
1635	,	,	,	,	,	,	,
1636	,	,	,	,	,	,	,
1637	,	,	,	,	,	,	,
1638	,	,	,	,	,	,	,
1639	,	,	,	,	,	,	,
1640	,	,	,	,	,	,	,
1641	,	,	,	,	,	,	,
1642	,	,	,	,	,	,	,
1643	,	,	,	,	,	,	,
1644	,	,	,	,	,	,	,
1645	,	,	,	,	,	,	,
1646	,	,	,	,	,	,	,
1647	,	,	,	,	,	,	,
1648	,	,	,	,	,	,	,
1649	,	,	,	,	,	,	,
1650	,	,	,	,	,	,	,
1651	,	,	,	,	,	,	,
1652	,	,	,	,	,	,	,
1653	,	,	,	,	,	,	,
1654	,	,	,	,	,	,	,
1655	,	,	,	,	,	,	,
1656	,	,	,	,	,	,	,
1657	,	,	,	,	,	,	,
1658	,	,	,	,	,	,	,
1659	,	,	,	,	,	,	,
1660	,	,	,	,	,	,	,
1661	,	,	,	,	,	,	,
1662	,	,	,	,	,	,	,
1663	,	,	,	,	,	,	,
1664	,	,	,	,	,	,	,
1665	,	,	,	,	,	,	,
1666	,	,	,	,	,	,	,
1667	,	,	,	,	,	,	,
1668	,	,	,	,	,	,	,
1669	,	,	,	,	,	,	,
1670	,	,	,	,	,	,	,
1671	,	,	,	,	,	,	,
1672	,	,	,	,	,	,	,
1673	,	,	,	,	,	,	,
1674	,	,	,	,	,	,	,
1675	,	,	,	,	,	,	,
1676	,	,	,	,	,	,	,
1677	,	,	,	,	,	,	,
1678	,	,	,	,	,	,	,
1679	,	,	,	,	,	,	,
1680	,	,	,	,	,	,	,
1681	,	,	,	,	,	,	,
1682	,	,	,	,	,	,	,
1683	,	,	,	,	,	,	,
1684	,	,	,	,	,	,	,
1685	,	,	,	,	,	,	,
1686	,	,	,	,	,	,	,
1687	,	,	,	,	,	,	,
1688	,	,	,	,	,	,	,
1689	,	,	,	,	,	,	,
1690	,	,	,	,	,	,	,
1691	,	,	,	,	,	,	,
1692	,	,	,	,	,	,	,
1693	,	,	,	,	,	,	,
1694	,	,	,	,	,	,	,
1695	,	,	,	,	,	,	,
1696	,	,	,	,	,	,	,
1697	,	,	,	,	,	,	,
1698	,	,	,	,	,	,	,
1699	,	,	,	,	,	,	,
1700	,	,	,	,	,	,	,
1701	,	,	,	,	,	,	,
1702	,	,	,	,	,	,	,
1703	,	,	,	,	,	,	,
1704	,	,	,	,	,	,	,
1705	,	,	,	,	,	,	,
1706	,	,	,	,	,	,	,
1707	,	,	,	,	,	,	,
1708	,	,	,	,	,	,	,
1709	,	,	,	,	,	,	,
1710	,	,	,	,	,	,	,
1711	,	,	,	,	,	,	,
1712	,	,	,	,	,	,	,
1713	,	,	,	,	,	,	,
1714	,	,	,	,	,	,	,
1715	,	,	,	,	,	,	,
1716	,	,	,	,	,	,	,
1717	,	,	,	,	,	,	,
1718	,	,	,	,	,	,	,
1719	,	,	,	,	,	,	,
1720	,	,	,	,	,	,	,
1721	,	,	,	,	,	,	,
1722	,	,	,	,	,	,	,
1723	,	,	,	,	,	,	,
1724	,	,	,	,	,	,	,
1725	,	,	,	,	,	,	,
1726	,	,	,	,	,	,	,
1727	,	,	,	,	,	,	,
1728	,	,	,	,	,	,	,
1729	,	,	,	,	,	,	,
1730	,	,	,	,	,	,	,
1731	,	,	,	,	,	,	,
1732	,	,	,	,	,	,	,
1733	,	,	,	,	,	,	,
1734	,	,	,	,	,	,	,
1735	,	,	,	,	,	,	,
1736	,	,	,	,	,	,	,
1737	,	,	,	,	,	,	,
1738	,	,	,	,	,	,	,
1739	,	,	,	,	,	,	,
1740	,	,	,	,	,	,	,
1741	,	,	,	,	,	,	,
1742	,	,	,	,	,	,	,
1743	,	,	,	,	,	,	,
1744	,	,	,	,	,	,	,
1745	,	,	,	,	,	,	,
1746	,	,	,	,	,	,	,
1747	,	,	,	,	,	,	,
1748	,	,	,	,	,	,	,
1749	,	,	,	,	,	,	,
1750	,	,	,	,	,	,	,
1751	,	,	,	,	,	,	,
1752	,	,	,	,	,	,	,
1753	,	,	,	,	,	,	,
1754	,	,	,	,	,	,	,
1755	,	,	,	,	,	,	,
1756	,	,	,	,	,	,	,
1757	,	,	,	,	,	,	,
1758	,	,	,	,	,	,	,
1759	,	,	,	,	,	,	,
1760	,	,	,	,	,	,	,
1761	,	,	,	,	,	,	,
1762	,	,	,	,	,	,	,
1763	,	,	,	,	,	,	,
1764	,	,	,	,	,	,	,
1765	,	,	,	,	,	,	,
1766	,	,	,	,	,	,	,
1767	,	,	,	,	,	,	,
1768	,	,	,	,	,	,	,
1769	,	,	,	,	,	,	,
1770	,	,	,	,	,	,	,
1771	,	,	,	,	,	,	,
1772	,	,	,	,	,	,	,
1773	,	,	,	,	,	,	,
1774	,	,	,	,	,	,	,
1775	,	,	,	,	,	,	,
1776	,	,	,	,	,	,	,
1777	,	,	,	,	,	,	,
1778	,	,	,	,	,	,	,
1779	,	,	,	,	,	,	,
1780	,	,	,	,	,	,	,
1781	,	,	,	,	,	,	,
1782	,	,	,	,	,	,	,
1783	,	,	,	,	,	,	,
1784	,	,	,	,	,	,	,
1785	,	,	,	,	,	,	,
1786	,	,	,	,	,	,	,
1787	,	,	,	,	,	,	,
1788	,	,	,	,	,	,	,
1789	,	,	,	,	,	,	,
1790	,	,	,	,	,	,	,
1791	,	,	,	,	,	,	,
1792	,	,	,	,	,	,	,
1793	,	,	,	,	,	,	,
1794	,	,	,	,	,	,	,
1795	,	,	,	,	,	,	,
1796	,	,	,	,	,	,	,
1797	,	,	,	,	,	,	,
1798	,	,	,	,	,	,	,
1799	,	,	,	,	,	,	,
1800	,	,	,	,	,	,	,
1801	,	,	,	,	,	,	,
1802	,	,	,	,	,	,	,
1803	,	,	,	,	,	,	,
1804	,	,	,	,	,	,	,
1805	,	,	,	,	,	,	,
1806	,	,	,	,	,	,	,
1807	,	,	,	,	,	,	,
1808	,	,	,	,	,	,	,
1809	,	,	,	,	,	,	,
1810	,	,	,	,	,	,	,
1811	,	,	,	,	,	,	,
1812	,	,	,	,	,	,	,
1813	,	,	,	,	,	,	,
1814	,	,	,	,	,	,	,
1815	,	,	,	,	,	,	,
1816	,	,	,	,	,	,	,
1817	,	,	,	,	,	,	,
1818	,	,	,	,	,	,	,
1819	,	,	,	,	,	,	,
1820	,	,	,	,	,	,	,
1821	,	,	,	,	,	,	,
1822	,	,	,	,	,	,	,
1823	,	,	,	,	,	,	,
1824	,	,	,	,	,	,	,
1825	,	,	,	,	,	,	,
1826	,	,	,	,	,	,	,
1827	,	,	,	,	,	,	,
1828	,	,	,	,	,	,	,
1829	,	,	,	,	,	,	,
1830	,	,	,	,	,	,	,
1831	,	,	,	,	,	,	,
1832	,	,	,	,	,	,	,
1833	,	,	,	,	,	,	,
1834	,	,	,	,	,	,	,
1835	,	,	,	,	,	,	,
1836	,	,	,	,	,	,	,
1837	,	,	,	,	,	,	,
1838	,	,	,	,	,	,	,
1839	,	,	,	,	,	,	,
1840	,	,	,	,	,	,	,
1841	,	,	,	,	,	,	,
1842	,	,	,	,	,	,	,
1843	,	,	,	,	,	,	,
1844	,	,	,	,	,	,	,
1845	,	,	,	,	,	,	,
1846	,	,	,	,	,	,	,
1847	,	,	,	,	,	,	,
1848	,	,	,	,	,	,	,
1849	,	,	,	,	,	,	,
1850	,	,	,	,	,	,	,
1851	,	,	,	,	,	,	,
1852	,	,	,	,	,	,	,
1853	,	,	,	,	,	,	,
1854	,	,	,	,	,	,	,
1855	,	,	,	,	,	,	,
1856	,	,	,	,	,	,	,
1857	,	,	,	,	,	,	,
1858	,	,	,	,	,	,	,
1859	,	,	,	,	,	,	,
1860	,	,	,	,	,	,	,
1861	,	,	,	,	,	,	,
1862	,	,	,	,	,	,	,
1863	,	,	,	,	,	,	,
1864	,	,	,	,	,	,	,
1865	,	,	,	,	,	,	,
1866	,	,	,	,	,	,	,
1867	,	,	,	,	,	,	,
1868	,	,	,	,	,	,	,
1869	,	,	,	,	,	,	,
1870	,	,	,	,	,	,	,
1871	,	,	,	,	,	,	,
1872	,	,	,	,	,	,	,
1873	,	,	,	,	,	,	,
1874	,	,	,	,	,	,	,
1875	,	,	,	,	,	,	,
1876	,	,	,	,	,	,	,
1877	,	,	,	,	,	,	,
1878	,	,	,	,	,	,	,
1879	,	,	,	,	,	,	,
1880	,	,	,	,	,	,	,
1881	,	,	,	,	,	,	,
1882	,	,	,	,	,	,	,
1883	,	,	,	,	,	,	,
1884	,	,	,	,	,	,	,
1885	,	,	,	,	,	,	,
1886	,	,	,	,	,	,	,
1887	,	,	,	,	,	,	,
1888	,	,	,	,	,	,	,
1889	,	,	,	,	,	,	,
1890	,	,	,	,	,	,	,
1891	,	,	,	,	,	,	,
1892	,	,	,	,	,	,	,
1893	,	,	,	,	,	,	,
1894	,	,	,	,	,	,	,
1895	,	,	,	,	,	,	,
1896	,	,	,	,	,	,	,
1897	,	,	,	,	,	,	,
1898	,	,	,	,	,	,	,
1899	,	,	,	,	,	,	,
1900	,	,	,	,	,	,	,
1901	,	,	,	,	,	,	,
1902	,	,	,	,	,	,	,
1903	,	,	,	,	,	,	,
1904	,	,	,	,	,	,	,
1905	,	,	,	,	,	,	,
1906	,	,	,	,	,	,	,
1907	,	,	,	,	,	,	,
1908	,	,	,	,	,	,	,
1909	,	,	,	,	,	,	,
1910	,	,	,	,	,	,	,
1911	,	,	,	,	,	,	,
1912	,	,	,	,	,	,	,
1913	,	,	,	,	,	,	,
1914	,	,	,	,	,	,	,
1915	,	,	,	,	,	,	,
1916	,	,	,	,	,	,	,
1917	,	,	,	,	,	,	,
1918	,	,	,	,	,	,	,
1919	,	,	,	,	,	,	,
1920	,	,	,	,	,	,	,
1921	,	,	,	,	,	,	,
1922	,	,	,	,	,	,	,
1923	,	,	,	,	,	,	,
1924	,	,	,	,	,	,	,
1925	,	,	,	,	,	,	,
1926	,	,	,	,	,	,	,
1927	,	,	,	,	,	,	,
1928	,	,	,	,	,	,	,
1929	,	,	,	,	,	,	,
1930	,	,	,	,	,	,	,
1931	,	,	,	,	,	,	,
1932	,	,	,	,	,	,	,
1933	,	,	,	,	,	,	,
1934	,	,	,	,	,	,	,
1935	,	,	,	,	,	,	,
1936	,	,	,	,	,	,	,
1937	,	,	,	,	,	,	,
1938	,	,	,	,	,	,	,
1939	,	,	,	,	,	,	,
1940	,	,	,	,	,	,	,
1941	,	,	,	,	,	,	,
1942	,	,	,	,	,	,	,
1943	,	,	,	,	,	,	,
1944	,	,	,	,	,	,	,
1945	,	,	,	,	,	,	,
1946	,	,	,	,	,	,	,
1947	,	,	,	,	,	,	,
1948	,	,	,	,	,	,	,
1949	,	,	,	,	,	,	,
1950	,	,	,	,	,	,	,
1951	,	,	,	,	,	,	,
1952	,	,	,	,	,	,	,
1953	,	,	,	,	,	,	,
1954	,	,	,	,	,	,	,
1955	,	,	,	,	,	,	,
1956	,	,	,	,	,	,	,
1957	,	,	,	,	,	,	,
1958	,	,	,	,	,	,	,
1959	,	,	,	,	,	,	,
1960	,	,	,	,	,	,	,
1961	,	,	,	,	,	,	,
1962	,	,	,	,	,	,	,
1963	,	,	,	,	,	,	,
1964	,	,	,	,	,	,	,
1965	,	,	,	,	,	,	,
1966	,	,	,	,	,	,	,
1967	,	,	,	,	,	,	,
1968	,	,	,	,	,	,	,
1969	,	,	,	,	,	,	,
1970	,	,	,	,	,	,	,
1971	,	,	,	,	,	,	,
1972	,	,	,	,	,	,	,
1973	,	,	,	,	,	,	,
1974	,	,	,	,	,	,	,
1975	,	,	,	,	,	,	,
1976	,	,	,	,	,	,	,
1977	,	,	,	,	,	,	,
1978	,	,	,	,	,	,	,
1979	,	,	,	,	,	,	,
1980	,	,	,	,	,	,	,
1981	,	,	,	,	,	,	,
1982	,	,	,	,	,	,	,
1983	,	,	,	,	,	,	,
1984	,	,	,	,	,	,	,
1985	,	,	,	,	,	,	,
1986	,	,	,	,	,	,	,
1987	,	,	,	,	,	,	,
1988	,	,	,	,	,	,	,
1989	,	,	,	,	,	,	,
1990	,	,	,	,	,	,	,
1991	,	,	,	,	,	,	,
1992	,	,	,	,	,	,	,
1993	,	,	,	,	,	,	,
1994	,	,	,	,	,	,	,
1995	,	,	,	,	,	,	,
1996	,	,	,	,	,	,	,
1997	,	,	,	,	,	,	,
1998	,	,	,	,	,	,	,
1999	,	,	,	,	,	,	,
[truncated: 13,001 more rows]

## Sheet: Fig1_supp3_panelA_rep2
	parS20 ParB CTP 0uM	parS20 ParB CTP 1uM	parS20 ParB CTP 10uM	parS20 ParB CTP 100uM	parS20 ParB CTP 1000uM	parS20 ParB CTP 5000uM	parS20 ParB CTP 10000uM
1	0.000, -0.004	0.000, 0.005	0.000, 0.000	0.000, -0.002	0.000, -0.006	0.000, 0.015	0.000, 0.012
2	0.200, -0.003	0.200, 0.004	0.200, 0.001	0.200, -0.001	0.200, -0.007	0.200, 0.015	0.200, 0.011
3	0.400, -0.003	0.400, 0.004	0.400, 0.001	0.400, -0.001	0.400, -0.008	0.400, 0.014	0.400, 0.011
4	0.600, -0.003	0.600, 0.003	0.600, 0.001	0.600, -0.001	0.600, -0.008	0.600, 0.013	0.600, 0.010
5	0.800, -0.004	0.800, 0.003	0.800, 0.002	0.800, -0.001	0.800, -0.009	0.800, 0.012	0.800, 0.009
6	1.000, -0.004	1.000, 0.002	1.000, 0.002	1.000, -0.000	1.000, -0.010	1.000, 0.011	1.000, 0.008
7	1.200, -0.004	1.200, 0.002	1.200, 0.002	1.200, -0.000	1.200, -0.010	1.200, 0.010	1.200, 0.007
8	1.400, -0.004	1.400, 0.002	1.400, 0.003	1.400, -0.001	1.400, -0.010	1.400, 0.009	1.400, 0.006
9	1.600, -0.004	1.600, 0.002	1.600, 0.003	1.600, -0.001	1.600, -0.010	1.600, 0.008	1.600, 0.005
10	1.800, -0.004	1.800, 0.002	1.800, 0.003	1.800, -0.001	1.800, -0.010	1.800, 0.007	1.800, 0.004
11	2.000, -0.004	2.000, 0.002	2.000, 0.003	2.000, -0.001	2.000, -0.010	2.000, 0.006	2.000, 0.004
12	2.200, -0.004	2.200, 0.002	2.200, 0.002	2.200, -0.001	2.200, -0.010	2.200, 0.005	2.200, 0.003
13	2.400, -0.004	2.400, 0.003	2.400, 0.002	2.400, -0.002	2.400, -0.009	2.400, 0.005	2.400, 0.002
14	2.600, -0.004	2.600, 0.003	2.600, 0.002	2.600, -0.002	2.600, -0.009	2.600, 0.004	2.600, 0.002
15	2.800, -0.004	2.800, 0.003	2.800, 0.002	2.800, -0.002	2.800, -0.009	2.800, 0.003	2.800, 0.002
16	3.000, -0.004	3.000, 0.003	3.000, 0.002	3.000, -0.002	3.000, -0.009	3.000, 0.003	3.000, 0.001
17	3.200, -0.004	3.200, 0.003	3.200, 0.002	3.200, -0.003	3.200, -0.009	3.200, 0.003	3.200, 0.001
18	3.400, -0.003	3.400, 0.003	3.400, 0.002	3.400, -0.003	3.400, -0.009	3.400, 0.002	3.400, 0.001
19	3.600, -0.003	3.600, 0.003	3.600, 0.002	3.600, -0.003	3.600, -0.009	3.600, 0.002	3.600, 0.001
20	3.800, -0.003	3.800, 0.003	3.800, 0.002	3.800, -0.003	3.800, -0.009	3.800, 0.001	3.800, 0.001
21	4.000, -0.003	4.000, 0.003	4.000, 0.002	4.000, -0.003	4.000, -0.009	4.000, 0.001	4.000, 0.000
22	4.200, -0.002	4.200, 0.003	4.200, 0.002	4.200, -0.003	4.200, -0.009	4.200, 0.000	4.200, 0.000
23	4.400, -0.002	4.400, 0.003	4.400, 0.002	4.400, -0.002	4.400, -0.009	4.400, -0.000	4.400, 0.000
24	4.600, -0.002	4.600, 0.002	4.600, 0.003	4.600, -0.002	4.600, -0.009	4.600, -0.001	4.600, 0.000
25	4.800, -0.002	4.800, 0.002	4.800, 0.003	4.800, -0.002	4.800, -0.009	4.800, -0.001	4.800, 0.000
26	5.000, -0.002	5.000, 0.002	5.000, 0.003	5.000, -0.002	5.000, -0.009	5.000, -0.002	5.000, -0.000
27	5.200, -0.002	5.200, 0.002	5.200, 0.003	5.200, -0.002	5.200, -0.009	5.200, -0.003	5.200, -0.000
28	5.400, -0.002	5.400, 0.002	5.400, 0.003	5.400, -0.002	5.400, -0.009	5.400, -0.003	5.400, -0.001
29	5.600, -0.002	5.600, 0.002	5.600, 0.003	5.600, -0.002	5.600, -0.008	5.600, -0.003	5.600, -0.001
30	5.800, -0.002	5.800, 0.002	5.800, 0.003	5.800, -0.002	5.800, -0.008	5.800, -0.004	5.800, -0.001
31	6.000, -0.002	6.000, 0.002	6.000, 0.003	6.000, -0.002	6.000, -0.008	6.000, -0.004	6.000, -0.001
32	6.200, -0.002	6.200, 0.002	6.200, 0.002	6.200, -0.001	6.200, -0.008	6.200, -0.004	6.200, -0.001
33	6.400, -0.001	6.400, 0.002	6.400, 0.002	6.400, -0.001	6.400, -0.008	6.400, -0.004	6.400, -0.001
34	6.600, -0.001	6.600, 0.002	6.600, 0.001	6.600, -0.001	6.600, -0.008	6.600, -0.004	6.600, -0.001
35	6.800, -0.001	6.800, 0.002	6.800, 0.001	6.800, -0.002	6.800, -0.008	6.800, -0.004	6.800, -0.001
36	7.000, -0.001	7.000, 0.002	7.000, 0.001	7.000, -0.002	7.000, -0.008	7.000, -0.004	7.000, -0.001
37	7.200, -0.001	7.200, 0.002	7.200, 0.001	7.200, -0.002	7.200, -0.008	7.200, -0.004	7.200, -0.001
38	7.400, -0.002	7.400, 0.002	7.400, 0.001	7.400, -0.003	7.400, -0.008	7.400, -0.004	7.400, -0.001
39	7.600, -0.002	7.600, 0.002	7.600, 0.001	7.600, -0.003	7.600, -0.008	7.600, -0.004	7.600, -0.001
40	7.800, -0.002	7.800, 0.002	7.800, 0.001	7.800, -0.003	7.800, -0.008	7.800, -0.004	7.800, -0.001
41	8.000, -0.002	8.000, 0.002	8.000, 0.001	8.000, -0.003	8.000, -0.008	8.000, -0.005	8.000, -0.001
42	8.200, -0.002	8.200, 0.002	8.200, 0.001	8.200, -0.003	8.200, -0.008	8.200, -0.005	8.200, -0.000
43	8.400, -0.002	8.400, 0.002	8.400, 0.001	8.400, -0.004	8.400, -0.008	8.400, -0.005	8.400, 0.000
44	8.600, -0.002	8.600, 0.002	8.600, 0.002	8.600, -0.004	8.600, -0.008	8.600, -0.005	8.600, 0.000
45	8.800, -0.002	8.800, 0.002	8.800, 0.002	8.800, -0.004	8.800, -0.008	8.800, -0.005	8.800, 0.001
46	9.000, -0.002	9.000, 0.002	9.000, 0.002	9.000, -0.004	9.000, -0.008	9.000, -0.005	9.000, 0.001
47	9.200, -0.001	9.200, 0.002	9.200, 0.002	9.200, -0.004	9.200, -0.008	9.200, -0.005	9.200, 0.001
48	9.400, -0.001	9.400, 0.003	9.400, 0.002	9.400, -0.004	9.400, -0.007	9.400, -0.005	9.400, 0.001
49	9.600, -0.001	9.600, 0.003	9.600, 0.002	9.600, -0.003	9.600, -0.007	9.600, -0.005	9.600, 0.001
50	9.800, -0.000	9.800, 0.003	9.800, 0.003	9.800, -0.003	9.800, -0.007	9.800, -0.005	9.800, 0.001
51	10.000, -0.000	10.000, 0.003	10.000, 0.003	10.000, -0.003	10.000, -0.006	10.000, -0.005	10.000, 0.001
52	10.200, -0.000	10.200, 0.003	10.200, 0.003	10.200, -0.003	10.200, -0.006	10.200, -0.005	10.200, 0.001
53	10.400, -0.000	10.400, 0.003	10.400, 0.002	10.400, -0.002	10.400, -0.006	10.400, -0.004	10.400, 0.002
54	10.600, -0.000	10.600, 0.003	10.600, 0.002	10.600, -0.002	10.600, -0.006	10.600, -0.004	10.600, 0.002
55	10.800, -0.001	10.800, 0.003	10.800, 0.002	10.800, -0.002	10.800, -0.005	10.800, -0.004	10.800, 0.002
56	11.000, -0.001	11.000, 0.003	11.000, 0.002	11.000, -0.002	11.000, -0.005	11.000, -0.004	11.000, 0.002
57	11.200, -0.001	11.200, 0.002	11.200, 0.002	11.200, -0.002	11.200, -0.005	11.200, -0.003	11.200, 0.002
58	11.400, -0.001	11.400, 0.002	11.400, 0.002	11.400, -0.002	11.400, -0.005	11.400, -0.003	11.400, 0.002
59	11.600, -0.002	11.600, 0.002	11.600, 0.002	11.600, -0.002	11.600, -0.005	11.600, -0.003	11.600, 0.002
60	11.800, -0.002	11.800, 0.002	11.800, 0.001	11.800, -0.001	11.800, -0.005	11.800, -0.004	11.800, 0.002
61	12.000, -0.002	12.000, 0.001	12.000, 0.001	12.000, -0.002	12.000, -0.005	12.000, -0.004	12.000, 0.002
62	12.200, -0.003	12.200, 0.001	12.200, 0.001	12.200, -0.002	12.200, -0.005	12.200, -0.004	12.200, 0.002
63	12.400, -0.003	12.400, 0.001	12.400, 0.000	12.400, -0.002	12.400, -0.005	12.400, -0.004	12.400, 0.002
64	12.600, -0.003	12.600, 0.000	12.600, -0.000	12.600, -0.002	12.600, -0.005	12.600, -0.004	12.600, 0.002
65	12.800, -0.003	12.800, 0.000	12.800, -0.000	12.800, -0.002	12.800, -0.005	12.800, -0.004	12.800, 0.001
66	13.000, -0.002	13.000, 0.000	13.000, -0.000	13.000, -0.002	13.000, -0.005	13.000, -0.004	13.000, 0.001
67	13.200, -0.002	13.200, 0.000	13.200, -0.001	13.200, -0.002	13.200, -0.006	13.200, -0.004	13.200, 0.001
68	13.400, -0.002	13.400, 0.000	13.400, -0.001	13.400, -0.002	13.400, -0.005	13.400, -0.004	13.400, 0.001
69	13.600, -0.002	13.600, 0.001	13.600, -0.001	13.600, -0.002	13.600, -0.005	13.600, -0.004	13.600, 0.000
70	13.800, -0.002	13.800, 0.001	13.800, -0.000	13.800, -0.002	13.800, -0.005	13.800, -0.004	13.800, 0.000
71	14.000, -0.002	14.000, 0.001	14.000, -0.000	14.000, -0.002	14.000, -0.005	14.000, -0.004	14.000, -0.000
72	14.200, -0.002	14.200, 0.001	14.200, -0.000	14.200, -0.002	14.200, -0.005	14.200, -0.004	14.200, -0.000
73	14.400, -0.002	14.400, 0.001	14.400, 0.000	14.400, -0.002	14.400, -0.005	14.400, -0.004	14.400, 0.000
74	14.600, -0.002	14.600, 0.001	14.600, 0.001	14.600, -0.003	14.600, -0.005	14.600, -0.004	14.600, 0.000
75	14.800, -0.002	14.800, 0.001	14.800, 0.001	14.800, -0.003	14.800, -0.005	14.800, -0.004	14.800, 0.000
76	15.000, -0.003	15.000, 0.002	15.000, 0.002	15.000, -0.003	15.000, -0.004	15.000, -0.004	15.000, 0.000
77	15.200, -0.003	15.200, 0.002	15.200, 0.002	15.200, -0.003	15.200, -0.004	15.200, -0.005	15.200, 0.001
78	15.400, -0.003	15.400, 0.002	15.400, 0.002	15.400, -0.003	15.400, -0.004	15.400, -0.005	15.400, 0.001
79	15.600, -0.003	15.600, 0.002	15.600, 0.002	15.600, -0.003	15.600, -0.004	15.600, -0.005	15.600, 0.001
80	15.800, -0.003	15.800, 0.002	15.800, 0.002	15.800, -0.003	15.800, -0.004	15.800, -0.006	15.800, 0.001
81	16.000, -0.002	16.000, 0.002	16.000, 0.002	16.000, -0.003	16.000, -0.005	16.000, -0.006	16.000, 0.001
82	16.200, -0.002	16.200, 0.002	16.200, 0.002	16.200, -0.003	16.200, -0.005	16.200, -0.006	16.200, 0.001
83	16.400, -0.002	16.400, 0.002	16.400, 0.001	16.400, -0.003	16.400, -0.005	16.400, -0.006	16.400, 0.001
84	16.600, -0.002	16.600, 0.001	16.600, 0.001	16.600, -0.003	16.600, -0.005	16.600, -0.006	16.600, 0.001
85	16.800, -0.002	16.800, 0.001	16.800, 0.001	16.800, -0.003	16.800, -0.005	16.800, -0.006	16.800, 0.001
86	17.000, -0.002	17.000, 0.001	17.000, 0.001	17.000, -0.002	17.000, -0.005	17.000, -0.006	17.000, 0.001
87	17.200, -0.001	17.200, 0.001	17.200, 0.000	17.200, -0.002	17.200, -0.005	17.200, -0.006	17.200, 0.001
88	17.400, -0.001	17.400, 0.001	17.400, 0.000	17.400, -0.002	17.400, -0.005	17.400, -0.005	17.400, 0.001
89	17.600, -0.001	17.600, 0.001	17.600, -0.000	17.600, -0.002	17.600, -0.005	17.600, -0.005	17.600, 0.001
90	17.800, -0.001	17.800, 0.001	17.800, -0.000	17.800, -0.002	17.800, -0.005	17.800, -0.005	17.800, 0.001
91	18.000, -0.001	18.000, 0.001	18.000, -0.000	18.000, -0.001	18.000, -0.005	18.000, -0.004	18.000, 0.001
92	18.200, -0.001	18.200, 0.001	18.200, -0.001	18.200, -0.001	18.200, -0.004	18.200, -0.004	18.200, 0.001
93	18.400, -0.001	18.400, 0.001	18.400, -0.000	18.400, -0.001	18.400, -0.004	18.400, -0.004	18.400, 0.001
94	18.600, -0.001	18.600, 0.001	18.600, -0.000	18.600, -0.001	18.600, -0.004	18.600, -0.004	18.600, 0.000
95	18.800, -0.001	18.800, 0.001	18.800, -0.000	18.800, -0.001	18.800, -0.004	18.800, -0.003	18.800, 0.000
96	19.000, -0.001	19.000, 0.001	19.000, -0.000	19.000, -0.001	19.000, -0.003	19.000, -0.003	19.000, 0.000
97	19.200, -0.000	19.200, 0.000	19.200, -0.000	19.200, -0.001	19.200, -0.003	19.200, -0.003	19.200, 0.000
98	19.400, -0.000	19.400, 0.000	19.400, 0.000	19.400, -0.001	19.400, -0.004	19.400, -0.003	19.400, 0.000
99	19.600, -0.001	19.600, 0.001	19.600, 0.000	19.600, -0.002	19.600, -0.004	19.600, -0.003	19.600, 0.000
100	19.800, -0.001	19.800, 0.001	19.800, 0.000	19.800, -0.002	19.800, -0.004	19.800, -0.003	19.800, 0.000
101	20.000, -0.001	20.000, 0.001	20.000, 0.000	20.000, -0.002	20.000, -0.004	20.000, -0.003	20.000, 0.001
102	20.200, -0.001	20.200, 0.001	20.200, 0.000	20.200, -0.002	20.200, -0.004	20.200, -0.002	20.200, 0.000
103	20.400, -0.001	20.400, 0.001	20.400, 0.000	20.400, -0.003	20.400, -0.004	20.400, -0.002	20.400, 0.000
104	20.600, -0.001	20.600, 0.000	20.600, 0.000	20.600, -0.003	20.600, -0.004	20.600, -0.002	20.600, 0.000
105	20.800, -0.001	20.800, 0.000	20.800, 0.000	20.800, -0.003	20.800, -0.004	20.800, -0.002	20.800, 0.001
106	21.000, -0.002	21.000, 0.000	21.000, 0.000	21.000, -0.003	21.000, -0.004	21.000, -0.002	21.000, 0.001
107	21.200, -0.002	21.200, 0.000	21.200, 0.000	21.200, -0.003	21.200, -0.004	21.200, -0.002	21.200, 0.001
108	21.400, -0.002	21.400, 0.000	21.400, 0.000	21.400, -0.003	21.400, -0.004	21.400, -0.002	21.400, 0.001
109	21.600, -0.003	21.600, -0.000	21.600, -0.000	21.600, -0.002	21.600, -0.003	21.600, -0.002	21.600, 0.001
110	21.800, -0.003	21.800, -0.000	21.800, 0.000	21.800, -0.002	21.800, -0.003	21.800, -0.002	21.800, 0.001
111	22.000, -0.003	22.000, -0.000	22.000, 0.000	22.000, -0.002	22.000, -0.003	22.000, -0.002	22.000, 0.002
112	22.200, -0.003	22.200, -0.000	22.200, 0.000	22.200, -0.001	22.200, -0.003	22.200, -0.002	22.200, 0.002
113	22.400, -0.002	22.400, -0.000	22.400, 0.000	22.400, -0.001	22.400, -0.002	22.400, -0.001	22.400, 0.002
114	22.600, -0.002	22.600, -0.000	22.600, 0.001	22.600, -0.000	22.600, -0.002	22.600, -0.001	22.600, 0.002
115	22.800, -0.002	22.800, -0.000	22.800, 0.001	22.800, -0.000	22.800, -0.002	22.800, -0.001	22.800, 0.002
116	23.000, -0.002	23.000, 0.000	23.000, 0.001	23.000, 0.000	23.000, -0.002	23.000, -0.001	23.000, 0.002
117	23.200, -0.001	23.200, 0.000	23.200, 0.001	23.200, 0.000	23.200, -0.002	23.200, -0.001	23.200, 0.002
118	23.400, -0.001	23.400, 0.000	23.400, 0.002	23.400, 0.000	23.400, -0.002	23.400, -0.001	23.400, 0.001
119	23.600, -0.001	23.600, 0.000	23.600, 0.002	23.600, 0.001	23.600, -0.001	23.600, -0.001	23.600, 0.001
120	23.800, -0.000	23.800, 0.000	23.800, 0.002	23.800, 0.001	23.800, -0.001	23.800, -0.001	23.800, 0.001
121	24.000, 0.000	24.000, 0.000	24.000, 0.002	24.000, 0.001	24.000, -0.001	24.000, -0.001	24.000, 0.001
122	24.200, 0.001	24.200, 0.000	24.200, 0.002	24.200, 0.001	24.200, -0.001	24.200, -0.001	24.200, 0.001
123	24.400, 0.001	24.400, 0.000	24.400, 0.001	24.400, 0.000	24.400, -0.000	24.400, -0.002	24.400, 0.001
124	24.600, 0.001	24.600, 0.001	24.600, 0.002	24.600, 0.000	24.600, -0.000	24.600, -0.002	24.600, 0.000
125	24.800, 0.001	24.800, 0.001	24.800, 0.002	24.800, -0.000	24.800, -0.000	24.800, -0.002	24.800, 0.000
126	25.000, 0.001	25.000, 0.001	25.000, 0.001	25.000, -0.000	25.000, 0.000	25.000, -0.002	25.000, 0.000
127	25.200, 0.001	25.200, 0.001	25.200, 0.001	25.200, -0.000	25.200, 0.000	25.200, -0.002	25.200, 0.000
128	25.400, 0.001	25.400, 0.001	25.400, 0.001	25.400, -0.000	25.400, 0.000	25.400, -0.002	25.400, 0.000
129	25.600, 0.000	25.600, 0.001	25.600, 0.001	25.600, -0.000	25.600, 0.000	25.600, -0.002	25.600, 0.000
130	25.800, 0.000	25.800, 0.001	25.800, 0.001	25.800, -0.001	25.800, -0.000	25.800, -0.002	25.800, 0.000
131	26.000, 0.000	26.000, 0.001	26.000, 0.001	26.000, -0.001	26.000, -0.000	26.000, -0.002	26.000, 0.001
132	26.200, 0.000	26.200, 0.001	26.200, 0.001	26.200, -0.001	26.200, -0.000	26.200, -0.002	26.200, 0.001
133	26.400, 0.000	26.400, 0.001	26.400, 0.001	26.400, -0.001	26.400, -0.001	26.400, -0.001	26.400, 0.000
134	26.600, 0.000	26.600, 0.001	26.600, 0.001	26.600, -0.001	26.600, -0.001	26.600, -0.001	26.600, 0.000
135	26.800, -0.000	26.800, 0.001	26.800, 0.001	26.800, -0.001	26.800, -0.001	26.800, -0.001	26.800, 0.000
136	27.000, -0.000	27.000, 0.001	27.000, 0.001	27.000, -0.001	27.000, -0.001	27.000, -0.000	27.000, 0.000
137	27.200, 0.000	27.200, 0.000	27.200, 0.001	27.200, -0.001	27.200, -0.001	27.200, -0.000	27.200, 0.000
138	27.400, 0.000	27.400, 0.000	27.400, 0.000	27.400, -0.001	27.400, -0.001	27.400, -0.000	27.400, -0.000
139	27.600, 0.000	27.600, -0.000	27.600, -0.000	27.600, -0.001	27.600, -0.001	27.600, 0.000	27.600, -0.000
140	27.800, 0.001	27.800, -0.000	27.800, -0.000	27.800, -0.000	27.800, -0.001	27.800, 0.000	27.800, 0.000
141	28.000, 0.001	28.000, -0.000	28.000, -0.001	28.000, -0.000	28.000, -0.000	28.000, 0.000	28.000, 0.000
142	28.200, 0.001	28.200, -0.000	28.200, -0.001	28.200, -0.000	28.200, -0.000	28.200, 0.000	28.200, 0.000
143	28.400, 0.000	28.400, -0.000	28.400, -0.001	28.400, -0.000	28.400, 0.000	28.400, 0.000	28.400, 0.000
144	28.600, 0.000	28.600, -0.000	28.600, -0.000	28.600, -0.000	28.600, 0.000	28.600, 0.000	28.600, 0.000
145	28.800, -0.000	28.800, -0.000	28.800, -0.000	28.800, 0.000	28.800, 0.001	28.800, -0.000	28.800, -0.000
146	29.000, -0.000	29.000, 0.000	29.000, -0.000	29.000, 0.000	29.000, 0.001	29.000, -0.000	29.000, -0.000
147	29.200, -0.000	29.200, 0.000	29.200, 0.000	29.200, 0.001	29.200, 0.001	29.200, -0.000	29.200, -0.000
148	29.400, -0.001	29.400, 0.000	29.400, 0.000	29.400, 0.001	29.400, 0.001	29.400, -0.000	29.400, -0.000
149	29.600, -0.001	29.600, 0.000	29.600, 0.000	29.600, 0.001	29.600, 0.001	29.600, 0.000	29.600, -0.000
150	29.800, -0.001	29.800, 0.000	29.800, 0.001	29.800, 0.001	29.800, 0.001	29.800, 0.000	29.800, -0.000
151	30.000, 0.000	30.000, 0.000	30.000, 0.000	30.000, 0.000	30.000, 0.000	30.000, 0.000	30.000, 0.000
152	30.200, 0.020	30.200, 0.020	30.200, 0.018	30.200, 0.017	30.200, 0.018	30.200, 0.011	30.200, 0.011
153	30.400, 0.045	30.400, 0.044	30.400, 0.041	30.400, 0.038	30.400, 0.039	30.400, 0.024	30.400, 0.025
154	30.600, 0.073	30.600, 0.072	30.600, 0.067	30.600, 0.062	30.600, 0.063	30.600, 0.039	30.600, 0.041
155	30.800, 0.106	30.800, 0.104	30.800, 0.097	30.800, 0.090	30.800, 0.090	30.800, 0.055	30.800, 0.057
156	31.000, 0.141	31.000, 0.138	31.000, 0.131	31.000, 0.120	31.000, 0.120	31.000, 0.073	31.000, 0.075
157	31.200, 0.178	31.200, 0.175	31.200, 0.167	31.200, 0.153	31.200, 0.150	31.200, 0.092	31.200, 0.094
158	31.400, 0.218	31.400, 0.214	31.400, 0.205	31.400, 0.188	31.400, 0.181	31.400, 0.111	31.400, 0.112
159	31.600, 0.258	31.600, 0.253	31.600, 0.244	31.600, 0.223	31.600, 0.213	31.600, 0.130	31.600, 0.130
160	31.800, 0.298	31.800, 0.291	31.800, 0.283	31.800, 0.258	31.800, 0.243	31.800, 0.148	31.800, 0.146
161	32.000, 0.336	32.000, 0.327	32.000, 0.321	32.000, 0.293	32.000, 0.272	32.000, 0.165	32.000, 0.161
162	32.200, 0.371	32.200, 0.361	32.200, 0.357	32.200, 0.325	32.200, 0.297	32.200, 0.179	32.200, 0.174
163	32.400, 0.403	32.400, 0.392	32.400, 0.390	32.400, 0.355	32.400, 0.320	32.400, 0.192	32.400, 0.184
164	32.600, 0.433	32.600, 0.421	32.600, 0.421	32.600, 0.383	32.600, 0.342	32.600, 0.203	32.600, 0.192
165	32.800, 0.462	32.800, 0.448	32.800, 0.451	32.800, 0.411	32.800, 0.362	32.800, 0.213	32.800, 0.199
166	33.000, 0.489	33.000, 0.474	33.000, 0.479	33.000, 0.437	33.000, 0.380	33.000, 0.222	33.000, 0.204
167	33.200, 0.514	33.200, 0.497	33.200, 0.506	33.200, 0.461	33.200, 0.397	33.200, 0.230	33.200, 0.209
168	33.400, 0.537	33.400, 0.518	33.400, 0.530	33.400, 0.485	33.400, 0.412	33.400, 0.237	33.400, 0.213
169	33.600, 0.558	33.600, 0.538	33.600, 0.553	33.600, 0.506	33.600, 0.426	33.600, 0.244	33.600, 0.217
170	33.800, 0.577	33.800, 0.555	33.800, 0.573	33.800, 0.527	33.800, 0.439	33.800, 0.249	33.800, 0.220
171	34.000, 0.594	34.000, 0.571	34.000, 0.592	34.000, 0.546	34.000, 0.450	34.000, 0.255	34.000, 0.223
172	34.200, 0.610	34.200, 0.585	34.200, 0.609	34.200, 0.564	34.200, 0.460	34.200, 0.259	34.200, 0.226
173	34.400, 0.624	34.400, 0.598	34.400, 0.625	34.400, 0.581	34.400, 0.470	34.400, 0.263	34.400, 0.228
174	34.600, 0.636	34.600, 0.610	34.600, 0.640	34.600, 0.596	34.600, 0.478	34.600, 0.267	34.600, 0.230
175	34.800, 0.647	34.800, 0.620	34.800, 0.652	34.800, 0.610	34.800, 0.486	34.800, 0.270	34.800, 0.232
176	35.000, 0.657	35.000, 0.628	35.000, 0.664	35.000, 0.623	35.000, 0.493	35.000, 0.273	35.000, 0.233
177	35.200, 0.666	35.200, 0.636	35.200, 0.675	35.200, 0.635	35.200, 0.499	35.200, 0.275	35.200, 0.234
178	35.400, 0.674	35.400, 0.643	35.400, 0.685	35.400, 0.646	35.400, 0.505	35.400, 0.277	35.400, 0.235
179	35.600, 0.681	35.600, 0.649	35.600, 0.694	35.600, 0.656	35.600, 0.510	35.600, 0.279	35.600, 0.236
180	35.800, 0.687	35.800, 0.654	35.800, 0.701	35.800, 0.665	35.800, 0.514	35.800, 0.281	35.800, 0.237
181	36.000, 0.692	36.000, 0.659	36.000, 0.708	36.000, 0.673	36.000, 0.518	36.000, 0.282	36.000, 0.238
182	36.200, 0.697	36.200, 0.663	36.200, 0.714	36.200, 0.681	36.200, 0.522	36.200, 0.284	36.200, 0.238
183	36.400, 0.701	36.400, 0.666	36.400, 0.719	36.400, 0.687	36.400, 0.525	36.400, 0.285	36.400, 0.238
184	36.600, 0.705	36.600, 0.670	36.600, 0.724	36.600, 0.693	36.600, 0.528	36.600, 0.287	36.600, 0.238
185	36.800, 0.708	36.800, 0.673	36.800, 0.728	36.800, 0.698	36.800, 0.530	36.800, 0.288	36.800, 0.238
186	37.000, 0.711	37.000, 0.675	37.000, 0.731	37.000, 0.703	37.000, 0.532	37.000, 0.289	37.000, 0.238
187	37.200, 0.714	37.200, 0.678	37.200, 0.734	37.200, 0.708	37.200, 0.534	37.200, 0.289	37.200, 0.238
188	37.400, 0.716	37.400, 0.680	37.400, 0.737	37.400, 0.712	37.400, 0.536	37.400, 0.290	37.400, 0.238
189	37.600, 0.719	37.600, 0.682	37.600, 0.740	37.600, 0.716	37.600, 0.537	37.600, 0.290	37.600, 0.238
190	37.800, 0.720	37.800, 0.683	37.800, 0.742	37.800, 0.719	37.800, 0.538	37.800, 0.291	37.800, 0.238
191	38.000, 0.722	38.000, 0.684	38.000, 0.744	38.000, 0.722	38.000, 0.539	38.000, 0.291	38.000, 0.238
192	38.200, 0.724	38.200, 0.686	38.200, 0.746	38.200, 0.725	38.200, 0.540	38.200, 0.292	38.200, 0.238
193	38.400, 0.725	38.400, 0.687	38.400, 0.748	38.400, 0.727	38.400, 0.541	38.400, 0.292	38.400, 0.238
194	38.600, 0.726	38.600, 0.688	38.600, 0.749	38.600, 0.730	38.600, 0.541	38.600, 0.292	38.600, 0.238
195	38.800, 0.727	38.800, 0.689	38.800, 0.751	38.800, 0.732	38.800, 0.542	38.800, 0.293	38.800, 0.238
196	39.000, 0.728	39.000, 0.689	39.000, 0.752	39.000, 0.734	39.000, 0.543	39.000, 0.293	39.000, 0.238
197	39.200, 0.729	39.200, 0.690	39.200, 0.753	39.200, 0.736	39.200, 0.543	39.200, 0.293	39.200, 0.238
198	39.400, 0.730	39.400, 0.691	39.400, 0.754	39.400, 0.738	39.400, 0.544	39.400, 0.293	39.400, 0.237
199	39.600, 0.731	39.600, 0.691	39.600, 0.755	39.600, 0.739	39.600, 0.544	39.600, 0.294	39.600, 0.237
200	39.800, 0.731	39.800, 0.692	39.800, 0.756	39.800, 0.740	39.800, 0.544	39.800, 0.294	39.800, 0.237
201	40.000, 0.732	40.000, 0.692	40.000, 0.757	40.000, 0.741	40.000, 0.545	40.000, 0.294	40.000, 0.237
202	40.200, 0.733	40.200, 0.693	40.200, 0.758	40.200, 0.742	40.200, 0.545	40.200, 0.295	40.200, 0.237
203	40.400, 0.733	40.400, 0.693	40.400, 0.759	40.400, 0.743	40.400, 0.545	40.400, 0.295	40.400, 0.237
204	40.600, 0.734	40.600, 0.694	40.600, 0.760	40.600, 0.744	40.600, 0.545	40.600, 0.295	40.600, 0.237
205	40.800, 0.735	40.800, 0.694	40.800, 0.761	40.800, 0.745	40.800, 0.545	40.800, 0.295	40.800, 0.237
206	41.000, 0.736	41.000, 0.695	41.000, 0.761	41.000, 0.746	41.000, 0.545	41.000, 0.295	41.000, 0.236
207	41.200, 0.736	41.200, 0.695	41.200, 0.762	41.200, 0.747	41.200, 0.544	41.200, 0.295	41.200, 0.236
208	41.400, 0.737	41.400, 0.695	41.400, 0.763	41.400, 0.747	41.400, 0.544	41.400, 0.295	41.400, 0.236
209	41.600, 0.738	41.600, 0.696	41.600, 0.764	41.600, 0.748	41.600, 0.544	41.600, 0.295	41.600, 0.235
210	41.800, 0.738	41.800, 0.696	41.800, 0.765	41.800, 0.749	41.800, 0.543	41.800, 0.295	41.800, 0.235
211	42.000, 0.739	42.000, 0.697	42.000, 0.765	42.000, 0.750	42.000, 0.543	42.000, 0.295	42.000, 0.234
212	42.200, 0.739	42.200, 0.697	42.200, 0.766	42.200, 0.751	42.200, 0.542	42.200, 0.295	42.200, 0.234
213	42.400, 0.739	42.400, 0.697	42.400, 0.766	42.400, 0.751	42.400, 0.542	42.400, 0.294	42.400, 0.234
214	42.600, 0.739	42.600, 0.697	42.600, 0.767	42.600, 0.752	42.600, 0.541	42.600, 0.294	42.600, 0.233
215	42.800, 0.739	42.800, 0.698	42.800, 0.767	42.800, 0.752	42.800, 0.541	42.800, 0.294	42.800, 0.233
216	43.000, 0.739	43.000, 0.698	43.000, 0.767	43.000, 0.753	43.000, 0.541	43.000, 0.294	43.000, 0.233
217	43.200, 0.739	43.200, 0.698	43.200, 0.767	43.200, 0.753	43.200, 0.540	43.200, 0.294	43.200, 0.233
218	43.400, 0.739	43.400, 0.698	43.400, 0.768	43.400, 0.753	43.400, 0.540	43.400, 0.294	43.400, 0.233
219	43.600, 0.739	43.600, 0.699	43.600, 0.768	43.600, 0.754	43.600, 0.540	43.600, 0.294	43.600, 0.233
220	43.800, 0.740	43.800, 0.699	43.800, 0.768	43.800, 0.754	43.800, 0.540	43.800, 0.294	43.800, 0.233
221	44.000, 0.740	44.000, 0.699	44.000, 0.768	44.000, 0.755	44.000, 0.540	44.000, 0.294	44.000, 0.232
222	44.200, 0.741	44.200, 0.699	44.200, 0.769	44.200, 0.755	44.200, 0.540	44.200, 0.294	44.200, 0.232
223	44.400, 0.741	44.400, 0.700	44.400, 0.769	44.400, 0.756	44.400, 0.539	44.400, 0.294	44.400, 0.232
224	44.600, 0.742	44.600, 0.700	44.600, 0.769	44.600, 0.756	44.600, 0.539	44.600, 0.294	44.600, 0.232
225	44.800, 0.742	44.800, 0.700	44.800, 0.769	44.800, 0.757	44.800, 0.539	44.800, 0.294	44.800, 0.232
226	45.000, 0.743	45.000, 0.700	45.000, 0.769	45.000, 0.757	45.000, 0.539	45.000, 0.294	45.000, 0.231
227	45.200, 0.743	45.200, 0.701	45.200, 0.770	45.200, 0.757	45.200, 0.539	45.200, 0.294	45.200, 0.231
228	45.400, 0.744	45.400, 0.702	45.400, 0.770	45.400, 0.757	45.400, 0.538	45.400, 0.294	45.400, 0.230
229	45.600, 0.744	45.600, 0.702	45.600, 0.770	45.600, 0.758	45.600, 0.538	45.600, 0.294	45.600, 0.230
230	45.800, 0.744	45.800, 0.702	45.800, 0.770	45.800, 0.758	45.800, 0.538	45.800, 0.294	45.800, 0.230
231	46.000, 0.744	46.000, 0.703	46.000, 0.770	46.000, 0.758	46.000, 0.537	46.000, 0.294	46.000, 0.229
232	46.200, 0.745	46.200, 0.703	46.200, 0.770	46.200, 0.758	46.200, 0.537	46.200, 0.293	46.200, 0.229
233	46.400, 0.745	46.400, 0.703	46.400, 0.771	46.400, 0.758	46.400, 0.536	46.400, 0.293	46.400, 0.229
234	46.600, 0.745	46.600, 0.704	46.600, 0.771	46.600, 0.758	46.600, 0.536	46.600, 0.293	46.600, 0.229
235	46.800, 0.745	46.800, 0.704	46.800, 0.772	46.800, 0.757	46.800, 0.535	46.800, 0.293	46.800, 0.229
236	47.000, 0.745	47.000, 0.704	47.000, 0.772	47.000, 0.757	47.000, 0.534	47.000, 0.293	47.000, 0.229
237	47.200, 0.745	47.200, 0.705	47.200, 0.772	47.200, 0.757	47.200, 0.533	47.200, 0.293	47.200, 0.229
238	47.400, 0.746	47.400, 0.705	47.400, 0.773	47.400, 0.757	47.400, 0.533	47.400, 0.292	47.400, 0.229
239	47.600, 0.746	47.600, 0.705	47.600, 0.773	47.600, 0.757	47.600, 0.532	47.600, 0.292	47.600, 0.229
240	47.800, 0.746	47.800, 0.705	47.800, 0.773	47.800, 0.757	47.800, 0.532	47.800, 0.292	47.800, 0.229
241	48.000, 0.747	48.000, 0.706	48.000, 0.773	48.000, 0.757	48.000, 0.531	48.000, 0.292	48.000, 0.228
242	48.200, 0.747	48.200, 0.706	48.200, 0.774	48.200, 0.757	48.200, 0.531	48.200, 0.292	48.200, 0.228
243	48.400, 0.747	48.400, 0.706	48.400, 0.774	48.400, 0.757	48.400, 0.531	48.400, 0.292	48.400, 0.228
244	48.600, 0.747	48.600, 0.706	48.600, 0.774	48.600, 0.757	48.600, 0.531	48.600, 0.292	48.600, 0.227
245	48.800, 0.748	48.800, 0.706	48.800, 0.774	48.800, 0.757	48.800, 0.530	48.800, 0.291	48.800, 0.227
246	49.000, 0.748	49.000, 0.707	49.000, 0.774	49.000, 0.758	49.000, 0.530	49.000, 0.291	49.000, 0.226
247	49.200, 0.748	49.200, 0.707	49.200, 0.775	49.200, 0.758	49.200, 0.530	49.200, 0.291	49.200, 0.226
248	49.400, 0.748	49.400, 0.707	49.400, 0.775	49.400, 0.758	49.400, 0.530	49.400, 0.291	49.400, 0.225
249	49.600, 0.749	49.600, 0.706	49.600, 0.775	49.600, 0.759	49.600, 0.530	49.600, 0.291	49.600, 0.225
250	49.800, 0.749	49.800, 0.706	49.800, 0.775	49.800, 0.759	49.800, 0.530	49.800, 0.291	49.800, 0.225
251	50.000, 0.749	50.000, 0.706	50.000, 0.775	50.000, 0.759	50.000, 0.530	50.000, 0.291	50.000, 0.225
252	50.200, 0.749	50.200, 0.706	50.200, 0.775	50.200, 0.759	50.200, 0.529	50.200, 0.291	50.200, 0.225
253	50.400, 0.749	50.400, 0.706	50.400, 0.776	50.400, 0.760	50.400, 0.529	50.400, 0.291	50.400, 0.225
254	50.600, 0.750	50.600, 0.707	50.600, 0.776	50.600, 0.760	50.600, 0.529	50.600, 0.291	50.600, 0.225
255	50.800, 0.750	50.800, 0.707	50.800, 0.776	50.800, 0.760	50.800, 0.528	50.800, 0.291	50.800, 0.225
256	51.000, 0.750	51.000, 0.707	51.000, 0.777	51.000, 0.760	51.000, 0.528	51.000, 0.291	51.000, 0.225
257	51.200, 0.750	51.200, 0.708	51.200, 0.777	51.200, 0.760	51.200, 0.527	51.200, 0.290	51.200, 0.225
258	51.400, 0.750	51.400, 0.708	51.400, 0.777	51.400, 0.760	51.400, 0.526	51.400, 0.290	51.400, 0.225
259	51.600, 0.750	51.600, 0.709	51.600, 0.777	51.600, 0.760	51.600, 0.525	51.600, 0.290	51.600, 0.225
260	51.800, 0.750	51.800, 0.709	51.800, 0.778	51.800, 0.760	51.800, 0.525	51.800, 0.290	51.800, 0.224
261	52.000, 0.751	52.000, 0.709	52.000, 0.778	52.000, 0.760	52.000, 0.524	52.000, 0.290	52.000, 0.224
262	52.200, 0.751	52.200, 0.710	52.200, 0.778	52.200, 0.760	52.200, 0.524	52.200, 0.290	52.200, 0.224
263	52.400, 0.751	52.400, 0.710	52.400, 0.779	52.400, 0.760	52.400, 0.523	52.400, 0.290	52.400, 0.224
264	52.600, 0.752	52.600, 0.711	52.600, 0.779	52.600, 0.761	52.600, 0.523	52.600, 0.290	52.600, 0.224
265	52.800, 0.752	52.800, 0.711	52.800, 0.780	52.800, 0.761	52.800, 0.522	52.800, 0.289	52.800, 0.224
266	53.000, 0.752	53.000, 0.711	53.000, 0.780	53.000, 0.761	53.000, 0.522	53.000, 0.289	53.000, 0.223
267	53.200, 0.753	53.200, 0.711	53.200, 0.781	53.200, 0.761	53.200, 0.521	53.200, 0.289	53.200, 0.223
268	53.400, 0.753	53.400, 0.711	53.400, 0.781	53.400, 0.761	53.400, 0.521	53.400, 0.289	53.400, 0.223
269	53.600, 0.753	53.600, 0.712	53.600, 0.781	53.600, 0.761	53.600, 0.521	53.600, 0.289	53.600, 0.222
270	53.800, 0.754	53.800, 0.712	53.800, 0.782	53.800, 0.761	53.800, 0.521	53.800, 0.288	53.800, 0.222
271	54.000, 0.754	54.000, 0.712	54.000, 0.782	54.000, 0.760	54.000, 0.521	54.000, 0.289	54.000, 0.222
272	54.200, 0.754	54.200, 0.712	54.200, 0.782	54.200, 0.760	54.200, 0.520	54.200, 0.289	54.200, 0.221
273	54.400, 0.754	54.400, 0.712	54.400, 0.782	54.400, 0.760	54.400, 0.520	54.400, 0.289	54.400, 0.221
274	54.600, 0.754	54.600, 0.712	54.600, 0.782	54.600, 0.760	54.600, 0.520	54.600, 0.288	54.600, 0.220
275	54.800, 0.753	54.800, 0.712	54.800, 0.782	54.800, 0.760	54.800, 0.520	54.800, 0.288	54.800, 0.220
276	55.000, 0.753	55.000, 0.713	55.000, 0.782	55.000, 0.760	55.000, 0.519	55.000, 0.287	55.000, 0.220
277	55.200, 0.753	55.200, 0.713	55.200, 0.782	55.200, 0.760	55.200, 0.519	55.200, 0.287	55.200, 0.220
278	55.400, 0.753	55.400, 0.713	55.400, 0.782	55.400, 0.760	55.400, 0.519	55.400, 0.286	55.400, 0.220
279	55.600, 0.753	55.600, 0.714	55.600, 0.783	55.600, 0.760	55.600, 0.518	55.600, 0.286	55.600, 0.220
280	55.800, 0.753	55.800, 0.714	55.800, 0.783	55.800, 0.760	55.800, 0.518	55.800, 0.286	55.800, 0.220
281	56.000, 0.754	56.000, 0.714	56.000, 0.783	56.000, 0.760	56.000, 0.518	56.000, 0.286	56.000, 0.219
282	56.200, 0.754	56.200, 0.715	56.200, 0.784	56.200, 0.760	56.200, 0.518	56.200, 0.286	56.200, 0.219
283	56.400, 0.754	56.400, 0.715	56.400, 0.784	56.400, 0.760	56.400, 0.517	56.400, 0.286	56.400, 0.219
284	56.600, 0.754	56.600, 0.715	56.600, 0.784	56.600, 0.761	56.600, 0.517	56.600, 0.285	56.600, 0.219
285	56.800, 0.755	56.800, 0.715	56.800, 0.785	56.800, 0.761	56.800, 0.516	56.800, 0.285	56.800, 0.219
286	57.000, 0.755	57.000, 0.715	57.000, 0.785	57.000, 0.761	57.000, 0.516	57.000, 0.285	57.000, 0.219
287	57.200, 0.755	57.200, 0.716	57.200, 0.785	57.200, 0.761	57.200, 0.516	57.200, 0.284	57.200, 0.218
288	57.400, 0.756	57.400, 0.716	57.400, 0.785	57.400, 0.761	57.400, 0.516	57.400, 0.284	57.400, 0.218
289	57.600, 0.756	57.600, 0.716	57.600, 0.785	57.600, 0.761	57.600, 0.516	57.600, 0.284	57.600, 0.218
290	57.800, 0.757	57.800, 0.717	57.800, 0.785	57.800, 0.760	57.800, 0.516	57.800, 0.284	57.800, 0.218
291	58.000, 0.758	58.000, 0.717	58.000, 0.784	58.000, 0.760	58.000, 0.516	58.000, 0.284	58.000, 0.217
292	58.200, 0.758	58.200, 0.717	58.200, 0.784	58.200, 0.760	58.200, 0.516	58.200, 0.284	58.200, 0.217
293	58.400, 0.759	58.400, 0.717	58.400, 0.784	58.400, 0.760	58.400, 0.516	58.400, 0.283	58.400, 0.217
294	58.600, 0.759	58.600, 0.717	58.600, 0.784	58.600, 0.760	58.600, 0.515	58.600, 0.283	58.600, 0.217
295	58.800, 0.759	58.800, 0.718	58.800, 0.784	58.800, 0.761	58.800, 0.515	58.800, 0.283	58.800, 0.217
296	59.000, 0.759	59.000, 0.718	59.000, 0.785	59.000, 0.761	59.000, 0.515	59.000, 0.283	59.000, 0.217
297	59.200, 0.759	59.200, 0.718	59.200, 0.785	59.200, 0.761	59.200, 0.515	59.200, 0.282	59.200, 0.216
298	59.400, 0.759	59.400, 0.718	59.400, 0.785	59.400, 0.761	59.400, 0.515	59.400, 0.282	59.400, 0.216
299	59.600, 0.760	59.600, 0.718	59.600, 0.786	59.600, 0.761	59.600, 0.514	59.600, 0.282	59.600, 0.216
300	59.800, 0.760	59.800, 0.718	59.800, 0.786	59.800, 0.761	59.800, 0.514	59.800, 0.281	59.800, 0.216
301	60.000, 0.760	60.000, 0.718	60.000, 0.787	60.000, 0.761	60.000, 0.514	60.000, 0.281	60.000, 0.216
302	60.200, 0.760	60.200, 0.719	60.200, 0.787	60.200, 0.762	60.200, 0.513	60.200, 0.281	60.200, 0.215
303	60.400, 0.760	60.400, 0.719	60.400, 0.787	60.400, 0.762	60.400, 0.513	60.400, 0.280	60.400, 0.215
304	60.600, 0.760	60.600, 0.720	60.600, 0.787	60.600, 0.763	60.600, 0.512	60.600, 0.280	60.600, 0.215
305	60.800, 0.760	60.800, 0.720	60.800, 0.788	60.800, 0.763	60.800, 0.512	60.800, 0.280	60.800, 0.215
306	61.000, 0.760	61.000, 0.720	61.000, 0.788	61.000, 0.763	61.000, 0.512	61.000, 0.280	61.000, 0.214
307	61.200, 0.760	61.200, 0.721	61.200, 0.788	61.200, 0.764	61.200, 0.512	61.200, 0.280	61.200, 0.214
308	61.400, 0.760	61.400, 0.721	61.400, 0.788	61.400, 0.764	61.400, 0.511	61.400, 0.280	61.400, 0.214
309	61.600, 0.760	61.600, 0.722	61.600, 0.788	61.600, 0.764	61.600, 0.511	61.600, 0.280	61.600, 0.213
310	61.800, 0.761	61.800, 0.722	61.800, 0.788	61.800, 0.764	61.800, 0.511	61.800, 0.280	61.800, 0.213
311	62.000, 0.761	62.000, 0.722	62.000, 0.788	62.000, 0.764	62.000, 0.511	62.000, 0.280	62.000, 0.212
312	62.200, 0.762	62.200, 0.722	62.200, 0.788	62.200, 0.764	62.200, 0.511	62.200, 0.280	62.200, 0.212
313	62.400, 0.762	62.400, 0.722	62.400, 0.788	62.400, 0.764	62.400, 0.510	62.400, 0.280	62.400, 0.211
314	62.600, 0.762	62.600, 0.721	62.600, 0.789	62.600, 0.764	62.600, 0.510	62.600, 0.280	62.600, 0.211
315	62.800, 0.762	62.800, 0.721	62.800, 0.789	62.800, 0.763	62.800, 0.510	62.800, 0.280	62.800, 0.211
316	63.000, 0.762	63.000, 0.721	63.000, 0.789	63.000, 0.763	63.000, 0.509	63.000, 0.280	63.000, 0.211
317	63.200, 0.762	63.200, 0.721	63.200, 0.790	63.200, 0.763	63.200, 0.509	63.200, 0.280	63.200, 0.211
318	63.400, 0.762	63.400, 0.721	63.400, 0.790	63.400, 0.763	63.400, 0.509	63.400, 0.279	63.400, 0.212
319	63.600, 0.763	63.600, 0.721	63.600, 0.790	63.600, 0.763	63.600, 0.508	63.600, 0.279	63.600, 0.212
320	63.800, 0.763	63.800, 0.722	63.800, 0.790	63.800, 0.762	63.800, 0.508	63.800, 0.278	63.800, 0.212
321	64.000, 0.763	64.000, 0.722	64.000, 0.790	64.000, 0.762	64.000, 0.508	64.000, 0.278	64.000, 0.212
322	64.200, 0.763	64.200, 0.722	64.200, 0.790	64.200, 0.762	64.200, 0.508	64.200, 0.278	64.200, 0.212
323	64.400, 0.763	64.400, 0.723	64.400, 0.790	64.400, 0.762	64.400, 0.507	64.400, 0.278	64.400, 0.212
324	64.600, 0.763	64.600, 0.723	64.600, 0.791	64.600, 0.762	64.600, 0.507	64.600, 0.278	64.600, 0.213
325	64.800, 0.763	64.800, 0.723	64.800, 0.791	64.800, 0.762	64.800, 0.507	64.800, 0.278	64.800, 0.213
326	65.000, 0.763	65.000, 0.723	65.000, 0.791	65.000, 0.762	65.000, 0.508	65.000, 0.278	65.000, 0.212
327	65.200, 0.764	65.200, 0.723	65.200, 0.791	65.200, 0.763	65.200, 0.508	65.200, 0.278	65.200, 0.212
328	65.400, 0.764	65.400, 0.723	65.400, 0.791	65.400, 0.763	65.400, 0.508	65.400, 0.278	65.400, 0.212
329	65.600, 0.765	65.600, 0.723	65.600, 0.791	65.600, 0.762	65.600, 0.508	65.600, 0.277	65.600, 0.211
330	65.800, 0.765	65.800, 0.724	65.800, 0.792	65.800, 0.762	65.800, 0.507	65.800, 0.277	65.800, 0.211
331	66.000, 0.766	66.000, 0.724	66.000, 0.792	66.000, 0.762	66.000, 0.507	66.000, 0.277	66.000, 0.210
332	66.200, 0.766	66.200, 0.724	66.200, 0.792	66.200, 0.762	66.200, 0.507	66.200, 0.277	66.200, 0.210
333	66.400, 0.766	66.400, 0.724	66.400, 0.792	66.400, 0.762	66.400, 0.507	66.400, 0.276	66.400, 0.210
334	66.600, 0.767	66.600, 0.724	66.600, 0.792	66.600, 0.762	66.600, 0.506	66.600, 0.276	66.600, 0.209
335	66.800, 0.767	66.800, 0.724	66.800, 0.792	66.800, 0.762	66.800, 0.506	66.800, 0.276	66.800, 0.209
336	67.000, 0.768	67.000, 0.724	67.000, 0.792	67.000, 0.762	67.000, 0.506	67.000, 0.276	67.000, 0.209
337	67.200, 0.768	67.200, 0.724	67.200, 0.792	67.200, 0.762	67.200, 0.505	67.200, 0.276	67.200, 0.208
338	67.400, 0.769	67.400, 0.725	67.400, 0.792	67.400, 0.762	67.400, 0.505	67.400, 0.276	67.400, 0.208
339	67.600, 0.769	67.600, 0.725	67.600, 0.792	67.600, 0.762	67.600, 0.505	67.600, 0.276	67.600, 0.207
340	67.800, 0.770	67.800, 0.725	67.800, 0.792	67.800, 0.762	67.800, 0.505	67.800, 0.276	67.800, 0.206
341	68.000, 0.770	68.000, 0.726	68.000, 0.792	68.000, 0.762	68.000, 0.505	68.000, 0.276	68.000, 0.206
342	68.200, 0.771	68.200, 0.726	68.200, 0.792	68.200, 0.762	68.200, 0.505	68.200, 0.276	68.200, 0.206
343	68.400, 0.771	68.400, 0.726	68.400, 0.793	68.400, 0.762	68.400, 0.505	68.400, 0.276	68.400, 0.205
344	68.600, 0.771	68.600, 0.727	68.600, 0.793	68.600, 0.762	68.600, 0.505	68.600, 0.276	68.600, 0.205
345	68.800, 0.772	68.800, 0.727	68.800, 0.793	68.800, 0.762	68.800, 0.505	68.800, 0.275	68.800, 0.205
346	69.000, 0.772	69.000, 0.727	69.000, 0.793	69.000, 0.762	69.000, 0.505	69.000, 0.275	69.000, 0.205
347	69.200, 0.772	69.200, 0.728	69.200, 0.793	69.200, 0.762	69.200, 0.505	69.200, 0.275	69.200, 0.205
348	69.400, 0.772	69.400, 0.728	69.400, 0.793	69.400, 0.762	69.400, 0.505	69.400, 0.275	69.400, 0.205
349	69.600, 0.772	69.600, 0.729	69.600, 0.794	69.600, 0.762	69.600, 0.506	69.600, 0.275	69.600, 0.205
350	69.800, 0.772	69.800, 0.729	69.800, 0.794	69.800, 0.762	69.800, 0.506	69.800, 0.275	69.800, 0.205
351	70.000, 0.771	70.000, 0.729	70.000, 0.794	70.000, 0.762	70.000, 0.506	70.000, 0.275	70.000, 0.205
352	70.200, 0.771	70.200, 0.729	70.200, 0.795	70.200, 0.762	70.200, 0.506	70.200, 0.274	70.200, 0.205
353	70.400, 0.771	70.400, 0.730	70.400, 0.795	70.400, 0.762	70.400, 0.506	70.400, 0.274	70.400, 0.205
354	70.600, 0.771	70.600, 0.730	70.600, 0.796	70.600, 0.762	70.600, 0.505	70.600, 0.274	70.600, 0.205
355	70.800, 0.771	70.800, 0.730	70.800, 0.796	70.800, 0.761	70.800, 0.505	70.800, 0.274	70.800, 0.205
356	71.000, 0.771	71.000, 0.730	71.000, 0.797	71.000, 0.761	71.000, 0.505	71.000, 0.274	71.000, 0.205
357	71.200, 0.771	71.200, 0.731	71.200, 0.797	71.200, 0.761	71.200, 0.504	71.200, 0.274	71.200, 0.205
358	71.400, 0.772	71.400, 0.731	71.400, 0.797	71.400, 0.761	71.400, 0.504	71.400, 0.274	71.400, 0.205
359	71.600, 0.772	71.600, 0.731	71.600, 0.797	71.600, 0.761	71.600, 0.504	71.600, 0.274	71.600, 0.204
360	71.800, 0.772	71.800, 0.732	71.800, 0.797	71.800, 0.761	71.800, 0.504	71.800, 0.274	71.800, 0.204
361	72.000, 0.773	72.000, 0.732	72.000, 0.797	72.000, 0.760	72.000, 0.503	72.000, 0.274	72.000, 0.204
362	72.200, 0.773	72.200, 0.732	72.200, 0.797	72.200, 0.760	72.200, 0.503	72.200, 0.273	72.200, 0.203
363	72.400, 0.773	72.400, 0.733	72.400, 0.798	72.400, 0.760	72.400, 0.503	72.400, 0.273	72.400, 0.203
364	72.600, 0.774	72.600, 0.733	72.600, 0.798	72.600, 0.760	72.600, 0.503	72.600, 0.272	72.600, 0.203
365	72.800, 0.774	72.800, 0.733	72.800, 0.798	72.800, 0.760	72.800, 0.503	72.800, 0.272	72.800, 0.202
366	73.000, 0.775	73.000, 0.733	73.000, 0.798	73.000, 0.760	73.000, 0.503	73.000, 0.272	73.000, 0.202
367	73.200, 0.775	73.200, 0.733	73.200, 0.798	73.200, 0.760	73.200, 0.503	73.200, 0.272	73.200, 0.202
368	73.400, 0.776	73.400, 0.733	73.400, 0.798	73.400, 0.760	73.400, 0.503	73.400, 0.272	73.400, 0.201
369	73.600, 0.776	73.600, 0.733	73.600, 0.798	73.600, 0.760	73.600, 0.503	73.600, 0.272	73.600, 0.201
370	73.800, 0.776	73.800, 0.733	73.800, 0.799	73.800, 0.761	73.800, 0.503	73.800, 0.272	73.800, 0.200
371	74.000, 0.776	74.000, 0.733	74.000, 0.799	74.000, 0.761	74.000, 0.503	74.000, 0.272	74.000, 0.200
372	74.200, 0.777	74.200, 0.733	74.200, 0.799	74.200, 0.761	74.200, 0.503	74.200, 0.272	74.200, 0.200
373	74.400, 0.777	74.400, 0.733	74.400, 0.799	74.400, 0.761	74.400, 0.503	74.400, 0.272	74.400, 0.199
374	74.600, 0.777	74.600, 0.734	74.600, 0.800	74.600, 0.761	74.600, 0.504	74.600, 0.272	74.600, 0.199
375	74.800, 0.777	74.800, 0.734	74.800, 0.800	74.800, 0.761	74.800, 0.504	74.800, 0.272	74.800, 0.199
376	75.000, 0.778	75.000, 0.734	75.000, 0.800	75.000, 0.761	75.000, 0.503	75.000, 0.272	75.000, 0.199
377	75.200, 0.778	75.200, 0.735	75.200, 0.800	75.200, 0.761	75.200, 0.503	75.200, 0.272	75.200, 0.199
378	75.400, 0.778	75.400, 0.735	75.400, 0.801	75.400, 0.762	75.400, 0.503	75.400, 0.272	75.400, 0.199
379	75.600, 0.778	75.600, 0.735	75.600, 0.801	75.600, 0.762	75.600, 0.502	75.600, 0.272	75.600, 0.199
380	75.800, 0.778	75.800, 0.736	75.800, 0.800	75.800, 0.762	75.800, 0.502	75.800, 0.271	75.800, 0.199
381	76.000, 0.778	76.000, 0.736	76.000, 0.800	76.000, 0.762	76.000, 0.502	76.000, 0.271	76.000, 0.199
382	76.200, 0.779	76.200, 0.736	76.200, 0.800	76.200, 0.762	76.200, 0.501	76.200, 0.271	76.200, 0.199
383	76.400, 0.779	76.400, 0.736	76.400, 0.800	76.400, 0.762	76.400, 0.501	76.400, 0.270	76.400, 0.199
384	76.600, 0.779	76.600, 0.736	76.600, 0.800	76.600, 0.762	76.600, 0.500	76.600, 0.270	76.600, 0.199
385	76.800, 0.780	76.800, 0.737	76.800, 0.800	76.800, 0.762	76.800, 0.500	76.800, 0.270	76.800, 0.199
386	77.000, 0.780	77.000, 0.737	77.000, 0.800	77.000, 0.762	77.000, 0.500	77.000, 0.269	77.000, 0.198
387	77.200, 0.780	77.200, 0.737	77.200, 0.801	77.200, 0.761	77.200, 0.499	77.200, 0.269	77.200, 0.198
388	77.400, 0.781	77.400, 0.737	77.400, 0.801	77.400, 0.761	77.400, 0.499	77.400, 0.269	77.400, 0.198
389	77.600, 0.781	77.600, 0.737	77.600, 0.801	77.600, 0.761	77.600, 0.499	77.600, 0.269	77.600, 0.197
390	77.800, 0.781	77.800, 0.737	77.800, 0.802	77.800, 0.760	77.800, 0.499	77.800, 0.268	77.800, 0.197
391	78.000, 0.782	78.000, 0.736	78.000, 0.802	78.000, 0.760	78.000, 0.499	78.000, 0.268	78.000, 0.196
392	78.200, 0.782	78.200, 0.736	78.200, 0.802	78.200, 0.759	78.200, 0.500	78.200, 0.268	78.200, 0.196
393	78.400, 0.782	78.400, 0.736	78.400, 0.803	78.400, 0.759	78.400, 0.500	78.400, 0.268	78.400, 0.196
394	78.600, 0.783	78.600, 0.737	78.600, 0.803	78.600, 0.759	78.600, 0.500	78.600, 0.268	78.600, 0.196
395	78.800, 0.783	78.800, 0.737	78.800, 0.804	78.800, 0.759	78.800, 0.500	78.800, 0.268	78.800, 0.195
396	79.000, 0.783	79.000, 0.737	79.000, 0.804	79.000, 0.759	79.000, 0.501	79.000, 0.268	79.000, 0.195
397	79.200, 0.784	79.200, 0.737	79.200, 0.804	79.200, 0.759	79.200, 0.501	79.200, 0.269	79.200, 0.195
398	79.400, 0.784	79.400, 0.738	79.400, 0.804	79.400, 0.759	79.400, 0.501	79.400, 0.269	79.400, 0.195
399	79.600, 0.784	79.600, 0.738	79.600, 0.804	79.600, 0.759	79.600, 0.501	79.600, 0.269	79.600, 0.195
400	79.800, 0.785	79.800, 0.739	79.800, 0.804	79.800, 0.759	79.800, 0.501	79.800, 0.269	79.800, 0.195
401	80.000, 0.785	80.000, 0.739	80.000, 0.804	80.000, 0.760	80.000, 0.501	80.000, 0.269	80.000, 0.196
402	80.200, 0.786	80.200, 0.740	80.200, 0.804	80.200, 0.760	80.200, 0.501	80.200, 0.269	80.200, 0.196
403	80.400, 0.786	80.400, 0.740	80.400, 0.805	80.400, 0.760	80.400, 0.501	80.400, 0.268	80.400, 0.196
404	80.600, 0.787	80.600, 0.741	80.600, 0.805	80.600, 0.761	80.600, 0.501	80.600, 0.268	80.600, 0.196
405	80.800, 0.787	80.800, 0.741	80.800, 0.805	80.800, 0.761	80.800, 0.501	80.800, 0.267	80.800, 0.196
406	81.000, 0.788	81.000, 0.741	81.000, 0.805	81.000, 0.761	81.000, 0.500	81.000, 0.267	81.000, 0.196
407	81.200, 0.788	81.200, 0.742	81.200, 0.805	81.200, 0.761	81.200, 0.500	81.200, 0.267	81.200, 0.196
408	81.400, 0.788	81.400, 0.742	81.400, 0.806	81.400, 0.762	81.400, 0.500	81.400, 0.267	81.400, 0.195
409	81.600, 0.788	81.600, 0.742	81.600, 0.806	81.600, 0.761	81.600, 0.500	81.600, 0.267	81.600, 0.195
410	81.800, 0.788	81.800, 0.742	81.800, 0.806	81.800, 0.761	81.800, 0.500	81.800, 0.267	81.800, 0.195
411	82.000, 0.789	82.000, 0.742	82.000, 0.806	82.000, 0.761	82.000, 0.500	82.000, 0.267	82.000, 0.194
412	82.200, 0.789	82.200, 0.742	82.200, 0.806	82.200, 0.761	82.200, 0.500	82.200, 0.267	82.200, 0.194
413	82.400, 0.789	82.400, 0.742	82.400, 0.806	82.400, 0.761	82.400, 0.499	82.400, 0.268	82.400, 0.193
414	82.600, 0.789	82.600, 0.742	82.600, 0.806	82.600, 0.761	82.600, 0.499	82.600, 0.268	82.600, 0.193
415	82.800, 0.789	82.800, 0.742	82.800, 0.807	82.800, 0.761	82.800, 0.499	82.800, 0.268	82.800, 0.192
416	83.000, 0.789	83.000, 0.742	83.000, 0.807	83.000, 0.761	83.000, 0.499	83.000, 0.268	83.000, 0.192
417	83.200, 0.789	83.200, 0.743	83.200, 0.807	83.200, 0.761	83.200, 0.499	83.200, 0.269	83.200, 0.192
418	83.400, 0.789	83.400, 0.743	83.400, 0.807	83.400, 0.760	83.400, 0.499	83.400, 0.269	83.400, 0.192
419	83.600, 0.789	83.600, 0.743	83.600, 0.808	83.600, 0.760	83.600, 0.499	83.600, 0.269	83.600, 0.192
420	83.800, 0.790	83.800, 0.743	83.800, 0.808	83.800, 0.760	83.800, 0.499	83.800, 0.268	83.800, 0.192
421	84.000, 0.790	84.000, 0.744	84.000, 0.808	84.000, 0.760	84.000, 0.499	84.000, 0.268	84.000, 0.192
422	84.200, 0.791	84.200, 0.744	84.200, 0.809	84.200, 0.760	84.200, 0.499	84.200, 0.268	84.200, 0.192
423	84.400, 0.791	84.400, 0.744	84.400, 0.809	84.400, 0.761	84.400, 0.499	84.400, 0.267	84.400, 0.192
424	84.600, 0.791	84.600, 0.744	84.600, 0.809	84.600, 0.761	84.600, 0.498	84.600, 0.267	84.600, 0.192
425	84.800, 0.792	84.800, 0.745	84.800, 0.809	84.800, 0.761	84.800, 0.498	84.800, 0.267	84.800, 0.192
426	85.000, 0.792	85.000, 0.745	85.000, 0.809	85.000, 0.761	85.000, 0.498	85.000, 0.267	85.000, 0.192
427	85.200, 0.792	85.200, 0.745	85.200, 0.809	85.200, 0.761	85.200, 0.497	85.200, 0.267	85.200, 0.192
428	85.400, 0.793	85.400, 0.746	85.400, 0.809	85.400, 0.761	85.400, 0.497	85.400, 0.267	85.400, 0.192
429	85.600, 0.793	85.600, 0.746	85.600, 0.809	85.600, 0.761	85.600, 0.497	85.600, 0.267	85.600, 0.192
430	85.800, 0.794	85.800, 0.746	85.800, 0.809	85.800, 0.761	85.800, 0.497	85.800, 0.267	85.800, 0.192
431	86.000, 0.794	86.000, 0.746	86.000, 0.809	86.000, 0.760	86.000, 0.496	86.000, 0.267	86.000, 0.192
432	86.200, 0.794	86.200, 0.747	86.200, 0.809	86.200, 0.760	86.200, 0.496	86.200, 0.267	86.200, 0.192
433	86.400, 0.794	86.400, 0.747	86.400, 0.809	86.400, 0.759	86.400, 0.496	86.400, 0.267	86.400, 0.191
434	86.600, 0.795	86.600, 0.747	86.600, 0.809	86.600, 0.759	86.600, 0.496	86.600, 0.267	86.600, 0.191
435	86.800, 0.795	86.800, 0.748	86.800, 0.809	86.800, 0.759	86.800, 0.496	86.800, 0.267	86.800, 0.191
436	87.000, 0.795	87.000, 0.748	87.000, 0.809	87.000, 0.758	87.000, 0.496	87.000, 0.267	87.000, 0.191
437	87.200, 0.795	87.200, 0.748	87.200, 0.809	87.200, 0.758	87.200, 0.496	87.200, 0.268	87.200, 0.191
438	87.400, 0.795	87.400, 0.748	87.400, 0.810	87.400, 0.757	87.400, 0.496	87.400, 0.268	87.400, 0.191
439	87.600, 0.795	87.600, 0.748	87.600, 0.810	87.600, 0.757	87.600, 0.496	87.600, 0.268	87.600, 0.190
440	87.800, 0.796	87.800, 0.748	87.800, 0.810	87.800, 0.757	87.800, 0.496	87.800, 0.267	87.800, 0.190
441	88.000, 0.796	88.000, 0.747	88.000, 0.811	88.000, 0.757	88.000, 0.496	88.000, 0.267	88.000, 0.189
442	88.200, 0.796	88.200, 0.747	88.200, 0.811	88.200, 0.757	88.200, 0.496	88.200, 0.267	88.200, 0.189
443	88.400, 0.796	88.400, 0.747	88.400, 0.811	88.400, 0.757	88.400, 0.496	88.400, 0.267	88.400, 0.189
444	88.600, 0.796	88.600, 0.747	88.600, 0.811	88.600, 0.757	88.600, 0.496	88.600, 0.267	88.600, 0.189
445	88.800, 0.797	88.800, 0.747	88.800, 0.811	88.800, 0.758	88.800, 0.497	88.800, 0.267	88.800, 0.189
446	89.000, 0.797	89.000, 0.747	89.000, 0.811	89.000, 0.758	89.000, 0.497	89.000, 0.266	89.000, 0.189
447	89.200, 0.797	89.200, 0.748	89.200, 0.811	89.200, 0.759	89.200, 0.497	89.200, 0.266	89.200, 0.189
448	89.400, 0.798	89.400, 0.748	89.400, 0.811	89.400, 0.759	89.400, 0.497	89.400, 0.266	89.400, 0.189
449	89.600, 0.798	89.600, 0.748	89.600, 0.811	89.600, 0.759	89.600, 0.497	89.600, 0.266	89.600, 0.189
450	89.800, 0.798	89.800, 0.749	89.800, 0.811	89.800, 0.759	89.800, 0.497	89.800, 0.265	89.800, 0.190
451	90.000, 0.798	90.000, 0.749	90.000, 0.811	90.000, 0.760	90.000, 0.497	90.000, 0.265	90.000, 0.190
452	90.200, 0.798	90.200, 0.749	90.200, 0.811	90.200, 0.760	90.200, 0.496	90.200, 0.264	90.200, 0.189
453	90.400, 0.798	90.400, 0.749	90.400, 0.811	90.400, 0.760	90.400, 0.496	90.400, 0.264	90.400, 0.189
454	90.600, 0.798	90.600, 0.750	90.600, 0.811	90.600, 0.760	90.600, 0.496	90.600, 0.263	90.600, 0.188
455	90.800, 0.799	90.800, 0.750	90.800, 0.812	90.800, 0.760	90.800, 0.496	90.800, 0.263	90.800, 0.188
456	91.000, 0.799	91.000, 0.750	91.000, 0.812	91.000, 0.760	91.000, 0.496	91.000, 0.263	91.000, 0.187
457	91.200, 0.799	91.200, 0.751	91.200, 0.812	91.200, 0.760	91.200, 0.496	91.200, 0.263	91.200, 0.187
458	91.400, 0.799	91.400, 0.751	91.400, 0.813	91.400, 0.760	91.400, 0.496	91.400, 0.263	91.400, 0.187
459	91.600, 0.799	91.600, 0.751	91.600, 0.813	91.600, 0.760	91.600, 0.496	91.600, 0.263	91.600, 0.187
460	91.800, 0.799	91.800, 0.751	91.800, 0.813	91.800, 0.760	91.800, 0.496	91.800, 0.263	91.800, 0.187
461	92.000, 0.800	92.000, 0.751	92.000, 0.813	92.000, 0.760	92.000, 0.496	92.000, 0.263	92.000, 0.186
462	92.200, 0.799	92.200, 0.751	92.200, 0.814	92.200, 0.760	92.200, 0.496	92.200, 0.263	92.200, 0.186
463	92.400, 0.799	92.400, 0.751	92.400, 0.813	92.400, 0.760	92.400, 0.496	92.400, 0.263	92.400, 0.186
464	92.600, 0.800	92.600, 0.752	92.600, 0.814	92.600, 0.761	92.600, 0.496	92.600, 0.263	92.600, 0.186
465	92.800, 0.800	92.800, 0.752	92.800, 0.814	92.800, 0.761	92.800, 0.496	92.800, 0.264	92.800, 0.186
466	93.000, 0.801	93.000, 0.752	93.000, 0.813	93.000, 0.761	93.000, 0.496	93.000, 0.264	93.000, 0.186
467	93.200, 0.801	93.200, 0.752	93.200, 0.814	93.200, 0.762	93.200, 0.495	93.200, 0.264	93.200, 0.186
468	93.400, 0.802	93.400, 0.752	93.400, 0.814	93.400, 0.762	93.400, 0.495	93.400, 0.264	93.400, 0.187
469	93.600, 0.802	93.600, 0.752	93.600, 0.814	93.600, 0.762	93.600, 0.494	93.600, 0.264	93.600, 0.187
470	93.800, 0.803	93.800, 0.753	93.800, 0.814	93.800, 0.762	93.800, 0.494	93.800, 0.263	93.800, 0.186
471	94.000, 0.804	94.000, 0.753	94.000, 0.815	94.000, 0.761	94.000, 0.493	94.000, 0.263	94.000, 0.186
472	94.200, 0.804	94.200, 0.753	94.200, 0.815	94.200, 0.761	94.200, 0.493	94.200, 0.263	94.200, 0.186
473	94.400, 0.805	94.400, 0.753	94.400, 0.815	94.400, 0.761	94.400, 0.493	94.400, 0.263	94.400, 0.185
474	94.600, 0.805	94.600, 0.753	94.600, 0.815	94.600, 0.761	94.600, 0.493	94.600, 0.262	94.600, 0.185
475	94.800, 0.806	94.800, 0.754	94.800, 0.816	94.800, 0.761	94.800, 0.493	94.800, 0.262	94.800, 0.185
476	95.000, 0.806	95.000, 0.754	95.000, 0.816	95.000, 0.760	95.000, 0.494	95.000, 0.262	95.000, 0.185
477	95.200, 0.806	95.200, 0.754	95.200, 0.816	95.200, 0.760	95.200, 0.494	95.200, 0.262	95.200, 0.185
478	95.400, 0.806	95.400, 0.755	95.400, 0.816	95.400, 0.760	95.400, 0.494	95.400, 0.262	95.400, 0.185
479	95.600, 0.806	95.600, 0.755	95.600, 0.816	95.600, 0.760	95.600, 0.494	95.600, 0.262	95.600, 0.185
480	95.800, 0.806	95.800, 0.755	95.800, 0.816	95.800, 0.760	95.800, 0.495	95.800, 0.262	95.800, 0.185
481	96.000, 0.806	96.000, 0.756	96.000, 0.816	96.000, 0.759	96.000, 0.495	96.000, 0.262	96.000, 0.185
482	96.200, 0.806	96.200, 0.756	96.200, 0.816	96.200, 0.759	96.200, 0.495	96.200, 0.262	96.200, 0.184
483	96.400, 0.806	96.400, 0.756	96.400, 0.816	96.400, 0.759	96.400, 0.496	96.400, 0.262	96.400, 0.184
484	96.600, 0.806	96.600, 0.756	96.600, 0.816	96.600, 0.759	96.600, 0.496	96.600, 0.263	96.600, 0.184
485	96.800, 0.806	96.800, 0.756	96.800, 0.816	96.800, 0.759	96.800, 0.496	96.800, 0.263	96.800, 0.184
486	97.000, 0.807	97.000, 0.756	97.000, 0.816	97.000, 0.759	97.000, 0.496	97.000, 0.263	97.000, 0.184
487	97.200, 0.807	97.200, 0.756	97.200, 0.816	97.200, 0.758	97.200, 0.495	97.200, 0.264	97.200, 0.184
488	97.400, 0.807	97.400, 0.756	97.400, 0.816	97.400, 0.758	97.400, 0.495	97.400, 0.264	97.400, 0.184
489	97.600, 0.807	97.600, 0.756	97.600, 0.815	97.600, 0.758	97.600, 0.495	97.600, 0.264	97.600, 0.184
490	97.800, 0.808	97.800, 0.756	97.800, 0.815	97.800, 0.758	97.800, 0.494	97.800, 0.264	97.800, 0.184
491	98.000, 0.808	98.000, 0.756	98.000, 0.815	98.000, 0.758	98.000, 0.494	98.000, 0.264	98.000, 0.184
492	98.200, 0.808	98.200, 0.756	98.200, 0.815	98.200, 0.759	98.200, 0.494	98.200, 0.263	98.200, 0.184
493	98.400, 0.809	98.400, 0.756	98.400, 0.815	98.400, 0.759	98.400, 0.494	98.400, 0.263	98.400, 0.183
494	98.600, 0.809	98.600, 0.756	98.600, 0.815	98.600, 0.759	98.600, 0.493	98.600, 0.263	98.600, 0.183
495	98.800, 0.809	98.800, 0.755	98.800, 0.815	98.800, 0.759	98.800, 0.493	98.800, 0.262	98.800, 0.183
496	99.000, 0.809	99.000, 0.755	99.000, 0.816	99.000, 0.759	99.000, 0.493	99.000, 0.262	99.000, 0.183
497	99.200, 0.810	99.200, 0.756	99.200, 0.816	99.200, 0.759	99.200, 0.493	99.200, 0.262	99.200, 0.182
498	99.400, 0.810	99.400, 0.756	99.400, 0.816	99.400, 0.760	99.400, 0.493	99.400, 0.261	99.400, 0.182
499	99.600, 0.810	99.600, 0.756	99.600, 0.816	99.600, 0.760	99.600, 0.493	99.600, 0.261	99.600, 0.182
500	99.800, 0.810	99.800, 0.756	99.800, 0.817	99.800, 0.760	99.800, 0.493	99.800, 0.261	99.800, 0.181
501	100.000, 0.810	100.000, 0.757	100.000, 0.817	100.000, 0.760	100.000, 0.493	100.000, 0.260	100.000, 0.181
502	100.200, 0.811	100.200, 0.757	100.200, 0.817	100.200, 0.760	100.200, 0.493	100.200, 0.261	100.200, 0.181
503	100.400, 0.811	100.400, 0.758	100.400, 0.817	100.400, 0.760	100.400, 0.493	100.400, 0.261	100.400, 0.181
504	100.600, 0.811	100.600, 0.758	100.600, 0.818	100.600, 0.760	100.600, 0.493	100.600, 0.261	100.600, 0.180
505	100.800, 0.811	100.800, 0.759	100.800, 0.818	100.800, 0.760	100.800, 0.493	100.800, 0.261	100.800, 0.180
506	101.000, 0.811	101.000, 0.760	101.000, 0.818	101.000, 0.760	101.000, 0.492	101.000, 0.262	101.000, 0.179
507	101.200, 0.811	101.200, 0.760	101.200, 0.818	101.200, 0.760	101.200, 0.492	101.200, 0.262	101.200, 0.179
508	101.400, 0.811	101.400, 0.761	101.400, 0.818	101.400, 0.759	101.400, 0.492	101.400, 0.262	101.400, 0.179
509	101.600, 0.811	101.600, 0.761	101.600, 0.818	101.600, 0.759	101.600, 0.492	101.600, 0.262	101.600, 0.178
510	101.800, 0.812	101.800, 0.762	101.800, 0.818	101.800, 0.759	101.800, 0.492	101.800, 0.262	101.800, 0.178
511	102.000, 0.812	102.000, 0.762	102.000, 0.818	102.000, 0.758	102.000, 0.492	102.000, 0.262	102.000, 0.178
512	102.200, 0.812	102.200, 0.762	102.200, 0.819	102.200, 0.758	102.200, 0.492	102.200, 0.262	102.200, 0.178
513	102.400, 0.813	102.400, 0.761	102.400, 0.819	102.400, 0.758	102.400, 0.492	102.400, 0.262	102.400, 0.178
514	102.600, 0.813	102.600, 0.761	102.600, 0.819	102.600, 0.758	102.600, 0.492	102.600, 0.262	102.600, 0.177
515	102.800, 0.813	102.800, 0.761	102.800, 0.819	102.800, 0.758	102.800, 0.492	102.800, 0.261	102.800, 0.177
516	103.000, 0.813	103.000, 0.761	103.000, 0.819	103.000, 0.759	103.000, 0.492	103.000, 0.261	103.000, 0.178
517	103.200, 0.813	103.200, 0.760	103.200, 0.819	103.200, 0.759	103.200, 0.492	103.200, 0.261	103.200, 0.178
518	103.400, 0.813	103.400, 0.760	103.400, 0.819	103.400, 0.759	103.400, 0.492	103.400, 0.261	103.400, 0.178
519	103.600, 0.813	103.600, 0.760	103.600, 0.819	103.600, 0.759	103.600, 0.492	103.600, 0.261	103.600, 0.178
520	103.800, 0.813	103.800, 0.760	103.800, 0.819	103.800, 0.759	103.800, 0.492	103.800, 0.261	103.800, 0.178
521	104.000, 0.814	104.000, 0.760	104.000, 0.819	104.000, 0.759	104.000, 0.492	104.000, 0.260	104.000, 0.178
522	104.200, 0.814	104.200, 0.761	104.200, 0.819	104.200, 0.759	104.200, 0.492	104.200, 0.261	104.200, 0.178
523	104.400, 0.814	104.400, 0.761	104.400, 0.819	104.400, 0.759	104.400, 0.492	104.400, 0.261	104.400, 0.178
524	104.600, 0.814	104.600, 0.761	104.600, 0.819	104.600, 0.759	104.600, 0.492	104.600, 0.261	104.600, 0.178
525	104.800, 0.814	104.800, 0.762	104.800, 0.820	104.800, 0.759	104.800, 0.492	104.800, 0.261	104.800, 0.178
526	105.000, 0.814	105.000, 0.762	105.000, 0.820	105.000, 0.759	105.000, 0.492	105.000, 0.261	105.000, 0.178
527	105.200, 0.815	105.200, 0.762	105.200, 0.820	105.200, 0.759	105.200, 0.492	105.200, 0.261	105.200, 0.178
528	105.400, 0.815	105.400, 0.762	105.400, 0.820	105.400, 0.759	105.400, 0.492	105.400, 0.261	105.400, 0.178
529	105.600, 0.816	105.600, 0.762	105.600, 0.821	105.600, 0.759	105.600, 0.492	105.600, 0.260	105.600, 0.178
530	105.800, 0.816	105.800, 0.762	105.800, 0.821	105.800, 0.759	105.800, 0.492	105.800, 0.260	105.800, 0.178
531	106.000, 0.816	106.000, 0.762	106.000, 0.821	106.000, 0.760	106.000, 0.492	106.000, 0.260	106.000, 0.177
532	106.200, 0.817	106.200, 0.762	106.200, 0.821	106.200, 0.760	106.200, 0.493	106.200, 0.259	106.200, 0.177
533	106.400, 0.817	106.400, 0.762	106.400, 0.821	106.400, 0.760	106.400, 0.493	106.400, 0.259	106.400, 0.177
534	106.600, 0.817	106.600, 0.762	106.600, 0.821	106.600, 0.760	106.600, 0.493	106.600, 0.259	106.600, 0.177
535	106.800, 0.817	106.800, 0.762	106.800, 0.821	106.800, 0.760	106.800, 0.493	106.800, 0.258	106.800, 0.176
536	107.000, 0.817	107.000, 0.762	107.000, 0.821	107.000, 0.760	107.000, 0.493	107.000, 0.258	107.000, 0.176
537	107.200, 0.818	107.200, 0.763	107.200, 0.821	107.200, 0.760	107.200, 0.492	107.200, 0.258	107.200, 0.176
538	107.400, 0.818	107.400, 0.763	107.400, 0.822	107.400, 0.760	107.400, 0.492	107.400, 0.258	107.400, 0.176
539	107.600, 0.818	107.600, 0.763	107.600, 0.822	107.600, 0.760	107.600, 0.491	107.600, 0.258	107.600, 0.175
540	107.800, 0.818	107.800, 0.764	107.800, 0.822	107.800, 0.760	107.800, 0.491	107.800, 0.257	107.800, 0.175
541	108.000, 0.818	108.000, 0.764	108.000, 0.822	108.000, 0.761	108.000, 0.491	108.000, 0.257	108.000, 0.175
542	108.200, 0.818	108.200, 0.765	108.200, 0.822	108.200, 0.761	108.200, 0.491	108.200, 0.257	108.200, 0.175
543	108.400, 0.819	108.400, 0.765	108.400, 0.822	108.400, 0.761	108.400, 0.490	108.400, 0.257	108.400, 0.175
544	108.600, 0.819	108.600, 0.765	108.600, 0.822	108.600, 0.761	108.600, 0.490	108.600, 0.257	108.600, 0.175
545	108.800, 0.820	108.800, 0.766	108.800, 0.822	108.800, 0.761	108.800, 0.490	108.800, 0.258	108.800, 0.175
546	109.000, 0.820	109.000, 0.766	109.000, 0.822	109.000, 0.761	109.000, 0.490	109.000, 0.258	109.000, 0.175
547	109.200, 0.821	109.200, 0.765	109.200, 0.821	109.200, 0.760	109.200, 0.490	109.200, 0.258	109.200, 0.175
548	109.400, 0.821	109.400, 0.765	109.400, 0.821	109.400, 0.760	109.400, 0.490	109.400, 0.258	109.400, 0.175
549	109.600, 0.821	109.600, 0.765	109.600, 0.821	109.600, 0.759	109.600, 0.490	109.600, 0.258	109.600, 0.175
550	109.800, 0.822	109.800, 0.765	109.800, 0.821	109.800, 0.759	109.800, 0.490	109.800, 0.258	109.800, 0.175
551	110.000, 0.822	110.000, 0.765	110.000, 0.821	110.000, 0.759	110.000, 0.490	110.000, 0.258	110.000, 0.175
552	110.200, 0.822	110.200, 0.765	110.200, 0.821	110.200, 0.759	110.200, 0.490	110.200, 0.258	110.200, 0.175
553	110.400, 0.822	110.400, 0.765	110.400, 0.821	110.400, 0.759	110.400, 0.490	110.400, 0.259	110.400, 0.175
554	110.600, 0.823	110.600, 0.765	110.600, 0.821	110.600, 0.759	110.600, 0.490	110.600, 0.259	110.600, 0.175
555	110.800, 0.823	110.800, 0.765	110.800, 0.821	110.800, 0.759	110.800, 0.490	110.800, 0.259	110.800, 0.174
556	111.000, 0.823	111.000, 0.765	111.000, 0.821	111.000, 0.759	111.000, 0.489	111.000, 0.259	111.000, 0.174
557	111.200, 0.823	111.200, 0.766	111.200, 0.821	111.200, 0.759	111.200, 0.489	111.200, 0.259	111.200, 0.174
558	111.400, 0.823	111.400, 0.766	111.400, 0.821	111.400, 0.759	111.400, 0.489	111.400, 0.259	111.400, 0.173
559	111.600, 0.823	111.600, 0.767	111.600, 0.822	111.600, 0.759	111.600, 0.489	111.600, 0.259	111.600, 0.173
560	111.800, 0.823	111.800, 0.767	111.800, 0.822	111.800, 0.760	111.800, 0.489	111.800, 0.259	111.800, 0.173
561	112.000, 0.823	112.000, 0.767	112.000, 0.822	112.000, 0.760	112.000, 0.489	112.000, 0.259	112.000, 0.173
562	112.200, 0.823	112.200, 0.767	112.200, 0.822	112.200, 0.760	112.200, 0.489	112.200, 0.259	112.200, 0.172
563	112.400, 0.823	112.400, 0.767	112.400, 0.822	112.400, 0.760	112.400, 0.489	112.400, 0.259	112.400, 0.172
564	112.600, 0.823	112.600, 0.767	112.600, 0.822	112.600, 0.760	112.600, 0.489	112.600, 0.259	112.600, 0.172
565	112.800, 0.823	112.800, 0.767	112.800, 0.822	112.800, 0.760	112.800, 0.489	112.800, 0.259	112.800, 0.172
566	113.000, 0.823	113.000, 0.767	113.000, 0.822	113.000, 0.760	113.000, 0.489	113.000, 0.259	113.000, 0.172
567	113.200, 0.823	113.200, 0.766	113.200, 0.822	113.200, 0.760	113.200, 0.489	113.200, 0.259	113.200, 0.172
568	113.400, 0.823	113.400, 0.766	113.400, 0.822	113.400, 0.760	113.400, 0.489	113.400, 0.259	113.400, 0.173
569	113.600, 0.824	113.600, 0.766	113.600, 0.822	113.600, 0.760	113.600, 0.490	113.600, 0.259	113.600, 0.173
570	113.800, 0.824	113.800, 0.767	113.800, 0.823	113.800, 0.760	113.800, 0.490	113.800, 0.259	113.800, 0.173
571	114.000, 0.824	114.000, 0.767	114.000, 0.823	114.000, 0.760	114.000, 0.490	114.000, 0.259	114.000, 0.173
572	114.200, 0.825	114.200, 0.767	114.200, 0.823	114.200, 0.760	114.200, 0.490	114.200, 0.259	114.200, 0.173
573	114.400, 0.825	114.400, 0.768	114.400, 0.823	114.400, 0.760	114.400, 0.490	114.400, 0.258	114.400, 0.172
574	114.600, 0.825	114.600, 0.768	114.600, 0.823	114.600, 0.760	114.600, 0.491	114.600, 0.258	114.600, 0.171
575	114.800, 0.825	114.800, 0.769	114.800, 0.823	114.800, 0.760	114.800, 0.491	114.800, 0.258	114.800, 0.171
576	115.000, 0.825	115.000, 0.769	115.000, 0.824	115.000, 0.760	115.000, 0.491	115.000, 0.258	115.000, 0.170
577	115.200, 0.825	115.200, 0.770	115.200, 0.824	115.200, 0.760	115.200, 0.491	115.200, 0.258	115.200, 0.170
578	115.400, 0.826	115.400, 0.770	115.400, 0.824	115.400, 0.760	115.400, 0.491	115.400, 0.258	115.400, 0.170
579	115.600, 0.826	115.600, 0.770	115.600, 0.825	115.600, 0.760	115.600, 0.491	115.600, 0.258	115.600, 0.169
580	115.800, 0.826	115.800, 0.770	115.800, 0.825	115.800, 0.760	115.800, 0.491	115.800, 0.257	115.800, 0.169
581	116.000, 0.826	116.000, 0.770	116.000, 0.825	116.000, 0.760	116.000, 0.491	116.000, 0.257	116.000, 0.169
582	116.200, 0.826	116.200, 0.770	116.200, 0.825	116.200, 0.760	116.200, 0.491	116.200, 0.257	116.200, 0.169
583	116.400, 0.827	116.400, 0.769	116.400, 0.825	116.400, 0.760	116.400, 0.490	116.400, 0.257	116.400, 0.169
584	116.600, 0.827	116.600, 0.769	116.600, 0.825	116.600, 0.760	116.600, 0.490	116.600, 0.258	116.600, 0.169
585	116.800, 0.827	116.800, 0.769	116.800, 0.825	116.800, 0.760	116.800, 0.490	116.800, 0.258	116.800, 0.169
586	117.000, 0.827	117.000, 0.769	117.000, 0.825	117.000, 0.759	117.000, 0.491	117.000, 0.258	117.000, 0.169
587	117.200, 0.827	117.200, 0.769	117.200, 0.825	117.200, 0.759	117.200, 0.491	117.200, 0.258	117.200, 0.170
588	117.400, 0.828	117.400, 0.769	117.400, 0.825	117.400, 0.759	117.400, 0.490	117.400, 0.258	117.400, 0.170
589	117.600, 0.828	117.600, 0.769	117.600, 0.825	117.600, 0.759	117.600, 0.490	117.600, 0.258	117.600, 0.170
590	117.800, 0.829	117.800, 0.769	117.800, 0.825	117.800, 0.759	117.800, 0.490	117.800, 0.258	117.800, 0.170
591	118.000, 0.829	118.000, 0.769	118.000, 0.825	118.000, 0.759	118.000, 0.490	118.000, 0.258	118.000, 0.170
592	118.200, 0.829	118.200, 0.770	118.200, 0.825	118.200, 0.759	118.200, 0.490	118.200, 0.257	118.200, 0.169
593	118.400, 0.829	118.400, 0.770	118.400, 0.826	118.400, 0.759	118.400, 0.490	118.400, 0.257	118.400, 0.169
594	118.600, 0.830	118.600, 0.770	118.600, 0.826	118.600, 0.760	118.600, 0.489	118.600, 0.257	118.600, 0.169
595	118.800, 0.830	118.800, 0.770	118.800, 0.827	118.800, 0.760	118.800, 0.489	118.800, 0.257	118.800, 0.169
596	119.000, 0.830	119.000, 0.770	119.000, 0.827	119.000, 0.760	119.000, 0.488	119.000, 0.257	119.000, 0.169
597	119.200, 0.830	119.200, 0.770	119.200, 0.827	119.200, 0.760	119.200, 0.488	119.200, 0.256	119.200, 0.169
598	119.400, 0.830	119.400, 0.771	119.400, 0.827	119.400, 0.760	119.400, 0.488	119.400, 0.256	119.400, 0.169
599	119.600, 0.831	119.600, 0.771	119.600, 0.827	119.600, 0.760	119.600, 0.488	119.600, 0.256	119.600, 0.169
600	119.800, 0.831	119.800, 0.771	119.800, 0.827	119.800, 0.761	119.800, 0.488	119.800, 0.256	119.800, 0.169
601	120.000, 0.831	120.000, 0.771	120.000, 0.828	120.000, 0.761	120.000, 0.489	120.000, 0.256	120.000, 0.170
602	120.200, 0.832	120.200, 0.772	120.200, 0.828	120.200, 0.761	120.200, 0.489	120.200, 0.256	120.200, 0.169
603	120.400, 0.832	120.400, 0.772	120.400, 0.828	120.400, 0.761	120.400, 0.489	120.400, 0.257	120.400, 0.169
604	120.600, 0.832	120.600, 0.772	120.600, 0.828	120.600, 0.761	120.600, 0.490	120.600, 0.257	120.600, 0.169
605	120.800, 0.832	120.800, 0.772	120.800, 0.828	120.800, 0.761	120.800, 0.490	120.800, 0.257	120.800, 0.169
606	121.000, 0.832	121.000, 0.772	121.000, 0.828	121.000, 0.761	121.000, 0.490	121.000, 0.257	121.000, 0.169
607	121.200, 0.832	121.200, 0.772	121.200, 0.827	121.200, 0.760	121.200, 0.489	121.200, 0.256	121.200, 0.169
608	121.400, 0.832	121.400, 0.773	121.400, 0.827	121.400, 0.760	121.400, 0.489	121.400, 0.256	121.400, 0.169
609	121.600, 0.832	121.600, 0.773	121.600, 0.827	121.600, 0.760	121.600, 0.489	121.600, 0.256	121.600, 0.169
610	121.800, 0.832	121.800, 0.773	121.800, 0.827	121.800, 0.760	121.800, 0.489	121.800, 0.256	121.800, 0.169
611	122.000, 0.832	122.000, 0.773	122.000, 0.827	122.000, 0.760	122.000, 0.488	122.000, 0.255	122.000, 0.169
612	122.200, 0.832	122.200, 0.773	122.200, 0.828	122.200, 0.760	122.200, 0.488	122.200, 0.255	122.200, 0.169
613	122.400, 0.833	122.400, 0.773	122.400, 0.828	122.400, 0.761	122.400, 0.488	122.400, 0.255	122.400, 0.169
614	122.600, 0.833	122.600, 0.773	122.600, 0.828	122.600, 0.761	122.600, 0.487	122.600, 0.255	122.600, 0.169
615	122.800, 0.833	122.800, 0.773	122.800, 0.828	122.800, 0.761	122.800, 0.487	122.800, 0.255	122.800, 0.168
616	123.000, 0.833	123.000, 0.773	123.000, 0.828	123.000, 0.761	123.000, 0.487	123.000, 0.255	123.000, 0.168
617	123.200, 0.833	123.200, 0.774	123.200, 0.828	123.200, 0.762	123.200, 0.487	123.200, 0.255	123.200, 0.168
618	123.400, 0.834	123.400, 0.774	123.400, 0.828	123.400, 0.762	123.400, 0.487	123.400, 0.255	123.400, 0.168
619	123.600, 0.834	123.600, 0.774	123.600, 0.828	123.600, 0.762	123.600, 0.487	123.600, 0.256	123.600, 0.168
620	123.800, 0.834	123.800, 0.775	123.800, 0.828	123.800, 0.762	123.800, 0.487	123.800, 0.256	123.800, 0.167
621	124.000, 0.835	124.000, 0.775	124.000, 0.828	124.000, 0.762	124.000, 0.487	124.000, 0.256	124.000, 0.167
622	124.200, 0.835	124.200, 0.776	124.200, 0.828	124.200, 0.762	124.200, 0.487	124.200, 0.256	124.200, 0.166
623	124.400, 0.835	124.400, 0.776	124.400, 0.828	124.400, 0.762	124.400, 0.487	124.400, 0.256	124.400, 0.166
624	124.600, 0.835	124.600, 0.776	124.600, 0.828	124.600, 0.762	124.600, 0.487	124.600, 0.256	124.600, 0.165
625	124.800, 0.835	124.800, 0.776	124.800, 0.828	124.800, 0.762	124.800, 0.487	124.800, 0.256	124.800, 0.165
626	125.000, 0.835	125.000, 0.776	125.000, 0.828	125.000, 0.762	125.000, 0.487	125.000, 0.256	125.000, 0.165
627	125.200, 0.835	125.200, 0.776	125.200, 0.829	125.200, 0.761	125.200, 0.487	125.200, 0.256	125.200, 0.165
628	125.400, 0.835	125.400, 0.776	125.400, 0.829	125.400, 0.761	125.400, 0.487	125.400, 0.256	125.400, 0.165
629	125.600, 0.835	125.600, 0.776	125.600, 0.829	125.600, 0.761	125.600, 0.487	125.600, 0.256	125.600, 0.165
630	125.800, 0.835	125.800, 0.776	125.800, 0.829	125.800, 0.761	125.800, 0.487	125.800, 0.255	125.800, 0.165
631	126.000, 0.836	126.000, 0.776	126.000, 0.830	126.000, 0.761	126.000, 0.487	126.000, 0.255	126.000, 0.165
632	126.200, 0.836	126.200, 0.776	126.200, 0.830	126.200, 0.761	126.200, 0.487	126.200, 0.255	126.200, 0.165
633	126.400, 0.836	126.400, 0.776	126.400, 0.831	126.400, 0.761	126.400, 0.487	126.400, 0.256	126.400, 0.165
634	126.600, 0.835	126.600, 0.776	126.600, 0.831	126.600, 0.762	126.600, 0.487	126.600, 0.256	126.600, 0.165
635	126.800, 0.835	126.800, 0.777	126.800, 0.831	126.800, 0.762	126.800, 0.487	126.800, 0.256	126.800, 0.166
636	127.000, 0.835	127.000, 0.777	127.000, 0.831	127.000, 0.762	127.000, 0.487	127.000, 0.256	127.000, 0.166
637	127.200, 0.835	127.200, 0.777	127.200, 0.832	127.200, 0.762	127.200, 0.487	127.200, 0.256	127.200, 0.166
638	127.400, 0.835	127.400, 0.777	127.400, 0.832	127.400, 0.762	127.400, 0.487	127.400, 0.257	127.400, 0.166
639	127.600, 0.835	127.600, 0.777	127.600, 0.832	127.600, 0.762	127.600, 0.487	127.600, 0.257	127.600, 0.166
640	127.800, 0.834	127.800, 0.777	127.800, 0.832	127.800, 0.762	127.800, 0.487	127.800, 0.257	127.800, 0.166
641	128.000, 0.835	128.000, 0.777	128.000, 0.832	128.000, 0.762	128.000, 0.487	128.000, 0.257	128.000, 0.166
642	128.200, 0.835	128.200, 0.777	128.200, 0.832	128.200, 0.762	128.200, 0.486	128.200, 0.257	128.200, 0.166
643	128.400, 0.835	128.400, 0.777	128.400, 0.831	128.400, 0.762	128.400, 0.486	128.400, 0.256	128.400, 0.166
644	128.600, 0.835	128.600, 0.777	128.600, 0.831	128.600, 0.762	128.600, 0.487	128.600, 0.256	128.600, 0.166
645	128.800, 0.835	128.800, 0.776	128.800, 0.830	128.800, 0.762	128.800, 0.487	128.800, 0.256	128.800, 0.166
646	129.000, 0.836	129.000, 0.776	129.000, 0.830	129.000, 0.762	129.000, 0.487	129.000, 0.256	129.000, 0.166
647	129.200, 0.836	129.200, 0.776	129.200, 0.830	129.200, 0.762	129.200, 0.487	129.200, 0.256	129.200, 0.166
648	129.400, 0.836	129.400, 0.776	129.400, 0.829	129.400, 0.762	129.400, 0.487	129.400, 0.256	129.400, 0.165
649	129.600, 0.837	129.600, 0.777	129.600, 0.829	129.600, 0.763	129.600, 0.488	129.600, 0.256	129.600, 0.165
650	129.800, 0.837	129.800, 0.777	129.800, 0.829	129.800, 0.763	129.800, 0.488	129.800, 0.256	129.800, 0.165
651	130.000, 0.838	130.000, 0.777	130.000, 0.829	130.000, 0.763	130.000, 0.488	130.000, 0.256	130.000, 0.164
652	130.200, 0.838	130.200, 0.777	130.200, 0.829	130.200, 0.764	130.200, 0.488	130.200, 0.256	130.200, 0.164
653	130.400, 0.838	130.400, 0.778	130.400, 0.829	130.400, 0.764	130.400, 0.488	130.400, 0.256	130.400, 0.163
654	130.600, 0.839	130.600, 0.778	130.600, 0.829	130.600, 0.764	130.600, 0.488	130.600, 0.256	130.600, 0.163
655	130.800, 0.839	130.800, 0.778	130.800, 0.829	130.800, 0.764	130.800, 0.488	130.800, 0.256	130.800, 0.163
656	131.000, 0.840	131.000, 0.779	131.000, 0.830	131.000, 0.764	131.000, 0.488	131.000, 0.256	131.000, 0.162
657	131.200, 0.840	131.200, 0.779	131.200, 0.830	131.200, 0.764	131.200, 0.487	131.200, 0.255	131.200, 0.162
658	131.400, 0.840	131.400, 0.779	131.400, 0.830	131.400, 0.764	131.400, 0.487	131.400, 0.255	131.400, 0.162
659	131.600, 0.841	131.600, 0.779	131.600, 0.830	131.600, 0.764	131.600, 0.486	131.600, 0.255	131.600, 0.162
660	131.800, 0.841	131.800, 0.779	131.800, 0.830	131.800, 0.764	131.800, 0.486	131.800, 0.255	131.800, 0.163
661	132.000, 0.841	132.000, 0.778	132.000, 0.830	132.000, 0.764	132.000, 0.486	132.000, 0.255	132.000, 0.163
662	132.200, 0.841	132.200, 0.778	132.200, 0.830	132.200, 0.764	132.200, 0.486	132.200, 0.256	132.200, 0.163
663	132.400, 0.841	132.400, 0.778	132.400, 0.830	132.400, 0.764	132.400, 0.486	132.400, 0.256	132.400, 0.163
664	132.600, 0.841	132.600, 0.778	132.600, 0.830	132.600, 0.765	132.600, 0.486	132.600, 0.256	132.600, 0.163
665	132.800, 0.842	132.800, 0.778	132.800, 0.830	132.800, 0.765	132.800, 0.486	132.800, 0.256	132.800, 0.163
666	133.000, 0.842	133.000, 0.778	133.000, 0.830	133.000, 0.765	133.000, 0.486	133.000, 0.256	133.000, 0.163
667	133.200, 0.842	133.200, 0.778	133.200, 0.830	133.200, 0.765	133.200, 0.486	133.200, 0.256	133.200, 0.164
668	133.400, 0.842	133.400, 0.778	133.400, 0.830	133.400, 0.765	133.400, 0.487	133.400, 0.256	133.400, 0.164
669	133.600, 0.842	133.600, 0.778	133.600, 0.830	133.600, 0.765	133.600, 0.487	133.600, 0.255	133.600, 0.163
670	133.800, 0.842	133.800, 0.779	133.800, 0.830	133.800, 0.765	133.800, 0.487	133.800, 0.255	133.800, 0.163
671	134.000, 0.843	134.000, 0.779	134.000, 0.831	134.000, 0.765	134.000, 0.487	134.000, 0.255	134.000, 0.163
672	134.200, 0.843	134.200, 0.779	134.200, 0.831	134.200, 0.765	134.200, 0.487	134.200, 0.255	134.200, 0.163
673	134.400, 0.843	134.400, 0.779	134.400, 0.831	134.400, 0.764	134.400, 0.487	134.400, 0.255	134.400, 0.162
674	134.600, 0.843	134.600, 0.780	134.600, 0.831	134.600, 0.764	134.600, 0.486	134.600, 0.255	134.600, 0.162
675	134.800, 0.844	134.800, 0.780	134.800, 0.831	134.800, 0.764	134.800, 0.486	134.800, 0.254	134.800, 0.162
676	135.000, 0.844	135.000, 0.780	135.000, 0.831	135.000, 0.764	135.000, 0.486	135.000, 0.254	135.000, 0.162
677	135.200, 0.844	135.200, 0.780	135.200, 0.831	135.200, 0.764	135.200, 0.486	135.200, 0.254	135.200, 0.162
678	135.400, 0.844	135.400, 0.780	135.400, 0.831	135.400, 0.764	135.400, 0.486	135.400, 0.254	135.400, 0.161
679	135.600, 0.843	135.600, 0.780	135.600, 0.831	135.600, 0.764	135.600, 0.486	135.600, 0.254	135.600, 0.161
680	135.800, 0.843	135.800, 0.780	135.800, 0.831	135.800, 0.764	135.800, 0.486	135.800, 0.254	135.800, 0.161
681	136.000, 0.843	136.000, 0.780	136.000, 0.832	136.000, 0.764	136.000, 0.486	136.000, 0.254	136.000, 0.161
682	136.200, 0.843	136.200, 0.781	136.200, 0.832	136.200, 0.764	136.200, 0.486	136.200, 0.253	136.200, 0.161
683	136.400, 0.842	136.400, 0.781	136.400, 0.832	136.400, 0.764	136.400, 0.486	136.400, 0.253	136.400, 0.161
684	136.600, 0.842	136.600, 0.781	136.600, 0.832	136.600, 0.764	136.600, 0.486	136.600, 0.253	136.600, 0.161
685	136.800, 0.842	136.800, 0.781	136.800, 0.832	136.800, 0.763	136.800, 0.487	136.800, 0.253	136.800, 0.161
686	137.000, 0.842	137.000, 0.782	137.000, 0.832	137.000, 0.763	137.000, 0.487	137.000, 0.253	137.000, 0.161
687	137.200, 0.842	137.200, 0.782	137.200, 0.832	137.200, 0.763	137.200, 0.487	137.200, 0.253	137.200, 0.161
688	137.400, 0.842	137.400, 0.782	137.400, 0.832	137.400, 0.763	137.400, 0.487	137.400, 0.252	137.400, 0.161
689	137.600, 0.842	137.600, 0.782	137.600, 0.832	137.600, 0.763	137.600, 0.487	137.600, 0.252	137.600, 0.161
690	137.800, 0.842	137.800, 0.782	137.800, 0.832	137.800, 0.763	137.800, 0.487	137.800, 0.252	137.800, 0.161
691	138.000, 0.843	138.000, 0.782	138.000, 0.832	138.000, 0.763	138.000, 0.486	138.000, 0.252	138.000, 0.161
692	138.200, 0.843	138.200, 0.782	138.200, 0.832	138.200, 0.763	138.200, 0.486	138.200, 0.252	138.200, 0.161
693	138.400, 0.843	138.400, 0.782	138.400, 0.832	138.400, 0.763	138.400, 0.486	138.400, 0.252	138.400, 0.160
694	138.600, 0.844	138.600, 0.782	138.600, 0.832	138.600, 0.763	138.600, 0.486	138.600, 0.252	138.600, 0.160
695	138.800, 0.844	138.800, 0.782	138.800, 0.831	138.800, 0.764	138.800, 0.486	138.800, 0.252	138.800, 0.160
696	139.000, 0.844	139.000, 0.782	139.000, 0.831	139.000, 0.764	139.000, 0.486	139.000, 0.252	139.000, 0.160
697	139.200, 0.845	139.200, 0.782	139.200, 0.832	139.200, 0.764	139.200, 0.486	139.200, 0.252	139.200, 0.160
698	139.400, 0.845	139.400, 0.782	139.400, 0.832	139.400, 0.765	139.400, 0.486	139.400, 0.253	139.400, 0.160
699	139.600, 0.845	139.600, 0.782	139.600, 0.832	139.600, 0.765	139.600, 0.486	139.600, 0.253	139.600, 0.160
700	139.800, 0.845	139.800, 0.782	139.800, 0.832	139.800, 0.766	139.800, 0.486	139.800, 0.253	139.800, 0.160
701	140.000, 0.846	140.000, 0.783	140.000, 0.832	140.000, 0.766	140.000, 0.486	140.000, 0.253	140.000, 0.160
702	140.200, 0.846	140.200, 0.783	140.200, 0.832	140.200, 0.766	140.200, 0.486	140.200, 0.253	140.200, 0.160
703	140.400, 0.846	140.400, 0.783	140.400, 0.832	140.400, 0.766	140.400, 0.486	140.400, 0.253	140.400, 0.160
704	140.600, 0.846	140.600, 0.784	140.600, 0.832	140.600, 0.766	140.600, 0.486	140.600, 0.253	140.600, 0.160
705	140.800, 0.846	140.800, 0.784	140.800, 0.833	140.800, 0.766	140.800, 0.486	140.800, 0.253	140.800, 0.159
706	141.000, 0.846	141.000, 0.784	141.000, 0.833	141.000, 0.766	141.000, 0.486	141.000, 0.253	141.000, 0.159
707	141.200, 0.846	141.200, 0.784	141.200, 0.833	141.200, 0.766	141.200, 0.486	141.200, 0.253	141.200, 0.159
708	141.400, 0.846	141.400, 0.785	141.400, 0.833	141.400, 0.766	141.400, 0.486	141.400, 0.252	141.400, 0.159
709	141.600, 0.846	141.600, 0.785	141.600, 0.833	141.600, 0.766	141.600, 0.486	141.600, 0.252	141.600, 0.159
710	141.800, 0.847	141.800, 0.785	141.800, 0.833	141.800, 0.766	141.800, 0.485	141.800, 0.252	141.800, 0.159
711	142.000, 0.847	142.000, 0.785	142.000, 0.833	142.000, 0.766	142.000, 0.485	142.000, 0.252	142.000, 0.158
712	142.200, 0.847	142.200, 0.785	142.200, 0.833	142.200, 0.766	142.200, 0.485	142.200, 0.252	142.200, 0.158
713	142.400, 0.847	142.400, 0.785	142.400, 0.833	142.400, 0.766	142.400, 0.485	142.400, 0.252	142.400, 0.158
714	142.600, 0.847	142.600, 0.784	142.600, 0.833	142.600, 0.766	142.600, 0.485	142.600, 0.252	142.600, 0.158
715	142.800, 0.847	142.800, 0.784	142.800, 0.833	142.800, 0.766	142.800, 0.485	142.800, 0.252	142.800, 0.158
716	143.000, 0.848	143.000, 0.784	143.000, 0.833	143.000, 0.766	143.000, 0.485	143.000, 0.252	143.000, 0.158
717	143.200, 0.848	143.200, 0.784	143.200, 0.833	143.200, 0.766	143.200, 0.485	143.200, 0.252	143.200, 0.158
718	143.400, 0.848	143.400, 0.784	143.400, 0.833	143.400, 0.767	143.400, 0.486	143.400, 0.252	143.400, 0.158
719	143.600, 0.848	143.600, 0.784	143.600, 0.833	143.600, 0.767	143.600, 0.486	143.600, 0.252	143.600, 0.158
720	143.800, 0.848	143.800, 0.784	143.800, 0.832	143.800, 0.767	143.800, 0.486	143.800, 0.252	143.800, 0.158
721	144.000, 0.848	144.000, 0.783	144.000, 0.832	144.000, 0.767	144.000, 0.486	144.000, 0.252	144.000, 0.159
722	144.200, 0.848	144.200, 0.784	144.200, 0.832	144.200, 0.767	144.200, 0.486	144.200, 0.252	144.200, 0.159
723	144.400, 0.848	144.400, 0.784	144.400, 0.832	144.400, 0.766	144.400, 0.486	144.400, 0.253	144.400, 0.159
724	144.600, 0.848	144.600, 0.784	144.600, 0.832	144.600, 0.767	144.600, 0.486	144.600, 0.253	144.600, 0.159
725	144.800, 0.848	144.800, 0.784	144.800, 0.832	144.800, 0.767	144.800, 0.486	144.800, 0.253	144.800, 0.159
726	145.000, 0.848	145.000, 0.784	145.000, 0.832	145.000, 0.767	145.000, 0.485	145.000, 0.253	145.000, 0.159
727	145.200, 0.848	145.200, 0.785	145.200, 0.832	145.200, 0.767	145.200, 0.485	145.200, 0.252	145.200, 0.159
728	145.400, 0.848	145.400, 0.785	145.400, 0.833	145.400, 0.768	145.400, 0.485	145.400, 0.252	145.400, 0.159
729	145.600, 0.848	145.600, 0.785	145.600, 0.833	145.600, 0.768	145.600, 0.485	145.600, 0.252	145.600, 0.159
730	145.800, 0.848	145.800, 0.785	145.800, 0.833	145.800, 0.768	145.800, 0.485	145.800, 0.252	145.800, 0.159
731	146.000, 0.848	146.000, 0.785	146.000, 0.833	146.000, 0.769	146.000, 0.484	146.000, 0.252	146.000, 0.159
732	146.200, 0.848	146.200, 0.786	146.200, 0.834	146.200, 0.768	146.200, 0.484	146.200, 0.252	146.200, 0.159
733	146.400, 0.848	146.400, 0.786	146.400, 0.834	146.400, 0.768	146.400, 0.484	146.400, 0.252	146.400, 0.159
734	146.600, 0.848	146.600, 0.786	146.600, 0.834	146.600, 0.768	146.600, 0.484	146.600, 0.252	146.600, 0.159
735	146.800, 0.848	146.800, 0.786	146.800, 0.834	146.800, 0.768	146.800, 0.484	146.800, 0.252	146.800, 0.159
736	147.000, 0.848	147.000, 0.787	147.000, 0.835	147.000, 0.768	147.000, 0.484	147.000, 0.252	147.000, 0.159
737	147.200, 0.849	147.200, 0.787	147.200, 0.835	147.200, 0.767	147.200, 0.484	147.200, 0.253	147.200, 0.159
738	147.400, 0.849	147.400, 0.787	147.400, 0.835	147.400, 0.767	147.400, 0.484	147.400, 0.253	147.400, 0.159
739	147.600, 0.849	147.600, 0.787	147.600, 0.835	147.600, 0.767	147.600, 0.484	147.600, 0.253	147.600, 0.158
740	147.800, 0.849	147.800, 0.787	147.800, 0.835	147.800, 0.766	147.800, 0.484	147.800, 0.253	147.800, 0.158
741	148.000, 0.850	148.000, 0.787	148.000, 0.835	148.000, 0.766	148.000, 0.485	148.000, 0.253	148.000, 0.158
742	148.200, 0.850	148.200, 0.787	148.200, 0.835	148.200, 0.766	148.200, 0.485	148.200, 0.253	148.200, 0.158
743	148.400, 0.850	148.400, 0.787	148.400, 0.835	148.400, 0.766	148.400, 0.485	148.400, 0.253	148.400, 0.157
744	148.600, 0.850	148.600, 0.787	148.600, 0.835	148.600, 0.767	148.600, 0.485	148.600, 0.253	148.600, 0.157
745	148.800, 0.851	148.800, 0.787	148.800, 0.835	148.800, 0.767	148.800, 0.485	148.800, 0.252	148.800, 0.157
746	149.000, 0.851	149.000, 0.787	149.000, 0.835	149.000, 0.767	149.000, 0.485	149.000, 0.252	149.000, 0.157
747	149.200, 0.851	149.200, 0.787	149.200, 0.836	149.200, 0.768	149.200, 0.485	149.200, 0.251	149.200, 0.157
748	149.400, 0.851	149.400, 0.787	149.400, 0.836	149.400, 0.768	149.400, 0.485	149.400, 0.251	149.400, 0.157
749	149.600, 0.851	149.600, 0.787	149.600, 0.836	149.600, 0.769	149.600, 0.485	149.600, 0.251	149.600, 0.157
750	149.800, 0.851	149.800, 0.787	149.800, 0.836	149.800, 0.769	149.800, 0.485	149.800, 0.250	149.800, 0.157
751	150.000, 0.851	150.000, 0.787	150.000, 0.836	150.000, 0.769	150.000, 0.485	150.000, 0.250	150.000, 0.157
752	150.200, 0.844	150.200, 0.779	150.200, 0.828	150.200, 0.762	150.200, 0.482	150.200, 0.249	150.200, 0.159
753	150.400, 0.836	150.400, 0.771	150.400, 0.819	150.400, 0.754	150.400, 0.480	150.400, 0.248	150.400, 0.162
754	150.600, 0.827	150.600, 0.762	150.600, 0.809	150.600, 0.745	150.600, 0.476	150.600, 0.246	150.600, 0.164
755	150.800, 0.817	150.800, 0.752	150.800, 0.798	150.800, 0.736	150.800, 0.473	150.800, 0.245	150.800, 0.167
756	151.000, 0.806	151.000, 0.742	151.000, 0.786	151.000, 0.726	151.000, 0.470	151.000, 0.244	151.000, 0.169
757	151.200, 0.796	151.200, 0.731	151.200, 0.774	151.200, 0.715	151.200, 0.466	151.200, 0.243	151.200, 0.171
758	151.400, 0.785	151.400, 0.721	151.400, 0.762	151.400, 0.705	151.400, 0.463	151.400, 0.242	151.400, 0.173
759	151.600, 0.775	151.600, 0.710	151.600, 0.750	151.600, 0.695	151.600, 0.459	151.600, 0.242	151.600, 0.175
760	151.800, 0.765	151.800, 0.701	151.800, 0.739	151.800, 0.686	151.800, 0.456	151.800, 0.241	151.800, 0.176
761	152.000, 0.756	152.000, 0.693	152.000, 0.729	152.000, 0.678	152.000, 0.453	152.000, 0.241	152.000, 0.177
762	152.200, 0.748	152.200, 0.686	152.200, 0.721	152.200, 0.671	152.200, 0.451	152.200, 0.241	152.200, 0.177
763	152.400, 0.741	152.400, 0.679	152.400, 0.713	152.400, 0.664	152.400, 0.448	152.400, 0.241	152.400, 0.178
764	152.600, 0.735	152.600, 0.673	152.600, 0.706	152.600, 0.658	152.600, 0.446	152.600, 0.240	152.600, 0.178
765	152.800, 0.729	152.800, 0.668	152.800, 0.699	152.800, 0.652	152.800, 0.443	152.800, 0.240	152.800, 0.179
766	153.000, 0.723	153.000, 0.663	153.000, 0.692	153.000, 0.646	153.000, 0.441	153.000, 0.240	153.000, 0.179
767	153.200, 0.718	153.200, 0.658	153.200, 0.686	153.200, 0.640	153.200, 0.439	153.200, 0.239	153.200, 0.179
768	153.400, 0.713	153.400, 0.654	153.400, 0.680	153.400, 0.635	153.400, 0.436	153.400, 0.239	153.400, 0.180
769	153.600, 0.708	153.600, 0.650	153.600, 0.675	153.600, 0.630	153.600, 0.434	153.600, 0.239	153.600, 0.180
770	153.800, 0.703	153.800, 0.646	153.800, 0.669	153.800, 0.625	153.800, 0.432	153.800, 0.239	153.800, 0.181
771	154.000, 0.699	154.000, 0.642	154.000, 0.664	154.000, 0.621	154.000, 0.430	154.000, 0.239	154.000, 0.182
772	154.200, 0.695	154.200, 0.638	154.200, 0.660	154.200, 0.616	154.200, 0.428	154.200, 0.239	154.200, 0.182
773	154.400, 0.691	154.400, 0.635	154.400, 0.655	154.400, 0.612	154.400, 0.427	154.400, 0.239	154.400, 0.183
774	154.600, 0.687	154.600, 0.632	154.600, 0.651	154.600, 0.608	154.600, 0.425	154.600, 0.238	154.600, 0.183
775	154.800, 0.684	154.800, 0.629	154.800, 0.647	154.800, 0.604	154.800, 0.424	154.800, 0.238	154.800, 0.184
776	155.000, 0.681	155.000, 0.626	155.000, 0.643	155.000, 0.600	155.000, 0.422	155.000, 0.237	155.000, 0.184
777	155.200, 0.678	155.200, 0.624	155.200, 0.640	155.200, 0.597	155.200, 0.420	155.200, 0.237	155.200, 0.184
778	155.400, 0.676	155.400, 0.621	155.400, 0.636	155.400, 0.594	155.400, 0.419	155.400, 0.237	155.400, 0.185
779	155.600, 0.673	155.600, 0.618	155.600, 0.633	155.600, 0.590	155.600, 0.417	155.600, 0.236	155.600, 0.185
780	155.800, 0.671	155.800, 0.616	155.800, 0.629	155.800, 0.587	155.800, 0.415	155.800, 0.236	155.800, 0.186
781	156.000, 0.669	156.000, 0.613	156.000, 0.626	156.000, 0.584	156.000, 0.414	156.000, 0.236	156.000, 0.186
782	156.200, 0.667	156.200, 0.611	156.200, 0.623	156.200, 0.581	156.200, 0.413	156.200, 0.235	156.200, 0.186
783	156.400, 0.665	156.400, 0.608	156.400, 0.620	156.400, 0.578	156.400, 0.411	156.400, 0.235	156.400, 0.187
784	156.600, 0.663	156.600, 0.606	156.600, 0.617	156.600, 0.575	156.600, 0.410	156.600, 0.234	156.600, 0.187
785	156.800, 0.661	156.800, 0.604	156.800, 0.615	156.800, 0.572	156.800, 0.409	156.800, 0.234	156.800, 0.187
786	157.000, 0.659	157.000, 0.602	157.000, 0.612	157.000, 0.569	157.000, 0.407	157.000, 0.233	157.000, 0.188
787	157.200, 0.657	157.200, 0.601	157.200, 0.610	157.200, 0.567	157.200, 0.406	157.200, 0.233	157.200, 0.188
788	157.400, 0.655	157.400, 0.599	157.400, 0.607	157.400, 0.565	157.400, 0.405	157.400, 0.232	157.400, 0.188
789	157.600, 0.653	157.600, 0.598	157.600, 0.605	157.600, 0.562	157.600, 0.404	157.600, 0.232	157.600, 0.188
790	157.800, 0.651	157.800, 0.597	157.800, 0.603	157.800, 0.560	157.800, 0.403	157.800, 0.232	157.800, 0.188
791	158.000, 0.650	158.000, 0.595	158.000, 0.600	158.000, 0.558	158.000, 0.402	158.000, 0.232	158.000, 0.188
792	158.200, 0.648	158.200, 0.594	158.200, 0.598	158.200, 0.556	158.200, 0.401	158.200, 0.232	158.200, 0.188
793	158.400, 0.647	158.400, 0.592	158.400, 0.597	158.400, 0.554	158.400, 0.400	158.400, 0.232	158.400, 0.188
794	158.600, 0.646	158.600, 0.591	158.600, 0.595	158.600, 0.552	158.600, 0.399	158.600, 0.232	158.600, 0.188
795	158.800, 0.644	158.800, 0.589	158.800, 0.593	158.800, 0.550	158.800, 0.398	158.800, 0.232	158.800, 0.188
796	159.000, 0.643	159.000, 0.588	159.000, 0.591	159.000, 0.548	159.000, 0.396	159.000, 0.232	159.000, 0.188
797	159.200, 0.642	159.200, 0.586	159.200, 0.590	159.200, 0.547	159.200, 0.395	159.200, 0.232	159.200, 0.188
798	159.400, 0.640	159.400, 0.585	159.400, 0.588	159.400, 0.545	159.400, 0.394	159.400, 0.232	159.400, 0.189
799	159.600, 0.639	159.600, 0.583	159.600, 0.586	159.600, 0.543	159.600, 0.393	159.600, 0.232	159.600, 0.189
800	159.800, 0.638	159.800, 0.582	159.800, 0.584	159.800, 0.541	159.800, 0.392	159.800, 0.232	159.800, 0.189
801	160.000, 0.636	160.000, 0.580	160.000, 0.583	160.000, 0.538	160.000, 0.390	160.000, 0.232	160.000, 0.189
802	160.200, 0.635	160.200, 0.579	160.200, 0.581	160.200, 0.537	160.200, 0.389	160.200, 0.232	160.200, 0.190
803	160.400, 0.634	160.400, 0.578	160.400, 0.580	160.400, 0.535	160.400, 0.388	160.400, 0.232	160.400, 0.190
804	160.600, 0.633	160.600, 0.576	160.600, 0.578	160.600, 0.533	160.600, 0.387	160.600, 0.231	160.600, 0.190
805	160.800, 0.631	160.800, 0.576	160.800, 0.577	160.800, 0.531	160.800, 0.386	160.800, 0.231	160.800, 0.190
806	161.000, 0.630	161.000, 0.575	161.000, 0.576	161.000, 0.530	161.000, 0.385	161.000, 0.231	161.000, 0.190
807	161.200, 0.629	161.200, 0.574	161.200, 0.574	161.200, 0.529	161.200, 0.384	161.200, 0.230	161.200, 0.190
808	161.400, 0.629	161.400, 0.573	161.400, 0.573	161.400, 0.527	161.400, 0.383	161.400, 0.230	161.400, 0.190
809	161.600, 0.628	161.600, 0.573	161.600, 0.572	161.600, 0.526	161.600, 0.382	161.600, 0.230	161.600, 0.190
810	161.800, 0.627	161.800, 0.572	161.800, 0.570	161.800, 0.525	161.800, 0.381	161.800, 0.230	161.800, 0.190
811	162.000, 0.626	162.000, 0.571	162.000, 0.569	162.000, 0.524	162.000, 0.381	162.000, 0.229	162.000, 0.190
812	162.200, 0.626	162.200, 0.570	162.200, 0.568	162.200, 0.522	162.200, 0.380	162.200, 0.229	162.200, 0.190
813	162.400, 0.625	162.400, 0.569	162.400, 0.567	162.400, 0.521	162.400, 0.380	162.400, 0.229	162.400, 0.190
814	162.600, 0.624	162.600, 0.569	162.600, 0.566	162.600, 0.520	162.600, 0.379	162.600, 0.228	162.600, 0.190
815	162.800, 0.624	162.800, 0.568	162.800, 0.564	162.800, 0.518	162.800, 0.378	162.800, 0.228	162.800, 0.190
816	163.000, 0.623	163.000, 0.567	163.000, 0.563	163.000, 0.517	163.000, 0.378	163.000, 0.228	163.000, 0.190
817	163.200, 0.622	163.200, 0.566	163.200, 0.562	163.200, 0.515	163.200, 0.377	163.200, 0.228	163.200, 0.190
818	163.400, 0.621	163.400, 0.565	163.400, 0.561	163.400, 0.514	163.400, 0.376	163.400, 0.227	163.400, 0.190
819	163.600, 0.621	163.600, 0.564	163.600, 0.560	163.600, 0.512	163.600, 0.376	163.600, 0.227	163.600, 0.190
820	163.800, 0.620	163.800, 0.563	163.800, 0.559	163.800, 0.511	163.800, 0.375	163.800, 0.227	163.800, 0.190
821	164.000, 0.619	164.000, 0.562	164.000, 0.558	164.000, 0.509	164.000, 0.374	164.000, 0.227	164.000, 0.191
822	164.200, 0.618	164.200, 0.561	164.200, 0.557	164.200, 0.508	164.200, 0.373	164.200, 0.227	164.200, 0.191
823	164.400, 0.618	164.400, 0.560	164.400, 0.556	164.400, 0.507	164.400, 0.373	164.400, 0.227	164.400, 0.191
824	164.600, 0.617	164.600, 0.559	164.600, 0.555	164.600, 0.506	164.600, 0.372	164.600, 0.227	164.600, 0.191
825	164.800, 0.616	164.800, 0.558	164.800, 0.554	164.800, 0.505	164.800, 0.371	164.800, 0.227	164.800, 0.191
826	165.000, 0.615	165.000, 0.558	165.000, 0.553	165.000, 0.504	165.000, 0.370	165.000, 0.227	165.000, 0.192
827	165.200, 0.615	165.200, 0.557	165.200, 0.552	165.200, 0.503	165.200, 0.370	165.200, 0.227	165.200, 0.192
828	165.400, 0.614	165.400, 0.556	165.400, 0.551	165.400, 0.502	165.400, 0.369	165.400, 0.227	165.400, 0.192
829	165.600, 0.613	165.600, 0.556	165.600, 0.550	165.600, 0.501	165.600, 0.368	165.600, 0.227	165.600, 0.192
830	165.800, 0.613	165.800, 0.555	165.800, 0.549	165.800, 0.501	165.800, 0.368	165.800, 0.227	165.800, 0.192
831	166.000, 0.612	166.000, 0.555	166.000, 0.548	166.000, 0.500	166.000, 0.367	166.000, 0.227	166.000, 0.192
832	166.200, 0.611	166.200, 0.555	166.200, 0.547	166.200, 0.500	166.200, 0.367	166.200, 0.226	166.200, 0.192
833	166.400, 0.611	166.400, 0.554	166.400, 0.546	166.400, 0.499	166.400, 0.366	166.400, 0.226	166.400, 0.192
834	166.600, 0.610	166.600, 0.554	166.600, 0.545	166.600, 0.498	166.600, 0.366	166.600, 0.226	166.600, 0.192
835	166.800, 0.610	166.800, 0.554	166.800, 0.544	166.800, 0.497	166.800, 0.365	166.800, 0.226	166.800, 0.192
836	167.000, 0.610	167.000, 0.553	167.000, 0.543	167.000, 0.496	167.000, 0.364	167.000, 0.226	167.000, 0.192
837	167.200, 0.609	167.200, 0.553	167.200, 0.542	167.200, 0.495	167.200, 0.364	167.200, 0.226	167.200, 0.192
838	167.400, 0.609	167.400, 0.552	167.400, 0.541	167.400, 0.494	167.400, 0.363	167.400, 0.225	167.400, 0.192
839	167.600, 0.608	167.600, 0.552	167.600, 0.540	167.600, 0.493	167.600, 0.362	167.600, 0.225	167.600, 0.191
840	167.800, 0.608	167.800, 0.551	167.800, 0.540	167.800, 0.492	167.800, 0.362	167.800, 0.225	167.800, 0.191
841	168.000, 0.607	168.000, 0.550	168.000, 0.539	168.000, 0.491	168.000, 0.361	168.000, 0.224	168.000, 0.191
842	168.200, 0.606	168.200, 0.550	168.200, 0.538	168.200, 0.490	168.200, 0.360	168.200, 0.224	168.200, 0.191
843	168.400, 0.605	168.400, 0.549	168.400, 0.537	168.400, 0.489	168.400, 0.359	168.400, 0.223	168.400, 0.191
844	168.600, 0.604	168.600, 0.548	168.600, 0.536	168.600, 0.488	168.600, 0.358	168.600, 0.223	168.600, 0.191
845	168.800, 0.603	168.800, 0.547	168.800, 0.536	168.800, 0.487	168.800, 0.358	168.800, 0.223	168.800, 0.191
846	169.000, 0.602	169.000, 0.546	169.000, 0.535	169.000, 0.486	169.000, 0.357	169.000, 0.222	169.000, 0.191
847	169.200, 0.601	169.200, 0.546	169.200, 0.535	169.200, 0.485	169.200, 0.356	169.200, 0.222	169.200, 0.191
848	169.400, 0.600	169.400, 0.545	169.400, 0.534	169.400, 0.485	169.400, 0.355	169.400, 0.222	169.400, 0.191
849	169.600, 0.600	169.600, 0.545	169.600, 0.534	169.600, 0.484	169.600, 0.355	169.600, 0.222	169.600, 0.191
850	169.800, 0.599	169.800, 0.544	169.800, 0.533	169.800, 0.483	169.800, 0.354	169.800, 0.222	169.800, 0.191
851	170.000, 0.599	170.000, 0.544	170.000, 0.532	170.000, 0.482	170.000, 0.354	170.000, 0.222	170.000, 0.191
852	170.200, 0.598	170.200, 0.543	170.200, 0.531	170.200, 0.481	170.200, 0.354	170.200, 0.222	170.200, 0.191
853	170.400, 0.598	170.400, 0.542	170.400, 0.531	170.400, 0.480	170.400, 0.353	170.400, 0.222	170.400, 0.191
854	170.600, 0.597	170.600, 0.541	170.600, 0.530	170.600, 0.479	170.600, 0.353	170.600, 0.222	170.600, 0.191
855	170.800, 0.597	170.800, 0.541	170.800, 0.529	170.800, 0.478	170.800, 0.352	170.800, 0.222	170.800, 0.191
856	171.000, 0.597	171.000, 0.540	171.000, 0.528	171.000, 0.477	171.000, 0.352	171.000, 0.222	171.000, 0.190
857	171.200, 0.596	171.200, 0.539	171.200, 0.527	171.200, 0.476	171.200, 0.351	171.200, 0.222	171.200, 0.190
858	171.400, 0.596	171.400, 0.538	171.400, 0.527	171.400, 0.475	171.400, 0.351	171.400, 0.221	171.400, 0.190
859	171.600, 0.595	171.600, 0.538	171.600, 0.526	171.600, 0.474	171.600, 0.350	171.600, 0.221	171.600, 0.190
860	171.800, 0.594	171.800, 0.537	171.800, 0.525	171.800, 0.474	171.800, 0.350	171.800, 0.220	171.800, 0.189
861	172.000, 0.593	172.000, 0.536	172.000, 0.524	172.000, 0.473	172.000, 0.349	172.000, 0.220	172.000, 0.189
862	172.200, 0.593	172.200, 0.535	172.200, 0.523	172.200, 0.473	172.200, 0.349	172.200, 0.219	172.200, 0.189
863	172.400, 0.592	172.400, 0.535	172.400, 0.522	172.400, 0.472	172.400, 0.348	172.400, 0.219	172.400, 0.189
864	172.600, 0.592	172.600, 0.534	172.600, 0.522	172.600, 0.471	172.600, 0.348	172.600, 0.219	172.600, 0.189
865	172.800, 0.591	172.800, 0.533	172.800, 0.521	172.800, 0.471	172.800, 0.347	172.800, 0.219	172.800, 0.189
866	173.000, 0.590	173.000, 0.533	173.000, 0.521	173.000, 0.470	173.000, 0.346	173.000, 0.218	173.000, 0.189
867	173.200, 0.590	173.200, 0.533	173.200, 0.520	173.200, 0.469	173.200, 0.345	173.200, 0.218	173.200, 0.189
868	173.400, 0.590	173.400, 0.532	173.400, 0.520	173.400, 0.468	173.400, 0.345	173.400, 0.218	173.400, 0.189
869	173.600, 0.589	173.600, 0.532	173.600, 0.519	173.600, 0.467	173.600, 0.344	173.600, 0.218	173.600, 0.188
870	173.800, 0.588	173.800, 0.531	173.800, 0.519	173.800, 0.466	173.800, 0.344	173.800, 0.218	173.800, 0.188
871	174.000, 0.588	174.000, 0.530	174.000, 0.518	174.000, 0.466	174.000, 0.343	174.000, 0.218	174.000, 0.188
872	174.200, 0.587	174.200, 0.530	174.200, 0.518	174.200, 0.465	174.200, 0.343	174.200, 0.218	174.200, 0.188
873	174.400, 0.587	174.400, 0.529	174.400, 0.517	174.400, 0.464	174.400, 0.342	174.400, 0.218	174.400, 0.188
874	174.600, 0.586	174.600, 0.529	174.600, 0.516	174.600, 0.463	174.600, 0.342	174.600, 0.217	174.600, 0.188
875	174.800, 0.586	174.800, 0.528	174.800, 0.515	174.800, 0.463	174.800, 0.341	174.800, 0.217	174.800, 0.188
876	175.000, 0.585	175.000, 0.527	175.000, 0.515	175.000, 0.462	175.000, 0.340	175.000, 0.217	175.000, 0.188
877	175.200, 0.585	175.200, 0.527	175.200, 0.514	175.200, 0.461	175.200, 0.340	175.200, 0.217	175.200, 0.188
878	175.400, 0.584	175.400, 0.526	175.400, 0.513	175.400, 0.461	175.400, 0.340	175.400, 0.216	175.400, 0.188
879	175.600, 0.584	175.600, 0.525	175.600, 0.512	175.600, 0.461	175.600, 0.339	175.600, 0.216	175.600, 0.188
880	175.800, 0.583	175.800, 0.525	175.800, 0.511	175.800, 0.460	175.800, 0.339	175.800, 0.216	175.800, 0.188
881	176.000, 0.583	176.000, 0.524	176.000, 0.510	176.000, 0.460	176.000, 0.339	176.000, 0.216	176.000, 0.188
882	176.200, 0.583	176.200, 0.524	176.200, 0.510	176.200, 0.459	176.200, 0.338	176.200, 0.216	176.200, 0.188
883	176.400, 0.582	176.400, 0.523	176.400, 0.509	176.400, 0.459	176.400, 0.338	176.400, 0.216	176.400, 0.188
884	176.600, 0.582	176.600, 0.523	176.600, 0.509	176.600, 0.458	176.600, 0.337	176.600, 0.216	176.600, 0.188
885	176.800, 0.582	176.800, 0.523	176.800, 0.508	176.800, 0.457	176.800, 0.337	176.800, 0.216	176.800, 0.188
886	177.000, 0.581	177.000, 0.522	177.000, 0.508	177.000, 0.456	177.000, 0.336	177.000, 0.217	177.000, 0.188
887	177.200, 0.581	177.200, 0.522	177.200, 0.507	177.200, 0.455	177.200, 0.336	177.200, 0.217	177.200, 0.188
888	177.400, 0.580	177.400, 0.522	177.400, 0.507	177.400, 0.455	177.400, 0.336	177.400, 0.217	177.400, 0.188
889	177.600, 0.579	177.600, 0.521	177.600, 0.507	177.600, 0.454	177.600, 0.335	177.600, 0.217	177.600, 0.188
890	177.800, 0.579	177.800, 0.521	177.800, 0.506	177.800, 0.453	177.800, 0.335	177.800, 0.217	177.800, 0.188
891	178.000, 0.578	178.000, 0.520	178.000, 0.506	178.000, 0.452	178.000, 0.334	178.000, 0.217	178.000, 0.188
892	178.200, 0.577	178.200, 0.520	178.200, 0.505	178.200, 0.452	178.200, 0.334	178.200, 0.217	178.200, 0.188
893	178.400, 0.577	178.400, 0.519	178.400, 0.504	178.400, 0.451	178.400, 0.333	178.400, 0.217	178.400, 0.188
894	178.600, 0.576	178.600, 0.519	178.600, 0.503	178.600, 0.450	178.600, 0.333	178.600, 0.217	178.600, 0.188
895	178.800, 0.576	178.800, 0.518	178.800, 0.503	178.800, 0.449	178.800, 0.332	178.800, 0.217	178.800, 0.187
896	179.000, 0.575	179.000, 0.517	179.000, 0.502	179.000, 0.448	179.000, 0.332	179.000, 0.217	179.000, 0.187
897	179.200, 0.575	179.200, 0.517	179.200, 0.501	179.200, 0.448	179.200, 0.331	179.200, 0.217	179.200, 0.187
898	179.400, 0.574	179.400, 0.516	179.400, 0.500	179.400, 0.447	179.400, 0.331	179.400, 0.216	179.400, 0.187
899	179.600, 0.574	179.600, 0.516	179.600, 0.499	179.600, 0.447	179.600, 0.330	179.600, 0.216	179.600, 0.187
900	179.800, 0.573	179.800, 0.515	179.800, 0.499	179.800, 0.446	179.800, 0.329	179.800, 0.216	179.800, 0.186
901	180.000, 0.572	180.000, 0.515	180.000, 0.498	180.000, 0.446	180.000, 0.329	180.000, 0.215	180.000, 0.186
902	180.200, 0.572	180.200, 0.514	180.200, 0.497	180.200, 0.445	180.200, 0.328	180.200, 0.215	180.200, 0.186
903	180.400, 0.571	180.400, 0.514	180.400, 0.497	180.400, 0.444	180.400, 0.328	180.400, 0.214	180.400, 0.186
904	180.600, 0.571	180.600, 0.513	180.600, 0.496	180.600, 0.444	180.600, 0.327	180.600, 0.214	180.600, 0.185
905	180.800, 0.570	180.800, 0.513	180.800, 0.496	180.800, 0.443	180.800, 0.327	180.800, 0.213	180.800, 0.185
906	181.000, 0.569	181.000, 0.513	181.000, 0.495	181.000, 0.442	181.000, 0.327	181.000, 0.213	181.000, 0.185
907	181.200, 0.569	181.200, 0.512	181.200, 0.495	181.200, 0.442	181.200, 0.326	181.200, 0.212	181.200, 0.185
908	181.400, 0.568	181.400, 0.512	181.400, 0.495	181.400, 0.441	181.400, 0.326	181.400, 0.212	181.400, 0.185
909	181.600, 0.568	181.600, 0.512	181.600, 0.494	181.600, 0.441	181.600, 0.325	181.600, 0.212	181.600, 0.185
910	181.800, 0.568	181.800, 0.511	181.800, 0.493	181.800, 0.440	181.800, 0.325	181.800, 0.211	181.800, 0.185
911	182.000, 0.567	182.000, 0.511	182.000, 0.492	182.000, 0.440	182.000, 0.324	182.000, 0.211	182.000, 0.185
912	182.200, 0.567	182.200, 0.510	182.200, 0.492	182.200, 0.439	182.200, 0.324	182.200, 0.211	182.200, 0.185
913	182.400, 0.566	182.400, 0.509	182.400, 0.491	182.400, 0.438	182.400, 0.324	182.400, 0.210	182.400, 0.185
914	182.600, 0.566	182.600, 0.508	182.600, 0.490	182.600, 0.437	182.600, 0.323	182.600, 0.210	182.600, 0.185
915	182.800, 0.565	182.800, 0.508	182.800, 0.489	182.800, 0.437	182.800, 0.323	182.800, 0.210	182.800, 0.185
916	183.000, 0.565	183.000, 0.507	183.000, 0.489	183.000, 0.436	183.000, 0.323	183.000, 0.210	183.000, 0.185
917	183.200, 0.564	183.200, 0.507	183.200, 0.488	183.200, 0.436	183.200, 0.323	183.200, 0.210	183.200, 0.185
918	183.400, 0.563	183.400, 0.507	183.400, 0.488	183.400, 0.436	183.400, 0.322	183.400, 0.210	183.400, 0.185
919	183.600, 0.563	183.600, 0.506	183.600, 0.487	183.600, 0.435	183.600, 0.322	183.600, 0.210	183.600, 0.185
920	183.800, 0.562	183.800, 0.506	183.800, 0.487	183.800, 0.435	183.800, 0.322	183.800, 0.210	183.800, 0.184
921	184.000, 0.562	184.000, 0.506	184.000, 0.487	184.000, 0.434	184.000, 0.322	184.000, 0.210	184.000, 0.184
922	184.200, 0.561	184.200, 0.505	184.200, 0.486	184.200, 0.434	184.200, 0.321	184.200, 0.209	184.200, 0.184
923	184.400, 0.561	184.400, 0.505	184.400, 0.485	184.400, 0.433	184.400, 0.321	184.400, 0.209	184.400, 0.184
924	184.600, 0.560	184.600, 0.504	184.600, 0.485	184.600, 0.432	184.600, 0.320	184.600, 0.209	184.600, 0.184
925	184.800, 0.560	184.800, 0.504	184.800, 0.484	184.800, 0.432	184.800, 0.320	184.800, 0.209	184.800, 0.184
926	185.000, 0.559	185.000, 0.503	185.000, 0.484	185.000, 0.431	185.000, 0.319	185.000, 0.209	185.000, 0.183
927	185.200, 0.559	185.200, 0.503	185.200, 0.483	185.200, 0.430	185.200, 0.319	185.200, 0.208	185.200, 0.183
928	185.400, 0.558	185.400, 0.502	185.400, 0.483	185.400, 0.430	185.400, 0.318	185.400, 0.208	185.400, 0.183
929	185.600, 0.558	185.600, 0.501	185.600, 0.482	185.600, 0.429	185.600, 0.318	185.600, 0.208	185.600, 0.183
930	185.800, 0.558	185.800, 0.501	185.800, 0.482	185.800, 0.428	185.800, 0.317	185.800, 0.208	185.800, 0.182
931	186.000, 0.558	186.000, 0.500	186.000, 0.481	186.000, 0.428	186.000, 0.317	186.000, 0.207	186.000, 0.182
932	186.200, 0.557	186.200, 0.500	186.200, 0.481	186.200, 0.427	186.200, 0.316	186.200, 0.207	186.200, 0.182
933	186.400, 0.557	186.400, 0.499	186.400, 0.480	186.400, 0.427	186.400, 0.316	186.400, 0.207	186.400, 0.182
934	186.600, 0.557	186.600, 0.499	186.600, 0.480	186.600, 0.426	186.600, 0.315	186.600, 0.207	186.600, 0.182
935	186.800, 0.556	186.800, 0.498	186.800, 0.479	186.800, 0.426	186.800, 0.315	186.800, 0.207	186.800, 0.182
936	187.000, 0.556	187.000, 0.498	187.000, 0.479	187.000, 0.425	187.000, 0.315	187.000, 0.207	187.000, 0.182
937	187.200, 0.556	187.200, 0.498	187.200, 0.478	187.200, 0.425	187.200, 0.314	187.200, 0.207	187.200, 0.182
938	187.400, 0.555	187.400, 0.497	187.400, 0.478	187.400, 0.424	187.400, 0.314	187.400, 0.207	187.400, 0.182
939	187.600, 0.555	187.600, 0.497	187.600, 0.477	187.600, 0.424	187.600, 0.314	187.600, 0.207	187.600, 0.182
940	187.800, 0.555	187.800, 0.496	187.800, 0.477	187.800, 0.423	187.800, 0.313	187.800, 0.207	187.800, 0.182
941	188.000, 0.554	188.000, 0.496	188.000, 0.476	188.000, 0.423	188.000, 0.313	188.000, 0.207	188.000, 0.182
942	188.200, 0.554	188.200, 0.496	188.200, 0.476	188.200, 0.422	188.200, 0.313	188.200, 0.207	188.200, 0.182
943	188.400, 0.553	188.400, 0.495	188.400, 0.475	188.400, 0.422	188.400, 0.313	188.400, 0.208	188.400, 0.181
944	188.600, 0.553	188.600, 0.495	188.600, 0.474	188.600, 0.421	188.600, 0.313	188.600, 0.207	188.600, 0.181
945	188.800, 0.552	188.800, 0.494	188.800, 0.474	188.800, 0.421	188.800, 0.313	188.800, 0.207	188.800, 0.181
946	189.000, 0.552	189.000, 0.493	189.000, 0.473	189.000, 0.420	189.000, 0.312	189.000, 0.207	189.000, 0.182
947	189.200, 0.551	189.200, 0.493	189.200, 0.473	189.200, 0.420	189.200, 0.312	189.200, 0.207	189.200, 0.182
948	189.400, 0.551	189.400, 0.492	189.400, 0.473	189.400, 0.419	189.400, 0.312	189.400, 0.206	189.400, 0.182
949	189.600, 0.551	189.600, 0.492	189.600, 0.472	189.600, 0.419	189.600, 0.311	189.600, 0.206	189.600, 0.182
950	189.800, 0.550	189.800, 0.491	189.800, 0.472	189.800, 0.418	189.800, 0.311	189.800, 0.206	189.800, 0.182
951	190.000, 0.550	190.000, 0.491	190.000, 0.472	190.000, 0.418	190.000, 0.310	190.000, 0.206	190.000, 0.182
952	190.200, 0.550	190.200, 0.491	190.200, 0.472	190.200, 0.417	190.200, 0.309	190.200, 0.206	190.200, 0.183
953	190.400, 0.549	190.400, 0.490	190.400, 0.471	190.400, 0.417	190.400, 0.309	190.400, 0.206	190.400, 0.183
954	190.600, 0.548	190.600, 0.490	190.600, 0.471	190.600, 0.416	190.600, 0.308	190.600, 0.206	190.600, 0.183
955	190.800, 0.548	190.800, 0.489	190.800, 0.470	190.800, 0.416	190.800, 0.308	190.800, 0.206	190.800, 0.183
956	191.000, 0.547	191.000, 0.489	191.000, 0.469	191.000, 0.415	191.000, 0.307	191.000, 0.205	191.000, 0.183
957	191.200, 0.547	191.200, 0.488	191.200, 0.469	191.200, 0.415	191.200, 0.307	191.200, 0.205	191.200, 0.183
958	191.400, 0.546	191.400, 0.488	191.400, 0.468	191.400, 0.415	191.400, 0.306	191.400, 0.205	191.400, 0.182
959	191.600, 0.546	191.600, 0.487	191.600, 0.467	191.600, 0.414	191.600, 0.306	191.600, 0.204	191.600, 0.182
960	191.800, 0.545	191.800, 0.487	191.800, 0.467	191.800, 0.414	191.800, 0.305	191.800, 0.204	191.800, 0.181
961	192.000, 0.544	192.000, 0.487	192.000, 0.466	192.000, 0.413	192.000, 0.305	192.000, 0.204	192.000, 0.181
962	192.200, 0.544	192.200, 0.486	192.200, 0.465	192.200, 0.413	192.200, 0.305	192.200, 0.204	192.200, 0.180
963	192.400, 0.543	192.400, 0.486	192.400, 0.465	192.400, 0.413	192.400, 0.305	192.400, 0.204	192.400, 0.180
964	192.600, 0.542	192.600, 0.485	192.600, 0.464	192.600, 0.412	192.600, 0.305	192.600, 0.203	192.600, 0.180
965	192.800, 0.542	192.800, 0.485	192.800, 0.464	192.800, 0.412	192.800, 0.305	192.800, 0.203	192.800, 0.180
966	193.000, 0.542	193.000, 0.485	193.000, 0.463	193.000, 0.411	193.000, 0.304	193.000, 0.203	193.000, 0.179
967	193.200, 0.541	193.200, 0.484	193.200, 0.463	193.200, 0.411	193.200, 0.304	193.200, 0.202	193.200, 0.179
968	193.400, 0.541	193.400, 0.484	193.400, 0.463	193.400, 0.411	193.400, 0.303	193.400, 0.202	193.400, 0.179
969	193.600, 0.540	193.600, 0.483	193.600, 0.462	193.600, 0.410	193.600, 0.303	193.600, 0.202	193.600, 0.179
970	193.800, 0.540	193.800, 0.483	193.800, 0.462	193.800, 0.410	193.800, 0.303	193.800, 0.202	193.800, 0.179
971	194.000, 0.539	194.000, 0.483	194.000, 0.462	194.000, 0.409	194.000, 0.302	194.000, 0.201	194.000, 0.179
972	194.200, 0.539	194.200, 0.482	194.200, 0.461	194.200, 0.408	194.200, 0.302	194.200, 0.201	194.200, 0.179
973	194.400, 0.539	194.400, 0.482	194.400, 0.461	194.400, 0.408	194.400, 0.302	194.400, 0.201	194.400, 0.179
974	194.600, 0.538	194.600, 0.482	194.600, 0.460	194.600, 0.407	194.600, 0.302	194.600, 0.200	194.600, 0.179
975	194.800, 0.538	194.800, 0.481	194.800, 0.460	194.800, 0.407	194.800, 0.302	194.800, 0.200	194.800, 0.179
976	195.000, 0.538	195.000, 0.481	195.000, 0.459	195.000, 0.406	195.000, 0.301	195.000, 0.200	195.000, 0.178
977	195.200, 0.537	195.200, 0.480	195.200, 0.459	195.200, 0.406	195.200, 0.301	195.200, 0.200	195.200, 0.178
978	195.400, 0.537	195.400, 0.480	195.400, 0.458	195.400, 0.405	195.400, 0.301	195.400, 0.200	195.400, 0.178
979	195.600, 0.537	195.600, 0.479	195.600, 0.458	195.600, 0.405	195.600, 0.300	195.600, 0.200	195.600, 0.178
980	195.800, 0.536	195.800, 0.479	195.800, 0.457	195.800, 0.405	195.800, 0.300	195.800, 0.200	195.800, 0.178
981	196.000, 0.536	196.000, 0.478	196.000, 0.457	196.000, 0.404	196.000, 0.300	196.000, 0.200	196.000, 0.178
982	196.200, 0.535	196.200, 0.478	196.200, 0.457	196.200, 0.404	196.200, 0.299	196.200, 0.200	196.200, 0.178
983	196.400, 0.535	196.400, 0.478	196.400, 0.456	196.400, 0.404	196.400, 0.299	196.400, 0.199	196.400, 0.178
984	196.600, 0.534	196.600, 0.477	196.600, 0.456	196.600, 0.404	196.600, 0.298	196.600, 0.199	196.600, 0.178
985	196.800, 0.533	196.800, 0.477	196.800, 0.456	196.800, 0.403	196.800, 0.298	196.800, 0.199	196.800, 0.179
986	197.000, 0.533	197.000, 0.477	197.000, 0.456	197.000, 0.403	197.000, 0.297	197.000, 0.199	197.000, 0.178
987	197.200, 0.532	197.200, 0.476	197.200, 0.456	197.200, 0.402	197.200, 0.297	197.200, 0.199	197.200, 0.178
988	197.400, 0.532	197.400, 0.476	197.400, 0.456	197.400, 0.402	197.400, 0.296	197.400, 0.199	197.400, 0.178
989	197.600, 0.531	197.600, 0.475	197.600, 0.455	197.600, 0.401	197.600, 0.296	197.600, 0.199	197.600, 0.178
990	197.800, 0.531	197.800, 0.475	197.800, 0.455	197.800, 0.400	197.800, 0.295	197.800, 0.199	197.800, 0.177
991	198.000, 0.530	198.000, 0.475	198.000, 0.454	198.000, 0.399	198.000, 0.295	198.000, 0.198	198.000, 0.177
992	198.200, 0.530	198.200, 0.474	198.200, 0.454	198.200, 0.399	198.200, 0.295	198.200, 0.198	198.200, 0.177
993	198.400, 0.530	198.400, 0.474	198.400, 0.453	198.400, 0.398	198.400, 0.295	198.400, 0.198	198.400, 0.176
994	198.600, 0.530	198.600, 0.473	198.600, 0.453	198.600, 0.397	198.600, 0.295	198.600, 0.197	198.600, 0.176
995	198.800, 0.530	198.800, 0.473	198.800, 0.452	198.800, 0.397	198.800, 0.296	198.800, 0.197	198.800, 0.176
996	199.000, 0.529	199.000, 0.473	199.000, 0.451	199.000, 0.396	199.000, 0.296	199.000, 0.197	199.000, 0.176
997	199.200, 0.529	199.200, 0.472	199.200, 0.450	199.200, 0.396	199.200, 0.296	199.200, 0.197	199.200, 0.176
998	199.400, 0.529	199.400, 0.472	199.400, 0.450	199.400, 0.396	199.400, 0.296	199.400, 0.197	199.400, 0.176
999	199.600, 0.529	199.600, 0.471	199.600, 0.449	199.600, 0.396	199.600, 0.295	199.600, 0.196	199.600, 0.176
1000	199.800, 0.529	199.800, 0.471	199.800, 0.449	199.800, 0.396	199.800, 0.295	199.800, 0.196	199.800, 0.176
1001	200.000, 0.528	200.000, 0.470	200.000, 0.449	200.000, 0.395	200.000, 0.295	200.000, 0.196	200.000, 0.176
1002	200.200, 0.528	200.200, 0.470	200.200, 0.448	200.200, 0.395	200.200, 0.294	200.200, 0.196	200.200, 0.176
1003	200.400, 0.527	200.400, 0.469	200.400, 0.448	200.400, 0.395	200.400, 0.294	200.400, 0.195	200.400, 0.176
1004	200.600, 0.527	200.600, 0.469	200.600, 0.448	200.600, 0.395	200.600, 0.293	200.600, 0.195	200.600, 0.176
1005	200.800, 0.526	200.800, 0.468	200.800, 0.448	200.800, 0.394	200.800, 0.293	200.800, 0.195	200.800, 0.176
1006	201.000, 0.526	201.000, 0.468	201.000, 0.447	201.000, 0.394	201.000, 0.292	201.000, 0.195	201.000, 0.176
1007	201.200, 0.526	201.200, 0.468	201.200, 0.447	201.200, 0.393	201.200, 0.291	201.200, 0.195	201.200, 0.176
1008	201.400, 0.525	201.400, 0.468	201.400, 0.446	201.400, 0.393	201.400, 0.291	201.400, 0.195	201.400, 0.175
1009	201.600, 0.525	201.600, 0.467	201.600, 0.446	201.600, 0.392	201.600, 0.290	201.600, 0.195	201.600, 0.175
1010	201.800, 0.525	201.800, 0.467	201.800, 0.445	201.800, 0.392	201.800, 0.290	201.800, 0.195	201.800, 0.175
1011	202.000, 0.524	202.000, 0.467	202.000, 0.445	202.000, 0.391	202.000, 0.289	202.000, 0.194	202.000, 0.175
1012	202.200, 0.524	202.200, 0.467	202.200, 0.444	202.200, 0.390	202.200, 0.289	202.200, 0.194	202.200, 0.175
1013	202.400, 0.523	202.400, 0.466	202.400, 0.444	202.400, 0.390	202.400, 0.289	202.400, 0.194	202.400, 0.175
1014	202.600, 0.523	202.600, 0.466	202.600, 0.443	202.600, 0.389	202.600, 0.288	202.600, 0.194	202.600, 0.175
1015	202.800, 0.523	202.800, 0.465	202.800, 0.443	202.800, 0.389	202.800, 0.288	202.800, 0.194	202.800, 0.175
1016	203.000, 0.522	203.000, 0.465	203.000, 0.443	203.000, 0.388	203.000, 0.288	203.000, 0.194	203.000, 0.174
1017	203.200, 0.522	203.200, 0.464	203.200, 0.442	203.200, 0.387	203.200, 0.288	203.200, 0.194	203.200, 0.175
1018	203.400, 0.521	203.400, 0.464	203.400, 0.442	203.400, 0.387	203.400, 0.288	203.400, 0.193	203.400, 0.175
1019	203.600, 0.521	203.600, 0.463	203.600, 0.441	203.600, 0.386	203.600, 0.288	203.600, 0.193	203.600, 0.175
1020	203.800, 0.520	203.800, 0.463	203.800, 0.441	203.800, 0.386	203.800, 0.288	203.800, 0.193	203.800, 0.174
1021	204.000, 0.520	204.000, 0.462	204.000, 0.441	204.000, 0.385	204.000, 0.288	204.000, 0.193	204.000, 0.174
1022	204.200, 0.520	204.200, 0.461	204.200, 0.440	204.200, 0.385	204.200, 0.288	204.200, 0.193	204.200, 0.174
1023	204.400, 0.519	204.400, 0.461	204.400, 0.440	204.400, 0.385	204.400, 0.288	204.400, 0.193	204.400, 0.174
1024	204.600, 0.519	204.600, 0.461	204.600, 0.440	204.600, 0.385	204.600, 0.287	204.600, 0.193	204.600, 0.174
1025	204.800, 0.519	204.800, 0.461	204.800, 0.439	204.800, 0.384	204.800, 0.287	204.800, 0.193	204.800, 0.174
1026	205.000, 0.519	205.000, 0.461	205.000, 0.438	205.000, 0.384	205.000, 0.287	205.000, 0.192	205.000, 0.174
1027	205.200, 0.518	205.200, 0.460	205.200, 0.438	205.200, 0.384	205.200, 0.286	205.200, 0.192	205.200, 0.174
1028	205.400, 0.518	205.400, 0.460	205.400, 0.437	205.400, 0.383	205.400, 0.286	205.400, 0.192	205.400, 0.174
1029	205.600, 0.517	205.600, 0.460	205.600, 0.436	205.600, 0.383	205.600, 0.286	205.600, 0.192	205.600, 0.174
1030	205.800, 0.517	205.800, 0.460	205.800, 0.435	205.800, 0.383	205.800, 0.285	205.800, 0.192	205.800, 0.173
1031	206.000, 0.516	206.000, 0.459	206.000, 0.435	206.000, 0.382	206.000, 0.285	206.000, 0.191	206.000, 0.173
1032	206.200, 0.516	206.200, 0.459	206.200, 0.434	206.200, 0.382	206.200, 0.285	206.200, 0.191	206.200, 0.173
1033	206.400, 0.515	206.400, 0.458	206.400, 0.433	206.400, 0.382	206.400, 0.284	206.400, 0.191	206.400, 0.173
1034	206.600, 0.514	206.600, 0.458	206.600, 0.433	206.600, 0.382	206.600, 0.284	206.600, 0.191	206.600, 0.173
1035	206.800, 0.514	206.800, 0.458	206.800, 0.433	206.800, 0.381	206.800, 0.284	206.800, 0.191	206.800, 0.173
1036	207.000, 0.513	207.000, 0.457	207.000, 0.432	207.000, 0.381	207.000, 0.284	207.000, 0.190	207.000, 0.173
1037	207.200, 0.513	207.200, 0.457	207.200, 0.432	207.200, 0.381	207.200, 0.284	207.200, 0.190	207.200, 0.172
1038	207.400, 0.512	207.400, 0.457	207.400, 0.432	207.400, 0.381	207.400, 0.283	207.400, 0.190	207.400, 0.172
1039	207.600, 0.512	207.600, 0.456	207.600, 0.432	207.600, 0.380	207.600, 0.283	207.600, 0.190	207.600, 0.172
1040	207.800, 0.512	207.800, 0.456	207.800, 0.432	207.800, 0.380	207.800, 0.283	207.800, 0.190	207.800, 0.172
1041	208.000, 0.511	208.000, 0.455	208.000, 0.432	208.000, 0.380	208.000, 0.283	208.000, 0.190	208.000, 0.171
1042	208.200, 0.511	208.200, 0.455	208.200, 0.432	208.200, 0.380	208.200, 0.283	208.200, 0.190	208.200, 0.171
1043	208.400, 0.510	208.400, 0.455	208.400, 0.432	208.400, 0.380	208.400, 0.283	208.400, 0.189	208.400, 0.171
1044	208.600, 0.510	208.600, 0.454	208.600, 0.432	208.600, 0.380	208.600, 0.283	208.600, 0.189	208.600, 0.171
1045	208.800, 0.510	208.800, 0.454	208.800, 0.431	208.800, 0.379	208.800, 0.282	208.800, 0.189	208.800, 0.171
1046	209.000, 0.509	209.000, 0.454	209.000, 0.431	209.000, 0.379	209.000, 0.282	209.000, 0.189	209.000, 0.171
1047	209.200, 0.509	209.200, 0.454	209.200, 0.431	209.200, 0.378	209.200, 0.282	209.200, 0.189	209.200, 0.171
1048	209.400, 0.509	209.400, 0.453	209.400, 0.430	209.400, 0.378	209.400, 0.281	209.400, 0.189	209.400, 0.171
1049	209.600, 0.509	209.600, 0.453	209.600, 0.430	209.600, 0.377	209.600, 0.281	209.600, 0.189	209.600, 0.172
1050	209.800, 0.508	209.800, 0.452	209.800, 0.429	209.800, 0.377	209.800, 0.280	209.800, 0.190	209.800, 0.171
1051	210.000, 0.508	210.000, 0.452	210.000, 0.429	210.000, 0.376	210.000, 0.280	210.000, 0.190	210.000, 0.171
1052	210.200, 0.508	210.200, 0.451	210.200, 0.428	210.200, 0.375	210.200, 0.280	210.200, 0.189	210.200, 0.171
1053	210.400, 0.508	210.400, 0.451	210.400, 0.428	210.400, 0.375	210.400, 0.279	210.400, 0.189	210.400, 0.171
1054	210.600, 0.507	210.600, 0.450	210.600, 0.427	210.600, 0.374	210.600, 0.279	210.600, 0.189	210.600, 0.171
1055	210.800, 0.507	210.800, 0.450	210.800, 0.427	210.800, 0.374	210.800, 0.279	210.800, 0.189	210.800, 0.172
1056	211.000, 0.507	211.000, 0.450	211.000, 0.427	211.000, 0.373	211.000, 0.279	211.000, 0.188	211.000, 0.171
1057	211.200, 0.507	211.200, 0.449	211.200, 0.426	211.200, 0.373	211.200, 0.279	211.200, 0.188	211.200, 0.171
1058	211.400, 0.506	211.400, 0.449	211.400, 0.426	211.400, 0.373	211.400, 0.279	211.400, 0.188	211.400, 0.171
1059	211.600, 0.506	211.600, 0.449	211.600, 0.425	211.600, 0.373	211.600, 0.279	211.600, 0.188	211.600, 0.171
1060	211.800, 0.505	211.800, 0.449	211.800, 0.425	211.800, 0.372	211.800, 0.278	211.800, 0.187	211.800, 0.170
1061	212.000, 0.505	212.000, 0.448	212.000, 0.424	212.000, 0.372	212.000, 0.278	212.000, 0.187	212.000, 0.170
1062	212.200, 0.504	212.200, 0.448	212.200, 0.424	212.200, 0.372	212.200, 0.278	212.200, 0.187	212.200, 0.169
1063	212.400, 0.504	212.400, 0.448	212.400, 0.424	212.400, 0.372	212.400, 0.279	212.400, 0.186	212.400, 0.169
1064	212.600, 0.503	212.600, 0.447	212.600, 0.424	212.600, 0.371	212.600, 0.278	212.600, 0.186	212.600, 0.168
1065	212.800, 0.503	212.800, 0.447	212.800, 0.424	212.800, 0.371	212.800, 0.278	212.800, 0.186	212.800, 0.168
1066	213.000, 0.502	213.000, 0.446	213.000, 0.423	213.000, 0.371	213.000, 0.278	213.000, 0.186	213.000, 0.168
1067	213.200, 0.502	213.200, 0.446	213.200, 0.423	213.200, 0.370	213.200, 0.278	213.200, 0.186	213.200, 0.168
1068	213.400, 0.502	213.400, 0.446	213.400, 0.423	213.400, 0.369	213.400, 0.277	213.400, 0.186	213.400, 0.168
1069	213.600, 0.501	213.600, 0.445	213.600, 0.423	213.600, 0.369	213.600, 0.277	213.600, 0.186	213.600, 0.168
1070	213.800, 0.501	213.800, 0.445	213.800, 0.422	213.800, 0.368	213.800, 0.277	213.800, 0.185	213.800, 0.167
1071	214.000, 0.501	214.000, 0.444	214.000, 0.422	214.000, 0.368	214.000, 0.276	214.000, 0.185	214.000, 0.167
1072	214.200, 0.500	214.200, 0.444	214.200, 0.422	214.200, 0.367	214.200, 0.276	214.200, 0.185	214.200, 0.167
1073	214.400, 0.500	214.400, 0.444	214.400, 0.421	214.400, 0.367	214.400, 0.276	214.400, 0.185	214.400, 0.167
1074	214.600, 0.500	214.600, 0.443	214.600, 0.421	214.600, 0.366	214.600, 0.275	214.600, 0.185	214.600, 0.168
1075	214.800, 0.499	214.800, 0.443	214.800, 0.420	214.800, 0.366	214.800, 0.275	214.800, 0.185	214.800, 0.168
1076	215.000, 0.499	215.000, 0.442	215.000, 0.420	215.000, 0.365	215.000, 0.275	215.000, 0.185	215.000, 0.168
1077	215.200, 0.499	215.200, 0.442	215.200, 0.420	215.200, 0.365	215.200, 0.275	215.200, 0.185	215.200, 0.168
1078	215.400, 0.498	215.400, 0.442	215.400, 0.419	215.400, 0.364	215.400, 0.275	215.400, 0.185	215.400, 0.168
1079	215.600, 0.498	215.600, 0.441	215.600, 0.419	215.600, 0.364	215.600, 0.275	215.600, 0.184	215.600, 0.168
1080	215.800, 0.498	215.800, 0.441	215.800, 0.418	215.800, 0.364	215.800, 0.274	215.800, 0.184	215.800, 0.168
1081	216.000, 0.497	216.000, 0.441	216.000, 0.418	216.000, 0.363	216.000, 0.274	216.000, 0.184	216.000, 0.169
1082	216.200, 0.497	216.200, 0.440	216.200, 0.418	216.200, 0.363	216.200, 0.274	216.200, 0.184	216.200, 0.169
1083	216.400, 0.497	216.400, 0.440	216.400, 0.418	216.400, 0.363	216.400, 0.274	216.400, 0.184	216.400, 0.169
1084	216.600, 0.497	216.600, 0.440	216.600, 0.417	216.600, 0.363	216.600, 0.274	216.600, 0.184	216.600, 0.169
1085	216.800, 0.496	216.800, 0.439	216.800, 0.417	216.800, 0.363	216.800, 0.273	216.800, 0.184	216.800, 0.169
1086	217.000, 0.496	217.000, 0.439	217.000, 0.417	217.000, 0.363	217.000, 0.273	217.000, 0.184	217.000, 0.169
1087	217.200, 0.496	217.200, 0.439	217.200, 0.417	217.200, 0.363	217.200, 0.273	217.200, 0.184	217.200, 0.168
1088	217.400, 0.496	217.400, 0.439	217.400, 0.416	217.400, 0.362	217.400, 0.273	217.400, 0.184	217.400, 0.168
1089	217.600, 0.496	217.600, 0.439	217.600, 0.416	217.600, 0.362	217.600, 0.273	217.600, 0.183	217.600, 0.168
1090	217.800, 0.495	217.800, 0.438	217.800, 0.416	217.800, 0.361	217.800, 0.273	217.800, 0.183	217.800, 0.168
1091	218.000, 0.495	218.000, 0.438	218.000, 0.416	218.000, 0.361	218.000, 0.273	218.000, 0.183	218.000, 0.167
1092	218.200, 0.495	218.200, 0.438	218.200, 0.415	218.200, 0.360	218.200, 0.272	218.200, 0.182	218.200, 0.167
1093	218.400, 0.494	218.400, 0.438	218.400, 0.415	218.400, 0.360	218.400, 0.272	218.400, 0.182	218.400, 0.167
1094	218.600, 0.494	218.600, 0.438	218.600, 0.414	218.600, 0.359	218.600, 0.272	218.600, 0.182	218.600, 0.167
1095	218.800, 0.494	218.800, 0.437	218.800, 0.414	218.800, 0.358	218.800, 0.272	218.800, 0.182	218.800, 0.167
1096	219.000, 0.493	219.000, 0.437	219.000, 0.414	219.000, 0.358	219.000, 0.272	219.000, 0.182	219.000, 0.167
1097	219.200, 0.493	219.200, 0.437	219.200, 0.413	219.200, 0.357	219.200, 0.272	219.200, 0.182	219.200, 0.166
1098	219.400, 0.492	219.400, 0.437	219.400, 0.413	219.400, 0.357	219.400, 0.272	219.400, 0.181	219.400, 0.166
1099	219.600, 0.492	219.600, 0.436	219.600, 0.412	219.600, 0.357	219.600, 0.271	219.600, 0.181	219.600, 0.166
1100	219.800, 0.492	219.800, 0.436	219.800, 0.412	219.800, 0.357	219.800, 0.271	219.800, 0.181	219.800, 0.166
1101	220.000, 0.491	220.000, 0.436	220.000, 0.412	220.000, 0.357	220.000, 0.271	220.000, 0.181	220.000, 0.166
1102	220.200, 0.491	220.200, 0.436	220.200, 0.411	220.200, 0.357	220.200, 0.271	220.200, 0.181	220.200, 0.166
1103	220.400, 0.490	220.400, 0.436	220.400, 0.411	220.400, 0.357	220.400, 0.270	220.400, 0.181	220.400, 0.166
1104	220.600, 0.490	220.600, 0.435	220.600, 0.411	220.600, 0.357	220.600, 0.270	220.600, 0.181	220.600, 0.166
1105	220.800, 0.490	220.800, 0.435	220.800, 0.411	220.800, 0.357	220.800, 0.270	220.800, 0.181	220.800, 0.165
1106	221.000, 0.490	221.000, 0.434	221.000, 0.410	221.000, 0.357	221.000, 0.270	221.000, 0.181	221.000, 0.165
1107	221.200, 0.489	221.200, 0.434	221.200, 0.410	221.200, 0.357	221.200, 0.269	221.200, 0.181	221.200, 0.165
1108	221.400, 0.489	221.400, 0.433	221.400, 0.410	221.400, 0.356	221.400, 0.269	221.400, 0.180	221.400, 0.164
1109	221.600, 0.489	221.600, 0.433	221.600, 0.409	221.600, 0.356	221.600, 0.269	221.600, 0.180	221.600, 0.164
1110	221.800, 0.488	221.800, 0.432	221.800, 0.409	221.800, 0.355	221.800, 0.268	221.800, 0.180	221.800, 0.164
1111	222.000, 0.488	222.000, 0.432	222.000, 0.409	222.000, 0.355	222.000, 0.268	222.000, 0.180	222.000, 0.164
1112	222.200, 0.488	222.200, 0.432	222.200, 0.408	222.200, 0.354	222.200, 0.268	222.200, 0.179	222.200, 0.164
1113	222.400, 0.488	222.400, 0.432	222.400, 0.408	222.400, 0.354	222.400, 0.267	222.400, 0.179	222.400, 0.164
1114	222.600, 0.488	222.600, 0.432	222.600, 0.407	222.600, 0.353	222.600, 0.267	222.600, 0.179	222.600, 0.164
1115	222.800, 0.487	222.800, 0.432	222.800, 0.407	222.800, 0.353	222.800, 0.267	222.800, 0.179	222.800, 0.164
1116	223.000, 0.487	223.000, 0.432	223.000, 0.407	223.000, 0.353	223.000, 0.267	223.000, 0.179	223.000, 0.164
1117	223.200, 0.487	223.200, 0.432	223.200, 0.406	223.200, 0.353	223.200, 0.266	223.200, 0.179	223.200, 0.164
1118	223.400, 0.487	223.400, 0.431	223.400, 0.406	223.400, 0.353	223.400, 0.266	223.400, 0.179	223.400, 0.164
1119	223.600, 0.486	223.600, 0.431	223.600, 0.406	223.600, 0.353	223.600, 0.266	223.600, 0.179	223.600, 0.164
1120	223.800, 0.486	223.800, 0.431	223.800, 0.406	223.800, 0.353	223.800, 0.266	223.800, 0.179	223.800, 0.164
1121	224.000, 0.485	224.000, 0.430	224.000, 0.405	224.000, 0.353	224.000, 0.266	224.000, 0.179	224.000, 0.164
1122	224.200, 0.485	224.200, 0.430	224.200, 0.405	224.200, 0.353	224.200, 0.266	224.200, 0.179	224.200, 0.164
1123	224.400, 0.484	224.400, 0.429	224.400, 0.404	224.400, 0.353	224.400, 0.266	224.400, 0.179	224.400, 0.164
1124	224.600, 0.484	224.600, 0.429	224.600, 0.404	224.600, 0.353	224.600, 0.266	224.600, 0.179	224.600, 0.164
1125	224.800, 0.484	224.800, 0.428	224.800, 0.404	224.800, 0.352	224.800, 0.266	224.800, 0.179	224.800, 0.164
1126	225.000, 0.483	225.000, 0.428	225.000, 0.403	225.000, 0.352	225.000, 0.266	225.000, 0.179	225.000, 0.164
1127	225.200, 0.483	225.200, 0.427	225.200, 0.403	225.200, 0.352	225.200, 0.266	225.200, 0.179	225.200, 0.164
1128	225.400, 0.483	225.400, 0.426	225.400, 0.403	225.400, 0.352	225.400, 0.266	225.400, 0.179	225.400, 0.164
1129	225.600, 0.482	225.600, 0.426	225.600, 0.402	225.600, 0.351	225.600, 0.266	225.600, 0.179	225.600, 0.164
1130	225.800, 0.482	225.800, 0.426	225.800, 0.402	225.800, 0.351	225.800, 0.266	225.800, 0.179	225.800, 0.164
1131	226.000, 0.482	226.000, 0.426	226.000, 0.402	226.000, 0.350	226.000, 0.265	226.000, 0.179	226.000, 0.164
1132	226.200, 0.482	226.200, 0.425	226.200, 0.401	226.200, 0.350	226.200, 0.265	226.200, 0.179	226.200, 0.164
1133	226.400, 0.482	226.400, 0.425	226.400, 0.401	226.400, 0.349	226.400, 0.264	226.400, 0.178	226.400, 0.164
1134	226.600, 0.482	226.600, 0.425	226.600, 0.401	226.600, 0.349	226.600, 0.264	226.600, 0.178	226.600, 0.164
1135	226.800, 0.482	226.800, 0.426	226.800, 0.400	226.800, 0.349	226.800, 0.263	226.800, 0.178	226.800, 0.164
1136	227.000, 0.481	227.000, 0.426	227.000, 0.400	227.000, 0.348	227.000, 0.263	227.000, 0.178	227.000, 0.163
1137	227.200, 0.481	227.200, 0.425	227.200, 0.400	227.200, 0.348	227.200, 0.263	227.200, 0.178	227.200, 0.163
1138	227.400, 0.481	227.400, 0.425	227.400, 0.399	227.400, 0.348	227.400, 0.263	227.400, 0.177	227.400, 0.163
1139	227.600, 0.480	227.600, 0.425	227.600, 0.399	227.600, 0.347	227.600, 0.263	227.600, 0.177	227.600, 0.163
1140	227.800, 0.480	227.800, 0.425	227.800, 0.399	227.800, 0.347	227.800, 0.263	227.800, 0.177	227.800, 0.163
1141	228.000, 0.479	228.000, 0.425	228.000, 0.399	228.000, 0.347	228.000, 0.263	228.000, 0.177	228.000, 0.163
1142	228.200, 0.479	228.200, 0.425	228.200, 0.399	228.200, 0.346	228.200, 0.263	228.200, 0.177	228.200, 0.163
1143	228.400, 0.478	228.400, 0.424	228.400, 0.399	228.400, 0.346	228.400, 0.263	228.400, 0.177	228.400, 0.162
1144	228.600, 0.478	228.600, 0.424	228.600, 0.398	228.600, 0.346	228.600, 0.263	228.600, 0.177	228.600, 0.162
1145	228.800, 0.477	228.800, 0.424	228.800, 0.398	228.800, 0.346	228.800, 0.263	228.800, 0.177	228.800, 0.162
1146	229.000, 0.477	229.000, 0.424	229.000, 0.398	229.000, 0.345	229.000, 0.263	229.000, 0.177	229.000, 0.162
1147	229.200, 0.476	229.200, 0.423	229.200, 0.398	229.200, 0.345	229.200, 0.263	229.200, 0.177	229.200, 0.162
1148	229.400, 0.476	229.400, 0.423	229.400, 0.397	229.400, 0.345	229.400, 0.263	229.400, 0.176	229.400, 0.162
1149	229.600, 0.476	229.600, 0.423	229.600, 0.397	229.600, 0.345	229.600, 0.262	229.600, 0.176	229.600, 0.162
1150	229.800, 0.476	229.800, 0.422	229.800, 0.396	229.800, 0.345	229.800, 0.262	229.800, 0.176	229.800, 0.162
1151	230.000, 0.476	230.000, 0.422	230.000, 0.396	230.000, 0.345	230.000, 0.262	230.000, 0.176	230.000, 0.162
1152	230.200, 0.476	230.200, 0.422	230.200, 0.396	230.200, 0.345	230.200, 0.261	230.200, 0.176	230.200, 0.161
1153	230.400, 0.476	230.400, 0.422	230.400, 0.396	230.400, 0.345	230.400, 0.261	230.400, 0.176	230.400, 0.161
1154	230.600, 0.476	230.600, 0.422	230.600, 0.396	230.600, 0.345	230.600, 0.261	230.600, 0.176	230.600, 0.161
1155	230.800, 0.476	230.800, 0.421	230.800, 0.396	230.800, 0.345	230.800, 0.261	230.800, 0.175	230.800, 0.161
1156	231.000, 0.476	231.000, 0.421	231.000, 0.396	231.000, 0.345	231.000, 0.261	231.000, 0.175	231.000, 0.161
1157	231.200, 0.475	231.200, 0.421	231.200, 0.396	231.200, 0.344	231.200, 0.261	231.200, 0.175	231.200, 0.161
1158	231.400, 0.475	231.400, 0.421	231.400, 0.395	231.400, 0.344	231.400, 0.261	231.400, 0.174	231.400, 0.161
1159	231.600, 0.475	231.600, 0.420	231.600, 0.395	231.600, 0.344	231.600, 0.261	231.600, 0.174	231.600, 0.160
1160	231.800, 0.474	231.800, 0.420	231.800, 0.395	231.800, 0.343	231.800, 0.261	231.800, 0.174	231.800, 0.160
1161	232.000, 0.474	232.000, 0.419	232.000, 0.395	232.000, 0.343	232.000, 0.261	232.000, 0.174	232.000, 0.160
1162	232.200, 0.473	232.200, 0.419	232.200, 0.395	232.200, 0.343	232.200, 0.261	232.200, 0.173	232.200, 0.160
1163	232.400, 0.473	232.400, 0.418	232.400, 0.395	232.400, 0.343	232.400, 0.261	232.400, 0.173	232.400, 0.159
1164	232.600, 0.473	232.600, 0.418	232.600, 0.394	232.600, 0.343	232.600, 0.260	232.600, 0.173	232.600, 0.159
1165	232.800, 0.472	232.800, 0.418	232.800, 0.394	232.800, 0.342	232.800, 0.260	232.800, 0.172	232.800, 0.159
1166	233.000, 0.472	233.000, 0.417	233.000, 0.393	233.000, 0.342	233.000, 0.260	233.000, 0.172	233.000, 0.159
1167	233.200, 0.472	233.200, 0.417	233.200, 0.392	233.200, 0.342	233.200, 0.260	233.200, 0.172	233.200, 0.159
1168	233.400, 0.472	233.400, 0.417	233.400, 0.391	233.400, 0.341	233.400, 0.260	233.400, 0.172	233.400, 0.159
1169	233.600, 0.472	233.600, 0.417	233.600, 0.391	233.600, 0.341	233.600, 0.259	233.600, 0.172	233.600, 0.159
1170	233.800, 0.471	233.800, 0.416	233.800, 0.391	233.800, 0.340	233.800, 0.259	233.800, 0.172	233.800, 0.159
1171	234.000, 0.471	234.000, 0.416	234.000, 0.390	234.000, 0.340	234.000, 0.259	234.000, 0.172	234.000, 0.159
1172	234.200, 0.471	234.200, 0.416	234.200, 0.390	234.200, 0.339	234.200, 0.258	234.200, 0.172	234.200, 0.159
1173	234.400, 0.471	234.400, 0.416	234.400, 0.390	234.400, 0.339	234.400, 0.258	234.400, 0.172	234.400, 0.159
1174	234.600, 0.471	234.600, 0.416	234.600, 0.390	234.600, 0.339	234.600, 0.258	234.600, 0.172	234.600, 0.159
1175	234.800, 0.470	234.800, 0.416	234.800, 0.389	234.800, 0.338	234.800, 0.258	234.800, 0.172	234.800, 0.160
1176	235.000, 0.470	235.000, 0.416	235.000, 0.389	235.000, 0.338	235.000, 0.258	235.000, 0.172	235.000, 0.160
1177	235.200, 0.470	235.200, 0.415	235.200, 0.389	235.200, 0.337	235.200, 0.258	235.200, 0.172	235.200, 0.160
1178	235.400, 0.469	235.400, 0.415	235.400, 0.389	235.400, 0.337	235.400, 0.258	235.400, 0.172	235.400, 0.160
1179	235.600, 0.468	235.600, 0.415	235.600, 0.389	235.600, 0.337	235.600, 0.258	235.600, 0.172	235.600, 0.160
1180	235.800, 0.468	235.800, 0.415	235.800, 0.389	235.800, 0.337	235.800, 0.258	235.800, 0.172	235.800, 0.160
1181	236.000, 0.467	236.000, 0.415	236.000, 0.389	236.000, 0.337	236.000, 0.258	236.000, 0.171	236.000, 0.160
1182	236.200, 0.467	236.200, 0.415	236.200, 0.389	236.200, 0.337	236.200, 0.258	236.200, 0.171	236.200, 0.159
1183	236.400, 0.467	236.400, 0.414	236.400, 0.389	236.400, 0.336	236.400, 0.258	236.400, 0.171	236.400, 0.159
1184	236.600, 0.466	236.600, 0.414	236.600, 0.389	236.600, 0.336	236.600, 0.258	236.600, 0.171	236.600, 0.159
1185	236.800, 0.466	236.800, 0.414	236.800, 0.389	236.800, 0.336	236.800, 0.258	236.800, 0.171	236.800, 0.159
1186	237.000, 0.466	237.000, 0.414	237.000, 0.388	237.000, 0.336	237.000, 0.258	237.000, 0.171	237.000, 0.159
1187	237.200, 0.466	237.200, 0.414	237.200, 0.388	237.200, 0.336	237.200, 0.257	237.200, 0.171	237.200, 0.159
1188	237.400, 0.465	237.400, 0.413	237.400, 0.388	237.400, 0.336	237.400, 0.257	237.400, 0.171	237.400, 0.159
1189	237.600, 0.465	237.600, 0.413	237.600, 0.387	237.600, 0.336	237.600, 0.257	237.600, 0.171	237.600, 0.159
1190	237.800, 0.465	237.800, 0.413	237.800, 0.387	237.800, 0.336	237.800, 0.256	237.800, 0.170	237.800, 0.159
1191	238.000, 0.465	238.000, 0.412	238.000, 0.386	238.000, 0.336	238.000, 0.256	238.000, 0.170	238.000, 0.159
1192	238.200, 0.465	238.200, 0.412	238.200, 0.386	238.200, 0.335	238.200, 0.256	238.200, 0.170	238.200, 0.159
1193	238.400, 0.465	238.400, 0.412	238.400, 0.385	238.400, 0.335	238.400, 0.256	238.400, 0.170	238.400, 0.159
1194	238.600, 0.465	238.600, 0.412	238.600, 0.385	238.600, 0.335	238.600, 0.256	238.600, 0.170	238.600, 0.159
1195	238.800, 0.465	238.800, 0.411	238.800, 0.385	238.800, 0.335	238.800, 0.256	238.800, 0.170	238.800, 0.159
1196	239.000, 0.464	239.000, 0.411	239.000, 0.384	239.000, 0.335	239.000, 0.256	239.000, 0.170	239.000, 0.159
1197	239.200, 0.464	239.200, 0.411	239.200, 0.384	239.200, 0.335	239.200, 0.256	239.200, 0.170	239.200, 0.159
1198	239.400, 0.464	239.400, 0.411	239.400, 0.384	239.400, 0.334	239.400, 0.256	239.400, 0.169	239.400, 0.160
1199	239.600, 0.464	239.600, 0.410	239.600, 0.384	239.600, 0.334	239.600, 0.256	239.600, 0.169	239.600, 0.160
1200	239.800, 0.463	239.800, 0.410	239.800, 0.384	239.800, 0.334	239.800, 0.256	239.800, 0.169	239.800, 0.160
1201	240.000, 0.463	240.000, 0.410	240.000, 0.383	240.000, 0.334	240.000, 0.255	240.000, 0.169	240.000, 0.160
1202	240.200, 0.463	240.200, 0.409	240.200, 0.383	240.200, 0.333	240.200, 0.255	240.200, 0.169	240.200, 0.160
1203	240.400, 0.463	240.400, 0.409	240.400, 0.383	240.400, 0.333	240.400, 0.255	240.400, 0.169	240.400, 0.160
1204	240.600, 0.463	240.600, 0.409	240.600, 0.383	240.600, 0.332	240.600, 0.254	240.600, 0.169	240.600, 0.160
1205	240.800, 0.463	240.800, 0.409	240.800, 0.382	240.800, 0.332	240.800, 0.254	240.800, 0.169	240.800, 0.160
1206	241.000, 0.462	241.000, 0.408	241.000, 0.382	241.000, 0.332	241.000, 0.253	241.000, 0.169	241.000, 0.160
1207	241.200, 0.462	241.200, 0.408	241.200, 0.382	241.200, 0.332	241.200, 0.253	241.200, 0.169	241.200, 0.160
1208	241.400, 0.462	241.400, 0.408	241.400, 0.382	241.400, 0.332	241.400, 0.253	241.400, 0.168	241.400, 0.160
1209	241.600, 0.461	241.600, 0.407	241.600, 0.381	241.600, 0.331	241.600, 0.252	241.600, 0.168	241.600, 0.159
1210	241.800, 0.460	241.800, 0.407	241.800, 0.381	241.800, 0.331	241.800, 0.252	241.800, 0.168	241.800, 0.159
1211	242.000, 0.460	242.000, 0.407	242.000, 0.381	242.000, 0.331	242.000, 0.252	242.000, 0.168	242.000, 0.159
1212	242.200, 0.460	242.200, 0.407	242.200, 0.381	242.200, 0.330	242.200, 0.252	242.200, 0.167	242.200, 0.158
1213	242.400, 0.459	242.400, 0.407	242.400, 0.381	242.400, 0.330	242.400, 0.252	242.400, 0.167	242.400, 0.158
1214	242.600, 0.459	242.600, 0.406	242.600, 0.381	242.600, 0.330	242.600, 0.252	242.600, 0.167	242.600, 0.157
1215	242.800, 0.458	242.800, 0.406	242.800, 0.381	242.800, 0.330	242.800, 0.252	242.800, 0.167	242.800, 0.157
1216	243.000, 0.458	243.000, 0.406	243.000, 0.381	243.000, 0.330	243.000, 0.251	243.000, 0.167	243.000, 0.157
1217	243.200, 0.457	243.200, 0.406	243.200, 0.380	243.200, 0.330	243.200, 0.251	243.200, 0.167	243.200, 0.157
1218	243.400, 0.457	243.400, 0.406	243.400, 0.380	243.400, 0.331	243.400, 0.251	243.400, 0.167	243.400, 0.158
1219	243.600, 0.457	243.600, 0.405	243.600, 0.380	243.600, 0.331	243.600, 0.251	243.600, 0.167	243.600, 0.158
1220	243.800, 0.457	243.800, 0.405	243.800, 0.380	243.800, 0.330	243.800, 0.251	243.800, 0.166	243.800, 0.158
1221	244.000, 0.457	244.000, 0.405	244.000, 0.379	244.000, 0.330	244.000, 0.251	244.000, 0.166	244.000, 0.158
1222	244.200, 0.457	244.200, 0.404	244.200, 0.379	244.200, 0.330	244.200, 0.251	244.200, 0.166	244.200, 0.158
1223	244.400, 0.457	244.400, 0.404	244.400, 0.379	244.400, 0.330	244.400, 0.251	244.400, 0.166	244.400, 0.158
1224	244.600, 0.457	244.600, 0.404	244.600, 0.378	244.600, 0.329	244.600, 0.251	244.600, 0.166	244.600, 0.158
1225	244.800, 0.457	244.800, 0.403	244.800, 0.378	244.800, 0.329	244.800, 0.250	244.800, 0.166	244.800, 0.158
1226	245.000, 0.457	245.000, 0.403	245.000, 0.378	245.000, 0.329	245.000, 0.250	245.000, 0.166	245.000, 0.158
1227	245.200, 0.456	245.200, 0.403	245.200, 0.377	245.200, 0.329	245.200, 0.250	245.200, 0.167	245.200, 0.158
1228	245.400, 0.456	245.400, 0.402	245.400, 0.377	245.400, 0.328	245.400, 0.251	245.400, 0.167	245.400, 0.158
1229	245.600, 0.456	245.600, 0.402	245.600, 0.376	245.600, 0.328	245.600, 0.251	245.600, 0.167	245.600, 0.158
1230	245.800, 0.455	245.800, 0.402	245.800, 0.376	245.800, 0.328	245.800, 0.251	245.800, 0.167	245.800, 0.157
1231	246.000, 0.455	246.000, 0.402	246.000, 0.376	246.000, 0.328	246.000, 0.251	246.000, 0.167	246.000, 0.157
1232	246.200, 0.455	246.200, 0.401	246.200, 0.375	246.200, 0.328	246.200, 0.251	246.200, 0.166	246.200, 0.157
1233	246.400, 0.454	246.400, 0.401	246.400, 0.375	246.400, 0.328	246.400, 0.251	246.400, 0.166	246.400, 0.156
1234	246.600, 0.454	246.600, 0.401	246.600, 0.375	246.600, 0.328	246.600, 0.251	246.600, 0.166	246.600, 0.156
1235	246.800, 0.454	246.800, 0.401	246.800, 0.375	246.800, 0.328	246.800, 0.251	246.800, 0.166	246.800, 0.156
1236	247.000, 0.454	247.000, 0.401	247.000, 0.374	247.000, 0.328	247.000, 0.251	247.000, 0.166	247.000, 0.156
1237	247.200, 0.454	247.200, 0.401	247.200, 0.374	247.200, 0.327	247.200, 0.251	247.200, 0.166	247.200, 0.156
1238	247.400, 0.454	247.400, 0.401	247.400, 0.374	247.400, 0.327	247.400, 0.251	247.400, 0.166	247.400, 0.155
1239	247.600, 0.453	247.600, 0.400	247.600, 0.374	247.600, 0.327	247.600, 0.251	247.600, 0.166	247.600, 0.155
1240	247.800, 0.453	247.800, 0.400	247.800, 0.373	247.800, 0.327	247.800, 0.251	247.800, 0.165	247.800, 0.155
1241	248.000, 0.453	248.000, 0.400	248.000, 0.373	248.000, 0.326	248.000, 0.250	248.000, 0.165	248.000, 0.155
1242	248.200, 0.453	248.200, 0.400	248.200, 0.373	248.200, 0.326	248.200, 0.250	248.200, 0.165	248.200, 0.155
1243	248.400, 0.453	248.400, 0.400	248.400, 0.373	248.400, 0.325	248.400, 0.250	248.400, 0.165	248.400, 0.155
1244	248.600, 0.453	248.600, 0.400	248.600, 0.373	248.600, 0.325	248.600, 0.250	248.600, 0.164	248.600, 0.154
1245	248.800, 0.453	248.800, 0.400	248.800, 0.373	248.800, 0.324	248.800, 0.250	248.800, 0.164	248.800, 0.155
1246	249.000, 0.453	249.000, 0.399	249.000, 0.373	249.000, 0.324	249.000, 0.250	249.000, 0.164	249.000, 0.155
1247	249.200, 0.453	249.200, 0.399	249.200, 0.373	249.200, 0.323	249.200, 0.250	249.200, 0.164	249.200, 0.155
1248	249.400, 0.453	249.400, 0.399	249.400, 0.372	249.400, 0.323	249.400, 0.250	249.400, 0.164	249.400, 0.155
1249	249.600, 0.452	249.600, 0.399	249.600, 0.372	249.600, 0.323	249.600, 0.250	249.600, 0.163	249.600, 0.155
1250	249.800, 0.452	249.800, 0.398	249.800, 0.372	249.800, 0.322	249.800, 0.250	249.800, 0.163	249.800, 0.155
1251	250.000, 0.452	250.000, 0.398	250.000, 0.371	250.000, 0.322	250.000, 0.250	250.000, 0.163	250.000, 0.155
1252	250.200, 0.451	250.200, 0.398	250.200, 0.371	250.200, 0.322	250.200, 0.250	250.200, 0.163	250.200, 0.155
1253	250.400, 0.451	250.400, 0.398	250.400, 0.371	250.400, 0.322	250.400, 0.250	250.400, 0.163	250.400, 0.155
1254	250.600, 0.450	250.600, 0.397	250.600, 0.371	250.600, 0.322	250.600, 0.250	250.600, 0.163	250.600, 0.155
1255	250.800, 0.450	250.800, 0.397	250.800, 0.370	250.800, 0.321	250.800, 0.249	250.800, 0.163	250.800, 0.155
1256	251.000, 0.449	251.000, 0.397	251.000, 0.370	251.000, 0.321	251.000, 0.249	251.000, 0.163	251.000, 0.155
1257	251.200, 0.449	251.200, 0.396	251.200, 0.370	251.200, 0.321	251.200, 0.249	251.200, 0.163	251.200, 0.155
1258	251.400, 0.448	251.400, 0.396	251.400, 0.369	251.400, 0.321	251.400, 0.248	251.400, 0.163	251.400, 0.155
1259	251.600, 0.448	251.600, 0.396	251.600, 0.369	251.600, 0.321	251.600, 0.248	251.600, 0.163	251.600, 0.155
1260	251.800, 0.447	251.800, 0.395	251.800, 0.369	251.800, 0.321	251.800, 0.248	251.800, 0.163	251.800, 0.155
1261	252.000, 0.447	252.000, 0.395	252.000, 0.368	252.000, 0.321	252.000, 0.248	252.000, 0.163	252.000, 0.155
1262	252.200, 0.447	252.200, 0.394	252.200, 0.368	252.200, 0.321	252.200, 0.247	252.200, 0.162	252.200, 0.155
1263	252.400, 0.447	252.400, 0.394	252.400, 0.368	252.400, 0.321	252.400, 0.247	252.400, 0.162	252.400, 0.154
1264	252.600, 0.446	252.600, 0.394	252.600, 0.367	252.600, 0.320	252.600, 0.247	252.600, 0.162	252.600, 0.154
1265	252.800, 0.446	252.800, 0.394	252.800, 0.367	252.800, 0.320	252.800, 0.247	252.800, 0.162	252.800, 0.154
1266	253.000, 0.446	253.000, 0.394	253.000, 0.367	253.000, 0.320	253.000, 0.247	253.000, 0.162	253.000, 0.154
1267	253.200, 0.446	253.200, 0.394	253.200, 0.367	253.200, 0.319	253.200, 0.246	253.200, 0.162	253.200, 0.154
1268	253.400, 0.446	253.400, 0.394	253.400, 0.367	253.400, 0.319	253.400, 0.246	253.400, 0.163	253.400, 0.154
1269	253.600, 0.446	253.600, 0.394	253.600, 0.366	253.600, 0.319	253.600, 0.246	253.600, 0.163	253.600, 0.154
1270	253.800, 0.446	253.800, 0.394	253.800, 0.366	253.800, 0.319	253.800, 0.246	253.800, 0.163	253.800, 0.154
1271	254.000, 0.446	254.000, 0.394	254.000, 0.366	254.000, 0.319	254.000, 0.246	254.000, 0.163	254.000, 0.154
1272	254.200, 0.446	254.200, 0.394	254.200, 0.367	254.200, 0.319	254.200, 0.246	254.200, 0.163	254.200, 0.154
1273	254.400, 0.446	254.400, 0.394	254.400, 0.367	254.400, 0.319	254.400, 0.246	254.400, 0.163	254.400, 0.154
1274	254.600, 0.446	254.600, 0.394	254.600, 0.367	254.600, 0.319	254.600, 0.246	254.600, 0.163	254.600, 0.154
1275	254.800, 0.446	254.800, 0.394	254.800, 0.367	254.800, 0.319	254.800, 0.246	254.800, 0.163	254.800, 0.153
1276	255.000, 0.446	255.000, 0.393	255.000, 0.367	255.000, 0.319	255.000, 0.246	255.000, 0.163	255.000, 0.153
1277	255.200, 0.446	255.200, 0.393	255.200, 0.367	255.200, 0.318	255.200, 0.246	255.200, 0.163	255.200, 0.153
1278	255.400, 0.446	255.400, 0.393	255.400, 0.367	255.400, 0.318	255.400, 0.246	255.400, 0.163	255.400, 0.153
1279	255.600, 0.445	255.600, 0.393	255.600, 0.367	255.600, 0.318	255.600, 0.246	255.600, 0.163	255.600, 0.153
1280	255.800, 0.445	255.800, 0.392	255.800, 0.367	255.800, 0.318	255.800, 0.247	255.800, 0.162	255.800, 0.153
1281	256.000, 0.445	256.000, 0.392	256.000, 0.366	256.000, 0.317	256.000, 0.247	256.000, 0.162	256.000, 0.154
1282	256.200, 0.445	256.200, 0.391	256.200, 0.366	256.200, 0.317	256.200, 0.247	256.200, 0.162	256.200, 0.154
1283	256.400, 0.444	256.400, 0.390	256.400, 0.365	256.400, 0.317	256.400, 0.247	256.400, 0.162	256.400, 0.154
1284	256.600, 0.444	256.600, 0.390	256.600, 0.365	256.600, 0.316	256.600, 0.247	256.600, 0.163	256.600, 0.154
1285	256.800, 0.444	256.800, 0.390	256.800, 0.365	256.800, 0.316	256.800, 0.247	256.800, 0.163	256.800, 0.154
1286	257.000, 0.443	257.000, 0.389	257.000, 0.364	257.000, 0.316	257.000, 0.247	257.000, 0.163	257.000, 0.154
1287	257.200, 0.443	257.200, 0.389	257.200, 0.364	257.200, 0.316	257.200, 0.247	257.200, 0.163	257.200, 0.154
1288	257.400, 0.443	257.400, 0.389	257.400, 0.364	257.400, 0.316	257.400, 0.246	257.400, 0.162	257.400, 0.154
1289	257.600, 0.442	257.600, 0.389	257.600, 0.364	257.600, 0.316	257.600, 0.246	257.600, 0.162	257.600, 0.154
1290	257.800, 0.442	257.800, 0.388	257.800, 0.363	257.800, 0.316	257.800, 0.246	257.800, 0.162	257.800, 0.154
1291	258.000, 0.442	258.000, 0.388	258.000, 0.363	258.000, 0.316	258.000, 0.246	258.000, 0.162	258.000, 0.154
1292	258.200, 0.441	258.200, 0.388	258.200, 0.363	258.200, 0.316	258.200, 0.246	258.200, 0.161	258.200, 0.153
1293	258.400, 0.441	258.400, 0.388	258.400, 0.363	258.400, 0.316	258.400, 0.246	258.400, 0.161	258.400, 0.153
1294	258.600, 0.441	258.600, 0.388	258.600, 0.363	258.600, 0.316	258.600, 0.245	258.600, 0.161	258.600, 0.153
1295	258.800, 0.440	258.800, 0.388	258.800, 0.363	258.800, 0.316	258.800, 0.245	258.800, 0.161	258.800, 0.153
1296	259.000, 0.440	259.000, 0.387	259.000, 0.363	259.000, 0.315	259.000, 0.245	259.000, 0.160	259.000, 0.152
1297	259.200, 0.440	259.200, 0.387	259.200, 0.363	259.200, 0.315	259.200, 0.245	259.200, 0.160	259.200, 0.152
1298	259.400, 0.439	259.400, 0.387	259.400, 0.363	259.400, 0.315	259.400, 0.244	259.400, 0.160	259.400, 0.152
1299	259.600, 0.439	259.600, 0.387	259.600, 0.362	259.600, 0.314	259.600, 0.244	259.600, 0.160	259.600, 0.153
1300	259.800, 0.439	259.800, 0.387	259.800, 0.362	259.800, 0.314	259.800, 0.244	259.800, 0.160	259.800, 0.153
1301	260.000, 0.438	260.000, 0.387	260.000, 0.362	260.000, 0.314	260.000, 0.244	260.000, 0.159	260.000, 0.153
1302	260.200, 0.438	260.200, 0.387	260.200, 0.361	260.200, 0.314	260.200, 0.244	260.200, 0.159	260.200, 0.153
1303	260.400, 0.438	260.400, 0.386	260.400, 0.361	260.400, 0.314	260.400, 0.244	260.400, 0.159	260.400, 0.153
1304	260.600, 0.437	260.600, 0.386	260.600, 0.361	260.600, 0.314	260.600, 0.244	260.600, 0.159	260.600, 0.154
1305	260.800, 0.437	260.800, 0.386	260.800, 0.361	260.800, 0.313	260.800, 0.243	260.800, 0.159	260.800, 0.154
1306	261.000, 0.437	261.000, 0.386	261.000, 0.361	261.000, 0.313	261.000, 0.243	261.000, 0.159	261.000, 0.154
1307	261.200, 0.437	261.200, 0.386	261.200, 0.360	261.200, 0.313	261.200, 0.243	261.200, 0.159	261.200, 0.154
1308	261.400, 0.437	261.400, 0.386	261.400, 0.360	261.400, 0.313	261.400, 0.242	261.400, 0.159	261.400, 0.153
1309	261.600, 0.436	261.600, 0.386	261.600, 0.360	261.600, 0.313	261.600, 0.242	261.600, 0.158	261.600, 0.153
1310	261.800, 0.436	261.800, 0.386	261.800, 0.360	261.800, 0.312	261.800, 0.242	261.800, 0.158	261.800, 0.153
1311	262.000, 0.436	262.000, 0.385	262.000, 0.360	262.000, 0.312	262.000, 0.242	262.000, 0.158	262.000, 0.152
1312	262.200, 0.436	262.200, 0.385	262.200, 0.360	262.200, 0.311	262.200, 0.242	262.200, 0.158	262.200, 0.152
1313	262.400, 0.436	262.400, 0.385	262.400, 0.360	262.400, 0.311	262.400, 0.243	262.400, 0.158	262.400, 0.151
1314	262.600, 0.435	262.600, 0.385	262.600, 0.360	262.600, 0.311	262.600, 0.243	262.600, 0.158	262.600, 0.151
1315	262.800, 0.435	262.800, 0.385	262.800, 0.359	262.800, 0.310	262.800, 0.243	262.800, 0.158	262.800, 0.151
1316	263.000, 0.435	263.000, 0.385	263.000, 0.359	263.000, 0.310	263.000, 0.243	263.000, 0.158	263.000, 0.151
1317	263.200, 0.435	263.200, 0.385	263.200, 0.359	263.200, 0.310	263.200, 0.244	263.200, 0.158	263.200, 0.151
1318	263.400, 0.435	263.400, 0.385	263.400, 0.359	263.400, 0.310	263.400, 0.244	263.400, 0.157	263.400, 0.151
1319	263.600, 0.434	263.600, 0.385	263.600, 0.358	263.600, 0.311	263.600, 0.244	263.600, 0.157	263.600, 0.151
1320	263.800, 0.434	263.800, 0.385	263.800, 0.358	263.800, 0.311	263.800, 0.244	263.800, 0.158	263.800, 0.151
1321	264.000, 0.434	264.000, 0.384	264.000, 0.358	264.000, 0.311	264.000, 0.244	264.000, 0.158	264.000, 0.152
1322	264.200, 0.434	264.200, 0.384	264.200, 0.357	264.200, 0.311	264.200, 0.244	264.200, 0.158	264.200, 0.152
1323	264.400, 0.434	264.400, 0.384	264.400, 0.357	264.400, 0.311	264.400, 0.244	264.400, 0.158	264.400, 0.152
1324	264.600, 0.433	264.600, 0.383	264.600, 0.357	264.600, 0.311	264.600, 0.244	264.600, 0.158	264.600, 0.152
1325	264.800, 0.433	264.800, 0.383	264.800, 0.357	264.800, 0.310	264.800, 0.243	264.800, 0.158	264.800, 0.152
1326	265.000, 0.433	265.000, 0.382	265.000, 0.356	265.000, 0.310	265.000, 0.243	265.000, 0.158	265.000, 0.152
1327	265.200, 0.433	265.200, 0.382	265.200, 0.356	265.200, 0.310	265.200, 0.242	265.200, 0.157	265.200, 0.152
1328	265.400, 0.433	265.400, 0.382	265.400, 0.356	265.400, 0.309	265.400, 0.242	265.400, 0.157	265.400, 0.151
1329	265.600, 0.433	265.600, 0.381	265.600, 0.356	265.600, 0.309	265.600, 0.242	265.600, 0.157	265.600, 0.151
1330	265.800, 0.433	265.800, 0.381	265.800, 0.356	265.800, 0.308	265.800, 0.242	265.800, 0.157	265.800, 0.151
1331	266.000, 0.433	266.000, 0.381	266.000, 0.355	266.000, 0.308	266.000, 0.242	266.000, 0.157	266.000, 0.151
1332	266.200, 0.433	266.200, 0.381	266.200, 0.355	266.200, 0.307	266.200, 0.242	266.200, 0.158	266.200, 0.151
1333	266.400, 0.433	266.400, 0.381	266.400, 0.355	266.400, 0.307	266.400, 0.242	266.400, 0.158	266.400, 0.150
1334	266.600, 0.433	266.600, 0.381	266.600, 0.355	266.600, 0.307	266.600, 0.242	266.600, 0.158	266.600, 0.150
1335	266.800, 0.433	266.800, 0.381	266.800, 0.355	266.800, 0.307	266.800, 0.242	266.800, 0.158	266.800, 0.150
1336	267.000, 0.432	267.000, 0.381	267.000, 0.355	267.000, 0.307	267.000, 0.242	267.000, 0.158	267.000, 0.150
1337	267.200, 0.432	267.200, 0.381	267.200, 0.355	267.200, 0.307	267.200, 0.242	267.200, 0.157	267.200, 0.150
1338	267.400, 0.432	267.400, 0.381	267.400, 0.355	267.400, 0.307	267.400, 0.242	267.400, 0.157	267.400, 0.150
1339	267.600, 0.432	267.600, 0.380	267.600, 0.354	267.600, 0.307	267.600, 0.242	267.600, 0.157	267.600, 0.150
1340	267.800, 0.431	267.800, 0.380	267.800, 0.354	267.800, 0.307	267.800, 0.242	267.800, 0.157	267.800, 0.150
1341	268.000, 0.431	268.000, 0.380	268.000, 0.354	268.000, 0.307	268.000, 0.242	268.000, 0.157	268.000, 0.150
1342	268.200, 0.431	268.200, 0.379	268.200, 0.353	268.200, 0.307	268.200, 0.242	268.200, 0.156	268.200, 0.150
1343	268.400, 0.430	268.400, 0.379	268.400, 0.353	268.400, 0.307	268.400, 0.242	268.400, 0.156	268.400, 0.150
1344	268.600, 0.430	268.600, 0.379	268.600, 0.352	268.600, 0.307	268.600, 0.241	268.600, 0.156	268.600, 0.150
1345	268.800, 0.430	268.800, 0.379	268.800, 0.352	268.800, 0.307	268.800, 0.241	268.800, 0.156	268.800, 0.150
1346	269.000, 0.430	269.000, 0.378	269.000, 0.352	269.000, 0.307	269.000, 0.241	269.000, 0.157	269.000, 0.150
1347	269.200, 0.430	269.200, 0.378	269.200, 0.352	269.200, 0.307	269.200, 0.241	269.200, 0.157	269.200, 0.150
1348	269.400, 0.430	269.400, 0.378	269.400, 0.352	269.400, 0.307	269.400, 0.240	269.400, 0.157	269.400, 0.150
1349	269.600, 0.430	269.600, 0.378	269.600, 0.352	269.600, 0.307	269.600, 0.240	269.600, 0.157	269.600, 0.150
1350	269.800, 0.430	269.800, 0.378	269.800, 0.352	269.800, 0.307	269.800, 0.240	269.800, 0.157	269.800, 0.150
1351	,	,	,	,	,	,	,
1352	,	,	,	,	,	,	,
1353	,	,	,	,	,	,	,
1354	,	,	,	,	,	,	,
1355	,	,	,	,	,	,	,
1356	,	,	,	,	,	,	,
1357	,	,	,	,	,	,	,
1358	,	,	,	,	,	,	,
1359	,	,	,	,	,	,	,
1360	,	,	,	,	,	,	,
1361	,	,	,	,	,	,	,
1362	,	,	,	,	,	,	,
1363	,	,	,	,	,	,	,
1364	,	,	,	,	,	,	,
1365	,	,	,	,	,	,	,
1366	,	,	,	,	,	,	,
1367	,	,	,	,	,	,	,
1368	,	,	,	,	,	,	,
1369	,	,	,	,	,	,	,
1370	,	,	,	,	,	,	,
1371	,	,	,	,	,	,	,
1372	,	,	,	,	,	,	,
1373	,	,	,	,	,	,	,
1374	,	,	,	,	,	,	,
1375	,	,	,	,	,	,	,
1376	,	,	,	,	,	,	,
1377	,	,	,	,	,	,	,
1378	,	,	,	,	,	,	,
1379	,	,	,	,	,	,	,
1380	,	,	,	,	,	,	,
1381	,	,	,	,	,	,	,
1382	,	,	,	,	,	,	,
1383	,	,	,	,	,	,	,
1384	,	,	,	,	,	,	,
1385	,	,	,	,	,	,	,
1386	,	,	,	,	,	,	,
1387	,	,	,	,	,	,	,
1388	,	,	,	,	,	,	,
1389	,	,	,	,	,	,	,
1390	,	,	,	,	,	,	,
1391	,	,	,	,	,	,	,
1392	,	,	,	,	,	,	,
1393	,	,	,	,	,	,	,
1394	,	,	,	,	,	,	,
1395	,	,	,	,	,	,	,
1396	,	,	,	,	,	,	,
1397	,	,	,	,	,	,	,
1398	,	,	,	,	,	,	,
1399	,	,	,	,	,	,	,
1400	,	,	,	,	,	,	,
1401	,	,	,	,	,	,	,
1402	,	,	,	,	,	,	,
1403	,	,	,	,	,	,	,
1404	,	,	,	,	,	,	,
1405	,	,	,	,	,	,	,
1406	,	,	,	,	,	,	,
1407	,	,	,	,	,	,	,
1408	,	,	,	,	,	,	,
1409	,	,	,	,	,	,	,
1410	,	,	,	,	,	,	,
1411	,	,	,	,	,	,	,
1412	,	,	,	,	,	,	,
1413	,	,	,	,	,	,	,
1414	,	,	,	,	,	,	,
1415	,	,	,	,	,	,	,
1416	,	,	,	,	,	,	,
1417	,	,	,	,	,	,	,
1418	,	,	,	,	,	,	,
1419	,	,	,	,	,	,	,
1420	,	,	,	,	,	,	,
1421	,	,	,	,	,	,	,
1422	,	,	,	,	,	,	,
1423	,	,	,	,	,	,	,
1424	,	,	,	,	,	,	,
1425	,	,	,	,	,	,	,
1426	,	,	,	,	,	,	,
1427	,	,	,	,	,	,	,
1428	,	,	,	,	,	,	,
1429	,	,	,	,	,	,	,
1430	,	,	,	,	,	,	,
1431	,	,	,	,	,	,	,
1432	,	,	,	,	,	,	,
1433	,	,	,	,	,	,	,
1434	,	,	,	,	,	,	,
1435	,	,	,	,	,	,	,
1436	,	,	,	,	,	,	,
1437	,	,	,	,	,	,	,
1438	,	,	,	,	,	,	,
1439	,	,	,	,	,	,	,
1440	,	,	,	,	,	,	,
1441	,	,	,	,	,	,	,
1442	,	,	,	,	,	,	,
1443	,	,	,	,	,	,	,
1444	,	,	,	,	,	,	,
1445	,	,	,	,	,	,	,
1446	,	,	,	,	,	,	,
1447	,	,	,	,	,	,	,
1448	,	,	,	,	,	,	,
1449	,	,	,	,	,	,	,
1450	,	,	,	,	,	,	,
1451	,	,	,	,	,	,	,
1452	,	,	,	,	,	,	,
1453	,	,	,	,	,	,	,
1454	,	,	,	,	,	,	,
1455	,	,	,	,	,	,	,
1456	,	,	,	,	,	,	,
1457	,	,	,	,	,	,	,
1458	,	,	,	,	,	,	,
1459	,	,	,	,	,	,	,
1460	,	,	,	,	,	,	,
1461	,	,	,	,	,	,	,
1462	,	,	,	,	,	,	,
1463	,	,	,	,	,	,	,
1464	,	,	,	,	,	,	,
1465	,	,	,	,	,	,	,
1466	,	,	,	,	,	,	,
1467	,	,	,	,	,	,	,
1468	,	,	,	,	,	,	,
1469	,	,	,	,	,	,	,
1470	,	,	,	,	,	,	,
1471	,	,	,	,	,	,	,
1472	,	,	,	,	,	,	,
1473	,	,	,	,	,	,	,
1474	,	,	,	,	,	,	,
1475	,	,	,	,	,	,	,
1476	,	,	,	,	,	,	,
1477	,	,	,	,	,	,	,
1478	,	,	,	,	,	,	,
1479	,	,	,	,	,	,	,
1480	,	,	,	,	,	,	,
1481	,	,	,	,	,	,	,
1482	,	,	,	,	,	,	,
1483	,	,	,	,	,	,	,
1484	,	,	,	,	,	,	,
1485	,	,	,	,	,	,	,
1486	,	,	,	,	,	,	,
1487	,	,	,	,	,	,	,
1488	,	,	,	,	,	,	,
1489	,	,	,	,	,	,	,
1490	,	,	,	,	,	,	,
1491	,	,	,	,	,	,	,
1492	,	,	,	,	,	,	,
1493	,	,	,	,	,	,	,
1494	,	,	,	,	,	,	,
1495	,	,	,	,	,	,	,
1496	,	,	,	,	,	,	,
1497	,	,	,	,	,	,	,
1498	,	,	,	,	,	,	,
1499	,	,	,	,	,	,	,
1500	,	,	,	,	,	,	,
1501	,	,	,	,	,	,	,
1502	,	,	,	,	,	,	,
1503	,	,	,	,	,	,	,
1504	,	,	,	,	,	,	,
1505	,	,	,	,	,	,	,
1506	,	,	,	,	,	,	,
1507	,	,	,	,	,	,	,
1508	,	,	,	,	,	,	,
1509	,	,	,	,	,	,	,
1510	,	,	,	,	,	,	,
1511	,	,	,	,	,	,	,
1512	,	,	,	,	,	,	,
1513	,	,	,	,	,	,	,
1514	,	,	,	,	,	,	,
1515	,	,	,	,	,	,	,
1516	,	,	,	,	,	,	,
1517	,	,	,	,	,	,	,
1518	,	,	,	,	,	,	,
1519	,	,	,	,	,	,	,
1520	,	,	,	,	,	,	,
1521	,	,	,	,	,	,	,
1522	,	,	,	,	,	,	,
1523	,	,	,	,	,	,	,
1524	,	,	,	,	,	,	,
1525	,	,	,	,	,	,	,
1526	,	,	,	,	,	,	,
1527	,	,	,	,	,	,	,
1528	,	,	,	,	,	,	,
1529	,	,	,	,	,	,	,
1530	,	,	,	,	,	,	,
1531	,	,	,	,	,	,	,
1532	,	,	,	,	,	,	,
1533	,	,	,	,	,	,	,
1534	,	,	,	,	,	,	,
1535	,	,	,	,	,	,	,
1536	,	,	,	,	,	,	,
1537	,	,	,	,	,	,	,
1538	,	,	,	,	,	,	,
1539	,	,	,	,	,	,	,
1540	,	,	,	,	,	,	,
1541	,	,	,	,	,	,	,
1542	,	,	,	,	,	,	,
1543	,	,	,	,	,	,	,
1544	,	,	,	,	,	,	,
1545	,	,	,	,	,	,	,
1546	,	,	,	,	,	,	,
1547	,	,	,	,	,	,	,
1548	,	,	,	,	,	,	,
1549	,	,	,	,	,	,	,
1550	,	,	,	,	,	,	,
1551	,	,	,	,	,	,	,
1552	,	,	,	,	,	,	,
1553	,	,	,	,	,	,	,
1554	,	,	,	,	,	,	,
1555	,	,	,	,	,	,	,
1556	,	,	,	,	,	,	,
1557	,	,	,	,	,	,	,
1558	,	,	,	,	,	,	,
1559	,	,	,	,	,	,	,
1560	,	,	,	,	,	,	,
1561	,	,	,	,	,	,	,
1562	,	,	,	,	,	,	,
1563	,	,	,	,	,	,	,
1564	,	,	,	,	,	,	,
1565	,	,	,	,	,	,	,
1566	,	,	,	,	,	,	,
1567	,	,	,	,	,	,	,
1568	,	,	,	,	,	,	,
1569	,	,	,	,	,	,	,
1570	,	,	,	,	,	,	,
1571	,	,	,	,	,	,	,
1572	,	,	,	,	,	,	,
1573	,	,	,	,	,	,	,
1574	,	,	,	,	,	,	,
1575	,	,	,	,	,	,	,
1576	,	,	,	,	,	,	,
1577	,	,	,	,	,	,	,
1578	,	,	,	,	,	,	,
1579	,	,	,	,	,	,	,
1580	,	,	,	,	,	,	,
1581	,	,	,	,	,	,	,
1582	,	,	,	,	,	,	,
1583	,	,	,	,	,	,	,
1584	,	,	,	,	,	,	,
1585	,	,	,	,	,	,	,
1586	,	,	,	,	,	,	,
1587	,	,	,	,	,	,	,
1588	,	,	,	,	,	,	,
1589	,	,	,	,	,	,	,
1590	,	,	,	,	,	,	,
1591	,	,	,	,	,	,	,
1592	,	,	,	,	,	,	,
1593	,	,	,	,	,	,	,
1594	,	,	,	,	,	,	,
1595	,	,	,	,	,	,	,
1596	,	,	,	,	,	,	,
1597	,	,	,	,	,	,	,
1598	,	,	,	,	,	,	,
1599	,	,	,	,	,	,	,
1600	,	,	,	,	,	,	,
1601	,	,	,	,	,	,	,
1602	,	,	,	,	,	,	,
1603	,	,	,	,	,	,	,
1604	,	,	,	,	,	,	,
1605	,	,	,	,	,	,	,
1606	,	,	,	,	,	,	,
1607	,	,	,	,	,	,	,
1608	,	,	,	,	,	,	,
1609	,	,	,	,	,	,	,
1610	,	,	,	,	,	,	,
1611	,	,	,	,	,	,	,
1612	,	,	,	,	,	,	,
1613	,	,	,	,	,	,	,
1614	,	,	,	,	,	,	,
1615	,	,	,	,	,	,	,
1616	,	,	,	,	,	,	,
1617	,	,	,	,	,	,	,
1618	,	,	,	,	,	,	,
1619	,	,	,	,	,	,	,
1620	,	,	,	,	,	,	,
1621	,	,	,	,	,	,	,
1622	,	,	,	,	,	,	,
1623	,	,	,	,	,	,	,
1624	,	,	,	,	,	,	,
1625	,	,	,	,	,	,	,
1626	,	,	,	,	,	,	,
1627	,	,	,	,	,	,	,
1628	,	,	,	,	,	,	,
1629	,	,	,	,	,	,	,
1630	,	,	,	,	,	,	,
1631	,	,	,	,	,	,	,
1632	,	,	,	,	,	,	,
1633	,	,	,	,	,	,	,
1634	,	,	,	,	,	,	,
1635	,	,	,	,	,	,	,
1636	,	,	,	,	,	,	,
1637	,	,	,	,	,	,	,
1638	,	,	,	,	,	,	,
1639	,	,	,	,	,	,	,
1640	,	,	,	,	,	,	,
1641	,	,	,	,	,	,	,
1642	,	,	,	,	,	,	,
1643	,	,	,	,	,	,	,
1644	,	,	,	,	,	,	,
1645	,	,	,	,	,	,	,
1646	,	,	,	,	,	,	,
1647	,	,	,	,	,	,	,
1648	,	,	,	,	,	,	,
1649	,	,	,	,	,	,	,
1650	,	,	,	,	,	,	,
1651	,	,	,	,	,	,	,
1652	,	,	,	,	,	,	,
1653	,	,	,	,	,	,	,
1654	,	,	,	,	,	,	,
1655	,	,	,	,	,	,	,
1656	,	,	,	,	,	,	,
1657	,	,	,	,	,	,	,
1658	,	,	,	,	,	,	,
1659	,	,	,	,	,	,	,
1660	,	,	,	,	,	,	,
1661	,	,	,	,	,	,	,
1662	,	,	,	,	,	,	,
1663	,	,	,	,	,	,	,
1664	,	,	,	,	,	,	,
1665	,	,	,	,	,	,	,
1666	,	,	,	,	,	,	,
1667	,	,	,	,	,	,	,
1668	,	,	,	,	,	,	,
1669	,	,	,	,	,	,	,
1670	,	,	,	,	,	,	,
1671	,	,	,	,	,	,	,
1672	,	,	,	,	,	,	,
1673	,	,	,	,	,	,	,
1674	,	,	,	,	,	,	,
1675	,	,	,	,	,	,	,
1676	,	,	,	,	,	,	,
1677	,	,	,	,	,	,	,
1678	,	,	,	,	,	,	,
1679	,	,	,	,	,	,	,
1680	,	,	,	,	,	,	,
1681	,	,	,	,	,	,	,
1682	,	,	,	,	,	,	,
1683	,	,	,	,	,	,	,
1684	,	,	,	,	,	,	,
1685	,	,	,	,	,	,	,
1686	,	,	,	,	,	,	,
1687	,	,	,	,	,	,	,
1688	,	,	,	,	,	,	,
1689	,	,	,	,	,	,	,
1690	,	,	,	,	,	,	,
1691	,	,	,	,	,	,	,
1692	,	,	,	,	,	,	,
1693	,	,	,	,	,	,	,
1694	,	,	,	,	,	,	,
1695	,	,	,	,	,	,	,
1696	,	,	,	,	,	,	,
1697	,	,	,	,	,	,	,
1698	,	,	,	,	,	,	,
1699	,	,	,	,	,	,	,
1700	,	,	,	,	,	,	,
1701	,	,	,	,	,	,	,
1702	,	,	,	,	,	,	,
1703	,	,	,	,	,	,	,
1704	,	,	,	,	,	,	,
1705	,	,	,	,	,	,	,
1706	,	,	,	,	,	,	,
1707	,	,	,	,	,	,	,
1708	,	,	,	,	,	,	,
1709	,	,	,	,	,	,	,
1710	,	,	,	,	,	,	,
1711	,	,	,	,	,	,	,
1712	,	,	,	,	,	,	,
1713	,	,	,	,	,	,	,
1714	,	,	,	,	,	,	,
1715	,	,	,	,	,	,	,
1716	,	,	,	,	,	,	,
1717	,	,	,	,	,	,	,
1718	,	,	,	,	,	,	,
1719	,	,	,	,	,	,	,
1720	,	,	,	,	,	,	,
1721	,	,	,	,	,	,	,
1722	,	,	,	,	,	,	,
1723	,	,	,	,	,	,	,
1724	,	,	,	,	,	,	,
1725	,	,	,	,	,	,	,
1726	,	,	,	,	,	,	,
1727	,	,	,	,	,	,	,
1728	,	,	,	,	,	,	,
1729	,	,	,	,	,	,	,
1730	,	,	,	,	,	,	,
1731	,	,	,	,	,	,	,
1732	,	,	,	,	,	,	,
1733	,	,	,	,	,	,	,
1734	,	,	,	,	,	,	,
1735	,	,	,	,	,	,	,
1736	,	,	,	,	,	,	,
1737	,	,	,	,	,	,	,
1738	,	,	,	,	,	,	,
1739	,	,	,	,	,	,	,
1740	,	,	,	,	,	,	,
1741	,	,	,	,	,	,	,
1742	,	,	,	,	,	,	,
1743	,	,	,	,	,	,	,
1744	,	,	,	,	,	,	,
1745	,	,	,	,	,	,	,
1746	,	,	,	,	,	,	,
1747	,	,	,	,	,	,	,
1748	,	,	,	,	,	,	,
1749	,	,	,	,	,	,	,
1750	,	,	,	,	,	,	,
1751	,	,	,	,	,	,	,
1752	,	,	,	,	,	,	,
1753	,	,	,	,	,	,	,
1754	,	,	,	,	,	,	,
1755	,	,	,	,	,	,	,
1756	,	,	,	,	,	,	,
1757	,	,	,	,	,	,	,
1758	,	,	,	,	,	,	,
1759	,	,	,	,	,	,	,
1760	,	,	,	,	,	,	,
1761	,	,	,	,	,	,	,
1762	,	,	,	,	,	,	,
1763	,	,	,	,	,	,	,
1764	,	,	,	,	,	,	,
1765	,	,	,	,	,	,	,
1766	,	,	,	,	,	,	,
1767	,	,	,	,	,	,	,
1768	,	,	,	,	,	,	,
1769	,	,	,	,	,	,	,
1770	,	,	,	,	,	,	,
1771	,	,	,	,	,	,	,
1772	,	,	,	,	,	,	,
1773	,	,	,	,	,	,	,
1774	,	,	,	,	,	,	,
1775	,	,	,	,	,	,	,
1776	,	,	,	,	,	,	,
1777	,	,	,	,	,	,	,
1778	,	,	,	,	,	,	,
1779	,	,	,	,	,	,	,
1780	,	,	,	,	,	,	,
1781	,	,	,	,	,	,	,
1782	,	,	,	,	,	,	,
1783	,	,	,	,	,	,	,
1784	,	,	,	,	,	,	,
1785	,	,	,	,	,	,	,
1786	,	,	,	,	,	,	,
1787	,	,	,	,	,	,	,
1788	,	,	,	,	,	,	,
1789	,	,	,	,	,	,	,
1790	,	,	,	,	,	,	,
1791	,	,	,	,	,	,	,
1792	,	,	,	,	,	,	,
1793	,	,	,	,	,	,	,
1794	,	,	,	,	,	,	,
1795	,	,	,	,	,	,	,
1796	,	,	,	,	,	,	,
1797	,	,	,	,	,	,	,
1798	,	,	,	,	,	,	,
1799	,	,	,	,	,	,	,
1800	,	,	,	,	,	,	,
1801	,	,	,	,	,	,	,
1802	,	,	,	,	,	,	,
1803	,	,	,	,	,	,	,
1804	,	,	,	,	,	,	,
1805	,	,	,	,	,	,	,
1806	,	,	,	,	,	,	,
1807	,	,	,	,	,	,	,
1808	,	,	,	,	,	,	,
1809	,	,	,	,	,	,	,
1810	,	,	,	,	,	,	,
1811	,	,	,	,	,	,	,
1812	,	,	,	,	,	,	,
1813	,	,	,	,	,	,	,
1814	,	,	,	,	,	,	,
1815	,	,	,	,	,	,	,
1816	,	,	,	,	,	,	,
1817	,	,	,	,	,	,	,
1818	,	,	,	,	,	,	,
1819	,	,	,	,	,	,	,
1820	,	,	,	,	,	,	,
1821	,	,	,	,	,	,	,
1822	,	,	,	,	,	,	,
1823	,	,	,	,	,	,	,
1824	,	,	,	,	,	,	,
1825	,	,	,	,	,	,	,
1826	,	,	,	,	,	,	,
1827	,	,	,	,	,	,	,
1828	,	,	,	,	,	,	,
1829	,	,	,	,	,	,	,
1830	,	,	,	,	,	,	,
1831	,	,	,	,	,	,	,
1832	,	,	,	,	,	,	,
1833	,	,	,	,	,	,	,
1834	,	,	,	,	,	,	,
1835	,	,	,	,	,	,	,
1836	,	,	,	,	,	,	,
1837	,	,	,	,	,	,	,
1838	,	,	,	,	,	,	,
1839	,	,	,	,	,	,	,
1840	,	,	,	,	,	,	,
1841	,	,	,	,	,	,	,
1842	,	,	,	,	,	,	,
1843	,	,	,	,	,	,	,
1844	,	,	,	,	,	,	,
1845	,	,	,	,	,	,	,
1846	,	,	,	,	,	,	,
1847	,	,	,	,	,	,	,
1848	,	,	,	,	,	,	,
1849	,	,	,	,	,	,	,
1850	,	,	,	,	,	,	,
1851	,	,	,	,	,	,	,
1852	,	,	,	,	,	,	,
1853	,	,	,	,	,	,	,
1854	,	,	,	,	,	,	,
1855	,	,	,	,	,	,	,
1856	,	,	,	,	,	,	,
1857	,	,	,	,	,	,	,
1858	,	,	,	,	,	,	,
1859	,	,	,	,	,	,	,
1860	,	,	,	,	,	,	,
1861	,	,	,	,	,	,	,
1862	,	,	,	,	,	,	,
1863	,	,	,	,	,	,	,
1864	,	,	,	,	,	,	,
1865	,	,	,	,	,	,	,
1866	,	,	,	,	,	,	,
1867	,	,	,	,	,	,	,
1868	,	,	,	,	,	,	,
1869	,	,	,	,	,	,	,
1870	,	,	,	,	,	,	,
1871	,	,	,	,	,	,	,
1872	,	,	,	,	,	,	,
1873	,	,	,	,	,	,	,
1874	,	,	,	,	,	,	,
1875	,	,	,	,	,	,	,
1876	,	,	,	,	,	,	,
1877	,	,	,	,	,	,	,
1878	,	,	,	,	,	,	,
1879	,	,	,	,	,	,	,
1880	,	,	,	,	,	,	,
1881	,	,	,	,	,	,	,
1882	,	,	,	,	,	,	,
1883	,	,	,	,	,	,	,
1884	,	,	,	,	,	,	,
1885	,	,	,	,	,	,	,
1886	,	,	,	,	,	,	,
1887	,	,	,	,	,	,	,
1888	,	,	,	,	,	,	,
1889	,	,	,	,	,	,	,
1890	,	,	,	,	,	,	,
1891	,	,	,	,	,	,	,
1892	,	,	,	,	,	,	,
1893	,	,	,	,	,	,	,
1894	,	,	,	,	,	,	,
1895	,	,	,	,	,	,	,
1896	,	,	,	,	,	,	,
1897	,	,	,	,	,	,	,
1898	,	,	,	,	,	,	,
1899	,	,	,	,	,	,	,
1900	,	,	,	,	,	,	,
1901	,	,	,	,	,	,	,
1902	,	,	,	,	,	,	,
1903	,	,	,	,	,	,	,
1904	,	,	,	,	,	,	,
1905	,	,	,	,	,	,	,
1906	,	,	,	,	,	,	,
1907	,	,	,	,	,	,	,
1908	,	,	,	,	,	,	,
1909	,	,	,	,	,	,	,
1910	,	,	,	,	,	,	,
1911	,	,	,	,	,	,	,
1912	,	,	,	,	,	,	,
1913	,	,	,	,	,	,	,
1914	,	,	,	,	,	,	,
1915	,	,	,	,	,	,	,
1916	,	,	,	,	,	,	,
1917	,	,	,	,	,	,	,
1918	,	,	,	,	,	,	,
1919	,	,	,	,	,	,	,
1920	,	,	,	,	,	,	,
1921	,	,	,	,	,	,	,
1922	,	,	,	,	,	,	,
1923	,	,	,	,	,	,	,
1924	,	,	,	,	,	,	,
1925	,	,	,	,	,	,	,
1926	,	,	,	,	,	,	,
1927	,	,	,	,	,	,	,
1928	,	,	,	,	,	,	,
1929	,	,	,	,	,	,	,
1930	,	,	,	,	,	,	,
1931	,	,	,	,	,	,	,
1932	,	,	,	,	,	,	,
1933	,	,	,	,	,	,	,
1934	,	,	,	,	,	,	,
1935	,	,	,	,	,	,	,
1936	,	,	,	,	,	,	,
1937	,	,	,	,	,	,	,
1938	,	,	,	,	,	,	,
1939	,	,	,	,	,	,	,
1940	,	,	,	,	,	,	,
1941	,	,	,	,	,	,	,
1942	,	,	,	,	,	,	,
1943	,	,	,	,	,	,	,
1944	,	,	,	,	,	,	,
1945	,	,	,	,	,	,	,
1946	,	,	,	,	,	,	,
1947	,	,	,	,	,	,	,
1948	,	,	,	,	,	,	,
1949	,	,	,	,	,	,	,
1950	,	,	,	,	,	,	,
1951	,	,	,	,	,	,	,
1952	,	,	,	,	,	,	,
1953	,	,	,	,	,	,	,
1954	,	,	,	,	,	,	,
1955	,	,	,	,	,	,	,
1956	,	,	,	,	,	,	,
1957	,	,	,	,	,	,	,
1958	,	,	,	,	,	,	,
1959	,	,	,	,	,	,	,
1960	,	,	,	,	,	,	,
1961	,	,	,	,	,	,	,
1962	,	,	,	,	,	,	,
1963	,	,	,	,	,	,	,
1964	,	,	,	,	,	,	,
1965	,	,	,	,	,	,	,
1966	,	,	,	,	,	,	,
1967	,	,	,	,	,	,	,
1968	,	,	,	,	,	,	,
1969	,	,	,	,	,	,	,
1970	,	,	,	,	,	,	,
1971	,	,	,	,	,	,	,
1972	,	,	,	,	,	,	,
1973	,	,	,	,	,	,	,
1974	,	,	,	,	,	,	,
1975	,	,	,	,	,	,	,
1976	,	,	,	,	,	,	,
1977	,	,	,	,	,	,	,
1978	,	,	,	,	,	,	,
1979	,	,	,	,	,	,	,
1980	,	,	,	,	,	,	,
1981	,	,	,	,	,	,	,
1982	,	,	,	,	,	,	,
1983	,	,	,	,	,	,	,
1984	,	,	,	,	,	,	,
1985	,	,	,	,	,	,	,
1986	,	,	,	,	,	,	,
1987	,	,	,	,	,	,	,
1988	,	,	,	,	,	,	,
1989	,	,	,	,	,	,	,
1990	,	,	,	,	,	,	,
1991	,	,	,	,	,	,	,
1992	,	,	,	,	,	,	,
1993	,	,	,	,	,	,	,
1994	,	,	,	,	,	,	,
1995	,	,	,	,	,	,	,
1996	,	,	,	,	,	,	,
1997	,	,	,	,	,	,	,
1998	,	,	,	,	,	,	,
1999	,	,	,	,	,	,	,
[truncated: 13,001 more rows]

## Sheet: Fig1_supp3_panelA_rep3
	parS20 ParB CTP 0uM	parS20 ParB CTP 1uM	parS20 ParB CTP 10uM	parS20 ParB CTP 100uM	parS20 ParB CTP 1000uM	parS20 ParB CTP 10000uM	parS20 ParB CTP 5000uM
1	0.000, -0.004	0.000, 0.005	0.000, 0.008	0.000, 0.007	0.000, -0.005	0.000, 0.002	0.000, 0.001
2	0.200, -0.004	0.200, 0.005	0.200, 0.008	0.200, 0.007	0.200, -0.005	0.200, 0.001	0.200, 0.001
3	0.400, -0.004	0.400, 0.004	0.400, 0.008	0.400, 0.006	0.400, -0.005	0.400, 0.001	0.400, 0.001
4	0.600, -0.004	0.600, 0.004	0.600, 0.008	0.600, 0.006	0.600, -0.005	0.600, 0.001	0.600, 0.001
5	0.800, -0.004	0.800, 0.004	0.800, 0.008	0.800, 0.005	0.800, -0.005	0.800, 0.001	0.800, 0.001
6	1.000, -0.004	1.000, 0.003	1.000, 0.007	1.000, 0.005	1.000, -0.005	1.000, 0.002	1.000, 0.001
7	1.200, -0.004	1.200, 0.003	1.200, 0.007	1.200, 0.004	1.200, -0.005	1.200, 0.002	1.200, 0.001
8	1.400, -0.004	1.400, 0.002	1.400, 0.006	1.400, 0.003	1.400, -0.005	1.400, 0.002	1.400, 0.001
9	1.600, -0.004	1.600, 0.002	1.600, 0.006	1.600, 0.003	1.600, -0.005	1.600, 0.002	1.600, 0.001
10	1.800, -0.003	1.800, 0.002	1.800, 0.005	1.800, 0.002	1.800, -0.005	1.800, 0.002	1.800, 0.001
11	2.000, -0.003	2.000, 0.002	2.000, 0.004	2.000, 0.002	2.000, -0.005	2.000, 0.002	2.000, 0.001
12	2.200, -0.003	2.200, 0.003	2.200, 0.004	2.200, 0.001	2.200, -0.005	2.200, 0.002	2.200, 0.001
13	2.400, -0.003	2.400, 0.003	2.400, 0.003	2.400, 0.001	2.400, -0.005	2.400, 0.003	2.400, 0.001
14	2.600, -0.003	2.600, 0.003	2.600, 0.003	2.600, 0.000	2.600, -0.005	2.600, 0.003	2.600, 0.001
15	2.800, -0.003	2.800, 0.003	2.800, 0.003	2.800, -0.000	2.800, -0.005	2.800, 0.003	2.800, 0.001
16	3.000, -0.003	3.000, 0.002	3.000, 0.003	3.000, -0.001	3.000, -0.005	3.000, 0.003	3.000, 0.001
17	3.200, -0.003	3.200, 0.002	3.200, 0.003	3.200, -0.001	3.200, -0.006	3.200, 0.003	3.200, 0.002
18	3.400, -0.003	3.400, 0.002	3.400, 0.003	3.400, -0.001	3.400, -0.006	3.400, 0.003	3.400, 0.002
19	3.600, -0.003	3.600, 0.002	3.600, 0.003	3.600, -0.001	3.600, -0.006	3.600, 0.004	3.600, 0.002
20	3.800, -0.004	3.800, 0.001	3.800, 0.004	3.800, -0.002	3.800, -0.006	3.800, 0.004	3.800, 0.002
21	4.000, -0.004	4.000, 0.001	4.000, 0.004	4.000, -0.002	4.000, -0.006	4.000, 0.004	4.000, 0.003
22	4.200, -0.004	4.200, 0.001	4.200, 0.004	4.200, -0.002	4.200, -0.006	4.200, 0.004	4.200, 0.003
23	4.400, -0.004	4.400, 0.001	4.400, 0.004	4.400, -0.002	4.400, -0.006	4.400, 0.004	4.400, 0.003
24	4.600, -0.004	4.600, 0.000	4.600, 0.004	4.600, -0.002	4.600, -0.006	4.600, 0.004	4.600, 0.002
25	4.800, -0.004	4.800, 0.000	4.800, 0.004	4.800, -0.002	4.800, -0.006	4.800, 0.004	4.800, 0.002
26	5.000, -0.003	5.000, -0.000	5.000, 0.004	5.000, -0.001	5.000, -0.006	5.000, 0.003	5.000, 0.002
27	5.200, -0.003	5.200, -0.000	5.200, 0.004	5.200, -0.001	5.200, -0.006	5.200, 0.003	5.200, 0.002
28	5.400, -0.003	5.400, -0.000	5.400, 0.003	5.400, -0.001	5.400, -0.006	5.400, 0.003	5.400, 0.002
29	5.600, -0.003	5.600, -0.000	5.600, 0.003	5.600, -0.001	5.600, -0.006	5.600, 0.002	5.600, 0.002
30	5.800, -0.002	5.800, -0.000	5.800, 0.003	5.800, -0.001	5.800, -0.006	5.800, 0.002	5.800, 0.002
31	6.000, -0.002	6.000, -0.000	6.000, 0.003	6.000, -0.001	6.000, -0.006	6.000, 0.001	6.000, 0.002
32	6.200, -0.002	6.200, -0.000	6.200, 0.003	6.200, -0.001	6.200, -0.006	6.200, 0.001	6.200, 0.002
33	6.400, -0.002	6.400, -0.000	6.400, 0.003	6.400, -0.002	6.400, -0.006	6.400, 0.001	6.400, 0.002
34	6.600, -0.002	6.600, -0.000	6.600, 0.003	6.600, -0.002	6.600, -0.006	6.600, 0.000	6.600, 0.001
35	6.800, -0.002	6.800, -0.000	6.800, 0.002	6.800, -0.002	6.800, -0.006	6.800, 0.000	6.800, 0.002
36	7.000, -0.001	7.000, -0.000	7.000, 0.002	7.000, -0.002	7.000, -0.006	7.000, 0.000	7.000, 0.002
37	7.200, -0.001	7.200, -0.000	7.200, 0.002	7.200, -0.003	7.200, -0.006	7.200, 0.000	7.200, 0.002
38	7.400, -0.001	7.400, -0.000	7.400, 0.002	7.400, -0.003	7.400, -0.006	7.400, 0.000	7.400, 0.002
39	7.600, -0.001	7.600, -0.000	7.600, 0.002	7.600, -0.003	7.600, -0.007	7.600, 0.000	7.600, 0.002
40	7.800, -0.001	7.800, -0.000	7.800, 0.002	7.800, -0.003	7.800, -0.007	7.800, 0.000	7.800, 0.002
41	8.000, -0.001	8.000, -0.000	8.000, 0.002	8.000, -0.003	8.000, -0.007	8.000, -0.000	8.000, 0.002
42	8.200, -0.001	8.200, -0.000	8.200, 0.002	8.200, -0.003	8.200, -0.007	8.200, -0.000	8.200, 0.002
43	8.400, -0.001	8.400, -0.001	8.400, 0.002	8.400, -0.003	8.400, -0.007	8.400, -0.000	8.400, 0.002
44	8.600, -0.001	8.600, -0.000	8.600, 0.002	8.600, -0.003	8.600, -0.007	8.600, -0.000	8.600, 0.002
45	8.800, -0.001	8.800, -0.000	8.800, 0.002	8.800, -0.002	8.800, -0.007	8.800, -0.000	8.800, 0.002
46	9.000, -0.001	9.000, -0.000	9.000, 0.002	9.000, -0.002	9.000, -0.007	9.000, -0.001	9.000, 0.002
47	9.200, -0.001	9.200, -0.000	9.200, 0.002	9.200, -0.002	9.200, -0.007	9.200, -0.001	9.200, 0.002
48	9.400, -0.000	9.400, -0.001	9.400, 0.002	9.400, -0.001	9.400, -0.007	9.400, -0.001	9.400, 0.002
49	9.600, 0.000	9.600, -0.001	9.600, 0.002	9.600, -0.001	9.600, -0.007	9.600, -0.001	9.600, 0.002
50	9.800, 0.000	9.800, -0.001	9.800, 0.002	9.800, -0.001	9.800, -0.007	9.800, -0.001	9.800, 0.002
51	10.000, 0.001	10.000, -0.001	10.000, 0.002	10.000, -0.001	10.000, -0.007	10.000, -0.001	10.000, 0.002
52	10.200, 0.001	10.200, -0.001	10.200, 0.002	10.200, -0.001	10.200, -0.007	10.200, -0.002	10.200, 0.002
53	10.400, 0.001	10.400, -0.001	10.400, 0.002	10.400, -0.001	10.400, -0.007	10.400, -0.002	10.400, 0.002
54	10.600, 0.001	10.600, -0.002	10.600, 0.001	10.600, -0.001	10.600, -0.007	10.600, -0.002	10.600, 0.001
55	10.800, 0.001	10.800, -0.002	10.800, 0.001	10.800, -0.002	10.800, -0.007	10.800, -0.002	10.800, 0.001
56	11.000, 0.001	11.000, -0.002	11.000, 0.001	11.000, -0.002	11.000, -0.007	11.000, -0.002	11.000, 0.001
57	11.200, 0.001	11.200, -0.002	11.200, 0.001	11.200, -0.002	11.200, -0.007	11.200, -0.002	11.200, 0.001
58	11.400, 0.001	11.400, -0.002	11.400, 0.001	11.400, -0.003	11.400, -0.007	11.400, -0.002	11.400, 0.001
59	11.600, 0.001	11.600, -0.002	11.600, 0.001	11.600, -0.003	11.600, -0.007	11.600, -0.002	11.600, 0.001
60	11.800, 0.000	11.800, -0.002	11.800, 0.001	11.800, -0.003	11.800, -0.006	11.800, -0.002	11.800, 0.001
61	12.000, 0.000	12.000, -0.002	12.000, 0.001	12.000, -0.004	12.000, -0.006	12.000, -0.002	12.000, 0.000
62	12.200, 0.001	12.200, -0.002	12.200, 0.001	12.200, -0.004	12.200, -0.006	12.200, -0.001	12.200, 0.000
63	12.400, 0.001	12.400, -0.002	12.400, 0.000	12.400, -0.004	12.400, -0.006	12.400, -0.001	12.400, -0.000
64	12.600, 0.000	12.600, -0.002	12.600, 0.000	12.600, -0.004	12.600, -0.006	12.600, -0.001	12.600, -0.000
65	12.800, 0.001	12.800, -0.002	12.800, 0.000	12.800, -0.003	12.800, -0.006	12.800, -0.001	12.800, -0.001
66	13.000, 0.000	13.000, -0.002	13.000, 0.000	13.000, -0.003	13.000, -0.006	13.000, -0.001	13.000, -0.001
67	13.200, 0.000	13.200, -0.002	13.200, 0.000	13.200, -0.003	13.200, -0.006	13.200, -0.001	13.200, -0.001
68	13.400, 0.001	13.400, -0.002	13.400, -0.000	13.400, -0.002	13.400, -0.005	13.400, -0.001	13.400, -0.001
69	13.600, 0.001	13.600, -0.001	13.600, -0.000	13.600, -0.002	13.600, -0.005	13.600, -0.001	13.600, -0.001
70	13.800, 0.001	13.800, -0.001	13.800, -0.000	13.800, -0.002	13.800, -0.005	13.800, -0.001	13.800, -0.001
71	14.000, 0.001	14.000, -0.001	14.000, -0.000	14.000, -0.002	14.000, -0.005	14.000, -0.002	14.000, -0.001
72	14.200, 0.001	14.200, -0.001	14.200, -0.001	14.200, -0.002	14.200, -0.004	14.200, -0.001	14.200, -0.001
73	14.400, 0.000	14.400, -0.000	14.400, -0.001	14.400, -0.002	14.400, -0.004	14.400, -0.002	14.400, -0.001
74	14.600, 0.000	14.600, -0.000	14.600, -0.000	14.600, -0.002	14.600, -0.004	14.600, -0.002	14.600, -0.001
75	14.800, -0.000	14.800, -0.000	14.800, -0.000	14.800, -0.002	14.800, -0.004	14.800, -0.002	14.800, -0.001
76	15.000, -0.001	15.000, -0.000	15.000, -0.000	15.000, -0.002	15.000, -0.004	15.000, -0.002	15.000, -0.001
77	15.200, -0.001	15.200, -0.000	15.200, 0.000	15.200, -0.002	15.200, -0.004	15.200, -0.002	15.200, -0.001
78	15.400, -0.001	15.400, -0.000	15.400, 0.000	15.400, -0.002	15.400, -0.004	15.400, -0.003	15.400, -0.001
79	15.600, -0.001	15.600, -0.000	15.600, 0.000	15.600, -0.002	15.600, -0.004	15.600, -0.003	15.600, -0.001
80	15.800, -0.001	15.800, -0.000	15.800, 0.000	15.800, -0.003	15.800, -0.004	15.800, -0.003	15.800, -0.001
81	16.000, -0.001	16.000, -0.001	16.000, 0.000	16.000, -0.003	16.000, -0.004	16.000, -0.003	16.000, -0.001
82	16.200, -0.001	16.200, -0.001	16.200, 0.000	16.200, -0.003	16.200, -0.005	16.200, -0.002	16.200, -0.001
83	16.400, -0.000	16.400, -0.001	16.400, 0.000	16.400, -0.002	16.400, -0.005	16.400, -0.002	16.400, -0.001
84	16.600, -0.000	16.600, -0.001	16.600, -0.000	16.600, -0.002	16.600, -0.005	16.600, -0.002	16.600, -0.001
85	16.800, 0.000	16.800, -0.001	16.800, -0.000	16.800, -0.002	16.800, -0.005	16.800, -0.002	16.800, -0.001
86	17.000, 0.000	17.000, -0.001	17.000, -0.000	17.000, -0.002	17.000, -0.005	17.000, -0.002	17.000, -0.001
87	17.200, 0.000	17.200, -0.001	17.200, -0.001	17.200, -0.002	17.200, -0.005	17.200, -0.002	17.200, -0.001
88	17.400, 0.001	17.400, -0.001	17.400, -0.001	17.400, -0.002	17.400, -0.005	17.400, -0.001	17.400, -0.001
89	17.600, 0.001	17.600, -0.001	17.600, -0.001	17.600, -0.003	17.600, -0.004	17.600, -0.001	17.600, -0.000
90	17.800, 0.001	17.800, -0.001	17.800, -0.001	17.800, -0.002	17.800, -0.004	17.800, -0.001	17.800, -0.000
91	18.000, 0.001	18.000, -0.001	18.000, -0.001	18.000, -0.002	18.000, -0.004	18.000, -0.000	18.000, -0.000
92	18.200, 0.001	18.200, -0.001	18.200, -0.001	18.200, -0.002	18.200, -0.004	18.200, -0.000	18.200, -0.000
93	18.400, 0.000	18.400, -0.001	18.400, -0.000	18.400, -0.002	18.400, -0.004	18.400, -0.000	18.400, -0.000
94	18.600, -0.000	18.600, -0.001	18.600, -0.000	18.600, -0.002	18.600, -0.003	18.600, -0.000	18.600, -0.000
95	18.800, -0.001	18.800, -0.001	18.800, -0.001	18.800, -0.002	18.800, -0.003	18.800, -0.000	18.800, -0.000
96	19.000, -0.001	19.000, -0.000	19.000, -0.001	19.000, -0.002	19.000, -0.003	19.000, -0.001	19.000, -0.000
97	19.200, -0.001	19.200, -0.000	19.200, -0.001	19.200, -0.001	19.200, -0.003	19.200, -0.001	19.200, -0.000
98	19.400, -0.001	19.400, -0.000	19.400, -0.000	19.400, -0.001	19.400, -0.003	19.400, -0.001	19.400, -0.000
99	19.600, -0.001	19.600, 0.000	19.600, -0.000	19.600, -0.001	19.600, -0.003	19.600, -0.001	19.600, -0.000
100	19.800, -0.001	19.800, 0.000	19.800, -0.000	19.800, -0.001	19.800, -0.003	19.800, -0.001	19.800, -0.000
101	20.000, -0.001	20.000, 0.000	20.000, 0.000	20.000, -0.000	20.000, -0.003	20.000, -0.001	20.000, -0.000
102	20.200, -0.001	20.200, 0.000	20.200, 0.000	20.200, -0.000	20.200, -0.003	20.200, -0.001	20.200, -0.001
103	20.400, -0.001	20.400, 0.000	20.400, 0.000	20.400, -0.000	20.400, -0.002	20.400, -0.001	20.400, -0.000
104	20.600, -0.000	20.600, 0.000	20.600, 0.000	20.600, -0.000	20.600, -0.002	20.600, -0.001	20.600, -0.000
105	20.800, 0.000	20.800, 0.000	20.800, 0.000	20.800, -0.000	20.800, -0.002	20.800, -0.002	20.800, -0.000
106	21.000, 0.000	21.000, 0.000	21.000, -0.000	21.000, -0.000	21.000, -0.002	21.000, -0.002	21.000, -0.000
107	21.200, 0.001	21.200, 0.000	21.200, -0.000	21.200, -0.000	21.200, -0.002	21.200, -0.002	21.200, -0.000
108	21.400, 0.001	21.400, 0.000	21.400, -0.000	21.400, -0.001	21.400, -0.002	21.400, -0.002	21.400, 0.000
109	21.600, 0.001	21.600, 0.000	21.600, -0.001	21.600, -0.001	21.600, -0.002	21.600, -0.002	21.600, 0.000
110	21.800, 0.001	21.800, 0.001	21.800, -0.001	21.800, -0.001	21.800, -0.002	21.800, -0.001	21.800, 0.000
111	22.000, 0.001	22.000, 0.001	22.000, -0.001	22.000, -0.001	22.000, -0.002	22.000, -0.001	22.000, 0.000
112	22.200, 0.001	22.200, 0.001	22.200, -0.001	22.200, -0.001	22.200, -0.002	22.200, -0.001	22.200, 0.000
113	22.400, 0.001	22.400, 0.001	22.400, -0.001	22.400, -0.001	22.400, -0.002	22.400, -0.002	22.400, 0.000
114	22.600, 0.001	22.600, 0.001	22.600, -0.001	22.600, -0.001	22.600, -0.002	22.600, -0.001	22.600, 0.000
115	22.800, 0.000	22.800, 0.001	22.800, -0.001	22.800, -0.001	22.800, -0.001	22.800, -0.001	22.800, 0.000
116	23.000, 0.000	23.000, 0.000	23.000, -0.001	23.000, -0.000	23.000, -0.001	23.000, -0.001	23.000, 0.000
117	23.200, -0.000	23.200, 0.000	23.200, -0.001	23.200, -0.000	23.200, -0.001	23.200, -0.001	23.200, 0.000
118	23.400, -0.000	23.400, 0.000	23.400, -0.000	23.400, 0.000	23.400, -0.001	23.400, -0.001	23.400, 0.000
119	23.600, -0.000	23.600, -0.000	23.600, -0.000	23.600, 0.000	23.600, -0.001	23.600, -0.000	23.600, 0.000
120	23.800, -0.001	23.800, -0.000	23.800, 0.000	23.800, 0.001	23.800, -0.001	23.800, -0.000	23.800, 0.000
121	24.000, -0.001	24.000, -0.001	24.000, 0.001	24.000, 0.001	24.000, -0.001	24.000, 0.000	24.000, -0.000
122	24.200, -0.001	24.200, -0.001	24.200, 0.001	24.200, 0.001	24.200, -0.001	24.200, 0.001	24.200, 0.000
123	24.400, -0.001	24.400, -0.001	24.400, 0.001	24.400, 0.001	24.400, -0.002	24.400, 0.001	24.400, 0.000
124	24.600, -0.001	24.600, -0.001	24.600, 0.001	24.600, 0.001	24.600, -0.002	24.600, 0.001	24.600, 0.000
125	24.800, -0.001	24.800, -0.001	24.800, 0.001	24.800, 0.001	24.800, -0.002	24.800, 0.001	24.800, 0.000
126	25.000, -0.001	25.000, -0.001	25.000, 0.001	25.000, 0.001	25.000, -0.002	25.000, 0.001	25.000, 0.000
127	25.200, -0.001	25.200, -0.001	25.200, 0.001	25.200, 0.001	25.200, -0.002	25.200, 0.001	25.200, 0.000
128	25.400, -0.001	25.400, -0.000	25.400, 0.001	25.400, 0.000	25.400, -0.002	25.400, 0.001	25.400, 0.000
129	25.600, -0.001	25.600, -0.000	25.600, 0.001	25.600, 0.000	25.600, -0.002	25.600, 0.001	25.600, 0.000
130	25.800, -0.001	25.800, 0.000	25.800, 0.001	25.800, 0.000	25.800, -0.002	25.800, 0.001	25.800, 0.000
131	26.000, -0.001	26.000, 0.000	26.000, 0.001	26.000, 0.000	26.000, -0.002	26.000, 0.001	26.000, 0.000
132	26.200, -0.001	26.200, 0.000	26.200, 0.001	26.200, 0.000	26.200, -0.002	26.200, 0.001	26.200, -0.000
133	26.400, -0.001	26.400, 0.001	26.400, 0.001	26.400, 0.000	26.400, -0.002	26.400, 0.000	26.400, -0.000
134	26.600, -0.001	26.600, 0.001	26.600, 0.000	26.600, 0.001	26.600, -0.002	26.600, 0.000	26.600, -0.000
135	26.800, -0.001	26.800, 0.001	26.800, 0.000	26.800, 0.001	26.800, -0.001	26.800, -0.000	26.800, -0.000
136	27.000, -0.001	27.000, 0.001	27.000, 0.000	27.000, 0.001	27.000, -0.001	27.000, -0.000	27.000, -0.000
137	27.200, -0.001	27.200, 0.001	27.200, -0.000	27.200, 0.001	27.200, -0.001	27.200, -0.000	27.200, -0.000
138	27.400, -0.001	27.400, 0.000	27.400, -0.000	27.400, 0.001	27.400, -0.000	27.400, -0.000	27.400, 0.000
139	27.600, -0.001	27.600, 0.000	27.600, -0.000	27.600, 0.001	27.600, -0.000	27.600, -0.000	27.600, 0.000
140	27.800, -0.001	27.800, 0.000	27.800, -0.001	27.800, 0.000	27.800, 0.000	27.800, -0.000	27.800, 0.000
141	28.000, -0.001	28.000, -0.000	28.000, -0.001	28.000, 0.000	28.000, 0.000	28.000, -0.000	28.000, 0.001
142	28.200, -0.000	28.200, -0.000	28.200, -0.001	28.200, 0.000	28.200, 0.000	28.200, -0.000	28.200, 0.001
143	28.400, -0.000	28.400, -0.000	28.400, -0.000	28.400, -0.000	28.400, 0.000	28.400, -0.000	28.400, 0.001
144	28.600, 0.000	28.600, -0.000	28.600, -0.000	28.600, -0.000	28.600, 0.000	28.600, -0.000	28.600, 0.001
145	28.800, 0.001	28.800, -0.000	28.800, -0.000	28.800, -0.000	28.800, 0.000	28.800, 0.000	28.800, 0.000
146	29.000, 0.001	29.000, -0.000	29.000, 0.000	29.000, -0.000	29.000, 0.000	29.000, 0.000	29.000, 0.000
147	29.200, 0.001	29.200, -0.000	29.200, 0.000	29.200, -0.001	29.200, 0.000	29.200, 0.000	29.200, -0.000
148	29.400, 0.001	29.400, -0.000	29.400, 0.001	29.400, -0.001	29.400, 0.000	29.400, 0.000	29.400, -0.001
149	29.600, 0.001	29.600, -0.000	29.600, 0.001	29.600, -0.001	29.600, -0.000	29.600, 0.000	29.600, -0.001
150	29.800, 0.001	29.800, 0.000	29.800, 0.001	29.800, -0.001	29.800, -0.000	29.800, 0.001	29.800, -0.001
151	30.000, 0.000	30.000, 0.000	30.000, 0.000	30.000, 0.000	30.000, 0.000	30.000, 0.000	30.000, 0.000
152	30.200, 0.020	30.200, 0.024	30.200, 0.018	30.200, 0.020	30.200, 0.020	30.200, 0.012	30.200, 0.012
153	30.400, 0.043	30.400, 0.052	30.400, 0.039	30.400, 0.043	30.400, 0.044	30.400, 0.025	30.400, 0.027
154	30.600, 0.070	30.600, 0.085	30.600, 0.064	30.600, 0.070	30.600, 0.071	30.600, 0.040	30.600, 0.044
155	30.800, 0.101	30.800, 0.122	30.800, 0.093	30.800, 0.101	30.800, 0.101	30.800, 0.056	30.800, 0.063
156	31.000, 0.135	31.000, 0.162	31.000, 0.125	31.000, 0.135	31.000, 0.133	31.000, 0.073	31.000, 0.084
157	31.200, 0.171	31.200, 0.204	31.200, 0.159	31.200, 0.171	31.200, 0.166	31.200, 0.091	31.200, 0.105
158	31.400, 0.208	31.400, 0.247	31.400, 0.195	31.400, 0.208	31.400, 0.201	31.400, 0.108	31.400, 0.127
159	31.600, 0.246	31.600, 0.290	31.600, 0.232	31.600, 0.246	31.600, 0.235	31.600, 0.124	31.600, 0.149
160	31.800, 0.283	31.800, 0.332	31.800, 0.269	31.800, 0.282	31.800, 0.267	31.800, 0.140	31.800, 0.169
161	32.000, 0.319	32.000, 0.371	32.000, 0.305	32.000, 0.318	32.000, 0.297	32.000, 0.153	32.000, 0.188
162	32.200, 0.352	32.200, 0.407	32.200, 0.339	32.200, 0.350	32.200, 0.323	32.200, 0.164	32.200, 0.204
163	32.400, 0.382	32.400, 0.439	32.400, 0.370	32.400, 0.380	32.400, 0.346	32.400, 0.173	32.400, 0.218
164	32.600, 0.411	32.600, 0.470	32.600, 0.400	32.600, 0.408	32.600, 0.368	32.600, 0.180	32.600, 0.229
165	32.800, 0.438	32.800, 0.498	32.800, 0.429	32.800, 0.434	32.800, 0.387	32.800, 0.186	32.800, 0.240
166	33.000, 0.464	33.000, 0.524	33.000, 0.456	33.000, 0.458	33.000, 0.405	33.000, 0.192	33.000, 0.248
167	33.200, 0.488	33.200, 0.547	33.200, 0.481	33.200, 0.480	33.200, 0.421	33.200, 0.196	33.200, 0.256
168	33.400, 0.509	33.400, 0.568	33.400, 0.505	33.400, 0.501	33.400, 0.435	33.400, 0.200	33.400, 0.262
169	33.600, 0.530	33.600, 0.586	33.600, 0.526	33.600, 0.519	33.600, 0.448	33.600, 0.203	33.600, 0.268
170	33.800, 0.548	33.800, 0.603	33.800, 0.546	33.800, 0.536	33.800, 0.460	33.800, 0.206	33.800, 0.273
171	34.000, 0.565	34.000, 0.617	34.000, 0.565	34.000, 0.551	34.000, 0.470	34.000, 0.208	34.000, 0.278
172	34.200, 0.580	34.200, 0.630	34.200, 0.582	34.200, 0.565	34.200, 0.480	34.200, 0.210	34.200, 0.282
173	34.400, 0.593	34.400, 0.642	34.400, 0.597	34.400, 0.577	34.400, 0.488	34.400, 0.212	34.400, 0.286
174	34.600, 0.606	34.600, 0.652	34.600, 0.611	34.600, 0.588	34.600, 0.496	34.600, 0.214	34.600, 0.290
175	34.800, 0.617	34.800, 0.661	34.800, 0.624	34.800, 0.598	34.800, 0.503	34.800, 0.215	34.800, 0.293
176	35.000, 0.627	35.000, 0.668	35.000, 0.635	35.000, 0.606	35.000, 0.509	35.000, 0.216	35.000, 0.296
177	35.200, 0.636	35.200, 0.675	35.200, 0.645	35.200, 0.614	35.200, 0.515	35.200, 0.217	35.200, 0.299
178	35.400, 0.644	35.400, 0.681	35.400, 0.654	35.400, 0.621	35.400, 0.520	35.400, 0.218	35.400, 0.301
179	35.600, 0.651	35.600, 0.686	35.600, 0.663	35.600, 0.628	35.600, 0.524	35.600, 0.218	35.600, 0.303
180	35.800, 0.658	35.800, 0.690	35.800, 0.670	35.800, 0.633	35.800, 0.528	35.800, 0.219	35.800, 0.305
181	36.000, 0.663	36.000, 0.694	36.000, 0.677	36.000, 0.639	36.000, 0.531	36.000, 0.220	36.000, 0.306
182	36.200, 0.669	36.200, 0.698	36.200, 0.683	36.200, 0.643	36.200, 0.534	36.200, 0.220	36.200, 0.307
183	36.400, 0.673	36.400, 0.700	36.400, 0.688	36.400, 0.648	36.400, 0.536	36.400, 0.220	36.400, 0.308
184	36.600, 0.677	36.600, 0.703	36.600, 0.693	36.600, 0.652	36.600, 0.539	36.600, 0.220	36.600, 0.309
185	36.800, 0.681	36.800, 0.705	36.800, 0.698	36.800, 0.655	36.800, 0.541	36.800, 0.220	36.800, 0.310
186	37.000, 0.684	37.000, 0.707	37.000, 0.701	37.000, 0.658	37.000, 0.543	37.000, 0.220	37.000, 0.311
187	37.200, 0.686	37.200, 0.708	37.200, 0.705	37.200, 0.661	37.200, 0.545	37.200, 0.220	37.200, 0.311
188	37.400, 0.689	37.400, 0.710	37.400, 0.708	37.400, 0.663	37.400, 0.546	37.400, 0.221	37.400, 0.312
189	37.600, 0.691	37.600, 0.711	37.600, 0.711	37.600, 0.665	37.600, 0.548	37.600, 0.221	37.600, 0.312
190	37.800, 0.693	37.800, 0.712	37.800, 0.714	37.800, 0.667	37.800, 0.549	37.800, 0.221	37.800, 0.313
191	38.000, 0.694	38.000, 0.713	38.000, 0.716	38.000, 0.668	38.000, 0.550	38.000, 0.222	38.000, 0.313
192	38.200, 0.696	38.200, 0.714	38.200, 0.718	38.200, 0.670	38.200, 0.551	38.200, 0.222	38.200, 0.314
193	38.400, 0.697	38.400, 0.715	38.400, 0.720	38.400, 0.671	38.400, 0.552	38.400, 0.222	38.400, 0.314
194	38.600, 0.698	38.600, 0.716	38.600, 0.722	38.600, 0.672	38.600, 0.553	38.600, 0.222	38.600, 0.315
195	38.800, 0.699	38.800, 0.717	38.800, 0.723	38.800, 0.673	38.800, 0.553	38.800, 0.222	38.800, 0.315
196	39.000, 0.700	39.000, 0.718	39.000, 0.725	39.000, 0.674	39.000, 0.554	39.000, 0.222	39.000, 0.315
197	39.200, 0.701	39.200, 0.719	39.200, 0.726	39.200, 0.675	39.200, 0.554	39.200, 0.222	39.200, 0.316
198	39.400, 0.702	39.400, 0.720	39.400, 0.727	39.400, 0.676	39.400, 0.555	39.400, 0.222	39.400, 0.316
199	39.600, 0.704	39.600, 0.721	39.600, 0.728	39.600, 0.676	39.600, 0.555	39.600, 0.222	39.600, 0.317
200	39.800, 0.705	39.800, 0.721	39.800, 0.729	39.800, 0.677	39.800, 0.556	39.800, 0.221	39.800, 0.317
201	40.000, 0.706	40.000, 0.722	40.000, 0.730	40.000, 0.678	40.000, 0.556	40.000, 0.221	40.000, 0.317
202	40.200, 0.707	40.200, 0.722	40.200, 0.731	40.200, 0.678	40.200, 0.556	40.200, 0.221	40.200, 0.317
203	40.400, 0.708	40.400, 0.723	40.400, 0.732	40.400, 0.679	40.400, 0.556	40.400, 0.220	40.400, 0.317
204	40.600, 0.708	40.600, 0.723	40.600, 0.733	40.600, 0.679	40.600, 0.556	40.600, 0.220	40.600, 0.318
205	40.800, 0.709	40.800, 0.723	40.800, 0.733	40.800, 0.680	40.800, 0.556	40.800, 0.220	40.800, 0.318
206	41.000, 0.710	41.000, 0.724	41.000, 0.734	41.000, 0.680	41.000, 0.556	41.000, 0.219	41.000, 0.318
207	41.200, 0.710	41.200, 0.724	41.200, 0.735	41.200, 0.680	41.200, 0.556	41.200, 0.219	41.200, 0.318
208	41.400, 0.711	41.400, 0.725	41.400, 0.736	41.400, 0.681	41.400, 0.556	41.400, 0.219	41.400, 0.318
209	41.600, 0.711	41.600, 0.725	41.600, 0.737	41.600, 0.681	41.600, 0.556	41.600, 0.220	41.600, 0.318
210	41.800, 0.712	41.800, 0.726	41.800, 0.738	41.800, 0.681	41.800, 0.556	41.800, 0.220	41.800, 0.318
211	42.000, 0.712	42.000, 0.726	42.000, 0.739	42.000, 0.682	42.000, 0.556	42.000, 0.220	42.000, 0.318
212	42.200, 0.712	42.200, 0.727	42.200, 0.739	42.200, 0.682	42.200, 0.556	42.200, 0.220	42.200, 0.317
213	42.400, 0.712	42.400, 0.727	42.400, 0.740	42.400, 0.683	42.400, 0.556	42.400, 0.221	42.400, 0.317
214	42.600, 0.713	42.600, 0.727	42.600, 0.741	42.600, 0.683	42.600, 0.556	42.600, 0.221	42.600, 0.317
215	42.800, 0.713	42.800, 0.727	42.800, 0.741	42.800, 0.684	42.800, 0.555	42.800, 0.221	42.800, 0.316
216	43.000, 0.713	43.000, 0.728	43.000, 0.741	43.000, 0.684	43.000, 0.555	43.000, 0.221	43.000, 0.316
217	43.200, 0.713	43.200, 0.728	43.200, 0.742	43.200, 0.685	43.200, 0.555	43.200, 0.221	43.200, 0.316
218	43.400, 0.714	43.400, 0.729	43.400, 0.742	43.400, 0.685	43.400, 0.555	43.400, 0.221	43.400, 0.316
219	43.600, 0.714	43.600, 0.729	43.600, 0.742	43.600, 0.685	43.600, 0.555	43.600, 0.221	43.600, 0.316
220	43.800, 0.714	43.800, 0.730	43.800, 0.742	43.800, 0.685	43.800, 0.555	43.800, 0.221	43.800, 0.316
221	44.000, 0.715	44.000, 0.730	44.000, 0.743	44.000, 0.685	44.000, 0.555	44.000, 0.221	44.000, 0.316
222	44.200, 0.715	44.200, 0.731	44.200, 0.743	44.200, 0.685	44.200, 0.555	44.200, 0.221	44.200, 0.316
223	44.400, 0.716	44.400, 0.731	44.400, 0.743	44.400, 0.685	44.400, 0.555	44.400, 0.221	44.400, 0.316
224	44.600, 0.716	44.600, 0.732	44.600, 0.743	44.600, 0.685	44.600, 0.555	44.600, 0.221	44.600, 0.316
225	44.800, 0.717	44.800, 0.732	44.800, 0.743	44.800, 0.685	44.800, 0.555	44.800, 0.221	44.800, 0.316
226	45.000, 0.717	45.000, 0.733	45.000, 0.744	45.000, 0.685	45.000, 0.555	45.000, 0.221	45.000, 0.316
227	45.200, 0.718	45.200, 0.734	45.200, 0.744	45.200, 0.685	45.200, 0.556	45.200, 0.221	45.200, 0.316
228	45.400, 0.718	45.400, 0.734	45.400, 0.745	45.400, 0.685	45.400, 0.556	45.400, 0.221	45.400, 0.316
229	45.600, 0.719	45.600, 0.735	45.600, 0.746	45.600, 0.686	45.600, 0.556	45.600, 0.221	45.600, 0.316
230	45.800, 0.719	45.800, 0.735	45.800, 0.747	45.800, 0.686	45.800, 0.556	45.800, 0.221	45.800, 0.316
231	46.000, 0.720	46.000, 0.735	46.000, 0.747	46.000, 0.686	46.000, 0.556	46.000, 0.220	46.000, 0.315
232	46.200, 0.721	46.200, 0.735	46.200, 0.748	46.200, 0.687	46.200, 0.556	46.200, 0.220	46.200, 0.315
233	46.400, 0.721	46.400, 0.735	46.400, 0.748	46.400, 0.687	46.400, 0.556	46.400, 0.219	46.400, 0.314
234	46.600, 0.722	46.600, 0.735	46.600, 0.749	46.600, 0.687	46.600, 0.555	46.600, 0.219	46.600, 0.314
235	46.800, 0.723	46.800, 0.736	46.800, 0.749	46.800, 0.688	46.800, 0.555	46.800, 0.219	46.800, 0.314
236	47.000, 0.723	47.000, 0.736	47.000, 0.749	47.000, 0.688	47.000, 0.555	47.000, 0.218	47.000, 0.314
237	47.200, 0.724	47.200, 0.736	47.200, 0.750	47.200, 0.689	47.200, 0.555	47.200, 0.218	47.200, 0.313
238	47.400, 0.724	47.400, 0.736	47.400, 0.750	47.400, 0.689	47.400, 0.554	47.400, 0.217	47.400, 0.313
239	47.600, 0.724	47.600, 0.736	47.600, 0.750	47.600, 0.690	47.600, 0.554	47.600, 0.217	47.600, 0.313
240	47.800, 0.725	47.800, 0.737	47.800, 0.750	47.800, 0.690	47.800, 0.554	47.800, 0.217	47.800, 0.313
241	48.000, 0.725	48.000, 0.737	48.000, 0.750	48.000, 0.690	48.000, 0.554	48.000, 0.217	48.000, 0.313
242	48.200, 0.725	48.200, 0.738	48.200, 0.750	48.200, 0.691	48.200, 0.554	48.200, 0.217	48.200, 0.314
243	48.400, 0.725	48.400, 0.738	48.400, 0.750	48.400, 0.691	48.400, 0.554	48.400, 0.217	48.400, 0.314
244	48.600, 0.726	48.600, 0.739	48.600, 0.750	48.600, 0.692	48.600, 0.554	48.600, 0.217	48.600, 0.314
245	48.800, 0.726	48.800, 0.739	48.800, 0.751	48.800, 0.692	48.800, 0.554	48.800, 0.217	48.800, 0.314
246	49.000, 0.726	49.000, 0.739	49.000, 0.751	49.000, 0.692	49.000, 0.553	49.000, 0.217	49.000, 0.314
247	49.200, 0.727	49.200, 0.739	49.200, 0.751	49.200, 0.693	49.200, 0.553	49.200, 0.218	49.200, 0.314
248	49.400, 0.727	49.400, 0.739	49.400, 0.752	49.400, 0.693	49.400, 0.553	49.400, 0.218	49.400, 0.314
249	49.600, 0.727	49.600, 0.740	49.600, 0.753	49.600, 0.693	49.600, 0.552	49.600, 0.218	49.600, 0.314
250	49.800, 0.728	49.800, 0.740	49.800, 0.753	49.800, 0.693	49.800, 0.552	49.800, 0.218	49.800, 0.315
251	50.000, 0.728	50.000, 0.740	50.000, 0.753	50.000, 0.692	50.000, 0.552	50.000, 0.218	50.000, 0.315
252	50.200, 0.728	50.200, 0.741	50.200, 0.754	50.200, 0.692	50.200, 0.551	50.200, 0.218	50.200, 0.314
253	50.400, 0.729	50.400, 0.741	50.400, 0.754	50.400, 0.693	50.400, 0.551	50.400, 0.218	50.400, 0.314
254	50.600, 0.729	50.600, 0.741	50.600, 0.755	50.600, 0.693	50.600, 0.550	50.600, 0.218	50.600, 0.314
255	50.800, 0.730	50.800, 0.742	50.800, 0.755	50.800, 0.693	50.800, 0.550	50.800, 0.218	50.800, 0.314
256	51.000, 0.730	51.000, 0.742	51.000, 0.755	51.000, 0.693	51.000, 0.550	51.000, 0.218	51.000, 0.313
257	51.200, 0.730	51.200, 0.742	51.200, 0.756	51.200, 0.693	51.200, 0.550	51.200, 0.217	51.200, 0.313
258	51.400, 0.731	51.400, 0.743	51.400, 0.756	51.400, 0.693	51.400, 0.550	51.400, 0.217	51.400, 0.313
259	51.600, 0.731	51.600, 0.743	51.600, 0.756	51.600, 0.693	51.600, 0.550	51.600, 0.217	51.600, 0.313
260	51.800, 0.731	51.800, 0.743	51.800, 0.756	51.800, 0.693	51.800, 0.550	51.800, 0.217	51.800, 0.312
261	52.000, 0.732	52.000, 0.743	52.000, 0.757	52.000, 0.693	52.000, 0.550	52.000, 0.217	52.000, 0.312
262	52.200, 0.732	52.200, 0.743	52.200, 0.757	52.200, 0.693	52.200, 0.550	52.200, 0.217	52.200, 0.312
263	52.400, 0.732	52.400, 0.744	52.400, 0.757	52.400, 0.693	52.400, 0.550	52.400, 0.216	52.400, 0.311
264	52.600, 0.733	52.600, 0.744	52.600, 0.758	52.600, 0.693	52.600, 0.550	52.600, 0.216	52.600, 0.311
265	52.800, 0.734	52.800, 0.744	52.800, 0.758	52.800, 0.693	52.800, 0.550	52.800, 0.216	52.800, 0.311
266	53.000, 0.734	53.000, 0.743	53.000, 0.759	53.000, 0.693	53.000, 0.550	53.000, 0.216	53.000, 0.311
267	53.200, 0.734	53.200, 0.743	53.200, 0.760	53.200, 0.693	53.200, 0.550	53.200, 0.216	53.200, 0.311
268	53.400, 0.735	53.400, 0.743	53.400, 0.760	53.400, 0.693	53.400, 0.549	53.400, 0.216	53.400, 0.311
269	53.600, 0.735	53.600, 0.743	53.600, 0.761	53.600, 0.693	53.600, 0.549	53.600, 0.216	53.600, 0.311
270	53.800, 0.735	53.800, 0.744	53.800, 0.761	53.800, 0.693	53.800, 0.549	53.800, 0.216	53.800, 0.311
271	54.000, 0.736	54.000, 0.744	54.000, 0.762	54.000, 0.693	54.000, 0.549	54.000, 0.215	54.000, 0.311
272	54.200, 0.736	54.200, 0.744	54.200, 0.762	54.200, 0.693	54.200, 0.548	54.200, 0.215	54.200, 0.310
273	54.400, 0.736	54.400, 0.744	54.400, 0.762	54.400, 0.694	54.400, 0.548	54.400, 0.215	54.400, 0.310
274	54.600, 0.737	54.600, 0.744	54.600, 0.762	54.600, 0.694	54.600, 0.548	54.600, 0.215	54.600, 0.310
275	54.800, 0.737	54.800, 0.744	54.800, 0.762	54.800, 0.694	54.800, 0.548	54.800, 0.215	54.800, 0.310
276	55.000, 0.737	55.000, 0.745	55.000, 0.762	55.000, 0.694	55.000, 0.548	55.000, 0.215	55.000, 0.310
277	55.200, 0.737	55.200, 0.745	55.200, 0.762	55.200, 0.694	55.200, 0.548	55.200, 0.215	55.200, 0.310
278	55.400, 0.737	55.400, 0.746	55.400, 0.762	55.400, 0.694	55.400, 0.548	55.400, 0.215	55.400, 0.310
279	55.600, 0.738	55.600, 0.746	55.600, 0.762	55.600, 0.694	55.600, 0.548	55.600, 0.215	55.600, 0.309
280	55.800, 0.738	55.800, 0.747	55.800, 0.762	55.800, 0.694	55.800, 0.548	55.800, 0.214	55.800, 0.309
281	56.000, 0.738	56.000, 0.747	56.000, 0.762	56.000, 0.694	56.000, 0.547	56.000, 0.214	56.000, 0.309
282	56.200, 0.738	56.200, 0.748	56.200, 0.762	56.200, 0.694	56.200, 0.547	56.200, 0.214	56.200, 0.308
283	56.400, 0.739	56.400, 0.748	56.400, 0.763	56.400, 0.694	56.400, 0.547	56.400, 0.213	56.400, 0.308
284	56.600, 0.739	56.600, 0.748	56.600, 0.763	56.600, 0.694	56.600, 0.547	56.600, 0.213	56.600, 0.307
285	56.800, 0.739	56.800, 0.748	56.800, 0.763	56.800, 0.694	56.800, 0.547	56.800, 0.213	56.800, 0.307
286	57.000, 0.740	57.000, 0.749	57.000, 0.764	57.000, 0.695	57.000, 0.547	57.000, 0.213	57.000, 0.307
287	57.200, 0.740	57.200, 0.749	57.200, 0.764	57.200, 0.695	57.200, 0.547	57.200, 0.213	57.200, 0.307
288	57.400, 0.740	57.400, 0.749	57.400, 0.764	57.400, 0.695	57.400, 0.547	57.400, 0.213	57.400, 0.307
289	57.600, 0.741	57.600, 0.749	57.600, 0.765	57.600, 0.695	57.600, 0.547	57.600, 0.213	57.600, 0.307
290	57.800, 0.741	57.800, 0.749	57.800, 0.765	57.800, 0.695	57.800, 0.547	57.800, 0.212	57.800, 0.307
291	58.000, 0.741	58.000, 0.749	58.000, 0.765	58.000, 0.695	58.000, 0.546	58.000, 0.212	58.000, 0.307
292	58.200, 0.742	58.200, 0.750	58.200, 0.766	58.200, 0.695	58.200, 0.546	58.200, 0.211	58.200, 0.307
293	58.400, 0.742	58.400, 0.750	58.400, 0.766	58.400, 0.694	58.400, 0.546	58.400, 0.211	58.400, 0.307
294	58.600, 0.743	58.600, 0.750	58.600, 0.766	58.600, 0.694	58.600, 0.546	58.600, 0.211	58.600, 0.307
295	58.800, 0.744	58.800, 0.751	58.800, 0.766	58.800, 0.694	58.800, 0.546	58.800, 0.211	58.800, 0.307
296	59.000, 0.744	59.000, 0.751	59.000, 0.766	59.000, 0.693	59.000, 0.545	59.000, 0.210	59.000, 0.307
297	59.200, 0.745	59.200, 0.752	59.200, 0.767	59.200, 0.693	59.200, 0.545	59.200, 0.210	59.200, 0.307
298	59.400, 0.746	59.400, 0.752	59.400, 0.767	59.400, 0.693	59.400, 0.545	59.400, 0.210	59.400, 0.306
299	59.600, 0.746	59.600, 0.752	59.600, 0.768	59.600, 0.692	59.600, 0.545	59.600, 0.210	59.600, 0.306
300	59.800, 0.747	59.800, 0.753	59.800, 0.768	59.800, 0.692	59.800, 0.545	59.800, 0.209	59.800, 0.305
301	60.000, 0.747	60.000, 0.753	60.000, 0.769	60.000, 0.692	60.000, 0.545	60.000, 0.209	60.000, 0.305
302	60.200, 0.747	60.200, 0.753	60.200, 0.769	60.200, 0.692	60.200, 0.545	60.200, 0.209	60.200, 0.304
303	60.400, 0.747	60.400, 0.754	60.400, 0.769	60.400, 0.693	60.400, 0.545	60.400, 0.209	60.400, 0.304
304	60.600, 0.748	60.600, 0.754	60.600, 0.769	60.600, 0.693	60.600, 0.545	60.600, 0.209	60.600, 0.304
305	60.800, 0.748	60.800, 0.754	60.800, 0.770	60.800, 0.693	60.800, 0.545	60.800, 0.208	60.800, 0.304
306	61.000, 0.748	61.000, 0.754	61.000, 0.770	61.000, 0.693	61.000, 0.545	61.000, 0.208	61.000, 0.304
307	61.200, 0.748	61.200, 0.754	61.200, 0.770	61.200, 0.693	61.200, 0.545	61.200, 0.208	61.200, 0.304
308	61.400, 0.748	61.400, 0.754	61.400, 0.771	61.400, 0.694	61.400, 0.545	61.400, 0.208	61.400, 0.304
309	61.600, 0.748	61.600, 0.754	61.600, 0.771	61.600, 0.694	61.600, 0.545	61.600, 0.208	61.600, 0.304
310	61.800, 0.748	61.800, 0.754	61.800, 0.771	61.800, 0.694	61.800, 0.545	61.800, 0.208	61.800, 0.304
311	62.000, 0.749	62.000, 0.754	62.000, 0.770	62.000, 0.694	62.000, 0.545	62.000, 0.209	62.000, 0.304
312	62.200, 0.749	62.200, 0.753	62.200, 0.770	62.200, 0.694	62.200, 0.545	62.200, 0.209	62.200, 0.304
313	62.400, 0.750	62.400, 0.753	62.400, 0.770	62.400, 0.694	62.400, 0.545	62.400, 0.209	62.400, 0.304
314	62.600, 0.750	62.600, 0.753	62.600, 0.770	62.600, 0.694	62.600, 0.545	62.600, 0.209	62.600, 0.304
315	62.800, 0.750	62.800, 0.753	62.800, 0.770	62.800, 0.694	62.800, 0.545	62.800, 0.209	62.800, 0.304
316	63.000, 0.751	63.000, 0.753	63.000, 0.770	63.000, 0.695	63.000, 0.545	63.000, 0.209	63.000, 0.304
317	63.200, 0.751	63.200, 0.753	63.200, 0.770	63.200, 0.695	63.200, 0.544	63.200, 0.209	63.200, 0.304
318	63.400, 0.752	63.400, 0.753	63.400, 0.771	63.400, 0.695	63.400, 0.544	63.400, 0.209	63.400, 0.304
319	63.600, 0.752	63.600, 0.754	63.600, 0.771	63.600, 0.695	63.600, 0.544	63.600, 0.209	63.600, 0.304
320	63.800, 0.752	63.800, 0.754	63.800, 0.772	63.800, 0.695	63.800, 0.543	63.800, 0.208	63.800, 0.303
321	64.000, 0.753	64.000, 0.754	64.000, 0.772	64.000, 0.695	64.000, 0.543	64.000, 0.208	64.000, 0.302
322	64.200, 0.753	64.200, 0.755	64.200, 0.773	64.200, 0.695	64.200, 0.542	64.200, 0.208	64.200, 0.302
323	64.400, 0.753	64.400, 0.755	64.400, 0.773	64.400, 0.695	64.400, 0.542	64.400, 0.207	64.400, 0.301
324	64.600, 0.754	64.600, 0.756	64.600, 0.774	64.600, 0.695	64.600, 0.542	64.600, 0.207	64.600, 0.300
325	64.800, 0.754	64.800, 0.756	64.800, 0.775	64.800, 0.694	64.800, 0.541	64.800, 0.207	64.800, 0.300
326	65.000, 0.754	65.000, 0.756	65.000, 0.775	65.000, 0.694	65.000, 0.540	65.000, 0.207	65.000, 0.299
327	65.200, 0.755	65.200, 0.757	65.200, 0.776	65.200, 0.694	65.200, 0.540	65.200, 0.207	65.200, 0.299
328	65.400, 0.755	65.400, 0.757	65.400, 0.776	65.400, 0.693	65.400, 0.540	65.400, 0.207	65.400, 0.298
329	65.600, 0.756	65.600, 0.757	65.600, 0.776	65.600, 0.693	65.600, 0.539	65.600, 0.208	65.600, 0.298
330	65.800, 0.756	65.800, 0.758	65.800, 0.776	65.800, 0.693	65.800, 0.539	65.800, 0.208	65.800, 0.298
331	66.000, 0.756	66.000, 0.758	66.000, 0.776	66.000, 0.693	66.000, 0.539	66.000, 0.208	66.000, 0.297
332	66.200, 0.756	66.200, 0.758	66.200, 0.776	66.200, 0.693	66.200, 0.539	66.200, 0.208	66.200, 0.297
333	66.400, 0.757	66.400, 0.758	66.400, 0.776	66.400, 0.693	66.400, 0.539	66.400, 0.208	66.400, 0.297
334	66.600, 0.757	66.600, 0.759	66.600, 0.776	66.600, 0.693	66.600, 0.540	66.600, 0.208	66.600, 0.297
335	66.800, 0.757	66.800, 0.759	66.800, 0.775	66.800, 0.693	66.800, 0.540	66.800, 0.208	66.800, 0.297
336	67.000, 0.758	67.000, 0.759	67.000, 0.775	67.000, 0.693	67.000, 0.540	67.000, 0.208	67.000, 0.297
337	67.200, 0.758	67.200, 0.760	67.200, 0.775	67.200, 0.693	67.200, 0.539	67.200, 0.207	67.200, 0.298
338	67.400, 0.758	67.400, 0.760	67.400, 0.775	67.400, 0.693	67.400, 0.539	67.400, 0.207	67.400, 0.298
339	67.600, 0.758	67.600, 0.760	67.600, 0.775	67.600, 0.693	67.600, 0.539	67.600, 0.206	67.600, 0.298
340	67.800, 0.759	67.800, 0.760	67.800, 0.775	67.800, 0.693	67.800, 0.539	67.800, 0.206	67.800, 0.298
341	68.000, 0.759	68.000, 0.760	68.000, 0.775	68.000, 0.693	68.000, 0.538	68.000, 0.205	68.000, 0.298
342	68.200, 0.759	68.200, 0.761	68.200, 0.775	68.200, 0.693	68.200, 0.538	68.200, 0.204	68.200, 0.298
343	68.400, 0.760	68.400, 0.761	68.400, 0.776	68.400, 0.693	68.400, 0.538	68.400, 0.204	68.400, 0.298
344	68.600, 0.760	68.600, 0.761	68.600, 0.776	68.600, 0.693	68.600, 0.538	68.600, 0.203	68.600, 0.298
345	68.800, 0.760	68.800, 0.762	68.800, 0.777	68.800, 0.693	68.800, 0.538	68.800, 0.203	68.800, 0.298
346	69.000, 0.761	69.000, 0.762	69.000, 0.777	69.000, 0.693	69.000, 0.538	69.000, 0.203	69.000, 0.298
347	69.200, 0.761	69.200, 0.762	69.200, 0.778	69.200, 0.693	69.200, 0.538	69.200, 0.202	69.200, 0.298
348	69.400, 0.761	69.400, 0.762	69.400, 0.778	69.400, 0.693	69.400, 0.538	69.400, 0.202	69.400, 0.298
349	69.600, 0.761	69.600, 0.762	69.600, 0.779	69.600, 0.693	69.600, 0.538	69.600, 0.202	69.600, 0.298
350	69.800, 0.761	69.800, 0.762	69.800, 0.779	69.800, 0.693	69.800, 0.537	69.800, 0.202	69.800, 0.297
351	70.000, 0.762	70.000, 0.763	70.000, 0.779	70.000, 0.693	70.000, 0.537	70.000, 0.202	70.000, 0.297
352	70.200, 0.762	70.200, 0.763	70.200, 0.780	70.200, 0.693	70.200, 0.537	70.200, 0.202	70.200, 0.296
353	70.400, 0.762	70.400, 0.763	70.400, 0.780	70.400, 0.693	70.400, 0.537	70.400, 0.203	70.400, 0.296
354	70.600, 0.763	70.600, 0.764	70.600, 0.780	70.600, 0.693	70.600, 0.537	70.600, 0.203	70.600, 0.296
355	70.800, 0.763	70.800, 0.764	70.800, 0.781	70.800, 0.692	70.800, 0.537	70.800, 0.203	70.800, 0.295
356	71.000, 0.763	71.000, 0.764	71.000, 0.781	71.000, 0.692	71.000, 0.536	71.000, 0.203	71.000, 0.295
357	71.200, 0.763	71.200, 0.765	71.200, 0.781	71.200, 0.692	71.200, 0.536	71.200, 0.203	71.200, 0.294
358	71.400, 0.763	71.400, 0.765	71.400, 0.781	71.400, 0.692	71.400, 0.536	71.400, 0.203	71.400, 0.294
359	71.600, 0.764	71.600, 0.766	71.600, 0.781	71.600, 0.692	71.600, 0.535	71.600, 0.203	71.600, 0.293
360	71.800, 0.764	71.800, 0.766	71.800, 0.781	71.800, 0.692	71.800, 0.535	71.800, 0.202	71.800, 0.293
361	72.000, 0.765	72.000, 0.766	72.000, 0.781	72.000, 0.692	72.000, 0.535	72.000, 0.202	72.000, 0.292
362	72.200, 0.765	72.200, 0.767	72.200, 0.781	72.200, 0.692	72.200, 0.536	72.200, 0.202	72.200, 0.292
363	72.400, 0.765	72.400, 0.767	72.400, 0.781	72.400, 0.692	72.400, 0.536	72.400, 0.202	72.400, 0.292
364	72.600, 0.765	72.600, 0.767	72.600, 0.781	72.600, 0.692	72.600, 0.536	72.600, 0.202	72.600, 0.292
365	72.800, 0.766	72.800, 0.767	72.800, 0.782	72.800, 0.692	72.800, 0.536	72.800, 0.202	72.800, 0.292
366	73.000, 0.766	73.000, 0.767	73.000, 0.782	73.000, 0.692	73.000, 0.536	73.000, 0.202	73.000, 0.292
367	73.200, 0.766	73.200, 0.767	73.200, 0.782	73.200, 0.692	73.200, 0.536	73.200, 0.202	73.200, 0.292
368	73.400, 0.766	73.400, 0.767	73.400, 0.782	73.400, 0.691	73.400, 0.536	73.400, 0.201	73.400, 0.293
369	73.600, 0.767	73.600, 0.767	73.600, 0.782	73.600, 0.691	73.600, 0.536	73.600, 0.201	73.600, 0.293
370	73.800, 0.767	73.800, 0.768	73.800, 0.782	73.800, 0.691	73.800, 0.536	73.800, 0.201	73.800, 0.294
371	74.000, 0.768	74.000, 0.768	74.000, 0.782	74.000, 0.692	74.000, 0.535	74.000, 0.201	74.000, 0.294
372	74.200, 0.768	74.200, 0.769	74.200, 0.783	74.200, 0.692	74.200, 0.535	74.200, 0.201	74.200, 0.294
373	74.400, 0.769	74.400, 0.769	74.400, 0.783	74.400, 0.692	74.400, 0.535	74.400, 0.201	74.400, 0.295
374	74.600, 0.769	74.600, 0.769	74.600, 0.783	74.600, 0.692	74.600, 0.534	74.600, 0.201	74.600, 0.295
375	74.800, 0.770	74.800, 0.770	74.800, 0.783	74.800, 0.692	74.800, 0.534	74.800, 0.201	74.800, 0.295
376	75.000, 0.770	75.000, 0.770	75.000, 0.784	75.000, 0.693	75.000, 0.534	75.000, 0.201	75.000, 0.294
377	75.200, 0.770	75.200, 0.771	75.200, 0.784	75.200, 0.693	75.200, 0.534	75.200, 0.201	75.200, 0.294
378	75.400, 0.771	75.400, 0.771	75.400, 0.784	75.400, 0.693	75.400, 0.534	75.400, 0.201	75.400, 0.293
379	75.600, 0.771	75.600, 0.771	75.600, 0.784	75.600, 0.693	75.600, 0.534	75.600, 0.201	75.600, 0.293
380	75.800, 0.771	75.800, 0.771	75.800, 0.784	75.800, 0.693	75.800, 0.534	75.800, 0.201	75.800, 0.292
381	76.000, 0.772	76.000, 0.771	76.000, 0.784	76.000, 0.692	76.000, 0.534	76.000, 0.200	76.000, 0.291
382	76.200, 0.772	76.200, 0.770	76.200, 0.784	76.200, 0.692	76.200, 0.534	76.200, 0.200	76.200, 0.290
383	76.400, 0.772	76.400, 0.770	76.400, 0.784	76.400, 0.692	76.400, 0.533	76.400, 0.199	76.400, 0.290
384	76.600, 0.772	76.600, 0.770	76.600, 0.785	76.600, 0.691	76.600, 0.533	76.600, 0.199	76.600, 0.289
385	76.800, 0.772	76.800, 0.770	76.800, 0.785	76.800, 0.691	76.800, 0.533	76.800, 0.199	76.800, 0.289
386	77.000, 0.772	77.000, 0.770	77.000, 0.785	77.000, 0.691	77.000, 0.532	77.000, 0.198	77.000, 0.289
387	77.200, 0.772	77.200, 0.770	77.200, 0.786	77.200, 0.690	77.200, 0.532	77.200, 0.198	77.200, 0.289
388	77.400, 0.773	77.400, 0.770	77.400, 0.786	77.400, 0.690	77.400, 0.532	77.400, 0.198	77.400, 0.289
389	77.600, 0.773	77.600, 0.771	77.600, 0.786	77.600, 0.690	77.600, 0.531	77.600, 0.198	77.600, 0.288
390	77.800, 0.773	77.800, 0.772	77.800, 0.787	77.800, 0.690	77.800, 0.531	77.800, 0.198	77.800, 0.288
391	78.000, 0.774	78.000, 0.772	78.000, 0.787	78.000, 0.690	78.000, 0.531	78.000, 0.198	78.000, 0.288
392	78.200, 0.774	78.200, 0.773	78.200, 0.787	78.200, 0.690	78.200, 0.531	78.200, 0.198	78.200, 0.288
393	78.400, 0.774	78.400, 0.773	78.400, 0.787	78.400, 0.690	78.400, 0.531	78.400, 0.198	78.400, 0.288
394	78.600, 0.774	78.600, 0.774	78.600, 0.787	78.600, 0.690	78.600, 0.531	78.600, 0.198	78.600, 0.288
395	78.800, 0.775	78.800, 0.774	78.800, 0.787	78.800, 0.691	78.800, 0.531	78.800, 0.198	78.800, 0.288
396	79.000, 0.775	79.000, 0.775	79.000, 0.787	79.000, 0.691	79.000, 0.531	79.000, 0.198	79.000, 0.288
397	79.200, 0.775	79.200, 0.775	79.200, 0.788	79.200, 0.691	79.200, 0.532	79.200, 0.198	79.200, 0.288
398	79.400, 0.775	79.400, 0.775	79.400, 0.788	79.400, 0.691	79.400, 0.532	79.400, 0.198	79.400, 0.288
399	79.600, 0.776	79.600, 0.775	79.600, 0.788	79.600, 0.692	79.600, 0.532	79.600, 0.197	79.600, 0.287
400	79.800, 0.776	79.800, 0.775	79.800, 0.788	79.800, 0.692	79.800, 0.532	79.800, 0.197	79.800, 0.287
401	80.000, 0.776	80.000, 0.775	80.000, 0.788	80.000, 0.692	80.000, 0.532	80.000, 0.196	80.000, 0.287
402	80.200, 0.776	80.200, 0.776	80.200, 0.788	80.200, 0.692	80.200, 0.532	80.200, 0.196	80.200, 0.287
403	80.400, 0.776	80.400, 0.776	80.400, 0.789	80.400, 0.692	80.400, 0.532	80.400, 0.195	80.400, 0.287
404	80.600, 0.777	80.600, 0.776	80.600, 0.789	80.600, 0.692	80.600, 0.531	80.600, 0.195	80.600, 0.286
405	80.800, 0.777	80.800, 0.776	80.800, 0.789	80.800, 0.692	80.800, 0.531	80.800, 0.195	80.800, 0.286
406	81.000, 0.777	81.000, 0.776	81.000, 0.790	81.000, 0.692	81.000, 0.531	81.000, 0.195	81.000, 0.286
407	81.200, 0.777	81.200, 0.776	81.200, 0.790	81.200, 0.692	81.200, 0.531	81.200, 0.195	81.200, 0.285
408	81.400, 0.778	81.400, 0.777	81.400, 0.790	81.400, 0.692	81.400, 0.531	81.400, 0.195	81.400, 0.285
409	81.600, 0.778	81.600, 0.777	81.600, 0.790	81.600, 0.692	81.600, 0.532	81.600, 0.195	81.600, 0.284
410	81.800, 0.779	81.800, 0.777	81.800, 0.790	81.800, 0.692	81.800, 0.532	81.800, 0.195	81.800, 0.284
411	82.000, 0.779	82.000, 0.777	82.000, 0.790	82.000, 0.692	82.000, 0.532	82.000, 0.195	82.000, 0.284
412	82.200, 0.779	82.200, 0.778	82.200, 0.790	82.200, 0.692	82.200, 0.532	82.200, 0.195	82.200, 0.284
413	82.400, 0.779	82.400, 0.778	82.400, 0.790	82.400, 0.692	82.400, 0.532	82.400, 0.195	82.400, 0.284
414	82.600, 0.780	82.600, 0.778	82.600, 0.791	82.600, 0.691	82.600, 0.531	82.600, 0.195	82.600, 0.285
415	82.800, 0.780	82.800, 0.778	82.800, 0.791	82.800, 0.691	82.800, 0.531	82.800, 0.195	82.800, 0.285
416	83.000, 0.780	83.000, 0.778	83.000, 0.791	83.000, 0.691	83.000, 0.531	83.000, 0.195	83.000, 0.285
417	83.200, 0.780	83.200, 0.779	83.200, 0.792	83.200, 0.691	83.200, 0.531	83.200, 0.195	83.200, 0.285
418	83.400, 0.780	83.400, 0.779	83.400, 0.792	83.400, 0.691	83.400, 0.531	83.400, 0.194	83.400, 0.285
419	83.600, 0.780	83.600, 0.779	83.600, 0.792	83.600, 0.691	83.600, 0.531	83.600, 0.194	83.600, 0.286
420	83.800, 0.780	83.800, 0.780	83.800, 0.793	83.800, 0.690	83.800, 0.530	83.800, 0.194	83.800, 0.286
421	84.000, 0.780	84.000, 0.780	84.000, 0.793	84.000, 0.690	84.000, 0.530	84.000, 0.194	84.000, 0.286
422	84.200, 0.780	84.200, 0.780	84.200, 0.793	84.200, 0.690	84.200, 0.529	84.200, 0.194	84.200, 0.286
423	84.400, 0.781	84.400, 0.780	84.400, 0.793	84.400, 0.691	84.400, 0.529	84.400, 0.193	84.400, 0.286
424	84.600, 0.781	84.600, 0.780	84.600, 0.794	84.600, 0.691	84.600, 0.528	84.600, 0.193	84.600, 0.286
425	84.800, 0.781	84.800, 0.780	84.800, 0.794	84.800, 0.691	84.800, 0.528	84.800, 0.193	84.800, 0.285
426	85.000, 0.781	85.000, 0.780	85.000, 0.794	85.000, 0.691	85.000, 0.528	85.000, 0.193	85.000, 0.285
427	85.200, 0.782	85.200, 0.780	85.200, 0.795	85.200, 0.691	85.200, 0.527	85.200, 0.193	85.200, 0.285
428	85.400, 0.782	85.400, 0.780	85.400, 0.795	85.400, 0.691	85.400, 0.527	85.400, 0.193	85.400, 0.284
429	85.600, 0.783	85.600, 0.780	85.600, 0.795	85.600, 0.691	85.600, 0.527	85.600, 0.193	85.600, 0.283
430	85.800, 0.783	85.800, 0.780	85.800, 0.795	85.800, 0.691	85.800, 0.527	85.800, 0.193	85.800, 0.283
431	86.000, 0.784	86.000, 0.780	86.000, 0.795	86.000, 0.691	86.000, 0.527	86.000, 0.193	86.000, 0.283
432	86.200, 0.784	86.200, 0.780	86.200, 0.795	86.200, 0.691	86.200, 0.526	86.200, 0.192	86.200, 0.283
433	86.400, 0.784	86.400, 0.780	86.400, 0.795	86.400, 0.691	86.400, 0.526	86.400, 0.192	86.400, 0.282
434	86.600, 0.785	86.600, 0.781	86.600, 0.796	86.600, 0.691	86.600, 0.526	86.600, 0.192	86.600, 0.282
435	86.800, 0.785	86.800, 0.781	86.800, 0.796	86.800, 0.691	86.800, 0.527	86.800, 0.192	86.800, 0.282
436	87.000, 0.785	87.000, 0.782	87.000, 0.796	87.000, 0.691	87.000, 0.527	87.000, 0.192	87.000, 0.282
437	87.200, 0.785	87.200, 0.782	87.200, 0.796	87.200, 0.691	87.200, 0.527	87.200, 0.193	87.200, 0.282
438	87.400, 0.786	87.400, 0.782	87.400, 0.796	87.400, 0.690	87.400, 0.527	87.400, 0.193	87.400, 0.282
439	87.600, 0.786	87.600, 0.783	87.600, 0.796	87.600, 0.690	87.600, 0.528	87.600, 0.192	87.600, 0.281
440	87.800, 0.786	87.800, 0.783	87.800, 0.796	87.800, 0.690	87.800, 0.527	87.800, 0.192	87.800, 0.281
441	88.000, 0.786	88.000, 0.783	88.000, 0.796	88.000, 0.690	88.000, 0.527	88.000, 0.192	88.000, 0.281
442	88.200, 0.786	88.200, 0.784	88.200, 0.796	88.200, 0.689	88.200, 0.527	88.200, 0.192	88.200, 0.281
443	88.400, 0.786	88.400, 0.784	88.400, 0.796	88.400, 0.689	88.400, 0.527	88.400, 0.192	88.400, 0.281
444	88.600, 0.786	88.600, 0.784	88.600, 0.796	88.600, 0.689	88.600, 0.527	88.600, 0.192	88.600, 0.281
445	88.800, 0.787	88.800, 0.785	88.800, 0.796	88.800, 0.689	88.800, 0.526	88.800, 0.192	88.800, 0.281
446	89.000, 0.787	89.000, 0.785	89.000, 0.796	89.000, 0.689	89.000, 0.526	89.000, 0.192	89.000, 0.281
447	89.200, 0.787	89.200, 0.785	89.200, 0.797	89.200, 0.689	89.200, 0.526	89.200, 0.192	89.200, 0.281
448	89.400, 0.787	89.400, 0.786	89.400, 0.797	89.400, 0.690	89.400, 0.526	89.400, 0.192	89.400, 0.281
449	89.600, 0.787	89.600, 0.786	89.600, 0.797	89.600, 0.690	89.600, 0.525	89.600, 0.192	89.600, 0.280
450	89.800, 0.788	89.800, 0.786	89.800, 0.797	89.800, 0.690	89.800, 0.525	89.800, 0.192	89.800, 0.280
451	90.000, 0.788	90.000, 0.786	90.000, 0.797	90.000, 0.690	90.000, 0.525	90.000, 0.192	90.000, 0.280
452	90.200, 0.788	90.200, 0.786	90.200, 0.797	90.200, 0.690	90.200, 0.525	90.200, 0.192	90.200, 0.280
453	90.400, 0.789	90.400, 0.786	90.400, 0.798	90.400, 0.690	90.400, 0.525	90.400, 0.192	90.400, 0.280
454	90.600, 0.789	90.600, 0.786	90.600, 0.798	90.600, 0.690	90.600, 0.525	90.600, 0.192	90.600, 0.280
455	90.800, 0.789	90.800, 0.786	90.800, 0.798	90.800, 0.690	90.800, 0.525	90.800, 0.191	90.800, 0.280
456	91.000, 0.790	91.000, 0.786	91.000, 0.798	91.000, 0.689	91.000, 0.524	91.000, 0.191	91.000, 0.280
457	91.200, 0.790	91.200, 0.786	91.200, 0.798	91.200, 0.689	91.200, 0.525	91.200, 0.191	91.200, 0.279
458	91.400, 0.790	91.400, 0.786	91.400, 0.799	91.400, 0.688	91.400, 0.525	91.400, 0.191	91.400, 0.279
459	91.600, 0.791	91.600, 0.786	91.600, 0.799	91.600, 0.688	91.600, 0.525	91.600, 0.191	91.600, 0.278
460	91.800, 0.791	91.800, 0.786	91.800, 0.799	91.800, 0.687	91.800, 0.525	91.800, 0.191	91.800, 0.278
461	92.000, 0.792	92.000, 0.787	92.000, 0.799	92.000, 0.687	92.000, 0.525	92.000, 0.190	92.000, 0.278
462	92.200, 0.792	92.200, 0.787	92.200, 0.798	92.200, 0.687	92.200, 0.525	92.200, 0.190	92.200, 0.278
463	92.400, 0.792	92.400, 0.787	92.400, 0.799	92.400, 0.687	92.400, 0.525	92.400, 0.190	92.400, 0.278
464	92.600, 0.792	92.600, 0.787	92.600, 0.799	92.600, 0.687	92.600, 0.525	92.600, 0.190	92.600, 0.277
465	92.800, 0.793	92.800, 0.788	92.800, 0.799	92.800, 0.687	92.800, 0.525	92.800, 0.190	92.800, 0.277
466	93.000, 0.793	93.000, 0.788	93.000, 0.799	93.000, 0.687	93.000, 0.525	93.000, 0.190	93.000, 0.277
467	93.200, 0.793	93.200, 0.788	93.200, 0.799	93.200, 0.687	93.200, 0.525	93.200, 0.190	93.200, 0.277
468	93.400, 0.793	93.400, 0.789	93.400, 0.799	93.400, 0.687	93.400, 0.524	93.400, 0.191	93.400, 0.277
469	93.600, 0.793	93.600, 0.789	93.600, 0.799	93.600, 0.688	93.600, 0.524	93.600, 0.191	93.600, 0.277
470	93.800, 0.794	93.800, 0.789	93.800, 0.799	93.800, 0.688	93.800, 0.524	93.800, 0.191	93.800, 0.277
471	94.000, 0.794	94.000, 0.789	94.000, 0.800	94.000, 0.688	94.000, 0.524	94.000, 0.191	94.000, 0.278
472	94.200, 0.794	94.200, 0.789	94.200, 0.800	94.200, 0.688	94.200, 0.523	94.200, 0.191	94.200, 0.278
473	94.400, 0.795	94.400, 0.789	94.400, 0.801	94.400, 0.689	94.400, 0.523	94.400, 0.190	94.400, 0.278
474	94.600, 0.795	94.600, 0.789	94.600, 0.801	94.600, 0.689	94.600, 0.523	94.600, 0.190	94.600, 0.278
475	94.800, 0.795	94.800, 0.789	94.800, 0.801	94.800, 0.689	94.800, 0.523	94.800, 0.190	94.800, 0.278
476	95.000, 0.795	95.000, 0.789	95.000, 0.802	95.000, 0.689	95.000, 0.523	95.000, 0.189	95.000, 0.278
477	95.200, 0.795	95.200, 0.789	95.200, 0.802	95.200, 0.689	95.200, 0.523	95.200, 0.189	95.200, 0.278
478	95.400, 0.795	95.400, 0.790	95.400, 0.802	95.400, 0.689	95.400, 0.523	95.400, 0.189	95.400, 0.278
479	95.600, 0.796	95.600, 0.790	95.600, 0.802	95.600, 0.689	95.600, 0.523	95.600, 0.189	95.600, 0.278
480	95.800, 0.796	95.800, 0.790	95.800, 0.802	95.800, 0.689	95.800, 0.523	95.800, 0.189	95.800, 0.278
481	96.000, 0.796	96.000, 0.791	96.000, 0.802	96.000, 0.688	96.000, 0.522	96.000, 0.189	96.000, 0.278
482	96.200, 0.796	96.200, 0.791	96.200, 0.802	96.200, 0.688	96.200, 0.522	96.200, 0.188	96.200, 0.278
483	96.400, 0.797	96.400, 0.791	96.400, 0.802	96.400, 0.688	96.400, 0.522	96.400, 0.188	96.400, 0.278
484	96.600, 0.797	96.600, 0.792	96.600, 0.802	96.600, 0.688	96.600, 0.522	96.600, 0.188	96.600, 0.278
485	96.800, 0.797	96.800, 0.792	96.800, 0.801	96.800, 0.688	96.800, 0.521	96.800, 0.188	96.800, 0.278
486	97.000, 0.797	97.000, 0.792	97.000, 0.801	97.000, 0.688	97.000, 0.521	97.000, 0.188	97.000, 0.277
487	97.200, 0.798	97.200, 0.792	97.200, 0.801	97.200, 0.687	97.200, 0.521	97.200, 0.188	97.200, 0.277
488	97.400, 0.798	97.400, 0.793	97.400, 0.801	97.400, 0.687	97.400, 0.520	97.400, 0.188	97.400, 0.277
489	97.600, 0.798	97.600, 0.793	97.600, 0.801	97.600, 0.687	97.600, 0.520	97.600, 0.188	97.600, 0.276
490	97.800, 0.799	97.800, 0.793	97.800, 0.802	97.800, 0.687	97.800, 0.520	97.800, 0.188	97.800, 0.276
491	98.000, 0.799	98.000, 0.793	98.000, 0.802	98.000, 0.687	98.000, 0.520	98.000, 0.188	98.000, 0.275
492	98.200, 0.799	98.200, 0.793	98.200, 0.802	98.200, 0.687	98.200, 0.519	98.200, 0.187	98.200, 0.275
493	98.400, 0.800	98.400, 0.794	98.400, 0.803	98.400, 0.687	98.400, 0.519	98.400, 0.187	98.400, 0.274
494	98.600, 0.800	98.600, 0.794	98.600, 0.803	98.600, 0.687	98.600, 0.519	98.600, 0.187	98.600, 0.274
495	98.800, 0.800	98.800, 0.794	98.800, 0.803	98.800, 0.687	98.800, 0.519	98.800, 0.187	98.800, 0.274
496	99.000, 0.800	99.000, 0.794	99.000, 0.804	99.000, 0.687	99.000, 0.519	99.000, 0.187	99.000, 0.274
497	99.200, 0.800	99.200, 0.794	99.200, 0.804	99.200, 0.687	99.200, 0.520	99.200, 0.187	99.200, 0.274
498	99.400, 0.801	99.400, 0.794	99.400, 0.804	99.400, 0.687	99.400, 0.520	99.400, 0.187	99.400, 0.274
499	99.600, 0.801	99.600, 0.794	99.600, 0.804	99.600, 0.687	99.600, 0.520	99.600, 0.187	99.600, 0.274
500	99.800, 0.801	99.800, 0.794	99.800, 0.804	99.800, 0.687	99.800, 0.520	99.800, 0.187	99.800, 0.274
501	100.000, 0.802	100.000, 0.795	100.000, 0.803	100.000, 0.687	100.000, 0.521	100.000, 0.187	100.000, 0.274
502	100.200, 0.802	100.200, 0.795	100.200, 0.803	100.200, 0.687	100.200, 0.521	100.200, 0.187	100.200, 0.274
503	100.400, 0.802	100.400, 0.795	100.400, 0.803	100.400, 0.687	100.400, 0.520	100.400, 0.187	100.400, 0.274
504	100.600, 0.802	100.600, 0.795	100.600, 0.803	100.600, 0.687	100.600, 0.520	100.600, 0.187	100.600, 0.274
505	100.800, 0.802	100.800, 0.796	100.800, 0.803	100.800, 0.688	100.800, 0.520	100.800, 0.187	100.800, 0.274
506	101.000, 0.802	101.000, 0.796	101.000, 0.803	101.000, 0.688	101.000, 0.520	101.000, 0.186	101.000, 0.274
507	101.200, 0.802	101.200, 0.797	101.200, 0.804	101.200, 0.688	101.200, 0.520	101.200, 0.186	101.200, 0.274
508	101.400, 0.802	101.400, 0.797	101.400, 0.804	101.400, 0.688	101.400, 0.520	101.400, 0.186	101.400, 0.273
509	101.600, 0.803	101.600, 0.797	101.600, 0.804	101.600, 0.688	101.600, 0.520	101.600, 0.186	101.600, 0.273
510	101.800, 0.803	101.800, 0.798	101.800, 0.804	101.800, 0.687	101.800, 0.520	101.800, 0.186	101.800, 0.273
511	102.000, 0.803	102.000, 0.798	102.000, 0.804	102.000, 0.687	102.000, 0.520	102.000, 0.185	102.000, 0.272
512	102.200, 0.803	102.200, 0.798	102.200, 0.805	102.200, 0.687	102.200, 0.520	102.200, 0.185	102.200, 0.272
513	102.400, 0.803	102.400, 0.799	102.400, 0.805	102.400, 0.687	102.400, 0.519	102.400, 0.185	102.400, 0.272
514	102.600, 0.803	102.600, 0.799	102.600, 0.805	102.600, 0.687	102.600, 0.519	102.600, 0.184	102.600, 0.272
515	102.800, 0.804	102.800, 0.799	102.800, 0.805	102.800, 0.686	102.800, 0.519	102.800, 0.184	102.800, 0.272
516	103.000, 0.804	103.000, 0.799	103.000, 0.805	103.000, 0.686	103.000, 0.519	103.000, 0.184	103.000, 0.272
517	103.200, 0.805	103.200, 0.798	103.200, 0.805	103.200, 0.685	103.200, 0.519	103.200, 0.184	103.200, 0.273
518	103.400, 0.805	103.400, 0.798	103.400, 0.805	103.400, 0.685	103.400, 0.519	103.400, 0.185	103.400, 0.273
519	103.600, 0.805	103.600, 0.798	103.600, 0.805	103.600, 0.685	103.600, 0.519	103.600, 0.185	103.600, 0.273
520	103.800, 0.805	103.800, 0.798	103.800, 0.805	103.800, 0.685	103.800, 0.519	103.800, 0.185	103.800, 0.273
521	104.000, 0.805	104.000, 0.799	104.000, 0.805	104.000, 0.685	104.000, 0.519	104.000, 0.185	104.000, 0.273
522	104.200, 0.805	104.200, 0.799	104.200, 0.805	104.200, 0.685	104.200, 0.519	104.200, 0.185	104.200, 0.273
523	104.400, 0.806	104.400, 0.800	104.400, 0.805	104.400, 0.685	104.400, 0.518	104.400, 0.185	104.400, 0.273
524	104.600, 0.806	104.600, 0.800	104.600, 0.806	104.600, 0.685	104.600, 0.518	104.600, 0.185	104.600, 0.272
525	104.800, 0.806	104.800, 0.800	104.800, 0.806	104.800, 0.686	104.800, 0.518	104.800, 0.185	104.800, 0.272
526	105.000, 0.806	105.000, 0.800	105.000, 0.806	105.000, 0.686	105.000, 0.518	105.000, 0.185	105.000, 0.272
527	105.200, 0.806	105.200, 0.800	105.200, 0.806	105.200, 0.686	105.200, 0.518	105.200, 0.185	105.200, 0.271
528	105.400, 0.807	105.400, 0.800	105.400, 0.806	105.400, 0.686	105.400, 0.518	105.400, 0.185	105.400, 0.271
529	105.600, 0.807	105.600, 0.801	105.600, 0.807	105.600, 0.686	105.600, 0.519	105.600, 0.185	105.600, 0.271
530	105.800, 0.807	105.800, 0.801	105.800, 0.807	105.800, 0.686	105.800, 0.519	105.800, 0.185	105.800, 0.271
531	106.000, 0.807	106.000, 0.801	106.000, 0.807	106.000, 0.686	106.000, 0.519	106.000, 0.186	106.000, 0.271
532	106.200, 0.807	106.200, 0.801	106.200, 0.807	106.200, 0.686	106.200, 0.519	106.200, 0.186	106.200, 0.271
533	106.400, 0.807	106.400, 0.802	106.400, 0.808	106.400, 0.686	106.400, 0.518	106.400, 0.185	106.400, 0.271
534	106.600, 0.807	106.600, 0.802	106.600, 0.807	106.600, 0.686	106.600, 0.518	106.600, 0.185	106.600, 0.271
535	106.800, 0.807	106.800, 0.802	106.800, 0.807	106.800, 0.686	106.800, 0.518	106.800, 0.185	106.800, 0.271
536	107.000, 0.808	107.000, 0.802	107.000, 0.807	107.000, 0.685	107.000, 0.518	107.000, 0.185	107.000, 0.271
537	107.200, 0.808	107.200, 0.802	107.200, 0.807	107.200, 0.685	107.200, 0.518	107.200, 0.185	107.200, 0.271
538	107.400, 0.808	107.400, 0.802	107.400, 0.807	107.400, 0.685	107.400, 0.519	107.400, 0.185	107.400, 0.271
539	107.600, 0.809	107.600, 0.802	107.600, 0.807	107.600, 0.685	107.600, 0.519	107.600, 0.184	107.600, 0.271
540	107.800, 0.809	107.800, 0.802	107.800, 0.807	107.800, 0.685	107.800, 0.519	107.800, 0.184	107.800, 0.271
541	108.000, 0.809	108.000, 0.802	108.000, 0.807	108.000, 0.685	108.000, 0.519	108.000, 0.183	108.000, 0.270
542	108.200, 0.809	108.200, 0.803	108.200, 0.807	108.200, 0.685	108.200, 0.519	108.200, 0.183	108.200, 0.270
543	108.400, 0.809	108.400, 0.803	108.400, 0.807	108.400, 0.685	108.400, 0.518	108.400, 0.183	108.400, 0.269
544	108.600, 0.810	108.600, 0.803	108.600, 0.807	108.600, 0.685	108.600, 0.518	108.600, 0.183	108.600, 0.269
545	108.800, 0.810	108.800, 0.803	108.800, 0.808	108.800, 0.685	108.800, 0.518	108.800, 0.183	108.800, 0.269
546	109.000, 0.810	109.000, 0.804	109.000, 0.808	109.000, 0.685	109.000, 0.518	109.000, 0.183	109.000, 0.269
547	109.200, 0.810	109.200, 0.804	109.200, 0.808	109.200, 0.685	109.200, 0.518	109.200, 0.183	109.200, 0.269
548	109.400, 0.810	109.400, 0.805	109.400, 0.808	109.400, 0.685	109.400, 0.517	109.400, 0.184	109.400, 0.269
549	109.600, 0.810	109.600, 0.805	109.600, 0.808	109.600, 0.685	109.600, 0.517	109.600, 0.184	109.600, 0.268
550	109.800, 0.810	109.800, 0.806	109.800, 0.808	109.800, 0.686	109.800, 0.517	109.800, 0.184	109.800, 0.268
551	110.000, 0.810	110.000, 0.806	110.000, 0.808	110.000, 0.686	110.000, 0.516	110.000, 0.185	110.000, 0.268
552	110.200, 0.810	110.200, 0.806	110.200, 0.808	110.200, 0.686	110.200, 0.516	110.200, 0.185	110.200, 0.267
553	110.400, 0.810	110.400, 0.807	110.400, 0.809	110.400, 0.685	110.400, 0.515	110.400, 0.185	110.400, 0.267
554	110.600, 0.810	110.600, 0.807	110.600, 0.809	110.600, 0.685	110.600, 0.515	110.600, 0.185	110.600, 0.267
555	110.800, 0.811	110.800, 0.807	110.800, 0.809	110.800, 0.685	110.800, 0.515	110.800, 0.185	110.800, 0.267
556	111.000, 0.811	111.000, 0.807	111.000, 0.809	111.000, 0.685	111.000, 0.515	111.000, 0.185	111.000, 0.267
557	111.200, 0.811	111.200, 0.807	111.200, 0.810	111.200, 0.685	111.200, 0.515	111.200, 0.185	111.200, 0.267
558	111.400, 0.812	111.400, 0.806	111.400, 0.810	111.400, 0.685	111.400, 0.515	111.400, 0.185	111.400, 0.267
559	111.600, 0.812	111.600, 0.806	111.600, 0.810	111.600, 0.684	111.600, 0.515	111.600, 0.185	111.600, 0.266
560	111.800, 0.812	111.800, 0.806	111.800, 0.810	111.800, 0.684	111.800, 0.515	111.800, 0.184	111.800, 0.266
561	112.000, 0.812	112.000, 0.806	112.000, 0.810	112.000, 0.684	112.000, 0.515	112.000, 0.184	112.000, 0.266
562	112.200, 0.812	112.200, 0.806	112.200, 0.810	112.200, 0.684	112.200, 0.516	112.200, 0.184	112.200, 0.266
563	112.400, 0.813	112.400, 0.806	112.400, 0.810	112.400, 0.683	112.400, 0.516	112.400, 0.184	112.400, 0.267
564	112.600, 0.813	112.600, 0.806	112.600, 0.810	112.600, 0.683	112.600, 0.516	112.600, 0.184	112.600, 0.267
565	112.800, 0.813	112.800, 0.806	112.800, 0.810	112.800, 0.683	112.800, 0.516	112.800, 0.184	112.800, 0.267
566	113.000, 0.813	113.000, 0.807	113.000, 0.810	113.000, 0.682	113.000, 0.516	113.000, 0.184	113.000, 0.267
567	113.200, 0.813	113.200, 0.807	113.200, 0.809	113.200, 0.682	113.200, 0.516	113.200, 0.184	113.200, 0.267
568	113.400, 0.813	113.400, 0.807	113.400, 0.809	113.400, 0.682	113.400, 0.516	113.400, 0.184	113.400, 0.267
569	113.600, 0.814	113.600, 0.807	113.600, 0.809	113.600, 0.681	113.600, 0.516	113.600, 0.183	113.600, 0.267
570	113.800, 0.814	113.800, 0.808	113.800, 0.809	113.800, 0.681	113.800, 0.516	113.800, 0.183	113.800, 0.268
571	114.000, 0.814	114.000, 0.808	114.000, 0.809	114.000, 0.681	114.000, 0.516	114.000, 0.182	114.000, 0.267
572	114.200, 0.814	114.200, 0.808	114.200, 0.809	114.200, 0.682	114.200, 0.516	114.200, 0.182	114.200, 0.267
573	114.400, 0.814	114.400, 0.808	114.400, 0.809	114.400, 0.682	114.400, 0.516	114.400, 0.181	114.400, 0.267
574	114.600, 0.814	114.600, 0.808	114.600, 0.809	114.600, 0.682	114.600, 0.516	114.600, 0.181	114.600, 0.267
575	114.800, 0.814	114.800, 0.808	114.800, 0.809	114.800, 0.683	114.800, 0.516	114.800, 0.181	114.800, 0.266
576	115.000, 0.814	115.000, 0.808	115.000, 0.810	115.000, 0.683	115.000, 0.516	115.000, 0.181	115.000, 0.266
577	115.200, 0.815	115.200, 0.808	115.200, 0.810	115.200, 0.683	115.200, 0.516	115.200, 0.181	115.200, 0.266
578	115.400, 0.815	115.400, 0.808	115.400, 0.810	115.400, 0.683	115.400, 0.515	115.400, 0.181	115.400, 0.265
579	115.600, 0.815	115.600, 0.808	115.600, 0.811	115.600, 0.683	115.600, 0.515	115.600, 0.181	115.600, 0.265
580	115.800, 0.815	115.800, 0.808	115.800, 0.811	115.800, 0.683	115.800, 0.515	115.800, 0.181	115.800, 0.265
581	116.000, 0.815	116.000, 0.807	116.000, 0.811	116.000, 0.683	116.000, 0.515	116.000, 0.182	116.000, 0.265
582	116.200, 0.815	116.200, 0.807	116.200, 0.811	116.200, 0.683	116.200, 0.514	116.200, 0.182	116.200, 0.265
583	116.400, 0.816	116.400, 0.807	116.400, 0.812	116.400, 0.683	116.400, 0.514	116.400, 0.182	116.400, 0.265
584	116.600, 0.816	116.600, 0.807	116.600, 0.812	116.600, 0.683	116.600, 0.514	116.600, 0.183	116.600, 0.265
585	116.800, 0.816	116.800, 0.807	116.800, 0.812	116.800, 0.683	116.800, 0.513	116.800, 0.183	116.800, 0.265
586	117.000, 0.816	117.000, 0.808	117.000, 0.812	117.000, 0.683	117.000, 0.513	117.000, 0.183	117.000, 0.265
587	117.200, 0.817	117.200, 0.808	117.200, 0.812	117.200, 0.683	117.200, 0.513	117.200, 0.183	117.200, 0.265
588	117.400, 0.817	117.400, 0.808	117.400, 0.812	117.400, 0.682	117.400, 0.513	117.400, 0.182	117.400, 0.265
589	117.600, 0.817	117.600, 0.809	117.600, 0.812	117.600, 0.682	117.600, 0.513	117.600, 0.182	117.600, 0.266
590	117.800, 0.817	117.800, 0.809	117.800, 0.812	117.800, 0.682	117.800, 0.513	117.800, 0.181	117.800, 0.266
591	118.000, 0.816	118.000, 0.809	118.000, 0.812	118.000, 0.682	118.000, 0.513	118.000, 0.181	118.000, 0.266
592	118.200, 0.816	118.200, 0.810	118.200, 0.812	118.200, 0.683	118.200, 0.513	118.200, 0.181	118.200, 0.266
593	118.400, 0.816	118.400, 0.810	118.400, 0.812	118.400, 0.683	118.400, 0.513	118.400, 0.180	118.400, 0.266
594	118.600, 0.817	118.600, 0.811	118.600, 0.812	118.600, 0.683	118.600, 0.513	118.600, 0.180	118.600, 0.266
595	118.800, 0.817	118.800, 0.811	118.800, 0.812	118.800, 0.683	118.800, 0.513	118.800, 0.180	118.800, 0.266
596	119.000, 0.817	119.000, 0.811	119.000, 0.812	119.000, 0.683	119.000, 0.512	119.000, 0.180	119.000, 0.266
597	119.200, 0.817	119.200, 0.812	119.200, 0.812	119.200, 0.683	119.200, 0.512	119.200, 0.180	119.200, 0.266
598	119.400, 0.817	119.400, 0.811	119.400, 0.812	119.400, 0.682	119.400, 0.512	119.400, 0.180	119.400, 0.266
599	119.600, 0.817	119.600, 0.811	119.600, 0.812	119.600, 0.682	119.600, 0.511	119.600, 0.179	119.600, 0.266
600	119.800, 0.817	119.800, 0.811	119.800, 0.812	119.800, 0.682	119.800, 0.511	119.800, 0.180	119.800, 0.265
601	120.000, 0.818	120.000, 0.810	120.000, 0.813	120.000, 0.682	120.000, 0.511	120.000, 0.180	120.000, 0.265
602	120.200, 0.818	120.200, 0.810	120.200, 0.813	120.200, 0.681	120.200, 0.510	120.200, 0.180	120.200, 0.265
603	120.400, 0.818	120.400, 0.810	120.400, 0.813	120.400, 0.681	120.400, 0.510	120.400, 0.181	120.400, 0.265
604	120.600, 0.818	120.600, 0.810	120.600, 0.813	120.600, 0.681	120.600, 0.510	120.600, 0.181	120.600, 0.265
605	120.800, 0.819	120.800, 0.810	120.800, 0.813	120.800, 0.680	120.800, 0.510	120.800, 0.181	120.800, 0.264
606	121.000, 0.819	121.000, 0.810	121.000, 0.813	121.000, 0.680	121.000, 0.511	121.000, 0.182	121.000, 0.264
607	121.200, 0.819	121.200, 0.810	121.200, 0.813	121.200, 0.680	121.200, 0.511	121.200, 0.182	121.200, 0.264
608	121.400, 0.819	121.400, 0.810	121.400, 0.813	121.400, 0.680	121.400, 0.512	121.400, 0.182	121.400, 0.263
609	121.600, 0.819	121.600, 0.810	121.600, 0.813	121.600, 0.680	121.600, 0.512	121.600, 0.182	121.600, 0.263
610	121.800, 0.819	121.800, 0.810	121.800, 0.813	121.800, 0.680	121.800, 0.512	121.800, 0.182	121.800, 0.263
611	122.000, 0.819	122.000, 0.811	122.000, 0.813	122.000, 0.680	122.000, 0.513	122.000, 0.181	122.000, 0.262
612	122.200, 0.819	122.200, 0.811	122.200, 0.813	122.200, 0.681	122.200, 0.513	122.200, 0.181	122.200, 0.262
613	122.400, 0.820	122.400, 0.811	122.400, 0.813	122.400, 0.681	122.400, 0.513	122.400, 0.180	122.400, 0.262
614	122.600, 0.820	122.600, 0.812	122.600, 0.813	122.600, 0.681	122.600, 0.513	122.600, 0.180	122.600, 0.261
615	122.800, 0.820	122.800, 0.812	122.800, 0.813	122.800, 0.681	122.800, 0.513	122.800, 0.180	122.800, 0.261
616	123.000, 0.820	123.000, 0.812	123.000, 0.813	123.000, 0.681	123.000, 0.512	123.000, 0.180	123.000, 0.261
617	123.200, 0.820	123.200, 0.813	123.200, 0.814	123.200, 0.681	123.200, 0.512	123.200, 0.180	123.200, 0.261
618	123.400, 0.820	123.400, 0.813	123.400, 0.814	123.400, 0.681	123.400, 0.512	123.400, 0.180	123.400, 0.261
619	123.600, 0.820	123.600, 0.813	123.600, 0.814	123.600, 0.681	123.600, 0.512	123.600, 0.180	123.600, 0.261
620	123.800, 0.820	123.800, 0.813	123.800, 0.815	123.800, 0.681	123.800, 0.511	123.800, 0.180	123.800, 0.262
621	124.000, 0.820	124.000, 0.814	124.000, 0.815	124.000, 0.681	124.000, 0.511	124.000, 0.181	124.000, 0.262
622	124.200, 0.820	124.200, 0.814	124.200, 0.816	124.200, 0.680	124.200, 0.511	124.200, 0.181	124.200, 0.262
623	124.400, 0.820	124.400, 0.814	124.400, 0.816	124.400, 0.680	124.400, 0.510	124.400, 0.181	124.400, 0.263
624	124.600, 0.821	124.600, 0.814	124.600, 0.816	124.600, 0.680	124.600, 0.510	124.600, 0.181	124.600, 0.263
625	124.800, 0.821	124.800, 0.814	124.800, 0.816	124.800, 0.680	124.800, 0.510	124.800, 0.181	124.800, 0.264
626	125.000, 0.821	125.000, 0.814	125.000, 0.816	125.000, 0.680	125.000, 0.510	125.000, 0.181	125.000, 0.264
627	125.200, 0.821	125.200, 0.814	125.200, 0.816	125.200, 0.680	125.200, 0.510	125.200, 0.181	125.200, 0.264
628	125.400, 0.821	125.400, 0.814	125.400, 0.816	125.400, 0.680	125.400, 0.510	125.400, 0.181	125.400, 0.264
629	125.600, 0.822	125.600, 0.814	125.600, 0.816	125.600, 0.679	125.600, 0.510	125.600, 0.180	125.600, 0.264
630	125.800, 0.822	125.800, 0.814	125.800, 0.816	125.800, 0.679	125.800, 0.510	125.800, 0.180	125.800, 0.263
631	126.000, 0.822	126.000, 0.814	126.000, 0.816	126.000, 0.679	126.000, 0.510	126.000, 0.180	126.000, 0.263
632	126.200, 0.822	126.200, 0.815	126.200, 0.815	126.200, 0.679	126.200, 0.510	126.200, 0.180	126.200, 0.262
633	126.400, 0.823	126.400, 0.815	126.400, 0.815	126.400, 0.678	126.400, 0.510	126.400, 0.180	126.400, 0.262
634	126.600, 0.823	126.600, 0.815	126.600, 0.815	126.600, 0.678	126.600, 0.510	126.600, 0.180	126.600, 0.261
635	126.800, 0.823	126.800, 0.815	126.800, 0.815	126.800, 0.678	126.800, 0.510	126.800, 0.180	126.800, 0.261
636	127.000, 0.823	127.000, 0.815	127.000, 0.815	127.000, 0.679	127.000, 0.510	127.000, 0.181	127.000, 0.261
637	127.200, 0.823	127.200, 0.815	127.200, 0.816	127.200, 0.679	127.200, 0.510	127.200, 0.181	127.200, 0.260
638	127.400, 0.823	127.400, 0.815	127.400, 0.816	127.400, 0.679	127.400, 0.510	127.400, 0.182	127.400, 0.260
639	127.600, 0.823	127.600, 0.815	127.600, 0.816	127.600, 0.679	127.600, 0.510	127.600, 0.182	127.600, 0.260
640	127.800, 0.822	127.800, 0.815	127.800, 0.816	127.800, 0.679	127.800, 0.510	127.800, 0.182	127.800, 0.260
641	128.000, 0.822	128.000, 0.815	128.000, 0.816	128.000, 0.679	128.000, 0.510	128.000, 0.182	128.000, 0.260
642	128.200, 0.822	128.200, 0.815	128.200, 0.816	128.200, 0.680	128.200, 0.510	128.200, 0.182	128.200, 0.260
643	128.400, 0.822	128.400, 0.815	128.400, 0.816	128.400, 0.680	128.400, 0.510	128.400, 0.181	128.400, 0.260
644	128.600, 0.822	128.600, 0.815	128.600, 0.816	128.600, 0.680	128.600, 0.509	128.600, 0.181	128.600, 0.260
645	128.800, 0.822	128.800, 0.816	128.800, 0.816	128.800, 0.680	128.800, 0.509	128.800, 0.181	128.800, 0.260
646	129.000, 0.822	129.000, 0.816	129.000, 0.816	129.000, 0.680	129.000, 0.509	129.000, 0.181	129.000, 0.260
647	129.200, 0.822	129.200, 0.816	129.200, 0.815	129.200, 0.679	129.200, 0.509	129.200, 0.180	129.200, 0.260
648	129.400, 0.822	129.400, 0.816	129.400, 0.815	129.400, 0.679	129.400, 0.509	129.400, 0.180	129.400, 0.260
649	129.600, 0.823	129.600, 0.817	129.600, 0.815	129.600, 0.679	129.600, 0.508	129.600, 0.180	129.600, 0.260
650	129.800, 0.823	129.800, 0.817	129.800, 0.815	129.800, 0.679	129.800, 0.508	129.800, 0.179	129.800, 0.260
651	130.000, 0.823	130.000, 0.817	130.000, 0.815	130.000, 0.678	130.000, 0.508	130.000, 0.179	130.000, 0.260
652	130.200, 0.823	130.200, 0.817	130.200, 0.815	130.200, 0.678	130.200, 0.508	130.200, 0.179	130.200, 0.260
653	130.400, 0.824	130.400, 0.817	130.400, 0.815	130.400, 0.678	130.400, 0.509	130.400, 0.179	130.400, 0.260
654	130.600, 0.824	130.600, 0.818	130.600, 0.815	130.600, 0.678	130.600, 0.509	130.600, 0.179	130.600, 0.260
655	130.800, 0.824	130.800, 0.818	130.800, 0.815	130.800, 0.678	130.800, 0.509	130.800, 0.179	130.800, 0.259
656	131.000, 0.824	131.000, 0.818	131.000, 0.815	131.000, 0.678	131.000, 0.509	131.000, 0.180	131.000, 0.259
657	131.200, 0.824	131.200, 0.818	131.200, 0.815	131.200, 0.678	131.200, 0.508	131.200, 0.180	131.200, 0.259
658	131.400, 0.824	131.400, 0.818	131.400, 0.815	131.400, 0.678	131.400, 0.508	131.400, 0.180	131.400, 0.258
659	131.600, 0.824	131.600, 0.818	131.600, 0.815	131.600, 0.678	131.600, 0.508	131.600, 0.180	131.600, 0.258
660	131.800, 0.824	131.800, 0.818	131.800, 0.815	131.800, 0.678	131.800, 0.508	131.800, 0.181	131.800, 0.258
661	132.000, 0.824	132.000, 0.819	132.000, 0.815	132.000, 0.678	132.000, 0.508	132.000, 0.181	132.000, 0.258
662	132.200, 0.825	132.200, 0.819	132.200, 0.815	132.200, 0.678	132.200, 0.508	132.200, 0.180	132.200, 0.258
663	132.400, 0.825	132.400, 0.819	132.400, 0.815	132.400, 0.678	132.400, 0.508	132.400, 0.180	132.400, 0.258
664	132.600, 0.825	132.600, 0.819	132.600, 0.815	132.600, 0.678	132.600, 0.508	132.600, 0.180	132.600, 0.258
665	132.800, 0.825	132.800, 0.819	132.800, 0.815	132.800, 0.678	132.800, 0.508	132.800, 0.179	132.800, 0.258
666	133.000, 0.825	133.000, 0.819	133.000, 0.815	133.000, 0.678	133.000, 0.508	133.000, 0.178	133.000, 0.258
667	133.200, 0.825	133.200, 0.819	133.200, 0.815	133.200, 0.678	133.200, 0.509	133.200, 0.178	133.200, 0.258
668	133.400, 0.825	133.400, 0.819	133.400, 0.815	133.400, 0.678	133.400, 0.509	133.400, 0.178	133.400, 0.258
669	133.600, 0.825	133.600, 0.819	133.600, 0.815	133.600, 0.678	133.600, 0.509	133.600, 0.177	133.600, 0.258
670	133.800, 0.826	133.800, 0.819	133.800, 0.816	133.800, 0.677	133.800, 0.509	133.800, 0.177	133.800, 0.258
671	134.000, 0.826	134.000, 0.819	134.000, 0.816	134.000, 0.677	134.000, 0.509	134.000, 0.177	134.000, 0.258
672	134.200, 0.827	134.200, 0.819	134.200, 0.816	134.200, 0.677	134.200, 0.509	134.200, 0.177	134.200, 0.258
673	134.400, 0.827	134.400, 0.819	134.400, 0.816	134.400, 0.676	134.400, 0.509	134.400, 0.177	134.400, 0.258
674	134.600, 0.827	134.600, 0.819	134.600, 0.816	134.600, 0.676	134.600, 0.509	134.600, 0.177	134.600, 0.258
675	134.800, 0.827	134.800, 0.819	134.800, 0.817	134.800, 0.676	134.800, 0.508	134.800, 0.177	134.800, 0.258
676	135.000, 0.828	135.000, 0.819	135.000, 0.817	135.000, 0.676	135.000, 0.508	135.000, 0.177	135.000, 0.258
677	135.200, 0.828	135.200, 0.819	135.200, 0.817	135.200, 0.676	135.200, 0.508	135.200, 0.178	135.200, 0.258
678	135.400, 0.828	135.400, 0.819	135.400, 0.817	135.400, 0.676	135.400, 0.508	135.400, 0.178	135.400, 0.258
679	135.600, 0.828	135.600, 0.819	135.600, 0.818	135.600, 0.676	135.600, 0.508	135.600, 0.178	135.600, 0.258
680	135.800, 0.828	135.800, 0.820	135.800, 0.818	135.800, 0.675	135.800, 0.507	135.800, 0.179	135.800, 0.258
681	136.000, 0.829	136.000, 0.820	136.000, 0.818	136.000, 0.675	136.000, 0.507	136.000, 0.179	136.000, 0.258
682	136.200, 0.829	136.200, 0.820	136.200, 0.818	136.200, 0.675	136.200, 0.507	136.200, 0.179	136.200, 0.258
683	136.400, 0.829	136.400, 0.821	136.400, 0.818	136.400, 0.675	136.400, 0.507	136.400, 0.178	136.400, 0.258
684	136.600, 0.829	136.600, 0.821	136.600, 0.818	136.600, 0.675	136.600, 0.507	136.600, 0.178	136.600, 0.258
685	136.800, 0.829	136.800, 0.821	136.800, 0.818	136.800, 0.675	136.800, 0.507	136.800, 0.178	136.800, 0.258
686	137.000, 0.828	137.000, 0.821	137.000, 0.818	137.000, 0.675	137.000, 0.507	137.000, 0.179	137.000, 0.258
687	137.200, 0.828	137.200, 0.821	137.200, 0.818	137.200, 0.675	137.200, 0.507	137.200, 0.179	137.200, 0.257
688	137.400, 0.829	137.400, 0.821	137.400, 0.818	137.400, 0.675	137.400, 0.507	137.400, 0.179	137.400, 0.257
689	137.600, 0.829	137.600, 0.821	137.600, 0.818	137.600, 0.676	137.600, 0.507	137.600, 0.179	137.600, 0.257
690	137.800, 0.829	137.800, 0.821	137.800, 0.818	137.800, 0.676	137.800, 0.506	137.800, 0.179	137.800, 0.256
691	138.000, 0.829	138.000, 0.821	138.000, 0.818	138.000, 0.676	138.000, 0.506	138.000, 0.179	138.000, 0.256
692	138.200, 0.829	138.200, 0.822	138.200, 0.818	138.200, 0.676	138.200, 0.506	138.200, 0.179	138.200, 0.256
693	138.400, 0.829	138.400, 0.822	138.400, 0.818	138.400, 0.676	138.400, 0.506	138.400, 0.179	138.400, 0.256
694	138.600, 0.829	138.600, 0.822	138.600, 0.818	138.600, 0.676	138.600, 0.507	138.600, 0.179	138.600, 0.256
695	138.800, 0.829	138.800, 0.822	138.800, 0.817	138.800, 0.676	138.800, 0.507	138.800, 0.179	138.800, 0.256
696	139.000, 0.830	139.000, 0.822	139.000, 0.817	139.000, 0.675	139.000, 0.507	139.000, 0.179	139.000, 0.256
697	139.200, 0.830	139.200, 0.822	139.200, 0.817	139.200, 0.675	139.200, 0.507	139.200, 0.179	139.200, 0.256
698	139.400, 0.830	139.400, 0.822	139.400, 0.817	139.400, 0.675	139.400, 0.507	139.400, 0.179	139.400, 0.256
699	139.600, 0.830	139.600, 0.822	139.600, 0.817	139.600, 0.675	139.600, 0.507	139.600, 0.179	139.600, 0.256
700	139.800, 0.830	139.800, 0.822	139.800, 0.817	139.800, 0.675	139.800, 0.507	139.800, 0.179	139.800, 0.256
701	140.000, 0.830	140.000, 0.822	140.000, 0.817	140.000, 0.675	140.000, 0.507	140.000, 0.179	140.000, 0.256
702	140.200, 0.830	140.200, 0.823	140.200, 0.817	140.200, 0.675	140.200, 0.507	140.200, 0.179	140.200, 0.256
703	140.400, 0.830	140.400, 0.822	140.400, 0.817	140.400, 0.675	140.400, 0.506	140.400, 0.179	140.400, 0.256
704	140.600, 0.830	140.600, 0.822	140.600, 0.816	140.600, 0.675	140.600, 0.506	140.600, 0.179	140.600, 0.256
705	140.800, 0.830	140.800, 0.822	140.800, 0.816	140.800, 0.675	140.800, 0.506	140.800, 0.179	140.800, 0.256
706	141.000, 0.830	141.000, 0.822	141.000, 0.816	141.000, 0.675	141.000, 0.505	141.000, 0.179	141.000, 0.256
707	141.200, 0.830	141.200, 0.821	141.200, 0.816	141.200, 0.676	141.200, 0.505	141.200, 0.179	141.200, 0.256
708	141.400, 0.830	141.400, 0.821	141.400, 0.816	141.400, 0.676	141.400, 0.505	141.400, 0.179	141.400, 0.256
709	141.600, 0.830	141.600, 0.821	141.600, 0.816	141.600, 0.676	141.600, 0.505	141.600, 0.179	141.600, 0.256
710	141.800, 0.831	141.800, 0.822	141.800, 0.817	141.800, 0.676	141.800, 0.504	141.800, 0.179	141.800, 0.256
711	142.000, 0.831	142.000, 0.822	142.000, 0.817	142.000, 0.676	142.000, 0.504	142.000, 0.179	142.000, 0.256
712	142.200, 0.831	142.200, 0.822	142.200, 0.817	142.200, 0.676	142.200, 0.504	142.200, 0.179	142.200, 0.256
713	142.400, 0.830	142.400, 0.822	142.400, 0.817	142.400, 0.676	142.400, 0.504	142.400, 0.179	142.400, 0.255
714	142.600, 0.830	142.600, 0.823	142.600, 0.818	142.600, 0.676	142.600, 0.504	142.600, 0.179	142.600, 0.255
715	142.800, 0.830	142.800, 0.823	142.800, 0.818	142.800, 0.676	142.800, 0.504	142.800, 0.179	142.800, 0.255
716	143.000, 0.830	143.000, 0.823	143.000, 0.818	143.000, 0.675	143.000, 0.504	143.000, 0.178	143.000, 0.255
717	143.200, 0.830	143.200, 0.824	143.200, 0.819	143.200, 0.675	143.200, 0.504	143.200, 0.178	143.200, 0.255
718	143.400, 0.830	143.400, 0.824	143.400, 0.819	143.400, 0.675	143.400, 0.504	143.400, 0.178	143.400, 0.254
719	143.600, 0.830	143.600, 0.824	143.600, 0.819	143.600, 0.675	143.600, 0.504	143.600, 0.178	143.600, 0.254
720	143.800, 0.830	143.800, 0.825	143.800, 0.819	143.800, 0.674	143.800, 0.504	143.800, 0.177	143.800, 0.253
721	144.000, 0.830	144.000, 0.825	144.000, 0.819	144.000, 0.674	144.000, 0.505	144.000, 0.177	144.000, 0.253
722	144.200, 0.831	144.200, 0.825	144.200, 0.819	144.200, 0.674	144.200, 0.505	144.200, 0.177	144.200, 0.253
723	144.400, 0.831	144.400, 0.824	144.400, 0.819	144.400, 0.673	144.400, 0.505	144.400, 0.176	144.400, 0.254
724	144.600, 0.831	144.600, 0.824	144.600, 0.819	144.600, 0.673	144.600, 0.505	144.600, 0.176	144.600, 0.254
725	144.800, 0.832	144.800, 0.824	144.800, 0.819	144.800, 0.672	144.800, 0.506	144.800, 0.176	144.800, 0.254
726	145.000, 0.832	145.000, 0.824	145.000, 0.819	145.000, 0.672	145.000, 0.506	145.000, 0.176	145.000, 0.253
727	145.200, 0.832	145.200, 0.824	145.200, 0.819	145.200, 0.672	145.200, 0.506	145.200, 0.176	145.200, 0.253
728	145.400, 0.833	145.400, 0.824	145.400, 0.819	145.400, 0.672	145.400, 0.507	145.400, 0.176	145.400, 0.253
729	145.600, 0.833	145.600, 0.823	145.600, 0.818	145.600, 0.672	145.600, 0.507	145.600, 0.177	145.600, 0.253
730	145.800, 0.833	145.800, 0.823	145.800, 0.818	145.800, 0.672	145.800, 0.507	145.800, 0.177	145.800, 0.253
731	146.000, 0.833	146.000, 0.823	146.000, 0.818	146.000, 0.673	146.000, 0.507	146.000, 0.177	146.000, 0.253
732	146.200, 0.833	146.200, 0.824	146.200, 0.818	146.200, 0.673	146.200, 0.507	146.200, 0.178	146.200, 0.253
733	146.400, 0.833	146.400, 0.824	146.400, 0.819	146.400, 0.673	146.400, 0.507	146.400, 0.178	146.400, 0.253
734	146.600, 0.833	146.600, 0.824	146.600, 0.819	146.600, 0.674	146.600, 0.506	146.600, 0.178	146.600, 0.253
735	146.800, 0.833	146.800, 0.825	146.800, 0.819	146.800, 0.674	146.800, 0.506	146.800, 0.178	146.800, 0.253
736	147.000, 0.833	147.000, 0.825	147.000, 0.819	147.000, 0.675	147.000, 0.506	147.000, 0.178	147.000, 0.252
737	147.200, 0.833	147.200, 0.825	147.200, 0.819	147.200, 0.675	147.200, 0.506	147.200, 0.177	147.200, 0.252
738	147.400, 0.833	147.400, 0.825	147.400, 0.819	147.400, 0.675	147.400, 0.505	147.400, 0.177	147.400, 0.252
739	147.600, 0.833	147.600, 0.825	147.600, 0.819	147.600, 0.675	147.600, 0.505	147.600, 0.177	147.600, 0.252
740	147.800, 0.834	147.800, 0.826	147.800, 0.820	147.800, 0.675	147.800, 0.505	147.800, 0.177	147.800, 0.253
741	148.000, 0.834	148.000, 0.826	148.000, 0.820	148.000, 0.675	148.000, 0.505	148.000, 0.177	148.000, 0.253
742	148.200, 0.834	148.200, 0.826	148.200, 0.820	148.200, 0.675	148.200, 0.505	148.200, 0.177	148.200, 0.253
743	148.400, 0.834	148.400, 0.826	148.400, 0.820	148.400, 0.675	148.400, 0.505	148.400, 0.177	148.400, 0.254
744	148.600, 0.834	148.600, 0.826	148.600, 0.821	148.600, 0.674	148.600, 0.505	148.600, 0.177	148.600, 0.253
745	148.800, 0.835	148.800, 0.826	148.800, 0.821	148.800, 0.674	148.800, 0.504	148.800, 0.176	148.800, 0.253
746	149.000, 0.835	149.000, 0.826	149.000, 0.821	149.000, 0.674	149.000, 0.504	149.000, 0.176	149.000, 0.253
747	149.200, 0.835	149.200, 0.826	149.200, 0.821	149.200, 0.674	149.200, 0.505	149.200, 0.176	149.200, 0.253
748	149.400, 0.835	149.400, 0.826	149.400, 0.821	149.400, 0.673	149.400, 0.505	149.400, 0.177	149.400, 0.253
749	149.600, 0.835	149.600, 0.826	149.600, 0.820	149.600, 0.673	149.600, 0.505	149.600, 0.177	149.600, 0.253
750	149.800, 0.834	149.800, 0.826	149.800, 0.820	149.800, 0.673	149.800, 0.505	149.800, 0.177	149.800, 0.253
751	150.000, 0.834	150.000, 0.826	150.000, 0.820	150.000, 0.673	150.000, 0.505	150.000, 0.177	150.000, 0.253
752	150.200, 0.827	150.200, 0.819	150.200, 0.812	150.200, 0.667	150.200, 0.503	150.200, 0.175	150.200, 0.253
753	150.400, 0.818	150.400, 0.811	150.400, 0.802	150.400, 0.659	150.400, 0.501	150.400, 0.173	150.400, 0.252
754	150.600, 0.808	150.600, 0.802	150.600, 0.791	150.600, 0.651	150.600, 0.499	150.600, 0.171	150.600, 0.252
755	150.800, 0.798	150.800, 0.792	150.800, 0.779	150.800, 0.642	150.800, 0.497	150.800, 0.168	150.800, 0.252
756	151.000, 0.787	151.000, 0.781	151.000, 0.767	151.000, 0.632	151.000, 0.494	151.000, 0.166	151.000, 0.251
757	151.200, 0.777	151.200, 0.770	151.200, 0.755	151.200, 0.621	151.200, 0.492	151.200, 0.164	151.200, 0.251
758	151.400, 0.766	151.400, 0.759	151.400, 0.743	151.400, 0.611	151.400, 0.489	151.400, 0.162	151.400, 0.251
759	151.600, 0.755	151.600, 0.748	151.600, 0.731	151.600, 0.601	151.600, 0.487	151.600, 0.159	151.600, 0.251
760	151.800, 0.745	151.800, 0.738	151.800, 0.720	151.800, 0.592	151.800, 0.484	151.800, 0.157	151.800, 0.251
761	152.000, 0.736	152.000, 0.729	152.000, 0.710	152.000, 0.584	152.000, 0.482	152.000, 0.156	152.000, 0.251
762	152.200, 0.729	152.200, 0.722	152.200, 0.702	152.200, 0.576	152.200, 0.480	152.200, 0.154	152.200, 0.251
763	152.400, 0.723	152.400, 0.715	152.400, 0.694	152.400, 0.569	152.400, 0.478	152.400, 0.153	152.400, 0.251
764	152.600, 0.717	152.600, 0.708	152.600, 0.686	152.600, 0.562	152.600, 0.475	152.600, 0.152	152.600, 0.251
765	152.800, 0.712	152.800, 0.702	152.800, 0.680	152.800, 0.556	152.800, 0.473	152.800, 0.151	152.800, 0.251
766	153.000, 0.706	153.000, 0.696	153.000, 0.673	153.000, 0.550	153.000, 0.471	153.000, 0.150	153.000, 0.251
767	153.200, 0.702	153.200, 0.691	153.200, 0.667	153.200, 0.545	153.200, 0.469	153.200, 0.149	153.200, 0.251
768	153.400, 0.697	153.400, 0.686	153.400, 0.661	153.400, 0.539	153.400, 0.467	153.400, 0.148	153.400, 0.250
769	153.600, 0.693	153.600, 0.681	153.600, 0.655	153.600, 0.534	153.600, 0.465	153.600, 0.147	153.600, 0.250
770	153.800, 0.689	153.800, 0.677	153.800, 0.650	153.800, 0.529	153.800, 0.463	153.800, 0.147	153.800, 0.250
771	154.000, 0.685	154.000, 0.673	154.000, 0.645	154.000, 0.524	154.000, 0.462	154.000, 0.146	154.000, 0.250
772	154.200, 0.682	154.200, 0.669	154.200, 0.640	154.200, 0.520	154.200, 0.460	154.200, 0.145	154.200, 0.250
773	154.400, 0.679	154.400, 0.665	154.400, 0.635	154.400, 0.515	154.400, 0.459	154.400, 0.145	154.400, 0.250
774	154.600, 0.676	154.600, 0.662	154.600, 0.631	154.600, 0.511	154.600, 0.457	154.600, 0.144	154.600, 0.250
775	154.800, 0.673	154.800, 0.658	154.800, 0.626	154.800, 0.507	154.800, 0.455	154.800, 0.144	154.800, 0.250
776	155.000, 0.670	155.000, 0.655	155.000, 0.622	155.000, 0.503	155.000, 0.454	155.000, 0.143	155.000, 0.250
777	155.200, 0.668	155.200, 0.652	155.200, 0.618	155.200, 0.499	155.200, 0.452	155.200, 0.142	155.200, 0.250
778	155.400, 0.665	155.400, 0.649	155.400, 0.614	155.400, 0.496	155.400, 0.451	155.400, 0.142	155.400, 0.250
779	155.600, 0.662	155.600, 0.646	155.600, 0.611	155.600, 0.492	155.600, 0.449	155.600, 0.141	155.600, 0.249
780	155.800, 0.660	155.800, 0.644	155.800, 0.608	155.800, 0.489	155.800, 0.448	155.800, 0.141	155.800, 0.249
781	156.000, 0.658	156.000, 0.641	156.000, 0.604	156.000, 0.486	156.000, 0.447	156.000, 0.140	156.000, 0.249
782	156.200, 0.655	156.200, 0.639	156.200, 0.601	156.200, 0.483	156.200, 0.446	156.200, 0.140	156.200, 0.249
783	156.400, 0.653	156.400, 0.637	156.400, 0.599	156.400, 0.480	156.400, 0.445	156.400, 0.140	156.400, 0.249
784	156.600, 0.651	156.600, 0.634	156.600, 0.596	156.600, 0.477	156.600, 0.443	156.600, 0.139	156.600, 0.249
785	156.800, 0.650	156.800, 0.632	156.800, 0.594	156.800, 0.474	156.800, 0.442	156.800, 0.139	156.800, 0.249
786	157.000, 0.648	157.000, 0.630	157.000, 0.591	157.000, 0.471	157.000, 0.441	157.000, 0.139	157.000, 0.249
787	157.200, 0.646	157.200, 0.628	157.200, 0.589	157.200, 0.468	157.200, 0.440	157.200, 0.139	157.200, 0.249
[truncated: 14,213 more rows]
