# Supplementary material for: ParB spreading on DNA requires cytidine triphosphate in vitro
Source: eLife journal article supplement (doi:10.7554/elife.53515), 2020-02-20
Supplement: fig1-figsupp3-data1 [file Fig1_supp3_panelB.xlsx]

## Sheet: FORMAT
	sample ID #1	sample ID #2	sample ID #3
data point	time point (sec), wavelength shift (nm)	time point (sec), wavelength shift (nm)	time point (sec), wavelength shift (nm)
1
2
3
.
.
.

## Sheet: Fig1_supp3_panelB_rep1
	parS20 ParB	parS20 ParB +CTP	parS20 ParB +CMP	parS20 ParB +CDP
1	0.000, 0.042	0.000, 0.041	0.000, 0.028	0.000, 0.031
2	0.200, 0.041	0.200, 0.040	0.200, 0.028	0.200, 0.031
3	0.400, 0.041	0.400, 0.040	0.400, 0.028	0.400, 0.030
4	0.600, 0.040	0.600, 0.040	0.600, 0.028	0.600, 0.030
5	0.800, 0.039	0.800, 0.039	0.800, 0.028	0.800, 0.029
6	1.000, 0.038	1.000, 0.038	1.000, 0.027	1.000, 0.028
7	1.200, 0.037	1.200, 0.038	1.200, 0.027	1.200, 0.028
8	1.400, 0.037	1.400, 0.037	1.400, 0.026	1.400, 0.027
9	1.600, 0.036	1.600, 0.036	1.600, 0.025	1.600, 0.026
10	1.800, 0.035	1.800, 0.035	1.800, 0.025	1.800, 0.025
11	2.000, 0.034	2.000, 0.034	2.000, 0.024	2.000, 0.025
12	2.200, 0.033	2.200, 0.033	2.200, 0.023	2.200, 0.024
13	2.400, 0.032	2.400, 0.032	2.400, 0.022	2.400, 0.023
14	2.600, 0.031	2.600, 0.031	2.600, 0.021	2.600, 0.022
15	2.800, 0.030	2.800, 0.030	2.800, 0.020	2.800, 0.022
16	3.000, 0.029	3.000, 0.029	3.000, 0.019	3.000, 0.021
17	3.200, 0.028	3.200, 0.028	3.200, 0.018	3.200, 0.020
18	3.400, 0.027	3.400, 0.028	3.400, 0.017	3.400, 0.020
19	3.600, 0.026	3.600, 0.027	3.600, 0.017	3.600, 0.019
20	3.800, 0.025	3.800, 0.027	3.800, 0.016	3.800, 0.018
21	4.000, 0.024	4.000, 0.026	4.000, 0.015	4.000, 0.018
22	4.200, 0.024	4.200, 0.025	4.200, 0.015	4.200, 0.017
23	4.400, 0.024	4.400, 0.025	4.400, 0.014	4.400, 0.017
24	4.600, 0.024	4.600, 0.024	4.600, 0.014	4.600, 0.016
25	4.800, 0.023	4.800, 0.024	4.800, 0.013	4.800, 0.016
26	5.000, 0.023	5.000, 0.023	5.000, 0.013	5.000, 0.016
27	5.200, 0.023	5.200, 0.023	5.200, 0.013	5.200, 0.015
28	5.400, 0.022	5.400, 0.022	5.400, 0.012	5.400, 0.015
29	5.600, 0.022	5.600, 0.021	5.600, 0.012	5.600, 0.015
30	5.800, 0.022	5.800, 0.021	5.800, 0.011	5.800, 0.014
31	6.000, 0.021	6.000, 0.020	6.000, 0.011	6.000, 0.014
32	6.200, 0.021	6.200, 0.019	6.200, 0.011	6.200, 0.013
33	6.400, 0.020	6.400, 0.019	6.400, 0.011	6.400, 0.013
34	6.600, 0.020	6.600, 0.018	6.600, 0.010	6.600, 0.012
35	6.800, 0.019	6.800, 0.018	6.800, 0.010	6.800, 0.012
36	7.000, 0.019	7.000, 0.017	7.000, 0.010	7.000, 0.011
37	7.200, 0.018	7.200, 0.017	7.200, 0.010	7.200, 0.010
38	7.400, 0.018	7.400, 0.016	7.400, 0.010	7.400, 0.010
39	7.600, 0.017	7.600, 0.016	7.600, 0.010	7.600, 0.009
40	7.800, 0.017	7.800, 0.016	7.800, 0.010	7.800, 0.009
41	8.000, 0.017	8.000, 0.015	8.000, 0.010	8.000, 0.009
42	8.200, 0.016	8.200, 0.015	8.200, 0.010	8.200, 0.008
43	8.400, 0.016	8.400, 0.015	8.400, 0.010	8.400, 0.008
44	8.600, 0.016	8.600, 0.014	8.600, 0.010	8.600, 0.007
45	8.800, 0.015	8.800, 0.014	8.800, 0.009	8.800, 0.007
46	9.000, 0.015	9.000, 0.013	9.000, 0.009	9.000, 0.007
47	9.200, 0.014	9.200, 0.013	9.200, 0.009	9.200, 0.006
48	9.400, 0.014	9.400, 0.012	9.400, 0.008	9.400, 0.006
49	9.600, 0.013	9.600, 0.011	9.600, 0.007	9.600, 0.006
50	9.800, 0.013	9.800, 0.011	9.800, 0.007	9.800, 0.005
51	10.000, 0.012	10.000, 0.010	10.000, 0.006	10.000, 0.005
52	10.200, 0.012	10.200, 0.010	10.200, 0.006	10.200, 0.004
53	10.400, 0.011	10.400, 0.009	10.400, 0.006	10.400, 0.004
54	10.600, 0.011	10.600, 0.009	10.600, 0.006	10.600, 0.004
55	10.800, 0.011	10.800, 0.008	10.800, 0.006	10.800, 0.004
56	11.000, 0.011	11.000, 0.008	11.000, 0.006	11.000, 0.004
57	11.200, 0.011	11.200, 0.008	11.200, 0.005	11.200, 0.004
58	11.400, 0.011	11.400, 0.008	11.400, 0.005	11.400, 0.004
59	11.600, 0.011	11.600, 0.008	11.600, 0.005	11.600, 0.003
60	11.800, 0.011	11.800, 0.008	11.800, 0.005	11.800, 0.003
61	12.000, 0.011	12.000, 0.008	12.000, 0.005	12.000, 0.003
62	12.200, 0.011	12.200, 0.008	12.200, 0.005	12.200, 0.003
63	12.400, 0.012	12.400, 0.008	12.400, 0.005	12.400, 0.003
64	12.600, 0.012	12.600, 0.008	12.600, 0.005	12.600, 0.003
65	12.800, 0.012	12.800, 0.007	12.800, 0.005	12.800, 0.003
66	13.000, 0.012	13.000, 0.007	13.000, 0.004	13.000, 0.003
67	13.200, 0.011	13.200, 0.007	13.200, 0.004	13.200, 0.003
68	13.400, 0.011	13.400, 0.007	13.400, 0.004	13.400, 0.003
69	13.600, 0.010	13.600, 0.007	13.600, 0.004	13.600, 0.003
70	13.800, 0.010	13.800, 0.007	13.800, 0.003	13.800, 0.003
71	14.000, 0.009	14.000, 0.006	14.000, 0.003	14.000, 0.003
72	14.200, 0.009	14.200, 0.006	14.200, 0.003	14.200, 0.003
73	14.400, 0.008	14.400, 0.006	14.400, 0.003	14.400, 0.003
74	14.600, 0.008	14.600, 0.006	14.600, 0.003	14.600, 0.003
75	14.800, 0.008	14.800, 0.006	14.800, 0.003	14.800, 0.003
76	15.000, 0.007	15.000, 0.007	15.000, 0.004	15.000, 0.002
77	15.200, 0.007	15.200, 0.007	15.200, 0.004	15.200, 0.002
78	15.400, 0.007	15.400, 0.007	15.400, 0.004	15.400, 0.002
79	15.600, 0.006	15.600, 0.007	15.600, 0.004	15.600, 0.002
80	15.800, 0.006	15.800, 0.007	15.800, 0.004	15.800, 0.002
81	16.000, 0.006	16.000, 0.007	16.000, 0.004	16.000, 0.002
82	16.200, 0.006	16.200, 0.006	16.200, 0.003	16.200, 0.001
83	16.400, 0.006	16.400, 0.006	16.400, 0.003	16.400, 0.001
84	16.600, 0.006	16.600, 0.006	16.600, 0.003	16.600, 0.001
85	16.800, 0.006	16.800, 0.005	16.800, 0.002	16.800, 0.001
86	17.000, 0.006	17.000, 0.005	17.000, 0.002	17.000, 0.001
87	17.200, 0.006	17.200, 0.004	17.200, 0.002	17.200, 0.001
88	17.400, 0.006	17.400, 0.004	17.400, 0.002	17.400, 0.001
89	17.600, 0.006	17.600, 0.003	17.600, 0.001	17.600, 0.001
90	17.800, 0.006	17.800, 0.003	17.800, 0.001	17.800, 0.001
91	18.000, 0.006	18.000, 0.003	18.000, 0.002	18.000, 0.002
92	18.200, 0.006	18.200, 0.003	18.200, 0.002	18.200, 0.002
93	18.400, 0.006	18.400, 0.003	18.400, 0.002	18.400, 0.002
94	18.600, 0.006	18.600, 0.003	18.600, 0.002	18.600, 0.002
95	18.800, 0.005	18.800, 0.003	18.800, 0.002	18.800, 0.002
96	19.000, 0.005	19.000, 0.003	19.000, 0.002	19.000, 0.002
97	19.200, 0.005	19.200, 0.003	19.200, 0.002	19.200, 0.002
98	19.400, 0.004	19.400, 0.003	19.400, 0.002	19.400, 0.002
99	19.600, 0.004	19.600, 0.003	19.600, 0.002	19.600, 0.002
100	19.800, 0.003	19.800, 0.003	19.800, 0.002	19.800, 0.002
101	20.000, 0.003	20.000, 0.003	20.000, 0.002	20.000, 0.002
102	20.200, 0.003	20.200, 0.003	20.200, 0.002	20.200, 0.002
103	20.400, 0.003	20.400, 0.003	20.400, 0.002	20.400, 0.002
104	20.600, 0.003	20.600, 0.002	20.600, 0.001	20.600, 0.001
105	20.800, 0.003	20.800, 0.002	20.800, 0.001	20.800, 0.001
106	21.000, 0.003	21.000, 0.002	21.000, 0.001	21.000, 0.001
107	21.200, 0.003	21.200, 0.002	21.200, 0.001	21.200, 0.001
108	21.400, 0.002	21.400, 0.002	21.400, 0.001	21.400, 0.001
109	21.600, 0.002	21.600, 0.002	21.600, 0.001	21.600, 0.001
110	21.800, 0.002	21.800, 0.002	21.800, 0.002	21.800, 0.001
111	22.000, 0.002	22.000, 0.002	22.000, 0.002	22.000, 0.001
112	22.200, 0.002	22.200, 0.002	22.200, 0.002	22.200, 0.001
113	22.400, 0.002	22.400, 0.002	22.400, 0.002	22.400, 0.001
114	22.600, 0.002	22.600, 0.002	22.600, 0.002	22.600, 0.001
115	22.800, 0.002	22.800, 0.002	22.800, 0.002	22.800, 0.001
116	23.000, 0.002	23.000, 0.002	23.000, 0.002	23.000, 0.001
117	23.200, 0.002	23.200, 0.002	23.200, 0.002	23.200, 0.000
118	23.400, 0.002	23.400, 0.002	23.400, 0.002	23.400, 0.000
119	23.600, 0.002	23.600, 0.002	23.600, 0.002	23.600, 0.000
120	23.800, 0.002	23.800, 0.003	23.800, 0.002	23.800, 0.000
121	24.000, 0.002	24.000, 0.003	24.000, 0.002	24.000, 0.000
122	24.200, 0.002	24.200, 0.003	24.200, 0.002	24.200, 0.000
123	24.400, 0.002	24.400, 0.003	24.400, 0.002	24.400, -0.000
124	24.600, 0.002	24.600, 0.003	24.600, 0.002	24.600, -0.000
125	24.800, 0.001	24.800, 0.003	24.800, 0.002	24.800, -0.000
126	25.000, 0.001	25.000, 0.003	25.000, 0.001	25.000, 0.000
127	25.200, 0.001	25.200, 0.003	25.200, 0.001	25.200, 0.000
128	25.400, 0.001	25.400, 0.002	25.400, 0.001	25.400, 0.000
129	25.600, 0.001	25.600, 0.002	25.600, 0.001	25.600, 0.000
130	25.800, 0.001	25.800, 0.002	25.800, 0.000	25.800, 0.000
131	26.000, 0.001	26.000, 0.002	26.000, 0.000	26.000, 0.000
132	26.200, 0.001	26.200, 0.001	26.200, 0.000	26.200, 0.001
133	26.400, 0.001	26.400, 0.001	26.400, -0.000	26.400, 0.000
134	26.600, 0.001	26.600, 0.001	26.600, -0.000	26.600, 0.000
135	26.800, 0.001	26.800, 0.001	26.800, -0.000	26.800, 0.000
136	27.000, 0.001	27.000, 0.000	27.000, -0.001	27.000, 0.000
137	27.200, 0.001	27.200, 0.000	27.200, -0.001	27.200, -0.000
138	27.400, 0.001	27.400, -0.000	27.400, -0.001	27.400, -0.000
139	27.600, 0.001	27.600, -0.000	27.600, -0.001	27.600, -0.000
140	27.800, 0.001	27.800, -0.000	27.800, -0.001	27.800, -0.000
141	28.000, 0.001	28.000, -0.000	28.000, -0.000	28.000, -0.000
142	28.200, 0.001	28.200, -0.000	28.200, -0.000	28.200, -0.000
143	28.400, 0.000	28.400, -0.000	28.400, -0.000	28.400, -0.000
144	28.600, 0.000	28.600, -0.000	28.600, 0.000	28.600, -0.000
145	28.800, -0.000	28.800, 0.000	28.800, 0.000	28.800, -0.000
146	29.000, -0.001	29.000, 0.000	29.000, 0.001	29.000, -0.000
147	29.200, -0.001	29.200, 0.000	29.200, 0.001	29.200, -0.000
148	29.400, -0.001	29.400, 0.000	29.400, 0.001	29.400, 0.000
149	29.600, -0.002	29.600, 0.000	29.600, 0.001	29.600, 0.000
150	29.800, -0.002	29.800, 0.000	29.800, 0.001	29.800, 0.000
151	30.000, 0.000	30.000, 0.000	30.000, 0.000	30.000, 0.000
152	30.200, 0.022	30.200, 0.022	30.200, 0.019	30.200, 0.019
153	30.400, 0.048	30.400, 0.047	30.400, 0.042	30.400, 0.041
154	30.600, 0.078	30.600, 0.076	30.600, 0.069	30.600, 0.067
155	30.800, 0.112	30.800, 0.108	30.800, 0.100	30.800, 0.097
156	31.000, 0.149	31.000, 0.142	31.000, 0.133	31.000, 0.129
157	31.200, 0.188	31.200, 0.178	31.200, 0.168	31.200, 0.163
158	31.400, 0.229	31.400, 0.214	31.400, 0.205	31.400, 0.199
159	31.600, 0.271	31.600, 0.250	31.600, 0.242	31.600, 0.236
160	31.800, 0.312	31.800, 0.284	31.800, 0.280	31.800, 0.272
161	32.000, 0.351	32.000, 0.316	32.000, 0.315	32.000, 0.306
162	32.200, 0.387	32.200, 0.344	32.200, 0.348	32.200, 0.338
163	32.400, 0.421	32.400, 0.369	32.400, 0.380	32.400, 0.369
164	32.600, 0.454	32.600, 0.393	32.600, 0.410	32.600, 0.397
165	32.800, 0.485	32.800, 0.414	32.800, 0.439	32.800, 0.425
166	33.000, 0.515	33.000, 0.434	33.000, 0.467	33.000, 0.452
167	33.200, 0.544	33.200, 0.452	33.200, 0.493	33.200, 0.477
168	33.400, 0.572	33.400, 0.469	33.400, 0.519	33.400, 0.500
169	33.600, 0.598	33.600, 0.484	33.600, 0.543	33.600, 0.523
170	33.800, 0.622	33.800, 0.497	33.800, 0.566	33.800, 0.544
171	34.000, 0.645	34.000, 0.510	34.000, 0.587	34.000, 0.564
172	34.200, 0.667	34.200, 0.520	34.200, 0.607	34.200, 0.583
173	34.400, 0.687	34.400, 0.530	34.400, 0.627	34.400, 0.601
174	34.600, 0.706	34.600, 0.539	34.600, 0.645	34.600, 0.618
175	34.800, 0.725	34.800, 0.547	34.800, 0.661	34.800, 0.633
176	35.000, 0.741	35.000, 0.554	35.000, 0.677	35.000, 0.647
177	35.200, 0.757	35.200, 0.561	35.200, 0.691	35.200, 0.660
178	35.400, 0.771	35.400, 0.568	35.400, 0.704	35.400, 0.672
179	35.600, 0.784	35.600, 0.573	35.600, 0.717	35.600, 0.683
180	35.800, 0.796	35.800, 0.578	35.800, 0.728	35.800, 0.693
181	36.000, 0.808	36.000, 0.583	36.000, 0.739	36.000, 0.703
182	36.200, 0.818	36.200, 0.588	36.200, 0.748	36.200, 0.711
183	36.400, 0.827	36.400, 0.592	36.400, 0.757	36.400, 0.719
184	36.600, 0.835	36.600, 0.595	36.600, 0.765	36.600, 0.726
185	36.800, 0.843	36.800, 0.599	36.800, 0.772	36.800, 0.732
186	37.000, 0.850	37.000, 0.602	37.000, 0.779	37.000, 0.738
187	37.200, 0.857	37.200, 0.604	37.200, 0.785	37.200, 0.744
188	37.400, 0.863	37.400, 0.607	37.400, 0.791	37.400, 0.749
189	37.600, 0.868	37.600, 0.609	37.600, 0.796	37.600, 0.753
190	37.800, 0.873	37.800, 0.611	37.800, 0.800	37.800, 0.757
191	38.000, 0.878	38.000, 0.612	38.000, 0.805	38.000, 0.761
192	38.200, 0.882	38.200, 0.614	38.200, 0.809	38.200, 0.765
193	38.400, 0.886	38.400, 0.616	38.400, 0.813	38.400, 0.768
194	38.600, 0.890	38.600, 0.617	38.600, 0.817	38.600, 0.771
195	38.800, 0.893	38.800, 0.618	38.800, 0.820	38.800, 0.773
196	39.000, 0.896	39.000, 0.620	39.000, 0.823	39.000, 0.776
197	39.200, 0.899	39.200, 0.621	39.200, 0.826	39.200, 0.778
198	39.400, 0.901	39.400, 0.622	39.400, 0.828	39.400, 0.780
199	39.600, 0.904	39.600, 0.623	39.600, 0.831	39.600, 0.782
200	39.800, 0.906	39.800, 0.624	39.800, 0.833	39.800, 0.784
201	40.000, 0.908	40.000, 0.625	40.000, 0.835	40.000, 0.786
202	40.200, 0.909	40.200, 0.625	40.200, 0.836	40.200, 0.787
203	40.400, 0.911	40.400, 0.625	40.400, 0.838	40.400, 0.788
204	40.600, 0.912	40.600, 0.625	40.600, 0.839	40.600, 0.790
205	40.800, 0.913	40.800, 0.626	40.800, 0.840	40.800, 0.791
206	41.000, 0.914	41.000, 0.626	41.000, 0.842	41.000, 0.792
207	41.200, 0.915	41.200, 0.626	41.200, 0.843	41.200, 0.792
208	41.400, 0.917	41.400, 0.626	41.400, 0.844	41.400, 0.793
209	41.600, 0.918	41.600, 0.626	41.600, 0.845	41.600, 0.794
210	41.800, 0.918	41.800, 0.626	41.800, 0.846	41.800, 0.795
211	42.000, 0.919	42.000, 0.626	42.000, 0.848	42.000, 0.795
212	42.200, 0.920	42.200, 0.626	42.200, 0.849	42.200, 0.796
213	42.400, 0.921	42.400, 0.626	42.400, 0.850	42.400, 0.796
214	42.600, 0.922	42.600, 0.626	42.600, 0.851	42.600, 0.796
215	42.800, 0.923	42.800, 0.626	42.800, 0.852	42.800, 0.797
216	43.000, 0.924	43.000, 0.626	43.000, 0.853	43.000, 0.797
217	43.200, 0.925	43.200, 0.626	43.200, 0.854	43.200, 0.798
218	43.400, 0.926	43.400, 0.626	43.400, 0.854	43.400, 0.798
219	43.600, 0.926	43.600, 0.626	43.600, 0.855	43.600, 0.799
220	43.800, 0.927	43.800, 0.625	43.800, 0.855	43.800, 0.799
221	44.000, 0.927	44.000, 0.625	44.000, 0.855	44.000, 0.799
222	44.200, 0.928	44.200, 0.625	44.200, 0.855	44.200, 0.800
223	44.400, 0.928	44.400, 0.625	44.400, 0.855	44.400, 0.800
224	44.600, 0.929	44.600, 0.625	44.600, 0.856	44.600, 0.800
225	44.800, 0.929	44.800, 0.625	44.800, 0.856	44.800, 0.801
226	45.000, 0.930	45.000, 0.625	45.000, 0.856	45.000, 0.801
227	45.200, 0.930	45.200, 0.625	45.200, 0.856	45.200, 0.801
228	45.400, 0.930	45.400, 0.625	45.400, 0.857	45.400, 0.801
229	45.600, 0.931	45.600, 0.625	45.600, 0.857	45.600, 0.801
230	45.800, 0.931	45.800, 0.624	45.800, 0.857	45.800, 0.801
231	46.000, 0.932	46.000, 0.624	46.000, 0.858	46.000, 0.801
232	46.200, 0.932	46.200, 0.624	46.200, 0.859	46.200, 0.801
233	46.400, 0.933	46.400, 0.623	46.400, 0.860	46.400, 0.801
234	46.600, 0.934	46.600, 0.623	46.600, 0.860	46.600, 0.801
235	46.800, 0.934	46.800, 0.622	46.800, 0.861	46.800, 0.800
236	47.000, 0.935	47.000, 0.622	47.000, 0.862	47.000, 0.800
237	47.200, 0.935	47.200, 0.621	47.200, 0.863	47.200, 0.800
238	47.400, 0.936	47.400, 0.621	47.400, 0.864	47.400, 0.801
239	47.600, 0.936	47.600, 0.621	47.600, 0.864	47.600, 0.801
240	47.800, 0.937	47.800, 0.621	47.800, 0.865	47.800, 0.801
241	48.000, 0.937	48.000, 0.621	48.000, 0.865	48.000, 0.801
242	48.200, 0.938	48.200, 0.621	48.200, 0.865	48.200, 0.802
243	48.400, 0.939	48.400, 0.620	48.400, 0.866	48.400, 0.802
244	48.600, 0.939	48.600, 0.620	48.600, 0.866	48.600, 0.802
245	48.800, 0.940	48.800, 0.620	48.800, 0.866	48.800, 0.802
246	49.000, 0.941	49.000, 0.620	49.000, 0.866	49.000, 0.802
247	49.200, 0.941	49.200, 0.620	49.200, 0.866	49.200, 0.803
248	49.400, 0.941	49.400, 0.620	49.400, 0.866	49.400, 0.803
249	49.600, 0.942	49.600, 0.619	49.600, 0.866	49.600, 0.803
250	49.800, 0.942	49.800, 0.619	49.800, 0.866	49.800, 0.803
251	50.000, 0.942	50.000, 0.619	50.000, 0.867	50.000, 0.803
252	50.200, 0.942	50.200, 0.618	50.200, 0.868	50.200, 0.803
253	50.400, 0.943	50.400, 0.618	50.400, 0.868	50.400, 0.803
254	50.600, 0.943	50.600, 0.618	50.600, 0.869	50.600, 0.803
255	50.800, 0.943	50.800, 0.617	50.800, 0.869	50.800, 0.803
256	51.000, 0.944	51.000, 0.617	51.000, 0.869	51.000, 0.803
257	51.200, 0.944	51.200, 0.616	51.200, 0.869	51.200, 0.803
258	51.400, 0.945	51.400, 0.616	51.400, 0.870	51.400, 0.803
259	51.600, 0.945	51.600, 0.615	51.600, 0.870	51.600, 0.803
260	51.800, 0.946	51.800, 0.615	51.800, 0.870	51.800, 0.803
261	52.000, 0.946	52.000, 0.614	52.000, 0.871	52.000, 0.804
262	52.200, 0.947	52.200, 0.614	52.200, 0.871	52.200, 0.804
263	52.400, 0.947	52.400, 0.614	52.400, 0.871	52.400, 0.804
264	52.600, 0.948	52.600, 0.614	52.600, 0.871	52.600, 0.804
265	52.800, 0.949	52.800, 0.613	52.800, 0.872	52.800, 0.804
266	53.000, 0.949	53.000, 0.613	53.000, 0.872	53.000, 0.804
267	53.200, 0.950	53.200, 0.613	53.200, 0.873	53.200, 0.805
268	53.400, 0.950	53.400, 0.613	53.400, 0.873	53.400, 0.805
269	53.600, 0.950	53.600, 0.613	53.600, 0.874	53.600, 0.805
270	53.800, 0.951	53.800, 0.613	53.800, 0.875	53.800, 0.805
271	54.000, 0.951	54.000, 0.613	54.000, 0.875	54.000, 0.806
272	54.200, 0.951	54.200, 0.613	54.200, 0.875	54.200, 0.806
273	54.400, 0.951	54.400, 0.612	54.400, 0.876	54.400, 0.806
274	54.600, 0.951	54.600, 0.612	54.600, 0.876	54.600, 0.806
275	54.800, 0.952	54.800, 0.611	54.800, 0.876	54.800, 0.806
276	55.000, 0.952	55.000, 0.611	55.000, 0.876	55.000, 0.806
277	55.200, 0.953	55.200, 0.610	55.200, 0.876	55.200, 0.806
278	55.400, 0.953	55.400, 0.610	55.400, 0.876	55.400, 0.806
279	55.600, 0.953	55.600, 0.610	55.600, 0.877	55.600, 0.806
280	55.800, 0.954	55.800, 0.609	55.800, 0.877	55.800, 0.806
281	56.000, 0.954	56.000, 0.609	56.000, 0.877	56.000, 0.806
282	56.200, 0.954	56.200, 0.608	56.200, 0.877	56.200, 0.805
283	56.400, 0.955	56.400, 0.608	56.400, 0.877	56.400, 0.805
284	56.600, 0.956	56.600, 0.608	56.600, 0.878	56.600, 0.805
285	56.800, 0.956	56.800, 0.608	56.800, 0.878	56.800, 0.805
286	57.000, 0.957	57.000, 0.608	57.000, 0.879	57.000, 0.805
287	57.200, 0.958	57.200, 0.608	57.200, 0.879	57.200, 0.805
288	57.400, 0.958	57.400, 0.608	57.400, 0.879	57.400, 0.805
289	57.600, 0.958	57.600, 0.607	57.600, 0.880	57.600, 0.805
290	57.800, 0.959	57.800, 0.607	57.800, 0.880	57.800, 0.806
291	58.000, 0.959	58.000, 0.607	58.000, 0.881	58.000, 0.806
292	58.200, 0.959	58.200, 0.607	58.200, 0.882	58.200, 0.806
293	58.400, 0.959	58.400, 0.607	58.400, 0.882	58.400, 0.806
294	58.600, 0.959	58.600, 0.607	58.600, 0.883	58.600, 0.806
295	58.800, 0.959	58.800, 0.607	58.800, 0.883	58.800, 0.806
296	59.000, 0.960	59.000, 0.607	59.000, 0.884	59.000, 0.807
297	59.200, 0.960	59.200, 0.607	59.200, 0.884	59.200, 0.807
298	59.400, 0.960	59.400, 0.607	59.400, 0.884	59.400, 0.807
299	59.600, 0.961	59.600, 0.607	59.600, 0.884	59.600, 0.807
300	59.800, 0.961	59.800, 0.606	59.800, 0.885	59.800, 0.807
301	60.000, 0.961	60.000, 0.605	60.000, 0.885	60.000, 0.807
302	60.200, 0.962	60.200, 0.605	60.200, 0.885	60.200, 0.807
303	60.400, 0.962	60.400, 0.604	60.400, 0.885	60.400, 0.807
304	60.600, 0.963	60.600, 0.603	60.600, 0.886	60.600, 0.808
305	60.800, 0.963	60.800, 0.602	60.800, 0.886	60.800, 0.808
306	61.000, 0.964	61.000, 0.602	61.000, 0.886	61.000, 0.808
307	61.200, 0.965	61.200, 0.601	61.200, 0.887	61.200, 0.808
308	61.400, 0.965	61.400, 0.599	61.400, 0.887	61.400, 0.808
309	61.600, 0.965	61.600, 0.598	61.600, 0.887	61.600, 0.808
310	61.800, 0.966	61.800, 0.598	61.800, 0.887	61.800, 0.808
311	62.000, 0.966	62.000, 0.597	62.000, 0.888	62.000, 0.809
312	62.200, 0.966	62.200, 0.597	62.200, 0.888	62.200, 0.809
313	62.400, 0.967	62.400, 0.596	62.400, 0.889	62.400, 0.809
314	62.600, 0.967	62.600, 0.596	62.600, 0.889	62.600, 0.809
315	62.800, 0.968	62.800, 0.596	62.800, 0.890	62.800, 0.809
316	63.000, 0.968	63.000, 0.596	63.000, 0.890	63.000, 0.809
317	63.200, 0.968	63.200, 0.597	63.200, 0.890	63.200, 0.809
318	63.400, 0.969	63.400, 0.597	63.400, 0.890	63.400, 0.809
319	63.600, 0.969	63.600, 0.597	63.600, 0.890	63.600, 0.809
320	63.800, 0.969	63.800, 0.597	63.800, 0.891	63.800, 0.809
321	64.000, 0.970	64.000, 0.598	64.000, 0.891	64.000, 0.810
322	64.200, 0.970	64.200, 0.598	64.200, 0.891	64.200, 0.810
323	64.400, 0.971	64.400, 0.598	64.400, 0.891	64.400, 0.810
324	64.600, 0.971	64.600, 0.598	64.600, 0.891	64.600, 0.811
325	64.800, 0.972	64.800, 0.597	64.800, 0.892	64.800, 0.811
326	65.000, 0.972	65.000, 0.597	65.000, 0.892	65.000, 0.812
327	65.200, 0.972	65.200, 0.596	65.200, 0.892	65.200, 0.812
328	65.400, 0.973	65.400, 0.596	65.400, 0.892	65.400, 0.812
329	65.600, 0.973	65.600, 0.595	65.600, 0.892	65.600, 0.812
330	65.800, 0.973	65.800, 0.594	65.800, 0.892	65.800, 0.813
331	66.000, 0.973	66.000, 0.593	66.000, 0.893	66.000, 0.813
332	66.200, 0.974	66.200, 0.593	66.200, 0.893	66.200, 0.813
333	66.400, 0.974	66.400, 0.592	66.400, 0.893	66.400, 0.813
334	66.600, 0.974	66.600, 0.592	66.600, 0.894	66.600, 0.812
335	66.800, 0.975	66.800, 0.592	66.800, 0.894	66.800, 0.812
336	67.000, 0.975	67.000, 0.591	67.000, 0.895	67.000, 0.812
337	67.200, 0.975	67.200, 0.591	67.200, 0.895	67.200, 0.812
338	67.400, 0.976	67.400, 0.591	67.400, 0.896	67.400, 0.812
339	67.600, 0.977	67.600, 0.591	67.600, 0.896	67.600, 0.812
340	67.800, 0.978	67.800, 0.591	67.800, 0.896	67.800, 0.812
341	68.000, 0.978	68.000, 0.591	68.000, 0.897	68.000, 0.812
342	68.200, 0.979	68.200, 0.590	68.200, 0.897	68.200, 0.812
343	68.400, 0.980	68.400, 0.590	68.400, 0.898	68.400, 0.812
344	68.600, 0.980	68.600, 0.590	68.600, 0.898	68.600, 0.813
345	68.800, 0.981	68.800, 0.590	68.800, 0.899	68.800, 0.812
346	69.000, 0.981	69.000, 0.589	69.000, 0.899	69.000, 0.812
347	69.200, 0.982	69.200, 0.589	69.200, 0.899	69.200, 0.812
348	69.400, 0.982	69.400, 0.588	69.400, 0.900	69.400, 0.812
349	69.600, 0.982	69.600, 0.588	69.600, 0.900	69.600, 0.812
350	69.800, 0.982	69.800, 0.587	69.800, 0.900	69.800, 0.812
351	70.000, 0.982	70.000, 0.587	70.000, 0.901	70.000, 0.812
352	70.200, 0.983	70.200, 0.587	70.200, 0.901	70.200, 0.812
353	70.400, 0.983	70.400, 0.586	70.400, 0.901	70.400, 0.812
354	70.600, 0.983	70.600, 0.586	70.600, 0.902	70.600, 0.812
355	70.800, 0.983	70.800, 0.586	70.800, 0.902	70.800, 0.812
356	71.000, 0.983	71.000, 0.586	71.000, 0.902	71.000, 0.813
357	71.200, 0.983	71.200, 0.586	71.200, 0.903	71.200, 0.813
358	71.400, 0.984	71.400, 0.585	71.400, 0.903	71.400, 0.813
359	71.600, 0.984	71.600, 0.585	71.600, 0.903	71.600, 0.814
360	71.800, 0.985	71.800, 0.585	71.800, 0.903	71.800, 0.814
361	72.000, 0.985	72.000, 0.584	72.000, 0.903	72.000, 0.815
362	72.200, 0.985	72.200, 0.584	72.200, 0.904	72.200, 0.815
363	72.400, 0.985	72.400, 0.584	72.400, 0.904	72.400, 0.816
364	72.600, 0.985	72.600, 0.583	72.600, 0.905	72.600, 0.816
365	72.800, 0.986	72.800, 0.583	72.800, 0.905	72.800, 0.816
366	73.000, 0.986	73.000, 0.583	73.000, 0.905	73.000, 0.816
367	73.200, 0.987	73.200, 0.582	73.200, 0.906	73.200, 0.817
368	73.400, 0.987	73.400, 0.582	73.400, 0.906	73.400, 0.817
369	73.600, 0.987	73.600, 0.582	73.600, 0.907	73.600, 0.817
370	73.800, 0.988	73.800, 0.581	73.800, 0.908	73.800, 0.817
371	74.000, 0.988	74.000, 0.581	74.000, 0.908	74.000, 0.818
372	74.200, 0.989	74.200, 0.581	74.200, 0.909	74.200, 0.818
373	74.400, 0.990	74.400, 0.581	74.400, 0.910	74.400, 0.818
374	74.600, 0.991	74.600, 0.581	74.600, 0.910	74.600, 0.818
375	74.800, 0.992	74.800, 0.581	74.800, 0.910	74.800, 0.818
376	75.000, 0.993	75.000, 0.581	75.000, 0.910	75.000, 0.818
377	75.200, 0.993	75.200, 0.581	75.200, 0.910	75.200, 0.818
378	75.400, 0.994	75.400, 0.581	75.400, 0.910	75.400, 0.818
379	75.600, 0.994	75.600, 0.581	75.600, 0.910	75.600, 0.818
380	75.800, 0.994	75.800, 0.580	75.800, 0.911	75.800, 0.818
381	76.000, 0.994	76.000, 0.580	76.000, 0.911	76.000, 0.818
382	76.200, 0.994	76.200, 0.580	76.200, 0.911	76.200, 0.817
383	76.400, 0.994	76.400, 0.580	76.400, 0.911	76.400, 0.817
384	76.600, 0.994	76.600, 0.580	76.600, 0.911	76.600, 0.817
385	76.800, 0.994	76.800, 0.580	76.800, 0.912	76.800, 0.817
386	77.000, 0.994	77.000, 0.579	77.000, 0.912	77.000, 0.817
387	77.200, 0.995	77.200, 0.579	77.200, 0.913	77.200, 0.816
388	77.400, 0.995	77.400, 0.578	77.400, 0.913	77.400, 0.816
389	77.600, 0.995	77.600, 0.577	77.600, 0.914	77.600, 0.816
390	77.800, 0.996	77.800, 0.577	77.800, 0.915	77.800, 0.816
391	78.000, 0.997	78.000, 0.576	78.000, 0.915	78.000, 0.816
392	78.200, 0.997	78.200, 0.576	78.200, 0.916	78.200, 0.816
393	78.400, 0.998	78.400, 0.575	78.400, 0.916	78.400, 0.816
394	78.600, 0.999	78.600, 0.575	78.600, 0.916	78.600, 0.817
395	78.800, 0.999	78.800, 0.575	78.800, 0.917	78.800, 0.817
396	79.000, 1.000	79.000, 0.574	79.000, 0.917	79.000, 0.817
397	79.200, 1.000	79.200, 0.574	79.200, 0.917	79.200, 0.817
398	79.400, 1.001	79.400, 0.574	79.400, 0.918	79.400, 0.817
399	79.600, 1.001	79.600, 0.575	79.600, 0.918	79.600, 0.817
400	79.800, 1.001	79.800, 0.575	79.800, 0.918	79.800, 0.817
401	80.000, 1.001	80.000, 0.575	80.000, 0.918	80.000, 0.817
402	80.200, 1.002	80.200, 0.575	80.200, 0.918	80.200, 0.817
403	80.400, 1.002	80.400, 0.575	80.400, 0.918	80.400, 0.817
404	80.600, 1.002	80.600, 0.575	80.600, 0.918	80.600, 0.817
405	80.800, 1.002	80.800, 0.574	80.800, 0.918	80.800, 0.817
406	81.000, 1.003	81.000, 0.574	81.000, 0.918	81.000, 0.817
407	81.200, 1.003	81.200, 0.574	81.200, 0.919	81.200, 0.817
408	81.400, 1.003	81.400, 0.574	81.400, 0.919	81.400, 0.817
409	81.600, 1.003	81.600, 0.573	81.600, 0.919	81.600, 0.817
410	81.800, 1.003	81.800, 0.573	81.800, 0.919	81.800, 0.818
411	82.000, 1.003	82.000, 0.572	82.000, 0.920	82.000, 0.818
412	82.200, 1.004	82.200, 0.572	82.200, 0.920	82.200, 0.818
413	82.400, 1.004	82.400, 0.571	82.400, 0.921	82.400, 0.818
414	82.600, 1.004	82.600, 0.571	82.600, 0.922	82.600, 0.818
415	82.800, 1.004	82.800, 0.570	82.800, 0.922	82.800, 0.819
416	83.000, 1.005	83.000, 0.570	83.000, 0.922	83.000, 0.819
417	83.200, 1.005	83.200, 0.570	83.200, 0.923	83.200, 0.819
418	83.400, 1.006	83.400, 0.569	83.400, 0.923	83.400, 0.819
419	83.600, 1.006	83.600, 0.569	83.600, 0.923	83.600, 0.819
420	83.800, 1.007	83.800, 0.569	83.800, 0.924	83.800, 0.819
421	84.000, 1.007	84.000, 0.569	84.000, 0.924	84.000, 0.819
422	84.200, 1.008	84.200, 0.568	84.200, 0.924	84.200, 0.819
423	84.400, 1.008	84.400, 0.568	84.400, 0.924	84.400, 0.819
424	84.600, 1.009	84.600, 0.568	84.600, 0.923	84.600, 0.819
425	84.800, 1.009	84.800, 0.568	84.800, 0.923	84.800, 0.820
426	85.000, 1.010	85.000, 0.568	85.000, 0.924	85.000, 0.820
427	85.200, 1.010	85.200, 0.568	85.200, 0.924	85.200, 0.820
428	85.400, 1.011	85.400, 0.568	85.400, 0.924	85.400, 0.820
429	85.600, 1.011	85.600, 0.568	85.600, 0.925	85.600, 0.820
430	85.800, 1.011	85.800, 0.568	85.800, 0.926	85.800, 0.821
431	86.000, 1.010	86.000, 0.567	86.000, 0.926	86.000, 0.821
432	86.200, 1.011	86.200, 0.567	86.200, 0.927	86.200, 0.821
433	86.400, 1.010	86.400, 0.567	86.400, 0.927	86.400, 0.821
434	86.600, 1.011	86.600, 0.567	86.600, 0.928	86.600, 0.821
435	86.800, 1.011	86.800, 0.567	86.800, 0.928	86.800, 0.821
436	87.000, 1.011	87.000, 0.566	87.000, 0.928	87.000, 0.821
437	87.200, 1.012	87.200, 0.566	87.200, 0.929	87.200, 0.821
438	87.400, 1.012	87.400, 0.566	87.400, 0.929	87.400, 0.821
439	87.600, 1.012	87.600, 0.565	87.600, 0.929	87.600, 0.821
440	87.800, 1.013	87.800, 0.565	87.800, 0.929	87.800, 0.821
441	88.000, 1.013	88.000, 0.564	88.000, 0.929	88.000, 0.821
442	88.200, 1.014	88.200, 0.564	88.200, 0.929	88.200, 0.821
443	88.400, 1.014	88.400, 0.564	88.400, 0.929	88.400, 0.821
444	88.600, 1.014	88.600, 0.563	88.600, 0.929	88.600, 0.821
445	88.800, 1.015	88.800, 0.563	88.800, 0.929	88.800, 0.821
446	89.000, 1.015	89.000, 0.563	89.000, 0.930	89.000, 0.821
447	89.200, 1.016	89.200, 0.563	89.200, 0.930	89.200, 0.821
448	89.400, 1.016	89.400, 0.563	89.400, 0.931	89.400, 0.821
449	89.600, 1.016	89.600, 0.562	89.600, 0.931	89.600, 0.821
450	89.800, 1.016	89.800, 0.562	89.800, 0.932	89.800, 0.821
451	90.000, 1.016	90.000, 0.562	90.000, 0.932	90.000, 0.822
452	90.200, 1.016	90.200, 0.562	90.200, 0.933	90.200, 0.822
453	90.400, 1.015	90.400, 0.561	90.400, 0.933	90.400, 0.822
454	90.600, 1.016	90.600, 0.561	90.600, 0.933	90.600, 0.822
455	90.800, 1.016	90.800, 0.560	90.800, 0.934	90.800, 0.822
456	91.000, 1.016	91.000, 0.560	91.000, 0.934	91.000, 0.822
457	91.200, 1.017	91.200, 0.560	91.200, 0.934	91.200, 0.822
458	91.400, 1.017	91.400, 0.560	91.400, 0.934	91.400, 0.823
459	91.600, 1.018	91.600, 0.559	91.600, 0.934	91.600, 0.823
460	91.800, 1.018	91.800, 0.559	91.800, 0.934	91.800, 0.823
461	92.000, 1.019	92.000, 0.559	92.000, 0.934	92.000, 0.823
462	92.200, 1.020	92.200, 0.559	92.200, 0.934	92.200, 0.823
463	92.400, 1.020	92.400, 0.559	92.400, 0.935	92.400, 0.823
464	92.600, 1.021	92.600, 0.559	92.600, 0.935	92.600, 0.823
465	92.800, 1.022	92.800, 0.558	92.800, 0.935	92.800, 0.823
466	93.000, 1.022	93.000, 0.558	93.000, 0.935	93.000, 0.823
467	93.200, 1.023	93.200, 0.558	93.200, 0.936	93.200, 0.824
468	93.400, 1.023	93.400, 0.558	93.400, 0.936	93.400, 0.824
469	93.600, 1.023	93.600, 0.557	93.600, 0.937	93.600, 0.824
470	93.800, 1.023	93.800, 0.557	93.800, 0.937	93.800, 0.824
471	94.000, 1.023	94.000, 0.557	94.000, 0.937	94.000, 0.824
472	94.200, 1.023	94.200, 0.557	94.200, 0.937	94.200, 0.824
473	94.400, 1.023	94.400, 0.557	94.400, 0.937	94.400, 0.824
474	94.600, 1.024	94.600, 0.557	94.600, 0.938	94.600, 0.824
475	94.800, 1.024	94.800, 0.557	94.800, 0.938	94.800, 0.824
476	95.000, 1.024	95.000, 0.558	95.000, 0.939	95.000, 0.823
477	95.200, 1.025	95.200, 0.558	95.200, 0.939	95.200, 0.823
478	95.400, 1.025	95.400, 0.558	95.400, 0.940	95.400, 0.823
479	95.600, 1.025	95.600, 0.558	95.600, 0.940	95.600, 0.823
480	95.800, 1.026	95.800, 0.558	95.800, 0.940	95.800, 0.822
481	96.000, 1.026	96.000, 0.558	96.000, 0.940	96.000, 0.822
482	96.200, 1.027	96.200, 0.557	96.200, 0.940	96.200, 0.822
483	96.400, 1.027	96.400, 0.557	96.400, 0.940	96.400, 0.822
484	96.600, 1.027	96.600, 0.556	96.600, 0.940	96.600, 0.822
485	96.800, 1.028	96.800, 0.555	96.800, 0.940	96.800, 0.822
486	97.000, 1.028	97.000, 0.555	97.000, 0.940	97.000, 0.822
487	97.200, 1.028	97.200, 0.554	97.200, 0.940	97.200, 0.822
488	97.400, 1.029	97.400, 0.553	97.400, 0.940	97.400, 0.822
489	97.600, 1.029	97.600, 0.553	97.600, 0.941	97.600, 0.822
490	97.800, 1.029	97.800, 0.552	97.800, 0.941	97.800, 0.822
491	98.000, 1.029	98.000, 0.552	98.000, 0.941	98.000, 0.822
492	98.200, 1.029	98.200, 0.552	98.200, 0.941	98.200, 0.822
493	98.400, 1.029	98.400, 0.552	98.400, 0.941	98.400, 0.822
494	98.600, 1.029	98.600, 0.551	98.600, 0.942	98.600, 0.822
495	98.800, 1.029	98.800, 0.551	98.800, 0.942	98.800, 0.822
496	99.000, 1.029	99.000, 0.551	99.000, 0.943	99.000, 0.822
497	99.200, 1.029	99.200, 0.551	99.200, 0.943	99.200, 0.823
498	99.400, 1.029	99.400, 0.551	99.400, 0.943	99.400, 0.823
499	99.600, 1.030	99.600, 0.551	99.600, 0.943	99.600, 0.823
500	99.800, 1.030	99.800, 0.550	99.800, 0.943	99.800, 0.823
501	100.000, 1.030	100.000, 0.550	100.000, 0.942	100.000, 0.824
502	100.200, 1.030	100.200, 0.550	100.200, 0.942	100.200, 0.824
503	100.400, 1.030	100.400, 0.550	100.400, 0.942	100.400, 0.824
504	100.600, 1.031	100.600, 0.550	100.600, 0.943	100.600, 0.824
505	100.800, 1.031	100.800, 0.550	100.800, 0.943	100.800, 0.824
506	101.000, 1.031	101.000, 0.550	101.000, 0.943	101.000, 0.824
507	101.200, 1.031	101.200, 0.550	101.200, 0.944	101.200, 0.824
508	101.400, 1.031	101.400, 0.549	101.400, 0.944	101.400, 0.824
509	101.600, 1.031	101.600, 0.549	101.600, 0.945	101.600, 0.823
510	101.800, 1.031	101.800, 0.549	101.800, 0.945	101.800, 0.823
511	102.000, 1.031	102.000, 0.549	102.000, 0.945	102.000, 0.823
512	102.200, 1.032	102.200, 0.549	102.200, 0.946	102.200, 0.823
513	102.400, 1.032	102.400, 0.549	102.400, 0.946	102.400, 0.823
514	102.600, 1.033	102.600, 0.549	102.600, 0.946	102.600, 0.823
515	102.800, 1.033	102.800, 0.549	102.800, 0.947	102.800, 0.823
516	103.000, 1.033	103.000, 0.549	103.000, 0.947	103.000, 0.823
517	103.200, 1.034	103.200, 0.549	103.200, 0.947	103.200, 0.823
518	103.400, 1.034	103.400, 0.548	103.400, 0.947	103.400, 0.823
519	103.600, 1.034	103.600, 0.548	103.600, 0.947	103.600, 0.823
520	103.800, 1.035	103.800, 0.548	103.800, 0.947	103.800, 0.823
521	104.000, 1.035	104.000, 0.547	104.000, 0.947	104.000, 0.823
522	104.200, 1.035	104.200, 0.546	104.200, 0.947	104.200, 0.822
523	104.400, 1.036	104.400, 0.546	104.400, 0.947	104.400, 0.822
524	104.600, 1.036	104.600, 0.545	104.600, 0.947	104.600, 0.822
525	104.800, 1.036	104.800, 0.545	104.800, 0.947	104.800, 0.822
526	105.000, 1.036	105.000, 0.544	105.000, 0.948	105.000, 0.821
527	105.200, 1.037	105.200, 0.544	105.200, 0.948	105.200, 0.821
528	105.400, 1.037	105.400, 0.543	105.400, 0.948	105.400, 0.820
529	105.600, 1.037	105.600, 0.543	105.600, 0.949	105.600, 0.819
530	105.800, 1.038	105.800, 0.543	105.800, 0.949	105.800, 0.818
531	106.000, 1.038	106.000, 0.543	106.000, 0.950	106.000, 0.818
532	106.200, 1.039	106.200, 0.543	106.200, 0.950	106.200, 0.818
533	106.400, 1.039	106.400, 0.544	106.400, 0.950	106.400, 0.818
534	106.600, 1.040	106.600, 0.544	106.600, 0.951	106.600, 0.817
535	106.800, 1.040	106.800, 0.544	106.800, 0.951	106.800, 0.817
536	107.000, 1.040	107.000, 0.545	107.000, 0.951	107.000, 0.817
537	107.200, 1.040	107.200, 0.544	107.200, 0.951	107.200, 0.817
538	107.400, 1.041	107.400, 0.544	107.400, 0.952	107.400, 0.816
539	107.600, 1.041	107.600, 0.544	107.600, 0.952	107.600, 0.816
540	107.800, 1.042	107.800, 0.544	107.800, 0.952	107.800, 0.816
541	108.000, 1.042	108.000, 0.543	108.000, 0.952	108.000, 0.815
542	108.200, 1.043	108.200, 0.543	108.200, 0.953	108.200, 0.815
543	108.400, 1.043	108.400, 0.543	108.400, 0.953	108.400, 0.814
544	108.600, 1.043	108.600, 0.543	108.600, 0.953	108.600, 0.813
545	108.800, 1.044	108.800, 0.542	108.800, 0.953	108.800, 0.812
546	109.000, 1.044	109.000, 0.542	109.000, 0.953	109.000, 0.810
547	109.200, 1.044	109.200, 0.542	109.200, 0.953	109.200, 0.808
548	109.400, 1.044	109.400, 0.541	109.400, 0.953	109.400, 0.807
549	109.600, 1.044	109.600, 0.541	109.600, 0.953	109.600, 0.805
550	109.800, 1.044	109.800, 0.541	109.800, 0.954	109.800, 0.804
551	110.000, 1.044	110.000, 0.541	110.000, 0.953	110.000, 0.803
552	110.200, 1.044	110.200, 0.541	110.200, 0.953	110.200, 0.802
553	110.400, 1.044	110.400, 0.540	110.400, 0.953	110.400, 0.802
554	110.600, 1.044	110.600, 0.540	110.600, 0.953	110.600, 0.801
555	110.800, 1.044	110.800, 0.540	110.800, 0.953	110.800, 0.800
556	111.000, 1.044	111.000, 0.539	111.000, 0.953	111.000, 0.799
557	111.200, 1.045	111.200, 0.539	111.200, 0.954	111.200, 0.799
558	111.400, 1.045	111.400, 0.539	111.400, 0.954	111.400, 0.799
559	111.600, 1.046	111.600, 0.539	111.600, 0.954	111.600, 0.799
560	111.800, 1.046	111.800, 0.539	111.800, 0.955	111.800, 0.799
561	112.000, 1.046	112.000, 0.539	112.000, 0.955	112.000, 0.799
562	112.200, 1.047	112.200, 0.539	112.200, 0.956	112.200, 0.799
563	112.400, 1.047	112.400, 0.539	112.400, 0.956	112.400, 0.799
564	112.600, 1.047	112.600, 0.539	112.600, 0.956	112.600, 0.800
565	112.800, 1.047	112.800, 0.539	112.800, 0.957	112.800, 0.800
566	113.000, 1.048	113.000, 0.539	113.000, 0.957	113.000, 0.800
567	113.200, 1.048	113.200, 0.538	113.200, 0.957	113.200, 0.801
568	113.400, 1.048	113.400, 0.538	113.400, 0.958	113.400, 0.801
569	113.600, 1.048	113.600, 0.538	113.600, 0.958	113.600, 0.801
570	113.800, 1.049	113.800, 0.538	113.800, 0.958	113.800, 0.801
571	114.000, 1.049	114.000, 0.538	114.000, 0.958	114.000, 0.801
572	114.200, 1.049	114.200, 0.538	114.200, 0.957	114.200, 0.801
573	114.400, 1.049	114.400, 0.537	114.400, 0.957	114.400, 0.801
574	114.600, 1.049	114.600, 0.537	114.600, 0.957	114.600, 0.801
575	114.800, 1.049	114.800, 0.537	114.800, 0.957	114.800, 0.801
576	115.000, 1.049	115.000, 0.538	115.000, 0.957	115.000, 0.801
577	115.200, 1.049	115.200, 0.538	115.200, 0.957	115.200, 0.801
578	115.400, 1.049	115.400, 0.538	115.400, 0.958	115.400, 0.800
579	115.600, 1.050	115.600, 0.538	115.600, 0.958	115.600, 0.800
580	115.800, 1.050	115.800, 0.538	115.800, 0.958	115.800, 0.800
581	116.000, 1.050	116.000, 0.538	116.000, 0.958	116.000, 0.800
582	116.200, 1.051	116.200, 0.538	116.200, 0.959	116.200, 0.800
583	116.400, 1.051	116.400, 0.538	116.400, 0.959	116.400, 0.799
584	116.600, 1.051	116.600, 0.538	116.600, 0.959	116.600, 0.799
585	116.800, 1.052	116.800, 0.537	116.800, 0.960	116.800, 0.799
586	117.000, 1.052	117.000, 0.537	117.000, 0.960	117.000, 0.799
587	117.200, 1.053	117.200, 0.536	117.200, 0.960	117.200, 0.799
588	117.400, 1.053	117.400, 0.536	117.400, 0.960	117.400, 0.799
589	117.600, 1.053	117.600, 0.535	117.600, 0.960	117.600, 0.799
590	117.800, 1.053	117.800, 0.534	117.800, 0.960	117.800, 0.799
591	118.000, 1.053	118.000, 0.534	118.000, 0.960	118.000, 0.799
592	118.200, 1.053	118.200, 0.534	118.200, 0.960	118.200, 0.799
593	118.400, 1.053	118.400, 0.533	118.400, 0.960	118.400, 0.799
594	118.600, 1.054	118.600, 0.533	118.600, 0.960	118.600, 0.798
595	118.800, 1.054	118.800, 0.533	118.800, 0.961	118.800, 0.798
596	119.000, 1.055	119.000, 0.533	119.000, 0.961	119.000, 0.798
597	119.200, 1.055	119.200, 0.532	119.200, 0.961	119.200, 0.797
598	119.400, 1.055	119.400, 0.532	119.400, 0.961	119.400, 0.797
599	119.600, 1.055	119.600, 0.532	119.600, 0.961	119.600, 0.796
600	119.800, 1.055	119.800, 0.532	119.800, 0.961	119.800, 0.796
601	120.000, 1.055	120.000, 0.532	120.000, 0.962	120.000, 0.795
602	120.200, 1.055	120.200, 0.532	120.200, 0.962	120.200, 0.795
603	120.400, 1.055	120.400, 0.533	120.400, 0.962	120.400, 0.794
604	120.600, 1.055	120.600, 0.533	120.600, 0.963	120.600, 0.794
605	120.800, 1.056	120.800, 0.533	120.800, 0.963	120.800, 0.794
606	121.000, 1.056	121.000, 0.533	121.000, 0.964	121.000, 0.794
607	121.200, 1.056	121.200, 0.533	121.200, 0.964	121.200, 0.794
608	121.400, 1.056	121.400, 0.533	121.400, 0.964	121.400, 0.794
609	121.600, 1.056	121.600, 0.533	121.600, 0.965	121.600, 0.793
610	121.800, 1.056	121.800, 0.533	121.800, 0.965	121.800, 0.793
611	122.000, 1.056	122.000, 0.533	122.000, 0.966	122.000, 0.793
612	122.200, 1.056	122.200, 0.533	122.200, 0.966	122.200, 0.793
613	122.400, 1.057	122.400, 0.533	122.400, 0.966	122.400, 0.793
614	122.600, 1.057	122.600, 0.533	122.600, 0.966	122.600, 0.792
615	122.800, 1.057	122.800, 0.533	122.800, 0.966	122.800, 0.792
616	123.000, 1.057	123.000, 0.532	123.000, 0.966	123.000, 0.792
617	123.200, 1.057	123.200, 0.532	123.200, 0.966	123.200, 0.792
618	123.400, 1.057	123.400, 0.532	123.400, 0.966	123.400, 0.792
619	123.600, 1.057	123.600, 0.532	123.600, 0.966	123.600, 0.792
620	123.800, 1.057	123.800, 0.531	123.800, 0.966	123.800, 0.793
621	124.000, 1.057	124.000, 0.531	124.000, 0.966	124.000, 0.793
622	124.200, 1.057	124.200, 0.531	124.200, 0.966	124.200, 0.793
623	124.400, 1.057	124.400, 0.531	124.400, 0.966	124.400, 0.792
624	124.600, 1.058	124.600, 0.531	124.600, 0.966	124.600, 0.792
625	124.800, 1.058	124.800, 0.531	124.800, 0.965	124.800, 0.792
626	125.000, 1.059	125.000, 0.530	125.000, 0.966	125.000, 0.792
627	125.200, 1.060	125.200, 0.530	125.200, 0.966	125.200, 0.791
628	125.400, 1.060	125.400, 0.530	125.400, 0.966	125.400, 0.791
629	125.600, 1.061	125.600, 0.530	125.600, 0.966	125.600, 0.791
630	125.800, 1.061	125.800, 0.530	125.800, 0.966	125.800, 0.790
631	126.000, 1.062	126.000, 0.530	126.000, 0.967	126.000, 0.790
632	126.200, 1.062	126.200, 0.529	126.200, 0.967	126.200, 0.790
633	126.400, 1.062	126.400, 0.529	126.400, 0.967	126.400, 0.790
634	126.600, 1.062	126.600, 0.529	126.600, 0.967	126.600, 0.790
635	126.800, 1.063	126.800, 0.529	126.800, 0.968	126.800, 0.790
636	127.000, 1.063	127.000, 0.528	127.000, 0.968	127.000, 0.790
637	127.200, 1.063	127.200, 0.528	127.200, 0.968	127.200, 0.791
638	127.400, 1.063	127.400, 0.528	127.400, 0.969	127.400, 0.791
639	127.600, 1.063	127.600, 0.527	127.600, 0.969	127.600, 0.791
640	127.800, 1.063	127.800, 0.527	127.800, 0.970	127.800, 0.791
641	128.000, 1.063	128.000, 0.527	128.000, 0.970	128.000, 0.791
642	128.200, 1.063	128.200, 0.526	128.200, 0.970	128.200, 0.790
643	128.400, 1.064	128.400, 0.526	128.400, 0.970	128.400, 0.790
644	128.600, 1.064	128.600, 0.526	128.600, 0.970	128.600, 0.790
645	128.800, 1.064	128.800, 0.526	128.800, 0.970	128.800, 0.789
646	129.000, 1.065	129.000, 0.526	129.000, 0.970	129.000, 0.789
647	129.200, 1.065	129.200, 0.527	129.200, 0.970	129.200, 0.789
648	129.400, 1.065	129.400, 0.527	129.400, 0.970	129.400, 0.789
649	129.600, 1.065	129.600, 0.527	129.600, 0.970	129.600, 0.789
650	129.800, 1.065	129.800, 0.527	129.800, 0.970	129.800, 0.790
651	130.000, 1.065	130.000, 0.527	130.000, 0.971	130.000, 0.790
652	130.200, 1.065	130.200, 0.526	130.200, 0.971	130.200, 0.790
653	130.400, 1.065	130.400, 0.526	130.400, 0.972	130.400, 0.790
654	130.600, 1.065	130.600, 0.526	130.600, 0.972	130.600, 0.791
655	130.800, 1.065	130.800, 0.525	130.800, 0.972	130.800, 0.791
656	131.000, 1.065	131.000, 0.525	131.000, 0.973	131.000, 0.791
657	131.200, 1.065	131.200, 0.525	131.200, 0.973	131.200, 0.791
658	131.400, 1.065	131.400, 0.525	131.400, 0.973	131.400, 0.791
659	131.600, 1.065	131.600, 0.525	131.600, 0.974	131.600, 0.791
660	131.800, 1.065	131.800, 0.524	131.800, 0.974	131.800, 0.791
661	132.000, 1.065	132.000, 0.524	132.000, 0.974	132.000, 0.790
662	132.200, 1.065	132.200, 0.524	132.200, 0.974	132.200, 0.790
663	132.400, 1.066	132.400, 0.524	132.400, 0.974	132.400, 0.790
664	132.600, 1.066	132.600, 0.524	132.600, 0.974	132.600, 0.790
665	132.800, 1.066	132.800, 0.524	132.800, 0.974	132.800, 0.790
666	133.000, 1.067	133.000, 0.524	133.000, 0.974	133.000, 0.790
667	133.200, 1.067	133.200, 0.524	133.200, 0.974	133.200, 0.789
668	133.400, 1.067	133.400, 0.524	133.400, 0.974	133.400, 0.789
669	133.600, 1.067	133.600, 0.524	133.600, 0.974	133.600, 0.789
670	133.800, 1.067	133.800, 0.524	133.800, 0.974	133.800, 0.789
671	134.000, 1.068	134.000, 0.524	134.000, 0.974	134.000, 0.788
672	134.200, 1.068	134.200, 0.523	134.200, 0.974	134.200, 0.788
673	134.400, 1.068	134.400, 0.523	134.400, 0.974	134.400, 0.788
674	134.600, 1.068	134.600, 0.523	134.600, 0.974	134.600, 0.788
675	134.800, 1.069	134.800, 0.523	134.800, 0.975	134.800, 0.788
676	135.000, 1.069	135.000, 0.523	135.000, 0.975	135.000, 0.788
677	135.200, 1.070	135.200, 0.523	135.200, 0.975	135.200, 0.788
678	135.400, 1.070	135.400, 0.523	135.400, 0.975	135.400, 0.788
679	135.600, 1.070	135.600, 0.523	135.600, 0.975	135.600, 0.788
680	135.800, 1.070	135.800, 0.523	135.800, 0.975	135.800, 0.788
681	136.000, 1.071	136.000, 0.523	136.000, 0.975	136.000, 0.788
682	136.200, 1.071	136.200, 0.523	136.200, 0.975	136.200, 0.788
683	136.400, 1.071	136.400, 0.523	136.400, 0.975	136.400, 0.787
684	136.600, 1.071	136.600, 0.523	136.600, 0.975	136.600, 0.787
685	136.800, 1.071	136.800, 0.523	136.800, 0.975	136.800, 0.787
686	137.000, 1.071	137.000, 0.523	137.000, 0.975	137.000, 0.786
687	137.200, 1.071	137.200, 0.523	137.200, 0.976	137.200, 0.786
688	137.400, 1.071	137.400, 0.523	137.400, 0.976	137.400, 0.785
689	137.600, 1.071	137.600, 0.523	137.600, 0.976	137.600, 0.785
690	137.800, 1.071	137.800, 0.522	137.800, 0.976	137.800, 0.785
691	138.000, 1.071	138.000, 0.522	138.000, 0.976	138.000, 0.785
692	138.200, 1.071	138.200, 0.522	138.200, 0.976	138.200, 0.785
693	138.400, 1.071	138.400, 0.522	138.400, 0.976	138.400, 0.785
694	138.600, 1.071	138.600, 0.521	138.600, 0.977	138.600, 0.786
695	138.800, 1.071	138.800, 0.521	138.800, 0.977	138.800, 0.786
696	139.000, 1.071	139.000, 0.521	139.000, 0.977	139.000, 0.786
697	139.200, 1.071	139.200, 0.521	139.200, 0.977	139.200, 0.786
698	139.400, 1.072	139.400, 0.521	139.400, 0.977	139.400, 0.785
699	139.600, 1.072	139.600, 0.521	139.600, 0.977	139.600, 0.785
700	139.800, 1.072	139.800, 0.520	139.800, 0.977	139.800, 0.784
701	140.000, 1.072	140.000, 0.520	140.000, 0.977	140.000, 0.783
702	140.200, 1.073	140.200, 0.520	140.200, 0.977	140.200, 0.783
703	140.400, 1.073	140.400, 0.520	140.400, 0.977	140.400, 0.781
704	140.600, 1.073	140.600, 0.519	140.600, 0.977	140.600, 0.780
705	140.800, 1.074	140.800, 0.519	140.800, 0.977	140.800, 0.779
706	141.000, 1.074	141.000, 0.519	141.000, 0.977	141.000, 0.778
707	141.200, 1.074	141.200, 0.518	141.200, 0.977	141.200, 0.777
708	141.400, 1.074	141.400, 0.518	141.400, 0.978	141.400, 0.777
709	141.600, 1.074	141.600, 0.518	141.600, 0.978	141.600, 0.776
710	141.800, 1.075	141.800, 0.517	141.800, 0.978	141.800, 0.775
711	142.000, 1.075	142.000, 0.517	142.000, 0.978	142.000, 0.775
712	142.200, 1.075	142.200, 0.517	142.200, 0.978	142.200, 0.774
713	142.400, 1.075	142.400, 0.517	142.400, 0.978	142.400, 0.774
714	142.600, 1.075	142.600, 0.517	142.600, 0.978	142.600, 0.774
715	142.800, 1.075	142.800, 0.517	142.800, 0.978	142.800, 0.774
716	143.000, 1.075	143.000, 0.517	143.000, 0.978	143.000, 0.774
717	143.200, 1.075	143.200, 0.518	143.200, 0.978	143.200, 0.774
718	143.400, 1.075	143.400, 0.517	143.400, 0.978	143.400, 0.774
719	143.600, 1.075	143.600, 0.517	143.600, 0.978	143.600, 0.774
720	143.800, 1.075	143.800, 0.517	143.800, 0.978	143.800, 0.774
721	144.000, 1.075	144.000, 0.517	144.000, 0.979	144.000, 0.774
722	144.200, 1.075	144.200, 0.517	144.200, 0.979	144.200, 0.774
723	144.400, 1.076	144.400, 0.517	144.400, 0.979	144.400, 0.773
724	144.600, 1.076	144.600, 0.517	144.600, 0.979	144.600, 0.773
725	144.800, 1.076	144.800, 0.517	144.800, 0.980	144.800, 0.773
726	145.000, 1.077	145.000, 0.517	145.000, 0.980	145.000, 0.772
727	145.200, 1.077	145.200, 0.517	145.200, 0.980	145.200, 0.772
728	145.400, 1.077	145.400, 0.517	145.400, 0.980	145.400, 0.772
729	145.600, 1.077	145.600, 0.517	145.600, 0.980	145.600, 0.772
730	145.800, 1.078	145.800, 0.517	145.800, 0.980	145.800, 0.772
731	146.000, 1.078	146.000, 0.517	146.000, 0.980	146.000, 0.771
732	146.200, 1.078	146.200, 0.517	146.200, 0.980	146.200, 0.771
733	146.400, 1.078	146.400, 0.517	146.400, 0.980	146.400, 0.771
734	146.600, 1.079	146.600, 0.517	146.600, 0.980	146.600, 0.771
735	146.800, 1.079	146.800, 0.517	146.800, 0.980	146.800, 0.771
736	147.000, 1.079	147.000, 0.517	147.000, 0.980	147.000, 0.771
737	147.200, 1.079	147.200, 0.516	147.200, 0.980	147.200, 0.771
738	147.400, 1.079	147.400, 0.516	147.400, 0.980	147.400, 0.771
739	147.600, 1.079	147.600, 0.516	147.600, 0.980	147.600, 0.771
740	147.800, 1.079	147.800, 0.516	147.800, 0.980	147.800, 0.771
741	148.000, 1.079	148.000, 0.516	148.000, 0.981	148.000, 0.770
742	148.200, 1.079	148.200, 0.516	148.200, 0.981	148.200, 0.770
743	148.400, 1.079	148.400, 0.516	148.400, 0.981	148.400, 0.769
744	148.600, 1.079	148.600, 0.516	148.600, 0.981	148.600, 0.769
745	148.800, 1.079	148.800, 0.516	148.800, 0.981	148.800, 0.769
746	149.000, 1.078	149.000, 0.516	149.000, 0.981	149.000, 0.768
747	149.200, 1.078	149.200, 0.516	149.200, 0.981	149.200, 0.768
748	149.400, 1.078	149.400, 0.515	149.400, 0.981	149.400, 0.768
749	149.600, 1.078	149.600, 0.515	149.600, 0.981	149.600, 0.768
750	149.800, 1.078	149.800, 0.515	149.800, 0.981	149.800, 0.768
751	150.000, 1.078	150.000, 0.515	150.000, 0.981	150.000, 0.768
752	150.200, 1.070	150.200, 0.514	150.200, 0.974	150.200, 0.763
753	150.400, 1.061	150.400, 0.512	150.400, 0.965	150.400, 0.758
754	150.600, 1.051	150.600, 0.511	150.600, 0.955	150.600, 0.752
755	150.800, 1.041	150.800, 0.509	150.800, 0.945	150.800, 0.746
756	151.000, 1.029	151.000, 0.507	151.000, 0.935	151.000, 0.739
757	151.200, 1.018	151.200, 0.505	151.200, 0.924	151.200, 0.732
758	151.400, 1.006	151.400, 0.503	151.400, 0.913	151.400, 0.725
759	151.600, 0.995	151.600, 0.502	151.600, 0.902	151.600, 0.718
760	151.800, 0.985	151.800, 0.500	151.800, 0.893	151.800, 0.711
761	152.000, 0.975	152.000, 0.498	152.000, 0.884	152.000, 0.705
762	152.200, 0.968	152.200, 0.497	152.200, 0.877	152.200, 0.700
763	152.400, 0.960	152.400, 0.495	152.400, 0.871	152.400, 0.695
764	152.600, 0.954	152.600, 0.493	152.600, 0.865	152.600, 0.690
765	152.800, 0.947	152.800, 0.492	152.800, 0.860	152.800, 0.686
766	153.000, 0.942	153.000, 0.490	153.000, 0.855	153.000, 0.681
767	153.200, 0.936	153.200, 0.489	153.200, 0.851	153.200, 0.677
768	153.400, 0.931	153.400, 0.488	153.400, 0.847	153.400, 0.673
769	153.600, 0.926	153.600, 0.487	153.600, 0.843	153.600, 0.670
770	153.800, 0.921	153.800, 0.485	153.800, 0.839	153.800, 0.666
771	154.000, 0.917	154.000, 0.484	154.000, 0.835	154.000, 0.663
772	154.200, 0.912	154.200, 0.483	154.200, 0.831	154.200, 0.659
773	154.400, 0.908	154.400, 0.482	154.400, 0.828	154.400, 0.656
774	154.600, 0.904	154.600, 0.480	154.600, 0.824	154.600, 0.654
775	154.800, 0.901	154.800, 0.479	154.800, 0.821	154.800, 0.651
776	155.000, 0.897	155.000, 0.479	155.000, 0.818	155.000, 0.648
777	155.200, 0.894	155.200, 0.478	155.200, 0.815	155.200, 0.646
778	155.400, 0.891	155.400, 0.477	155.400, 0.813	155.400, 0.644
779	155.600, 0.888	155.600, 0.477	155.600, 0.810	155.600, 0.642
780	155.800, 0.886	155.800, 0.476	155.800, 0.808	155.800, 0.641
781	156.000, 0.884	156.000, 0.476	156.000, 0.806	156.000, 0.639
782	156.200, 0.881	156.200, 0.475	156.200, 0.804	156.200, 0.638
783	156.400, 0.879	156.400, 0.475	156.400, 0.802	156.400, 0.636
784	156.600, 0.877	156.600, 0.474	156.600, 0.800	156.600, 0.634
785	156.800, 0.875	156.800, 0.473	156.800, 0.798	156.800, 0.633
786	157.000, 0.873	157.000, 0.473	157.000, 0.797	157.000, 0.631
787	157.200, 0.871	157.200, 0.473	157.200, 0.795	157.200, 0.630
788	157.400, 0.869	157.400, 0.472	157.400, 0.794	157.400, 0.628
789	157.600, 0.866	157.600, 0.471	157.600, 0.792	157.600, 0.626
790	157.800, 0.864	157.800, 0.471	157.800, 0.791	157.800, 0.625
791	158.000, 0.862	158.000, 0.470	158.000, 0.789	158.000, 0.623
792	158.200, 0.860	158.200, 0.469	158.200, 0.787	158.200, 0.622
793	158.400, 0.858	158.400, 0.468	158.400, 0.786	158.400, 0.621
794	158.600, 0.856	158.600, 0.468	158.600, 0.785	158.600, 0.619
795	158.800, 0.855	158.800, 0.467	158.800, 0.783	158.800, 0.618
796	159.000, 0.853	159.000, 0.466	159.000, 0.782	159.000, 0.617
797	159.200, 0.852	159.200, 0.466	159.200, 0.781	159.200, 0.616
798	159.400, 0.851	159.400, 0.465	159.400, 0.779	159.400, 0.615
799	159.600, 0.850	159.600, 0.465	159.600, 0.778	159.600, 0.614
800	159.800, 0.849	159.800, 0.464	159.800, 0.777	159.800, 0.613
801	160.000, 0.848	160.000, 0.464	160.000, 0.775	160.000, 0.612
802	160.200, 0.847	160.200, 0.463	160.200, 0.774	160.200, 0.611
803	160.400, 0.846	160.400, 0.463	160.400, 0.772	160.400, 0.610
804	160.600, 0.845	160.600, 0.462	160.600, 0.771	160.600, 0.609
805	160.800, 0.844	160.800, 0.462	160.800, 0.770	160.800, 0.609
806	161.000, 0.843	161.000, 0.461	161.000, 0.769	161.000, 0.608
807	161.200, 0.842	161.200, 0.461	161.200, 0.767	161.200, 0.607
808	161.400, 0.840	161.400, 0.461	161.400, 0.766	161.400, 0.607
809	161.600, 0.839	161.600, 0.460	161.600, 0.765	161.600, 0.606
810	161.800, 0.838	161.800, 0.460	161.800, 0.764	161.800, 0.605
811	162.000, 0.837	162.000, 0.460	162.000, 0.763	162.000, 0.604
812	162.200, 0.836	162.200, 0.459	162.200, 0.762	162.200, 0.604
813	162.400, 0.835	162.400, 0.459	162.400, 0.761	162.400, 0.603
814	162.600, 0.833	162.600, 0.458	162.600, 0.760	162.600, 0.602
815	162.800, 0.832	162.800, 0.458	162.800, 0.760	162.800, 0.601
816	163.000, 0.831	163.000, 0.457	163.000, 0.759	163.000, 0.600
817	163.200, 0.830	163.200, 0.457	163.200, 0.758	163.200, 0.600
818	163.400, 0.830	163.400, 0.456	163.400, 0.757	163.400, 0.599
819	163.600, 0.829	163.600, 0.456	163.600, 0.756	163.600, 0.598
820	163.800, 0.828	163.800, 0.455	163.800, 0.756	163.800, 0.597
821	164.000, 0.827	164.000, 0.455	164.000, 0.755	164.000, 0.596
822	164.200, 0.826	164.200, 0.455	164.200, 0.754	164.200, 0.595
823	164.400, 0.826	164.400, 0.454	164.400, 0.753	164.400, 0.594
824	164.600, 0.825	164.600, 0.454	164.600, 0.752	164.600, 0.594
825	164.800, 0.824	164.800, 0.454	164.800, 0.751	164.800, 0.593
826	165.000, 0.823	165.000, 0.453	165.000, 0.751	165.000, 0.592
827	165.200, 0.822	165.200, 0.453	165.200, 0.750	165.200, 0.591
828	165.400, 0.821	165.400, 0.453	165.400, 0.749	165.400, 0.591
829	165.600, 0.821	165.600, 0.452	165.600, 0.748	165.600, 0.590
830	165.800, 0.820	165.800, 0.452	165.800, 0.747	165.800, 0.589
831	166.000, 0.819	166.000, 0.452	166.000, 0.746	166.000, 0.588
832	166.200, 0.818	166.200, 0.451	166.200, 0.745	166.200, 0.588
833	166.400, 0.818	166.400, 0.451	166.400, 0.744	166.400, 0.587
834	166.600, 0.817	166.600, 0.450	166.600, 0.743	166.600, 0.586
835	166.800, 0.816	166.800, 0.449	166.800, 0.742	166.800, 0.586
836	167.000, 0.816	167.000, 0.449	167.000, 0.742	167.000, 0.585
837	167.200, 0.815	167.200, 0.448	167.200, 0.741	167.200, 0.584
838	167.400, 0.815	167.400, 0.448	167.400, 0.740	167.400, 0.584
839	167.600, 0.814	167.600, 0.447	167.600, 0.740	167.600, 0.583
840	167.800, 0.813	167.800, 0.447	167.800, 0.740	167.800, 0.582
841	168.000, 0.813	168.000, 0.447	168.000, 0.739	168.000, 0.582
842	168.200, 0.812	168.200, 0.446	168.200, 0.739	168.200, 0.581
843	168.400, 0.811	168.400, 0.446	168.400, 0.739	168.400, 0.580
844	168.600, 0.810	168.600, 0.446	168.600, 0.738	168.600, 0.580
845	168.800, 0.809	168.800, 0.446	168.800, 0.738	168.800, 0.579
846	169.000, 0.809	169.000, 0.446	169.000, 0.737	169.000, 0.578
847	169.200, 0.808	169.200, 0.445	169.200, 0.736	169.200, 0.578
848	169.400, 0.807	169.400, 0.445	169.400, 0.735	169.400, 0.577
849	169.600, 0.806	169.600, 0.444	169.600, 0.734	169.600, 0.576
850	169.800, 0.805	169.800, 0.444	169.800, 0.733	169.800, 0.576
851	170.000, 0.804	170.000, 0.444	170.000, 0.732	170.000, 0.575
852	170.200, 0.804	170.200, 0.443	170.200, 0.731	170.200, 0.575
853	170.400, 0.803	170.400, 0.443	170.400, 0.730	170.400, 0.575
854	170.600, 0.802	170.600, 0.442	170.600, 0.729	170.600, 0.574
855	170.800, 0.802	170.800, 0.441	170.800, 0.729	170.800, 0.574
856	171.000, 0.801	171.000, 0.441	171.000, 0.728	171.000, 0.573
857	171.200, 0.801	171.200, 0.440	171.200, 0.727	171.200, 0.573
858	171.400, 0.800	171.400, 0.440	171.400, 0.726	171.400, 0.572
859	171.600, 0.799	171.600, 0.439	171.600, 0.726	171.600, 0.571
860	171.800, 0.799	171.800, 0.439	171.800, 0.725	171.800, 0.570
861	172.000, 0.798	172.000, 0.438	172.000, 0.725	172.000, 0.569
862	172.200, 0.797	172.200, 0.438	172.200, 0.724	172.200, 0.568
863	172.400, 0.797	172.400, 0.437	172.400, 0.724	172.400, 0.568
864	172.600, 0.796	172.600, 0.437	172.600, 0.723	172.600, 0.567
865	172.800, 0.795	172.800, 0.437	172.800, 0.722	172.800, 0.566
866	173.000, 0.795	173.000, 0.436	173.000, 0.721	173.000, 0.566
867	173.200, 0.794	173.200, 0.436	173.200, 0.721	173.200, 0.565
868	173.400, 0.793	173.400, 0.435	173.400, 0.720	173.400, 0.565
869	173.600, 0.793	173.600, 0.435	173.600, 0.720	173.600, 0.565
870	173.800, 0.792	173.800, 0.434	173.800, 0.719	173.800, 0.564
871	174.000, 0.791	174.000, 0.434	174.000, 0.718	174.000, 0.564
872	174.200, 0.790	174.200, 0.433	174.200, 0.718	174.200, 0.563
873	174.400, 0.790	174.400, 0.433	174.400, 0.717	174.400, 0.563
874	174.600, 0.789	174.600, 0.432	174.600, 0.717	174.600, 0.562
875	174.800, 0.788	174.800, 0.432	174.800, 0.716	174.800, 0.561
876	175.000, 0.788	175.000, 0.431	175.000, 0.715	175.000, 0.560
877	175.200, 0.787	175.200, 0.431	175.200, 0.715	175.200, 0.559
878	175.400, 0.786	175.400, 0.430	175.400, 0.714	175.400, 0.558
879	175.600, 0.785	175.600, 0.430	175.600, 0.713	175.600, 0.557
880	175.800, 0.785	175.800, 0.429	175.800, 0.712	175.800, 0.556
881	176.000, 0.784	176.000, 0.429	176.000, 0.711	176.000, 0.556
882	176.200, 0.783	176.200, 0.428	176.200, 0.710	176.200, 0.555
883	176.400, 0.783	176.400, 0.428	176.400, 0.709	176.400, 0.554
884	176.600, 0.783	176.600, 0.428	176.600, 0.708	176.600, 0.554
885	176.800, 0.782	176.800, 0.428	176.800, 0.708	176.800, 0.553
886	177.000, 0.782	177.000, 0.428	177.000, 0.707	177.000, 0.553
887	177.200, 0.781	177.200, 0.427	177.200, 0.706	177.200, 0.553
888	177.400, 0.781	177.400, 0.427	177.400, 0.706	177.400, 0.552
889	177.600, 0.780	177.600, 0.426	177.600, 0.705	177.600, 0.552
890	177.800, 0.779	177.800, 0.426	177.800, 0.705	177.800, 0.552
891	178.000, 0.779	178.000, 0.426	178.000, 0.704	178.000, 0.551
892	178.200, 0.779	178.200, 0.425	178.200, 0.703	178.200, 0.551
893	178.400, 0.778	178.400, 0.425	178.400, 0.703	178.400, 0.551
894	178.600, 0.778	178.600, 0.425	178.600, 0.703	178.600, 0.550
895	178.800, 0.777	178.800, 0.424	178.800, 0.702	178.800, 0.549
896	179.000, 0.776	179.000, 0.424	179.000, 0.702	179.000, 0.549
897	179.200, 0.775	179.200, 0.423	179.200, 0.702	179.200, 0.548
898	179.400, 0.774	179.400, 0.422	179.400, 0.701	179.400, 0.547
899	179.600, 0.773	179.600, 0.422	179.600, 0.700	179.600, 0.546
900	179.800, 0.773	179.800, 0.421	179.800, 0.700	179.800, 0.545
901	180.000, 0.772	180.000, 0.421	180.000, 0.699	180.000, 0.544
902	180.200, 0.771	180.200, 0.420	180.200, 0.699	180.200, 0.543
903	180.400, 0.771	180.400, 0.420	180.400, 0.698	180.400, 0.542
904	180.600, 0.770	180.600, 0.419	180.600, 0.698	180.600, 0.542
905	180.800, 0.769	180.800, 0.418	180.800, 0.697	180.800, 0.541
906	181.000, 0.768	181.000, 0.418	181.000, 0.697	181.000, 0.541
907	181.200, 0.768	181.200, 0.418	181.200, 0.696	181.200, 0.540
908	181.400, 0.767	181.400, 0.417	181.400, 0.695	181.400, 0.540
909	181.600, 0.767	181.600, 0.417	181.600, 0.694	181.600, 0.539
910	181.800, 0.766	181.800, 0.417	181.800, 0.694	181.800, 0.539
911	182.000, 0.766	182.000, 0.416	182.000, 0.693	182.000, 0.538
912	182.200, 0.766	182.200, 0.416	182.200, 0.693	182.200, 0.538
913	182.400, 0.765	182.400, 0.416	182.400, 0.692	182.400, 0.538
914	182.600, 0.765	182.600, 0.416	182.600, 0.692	182.600, 0.537
915	182.800, 0.764	182.800, 0.416	182.800, 0.691	182.800, 0.537
916	183.000, 0.764	183.000, 0.415	183.000, 0.691	183.000, 0.536
917	183.200, 0.763	183.200, 0.415	183.200, 0.690	183.200, 0.536
918	183.400, 0.762	183.400, 0.415	183.400, 0.690	183.400, 0.535
919	183.600, 0.762	183.600, 0.414	183.600, 0.689	183.600, 0.535
920	183.800, 0.761	183.800, 0.414	183.800, 0.688	183.800, 0.534
921	184.000, 0.760	184.000, 0.413	184.000, 0.687	184.000, 0.534
922	184.200, 0.759	184.200, 0.413	184.200, 0.686	184.200, 0.533
923	184.400, 0.758	184.400, 0.413	184.400, 0.686	184.400, 0.533
924	184.600, 0.757	184.600, 0.412	184.600, 0.685	184.600, 0.532
925	184.800, 0.756	184.800, 0.412	184.800, 0.684	184.800, 0.532
926	185.000, 0.756	185.000, 0.412	185.000, 0.683	185.000, 0.531
927	185.200, 0.755	185.200, 0.412	185.200, 0.683	185.200, 0.531
928	185.400, 0.754	185.400, 0.411	185.400, 0.682	185.400, 0.530
929	185.600, 0.754	185.600, 0.411	185.600, 0.682	185.600, 0.529
930	185.800, 0.753	185.800, 0.411	185.800, 0.682	185.800, 0.529
931	186.000, 0.753	186.000, 0.410	186.000, 0.682	186.000, 0.528
932	186.200, 0.752	186.200, 0.410	186.200, 0.681	186.200, 0.527
933	186.400, 0.752	186.400, 0.409	186.400, 0.680	186.400, 0.527
934	186.600, 0.752	186.600, 0.409	186.600, 0.680	186.600, 0.526
935	186.800, 0.751	186.800, 0.408	186.800, 0.679	186.800, 0.525
936	187.000, 0.751	187.000, 0.407	187.000, 0.678	187.000, 0.525
937	187.200, 0.750	187.200, 0.407	187.200, 0.678	187.200, 0.524
938	187.400, 0.750	187.400, 0.406	187.400, 0.677	187.400, 0.524
939	187.600, 0.749	187.600, 0.406	187.600, 0.676	187.600, 0.523
940	187.800, 0.748	187.800, 0.406	187.800, 0.676	187.800, 0.523
941	188.000, 0.748	188.000, 0.405	188.000, 0.675	188.000, 0.522
942	188.200, 0.747	188.200, 0.405	188.200, 0.674	188.200, 0.522
943	188.400, 0.746	188.400, 0.405	188.400, 0.673	188.400, 0.522
944	188.600, 0.746	188.600, 0.404	188.600, 0.672	188.600, 0.521
945	188.800, 0.746	188.800, 0.404	188.800, 0.672	188.800, 0.521
946	189.000, 0.745	189.000, 0.403	189.000, 0.671	189.000, 0.521
947	189.200, 0.745	189.200, 0.403	189.200, 0.671	189.200, 0.520
948	189.400, 0.744	189.400, 0.402	189.400, 0.670	189.400, 0.520
949	189.600, 0.744	189.600, 0.402	189.600, 0.670	189.600, 0.519
950	189.800, 0.744	189.800, 0.402	189.800, 0.670	189.800, 0.519
951	190.000, 0.743	190.000, 0.401	190.000, 0.669	190.000, 0.518
952	190.200, 0.743	190.200, 0.401	190.200, 0.669	190.200, 0.517
953	190.400, 0.742	190.400, 0.401	190.400, 0.668	190.400, 0.517
954	190.600, 0.742	190.600, 0.400	190.600, 0.668	190.600, 0.516
955	190.800, 0.741	190.800, 0.400	190.800, 0.668	190.800, 0.515
956	191.000, 0.740	191.000, 0.400	191.000, 0.667	191.000, 0.515
957	191.200, 0.739	191.200, 0.399	191.200, 0.667	191.200, 0.514
958	191.400, 0.739	191.400, 0.399	191.400, 0.667	191.400, 0.514
959	191.600, 0.738	191.600, 0.399	191.600, 0.666	191.600, 0.513
960	191.800, 0.737	191.800, 0.398	191.800, 0.666	191.800, 0.513
961	192.000, 0.736	192.000, 0.398	192.000, 0.665	192.000, 0.512
962	192.200, 0.735	192.200, 0.397	192.200, 0.664	192.200, 0.512
963	192.400, 0.735	192.400, 0.397	192.400, 0.664	192.400, 0.511
964	192.600, 0.734	192.600, 0.397	192.600, 0.663	192.600, 0.511
965	192.800, 0.733	192.800, 0.396	192.800, 0.663	192.800, 0.510
966	193.000, 0.733	193.000, 0.396	193.000, 0.662	193.000, 0.509
967	193.200, 0.732	193.200, 0.395	193.200, 0.662	193.200, 0.509
968	193.400, 0.732	193.400, 0.395	193.400, 0.661	193.400, 0.508
969	193.600, 0.731	193.600, 0.395	193.600, 0.661	193.600, 0.507
970	193.800, 0.731	193.800, 0.395	193.800, 0.660	193.800, 0.506
971	194.000, 0.731	194.000, 0.394	194.000, 0.659	194.000, 0.505
972	194.200, 0.730	194.200, 0.394	194.200, 0.659	194.200, 0.505
973	194.400, 0.730	194.400, 0.394	194.400, 0.658	194.400, 0.504
974	194.600, 0.730	194.600, 0.394	194.600, 0.657	194.600, 0.503
975	194.800, 0.729	194.800, 0.393	194.800, 0.657	194.800, 0.503
976	195.000, 0.729	195.000, 0.393	195.000, 0.656	195.000, 0.502
977	195.200, 0.728	195.200, 0.393	195.200, 0.655	195.200, 0.502
978	195.400, 0.728	195.400, 0.392	195.400, 0.654	195.400, 0.501
979	195.600, 0.727	195.600, 0.392	195.600, 0.654	195.600, 0.501
980	195.800, 0.727	195.800, 0.391	195.800, 0.653	195.800, 0.501
981	196.000, 0.726	196.000, 0.391	196.000, 0.653	196.000, 0.500
982	196.200, 0.726	196.200, 0.390	196.200, 0.652	196.200, 0.500
983	196.400, 0.725	196.400, 0.390	196.400, 0.652	196.400, 0.500
984	196.600, 0.725	196.600, 0.389	196.600, 0.652	196.600, 0.499
985	196.800, 0.724	196.800, 0.389	196.800, 0.651	196.800, 0.499
986	197.000, 0.723	197.000, 0.388	197.000, 0.651	197.000, 0.499
987	197.200, 0.723	197.200, 0.388	197.200, 0.651	197.200, 0.498
988	197.400, 0.723	197.400, 0.388	197.400, 0.651	197.400, 0.498
989	197.600, 0.723	197.600, 0.387	197.600, 0.650	197.600, 0.498
990	197.800, 0.722	197.800, 0.387	197.800, 0.650	197.800, 0.497
991	198.000, 0.722	198.000, 0.387	198.000, 0.649	198.000, 0.497
992	198.200, 0.721	198.200, 0.387	198.200, 0.649	198.200, 0.496
993	198.400, 0.720	198.400, 0.387	198.400, 0.649	198.400, 0.495
994	198.600, 0.720	198.600, 0.387	198.600, 0.648	198.600, 0.495
995	198.800, 0.719	198.800, 0.387	198.800, 0.648	198.800, 0.494
996	199.000, 0.719	199.000, 0.386	199.000, 0.648	199.000, 0.494
997	199.200, 0.718	199.200, 0.386	199.200, 0.647	199.200, 0.493
998	199.400, 0.718	199.400, 0.385	199.400, 0.647	199.400, 0.492
999	199.600, 0.717	199.600, 0.385	199.600, 0.646	199.600, 0.492
1000	199.800, 0.717	199.800, 0.384	199.800, 0.645	199.800, 0.491
1001	200.000, 0.716	200.000, 0.384	200.000, 0.645	200.000, 0.491
1002	200.200, 0.716	200.200, 0.383	200.200, 0.644	200.200, 0.490
1003	200.400, 0.715	200.400, 0.383	200.400, 0.644	200.400, 0.490
1004	200.600, 0.715	200.600, 0.382	200.600, 0.643	200.600, 0.490
1005	200.800, 0.714	200.800, 0.382	200.800, 0.642	200.800, 0.489
1006	201.000, 0.714	201.000, 0.382	201.000, 0.641	201.000, 0.489
1007	201.200, 0.714	201.200, 0.381	201.200, 0.641	201.200, 0.489
1008	201.400, 0.714	201.400, 0.381	201.400, 0.640	201.400, 0.488
1009	201.600, 0.713	201.600, 0.381	201.600, 0.639	201.600, 0.488
1010	201.800, 0.713	201.800, 0.380	201.800, 0.638	201.800, 0.487
1011	202.000, 0.712	202.000, 0.380	202.000, 0.638	202.000, 0.486
1012	202.200, 0.712	202.200, 0.380	202.200, 0.637	202.200, 0.486
1013	202.400, 0.711	202.400, 0.379	202.400, 0.637	202.400, 0.485
1014	202.600, 0.710	202.600, 0.379	202.600, 0.636	202.600, 0.485
1015	202.800, 0.710	202.800, 0.378	202.800, 0.636	202.800, 0.484
1016	203.000, 0.709	203.000, 0.377	203.000, 0.635	203.000, 0.484
1017	203.200, 0.708	203.200, 0.377	203.200, 0.635	203.200, 0.483
1018	203.400, 0.707	203.400, 0.376	203.400, 0.634	203.400, 0.482
1019	203.600, 0.707	203.600, 0.376	203.600, 0.634	203.600, 0.482
1020	203.800, 0.706	203.800, 0.375	203.800, 0.634	203.800, 0.482
1021	204.000, 0.706	204.000, 0.375	204.000, 0.633	204.000, 0.481
1022	204.200, 0.705	204.200, 0.375	204.200, 0.633	204.200, 0.481
1023	204.400, 0.705	204.400, 0.375	204.400, 0.632	204.400, 0.480
1024	204.600, 0.704	204.600, 0.374	204.600, 0.632	204.600, 0.480
1025	204.800, 0.704	204.800, 0.374	204.800, 0.631	204.800, 0.480
1026	205.000, 0.703	205.000, 0.374	205.000, 0.631	205.000, 0.479
1027	205.200, 0.703	205.200, 0.373	205.200, 0.630	205.200, 0.479
1028	205.400, 0.703	205.400, 0.373	205.400, 0.630	205.400, 0.478
1029	205.600, 0.703	205.600, 0.373	205.600, 0.630	205.600, 0.478
1030	205.800, 0.703	205.800, 0.372	205.800, 0.630	205.800, 0.477
1031	206.000, 0.702	206.000, 0.372	206.000, 0.629	206.000, 0.477
1032	206.200, 0.702	206.200, 0.372	206.200, 0.629	206.200, 0.476
1033	206.400, 0.701	206.400, 0.371	206.400, 0.629	206.400, 0.476
1034	206.600, 0.701	206.600, 0.371	206.600, 0.628	206.600, 0.475
1035	206.800, 0.701	206.800, 0.371	206.800, 0.628	206.800, 0.475
1036	207.000, 0.700	207.000, 0.371	207.000, 0.628	207.000, 0.474
1037	207.200, 0.700	207.200, 0.370	207.200, 0.627	207.200, 0.474
1038	207.400, 0.700	207.400, 0.370	207.400, 0.627	207.400, 0.474
1039	207.600, 0.699	207.600, 0.370	207.600, 0.626	207.600, 0.473
1040	207.800, 0.699	207.800, 0.370	207.800, 0.626	207.800, 0.473
1041	208.000, 0.698	208.000, 0.369	208.000, 0.625	208.000, 0.473
1042	208.200, 0.697	208.200, 0.369	208.200, 0.624	208.200, 0.472
1043	208.400, 0.697	208.400, 0.368	208.400, 0.624	208.400, 0.472
1044	208.600, 0.696	208.600, 0.368	208.600, 0.623	208.600, 0.471
1045	208.800, 0.696	208.800, 0.367	208.800, 0.623	208.800, 0.471
1046	209.000, 0.695	209.000, 0.367	209.000, 0.622	209.000, 0.470
1047	209.200, 0.694	209.200, 0.366	209.200, 0.622	209.200, 0.470
1048	209.400, 0.694	209.400, 0.366	209.400, 0.621	209.400, 0.470
1049	209.600, 0.693	209.600, 0.365	209.600, 0.621	209.600, 0.469
1050	209.800, 0.693	209.800, 0.365	209.800, 0.620	209.800, 0.469
1051	210.000, 0.693	210.000, 0.365	210.000, 0.620	210.000, 0.468
1052	210.200, 0.692	210.200, 0.365	210.200, 0.620	210.200, 0.468
1053	210.400, 0.692	210.400, 0.364	210.400, 0.619	210.400, 0.467
1054	210.600, 0.691	210.600, 0.364	210.600, 0.619	210.600, 0.467
1055	210.800, 0.691	210.800, 0.364	210.800, 0.619	210.800, 0.466
1056	211.000, 0.690	211.000, 0.364	211.000, 0.618	211.000, 0.466
1057	211.200, 0.689	211.200, 0.363	211.200, 0.618	211.200, 0.466
1058	211.400, 0.689	211.400, 0.363	211.400, 0.617	211.400, 0.465
1059	211.600, 0.688	211.600, 0.363	211.600, 0.617	211.600, 0.465
1060	211.800, 0.688	211.800, 0.363	211.800, 0.617	211.800, 0.464
1061	212.000, 0.687	212.000, 0.363	212.000, 0.616	212.000, 0.464
1062	212.200, 0.687	212.200, 0.363	212.200, 0.616	212.200, 0.463
1063	212.400, 0.686	212.400, 0.363	212.400, 0.616	212.400, 0.463
1064	212.600, 0.686	212.600, 0.362	212.600, 0.615	212.600, 0.462
1065	212.800, 0.685	212.800, 0.362	212.800, 0.614	212.800, 0.462
1066	213.000, 0.685	213.000, 0.362	213.000, 0.614	213.000, 0.461
1067	213.200, 0.684	213.200, 0.361	213.200, 0.613	213.200, 0.461
1068	213.400, 0.684	213.400, 0.361	213.400, 0.613	213.400, 0.461
1069	213.600, 0.684	213.600, 0.360	213.600, 0.613	213.600, 0.460
1070	213.800, 0.684	213.800, 0.360	213.800, 0.613	213.800, 0.460
1071	214.000, 0.684	214.000, 0.359	214.000, 0.612	214.000, 0.460
1072	214.200, 0.684	214.200, 0.359	214.200, 0.612	214.200, 0.459
1073	214.400, 0.683	214.400, 0.358	214.400, 0.612	214.400, 0.459
1074	214.600, 0.683	214.600, 0.358	214.600, 0.611	214.600, 0.458
1075	214.800, 0.682	214.800, 0.357	214.800, 0.611	214.800, 0.458
1076	215.000, 0.682	215.000, 0.357	215.000, 0.610	215.000, 0.457
1077	215.200, 0.681	215.200, 0.356	215.200, 0.610	215.200, 0.457
1078	215.400, 0.681	215.400, 0.356	215.400, 0.609	215.400, 0.456
1079	215.600, 0.680	215.600, 0.356	215.600, 0.608	215.600, 0.456
1080	215.800, 0.680	215.800, 0.356	215.800, 0.608	215.800, 0.456
1081	216.000, 0.680	216.000, 0.355	216.000, 0.607	216.000, 0.455
1082	216.200, 0.679	216.200, 0.355	216.200, 0.606	216.200, 0.455
1083	216.400, 0.678	216.400, 0.355	216.400, 0.605	216.400, 0.454
1084	216.600, 0.678	216.600, 0.355	216.600, 0.605	216.600, 0.454
1085	216.800, 0.678	216.800, 0.355	216.800, 0.604	216.800, 0.454
1086	217.000, 0.677	217.000, 0.354	217.000, 0.604	217.000, 0.453
1087	217.200, 0.677	217.200, 0.354	217.200, 0.603	217.200, 0.453
1088	217.400, 0.677	217.400, 0.354	217.400, 0.603	217.400, 0.452
1089	217.600, 0.677	217.600, 0.353	217.600, 0.603	217.600, 0.452
1090	217.800, 0.676	217.800, 0.353	217.800, 0.602	217.800, 0.451
1091	218.000, 0.676	218.000, 0.352	218.000, 0.602	218.000, 0.451
1092	218.200, 0.676	218.200, 0.352	218.200, 0.602	218.200, 0.450
1093	218.400, 0.675	218.400, 0.352	218.400, 0.601	218.400, 0.450
1094	218.600, 0.675	218.600, 0.352	218.600, 0.601	218.600, 0.450
1095	218.800, 0.674	218.800, 0.351	218.800, 0.601	218.800, 0.450
1096	219.000, 0.674	219.000, 0.351	219.000, 0.601	219.000, 0.449
1097	219.200, 0.673	219.200, 0.350	219.200, 0.600	219.200, 0.449
1098	219.400, 0.672	219.400, 0.350	219.400, 0.600	219.400, 0.449
1099	219.600, 0.672	219.600, 0.350	219.600, 0.600	219.600, 0.448
1100	219.800, 0.671	219.800, 0.350	219.800, 0.600	219.800, 0.448
1101	220.000, 0.671	220.000, 0.349	220.000, 0.599	220.000, 0.447
1102	220.200, 0.670	220.200, 0.349	220.200, 0.599	220.200, 0.447
1103	220.400, 0.670	220.400, 0.349	220.400, 0.598	220.400, 0.446
1104	220.600, 0.669	220.600, 0.349	220.600, 0.598	220.600, 0.446
1105	220.800, 0.669	220.800, 0.348	220.800, 0.597	220.800, 0.445
1106	221.000, 0.669	221.000, 0.348	221.000, 0.596	221.000, 0.445
1107	221.200, 0.668	221.200, 0.348	221.200, 0.596	221.200, 0.444
1108	221.400, 0.668	221.400, 0.348	221.400, 0.595	221.400, 0.443
1109	221.600, 0.668	221.600, 0.348	221.600, 0.595	221.600, 0.443
1110	221.800, 0.668	221.800, 0.347	221.800, 0.594	221.800, 0.443
1111	222.000, 0.667	222.000, 0.347	222.000, 0.594	222.000, 0.443
1112	222.200, 0.667	222.200, 0.347	222.200, 0.594	222.200, 0.442
1113	222.400, 0.667	222.400, 0.346	222.400, 0.593	222.400, 0.442
1114	222.600, 0.667	222.600, 0.346	222.600, 0.593	222.600, 0.442
1115	222.800, 0.667	222.800, 0.345	222.800, 0.593	222.800, 0.441
1116	223.000, 0.666	223.000, 0.345	223.000, 0.593	223.000, 0.441
1117	223.200, 0.666	223.200, 0.344	223.200, 0.593	223.200, 0.440
1118	223.400, 0.666	223.400, 0.344	223.400, 0.593	223.400, 0.440
1119	223.600, 0.665	223.600, 0.343	223.600, 0.593	223.600, 0.439
1120	223.800, 0.664	223.800, 0.343	223.800, 0.593	223.800, 0.439
1121	224.000, 0.664	224.000, 0.342	224.000, 0.592	224.000, 0.439
1122	224.200, 0.663	224.200, 0.342	224.200, 0.592	224.200, 0.439
1123	224.400, 0.662	224.400, 0.342	224.400, 0.592	224.400, 0.438
1124	224.600, 0.662	224.600, 0.341	224.600, 0.591	224.600, 0.438
1125	224.800, 0.661	224.800, 0.341	224.800, 0.591	224.800, 0.438
1126	225.000, 0.661	225.000, 0.341	225.000, 0.591	225.000, 0.438
1127	225.200, 0.661	225.200, 0.341	225.200, 0.590	225.200, 0.437
1128	225.400, 0.660	225.400, 0.340	225.400, 0.590	225.400, 0.437
1129	225.600, 0.660	225.600, 0.340	225.600, 0.589	225.600, 0.436
1130	225.800, 0.660	225.800, 0.340	225.800, 0.589	225.800, 0.436
1131	226.000, 0.660	226.000, 0.340	226.000, 0.588	226.000, 0.436
1132	226.200, 0.659	226.200, 0.340	226.200, 0.587	226.200, 0.435
1133	226.400, 0.659	226.400, 0.340	226.400, 0.586	226.400, 0.434
1134	226.600, 0.659	226.600, 0.339	226.600, 0.586	226.600, 0.434
1135	226.800, 0.658	226.800, 0.339	226.800, 0.585	226.800, 0.433
1136	227.000, 0.658	227.000, 0.339	227.000, 0.585	227.000, 0.433
1137	227.200, 0.657	227.200, 0.339	227.200, 0.584	227.200, 0.432
1138	227.400, 0.657	227.400, 0.339	227.400, 0.584	227.400, 0.432
1139	227.600, 0.656	227.600, 0.339	227.600, 0.583	227.600, 0.432
1140	227.800, 0.655	227.800, 0.339	227.800, 0.583	227.800, 0.432
1141	228.000, 0.654	228.000, 0.339	228.000, 0.583	228.000, 0.432
1142	228.200, 0.654	228.200, 0.339	228.200, 0.583	228.200, 0.432
1143	228.400, 0.653	228.400, 0.338	228.400, 0.583	228.400, 0.431
1144	228.600, 0.652	228.600, 0.338	228.600, 0.583	228.600, 0.431
1145	228.800, 0.652	228.800, 0.337	228.800, 0.582	228.800, 0.431
1146	229.000, 0.651	229.000, 0.337	229.000, 0.582	229.000, 0.431
1147	229.200, 0.650	229.200, 0.336	229.200, 0.582	229.200, 0.430
1148	229.400, 0.650	229.400, 0.336	229.400, 0.582	229.400, 0.430
1149	229.600, 0.649	229.600, 0.336	229.600, 0.581	229.600, 0.430
1150	229.800, 0.649	229.800, 0.335	229.800, 0.581	229.800, 0.429
1151	230.000, 0.649	230.000, 0.335	230.000, 0.581	230.000, 0.429
1152	230.200, 0.649	230.200, 0.335	230.200, 0.581	230.200, 0.428
1153	230.400, 0.648	230.400, 0.335	230.400, 0.580	230.400, 0.427
1154	230.600, 0.648	230.600, 0.335	230.600, 0.580	230.600, 0.426
1155	230.800, 0.648	230.800, 0.335	230.800, 0.579	230.800, 0.426
1156	231.000, 0.647	231.000, 0.335	231.000, 0.579	231.000, 0.425
1157	231.200, 0.647	231.200, 0.334	231.200, 0.579	231.200, 0.425
1158	231.400, 0.647	231.400, 0.334	231.400, 0.578	231.400, 0.424
1159	231.600, 0.647	231.600, 0.334	231.600, 0.577	231.600, 0.423
1160	231.800, 0.647	231.800, 0.333	231.800, 0.577	231.800, 0.423
1161	232.000, 0.647	232.000, 0.333	232.000, 0.577	232.000, 0.422
1162	232.200, 0.647	232.200, 0.333	232.200, 0.576	232.200, 0.422
1163	232.400, 0.647	232.400, 0.332	232.400, 0.576	232.400, 0.422
1164	232.600, 0.646	232.600, 0.332	232.600, 0.575	232.600, 0.422
1165	232.800, 0.646	232.800, 0.332	232.800, 0.575	232.800, 0.421
1166	233.000, 0.646	233.000, 0.331	233.000, 0.575	233.000, 0.421
1167	233.200, 0.646	233.200, 0.331	233.200, 0.575	233.200, 0.421
1168	233.400, 0.645	233.400, 0.330	233.400, 0.574	233.400, 0.421
1169	233.600, 0.645	233.600, 0.330	233.600, 0.574	233.600, 0.421
1170	233.800, 0.645	233.800, 0.330	233.800, 0.573	233.800, 0.421
1171	234.000, 0.644	234.000, 0.329	234.000, 0.573	234.000, 0.421
1172	234.200, 0.644	234.200, 0.329	234.200, 0.572	234.200, 0.421
1173	234.400, 0.643	234.400, 0.329	234.400, 0.572	234.400, 0.421
1174	234.600, 0.642	234.600, 0.328	234.600, 0.571	234.600, 0.421
1175	234.800, 0.642	234.800, 0.328	234.800, 0.571	234.800, 0.420
1176	235.000, 0.642	235.000, 0.327	235.000, 0.570	235.000, 0.420
1177	235.200, 0.641	235.200, 0.327	235.200, 0.569	235.200, 0.419
1178	235.400, 0.641	235.400, 0.326	235.400, 0.569	235.400, 0.419
1179	235.600, 0.641	235.600, 0.326	235.600, 0.568	235.600, 0.418
1180	235.800, 0.641	235.800, 0.326	235.800, 0.568	235.800, 0.418
1181	236.000, 0.640	236.000, 0.325	236.000, 0.568	236.000, 0.417
1182	236.200, 0.640	236.200, 0.325	236.200, 0.568	236.200, 0.416
1183	236.400, 0.640	236.400, 0.325	236.400, 0.568	236.400, 0.416
1184	236.600, 0.640	236.600, 0.325	236.600, 0.568	236.600, 0.415
1185	236.800, 0.639	236.800, 0.325	236.800, 0.568	236.800, 0.415
1186	237.000, 0.639	237.000, 0.325	237.000, 0.567	237.000, 0.414
1187	237.200, 0.639	237.200, 0.325	237.200, 0.567	237.200, 0.414
1188	237.400, 0.638	237.400, 0.325	237.400, 0.567	237.400, 0.413
1189	237.600, 0.638	237.600, 0.325	237.600, 0.567	237.600, 0.413
1190	237.800, 0.637	237.800, 0.325	237.800, 0.566	237.800, 0.412
1191	238.000, 0.637	238.000, 0.325	238.000, 0.566	238.000, 0.412
1192	238.200, 0.636	238.200, 0.324	238.200, 0.566	238.200, 0.412
1193	238.400, 0.636	238.400, 0.324	238.400, 0.565	238.400, 0.411
1194	238.600, 0.635	238.600, 0.323	238.600, 0.565	238.600, 0.411
1195	238.800, 0.635	238.800, 0.322	238.800, 0.564	238.800, 0.410
1196	239.000, 0.634	239.000, 0.322	239.000, 0.564	239.000, 0.410
1197	239.200, 0.634	239.200, 0.322	239.200, 0.564	239.200, 0.409
1198	239.400, 0.634	239.400, 0.321	239.400, 0.564	239.400, 0.409
1199	239.600, 0.634	239.600, 0.321	239.600, 0.564	239.600, 0.409
1200	239.800, 0.633	239.800, 0.321	239.800, 0.564	239.800, 0.408
1201	240.000, 0.633	240.000, 0.321	240.000, 0.563	240.000, 0.408
1202	240.200, 0.633	240.200, 0.321	240.200, 0.563	240.200, 0.408
1203	240.400, 0.632	240.400, 0.321	240.400, 0.563	240.400, 0.408
1204	240.600, 0.632	240.600, 0.320	240.600, 0.562	240.600, 0.408
1205	240.800, 0.632	240.800, 0.320	240.800, 0.562	240.800, 0.408
1206	241.000, 0.631	241.000, 0.320	241.000, 0.561	241.000, 0.408
1207	241.200, 0.631	241.200, 0.320	241.200, 0.561	241.200, 0.408
1208	241.400, 0.631	241.400, 0.319	241.400, 0.560	241.400, 0.408
1209	241.600, 0.630	241.600, 0.319	241.600, 0.560	241.600, 0.408
1210	241.800, 0.630	241.800, 0.318	241.800, 0.559	241.800, 0.407
1211	242.000, 0.629	242.000, 0.318	242.000, 0.559	242.000, 0.407
1212	242.200, 0.629	242.200, 0.317	242.200, 0.559	242.200, 0.407
1213	242.400, 0.628	242.400, 0.317	242.400, 0.558	242.400, 0.406
1214	242.600, 0.628	242.600, 0.317	242.600, 0.558	242.600, 0.405
1215	242.800, 0.627	242.800, 0.317	242.800, 0.558	242.800, 0.405
1216	243.000, 0.627	243.000, 0.317	243.000, 0.558	243.000, 0.404
1217	243.200, 0.627	243.200, 0.317	243.200, 0.557	243.200, 0.404
1218	243.400, 0.626	243.400, 0.317	243.400, 0.557	243.400, 0.403
1219	243.600, 0.626	243.600, 0.317	243.600, 0.556	243.600, 0.403
1220	243.800, 0.626	243.800, 0.317	243.800, 0.556	243.800, 0.403
1221	244.000, 0.626	244.000, 0.316	244.000, 0.555	244.000, 0.403
1222	244.200, 0.626	244.200, 0.316	244.200, 0.555	244.200, 0.403
1223	244.400, 0.626	244.400, 0.315	244.400, 0.555	244.400, 0.403
1224	244.600, 0.626	244.600, 0.315	244.600, 0.554	244.600, 0.402
1225	244.800, 0.626	244.800, 0.314	244.800, 0.554	244.800, 0.402
1226	245.000, 0.626	245.000, 0.314	245.000, 0.553	245.000, 0.401
1227	245.200, 0.626	245.200, 0.313	245.200, 0.553	245.200, 0.401
1228	245.400, 0.625	245.400, 0.313	245.400, 0.553	245.400, 0.400
1229	245.600, 0.625	245.600, 0.313	245.600, 0.553	245.600, 0.399
1230	245.800, 0.624	245.800, 0.313	245.800, 0.553	245.800, 0.399
1231	246.000, 0.624	246.000, 0.313	246.000, 0.553	246.000, 0.398
1232	246.200, 0.623	246.200, 0.313	246.200, 0.553	246.200, 0.398
1233	246.400, 0.623	246.400, 0.313	246.400, 0.553	246.400, 0.398
1234	246.600, 0.622	246.600, 0.312	246.600, 0.553	246.600, 0.397
1235	246.800, 0.621	246.800, 0.312	246.800, 0.553	246.800, 0.397
1236	247.000, 0.621	247.000, 0.311	247.000, 0.553	247.000, 0.397
1237	247.200, 0.620	247.200, 0.311	247.200, 0.552	247.200, 0.396
1238	247.400, 0.620	247.400, 0.310	247.400, 0.552	247.400, 0.396
1239	247.600, 0.619	247.600, 0.310	247.600, 0.552	247.600, 0.396
1240	247.800, 0.619	247.800, 0.310	247.800, 0.552	247.800, 0.396
1241	248.000, 0.619	248.000, 0.309	248.000, 0.551	248.000, 0.396
1242	248.200, 0.619	248.200, 0.309	248.200, 0.550	248.200, 0.395
1243	248.400, 0.619	248.400, 0.309	248.400, 0.550	248.400, 0.395
1244	248.600, 0.618	248.600, 0.308	248.600, 0.549	248.600, 0.395
1245	248.800, 0.618	248.800, 0.308	248.800, 0.549	248.800, 0.394
1246	249.000, 0.618	249.000, 0.308	249.000, 0.548	249.000, 0.394
1247	249.200, 0.617	249.200, 0.308	249.200, 0.548	249.200, 0.393
1248	249.400, 0.617	249.400, 0.308	249.400, 0.548	249.400, 0.393
1249	249.600, 0.617	249.600, 0.308	249.600, 0.547	249.600, 0.392
1250	249.800, 0.616	249.800, 0.308	249.800, 0.547	249.800, 0.392
1251	250.000, 0.616	250.000, 0.308	250.000, 0.547	250.000, 0.391
1252	250.200, 0.615	250.200, 0.308	250.200, 0.547	250.200, 0.391
1253	250.400, 0.615	250.400, 0.307	250.400, 0.546	250.400, 0.390
1254	250.600, 0.615	250.600, 0.307	250.600, 0.546	250.600, 0.390
1255	250.800, 0.614	250.800, 0.307	250.800, 0.546	250.800, 0.389
1256	251.000, 0.614	251.000, 0.306	251.000, 0.546	251.000, 0.389
1257	251.200, 0.614	251.200, 0.306	251.200, 0.545	251.200, 0.388
1258	251.400, 0.613	251.400, 0.306	251.400, 0.545	251.400, 0.388
1259	251.600, 0.613	251.600, 0.305	251.600, 0.544	251.600, 0.387
1260	251.800, 0.613	251.800, 0.305	251.800, 0.544	251.800, 0.387
1261	252.000, 0.613	252.000, 0.305	252.000, 0.543	252.000, 0.387
1262	252.200, 0.613	252.200, 0.305	252.200, 0.543	252.200, 0.386
1263	252.400, 0.613	252.400, 0.304	252.400, 0.542	252.400, 0.386
1264	252.600, 0.613	252.600, 0.304	252.600, 0.542	252.600, 0.386
1265	252.800, 0.613	252.800, 0.304	252.800, 0.542	252.800, 0.386
1266	253.000, 0.613	253.000, 0.304	253.000, 0.541	253.000, 0.385
1267	253.200, 0.613	253.200, 0.304	253.200, 0.541	253.200, 0.385
1268	253.400, 0.612	253.400, 0.303	253.400, 0.541	253.400, 0.384
1269	253.600, 0.612	253.600, 0.303	253.600, 0.540	253.600, 0.384
1270	253.800, 0.612	253.800, 0.303	253.800, 0.540	253.800, 0.384
1271	254.000, 0.611	254.000, 0.303	254.000, 0.540	254.000, 0.383
1272	254.200, 0.611	254.200, 0.302	254.200, 0.540	254.200, 0.383
1273	254.400, 0.610	254.400, 0.302	254.400, 0.540	254.400, 0.383
1274	254.600, 0.610	254.600, 0.302	254.600, 0.540	254.600, 0.383
1275	254.800, 0.609	254.800, 0.302	254.800, 0.540	254.800, 0.383
1276	255.000, 0.609	255.000, 0.302	255.000, 0.540	255.000, 0.383
1277	255.200, 0.608	255.200, 0.301	255.200, 0.539	255.200, 0.383
1278	255.400, 0.608	255.400, 0.301	255.400, 0.539	255.400, 0.383
1279	255.600, 0.607	255.600, 0.301	255.600, 0.539	255.600, 0.383
1280	255.800, 0.607	255.800, 0.301	255.800, 0.538	255.800, 0.383
1281	256.000, 0.607	256.000, 0.301	256.000, 0.538	256.000, 0.382
1282	256.200, 0.606	256.200, 0.300	256.200, 0.537	256.200, 0.382
1283	256.400, 0.606	256.400, 0.300	256.400, 0.537	256.400, 0.382
1284	256.600, 0.606	256.600, 0.300	256.600, 0.536	256.600, 0.381
1285	256.800, 0.605	256.800, 0.299	256.800, 0.536	256.800, 0.381
1286	257.000, 0.605	257.000, 0.299	257.000, 0.535	257.000, 0.380
1287	257.200, 0.605	257.200, 0.299	257.200, 0.535	257.200, 0.380
1288	257.400, 0.604	257.400, 0.299	257.400, 0.534	257.400, 0.380
1289	257.600, 0.604	257.600, 0.298	257.600, 0.534	257.600, 0.379
1290	257.800, 0.604	257.800, 0.298	257.800, 0.534	257.800, 0.379
1291	258.000, 0.603	258.000, 0.298	258.000, 0.534	258.000, 0.379
1292	258.200, 0.603	258.200, 0.299	258.200, 0.534	258.200, 0.379
1293	258.400, 0.603	258.400, 0.299	258.400, 0.534	258.400, 0.379
1294	258.600, 0.602	258.600, 0.299	258.600, 0.534	258.600, 0.379
1295	258.800, 0.602	258.800, 0.299	258.800, 0.534	258.800, 0.379
1296	259.000, 0.602	259.000, 0.298	259.000, 0.534	259.000, 0.379
1297	259.200, 0.602	259.200, 0.298	259.200, 0.533	259.200, 0.379
1298	259.400, 0.601	259.400, 0.298	259.400, 0.533	259.400, 0.378
1299	259.600, 0.601	259.600, 0.297	259.600, 0.533	259.600, 0.378
1300	259.800, 0.601	259.800, 0.297	259.800, 0.532	259.800, 0.377
1301	260.000, 0.601	260.000, 0.297	260.000, 0.532	260.000, 0.376
1302	260.200, 0.600	260.200, 0.296	260.200, 0.531	260.200, 0.376
1303	260.400, 0.600	260.400, 0.295	260.400, 0.531	260.400, 0.375
1304	260.600, 0.600	260.600, 0.295	260.600, 0.530	260.600, 0.374
1305	260.800, 0.599	260.800, 0.294	260.800, 0.530	260.800, 0.374
1306	261.000, 0.599	261.000, 0.294	261.000, 0.530	261.000, 0.373
1307	261.200, 0.598	261.200, 0.294	261.200, 0.529	261.200, 0.373
1308	261.400, 0.598	261.400, 0.294	261.400, 0.529	261.400, 0.372
1309	261.600, 0.598	261.600, 0.294	261.600, 0.529	261.600, 0.372
1310	261.800, 0.598	261.800, 0.294	261.800, 0.528	261.800, 0.372
1311	262.000, 0.597	262.000, 0.294	262.000, 0.528	262.000, 0.372
1312	262.200, 0.597	262.200, 0.294	262.200, 0.528	262.200, 0.372
1313	262.400, 0.597	262.400, 0.294	262.400, 0.528	262.400, 0.372
1314	262.600, 0.597	262.600, 0.294	262.600, 0.528	262.600, 0.372
1315	262.800, 0.596	262.800, 0.294	262.800, 0.528	262.800, 0.372
1316	263.000, 0.596	263.000, 0.294	263.000, 0.528	263.000, 0.371
1317	263.200, 0.596	263.200, 0.294	263.200, 0.527	263.200, 0.371
1318	263.400, 0.595	263.400, 0.293	263.400, 0.527	263.400, 0.371
1319	263.600, 0.595	263.600, 0.293	263.600, 0.527	263.600, 0.371
1320	263.800, 0.595	263.800, 0.293	263.800, 0.526	263.800, 0.370
1321	264.000, 0.595	264.000, 0.293	264.000, 0.526	264.000, 0.370
1322	264.200, 0.594	264.200, 0.293	264.200, 0.525	264.200, 0.370
1323	264.400, 0.594	264.400, 0.292	264.400, 0.525	264.400, 0.369
1324	264.600, 0.594	264.600, 0.292	264.600, 0.525	264.600, 0.369
1325	264.800, 0.593	264.800, 0.291	264.800, 0.525	264.800, 0.368
1326	265.000, 0.593	265.000, 0.291	265.000, 0.524	265.000, 0.368
1327	265.200, 0.593	265.200, 0.291	265.200, 0.524	265.200, 0.368
1328	265.400, 0.593	265.400, 0.291	265.400, 0.524	265.400, 0.368
1329	265.600, 0.593	265.600, 0.291	265.600, 0.524	265.600, 0.367
1330	265.800, 0.592	265.800, 0.291	265.800, 0.524	265.800, 0.367
1331	266.000, 0.592	266.000, 0.290	266.000, 0.524	266.000, 0.367
1332	266.200, 0.592	266.200, 0.290	266.200, 0.524	266.200, 0.367
1333	266.400, 0.592	266.400, 0.290	266.400, 0.524	266.400, 0.367
1334	266.600, 0.592	266.600, 0.289	266.600, 0.524	266.600, 0.367
1335	266.800, 0.591	266.800, 0.289	266.800, 0.523	266.800, 0.366
1336	267.000, 0.591	267.000, 0.288	267.000, 0.523	267.000, 0.366
1337	267.200, 0.590	267.200, 0.288	267.200, 0.522	267.200, 0.366
1338	267.400, 0.590	267.400, 0.288	267.400, 0.522	267.400, 0.365
1339	267.600, 0.590	267.600, 0.287	267.600, 0.521	267.600, 0.365
1340	267.800, 0.589	267.800, 0.287	267.800, 0.521	267.800, 0.365
1341	268.000, 0.589	268.000, 0.287	268.000, 0.520	268.000, 0.364
1342	268.200, 0.589	268.200, 0.286	268.200, 0.520	268.200, 0.364
1343	268.400, 0.589	268.400, 0.286	268.400, 0.519	268.400, 0.363
1344	268.600, 0.589	268.600, 0.286	268.600, 0.519	268.600, 0.363
1345	268.800, 0.589	268.800, 0.286	268.800, 0.519	268.800, 0.363
1346	269.000, 0.589	269.000, 0.286	269.000, 0.519	269.000, 0.363
1347	269.200, 0.589	269.200, 0.286	269.200, 0.519	269.200, 0.363
1348	269.400, 0.590	269.400, 0.286	269.400, 0.518	269.400, 0.363
1349	269.600, 0.590	269.600, 0.287	269.600, 0.519	269.600, 0.363
1350	269.800, 0.590	269.800, 0.287	269.800, 0.518	269.800, 0.363
1351	,	,	,	,
1352	,	,	,	,
1353	,	,	,	,
1354	,	,	,	,
1355	,	,	,	,
1356	,	,	,	,
1357	,	,	,	,
1358	,	,	,	,
1359	,	,	,	,
1360	,	,	,	,
1361	,	,	,	,
1362	,	,	,	,
1363	,	,	,	,
1364	,	,	,	,
1365	,	,	,	,
1366	,	,	,	,
1367	,	,	,	,
1368	,	,	,	,
1369	,	,	,	,
1370	,	,	,	,
1371	,	,	,	,
1372	,	,	,	,
1373	,	,	,	,
1374	,	,	,	,
1375	,	,	,	,
1376	,	,	,	,
1377	,	,	,	,
1378	,	,	,	,
1379	,	,	,	,
1380	,	,	,	,
1381	,	,	,	,
1382	,	,	,	,
1383	,	,	,	,
1384	,	,	,	,
1385	,	,	,	,
1386	,	,	,	,
1387	,	,	,	,
1388	,	,	,	,
1389	,	,	,	,
1390	,	,	,	,
1391	,	,	,	,
1392	,	,	,	,
1393	,	,	,	,
1394	,	,	,	,
1395	,	,	,	,
1396	,	,	,	,
1397	,	,	,	,
1398	,	,	,	,
1399	,	,	,	,
1400	,	,	,	,
1401	,	,	,	,
1402	,	,	,	,
1403	,	,	,	,
1404	,	,	,	,
1405	,	,	,	,
1406	,	,	,	,
1407	,	,	,	,
1408	,	,	,	,
1409	,	,	,	,
1410	,	,	,	,
1411	,	,	,	,
1412	,	,	,	,
1413	,	,	,	,
1414	,	,	,	,
1415	,	,	,	,
1416	,	,	,	,
1417	,	,	,	,
1418	,	,	,	,
1419	,	,	,	,
1420	,	,	,	,
1421	,	,	,	,
1422	,	,	,	,
1423	,	,	,	,
1424	,	,	,	,
1425	,	,	,	,
1426	,	,	,	,
1427	,	,	,	,
1428	,	,	,	,
1429	,	,	,	,
1430	,	,	,	,
1431	,	,	,	,
1432	,	,	,	,
1433	,	,	,	,
1434	,	,	,	,
1435	,	,	,	,
1436	,	,	,	,
1437	,	,	,	,
1438	,	,	,	,
1439	,	,	,	,
1440	,	,	,	,
1441	,	,	,	,
1442	,	,	,	,
1443	,	,	,	,
1444	,	,	,	,
1445	,	,	,	,
1446	,	,	,	,
1447	,	,	,	,
1448	,	,	,	,
1449	,	,	,	,
1450	,	,	,	,
1451	,	,	,	,
1452	,	,	,	,
1453	,	,	,	,
1454	,	,	,	,
1455	,	,	,	,
1456	,	,	,	,
1457	,	,	,	,
1458	,	,	,	,
1459	,	,	,	,
1460	,	,	,	,
1461	,	,	,	,
1462	,	,	,	,
1463	,	,	,	,
1464	,	,	,	,
1465	,	,	,	,
1466	,	,	,	,
1467	,	,	,	,
1468	,	,	,	,
1469	,	,	,	,
1470	,	,	,	,
1471	,	,	,	,
1472	,	,	,	,
1473	,	,	,	,
1474	,	,	,	,
1475	,	,	,	,
1476	,	,	,	,
1477	,	,	,	,
1478	,	,	,	,
1479	,	,	,	,
1480	,	,	,	,
1481	,	,	,	,
1482	,	,	,	,
1483	,	,	,	,
1484	,	,	,	,
1485	,	,	,	,
1486	,	,	,	,
1487	,	,	,	,
1488	,	,	,	,
1489	,	,	,	,
1490	,	,	,	,
1491	,	,	,	,
1492	,	,	,	,
1493	,	,	,	,
1494	,	,	,	,
1495	,	,	,	,
1496	,	,	,	,
1497	,	,	,	,
1498	,	,	,	,
1499	,	,	,	,
1500	,	,	,	,
1501	,	,	,	,
1502	,	,	,	,
1503	,	,	,	,
1504	,	,	,	,
1505	,	,	,	,
1506	,	,	,	,
1507	,	,	,	,
1508	,	,	,	,
1509	,	,	,	,
1510	,	,	,	,
1511	,	,	,	,
1512	,	,	,	,
1513	,	,	,	,
1514	,	,	,	,
1515	,	,	,	,
1516	,	,	,	,
1517	,	,	,	,
1518	,	,	,	,
1519	,	,	,	,
1520	,	,	,	,
1521	,	,	,	,
1522	,	,	,	,
1523	,	,	,	,
1524	,	,	,	,
1525	,	,	,	,
1526	,	,	,	,
1527	,	,	,	,
1528	,	,	,	,
1529	,	,	,	,
1530	,	,	,	,
1531	,	,	,	,
1532	,	,	,	,
1533	,	,	,	,
1534	,	,	,	,
1535	,	,	,	,
1536	,	,	,	,
1537	,	,	,	,
1538	,	,	,	,
1539	,	,	,	,
1540	,	,	,	,
1541	,	,	,	,
1542	,	,	,	,
1543	,	,	,	,
1544	,	,	,	,
1545	,	,	,	,
1546	,	,	,	,
1547	,	,	,	,
1548	,	,	,	,
1549	,	,	,	,
1550	,	,	,	,
1551	,	,	,	,
1552	,	,	,	,
1553	,	,	,	,
1554	,	,	,	,
1555	,	,	,	,
1556	,	,	,	,
1557	,	,	,	,
1558	,	,	,	,
1559	,	,	,	,
1560	,	,	,	,
1561	,	,	,	,
1562	,	,	,	,
1563	,	,	,	,
1564	,	,	,	,
1565	,	,	,	,
1566	,	,	,	,
1567	,	,	,	,
1568	,	,	,	,
1569	,	,	,	,
1570	,	,	,	,
1571	,	,	,	,
1572	,	,	,	,
1573	,	,	,	,
1574	,	,	,	,
1575	,	,	,	,
1576	,	,	,	,
1577	,	,	,	,
1578	,	,	,	,
1579	,	,	,	,
1580	,	,	,	,
1581	,	,	,	,
1582	,	,	,	,
1583	,	,	,	,
1584	,	,	,	,
1585	,	,	,	,
1586	,	,	,	,
1587	,	,	,	,
1588	,	,	,	,
1589	,	,	,	,
1590	,	,	,	,
1591	,	,	,	,
1592	,	,	,	,
1593	,	,	,	,
1594	,	,	,	,
1595	,	,	,	,
1596	,	,	,	,
1597	,	,	,	,
1598	,	,	,	,
1599	,	,	,	,
1600	,	,	,	,
1601	,	,	,	,
1602	,	,	,	,
1603	,	,	,	,
1604	,	,	,	,
1605	,	,	,	,
1606	,	,	,	,
1607	,	,	,	,
1608	,	,	,	,
1609	,	,	,	,
1610	,	,	,	,
1611	,	,	,	,
1612	,	,	,	,
1613	,	,	,	,
1614	,	,	,	,
1615	,	,	,	,
1616	,	,	,	,
1617	,	,	,	,
1618	,	,	,	,
1619	,	,	,	,
1620	,	,	,	,
1621	,	,	,	,
1622	,	,	,	,
1623	,	,	,	,
1624	,	,	,	,
1625	,	,	,	,
1626	,	,	,	,
1627	,	,	,	,
1628	,	,	,	,
1629	,	,	,	,
1630	,	,	,	,
1631	,	,	,	,
1632	,	,	,	,
1633	,	,	,	,
1634	,	,	,	,
1635	,	,	,	,
1636	,	,	,	,
1637	,	,	,	,
1638	,	,	,	,
1639	,	,	,	,
1640	,	,	,	,
1641	,	,	,	,
1642	,	,	,	,
1643	,	,	,	,
1644	,	,	,	,
1645	,	,	,	,
1646	,	,	,	,
1647	,	,	,	,
1648	,	,	,	,
1649	,	,	,	,
1650	,	,	,	,
1651	,	,	,	,
1652	,	,	,	,
1653	,	,	,	,
1654	,	,	,	,
1655	,	,	,	,
1656	,	,	,	,
1657	,	,	,	,
1658	,	,	,	,
1659	,	,	,	,
1660	,	,	,	,
1661	,	,	,	,
1662	,	,	,	,
1663	,	,	,	,
1664	,	,	,	,
1665	,	,	,	,
1666	,	,	,	,
1667	,	,	,	,
1668	,	,	,	,
1669	,	,	,	,
1670	,	,	,	,
1671	,	,	,	,
1672	,	,	,	,
1673	,	,	,	,
1674	,	,	,	,
1675	,	,	,	,
1676	,	,	,	,
1677	,	,	,	,
1678	,	,	,	,
1679	,	,	,	,
1680	,	,	,	,
1681	,	,	,	,
1682	,	,	,	,
1683	,	,	,	,
1684	,	,	,	,
1685	,	,	,	,
1686	,	,	,	,
1687	,	,	,	,
1688	,	,	,	,
1689	,	,	,	,
1690	,	,	,	,
1691	,	,	,	,
1692	,	,	,	,
1693	,	,	,	,
1694	,	,	,	,
1695	,	,	,	,
1696	,	,	,	,
1697	,	,	,	,
1698	,	,	,	,
1699	,	,	,	,
1700	,	,	,	,
1701	,	,	,	,
1702	,	,	,	,
1703	,	,	,	,
1704	,	,	,	,
1705	,	,	,	,
1706	,	,	,	,
1707	,	,	,	,
1708	,	,	,	,
1709	,	,	,	,
1710	,	,	,	,
1711	,	,	,	,
1712	,	,	,	,
1713	,	,	,	,
1714	,	,	,	,
1715	,	,	,	,
1716	,	,	,	,
1717	,	,	,	,
1718	,	,	,	,
1719	,	,	,	,
1720	,	,	,	,
1721	,	,	,	,
1722	,	,	,	,
1723	,	,	,	,
1724	,	,	,	,
1725	,	,	,	,
1726	,	,	,	,
1727	,	,	,	,
1728	,	,	,	,
1729	,	,	,	,
1730	,	,	,	,
1731	,	,	,	,
1732	,	,	,	,
1733	,	,	,	,
1734	,	,	,	,
1735	,	,	,	,
1736	,	,	,	,
1737	,	,	,	,
1738	,	,	,	,
1739	,	,	,	,
1740	,	,	,	,
1741	,	,	,	,
1742	,	,	,	,
1743	,	,	,	,
1744	,	,	,	,
1745	,	,	,	,
1746	,	,	,	,
1747	,	,	,	,
1748	,	,	,	,
1749	,	,	,	,
1750	,	,	,	,
1751	,	,	,	,
1752	,	,	,	,
1753	,	,	,	,
1754	,	,	,	,
1755	,	,	,	,
1756	,	,	,	,
1757	,	,	,	,
1758	,	,	,	,
1759	,	,	,	,
1760	,	,	,	,
1761	,	,	,	,
1762	,	,	,	,
1763	,	,	,	,
1764	,	,	,	,
1765	,	,	,	,
1766	,	,	,	,
1767	,	,	,	,
1768	,	,	,	,
1769	,	,	,	,
1770	,	,	,	,
1771	,	,	,	,
1772	,	,	,	,
1773	,	,	,	,
1774	,	,	,	,
1775	,	,	,	,
1776	,	,	,	,
1777	,	,	,	,
1778	,	,	,	,
1779	,	,	,	,
1780	,	,	,	,
1781	,	,	,	,
1782	,	,	,	,
1783	,	,	,	,
1784	,	,	,	,
1785	,	,	,	,
1786	,	,	,	,
1787	,	,	,	,
1788	,	,	,	,
1789	,	,	,	,
1790	,	,	,	,
1791	,	,	,	,
1792	,	,	,	,
1793	,	,	,	,
1794	,	,	,	,
1795	,	,	,	,
1796	,	,	,	,
1797	,	,	,	,
1798	,	,	,	,
1799	,	,	,	,
1800	,	,	,	,
1801	,	,	,	,
1802	,	,	,	,
1803	,	,	,	,
1804	,	,	,	,
1805	,	,	,	,
1806	,	,	,	,
1807	,	,	,	,
1808	,	,	,	,
1809	,	,	,	,
1810	,	,	,	,
1811	,	,	,	,
1812	,	,	,	,
1813	,	,	,	,
1814	,	,	,	,
1815	,	,	,	,
1816	,	,	,	,
1817	,	,	,	,
1818	,	,	,	,
1819	,	,	,	,
1820	,	,	,	,
1821	,	,	,	,
1822	,	,	,	,
1823	,	,	,	,
1824	,	,	,	,
1825	,	,	,	,
1826	,	,	,	,
1827	,	,	,	,
1828	,	,	,	,
1829	,	,	,	,
1830	,	,	,	,
1831	,	,	,	,
1832	,	,	,	,
1833	,	,	,	,
1834	,	,	,	,
1835	,	,	,	,
1836	,	,	,	,
1837	,	,	,	,
1838	,	,	,	,
1839	,	,	,	,
1840	,	,	,	,
1841	,	,	,	,
1842	,	,	,	,
1843	,	,	,	,
1844	,	,	,	,
1845	,	,	,	,
1846	,	,	,	,
1847	,	,	,	,
1848	,	,	,	,
1849	,	,	,	,
1850	,	,	,	,
1851	,	,	,	,
1852	,	,	,	,
1853	,	,	,	,
1854	,	,	,	,
1855	,	,	,	,
1856	,	,	,	,
1857	,	,	,	,
1858	,	,	,	,
1859	,	,	,	,
1860	,	,	,	,
1861	,	,	,	,
1862	,	,	,	,
1863	,	,	,	,
1864	,	,	,	,
1865	,	,	,	,
1866	,	,	,	,
1867	,	,	,	,
1868	,	,	,	,
1869	,	,	,	,
1870	,	,	,	,
1871	,	,	,	,
1872	,	,	,	,
1873	,	,	,	,
1874	,	,	,	,
1875	,	,	,	,
1876	,	,	,	,
1877	,	,	,	,
1878	,	,	,	,
1879	,	,	,	,
1880	,	,	,	,
1881	,	,	,	,
1882	,	,	,	,
1883	,	,	,	,
1884	,	,	,	,
1885	,	,	,	,
1886	,	,	,	,
1887	,	,	,	,
1888	,	,	,	,
1889	,	,	,	,
1890	,	,	,	,
1891	,	,	,	,
1892	,	,	,	,
1893	,	,	,	,
1894	,	,	,	,
1895	,	,	,	,
1896	,	,	,	,
1897	,	,	,	,
1898	,	,	,	,
1899	,	,	,	,
1900	,	,	,	,
1901	,	,	,	,
1902	,	,	,	,
1903	,	,	,	,
1904	,	,	,	,
1905	,	,	,	,
1906	,	,	,	,
1907	,	,	,	,
1908	,	,	,	,
1909	,	,	,	,
1910	,	,	,	,
1911	,	,	,	,
1912	,	,	,	,
1913	,	,	,	,
1914	,	,	,	,
1915	,	,	,	,
1916	,	,	,	,
1917	,	,	,	,
1918	,	,	,	,
1919	,	,	,	,
1920	,	,	,	,
1921	,	,	,	,
1922	,	,	,	,
1923	,	,	,	,
1924	,	,	,	,
1925	,	,	,	,
1926	,	,	,	,
1927	,	,	,	,
1928	,	,	,	,
1929	,	,	,	,
1930	,	,	,	,
1931	,	,	,	,
1932	,	,	,	,
1933	,	,	,	,
1934	,	,	,	,
1935	,	,	,	,
1936	,	,	,	,
1937	,	,	,	,
1938	,	,	,	,
1939	,	,	,	,
1940	,	,	,	,
1941	,	,	,	,
1942	,	,	,	,
1943	,	,	,	,
1944	,	,	,	,
1945	,	,	,	,
1946	,	,	,	,
1947	,	,	,	,
1948	,	,	,	,
1949	,	,	,	,
1950	,	,	,	,
1951	,	,	,	,
1952	,	,	,	,
1953	,	,	,	,
1954	,	,	,	,
1955	,	,	,	,
1956	,	,	,	,
1957	,	,	,	,
1958	,	,	,	,
1959	,	,	,	,
1960	,	,	,	,
1961	,	,	,	,
1962	,	,	,	,
1963	,	,	,	,
1964	,	,	,	,
1965	,	,	,	,
1966	,	,	,	,
1967	,	,	,	,
1968	,	,	,	,
1969	,	,	,	,
1970	,	,	,	,
1971	,	,	,	,
1972	,	,	,	,
1973	,	,	,	,
1974	,	,	,	,
1975	,	,	,	,
1976	,	,	,	,
1977	,	,	,	,
1978	,	,	,	,
1979	,	,	,	,
1980	,	,	,	,
1981	,	,	,	,
1982	,	,	,	,
1983	,	,	,	,
1984	,	,	,	,
1985	,	,	,	,
1986	,	,	,	,
1987	,	,	,	,
1988	,	,	,	,
1989	,	,	,	,
1990	,	,	,	,
1991	,	,	,	,
1992	,	,	,	,
1993	,	,	,	,
1994	,	,	,	,
1995	,	,	,	,
1996	,	,	,	,
1997	,	,	,	,
1998	,	,	,	,
1999	,	,	,	,
[truncated: 13,001 more rows]

## Sheet: Fig1_supp3_panelB_rep2
	parS20 ParB	parS20 ParB +CMP	parS20 ParB +CDP	parS20 ParB +CTP
1	0.000, 0.003	0.000, 0.003	0.000, 0.005	0.000, 0.005
2	0.200, 0.003	0.200, 0.003	0.200, 0.005	0.200, 0.005
3	0.400, 0.002	0.400, 0.003	0.400, 0.004	0.400, 0.004
4	0.600, 0.002	0.600, 0.004	0.600, 0.003	0.600, 0.004
5	0.800, 0.002	0.800, 0.004	0.800, 0.002	0.800, 0.004
6	1.000, 0.002	1.000, 0.004	1.000, 0.001	1.000, 0.004
7	1.200, 0.001	1.200, 0.005	1.200, 0.001	1.200, 0.004
8	1.400, 0.001	1.400, 0.005	1.400, 0.000	1.400, 0.004
9	1.600, 0.001	1.600, 0.005	1.600, -0.000	1.600, 0.004
10	1.800, 0.001	1.800, 0.005	1.800, -0.000	1.800, 0.004
11	2.000, 0.001	2.000, 0.005	2.000, -0.001	2.000, 0.004
12	2.200, 0.001	2.200, 0.005	2.200, -0.001	2.200, 0.004
13	2.400, 0.001	2.400, 0.005	2.400, -0.001	2.400, 0.004
14	2.600, 0.001	2.600, 0.005	2.600, -0.001	2.600, 0.004
15	2.800, 0.001	2.800, 0.005	2.800, -0.000	2.800, 0.004
16	3.000, 0.001	3.000, 0.005	3.000, -0.000	3.000, 0.004
17	3.200, 0.001	3.200, 0.005	3.200, -0.000	3.200, 0.003
18	3.400, 0.001	3.400, 0.005	3.400, 0.000	3.400, 0.003
19	3.600, 0.001	3.600, 0.005	3.600, 0.000	3.600, 0.003
20	3.800, 0.001	3.800, 0.005	3.800, -0.000	3.800, 0.003
21	4.000, 0.001	4.000, 0.005	4.000, -0.000	4.000, 0.002
22	4.200, 0.001	4.200, 0.005	4.200, -0.000	4.200, 0.002
23	4.400, 0.001	4.400, 0.005	4.400, -0.001	4.400, 0.002
24	4.600, 0.001	4.600, 0.005	4.600, -0.001	4.600, 0.002
25	4.800, 0.001	4.800, 0.005	4.800, -0.001	4.800, 0.003
26	5.000, 0.001	5.000, 0.004	5.000, -0.001	5.000, 0.003
27	5.200, 0.000	5.200, 0.004	5.200, -0.001	5.200, 0.003
28	5.400, 0.000	5.400, 0.004	5.400, -0.001	5.400, 0.003
29	5.600, 0.000	5.600, 0.004	5.600, -0.001	5.600, 0.003
30	5.800, 0.000	5.800, 0.003	5.800, -0.002	5.800, 0.002
31	6.000, 0.000	6.000, 0.003	6.000, -0.002	6.000, 0.002
32	6.200, 0.000	6.200, 0.003	6.200, -0.002	6.200, 0.002
33	6.400, -0.000	6.400, 0.003	6.400, -0.002	6.400, 0.002
34	6.600, -0.000	6.600, 0.003	6.600, -0.002	6.600, 0.001
35	6.800, -0.000	6.800, 0.002	6.800, -0.002	6.800, 0.001
36	7.000, -0.000	7.000, 0.002	7.000, -0.002	7.000, 0.001
37	7.200, -0.000	7.200, 0.002	7.200, -0.002	7.200, 0.001
38	7.400, -0.000	7.400, 0.002	7.400, -0.003	7.400, 0.001
39	7.600, -0.000	7.600, 0.002	7.600, -0.003	7.600, 0.001
40	7.800, -0.000	7.800, 0.002	7.800, -0.003	7.800, 0.001
41	8.000, -0.001	8.000, 0.002	8.000, -0.002	8.000, 0.001
42	8.200, -0.001	8.200, 0.002	8.200, -0.002	8.200, 0.001
43	8.400, -0.001	8.400, 0.003	8.400, -0.002	8.400, 0.001
44	8.600, -0.001	8.600, 0.003	8.600, -0.002	8.600, 0.001
45	8.800, -0.001	8.800, 0.003	8.800, -0.002	8.800, 0.001
46	9.000, -0.001	9.000, 0.003	9.000, -0.002	9.000, 0.001
47	9.200, -0.001	9.200, 0.004	9.200, -0.001	9.200, 0.001
48	9.400, -0.001	9.400, 0.004	9.400, -0.001	9.400, 0.001
49	9.600, -0.001	9.600, 0.004	9.600, -0.001	9.600, 0.001
50	9.800, -0.002	9.800, 0.004	9.800, -0.001	9.800, 0.001
51	10.000, -0.002	10.000, 0.003	10.000, -0.000	10.000, 0.001
52	10.200, -0.002	10.200, 0.003	10.200, -0.000	10.200, 0.001
53	10.400, -0.002	10.400, 0.003	10.400, -0.000	10.400, 0.001
54	10.600, -0.002	10.600, 0.003	10.600, -0.001	10.600, 0.000
55	10.800, -0.002	10.800, 0.003	10.800, -0.001	10.800, 0.000
56	11.000, -0.002	11.000, 0.002	11.000, -0.002	11.000, 0.000
57	11.200, -0.001	11.200, 0.002	11.200, -0.002	11.200, 0.000
58	11.400, -0.001	11.400, 0.002	11.400, -0.002	11.400, 0.001
59	11.600, -0.001	11.600, 0.001	11.600, -0.003	11.600, 0.001
60	11.800, -0.001	11.800, 0.001	11.800, -0.003	11.800, 0.001
61	12.000, -0.001	12.000, 0.001	12.000, -0.003	12.000, 0.001
62	12.200, -0.001	12.200, 0.000	12.200, -0.003	12.200, 0.000
63	12.400, -0.001	12.400, 0.000	12.400, -0.003	12.400, 0.000
64	12.600, -0.001	12.600, 0.000	12.600, -0.003	12.600, 0.000
65	12.800, -0.001	12.800, 0.000	12.800, -0.003	12.800, 0.000
66	13.000, -0.001	13.000, 0.000	13.000, -0.003	13.000, -0.000
67	13.200, -0.001	13.200, 0.000	13.200, -0.003	13.200, -0.000
68	13.400, -0.001	13.400, 0.000	13.400, -0.003	13.400, -0.000
69	13.600, -0.001	13.600, 0.000	13.600, -0.003	13.600, -0.000
70	13.800, -0.002	13.800, 0.000	13.800, -0.002	13.800, -0.000
71	14.000, -0.002	14.000, 0.000	14.000, -0.002	14.000, -0.000
72	14.200, -0.002	14.200, 0.000	14.200, -0.002	14.200, -0.001
73	14.400, -0.002	14.400, 0.001	14.400, -0.002	14.400, -0.001
74	14.600, -0.002	14.600, 0.001	14.600, -0.001	14.600, -0.000
75	14.800, -0.002	14.800, 0.001	14.800, -0.001	14.800, -0.000
76	15.000, -0.002	15.000, 0.001	15.000, -0.001	15.000, -0.000
77	15.200, -0.002	15.200, 0.001	15.200, -0.001	15.200, 0.000
78	15.400, -0.002	15.400, 0.001	15.400, -0.001	15.400, 0.000
79	15.600, -0.002	15.600, 0.001	15.600, -0.001	15.600, 0.001
80	15.800, -0.003	15.800, 0.001	15.800, -0.002	15.800, 0.001
81	16.000, -0.003	16.000, 0.001	16.000, -0.002	16.000, 0.000
82	16.200, -0.003	16.200, 0.001	16.200, -0.002	16.200, 0.000
83	16.400, -0.003	16.400, 0.001	16.400, -0.002	16.400, 0.000
84	16.600, -0.003	16.600, 0.001	16.600, -0.003	16.600, 0.000
85	16.800, -0.003	16.800, 0.001	16.800, -0.003	16.800, 0.000
86	17.000, -0.003	17.000, 0.001	17.000, -0.003	17.000, -0.000
87	17.200, -0.003	17.200, 0.001	17.200, -0.003	17.200, -0.000
88	17.400, -0.002	17.400, 0.001	17.400, -0.003	17.400, -0.000
89	17.600, -0.002	17.600, 0.001	17.600, -0.003	17.600, -0.000
90	17.800, -0.002	17.800, 0.001	17.800, -0.003	17.800, -0.000
91	18.000, -0.002	18.000, 0.001	18.000, -0.003	18.000, -0.000
92	18.200, -0.002	18.200, 0.001	18.200, -0.003	18.200, -0.001
93	18.400, -0.002	18.400, 0.001	18.400, -0.002	18.400, -0.001
94	18.600, -0.001	18.600, 0.001	18.600, -0.002	18.600, -0.001
95	18.800, -0.001	18.800, 0.000	18.800, -0.002	18.800, -0.001
96	19.000, -0.001	19.000, 0.000	19.000, -0.001	19.000, -0.000
97	19.200, -0.001	19.200, 0.000	19.200, -0.001	19.200, -0.000
98	19.400, -0.002	19.400, -0.000	19.400, -0.001	19.400, -0.000
99	19.600, -0.002	19.600, -0.000	19.600, -0.001	19.600, -0.000
100	19.800, -0.002	19.800, -0.000	19.800, -0.001	19.800, 0.000
101	20.000, -0.002	20.000, -0.000	20.000, -0.001	20.000, 0.000
102	20.200, -0.002	20.200, -0.000	20.200, -0.001	20.200, 0.000
103	20.400, -0.003	20.400, -0.000	20.400, -0.001	20.400, 0.001
104	20.600, -0.003	20.600, 0.000	20.600, -0.001	20.600, 0.001
105	20.800, -0.003	20.800, 0.000	20.800, -0.001	20.800, 0.001
106	21.000, -0.003	21.000, 0.000	21.000, -0.001	21.000, 0.001
107	21.200, -0.002	21.200, 0.000	21.200, -0.001	21.200, 0.001
108	21.400, -0.002	21.400, 0.000	21.400, -0.001	21.400, 0.001
109	21.600, -0.002	21.600, 0.000	21.600, -0.001	21.600, 0.001
110	21.800, -0.002	21.800, 0.001	21.800, -0.001	21.800, 0.001
111	22.000, -0.002	22.000, 0.001	22.000, -0.001	22.000, 0.000
112	22.200, -0.002	22.200, 0.001	22.200, -0.001	22.200, 0.000
113	22.400, -0.002	22.400, 0.001	22.400, -0.001	22.400, 0.000
114	22.600, -0.002	22.600, 0.001	22.600, -0.000	22.600, -0.000
115	22.800, -0.001	22.800, 0.002	22.800, -0.001	22.800, -0.000
116	23.000, -0.001	23.000, 0.002	23.000, -0.001	23.000, -0.000
117	23.200, -0.001	23.200, 0.001	23.200, -0.001	23.200, -0.000
118	23.400, -0.001	23.400, 0.001	23.400, -0.001	23.400, -0.000
119	23.600, -0.001	23.600, 0.001	23.600, -0.001	23.600, -0.000
120	23.800, -0.001	23.800, 0.001	23.800, -0.001	23.800, -0.000
121	24.000, -0.001	24.000, 0.001	24.000, -0.001	24.000, -0.000
122	24.200, -0.001	24.200, 0.001	24.200, -0.001	24.200, -0.000
123	24.400, -0.001	24.400, 0.001	24.400, -0.001	24.400, 0.000
124	24.600, -0.001	24.600, 0.001	24.600, -0.001	24.600, 0.000
125	24.800, -0.001	24.800, 0.001	24.800, -0.001	24.800, 0.000
126	25.000, -0.001	25.000, 0.001	25.000, -0.001	25.000, 0.001
127	25.200, -0.001	25.200, 0.001	25.200, -0.001	25.200, 0.001
128	25.400, -0.000	25.400, 0.001	25.400, -0.001	25.400, 0.001
129	25.600, -0.001	25.600, 0.001	25.600, -0.001	25.600, 0.001
130	25.800, -0.001	25.800, 0.001	25.800, -0.001	25.800, 0.001
131	26.000, -0.001	26.000, 0.001	26.000, -0.001	26.000, 0.001
132	26.200, -0.001	26.200, 0.001	26.200, -0.001	26.200, 0.001
133	26.400, -0.001	26.400, 0.001	26.400, -0.001	26.400, 0.001
134	26.600, -0.001	26.600, 0.001	26.600, -0.001	26.600, 0.001
135	26.800, -0.001	26.800, 0.000	26.800, -0.001	26.800, 0.001
136	27.000, -0.001	27.000, 0.000	27.000, -0.001	27.000, 0.001
137	27.200, -0.001	27.200, -0.000	27.200, -0.001	27.200, 0.001
138	27.400, -0.001	27.400, -0.000	27.400, -0.001	27.400, 0.000
139	27.600, -0.001	27.600, -0.000	27.600, -0.000	27.600, 0.000
140	27.800, -0.001	27.800, -0.000	27.800, -0.000	27.800, -0.000
141	28.000, -0.001	28.000, -0.000	28.000, 0.000	28.000, -0.000
142	28.200, -0.000	28.200, -0.000	28.200, 0.000	28.200, -0.000
143	28.400, -0.000	28.400, -0.000	28.400, 0.000	28.400, -0.000
144	28.600, 0.000	28.600, 0.000	28.600, 0.000	28.600, -0.000
145	28.800, 0.000	28.800, 0.000	28.800, 0.000	28.800, -0.000
146	29.000, 0.001	29.000, 0.000	29.000, 0.000	29.000, -0.000
147	29.200, 0.001	29.200, 0.000	29.200, 0.000	29.200, -0.000
148	29.400, 0.001	29.400, 0.000	29.400, 0.000	29.400, -0.000
149	29.600, 0.001	29.600, 0.000	29.600, 0.000	29.600, 0.000
150	29.800, 0.001	29.800, 0.000	29.800, 0.000	29.800, 0.000
151	30.000, 0.000	30.000, 0.000	30.000, 0.000	30.000, 0.000
152	30.200, 0.023	30.200, 0.020	30.200, 0.021	30.200, 0.018
153	30.400, 0.050	30.400, 0.045	30.400, 0.047	30.400, 0.039
154	30.600, 0.081	30.600, 0.073	30.600, 0.077	30.600, 0.063
155	30.800, 0.116	30.800, 0.105	30.800, 0.110	30.800, 0.089
156	31.000, 0.154	31.000, 0.141	31.000, 0.146	31.000, 0.117
157	31.200, 0.194	31.200, 0.179	31.200, 0.183	31.200, 0.146
158	31.400, 0.235	31.400, 0.218	31.400, 0.222	31.400, 0.176
159	31.600, 0.276	31.600, 0.257	31.600, 0.261	31.600, 0.205
160	31.800, 0.315	31.800, 0.296	31.800, 0.299	31.800, 0.232
161	32.000, 0.352	32.000, 0.333	32.000, 0.334	32.000, 0.257
162	32.200, 0.385	32.200, 0.367	32.200, 0.366	32.200, 0.279
163	32.400, 0.415	32.400, 0.397	32.400, 0.395	32.400, 0.297
164	32.600, 0.443	32.600, 0.425	32.600, 0.421	32.600, 0.314
165	32.800, 0.469	32.800, 0.452	32.800, 0.445	32.800, 0.330
166	33.000, 0.492	33.000, 0.476	33.000, 0.467	33.000, 0.344
167	33.200, 0.513	33.200, 0.497	33.200, 0.487	33.200, 0.356
168	33.400, 0.533	33.400, 0.517	33.400, 0.505	33.400, 0.367
169	33.600, 0.550	33.600, 0.534	33.600, 0.522	33.600, 0.377
170	33.800, 0.565	33.800, 0.549	33.800, 0.536	33.800, 0.385
171	34.000, 0.578	34.000, 0.563	34.000, 0.549	34.000, 0.393
172	34.200, 0.590	34.200, 0.574	34.200, 0.560	34.200, 0.399
173	34.400, 0.601	34.400, 0.584	34.400, 0.570	34.400, 0.405
174	34.600, 0.610	34.600, 0.593	34.600, 0.579	34.600, 0.410
175	34.800, 0.618	34.800, 0.601	34.800, 0.587	34.800, 0.415
176	35.000, 0.626	35.000, 0.607	35.000, 0.593	35.000, 0.419
177	35.200, 0.632	35.200, 0.613	35.200, 0.599	35.200, 0.422
178	35.400, 0.637	35.400, 0.617	35.400, 0.604	35.400, 0.426
179	35.600, 0.642	35.600, 0.621	35.600, 0.608	35.600, 0.429
180	35.800, 0.646	35.800, 0.625	35.800, 0.612	35.800, 0.432
181	36.000, 0.650	36.000, 0.628	36.000, 0.615	36.000, 0.434
182	36.200, 0.653	36.200, 0.631	36.200, 0.617	36.200, 0.436
183	36.400, 0.655	36.400, 0.634	36.400, 0.620	36.400, 0.438
184	36.600, 0.657	36.600, 0.636	36.600, 0.622	36.600, 0.440
185	36.800, 0.659	36.800, 0.638	36.800, 0.624	36.800, 0.442
186	37.000, 0.661	37.000, 0.640	37.000, 0.625	37.000, 0.443
187	37.200, 0.662	37.200, 0.642	37.200, 0.626	37.200, 0.445
188	37.400, 0.664	37.400, 0.644	37.400, 0.627	37.400, 0.446
189	37.600, 0.665	37.600, 0.645	37.600, 0.628	37.600, 0.447
190	37.800, 0.666	37.800, 0.646	37.800, 0.629	37.800, 0.448
191	38.000, 0.668	38.000, 0.648	38.000, 0.630	38.000, 0.449
192	38.200, 0.669	38.200, 0.649	38.200, 0.630	38.200, 0.449
193	38.400, 0.670	38.400, 0.650	38.400, 0.631	38.400, 0.450
194	38.600, 0.672	38.600, 0.650	38.600, 0.632	38.600, 0.450
195	38.800, 0.673	38.800, 0.651	38.800, 0.632	38.800, 0.450
196	39.000, 0.674	39.000, 0.652	39.000, 0.633	39.000, 0.450
197	39.200, 0.676	39.200, 0.652	39.200, 0.633	39.200, 0.450
198	39.400, 0.677	39.400, 0.652	39.400, 0.634	39.400, 0.450
199	39.600, 0.678	39.600, 0.653	39.600, 0.635	39.600, 0.451
200	39.800, 0.679	39.800, 0.653	39.800, 0.635	39.800, 0.451
201	40.000, 0.680	40.000, 0.654	40.000, 0.636	40.000, 0.451
202	40.200, 0.681	40.200, 0.654	40.200, 0.637	40.200, 0.451
203	40.400, 0.681	40.400, 0.655	40.400, 0.637	40.400, 0.451
204	40.600, 0.682	40.600, 0.655	40.600, 0.638	40.600, 0.451
205	40.800, 0.682	40.800, 0.655	40.800, 0.638	40.800, 0.452
206	41.000, 0.683	41.000, 0.656	41.000, 0.638	41.000, 0.452
207	41.200, 0.683	41.200, 0.656	41.200, 0.638	41.200, 0.452
208	41.400, 0.684	41.400, 0.656	41.400, 0.638	41.400, 0.452
209	41.600, 0.684	41.600, 0.656	41.600, 0.638	41.600, 0.453
210	41.800, 0.685	41.800, 0.656	41.800, 0.638	41.800, 0.453
211	42.000, 0.685	42.000, 0.656	42.000, 0.638	42.000, 0.453
212	42.200, 0.685	42.200, 0.656	42.200, 0.638	42.200, 0.454
213	42.400, 0.686	42.400, 0.656	42.400, 0.638	42.400, 0.454
214	42.600, 0.686	42.600, 0.656	42.600, 0.638	42.600, 0.454
215	42.800, 0.687	42.800, 0.656	42.800, 0.639	42.800, 0.455
216	43.000, 0.687	43.000, 0.657	43.000, 0.639	43.000, 0.455
217	43.200, 0.688	43.200, 0.657	43.200, 0.640	43.200, 0.455
218	43.400, 0.689	43.400, 0.657	43.400, 0.640	43.400, 0.455
219	43.600, 0.689	43.600, 0.658	43.600, 0.640	43.600, 0.455
220	43.800, 0.690	43.800, 0.658	43.800, 0.641	43.800, 0.455
221	44.000, 0.691	44.000, 0.659	44.000, 0.641	44.000, 0.455
222	44.200, 0.692	44.200, 0.659	44.200, 0.642	44.200, 0.455
223	44.400, 0.692	44.400, 0.660	44.400, 0.642	44.400, 0.455
224	44.600, 0.693	44.600, 0.660	44.600, 0.643	44.600, 0.454
225	44.800, 0.694	44.800, 0.660	44.800, 0.643	44.800, 0.454
226	45.000, 0.694	45.000, 0.660	45.000, 0.643	45.000, 0.454
227	45.200, 0.694	45.200, 0.661	45.200, 0.643	45.200, 0.453
228	45.400, 0.695	45.400, 0.661	45.400, 0.642	45.400, 0.453
229	45.600, 0.695	45.600, 0.661	45.600, 0.642	45.600, 0.453
230	45.800, 0.695	45.800, 0.661	45.800, 0.642	45.800, 0.453
231	46.000, 0.695	46.000, 0.661	46.000, 0.642	46.000, 0.453
232	46.200, 0.695	46.200, 0.662	46.200, 0.642	46.200, 0.453
233	46.400, 0.696	46.400, 0.662	46.400, 0.641	46.400, 0.453
234	46.600, 0.696	46.600, 0.662	46.600, 0.641	46.600, 0.453
235	46.800, 0.696	46.800, 0.663	46.800, 0.641	46.800, 0.453
236	47.000, 0.696	47.000, 0.663	47.000, 0.641	47.000, 0.452
237	47.200, 0.697	47.200, 0.663	47.200, 0.641	47.200, 0.452
238	47.400, 0.697	47.400, 0.663	47.400, 0.641	47.400, 0.452
239	47.600, 0.698	47.600, 0.664	47.600, 0.641	47.600, 0.451
240	47.800, 0.699	47.800, 0.664	47.800, 0.642	47.800, 0.451
241	48.000, 0.700	48.000, 0.664	48.000, 0.642	48.000, 0.451
242	48.200, 0.701	48.200, 0.664	48.200, 0.642	48.200, 0.450
243	48.400, 0.702	48.400, 0.664	48.400, 0.642	48.400, 0.450
244	48.600, 0.702	48.600, 0.664	48.600, 0.643	48.600, 0.450
245	48.800, 0.702	48.800, 0.664	48.800, 0.643	48.800, 0.450
246	49.000, 0.702	49.000, 0.664	49.000, 0.643	49.000, 0.450
247	49.200, 0.702	49.200, 0.664	49.200, 0.643	49.200, 0.450
248	49.400, 0.702	49.400, 0.664	49.400, 0.643	49.400, 0.450
249	49.600, 0.703	49.600, 0.665	49.600, 0.643	49.600, 0.450
250	49.800, 0.703	49.800, 0.665	49.800, 0.644	49.800, 0.451
251	50.000, 0.703	50.000, 0.665	50.000, 0.644	50.000, 0.451
252	50.200, 0.703	50.200, 0.666	50.200, 0.645	50.200, 0.451
253	50.400, 0.703	50.400, 0.666	50.400, 0.645	50.400, 0.451
254	50.600, 0.703	50.600, 0.666	50.600, 0.645	50.600, 0.450
255	50.800, 0.703	50.800, 0.666	50.800, 0.646	50.800, 0.450
256	51.000, 0.703	51.000, 0.667	51.000, 0.646	51.000, 0.450
257	51.200, 0.704	51.200, 0.667	51.200, 0.647	51.200, 0.449
258	51.400, 0.704	51.400, 0.667	51.400, 0.647	51.400, 0.449
259	51.600, 0.705	51.600, 0.667	51.600, 0.647	51.600, 0.449
260	51.800, 0.705	51.800, 0.667	51.800, 0.647	51.800, 0.448
261	52.000, 0.706	52.000, 0.667	52.000, 0.648	52.000, 0.448
262	52.200, 0.706	52.200, 0.667	52.200, 0.647	52.200, 0.448
263	52.400, 0.707	52.400, 0.667	52.400, 0.647	52.400, 0.448
264	52.600, 0.707	52.600, 0.668	52.600, 0.647	52.600, 0.447
265	52.800, 0.707	52.800, 0.668	52.800, 0.647	52.800, 0.447
266	53.000, 0.708	53.000, 0.669	53.000, 0.647	53.000, 0.447
267	53.200, 0.708	53.200, 0.669	53.200, 0.647	53.200, 0.447
268	53.400, 0.709	53.400, 0.670	53.400, 0.647	53.400, 0.447
269	53.600, 0.709	53.600, 0.671	53.600, 0.647	53.600, 0.446
270	53.800, 0.710	53.800, 0.671	53.800, 0.647	53.800, 0.446
271	54.000, 0.710	54.000, 0.672	54.000, 0.647	54.000, 0.446
272	54.200, 0.711	54.200, 0.673	54.200, 0.647	54.200, 0.446
273	54.400, 0.711	54.400, 0.673	54.400, 0.647	54.400, 0.446
274	54.600, 0.712	54.600, 0.673	54.600, 0.647	54.600, 0.446
275	54.800, 0.712	54.800, 0.673	54.800, 0.647	54.800, 0.446
276	55.000, 0.713	55.000, 0.673	55.000, 0.647	55.000, 0.446
277	55.200, 0.713	55.200, 0.674	55.200, 0.647	55.200, 0.446
278	55.400, 0.713	55.400, 0.674	55.400, 0.647	55.400, 0.446
279	55.600, 0.713	55.600, 0.674	55.600, 0.647	55.600, 0.446
280	55.800, 0.714	55.800, 0.674	55.800, 0.647	55.800, 0.446
281	56.000, 0.714	56.000, 0.674	56.000, 0.648	56.000, 0.446
282	56.200, 0.715	56.200, 0.675	56.200, 0.648	56.200, 0.446
283	56.400, 0.715	56.400, 0.675	56.400, 0.649	56.400, 0.447
284	56.600, 0.716	56.600, 0.675	56.600, 0.649	56.600, 0.447
285	56.800, 0.716	56.800, 0.675	56.800, 0.649	56.800, 0.446
286	57.000, 0.717	57.000, 0.675	57.000, 0.649	57.000, 0.446
287	57.200, 0.717	57.200, 0.676	57.200, 0.650	57.200, 0.446
288	57.400, 0.718	57.400, 0.676	57.400, 0.650	57.400, 0.446
289	57.600, 0.719	57.600, 0.676	57.600, 0.650	57.600, 0.445
290	57.800, 0.719	57.800, 0.677	57.800, 0.651	57.800, 0.445
291	58.000, 0.720	58.000, 0.677	58.000, 0.651	58.000, 0.445
292	58.200, 0.720	58.200, 0.677	58.200, 0.651	58.200, 0.445
293	58.400, 0.721	58.400, 0.678	58.400, 0.651	58.400, 0.445
294	58.600, 0.721	58.600, 0.678	58.600, 0.651	58.600, 0.445
295	58.800, 0.721	58.800, 0.678	58.800, 0.651	58.800, 0.445
296	59.000, 0.722	59.000, 0.678	59.000, 0.652	59.000, 0.445
297	59.200, 0.722	59.200, 0.679	59.200, 0.652	59.200, 0.445
298	59.400, 0.722	59.400, 0.679	59.400, 0.652	59.400, 0.444
299	59.600, 0.722	59.600, 0.679	59.600, 0.652	59.600, 0.444
300	59.800, 0.722	59.800, 0.680	59.800, 0.653	59.800, 0.444
301	60.000, 0.722	60.000, 0.680	60.000, 0.653	60.000, 0.444
302	60.200, 0.722	60.200, 0.680	60.200, 0.653	60.200, 0.444
303	60.400, 0.722	60.400, 0.680	60.400, 0.653	60.400, 0.444
304	60.600, 0.722	60.600, 0.680	60.600, 0.653	60.600, 0.443
305	60.800, 0.722	60.800, 0.680	60.800, 0.652	60.800, 0.443
306	61.000, 0.723	61.000, 0.680	61.000, 0.652	61.000, 0.443
307	61.200, 0.723	61.200, 0.680	61.200, 0.652	61.200, 0.443
308	61.400, 0.723	61.400, 0.680	61.400, 0.652	61.400, 0.444
309	61.600, 0.723	61.600, 0.680	61.600, 0.652	61.600, 0.444
310	61.800, 0.723	61.800, 0.681	61.800, 0.653	61.800, 0.444
311	62.000, 0.724	62.000, 0.681	62.000, 0.653	62.000, 0.444
312	62.200, 0.724	62.200, 0.682	62.200, 0.653	62.200, 0.444
313	62.400, 0.724	62.400, 0.682	62.400, 0.653	62.400, 0.444
314	62.600, 0.725	62.600, 0.683	62.600, 0.653	62.600, 0.444
315	62.800, 0.725	62.800, 0.683	62.800, 0.653	62.800, 0.444
316	63.000, 0.725	63.000, 0.683	63.000, 0.653	63.000, 0.443
317	63.200, 0.725	63.200, 0.684	63.200, 0.653	63.200, 0.443
318	63.400, 0.725	63.400, 0.684	63.400, 0.653	63.400, 0.443
319	63.600, 0.726	63.600, 0.684	63.600, 0.653	63.600, 0.443
320	63.800, 0.726	63.800, 0.684	63.800, 0.653	63.800, 0.443
321	64.000, 0.726	64.000, 0.684	64.000, 0.652	64.000, 0.442
322	64.200, 0.727	64.200, 0.684	64.200, 0.652	64.200, 0.442
323	64.400, 0.727	64.400, 0.683	64.400, 0.652	64.400, 0.442
324	64.600, 0.728	64.600, 0.683	64.600, 0.653	64.600, 0.441
325	64.800, 0.729	64.800, 0.683	64.800, 0.653	64.800, 0.441
326	65.000, 0.729	65.000, 0.682	65.000, 0.653	65.000, 0.441
327	65.200, 0.730	65.200, 0.682	65.200, 0.654	65.200, 0.441
328	65.400, 0.731	65.400, 0.682	65.400, 0.654	65.400, 0.441
329	65.600, 0.731	65.600, 0.682	65.600, 0.655	65.600, 0.441
330	65.800, 0.732	65.800, 0.683	65.800, 0.655	65.800, 0.441
331	66.000, 0.732	66.000, 0.683	66.000, 0.656	66.000, 0.441
332	66.200, 0.732	66.200, 0.683	66.200, 0.656	66.200, 0.441
333	66.400, 0.732	66.400, 0.684	66.400, 0.657	66.400, 0.441
334	66.600, 0.732	66.600, 0.684	66.600, 0.657	66.600, 0.441
335	66.800, 0.732	66.800, 0.684	66.800, 0.657	66.800, 0.442
336	67.000, 0.732	67.000, 0.684	67.000, 0.657	67.000, 0.442
337	67.200, 0.731	67.200, 0.685	67.200, 0.657	67.200, 0.442
338	67.400, 0.732	67.400, 0.685	67.400, 0.657	67.400, 0.442
339	67.600, 0.732	67.600, 0.686	67.600, 0.658	67.600, 0.441
340	67.800, 0.732	67.800, 0.686	67.800, 0.658	67.800, 0.441
341	68.000, 0.732	68.000, 0.686	68.000, 0.658	68.000, 0.441
342	68.200, 0.732	68.200, 0.686	68.200, 0.658	68.200, 0.441
343	68.400, 0.733	68.400, 0.686	68.400, 0.657	68.400, 0.441
344	68.600, 0.733	68.600, 0.687	68.600, 0.657	68.600, 0.440
345	68.800, 0.734	68.800, 0.687	68.800, 0.657	68.800, 0.440
346	69.000, 0.735	69.000, 0.687	69.000, 0.657	69.000, 0.441
347	69.200, 0.736	69.200, 0.688	69.200, 0.657	69.200, 0.441
348	69.400, 0.736	69.400, 0.688	69.400, 0.657	69.400, 0.441
349	69.600, 0.737	69.600, 0.689	69.600, 0.657	69.600, 0.441
350	69.800, 0.738	69.800, 0.689	69.800, 0.657	69.800, 0.441
351	70.000, 0.738	70.000, 0.690	70.000, 0.657	70.000, 0.441
352	70.200, 0.738	70.200, 0.690	70.200, 0.657	70.200, 0.440
353	70.400, 0.739	70.400, 0.690	70.400, 0.658	70.400, 0.440
354	70.600, 0.739	70.600, 0.691	70.600, 0.658	70.600, 0.440
355	70.800, 0.739	70.800, 0.691	70.800, 0.657	70.800, 0.439
356	71.000, 0.739	71.000, 0.691	71.000, 0.657	71.000, 0.439
357	71.200, 0.739	71.200, 0.691	71.200, 0.658	71.200, 0.439
358	71.400, 0.739	71.400, 0.691	71.400, 0.658	71.400, 0.439
359	71.600, 0.739	71.600, 0.691	71.600, 0.658	71.600, 0.438
360	71.800, 0.739	71.800, 0.691	71.800, 0.658	71.800, 0.438
361	72.000, 0.739	72.000, 0.692	72.000, 0.658	72.000, 0.438
362	72.200, 0.739	72.200, 0.692	72.200, 0.657	72.200, 0.437
363	72.400, 0.739	72.400, 0.693	72.400, 0.657	72.400, 0.437
364	72.600, 0.739	72.600, 0.693	72.600, 0.657	72.600, 0.437
365	72.800, 0.740	72.800, 0.694	72.800, 0.657	72.800, 0.437
366	73.000, 0.740	73.000, 0.694	73.000, 0.657	73.000, 0.437
367	73.200, 0.741	73.200, 0.695	73.200, 0.657	73.200, 0.437
368	73.400, 0.741	73.400, 0.695	73.400, 0.657	73.400, 0.437
369	73.600, 0.742	73.600, 0.696	73.600, 0.657	73.600, 0.436
370	73.800, 0.742	73.800, 0.696	73.800, 0.658	73.800, 0.436
371	74.000, 0.742	74.000, 0.697	74.000, 0.658	74.000, 0.436
372	74.200, 0.743	74.200, 0.697	74.200, 0.658	74.200, 0.436
373	74.400, 0.743	74.400, 0.697	74.400, 0.658	74.400, 0.436
374	74.600, 0.743	74.600, 0.698	74.600, 0.659	74.600, 0.436
375	74.800, 0.743	74.800, 0.698	74.800, 0.659	74.800, 0.436
376	75.000, 0.743	75.000, 0.697	75.000, 0.660	75.000, 0.436
377	75.200, 0.743	75.200, 0.697	75.200, 0.660	75.200, 0.437
378	75.400, 0.744	75.400, 0.697	75.400, 0.661	75.400, 0.437
379	75.600, 0.744	75.600, 0.697	75.600, 0.662	75.600, 0.437
380	75.800, 0.744	75.800, 0.697	75.800, 0.662	75.800, 0.436
381	76.000, 0.744	76.000, 0.697	76.000, 0.663	76.000, 0.436
382	76.200, 0.744	76.200, 0.697	76.200, 0.663	76.200, 0.436
383	76.400, 0.745	76.400, 0.697	76.400, 0.663	76.400, 0.436
384	76.600, 0.745	76.600, 0.697	76.600, 0.663	76.600, 0.436
385	76.800, 0.745	76.800, 0.697	76.800, 0.663	76.800, 0.435
386	77.000, 0.746	77.000, 0.698	77.000, 0.663	77.000, 0.435
387	77.200, 0.746	77.200, 0.698	77.200, 0.663	77.200, 0.435
388	77.400, 0.746	77.400, 0.698	77.400, 0.662	77.400, 0.434
389	77.600, 0.747	77.600, 0.699	77.600, 0.662	77.600, 0.434
390	77.800, 0.748	77.800, 0.699	77.800, 0.661	77.800, 0.434
391	78.000, 0.748	78.000, 0.699	78.000, 0.661	78.000, 0.434
392	78.200, 0.748	78.200, 0.700	78.200, 0.661	78.200, 0.434
393	78.400, 0.749	78.400, 0.700	78.400, 0.661	78.400, 0.434
394	78.600, 0.749	78.600, 0.701	78.600, 0.661	78.600, 0.434
395	78.800, 0.750	78.800, 0.701	78.800, 0.662	78.800, 0.434
396	79.000, 0.750	79.000, 0.701	79.000, 0.662	79.000, 0.434
397	79.200, 0.750	79.200, 0.701	79.200, 0.662	79.200, 0.434
398	79.400, 0.751	79.400, 0.701	79.400, 0.663	79.400, 0.434
399	79.600, 0.751	79.600, 0.701	79.600, 0.663	79.600, 0.434
400	79.800, 0.751	79.800, 0.701	79.800, 0.664	79.800, 0.434
401	80.000, 0.752	80.000, 0.702	80.000, 0.664	80.000, 0.434
402	80.200, 0.752	80.200, 0.702	80.200, 0.665	80.200, 0.434
403	80.400, 0.753	80.400, 0.702	80.400, 0.665	80.400, 0.434
404	80.600, 0.753	80.600, 0.702	80.600, 0.665	80.600, 0.433
405	80.800, 0.753	80.800, 0.702	80.800, 0.665	80.800, 0.433
406	81.000, 0.753	81.000, 0.703	81.000, 0.666	81.000, 0.433
407	81.200, 0.753	81.200, 0.703	81.200, 0.666	81.200, 0.433
408	81.400, 0.753	81.400, 0.703	81.400, 0.666	81.400, 0.433
409	81.600, 0.753	81.600, 0.703	81.600, 0.666	81.600, 0.433
410	81.800, 0.753	81.800, 0.704	81.800, 0.666	81.800, 0.433
411	82.000, 0.753	82.000, 0.704	82.000, 0.666	82.000, 0.433
412	82.200, 0.753	82.200, 0.704	82.200, 0.666	82.200, 0.432
413	82.400, 0.753	82.400, 0.704	82.400, 0.666	82.400, 0.432
414	82.600, 0.753	82.600, 0.704	82.600, 0.666	82.600, 0.432
415	82.800, 0.753	82.800, 0.705	82.800, 0.666	82.800, 0.432
416	83.000, 0.754	83.000, 0.705	83.000, 0.666	83.000, 0.432
417	83.200, 0.754	83.200, 0.705	83.200, 0.666	83.200, 0.432
418	83.400, 0.754	83.400, 0.705	83.400, 0.666	83.400, 0.432
419	83.600, 0.755	83.600, 0.705	83.600, 0.666	83.600, 0.432
420	83.800, 0.755	83.800, 0.705	83.800, 0.666	83.800, 0.432
421	84.000, 0.756	84.000, 0.706	84.000, 0.666	84.000, 0.432
422	84.200, 0.756	84.200, 0.706	84.200, 0.666	84.200, 0.432
423	84.400, 0.757	84.400, 0.706	84.400, 0.666	84.400, 0.432
424	84.600, 0.758	84.600, 0.706	84.600, 0.666	84.600, 0.432
425	84.800, 0.759	84.800, 0.707	84.800, 0.666	84.800, 0.432
426	85.000, 0.759	85.000, 0.707	85.000, 0.666	85.000, 0.432
427	85.200, 0.760	85.200, 0.708	85.200, 0.667	85.200, 0.432
428	85.400, 0.761	85.400, 0.708	85.400, 0.667	85.400, 0.432
429	85.600, 0.762	85.600, 0.708	85.600, 0.667	85.600, 0.431
430	85.800, 0.762	85.800, 0.708	85.800, 0.667	85.800, 0.431
431	86.000, 0.762	86.000, 0.708	86.000, 0.668	86.000, 0.430
432	86.200, 0.762	86.200, 0.708	86.200, 0.668	86.200, 0.430
433	86.400, 0.763	86.400, 0.709	86.400, 0.668	86.400, 0.430
434	86.600, 0.763	86.600, 0.709	86.600, 0.669	86.600, 0.429
435	86.800, 0.762	86.800, 0.709	86.800, 0.669	86.800, 0.429
436	87.000, 0.762	87.000, 0.709	87.000, 0.669	87.000, 0.429
437	87.200, 0.762	87.200, 0.709	87.200, 0.669	87.200, 0.429
438	87.400, 0.761	87.400, 0.710	87.400, 0.669	87.400, 0.429
439	87.600, 0.761	87.600, 0.710	87.600, 0.669	87.600, 0.429
440	87.800, 0.761	87.800, 0.710	87.800, 0.670	87.800, 0.429
441	88.000, 0.761	88.000, 0.711	88.000, 0.670	88.000, 0.429
442	88.200, 0.760	88.200, 0.711	88.200, 0.670	88.200, 0.430
443	88.400, 0.760	88.400, 0.711	88.400, 0.670	88.400, 0.430
444	88.600, 0.760	88.600, 0.711	88.600, 0.671	88.600, 0.430
445	88.800, 0.760	88.800, 0.711	88.800, 0.671	88.800, 0.430
446	89.000, 0.761	89.000, 0.711	89.000, 0.671	89.000, 0.430
447	89.200, 0.761	89.200, 0.712	89.200, 0.671	89.200, 0.429
448	89.400, 0.761	89.400, 0.712	89.400, 0.672	89.400, 0.429
449	89.600, 0.762	89.600, 0.712	89.600, 0.672	89.600, 0.429
450	89.800, 0.763	89.800, 0.712	89.800, 0.672	89.800, 0.429
451	90.000, 0.763	90.000, 0.712	90.000, 0.672	90.000, 0.429
452	90.200, 0.764	90.200, 0.712	90.200, 0.672	90.200, 0.428
453	90.400, 0.765	90.400, 0.712	90.400, 0.672	90.400, 0.428
454	90.600, 0.766	90.600, 0.712	90.600, 0.672	90.600, 0.428
455	90.800, 0.766	90.800, 0.712	90.800, 0.672	90.800, 0.428
456	91.000, 0.767	91.000, 0.712	91.000, 0.672	91.000, 0.428
457	91.200, 0.767	91.200, 0.712	91.200, 0.672	91.200, 0.428
458	91.400, 0.768	91.400, 0.712	91.400, 0.672	91.400, 0.428
459	91.600, 0.768	91.600, 0.713	91.600, 0.672	91.600, 0.428
460	91.800, 0.768	91.800, 0.713	91.800, 0.672	91.800, 0.428
461	92.000, 0.769	92.000, 0.713	92.000, 0.672	92.000, 0.429
462	92.200, 0.769	92.200, 0.713	92.200, 0.672	92.200, 0.429
463	92.400, 0.769	92.400, 0.713	92.400, 0.672	92.400, 0.429
464	92.600, 0.769	92.600, 0.714	92.600, 0.672	92.600, 0.429
465	92.800, 0.769	92.800, 0.714	92.800, 0.672	92.800, 0.429
466	93.000, 0.769	93.000, 0.714	93.000, 0.672	93.000, 0.429
467	93.200, 0.769	93.200, 0.714	93.200, 0.672	93.200, 0.429
468	93.400, 0.770	93.400, 0.714	93.400, 0.672	93.400, 0.429
469	93.600, 0.770	93.600, 0.714	93.600, 0.672	93.600, 0.429
470	93.800, 0.770	93.800, 0.714	93.800, 0.672	93.800, 0.429
471	94.000, 0.770	94.000, 0.714	94.000, 0.671	94.000, 0.429
472	94.200, 0.770	94.200, 0.714	94.200, 0.671	94.200, 0.428
473	94.400, 0.770	94.400, 0.714	94.400, 0.671	94.400, 0.428
474	94.600, 0.770	94.600, 0.714	94.600, 0.671	94.600, 0.428
475	94.800, 0.770	94.800, 0.714	94.800, 0.672	94.800, 0.428
476	95.000, 0.770	95.000, 0.714	95.000, 0.672	95.000, 0.428
477	95.200, 0.770	95.200, 0.715	95.200, 0.672	95.200, 0.429
478	95.400, 0.770	95.400, 0.715	95.400, 0.673	95.400, 0.429
479	95.600, 0.770	95.600, 0.716	95.600, 0.673	95.600, 0.429
480	95.800, 0.771	95.800, 0.716	95.800, 0.673	95.800, 0.429
481	96.000, 0.771	96.000, 0.717	96.000, 0.673	96.000, 0.429
482	96.200, 0.771	96.200, 0.718	96.200, 0.673	96.200, 0.429
483	96.400, 0.772	96.400, 0.718	96.400, 0.673	96.400, 0.428
484	96.600, 0.772	96.600, 0.719	96.600, 0.674	96.600, 0.428
485	96.800, 0.772	96.800, 0.719	96.800, 0.674	96.800, 0.428
486	97.000, 0.772	97.000, 0.719	97.000, 0.674	97.000, 0.428
487	97.200, 0.772	97.200, 0.719	97.200, 0.674	97.200, 0.428
488	97.400, 0.773	97.400, 0.719	97.400, 0.675	97.400, 0.428
489	97.600, 0.773	97.600, 0.719	97.600, 0.675	97.600, 0.428
490	97.800, 0.773	97.800, 0.719	97.800, 0.675	97.800, 0.428
491	98.000, 0.773	98.000, 0.719	98.000, 0.675	98.000, 0.428
492	98.200, 0.773	98.200, 0.719	98.200, 0.675	98.200, 0.428
493	98.400, 0.773	98.400, 0.719	98.400, 0.676	98.400, 0.428
494	98.600, 0.773	98.600, 0.719	98.600, 0.676	98.600, 0.429
495	98.800, 0.774	98.800, 0.719	98.800, 0.676	98.800, 0.429
496	99.000, 0.774	99.000, 0.718	99.000, 0.676	99.000, 0.429
497	99.200, 0.774	99.200, 0.718	99.200, 0.676	99.200, 0.429
498	99.400, 0.775	99.400, 0.718	99.400, 0.676	99.400, 0.429
499	99.600, 0.775	99.600, 0.718	99.600, 0.675	99.600, 0.429
500	99.800, 0.775	99.800, 0.718	99.800, 0.675	99.800, 0.429
501	100.000, 0.776	100.000, 0.718	100.000, 0.675	100.000, 0.429
502	100.200, 0.776	100.200, 0.719	100.200, 0.675	100.200, 0.429
503	100.400, 0.776	100.400, 0.719	100.400, 0.675	100.400, 0.429
504	100.600, 0.776	100.600, 0.720	100.600, 0.675	100.600, 0.429
505	100.800, 0.776	100.800, 0.720	100.800, 0.675	100.800, 0.429
506	101.000, 0.776	101.000, 0.720	101.000, 0.675	101.000, 0.429
507	101.200, 0.776	101.200, 0.721	101.200, 0.675	101.200, 0.429
508	101.400, 0.776	101.400, 0.721	101.400, 0.676	101.400, 0.429
509	101.600, 0.777	101.600, 0.722	101.600, 0.676	101.600, 0.429
510	101.800, 0.777	101.800, 0.722	101.800, 0.676	101.800, 0.429
511	102.000, 0.777	102.000, 0.722	102.000, 0.676	102.000, 0.429
512	102.200, 0.777	102.200, 0.722	102.200, 0.676	102.200, 0.429
513	102.400, 0.777	102.400, 0.723	102.400, 0.676	102.400, 0.428
514	102.600, 0.777	102.600, 0.723	102.600, 0.676	102.600, 0.428
515	102.800, 0.777	102.800, 0.723	102.800, 0.676	102.800, 0.428
516	103.000, 0.778	103.000, 0.723	103.000, 0.676	103.000, 0.428
517	103.200, 0.778	103.200, 0.723	103.200, 0.676	103.200, 0.428
518	103.400, 0.779	103.400, 0.723	103.400, 0.676	103.400, 0.428
519	103.600, 0.779	103.600, 0.723	103.600, 0.677	103.600, 0.428
520	103.800, 0.779	103.800, 0.723	103.800, 0.677	103.800, 0.428
521	104.000, 0.780	104.000, 0.723	104.000, 0.677	104.000, 0.428
522	104.200, 0.780	104.200, 0.723	104.200, 0.677	104.200, 0.428
523	104.400, 0.780	104.400, 0.723	104.400, 0.678	104.400, 0.428
524	104.600, 0.781	104.600, 0.723	104.600, 0.678	104.600, 0.428
525	104.800, 0.781	104.800, 0.723	104.800, 0.677	104.800, 0.428
526	105.000, 0.782	105.000, 0.723	105.000, 0.677	105.000, 0.427
527	105.200, 0.782	105.200, 0.723	105.200, 0.677	105.200, 0.427
528	105.400, 0.782	105.400, 0.724	105.400, 0.677	105.400, 0.427
529	105.600, 0.782	105.600, 0.724	105.600, 0.677	105.600, 0.427
530	105.800, 0.782	105.800, 0.724	105.800, 0.677	105.800, 0.426
531	106.000, 0.783	106.000, 0.724	106.000, 0.677	106.000, 0.426
532	106.200, 0.783	106.200, 0.724	106.200, 0.677	106.200, 0.426
533	106.400, 0.783	106.400, 0.725	106.400, 0.677	106.400, 0.426
534	106.600, 0.783	106.600, 0.725	106.600, 0.677	106.600, 0.426
535	106.800, 0.783	106.800, 0.725	106.800, 0.677	106.800, 0.426
536	107.000, 0.784	107.000, 0.725	107.000, 0.678	107.000, 0.427
537	107.200, 0.784	107.200, 0.725	107.200, 0.678	107.200, 0.427
538	107.400, 0.784	107.400, 0.725	107.400, 0.678	107.400, 0.427
539	107.600, 0.784	107.600, 0.725	107.600, 0.679	107.600, 0.427
540	107.800, 0.784	107.800, 0.725	107.800, 0.679	107.800, 0.427
541	108.000, 0.784	108.000, 0.724	108.000, 0.679	108.000, 0.427
542	108.200, 0.785	108.200, 0.724	108.200, 0.679	108.200, 0.427
543	108.400, 0.785	108.400, 0.724	108.400, 0.680	108.400, 0.427
544	108.600, 0.785	108.600, 0.724	108.600, 0.679	108.600, 0.428
545	108.800, 0.785	108.800, 0.725	108.800, 0.679	108.800, 0.427
546	109.000, 0.785	109.000, 0.725	109.000, 0.679	109.000, 0.427
547	109.200, 0.785	109.200, 0.725	109.200, 0.679	109.200, 0.427
548	109.400, 0.785	109.400, 0.726	109.400, 0.678	109.400, 0.427
549	109.600, 0.786	109.600, 0.726	109.600, 0.678	109.600, 0.427
550	109.800, 0.786	109.800, 0.727	109.800, 0.678	109.800, 0.427
551	110.000, 0.787	110.000, 0.727	110.000, 0.678	110.000, 0.427
552	110.200, 0.788	110.200, 0.728	110.200, 0.678	110.200, 0.426
553	110.400, 0.788	110.400, 0.728	110.400, 0.678	110.400, 0.426
554	110.600, 0.789	110.600, 0.729	110.600, 0.678	110.600, 0.426
555	110.800, 0.789	110.800, 0.729	110.800, 0.678	110.800, 0.425
556	111.000, 0.789	111.000, 0.730	111.000, 0.679	111.000, 0.425
557	111.200, 0.790	111.200, 0.730	111.200, 0.679	111.200, 0.424
558	111.400, 0.790	111.400, 0.730	111.400, 0.680	111.400, 0.424
559	111.600, 0.790	111.600, 0.730	111.600, 0.681	111.600, 0.424
560	111.800, 0.790	111.800, 0.730	111.800, 0.681	111.800, 0.424
561	112.000, 0.790	112.000, 0.729	112.000, 0.682	112.000, 0.424
562	112.200, 0.789	112.200, 0.729	112.200, 0.683	112.200, 0.424
563	112.400, 0.789	112.400, 0.729	112.400, 0.683	112.400, 0.424
564	112.600, 0.789	112.600, 0.730	112.600, 0.683	112.600, 0.424
565	112.800, 0.789	112.800, 0.730	112.800, 0.683	112.800, 0.424
566	113.000, 0.789	113.000, 0.730	113.000, 0.684	113.000, 0.425
567	113.200, 0.789	113.200, 0.730	113.200, 0.684	113.200, 0.425
568	113.400, 0.790	113.400, 0.729	113.400, 0.684	113.400, 0.425
569	113.600, 0.790	113.600, 0.729	113.600, 0.684	113.600, 0.425
570	113.800, 0.790	113.800, 0.729	113.800, 0.683	113.800, 0.425
571	114.000, 0.790	114.000, 0.729	114.000, 0.683	114.000, 0.425
572	114.200, 0.791	114.200, 0.730	114.200, 0.683	114.200, 0.425
573	114.400, 0.791	114.400, 0.730	114.400, 0.683	114.400, 0.425
574	114.600, 0.791	114.600, 0.730	114.600, 0.683	114.600, 0.425
575	114.800, 0.792	114.800, 0.730	114.800, 0.683	114.800, 0.425
576	115.000, 0.792	115.000, 0.730	115.000, 0.682	115.000, 0.425
577	115.200, 0.792	115.200, 0.730	115.200, 0.682	115.200, 0.425
578	115.400, 0.792	115.400, 0.730	115.400, 0.681	115.400, 0.425
579	115.600, 0.793	115.600, 0.730	115.600, 0.681	115.600, 0.425
580	115.800, 0.793	115.800, 0.730	115.800, 0.681	115.800, 0.425
581	116.000, 0.793	116.000, 0.730	116.000, 0.681	116.000, 0.425
582	116.200, 0.794	116.200, 0.730	116.200, 0.681	116.200, 0.425
583	116.400, 0.794	116.400, 0.730	116.400, 0.681	116.400, 0.425
584	116.600, 0.794	116.600, 0.731	116.600, 0.681	116.600, 0.425
585	116.800, 0.795	116.800, 0.731	116.800, 0.681	116.800, 0.425
586	117.000, 0.795	117.000, 0.731	117.000, 0.681	117.000, 0.425
587	117.200, 0.795	117.200, 0.731	117.200, 0.681	117.200, 0.424
588	117.400, 0.796	117.400, 0.731	117.400, 0.682	117.400, 0.424
589	117.600, 0.796	117.600, 0.731	117.600, 0.682	117.600, 0.424
590	117.800, 0.796	117.800, 0.731	117.800, 0.682	117.800, 0.424
591	118.000, 0.796	118.000, 0.731	118.000, 0.683	118.000, 0.424
592	118.200, 0.796	118.200, 0.732	118.200, 0.683	118.200, 0.424
593	118.400, 0.796	118.400, 0.732	118.400, 0.683	118.400, 0.424
594	118.600, 0.796	118.600, 0.732	118.600, 0.683	118.600, 0.424
595	118.800, 0.796	118.800, 0.732	118.800, 0.683	118.800, 0.424
596	119.000, 0.796	119.000, 0.732	119.000, 0.682	119.000, 0.425
597	119.200, 0.796	119.200, 0.732	119.200, 0.682	119.200, 0.425
598	119.400, 0.796	119.400, 0.732	119.400, 0.682	119.400, 0.425
599	119.600, 0.796	119.600, 0.732	119.600, 0.682	119.600, 0.425
600	119.800, 0.796	119.800, 0.732	119.800, 0.683	119.800, 0.425
601	120.000, 0.796	120.000, 0.732	120.000, 0.683	120.000, 0.425
602	120.200, 0.796	120.200, 0.732	120.200, 0.683	120.200, 0.425
603	120.400, 0.797	120.400, 0.732	120.400, 0.683	120.400, 0.425
604	120.600, 0.797	120.600, 0.732	120.600, 0.683	120.600, 0.425
605	120.800, 0.798	120.800, 0.732	120.800, 0.682	120.800, 0.425
606	121.000, 0.798	121.000, 0.732	121.000, 0.682	121.000, 0.425
607	121.200, 0.799	121.200, 0.732	121.200, 0.682	121.200, 0.425
608	121.400, 0.799	121.400, 0.733	121.400, 0.682	121.400, 0.425
609	121.600, 0.799	121.600, 0.733	121.600, 0.682	121.600, 0.424
610	121.800, 0.800	121.800, 0.734	121.800, 0.682	121.800, 0.424
611	122.000, 0.800	122.000, 0.734	122.000, 0.682	122.000, 0.425
612	122.200, 0.801	122.200, 0.735	122.200, 0.683	122.200, 0.425
613	122.400, 0.801	122.400, 0.735	122.400, 0.683	122.400, 0.425
614	122.600, 0.801	122.600, 0.735	122.600, 0.683	122.600, 0.425
615	122.800, 0.802	122.800, 0.736	122.800, 0.683	122.800, 0.425
616	123.000, 0.802	123.000, 0.736	123.000, 0.683	123.000, 0.425
617	123.200, 0.802	123.200, 0.736	123.200, 0.683	123.200, 0.425
618	123.400, 0.802	123.400, 0.736	123.400, 0.684	123.400, 0.425
619	123.600, 0.803	123.600, 0.736	123.600, 0.684	123.600, 0.425
620	123.800, 0.803	123.800, 0.736	123.800, 0.684	123.800, 0.425
621	124.000, 0.803	124.000, 0.735	124.000, 0.684	124.000, 0.425
622	124.200, 0.803	124.200, 0.735	124.200, 0.684	124.200, 0.425
623	124.400, 0.803	124.400, 0.735	124.400, 0.684	124.400, 0.425
624	124.600, 0.803	124.600, 0.735	124.600, 0.684	124.600, 0.425
625	124.800, 0.803	124.800, 0.735	124.800, 0.685	124.800, 0.425
626	125.000, 0.803	125.000, 0.735	125.000, 0.685	125.000, 0.425
627	125.200, 0.803	125.200, 0.735	125.200, 0.685	125.200, 0.425
628	125.400, 0.803	125.400, 0.735	125.400, 0.685	125.400, 0.425
629	125.600, 0.803	125.600, 0.735	125.600, 0.686	125.600, 0.425
630	125.800, 0.803	125.800, 0.736	125.800, 0.686	125.800, 0.425
631	126.000, 0.803	126.000, 0.736	126.000, 0.686	126.000, 0.426
632	126.200, 0.803	126.200, 0.736	126.200, 0.686	126.200, 0.426
633	126.400, 0.804	126.400, 0.736	126.400, 0.686	126.400, 0.426
634	126.600, 0.804	126.600, 0.736	126.600, 0.686	126.600, 0.426
635	126.800, 0.805	126.800, 0.736	126.800, 0.686	126.800, 0.426
636	127.000, 0.805	127.000, 0.736	127.000, 0.686	127.000, 0.426
637	127.200, 0.805	127.200, 0.736	127.200, 0.686	127.200, 0.425
638	127.400, 0.805	127.400, 0.736	127.400, 0.686	127.400, 0.425
639	127.600, 0.805	127.600, 0.736	127.600, 0.686	127.600, 0.425
640	127.800, 0.805	127.800, 0.737	127.800, 0.686	127.800, 0.425
641	128.000, 0.805	128.000, 0.737	128.000, 0.686	128.000, 0.425
642	128.200, 0.806	128.200, 0.737	128.200, 0.686	128.200, 0.425
643	128.400, 0.806	128.400, 0.737	128.400, 0.686	128.400, 0.425
644	128.600, 0.806	128.600, 0.737	128.600, 0.686	128.600, 0.425
645	128.800, 0.807	128.800, 0.737	128.800, 0.686	128.800, 0.424
646	129.000, 0.807	129.000, 0.737	129.000, 0.686	129.000, 0.424
647	129.200, 0.807	129.200, 0.737	129.200, 0.686	129.200, 0.424
648	129.400, 0.807	129.400, 0.737	129.400, 0.686	129.400, 0.424
649	129.600, 0.807	129.600, 0.737	129.600, 0.686	129.600, 0.424
650	129.800, 0.806	129.800, 0.737	129.800, 0.686	129.800, 0.424
651	130.000, 0.806	130.000, 0.737	130.000, 0.686	130.000, 0.424
652	130.200, 0.806	130.200, 0.738	130.200, 0.686	130.200, 0.424
653	130.400, 0.806	130.400, 0.738	130.400, 0.687	130.400, 0.424
654	130.600, 0.806	130.600, 0.738	130.600, 0.687	130.600, 0.424
655	130.800, 0.806	130.800, 0.738	130.800, 0.687	130.800, 0.424
656	131.000, 0.806	131.000, 0.738	131.000, 0.687	131.000, 0.424
657	131.200, 0.806	131.200, 0.738	131.200, 0.687	131.200, 0.424
658	131.400, 0.807	131.400, 0.738	131.400, 0.687	131.400, 0.424
659	131.600, 0.807	131.600, 0.738	131.600, 0.687	131.600, 0.424
660	131.800, 0.808	131.800, 0.739	131.800, 0.687	131.800, 0.424
661	132.000, 0.808	132.000, 0.739	132.000, 0.687	132.000, 0.424
662	132.200, 0.809	132.200, 0.739	132.200, 0.687	132.200, 0.424
663	132.400, 0.810	132.400, 0.739	132.400, 0.687	132.400, 0.424
664	132.600, 0.810	132.600, 0.739	132.600, 0.687	132.600, 0.424
665	132.800, 0.810	132.800, 0.739	132.800, 0.687	132.800, 0.424
666	133.000, 0.810	133.000, 0.739	133.000, 0.687	133.000, 0.424
667	133.200, 0.810	133.200, 0.739	133.200, 0.687	133.200, 0.424
668	133.400, 0.810	133.400, 0.739	133.400, 0.687	133.400, 0.424
669	133.600, 0.810	133.600, 0.740	133.600, 0.687	133.600, 0.424
670	133.800, 0.810	133.800, 0.740	133.800, 0.687	133.800, 0.424
671	134.000, 0.810	134.000, 0.740	134.000, 0.687	134.000, 0.424
672	134.200, 0.810	134.200, 0.741	134.200, 0.688	134.200, 0.424
673	134.400, 0.811	134.400, 0.741	134.400, 0.688	134.400, 0.424
674	134.600, 0.811	134.600, 0.741	134.600, 0.688	134.600, 0.425
675	134.800, 0.812	134.800, 0.741	134.800, 0.688	134.800, 0.425
676	135.000, 0.812	135.000, 0.742	135.000, 0.688	135.000, 0.425
677	135.200, 0.812	135.200, 0.742	135.200, 0.688	135.200, 0.425
678	135.400, 0.813	135.400, 0.742	135.400, 0.688	135.400, 0.425
679	135.600, 0.813	135.600, 0.742	135.600, 0.688	135.600, 0.424
680	135.800, 0.813	135.800, 0.742	135.800, 0.688	135.800, 0.424
681	136.000, 0.813	136.000, 0.743	136.000, 0.688	136.000, 0.424
682	136.200, 0.813	136.200, 0.743	136.200, 0.688	136.200, 0.424
683	136.400, 0.812	136.400, 0.743	136.400, 0.688	136.400, 0.424
684	136.600, 0.812	136.600, 0.743	136.600, 0.688	136.600, 0.424
685	136.800, 0.812	136.800, 0.743	136.800, 0.688	136.800, 0.425
686	137.000, 0.812	137.000, 0.742	137.000, 0.688	137.000, 0.425
687	137.200, 0.812	137.200, 0.742	137.200, 0.688	137.200, 0.425
688	137.400, 0.812	137.400, 0.742	137.400, 0.687	137.400, 0.425
689	137.600, 0.813	137.600, 0.742	137.600, 0.687	137.600, 0.425
690	137.800, 0.813	137.800, 0.742	137.800, 0.687	137.800, 0.425
691	138.000, 0.813	138.000, 0.742	138.000, 0.687	138.000, 0.426
692	138.200, 0.813	138.200, 0.742	138.200, 0.686	138.200, 0.426
693	138.400, 0.814	138.400, 0.742	138.400, 0.687	138.400, 0.426
694	138.600, 0.814	138.600, 0.742	138.600, 0.687	138.600, 0.426
695	138.800, 0.814	138.800, 0.742	138.800, 0.687	138.800, 0.426
696	139.000, 0.814	139.000, 0.743	139.000, 0.687	139.000, 0.426
697	139.200, 0.814	139.200, 0.743	139.200, 0.687	139.200, 0.425
698	139.400, 0.813	139.400, 0.743	139.400, 0.687	139.400, 0.425
699	139.600, 0.813	139.600, 0.744	139.600, 0.687	139.600, 0.425
700	139.800, 0.813	139.800, 0.744	139.800, 0.688	139.800, 0.425
701	140.000, 0.813	140.000, 0.744	140.000, 0.688	140.000, 0.425
702	140.200, 0.813	140.200, 0.744	140.200, 0.688	140.200, 0.425
703	140.400, 0.813	140.400, 0.744	140.400, 0.688	140.400, 0.425
704	140.600, 0.814	140.600, 0.744	140.600, 0.688	140.600, 0.424
705	140.800, 0.814	140.800, 0.744	140.800, 0.688	140.800, 0.424
706	141.000, 0.815	141.000, 0.744	141.000, 0.687	141.000, 0.424
707	141.200, 0.815	141.200, 0.744	141.200, 0.687	141.200, 0.424
708	141.400, 0.816	141.400, 0.744	141.400, 0.687	141.400, 0.424
709	141.600, 0.816	141.600, 0.744	141.600, 0.686	141.600, 0.424
710	141.800, 0.817	141.800, 0.744	141.800, 0.686	141.800, 0.424
711	142.000, 0.817	142.000, 0.744	142.000, 0.686	142.000, 0.425
712	142.200, 0.817	142.200, 0.744	142.200, 0.686	142.200, 0.425
713	142.400, 0.817	142.400, 0.745	142.400, 0.686	142.400, 0.425
714	142.600, 0.817	142.600, 0.745	142.600, 0.686	142.600, 0.425
715	142.800, 0.817	142.800, 0.745	142.800, 0.687	142.800, 0.425
716	143.000, 0.817	143.000, 0.745	143.000, 0.687	143.000, 0.425
717	143.200, 0.817	143.200, 0.745	143.200, 0.688	143.200, 0.425
718	143.400, 0.817	143.400, 0.746	143.400, 0.688	143.400, 0.425
719	143.600, 0.817	143.600, 0.746	143.600, 0.688	143.600, 0.425
720	143.800, 0.817	143.800, 0.746	143.800, 0.688	143.800, 0.425
721	144.000, 0.817	144.000, 0.746	144.000, 0.688	144.000, 0.425
722	144.200, 0.817	144.200, 0.745	144.200, 0.688	144.200, 0.425
723	144.400, 0.818	144.400, 0.745	144.400, 0.688	144.400, 0.425
724	144.600, 0.818	144.600, 0.745	144.600, 0.688	144.600, 0.424
725	144.800, 0.818	144.800, 0.745	144.800, 0.688	144.800, 0.424
726	145.000, 0.818	145.000, 0.745	145.000, 0.688	145.000, 0.423
727	145.200, 0.818	145.200, 0.745	145.200, 0.688	145.200, 0.423
728	145.400, 0.818	145.400, 0.745	145.400, 0.688	145.400, 0.423
729	145.600, 0.818	145.600, 0.745	145.600, 0.688	145.600, 0.423
730	145.800, 0.818	145.800, 0.745	145.800, 0.688	145.800, 0.423
731	146.000, 0.818	146.000, 0.745	146.000, 0.688	146.000, 0.423
732	146.200, 0.818	146.200, 0.745	146.200, 0.688	146.200, 0.424
733	146.400, 0.818	146.400, 0.745	146.400, 0.688	146.400, 0.424
734	146.600, 0.818	146.600, 0.745	146.600, 0.688	146.600, 0.424
735	146.800, 0.818	146.800, 0.745	146.800, 0.688	146.800, 0.424
736	147.000, 0.818	147.000, 0.745	147.000, 0.688	147.000, 0.424
737	147.200, 0.818	147.200, 0.746	147.200, 0.687	147.200, 0.424
738	147.400, 0.818	147.400, 0.746	147.400, 0.687	147.400, 0.425
739	147.600, 0.818	147.600, 0.746	147.600, 0.687	147.600, 0.425
740	147.800, 0.819	147.800, 0.746	147.800, 0.687	147.800, 0.425
741	148.000, 0.819	148.000, 0.746	148.000, 0.687	148.000, 0.425
742	148.200, 0.819	148.200, 0.746	148.200, 0.687	148.200, 0.425
743	148.400, 0.819	148.400, 0.746	148.400, 0.687	148.400, 0.424
744	148.600, 0.820	148.600, 0.746	148.600, 0.688	148.600, 0.424
745	148.800, 0.819	148.800, 0.747	148.800, 0.688	148.800, 0.424
746	149.000, 0.819	149.000, 0.747	149.000, 0.688	149.000, 0.424
747	149.200, 0.819	149.200, 0.747	149.200, 0.688	149.200, 0.424
748	149.400, 0.819	149.400, 0.747	149.400, 0.688	149.400, 0.424
749	149.600, 0.819	149.600, 0.748	149.600, 0.688	149.600, 0.423
750	149.800, 0.819	149.800, 0.748	149.800, 0.688	149.800, 0.423
751	150.000, 0.819	150.000, 0.748	150.000, 0.688	150.000, 0.423
752	150.200, 0.811	150.200, 0.742	150.200, 0.682	150.200, 0.422
753	150.400, 0.802	150.400, 0.735	150.400, 0.675	150.400, 0.420
754	150.600, 0.792	150.600, 0.727	150.600, 0.667	150.600, 0.419
755	150.800, 0.781	150.800, 0.719	150.800, 0.658	150.800, 0.418
756	151.000, 0.770	151.000, 0.710	151.000, 0.649	151.000, 0.416
757	151.200, 0.758	151.200, 0.700	151.200, 0.639	151.200, 0.415
758	151.400, 0.747	151.400, 0.691	151.400, 0.630	151.400, 0.413
759	151.600, 0.736	151.600, 0.682	151.600, 0.620	151.600, 0.412
760	151.800, 0.725	151.800, 0.673	151.800, 0.611	151.800, 0.411
761	152.000, 0.716	152.000, 0.666	152.000, 0.603	152.000, 0.410
762	152.200, 0.709	152.200, 0.660	152.200, 0.597	152.200, 0.409
763	152.400, 0.702	152.400, 0.654	152.400, 0.591	152.400, 0.408
764	152.600, 0.695	152.600, 0.649	152.600, 0.585	152.600, 0.407
765	152.800, 0.689	152.800, 0.644	152.800, 0.580	152.800, 0.407
766	153.000, 0.683	153.000, 0.639	153.000, 0.575	153.000, 0.406
767	153.200, 0.678	153.200, 0.635	153.200, 0.571	153.200, 0.406
768	153.400, 0.673	153.400, 0.631	153.400, 0.567	153.400, 0.405
769	153.600, 0.668	153.600, 0.628	153.600, 0.563	153.600, 0.405
770	153.800, 0.664	153.800, 0.624	153.800, 0.559	153.800, 0.404
771	154.000, 0.660	154.000, 0.621	154.000, 0.556	154.000, 0.404
772	154.200, 0.656	154.200, 0.618	154.200, 0.553	154.200, 0.404
773	154.400, 0.652	154.400, 0.615	154.400, 0.550	154.400, 0.403
774	154.600, 0.649	154.600, 0.613	154.600, 0.547	154.600, 0.403
775	154.800, 0.646	154.800, 0.610	154.800, 0.544	154.800, 0.403
776	155.000, 0.643	155.000, 0.607	155.000, 0.541	155.000, 0.403
777	155.200, 0.640	155.200, 0.605	155.200, 0.538	155.200, 0.402
778	155.400, 0.638	155.400, 0.603	155.400, 0.536	155.400, 0.402
779	155.600, 0.635	155.600, 0.601	155.600, 0.534	155.600, 0.402
780	155.800, 0.633	155.800, 0.599	155.800, 0.532	155.800, 0.401
781	156.000, 0.631	156.000, 0.597	156.000, 0.530	156.000, 0.401
782	156.200, 0.629	156.200, 0.596	156.200, 0.528	156.200, 0.401
783	156.400, 0.627	156.400, 0.594	156.400, 0.527	156.400, 0.401
784	156.600, 0.625	156.600, 0.593	156.600, 0.525	156.600, 0.401
785	156.800, 0.623	156.800, 0.591	156.800, 0.524	156.800, 0.401
786	157.000, 0.621	157.000, 0.590	157.000, 0.523	157.000, 0.401
787	157.200, 0.619	157.200, 0.588	157.200, 0.522	157.200, 0.400
788	157.400, 0.617	157.400, 0.587	157.400, 0.520	157.400, 0.400
789	157.600, 0.616	157.600, 0.586	157.600, 0.519	157.600, 0.400
790	157.800, 0.615	157.800, 0.584	157.800, 0.518	157.800, 0.400
791	158.000, 0.613	158.000, 0.583	158.000, 0.517	158.000, 0.400
792	158.200, 0.612	158.200, 0.582	158.200, 0.515	158.200, 0.399
793	158.400, 0.611	158.400, 0.581	158.400, 0.514	158.400, 0.399
794	158.600, 0.609	158.600, 0.579	158.600, 0.513	158.600, 0.398
795	158.800, 0.608	158.800, 0.578	158.800, 0.512	158.800, 0.398
796	159.000, 0.607	159.000, 0.577	159.000, 0.511	159.000, 0.397
797	159.200, 0.606	159.200, 0.576	159.200, 0.509	159.200, 0.396
798	159.400, 0.604	159.400, 0.575	159.400, 0.508	159.400, 0.396
799	159.600, 0.603	159.600, 0.575	159.600, 0.507	159.600, 0.395
800	159.800, 0.601	159.800, 0.574	159.800, 0.506	159.800, 0.395
801	160.000, 0.600	160.000, 0.574	160.000, 0.505	160.000, 0.395
802	160.200, 0.599	160.200, 0.573	160.200, 0.505	160.200, 0.395
803	160.400, 0.598	160.400, 0.572	160.400, 0.504	160.400, 0.395
804	160.600, 0.597	160.600, 0.571	160.600, 0.503	160.600, 0.395
805	160.800, 0.596	160.800, 0.570	160.800, 0.502	160.800, 0.395
806	161.000, 0.595	161.000, 0.569	161.000, 0.501	161.000, 0.395
807	161.200, 0.594	161.200, 0.568	161.200, 0.501	161.200, 0.395
808	161.400, 0.593	161.400, 0.567	161.400, 0.500	161.400, 0.395
809	161.600, 0.592	161.600, 0.566	161.600, 0.499	161.600, 0.394
810	161.800, 0.591	161.800, 0.566	161.800, 0.499	161.800, 0.394
811	162.000, 0.590	162.000, 0.565	162.000, 0.498	162.000, 0.394
812	162.200, 0.589	162.200, 0.564	162.200, 0.498	162.200, 0.393
813	162.400, 0.588	162.400, 0.564	162.400, 0.497	162.400, 0.393
814	162.600, 0.587	162.600, 0.563	162.600, 0.496	162.600, 0.393
815	162.800, 0.586	162.800, 0.562	162.800, 0.496	162.800, 0.393
816	163.000, 0.586	163.000, 0.562	163.000, 0.495	163.000, 0.392
817	163.200, 0.585	163.200, 0.562	163.200, 0.494	163.200, 0.392
818	163.400, 0.584	163.400, 0.561	163.400, 0.493	163.400, 0.392
819	163.600, 0.583	163.600, 0.561	163.600, 0.492	163.600, 0.391
820	163.800, 0.583	163.800, 0.560	163.800, 0.492	163.800, 0.391
821	164.000, 0.582	164.000, 0.560	164.000, 0.491	164.000, 0.391
822	164.200, 0.582	164.200, 0.559	164.200, 0.490	164.200, 0.391
823	164.400, 0.581	164.400, 0.558	164.400, 0.489	164.400, 0.391
824	164.600, 0.581	164.600, 0.557	164.600, 0.488	164.600, 0.391
825	164.800, 0.580	164.800, 0.556	164.800, 0.487	164.800, 0.391
826	165.000, 0.580	165.000, 0.555	165.000, 0.486	165.000, 0.391
827	165.200, 0.579	165.200, 0.555	165.200, 0.485	165.200, 0.390
828	165.400, 0.579	165.400, 0.554	165.400, 0.485	165.400, 0.390
829	165.600, 0.579	165.600, 0.553	165.600, 0.484	165.600, 0.390
830	165.800, 0.578	165.800, 0.553	165.800, 0.484	165.800, 0.390
831	166.000, 0.577	166.000, 0.552	166.000, 0.483	166.000, 0.390
832	166.200, 0.577	166.200, 0.552	166.200, 0.483	166.200, 0.390
833	166.400, 0.576	166.400, 0.551	166.400, 0.483	166.400, 0.390
834	166.600, 0.575	166.600, 0.551	166.600, 0.482	166.600, 0.390
835	166.800, 0.575	166.800, 0.551	166.800, 0.482	166.800, 0.390
836	167.000, 0.574	167.000, 0.551	167.000, 0.481	167.000, 0.390
837	167.200, 0.573	167.200, 0.550	167.200, 0.481	167.200, 0.390
838	167.400, 0.572	167.400, 0.550	167.400, 0.481	167.400, 0.389
839	167.600, 0.571	167.600, 0.550	167.600, 0.480	167.600, 0.389
840	167.800, 0.570	167.800, 0.550	167.800, 0.479	167.800, 0.389
841	168.000, 0.570	168.000, 0.549	168.000, 0.479	168.000, 0.389
842	168.200, 0.569	168.200, 0.548	168.200, 0.478	168.200, 0.388
843	168.400, 0.569	168.400, 0.548	168.400, 0.477	168.400, 0.388
844	168.600, 0.568	168.600, 0.547	168.600, 0.476	168.600, 0.388
845	168.800, 0.567	168.800, 0.546	168.800, 0.475	168.800, 0.387
846	169.000, 0.567	169.000, 0.546	169.000, 0.474	169.000, 0.387
847	169.200, 0.566	169.200, 0.545	169.200, 0.474	169.200, 0.386
848	169.400, 0.566	169.400, 0.544	169.400, 0.473	169.400, 0.386
849	169.600, 0.565	169.600, 0.543	169.600, 0.472	169.600, 0.386
850	169.800, 0.564	169.800, 0.543	169.800, 0.472	169.800, 0.386
851	170.000, 0.564	170.000, 0.542	170.000, 0.471	170.000, 0.385
852	170.200, 0.563	170.200, 0.541	170.200, 0.471	170.200, 0.385
853	170.400, 0.562	170.400, 0.541	170.400, 0.470	170.400, 0.385
854	170.600, 0.561	170.600, 0.541	170.600, 0.470	170.600, 0.385
855	170.800, 0.561	170.800, 0.540	170.800, 0.470	170.800, 0.385
856	171.000, 0.560	171.000, 0.540	171.000, 0.470	171.000, 0.385
857	171.200, 0.559	171.200, 0.539	171.200, 0.469	171.200, 0.385
858	171.400, 0.559	171.400, 0.539	171.400, 0.469	171.400, 0.385
859	171.600, 0.558	171.600, 0.538	171.600, 0.469	171.600, 0.384
860	171.800, 0.558	171.800, 0.538	171.800, 0.468	171.800, 0.384
861	172.000, 0.557	172.000, 0.537	172.000, 0.468	172.000, 0.384
862	172.200, 0.557	172.200, 0.537	172.200, 0.467	172.200, 0.384
863	172.400, 0.556	172.400, 0.536	172.400, 0.467	172.400, 0.384
864	172.600, 0.556	172.600, 0.536	172.600, 0.466	172.600, 0.384
865	172.800, 0.555	172.800, 0.536	172.800, 0.466	172.800, 0.383
866	173.000, 0.555	173.000, 0.535	173.000, 0.465	173.000, 0.383
867	173.200, 0.554	173.200, 0.535	173.200, 0.465	173.200, 0.383
868	173.400, 0.554	173.400, 0.535	173.400, 0.464	173.400, 0.383
869	173.600, 0.554	173.600, 0.535	173.600, 0.464	173.600, 0.383
870	173.800, 0.553	173.800, 0.534	173.800, 0.463	173.800, 0.383
871	174.000, 0.553	174.000, 0.534	174.000, 0.463	174.000, 0.383
872	174.200, 0.553	174.200, 0.534	174.200, 0.463	174.200, 0.383
873	174.400, 0.553	174.400, 0.534	174.400, 0.462	174.400, 0.382
874	174.600, 0.552	174.600, 0.533	174.600, 0.462	174.600, 0.382
875	174.800, 0.552	174.800, 0.533	174.800, 0.461	174.800, 0.382
876	175.000, 0.551	175.000, 0.532	175.000, 0.461	175.000, 0.382
877	175.200, 0.551	175.200, 0.532	175.200, 0.461	175.200, 0.381
878	175.400, 0.550	175.400, 0.531	175.400, 0.460	175.400, 0.381
879	175.600, 0.550	175.600, 0.531	175.600, 0.459	175.600, 0.381
880	175.800, 0.550	175.800, 0.530	175.800, 0.459	175.800, 0.381
881	176.000, 0.549	176.000, 0.529	176.000, 0.458	176.000, 0.380
882	176.200, 0.549	176.200, 0.529	176.200, 0.457	176.200, 0.380
883	176.400, 0.548	176.400, 0.528	176.400, 0.457	176.400, 0.380
884	176.600, 0.547	176.600, 0.527	176.600, 0.456	176.600, 0.380
885	176.800, 0.546	176.800, 0.527	176.800, 0.455	176.800, 0.380
886	177.000, 0.546	177.000, 0.526	177.000, 0.455	177.000, 0.380
887	177.200, 0.545	177.200, 0.526	177.200, 0.454	177.200, 0.380
888	177.400, 0.545	177.400, 0.525	177.400, 0.454	177.400, 0.380
889	177.600, 0.545	177.600, 0.525	177.600, 0.454	177.600, 0.379
890	177.800, 0.544	177.800, 0.524	177.800, 0.453	177.800, 0.379
891	178.000, 0.544	178.000, 0.524	178.000, 0.453	178.000, 0.379
892	178.200, 0.543	178.200, 0.524	178.200, 0.453	178.200, 0.379
893	178.400, 0.543	178.400, 0.524	178.400, 0.452	178.400, 0.378
894	178.600, 0.542	178.600, 0.524	178.600, 0.451	178.600, 0.378
895	178.800, 0.542	178.800, 0.524	178.800, 0.451	178.800, 0.378
896	179.000, 0.541	179.000, 0.523	179.000, 0.450	179.000, 0.377
897	179.200, 0.541	179.200, 0.523	179.200, 0.450	179.200, 0.377
898	179.400, 0.540	179.400, 0.523	179.400, 0.450	179.400, 0.377
899	179.600, 0.540	179.600, 0.522	179.600, 0.449	179.600, 0.376
900	179.800, 0.539	179.800, 0.522	179.800, 0.449	179.800, 0.376
901	180.000, 0.539	180.000, 0.522	180.000, 0.448	180.000, 0.375
902	180.200, 0.538	180.200, 0.521	180.200, 0.448	180.200, 0.375
903	180.400, 0.538	180.400, 0.521	180.400, 0.447	180.400, 0.375
904	180.600, 0.538	180.600, 0.521	180.600, 0.447	180.600, 0.375
905	180.800, 0.537	180.800, 0.520	180.800, 0.446	180.800, 0.375
906	181.000, 0.537	181.000, 0.520	181.000, 0.446	181.000, 0.375
907	181.200, 0.536	181.200, 0.519	181.200, 0.446	181.200, 0.374
908	181.400, 0.536	181.400, 0.519	181.400, 0.445	181.400, 0.374
909	181.600, 0.536	181.600, 0.518	181.600, 0.445	181.600, 0.374
910	181.800, 0.535	181.800, 0.517	181.800, 0.445	181.800, 0.373
911	182.000, 0.535	182.000, 0.517	182.000, 0.445	182.000, 0.373
912	182.200, 0.535	182.200, 0.516	182.200, 0.444	182.200, 0.373
913	182.400, 0.534	182.400, 0.516	182.400, 0.444	182.400, 0.372
914	182.600, 0.534	182.600, 0.516	182.600, 0.443	182.600, 0.372
915	182.800, 0.533	182.800, 0.515	182.800, 0.443	182.800, 0.372
916	183.000, 0.533	183.000, 0.515	183.000, 0.443	183.000, 0.371
917	183.200, 0.533	183.200, 0.515	183.200, 0.443	183.200, 0.371
918	183.400, 0.532	183.400, 0.515	183.400, 0.442	183.400, 0.371
919	183.600, 0.532	183.600, 0.514	183.600, 0.442	183.600, 0.371
920	183.800, 0.532	183.800, 0.514	183.800, 0.441	183.800, 0.370
921	184.000, 0.532	184.000, 0.514	184.000, 0.441	184.000, 0.370
922	184.200, 0.531	184.200, 0.513	184.200, 0.441	184.200, 0.370
923	184.400, 0.531	184.400, 0.513	184.400, 0.440	184.400, 0.370
924	184.600, 0.531	184.600, 0.513	184.600, 0.440	184.600, 0.370
925	184.800, 0.530	184.800, 0.512	184.800, 0.439	184.800, 0.370
926	185.000, 0.530	185.000, 0.512	185.000, 0.438	185.000, 0.370
927	185.200, 0.529	185.200, 0.511	185.200, 0.438	185.200, 0.370
928	185.400, 0.529	185.400, 0.511	185.400, 0.437	185.400, 0.370
929	185.600, 0.529	185.600, 0.510	185.600, 0.437	185.600, 0.370
930	185.800, 0.528	185.800, 0.509	185.800, 0.436	185.800, 0.370
931	186.000, 0.528	186.000, 0.509	186.000, 0.436	186.000, 0.370
932	186.200, 0.527	186.200, 0.508	186.200, 0.435	186.200, 0.369
933	186.400, 0.526	186.400, 0.508	186.400, 0.435	186.400, 0.369
934	186.600, 0.526	186.600, 0.508	186.600, 0.434	186.600, 0.369
935	186.800, 0.525	186.800, 0.507	186.800, 0.434	186.800, 0.369
936	187.000, 0.525	187.000, 0.507	187.000, 0.434	187.000, 0.368
937	187.200, 0.525	187.200, 0.507	187.200, 0.433	187.200, 0.368
938	187.400, 0.524	187.400, 0.506	187.400, 0.433	187.400, 0.368
939	187.600, 0.524	187.600, 0.506	187.600, 0.433	187.600, 0.367
940	187.800, 0.524	187.800, 0.505	187.800, 0.433	187.800, 0.367
941	188.000, 0.523	188.000, 0.505	188.000, 0.432	188.000, 0.367
942	188.200, 0.523	188.200, 0.504	188.200, 0.432	188.200, 0.366
943	188.400, 0.522	188.400, 0.504	188.400, 0.432	188.400, 0.366
944	188.600, 0.522	188.600, 0.503	188.600, 0.431	188.600, 0.366
945	188.800, 0.522	188.800, 0.503	188.800, 0.431	188.800, 0.366
946	189.000, 0.521	189.000, 0.503	189.000, 0.430	189.000, 0.366
947	189.200, 0.521	189.200, 0.502	189.200, 0.430	189.200, 0.365
948	189.400, 0.520	189.400, 0.502	189.400, 0.429	189.400, 0.365
949	189.600, 0.519	189.600, 0.502	189.600, 0.429	189.600, 0.365
950	189.800, 0.518	189.800, 0.501	189.800, 0.429	189.800, 0.365
951	190.000, 0.518	190.000, 0.501	190.000, 0.428	190.000, 0.365
952	190.200, 0.517	190.200, 0.500	190.200, 0.428	190.200, 0.364
953	190.400, 0.517	190.400, 0.500	190.400, 0.428	190.400, 0.364
954	190.600, 0.517	190.600, 0.499	190.600, 0.427	190.600, 0.364
955	190.800, 0.516	190.800, 0.499	190.800, 0.427	190.800, 0.364
956	191.000, 0.516	191.000, 0.499	191.000, 0.427	191.000, 0.364
957	191.200, 0.516	191.200, 0.498	191.200, 0.427	191.200, 0.363
958	191.400, 0.516	191.400, 0.497	191.400, 0.427	191.400, 0.363
959	191.600, 0.515	191.600, 0.497	191.600, 0.426	191.600, 0.363
960	191.800, 0.515	191.800, 0.496	191.800, 0.426	191.800, 0.363
961	192.000, 0.515	192.000, 0.496	192.000, 0.425	192.000, 0.363
962	192.200, 0.515	192.200, 0.496	192.200, 0.425	192.200, 0.363
963	192.400, 0.515	192.400, 0.496	192.400, 0.424	192.400, 0.362
964	192.600, 0.515	192.600, 0.495	192.600, 0.423	192.600, 0.362
965	192.800, 0.514	192.800, 0.495	192.800, 0.423	192.800, 0.362
966	193.000, 0.514	193.000, 0.495	193.000, 0.422	193.000, 0.362
967	193.200, 0.513	193.200, 0.495	193.200, 0.422	193.200, 0.362
968	193.400, 0.513	193.400, 0.495	193.400, 0.422	193.400, 0.361
969	193.600, 0.512	193.600, 0.495	193.600, 0.421	193.600, 0.361
970	193.800, 0.512	193.800, 0.494	193.800, 0.421	193.800, 0.361
971	194.000, 0.511	194.000, 0.494	194.000, 0.421	194.000, 0.361
972	194.200, 0.511	194.200, 0.494	194.200, 0.420	194.200, 0.360
973	194.400, 0.510	194.400, 0.493	194.400, 0.420	194.400, 0.360
974	194.600, 0.510	194.600, 0.493	194.600, 0.420	194.600, 0.360
975	194.800, 0.510	194.800, 0.493	194.800, 0.420	194.800, 0.360
976	195.000, 0.509	195.000, 0.493	195.000, 0.419	195.000, 0.359
977	195.200, 0.509	195.200, 0.492	195.200, 0.419	195.200, 0.359
978	195.400, 0.509	195.400, 0.492	195.400, 0.419	195.400, 0.359
979	195.600, 0.508	195.600, 0.492	195.600, 0.418	195.600, 0.359
980	195.800, 0.508	195.800, 0.491	195.800, 0.418	195.800, 0.358
981	196.000, 0.508	196.000, 0.491	196.000, 0.417	196.000, 0.358
982	196.200, 0.508	196.200, 0.491	196.200, 0.417	196.200, 0.358
983	196.400, 0.507	196.400, 0.490	196.400, 0.416	196.400, 0.358
984	196.600, 0.507	196.600, 0.490	196.600, 0.416	196.600, 0.358
985	196.800, 0.507	196.800, 0.489	196.800, 0.416	196.800, 0.357
986	197.000, 0.507	197.000, 0.489	197.000, 0.416	197.000, 0.358
987	197.200, 0.506	197.200, 0.488	197.200, 0.416	197.200, 0.358
988	197.400, 0.506	197.400, 0.488	197.400, 0.415	197.400, 0.358
989	197.600, 0.506	197.600, 0.487	197.600, 0.414	197.600, 0.357
990	197.800, 0.505	197.800, 0.487	197.800, 0.414	197.800, 0.357
991	198.000, 0.505	198.000, 0.486	198.000, 0.413	198.000, 0.357
992	198.200, 0.504	198.200, 0.485	198.200, 0.413	198.200, 0.357
993	198.400, 0.504	198.400, 0.485	198.400, 0.412	198.400, 0.357
994	198.600, 0.503	198.600, 0.485	198.600, 0.412	198.600, 0.356
995	198.800, 0.503	198.800, 0.485	198.800, 0.411	198.800, 0.356
996	199.000, 0.503	199.000, 0.485	199.000, 0.411	199.000, 0.356
997	199.200, 0.502	199.200, 0.485	199.200, 0.411	199.200, 0.356
998	199.400, 0.502	199.400, 0.485	199.400, 0.410	199.400, 0.355
999	199.600, 0.502	199.600, 0.485	199.600, 0.410	199.600, 0.355
1000	199.800, 0.501	199.800, 0.484	199.800, 0.410	199.800, 0.354
1001	200.000, 0.501	200.000, 0.484	200.000, 0.410	200.000, 0.354
1002	200.200, 0.501	200.200, 0.484	200.200, 0.410	200.200, 0.353
1003	200.400, 0.501	200.400, 0.483	200.400, 0.410	200.400, 0.353
1004	200.600, 0.500	200.600, 0.483	200.600, 0.410	200.600, 0.353
1005	200.800, 0.500	200.800, 0.483	200.800, 0.410	200.800, 0.353
1006	201.000, 0.500	201.000, 0.482	201.000, 0.409	201.000, 0.353
1007	201.200, 0.500	201.200, 0.482	201.200, 0.409	201.200, 0.353
1008	201.400, 0.499	201.400, 0.481	201.400, 0.408	201.400, 0.353
1009	201.600, 0.499	201.600, 0.480	201.600, 0.408	201.600, 0.353
1010	201.800, 0.499	201.800, 0.480	201.800, 0.407	201.800, 0.352
1011	202.000, 0.498	202.000, 0.479	202.000, 0.407	202.000, 0.352
1012	202.200, 0.498	202.200, 0.479	202.200, 0.407	202.200, 0.352
1013	202.400, 0.498	202.400, 0.478	202.400, 0.406	202.400, 0.352
1014	202.600, 0.497	202.600, 0.478	202.600, 0.406	202.600, 0.352
1015	202.800, 0.497	202.800, 0.478	202.800, 0.406	202.800, 0.352
1016	203.000, 0.497	203.000, 0.478	203.000, 0.405	203.000, 0.352
1017	203.200, 0.497	203.200, 0.478	203.200, 0.405	203.200, 0.351
1018	203.400, 0.497	203.400, 0.477	203.400, 0.404	203.400, 0.351
1019	203.600, 0.496	203.600, 0.477	203.600, 0.404	203.600, 0.351
1020	203.800, 0.496	203.800, 0.477	203.800, 0.403	203.800, 0.351
1021	204.000, 0.496	204.000, 0.477	204.000, 0.403	204.000, 0.350
1022	204.200, 0.495	204.200, 0.477	204.200, 0.402	204.200, 0.350
1023	204.400, 0.495	204.400, 0.476	204.400, 0.402	204.400, 0.350
1024	204.600, 0.495	204.600, 0.476	204.600, 0.402	204.600, 0.350
1025	204.800, 0.494	204.800, 0.476	204.800, 0.402	204.800, 0.350
1026	205.000, 0.494	205.000, 0.476	205.000, 0.401	205.000, 0.349
1027	205.200, 0.494	205.200, 0.475	205.200, 0.401	205.200, 0.349
1028	205.400, 0.494	205.400, 0.475	205.400, 0.401	205.400, 0.349
1029	205.600, 0.493	205.600, 0.474	205.600, 0.400	205.600, 0.348
1030	205.800, 0.493	205.800, 0.473	205.800, 0.400	205.800, 0.348
1031	206.000, 0.492	206.000, 0.473	206.000, 0.400	206.000, 0.348
1032	206.200, 0.492	206.200, 0.472	206.200, 0.400	206.200, 0.348
1033	206.400, 0.491	206.400, 0.472	206.400, 0.400	206.400, 0.347
1034	206.600, 0.491	206.600, 0.472	206.600, 0.399	206.600, 0.347
1035	206.800, 0.491	206.800, 0.471	206.800, 0.399	206.800, 0.347
1036	207.000, 0.491	207.000, 0.471	207.000, 0.399	207.000, 0.347
1037	207.200, 0.490	207.200, 0.471	207.200, 0.398	207.200, 0.347
1038	207.400, 0.490	207.400, 0.471	207.400, 0.398	207.400, 0.347
1039	207.600, 0.490	207.600, 0.471	207.600, 0.397	207.600, 0.347
1040	207.800, 0.489	207.800, 0.471	207.800, 0.397	207.800, 0.347
1041	208.000, 0.489	208.000, 0.470	208.000, 0.396	208.000, 0.347
1042	208.200, 0.489	208.200, 0.470	208.200, 0.396	208.200, 0.347
1043	208.400, 0.488	208.400, 0.470	208.400, 0.396	208.400, 0.347
1044	208.600, 0.488	208.600, 0.470	208.600, 0.396	208.600, 0.347
1045	208.800, 0.488	208.800, 0.470	208.800, 0.395	208.800, 0.347
1046	209.000, 0.487	209.000, 0.470	209.000, 0.395	209.000, 0.347
1047	209.200, 0.487	209.200, 0.469	209.200, 0.395	209.200, 0.347
1048	209.400, 0.486	209.400, 0.468	209.400, 0.395	209.400, 0.347
1049	209.600, 0.486	209.600, 0.468	209.600, 0.395	209.600, 0.347
1050	209.800, 0.485	209.800, 0.468	209.800, 0.395	209.800, 0.346
1051	210.000, 0.485	210.000, 0.467	210.000, 0.395	210.000, 0.346
1052	210.200, 0.485	210.200, 0.467	210.200, 0.394	210.200, 0.346
1053	210.400, 0.485	210.400, 0.466	210.400, 0.394	210.400, 0.346
1054	210.600, 0.485	210.600, 0.466	210.600, 0.394	210.600, 0.346
1055	210.800, 0.485	210.800, 0.465	210.800, 0.394	210.800, 0.346
1056	211.000, 0.485	211.000, 0.465	211.000, 0.394	211.000, 0.346
1057	211.200, 0.485	211.200, 0.465	211.200, 0.393	211.200, 0.346
1058	211.400, 0.485	211.400, 0.465	211.400, 0.393	211.400, 0.345
1059	211.600, 0.485	211.600, 0.464	211.600, 0.393	211.600, 0.345
1060	211.800, 0.485	211.800, 0.464	211.800, 0.392	211.800, 0.345
1061	212.000, 0.485	212.000, 0.464	212.000, 0.392	212.000, 0.345
1062	212.200, 0.485	212.200, 0.464	212.200, 0.391	212.200, 0.344
1063	212.400, 0.485	212.400, 0.464	212.400, 0.391	212.400, 0.344
1064	212.600, 0.485	212.600, 0.464	212.600, 0.390	212.600, 0.343
1065	212.800, 0.484	212.800, 0.464	212.800, 0.390	212.800, 0.343
1066	213.000, 0.484	213.000, 0.464	213.000, 0.390	213.000, 0.342
1067	213.200, 0.483	213.200, 0.464	213.200, 0.389	213.200, 0.342
1068	213.400, 0.483	213.400, 0.464	213.400, 0.389	213.400, 0.341
1069	213.600, 0.482	213.600, 0.463	213.600, 0.389	213.600, 0.341
1070	213.800, 0.482	213.800, 0.463	213.800, 0.388	213.800, 0.340
1071	214.000, 0.481	214.000, 0.463	214.000, 0.388	214.000, 0.340
1072	214.200, 0.481	214.200, 0.462	214.200, 0.388	214.200, 0.340
1073	214.400, 0.480	214.400, 0.462	214.400, 0.387	214.400, 0.340
1074	214.600, 0.480	214.600, 0.461	214.600, 0.387	214.600, 0.340
1075	214.800, 0.479	214.800, 0.461	214.800, 0.387	214.800, 0.340
1076	215.000, 0.479	215.000, 0.461	215.000, 0.387	215.000, 0.340
1077	215.200, 0.478	215.200, 0.460	215.200, 0.387	215.200, 0.340
1078	215.400, 0.478	215.400, 0.460	215.400, 0.386	215.400, 0.340
1079	215.600, 0.478	215.600, 0.460	215.600, 0.386	215.600, 0.340
1080	215.800, 0.478	215.800, 0.459	215.800, 0.386	215.800, 0.341
1081	216.000, 0.478	216.000, 0.459	216.000, 0.385	216.000, 0.341
1082	216.200, 0.478	216.200, 0.458	216.200, 0.385	216.200, 0.341
1083	216.400, 0.477	216.400, 0.458	216.400, 0.385	216.400, 0.341
1084	216.600, 0.477	216.600, 0.457	216.600, 0.385	216.600, 0.340
1085	216.800, 0.477	216.800, 0.457	216.800, 0.384	216.800, 0.340
1086	217.000, 0.477	217.000, 0.457	217.000, 0.384	217.000, 0.340
1087	217.200, 0.477	217.200, 0.456	217.200, 0.384	217.200, 0.340
1088	217.400, 0.476	217.400, 0.456	217.400, 0.384	217.400, 0.340
1089	217.600, 0.476	217.600, 0.456	217.600, 0.383	217.600, 0.339
1090	217.800, 0.476	217.800, 0.456	217.800, 0.383	217.800, 0.339
1091	218.000, 0.475	218.000, 0.455	218.000, 0.383	218.000, 0.339
1092	218.200, 0.475	218.200, 0.455	218.200, 0.383	218.200, 0.339
1093	218.400, 0.474	218.400, 0.455	218.400, 0.383	218.400, 0.339
1094	218.600, 0.474	218.600, 0.455	218.600, 0.382	218.600, 0.338
1095	218.800, 0.473	218.800, 0.455	218.800, 0.382	218.800, 0.338
1096	219.000, 0.473	219.000, 0.454	219.000, 0.382	219.000, 0.338
1097	219.200, 0.473	219.200, 0.454	219.200, 0.382	219.200, 0.337
1098	219.400, 0.472	219.400, 0.454	219.400, 0.381	219.400, 0.337
1099	219.600, 0.472	219.600, 0.454	219.600, 0.381	219.600, 0.337
1100	219.800, 0.472	219.800, 0.454	219.800, 0.381	219.800, 0.337
1101	220.000, 0.471	220.000, 0.453	220.000, 0.380	220.000, 0.337
1102	220.200, 0.471	220.200, 0.453	220.200, 0.380	220.200, 0.336
1103	220.400, 0.471	220.400, 0.453	220.400, 0.380	220.400, 0.336
1104	220.600, 0.471	220.600, 0.453	220.600, 0.380	220.600, 0.336
1105	220.800, 0.471	220.800, 0.453	220.800, 0.379	220.800, 0.336
1106	221.000, 0.471	221.000, 0.452	221.000, 0.379	221.000, 0.336
1107	221.200, 0.471	221.200, 0.452	221.200, 0.379	221.200, 0.336
1108	221.400, 0.471	221.400, 0.452	221.400, 0.379	221.400, 0.335
1109	221.600, 0.470	221.600, 0.452	221.600, 0.379	221.600, 0.335
1110	221.800, 0.470	221.800, 0.451	221.800, 0.378	221.800, 0.335
1111	222.000, 0.470	222.000, 0.451	222.000, 0.378	222.000, 0.335
1112	222.200, 0.469	222.200, 0.451	222.200, 0.378	222.200, 0.335
1113	222.400, 0.469	222.400, 0.450	222.400, 0.378	222.400, 0.335
1114	222.600, 0.469	222.600, 0.450	222.600, 0.377	222.600, 0.334
1115	222.800, 0.468	222.800, 0.450	222.800, 0.377	222.800, 0.334
1116	223.000, 0.468	223.000, 0.450	223.000, 0.377	223.000, 0.334
1117	223.200, 0.468	223.200, 0.449	223.200, 0.376	223.200, 0.334
1118	223.400, 0.467	223.400, 0.449	223.400, 0.376	223.400, 0.334
1119	223.600, 0.467	223.600, 0.449	223.600, 0.375	223.600, 0.333
1120	223.800, 0.467	223.800, 0.449	223.800, 0.375	223.800, 0.333
1121	224.000, 0.467	224.000, 0.449	224.000, 0.375	224.000, 0.333
1122	224.200, 0.467	224.200, 0.449	224.200, 0.375	224.200, 0.333
1123	224.400, 0.467	224.400, 0.449	224.400, 0.375	224.400, 0.333
1124	224.600, 0.466	224.600, 0.449	224.600, 0.374	224.600, 0.333
1125	224.800, 0.466	224.800, 0.449	224.800, 0.374	224.800, 0.333
1126	225.000, 0.466	225.000, 0.448	225.000, 0.374	225.000, 0.333
1127	225.200, 0.466	225.200, 0.448	225.200, 0.374	225.200, 0.333
1128	225.400, 0.465	225.400, 0.448	225.400, 0.373	225.400, 0.333
1129	225.600, 0.465	225.600, 0.448	225.600, 0.373	225.600, 0.333
1130	225.800, 0.465	225.800, 0.447	225.800, 0.372	225.800, 0.333
1131	226.000, 0.465	226.000, 0.447	226.000, 0.372	226.000, 0.333
1132	226.200, 0.464	226.200, 0.447	226.200, 0.372	226.200, 0.333
1133	226.400, 0.464	226.400, 0.446	226.400, 0.371	226.400, 0.333
1134	226.600, 0.464	226.600, 0.446	226.600, 0.371	226.600, 0.332
1135	226.800, 0.464	226.800, 0.446	226.800, 0.371	226.800, 0.332
1136	227.000, 0.463	227.000, 0.445	227.000, 0.371	227.000, 0.332
1137	227.200, 0.463	227.200, 0.445	227.200, 0.371	227.200, 0.332
1138	227.400, 0.463	227.400, 0.445	227.400, 0.370	227.400, 0.331
1139	227.600, 0.463	227.600, 0.444	227.600, 0.370	227.600, 0.331
1140	227.800, 0.463	227.800, 0.444	227.800, 0.370	227.800, 0.331
1141	228.000, 0.463	228.000, 0.444	228.000, 0.370	228.000, 0.331
1142	228.200, 0.463	228.200, 0.444	228.200, 0.370	228.200, 0.331
1143	228.400, 0.463	228.400, 0.443	228.400, 0.369	228.400, 0.331
1144	228.600, 0.462	228.600, 0.443	228.600, 0.369	228.600, 0.330
1145	228.800, 0.462	228.800, 0.443	228.800, 0.369	228.800, 0.330
1146	229.000, 0.462	229.000, 0.443	229.000, 0.369	229.000, 0.330
1147	229.200, 0.461	229.200, 0.443	229.200, 0.368	229.200, 0.330
1148	229.400, 0.461	229.400, 0.443	229.400, 0.368	229.400, 0.330
1149	229.600, 0.461	229.600, 0.443	229.600, 0.368	229.600, 0.330
1150	229.800, 0.460	229.800, 0.442	229.800, 0.368	229.800, 0.330
1151	230.000, 0.460	230.000, 0.442	230.000, 0.367	230.000, 0.330
1152	230.200, 0.460	230.200, 0.442	230.200, 0.367	230.200, 0.330
1153	230.400, 0.459	230.400, 0.441	230.400, 0.367	230.400, 0.330
1154	230.600, 0.459	230.600, 0.441	230.600, 0.366	230.600, 0.329
1155	230.800, 0.459	230.800, 0.440	230.800, 0.366	230.800, 0.329
1156	231.000, 0.458	231.000, 0.440	231.000, 0.366	231.000, 0.329
1157	231.200, 0.458	231.200, 0.439	231.200, 0.366	231.200, 0.329
1158	231.400, 0.458	231.400, 0.439	231.400, 0.365	231.400, 0.329
1159	231.600, 0.458	231.600, 0.439	231.600, 0.365	231.600, 0.328
1160	231.800, 0.458	231.800, 0.439	231.800, 0.365	231.800, 0.328
1161	232.000, 0.457	232.000, 0.439	232.000, 0.365	232.000, 0.328
1162	232.200, 0.457	232.200, 0.439	232.200, 0.364	232.200, 0.327
1163	232.400, 0.457	232.400, 0.439	232.400, 0.364	232.400, 0.327
1164	232.600, 0.457	232.600, 0.439	232.600, 0.364	232.600, 0.327
1165	232.800, 0.457	232.800, 0.439	232.800, 0.363	232.800, 0.327
1166	233.000, 0.457	233.000, 0.439	233.000, 0.363	233.000, 0.326
1167	233.200, 0.457	233.200, 0.439	233.200, 0.363	233.200, 0.326
1168	233.400, 0.457	233.400, 0.439	233.400, 0.363	233.400, 0.326
1169	233.600, 0.456	233.600, 0.439	233.600, 0.363	233.600, 0.326
1170	233.800, 0.456	233.800, 0.438	233.800, 0.362	233.800, 0.326
1171	234.000, 0.456	234.000, 0.438	234.000, 0.362	234.000, 0.326
1172	234.200, 0.455	234.200, 0.438	234.200, 0.362	234.200, 0.325
1173	234.400, 0.455	234.400, 0.438	234.400, 0.362	234.400, 0.325
1174	234.600, 0.455	234.600, 0.437	234.600, 0.361	234.600, 0.325
1175	234.800, 0.455	234.800, 0.437	234.800, 0.361	234.800, 0.325
1176	235.000, 0.455	235.000, 0.437	235.000, 0.361	235.000, 0.325
1177	235.200, 0.454	235.200, 0.436	235.200, 0.360	235.200, 0.325
1178	235.400, 0.454	235.400, 0.436	235.400, 0.360	235.400, 0.326
1179	235.600, 0.454	235.600, 0.436	235.600, 0.360	235.600, 0.325
1180	235.800, 0.453	235.800, 0.435	235.800, 0.360	235.800, 0.325
1181	236.000, 0.453	236.000, 0.435	236.000, 0.359	236.000, 0.325
1182	236.200, 0.453	236.200, 0.434	236.200, 0.359	236.200, 0.325
1183	236.400, 0.453	236.400, 0.434	236.400, 0.359	236.400, 0.325
1184	236.600, 0.453	236.600, 0.434	236.600, 0.358	236.600, 0.325
1185	236.800, 0.453	236.800, 0.433	236.800, 0.358	236.800, 0.325
1186	237.000, 0.453	237.000, 0.433	237.000, 0.358	237.000, 0.325
1187	237.200, 0.452	237.200, 0.433	237.200, 0.358	237.200, 0.324
1188	237.400, 0.452	237.400, 0.433	237.400, 0.358	237.400, 0.324
1189	237.600, 0.452	237.600, 0.433	237.600, 0.358	237.600, 0.324
1190	237.800, 0.451	237.800, 0.433	237.800, 0.358	237.800, 0.323
1191	238.000, 0.451	238.000, 0.433	238.000, 0.358	238.000, 0.323
1192	238.200, 0.451	238.200, 0.433	238.200, 0.358	238.200, 0.323
1193	238.400, 0.451	238.400, 0.433	238.400, 0.358	238.400, 0.322
1194	238.600, 0.451	238.600, 0.432	238.600, 0.357	238.600, 0.322
1195	238.800, 0.451	238.800, 0.432	238.800, 0.357	238.800, 0.322
1196	239.000, 0.451	239.000, 0.432	239.000, 0.356	239.000, 0.322
1197	239.200, 0.451	239.200, 0.432	239.200, 0.356	239.200, 0.322
1198	239.400, 0.451	239.400, 0.432	239.400, 0.356	239.400, 0.322
1199	239.600, 0.451	239.600, 0.431	239.600, 0.356	239.600, 0.322
1200	239.800, 0.451	239.800, 0.431	239.800, 0.356	239.800, 0.322
1201	240.000, 0.451	240.000, 0.431	240.000, 0.355	240.000, 0.321
1202	240.200, 0.451	240.200, 0.431	240.200, 0.355	240.200, 0.321
1203	240.400, 0.451	240.400, 0.431	240.400, 0.355	240.400, 0.321
1204	240.600, 0.451	240.600, 0.431	240.600, 0.355	240.600, 0.321
1205	240.800, 0.451	240.800, 0.431	240.800, 0.354	240.800, 0.321
1206	241.000, 0.451	241.000, 0.431	241.000, 0.354	241.000, 0.321
1207	241.200, 0.450	241.200, 0.431	241.200, 0.354	241.200, 0.321
1208	241.400, 0.450	241.400, 0.430	241.400, 0.354	241.400, 0.321
1209	241.600, 0.449	241.600, 0.430	241.600, 0.354	241.600, 0.320
1210	241.800, 0.449	241.800, 0.430	241.800, 0.354	241.800, 0.320
1211	242.000, 0.448	242.000, 0.430	242.000, 0.353	242.000, 0.320
1212	242.200, 0.448	242.200, 0.429	242.200, 0.353	242.200, 0.320
1213	242.400, 0.447	242.400, 0.429	242.400, 0.353	242.400, 0.320
1214	242.600, 0.447	242.600, 0.429	242.600, 0.353	242.600, 0.320
1215	242.800, 0.447	242.800, 0.429	242.800, 0.352	242.800, 0.320
1216	243.000, 0.447	243.000, 0.428	243.000, 0.352	243.000, 0.320
1217	243.200, 0.447	243.200, 0.428	243.200, 0.352	243.200, 0.320
1218	243.400, 0.446	243.400, 0.428	243.400, 0.352	243.400, 0.320
1219	243.600, 0.446	243.600, 0.428	243.600, 0.352	243.600, 0.320
1220	243.800, 0.446	243.800, 0.427	243.800, 0.352	243.800, 0.320
1221	244.000, 0.446	244.000, 0.427	244.000, 0.351	244.000, 0.320
1222	244.200, 0.446	244.200, 0.427	244.200, 0.351	244.200, 0.320
1223	244.400, 0.446	244.400, 0.426	244.400, 0.351	244.400, 0.320
1224	244.600, 0.445	244.600, 0.426	244.600, 0.351	244.600, 0.320
1225	244.800, 0.445	244.800, 0.426	244.800, 0.351	244.800, 0.320
1226	245.000, 0.445	245.000, 0.426	245.000, 0.351	245.000, 0.319
1227	245.200, 0.444	245.200, 0.425	245.200, 0.351	245.200, 0.319
1228	245.400, 0.444	245.400, 0.425	245.400, 0.350	245.400, 0.319
1229	245.600, 0.444	245.600, 0.425	245.600, 0.350	245.600, 0.318
1230	245.800, 0.444	245.800, 0.425	245.800, 0.350	245.800, 0.318
1231	246.000, 0.443	246.000, 0.425	246.000, 0.349	246.000, 0.318
1232	246.200, 0.443	246.200, 0.425	246.200, 0.349	246.200, 0.318
1233	246.400, 0.443	246.400, 0.425	246.400, 0.349	246.400, 0.317
1234	246.600, 0.443	246.600, 0.424	246.600, 0.349	246.600, 0.317
1235	246.800, 0.443	246.800, 0.424	246.800, 0.348	246.800, 0.317
1236	247.000, 0.443	247.000, 0.424	247.000, 0.348	247.000, 0.317
1237	247.200, 0.443	247.200, 0.424	247.200, 0.348	247.200, 0.317
1238	247.400, 0.443	247.400, 0.423	247.400, 0.347	247.400, 0.317
1239	247.600, 0.442	247.600, 0.423	247.600, 0.347	247.600, 0.317
1240	247.800, 0.442	247.800, 0.423	247.800, 0.347	247.800, 0.317
1241	248.000, 0.442	248.000, 0.423	248.000, 0.347	248.000, 0.317
1242	248.200, 0.442	248.200, 0.423	248.200, 0.347	248.200, 0.316
1243	248.400, 0.442	248.400, 0.422	248.400, 0.347	248.400, 0.316
1244	248.600, 0.441	248.600, 0.422	248.600, 0.347	248.600, 0.316
1245	248.800, 0.441	248.800, 0.422	248.800, 0.347	248.800, 0.316
1246	249.000, 0.441	249.000, 0.422	249.000, 0.347	249.000, 0.316
1247	249.200, 0.440	249.200, 0.422	249.200, 0.347	249.200, 0.315
1248	249.400, 0.440	249.400, 0.421	249.400, 0.347	249.400, 0.315
1249	249.600, 0.440	249.600, 0.421	249.600, 0.348	249.600, 0.315
1250	249.800, 0.440	249.800, 0.421	249.800, 0.347	249.800, 0.315
1251	250.000, 0.440	250.000, 0.420	250.000, 0.347	250.000, 0.314
1252	250.200, 0.440	250.200, 0.420	250.200, 0.347	250.200, 0.314
1253	250.400, 0.440	250.400, 0.420	250.400, 0.347	250.400, 0.314
1254	250.600, 0.440	250.600, 0.419	250.600, 0.347	250.600, 0.314
1255	250.800, 0.439	250.800, 0.419	250.800, 0.347	250.800, 0.313
1256	251.000, 0.439	251.000, 0.419	251.000, 0.347	251.000, 0.313
1257	251.200, 0.439	251.200, 0.419	251.200, 0.346	251.200, 0.313
1258	251.400, 0.439	251.400, 0.418	251.400, 0.346	251.400, 0.314
1259	251.600, 0.439	251.600, 0.418	251.600, 0.345	251.600, 0.314
1260	251.800, 0.439	251.800, 0.418	251.800, 0.345	251.800, 0.314
1261	252.000, 0.439	252.000, 0.418	252.000, 0.345	252.000, 0.314
1262	252.200, 0.439	252.200, 0.418	252.200, 0.345	252.200, 0.314
1263	252.400, 0.439	252.400, 0.418	252.400, 0.344	252.400, 0.314
1264	252.600, 0.439	252.600, 0.418	252.600, 0.344	252.600, 0.314
1265	252.800, 0.439	252.800, 0.418	252.800, 0.344	252.800, 0.315
1266	253.000, 0.438	253.000, 0.419	253.000, 0.344	253.000, 0.315
1267	253.200, 0.438	253.200, 0.418	253.200, 0.343	253.200, 0.314
1268	253.400, 0.438	253.400, 0.418	253.400, 0.343	253.400, 0.314
1269	253.600, 0.438	253.600, 0.418	253.600, 0.343	253.600, 0.314
1270	253.800, 0.438	253.800, 0.418	253.800, 0.343	253.800, 0.314
1271	254.000, 0.437	254.000, 0.418	254.000, 0.342	254.000, 0.314
1272	254.200, 0.437	254.200, 0.418	254.200, 0.342	254.200, 0.313
1273	254.400, 0.437	254.400, 0.418	254.400, 0.342	254.400, 0.313
1274	254.600, 0.437	254.600, 0.418	254.600, 0.342	254.600, 0.313
1275	254.800, 0.437	254.800, 0.417	254.800, 0.341	254.800, 0.313
1276	255.000, 0.437	255.000, 0.417	255.000, 0.341	255.000, 0.313
1277	255.200, 0.437	255.200, 0.417	255.200, 0.341	255.200, 0.313
1278	255.400, 0.437	255.400, 0.416	255.400, 0.341	255.400, 0.313
1279	255.600, 0.437	255.600, 0.416	255.600, 0.341	255.600, 0.313
1280	255.800, 0.437	255.800, 0.415	255.800, 0.340	255.800, 0.313
1281	256.000, 0.437	256.000, 0.415	256.000, 0.340	256.000, 0.313
1282	256.200, 0.437	256.200, 0.414	256.200, 0.340	256.200, 0.312
1283	256.400, 0.437	256.400, 0.414	256.400, 0.339	256.400, 0.312
1284	256.600, 0.436	256.600, 0.414	256.600, 0.339	256.600, 0.312
1285	256.800, 0.436	256.800, 0.414	256.800, 0.338	256.800, 0.312
1286	257.000, 0.436	257.000, 0.413	257.000, 0.338	257.000, 0.312
1287	257.200, 0.435	257.200, 0.413	257.200, 0.338	257.200, 0.312
1288	257.400, 0.435	257.400, 0.413	257.400, 0.338	257.400, 0.311
1289	257.600, 0.434	257.600, 0.413	257.600, 0.338	257.600, 0.311
1290	257.800, 0.434	257.800, 0.414	257.800, 0.338	257.800, 0.311
1291	258.000, 0.433	258.000, 0.414	258.000, 0.338	258.000, 0.311
1292	258.200, 0.433	258.200, 0.414	258.200, 0.338	258.200, 0.311
1293	258.400, 0.433	258.400, 0.413	258.400, 0.338	258.400, 0.311
1294	258.600, 0.432	258.600, 0.413	258.600, 0.338	258.600, 0.311
1295	258.800, 0.432	258.800, 0.413	258.800, 0.338	258.800, 0.311
1296	259.000, 0.432	259.000, 0.413	259.000, 0.338	259.000, 0.311
1297	259.200, 0.432	259.200, 0.413	259.200, 0.338	259.200, 0.310
1298	259.400, 0.432	259.400, 0.412	259.400, 0.338	259.400, 0.310
1299	259.600, 0.432	259.600, 0.412	259.600, 0.338	259.600, 0.310
1300	259.800, 0.431	259.800, 0.412	259.800, 0.338	259.800, 0.310
1301	260.000, 0.431	260.000, 0.412	260.000, 0.337	260.000, 0.310
1302	260.200, 0.431	260.200, 0.411	260.200, 0.337	260.200, 0.311
1303	260.400, 0.431	260.400, 0.411	260.400, 0.336	260.400, 0.311
1304	260.600, 0.431	260.600, 0.411	260.600, 0.336	260.600, 0.311
1305	260.800, 0.431	260.800, 0.411	260.800, 0.335	260.800, 0.311
1306	261.000, 0.431	261.000, 0.411	261.000, 0.335	261.000, 0.311
1307	261.200, 0.431	261.200, 0.411	261.200, 0.335	261.200, 0.311
1308	261.400, 0.431	261.400, 0.411	261.400, 0.335	261.400, 0.311
1309	261.600, 0.431	261.600, 0.411	261.600, 0.335	261.600, 0.311
1310	261.800, 0.430	261.800, 0.411	261.800, 0.335	261.800, 0.311
1311	262.000, 0.430	262.000, 0.411	262.000, 0.335	262.000, 0.311
1312	262.200, 0.430	262.200, 0.411	262.200, 0.335	262.200, 0.311
1313	262.400, 0.430	262.400, 0.411	262.400, 0.335	262.400, 0.310
1314	262.600, 0.430	262.600, 0.410	262.600, 0.335	262.600, 0.310
1315	262.800, 0.430	262.800, 0.410	262.800, 0.335	262.800, 0.310
1316	263.000, 0.429	263.000, 0.410	263.000, 0.335	263.000, 0.310
1317	263.200, 0.429	263.200, 0.409	263.200, 0.335	263.200, 0.310
1318	263.400, 0.429	263.400, 0.409	263.400, 0.335	263.400, 0.310
1319	263.600, 0.429	263.600, 0.409	263.600, 0.335	263.600, 0.309
1320	263.800, 0.428	263.800, 0.409	263.800, 0.334	263.800, 0.309
1321	264.000, 0.428	264.000, 0.409	264.000, 0.334	264.000, 0.309
1322	264.200, 0.428	264.200, 0.408	264.200, 0.334	264.200, 0.309
1323	264.400, 0.427	264.400, 0.408	264.400, 0.333	264.400, 0.308
1324	264.600, 0.427	264.600, 0.408	264.600, 0.333	264.600, 0.308
1325	264.800, 0.427	264.800, 0.407	264.800, 0.333	264.800, 0.308
1326	265.000, 0.427	265.000, 0.407	265.000, 0.333	265.000, 0.307
1327	265.200, 0.427	265.200, 0.407	265.200, 0.332	265.200, 0.307
1328	265.400, 0.427	265.400, 0.407	265.400, 0.332	265.400, 0.307
1329	265.600, 0.427	265.600, 0.407	265.600, 0.332	265.600, 0.307
1330	265.800, 0.426	265.800, 0.407	265.800, 0.332	265.800, 0.307
1331	266.000, 0.426	266.000, 0.407	266.000, 0.332	266.000, 0.307
1332	266.200, 0.427	266.200, 0.407	266.200, 0.332	266.200, 0.307
1333	266.400, 0.427	266.400, 0.407	266.400, 0.331	266.400, 0.307
1334	266.600, 0.426	266.600, 0.406	266.600, 0.331	266.600, 0.307
1335	266.800, 0.426	266.800, 0.406	266.800, 0.330	266.800, 0.307
1336	267.000, 0.426	267.000, 0.406	267.000, 0.330	267.000, 0.307
1337	267.200, 0.426	267.200, 0.406	267.200, 0.330	267.200, 0.307
1338	267.400, 0.426	267.400, 0.406	267.400, 0.330	267.400, 0.307
1339	267.600, 0.426	267.600, 0.406	267.600, 0.329	267.600, 0.306
1340	267.800, 0.425	267.800, 0.405	267.800, 0.329	267.800, 0.306
1341	268.000, 0.425	268.000, 0.405	268.000, 0.329	268.000, 0.306
1342	268.200, 0.425	268.200, 0.405	268.200, 0.329	268.200, 0.305
1343	268.400, 0.425	268.400, 0.405	268.400, 0.329	268.400, 0.305
1344	268.600, 0.424	268.600, 0.404	268.600, 0.329	268.600, 0.305
1345	268.800, 0.424	268.800, 0.404	268.800, 0.329	268.800, 0.305
1346	269.000, 0.424	269.000, 0.404	269.000, 0.329	269.000, 0.304
1347	269.200, 0.424	269.200, 0.404	269.200, 0.330	269.200, 0.304
1348	269.400, 0.424	269.400, 0.404	269.400, 0.330	269.400, 0.304
1349	269.600, 0.424	269.600, 0.404	269.600, 0.330	269.600, 0.304
1350	269.800, 0.424	269.800, 0.404	269.800, 0.330	269.800, 0.304
1351	,	,	,	,
1352	,	,	,	,
1353	,	,	,	,
1354	,	,	,	,
1355	,	,	,	,
1356	,	,	,	,
1357	,	,	,	,
1358	,	,	,	,
1359	,	,	,	,
1360	,	,	,	,
1361	,	,	,	,
1362	,	,	,	,
1363	,	,	,	,
1364	,	,	,	,
1365	,	,	,	,
1366	,	,	,	,
1367	,	,	,	,
1368	,	,	,	,
1369	,	,	,	,
1370	,	,	,	,
1371	,	,	,	,
1372	,	,	,	,
1373	,	,	,	,
1374	,	,	,	,
1375	,	,	,	,
1376	,	,	,	,
1377	,	,	,	,
1378	,	,	,	,
1379	,	,	,	,
1380	,	,	,	,
1381	,	,	,	,
1382	,	,	,	,
1383	,	,	,	,
1384	,	,	,	,
1385	,	,	,	,
1386	,	,	,	,
1387	,	,	,	,
1388	,	,	,	,
1389	,	,	,	,
1390	,	,	,	,
1391	,	,	,	,
1392	,	,	,	,
1393	,	,	,	,
1394	,	,	,	,
1395	,	,	,	,
1396	,	,	,	,
1397	,	,	,	,
1398	,	,	,	,
1399	,	,	,	,
1400	,	,	,	,
1401	,	,	,	,
1402	,	,	,	,
1403	,	,	,	,
1404	,	,	,	,
1405	,	,	,	,
1406	,	,	,	,
1407	,	,	,	,
1408	,	,	,	,
1409	,	,	,	,
1410	,	,	,	,
1411	,	,	,	,
1412	,	,	,	,
1413	,	,	,	,
1414	,	,	,	,
1415	,	,	,	,
1416	,	,	,	,
1417	,	,	,	,
1418	,	,	,	,
1419	,	,	,	,
1420	,	,	,	,
1421	,	,	,	,
1422	,	,	,	,
1423	,	,	,	,
1424	,	,	,	,
1425	,	,	,	,
1426	,	,	,	,
1427	,	,	,	,
1428	,	,	,	,
1429	,	,	,	,
1430	,	,	,	,
1431	,	,	,	,
1432	,	,	,	,
1433	,	,	,	,
1434	,	,	,	,
1435	,	,	,	,
1436	,	,	,	,
1437	,	,	,	,
1438	,	,	,	,
1439	,	,	,	,
1440	,	,	,	,
1441	,	,	,	,
1442	,	,	,	,
1443	,	,	,	,
1444	,	,	,	,
1445	,	,	,	,
1446	,	,	,	,
1447	,	,	,	,
1448	,	,	,	,
1449	,	,	,	,
1450	,	,	,	,
1451	,	,	,	,
1452	,	,	,	,
1453	,	,	,	,
1454	,	,	,	,
1455	,	,	,	,
1456	,	,	,	,
1457	,	,	,	,
1458	,	,	,	,
1459	,	,	,	,
1460	,	,	,	,
1461	,	,	,	,
1462	,	,	,	,
1463	,	,	,	,
1464	,	,	,	,
1465	,	,	,	,
1466	,	,	,	,
1467	,	,	,	,
1468	,	,	,	,
1469	,	,	,	,
1470	,	,	,	,
1471	,	,	,	,
1472	,	,	,	,
1473	,	,	,	,
1474	,	,	,	,
1475	,	,	,	,
1476	,	,	,	,
1477	,	,	,	,
1478	,	,	,	,
1479	,	,	,	,
1480	,	,	,	,
1481	,	,	,	,
1482	,	,	,	,
1483	,	,	,	,
1484	,	,	,	,
1485	,	,	,	,
1486	,	,	,	,
1487	,	,	,	,
1488	,	,	,	,
1489	,	,	,	,
1490	,	,	,	,
1491	,	,	,	,
1492	,	,	,	,
1493	,	,	,	,
1494	,	,	,	,
1495	,	,	,	,
1496	,	,	,	,
1497	,	,	,	,
1498	,	,	,	,
1499	,	,	,	,
1500	,	,	,	,
1501	,	,	,	,
1502	,	,	,	,
1503	,	,	,	,
1504	,	,	,	,
1505	,	,	,	,
1506	,	,	,	,
1507	,	,	,	,
1508	,	,	,	,
1509	,	,	,	,
1510	,	,	,	,
1511	,	,	,	,
1512	,	,	,	,
1513	,	,	,	,
1514	,	,	,	,
1515	,	,	,	,
1516	,	,	,	,
1517	,	,	,	,
1518	,	,	,	,
1519	,	,	,	,
1520	,	,	,	,
1521	,	,	,	,
1522	,	,	,	,
1523	,	,	,	,
1524	,	,	,	,
1525	,	,	,	,
1526	,	,	,	,
1527	,	,	,	,
1528	,	,	,	,
1529	,	,	,	,
1530	,	,	,	,
1531	,	,	,	,
1532	,	,	,	,
1533	,	,	,	,
1534	,	,	,	,
1535	,	,	,	,
1536	,	,	,	,
1537	,	,	,	,
1538	,	,	,	,
1539	,	,	,	,
1540	,	,	,	,
1541	,	,	,	,
1542	,	,	,	,
1543	,	,	,	,
1544	,	,	,	,
1545	,	,	,	,
1546	,	,	,	,
1547	,	,	,	,
1548	,	,	,	,
1549	,	,	,	,
1550	,	,	,	,
1551	,	,	,	,
1552	,	,	,	,
1553	,	,	,	,
1554	,	,	,	,
1555	,	,	,	,
1556	,	,	,	,
1557	,	,	,	,
1558	,	,	,	,
1559	,	,	,	,
1560	,	,	,	,
1561	,	,	,	,
1562	,	,	,	,
1563	,	,	,	,
1564	,	,	,	,
1565	,	,	,	,
1566	,	,	,	,
1567	,	,	,	,
1568	,	,	,	,
1569	,	,	,	,
1570	,	,	,	,
1571	,	,	,	,
1572	,	,	,	,
1573	,	,	,	,
1574	,	,	,	,
1575	,	,	,	,
1576	,	,	,	,
1577	,	,	,	,
1578	,	,	,	,
1579	,	,	,	,
1580	,	,	,	,
1581	,	,	,	,
1582	,	,	,	,
1583	,	,	,	,
1584	,	,	,	,
1585	,	,	,	,
1586	,	,	,	,
1587	,	,	,	,
1588	,	,	,	,
1589	,	,	,	,
1590	,	,	,	,
1591	,	,	,	,
1592	,	,	,	,
1593	,	,	,	,
1594	,	,	,	,
1595	,	,	,	,
1596	,	,	,	,
1597	,	,	,	,
1598	,	,	,	,
1599	,	,	,	,
1600	,	,	,	,
1601	,	,	,	,
1602	,	,	,	,
1603	,	,	,	,
1604	,	,	,	,
1605	,	,	,	,
1606	,	,	,	,
1607	,	,	,	,
1608	,	,	,	,
1609	,	,	,	,
1610	,	,	,	,
1611	,	,	,	,
1612	,	,	,	,
1613	,	,	,	,
1614	,	,	,	,
1615	,	,	,	,
1616	,	,	,	,
1617	,	,	,	,
1618	,	,	,	,
1619	,	,	,	,
1620	,	,	,	,
1621	,	,	,	,
1622	,	,	,	,
1623	,	,	,	,
1624	,	,	,	,
1625	,	,	,	,
1626	,	,	,	,
1627	,	,	,	,
1628	,	,	,	,
1629	,	,	,	,
1630	,	,	,	,
1631	,	,	,	,
1632	,	,	,	,
1633	,	,	,	,
1634	,	,	,	,
1635	,	,	,	,
1636	,	,	,	,
1637	,	,	,	,
1638	,	,	,	,
1639	,	,	,	,
1640	,	,	,	,
1641	,	,	,	,
1642	,	,	,	,
1643	,	,	,	,
1644	,	,	,	,
1645	,	,	,	,
1646	,	,	,	,
1647	,	,	,	,
1648	,	,	,	,
1649	,	,	,	,
1650	,	,	,	,
1651	,	,	,	,
1652	,	,	,	,
1653	,	,	,	,
1654	,	,	,	,
1655	,	,	,	,
1656	,	,	,	,
1657	,	,	,	,
1658	,	,	,	,
1659	,	,	,	,
1660	,	,	,	,
1661	,	,	,	,
1662	,	,	,	,
1663	,	,	,	,
1664	,	,	,	,
1665	,	,	,	,
1666	,	,	,	,
1667	,	,	,	,
1668	,	,	,	,
1669	,	,	,	,
1670	,	,	,	,
1671	,	,	,	,
1672	,	,	,	,
1673	,	,	,	,
1674	,	,	,	,
1675	,	,	,	,
1676	,	,	,	,
1677	,	,	,	,
1678	,	,	,	,
1679	,	,	,	,
1680	,	,	,	,
1681	,	,	,	,
1682	,	,	,	,
1683	,	,	,	,
1684	,	,	,	,
1685	,	,	,	,
1686	,	,	,	,
1687	,	,	,	,
1688	,	,	,	,
1689	,	,	,	,
1690	,	,	,	,
1691	,	,	,	,
1692	,	,	,	,
1693	,	,	,	,
1694	,	,	,	,
1695	,	,	,	,
1696	,	,	,	,
1697	,	,	,	,
1698	,	,	,	,
1699	,	,	,	,
1700	,	,	,	,
1701	,	,	,	,
1702	,	,	,	,
1703	,	,	,	,
1704	,	,	,	,
1705	,	,	,	,
1706	,	,	,	,
1707	,	,	,	,
1708	,	,	,	,
1709	,	,	,	,
1710	,	,	,	,
1711	,	,	,	,
1712	,	,	,	,
1713	,	,	,	,
1714	,	,	,	,
1715	,	,	,	,
1716	,	,	,	,
1717	,	,	,	,
1718	,	,	,	,
1719	,	,	,	,
1720	,	,	,	,
1721	,	,	,	,
1722	,	,	,	,
1723	,	,	,	,
1724	,	,	,	,
1725	,	,	,	,
1726	,	,	,	,
1727	,	,	,	,
1728	,	,	,	,
1729	,	,	,	,
1730	,	,	,	,
1731	,	,	,	,
1732	,	,	,	,
1733	,	,	,	,
1734	,	,	,	,
1735	,	,	,	,
1736	,	,	,	,
1737	,	,	,	,
1738	,	,	,	,
1739	,	,	,	,
1740	,	,	,	,
1741	,	,	,	,
1742	,	,	,	,
1743	,	,	,	,
1744	,	,	,	,
1745	,	,	,	,
1746	,	,	,	,
1747	,	,	,	,
1748	,	,	,	,
1749	,	,	,	,
1750	,	,	,	,
1751	,	,	,	,
1752	,	,	,	,
1753	,	,	,	,
1754	,	,	,	,
1755	,	,	,	,
1756	,	,	,	,
1757	,	,	,	,
1758	,	,	,	,
1759	,	,	,	,
1760	,	,	,	,
1761	,	,	,	,
1762	,	,	,	,
1763	,	,	,	,
1764	,	,	,	,
1765	,	,	,	,
1766	,	,	,	,
1767	,	,	,	,
1768	,	,	,	,
1769	,	,	,	,
1770	,	,	,	,
1771	,	,	,	,
1772	,	,	,	,
1773	,	,	,	,
1774	,	,	,	,
1775	,	,	,	,
1776	,	,	,	,
1777	,	,	,	,
1778	,	,	,	,
1779	,	,	,	,
1780	,	,	,	,
1781	,	,	,	,
1782	,	,	,	,
1783	,	,	,	,
1784	,	,	,	,
1785	,	,	,	,
1786	,	,	,	,
1787	,	,	,	,
1788	,	,	,	,
1789	,	,	,	,
1790	,	,	,	,
1791	,	,	,	,
1792	,	,	,	,
1793	,	,	,	,
1794	,	,	,	,
1795	,	,	,	,
1796	,	,	,	,
1797	,	,	,	,
1798	,	,	,	,
1799	,	,	,	,
1800	,	,	,	,
1801	,	,	,	,
1802	,	,	,	,
1803	,	,	,	,
1804	,	,	,	,
1805	,	,	,	,
1806	,	,	,	,
1807	,	,	,	,
1808	,	,	,	,
1809	,	,	,	,
1810	,	,	,	,
1811	,	,	,	,
1812	,	,	,	,
1813	,	,	,	,
1814	,	,	,	,
1815	,	,	,	,
1816	,	,	,	,
1817	,	,	,	,
1818	,	,	,	,
1819	,	,	,	,
1820	,	,	,	,
1821	,	,	,	,
1822	,	,	,	,
1823	,	,	,	,
1824	,	,	,	,
1825	,	,	,	,
1826	,	,	,	,
1827	,	,	,	,
1828	,	,	,	,
1829	,	,	,	,
1830	,	,	,	,
1831	,	,	,	,
1832	,	,	,	,
1833	,	,	,	,
1834	,	,	,	,
1835	,	,	,	,
1836	,	,	,	,
1837	,	,	,	,
1838	,	,	,	,
1839	,	,	,	,
1840	,	,	,	,
1841	,	,	,	,
1842	,	,	,	,
1843	,	,	,	,
1844	,	,	,	,
1845	,	,	,	,
1846	,	,	,	,
1847	,	,	,	,
1848	,	,	,	,
1849	,	,	,	,
1850	,	,	,	,
1851	,	,	,	,
1852	,	,	,	,
1853	,	,	,	,
1854	,	,	,	,
1855	,	,	,	,
1856	,	,	,	,
1857	,	,	,	,
1858	,	,	,	,
1859	,	,	,	,
1860	,	,	,	,
1861	,	,	,	,
1862	,	,	,	,
1863	,	,	,	,
1864	,	,	,	,
1865	,	,	,	,
1866	,	,	,	,
1867	,	,	,	,
1868	,	,	,	,
1869	,	,	,	,
1870	,	,	,	,
1871	,	,	,	,
1872	,	,	,	,
1873	,	,	,	,
1874	,	,	,	,
1875	,	,	,	,
1876	,	,	,	,
1877	,	,	,	,
1878	,	,	,	,
1879	,	,	,	,
1880	,	,	,	,
1881	,	,	,	,
1882	,	,	,	,
1883	,	,	,	,
1884	,	,	,	,
1885	,	,	,	,
1886	,	,	,	,
1887	,	,	,	,
1888	,	,	,	,
1889	,	,	,	,
1890	,	,	,	,
1891	,	,	,	,
1892	,	,	,	,
1893	,	,	,	,
1894	,	,	,	,
1895	,	,	,	,
1896	,	,	,	,
1897	,	,	,	,
1898	,	,	,	,
1899	,	,	,	,
1900	,	,	,	,
1901	,	,	,	,
1902	,	,	,	,
1903	,	,	,	,
1904	,	,	,	,
1905	,	,	,	,
1906	,	,	,	,
1907	,	,	,	,
1908	,	,	,	,
1909	,	,	,	,
1910	,	,	,	,
1911	,	,	,	,
1912	,	,	,	,
1913	,	,	,	,
1914	,	,	,	,
1915	,	,	,	,
1916	,	,	,	,
1917	,	,	,	,
1918	,	,	,	,
1919	,	,	,	,
1920	,	,	,	,
1921	,	,	,	,
1922	,	,	,	,
1923	,	,	,	,
1924	,	,	,	,
1925	,	,	,	,
1926	,	,	,	,
1927	,	,	,	,
1928	,	,	,	,
1929	,	,	,	,
1930	,	,	,	,
1931	,	,	,	,
1932	,	,	,	,
1933	,	,	,	,
1934	,	,	,	,
1935	,	,	,	,
1936	,	,	,	,
1937	,	,	,	,
1938	,	,	,	,
1939	,	,	,	,
1940	,	,	,	,
1941	,	,	,	,
1942	,	,	,	,
1943	,	,	,	,
1944	,	,	,	,
1945	,	,	,	,
1946	,	,	,	,
1947	,	,	,	,
1948	,	,	,	,
1949	,	,	,	,
1950	,	,	,	,
1951	,	,	,	,
1952	,	,	,	,
1953	,	,	,	,
1954	,	,	,	,
1955	,	,	,	,
1956	,	,	,	,
1957	,	,	,	,
1958	,	,	,	,
1959	,	,	,	,
1960	,	,	,	,
1961	,	,	,	,
1962	,	,	,	,
1963	,	,	,	,
1964	,	,	,	,
1965	,	,	,	,
1966	,	,	,	,
1967	,	,	,	,
1968	,	,	,	,
1969	,	,	,	,
1970	,	,	,	,
1971	,	,	,	,
1972	,	,	,	,
1973	,	,	,	,
1974	,	,	,	,
1975	,	,	,	,
1976	,	,	,	,
1977	,	,	,	,
1978	,	,	,	,
1979	,	,	,	,
1980	,	,	,	,
1981	,	,	,	,
1982	,	,	,	,
1983	,	,	,	,
1984	,	,	,	,
1985	,	,	,	,
1986	,	,	,	,
1987	,	,	,	,
1988	,	,	,	,
1989	,	,	,	,
1990	,	,	,	,
1991	,	,	,	,
1992	,	,	,	,
1993	,	,	,	,
1994	,	,	,	,
1995	,	,	,	,
1996	,	,	,	,
1997	,	,	,	,
1998	,	,	,	,
1999	,	,	,	,
[truncated: 13,001 more rows]

## Sheet: Fig1_supp3_panelB_rep3
	parS20 ParB +CDP	parS20 ParB	parS20 ParB +CMP	parS20 ParB +CTP
1	0.000, 0.008	0.000, 0.006	0.000, 0.020	0.000, 0.013
2	0.200, 0.008	0.200, 0.006	0.200, 0.019	0.200, 0.012
3	0.400, 0.008	0.400, 0.006	0.400, 0.018	0.400, 0.011
4	0.600, 0.007	0.600, 0.006	0.600, 0.016	0.600, 0.011
5	0.800, 0.007	0.800, 0.006	0.800, 0.015	0.800, 0.010
6	1.000, 0.007	1.000, 0.006	1.000, 0.014	1.000, 0.009
7	1.200, 0.006	1.200, 0.006	1.200, 0.013	1.200, 0.008
8	1.400, 0.006	1.400, 0.005	1.400, 0.012	1.400, 0.007
9	1.600, 0.005	1.600, 0.005	1.600, 0.011	1.600, 0.007
10	1.800, 0.005	1.800, 0.004	1.800, 0.010	1.800, 0.006
11	2.000, 0.005	2.000, 0.003	2.000, 0.010	2.000, 0.005
12	2.200, 0.005	2.200, 0.003	2.200, 0.010	2.200, 0.004
13	2.400, 0.005	2.400, 0.002	2.400, 0.009	2.400, 0.004
14	2.600, 0.004	2.600, 0.001	2.600, 0.009	2.600, 0.003
15	2.800, 0.004	2.800, 0.000	2.800, 0.009	2.800, 0.003
16	3.000, 0.004	3.000, -0.000	3.000, 0.009	3.000, 0.002
17	3.200, 0.003	3.200, -0.001	3.200, 0.008	3.200, 0.002
18	3.400, 0.003	3.400, -0.002	3.400, 0.008	3.400, 0.001
19	3.600, 0.003	3.600, -0.002	3.600, 0.007	3.600, 0.001
20	3.800, 0.002	3.800, -0.003	3.800, 0.007	3.800, 0.001
21	4.000, 0.002	4.000, -0.003	4.000, 0.006	4.000, 0.001
22	4.200, 0.002	4.200, -0.004	4.200, 0.006	4.200, 0.001
23	4.400, 0.002	4.400, -0.004	4.400, 0.005	4.400, 0.001
24	4.600, 0.001	4.600, -0.004	4.600, 0.005	4.600, 0.001
25	4.800, 0.001	4.800, -0.004	4.800, 0.004	4.800, 0.001
26	5.000, 0.001	5.000, -0.005	5.000, 0.004	5.000, 0.001
27	5.200, 0.001	5.200, -0.005	5.200, 0.003	5.200, 0.001
28	5.400, 0.001	5.400, -0.005	5.400, 0.003	5.400, 0.000
29	5.600, 0.001	5.600, -0.005	5.600, 0.002	5.600, 0.000
30	5.800, 0.001	5.800, -0.005	5.800, 0.002	5.800, -0.000
31	6.000, 0.001	6.000, -0.005	6.000, 0.002	6.000, -0.001
32	6.200, 0.001	6.200, -0.004	6.200, 0.002	6.200, -0.001
33	6.400, 0.001	6.400, -0.004	6.400, 0.002	6.400, -0.002
34	6.600, 0.001	6.600, -0.004	6.600, 0.002	6.600, -0.002
35	6.800, 0.001	6.800, -0.004	6.800, 0.002	6.800, -0.002
36	7.000, 0.001	7.000, -0.004	7.000, 0.002	7.000, -0.003
37	7.200, 0.001	7.200, -0.003	7.200, 0.002	7.200, -0.003
38	7.400, 0.001	7.400, -0.003	7.400, 0.001	7.400, -0.003
39	7.600, 0.002	7.600, -0.003	7.600, 0.001	7.600, -0.003
40	7.800, 0.002	7.800, -0.003	7.800, 0.001	7.800, -0.003
41	8.000, 0.002	8.000, -0.003	8.000, 0.001	8.000, -0.003
42	8.200, 0.002	8.200, -0.003	8.200, 0.001	8.200, -0.003
43	8.400, 0.002	8.400, -0.003	8.400, 0.000	8.400, -0.002
44	8.600, 0.002	8.600, -0.003	8.600, 0.000	8.600, -0.002
45	8.800, 0.002	8.800, -0.003	8.800, -0.000	8.800, -0.002
46	9.000, 0.002	9.000, -0.003	9.000, -0.000	9.000, -0.002
47	9.200, 0.001	9.200, -0.003	9.200, -0.000	9.200, -0.002
48	9.400, 0.001	9.400, -0.004	9.400, -0.001	9.400, -0.002
49	9.600, 0.001	9.600, -0.004	9.600, -0.001	9.600, -0.002
50	9.800, 0.001	9.800, -0.004	9.800, -0.001	9.800, -0.002
51	10.000, 0.001	10.000, -0.004	10.000, -0.001	10.000, -0.002
52	10.200, 0.001	10.200, -0.005	10.200, -0.001	10.200, -0.001
53	10.400, 0.001	10.400, -0.005	10.400, -0.000	10.400, -0.001
54	10.600, 0.002	10.600, -0.006	10.600, -0.000	10.600, -0.001
55	10.800, 0.002	10.800, -0.006	10.800, -0.000	10.800, -0.001
56	11.000, 0.002	11.000, -0.007	11.000, -0.001	11.000, -0.001
57	11.200, 0.002	11.200, -0.007	11.200, -0.001	11.200, -0.001
58	11.400, 0.002	11.400, -0.007	11.400, -0.001	11.400, -0.001
59	11.600, 0.002	11.600, -0.007	11.600, -0.001	11.600, -0.001
60	11.800, 0.002	11.800, -0.007	11.800, -0.001	11.800, -0.002
61	12.000, 0.001	12.000, -0.007	12.000, -0.001	12.000, -0.002
62	12.200, 0.001	12.200, -0.007	12.200, -0.001	12.200, -0.002
63	12.400, 0.001	12.400, -0.007	12.400, -0.001	12.400, -0.002
64	12.600, 0.000	12.600, -0.006	12.600, -0.000	12.600, -0.002
65	12.800, 0.000	12.800, -0.006	12.800, -0.000	12.800, -0.002
66	13.000, 0.000	13.000, -0.006	13.000, -0.000	13.000, -0.002
67	13.200, -0.000	13.200, -0.006	13.200, -0.000	13.200, -0.002
68	13.400, -0.000	13.400, -0.005	13.400, 0.000	13.400, -0.002
69	13.600, -0.000	13.600, -0.005	13.600, 0.000	13.600, -0.001
70	13.800, -0.000	13.800, -0.004	13.800, 0.000	13.800, -0.001
71	14.000, -0.001	14.000, -0.004	14.000, 0.000	14.000, -0.001
72	14.200, -0.001	14.200, -0.004	14.200, -0.000	14.200, -0.001
73	14.400, -0.001	14.400, -0.004	14.400, -0.000	14.400, -0.002
74	14.600, -0.001	14.600, -0.004	14.600, -0.000	14.600, -0.002
75	14.800, -0.001	14.800, -0.004	14.800, -0.000	14.800, -0.002
76	15.000, -0.001	15.000, -0.004	15.000, -0.001	15.000, -0.002
77	15.200, -0.000	15.200, -0.004	15.200, -0.001	15.200, -0.002
78	15.400, -0.000	15.400, -0.004	15.400, -0.001	15.400, -0.002
79	15.600, -0.000	15.600, -0.004	15.600, -0.001	15.600, -0.003
80	15.800, -0.001	15.800, -0.004	15.800, -0.001	15.800, -0.003
81	16.000, -0.001	16.000, -0.004	16.000, -0.001	16.000, -0.003
82	16.200, -0.001	16.200, -0.004	16.200, -0.001	16.200, -0.003
83	16.400, -0.001	16.400, -0.004	16.400, -0.001	16.400, -0.003
84	16.600, -0.001	16.600, -0.004	16.600, -0.001	16.600, -0.003
85	16.800, -0.001	16.800, -0.004	16.800, -0.001	16.800, -0.002
86	17.000, -0.001	17.000, -0.004	17.000, -0.001	17.000, -0.002
87	17.200, -0.001	17.200, -0.004	17.200, -0.001	17.200, -0.003
88	17.400, -0.001	17.400, -0.004	17.400, -0.001	17.400, -0.003
89	17.600, -0.001	17.600, -0.004	17.600, -0.001	17.600, -0.003
90	17.800, -0.001	17.800, -0.004	17.800, -0.001	17.800, -0.003
91	18.000, -0.001	18.000, -0.003	18.000, -0.001	18.000, -0.003
92	18.200, -0.001	18.200, -0.003	18.200, -0.001	18.200, -0.002
93	18.400, -0.001	18.400, -0.003	18.400, -0.001	18.400, -0.002
94	18.600, -0.001	18.600, -0.003	18.600, -0.002	18.600, -0.002
95	18.800, -0.001	18.800, -0.003	18.800, -0.002	18.800, -0.002
96	19.000, -0.000	19.000, -0.003	19.000, -0.001	19.000, -0.002
97	19.200, 0.000	19.200, -0.003	19.200, -0.002	19.200, -0.002
98	19.400, 0.000	19.400, -0.003	19.400, -0.002	19.400, -0.001
99	19.600, 0.001	19.600, -0.003	19.600, -0.001	19.600, -0.001
100	19.800, 0.001	19.800, -0.003	19.800, -0.001	19.800, -0.001
101	20.000, 0.001	20.000, -0.002	20.000, -0.001	20.000, -0.001
102	20.200, 0.001	20.200, -0.002	20.200, -0.001	20.200, -0.001
103	20.400, 0.001	20.400, -0.002	20.400, -0.001	20.400, -0.001
104	20.600, 0.001	20.600, -0.002	20.600, -0.001	20.600, -0.001
105	20.800, 0.001	20.800, -0.002	20.800, -0.001	20.800, -0.001
106	21.000, 0.001	21.000, -0.002	21.000, -0.001	21.000, -0.001
107	21.200, 0.001	21.200, -0.003	21.200, -0.001	21.200, -0.001
108	21.400, 0.001	21.400, -0.003	21.400, -0.001	21.400, -0.002
109	21.600, 0.001	21.600, -0.003	21.600, -0.001	21.600, -0.002
110	21.800, 0.000	21.800, -0.003	21.800, -0.001	21.800, -0.002
111	22.000, 0.000	22.000, -0.003	22.000, -0.001	22.000, -0.001
112	22.200, -0.000	22.200, -0.003	22.200, -0.001	22.200, -0.001
113	22.400, -0.000	22.400, -0.003	22.400, -0.001	22.400, -0.001
114	22.600, -0.000	22.600, -0.003	22.600, -0.001	22.600, -0.001
115	22.800, -0.000	22.800, -0.003	22.800, -0.001	22.800, -0.001
116	23.000, -0.000	23.000, -0.003	23.000, -0.001	23.000, -0.001
117	23.200, -0.000	23.200, -0.003	23.200, -0.001	23.200, -0.001
118	23.400, -0.000	23.400, -0.003	23.400, -0.001	23.400, -0.001
119	23.600, -0.000	23.600, -0.003	23.600, -0.001	23.600, -0.001
120	23.800, -0.000	23.800, -0.002	23.800, -0.001	23.800, -0.001
121	24.000, 0.000	24.000, -0.002	24.000, -0.001	24.000, -0.001
122	24.200, 0.000	24.200, -0.001	24.200, -0.001	24.200, -0.001
123	24.400, 0.001	24.400, -0.001	24.400, -0.001	24.400, -0.001
124	24.600, 0.001	24.600, -0.001	24.600, -0.001	24.600, -0.001
125	24.800, 0.001	24.800, -0.001	24.800, -0.001	24.800, -0.001
126	25.000, 0.001	25.000, -0.000	25.000, -0.001	25.000, -0.001
127	25.200, 0.000	25.200, 0.000	25.200, -0.001	25.200, -0.000
128	25.400, 0.000	25.400, 0.000	25.400, -0.001	25.400, -0.000
129	25.600, 0.000	25.600, 0.000	25.600, -0.001	25.600, -0.000
130	25.800, 0.000	25.800, 0.000	25.800, -0.001	25.800, -0.000
131	26.000, 0.000	26.000, 0.000	26.000, -0.001	26.000, -0.000
132	26.200, 0.000	26.200, 0.000	26.200, -0.001	26.200, -0.000
133	26.400, 0.000	26.400, 0.000	26.400, -0.001	26.400, -0.000
134	26.600, 0.001	26.600, 0.000	26.600, -0.001	26.600, -0.000
135	26.800, 0.001	26.800, 0.000	26.800, -0.001	26.800, -0.000
136	27.000, 0.001	27.000, 0.000	27.000, -0.001	27.000, -0.000
137	27.200, 0.001	27.200, 0.000	27.200, -0.001	27.200, -0.000
138	27.400, 0.001	27.400, 0.000	27.400, -0.000	27.400, -0.000
139	27.600, 0.001	27.600, 0.000	27.600, -0.000	27.600, -0.000
140	27.800, 0.001	27.800, -0.000	27.800, -0.000	27.800, -0.000
141	28.000, 0.001	28.000, -0.000	28.000, 0.000	28.000, -0.000
142	28.200, 0.001	28.200, -0.000	28.200, 0.000	28.200, -0.000
143	28.400, 0.000	28.400, -0.000	28.400, 0.000	28.400, -0.000
144	28.600, -0.000	28.600, -0.000	28.600, 0.000	28.600, 0.000
145	28.800, -0.000	28.800, -0.000	28.800, 0.000	28.800, 0.000
146	29.000, -0.001	29.000, 0.000	29.000, 0.000	29.000, 0.000
147	29.200, -0.001	29.200, 0.000	29.200, 0.000	29.200, 0.000
148	29.400, -0.001	29.400, 0.000	29.400, 0.000	29.400, 0.000
149	29.600, -0.002	29.600, 0.000	29.600, 0.000	29.600, 0.000
150	29.800, -0.002	29.800, 0.000	29.800, 0.000	29.800, 0.000
151	30.000, 0.000	30.000, 0.000	30.000, 0.000	30.000, 0.000
152	30.200, 0.021	30.200, 0.021	30.200, 0.018	30.200, 0.015
153	30.400, 0.046	30.400, 0.046	30.400, 0.041	30.400, 0.033
154	30.600, 0.074	30.600, 0.075	30.600, 0.067	30.600, 0.055
155	30.800, 0.106	30.800, 0.107	30.800, 0.096	30.800, 0.078
156	31.000, 0.141	31.000, 0.142	31.000, 0.129	31.000, 0.103
157	31.200, 0.177	31.200, 0.178	31.200, 0.164	31.200, 0.130
158	31.400, 0.214	31.400, 0.216	31.400, 0.200	31.400, 0.157
159	31.600, 0.250	31.600, 0.254	31.600, 0.236	31.600, 0.184
160	31.800, 0.286	31.800, 0.291	31.800, 0.273	31.800, 0.210
161	32.000, 0.320	32.000, 0.325	32.000, 0.307	32.000, 0.234
162	32.200, 0.350	32.200, 0.356	32.200, 0.339	32.200, 0.255
163	32.400, 0.377	32.400, 0.384	32.400, 0.368	32.400, 0.275
164	32.600, 0.402	32.600, 0.410	32.600, 0.396	32.600, 0.292
165	32.800, 0.425	32.800, 0.434	32.800, 0.421	32.800, 0.307
166	33.000, 0.447	33.000, 0.456	33.000, 0.444	33.000, 0.322
167	33.200, 0.466	33.200, 0.476	33.200, 0.465	33.200, 0.334
168	33.400, 0.483	33.400, 0.494	33.400, 0.484	33.400, 0.346
169	33.600, 0.499	33.600, 0.510	33.600, 0.502	33.600, 0.356
170	33.800, 0.513	33.800, 0.524	33.800, 0.517	33.800, 0.365
171	34.000, 0.525	34.000, 0.537	34.000, 0.531	34.000, 0.374
172	34.200, 0.536	34.200, 0.548	34.200, 0.544	34.200, 0.381
173	34.400, 0.546	34.400, 0.558	34.400, 0.555	34.400, 0.388
174	34.600, 0.555	34.600, 0.567	34.600, 0.565	34.600, 0.394
175	34.800, 0.562	34.800, 0.574	34.800, 0.574	34.800, 0.399
176	35.000, 0.569	35.000, 0.581	35.000, 0.582	35.000, 0.404
177	35.200, 0.575	35.200, 0.587	35.200, 0.588	35.200, 0.408
178	35.400, 0.580	35.400, 0.592	35.400, 0.594	35.400, 0.411
179	35.600, 0.585	35.600, 0.597	35.600, 0.599	35.600, 0.414
180	35.800, 0.589	35.800, 0.601	35.800, 0.604	35.800, 0.417
181	36.000, 0.593	36.000, 0.604	36.000, 0.608	36.000, 0.419
182	36.200, 0.596	36.200, 0.607	36.200, 0.612	36.200, 0.421
183	36.400, 0.599	36.400, 0.609	36.400, 0.615	36.400, 0.422
184	36.600, 0.602	36.600, 0.611	36.600, 0.617	36.600, 0.424
185	36.800, 0.604	36.800, 0.613	36.800, 0.620	36.800, 0.425
186	37.000, 0.606	37.000, 0.615	37.000, 0.622	37.000, 0.426
187	37.200, 0.608	37.200, 0.616	37.200, 0.623	37.200, 0.428
188	37.400, 0.609	37.400, 0.618	37.400, 0.625	37.400, 0.429
189	37.600, 0.610	37.600, 0.619	37.600, 0.626	37.600, 0.430
190	37.800, 0.612	37.800, 0.620	37.800, 0.627	37.800, 0.432
191	38.000, 0.612	38.000, 0.621	38.000, 0.629	38.000, 0.433
192	38.200, 0.613	38.200, 0.622	38.200, 0.630	38.200, 0.434
193	38.400, 0.614	38.400, 0.623	38.400, 0.631	38.400, 0.435
194	38.600, 0.615	38.600, 0.624	38.600, 0.631	38.600, 0.436
195	38.800, 0.615	38.800, 0.624	38.800, 0.632	38.800, 0.437
196	39.000, 0.616	39.000, 0.625	39.000, 0.632	39.000, 0.437
197	39.200, 0.617	39.200, 0.626	39.200, 0.632	39.200, 0.438
198	39.400, 0.617	39.400, 0.626	39.400, 0.633	39.400, 0.438
199	39.600, 0.618	39.600, 0.626	39.600, 0.633	39.600, 0.438
200	39.800, 0.619	39.800, 0.626	39.800, 0.634	39.800, 0.438
201	40.000, 0.619	40.000, 0.627	40.000, 0.634	40.000, 0.439
202	40.200, 0.620	40.200, 0.627	40.200, 0.635	40.200, 0.439
203	40.400, 0.621	40.400, 0.627	40.400, 0.636	40.400, 0.439
204	40.600, 0.621	40.600, 0.627	40.600, 0.636	40.600, 0.439
205	40.800, 0.622	40.800, 0.628	40.800, 0.636	40.800, 0.439
206	41.000, 0.622	41.000, 0.628	41.000, 0.636	41.000, 0.439
207	41.200, 0.622	41.200, 0.628	41.200, 0.637	41.200, 0.439
208	41.400, 0.623	41.400, 0.628	41.400, 0.637	41.400, 0.440
209	41.600, 0.623	41.600, 0.628	41.600, 0.637	41.600, 0.440
210	41.800, 0.624	41.800, 0.628	41.800, 0.638	41.800, 0.440
211	42.000, 0.624	42.000, 0.629	42.000, 0.638	42.000, 0.440
212	42.200, 0.625	42.200, 0.629	42.200, 0.638	42.200, 0.441
213	42.400, 0.625	42.400, 0.629	42.400, 0.638	42.400, 0.440
214	42.600, 0.626	42.600, 0.629	42.600, 0.638	42.600, 0.440
215	42.800, 0.626	42.800, 0.629	42.800, 0.639	42.800, 0.440
216	43.000, 0.627	43.000, 0.629	43.000, 0.639	43.000, 0.440
217	43.200, 0.627	43.200, 0.630	43.200, 0.639	43.200, 0.440
218	43.400, 0.628	43.400, 0.630	43.400, 0.640	43.400, 0.439
219	43.600, 0.628	43.600, 0.630	43.600, 0.640	43.600, 0.439
220	43.800, 0.628	43.800, 0.630	43.800, 0.640	43.800, 0.440
221	44.000, 0.628	44.000, 0.630	44.000, 0.641	44.000, 0.440
222	44.200, 0.628	44.200, 0.630	44.200, 0.641	44.200, 0.440
223	44.400, 0.628	44.400, 0.630	44.400, 0.641	44.400, 0.440
224	44.600, 0.628	44.600, 0.630	44.600, 0.641	44.600, 0.440
225	44.800, 0.627	44.800, 0.630	44.800, 0.642	44.800, 0.440
226	45.000, 0.627	45.000, 0.630	45.000, 0.642	45.000, 0.441
227	45.200, 0.627	45.200, 0.630	45.200, 0.642	45.200, 0.441
228	45.400, 0.628	45.400, 0.630	45.400, 0.642	45.400, 0.441
229	45.600, 0.628	45.600, 0.630	45.600, 0.642	45.600, 0.441
230	45.800, 0.629	45.800, 0.631	45.800, 0.642	45.800, 0.442
231	46.000, 0.629	46.000, 0.631	46.000, 0.643	46.000, 0.442
232	46.200, 0.629	46.200, 0.631	46.200, 0.643	46.200, 0.442
233	46.400, 0.630	46.400, 0.632	46.400, 0.643	46.400, 0.441
234	46.600, 0.630	46.600, 0.632	46.600, 0.643	46.600, 0.441
235	46.800, 0.631	46.800, 0.632	46.800, 0.643	46.800, 0.441
236	47.000, 0.631	47.000, 0.632	47.000, 0.643	47.000, 0.441
237	47.200, 0.631	47.200, 0.633	47.200, 0.643	47.200, 0.441
238	47.400, 0.631	47.400, 0.633	47.400, 0.644	47.400, 0.441
239	47.600, 0.631	47.600, 0.633	47.600, 0.644	47.600, 0.440
240	47.800, 0.631	47.800, 0.633	47.800, 0.644	47.800, 0.440
241	48.000, 0.631	48.000, 0.633	48.000, 0.644	48.000, 0.441
242	48.200, 0.630	48.200, 0.632	48.200, 0.645	48.200, 0.441
243	48.400, 0.630	48.400, 0.632	48.400, 0.645	48.400, 0.441
244	48.600, 0.630	48.600, 0.632	48.600, 0.645	48.600, 0.441
245	48.800, 0.631	48.800, 0.632	48.800, 0.645	48.800, 0.441
246	49.000, 0.631	49.000, 0.632	49.000, 0.646	49.000, 0.440
247	49.200, 0.631	49.200, 0.632	49.200, 0.646	49.200, 0.440
248	49.400, 0.632	49.400, 0.632	49.400, 0.646	49.400, 0.440
249	49.600, 0.632	49.600, 0.632	49.600, 0.646	49.600, 0.440
250	49.800, 0.632	49.800, 0.632	49.800, 0.646	49.800, 0.440
251	50.000, 0.632	50.000, 0.633	50.000, 0.645	50.000, 0.439
252	50.200, 0.632	50.200, 0.633	50.200, 0.645	50.200, 0.439
253	50.400, 0.633	50.400, 0.633	50.400, 0.645	50.400, 0.439
254	50.600, 0.633	50.600, 0.634	50.600, 0.645	50.600, 0.439
255	50.800, 0.633	50.800, 0.634	50.800, 0.645	50.800, 0.438
256	51.000, 0.633	51.000, 0.634	51.000, 0.645	51.000, 0.439
257	51.200, 0.633	51.200, 0.635	51.200, 0.646	51.200, 0.439
258	51.400, 0.633	51.400, 0.635	51.400, 0.646	51.400, 0.439
259	51.600, 0.633	51.600, 0.636	51.600, 0.646	51.600, 0.439
260	51.800, 0.633	51.800, 0.636	51.800, 0.647	51.800, 0.439
261	52.000, 0.633	52.000, 0.636	52.000, 0.647	52.000, 0.439
262	52.200, 0.633	52.200, 0.637	52.200, 0.648	52.200, 0.439
263	52.400, 0.633	52.400, 0.637	52.400, 0.649	52.400, 0.439
264	52.600, 0.633	52.600, 0.637	52.600, 0.649	52.600, 0.438
265	52.800, 0.633	52.800, 0.637	52.800, 0.649	52.800, 0.438
266	53.000, 0.633	53.000, 0.638	53.000, 0.650	53.000, 0.438
267	53.200, 0.634	53.200, 0.637	53.200, 0.650	53.200, 0.437
268	53.400, 0.634	53.400, 0.638	53.400, 0.650	53.400, 0.437
269	53.600, 0.633	53.600, 0.638	53.600, 0.650	53.600, 0.436
270	53.800, 0.633	53.800, 0.638	53.800, 0.650	53.800, 0.436
271	54.000, 0.633	54.000, 0.638	54.000, 0.650	54.000, 0.436
272	54.200, 0.633	54.200, 0.638	54.200, 0.651	54.200, 0.435
273	54.400, 0.633	54.400, 0.638	54.400, 0.651	54.400, 0.435
274	54.600, 0.634	54.600, 0.639	54.600, 0.652	54.600, 0.436
275	54.800, 0.634	54.800, 0.639	54.800, 0.652	54.800, 0.436
276	55.000, 0.634	55.000, 0.639	55.000, 0.652	55.000, 0.436
277	55.200, 0.634	55.200, 0.639	55.200, 0.652	55.200, 0.436
278	55.400, 0.635	55.400, 0.640	55.400, 0.653	55.400, 0.436
279	55.600, 0.635	55.600, 0.640	55.600, 0.653	55.600, 0.436
280	55.800, 0.635	55.800, 0.640	55.800, 0.653	55.800, 0.436
281	56.000, 0.635	56.000, 0.640	56.000, 0.653	56.000, 0.436
282	56.200, 0.635	56.200, 0.640	56.200, 0.653	56.200, 0.436
283	56.400, 0.635	56.400, 0.641	56.400, 0.653	56.400, 0.436
284	56.600, 0.636	56.600, 0.641	56.600, 0.653	56.600, 0.436
285	56.800, 0.636	56.800, 0.641	56.800, 0.653	56.800, 0.436
286	57.000, 0.636	57.000, 0.641	57.000, 0.652	57.000, 0.436
287	57.200, 0.637	57.200, 0.641	57.200, 0.652	57.200, 0.436
288	57.400, 0.637	57.400, 0.642	57.400, 0.652	57.400, 0.436
289	57.600, 0.636	57.600, 0.642	57.600, 0.652	57.600, 0.436
290	57.800, 0.636	57.800, 0.643	57.800, 0.652	57.800, 0.435
291	58.000, 0.636	58.000, 0.643	58.000, 0.653	58.000, 0.435
292	58.200, 0.636	58.200, 0.643	58.200, 0.653	58.200, 0.435
293	58.400, 0.636	58.400, 0.643	58.400, 0.653	58.400, 0.435
294	58.600, 0.637	58.600, 0.643	58.600, 0.654	58.600, 0.435
295	58.800, 0.637	58.800, 0.643	58.800, 0.654	58.800, 0.435
296	59.000, 0.637	59.000, 0.643	59.000, 0.654	59.000, 0.435
297	59.200, 0.637	59.200, 0.643	59.200, 0.654	59.200, 0.435
298	59.400, 0.637	59.400, 0.643	59.400, 0.655	59.400, 0.435
299	59.600, 0.636	59.600, 0.643	59.600, 0.655	59.600, 0.435
300	59.800, 0.636	59.800, 0.643	59.800, 0.655	59.800, 0.435
301	60.000, 0.636	60.000, 0.643	60.000, 0.656	60.000, 0.435
302	60.200, 0.636	60.200, 0.643	60.200, 0.656	60.200, 0.435
303	60.400, 0.636	60.400, 0.643	60.400, 0.656	60.400, 0.435
304	60.600, 0.636	60.600, 0.643	60.600, 0.656	60.600, 0.435
305	60.800, 0.636	60.800, 0.644	60.800, 0.656	60.800, 0.435
306	61.000, 0.636	61.000, 0.644	61.000, 0.656	61.000, 0.435
307	61.200, 0.636	61.200, 0.645	61.200, 0.656	61.200, 0.435
308	61.400, 0.636	61.400, 0.645	61.400, 0.656	61.400, 0.435
309	61.600, 0.636	61.600, 0.645	61.600, 0.656	61.600, 0.435
310	61.800, 0.636	61.800, 0.645	61.800, 0.656	61.800, 0.435
311	62.000, 0.636	62.000, 0.646	62.000, 0.656	62.000, 0.435
312	62.200, 0.637	62.200, 0.646	62.200, 0.656	62.200, 0.434
313	62.400, 0.638	62.400, 0.646	62.400, 0.656	62.400, 0.434
314	62.600, 0.638	62.600, 0.646	62.600, 0.656	62.600, 0.434
315	62.800, 0.638	62.800, 0.647	62.800, 0.657	62.800, 0.434
316	63.000, 0.639	63.000, 0.647	63.000, 0.657	63.000, 0.434
317	63.200, 0.639	63.200, 0.647	63.200, 0.657	63.200, 0.433
318	63.400, 0.639	63.400, 0.647	63.400, 0.657	63.400, 0.433
319	63.600, 0.639	63.600, 0.647	63.600, 0.657	63.600, 0.433
320	63.800, 0.639	63.800, 0.647	63.800, 0.657	63.800, 0.433
321	64.000, 0.639	64.000, 0.648	64.000, 0.657	64.000, 0.433
322	64.200, 0.638	64.200, 0.648	64.200, 0.657	64.200, 0.433
323	64.400, 0.638	64.400, 0.648	64.400, 0.657	64.400, 0.433
324	64.600, 0.638	64.600, 0.648	64.600, 0.657	64.600, 0.433
325	64.800, 0.638	64.800, 0.648	64.800, 0.657	64.800, 0.433
326	65.000, 0.638	65.000, 0.648	65.000, 0.657	65.000, 0.433
327	65.200, 0.638	65.200, 0.648	65.200, 0.657	65.200, 0.433
328	65.400, 0.638	65.400, 0.648	65.400, 0.657	65.400, 0.433
329	65.600, 0.638	65.600, 0.648	65.600, 0.657	65.600, 0.432
330	65.800, 0.639	65.800, 0.647	65.800, 0.657	65.800, 0.432
331	66.000, 0.639	66.000, 0.647	66.000, 0.657	66.000, 0.432
332	66.200, 0.639	66.200, 0.647	66.200, 0.658	66.200, 0.432
333	66.400, 0.639	66.400, 0.647	66.400, 0.658	66.400, 0.432
334	66.600, 0.639	66.600, 0.648	66.600, 0.658	66.600, 0.432
335	66.800, 0.639	66.800, 0.648	66.800, 0.659	66.800, 0.432
336	67.000, 0.639	67.000, 0.648	67.000, 0.659	67.000, 0.432
337	67.200, 0.639	67.200, 0.648	67.200, 0.659	67.200, 0.432
338	67.400, 0.639	67.400, 0.648	67.400, 0.659	67.400, 0.432
339	67.600, 0.639	67.600, 0.648	67.600, 0.660	67.600, 0.432
340	67.800, 0.639	67.800, 0.648	67.800, 0.660	67.800, 0.432
341	68.000, 0.639	68.000, 0.648	68.000, 0.660	68.000, 0.432
342	68.200, 0.639	68.200, 0.648	68.200, 0.660	68.200, 0.433
343	68.400, 0.639	68.400, 0.648	68.400, 0.660	68.400, 0.433
344	68.600, 0.638	68.600, 0.648	68.600, 0.660	68.600, 0.433
345	68.800, 0.638	68.800, 0.649	68.800, 0.660	68.800, 0.433
346	69.000, 0.638	69.000, 0.649	69.000, 0.660	69.000, 0.433
347	69.200, 0.638	69.200, 0.649	69.200, 0.660	69.200, 0.433
348	69.400, 0.639	69.400, 0.649	69.400, 0.660	69.400, 0.433
349	69.600, 0.639	69.600, 0.649	69.600, 0.660	69.600, 0.433
350	69.800, 0.639	69.800, 0.649	69.800, 0.660	69.800, 0.433
351	70.000, 0.640	70.000, 0.649	70.000, 0.661	70.000, 0.433
352	70.200, 0.640	70.200, 0.649	70.200, 0.661	70.200, 0.433
353	70.400, 0.640	70.400, 0.649	70.400, 0.661	70.400, 0.432
354	70.600, 0.640	70.600, 0.649	70.600, 0.661	70.600, 0.432
355	70.800, 0.640	70.800, 0.649	70.800, 0.661	70.800, 0.432
356	71.000, 0.640	71.000, 0.649	71.000, 0.661	71.000, 0.431
357	71.200, 0.640	71.200, 0.649	71.200, 0.662	71.200, 0.431
358	71.400, 0.640	71.400, 0.649	71.400, 0.662	71.400, 0.431
359	71.600, 0.641	71.600, 0.650	71.600, 0.662	71.600, 0.430
360	71.800, 0.641	71.800, 0.650	71.800, 0.662	71.800, 0.430
361	72.000, 0.641	72.000, 0.650	72.000, 0.662	72.000, 0.430
362	72.200, 0.641	72.200, 0.650	72.200, 0.662	72.200, 0.430
363	72.400, 0.641	72.400, 0.650	72.400, 0.662	72.400, 0.430
364	72.600, 0.641	72.600, 0.650	72.600, 0.662	72.600, 0.429
365	72.800, 0.641	72.800, 0.650	72.800, 0.662	72.800, 0.429
366	73.000, 0.641	73.000, 0.650	73.000, 0.662	73.000, 0.429
367	73.200, 0.641	73.200, 0.650	73.200, 0.663	73.200, 0.429
368	73.400, 0.642	73.400, 0.651	73.400, 0.663	73.400, 0.429
369	73.600, 0.642	73.600, 0.651	73.600, 0.663	73.600, 0.429
370	73.800, 0.642	73.800, 0.651	73.800, 0.663	73.800, 0.429
371	74.000, 0.642	74.000, 0.652	74.000, 0.664	74.000, 0.429
372	74.200, 0.641	74.200, 0.652	74.200, 0.664	74.200, 0.429
373	74.400, 0.641	74.400, 0.652	74.400, 0.664	74.400, 0.429
374	74.600, 0.641	74.600, 0.652	74.600, 0.664	74.600, 0.429
375	74.800, 0.641	74.800, 0.653	74.800, 0.664	74.800, 0.430
376	75.000, 0.641	75.000, 0.653	75.000, 0.665	75.000, 0.430
377	75.200, 0.641	75.200, 0.653	75.200, 0.665	75.200, 0.430
378	75.400, 0.641	75.400, 0.653	75.400, 0.665	75.400, 0.430
379	75.600, 0.642	75.600, 0.653	75.600, 0.666	75.600, 0.430
380	75.800, 0.642	75.800, 0.653	75.800, 0.666	75.800, 0.429
381	76.000, 0.642	76.000, 0.653	76.000, 0.666	76.000, 0.429
382	76.200, 0.642	76.200, 0.653	76.200, 0.666	76.200, 0.429
383	76.400, 0.642	76.400, 0.653	76.400, 0.666	76.400, 0.429
384	76.600, 0.642	76.600, 0.653	76.600, 0.666	76.600, 0.428
385	76.800, 0.643	76.800, 0.652	76.800, 0.666	76.800, 0.428
386	77.000, 0.643	77.000, 0.652	77.000, 0.666	77.000, 0.428
387	77.200, 0.643	77.200, 0.652	77.200, 0.666	77.200, 0.428
388	77.400, 0.643	77.400, 0.652	77.400, 0.666	77.400, 0.428
389	77.600, 0.643	77.600, 0.652	77.600, 0.667	77.600, 0.428
390	77.800, 0.644	77.800, 0.652	77.800, 0.667	77.800, 0.428
391	78.000, 0.644	78.000, 0.652	78.000, 0.667	78.000, 0.428
392	78.200, 0.644	78.200, 0.652	78.200, 0.667	78.200, 0.428
393	78.400, 0.644	78.400, 0.652	78.400, 0.667	78.400, 0.428
394	78.600, 0.644	78.600, 0.653	78.600, 0.668	78.600, 0.428
395	78.800, 0.644	78.800, 0.653	78.800, 0.668	78.800, 0.428
396	79.000, 0.644	79.000, 0.653	79.000, 0.669	79.000, 0.428
397	79.200, 0.644	79.200, 0.653	79.200, 0.669	79.200, 0.428
398	79.400, 0.644	79.400, 0.653	79.400, 0.669	79.400, 0.428
399	79.600, 0.644	79.600, 0.654	79.600, 0.670	79.600, 0.427
400	79.800, 0.644	79.800, 0.654	79.800, 0.670	79.800, 0.427
401	80.000, 0.643	80.000, 0.654	80.000, 0.670	80.000, 0.427
402	80.200, 0.643	80.200, 0.654	80.200, 0.670	80.200, 0.426
403	80.400, 0.643	80.400, 0.654	80.400, 0.670	80.400, 0.426
404	80.600, 0.643	80.600, 0.655	80.600, 0.670	80.600, 0.426
405	80.800, 0.643	80.800, 0.655	80.800, 0.670	80.800, 0.426
406	81.000, 0.643	81.000, 0.655	81.000, 0.670	81.000, 0.426
407	81.200, 0.643	81.200, 0.655	81.200, 0.670	81.200, 0.426
408	81.400, 0.643	81.400, 0.655	81.400, 0.670	81.400, 0.426
409	81.600, 0.643	81.600, 0.656	81.600, 0.670	81.600, 0.426
410	81.800, 0.644	81.800, 0.656	81.800, 0.670	81.800, 0.426
411	82.000, 0.644	82.000, 0.656	82.000, 0.670	82.000, 0.426
412	82.200, 0.644	82.200, 0.656	82.200, 0.669	82.200, 0.426
413	82.400, 0.644	82.400, 0.656	82.400, 0.669	82.400, 0.426
414	82.600, 0.645	82.600, 0.656	82.600, 0.670	82.600, 0.426
415	82.800, 0.645	82.800, 0.656	82.800, 0.670	82.800, 0.426
416	83.000, 0.645	83.000, 0.656	83.000, 0.670	83.000, 0.426
417	83.200, 0.645	83.200, 0.656	83.200, 0.670	83.200, 0.426
418	83.400, 0.646	83.400, 0.656	83.400, 0.670	83.400, 0.426
419	83.600, 0.646	83.600, 0.656	83.600, 0.670	83.600, 0.426
420	83.800, 0.646	83.800, 0.656	83.800, 0.671	83.800, 0.426
421	84.000, 0.646	84.000, 0.657	84.000, 0.671	84.000, 0.425
422	84.200, 0.646	84.200, 0.657	84.200, 0.672	84.200, 0.425
423	84.400, 0.646	84.400, 0.657	84.400, 0.672	84.400, 0.425
424	84.600, 0.645	84.600, 0.657	84.600, 0.672	84.600, 0.425
425	84.800, 0.645	84.800, 0.657	84.800, 0.672	84.800, 0.425
426	85.000, 0.645	85.000, 0.657	85.000, 0.672	85.000, 0.425
427	85.200, 0.645	85.200, 0.657	85.200, 0.673	85.200, 0.425
428	85.400, 0.645	85.400, 0.657	85.400, 0.673	85.400, 0.425
429	85.600, 0.645	85.600, 0.657	85.600, 0.673	85.600, 0.425
430	85.800, 0.645	85.800, 0.657	85.800, 0.673	85.800, 0.426
431	86.000, 0.645	86.000, 0.657	86.000, 0.673	86.000, 0.426
432	86.200, 0.645	86.200, 0.657	86.200, 0.673	86.200, 0.426
433	86.400, 0.645	86.400, 0.657	86.400, 0.673	86.400, 0.426
434	86.600, 0.645	86.600, 0.657	86.600, 0.673	86.600, 0.426
435	86.800, 0.646	86.800, 0.657	86.800, 0.673	86.800, 0.426
436	87.000, 0.646	87.000, 0.658	87.000, 0.672	87.000, 0.426
437	87.200, 0.646	87.200, 0.658	87.200, 0.672	87.200, 0.426
438	87.400, 0.646	87.400, 0.659	87.400, 0.672	87.400, 0.425
439	87.600, 0.645	87.600, 0.660	87.600, 0.673	87.600, 0.425
440	87.800, 0.645	87.800, 0.660	87.800, 0.673	87.800, 0.425
441	88.000, 0.645	88.000, 0.660	88.000, 0.673	88.000, 0.424
442	88.200, 0.645	88.200, 0.661	88.200, 0.673	88.200, 0.424
443	88.400, 0.645	88.400, 0.661	88.400, 0.673	88.400, 0.424
444	88.600, 0.645	88.600, 0.661	88.600, 0.673	88.600, 0.424
445	88.800, 0.645	88.800, 0.661	88.800, 0.673	88.800, 0.424
446	89.000, 0.645	89.000, 0.661	89.000, 0.673	89.000, 0.424
447	89.200, 0.645	89.200, 0.661	89.200, 0.674	89.200, 0.425
448	89.400, 0.646	89.400, 0.661	89.400, 0.674	89.400, 0.425
449	89.600, 0.646	89.600, 0.661	89.600, 0.674	89.600, 0.425
450	89.800, 0.646	89.800, 0.661	89.800, 0.675	89.800, 0.426
451	90.000, 0.646	90.000, 0.661	90.000, 0.675	90.000, 0.426
452	90.200, 0.646	90.200, 0.661	90.200, 0.675	90.200, 0.427
453	90.400, 0.647	90.400, 0.661	90.400, 0.675	90.400, 0.427
454	90.600, 0.647	90.600, 0.661	90.600, 0.675	90.600, 0.427
455	90.800, 0.647	90.800, 0.661	90.800, 0.675	90.800, 0.427
456	91.000, 0.647	91.000, 0.661	91.000, 0.675	91.000, 0.427
457	91.200, 0.647	91.200, 0.661	91.200, 0.675	91.200, 0.427
458	91.400, 0.647	91.400, 0.661	91.400, 0.675	91.400, 0.427
459	91.600, 0.647	91.600, 0.661	91.600, 0.675	91.600, 0.427
460	91.800, 0.647	91.800, 0.661	91.800, 0.675	91.800, 0.427
461	92.000, 0.647	92.000, 0.662	92.000, 0.675	92.000, 0.427
462	92.200, 0.647	92.200, 0.662	92.200, 0.675	92.200, 0.426
463	92.400, 0.647	92.400, 0.662	92.400, 0.676	92.400, 0.426
464	92.600, 0.647	92.600, 0.662	92.600, 0.676	92.600, 0.426
465	92.800, 0.647	92.800, 0.663	92.800, 0.676	92.800, 0.425
466	93.000, 0.647	93.000, 0.663	93.000, 0.677	93.000, 0.425
467	93.200, 0.647	93.200, 0.664	93.200, 0.677	93.200, 0.425
468	93.400, 0.647	93.400, 0.664	93.400, 0.677	93.400, 0.425
469	93.600, 0.647	93.600, 0.664	93.600, 0.677	93.600, 0.424
470	93.800, 0.646	93.800, 0.665	93.800, 0.677	93.800, 0.424
471	94.000, 0.647	94.000, 0.665	94.000, 0.677	94.000, 0.424
472	94.200, 0.647	94.200, 0.665	94.200, 0.677	94.200, 0.424
473	94.400, 0.647	94.400, 0.665	94.400, 0.678	94.400, 0.424
474	94.600, 0.647	94.600, 0.665	94.600, 0.678	94.600, 0.424
475	94.800, 0.647	94.800, 0.665	94.800, 0.677	94.800, 0.424
476	95.000, 0.647	95.000, 0.665	95.000, 0.677	95.000, 0.424
477	95.200, 0.647	95.200, 0.665	95.200, 0.677	95.200, 0.424
478	95.400, 0.647	95.400, 0.665	95.400, 0.677	95.400, 0.424
479	95.600, 0.647	95.600, 0.666	95.600, 0.677	95.600, 0.424
480	95.800, 0.647	95.800, 0.666	95.800, 0.678	95.800, 0.424
481	96.000, 0.647	96.000, 0.666	96.000, 0.678	96.000, 0.425
482	96.200, 0.648	96.200, 0.667	96.200, 0.679	96.200, 0.425
483	96.400, 0.648	96.400, 0.667	96.400, 0.679	96.400, 0.425
484	96.600, 0.648	96.600, 0.667	96.600, 0.680	96.600, 0.425
485	96.800, 0.648	96.800, 0.668	96.800, 0.680	96.800, 0.425
486	97.000, 0.648	97.000, 0.668	97.000, 0.681	97.000, 0.425
487	97.200, 0.648	97.200, 0.668	97.200, 0.681	97.200, 0.425
488	97.400, 0.648	97.400, 0.668	97.400, 0.681	97.400, 0.425
489	97.600, 0.648	97.600, 0.668	97.600, 0.681	97.600, 0.425
490	97.800, 0.648	97.800, 0.669	97.800, 0.681	97.800, 0.425
491	98.000, 0.648	98.000, 0.669	98.000, 0.681	98.000, 0.425
492	98.200, 0.648	98.200, 0.669	98.200, 0.681	98.200, 0.425
493	98.400, 0.648	98.400, 0.669	98.400, 0.681	98.400, 0.425
494	98.600, 0.648	98.600, 0.668	98.600, 0.681	98.600, 0.425
495	98.800, 0.647	98.800, 0.668	98.800, 0.681	98.800, 0.425
496	99.000, 0.647	99.000, 0.668	99.000, 0.681	99.000, 0.424
497	99.200, 0.647	99.200, 0.668	99.200, 0.681	99.200, 0.424
498	99.400, 0.647	99.400, 0.668	99.400, 0.681	99.400, 0.424
499	99.600, 0.647	99.600, 0.668	99.600, 0.681	99.600, 0.424
500	99.800, 0.647	99.800, 0.669	99.800, 0.681	99.800, 0.424
501	100.000, 0.647	100.000, 0.669	100.000, 0.682	100.000, 0.424
502	100.200, 0.647	100.200, 0.669	100.200, 0.682	100.200, 0.424
503	100.400, 0.647	100.400, 0.669	100.400, 0.682	100.400, 0.424
504	100.600, 0.647	100.600, 0.669	100.600, 0.683	100.600, 0.424
505	100.800, 0.647	100.800, 0.669	100.800, 0.683	100.800, 0.424
506	101.000, 0.647	101.000, 0.669	101.000, 0.683	101.000, 0.424
507	101.200, 0.648	101.200, 0.670	101.200, 0.683	101.200, 0.424
508	101.400, 0.648	101.400, 0.670	101.400, 0.683	101.400, 0.424
509	101.600, 0.648	101.600, 0.671	101.600, 0.683	101.600, 0.424
510	101.800, 0.648	101.800, 0.671	101.800, 0.683	101.800, 0.424
511	102.000, 0.648	102.000, 0.672	102.000, 0.684	102.000, 0.424
512	102.200, 0.648	102.200, 0.672	102.200, 0.684	102.200, 0.424
513	102.400, 0.648	102.400, 0.672	102.400, 0.684	102.400, 0.423
514	102.600, 0.648	102.600, 0.671	102.600, 0.683	102.600, 0.423
515	102.800, 0.648	102.800, 0.671	102.800, 0.683	102.800, 0.423
516	103.000, 0.648	103.000, 0.671	103.000, 0.683	103.000, 0.423
517	103.200, 0.648	103.200, 0.671	103.200, 0.683	103.200, 0.423
518	103.400, 0.649	103.400, 0.671	103.400, 0.683	103.400, 0.423
519	103.600, 0.649	103.600, 0.671	103.600, 0.683	103.600, 0.422
520	103.800, 0.649	103.800, 0.671	103.800, 0.683	103.800, 0.422
521	104.000, 0.650	104.000, 0.671	104.000, 0.683	104.000, 0.422
522	104.200, 0.650	104.200, 0.672	104.200, 0.683	104.200, 0.423
523	104.400, 0.650	104.400, 0.672	104.400, 0.684	104.400, 0.423
524	104.600, 0.650	104.600, 0.672	104.600, 0.684	104.600, 0.423
525	104.800, 0.650	104.800, 0.672	104.800, 0.684	104.800, 0.423
526	105.000, 0.650	105.000, 0.672	105.000, 0.684	105.000, 0.423
527	105.200, 0.650	105.200, 0.673	105.200, 0.685	105.200, 0.423
528	105.400, 0.649	105.400, 0.673	105.400, 0.685	105.400, 0.423
529	105.600, 0.649	105.600, 0.673	105.600, 0.685	105.600, 0.423
530	105.800, 0.648	105.800, 0.673	105.800, 0.685	105.800, 0.423
531	106.000, 0.648	106.000, 0.674	106.000, 0.685	106.000, 0.423
532	106.200, 0.647	106.200, 0.674	106.200, 0.685	106.200, 0.423
533	106.400, 0.647	106.400, 0.674	106.400, 0.684	106.400, 0.423
534	106.600, 0.647	106.600, 0.674	106.600, 0.684	106.600, 0.423
535	106.800, 0.646	106.800, 0.674	106.800, 0.684	106.800, 0.423
536	107.000, 0.646	107.000, 0.674	107.000, 0.684	107.000, 0.423
537	107.200, 0.646	107.200, 0.674	107.200, 0.684	107.200, 0.424
538	107.400, 0.646	107.400, 0.674	107.400, 0.684	107.400, 0.424
539	107.600, 0.646	107.600, 0.674	107.600, 0.684	107.600, 0.424
540	107.800, 0.646	107.800, 0.674	107.800, 0.684	107.800, 0.424
541	108.000, 0.646	108.000, 0.674	108.000, 0.684	108.000, 0.424
542	108.200, 0.646	108.200, 0.675	108.200, 0.684	108.200, 0.425
543	108.400, 0.646	108.400, 0.675	108.400, 0.685	108.400, 0.424
544	108.600, 0.647	108.600, 0.675	108.600, 0.685	108.600, 0.424
545	108.800, 0.647	108.800, 0.676	108.800, 0.686	108.800, 0.424
546	109.000, 0.648	109.000, 0.676	109.000, 0.686	109.000, 0.423
547	109.200, 0.648	109.200, 0.676	109.200, 0.686	109.200, 0.423
548	109.400, 0.649	109.400, 0.677	109.400, 0.686	109.400, 0.423
549	109.600, 0.649	109.600, 0.677	109.600, 0.686	109.600, 0.423
550	109.800, 0.649	109.800, 0.678	109.800, 0.686	109.800, 0.423
551	110.000, 0.649	110.000, 0.678	110.000, 0.686	110.000, 0.422
552	110.200, 0.650	110.200, 0.678	110.200, 0.686	110.200, 0.422
553	110.400, 0.650	110.400, 0.678	110.400, 0.686	110.400, 0.422
554	110.600, 0.650	110.600, 0.678	110.600, 0.686	110.600, 0.422
555	110.800, 0.650	110.800, 0.678	110.800, 0.687	110.800, 0.422
556	111.000, 0.650	111.000, 0.678	111.000, 0.687	111.000, 0.422
557	111.200, 0.650	111.200, 0.678	111.200, 0.687	111.200, 0.421
558	111.400, 0.650	111.400, 0.678	111.400, 0.687	111.400, 0.421
559	111.600, 0.650	111.600, 0.678	111.600, 0.687	111.600, 0.421
560	111.800, 0.649	111.800, 0.677	111.800, 0.688	111.800, 0.421
561	112.000, 0.649	112.000, 0.678	112.000, 0.688	112.000, 0.421
562	112.200, 0.649	112.200, 0.678	112.200, 0.688	112.200, 0.421
563	112.400, 0.649	112.400, 0.678	112.400, 0.688	112.400, 0.421
564	112.600, 0.649	112.600, 0.678	112.600, 0.688	112.600, 0.422
565	112.800, 0.649	112.800, 0.679	112.800, 0.688	112.800, 0.422
566	113.000, 0.649	113.000, 0.679	113.000, 0.688	113.000, 0.422
567	113.200, 0.649	113.200, 0.679	113.200, 0.688	113.200, 0.422
568	113.400, 0.648	113.400, 0.679	113.400, 0.688	113.400, 0.422
569	113.600, 0.648	113.600, 0.679	113.600, 0.688	113.600, 0.422
570	113.800, 0.648	113.800, 0.679	113.800, 0.687	113.800, 0.422
571	114.000, 0.648	114.000, 0.679	114.000, 0.687	114.000, 0.422
572	114.200, 0.648	114.200, 0.679	114.200, 0.687	114.200, 0.422
573	114.400, 0.648	114.400, 0.679	114.400, 0.687	114.400, 0.422
574	114.600, 0.647	114.600, 0.679	114.600, 0.687	114.600, 0.422
575	114.800, 0.647	114.800, 0.680	114.800, 0.688	114.800, 0.422
576	115.000, 0.647	115.000, 0.680	115.000, 0.688	115.000, 0.422
577	115.200, 0.647	115.200, 0.680	115.200, 0.688	115.200, 0.422
578	115.400, 0.647	115.400, 0.680	115.400, 0.689	115.400, 0.421
579	115.600, 0.647	115.600, 0.681	115.600, 0.689	115.600, 0.421
580	115.800, 0.647	115.800, 0.681	115.800, 0.689	115.800, 0.421
581	116.000, 0.648	116.000, 0.682	116.000, 0.689	116.000, 0.421
582	116.200, 0.648	116.200, 0.682	116.200, 0.690	116.200, 0.421
583	116.400, 0.648	116.400, 0.682	116.400, 0.690	116.400, 0.422
584	116.600, 0.648	116.600, 0.683	116.600, 0.690	116.600, 0.422
585	116.800, 0.648	116.800, 0.683	116.800, 0.689	116.800, 0.422
586	117.000, 0.648	117.000, 0.683	117.000, 0.689	117.000, 0.423
587	117.200, 0.648	117.200, 0.683	117.200, 0.689	117.200, 0.423
588	117.400, 0.648	117.400, 0.683	117.400, 0.689	117.400, 0.423
589	117.600, 0.648	117.600, 0.683	117.600, 0.689	117.600, 0.423
590	117.800, 0.649	117.800, 0.683	117.800, 0.689	117.800, 0.423
591	118.000, 0.649	118.000, 0.683	118.000, 0.690	118.000, 0.423
592	118.200, 0.649	118.200, 0.683	118.200, 0.690	118.200, 0.423
593	118.400, 0.648	118.400, 0.683	118.400, 0.690	118.400, 0.423
594	118.600, 0.648	118.600, 0.683	118.600, 0.690	118.600, 0.423
595	118.800, 0.648	118.800, 0.683	118.800, 0.691	118.800, 0.423
596	119.000, 0.648	119.000, 0.682	119.000, 0.691	119.000, 0.423
597	119.200, 0.648	119.200, 0.682	119.200, 0.691	119.200, 0.423
598	119.400, 0.648	119.400, 0.682	119.400, 0.691	119.400, 0.423
599	119.600, 0.648	119.600, 0.682	119.600, 0.692	119.600, 0.422
600	119.800, 0.648	119.800, 0.682	119.800, 0.692	119.800, 0.422
601	120.000, 0.648	120.000, 0.682	120.000, 0.692	120.000, 0.422
602	120.200, 0.647	120.200, 0.682	120.200, 0.691	120.200, 0.422
603	120.400, 0.647	120.400, 0.683	120.400, 0.691	120.400, 0.422
604	120.600, 0.647	120.600, 0.683	120.600, 0.691	120.600, 0.422
605	120.800, 0.647	120.800, 0.684	120.800, 0.691	120.800, 0.422
606	121.000, 0.647	121.000, 0.684	121.000, 0.691	121.000, 0.421
607	121.200, 0.647	121.200, 0.684	121.200, 0.691	121.200, 0.421
608	121.400, 0.647	121.400, 0.685	121.400, 0.691	121.400, 0.421
609	121.600, 0.647	121.600, 0.685	121.600, 0.691	121.600, 0.421
610	121.800, 0.647	121.800, 0.685	121.800, 0.691	121.800, 0.421
611	122.000, 0.647	122.000, 0.684	122.000, 0.691	122.000, 0.421
612	122.200, 0.647	122.200, 0.685	122.200, 0.691	122.200, 0.421
613	122.400, 0.647	122.400, 0.685	122.400, 0.691	122.400, 0.422
614	122.600, 0.647	122.600, 0.685	122.600, 0.691	122.600, 0.422
615	122.800, 0.648	122.800, 0.685	122.800, 0.691	122.800, 0.422
616	123.000, 0.648	123.000, 0.685	123.000, 0.691	123.000, 0.423
617	123.200, 0.648	123.200, 0.685	123.200, 0.691	123.200, 0.423
618	123.400, 0.648	123.400, 0.685	123.400, 0.691	123.400, 0.424
619	123.600, 0.648	123.600, 0.685	123.600, 0.691	123.600, 0.424
620	123.800, 0.648	123.800, 0.685	123.800, 0.691	123.800, 0.425
621	124.000, 0.648	124.000, 0.685	124.000, 0.691	124.000, 0.425
622	124.200, 0.648	124.200, 0.685	124.200, 0.692	124.200, 0.425
623	124.400, 0.648	124.400, 0.685	124.400, 0.692	124.400, 0.425
624	124.600, 0.648	124.600, 0.685	124.600, 0.692	124.600, 0.425
625	124.800, 0.648	124.800, 0.685	124.800, 0.692	124.800, 0.424
626	125.000, 0.648	125.000, 0.685	125.000, 0.692	125.000, 0.424
627	125.200, 0.648	125.200, 0.686	125.200, 0.692	125.200, 0.423
628	125.400, 0.647	125.400, 0.686	125.400, 0.692	125.400, 0.422
629	125.600, 0.647	125.600, 0.686	125.600, 0.692	125.600, 0.422
630	125.800, 0.647	125.800, 0.686	125.800, 0.692	125.800, 0.421
631	126.000, 0.647	126.000, 0.686	126.000, 0.692	126.000, 0.421
632	126.200, 0.647	126.200, 0.686	126.200, 0.692	126.200, 0.421
633	126.400, 0.647	126.400, 0.687	126.400, 0.692	126.400, 0.420
634	126.600, 0.647	126.600, 0.687	126.600, 0.692	126.600, 0.420
635	126.800, 0.647	126.800, 0.687	126.800, 0.692	126.800, 0.420
636	127.000, 0.647	127.000, 0.687	127.000, 0.692	127.000, 0.420
637	127.200, 0.647	127.200, 0.687	127.200, 0.692	127.200, 0.420
638	127.400, 0.647	127.400, 0.687	127.400, 0.692	127.400, 0.420
639	127.600, 0.647	127.600, 0.687	127.600, 0.692	127.600, 0.421
640	127.800, 0.647	127.800, 0.687	127.800, 0.693	127.800, 0.421
641	128.000, 0.647	128.000, 0.688	128.000, 0.693	128.000, 0.421
642	128.200, 0.647	128.200, 0.688	128.200, 0.693	128.200, 0.421
643	128.400, 0.646	128.400, 0.688	128.400, 0.693	128.400, 0.422
644	128.600, 0.646	128.600, 0.688	128.600, 0.693	128.600, 0.422
645	128.800, 0.646	128.800, 0.688	128.800, 0.693	128.800, 0.422
646	129.000, 0.645	129.000, 0.688	129.000, 0.693	129.000, 0.422
647	129.200, 0.645	129.200, 0.688	129.200, 0.693	129.200, 0.422
648	129.400, 0.645	129.400, 0.688	129.400, 0.693	129.400, 0.422
649	129.600, 0.645	129.600, 0.687	129.600, 0.693	129.600, 0.422
650	129.800, 0.645	129.800, 0.687	129.800, 0.694	129.800, 0.422
651	130.000, 0.645	130.000, 0.687	130.000, 0.694	130.000, 0.422
652	130.200, 0.646	130.200, 0.687	130.200, 0.694	130.200, 0.422
653	130.400, 0.646	130.400, 0.687	130.400, 0.694	130.400, 0.422
654	130.600, 0.646	130.600, 0.687	130.600, 0.694	130.600, 0.421
655	130.800, 0.646	130.800, 0.687	130.800, 0.694	130.800, 0.421
656	131.000, 0.646	131.000, 0.687	131.000, 0.694	131.000, 0.421
657	131.200, 0.647	131.200, 0.687	131.200, 0.694	131.200, 0.421
658	131.400, 0.647	131.400, 0.687	131.400, 0.694	131.400, 0.421
659	131.600, 0.647	131.600, 0.688	131.600, 0.694	131.600, 0.420
660	131.800, 0.647	131.800, 0.688	131.800, 0.694	131.800, 0.420
661	132.000, 0.647	132.000, 0.689	132.000, 0.693	132.000, 0.420
662	132.200, 0.647	132.200, 0.689	132.200, 0.694	132.200, 0.420
663	132.400, 0.647	132.400, 0.690	132.400, 0.694	132.400, 0.420
664	132.600, 0.647	132.600, 0.690	132.600, 0.694	132.600, 0.421
665	132.800, 0.647	132.800, 0.690	132.800, 0.694	132.800, 0.421
666	133.000, 0.647	133.000, 0.690	133.000, 0.694	133.000, 0.421
667	133.200, 0.647	133.200, 0.690	133.200, 0.695	133.200, 0.422
668	133.400, 0.647	133.400, 0.690	133.400, 0.695	133.400, 0.422
669	133.600, 0.647	133.600, 0.690	133.600, 0.695	133.600, 0.422
670	133.800, 0.646	133.800, 0.690	133.800, 0.695	133.800, 0.422
671	134.000, 0.646	134.000, 0.690	134.000, 0.695	134.000, 0.422
672	134.200, 0.646	134.200, 0.690	134.200, 0.695	134.200, 0.422
673	134.400, 0.646	134.400, 0.690	134.400, 0.695	134.400, 0.422
674	134.600, 0.645	134.600, 0.690	134.600, 0.695	134.600, 0.422
675	134.800, 0.645	134.800, 0.689	134.800, 0.695	134.800, 0.422
676	135.000, 0.645	135.000, 0.689	135.000, 0.695	135.000, 0.422
677	135.200, 0.646	135.200, 0.689	135.200, 0.695	135.200, 0.421
678	135.400, 0.645	135.400, 0.689	135.400, 0.695	135.400, 0.421
679	135.600, 0.645	135.600, 0.689	135.600, 0.695	135.600, 0.421
680	135.800, 0.645	135.800, 0.689	135.800, 0.696	135.800, 0.421
681	136.000, 0.645	136.000, 0.690	136.000, 0.696	136.000, 0.421
682	136.200, 0.645	136.200, 0.690	136.200, 0.696	136.200, 0.421
683	136.400, 0.645	136.400, 0.690	136.400, 0.697	136.400, 0.421
684	136.600, 0.645	136.600, 0.690	136.600, 0.697	136.600, 0.421
685	136.800, 0.645	136.800, 0.690	136.800, 0.697	136.800, 0.421
686	137.000, 0.645	137.000, 0.690	137.000, 0.697	137.000, 0.421
687	137.200, 0.645	137.200, 0.691	137.200, 0.697	137.200, 0.422
688	137.400, 0.645	137.400, 0.691	137.400, 0.697	137.400, 0.422
689	137.600, 0.645	137.600, 0.691	137.600, 0.697	137.600, 0.422
690	137.800, 0.645	137.800, 0.691	137.800, 0.697	137.800, 0.422
691	138.000, 0.645	138.000, 0.691	138.000, 0.697	138.000, 0.422
692	138.200, 0.645	138.200, 0.691	138.200, 0.697	138.200, 0.422
693	138.400, 0.645	138.400, 0.691	138.400, 0.697	138.400, 0.422
694	138.600, 0.645	138.600, 0.691	138.600, 0.697	138.600, 0.422
695	138.800, 0.645	138.800, 0.691	138.800, 0.697	138.800, 0.422
696	139.000, 0.645	139.000, 0.691	139.000, 0.697	139.000, 0.421
697	139.200, 0.644	139.200, 0.691	139.200, 0.698	139.200, 0.421
698	139.400, 0.644	139.400, 0.691	139.400, 0.698	139.400, 0.421
699	139.600, 0.644	139.600, 0.692	139.600, 0.697	139.600, 0.420
700	139.800, 0.644	139.800, 0.692	139.800, 0.697	139.800, 0.420
701	140.000, 0.644	140.000, 0.692	140.000, 0.697	140.000, 0.420
702	140.200, 0.644	140.200, 0.692	140.200, 0.697	140.200, 0.420
703	140.400, 0.644	140.400, 0.692	140.400, 0.697	140.400, 0.420
704	140.600, 0.644	140.600, 0.693	140.600, 0.697	140.600, 0.420
705	140.800, 0.643	140.800, 0.693	140.800, 0.696	140.800, 0.420
706	141.000, 0.643	141.000, 0.693	141.000, 0.696	141.000, 0.421
707	141.200, 0.643	141.200, 0.693	141.200, 0.696	141.200, 0.421
708	141.400, 0.643	141.400, 0.693	141.400, 0.696	141.400, 0.421
709	141.600, 0.643	141.600, 0.693	141.600, 0.696	141.600, 0.421
710	141.800, 0.643	141.800, 0.692	141.800, 0.696	141.800, 0.421
711	142.000, 0.643	142.000, 0.692	142.000, 0.696	142.000, 0.421
712	142.200, 0.643	142.200, 0.692	142.200, 0.696	142.200, 0.421
713	142.400, 0.644	142.400, 0.692	142.400, 0.697	142.400, 0.421
714	142.600, 0.644	142.600, 0.691	142.600, 0.697	142.600, 0.421
715	142.800, 0.644	142.800, 0.691	142.800, 0.697	142.800, 0.421
716	143.000, 0.644	143.000, 0.691	143.000, 0.698	143.000, 0.421
717	143.200, 0.644	143.200, 0.692	143.200, 0.698	143.200, 0.421
718	143.400, 0.644	143.400, 0.692	143.400, 0.698	143.400, 0.421
719	143.600, 0.644	143.600, 0.691	143.600, 0.699	143.600, 0.421
720	143.800, 0.644	143.800, 0.691	143.800, 0.699	143.800, 0.421
721	144.000, 0.644	144.000, 0.691	144.000, 0.699	144.000, 0.421
722	144.200, 0.643	144.200, 0.691	144.200, 0.699	144.200, 0.422
723	144.400, 0.643	144.400, 0.691	144.400, 0.699	144.400, 0.422
724	144.600, 0.643	144.600, 0.692	144.600, 0.699	144.600, 0.422
725	144.800, 0.643	144.800, 0.692	144.800, 0.699	144.800, 0.422
726	145.000, 0.642	145.000, 0.692	145.000, 0.699	145.000, 0.422
727	145.200, 0.642	145.200, 0.692	145.200, 0.699	145.200, 0.421
728	145.400, 0.642	145.400, 0.692	145.400, 0.699	145.400, 0.421
729	145.600, 0.642	145.600, 0.692	145.600, 0.699	145.600, 0.421
730	145.800, 0.642	145.800, 0.692	145.800, 0.698	145.800, 0.421
731	146.000, 0.642	146.000, 0.692	146.000, 0.698	146.000, 0.420
732	146.200, 0.642	146.200, 0.692	146.200, 0.698	146.200, 0.420
733	146.400, 0.643	146.400, 0.692	146.400, 0.698	146.400, 0.420
734	146.600, 0.643	146.600, 0.692	146.600, 0.698	146.600, 0.420
735	146.800, 0.643	146.800, 0.692	146.800, 0.698	146.800, 0.421
736	147.000, 0.643	147.000, 0.693	147.000, 0.698	147.000, 0.421
737	147.200, 0.643	147.200, 0.693	147.200, 0.698	147.200, 0.421
738	147.400, 0.643	147.400, 0.693	147.400, 0.698	147.400, 0.421
739	147.600, 0.643	147.600, 0.693	147.600, 0.698	147.600, 0.421
740	147.800, 0.644	147.800, 0.693	147.800, 0.699	147.800, 0.421
741	148.000, 0.644	148.000, 0.693	148.000, 0.699	148.000, 0.420
742	148.200, 0.644	148.200, 0.693	148.200, 0.699	148.200, 0.420
743	148.400, 0.645	148.400, 0.693	148.400, 0.699	148.400, 0.420
744	148.600, 0.645	148.600, 0.693	148.600, 0.699	148.600, 0.420
745	148.800, 0.645	148.800, 0.694	148.800, 0.699	148.800, 0.420
746	149.000, 0.645	149.000, 0.694	149.000, 0.699	149.000, 0.420
747	149.200, 0.645	149.200, 0.694	149.200, 0.699	149.200, 0.420
748	149.400, 0.644	149.400, 0.694	149.400, 0.699	149.400, 0.419
749	149.600, 0.644	149.600, 0.695	149.600, 0.699	149.600, 0.419
750	149.800, 0.644	149.800, 0.695	149.800, 0.699	149.800, 0.419
751	150.000, 0.644	150.000, 0.695	150.000, 0.699	150.000, 0.419
752	150.200, 0.637	150.200, 0.688	150.200, 0.692	150.200, 0.418
753	150.400, 0.629	150.400, 0.680	150.400, 0.685	150.400, 0.416
754	150.600, 0.620	150.600, 0.671	150.600, 0.676	150.600, 0.414
755	150.800, 0.610	150.800, 0.661	150.800, 0.667	150.800, 0.412
756	151.000, 0.600	151.000, 0.651	151.000, 0.657	151.000, 0.410
757	151.200, 0.590	151.200, 0.641	151.200, 0.648	151.200, 0.409
758	151.400, 0.580	151.400, 0.631	151.400, 0.638	151.400, 0.407
759	151.600, 0.570	151.600, 0.621	151.600, 0.629	151.600, 0.405
760	151.800, 0.560	151.800, 0.612	151.800, 0.620	151.800, 0.403
761	152.000, 0.552	152.000, 0.603	152.000, 0.613	152.000, 0.402
762	152.200, 0.546	152.200, 0.596	152.200, 0.607	152.200, 0.401
763	152.400, 0.540	152.400, 0.590	152.400, 0.601	152.400, 0.400
764	152.600, 0.534	152.600, 0.585	152.600, 0.596	152.600, 0.399
765	152.800, 0.529	152.800, 0.579	152.800, 0.591	152.800, 0.399
766	153.000, 0.524	153.000, 0.575	153.000, 0.587	153.000, 0.398
767	153.200, 0.520	153.200, 0.570	153.200, 0.582	153.200, 0.397
768	153.400, 0.516	153.400, 0.566	153.400, 0.579	153.400, 0.397
769	153.600, 0.512	153.600, 0.561	153.600, 0.575	153.600, 0.396
770	153.800, 0.509	153.800, 0.558	153.800, 0.572	153.800, 0.395
771	154.000, 0.505	154.000, 0.554	154.000, 0.569	154.000, 0.394
772	154.200, 0.502	154.200, 0.550	154.200, 0.566	154.200, 0.394
773	154.400, 0.500	154.400, 0.547	154.400, 0.563	154.400, 0.393
774	154.600, 0.497	154.600, 0.545	154.600, 0.561	154.600, 0.393
775	154.800, 0.494	154.800, 0.542	154.800, 0.559	154.800, 0.392
776	155.000, 0.492	155.000, 0.539	155.000, 0.557	155.000, 0.392
777	155.200, 0.490	155.200, 0.537	155.200, 0.555	155.200, 0.391
778	155.400, 0.488	155.400, 0.535	155.400, 0.553	155.400, 0.391
779	155.600, 0.486	155.600, 0.533	155.600, 0.551	155.600, 0.391
780	155.800, 0.484	155.800, 0.531	155.800, 0.549	155.800, 0.390
781	156.000, 0.482	156.000, 0.529	156.000, 0.548	156.000, 0.390
782	156.200, 0.480	156.200, 0.528	156.200, 0.546	156.200, 0.390
783	156.400, 0.478	156.400, 0.527	156.400, 0.545	156.400, 0.389
784	156.600, 0.477	156.600, 0.525	156.600, 0.544	156.600, 0.389
785	156.800, 0.475	156.800, 0.524	156.800, 0.542	156.800, 0.389
786	157.000, 0.474	157.000, 0.523	157.000, 0.541	157.000, 0.389
787	157.200, 0.472	157.200, 0.522	157.200, 0.540	157.200, 0.389
788	157.400, 0.471	157.400, 0.520	157.400, 0.538	157.400, 0.389
789	157.600, 0.470	157.600, 0.519	157.600, 0.537	157.600, 0.388
790	157.800, 0.468	157.800, 0.518	157.800, 0.536	157.800, 0.388
791	158.000, 0.467	158.000, 0.517	158.000, 0.535	158.000, 0.388
792	158.200, 0.466	158.200, 0.515	158.200, 0.534	158.200, 0.388
793	158.400, 0.465	158.400, 0.514	158.400, 0.533	158.400, 0.388
794	158.600, 0.464	158.600, 0.513	158.600, 0.533	158.600, 0.387
795	158.800, 0.463	158.800, 0.511	158.800, 0.532	158.800, 0.387
796	159.000, 0.462	159.000, 0.510	159.000, 0.531	159.000, 0.387
797	159.200, 0.461	159.200, 0.510	159.200, 0.530	159.200, 0.386
798	159.400, 0.460	159.400, 0.509	159.400, 0.529	159.400, 0.386
799	159.600, 0.459	159.600, 0.508	159.600, 0.528	159.600, 0.386
800	159.800, 0.458	159.800, 0.508	159.800, 0.527	159.800, 0.386
801	160.000, 0.457	160.000, 0.507	160.000, 0.527	160.000, 0.386
802	160.200, 0.456	160.200, 0.506	160.200, 0.526	160.200, 0.385
803	160.400, 0.455	160.400, 0.506	160.400, 0.525	160.400, 0.385
804	160.600, 0.455	160.600, 0.505	160.600, 0.524	160.600, 0.385
805	160.800, 0.454	160.800, 0.504	160.800, 0.523	160.800, 0.385
806	161.000, 0.453	161.000, 0.504	161.000, 0.523	161.000, 0.385
807	161.200, 0.452	161.200, 0.503	161.200, 0.522	161.200, 0.385
808	161.400, 0.451	161.400, 0.502	161.400, 0.521	161.400, 0.384
809	161.600, 0.451	161.600, 0.501	161.600, 0.521	161.600, 0.384
810	161.800, 0.450	161.800, 0.500	161.800, 0.520	161.800, 0.384
811	162.000, 0.449	162.000, 0.499	162.000, 0.520	162.000, 0.384
812	162.200, 0.448	162.200, 0.498	162.200, 0.519	162.200, 0.383
813	162.400, 0.447	162.400, 0.497	162.400, 0.518	162.400, 0.383
814	162.600, 0.446	162.600, 0.496	162.600, 0.518	162.600, 0.383
815	162.800, 0.445	162.800, 0.495	162.800, 0.517	162.800, 0.383
816	163.000, 0.444	163.000, 0.494	163.000, 0.516	163.000, 0.383
817	163.200, 0.443	163.200, 0.494	163.200, 0.516	163.200, 0.383
818	163.400, 0.442	163.400, 0.493	163.400, 0.515	163.400, 0.383
819	163.600, 0.441	163.600, 0.493	163.600, 0.515	163.600, 0.382
820	163.800, 0.441	163.800, 0.492	163.800, 0.515	163.800, 0.382
821	164.000, 0.440	164.000, 0.492	164.000, 0.514	164.000, 0.382
822	164.200, 0.439	164.200, 0.491	164.200, 0.514	164.200, 0.382
823	164.400, 0.439	164.400, 0.491	164.400, 0.514	164.400, 0.382
824	164.600, 0.438	164.600, 0.490	164.600, 0.513	164.600, 0.382
825	164.800, 0.437	164.800, 0.490	164.800, 0.513	164.800, 0.381
826	165.000, 0.437	165.000, 0.489	165.000, 0.513	165.000, 0.381
827	165.200, 0.436	165.200, 0.489	165.200, 0.513	165.200, 0.381
828	165.400, 0.435	165.400, 0.489	165.400, 0.512	165.400, 0.381
829	165.600, 0.435	165.600, 0.488	165.600, 0.512	165.600, 0.381
830	165.800, 0.434	165.800, 0.488	165.800, 0.511	165.800, 0.381
831	166.000, 0.433	166.000, 0.487	166.000, 0.510	166.000, 0.380
832	166.200, 0.433	166.200, 0.487	166.200, 0.510	166.200, 0.380
833	166.400, 0.432	166.400, 0.486	166.400, 0.509	166.400, 0.380
834	166.600, 0.432	166.600, 0.485	166.600, 0.508	166.600, 0.380
835	166.800, 0.431	166.800, 0.485	166.800, 0.508	166.800, 0.380
836	167.000, 0.431	167.000, 0.484	167.000, 0.507	167.000, 0.379
837	167.200, 0.430	167.200, 0.483	167.200, 0.506	167.200, 0.379
838	167.400, 0.430	167.400, 0.483	167.400, 0.506	167.400, 0.378
839	167.600, 0.429	167.600, 0.482	167.600, 0.505	167.600, 0.378
840	167.800, 0.429	167.800, 0.481	167.800, 0.505	167.800, 0.378
841	168.000, 0.428	168.000, 0.481	168.000, 0.505	168.000, 0.378
842	168.200, 0.427	168.200, 0.480	168.200, 0.504	168.200, 0.377
843	168.400, 0.427	168.400, 0.479	168.400, 0.504	168.400, 0.377
844	168.600, 0.426	168.600, 0.479	168.600, 0.504	168.600, 0.377
845	168.800, 0.426	168.800, 0.478	168.800, 0.503	168.800, 0.377
846	169.000, 0.425	169.000, 0.478	169.000, 0.503	169.000, 0.377
847	169.200, 0.425	169.200, 0.477	169.200, 0.502	169.200, 0.377
848	169.400, 0.424	169.400, 0.477	169.400, 0.502	169.400, 0.377
849	169.600, 0.424	169.600, 0.476	169.600, 0.501	169.600, 0.377
850	169.800, 0.423	169.800, 0.475	169.800, 0.501	169.800, 0.377
851	170.000, 0.423	170.000, 0.475	170.000, 0.500	170.000, 0.377
852	170.200, 0.423	170.200, 0.474	170.200, 0.500	170.200, 0.377
853	170.400, 0.422	170.400, 0.474	170.400, 0.500	170.400, 0.377
854	170.600, 0.422	170.600, 0.473	170.600, 0.499	170.600, 0.376
855	170.800, 0.421	170.800, 0.473	170.800, 0.499	170.800, 0.376
856	171.000, 0.420	171.000, 0.473	171.000, 0.498	171.000, 0.376
857	171.200, 0.420	171.200, 0.472	171.200, 0.498	171.200, 0.376
858	171.400, 0.419	171.400, 0.472	171.400, 0.497	171.400, 0.376
859	171.600, 0.419	171.600, 0.472	171.600, 0.497	171.600, 0.375
860	171.800, 0.418	171.800, 0.471	171.800, 0.497	171.800, 0.375
861	172.000, 0.417	172.000, 0.471	172.000, 0.496	172.000, 0.375
862	172.200, 0.416	172.200, 0.470	172.200, 0.496	172.200, 0.375
863	172.400, 0.416	172.400, 0.470	172.400, 0.495	172.400, 0.375
864	172.600, 0.415	172.600, 0.469	172.600, 0.495	172.600, 0.374
865	172.800, 0.414	172.800, 0.468	172.800, 0.494	172.800, 0.374
866	173.000, 0.414	173.000, 0.468	173.000, 0.494	173.000, 0.374
867	173.200, 0.413	173.200, 0.467	173.200, 0.493	173.200, 0.374
868	173.400, 0.412	173.400, 0.467	173.400, 0.493	173.400, 0.374
869	173.600, 0.412	173.600, 0.466	173.600, 0.493	173.600, 0.374
870	173.800, 0.412	173.800, 0.466	173.800, 0.492	173.800, 0.373
871	174.000, 0.411	174.000, 0.465	174.000, 0.492	174.000, 0.373
872	174.200, 0.411	174.200, 0.465	174.200, 0.491	174.200, 0.373
873	174.400, 0.410	174.400, 0.464	174.400, 0.491	174.400, 0.373
874	174.600, 0.410	174.600, 0.464	174.600, 0.491	174.600, 0.373
875	174.800, 0.410	174.800, 0.463	174.800, 0.490	174.800, 0.373
876	175.000, 0.410	175.000, 0.463	175.000, 0.489	175.000, 0.372
877	175.200, 0.409	175.200, 0.462	175.200, 0.489	175.200, 0.372
878	175.400, 0.409	175.400, 0.462	175.400, 0.488	175.400, 0.372
879	175.600, 0.408	175.600, 0.462	175.600, 0.488	175.600, 0.372
880	175.800, 0.408	175.800, 0.462	175.800, 0.487	175.800, 0.371
881	176.000, 0.407	176.000, 0.461	176.000, 0.487	176.000, 0.371
882	176.200, 0.407	176.200, 0.461	176.200, 0.487	176.200, 0.371
883	176.400, 0.406	176.400, 0.460	176.400, 0.486	176.400, 0.371
884	176.600, 0.405	176.600, 0.460	176.600, 0.486	176.600, 0.371
885	176.800, 0.405	176.800, 0.460	176.800, 0.485	176.800, 0.371
886	177.000, 0.404	177.000, 0.459	177.000, 0.485	177.000, 0.371
887	177.200, 0.404	177.200, 0.459	177.200, 0.485	177.200, 0.371
888	177.400, 0.403	177.400, 0.458	177.400, 0.484	177.400, 0.371
889	177.600, 0.403	177.600, 0.457	177.600, 0.484	177.600, 0.371
890	177.800, 0.402	177.800, 0.457	177.800, 0.484	177.800, 0.371
891	178.000, 0.402	178.000, 0.456	178.000, 0.483	178.000, 0.371
892	178.200, 0.401	178.200, 0.455	178.200, 0.483	178.200, 0.371
893	178.400, 0.401	178.400, 0.455	178.400, 0.482	178.400, 0.371
894	178.600, 0.400	178.600, 0.454	178.600, 0.482	178.600, 0.370
895	178.800, 0.400	178.800, 0.454	178.800, 0.481	178.800, 0.370
896	179.000, 0.399	179.000, 0.453	179.000, 0.480	179.000, 0.370
897	179.200, 0.399	179.200, 0.453	179.200, 0.479	179.200, 0.370
898	179.400, 0.398	179.400, 0.453	179.400, 0.479	179.400, 0.370
899	179.600, 0.398	179.600, 0.452	179.600, 0.478	179.600, 0.369
900	179.800, 0.397	179.800, 0.452	179.800, 0.478	179.800, 0.369
901	180.000, 0.397	180.000, 0.452	180.000, 0.477	180.000, 0.369
902	180.200, 0.396	180.200, 0.452	180.200, 0.477	180.200, 0.369
903	180.400, 0.395	180.400, 0.451	180.400, 0.477	180.400, 0.368
904	180.600, 0.395	180.600, 0.451	180.600, 0.477	180.600, 0.368
905	180.800, 0.394	180.800, 0.451	180.800, 0.476	180.800, 0.368
906	181.000, 0.393	181.000, 0.451	181.000, 0.476	181.000, 0.367
907	181.200, 0.393	181.200, 0.450	181.200, 0.476	181.200, 0.367
908	181.400, 0.392	181.400, 0.450	181.400, 0.476	181.400, 0.367
909	181.600, 0.391	181.600, 0.449	181.600, 0.476	181.600, 0.367
910	181.800, 0.391	181.800, 0.449	181.800, 0.475	181.800, 0.367
911	182.000, 0.390	182.000, 0.448	182.000, 0.475	182.000, 0.367
912	182.200, 0.390	182.200, 0.448	182.200, 0.474	182.200, 0.367
913	182.400, 0.390	182.400, 0.448	182.400, 0.473	182.400, 0.367
914	182.600, 0.390	182.600, 0.447	182.600, 0.473	182.600, 0.367
915	182.800, 0.389	182.800, 0.447	182.800, 0.472	182.800, 0.366
916	183.000, 0.389	183.000, 0.446	183.000, 0.472	183.000, 0.366
917	183.200, 0.389	183.200, 0.446	183.200, 0.471	183.200, 0.366
918	183.400, 0.389	183.400, 0.445	183.400, 0.471	183.400, 0.366
919	183.600, 0.389	183.600, 0.444	183.600, 0.470	183.600, 0.365
920	183.800, 0.388	183.800, 0.444	183.800, 0.470	183.800, 0.365
921	184.000, 0.388	184.000, 0.443	184.000, 0.469	184.000, 0.364
922	184.200, 0.387	184.200, 0.443	184.200, 0.469	184.200, 0.364
923	184.400, 0.387	184.400, 0.442	184.400, 0.468	184.400, 0.364
924	184.600, 0.386	184.600, 0.442	184.600, 0.468	184.600, 0.364
925	184.800, 0.386	184.800, 0.441	184.800, 0.467	184.800, 0.363
926	185.000, 0.385	185.000, 0.441	185.000, 0.467	185.000, 0.363
927	185.200, 0.384	185.200, 0.440	185.200, 0.466	185.200, 0.363
928	185.400, 0.384	185.400, 0.440	185.400, 0.466	185.400, 0.363
929	185.600, 0.383	185.600, 0.440	185.600, 0.465	185.600, 0.363
930	185.800, 0.383	185.800, 0.439	185.800, 0.465	185.800, 0.363
931	186.000, 0.383	186.000, 0.439	186.000, 0.465	186.000, 0.362
932	186.200, 0.382	186.200, 0.440	186.200, 0.465	186.200, 0.362
933	186.400, 0.382	186.400, 0.439	186.400, 0.465	186.400, 0.362
934	186.600, 0.382	186.600, 0.439	186.600, 0.465	186.600, 0.362
935	186.800, 0.381	186.800, 0.439	186.800, 0.464	186.800, 0.362
936	187.000, 0.381	187.000, 0.439	187.000, 0.464	187.000, 0.362
937	187.200, 0.381	187.200, 0.438	187.200, 0.464	187.200, 0.362
938	187.400, 0.380	187.400, 0.438	187.400, 0.464	187.400, 0.362
939	187.600, 0.380	187.600, 0.437	187.600, 0.463	187.600, 0.362
940	187.800, 0.379	187.800, 0.437	187.800, 0.463	187.800, 0.362
941	188.000, 0.378	188.000, 0.436	188.000, 0.463	188.000, 0.362
942	188.200, 0.378	188.200, 0.435	188.200, 0.462	188.200, 0.362
943	188.400, 0.377	188.400, 0.435	188.400, 0.462	188.400, 0.362
944	188.600, 0.376	188.600, 0.434	188.600, 0.462	188.600, 0.362
945	188.800, 0.376	188.800, 0.434	188.800, 0.462	188.800, 0.361
946	189.000, 0.375	189.000, 0.433	189.000, 0.461	189.000, 0.361
947	189.200, 0.375	189.200, 0.433	189.200, 0.461	189.200, 0.361
948	189.400, 0.375	189.400, 0.432	189.400, 0.460	189.400, 0.361
949	189.600, 0.374	189.600, 0.432	189.600, 0.460	189.600, 0.360
950	189.800, 0.374	189.800, 0.432	189.800, 0.460	189.800, 0.360
951	190.000, 0.374	190.000, 0.431	190.000, 0.459	190.000, 0.359
952	190.200, 0.373	190.200, 0.431	190.200, 0.459	190.200, 0.359
953	190.400, 0.373	190.400, 0.430	190.400, 0.458	190.400, 0.359
954	190.600, 0.373	190.600, 0.430	190.600, 0.458	190.600, 0.359
955	190.800, 0.372	190.800, 0.430	190.800, 0.458	190.800, 0.358
956	191.000, 0.372	191.000, 0.429	191.000, 0.457	191.000, 0.358
957	191.200, 0.371	191.200, 0.429	191.200, 0.457	191.200, 0.358
958	191.400, 0.371	191.400, 0.429	191.400, 0.456	191.400, 0.358
959	191.600, 0.370	191.600, 0.428	191.600, 0.456	191.600, 0.358
960	191.800, 0.370	191.800, 0.428	191.800, 0.456	191.800, 0.358
961	192.000, 0.370	192.000, 0.428	192.000, 0.455	192.000, 0.357
962	192.200, 0.369	192.200, 0.427	192.200, 0.455	192.200, 0.357
963	192.400, 0.369	192.400, 0.427	192.400, 0.454	192.400, 0.358
964	192.600, 0.369	192.600, 0.427	192.600, 0.454	192.600, 0.358
965	192.800, 0.368	192.800, 0.427	192.800, 0.454	192.800, 0.358
966	193.000, 0.368	193.000, 0.427	193.000, 0.453	193.000, 0.358
967	193.200, 0.368	193.200, 0.426	193.200, 0.453	193.200, 0.358
968	193.400, 0.368	193.400, 0.426	193.400, 0.452	193.400, 0.358
969	193.600, 0.367	193.600, 0.425	193.600, 0.451	193.600, 0.358
970	193.800, 0.367	193.800, 0.425	193.800, 0.451	193.800, 0.357
971	194.000, 0.366	194.000, 0.424	194.000, 0.450	194.000, 0.357
972	194.200, 0.366	194.200, 0.423	194.200, 0.450	194.200, 0.357
973	194.400, 0.365	194.400, 0.423	194.400, 0.450	194.400, 0.357
974	194.600, 0.365	194.600, 0.422	194.600, 0.449	194.600, 0.356
975	194.800, 0.364	194.800, 0.422	194.800, 0.449	194.800, 0.356
976	195.000, 0.364	195.000, 0.422	195.000, 0.448	195.000, 0.356
977	195.200, 0.363	195.200, 0.421	195.200, 0.448	195.200, 0.356
978	195.400, 0.363	195.400, 0.421	195.400, 0.447	195.400, 0.355
979	195.600, 0.363	195.600, 0.421	195.600, 0.447	195.600, 0.355
980	195.800, 0.362	195.800, 0.420	195.800, 0.446	195.800, 0.355
981	196.000, 0.362	196.000, 0.420	196.000, 0.446	196.000, 0.355
982	196.200, 0.361	196.200, 0.420	196.200, 0.446	196.200, 0.355
983	196.400, 0.361	196.400, 0.419	196.400, 0.445	196.400, 0.355
984	196.600, 0.360	196.600, 0.419	196.600, 0.445	196.600, 0.354
985	196.800, 0.360	196.800, 0.419	196.800, 0.444	196.800, 0.354
986	197.000, 0.360	197.000, 0.418	197.000, 0.444	197.000, 0.354
987	197.200, 0.359	197.200, 0.418	197.200, 0.443	197.200, 0.354
988	197.400, 0.359	197.400, 0.418	197.400, 0.443	197.400, 0.353
989	197.600, 0.359	197.600, 0.417	197.600, 0.442	197.600, 0.353
990	197.800, 0.358	197.800, 0.417	197.800, 0.442	197.800, 0.353
991	198.000, 0.358	198.000, 0.417	198.000, 0.442	198.000, 0.352
992	198.200, 0.358	198.200, 0.417	198.200, 0.442	198.200, 0.352
993	198.400, 0.357	198.400, 0.416	198.400, 0.442	198.400, 0.352
994	198.600, 0.357	198.600, 0.416	198.600, 0.442	198.600, 0.351
995	198.800, 0.357	198.800, 0.416	198.800, 0.441	198.800, 0.351
996	199.000, 0.357	199.000, 0.415	199.000, 0.441	199.000, 0.352
997	199.200, 0.357	199.200, 0.415	199.200, 0.441	199.200, 0.352
998	199.400, 0.356	199.400, 0.415	199.400, 0.440	199.400, 0.352
999	199.600, 0.356	199.600, 0.414	199.600, 0.440	199.600, 0.352
1000	199.800, 0.356	199.800, 0.414	199.800, 0.440	199.800, 0.352
1001	200.000, 0.355	200.000, 0.413	200.000, 0.439	200.000, 0.352
1002	200.200, 0.355	200.200, 0.412	200.200, 0.439	200.200, 0.352
1003	200.400, 0.355	200.400, 0.412	200.400, 0.438	200.400, 0.352
1004	200.600, 0.354	200.600, 0.411	200.600, 0.437	200.600, 0.351
1005	200.800, 0.354	200.800, 0.411	200.800, 0.437	200.800, 0.351
1006	201.000, 0.354	201.000, 0.410	201.000, 0.436	201.000, 0.351
1007	201.200, 0.354	201.200, 0.410	201.200, 0.436	201.200, 0.351
1008	201.400, 0.353	201.400, 0.409	201.400, 0.436	201.400, 0.350
1009	201.600, 0.353	201.600, 0.409	201.600, 0.435	201.600, 0.350
1010	201.800, 0.353	201.800, 0.409	201.800, 0.435	201.800, 0.349
1011	202.000, 0.353	202.000, 0.408	202.000, 0.435	202.000, 0.349
1012	202.200, 0.352	202.200, 0.408	202.200, 0.435	202.200, 0.348
1013	202.400, 0.352	202.400, 0.407	202.400, 0.435	202.400, 0.348
1014	202.600, 0.352	202.600, 0.407	202.600, 0.434	202.600, 0.348
1015	202.800, 0.351	202.800, 0.407	202.800, 0.434	202.800, 0.347
1016	203.000, 0.350	203.000, 0.406	203.000, 0.434	203.000, 0.347
1017	203.200, 0.350	203.200, 0.406	203.200, 0.433	203.200, 0.347
1018	203.400, 0.349	203.400, 0.406	203.400, 0.433	203.400, 0.347
1019	203.600, 0.349	203.600, 0.406	203.600, 0.433	203.600, 0.347
1020	203.800, 0.348	203.800, 0.406	203.800, 0.432	203.800, 0.347
1021	204.000, 0.348	204.000, 0.406	204.000, 0.432	204.000, 0.346
1022	204.200, 0.347	204.200, 0.406	204.200, 0.432	204.200, 0.346
1023	204.400, 0.347	204.400, 0.406	204.400, 0.431	204.400, 0.346
1024	204.600, 0.346	204.600, 0.405	204.600, 0.431	204.600, 0.347
1025	204.800, 0.346	204.800, 0.405	204.800, 0.431	204.800, 0.347
1026	205.000, 0.346	205.000, 0.405	205.000, 0.430	205.000, 0.347
1027	205.200, 0.345	205.200, 0.405	205.200, 0.430	205.200, 0.347
1028	205.400, 0.345	205.400, 0.405	205.400, 0.430	205.400, 0.347
1029	205.600, 0.345	205.600, 0.404	205.600, 0.430	205.600, 0.347
1030	205.800, 0.345	205.800, 0.404	205.800, 0.429	205.800, 0.347
1031	206.000, 0.345	206.000, 0.403	206.000, 0.429	206.000, 0.347
1032	206.200, 0.344	206.200, 0.403	206.200, 0.429	206.200, 0.347
1033	206.400, 0.344	206.400, 0.402	206.400, 0.429	206.400, 0.346
1034	206.600, 0.343	206.600, 0.402	206.600, 0.428	206.600, 0.346
1035	206.800, 0.343	206.800, 0.401	206.800, 0.428	206.800, 0.346
1036	207.000, 0.342	207.000, 0.401	207.000, 0.427	207.000, 0.345
1037	207.200, 0.342	207.200, 0.401	207.200, 0.427	207.200, 0.345
1038	207.400, 0.342	207.400, 0.400	207.400, 0.427	207.400, 0.345
1039	207.600, 0.341	207.600, 0.400	207.600, 0.427	207.600, 0.344
1040	207.800, 0.341	207.800, 0.400	207.800, 0.427	207.800, 0.344
1041	208.000, 0.341	208.000, 0.399	208.000, 0.426	208.000, 0.344
1042	208.200, 0.341	208.200, 0.399	208.200, 0.426	208.200, 0.344
1043	208.400, 0.340	208.400, 0.399	208.400, 0.426	208.400, 0.344
1044	208.600, 0.340	208.600, 0.399	208.600, 0.426	208.600, 0.344
1045	208.800, 0.340	208.800, 0.398	208.800, 0.425	208.800, 0.344
1046	209.000, 0.339	209.000, 0.398	209.000, 0.425	209.000, 0.344
1047	209.200, 0.339	209.200, 0.398	209.200, 0.425	209.200, 0.344
1048	209.400, 0.339	209.400, 0.398	209.400, 0.424	209.400, 0.344
1049	209.600, 0.339	209.600, 0.397	209.600, 0.424	209.600, 0.344
1050	209.800, 0.338	209.800, 0.397	209.800, 0.423	209.800, 0.344
1051	210.000, 0.338	210.000, 0.397	210.000, 0.423	210.000, 0.344
1052	210.200, 0.338	210.200, 0.397	210.200, 0.423	210.200, 0.344
1053	210.400, 0.337	210.400, 0.396	210.400, 0.422	210.400, 0.344
1054	210.600, 0.337	210.600, 0.396	210.600, 0.422	210.600, 0.344
1055	210.800, 0.336	210.800, 0.396	210.800, 0.421	210.800, 0.344
1056	211.000, 0.336	211.000, 0.395	211.000, 0.421	211.000, 0.344
1057	211.200, 0.336	211.200, 0.395	211.200, 0.421	211.200, 0.343
1058	211.400, 0.335	211.400, 0.395	211.400, 0.420	211.400, 0.343
1059	211.600, 0.335	211.600, 0.395	211.600, 0.420	211.600, 0.343
1060	211.800, 0.335	211.800, 0.394	211.800, 0.420	211.800, 0.342
1061	212.000, 0.334	212.000, 0.394	212.000, 0.419	212.000, 0.342
1062	212.200, 0.334	212.200, 0.394	212.200, 0.419	212.200, 0.342
1063	212.400, 0.334	212.400, 0.393	212.400, 0.418	212.400, 0.341
1064	212.600, 0.333	212.600, 0.392	212.600, 0.418	212.600, 0.341
1065	212.800, 0.333	212.800, 0.392	212.800, 0.417	212.800, 0.340
1066	213.000, 0.333	213.000, 0.391	213.000, 0.417	213.000, 0.340
1067	213.200, 0.333	213.200, 0.391	213.200, 0.417	213.200, 0.340
1068	213.400, 0.332	213.400, 0.391	213.400, 0.416	213.400, 0.340
1069	213.600, 0.332	213.600, 0.390	213.600, 0.416	213.600, 0.340
1070	213.800, 0.332	213.800, 0.390	213.800, 0.416	213.800, 0.339
1071	214.000, 0.332	214.000, 0.390	214.000, 0.415	214.000, 0.339
1072	214.200, 0.332	214.200, 0.390	214.200, 0.415	214.200, 0.339
1073	214.400, 0.331	214.400, 0.389	214.400, 0.415	214.400, 0.339
1074	214.600, 0.331	214.600, 0.389	214.600, 0.414	214.600, 0.339
1075	214.800, 0.331	214.800, 0.388	214.800, 0.414	214.800, 0.339
1076	215.000, 0.330	215.000, 0.388	215.000, 0.414	215.000, 0.339
1077	215.200, 0.330	215.200, 0.387	215.200, 0.414	215.200, 0.339
1078	215.400, 0.329	215.400, 0.387	215.400, 0.414	215.400, 0.338
1079	215.600, 0.329	215.600, 0.387	215.600, 0.413	215.600, 0.338
1080	215.800, 0.329	215.800, 0.387	215.800, 0.413	215.800, 0.338
1081	216.000, 0.328	216.000, 0.386	216.000, 0.412	216.000, 0.338
1082	216.200, 0.328	216.200, 0.386	216.200, 0.412	216.200, 0.337
1083	216.400, 0.328	216.400, 0.386	216.400, 0.412	216.400, 0.337
1084	216.600, 0.328	216.600, 0.386	216.600, 0.412	216.600, 0.337
1085	216.800, 0.327	216.800, 0.385	216.800, 0.412	216.800, 0.336
1086	217.000, 0.327	217.000, 0.385	217.000, 0.412	217.000, 0.336
1087	217.200, 0.327	217.200, 0.385	217.200, 0.412	217.200, 0.336
1088	217.400, 0.326	217.400, 0.385	217.400, 0.412	217.400, 0.336
1089	217.600, 0.326	217.600, 0.385	217.600, 0.412	217.600, 0.336
1090	217.800, 0.326	217.800, 0.385	217.800, 0.411	217.800, 0.336
1091	218.000, 0.325	218.000, 0.385	218.000, 0.411	218.000, 0.336
1092	218.200, 0.325	218.200, 0.385	218.200, 0.411	218.200, 0.336
1093	218.400, 0.325	218.400, 0.385	218.400, 0.411	218.400, 0.336
1094	218.600, 0.324	218.600, 0.384	218.600, 0.411	218.600, 0.336
1095	218.800, 0.324	218.800, 0.384	218.800, 0.410	218.800, 0.336
1096	219.000, 0.323	219.000, 0.383	219.000, 0.410	219.000, 0.336
1097	219.200, 0.323	219.200, 0.383	219.200, 0.410	219.200, 0.335
1098	219.400, 0.323	219.400, 0.383	219.400, 0.409	219.400, 0.336
1099	219.600, 0.323	219.600, 0.382	219.600, 0.409	219.600, 0.336
1100	219.800, 0.323	219.800, 0.382	219.800, 0.409	219.800, 0.336
1101	220.000, 0.323	220.000, 0.382	220.000, 0.408	220.000, 0.336
1102	220.200, 0.323	220.200, 0.382	220.200, 0.408	220.200, 0.336
1103	220.400, 0.323	220.400, 0.382	220.400, 0.408	220.400, 0.336
1104	220.600, 0.323	220.600, 0.382	220.600, 0.407	220.600, 0.336
1105	220.800, 0.322	220.800, 0.381	220.800, 0.407	220.800, 0.336
1106	221.000, 0.322	221.000, 0.381	221.000, 0.407	221.000, 0.335
1107	221.200, 0.322	221.200, 0.381	221.200, 0.406	221.200, 0.335
1108	221.400, 0.321	221.400, 0.380	221.400, 0.406	221.400, 0.335
1109	221.600, 0.321	221.600, 0.380	221.600, 0.406	221.600, 0.335
1110	221.800, 0.320	221.800, 0.380	221.800, 0.405	221.800, 0.335
1111	222.000, 0.320	222.000, 0.380	222.000, 0.405	222.000, 0.335
1112	222.200, 0.320	222.200, 0.379	222.200, 0.405	222.200, 0.334
1113	222.400, 0.320	222.400, 0.379	222.400, 0.404	222.400, 0.334
1114	222.600, 0.319	222.600, 0.378	222.600, 0.404	222.600, 0.334
1115	222.800, 0.319	222.800, 0.378	222.800, 0.404	222.800, 0.333
1116	223.000, 0.319	223.000, 0.378	223.000, 0.403	223.000, 0.333
1117	223.200, 0.319	223.200, 0.377	223.200, 0.403	223.200, 0.333
1118	223.400, 0.318	223.400, 0.377	223.400, 0.403	223.400, 0.333
1119	223.600, 0.318	223.600, 0.377	223.600, 0.403	223.600, 0.333
1120	223.800, 0.317	223.800, 0.377	223.800, 0.403	223.800, 0.333
1121	224.000, 0.317	224.000, 0.376	224.000, 0.402	224.000, 0.334
1122	224.200, 0.316	224.200, 0.376	224.200, 0.402	224.200, 0.334
1123	224.400, 0.316	224.400, 0.375	224.400, 0.402	224.400, 0.334
1124	224.600, 0.316	224.600, 0.375	224.600, 0.402	224.600, 0.334
1125	224.800, 0.315	224.800, 0.375	224.800, 0.402	224.800, 0.334
1126	225.000, 0.315	225.000, 0.375	225.000, 0.402	225.000, 0.334
1127	225.200, 0.315	225.200, 0.375	225.200, 0.402	225.200, 0.333
1128	225.400, 0.314	225.400, 0.375	225.400, 0.402	225.400, 0.333
1129	225.600, 0.314	225.600, 0.375	225.600, 0.401	225.600, 0.333
1130	225.800, 0.314	225.800, 0.375	225.800, 0.401	225.800, 0.332
1131	226.000, 0.314	226.000, 0.375	226.000, 0.401	226.000, 0.332
1132	226.200, 0.314	226.200, 0.375	226.200, 0.401	226.200, 0.331
1133	226.400, 0.313	226.400, 0.375	226.400, 0.400	226.400, 0.331
1134	226.600, 0.313	226.600, 0.375	226.600, 0.400	226.600, 0.331
1135	226.800, 0.313	226.800, 0.374	226.800, 0.400	226.800, 0.330
1136	227.000, 0.313	227.000, 0.374	227.000, 0.399	227.000, 0.330
1137	227.200, 0.312	227.200, 0.374	227.200, 0.399	227.200, 0.330
1138	227.400, 0.312	227.400, 0.373	227.400, 0.399	227.400, 0.330
1139	227.600, 0.312	227.600, 0.373	227.600, 0.398	227.600, 0.329
1140	227.800, 0.312	227.800, 0.372	227.800, 0.398	227.800, 0.329
1141	228.000, 0.311	228.000, 0.372	228.000, 0.397	228.000, 0.329
1142	228.200, 0.311	228.200, 0.371	228.200, 0.397	228.200, 0.329
1143	228.400, 0.311	228.400, 0.371	228.400, 0.397	228.400, 0.329
1144	228.600, 0.311	228.600, 0.370	228.600, 0.396	228.600, 0.329
1145	228.800, 0.310	228.800, 0.370	228.800, 0.396	228.800, 0.329
1146	229.000, 0.310	229.000, 0.369	229.000, 0.395	229.000, 0.329
1147	229.200, 0.310	229.200, 0.369	229.200, 0.395	229.200, 0.329
1148	229.400, 0.309	229.400, 0.369	229.400, 0.395	229.400, 0.329
1149	229.600, 0.309	229.600, 0.368	229.600, 0.394	229.600, 0.329
1150	229.800, 0.308	229.800, 0.368	229.800, 0.394	229.800, 0.328
1151	230.000, 0.308	230.000, 0.368	230.000, 0.394	230.000, 0.328
1152	230.200, 0.307	230.200, 0.368	230.200, 0.394	230.200, 0.328
1153	230.400, 0.307	230.400, 0.368	230.400, 0.393	230.400, 0.328
1154	230.600, 0.307	230.600, 0.367	230.600, 0.393	230.600, 0.328
1155	230.800, 0.306	230.800, 0.367	230.800, 0.393	230.800, 0.328
1156	231.000, 0.306	231.000, 0.367	231.000, 0.393	231.000, 0.328
1157	231.200, 0.306	231.200, 0.367	231.200, 0.393	231.200, 0.328
1158	231.400, 0.305	231.400, 0.367	231.400, 0.393	231.400, 0.327
1159	231.600, 0.305	231.600, 0.367	231.600, 0.393	231.600, 0.327
1160	231.800, 0.305	231.800, 0.366	231.800, 0.393	231.800, 0.327
1161	232.000, 0.305	232.000, 0.366	232.000, 0.393	232.000, 0.327
1162	232.200, 0.305	232.200, 0.366	232.200, 0.392	232.200, 0.327
1163	232.400, 0.305	232.400, 0.366	232.400, 0.392	232.400, 0.327
1164	232.600, 0.304	232.600, 0.366	232.600, 0.392	232.600, 0.327
1165	232.800, 0.304	232.800, 0.365	232.800, 0.391	232.800, 0.327
1166	233.000, 0.304	233.000, 0.365	233.000, 0.391	233.000, 0.327
1167	233.200, 0.304	233.200, 0.365	233.200, 0.391	233.200, 0.327
1168	233.400, 0.304	233.400, 0.365	233.400, 0.390	233.400, 0.327
1169	233.600, 0.303	233.600, 0.365	233.600, 0.390	233.600, 0.327
1170	233.800, 0.303	233.800, 0.364	233.800, 0.389	233.800, 0.327
1171	234.000, 0.303	234.000, 0.364	234.000, 0.389	234.000, 0.327
1172	234.200, 0.303	234.200, 0.364	234.200, 0.389	234.200, 0.326
1173	234.400, 0.303	234.400, 0.364	234.400, 0.388	234.400, 0.326
1174	234.600, 0.303	234.600, 0.363	234.600, 0.388	234.600, 0.326
1175	234.800, 0.303	234.800, 0.363	234.800, 0.388	234.800, 0.326
1176	235.000, 0.303	235.000, 0.362	235.000, 0.388	235.000, 0.325
1177	235.200, 0.302	235.200, 0.362	235.200, 0.387	235.200, 0.325
1178	235.400, 0.302	235.400, 0.362	235.400, 0.387	235.400, 0.325
1179	235.600, 0.302	235.600, 0.361	235.600, 0.387	235.600, 0.325
1180	235.800, 0.301	235.800, 0.361	235.800, 0.387	235.800, 0.325
1181	236.000, 0.301	236.000, 0.361	236.000, 0.387	236.000, 0.325
1182	236.200, 0.301	236.200, 0.361	236.200, 0.387	236.200, 0.325
1183	236.400, 0.300	236.400, 0.362	236.400, 0.387	236.400, 0.325
1184	236.600, 0.300	236.600, 0.362	236.600, 0.387	236.600, 0.325
1185	236.800, 0.300	236.800, 0.362	236.800, 0.386	236.800, 0.325
1186	237.000, 0.299	237.000, 0.362	237.000, 0.386	237.000, 0.325
1187	237.200, 0.299	237.200, 0.362	237.200, 0.386	237.200, 0.325
1188	237.400, 0.299	237.400, 0.362	237.400, 0.385	237.400, 0.324
1189	237.600, 0.299	237.600, 0.362	237.600, 0.385	237.600, 0.324
1190	237.800, 0.299	237.800, 0.362	237.800, 0.385	237.800, 0.324
1191	238.000, 0.299	238.000, 0.362	238.000, 0.385	238.000, 0.323
1192	238.200, 0.299	238.200, 0.361	238.200, 0.385	238.200, 0.323
1193	238.400, 0.299	238.400, 0.361	238.400, 0.384	238.400, 0.323
1194	238.600, 0.299	238.600, 0.360	238.600, 0.384	238.600, 0.323
1195	238.800, 0.299	238.800, 0.360	238.800, 0.384	238.800, 0.323
1196	239.000, 0.299	239.000, 0.359	239.000, 0.383	239.000, 0.323
1197	239.200, 0.299	239.200, 0.359	239.200, 0.383	239.200, 0.323
1198	239.400, 0.299	239.400, 0.358	239.400, 0.383	239.400, 0.323
1199	239.600, 0.299	239.600, 0.358	239.600, 0.383	239.600, 0.322
1200	239.800, 0.298	239.800, 0.357	239.800, 0.382	239.800, 0.322
1201	240.000, 0.298	240.000, 0.357	240.000, 0.382	240.000, 0.322
1202	240.200, 0.297	240.200, 0.357	240.200, 0.381	240.200, 0.322
1203	240.400, 0.297	240.400, 0.357	240.400, 0.381	240.400, 0.322
1204	240.600, 0.297	240.600, 0.357	240.600, 0.380	240.600, 0.322
1205	240.800, 0.296	240.800, 0.357	240.800, 0.380	240.800, 0.322
1206	241.000, 0.296	241.000, 0.357	241.000, 0.380	241.000, 0.322
1207	241.200, 0.296	241.200, 0.357	241.200, 0.380	241.200, 0.322
1208	241.400, 0.296	241.400, 0.356	241.400, 0.379	241.400, 0.321
1209	241.600, 0.295	241.600, 0.356	241.600, 0.379	241.600, 0.321
1210	241.800, 0.295	241.800, 0.356	241.800, 0.379	241.800, 0.321
1211	242.000, 0.294	242.000, 0.356	242.000, 0.379	242.000, 0.321
1212	242.200, 0.294	242.200, 0.356	242.200, 0.379	242.200, 0.321
1213	242.400, 0.294	242.400, 0.356	242.400, 0.379	242.400, 0.321
1214	242.600, 0.294	242.600, 0.356	242.600, 0.379	242.600, 0.321
1215	242.800, 0.294	242.800, 0.356	242.800, 0.379	242.800, 0.321
1216	243.000, 0.294	243.000, 0.356	243.000, 0.379	243.000, 0.321
1217	243.200, 0.294	243.200, 0.356	243.200, 0.379	243.200, 0.321
1218	243.400, 0.293	243.400, 0.355	243.400, 0.379	243.400, 0.321
1219	243.600, 0.293	243.600, 0.355	243.600, 0.378	243.600, 0.321
1220	243.800, 0.292	243.800, 0.355	243.800, 0.378	243.800, 0.320
1221	244.000, 0.292	244.000, 0.354	244.000, 0.377	244.000, 0.320
1222	244.200, 0.291	244.200, 0.354	244.200, 0.377	244.200, 0.320
1223	244.400, 0.291	244.400, 0.353	244.400, 0.377	244.400, 0.320
1224	244.600, 0.291	244.600, 0.353	244.600, 0.376	244.600, 0.320
1225	244.800, 0.291	244.800, 0.353	244.800, 0.376	244.800, 0.320
1226	245.000, 0.290	245.000, 0.352	245.000, 0.376	245.000, 0.320
1227	245.200, 0.290	245.200, 0.352	245.200, 0.376	245.200, 0.320
1228	245.400, 0.290	245.400, 0.352	245.400, 0.376	245.400, 0.320
1229	245.600, 0.290	245.600, 0.351	245.600, 0.375	245.600, 0.321
1230	245.800, 0.290	245.800, 0.351	245.800, 0.375	245.800, 0.321
1231	246.000, 0.290	246.000, 0.351	246.000, 0.375	246.000, 0.321
1232	246.200, 0.289	246.200, 0.351	246.200, 0.375	246.200, 0.321
1233	246.400, 0.289	246.400, 0.351	246.400, 0.375	246.400, 0.321
1234	246.600, 0.289	246.600, 0.351	246.600, 0.375	246.600, 0.321
1235	246.800, 0.289	246.800, 0.350	246.800, 0.375	246.800, 0.320
1236	247.000, 0.289	247.000, 0.350	247.000, 0.374	247.000, 0.320
1237	247.200, 0.289	247.200, 0.350	247.200, 0.374	247.200, 0.319
1238	247.400, 0.289	247.400, 0.350	247.400, 0.374	247.400, 0.319
1239	247.600, 0.289	247.600, 0.349	247.600, 0.373	247.600, 0.318
1240	247.800, 0.289	247.800, 0.349	247.800, 0.373	247.800, 0.318
1241	248.000, 0.289	248.000, 0.349	248.000, 0.372	248.000, 0.317
1242	248.200, 0.289	248.200, 0.348	248.200, 0.372	248.200, 0.317
1243	248.400, 0.289	248.400, 0.348	248.400, 0.372	248.400, 0.317
1244	248.600, 0.288	248.600, 0.348	248.600, 0.372	248.600, 0.316
1245	248.800, 0.288	248.800, 0.347	248.800, 0.371	248.800, 0.317
1246	249.000, 0.288	249.000, 0.347	249.000, 0.371	249.000, 0.317
1247	249.200, 0.288	249.200, 0.347	249.200, 0.371	249.200, 0.317
1248	249.400, 0.287	249.400, 0.347	249.400, 0.371	249.400, 0.317
1249	249.600, 0.287	249.600, 0.347	249.600, 0.371	249.600, 0.317
1250	249.800, 0.287	249.800, 0.347	249.800, 0.371	249.800, 0.317
1251	250.000, 0.286	250.000, 0.347	250.000, 0.371	250.000, 0.317
1252	250.200, 0.286	250.200, 0.347	250.200, 0.371	250.200, 0.317
1253	250.400, 0.286	250.400, 0.347	250.400, 0.371	250.400, 0.317
1254	250.600, 0.286	250.600, 0.347	250.600, 0.371	250.600, 0.317
1255	250.800, 0.285	250.800, 0.347	250.800, 0.371	250.800, 0.317
1256	251.000, 0.285	251.000, 0.347	251.000, 0.370	251.000, 0.317
1257	251.200, 0.285	251.200, 0.347	251.200, 0.370	251.200, 0.317
1258	251.400, 0.285	251.400, 0.347	251.400, 0.370	251.400, 0.317
1259	251.600, 0.285	251.600, 0.347	251.600, 0.370	251.600, 0.317
1260	251.800, 0.285	251.800, 0.346	251.800, 0.370	251.800, 0.316
1261	252.000, 0.285	252.000, 0.346	252.000, 0.369	252.000, 0.316
1262	252.200, 0.285	252.200, 0.346	252.200, 0.369	252.200, 0.316
1263	252.400, 0.285	252.400, 0.345	252.400, 0.369	252.400, 0.316
1264	252.600, 0.285	252.600, 0.345	252.600, 0.368	252.600, 0.316
1265	252.800, 0.285	252.800, 0.345	252.800, 0.368	252.800, 0.316
1266	253.000, 0.284	253.000, 0.344	253.000, 0.368	253.000, 0.316
1267	253.200, 0.284	253.200, 0.344	253.200, 0.368	253.200, 0.315
1268	253.400, 0.284	253.400, 0.344	253.400, 0.367	253.400, 0.315
1269	253.600, 0.283	253.600, 0.343	253.600, 0.367	253.600, 0.315
1270	253.800, 0.283	253.800, 0.343	253.800, 0.367	253.800, 0.315
1271	254.000, 0.283	254.000, 0.343	254.000, 0.367	254.000, 0.315
1272	254.200, 0.283	254.200, 0.343	254.200, 0.367	254.200, 0.314
1273	254.400, 0.282	254.400, 0.343	254.400, 0.366	254.400, 0.314
1274	254.600, 0.282	254.600, 0.343	254.600, 0.366	254.600, 0.314
1275	254.800, 0.282	254.800, 0.343	254.800, 0.366	254.800, 0.314
1276	255.000, 0.282	255.000, 0.343	255.000, 0.366	255.000, 0.314
1277	255.200, 0.282	255.200, 0.343	255.200, 0.366	255.200, 0.314
1278	255.400, 0.282	255.400, 0.343	255.400, 0.366	255.400, 0.313
1279	255.600, 0.282	255.600, 0.343	255.600, 0.366	255.600, 0.313
1280	255.800, 0.282	255.800, 0.343	255.800, 0.366	255.800, 0.313
1281	256.000, 0.282	256.000, 0.343	256.000, 0.366	256.000, 0.313
1282	256.200, 0.281	256.200, 0.343	256.200, 0.366	256.200, 0.313
1283	256.400, 0.281	256.400, 0.342	256.400, 0.366	256.400, 0.313
1284	256.600, 0.281	256.600, 0.342	256.600, 0.366	256.600, 0.313
1285	256.800, 0.280	256.800, 0.342	256.800, 0.365	256.800, 0.313
1286	257.000, 0.280	257.000, 0.342	257.000, 0.365	257.000, 0.313
1287	257.200, 0.279	257.200, 0.341	257.200, 0.364	257.200, 0.313
1288	257.400, 0.279	257.400, 0.341	257.400, 0.364	257.400, 0.313
1289	257.600, 0.279	257.600, 0.341	257.600, 0.364	257.600, 0.313
1290	257.800, 0.278	257.800, 0.341	257.800, 0.363	257.800, 0.313
1291	258.000, 0.278	258.000, 0.341	258.000, 0.363	258.000, 0.313
1292	258.200, 0.278	258.200, 0.340	258.200, 0.362	258.200, 0.313
1293	258.400, 0.278	258.400, 0.340	258.400, 0.362	258.400, 0.313
1294	258.600, 0.279	258.600, 0.340	258.600, 0.361	258.600, 0.313
1295	258.800, 0.279	258.800, 0.340	258.800, 0.361	258.800, 0.313
1296	259.000, 0.279	259.000, 0.339	259.000, 0.361	259.000, 0.313
1297	259.200, 0.279	259.200, 0.339	259.200, 0.361	259.200, 0.313
1298	259.400, 0.279	259.400, 0.339	259.400, 0.361	259.400, 0.313
1299	259.600, 0.279	259.600, 0.339	259.600, 0.361	259.600, 0.313
1300	259.800, 0.279	259.800, 0.338	259.800, 0.361	259.800, 0.313
1301	260.000, 0.278	260.000, 0.338	260.000, 0.361	260.000, 0.313
1302	260.200, 0.278	260.200, 0.338	260.200, 0.361	260.200, 0.312
1303	260.400, 0.278	260.400, 0.337	260.400, 0.361	260.400, 0.312
1304	260.600, 0.278	260.600, 0.337	260.600, 0.361	260.600, 0.312
1305	260.800, 0.278	260.800, 0.337	260.800, 0.361	260.800, 0.312
1306	261.000, 0.278	261.000, 0.337	261.000, 0.361	261.000, 0.311
1307	261.200, 0.278	261.200, 0.337	261.200, 0.361	261.200, 0.311
1308	261.400, 0.277	261.400, 0.337	261.400, 0.361	261.400, 0.311
1309	261.600, 0.277	261.600, 0.337	261.600, 0.361	261.600, 0.311
1310	261.800, 0.277	261.800, 0.337	261.800, 0.360	261.800, 0.311
1311	262.000, 0.277	262.000, 0.337	262.000, 0.360	262.000, 0.311
1312	262.200, 0.277	262.200, 0.337	262.200, 0.360	262.200, 0.311
1313	262.400, 0.277	262.400, 0.337	262.400, 0.360	262.400, 0.311
1314	262.600, 0.276	262.600, 0.337	262.600, 0.359	262.600, 0.311
1315	262.800, 0.276	262.800, 0.337	262.800, 0.359	262.800, 0.310
1316	263.000, 0.276	263.000, 0.337	263.000, 0.359	263.000, 0.310
1317	263.200, 0.275	263.200, 0.337	263.200, 0.359	263.200, 0.310
1318	263.400, 0.275	263.400, 0.336	263.400, 0.359	263.400, 0.310
1319	263.600, 0.274	263.600, 0.336	263.600, 0.358	263.600, 0.310
1320	263.800, 0.274	263.800, 0.336	263.800, 0.358	263.800, 0.310
1321	264.000, 0.274	264.000, 0.335	264.000, 0.358	264.000, 0.310
1322	264.200, 0.273	264.200, 0.335	264.200, 0.358	264.200, 0.310
1323	264.400, 0.273	264.400, 0.335	264.400, 0.357	264.400, 0.310
1324	264.600, 0.273	264.600, 0.334	264.600, 0.357	264.600, 0.310
1325	264.800, 0.273	264.800, 0.334	264.800, 0.357	264.800, 0.310
1326	265.000, 0.273	265.000, 0.334	265.000, 0.357	265.000, 0.310
1327	265.200, 0.273	265.200, 0.334	265.200, 0.356	265.200, 0.310
1328	265.400, 0.273	265.400, 0.334	265.400, 0.356	265.400, 0.310
1329	265.600, 0.273	265.600, 0.334	265.600, 0.356	265.600, 0.310
1330	265.800, 0.273	265.800, 0.334	265.800, 0.356	265.800, 0.310
1331	266.000, 0.273	266.000, 0.334	266.000, 0.355	266.000, 0.310
1332	266.200, 0.273	266.200, 0.335	266.200, 0.355	266.200, 0.309
1333	266.400, 0.272	266.400, 0.335	266.400, 0.355	266.400, 0.309
1334	266.600, 0.272	266.600, 0.335	266.600, 0.355	266.600, 0.309
1335	266.800, 0.272	266.800, 0.335	266.800, 0.354	266.800, 0.309
1336	267.000, 0.271	267.000, 0.335	267.000, 0.354	267.000, 0.309
1337	267.200, 0.271	267.200, 0.334	267.200, 0.354	267.200, 0.309
1338	267.400, 0.270	267.400, 0.334	267.400, 0.354	267.400, 0.309
1339	267.600, 0.270	267.600, 0.334	267.600, 0.354	267.600, 0.309
1340	267.800, 0.270	267.800, 0.334	267.800, 0.354	267.800, 0.308
1341	268.000, 0.270	268.000, 0.333	268.000, 0.354	268.000, 0.308
1342	268.200, 0.269	268.200, 0.333	268.200, 0.353	268.200, 0.308
1343	268.400, 0.269	268.400, 0.332	268.400, 0.353	268.400, 0.308
1344	268.600, 0.269	268.600, 0.331	268.600, 0.353	268.600, 0.308
1345	268.800, 0.269	268.800, 0.331	268.800, 0.353	268.800, 0.308
1346	269.000, 0.270	269.000, 0.331	269.000, 0.353	269.000, 0.308
1347	269.200, 0.270	269.200, 0.330	269.200, 0.353	269.200, 0.308
1348	269.400, 0.270	269.400, 0.330	269.400, 0.353	269.400, 0.308
1349	269.600, 0.271	269.600, 0.329	269.600, 0.353	269.600, 0.308
1350	269.800, 0.271	269.800, 0.329	269.800, 0.353	269.800, 0.308
1351	,	,	,	,
1352	,	,	,	,
1353	,	,	,	,
1354	,	,	,	,
1355	,	,	,	,
1356	,	,	,	,
1357	,	,	,	,
1358	,	,	,	,
1359	,	,	,	,
1360	,	,	,	,
1361	,	,	,	,
1362	,	,	,	,
1363	,	,	,	,
1364	,	,	,	,
1365	,	,	,	,
1366	,	,	,	,
1367	,	,	,	,
1368	,	,	,	,
1369	,	,	,	,
1370	,	,	,	,
1371	,	,	,	,
1372	,	,	,	,
1373	,	,	,	,
1374	,	,	,	,
1375	,	,	,	,
1376	,	,	,	,
1377	,	,	,	,
1378	,	,	,	,
1379	,	,	,	,
1380	,	,	,	,
1381	,	,	,	,
1382	,	,	,	,
1383	,	,	,	,
1384	,	,	,	,
1385	,	,	,	,
1386	,	,	,	,
1387	,	,	,	,
1388	,	,	,	,
1389	,	,	,	,
1390	,	,	,	,
1391	,	,	,	,
1392	,	,	,	,
1393	,	,	,	,
1394	,	,	,	,
1395	,	,	,	,
1396	,	,	,	,
1397	,	,	,	,
1398	,	,	,	,
1399	,	,	,	,
1400	,	,	,	,
1401	,	,	,	,
1402	,	,	,	,
1403	,	,	,	,
1404	,	,	,	,
1405	,	,	,	,
1406	,	,	,	,
1407	,	,	,	,
1408	,	,	,	,
1409	,	,	,	,
1410	,	,	,	,
1411	,	,	,	,
1412	,	,	,	,
1413	,	,	,	,
1414	,	,	,	,
1415	,	,	,	,
1416	,	,	,	,
1417	,	,	,	,
1418	,	,	,	,
1419	,	,	,	,
1420	,	,	,	,
1421	,	,	,	,
1422	,	,	,	,
1423	,	,	,	,
1424	,	,	,	,
1425	,	,	,	,
1426	,	,	,	,
1427	,	,	,	,
1428	,	,	,	,
1429	,	,	,	,
1430	,	,	,	,
1431	,	,	,	,
1432	,	,	,	,
1433	,	,	,	,
1434	,	,	,	,
1435	,	,	,	,
1436	,	,	,	,
1437	,	,	,	,
1438	,	,	,	,
1439	,	,	,	,
1440	,	,	,	,
1441	,	,	,	,
1442	,	,	,	,
1443	,	,	,	,
1444	,	,	,	,
1445	,	,	,	,
1446	,	,	,	,
1447	,	,	,	,
1448	,	,	,	,
1449	,	,	,	,
1450	,	,	,	,
1451	,	,	,	,
1452	,	,	,	,
1453	,	,	,	,
1454	,	,	,	,
1455	,	,	,	,
1456	,	,	,	,
1457	,	,	,	,
1458	,	,	,	,
1459	,	,	,	,
1460	,	,	,	,
1461	,	,	,	,
1462	,	,	,	,
1463	,	,	,	,
1464	,	,	,	,
1465	,	,	,	,
1466	,	,	,	,
1467	,	,	,	,
1468	,	,	,	,
1469	,	,	,	,
1470	,	,	,	,
1471	,	,	,	,
1472	,	,	,	,
1473	,	,	,	,
1474	,	,	,	,
1475	,	,	,	,
1476	,	,	,	,
1477	,	,	,	,
1478	,	,	,	,
1479	,	,	,	,
1480	,	,	,	,
1481	,	,	,	,
1482	,	,	,	,
1483	,	,	,	,
1484	,	,	,	,
1485	,	,	,	,
1486	,	,	,	,
1487	,	,	,	,
1488	,	,	,	,
1489	,	,	,	,
1490	,	,	,	,
1491	,	,	,	,
1492	,	,	,	,
1493	,	,	,	,
1494	,	,	,	,
1495	,	,	,	,
1496	,	,	,	,
1497	,	,	,	,
1498	,	,	,	,
1499	,	,	,	,
1500	,	,	,	,
1501	,	,	,	,
1502	,	,	,	,
1503	,	,	,	,
1504	,	,	,	,
1505	,	,	,	,
1506	,	,	,	,
1507	,	,	,	,
1508	,	,	,	,
1509	,	,	,	,
1510	,	,	,	,
1511	,	,	,	,
1512	,	,	,	,
1513	,	,	,	,
1514	,	,	,	,
1515	,	,	,	,
1516	,	,	,	,
1517	,	,	,	,
1518	,	,	,	,
1519	,	,	,	,
1520	,	,	,	,
1521	,	,	,	,
1522	,	,	,	,
1523	,	,	,	,
1524	,	,	,	,
1525	,	,	,	,
1526	,	,	,	,
1527	,	,	,	,
1528	,	,	,	,
1529	,	,	,	,
1530	,	,	,	,
1531	,	,	,	,
1532	,	,	,	,
1533	,	,	,	,
1534	,	,	,	,
1535	,	,	,	,
1536	,	,	,	,
1537	,	,	,	,
1538	,	,	,	,
1539	,	,	,	,
1540	,	,	,	,
1541	,	,	,	,
1542	,	,	,	,
1543	,	,	,	,
1544	,	,	,	,
1545	,	,	,	,
1546	,	,	,	,
1547	,	,	,	,
1548	,	,	,	,
1549	,	,	,	,
1550	,	,	,	,
1551	,	,	,	,
1552	,	,	,	,
1553	,	,	,	,
1554	,	,	,	,
1555	,	,	,	,
1556	,	,	,	,
1557	,	,	,	,
1558	,	,	,	,
1559	,	,	,	,
1560	,	,	,	,
1561	,	,	,	,
1562	,	,	,	,
1563	,	,	,	,
1564	,	,	,	,
1565	,	,	,	,
1566	,	,	,	,
1567	,	,	,	,
1568	,	,	,	,
1569	,	,	,	,
1570	,	,	,	,
1571	,	,	,	,
1572	,	,	,	,
1573	,	,	,	,
1574	,	,	,	,
1575	,	,	,	,
1576	,	,	,	,
1577	,	,	,	,
1578	,	,	,	,
1579	,	,	,	,
1580	,	,	,	,
1581	,	,	,	,
1582	,	,	,	,
1583	,	,	,	,
1584	,	,	,	,
1585	,	,	,	,
1586	,	,	,	,
1587	,	,	,	,
1588	,	,	,	,
1589	,	,	,	,
1590	,	,	,	,
1591	,	,	,	,
1592	,	,	,	,
1593	,	,	,	,
1594	,	,	,	,
1595	,	,	,	,
1596	,	,	,	,
1597	,	,	,	,
1598	,	,	,	,
1599	,	,	,	,
1600	,	,	,	,
1601	,	,	,	,
1602	,	,	,	,
1603	,	,	,	,
1604	,	,	,	,
1605	,	,	,	,
1606	,	,	,	,
1607	,	,	,	,
1608	,	,	,	,
1609	,	,	,	,
1610	,	,	,	,
1611	,	,	,	,
1612	,	,	,	,
1613	,	,	,	,
1614	,	,	,	,
1615	,	,	,	,
1616	,	,	,	,
1617	,	,	,	,
1618	,	,	,	,
1619	,	,	,	,
1620	,	,	,	,
1621	,	,	,	,
1622	,	,	,	,
1623	,	,	,	,
1624	,	,	,	,
1625	,	,	,	,
1626	,	,	,	,
1627	,	,	,	,
1628	,	,	,	,
1629	,	,	,	,
1630	,	,	,	,
1631	,	,	,	,
1632	,	,	,	,
1633	,	,	,	,
1634	,	,	,	,
1635	,	,	,	,
1636	,	,	,	,
1637	,	,	,	,
1638	,	,	,	,
1639	,	,	,	,
1640	,	,	,	,
1641	,	,	,	,
1642	,	,	,	,
1643	,	,	,	,
1644	,	,	,	,
1645	,	,	,	,
1646	,	,	,	,
1647	,	,	,	,
1648	,	,	,	,
1649	,	,	,	,
1650	,	,	,	,
1651	,	,	,	,
1652	,	,	,	,
1653	,	,	,	,
1654	,	,	,	,
1655	,	,	,	,
1656	,	,	,	,
1657	,	,	,	,
1658	,	,	,	,
1659	,	,	,	,
1660	,	,	,	,
1661	,	,	,	,
1662	,	,	,	,
1663	,	,	,	,
1664	,	,	,	,
1665	,	,	,	,
1666	,	,	,	,
1667	,	,	,	,
1668	,	,	,	,
1669	,	,	,	,
1670	,	,	,	,
1671	,	,	,	,
1672	,	,	,	,
1673	,	,	,	,
1674	,	,	,	,
1675	,	,	,	,
1676	,	,	,	,
1677	,	,	,	,
1678	,	,	,	,
1679	,	,	,	,
1680	,	,	,	,
1681	,	,	,	,
1682	,	,	,	,
1683	,	,	,	,
1684	,	,	,	,
1685	,	,	,	,
1686	,	,	,	,
1687	,	,	,	,
1688	,	,	,	,
1689	,	,	,	,
1690	,	,	,	,
1691	,	,	,	,
1692	,	,	,	,
1693	,	,	,	,
1694	,	,	,	,
1695	,	,	,	,
1696	,	,	,	,
1697	,	,	,	,
1698	,	,	,	,
1699	,	,	,	,
1700	,	,	,	,
1701	,	,	,	,
1702	,	,	,	,
1703	,	,	,	,
1704	,	,	,	,
1705	,	,	,	,
1706	,	,	,	,
1707	,	,	,	,
1708	,	,	,	,
1709	,	,	,	,
1710	,	,	,	,
1711	,	,	,	,
1712	,	,	,	,
1713	,	,	,	,
1714	,	,	,	,
1715	,	,	,	,
1716	,	,	,	,
1717	,	,	,	,
1718	,	,	,	,
1719	,	,	,	,
1720	,	,	,	,
1721	,	,	,	,
1722	,	,	,	,
1723	,	,	,	,
1724	,	,	,	,
1725	,	,	,	,
1726	,	,	,	,
1727	,	,	,	,
1728	,	,	,	,
1729	,	,	,	,
1730	,	,	,	,
1731	,	,	,	,
1732	,	,	,	,
1733	,	,	,	,
1734	,	,	,	,
1735	,	,	,	,
1736	,	,	,	,
1737	,	,	,	,
1738	,	,	,	,
1739	,	,	,	,
1740	,	,	,	,
1741	,	,	,	,
1742	,	,	,	,
1743	,	,	,	,
1744	,	,	,	,
1745	,	,	,	,
1746	,	,	,	,
1747	,	,	,	,
1748	,	,	,	,
1749	,	,	,	,
1750	,	,	,	,
1751	,	,	,	,
1752	,	,	,	,
1753	,	,	,	,
1754	,	,	,	,
1755	,	,	,	,
1756	,	,	,	,
1757	,	,	,	,
1758	,	,	,	,
1759	,	,	,	,
1760	,	,	,	,
1761	,	,	,	,
1762	,	,	,	,
1763	,	,	,	,
1764	,	,	,	,
1765	,	,	,	,
1766	,	,	,	,
1767	,	,	,	,
1768	,	,	,	,
1769	,	,	,	,
1770	,	,	,	,
1771	,	,	,	,
1772	,	,	,	,
1773	,	,	,	,
1774	,	,	,	,
1775	,	,	,	,
1776	,	,	,	,
1777	,	,	,	,
1778	,	,	,	,
1779	,	,	,	,
1780	,	,	,	,
1781	,	,	,	,
1782	,	,	,	,
1783	,	,	,	,
1784	,	,	,	,
1785	,	,	,	,
1786	,	,	,	,
1787	,	,	,	,
1788	,	,	,	,
1789	,	,	,	,
1790	,	,	,	,
1791	,	,	,	,
1792	,	,	,	,
1793	,	,	,	,
1794	,	,	,	,
1795	,	,	,	,
1796	,	,	,	,
1797	,	,	,	,
1798	,	,	,	,
1799	,	,	,	,
1800	,	,	,	,
1801	,	,	,	,
1802	,	,	,	,
1803	,	,	,	,
1804	,	,	,	,
1805	,	,	,	,
1806	,	,	,	,
1807	,	,	,	,
1808	,	,	,	,
1809	,	,	,	,
1810	,	,	,	,
1811	,	,	,	,
1812	,	,	,	,
1813	,	,	,	,
1814	,	,	,	,
1815	,	,	,	,
1816	,	,	,	,
1817	,	,	,	,
1818	,	,	,	,
1819	,	,	,	,
1820	,	,	,	,
1821	,	,	,	,
1822	,	,	,	,
1823	,	,	,	,
1824	,	,	,	,
1825	,	,	,	,
1826	,	,	,	,
1827	,	,	,	,
1828	,	,	,	,
1829	,	,	,	,
1830	,	,	,	,
1831	,	,	,	,
1832	,	,	,	,
1833	,	,	,	,
1834	,	,	,	,
1835	,	,	,	,
1836	,	,	,	,
1837	,	,	,	,
1838	,	,	,	,
1839	,	,	,	,
1840	,	,	,	,
1841	,	,	,	,
1842	,	,	,	,
1843	,	,	,	,
1844	,	,	,	,
1845	,	,	,	,
1846	,	,	,	,
1847	,	,	,	,
1848	,	,	,	,
1849	,	,	,	,
1850	,	,	,	,
1851	,	,	,	,
1852	,	,	,	,
1853	,	,	,	,
1854	,	,	,	,
1855	,	,	,	,
1856	,	,	,	,
1857	,	,	,	,
1858	,	,	,	,
1859	,	,	,	,
1860	,	,	,	,
1861	,	,	,	,
1862	,	,	,	,
1863	,	,	,	,
1864	,	,	,	,
1865	,	,	,	,
1866	,	,	,	,
1867	,	,	,	,
1868	,	,	,	,
1869	,	,	,	,
1870	,	,	,	,
1871	,	,	,	,
1872	,	,	,	,
1873	,	,	,	,
1874	,	,	,	,
1875	,	,	,	,
1876	,	,	,	,
1877	,	,	,	,
1878	,	,	,	,
1879	,	,	,	,
1880	,	,	,	,
1881	,	,	,	,
1882	,	,	,	,
1883	,	,	,	,
1884	,	,	,	,
1885	,	,	,	,
1886	,	,	,	,
1887	,	,	,	,
1888	,	,	,	,
1889	,	,	,	,
1890	,	,	,	,
1891	,	,	,	,
1892	,	,	,	,
1893	,	,	,	,
1894	,	,	,	,
1895	,	,	,	,
1896	,	,	,	,
1897	,	,	,	,
1898	,	,	,	,
1899	,	,	,	,
1900	,	,	,	,
1901	,	,	,	,
1902	,	,	,	,
1903	,	,	,	,
1904	,	,	,	,
1905	,	,	,	,
1906	,	,	,	,
1907	,	,	,	,
1908	,	,	,	,
1909	,	,	,	,
1910	,	,	,	,
1911	,	,	,	,
1912	,	,	,	,
1913	,	,	,	,
1914	,	,	,	,
1915	,	,	,	,
1916	,	,	,	,
1917	,	,	,	,
1918	,	,	,	,
1919	,	,	,	,
1920	,	,	,	,
1921	,	,	,	,
1922	,	,	,	,
1923	,	,	,	,
1924	,	,	,	,
1925	,	,	,	,
1926	,	,	,	,
1927	,	,	,	,
1928	,	,	,	,
1929	,	,	,	,
1930	,	,	,	,
1931	,	,	,	,
1932	,	,	,	,
1933	,	,	,	,
1934	,	,	,	,
1935	,	,	,	,
1936	,	,	,	,
1937	,	,	,	,
1938	,	,	,	,
1939	,	,	,	,
1940	,	,	,	,
1941	,	,	,	,
1942	,	,	,	,
1943	,	,	,	,
1944	,	,	,	,
1945	,	,	,	,
1946	,	,	,	,
1947	,	,	,	,
1948	,	,	,	,
1949	,	,	,	,
1950	,	,	,	,
1951	,	,	,	,
1952	,	,	,	,
1953	,	,	,	,
1954	,	,	,	,
1955	,	,	,	,
1956	,	,	,	,
1957	,	,	,	,
1958	,	,	,	,
1959	,	,	,	,
1960	,	,	,	,
1961	,	,	,	,
1962	,	,	,	,
1963	,	,	,	,
1964	,	,	,	,
1965	,	,	,	,
1966	,	,	,	,
1967	,	,	,	,
1968	,	,	,	,
1969	,	,	,	,
1970	,	,	,	,
1971	,	,	,	,
1972	,	,	,	,
1973	,	,	,	,
1974	,	,	,	,
1975	,	,	,	,
1976	,	,	,	,
1977	,	,	,	,
1978	,	,	,	,
1979	,	,	,	,
1980	,	,	,	,
1981	,	,	,	,
1982	,	,	,	,
1983	,	,	,	,
1984	,	,	,	,
1985	,	,	,	,
1986	,	,	,	,
1987	,	,	,	,
1988	,	,	,	,
1989	,	,	,	,
1990	,	,	,	,
1991	,	,	,	,
1992	,	,	,	,
1993	,	,	,	,
1994	,	,	,	,
1995	,	,	,	,
1996	,	,	,	,
1997	,	,	,	,
1998	,	,	,	,
1999	,	,	,	,
[truncated: 13,001 more rows]
