# Supplementary material for: ParB spreading on DNA requires cytidine triphosphate in vitro
Source: eLife journal article supplement (doi:10.7554/elife.53515), 2020-02-20
Supplement: fig2-data1 [file Fig2_panelA.xlsx]

## Sheet: FORMAT
	sample ID #1	sample ID #2	sample ID #3
data point	time point (sec), wavelength shift (nm)	time point (sec), wavelength shift (nm)	time point (sec), wavelength shift (nm)
1
2
3
.
.
.

## Sheet: Fig2_panelA_rep1
	169bp closed parS DNA ParB CTP	169bp closed parS DNA ParB	169bp closed parS DNA ParB ATP	169bp closed parS DNA ParB UTP	169bp closed parS DNA ParB GTP	169bp closed scrambled parS DNA ParB CTP	169bp closed scrambled parS DNA ParB
1	0.000, 0.010	0.000, 0.043	0.000, 0.017	0.000, 0.029	0.000, 0.038	0.000, 0.003	0.000, 0.057
2	0.200, 0.009	0.200, 0.043	0.200, 0.018	0.200, 0.029	0.200, 0.038	0.200, 0.003	0.200, 0.055
3	0.400, 0.009	0.400, 0.042	0.400, 0.018	0.400, 0.028	0.400, 0.037	0.400, 0.003	0.400, 0.052
4	0.600, 0.009	0.600, 0.042	0.600, 0.019	0.600, 0.028	0.600, 0.037	0.600, 0.003	0.600, 0.048
5	0.800, 0.009	0.800, 0.041	0.800, 0.019	0.800, 0.027	0.800, 0.036	0.800, 0.003	0.800, 0.045
6	1.000, 0.009	1.000, 0.040	1.000, 0.020	1.000, 0.026	1.000, 0.036	1.000, 0.003	1.000, 0.042
7	1.200, 0.009	1.200, 0.040	1.200, 0.020	1.200, 0.025	1.200, 0.035	1.200, 0.003	1.200, 0.038
8	1.400, 0.009	1.400, 0.039	1.400, 0.020	1.400, 0.024	1.400, 0.034	1.400, 0.003	1.400, 0.035
9	1.600, 0.008	1.600, 0.038	1.600, 0.020	1.600, 0.023	1.600, 0.034	1.600, 0.003	1.600, 0.032
10	1.800, 0.008	1.800, 0.037	1.800, 0.020	1.800, 0.022	1.800, 0.033	1.800, 0.003	1.800, 0.030
11	2.000, 0.008	2.000, 0.036	2.000, 0.019	2.000, 0.021	2.000, 0.032	2.000, 0.003	2.000, 0.028
12	2.200, 0.008	2.200, 0.036	2.200, 0.019	2.200, 0.021	2.200, 0.032	2.200, 0.002	2.200, 0.027
13	2.400, 0.008	2.400, 0.035	2.400, 0.018	2.400, 0.020	2.400, 0.031	2.400, 0.002	2.400, 0.026
14	2.600, 0.008	2.600, 0.034	2.600, 0.018	2.600, 0.019	2.600, 0.030	2.600, 0.002	2.600, 0.026
15	2.800, 0.008	2.800, 0.033	2.800, 0.018	2.800, 0.019	2.800, 0.030	2.800, 0.002	2.800, 0.025
16	3.000, 0.008	3.000, 0.032	3.000, 0.017	3.000, 0.019	3.000, 0.029	3.000, 0.002	3.000, 0.024
17	3.200, 0.008	3.200, 0.031	3.200, 0.017	3.200, 0.018	3.200, 0.029	3.200, 0.002	3.200, 0.024
18	3.400, 0.008	3.400, 0.030	3.400, 0.017	3.400, 0.018	3.400, 0.028	3.400, 0.002	3.400, 0.023
19	3.600, 0.008	3.600, 0.030	3.600, 0.017	3.600, 0.017	3.600, 0.028	3.600, 0.002	3.600, 0.022
20	3.800, 0.007	3.800, 0.029	3.800, 0.017	3.800, 0.017	3.800, 0.027	3.800, 0.001	3.800, 0.021
21	4.000, 0.007	4.000, 0.029	4.000, 0.017	4.000, 0.017	4.000, 0.027	4.000, 0.001	4.000, 0.020
22	4.200, 0.007	4.200, 0.028	4.200, 0.017	4.200, 0.016	4.200, 0.026	4.200, 0.002	4.200, 0.019
23	4.400, 0.007	4.400, 0.028	4.400, 0.018	4.400, 0.016	4.400, 0.026	4.400, 0.002	4.400, 0.019
24	4.600, 0.007	4.600, 0.027	4.600, 0.018	4.600, 0.015	4.600, 0.026	4.600, 0.002	4.600, 0.018
25	4.800, 0.006	4.800, 0.027	4.800, 0.018	4.800, 0.015	4.800, 0.025	4.800, 0.003	4.800, 0.018
26	5.000, 0.006	5.000, 0.027	5.000, 0.018	5.000, 0.014	5.000, 0.025	5.000, 0.003	5.000, 0.017
27	5.200, 0.006	5.200, 0.027	5.200, 0.018	5.200, 0.013	5.200, 0.024	5.200, 0.003	5.200, 0.017
28	5.400, 0.006	5.400, 0.026	5.400, 0.018	5.400, 0.013	5.400, 0.024	5.400, 0.004	5.400, 0.016
29	5.600, 0.006	5.600, 0.026	5.600, 0.018	5.600, 0.012	5.600, 0.023	5.600, 0.004	5.600, 0.016
30	5.800, 0.006	5.800, 0.026	5.800, 0.018	5.800, 0.011	5.800, 0.023	5.800, 0.004	5.800, 0.015
31	6.000, 0.006	6.000, 0.025	6.000, 0.018	6.000, 0.011	6.000, 0.023	6.000, 0.004	6.000, 0.015
32	6.200, 0.007	6.200, 0.024	6.200, 0.018	6.200, 0.010	6.200, 0.022	6.200, 0.004	6.200, 0.014
33	6.400, 0.007	6.400, 0.023	6.400, 0.018	6.400, 0.009	6.400, 0.022	6.400, 0.004	6.400, 0.014
34	6.600, 0.007	6.600, 0.023	6.600, 0.018	6.600, 0.009	6.600, 0.022	6.600, 0.004	6.600, 0.014
35	6.800, 0.007	6.800, 0.022	6.800, 0.018	6.800, 0.009	6.800, 0.022	6.800, 0.004	6.800, 0.013
36	7.000, 0.008	7.000, 0.021	7.000, 0.018	7.000, 0.008	7.000, 0.021	7.000, 0.004	7.000, 0.013
37	7.200, 0.008	7.200, 0.021	7.200, 0.017	7.200, 0.008	7.200, 0.021	7.200, 0.004	7.200, 0.012
38	7.400, 0.008	7.400, 0.021	7.400, 0.017	7.400, 0.008	7.400, 0.021	7.400, 0.003	7.400, 0.011
39	7.600, 0.008	7.600, 0.020	7.600, 0.017	7.600, 0.007	7.600, 0.021	7.600, 0.003	7.600, 0.011
40	7.800, 0.008	7.800, 0.020	7.800, 0.017	7.800, 0.007	7.800, 0.020	7.800, 0.003	7.800, 0.011
41	8.000, 0.008	8.000, 0.019	8.000, 0.016	8.000, 0.007	8.000, 0.020	8.000, 0.003	8.000, 0.011
42	8.200, 0.008	8.200, 0.019	8.200, 0.016	8.200, 0.007	8.200, 0.020	8.200, 0.003	8.200, 0.011
43	8.400, 0.007	8.400, 0.019	8.400, 0.016	8.400, 0.006	8.400, 0.020	8.400, 0.003	8.400, 0.011
44	8.600, 0.007	8.600, 0.019	8.600, 0.015	8.600, 0.006	8.600, 0.019	8.600, 0.003	8.600, 0.011
45	8.800, 0.007	8.800, 0.018	8.800, 0.015	8.800, 0.006	8.800, 0.019	8.800, 0.003	8.800, 0.011
46	9.000, 0.007	9.000, 0.018	9.000, 0.015	9.000, 0.006	9.000, 0.019	9.000, 0.003	9.000, 0.011
47	9.200, 0.007	9.200, 0.018	9.200, 0.015	9.200, 0.006	9.200, 0.018	9.200, 0.003	9.200, 0.010
48	9.400, 0.007	9.400, 0.017	9.400, 0.014	9.400, 0.005	9.400, 0.018	9.400, 0.004	9.400, 0.010
49	9.600, 0.007	9.600, 0.017	9.600, 0.014	9.600, 0.005	9.600, 0.017	9.600, 0.004	9.600, 0.010
50	9.800, 0.007	9.800, 0.016	9.800, 0.014	9.800, 0.005	9.800, 0.017	9.800, 0.004	9.800, 0.010
51	10.000, 0.007	10.000, 0.016	10.000, 0.014	10.000, 0.004	10.000, 0.016	10.000, 0.004	10.000, 0.010
52	10.200, 0.007	10.200, 0.015	10.200, 0.014	10.200, 0.004	10.200, 0.016	10.200, 0.004	10.200, 0.009
53	10.400, 0.007	10.400, 0.015	10.400, 0.014	10.400, 0.004	10.400, 0.015	10.400, 0.003	10.400, 0.009
54	10.600, 0.006	10.600, 0.015	10.600, 0.014	10.600, 0.004	10.600, 0.015	10.600, 0.003	10.600, 0.008
55	10.800, 0.006	10.800, 0.015	10.800, 0.014	10.800, 0.003	10.800, 0.015	10.800, 0.004	10.800, 0.008
56	11.000, 0.006	11.000, 0.015	11.000, 0.014	11.000, 0.003	11.000, 0.014	11.000, 0.003	11.000, 0.008
57	11.200, 0.006	11.200, 0.015	11.200, 0.014	11.200, 0.003	11.200, 0.014	11.200, 0.004	11.200, 0.008
58	11.400, 0.006	11.400, 0.014	11.400, 0.014	11.400, 0.002	11.400, 0.014	11.400, 0.004	11.400, 0.007
59	11.600, 0.006	11.600, 0.014	11.600, 0.014	11.600, 0.002	11.600, 0.014	11.600, 0.003	11.600, 0.007
60	11.800, 0.006	11.800, 0.014	11.800, 0.013	11.800, 0.002	11.800, 0.014	11.800, 0.003	11.800, 0.007
61	12.000, 0.006	12.000, 0.014	12.000, 0.013	12.000, 0.002	12.000, 0.014	12.000, 0.003	12.000, 0.007
62	12.200, 0.006	12.200, 0.014	12.200, 0.013	12.200, 0.002	12.200, 0.015	12.200, 0.003	12.200, 0.007
63	12.400, 0.006	12.400, 0.014	12.400, 0.012	12.400, 0.002	12.400, 0.015	12.400, 0.003	12.400, 0.007
64	12.600, 0.006	12.600, 0.014	12.600, 0.012	12.600, 0.002	12.600, 0.015	12.600, 0.003	12.600, 0.007
65	12.800, 0.006	12.800, 0.013	12.800, 0.012	12.800, 0.002	12.800, 0.014	12.800, 0.002	12.800, 0.007
66	13.000, 0.006	13.000, 0.013	13.000, 0.011	13.000, 0.001	13.000, 0.014	13.000, 0.002	13.000, 0.007
67	13.200, 0.006	13.200, 0.013	13.200, 0.010	13.200, 0.002	13.200, 0.014	13.200, 0.002	13.200, 0.007
68	13.400, 0.006	13.400, 0.013	13.400, 0.010	13.400, 0.001	13.400, 0.013	13.400, 0.002	13.400, 0.006
69	13.600, 0.006	13.600, 0.013	13.600, 0.010	13.600, 0.001	13.600, 0.013	13.600, 0.002	13.600, 0.006
70	13.800, 0.006	13.800, 0.012	13.800, 0.009	13.800, 0.001	13.800, 0.012	13.800, 0.002	13.800, 0.006
71	14.000, 0.006	14.000, 0.012	14.000, 0.009	14.000, 0.001	14.000, 0.012	14.000, 0.002	14.000, 0.005
72	14.200, 0.006	14.200, 0.012	14.200, 0.009	14.200, 0.001	14.200, 0.011	14.200, 0.002	14.200, 0.005
73	14.400, 0.006	14.400, 0.012	14.400, 0.008	14.400, 0.001	14.400, 0.011	14.400, 0.002	14.400, 0.005
74	14.600, 0.006	14.600, 0.012	14.600, 0.008	14.600, 0.001	14.600, 0.011	14.600, 0.002	14.600, 0.004
75	14.800, 0.006	14.800, 0.012	14.800, 0.008	14.800, 0.001	14.800, 0.010	14.800, 0.002	14.800, 0.004
76	15.000, 0.006	15.000, 0.011	15.000, 0.008	15.000, 0.000	15.000, 0.010	15.000, 0.002	15.000, 0.004
77	15.200, 0.005	15.200, 0.011	15.200, 0.008	15.200, -0.000	15.200, 0.010	15.200, 0.002	15.200, 0.004
78	15.400, 0.005	15.400, 0.010	15.400, 0.008	15.400, -0.000	15.400, 0.010	15.400, 0.002	15.400, 0.004
79	15.600, 0.005	15.600, 0.010	15.600, 0.008	15.600, -0.001	15.600, 0.010	15.600, 0.002	15.600, 0.004
80	15.800, 0.004	15.800, 0.010	15.800, 0.008	15.800, -0.001	15.800, 0.010	15.800, 0.002	15.800, 0.004
81	16.000, 0.004	16.000, 0.009	16.000, 0.008	16.000, -0.001	16.000, 0.010	16.000, 0.002	16.000, 0.004
82	16.200, 0.004	16.200, 0.009	16.200, 0.008	16.200, -0.001	16.200, 0.010	16.200, 0.002	16.200, 0.004
83	16.400, 0.005	16.400, 0.009	16.400, 0.007	16.400, -0.001	16.400, 0.009	16.400, 0.002	16.400, 0.004
84	16.600, 0.005	16.600, 0.009	16.600, 0.007	16.600, -0.001	16.600, 0.009	16.600, 0.002	16.600, 0.004
85	16.800, 0.005	16.800, 0.009	16.800, 0.007	16.800, -0.001	16.800, 0.009	16.800, 0.001	16.800, 0.004
86	17.000, 0.005	17.000, 0.009	17.000, 0.007	17.000, -0.001	17.000, 0.009	17.000, 0.001	17.000, 0.004
87	17.200, 0.005	17.200, 0.008	17.200, 0.007	17.200, -0.001	17.200, 0.009	17.200, 0.001	17.200, 0.004
88	17.400, 0.005	17.400, 0.008	17.400, 0.007	17.400, -0.001	17.400, 0.009	17.400, 0.001	17.400, 0.004
89	17.600, 0.005	17.600, 0.008	17.600, 0.007	17.600, -0.001	17.600, 0.009	17.600, 0.001	17.600, 0.004
90	17.800, 0.005	17.800, 0.008	17.800, 0.007	17.800, -0.001	17.800, 0.009	17.800, 0.001	17.800, 0.004
91	18.000, 0.005	18.000, 0.008	18.000, 0.006	18.000, -0.001	18.000, 0.009	18.000, 0.001	18.000, 0.003
92	18.200, 0.004	18.200, 0.008	18.200, 0.006	18.200, -0.001	18.200, 0.009	18.200, 0.001	18.200, 0.003
93	18.400, 0.004	18.400, 0.008	18.400, 0.006	18.400, -0.001	18.400, 0.009	18.400, 0.001	18.400, 0.003
94	18.600, 0.004	18.600, 0.008	18.600, 0.005	18.600, -0.001	18.600, 0.009	18.600, 0.001	18.600, 0.003
95	18.800, 0.004	18.800, 0.008	18.800, 0.005	18.800, -0.002	18.800, 0.009	18.800, 0.002	18.800, 0.002
96	19.000, 0.004	19.000, 0.008	19.000, 0.005	19.000, -0.002	19.000, 0.008	19.000, 0.002	19.000, 0.002
97	19.200, 0.004	19.200, 0.007	19.200, 0.005	19.200, -0.002	19.200, 0.008	19.200, 0.002	19.200, 0.002
98	19.400, 0.004	19.400, 0.007	19.400, 0.005	19.400, -0.003	19.400, 0.008	19.400, 0.002	19.400, 0.002
99	19.600, 0.004	19.600, 0.007	19.600, 0.005	19.600, -0.003	19.600, 0.008	19.600, 0.002	19.600, 0.002
100	19.800, 0.004	19.800, 0.006	19.800, 0.005	19.800, -0.003	19.800, 0.007	19.800, 0.002	19.800, 0.002
101	20.000, 0.005	20.000, 0.006	20.000, 0.004	20.000, -0.003	20.000, 0.007	20.000, 0.002	20.000, 0.002
102	20.200, 0.005	20.200, 0.006	20.200, 0.004	20.200, -0.003	20.200, 0.007	20.200, 0.002	20.200, 0.002
103	20.400, 0.005	20.400, 0.005	20.400, 0.004	20.400, -0.003	20.400, 0.007	20.400, 0.002	20.400, 0.002
104	20.600, 0.005	20.600, 0.005	20.600, 0.005	20.600, -0.003	20.600, 0.006	20.600, 0.002	20.600, 0.002
105	20.800, 0.005	20.800, 0.004	20.800, 0.005	20.800, -0.003	20.800, 0.006	20.800, 0.001	20.800, 0.002
106	21.000, 0.005	21.000, 0.004	21.000, 0.005	21.000, -0.002	21.000, 0.006	21.000, 0.001	21.000, 0.002
107	21.200, 0.005	21.200, 0.004	21.200, 0.005	21.200, -0.002	21.200, 0.006	21.200, 0.001	21.200, 0.001
108	21.400, 0.004	21.400, 0.003	21.400, 0.005	21.400, -0.002	21.400, 0.005	21.400, 0.001	21.400, 0.001
109	21.600, 0.004	21.600, 0.003	21.600, 0.005	21.600, -0.001	21.600, 0.005	21.600, 0.001	21.600, 0.001
110	21.800, 0.004	21.800, 0.003	21.800, 0.004	21.800, -0.001	21.800, 0.005	21.800, 0.001	21.800, 0.001
111	22.000, 0.003	22.000, 0.003	22.000, 0.004	22.000, -0.001	22.000, 0.005	22.000, 0.001	22.000, 0.001
112	22.200, 0.003	22.200, 0.003	22.200, 0.004	22.200, -0.001	22.200, 0.005	22.200, 0.001	22.200, 0.001
113	22.400, 0.003	22.400, 0.003	22.400, 0.003	22.400, -0.000	22.400, 0.005	22.400, 0.001	22.400, 0.001
114	22.600, 0.003	22.600, 0.003	22.600, 0.003	22.600, -0.000	22.600, 0.005	22.600, 0.001	22.600, 0.001
115	22.800, 0.002	22.800, 0.003	22.800, 0.003	22.800, -0.000	22.800, 0.004	22.800, 0.001	22.800, 0.001
116	23.000, 0.002	23.000, 0.003	23.000, 0.003	23.000, -0.000	23.000, 0.004	23.000, 0.000	23.000, 0.001
117	23.200, 0.002	23.200, 0.003	23.200, 0.003	23.200, -0.000	23.200, 0.004	23.200, 0.000	23.200, 0.001
118	23.400, 0.002	23.400, 0.003	23.400, 0.003	23.400, -0.000	23.400, 0.004	23.400, -0.000	23.400, 0.001
119	23.600, 0.002	23.600, 0.003	23.600, 0.002	23.600, -0.000	23.600, 0.004	23.600, -0.000	23.600, 0.001
120	23.800, 0.002	23.800, 0.003	23.800, 0.002	23.800, -0.000	23.800, 0.004	23.800, -0.000	23.800, 0.001
121	24.000, 0.002	24.000, 0.002	24.000, 0.002	24.000, -0.000	24.000, 0.004	24.000, -0.001	24.000, 0.001
122	24.200, 0.002	24.200, 0.002	24.200, 0.003	24.200, -0.000	24.200, 0.004	24.200, -0.001	24.200, 0.001
123	24.400, 0.002	24.400, 0.002	24.400, 0.003	24.400, -0.000	24.400, 0.004	24.400, -0.001	24.400, 0.002
124	24.600, 0.002	24.600, 0.002	24.600, 0.003	24.600, -0.000	24.600, 0.004	24.600, -0.001	24.600, 0.001
125	24.800, 0.002	24.800, 0.002	24.800, 0.002	24.800, -0.000	24.800, 0.003	24.800, -0.001	24.800, 0.001
126	25.000, 0.002	25.000, 0.002	25.000, 0.002	25.000, -0.000	25.000, 0.003	25.000, -0.001	25.000, 0.001
127	25.200, 0.001	25.200, 0.002	25.200, 0.002	25.200, -0.000	25.200, 0.002	25.200, -0.001	25.200, 0.001
128	25.400, 0.001	25.400, 0.002	25.400, 0.002	25.400, -0.000	25.400, 0.002	25.400, -0.001	25.400, 0.001
129	25.600, 0.001	25.600, 0.002	25.600, 0.002	25.600, -0.000	25.600, 0.002	25.600, -0.001	25.600, 0.001
130	25.800, 0.001	25.800, 0.002	25.800, 0.001	25.800, -0.000	25.800, 0.001	25.800, -0.001	25.800, 0.001
131	26.000, 0.001	26.000, 0.002	26.000, 0.001	26.000, -0.001	26.000, 0.001	26.000, -0.000	26.000, 0.001
132	26.200, 0.001	26.200, 0.002	26.200, 0.001	26.200, -0.000	26.200, 0.001	26.200, -0.000	26.200, 0.001
133	26.400, 0.001	26.400, 0.001	26.400, 0.001	26.400, -0.000	26.400, 0.001	26.400, 0.000	26.400, 0.001
134	26.600, 0.001	26.600, 0.001	26.600, 0.000	26.600, -0.000	26.600, 0.000	26.600, 0.000	26.600, 0.001
135	26.800, 0.001	26.800, 0.001	26.800, 0.000	26.800, -0.000	26.800, 0.000	26.800, 0.000	26.800, 0.001
136	27.000, 0.001	27.000, 0.001	27.000, 0.000	27.000, 0.000	27.000, 0.000	27.000, 0.000	27.000, 0.001
137	27.200, 0.001	27.200, 0.001	27.200, 0.000	27.200, 0.000	27.200, 0.000	27.200, 0.000	27.200, 0.001
138	27.400, 0.001	27.400, 0.001	27.400, 0.000	27.400, 0.000	27.400, 0.000	27.400, 0.000	27.400, 0.001
139	27.600, 0.001	27.600, 0.001	27.600, -0.000	27.600, 0.000	27.600, 0.000	27.600, 0.000	27.600, 0.001
140	27.800, 0.001	27.800, 0.000	27.800, -0.000	27.800, 0.000	27.800, 0.001	27.800, 0.000	27.800, 0.001
141	28.000, 0.000	28.000, 0.000	28.000, -0.000	28.000, 0.000	28.000, 0.001	28.000, 0.000	28.000, 0.001
142	28.200, 0.000	28.200, -0.000	28.200, -0.000	28.200, 0.000	28.200, 0.001	28.200, 0.000	28.200, 0.000
143	28.400, -0.000	28.400, -0.000	28.400, -0.000	28.400, 0.000	28.400, 0.000	28.400, 0.000	28.400, 0.000
144	28.600, -0.000	28.600, -0.000	28.600, -0.000	28.600, 0.000	28.600, 0.000	28.600, -0.000	28.600, 0.000
145	28.800, -0.001	28.800, -0.000	28.800, -0.000	28.800, 0.000	28.800, -0.000	28.800, -0.000	28.800, -0.000
146	29.000, -0.001	29.000, -0.000	29.000, -0.000	29.000, -0.000	29.000, -0.000	29.000, -0.000	29.000, -0.001
147	29.200, -0.001	29.200, -0.000	29.200, 0.000	29.200, -0.000	29.200, -0.001	29.200, -0.000	29.200, -0.001
148	29.400, -0.001	29.400, -0.001	29.400, 0.000	29.400, -0.000	29.400, -0.001	29.400, -0.000	29.400, -0.001
149	29.600, -0.001	29.600, -0.001	29.600, 0.000	29.600, -0.000	29.600, -0.001	29.600, -0.000	29.600, -0.001
150	29.800, -0.001	29.800, -0.001	29.800, 0.000	29.800, -0.001	29.800, -0.001	29.800, -0.001	29.800, -0.001
151	30.000, 0.000	30.000, 0.000	30.000, 0.000	30.000, 0.000	30.000, 0.000	30.000, 0.000	30.000, 0.000
152	30.200, 0.009	30.200, 0.013	30.200, 0.012	30.200, 0.012	30.200, 0.011	30.200, -0.000	30.200, -0.001
153	30.400, 0.019	30.400, 0.028	30.400, 0.026	30.400, 0.027	30.400, 0.024	30.400, -0.001	30.400, -0.002
154	30.600, 0.031	30.600, 0.045	30.600, 0.042	30.600, 0.043	30.600, 0.039	30.600, -0.002	30.600, -0.003
155	30.800, 0.045	30.800, 0.063	30.800, 0.059	30.800, 0.059	30.800, 0.054	30.800, -0.002	30.800, -0.005
156	31.000, 0.061	31.000, 0.082	31.000, 0.077	31.000, 0.077	31.000, 0.070	31.000, -0.003	31.000, -0.006
157	31.200, 0.078	31.200, 0.100	31.200, 0.095	31.200, 0.094	31.200, 0.086	31.200, -0.004	31.200, -0.007
158	31.400, 0.096	31.400, 0.118	31.400, 0.113	31.400, 0.111	31.400, 0.102	31.400, -0.004	31.400, -0.009
159	31.600, 0.114	31.600, 0.134	31.600, 0.130	31.600, 0.127	31.600, 0.117	31.600, -0.005	31.600, -0.010
160	31.800, 0.133	31.800, 0.149	31.800, 0.145	31.800, 0.141	31.800, 0.130	31.800, -0.006	31.800, -0.010
161	32.000, 0.151	32.000, 0.161	32.000, 0.158	32.000, 0.153	32.000, 0.141	32.000, -0.006	32.000, -0.010
162	32.200, 0.169	32.200, 0.170	32.200, 0.168	32.200, 0.162	32.200, 0.149	32.200, -0.007	32.200, -0.010
163	32.400, 0.185	32.400, 0.176	32.400, 0.175	32.400, 0.169	32.400, 0.154	32.400, -0.007	32.400, -0.011
164	32.600, 0.202	32.600, 0.182	32.600, 0.181	32.600, 0.174	32.600, 0.159	32.600, -0.007	32.600, -0.011
165	32.800, 0.218	32.800, 0.186	32.800, 0.186	32.800, 0.178	32.800, 0.163	32.800, -0.007	32.800, -0.010
166	33.000, 0.235	33.000, 0.188	33.000, 0.189	33.000, 0.181	33.000, 0.165	33.000, -0.008	33.000, -0.010
167	33.200, 0.252	33.200, 0.190	33.200, 0.192	33.200, 0.184	33.200, 0.166	33.200, -0.008	33.200, -0.010
168	33.400, 0.268	33.400, 0.192	33.400, 0.194	33.400, 0.185	33.400, 0.167	33.400, -0.008	33.400, -0.010
169	33.600, 0.285	33.600, 0.193	33.600, 0.196	33.600, 0.187	33.600, 0.167	33.600, -0.009	33.600, -0.010
170	33.800, 0.301	33.800, 0.194	33.800, 0.198	33.800, 0.188	33.800, 0.167	33.800, -0.009	33.800, -0.010
171	34.000, 0.318	34.000, 0.195	34.000, 0.199	34.000, 0.189	34.000, 0.167	34.000, -0.009	34.000, -0.010
172	34.200, 0.335	34.200, 0.196	34.200, 0.200	34.200, 0.190	34.200, 0.167	34.200, -0.010	34.200, -0.010
173	34.400, 0.351	34.400, 0.196	34.400, 0.201	34.400, 0.191	34.400, 0.167	34.400, -0.010	34.400, -0.010
174	34.600, 0.368	34.600, 0.197	34.600, 0.202	34.600, 0.192	34.600, 0.167	34.600, -0.011	34.600, -0.010
175	34.800, 0.384	34.800, 0.197	34.800, 0.203	34.800, 0.192	34.800, 0.167	34.800, -0.011	34.800, -0.010
176	35.000, 0.401	35.000, 0.197	35.000, 0.203	35.000, 0.193	35.000, 0.166	35.000, -0.012	35.000, -0.010
177	35.200, 0.418	35.200, 0.197	35.200, 0.204	35.200, 0.193	35.200, 0.166	35.200, -0.012	35.200, -0.010
178	35.400, 0.434	35.400, 0.197	35.400, 0.205	35.400, 0.194	35.400, 0.166	35.400, -0.013	35.400, -0.010
179	35.600, 0.450	35.600, 0.197	35.600, 0.205	35.600, 0.194	35.600, 0.166	35.600, -0.013	35.600, -0.010
180	35.800, 0.467	35.800, 0.197	35.800, 0.206	35.800, 0.195	35.800, 0.165	35.800, -0.014	35.800, -0.010
181	36.000, 0.483	36.000, 0.197	36.000, 0.207	36.000, 0.195	36.000, 0.165	36.000, -0.015	36.000, -0.010
182	36.200, 0.499	36.200, 0.197	36.200, 0.208	36.200, 0.196	36.200, 0.165	36.200, -0.015	36.200, -0.010
183	36.400, 0.515	36.400, 0.198	36.400, 0.209	36.400, 0.196	36.400, 0.165	36.400, -0.016	36.400, -0.010
184	36.600, 0.531	36.600, 0.198	36.600, 0.209	36.600, 0.196	36.600, 0.164	36.600, -0.016	36.600, -0.009
185	36.800, 0.548	36.800, 0.198	36.800, 0.210	36.800, 0.197	36.800, 0.164	36.800, -0.017	36.800, -0.010
186	37.000, 0.563	37.000, 0.198	37.000, 0.211	37.000, 0.197	37.000, 0.164	37.000, -0.017	37.000, -0.010
187	37.200, 0.579	37.200, 0.198	37.200, 0.212	37.200, 0.197	37.200, 0.164	37.200, -0.017	37.200, -0.011
188	37.400, 0.595	37.400, 0.198	37.400, 0.213	37.400, 0.198	37.400, 0.164	37.400, -0.018	37.400, -0.011
189	37.600, 0.610	37.600, 0.198	37.600, 0.214	37.600, 0.198	37.600, 0.164	37.600, -0.018	37.600, -0.012
190	37.800, 0.625	37.800, 0.198	37.800, 0.214	37.800, 0.198	37.800, 0.164	37.800, -0.019	37.800, -0.012
191	38.000, 0.641	38.000, 0.198	38.000, 0.215	38.000, 0.198	38.000, 0.165	38.000, -0.020	38.000, -0.012
192	38.200, 0.656	38.200, 0.198	38.200, 0.215	38.200, 0.199	38.200, 0.165	38.200, -0.020	38.200, -0.012
193	38.400, 0.671	38.400, 0.197	38.400, 0.216	38.400, 0.199	38.400, 0.164	38.400, -0.021	38.400, -0.013
194	38.600, 0.686	38.600, 0.197	38.600, 0.216	38.600, 0.199	38.600, 0.164	38.600, -0.021	38.600, -0.013
195	38.800, 0.701	38.800, 0.197	38.800, 0.216	38.800, 0.199	38.800, 0.164	38.800, -0.022	38.800, -0.013
196	39.000, 0.716	39.000, 0.197	39.000, 0.216	39.000, 0.199	39.000, 0.164	39.000, -0.022	39.000, -0.013
197	39.200, 0.731	39.200, 0.197	39.200, 0.217	39.200, 0.199	39.200, 0.163	39.200, -0.022	39.200, -0.014
198	39.400, 0.746	39.400, 0.196	39.400, 0.217	39.400, 0.200	39.400, 0.163	39.400, -0.023	39.400, -0.014
199	39.600, 0.761	39.600, 0.196	39.600, 0.217	39.600, 0.200	39.600, 0.163	39.600, -0.023	39.600, -0.014
200	39.800, 0.776	39.800, 0.196	39.800, 0.217	39.800, 0.200	39.800, 0.162	39.800, -0.023	39.800, -0.014
201	40.000, 0.791	40.000, 0.196	40.000, 0.217	40.000, 0.201	40.000, 0.162	40.000, -0.023	40.000, -0.014
202	40.200, 0.806	40.200, 0.196	40.200, 0.218	40.200, 0.201	40.200, 0.161	40.200, -0.023	40.200, -0.014
203	40.400, 0.821	40.400, 0.196	40.400, 0.218	40.400, 0.201	40.400, 0.161	40.400, -0.023	40.400, -0.013
204	40.600, 0.836	40.600, 0.196	40.600, 0.218	40.600, 0.201	40.600, 0.161	40.600, -0.023	40.600, -0.013
205	40.800, 0.851	40.800, 0.196	40.800, 0.219	40.800, 0.202	40.800, 0.161	40.800, -0.023	40.800, -0.013
206	41.000, 0.866	41.000, 0.196	41.000, 0.219	41.000, 0.202	41.000, 0.161	41.000, -0.023	41.000, -0.013
207	41.200, 0.880	41.200, 0.195	41.200, 0.220	41.200, 0.202	41.200, 0.161	41.200, -0.023	41.200, -0.013
208	41.400, 0.894	41.400, 0.195	41.400, 0.220	41.400, 0.203	41.400, 0.161	41.400, -0.023	41.400, -0.013
209	41.600, 0.908	41.600, 0.195	41.600, 0.221	41.600, 0.203	41.600, 0.161	41.600, -0.024	41.600, -0.013
210	41.800, 0.922	41.800, 0.195	41.800, 0.221	41.800, 0.203	41.800, 0.162	41.800, -0.024	41.800, -0.013
211	42.000, 0.935	42.000, 0.195	42.000, 0.222	42.000, 0.204	42.000, 0.162	42.000, -0.025	42.000, -0.013
212	42.200, 0.948	42.200, 0.195	42.200, 0.222	42.200, 0.204	42.200, 0.162	42.200, -0.025	42.200, -0.013
213	42.400, 0.962	42.400, 0.195	42.400, 0.222	42.400, 0.204	42.400, 0.161	42.400, -0.025	42.400, -0.012
214	42.600, 0.975	42.600, 0.195	42.600, 0.223	42.600, 0.205	42.600, 0.161	42.600, -0.026	42.600, -0.012
215	42.800, 0.989	42.800, 0.195	42.800, 0.223	42.800, 0.205	42.800, 0.161	42.800, -0.026	42.800, -0.012
216	43.000, 1.002	43.000, 0.195	43.000, 0.224	43.000, 0.205	43.000, 0.161	43.000, -0.027	43.000, -0.012
217	43.200, 1.015	43.200, 0.195	43.200, 0.224	43.200, 0.206	43.200, 0.161	43.200, -0.028	43.200, -0.012
218	43.400, 1.029	43.400, 0.195	43.400, 0.224	43.400, 0.206	43.400, 0.161	43.400, -0.028	43.400, -0.012
219	43.600, 1.042	43.600, 0.195	43.600, 0.225	43.600, 0.206	43.600, 0.161	43.600, -0.029	43.600, -0.012
220	43.800, 1.055	43.800, 0.195	43.800, 0.225	43.800, 0.206	43.800, 0.161	43.800, -0.029	43.800, -0.012
221	44.000, 1.068	44.000, 0.195	44.000, 0.225	44.000, 0.206	44.000, 0.160	44.000, -0.029	44.000, -0.013
222	44.200, 1.081	44.200, 0.195	44.200, 0.225	44.200, 0.206	44.200, 0.160	44.200, -0.030	44.200, -0.013
223	44.400, 1.094	44.400, 0.194	44.400, 0.225	44.400, 0.206	44.400, 0.160	44.400, -0.030	44.400, -0.013
224	44.600, 1.106	44.600, 0.194	44.600, 0.226	44.600, 0.206	44.600, 0.160	44.600, -0.030	44.600, -0.013
225	44.800, 1.119	44.800, 0.193	44.800, 0.226	44.800, 0.206	44.800, 0.160	44.800, -0.030	44.800, -0.014
226	45.000, 1.132	45.000, 0.193	45.000, 0.227	45.000, 0.206	45.000, 0.160	45.000, -0.030	45.000, -0.014
227	45.200, 1.144	45.200, 0.192	45.200, 0.227	45.200, 0.206	45.200, 0.160	45.200, -0.030	45.200, -0.015
228	45.400, 1.157	45.400, 0.192	45.400, 0.228	45.400, 0.206	45.400, 0.160	45.400, -0.030	45.400, -0.015
229	45.600, 1.169	45.600, 0.191	45.600, 0.228	45.600, 0.206	45.600, 0.160	45.600, -0.030	45.600, -0.016
230	45.800, 1.181	45.800, 0.191	45.800, 0.229	45.800, 0.206	45.800, 0.160	45.800, -0.030	45.800, -0.016
231	46.000, 1.194	46.000, 0.191	46.000, 0.229	46.000, 0.206	46.000, 0.160	46.000, -0.030	46.000, -0.016
232	46.200, 1.205	46.200, 0.191	46.200, 0.229	46.200, 0.205	46.200, 0.160	46.200, -0.030	46.200, -0.016
233	46.400, 1.217	46.400, 0.191	46.400, 0.229	46.400, 0.206	46.400, 0.160	46.400, -0.030	46.400, -0.017
234	46.600, 1.229	46.600, 0.191	46.600, 0.229	46.600, 0.206	46.600, 0.160	46.600, -0.031	46.600, -0.017
235	46.800, 1.241	46.800, 0.191	46.800, 0.229	46.800, 0.206	46.800, 0.160	46.800, -0.032	46.800, -0.017
236	47.000, 1.252	47.000, 0.191	47.000, 0.229	47.000, 0.206	47.000, 0.160	47.000, -0.032	47.000, -0.017
237	47.200, 1.264	47.200, 0.191	47.200, 0.228	47.200, 0.207	47.200, 0.160	47.200, -0.033	47.200, -0.017
238	47.400, 1.275	47.400, 0.191	47.400, 0.228	47.400, 0.207	47.400, 0.160	47.400, -0.033	47.400, -0.017
239	47.600, 1.287	47.600, 0.191	47.600, 0.228	47.600, 0.207	47.600, 0.160	47.600, -0.033	47.600, -0.018
240	47.800, 1.298	47.800, 0.191	47.800, 0.228	47.800, 0.207	47.800, 0.159	47.800, -0.034	47.800, -0.018
241	48.000, 1.310	48.000, 0.191	48.000, 0.228	48.000, 0.208	48.000, 0.159	48.000, -0.034	48.000, -0.019
242	48.200, 1.321	48.200, 0.191	48.200, 0.228	48.200, 0.208	48.200, 0.159	48.200, -0.034	48.200, -0.019
243	48.400, 1.332	48.400, 0.191	48.400, 0.228	48.400, 0.208	48.400, 0.159	48.400, -0.034	48.400, -0.019
244	48.600, 1.343	48.600, 0.191	48.600, 0.229	48.600, 0.208	48.600, 0.159	48.600, -0.034	48.600, -0.019
245	48.800, 1.354	48.800, 0.191	48.800, 0.229	48.800, 0.208	48.800, 0.159	48.800, -0.034	48.800, -0.019
246	49.000, 1.365	49.000, 0.191	49.000, 0.230	49.000, 0.208	49.000, 0.159	49.000, -0.035	49.000, -0.019
247	49.200, 1.376	49.200, 0.191	49.200, 0.230	49.200, 0.208	49.200, 0.159	49.200, -0.035	49.200, -0.019
248	49.400, 1.388	49.400, 0.191	49.400, 0.231	49.400, 0.208	49.400, 0.159	49.400, -0.035	49.400, -0.019
249	49.600, 1.399	49.600, 0.191	49.600, 0.231	49.600, 0.208	49.600, 0.159	49.600, -0.036	49.600, -0.019
250	49.800, 1.409	49.800, 0.191	49.800, 0.231	49.800, 0.208	49.800, 0.160	49.800, -0.036	49.800, -0.018
251	50.000, 1.420	50.000, 0.190	50.000, 0.232	50.000, 0.209	50.000, 0.160	50.000, -0.037	50.000, -0.018
252	50.200, 1.430	50.200, 0.190	50.200, 0.232	50.200, 0.209	50.200, 0.160	50.200, -0.037	50.200, -0.018
253	50.400, 1.441	50.400, 0.190	50.400, 0.232	50.400, 0.209	50.400, 0.160	50.400, -0.038	50.400, -0.017
254	50.600, 1.451	50.600, 0.189	50.600, 0.232	50.600, 0.209	50.600, 0.160	50.600, -0.038	50.600, -0.017
255	50.800, 1.461	50.800, 0.189	50.800, 0.232	50.800, 0.210	50.800, 0.160	50.800, -0.038	50.800, -0.017
256	51.000, 1.471	51.000, 0.189	51.000, 0.232	51.000, 0.210	51.000, 0.159	51.000, -0.038	51.000, -0.017
257	51.200, 1.481	51.200, 0.189	51.200, 0.232	51.200, 0.210	51.200, 0.159	51.200, -0.038	51.200, -0.017
258	51.400, 1.491	51.400, 0.189	51.400, 0.232	51.400, 0.210	51.400, 0.159	51.400, -0.038	51.400, -0.017
259	51.600, 1.501	51.600, 0.189	51.600, 0.232	51.600, 0.211	51.600, 0.159	51.600, -0.038	51.600, -0.018
260	51.800, 1.510	51.800, 0.189	51.800, 0.232	51.800, 0.211	51.800, 0.159	51.800, -0.038	51.800, -0.018
261	52.000, 1.520	52.000, 0.189	52.000, 0.232	52.000, 0.211	52.000, 0.159	52.000, -0.038	52.000, -0.019
262	52.200, 1.529	52.200, 0.189	52.200, 0.232	52.200, 0.211	52.200, 0.159	52.200, -0.038	52.200, -0.020
263	52.400, 1.539	52.400, 0.188	52.400, 0.232	52.400, 0.211	52.400, 0.159	52.400, -0.038	52.400, -0.020
264	52.600, 1.548	52.600, 0.188	52.600, 0.232	52.600, 0.210	52.600, 0.159	52.600, -0.039	52.600, -0.021
265	52.800, 1.557	52.800, 0.188	52.800, 0.233	52.800, 0.210	52.800, 0.159	52.800, -0.039	52.800, -0.021
266	53.000, 1.567	53.000, 0.188	53.000, 0.233	53.000, 0.210	53.000, 0.158	53.000, -0.039	53.000, -0.022
267	53.200, 1.576	53.200, 0.188	53.200, 0.233	53.200, 0.210	53.200, 0.158	53.200, -0.040	53.200, -0.022
268	53.400, 1.586	53.400, 0.188	53.400, 0.233	53.400, 0.209	53.400, 0.159	53.400, -0.040	53.400, -0.023
269	53.600, 1.595	53.600, 0.188	53.600, 0.233	53.600, 0.209	53.600, 0.159	53.600, -0.040	53.600, -0.023
270	53.800, 1.604	53.800, 0.188	53.800, 0.233	53.800, 0.209	53.800, 0.159	53.800, -0.040	53.800, -0.023
271	54.000, 1.614	54.000, 0.188	54.000, 0.234	54.000, 0.210	54.000, 0.160	54.000, -0.040	54.000, -0.023
272	54.200, 1.623	54.200, 0.188	54.200, 0.234	54.200, 0.210	54.200, 0.160	54.200, -0.040	54.200, -0.023
273	54.400, 1.632	54.400, 0.188	54.400, 0.234	54.400, 0.210	54.400, 0.160	54.400, -0.040	54.400, -0.023
274	54.600, 1.641	54.600, 0.188	54.600, 0.234	54.600, 0.211	54.600, 0.160	54.600, -0.040	54.600, -0.023
275	54.800, 1.650	54.800, 0.188	54.800, 0.234	54.800, 0.211	54.800, 0.160	54.800, -0.040	54.800, -0.022
276	55.000, 1.659	55.000, 0.187	55.000, 0.234	55.000, 0.212	55.000, 0.161	55.000, -0.040	55.000, -0.022
277	55.200, 1.667	55.200, 0.187	55.200, 0.234	55.200, 0.212	55.200, 0.161	55.200, -0.041	55.200, -0.021
278	55.400, 1.676	55.400, 0.187	55.400, 0.234	55.400, 0.212	55.400, 0.161	55.400, -0.041	55.400, -0.021
279	55.600, 1.684	55.600, 0.187	55.600, 0.234	55.600, 0.212	55.600, 0.160	55.600, -0.042	55.600, -0.021
280	55.800, 1.692	55.800, 0.187	55.800, 0.235	55.800, 0.212	55.800, 0.160	55.800, -0.042	55.800, -0.021
281	56.000, 1.701	56.000, 0.187	56.000, 0.235	56.000, 0.212	56.000, 0.160	56.000, -0.043	56.000, -0.021
282	56.200, 1.709	56.200, 0.187	56.200, 0.235	56.200, 0.212	56.200, 0.160	56.200, -0.043	56.200, -0.022
283	56.400, 1.717	56.400, 0.187	56.400, 0.236	56.400, 0.212	56.400, 0.160	56.400, -0.044	56.400, -0.022
284	56.600, 1.726	56.600, 0.187	56.600, 0.236	56.600, 0.212	56.600, 0.159	56.600, -0.044	56.600, -0.022
285	56.800, 1.734	56.800, 0.187	56.800, 0.236	56.800, 0.212	56.800, 0.159	56.800, -0.044	56.800, -0.022
286	57.000, 1.741	57.000, 0.187	57.000, 0.237	57.000, 0.211	57.000, 0.159	57.000, -0.044	57.000, -0.022
287	57.200, 1.749	57.200, 0.187	57.200, 0.237	57.200, 0.211	57.200, 0.160	57.200, -0.044	57.200, -0.023
288	57.400, 1.757	57.400, 0.187	57.400, 0.237	57.400, 0.211	57.400, 0.160	57.400, -0.044	57.400, -0.023
289	57.600, 1.765	57.600, 0.187	57.600, 0.237	57.600, 0.211	57.600, 0.160	57.600, -0.044	57.600, -0.023
290	57.800, 1.773	57.800, 0.187	57.800, 0.238	57.800, 0.212	57.800, 0.160	57.800, -0.044	57.800, -0.024
291	58.000, 1.780	58.000, 0.187	58.000, 0.238	58.000, 0.212	58.000, 0.160	58.000, -0.044	58.000, -0.024
292	58.200, 1.788	58.200, 0.187	58.200, 0.238	58.200, 0.212	58.200, 0.160	58.200, -0.044	58.200, -0.024
293	58.400, 1.796	58.400, 0.187	58.400, 0.238	58.400, 0.213	58.400, 0.159	58.400, -0.044	58.400, -0.024
294	58.600, 1.804	58.600, 0.187	58.600, 0.238	58.600, 0.213	58.600, 0.159	58.600, -0.044	58.600, -0.024
295	58.800, 1.812	58.800, 0.187	58.800, 0.238	58.800, 0.212	58.800, 0.159	58.800, -0.044	58.800, -0.024
296	59.000, 1.819	59.000, 0.187	59.000, 0.238	59.000, 0.212	59.000, 0.159	59.000, -0.044	59.000, -0.025
297	59.200, 1.827	59.200, 0.186	59.200, 0.237	59.200, 0.212	59.200, 0.158	59.200, -0.044	59.200, -0.025
298	59.400, 1.835	59.400, 0.186	59.400, 0.237	59.400, 0.212	59.400, 0.158	59.400, -0.045	59.400, -0.026
299	59.600, 1.842	59.600, 0.186	59.600, 0.237	59.600, 0.212	59.600, 0.157	59.600, -0.045	59.600, -0.026
300	59.800, 1.850	59.800, 0.186	59.800, 0.237	59.800, 0.212	59.800, 0.157	59.800, -0.045	59.800, -0.027
301	60.000, 1.858	60.000, 0.186	60.000, 0.237	60.000, 0.212	60.000, 0.157	60.000, -0.045	60.000, -0.028
302	60.200, 1.865	60.200, 0.186	60.200, 0.238	60.200, 0.212	60.200, 0.158	60.200, -0.046	60.200, -0.028
303	60.400, 1.872	60.400, 0.185	60.400, 0.238	60.400, 0.212	60.400, 0.158	60.400, -0.046	60.400, -0.029
304	60.600, 1.880	60.600, 0.185	60.600, 0.238	60.600, 0.212	60.600, 0.158	60.600, -0.046	60.600, -0.028
305	60.800, 1.886	60.800, 0.185	60.800, 0.238	60.800, 0.213	60.800, 0.159	60.800, -0.046	60.800, -0.028
306	61.000, 1.893	61.000, 0.185	61.000, 0.239	61.000, 0.213	61.000, 0.159	61.000, -0.046	61.000, -0.028
307	61.200, 1.900	61.200, 0.185	61.200, 0.239	61.200, 0.213	61.200, 0.159	61.200, -0.047	61.200, -0.028
308	61.400, 1.907	61.400, 0.185	61.400, 0.239	61.400, 0.213	61.400, 0.159	61.400, -0.047	61.400, -0.028
309	61.600, 1.913	61.600, 0.185	61.600, 0.240	61.600, 0.213	61.600, 0.160	61.600, -0.047	61.600, -0.027
310	61.800, 1.920	61.800, 0.184	61.800, 0.240	61.800, 0.213	61.800, 0.160	61.800, -0.047	61.800, -0.027
311	62.000, 1.927	62.000, 0.185	62.000, 0.240	62.000, 0.213	62.000, 0.160	62.000, -0.047	62.000, -0.026
312	62.200, 1.933	62.200, 0.185	62.200, 0.241	62.200, 0.213	62.200, 0.160	62.200, -0.047	62.200, -0.026
313	62.400, 1.940	62.400, 0.184	62.400, 0.241	62.400, 0.213	62.400, 0.160	62.400, -0.047	62.400, -0.026
314	62.600, 1.946	62.600, 0.185	62.600, 0.241	62.600, 0.213	62.600, 0.159	62.600, -0.048	62.600, -0.026
315	62.800, 1.953	62.800, 0.185	62.800, 0.241	62.800, 0.213	62.800, 0.159	62.800, -0.048	62.800, -0.026
316	63.000, 1.959	63.000, 0.184	63.000, 0.241	63.000, 0.213	63.000, 0.159	63.000, -0.048	63.000, -0.026
317	63.200, 1.965	63.200, 0.184	63.200, 0.242	63.200, 0.213	63.200, 0.159	63.200, -0.049	63.200, -0.027
318	63.400, 1.971	63.400, 0.185	63.400, 0.242	63.400, 0.213	63.400, 0.159	63.400, -0.049	63.400, -0.027
319	63.600, 1.978	63.600, 0.184	63.600, 0.242	63.600, 0.213	63.600, 0.159	63.600, -0.049	63.600, -0.028
320	63.800, 1.984	63.800, 0.184	63.800, 0.242	63.800, 0.213	63.800, 0.159	63.800, -0.049	63.800, -0.028
321	64.000, 1.991	64.000, 0.184	64.000, 0.243	64.000, 0.214	64.000, 0.159	64.000, -0.049	64.000, -0.029
322	64.200, 1.997	64.200, 0.184	64.200, 0.243	64.200, 0.214	64.200, 0.159	64.200, -0.049	64.200, -0.029
323	64.400, 2.003	64.400, 0.185	64.400, 0.243	64.400, 0.214	64.400, 0.159	64.400, -0.049	64.400, -0.029
324	64.600, 2.009	64.600, 0.185	64.600, 0.243	64.600, 0.214	64.600, 0.159	64.600, -0.049	64.600, -0.029
325	64.800, 2.015	64.800, 0.185	64.800, 0.243	64.800, 0.215	64.800, 0.159	64.800, -0.049	64.800, -0.030
326	65.000, 2.021	65.000, 0.185	65.000, 0.243	65.000, 0.215	65.000, 0.158	65.000, -0.049	65.000, -0.030
327	65.200, 2.027	65.200, 0.184	65.200, 0.243	65.200, 0.215	65.200, 0.158	65.200, -0.049	65.200, -0.029
328	65.400, 2.033	65.400, 0.184	65.400, 0.243	65.400, 0.215	65.400, 0.158	65.400, -0.049	65.400, -0.029
329	65.600, 2.039	65.600, 0.184	65.600, 0.243	65.600, 0.215	65.600, 0.158	65.600, -0.049	65.600, -0.029
330	65.800, 2.045	65.800, 0.184	65.800, 0.243	65.800, 0.215	65.800, 0.158	65.800, -0.049	65.800, -0.029
331	66.000, 2.051	66.000, 0.184	66.000, 0.243	66.000, 0.216	66.000, 0.158	66.000, -0.049	66.000, -0.029
332	66.200, 2.057	66.200, 0.184	66.200, 0.243	66.200, 0.216	66.200, 0.158	66.200, -0.049	66.200, -0.029
333	66.400, 2.063	66.400, 0.184	66.400, 0.243	66.400, 0.216	66.400, 0.158	66.400, -0.050	66.400, -0.029
334	66.600, 2.069	66.600, 0.183	66.600, 0.244	66.600, 0.216	66.600, 0.158	66.600, -0.050	66.600, -0.029
335	66.800, 2.074	66.800, 0.183	66.800, 0.244	66.800, 0.216	66.800, 0.158	66.800, -0.050	66.800, -0.029
336	67.000, 2.080	67.000, 0.183	67.000, 0.244	67.000, 0.216	67.000, 0.158	67.000, -0.050	67.000, -0.030
337	67.200, 2.085	67.200, 0.183	67.200, 0.244	67.200, 0.216	67.200, 0.158	67.200, -0.051	67.200, -0.030
338	67.400, 2.091	67.400, 0.183	67.400, 0.245	67.400, 0.216	67.400, 0.158	67.400, -0.051	67.400, -0.031
339	67.600, 2.096	67.600, 0.183	67.600, 0.245	67.600, 0.216	67.600, 0.158	67.600, -0.051	67.600, -0.031
340	67.800, 2.101	67.800, 0.183	67.800, 0.245	67.800, 0.216	67.800, 0.158	67.800, -0.052	67.800, -0.031
341	68.000, 2.106	68.000, 0.183	68.000, 0.245	68.000, 0.216	68.000, 0.158	68.000, -0.052	68.000, -0.031
342	68.200, 2.111	68.200, 0.183	68.200, 0.245	68.200, 0.216	68.200, 0.158	68.200, -0.052	68.200, -0.031
343	68.400, 2.115	68.400, 0.184	68.400, 0.245	68.400, 0.216	68.400, 0.158	68.400, -0.052	68.400, -0.031
344	68.600, 2.120	68.600, 0.184	68.600, 0.245	68.600, 0.217	68.600, 0.157	68.600, -0.052	68.600, -0.030
345	68.800, 2.125	68.800, 0.184	68.800, 0.245	68.800, 0.217	68.800, 0.157	68.800, -0.052	68.800, -0.030
346	69.000, 2.130	69.000, 0.184	69.000, 0.244	69.000, 0.217	69.000, 0.157	69.000, -0.052	69.000, -0.030
347	69.200, 2.135	69.200, 0.184	69.200, 0.244	69.200, 0.217	69.200, 0.157	69.200, -0.053	69.200, -0.029
348	69.400, 2.140	69.400, 0.184	69.400, 0.244	69.400, 0.217	69.400, 0.158	69.400, -0.053	69.400, -0.029
349	69.600, 2.145	69.600, 0.184	69.600, 0.244	69.600, 0.217	69.600, 0.158	69.600, -0.053	69.600, -0.029
350	69.800, 2.150	69.800, 0.184	69.800, 0.244	69.800, 0.217	69.800, 0.159	69.800, -0.053	69.800, -0.028
351	70.000, 2.155	70.000, 0.184	70.000, 0.244	70.000, 0.217	70.000, 0.159	70.000, -0.053	70.000, -0.028
352	70.200, 2.160	70.200, 0.183	70.200, 0.244	70.200, 0.217	70.200, 0.159	70.200, -0.054	70.200, -0.028
353	70.400, 2.165	70.400, 0.183	70.400, 0.245	70.400, 0.217	70.400, 0.159	70.400, -0.054	70.400, -0.028
354	70.600, 2.170	70.600, 0.182	70.600, 0.245	70.600, 0.217	70.600, 0.159	70.600, -0.053	70.600, -0.029
355	70.800, 2.174	70.800, 0.182	70.800, 0.245	70.800, 0.217	70.800, 0.159	70.800, -0.053	70.800, -0.029
356	71.000, 2.178	71.000, 0.181	71.000, 0.246	71.000, 0.216	71.000, 0.159	71.000, -0.053	71.000, -0.029
357	71.200, 2.183	71.200, 0.181	71.200, 0.246	71.200, 0.216	71.200, 0.159	71.200, -0.053	71.200, -0.030
358	71.400, 2.187	71.400, 0.181	71.400, 0.246	71.400, 0.216	71.400, 0.159	71.400, -0.053	71.400, -0.030
359	71.600, 2.191	71.600, 0.180	71.600, 0.246	71.600, 0.216	71.600, 0.159	71.600, -0.053	71.600, -0.030
360	71.800, 2.196	71.800, 0.180	71.800, 0.246	71.800, 0.216	71.800, 0.158	71.800, -0.053	71.800, -0.030
361	72.000, 2.200	72.000, 0.180	72.000, 0.246	72.000, 0.216	72.000, 0.158	72.000, -0.053	72.000, -0.030
362	72.200, 2.204	72.200, 0.181	72.200, 0.246	72.200, 0.216	72.200, 0.158	72.200, -0.053	72.200, -0.030
363	72.400, 2.209	72.400, 0.181	72.400, 0.246	72.400, 0.217	72.400, 0.158	72.400, -0.053	72.400, -0.030
364	72.600, 2.213	72.600, 0.181	72.600, 0.246	72.600, 0.217	72.600, 0.158	72.600, -0.053	72.600, -0.030
365	72.800, 2.217	72.800, 0.181	72.800, 0.246	72.800, 0.218	72.800, 0.158	72.800, -0.053	72.800, -0.030
366	73.000, 2.221	73.000, 0.182	73.000, 0.246	73.000, 0.218	73.000, 0.158	73.000, -0.054	73.000, -0.030
367	73.200, 2.225	73.200, 0.182	73.200, 0.246	73.200, 0.219	73.200, 0.158	73.200, -0.054	73.200, -0.030
368	73.400, 2.229	73.400, 0.183	73.400, 0.246	73.400, 0.219	73.400, 0.158	73.400, -0.055	73.400, -0.031
369	73.600, 2.234	73.600, 0.183	73.600, 0.246	73.600, 0.219	73.600, 0.158	73.600, -0.055	73.600, -0.031
370	73.800, 2.238	73.800, 0.184	73.800, 0.246	73.800, 0.219	73.800, 0.158	73.800, -0.055	73.800, -0.031
371	74.000, 2.242	74.000, 0.184	74.000, 0.247	74.000, 0.219	74.000, 0.158	74.000, -0.056	74.000, -0.032
372	74.200, 2.246	74.200, 0.184	74.200, 0.247	74.200, 0.219	74.200, 0.158	74.200, -0.056	74.200, -0.032
373	74.400, 2.250	74.400, 0.184	74.400, 0.247	74.400, 0.219	74.400, 0.158	74.400, -0.055	74.400, -0.032
374	74.600, 2.254	74.600, 0.184	74.600, 0.247	74.600, 0.219	74.600, 0.158	74.600, -0.055	74.600, -0.032
375	74.800, 2.258	74.800, 0.183	74.800, 0.248	74.800, 0.218	74.800, 0.158	74.800, -0.055	74.800, -0.033
376	75.000, 2.262	75.000, 0.183	75.000, 0.248	75.000, 0.218	75.000, 0.158	75.000, -0.055	75.000, -0.033
377	75.200, 2.266	75.200, 0.183	75.200, 0.248	75.200, 0.217	75.200, 0.158	75.200, -0.055	75.200, -0.033
378	75.400, 2.270	75.400, 0.182	75.400, 0.248	75.400, 0.217	75.400, 0.159	75.400, -0.055	75.400, -0.033
379	75.600, 2.274	75.600, 0.182	75.600, 0.248	75.600, 0.216	75.600, 0.158	75.600, -0.055	75.600, -0.032
380	75.800, 2.278	75.800, 0.182	75.800, 0.248	75.800, 0.216	75.800, 0.159	75.800, -0.055	75.800, -0.032
381	76.000, 2.282	76.000, 0.182	76.000, 0.247	76.000, 0.216	76.000, 0.159	76.000, -0.055	76.000, -0.032
382	76.200, 2.286	76.200, 0.182	76.200, 0.248	76.200, 0.216	76.200, 0.159	76.200, -0.055	76.200, -0.031
383	76.400, 2.290	76.400, 0.181	76.400, 0.248	76.400, 0.216	76.400, 0.159	76.400, -0.055	76.400, -0.031
384	76.600, 2.293	76.600, 0.182	76.600, 0.248	76.600, 0.216	76.600, 0.159	76.600, -0.056	76.600, -0.031
385	76.800, 2.297	76.800, 0.182	76.800, 0.248	76.800, 0.217	76.800, 0.159	76.800, -0.056	76.800, -0.031
386	77.000, 2.301	77.000, 0.182	77.000, 0.248	77.000, 0.217	77.000, 0.159	77.000, -0.056	77.000, -0.032
387	77.200, 2.305	77.200, 0.182	77.200, 0.248	77.200, 0.217	77.200, 0.159	77.200, -0.057	77.200, -0.032
388	77.400, 2.309	77.400, 0.182	77.400, 0.249	77.400, 0.218	77.400, 0.159	77.400, -0.057	77.400, -0.033
389	77.600, 2.313	77.600, 0.182	77.600, 0.249	77.600, 0.218	77.600, 0.159	77.600, -0.057	77.600, -0.033
390	77.800, 2.316	77.800, 0.182	77.800, 0.249	77.800, 0.218	77.800, 0.159	77.800, -0.058	77.800, -0.033
391	78.000, 2.320	78.000, 0.182	78.000, 0.250	78.000, 0.218	78.000, 0.159	78.000, -0.058	78.000, -0.033
392	78.200, 2.323	78.200, 0.182	78.200, 0.250	78.200, 0.218	78.200, 0.158	78.200, -0.058	78.200, -0.033
393	78.400, 2.327	78.400, 0.182	78.400, 0.250	78.400, 0.219	78.400, 0.158	78.400, -0.058	78.400, -0.033
394	78.600, 2.330	78.600, 0.182	78.600, 0.250	78.600, 0.219	78.600, 0.158	78.600, -0.058	78.600, -0.033
395	78.800, 2.333	78.800, 0.182	78.800, 0.249	78.800, 0.219	78.800, 0.158	78.800, -0.058	78.800, -0.033
396	79.000, 2.336	79.000, 0.182	79.000, 0.249	79.000, 0.219	79.000, 0.158	79.000, -0.058	79.000, -0.033
397	79.200, 2.339	79.200, 0.182	79.200, 0.249	79.200, 0.220	79.200, 0.158	79.200, -0.058	79.200, -0.033
398	79.400, 2.342	79.400, 0.182	79.400, 0.248	79.400, 0.220	79.400, 0.158	79.400, -0.058	79.400, -0.033
399	79.600, 2.345	79.600, 0.182	79.600, 0.248	79.600, 0.220	79.600, 0.158	79.600, -0.058	79.600, -0.033
400	79.800, 2.348	79.800, 0.182	79.800, 0.248	79.800, 0.220	79.800, 0.158	79.800, -0.058	79.800, -0.032
401	80.000, 2.351	80.000, 0.182	80.000, 0.248	80.000, 0.220	80.000, 0.158	80.000, -0.058	80.000, -0.032
402	80.200, 2.354	80.200, 0.182	80.200, 0.248	80.200, 0.220	80.200, 0.158	80.200, -0.058	80.200, -0.032
403	80.400, 2.356	80.400, 0.182	80.400, 0.248	80.400, 0.220	80.400, 0.158	80.400, -0.059	80.400, -0.033
404	80.600, 2.359	80.600, 0.182	80.600, 0.248	80.600, 0.219	80.600, 0.158	80.600, -0.059	80.600, -0.033
405	80.800, 2.362	80.800, 0.183	80.800, 0.249	80.800, 0.219	80.800, 0.158	80.800, -0.059	80.800, -0.033
406	81.000, 2.366	81.000, 0.183	81.000, 0.249	81.000, 0.219	81.000, 0.158	81.000, -0.059	81.000, -0.033
407	81.200, 2.369	81.200, 0.183	81.200, 0.250	81.200, 0.218	81.200, 0.158	81.200, -0.059	81.200, -0.033
408	81.400, 2.372	81.400, 0.183	81.400, 0.250	81.400, 0.218	81.400, 0.158	81.400, -0.059	81.400, -0.033
409	81.600, 2.376	81.600, 0.183	81.600, 0.251	81.600, 0.218	81.600, 0.158	81.600, -0.060	81.600, -0.033
410	81.800, 2.379	81.800, 0.183	81.800, 0.251	81.800, 0.218	81.800, 0.158	81.800, -0.060	81.800, -0.033
411	82.000, 2.382	82.000, 0.182	82.000, 0.252	82.000, 0.218	82.000, 0.159	82.000, -0.060	82.000, -0.034
412	82.200, 2.384	82.200, 0.182	82.200, 0.252	82.200, 0.218	82.200, 0.159	82.200, -0.061	82.200, -0.034
413	82.400, 2.387	82.400, 0.182	82.400, 0.252	82.400, 0.218	82.400, 0.159	82.400, -0.061	82.400, -0.034
414	82.600, 2.390	82.600, 0.183	82.600, 0.253	82.600, 0.218	82.600, 0.159	82.600, -0.061	82.600, -0.034
415	82.800, 2.392	82.800, 0.183	82.800, 0.253	82.800, 0.219	82.800, 0.160	82.800, -0.061	82.800, -0.035
416	83.000, 2.395	83.000, 0.183	83.000, 0.253	83.000, 0.219	83.000, 0.160	83.000, -0.061	83.000, -0.035
417	83.200, 2.397	83.200, 0.183	83.200, 0.253	83.200, 0.219	83.200, 0.160	83.200, -0.060	83.200, -0.035
418	83.400, 2.400	83.400, 0.183	83.400, 0.253	83.400, 0.219	83.400, 0.159	83.400, -0.060	83.400, -0.035
419	83.600, 2.402	83.600, 0.183	83.600, 0.253	83.600, 0.219	83.600, 0.159	83.600, -0.060	83.600, -0.035
420	83.800, 2.405	83.800, 0.183	83.800, 0.253	83.800, 0.219	83.800, 0.159	83.800, -0.060	83.800, -0.036
421	84.000, 2.408	84.000, 0.183	84.000, 0.253	84.000, 0.219	84.000, 0.159	84.000, -0.060	84.000, -0.036
422	84.200, 2.410	84.200, 0.183	84.200, 0.253	84.200, 0.219	84.200, 0.159	84.200, -0.060	84.200, -0.036
423	84.400, 2.413	84.400, 0.183	84.400, 0.254	84.400, 0.220	84.400, 0.159	84.400, -0.060	84.400, -0.036
424	84.600, 2.416	84.600, 0.183	84.600, 0.254	84.600, 0.220	84.600, 0.159	84.600, -0.060	84.600, -0.037
425	84.800, 2.419	84.800, 0.183	84.800, 0.254	84.800, 0.220	84.800, 0.159	84.800, -0.060	84.800, -0.037
426	85.000, 2.421	85.000, 0.183	85.000, 0.254	85.000, 0.220	85.000, 0.159	85.000, -0.060	85.000, -0.037
427	85.200, 2.424	85.200, 0.183	85.200, 0.254	85.200, 0.220	85.200, 0.159	85.200, -0.060	85.200, -0.038
428	85.400, 2.427	85.400, 0.183	85.400, 0.253	85.400, 0.220	85.400, 0.158	85.400, -0.060	85.400, -0.038
429	85.600, 2.429	85.600, 0.183	85.600, 0.253	85.600, 0.220	85.600, 0.158	85.600, -0.061	85.600, -0.038
430	85.800, 2.431	85.800, 0.183	85.800, 0.253	85.800, 0.220	85.800, 0.158	85.800, -0.061	85.800, -0.038
431	86.000, 2.434	86.000, 0.183	86.000, 0.253	86.000, 0.220	86.000, 0.158	86.000, -0.062	86.000, -0.038
432	86.200, 2.436	86.200, 0.183	86.200, 0.253	86.200, 0.221	86.200, 0.158	86.200, -0.062	86.200, -0.038
433	86.400, 2.438	86.400, 0.183	86.400, 0.253	86.400, 0.221	86.400, 0.159	86.400, -0.062	86.400, -0.038
434	86.600, 2.441	86.600, 0.183	86.600, 0.253	86.600, 0.221	86.600, 0.159	86.600, -0.062	86.600, -0.038
435	86.800, 2.443	86.800, 0.183	86.800, 0.252	86.800, 0.221	86.800, 0.159	86.800, -0.063	86.800, -0.038
436	87.000, 2.445	87.000, 0.183	87.000, 0.252	87.000, 0.221	87.000, 0.158	87.000, -0.063	87.000, -0.037
437	87.200, 2.448	87.200, 0.183	87.200, 0.252	87.200, 0.221	87.200, 0.158	87.200, -0.063	87.200, -0.037
438	87.400, 2.450	87.400, 0.183	87.400, 0.252	87.400, 0.221	87.400, 0.158	87.400, -0.063	87.400, -0.037
439	87.600, 2.452	87.600, 0.183	87.600, 0.253	87.600, 0.221	87.600, 0.158	87.600, -0.063	87.600, -0.037
440	87.800, 2.455	87.800, 0.183	87.800, 0.253	87.800, 0.222	87.800, 0.158	87.800, -0.062	87.800, -0.037
441	88.000, 2.457	88.000, 0.183	88.000, 0.253	88.000, 0.222	88.000, 0.159	88.000, -0.062	88.000, -0.037
442	88.200, 2.459	88.200, 0.183	88.200, 0.254	88.200, 0.222	88.200, 0.159	88.200, -0.062	88.200, -0.037
443	88.400, 2.461	88.400, 0.183	88.400, 0.254	88.400, 0.222	88.400, 0.159	88.400, -0.062	88.400, -0.037
444	88.600, 2.463	88.600, 0.182	88.600, 0.254	88.600, 0.221	88.600, 0.159	88.600, -0.062	88.600, -0.037
445	88.800, 2.465	88.800, 0.182	88.800, 0.254	88.800, 0.221	88.800, 0.159	88.800, -0.062	88.800, -0.037
446	89.000, 2.467	89.000, 0.182	89.000, 0.255	89.000, 0.221	89.000, 0.159	89.000, -0.062	89.000, -0.037
447	89.200, 2.469	89.200, 0.182	89.200, 0.255	89.200, 0.221	89.200, 0.159	89.200, -0.062	89.200, -0.037
448	89.400, 2.472	89.400, 0.181	89.400, 0.255	89.400, 0.221	89.400, 0.159	89.400, -0.062	89.400, -0.037
449	89.600, 2.474	89.600, 0.181	89.600, 0.256	89.600, 0.220	89.600, 0.159	89.600, -0.062	89.600, -0.037
450	89.800, 2.476	89.800, 0.181	89.800, 0.256	89.800, 0.220	89.800, 0.159	89.800, -0.062	89.800, -0.037
451	90.000, 2.478	90.000, 0.181	90.000, 0.256	90.000, 0.220	90.000, 0.160	90.000, -0.062	90.000, -0.037
452	90.200, 2.481	90.200, 0.181	90.200, 0.256	90.200, 0.220	90.200, 0.160	90.200, -0.062	90.200, -0.036
453	90.400, 2.483	90.400, 0.181	90.400, 0.256	90.400, 0.220	90.400, 0.161	90.400, -0.062	90.400, -0.036
454	90.600, 2.485	90.600, 0.181	90.600, 0.256	90.600, 0.220	90.600, 0.161	90.600, -0.062	90.600, -0.036
455	90.800, 2.487	90.800, 0.182	90.800, 0.256	90.800, 0.220	90.800, 0.161	90.800, -0.063	90.800, -0.036
456	91.000, 2.489	91.000, 0.182	91.000, 0.256	91.000, 0.220	91.000, 0.161	91.000, -0.063	91.000, -0.036
457	91.200, 2.491	91.200, 0.182	91.200, 0.256	91.200, 0.220	91.200, 0.161	91.200, -0.063	91.200, -0.036
458	91.400, 2.493	91.400, 0.182	91.400, 0.256	91.400, 0.220	91.400, 0.161	91.400, -0.063	91.400, -0.036
459	91.600, 2.495	91.600, 0.182	91.600, 0.255	91.600, 0.220	91.600, 0.161	91.600, -0.063	91.600, -0.036
460	91.800, 2.497	91.800, 0.182	91.800, 0.255	91.800, 0.220	91.800, 0.161	91.800, -0.063	91.800, -0.036
461	92.000, 2.499	92.000, 0.182	92.000, 0.255	92.000, 0.220	92.000, 0.161	92.000, -0.063	92.000, -0.036
462	92.200, 2.501	92.200, 0.182	92.200, 0.255	92.200, 0.221	92.200, 0.161	92.200, -0.063	92.200, -0.036
463	92.400, 2.502	92.400, 0.182	92.400, 0.255	92.400, 0.221	92.400, 0.160	92.400, -0.063	92.400, -0.036
464	92.600, 2.504	92.600, 0.182	92.600, 0.255	92.600, 0.221	92.600, 0.160	92.600, -0.062	92.600, -0.036
465	92.800, 2.506	92.800, 0.182	92.800, 0.255	92.800, 0.221	92.800, 0.160	92.800, -0.062	92.800, -0.036
466	93.000, 2.507	93.000, 0.182	93.000, 0.255	93.000, 0.222	93.000, 0.159	93.000, -0.062	93.000, -0.036
467	93.200, 2.509	93.200, 0.182	93.200, 0.255	93.200, 0.222	93.200, 0.159	93.200, -0.062	93.200, -0.036
468	93.400, 2.511	93.400, 0.182	93.400, 0.255	93.400, 0.222	93.400, 0.160	93.400, -0.062	93.400, -0.036
469	93.600, 2.513	93.600, 0.182	93.600, 0.255	93.600, 0.222	93.600, 0.160	93.600, -0.062	93.600, -0.037
470	93.800, 2.515	93.800, 0.182	93.800, 0.255	93.800, 0.222	93.800, 0.160	93.800, -0.062	93.800, -0.037
471	94.000, 2.517	94.000, 0.182	94.000, 0.255	94.000, 0.222	94.000, 0.161	94.000, -0.062	94.000, -0.037
472	94.200, 2.519	94.200, 0.182	94.200, 0.255	94.200, 0.222	94.200, 0.161	94.200, -0.062	94.200, -0.038
473	94.400, 2.520	94.400, 0.182	94.400, 0.256	94.400, 0.221	94.400, 0.161	94.400, -0.063	94.400, -0.038
474	94.600, 2.522	94.600, 0.183	94.600, 0.256	94.600, 0.221	94.600, 0.162	94.600, -0.063	94.600, -0.038
475	94.800, 2.524	94.800, 0.183	94.800, 0.256	94.800, 0.221	94.800, 0.162	94.800, -0.064	94.800, -0.039
476	95.000, 2.525	95.000, 0.183	95.000, 0.257	95.000, 0.220	95.000, 0.163	95.000, -0.064	95.000, -0.039
477	95.200, 2.527	95.200, 0.184	95.200, 0.257	95.200, 0.220	95.200, 0.163	95.200, -0.065	95.200, -0.039
478	95.400, 2.529	95.400, 0.184	95.400, 0.257	95.400, 0.220	95.400, 0.163	95.400, -0.065	95.400, -0.039
479	95.600, 2.531	95.600, 0.184	95.600, 0.257	95.600, 0.220	95.600, 0.163	95.600, -0.065	95.600, -0.039
480	95.800, 2.532	95.800, 0.184	95.800, 0.257	95.800, 0.221	95.800, 0.163	95.800, -0.066	95.800, -0.039
481	96.000, 2.534	96.000, 0.184	96.000, 0.257	96.000, 0.221	96.000, 0.163	96.000, -0.066	96.000, -0.039
482	96.200, 2.535	96.200, 0.185	96.200, 0.257	96.200, 0.222	96.200, 0.162	96.200, -0.066	96.200, -0.038
483	96.400, 2.536	96.400, 0.185	96.400, 0.257	96.400, 0.222	96.400, 0.161	96.400, -0.066	96.400, -0.038
484	96.600, 2.538	96.600, 0.184	96.600, 0.257	96.600, 0.223	96.600, 0.161	96.600, -0.066	96.600, -0.038
485	96.800, 2.540	96.800, 0.184	96.800, 0.257	96.800, 0.223	96.800, 0.161	96.800, -0.066	96.800, -0.038
486	97.000, 2.541	97.000, 0.184	97.000, 0.256	97.000, 0.223	97.000, 0.160	97.000, -0.066	97.000, -0.038
487	97.200, 2.542	97.200, 0.183	97.200, 0.256	97.200, 0.223	97.200, 0.160	97.200, -0.066	97.200, -0.038
488	97.400, 2.544	97.400, 0.183	97.400, 0.256	97.400, 0.223	97.400, 0.160	97.400, -0.066	97.400, -0.038
489	97.600, 2.545	97.600, 0.182	97.600, 0.256	97.600, 0.223	97.600, 0.160	97.600, -0.065	97.600, -0.038
490	97.800, 2.547	97.800, 0.182	97.800, 0.256	97.800, 0.223	97.800, 0.159	97.800, -0.065	97.800, -0.038
491	98.000, 2.548	98.000, 0.182	98.000, 0.257	98.000, 0.223	98.000, 0.159	98.000, -0.065	98.000, -0.038
492	98.200, 2.549	98.200, 0.182	98.200, 0.257	98.200, 0.223	98.200, 0.159	98.200, -0.065	98.200, -0.038
493	98.400, 2.551	98.400, 0.182	98.400, 0.258	98.400, 0.222	98.400, 0.159	98.400, -0.065	98.400, -0.038
494	98.600, 2.552	98.600, 0.182	98.600, 0.258	98.600, 0.222	98.600, 0.159	98.600, -0.065	98.600, -0.038
495	98.800, 2.554	98.800, 0.182	98.800, 0.258	98.800, 0.222	98.800, 0.159	98.800, -0.065	98.800, -0.038
496	99.000, 2.555	99.000, 0.182	99.000, 0.259	99.000, 0.221	99.000, 0.160	99.000, -0.065	99.000, -0.038
497	99.200, 2.556	99.200, 0.182	99.200, 0.259	99.200, 0.221	99.200, 0.161	99.200, -0.065	99.200, -0.038
498	99.400, 2.558	99.400, 0.182	99.400, 0.260	99.400, 0.221	99.400, 0.161	99.400, -0.065	99.400, -0.037
499	99.600, 2.559	99.600, 0.183	99.600, 0.260	99.600, 0.221	99.600, 0.161	99.600, -0.065	99.600, -0.037
500	99.800, 2.560	99.800, 0.183	99.800, 0.260	99.800, 0.221	99.800, 0.162	99.800, -0.065	99.800, -0.037
501	100.000, 2.561	100.000, 0.183	100.000, 0.260	100.000, 0.222	100.000, 0.162	100.000, -0.065	100.000, -0.037
502	100.200, 2.562	100.200, 0.183	100.200, 0.260	100.200, 0.222	100.200, 0.162	100.200, -0.065	100.200, -0.038
503	100.400, 2.564	100.400, 0.183	100.400, 0.261	100.400, 0.222	100.400, 0.162	100.400, -0.066	100.400, -0.038
504	100.600, 2.565	100.600, 0.183	100.600, 0.261	100.600, 0.222	100.600, 0.162	100.600, -0.066	100.600, -0.038
505	100.800, 2.566	100.800, 0.183	100.800, 0.261	100.800, 0.222	100.800, 0.162	100.800, -0.066	100.800, -0.038
506	101.000, 2.567	101.000, 0.183	101.000, 0.261	101.000, 0.222	101.000, 0.162	101.000, -0.066	101.000, -0.039
507	101.200, 2.568	101.200, 0.182	101.200, 0.261	101.200, 0.222	101.200, 0.162	101.200, -0.066	101.200, -0.039
508	101.400, 2.569	101.400, 0.182	101.400, 0.261	101.400, 0.222	101.400, 0.162	101.400, -0.066	101.400, -0.039
509	101.600, 2.570	101.600, 0.182	101.600, 0.261	101.600, 0.222	101.600, 0.161	101.600, -0.066	101.600, -0.039
510	101.800, 2.571	101.800, 0.182	101.800, 0.261	101.800, 0.223	101.800, 0.161	101.800, -0.066	101.800, -0.039
511	102.000, 2.572	102.000, 0.182	102.000, 0.261	102.000, 0.223	102.000, 0.160	102.000, -0.066	102.000, -0.039
512	102.200, 2.573	102.200, 0.182	102.200, 0.260	102.200, 0.223	102.200, 0.160	102.200, -0.066	102.200, -0.038
513	102.400, 2.574	102.400, 0.182	102.400, 0.260	102.400, 0.223	102.400, 0.160	102.400, -0.066	102.400, -0.038
514	102.600, 2.575	102.600, 0.182	102.600, 0.260	102.600, 0.223	102.600, 0.160	102.600, -0.066	102.600, -0.038
515	102.800, 2.576	102.800, 0.182	102.800, 0.260	102.800, 0.224	102.800, 0.160	102.800, -0.066	102.800, -0.038
516	103.000, 2.577	103.000, 0.182	103.000, 0.259	103.000, 0.224	103.000, 0.160	103.000, -0.066	103.000, -0.038
517	103.200, 2.578	103.200, 0.182	103.200, 0.259	103.200, 0.224	103.200, 0.160	103.200, -0.066	103.200, -0.038
518	103.400, 2.579	103.400, 0.182	103.400, 0.259	103.400, 0.224	103.400, 0.160	103.400, -0.066	103.400, -0.038
519	103.600, 2.580	103.600, 0.182	103.600, 0.259	103.600, 0.224	103.600, 0.160	103.600, -0.067	103.600, -0.038
520	103.800, 2.581	103.800, 0.183	103.800, 0.259	103.800, 0.224	103.800, 0.160	103.800, -0.067	103.800, -0.038
521	104.000, 2.582	104.000, 0.183	104.000, 0.259	104.000, 0.224	104.000, 0.160	104.000, -0.067	104.000, -0.038
522	104.200, 2.584	104.200, 0.183	104.200, 0.259	104.200, 0.224	104.200, 0.160	104.200, -0.067	104.200, -0.038
523	104.400, 2.585	104.400, 0.183	104.400, 0.260	104.400, 0.223	104.400, 0.160	104.400, -0.067	104.400, -0.038
524	104.600, 2.586	104.600, 0.183	104.600, 0.260	104.600, 0.223	104.600, 0.160	104.600, -0.067	104.600, -0.038
525	104.800, 2.586	104.800, 0.183	104.800, 0.260	104.800, 0.223	104.800, 0.160	104.800, -0.067	104.800, -0.038
526	105.000, 2.587	105.000, 0.183	105.000, 0.261	105.000, 0.223	105.000, 0.160	105.000, -0.067	105.000, -0.038
527	105.200, 2.588	105.200, 0.183	105.200, 0.261	105.200, 0.223	105.200, 0.160	105.200, -0.067	105.200, -0.038
528	105.400, 2.589	105.400, 0.183	105.400, 0.261	105.400, 0.223	105.400, 0.160	105.400, -0.067	105.400, -0.038
529	105.600, 2.590	105.600, 0.183	105.600, 0.261	105.600, 0.223	105.600, 0.160	105.600, -0.067	105.600, -0.038
530	105.800, 2.591	105.800, 0.183	105.800, 0.261	105.800, 0.223	105.800, 0.160	105.800, -0.067	105.800, -0.039
531	106.000, 2.593	106.000, 0.183	106.000, 0.261	106.000, 0.223	106.000, 0.160	106.000, -0.067	106.000, -0.039
532	106.200, 2.594	106.200, 0.183	106.200, 0.261	106.200, 0.223	106.200, 0.160	106.200, -0.067	106.200, -0.039
533	106.400, 2.595	106.400, 0.183	106.400, 0.261	106.400, 0.223	106.400, 0.160	106.400, -0.067	106.400, -0.039
534	106.600, 2.596	106.600, 0.183	106.600, 0.261	106.600, 0.223	106.600, 0.160	106.600, -0.067	106.600, -0.039
535	106.800, 2.596	106.800, 0.183	106.800, 0.261	106.800, 0.223	106.800, 0.160	106.800, -0.067	106.800, -0.039
536	107.000, 2.597	107.000, 0.183	107.000, 0.261	107.000, 0.223	107.000, 0.160	107.000, -0.067	107.000, -0.040
537	107.200, 2.597	107.200, 0.182	107.200, 0.261	107.200, 0.223	107.200, 0.160	107.200, -0.066	107.200, -0.040
538	107.400, 2.598	107.400, 0.182	107.400, 0.261	107.400, 0.223	107.400, 0.161	107.400, -0.066	107.400, -0.040
539	107.600, 2.599	107.600, 0.182	107.600, 0.261	107.600, 0.223	107.600, 0.161	107.600, -0.066	107.600, -0.040
540	107.800, 2.599	107.800, 0.182	107.800, 0.261	107.800, 0.223	107.800, 0.161	107.800, -0.066	107.800, -0.040
541	108.000, 2.600	108.000, 0.182	108.000, 0.261	108.000, 0.222	108.000, 0.161	108.000, -0.066	108.000, -0.041
542	108.200, 2.601	108.200, 0.182	108.200, 0.261	108.200, 0.222	108.200, 0.161	108.200, -0.065	108.200, -0.041
543	108.400, 2.601	108.400, 0.182	108.400, 0.261	108.400, 0.222	108.400, 0.161	108.400, -0.066	108.400, -0.041
544	108.600, 2.602	108.600, 0.182	108.600, 0.261	108.600, 0.222	108.600, 0.161	108.600, -0.066	108.600, -0.041
545	108.800, 2.603	108.800, 0.182	108.800, 0.262	108.800, 0.222	108.800, 0.161	108.800, -0.066	108.800, -0.041
546	109.000, 2.604	109.000, 0.182	109.000, 0.262	109.000, 0.222	109.000, 0.161	109.000, -0.066	109.000, -0.041
547	109.200, 2.605	109.200, 0.183	109.200, 0.262	109.200, 0.222	109.200, 0.160	109.200, -0.066	109.200, -0.041
548	109.400, 2.607	109.400, 0.183	109.400, 0.262	109.400, 0.223	109.400, 0.160	109.400, -0.066	109.400, -0.041
549	109.600, 2.608	109.600, 0.183	109.600, 0.262	109.600, 0.223	109.600, 0.160	109.600, -0.066	109.600, -0.041
550	109.800, 2.609	109.800, 0.183	109.800, 0.263	109.800, 0.223	109.800, 0.160	109.800, -0.067	109.800, -0.040
551	110.000, 2.610	110.000, 0.183	110.000, 0.263	110.000, 0.223	110.000, 0.160	110.000, -0.067	110.000, -0.040
552	110.200, 2.611	110.200, 0.183	110.200, 0.263	110.200, 0.223	110.200, 0.160	110.200, -0.067	110.200, -0.040
553	110.400, 2.612	110.400, 0.183	110.400, 0.263	110.400, 0.223	110.400, 0.160	110.400, -0.068	110.400, -0.040
554	110.600, 2.613	110.600, 0.183	110.600, 0.263	110.600, 0.224	110.600, 0.160	110.600, -0.068	110.600, -0.039
555	110.800, 2.614	110.800, 0.183	110.800, 0.263	110.800, 0.224	110.800, 0.160	110.800, -0.068	110.800, -0.039
556	111.000, 2.615	111.000, 0.183	111.000, 0.263	111.000, 0.224	111.000, 0.161	111.000, -0.069	111.000, -0.039
557	111.200, 2.616	111.200, 0.182	111.200, 0.263	111.200, 0.225	111.200, 0.161	111.200, -0.069	111.200, -0.039
558	111.400, 2.616	111.400, 0.182	111.400, 0.263	111.400, 0.225	111.400, 0.162	111.400, -0.069	111.400, -0.039
559	111.600, 2.617	111.600, 0.182	111.600, 0.263	111.600, 0.225	111.600, 0.162	111.600, -0.069	111.600, -0.039
560	111.800, 2.618	111.800, 0.182	111.800, 0.263	111.800, 0.225	111.800, 0.162	111.800, -0.070	111.800, -0.039
561	112.000, 2.619	112.000, 0.182	112.000, 0.263	112.000, 0.226	112.000, 0.162	112.000, -0.070	112.000, -0.039
562	112.200, 2.619	112.200, 0.182	112.200, 0.263	112.200, 0.226	112.200, 0.161	112.200, -0.070	112.200, -0.040
563	112.400, 2.620	112.400, 0.182	112.400, 0.263	112.400, 0.226	112.400, 0.161	112.400, -0.070	112.400, -0.040
564	112.600, 2.620	112.600, 0.182	112.600, 0.263	112.600, 0.226	112.600, 0.161	112.600, -0.070	112.600, -0.040
565	112.800, 2.621	112.800, 0.182	112.800, 0.263	112.800, 0.226	112.800, 0.160	112.800, -0.070	112.800, -0.040
566	113.000, 2.621	113.000, 0.182	113.000, 0.264	113.000, 0.226	113.000, 0.160	113.000, -0.070	113.000, -0.040
567	113.200, 2.621	113.200, 0.182	113.200, 0.264	113.200, 0.226	113.200, 0.159	113.200, -0.070	113.200, -0.040
568	113.400, 2.622	113.400, 0.182	113.400, 0.265	113.400, 0.225	113.400, 0.159	113.400, -0.069	113.400, -0.040
569	113.600, 2.622	113.600, 0.182	113.600, 0.265	113.600, 0.225	113.600, 0.159	113.600, -0.069	113.600, -0.040
570	113.800, 2.622	113.800, 0.182	113.800, 0.265	113.800, 0.224	113.800, 0.159	113.800, -0.069	113.800, -0.040
571	114.000, 2.623	114.000, 0.183	114.000, 0.265	114.000, 0.224	114.000, 0.160	114.000, -0.069	114.000, -0.040
572	114.200, 2.623	114.200, 0.183	114.200, 0.265	114.200, 0.224	114.200, 0.160	114.200, -0.069	114.200, -0.040
573	114.400, 2.624	114.400, 0.183	114.400, 0.265	114.400, 0.224	114.400, 0.160	114.400, -0.069	114.400, -0.040
574	114.600, 2.624	114.600, 0.183	114.600, 0.265	114.600, 0.225	114.600, 0.161	114.600, -0.069	114.600, -0.039
575	114.800, 2.625	114.800, 0.183	114.800, 0.265	114.800, 0.225	114.800, 0.161	114.800, -0.069	114.800, -0.039
576	115.000, 2.626	115.000, 0.183	115.000, 0.264	115.000, 0.225	115.000, 0.162	115.000, -0.069	115.000, -0.039
577	115.200, 2.626	115.200, 0.183	115.200, 0.264	115.200, 0.225	115.200, 0.162	115.200, -0.069	115.200, -0.039
578	115.400, 2.627	115.400, 0.183	115.400, 0.264	115.400, 0.225	115.400, 0.162	115.400, -0.069	115.400, -0.040
579	115.600, 2.627	115.600, 0.183	115.600, 0.264	115.600, 0.225	115.600, 0.163	115.600, -0.069	115.600, -0.040
580	115.800, 2.628	115.800, 0.183	115.800, 0.263	115.800, 0.224	115.800, 0.163	115.800, -0.069	115.800, -0.040
581	116.000, 2.628	116.000, 0.183	116.000, 0.263	116.000, 0.224	116.000, 0.162	116.000, -0.069	116.000, -0.039
582	116.200, 2.628	116.200, 0.183	116.200, 0.263	116.200, 0.224	116.200, 0.162	116.200, -0.069	116.200, -0.039
583	116.400, 2.629	116.400, 0.183	116.400, 0.263	116.400, 0.224	116.400, 0.162	116.400, -0.069	116.400, -0.039
584	116.600, 2.630	116.600, 0.183	116.600, 0.263	116.600, 0.224	116.600, 0.162	116.600, -0.069	116.600, -0.039
585	116.800, 2.630	116.800, 0.182	116.800, 0.264	116.800, 0.224	116.800, 0.162	116.800, -0.069	116.800, -0.039
586	117.000, 2.630	117.000, 0.182	117.000, 0.264	117.000, 0.224	117.000, 0.162	117.000, -0.069	117.000, -0.039
587	117.200, 2.630	117.200, 0.182	117.200, 0.265	117.200, 0.224	117.200, 0.162	117.200, -0.069	117.200, -0.039
588	117.400, 2.631	117.400, 0.182	117.400, 0.265	117.400, 0.224	117.400, 0.162	117.400, -0.069	117.400, -0.039
589	117.600, 2.631	117.600, 0.181	117.600, 0.265	117.600, 0.224	117.600, 0.162	117.600, -0.069	117.600, -0.039
590	117.800, 2.632	117.800, 0.181	117.800, 0.265	117.800, 0.224	117.800, 0.162	117.800, -0.069	117.800, -0.039
591	118.000, 2.633	118.000, 0.181	118.000, 0.266	118.000, 0.224	118.000, 0.162	118.000, -0.069	118.000, -0.040
592	118.200, 2.633	118.200, 0.181	118.200, 0.266	118.200, 0.224	118.200, 0.162	118.200, -0.069	118.200, -0.040
593	118.400, 2.634	118.400, 0.181	118.400, 0.266	118.400, 0.225	118.400, 0.161	118.400, -0.069	118.400, -0.041
594	118.600, 2.635	118.600, 0.181	118.600, 0.266	118.600, 0.225	118.600, 0.161	118.600, -0.070	118.600, -0.041
595	118.800, 2.636	118.800, 0.182	118.800, 0.266	118.800, 0.225	118.800, 0.161	118.800, -0.070	118.800, -0.042
596	119.000, 2.636	119.000, 0.181	119.000, 0.266	119.000, 0.225	119.000, 0.161	119.000, -0.070	119.000, -0.042
597	119.200, 2.637	119.200, 0.182	119.200, 0.267	119.200, 0.225	119.200, 0.162	119.200, -0.070	119.200, -0.041
598	119.400, 2.638	119.400, 0.182	119.400, 0.267	119.400, 0.225	119.400, 0.162	119.400, -0.071	119.400, -0.041
599	119.600, 2.639	119.600, 0.182	119.600, 0.266	119.600, 0.225	119.600, 0.162	119.600, -0.071	119.600, -0.041
600	119.800, 2.639	119.800, 0.182	119.800, 0.266	119.800, 0.225	119.800, 0.162	119.800, -0.071	119.800, -0.040
601	120.000, 2.640	120.000, 0.182	120.000, 0.266	120.000, 0.226	120.000, 0.162	120.000, -0.071	120.000, -0.040
602	120.200, 2.640	120.200, 0.182	120.200, 0.266	120.200, 0.226	120.200, 0.162	120.200, -0.071	120.200, -0.039
603	120.400, 2.641	120.400, 0.182	120.400, 0.266	120.400, 0.226	120.400, 0.162	120.400, -0.071	120.400, -0.039
604	120.600, 2.641	120.600, 0.182	120.600, 0.266	120.600, 0.227	120.600, 0.162	120.600, -0.071	120.600, -0.039
605	120.800, 2.641	120.800, 0.182	120.800, 0.266	120.800, 0.227	120.800, 0.162	120.800, -0.071	120.800, -0.038
606	121.000, 2.641	121.000, 0.182	121.000, 0.266	121.000, 0.227	121.000, 0.162	121.000, -0.070	121.000, -0.038
607	121.200, 2.642	121.200, 0.182	121.200, 0.266	121.200, 0.227	121.200, 0.162	121.200, -0.070	121.200, -0.038
608	121.400, 2.642	121.400, 0.182	121.400, 0.266	121.400, 0.227	121.400, 0.162	121.400, -0.070	121.400, -0.038
609	121.600, 2.642	121.600, 0.182	121.600, 0.266	121.600, 0.227	121.600, 0.162	121.600, -0.069	121.600, -0.039
610	121.800, 2.642	121.800, 0.182	121.800, 0.266	121.800, 0.227	121.800, 0.162	121.800, -0.069	121.800, -0.039
611	122.000, 2.642	122.000, 0.182	122.000, 0.266	122.000, 0.227	122.000, 0.162	122.000, -0.069	122.000, -0.039
612	122.200, 2.643	122.200, 0.182	122.200, 0.266	122.200, 0.227	122.200, 0.162	122.200, -0.070	122.200, -0.040
613	122.400, 2.643	122.400, 0.182	122.400, 0.265	122.400, 0.227	122.400, 0.162	122.400, -0.070	122.400, -0.040
614	122.600, 2.643	122.600, 0.182	122.600, 0.265	122.600, 0.227	122.600, 0.162	122.600, -0.070	122.600, -0.040
615	122.800, 2.643	122.800, 0.181	122.800, 0.265	122.800, 0.227	122.800, 0.162	122.800, -0.070	122.800, -0.040
616	123.000, 2.643	123.000, 0.182	123.000, 0.265	123.000, 0.226	123.000, 0.161	123.000, -0.070	123.000, -0.040
617	123.200, 2.643	123.200, 0.182	123.200, 0.265	123.200, 0.226	123.200, 0.161	123.200, -0.070	123.200, -0.040
618	123.400, 2.643	123.400, 0.182	123.400, 0.265	123.400, 0.226	123.400, 0.161	123.400, -0.070	123.400, -0.040
619	123.600, 2.644	123.600, 0.182	123.600, 0.265	123.600, 0.226	123.600, 0.161	123.600, -0.070	123.600, -0.040
620	123.800, 2.644	123.800, 0.182	123.800, 0.265	123.800, 0.226	123.800, 0.161	123.800, -0.070	123.800, -0.039
621	124.000, 2.645	124.000, 0.182	124.000, 0.265	124.000, 0.226	124.000, 0.161	124.000, -0.069	124.000, -0.039
622	124.200, 2.645	124.200, 0.182	124.200, 0.266	124.200, 0.226	124.200, 0.161	124.200, -0.069	124.200, -0.039
623	124.400, 2.646	124.400, 0.182	124.400, 0.266	124.400, 0.226	124.400, 0.161	124.400, -0.069	124.400, -0.039
624	124.600, 2.646	124.600, 0.182	124.600, 0.267	124.600, 0.226	124.600, 0.161	124.600, -0.070	124.600, -0.039
625	124.800, 2.647	124.800, 0.182	124.800, 0.267	124.800, 0.226	124.800, 0.162	124.800, -0.070	124.800, -0.038
626	125.000, 2.648	125.000, 0.182	125.000, 0.268	125.000, 0.227	125.000, 0.162	125.000, -0.070	125.000, -0.038
627	125.200, 2.648	125.200, 0.182	125.200, 0.268	125.200, 0.227	125.200, 0.162	125.200, -0.070	125.200, -0.038
628	125.400, 2.648	125.400, 0.182	125.400, 0.268	125.400, 0.227	125.400, 0.162	125.400, -0.070	125.400, -0.038
629	125.600, 2.649	125.600, 0.182	125.600, 0.268	125.600, 0.227	125.600, 0.162	125.600, -0.070	125.600, -0.038
630	125.800, 2.649	125.800, 0.182	125.800, 0.268	125.800, 0.227	125.800, 0.161	125.800, -0.070	125.800, -0.038
631	126.000, 2.649	126.000, 0.182	126.000, 0.268	126.000, 0.227	126.000, 0.161	126.000, -0.071	126.000, -0.039
632	126.200, 2.649	126.200, 0.182	126.200, 0.268	126.200, 0.227	126.200, 0.161	126.200, -0.071	126.200, -0.039
633	126.400, 2.649	126.400, 0.182	126.400, 0.268	126.400, 0.227	126.400, 0.160	126.400, -0.071	126.400, -0.039
634	126.600, 2.649	126.600, 0.182	126.600, 0.268	126.600, 0.227	126.600, 0.160	126.600, -0.071	126.600, -0.039
635	126.800, 2.649	126.800, 0.182	126.800, 0.268	126.800, 0.227	126.800, 0.160	126.800, -0.071	126.800, -0.039
636	127.000, 2.649	127.000, 0.182	127.000, 0.268	127.000, 0.227	127.000, 0.160	127.000, -0.071	127.000, -0.040
637	127.200, 2.650	127.200, 0.181	127.200, 0.268	127.200, 0.227	127.200, 0.160	127.200, -0.071	127.200, -0.040
638	127.400, 2.650	127.400, 0.181	127.400, 0.268	127.400, 0.227	127.400, 0.161	127.400, -0.071	127.400, -0.040
639	127.600, 2.650	127.600, 0.181	127.600, 0.268	127.600, 0.227	127.600, 0.161	127.600, -0.071	127.600, -0.040
640	127.800, 2.651	127.800, 0.181	127.800, 0.268	127.800, 0.227	127.800, 0.161	127.800, -0.071	127.800, -0.040
641	128.000, 2.651	128.000, 0.181	128.000, 0.268	128.000, 0.228	128.000, 0.161	128.000, -0.071	128.000, -0.040
642	128.200, 2.652	128.200, 0.181	128.200, 0.268	128.200, 0.228	128.200, 0.162	128.200, -0.071	128.200, -0.040
643	128.400, 2.652	128.400, 0.180	128.400, 0.268	128.400, 0.228	128.400, 0.162	128.400, -0.071	128.400, -0.040
644	128.600, 2.653	128.600, 0.180	128.600, 0.268	128.600, 0.228	128.600, 0.163	128.600, -0.071	128.600, -0.040
645	128.800, 2.653	128.800, 0.180	128.800, 0.268	128.800, 0.228	128.800, 0.163	128.800, -0.071	128.800, -0.040
646	129.000, 2.654	129.000, 0.181	129.000, 0.268	129.000, 0.228	129.000, 0.163	129.000, -0.071	129.000, -0.040
647	129.200, 2.654	129.200, 0.181	129.200, 0.268	129.200, 0.228	129.200, 0.163	129.200, -0.071	129.200, -0.040
648	129.400, 2.655	129.400, 0.181	129.400, 0.268	129.400, 0.228	129.400, 0.163	129.400, -0.070	129.400, -0.040
649	129.600, 2.655	129.600, 0.181	129.600, 0.268	129.600, 0.229	129.600, 0.163	129.600, -0.071	129.600, -0.040
650	129.800, 2.655	129.800, 0.181	129.800, 0.268	129.800, 0.228	129.800, 0.163	129.800, -0.071	129.800, -0.040
651	130.000, 2.656	130.000, 0.182	130.000, 0.268	130.000, 0.228	130.000, 0.163	130.000, -0.071	130.000, -0.040
652	130.200, 2.656	130.200, 0.182	130.200, 0.268	130.200, 0.228	130.200, 0.163	130.200, -0.071	130.200, -0.040
653	130.400, 2.656	130.400, 0.182	130.400, 0.268	130.400, 0.228	130.400, 0.163	130.400, -0.071	130.400, -0.040
654	130.600, 2.657	130.600, 0.182	130.600, 0.269	130.600, 0.228	130.600, 0.162	130.600, -0.070	130.600, -0.040
655	130.800, 2.657	130.800, 0.182	130.800, 0.269	130.800, 0.228	130.800, 0.162	130.800, -0.070	130.800, -0.041
656	131.000, 2.657	131.000, 0.182	131.000, 0.269	131.000, 0.227	131.000, 0.162	131.000, -0.070	131.000, -0.041
657	131.200, 2.657	131.200, 0.182	131.200, 0.269	131.200, 0.227	131.200, 0.161	131.200, -0.070	131.200, -0.041
658	131.400, 2.657	131.400, 0.182	131.400, 0.269	131.400, 0.227	131.400, 0.161	131.400, -0.070	131.400, -0.041
659	131.600, 2.658	131.600, 0.182	131.600, 0.269	131.600, 0.226	131.600, 0.161	131.600, -0.070	131.600, -0.042
660	131.800, 2.658	131.800, 0.182	131.800, 0.269	131.800, 0.226	131.800, 0.161	131.800, -0.070	131.800, -0.042
661	132.000, 2.658	132.000, 0.182	132.000, 0.269	132.000, 0.226	132.000, 0.161	132.000, -0.070	132.000, -0.042
662	132.200, 2.659	132.200, 0.182	132.200, 0.269	132.200, 0.226	132.200, 0.161	132.200, -0.070	132.200, -0.042
663	132.400, 2.659	132.400, 0.182	132.400, 0.269	132.400, 0.226	132.400, 0.161	132.400, -0.070	132.400, -0.043
664	132.600, 2.659	132.600, 0.182	132.600, 0.269	132.600, 0.225	132.600, 0.161	132.600, -0.070	132.600, -0.043
665	132.800, 2.658	132.800, 0.182	132.800, 0.269	132.800, 0.225	132.800, 0.162	132.800, -0.070	132.800, -0.042
666	133.000, 2.658	133.000, 0.182	133.000, 0.269	133.000, 0.225	133.000, 0.162	133.000, -0.070	133.000, -0.042
667	133.200, 2.659	133.200, 0.182	133.200, 0.269	133.200, 0.226	133.200, 0.162	133.200, -0.070	133.200, -0.042
668	133.400, 2.658	133.400, 0.182	133.400, 0.269	133.400, 0.226	133.400, 0.163	133.400, -0.070	133.400, -0.042
669	133.600, 2.659	133.600, 0.182	133.600, 0.269	133.600, 0.226	133.600, 0.163	133.600, -0.071	133.600, -0.042
670	133.800, 2.659	133.800, 0.182	133.800, 0.269	133.800, 0.227	133.800, 0.163	133.800, -0.071	133.800, -0.041
671	134.000, 2.659	134.000, 0.182	134.000, 0.269	134.000, 0.228	134.000, 0.163	134.000, -0.071	134.000, -0.041
672	134.200, 2.660	134.200, 0.182	134.200, 0.269	134.200, 0.228	134.200, 0.163	134.200, -0.072	134.200, -0.041
673	134.400, 2.660	134.400, 0.181	134.400, 0.269	134.400, 0.229	134.400, 0.163	134.400, -0.072	134.400, -0.042
674	134.600, 2.660	134.600, 0.181	134.600, 0.269	134.600, 0.229	134.600, 0.163	134.600, -0.072	134.600, -0.042
675	134.800, 2.661	134.800, 0.181	134.800, 0.268	134.800, 0.229	134.800, 0.163	134.800, -0.072	134.800, -0.042
676	135.000, 2.661	135.000, 0.181	135.000, 0.268	135.000, 0.229	135.000, 0.163	135.000, -0.073	135.000, -0.042
677	135.200, 2.661	135.200, 0.181	135.200, 0.268	135.200, 0.229	135.200, 0.163	135.200, -0.073	135.200, -0.042
678	135.400, 2.661	135.400, 0.182	135.400, 0.268	135.400, 0.229	135.400, 0.163	135.400, -0.072	135.400, -0.042
679	135.600, 2.662	135.600, 0.182	135.600, 0.268	135.600, 0.229	135.600, 0.162	135.600, -0.072	135.600, -0.042
680	135.800, 2.662	135.800, 0.182	135.800, 0.269	135.800, 0.229	135.800, 0.162	135.800, -0.072	135.800, -0.042
681	136.000, 2.661	136.000, 0.182	136.000, 0.269	136.000, 0.229	136.000, 0.162	136.000, -0.072	136.000, -0.042
682	136.200, 2.661	136.200, 0.182	136.200, 0.269	136.200, 0.229	136.200, 0.162	136.200, -0.072	136.200, -0.042
683	136.400, 2.661	136.400, 0.182	136.400, 0.270	136.400, 0.228	136.400, 0.161	136.400, -0.072	136.400, -0.042
684	136.600, 2.660	136.600, 0.182	136.600, 0.270	136.600, 0.228	136.600, 0.161	136.600, -0.072	136.600, -0.042
685	136.800, 2.660	136.800, 0.182	136.800, 0.270	136.800, 0.228	136.800, 0.161	136.800, -0.071	136.800, -0.042
686	137.000, 2.660	137.000, 0.182	137.000, 0.270	137.000, 0.228	137.000, 0.161	137.000, -0.071	137.000, -0.041
687	137.200, 2.660	137.200, 0.182	137.200, 0.270	137.200, 0.228	137.200, 0.161	137.200, -0.071	137.200, -0.041
688	137.400, 2.660	137.400, 0.182	137.400, 0.271	137.400, 0.228	137.400, 0.161	137.400, -0.071	137.400, -0.041
689	137.600, 2.661	137.600, 0.182	137.600, 0.271	137.600, 0.228	137.600, 0.161	137.600, -0.071	137.600, -0.041
690	137.800, 2.661	137.800, 0.182	137.800, 0.271	137.800, 0.228	137.800, 0.161	137.800, -0.071	137.800, -0.041
691	138.000, 2.661	138.000, 0.182	138.000, 0.271	138.000, 0.228	138.000, 0.161	138.000, -0.071	138.000, -0.041
692	138.200, 2.661	138.200, 0.182	138.200, 0.271	138.200, 0.228	138.200, 0.161	138.200, -0.071	138.200, -0.040
693	138.400, 2.661	138.400, 0.182	138.400, 0.271	138.400, 0.228	138.400, 0.161	138.400, -0.071	138.400, -0.040
694	138.600, 2.662	138.600, 0.182	138.600, 0.271	138.600, 0.227	138.600, 0.161	138.600, -0.071	138.600, -0.040
695	138.800, 2.662	138.800, 0.182	138.800, 0.271	138.800, 0.227	138.800, 0.162	138.800, -0.071	138.800, -0.040
696	139.000, 2.662	139.000, 0.182	139.000, 0.271	139.000, 0.227	139.000, 0.162	139.000, -0.072	139.000, -0.040
697	139.200, 2.662	139.200, 0.182	139.200, 0.271	139.200, 0.227	139.200, 0.163	139.200, -0.072	139.200, -0.040
698	139.400, 2.661	139.400, 0.182	139.400, 0.271	139.400, 0.227	139.400, 0.163	139.400, -0.072	139.400, -0.039
699	139.600, 2.661	139.600, 0.181	139.600, 0.271	139.600, 0.227	139.600, 0.163	139.600, -0.072	139.600, -0.039
700	139.800, 2.661	139.800, 0.181	139.800, 0.271	139.800, 0.227	139.800, 0.163	139.800, -0.072	139.800, -0.039
701	140.000, 2.660	140.000, 0.181	140.000, 0.271	140.000, 0.228	140.000, 0.163	140.000, -0.073	140.000, -0.039
702	140.200, 2.660	140.200, 0.181	140.200, 0.271	140.200, 0.228	140.200, 0.163	140.200, -0.073	140.200, -0.039
703	140.400, 2.660	140.400, 0.181	140.400, 0.271	140.400, 0.228	140.400, 0.163	140.400, -0.073	140.400, -0.039
704	140.600, 2.661	140.600, 0.181	140.600, 0.271	140.600, 0.228	140.600, 0.163	140.600, -0.072	140.600, -0.039
705	140.800, 2.661	140.800, 0.181	140.800, 0.271	140.800, 0.229	140.800, 0.162	140.800, -0.072	140.800, -0.039
706	141.000, 2.661	141.000, 0.181	141.000, 0.271	141.000, 0.229	141.000, 0.162	141.000, -0.072	141.000, -0.039
707	141.200, 2.661	141.200, 0.181	141.200, 0.271	141.200, 0.229	141.200, 0.162	141.200, -0.072	141.200, -0.039
708	141.400, 2.662	141.400, 0.181	141.400, 0.271	141.400, 0.229	141.400, 0.161	141.400, -0.072	141.400, -0.040
709	141.600, 2.662	141.600, 0.181	141.600, 0.271	141.600, 0.229	141.600, 0.161	141.600, -0.072	141.600, -0.040
710	141.800, 2.662	141.800, 0.182	141.800, 0.271	141.800, 0.229	141.800, 0.161	141.800, -0.072	141.800, -0.040
711	142.000, 2.663	142.000, 0.181	142.000, 0.271	142.000, 0.229	142.000, 0.161	142.000, -0.072	142.000, -0.040
712	142.200, 2.663	142.200, 0.181	142.200, 0.271	142.200, 0.228	142.200, 0.161	142.200, -0.072	142.200, -0.040
713	142.400, 2.664	142.400, 0.181	142.400, 0.271	142.400, 0.228	142.400, 0.161	142.400, -0.073	142.400, -0.040
714	142.600, 2.664	142.600, 0.181	142.600, 0.271	142.600, 0.228	142.600, 0.161	142.600, -0.073	142.600, -0.040
715	142.800, 2.664	142.800, 0.181	142.800, 0.271	142.800, 0.228	142.800, 0.162	142.800, -0.073	142.800, -0.040
716	143.000, 2.664	143.000, 0.181	143.000, 0.271	143.000, 0.228	143.000, 0.162	143.000, -0.073	143.000, -0.040
717	143.200, 2.664	143.200, 0.181	143.200, 0.271	143.200, 0.228	143.200, 0.162	143.200, -0.073	143.200, -0.041
718	143.400, 2.663	143.400, 0.180	143.400, 0.271	143.400, 0.228	143.400, 0.162	143.400, -0.073	143.400, -0.041
719	143.600, 2.663	143.600, 0.180	143.600, 0.271	143.600, 0.228	143.600, 0.162	143.600, -0.073	143.600, -0.041
720	143.800, 2.663	143.800, 0.180	143.800, 0.271	143.800, 0.228	143.800, 0.162	143.800, -0.073	143.800, -0.041
721	144.000, 2.662	144.000, 0.179	144.000, 0.271	144.000, 0.228	144.000, 0.162	144.000, -0.073	144.000, -0.041
722	144.200, 2.662	144.200, 0.179	144.200, 0.271	144.200, 0.228	144.200, 0.162	144.200, -0.073	144.200, -0.040
723	144.400, 2.662	144.400, 0.179	144.400, 0.271	144.400, 0.229	144.400, 0.162	144.400, -0.072	144.400, -0.040
724	144.600, 2.662	144.600, 0.180	144.600, 0.271	144.600, 0.229	144.600, 0.162	144.600, -0.072	144.600, -0.040
725	144.800, 2.662	144.800, 0.180	144.800, 0.271	144.800, 0.230	144.800, 0.162	144.800, -0.072	144.800, -0.040
726	145.000, 2.662	145.000, 0.180	145.000, 0.271	145.000, 0.230	145.000, 0.162	145.000, -0.072	145.000, -0.040
727	145.200, 2.663	145.200, 0.181	145.200, 0.271	145.200, 0.230	145.200, 0.162	145.200, -0.072	145.200, -0.041
728	145.400, 2.663	145.400, 0.181	145.400, 0.271	145.400, 0.231	145.400, 0.162	145.400, -0.072	145.400, -0.041
729	145.600, 2.663	145.600, 0.181	145.600, 0.271	145.600, 0.231	145.600, 0.162	145.600, -0.072	145.600, -0.041
730	145.800, 2.664	145.800, 0.181	145.800, 0.271	145.800, 0.231	145.800, 0.162	145.800, -0.072	145.800, -0.041
731	146.000, 2.664	146.000, 0.181	146.000, 0.272	146.000, 0.230	146.000, 0.161	146.000, -0.073	146.000, -0.041
732	146.200, 2.664	146.200, 0.182	146.200, 0.272	146.200, 0.230	146.200, 0.161	146.200, -0.073	146.200, -0.041
733	146.400, 2.664	146.400, 0.182	146.400, 0.272	146.400, 0.230	146.400, 0.161	146.400, -0.073	146.400, -0.041
734	146.600, 2.664	146.600, 0.182	146.600, 0.272	146.600, 0.229	146.600, 0.160	146.600, -0.073	146.600, -0.041
735	146.800, 2.665	146.800, 0.182	146.800, 0.272	146.800, 0.229	146.800, 0.160	146.800, -0.073	146.800, -0.041
736	147.000, 2.665	147.000, 0.182	147.000, 0.272	147.000, 0.228	147.000, 0.160	147.000, -0.073	147.000, -0.041
737	147.200, 2.665	147.200, 0.183	147.200, 0.272	147.200, 0.228	147.200, 0.160	147.200, -0.073	147.200, -0.041
738	147.400, 2.665	147.400, 0.183	147.400, 0.272	147.400, 0.228	147.400, 0.160	147.400, -0.073	147.400, -0.041
739	147.600, 2.665	147.600, 0.183	147.600, 0.272	147.600, 0.228	147.600, 0.160	147.600, -0.073	147.600, -0.041
740	147.800, 2.664	147.800, 0.183	147.800, 0.272	147.800, 0.228	147.800, 0.160	147.800, -0.073	147.800, -0.041
741	148.000, 2.664	148.000, 0.183	148.000, 0.272	148.000, 0.228	148.000, 0.161	148.000, -0.073	148.000, -0.040
742	148.200, 2.664	148.200, 0.183	148.200, 0.272	148.200, 0.228	148.200, 0.161	148.200, -0.073	148.200, -0.040
743	148.400, 2.664	148.400, 0.183	148.400, 0.272	148.400, 0.229	148.400, 0.162	148.400, -0.073	148.400, -0.040
744	148.600, 2.664	148.600, 0.183	148.600, 0.272	148.600, 0.229	148.600, 0.162	148.600, -0.073	148.600, -0.040
745	148.800, 2.664	148.800, 0.183	148.800, 0.272	148.800, 0.229	148.800, 0.162	148.800, -0.073	148.800, -0.039
746	149.000, 2.664	149.000, 0.183	149.000, 0.271	149.000, 0.229	149.000, 0.163	149.000, -0.073	149.000, -0.039
747	149.200, 2.664	149.200, 0.182	149.200, 0.271	149.200, 0.229	149.200, 0.163	149.200, -0.073	149.200, -0.039
748	149.400, 2.665	149.400, 0.182	149.400, 0.271	149.400, 0.229	149.400, 0.163	149.400, -0.073	149.400, -0.039
749	149.600, 2.665	149.600, 0.182	149.600, 0.271	149.600, 0.229	149.600, 0.163	149.600, -0.073	149.600, -0.038
750	149.800, 2.665	149.800, 0.181	149.800, 0.271	149.800, 0.229	149.800, 0.163	149.800, -0.073	149.800, -0.038
751	150.000, 2.665	150.000, 0.181	150.000, 0.271	150.000, 0.229	150.000, 0.163	150.000, -0.073	150.000, -0.038
752	150.200, 2.658	150.200, 0.178	150.200, 0.266	150.200, 0.226	150.200, 0.160	150.200, -0.074	150.200, -0.039
753	150.400, 2.649	150.400, 0.174	150.400, 0.261	150.400, 0.222	150.400, 0.156	150.400, -0.075	150.400, -0.040
754	150.600, 2.638	150.600, 0.170	150.600, 0.255	150.600, 0.217	150.600, 0.151	150.600, -0.075	150.600, -0.041
755	150.800, 2.625	150.800, 0.166	150.800, 0.249	150.800, 0.212	150.800, 0.147	150.800, -0.076	150.800, -0.042
756	151.000, 2.610	151.000, 0.162	151.000, 0.242	151.000, 0.206	151.000, 0.142	151.000, -0.077	151.000, -0.042
757	151.200, 2.593	151.200, 0.157	151.200, 0.235	151.200, 0.201	151.200, 0.137	151.200, -0.077	151.200, -0.043
758	151.400, 2.575	151.400, 0.153	151.400, 0.228	151.400, 0.195	151.400, 0.132	151.400, -0.077	151.400, -0.044
759	151.600, 2.554	151.600, 0.150	151.600, 0.222	151.600, 0.190	151.600, 0.127	151.600, -0.077	151.600, -0.044
760	151.800, 2.532	151.800, 0.146	151.800, 0.216	151.800, 0.185	151.800, 0.123	151.800, -0.077	151.800, -0.045
761	152.000, 2.509	152.000, 0.144	152.000, 0.210	152.000, 0.180	152.000, 0.119	152.000, -0.077	152.000, -0.045
762	152.200, 2.485	152.200, 0.142	152.200, 0.206	152.200, 0.176	152.200, 0.116	152.200, -0.076	152.200, -0.045
763	152.400, 2.461	152.400, 0.140	152.400, 0.201	152.400, 0.172	152.400, 0.113	152.400, -0.076	152.400, -0.045
764	152.600, 2.435	152.600, 0.138	152.600, 0.197	152.600, 0.169	152.600, 0.111	152.600, -0.075	152.600, -0.044
765	152.800, 2.410	152.800, 0.137	152.800, 0.194	152.800, 0.166	152.800, 0.108	152.800, -0.074	152.800, -0.044
766	153.000, 2.384	153.000, 0.135	153.000, 0.190	153.000, 0.163	153.000, 0.106	153.000, -0.073	153.000, -0.044
767	153.200, 2.358	153.200, 0.134	153.200, 0.187	153.200, 0.160	153.200, 0.105	153.200, -0.073	153.200, -0.045
768	153.400, 2.332	153.400, 0.132	153.400, 0.184	153.400, 0.158	153.400, 0.103	153.400, -0.072	153.400, -0.045
769	153.600, 2.306	153.600, 0.131	153.600, 0.181	153.600, 0.155	153.600, 0.101	153.600, -0.072	153.600, -0.045
770	153.800, 2.280	153.800, 0.130	153.800, 0.178	153.800, 0.153	153.800, 0.100	153.800, -0.071	153.800, -0.044
771	154.000, 2.254	154.000, 0.128	154.000, 0.176	154.000, 0.151	154.000, 0.098	154.000, -0.071	154.000, -0.044
772	154.200, 2.228	154.200, 0.127	154.200, 0.173	154.200, 0.148	154.200, 0.097	154.200, -0.070	154.200, -0.043
773	154.400, 2.202	154.400, 0.126	154.400, 0.171	154.400, 0.146	154.400, 0.096	154.400, -0.070	154.400, -0.043
774	154.600, 2.177	154.600, 0.125	154.600, 0.169	154.600, 0.144	154.600, 0.094	154.600, -0.069	154.600, -0.042
775	154.800, 2.151	154.800, 0.124	154.800, 0.167	154.800, 0.142	154.800, 0.093	154.800, -0.068	154.800, -0.041
776	155.000, 2.126	155.000, 0.123	155.000, 0.164	155.000, 0.141	155.000, 0.092	155.000, -0.067	155.000, -0.040
777	155.200, 2.102	155.200, 0.123	155.200, 0.163	155.200, 0.139	155.200, 0.090	155.200, -0.066	155.200, -0.040
778	155.400, 2.077	155.400, 0.122	155.400, 0.161	155.400, 0.138	155.400, 0.089	155.400, -0.065	155.400, -0.039
779	155.600, 2.052	155.600, 0.122	155.600, 0.160	155.600, 0.137	155.600, 0.088	155.600, -0.064	155.600, -0.039
780	155.800, 2.028	155.800, 0.121	155.800, 0.158	155.800, 0.136	155.800, 0.087	155.800, -0.063	155.800, -0.039
781	156.000, 2.004	156.000, 0.121	156.000, 0.157	156.000, 0.135	156.000, 0.086	156.000, -0.062	156.000, -0.039
782	156.200, 1.980	156.200, 0.121	156.200, 0.156	156.200, 0.134	156.200, 0.085	156.200, -0.061	156.200, -0.039
783	156.400, 1.957	156.400, 0.121	156.400, 0.155	156.400, 0.133	156.400, 0.085	156.400, -0.060	156.400, -0.038
784	156.600, 1.933	156.600, 0.120	156.600, 0.154	156.600, 0.132	156.600, 0.084	156.600, -0.059	156.600, -0.038
785	156.800, 1.910	156.800, 0.120	156.800, 0.153	156.800, 0.131	156.800, 0.083	156.800, -0.058	156.800, -0.038
786	157.000, 1.887	157.000, 0.120	157.000, 0.152	157.000, 0.130	157.000, 0.082	157.000, -0.058	157.000, -0.038
787	157.200, 1.864	157.200, 0.120	157.200, 0.152	157.200, 0.130	157.200, 0.082	157.200, -0.057	157.200, -0.038
788	157.400, 1.841	157.400, 0.120	157.400, 0.151	157.400, 0.129	157.400, 0.081	157.400, -0.057	157.400, -0.037
789	157.600, 1.819	157.600, 0.120	157.600, 0.151	157.600, 0.128	157.600, 0.080	157.600, -0.056	157.600, -0.037
790	157.800, 1.796	157.800, 0.120	157.800, 0.150	157.800, 0.127	157.800, 0.080	157.800, -0.056	157.800, -0.036
791	158.000, 1.774	158.000, 0.120	158.000, 0.150	158.000, 0.126	158.000, 0.079	158.000, -0.055	158.000, -0.035
792	158.200, 1.753	158.200, 0.120	158.200, 0.149	158.200, 0.126	158.200, 0.078	158.200, -0.055	158.200, -0.035
793	158.400, 1.731	158.400, 0.119	158.400, 0.148	158.400, 0.125	158.400, 0.078	158.400, -0.054	158.400, -0.034
794	158.600, 1.710	158.600, 0.119	158.600, 0.147	158.600, 0.124	158.600, 0.077	158.600, -0.054	158.600, -0.033
795	158.800, 1.689	158.800, 0.119	158.800, 0.147	158.800, 0.124	158.800, 0.076	158.800, -0.053	158.800, -0.032
796	159.000, 1.669	159.000, 0.118	159.000, 0.146	159.000, 0.123	159.000, 0.075	159.000, -0.053	159.000, -0.031
797	159.200, 1.648	159.200, 0.118	159.200, 0.145	159.200, 0.122	159.200, 0.075	159.200, -0.052	159.200, -0.031
798	159.400, 1.629	159.400, 0.117	159.400, 0.145	159.400, 0.122	159.400, 0.074	159.400, -0.051	159.400, -0.030
799	159.600, 1.609	159.600, 0.117	159.600, 0.144	159.600, 0.121	159.600, 0.074	159.600, -0.051	159.600, -0.030
800	159.800, 1.590	159.800, 0.116	159.800, 0.143	159.800, 0.121	159.800, 0.073	159.800, -0.050	159.800, -0.030
801	160.000, 1.571	160.000, 0.116	160.000, 0.142	160.000, 0.120	160.000, 0.073	160.000, -0.050	160.000, -0.030
802	160.200, 1.552	160.200, 0.115	160.200, 0.141	160.200, 0.120	160.200, 0.073	160.200, -0.050	160.200, -0.029
803	160.400, 1.533	160.400, 0.115	160.400, 0.140	160.400, 0.119	160.400, 0.073	160.400, -0.049	160.400, -0.029
804	160.600, 1.515	160.600, 0.115	160.600, 0.140	160.600, 0.119	160.600, 0.072	160.600, -0.049	160.600, -0.029
805	160.800, 1.498	160.800, 0.115	160.800, 0.139	160.800, 0.118	160.800, 0.072	160.800, -0.049	160.800, -0.029
806	161.000, 1.480	161.000, 0.115	161.000, 0.138	161.000, 0.118	161.000, 0.071	161.000, -0.048	161.000, -0.029
807	161.200, 1.463	161.200, 0.115	161.200, 0.137	161.200, 0.117	161.200, 0.071	161.200, -0.047	161.200, -0.029
808	161.400, 1.446	161.400, 0.115	161.400, 0.137	161.400, 0.117	161.400, 0.071	161.400, -0.047	161.400, -0.030
809	161.600, 1.429	161.600, 0.116	161.600, 0.136	161.600, 0.116	161.600, 0.070	161.600, -0.046	161.600, -0.030
810	161.800, 1.413	161.800, 0.116	161.800, 0.136	161.800, 0.116	161.800, 0.070	161.800, -0.046	161.800, -0.030
811	162.000, 1.397	162.000, 0.116	162.000, 0.135	162.000, 0.115	162.000, 0.070	162.000, -0.045	162.000, -0.030
812	162.200, 1.381	162.200, 0.116	162.200, 0.135	162.200, 0.115	162.200, 0.069	162.200, -0.045	162.200, -0.029
813	162.400, 1.366	162.400, 0.116	162.400, 0.134	162.400, 0.115	162.400, 0.069	162.400, -0.045	162.400, -0.029
814	162.600, 1.351	162.600, 0.116	162.600, 0.134	162.600, 0.114	162.600, 0.069	162.600, -0.044	162.600, -0.029
815	162.800, 1.336	162.800, 0.116	162.800, 0.134	162.800, 0.114	162.800, 0.068	162.800, -0.044	162.800, -0.028
816	163.000, 1.322	163.000, 0.116	163.000, 0.134	163.000, 0.114	163.000, 0.068	163.000, -0.043	163.000, -0.028
817	163.200, 1.308	163.200, 0.116	163.200, 0.134	163.200, 0.113	163.200, 0.068	163.200, -0.043	163.200, -0.027
818	163.400, 1.294	163.400, 0.116	163.400, 0.133	163.400, 0.113	163.400, 0.067	163.400, -0.043	163.400, -0.027
819	163.600, 1.280	163.600, 0.115	163.600, 0.133	163.600, 0.112	163.600, 0.067	163.600, -0.042	163.600, -0.026
820	163.800, 1.267	163.800, 0.115	163.800, 0.133	163.800, 0.112	163.800, 0.067	163.800, -0.042	163.800, -0.025
821	164.000, 1.253	164.000, 0.115	164.000, 0.132	164.000, 0.112	164.000, 0.066	164.000, -0.042	164.000, -0.025
822	164.200, 1.240	164.200, 0.115	164.200, 0.132	164.200, 0.112	164.200, 0.066	164.200, -0.042	164.200, -0.024
823	164.400, 1.228	164.400, 0.115	164.400, 0.132	164.400, 0.111	164.400, 0.066	164.400, -0.041	164.400, -0.023
824	164.600, 1.215	164.600, 0.115	164.600, 0.132	164.600, 0.111	164.600, 0.065	164.600, -0.041	164.600, -0.022
825	164.800, 1.203	164.800, 0.115	164.800, 0.131	164.800, 0.111	164.800, 0.065	164.800, -0.040	164.800, -0.022
826	165.000, 1.191	165.000, 0.115	165.000, 0.131	165.000, 0.110	165.000, 0.065	165.000, -0.040	165.000, -0.021
827	165.200, 1.179	165.200, 0.115	165.200, 0.131	165.200, 0.110	165.200, 0.065	165.200, -0.039	165.200, -0.021
828	165.400, 1.168	165.400, 0.115	165.400, 0.131	165.400, 0.110	165.400, 0.065	165.400, -0.039	165.400, -0.021
829	165.600, 1.157	165.600, 0.115	165.600, 0.131	165.600, 0.110	165.600, 0.065	165.600, -0.038	165.600, -0.020
830	165.800, 1.145	165.800, 0.115	165.800, 0.131	165.800, 0.110	165.800, 0.065	165.800, -0.038	165.800, -0.020
831	166.000, 1.134	166.000, 0.115	166.000, 0.131	166.000, 0.109	166.000, 0.065	166.000, -0.038	166.000, -0.020
832	166.200, 1.124	166.200, 0.115	166.200, 0.131	166.200, 0.109	166.200, 0.065	166.200, -0.038	166.200, -0.020
833	166.400, 1.113	166.400, 0.115	166.400, 0.131	166.400, 0.109	166.400, 0.065	166.400, -0.037	166.400, -0.019
834	166.600, 1.103	166.600, 0.115	166.600, 0.131	166.600, 0.109	166.600, 0.065	166.600, -0.037	166.600, -0.019
835	166.800, 1.093	166.800, 0.115	166.800, 0.131	166.800, 0.109	166.800, 0.065	166.800, -0.037	166.800, -0.019
836	167.000, 1.083	167.000, 0.115	167.000, 0.131	167.000, 0.108	167.000, 0.065	167.000, -0.037	167.000, -0.018
837	167.200, 1.073	167.200, 0.115	167.200, 0.131	167.200, 0.108	167.200, 0.064	167.200, -0.037	167.200, -0.018
838	167.400, 1.063	167.400, 0.115	167.400, 0.130	167.400, 0.107	167.400, 0.064	167.400, -0.036	167.400, -0.018
839	167.600, 1.054	167.600, 0.115	167.600, 0.130	167.600, 0.107	167.600, 0.064	167.600, -0.036	167.600, -0.017
840	167.800, 1.045	167.800, 0.115	167.800, 0.129	167.800, 0.107	167.800, 0.063	167.800, -0.036	167.800, -0.017
841	168.000, 1.036	168.000, 0.114	168.000, 0.128	168.000, 0.107	168.000, 0.063	168.000, -0.036	168.000, -0.017
842	168.200, 1.027	168.200, 0.114	168.200, 0.128	168.200, 0.107	168.200, 0.063	168.200, -0.035	168.200, -0.016
843	168.400, 1.019	168.400, 0.114	168.400, 0.128	168.400, 0.107	168.400, 0.062	168.400, -0.035	168.400, -0.016
844	168.600, 1.011	168.600, 0.114	168.600, 0.127	168.600, 0.106	168.600, 0.062	168.600, -0.034	168.600, -0.016
845	168.800, 1.003	168.800, 0.114	168.800, 0.127	168.800, 0.106	168.800, 0.063	168.800, -0.034	168.800, -0.015
846	169.000, 0.995	169.000, 0.114	169.000, 0.127	169.000, 0.105	169.000, 0.063	169.000, -0.033	169.000, -0.015
847	169.200, 0.987	169.200, 0.114	169.200, 0.127	169.200, 0.105	169.200, 0.063	169.200, -0.033	169.200, -0.015
848	169.400, 0.980	169.400, 0.114	169.400, 0.127	169.400, 0.105	169.400, 0.064	169.400, -0.033	169.400, -0.015
849	169.600, 0.972	169.600, 0.114	169.600, 0.127	169.600, 0.105	169.600, 0.064	169.600, -0.032	169.600, -0.015
850	169.800, 0.965	169.800, 0.114	169.800, 0.127	169.800, 0.105	169.800, 0.064	169.800, -0.032	169.800, -0.015
851	170.000, 0.957	170.000, 0.114	170.000, 0.128	170.000, 0.105	170.000, 0.064	170.000, -0.032	170.000, -0.015
852	170.200, 0.950	170.200, 0.114	170.200, 0.128	170.200, 0.105	170.200, 0.064	170.200, -0.031	170.200, -0.014
853	170.400, 0.943	170.400, 0.115	170.400, 0.128	170.400, 0.105	170.400, 0.064	170.400, -0.031	170.400, -0.014
854	170.600, 0.936	170.600, 0.115	170.600, 0.129	170.600, 0.104	170.600, 0.064	170.600, -0.031	170.600, -0.014
855	170.800, 0.929	170.800, 0.116	170.800, 0.129	170.800, 0.104	170.800, 0.064	170.800, -0.031	170.800, -0.013
856	171.000, 0.922	171.000, 0.116	171.000, 0.129	171.000, 0.104	171.000, 0.064	171.000, -0.031	171.000, -0.013
857	171.200, 0.915	171.200, 0.116	171.200, 0.128	171.200, 0.104	171.200, 0.063	171.200, -0.030	171.200, -0.012
858	171.400, 0.908	171.400, 0.117	171.400, 0.128	171.400, 0.104	171.400, 0.063	171.400, -0.030	171.400, -0.012
859	171.600, 0.902	171.600, 0.117	171.600, 0.128	171.600, 0.105	171.600, 0.063	171.600, -0.030	171.600, -0.011
860	171.800, 0.895	171.800, 0.117	171.800, 0.128	171.800, 0.105	171.800, 0.063	171.800, -0.030	171.800, -0.011
861	172.000, 0.889	172.000, 0.117	172.000, 0.128	172.000, 0.105	172.000, 0.063	172.000, -0.029	172.000, -0.011
862	172.200, 0.884	172.200, 0.117	172.200, 0.127	172.200, 0.105	172.200, 0.063	172.200, -0.029	172.200, -0.010
863	172.400, 0.878	172.400, 0.117	172.400, 0.127	172.400, 0.105	172.400, 0.063	172.400, -0.029	172.400, -0.010
864	172.600, 0.872	172.600, 0.117	172.600, 0.127	172.600, 0.104	172.600, 0.063	172.600, -0.028	172.600, -0.010
865	172.800, 0.867	172.800, 0.117	172.800, 0.127	172.800, 0.104	172.800, 0.063	172.800, -0.028	172.800, -0.010
866	173.000, 0.861	173.000, 0.117	173.000, 0.126	173.000, 0.104	173.000, 0.063	173.000, -0.028	173.000, -0.010
867	173.200, 0.856	173.200, 0.117	173.200, 0.126	173.200, 0.104	173.200, 0.063	173.200, -0.028	173.200, -0.010
868	173.400, 0.850	173.400, 0.116	173.400, 0.126	173.400, 0.104	173.400, 0.063	173.400, -0.027	173.400, -0.010
869	173.600, 0.845	173.600, 0.116	173.600, 0.125	173.600, 0.104	173.600, 0.063	173.600, -0.027	173.600, -0.009
870	173.800, 0.840	173.800, 0.116	173.800, 0.125	173.800, 0.104	173.800, 0.063	173.800, -0.027	173.800, -0.009
871	174.000, 0.835	174.000, 0.117	174.000, 0.125	174.000, 0.104	174.000, 0.064	174.000, -0.026	174.000, -0.009
872	174.200, 0.830	174.200, 0.117	174.200, 0.125	174.200, 0.104	174.200, 0.064	174.200, -0.026	174.200, -0.009
873	174.400, 0.825	174.400, 0.117	174.400, 0.125	174.400, 0.104	174.400, 0.064	174.400, -0.026	174.400, -0.008
874	174.600, 0.820	174.600, 0.117	174.600, 0.125	174.600, 0.103	174.600, 0.064	174.600, -0.026	174.600, -0.008
875	174.800, 0.815	174.800, 0.117	174.800, 0.125	174.800, 0.103	174.800, 0.063	174.800, -0.026	174.800, -0.008
876	175.000, 0.810	175.000, 0.117	175.000, 0.125	175.000, 0.103	175.000, 0.063	175.000, -0.026	175.000, -0.007
877	175.200, 0.806	175.200, 0.117	175.200, 0.125	175.200, 0.103	175.200, 0.063	175.200, -0.025	175.200, -0.007
878	175.400, 0.801	175.400, 0.117	175.400, 0.126	175.400, 0.103	175.400, 0.063	175.400, -0.025	175.400, -0.006
879	175.600, 0.797	175.600, 0.117	175.600, 0.126	175.600, 0.103	175.600, 0.063	175.600, -0.025	175.600, -0.006
880	175.800, 0.792	175.800, 0.117	175.800, 0.126	175.800, 0.103	175.800, 0.063	175.800, -0.025	175.800, -0.006
881	176.000, 0.788	176.000, 0.117	176.000, 0.126	176.000, 0.103	176.000, 0.062	176.000, -0.025	176.000, -0.005
882	176.200, 0.784	176.200, 0.117	176.200, 0.126	176.200, 0.103	176.200, 0.062	176.200, -0.024	176.200, -0.005
883	176.400, 0.780	176.400, 0.117	176.400, 0.126	176.400, 0.102	176.400, 0.062	176.400, -0.024	176.400, -0.005
884	176.600, 0.776	176.600, 0.118	176.600, 0.126	176.600, 0.102	176.600, 0.062	176.600, -0.024	176.600, -0.005
885	176.800, 0.772	176.800, 0.118	176.800, 0.126	176.800, 0.102	176.800, 0.062	176.800, -0.024	176.800, -0.005
886	177.000, 0.768	177.000, 0.118	177.000, 0.126	177.000, 0.102	177.000, 0.063	177.000, -0.024	177.000, -0.005
887	177.200, 0.764	177.200, 0.118	177.200, 0.126	177.200, 0.101	177.200, 0.063	177.200, -0.024	177.200, -0.005
888	177.400, 0.760	177.400, 0.118	177.400, 0.126	177.400, 0.101	177.400, 0.063	177.400, -0.024	177.400, -0.005
889	177.600, 0.756	177.600, 0.118	177.600, 0.126	177.600, 0.101	177.600, 0.063	177.600, -0.023	177.600, -0.005
890	177.800, 0.752	177.800, 0.118	177.800, 0.126	177.800, 0.101	177.800, 0.063	177.800, -0.023	177.800, -0.005
891	178.000, 0.748	178.000, 0.118	178.000, 0.126	178.000, 0.101	178.000, 0.063	178.000, -0.023	178.000, -0.005
892	178.200, 0.744	178.200, 0.118	178.200, 0.126	178.200, 0.101	178.200, 0.064	178.200, -0.022	178.200, -0.005
893	178.400, 0.740	178.400, 0.118	178.400, 0.126	178.400, 0.101	178.400, 0.064	178.400, -0.022	178.400, -0.005
894	178.600, 0.737	178.600, 0.118	178.600, 0.126	178.600, 0.101	178.600, 0.064	178.600, -0.022	178.600, -0.005
895	178.800, 0.733	178.800, 0.118	178.800, 0.126	178.800, 0.101	178.800, 0.064	178.800, -0.022	178.800, -0.005
896	179.000, 0.729	179.000, 0.118	179.000, 0.126	179.000, 0.101	179.000, 0.064	179.000, -0.022	179.000, -0.005
897	179.200, 0.726	179.200, 0.118	179.200, 0.126	179.200, 0.101	179.200, 0.064	179.200, -0.022	179.200, -0.004
898	179.400, 0.722	179.400, 0.118	179.400, 0.125	179.400, 0.101	179.400, 0.064	179.400, -0.021	179.400, -0.004
899	179.600, 0.719	179.600, 0.118	179.600, 0.125	179.600, 0.101	179.600, 0.063	179.600, -0.021	179.600, -0.004
900	179.800, 0.716	179.800, 0.118	179.800, 0.125	179.800, 0.101	179.800, 0.063	179.800, -0.021	179.800, -0.003
901	180.000, 0.712	180.000, 0.118	180.000, 0.125	180.000, 0.101	180.000, 0.063	180.000, -0.021	180.000, -0.003
902	180.200, 0.709	180.200, 0.118	180.200, 0.126	180.200, 0.101	180.200, 0.063	180.200, -0.021	180.200, -0.003
903	180.400, 0.706	180.400, 0.118	180.400, 0.126	180.400, 0.101	180.400, 0.063	180.400, -0.021	180.400, -0.003
904	180.600, 0.703	180.600, 0.117	180.600, 0.126	180.600, 0.101	180.600, 0.064	180.600, -0.021	180.600, -0.003
905	180.800, 0.700	180.800, 0.117	180.800, 0.126	180.800, 0.101	180.800, 0.064	180.800, -0.020	180.800, -0.003
906	181.000, 0.697	181.000, 0.117	181.000, 0.126	181.000, 0.101	181.000, 0.064	181.000, -0.020	181.000, -0.002
907	181.200, 0.695	181.200, 0.117	181.200, 0.126	181.200, 0.101	181.200, 0.064	181.200, -0.020	181.200, -0.002
908	181.400, 0.692	181.400, 0.117	181.400, 0.126	181.400, 0.101	181.400, 0.064	181.400, -0.019	181.400, -0.002
909	181.600, 0.689	181.600, 0.117	181.600, 0.126	181.600, 0.101	181.600, 0.064	181.600, -0.019	181.600, -0.002
910	181.800, 0.686	181.800, 0.117	181.800, 0.126	181.800, 0.101	181.800, 0.064	181.800, -0.019	181.800, -0.002
911	182.000, 0.683	182.000, 0.117	182.000, 0.126	182.000, 0.101	182.000, 0.064	182.000, -0.019	182.000, -0.002
912	182.200, 0.680	182.200, 0.117	182.200, 0.126	182.200, 0.101	182.200, 0.064	182.200, -0.019	182.200, -0.002
913	182.400, 0.677	182.400, 0.117	182.400, 0.126	182.400, 0.102	182.400, 0.064	182.400, -0.019	182.400, -0.002
914	182.600, 0.674	182.600, 0.118	182.600, 0.126	182.600, 0.102	182.600, 0.064	182.600, -0.019	182.600, -0.002
915	182.800, 0.671	182.800, 0.118	182.800, 0.125	182.800, 0.102	182.800, 0.064	182.800, -0.019	182.800, -0.002
916	183.000, 0.668	183.000, 0.119	183.000, 0.125	183.000, 0.102	183.000, 0.064	183.000, -0.019	183.000, -0.002
917	183.200, 0.666	183.200, 0.119	183.200, 0.125	183.200, 0.102	183.200, 0.064	183.200, -0.019	183.200, -0.002
918	183.400, 0.663	183.400, 0.120	183.400, 0.125	183.400, 0.102	183.400, 0.064	183.400, -0.018	183.400, -0.002
919	183.600, 0.660	183.600, 0.120	183.600, 0.125	183.600, 0.102	183.600, 0.064	183.600, -0.018	183.600, -0.002
920	183.800, 0.657	183.800, 0.120	183.800, 0.125	183.800, 0.102	183.800, 0.063	183.800, -0.018	183.800, -0.002
921	184.000, 0.655	184.000, 0.121	184.000, 0.126	184.000, 0.102	184.000, 0.063	184.000, -0.018	184.000, -0.002
922	184.200, 0.652	184.200, 0.121	184.200, 0.126	184.200, 0.102	184.200, 0.064	184.200, -0.018	184.200, -0.002
923	184.400, 0.650	184.400, 0.121	184.400, 0.126	184.400, 0.102	184.400, 0.064	184.400, -0.018	184.400, -0.002
924	184.600, 0.647	184.600, 0.121	184.600, 0.126	184.600, 0.102	184.600, 0.064	184.600, -0.018	184.600, -0.002
925	184.800, 0.645	184.800, 0.121	184.800, 0.127	184.800, 0.102	184.800, 0.064	184.800, -0.018	184.800, -0.002
926	185.000, 0.642	185.000, 0.121	185.000, 0.127	185.000, 0.102	185.000, 0.064	185.000, -0.018	185.000, -0.002
927	185.200, 0.640	185.200, 0.121	185.200, 0.127	185.200, 0.102	185.200, 0.064	185.200, -0.018	185.200, -0.002
928	185.400, 0.637	185.400, 0.121	185.400, 0.127	185.400, 0.102	185.400, 0.064	185.400, -0.018	185.400, -0.002
929	185.600, 0.635	185.600, 0.121	185.600, 0.127	185.600, 0.103	185.600, 0.064	185.600, -0.018	185.600, -0.002
930	185.800, 0.632	185.800, 0.120	185.800, 0.127	185.800, 0.103	185.800, 0.064	185.800, -0.018	185.800, -0.002
931	186.000, 0.630	186.000, 0.120	186.000, 0.126	186.000, 0.102	186.000, 0.064	186.000, -0.018	186.000, -0.001
932	186.200, 0.628	186.200, 0.120	186.200, 0.126	186.200, 0.102	186.200, 0.064	186.200, -0.018	186.200, -0.001
933	186.400, 0.626	186.400, 0.120	186.400, 0.126	186.400, 0.102	186.400, 0.064	186.400, -0.018	186.400, -0.001
934	186.600, 0.624	186.600, 0.120	186.600, 0.126	186.600, 0.102	186.600, 0.064	186.600, -0.018	186.600, -0.001
935	186.800, 0.621	186.800, 0.120	186.800, 0.126	186.800, 0.102	186.800, 0.064	186.800, -0.018	186.800, -0.001
936	187.000, 0.619	187.000, 0.120	187.000, 0.126	187.000, 0.102	187.000, 0.064	187.000, -0.018	187.000, -0.001
937	187.200, 0.617	187.200, 0.120	187.200, 0.126	187.200, 0.102	187.200, 0.064	187.200, -0.018	187.200, -0.001
938	187.400, 0.615	187.400, 0.120	187.400, 0.126	187.400, 0.102	187.400, 0.064	187.400, -0.018	187.400, -0.001
939	187.600, 0.613	187.600, 0.120	187.600, 0.126	187.600, 0.101	187.600, 0.064	187.600, -0.017	187.600, -0.001
940	187.800, 0.611	187.800, 0.120	187.800, 0.126	187.800, 0.101	187.800, 0.064	187.800, -0.017	187.800, -0.001
941	188.000, 0.609	188.000, 0.120	188.000, 0.125	188.000, 0.101	188.000, 0.064	188.000, -0.017	188.000, -0.000
942	188.200, 0.606	188.200, 0.120	188.200, 0.125	188.200, 0.101	188.200, 0.064	188.200, -0.016	188.200, -0.000
943	188.400, 0.604	188.400, 0.121	188.400, 0.125	188.400, 0.101	188.400, 0.064	188.400, -0.016	188.400, 0.000
944	188.600, 0.602	188.600, 0.121	188.600, 0.125	188.600, 0.101	188.600, 0.064	188.600, -0.016	188.600, 0.001
945	188.800, 0.600	188.800, 0.121	188.800, 0.125	188.800, 0.101	188.800, 0.064	188.800, -0.016	188.800, 0.001
946	189.000, 0.598	189.000, 0.121	189.000, 0.125	189.000, 0.101	189.000, 0.064	189.000, -0.015	189.000, 0.001
947	189.200, 0.596	189.200, 0.121	189.200, 0.125	189.200, 0.101	189.200, 0.065	189.200, -0.015	189.200, 0.002
948	189.400, 0.594	189.400, 0.120	189.400, 0.125	189.400, 0.101	189.400, 0.065	189.400, -0.015	189.400, 0.002
949	189.600, 0.592	189.600, 0.121	189.600, 0.125	189.600, 0.101	189.600, 0.065	189.600, -0.015	189.600, 0.002
950	189.800, 0.590	189.800, 0.121	189.800, 0.125	189.800, 0.101	189.800, 0.065	189.800, -0.015	189.800, 0.002
951	190.000, 0.588	190.000, 0.121	190.000, 0.125	190.000, 0.101	190.000, 0.066	190.000, -0.015	190.000, 0.002
952	190.200, 0.586	190.200, 0.121	190.200, 0.125	190.200, 0.101	190.200, 0.066	190.200, -0.016	190.200, 0.002
953	190.400, 0.584	190.400, 0.122	190.400, 0.126	190.400, 0.101	190.400, 0.066	190.400, -0.016	190.400, 0.002
954	190.600, 0.583	190.600, 0.122	190.600, 0.126	190.600, 0.101	190.600, 0.066	190.600, -0.015	190.600, 0.002
955	190.800, 0.581	190.800, 0.122	190.800, 0.126	190.800, 0.101	190.800, 0.066	190.800, -0.015	190.800, 0.002
956	191.000, 0.579	191.000, 0.122	191.000, 0.126	191.000, 0.101	191.000, 0.066	191.000, -0.015	191.000, 0.002
957	191.200, 0.578	191.200, 0.122	191.200, 0.127	191.200, 0.101	191.200, 0.066	191.200, -0.015	191.200, 0.002
958	191.400, 0.576	191.400, 0.122	191.400, 0.127	191.400, 0.101	191.400, 0.066	191.400, -0.015	191.400, 0.002
959	191.600, 0.575	191.600, 0.122	191.600, 0.127	191.600, 0.102	191.600, 0.066	191.600, -0.015	191.600, 0.003
960	191.800, 0.573	191.800, 0.122	191.800, 0.127	191.800, 0.102	191.800, 0.066	191.800, -0.014	191.800, 0.003
961	192.000, 0.571	192.000, 0.122	192.000, 0.127	192.000, 0.102	192.000, 0.066	192.000, -0.014	192.000, 0.003
962	192.200, 0.569	192.200, 0.122	192.200, 0.127	192.200, 0.102	192.200, 0.066	192.200, -0.014	192.200, 0.003
963	192.400, 0.567	192.400, 0.122	192.400, 0.127	192.400, 0.102	192.400, 0.066	192.400, -0.014	192.400, 0.003
964	192.600, 0.565	192.600, 0.122	192.600, 0.127	192.600, 0.102	192.600, 0.065	192.600, -0.014	192.600, 0.003
965	192.800, 0.563	192.800, 0.122	192.800, 0.127	192.800, 0.102	192.800, 0.065	192.800, -0.014	192.800, 0.003
966	193.000, 0.561	193.000, 0.122	193.000, 0.127	193.000, 0.102	193.000, 0.065	193.000, -0.013	193.000, 0.004
967	193.200, 0.559	193.200, 0.122	193.200, 0.127	193.200, 0.102	193.200, 0.066	193.200, -0.013	193.200, 0.003
968	193.400, 0.558	193.400, 0.123	193.400, 0.127	193.400, 0.102	193.400, 0.066	193.400, -0.013	193.400, 0.003
969	193.600, 0.556	193.600, 0.123	193.600, 0.127	193.600, 0.102	193.600, 0.066	193.600, -0.013	193.600, 0.003
970	193.800, 0.554	193.800, 0.123	193.800, 0.128	193.800, 0.102	193.800, 0.066	193.800, -0.013	193.800, 0.003
971	194.000, 0.552	194.000, 0.123	194.000, 0.128	194.000, 0.102	194.000, 0.067	194.000, -0.013	194.000, 0.003
972	194.200, 0.551	194.200, 0.123	194.200, 0.128	194.200, 0.102	194.200, 0.067	194.200, -0.013	194.200, 0.004
973	194.400, 0.549	194.400, 0.123	194.400, 0.128	194.400, 0.101	194.400, 0.067	194.400, -0.013	194.400, 0.004
974	194.600, 0.548	194.600, 0.123	194.600, 0.128	194.600, 0.101	194.600, 0.067	194.600, -0.013	194.600, 0.004
975	194.800, 0.547	194.800, 0.123	194.800, 0.128	194.800, 0.101	194.800, 0.067	194.800, -0.013	194.800, 0.004
976	195.000, 0.545	195.000, 0.123	195.000, 0.128	195.000, 0.101	195.000, 0.067	195.000, -0.013	195.000, 0.004
977	195.200, 0.544	195.200, 0.123	195.200, 0.128	195.200, 0.101	195.200, 0.067	195.200, -0.013	195.200, 0.004
978	195.400, 0.543	195.400, 0.123	195.400, 0.128	195.400, 0.101	195.400, 0.067	195.400, -0.013	195.400, 0.005
979	195.600, 0.541	195.600, 0.123	195.600, 0.127	195.600, 0.101	195.600, 0.067	195.600, -0.013	195.600, 0.004
980	195.800, 0.540	195.800, 0.123	195.800, 0.127	195.800, 0.102	195.800, 0.067	195.800, -0.013	195.800, 0.004
981	196.000, 0.538	196.000, 0.123	196.000, 0.127	196.000, 0.102	196.000, 0.067	196.000, -0.013	196.000, 0.004
982	196.200, 0.537	196.200, 0.123	196.200, 0.127	196.200, 0.102	196.200, 0.066	196.200, -0.012	196.200, 0.004
983	196.400, 0.536	196.400, 0.123	196.400, 0.127	196.400, 0.102	196.400, 0.066	196.400, -0.012	196.400, 0.004
984	196.600, 0.534	196.600, 0.123	196.600, 0.127	196.600, 0.102	196.600, 0.066	196.600, -0.012	196.600, 0.004
985	196.800, 0.533	196.800, 0.123	196.800, 0.127	196.800, 0.102	196.800, 0.066	196.800, -0.011	196.800, 0.003
986	197.000, 0.532	197.000, 0.123	197.000, 0.127	197.000, 0.102	197.000, 0.066	197.000, -0.011	197.000, 0.003
987	197.200, 0.530	197.200, 0.123	197.200, 0.126	197.200, 0.103	197.200, 0.066	197.200, -0.011	197.200, 0.003
988	197.400, 0.529	197.400, 0.123	197.400, 0.126	197.400, 0.102	197.400, 0.066	197.400, -0.011	197.400, 0.003
989	197.600, 0.528	197.600, 0.123	197.600, 0.126	197.600, 0.102	197.600, 0.066	197.600, -0.010	197.600, 0.003
990	197.800, 0.527	197.800, 0.123	197.800, 0.127	197.800, 0.102	197.800, 0.066	197.800, -0.010	197.800, 0.004
991	198.000, 0.525	198.000, 0.123	198.000, 0.127	198.000, 0.102	198.000, 0.067	198.000, -0.010	198.000, 0.004
992	198.200, 0.524	198.200, 0.123	198.200, 0.127	198.200, 0.102	198.200, 0.067	198.200, -0.010	198.200, 0.005
993	198.400, 0.523	198.400, 0.123	198.400, 0.127	198.400, 0.102	198.400, 0.067	198.400, -0.011	198.400, 0.005
994	198.600, 0.522	198.600, 0.123	198.600, 0.128	198.600, 0.102	198.600, 0.068	198.600, -0.011	198.600, 0.005
995	198.800, 0.520	198.800, 0.123	198.800, 0.128	198.800, 0.102	198.800, 0.068	198.800, -0.011	198.800, 0.006
996	199.000, 0.519	199.000, 0.123	199.000, 0.128	199.000, 0.102	199.000, 0.068	199.000, -0.011	199.000, 0.006
997	199.200, 0.518	199.200, 0.123	199.200, 0.128	199.200, 0.102	199.200, 0.068	199.200, -0.011	199.200, 0.006
998	199.400, 0.516	199.400, 0.123	199.400, 0.128	199.400, 0.103	199.400, 0.068	199.400, -0.011	199.400, 0.006
999	199.600, 0.515	199.600, 0.123	199.600, 0.128	199.600, 0.103	199.600, 0.068	199.600, -0.011	199.600, 0.006
1000	199.800, 0.513	199.800, 0.123	199.800, 0.128	199.800, 0.103	199.800, 0.068	199.800, -0.011	199.800, 0.006
1001	200.000, 0.512	200.000, 0.124	200.000, 0.128	200.000, 0.103	200.000, 0.068	200.000, -0.011	200.000, 0.006
1002	200.200, 0.510	200.200, 0.124	200.200, 0.128	200.200, 0.103	200.200, 0.068	200.200, -0.011	200.200, 0.005
1003	200.400, 0.509	200.400, 0.124	200.400, 0.128	200.400, 0.103	200.400, 0.068	200.400, -0.010	200.400, 0.005
1004	200.600, 0.508	200.600, 0.124	200.600, 0.128	200.600, 0.103	200.600, 0.068	200.600, -0.010	200.600, 0.005
1005	200.800, 0.507	200.800, 0.124	200.800, 0.128	200.800, 0.103	200.800, 0.068	200.800, -0.010	200.800, 0.005
1006	201.000, 0.506	201.000, 0.125	201.000, 0.128	201.000, 0.103	201.000, 0.068	201.000, -0.010	201.000, 0.005
1007	201.200, 0.505	201.200, 0.125	201.200, 0.128	201.200, 0.103	201.200, 0.067	201.200, -0.010	201.200, 0.005
1008	201.400, 0.504	201.400, 0.125	201.400, 0.127	201.400, 0.103	201.400, 0.067	201.400, -0.010	201.400, 0.005
1009	201.600, 0.503	201.600, 0.125	201.600, 0.128	201.600, 0.103	201.600, 0.067	201.600, -0.010	201.600, 0.005
1010	201.800, 0.501	201.800, 0.124	201.800, 0.128	201.800, 0.102	201.800, 0.067	201.800, -0.010	201.800, 0.005
1011	202.000, 0.500	202.000, 0.124	202.000, 0.128	202.000, 0.102	202.000, 0.068	202.000, -0.010	202.000, 0.005
1012	202.200, 0.499	202.200, 0.124	202.200, 0.128	202.200, 0.102	202.200, 0.068	202.200, -0.009	202.200, 0.006
1013	202.400, 0.498	202.400, 0.124	202.400, 0.128	202.400, 0.102	202.400, 0.068	202.400, -0.009	202.400, 0.006
1014	202.600, 0.497	202.600, 0.124	202.600, 0.128	202.600, 0.102	202.600, 0.068	202.600, -0.009	202.600, 0.006
1015	202.800, 0.495	202.800, 0.124	202.800, 0.128	202.800, 0.102	202.800, 0.068	202.800, -0.009	202.800, 0.006
1016	203.000, 0.494	203.000, 0.124	203.000, 0.128	203.000, 0.102	203.000, 0.069	203.000, -0.009	203.000, 0.006
1017	203.200, 0.493	203.200, 0.124	203.200, 0.128	203.200, 0.101	203.200, 0.069	203.200, -0.009	203.200, 0.006
1018	203.400, 0.492	203.400, 0.124	203.400, 0.128	203.400, 0.101	203.400, 0.069	203.400, -0.009	203.400, 0.006
1019	203.600, 0.491	203.600, 0.125	203.600, 0.128	203.600, 0.101	203.600, 0.069	203.600, -0.010	203.600, 0.007
1020	203.800, 0.490	203.800, 0.125	203.800, 0.128	203.800, 0.101	203.800, 0.069	203.800, -0.009	203.800, 0.007
1021	204.000, 0.489	204.000, 0.125	204.000, 0.127	204.000, 0.101	204.000, 0.069	204.000, -0.009	204.000, 0.007
1022	204.200, 0.488	204.200, 0.125	204.200, 0.127	204.200, 0.101	204.200, 0.069	204.200, -0.009	204.200, 0.007
1023	204.400, 0.487	204.400, 0.125	204.400, 0.127	204.400, 0.101	204.400, 0.069	204.400, -0.009	204.400, 0.007
1024	204.600, 0.487	204.600, 0.125	204.600, 0.128	204.600, 0.102	204.600, 0.069	204.600, -0.009	204.600, 0.007
1025	204.800, 0.486	204.800, 0.125	204.800, 0.128	204.800, 0.102	204.800, 0.069	204.800, -0.009	204.800, 0.007
1026	205.000, 0.485	205.000, 0.125	205.000, 0.128	205.000, 0.102	205.000, 0.069	205.000, -0.009	205.000, 0.007
1027	205.200, 0.484	205.200, 0.125	205.200, 0.128	205.200, 0.103	205.200, 0.069	205.200, -0.009	205.200, 0.006
1028	205.400, 0.483	205.400, 0.125	205.400, 0.129	205.400, 0.103	205.400, 0.069	205.400, -0.008	205.400, 0.006
1029	205.600, 0.482	205.600, 0.125	205.600, 0.129	205.600, 0.103	205.600, 0.069	205.600, -0.008	205.600, 0.006
1030	205.800, 0.481	205.800, 0.125	205.800, 0.129	205.800, 0.103	205.800, 0.069	205.800, -0.008	205.800, 0.006
1031	206.000, 0.480	206.000, 0.125	206.000, 0.130	206.000, 0.102	206.000, 0.069	206.000, -0.008	206.000, 0.005
1032	206.200, 0.478	206.200, 0.125	206.200, 0.130	206.200, 0.102	206.200, 0.069	206.200, -0.008	206.200, 0.005
1033	206.400, 0.477	206.400, 0.125	206.400, 0.130	206.400, 0.102	206.400, 0.069	206.400, -0.008	206.400, 0.005
1034	206.600, 0.476	206.600, 0.125	206.600, 0.130	206.600, 0.102	206.600, 0.069	206.600, -0.008	206.600, 0.005
1035	206.800, 0.475	206.800, 0.125	206.800, 0.130	206.800, 0.102	206.800, 0.069	206.800, -0.008	206.800, 0.005
1036	207.000, 0.475	207.000, 0.125	207.000, 0.130	207.000, 0.102	207.000, 0.069	207.000, -0.008	207.000, 0.005
1037	207.200, 0.474	207.200, 0.125	207.200, 0.130	207.200, 0.102	207.200, 0.070	207.200, -0.008	207.200, 0.005
1038	207.400, 0.473	207.400, 0.126	207.400, 0.130	207.400, 0.102	207.400, 0.070	207.400, -0.007	207.400, 0.005
1039	207.600, 0.472	207.600, 0.126	207.600, 0.130	207.600, 0.102	207.600, 0.070	207.600, -0.007	207.600, 0.006
1040	207.800, 0.472	207.800, 0.126	207.800, 0.130	207.800, 0.102	207.800, 0.070	207.800, -0.007	207.800, 0.006
1041	208.000, 0.471	208.000, 0.126	208.000, 0.130	208.000, 0.102	208.000, 0.070	208.000, -0.008	208.000, 0.006
1042	208.200, 0.470	208.200, 0.126	208.200, 0.129	208.200, 0.102	208.200, 0.070	208.200, -0.008	208.200, 0.007
1043	208.400, 0.469	208.400, 0.126	208.400, 0.129	208.400, 0.103	208.400, 0.070	208.400, -0.008	208.400, 0.007
1044	208.600, 0.468	208.600, 0.126	208.600, 0.129	208.600, 0.103	208.600, 0.070	208.600, -0.008	208.600, 0.007
1045	208.800, 0.467	208.800, 0.126	208.800, 0.129	208.800, 0.103	208.800, 0.070	208.800, -0.008	208.800, 0.008
1046	209.000, 0.466	209.000, 0.126	209.000, 0.129	209.000, 0.103	209.000, 0.070	209.000, -0.008	209.000, 0.008
1047	209.200, 0.465	209.200, 0.126	209.200, 0.129	209.200, 0.103	209.200, 0.070	209.200, -0.008	209.200, 0.008
1048	209.400, 0.464	209.400, 0.126	209.400, 0.129	209.400, 0.103	209.400, 0.070	209.400, -0.008	209.400, 0.008
1049	209.600, 0.463	209.600, 0.126	209.600, 0.129	209.600, 0.103	209.600, 0.070	209.600, -0.007	209.600, 0.008
1050	209.800, 0.463	209.800, 0.126	209.800, 0.129	209.800, 0.103	209.800, 0.070	209.800, -0.007	209.800, 0.008
1051	210.000, 0.462	210.000, 0.126	210.000, 0.129	210.000, 0.103	210.000, 0.070	210.000, -0.007	210.000, 0.008
1052	210.200, 0.461	210.200, 0.126	210.200, 0.129	210.200, 0.103	210.200, 0.070	210.200, -0.006	210.200, 0.008
1053	210.400, 0.460	210.400, 0.126	210.400, 0.129	210.400, 0.103	210.400, 0.070	210.400, -0.006	210.400, 0.008
1054	210.600, 0.459	210.600, 0.126	210.600, 0.129	210.600, 0.103	210.600, 0.070	210.600, -0.006	210.600, 0.008
1055	210.800, 0.459	210.800, 0.126	210.800, 0.129	210.800, 0.104	210.800, 0.070	210.800, -0.006	210.800, 0.008
1056	211.000, 0.458	211.000, 0.126	211.000, 0.129	211.000, 0.104	211.000, 0.070	211.000, -0.005	211.000, 0.008
1057	211.200, 0.457	211.200, 0.126	211.200, 0.130	211.200, 0.104	211.200, 0.071	211.200, -0.005	211.200, 0.008
1058	211.400, 0.457	211.400, 0.127	211.400, 0.130	211.400, 0.105	211.400, 0.071	211.400, -0.005	211.400, 0.008
1059	211.600, 0.456	211.600, 0.127	211.600, 0.130	211.600, 0.105	211.600, 0.071	211.600, -0.005	211.600, 0.008
1060	211.800, 0.455	211.800, 0.126	211.800, 0.130	211.800, 0.105	211.800, 0.071	211.800, -0.005	211.800, 0.008
1061	212.000, 0.454	212.000, 0.126	212.000, 0.131	212.000, 0.105	212.000, 0.072	212.000, -0.005	212.000, 0.008
1062	212.200, 0.453	212.200, 0.126	212.200, 0.131	212.200, 0.105	212.200, 0.072	212.200, -0.006	212.200, 0.007
1063	212.400, 0.453	212.400, 0.126	212.400, 0.131	212.400, 0.104	212.400, 0.072	212.400, -0.006	212.400, 0.007
1064	212.600, 0.452	212.600, 0.126	212.600, 0.131	212.600, 0.104	212.600, 0.072	212.600, -0.006	212.600, 0.007
1065	212.800, 0.451	212.800, 0.126	212.800, 0.131	212.800, 0.104	212.800, 0.072	212.800, -0.006	212.800, 0.007
1066	213.000, 0.451	213.000, 0.126	213.000, 0.132	213.000, 0.104	213.000, 0.072	213.000, -0.006	213.000, 0.007
1067	213.200, 0.450	213.200, 0.126	213.200, 0.132	213.200, 0.103	213.200, 0.072	213.200, -0.006	213.200, 0.006
1068	213.400, 0.450	213.400, 0.127	213.400, 0.132	213.400, 0.103	213.400, 0.072	213.400, -0.006	213.400, 0.006
1069	213.600, 0.449	213.600, 0.127	213.600, 0.132	213.600, 0.103	213.600, 0.072	213.600, -0.006	213.600, 0.006
1070	213.800, 0.449	213.800, 0.127	213.800, 0.132	213.800, 0.103	213.800, 0.071	213.800, -0.006	213.800, 0.006
1071	214.000, 0.448	214.000, 0.127	214.000, 0.132	214.000, 0.102	214.000, 0.071	214.000, -0.006	214.000, 0.007
1072	214.200, 0.447	214.200, 0.128	214.200, 0.132	214.200, 0.102	214.200, 0.071	214.200, -0.006	214.200, 0.007
1073	214.400, 0.447	214.400, 0.128	214.400, 0.132	214.400, 0.102	214.400, 0.071	214.400, -0.006	214.400, 0.007
1074	214.600, 0.446	214.600, 0.128	214.600, 0.132	214.600, 0.102	214.600, 0.071	214.600, -0.006	214.600, 0.007
1075	214.800, 0.446	214.800, 0.129	214.800, 0.132	214.800, 0.102	214.800, 0.071	214.800, -0.006	214.800, 0.007
1076	215.000, 0.445	215.000, 0.129	215.000, 0.132	215.000, 0.102	215.000, 0.071	215.000, -0.006	215.000, 0.008
1077	215.200, 0.444	215.200, 0.129	215.200, 0.131	215.200, 0.102	215.200, 0.072	215.200, -0.006	215.200, 0.008
1078	215.400, 0.443	215.400, 0.129	215.400, 0.131	215.400, 0.102	215.400, 0.072	215.400, -0.005	215.400, 0.008
1079	215.600, 0.443	215.600, 0.129	215.600, 0.131	215.600, 0.102	215.600, 0.072	215.600, -0.005	215.600, 0.008
1080	215.800, 0.442	215.800, 0.129	215.800, 0.131	215.800, 0.102	215.800, 0.072	215.800, -0.005	215.800, 0.008
1081	216.000, 0.441	216.000, 0.129	216.000, 0.130	216.000, 0.102	216.000, 0.072	216.000, -0.005	216.000, 0.009
1082	216.200, 0.441	216.200, 0.128	216.200, 0.130	216.200, 0.102	216.200, 0.072	216.200, -0.004	216.200, 0.009
1083	216.400, 0.440	216.400, 0.128	216.400, 0.130	216.400, 0.102	216.400, 0.072	216.400, -0.004	216.400, 0.009
1084	216.600, 0.439	216.600, 0.128	216.600, 0.130	216.600, 0.102	216.600, 0.072	216.600, -0.004	216.600, 0.009
1085	216.800, 0.439	216.800, 0.128	216.800, 0.130	216.800, 0.102	216.800, 0.072	216.800, -0.004	216.800, 0.009
1086	217.000, 0.438	217.000, 0.127	217.000, 0.130	217.000, 0.102	217.000, 0.072	217.000, -0.004	217.000, 0.009
1087	217.200, 0.438	217.200, 0.127	217.200, 0.130	217.200, 0.102	217.200, 0.072	217.200, -0.004	217.200, 0.009
1088	217.400, 0.438	217.400, 0.127	217.400, 0.130	217.400, 0.102	217.400, 0.072	217.400, -0.005	217.400, 0.010
1089	217.600, 0.437	217.600, 0.127	217.600, 0.130	217.600, 0.102	217.600, 0.073	217.600, -0.005	217.600, 0.010
1090	217.800, 0.437	217.800, 0.127	217.800, 0.130	217.800, 0.102	217.800, 0.073	217.800, -0.004	217.800, 0.010
1091	218.000, 0.436	218.000, 0.127	218.000, 0.130	218.000, 0.102	218.000, 0.073	218.000, -0.005	218.000, 0.010
1092	218.200, 0.436	218.200, 0.127	218.200, 0.130	218.200, 0.102	218.200, 0.073	218.200, -0.005	218.200, 0.009
1093	218.400, 0.435	218.400, 0.127	218.400, 0.130	218.400, 0.102	218.400, 0.073	218.400, -0.005	218.400, 0.009
1094	218.600, 0.435	218.600, 0.128	218.600, 0.130	218.600, 0.103	218.600, 0.073	218.600, -0.005	218.600, 0.009
1095	218.800, 0.434	218.800, 0.128	218.800, 0.131	218.800, 0.103	218.800, 0.074	218.800, -0.004	218.800, 0.008
1096	219.000, 0.434	219.000, 0.129	219.000, 0.131	219.000, 0.103	219.000, 0.074	219.000, -0.004	219.000, 0.008
1097	219.200, 0.433	219.200, 0.129	219.200, 0.131	219.200, 0.103	219.200, 0.074	219.200, -0.004	219.200, 0.008
1098	219.400, 0.433	219.400, 0.129	219.400, 0.131	219.400, 0.103	219.400, 0.074	219.400, -0.004	219.400, 0.008
1099	219.600, 0.432	219.600, 0.130	219.600, 0.130	219.600, 0.104	219.600, 0.073	219.600, -0.004	219.600, 0.008
1100	219.800, 0.432	219.800, 0.130	219.800, 0.130	219.800, 0.104	219.800, 0.073	219.800, -0.004	219.800, 0.008
1101	220.000, 0.431	220.000, 0.130	220.000, 0.130	220.000, 0.105	220.000, 0.073	220.000, -0.004	220.000, 0.008
1102	220.200, 0.431	220.200, 0.130	220.200, 0.130	220.200, 0.105	220.200, 0.073	220.200, -0.004	220.200, 0.008
1103	220.400, 0.430	220.400, 0.130	220.400, 0.130	220.400, 0.105	220.400, 0.073	220.400, -0.004	220.400, 0.008
1104	220.600, 0.430	220.600, 0.130	220.600, 0.130	220.600, 0.105	220.600, 0.073	220.600, -0.004	220.600, 0.008
1105	220.800, 0.429	220.800, 0.129	220.800, 0.130	220.800, 0.105	220.800, 0.073	220.800, -0.004	220.800, 0.009
1106	221.000, 0.428	221.000, 0.129	221.000, 0.130	221.000, 0.105	221.000, 0.073	221.000, -0.004	221.000, 0.009
1107	221.200, 0.427	221.200, 0.129	221.200, 0.130	221.200, 0.105	221.200, 0.074	221.200, -0.004	221.200, 0.009
1108	221.400, 0.427	221.400, 0.129	221.400, 0.130	221.400, 0.104	221.400, 0.074	221.400, -0.004	221.400, 0.009
1109	221.600, 0.426	221.600, 0.129	221.600, 0.130	221.600, 0.104	221.600, 0.074	221.600, -0.004	221.600, 0.009
1110	221.800, 0.425	221.800, 0.129	221.800, 0.130	221.800, 0.105	221.800, 0.073	221.800, -0.004	221.800, 0.009
1111	222.000, 0.425	222.000, 0.129	222.000, 0.131	222.000, 0.105	222.000, 0.073	222.000, -0.004	222.000, 0.009
1112	222.200, 0.424	222.200, 0.129	222.200, 0.131	222.200, 0.105	222.200, 0.073	222.200, -0.004	222.200, 0.009
1113	222.400, 0.424	222.400, 0.129	222.400, 0.131	222.400, 0.105	222.400, 0.073	222.400, -0.004	222.400, 0.009
1114	222.600, 0.424	222.600, 0.129	222.600, 0.132	222.600, 0.105	222.600, 0.073	222.600, -0.004	222.600, 0.009
1115	222.800, 0.423	222.800, 0.129	222.800, 0.132	222.800, 0.105	222.800, 0.073	222.800, -0.004	222.800, 0.009
1116	223.000, 0.423	223.000, 0.129	223.000, 0.132	223.000, 0.105	223.000, 0.073	223.000, -0.004	223.000, 0.009
1117	223.200, 0.423	223.200, 0.129	223.200, 0.132	223.200, 0.105	223.200, 0.073	223.200, -0.004	223.200, 0.008
1118	223.400, 0.423	223.400, 0.129	223.400, 0.132	223.400, 0.105	223.400, 0.073	223.400, -0.004	223.400, 0.009
1119	223.600, 0.423	223.600, 0.129	223.600, 0.132	223.600, 0.105	223.600, 0.073	223.600, -0.004	223.600, 0.008
1120	223.800, 0.422	223.800, 0.129	223.800, 0.132	223.800, 0.105	223.800, 0.073	223.800, -0.005	223.800, 0.009
1121	224.000, 0.422	224.000, 0.129	224.000, 0.132	224.000, 0.105	224.000, 0.073	224.000, -0.005	224.000, 0.009
1122	224.200, 0.422	224.200, 0.129	224.200, 0.132	224.200, 0.105	224.200, 0.073	224.200, -0.005	224.200, 0.009
1123	224.400, 0.421	224.400, 0.129	224.400, 0.132	224.400, 0.105	224.400, 0.073	224.400, -0.005	224.400, 0.009
1124	224.600, 0.421	224.600, 0.129	224.600, 0.132	224.600, 0.105	224.600, 0.073	224.600, -0.005	224.600, 0.009
1125	224.800, 0.421	224.800, 0.129	224.800, 0.132	224.800, 0.105	224.800, 0.073	224.800, -0.005	224.800, 0.009
1126	225.000, 0.420	225.000, 0.129	225.000, 0.132	225.000, 0.105	225.000, 0.073	225.000, -0.005	225.000, 0.009
1127	225.200, 0.419	225.200, 0.129	225.200, 0.132	225.200, 0.105	225.200, 0.073	225.200, -0.005	225.200, 0.009
1128	225.400, 0.419	225.400, 0.129	225.400, 0.131	225.400, 0.105	225.400, 0.073	225.400, -0.005	225.400, 0.009
1129	225.600, 0.418	225.600, 0.129	225.600, 0.131	225.600, 0.105	225.600, 0.074	225.600, -0.005	225.600, 0.009
1130	225.800, 0.418	225.800, 0.129	225.800, 0.132	225.800, 0.105	225.800, 0.074	225.800, -0.005	225.800, 0.009
1131	226.000, 0.418	226.000, 0.129	226.000, 0.132	226.000, 0.105	226.000, 0.074	226.000, -0.005	226.000, 0.009
1132	226.200, 0.417	226.200, 0.130	226.200, 0.132	226.200, 0.105	226.200, 0.074	226.200, -0.005	226.200, 0.009
1133	226.400, 0.417	226.400, 0.130	226.400, 0.132	226.400, 0.105	226.400, 0.074	226.400, -0.005	226.400, 0.009
1134	226.600, 0.416	226.600, 0.130	226.600, 0.132	226.600, 0.105	226.600, 0.074	226.600, -0.005	226.600, 0.009
1135	226.800, 0.416	226.800, 0.130	226.800, 0.132	226.800, 0.105	226.800, 0.075	226.800, -0.004	226.800, 0.009
1136	227.000, 0.416	227.000, 0.130	227.000, 0.132	227.000, 0.104	227.000, 0.075	227.000, -0.004	227.000, 0.009
1137	227.200, 0.415	227.200, 0.130	227.200, 0.132	227.200, 0.104	227.200, 0.075	227.200, -0.004	227.200, 0.009
1138	227.400, 0.415	227.400, 0.130	227.400, 0.132	227.400, 0.104	227.400, 0.075	227.400, -0.003	227.400, 0.009
1139	227.600, 0.414	227.600, 0.130	227.600, 0.132	227.600, 0.104	227.600, 0.075	227.600, -0.003	227.600, 0.009
1140	227.800, 0.413	227.800, 0.129	227.800, 0.133	227.800, 0.104	227.800, 0.075	227.800, -0.003	227.800, 0.010
1141	228.000, 0.413	228.000, 0.129	228.000, 0.133	228.000, 0.105	228.000, 0.075	228.000, -0.003	228.000, 0.010
1142	228.200, 0.413	228.200, 0.129	228.200, 0.133	228.200, 0.105	228.200, 0.075	228.200, -0.003	228.200, 0.010
1143	228.400, 0.412	228.400, 0.129	228.400, 0.133	228.400, 0.105	228.400, 0.075	228.400, -0.002	228.400, 0.010
1144	228.600, 0.412	228.600, 0.129	228.600, 0.134	228.600, 0.105	228.600, 0.075	228.600, -0.002	228.600, 0.010
1145	228.800, 0.412	228.800, 0.129	228.800, 0.134	228.800, 0.105	228.800, 0.075	228.800, -0.002	228.800, 0.010
1146	229.000, 0.411	229.000, 0.129	229.000, 0.133	229.000, 0.105	229.000, 0.075	229.000, -0.002	229.000, 0.010
1147	229.200, 0.411	229.200, 0.130	229.200, 0.133	229.200, 0.105	229.200, 0.075	229.200, -0.003	229.200, 0.010
1148	229.400, 0.410	229.400, 0.130	229.400, 0.133	229.400, 0.105	229.400, 0.075	229.400, -0.003	229.400, 0.010
1149	229.600, 0.410	229.600, 0.130	229.600, 0.133	229.600, 0.105	229.600, 0.074	229.600, -0.003	229.600, 0.010
1150	229.800, 0.410	229.800, 0.130	229.800, 0.133	229.800, 0.105	229.800, 0.074	229.800, -0.003	229.800, 0.010
1151	230.000, 0.409	230.000, 0.130	230.000, 0.133	230.000, 0.105	230.000, 0.074	230.000, -0.003	230.000, 0.010
1152	230.200, 0.409	230.200, 0.130	230.200, 0.133	230.200, 0.104	230.200, 0.074	230.200, -0.003	230.200, 0.010
1153	230.400, 0.409	230.400, 0.131	230.400, 0.133	230.400, 0.104	230.400, 0.074	230.400, -0.003	230.400, 0.010
1154	230.600, 0.408	230.600, 0.131	230.600, 0.133	230.600, 0.104	230.600, 0.074	230.600, -0.003	230.600, 0.010
1155	230.800, 0.408	230.800, 0.131	230.800, 0.133	230.800, 0.104	230.800, 0.075	230.800, -0.003	230.800, 0.010
1156	231.000, 0.408	231.000, 0.131	231.000, 0.133	231.000, 0.104	231.000, 0.075	231.000, -0.003	231.000, 0.010
1157	231.200, 0.407	231.200, 0.130	231.200, 0.134	231.200, 0.104	231.200, 0.075	231.200, -0.003	231.200, 0.010
1158	231.400, 0.407	231.400, 0.130	231.400, 0.134	231.400, 0.104	231.400, 0.075	231.400, -0.003	231.400, 0.010
1159	231.600, 0.407	231.600, 0.130	231.600, 0.133	231.600, 0.104	231.600, 0.075	231.600, -0.003	231.600, 0.010
1160	231.800, 0.406	231.800, 0.130	231.800, 0.133	231.800, 0.104	231.800, 0.075	231.800, -0.004	231.800, 0.010
1161	232.000, 0.406	232.000, 0.130	232.000, 0.133	232.000, 0.105	232.000, 0.075	232.000, -0.004	232.000, 0.010
1162	232.200, 0.406	232.200, 0.130	232.200, 0.133	232.200, 0.105	232.200, 0.075	232.200, -0.004	232.200, 0.010
1163	232.400, 0.406	232.400, 0.130	232.400, 0.133	232.400, 0.105	232.400, 0.075	232.400, -0.004	232.400, 0.010
1164	232.600, 0.406	232.600, 0.130	232.600, 0.133	232.600, 0.105	232.600, 0.075	232.600, -0.004	232.600, 0.010
1165	232.800, 0.406	232.800, 0.131	232.800, 0.133	232.800, 0.106	232.800, 0.074	232.800, -0.004	232.800, 0.010
1166	233.000, 0.405	233.000, 0.131	233.000, 0.133	233.000, 0.106	233.000, 0.074	233.000, -0.004	233.000, 0.010
1167	233.200, 0.405	233.200, 0.131	233.200, 0.133	233.200, 0.106	233.200, 0.074	233.200, -0.004	233.200, 0.010
1168	233.400, 0.405	233.400, 0.131	233.400, 0.133	233.400, 0.106	233.400, 0.074	233.400, -0.004	233.400, 0.010
1169	233.600, 0.405	233.600, 0.131	233.600, 0.134	233.600, 0.106	233.600, 0.074	233.600, -0.004	233.600, 0.010
1170	233.800, 0.405	233.800, 0.131	233.800, 0.134	233.800, 0.105	233.800, 0.074	233.800, -0.004	233.800, 0.010
1171	234.000, 0.404	234.000, 0.131	234.000, 0.134	234.000, 0.105	234.000, 0.074	234.000, -0.003	234.000, 0.011
1172	234.200, 0.404	234.200, 0.131	234.200, 0.134	234.200, 0.105	234.200, 0.074	234.200, -0.003	234.200, 0.011
1173	234.400, 0.403	234.400, 0.131	234.400, 0.134	234.400, 0.105	234.400, 0.074	234.400, -0.003	234.400, 0.011
1174	234.600, 0.403	234.600, 0.131	234.600, 0.134	234.600, 0.105	234.600, 0.074	234.600, -0.003	234.600, 0.011
1175	234.800, 0.403	234.800, 0.131	234.800, 0.134	234.800, 0.105	234.800, 0.074	234.800, -0.003	234.800, 0.012
1176	235.000, 0.403	235.000, 0.131	235.000, 0.134	235.000, 0.105	235.000, 0.075	235.000, -0.003	235.000, 0.012
1177	235.200, 0.403	235.200, 0.131	235.200, 0.134	235.200, 0.105	235.200, 0.075	235.200, -0.003	235.200, 0.012
1178	235.400, 0.403	235.400, 0.131	235.400, 0.134	235.400, 0.106	235.400, 0.075	235.400, -0.003	235.400, 0.012
1179	235.600, 0.404	235.600, 0.131	235.600, 0.134	235.600, 0.106	235.600, 0.075	235.600, -0.003	235.600, 0.012
1180	235.800, 0.404	235.800, 0.131	235.800, 0.134	235.800, 0.106	235.800, 0.075	235.800, -0.002	235.800, 0.012
1181	236.000, 0.405	236.000, 0.131	236.000, 0.134	236.000, 0.106	236.000, 0.076	236.000, -0.002	236.000, 0.012
1182	236.200, 0.405	236.200, 0.131	236.200, 0.135	236.200, 0.106	236.200, 0.076	236.200, -0.002	236.200, 0.012
1183	236.400, 0.406	236.400, 0.131	236.400, 0.135	236.400, 0.106	236.400, 0.076	236.400, -0.002	236.400, 0.011
1184	236.600, 0.406	236.600, 0.131	236.600, 0.135	236.600, 0.106	236.600, 0.076	236.600, -0.002	236.600, 0.011
1185	236.800, 0.407	236.800, 0.132	236.800, 0.135	236.800, 0.106	236.800, 0.076	236.800, -0.002	236.800, 0.011
1186	237.000, 0.407	237.000, 0.132	237.000, 0.135	237.000, 0.106	237.000, 0.076	237.000, -0.003	237.000, 0.011
1187	237.200, 0.407	237.200, 0.132	237.200, 0.135	237.200, 0.105	237.200, 0.076	237.200, -0.003	237.200, 0.011
1188	237.400, 0.407	237.400, 0.132	237.400, 0.135	237.400, 0.105	237.400, 0.076	237.400, -0.003	237.400, 0.011
1189	237.600, 0.407	237.600, 0.132	237.600, 0.135	237.600, 0.105	237.600, 0.076	237.600, -0.003	237.600, 0.011
1190	237.800, 0.407	237.800, 0.131	237.800, 0.135	237.800, 0.105	237.800, 0.076	237.800, -0.003	237.800, 0.010
1191	238.000, 0.407	238.000, 0.131	238.000, 0.135	238.000, 0.105	238.000, 0.076	238.000, -0.003	238.000, 0.010
1192	238.200, 0.406	238.200, 0.131	238.200, 0.135	238.200, 0.105	238.200, 0.076	238.200, -0.003	238.200, 0.010
1193	238.400, 0.406	238.400, 0.131	238.400, 0.134	238.400, 0.105	238.400, 0.076	238.400, -0.003	238.400, 0.010
1194	238.600, 0.405	238.600, 0.131	238.600, 0.134	238.600, 0.105	238.600, 0.076	238.600, -0.004	238.600, 0.010
1195	238.800, 0.405	238.800, 0.131	238.800, 0.134	238.800, 0.105	238.800, 0.076	238.800, -0.004	238.800, 0.010
1196	239.000, 0.405	239.000, 0.131	239.000, 0.134	239.000, 0.105	239.000, 0.076	239.000, -0.003	239.000, 0.010
1197	239.200, 0.405	239.200, 0.131	239.200, 0.134	239.200, 0.105	239.200, 0.076	239.200, -0.003	239.200, 0.010
1198	239.400, 0.404	239.400, 0.131	239.400, 0.134	239.400, 0.105	239.400, 0.076	239.400, -0.003	239.400, 0.010
1199	239.600, 0.404	239.600, 0.131	239.600, 0.135	239.600, 0.105	239.600, 0.076	239.600, -0.002	239.600, 0.010
1200	239.800, 0.404	239.800, 0.131	239.800, 0.135	239.800, 0.105	239.800, 0.076	239.800, -0.002	239.800, 0.009
1201	240.000, 0.404	240.000, 0.131	240.000, 0.135	240.000, 0.106	240.000, 0.077	240.000, -0.002	240.000, 0.009
1202	240.200, 0.404	240.200, 0.131	240.200, 0.135	240.200, 0.106	240.200, 0.077	240.200, -0.002	240.200, 0.009
1203	240.400, 0.403	240.400, 0.131	240.400, 0.136	240.400, 0.106	240.400, 0.077	240.400, -0.002	240.400, 0.009
1204	240.600, 0.403	240.600, 0.131	240.600, 0.136	240.600, 0.106	240.600, 0.077	240.600, -0.002	240.600, 0.009
1205	240.800, 0.403	240.800, 0.131	240.800, 0.136	240.800, 0.106	240.800, 0.077	240.800, -0.001	240.800, 0.009
1206	241.000, 0.402	241.000, 0.131	241.000, 0.136	241.000, 0.106	241.000, 0.077	241.000, -0.001	241.000, 0.010
1207	241.200, 0.402	241.200, 0.131	241.200, 0.135	241.200, 0.107	241.200, 0.077	241.200, -0.001	241.200, 0.010
1208	241.400, 0.402	241.400, 0.131	241.400, 0.135	241.400, 0.107	241.400, 0.077	241.400, -0.002	241.400, 0.010
1209	241.600, 0.401	241.600, 0.131	241.600, 0.135	241.600, 0.107	241.600, 0.077	241.600, -0.002	241.600, 0.011
1210	241.800, 0.401	241.800, 0.131	241.800, 0.135	241.800, 0.107	241.800, 0.077	241.800, -0.002	241.800, 0.011
1211	242.000, 0.401	242.000, 0.131	242.000, 0.135	242.000, 0.107	242.000, 0.078	242.000, -0.002	242.000, 0.011
1212	242.200, 0.401	242.200, 0.131	242.200, 0.135	242.200, 0.107	242.200, 0.078	242.200, -0.002	242.200, 0.012
1213	242.400, 0.401	242.400, 0.131	242.400, 0.134	242.400, 0.107	242.400, 0.078	242.400, -0.002	242.400, 0.012
1214	242.600, 0.401	242.600, 0.131	242.600, 0.134	242.600, 0.107	242.600, 0.078	242.600, -0.002	242.600, 0.012
1215	242.800, 0.401	242.800, 0.131	242.800, 0.134	242.800, 0.107	242.800, 0.077	242.800, -0.002	242.800, 0.012
1216	243.000, 0.400	243.000, 0.131	243.000, 0.134	243.000, 0.106	243.000, 0.077	243.000, -0.002	243.000, 0.012
1217	243.200, 0.400	243.200, 0.132	243.200, 0.135	243.200, 0.106	243.200, 0.077	243.200, -0.002	243.200, 0.011
1218	243.400, 0.400	243.400, 0.132	243.400, 0.135	243.400, 0.106	243.400, 0.077	243.400, -0.002	243.400, 0.011
1219	243.600, 0.400	243.600, 0.132	243.600, 0.135	243.600, 0.106	243.600, 0.077	243.600, -0.002	243.600, 0.011
1220	243.800, 0.400	243.800, 0.132	243.800, 0.136	243.800, 0.106	243.800, 0.077	243.800, -0.002	243.800, 0.011
1221	244.000, 0.400	244.000, 0.132	244.000, 0.136	244.000, 0.106	244.000, 0.077	244.000, -0.002	244.000, 0.011
1222	244.200, 0.400	244.200, 0.132	244.200, 0.136	244.200, 0.106	244.200, 0.077	244.200, -0.002	244.200, 0.011
1223	244.400, 0.399	244.400, 0.132	244.400, 0.136	244.400, 0.106	244.400, 0.077	244.400, -0.002	244.400, 0.011
1224	244.600, 0.399	244.600, 0.132	244.600, 0.136	244.600, 0.106	244.600, 0.077	244.600, -0.002	244.600, 0.011
1225	244.800, 0.399	244.800, 0.132	244.800, 0.136	244.800, 0.106	244.800, 0.077	244.800, -0.002	244.800, 0.011
1226	245.000, 0.398	245.000, 0.132	245.000, 0.136	245.000, 0.105	245.000, 0.076	245.000, -0.003	245.000, 0.011
1227	245.200, 0.397	245.200, 0.132	245.200, 0.136	245.200, 0.105	245.200, 0.076	245.200, -0.003	245.200, 0.011
1228	245.400, 0.397	245.400, 0.132	245.400, 0.136	245.400, 0.105	245.400, 0.076	245.400, -0.003	245.400, 0.011
1229	245.600, 0.396	245.600, 0.132	245.600, 0.136	245.600, 0.105	245.600, 0.077	245.600, -0.003	245.600, 0.011
1230	245.800, 0.396	245.800, 0.132	245.800, 0.136	245.800, 0.105	245.800, 0.077	245.800, -0.003	245.800, 0.011
1231	246.000, 0.395	246.000, 0.132	246.000, 0.136	246.000, 0.105	246.000, 0.077	246.000, -0.003	246.000, 0.011
1232	246.200, 0.395	246.200, 0.132	246.200, 0.135	246.200, 0.105	246.200, 0.077	246.200, -0.003	246.200, 0.012
1233	246.400, 0.395	246.400, 0.132	246.400, 0.135	246.400, 0.105	246.400, 0.077	246.400, -0.002	246.400, 0.012
1234	246.600, 0.395	246.600, 0.132	246.600, 0.135	246.600, 0.105	246.600, 0.077	246.600, -0.002	246.600, 0.012
1235	246.800, 0.395	246.800, 0.133	246.800, 0.135	246.800, 0.105	246.800, 0.077	246.800, -0.002	246.800, 0.012
1236	247.000, 0.395	247.000, 0.133	247.000, 0.135	247.000, 0.105	247.000, 0.077	247.000, -0.002	247.000, 0.012
1237	247.200, 0.395	247.200, 0.133	247.200, 0.135	247.200, 0.105	247.200, 0.077	247.200, -0.002	247.200, 0.012
1238	247.400, 0.395	247.400, 0.133	247.400, 0.135	247.400, 0.105	247.400, 0.077	247.400, -0.001	247.400, 0.012
1239	247.600, 0.395	247.600, 0.134	247.600, 0.135	247.600, 0.105	247.600, 0.077	247.600, -0.001	247.600, 0.012
1240	247.800, 0.395	247.800, 0.134	247.800, 0.135	247.800, 0.105	247.800, 0.077	247.800, -0.001	247.800, 0.012
1241	248.000, 0.395	248.000, 0.134	248.000, 0.135	248.000, 0.105	248.000, 0.078	248.000, -0.001	248.000, 0.011
1242	248.200, 0.395	248.200, 0.134	248.200, 0.135	248.200, 0.105	248.200, 0.078	248.200, -0.001	248.200, 0.011
1243	248.400, 0.395	248.400, 0.133	248.400, 0.135	248.400, 0.106	248.400, 0.078	248.400, -0.001	248.400, 0.011
1244	248.600, 0.395	248.600, 0.133	248.600, 0.135	248.600, 0.106	248.600, 0.078	248.600, -0.000	248.600, 0.010
1245	248.800, 0.395	248.800, 0.133	248.800, 0.135	248.800, 0.106	248.800, 0.077	248.800, -0.000	248.800, 0.010
1246	249.000, 0.395	249.000, 0.133	249.000, 0.135	249.000, 0.106	249.000, 0.077	249.000, -0.000	249.000, 0.010
1247	249.200, 0.394	249.200, 0.133	249.200, 0.136	249.200, 0.106	249.200, 0.077	249.200, -0.000	249.200, 0.010
1248	249.400, 0.394	249.400, 0.133	249.400, 0.136	249.400, 0.106	249.400, 0.077	249.400, 0.000	249.400, 0.010
1249	249.600, 0.394	249.600, 0.133	249.600, 0.136	249.600, 0.106	249.600, 0.077	249.600, 0.000	249.600, 0.010
1250	249.800, 0.393	249.800, 0.133	249.800, 0.136	249.800, 0.106	249.800, 0.077	249.800, 0.000	249.800, 0.010
1251	250.000, 0.393	250.000, 0.133	250.000, 0.136	250.000, 0.106	250.000, 0.077	250.000, 0.000	250.000, 0.010
1252	250.200, 0.393	250.200, 0.133	250.200, 0.136	250.200, 0.106	250.200, 0.077	250.200, -0.000	250.200, 0.010
1253	250.400, 0.392	250.400, 0.133	250.400, 0.136	250.400, 0.106	250.400, 0.078	250.400, -0.000	250.400, 0.011
1254	250.600, 0.392	250.600, 0.133	250.600, 0.135	250.600, 0.106	250.600, 0.078	250.600, -0.001	250.600, 0.011
1255	250.800, 0.392	250.800, 0.133	250.800, 0.135	250.800, 0.106	250.800, 0.078	250.800, -0.001	250.800, 0.011
1256	251.000, 0.391	251.000, 0.132	251.000, 0.135	251.000, 0.106	251.000, 0.078	251.000, -0.001	251.000, 0.011
1257	251.200, 0.391	251.200, 0.132	251.200, 0.134	251.200, 0.106	251.200, 0.079	251.200, -0.001	251.200, 0.012
1258	251.400, 0.391	251.400, 0.132	251.400, 0.134	251.400, 0.106	251.400, 0.079	251.400, -0.001	251.400, 0.012
1259	251.600, 0.391	251.600, 0.132	251.600, 0.134	251.600, 0.106	251.600, 0.079	251.600, -0.002	251.600, 0.012
1260	251.800, 0.391	251.800, 0.132	251.800, 0.134	251.800, 0.106	251.800, 0.079	251.800, -0.002	251.800, 0.012
1261	252.000, 0.391	252.000, 0.132	252.000, 0.134	252.000, 0.106	252.000, 0.079	252.000, -0.002	252.000, 0.012
1262	252.200, 0.391	252.200, 0.131	252.200, 0.134	252.200, 0.106	252.200, 0.079	252.200, -0.002	252.200, 0.012
1263	252.400, 0.391	252.400, 0.131	252.400, 0.134	252.400, 0.106	252.400, 0.079	252.400, -0.002	252.400, 0.012
1264	252.600, 0.391	252.600, 0.132	252.600, 0.135	252.600, 0.106	252.600, 0.079	252.600, -0.002	252.600, 0.012
1265	252.800, 0.391	252.800, 0.132	252.800, 0.135	252.800, 0.106	252.800, 0.079	252.800, -0.001	252.800, 0.012
1266	253.000, 0.391	253.000, 0.132	253.000, 0.135	253.000, 0.106	253.000, 0.079	253.000, -0.001	253.000, 0.012
1267	253.200, 0.391	253.200, 0.132	253.200, 0.135	253.200, 0.106	253.200, 0.078	253.200, -0.001	253.200, 0.012
1268	253.400, 0.392	253.400, 0.133	253.400, 0.136	253.400, 0.106	253.400, 0.078	253.400, -0.001	253.400, 0.011
1269	253.600, 0.392	253.600, 0.133	253.600, 0.136	253.600, 0.106	253.600, 0.078	253.600, -0.001	253.600, 0.011
1270	253.800, 0.392	253.800, 0.133	253.800, 0.137	253.800, 0.106	253.800, 0.079	253.800, -0.001	253.800, 0.011
1271	254.000, 0.392	254.000, 0.133	254.000, 0.137	254.000, 0.107	254.000, 0.079	254.000, -0.001	254.000, 0.011
1272	254.200, 0.391	254.200, 0.134	254.200, 0.137	254.200, 0.107	254.200, 0.079	254.200, -0.001	254.200, 0.011
1273	254.400, 0.391	254.400, 0.134	254.400, 0.137	254.400, 0.107	254.400, 0.079	254.400, -0.001	254.400, 0.011
1274	254.600, 0.391	254.600, 0.134	254.600, 0.137	254.600, 0.107	254.600, 0.079	254.600, -0.001	254.600, 0.011
1275	254.800, 0.391	254.800, 0.134	254.800, 0.137	254.800, 0.107	254.800, 0.079	254.800, -0.001	254.800, 0.011
1276	255.000, 0.391	255.000, 0.134	255.000, 0.137	255.000, 0.107	255.000, 0.080	255.000, -0.001	255.000, 0.011
1277	255.200, 0.390	255.200, 0.134	255.200, 0.137	255.200, 0.107	255.200, 0.080	255.200, -0.000	255.200, 0.011
1278	255.400, 0.390	255.400, 0.134	255.400, 0.137	255.400, 0.107	255.400, 0.080	255.400, -0.000	255.400, 0.011
1279	255.600, 0.390	255.600, 0.134	255.600, 0.137	255.600, 0.107	255.600, 0.080	255.600, -0.000	255.600, 0.011
1280	255.800, 0.389	255.800, 0.134	255.800, 0.136	255.800, 0.107	255.800, 0.080	255.800, -0.000	255.800, 0.011
1281	256.000, 0.389	256.000, 0.134	256.000, 0.136	256.000, 0.107	256.000, 0.080	256.000, 0.000	256.000, 0.011
1282	256.200, 0.389	256.200, 0.134	256.200, 0.136	256.200, 0.107	256.200, 0.080	256.200, 0.000	256.200, 0.011
1283	256.400, 0.388	256.400, 0.135	256.400, 0.136	256.400, 0.107	256.400, 0.080	256.400, 0.000	256.400, 0.011
1284	256.600, 0.388	256.600, 0.135	256.600, 0.137	256.600, 0.107	256.600, 0.080	256.600, 0.000	256.600, 0.011
1285	256.800, 0.388	256.800, 0.135	256.800, 0.137	256.800, 0.107	256.800, 0.080	256.800, 0.000	256.800, 0.011
1286	257.000, 0.387	257.000, 0.135	257.000, 0.137	257.000, 0.107	257.000, 0.080	257.000, 0.000	257.000, 0.011
1287	257.200, 0.387	257.200, 0.135	257.200, 0.137	257.200, 0.107	257.200, 0.080	257.200, 0.000	257.200, 0.011
1288	257.400, 0.387	257.400, 0.135	257.400, 0.137	257.400, 0.107	257.400, 0.080	257.400, 0.000	257.400, 0.011
1289	257.600, 0.386	257.600, 0.135	257.600, 0.137	257.600, 0.107	257.600, 0.080	257.600, 0.000	257.600, 0.011
1290	257.800, 0.386	257.800, 0.135	257.800, 0.137	257.800, 0.107	257.800, 0.080	257.800, -0.000	257.800, 0.011
1291	258.000, 0.386	258.000, 0.135	258.000, 0.137	258.000, 0.107	258.000, 0.080	258.000, -0.000	258.000, 0.011
1292	258.200, 0.386	258.200, 0.135	258.200, 0.136	258.200, 0.107	258.200, 0.080	258.200, -0.001	258.200, 0.011
1293	258.400, 0.386	258.400, 0.135	258.400, 0.136	258.400, 0.107	258.400, 0.080	258.400, -0.001	258.400, 0.011
1294	258.600, 0.385	258.600, 0.135	258.600, 0.136	258.600, 0.107	258.600, 0.080	258.600, -0.001	258.600, 0.011
1295	258.800, 0.385	258.800, 0.134	258.800, 0.136	258.800, 0.107	258.800, 0.080	258.800, -0.001	258.800, 0.011
1296	259.000, 0.385	259.000, 0.134	259.000, 0.136	259.000, 0.106	259.000, 0.080	259.000, -0.001	259.000, 0.011
1297	259.200, 0.385	259.200, 0.134	259.200, 0.136	259.200, 0.106	259.200, 0.080	259.200, -0.001	259.200, 0.012
1298	259.400, 0.385	259.400, 0.134	259.400, 0.136	259.400, 0.106	259.400, 0.079	259.400, -0.002	259.400, 0.011
1299	259.600, 0.386	259.600, 0.134	259.600, 0.136	259.600, 0.107	259.600, 0.079	259.600, -0.001	259.600, 0.011
1300	259.800, 0.386	259.800, 0.134	259.800, 0.136	259.800, 0.107	259.800, 0.079	259.800, -0.001	259.800, 0.011
1301	260.000, 0.386	260.000, 0.134	260.000, 0.136	260.000, 0.107	260.000, 0.079	260.000, -0.001	260.000, 0.011
1302	260.200, 0.386	260.200, 0.135	260.200, 0.136	260.200, 0.107	260.200, 0.079	260.200, -0.001	260.200, 0.011
1303	260.400, 0.386	260.400, 0.135	260.400, 0.136	260.400, 0.107	260.400, 0.079	260.400, -0.001	260.400, 0.011
1304	260.600, 0.386	260.600, 0.135	260.600, 0.137	260.600, 0.107	260.600, 0.079	260.600, -0.001	260.600, 0.011
1305	260.800, 0.386	260.800, 0.135	260.800, 0.137	260.800, 0.107	260.800, 0.079	260.800, -0.001	260.800, 0.011
1306	261.000, 0.385	261.000, 0.135	261.000, 0.137	261.000, 0.107	261.000, 0.079	261.000, -0.001	261.000, 0.012
1307	261.200, 0.385	261.200, 0.135	261.200, 0.137	261.200, 0.107	261.200, 0.079	261.200, -0.001	261.200, 0.012
1308	261.400, 0.384	261.400, 0.135	261.400, 0.137	261.400, 0.107	261.400, 0.079	261.400, -0.001	261.400, 0.012
1309	261.600, 0.383	261.600, 0.135	261.600, 0.137	261.600, 0.107	261.600, 0.079	261.600, -0.001	261.600, 0.012
1310	261.800, 0.383	261.800, 0.135	261.800, 0.137	261.800, 0.107	261.800, 0.080	261.800, -0.001	261.800, 0.012
1311	262.000, 0.382	262.000, 0.135	262.000, 0.137	262.000, 0.107	262.000, 0.080	262.000, -0.001	262.000, 0.011
1312	262.200, 0.381	262.200, 0.135	262.200, 0.137	262.200, 0.107	262.200, 0.080	262.200, -0.001	262.200, 0.012
1313	262.400, 0.381	262.400, 0.135	262.400, 0.137	262.400, 0.106	262.400, 0.080	262.400, -0.002	262.400, 0.012
1314	262.600, 0.381	262.600, 0.135	262.600, 0.137	262.600, 0.106	262.600, 0.080	262.600, -0.002	262.600, 0.011
1315	262.800, 0.381	262.800, 0.135	262.800, 0.137	262.800, 0.106	262.800, 0.080	262.800, -0.001	262.800, 0.011
1316	263.000, 0.380	263.000, 0.135	263.000, 0.137	263.000, 0.106	263.000, 0.080	263.000, -0.001	263.000, 0.011
1317	263.200, 0.380	263.200, 0.135	263.200, 0.137	263.200, 0.106	263.200, 0.080	263.200, -0.001	263.200, 0.011
1318	263.400, 0.380	263.400, 0.135	263.400, 0.137	263.400, 0.106	263.400, 0.080	263.400, -0.001	263.400, 0.011
1319	263.600, 0.380	263.600, 0.135	263.600, 0.137	263.600, 0.106	263.600, 0.080	263.600, -0.001	263.600, 0.011
1320	263.800, 0.381	263.800, 0.135	263.800, 0.137	263.800, 0.106	263.800, 0.080	263.800, -0.001	263.800, 0.011
1321	264.000, 0.381	264.000, 0.135	264.000, 0.138	264.000, 0.106	264.000, 0.079	264.000, -0.001	264.000, 0.011
1322	264.200, 0.381	264.200, 0.135	264.200, 0.138	264.200, 0.106	264.200, 0.079	264.200, -0.000	264.200, 0.011
1323	264.400, 0.381	264.400, 0.135	264.400, 0.138	264.400, 0.106	264.400, 0.079	264.400, -0.000	264.400, 0.011
1324	264.600, 0.380	264.600, 0.135	264.600, 0.138	264.600, 0.106	264.600, 0.079	264.600, -0.000	264.600, 0.011
1325	264.800, 0.380	264.800, 0.135	264.800, 0.138	264.800, 0.106	264.800, 0.079	264.800, 0.000	264.800, 0.011
1326	265.000, 0.380	265.000, 0.135	265.000, 0.138	265.000, 0.106	265.000, 0.079	265.000, 0.000	265.000, 0.012
1327	265.200, 0.380	265.200, 0.135	265.200, 0.138	265.200, 0.106	265.200, 0.079	265.200, -0.000	265.200, 0.012
1328	265.400, 0.380	265.400, 0.135	265.400, 0.138	265.400, 0.106	265.400, 0.079	265.400, -0.000	265.400, 0.012
1329	265.600, 0.379	265.600, 0.134	265.600, 0.138	265.600, 0.106	265.600, 0.079	265.600, -0.000	265.600, 0.012
1330	265.800, 0.379	265.800, 0.134	265.800, 0.138	265.800, 0.106	265.800, 0.079	265.800, -0.001	265.800, 0.012
1331	266.000, 0.379	266.000, 0.134	266.000, 0.138	266.000, 0.106	266.000, 0.079	266.000, -0.001	266.000, 0.012
1332	266.200, 0.379	266.200, 0.134	266.200, 0.138	266.200, 0.107	266.200, 0.080	266.200, -0.001	266.200, 0.013
1333	266.400, 0.379	266.400, 0.135	266.400, 0.138	266.400, 0.107	266.400, 0.080	266.400, -0.001	266.400, 0.013
1334	266.600, 0.378	266.600, 0.135	266.600, 0.138	266.600, 0.107	266.600, 0.080	266.600, -0.001	266.600, 0.013
1335	266.800, 0.378	266.800, 0.135	266.800, 0.138	266.800, 0.107	266.800, 0.080	266.800, -0.001	266.800, 0.013
1336	267.000, 0.378	267.000, 0.135	267.000, 0.138	267.000, 0.107	267.000, 0.080	267.000, -0.000	267.000, 0.012
1337	267.200, 0.378	267.200, 0.135	267.200, 0.138	267.200, 0.108	267.200, 0.080	267.200, -0.000	267.200, 0.012
1338	267.400, 0.378	267.400, 0.136	267.400, 0.138	267.400, 0.108	267.400, 0.080	267.400, -0.000	267.400, 0.012
1339	267.600, 0.378	267.600, 0.136	267.600, 0.138	267.600, 0.108	267.600, 0.080	267.600, -0.000	267.600, 0.012
1340	267.800, 0.377	267.800, 0.136	267.800, 0.138	267.800, 0.108	267.800, 0.080	267.800, 0.000	267.800, 0.012
1341	268.000, 0.377	268.000, 0.136	268.000, 0.138	268.000, 0.108	268.000, 0.080	268.000, 0.000	268.000, 0.012
1342	268.200, 0.377	268.200, 0.136	268.200, 0.138	268.200, 0.108	268.200, 0.080	268.200, 0.000	268.200, 0.012
1343	268.400, 0.377	268.400, 0.135	268.400, 0.138	268.400, 0.108	268.400, 0.080	268.400, 0.000	268.400, 0.012
1344	268.600, 0.377	268.600, 0.135	268.600, 0.138	268.600, 0.108	268.600, 0.080	268.600, 0.000	268.600, 0.012
1345	268.800, 0.377	268.800, 0.135	268.800, 0.138	268.800, 0.108	268.800, 0.080	268.800, 0.000	268.800, 0.012
1346	269.000, 0.377	269.000, 0.135	269.000, 0.138	269.000, 0.108	269.000, 0.080	269.000, 0.000	269.000, 0.012
1347	269.200, 0.377	269.200, 0.135	269.200, 0.138	269.200, 0.108	269.200, 0.080	269.200, 0.000	269.200, 0.012
1348	269.400, 0.377	269.400, 0.135	269.400, 0.138	269.400, 0.108	269.400, 0.080	269.400, 0.000	269.400, 0.012
1349	269.600, 0.377	269.600, 0.135	269.600, 0.138	269.600, 0.108	269.600, 0.080	269.600, 0.000	269.600, 0.012
1350	269.800, 0.377	269.800, 0.135	269.800, 0.138	269.800, 0.108	269.800, 0.080	269.800, 0.000	269.800, 0.013
1351	,	,	,	,	,	,	,
1352	,	,	,	,	,	,	,
1353	,	,	,	,	,	,	,
1354	,	,	,	,	,	,	,
1355	,	,	,	,	,	,	,
1356	,	,	,	,	,	,	,
1357	,	,	,	,	,	,	,
1358	,	,	,	,	,	,	,
1359	,	,	,	,	,	,	,
1360	,	,	,	,	,	,	,
1361	,	,	,	,	,	,	,
1362	,	,	,	,	,	,	,
1363	,	,	,	,	,	,	,
1364	,	,	,	,	,	,	,
1365	,	,	,	,	,	,	,
1366	,	,	,	,	,	,	,
1367	,	,	,	,	,	,	,
1368	,	,	,	,	,	,	,
1369	,	,	,	,	,	,	,
1370	,	,	,	,	,	,	,
1371	,	,	,	,	,	,	,
1372	,	,	,	,	,	,	,
1373	,	,	,	,	,	,	,
1374	,	,	,	,	,	,	,
1375	,	,	,	,	,	,	,
1376	,	,	,	,	,	,	,
1377	,	,	,	,	,	,	,
1378	,	,	,	,	,	,	,
1379	,	,	,	,	,	,	,
1380	,	,	,	,	,	,	,
1381	,	,	,	,	,	,	,
1382	,	,	,	,	,	,	,
1383	,	,	,	,	,	,	,
1384	,	,	,	,	,	,	,
1385	,	,	,	,	,	,	,
1386	,	,	,	,	,	,	,
1387	,	,	,	,	,	,	,
1388	,	,	,	,	,	,	,
1389	,	,	,	,	,	,	,
1390	,	,	,	,	,	,	,
1391	,	,	,	,	,	,	,
1392	,	,	,	,	,	,	,
1393	,	,	,	,	,	,	,
1394	,	,	,	,	,	,	,
1395	,	,	,	,	,	,	,
1396	,	,	,	,	,	,	,
1397	,	,	,	,	,	,	,
1398	,	,	,	,	,	,	,
1399	,	,	,	,	,	,	,
1400	,	,	,	,	,	,	,
1401	,	,	,	,	,	,	,
1402	,	,	,	,	,	,	,
1403	,	,	,	,	,	,	,
1404	,	,	,	,	,	,	,
1405	,	,	,	,	,	,	,
1406	,	,	,	,	,	,	,
1407	,	,	,	,	,	,	,
1408	,	,	,	,	,	,	,
1409	,	,	,	,	,	,	,
1410	,	,	,	,	,	,	,
1411	,	,	,	,	,	,	,
1412	,	,	,	,	,	,	,
1413	,	,	,	,	,	,	,
1414	,	,	,	,	,	,	,
1415	,	,	,	,	,	,	,
1416	,	,	,	,	,	,	,
1417	,	,	,	,	,	,	,
1418	,	,	,	,	,	,	,
1419	,	,	,	,	,	,	,
1420	,	,	,	,	,	,	,
1421	,	,	,	,	,	,	,
1422	,	,	,	,	,	,	,
1423	,	,	,	,	,	,	,
1424	,	,	,	,	,	,	,
1425	,	,	,	,	,	,	,
1426	,	,	,	,	,	,	,
1427	,	,	,	,	,	,	,
1428	,	,	,	,	,	,	,
1429	,	,	,	,	,	,	,
1430	,	,	,	,	,	,	,
1431	,	,	,	,	,	,	,
1432	,	,	,	,	,	,	,
1433	,	,	,	,	,	,	,
1434	,	,	,	,	,	,	,
1435	,	,	,	,	,	,	,
1436	,	,	,	,	,	,	,
1437	,	,	,	,	,	,	,
1438	,	,	,	,	,	,	,
1439	,	,	,	,	,	,	,
1440	,	,	,	,	,	,	,
1441	,	,	,	,	,	,	,
1442	,	,	,	,	,	,	,
1443	,	,	,	,	,	,	,
1444	,	,	,	,	,	,	,
1445	,	,	,	,	,	,	,
1446	,	,	,	,	,	,	,
1447	,	,	,	,	,	,	,
1448	,	,	,	,	,	,	,
1449	,	,	,	,	,	,	,
1450	,	,	,	,	,	,	,
1451	,	,	,	,	,	,	,
1452	,	,	,	,	,	,	,
1453	,	,	,	,	,	,	,
1454	,	,	,	,	,	,	,
1455	,	,	,	,	,	,	,
1456	,	,	,	,	,	,	,
1457	,	,	,	,	,	,	,
1458	,	,	,	,	,	,	,
1459	,	,	,	,	,	,	,
1460	,	,	,	,	,	,	,
1461	,	,	,	,	,	,	,
1462	,	,	,	,	,	,	,
1463	,	,	,	,	,	,	,
1464	,	,	,	,	,	,	,
1465	,	,	,	,	,	,	,
1466	,	,	,	,	,	,	,
1467	,	,	,	,	,	,	,
1468	,	,	,	,	,	,	,
1469	,	,	,	,	,	,	,
1470	,	,	,	,	,	,	,
1471	,	,	,	,	,	,	,
1472	,	,	,	,	,	,	,
1473	,	,	,	,	,	,	,
1474	,	,	,	,	,	,	,
1475	,	,	,	,	,	,	,
1476	,	,	,	,	,	,	,
1477	,	,	,	,	,	,	,
1478	,	,	,	,	,	,	,
1479	,	,	,	,	,	,	,
1480	,	,	,	,	,	,	,
1481	,	,	,	,	,	,	,
1482	,	,	,	,	,	,	,
1483	,	,	,	,	,	,	,
1484	,	,	,	,	,	,	,
1485	,	,	,	,	,	,	,
1486	,	,	,	,	,	,	,
1487	,	,	,	,	,	,	,
1488	,	,	,	,	,	,	,
1489	,	,	,	,	,	,	,
1490	,	,	,	,	,	,	,
1491	,	,	,	,	,	,	,
1492	,	,	,	,	,	,	,
1493	,	,	,	,	,	,	,
1494	,	,	,	,	,	,	,
1495	,	,	,	,	,	,	,
1496	,	,	,	,	,	,	,
1497	,	,	,	,	,	,	,
1498	,	,	,	,	,	,	,
1499	,	,	,	,	,	,	,
1500	,	,	,	,	,	,	,
1501	,	,	,	,	,	,	,
1502	,	,	,	,	,	,	,
1503	,	,	,	,	,	,	,
1504	,	,	,	,	,	,	,
1505	,	,	,	,	,	,	,
1506	,	,	,	,	,	,	,
1507	,	,	,	,	,	,	,
1508	,	,	,	,	,	,	,
1509	,	,	,	,	,	,	,
1510	,	,	,	,	,	,	,
1511	,	,	,	,	,	,	,
1512	,	,	,	,	,	,	,
1513	,	,	,	,	,	,	,
1514	,	,	,	,	,	,	,
1515	,	,	,	,	,	,	,
1516	,	,	,	,	,	,	,
1517	,	,	,	,	,	,	,
1518	,	,	,	,	,	,	,
1519	,	,	,	,	,	,	,
1520	,	,	,	,	,	,	,
1521	,	,	,	,	,	,	,
1522	,	,	,	,	,	,	,
1523	,	,	,	,	,	,	,
1524	,	,	,	,	,	,	,
1525	,	,	,	,	,	,	,
1526	,	,	,	,	,	,	,
1527	,	,	,	,	,	,	,
1528	,	,	,	,	,	,	,
1529	,	,	,	,	,	,	,
1530	,	,	,	,	,	,	,
1531	,	,	,	,	,	,	,
1532	,	,	,	,	,	,	,
1533	,	,	,	,	,	,	,
1534	,	,	,	,	,	,	,
1535	,	,	,	,	,	,	,
1536	,	,	,	,	,	,	,
1537	,	,	,	,	,	,	,
1538	,	,	,	,	,	,	,
1539	,	,	,	,	,	,	,
1540	,	,	,	,	,	,	,
1541	,	,	,	,	,	,	,
1542	,	,	,	,	,	,	,
1543	,	,	,	,	,	,	,
1544	,	,	,	,	,	,	,
1545	,	,	,	,	,	,	,
1546	,	,	,	,	,	,	,
1547	,	,	,	,	,	,	,
1548	,	,	,	,	,	,	,
1549	,	,	,	,	,	,	,
1550	,	,	,	,	,	,	,
1551	,	,	,	,	,	,	,
1552	,	,	,	,	,	,	,
1553	,	,	,	,	,	,	,
1554	,	,	,	,	,	,	,
1555	,	,	,	,	,	,	,
1556	,	,	,	,	,	,	,
1557	,	,	,	,	,	,	,
1558	,	,	,	,	,	,	,
1559	,	,	,	,	,	,	,
1560	,	,	,	,	,	,	,
1561	,	,	,	,	,	,	,
1562	,	,	,	,	,	,	,
1563	,	,	,	,	,	,	,
1564	,	,	,	,	,	,	,
1565	,	,	,	,	,	,	,
1566	,	,	,	,	,	,	,
1567	,	,	,	,	,	,	,
1568	,	,	,	,	,	,	,
1569	,	,	,	,	,	,	,
1570	,	,	,	,	,	,	,
1571	,	,	,	,	,	,	,
1572	,	,	,	,	,	,	,
1573	,	,	,	,	,	,	,
1574	,	,	,	,	,	,	,
1575	,	,	,	,	,	,	,
1576	,	,	,	,	,	,	,
1577	,	,	,	,	,	,	,
1578	,	,	,	,	,	,	,
1579	,	,	,	,	,	,	,
1580	,	,	,	,	,	,	,
1581	,	,	,	,	,	,	,
1582	,	,	,	,	,	,	,
1583	,	,	,	,	,	,	,
1584	,	,	,	,	,	,	,
1585	,	,	,	,	,	,	,
1586	,	,	,	,	,	,	,
1587	,	,	,	,	,	,	,
1588	,	,	,	,	,	,	,
1589	,	,	,	,	,	,	,
1590	,	,	,	,	,	,	,
1591	,	,	,	,	,	,	,
1592	,	,	,	,	,	,	,
1593	,	,	,	,	,	,	,
1594	,	,	,	,	,	,	,
1595	,	,	,	,	,	,	,
1596	,	,	,	,	,	,	,
1597	,	,	,	,	,	,	,
1598	,	,	,	,	,	,	,
1599	,	,	,	,	,	,	,
1600	,	,	,	,	,	,	,
1601	,	,	,	,	,	,	,
1602	,	,	,	,	,	,	,
1603	,	,	,	,	,	,	,
1604	,	,	,	,	,	,	,
1605	,	,	,	,	,	,	,
1606	,	,	,	,	,	,	,
1607	,	,	,	,	,	,	,
1608	,	,	,	,	,	,	,
1609	,	,	,	,	,	,	,
1610	,	,	,	,	,	,	,
1611	,	,	,	,	,	,	,
1612	,	,	,	,	,	,	,
1613	,	,	,	,	,	,	,
1614	,	,	,	,	,	,	,
1615	,	,	,	,	,	,	,
1616	,	,	,	,	,	,	,
1617	,	,	,	,	,	,	,
1618	,	,	,	,	,	,	,
1619	,	,	,	,	,	,	,
1620	,	,	,	,	,	,	,
1621	,	,	,	,	,	,	,
1622	,	,	,	,	,	,	,
1623	,	,	,	,	,	,	,
1624	,	,	,	,	,	,	,
1625	,	,	,	,	,	,	,
1626	,	,	,	,	,	,	,
1627	,	,	,	,	,	,	,
1628	,	,	,	,	,	,	,
1629	,	,	,	,	,	,	,
1630	,	,	,	,	,	,	,
1631	,	,	,	,	,	,	,
1632	,	,	,	,	,	,	,
1633	,	,	,	,	,	,	,
1634	,	,	,	,	,	,	,
1635	,	,	,	,	,	,	,
1636	,	,	,	,	,	,	,
1637	,	,	,	,	,	,	,
1638	,	,	,	,	,	,	,
1639	,	,	,	,	,	,	,
1640	,	,	,	,	,	,	,
1641	,	,	,	,	,	,	,
1642	,	,	,	,	,	,	,
1643	,	,	,	,	,	,	,
1644	,	,	,	,	,	,	,
1645	,	,	,	,	,	,	,
1646	,	,	,	,	,	,	,
1647	,	,	,	,	,	,	,
1648	,	,	,	,	,	,	,
1649	,	,	,	,	,	,	,
1650	,	,	,	,	,	,	,
1651	,	,	,	,	,	,	,
1652	,	,	,	,	,	,	,
1653	,	,	,	,	,	,	,
1654	,	,	,	,	,	,	,
1655	,	,	,	,	,	,	,
1656	,	,	,	,	,	,	,
1657	,	,	,	,	,	,	,
1658	,	,	,	,	,	,	,
1659	,	,	,	,	,	,	,
1660	,	,	,	,	,	,	,
1661	,	,	,	,	,	,	,
1662	,	,	,	,	,	,	,
1663	,	,	,	,	,	,	,
1664	,	,	,	,	,	,	,
1665	,	,	,	,	,	,	,
1666	,	,	,	,	,	,	,
1667	,	,	,	,	,	,	,
1668	,	,	,	,	,	,	,
1669	,	,	,	,	,	,	,
1670	,	,	,	,	,	,	,
1671	,	,	,	,	,	,	,
1672	,	,	,	,	,	,	,
1673	,	,	,	,	,	,	,
1674	,	,	,	,	,	,	,
1675	,	,	,	,	,	,	,
1676	,	,	,	,	,	,	,
1677	,	,	,	,	,	,	,
1678	,	,	,	,	,	,	,
1679	,	,	,	,	,	,	,
1680	,	,	,	,	,	,	,
1681	,	,	,	,	,	,	,
1682	,	,	,	,	,	,	,
1683	,	,	,	,	,	,	,
1684	,	,	,	,	,	,	,
1685	,	,	,	,	,	,	,
1686	,	,	,	,	,	,	,
1687	,	,	,	,	,	,	,
1688	,	,	,	,	,	,	,
1689	,	,	,	,	,	,	,
1690	,	,	,	,	,	,	,
1691	,	,	,	,	,	,	,
1692	,	,	,	,	,	,	,
1693	,	,	,	,	,	,	,
1694	,	,	,	,	,	,	,
1695	,	,	,	,	,	,	,
1696	,	,	,	,	,	,	,
1697	,	,	,	,	,	,	,
1698	,	,	,	,	,	,	,
1699	,	,	,	,	,	,	,
1700	,	,	,	,	,	,	,
1701	,	,	,	,	,	,	,
1702	,	,	,	,	,	,	,
1703	,	,	,	,	,	,	,
1704	,	,	,	,	,	,	,
1705	,	,	,	,	,	,	,
1706	,	,	,	,	,	,	,
1707	,	,	,	,	,	,	,
1708	,	,	,	,	,	,	,
1709	,	,	,	,	,	,	,
1710	,	,	,	,	,	,	,
1711	,	,	,	,	,	,	,
1712	,	,	,	,	,	,	,
1713	,	,	,	,	,	,	,
1714	,	,	,	,	,	,	,
1715	,	,	,	,	,	,	,
1716	,	,	,	,	,	,	,
1717	,	,	,	,	,	,	,
1718	,	,	,	,	,	,	,
1719	,	,	,	,	,	,	,
1720	,	,	,	,	,	,	,
1721	,	,	,	,	,	,	,
1722	,	,	,	,	,	,	,
1723	,	,	,	,	,	,	,
1724	,	,	,	,	,	,	,
1725	,	,	,	,	,	,	,
1726	,	,	,	,	,	,	,
1727	,	,	,	,	,	,	,
1728	,	,	,	,	,	,	,
1729	,	,	,	,	,	,	,
1730	,	,	,	,	,	,	,
1731	,	,	,	,	,	,	,
1732	,	,	,	,	,	,	,
1733	,	,	,	,	,	,	,
1734	,	,	,	,	,	,	,
1735	,	,	,	,	,	,	,
1736	,	,	,	,	,	,	,
1737	,	,	,	,	,	,	,
1738	,	,	,	,	,	,	,
1739	,	,	,	,	,	,	,
1740	,	,	,	,	,	,	,
1741	,	,	,	,	,	,	,
1742	,	,	,	,	,	,	,
1743	,	,	,	,	,	,	,
1744	,	,	,	,	,	,	,
1745	,	,	,	,	,	,	,
1746	,	,	,	,	,	,	,
1747	,	,	,	,	,	,	,
1748	,	,	,	,	,	,	,
1749	,	,	,	,	,	,	,
1750	,	,	,	,	,	,	,
1751	,	,	,	,	,	,	,
1752	,	,	,	,	,	,	,
1753	,	,	,	,	,	,	,
1754	,	,	,	,	,	,	,
1755	,	,	,	,	,	,	,
1756	,	,	,	,	,	,	,
1757	,	,	,	,	,	,	,
1758	,	,	,	,	,	,	,
1759	,	,	,	,	,	,	,
1760	,	,	,	,	,	,	,
1761	,	,	,	,	,	,	,
1762	,	,	,	,	,	,	,
1763	,	,	,	,	,	,	,
1764	,	,	,	,	,	,	,
1765	,	,	,	,	,	,	,
1766	,	,	,	,	,	,	,
1767	,	,	,	,	,	,	,
1768	,	,	,	,	,	,	,
1769	,	,	,	,	,	,	,
1770	,	,	,	,	,	,	,
1771	,	,	,	,	,	,	,
1772	,	,	,	,	,	,	,
1773	,	,	,	,	,	,	,
1774	,	,	,	,	,	,	,
1775	,	,	,	,	,	,	,
1776	,	,	,	,	,	,	,
1777	,	,	,	,	,	,	,
1778	,	,	,	,	,	,	,
1779	,	,	,	,	,	,	,
1780	,	,	,	,	,	,	,
1781	,	,	,	,	,	,	,
1782	,	,	,	,	,	,	,
1783	,	,	,	,	,	,	,
1784	,	,	,	,	,	,	,
1785	,	,	,	,	,	,	,
1786	,	,	,	,	,	,	,
1787	,	,	,	,	,	,	,
1788	,	,	,	,	,	,	,
1789	,	,	,	,	,	,	,
1790	,	,	,	,	,	,	,
1791	,	,	,	,	,	,	,
1792	,	,	,	,	,	,	,
1793	,	,	,	,	,	,	,
1794	,	,	,	,	,	,	,
1795	,	,	,	,	,	,	,
1796	,	,	,	,	,	,	,
1797	,	,	,	,	,	,	,
1798	,	,	,	,	,	,	,
1799	,	,	,	,	,	,	,
1800	,	,	,	,	,	,	,
1801	,	,	,	,	,	,	,
1802	,	,	,	,	,	,	,
1803	,	,	,	,	,	,	,
1804	,	,	,	,	,	,	,
1805	,	,	,	,	,	,	,
1806	,	,	,	,	,	,	,
1807	,	,	,	,	,	,	,
1808	,	,	,	,	,	,	,
1809	,	,	,	,	,	,	,
1810	,	,	,	,	,	,	,
1811	,	,	,	,	,	,	,
1812	,	,	,	,	,	,	,
1813	,	,	,	,	,	,	,
1814	,	,	,	,	,	,	,
1815	,	,	,	,	,	,	,
1816	,	,	,	,	,	,	,
1817	,	,	,	,	,	,	,
1818	,	,	,	,	,	,	,
1819	,	,	,	,	,	,	,
1820	,	,	,	,	,	,	,
1821	,	,	,	,	,	,	,
1822	,	,	,	,	,	,	,
1823	,	,	,	,	,	,	,
1824	,	,	,	,	,	,	,
1825	,	,	,	,	,	,	,
1826	,	,	,	,	,	,	,
1827	,	,	,	,	,	,	,
1828	,	,	,	,	,	,	,
1829	,	,	,	,	,	,	,
1830	,	,	,	,	,	,	,
1831	,	,	,	,	,	,	,
1832	,	,	,	,	,	,	,
1833	,	,	,	,	,	,	,
1834	,	,	,	,	,	,	,
1835	,	,	,	,	,	,	,
1836	,	,	,	,	,	,	,
1837	,	,	,	,	,	,	,
1838	,	,	,	,	,	,	,
1839	,	,	,	,	,	,	,
1840	,	,	,	,	,	,	,
1841	,	,	,	,	,	,	,
1842	,	,	,	,	,	,	,
1843	,	,	,	,	,	,	,
1844	,	,	,	,	,	,	,
1845	,	,	,	,	,	,	,
1846	,	,	,	,	,	,	,
1847	,	,	,	,	,	,	,
1848	,	,	,	,	,	,	,
1849	,	,	,	,	,	,	,
1850	,	,	,	,	,	,	,
1851	,	,	,	,	,	,	,
1852	,	,	,	,	,	,	,
1853	,	,	,	,	,	,	,
1854	,	,	,	,	,	,	,
1855	,	,	,	,	,	,	,
1856	,	,	,	,	,	,	,
1857	,	,	,	,	,	,	,
1858	,	,	,	,	,	,	,
1859	,	,	,	,	,	,	,
1860	,	,	,	,	,	,	,
1861	,	,	,	,	,	,	,
1862	,	,	,	,	,	,	,
1863	,	,	,	,	,	,	,
1864	,	,	,	,	,	,	,
1865	,	,	,	,	,	,	,
1866	,	,	,	,	,	,	,
1867	,	,	,	,	,	,	,
1868	,	,	,	,	,	,	,
1869	,	,	,	,	,	,	,
1870	,	,	,	,	,	,	,
1871	,	,	,	,	,	,	,
1872	,	,	,	,	,	,	,
1873	,	,	,	,	,	,	,
1874	,	,	,	,	,	,	,
1875	,	,	,	,	,	,	,
1876	,	,	,	,	,	,	,
1877	,	,	,	,	,	,	,
1878	,	,	,	,	,	,	,
1879	,	,	,	,	,	,	,
1880	,	,	,	,	,	,	,
1881	,	,	,	,	,	,	,
1882	,	,	,	,	,	,	,
1883	,	,	,	,	,	,	,
1884	,	,	,	,	,	,	,
1885	,	,	,	,	,	,	,
1886	,	,	,	,	,	,	,
1887	,	,	,	,	,	,	,
1888	,	,	,	,	,	,	,
1889	,	,	,	,	,	,	,
1890	,	,	,	,	,	,	,
1891	,	,	,	,	,	,	,
1892	,	,	,	,	,	,	,
1893	,	,	,	,	,	,	,
1894	,	,	,	,	,	,	,
1895	,	,	,	,	,	,	,
1896	,	,	,	,	,	,	,
1897	,	,	,	,	,	,	,
1898	,	,	,	,	,	,	,
1899	,	,	,	,	,	,	,
1900	,	,	,	,	,	,	,
1901	,	,	,	,	,	,	,
1902	,	,	,	,	,	,	,
1903	,	,	,	,	,	,	,
1904	,	,	,	,	,	,	,
1905	,	,	,	,	,	,	,
1906	,	,	,	,	,	,	,
1907	,	,	,	,	,	,	,
1908	,	,	,	,	,	,	,
1909	,	,	,	,	,	,	,
1910	,	,	,	,	,	,	,
1911	,	,	,	,	,	,	,
1912	,	,	,	,	,	,	,
1913	,	,	,	,	,	,	,
1914	,	,	,	,	,	,	,
1915	,	,	,	,	,	,	,
1916	,	,	,	,	,	,	,
1917	,	,	,	,	,	,	,
1918	,	,	,	,	,	,	,
1919	,	,	,	,	,	,	,
1920	,	,	,	,	,	,	,
1921	,	,	,	,	,	,	,
1922	,	,	,	,	,	,	,
1923	,	,	,	,	,	,	,
1924	,	,	,	,	,	,	,
1925	,	,	,	,	,	,	,
1926	,	,	,	,	,	,	,
1927	,	,	,	,	,	,	,
1928	,	,	,	,	,	,	,
1929	,	,	,	,	,	,	,
1930	,	,	,	,	,	,	,
1931	,	,	,	,	,	,	,
1932	,	,	,	,	,	,	,
1933	,	,	,	,	,	,	,
1934	,	,	,	,	,	,	,
1935	,	,	,	,	,	,	,
1936	,	,	,	,	,	,	,
1937	,	,	,	,	,	,	,
1938	,	,	,	,	,	,	,
1939	,	,	,	,	,	,	,
1940	,	,	,	,	,	,	,
1941	,	,	,	,	,	,	,
1942	,	,	,	,	,	,	,
1943	,	,	,	,	,	,	,
1944	,	,	,	,	,	,	,
1945	,	,	,	,	,	,	,
1946	,	,	,	,	,	,	,
1947	,	,	,	,	,	,	,
1948	,	,	,	,	,	,	,
1949	,	,	,	,	,	,	,
1950	,	,	,	,	,	,	,
1951	,	,	,	,	,	,	,
1952	,	,	,	,	,	,	,
1953	,	,	,	,	,	,	,
1954	,	,	,	,	,	,	,
1955	,	,	,	,	,	,	,
1956	,	,	,	,	,	,	,
1957	,	,	,	,	,	,	,
1958	,	,	,	,	,	,	,
1959	,	,	,	,	,	,	,
1960	,	,	,	,	,	,	,
1961	,	,	,	,	,	,	,
1962	,	,	,	,	,	,	,
1963	,	,	,	,	,	,	,
1964	,	,	,	,	,	,	,
1965	,	,	,	,	,	,	,
1966	,	,	,	,	,	,	,
1967	,	,	,	,	,	,	,
1968	,	,	,	,	,	,	,
1969	,	,	,	,	,	,	,
1970	,	,	,	,	,	,	,
1971	,	,	,	,	,	,	,
1972	,	,	,	,	,	,	,
1973	,	,	,	,	,	,	,
1974	,	,	,	,	,	,	,
1975	,	,	,	,	,	,	,
1976	,	,	,	,	,	,	,
1977	,	,	,	,	,	,	,
1978	,	,	,	,	,	,	,
1979	,	,	,	,	,	,	,
1980	,	,	,	,	,	,	,
1981	,	,	,	,	,	,	,
1982	,	,	,	,	,	,	,
1983	,	,	,	,	,	,	,
1984	,	,	,	,	,	,	,
1985	,	,	,	,	,	,	,
1986	,	,	,	,	,	,	,
1987	,	,	,	,	,	,	,
1988	,	,	,	,	,	,	,
1989	,	,	,	,	,	,	,
1990	,	,	,	,	,	,	,
1991	,	,	,	,	,	,	,
1992	,	,	,	,	,	,	,
1993	,	,	,	,	,	,	,
1994	,	,	,	,	,	,	,
1995	,	,	,	,	,	,	,
1996	,	,	,	,	,	,	,
1997	,	,	,	,	,	,	,
1998	,	,	,	,	,	,	,
1999	,	,	,	,	,	,	,
[truncated: 13,001 more rows]

## Sheet: Fig2_panelA_rep2
	169bp closed parS DNA ParB CTP	169bp closed parS DNA ParB ATP	169bp closed parS DNA ParB UTP	169bp closed parS DNA ParB	169bp closed parS DNA ParB GTP	169bp closed scrambled parS DNA ParB CTP	169bp closed scrambled parS DNA ParB
1	0.000, 0.012	0.000, 0.032	0.000, 0.034	0.000, 0.020	0.000, 0.035	0.000, 0.016	0.000, 0.007
2	0.200, 0.011	0.200, 0.032	0.200, 0.033	0.200, 0.021	0.200, 0.035	0.200, 0.015	0.200, 0.006
3	0.400, 0.011	0.400, 0.032	0.400, 0.033	0.400, 0.022	0.400, 0.034	0.400, 0.015	0.400, 0.006
4	0.600, 0.011	0.600, 0.031	0.600, 0.032	0.600, 0.022	0.600, 0.033	0.600, 0.014	0.600, 0.005
5	0.800, 0.011	0.800, 0.031	0.800, 0.031	0.800, 0.023	0.800, 0.032	0.800, 0.014	0.800, 0.005
6	1.000, 0.011	1.000, 0.030	1.000, 0.030	1.000, 0.023	1.000, 0.031	1.000, 0.013	1.000, 0.004
7	1.200, 0.011	1.200, 0.030	1.200, 0.029	1.200, 0.023	1.200, 0.030	1.200, 0.013	1.200, 0.004
8	1.400, 0.011	1.400, 0.029	1.400, 0.028	1.400, 0.023	1.400, 0.029	1.400, 0.013	1.400, 0.003
9	1.600, 0.010	1.600, 0.028	1.600, 0.027	1.600, 0.023	1.600, 0.028	1.600, 0.012	1.600, 0.003
10	1.800, 0.010	1.800, 0.028	1.800, 0.026	1.800, 0.022	1.800, 0.027	1.800, 0.012	1.800, 0.002
11	2.000, 0.010	2.000, 0.027	2.000, 0.026	2.000, 0.022	2.000, 0.027	2.000, 0.012	2.000, 0.002
12	2.200, 0.009	2.200, 0.027	2.200, 0.025	2.200, 0.021	2.200, 0.026	2.200, 0.012	2.200, 0.002
13	2.400, 0.009	2.400, 0.026	2.400, 0.024	2.400, 0.020	2.400, 0.025	2.400, 0.012	2.400, 0.002
14	2.600, 0.009	2.600, 0.026	2.600, 0.023	2.600, 0.020	2.600, 0.024	2.600, 0.012	2.600, 0.002
15	2.800, 0.009	2.800, 0.025	2.800, 0.023	2.800, 0.019	2.800, 0.024	2.800, 0.011	2.800, 0.001
16	3.000, 0.009	3.000, 0.025	3.000, 0.022	3.000, 0.019	3.000, 0.023	3.000, 0.011	3.000, 0.001
17	3.200, 0.009	3.200, 0.025	3.200, 0.022	3.200, 0.018	3.200, 0.023	3.200, 0.011	3.200, 0.001
18	3.400, 0.009	3.400, 0.025	3.400, 0.022	3.400, 0.018	3.400, 0.022	3.400, 0.011	3.400, 0.001
19	3.600, 0.009	3.600, 0.025	3.600, 0.021	3.600, 0.018	3.600, 0.022	3.600, 0.011	3.600, 0.001
20	3.800, 0.009	3.800, 0.024	3.800, 0.021	3.800, 0.017	3.800, 0.022	3.800, 0.011	3.800, 0.001
21	4.000, 0.008	4.000, 0.024	4.000, 0.021	4.000, 0.017	4.000, 0.021	4.000, 0.011	4.000, 0.001
22	4.200, 0.008	4.200, 0.024	4.200, 0.020	4.200, 0.017	4.200, 0.021	4.200, 0.010	4.200, 0.001
23	4.400, 0.008	4.400, 0.024	4.400, 0.020	4.400, 0.017	4.400, 0.020	4.400, 0.010	4.400, 0.001
24	4.600, 0.008	4.600, 0.024	4.600, 0.020	4.600, 0.016	4.600, 0.020	4.600, 0.010	4.600, 0.001
25	4.800, 0.008	4.800, 0.024	4.800, 0.020	4.800, 0.016	4.800, 0.019	4.800, 0.010	4.800, 0.001
26	5.000, 0.008	5.000, 0.024	5.000, 0.020	5.000, 0.016	5.000, 0.019	5.000, 0.010	5.000, 0.001
27	5.200, 0.008	5.200, 0.024	5.200, 0.020	5.200, 0.016	5.200, 0.018	5.200, 0.010	5.200, 0.001
28	5.400, 0.008	5.400, 0.023	5.400, 0.020	5.400, 0.016	5.400, 0.018	5.400, 0.011	5.400, 0.002
29	5.600, 0.008	5.600, 0.023	5.600, 0.019	5.600, 0.016	5.600, 0.017	5.600, 0.011	5.600, 0.002
30	5.800, 0.007	5.800, 0.022	5.800, 0.019	5.800, 0.016	5.800, 0.017	5.800, 0.011	5.800, 0.002
31	6.000, 0.007	6.000, 0.022	6.000, 0.019	6.000, 0.016	6.000, 0.017	6.000, 0.011	6.000, 0.002
32	6.200, 0.007	6.200, 0.021	6.200, 0.019	6.200, 0.016	6.200, 0.016	6.200, 0.011	6.200, 0.003
33	6.400, 0.007	6.400, 0.020	6.400, 0.018	6.400, 0.015	6.400, 0.016	6.400, 0.011	6.400, 0.003
34	6.600, 0.007	6.600, 0.020	6.600, 0.018	6.600, 0.015	6.600, 0.015	6.600, 0.011	6.600, 0.003
35	6.800, 0.008	6.800, 0.019	6.800, 0.018	6.800, 0.015	6.800, 0.015	6.800, 0.011	6.800, 0.004
36	7.000, 0.008	7.000, 0.019	7.000, 0.017	7.000, 0.014	7.000, 0.015	7.000, 0.011	7.000, 0.004
37	7.200, 0.008	7.200, 0.018	7.200, 0.017	7.200, 0.014	7.200, 0.015	7.200, 0.011	7.200, 0.004
38	7.400, 0.008	7.400, 0.018	7.400, 0.017	7.400, 0.014	7.400, 0.014	7.400, 0.011	7.400, 0.004
39	7.600, 0.008	7.600, 0.018	7.600, 0.017	7.600, 0.013	7.600, 0.014	7.600, 0.011	7.600, 0.004
40	7.800, 0.008	7.800, 0.017	7.800, 0.016	7.800, 0.012	7.800, 0.014	7.800, 0.011	7.800, 0.004
41	8.000, 0.008	8.000, 0.017	8.000, 0.016	8.000, 0.012	8.000, 0.013	8.000, 0.011	8.000, 0.004
42	8.200, 0.008	8.200, 0.017	8.200, 0.016	8.200, 0.011	8.200, 0.013	8.200, 0.010	8.200, 0.004
43	8.400, 0.008	8.400, 0.017	8.400, 0.016	8.400, 0.011	8.400, 0.013	8.400, 0.010	8.400, 0.004
44	8.600, 0.008	8.600, 0.017	8.600, 0.015	8.600, 0.010	8.600, 0.012	8.600, 0.010	8.600, 0.005
45	8.800, 0.008	8.800, 0.017	8.800, 0.015	8.800, 0.010	8.800, 0.012	8.800, 0.010	8.800, 0.005
46	9.000, 0.008	9.000, 0.016	9.000, 0.015	9.000, 0.010	9.000, 0.011	9.000, 0.010	9.000, 0.005
47	9.200, 0.008	9.200, 0.016	9.200, 0.015	9.200, 0.010	9.200, 0.011	9.200, 0.010	9.200, 0.004
48	9.400, 0.008	9.400, 0.016	9.400, 0.014	9.400, 0.010	9.400, 0.011	9.400, 0.010	9.400, 0.004
49	9.600, 0.008	9.600, 0.015	9.600, 0.014	9.600, 0.010	9.600, 0.011	9.600, 0.010	9.600, 0.004
50	9.800, 0.008	9.800, 0.015	9.800, 0.013	9.800, 0.010	9.800, 0.011	9.800, 0.010	9.800, 0.004
51	10.000, 0.008	10.000, 0.015	10.000, 0.013	10.000, 0.010	10.000, 0.010	10.000, 0.009	10.000, 0.004
52	10.200, 0.008	10.200, 0.014	10.200, 0.013	10.200, 0.011	10.200, 0.010	10.200, 0.009	10.200, 0.004
53	10.400, 0.008	10.400, 0.014	10.400, 0.013	10.400, 0.010	10.400, 0.010	10.400, 0.009	10.400, 0.004
54	10.600, 0.008	10.600, 0.013	10.600, 0.013	10.600, 0.010	10.600, 0.010	10.600, 0.009	10.600, 0.004
55	10.800, 0.008	10.800, 0.013	10.800, 0.013	10.800, 0.010	10.800, 0.010	10.800, 0.009	10.800, 0.004
56	11.000, 0.008	11.000, 0.013	11.000, 0.013	11.000, 0.010	11.000, 0.010	11.000, 0.009	11.000, 0.004
57	11.200, 0.007	11.200, 0.013	11.200, 0.013	11.200, 0.010	11.200, 0.010	11.200, 0.008	11.200, 0.003
58	11.400, 0.007	11.400, 0.012	11.400, 0.012	11.400, 0.010	11.400, 0.010	11.400, 0.008	11.400, 0.003
59	11.600, 0.007	11.600, 0.012	11.600, 0.012	11.600, 0.009	11.600, 0.010	11.600, 0.008	11.600, 0.003
60	11.800, 0.007	11.800, 0.012	11.800, 0.012	11.800, 0.009	11.800, 0.010	11.800, 0.008	11.800, 0.003
61	12.000, 0.007	12.000, 0.011	12.000, 0.011	12.000, 0.009	12.000, 0.010	12.000, 0.008	12.000, 0.003
62	12.200, 0.007	12.200, 0.011	12.200, 0.011	12.200, 0.009	12.200, 0.009	12.200, 0.008	12.200, 0.003
63	12.400, 0.007	12.400, 0.011	12.400, 0.011	12.400, 0.009	12.400, 0.009	12.400, 0.008	12.400, 0.003
64	12.600, 0.007	12.600, 0.011	12.600, 0.011	12.600, 0.009	12.600, 0.009	12.600, 0.008	12.600, 0.003
65	12.800, 0.007	12.800, 0.011	12.800, 0.011	12.800, 0.009	12.800, 0.009	12.800, 0.008	12.800, 0.003
66	13.000, 0.007	13.000, 0.010	13.000, 0.011	13.000, 0.009	13.000, 0.008	13.000, 0.008	13.000, 0.003
67	13.200, 0.007	13.200, 0.010	13.200, 0.011	13.200, 0.009	13.200, 0.008	13.200, 0.008	13.200, 0.003
68	13.400, 0.007	13.400, 0.010	13.400, 0.011	13.400, 0.009	13.400, 0.008	13.400, 0.008	13.400, 0.003
69	13.600, 0.006	13.600, 0.010	13.600, 0.011	13.600, 0.009	13.600, 0.007	13.600, 0.008	13.600, 0.003
70	13.800, 0.006	13.800, 0.010	13.800, 0.011	13.800, 0.009	13.800, 0.007	13.800, 0.007	13.800, 0.003
71	14.000, 0.006	14.000, 0.010	14.000, 0.011	14.000, 0.009	14.000, 0.007	14.000, 0.007	14.000, 0.003
72	14.200, 0.006	14.200, 0.010	14.200, 0.011	14.200, 0.009	14.200, 0.007	14.200, 0.007	14.200, 0.003
73	14.400, 0.005	14.400, 0.010	14.400, 0.011	14.400, 0.008	14.400, 0.007	14.400, 0.006	14.400, 0.003
74	14.600, 0.005	14.600, 0.010	14.600, 0.010	14.600, 0.008	14.600, 0.007	14.600, 0.006	14.600, 0.003
75	14.800, 0.005	14.800, 0.010	14.800, 0.010	14.800, 0.007	14.800, 0.007	14.800, 0.006	14.800, 0.002
76	15.000, 0.005	15.000, 0.010	15.000, 0.009	15.000, 0.007	15.000, 0.007	15.000, 0.005	15.000, 0.002
77	15.200, 0.005	15.200, 0.010	15.200, 0.008	15.200, 0.007	15.200, 0.007	15.200, 0.005	15.200, 0.002
78	15.400, 0.005	15.400, 0.010	15.400, 0.008	15.400, 0.007	15.400, 0.007	15.400, 0.005	15.400, 0.001
79	15.600, 0.005	15.600, 0.010	15.600, 0.007	15.600, 0.006	15.600, 0.007	15.600, 0.005	15.600, 0.001
80	15.800, 0.005	15.800, 0.010	15.800, 0.007	15.800, 0.006	15.800, 0.007	15.800, 0.005	15.800, 0.001
81	16.000, 0.005	16.000, 0.009	16.000, 0.007	16.000, 0.006	16.000, 0.007	16.000, 0.005	16.000, 0.000
82	16.200, 0.005	16.200, 0.009	16.200, 0.007	16.200, 0.006	16.200, 0.006	16.200, 0.005	16.200, 0.000
83	16.400, 0.005	16.400, 0.009	16.400, 0.007	16.400, 0.006	16.400, 0.006	16.400, 0.005	16.400, 0.000
84	16.600, 0.005	16.600, 0.009	16.600, 0.006	16.600, 0.006	16.600, 0.006	16.600, 0.005	16.600, -0.000
85	16.800, 0.005	16.800, 0.009	16.800, 0.006	16.800, 0.006	16.800, 0.005	16.800, 0.005	16.800, -0.000
86	17.000, 0.005	17.000, 0.008	17.000, 0.006	17.000, 0.007	17.000, 0.005	17.000, 0.005	17.000, -0.000
87	17.200, 0.005	17.200, 0.008	17.200, 0.006	17.200, 0.007	17.200, 0.005	17.200, 0.005	17.200, 0.000
88	17.400, 0.005	17.400, 0.008	17.400, 0.006	17.400, 0.006	17.400, 0.004	17.400, 0.005	17.400, 0.000
89	17.600, 0.005	17.600, 0.008	17.600, 0.006	17.600, 0.006	17.600, 0.004	17.600, 0.005	17.600, 0.001
90	17.800, 0.005	17.800, 0.007	17.800, 0.006	17.800, 0.006	17.800, 0.004	17.800, 0.005	17.800, 0.001
91	18.000, 0.005	18.000, 0.007	18.000, 0.006	18.000, 0.006	18.000, 0.004	18.000, 0.005	18.000, 0.001
92	18.200, 0.005	18.200, 0.007	18.200, 0.005	18.200, 0.005	18.200, 0.004	18.200, 0.005	18.200, 0.001
93	18.400, 0.005	18.400, 0.007	18.400, 0.005	18.400, 0.005	18.400, 0.003	18.400, 0.005	18.400, 0.001
94	18.600, 0.005	18.600, 0.007	18.600, 0.005	18.600, 0.005	18.600, 0.003	18.600, 0.005	18.600, 0.001
95	18.800, 0.005	18.800, 0.007	18.800, 0.005	18.800, 0.005	18.800, 0.003	18.800, 0.005	18.800, 0.001
96	19.000, 0.005	19.000, 0.006	19.000, 0.005	19.000, 0.004	19.000, 0.003	19.000, 0.005	19.000, 0.001
97	19.200, 0.005	19.200, 0.006	19.200, 0.005	19.200, 0.004	19.200, 0.003	19.200, 0.005	19.200, 0.001
98	19.400, 0.005	19.400, 0.006	19.400, 0.005	19.400, 0.004	19.400, 0.003	19.400, 0.005	19.400, 0.001
99	19.600, 0.005	19.600, 0.006	19.600, 0.005	19.600, 0.004	19.600, 0.003	19.600, 0.005	19.600, 0.001
100	19.800, 0.005	19.800, 0.006	19.800, 0.005	19.800, 0.004	19.800, 0.003	19.800, 0.005	19.800, 0.000
101	20.000, 0.004	20.000, 0.005	20.000, 0.005	20.000, 0.004	20.000, 0.003	20.000, 0.005	20.000, 0.000
102	20.200, 0.004	20.200, 0.005	20.200, 0.005	20.200, 0.004	20.200, 0.003	20.200, 0.004	20.200, 0.000
103	20.400, 0.004	20.400, 0.005	20.400, 0.005	20.400, 0.004	20.400, 0.003	20.400, 0.004	20.400, -0.000
104	20.600, 0.004	20.600, 0.005	20.600, 0.005	20.600, 0.004	20.600, 0.003	20.600, 0.004	20.600, -0.000
105	20.800, 0.003	20.800, 0.004	20.800, 0.005	20.800, 0.003	20.800, 0.003	20.800, 0.004	20.800, -0.000
106	21.000, 0.003	21.000, 0.004	21.000, 0.005	21.000, 0.003	21.000, 0.003	21.000, 0.004	21.000, -0.000
107	21.200, 0.003	21.200, 0.004	21.200, 0.005	21.200, 0.003	21.200, 0.003	21.200, 0.004	21.200, -0.000
108	21.400, 0.003	21.400, 0.004	21.400, 0.005	21.400, 0.003	21.400, 0.003	21.400, 0.004	21.400, -0.000
109	21.600, 0.003	21.600, 0.004	21.600, 0.005	21.600, 0.003	21.600, 0.003	21.600, 0.004	21.600, -0.000
110	21.800, 0.004	21.800, 0.004	21.800, 0.005	21.800, 0.003	21.800, 0.003	21.800, 0.003	21.800, -0.000
111	22.000, 0.004	22.000, 0.004	22.000, 0.005	22.000, 0.003	22.000, 0.003	22.000, 0.003	22.000, -0.000
112	22.200, 0.004	22.200, 0.004	22.200, 0.005	22.200, 0.003	22.200, 0.003	22.200, 0.003	22.200, 0.000
113	22.400, 0.003	22.400, 0.004	22.400, 0.005	22.400, 0.003	22.400, 0.003	22.400, 0.003	22.400, 0.000
114	22.600, 0.003	22.600, 0.004	22.600, 0.005	22.600, 0.003	22.600, 0.003	22.600, 0.003	22.600, 0.000
115	22.800, 0.003	22.800, 0.004	22.800, 0.005	22.800, 0.003	22.800, 0.003	22.800, 0.003	22.800, 0.001
116	23.000, 0.003	23.000, 0.003	23.000, 0.004	23.000, 0.003	23.000, 0.003	23.000, 0.003	23.000, 0.001
117	23.200, 0.003	23.200, 0.003	23.200, 0.004	23.200, 0.003	23.200, 0.003	23.200, 0.003	23.200, 0.001
118	23.400, 0.003	23.400, 0.003	23.400, 0.004	23.400, 0.003	23.400, 0.003	23.400, 0.003	23.400, 0.001
119	23.600, 0.002	23.600, 0.003	23.600, 0.004	23.600, 0.003	23.600, 0.003	23.600, 0.003	23.600, 0.001
120	23.800, 0.002	23.800, 0.002	23.800, 0.003	23.800, 0.002	23.800, 0.003	23.800, 0.003	23.800, 0.001
121	24.000, 0.002	24.000, 0.002	24.000, 0.003	24.000, 0.002	24.000, 0.002	24.000, 0.003	24.000, 0.001
122	24.200, 0.002	24.200, 0.002	24.200, 0.003	24.200, 0.002	24.200, 0.002	24.200, 0.003	24.200, 0.000
123	24.400, 0.002	24.400, 0.002	24.400, 0.003	24.400, 0.001	24.400, 0.002	24.400, 0.003	24.400, 0.000
124	24.600, 0.002	24.600, 0.002	24.600, 0.003	24.600, 0.001	24.600, 0.002	24.600, 0.003	24.600, 0.000
125	24.800, 0.002	24.800, 0.002	24.800, 0.003	24.800, 0.001	24.800, 0.002	24.800, 0.003	24.800, 0.000
126	25.000, 0.002	25.000, 0.002	25.000, 0.002	25.000, 0.001	25.000, 0.001	25.000, 0.003	25.000, 0.000
127	25.200, 0.002	25.200, 0.002	25.200, 0.002	25.200, 0.000	25.200, 0.001	25.200, 0.003	25.200, 0.000
128	25.400, 0.002	25.400, 0.002	25.400, 0.002	25.400, 0.000	25.400, 0.001	25.400, 0.003	25.400, 0.000
129	25.600, 0.002	25.600, 0.002	25.600, 0.001	25.600, 0.000	25.600, 0.001	25.600, 0.003	25.600, 0.000
130	25.800, 0.002	25.800, 0.002	25.800, 0.001	25.800, 0.000	25.800, 0.001	25.800, 0.003	25.800, 0.000
131	26.000, 0.002	26.000, 0.002	26.000, 0.001	26.000, 0.000	26.000, 0.001	26.000, 0.003	26.000, 0.000
132	26.200, 0.002	26.200, 0.002	26.200, 0.000	26.200, 0.000	26.200, 0.001	26.200, 0.002	26.200, 0.001
133	26.400, 0.002	26.400, 0.002	26.400, 0.000	26.400, 0.000	26.400, 0.001	26.400, 0.002	26.400, 0.001
134	26.600, 0.002	26.600, 0.001	26.600, -0.000	26.600, 0.000	26.600, 0.001	26.600, 0.002	26.600, 0.000
135	26.800, 0.002	26.800, 0.001	26.800, -0.000	26.800, 0.000	26.800, 0.001	26.800, 0.002	26.800, 0.000
136	27.000, 0.001	27.000, 0.001	27.000, -0.000	27.000, 0.000	27.000, 0.000	27.000, 0.001	27.000, 0.000
137	27.200, 0.001	27.200, 0.001	27.200, -0.000	27.200, 0.000	27.200, 0.000	27.200, 0.001	27.200, -0.000
138	27.400, 0.001	27.400, 0.000	27.400, -0.000	27.400, 0.000	27.400, 0.000	27.400, 0.001	27.400, -0.000
139	27.600, 0.000	27.600, 0.001	27.600, 0.000	27.600, 0.000	27.600, -0.000	27.600, 0.001	27.600, 0.000
140	27.800, 0.000	27.800, 0.001	27.800, 0.000	27.800, 0.000	27.800, -0.000	27.800, 0.000	27.800, 0.000
141	28.000, -0.000	28.000, 0.001	28.000, 0.000	28.000, 0.000	28.000, -0.000	28.000, 0.000	28.000, 0.000
142	28.200, -0.000	28.200, 0.001	28.200, 0.001	28.200, 0.000	28.200, -0.001	28.200, -0.000	28.200, 0.000
143	28.400, -0.000	28.400, 0.000	28.400, 0.001	28.400, 0.000	28.400, -0.001	28.400, -0.000	28.400, 0.000
144	28.600, -0.000	28.600, 0.000	28.600, 0.000	28.600, -0.000	28.600, -0.000	28.600, -0.000	28.600, 0.000
145	28.800, -0.000	28.800, -0.000	28.800, 0.000	28.800, -0.000	28.800, -0.000	28.800, -0.000	28.800, 0.000
146	29.000, -0.000	29.000, -0.000	29.000, 0.000	29.000, -0.000	29.000, -0.000	29.000, -0.000	29.000, -0.000
147	29.200, -0.000	29.200, -0.001	29.200, -0.000	29.200, -0.000	29.200, 0.000	29.200, -0.001	29.200, -0.000
148	29.400, -0.000	29.400, -0.001	29.400, -0.000	29.400, -0.000	29.400, 0.000	29.400, -0.001	29.400, -0.000
149	29.600, -0.000	29.600, -0.001	29.600, -0.001	29.600, -0.000	29.600, 0.001	29.600, -0.001	29.600, -0.000
150	29.800, -0.000	29.800, -0.002	29.800, -0.001	29.800, -0.000	29.800, 0.001	29.800, -0.001	29.800, -0.000
151	30.000, 0.000	30.000, 0.000	30.000, 0.000	30.000, 0.000	30.000, 0.000	30.000, 0.000	30.000, 0.000
152	30.200, 0.006	30.200, 0.009	30.200, 0.012	30.200, 0.011	30.200, 0.008	30.200, -0.003	30.200, -0.001
153	30.400, 0.013	30.400, 0.020	30.400, 0.025	30.400, 0.024	30.400, 0.016	30.400, -0.006	30.400, -0.002
154	30.600, 0.022	30.600, 0.031	30.600, 0.040	30.600, 0.038	30.600, 0.026	30.600, -0.009	30.600, -0.004
155	30.800, 0.031	30.800, 0.044	30.800, 0.056	30.800, 0.053	30.800, 0.037	30.800, -0.013	30.800, -0.005
156	31.000, 0.042	31.000, 0.058	31.000, 0.072	31.000, 0.069	31.000, 0.048	31.000, -0.016	31.000, -0.006
157	31.200, 0.054	31.200, 0.071	31.200, 0.087	31.200, 0.085	31.200, 0.060	31.200, -0.020	31.200, -0.008
158	31.400, 0.066	31.400, 0.084	31.400, 0.103	31.400, 0.100	31.400, 0.072	31.400, -0.024	31.400, -0.009
159	31.600, 0.079	31.600, 0.097	31.600, 0.117	31.600, 0.115	31.600, 0.083	31.600, -0.028	31.600, -0.010
160	31.800, 0.092	31.800, 0.109	31.800, 0.129	31.800, 0.128	31.800, 0.095	31.800, -0.031	31.800, -0.011
161	32.000, 0.106	32.000, 0.118	32.000, 0.139	32.000, 0.139	32.000, 0.104	32.000, -0.034	32.000, -0.012
162	32.200, 0.118	32.200, 0.126	32.200, 0.146	32.200, 0.147	32.200, 0.113	32.200, -0.036	32.200, -0.013
163	32.400, 0.131	32.400, 0.132	32.400, 0.151	32.400, 0.153	32.400, 0.118	32.400, -0.038	32.400, -0.014
164	32.600, 0.144	32.600, 0.137	32.600, 0.155	32.600, 0.158	32.600, 0.124	32.600, -0.040	32.600, -0.015
165	32.800, 0.156	32.800, 0.141	32.800, 0.157	32.800, 0.162	32.800, 0.128	32.800, -0.042	32.800, -0.016
166	33.000, 0.169	33.000, 0.144	33.000, 0.159	33.000, 0.165	33.000, 0.132	33.000, -0.044	33.000, -0.016
167	33.200, 0.181	33.200, 0.146	33.200, 0.161	33.200, 0.167	33.200, 0.135	33.200, -0.045	33.200, -0.017
168	33.400, 0.193	33.400, 0.148	33.400, 0.162	33.400, 0.169	33.400, 0.138	33.400, -0.047	33.400, -0.018
169	33.600, 0.205	33.600, 0.149	33.600, 0.162	33.600, 0.170	33.600, 0.140	33.600, -0.048	33.600, -0.018
170	33.800, 0.218	33.800, 0.150	33.800, 0.162	33.800, 0.171	33.800, 0.141	33.800, -0.050	33.800, -0.019
171	34.000, 0.230	34.000, 0.151	34.000, 0.163	34.000, 0.171	34.000, 0.142	34.000, -0.051	34.000, -0.020
172	34.200, 0.242	34.200, 0.151	34.200, 0.163	34.200, 0.172	34.200, 0.143	34.200, -0.052	34.200, -0.020
173	34.400, 0.254	34.400, 0.152	34.400, 0.163	34.400, 0.172	34.400, 0.143	34.400, -0.053	34.400, -0.021
174	34.600, 0.266	34.600, 0.152	34.600, 0.163	34.600, 0.172	34.600, 0.144	34.600, -0.054	34.600, -0.021
175	34.800, 0.278	34.800, 0.152	34.800, 0.163	34.800, 0.172	34.800, 0.144	34.800, -0.056	34.800, -0.022
176	35.000, 0.289	35.000, 0.153	35.000, 0.163	35.000, 0.173	35.000, 0.144	35.000, -0.057	35.000, -0.022
177	35.200, 0.301	35.200, 0.153	35.200, 0.163	35.200, 0.173	35.200, 0.144	35.200, -0.058	35.200, -0.023
178	35.400, 0.313	35.400, 0.153	35.400, 0.163	35.400, 0.173	35.400, 0.144	35.400, -0.059	35.400, -0.023
179	35.600, 0.324	35.600, 0.153	35.600, 0.162	35.600, 0.173	35.600, 0.144	35.600, -0.060	35.600, -0.024
180	35.800, 0.336	35.800, 0.154	35.800, 0.162	35.800, 0.173	35.800, 0.144	35.800, -0.061	35.800, -0.024
181	36.000, 0.348	36.000, 0.154	36.000, 0.161	36.000, 0.173	36.000, 0.144	36.000, -0.062	36.000, -0.025
182	36.200, 0.359	36.200, 0.154	36.200, 0.161	36.200, 0.173	36.200, 0.144	36.200, -0.063	36.200, -0.025
183	36.400, 0.371	36.400, 0.154	36.400, 0.161	36.400, 0.174	36.400, 0.144	36.400, -0.063	36.400, -0.026
184	36.600, 0.383	36.600, 0.154	36.600, 0.160	36.600, 0.174	36.600, 0.143	36.600, -0.064	36.600, -0.026
185	36.800, 0.394	36.800, 0.154	36.800, 0.160	36.800, 0.174	36.800, 0.143	36.800, -0.065	36.800, -0.027
186	37.000, 0.406	37.000, 0.154	37.000, 0.160	37.000, 0.174	37.000, 0.142	37.000, -0.066	37.000, -0.027
187	37.200, 0.417	37.200, 0.155	37.200, 0.160	37.200, 0.174	37.200, 0.142	37.200, -0.067	37.200, -0.027
188	37.400, 0.429	37.400, 0.155	37.400, 0.160	37.400, 0.174	37.400, 0.141	37.400, -0.068	37.400, -0.028
189	37.600, 0.440	37.600, 0.155	37.600, 0.160	37.600, 0.173	37.600, 0.141	37.600, -0.069	37.600, -0.028
190	37.800, 0.452	37.800, 0.155	37.800, 0.160	37.800, 0.173	37.800, 0.140	37.800, -0.070	37.800, -0.029
191	38.000, 0.463	38.000, 0.155	38.000, 0.160	38.000, 0.172	38.000, 0.140	38.000, -0.071	38.000, -0.029
192	38.200, 0.474	38.200, 0.155	38.200, 0.161	38.200, 0.172	38.200, 0.139	38.200, -0.071	38.200, -0.030
193	38.400, 0.485	38.400, 0.156	38.400, 0.161	38.400, 0.171	38.400, 0.139	38.400, -0.072	38.400, -0.030
194	38.600, 0.497	38.600, 0.156	38.600, 0.161	38.600, 0.171	38.600, 0.139	38.600, -0.073	38.600, -0.030
195	38.800, 0.508	38.800, 0.156	38.800, 0.162	38.800, 0.171	38.800, 0.138	38.800, -0.074	38.800, -0.031
196	39.000, 0.518	39.000, 0.157	39.000, 0.162	39.000, 0.171	39.000, 0.138	39.000, -0.074	39.000, -0.031
197	39.200, 0.529	39.200, 0.157	39.200, 0.162	39.200, 0.171	39.200, 0.138	39.200, -0.075	39.200, -0.031
198	39.400, 0.539	39.400, 0.157	39.400, 0.162	39.400, 0.171	39.400, 0.138	39.400, -0.076	39.400, -0.032
199	39.600, 0.550	39.600, 0.158	39.600, 0.161	39.600, 0.171	39.600, 0.138	39.600, -0.077	39.600, -0.032
200	39.800, 0.561	39.800, 0.158	39.800, 0.161	39.800, 0.171	39.800, 0.138	39.800, -0.077	39.800, -0.032
201	40.000, 0.571	40.000, 0.158	40.000, 0.161	40.000, 0.171	40.000, 0.138	40.000, -0.078	40.000, -0.032
202	40.200, 0.581	40.200, 0.158	40.200, 0.160	40.200, 0.171	40.200, 0.138	40.200, -0.078	40.200, -0.033
203	40.400, 0.592	40.400, 0.158	40.400, 0.160	40.400, 0.172	40.400, 0.138	40.400, -0.078	40.400, -0.033
204	40.600, 0.602	40.600, 0.158	40.600, 0.159	40.600, 0.172	40.600, 0.138	40.600, -0.079	40.600, -0.033
205	40.800, 0.612	40.800, 0.158	40.800, 0.159	40.800, 0.172	40.800, 0.138	40.800, -0.079	40.800, -0.033
206	41.000, 0.622	41.000, 0.158	41.000, 0.158	41.000, 0.172	41.000, 0.138	41.000, -0.080	41.000, -0.033
207	41.200, 0.633	41.200, 0.158	41.200, 0.158	41.200, 0.172	41.200, 0.137	41.200, -0.080	41.200, -0.033
208	41.400, 0.643	41.400, 0.158	41.400, 0.158	41.400, 0.172	41.400, 0.137	41.400, -0.081	41.400, -0.034
209	41.600, 0.653	41.600, 0.158	41.600, 0.157	41.600, 0.172	41.600, 0.136	41.600, -0.081	41.600, -0.034
210	41.800, 0.663	41.800, 0.158	41.800, 0.157	41.800, 0.171	41.800, 0.136	41.800, -0.082	41.800, -0.034
211	42.000, 0.673	42.000, 0.157	42.000, 0.157	42.000, 0.171	42.000, 0.135	42.000, -0.083	42.000, -0.034
212	42.200, 0.683	42.200, 0.157	42.200, 0.157	42.200, 0.171	42.200, 0.134	42.200, -0.083	42.200, -0.034
213	42.400, 0.693	42.400, 0.157	42.400, 0.157	42.400, 0.171	42.400, 0.134	42.400, -0.084	42.400, -0.035
214	42.600, 0.702	42.600, 0.157	42.600, 0.157	42.600, 0.171	42.600, 0.133	42.600, -0.084	42.600, -0.035
215	42.800, 0.712	42.800, 0.157	42.800, 0.157	42.800, 0.171	42.800, 0.132	42.800, -0.085	42.800, -0.035
216	43.000, 0.722	43.000, 0.158	43.000, 0.157	43.000, 0.171	43.000, 0.132	43.000, -0.086	43.000, -0.035
217	43.200, 0.731	43.200, 0.158	43.200, 0.156	43.200, 0.171	43.200, 0.131	43.200, -0.087	43.200, -0.036
218	43.400, 0.741	43.400, 0.158	43.400, 0.156	43.400, 0.171	43.400, 0.130	43.400, -0.087	43.400, -0.036
219	43.600, 0.750	43.600, 0.158	43.600, 0.156	43.600, 0.170	43.600, 0.130	43.600, -0.088	43.600, -0.036
220	43.800, 0.760	43.800, 0.158	43.800, 0.156	43.800, 0.170	43.800, 0.130	43.800, -0.089	43.800, -0.036
221	44.000, 0.769	44.000, 0.158	44.000, 0.156	44.000, 0.170	44.000, 0.129	44.000, -0.089	44.000, -0.036
222	44.200, 0.779	44.200, 0.158	44.200, 0.156	44.200, 0.170	44.200, 0.129	44.200, -0.090	44.200, -0.036
223	44.400, 0.788	44.400, 0.158	44.400, 0.156	44.400, 0.170	44.400, 0.128	44.400, -0.090	44.400, -0.037
224	44.600, 0.798	44.600, 0.158	44.600, 0.156	44.600, 0.170	44.600, 0.128	44.600, -0.091	44.600, -0.037
225	44.800, 0.808	44.800, 0.158	44.800, 0.155	44.800, 0.170	44.800, 0.128	44.800, -0.091	44.800, -0.037
226	45.000, 0.818	45.000, 0.158	45.000, 0.155	45.000, 0.170	45.000, 0.128	45.000, -0.092	45.000, -0.037
227	45.200, 0.827	45.200, 0.158	45.200, 0.155	45.200, 0.170	45.200, 0.128	45.200, -0.092	45.200, -0.037
228	45.400, 0.837	45.400, 0.158	45.400, 0.154	45.400, 0.170	45.400, 0.127	45.400, -0.092	45.400, -0.037
229	45.600, 0.846	45.600, 0.158	45.600, 0.154	45.600, 0.170	45.600, 0.127	45.600, -0.093	45.600, -0.037
230	45.800, 0.856	45.800, 0.158	45.800, 0.154	45.800, 0.170	45.800, 0.127	45.800, -0.093	45.800, -0.037
231	46.000, 0.865	46.000, 0.159	46.000, 0.153	46.000, 0.170	46.000, 0.127	46.000, -0.093	46.000, -0.037
232	46.200, 0.874	46.200, 0.159	46.200, 0.153	46.200, 0.170	46.200, 0.127	46.200, -0.093	46.200, -0.038
233	46.400, 0.883	46.400, 0.159	46.400, 0.153	46.400, 0.170	46.400, 0.127	46.400, -0.094	46.400, -0.038
234	46.600, 0.891	46.600, 0.159	46.600, 0.153	46.600, 0.170	46.600, 0.127	46.600, -0.094	46.600, -0.039
235	46.800, 0.900	46.800, 0.159	46.800, 0.153	46.800, 0.170	46.800, 0.127	46.800, -0.095	46.800, -0.039
236	47.000, 0.909	47.000, 0.160	47.000, 0.152	47.000, 0.170	47.000, 0.127	47.000, -0.095	47.000, -0.040
237	47.200, 0.917	47.200, 0.160	47.200, 0.152	47.200, 0.170	47.200, 0.127	47.200, -0.095	47.200, -0.041
238	47.400, 0.926	47.400, 0.160	47.400, 0.152	47.400, 0.170	47.400, 0.126	47.400, -0.096	47.400, -0.041
239	47.600, 0.934	47.600, 0.160	47.600, 0.153	47.600, 0.170	47.600, 0.126	47.600, -0.096	47.600, -0.041
240	47.800, 0.943	47.800, 0.160	47.800, 0.153	47.800, 0.170	47.800, 0.126	47.800, -0.096	47.800, -0.042
241	48.000, 0.951	48.000, 0.160	48.000, 0.153	48.000, 0.169	48.000, 0.126	48.000, -0.097	48.000, -0.042
242	48.200, 0.959	48.200, 0.160	48.200, 0.153	48.200, 0.169	48.200, 0.126	48.200, -0.097	48.200, -0.042
243	48.400, 0.968	48.400, 0.160	48.400, 0.153	48.400, 0.169	48.400, 0.126	48.400, -0.098	48.400, -0.042
244	48.600, 0.976	48.600, 0.160	48.600, 0.153	48.600, 0.169	48.600, 0.126	48.600, -0.098	48.600, -0.042
245	48.800, 0.984	48.800, 0.160	48.800, 0.153	48.800, 0.169	48.800, 0.126	48.800, -0.099	48.800, -0.042
246	49.000, 0.993	49.000, 0.159	49.000, 0.153	49.000, 0.169	49.000, 0.125	49.000, -0.099	49.000, -0.042
247	49.200, 1.001	49.200, 0.159	49.200, 0.152	49.200, 0.169	49.200, 0.125	49.200, -0.100	49.200, -0.042
248	49.400, 1.009	49.400, 0.159	49.400, 0.152	49.400, 0.169	49.400, 0.125	49.400, -0.100	49.400, -0.042
249	49.600, 1.018	49.600, 0.159	49.600, 0.152	49.600, 0.169	49.600, 0.124	49.600, -0.100	49.600, -0.042
250	49.800, 1.026	49.800, 0.159	49.800, 0.152	49.800, 0.169	49.800, 0.124	49.800, -0.101	49.800, -0.042
251	50.000, 1.034	50.000, 0.158	50.000, 0.151	50.000, 0.169	50.000, 0.124	50.000, -0.101	50.000, -0.042
252	50.200, 1.042	50.200, 0.158	50.200, 0.152	50.200, 0.170	50.200, 0.124	50.200, -0.101	50.200, -0.042
253	50.400, 1.050	50.400, 0.158	50.400, 0.152	50.400, 0.170	50.400, 0.123	50.400, -0.102	50.400, -0.043
254	50.600, 1.058	50.600, 0.159	50.600, 0.152	50.600, 0.170	50.600, 0.123	50.600, -0.102	50.600, -0.043
255	50.800, 1.066	50.800, 0.159	50.800, 0.152	50.800, 0.170	50.800, 0.123	50.800, -0.102	50.800, -0.043
256	51.000, 1.074	51.000, 0.159	51.000, 0.152	51.000, 0.170	51.000, 0.122	51.000, -0.103	51.000, -0.043
257	51.200, 1.082	51.200, 0.159	51.200, 0.152	51.200, 0.170	51.200, 0.122	51.200, -0.103	51.200, -0.043
258	51.400, 1.090	51.400, 0.159	51.400, 0.151	51.400, 0.170	51.400, 0.122	51.400, -0.104	51.400, -0.043
259	51.600, 1.098	51.600, 0.159	51.600, 0.151	51.600, 0.169	51.600, 0.121	51.600, -0.104	51.600, -0.044
260	51.800, 1.106	51.800, 0.159	51.800, 0.151	51.800, 0.169	51.800, 0.121	51.800, -0.104	51.800, -0.044
261	52.000, 1.113	52.000, 0.159	52.000, 0.151	52.000, 0.168	52.000, 0.121	52.000, -0.104	52.000, -0.044
262	52.200, 1.121	52.200, 0.159	52.200, 0.150	52.200, 0.168	52.200, 0.120	52.200, -0.104	52.200, -0.044
263	52.400, 1.128	52.400, 0.159	52.400, 0.150	52.400, 0.168	52.400, 0.120	52.400, -0.105	52.400, -0.044
264	52.600, 1.136	52.600, 0.159	52.600, 0.149	52.600, 0.167	52.600, 0.119	52.600, -0.105	52.600, -0.044
265	52.800, 1.143	52.800, 0.159	52.800, 0.149	52.800, 0.167	52.800, 0.119	52.800, -0.105	52.800, -0.045
266	53.000, 1.150	53.000, 0.159	53.000, 0.148	53.000, 0.167	53.000, 0.119	53.000, -0.105	53.000, -0.045
267	53.200, 1.157	53.200, 0.158	53.200, 0.148	53.200, 0.167	53.200, 0.119	53.200, -0.105	53.200, -0.045
268	53.400, 1.164	53.400, 0.158	53.400, 0.148	53.400, 0.167	53.400, 0.119	53.400, -0.105	53.400, -0.046
269	53.600, 1.172	53.600, 0.158	53.600, 0.148	53.600, 0.167	53.600, 0.119	53.600, -0.105	53.600, -0.046
270	53.800, 1.179	53.800, 0.158	53.800, 0.148	53.800, 0.167	53.800, 0.119	53.800, -0.105	53.800, -0.046
271	54.000, 1.186	54.000, 0.158	54.000, 0.148	54.000, 0.167	54.000, 0.119	54.000, -0.105	54.000, -0.046
272	54.200, 1.193	54.200, 0.158	54.200, 0.148	54.200, 0.167	54.200, 0.119	54.200, -0.106	54.200, -0.046
273	54.400, 1.200	54.400, 0.159	54.400, 0.148	54.400, 0.167	54.400, 0.119	54.400, -0.106	54.400, -0.046
274	54.600, 1.207	54.600, 0.159	54.600, 0.148	54.600, 0.168	54.600, 0.119	54.600, -0.107	54.600, -0.046
275	54.800, 1.214	54.800, 0.159	54.800, 0.148	54.800, 0.168	54.800, 0.119	54.800, -0.107	54.800, -0.046
276	55.000, 1.221	55.000, 0.159	55.000, 0.148	55.000, 0.168	55.000, 0.119	55.000, -0.108	55.000, -0.046
277	55.200, 1.228	55.200, 0.159	55.200, 0.148	55.200, 0.168	55.200, 0.119	55.200, -0.108	55.200, -0.046
278	55.400, 1.235	55.400, 0.159	55.400, 0.148	55.400, 0.168	55.400, 0.119	55.400, -0.108	55.400, -0.046
279	55.600, 1.242	55.600, 0.159	55.600, 0.148	55.600, 0.168	55.600, 0.118	55.600, -0.109	55.600, -0.047
280	55.800, 1.248	55.800, 0.159	55.800, 0.148	55.800, 0.168	55.800, 0.118	55.800, -0.109	55.800, -0.047
281	56.000, 1.255	56.000, 0.159	56.000, 0.147	56.000, 0.167	56.000, 0.118	56.000, -0.109	56.000, -0.047
282	56.200, 1.261	56.200, 0.159	56.200, 0.147	56.200, 0.167	56.200, 0.118	56.200, -0.109	56.200, -0.048
283	56.400, 1.268	56.400, 0.159	56.400, 0.147	56.400, 0.167	56.400, 0.118	56.400, -0.110	56.400, -0.048
284	56.600, 1.274	56.600, 0.159	56.600, 0.147	56.600, 0.167	56.600, 0.118	56.600, -0.110	56.600, -0.048
285	56.800, 1.281	56.800, 0.159	56.800, 0.147	56.800, 0.167	56.800, 0.118	56.800, -0.110	56.800, -0.048
286	57.000, 1.287	57.000, 0.159	57.000, 0.147	57.000, 0.166	57.000, 0.118	57.000, -0.111	57.000, -0.049
287	57.200, 1.294	57.200, 0.159	57.200, 0.148	57.200, 0.166	57.200, 0.118	57.200, -0.111	57.200, -0.049
288	57.400, 1.300	57.400, 0.159	57.400, 0.148	57.400, 0.166	57.400, 0.118	57.400, -0.111	57.400, -0.049
289	57.600, 1.306	57.600, 0.159	57.600, 0.148	57.600, 0.166	57.600, 0.118	57.600, -0.112	57.600, -0.049
290	57.800, 1.312	57.800, 0.159	57.800, 0.148	57.800, 0.167	57.800, 0.118	57.800, -0.112	57.800, -0.048
291	58.000, 1.319	58.000, 0.159	58.000, 0.148	58.000, 0.167	58.000, 0.117	58.000, -0.113	58.000, -0.048
292	58.200, 1.325	58.200, 0.159	58.200, 0.148	58.200, 0.168	58.200, 0.117	58.200, -0.113	58.200, -0.048
293	58.400, 1.331	58.400, 0.159	58.400, 0.148	58.400, 0.168	58.400, 0.117	58.400, -0.113	58.400, -0.048
294	58.600, 1.337	58.600, 0.159	58.600, 0.148	58.600, 0.168	58.600, 0.116	58.600, -0.114	58.600, -0.048
295	58.800, 1.343	58.800, 0.159	58.800, 0.147	58.800, 0.169	58.800, 0.116	58.800, -0.114	58.800, -0.048
296	59.000, 1.349	59.000, 0.159	59.000, 0.147	59.000, 0.169	59.000, 0.115	59.000, -0.114	59.000, -0.048
297	59.200, 1.355	59.200, 0.159	59.200, 0.147	59.200, 0.169	59.200, 0.114	59.200, -0.114	59.200, -0.048
298	59.400, 1.361	59.400, 0.160	59.400, 0.147	59.400, 0.168	59.400, 0.114	59.400, -0.114	59.400, -0.048
299	59.600, 1.367	59.600, 0.160	59.600, 0.146	59.600, 0.168	59.600, 0.113	59.600, -0.114	59.600, -0.049
300	59.800, 1.373	59.800, 0.160	59.800, 0.146	59.800, 0.168	59.800, 0.113	59.800, -0.113	59.800, -0.049
301	60.000, 1.379	60.000, 0.159	60.000, 0.146	60.000, 0.167	60.000, 0.113	60.000, -0.113	60.000, -0.050
302	60.200, 1.385	60.200, 0.159	60.200, 0.146	60.200, 0.167	60.200, 0.113	60.200, -0.113	60.200, -0.050
303	60.400, 1.391	60.400, 0.159	60.400, 0.146	60.400, 0.166	60.400, 0.114	60.400, -0.113	60.400, -0.051
304	60.600, 1.397	60.600, 0.159	60.600, 0.146	60.600, 0.166	60.600, 0.114	60.600, -0.114	60.600, -0.051
305	60.800, 1.403	60.800, 0.159	60.800, 0.146	60.800, 0.166	60.800, 0.114	60.800, -0.114	60.800, -0.052
306	61.000, 1.408	61.000, 0.159	61.000, 0.146	61.000, 0.165	61.000, 0.114	61.000, -0.114	61.000, -0.052
307	61.200, 1.414	61.200, 0.159	61.200, 0.146	61.200, 0.165	61.200, 0.115	61.200, -0.114	61.200, -0.052
308	61.400, 1.420	61.400, 0.159	61.400, 0.146	61.400, 0.165	61.400, 0.115	61.400, -0.114	61.400, -0.053
309	61.600, 1.425	61.600, 0.159	61.600, 0.146	61.600, 0.166	61.600, 0.115	61.600, -0.115	61.600, -0.053
310	61.800, 1.431	61.800, 0.159	61.800, 0.147	61.800, 0.166	61.800, 0.115	61.800, -0.115	61.800, -0.053
311	62.000, 1.436	62.000, 0.159	62.000, 0.147	62.000, 0.166	62.000, 0.115	62.000, -0.115	62.000, -0.053
312	62.200, 1.442	62.200, 0.158	62.200, 0.146	62.200, 0.166	62.200, 0.114	62.200, -0.115	62.200, -0.053
313	62.400, 1.447	62.400, 0.158	62.400, 0.146	62.400, 0.166	62.400, 0.114	62.400, -0.115	62.400, -0.052
314	62.600, 1.453	62.600, 0.158	62.600, 0.146	62.600, 0.166	62.600, 0.114	62.600, -0.115	62.600, -0.052
315	62.800, 1.458	62.800, 0.158	62.800, 0.146	62.800, 0.165	62.800, 0.113	62.800, -0.115	62.800, -0.052
316	63.000, 1.464	63.000, 0.158	63.000, 0.145	63.000, 0.165	63.000, 0.113	63.000, -0.115	63.000, -0.052
317	63.200, 1.469	63.200, 0.158	63.200, 0.145	63.200, 0.165	63.200, 0.112	63.200, -0.115	63.200, -0.052
318	63.400, 1.475	63.400, 0.158	63.400, 0.145	63.400, 0.165	63.400, 0.112	63.400, -0.115	63.400, -0.052
319	63.600, 1.480	63.600, 0.158	63.600, 0.145	63.600, 0.165	63.600, 0.112	63.600, -0.115	63.600, -0.052
320	63.800, 1.486	63.800, 0.158	63.800, 0.144	63.800, 0.165	63.800, 0.111	63.800, -0.115	63.800, -0.053
321	64.000, 1.491	64.000, 0.159	64.000, 0.144	64.000, 0.165	64.000, 0.111	64.000, -0.115	64.000, -0.053
322	64.200, 1.497	64.200, 0.159	64.200, 0.144	64.200, 0.165	64.200, 0.111	64.200, -0.115	64.200, -0.053
323	64.400, 1.502	64.400, 0.159	64.400, 0.144	64.400, 0.165	64.400, 0.111	64.400, -0.115	64.400, -0.054
324	64.600, 1.507	64.600, 0.160	64.600, 0.143	64.600, 0.166	64.600, 0.111	64.600, -0.115	64.600, -0.054
325	64.800, 1.512	64.800, 0.160	64.800, 0.143	64.800, 0.166	64.800, 0.111	64.800, -0.116	64.800, -0.054
326	65.000, 1.517	65.000, 0.160	65.000, 0.143	65.000, 0.166	65.000, 0.111	65.000, -0.116	65.000, -0.054
327	65.200, 1.522	65.200, 0.161	65.200, 0.143	65.200, 0.166	65.200, 0.110	65.200, -0.116	65.200, -0.054
328	65.400, 1.527	65.400, 0.161	65.400, 0.142	65.400, 0.167	65.400, 0.110	65.400, -0.116	65.400, -0.054
329	65.600, 1.532	65.600, 0.160	65.600, 0.142	65.600, 0.167	65.600, 0.110	65.600, -0.117	65.600, -0.054
330	65.800, 1.537	65.800, 0.160	65.800, 0.142	65.800, 0.167	65.800, 0.110	65.800, -0.117	65.800, -0.054
331	66.000, 1.542	66.000, 0.160	66.000, 0.142	66.000, 0.167	66.000, 0.110	66.000, -0.118	66.000, -0.054
332	66.200, 1.547	66.200, 0.160	66.200, 0.142	66.200, 0.166	66.200, 0.110	66.200, -0.118	66.200, -0.054
333	66.400, 1.552	66.400, 0.159	66.400, 0.143	66.400, 0.166	66.400, 0.110	66.400, -0.119	66.400, -0.054
334	66.600, 1.557	66.600, 0.159	66.600, 0.143	66.600, 0.166	66.600, 0.111	66.600, -0.119	66.600, -0.054
335	66.800, 1.562	66.800, 0.159	66.800, 0.144	66.800, 0.165	66.800, 0.110	66.800, -0.119	66.800, -0.054
336	67.000, 1.567	67.000, 0.159	67.000, 0.144	67.000, 0.165	67.000, 0.110	67.000, -0.120	67.000, -0.055
337	67.200, 1.572	67.200, 0.158	67.200, 0.145	67.200, 0.165	67.200, 0.110	67.200, -0.120	67.200, -0.055
338	67.400, 1.577	67.400, 0.158	67.400, 0.145	67.400, 0.165	67.400, 0.110	67.400, -0.120	67.400, -0.055
339	67.600, 1.582	67.600, 0.158	67.600, 0.145	67.600, 0.165	67.600, 0.109	67.600, -0.121	67.600, -0.055
340	67.800, 1.586	67.800, 0.158	67.800, 0.145	67.800, 0.165	67.800, 0.109	67.800, -0.121	67.800, -0.056
341	68.000, 1.591	68.000, 0.158	68.000, 0.145	68.000, 0.165	68.000, 0.109	68.000, -0.121	68.000, -0.056
342	68.200, 1.595	68.200, 0.158	68.200, 0.145	68.200, 0.166	68.200, 0.109	68.200, -0.121	68.200, -0.056
343	68.400, 1.600	68.400, 0.158	68.400, 0.145	68.400, 0.166	68.400, 0.109	68.400, -0.121	68.400, -0.057
344	68.600, 1.604	68.600, 0.158	68.600, 0.145	68.600, 0.166	68.600, 0.109	68.600, -0.121	68.600, -0.057
345	68.800, 1.608	68.800, 0.158	68.800, 0.145	68.800, 0.165	68.800, 0.109	68.800, -0.121	68.800, -0.056
346	69.000, 1.612	69.000, 0.159	69.000, 0.145	69.000, 0.165	69.000, 0.109	69.000, -0.121	69.000, -0.056
347	69.200, 1.617	69.200, 0.159	69.200, 0.145	69.200, 0.165	69.200, 0.109	69.200, -0.121	69.200, -0.056
348	69.400, 1.621	69.400, 0.159	69.400, 0.144	69.400, 0.165	69.400, 0.109	69.400, -0.122	69.400, -0.057
349	69.600, 1.625	69.600, 0.158	69.600, 0.144	69.600, 0.165	69.600, 0.109	69.600, -0.122	69.600, -0.057
350	69.800, 1.630	69.800, 0.158	69.800, 0.144	69.800, 0.165	69.800, 0.109	69.800, -0.122	69.800, -0.057
351	70.000, 1.634	70.000, 0.158	70.000, 0.143	70.000, 0.165	70.000, 0.109	70.000, -0.122	70.000, -0.057
352	70.200, 1.638	70.200, 0.158	70.200, 0.143	70.200, 0.165	70.200, 0.109	70.200, -0.123	70.200, -0.057
353	70.400, 1.642	70.400, 0.158	70.400, 0.143	70.400, 0.165	70.400, 0.109	70.400, -0.123	70.400, -0.057
354	70.600, 1.647	70.600, 0.158	70.600, 0.143	70.600, 0.165	70.600, 0.109	70.600, -0.123	70.600, -0.057
355	70.800, 1.651	70.800, 0.158	70.800, 0.142	70.800, 0.165	70.800, 0.109	70.800, -0.123	70.800, -0.058
356	71.000, 1.654	71.000, 0.158	71.000, 0.142	71.000, 0.165	71.000, 0.109	71.000, -0.123	71.000, -0.058
357	71.200, 1.659	71.200, 0.158	71.200, 0.142	71.200, 0.165	71.200, 0.109	71.200, -0.123	71.200, -0.058
358	71.400, 1.663	71.400, 0.158	71.400, 0.142	71.400, 0.165	71.400, 0.109	71.400, -0.123	71.400, -0.058
359	71.600, 1.667	71.600, 0.157	71.600, 0.142	71.600, 0.165	71.600, 0.109	71.600, -0.122	71.600, -0.058
360	71.800, 1.671	71.800, 0.157	71.800, 0.143	71.800, 0.165	71.800, 0.108	71.800, -0.122	71.800, -0.058
361	72.000, 1.675	72.000, 0.157	72.000, 0.142	72.000, 0.165	72.000, 0.108	72.000, -0.122	72.000, -0.058
362	72.200, 1.679	72.200, 0.157	72.200, 0.143	72.200, 0.165	72.200, 0.107	72.200, -0.122	72.200, -0.058
363	72.400, 1.683	72.400, 0.157	72.400, 0.143	72.400, 0.165	72.400, 0.107	72.400, -0.122	72.400, -0.058
364	72.600, 1.687	72.600, 0.157	72.600, 0.143	72.600, 0.165	72.600, 0.106	72.600, -0.122	72.600, -0.058
365	72.800, 1.691	72.800, 0.157	72.800, 0.143	72.800, 0.165	72.800, 0.106	72.800, -0.123	72.800, -0.057
366	73.000, 1.695	73.000, 0.157	73.000, 0.143	73.000, 0.165	73.000, 0.106	73.000, -0.123	73.000, -0.057
367	73.200, 1.699	73.200, 0.157	73.200, 0.142	73.200, 0.164	73.200, 0.105	73.200, -0.124	73.200, -0.058
368	73.400, 1.704	73.400, 0.157	73.400, 0.142	73.400, 0.164	73.400, 0.105	73.400, -0.124	73.400, -0.058
369	73.600, 1.708	73.600, 0.158	73.600, 0.142	73.600, 0.164	73.600, 0.105	73.600, -0.124	73.600, -0.058
370	73.800, 1.712	73.800, 0.158	73.800, 0.142	73.800, 0.164	73.800, 0.104	73.800, -0.125	73.800, -0.058
371	74.000, 1.716	74.000, 0.158	74.000, 0.141	74.000, 0.164	74.000, 0.104	74.000, -0.125	74.000, -0.059
372	74.200, 1.720	74.200, 0.158	74.200, 0.141	74.200, 0.164	74.200, 0.104	74.200, -0.125	74.200, -0.059
373	74.400, 1.724	74.400, 0.158	74.400, 0.141	74.400, 0.164	74.400, 0.104	74.400, -0.125	74.400, -0.059
374	74.600, 1.727	74.600, 0.158	74.600, 0.141	74.600, 0.164	74.600, 0.104	74.600, -0.125	74.600, -0.060
375	74.800, 1.730	74.800, 0.158	74.800, 0.141	74.800, 0.164	74.800, 0.104	74.800, -0.125	74.800, -0.060
376	75.000, 1.734	75.000, 0.158	75.000, 0.141	75.000, 0.164	75.000, 0.105	75.000, -0.125	75.000, -0.060
377	75.200, 1.737	75.200, 0.158	75.200, 0.141	75.200, 0.164	75.200, 0.105	75.200, -0.125	75.200, -0.060
378	75.400, 1.740	75.400, 0.158	75.400, 0.141	75.400, 0.164	75.400, 0.105	75.400, -0.125	75.400, -0.061
379	75.600, 1.744	75.600, 0.158	75.600, 0.141	75.600, 0.164	75.600, 0.106	75.600, -0.124	75.600, -0.061
380	75.800, 1.747	75.800, 0.157	75.800, 0.141	75.800, 0.163	75.800, 0.106	75.800, -0.124	75.800, -0.061
381	76.000, 1.751	76.000, 0.157	76.000, 0.141	76.000, 0.163	76.000, 0.106	76.000, -0.124	76.000, -0.060
382	76.200, 1.754	76.200, 0.157	76.200, 0.141	76.200, 0.163	76.200, 0.106	76.200, -0.125	76.200, -0.060
383	76.400, 1.757	76.400, 0.157	76.400, 0.141	76.400, 0.163	76.400, 0.106	76.400, -0.125	76.400, -0.060
384	76.600, 1.761	76.600, 0.157	76.600, 0.141	76.600, 0.163	76.600, 0.105	76.600, -0.125	76.600, -0.060
385	76.800, 1.765	76.800, 0.157	76.800, 0.141	76.800, 0.163	76.800, 0.105	76.800, -0.125	76.800, -0.060
386	77.000, 1.769	77.000, 0.157	77.000, 0.141	77.000, 0.162	77.000, 0.105	77.000, -0.125	77.000, -0.060
387	77.200, 1.773	77.200, 0.157	77.200, 0.141	77.200, 0.162	77.200, 0.105	77.200, -0.125	77.200, -0.060
388	77.400, 1.776	77.400, 0.157	77.400, 0.141	77.400, 0.162	77.400, 0.105	77.400, -0.125	77.400, -0.060
389	77.600, 1.780	77.600, 0.157	77.600, 0.141	77.600, 0.162	77.600, 0.104	77.600, -0.125	77.600, -0.060
390	77.800, 1.783	77.800, 0.158	77.800, 0.141	77.800, 0.163	77.800, 0.104	77.800, -0.125	77.800, -0.060
391	78.000, 1.786	78.000, 0.158	78.000, 0.141	78.000, 0.163	78.000, 0.104	78.000, -0.125	78.000, -0.060
392	78.200, 1.790	78.200, 0.158	78.200, 0.141	78.200, 0.163	78.200, 0.103	78.200, -0.125	78.200, -0.060
393	78.400, 1.793	78.400, 0.158	78.400, 0.140	78.400, 0.163	78.400, 0.103	78.400, -0.126	78.400, -0.060
394	78.600, 1.796	78.600, 0.158	78.600, 0.140	78.600, 0.163	78.600, 0.103	78.600, -0.126	78.600, -0.061
395	78.800, 1.799	78.800, 0.159	78.800, 0.140	78.800, 0.163	78.800, 0.103	78.800, -0.126	78.800, -0.061
396	79.000, 1.802	79.000, 0.159	79.000, 0.140	79.000, 0.163	79.000, 0.102	79.000, -0.127	79.000, -0.061
397	79.200, 1.805	79.200, 0.158	79.200, 0.140	79.200, 0.163	79.200, 0.102	79.200, -0.127	79.200, -0.061
398	79.400, 1.808	79.400, 0.158	79.400, 0.139	79.400, 0.163	79.400, 0.102	79.400, -0.127	79.400, -0.061
399	79.600, 1.811	79.600, 0.158	79.600, 0.139	79.600, 0.163	79.600, 0.102	79.600, -0.128	79.600, -0.062
400	79.800, 1.814	79.800, 0.158	79.800, 0.139	79.800, 0.163	79.800, 0.102	79.800, -0.128	79.800, -0.062
401	80.000, 1.818	80.000, 0.157	80.000, 0.139	80.000, 0.163	80.000, 0.102	80.000, -0.128	80.000, -0.062
402	80.200, 1.821	80.200, 0.157	80.200, 0.139	80.200, 0.164	80.200, 0.102	80.200, -0.128	80.200, -0.062
403	80.400, 1.824	80.400, 0.157	80.400, 0.139	80.400, 0.164	80.400, 0.102	80.400, -0.129	80.400, -0.062
404	80.600, 1.827	80.600, 0.156	80.600, 0.139	80.600, 0.164	80.600, 0.102	80.600, -0.129	80.600, -0.062
405	80.800, 1.830	80.800, 0.156	80.800, 0.139	80.800, 0.164	80.800, 0.102	80.800, -0.129	80.800, -0.062
406	81.000, 1.832	81.000, 0.156	81.000, 0.139	81.000, 0.164	81.000, 0.103	81.000, -0.129	81.000, -0.062
407	81.200, 1.835	81.200, 0.155	81.200, 0.139	81.200, 0.164	81.200, 0.103	81.200, -0.128	81.200, -0.062
408	81.400, 1.837	81.400, 0.155	81.400, 0.139	81.400, 0.164	81.400, 0.103	81.400, -0.128	81.400, -0.062
409	81.600, 1.840	81.600, 0.155	81.600, 0.139	81.600, 0.164	81.600, 0.103	81.600, -0.128	81.600, -0.062
410	81.800, 1.842	81.800, 0.155	81.800, 0.139	81.800, 0.164	81.800, 0.103	81.800, -0.128	81.800, -0.063
411	82.000, 1.845	82.000, 0.155	82.000, 0.139	82.000, 0.164	82.000, 0.103	82.000, -0.128	82.000, -0.063
412	82.200, 1.848	82.200, 0.155	82.200, 0.139	82.200, 0.163	82.200, 0.103	82.200, -0.128	82.200, -0.063
413	82.400, 1.850	82.400, 0.155	82.400, 0.139	82.400, 0.163	82.400, 0.103	82.400, -0.128	82.400, -0.063
414	82.600, 1.853	82.600, 0.155	82.600, 0.139	82.600, 0.163	82.600, 0.103	82.600, -0.128	82.600, -0.063
415	82.800, 1.856	82.800, 0.155	82.800, 0.139	82.800, 0.163	82.800, 0.102	82.800, -0.128	82.800, -0.063
416	83.000, 1.859	83.000, 0.155	83.000, 0.139	83.000, 0.163	83.000, 0.102	83.000, -0.128	83.000, -0.063
417	83.200, 1.862	83.200, 0.155	83.200, 0.139	83.200, 0.163	83.200, 0.102	83.200, -0.128	83.200, -0.064
418	83.400, 1.865	83.400, 0.155	83.400, 0.139	83.400, 0.163	83.400, 0.101	83.400, -0.128	83.400, -0.064
419	83.600, 1.868	83.600, 0.155	83.600, 0.139	83.600, 0.163	83.600, 0.101	83.600, -0.128	83.600, -0.064
420	83.800, 1.871	83.800, 0.155	83.800, 0.139	83.800, 0.163	83.800, 0.101	83.800, -0.128	83.800, -0.064
421	84.000, 1.874	84.000, 0.155	84.000, 0.139	84.000, 0.163	84.000, 0.100	84.000, -0.128	84.000, -0.064
422	84.200, 1.877	84.200, 0.155	84.200, 0.139	84.200, 0.162	84.200, 0.100	84.200, -0.128	84.200, -0.064
423	84.400, 1.880	84.400, 0.155	84.400, 0.139	84.400, 0.162	84.400, 0.100	84.400, -0.128	84.400, -0.064
424	84.600, 1.882	84.600, 0.155	84.600, 0.139	84.600, 0.162	84.600, 0.100	84.600, -0.128	84.600, -0.064
425	84.800, 1.884	84.800, 0.156	84.800, 0.139	84.800, 0.162	84.800, 0.100	84.800, -0.129	84.800, -0.064
426	85.000, 1.887	85.000, 0.156	85.000, 0.139	85.000, 0.162	85.000, 0.100	85.000, -0.129	85.000, -0.064
427	85.200, 1.889	85.200, 0.157	85.200, 0.139	85.200, 0.162	85.200, 0.100	85.200, -0.129	85.200, -0.064
428	85.400, 1.892	85.400, 0.157	85.400, 0.138	85.400, 0.162	85.400, 0.100	85.400, -0.129	85.400, -0.064
429	85.600, 1.894	85.600, 0.158	85.600, 0.138	85.600, 0.162	85.600, 0.100	85.600, -0.129	85.600, -0.064
430	85.800, 1.897	85.800, 0.158	85.800, 0.138	85.800, 0.162	85.800, 0.100	85.800, -0.130	85.800, -0.063
431	86.000, 1.899	86.000, 0.158	86.000, 0.138	86.000, 0.162	86.000, 0.100	86.000, -0.130	86.000, -0.063
432	86.200, 1.902	86.200, 0.158	86.200, 0.138	86.200, 0.162	86.200, 0.100	86.200, -0.130	86.200, -0.063
433	86.400, 1.904	86.400, 0.158	86.400, 0.138	86.400, 0.163	86.400, 0.100	86.400, -0.130	86.400, -0.063
434	86.600, 1.907	86.600, 0.158	86.600, 0.138	86.600, 0.163	86.600, 0.100	86.600, -0.131	86.600, -0.063
435	86.800, 1.909	86.800, 0.158	86.800, 0.138	86.800, 0.163	86.800, 0.100	86.800, -0.131	86.800, -0.063
436	87.000, 1.912	87.000, 0.158	87.000, 0.138	87.000, 0.164	87.000, 0.100	87.000, -0.131	87.000, -0.064
437	87.200, 1.914	87.200, 0.158	87.200, 0.138	87.200, 0.164	87.200, 0.100	87.200, -0.131	87.200, -0.064
438	87.400, 1.916	87.400, 0.157	87.400, 0.138	87.400, 0.164	87.400, 0.099	87.400, -0.131	87.400, -0.064
439	87.600, 1.918	87.600, 0.157	87.600, 0.137	87.600, 0.164	87.600, 0.099	87.600, -0.131	87.600, -0.065
440	87.800, 1.920	87.800, 0.156	87.800, 0.137	87.800, 0.163	87.800, 0.099	87.800, -0.131	87.800, -0.065
441	88.000, 1.922	88.000, 0.156	88.000, 0.137	88.000, 0.163	88.000, 0.099	88.000, -0.131	88.000, -0.065
442	88.200, 1.924	88.200, 0.156	88.200, 0.137	88.200, 0.162	88.200, 0.099	88.200, -0.131	88.200, -0.065
443	88.400, 1.926	88.400, 0.156	88.400, 0.137	88.400, 0.162	88.400, 0.099	88.400, -0.131	88.400, -0.065
444	88.600, 1.927	88.600, 0.156	88.600, 0.137	88.600, 0.162	88.600, 0.099	88.600, -0.131	88.600, -0.066
445	88.800, 1.929	88.800, 0.156	88.800, 0.137	88.800, 0.162	88.800, 0.099	88.800, -0.130	88.800, -0.066
446	89.000, 1.931	89.000, 0.156	89.000, 0.137	89.000, 0.161	89.000, 0.099	89.000, -0.130	89.000, -0.066
447	89.200, 1.934	89.200, 0.156	89.200, 0.137	89.200, 0.161	89.200, 0.099	89.200, -0.130	89.200, -0.065
448	89.400, 1.936	89.400, 0.156	89.400, 0.137	89.400, 0.161	89.400, 0.099	89.400, -0.130	89.400, -0.065
449	89.600, 1.939	89.600, 0.156	89.600, 0.137	89.600, 0.161	89.600, 0.099	89.600, -0.130	89.600, -0.065
450	89.800, 1.941	89.800, 0.156	89.800, 0.137	89.800, 0.161	89.800, 0.099	89.800, -0.131	89.800, -0.065
451	90.000, 1.944	90.000, 0.156	90.000, 0.137	90.000, 0.161	90.000, 0.099	90.000, -0.131	90.000, -0.065
452	90.200, 1.946	90.200, 0.156	90.200, 0.138	90.200, 0.161	90.200, 0.099	90.200, -0.131	90.200, -0.065
453	90.400, 1.949	90.400, 0.156	90.400, 0.138	90.400, 0.161	90.400, 0.099	90.400, -0.131	90.400, -0.065
454	90.600, 1.951	90.600, 0.156	90.600, 0.138	90.600, 0.161	90.600, 0.098	90.600, -0.131	90.600, -0.065
455	90.800, 1.953	90.800, 0.156	90.800, 0.138	90.800, 0.161	90.800, 0.098	90.800, -0.131	90.800, -0.065
456	91.000, 1.954	91.000, 0.156	91.000, 0.137	91.000, 0.161	91.000, 0.098	91.000, -0.132	91.000, -0.066
457	91.200, 1.956	91.200, 0.156	91.200, 0.137	91.200, 0.161	91.200, 0.098	91.200, -0.132	91.200, -0.066
458	91.400, 1.957	91.400, 0.156	91.400, 0.137	91.400, 0.161	91.400, 0.098	91.400, -0.132	91.400, -0.066
459	91.600, 1.959	91.600, 0.157	91.600, 0.136	91.600, 0.161	91.600, 0.098	91.600, -0.132	91.600, -0.067
460	91.800, 1.961	91.800, 0.157	91.800, 0.136	91.800, 0.161	91.800, 0.098	91.800, -0.132	91.800, -0.067
461	92.000, 1.963	92.000, 0.158	92.000, 0.136	92.000, 0.161	92.000, 0.098	92.000, -0.132	92.000, -0.067
462	92.200, 1.965	92.200, 0.158	92.200, 0.136	92.200, 0.161	92.200, 0.098	92.200, -0.133	92.200, -0.067
463	92.400, 1.967	92.400, 0.158	92.400, 0.136	92.400, 0.161	92.400, 0.098	92.400, -0.133	92.400, -0.067
464	92.600, 1.969	92.600, 0.158	92.600, 0.136	92.600, 0.161	92.600, 0.098	92.600, -0.133	92.600, -0.067
465	92.800, 1.970	92.800, 0.158	92.800, 0.136	92.800, 0.161	92.800, 0.097	92.800, -0.133	92.800, -0.067
466	93.000, 1.973	93.000, 0.158	93.000, 0.136	93.000, 0.161	93.000, 0.097	93.000, -0.133	93.000, -0.067
467	93.200, 1.975	93.200, 0.158	93.200, 0.136	93.200, 0.161	93.200, 0.097	93.200, -0.133	93.200, -0.067
468	93.400, 1.977	93.400, 0.158	93.400, 0.136	93.400, 0.161	93.400, 0.097	93.400, -0.133	93.400, -0.067
469	93.600, 1.979	93.600, 0.157	93.600, 0.136	93.600, 0.161	93.600, 0.097	93.600, -0.134	93.600, -0.067
470	93.800, 1.982	93.800, 0.157	93.800, 0.136	93.800, 0.161	93.800, 0.097	93.800, -0.134	93.800, -0.067
471	94.000, 1.984	94.000, 0.157	94.000, 0.136	94.000, 0.160	94.000, 0.096	94.000, -0.134	94.000, -0.067
472	94.200, 1.986	94.200, 0.157	94.200, 0.136	94.200, 0.160	94.200, 0.096	94.200, -0.134	94.200, -0.067
473	94.400, 1.988	94.400, 0.157	94.400, 0.136	94.400, 0.160	94.400, 0.096	94.400, -0.134	94.400, -0.067
474	94.600, 1.990	94.600, 0.157	94.600, 0.136	94.600, 0.160	94.600, 0.096	94.600, -0.134	94.600, -0.067
475	94.800, 1.991	94.800, 0.156	94.800, 0.136	94.800, 0.160	94.800, 0.095	94.800, -0.134	94.800, -0.067
476	95.000, 1.993	95.000, 0.156	95.000, 0.136	95.000, 0.160	95.000, 0.095	95.000, -0.135	95.000, -0.067
477	95.200, 1.995	95.200, 0.156	95.200, 0.136	95.200, 0.160	95.200, 0.095	95.200, -0.135	95.200, -0.067
478	95.400, 1.996	95.400, 0.156	95.400, 0.136	95.400, 0.160	95.400, 0.095	95.400, -0.135	95.400, -0.067
479	95.600, 1.998	95.600, 0.156	95.600, 0.136	95.600, 0.160	95.600, 0.096	95.600, -0.135	95.600, -0.067
480	95.800, 2.000	95.800, 0.156	95.800, 0.136	95.800, 0.160	95.800, 0.096	95.800, -0.134	95.800, -0.067
481	96.000, 2.001	96.000, 0.156	96.000, 0.136	96.000, 0.160	96.000, 0.096	96.000, -0.134	96.000, -0.067
482	96.200, 2.003	96.200, 0.155	96.200, 0.136	96.200, 0.160	96.200, 0.097	96.200, -0.134	96.200, -0.067
483	96.400, 2.004	96.400, 0.155	96.400, 0.136	96.400, 0.160	96.400, 0.097	96.400, -0.134	96.400, -0.067
484	96.600, 2.005	96.600, 0.154	96.600, 0.136	96.600, 0.160	96.600, 0.097	96.600, -0.134	96.600, -0.067
485	96.800, 2.007	96.800, 0.154	96.800, 0.136	96.800, 0.161	96.800, 0.097	96.800, -0.134	96.800, -0.067
486	97.000, 2.008	97.000, 0.154	97.000, 0.136	97.000, 0.161	97.000, 0.096	97.000, -0.134	97.000, -0.067
487	97.200, 2.010	97.200, 0.154	97.200, 0.136	97.200, 0.161	97.200, 0.096	97.200, -0.134	97.200, -0.068
488	97.400, 2.011	97.400, 0.154	97.400, 0.135	97.400, 0.161	97.400, 0.096	97.400, -0.133	97.400, -0.068
489	97.600, 2.012	97.600, 0.154	97.600, 0.135	97.600, 0.161	97.600, 0.096	97.600, -0.133	97.600, -0.068
490	97.800, 2.014	97.800, 0.154	97.800, 0.135	97.800, 0.161	97.800, 0.096	97.800, -0.133	97.800, -0.068
491	98.000, 2.015	98.000, 0.155	98.000, 0.135	98.000, 0.161	98.000, 0.096	98.000, -0.133	98.000, -0.068
492	98.200, 2.017	98.200, 0.155	98.200, 0.135	98.200, 0.161	98.200, 0.095	98.200, -0.134	98.200, -0.068
493	98.400, 2.018	98.400, 0.155	98.400, 0.135	98.400, 0.161	98.400, 0.095	98.400, -0.134	98.400, -0.068
494	98.600, 2.020	98.600, 0.155	98.600, 0.135	98.600, 0.161	98.600, 0.095	98.600, -0.134	98.600, -0.068
495	98.800, 2.021	98.800, 0.156	98.800, 0.135	98.800, 0.161	98.800, 0.095	98.800, -0.134	98.800, -0.068
496	99.000, 2.022	99.000, 0.156	99.000, 0.135	99.000, 0.161	99.000, 0.095	99.000, -0.134	99.000, -0.068
497	99.200, 2.024	99.200, 0.156	99.200, 0.134	99.200, 0.160	99.200, 0.095	99.200, -0.135	99.200, -0.068
498	99.400, 2.025	99.400, 0.156	99.400, 0.134	99.400, 0.160	99.400, 0.095	99.400, -0.135	99.400, -0.068
499	99.600, 2.026	99.600, 0.156	99.600, 0.134	99.600, 0.160	99.600, 0.096	99.600, -0.135	99.600, -0.068
500	99.800, 2.028	99.800, 0.156	99.800, 0.134	99.800, 0.160	99.800, 0.096	99.800, -0.135	99.800, -0.069
501	100.000, 2.029	100.000, 0.156	100.000, 0.135	100.000, 0.160	100.000, 0.096	100.000, -0.135	100.000, -0.069
502	100.200, 2.031	100.200, 0.156	100.200, 0.135	100.200, 0.160	100.200, 0.095	100.200, -0.136	100.200, -0.069
503	100.400, 2.032	100.400, 0.156	100.400, 0.135	100.400, 0.160	100.400, 0.095	100.400, -0.136	100.400, -0.069
504	100.600, 2.034	100.600, 0.156	100.600, 0.135	100.600, 0.160	100.600, 0.094	100.600, -0.135	100.600, -0.069
505	100.800, 2.035	100.800, 0.157	100.800, 0.135	100.800, 0.159	100.800, 0.094	100.800, -0.135	100.800, -0.069
506	101.000, 2.037	101.000, 0.157	101.000, 0.135	101.000, 0.159	101.000, 0.093	101.000, -0.135	101.000, -0.069
507	101.200, 2.038	101.200, 0.157	101.200, 0.135	101.200, 0.159	101.200, 0.093	101.200, -0.135	101.200, -0.069
508	101.400, 2.039	101.400, 0.157	101.400, 0.135	101.400, 0.159	101.400, 0.092	101.400, -0.134	101.400, -0.069
509	101.600, 2.041	101.600, 0.157	101.600, 0.135	101.600, 0.159	101.600, 0.092	101.600, -0.134	101.600, -0.069
510	101.800, 2.042	101.800, 0.157	101.800, 0.135	101.800, 0.159	101.800, 0.092	101.800, -0.134	101.800, -0.069
511	102.000, 2.043	102.000, 0.157	102.000, 0.135	102.000, 0.159	102.000, 0.092	102.000, -0.134	102.000, -0.069
512	102.200, 2.044	102.200, 0.157	102.200, 0.135	102.200, 0.159	102.200, 0.092	102.200, -0.134	102.200, -0.069
513	102.400, 2.046	102.400, 0.156	102.400, 0.134	102.400, 0.159	102.400, 0.092	102.400, -0.135	102.400, -0.068
514	102.600, 2.047	102.600, 0.155	102.600, 0.134	102.600, 0.159	102.600, 0.092	102.600, -0.135	102.600, -0.068
515	102.800, 2.048	102.800, 0.155	102.800, 0.134	102.800, 0.159	102.800, 0.092	102.800, -0.135	102.800, -0.068
516	103.000, 2.050	103.000, 0.154	103.000, 0.134	103.000, 0.159	103.000, 0.092	103.000, -0.136	103.000, -0.068
517	103.200, 2.051	103.200, 0.154	103.200, 0.134	103.200, 0.160	103.200, 0.093	103.200, -0.136	103.200, -0.068
518	103.400, 2.052	103.400, 0.153	103.400, 0.134	103.400, 0.160	103.400, 0.093	103.400, -0.137	103.400, -0.068
519	103.600, 2.054	103.600, 0.153	103.600, 0.134	103.600, 0.160	103.600, 0.093	103.600, -0.137	103.600, -0.068
520	103.800, 2.055	103.800, 0.154	103.800, 0.134	103.800, 0.161	103.800, 0.093	103.800, -0.137	103.800, -0.068
521	104.000, 2.056	104.000, 0.154	104.000, 0.134	104.000, 0.161	104.000, 0.093	104.000, -0.137	104.000, -0.068
522	104.200, 2.057	104.200, 0.154	104.200, 0.134	104.200, 0.161	104.200, 0.093	104.200, -0.137	104.200, -0.068
523	104.400, 2.059	104.400, 0.154	104.400, 0.134	104.400, 0.161	104.400, 0.093	104.400, -0.137	104.400, -0.068
524	104.600, 2.060	104.600, 0.154	104.600, 0.134	104.600, 0.161	104.600, 0.093	104.600, -0.137	104.600, -0.068
525	104.800, 2.062	104.800, 0.155	104.800, 0.134	104.800, 0.161	104.800, 0.093	104.800, -0.137	104.800, -0.068
526	105.000, 2.063	105.000, 0.155	105.000, 0.134	105.000, 0.160	105.000, 0.093	105.000, -0.137	105.000, -0.068
527	105.200, 2.064	105.200, 0.155	105.200, 0.134	105.200, 0.160	105.200, 0.092	105.200, -0.137	105.200, -0.068
528	105.400, 2.066	105.400, 0.155	105.400, 0.134	105.400, 0.160	105.400, 0.092	105.400, -0.137	105.400, -0.069
529	105.600, 2.067	105.600, 0.155	105.600, 0.134	105.600, 0.160	105.600, 0.092	105.600, -0.136	105.600, -0.069
530	105.800, 2.068	105.800, 0.155	105.800, 0.134	105.800, 0.160	105.800, 0.092	105.800, -0.136	105.800, -0.069
531	106.000, 2.069	106.000, 0.155	106.000, 0.134	106.000, 0.160	106.000, 0.092	106.000, -0.137	106.000, -0.069
532	106.200, 2.070	106.200, 0.155	106.200, 0.134	106.200, 0.160	106.200, 0.092	106.200, -0.137	106.200, -0.069
533	106.400, 2.071	106.400, 0.155	106.400, 0.134	106.400, 0.159	106.400, 0.092	106.400, -0.137	106.400, -0.069
534	106.600, 2.072	106.600, 0.154	106.600, 0.133	106.600, 0.159	106.600, 0.092	106.600, -0.137	106.600, -0.069
535	106.800, 2.073	106.800, 0.154	106.800, 0.133	106.800, 0.159	106.800, 0.091	106.800, -0.138	106.800, -0.069
536	107.000, 2.074	107.000, 0.154	107.000, 0.133	107.000, 0.159	107.000, 0.091	107.000, -0.138	107.000, -0.069
537	107.200, 2.075	107.200, 0.154	107.200, 0.133	107.200, 0.159	107.200, 0.091	107.200, -0.138	107.200, -0.069
538	107.400, 2.076	107.400, 0.154	107.400, 0.132	107.400, 0.159	107.400, 0.091	107.400, -0.138	107.400, -0.069
539	107.600, 2.077	107.600, 0.155	107.600, 0.132	107.600, 0.159	107.600, 0.091	107.600, -0.138	107.600, -0.069
540	107.800, 2.078	107.800, 0.155	107.800, 0.132	107.800, 0.159	107.800, 0.091	107.800, -0.138	107.800, -0.069
541	108.000, 2.079	108.000, 0.155	108.000, 0.132	108.000, 0.159	108.000, 0.091	108.000, -0.138	108.000, -0.069
542	108.200, 2.080	108.200, 0.155	108.200, 0.132	108.200, 0.159	108.200, 0.090	108.200, -0.138	108.200, -0.069
543	108.400, 2.081	108.400, 0.155	108.400, 0.132	108.400, 0.159	108.400, 0.090	108.400, -0.138	108.400, -0.069
544	108.600, 2.082	108.600, 0.155	108.600, 0.132	108.600, 0.159	108.600, 0.090	108.600, -0.138	108.600, -0.070
545	108.800, 2.083	108.800, 0.155	108.800, 0.132	108.800, 0.159	108.800, 0.090	108.800, -0.138	108.800, -0.070
546	109.000, 2.084	109.000, 0.155	109.000, 0.132	109.000, 0.159	109.000, 0.090	109.000, -0.138	109.000, -0.070
547	109.200, 2.085	109.200, 0.155	109.200, 0.132	109.200, 0.159	109.200, 0.090	109.200, -0.138	109.200, -0.070
548	109.400, 2.086	109.400, 0.154	109.400, 0.132	109.400, 0.160	109.400, 0.091	109.400, -0.138	109.400, -0.071
549	109.600, 2.087	109.600, 0.154	109.600, 0.132	109.600, 0.160	109.600, 0.091	109.600, -0.138	109.600, -0.071
550	109.800, 2.087	109.800, 0.154	109.800, 0.132	109.800, 0.160	109.800, 0.091	109.800, -0.138	109.800, -0.071
551	110.000, 2.088	110.000, 0.154	110.000, 0.132	110.000, 0.160	110.000, 0.091	110.000, -0.138	110.000, -0.071
552	110.200, 2.089	110.200, 0.153	110.200, 0.132	110.200, 0.160	110.200, 0.091	110.200, -0.139	110.200, -0.071
553	110.400, 2.090	110.400, 0.153	110.400, 0.132	110.400, 0.160	110.400, 0.090	110.400, -0.139	110.400, -0.071
554	110.600, 2.091	110.600, 0.154	110.600, 0.132	110.600, 0.160	110.600, 0.090	110.600, -0.139	110.600, -0.071
555	110.800, 2.092	110.800, 0.154	110.800, 0.132	110.800, 0.159	110.800, 0.090	110.800, -0.139	110.800, -0.071
556	111.000, 2.093	111.000, 0.154	111.000, 0.132	111.000, 0.159	111.000, 0.091	111.000, -0.139	111.000, -0.071
557	111.200, 2.095	111.200, 0.154	111.200, 0.132	111.200, 0.159	111.200, 0.091	111.200, -0.139	111.200, -0.071
558	111.400, 2.096	111.400, 0.154	111.400, 0.132	111.400, 0.160	111.400, 0.091	111.400, -0.139	111.400, -0.071
559	111.600, 2.097	111.600, 0.154	111.600, 0.132	111.600, 0.160	111.600, 0.090	111.600, -0.139	111.600, -0.070
560	111.800, 2.098	111.800, 0.154	111.800, 0.132	111.800, 0.160	111.800, 0.090	111.800, -0.139	111.800, -0.070
561	112.000, 2.099	112.000, 0.154	112.000, 0.132	112.000, 0.160	112.000, 0.090	112.000, -0.139	112.000, -0.070
562	112.200, 2.100	112.200, 0.154	112.200, 0.131	112.200, 0.160	112.200, 0.089	112.200, -0.139	112.200, -0.070
563	112.400, 2.100	112.400, 0.154	112.400, 0.131	112.400, 0.160	112.400, 0.089	112.400, -0.139	112.400, -0.069
564	112.600, 2.101	112.600, 0.154	112.600, 0.131	112.600, 0.160	112.600, 0.089	112.600, -0.139	112.600, -0.069
565	112.800, 2.102	112.800, 0.153	112.800, 0.131	112.800, 0.160	112.800, 0.089	112.800, -0.139	112.800, -0.069
566	113.000, 2.102	113.000, 0.153	113.000, 0.131	113.000, 0.160	113.000, 0.089	113.000, -0.139	113.000, -0.069
567	113.200, 2.103	113.200, 0.153	113.200, 0.131	113.200, 0.160	113.200, 0.089	113.200, -0.139	113.200, -0.069
568	113.400, 2.104	113.400, 0.153	113.400, 0.131	113.400, 0.160	113.400, 0.089	113.400, -0.139	113.400, -0.069
569	113.600, 2.104	113.600, 0.153	113.600, 0.131	113.600, 0.160	113.600, 0.089	113.600, -0.140	113.600, -0.069
570	113.800, 2.105	113.800, 0.153	113.800, 0.131	113.800, 0.160	113.800, 0.089	113.800, -0.140	113.800, -0.070
571	114.000, 2.106	114.000, 0.153	114.000, 0.131	114.000, 0.159	114.000, 0.089	114.000, -0.140	114.000, -0.070
572	114.200, 2.106	114.200, 0.153	114.200, 0.132	114.200, 0.159	114.200, 0.089	114.200, -0.140	114.200, -0.070
573	114.400, 2.107	114.400, 0.154	114.400, 0.131	114.400, 0.159	114.400, 0.089	114.400, -0.140	114.400, -0.070
574	114.600, 2.108	114.600, 0.154	114.600, 0.132	114.600, 0.159	114.600, 0.089	114.600, -0.140	114.600, -0.070
575	114.800, 2.108	114.800, 0.154	114.800, 0.132	114.800, 0.159	114.800, 0.089	114.800, -0.140	114.800, -0.071
576	115.000, 2.109	115.000, 0.154	115.000, 0.132	115.000, 0.158	115.000, 0.089	115.000, -0.140	115.000, -0.071
577	115.200, 2.110	115.200, 0.154	115.200, 0.132	115.200, 0.158	115.200, 0.089	115.200, -0.140	115.200, -0.071
578	115.400, 2.110	115.400, 0.154	115.400, 0.132	115.400, 0.158	115.400, 0.090	115.400, -0.140	115.400, -0.071
579	115.600, 2.111	115.600, 0.153	115.600, 0.131	115.600, 0.158	115.600, 0.090	115.600, -0.140	115.600, -0.071
580	115.800, 2.112	115.800, 0.153	115.800, 0.131	115.800, 0.158	115.800, 0.090	115.800, -0.140	115.800, -0.071
581	116.000, 2.113	116.000, 0.153	116.000, 0.131	116.000, 0.158	116.000, 0.090	116.000, -0.140	116.000, -0.071
582	116.200, 2.114	116.200, 0.152	116.200, 0.131	116.200, 0.158	116.200, 0.090	116.200, -0.140	116.200, -0.072
583	116.400, 2.115	116.400, 0.152	116.400, 0.131	116.400, 0.158	116.400, 0.090	116.400, -0.140	116.400, -0.071
584	116.600, 2.116	116.600, 0.152	116.600, 0.131	116.600, 0.158	116.600, 0.090	116.600, -0.140	116.600, -0.072
585	116.800, 2.117	116.800, 0.152	116.800, 0.131	116.800, 0.157	116.800, 0.090	116.800, -0.140	116.800, -0.072
586	117.000, 2.117	117.000, 0.152	117.000, 0.131	117.000, 0.157	117.000, 0.090	117.000, -0.140	117.000, -0.072
587	117.200, 2.118	117.200, 0.152	117.200, 0.131	117.200, 0.157	117.200, 0.090	117.200, -0.140	117.200, -0.072
588	117.400, 2.119	117.400, 0.152	117.400, 0.131	117.400, 0.157	117.400, 0.090	117.400, -0.140	117.400, -0.072
589	117.600, 2.119	117.600, 0.152	117.600, 0.131	117.600, 0.158	117.600, 0.091	117.600, -0.140	117.600, -0.072
590	117.800, 2.120	117.800, 0.152	117.800, 0.130	117.800, 0.158	117.800, 0.091	117.800, -0.140	117.800, -0.073
591	118.000, 2.120	118.000, 0.152	118.000, 0.130	118.000, 0.158	118.000, 0.090	118.000, -0.140	118.000, -0.073
592	118.200, 2.121	118.200, 0.153	118.200, 0.130	118.200, 0.158	118.200, 0.090	118.200, -0.140	118.200, -0.073
593	118.400, 2.121	118.400, 0.153	118.400, 0.130	118.400, 0.158	118.400, 0.090	118.400, -0.140	118.400, -0.073
594	118.600, 2.121	118.600, 0.153	118.600, 0.130	118.600, 0.158	118.600, 0.089	118.600, -0.140	118.600, -0.073
595	118.800, 2.122	118.800, 0.153	118.800, 0.130	118.800, 0.157	118.800, 0.089	118.800, -0.141	118.800, -0.073
596	119.000, 2.122	119.000, 0.153	119.000, 0.130	119.000, 0.157	119.000, 0.088	119.000, -0.141	119.000, -0.073
597	119.200, 2.123	119.200, 0.152	119.200, 0.130	119.200, 0.157	119.200, 0.088	119.200, -0.141	119.200, -0.073
598	119.400, 2.124	119.400, 0.152	119.400, 0.131	119.400, 0.157	119.400, 0.088	119.400, -0.142	119.400, -0.073
599	119.600, 2.124	119.600, 0.152	119.600, 0.131	119.600, 0.157	119.600, 0.087	119.600, -0.142	119.600, -0.073
600	119.800, 2.125	119.800, 0.152	119.800, 0.132	119.800, 0.157	119.800, 0.087	119.800, -0.142	119.800, -0.073
601	120.000, 2.126	120.000, 0.152	120.000, 0.132	120.000, 0.157	120.000, 0.087	120.000, -0.142	120.000, -0.073
602	120.200, 2.126	120.200, 0.152	120.200, 0.132	120.200, 0.157	120.200, 0.087	120.200, -0.142	120.200, -0.073
603	120.400, 2.127	120.400, 0.152	120.400, 0.133	120.400, 0.157	120.400, 0.087	120.400, -0.142	120.400, -0.073
604	120.600, 2.128	120.600, 0.152	120.600, 0.133	120.600, 0.157	120.600, 0.087	120.600, -0.142	120.600, -0.072
605	120.800, 2.128	120.800, 0.152	120.800, 0.133	120.800, 0.157	120.800, 0.087	120.800, -0.142	120.800, -0.072
606	121.000, 2.129	121.000, 0.153	121.000, 0.132	121.000, 0.157	121.000, 0.087	121.000, -0.142	121.000, -0.072
607	121.200, 2.130	121.200, 0.153	121.200, 0.132	121.200, 0.157	121.200, 0.087	121.200, -0.142	121.200, -0.072
608	121.400, 2.130	121.400, 0.153	121.400, 0.132	121.400, 0.157	121.400, 0.087	121.400, -0.142	121.400, -0.072
609	121.600, 2.131	121.600, 0.153	121.600, 0.131	121.600, 0.157	121.600, 0.087	121.600, -0.142	121.600, -0.072
610	121.800, 2.132	121.800, 0.154	121.800, 0.131	121.800, 0.157	121.800, 0.087	121.800, -0.143	121.800, -0.073
611	122.000, 2.132	122.000, 0.154	122.000, 0.131	122.000, 0.157	122.000, 0.087	122.000, -0.143	122.000, -0.073
612	122.200, 2.133	122.200, 0.154	122.200, 0.130	122.200, 0.157	122.200, 0.087	122.200, -0.143	122.200, -0.073
613	122.400, 2.133	122.400, 0.154	122.400, 0.130	122.400, 0.156	122.400, 0.087	122.400, -0.144	122.400, -0.073
614	122.600, 2.134	122.600, 0.153	122.600, 0.130	122.600, 0.156	122.600, 0.087	122.600, -0.144	122.600, -0.073
615	122.800, 2.134	122.800, 0.153	122.800, 0.130	122.800, 0.156	122.800, 0.087	122.800, -0.144	122.800, -0.073
616	123.000, 2.135	123.000, 0.153	123.000, 0.130	123.000, 0.156	123.000, 0.087	123.000, -0.144	123.000, -0.073
617	123.200, 2.135	123.200, 0.153	123.200, 0.130	123.200, 0.156	123.200, 0.087	123.200, -0.144	123.200, -0.073
618	123.400, 2.136	123.400, 0.153	123.400, 0.130	123.400, 0.156	123.400, 0.087	123.400, -0.144	123.400, -0.073
619	123.600, 2.137	123.600, 0.153	123.600, 0.130	123.600, 0.156	123.600, 0.087	123.600, -0.144	123.600, -0.073
620	123.800, 2.137	123.800, 0.153	123.800, 0.130	123.800, 0.156	123.800, 0.087	123.800, -0.144	123.800, -0.073
621	124.000, 2.138	124.000, 0.153	124.000, 0.130	124.000, 0.156	124.000, 0.087	124.000, -0.144	124.000, -0.074
622	124.200, 2.139	124.200, 0.153	124.200, 0.129	124.200, 0.156	124.200, 0.087	124.200, -0.144	124.200, -0.074
623	124.400, 2.139	124.400, 0.153	124.400, 0.129	124.400, 0.156	124.400, 0.087	124.400, -0.144	124.400, -0.074
624	124.600, 2.140	124.600, 0.153	124.600, 0.129	124.600, 0.156	124.600, 0.087	124.600, -0.144	124.600, -0.074
625	124.800, 2.141	124.800, 0.153	124.800, 0.129	124.800, 0.156	124.800, 0.087	124.800, -0.144	124.800, -0.074
626	125.000, 2.141	125.000, 0.152	125.000, 0.128	125.000, 0.156	125.000, 0.087	125.000, -0.145	125.000, -0.074
627	125.200, 2.142	125.200, 0.152	125.200, 0.128	125.200, 0.156	125.200, 0.087	125.200, -0.145	125.200, -0.073
628	125.400, 2.142	125.400, 0.152	125.400, 0.128	125.400, 0.156	125.400, 0.086	125.400, -0.145	125.400, -0.073
629	125.600, 2.142	125.600, 0.152	125.600, 0.128	125.600, 0.156	125.600, 0.086	125.600, -0.145	125.600, -0.074
630	125.800, 2.142	125.800, 0.152	125.800, 0.128	125.800, 0.156	125.800, 0.087	125.800, -0.145	125.800, -0.073
631	126.000, 2.143	126.000, 0.152	126.000, 0.128	126.000, 0.156	126.000, 0.086	126.000, -0.146	126.000, -0.073
632	126.200, 2.143	126.200, 0.152	126.200, 0.128	126.200, 0.156	126.200, 0.086	126.200, -0.146	126.200, -0.073
633	126.400, 2.143	126.400, 0.151	126.400, 0.128	126.400, 0.156	126.400, 0.086	126.400, -0.146	126.400, -0.073
634	126.600, 2.143	126.600, 0.151	126.600, 0.128	126.600, 0.156	126.600, 0.086	126.600, -0.146	126.600, -0.074
635	126.800, 2.143	126.800, 0.151	126.800, 0.128	126.800, 0.156	126.800, 0.086	126.800, -0.146	126.800, -0.074
636	127.000, 2.144	127.000, 0.151	127.000, 0.128	127.000, 0.157	127.000, 0.086	127.000, -0.146	127.000, -0.074
637	127.200, 2.144	127.200, 0.151	127.200, 0.129	127.200, 0.157	127.200, 0.086	127.200, -0.146	127.200, -0.074
638	127.400, 2.145	127.400, 0.150	127.400, 0.129	127.400, 0.157	127.400, 0.086	127.400, -0.146	127.400, -0.074
639	127.600, 2.145	127.600, 0.151	127.600, 0.129	127.600, 0.157	127.600, 0.086	127.600, -0.146	127.600, -0.074
640	127.800, 2.146	127.800, 0.151	127.800, 0.129	127.800, 0.157	127.800, 0.086	127.800, -0.146	127.800, -0.074
641	128.000, 2.147	128.000, 0.151	128.000, 0.129	128.000, 0.157	128.000, 0.086	128.000, -0.146	128.000, -0.074
642	128.200, 2.148	128.200, 0.151	128.200, 0.129	128.200, 0.157	128.200, 0.086	128.200, -0.146	128.200, -0.074
643	128.400, 2.148	128.400, 0.152	128.400, 0.129	128.400, 0.157	128.400, 0.085	128.400, -0.146	128.400, -0.074
644	128.600, 2.149	128.600, 0.152	128.600, 0.129	128.600, 0.157	128.600, 0.085	128.600, -0.146	128.600, -0.074
645	128.800, 2.150	128.800, 0.152	128.800, 0.129	128.800, 0.156	128.800, 0.085	128.800, -0.145	128.800, -0.074
646	129.000, 2.150	129.000, 0.152	129.000, 0.129	129.000, 0.156	129.000, 0.085	129.000, -0.145	129.000, -0.074
647	129.200, 2.150	129.200, 0.152	129.200, 0.129	129.200, 0.156	129.200, 0.084	129.200, -0.145	129.200, -0.074
648	129.400, 2.151	129.400, 0.152	129.400, 0.129	129.400, 0.156	129.400, 0.084	129.400, -0.145	129.400, -0.074
649	129.600, 2.151	129.600, 0.152	129.600, 0.129	129.600, 0.156	129.600, 0.084	129.600, -0.145	129.600, -0.074
650	129.800, 2.151	129.800, 0.152	129.800, 0.129	129.800, 0.156	129.800, 0.084	129.800, -0.145	129.800, -0.074
651	130.000, 2.152	130.000, 0.152	130.000, 0.129	130.000, 0.156	130.000, 0.084	130.000, -0.145	130.000, -0.074
652	130.200, 2.152	130.200, 0.152	130.200, 0.129	130.200, 0.156	130.200, 0.084	130.200, -0.146	130.200, -0.074
653	130.400, 2.152	130.400, 0.152	130.400, 0.129	130.400, 0.156	130.400, 0.084	130.400, -0.146	130.400, -0.075
654	130.600, 2.152	130.600, 0.153	130.600, 0.129	130.600, 0.156	130.600, 0.084	130.600, -0.146	130.600, -0.075
655	130.800, 2.153	130.800, 0.152	130.800, 0.129	130.800, 0.156	130.800, 0.084	130.800, -0.146	130.800, -0.075
656	131.000, 2.153	131.000, 0.152	131.000, 0.129	131.000, 0.156	131.000, 0.084	131.000, -0.146	131.000, -0.075
657	131.200, 2.153	131.200, 0.152	131.200, 0.129	131.200, 0.157	131.200, 0.084	131.200, -0.147	131.200, -0.075
658	131.400, 2.153	131.400, 0.152	131.400, 0.129	131.400, 0.157	131.400, 0.085	131.400, -0.147	131.400, -0.075
659	131.600, 2.153	131.600, 0.152	131.600, 0.129	131.600, 0.157	131.600, 0.085	131.600, -0.147	131.600, -0.075
660	131.800, 2.153	131.800, 0.151	131.800, 0.129	131.800, 0.157	131.800, 0.085	131.800, -0.147	131.800, -0.075
661	132.000, 2.153	132.000, 0.151	132.000, 0.129	132.000, 0.157	132.000, 0.085	132.000, -0.147	132.000, -0.074
662	132.200, 2.153	132.200, 0.151	132.200, 0.129	132.200, 0.156	132.200, 0.085	132.200, -0.146	132.200, -0.074
663	132.400, 2.154	132.400, 0.151	132.400, 0.129	132.400, 0.156	132.400, 0.086	132.400, -0.146	132.400, -0.074
664	132.600, 2.154	132.600, 0.151	132.600, 0.129	132.600, 0.155	132.600, 0.086	132.600, -0.146	132.600, -0.074
665	132.800, 2.154	132.800, 0.151	132.800, 0.129	132.800, 0.155	132.800, 0.086	132.800, -0.145	132.800, -0.074
666	133.000, 2.154	133.000, 0.151	133.000, 0.129	133.000, 0.155	133.000, 0.086	133.000, -0.145	133.000, -0.075
667	133.200, 2.154	133.200, 0.151	133.200, 0.129	133.200, 0.155	133.200, 0.086	133.200, -0.145	133.200, -0.075
668	133.400, 2.154	133.400, 0.151	133.400, 0.129	133.400, 0.154	133.400, 0.086	133.400, -0.145	133.400, -0.075
669	133.600, 2.155	133.600, 0.150	133.600, 0.128	133.600, 0.154	133.600, 0.086	133.600, -0.146	133.600, -0.075
670	133.800, 2.155	133.800, 0.150	133.800, 0.128	133.800, 0.154	133.800, 0.086	133.800, -0.146	133.800, -0.075
671	134.000, 2.156	134.000, 0.150	134.000, 0.127	134.000, 0.155	134.000, 0.086	134.000, -0.146	134.000, -0.075
672	134.200, 2.156	134.200, 0.150	134.200, 0.127	134.200, 0.155	134.200, 0.086	134.200, -0.147	134.200, -0.075
673	134.400, 2.157	134.400, 0.150	134.400, 0.127	134.400, 0.155	134.400, 0.085	134.400, -0.147	134.400, -0.076
674	134.600, 2.157	134.600, 0.150	134.600, 0.127	134.600, 0.155	134.600, 0.085	134.600, -0.147	134.600, -0.076
675	134.800, 2.158	134.800, 0.150	134.800, 0.127	134.800, 0.155	134.800, 0.084	134.800, -0.147	134.800, -0.076
676	135.000, 2.158	135.000, 0.149	135.000, 0.127	135.000, 0.156	135.000, 0.084	135.000, -0.147	135.000, -0.076
677	135.200, 2.158	135.200, 0.149	135.200, 0.127	135.200, 0.155	135.200, 0.084	135.200, -0.147	135.200, -0.076
678	135.400, 2.159	135.400, 0.149	135.400, 0.127	135.400, 0.155	135.400, 0.083	135.400, -0.147	135.400, -0.076
679	135.600, 2.160	135.600, 0.149	135.600, 0.127	135.600, 0.155	135.600, 0.083	135.600, -0.147	135.600, -0.076
680	135.800, 2.160	135.800, 0.149	135.800, 0.127	135.800, 0.155	135.800, 0.083	135.800, -0.147	135.800, -0.076
681	136.000, 2.161	136.000, 0.150	136.000, 0.127	136.000, 0.154	136.000, 0.083	136.000, -0.147	136.000, -0.076
682	136.200, 2.161	136.200, 0.150	136.200, 0.127	136.200, 0.154	136.200, 0.083	136.200, -0.147	136.200, -0.075
683	136.400, 2.161	136.400, 0.151	136.400, 0.127	136.400, 0.154	136.400, 0.083	136.400, -0.147	136.400, -0.075
684	136.600, 2.162	136.600, 0.151	136.600, 0.127	136.600, 0.154	136.600, 0.083	136.600, -0.148	136.600, -0.075
685	136.800, 2.162	136.800, 0.152	136.800, 0.127	136.800, 0.154	136.800, 0.083	136.800, -0.148	136.800, -0.076
686	137.000, 2.162	137.000, 0.152	137.000, 0.127	137.000, 0.154	137.000, 0.083	137.000, -0.148	137.000, -0.076
687	137.200, 2.162	137.200, 0.152	137.200, 0.127	137.200, 0.154	137.200, 0.084	137.200, -0.148	137.200, -0.076
688	137.400, 2.162	137.400, 0.152	137.400, 0.127	137.400, 0.154	137.400, 0.084	137.400, -0.148	137.400, -0.075
689	137.600, 2.162	137.600, 0.152	137.600, 0.127	137.600, 0.154	137.600, 0.085	137.600, -0.148	137.600, -0.075
690	137.800, 2.162	137.800, 0.152	137.800, 0.127	137.800, 0.154	137.800, 0.085	137.800, -0.148	137.800, -0.075
691	138.000, 2.162	138.000, 0.152	138.000, 0.127	138.000, 0.154	138.000, 0.085	138.000, -0.148	138.000, -0.075
692	138.200, 2.162	138.200, 0.152	138.200, 0.127	138.200, 0.154	138.200, 0.085	138.200, -0.148	138.200, -0.075
693	138.400, 2.163	138.400, 0.152	138.400, 0.127	138.400, 0.154	138.400, 0.085	138.400, -0.148	138.400, -0.075
694	138.600, 2.163	138.600, 0.151	138.600, 0.127	138.600, 0.154	138.600, 0.085	138.600, -0.148	138.600, -0.075
695	138.800, 2.163	138.800, 0.150	138.800, 0.128	138.800, 0.154	138.800, 0.085	138.800, -0.147	138.800, -0.076
696	139.000, 2.164	139.000, 0.150	139.000, 0.128	139.000, 0.154	139.000, 0.085	139.000, -0.147	139.000, -0.076
697	139.200, 2.164	139.200, 0.150	139.200, 0.128	139.200, 0.154	139.200, 0.084	139.200, -0.147	139.200, -0.076
698	139.400, 2.164	139.400, 0.149	139.400, 0.127	139.400, 0.154	139.400, 0.084	139.400, -0.147	139.400, -0.076
699	139.600, 2.164	139.600, 0.149	139.600, 0.127	139.600, 0.154	139.600, 0.084	139.600, -0.147	139.600, -0.076
700	139.800, 2.165	139.800, 0.150	139.800, 0.127	139.800, 0.154	139.800, 0.084	139.800, -0.147	139.800, -0.076
701	140.000, 2.165	140.000, 0.150	140.000, 0.127	140.000, 0.154	140.000, 0.084	140.000, -0.147	140.000, -0.076
702	140.200, 2.165	140.200, 0.150	140.200, 0.126	140.200, 0.154	140.200, 0.084	140.200, -0.148	140.200, -0.076
703	140.400, 2.165	140.400, 0.150	140.400, 0.126	140.400, 0.154	140.400, 0.083	140.400, -0.148	140.400, -0.076
704	140.600, 2.165	140.600, 0.150	140.600, 0.126	140.600, 0.154	140.600, 0.083	140.600, -0.148	140.600, -0.076
705	140.800, 2.165	140.800, 0.151	140.800, 0.126	140.800, 0.154	140.800, 0.083	140.800, -0.148	140.800, -0.077
706	141.000, 2.165	141.000, 0.151	141.000, 0.126	141.000, 0.154	141.000, 0.082	141.000, -0.149	141.000, -0.077
707	141.200, 2.165	141.200, 0.151	141.200, 0.126	141.200, 0.154	141.200, 0.082	141.200, -0.149	141.200, -0.077
708	141.400, 2.165	141.400, 0.151	141.400, 0.126	141.400, 0.154	141.400, 0.082	141.400, -0.149	141.400, -0.077
709	141.600, 2.165	141.600, 0.151	141.600, 0.126	141.600, 0.154	141.600, 0.082	141.600, -0.149	141.600, -0.077
710	141.800, 2.165	141.800, 0.151	141.800, 0.126	141.800, 0.154	141.800, 0.082	141.800, -0.149	141.800, -0.077
711	142.000, 2.166	142.000, 0.151	142.000, 0.126	142.000, 0.154	142.000, 0.081	142.000, -0.149	142.000, -0.078
712	142.200, 2.166	142.200, 0.151	142.200, 0.126	142.200, 0.153	142.200, 0.081	142.200, -0.149	142.200, -0.078
713	142.400, 2.167	142.400, 0.150	142.400, 0.126	142.400, 0.153	142.400, 0.082	142.400, -0.149	142.400, -0.078
714	142.600, 2.167	142.600, 0.150	142.600, 0.126	142.600, 0.153	142.600, 0.082	142.600, -0.149	142.600, -0.078
715	142.800, 2.168	142.800, 0.150	142.800, 0.126	142.800, 0.152	142.800, 0.082	142.800, -0.149	142.800, -0.078
716	143.000, 2.168	143.000, 0.150	143.000, 0.126	143.000, 0.152	143.000, 0.082	143.000, -0.149	143.000, -0.078
717	143.200, 2.168	143.200, 0.150	143.200, 0.126	143.200, 0.152	143.200, 0.082	143.200, -0.149	143.200, -0.078
718	143.400, 2.168	143.400, 0.150	143.400, 0.126	143.400, 0.152	143.400, 0.083	143.400, -0.148	143.400, -0.077
719	143.600, 2.168	143.600, 0.149	143.600, 0.126	143.600, 0.151	143.600, 0.083	143.600, -0.148	143.600, -0.077
720	143.800, 2.168	143.800, 0.149	143.800, 0.125	143.800, 0.151	143.800, 0.083	143.800, -0.148	143.800, -0.076
721	144.000, 2.168	144.000, 0.149	144.000, 0.125	144.000, 0.151	144.000, 0.083	144.000, -0.148	144.000, -0.076
722	144.200, 2.168	144.200, 0.149	144.200, 0.125	144.200, 0.151	144.200, 0.083	144.200, -0.148	144.200, -0.075
723	144.400, 2.169	144.400, 0.149	144.400, 0.125	144.400, 0.151	144.400, 0.082	144.400, -0.148	144.400, -0.075
724	144.600, 2.169	144.600, 0.149	144.600, 0.124	144.600, 0.152	144.600, 0.082	144.600, -0.148	144.600, -0.075
725	144.800, 2.169	144.800, 0.149	144.800, 0.124	144.800, 0.152	144.800, 0.082	144.800, -0.148	144.800, -0.075
726	145.000, 2.169	145.000, 0.149	145.000, 0.124	145.000, 0.152	145.000, 0.081	145.000, -0.148	145.000, -0.075
727	145.200, 2.169	145.200, 0.149	145.200, 0.124	145.200, 0.152	145.200, 0.081	145.200, -0.148	145.200, -0.075
728	145.400, 2.169	145.400, 0.150	145.400, 0.124	145.400, 0.153	145.400, 0.081	145.400, -0.148	145.400, -0.075
729	145.600, 2.169	145.600, 0.150	145.600, 0.124	145.600, 0.153	145.600, 0.081	145.600, -0.149	145.600, -0.074
730	145.800, 2.169	145.800, 0.150	145.800, 0.125	145.800, 0.153	145.800, 0.080	145.800, -0.149	145.800, -0.075
731	146.000, 2.169	146.000, 0.150	146.000, 0.125	146.000, 0.153	146.000, 0.081	146.000, -0.149	146.000, -0.075
732	146.200, 2.169	146.200, 0.150	146.200, 0.125	146.200, 0.153	146.200, 0.081	146.200, -0.149	146.200, -0.075
733	146.400, 2.169	146.400, 0.150	146.400, 0.125	146.400, 0.154	146.400, 0.081	146.400, -0.149	146.400, -0.075
734	146.600, 2.169	146.600, 0.150	146.600, 0.125	146.600, 0.154	146.600, 0.081	146.600, -0.149	146.600, -0.075
735	146.800, 2.169	146.800, 0.150	146.800, 0.125	146.800, 0.154	146.800, 0.082	146.800, -0.149	146.800, -0.076
736	147.000, 2.169	147.000, 0.150	147.000, 0.125	147.000, 0.154	147.000, 0.082	147.000, -0.149	147.000, -0.076
737	147.200, 2.169	147.200, 0.150	147.200, 0.126	147.200, 0.155	147.200, 0.082	147.200, -0.149	147.200, -0.076
738	147.400, 2.169	147.400, 0.150	147.400, 0.126	147.400, 0.155	147.400, 0.082	147.400, -0.149	147.400, -0.077
739	147.600, 2.169	147.600, 0.149	147.600, 0.125	147.600, 0.155	147.600, 0.082	147.600, -0.150	147.600, -0.077
740	147.800, 2.170	147.800, 0.149	147.800, 0.125	147.800, 0.155	147.800, 0.082	147.800, -0.150	147.800, -0.077
741	148.000, 2.170	148.000, 0.149	148.000, 0.125	148.000, 0.155	148.000, 0.082	148.000, -0.150	148.000, -0.078
742	148.200, 2.170	148.200, 0.149	148.200, 0.125	148.200, 0.155	148.200, 0.081	148.200, -0.150	148.200, -0.078
743	148.400, 2.170	148.400, 0.149	148.400, 0.125	148.400, 0.155	148.400, 0.081	148.400, -0.150	148.400, -0.078
744	148.600, 2.170	148.600, 0.149	148.600, 0.125	148.600, 0.154	148.600, 0.081	148.600, -0.149	148.600, -0.078
745	148.800, 2.170	148.800, 0.150	148.800, 0.125	148.800, 0.154	148.800, 0.080	148.800, -0.149	148.800, -0.078
746	149.000, 2.170	149.000, 0.150	149.000, 0.124	149.000, 0.153	149.000, 0.080	149.000, -0.149	149.000, -0.078
747	149.200, 2.170	149.200, 0.150	149.200, 0.124	149.200, 0.152	149.200, 0.080	149.200, -0.149	149.200, -0.078
748	149.400, 2.170	149.400, 0.150	149.400, 0.124	149.400, 0.152	149.400, 0.080	149.400, -0.149	149.400, -0.077
749	149.600, 2.170	149.600, 0.150	149.600, 0.124	149.600, 0.151	149.600, 0.080	149.600, -0.149	149.600, -0.077
750	149.800, 2.170	149.800, 0.150	149.800, 0.124	149.800, 0.150	149.800, 0.080	149.800, -0.149	149.800, -0.077
751	150.000, 2.170	150.000, 0.150	150.000, 0.124	150.000, 0.150	150.000, 0.080	150.000, -0.149	150.000, -0.077
752	150.200, 2.166	150.200, 0.148	150.200, 0.123	150.200, 0.148	150.200, 0.079	150.200, -0.148	150.200, -0.077
753	150.400, 2.161	150.400, 0.146	150.400, 0.122	150.400, 0.146	150.400, 0.078	150.400, -0.146	150.400, -0.077
754	150.600, 2.153	150.600, 0.143	150.600, 0.121	150.600, 0.143	150.600, 0.077	150.600, -0.144	150.600, -0.076
755	150.800, 2.145	150.800, 0.141	150.800, 0.119	150.800, 0.141	150.800, 0.076	150.800, -0.142	150.800, -0.076
756	151.000, 2.134	151.000, 0.138	151.000, 0.118	151.000, 0.138	151.000, 0.074	151.000, -0.140	151.000, -0.075
757	151.200, 2.122	151.200, 0.135	151.200, 0.116	151.200, 0.135	151.200, 0.073	151.200, -0.138	151.200, -0.074
758	151.400, 2.108	151.400, 0.132	151.400, 0.114	151.400, 0.133	151.400, 0.072	151.400, -0.136	151.400, -0.073
759	151.600, 2.093	151.600, 0.129	151.600, 0.113	151.600, 0.131	151.600, 0.070	151.600, -0.133	151.600, -0.072
760	151.800, 2.076	151.800, 0.127	151.800, 0.111	151.800, 0.129	151.800, 0.069	151.800, -0.131	151.800, -0.071
761	152.000, 2.058	152.000, 0.125	152.000, 0.110	152.000, 0.128	152.000, 0.068	152.000, -0.128	152.000, -0.069
762	152.200, 2.040	152.200, 0.123	152.200, 0.109	152.200, 0.127	152.200, 0.067	152.200, -0.126	152.200, -0.068
763	152.400, 2.021	152.400, 0.121	152.400, 0.108	152.400, 0.126	152.400, 0.067	152.400, -0.124	152.400, -0.066
764	152.600, 2.002	152.600, 0.120	152.600, 0.107	152.600, 0.125	152.600, 0.066	152.600, -0.122	152.600, -0.065
765	152.800, 1.983	152.800, 0.118	152.800, 0.107	152.800, 0.124	152.800, 0.065	152.800, -0.121	152.800, -0.064
766	153.000, 1.963	153.000, 0.117	153.000, 0.106	153.000, 0.123	153.000, 0.065	153.000, -0.119	153.000, -0.062
767	153.200, 1.943	153.200, 0.116	153.200, 0.105	153.200, 0.123	153.200, 0.065	153.200, -0.117	153.200, -0.061
768	153.400, 1.924	153.400, 0.115	153.400, 0.105	153.400, 0.122	153.400, 0.065	153.400, -0.116	153.400, -0.060
769	153.600, 1.904	153.600, 0.114	153.600, 0.104	153.600, 0.122	153.600, 0.065	153.600, -0.114	153.600, -0.059
770	153.800, 1.884	153.800, 0.113	153.800, 0.104	153.800, 0.122	153.800, 0.065	153.800, -0.113	153.800, -0.058
771	154.000, 1.864	154.000, 0.112	154.000, 0.103	154.000, 0.121	154.000, 0.065	154.000, -0.112	154.000, -0.057
772	154.200, 1.844	154.200, 0.111	154.200, 0.103	154.200, 0.121	154.200, 0.065	154.200, -0.111	154.200, -0.056
773	154.400, 1.824	154.400, 0.110	154.400, 0.102	154.400, 0.121	154.400, 0.065	154.400, -0.109	154.400, -0.055
774	154.600, 1.804	154.600, 0.109	154.600, 0.102	154.600, 0.121	154.600, 0.065	154.600, -0.108	154.600, -0.054
775	154.800, 1.784	154.800, 0.108	154.800, 0.102	154.800, 0.121	154.800, 0.066	154.800, -0.107	154.800, -0.053
776	155.000, 1.764	155.000, 0.107	155.000, 0.101	155.000, 0.120	155.000, 0.066	155.000, -0.106	155.000, -0.053
777	155.200, 1.744	155.200, 0.106	155.200, 0.101	155.200, 0.120	155.200, 0.066	155.200, -0.105	155.200, -0.052
778	155.400, 1.725	155.400, 0.105	155.400, 0.101	155.400, 0.121	155.400, 0.066	155.400, -0.104	155.400, -0.051
779	155.600, 1.705	155.600, 0.105	155.600, 0.101	155.600, 0.121	155.600, 0.066	155.600, -0.103	155.600, -0.050
780	155.800, 1.686	155.800, 0.104	155.800, 0.101	155.800, 0.121	155.800, 0.066	155.800, -0.102	155.800, -0.049
781	156.000, 1.667	156.000, 0.104	156.000, 0.101	156.000, 0.121	156.000, 0.066	156.000, -0.101	156.000, -0.049
782	156.200, 1.648	156.200, 0.103	156.200, 0.102	156.200, 0.121	156.200, 0.066	156.200, -0.100	156.200, -0.048
783	156.400, 1.629	156.400, 0.103	156.400, 0.102	156.400, 0.121	156.400, 0.066	156.400, -0.100	156.400, -0.047
784	156.600, 1.611	156.600, 0.103	156.600, 0.102	156.600, 0.121	156.600, 0.066	156.600, -0.099	156.600, -0.046
785	156.800, 1.593	156.800, 0.103	156.800, 0.102	156.800, 0.121	156.800, 0.067	156.800, -0.098	156.800, -0.045
786	157.000, 1.575	157.000, 0.103	157.000, 0.102	157.000, 0.121	157.000, 0.067	157.000, -0.097	157.000, -0.044
787	157.200, 1.557	157.200, 0.103	157.200, 0.102	157.200, 0.121	157.200, 0.067	157.200, -0.096	157.200, -0.043
788	157.400, 1.539	157.400, 0.103	157.400, 0.102	157.400, 0.121	157.400, 0.068	157.400, -0.096	157.400, -0.042
789	157.600, 1.522	157.600, 0.103	157.600, 0.102	157.600, 0.121	157.600, 0.068	157.600, -0.095	157.600, -0.042
790	157.800, 1.505	157.800, 0.103	157.800, 0.102	157.800, 0.121	157.800, 0.068	157.800, -0.094	157.800, -0.041
791	158.000, 1.487	158.000, 0.103	158.000, 0.102	158.000, 0.121	158.000, 0.068	158.000, -0.094	158.000, -0.040
792	158.200, 1.470	158.200, 0.103	158.200, 0.102	158.200, 0.121	158.200, 0.068	158.200, -0.093	158.200, -0.039
793	158.400, 1.454	158.400, 0.102	158.400, 0.102	158.400, 0.121	158.400, 0.068	158.400, -0.092	158.400, -0.039
794	158.600, 1.437	158.600, 0.102	158.600, 0.102	158.600, 0.121	158.600, 0.068	158.600, -0.091	158.600, -0.038
795	158.800, 1.421	158.800, 0.101	158.800, 0.102	158.800, 0.121	158.800, 0.068	158.800, -0.090	158.800, -0.038
796	159.000, 1.405	159.000, 0.101	159.000, 0.103	159.000, 0.121	159.000, 0.068	159.000, -0.090	159.000, -0.038
797	159.200, 1.389	159.200, 0.101	159.200, 0.103	159.200, 0.121	159.200, 0.068	159.200, -0.089	159.200, -0.037
798	159.400, 1.374	159.400, 0.100	159.400, 0.103	159.400, 0.121	159.400, 0.068	159.400, -0.089	159.400, -0.037
799	159.600, 1.359	159.600, 0.100	159.600, 0.104	159.600, 0.121	159.600, 0.069	159.600, -0.088	159.600, -0.037
800	159.800, 1.344	159.800, 0.100	159.800, 0.104	159.800, 0.121	159.800, 0.068	159.800, -0.087	159.800, -0.037
801	160.000, 1.329	160.000, 0.100	160.000, 0.104	160.000, 0.122	160.000, 0.068	160.000, -0.087	160.000, -0.036
802	160.200, 1.315	160.200, 0.100	160.200, 0.104	160.200, 0.121	160.200, 0.068	160.200, -0.086	160.200, -0.035
803	160.400, 1.300	160.400, 0.100	160.400, 0.104	160.400, 0.121	160.400, 0.068	160.400, -0.086	160.400, -0.035
804	160.600, 1.286	160.600, 0.100	160.600, 0.104	160.600, 0.121	160.600, 0.068	160.600, -0.085	160.600, -0.034
805	160.800, 1.272	160.800, 0.100	160.800, 0.105	160.800, 0.122	160.800, 0.068	160.800, -0.084	160.800, -0.033
806	161.000, 1.259	161.000, 0.100	161.000, 0.105	161.000, 0.122	161.000, 0.069	161.000, -0.084	161.000, -0.032
807	161.200, 1.245	161.200, 0.100	161.200, 0.105	161.200, 0.122	161.200, 0.069	161.200, -0.083	161.200, -0.032
808	161.400, 1.232	161.400, 0.100	161.400, 0.105	161.400, 0.122	161.400, 0.069	161.400, -0.082	161.400, -0.031
809	161.600, 1.219	161.600, 0.100	161.600, 0.105	161.600, 0.122	161.600, 0.069	161.600, -0.081	161.600, -0.030
810	161.800, 1.206	161.800, 0.100	161.800, 0.104	161.800, 0.122	161.800, 0.069	161.800, -0.081	161.800, -0.030
811	162.000, 1.193	162.000, 0.099	162.000, 0.104	162.000, 0.122	162.000, 0.068	162.000, -0.080	162.000, -0.029
812	162.200, 1.181	162.200, 0.099	162.200, 0.104	162.200, 0.122	162.200, 0.068	162.200, -0.079	162.200, -0.029
813	162.400, 1.169	162.400, 0.099	162.400, 0.103	162.400, 0.122	162.400, 0.068	162.400, -0.079	162.400, -0.028
814	162.600, 1.157	162.600, 0.099	162.600, 0.103	162.600, 0.123	162.600, 0.069	162.600, -0.078	162.600, -0.028
815	162.800, 1.145	162.800, 0.099	162.800, 0.104	162.800, 0.123	162.800, 0.069	162.800, -0.078	162.800, -0.028
816	163.000, 1.134	163.000, 0.099	163.000, 0.104	163.000, 0.124	163.000, 0.069	163.000, -0.077	163.000, -0.028
817	163.200, 1.123	163.200, 0.099	163.200, 0.104	163.200, 0.124	163.200, 0.069	163.200, -0.077	163.200, -0.028
818	163.400, 1.112	163.400, 0.098	163.400, 0.104	163.400, 0.124	163.400, 0.069	163.400, -0.077	163.400, -0.027
819	163.600, 1.101	163.600, 0.098	163.600, 0.105	163.600, 0.124	163.600, 0.069	163.600, -0.076	163.600, -0.027
820	163.800, 1.091	163.800, 0.098	163.800, 0.105	163.800, 0.123	163.800, 0.069	163.800, -0.076	163.800, -0.027
821	164.000, 1.081	164.000, 0.098	164.000, 0.105	164.000, 0.123	164.000, 0.069	164.000, -0.075	164.000, -0.027
822	164.200, 1.070	164.200, 0.098	164.200, 0.105	164.200, 0.123	164.200, 0.069	164.200, -0.075	164.200, -0.026
823	164.400, 1.060	164.400, 0.098	164.400, 0.105	164.400, 0.123	164.400, 0.069	164.400, -0.075	164.400, -0.026
824	164.600, 1.051	164.600, 0.098	164.600, 0.105	164.600, 0.123	164.600, 0.069	164.600, -0.074	164.600, -0.026
825	164.800, 1.041	164.800, 0.098	164.800, 0.105	164.800, 0.123	164.800, 0.069	164.800, -0.074	164.800, -0.025
826	165.000, 1.032	165.000, 0.098	165.000, 0.105	165.000, 0.123	165.000, 0.069	165.000, -0.073	165.000, -0.025
827	165.200, 1.023	165.200, 0.098	165.200, 0.105	165.200, 0.123	165.200, 0.069	165.200, -0.072	165.200, -0.025
828	165.400, 1.014	165.400, 0.098	165.400, 0.105	165.400, 0.123	165.400, 0.069	165.400, -0.072	165.400, -0.025
829	165.600, 1.005	165.600, 0.098	165.600, 0.105	165.600, 0.123	165.600, 0.068	165.600, -0.071	165.600, -0.025
830	165.800, 0.997	165.800, 0.098	165.800, 0.105	165.800, 0.124	165.800, 0.068	165.800, -0.071	165.800, -0.024
831	166.000, 0.989	166.000, 0.098	166.000, 0.105	166.000, 0.124	166.000, 0.068	166.000, -0.070	166.000, -0.024
832	166.200, 0.980	166.200, 0.098	166.200, 0.105	166.200, 0.124	166.200, 0.068	166.200, -0.070	166.200, -0.024
833	166.400, 0.972	166.400, 0.098	166.400, 0.105	166.400, 0.124	166.400, 0.068	166.400, -0.070	166.400, -0.024
834	166.600, 0.965	166.600, 0.098	166.600, 0.105	166.600, 0.124	166.600, 0.068	166.600, -0.069	166.600, -0.023
835	166.800, 0.957	166.800, 0.097	166.800, 0.105	166.800, 0.124	166.800, 0.068	166.800, -0.069	166.800, -0.023
836	167.000, 0.950	167.000, 0.097	167.000, 0.105	167.000, 0.124	167.000, 0.068	167.000, -0.069	167.000, -0.023
837	167.200, 0.943	167.200, 0.097	167.200, 0.105	167.200, 0.124	167.200, 0.068	167.200, -0.069	167.200, -0.022
838	167.400, 0.936	167.400, 0.096	167.400, 0.105	167.400, 0.124	167.400, 0.068	167.400, -0.068	167.400, -0.022
839	167.600, 0.929	167.600, 0.096	167.600, 0.105	167.600, 0.124	167.600, 0.068	167.600, -0.068	167.600, -0.021
840	167.800, 0.922	167.800, 0.095	167.800, 0.105	167.800, 0.124	167.800, 0.068	167.800, -0.068	167.800, -0.021
841	168.000, 0.915	168.000, 0.095	168.000, 0.105	168.000, 0.124	168.000, 0.068	168.000, -0.068	168.000, -0.020
842	168.200, 0.909	168.200, 0.095	168.200, 0.105	168.200, 0.124	168.200, 0.068	168.200, -0.068	168.200, -0.019
843	168.400, 0.902	168.400, 0.094	168.400, 0.105	168.400, 0.124	168.400, 0.069	168.400, -0.068	168.400, -0.019
844	168.600, 0.896	168.600, 0.094	168.600, 0.105	168.600, 0.124	168.600, 0.069	168.600, -0.068	168.600, -0.018
845	168.800, 0.890	168.800, 0.094	168.800, 0.105	168.800, 0.124	168.800, 0.069	168.800, -0.068	168.800, -0.018
846	169.000, 0.884	169.000, 0.094	169.000, 0.105	169.000, 0.124	169.000, 0.069	169.000, -0.068	169.000, -0.018
847	169.200, 0.877	169.200, 0.094	169.200, 0.105	169.200, 0.124	169.200, 0.069	169.200, -0.067	169.200, -0.018
848	169.400, 0.871	169.400, 0.095	169.400, 0.105	169.400, 0.124	169.400, 0.069	169.400, -0.067	169.400, -0.018
849	169.600, 0.866	169.600, 0.095	169.600, 0.104	169.600, 0.124	169.600, 0.070	169.600, -0.067	169.600, -0.018
850	169.800, 0.860	169.800, 0.095	169.800, 0.104	169.800, 0.125	169.800, 0.070	169.800, -0.067	169.800, -0.018
851	170.000, 0.854	170.000, 0.095	170.000, 0.104	170.000, 0.125	170.000, 0.070	170.000, -0.066	170.000, -0.018
852	170.200, 0.849	170.200, 0.095	170.200, 0.103	170.200, 0.125	170.200, 0.070	170.200, -0.066	170.200, -0.018
853	170.400, 0.843	170.400, 0.095	170.400, 0.103	170.400, 0.125	170.400, 0.069	170.400, -0.066	170.400, -0.018
854	170.600, 0.838	170.600, 0.095	170.600, 0.103	170.600, 0.125	170.600, 0.069	170.600, -0.066	170.600, -0.018
855	170.800, 0.833	170.800, 0.095	170.800, 0.103	170.800, 0.125	170.800, 0.069	170.800, -0.065	170.800, -0.018
856	171.000, 0.828	171.000, 0.095	171.000, 0.103	171.000, 0.125	171.000, 0.069	171.000, -0.065	171.000, -0.018
857	171.200, 0.823	171.200, 0.095	171.200, 0.103	171.200, 0.125	171.200, 0.069	171.200, -0.064	171.200, -0.017
858	171.400, 0.818	171.400, 0.095	171.400, 0.103	171.400, 0.125	171.400, 0.068	171.400, -0.064	171.400, -0.017
859	171.600, 0.813	171.600, 0.095	171.600, 0.103	171.600, 0.125	171.600, 0.068	171.600, -0.064	171.600, -0.016
860	171.800, 0.808	171.800, 0.095	171.800, 0.103	171.800, 0.125	171.800, 0.068	171.800, -0.063	171.800, -0.016
861	172.000, 0.804	172.000, 0.095	172.000, 0.103	172.000, 0.125	172.000, 0.068	172.000, -0.063	172.000, -0.015
862	172.200, 0.799	172.200, 0.095	172.200, 0.103	172.200, 0.125	172.200, 0.068	172.200, -0.063	172.200, -0.015
863	172.400, 0.795	172.400, 0.095	172.400, 0.103	172.400, 0.125	172.400, 0.068	172.400, -0.063	172.400, -0.015
864	172.600, 0.790	172.600, 0.095	172.600, 0.103	172.600, 0.125	172.600, 0.067	172.600, -0.063	172.600, -0.015
865	172.800, 0.786	172.800, 0.095	172.800, 0.104	172.800, 0.125	172.800, 0.067	172.800, -0.063	172.800, -0.015
866	173.000, 0.782	173.000, 0.095	173.000, 0.104	173.000, 0.124	173.000, 0.067	173.000, -0.063	173.000, -0.015
867	173.200, 0.778	173.200, 0.095	173.200, 0.104	173.200, 0.124	173.200, 0.067	173.200, -0.063	173.200, -0.015
868	173.400, 0.773	173.400, 0.095	173.400, 0.104	173.400, 0.124	173.400, 0.067	173.400, -0.063	173.400, -0.015
869	173.600, 0.769	173.600, 0.095	173.600, 0.104	173.600, 0.124	173.600, 0.067	173.600, -0.063	173.600, -0.015
870	173.800, 0.766	173.800, 0.095	173.800, 0.104	173.800, 0.124	173.800, 0.067	173.800, -0.062	173.800, -0.015
871	174.000, 0.762	174.000, 0.095	174.000, 0.104	174.000, 0.125	174.000, 0.067	174.000, -0.062	174.000, -0.015
872	174.200, 0.758	174.200, 0.094	174.200, 0.104	174.200, 0.125	174.200, 0.067	174.200, -0.062	174.200, -0.015
873	174.400, 0.754	174.400, 0.094	174.400, 0.104	174.400, 0.125	174.400, 0.067	174.400, -0.062	174.400, -0.015
874	174.600, 0.751	174.600, 0.094	174.600, 0.104	174.600, 0.125	174.600, 0.067	174.600, -0.062	174.600, -0.015
875	174.800, 0.747	174.800, 0.094	174.800, 0.104	174.800, 0.125	174.800, 0.067	174.800, -0.061	174.800, -0.014
876	175.000, 0.743	175.000, 0.094	175.000, 0.104	175.000, 0.125	175.000, 0.067	175.000, -0.061	175.000, -0.014
877	175.200, 0.739	175.200, 0.093	175.200, 0.104	175.200, 0.125	175.200, 0.067	175.200, -0.061	175.200, -0.014
878	175.400, 0.736	175.400, 0.093	175.400, 0.104	175.400, 0.125	175.400, 0.066	175.400, -0.060	175.400, -0.014
879	175.600, 0.732	175.600, 0.093	175.600, 0.104	175.600, 0.125	175.600, 0.066	175.600, -0.060	175.600, -0.013
880	175.800, 0.728	175.800, 0.093	175.800, 0.104	175.800, 0.125	175.800, 0.066	175.800, -0.059	175.800, -0.013
881	176.000, 0.724	176.000, 0.093	176.000, 0.104	176.000, 0.125	176.000, 0.066	176.000, -0.059	176.000, -0.013
882	176.200, 0.721	176.200, 0.093	176.200, 0.104	176.200, 0.125	176.200, 0.065	176.200, -0.059	176.200, -0.013
883	176.400, 0.718	176.400, 0.093	176.400, 0.104	176.400, 0.125	176.400, 0.065	176.400, -0.059	176.400, -0.013
884	176.600, 0.714	176.600, 0.093	176.600, 0.104	176.600, 0.125	176.600, 0.065	176.600, -0.059	176.600, -0.013
885	176.800, 0.711	176.800, 0.093	176.800, 0.104	176.800, 0.125	176.800, 0.065	176.800, -0.059	176.800, -0.012
886	177.000, 0.708	177.000, 0.093	177.000, 0.103	177.000, 0.125	177.000, 0.066	177.000, -0.059	177.000, -0.012
887	177.200, 0.705	177.200, 0.093	177.200, 0.103	177.200, 0.124	177.200, 0.066	177.200, -0.059	177.200, -0.012
888	177.400, 0.702	177.400, 0.094	177.400, 0.103	177.400, 0.124	177.400, 0.066	177.400, -0.059	177.400, -0.012
889	177.600, 0.699	177.600, 0.094	177.600, 0.103	177.600, 0.124	177.600, 0.067	177.600, -0.059	177.600, -0.012
890	177.800, 0.696	177.800, 0.094	177.800, 0.103	177.800, 0.124	177.800, 0.067	177.800, -0.058	177.800, -0.011
891	178.000, 0.693	178.000, 0.094	178.000, 0.103	178.000, 0.125	178.000, 0.067	178.000, -0.058	178.000, -0.011
892	178.200, 0.690	178.200, 0.094	178.200, 0.103	178.200, 0.125	178.200, 0.067	178.200, -0.058	178.200, -0.011
893	178.400, 0.687	178.400, 0.094	178.400, 0.103	178.400, 0.125	178.400, 0.066	178.400, -0.058	178.400, -0.011
894	178.600, 0.684	178.600, 0.093	178.600, 0.103	178.600, 0.125	178.600, 0.066	178.600, -0.058	178.600, -0.012
895	178.800, 0.681	178.800, 0.093	178.800, 0.102	178.800, 0.126	178.800, 0.066	178.800, -0.058	178.800, -0.012
896	179.000, 0.678	179.000, 0.094	179.000, 0.102	179.000, 0.126	179.000, 0.065	179.000, -0.058	179.000, -0.012
897	179.200, 0.675	179.200, 0.094	179.200, 0.102	179.200, 0.126	179.200, 0.065	179.200, -0.058	179.200, -0.011
898	179.400, 0.672	179.400, 0.094	179.400, 0.102	179.400, 0.126	179.400, 0.065	179.400, -0.057	179.400, -0.011
899	179.600, 0.670	179.600, 0.094	179.600, 0.102	179.600, 0.126	179.600, 0.064	179.600, -0.057	179.600, -0.011
900	179.800, 0.667	179.800, 0.094	179.800, 0.102	179.800, 0.126	179.800, 0.064	179.800, -0.057	179.800, -0.011
901	180.000, 0.664	180.000, 0.094	180.000, 0.102	180.000, 0.126	180.000, 0.064	180.000, -0.057	180.000, -0.011
902	180.200, 0.661	180.200, 0.094	180.200, 0.102	180.200, 0.126	180.200, 0.064	180.200, -0.057	180.200, -0.010
903	180.400, 0.659	180.400, 0.094	180.400, 0.102	180.400, 0.125	180.400, 0.065	180.400, -0.057	180.400, -0.010
904	180.600, 0.656	180.600, 0.094	180.600, 0.101	180.600, 0.125	180.600, 0.065	180.600, -0.056	180.600, -0.010
905	180.800, 0.653	180.800, 0.094	180.800, 0.101	180.800, 0.125	180.800, 0.065	180.800, -0.056	180.800, -0.009
906	181.000, 0.650	181.000, 0.094	181.000, 0.102	181.000, 0.124	181.000, 0.065	181.000, -0.056	181.000, -0.009
907	181.200, 0.648	181.200, 0.094	181.200, 0.102	181.200, 0.124	181.200, 0.065	181.200, -0.055	181.200, -0.008
908	181.400, 0.645	181.400, 0.094	181.400, 0.102	181.400, 0.124	181.400, 0.065	181.400, -0.055	181.400, -0.008
909	181.600, 0.642	181.600, 0.094	181.600, 0.102	181.600, 0.124	181.600, 0.065	181.600, -0.055	181.600, -0.008
910	181.800, 0.639	181.800, 0.094	181.800, 0.102	181.800, 0.124	181.800, 0.065	181.800, -0.055	181.800, -0.008
911	182.000, 0.637	182.000, 0.093	182.000, 0.102	182.000, 0.124	182.000, 0.065	182.000, -0.055	182.000, -0.009
912	182.200, 0.634	182.200, 0.093	182.200, 0.102	182.200, 0.123	182.200, 0.064	182.200, -0.055	182.200, -0.009
913	182.400, 0.631	182.400, 0.093	182.400, 0.102	182.400, 0.123	182.400, 0.064	182.400, -0.055	182.400, -0.009
914	182.600, 0.629	182.600, 0.093	182.600, 0.102	182.600, 0.123	182.600, 0.064	182.600, -0.055	182.600, -0.010
915	182.800, 0.626	182.800, 0.093	182.800, 0.102	182.800, 0.123	182.800, 0.063	182.800, -0.055	182.800, -0.010
916	183.000, 0.624	183.000, 0.092	183.000, 0.102	183.000, 0.123	183.000, 0.064	183.000, -0.055	183.000, -0.010
917	183.200, 0.621	183.200, 0.092	183.200, 0.102	183.200, 0.123	183.200, 0.064	183.200, -0.055	183.200, -0.010
918	183.400, 0.619	183.400, 0.092	183.400, 0.102	183.400, 0.123	183.400, 0.064	183.400, -0.055	183.400, -0.010
919	183.600, 0.616	183.600, 0.092	183.600, 0.102	183.600, 0.123	183.600, 0.064	183.600, -0.055	183.600, -0.010
920	183.800, 0.614	183.800, 0.092	183.800, 0.102	183.800, 0.123	183.800, 0.064	183.800, -0.055	183.800, -0.010
921	184.000, 0.611	184.000, 0.092	184.000, 0.102	184.000, 0.123	184.000, 0.064	184.000, -0.055	184.000, -0.009
922	184.200, 0.609	184.200, 0.091	184.200, 0.101	184.200, 0.123	184.200, 0.064	184.200, -0.055	184.200, -0.009
923	184.400, 0.607	184.400, 0.091	184.400, 0.101	184.400, 0.123	184.400, 0.064	184.400, -0.055	184.400, -0.009
924	184.600, 0.605	184.600, 0.091	184.600, 0.101	184.600, 0.123	184.600, 0.065	184.600, -0.055	184.600, -0.009
925	184.800, 0.602	184.800, 0.091	184.800, 0.100	184.800, 0.123	184.800, 0.065	184.800, -0.054	184.800, -0.008
926	185.000, 0.600	185.000, 0.091	185.000, 0.100	185.000, 0.124	185.000, 0.065	185.000, -0.054	185.000, -0.008
927	185.200, 0.598	185.200, 0.091	185.200, 0.100	185.200, 0.124	185.200, 0.065	185.200, -0.054	185.200, -0.008
928	185.400, 0.595	185.400, 0.091	185.400, 0.100	185.400, 0.124	185.400, 0.064	185.400, -0.054	185.400, -0.008
929	185.600, 0.593	185.600, 0.091	185.600, 0.100	185.600, 0.124	185.600, 0.064	185.600, -0.054	185.600, -0.008
930	185.800, 0.591	185.800, 0.091	185.800, 0.100	185.800, 0.124	185.800, 0.064	185.800, -0.054	185.800, -0.008
931	186.000, 0.589	186.000, 0.091	186.000, 0.100	186.000, 0.124	186.000, 0.064	186.000, -0.054	186.000, -0.008
932	186.200, 0.587	186.200, 0.091	186.200, 0.100	186.200, 0.124	186.200, 0.064	186.200, -0.054	186.200, -0.008
933	186.400, 0.584	186.400, 0.091	186.400, 0.100	186.400, 0.123	186.400, 0.063	186.400, -0.054	186.400, -0.009
934	186.600, 0.582	186.600, 0.091	186.600, 0.100	186.600, 0.123	186.600, 0.063	186.600, -0.054	186.600, -0.009
935	186.800, 0.580	186.800, 0.091	186.800, 0.100	186.800, 0.123	186.800, 0.063	186.800, -0.054	186.800, -0.009
936	187.000, 0.577	187.000, 0.091	187.000, 0.100	187.000, 0.123	187.000, 0.063	187.000, -0.054	187.000, -0.008
937	187.200, 0.575	187.200, 0.091	187.200, 0.100	187.200, 0.122	187.200, 0.062	187.200, -0.054	187.200, -0.008
938	187.400, 0.573	187.400, 0.091	187.400, 0.100	187.400, 0.122	187.400, 0.062	187.400, -0.053	187.400, -0.008
939	187.600, 0.570	187.600, 0.091	187.600, 0.100	187.600, 0.122	187.600, 0.062	187.600, -0.053	187.600, -0.008
940	187.800, 0.568	187.800, 0.091	187.800, 0.100	187.800, 0.122	187.800, 0.062	187.800, -0.053	187.800, -0.007
941	188.000, 0.566	188.000, 0.091	188.000, 0.100	188.000, 0.122	188.000, 0.062	188.000, -0.053	188.000, -0.007
942	188.200, 0.564	188.200, 0.090	188.200, 0.100	188.200, 0.122	188.200, 0.062	188.200, -0.052	188.200, -0.007
943	188.400, 0.562	188.400, 0.090	188.400, 0.100	188.400, 0.122	188.400, 0.062	188.400, -0.052	188.400, -0.007
944	188.600, 0.560	188.600, 0.090	188.600, 0.100	188.600, 0.122	188.600, 0.062	188.600, -0.052	188.600, -0.007
945	188.800, 0.558	188.800, 0.090	188.800, 0.100	188.800, 0.122	188.800, 0.062	188.800, -0.052	188.800, -0.007
946	189.000, 0.556	189.000, 0.090	189.000, 0.100	189.000, 0.122	189.000, 0.062	189.000, -0.052	189.000, -0.007
947	189.200, 0.554	189.200, 0.090	189.200, 0.100	189.200, 0.123	189.200, 0.062	189.200, -0.052	189.200, -0.007
948	189.400, 0.552	189.400, 0.090	189.400, 0.100	189.400, 0.123	189.400, 0.062	189.400, -0.052	189.400, -0.007
949	189.600, 0.550	189.600, 0.089	189.600, 0.100	189.600, 0.123	189.600, 0.062	189.600, -0.052	189.600, -0.007
950	189.800, 0.548	189.800, 0.089	189.800, 0.100	189.800, 0.123	189.800, 0.062	189.800, -0.052	189.800, -0.008
951	190.000, 0.547	190.000, 0.089	190.000, 0.100	190.000, 0.123	190.000, 0.062	190.000, -0.051	190.000, -0.008
952	190.200, 0.545	190.200, 0.089	190.200, 0.100	190.200, 0.123	190.200, 0.062	190.200, -0.051	190.200, -0.007
953	190.400, 0.543	190.400, 0.089	190.400, 0.100	190.400, 0.123	190.400, 0.061	190.400, -0.051	190.400, -0.007
954	190.600, 0.541	190.600, 0.089	190.600, 0.100	190.600, 0.123	190.600, 0.061	190.600, -0.051	190.600, -0.007
955	190.800, 0.539	190.800, 0.089	190.800, 0.100	190.800, 0.122	190.800, 0.061	190.800, -0.051	190.800, -0.007
956	191.000, 0.537	191.000, 0.089	191.000, 0.100	191.000, 0.122	191.000, 0.061	191.000, -0.051	191.000, -0.007
957	191.200, 0.535	191.200, 0.089	191.200, 0.100	191.200, 0.122	191.200, 0.061	191.200, -0.051	191.200, -0.006
958	191.400, 0.533	191.400, 0.089	191.400, 0.100	191.400, 0.121	191.400, 0.061	191.400, -0.051	191.400, -0.006
959	191.600, 0.531	191.600, 0.089	191.600, 0.099	191.600, 0.121	191.600, 0.061	191.600, -0.051	191.600, -0.006
960	191.800, 0.529	191.800, 0.089	191.800, 0.099	191.800, 0.121	191.800, 0.061	191.800, -0.051	191.800, -0.005
961	192.000, 0.526	192.000, 0.089	192.000, 0.099	192.000, 0.121	192.000, 0.061	192.000, -0.051	192.000, -0.005
962	192.200, 0.524	192.200, 0.089	192.200, 0.099	192.200, 0.121	192.200, 0.061	192.200, -0.051	192.200, -0.005
963	192.400, 0.522	192.400, 0.089	192.400, 0.099	192.400, 0.121	192.400, 0.061	192.400, -0.051	192.400, -0.005
964	192.600, 0.520	192.600, 0.089	192.600, 0.100	192.600, 0.121	192.600, 0.061	192.600, -0.051	192.600, -0.005
965	192.800, 0.518	192.800, 0.089	192.800, 0.100	192.800, 0.121	192.800, 0.061	192.800, -0.051	192.800, -0.005
966	193.000, 0.516	193.000, 0.089	193.000, 0.100	193.000, 0.121	193.000, 0.061	193.000, -0.051	193.000, -0.005
967	193.200, 0.513	193.200, 0.089	193.200, 0.100	193.200, 0.122	193.200, 0.060	193.200, -0.051	193.200, -0.005
968	193.400, 0.512	193.400, 0.089	193.400, 0.100	193.400, 0.122	193.400, 0.060	193.400, -0.051	193.400, -0.006
969	193.600, 0.510	193.600, 0.089	193.600, 0.100	193.600, 0.122	193.600, 0.060	193.600, -0.051	193.600, -0.006
970	193.800, 0.508	193.800, 0.089	193.800, 0.100	193.800, 0.122	193.800, 0.060	193.800, -0.051	193.800, -0.007
971	194.000, 0.506	194.000, 0.089	194.000, 0.100	194.000, 0.122	194.000, 0.060	194.000, -0.050	194.000, -0.007
972	194.200, 0.504	194.200, 0.089	194.200, 0.100	194.200, 0.122	194.200, 0.060	194.200, -0.050	194.200, -0.007
973	194.400, 0.503	194.400, 0.089	194.400, 0.099	194.400, 0.122	194.400, 0.060	194.400, -0.050	194.400, -0.007
974	194.600, 0.501	194.600, 0.089	194.600, 0.099	194.600, 0.122	194.600, 0.060	194.600, -0.050	194.600, -0.007
975	194.800, 0.499	194.800, 0.089	194.800, 0.099	194.800, 0.122	194.800, 0.060	194.800, -0.050	194.800, -0.007
976	195.000, 0.498	195.000, 0.088	195.000, 0.099	195.000, 0.122	195.000, 0.060	195.000, -0.050	195.000, -0.006
977	195.200, 0.496	195.200, 0.088	195.200, 0.099	195.200, 0.122	195.200, 0.059	195.200, -0.050	195.200, -0.006
978	195.400, 0.494	195.400, 0.088	195.400, 0.099	195.400, 0.121	195.400, 0.059	195.400, -0.050	195.400, -0.006
979	195.600, 0.493	195.600, 0.088	195.600, 0.099	195.600, 0.121	195.600, 0.059	195.600, -0.050	195.600, -0.006
980	195.800, 0.491	195.800, 0.087	195.800, 0.099	195.800, 0.121	195.800, 0.059	195.800, -0.050	195.800, -0.005
981	196.000, 0.489	196.000, 0.087	196.000, 0.099	196.000, 0.121	196.000, 0.059	196.000, -0.050	196.000, -0.005
982	196.200, 0.487	196.200, 0.087	196.200, 0.099	196.200, 0.121	196.200, 0.059	196.200, -0.049	196.200, -0.005
983	196.400, 0.485	196.400, 0.087	196.400, 0.099	196.400, 0.120	196.400, 0.059	196.400, -0.049	196.400, -0.004
984	196.600, 0.483	196.600, 0.087	196.600, 0.099	196.600, 0.120	196.600, 0.058	196.600, -0.049	196.600, -0.004
985	196.800, 0.482	196.800, 0.087	196.800, 0.098	196.800, 0.120	196.800, 0.058	196.800, -0.049	196.800, -0.004
986	197.000, 0.480	197.000, 0.087	197.000, 0.098	197.000, 0.120	197.000, 0.058	197.000, -0.049	197.000, -0.004
987	197.200, 0.478	197.200, 0.087	197.200, 0.098	197.200, 0.120	197.200, 0.058	197.200, -0.049	197.200, -0.004
988	197.400, 0.477	197.400, 0.087	197.400, 0.098	197.400, 0.120	197.400, 0.057	197.400, -0.049	197.400, -0.004
989	197.600, 0.475	197.600, 0.087	197.600, 0.098	197.600, 0.120	197.600, 0.057	197.600, -0.049	197.600, -0.004
990	197.800, 0.473	197.800, 0.087	197.800, 0.097	197.800, 0.120	197.800, 0.057	197.800, -0.049	197.800, -0.004
991	198.000, 0.472	198.000, 0.087	198.000, 0.097	198.000, 0.120	198.000, 0.058	198.000, -0.049	198.000, -0.004
992	198.200, 0.470	198.200, 0.087	198.200, 0.097	198.200, 0.120	198.200, 0.058	198.200, -0.049	198.200, -0.004
993	198.400, 0.469	198.400, 0.087	198.400, 0.097	198.400, 0.120	198.400, 0.058	198.400, -0.049	198.400, -0.004
994	198.600, 0.467	198.600, 0.087	198.600, 0.097	198.600, 0.120	198.600, 0.058	198.600, -0.049	198.600, -0.004
995	198.800, 0.466	198.800, 0.087	198.800, 0.097	198.800, 0.120	198.800, 0.058	198.800, -0.049	198.800, -0.004
996	199.000, 0.464	199.000, 0.087	199.000, 0.097	199.000, 0.120	199.000, 0.058	199.000, -0.049	199.000, -0.004
997	199.200, 0.463	199.200, 0.086	199.200, 0.097	199.200, 0.120	199.200, 0.057	199.200, -0.049	199.200, -0.005
998	199.400, 0.461	199.400, 0.087	199.400, 0.097	199.400, 0.120	199.400, 0.057	199.400, -0.049	199.400, -0.005
999	199.600, 0.459	199.600, 0.086	199.600, 0.098	199.600, 0.120	199.600, 0.057	199.600, -0.049	199.600, -0.004
1000	199.800, 0.458	199.800, 0.086	199.800, 0.098	199.800, 0.120	199.800, 0.057	199.800, -0.049	199.800, -0.004
1001	200.000, 0.456	200.000, 0.086	200.000, 0.098	200.000, 0.120	200.000, 0.057	200.000, -0.049	200.000, -0.004
1002	200.200, 0.455	200.200, 0.086	200.200, 0.098	200.200, 0.120	200.200, 0.057	200.200, -0.050	200.200, -0.004
1003	200.400, 0.453	200.400, 0.086	200.400, 0.098	200.400, 0.120	200.400, 0.057	200.400, -0.050	200.400, -0.004
1004	200.600, 0.451	200.600, 0.086	200.600, 0.098	200.600, 0.119	200.600, 0.057	200.600, -0.050	200.600, -0.004
1005	200.800, 0.450	200.800, 0.086	200.800, 0.097	200.800, 0.119	200.800, 0.057	200.800, -0.050	200.800, -0.004
1006	201.000, 0.448	201.000, 0.086	201.000, 0.097	201.000, 0.119	201.000, 0.057	201.000, -0.050	201.000, -0.003
1007	201.200, 0.447	201.200, 0.086	201.200, 0.097	201.200, 0.119	201.200, 0.057	201.200, -0.049	201.200, -0.003
1008	201.400, 0.445	201.400, 0.086	201.400, 0.097	201.400, 0.118	201.400, 0.057	201.400, -0.049	201.400, -0.003
1009	201.600, 0.443	201.600, 0.087	201.600, 0.097	201.600, 0.118	201.600, 0.057	201.600, -0.049	201.600, -0.003
1010	201.800, 0.442	201.800, 0.086	201.800, 0.096	201.800, 0.118	201.800, 0.057	201.800, -0.048	201.800, -0.003
1011	202.000, 0.440	202.000, 0.086	202.000, 0.096	202.000, 0.118	202.000, 0.058	202.000, -0.048	202.000, -0.003
1012	202.200, 0.439	202.200, 0.086	202.200, 0.096	202.200, 0.118	202.200, 0.058	202.200, -0.048	202.200, -0.003
1013	202.400, 0.438	202.400, 0.086	202.400, 0.096	202.400, 0.118	202.400, 0.058	202.400, -0.048	202.400, -0.003
1014	202.600, 0.436	202.600, 0.086	202.600, 0.096	202.600, 0.118	202.600, 0.057	202.600, -0.048	202.600, -0.003
1015	202.800, 0.435	202.800, 0.086	202.800, 0.096	202.800, 0.118	202.800, 0.057	202.800, -0.048	202.800, -0.004
1016	203.000, 0.434	203.000, 0.086	203.000, 0.096	203.000, 0.118	203.000, 0.057	203.000, -0.048	203.000, -0.004
1017	203.200, 0.432	203.200, 0.086	203.200, 0.095	203.200, 0.118	203.200, 0.057	203.200, -0.048	203.200, -0.004
1018	203.400, 0.431	203.400, 0.086	203.400, 0.095	203.400, 0.118	203.400, 0.056	203.400, -0.048	203.400, -0.004
1019	203.600, 0.430	203.600, 0.086	203.600, 0.095	203.600, 0.118	203.600, 0.056	203.600, -0.048	203.600, -0.004
1020	203.800, 0.429	203.800, 0.085	203.800, 0.096	203.800, 0.118	203.800, 0.056	203.800, -0.048	203.800, -0.005
1021	204.000, 0.428	204.000, 0.085	204.000, 0.096	204.000, 0.119	204.000, 0.056	204.000, -0.048	204.000, -0.005
1022	204.200, 0.427	204.200, 0.085	204.200, 0.096	204.200, 0.119	204.200, 0.056	204.200, -0.048	204.200, -0.005
1023	204.400, 0.425	204.400, 0.085	204.400, 0.096	204.400, 0.119	204.400, 0.056	204.400, -0.048	204.400, -0.005
1024	204.600, 0.424	204.600, 0.085	204.600, 0.096	204.600, 0.119	204.600, 0.056	204.600, -0.048	204.600, -0.004
1025	204.800, 0.423	204.800, 0.085	204.800, 0.095	204.800, 0.119	204.800, 0.057	204.800, -0.048	204.800, -0.004
1026	205.000, 0.421	205.000, 0.085	205.000, 0.095	205.000, 0.119	205.000, 0.057	205.000, -0.048	205.000, -0.004
1027	205.200, 0.420	205.200, 0.085	205.200, 0.095	205.200, 0.119	205.200, 0.057	205.200, -0.048	205.200, -0.003
1028	205.400, 0.418	205.400, 0.085	205.400, 0.095	205.400, 0.119	205.400, 0.057	205.400, -0.048	205.400, -0.003
1029	205.600, 0.417	205.600, 0.085	205.600, 0.095	205.600, 0.119	205.600, 0.057	205.600, -0.047	205.600, -0.003
1030	205.800, 0.415	205.800, 0.085	205.800, 0.095	205.800, 0.119	205.800, 0.057	205.800, -0.047	205.800, -0.002
1031	206.000, 0.414	206.000, 0.085	206.000, 0.095	206.000, 0.119	206.000, 0.057	206.000, -0.047	206.000, -0.002
1032	206.200, 0.412	206.200, 0.085	206.200, 0.095	206.200, 0.119	206.200, 0.057	206.200, -0.047	206.200, -0.002
1033	206.400, 0.411	206.400, 0.085	206.400, 0.095	206.400, 0.119	206.400, 0.057	206.400, -0.047	206.400, -0.002
1034	206.600, 0.409	206.600, 0.085	206.600, 0.095	206.600, 0.118	206.600, 0.057	206.600, -0.047	206.600, -0.002
1035	206.800, 0.407	206.800, 0.085	206.800, 0.095	206.800, 0.118	206.800, 0.057	206.800, -0.047	206.800, -0.002
1036	207.000, 0.406	207.000, 0.085	207.000, 0.095	207.000, 0.118	207.000, 0.057	207.000, -0.047	207.000, -0.003
1037	207.200, 0.405	207.200, 0.085	207.200, 0.096	207.200, 0.118	207.200, 0.056	207.200, -0.046	207.200, -0.003
1038	207.400, 0.403	207.400, 0.085	207.400, 0.096	207.400, 0.118	207.400, 0.056	207.400, -0.046	207.400, -0.003
1039	207.600, 0.402	207.600, 0.085	207.600, 0.096	207.600, 0.118	207.600, 0.056	207.600, -0.046	207.600, -0.003
1040	207.800, 0.401	207.800, 0.085	207.800, 0.096	207.800, 0.117	207.800, 0.055	207.800, -0.046	207.800, -0.004
1041	208.000, 0.400	208.000, 0.085	208.000, 0.096	208.000, 0.117	208.000, 0.055	208.000, -0.047	208.000, -0.004
1042	208.200, 0.399	208.200, 0.085	208.200, 0.095	208.200, 0.117	208.200, 0.055	208.200, -0.047	208.200, -0.004
1043	208.400, 0.398	208.400, 0.085	208.400, 0.095	208.400, 0.117	208.400, 0.055	208.400, -0.047	208.400, -0.004
1044	208.600, 0.397	208.600, 0.085	208.600, 0.095	208.600, 0.117	208.600, 0.055	208.600, -0.047	208.600, -0.005
1045	208.800, 0.396	208.800, 0.085	208.800, 0.095	208.800, 0.117	208.800, 0.055	208.800, -0.047	208.800, -0.005
1046	209.000, 0.395	209.000, 0.085	209.000, 0.094	209.000, 0.117	209.000, 0.054	209.000, -0.047	209.000, -0.005
1047	209.200, 0.394	209.200, 0.085	209.200, 0.094	209.200, 0.117	209.200, 0.055	209.200, -0.047	209.200, -0.005
1048	209.400, 0.392	209.400, 0.085	209.400, 0.094	209.400, 0.117	209.400, 0.055	209.400, -0.046	209.400, -0.004
1049	209.600, 0.392	209.600, 0.085	209.600, 0.094	209.600, 0.118	209.600, 0.055	209.600, -0.046	209.600, -0.004
1050	209.800, 0.391	209.800, 0.085	209.800, 0.094	209.800, 0.118	209.800, 0.055	209.800, -0.046	209.800, -0.004
1051	210.000, 0.390	210.000, 0.085	210.000, 0.094	210.000, 0.118	210.000, 0.055	210.000, -0.046	210.000, -0.003
1052	210.200, 0.389	210.200, 0.085	210.200, 0.094	210.200, 0.118	210.200, 0.055	210.200, -0.046	210.200, -0.003
1053	210.400, 0.388	210.400, 0.085	210.400, 0.094	210.400, 0.118	210.400, 0.055	210.400, -0.046	210.400, -0.002
1054	210.600, 0.387	210.600, 0.085	210.600, 0.094	210.600, 0.118	210.600, 0.055	210.600, -0.046	210.600, -0.002
1055	210.800, 0.386	210.800, 0.085	210.800, 0.094	210.800, 0.118	210.800, 0.055	210.800, -0.046	210.800, -0.002
1056	211.000, 0.385	211.000, 0.085	211.000, 0.094	211.000, 0.118	211.000, 0.055	211.000, -0.046	211.000, -0.002
1057	211.200, 0.384	211.200, 0.085	211.200, 0.094	211.200, 0.118	211.200, 0.055	211.200, -0.046	211.200, -0.002
1058	211.400, 0.383	211.400, 0.085	211.400, 0.095	211.400, 0.118	211.400, 0.054	211.400, -0.047	211.400, -0.002
1059	211.600, 0.381	211.600, 0.085	211.600, 0.094	211.600, 0.117	211.600, 0.054	211.600, -0.047	211.600, -0.002
1060	211.800, 0.380	211.800, 0.085	211.800, 0.094	211.800, 0.117	211.800, 0.054	211.800, -0.047	211.800, -0.002
1061	212.000, 0.379	212.000, 0.085	212.000, 0.094	212.000, 0.117	212.000, 0.054	212.000, -0.047	212.000, -0.003
1062	212.200, 0.378	212.200, 0.085	212.200, 0.094	212.200, 0.117	212.200, 0.054	212.200, -0.048	212.200, -0.003
1063	212.400, 0.377	212.400, 0.085	212.400, 0.094	212.400, 0.117	212.400, 0.054	212.400, -0.048	212.400, -0.003
1064	212.600, 0.376	212.600, 0.084	212.600, 0.094	212.600, 0.117	212.600, 0.054	212.600, -0.047	212.600, -0.003
1065	212.800, 0.375	212.800, 0.084	212.800, 0.094	212.800, 0.117	212.800, 0.054	212.800, -0.047	212.800, -0.004
1066	213.000, 0.373	213.000, 0.084	213.000, 0.094	213.000, 0.117	213.000, 0.054	213.000, -0.047	213.000, -0.004
1067	213.200, 0.372	213.200, 0.084	213.200, 0.094	213.200, 0.118	213.200, 0.054	213.200, -0.046	213.200, -0.004
1068	213.400, 0.371	213.400, 0.084	213.400, 0.094	213.400, 0.118	213.400, 0.054	213.400, -0.046	213.400, -0.004
1069	213.600, 0.370	213.600, 0.084	213.600, 0.094	213.600, 0.118	213.600, 0.054	213.600, -0.046	213.600, -0.004
1070	213.800, 0.369	213.800, 0.084	213.800, 0.093	213.800, 0.118	213.800, 0.054	213.800, -0.046	213.800, -0.004
1071	214.000, 0.368	214.000, 0.083	214.000, 0.093	214.000, 0.118	214.000, 0.054	214.000, -0.045	214.000, -0.004
1072	214.200, 0.367	214.200, 0.083	214.200, 0.093	214.200, 0.118	214.200, 0.054	214.200, -0.045	214.200, -0.004
1073	214.400, 0.366	214.400, 0.083	214.400, 0.092	214.400, 0.118	214.400, 0.054	214.400, -0.045	214.400, -0.004
1074	214.600, 0.365	214.600, 0.083	214.600, 0.092	214.600, 0.118	214.600, 0.053	214.600, -0.045	214.600, -0.004
1075	214.800, 0.364	214.800, 0.083	214.800, 0.092	214.800, 0.118	214.800, 0.053	214.800, -0.045	214.800, -0.004
1076	215.000, 0.363	215.000, 0.083	215.000, 0.092	215.000, 0.118	215.000, 0.053	215.000, -0.045	215.000, -0.004
1077	215.200, 0.362	215.200, 0.083	215.200, 0.092	215.200, 0.118	215.200, 0.053	215.200, -0.046	215.200, -0.004
1078	215.400, 0.361	215.400, 0.083	215.400, 0.092	215.400, 0.118	215.400, 0.053	215.400, -0.046	215.400, -0.004
1079	215.600, 0.360	215.600, 0.083	215.600, 0.092	215.600, 0.117	215.600, 0.053	215.600, -0.046	215.600, -0.004
1080	215.800, 0.359	215.800, 0.083	215.800, 0.092	215.800, 0.117	215.800, 0.053	215.800, -0.046	215.800, -0.004
1081	216.000, 0.358	216.000, 0.082	216.000, 0.092	216.000, 0.117	216.000, 0.053	216.000, -0.047	216.000, -0.004
1082	216.200, 0.357	216.200, 0.082	216.200, 0.092	216.200, 0.116	216.200, 0.053	216.200, -0.046	216.200, -0.004
1083	216.400, 0.357	216.400, 0.082	216.400, 0.092	216.400, 0.116	216.400, 0.053	216.400, -0.046	216.400, -0.004
1084	216.600, 0.356	216.600, 0.082	216.600, 0.093	216.600, 0.116	216.600, 0.053	216.600, -0.046	216.600, -0.004
1085	216.800, 0.355	216.800, 0.082	216.800, 0.092	216.800, 0.116	216.800, 0.053	216.800, -0.046	216.800, -0.003
1086	217.000, 0.354	217.000, 0.082	217.000, 0.092	217.000, 0.116	217.000, 0.053	217.000, -0.046	217.000, -0.003
1087	217.200, 0.353	217.200, 0.082	217.200, 0.092	217.200, 0.116	217.200, 0.053	217.200, -0.046	217.200, -0.003
1088	217.400, 0.352	217.400, 0.082	217.400, 0.092	217.400, 0.116	217.400, 0.054	217.400, -0.046	217.400, -0.002
1089	217.600, 0.351	217.600, 0.082	217.600, 0.092	217.600, 0.116	217.600, 0.054	217.600, -0.046	217.600, -0.002
1090	217.800, 0.350	217.800, 0.082	217.800, 0.092	217.800, 0.116	217.800, 0.054	217.800, -0.045	217.800, -0.001
1091	218.000, 0.349	218.000, 0.082	218.000, 0.092	218.000, 0.116	218.000, 0.054	218.000, -0.045	218.000, -0.001
1092	218.200, 0.348	218.200, 0.082	218.200, 0.092	218.200, 0.116	218.200, 0.053	218.200, -0.045	218.200, -0.001
1093	218.400, 0.347	218.400, 0.083	218.400, 0.092	218.400, 0.116	218.400, 0.053	218.400, -0.045	218.400, -0.002
1094	218.600, 0.346	218.600, 0.083	218.600, 0.092	218.600, 0.116	218.600, 0.053	218.600, -0.045	218.600, -0.002
1095	218.800, 0.345	218.800, 0.083	218.800, 0.092	218.800, 0.116	218.800, 0.052	218.800, -0.045	218.800, -0.002
1096	219.000, 0.344	219.000, 0.083	219.000, 0.092	219.000, 0.116	219.000, 0.052	219.000, -0.045	219.000, -0.002
1097	219.200, 0.344	219.200, 0.083	219.200, 0.092	219.200, 0.116	219.200, 0.052	219.200, -0.045	219.200, -0.002
1098	219.400, 0.343	219.400, 0.083	219.400, 0.092	219.400, 0.117	219.400, 0.051	219.400, -0.046	219.400, -0.002
1099	219.600, 0.342	219.600, 0.083	219.600, 0.092	219.600, 0.117	219.600, 0.051	219.600, -0.046	219.600, -0.002
1100	219.800, 0.342	219.800, 0.083	219.800, 0.092	219.800, 0.117	219.800, 0.051	219.800, -0.046	219.800, -0.002
1101	220.000, 0.341	220.000, 0.082	220.000, 0.092	220.000, 0.118	220.000, 0.051	220.000, -0.046	220.000, -0.002
1102	220.200, 0.340	220.200, 0.082	220.200, 0.092	220.200, 0.118	220.200, 0.051	220.200, -0.046	220.200, -0.002
1103	220.400, 0.340	220.400, 0.082	220.400, 0.092	220.400, 0.118	220.400, 0.051	220.400, -0.046	220.400, -0.003
1104	220.600, 0.339	220.600, 0.082	220.600, 0.092	220.600, 0.118	220.600, 0.051	220.600, -0.046	220.600, -0.003
1105	220.800, 0.338	220.800, 0.082	220.800, 0.092	220.800, 0.118	220.800, 0.051	220.800, -0.046	220.800, -0.002
1106	221.000, 0.337	221.000, 0.082	221.000, 0.092	221.000, 0.118	221.000, 0.051	221.000, -0.046	221.000, -0.002
1107	221.200, 0.336	221.200, 0.081	221.200, 0.092	221.200, 0.118	221.200, 0.051	221.200, -0.046	221.200, -0.002
1108	221.400, 0.335	221.400, 0.081	221.400, 0.092	221.400, 0.118	221.400, 0.052	221.400, -0.046	221.400, -0.002
1109	221.600, 0.335	221.600, 0.081	221.600, 0.092	221.600, 0.117	221.600, 0.052	221.600, -0.046	221.600, -0.002
1110	221.800, 0.334	221.800, 0.081	221.800, 0.091	221.800, 0.117	221.800, 0.052	221.800, -0.046	221.800, -0.002
1111	222.000, 0.333	222.000, 0.081	222.000, 0.092	222.000, 0.117	222.000, 0.052	222.000, -0.046	222.000, -0.002
1112	222.200, 0.332	222.200, 0.081	222.200, 0.092	222.200, 0.117	222.200, 0.052	222.200, -0.046	222.200, -0.002
1113	222.400, 0.331	222.400, 0.081	222.400, 0.092	222.400, 0.117	222.400, 0.052	222.400, -0.046	222.400, -0.002
1114	222.600, 0.331	222.600, 0.081	222.600, 0.091	222.600, 0.117	222.600, 0.052	222.600, -0.046	222.600, -0.002
1115	222.800, 0.330	222.800, 0.081	222.800, 0.091	222.800, 0.116	222.800, 0.051	222.800, -0.046	222.800, -0.002
1116	223.000, 0.330	223.000, 0.081	223.000, 0.091	223.000, 0.116	223.000, 0.051	223.000, -0.046	223.000, -0.002
1117	223.200, 0.329	223.200, 0.081	223.200, 0.091	223.200, 0.116	223.200, 0.051	223.200, -0.046	223.200, -0.002
1118	223.400, 0.328	223.400, 0.081	223.400, 0.091	223.400, 0.117	223.400, 0.051	223.400, -0.046	223.400, -0.003
1119	223.600, 0.327	223.600, 0.081	223.600, 0.090	223.600, 0.116	223.600, 0.050	223.600, -0.046	223.600, -0.003
1120	223.800, 0.326	223.800, 0.081	223.800, 0.090	223.800, 0.116	223.800, 0.050	223.800, -0.046	223.800, -0.003
1121	224.000, 0.325	224.000, 0.082	224.000, 0.090	224.000, 0.116	224.000, 0.050	224.000, -0.046	224.000, -0.003
1122	224.200, 0.325	224.200, 0.082	224.200, 0.090	224.200, 0.116	224.200, 0.050	224.200, -0.045	224.200, -0.003
1123	224.400, 0.324	224.400, 0.082	224.400, 0.090	224.400, 0.116	224.400, 0.050	224.400, -0.045	224.400, -0.003
1124	224.600, 0.323	224.600, 0.082	224.600, 0.090	224.600, 0.116	224.600, 0.050	224.600, -0.045	224.600, -0.003
1125	224.800, 0.323	224.800, 0.082	224.800, 0.090	224.800, 0.116	224.800, 0.050	224.800, -0.045	224.800, -0.003
1126	225.000, 0.322	225.000, 0.082	225.000, 0.090	225.000, 0.116	225.000, 0.050	225.000, -0.045	225.000, -0.003
1127	225.200, 0.321	225.200, 0.082	225.200, 0.090	225.200, 0.116	225.200, 0.050	225.200, -0.045	225.200, -0.003
1128	225.400, 0.321	225.400, 0.082	225.400, 0.090	225.400, 0.116	225.400, 0.050	225.400, -0.045	225.400, -0.003
1129	225.600, 0.320	225.600, 0.082	225.600, 0.089	225.600, 0.116	225.600, 0.050	225.600, -0.045	225.600, -0.003
1130	225.800, 0.320	225.800, 0.082	225.800, 0.089	225.800, 0.116	225.800, 0.050	225.800, -0.045	225.800, -0.003
1131	226.000, 0.319	226.000, 0.082	226.000, 0.089	226.000, 0.116	226.000, 0.050	226.000, -0.045	226.000, -0.003
1132	226.200, 0.318	226.200, 0.081	226.200, 0.089	226.200, 0.115	226.200, 0.050	226.200, -0.045	226.200, -0.003
1133	226.400, 0.318	226.400, 0.081	226.400, 0.089	226.400, 0.115	226.400, 0.050	226.400, -0.045	226.400, -0.003
1134	226.600, 0.317	226.600, 0.081	226.600, 0.089	226.600, 0.115	226.600, 0.050	226.600, -0.045	226.600, -0.003
1135	226.800, 0.316	226.800, 0.081	226.800, 0.089	226.800, 0.115	226.800, 0.050	226.800, -0.045	226.800, -0.003
1136	227.000, 0.315	227.000, 0.081	227.000, 0.089	227.000, 0.115	227.000, 0.050	227.000, -0.045	227.000, -0.003
1137	227.200, 0.315	227.200, 0.081	227.200, 0.089	227.200, 0.115	227.200, 0.050	227.200, -0.045	227.200, -0.003
1138	227.400, 0.314	227.400, 0.081	227.400, 0.090	227.400, 0.115	227.400, 0.051	227.400, -0.045	227.400, -0.003
1139	227.600, 0.313	227.600, 0.081	227.600, 0.090	227.600, 0.114	227.600, 0.051	227.600, -0.045	227.600, -0.003
1140	227.800, 0.312	227.800, 0.081	227.800, 0.090	227.800, 0.114	227.800, 0.051	227.800, -0.045	227.800, -0.003
1141	228.000, 0.312	228.000, 0.081	228.000, 0.090	228.000, 0.114	228.000, 0.051	228.000, -0.046	228.000, -0.002
1142	228.200, 0.311	228.200, 0.081	228.200, 0.090	228.200, 0.114	228.200, 0.051	228.200, -0.046	228.200, -0.002
1143	228.400, 0.310	228.400, 0.081	228.400, 0.090	228.400, 0.114	228.400, 0.051	228.400, -0.046	228.400, -0.002
1144	228.600, 0.309	228.600, 0.080	228.600, 0.090	228.600, 0.114	228.600, 0.051	228.600, -0.046	228.600, -0.002
1145	228.800, 0.309	228.800, 0.080	228.800, 0.090	228.800, 0.114	228.800, 0.051	228.800, -0.046	228.800, -0.002
1146	229.000, 0.308	229.000, 0.080	229.000, 0.090	229.000, 0.114	229.000, 0.051	229.000, -0.046	229.000, -0.002
1147	229.200, 0.307	229.200, 0.080	229.200, 0.090	229.200, 0.114	229.200, 0.051	229.200, -0.046	229.200, -0.002
1148	229.400, 0.306	229.400, 0.080	229.400, 0.089	229.400, 0.114	229.400, 0.051	229.400, -0.047	229.400, -0.002
1149	229.600, 0.306	229.600, 0.080	229.600, 0.089	229.600, 0.114	229.600, 0.051	229.600, -0.047	229.600, -0.002
1150	229.800, 0.305	229.800, 0.080	229.800, 0.089	229.800, 0.114	229.800, 0.051	229.800, -0.047	229.800, -0.002
1151	230.000, 0.305	230.000, 0.080	230.000, 0.089	230.000, 0.114	230.000, 0.051	230.000, -0.047	230.000, -0.002
1152	230.200, 0.304	230.200, 0.080	230.200, 0.089	230.200, 0.114	230.200, 0.051	230.200, -0.046	230.200, -0.002
1153	230.400, 0.304	230.400, 0.080	230.400, 0.089	230.400, 0.114	230.400, 0.051	230.400, -0.046	230.400, -0.002
1154	230.600, 0.303	230.600, 0.080	230.600, 0.090	230.600, 0.114	230.600, 0.051	230.600, -0.045	230.600, -0.002
1155	230.800, 0.303	230.800, 0.080	230.800, 0.090	230.800, 0.113	230.800, 0.051	230.800, -0.045	230.800, -0.003
1156	231.000, 0.303	231.000, 0.080	231.000, 0.090	231.000, 0.113	231.000, 0.051	231.000, -0.044	231.000, -0.003
1157	231.200, 0.302	231.200, 0.080	231.200, 0.090	231.200, 0.113	231.200, 0.051	231.200, -0.044	231.200, -0.003
1158	231.400, 0.302	231.400, 0.080	231.400, 0.090	231.400, 0.113	231.400, 0.051	231.400, -0.044	231.400, -0.003
1159	231.600, 0.302	231.600, 0.081	231.600, 0.090	231.600, 0.113	231.600, 0.050	231.600, -0.044	231.600, -0.003
1160	231.800, 0.302	231.800, 0.081	231.800, 0.090	231.800, 0.113	231.800, 0.050	231.800, -0.044	231.800, -0.003
1161	232.000, 0.301	232.000, 0.081	232.000, 0.090	232.000, 0.113	232.000, 0.050	232.000, -0.044	232.000, -0.003
1162	232.200, 0.301	232.200, 0.081	232.200, 0.090	232.200, 0.113	232.200, 0.050	232.200, -0.044	232.200, -0.003
1163	232.400, 0.300	232.400, 0.080	232.400, 0.089	232.400, 0.113	232.400, 0.050	232.400, -0.044	232.400, -0.003
1164	232.600, 0.299	232.600, 0.080	232.600, 0.089	232.600, 0.113	232.600, 0.050	232.600, -0.044	232.600, -0.003
1165	232.800, 0.298	232.800, 0.080	232.800, 0.089	232.800, 0.113	232.800, 0.049	232.800, -0.044	232.800, -0.003
1166	233.000, 0.297	233.000, 0.080	233.000, 0.089	233.000, 0.113	233.000, 0.049	233.000, -0.044	233.000, -0.003
1167	233.200, 0.296	233.200, 0.080	233.200, 0.088	233.200, 0.114	233.200, 0.049	233.200, -0.045	233.200, -0.003
1168	233.400, 0.296	233.400, 0.080	233.400, 0.088	233.400, 0.114	233.400, 0.049	233.400, -0.045	233.400, -0.003
1169	233.600, 0.295	233.600, 0.079	233.600, 0.088	233.600, 0.114	233.600, 0.049	233.600, -0.045	233.600, -0.003
1170	233.800, 0.294	233.800, 0.079	233.800, 0.088	233.800, 0.114	233.800, 0.049	233.800, -0.045	233.800, -0.003
1171	234.000, 0.293	234.000, 0.079	234.000, 0.088	234.000, 0.114	234.000, 0.049	234.000, -0.045	234.000, -0.002
1172	234.200, 0.292	234.200, 0.079	234.200, 0.088	234.200, 0.114	234.200, 0.049	234.200, -0.045	234.200, -0.003
1173	234.400, 0.292	234.400, 0.079	234.400, 0.088	234.400, 0.114	234.400, 0.049	234.400, -0.045	234.400, -0.003
1174	234.600, 0.291	234.600, 0.079	234.600, 0.088	234.600, 0.114	234.600, 0.049	234.600, -0.045	234.600, -0.003
1175	234.800, 0.291	234.800, 0.079	234.800, 0.089	234.800, 0.113	234.800, 0.049	234.800, -0.045	234.800, -0.003
1176	235.000, 0.290	235.000, 0.079	235.000, 0.089	235.000, 0.113	235.000, 0.049	235.000, -0.045	235.000, -0.003
1177	235.200, 0.290	235.200, 0.079	235.200, 0.089	235.200, 0.113	235.200, 0.049	235.200, -0.045	235.200, -0.003
1178	235.400, 0.289	235.400, 0.080	235.400, 0.089	235.400, 0.113	235.400, 0.049	235.400, -0.045	235.400, -0.003
1179	235.600, 0.289	235.600, 0.080	235.600, 0.089	235.600, 0.113	235.600, 0.049	235.600, -0.045	235.600, -0.003
1180	235.800, 0.289	235.800, 0.080	235.800, 0.089	235.800, 0.113	235.800, 0.049	235.800, -0.045	235.800, -0.003
1181	236.000, 0.288	236.000, 0.080	236.000, 0.089	236.000, 0.113	236.000, 0.048	236.000, -0.045	236.000, -0.002
1182	236.200, 0.288	236.200, 0.080	236.200, 0.089	236.200, 0.113	236.200, 0.048	236.200, -0.045	236.200, -0.002
1183	236.400, 0.288	236.400, 0.080	236.400, 0.088	236.400, 0.113	236.400, 0.048	236.400, -0.045	236.400, -0.002
1184	236.600, 0.287	236.600, 0.079	236.600, 0.088	236.600, 0.113	236.600, 0.047	236.600, -0.045	236.600, -0.001
1185	236.800, 0.287	236.800, 0.079	236.800, 0.088	236.800, 0.113	236.800, 0.047	236.800, -0.045	236.800, -0.001
1186	237.000, 0.287	237.000, 0.079	237.000, 0.088	237.000, 0.113	237.000, 0.047	237.000, -0.045	237.000, -0.001
1187	237.200, 0.287	237.200, 0.079	237.200, 0.088	237.200, 0.113	237.200, 0.047	237.200, -0.045	237.200, -0.000
1188	237.400, 0.286	237.400, 0.079	237.400, 0.087	237.400, 0.113	237.400, 0.047	237.400, -0.045	237.400, -0.000
1189	237.600, 0.286	237.600, 0.079	237.600, 0.087	237.600, 0.113	237.600, 0.047	237.600, -0.045	237.600, -0.000
1190	237.800, 0.285	237.800, 0.079	237.800, 0.087	237.800, 0.112	237.800, 0.048	237.800, -0.045	237.800, -0.000
1191	238.000, 0.285	238.000, 0.079	238.000, 0.087	238.000, 0.112	238.000, 0.048	238.000, -0.045	238.000, -0.000
1192	238.200, 0.284	238.200, 0.079	238.200, 0.087	238.200, 0.112	238.200, 0.048	238.200, -0.045	238.200, -0.001
1193	238.400, 0.284	238.400, 0.079	238.400, 0.086	238.400, 0.112	238.400, 0.048	238.400, -0.045	238.400, -0.001
1194	238.600, 0.284	238.600, 0.080	238.600, 0.086	238.600, 0.112	238.600, 0.049	238.600, -0.045	238.600, -0.001
1195	238.800, 0.283	238.800, 0.080	238.800, 0.086	238.800, 0.112	238.800, 0.049	238.800, -0.045	238.800, -0.001
1196	239.000, 0.283	239.000, 0.080	239.000, 0.086	239.000, 0.112	239.000, 0.049	239.000, -0.045	239.000, -0.001
1197	239.200, 0.283	239.200, 0.080	239.200, 0.086	239.200, 0.112	239.200, 0.048	239.200, -0.045	239.200, -0.001
1198	239.400, 0.282	239.400, 0.080	239.400, 0.086	239.400, 0.112	239.400, 0.048	239.400, -0.045	239.400, -0.001
1199	239.600, 0.282	239.600, 0.080	239.600, 0.086	239.600, 0.113	239.600, 0.048	239.600, -0.045	239.600, -0.001
1200	239.800, 0.281	239.800, 0.080	239.800, 0.086	239.800, 0.113	239.800, 0.047	239.800, -0.044	239.800, -0.001
1201	240.000, 0.281	240.000, 0.080	240.000, 0.087	240.000, 0.113	240.000, 0.047	240.000, -0.044	240.000, -0.001
1202	240.200, 0.280	240.200, 0.080	240.200, 0.087	240.200, 0.112	240.200, 0.047	240.200, -0.044	240.200, -0.002
1203	240.400, 0.279	240.400, 0.080	240.400, 0.087	240.400, 0.112	240.400, 0.047	240.400, -0.044	240.400, -0.002
1204	240.600, 0.279	240.600, 0.079	240.600, 0.087	240.600, 0.112	240.600, 0.047	240.600, -0.044	240.600, -0.002
1205	240.800, 0.279	240.800, 0.079	240.800, 0.087	240.800, 0.112	240.800, 0.047	240.800, -0.044	240.800, -0.002
1206	241.000, 0.278	241.000, 0.079	241.000, 0.087	241.000, 0.112	241.000, 0.047	241.000, -0.044	241.000, -0.002
1207	241.200, 0.278	241.200, 0.079	241.200, 0.087	241.200, 0.112	241.200, 0.047	241.200, -0.044	241.200, -0.002
1208	241.400, 0.277	241.400, 0.078	241.400, 0.086	241.400, 0.112	241.400, 0.047	241.400, -0.044	241.400, -0.002
1209	241.600, 0.277	241.600, 0.078	241.600, 0.086	241.600, 0.112	241.600, 0.047	241.600, -0.044	241.600, -0.003
1210	241.800, 0.276	241.800, 0.078	241.800, 0.086	241.800, 0.112	241.800, 0.047	241.800, -0.044	241.800, -0.003
1211	242.000, 0.276	242.000, 0.077	242.000, 0.085	242.000, 0.111	242.000, 0.047	242.000, -0.044	242.000, -0.003
1212	242.200, 0.276	242.200, 0.077	242.200, 0.085	242.200, 0.111	242.200, 0.047	242.200, -0.044	242.200, -0.004
1213	242.400, 0.275	242.400, 0.077	242.400, 0.085	242.400, 0.111	242.400, 0.046	242.400, -0.044	242.400, -0.004
1214	242.600, 0.275	242.600, 0.077	242.600, 0.085	242.600, 0.111	242.600, 0.046	242.600, -0.044	242.600, -0.003
1215	242.800, 0.275	242.800, 0.077	242.800, 0.085	242.800, 0.111	242.800, 0.046	242.800, -0.044	242.800, -0.003
1216	243.000, 0.274	243.000, 0.077	243.000, 0.085	243.000, 0.111	243.000, 0.046	243.000, -0.044	243.000, -0.003
1217	243.200, 0.274	243.200, 0.077	243.200, 0.085	243.200, 0.110	243.200, 0.046	243.200, -0.044	243.200, -0.003
1218	243.400, 0.274	243.400, 0.077	243.400, 0.086	243.400, 0.110	243.400, 0.046	243.400, -0.044	243.400, -0.003
1219	243.600, 0.274	243.600, 0.077	243.600, 0.086	243.600, 0.111	243.600, 0.046	243.600, -0.044	243.600, -0.003
1220	243.800, 0.273	243.800, 0.077	243.800, 0.086	243.800, 0.111	243.800, 0.046	243.800, -0.044	243.800, -0.003
1221	244.000, 0.273	244.000, 0.078	244.000, 0.086	244.000, 0.111	244.000, 0.046	244.000, -0.044	244.000, -0.003
1222	244.200, 0.273	244.200, 0.078	244.200, 0.087	244.200, 0.111	244.200, 0.046	244.200, -0.044	244.200, -0.002
1223	244.400, 0.272	244.400, 0.078	244.400, 0.087	244.400, 0.111	244.400, 0.046	244.400, -0.044	244.400, -0.002
1224	244.600, 0.272	244.600, 0.078	244.600, 0.087	244.600, 0.111	244.600, 0.046	244.600, -0.044	244.600, -0.002
1225	244.800, 0.272	244.800, 0.078	244.800, 0.086	244.800, 0.111	244.800, 0.046	244.800, -0.044	244.800, -0.002
1226	245.000, 0.272	245.000, 0.078	245.000, 0.086	245.000, 0.111	245.000, 0.046	245.000, -0.044	245.000, -0.002
1227	245.200, 0.271	245.200, 0.078	245.200, 0.086	245.200, 0.112	245.200, 0.046	245.200, -0.044	245.200, -0.002
1228	245.400, 0.271	245.400, 0.078	245.400, 0.086	245.400, 0.112	245.400, 0.046	245.400, -0.044	245.400, -0.002
1229	245.600, 0.270	245.600, 0.078	245.600, 0.087	245.600, 0.112	245.600, 0.046	245.600, -0.044	245.600, -0.002
1230	245.800, 0.270	245.800, 0.078	245.800, 0.086	245.800, 0.112	245.800, 0.046	245.800, -0.044	245.800, -0.002
1231	246.000, 0.269	246.000, 0.078	246.000, 0.086	246.000, 0.112	246.000, 0.046	246.000, -0.044	246.000, -0.002
1232	246.200, 0.269	246.200, 0.078	246.200, 0.086	246.200, 0.112	246.200, 0.046	246.200, -0.044	246.200, -0.002
1233	246.400, 0.268	246.400, 0.078	246.400, 0.086	246.400, 0.112	246.400, 0.046	246.400, -0.044	246.400, -0.002
1234	246.600, 0.268	246.600, 0.078	246.600, 0.086	246.600, 0.112	246.600, 0.046	246.600, -0.044	246.600, -0.002
1235	246.800, 0.267	246.800, 0.078	246.800, 0.086	246.800, 0.112	246.800, 0.046	246.800, -0.044	246.800, -0.002
1236	247.000, 0.267	247.000, 0.078	247.000, 0.086	247.000, 0.112	247.000, 0.046	247.000, -0.044	247.000, -0.002
1237	247.200, 0.267	247.200, 0.078	247.200, 0.086	247.200, 0.112	247.200, 0.047	247.200, -0.044	247.200, -0.002
1238	247.400, 0.266	247.400, 0.078	247.400, 0.086	247.400, 0.111	247.400, 0.047	247.400, -0.044	247.400, -0.002
1239	247.600, 0.266	247.600, 0.078	247.600, 0.086	247.600, 0.111	247.600, 0.047	247.600, -0.044	247.600, -0.002
1240	247.800, 0.266	247.800, 0.078	247.800, 0.086	247.800, 0.110	247.800, 0.047	247.800, -0.044	247.800, -0.002
1241	248.000, 0.266	248.000, 0.078	248.000, 0.086	248.000, 0.110	248.000, 0.047	248.000, -0.044	248.000, -0.002
1242	248.200, 0.266	248.200, 0.077	248.200, 0.085	248.200, 0.110	248.200, 0.047	248.200, -0.044	248.200, -0.002
1243	248.400, 0.265	248.400, 0.077	248.400, 0.085	248.400, 0.110	248.400, 0.047	248.400, -0.044	248.400, -0.003
1244	248.600, 0.265	248.600, 0.077	248.600, 0.086	248.600, 0.110	248.600, 0.047	248.600, -0.044	248.600, -0.003
1245	248.800, 0.265	248.800, 0.077	248.800, 0.086	248.800, 0.110	248.800, 0.046	248.800, -0.044	248.800, -0.003
1246	249.000, 0.264	249.000, 0.077	249.000, 0.086	249.000, 0.110	249.000, 0.046	249.000, -0.044	249.000, -0.003
1247	249.200, 0.264	249.200, 0.077	249.200, 0.086	249.200, 0.110	249.200, 0.046	249.200, -0.044	249.200, -0.003
1248	249.400, 0.264	249.400, 0.077	249.400, 0.086	249.400, 0.110	249.400, 0.046	249.400, -0.044	249.400, -0.002
1249	249.600, 0.263	249.600, 0.077	249.600, 0.085	249.600, 0.110	249.600, 0.045	249.600, -0.044	249.600, -0.002
1250	249.800, 0.263	249.800, 0.077	249.800, 0.085	249.800, 0.111	249.800, 0.045	249.800, -0.044	249.800, -0.002
1251	250.000, 0.262	250.000, 0.077	250.000, 0.085	250.000, 0.111	250.000, 0.045	250.000, -0.044	250.000, -0.001
1252	250.200, 0.262	250.200, 0.076	250.200, 0.085	250.200, 0.111	250.200, 0.045	250.200, -0.044	250.200, -0.001
1253	250.400, 0.262	250.400, 0.077	250.400, 0.085	250.400, 0.111	250.400, 0.045	250.400, -0.044	250.400, -0.001
1254	250.600, 0.261	250.600, 0.077	250.600, 0.085	250.600, 0.111	250.600, 0.045	250.600, -0.044	250.600, -0.001
1255	250.800, 0.261	250.800, 0.077	250.800, 0.084	250.800, 0.111	250.800, 0.045	250.800, -0.044	250.800, -0.001
1256	251.000, 0.261	251.000, 0.077	251.000, 0.084	251.000, 0.111	251.000, 0.045	251.000, -0.044	251.000, -0.001
1257	251.200, 0.261	251.200, 0.077	251.200, 0.084	251.200, 0.110	251.200, 0.045	251.200, -0.044	251.200, -0.001
1258	251.400, 0.260	251.400, 0.077	251.400, 0.084	251.400, 0.110	251.400, 0.045	251.400, -0.044	251.400, -0.001
1259	251.600, 0.260	251.600, 0.078	251.600, 0.084	251.600, 0.110	251.600, 0.045	251.600, -0.044	251.600, -0.001
1260	251.800, 0.259	251.800, 0.078	251.800, 0.084	251.800, 0.110	251.800, 0.045	251.800, -0.044	251.800, -0.002
1261	252.000, 0.259	252.000, 0.078	252.000, 0.084	252.000, 0.110	252.000, 0.045	252.000, -0.044	252.000, -0.002
1262	252.200, 0.259	252.200, 0.078	252.200, 0.083	252.200, 0.110	252.200, 0.045	252.200, -0.044	252.200, -0.002
1263	252.400, 0.259	252.400, 0.078	252.400, 0.083	252.400, 0.110	252.400, 0.045	252.400, -0.044	252.400, -0.002
1264	252.600, 0.259	252.600, 0.077	252.600, 0.083	252.600, 0.109	252.600, 0.045	252.600, -0.044	252.600, -0.002
1265	252.800, 0.258	252.800, 0.077	252.800, 0.083	252.800, 0.109	252.800, 0.045	252.800, -0.044	252.800, -0.002
1266	253.000, 0.258	253.000, 0.077	253.000, 0.083	253.000, 0.109	253.000, 0.045	253.000, -0.044	253.000, -0.002
1267	253.200, 0.258	253.200, 0.077	253.200, 0.083	253.200, 0.109	253.200, 0.045	253.200, -0.044	253.200, -0.002
1268	253.400, 0.258	253.400, 0.077	253.400, 0.084	253.400, 0.109	253.400, 0.045	253.400, -0.043	253.400, -0.002
1269	253.600, 0.257	253.600, 0.077	253.600, 0.084	253.600, 0.109	253.600, 0.045	253.600, -0.043	253.600, -0.001
1270	253.800, 0.257	253.800, 0.077	253.800, 0.084	253.800, 0.109	253.800, 0.045	253.800, -0.043	253.800, -0.001
1271	254.000, 0.257	254.000, 0.077	254.000, 0.084	254.000, 0.109	254.000, 0.045	254.000, -0.043	254.000, -0.001
1272	254.200, 0.256	254.200, 0.077	254.200, 0.085	254.200, 0.109	254.200, 0.045	254.200, -0.044	254.200, -0.001
1273	254.400, 0.256	254.400, 0.077	254.400, 0.085	254.400, 0.108	254.400, 0.045	254.400, -0.044	254.400, -0.001
1274	254.600, 0.256	254.600, 0.077	254.600, 0.085	254.600, 0.108	254.600, 0.045	254.600, -0.044	254.600, -0.001
1275	254.800, 0.255	254.800, 0.077	254.800, 0.086	254.800, 0.109	254.800, 0.045	254.800, -0.044	254.800, -0.001
1276	255.000, 0.255	255.000, 0.077	255.000, 0.086	255.000, 0.109	255.000, 0.045	255.000, -0.044	255.000, -0.001
1277	255.200, 0.255	255.200, 0.077	255.200, 0.085	255.200, 0.109	255.200, 0.044	255.200, -0.045	255.200, -0.001
1278	255.400, 0.255	255.400, 0.078	255.400, 0.085	255.400, 0.109	255.400, 0.044	255.400, -0.045	255.400, -0.001
1279	255.600, 0.254	255.600, 0.078	255.600, 0.085	255.600, 0.109	255.600, 0.044	255.600, -0.045	255.600, -0.001
1280	255.800, 0.254	255.800, 0.078	255.800, 0.085	255.800, 0.109	255.800, 0.044	255.800, -0.045	255.800, -0.001
1281	256.000, 0.254	256.000, 0.078	256.000, 0.084	256.000, 0.109	256.000, 0.044	256.000, -0.045	256.000, -0.001
1282	256.200, 0.253	256.200, 0.078	256.200, 0.084	256.200, 0.109	256.200, 0.044	256.200, -0.045	256.200, -0.001
1283	256.400, 0.253	256.400, 0.078	256.400, 0.084	256.400, 0.108	256.400, 0.044	256.400, -0.045	256.400, -0.001
1284	256.600, 0.252	256.600, 0.077	256.600, 0.084	256.600, 0.108	256.600, 0.044	256.600, -0.045	256.600, -0.001
1285	256.800, 0.252	256.800, 0.077	256.800, 0.083	256.800, 0.108	256.800, 0.044	256.800, -0.045	256.800, -0.001
1286	257.000, 0.252	257.000, 0.077	257.000, 0.083	257.000, 0.108	257.000, 0.044	257.000, -0.045	257.000, -0.001
1287	257.200, 0.252	257.200, 0.077	257.200, 0.083	257.200, 0.108	257.200, 0.044	257.200, -0.044	257.200, -0.001
1288	257.400, 0.252	257.400, 0.076	257.400, 0.083	257.400, 0.108	257.400, 0.044	257.400, -0.044	257.400, -0.001
1289	257.600, 0.252	257.600, 0.076	257.600, 0.084	257.600, 0.108	257.600, 0.045	257.600, -0.044	257.600, -0.001
1290	257.800, 0.252	257.800, 0.076	257.800, 0.084	257.800, 0.108	257.800, 0.045	257.800, -0.044	257.800, -0.001
1291	258.000, 0.251	258.000, 0.075	258.000, 0.084	258.000, 0.108	258.000, 0.045	258.000, -0.044	258.000, -0.001
1292	258.200, 0.251	258.200, 0.075	258.200, 0.084	258.200, 0.108	258.200, 0.045	258.200, -0.044	258.200, -0.001
1293	258.400, 0.251	258.400, 0.075	258.400, 0.084	258.400, 0.108	258.400, 0.045	258.400, -0.044	258.400, -0.001
1294	258.600, 0.251	258.600, 0.075	258.600, 0.084	258.600, 0.108	258.600, 0.045	258.600, -0.044	258.600, -0.001
1295	258.800, 0.250	258.800, 0.075	258.800, 0.084	258.800, 0.108	258.800, 0.045	258.800, -0.044	258.800, -0.001
1296	259.000, 0.250	259.000, 0.075	259.000, 0.084	259.000, 0.108	259.000, 0.045	259.000, -0.044	259.000, -0.001
1297	259.200, 0.250	259.200, 0.075	259.200, 0.084	259.200, 0.108	259.200, 0.045	259.200, -0.044	259.200, -0.001
1298	259.400, 0.250	259.400, 0.075	259.400, 0.084	259.400, 0.108	259.400, 0.044	259.400, -0.044	259.400, -0.001
1299	259.600, 0.249	259.600, 0.075	259.600, 0.084	259.600, 0.108	259.600, 0.044	259.600, -0.044	259.600, -0.001
1300	259.800, 0.249	259.800, 0.075	259.800, 0.084	259.800, 0.108	259.800, 0.044	259.800, -0.044	259.800, -0.001
1301	260.000, 0.248	260.000, 0.074	260.000, 0.084	260.000, 0.108	260.000, 0.044	260.000, -0.044	260.000, -0.001
1302	260.200, 0.247	260.200, 0.074	260.200, 0.084	260.200, 0.108	260.200, 0.044	260.200, -0.044	260.200, -0.001
1303	260.400, 0.247	260.400, 0.074	260.400, 0.084	260.400, 0.108	260.400, 0.043	260.400, -0.043	260.400, -0.001
1304	260.600, 0.247	260.600, 0.074	260.600, 0.084	260.600, 0.108	260.600, 0.043	260.600, -0.043	260.600, -0.001
1305	260.800, 0.247	260.800, 0.074	260.800, 0.084	260.800, 0.108	260.800, 0.043	260.800, -0.043	260.800, -0.001
1306	261.000, 0.247	261.000, 0.074	261.000, 0.084	261.000, 0.108	261.000, 0.043	261.000, -0.043	261.000, -0.001
1307	261.200, 0.247	261.200, 0.074	261.200, 0.084	261.200, 0.107	261.200, 0.043	261.200, -0.043	261.200, -0.001
1308	261.400, 0.247	261.400, 0.074	261.400, 0.084	261.400, 0.107	261.400, 0.043	261.400, -0.043	261.400, -0.001
1309	261.600, 0.247	261.600, 0.074	261.600, 0.084	261.600, 0.107	261.600, 0.043	261.600, -0.043	261.600, -0.001
1310	261.800, 0.247	261.800, 0.074	261.800, 0.084	261.800, 0.106	261.800, 0.043	261.800, -0.043	261.800, -0.001
1311	262.000, 0.246	262.000, 0.075	262.000, 0.083	262.000, 0.106	262.000, 0.043	262.000, -0.043	262.000, -0.001
1312	262.200, 0.246	262.200, 0.075	262.200, 0.083	262.200, 0.106	262.200, 0.044	262.200, -0.043	262.200, -0.001
1313	262.400, 0.246	262.400, 0.075	262.400, 0.083	262.400, 0.106	262.400, 0.044	262.400, -0.043	262.400, -0.001
1314	262.600, 0.245	262.600, 0.075	262.600, 0.083	262.600, 0.106	262.600, 0.044	262.600, -0.043	262.600, -0.001
1315	262.800, 0.245	262.800, 0.075	262.800, 0.083	262.800, 0.106	262.800, 0.044	262.800, -0.043	262.800, -0.001
1316	263.000, 0.245	263.000, 0.075	263.000, 0.083	263.000, 0.106	263.000, 0.044	263.000, -0.043	263.000, -0.001
1317	263.200, 0.244	263.200, 0.075	263.200, 0.083	263.200, 0.106	263.200, 0.044	263.200, -0.043	263.200, -0.001
1318	263.400, 0.244	263.400, 0.075	263.400, 0.083	263.400, 0.106	263.400, 0.044	263.400, -0.043	263.400, -0.000
1319	263.600, 0.243	263.600, 0.075	263.600, 0.083	263.600, 0.106	263.600, 0.045	263.600, -0.043	263.600, -0.000
1320	263.800, 0.243	263.800, 0.075	263.800, 0.083	263.800, 0.106	263.800, 0.045	263.800, -0.043	263.800, -0.000
1321	264.000, 0.243	264.000, 0.074	264.000, 0.083	264.000, 0.107	264.000, 0.045	264.000, -0.044	264.000, -0.000
1322	264.200, 0.242	264.200, 0.074	264.200, 0.083	264.200, 0.107	264.200, 0.045	264.200, -0.043	264.200, 0.000
1323	264.400, 0.242	264.400, 0.074	264.400, 0.083	264.400, 0.107	264.400, 0.045	264.400, -0.043	264.400, 0.000
1324	264.600, 0.242	264.600, 0.074	264.600, 0.084	264.600, 0.107	264.600, 0.045	264.600, -0.043	264.600, 0.000
1325	264.800, 0.242	264.800, 0.074	264.800, 0.084	264.800, 0.107	264.800, 0.045	264.800, -0.043	264.800, 0.000
1326	265.000, 0.241	265.000, 0.074	265.000, 0.083	265.000, 0.107	265.000, 0.045	265.000, -0.043	265.000, 0.000
1327	265.200, 0.241	265.200, 0.074	265.200, 0.083	265.200, 0.107	265.200, 0.045	265.200, -0.043	265.200, 0.000
1328	265.400, 0.241	265.400, 0.074	265.400, 0.083	265.400, 0.107	265.400, 0.045	265.400, -0.043	265.400, 0.000
1329	265.600, 0.241	265.600, 0.074	265.600, 0.082	265.600, 0.107	265.600, 0.045	265.600, -0.044	265.600, -0.000
1330	265.800, 0.241	265.800, 0.074	265.800, 0.082	265.800, 0.107	265.800, 0.045	265.800, -0.044	265.800, -0.000
1331	266.000, 0.241	266.000, 0.074	266.000, 0.082	266.000, 0.107	266.000, 0.045	266.000, -0.044	266.000, -0.000
1332	266.200, 0.241	266.200, 0.075	266.200, 0.081	266.200, 0.107	266.200, 0.045	266.200, -0.044	266.200, -0.000
1333	266.400, 0.241	266.400, 0.075	266.400, 0.081	266.400, 0.107	266.400, 0.044	266.400, -0.044	266.400, -0.000
1334	266.600, 0.240	266.600, 0.074	266.600, 0.081	266.600, 0.107	266.600, 0.044	266.600, -0.044	266.600, -0.000
1335	266.800, 0.240	266.800, 0.074	266.800, 0.081	266.800, 0.107	266.800, 0.044	266.800, -0.044	266.800, -0.000
1336	267.000, 0.240	267.000, 0.074	267.000, 0.081	267.000, 0.107	267.000, 0.044	267.000, -0.044	267.000, -0.000
1337	267.200, 0.240	267.200, 0.074	267.200, 0.081	267.200, 0.107	267.200, 0.044	267.200, -0.044	267.200, -0.000
1338	267.400, 0.240	267.400, 0.074	267.400, 0.081	267.400, 0.107	267.400, 0.044	267.400, -0.044	267.400, -0.000
1339	267.600, 0.240	267.600, 0.074	267.600, 0.081	267.600, 0.107	267.600, 0.044	267.600, -0.044	267.600, -0.000
1340	267.800, 0.240	267.800, 0.074	267.800, 0.081	267.800, 0.107	267.800, 0.044	267.800, -0.044	267.800, -0.000
1341	268.000, 0.240	268.000, 0.074	268.000, 0.082	268.000, 0.107	268.000, 0.043	268.000, -0.044	268.000, -0.000
1342	268.200, 0.240	268.200, 0.074	268.200, 0.082	268.200, 0.107	268.200, 0.043	268.200, -0.044	268.200, -0.000
1343	268.400, 0.240	268.400, 0.074	268.400, 0.082	268.400, 0.106	268.400, 0.043	268.400, -0.044	268.400, -0.000
1344	268.600, 0.240	268.600, 0.074	268.600, 0.082	268.600, 0.106	268.600, 0.043	268.600, -0.044	268.600, -0.000
1345	268.800, 0.239	268.800, 0.074	268.800, 0.082	268.800, 0.106	268.800, 0.043	268.800, -0.043	268.800, -0.000
1346	269.000, 0.239	269.000, 0.074	269.000, 0.082	269.000, 0.106	269.000, 0.043	269.000, -0.043	269.000, -0.000
1347	269.200, 0.239	269.200, 0.074	269.200, 0.082	269.200, 0.106	269.200, 0.043	269.200, -0.043	269.200, -0.001
1348	269.400, 0.239	269.400, 0.075	269.400, 0.082	269.400, 0.106	269.400, 0.043	269.400, -0.043	269.400, -0.001
1349	269.600, 0.238	269.600, 0.075	269.600, 0.082	269.600, 0.106	269.600, 0.042	269.600, -0.043	269.600, -0.001
1350	269.800, 0.238	269.800, 0.075	269.800, 0.082	269.800, 0.105	269.800, 0.042	269.800, -0.043	269.800, -0.001
1351	,	,	,	,	,	,	,
1352	,	,	,	,	,	,	,
1353	,	,	,	,	,	,	,
1354	,	,	,	,	,	,	,
1355	,	,	,	,	,	,	,
1356	,	,	,	,	,	,	,
1357	,	,	,	,	,	,	,
1358	,	,	,	,	,	,	,
1359	,	,	,	,	,	,	,
1360	,	,	,	,	,	,	,
1361	,	,	,	,	,	,	,
1362	,	,	,	,	,	,	,
1363	,	,	,	,	,	,	,
1364	,	,	,	,	,	,	,
1365	,	,	,	,	,	,	,
1366	,	,	,	,	,	,	,
1367	,	,	,	,	,	,	,
1368	,	,	,	,	,	,	,
1369	,	,	,	,	,	,	,
1370	,	,	,	,	,	,	,
1371	,	,	,	,	,	,	,
1372	,	,	,	,	,	,	,
1373	,	,	,	,	,	,	,
1374	,	,	,	,	,	,	,
1375	,	,	,	,	,	,	,
1376	,	,	,	,	,	,	,
1377	,	,	,	,	,	,	,
1378	,	,	,	,	,	,	,
1379	,	,	,	,	,	,	,
1380	,	,	,	,	,	,	,
1381	,	,	,	,	,	,	,
1382	,	,	,	,	,	,	,
1383	,	,	,	,	,	,	,
1384	,	,	,	,	,	,	,
1385	,	,	,	,	,	,	,
1386	,	,	,	,	,	,	,
1387	,	,	,	,	,	,	,
1388	,	,	,	,	,	,	,
1389	,	,	,	,	,	,	,
1390	,	,	,	,	,	,	,
1391	,	,	,	,	,	,	,
1392	,	,	,	,	,	,	,
1393	,	,	,	,	,	,	,
1394	,	,	,	,	,	,	,
1395	,	,	,	,	,	,	,
1396	,	,	,	,	,	,	,
1397	,	,	,	,	,	,	,
1398	,	,	,	,	,	,	,
1399	,	,	,	,	,	,	,
1400	,	,	,	,	,	,	,
1401	,	,	,	,	,	,	,
1402	,	,	,	,	,	,	,
1403	,	,	,	,	,	,	,
1404	,	,	,	,	,	,	,
1405	,	,	,	,	,	,	,
1406	,	,	,	,	,	,	,
1407	,	,	,	,	,	,	,
1408	,	,	,	,	,	,	,
1409	,	,	,	,	,	,	,
1410	,	,	,	,	,	,	,
1411	,	,	,	,	,	,	,
1412	,	,	,	,	,	,	,
1413	,	,	,	,	,	,	,
1414	,	,	,	,	,	,	,
1415	,	,	,	,	,	,	,
1416	,	,	,	,	,	,	,
1417	,	,	,	,	,	,	,
1418	,	,	,	,	,	,	,
1419	,	,	,	,	,	,	,
1420	,	,	,	,	,	,	,
1421	,	,	,	,	,	,	,
1422	,	,	,	,	,	,	,
1423	,	,	,	,	,	,	,
1424	,	,	,	,	,	,	,
1425	,	,	,	,	,	,	,
1426	,	,	,	,	,	,	,
1427	,	,	,	,	,	,	,
1428	,	,	,	,	,	,	,
1429	,	,	,	,	,	,	,
1430	,	,	,	,	,	,	,
1431	,	,	,	,	,	,	,
1432	,	,	,	,	,	,	,
1433	,	,	,	,	,	,	,
1434	,	,	,	,	,	,	,
1435	,	,	,	,	,	,	,
1436	,	,	,	,	,	,	,
1437	,	,	,	,	,	,	,
1438	,	,	,	,	,	,	,
1439	,	,	,	,	,	,	,
1440	,	,	,	,	,	,	,
1441	,	,	,	,	,	,	,
1442	,	,	,	,	,	,	,
1443	,	,	,	,	,	,	,
1444	,	,	,	,	,	,	,
1445	,	,	,	,	,	,	,
1446	,	,	,	,	,	,	,
1447	,	,	,	,	,	,	,
1448	,	,	,	,	,	,	,
1449	,	,	,	,	,	,	,
1450	,	,	,	,	,	,	,
1451	,	,	,	,	,	,	,
1452	,	,	,	,	,	,	,
1453	,	,	,	,	,	,	,
1454	,	,	,	,	,	,	,
1455	,	,	,	,	,	,	,
1456	,	,	,	,	,	,	,
1457	,	,	,	,	,	,	,
1458	,	,	,	,	,	,	,
1459	,	,	,	,	,	,	,
1460	,	,	,	,	,	,	,
1461	,	,	,	,	,	,	,
1462	,	,	,	,	,	,	,
1463	,	,	,	,	,	,	,
1464	,	,	,	,	,	,	,
1465	,	,	,	,	,	,	,
1466	,	,	,	,	,	,	,
1467	,	,	,	,	,	,	,
1468	,	,	,	,	,	,	,
1469	,	,	,	,	,	,	,
1470	,	,	,	,	,	,	,
1471	,	,	,	,	,	,	,
1472	,	,	,	,	,	,	,
1473	,	,	,	,	,	,	,
1474	,	,	,	,	,	,	,
1475	,	,	,	,	,	,	,
1476	,	,	,	,	,	,	,
1477	,	,	,	,	,	,	,
1478	,	,	,	,	,	,	,
1479	,	,	,	,	,	,	,
1480	,	,	,	,	,	,	,
1481	,	,	,	,	,	,	,
1482	,	,	,	,	,	,	,
1483	,	,	,	,	,	,	,
1484	,	,	,	,	,	,	,
1485	,	,	,	,	,	,	,
1486	,	,	,	,	,	,	,
1487	,	,	,	,	,	,	,
1488	,	,	,	,	,	,	,
1489	,	,	,	,	,	,	,
1490	,	,	,	,	,	,	,
1491	,	,	,	,	,	,	,
1492	,	,	,	,	,	,	,
1493	,	,	,	,	,	,	,
1494	,	,	,	,	,	,	,
1495	,	,	,	,	,	,	,
1496	,	,	,	,	,	,	,
1497	,	,	,	,	,	,	,
1498	,	,	,	,	,	,	,
1499	,	,	,	,	,	,	,
1500	,	,	,	,	,	,	,
1501	,	,	,	,	,	,	,
1502	,	,	,	,	,	,	,
1503	,	,	,	,	,	,	,
1504	,	,	,	,	,	,	,
1505	,	,	,	,	,	,	,
1506	,	,	,	,	,	,	,
1507	,	,	,	,	,	,	,
1508	,	,	,	,	,	,	,
1509	,	,	,	,	,	,	,
1510	,	,	,	,	,	,	,
1511	,	,	,	,	,	,	,
1512	,	,	,	,	,	,	,
1513	,	,	,	,	,	,	,
1514	,	,	,	,	,	,	,
1515	,	,	,	,	,	,	,
1516	,	,	,	,	,	,	,
1517	,	,	,	,	,	,	,
1518	,	,	,	,	,	,	,
1519	,	,	,	,	,	,	,
1520	,	,	,	,	,	,	,
1521	,	,	,	,	,	,	,
1522	,	,	,	,	,	,	,
1523	,	,	,	,	,	,	,
1524	,	,	,	,	,	,	,
1525	,	,	,	,	,	,	,
1526	,	,	,	,	,	,	,
1527	,	,	,	,	,	,	,
1528	,	,	,	,	,	,	,
1529	,	,	,	,	,	,	,
1530	,	,	,	,	,	,	,
1531	,	,	,	,	,	,	,
1532	,	,	,	,	,	,	,
1533	,	,	,	,	,	,	,
1534	,	,	,	,	,	,	,
1535	,	,	,	,	,	,	,
1536	,	,	,	,	,	,	,
1537	,	,	,	,	,	,	,
1538	,	,	,	,	,	,	,
1539	,	,	,	,	,	,	,
1540	,	,	,	,	,	,	,
1541	,	,	,	,	,	,	,
1542	,	,	,	,	,	,	,
1543	,	,	,	,	,	,	,
1544	,	,	,	,	,	,	,
1545	,	,	,	,	,	,	,
1546	,	,	,	,	,	,	,
1547	,	,	,	,	,	,	,
1548	,	,	,	,	,	,	,
1549	,	,	,	,	,	,	,
1550	,	,	,	,	,	,	,
1551	,	,	,	,	,	,	,
1552	,	,	,	,	,	,	,
1553	,	,	,	,	,	,	,
1554	,	,	,	,	,	,	,
1555	,	,	,	,	,	,	,
1556	,	,	,	,	,	,	,
1557	,	,	,	,	,	,	,
1558	,	,	,	,	,	,	,
1559	,	,	,	,	,	,	,
1560	,	,	,	,	,	,	,
1561	,	,	,	,	,	,	,
1562	,	,	,	,	,	,	,
1563	,	,	,	,	,	,	,
1564	,	,	,	,	,	,	,
1565	,	,	,	,	,	,	,
1566	,	,	,	,	,	,	,
1567	,	,	,	,	,	,	,
1568	,	,	,	,	,	,	,
1569	,	,	,	,	,	,	,
1570	,	,	,	,	,	,	,
1571	,	,	,	,	,	,	,
1572	,	,	,	,	,	,	,
1573	,	,	,	,	,	,	,
1574	,	,	,	,	,	,	,
1575	,	,	,	,	,	,	,
1576	,	,	,	,	,	,	,
1577	,	,	,	,	,	,	,
1578	,	,	,	,	,	,	,
1579	,	,	,	,	,	,	,
1580	,	,	,	,	,	,	,
1581	,	,	,	,	,	,	,
1582	,	,	,	,	,	,	,
1583	,	,	,	,	,	,	,
1584	,	,	,	,	,	,	,
1585	,	,	,	,	,	,	,
1586	,	,	,	,	,	,	,
1587	,	,	,	,	,	,	,
1588	,	,	,	,	,	,	,
1589	,	,	,	,	,	,	,
1590	,	,	,	,	,	,	,
1591	,	,	,	,	,	,	,
1592	,	,	,	,	,	,	,
1593	,	,	,	,	,	,	,
1594	,	,	,	,	,	,	,
1595	,	,	,	,	,	,	,
1596	,	,	,	,	,	,	,
1597	,	,	,	,	,	,	,
1598	,	,	,	,	,	,	,
1599	,	,	,	,	,	,	,
1600	,	,	,	,	,	,	,
1601	,	,	,	,	,	,	,
1602	,	,	,	,	,	,	,
1603	,	,	,	,	,	,	,
1604	,	,	,	,	,	,	,
1605	,	,	,	,	,	,	,
1606	,	,	,	,	,	,	,
1607	,	,	,	,	,	,	,
1608	,	,	,	,	,	,	,
1609	,	,	,	,	,	,	,
1610	,	,	,	,	,	,	,
1611	,	,	,	,	,	,	,
1612	,	,	,	,	,	,	,
1613	,	,	,	,	,	,	,
1614	,	,	,	,	,	,	,
1615	,	,	,	,	,	,	,
1616	,	,	,	,	,	,	,
1617	,	,	,	,	,	,	,
1618	,	,	,	,	,	,	,
1619	,	,	,	,	,	,	,
1620	,	,	,	,	,	,	,
1621	,	,	,	,	,	,	,
1622	,	,	,	,	,	,	,
1623	,	,	,	,	,	,	,
1624	,	,	,	,	,	,	,
1625	,	,	,	,	,	,	,
1626	,	,	,	,	,	,	,
1627	,	,	,	,	,	,	,
1628	,	,	,	,	,	,	,
1629	,	,	,	,	,	,	,
1630	,	,	,	,	,	,	,
1631	,	,	,	,	,	,	,
1632	,	,	,	,	,	,	,
1633	,	,	,	,	,	,	,
1634	,	,	,	,	,	,	,
1635	,	,	,	,	,	,	,
1636	,	,	,	,	,	,	,
1637	,	,	,	,	,	,	,
1638	,	,	,	,	,	,	,
1639	,	,	,	,	,	,	,
1640	,	,	,	,	,	,	,
1641	,	,	,	,	,	,	,
1642	,	,	,	,	,	,	,
1643	,	,	,	,	,	,	,
1644	,	,	,	,	,	,	,
1645	,	,	,	,	,	,	,
1646	,	,	,	,	,	,	,
1647	,	,	,	,	,	,	,
1648	,	,	,	,	,	,	,
1649	,	,	,	,	,	,	,
1650	,	,	,	,	,	,	,
1651	,	,	,	,	,	,	,
1652	,	,	,	,	,	,	,
1653	,	,	,	,	,	,	,
1654	,	,	,	,	,	,	,
1655	,	,	,	,	,	,	,
1656	,	,	,	,	,	,	,
1657	,	,	,	,	,	,	,
1658	,	,	,	,	,	,	,
1659	,	,	,	,	,	,	,
1660	,	,	,	,	,	,	,
1661	,	,	,	,	,	,	,
1662	,	,	,	,	,	,	,
1663	,	,	,	,	,	,	,
1664	,	,	,	,	,	,	,
1665	,	,	,	,	,	,	,
1666	,	,	,	,	,	,	,
1667	,	,	,	,	,	,	,
1668	,	,	,	,	,	,	,
1669	,	,	,	,	,	,	,
1670	,	,	,	,	,	,	,
1671	,	,	,	,	,	,	,
1672	,	,	,	,	,	,	,
1673	,	,	,	,	,	,	,
1674	,	,	,	,	,	,	,
1675	,	,	,	,	,	,	,
1676	,	,	,	,	,	,	,
1677	,	,	,	,	,	,	,
1678	,	,	,	,	,	,	,
1679	,	,	,	,	,	,	,
1680	,	,	,	,	,	,	,
1681	,	,	,	,	,	,	,
1682	,	,	,	,	,	,	,
1683	,	,	,	,	,	,	,
1684	,	,	,	,	,	,	,
1685	,	,	,	,	,	,	,
1686	,	,	,	,	,	,	,
1687	,	,	,	,	,	,	,
1688	,	,	,	,	,	,	,
1689	,	,	,	,	,	,	,
1690	,	,	,	,	,	,	,
1691	,	,	,	,	,	,	,
1692	,	,	,	,	,	,	,
1693	,	,	,	,	,	,	,
1694	,	,	,	,	,	,	,
1695	,	,	,	,	,	,	,
1696	,	,	,	,	,	,	,
1697	,	,	,	,	,	,	,
1698	,	,	,	,	,	,	,
1699	,	,	,	,	,	,	,
1700	,	,	,	,	,	,	,
1701	,	,	,	,	,	,	,
1702	,	,	,	,	,	,	,
1703	,	,	,	,	,	,	,
1704	,	,	,	,	,	,	,
1705	,	,	,	,	,	,	,
1706	,	,	,	,	,	,	,
1707	,	,	,	,	,	,	,
1708	,	,	,	,	,	,	,
1709	,	,	,	,	,	,	,
1710	,	,	,	,	,	,	,
1711	,	,	,	,	,	,	,
1712	,	,	,	,	,	,	,
1713	,	,	,	,	,	,	,
1714	,	,	,	,	,	,	,
1715	,	,	,	,	,	,	,
1716	,	,	,	,	,	,	,
1717	,	,	,	,	,	,	,
1718	,	,	,	,	,	,	,
1719	,	,	,	,	,	,	,
1720	,	,	,	,	,	,	,
1721	,	,	,	,	,	,	,
1722	,	,	,	,	,	,	,
1723	,	,	,	,	,	,	,
1724	,	,	,	,	,	,	,
1725	,	,	,	,	,	,	,
1726	,	,	,	,	,	,	,
1727	,	,	,	,	,	,	,
1728	,	,	,	,	,	,	,
1729	,	,	,	,	,	,	,
1730	,	,	,	,	,	,	,
1731	,	,	,	,	,	,	,
1732	,	,	,	,	,	,	,
1733	,	,	,	,	,	,	,
1734	,	,	,	,	,	,	,
1735	,	,	,	,	,	,	,
1736	,	,	,	,	,	,	,
1737	,	,	,	,	,	,	,
1738	,	,	,	,	,	,	,
1739	,	,	,	,	,	,	,
1740	,	,	,	,	,	,	,
1741	,	,	,	,	,	,	,
1742	,	,	,	,	,	,	,
1743	,	,	,	,	,	,	,
1744	,	,	,	,	,	,	,
1745	,	,	,	,	,	,	,
1746	,	,	,	,	,	,	,
1747	,	,	,	,	,	,	,
1748	,	,	,	,	,	,	,
1749	,	,	,	,	,	,	,
1750	,	,	,	,	,	,	,
1751	,	,	,	,	,	,	,
1752	,	,	,	,	,	,	,
1753	,	,	,	,	,	,	,
1754	,	,	,	,	,	,	,
1755	,	,	,	,	,	,	,
1756	,	,	,	,	,	,	,
1757	,	,	,	,	,	,	,
1758	,	,	,	,	,	,	,
1759	,	,	,	,	,	,	,
1760	,	,	,	,	,	,	,
1761	,	,	,	,	,	,	,
1762	,	,	,	,	,	,	,
1763	,	,	,	,	,	,	,
1764	,	,	,	,	,	,	,
1765	,	,	,	,	,	,	,
1766	,	,	,	,	,	,	,
1767	,	,	,	,	,	,	,
1768	,	,	,	,	,	,	,
1769	,	,	,	,	,	,	,
1770	,	,	,	,	,	,	,
1771	,	,	,	,	,	,	,
1772	,	,	,	,	,	,	,
1773	,	,	,	,	,	,	,
1774	,	,	,	,	,	,	,
1775	,	,	,	,	,	,	,
1776	,	,	,	,	,	,	,
1777	,	,	,	,	,	,	,
1778	,	,	,	,	,	,	,
1779	,	,	,	,	,	,	,
1780	,	,	,	,	,	,	,
1781	,	,	,	,	,	,	,
1782	,	,	,	,	,	,	,
1783	,	,	,	,	,	,	,
1784	,	,	,	,	,	,	,
1785	,	,	,	,	,	,	,
1786	,	,	,	,	,	,	,
1787	,	,	,	,	,	,	,
1788	,	,	,	,	,	,	,
1789	,	,	,	,	,	,	,
1790	,	,	,	,	,	,	,
1791	,	,	,	,	,	,	,
1792	,	,	,	,	,	,	,
1793	,	,	,	,	,	,	,
1794	,	,	,	,	,	,	,
1795	,	,	,	,	,	,	,
1796	,	,	,	,	,	,	,
1797	,	,	,	,	,	,	,
1798	,	,	,	,	,	,	,
1799	,	,	,	,	,	,	,
1800	,	,	,	,	,	,	,
1801	,	,	,	,	,	,	,
1802	,	,	,	,	,	,	,
1803	,	,	,	,	,	,	,
1804	,	,	,	,	,	,	,
1805	,	,	,	,	,	,	,
1806	,	,	,	,	,	,	,
1807	,	,	,	,	,	,	,
1808	,	,	,	,	,	,	,
1809	,	,	,	,	,	,	,
1810	,	,	,	,	,	,	,
1811	,	,	,	,	,	,	,
1812	,	,	,	,	,	,	,
1813	,	,	,	,	,	,	,
1814	,	,	,	,	,	,	,
1815	,	,	,	,	,	,	,
1816	,	,	,	,	,	,	,
1817	,	,	,	,	,	,	,
1818	,	,	,	,	,	,	,
1819	,	,	,	,	,	,	,
1820	,	,	,	,	,	,	,
1821	,	,	,	,	,	,	,
1822	,	,	,	,	,	,	,
1823	,	,	,	,	,	,	,
1824	,	,	,	,	,	,	,
1825	,	,	,	,	,	,	,
1826	,	,	,	,	,	,	,
1827	,	,	,	,	,	,	,
1828	,	,	,	,	,	,	,
1829	,	,	,	,	,	,	,
1830	,	,	,	,	,	,	,
1831	,	,	,	,	,	,	,
1832	,	,	,	,	,	,	,
1833	,	,	,	,	,	,	,
1834	,	,	,	,	,	,	,
1835	,	,	,	,	,	,	,
1836	,	,	,	,	,	,	,
1837	,	,	,	,	,	,	,
1838	,	,	,	,	,	,	,
1839	,	,	,	,	,	,	,
1840	,	,	,	,	,	,	,
1841	,	,	,	,	,	,	,
1842	,	,	,	,	,	,	,
1843	,	,	,	,	,	,	,
1844	,	,	,	,	,	,	,
1845	,	,	,	,	,	,	,
1846	,	,	,	,	,	,	,
1847	,	,	,	,	,	,	,
1848	,	,	,	,	,	,	,
1849	,	,	,	,	,	,	,
1850	,	,	,	,	,	,	,
1851	,	,	,	,	,	,	,
1852	,	,	,	,	,	,	,
1853	,	,	,	,	,	,	,
1854	,	,	,	,	,	,	,
1855	,	,	,	,	,	,	,
1856	,	,	,	,	,	,	,
1857	,	,	,	,	,	,	,
1858	,	,	,	,	,	,	,
1859	,	,	,	,	,	,	,
1860	,	,	,	,	,	,	,
1861	,	,	,	,	,	,	,
1862	,	,	,	,	,	,	,
1863	,	,	,	,	,	,	,
1864	,	,	,	,	,	,	,
1865	,	,	,	,	,	,	,
1866	,	,	,	,	,	,	,
1867	,	,	,	,	,	,	,
1868	,	,	,	,	,	,	,
1869	,	,	,	,	,	,	,
1870	,	,	,	,	,	,	,
1871	,	,	,	,	,	,	,
1872	,	,	,	,	,	,	,
1873	,	,	,	,	,	,	,
1874	,	,	,	,	,	,	,
1875	,	,	,	,	,	,	,
1876	,	,	,	,	,	,	,
1877	,	,	,	,	,	,	,
1878	,	,	,	,	,	,	,
1879	,	,	,	,	,	,	,
1880	,	,	,	,	,	,	,
1881	,	,	,	,	,	,	,
1882	,	,	,	,	,	,	,
1883	,	,	,	,	,	,	,
1884	,	,	,	,	,	,	,
1885	,	,	,	,	,	,	,
1886	,	,	,	,	,	,	,
1887	,	,	,	,	,	,	,
1888	,	,	,	,	,	,	,
1889	,	,	,	,	,	,	,
1890	,	,	,	,	,	,	,
1891	,	,	,	,	,	,	,
1892	,	,	,	,	,	,	,
1893	,	,	,	,	,	,	,
1894	,	,	,	,	,	,	,
1895	,	,	,	,	,	,	,
1896	,	,	,	,	,	,	,
1897	,	,	,	,	,	,	,
1898	,	,	,	,	,	,	,
1899	,	,	,	,	,	,	,
1900	,	,	,	,	,	,	,
1901	,	,	,	,	,	,	,
1902	,	,	,	,	,	,	,
1903	,	,	,	,	,	,	,
1904	,	,	,	,	,	,	,
1905	,	,	,	,	,	,	,
1906	,	,	,	,	,	,	,
1907	,	,	,	,	,	,	,
1908	,	,	,	,	,	,	,
1909	,	,	,	,	,	,	,
1910	,	,	,	,	,	,	,
1911	,	,	,	,	,	,	,
1912	,	,	,	,	,	,	,
1913	,	,	,	,	,	,	,
1914	,	,	,	,	,	,	,
1915	,	,	,	,	,	,	,
1916	,	,	,	,	,	,	,
1917	,	,	,	,	,	,	,
1918	,	,	,	,	,	,	,
1919	,	,	,	,	,	,	,
1920	,	,	,	,	,	,	,
1921	,	,	,	,	,	,	,
1922	,	,	,	,	,	,	,
1923	,	,	,	,	,	,	,
1924	,	,	,	,	,	,	,
1925	,	,	,	,	,	,	,
1926	,	,	,	,	,	,	,
1927	,	,	,	,	,	,	,
1928	,	,	,	,	,	,	,
1929	,	,	,	,	,	,	,
1930	,	,	,	,	,	,	,
1931	,	,	,	,	,	,	,
1932	,	,	,	,	,	,	,
1933	,	,	,	,	,	,	,
1934	,	,	,	,	,	,	,
1935	,	,	,	,	,	,	,
1936	,	,	,	,	,	,	,
1937	,	,	,	,	,	,	,
1938	,	,	,	,	,	,	,
1939	,	,	,	,	,	,	,
1940	,	,	,	,	,	,	,
1941	,	,	,	,	,	,	,
1942	,	,	,	,	,	,	,
1943	,	,	,	,	,	,	,
1944	,	,	,	,	,	,	,
1945	,	,	,	,	,	,	,
1946	,	,	,	,	,	,	,
1947	,	,	,	,	,	,	,
1948	,	,	,	,	,	,	,
1949	,	,	,	,	,	,	,
1950	,	,	,	,	,	,	,
1951	,	,	,	,	,	,	,
1952	,	,	,	,	,	,	,
1953	,	,	,	,	,	,	,
1954	,	,	,	,	,	,	,
1955	,	,	,	,	,	,	,
1956	,	,	,	,	,	,	,
1957	,	,	,	,	,	,	,
1958	,	,	,	,	,	,	,
1959	,	,	,	,	,	,	,
1960	,	,	,	,	,	,	,
1961	,	,	,	,	,	,	,
1962	,	,	,	,	,	,	,
1963	,	,	,	,	,	,	,
1964	,	,	,	,	,	,	,
1965	,	,	,	,	,	,	,
1966	,	,	,	,	,	,	,
1967	,	,	,	,	,	,	,
1968	,	,	,	,	,	,	,
1969	,	,	,	,	,	,	,
1970	,	,	,	,	,	,	,
1971	,	,	,	,	,	,	,
1972	,	,	,	,	,	,	,
1973	,	,	,	,	,	,	,
1974	,	,	,	,	,	,	,
1975	,	,	,	,	,	,	,
1976	,	,	,	,	,	,	,
1977	,	,	,	,	,	,	,
1978	,	,	,	,	,	,	,
1979	,	,	,	,	,	,	,
1980	,	,	,	,	,	,	,
1981	,	,	,	,	,	,	,
1982	,	,	,	,	,	,	,
1983	,	,	,	,	,	,	,
1984	,	,	,	,	,	,	,
1985	,	,	,	,	,	,	,
1986	,	,	,	,	,	,	,
1987	,	,	,	,	,	,	,
1988	,	,	,	,	,	,	,
1989	,	,	,	,	,	,	,
1990	,	,	,	,	,	,	,
1991	,	,	,	,	,	,	,
1992	,	,	,	,	,	,	,
1993	,	,	,	,	,	,	,
1994	,	,	,	,	,	,	,
1995	,	,	,	,	,	,	,
1996	,	,	,	,	,	,	,
1997	,	,	,	,	,	,	,
1998	,	,	,	,	,	,	,
1999	,	,	,	,	,	,	,
[truncated: 13,001 more rows]

## Sheet: Fig2_panelA_rep3
	169bp closed parS DNA ParB	169bp closed parS DNA ParB UTP	169bp closed parS DNA ParB ATP	169bp closed parS DNA ParB GTP	169bp closed scrambled parS DNA ParB	169bp closed scrambled parS DNA ParB CTP	169bp closed parS DNA ParB CTP
1	0.000, 0.016	0.000, 0.039	0.000, 0.038	0.000, 0.023	0.000, 0.045	0.000, 0.026	0.000, 0.028
2	0.200, 0.016	0.200, 0.038	0.200, 0.037	0.200, 0.024	0.200, 0.043	0.200, 0.025	0.200, 0.027
3	0.400, 0.016	0.400, 0.036	0.400, 0.036	0.400, 0.024	0.400, 0.041	0.400, 0.024	0.400, 0.026
4	0.600, 0.016	0.600, 0.034	0.600, 0.035	0.600, 0.024	0.600, 0.040	0.600, 0.023	0.600, 0.025
5	0.800, 0.017	0.800, 0.033	0.800, 0.034	0.800, 0.024	0.800, 0.038	0.800, 0.022	0.800, 0.024
6	1.000, 0.017	1.000, 0.031	1.000, 0.032	1.000, 0.024	1.000, 0.036	1.000, 0.021	1.000, 0.023
7	1.200, 0.017	1.200, 0.029	1.200, 0.031	1.200, 0.023	1.200, 0.034	1.200, 0.021	1.200, 0.022
8	1.400, 0.018	1.400, 0.027	1.400, 0.030	1.400, 0.023	1.400, 0.032	1.400, 0.020	1.400, 0.020
9	1.600, 0.018	1.600, 0.025	1.600, 0.029	1.600, 0.023	1.600, 0.030	1.600, 0.019	1.600, 0.019
10	1.800, 0.018	1.800, 0.024	1.800, 0.028	1.800, 0.022	1.800, 0.028	1.800, 0.019	1.800, 0.018
11	2.000, 0.018	2.000, 0.023	2.000, 0.027	2.000, 0.021	2.000, 0.027	2.000, 0.019	2.000, 0.017
12	2.200, 0.018	2.200, 0.022	2.200, 0.026	2.200, 0.021	2.200, 0.026	2.200, 0.019	2.200, 0.017
13	2.400, 0.019	2.400, 0.021	2.400, 0.025	2.400, 0.020	2.400, 0.026	2.400, 0.019	2.400, 0.016
14	2.600, 0.019	2.600, 0.021	2.600, 0.024	2.600, 0.019	2.600, 0.025	2.600, 0.019	2.600, 0.016
15	2.800, 0.019	2.800, 0.020	2.800, 0.023	2.800, 0.019	2.800, 0.024	2.800, 0.020	2.800, 0.016
16	3.000, 0.019	3.000, 0.019	3.000, 0.023	3.000, 0.019	3.000, 0.023	3.000, 0.020	3.000, 0.016
17	3.200, 0.019	3.200, 0.019	3.200, 0.022	3.200, 0.019	3.200, 0.022	3.200, 0.020	3.200, 0.016
18	3.400, 0.018	3.400, 0.018	3.400, 0.021	3.400, 0.019	3.400, 0.022	3.400, 0.019	3.400, 0.016
19	3.600, 0.018	3.600, 0.018	3.600, 0.021	3.600, 0.019	3.600, 0.021	3.600, 0.019	3.600, 0.016
20	3.800, 0.018	3.800, 0.018	3.800, 0.021	3.800, 0.019	3.800, 0.021	3.800, 0.019	3.800, 0.016
21	4.000, 0.018	4.000, 0.017	4.000, 0.021	4.000, 0.019	4.000, 0.020	4.000, 0.019	4.000, 0.015
22	4.200, 0.018	4.200, 0.017	4.200, 0.021	4.200, 0.018	4.200, 0.020	4.200, 0.019	4.200, 0.015
23	4.400, 0.018	4.400, 0.017	4.400, 0.021	4.400, 0.018	4.400, 0.020	4.400, 0.019	4.400, 0.015
24	4.600, 0.018	4.600, 0.017	4.600, 0.021	4.600, 0.018	4.600, 0.019	4.600, 0.019	4.600, 0.015
25	4.800, 0.018	4.800, 0.016	4.800, 0.021	4.800, 0.018	4.800, 0.019	4.800, 0.018	4.800, 0.015
26	5.000, 0.018	5.000, 0.016	5.000, 0.020	5.000, 0.018	5.000, 0.018	5.000, 0.018	5.000, 0.014
27	5.200, 0.018	5.200, 0.016	5.200, 0.020	5.200, 0.018	5.200, 0.017	5.200, 0.018	5.200, 0.014
28	5.400, 0.018	5.400, 0.015	5.400, 0.020	5.400, 0.017	5.400, 0.017	5.400, 0.018	5.400, 0.013
29	5.600, 0.017	5.600, 0.015	5.600, 0.020	5.600, 0.017	5.600, 0.016	5.600, 0.017	5.600, 0.013
30	5.800, 0.017	5.800, 0.015	5.800, 0.019	5.800, 0.017	5.800, 0.016	5.800, 0.017	5.800, 0.013
31	6.000, 0.017	6.000, 0.014	6.000, 0.019	6.000, 0.016	6.000, 0.015	6.000, 0.017	6.000, 0.013
32	6.200, 0.017	6.200, 0.014	6.200, 0.019	6.200, 0.016	6.200, 0.015	6.200, 0.017	6.200, 0.012
33	6.400, 0.016	6.400, 0.014	6.400, 0.018	6.400, 0.016	6.400, 0.014	6.400, 0.017	6.400, 0.012
34	6.600, 0.016	6.600, 0.013	6.600, 0.018	6.600, 0.015	6.600, 0.014	6.600, 0.017	6.600, 0.012
35	6.800, 0.016	6.800, 0.013	6.800, 0.017	6.800, 0.015	6.800, 0.013	6.800, 0.016	6.800, 0.012
36	7.000, 0.016	7.000, 0.013	7.000, 0.017	7.000, 0.015	7.000, 0.013	7.000, 0.016	7.000, 0.011
37	7.200, 0.016	7.200, 0.013	7.200, 0.017	7.200, 0.015	7.200, 0.012	7.200, 0.015	7.200, 0.011
38	7.400, 0.016	7.400, 0.012	7.400, 0.017	7.400, 0.015	7.400, 0.012	7.400, 0.015	7.400, 0.011
39	7.600, 0.016	7.600, 0.012	7.600, 0.016	7.600, 0.014	7.600, 0.012	7.600, 0.014	7.600, 0.011
40	7.800, 0.016	7.800, 0.012	7.800, 0.016	7.800, 0.014	7.800, 0.012	7.800, 0.014	7.800, 0.010
41	8.000, 0.016	8.000, 0.011	8.000, 0.016	8.000, 0.014	8.000, 0.011	8.000, 0.013	8.000, 0.010
42	8.200, 0.015	8.200, 0.011	8.200, 0.016	8.200, 0.014	8.200, 0.011	8.200, 0.013	8.200, 0.010
43	8.400, 0.015	8.400, 0.011	8.400, 0.016	8.400, 0.013	8.400, 0.011	8.400, 0.012	8.400, 0.009
44	8.600, 0.015	8.600, 0.011	8.600, 0.016	8.600, 0.013	8.600, 0.010	8.600, 0.012	8.600, 0.009
45	8.800, 0.015	8.800, 0.011	8.800, 0.016	8.800, 0.012	8.800, 0.010	8.800, 0.011	8.800, 0.009
46	9.000, 0.015	9.000, 0.010	9.000, 0.016	9.000, 0.012	9.000, 0.009	9.000, 0.011	9.000, 0.008
47	9.200, 0.014	9.200, 0.010	9.200, 0.015	9.200, 0.011	9.200, 0.009	9.200, 0.011	9.200, 0.008
48	9.400, 0.014	9.400, 0.010	9.400, 0.015	9.400, 0.011	9.400, 0.008	9.400, 0.010	9.400, 0.008
49	9.600, 0.014	9.600, 0.009	9.600, 0.015	9.600, 0.011	9.600, 0.008	9.600, 0.010	9.600, 0.008
50	9.800, 0.014	9.800, 0.009	9.800, 0.015	9.800, 0.011	9.800, 0.008	9.800, 0.010	9.800, 0.007
51	10.000, 0.013	10.000, 0.009	10.000, 0.015	10.000, 0.011	10.000, 0.007	10.000, 0.010	10.000, 0.007
52	10.200, 0.013	10.200, 0.009	10.200, 0.014	10.200, 0.011	10.200, 0.007	10.200, 0.010	10.200, 0.007
53	10.400, 0.013	10.400, 0.009	10.400, 0.014	10.400, 0.011	10.400, 0.007	10.400, 0.010	10.400, 0.007
54	10.600, 0.013	10.600, 0.008	10.600, 0.014	10.600, 0.011	10.600, 0.007	10.600, 0.010	10.600, 0.007
55	10.800, 0.013	10.800, 0.008	10.800, 0.014	10.800, 0.011	10.800, 0.006	10.800, 0.009	10.800, 0.007
56	11.000, 0.013	11.000, 0.008	11.000, 0.013	11.000, 0.011	11.000, 0.006	11.000, 0.009	11.000, 0.007
57	11.200, 0.012	11.200, 0.008	11.200, 0.013	11.200, 0.011	11.200, 0.006	11.200, 0.009	11.200, 0.007
58	11.400, 0.012	11.400, 0.008	11.400, 0.013	11.400, 0.011	11.400, 0.006	11.400, 0.009	11.400, 0.007
59	11.600, 0.012	11.600, 0.008	11.600, 0.013	11.600, 0.011	11.600, 0.006	11.600, 0.009	11.600, 0.006
60	11.800, 0.011	11.800, 0.008	11.800, 0.013	11.800, 0.011	11.800, 0.006	11.800, 0.009	11.800, 0.006
61	12.000, 0.011	12.000, 0.008	12.000, 0.012	12.000, 0.011	12.000, 0.006	12.000, 0.008	12.000, 0.006
62	12.200, 0.011	12.200, 0.008	12.200, 0.013	12.200, 0.010	12.200, 0.006	12.200, 0.008	12.200, 0.006
63	12.400, 0.011	12.400, 0.009	12.400, 0.013	12.400, 0.010	12.400, 0.006	12.400, 0.008	12.400, 0.006
64	12.600, 0.011	12.600, 0.009	12.600, 0.012	12.600, 0.010	12.600, 0.006	12.600, 0.008	12.600, 0.006
65	12.800, 0.010	12.800, 0.009	12.800, 0.012	12.800, 0.009	12.800, 0.006	12.800, 0.008	12.800, 0.006
66	13.000, 0.010	13.000, 0.009	13.000, 0.012	13.000, 0.009	13.000, 0.006	13.000, 0.008	13.000, 0.006
67	13.200, 0.010	13.200, 0.008	13.200, 0.012	13.200, 0.009	13.200, 0.006	13.200, 0.008	13.200, 0.006
68	13.400, 0.010	13.400, 0.008	13.400, 0.012	13.400, 0.009	13.400, 0.005	13.400, 0.008	13.400, 0.005
69	13.600, 0.010	13.600, 0.008	13.600, 0.012	13.600, 0.008	13.600, 0.005	13.600, 0.008	13.600, 0.005
70	13.800, 0.009	13.800, 0.008	13.800, 0.012	13.800, 0.008	13.800, 0.005	13.800, 0.008	13.800, 0.005
71	14.000, 0.009	14.000, 0.008	14.000, 0.012	14.000, 0.008	14.000, 0.005	14.000, 0.007	14.000, 0.005
72	14.200, 0.009	14.200, 0.007	14.200, 0.012	14.200, 0.008	14.200, 0.005	14.200, 0.007	14.200, 0.005
73	14.400, 0.008	14.400, 0.007	14.400, 0.012	14.400, 0.007	14.400, 0.004	14.400, 0.007	14.400, 0.005
74	14.600, 0.008	14.600, 0.007	14.600, 0.011	14.600, 0.007	14.600, 0.004	14.600, 0.007	14.600, 0.005
75	14.800, 0.007	14.800, 0.006	14.800, 0.011	14.800, 0.007	14.800, 0.004	14.800, 0.007	14.800, 0.004
76	15.000, 0.007	15.000, 0.006	15.000, 0.011	15.000, 0.007	15.000, 0.004	15.000, 0.006	15.000, 0.004
77	15.200, 0.007	15.200, 0.005	15.200, 0.011	15.200, 0.007	15.200, 0.004	15.200, 0.006	15.200, 0.004
78	15.400, 0.007	15.400, 0.005	15.400, 0.011	15.400, 0.007	15.400, 0.004	15.400, 0.006	15.400, 0.004
79	15.600, 0.007	15.600, 0.005	15.600, 0.011	15.600, 0.007	15.600, 0.004	15.600, 0.006	15.600, 0.004
80	15.800, 0.006	15.800, 0.004	15.800, 0.011	15.800, 0.007	15.800, 0.004	15.800, 0.006	15.800, 0.004
81	16.000, 0.006	16.000, 0.004	16.000, 0.011	16.000, 0.007	16.000, 0.004	16.000, 0.006	16.000, 0.004
82	16.200, 0.006	16.200, 0.004	16.200, 0.010	16.200, 0.007	16.200, 0.004	16.200, 0.006	16.200, 0.004
83	16.400, 0.007	16.400, 0.004	16.400, 0.010	16.400, 0.006	16.400, 0.004	16.400, 0.005	16.400, 0.004
84	16.600, 0.007	16.600, 0.004	16.600, 0.010	16.600, 0.006	16.600, 0.004	16.600, 0.005	16.600, 0.004
85	16.800, 0.007	16.800, 0.004	16.800, 0.010	16.800, 0.006	16.800, 0.004	16.800, 0.005	16.800, 0.003
86	17.000, 0.007	17.000, 0.004	17.000, 0.009	17.000, 0.006	17.000, 0.004	17.000, 0.005	17.000, 0.003
87	17.200, 0.007	17.200, 0.004	17.200, 0.009	17.200, 0.006	17.200, 0.004	17.200, 0.004	17.200, 0.003
88	17.400, 0.007	17.400, 0.004	17.400, 0.009	17.400, 0.005	17.400, 0.003	17.400, 0.004	17.400, 0.003
89	17.600, 0.008	17.600, 0.004	17.600, 0.009	17.600, 0.005	17.600, 0.003	17.600, 0.004	17.600, 0.003
90	17.800, 0.008	17.800, 0.004	17.800, 0.008	17.800, 0.005	17.800, 0.003	17.800, 0.003	17.800, 0.003
91	18.000, 0.007	18.000, 0.004	18.000, 0.008	18.000, 0.004	18.000, 0.003	18.000, 0.003	18.000, 0.003
92	18.200, 0.007	18.200, 0.004	18.200, 0.008	18.200, 0.004	18.200, 0.002	18.200, 0.003	18.200, 0.003
93	18.400, 0.007	18.400, 0.004	18.400, 0.007	18.400, 0.004	18.400, 0.002	18.400, 0.003	18.400, 0.003
94	18.600, 0.007	18.600, 0.003	18.600, 0.007	18.600, 0.004	18.600, 0.002	18.600, 0.002	18.600, 0.003
95	18.800, 0.007	18.800, 0.003	18.800, 0.007	18.800, 0.005	18.800, 0.001	18.800, 0.002	18.800, 0.002
96	19.000, 0.007	19.000, 0.003	19.000, 0.006	19.000, 0.005	19.000, 0.001	19.000, 0.002	19.000, 0.002
97	19.200, 0.007	19.200, 0.003	19.200, 0.006	19.200, 0.005	19.200, 0.001	19.200, 0.002	19.200, 0.002
98	19.400, 0.006	19.400, 0.003	19.400, 0.006	19.400, 0.005	19.400, 0.001	19.400, 0.002	19.400, 0.002
99	19.600, 0.006	19.600, 0.003	19.600, 0.006	19.600, 0.005	19.600, 0.001	19.600, 0.002	19.600, 0.002
100	19.800, 0.005	19.800, 0.003	19.800, 0.006	19.800, 0.005	19.800, 0.002	19.800, 0.002	19.800, 0.002
101	20.000, 0.005	20.000, 0.003	20.000, 0.006	20.000, 0.005	20.000, 0.002	20.000, 0.002	20.000, 0.002
102	20.200, 0.004	20.200, 0.002	20.200, 0.006	20.200, 0.005	20.200, 0.002	20.200, 0.002	20.200, 0.002
103	20.400, 0.004	20.400, 0.002	20.400, 0.006	20.400, 0.005	20.400, 0.002	20.400, 0.002	20.400, 0.002
104	20.600, 0.003	20.600, 0.002	20.600, 0.005	20.600, 0.005	20.600, 0.002	20.600, 0.002	20.600, 0.002
105	20.800, 0.003	20.800, 0.002	20.800, 0.005	20.800, 0.005	20.800, 0.002	20.800, 0.002	20.800, 0.002
106	21.000, 0.003	21.000, 0.002	21.000, 0.005	21.000, 0.005	21.000, 0.002	21.000, 0.002	21.000, 0.002
107	21.200, 0.002	21.200, 0.002	21.200, 0.005	21.200, 0.005	21.200, 0.001	21.200, 0.002	21.200, 0.002
108	21.400, 0.002	21.400, 0.002	21.400, 0.005	21.400, 0.005	21.400, 0.001	21.400, 0.002	21.400, 0.002
109	21.600, 0.002	21.600, 0.002	21.600, 0.005	21.600, 0.004	21.600, 0.001	21.600, 0.002	21.600, 0.002
110	21.800, 0.002	21.800, 0.002	21.800, 0.005	21.800, 0.004	21.800, 0.001	21.800, 0.002	21.800, 0.002
111	22.000, 0.003	22.000, 0.002	22.000, 0.005	22.000, 0.004	22.000, 0.001	22.000, 0.001	22.000, 0.002
112	22.200, 0.003	22.200, 0.002	22.200, 0.005	22.200, 0.004	22.200, 0.001	22.200, 0.001	22.200, 0.002
113	22.400, 0.003	22.400, 0.002	22.400, 0.005	22.400, 0.004	22.400, 0.001	22.400, 0.001	22.400, 0.002
114	22.600, 0.004	22.600, 0.002	22.600, 0.005	22.600, 0.003	22.600, 0.001	22.600, 0.001	22.600, 0.002
115	22.800, 0.004	22.800, 0.002	22.800, 0.005	22.800, 0.003	22.800, 0.002	22.800, 0.001	22.800, 0.002
116	23.000, 0.004	23.000, 0.002	23.000, 0.005	23.000, 0.003	23.000, 0.002	23.000, 0.000	23.000, 0.002
117	23.200, 0.004	23.200, 0.002	23.200, 0.004	23.200, 0.003	23.200, 0.002	23.200, 0.000	23.200, 0.002
118	23.400, 0.004	23.400, 0.002	23.400, 0.004	23.400, 0.003	23.400, 0.002	23.400, 0.000	23.400, 0.001
119	23.600, 0.004	23.600, 0.002	23.600, 0.004	23.600, 0.003	23.600, 0.002	23.600, 0.000	23.600, 0.001
120	23.800, 0.004	23.800, 0.003	23.800, 0.004	23.800, 0.002	23.800, 0.002	23.800, 0.000	23.800, 0.001
121	24.000, 0.004	24.000, 0.003	24.000, 0.004	24.000, 0.002	24.000, 0.002	24.000, 0.000	24.000, 0.001
122	24.200, 0.003	24.200, 0.003	24.200, 0.003	24.200, 0.003	24.200, 0.002	24.200, 0.000	24.200, 0.000
123	24.400, 0.003	24.400, 0.003	24.400, 0.003	24.400, 0.003	24.400, 0.002	24.400, 0.000	24.400, 0.000
124	24.600, 0.002	24.600, 0.003	24.600, 0.003	24.600, 0.003	24.600, 0.002	24.600, 0.000	24.600, -0.000
125	24.800, 0.002	24.800, 0.002	24.800, 0.003	24.800, 0.003	24.800, 0.002	24.800, 0.000	24.800, -0.000
126	25.000, 0.002	25.000, 0.002	25.000, 0.003	25.000, 0.003	25.000, 0.001	25.000, -0.000	25.000, -0.000
127	25.200, 0.001	25.200, 0.002	25.200, 0.003	25.200, 0.003	25.200, 0.001	25.200, -0.000	25.200, -0.000
128	25.400, 0.001	25.400, 0.002	25.400, 0.003	25.400, 0.002	25.400, 0.001	25.400, -0.001	25.400, -0.000
129	25.600, 0.001	25.600, 0.001	25.600, 0.002	25.600, 0.002	25.600, 0.000	25.600, -0.001	25.600, -0.000
130	25.800, 0.000	25.800, 0.001	25.800, 0.002	25.800, 0.002	25.800, 0.000	25.800, -0.001	25.800, -0.000
131	26.000, 0.000	26.000, 0.001	26.000, 0.002	26.000, 0.002	26.000, -0.000	26.000, -0.002	26.000, -0.000
132	26.200, 0.000	26.200, 0.000	26.200, 0.002	26.200, 0.002	26.200, -0.000	26.200, -0.002	26.200, -0.000
133	26.400, 0.001	26.400, 0.000	26.400, 0.002	26.400, 0.001	26.400, -0.000	26.400, -0.002	26.400, -0.000
134	26.600, 0.001	26.600, 0.000	26.600, 0.002	26.600, 0.001	26.600, 0.000	26.600, -0.002	26.600, -0.000
135	26.800, 0.000	26.800, 0.000	26.800, 0.001	26.800, 0.001	26.800, -0.000	26.800, -0.001	26.800, -0.000
136	27.000, 0.000	27.000, -0.000	27.000, 0.001	27.000, 0.001	27.000, -0.000	27.000, -0.001	27.000, -0.000
137	27.200, 0.000	27.200, -0.000	27.200, 0.001	27.200, 0.001	27.200, -0.000	27.200, -0.001	27.200, -0.000
138	27.400, -0.000	27.400, 0.000	27.400, 0.001	27.400, 0.001	27.400, -0.000	27.400, -0.000	27.400, -0.000
139	27.600, -0.000	27.600, 0.000	27.600, 0.001	27.600, 0.001	27.600, -0.000	27.600, 0.000	27.600, 0.000
140	27.800, -0.000	27.800, 0.000	27.800, 0.000	27.800, 0.000	27.800, -0.000	27.800, 0.000	27.800, 0.000
141	28.000, -0.000	28.000, 0.000	28.000, 0.000	28.000, 0.000	28.000, -0.000	28.000, 0.001	28.000, 0.000
142	28.200, -0.000	28.200, 0.001	28.200, -0.000	28.200, 0.000	28.200, 0.000	28.200, 0.001	28.200, 0.000
143	28.400, -0.000	28.400, 0.000	28.400, -0.000	28.400, -0.000	28.400, 0.000	28.400, 0.001	28.400, 0.000
144	28.600, -0.000	28.600, 0.000	28.600, -0.000	28.600, -0.000	28.600, 0.000	28.600, 0.001	28.600, -0.000
145	28.800, -0.000	28.800, -0.000	28.800, -0.000	28.800, -0.000	28.800, 0.000	28.800, 0.001	28.800, -0.000
146	29.000, -0.000	29.000, -0.000	29.000, -0.001	29.000, -0.000	29.000, 0.000	29.000, 0.000	29.000, -0.000
147	29.200, 0.000	29.200, -0.000	29.200, -0.001	29.200, -0.001	29.200, 0.000	29.200, 0.000	29.200, -0.000
148	29.400, 0.000	29.400, -0.000	29.400, -0.001	29.400, -0.001	29.400, 0.000	29.400, -0.000	29.400, -0.000
149	29.600, 0.000	29.600, -0.000	29.600, -0.001	29.600, -0.001	29.600, 0.000	29.600, -0.001	29.600, -0.000
150	29.800, 0.000	29.800, -0.001	29.800, -0.000	29.800, -0.001	29.800, 0.000	29.800, -0.001	29.800, -0.000
151	30.000, 0.000	30.000, 0.000	30.000, 0.000	30.000, 0.000	30.000, 0.000	30.000, 0.000	30.000, 0.000
152	30.200, 0.006	30.200, 0.004	30.200, 0.004	30.200, 0.004	30.200, -0.001	30.200, -0.001	30.200, 0.005
153	30.400, 0.013	30.400, 0.009	30.400, 0.009	30.400, 0.010	30.400, -0.001	30.400, -0.002	30.400, 0.010
154	30.600, 0.021	30.600, 0.014	30.600, 0.016	30.600, 0.016	30.600, -0.002	30.600, -0.003	30.600, 0.017
155	30.800, 0.029	30.800, 0.020	30.800, 0.023	30.800, 0.023	30.800, -0.003	30.800, -0.004	30.800, 0.026
156	31.000, 0.038	31.000, 0.027	31.000, 0.031	31.000, 0.031	31.000, -0.004	31.000, -0.005	31.000, 0.035
157	31.200, 0.047	31.200, 0.035	31.200, 0.039	31.200, 0.039	31.200, -0.006	31.200, -0.006	31.200, 0.045
158	31.400, 0.056	31.400, 0.042	31.400, 0.047	31.400, 0.047	31.400, -0.007	31.400, -0.008	31.400, 0.056
159	31.600, 0.065	31.600, 0.049	31.600, 0.056	31.600, 0.055	31.600, -0.008	31.600, -0.009	31.600, 0.067
160	31.800, 0.073	31.800, 0.056	31.800, 0.064	31.800, 0.063	31.800, -0.009	31.800, -0.010	31.800, 0.079
161	32.000, 0.080	32.000, 0.063	32.000, 0.071	32.000, 0.070	32.000, -0.010	32.000, -0.010	32.000, 0.091
162	32.200, 0.086	32.200, 0.068	32.200, 0.078	32.200, 0.076	32.200, -0.010	32.200, -0.011	32.200, 0.102
163	32.400, 0.091	32.400, 0.072	32.400, 0.082	32.400, 0.080	32.400, -0.012	32.400, -0.011	32.400, 0.113
164	32.600, 0.094	32.600, 0.076	32.600, 0.086	32.600, 0.083	32.600, -0.013	32.600, -0.012	32.600, 0.125
165	32.800, 0.097	32.800, 0.078	32.800, 0.089	32.800, 0.085	32.800, -0.014	32.800, -0.012	32.800, 0.135
166	33.000, 0.099	33.000, 0.080	33.000, 0.091	33.000, 0.087	33.000, -0.015	33.000, -0.013	33.000, 0.146
167	33.200, 0.100	33.200, 0.081	33.200, 0.093	33.200, 0.088	33.200, -0.016	33.200, -0.013	33.200, 0.156
168	33.400, 0.101	33.400, 0.083	33.400, 0.094	33.400, 0.089	33.400, -0.017	33.400, -0.014	33.400, 0.166
169	33.600, 0.102	33.600, 0.083	33.600, 0.095	33.600, 0.089	33.600, -0.017	33.600, -0.014	33.600, 0.176
170	33.800, 0.103	33.800, 0.084	33.800, 0.096	33.800, 0.089	33.800, -0.018	33.800, -0.015	33.800, 0.186
171	34.000, 0.103	34.000, 0.085	34.000, 0.097	34.000, 0.089	34.000, -0.018	34.000, -0.015	34.000, 0.196
172	34.200, 0.103	34.200, 0.085	34.200, 0.098	34.200, 0.089	34.200, -0.018	34.200, -0.016	34.200, 0.205
173	34.400, 0.104	34.400, 0.086	34.400, 0.099	34.400, 0.089	34.400, -0.018	34.400, -0.016	34.400, 0.214
174	34.600, 0.104	34.600, 0.086	34.600, 0.100	34.600, 0.089	34.600, -0.019	34.600, -0.016	34.600, 0.224
175	34.800, 0.105	34.800, 0.086	34.800, 0.101	34.800, 0.089	34.800, -0.019	34.800, -0.016	34.800, 0.233
176	35.000, 0.105	35.000, 0.087	35.000, 0.101	35.000, 0.089	35.000, -0.019	35.000, -0.017	35.000, 0.242
177	35.200, 0.106	35.200, 0.087	35.200, 0.102	35.200, 0.089	35.200, -0.019	35.200, -0.017	35.200, 0.250
178	35.400, 0.107	35.400, 0.087	35.400, 0.103	35.400, 0.089	35.400, -0.019	35.400, -0.017	35.400, 0.260
179	35.600, 0.108	35.600, 0.087	35.600, 0.104	35.600, 0.089	35.600, -0.020	35.600, -0.017	35.600, 0.269
180	35.800, 0.108	35.800, 0.087	35.800, 0.105	35.800, 0.089	35.800, -0.020	35.800, -0.018	35.800, 0.278
181	36.000, 0.109	36.000, 0.087	36.000, 0.105	36.000, 0.090	36.000, -0.020	36.000, -0.018	36.000, 0.287
182	36.200, 0.109	36.200, 0.087	36.200, 0.106	36.200, 0.090	36.200, -0.020	36.200, -0.018	36.200, 0.296
183	36.400, 0.110	36.400, 0.088	36.400, 0.106	36.400, 0.091	36.400, -0.021	36.400, -0.019	36.400, 0.305
184	36.600, 0.111	36.600, 0.088	36.600, 0.106	36.600, 0.091	36.600, -0.021	36.600, -0.019	36.600, 0.314
185	36.800, 0.111	36.800, 0.088	36.800, 0.107	36.800, 0.091	36.800, -0.021	36.800, -0.019	36.800, 0.323
186	37.000, 0.112	37.000, 0.089	37.000, 0.107	37.000, 0.091	37.000, -0.022	37.000, -0.020	37.000, 0.332
187	37.200, 0.112	37.200, 0.089	37.200, 0.107	37.200, 0.091	37.200, -0.022	37.200, -0.020	37.200, 0.341
188	37.400, 0.113	37.400, 0.090	37.400, 0.108	37.400, 0.091	37.400, -0.022	37.400, -0.020	37.400, 0.349
189	37.600, 0.113	37.600, 0.090	37.600, 0.108	37.600, 0.091	37.600, -0.023	37.600, -0.021	37.600, 0.358
190	37.800, 0.114	37.800, 0.091	37.800, 0.109	37.800, 0.091	37.800, -0.023	37.800, -0.021	37.800, 0.366
191	38.000, 0.114	38.000, 0.091	38.000, 0.109	38.000, 0.091	38.000, -0.023	38.000, -0.021	38.000, 0.375
192	38.200, 0.114	38.200, 0.091	38.200, 0.110	38.200, 0.091	38.200, -0.023	38.200, -0.021	38.200, 0.383
193	38.400, 0.115	38.400, 0.092	38.400, 0.110	38.400, 0.091	38.400, -0.023	38.400, -0.021	38.400, 0.391
194	38.600, 0.115	38.600, 0.092	38.600, 0.110	38.600, 0.091	38.600, -0.023	38.600, -0.021	38.600, 0.399
195	38.800, 0.115	38.800, 0.092	38.800, 0.111	38.800, 0.091	38.800, -0.023	38.800, -0.021	38.800, 0.407
196	39.000, 0.116	39.000, 0.092	39.000, 0.111	39.000, 0.091	39.000, -0.024	39.000, -0.020	39.000, 0.415
197	39.200, 0.116	39.200, 0.092	39.200, 0.111	39.200, 0.092	39.200, -0.024	39.200, -0.020	39.200, 0.423
198	39.400, 0.116	39.400, 0.092	39.400, 0.111	39.400, 0.092	39.400, -0.024	39.400, -0.020	39.400, 0.431
199	39.600, 0.116	39.600, 0.092	39.600, 0.112	39.600, 0.092	39.600, -0.025	39.600, -0.020	39.600, 0.438
200	39.800, 0.116	39.800, 0.093	39.800, 0.112	39.800, 0.092	39.800, -0.025	39.800, -0.020	39.800, 0.446
201	40.000, 0.116	40.000, 0.093	40.000, 0.112	40.000, 0.092	40.000, -0.025	40.000, -0.020	40.000, 0.454
202	40.200, 0.116	40.200, 0.093	40.200, 0.112	40.200, 0.092	40.200, -0.025	40.200, -0.020	40.200, 0.461
203	40.400, 0.116	40.400, 0.094	40.400, 0.112	40.400, 0.092	40.400, -0.026	40.400, -0.021	40.400, 0.469
204	40.600, 0.117	40.600, 0.094	40.600, 0.112	40.600, 0.092	40.600, -0.026	40.600, -0.020	40.600, 0.477
205	40.800, 0.117	40.800, 0.094	40.800, 0.112	40.800, 0.092	40.800, -0.026	40.800, -0.020	40.800, 0.484
206	41.000, 0.118	41.000, 0.095	41.000, 0.112	41.000, 0.092	41.000, -0.027	41.000, -0.021	41.000, 0.492
207	41.200, 0.119	41.200, 0.096	41.200, 0.112	41.200, 0.092	41.200, -0.027	41.200, -0.021	41.200, 0.500
208	41.400, 0.119	41.400, 0.096	41.400, 0.112	41.400, 0.092	41.400, -0.027	41.400, -0.020	41.400, 0.507
209	41.600, 0.120	41.600, 0.097	41.600, 0.113	41.600, 0.092	41.600, -0.027	41.600, -0.020	41.600, 0.515
210	41.800, 0.120	41.800, 0.098	41.800, 0.113	41.800, 0.092	41.800, -0.027	41.800, -0.020	41.800, 0.523
211	42.000, 0.121	42.000, 0.099	42.000, 0.114	42.000, 0.092	42.000, -0.027	42.000, -0.021	42.000, 0.530
212	42.200, 0.121	42.200, 0.099	42.200, 0.114	42.200, 0.092	42.200, -0.028	42.200, -0.021	42.200, 0.538
213	42.400, 0.122	42.400, 0.100	42.400, 0.115	42.400, 0.092	42.400, -0.028	42.400, -0.021	42.400, 0.546
214	42.600, 0.122	42.600, 0.100	42.600, 0.116	42.600, 0.093	42.600, -0.029	42.600, -0.021	42.600, 0.553
215	42.800, 0.123	42.800, 0.101	42.800, 0.116	42.800, 0.094	42.800, -0.029	42.800, -0.021	42.800, 0.561
216	43.000, 0.124	43.000, 0.101	43.000, 0.117	43.000, 0.094	43.000, -0.029	43.000, -0.022	43.000, 0.568
217	43.200, 0.124	43.200, 0.101	43.200, 0.117	43.200, 0.094	43.200, -0.029	43.200, -0.022	43.200, 0.575
218	43.400, 0.125	43.400, 0.101	43.400, 0.117	43.400, 0.094	43.400, -0.030	43.400, -0.023	43.400, 0.583
219	43.600, 0.125	43.600, 0.101	43.600, 0.118	43.600, 0.094	43.600, -0.030	43.600, -0.023	43.600, 0.590
220	43.800, 0.126	43.800, 0.102	43.800, 0.118	43.800, 0.094	43.800, -0.030	43.800, -0.024	43.800, 0.597
221	44.000, 0.127	44.000, 0.102	44.000, 0.118	44.000, 0.093	44.000, -0.030	44.000, -0.024	44.000, 0.604
222	44.200, 0.127	44.200, 0.102	44.200, 0.118	44.200, 0.093	44.200, -0.030	44.200, -0.025	44.200, 0.611
223	44.400, 0.128	44.400, 0.102	44.400, 0.118	44.400, 0.093	44.400, -0.030	44.400, -0.025	44.400, 0.618
224	44.600, 0.128	44.600, 0.102	44.600, 0.118	44.600, 0.093	44.600, -0.030	44.600, -0.025	44.600, 0.625
225	44.800, 0.129	44.800, 0.102	44.800, 0.118	44.800, 0.094	44.800, -0.030	44.800, -0.026	44.800, 0.632
226	45.000, 0.129	45.000, 0.103	45.000, 0.118	45.000, 0.094	45.000, -0.030	45.000, -0.026	45.000, 0.639
227	45.200, 0.130	45.200, 0.103	45.200, 0.118	45.200, 0.094	45.200, -0.030	45.200, -0.026	45.200, 0.646
228	45.400, 0.130	45.400, 0.104	45.400, 0.118	45.400, 0.094	45.400, -0.030	45.400, -0.025	45.400, 0.653
229	45.600, 0.130	45.600, 0.104	45.600, 0.118	45.600, 0.094	45.600, -0.030	45.600, -0.025	45.600, 0.660
230	45.800, 0.130	45.800, 0.104	45.800, 0.118	45.800, 0.095	45.800, -0.030	45.800, -0.025	45.800, 0.667
231	46.000, 0.131	46.000, 0.105	46.000, 0.119	46.000, 0.095	46.000, -0.030	46.000, -0.025	46.000, 0.674
232	46.200, 0.131	46.200, 0.105	46.200, 0.119	46.200, 0.095	46.200, -0.030	46.200, -0.025	46.200, 0.681
233	46.400, 0.131	46.400, 0.105	46.400, 0.119	46.400, 0.095	46.400, -0.030	46.400, -0.025	46.400, 0.688
234	46.600, 0.131	46.600, 0.106	46.600, 0.120	46.600, 0.095	46.600, -0.030	46.600, -0.024	46.600, 0.694
235	46.800, 0.132	46.800, 0.106	46.800, 0.120	46.800, 0.096	46.800, -0.031	46.800, -0.024	46.800, 0.701
236	47.000, 0.132	47.000, 0.107	47.000, 0.120	47.000, 0.096	47.000, -0.031	47.000, -0.024	47.000, 0.707
237	47.200, 0.132	47.200, 0.107	47.200, 0.120	47.200, 0.095	47.200, -0.032	47.200, -0.024	47.200, 0.714
238	47.400, 0.132	47.400, 0.107	47.400, 0.120	47.400, 0.095	47.400, -0.032	47.400, -0.024	47.400, 0.720
239	47.600, 0.132	47.600, 0.107	47.600, 0.120	47.600, 0.095	47.600, -0.032	47.600, -0.024	47.600, 0.727
240	47.800, 0.133	47.800, 0.107	47.800, 0.121	47.800, 0.095	47.800, -0.033	47.800, -0.025	47.800, 0.733
241	48.000, 0.133	48.000, 0.108	48.000, 0.121	48.000, 0.095	48.000, -0.033	48.000, -0.025	48.000, 0.740
242	48.200, 0.133	48.200, 0.108	48.200, 0.121	48.200, 0.095	48.200, -0.034	48.200, -0.025	48.200, 0.747
243	48.400, 0.134	48.400, 0.108	48.400, 0.121	48.400, 0.095	48.400, -0.034	48.400, -0.026	48.400, 0.753
244	48.600, 0.134	48.600, 0.109	48.600, 0.121	48.600, 0.095	48.600, -0.034	48.600, -0.026	48.600, 0.760
245	48.800, 0.134	48.800, 0.109	48.800, 0.121	48.800, 0.096	48.800, -0.035	48.800, -0.026	48.800, 0.767
246	49.000, 0.134	49.000, 0.110	49.000, 0.121	49.000, 0.096	49.000, -0.035	49.000, -0.026	49.000, 0.773
247	49.200, 0.135	49.200, 0.110	49.200, 0.122	49.200, 0.097	49.200, -0.035	49.200, -0.026	49.200, 0.780
248	49.400, 0.135	49.400, 0.111	49.400, 0.122	49.400, 0.098	49.400, -0.035	49.400, -0.026	49.400, 0.787
249	49.600, 0.135	49.600, 0.111	49.600, 0.122	49.600, 0.098	49.600, -0.035	49.600, -0.026	49.600, 0.793
250	49.800, 0.136	49.800, 0.111	49.800, 0.122	49.800, 0.099	49.800, -0.035	49.800, -0.026	49.800, 0.799
251	50.000, 0.136	50.000, 0.111	50.000, 0.123	50.000, 0.099	50.000, -0.035	50.000, -0.026	50.000, 0.806
252	50.200, 0.136	50.200, 0.111	50.200, 0.123	50.200, 0.100	50.200, -0.035	50.200, -0.026	50.200, 0.812
253	50.400, 0.137	50.400, 0.112	50.400, 0.123	50.400, 0.100	50.400, -0.035	50.400, -0.027	50.400, 0.818
254	50.600, 0.137	50.600, 0.112	50.600, 0.124	50.600, 0.100	50.600, -0.035	50.600, -0.027	50.600, 0.823
255	50.800, 0.137	50.800, 0.112	50.800, 0.124	50.800, 0.100	50.800, -0.035	50.800, -0.027	50.800, 0.829
256	51.000, 0.137	51.000, 0.112	51.000, 0.124	51.000, 0.100	51.000, -0.035	51.000, -0.027	51.000, 0.835
257	51.200, 0.137	51.200, 0.112	51.200, 0.125	51.200, 0.100	51.200, -0.035	51.200, -0.027	51.200, 0.841
258	51.400, 0.137	51.400, 0.112	51.400, 0.125	51.400, 0.099	51.400, -0.035	51.400, -0.028	51.400, 0.847
259	51.600, 0.138	51.600, 0.112	51.600, 0.125	51.600, 0.099	51.600, -0.035	51.600, -0.028	51.600, 0.853
260	51.800, 0.138	51.800, 0.113	51.800, 0.125	51.800, 0.098	51.800, -0.035	51.800, -0.029	51.800, 0.859
261	52.000, 0.138	52.000, 0.113	52.000, 0.125	52.000, 0.098	52.000, -0.035	52.000, -0.029	52.000, 0.866
262	52.200, 0.138	52.200, 0.113	52.200, 0.125	52.200, 0.097	52.200, -0.035	52.200, -0.029	52.200, 0.872
263	52.400, 0.139	52.400, 0.114	52.400, 0.125	52.400, 0.097	52.400, -0.035	52.400, -0.029	52.400, 0.878
264	52.600, 0.139	52.600, 0.114	52.600, 0.126	52.600, 0.097	52.600, -0.035	52.600, -0.029	52.600, 0.883
265	52.800, 0.139	52.800, 0.114	52.800, 0.126	52.800, 0.097	52.800, -0.035	52.800, -0.029	52.800, 0.889
266	53.000, 0.140	53.000, 0.115	53.000, 0.126	53.000, 0.097	53.000, -0.035	53.000, -0.029	53.000, 0.895
267	53.200, 0.140	53.200, 0.115	53.200, 0.126	53.200, 0.096	53.200, -0.035	53.200, -0.029	53.200, 0.901
268	53.400, 0.140	53.400, 0.116	53.400, 0.126	53.400, 0.096	53.400, -0.036	53.400, -0.029	53.400, 0.907
269	53.600, 0.140	53.600, 0.116	53.600, 0.126	53.600, 0.097	53.600, -0.036	53.600, -0.028	53.600, 0.913
270	53.800, 0.141	53.800, 0.116	53.800, 0.126	53.800, 0.097	53.800, -0.036	53.800, -0.028	53.800, 0.918
271	54.000, 0.141	54.000, 0.116	54.000, 0.125	54.000, 0.097	54.000, -0.036	54.000, -0.028	54.000, 0.924
272	54.200, 0.141	54.200, 0.116	54.200, 0.125	54.200, 0.097	54.200, -0.036	54.200, -0.028	54.200, 0.930
273	54.400, 0.141	54.400, 0.116	54.400, 0.125	54.400, 0.097	54.400, -0.037	54.400, -0.028	54.400, 0.935
274	54.600, 0.140	54.600, 0.116	54.600, 0.125	54.600, 0.097	54.600, -0.037	54.600, -0.027	54.600, 0.941
275	54.800, 0.140	54.800, 0.116	54.800, 0.125	54.800, 0.097	54.800, -0.038	54.800, -0.027	54.800, 0.947
276	55.000, 0.140	55.000, 0.116	55.000, 0.126	55.000, 0.097	55.000, -0.038	55.000, -0.028	55.000, 0.952
277	55.200, 0.141	55.200, 0.116	55.200, 0.126	55.200, 0.097	55.200, -0.038	55.200, -0.028	55.200, 0.958
278	55.400, 0.141	55.400, 0.116	55.400, 0.126	55.400, 0.097	55.400, -0.038	55.400, -0.028	55.400, 0.963
279	55.600, 0.141	55.600, 0.117	55.600, 0.127	55.600, 0.097	55.600, -0.039	55.600, -0.029	55.600, 0.969
280	55.800, 0.142	55.800, 0.117	55.800, 0.127	55.800, 0.097	55.800, -0.039	55.800, -0.029	55.800, 0.974
281	56.000, 0.142	56.000, 0.117	56.000, 0.127	56.000, 0.098	56.000, -0.039	56.000, -0.030	56.000, 0.980
282	56.200, 0.143	56.200, 0.117	56.200, 0.127	56.200, 0.098	56.200, -0.039	56.200, -0.030	56.200, 0.985
283	56.400, 0.143	56.400, 0.117	56.400, 0.128	56.400, 0.098	56.400, -0.039	56.400, -0.030	56.400, 0.991
284	56.600, 0.143	56.600, 0.117	56.600, 0.128	56.600, 0.098	56.600, -0.039	56.600, -0.031	56.600, 0.997
285	56.800, 0.144	56.800, 0.117	56.800, 0.128	56.800, 0.099	56.800, -0.039	56.800, -0.031	56.800, 1.002
286	57.000, 0.144	57.000, 0.117	57.000, 0.129	57.000, 0.099	57.000, -0.039	57.000, -0.031	57.000, 1.008
287	57.200, 0.144	57.200, 0.118	57.200, 0.129	57.200, 0.099	57.200, -0.039	57.200, -0.031	57.200, 1.013
288	57.400, 0.144	57.400, 0.118	57.400, 0.129	57.400, 0.100	57.400, -0.039	57.400, -0.031	57.400, 1.018
289	57.600, 0.145	57.600, 0.118	57.600, 0.129	57.600, 0.100	57.600, -0.039	57.600, -0.031	57.600, 1.024
290	57.800, 0.145	57.800, 0.118	57.800, 0.129	57.800, 0.100	57.800, -0.039	57.800, -0.031	57.800, 1.029
291	58.000, 0.145	58.000, 0.118	58.000, 0.129	58.000, 0.100	58.000, -0.040	58.000, -0.031	58.000, 1.034
292	58.200, 0.145	58.200, 0.118	58.200, 0.129	58.200, 0.101	58.200, -0.040	58.200, -0.031	58.200, 1.039
293	58.400, 0.145	58.400, 0.119	58.400, 0.129	58.400, 0.101	58.400, -0.040	58.400, -0.031	58.400, 1.044
294	58.600, 0.145	58.600, 0.119	58.600, 0.130	58.600, 0.101	58.600, -0.040	58.600, -0.031	58.600, 1.049
295	58.800, 0.145	58.800, 0.119	58.800, 0.130	58.800, 0.100	58.800, -0.039	58.800, -0.031	58.800, 1.054
296	59.000, 0.145	59.000, 0.120	59.000, 0.130	59.000, 0.100	59.000, -0.039	59.000, -0.031	59.000, 1.058
297	59.200, 0.146	59.200, 0.120	59.200, 0.130	59.200, 0.100	59.200, -0.039	59.200, -0.031	59.200, 1.063
298	59.400, 0.146	59.400, 0.120	59.400, 0.130	59.400, 0.100	59.400, -0.039	59.400, -0.031	59.400, 1.068
299	59.600, 0.146	59.600, 0.121	59.600, 0.130	59.600, 0.100	59.600, -0.039	59.600, -0.031	59.600, 1.073
300	59.800, 0.146	59.800, 0.121	59.800, 0.130	59.800, 0.099	59.800, -0.039	59.800, -0.031	59.800, 1.077
301	60.000, 0.146	60.000, 0.121	60.000, 0.130	60.000, 0.099	60.000, -0.039	60.000, -0.031	60.000, 1.082
302	60.200, 0.146	60.200, 0.121	60.200, 0.130	60.200, 0.099	60.200, -0.039	60.200, -0.032	60.200, 1.087
303	60.400, 0.146	60.400, 0.121	60.400, 0.130	60.400, 0.099	60.400, -0.040	60.400, -0.032	60.400, 1.092
304	60.600, 0.145	60.600, 0.120	60.600, 0.130	60.600, 0.099	60.600, -0.040	60.600, -0.031	60.600, 1.097
305	60.800, 0.145	60.800, 0.120	60.800, 0.131	60.800, 0.099	60.800, -0.040	60.800, -0.031	60.800, 1.102
306	61.000, 0.145	61.000, 0.120	61.000, 0.131	61.000, 0.099	61.000, -0.040	61.000, -0.031	61.000, 1.106
307	61.200, 0.145	61.200, 0.120	61.200, 0.131	61.200, 0.100	61.200, -0.040	61.200, -0.031	61.200, 1.111
308	61.400, 0.145	61.400, 0.120	61.400, 0.131	61.400, 0.100	61.400, -0.040	61.400, -0.031	61.400, 1.115
309	61.600, 0.145	61.600, 0.120	61.600, 0.131	61.600, 0.100	61.600, -0.040	61.600, -0.032	61.600, 1.120
310	61.800, 0.145	61.800, 0.120	61.800, 0.131	61.800, 0.100	61.800, -0.040	61.800, -0.032	61.800, 1.124
311	62.000, 0.146	62.000, 0.120	62.000, 0.131	62.000, 0.100	62.000, -0.040	62.000, -0.032	62.000, 1.129
312	62.200, 0.146	62.200, 0.120	62.200, 0.131	62.200, 0.100	62.200, -0.040	62.200, -0.032	62.200, 1.133
313	62.400, 0.147	62.400, 0.121	62.400, 0.131	62.400, 0.100	62.400, -0.040	62.400, -0.032	62.400, 1.138
314	62.600, 0.147	62.600, 0.121	62.600, 0.131	62.600, 0.100	62.600, -0.040	62.600, -0.032	62.600, 1.142
315	62.800, 0.147	62.800, 0.122	62.800, 0.131	62.800, 0.099	62.800, -0.040	62.800, -0.032	62.800, 1.147
316	63.000, 0.148	63.000, 0.122	63.000, 0.131	63.000, 0.099	63.000, -0.040	63.000, -0.032	63.000, 1.151
317	63.200, 0.148	63.200, 0.123	63.200, 0.131	63.200, 0.099	63.200, -0.040	63.200, -0.032	63.200, 1.156
318	63.400, 0.148	63.400, 0.123	63.400, 0.131	63.400, 0.100	63.400, -0.040	63.400, -0.032	63.400, 1.161
319	63.600, 0.148	63.600, 0.123	63.600, 0.131	63.600, 0.100	63.600, -0.040	63.600, -0.032	63.600, 1.165
320	63.800, 0.148	63.800, 0.123	63.800, 0.132	63.800, 0.100	63.800, -0.040	63.800, -0.032	63.800, 1.170
321	64.000, 0.148	64.000, 0.123	64.000, 0.132	64.000, 0.100	64.000, -0.040	64.000, -0.033	64.000, 1.174
322	64.200, 0.148	64.200, 0.123	64.200, 0.132	64.200, 0.099	64.200, -0.040	64.200, -0.033	64.200, 1.179
323	64.400, 0.148	64.400, 0.123	64.400, 0.132	64.400, 0.099	64.400, -0.040	64.400, -0.033	64.400, 1.184
324	64.600, 0.148	64.600, 0.123	64.600, 0.133	64.600, 0.099	64.600, -0.040	64.600, -0.033	64.600, 1.188
325	64.800, 0.148	64.800, 0.123	64.800, 0.133	64.800, 0.099	64.800, -0.041	64.800, -0.033	64.800, 1.193
326	65.000, 0.148	65.000, 0.123	65.000, 0.133	65.000, 0.099	65.000, -0.041	65.000, -0.033	65.000, 1.197
327	65.200, 0.148	65.200, 0.123	65.200, 0.133	65.200, 0.099	65.200, -0.041	65.200, -0.033	65.200, 1.201
328	65.400, 0.148	65.400, 0.123	65.400, 0.133	65.400, 0.099	65.400, -0.041	65.400, -0.033	65.400, 1.205
329	65.600, 0.149	65.600, 0.123	65.600, 0.132	65.600, 0.100	65.600, -0.040	65.600, -0.033	65.600, 1.209
330	65.800, 0.149	65.800, 0.123	65.800, 0.132	65.800, 0.100	65.800, -0.040	65.800, -0.033	65.800, 1.213
331	66.000, 0.149	66.000, 0.123	66.000, 0.132	66.000, 0.100	66.000, -0.040	66.000, -0.033	66.000, 1.217
332	66.200, 0.149	66.200, 0.123	66.200, 0.132	66.200, 0.100	66.200, -0.040	66.200, -0.033	66.200, 1.221
333	66.400, 0.150	66.400, 0.123	66.400, 0.132	66.400, 0.101	66.400, -0.040	66.400, -0.033	66.400, 1.225
334	66.600, 0.150	66.600, 0.124	66.600, 0.133	66.600, 0.101	66.600, -0.040	66.600, -0.032	66.600, 1.229
335	66.800, 0.150	66.800, 0.124	66.800, 0.133	66.800, 0.102	66.800, -0.041	66.800, -0.032	66.800, 1.232
336	67.000, 0.150	67.000, 0.124	67.000, 0.133	67.000, 0.102	67.000, -0.041	67.000, -0.032	67.000, 1.236
337	67.200, 0.150	67.200, 0.124	67.200, 0.133	67.200, 0.103	67.200, -0.041	67.200, -0.032	67.200, 1.240
338	67.400, 0.150	67.400, 0.124	67.400, 0.133	67.400, 0.103	67.400, -0.042	67.400, -0.033	67.400, 1.244
339	67.600, 0.150	67.600, 0.124	67.600, 0.133	67.600, 0.103	67.600, -0.042	67.600, -0.033	67.600, 1.248
340	67.800, 0.150	67.800, 0.124	67.800, 0.133	67.800, 0.103	67.800, -0.042	67.800, -0.033	67.800, 1.252
341	68.000, 0.151	68.000, 0.124	68.000, 0.133	68.000, 0.103	68.000, -0.042	68.000, -0.033	68.000, 1.257
342	68.200, 0.151	68.200, 0.124	68.200, 0.133	68.200, 0.102	68.200, -0.042	68.200, -0.034	68.200, 1.261
343	68.400, 0.151	68.400, 0.124	68.400, 0.133	68.400, 0.102	68.400, -0.043	68.400, -0.034	68.400, 1.265
344	68.600, 0.152	68.600, 0.124	68.600, 0.133	68.600, 0.102	68.600, -0.042	68.600, -0.034	68.600, 1.270
345	68.800, 0.152	68.800, 0.124	68.800, 0.133	68.800, 0.102	68.800, -0.042	68.800, -0.034	68.800, 1.274
346	69.000, 0.152	69.000, 0.125	69.000, 0.133	69.000, 0.102	69.000, -0.042	69.000, -0.034	69.000, 1.278
347	69.200, 0.153	69.200, 0.125	69.200, 0.133	69.200, 0.102	69.200, -0.042	69.200, -0.034	69.200, 1.282
348	69.400, 0.153	69.400, 0.125	69.400, 0.133	69.400, 0.101	69.400, -0.042	69.400, -0.034	69.400, 1.286
349	69.600, 0.153	69.600, 0.125	69.600, 0.132	69.600, 0.101	69.600, -0.041	69.600, -0.033	69.600, 1.290
350	69.800, 0.154	69.800, 0.125	69.800, 0.132	69.800, 0.101	69.800, -0.041	69.800, -0.033	69.800, 1.294
351	70.000, 0.154	70.000, 0.126	70.000, 0.132	70.000, 0.101	70.000, -0.041	70.000, -0.033	70.000, 1.298
352	70.200, 0.154	70.200, 0.126	70.200, 0.133	70.200, 0.101	70.200, -0.041	70.200, -0.033	70.200, 1.302
353	70.400, 0.154	70.400, 0.126	70.400, 0.133	70.400, 0.101	70.400, -0.042	70.400, -0.033	70.400, 1.305
354	70.600, 0.153	70.600, 0.126	70.600, 0.133	70.600, 0.101	70.600, -0.042	70.600, -0.033	70.600, 1.309
355	70.800, 0.153	70.800, 0.126	70.800, 0.133	70.800, 0.101	70.800, -0.042	70.800, -0.033	70.800, 1.312
356	71.000, 0.153	71.000, 0.126	71.000, 0.134	71.000, 0.101	71.000, -0.043	71.000, -0.033	71.000, 1.316
357	71.200, 0.153	71.200, 0.126	71.200, 0.134	71.200, 0.101	71.200, -0.043	71.200, -0.033	71.200, 1.320
358	71.400, 0.152	71.400, 0.126	71.400, 0.134	71.400, 0.102	71.400, -0.043	71.400, -0.033	71.400, 1.323
359	71.600, 0.153	71.600, 0.126	71.600, 0.133	71.600, 0.102	71.600, -0.043	71.600, -0.033	71.600, 1.327
360	71.800, 0.153	71.800, 0.126	71.800, 0.134	71.800, 0.102	71.800, -0.043	71.800, -0.033	71.800, 1.330
361	72.000, 0.153	72.000, 0.126	72.000, 0.134	72.000, 0.103	72.000, -0.044	72.000, -0.034	72.000, 1.334
362	72.200, 0.153	72.200, 0.126	72.200, 0.134	72.200, 0.103	72.200, -0.044	72.200, -0.034	72.200, 1.337
363	72.400, 0.154	72.400, 0.126	72.400, 0.135	72.400, 0.103	72.400, -0.044	72.400, -0.034	72.400, 1.340
364	72.600, 0.154	72.600, 0.126	72.600, 0.135	72.600, 0.103	72.600, -0.044	72.600, -0.034	72.600, 1.344
365	72.800, 0.154	72.800, 0.126	72.800, 0.135	72.800, 0.103	72.800, -0.044	72.800, -0.035	72.800, 1.347
366	73.000, 0.154	73.000, 0.126	73.000, 0.136	73.000, 0.103	73.000, -0.044	73.000, -0.035	73.000, 1.351
367	73.200, 0.155	73.200, 0.127	73.200, 0.136	73.200, 0.102	73.200, -0.044	73.200, -0.035	73.200, 1.355
368	73.400, 0.155	73.400, 0.127	73.400, 0.136	73.400, 0.102	73.400, -0.044	73.400, -0.034	73.400, 1.358
369	73.600, 0.155	73.600, 0.128	73.600, 0.136	73.600, 0.102	73.600, -0.044	73.600, -0.034	73.600, 1.362
370	73.800, 0.155	73.800, 0.128	73.800, 0.136	73.800, 0.102	73.800, -0.044	73.800, -0.034	73.800, 1.365
371	74.000, 0.155	74.000, 0.128	74.000, 0.135	74.000, 0.102	74.000, -0.044	74.000, -0.034	74.000, 1.369
372	74.200, 0.155	74.200, 0.128	74.200, 0.135	74.200, 0.101	74.200, -0.044	74.200, -0.034	74.200, 1.372
373	74.400, 0.155	74.400, 0.128	74.400, 0.135	74.400, 0.101	74.400, -0.044	74.400, -0.034	74.400, 1.375
374	74.600, 0.155	74.600, 0.128	74.600, 0.135	74.600, 0.101	74.600, -0.044	74.600, -0.034	74.600, 1.379
375	74.800, 0.154	74.800, 0.128	74.800, 0.135	74.800, 0.100	74.800, -0.044	74.800, -0.034	74.800, 1.382
376	75.000, 0.154	75.000, 0.129	75.000, 0.135	75.000, 0.100	75.000, -0.044	75.000, -0.034	75.000, 1.385
377	75.200, 0.154	75.200, 0.129	75.200, 0.134	75.200, 0.101	75.200, -0.044	75.200, -0.034	75.200, 1.388
378	75.400, 0.154	75.400, 0.129	75.400, 0.134	75.400, 0.101	75.400, -0.044	75.400, -0.035	75.400, 1.392
379	75.600, 0.154	75.600, 0.129	75.600, 0.134	75.600, 0.102	75.600, -0.044	75.600, -0.035	75.600, 1.395
380	75.800, 0.154	75.800, 0.129	75.800, 0.134	75.800, 0.102	75.800, -0.044	75.800, -0.035	75.800, 1.398
381	76.000, 0.154	76.000, 0.129	76.000, 0.134	76.000, 0.103	76.000, -0.044	76.000, -0.036	76.000, 1.401
382	76.200, 0.154	76.200, 0.129	76.200, 0.134	76.200, 0.103	76.200, -0.044	76.200, -0.036	76.200, 1.404
383	76.400, 0.155	76.400, 0.129	76.400, 0.134	76.400, 0.104	76.400, -0.044	76.400, -0.036	76.400, 1.407
384	76.600, 0.155	76.600, 0.129	76.600, 0.135	76.600, 0.104	76.600, -0.044	76.600, -0.036	76.600, 1.410
385	76.800, 0.155	76.800, 0.129	76.800, 0.135	76.800, 0.104	76.800, -0.044	76.800, -0.036	76.800, 1.413
386	77.000, 0.155	77.000, 0.129	77.000, 0.135	77.000, 0.104	77.000, -0.044	77.000, -0.036	77.000, 1.416
387	77.200, 0.156	77.200, 0.129	77.200, 0.136	77.200, 0.105	77.200, -0.044	77.200, -0.036	77.200, 1.420
388	77.400, 0.156	77.400, 0.129	77.400, 0.136	77.400, 0.105	77.400, -0.044	77.400, -0.035	77.400, 1.423
389	77.600, 0.156	77.600, 0.129	77.600, 0.136	77.600, 0.105	77.600, -0.044	77.600, -0.035	77.600, 1.426
390	77.800, 0.156	77.800, 0.129	77.800, 0.136	77.800, 0.105	77.800, -0.045	77.800, -0.035	77.800, 1.430
391	78.000, 0.156	78.000, 0.129	78.000, 0.137	78.000, 0.105	78.000, -0.045	78.000, -0.035	78.000, 1.433
392	78.200, 0.156	78.200, 0.129	78.200, 0.137	78.200, 0.105	78.200, -0.045	78.200, -0.035	78.200, 1.436
393	78.400, 0.157	78.400, 0.129	78.400, 0.137	78.400, 0.105	78.400, -0.045	78.400, -0.035	78.400, 1.439
394	78.600, 0.157	78.600, 0.129	78.600, 0.137	78.600, 0.104	78.600, -0.045	78.600, -0.035	78.600, 1.443
395	78.800, 0.157	78.800, 0.129	78.800, 0.137	78.800, 0.104	78.800, -0.045	78.800, -0.036	78.800, 1.446
396	79.000, 0.158	79.000, 0.129	79.000, 0.137	79.000, 0.104	79.000, -0.045	79.000, -0.036	79.000, 1.449
397	79.200, 0.158	79.200, 0.129	79.200, 0.137	79.200, 0.104	79.200, -0.045	79.200, -0.036	79.200, 1.453
398	79.400, 0.158	79.400, 0.129	79.400, 0.137	79.400, 0.104	79.400, -0.045	79.400, -0.037	79.400, 1.456
399	79.600, 0.158	79.600, 0.129	79.600, 0.137	79.600, 0.104	79.600, -0.045	79.600, -0.037	79.600, 1.459
400	79.800, 0.158	79.800, 0.129	79.800, 0.137	79.800, 0.104	79.800, -0.045	79.800, -0.037	79.800, 1.462
401	80.000, 0.158	80.000, 0.130	80.000, 0.137	80.000, 0.104	80.000, -0.044	80.000, -0.037	80.000, 1.465
402	80.200, 0.158	80.200, 0.130	80.200, 0.137	80.200, 0.104	80.200, -0.044	80.200, -0.037	80.200, 1.468
403	80.400, 0.157	80.400, 0.130	80.400, 0.137	80.400, 0.104	80.400, -0.044	80.400, -0.037	80.400, 1.470
404	80.600, 0.157	80.600, 0.130	80.600, 0.137	80.600, 0.103	80.600, -0.044	80.600, -0.037	80.600, 1.473
405	80.800, 0.156	80.800, 0.131	80.800, 0.137	80.800, 0.103	80.800, -0.044	80.800, -0.037	80.800, 1.476
406	81.000, 0.156	81.000, 0.131	81.000, 0.137	81.000, 0.103	81.000, -0.045	81.000, -0.036	81.000, 1.479
407	81.200, 0.156	81.200, 0.131	81.200, 0.137	81.200, 0.103	81.200, -0.045	81.200, -0.036	81.200, 1.482
408	81.400, 0.155	81.400, 0.131	81.400, 0.137	81.400, 0.102	81.400, -0.045	81.400, -0.036	81.400, 1.485
409	81.600, 0.155	81.600, 0.132	81.600, 0.138	81.600, 0.103	81.600, -0.045	81.600, -0.035	81.600, 1.488
410	81.800, 0.155	81.800, 0.132	81.800, 0.138	81.800, 0.103	81.800, -0.046	81.800, -0.035	81.800, 1.491
411	82.000, 0.155	82.000, 0.132	82.000, 0.138	82.000, 0.103	82.000, -0.046	82.000, -0.035	82.000, 1.493
412	82.200, 0.155	82.200, 0.132	82.200, 0.139	82.200, 0.103	82.200, -0.046	82.200, -0.035	82.200, 1.496
413	82.400, 0.156	82.400, 0.132	82.400, 0.139	82.400, 0.103	82.400, -0.046	82.400, -0.035	82.400, 1.499
414	82.600, 0.156	82.600, 0.132	82.600, 0.139	82.600, 0.103	82.600, -0.047	82.600, -0.035	82.600, 1.502
415	82.800, 0.157	82.800, 0.132	82.800, 0.139	82.800, 0.104	82.800, -0.047	82.800, -0.036	82.800, 1.505
416	83.000, 0.157	83.000, 0.132	83.000, 0.140	83.000, 0.104	83.000, -0.047	83.000, -0.036	83.000, 1.508
417	83.200, 0.158	83.200, 0.132	83.200, 0.140	83.200, 0.104	83.200, -0.047	83.200, -0.036	83.200, 1.511
418	83.400, 0.159	83.400, 0.132	83.400, 0.140	83.400, 0.104	83.400, -0.047	83.400, -0.036	83.400, 1.514
419	83.600, 0.159	83.600, 0.132	83.600, 0.140	83.600, 0.104	83.600, -0.047	83.600, -0.036	83.600, 1.516
420	83.800, 0.159	83.800, 0.131	83.800, 0.140	83.800, 0.104	83.800, -0.047	83.800, -0.036	83.800, 1.518
421	84.000, 0.159	84.000, 0.131	84.000, 0.139	84.000, 0.104	84.000, -0.047	84.000, -0.036	84.000, 1.521
422	84.200, 0.159	84.200, 0.131	84.200, 0.139	84.200, 0.104	84.200, -0.047	84.200, -0.037	84.200, 1.523
423	84.400, 0.159	84.400, 0.131	84.400, 0.139	84.400, 0.104	84.400, -0.047	84.400, -0.037	84.400, 1.526
424	84.600, 0.159	84.600, 0.131	84.600, 0.140	84.600, 0.104	84.600, -0.047	84.600, -0.037	84.600, 1.528
425	84.800, 0.159	84.800, 0.131	84.800, 0.140	84.800, 0.103	84.800, -0.047	84.800, -0.037	84.800, 1.531
426	85.000, 0.159	85.000, 0.131	85.000, 0.140	85.000, 0.103	85.000, -0.046	85.000, -0.037	85.000, 1.533
427	85.200, 0.159	85.200, 0.131	85.200, 0.140	85.200, 0.103	85.200, -0.046	85.200, -0.037	85.200, 1.536
428	85.400, 0.159	85.400, 0.132	85.400, 0.140	85.400, 0.103	85.400, -0.045	85.400, -0.037	85.400, 1.539
429	85.600, 0.159	85.600, 0.132	85.600, 0.140	85.600, 0.103	85.600, -0.045	85.600, -0.037	85.600, 1.542
430	85.800, 0.159	85.800, 0.132	85.800, 0.140	85.800, 0.103	85.800, -0.045	85.800, -0.037	85.800, 1.544
431	86.000, 0.158	86.000, 0.132	86.000, 0.140	86.000, 0.103	86.000, -0.044	86.000, -0.038	86.000, 1.547
432	86.200, 0.158	86.200, 0.133	86.200, 0.141	86.200, 0.103	86.200, -0.044	86.200, -0.038	86.200, 1.550
433	86.400, 0.159	86.400, 0.133	86.400, 0.141	86.400, 0.103	86.400, -0.044	86.400, -0.038	86.400, 1.553
434	86.600, 0.159	86.600, 0.133	86.600, 0.141	86.600, 0.104	86.600, -0.044	86.600, -0.038	86.600, 1.556
435	86.800, 0.159	86.800, 0.134	86.800, 0.141	86.800, 0.104	86.800, -0.044	86.800, -0.038	86.800, 1.559
436	87.000, 0.159	87.000, 0.134	87.000, 0.141	87.000, 0.104	87.000, -0.044	87.000, -0.038	87.000, 1.561
437	87.200, 0.159	87.200, 0.134	87.200, 0.141	87.200, 0.104	87.200, -0.045	87.200, -0.038	87.200, 1.564
438	87.400, 0.158	87.400, 0.134	87.400, 0.141	87.400, 0.105	87.400, -0.045	87.400, -0.038	87.400, 1.567
439	87.600, 0.158	87.600, 0.134	87.600, 0.141	87.600, 0.105	87.600, -0.045	87.600, -0.037	87.600, 1.569
440	87.800, 0.158	87.800, 0.134	87.800, 0.141	87.800, 0.105	87.800, -0.045	87.800, -0.037	87.800, 1.572
441	88.000, 0.159	88.000, 0.133	88.000, 0.141	88.000, 0.105	88.000, -0.046	88.000, -0.037	88.000, 1.574
442	88.200, 0.159	88.200, 0.133	88.200, 0.141	88.200, 0.104	88.200, -0.046	88.200, -0.037	88.200, 1.577
443	88.400, 0.159	88.400, 0.133	88.400, 0.141	88.400, 0.104	88.400, -0.046	88.400, -0.037	88.400, 1.579
444	88.600, 0.160	88.600, 0.133	88.600, 0.142	88.600, 0.104	88.600, -0.046	88.600, -0.037	88.600, 1.582
445	88.800, 0.160	88.800, 0.133	88.800, 0.141	88.800, 0.104	88.800, -0.046	88.800, -0.037	88.800, 1.584
446	89.000, 0.160	89.000, 0.133	89.000, 0.142	89.000, 0.103	89.000, -0.046	89.000, -0.037	89.000, 1.587
447	89.200, 0.161	89.200, 0.133	89.200, 0.141	89.200, 0.103	89.200, -0.046	89.200, -0.037	89.200, 1.589
448	89.400, 0.161	89.400, 0.133	89.400, 0.141	89.400, 0.103	89.400, -0.045	89.400, -0.037	89.400, 1.591
449	89.600, 0.161	89.600, 0.133	89.600, 0.141	89.600, 0.104	89.600, -0.045	89.600, -0.037	89.600, 1.594
450	89.800, 0.161	89.800, 0.133	89.800, 0.141	89.800, 0.104	89.800, -0.045	89.800, -0.037	89.800, 1.596
451	90.000, 0.161	90.000, 0.133	90.000, 0.141	90.000, 0.104	90.000, -0.045	90.000, -0.038	90.000, 1.598
452	90.200, 0.161	90.200, 0.134	90.200, 0.141	90.200, 0.104	90.200, -0.045	90.200, -0.038	90.200, 1.601
453	90.400, 0.161	90.400, 0.134	90.400, 0.141	90.400, 0.104	90.400, -0.045	90.400, -0.038	90.400, 1.603
454	90.600, 0.162	90.600, 0.134	90.600, 0.140	90.600, 0.104	90.600, -0.045	90.600, -0.038	90.600, 1.606
455	90.800, 0.161	90.800, 0.135	90.800, 0.140	90.800, 0.104	90.800, -0.045	90.800, -0.039	90.800, 1.609
456	91.000, 0.161	91.000, 0.135	91.000, 0.140	91.000, 0.104	91.000, -0.045	91.000, -0.039	91.000, 1.611
457	91.200, 0.161	91.200, 0.135	91.200, 0.140	91.200, 0.104	91.200, -0.045	91.200, -0.039	91.200, 1.614
458	91.400, 0.161	91.400, 0.135	91.400, 0.141	91.400, 0.104	91.400, -0.045	91.400, -0.039	91.400, 1.616
459	91.600, 0.161	91.600, 0.135	91.600, 0.141	91.600, 0.104	91.600, -0.045	91.600, -0.039	91.600, 1.618
460	91.800, 0.161	91.800, 0.134	91.800, 0.141	91.800, 0.104	91.800, -0.045	91.800, -0.039	91.800, 1.621
461	92.000, 0.162	92.000, 0.134	92.000, 0.141	92.000, 0.104	92.000, -0.045	92.000, -0.039	92.000, 1.623
462	92.200, 0.161	92.200, 0.134	92.200, 0.141	92.200, 0.104	92.200, -0.045	92.200, -0.039	92.200, 1.625
463	92.400, 0.161	92.400, 0.134	92.400, 0.142	92.400, 0.104	92.400, -0.045	92.400, -0.039	92.400, 1.628
464	92.600, 0.161	92.600, 0.134	92.600, 0.142	92.600, 0.105	92.600, -0.044	92.600, -0.039	92.600, 1.630
465	92.800, 0.161	92.800, 0.133	92.800, 0.142	92.800, 0.105	92.800, -0.044	92.800, -0.039	92.800, 1.632
466	93.000, 0.161	93.000, 0.133	93.000, 0.142	93.000, 0.105	93.000, -0.044	93.000, -0.039	93.000, 1.634
467	93.200, 0.161	93.200, 0.133	93.200, 0.142	93.200, 0.105	93.200, -0.044	93.200, -0.039	93.200, 1.636
468	93.400, 0.161	93.400, 0.133	93.400, 0.142	93.400, 0.105	93.400, -0.044	93.400, -0.039	93.400, 1.639
469	93.600, 0.161	93.600, 0.133	93.600, 0.142	93.600, 0.106	93.600, -0.044	93.600, -0.039	93.600, 1.641
470	93.800, 0.161	93.800, 0.133	93.800, 0.141	93.800, 0.106	93.800, -0.044	93.800, -0.038	93.800, 1.643
471	94.000, 0.161	94.000, 0.133	94.000, 0.141	94.000, 0.106	94.000, -0.044	94.000, -0.038	94.000, 1.645
472	94.200, 0.161	94.200, 0.133	94.200, 0.141	94.200, 0.106	94.200, -0.044	94.200, -0.038	94.200, 1.647
473	94.400, 0.161	94.400, 0.134	94.400, 0.141	94.400, 0.106	94.400, -0.044	94.400, -0.038	94.400, 1.650
474	94.600, 0.162	94.600, 0.134	94.600, 0.142	94.600, 0.106	94.600, -0.045	94.600, -0.038	94.600, 1.652
475	94.800, 0.162	94.800, 0.134	94.800, 0.142	94.800, 0.105	94.800, -0.045	94.800, -0.038	94.800, 1.654
476	95.000, 0.162	95.000, 0.134	95.000, 0.142	95.000, 0.105	95.000, -0.045	95.000, -0.038	95.000, 1.655
477	95.200, 0.162	95.200, 0.135	95.200, 0.142	95.200, 0.105	95.200, -0.045	95.200, -0.038	95.200, 1.657
478	95.400, 0.162	95.400, 0.135	95.400, 0.141	95.400, 0.104	95.400, -0.046	95.400, -0.038	95.400, 1.659
479	95.600, 0.162	95.600, 0.135	95.600, 0.141	95.600, 0.104	95.600, -0.046	95.600, -0.038	95.600, 1.661
480	95.800, 0.161	95.800, 0.135	95.800, 0.141	95.800, 0.104	95.800, -0.046	95.800, -0.039	95.800, 1.663
481	96.000, 0.162	96.000, 0.136	96.000, 0.141	96.000, 0.104	96.000, -0.045	96.000, -0.039	96.000, 1.664
482	96.200, 0.161	96.200, 0.136	96.200, 0.141	96.200, 0.104	96.200, -0.045	96.200, -0.040	96.200, 1.666
483	96.400, 0.161	96.400, 0.136	96.400, 0.141	96.400, 0.104	96.400, -0.045	96.400, -0.040	96.400, 1.668
484	96.600, 0.161	96.600, 0.136	96.600, 0.141	96.600, 0.104	96.600, -0.045	96.600, -0.040	96.600, 1.670
485	96.800, 0.161	96.800, 0.136	96.800, 0.141	96.800, 0.104	96.800, -0.044	96.800, -0.041	96.800, 1.673
486	97.000, 0.161	97.000, 0.136	97.000, 0.141	97.000, 0.104	97.000, -0.044	97.000, -0.041	97.000, 1.675
487	97.200, 0.161	97.200, 0.136	97.200, 0.141	97.200, 0.104	97.200, -0.044	97.200, -0.041	97.200, 1.677
488	97.400, 0.161	97.400, 0.136	97.400, 0.141	97.400, 0.104	97.400, -0.044	97.400, -0.040	97.400, 1.679
489	97.600, 0.162	97.600, 0.136	97.600, 0.141	97.600, 0.105	97.600, -0.044	97.600, -0.040	97.600, 1.681
490	97.800, 0.162	97.800, 0.136	97.800, 0.141	97.800, 0.105	97.800, -0.044	97.800, -0.040	97.800, 1.683
491	98.000, 0.163	98.000, 0.136	98.000, 0.142	98.000, 0.105	98.000, -0.044	98.000, -0.039	98.000, 1.685
492	98.200, 0.163	98.200, 0.136	98.200, 0.142	98.200, 0.105	98.200, -0.044	98.200, -0.039	98.200, 1.687
493	98.400, 0.163	98.400, 0.135	98.400, 0.142	98.400, 0.105	98.400, -0.044	98.400, -0.038	98.400, 1.689
494	98.600, 0.163	98.600, 0.135	98.600, 0.142	98.600, 0.105	98.600, -0.044	98.600, -0.038	98.600, 1.691
495	98.800, 0.163	98.800, 0.135	98.800, 0.142	98.800, 0.105	98.800, -0.044	98.800, -0.038	98.800, 1.693
496	99.000, 0.163	99.000, 0.135	99.000, 0.142	99.000, 0.105	99.000, -0.044	99.000, -0.038	99.000, 1.695
497	99.200, 0.164	99.200, 0.134	99.200, 0.142	99.200, 0.105	99.200, -0.044	99.200, -0.038	99.200, 1.697
498	99.400, 0.164	99.400, 0.134	99.400, 0.142	99.400, 0.105	99.400, -0.044	99.400, -0.038	99.400, 1.699
499	99.600, 0.164	99.600, 0.134	99.600, 0.142	99.600, 0.105	99.600, -0.044	99.600, -0.038	99.600, 1.700
500	99.800, 0.164	99.800, 0.135	99.800, 0.142	99.800, 0.105	99.800, -0.044	99.800, -0.039	99.800, 1.702
501	100.000, 0.164	100.000, 0.135	100.000, 0.142	100.000, 0.105	100.000, -0.044	100.000, -0.039	100.000, 1.704
502	100.200, 0.163	100.200, 0.135	100.200, 0.143	100.200, 0.105	100.200, -0.044	100.200, -0.040	100.200, 1.706
503	100.400, 0.163	100.400, 0.135	100.400, 0.143	100.400, 0.105	100.400, -0.045	100.400, -0.040	100.400, 1.708
504	100.600, 0.163	100.600, 0.135	100.600, 0.143	100.600, 0.105	100.600, -0.045	100.600, -0.041	100.600, 1.710
505	100.800, 0.163	100.800, 0.136	100.800, 0.143	100.800, 0.105	100.800, -0.045	100.800, -0.041	100.800, 1.712
506	101.000, 0.163	101.000, 0.136	101.000, 0.143	101.000, 0.105	101.000, -0.045	101.000, -0.042	101.000, 1.714
507	101.200, 0.163	101.200, 0.137	101.200, 0.143	101.200, 0.105	101.200, -0.046	101.200, -0.042	101.200, 1.716
508	101.400, 0.163	101.400, 0.137	101.400, 0.143	101.400, 0.105	101.400, -0.046	101.400, -0.042	101.400, 1.717
509	101.600, 0.163	101.600, 0.137	101.600, 0.143	101.600, 0.106	101.600, -0.046	101.600, -0.041	101.600, 1.719
510	101.800, 0.163	101.800, 0.138	101.800, 0.143	101.800, 0.106	101.800, -0.046	101.800, -0.041	101.800, 1.721
511	102.000, 0.163	102.000, 0.138	102.000, 0.144	102.000, 0.106	102.000, -0.046	102.000, -0.041	102.000, 1.722
512	102.200, 0.163	102.200, 0.139	102.200, 0.144	102.200, 0.106	102.200, -0.045	102.200, -0.040	102.200, 1.724
513	102.400, 0.163	102.400, 0.139	102.400, 0.144	102.400, 0.106	102.400, -0.045	102.400, -0.040	102.400, 1.726
514	102.600, 0.163	102.600, 0.139	102.600, 0.144	102.600, 0.106	102.600, -0.045	102.600, -0.039	102.600, 1.727
515	102.800, 0.163	102.800, 0.139	102.800, 0.143	102.800, 0.106	102.800, -0.044	102.800, -0.039	102.800, 1.729
516	103.000, 0.163	103.000, 0.139	103.000, 0.143	103.000, 0.106	103.000, -0.044	103.000, -0.039	103.000, 1.731
517	103.200, 0.163	103.200, 0.139	103.200, 0.143	103.200, 0.106	103.200, -0.044	103.200, -0.039	103.200, 1.733
518	103.400, 0.163	103.400, 0.139	103.400, 0.143	103.400, 0.106	103.400, -0.044	103.400, -0.039	103.400, 1.735
519	103.600, 0.163	103.600, 0.139	103.600, 0.143	103.600, 0.106	103.600, -0.044	103.600, -0.039	103.600, 1.737
520	103.800, 0.163	103.800, 0.138	103.800, 0.143	103.800, 0.106	103.800, -0.044	103.800, -0.039	103.800, 1.739
521	104.000, 0.163	104.000, 0.138	104.000, 0.143	104.000, 0.106	104.000, -0.044	104.000, -0.039	104.000, 1.741
522	104.200, 0.163	104.200, 0.138	104.200, 0.143	104.200, 0.106	104.200, -0.044	104.200, -0.039	104.200, 1.743
523	104.400, 0.163	104.400, 0.138	104.400, 0.143	104.400, 0.106	104.400, -0.044	104.400, -0.039	104.400, 1.744
524	104.600, 0.164	104.600, 0.138	104.600, 0.143	104.600, 0.106	104.600, -0.044	104.600, -0.039	104.600, 1.746
525	104.800, 0.164	104.800, 0.138	104.800, 0.143	104.800, 0.106	104.800, -0.044	104.800, -0.039	104.800, 1.748
526	105.000, 0.164	105.000, 0.138	105.000, 0.143	105.000, 0.106	105.000, -0.045	105.000, -0.040	105.000, 1.750
527	105.200, 0.164	105.200, 0.137	105.200, 0.144	105.200, 0.106	105.200, -0.045	105.200, -0.039	105.200, 1.751
528	105.400, 0.164	105.400, 0.137	105.400, 0.144	105.400, 0.106	105.400, -0.045	105.400, -0.040	105.400, 1.753
529	105.600, 0.164	105.600, 0.138	105.600, 0.145	105.600, 0.106	105.600, -0.045	105.600, -0.040	105.600, 1.754
530	105.800, 0.164	105.800, 0.138	105.800, 0.145	105.800, 0.107	105.800, -0.045	105.800, -0.040	105.800, 1.756
531	106.000, 0.164	106.000, 0.138	106.000, 0.145	106.000, 0.106	106.000, -0.045	106.000, -0.040	106.000, 1.757
532	106.200, 0.164	106.200, 0.139	106.200, 0.146	106.200, 0.106	106.200, -0.044	106.200, -0.040	106.200, 1.758
533	106.400, 0.164	106.400, 0.139	106.400, 0.146	106.400, 0.106	106.400, -0.044	106.400, -0.040	106.400, 1.760
534	106.600, 0.164	106.600, 0.139	106.600, 0.146	106.600, 0.105	106.600, -0.045	106.600, -0.040	106.600, 1.761
535	106.800, 0.163	106.800, 0.140	106.800, 0.145	106.800, 0.105	106.800, -0.045	106.800, -0.040	106.800, 1.762
536	107.000, 0.163	107.000, 0.140	107.000, 0.146	107.000, 0.105	107.000, -0.045	107.000, -0.040	107.000, 1.764
537	107.200, 0.163	107.200, 0.140	107.200, 0.145	107.200, 0.105	107.200, -0.045	107.200, -0.040	107.200, 1.765
538	107.400, 0.163	107.400, 0.140	107.400, 0.145	107.400, 0.104	107.400, -0.045	107.400, -0.041	107.400, 1.766
539	107.600, 0.163	107.600, 0.140	107.600, 0.145	107.600, 0.104	107.600, -0.045	107.600, -0.041	107.600, 1.768
540	107.800, 0.163	107.800, 0.140	107.800, 0.145	107.800, 0.104	107.800, -0.045	107.800, -0.041	107.800, 1.769
541	108.000, 0.163	108.000, 0.140	108.000, 0.145	108.000, 0.104	108.000, -0.045	108.000, -0.041	108.000, 1.771
542	108.200, 0.163	108.200, 0.140	108.200, 0.145	108.200, 0.104	108.200, -0.045	108.200, -0.041	108.200, 1.772
543	108.400, 0.163	108.400, 0.140	108.400, 0.145	108.400, 0.104	108.400, -0.046	108.400, -0.041	108.400, 1.774
544	108.600, 0.164	108.600, 0.140	108.600, 0.145	108.600, 0.104	108.600, -0.046	108.600, -0.041	108.600, 1.775
545	108.800, 0.164	108.800, 0.140	108.800, 0.145	108.800, 0.104	108.800, -0.046	108.800, -0.041	108.800, 1.777
546	109.000, 0.164	109.000, 0.141	109.000, 0.145	109.000, 0.104	109.000, -0.046	109.000, -0.041	109.000, 1.778
547	109.200, 0.164	109.200, 0.141	109.200, 0.145	109.200, 0.104	109.200, -0.046	109.200, -0.041	109.200, 1.780
548	109.400, 0.164	109.400, 0.141	109.400, 0.145	109.400, 0.104	109.400, -0.046	109.400, -0.041	109.400, 1.781
549	109.600, 0.164	109.600, 0.142	109.600, 0.145	109.600, 0.104	109.600, -0.045	109.600, -0.041	109.600, 1.783
550	109.800, 0.164	109.800, 0.142	109.800, 0.145	109.800, 0.104	109.800, -0.045	109.800, -0.041	109.800, 1.785
551	110.000, 0.165	110.000, 0.142	110.000, 0.145	110.000, 0.104	110.000, -0.045	110.000, -0.040	110.000, 1.786
552	110.200, 0.165	110.200, 0.142	110.200, 0.144	110.200, 0.103	110.200, -0.045	110.200, -0.040	110.200, 1.787
553	110.400, 0.164	110.400, 0.142	110.400, 0.144	110.400, 0.103	110.400, -0.044	110.400, -0.040	110.400, 1.789
554	110.600, 0.164	110.600, 0.143	110.600, 0.144	110.600, 0.103	110.600, -0.044	110.600, -0.040	110.600, 1.790
555	110.800, 0.164	110.800, 0.143	110.800, 0.144	110.800, 0.103	110.800, -0.044	110.800, -0.040	110.800, 1.792
556	111.000, 0.164	111.000, 0.143	111.000, 0.144	111.000, 0.103	111.000, -0.043	111.000, -0.040	111.000, 1.793
557	111.200, 0.164	111.200, 0.143	111.200, 0.145	111.200, 0.104	111.200, -0.043	111.200, -0.040	111.200, 1.795
558	111.400, 0.164	111.400, 0.143	111.400, 0.145	111.400, 0.104	111.400, -0.043	111.400, -0.040	111.400, 1.796
559	111.600, 0.164	111.600, 0.143	111.600, 0.145	111.600, 0.105	111.600, -0.043	111.600, -0.040	111.600, 1.798
560	111.800, 0.164	111.800, 0.142	111.800, 0.145	111.800, 0.105	111.800, -0.043	111.800, -0.040	111.800, 1.799
561	112.000, 0.164	112.000, 0.142	112.000, 0.145	112.000, 0.105	112.000, -0.043	112.000, -0.039	112.000, 1.801
562	112.200, 0.164	112.200, 0.142	112.200, 0.146	112.200, 0.106	112.200, -0.043	112.200, -0.039	112.200, 1.802
563	112.400, 0.164	112.400, 0.142	112.400, 0.146	112.400, 0.106	112.400, -0.043	112.400, -0.039	112.400, 1.804
564	112.600, 0.164	112.600, 0.142	112.600, 0.146	112.600, 0.105	112.600, -0.044	112.600, -0.039	112.600, 1.805
565	112.800, 0.165	112.800, 0.142	112.800, 0.146	112.800, 0.105	112.800, -0.044	112.800, -0.038	112.800, 1.806
566	113.000, 0.165	113.000, 0.142	113.000, 0.146	113.000, 0.105	113.000, -0.044	113.000, -0.038	113.000, 1.808
567	113.200, 0.165	113.200, 0.142	113.200, 0.146	113.200, 0.105	113.200, -0.044	113.200, -0.038	113.200, 1.809
568	113.400, 0.165	113.400, 0.142	113.400, 0.146	113.400, 0.105	113.400, -0.044	113.400, -0.038	113.400, 1.810
569	113.600, 0.165	113.600, 0.141	113.600, 0.147	113.600, 0.105	113.600, -0.044	113.600, -0.038	113.600, 1.812
570	113.800, 0.166	113.800, 0.141	113.800, 0.147	113.800, 0.104	113.800, -0.044	113.800, -0.038	113.800, 1.813
571	114.000, 0.166	114.000, 0.141	114.000, 0.147	114.000, 0.104	114.000, -0.044	114.000, -0.038	114.000, 1.814
572	114.200, 0.166	114.200, 0.141	114.200, 0.147	114.200, 0.104	114.200, -0.044	114.200, -0.039	114.200, 1.816
573	114.400, 0.166	114.400, 0.141	114.400, 0.147	114.400, 0.104	114.400, -0.044	114.400, -0.039	114.400, 1.817
574	114.600, 0.166	114.600, 0.141	114.600, 0.147	114.600, 0.104	114.600, -0.044	114.600, -0.039	114.600, 1.818
575	114.800, 0.166	114.800, 0.141	114.800, 0.147	114.800, 0.105	114.800, -0.043	114.800, -0.039	114.800, 1.820
576	115.000, 0.166	115.000, 0.141	115.000, 0.147	115.000, 0.105	115.000, -0.043	115.000, -0.040	115.000, 1.821
577	115.200, 0.166	115.200, 0.141	115.200, 0.147	115.200, 0.106	115.200, -0.043	115.200, -0.040	115.200, 1.822
578	115.400, 0.166	115.400, 0.140	115.400, 0.147	115.400, 0.106	115.400, -0.043	115.400, -0.040	115.400, 1.824
579	115.600, 0.166	115.600, 0.140	115.600, 0.147	115.600, 0.107	115.600, -0.043	115.600, -0.039	115.600, 1.825
580	115.800, 0.166	115.800, 0.140	115.800, 0.146	115.800, 0.107	115.800, -0.043	115.800, -0.039	115.800, 1.827
581	116.000, 0.166	116.000, 0.141	116.000, 0.146	116.000, 0.107	116.000, -0.042	116.000, -0.039	116.000, 1.828
582	116.200, 0.166	116.200, 0.141	116.200, 0.146	116.200, 0.107	116.200, -0.042	116.200, -0.039	116.200, 1.829
583	116.400, 0.166	116.400, 0.141	116.400, 0.146	116.400, 0.107	116.400, -0.043	116.400, -0.039	116.400, 1.830
584	116.600, 0.166	116.600, 0.141	116.600, 0.145	116.600, 0.107	116.600, -0.043	116.600, -0.039	116.600, 1.831
585	116.800, 0.166	116.800, 0.141	116.800, 0.145	116.800, 0.107	116.800, -0.043	116.800, -0.039	116.800, 1.833
586	117.000, 0.166	117.000, 0.141	117.000, 0.145	117.000, 0.106	117.000, -0.043	117.000, -0.038	117.000, 1.834
587	117.200, 0.166	117.200, 0.141	117.200, 0.146	117.200, 0.106	117.200, -0.043	117.200, -0.038	117.200, 1.835
588	117.400, 0.166	117.400, 0.141	117.400, 0.146	117.400, 0.106	117.400, -0.043	117.400, -0.038	117.400, 1.837
589	117.600, 0.166	117.600, 0.140	117.600, 0.147	117.600, 0.105	117.600, -0.043	117.600, -0.038	117.600, 1.838
590	117.800, 0.166	117.800, 0.140	117.800, 0.147	117.800, 0.105	117.800, -0.043	117.800, -0.038	117.800, 1.839
591	118.000, 0.166	118.000, 0.140	118.000, 0.147	118.000, 0.106	118.000, -0.043	118.000, -0.038	118.000, 1.841
592	118.200, 0.166	118.200, 0.140	118.200, 0.148	118.200, 0.106	118.200, -0.043	118.200, -0.038	118.200, 1.842
593	118.400, 0.166	118.400, 0.140	118.400, 0.148	118.400, 0.106	118.400, -0.043	118.400, -0.038	118.400, 1.843
594	118.600, 0.167	118.600, 0.140	118.600, 0.148	118.600, 0.106	118.600, -0.043	118.600, -0.039	118.600, 1.844
595	118.800, 0.166	118.800, 0.141	118.800, 0.148	118.800, 0.106	118.800, -0.043	118.800, -0.039	118.800, 1.846
596	119.000, 0.166	119.000, 0.141	119.000, 0.148	119.000, 0.106	119.000, -0.043	119.000, -0.039	119.000, 1.847
597	119.200, 0.166	119.200, 0.141	119.200, 0.148	119.200, 0.106	119.200, -0.043	119.200, -0.039	119.200, 1.848
598	119.400, 0.166	119.400, 0.141	119.400, 0.148	119.400, 0.106	119.400, -0.043	119.400, -0.039	119.400, 1.850
599	119.600, 0.166	119.600, 0.141	119.600, 0.147	119.600, 0.106	119.600, -0.043	119.600, -0.040	119.600, 1.851
600	119.800, 0.165	119.800, 0.141	119.800, 0.147	119.800, 0.106	119.800, -0.043	119.800, -0.040	119.800, 1.852
601	120.000, 0.165	120.000, 0.142	120.000, 0.147	120.000, 0.106	120.000, -0.043	120.000, -0.040	120.000, 1.852
602	120.200, 0.165	120.200, 0.142	120.200, 0.148	120.200, 0.106	120.200, -0.043	120.200, -0.040	120.200, 1.853
603	120.400, 0.165	120.400, 0.142	120.400, 0.148	120.400, 0.107	120.400, -0.044	120.400, -0.040	120.400, 1.854
604	120.600, 0.165	120.600, 0.142	120.600, 0.148	120.600, 0.107	120.600, -0.044	120.600, -0.041	120.600, 1.855
605	120.800, 0.165	120.800, 0.142	120.800, 0.148	120.800, 0.107	120.800, -0.044	120.800, -0.041	120.800, 1.855
606	121.000, 0.165	121.000, 0.142	121.000, 0.148	121.000, 0.107	121.000, -0.044	121.000, -0.041	121.000, 1.856
607	121.200, 0.165	121.200, 0.142	121.200, 0.148	121.200, 0.107	121.200, -0.044	121.200, -0.041	121.200, 1.857
608	121.400, 0.165	121.400, 0.142	121.400, 0.148	121.400, 0.107	121.400, -0.044	121.400, -0.041	121.400, 1.858
609	121.600, 0.166	121.600, 0.142	121.600, 0.148	121.600, 0.107	121.600, -0.044	121.600, -0.041	121.600, 1.859
610	121.800, 0.166	121.800, 0.141	121.800, 0.148	121.800, 0.107	121.800, -0.044	121.800, -0.041	121.800, 1.860
611	122.000, 0.167	122.000, 0.141	122.000, 0.148	122.000, 0.107	122.000, -0.043	122.000, -0.042	122.000, 1.861
612	122.200, 0.167	122.200, 0.141	122.200, 0.148	122.200, 0.107	122.200, -0.043	122.200, -0.042	122.200, 1.863
613	122.400, 0.168	122.400, 0.141	122.400, 0.148	122.400, 0.107	122.400, -0.043	122.400, -0.042	122.400, 1.864
614	122.600, 0.168	122.600, 0.141	122.600, 0.148	122.600, 0.107	122.600, -0.043	122.600, -0.042	122.600, 1.865
615	122.800, 0.168	122.800, 0.141	122.800, 0.148	122.800, 0.107	122.800, -0.043	122.800, -0.042	122.800, 1.866
616	123.000, 0.169	123.000, 0.141	123.000, 0.148	123.000, 0.106	123.000, -0.043	123.000, -0.042	123.000, 1.868
617	123.200, 0.168	123.200, 0.141	123.200, 0.148	123.200, 0.106	123.200, -0.043	123.200, -0.042	123.200, 1.869
618	123.400, 0.168	123.400, 0.142	123.400, 0.148	123.400, 0.106	123.400, -0.043	123.400, -0.042	123.400, 1.870
619	123.600, 0.168	123.600, 0.142	123.600, 0.148	123.600, 0.106	123.600, -0.043	123.600, -0.041	123.600, 1.871
620	123.800, 0.168	123.800, 0.142	123.800, 0.148	123.800, 0.106	123.800, -0.043	123.800, -0.041	123.800, 1.871
621	124.000, 0.167	124.000, 0.142	124.000, 0.148	124.000, 0.106	124.000, -0.043	124.000, -0.041	124.000, 1.872
622	124.200, 0.167	124.200, 0.142	124.200, 0.148	124.200, 0.106	124.200, -0.043	124.200, -0.041	124.200, 1.873
623	124.400, 0.167	124.400, 0.143	124.400, 0.148	124.400, 0.106	124.400, -0.043	124.400, -0.040	124.400, 1.873
624	124.600, 0.167	124.600, 0.143	124.600, 0.148	124.600, 0.106	124.600, -0.043	124.600, -0.040	124.600, 1.874
625	124.800, 0.167	124.800, 0.143	124.800, 0.147	124.800, 0.106	124.800, -0.043	124.800, -0.040	124.800, 1.875
626	125.000, 0.167	125.000, 0.143	125.000, 0.147	125.000, 0.106	125.000, -0.044	125.000, -0.039	125.000, 1.876
627	125.200, 0.167	125.200, 0.143	125.200, 0.147	125.200, 0.106	125.200, -0.044	125.200, -0.039	125.200, 1.877
628	125.400, 0.167	125.400, 0.143	125.400, 0.147	125.400, 0.106	125.400, -0.043	125.400, -0.039	125.400, 1.877
629	125.600, 0.167	125.600, 0.143	125.600, 0.147	125.600, 0.106	125.600, -0.043	125.600, -0.039	125.600, 1.878
630	125.800, 0.167	125.800, 0.143	125.800, 0.147	125.800, 0.106	125.800, -0.043	125.800, -0.039	125.800, 1.879
631	126.000, 0.167	126.000, 0.143	126.000, 0.147	126.000, 0.106	126.000, -0.043	126.000, -0.039	126.000, 1.881
632	126.200, 0.168	126.200, 0.143	126.200, 0.148	126.200, 0.106	126.200, -0.044	126.200, -0.039	126.200, 1.882
633	126.400, 0.168	126.400, 0.143	126.400, 0.148	126.400, 0.106	126.400, -0.044	126.400, -0.039	126.400, 1.883
634	126.600, 0.168	126.600, 0.143	126.600, 0.148	126.600, 0.107	126.600, -0.044	126.600, -0.039	126.600, 1.885
635	126.800, 0.168	126.800, 0.143	126.800, 0.148	126.800, 0.107	126.800, -0.044	126.800, -0.039	126.800, 1.886
636	127.000, 0.168	127.000, 0.143	127.000, 0.148	127.000, 0.107	127.000, -0.044	127.000, -0.039	127.000, 1.887
637	127.200, 0.167	127.200, 0.143	127.200, 0.148	127.200, 0.108	127.200, -0.044	127.200, -0.039	127.200, 1.888
638	127.400, 0.167	127.400, 0.143	127.400, 0.149	127.400, 0.108	127.400, -0.044	127.400, -0.039	127.400, 1.889
639	127.600, 0.167	127.600, 0.143	127.600, 0.149	127.600, 0.109	127.600, -0.044	127.600, -0.039	127.600, 1.890
640	127.800, 0.167	127.800, 0.143	127.800, 0.149	127.800, 0.109	127.800, -0.043	127.800, -0.039	127.800, 1.891
641	128.000, 0.167	128.000, 0.143	128.000, 0.149	128.000, 0.109	128.000, -0.043	128.000, -0.040	128.000, 1.892
642	128.200, 0.167	128.200, 0.143	128.200, 0.149	128.200, 0.109	128.200, -0.043	128.200, -0.040	128.200, 1.893
643	128.400, 0.167	128.400, 0.143	128.400, 0.149	128.400, 0.109	128.400, -0.042	128.400, -0.040	128.400, 1.894
644	128.600, 0.167	128.600, 0.144	128.600, 0.149	128.600, 0.109	128.600, -0.042	128.600, -0.040	128.600, 1.896
645	128.800, 0.167	128.800, 0.144	128.800, 0.149	128.800, 0.109	128.800, -0.042	128.800, -0.040	128.800, 1.897
646	129.000, 0.167	129.000, 0.144	129.000, 0.149	129.000, 0.109	129.000, -0.041	129.000, -0.040	129.000, 1.897
647	129.200, 0.168	129.200, 0.144	129.200, 0.149	129.200, 0.109	129.200, -0.041	129.200, -0.040	129.200, 1.898
648	129.400, 0.168	129.400, 0.144	129.400, 0.150	129.400, 0.109	129.400, -0.041	129.400, -0.040	129.400, 1.899
649	129.600, 0.168	129.600, 0.144	129.600, 0.150	129.600, 0.109	129.600, -0.041	129.600, -0.040	129.600, 1.900
650	129.800, 0.168	129.800, 0.144	129.800, 0.150	129.800, 0.108	129.800, -0.041	129.800, -0.040	129.800, 1.900
651	130.000, 0.168	130.000, 0.144	130.000, 0.150	130.000, 0.108	130.000, -0.041	130.000, -0.040	130.000, 1.901
652	130.200, 0.168	130.200, 0.144	130.200, 0.150	130.200, 0.108	130.200, -0.042	130.200, -0.040	130.200, 1.902
653	130.400, 0.168	130.400, 0.144	130.400, 0.149	130.400, 0.108	130.400, -0.042	130.400, -0.040	130.400, 1.903
654	130.600, 0.168	130.600, 0.144	130.600, 0.149	130.600, 0.108	130.600, -0.042	130.600, -0.040	130.600, 1.904
655	130.800, 0.168	130.800, 0.144	130.800, 0.149	130.800, 0.108	130.800, -0.042	130.800, -0.040	130.800, 1.904
656	131.000, 0.168	131.000, 0.144	131.000, 0.148	131.000, 0.108	131.000, -0.042	131.000, -0.040	131.000, 1.905
657	131.200, 0.168	131.200, 0.144	131.200, 0.148	131.200, 0.108	131.200, -0.042	131.200, -0.040	131.200, 1.905
658	131.400, 0.168	131.400, 0.143	131.400, 0.148	131.400, 0.107	131.400, -0.042	131.400, -0.040	131.400, 1.906
659	131.600, 0.168	131.600, 0.143	131.600, 0.148	131.600, 0.107	131.600, -0.041	131.600, -0.041	131.600, 1.907
660	131.800, 0.168	131.800, 0.143	131.800, 0.148	131.800, 0.107	131.800, -0.041	131.800, -0.041	131.800, 1.908
661	132.000, 0.168	132.000, 0.143	132.000, 0.148	132.000, 0.107	132.000, -0.041	132.000, -0.041	132.000, 1.909
662	132.200, 0.168	132.200, 0.143	132.200, 0.148	132.200, 0.107	132.200, -0.041	132.200, -0.041	132.200, 1.910
663	132.400, 0.169	132.400, 0.143	132.400, 0.148	132.400, 0.108	132.400, -0.041	132.400, -0.041	132.400, 1.911
664	132.600, 0.169	132.600, 0.143	132.600, 0.149	132.600, 0.108	132.600, -0.041	132.600, -0.041	132.600, 1.912
665	132.800, 0.169	132.800, 0.143	132.800, 0.149	132.800, 0.108	132.800, -0.041	132.800, -0.040	132.800, 1.913
666	133.000, 0.169	133.000, 0.143	133.000, 0.149	133.000, 0.108	133.000, -0.041	133.000, -0.040	133.000, 1.914
667	133.200, 0.169	133.200, 0.143	133.200, 0.149	133.200, 0.108	133.200, -0.042	133.200, -0.040	133.200, 1.914
668	133.400, 0.169	133.400, 0.143	133.400, 0.149	133.400, 0.108	133.400, -0.042	133.400, -0.041	133.400, 1.915
669	133.600, 0.169	133.600, 0.143	133.600, 0.149	133.600, 0.108	133.600, -0.042	133.600, -0.041	133.600, 1.916
670	133.800, 0.169	133.800, 0.143	133.800, 0.148	133.800, 0.108	133.800, -0.042	133.800, -0.041	133.800, 1.917
671	134.000, 0.169	134.000, 0.143	134.000, 0.148	134.000, 0.108	134.000, -0.042	134.000, -0.041	134.000, 1.918
672	134.200, 0.169	134.200, 0.143	134.200, 0.148	134.200, 0.108	134.200, -0.042	134.200, -0.041	134.200, 1.919
673	134.400, 0.169	134.400, 0.144	134.400, 0.148	134.400, 0.108	134.400, -0.043	134.400, -0.041	134.400, 1.920
674	134.600, 0.169	134.600, 0.144	134.600, 0.148	134.600, 0.108	134.600, -0.042	134.600, -0.041	134.600, 1.920
675	134.800, 0.169	134.800, 0.144	134.800, 0.148	134.800, 0.108	134.800, -0.042	134.800, -0.041	134.800, 1.921
676	135.000, 0.169	135.000, 0.144	135.000, 0.148	135.000, 0.108	135.000, -0.042	135.000, -0.041	135.000, 1.921
677	135.200, 0.169	135.200, 0.144	135.200, 0.149	135.200, 0.108	135.200, -0.042	135.200, -0.041	135.200, 1.921
678	135.400, 0.169	135.400, 0.144	135.400, 0.149	135.400, 0.108	135.400, -0.042	135.400, -0.041	135.400, 1.922
679	135.600, 0.169	135.600, 0.144	135.600, 0.149	135.600, 0.109	135.600, -0.041	135.600, -0.041	135.600, 1.922
680	135.800, 0.169	135.800, 0.144	135.800, 0.149	135.800, 0.109	135.800, -0.041	135.800, -0.041	135.800, 1.923
681	136.000, 0.169	136.000, 0.144	136.000, 0.149	136.000, 0.110	136.000, -0.041	136.000, -0.041	136.000, 1.923
682	136.200, 0.169	136.200, 0.144	136.200, 0.149	136.200, 0.110	136.200, -0.041	136.200, -0.041	136.200, 1.924
683	136.400, 0.169	136.400, 0.144	136.400, 0.149	136.400, 0.111	136.400, -0.041	136.400, -0.041	136.400, 1.925
684	136.600, 0.169	136.600, 0.145	136.600, 0.149	136.600, 0.111	136.600, -0.041	136.600, -0.041	136.600, 1.926
685	136.800, 0.169	136.800, 0.144	136.800, 0.149	136.800, 0.111	136.800, -0.041	136.800, -0.041	136.800, 1.926
686	137.000, 0.169	137.000, 0.144	137.000, 0.149	137.000, 0.111	137.000, -0.041	137.000, -0.041	137.000, 1.927
687	137.200, 0.170	137.200, 0.145	137.200, 0.150	137.200, 0.111	137.200, -0.041	137.200, -0.041	137.200, 1.928
688	137.400, 0.170	137.400, 0.145	137.400, 0.150	137.400, 0.111	137.400, -0.041	137.400, -0.041	137.400, 1.929
689	137.600, 0.170	137.600, 0.145	137.600, 0.150	137.600, 0.110	137.600, -0.041	137.600, -0.041	137.600, 1.930
690	137.800, 0.170	137.800, 0.145	137.800, 0.150	137.800, 0.110	137.800, -0.041	137.800, -0.041	137.800, 1.930
691	138.000, 0.171	138.000, 0.146	138.000, 0.150	138.000, 0.110	138.000, -0.041	138.000, -0.041	138.000, 1.931
692	138.200, 0.171	138.200, 0.146	138.200, 0.150	138.200, 0.110	138.200, -0.041	138.200, -0.041	138.200, 1.932
693	138.400, 0.170	138.400, 0.146	138.400, 0.150	138.400, 0.110	138.400, -0.041	138.400, -0.041	138.400, 1.933
694	138.600, 0.170	138.600, 0.146	138.600, 0.150	138.600, 0.109	138.600, -0.041	138.600, -0.041	138.600, 1.933
695	138.800, 0.170	138.800, 0.147	138.800, 0.150	138.800, 0.109	138.800, -0.041	138.800, -0.040	138.800, 1.934
696	139.000, 0.170	139.000, 0.147	139.000, 0.150	139.000, 0.108	139.000, -0.041	139.000, -0.040	139.000, 1.935
697	139.200, 0.170	139.200, 0.147	139.200, 0.150	139.200, 0.108	139.200, -0.041	139.200, -0.040	139.200, 1.935
698	139.400, 0.170	139.400, 0.147	139.400, 0.150	139.400, 0.108	139.400, -0.041	139.400, -0.040	139.400, 1.936
699	139.600, 0.170	139.600, 0.148	139.600, 0.150	139.600, 0.108	139.600, -0.041	139.600, -0.039	139.600, 1.937
700	139.800, 0.170	139.800, 0.148	139.800, 0.150	139.800, 0.108	139.800, -0.041	139.800, -0.039	139.800, 1.938
701	140.000, 0.170	140.000, 0.147	140.000, 0.150	140.000, 0.108	140.000, -0.041	140.000, -0.039	140.000, 1.938
702	140.200, 0.170	140.200, 0.147	140.200, 0.150	140.200, 0.108	140.200, -0.041	140.200, -0.039	140.200, 1.938
703	140.400, 0.170	140.400, 0.147	140.400, 0.150	140.400, 0.109	140.400, -0.041	140.400, -0.039	140.400, 1.939
704	140.600, 0.169	140.600, 0.146	140.600, 0.150	140.600, 0.109	140.600, -0.041	140.600, -0.039	140.600, 1.939
705	140.800, 0.169	140.800, 0.146	140.800, 0.150	140.800, 0.109	140.800, -0.041	140.800, -0.039	140.800, 1.940
706	141.000, 0.169	141.000, 0.145	141.000, 0.151	141.000, 0.109	141.000, -0.041	141.000, -0.039	141.000, 1.940
707	141.200, 0.169	141.200, 0.145	141.200, 0.151	141.200, 0.109	141.200, -0.041	141.200, -0.039	141.200, 1.940
708	141.400, 0.169	141.400, 0.145	141.400, 0.151	141.400, 0.109	141.400, -0.041	141.400, -0.039	141.400, 1.941
709	141.600, 0.169	141.600, 0.145	141.600, 0.150	141.600, 0.110	141.600, -0.041	141.600, -0.039	141.600, 1.941
710	141.800, 0.169	141.800, 0.145	141.800, 0.150	141.800, 0.110	141.800, -0.041	141.800, -0.040	141.800, 1.941
711	142.000, 0.169	142.000, 0.145	142.000, 0.150	142.000, 0.110	142.000, -0.041	142.000, -0.040	142.000, 1.942
712	142.200, 0.169	142.200, 0.145	142.200, 0.151	142.200, 0.110	142.200, -0.042	142.200, -0.040	142.200, 1.942
713	142.400, 0.169	142.400, 0.145	142.400, 0.151	142.400, 0.110	142.400, -0.042	142.400, -0.040	142.400, 1.943
714	142.600, 0.169	142.600, 0.145	142.600, 0.151	142.600, 0.110	142.600, -0.042	142.600, -0.040	142.600, 1.944
715	142.800, 0.169	142.800, 0.146	142.800, 0.151	142.800, 0.110	142.800, -0.042	142.800, -0.040	142.800, 1.945
716	143.000, 0.169	143.000, 0.146	143.000, 0.152	143.000, 0.109	143.000, -0.042	143.000, -0.040	143.000, 1.946
717	143.200, 0.169	143.200, 0.146	143.200, 0.152	143.200, 0.109	143.200, -0.042	143.200, -0.040	143.200, 1.947
718	143.400, 0.170	143.400, 0.146	143.400, 0.152	143.400, 0.109	143.400, -0.041	143.400, -0.039	143.400, 1.948
719	143.600, 0.170	143.600, 0.147	143.600, 0.153	143.600, 0.108	143.600, -0.041	143.600, -0.039	143.600, 1.949
720	143.800, 0.170	143.800, 0.147	143.800, 0.153	143.800, 0.108	143.800, -0.041	143.800, -0.039	143.800, 1.950
721	144.000, 0.170	144.000, 0.147	144.000, 0.153	144.000, 0.108	144.000, -0.041	144.000, -0.039	144.000, 1.951
722	144.200, 0.170	144.200, 0.147	144.200, 0.153	144.200, 0.108	144.200, -0.041	144.200, -0.039	144.200, 1.951
723	144.400, 0.171	144.400, 0.147	144.400, 0.153	144.400, 0.108	144.400, -0.041	144.400, -0.039	144.400, 1.951
724	144.600, 0.171	144.600, 0.147	144.600, 0.153	144.600, 0.108	144.600, -0.040	144.600, -0.039	144.600, 1.952
725	144.800, 0.171	144.800, 0.147	144.800, 0.153	144.800, 0.108	144.800, -0.040	144.800, -0.039	144.800, 1.952
726	145.000, 0.171	145.000, 0.148	145.000, 0.152	145.000, 0.108	145.000, -0.040	145.000, -0.039	145.000, 1.953
727	145.200, 0.171	145.200, 0.148	145.200, 0.152	145.200, 0.108	145.200, -0.040	145.200, -0.039	145.200, 1.953
728	145.400, 0.171	145.400, 0.148	145.400, 0.152	145.400, 0.109	145.400, -0.040	145.400, -0.039	145.400, 1.953
729	145.600, 0.171	145.600, 0.148	145.600, 0.152	145.600, 0.109	145.600, -0.040	145.600, -0.039	145.600, 1.953
730	145.800, 0.171	145.800, 0.149	145.800, 0.152	145.800, 0.110	145.800, -0.040	145.800, -0.039	145.800, 1.953
731	146.000, 0.171	146.000, 0.149	146.000, 0.151	146.000, 0.110	146.000, -0.041	146.000, -0.039	146.000, 1.954
732	146.200, 0.170	146.200, 0.149	146.200, 0.151	146.200, 0.110	146.200, -0.041	146.200, -0.039	146.200, 1.954
733	146.400, 0.170	146.400, 0.149	146.400, 0.151	146.400, 0.111	146.400, -0.041	146.400, -0.039	146.400, 1.955
734	146.600, 0.169	146.600, 0.149	146.600, 0.151	146.600, 0.111	146.600, -0.040	146.600, -0.039	146.600, 1.956
735	146.800, 0.169	146.800, 0.149	146.800, 0.151	146.800, 0.111	146.800, -0.040	146.800, -0.039	146.800, 1.956
736	147.000, 0.169	147.000, 0.149	147.000, 0.150	147.000, 0.111	147.000, -0.040	147.000, -0.039	147.000, 1.957
737	147.200, 0.168	147.200, 0.149	147.200, 0.150	147.200, 0.111	147.200, -0.040	147.200, -0.039	147.200, 1.958
738	147.400, 0.168	147.400, 0.149	147.400, 0.150	147.400, 0.111	147.400, -0.040	147.400, -0.039	147.400, 1.958
739	147.600, 0.168	147.600, 0.148	147.600, 0.150	147.600, 0.111	147.600, -0.040	147.600, -0.039	147.600, 1.959
740	147.800, 0.168	147.800, 0.148	147.800, 0.150	147.800, 0.111	147.800, -0.040	147.800, -0.039	147.800, 1.959
741	148.000, 0.168	148.000, 0.148	148.000, 0.150	148.000, 0.110	148.000, -0.041	148.000, -0.039	148.000, 1.960
742	148.200, 0.169	148.200, 0.148	148.200, 0.150	148.200, 0.110	148.200, -0.041	148.200, -0.039	148.200, 1.960
743	148.400, 0.169	148.400, 0.148	148.400, 0.150	148.400, 0.110	148.400, -0.041	148.400, -0.040	148.400, 1.961
744	148.600, 0.170	148.600, 0.148	148.600, 0.150	148.600, 0.110	148.600, -0.041	148.600, -0.040	148.600, 1.961
745	148.800, 0.170	148.800, 0.148	148.800, 0.150	148.800, 0.110	148.800, -0.041	148.800, -0.040	148.800, 1.962
746	149.000, 0.171	149.000, 0.148	149.000, 0.150	149.000, 0.110	149.000, -0.041	149.000, -0.040	149.000, 1.962
[truncated: 14,254 more rows]
