# Supplementary material for: ParB spreading on DNA requires cytidine triphosphate in vitro
Source: eLife journal article supplement (doi:10.7554/elife.53515), 2020-02-20
Supplement: fig2-data1 [file Fig2_panelB.xlsx]

## Sheet: FORMAT
	sample ID #1	sample ID #2	sample ID #3
data point	time point (sec), wavelength shift (nm)	time point (sec), wavelength shift (nm)	time point (sec), wavelength shift (nm)
1
2
3
.
.
.

## Sheet: Fig2_panelB_rep1
	169bp closed parS DNA ParB (R104A)	169bp closed parS DNA ParB (R104A) CTP
1	0.000, 0.011	0.000, -0.014
2	0.200, 0.010	0.200, -0.015
3	0.400, 0.010	0.400, -0.016
4	0.600, 0.009	0.600, -0.017
5	0.800, 0.009	0.800, -0.017
6	1.000, 0.008	1.000, -0.018
7	1.200, 0.008	1.200, -0.019
8	1.400, 0.007	1.400, -0.020
9	1.600, 0.006	1.600, -0.021
10	1.800, 0.005	1.800, -0.021
11	2.000, 0.004	2.000, -0.021
12	2.200, 0.004	2.200, -0.021
13	2.400, 0.003	2.400, -0.021
14	2.600, 0.002	2.600, -0.021
15	2.800, 0.001	2.800, -0.021
16	3.000, 0.001	3.000, -0.021
17	3.200, 0.000	3.200, -0.021
18	3.400, 0.000	3.400, -0.020
19	3.600, -0.000	3.600, -0.020
20	3.800, -0.001	3.800, -0.020
21	4.000, -0.001	4.000, -0.021
22	4.200, -0.001	4.200, -0.021
23	4.400, -0.001	4.400, -0.021
24	4.600, -0.001	4.600, -0.020
25	4.800, -0.000	4.800, -0.020
26	5.000, -0.000	5.000, -0.020
27	5.200, -0.000	5.200, -0.020
28	5.400, -0.000	5.400, -0.020
29	5.600, -0.000	5.600, -0.020
30	5.800, -0.000	5.800, -0.020
31	6.000, 0.000	6.000, -0.020
32	6.200, 0.000	6.200, -0.020
33	6.400, 0.000	6.400, -0.019
34	6.600, 0.000	6.600, -0.019
35	6.800, 0.000	6.800, -0.019
36	7.000, 0.001	7.000, -0.018
37	7.200, 0.000	7.200, -0.018
38	7.400, 0.000	7.400, -0.018
39	7.600, 0.000	7.600, -0.018
40	7.800, -0.000	7.800, -0.018
41	8.000, -0.000	8.000, -0.018
42	8.200, -0.000	8.200, -0.017
43	8.400, -0.000	8.400, -0.017
44	8.600, -0.000	8.600, -0.017
45	8.800, -0.000	8.800, -0.017
46	9.000, -0.000	9.000, -0.016
47	9.200, -0.000	9.200, -0.016
48	9.400, -0.000	9.400, -0.016
49	9.600, -0.000	9.600, -0.016
50	9.800, -0.000	9.800, -0.016
51	10.000, -0.001	10.000, -0.015
52	10.200, -0.001	10.200, -0.016
53	10.400, -0.001	10.400, -0.016
54	10.600, -0.001	10.600, -0.016
55	10.800, -0.001	10.800, -0.016
56	11.000, -0.001	11.000, -0.016
57	11.200, -0.001	11.200, -0.016
58	11.400, -0.002	11.400, -0.016
59	11.600, -0.002	11.600, -0.016
60	11.800, -0.002	11.800, -0.016
61	12.000, -0.002	12.000, -0.015
62	12.200, -0.002	12.200, -0.015
63	12.400, -0.001	12.400, -0.015
64	12.600, -0.001	12.600, -0.014
65	12.800, -0.001	12.800, -0.014
66	13.000, -0.001	13.000, -0.013
67	13.200, -0.001	13.200, -0.013
68	13.400, -0.000	13.400, -0.012
69	13.600, -0.000	13.600, -0.012
70	13.800, -0.000	13.800, -0.012
71	14.000, -0.000	14.000, -0.012
72	14.200, -0.000	14.200, -0.012
73	14.400, -0.000	14.400, -0.012
74	14.600, -0.000	14.600, -0.012
75	14.800, -0.000	14.800, -0.012
76	15.000, -0.000	15.000, -0.012
77	15.200, -0.000	15.200, -0.012
78	15.400, -0.000	15.400, -0.012
79	15.600, -0.000	15.600, -0.012
80	15.800, -0.000	15.800, -0.011
81	16.000, -0.000	16.000, -0.011
82	16.200, -0.000	16.200, -0.011
83	16.400, -0.000	16.400, -0.010
84	16.600, -0.000	16.600, -0.010
85	16.800, -0.001	16.800, -0.009
86	17.000, -0.001	17.000, -0.009
87	17.200, -0.001	17.200, -0.009
88	17.400, -0.001	17.400, -0.008
89	17.600, -0.000	17.600, -0.008
90	17.800, -0.000	17.800, -0.008
91	18.000, 0.000	18.000, -0.008
92	18.200, 0.000	18.200, -0.008
93	18.400, 0.001	18.400, -0.007
94	18.600, 0.001	18.600, -0.007
95	18.800, 0.001	18.800, -0.007
96	19.000, 0.002	19.000, -0.007
97	19.200, 0.002	19.200, -0.007
98	19.400, 0.002	19.400, -0.007
99	19.600, 0.002	19.600, -0.007
100	19.800, 0.002	19.800, -0.007
101	20.000, 0.001	20.000, -0.007
102	20.200, 0.001	20.200, -0.006
103	20.400, 0.001	20.400, -0.006
104	20.600, 0.001	20.600, -0.006
105	20.800, 0.000	20.800, -0.006
106	21.000, 0.000	21.000, -0.006
107	21.200, 0.000	21.200, -0.006
108	21.400, 0.000	21.400, -0.006
109	21.600, 0.000	21.600, -0.006
110	21.800, 0.001	21.800, -0.006
111	22.000, 0.001	22.000, -0.005
112	22.200, 0.001	22.200, -0.005
113	22.400, 0.001	22.400, -0.005
114	22.600, 0.001	22.600, -0.004
115	22.800, 0.001	22.800, -0.004
116	23.000, 0.002	23.000, -0.004
117	23.200, 0.002	23.200, -0.004
118	23.400, 0.002	23.400, -0.004
119	23.600, 0.002	23.600, -0.004
120	23.800, 0.002	23.800, -0.003
121	24.000, 0.002	24.000, -0.003
122	24.200, 0.002	24.200, -0.003
123	24.400, 0.002	24.400, -0.003
124	24.600, 0.002	24.600, -0.002
125	24.800, 0.002	24.800, -0.002
126	25.000, 0.002	25.000, -0.002
127	25.200, 0.002	25.200, -0.002
128	25.400, 0.002	25.400, -0.002
129	25.600, 0.002	25.600, -0.002
130	25.800, 0.002	25.800, -0.001
131	26.000, 0.002	26.000, -0.001
132	26.200, 0.002	26.200, -0.001
133	26.400, 0.002	26.400, -0.001
134	26.600, 0.001	26.600, -0.001
135	26.800, 0.001	26.800, -0.001
136	27.000, 0.001	27.000, -0.001
137	27.200, 0.001	27.200, -0.001
138	27.400, 0.000	27.400, -0.001
139	27.600, 0.000	27.600, -0.001
140	27.800, -0.000	27.800, -0.001
141	28.000, -0.000	28.000, -0.000
142	28.200, -0.000	28.200, -0.000
143	28.400, -0.000	28.400, 0.000
144	28.600, -0.000	28.600, 0.000
145	28.800, -0.000	28.800, 0.000
146	29.000, -0.000	29.000, 0.001
147	29.200, -0.000	29.200, 0.001
148	29.400, -0.000	29.400, 0.001
149	29.600, 0.000	29.600, 0.001
150	29.800, 0.000	29.800, 0.001
151	30.000, 0.000	30.000, 0.000
152	30.200, 0.010	30.200, 0.008
153	30.400, 0.021	30.400, 0.018
154	30.600, 0.034	30.600, 0.029
155	30.800, 0.049	30.800, 0.042
156	31.000, 0.065	31.000, 0.057
157	31.200, 0.083	31.200, 0.073
158	31.400, 0.101	31.400, 0.090
159	31.600, 0.119	31.600, 0.108
160	31.800, 0.136	31.800, 0.125
161	32.000, 0.153	32.000, 0.143
162	32.200, 0.168	32.200, 0.159
163	32.400, 0.182	32.400, 0.174
164	32.600, 0.195	32.600, 0.189
165	32.800, 0.208	32.800, 0.203
166	33.000, 0.218	33.000, 0.216
167	33.200, 0.228	33.200, 0.228
168	33.400, 0.237	33.400, 0.239
169	33.600, 0.245	33.600, 0.249
170	33.800, 0.252	33.800, 0.258
171	34.000, 0.257	34.000, 0.266
172	34.200, 0.263	34.200, 0.273
173	34.400, 0.267	34.400, 0.279
174	34.600, 0.271	34.600, 0.285
175	34.800, 0.274	34.800, 0.290
176	35.000, 0.277	35.000, 0.294
177	35.200, 0.279	35.200, 0.298
178	35.400, 0.281	35.400, 0.301
179	35.600, 0.283	35.600, 0.304
180	35.800, 0.285	35.800, 0.307
181	36.000, 0.286	36.000, 0.309
182	36.200, 0.287	36.200, 0.311
183	36.400, 0.289	36.400, 0.313
184	36.600, 0.290	36.600, 0.315
185	36.800, 0.291	36.800, 0.316
186	37.000, 0.292	37.000, 0.318
187	37.200, 0.292	37.200, 0.319
188	37.400, 0.293	37.400, 0.320
189	37.600, 0.294	37.600, 0.321
190	37.800, 0.294	37.800, 0.322
191	38.000, 0.295	38.000, 0.322
192	38.200, 0.295	38.200, 0.323
193	38.400, 0.296	38.400, 0.324
194	38.600, 0.296	38.600, 0.324
195	38.800, 0.297	38.800, 0.325
196	39.000, 0.297	39.000, 0.326
197	39.200, 0.298	39.200, 0.326
198	39.400, 0.298	39.400, 0.327
199	39.600, 0.298	39.600, 0.327
200	39.800, 0.299	39.800, 0.328
201	40.000, 0.299	40.000, 0.328
202	40.200, 0.299	40.200, 0.329
203	40.400, 0.300	40.400, 0.329
204	40.600, 0.300	40.600, 0.330
205	40.800, 0.300	40.800, 0.330
206	41.000, 0.300	41.000, 0.331
207	41.200, 0.301	41.200, 0.331
208	41.400, 0.301	41.400, 0.332
209	41.600, 0.301	41.600, 0.332
210	41.800, 0.301	41.800, 0.333
211	42.000, 0.302	42.000, 0.333
212	42.200, 0.302	42.200, 0.333
213	42.400, 0.302	42.400, 0.333
214	42.600, 0.302	42.600, 0.333
215	42.800, 0.303	42.800, 0.333
216	43.000, 0.303	43.000, 0.333
217	43.200, 0.303	43.200, 0.333
218	43.400, 0.303	43.400, 0.334
219	43.600, 0.304	43.600, 0.334
220	43.800, 0.304	43.800, 0.334
221	44.000, 0.304	44.000, 0.334
222	44.200, 0.304	44.200, 0.334
223	44.400, 0.304	44.400, 0.334
224	44.600, 0.304	44.600, 0.334
225	44.800, 0.304	44.800, 0.335
226	45.000, 0.304	45.000, 0.335
227	45.200, 0.305	45.200, 0.335
228	45.400, 0.305	45.400, 0.336
229	45.600, 0.305	45.600, 0.336
230	45.800, 0.305	45.800, 0.336
231	46.000, 0.305	46.000, 0.336
232	46.200, 0.305	46.200, 0.336
233	46.400, 0.305	46.400, 0.335
234	46.600, 0.305	46.600, 0.335
235	46.800, 0.306	46.800, 0.335
236	47.000, 0.306	47.000, 0.335
237	47.200, 0.306	47.200, 0.335
238	47.400, 0.306	47.400, 0.336
239	47.600, 0.306	47.600, 0.335
240	47.800, 0.305	47.800, 0.336
241	48.000, 0.305	48.000, 0.335
242	48.200, 0.305	48.200, 0.336
243	48.400, 0.305	48.400, 0.336
244	48.600, 0.305	48.600, 0.336
245	48.800, 0.305	48.800, 0.336
246	49.000, 0.305	49.000, 0.336
247	49.200, 0.305	49.200, 0.336
248	49.400, 0.305	49.400, 0.336
249	49.600, 0.305	49.600, 0.336
250	49.800, 0.306	49.800, 0.336
251	50.000, 0.306	50.000, 0.336
252	50.200, 0.306	50.200, 0.336
253	50.400, 0.306	50.400, 0.336
254	50.600, 0.306	50.600, 0.335
255	50.800, 0.306	50.800, 0.335
256	51.000, 0.306	51.000, 0.335
257	51.200, 0.306	51.200, 0.335
258	51.400, 0.306	51.400, 0.335
259	51.600, 0.307	51.600, 0.335
260	51.800, 0.307	51.800, 0.335
261	52.000, 0.307	52.000, 0.335
262	52.200, 0.307	52.200, 0.336
263	52.400, 0.307	52.400, 0.336
264	52.600, 0.307	52.600, 0.336
265	52.800, 0.307	52.800, 0.336
266	53.000, 0.307	53.000, 0.335
267	53.200, 0.307	53.200, 0.335
268	53.400, 0.307	53.400, 0.335
269	53.600, 0.308	53.600, 0.335
270	53.800, 0.308	53.800, 0.335
271	54.000, 0.308	54.000, 0.335
272	54.200, 0.308	54.200, 0.335
273	54.400, 0.309	54.400, 0.335
274	54.600, 0.309	54.600, 0.334
275	54.800, 0.309	54.800, 0.334
276	55.000, 0.309	55.000, 0.334
277	55.200, 0.309	55.200, 0.333
278	55.400, 0.310	55.400, 0.333
279	55.600, 0.310	55.600, 0.333
280	55.800, 0.310	55.800, 0.333
281	56.000, 0.310	56.000, 0.333
282	56.200, 0.310	56.200, 0.333
283	56.400, 0.310	56.400, 0.333
284	56.600, 0.309	56.600, 0.333
285	56.800, 0.309	56.800, 0.333
286	57.000, 0.309	57.000, 0.333
287	57.200, 0.309	57.200, 0.333
288	57.400, 0.309	57.400, 0.333
289	57.600, 0.309	57.600, 0.333
290	57.800, 0.309	57.800, 0.333
291	58.000, 0.309	58.000, 0.333
292	58.200, 0.309	58.200, 0.333
293	58.400, 0.309	58.400, 0.333
294	58.600, 0.309	58.600, 0.333
295	58.800, 0.309	58.800, 0.333
296	59.000, 0.309	59.000, 0.333
297	59.200, 0.309	59.200, 0.333
298	59.400, 0.308	59.400, 0.333
299	59.600, 0.308	59.600, 0.333
300	59.800, 0.308	59.800, 0.333
301	60.000, 0.308	60.000, 0.332
302	60.200, 0.308	60.200, 0.332
303	60.400, 0.308	60.400, 0.332
304	60.600, 0.308	60.600, 0.332
305	60.800, 0.308	60.800, 0.332
306	61.000, 0.307	61.000, 0.332
307	61.200, 0.308	61.200, 0.331
308	61.400, 0.308	61.400, 0.331
309	61.600, 0.307	61.600, 0.331
310	61.800, 0.308	61.800, 0.331
311	62.000, 0.308	62.000, 0.331
312	62.200, 0.308	62.200, 0.330
313	62.400, 0.308	62.400, 0.330
314	62.600, 0.308	62.600, 0.330
315	62.800, 0.308	62.800, 0.330
316	63.000, 0.308	63.000, 0.330
317	63.200, 0.308	63.200, 0.330
318	63.400, 0.308	63.400, 0.330
319	63.600, 0.308	63.600, 0.330
320	63.800, 0.309	63.800, 0.330
321	64.000, 0.309	64.000, 0.330
322	64.200, 0.309	64.200, 0.330
323	64.400, 0.309	64.400, 0.330
324	64.600, 0.309	64.600, 0.330
325	64.800, 0.309	64.800, 0.330
326	65.000, 0.309	65.000, 0.330
327	65.200, 0.309	65.200, 0.330
328	65.400, 0.309	65.400, 0.330
329	65.600, 0.310	65.600, 0.330
330	65.800, 0.310	65.800, 0.330
331	66.000, 0.310	66.000, 0.330
332	66.200, 0.310	66.200, 0.330
333	66.400, 0.310	66.400, 0.330
334	66.600, 0.310	66.600, 0.330
335	66.800, 0.310	66.800, 0.330
336	67.000, 0.310	67.000, 0.329
337	67.200, 0.310	67.200, 0.329
338	67.400, 0.310	67.400, 0.329
339	67.600, 0.310	67.600, 0.329
340	67.800, 0.310	67.800, 0.329
341	68.000, 0.310	68.000, 0.329
342	68.200, 0.310	68.200, 0.329
343	68.400, 0.310	68.400, 0.328
344	68.600, 0.310	68.600, 0.328
345	68.800, 0.310	68.800, 0.328
346	69.000, 0.310	69.000, 0.328
347	69.200, 0.310	69.200, 0.328
348	69.400, 0.309	69.400, 0.328
349	69.600, 0.309	69.600, 0.329
350	69.800, 0.309	69.800, 0.329
351	70.000, 0.309	70.000, 0.329
352	70.200, 0.308	70.200, 0.329
353	70.400, 0.308	70.400, 0.329
354	70.600, 0.308	70.600, 0.329
355	70.800, 0.308	70.800, 0.329
356	71.000, 0.308	71.000, 0.329
357	71.200, 0.308	71.200, 0.329
358	71.400, 0.309	71.400, 0.329
359	71.600, 0.309	71.600, 0.329
360	71.800, 0.309	71.800, 0.329
361	72.000, 0.309	72.000, 0.328
362	72.200, 0.310	72.200, 0.328
363	72.400, 0.310	72.400, 0.328
364	72.600, 0.310	72.600, 0.327
365	72.800, 0.310	72.800, 0.327
366	73.000, 0.310	73.000, 0.327
367	73.200, 0.310	73.200, 0.327
368	73.400, 0.310	73.400, 0.327
369	73.600, 0.309	73.600, 0.326
370	73.800, 0.309	73.800, 0.326
371	74.000, 0.309	74.000, 0.326
372	74.200, 0.309	74.200, 0.326
373	74.400, 0.309	74.400, 0.326
374	74.600, 0.309	74.600, 0.326
375	74.800, 0.309	74.800, 0.326
376	75.000, 0.310	75.000, 0.326
377	75.200, 0.310	75.200, 0.326
378	75.400, 0.310	75.400, 0.326
379	75.600, 0.310	75.600, 0.326
380	75.800, 0.310	75.800, 0.326
381	76.000, 0.310	76.000, 0.326
382	76.200, 0.310	76.200, 0.326
383	76.400, 0.310	76.400, 0.326
384	76.600, 0.310	76.600, 0.326
385	76.800, 0.310	76.800, 0.326
386	77.000, 0.310	77.000, 0.326
387	77.200, 0.310	77.200, 0.326
388	77.400, 0.310	77.400, 0.326
389	77.600, 0.310	77.600, 0.326
390	77.800, 0.310	77.800, 0.326
391	78.000, 0.310	78.000, 0.325
392	78.200, 0.310	78.200, 0.325
393	78.400, 0.310	78.400, 0.325
394	78.600, 0.310	78.600, 0.325
395	78.800, 0.310	78.800, 0.325
396	79.000, 0.310	79.000, 0.325
397	79.200, 0.310	79.200, 0.325
398	79.400, 0.310	79.400, 0.325
399	79.600, 0.310	79.600, 0.325
400	79.800, 0.310	79.800, 0.324
401	80.000, 0.310	80.000, 0.324
402	80.200, 0.310	80.200, 0.324
403	80.400, 0.310	80.400, 0.324
404	80.600, 0.310	80.600, 0.324
405	80.800, 0.310	80.800, 0.324
406	81.000, 0.310	81.000, 0.324
407	81.200, 0.310	81.200, 0.324
408	81.400, 0.309	81.400, 0.324
409	81.600, 0.309	81.600, 0.324
410	81.800, 0.309	81.800, 0.324
411	82.000, 0.309	82.000, 0.324
412	82.200, 0.309	82.200, 0.324
413	82.400, 0.309	82.400, 0.325
414	82.600, 0.309	82.600, 0.325
415	82.800, 0.309	82.800, 0.324
416	83.000, 0.310	83.000, 0.324
417	83.200, 0.310	83.200, 0.324
418	83.400, 0.311	83.400, 0.324
419	83.600, 0.311	83.600, 0.324
420	83.800, 0.311	83.800, 0.324
421	84.000, 0.311	84.000, 0.324
422	84.200, 0.311	84.200, 0.324
423	84.400, 0.312	84.400, 0.324
424	84.600, 0.312	84.600, 0.324
425	84.800, 0.312	84.800, 0.324
426	85.000, 0.312	85.000, 0.323
427	85.200, 0.312	85.200, 0.323
428	85.400, 0.312	85.400, 0.323
429	85.600, 0.312	85.600, 0.323
430	85.800, 0.312	85.800, 0.323
431	86.000, 0.312	86.000, 0.323
432	86.200, 0.312	86.200, 0.323
433	86.400, 0.312	86.400, 0.323
434	86.600, 0.312	86.600, 0.323
435	86.800, 0.312	86.800, 0.323
436	87.000, 0.312	87.000, 0.323
437	87.200, 0.312	87.200, 0.323
438	87.400, 0.312	87.400, 0.323
439	87.600, 0.312	87.600, 0.323
440	87.800, 0.312	87.800, 0.323
441	88.000, 0.312	88.000, 0.323
442	88.200, 0.312	88.200, 0.324
443	88.400, 0.312	88.400, 0.324
444	88.600, 0.312	88.600, 0.324
445	88.800, 0.312	88.800, 0.324
446	89.000, 0.312	89.000, 0.324
447	89.200, 0.312	89.200, 0.323
448	89.400, 0.312	89.400, 0.323
449	89.600, 0.312	89.600, 0.323
450	89.800, 0.313	89.800, 0.322
451	90.000, 0.313	90.000, 0.322
452	90.200, 0.313	90.200, 0.322
453	90.400, 0.313	90.400, 0.322
454	90.600, 0.313	90.600, 0.321
455	90.800, 0.313	90.800, 0.321
456	91.000, 0.313	91.000, 0.321
457	91.200, 0.313	91.200, 0.320
458	91.400, 0.313	91.400, 0.320
459	91.600, 0.313	91.600, 0.321
460	91.800, 0.312	91.800, 0.321
461	92.000, 0.312	92.000, 0.321
462	92.200, 0.312	92.200, 0.321
463	92.400, 0.312	92.400, 0.321
464	92.600, 0.312	92.600, 0.321
465	92.800, 0.312	92.800, 0.321
466	93.000, 0.312	93.000, 0.321
467	93.200, 0.312	93.200, 0.321
468	93.400, 0.312	93.400, 0.320
469	93.600, 0.313	93.600, 0.321
470	93.800, 0.313	93.800, 0.321
471	94.000, 0.313	94.000, 0.321
472	94.200, 0.313	94.200, 0.321
473	94.400, 0.313	94.400, 0.321
474	94.600, 0.313	94.600, 0.321
475	94.800, 0.314	94.800, 0.321
476	95.000, 0.314	95.000, 0.321
477	95.200, 0.314	95.200, 0.321
478	95.400, 0.314	95.400, 0.322
479	95.600, 0.314	95.600, 0.322
480	95.800, 0.314	95.800, 0.322
481	96.000, 0.314	96.000, 0.322
482	96.200, 0.314	96.200, 0.322
483	96.400, 0.314	96.400, 0.322
484	96.600, 0.314	96.600, 0.321
485	96.800, 0.314	96.800, 0.321
486	97.000, 0.314	97.000, 0.321
487	97.200, 0.314	97.200, 0.321
488	97.400, 0.314	97.400, 0.321
489	97.600, 0.314	97.600, 0.321
490	97.800, 0.314	97.800, 0.320
491	98.000, 0.314	98.000, 0.321
492	98.200, 0.314	98.200, 0.320
493	98.400, 0.314	98.400, 0.321
494	98.600, 0.314	98.600, 0.321
495	98.800, 0.313	98.800, 0.321
496	99.000, 0.313	99.000, 0.321
497	99.200, 0.313	99.200, 0.321
498	99.400, 0.313	99.400, 0.321
499	99.600, 0.313	99.600, 0.321
500	99.800, 0.314	99.800, 0.321
501	100.000, 0.314	100.000, 0.321
502	100.200, 0.314	100.200, 0.320
503	100.400, 0.314	100.400, 0.320
504	100.600, 0.314	100.600, 0.320
505	100.800, 0.314	100.800, 0.320
506	101.000, 0.314	101.000, 0.319
507	101.200, 0.315	101.200, 0.319
508	101.400, 0.314	101.400, 0.319
509	101.600, 0.314	101.600, 0.318
510	101.800, 0.314	101.800, 0.318
511	102.000, 0.313	102.000, 0.318
512	102.200, 0.313	102.200, 0.317
513	102.400, 0.313	102.400, 0.317
514	102.600, 0.313	102.600, 0.317
515	102.800, 0.313	102.800, 0.317
516	103.000, 0.313	103.000, 0.317
517	103.200, 0.313	103.200, 0.317
518	103.400, 0.313	103.400, 0.317
519	103.600, 0.313	103.600, 0.317
520	103.800, 0.313	103.800, 0.318
521	104.000, 0.314	104.000, 0.318
522	104.200, 0.314	104.200, 0.318
523	104.400, 0.314	104.400, 0.318
524	104.600, 0.315	104.600, 0.318
525	104.800, 0.315	104.800, 0.318
526	105.000, 0.315	105.000, 0.319
527	105.200, 0.315	105.200, 0.319
528	105.400, 0.315	105.400, 0.319
529	105.600, 0.316	105.600, 0.319
530	105.800, 0.316	105.800, 0.319
531	106.000, 0.316	106.000, 0.319
532	106.200, 0.316	106.200, 0.319
533	106.400, 0.316	106.400, 0.320
534	106.600, 0.316	106.600, 0.320
535	106.800, 0.316	106.800, 0.320
536	107.000, 0.316	107.000, 0.320
537	107.200, 0.315	107.200, 0.320
538	107.400, 0.315	107.400, 0.319
539	107.600, 0.315	107.600, 0.319
540	107.800, 0.315	107.800, 0.319
541	108.000, 0.315	108.000, 0.319
542	108.200, 0.315	108.200, 0.318
543	108.400, 0.315	108.400, 0.318
544	108.600, 0.314	108.600, 0.318
545	108.800, 0.314	108.800, 0.318
546	109.000, 0.314	109.000, 0.318
547	109.200, 0.314	109.200, 0.318
548	109.400, 0.314	109.400, 0.318
549	109.600, 0.315	109.600, 0.318
550	109.800, 0.315	109.800, 0.318
551	110.000, 0.315	110.000, 0.318
552	110.200, 0.315	110.200, 0.318
553	110.400, 0.315	110.400, 0.318
554	110.600, 0.315	110.600, 0.318
555	110.800, 0.316	110.800, 0.319
556	111.000, 0.316	111.000, 0.319
557	111.200, 0.316	111.200, 0.319
558	111.400, 0.316	111.400, 0.319
559	111.600, 0.316	111.600, 0.319
560	111.800, 0.315	111.800, 0.319
561	112.000, 0.315	112.000, 0.319
562	112.200, 0.315	112.200, 0.318
563	112.400, 0.315	112.400, 0.318
564	112.600, 0.315	112.600, 0.318
565	112.800, 0.315	112.800, 0.318
566	113.000, 0.315	113.000, 0.318
567	113.200, 0.315	113.200, 0.318
568	113.400, 0.315	113.400, 0.318
569	113.600, 0.315	113.600, 0.319
570	113.800, 0.315	113.800, 0.319
571	114.000, 0.315	114.000, 0.319
572	114.200, 0.315	114.200, 0.320
573	114.400, 0.315	114.400, 0.320
574	114.600, 0.316	114.600, 0.320
575	114.800, 0.316	114.800, 0.320
576	115.000, 0.316	115.000, 0.320
577	115.200, 0.316	115.200, 0.320
578	115.400, 0.315	115.400, 0.320
579	115.600, 0.315	115.600, 0.320
580	115.800, 0.315	115.800, 0.320
581	116.000, 0.315	116.000, 0.320
582	116.200, 0.315	116.200, 0.319
583	116.400, 0.316	116.400, 0.319
584	116.600, 0.316	116.600, 0.319
585	116.800, 0.316	116.800, 0.319
586	117.000, 0.316	117.000, 0.319
587	117.200, 0.316	117.200, 0.319
588	117.400, 0.316	117.400, 0.319
589	117.600, 0.317	117.600, 0.320
590	117.800, 0.317	117.800, 0.320
591	118.000, 0.317	118.000, 0.320
592	118.200, 0.317	118.200, 0.320
593	118.400, 0.317	118.400, 0.320
594	118.600, 0.318	118.600, 0.320
595	118.800, 0.318	118.800, 0.320
596	119.000, 0.318	119.000, 0.320
597	119.200, 0.318	119.200, 0.321
598	119.400, 0.318	119.400, 0.321
599	119.600, 0.318	119.600, 0.321
600	119.800, 0.318	119.800, 0.321
601	120.000, 0.318	120.000, 0.321
602	120.200, 0.318	120.200, 0.320
603	120.400, 0.319	120.400, 0.320
604	120.600, 0.319	120.600, 0.320
605	120.800, 0.319	120.800, 0.320
606	121.000, 0.319	121.000, 0.320
607	121.200, 0.319	121.200, 0.319
608	121.400, 0.319	121.400, 0.319
609	121.600, 0.319	121.600, 0.319
610	121.800, 0.319	121.800, 0.318
611	122.000, 0.319	122.000, 0.318
612	122.200, 0.319	122.200, 0.318
613	122.400, 0.319	122.400, 0.318
614	122.600, 0.319	122.600, 0.318
615	122.800, 0.319	122.800, 0.318
616	123.000, 0.319	123.000, 0.318
617	123.200, 0.319	123.200, 0.318
618	123.400, 0.320	123.400, 0.319
619	123.600, 0.320	123.600, 0.319
620	123.800, 0.320	123.800, 0.319
621	124.000, 0.320	124.000, 0.319
622	124.200, 0.320	124.200, 0.320
623	124.400, 0.320	124.400, 0.320
624	124.600, 0.320	124.600, 0.320
625	124.800, 0.320	124.800, 0.320
626	125.000, 0.320	125.000, 0.320
627	125.200, 0.320	125.200, 0.320
628	125.400, 0.320	125.400, 0.320
629	125.600, 0.320	125.600, 0.320
630	125.800, 0.320	125.800, 0.321
631	126.000, 0.320	126.000, 0.321
632	126.200, 0.320	126.200, 0.321
633	126.400, 0.321	126.400, 0.321
634	126.600, 0.321	126.600, 0.321
635	126.800, 0.321	126.800, 0.321
636	127.000, 0.321	127.000, 0.320
637	127.200, 0.321	127.200, 0.320
638	127.400, 0.321	127.400, 0.320
639	127.600, 0.321	127.600, 0.321
640	127.800, 0.321	127.800, 0.320
641	128.000, 0.321	128.000, 0.320
642	128.200, 0.321	128.200, 0.320
643	128.400, 0.321	128.400, 0.320
644	128.600, 0.321	128.600, 0.319
645	128.800, 0.321	128.800, 0.319
646	129.000, 0.321	129.000, 0.319
647	129.200, 0.320	129.200, 0.319
648	129.400, 0.320	129.400, 0.319
649	129.600, 0.320	129.600, 0.319
650	129.800, 0.320	129.800, 0.319
651	130.000, 0.320	130.000, 0.319
652	130.200, 0.320	130.200, 0.319
653	130.400, 0.320	130.400, 0.319
654	130.600, 0.320	130.600, 0.319
655	130.800, 0.320	130.800, 0.319
656	131.000, 0.320	131.000, 0.320
657	131.200, 0.320	131.200, 0.320
658	131.400, 0.320	131.400, 0.320
659	131.600, 0.320	131.600, 0.320
660	131.800, 0.321	131.800, 0.320
661	132.000, 0.321	132.000, 0.319
662	132.200, 0.321	132.200, 0.319
663	132.400, 0.321	132.400, 0.319
664	132.600, 0.321	132.600, 0.319
665	132.800, 0.321	132.800, 0.320
666	133.000, 0.321	133.000, 0.320
667	133.200, 0.320	133.200, 0.320
668	133.400, 0.320	133.400, 0.320
669	133.600, 0.320	133.600, 0.320
670	133.800, 0.320	133.800, 0.320
671	134.000, 0.320	134.000, 0.321
672	134.200, 0.320	134.200, 0.321
673	134.400, 0.320	134.400, 0.321
674	134.600, 0.320	134.600, 0.321
675	134.800, 0.320	134.800, 0.321
676	135.000, 0.320	135.000, 0.321
677	135.200, 0.321	135.200, 0.321
678	135.400, 0.321	135.400, 0.320
679	135.600, 0.321	135.600, 0.320
680	135.800, 0.321	135.800, 0.320
681	136.000, 0.321	136.000, 0.320
682	136.200, 0.322	136.200, 0.320
683	136.400, 0.322	136.400, 0.320
684	136.600, 0.322	136.600, 0.320
685	136.800, 0.322	136.800, 0.320
686	137.000, 0.322	137.000, 0.321
687	137.200, 0.322	137.200, 0.321
688	137.400, 0.322	137.400, 0.321
689	137.600, 0.322	137.600, 0.321
690	137.800, 0.322	137.800, 0.321
691	138.000, 0.322	138.000, 0.322
692	138.200, 0.323	138.200, 0.322
693	138.400, 0.323	138.400, 0.322
694	138.600, 0.323	138.600, 0.322
695	138.800, 0.323	138.800, 0.322
696	139.000, 0.323	139.000, 0.322
697	139.200, 0.323	139.200, 0.322
698	139.400, 0.323	139.400, 0.322
699	139.600, 0.323	139.600, 0.322
700	139.800, 0.323	139.800, 0.322
701	140.000, 0.323	140.000, 0.322
702	140.200, 0.323	140.200, 0.321
703	140.400, 0.323	140.400, 0.321
704	140.600, 0.323	140.600, 0.321
705	140.800, 0.323	140.800, 0.321
706	141.000, 0.323	141.000, 0.321
707	141.200, 0.323	141.200, 0.321
708	141.400, 0.323	141.400, 0.321
709	141.600, 0.323	141.600, 0.321
710	141.800, 0.323	141.800, 0.321
711	142.000, 0.323	142.000, 0.321
712	142.200, 0.323	142.200, 0.321
713	142.400, 0.323	142.400, 0.321
714	142.600, 0.323	142.600, 0.321
715	142.800, 0.323	142.800, 0.321
716	143.000, 0.323	143.000, 0.321
717	143.200, 0.322	143.200, 0.321
718	143.400, 0.322	143.400, 0.321
719	143.600, 0.322	143.600, 0.320
720	143.800, 0.322	143.800, 0.320
721	144.000, 0.323	144.000, 0.320
722	144.200, 0.323	144.200, 0.320
723	144.400, 0.323	144.400, 0.319
724	144.600, 0.323	144.600, 0.319
725	144.800, 0.323	144.800, 0.320
726	145.000, 0.323	145.000, 0.320
727	145.200, 0.323	145.200, 0.320
728	145.400, 0.323	145.400, 0.320
729	145.600, 0.322	145.600, 0.320
730	145.800, 0.322	145.800, 0.321
731	146.000, 0.322	146.000, 0.321
732	146.200, 0.322	146.200, 0.321
733	146.400, 0.323	146.400, 0.322
734	146.600, 0.323	146.600, 0.322
735	146.800, 0.323	146.800, 0.322
736	147.000, 0.324	147.000, 0.322
737	147.200, 0.324	147.200, 0.322
738	147.400, 0.324	147.400, 0.322
739	147.600, 0.324	147.600, 0.322
740	147.800, 0.324	147.800, 0.322
741	148.000, 0.324	148.000, 0.322
742	148.200, 0.324	148.200, 0.322
743	148.400, 0.324	148.400, 0.322
744	148.600, 0.324	148.600, 0.322
745	148.800, 0.324	148.800, 0.322
746	149.000, 0.324	149.000, 0.322
747	149.200, 0.324	149.200, 0.322
748	149.400, 0.324	149.400, 0.322
749	149.600, 0.324	149.600, 0.322
750	149.800, 0.324	149.800, 0.322
751	150.000, 0.324	150.000, 0.322
752	150.200, 0.323	150.200, 0.320
753	150.400, 0.321	150.400, 0.317
754	150.600, 0.319	150.600, 0.315
755	150.800, 0.317	150.800, 0.312
756	151.000, 0.314	151.000, 0.309
757	151.200, 0.312	151.200, 0.307
758	151.400, 0.310	151.400, 0.304
759	151.600, 0.308	151.600, 0.302
760	151.800, 0.306	151.800, 0.299
761	152.000, 0.305	152.000, 0.297
762	152.200, 0.303	152.200, 0.296
763	152.400, 0.302	152.400, 0.294
764	152.600, 0.301	152.600, 0.293
765	152.800, 0.300	152.800, 0.291
766	153.000, 0.299	153.000, 0.290
767	153.200, 0.298	153.200, 0.288
768	153.400, 0.297	153.400, 0.287
769	153.600, 0.296	153.600, 0.285
770	153.800, 0.295	153.800, 0.284
771	154.000, 0.294	154.000, 0.283
772	154.200, 0.294	154.200, 0.282
773	154.400, 0.293	154.400, 0.281
774	154.600, 0.292	154.600, 0.280
775	154.800, 0.292	154.800, 0.279
776	155.000, 0.291	155.000, 0.278
777	155.200, 0.290	155.200, 0.277
778	155.400, 0.290	155.400, 0.276
779	155.600, 0.289	155.600, 0.275
780	155.800, 0.289	155.800, 0.274
781	156.000, 0.288	156.000, 0.274
782	156.200, 0.288	156.200, 0.273
783	156.400, 0.287	156.400, 0.272
784	156.600, 0.287	156.600, 0.271
785	156.800, 0.286	156.800, 0.271
786	157.000, 0.286	157.000, 0.270
787	157.200, 0.286	157.200, 0.269
788	157.400, 0.286	157.400, 0.269
789	157.600, 0.286	157.600, 0.268
790	157.800, 0.286	157.800, 0.267
791	158.000, 0.285	158.000, 0.266
792	158.200, 0.285	158.200, 0.266
793	158.400, 0.285	158.400, 0.264
794	158.600, 0.285	158.600, 0.263
795	158.800, 0.285	158.800, 0.262
796	159.000, 0.284	159.000, 0.262
797	159.200, 0.284	159.200, 0.261
798	159.400, 0.284	159.400, 0.260
799	159.600, 0.284	159.600, 0.259
800	159.800, 0.283	159.800, 0.259
801	160.000, 0.283	160.000, 0.258
802	160.200, 0.283	160.200, 0.257
803	160.400, 0.283	160.400, 0.256
804	160.600, 0.282	160.600, 0.256
805	160.800, 0.282	160.800, 0.255
806	161.000, 0.282	161.000, 0.254
807	161.200, 0.282	161.200, 0.254
808	161.400, 0.282	161.400, 0.253
809	161.600, 0.281	161.600, 0.253
810	161.800, 0.281	161.800, 0.252
811	162.000, 0.281	162.000, 0.251
812	162.200, 0.281	162.200, 0.250
813	162.400, 0.281	162.400, 0.249
814	162.600, 0.280	162.600, 0.248
815	162.800, 0.280	162.800, 0.248
816	163.000, 0.279	163.000, 0.247
817	163.200, 0.279	163.200, 0.247
818	163.400, 0.279	163.400, 0.246
819	163.600, 0.278	163.600, 0.246
820	163.800, 0.278	163.800, 0.246
821	164.000, 0.277	164.000, 0.245
822	164.200, 0.277	164.200, 0.245
823	164.400, 0.277	164.400, 0.244
824	164.600, 0.276	164.600, 0.244
825	164.800, 0.276	164.800, 0.243
826	165.000, 0.276	165.000, 0.243
827	165.200, 0.276	165.200, 0.242
828	165.400, 0.276	165.400, 0.242
829	165.600, 0.276	165.600, 0.241
830	165.800, 0.276	165.800, 0.241
831	166.000, 0.276	166.000, 0.240
832	166.200, 0.276	166.200, 0.240
833	166.400, 0.276	166.400, 0.239
834	166.600, 0.276	166.600, 0.238
835	166.800, 0.276	166.800, 0.238
836	167.000, 0.276	167.000, 0.238
837	167.200, 0.276	167.200, 0.237
838	167.400, 0.276	167.400, 0.237
839	167.600, 0.275	167.600, 0.236
840	167.800, 0.275	167.800, 0.236
841	168.000, 0.275	168.000, 0.235
842	168.200, 0.275	168.200, 0.235
843	168.400, 0.275	168.400, 0.235
844	168.600, 0.275	168.600, 0.234
845	168.800, 0.274	168.800, 0.234
846	169.000, 0.274	169.000, 0.234
847	169.200, 0.274	169.200, 0.233
848	169.400, 0.273	169.400, 0.232
849	169.600, 0.273	169.600, 0.232
850	169.800, 0.273	169.800, 0.231
851	170.000, 0.273	170.000, 0.231
852	170.200, 0.273	170.200, 0.230
853	170.400, 0.273	170.400, 0.230
854	170.600, 0.273	170.600, 0.229
855	170.800, 0.273	170.800, 0.229
856	171.000, 0.273	171.000, 0.228
857	171.200, 0.273	171.200, 0.227
858	171.400, 0.273	171.400, 0.227
859	171.600, 0.273	171.600, 0.227
860	171.800, 0.273	171.800, 0.226
861	172.000, 0.273	172.000, 0.226
862	172.200, 0.273	172.200, 0.225
863	172.400, 0.273	172.400, 0.225
864	172.600, 0.273	172.600, 0.225
865	172.800, 0.273	172.800, 0.224
866	173.000, 0.273	173.000, 0.223
867	173.200, 0.273	173.200, 0.223
868	173.400, 0.273	173.400, 0.222
869	173.600, 0.272	173.600, 0.222
870	173.800, 0.272	173.800, 0.221
871	174.000, 0.271	174.000, 0.220
872	174.200, 0.271	174.200, 0.220
873	174.400, 0.270	174.400, 0.219
874	174.600, 0.269	174.600, 0.219
875	174.800, 0.269	174.800, 0.218
876	175.000, 0.269	175.000, 0.218
877	175.200, 0.268	175.200, 0.218
878	175.400, 0.268	175.400, 0.217
879	175.600, 0.267	175.600, 0.217
880	175.800, 0.267	175.800, 0.217
881	176.000, 0.267	176.000, 0.216
882	176.200, 0.267	176.200, 0.216
883	176.400, 0.267	176.400, 0.216
884	176.600, 0.267	176.600, 0.215
885	176.800, 0.267	176.800, 0.215
886	177.000, 0.267	177.000, 0.215
887	177.200, 0.267	177.200, 0.215
888	177.400, 0.267	177.400, 0.215
889	177.600, 0.266	177.600, 0.215
890	177.800, 0.266	177.800, 0.214
891	178.000, 0.266	178.000, 0.214
892	178.200, 0.266	178.200, 0.214
893	178.400, 0.266	178.400, 0.214
894	178.600, 0.265	178.600, 0.214
895	178.800, 0.265	178.800, 0.213
896	179.000, 0.266	179.000, 0.213
897	179.200, 0.266	179.200, 0.212
898	179.400, 0.266	179.400, 0.212
899	179.600, 0.266	179.600, 0.211
900	179.800, 0.266	179.800, 0.210
901	180.000, 0.266	180.000, 0.210
902	180.200, 0.266	180.200, 0.210
903	180.400, 0.266	180.400, 0.209
904	180.600, 0.266	180.600, 0.209
905	180.800, 0.266	180.800, 0.208
906	181.000, 0.266	181.000, 0.208
907	181.200, 0.265	181.200, 0.208
908	181.400, 0.265	181.400, 0.208
909	181.600, 0.265	181.600, 0.208
910	181.800, 0.265	181.800, 0.208
911	182.000, 0.265	182.000, 0.207
912	182.200, 0.264	182.200, 0.207
913	182.400, 0.264	182.400, 0.206
914	182.600, 0.264	182.600, 0.206
915	182.800, 0.264	182.800, 0.205
916	183.000, 0.264	183.000, 0.205
917	183.200, 0.264	183.200, 0.204
918	183.400, 0.264	183.400, 0.204
919	183.600, 0.264	183.600, 0.203
920	183.800, 0.264	183.800, 0.203
921	184.000, 0.264	184.000, 0.203
922	184.200, 0.264	184.200, 0.202
923	184.400, 0.264	184.400, 0.202
924	184.600, 0.264	184.600, 0.202
925	184.800, 0.264	184.800, 0.202
926	185.000, 0.264	185.000, 0.201
927	185.200, 0.264	185.200, 0.201
928	185.400, 0.264	185.400, 0.201
929	185.600, 0.263	185.600, 0.201
930	185.800, 0.263	185.800, 0.201
931	186.000, 0.262	186.000, 0.200
932	186.200, 0.262	186.200, 0.200
933	186.400, 0.262	186.400, 0.200
934	186.600, 0.261	186.600, 0.199
935	186.800, 0.261	186.800, 0.199
936	187.000, 0.261	187.000, 0.199
937	187.200, 0.261	187.200, 0.199
938	187.400, 0.261	187.400, 0.199
939	187.600, 0.261	187.600, 0.198
940	187.800, 0.261	187.800, 0.198
941	188.000, 0.261	188.000, 0.198
942	188.200, 0.261	188.200, 0.198
943	188.400, 0.261	188.400, 0.197
944	188.600, 0.261	188.600, 0.197
945	188.800, 0.260	188.800, 0.197
946	189.000, 0.260	189.000, 0.196
947	189.200, 0.260	189.200, 0.196
948	189.400, 0.260	189.400, 0.196
949	189.600, 0.260	189.600, 0.195
950	189.800, 0.260	189.800, 0.195
951	190.000, 0.260	190.000, 0.195
952	190.200, 0.259	190.200, 0.195
953	190.400, 0.259	190.400, 0.195
954	190.600, 0.258	190.600, 0.194
955	190.800, 0.258	190.800, 0.194
956	191.000, 0.258	191.000, 0.194
957	191.200, 0.258	191.200, 0.194
958	191.400, 0.258	191.400, 0.194
959	191.600, 0.258	191.600, 0.194
960	191.800, 0.258	191.800, 0.194
961	192.000, 0.258	192.000, 0.194
962	192.200, 0.258	192.200, 0.193
963	192.400, 0.258	192.400, 0.193
964	192.600, 0.258	192.600, 0.193
965	192.800, 0.258	192.800, 0.192
966	193.000, 0.258	193.000, 0.191
967	193.200, 0.258	193.200, 0.191
968	193.400, 0.258	193.400, 0.190
969	193.600, 0.258	193.600, 0.190
970	193.800, 0.258	193.800, 0.189
971	194.000, 0.257	194.000, 0.189
972	194.200, 0.257	194.200, 0.188
973	194.400, 0.257	194.400, 0.188
974	194.600, 0.256	194.600, 0.188
975	194.800, 0.256	194.800, 0.188
976	195.000, 0.256	195.000, 0.188
977	195.200, 0.256	195.200, 0.188
978	195.400, 0.257	195.400, 0.188
979	195.600, 0.257	195.600, 0.189
980	195.800, 0.257	195.800, 0.189
981	196.000, 0.257	196.000, 0.189
982	196.200, 0.257	196.200, 0.189
983	196.400, 0.256	196.400, 0.189
984	196.600, 0.256	196.600, 0.189
985	196.800, 0.256	196.800, 0.188
986	197.000, 0.256	197.000, 0.188
987	197.200, 0.256	197.200, 0.188
988	197.400, 0.256	197.400, 0.187
989	197.600, 0.256	197.600, 0.187
990	197.800, 0.255	197.800, 0.186
991	198.000, 0.255	198.000, 0.186
992	198.200, 0.255	198.200, 0.185
993	198.400, 0.255	198.400, 0.185
994	198.600, 0.255	198.600, 0.185
995	198.800, 0.255	198.800, 0.185
996	199.000, 0.255	199.000, 0.185
997	199.200, 0.255	199.200, 0.185
998	199.400, 0.255	199.400, 0.184
999	199.600, 0.255	199.600, 0.184
1000	199.800, 0.255	199.800, 0.184
1001	200.000, 0.255	200.000, 0.184
1002	200.200, 0.255	200.200, 0.184
1003	200.400, 0.255	200.400, 0.184
1004	200.600, 0.254	200.600, 0.184
1005	200.800, 0.254	200.800, 0.184
1006	201.000, 0.254	201.000, 0.184
1007	201.200, 0.254	201.200, 0.183
1008	201.400, 0.253	201.400, 0.183
1009	201.600, 0.253	201.600, 0.183
1010	201.800, 0.253	201.800, 0.183
1011	202.000, 0.252	202.000, 0.183
1012	202.200, 0.252	202.200, 0.183
1013	202.400, 0.252	202.400, 0.183
1014	202.600, 0.252	202.600, 0.182
1015	202.800, 0.251	202.800, 0.182
1016	203.000, 0.251	203.000, 0.182
1017	203.200, 0.251	203.200, 0.182
1018	203.400, 0.251	203.400, 0.181
1019	203.600, 0.251	203.600, 0.181
1020	203.800, 0.252	203.800, 0.181
1021	204.000, 0.251	204.000, 0.181
1022	204.200, 0.251	204.200, 0.181
1023	204.400, 0.251	204.400, 0.181
1024	204.600, 0.251	204.600, 0.181
1025	204.800, 0.251	204.800, 0.181
1026	205.000, 0.251	205.000, 0.180
1027	205.200, 0.251	205.200, 0.180
1028	205.400, 0.251	205.400, 0.180
1029	205.600, 0.251	205.600, 0.180
1030	205.800, 0.251	205.800, 0.180
1031	206.000, 0.251	206.000, 0.180
1032	206.200, 0.251	206.200, 0.180
1033	206.400, 0.251	206.400, 0.180
1034	206.600, 0.251	206.600, 0.180
1035	206.800, 0.251	206.800, 0.180
1036	207.000, 0.251	207.000, 0.180
1037	207.200, 0.251	207.200, 0.180
1038	207.400, 0.251	207.400, 0.180
1039	207.600, 0.251	207.600, 0.180
1040	207.800, 0.251	207.800, 0.179
1041	208.000, 0.251	208.000, 0.179
1042	208.200, 0.251	208.200, 0.179
1043	208.400, 0.251	208.400, 0.178
1044	208.600, 0.251	208.600, 0.178
1045	208.800, 0.251	208.800, 0.178
1046	209.000, 0.251	209.000, 0.177
1047	209.200, 0.251	209.200, 0.177
1048	209.400, 0.251	209.400, 0.177
1049	209.600, 0.251	209.600, 0.177
1050	209.800, 0.251	209.800, 0.177
1051	210.000, 0.251	210.000, 0.177
1052	210.200, 0.251	210.200, 0.177
1053	210.400, 0.250	210.400, 0.177
1054	210.600, 0.250	210.600, 0.177
1055	210.800, 0.249	210.800, 0.177
1056	211.000, 0.249	211.000, 0.177
1057	211.200, 0.249	211.200, 0.177
1058	211.400, 0.248	211.400, 0.177
1059	211.600, 0.248	211.600, 0.177
1060	211.800, 0.247	211.800, 0.176
1061	212.000, 0.247	212.000, 0.176
1062	212.200, 0.246	212.200, 0.176
1063	212.400, 0.246	212.400, 0.176
1064	212.600, 0.246	212.600, 0.176
1065	212.800, 0.246	212.800, 0.176
1066	213.000, 0.246	213.000, 0.176
1067	213.200, 0.246	213.200, 0.175
1068	213.400, 0.246	213.400, 0.175
1069	213.600, 0.246	213.600, 0.175
1070	213.800, 0.246	213.800, 0.175
1071	214.000, 0.246	214.000, 0.174
1072	214.200, 0.245	214.200, 0.174
1073	214.400, 0.245	214.400, 0.174
1074	214.600, 0.246	214.600, 0.174
1075	214.800, 0.246	214.800, 0.174
1076	215.000, 0.247	215.000, 0.174
1077	215.200, 0.247	215.200, 0.174
1078	215.400, 0.247	215.400, 0.174
1079	215.600, 0.247	215.600, 0.174
1080	215.800, 0.248	215.800, 0.174
1081	216.000, 0.248	216.000, 0.174
1082	216.200, 0.248	216.200, 0.174
1083	216.400, 0.248	216.400, 0.174
1084	216.600, 0.248	216.600, 0.174
1085	216.800, 0.247	216.800, 0.174
1086	217.000, 0.247	217.000, 0.174
1087	217.200, 0.247	217.200, 0.173
1088	217.400, 0.247	217.400, 0.173
1089	217.600, 0.246	217.600, 0.173
1090	217.800, 0.246	217.800, 0.172
1091	218.000, 0.245	218.000, 0.172
1092	218.200, 0.245	218.200, 0.172
1093	218.400, 0.245	218.400, 0.172
1094	218.600, 0.245	218.600, 0.172
1095	218.800, 0.244	218.800, 0.171
1096	219.000, 0.244	219.000, 0.171
1097	219.200, 0.244	219.200, 0.172
1098	219.400, 0.244	219.400, 0.172
1099	219.600, 0.245	219.600, 0.172
1100	219.800, 0.244	219.800, 0.171
1101	220.000, 0.244	220.000, 0.171
1102	220.200, 0.244	220.200, 0.171
1103	220.400, 0.244	220.400, 0.171
1104	220.600, 0.244	220.600, 0.171
1105	220.800, 0.244	220.800, 0.171
1106	221.000, 0.244	221.000, 0.171
1107	221.200, 0.244	221.200, 0.172
1108	221.400, 0.244	221.400, 0.172
1109	221.600, 0.244	221.600, 0.172
1110	221.800, 0.244	221.800, 0.172
1111	222.000, 0.244	222.000, 0.172
1112	222.200, 0.244	222.200, 0.171
1113	222.400, 0.244	222.400, 0.171
1114	222.600, 0.243	222.600, 0.171
1115	222.800, 0.243	222.800, 0.171
1116	223.000, 0.243	223.000, 0.170
1117	223.200, 0.243	223.200, 0.170
1118	223.400, 0.243	223.400, 0.170
1119	223.600, 0.243	223.600, 0.170
1120	223.800, 0.243	223.800, 0.170
1121	224.000, 0.244	224.000, 0.170
1122	224.200, 0.244	224.200, 0.170
1123	224.400, 0.244	224.400, 0.170
1124	224.600, 0.244	224.600, 0.170
1125	224.800, 0.244	224.800, 0.170
1126	225.000, 0.244	225.000, 0.170
1127	225.200, 0.244	225.200, 0.170
1128	225.400, 0.244	225.400, 0.170
1129	225.600, 0.244	225.600, 0.169
1130	225.800, 0.244	225.800, 0.169
1131	226.000, 0.244	226.000, 0.169
1132	226.200, 0.243	226.200, 0.168
1133	226.400, 0.243	226.400, 0.168
1134	226.600, 0.243	226.600, 0.168
1135	226.800, 0.243	226.800, 0.168
1136	227.000, 0.243	227.000, 0.168
1137	227.200, 0.242	227.200, 0.168
1138	227.400, 0.242	227.400, 0.168
1139	227.600, 0.242	227.600, 0.168
1140	227.800, 0.241	227.800, 0.168
1141	228.000, 0.241	228.000, 0.168
1142	228.200, 0.241	228.200, 0.168
1143	228.400, 0.240	228.400, 0.168
1144	228.600, 0.240	228.600, 0.168
1145	228.800, 0.240	228.800, 0.169
1146	229.000, 0.240	229.000, 0.169
1147	229.200, 0.240	229.200, 0.169
1148	229.400, 0.240	229.400, 0.168
1149	229.600, 0.240	229.600, 0.168
1150	229.800, 0.240	229.800, 0.168
1151	230.000, 0.240	230.000, 0.168
1152	230.200, 0.240	230.200, 0.167
1153	230.400, 0.240	230.400, 0.167
1154	230.600, 0.240	230.600, 0.167
1155	230.800, 0.241	230.800, 0.167
1156	231.000, 0.241	231.000, 0.167
1157	231.200, 0.241	231.200, 0.167
1158	231.400, 0.241	231.400, 0.167
1159	231.600, 0.241	231.600, 0.167
1160	231.800, 0.241	231.800, 0.167
1161	232.000, 0.241	232.000, 0.167
1162	232.200, 0.241	232.200, 0.167
1163	232.400, 0.241	232.400, 0.167
1164	232.600, 0.241	232.600, 0.167
1165	232.800, 0.241	232.800, 0.167
1166	233.000, 0.241	233.000, 0.167
1167	233.200, 0.241	233.200, 0.167
1168	233.400, 0.241	233.400, 0.167
1169	233.600, 0.240	233.600, 0.167
1170	233.800, 0.240	233.800, 0.167
1171	234.000, 0.240	234.000, 0.166
1172	234.200, 0.239	234.200, 0.166
1173	234.400, 0.239	234.400, 0.166
1174	234.600, 0.239	234.600, 0.166
1175	234.800, 0.239	234.800, 0.166
1176	235.000, 0.239	235.000, 0.166
1177	235.200, 0.239	235.200, 0.165
1178	235.400, 0.239	235.400, 0.165
1179	235.600, 0.239	235.600, 0.165
1180	235.800, 0.239	235.800, 0.165
1181	236.000, 0.239	236.000, 0.165
1182	236.200, 0.239	236.200, 0.165
1183	236.400, 0.239	236.400, 0.165
1184	236.600, 0.239	236.600, 0.165
1185	236.800, 0.239	236.800, 0.164
1186	237.000, 0.239	237.000, 0.164
1187	237.200, 0.239	237.200, 0.164
1188	237.400, 0.239	237.400, 0.164
1189	237.600, 0.239	237.600, 0.164
1190	237.800, 0.239	237.800, 0.163
1191	238.000, 0.239	238.000, 0.163
1192	238.200, 0.239	238.200, 0.163
1193	238.400, 0.239	238.400, 0.164
1194	238.600, 0.239	238.600, 0.164
1195	238.800, 0.238	238.800, 0.164
1196	239.000, 0.238	239.000, 0.164
1197	239.200, 0.238	239.200, 0.164
1198	239.400, 0.238	239.400, 0.164
1199	239.600, 0.238	239.600, 0.164
1200	239.800, 0.238	239.800, 0.164
1201	240.000, 0.238	240.000, 0.164
1202	240.200, 0.237	240.200, 0.164
1203	240.400, 0.237	240.400, 0.164
1204	240.600, 0.237	240.600, 0.164
1205	240.800, 0.237	240.800, 0.164
1206	241.000, 0.237	241.000, 0.164
1207	241.200, 0.236	241.200, 0.164
1208	241.400, 0.236	241.400, 0.164
1209	241.600, 0.236	241.600, 0.164
1210	241.800, 0.236	241.800, 0.164
1211	242.000, 0.236	242.000, 0.164
1212	242.200, 0.236	242.200, 0.164
1213	242.400, 0.236	242.400, 0.164
1214	242.600, 0.236	242.600, 0.164
1215	242.800, 0.236	242.800, 0.164
1216	243.000, 0.236	243.000, 0.164
1217	243.200, 0.236	243.200, 0.164
1218	243.400, 0.236	243.400, 0.164
1219	243.600, 0.236	243.600, 0.164
1220	243.800, 0.236	243.800, 0.164
1221	244.000, 0.237	244.000, 0.163
1222	244.200, 0.237	244.200, 0.163
1223	244.400, 0.237	244.400, 0.163
1224	244.600, 0.237	244.600, 0.163
1225	244.800, 0.237	244.800, 0.163
1226	245.000, 0.237	245.000, 0.163
1227	245.200, 0.237	245.200, 0.162
1228	245.400, 0.237	245.400, 0.162
1229	245.600, 0.237	245.600, 0.162
1230	245.800, 0.236	245.800, 0.162
1231	246.000, 0.236	246.000, 0.161
1232	246.200, 0.236	246.200, 0.161
1233	246.400, 0.235	246.400, 0.161
1234	246.600, 0.235	246.600, 0.161
1235	246.800, 0.235	246.800, 0.161
1236	247.000, 0.235	247.000, 0.161
1237	247.200, 0.234	247.200, 0.162
1238	247.400, 0.234	247.400, 0.162
1239	247.600, 0.234	247.600, 0.162
1240	247.800, 0.234	247.800, 0.161
1241	248.000, 0.234	248.000, 0.161
1242	248.200, 0.234	248.200, 0.161
1243	248.400, 0.234	248.400, 0.161
1244	248.600, 0.234	248.600, 0.161
1245	248.800, 0.234	248.800, 0.161
1246	249.000, 0.234	249.000, 0.161
1247	249.200, 0.234	249.200, 0.161
1248	249.400, 0.234	249.400, 0.160
1249	249.600, 0.234	249.600, 0.160
1250	249.800, 0.234	249.800, 0.160
1251	250.000, 0.234	250.000, 0.160
1252	250.200, 0.234	250.200, 0.160
1253	250.400, 0.234	250.400, 0.161
1254	250.600, 0.234	250.600, 0.161
1255	250.800, 0.234	250.800, 0.161
1256	251.000, 0.233	251.000, 0.161
1257	251.200, 0.233	251.200, 0.161
1258	251.400, 0.233	251.400, 0.161
1259	251.600, 0.233	251.600, 0.161
1260	251.800, 0.233	251.800, 0.161
1261	252.000, 0.232	252.000, 0.161
1262	252.200, 0.232	252.200, 0.161
1263	252.400, 0.232	252.400, 0.161
1264	252.600, 0.232	252.600, 0.161
1265	252.800, 0.232	252.800, 0.161
1266	253.000, 0.233	253.000, 0.161
1267	253.200, 0.233	253.200, 0.161
1268	253.400, 0.233	253.400, 0.161
1269	253.600, 0.234	253.600, 0.161
1270	253.800, 0.234	253.800, 0.161
1271	254.000, 0.234	254.000, 0.161
1272	254.200, 0.234	254.200, 0.161
1273	254.400, 0.234	254.400, 0.161
1274	254.600, 0.234	254.600, 0.161
1275	254.800, 0.234	254.800, 0.160
1276	255.000, 0.234	255.000, 0.160
1277	255.200, 0.234	255.200, 0.160
1278	255.400, 0.234	255.400, 0.159
1279	255.600, 0.233	255.600, 0.159
1280	255.800, 0.233	255.800, 0.159
1281	256.000, 0.233	256.000, 0.158
1282	256.200, 0.233	256.200, 0.158
1283	256.400, 0.232	256.400, 0.158
1284	256.600, 0.232	256.600, 0.158
1285	256.800, 0.232	256.800, 0.158
1286	257.000, 0.232	257.000, 0.158
1287	257.200, 0.232	257.200, 0.158
1288	257.400, 0.232	257.400, 0.158
1289	257.600, 0.232	257.600, 0.158
1290	257.800, 0.232	257.800, 0.158
1291	258.000, 0.232	258.000, 0.158
1292	258.200, 0.232	258.200, 0.157
1293	258.400, 0.232	258.400, 0.157
1294	258.600, 0.232	258.600, 0.158
1295	258.800, 0.232	258.800, 0.158
1296	259.000, 0.232	259.000, 0.158
1297	259.200, 0.232	259.200, 0.159
1298	259.400, 0.231	259.400, 0.159
1299	259.600, 0.231	259.600, 0.159
1300	259.800, 0.231	259.800, 0.159
1301	260.000, 0.231	260.000, 0.160
1302	260.200, 0.231	260.200, 0.160
1303	260.400, 0.231	260.400, 0.160
1304	260.600, 0.231	260.600, 0.160
1305	260.800, 0.231	260.800, 0.160
1306	261.000, 0.231	261.000, 0.159
1307	261.200, 0.231	261.200, 0.159
1308	261.400, 0.231	261.400, 0.159
1309	261.600, 0.232	261.600, 0.158
1310	261.800, 0.232	261.800, 0.158
1311	262.000, 0.232	262.000, 0.158
1312	262.200, 0.231	262.200, 0.158
1313	262.400, 0.231	262.400, 0.158
1314	262.600, 0.231	262.600, 0.158
1315	262.800, 0.230	262.800, 0.158
1316	263.000, 0.230	263.000, 0.158
1317	263.200, 0.230	263.200, 0.158
1318	263.400, 0.230	263.400, 0.158
1319	263.600, 0.230	263.600, 0.158
1320	263.800, 0.230	263.800, 0.158
1321	264.000, 0.230	264.000, 0.158
1322	264.200, 0.230	264.200, 0.158
1323	264.400, 0.229	264.400, 0.158
1324	264.600, 0.229	264.600, 0.158
1325	264.800, 0.229	264.800, 0.158
1326	265.000, 0.229	265.000, 0.157
1327	265.200, 0.229	265.200, 0.157
1328	265.400, 0.229	265.400, 0.157
1329	265.600, 0.229	265.600, 0.157
1330	265.800, 0.229	265.800, 0.157
1331	266.000, 0.229	266.000, 0.157
1332	266.200, 0.229	266.200, 0.157
1333	266.400, 0.229	266.400, 0.157
1334	266.600, 0.229	266.600, 0.157
1335	266.800, 0.229	266.800, 0.157
1336	267.000, 0.229	267.000, 0.157
1337	267.200, 0.229	267.200, 0.157
1338	267.400, 0.229	267.400, 0.157
1339	267.600, 0.229	267.600, 0.157
1340	267.800, 0.229	267.800, 0.157
1341	268.000, 0.229	268.000, 0.157
1342	268.200, 0.228	268.200, 0.157
1343	268.400, 0.228	268.400, 0.157
1344	268.600, 0.228	268.600, 0.157
1345	268.800, 0.228	268.800, 0.157
1346	269.000, 0.228	269.000, 0.157
1347	269.200, 0.228	269.200, 0.157
1348	269.400, 0.228	269.400, 0.157
1349	269.600, 0.228	269.600, 0.157
1350	269.800, 0.228	269.800, 0.157
1351	,	,
1352	,	,
1353	,	,
1354	,	,
1355	,	,
1356	,	,
1357	,	,
1358	,	,
1359	,	,
1360	,	,
1361	,	,
1362	,	,
1363	,	,
1364	,	,
1365	,	,
1366	,	,
1367	,	,
1368	,	,
1369	,	,
1370	,	,
1371	,	,
1372	,	,
1373	,	,
1374	,	,
1375	,	,
1376	,	,
1377	,	,
1378	,	,
1379	,	,
1380	,	,
1381	,	,
1382	,	,
1383	,	,
1384	,	,
1385	,	,
1386	,	,
1387	,	,
1388	,	,
1389	,	,
1390	,	,
1391	,	,
1392	,	,
1393	,	,
1394	,	,
1395	,	,
1396	,	,
1397	,	,
1398	,	,
1399	,	,
1400	,	,
1401	,	,
1402	,	,
1403	,	,
1404	,	,
1405	,	,
1406	,	,
1407	,	,
1408	,	,
1409	,	,
1410	,	,
1411	,	,
1412	,	,
1413	,	,
1414	,	,
1415	,	,
1416	,	,
1417	,	,
1418	,	,
1419	,	,
1420	,	,
1421	,	,
1422	,	,
1423	,	,
1424	,	,
1425	,	,
1426	,	,
1427	,	,
1428	,	,
1429	,	,
1430	,	,
1431	,	,
1432	,	,
1433	,	,
1434	,	,
1435	,	,
1436	,	,
1437	,	,
1438	,	,
1439	,	,
1440	,	,
1441	,	,
1442	,	,
1443	,	,
1444	,	,
1445	,	,
1446	,	,
1447	,	,
1448	,	,
1449	,	,
1450	,	,
1451	,	,
1452	,	,
1453	,	,
1454	,	,
1455	,	,
1456	,	,
1457	,	,
1458	,	,
1459	,	,
1460	,	,
1461	,	,
1462	,	,
1463	,	,
1464	,	,
1465	,	,
1466	,	,
1467	,	,
1468	,	,
1469	,	,
1470	,	,
1471	,	,
1472	,	,
1473	,	,
1474	,	,
1475	,	,
1476	,	,
1477	,	,
1478	,	,
1479	,	,
1480	,	,
1481	,	,
1482	,	,
1483	,	,
1484	,	,
1485	,	,
1486	,	,
1487	,	,
1488	,	,
1489	,	,
1490	,	,
1491	,	,
1492	,	,
1493	,	,
1494	,	,
1495	,	,
1496	,	,
1497	,	,
1498	,	,
1499	,	,
1500	,	,
1501	,	,
1502	,	,
1503	,	,
1504	,	,
1505	,	,
1506	,	,
1507	,	,
1508	,	,
1509	,	,
1510	,	,
1511	,	,
1512	,	,
1513	,	,
1514	,	,
1515	,	,
1516	,	,
1517	,	,
1518	,	,
1519	,	,
1520	,	,
1521	,	,
1522	,	,
1523	,	,
1524	,	,
1525	,	,
1526	,	,
1527	,	,
1528	,	,
1529	,	,
1530	,	,
1531	,	,
1532	,	,
1533	,	,
1534	,	,
1535	,	,
1536	,	,
1537	,	,
1538	,	,
1539	,	,
1540	,	,
1541	,	,
1542	,	,
1543	,	,
1544	,	,
1545	,	,
1546	,	,
1547	,	,
1548	,	,
1549	,	,
1550	,	,
1551	,	,
1552	,	,
1553	,	,
1554	,	,
1555	,	,
1556	,	,
1557	,	,
1558	,	,
1559	,	,
1560	,	,
1561	,	,
1562	,	,
1563	,	,
1564	,	,
1565	,	,
1566	,	,
1567	,	,
1568	,	,
1569	,	,
1570	,	,
1571	,	,
1572	,	,
1573	,	,
1574	,	,
1575	,	,
1576	,	,
1577	,	,
1578	,	,
1579	,	,
1580	,	,
1581	,	,
1582	,	,
1583	,	,
1584	,	,
1585	,	,
1586	,	,
1587	,	,
1588	,	,
1589	,	,
1590	,	,
1591	,	,
1592	,	,
1593	,	,
1594	,	,
1595	,	,
1596	,	,
1597	,	,
1598	,	,
1599	,	,
1600	,	,
1601	,	,
1602	,	,
1603	,	,
1604	,	,
1605	,	,
1606	,	,
1607	,	,
1608	,	,
1609	,	,
1610	,	,
1611	,	,
1612	,	,
1613	,	,
1614	,	,
1615	,	,
1616	,	,
1617	,	,
1618	,	,
1619	,	,
1620	,	,
1621	,	,
1622	,	,
1623	,	,
1624	,	,
1625	,	,
1626	,	,
1627	,	,
1628	,	,
1629	,	,
1630	,	,
1631	,	,
1632	,	,
1633	,	,
1634	,	,
1635	,	,
1636	,	,
1637	,	,
1638	,	,
1639	,	,
1640	,	,
1641	,	,
1642	,	,
1643	,	,
1644	,	,
1645	,	,
1646	,	,
1647	,	,
1648	,	,
1649	,	,
1650	,	,
1651	,	,
1652	,	,
1653	,	,
1654	,	,
1655	,	,
1656	,	,
1657	,	,
1658	,	,
1659	,	,
1660	,	,
1661	,	,
1662	,	,
1663	,	,
1664	,	,
1665	,	,
1666	,	,
1667	,	,
1668	,	,
1669	,	,
1670	,	,
1671	,	,
1672	,	,
1673	,	,
1674	,	,
1675	,	,
1676	,	,
1677	,	,
1678	,	,
1679	,	,
1680	,	,
1681	,	,
1682	,	,
1683	,	,
1684	,	,
1685	,	,
1686	,	,
1687	,	,
1688	,	,
1689	,	,
1690	,	,
1691	,	,
1692	,	,
1693	,	,
1694	,	,
1695	,	,
1696	,	,
1697	,	,
1698	,	,
1699	,	,
1700	,	,
1701	,	,
1702	,	,
1703	,	,
1704	,	,
1705	,	,
1706	,	,
1707	,	,
1708	,	,
1709	,	,
1710	,	,
1711	,	,
1712	,	,
1713	,	,
1714	,	,
1715	,	,
1716	,	,
1717	,	,
1718	,	,
1719	,	,
1720	,	,
1721	,	,
1722	,	,
1723	,	,
1724	,	,
1725	,	,
1726	,	,
1727	,	,
1728	,	,
1729	,	,
1730	,	,
1731	,	,
1732	,	,
1733	,	,
1734	,	,
1735	,	,
1736	,	,
1737	,	,
1738	,	,
1739	,	,
1740	,	,
1741	,	,
1742	,	,
1743	,	,
1744	,	,
1745	,	,
1746	,	,
1747	,	,
1748	,	,
1749	,	,
1750	,	,
1751	,	,
1752	,	,
1753	,	,
1754	,	,
1755	,	,
1756	,	,
1757	,	,
1758	,	,
1759	,	,
1760	,	,
1761	,	,
1762	,	,
1763	,	,
1764	,	,
1765	,	,
1766	,	,
1767	,	,
1768	,	,
1769	,	,
1770	,	,
1771	,	,
1772	,	,
1773	,	,
1774	,	,
1775	,	,
1776	,	,
1777	,	,
1778	,	,
1779	,	,
1780	,	,
1781	,	,
1782	,	,
1783	,	,
1784	,	,
1785	,	,
1786	,	,
1787	,	,
1788	,	,
1789	,	,
1790	,	,
1791	,	,
1792	,	,
1793	,	,
1794	,	,
1795	,	,
1796	,	,
1797	,	,
1798	,	,
1799	,	,
1800	,	,
1801	,	,
1802	,	,
1803	,	,
1804	,	,
1805	,	,
1806	,	,
1807	,	,
1808	,	,
1809	,	,
1810	,	,
1811	,	,
1812	,	,
1813	,	,
1814	,	,
1815	,	,
1816	,	,
1817	,	,
1818	,	,
1819	,	,
1820	,	,
1821	,	,
1822	,	,
1823	,	,
1824	,	,
1825	,	,
1826	,	,
1827	,	,
1828	,	,
1829	,	,
1830	,	,
1831	,	,
1832	,	,
1833	,	,
1834	,	,
1835	,	,
1836	,	,
1837	,	,
1838	,	,
1839	,	,
1840	,	,
1841	,	,
1842	,	,
1843	,	,
1844	,	,
1845	,	,
1846	,	,
1847	,	,
1848	,	,
1849	,	,
1850	,	,
1851	,	,
1852	,	,
1853	,	,
1854	,	,
1855	,	,
1856	,	,
1857	,	,
1858	,	,
1859	,	,
1860	,	,
1861	,	,
1862	,	,
1863	,	,
1864	,	,
1865	,	,
1866	,	,
1867	,	,
1868	,	,
1869	,	,
1870	,	,
1871	,	,
1872	,	,
1873	,	,
1874	,	,
1875	,	,
1876	,	,
1877	,	,
1878	,	,
1879	,	,
1880	,	,
1881	,	,
1882	,	,
1883	,	,
1884	,	,
1885	,	,
1886	,	,
1887	,	,
1888	,	,
1889	,	,
1890	,	,
1891	,	,
1892	,	,
1893	,	,
1894	,	,
1895	,	,
1896	,	,
1897	,	,
1898	,	,
1899	,	,
1900	,	,
1901	,	,
1902	,	,
1903	,	,
1904	,	,
1905	,	,
1906	,	,
1907	,	,
1908	,	,
1909	,	,
1910	,	,
1911	,	,
1912	,	,
1913	,	,
1914	,	,
1915	,	,
1916	,	,
1917	,	,
1918	,	,
1919	,	,
1920	,	,
1921	,	,
1922	,	,
1923	,	,
1924	,	,
1925	,	,
1926	,	,
1927	,	,
1928	,	,
1929	,	,
1930	,	,
1931	,	,
1932	,	,
1933	,	,
1934	,	,
1935	,	,
1936	,	,
1937	,	,
1938	,	,
1939	,	,
1940	,	,
1941	,	,
1942	,	,
1943	,	,
1944	,	,
1945	,	,
1946	,	,
1947	,	,
1948	,	,
1949	,	,
1950	,	,
1951	,	,
1952	,	,
1953	,	,
1954	,	,
1955	,	,
1956	,	,
1957	,	,
1958	,	,
1959	,	,
1960	,	,
1961	,	,
1962	,	,
1963	,	,
1964	,	,
1965	,	,
1966	,	,
1967	,	,
1968	,	,
1969	,	,
1970	,	,
1971	,	,
1972	,	,
1973	,	,
1974	,	,
1975	,	,
1976	,	,
1977	,	,
1978	,	,
1979	,	,
1980	,	,
1981	,	,
1982	,	,
1983	,	,
1984	,	,
1985	,	,
1986	,	,
1987	,	,
1988	,	,
1989	,	,
1990	,	,
1991	,	,
1992	,	,
1993	,	,
1994	,	,
1995	,	,
1996	,	,
1997	,	,
1998	,	,
1999	,	,
[truncated: 13,001 more rows]

## Sheet: Fig2_panelB_rep2
	169bp closed parS DNA ParB (R104A)	169bp closed parS DNA ParB (R104A) CTP
1	0.000, -0.004	0.000, 0.004
2	0.200, -0.005	0.200, 0.004
3	0.400, -0.006	0.400, 0.003
4	0.600, -0.006	0.600, 0.002
5	0.800, -0.007	0.800, 0.001
6	1.000, -0.008	1.000, 0.000
7	1.200, -0.009	1.200, -0.001
8	1.400, -0.010	1.400, -0.001
9	1.600, -0.011	1.600, -0.002
10	1.800, -0.011	1.800, -0.003
11	2.000, -0.012	2.000, -0.004
12	2.200, -0.012	2.200, -0.004
13	2.400, -0.012	2.400, -0.004
14	2.600, -0.013	2.600, -0.005
15	2.800, -0.013	2.800, -0.005
16	3.000, -0.013	3.000, -0.005
17	3.200, -0.014	3.200, -0.005
18	3.400, -0.014	3.400, -0.005
19	3.600, -0.014	3.600, -0.006
20	3.800, -0.014	3.800, -0.006
21	4.000, -0.014	4.000, -0.006
22	4.200, -0.014	4.200, -0.006
23	4.400, -0.014	4.400, -0.005
24	4.600, -0.013	4.600, -0.005
25	4.800, -0.013	4.800, -0.005
26	5.000, -0.012	5.000, -0.005
27	5.200, -0.012	5.200, -0.005
28	5.400, -0.011	5.400, -0.005
29	5.600, -0.011	5.600, -0.005
30	5.800, -0.010	5.800, -0.004
31	6.000, -0.010	6.000, -0.004
32	6.200, -0.009	6.200, -0.004
33	6.400, -0.009	6.400, -0.004
34	6.600, -0.009	6.600, -0.005
35	6.800, -0.008	6.800, -0.005
36	7.000, -0.008	7.000, -0.005
37	7.200, -0.008	7.200, -0.004
38	7.400, -0.008	7.400, -0.004
39	7.600, -0.008	7.600, -0.004
40	7.800, -0.008	7.800, -0.004
41	8.000, -0.008	8.000, -0.004
42	8.200, -0.008	8.200, -0.004
43	8.400, -0.008	8.400, -0.004
44	8.600, -0.007	8.600, -0.004
45	8.800, -0.007	8.800, -0.004
46	9.000, -0.007	9.000, -0.004
47	9.200, -0.007	9.200, -0.004
48	9.400, -0.006	9.400, -0.003
49	9.600, -0.006	9.600, -0.003
50	9.800, -0.006	9.800, -0.003
51	10.000, -0.006	10.000, -0.003
52	10.200, -0.005	10.200, -0.003
53	10.400, -0.005	10.400, -0.003
54	10.600, -0.005	10.600, -0.003
55	10.800, -0.005	10.800, -0.003
56	11.000, -0.005	11.000, -0.002
57	11.200, -0.006	11.200, -0.002
58	11.400, -0.006	11.400, -0.002
59	11.600, -0.005	11.600, -0.002
60	11.800, -0.005	11.800, -0.002
61	12.000, -0.005	12.000, -0.002
62	12.200, -0.005	12.200, -0.002
63	12.400, -0.004	12.400, -0.002
64	12.600, -0.004	12.600, -0.002
65	12.800, -0.004	12.800, -0.002
66	13.000, -0.004	13.000, -0.002
67	13.200, -0.003	13.200, -0.002
68	13.400, -0.003	13.400, -0.002
69	13.600, -0.003	13.600, -0.003
70	13.800, -0.003	13.800, -0.003
71	14.000, -0.003	14.000, -0.003
72	14.200, -0.003	14.200, -0.003
73	14.400, -0.003	14.400, -0.003
74	14.600, -0.003	14.600, -0.003
75	14.800, -0.003	14.800, -0.003
76	15.000, -0.003	15.000, -0.003
77	15.200, -0.003	15.200, -0.003
78	15.400, -0.003	15.400, -0.003
79	15.600, -0.003	15.600, -0.003
80	15.800, -0.003	15.800, -0.003
81	16.000, -0.003	16.000, -0.003
82	16.200, -0.003	16.200, -0.003
83	16.400, -0.002	16.400, -0.003
84	16.600, -0.002	16.600, -0.003
85	16.800, -0.002	16.800, -0.003
86	17.000, -0.002	17.000, -0.003
87	17.200, -0.002	17.200, -0.002
88	17.400, -0.002	17.400, -0.002
89	17.600, -0.001	17.600, -0.002
90	17.800, -0.001	17.800, -0.002
91	18.000, -0.001	18.000, -0.001
92	18.200, -0.001	18.200, -0.001
93	18.400, -0.001	18.400, -0.001
94	18.600, -0.001	18.600, -0.001
95	18.800, -0.001	18.800, -0.001
96	19.000, -0.001	19.000, -0.001
97	19.200, -0.002	19.200, -0.001
98	19.400, -0.002	19.400, -0.001
99	19.600, -0.002	19.600, -0.001
100	19.800, -0.002	19.800, -0.001
101	20.000, -0.002	20.000, -0.001
102	20.200, -0.001	20.200, -0.002
103	20.400, -0.001	20.400, -0.002
104	20.600, -0.001	20.600, -0.002
105	20.800, -0.001	20.800, -0.002
106	21.000, -0.000	21.000, -0.002
107	21.200, 0.000	21.200, -0.002
108	21.400, 0.000	21.400, -0.002
109	21.600, 0.001	21.600, -0.002
110	21.800, 0.001	21.800, -0.002
111	22.000, 0.001	22.000, -0.002
112	22.200, 0.000	22.200, -0.001
113	22.400, 0.000	22.400, -0.001
114	22.600, -0.000	22.600, -0.001
115	22.800, -0.000	22.800, -0.001
116	23.000, -0.000	23.000, -0.001
117	23.200, -0.000	23.200, -0.001
118	23.400, -0.000	23.400, -0.001
119	23.600, -0.000	23.600, -0.001
120	23.800, -0.000	23.800, -0.001
121	24.000, -0.000	24.000, -0.001
122	24.200, -0.000	24.200, -0.001
123	24.400, -0.000	24.400, -0.000
124	24.600, 0.000	24.600, -0.000
125	24.800, 0.000	24.800, -0.000
126	25.000, 0.001	25.000, 0.000
127	25.200, 0.001	25.200, 0.000
128	25.400, 0.001	25.400, 0.000
129	25.600, 0.001	25.600, 0.000
130	25.800, 0.001	25.800, 0.000
131	26.000, 0.001	26.000, 0.000
132	26.200, 0.000	26.200, 0.000
133	26.400, 0.000	26.400, 0.000
134	26.600, 0.000	26.600, 0.000
135	26.800, 0.000	26.800, -0.000
136	27.000, -0.000	27.000, -0.000
137	27.200, -0.000	27.200, -0.001
138	27.400, -0.001	27.400, -0.001
139	27.600, -0.001	27.600, -0.001
140	27.800, -0.001	27.800, -0.001
141	28.000, -0.001	28.000, -0.001
142	28.200, -0.001	28.200, -0.000
143	28.400, -0.001	28.400, -0.000
144	28.600, -0.000	28.600, -0.000
145	28.800, 0.000	28.800, 0.000
146	29.000, 0.001	29.000, 0.000
147	29.200, 0.001	29.200, 0.001
148	29.400, 0.002	29.400, 0.001
149	29.600, 0.002	29.600, 0.001
150	29.800, 0.003	29.800, 0.002
151	30.000, 0.000	30.000, 0.000
152	30.200, 0.009	30.200, 0.007
153	30.400, 0.021	30.400, 0.016
154	30.600, 0.034	30.600, 0.026
155	30.800, 0.049	30.800, 0.038
156	31.000, 0.065	31.000, 0.051
157	31.200, 0.083	31.200, 0.066
158	31.400, 0.101	31.400, 0.080
159	31.600, 0.119	31.600, 0.095
160	31.800, 0.137	31.800, 0.110
161	32.000, 0.155	32.000, 0.125
162	32.200, 0.170	32.200, 0.139
163	32.400, 0.184	32.400, 0.151
164	32.600, 0.197	32.600, 0.163
165	32.800, 0.210	32.800, 0.174
166	33.000, 0.221	33.000, 0.184
167	33.200, 0.230	33.200, 0.194
168	33.400, 0.239	33.400, 0.202
169	33.600, 0.247	33.600, 0.210
170	33.800, 0.254	33.800, 0.216
171	34.000, 0.260	34.000, 0.223
172	34.200, 0.265	34.200, 0.228
173	34.400, 0.270	34.400, 0.233
174	34.600, 0.274	34.600, 0.238
175	34.800, 0.277	34.800, 0.242
176	35.000, 0.280	35.000, 0.245
177	35.200, 0.283	35.200, 0.248
178	35.400, 0.285	35.400, 0.250
179	35.600, 0.287	35.600, 0.252
180	35.800, 0.288	35.800, 0.253
181	36.000, 0.290	36.000, 0.254
182	36.200, 0.291	36.200, 0.255
183	36.400, 0.292	36.400, 0.256
184	36.600, 0.293	36.600, 0.257
185	36.800, 0.293	36.800, 0.257
186	37.000, 0.294	37.000, 0.258
187	37.200, 0.295	37.200, 0.258
188	37.400, 0.295	37.400, 0.258
189	37.600, 0.296	37.600, 0.259
190	37.800, 0.296	37.800, 0.259
191	38.000, 0.297	38.000, 0.260
192	38.200, 0.297	38.200, 0.260
193	38.400, 0.297	38.400, 0.261
194	38.600, 0.297	38.600, 0.261
195	38.800, 0.298	38.800, 0.261
196	39.000, 0.298	39.000, 0.262
197	39.200, 0.299	39.200, 0.262
198	39.400, 0.299	39.400, 0.262
199	39.600, 0.299	39.600, 0.262
200	39.800, 0.300	39.800, 0.262
201	40.000, 0.300	40.000, 0.262
202	40.200, 0.301	40.200, 0.262
203	40.400, 0.301	40.400, 0.262
204	40.600, 0.302	40.600, 0.262
205	40.800, 0.302	40.800, 0.262
206	41.000, 0.303	41.000, 0.262
207	41.200, 0.303	41.200, 0.262
208	41.400, 0.304	41.400, 0.262
209	41.600, 0.304	41.600, 0.262
210	41.800, 0.304	41.800, 0.262
211	42.000, 0.303	42.000, 0.262
212	42.200, 0.303	42.200, 0.262
213	42.400, 0.303	42.400, 0.262
214	42.600, 0.303	42.600, 0.262
215	42.800, 0.303	42.800, 0.262
216	43.000, 0.303	43.000, 0.263
217	43.200, 0.304	43.200, 0.263
218	43.400, 0.304	43.400, 0.263
219	43.600, 0.304	43.600, 0.264
220	43.800, 0.304	43.800, 0.264
221	44.000, 0.305	44.000, 0.264
222	44.200, 0.305	44.200, 0.264
223	44.400, 0.305	44.400, 0.265
224	44.600, 0.305	44.600, 0.265
225	44.800, 0.306	44.800, 0.265
226	45.000, 0.306	45.000, 0.265
227	45.200, 0.306	45.200, 0.265
228	45.400, 0.307	45.400, 0.264
229	45.600, 0.307	45.600, 0.264
230	45.800, 0.307	45.800, 0.264
231	46.000, 0.307	46.000, 0.263
232	46.200, 0.307	46.200, 0.263
233	46.400, 0.307	46.400, 0.262
234	46.600, 0.308	46.600, 0.262
235	46.800, 0.308	46.800, 0.262
236	47.000, 0.308	47.000, 0.262
237	47.200, 0.308	47.200, 0.261
238	47.400, 0.308	47.400, 0.261
239	47.600, 0.309	47.600, 0.261
240	47.800, 0.308	47.800, 0.261
241	48.000, 0.308	48.000, 0.261
242	48.200, 0.308	48.200, 0.261
243	48.400, 0.308	48.400, 0.261
244	48.600, 0.308	48.600, 0.261
245	48.800, 0.308	48.800, 0.261
246	49.000, 0.308	49.000, 0.261
247	49.200, 0.308	49.200, 0.261
248	49.400, 0.308	49.400, 0.261
249	49.600, 0.308	49.600, 0.261
250	49.800, 0.308	49.800, 0.261
251	50.000, 0.308	50.000, 0.261
252	50.200, 0.308	50.200, 0.262
253	50.400, 0.309	50.400, 0.262
254	50.600, 0.309	50.600, 0.263
255	50.800, 0.309	50.800, 0.263
256	51.000, 0.309	51.000, 0.263
257	51.200, 0.309	51.200, 0.263
258	51.400, 0.310	51.400, 0.263
259	51.600, 0.310	51.600, 0.263
260	51.800, 0.310	51.800, 0.263
261	52.000, 0.310	52.000, 0.263
262	52.200, 0.310	52.200, 0.263
263	52.400, 0.310	52.400, 0.262
264	52.600, 0.309	52.600, 0.262
265	52.800, 0.309	52.800, 0.262
266	53.000, 0.309	53.000, 0.262
267	53.200, 0.309	53.200, 0.262
268	53.400, 0.309	53.400, 0.262
269	53.600, 0.309	53.600, 0.262
270	53.800, 0.308	53.800, 0.262
271	54.000, 0.308	54.000, 0.262
272	54.200, 0.308	54.200, 0.262
273	54.400, 0.308	54.400, 0.262
274	54.600, 0.308	54.600, 0.262
275	54.800, 0.309	54.800, 0.262
276	55.000, 0.309	55.000, 0.262
277	55.200, 0.309	55.200, 0.262
278	55.400, 0.309	55.400, 0.261
279	55.600, 0.309	55.600, 0.261
280	55.800, 0.309	55.800, 0.261
281	56.000, 0.309	56.000, 0.261
282	56.200, 0.309	56.200, 0.261
283	56.400, 0.309	56.400, 0.261
284	56.600, 0.309	56.600, 0.261
285	56.800, 0.308	56.800, 0.261
286	57.000, 0.308	57.000, 0.262
287	57.200, 0.308	57.200, 0.262
288	57.400, 0.308	57.400, 0.262
289	57.600, 0.308	57.600, 0.262
290	57.800, 0.308	57.800, 0.262
291	58.000, 0.308	58.000, 0.262
292	58.200, 0.308	58.200, 0.262
293	58.400, 0.309	58.400, 0.262
294	58.600, 0.309	58.600, 0.261
295	58.800, 0.309	58.800, 0.261
296	59.000, 0.310	59.000, 0.260
297	59.200, 0.310	59.200, 0.260
298	59.400, 0.310	59.400, 0.260
299	59.600, 0.310	59.600, 0.260
300	59.800, 0.310	59.800, 0.260
301	60.000, 0.310	60.000, 0.260
302	60.200, 0.310	60.200, 0.260
303	60.400, 0.310	60.400, 0.260
304	60.600, 0.310	60.600, 0.260
305	60.800, 0.309	60.800, 0.260
306	61.000, 0.309	61.000, 0.260
307	61.200, 0.309	61.200, 0.260
308	61.400, 0.308	61.400, 0.259
309	61.600, 0.308	61.600, 0.260
310	61.800, 0.308	61.800, 0.260
311	62.000, 0.308	62.000, 0.260
312	62.200, 0.308	62.200, 0.260
313	62.400, 0.308	62.400, 0.260
314	62.600, 0.308	62.600, 0.260
315	62.800, 0.308	62.800, 0.260
316	63.000, 0.307	63.000, 0.260
317	63.200, 0.307	63.200, 0.260
318	63.400, 0.307	63.400, 0.260
319	63.600, 0.307	63.600, 0.260
320	63.800, 0.307	63.800, 0.260
321	64.000, 0.307	64.000, 0.260
322	64.200, 0.307	64.200, 0.260
323	64.400, 0.307	64.400, 0.260
324	64.600, 0.307	64.600, 0.260
325	64.800, 0.307	64.800, 0.259
326	65.000, 0.307	65.000, 0.259
327	65.200, 0.307	65.200, 0.259
328	65.400, 0.307	65.400, 0.259
329	65.600, 0.307	65.600, 0.259
330	65.800, 0.307	65.800, 0.259
331	66.000, 0.308	66.000, 0.259
332	66.200, 0.308	66.200, 0.259
333	66.400, 0.308	66.400, 0.259
334	66.600, 0.308	66.600, 0.259
335	66.800, 0.308	66.800, 0.259
336	67.000, 0.308	67.000, 0.259
337	67.200, 0.308	67.200, 0.258
338	67.400, 0.308	67.400, 0.258
339	67.600, 0.308	67.600, 0.258
340	67.800, 0.308	67.800, 0.258
341	68.000, 0.308	68.000, 0.258
342	68.200, 0.308	68.200, 0.258
343	68.400, 0.308	68.400, 0.258
344	68.600, 0.308	68.600, 0.257
345	68.800, 0.308	68.800, 0.257
346	69.000, 0.308	69.000, 0.257
347	69.200, 0.309	69.200, 0.257
348	69.400, 0.309	69.400, 0.257
349	69.600, 0.309	69.600, 0.257
350	69.800, 0.310	69.800, 0.257
351	70.000, 0.310	70.000, 0.258
352	70.200, 0.310	70.200, 0.258
353	70.400, 0.310	70.400, 0.258
354	70.600, 0.311	70.600, 0.258
355	70.800, 0.311	70.800, 0.258
356	71.000, 0.311	71.000, 0.258
357	71.200, 0.311	71.200, 0.258
358	71.400, 0.311	71.400, 0.258
359	71.600, 0.311	71.600, 0.258
360	71.800, 0.310	71.800, 0.258
361	72.000, 0.310	72.000, 0.258
362	72.200, 0.309	72.200, 0.258
363	72.400, 0.309	72.400, 0.258
364	72.600, 0.308	72.600, 0.258
365	72.800, 0.308	72.800, 0.258
366	73.000, 0.308	73.000, 0.258
367	73.200, 0.308	73.200, 0.258
368	73.400, 0.308	73.400, 0.259
369	73.600, 0.308	73.600, 0.259
370	73.800, 0.307	73.800, 0.259
371	74.000, 0.307	74.000, 0.259
372	74.200, 0.307	74.200, 0.258
373	74.400, 0.307	74.400, 0.258
374	74.600, 0.307	74.600, 0.258
375	74.800, 0.307	74.800, 0.258
376	75.000, 0.307	75.000, 0.258
377	75.200, 0.307	75.200, 0.258
378	75.400, 0.307	75.400, 0.258
379	75.600, 0.308	75.600, 0.258
380	75.800, 0.308	75.800, 0.258
381	76.000, 0.308	76.000, 0.258
382	76.200, 0.308	76.200, 0.258
383	76.400, 0.308	76.400, 0.258
384	76.600, 0.308	76.600, 0.259
385	76.800, 0.308	76.800, 0.259
386	77.000, 0.309	77.000, 0.259
387	77.200, 0.309	77.200, 0.259
388	77.400, 0.309	77.400, 0.259
389	77.600, 0.309	77.600, 0.259
390	77.800, 0.309	77.800, 0.259
391	78.000, 0.309	78.000, 0.259
392	78.200, 0.309	78.200, 0.258
393	78.400, 0.310	78.400, 0.258
394	78.600, 0.310	78.600, 0.258
395	78.800, 0.310	78.800, 0.258
396	79.000, 0.310	79.000, 0.258
397	79.200, 0.309	79.200, 0.258
398	79.400, 0.309	79.400, 0.258
399	79.600, 0.309	79.600, 0.258
400	79.800, 0.309	79.800, 0.258
401	80.000, 0.309	80.000, 0.258
402	80.200, 0.309	80.200, 0.258
403	80.400, 0.309	80.400, 0.258
404	80.600, 0.308	80.600, 0.258
405	80.800, 0.308	80.800, 0.258
406	81.000, 0.308	81.000, 0.258
407	81.200, 0.308	81.200, 0.258
408	81.400, 0.308	81.400, 0.258
409	81.600, 0.309	81.600, 0.257
410	81.800, 0.309	81.800, 0.257
411	82.000, 0.309	82.000, 0.257
412	82.200, 0.309	82.200, 0.256
413	82.400, 0.309	82.400, 0.256
414	82.600, 0.309	82.600, 0.256
415	82.800, 0.309	82.800, 0.256
416	83.000, 0.309	83.000, 0.256
417	83.200, 0.309	83.200, 0.257
418	83.400, 0.310	83.400, 0.257
419	83.600, 0.309	83.600, 0.257
420	83.800, 0.309	83.800, 0.257
421	84.000, 0.309	84.000, 0.257
422	84.200, 0.309	84.200, 0.257
423	84.400, 0.308	84.400, 0.257
424	84.600, 0.308	84.600, 0.258
425	84.800, 0.308	84.800, 0.258
426	85.000, 0.308	85.000, 0.258
427	85.200, 0.308	85.200, 0.258
428	85.400, 0.309	85.400, 0.258
429	85.600, 0.309	85.600, 0.258
430	85.800, 0.309	85.800, 0.258
431	86.000, 0.309	86.000, 0.258
432	86.200, 0.310	86.200, 0.257
433	86.400, 0.310	86.400, 0.257
434	86.600, 0.310	86.600, 0.257
435	86.800, 0.311	86.800, 0.258
436	87.000, 0.311	87.000, 0.258
437	87.200, 0.311	87.200, 0.258
438	87.400, 0.311	87.400, 0.258
439	87.600, 0.311	87.600, 0.258
440	87.800, 0.311	87.800, 0.258
441	88.000, 0.310	88.000, 0.258
442	88.200, 0.310	88.200, 0.259
443	88.400, 0.309	88.400, 0.259
444	88.600, 0.309	88.600, 0.259
445	88.800, 0.309	88.800, 0.259
446	89.000, 0.309	89.000, 0.259
447	89.200, 0.309	89.200, 0.259
448	89.400, 0.308	89.400, 0.259
449	89.600, 0.308	89.600, 0.259
450	89.800, 0.308	89.800, 0.259
451	90.000, 0.308	90.000, 0.259
452	90.200, 0.308	90.200, 0.259
453	90.400, 0.308	90.400, 0.259
454	90.600, 0.308	90.600, 0.259
455	90.800, 0.308	90.800, 0.259
456	91.000, 0.308	91.000, 0.260
457	91.200, 0.308	91.200, 0.260
458	91.400, 0.308	91.400, 0.260
459	91.600, 0.308	91.600, 0.260
460	91.800, 0.308	91.800, 0.260
461	92.000, 0.309	92.000, 0.260
462	92.200, 0.309	92.200, 0.260
463	92.400, 0.309	92.400, 0.260
464	92.600, 0.309	92.600, 0.260
465	92.800, 0.309	92.800, 0.260
466	93.000, 0.309	93.000, 0.260
467	93.200, 0.309	93.200, 0.260
468	93.400, 0.309	93.400, 0.260
469	93.600, 0.309	93.600, 0.260
470	93.800, 0.309	93.800, 0.260
471	94.000, 0.309	94.000, 0.260
472	94.200, 0.310	94.200, 0.260
473	94.400, 0.310	94.400, 0.260
474	94.600, 0.310	94.600, 0.260
475	94.800, 0.310	94.800, 0.260
476	95.000, 0.310	95.000, 0.259
477	95.200, 0.310	95.200, 0.259
478	95.400, 0.310	95.400, 0.259
479	95.600, 0.311	95.600, 0.259
480	95.800, 0.311	95.800, 0.259
481	96.000, 0.311	96.000, 0.259
482	96.200, 0.311	96.200, 0.259
483	96.400, 0.312	96.400, 0.259
484	96.600, 0.312	96.600, 0.259
485	96.800, 0.312	96.800, 0.259
486	97.000, 0.312	97.000, 0.259
487	97.200, 0.312	97.200, 0.259
488	97.400, 0.312	97.400, 0.259
489	97.600, 0.311	97.600, 0.259
490	97.800, 0.311	97.800, 0.259
491	98.000, 0.311	98.000, 0.259
492	98.200, 0.311	98.200, 0.260
493	98.400, 0.311	98.400, 0.260
494	98.600, 0.310	98.600, 0.260
495	98.800, 0.310	98.800, 0.260
496	99.000, 0.310	99.000, 0.260
497	99.200, 0.310	99.200, 0.260
498	99.400, 0.310	99.400, 0.260
499	99.600, 0.310	99.600, 0.260
500	99.800, 0.310	99.800, 0.260
501	100.000, 0.310	100.000, 0.260
502	100.200, 0.311	100.200, 0.260
503	100.400, 0.311	100.400, 0.260
504	100.600, 0.311	100.600, 0.260
505	100.800, 0.311	100.800, 0.260
506	101.000, 0.311	101.000, 0.260
507	101.200, 0.311	101.200, 0.260
508	101.400, 0.311	101.400, 0.260
509	101.600, 0.311	101.600, 0.260
510	101.800, 0.311	101.800, 0.260
511	102.000, 0.311	102.000, 0.260
512	102.200, 0.311	102.200, 0.260
513	102.400, 0.311	102.400, 0.260
514	102.600, 0.311	102.600, 0.260
515	102.800, 0.311	102.800, 0.261
516	103.000, 0.311	103.000, 0.261
517	103.200, 0.311	103.200, 0.261
518	103.400, 0.311	103.400, 0.261
519	103.600, 0.311	103.600, 0.261
520	103.800, 0.311	103.800, 0.261
521	104.000, 0.311	104.000, 0.261
522	104.200, 0.310	104.200, 0.261
523	104.400, 0.310	104.400, 0.261
524	104.600, 0.311	104.600, 0.261
525	104.800, 0.311	104.800, 0.261
526	105.000, 0.311	105.000, 0.261
527	105.200, 0.311	105.200, 0.261
528	105.400, 0.311	105.400, 0.261
529	105.600, 0.312	105.600, 0.261
530	105.800, 0.312	105.800, 0.262
531	106.000, 0.312	106.000, 0.262
532	106.200, 0.312	106.200, 0.262
533	106.400, 0.311	106.400, 0.262
534	106.600, 0.311	106.600, 0.263
535	106.800, 0.311	106.800, 0.263
536	107.000, 0.311	107.000, 0.263
537	107.200, 0.311	107.200, 0.263
538	107.400, 0.311	107.400, 0.263
539	107.600, 0.311	107.600, 0.263
540	107.800, 0.311	107.800, 0.262
541	108.000, 0.311	108.000, 0.262
542	108.200, 0.312	108.200, 0.262
543	108.400, 0.312	108.400, 0.262
544	108.600, 0.312	108.600, 0.261
545	108.800, 0.312	108.800, 0.261
546	109.000, 0.313	109.000, 0.261
547	109.200, 0.312	109.200, 0.261
548	109.400, 0.312	109.400, 0.261
549	109.600, 0.312	109.600, 0.261
550	109.800, 0.312	109.800, 0.261
551	110.000, 0.312	110.000, 0.261
552	110.200, 0.312	110.200, 0.261
553	110.400, 0.312	110.400, 0.261
554	110.600, 0.312	110.600, 0.262
555	110.800, 0.312	110.800, 0.262
556	111.000, 0.312	111.000, 0.262
557	111.200, 0.312	111.200, 0.262
558	111.400, 0.312	111.400, 0.263
559	111.600, 0.312	111.600, 0.263
560	111.800, 0.312	111.800, 0.263
561	112.000, 0.312	112.000, 0.263
562	112.200, 0.312	112.200, 0.263
563	112.400, 0.312	112.400, 0.263
564	112.600, 0.312	112.600, 0.263
565	112.800, 0.312	112.800, 0.263
566	113.000, 0.312	113.000, 0.263
567	113.200, 0.312	113.200, 0.263
568	113.400, 0.312	113.400, 0.263
569	113.600, 0.313	113.600, 0.263
570	113.800, 0.313	113.800, 0.264
571	114.000, 0.313	114.000, 0.264
572	114.200, 0.313	114.200, 0.264
573	114.400, 0.314	114.400, 0.265
574	114.600, 0.314	114.600, 0.265
575	114.800, 0.314	114.800, 0.265
576	115.000, 0.314	115.000, 0.265
577	115.200, 0.314	115.200, 0.264
578	115.400, 0.313	115.400, 0.264
579	115.600, 0.313	115.600, 0.264
580	115.800, 0.313	115.800, 0.264
581	116.000, 0.313	116.000, 0.264
582	116.200, 0.313	116.200, 0.264
583	116.400, 0.313	116.400, 0.264
584	116.600, 0.313	116.600, 0.265
585	116.800, 0.313	116.800, 0.265
586	117.000, 0.313	117.000, 0.265
587	117.200, 0.313	117.200, 0.265
588	117.400, 0.314	117.400, 0.265
589	117.600, 0.314	117.600, 0.265
590	117.800, 0.314	117.800, 0.265
591	118.000, 0.314	118.000, 0.265
592	118.200, 0.315	118.200, 0.265
593	118.400, 0.315	118.400, 0.265
594	118.600, 0.315	118.600, 0.264
595	118.800, 0.315	118.800, 0.264
596	119.000, 0.315	119.000, 0.264
597	119.200, 0.314	119.200, 0.264
598	119.400, 0.314	119.400, 0.264
599	119.600, 0.314	119.600, 0.264
600	119.800, 0.314	119.800, 0.264
601	120.000, 0.314	120.000, 0.264
602	120.200, 0.314	120.200, 0.264
603	120.400, 0.314	120.400, 0.265
604	120.600, 0.313	120.600, 0.265
605	120.800, 0.313	120.800, 0.265
606	121.000, 0.313	121.000, 0.265
607	121.200, 0.314	121.200, 0.265
608	121.400, 0.314	121.400, 0.266
609	121.600, 0.314	121.600, 0.266
610	121.800, 0.315	121.800, 0.266
611	122.000, 0.315	122.000, 0.266
612	122.200, 0.316	122.200, 0.267
613	122.400, 0.316	122.400, 0.267
614	122.600, 0.316	122.600, 0.267
615	122.800, 0.316	122.800, 0.267
616	123.000, 0.316	123.000, 0.267
617	123.200, 0.316	123.200, 0.267
618	123.400, 0.316	123.400, 0.267
619	123.600, 0.316	123.600, 0.267
620	123.800, 0.315	123.800, 0.267
621	124.000, 0.315	124.000, 0.266
622	124.200, 0.315	124.200, 0.266
623	124.400, 0.314	124.400, 0.266
624	124.600, 0.314	124.600, 0.266
625	124.800, 0.314	124.800, 0.266
626	125.000, 0.314	125.000, 0.266
627	125.200, 0.314	125.200, 0.266
628	125.400, 0.315	125.400, 0.266
629	125.600, 0.315	125.600, 0.266
630	125.800, 0.315	125.800, 0.266
631	126.000, 0.315	126.000, 0.266
632	126.200, 0.316	126.200, 0.266
633	126.400, 0.316	126.400, 0.266
634	126.600, 0.316	126.600, 0.266
635	126.800, 0.317	126.800, 0.267
636	127.000, 0.317	127.000, 0.267
637	127.200, 0.317	127.200, 0.267
638	127.400, 0.317	127.400, 0.267
639	127.600, 0.317	127.600, 0.267
640	127.800, 0.317	127.800, 0.268
641	128.000, 0.317	128.000, 0.268
642	128.200, 0.317	128.200, 0.268
643	128.400, 0.317	128.400, 0.268
644	128.600, 0.317	128.600, 0.269
645	128.800, 0.317	128.800, 0.269
646	129.000, 0.317	129.000, 0.269
647	129.200, 0.317	129.200, 0.269
648	129.400, 0.317	129.400, 0.269
649	129.600, 0.317	129.600, 0.269
650	129.800, 0.317	129.800, 0.269
651	130.000, 0.317	130.000, 0.269
652	130.200, 0.316	130.200, 0.269
653	130.400, 0.316	130.400, 0.270
654	130.600, 0.316	130.600, 0.270
655	130.800, 0.316	130.800, 0.270
656	131.000, 0.316	131.000, 0.270
657	131.200, 0.316	131.200, 0.270
658	131.400, 0.316	131.400, 0.270
659	131.600, 0.316	131.600, 0.270
660	131.800, 0.316	131.800, 0.270
661	132.000, 0.316	132.000, 0.270
662	132.200, 0.316	132.200, 0.270
663	132.400, 0.316	132.400, 0.270
664	132.600, 0.316	132.600, 0.270
665	132.800, 0.316	132.800, 0.270
666	133.000, 0.317	133.000, 0.270
667	133.200, 0.317	133.200, 0.270
668	133.400, 0.317	133.400, 0.270
669	133.600, 0.317	133.600, 0.270
670	133.800, 0.317	133.800, 0.269
671	134.000, 0.317	134.000, 0.269
672	134.200, 0.317	134.200, 0.269
673	134.400, 0.317	134.400, 0.269
674	134.600, 0.317	134.600, 0.269
675	134.800, 0.317	134.800, 0.268
676	135.000, 0.317	135.000, 0.268
677	135.200, 0.317	135.200, 0.268
678	135.400, 0.317	135.400, 0.268
679	135.600, 0.317	135.600, 0.268
680	135.800, 0.317	135.800, 0.268
681	136.000, 0.317	136.000, 0.268
682	136.200, 0.317	136.200, 0.269
683	136.400, 0.317	136.400, 0.269
684	136.600, 0.318	136.600, 0.269
685	136.800, 0.318	136.800, 0.269
686	137.000, 0.319	137.000, 0.270
687	137.200, 0.319	137.200, 0.270
688	137.400, 0.319	137.400, 0.270
689	137.600, 0.319	137.600, 0.270
690	137.800, 0.320	137.800, 0.270
691	138.000, 0.320	138.000, 0.270
692	138.200, 0.320	138.200, 0.270
693	138.400, 0.320	138.400, 0.270
694	138.600, 0.320	138.600, 0.270
695	138.800, 0.320	138.800, 0.270
696	139.000, 0.319	139.000, 0.270
697	139.200, 0.319	139.200, 0.270
698	139.400, 0.319	139.400, 0.270
699	139.600, 0.319	139.600, 0.270
700	139.800, 0.318	139.800, 0.269
701	140.000, 0.318	140.000, 0.269
702	140.200, 0.318	140.200, 0.269
703	140.400, 0.318	140.400, 0.269
704	140.600, 0.318	140.600, 0.269
705	140.800, 0.317	140.800, 0.269
706	141.000, 0.318	141.000, 0.269
707	141.200, 0.318	141.200, 0.268
708	141.400, 0.318	141.400, 0.269
709	141.600, 0.318	141.600, 0.269
710	141.800, 0.318	141.800, 0.269
711	142.000, 0.318	142.000, 0.269
712	142.200, 0.318	142.200, 0.270
713	142.400, 0.318	142.400, 0.270
714	142.600, 0.318	142.600, 0.270
715	142.800, 0.319	142.800, 0.271
716	143.000, 0.319	143.000, 0.271
717	143.200, 0.320	143.200, 0.271
718	143.400, 0.320	143.400, 0.272
719	143.600, 0.320	143.600, 0.272
720	143.800, 0.321	143.800, 0.272
721	144.000, 0.321	144.000, 0.272
722	144.200, 0.321	144.200, 0.272
723	144.400, 0.321	144.400, 0.272
724	144.600, 0.321	144.600, 0.272
725	144.800, 0.321	144.800, 0.271
726	145.000, 0.321	145.000, 0.271
727	145.200, 0.321	145.200, 0.271
728	145.400, 0.320	145.400, 0.271
729	145.600, 0.320	145.600, 0.271
730	145.800, 0.320	145.800, 0.270
731	146.000, 0.320	146.000, 0.271
732	146.200, 0.321	146.200, 0.271
733	146.400, 0.321	146.400, 0.271
734	146.600, 0.321	146.600, 0.271
735	146.800, 0.321	146.800, 0.271
736	147.000, 0.321	147.000, 0.271
737	147.200, 0.321	147.200, 0.271
738	147.400, 0.321	147.400, 0.271
739	147.600, 0.321	147.600, 0.271
740	147.800, 0.320	147.800, 0.271
741	148.000, 0.320	148.000, 0.271
742	148.200, 0.320	148.200, 0.271
743	148.400, 0.320	148.400, 0.271
744	148.600, 0.320	148.600, 0.271
745	148.800, 0.320	148.800, 0.272
746	149.000, 0.320	149.000, 0.272
747	149.200, 0.320	149.200, 0.272
748	149.400, 0.320	149.400, 0.272
749	149.600, 0.321	149.600, 0.272
750	149.800, 0.321	149.800, 0.273
751	150.000, 0.321	150.000, 0.273
752	150.200, 0.319	150.200, 0.272
753	150.400, 0.317	150.400, 0.272
754	150.600, 0.315	150.600, 0.271
755	150.800, 0.312	150.800, 0.271
756	151.000, 0.310	151.000, 0.270
757	151.200, 0.307	151.200, 0.269
758	151.400, 0.305	151.400, 0.268
759	151.600, 0.303	151.600, 0.268
760	151.800, 0.302	151.800, 0.267
761	152.000, 0.300	152.000, 0.266
762	152.200, 0.299	152.200, 0.265
763	152.400, 0.298	152.400, 0.264
764	152.600, 0.297	152.600, 0.263
765	152.800, 0.296	152.800, 0.263
766	153.000, 0.296	153.000, 0.262
767	153.200, 0.295	153.200, 0.262
768	153.400, 0.294	153.400, 0.262
769	153.600, 0.294	153.600, 0.261
770	153.800, 0.293	153.800, 0.261
771	154.000, 0.292	154.000, 0.261
772	154.200, 0.291	154.200, 0.260
773	154.400, 0.291	154.400, 0.260
774	154.600, 0.290	154.600, 0.260
775	154.800, 0.290	154.800, 0.259
776	155.000, 0.289	155.000, 0.259
777	155.200, 0.289	155.200, 0.259
778	155.400, 0.289	155.400, 0.259
779	155.600, 0.288	155.600, 0.258
780	155.800, 0.288	155.800, 0.258
781	156.000, 0.287	156.000, 0.258
782	156.200, 0.287	156.200, 0.258
783	156.400, 0.286	156.400, 0.258
784	156.600, 0.286	156.600, 0.258
785	156.800, 0.285	156.800, 0.258
786	157.000, 0.285	157.000, 0.258
787	157.200, 0.285	157.200, 0.258
788	157.400, 0.284	157.400, 0.258
789	157.600, 0.284	157.600, 0.258
790	157.800, 0.284	157.800, 0.257
791	158.000, 0.283	158.000, 0.257
792	158.200, 0.283	158.200, 0.256
793	158.400, 0.283	158.400, 0.256
794	158.600, 0.282	158.600, 0.256
795	158.800, 0.282	158.800, 0.256
796	159.000, 0.282	159.000, 0.255
797	159.200, 0.282	159.200, 0.255
798	159.400, 0.282	159.400, 0.255
799	159.600, 0.282	159.600, 0.255
800	159.800, 0.281	159.800, 0.255
801	160.000, 0.281	160.000, 0.255
802	160.200, 0.281	160.200, 0.255
803	160.400, 0.280	160.400, 0.255
804	160.600, 0.280	160.600, 0.255
805	160.800, 0.280	160.800, 0.255
806	161.000, 0.279	161.000, 0.255
807	161.200, 0.279	161.200, 0.255
808	161.400, 0.279	161.400, 0.254
809	161.600, 0.279	161.600, 0.254
810	161.800, 0.279	161.800, 0.254
811	162.000, 0.279	162.000, 0.254
812	162.200, 0.278	162.200, 0.254
813	162.400, 0.278	162.400, 0.254
814	162.600, 0.278	162.600, 0.254
815	162.800, 0.279	162.800, 0.254
816	163.000, 0.279	163.000, 0.254
817	163.200, 0.279	163.200, 0.254
818	163.400, 0.279	163.400, 0.254
819	163.600, 0.279	163.600, 0.255
820	163.800, 0.279	163.800, 0.255
821	164.000, 0.278	164.000, 0.255
822	164.200, 0.278	164.200, 0.254
823	164.400, 0.278	164.400, 0.254
824	164.600, 0.278	164.600, 0.254
825	164.800, 0.278	164.800, 0.254
826	165.000, 0.278	165.000, 0.254
827	165.200, 0.278	165.200, 0.254
828	165.400, 0.277	165.400, 0.253
829	165.600, 0.277	165.600, 0.253
830	165.800, 0.277	165.800, 0.253
831	166.000, 0.276	166.000, 0.253
832	166.200, 0.276	166.200, 0.252
833	166.400, 0.276	166.400, 0.252
834	166.600, 0.276	166.600, 0.252
835	166.800, 0.275	166.800, 0.252
836	167.000, 0.275	167.000, 0.252
837	167.200, 0.275	167.200, 0.252
838	167.400, 0.275	167.400, 0.252
839	167.600, 0.275	167.600, 0.252
840	167.800, 0.275	167.800, 0.252
841	168.000, 0.275	168.000, 0.252
842	168.200, 0.275	168.200, 0.252
843	168.400, 0.275	168.400, 0.252
844	168.600, 0.275	168.600, 0.252
845	168.800, 0.275	168.800, 0.252
846	169.000, 0.275	169.000, 0.252
847	169.200, 0.275	169.200, 0.252
848	169.400, 0.274	169.400, 0.252
849	169.600, 0.274	169.600, 0.252
850	169.800, 0.274	169.800, 0.252
851	170.000, 0.274	170.000, 0.252
852	170.200, 0.274	170.200, 0.251
853	170.400, 0.274	170.400, 0.251
854	170.600, 0.274	170.600, 0.251
855	170.800, 0.274	170.800, 0.251
856	171.000, 0.274	171.000, 0.251
857	171.200, 0.274	171.200, 0.250
858	171.400, 0.274	171.400, 0.250
859	171.600, 0.274	171.600, 0.250
860	171.800, 0.274	171.800, 0.250
861	172.000, 0.274	172.000, 0.250
862	172.200, 0.274	172.200, 0.250
863	172.400, 0.274	172.400, 0.250
864	172.600, 0.274	172.600, 0.250
865	172.800, 0.274	172.800, 0.250
866	173.000, 0.274	173.000, 0.250
867	173.200, 0.273	173.200, 0.250
868	173.400, 0.273	173.400, 0.250
869	173.600, 0.273	173.600, 0.250
870	173.800, 0.273	173.800, 0.250
871	174.000, 0.273	174.000, 0.250
872	174.200, 0.273	174.200, 0.250
873	174.400, 0.273	174.400, 0.249
874	174.600, 0.273	174.600, 0.249
875	174.800, 0.273	174.800, 0.249
876	175.000, 0.273	175.000, 0.249
877	175.200, 0.273	175.200, 0.249
878	175.400, 0.273	175.400, 0.249
879	175.600, 0.273	175.600, 0.248
880	175.800, 0.273	175.800, 0.248
881	176.000, 0.273	176.000, 0.248
882	176.200, 0.273	176.200, 0.247
883	176.400, 0.273	176.400, 0.247
884	176.600, 0.273	176.600, 0.247
885	176.800, 0.273	176.800, 0.246
886	177.000, 0.273	177.000, 0.246
887	177.200, 0.273	177.200, 0.246
888	177.400, 0.273	177.400, 0.246
889	177.600, 0.273	177.600, 0.246
890	177.800, 0.272	177.800, 0.246
891	178.000, 0.272	178.000, 0.246
892	178.200, 0.271	178.200, 0.246
893	178.400, 0.271	178.400, 0.246
894	178.600, 0.271	178.600, 0.245
895	178.800, 0.270	178.800, 0.245
896	179.000, 0.270	179.000, 0.245
897	179.200, 0.269	179.200, 0.245
898	179.400, 0.269	179.400, 0.245
899	179.600, 0.269	179.600, 0.245
900	179.800, 0.268	179.800, 0.245
901	180.000, 0.268	180.000, 0.245
902	180.200, 0.268	180.200, 0.245
903	180.400, 0.268	180.400, 0.245
904	180.600, 0.268	180.600, 0.245
905	180.800, 0.268	180.800, 0.244
906	181.000, 0.268	181.000, 0.244
907	181.200, 0.268	181.200, 0.244
908	181.400, 0.268	181.400, 0.244
909	181.600, 0.268	181.600, 0.244
910	181.800, 0.268	181.800, 0.244
911	182.000, 0.268	182.000, 0.244
912	182.200, 0.268	182.200, 0.243
913	182.400, 0.268	182.400, 0.243
914	182.600, 0.268	182.600, 0.243
915	182.800, 0.269	182.800, 0.243
916	183.000, 0.269	183.000, 0.243
917	183.200, 0.269	183.200, 0.243
918	183.400, 0.269	183.400, 0.243
919	183.600, 0.268	183.600, 0.243
920	183.800, 0.268	183.800, 0.242
921	184.000, 0.268	184.000, 0.242
922	184.200, 0.268	184.200, 0.242
923	184.400, 0.267	184.400, 0.242
924	184.600, 0.267	184.600, 0.242
925	184.800, 0.267	184.800, 0.242
926	185.000, 0.266	185.000, 0.242
927	185.200, 0.266	185.200, 0.242
928	185.400, 0.266	185.400, 0.242
929	185.600, 0.266	185.600, 0.242
930	185.800, 0.265	185.800, 0.243
931	186.000, 0.265	186.000, 0.243
932	186.200, 0.265	186.200, 0.243
933	186.400, 0.265	186.400, 0.242
934	186.600, 0.266	186.600, 0.242
935	186.800, 0.266	186.800, 0.242
936	187.000, 0.266	187.000, 0.242
937	187.200, 0.266	187.200, 0.242
938	187.400, 0.266	187.400, 0.241
939	187.600, 0.266	187.600, 0.241
940	187.800, 0.266	187.800, 0.241
941	188.000, 0.266	188.000, 0.241
942	188.200, 0.266	188.200, 0.241
943	188.400, 0.266	188.400, 0.241
944	188.600, 0.266	188.600, 0.241
945	188.800, 0.266	188.800, 0.241
946	189.000, 0.266	189.000, 0.241
947	189.200, 0.266	189.200, 0.241
948	189.400, 0.266	189.400, 0.241
949	189.600, 0.266	189.600, 0.240
950	189.800, 0.265	189.800, 0.240
951	190.000, 0.265	190.000, 0.240
952	190.200, 0.265	190.200, 0.239
953	190.400, 0.265	190.400, 0.239
954	190.600, 0.264	190.600, 0.239
955	190.800, 0.264	190.800, 0.239
956	191.000, 0.264	191.000, 0.239
957	191.200, 0.264	191.200, 0.239
958	191.400, 0.264	191.400, 0.239
959	191.600, 0.263	191.600, 0.239
960	191.800, 0.263	191.800, 0.239
961	192.000, 0.263	192.000, 0.239
962	192.200, 0.263	192.200, 0.239
963	192.400, 0.263	192.400, 0.239
964	192.600, 0.263	192.600, 0.239
965	192.800, 0.262	192.800, 0.239
966	193.000, 0.262	193.000, 0.239
967	193.200, 0.262	193.200, 0.239
968	193.400, 0.262	193.400, 0.239
969	193.600, 0.262	193.600, 0.239
970	193.800, 0.262	193.800, 0.239
971	194.000, 0.262	194.000, 0.239
972	194.200, 0.261	194.200, 0.239
973	194.400, 0.261	194.400, 0.239
974	194.600, 0.261	194.600, 0.239
975	194.800, 0.261	194.800, 0.239
976	195.000, 0.261	195.000, 0.239
977	195.200, 0.262	195.200, 0.239
978	195.400, 0.262	195.400, 0.239
979	195.600, 0.262	195.600, 0.239
980	195.800, 0.262	195.800, 0.238
981	196.000, 0.262	196.000, 0.238
982	196.200, 0.262	196.200, 0.238
983	196.400, 0.262	196.400, 0.238
984	196.600, 0.261	196.600, 0.237
985	196.800, 0.261	196.800, 0.237
986	197.000, 0.261	197.000, 0.237
987	197.200, 0.261	197.200, 0.237
988	197.400, 0.261	197.400, 0.237
989	197.600, 0.261	197.600, 0.237
990	197.800, 0.261	197.800, 0.237
991	198.000, 0.261	198.000, 0.237
992	198.200, 0.261	198.200, 0.237
993	198.400, 0.261	198.400, 0.237
994	198.600, 0.261	198.600, 0.237
995	198.800, 0.261	198.800, 0.237
996	199.000, 0.261	199.000, 0.237
997	199.200, 0.261	199.200, 0.237
998	199.400, 0.260	199.400, 0.237
999	199.600, 0.260	199.600, 0.237
1000	199.800, 0.260	199.800, 0.237
1001	200.000, 0.260	200.000, 0.237
1002	200.200, 0.260	200.200, 0.236
1003	200.400, 0.260	200.400, 0.236
1004	200.600, 0.260	200.600, 0.236
1005	200.800, 0.260	200.800, 0.236
1006	201.000, 0.260	201.000, 0.236
1007	201.200, 0.260	201.200, 0.236
1008	201.400, 0.260	201.400, 0.236
1009	201.600, 0.260	201.600, 0.236
1010	201.800, 0.260	201.800, 0.236
1011	202.000, 0.260	202.000, 0.236
1012	202.200, 0.260	202.200, 0.236
1013	202.400, 0.260	202.400, 0.236
1014	202.600, 0.260	202.600, 0.236
1015	202.800, 0.260	202.800, 0.236
1016	203.000, 0.259	203.000, 0.236
1017	203.200, 0.259	203.200, 0.236
1018	203.400, 0.259	203.400, 0.235
1019	203.600, 0.259	203.600, 0.235
1020	203.800, 0.259	203.800, 0.234
1021	204.000, 0.258	204.000, 0.234
1022	204.200, 0.258	204.200, 0.234
1023	204.400, 0.258	204.400, 0.233
1024	204.600, 0.258	204.600, 0.233
1025	204.800, 0.258	204.800, 0.233
1026	205.000, 0.258	205.000, 0.233
1027	205.200, 0.258	205.200, 0.233
1028	205.400, 0.258	205.400, 0.233
1029	205.600, 0.258	205.600, 0.233
1030	205.800, 0.258	205.800, 0.233
1031	206.000, 0.257	206.000, 0.233
1032	206.200, 0.257	206.200, 0.233
1033	206.400, 0.257	206.400, 0.233
1034	206.600, 0.257	206.600, 0.232
1035	206.800, 0.257	206.800, 0.232
1036	207.000, 0.257	207.000, 0.232
1037	207.200, 0.257	207.200, 0.232
1038	207.400, 0.257	207.400, 0.232
1039	207.600, 0.257	207.600, 0.232
1040	207.800, 0.257	207.800, 0.231
1041	208.000, 0.256	208.000, 0.231
1042	208.200, 0.256	208.200, 0.231
1043	208.400, 0.256	208.400, 0.231
1044	208.600, 0.256	208.600, 0.231
1045	208.800, 0.256	208.800, 0.231
1046	209.000, 0.255	209.000, 0.231
1047	209.200, 0.255	209.200, 0.231
1048	209.400, 0.255	209.400, 0.231
1049	209.600, 0.255	209.600, 0.231
1050	209.800, 0.255	209.800, 0.231
1051	210.000, 0.255	210.000, 0.231
1052	210.200, 0.255	210.200, 0.231
1053	210.400, 0.255	210.400, 0.232
1054	210.600, 0.255	210.600, 0.232
1055	210.800, 0.255	210.800, 0.232
1056	211.000, 0.256	211.000, 0.232
1057	211.200, 0.256	211.200, 0.232
1058	211.400, 0.256	211.400, 0.232
1059	211.600, 0.256	211.600, 0.232
1060	211.800, 0.256	211.800, 0.232
1061	212.000, 0.255	212.000, 0.232
1062	212.200, 0.255	212.200, 0.231
1063	212.400, 0.255	212.400, 0.231
1064	212.600, 0.255	212.600, 0.231
1065	212.800, 0.255	212.800, 0.230
1066	213.000, 0.254	213.000, 0.230
1067	213.200, 0.254	213.200, 0.230
1068	213.400, 0.254	213.400, 0.230
1069	213.600, 0.254	213.600, 0.230
1070	213.800, 0.255	213.800, 0.230
1071	214.000, 0.255	214.000, 0.230
1072	214.200, 0.255	214.200, 0.229
1073	214.400, 0.255	214.400, 0.229
1074	214.600, 0.255	214.600, 0.229
1075	214.800, 0.255	214.800, 0.229
1076	215.000, 0.255	215.000, 0.228
1077	215.200, 0.255	215.200, 0.228
1078	215.400, 0.255	215.400, 0.229
1079	215.600, 0.255	215.600, 0.229
1080	215.800, 0.254	215.800, 0.229
1081	216.000, 0.254	216.000, 0.229
1082	216.200, 0.254	216.200, 0.229
1083	216.400, 0.254	216.400, 0.229
1084	216.600, 0.254	216.600, 0.229
1085	216.800, 0.254	216.800, 0.229
1086	217.000, 0.254	217.000, 0.229
1087	217.200, 0.254	217.200, 0.229
1088	217.400, 0.254	217.400, 0.229
1089	217.600, 0.253	217.600, 0.229
1090	217.800, 0.253	217.800, 0.229
1091	218.000, 0.253	218.000, 0.229
1092	218.200, 0.253	218.200, 0.229
1093	218.400, 0.253	218.400, 0.229
1094	218.600, 0.253	218.600, 0.228
1095	218.800, 0.253	218.800, 0.228
1096	219.000, 0.253	219.000, 0.228
1097	219.200, 0.253	219.200, 0.228
1098	219.400, 0.253	219.400, 0.228
1099	219.600, 0.253	219.600, 0.229
1100	219.800, 0.253	219.800, 0.229
1101	220.000, 0.253	220.000, 0.229
1102	220.200, 0.253	220.200, 0.229
1103	220.400, 0.253	220.400, 0.229
1104	220.600, 0.253	220.600, 0.229
1105	220.800, 0.253	220.800, 0.229
1106	221.000, 0.253	221.000, 0.229
1107	221.200, 0.253	221.200, 0.229
1108	221.400, 0.253	221.400, 0.229
1109	221.600, 0.253	221.600, 0.228
1110	221.800, 0.253	221.800, 0.228
1111	222.000, 0.253	222.000, 0.228
1112	222.200, 0.253	222.200, 0.227
1113	222.400, 0.253	222.400, 0.227
1114	222.600, 0.252	222.600, 0.226
1115	222.800, 0.252	222.800, 0.226
1116	223.000, 0.252	223.000, 0.226
1117	223.200, 0.252	223.200, 0.226
1118	223.400, 0.252	223.400, 0.226
1119	223.600, 0.252	223.600, 0.226
1120	223.800, 0.252	223.800, 0.226
1121	224.000, 0.251	224.000, 0.226
1122	224.200, 0.251	224.200, 0.226
1123	224.400, 0.251	224.400, 0.226
1124	224.600, 0.251	224.600, 0.226
1125	224.800, 0.251	224.800, 0.226
1126	225.000, 0.250	225.000, 0.226
1127	225.200, 0.250	225.200, 0.227
1128	225.400, 0.250	225.400, 0.227
1129	225.600, 0.250	225.600, 0.227
1130	225.800, 0.250	225.800, 0.227
1131	226.000, 0.250	226.000, 0.227
1132	226.200, 0.250	226.200, 0.227
1133	226.400, 0.250	226.400, 0.227
1134	226.600, 0.249	226.600, 0.226
1135	226.800, 0.249	226.800, 0.226
1136	227.000, 0.249	227.000, 0.226
1137	227.200, 0.249	227.200, 0.226
1138	227.400, 0.249	227.400, 0.226
1139	227.600, 0.248	227.600, 0.225
1140	227.800, 0.248	227.800, 0.225
1141	228.000, 0.248	228.000, 0.225
1142	228.200, 0.248	228.200, 0.225
1143	228.400, 0.248	228.400, 0.225
1144	228.600, 0.247	228.600, 0.225
1145	228.800, 0.247	228.800, 0.225
1146	229.000, 0.247	229.000, 0.224
1147	229.200, 0.247	229.200, 0.224
1148	229.400, 0.248	229.400, 0.224
1149	229.600, 0.248	229.600, 0.224
1150	229.800, 0.248	229.800, 0.224
1151	230.000, 0.249	230.000, 0.224
1152	230.200, 0.249	230.200, 0.224
1153	230.400, 0.249	230.400, 0.224
1154	230.600, 0.249	230.600, 0.224
1155	230.800, 0.249	230.800, 0.224
1156	231.000, 0.249	231.000, 0.224
1157	231.200, 0.250	231.200, 0.224
1158	231.400, 0.250	231.400, 0.224
1159	231.600, 0.250	231.600, 0.224
1160	231.800, 0.250	231.800, 0.224
1161	232.000, 0.249	232.000, 0.224
1162	232.200, 0.249	232.200, 0.224
1163	232.400, 0.249	232.400, 0.224
1164	232.600, 0.249	232.600, 0.224
1165	232.800, 0.249	232.800, 0.224
1166	233.000, 0.249	233.000, 0.224
1167	233.200, 0.249	233.200, 0.224
1168	233.400, 0.249	233.400, 0.224
1169	233.600, 0.249	233.600, 0.224
1170	233.800, 0.248	233.800, 0.224
1171	234.000, 0.248	234.000, 0.224
1172	234.200, 0.248	234.200, 0.224
1173	234.400, 0.248	234.400, 0.223
1174	234.600, 0.248	234.600, 0.223
1175	234.800, 0.248	234.800, 0.223
1176	235.000, 0.248	235.000, 0.223
1177	235.200, 0.248	235.200, 0.223
1178	235.400, 0.247	235.400, 0.223
1179	235.600, 0.247	235.600, 0.223
1180	235.800, 0.247	235.800, 0.223
1181	236.000, 0.247	236.000, 0.223
1182	236.200, 0.247	236.200, 0.223
1183	236.400, 0.247	236.400, 0.223
1184	236.600, 0.247	236.600, 0.223
1185	236.800, 0.247	236.800, 0.223
1186	237.000, 0.248	237.000, 0.223
1187	237.200, 0.248	237.200, 0.224
1188	237.400, 0.248	237.400, 0.223
1189	237.600, 0.248	237.600, 0.223
1190	237.800, 0.248	237.800, 0.223
1191	238.000, 0.248	238.000, 0.224
1192	238.200, 0.248	238.200, 0.224
1193	238.400, 0.248	238.400, 0.224
1194	238.600, 0.248	238.600, 0.224
1195	238.800, 0.248	238.800, 0.224
1196	239.000, 0.248	239.000, 0.224
1197	239.200, 0.247	239.200, 0.224
1198	239.400, 0.247	239.400, 0.224
1199	239.600, 0.247	239.600, 0.224
1200	239.800, 0.246	239.800, 0.224
1201	240.000, 0.246	240.000, 0.223
1202	240.200, 0.246	240.200, 0.223
1203	240.400, 0.246	240.400, 0.223
1204	240.600, 0.246	240.600, 0.223
1205	240.800, 0.246	240.800, 0.222
1206	241.000, 0.246	241.000, 0.222
1207	241.200, 0.246	241.200, 0.222
1208	241.400, 0.246	241.400, 0.221
1209	241.600, 0.246	241.600, 0.221
1210	241.800, 0.246	241.800, 0.221
1211	242.000, 0.246	242.000, 0.221
1212	242.200, 0.245	242.200, 0.221
1213	242.400, 0.245	242.400, 0.221
1214	242.600, 0.245	242.600, 0.221
1215	242.800, 0.245	242.800, 0.221
1216	243.000, 0.244	243.000, 0.221
1217	243.200, 0.244	243.200, 0.221
1218	243.400, 0.244	243.400, 0.221
1219	243.600, 0.244	243.600, 0.221
1220	243.800, 0.244	243.800, 0.221
1221	244.000, 0.243	244.000, 0.221
1222	244.200, 0.243	244.200, 0.221
1223	244.400, 0.243	244.400, 0.221
1224	244.600, 0.243	244.600, 0.221
1225	244.800, 0.243	244.800, 0.221
1226	245.000, 0.243	245.000, 0.221
1227	245.200, 0.242	245.200, 0.221
1228	245.400, 0.242	245.400, 0.221
1229	245.600, 0.242	245.600, 0.221
1230	245.800, 0.242	245.800, 0.221
1231	246.000, 0.243	246.000, 0.220
1232	246.200, 0.243	246.200, 0.220
1233	246.400, 0.243	246.400, 0.220
1234	246.600, 0.243	246.600, 0.220
1235	246.800, 0.243	246.800, 0.220
1236	247.000, 0.243	247.000, 0.220
1237	247.200, 0.244	247.200, 0.219
1238	247.400, 0.244	247.400, 0.219
1239	247.600, 0.244	247.600, 0.219
1240	247.800, 0.244	247.800, 0.219
1241	248.000, 0.243	248.000, 0.219
1242	248.200, 0.243	248.200, 0.219
1243	248.400, 0.243	248.400, 0.219
1244	248.600, 0.243	248.600, 0.219
1245	248.800, 0.242	248.800, 0.219
1246	249.000, 0.242	249.000, 0.219
1247	249.200, 0.242	249.200, 0.220
1248	249.400, 0.242	249.400, 0.220
1249	249.600, 0.242	249.600, 0.220
1250	249.800, 0.242	249.800, 0.220
1251	250.000, 0.242	250.000, 0.220
1252	250.200, 0.242	250.200, 0.220
1253	250.400, 0.242	250.400, 0.220
1254	250.600, 0.242	250.600, 0.220
1255	250.800, 0.242	250.800, 0.220
1256	251.000, 0.242	251.000, 0.219
1257	251.200, 0.243	251.200, 0.219
1258	251.400, 0.243	251.400, 0.219
1259	251.600, 0.243	251.600, 0.219
1260	251.800, 0.243	251.800, 0.219
1261	252.000, 0.243	252.000, 0.219
1262	252.200, 0.242	252.200, 0.219
1263	252.400, 0.243	252.400, 0.219
1264	252.600, 0.243	252.600, 0.219
1265	252.800, 0.243	252.800, 0.219
1266	253.000, 0.243	253.000, 0.219
1267	253.200, 0.242	253.200, 0.219
1268	253.400, 0.242	253.400, 0.219
1269	253.600, 0.242	253.600, 0.219
1270	253.800, 0.242	253.800, 0.220
1271	254.000, 0.241	254.000, 0.220
1272	254.200, 0.241	254.200, 0.220
1273	254.400, 0.241	254.400, 0.220
1274	254.600, 0.241	254.600, 0.219
1275	254.800, 0.241	254.800, 0.219
1276	255.000, 0.241	255.000, 0.219
1277	255.200, 0.241	255.200, 0.219
1278	255.400, 0.241	255.400, 0.219
1279	255.600, 0.241	255.600, 0.218
1280	255.800, 0.241	255.800, 0.218
1281	256.000, 0.241	256.000, 0.218
1282	256.200, 0.241	256.200, 0.218
1283	256.400, 0.241	256.400, 0.218
1284	256.600, 0.241	256.600, 0.218
1285	256.800, 0.241	256.800, 0.218
1286	257.000, 0.241	257.000, 0.218
1287	257.200, 0.241	257.200, 0.218
1288	257.400, 0.241	257.400, 0.218
1289	257.600, 0.241	257.600, 0.217
1290	257.800, 0.240	257.800, 0.217
1291	258.000, 0.240	258.000, 0.217
1292	258.200, 0.240	258.200, 0.217
1293	258.400, 0.240	258.400, 0.217
1294	258.600, 0.240	258.600, 0.217
1295	258.800, 0.240	258.800, 0.217
1296	259.000, 0.240	259.000, 0.217
1297	259.200, 0.240	259.200, 0.217
1298	259.400, 0.240	259.400, 0.217
1299	259.600, 0.240	259.600, 0.216
1300	259.800, 0.240	259.800, 0.216
1301	260.000, 0.240	260.000, 0.216
1302	260.200, 0.240	260.200, 0.216
1303	260.400, 0.240	260.400, 0.216
1304	260.600, 0.240	260.600, 0.216
1305	260.800, 0.240	260.800, 0.216
1306	261.000, 0.240	261.000, 0.216
1307	261.200, 0.240	261.200, 0.216
1308	261.400, 0.240	261.400, 0.216
1309	261.600, 0.240	261.600, 0.216
1310	261.800, 0.240	261.800, 0.216
1311	262.000, 0.239	262.000, 0.216
1312	262.200, 0.239	262.200, 0.216
1313	262.400, 0.239	262.400, 0.216
1314	262.600, 0.239	262.600, 0.216
1315	262.800, 0.239	262.800, 0.216
1316	263.000, 0.239	263.000, 0.216
1317	263.200, 0.239	263.200, 0.216
1318	263.400, 0.239	263.400, 0.216
1319	263.600, 0.239	263.600, 0.215
1320	263.800, 0.239	263.800, 0.215
1321	264.000, 0.240	264.000, 0.215
1322	264.200, 0.240	264.200, 0.215
1323	264.400, 0.241	264.400, 0.215
1324	264.600, 0.241	264.600, 0.215
1325	264.800, 0.241	264.800, 0.216
1326	265.000, 0.241	265.000, 0.216
1327	265.200, 0.241	265.200, 0.216
1328	265.400, 0.240	265.400, 0.216
1329	265.600, 0.240	265.600, 0.217
1330	265.800, 0.240	265.800, 0.217
1331	266.000, 0.240	266.000, 0.217
1332	266.200, 0.239	266.200, 0.217
1333	266.400, 0.239	266.400, 0.217
1334	266.600, 0.239	266.600, 0.217
1335	266.800, 0.238	266.800, 0.217
1336	267.000, 0.238	267.000, 0.216
1337	267.200, 0.238	267.200, 0.216
1338	267.400, 0.238	267.400, 0.215
1339	267.600, 0.238	267.600, 0.215
1340	267.800, 0.238	267.800, 0.214
1341	268.000, 0.238	268.000, 0.214
1342	268.200, 0.238	268.200, 0.214
1343	268.400, 0.238	268.400, 0.214
1344	268.600, 0.238	268.600, 0.214
1345	268.800, 0.238	268.800, 0.214
1346	269.000, 0.238	269.000, 0.214
1347	269.200, 0.238	269.200, 0.215
1348	269.400, 0.238	269.400, 0.215
1349	269.600, 0.238	269.600, 0.215
1350	269.800, 0.238	269.800, 0.216
1351	,	,
1352	,	,
1353	,	,
1354	,	,
1355	,	,
1356	,	,
1357	,	,
1358	,	,
1359	,	,
1360	,	,
1361	,	,
1362	,	,
1363	,	,
1364	,	,
1365	,	,
1366	,	,
1367	,	,
1368	,	,
1369	,	,
1370	,	,
1371	,	,
1372	,	,
1373	,	,
1374	,	,
1375	,	,
1376	,	,
1377	,	,
1378	,	,
1379	,	,
1380	,	,
1381	,	,
1382	,	,
1383	,	,
1384	,	,
1385	,	,
1386	,	,
1387	,	,
1388	,	,
1389	,	,
1390	,	,
1391	,	,
1392	,	,
1393	,	,
1394	,	,
1395	,	,
1396	,	,
1397	,	,
1398	,	,
1399	,	,
1400	,	,
1401	,	,
1402	,	,
1403	,	,
1404	,	,
1405	,	,
1406	,	,
1407	,	,
1408	,	,
1409	,	,
1410	,	,
1411	,	,
1412	,	,
1413	,	,
1414	,	,
1415	,	,
1416	,	,
1417	,	,
1418	,	,
1419	,	,
1420	,	,
1421	,	,
1422	,	,
1423	,	,
1424	,	,
1425	,	,
1426	,	,
1427	,	,
1428	,	,
1429	,	,
1430	,	,
1431	,	,
1432	,	,
1433	,	,
1434	,	,
1435	,	,
1436	,	,
1437	,	,
1438	,	,
1439	,	,
1440	,	,
1441	,	,
1442	,	,
1443	,	,
1444	,	,
1445	,	,
1446	,	,
1447	,	,
1448	,	,
1449	,	,
1450	,	,
1451	,	,
1452	,	,
1453	,	,
1454	,	,
1455	,	,
1456	,	,
1457	,	,
1458	,	,
1459	,	,
1460	,	,
1461	,	,
1462	,	,
1463	,	,
1464	,	,
1465	,	,
1466	,	,
1467	,	,
1468	,	,
1469	,	,
1470	,	,
1471	,	,
1472	,	,
1473	,	,
1474	,	,
1475	,	,
1476	,	,
1477	,	,
1478	,	,
1479	,	,
1480	,	,
1481	,	,
1482	,	,
1483	,	,
1484	,	,
1485	,	,
1486	,	,
1487	,	,
1488	,	,
1489	,	,
1490	,	,
1491	,	,
1492	,	,
1493	,	,
1494	,	,
1495	,	,
1496	,	,
1497	,	,
1498	,	,
1499	,	,
1500	,	,
1501	,	,
1502	,	,
1503	,	,
1504	,	,
1505	,	,
1506	,	,
1507	,	,
1508	,	,
1509	,	,
1510	,	,
1511	,	,
1512	,	,
1513	,	,
1514	,	,
1515	,	,
1516	,	,
1517	,	,
1518	,	,
1519	,	,
1520	,	,
1521	,	,
1522	,	,
1523	,	,
1524	,	,
1525	,	,
1526	,	,
1527	,	,
1528	,	,
1529	,	,
1530	,	,
1531	,	,
1532	,	,
1533	,	,
1534	,	,
1535	,	,
1536	,	,
1537	,	,
1538	,	,
1539	,	,
1540	,	,
1541	,	,
1542	,	,
1543	,	,
1544	,	,
1545	,	,
1546	,	,
1547	,	,
1548	,	,
1549	,	,
1550	,	,
1551	,	,
1552	,	,
1553	,	,
1554	,	,
1555	,	,
1556	,	,
1557	,	,
1558	,	,
1559	,	,
1560	,	,
1561	,	,
1562	,	,
1563	,	,
1564	,	,
1565	,	,
1566	,	,
1567	,	,
1568	,	,
1569	,	,
1570	,	,
1571	,	,
1572	,	,
1573	,	,
1574	,	,
1575	,	,
1576	,	,
1577	,	,
1578	,	,
1579	,	,
1580	,	,
1581	,	,
1582	,	,
1583	,	,
1584	,	,
1585	,	,
1586	,	,
1587	,	,
1588	,	,
1589	,	,
1590	,	,
1591	,	,
1592	,	,
1593	,	,
1594	,	,
1595	,	,
1596	,	,
1597	,	,
1598	,	,
1599	,	,
1600	,	,
1601	,	,
1602	,	,
1603	,	,
1604	,	,
1605	,	,
1606	,	,
1607	,	,
1608	,	,
1609	,	,
1610	,	,
1611	,	,
1612	,	,
1613	,	,
1614	,	,
1615	,	,
1616	,	,
1617	,	,
1618	,	,
1619	,	,
1620	,	,
1621	,	,
1622	,	,
1623	,	,
1624	,	,
1625	,	,
1626	,	,
1627	,	,
1628	,	,
1629	,	,
1630	,	,
1631	,	,
1632	,	,
1633	,	,
1634	,	,
1635	,	,
1636	,	,
1637	,	,
1638	,	,
1639	,	,
1640	,	,
1641	,	,
1642	,	,
1643	,	,
1644	,	,
1645	,	,
1646	,	,
1647	,	,
1648	,	,
1649	,	,
1650	,	,
1651	,	,
1652	,	,
1653	,	,
1654	,	,
1655	,	,
1656	,	,
1657	,	,
1658	,	,
1659	,	,
1660	,	,
1661	,	,
1662	,	,
1663	,	,
1664	,	,
1665	,	,
1666	,	,
1667	,	,
1668	,	,
1669	,	,
1670	,	,
1671	,	,
1672	,	,
1673	,	,
1674	,	,
1675	,	,
1676	,	,
1677	,	,
1678	,	,
1679	,	,
1680	,	,
1681	,	,
1682	,	,
1683	,	,
1684	,	,
1685	,	,
1686	,	,
1687	,	,
1688	,	,
1689	,	,
1690	,	,
1691	,	,
1692	,	,
1693	,	,
1694	,	,
1695	,	,
1696	,	,
1697	,	,
1698	,	,
1699	,	,
1700	,	,
1701	,	,
1702	,	,
1703	,	,
1704	,	,
1705	,	,
1706	,	,
1707	,	,
1708	,	,
1709	,	,
1710	,	,
1711	,	,
1712	,	,
1713	,	,
1714	,	,
1715	,	,
1716	,	,
1717	,	,
1718	,	,
1719	,	,
1720	,	,
1721	,	,
1722	,	,
1723	,	,
1724	,	,
1725	,	,
1726	,	,
1727	,	,
1728	,	,
1729	,	,
1730	,	,
1731	,	,
1732	,	,
1733	,	,
1734	,	,
1735	,	,
1736	,	,
1737	,	,
1738	,	,
1739	,	,
1740	,	,
1741	,	,
1742	,	,
1743	,	,
1744	,	,
1745	,	,
1746	,	,
1747	,	,
1748	,	,
1749	,	,
1750	,	,
1751	,	,
1752	,	,
1753	,	,
1754	,	,
1755	,	,
1756	,	,
1757	,	,
1758	,	,
1759	,	,
1760	,	,
1761	,	,
1762	,	,
1763	,	,
1764	,	,
1765	,	,
1766	,	,
1767	,	,
1768	,	,
1769	,	,
1770	,	,
1771	,	,
1772	,	,
1773	,	,
1774	,	,
1775	,	,
1776	,	,
1777	,	,
1778	,	,
1779	,	,
1780	,	,
1781	,	,
1782	,	,
1783	,	,
1784	,	,
1785	,	,
1786	,	,
1787	,	,
1788	,	,
1789	,	,
1790	,	,
1791	,	,
1792	,	,
1793	,	,
1794	,	,
1795	,	,
1796	,	,
1797	,	,
1798	,	,
1799	,	,
1800	,	,
1801	,	,
1802	,	,
1803	,	,
1804	,	,
1805	,	,
1806	,	,
1807	,	,
1808	,	,
1809	,	,
1810	,	,
1811	,	,
1812	,	,
1813	,	,
1814	,	,
1815	,	,
1816	,	,
1817	,	,
1818	,	,
1819	,	,
1820	,	,
1821	,	,
1822	,	,
1823	,	,
1824	,	,
1825	,	,
1826	,	,
1827	,	,
1828	,	,
1829	,	,
1830	,	,
1831	,	,
1832	,	,
1833	,	,
1834	,	,
1835	,	,
1836	,	,
1837	,	,
1838	,	,
1839	,	,
1840	,	,
1841	,	,
1842	,	,
1843	,	,
1844	,	,
1845	,	,
1846	,	,
1847	,	,
1848	,	,
1849	,	,
1850	,	,
1851	,	,
1852	,	,
1853	,	,
1854	,	,
1855	,	,
1856	,	,
1857	,	,
1858	,	,
1859	,	,
1860	,	,
1861	,	,
1862	,	,
1863	,	,
1864	,	,
1865	,	,
1866	,	,
1867	,	,
1868	,	,
1869	,	,
1870	,	,
1871	,	,
1872	,	,
1873	,	,
1874	,	,
1875	,	,
1876	,	,
1877	,	,
1878	,	,
1879	,	,
1880	,	,
1881	,	,
1882	,	,
1883	,	,
1884	,	,
1885	,	,
1886	,	,
1887	,	,
1888	,	,
1889	,	,
1890	,	,
1891	,	,
1892	,	,
1893	,	,
1894	,	,
1895	,	,
1896	,	,
1897	,	,
1898	,	,
1899	,	,
1900	,	,
1901	,	,
1902	,	,
1903	,	,
1904	,	,
1905	,	,
1906	,	,
1907	,	,
1908	,	,
1909	,	,
1910	,	,
1911	,	,
1912	,	,
1913	,	,
1914	,	,
1915	,	,
1916	,	,
1917	,	,
1918	,	,
1919	,	,
1920	,	,
1921	,	,
1922	,	,
1923	,	,
1924	,	,
1925	,	,
1926	,	,
1927	,	,
1928	,	,
1929	,	,
1930	,	,
1931	,	,
1932	,	,
1933	,	,
1934	,	,
1935	,	,
1936	,	,
1937	,	,
1938	,	,
1939	,	,
1940	,	,
1941	,	,
1942	,	,
1943	,	,
1944	,	,
1945	,	,
1946	,	,
1947	,	,
1948	,	,
1949	,	,
1950	,	,
1951	,	,
1952	,	,
1953	,	,
1954	,	,
1955	,	,
1956	,	,
1957	,	,
1958	,	,
1959	,	,
1960	,	,
1961	,	,
1962	,	,
1963	,	,
1964	,	,
1965	,	,
1966	,	,
1967	,	,
1968	,	,
1969	,	,
1970	,	,
1971	,	,
1972	,	,
1973	,	,
1974	,	,
1975	,	,
1976	,	,
1977	,	,
1978	,	,
1979	,	,
1980	,	,
1981	,	,
1982	,	,
1983	,	,
1984	,	,
1985	,	,
1986	,	,
1987	,	,
1988	,	,
1989	,	,
1990	,	,
1991	,	,
1992	,	,
1993	,	,
1994	,	,
1995	,	,
1996	,	,
1997	,	,
1998	,	,
1999	,	,
[truncated: 13,001 more rows]

## Sheet: Fig2_panelB_rep3
	169bp closed parS DNA ParB (R104A)	169bp closed parS DNA ParB (R104A) CTP
1	0.000, 0.008	0.000, -0.034
2	0.200, 0.006	0.200, -0.034
3	0.400, 0.005	0.400, -0.033
4	0.600, 0.003	0.600, -0.033
5	0.800, 0.002	0.800, -0.033
6	1.000, 0.001	1.000, -0.032
7	1.200, -0.001	1.200, -0.032
8	1.400, -0.002	1.400, -0.032
9	1.600, -0.003	1.600, -0.032
10	1.800, -0.004	1.800, -0.032
11	2.000, -0.005	2.000, -0.032
12	2.200, -0.005	2.200, -0.032
13	2.400, -0.005	2.400, -0.031
14	2.600, -0.005	2.600, -0.031
15	2.800, -0.005	2.800, -0.031
16	3.000, -0.005	3.000, -0.030
17	3.200, -0.005	3.200, -0.030
18	3.400, -0.005	3.400, -0.029
19	3.600, -0.005	3.600, -0.029
20	3.800, -0.005	3.800, -0.028
21	4.000, -0.005	4.000, -0.028
22	4.200, -0.005	4.200, -0.027
23	4.400, -0.004	4.400, -0.027
24	4.600, -0.004	4.600, -0.026
25	4.800, -0.004	4.800, -0.026
26	5.000, -0.004	5.000, -0.026
27	5.200, -0.003	5.200, -0.025
28	5.400, -0.003	5.400, -0.025
29	5.600, -0.003	5.600, -0.024
30	5.800, -0.003	5.800, -0.024
31	6.000, -0.003	6.000, -0.023
32	6.200, -0.003	6.200, -0.023
33	6.400, -0.003	6.400, -0.022
34	6.600, -0.003	6.600, -0.022
35	6.800, -0.002	6.800, -0.021
36	7.000, -0.002	7.000, -0.021
37	7.200, -0.002	7.200, -0.020
38	7.400, -0.002	7.400, -0.020
39	7.600, -0.002	7.600, -0.019
40	7.800, -0.002	7.800, -0.019
41	8.000, -0.002	8.000, -0.019
42	8.200, -0.002	8.200, -0.018
43	8.400, -0.002	8.400, -0.018
44	8.600, -0.002	8.600, -0.018
45	8.800, -0.002	8.800, -0.018
46	9.000, -0.002	9.000, -0.017
47	9.200, -0.002	9.200, -0.017
48	9.400, -0.002	9.400, -0.017
49	9.600, -0.002	9.600, -0.016
50	9.800, -0.002	9.800, -0.016
51	10.000, -0.002	10.000, -0.015
52	10.200, -0.002	10.200, -0.014
53	10.400, -0.002	10.400, -0.014
54	10.600, -0.001	10.600, -0.013
55	10.800, -0.001	10.800, -0.013
56	11.000, -0.001	11.000, -0.013
57	11.200, -0.001	11.200, -0.013
58	11.400, -0.001	11.400, -0.012
59	11.600, -0.001	11.600, -0.012
60	11.800, -0.001	11.800, -0.012
61	12.000, -0.001	12.000, -0.012
62	12.200, -0.001	12.200, -0.012
63	12.400, -0.001	12.400, -0.012
64	12.600, -0.001	12.600, -0.013
65	12.800, -0.001	12.800, -0.012
66	13.000, -0.001	13.000, -0.012
67	13.200, -0.001	13.200, -0.012
68	13.400, -0.001	13.400, -0.012
69	13.600, -0.001	13.600, -0.011
70	13.800, -0.001	13.800, -0.011
71	14.000, -0.001	14.000, -0.010
72	14.200, -0.001	14.200, -0.010
73	14.400, -0.001	14.400, -0.010
74	14.600, -0.001	14.600, -0.010
75	14.800, -0.001	14.800, -0.010
76	15.000, -0.000	15.000, -0.010
77	15.200, -0.000	15.200, -0.010
78	15.400, -0.000	15.400, -0.009
79	15.600, -0.000	15.600, -0.009
80	15.800, -0.000	15.800, -0.009
81	16.000, -0.000	16.000, -0.009
82	16.200, -0.000	16.200, -0.009
83	16.400, -0.000	16.400, -0.009
84	16.600, -0.000	16.600, -0.008
85	16.800, -0.001	16.800, -0.008
86	17.000, -0.001	17.000, -0.008
87	17.200, -0.001	17.200, -0.008
88	17.400, -0.001	17.400, -0.007
89	17.600, -0.001	17.600, -0.007
90	17.800, -0.001	17.800, -0.007
91	18.000, -0.001	18.000, -0.006
92	18.200, -0.000	18.200, -0.006
93	18.400, -0.000	18.400, -0.006
94	18.600, -0.000	18.600, -0.006
95	18.800, -0.000	18.800, -0.005
96	19.000, -0.000	19.000, -0.005
97	19.200, -0.000	19.200, -0.005
98	19.400, -0.000	19.400, -0.005
99	19.600, -0.000	19.600, -0.005
100	19.800, -0.000	19.800, -0.005
101	20.000, -0.000	20.000, -0.005
102	20.200, -0.000	20.200, -0.005
103	20.400, -0.000	20.400, -0.005
104	20.600, -0.000	20.600, -0.005
105	20.800, -0.000	20.800, -0.005
106	21.000, -0.000	21.000, -0.005
107	21.200, -0.000	21.200, -0.005
108	21.400, -0.000	21.400, -0.005
109	21.600, -0.000	21.600, -0.004
110	21.800, -0.000	21.800, -0.004
111	22.000, -0.001	22.000, -0.004
112	22.200, -0.001	22.200, -0.004
113	22.400, -0.001	22.400, -0.003
114	22.600, -0.001	22.600, -0.003
115	22.800, -0.001	22.800, -0.003
116	23.000, -0.000	23.000, -0.003
117	23.200, -0.000	23.200, -0.002
118	23.400, 0.000	23.400, -0.002
119	23.600, 0.000	23.600, -0.002
120	23.800, 0.001	23.800, -0.001
121	24.000, 0.001	24.000, -0.001
122	24.200, 0.001	24.200, -0.001
123	24.400, 0.001	24.400, -0.001
124	24.600, 0.001	24.600, -0.001
125	24.800, 0.001	24.800, -0.001
126	25.000, 0.001	25.000, -0.001
127	25.200, 0.001	25.200, -0.001
128	25.400, 0.000	25.400, -0.001
129	25.600, 0.000	25.600, -0.001
130	25.800, -0.000	25.800, -0.001
131	26.000, -0.000	26.000, -0.001
132	26.200, -0.000	26.200, -0.001
133	26.400, -0.000	26.400, -0.001
134	26.600, -0.000	26.600, -0.001
135	26.800, -0.000	26.800, -0.001
136	27.000, -0.000	27.000, -0.001
137	27.200, -0.000	27.200, -0.001
138	27.400, -0.000	27.400, -0.001
139	27.600, -0.000	27.600, -0.000
140	27.800, -0.000	27.800, -0.000
141	28.000, -0.000	28.000, -0.000
142	28.200, -0.000	28.200, 0.000
143	28.400, -0.000	28.400, 0.000
144	28.600, -0.000	28.600, 0.000
145	28.800, -0.000	28.800, 0.000
146	29.000, 0.000	29.000, 0.000
147	29.200, 0.000	29.200, 0.000
148	29.400, 0.000	29.400, 0.001
149	29.600, 0.001	29.600, 0.001
150	29.800, 0.001	29.800, 0.001
151	30.000, 0.000	30.000, 0.000
152	30.200, 0.008	30.200, 0.007
153	30.400, 0.018	30.400, 0.015
154	30.600, 0.031	30.600, 0.025
155	30.800, 0.045	30.800, 0.037
156	31.000, 0.061	31.000, 0.050
157	31.200, 0.078	31.200, 0.064
158	31.400, 0.095	31.400, 0.079
159	31.600, 0.114	31.600, 0.094
160	31.800, 0.132	31.800, 0.110
161	32.000, 0.149	32.000, 0.125
162	32.200, 0.165	32.200, 0.139
163	32.400, 0.180	32.400, 0.153
164	32.600, 0.194	32.600, 0.165
165	32.800, 0.206	32.800, 0.176
166	33.000, 0.218	33.000, 0.187
167	33.200, 0.228	33.200, 0.196
168	33.400, 0.237	33.400, 0.205
169	33.600, 0.245	33.600, 0.212
170	33.800, 0.252	33.800, 0.219
171	34.000, 0.258	34.000, 0.225
172	34.200, 0.264	34.200, 0.230
173	34.400, 0.269	34.400, 0.235
174	34.600, 0.273	34.600, 0.239
175	34.800, 0.277	34.800, 0.242
176	35.000, 0.280	35.000, 0.245
177	35.200, 0.283	35.200, 0.248
178	35.400, 0.285	35.400, 0.250
179	35.600, 0.287	35.600, 0.252
180	35.800, 0.289	35.800, 0.254
181	36.000, 0.290	36.000, 0.256
182	36.200, 0.292	36.200, 0.258
183	36.400, 0.293	36.400, 0.259
184	36.600, 0.294	36.600, 0.260
185	36.800, 0.294	36.800, 0.261
186	37.000, 0.295	37.000, 0.261
187	37.200, 0.296	37.200, 0.262
188	37.400, 0.296	37.400, 0.262
189	37.600, 0.297	37.600, 0.262
190	37.800, 0.298	37.800, 0.263
191	38.000, 0.299	38.000, 0.263
192	38.200, 0.299	38.200, 0.263
193	38.400, 0.300	38.400, 0.263
194	38.600, 0.301	38.600, 0.263
195	38.800, 0.301	38.800, 0.263
196	39.000, 0.302	39.000, 0.263
197	39.200, 0.302	39.200, 0.263
198	39.400, 0.302	39.400, 0.263
199	39.600, 0.302	39.600, 0.263
200	39.800, 0.303	39.800, 0.263
201	40.000, 0.303	40.000, 0.262
202	40.200, 0.303	40.200, 0.262
203	40.400, 0.303	40.400, 0.262
204	40.600, 0.303	40.600, 0.262
205	40.800, 0.303	40.800, 0.261
206	41.000, 0.304	41.000, 0.261
207	41.200, 0.304	41.200, 0.261
208	41.400, 0.304	41.400, 0.261
209	41.600, 0.305	41.600, 0.261
210	41.800, 0.305	41.800, 0.261
211	42.000, 0.305	42.000, 0.261
212	42.200, 0.306	42.200, 0.261
213	42.400, 0.306	42.400, 0.260
214	42.600, 0.305	42.600, 0.260
215	42.800, 0.305	42.800, 0.260
216	43.000, 0.305	43.000, 0.260
217	43.200, 0.305	43.200, 0.260
218	43.400, 0.304	43.400, 0.260
219	43.600, 0.304	43.600, 0.260
220	43.800, 0.304	43.800, 0.260
221	44.000, 0.304	44.000, 0.260
222	44.200, 0.305	44.200, 0.261
223	44.400, 0.305	44.400, 0.261
224	44.600, 0.305	44.600, 0.261
225	44.800, 0.306	44.800, 0.261
226	45.000, 0.306	45.000, 0.261
227	45.200, 0.306	45.200, 0.261
228	45.400, 0.307	45.400, 0.261
229	45.600, 0.307	45.600, 0.261
230	45.800, 0.307	45.800, 0.260
231	46.000, 0.307	46.000, 0.260
232	46.200, 0.307	46.200, 0.260
233	46.400, 0.307	46.400, 0.260
234	46.600, 0.307	46.600, 0.260
235	46.800, 0.307	46.800, 0.260
236	47.000, 0.307	47.000, 0.259
237	47.200, 0.307	47.200, 0.259
238	47.400, 0.307	47.400, 0.259
239	47.600, 0.307	47.600, 0.259
240	47.800, 0.308	47.800, 0.259
241	48.000, 0.308	48.000, 0.259
242	48.200, 0.308	48.200, 0.259
243	48.400, 0.309	48.400, 0.259
244	48.600, 0.309	48.600, 0.259
245	48.800, 0.309	48.800, 0.259
246	49.000, 0.309	49.000, 0.259
247	49.200, 0.309	49.200, 0.259
248	49.400, 0.309	49.400, 0.260
249	49.600, 0.309	49.600, 0.260
250	49.800, 0.309	49.800, 0.260
251	50.000, 0.309	50.000, 0.261
252	50.200, 0.309	50.200, 0.261
253	50.400, 0.309	50.400, 0.261
254	50.600, 0.309	50.600, 0.261
255	50.800, 0.309	50.800, 0.260
256	51.000, 0.309	51.000, 0.260
257	51.200, 0.309	51.200, 0.260
258	51.400, 0.309	51.400, 0.259
259	51.600, 0.309	51.600, 0.259
260	51.800, 0.310	51.800, 0.259
261	52.000, 0.310	52.000, 0.259
262	52.200, 0.310	52.200, 0.258
263	52.400, 0.310	52.400, 0.258
264	52.600, 0.310	52.600, 0.258
265	52.800, 0.310	52.800, 0.258
266	53.000, 0.309	53.000, 0.257
267	53.200, 0.309	53.200, 0.257
268	53.400, 0.309	53.400, 0.257
269	53.600, 0.309	53.600, 0.257
270	53.800, 0.309	53.800, 0.257
271	54.000, 0.309	54.000, 0.257
272	54.200, 0.309	54.200, 0.257
273	54.400, 0.309	54.400, 0.257
274	54.600, 0.309	54.600, 0.257
275	54.800, 0.309	54.800, 0.257
276	55.000, 0.308	55.000, 0.257
277	55.200, 0.308	55.200, 0.257
278	55.400, 0.308	55.400, 0.257
279	55.600, 0.308	55.600, 0.257
280	55.800, 0.308	55.800, 0.257
281	56.000, 0.308	56.000, 0.257
282	56.200, 0.308	56.200, 0.257
283	56.400, 0.308	56.400, 0.257
284	56.600, 0.308	56.600, 0.257
285	56.800, 0.308	56.800, 0.256
286	57.000, 0.308	57.000, 0.256
287	57.200, 0.308	57.200, 0.256
288	57.400, 0.308	57.400, 0.255
289	57.600, 0.308	57.600, 0.255
290	57.800, 0.308	57.800, 0.254
291	58.000, 0.308	58.000, 0.254
292	58.200, 0.308	58.200, 0.254
293	58.400, 0.308	58.400, 0.254
294	58.600, 0.308	58.600, 0.254
295	58.800, 0.308	58.800, 0.254
296	59.000, 0.308	59.000, 0.254
297	59.200, 0.309	59.200, 0.255
298	59.400, 0.309	59.400, 0.255
299	59.600, 0.309	59.600, 0.255
300	59.800, 0.309	59.800, 0.255
301	60.000, 0.310	60.000, 0.256
302	60.200, 0.310	60.200, 0.256
303	60.400, 0.310	60.400, 0.256
304	60.600, 0.310	60.600, 0.256
305	60.800, 0.310	60.800, 0.256
306	61.000, 0.310	61.000, 0.256
307	61.200, 0.310	61.200, 0.256
308	61.400, 0.310	61.400, 0.255
309	61.600, 0.310	61.600, 0.255
310	61.800, 0.310	61.800, 0.255
311	62.000, 0.310	62.000, 0.254
312	62.200, 0.310	62.200, 0.254
313	62.400, 0.310	62.400, 0.254
314	62.600, 0.310	62.600, 0.254
315	62.800, 0.310	62.800, 0.254
316	63.000, 0.310	63.000, 0.254
317	63.200, 0.310	63.200, 0.254
318	63.400, 0.310	63.400, 0.254
319	63.600, 0.310	63.600, 0.254
320	63.800, 0.310	63.800, 0.254
321	64.000, 0.310	64.000, 0.255
322	64.200, 0.309	64.200, 0.255
323	64.400, 0.309	64.400, 0.254
324	64.600, 0.309	64.600, 0.254
325	64.800, 0.309	64.800, 0.254
326	65.000, 0.309	65.000, 0.253
327	65.200, 0.309	65.200, 0.253
328	65.400, 0.309	65.400, 0.253
329	65.600, 0.309	65.600, 0.253
330	65.800, 0.309	65.800, 0.253
331	66.000, 0.309	66.000, 0.252
332	66.200, 0.309	66.200, 0.252
333	66.400, 0.309	66.400, 0.252
334	66.600, 0.310	66.600, 0.252
335	66.800, 0.310	66.800, 0.252
336	67.000, 0.310	67.000, 0.252
337	67.200, 0.310	67.200, 0.252
338	67.400, 0.309	67.400, 0.252
339	67.600, 0.310	67.600, 0.252
340	67.800, 0.310	67.800, 0.253
341	68.000, 0.310	68.000, 0.253
342	68.200, 0.310	68.200, 0.253
343	68.400, 0.310	68.400, 0.253
344	68.600, 0.310	68.600, 0.253
345	68.800, 0.310	68.800, 0.253
346	69.000, 0.310	69.000, 0.253
347	69.200, 0.309	69.200, 0.253
348	69.400, 0.309	69.400, 0.253
349	69.600, 0.309	69.600, 0.253
350	69.800, 0.309	69.800, 0.252
351	70.000, 0.308	70.000, 0.252
352	70.200, 0.308	70.200, 0.252
353	70.400, 0.308	70.400, 0.251
354	70.600, 0.308	70.600, 0.251
355	70.800, 0.308	70.800, 0.251
356	71.000, 0.308	71.000, 0.251
357	71.200, 0.308	71.200, 0.251
358	71.400, 0.309	71.400, 0.251
359	71.600, 0.309	71.600, 0.251
360	71.800, 0.309	71.800, 0.251
361	72.000, 0.309	72.000, 0.251
362	72.200, 0.309	72.200, 0.251
363	72.400, 0.309	72.400, 0.251
364	72.600, 0.309	72.600, 0.251
365	72.800, 0.309	72.800, 0.251
366	73.000, 0.310	73.000, 0.251
367	73.200, 0.310	73.200, 0.251
368	73.400, 0.310	73.400, 0.251
369	73.600, 0.310	73.600, 0.251
370	73.800, 0.310	73.800, 0.251
371	74.000, 0.309	74.000, 0.251
372	74.200, 0.309	74.200, 0.252
373	74.400, 0.309	74.400, 0.252
374	74.600, 0.309	74.600, 0.252
375	74.800, 0.309	74.800, 0.251
376	75.000, 0.309	75.000, 0.251
377	75.200, 0.308	75.200, 0.251
378	75.400, 0.308	75.400, 0.251
379	75.600, 0.308	75.600, 0.251
380	75.800, 0.308	75.800, 0.251
381	76.000, 0.308	76.000, 0.251
382	76.200, 0.308	76.200, 0.251
383	76.400, 0.308	76.400, 0.251
384	76.600, 0.308	76.600, 0.251
385	76.800, 0.308	76.800, 0.251
386	77.000, 0.308	77.000, 0.251
387	77.200, 0.309	77.200, 0.251
388	77.400, 0.309	77.400, 0.251
389	77.600, 0.309	77.600, 0.251
390	77.800, 0.309	77.800, 0.251
391	78.000, 0.309	78.000, 0.251
392	78.200, 0.309	78.200, 0.251
393	78.400, 0.310	78.400, 0.251
394	78.600, 0.310	78.600, 0.251
395	78.800, 0.310	78.800, 0.250
396	79.000, 0.310	79.000, 0.250
397	79.200, 0.311	79.200, 0.250
398	79.400, 0.311	79.400, 0.250
399	79.600, 0.311	79.600, 0.250
400	79.800, 0.311	79.800, 0.250
401	80.000, 0.311	80.000, 0.250
402	80.200, 0.311	80.200, 0.250
403	80.400, 0.311	80.400, 0.251
404	80.600, 0.311	80.600, 0.251
405	80.800, 0.310	80.800, 0.251
406	81.000, 0.310	81.000, 0.251
407	81.200, 0.310	81.200, 0.251
408	81.400, 0.309	81.400, 0.251
409	81.600, 0.309	81.600, 0.251
410	81.800, 0.309	81.800, 0.251
411	82.000, 0.309	82.000, 0.251
412	82.200, 0.308	82.200, 0.251
413	82.400, 0.308	82.400, 0.251
414	82.600, 0.308	82.600, 0.251
415	82.800, 0.308	82.800, 0.251
416	83.000, 0.308	83.000, 0.251
417	83.200, 0.308	83.200, 0.251
418	83.400, 0.309	83.400, 0.251
419	83.600, 0.309	83.600, 0.251
420	83.800, 0.310	83.800, 0.251
421	84.000, 0.310	84.000, 0.250
422	84.200, 0.310	84.200, 0.251
423	84.400, 0.310	84.400, 0.251
424	84.600, 0.310	84.600, 0.251
425	84.800, 0.309	84.800, 0.251
426	85.000, 0.309	85.000, 0.251
427	85.200, 0.309	85.200, 0.251
428	85.400, 0.309	85.400, 0.251
429	85.600, 0.309	85.600, 0.251
430	85.800, 0.309	85.800, 0.251
431	86.000, 0.309	86.000, 0.252
432	86.200, 0.308	86.200, 0.252
433	86.400, 0.308	86.400, 0.252
434	86.600, 0.308	86.600, 0.253
435	86.800, 0.307	86.800, 0.253
436	87.000, 0.307	87.000, 0.253
437	87.200, 0.307	87.200, 0.253
438	87.400, 0.307	87.400, 0.253
439	87.600, 0.308	87.600, 0.253
440	87.800, 0.308	87.800, 0.253
441	88.000, 0.308	88.000, 0.253
442	88.200, 0.308	88.200, 0.253
443	88.400, 0.308	88.400, 0.252
444	88.600, 0.308	88.600, 0.252
445	88.800, 0.308	88.800, 0.252
446	89.000, 0.308	89.000, 0.251
447	89.200, 0.308	89.200, 0.251
448	89.400, 0.308	89.400, 0.250
449	89.600, 0.308	89.600, 0.250
450	89.800, 0.308	89.800, 0.250
451	90.000, 0.308	90.000, 0.250
452	90.200, 0.308	90.200, 0.250
453	90.400, 0.308	90.400, 0.250
454	90.600, 0.307	90.600, 0.251
455	90.800, 0.307	90.800, 0.251
456	91.000, 0.307	91.000, 0.251
457	91.200, 0.307	91.200, 0.251
458	91.400, 0.307	91.400, 0.251
459	91.600, 0.307	91.600, 0.251
460	91.800, 0.307	91.800, 0.251
461	92.000, 0.307	92.000, 0.251
462	92.200, 0.307	92.200, 0.251
463	92.400, 0.307	92.400, 0.251
464	92.600, 0.308	92.600, 0.251
465	92.800, 0.308	92.800, 0.251
466	93.000, 0.308	93.000, 0.252
467	93.200, 0.309	93.200, 0.252
468	93.400, 0.309	93.400, 0.252
469	93.600, 0.309	93.600, 0.252
470	93.800, 0.310	93.800, 0.252
471	94.000, 0.310	94.000, 0.253
472	94.200, 0.310	94.200, 0.253
473	94.400, 0.311	94.400, 0.253
474	94.600, 0.311	94.600, 0.253
475	94.800, 0.311	94.800, 0.254
476	95.000, 0.311	95.000, 0.253
477	95.200, 0.311	95.200, 0.253
478	95.400, 0.311	95.400, 0.253
479	95.600, 0.310	95.600, 0.253
480	95.800, 0.310	95.800, 0.253
481	96.000, 0.310	96.000, 0.252
482	96.200, 0.310	96.200, 0.252
483	96.400, 0.310	96.400, 0.252
484	96.600, 0.309	96.600, 0.251
485	96.800, 0.309	96.800, 0.251
486	97.000, 0.309	97.000, 0.251
487	97.200, 0.309	97.200, 0.251
488	97.400, 0.309	97.400, 0.251
489	97.600, 0.309	97.600, 0.251
490	97.800, 0.309	97.800, 0.251
491	98.000, 0.309	98.000, 0.251
492	98.200, 0.309	98.200, 0.251
493	98.400, 0.309	98.400, 0.252
494	98.600, 0.309	98.600, 0.252
495	98.800, 0.310	98.800, 0.253
496	99.000, 0.310	99.000, 0.253
497	99.200, 0.310	99.200, 0.253
498	99.400, 0.310	99.400, 0.254
499	99.600, 0.310	99.600, 0.254
500	99.800, 0.310	99.800, 0.254
501	100.000, 0.311	100.000, 0.254
502	100.200, 0.311	100.200, 0.254
503	100.400, 0.311	100.400, 0.254
504	100.600, 0.311	100.600, 0.254
505	100.800, 0.311	100.800, 0.254
506	101.000, 0.311	101.000, 0.254
507	101.200, 0.311	101.200, 0.254
508	101.400, 0.311	101.400, 0.254
509	101.600, 0.311	101.600, 0.254
510	101.800, 0.311	101.800, 0.253
511	102.000, 0.311	102.000, 0.253
512	102.200, 0.310	102.200, 0.253
513	102.400, 0.311	102.400, 0.253
514	102.600, 0.311	102.600, 0.253
515	102.800, 0.311	102.800, 0.253
516	103.000, 0.311	103.000, 0.254
517	103.200, 0.311	103.200, 0.254
518	103.400, 0.311	103.400, 0.254
519	103.600, 0.311	103.600, 0.254
520	103.800, 0.311	103.800, 0.254
521	104.000, 0.311	104.000, 0.255
522	104.200, 0.311	104.200, 0.255
523	104.400, 0.310	104.400, 0.255
524	104.600, 0.310	104.600, 0.255
525	104.800, 0.310	104.800, 0.254
526	105.000, 0.310	105.000, 0.254
527	105.200, 0.310	105.200, 0.254
528	105.400, 0.310	105.400, 0.253
529	105.600, 0.310	105.600, 0.253
530	105.800, 0.310	105.800, 0.253
531	106.000, 0.310	106.000, 0.253
532	106.200, 0.310	106.200, 0.253
533	106.400, 0.310	106.400, 0.253
534	106.600, 0.310	106.600, 0.253
535	106.800, 0.311	106.800, 0.253
536	107.000, 0.311	107.000, 0.253
537	107.200, 0.311	107.200, 0.254
538	107.400, 0.311	107.400, 0.254
539	107.600, 0.311	107.600, 0.254
540	107.800, 0.312	107.800, 0.255
541	108.000, 0.312	108.000, 0.255
542	108.200, 0.312	108.200, 0.255
543	108.400, 0.312	108.400, 0.255
544	108.600, 0.311	108.600, 0.255
545	108.800, 0.311	108.800, 0.255
546	109.000, 0.311	109.000, 0.255
547	109.200, 0.312	109.200, 0.255
548	109.400, 0.312	109.400, 0.255
549	109.600, 0.312	109.600, 0.256
550	109.800, 0.312	109.800, 0.255
551	110.000, 0.312	110.000, 0.255
552	110.200, 0.312	110.200, 0.255
553	110.400, 0.312	110.400, 0.255
554	110.600, 0.312	110.600, 0.255
555	110.800, 0.312	110.800, 0.255
556	111.000, 0.312	111.000, 0.254
557	111.200, 0.312	111.200, 0.254
558	111.400, 0.312	111.400, 0.254
559	111.600, 0.312	111.600, 0.254
560	111.800, 0.312	111.800, 0.254
561	112.000, 0.312	112.000, 0.254
562	112.200, 0.312	112.200, 0.254
563	112.400, 0.312	112.400, 0.254
564	112.600, 0.312	112.600, 0.254
565	112.800, 0.312	112.800, 0.254
566	113.000, 0.312	113.000, 0.254
567	113.200, 0.312	113.200, 0.254
568	113.400, 0.312	113.400, 0.254
569	113.600, 0.312	113.600, 0.254
570	113.800, 0.312	113.800, 0.254
571	114.000, 0.312	114.000, 0.254
572	114.200, 0.312	114.200, 0.255
573	114.400, 0.313	114.400, 0.255
574	114.600, 0.313	114.600, 0.255
575	114.800, 0.313	114.800, 0.255
576	115.000, 0.313	115.000, 0.255
577	115.200, 0.313	115.200, 0.255
578	115.400, 0.313	115.400, 0.255
579	115.600, 0.313	115.600, 0.255
580	115.800, 0.313	115.800, 0.255
581	116.000, 0.313	116.000, 0.255
582	116.200, 0.313	116.200, 0.255
583	116.400, 0.313	116.400, 0.254
584	116.600, 0.313	116.600, 0.254
585	116.800, 0.313	116.800, 0.254
586	117.000, 0.313	117.000, 0.254
587	117.200, 0.313	117.200, 0.254
588	117.400, 0.313	117.400, 0.254
589	117.600, 0.314	117.600, 0.255
590	117.800, 0.314	117.800, 0.255
591	118.000, 0.314	118.000, 0.255
592	118.200, 0.314	118.200, 0.256
593	118.400, 0.314	118.400, 0.256
594	118.600, 0.314	118.600, 0.256
595	118.800, 0.314	118.800, 0.256
596	119.000, 0.314	119.000, 0.256
597	119.200, 0.314	119.200, 0.256
598	119.400, 0.314	119.400, 0.256
599	119.600, 0.314	119.600, 0.256
600	119.800, 0.314	119.800, 0.256
601	120.000, 0.315	120.000, 0.256
602	120.200, 0.315	120.200, 0.256
603	120.400, 0.315	120.400, 0.255
604	120.600, 0.315	120.600, 0.255
605	120.800, 0.315	120.800, 0.255
606	121.000, 0.315	121.000, 0.255
607	121.200, 0.315	121.200, 0.256
608	121.400, 0.315	121.400, 0.256
609	121.600, 0.315	121.600, 0.256
610	121.800, 0.315	121.800, 0.256
611	122.000, 0.315	122.000, 0.257
612	122.200, 0.315	122.200, 0.257
613	122.400, 0.315	122.400, 0.257
614	122.600, 0.315	122.600, 0.257
615	122.800, 0.315	122.800, 0.257
616	123.000, 0.315	123.000, 0.257
617	123.200, 0.315	123.200, 0.257
618	123.400, 0.315	123.400, 0.257
619	123.600, 0.315	123.600, 0.257
620	123.800, 0.315	123.800, 0.257
621	124.000, 0.315	124.000, 0.257
622	124.200, 0.315	124.200, 0.257
623	124.400, 0.315	124.400, 0.257
624	124.600, 0.316	124.600, 0.257
625	124.800, 0.316	124.800, 0.257
626	125.000, 0.316	125.000, 0.257
627	125.200, 0.316	125.200, 0.257
628	125.400, 0.316	125.400, 0.257
629	125.600, 0.316	125.600, 0.257
630	125.800, 0.316	125.800, 0.257
631	126.000, 0.315	126.000, 0.257
632	126.200, 0.315	126.200, 0.256
633	126.400, 0.315	126.400, 0.256
634	126.600, 0.315	126.600, 0.256
635	126.800, 0.315	126.800, 0.256
636	127.000, 0.315	127.000, 0.256
637	127.200, 0.315	127.200, 0.256
638	127.400, 0.315	127.400, 0.256
639	127.600, 0.315	127.600, 0.257
640	127.800, 0.315	127.800, 0.257
641	128.000, 0.316	128.000, 0.257
642	128.200, 0.316	128.200, 0.257
643	128.400, 0.316	128.400, 0.257
644	128.600, 0.316	128.600, 0.257
645	128.800, 0.317	128.800, 0.258
646	129.000, 0.317	129.000, 0.258
647	129.200, 0.317	129.200, 0.258
648	129.400, 0.317	129.400, 0.258
649	129.600, 0.317	129.600, 0.258
650	129.800, 0.316	129.800, 0.258
651	130.000, 0.316	130.000, 0.258
652	130.200, 0.316	130.200, 0.258
653	130.400, 0.316	130.400, 0.258
654	130.600, 0.316	130.600, 0.257
655	130.800, 0.316	130.800, 0.257
656	131.000, 0.316	131.000, 0.257
657	131.200, 0.317	131.200, 0.257
658	131.400, 0.317	131.400, 0.257
659	131.600, 0.317	131.600, 0.258
660	131.800, 0.317	131.800, 0.258
661	132.000, 0.318	132.000, 0.258
662	132.200, 0.318	132.200, 0.258
663	132.400, 0.318	132.400, 0.258
664	132.600, 0.318	132.600, 0.258
665	132.800, 0.318	132.800, 0.258
666	133.000, 0.318	133.000, 0.259
667	133.200, 0.318	133.200, 0.259
668	133.400, 0.318	133.400, 0.259
669	133.600, 0.318	133.600, 0.259
670	133.800, 0.317	133.800, 0.259
671	134.000, 0.317	134.000, 0.259
672	134.200, 0.317	134.200, 0.259
673	134.400, 0.317	134.400, 0.259
674	134.600, 0.317	134.600, 0.259
675	134.800, 0.317	134.800, 0.259
676	135.000, 0.317	135.000, 0.259
677	135.200, 0.317	135.200, 0.259
678	135.400, 0.317	135.400, 0.259
679	135.600, 0.317	135.600, 0.259
680	135.800, 0.317	135.800, 0.259
681	136.000, 0.317	136.000, 0.259
682	136.200, 0.317	136.200, 0.259
683	136.400, 0.317	136.400, 0.259
684	136.600, 0.317	136.600, 0.258
685	136.800, 0.317	136.800, 0.258
686	137.000, 0.317	137.000, 0.259
687	137.200, 0.317	137.200, 0.259
688	137.400, 0.318	137.400, 0.259
689	137.600, 0.318	137.600, 0.259
690	137.800, 0.318	137.800, 0.259
691	138.000, 0.318	138.000, 0.259
692	138.200, 0.319	138.200, 0.260
693	138.400, 0.319	138.400, 0.260
694	138.600, 0.319	138.600, 0.260
695	138.800, 0.319	138.800, 0.260
696	139.000, 0.319	139.000, 0.260
697	139.200, 0.319	139.200, 0.260
698	139.400, 0.319	139.400, 0.260
699	139.600, 0.319	139.600, 0.260
700	139.800, 0.318	139.800, 0.260
701	140.000, 0.318	140.000, 0.260
702	140.200, 0.318	140.200, 0.260
703	140.400, 0.318	140.400, 0.260
704	140.600, 0.318	140.600, 0.260
705	140.800, 0.318	140.800, 0.260
706	141.000, 0.318	141.000, 0.260
707	141.200, 0.318	141.200, 0.260
708	141.400, 0.318	141.400, 0.260
709	141.600, 0.318	141.600, 0.260
710	141.800, 0.318	141.800, 0.260
711	142.000, 0.318	142.000, 0.261
712	142.200, 0.318	142.200, 0.261
713	142.400, 0.318	142.400, 0.261
714	142.600, 0.318	142.600, 0.262
715	142.800, 0.318	142.800, 0.262
716	143.000, 0.318	143.000, 0.262
717	143.200, 0.318	143.200, 0.263
718	143.400, 0.319	143.400, 0.263
719	143.600, 0.319	143.600, 0.263
720	143.800, 0.319	143.800, 0.263
721	144.000, 0.319	144.000, 0.263
722	144.200, 0.319	144.200, 0.263
723	144.400, 0.320	144.400, 0.263
724	144.600, 0.320	144.600, 0.262
725	144.800, 0.320	144.800, 0.262
726	145.000, 0.320	145.000, 0.262
727	145.200, 0.320	145.200, 0.262
728	145.400, 0.321	145.400, 0.262
729	145.600, 0.321	145.600, 0.262
730	145.800, 0.321	145.800, 0.262
731	146.000, 0.321	146.000, 0.262
732	146.200, 0.321	146.200, 0.262
733	146.400, 0.321	146.400, 0.262
734	146.600, 0.321	146.600, 0.262
735	146.800, 0.320	146.800, 0.262
736	147.000, 0.320	147.000, 0.262
737	147.200, 0.320	147.200, 0.262
738	147.400, 0.320	147.400, 0.262
739	147.600, 0.320	147.600, 0.262
740	147.800, 0.320	147.800, 0.262
741	148.000, 0.320	148.000, 0.262
742	148.200, 0.320	148.200, 0.262
743	148.400, 0.320	148.400, 0.262
744	148.600, 0.320	148.600, 0.262
745	148.800, 0.320	148.800, 0.262
746	149.000, 0.320	149.000, 0.263
747	149.200, 0.320	149.200, 0.263
748	149.400, 0.320	149.400, 0.263
749	149.600, 0.320	149.600, 0.263
750	149.800, 0.320	149.800, 0.263
751	150.000, 0.320	150.000, 0.263
752	150.200, 0.318	150.200, 0.261
753	150.400, 0.316	150.400, 0.259
754	150.600, 0.314	150.600, 0.256
755	150.800, 0.312	150.800, 0.253
756	151.000, 0.310	151.000, 0.250
757	151.200, 0.307	151.200, 0.247
758	151.400, 0.305	151.400, 0.244
759	151.600, 0.302	151.600, 0.242
760	151.800, 0.300	151.800, 0.239
761	152.000, 0.298	152.000, 0.237
762	152.200, 0.296	152.200, 0.236
763	152.400, 0.294	152.400, 0.234
764	152.600, 0.293	152.600, 0.232
765	152.800, 0.292	152.800, 0.230
766	153.000, 0.291	153.000, 0.229
767	153.200, 0.290	153.200, 0.228
768	153.400, 0.289	153.400, 0.227
769	153.600, 0.288	153.600, 0.226
770	153.800, 0.287	153.800, 0.225
771	154.000, 0.286	154.000, 0.225
772	154.200, 0.286	154.200, 0.224
773	154.400, 0.285	154.400, 0.223
774	154.600, 0.285	154.600, 0.223
775	154.800, 0.284	154.800, 0.222
776	155.000, 0.284	155.000, 0.222
777	155.200, 0.283	155.200, 0.222
778	155.400, 0.283	155.400, 0.221
779	155.600, 0.282	155.600, 0.221
780	155.800, 0.281	155.800, 0.220
781	156.000, 0.281	156.000, 0.220
782	156.200, 0.280	156.200, 0.219
783	156.400, 0.279	156.400, 0.219
784	156.600, 0.279	156.600, 0.219
785	156.800, 0.279	156.800, 0.219
786	157.000, 0.278	157.000, 0.218
787	157.200, 0.278	157.200, 0.218
788	157.400, 0.278	157.400, 0.218
789	157.600, 0.278	157.600, 0.218
790	157.800, 0.278	157.800, 0.218
791	158.000, 0.278	158.000, 0.218
792	158.200, 0.278	158.200, 0.218
793	158.400, 0.278	158.400, 0.218
794	158.600, 0.278	158.600, 0.218
795	158.800, 0.278	158.800, 0.218
796	159.000, 0.278	159.000, 0.217
797	159.200, 0.278	159.200, 0.217
798	159.400, 0.277	159.400, 0.216
799	159.600, 0.276	159.600, 0.216
800	159.800, 0.276	159.800, 0.216
801	160.000, 0.276	160.000, 0.216
802	160.200, 0.275	160.200, 0.215
803	160.400, 0.275	160.400, 0.215
804	160.600, 0.275	160.600, 0.215
805	160.800, 0.274	160.800, 0.214
806	161.000, 0.274	161.000, 0.214
807	161.200, 0.274	161.200, 0.214
808	161.400, 0.274	161.400, 0.214
809	161.600, 0.274	161.600, 0.214
810	161.800, 0.274	161.800, 0.214
811	162.000, 0.274	162.000, 0.214
812	162.200, 0.274	162.200, 0.214
813	162.400, 0.274	162.400, 0.214
814	162.600, 0.274	162.600, 0.214
815	162.800, 0.274	162.800, 0.214
816	163.000, 0.274	163.000, 0.214
817	163.200, 0.274	163.200, 0.215
818	163.400, 0.274	163.400, 0.215
819	163.600, 0.274	163.600, 0.216
820	163.800, 0.274	163.800, 0.216
821	164.000, 0.274	164.000, 0.216
822	164.200, 0.274	164.200, 0.216
823	164.400, 0.273	164.400, 0.216
824	164.600, 0.273	164.600, 0.216
825	164.800, 0.272	164.800, 0.216
826	165.000, 0.272	165.000, 0.216
827	165.200, 0.272	165.200, 0.215
828	165.400, 0.271	165.400, 0.215
829	165.600, 0.271	165.600, 0.215
830	165.800, 0.271	165.800, 0.214
831	166.000, 0.272	166.000, 0.214
832	166.200, 0.272	166.200, 0.214
833	166.400, 0.272	166.400, 0.214
834	166.600, 0.272	166.600, 0.214
835	166.800, 0.272	166.800, 0.213
836	167.000, 0.272	167.000, 0.213
837	167.200, 0.272	167.200, 0.213
838	167.400, 0.272	167.400, 0.214
839	167.600, 0.271	167.600, 0.214
840	167.800, 0.271	167.800, 0.214
841	168.000, 0.271	168.000, 0.214
842	168.200, 0.270	168.200, 0.214
843	168.400, 0.270	168.400, 0.214
844	168.600, 0.270	168.600, 0.213
845	168.800, 0.270	168.800, 0.213
846	169.000, 0.269	169.000, 0.213
847	169.200, 0.269	169.200, 0.213
848	169.400, 0.269	169.400, 0.213
849	169.600, 0.269	169.600, 0.213
850	169.800, 0.269	169.800, 0.213
851	170.000, 0.268	170.000, 0.213
852	170.200, 0.268	170.200, 0.213
853	170.400, 0.268	170.400, 0.213
854	170.600, 0.268	170.600, 0.213
855	170.800, 0.268	170.800, 0.212
856	171.000, 0.268	171.000, 0.213
857	171.200, 0.268	171.200, 0.212
858	171.400, 0.268	171.400, 0.212
859	171.600, 0.267	171.600, 0.212
860	171.800, 0.267	171.800, 0.212
861	172.000, 0.267	172.000, 0.212
862	172.200, 0.267	172.200, 0.211
863	172.400, 0.267	172.400, 0.211
864	172.600, 0.267	172.600, 0.211
865	172.800, 0.267	172.800, 0.211
866	173.000, 0.267	173.000, 0.211
867	173.200, 0.267	173.200, 0.211
868	173.400, 0.267	173.400, 0.211
869	173.600, 0.267	173.600, 0.212
870	173.800, 0.267	173.800, 0.212
871	174.000, 0.267	174.000, 0.212
872	174.200, 0.266	174.200, 0.212
873	174.400, 0.266	174.400, 0.212
874	174.600, 0.266	174.600, 0.212
875	174.800, 0.266	174.800, 0.212
876	175.000, 0.266	175.000, 0.212
877	175.200, 0.265	175.200, 0.212
878	175.400, 0.265	175.400, 0.212
879	175.600, 0.265	175.600, 0.211
880	175.800, 0.265	175.800, 0.211
881	176.000, 0.264	176.000, 0.211
882	176.200, 0.264	176.200, 0.211
883	176.400, 0.264	176.400, 0.211
884	176.600, 0.264	176.600, 0.211
885	176.800, 0.264	176.800, 0.211
886	177.000, 0.264	177.000, 0.211
887	177.200, 0.264	177.200, 0.211
888	177.400, 0.264	177.400, 0.211
889	177.600, 0.264	177.600, 0.211
890	177.800, 0.264	177.800, 0.211
891	178.000, 0.264	178.000, 0.211
892	178.200, 0.264	178.200, 0.211
893	178.400, 0.264	178.400, 0.211
894	178.600, 0.264	178.600, 0.211
895	178.800, 0.264	178.800, 0.211
896	179.000, 0.264	179.000, 0.211
897	179.200, 0.264	179.200, 0.211
898	179.400, 0.264	179.400, 0.210
899	179.600, 0.264	179.600, 0.210
900	179.800, 0.263	179.800, 0.210
901	180.000, 0.263	180.000, 0.210
902	180.200, 0.263	180.200, 0.210
903	180.400, 0.263	180.400, 0.210
904	180.600, 0.263	180.600, 0.210
905	180.800, 0.263	180.800, 0.210
906	181.000, 0.263	181.000, 0.210
907	181.200, 0.263	181.200, 0.210
908	181.400, 0.262	181.400, 0.210
909	181.600, 0.262	181.600, 0.210
910	181.800, 0.262	181.800, 0.209
911	182.000, 0.262	182.000, 0.209
912	182.200, 0.262	182.200, 0.210
913	182.400, 0.262	182.400, 0.210
914	182.600, 0.262	182.600, 0.210
915	182.800, 0.262	182.800, 0.210
916	183.000, 0.262	183.000, 0.210
917	183.200, 0.261	183.200, 0.210
918	183.400, 0.261	183.400, 0.210
919	183.600, 0.261	183.600, 0.210
920	183.800, 0.261	183.800, 0.209
921	184.000, 0.261	184.000, 0.209
922	184.200, 0.261	184.200, 0.209
923	184.400, 0.261	184.400, 0.209
924	184.600, 0.261	184.600, 0.209
925	184.800, 0.261	184.800, 0.209
926	185.000, 0.261	185.000, 0.209
927	185.200, 0.261	185.200, 0.208
928	185.400, 0.260	185.400, 0.208
929	185.600, 0.260	185.600, 0.208
930	185.800, 0.259	185.800, 0.208
931	186.000, 0.259	186.000, 0.209
932	186.200, 0.258	186.200, 0.209
933	186.400, 0.258	186.400, 0.209
934	186.600, 0.258	186.600, 0.209
935	186.800, 0.258	186.800, 0.209
936	187.000, 0.258	187.000, 0.209
937	187.200, 0.258	187.200, 0.208
938	187.400, 0.258	187.400, 0.208
939	187.600, 0.258	187.600, 0.208
940	187.800, 0.258	187.800, 0.208
941	188.000, 0.259	188.000, 0.208
942	188.200, 0.259	188.200, 0.208
943	188.400, 0.259	188.400, 0.207
944	188.600, 0.259	188.600, 0.207
945	188.800, 0.259	188.800, 0.207
946	189.000, 0.259	189.000, 0.207
947	189.200, 0.259	189.200, 0.207
948	189.400, 0.259	189.400, 0.206
949	189.600, 0.259	189.600, 0.206
950	189.800, 0.259	189.800, 0.206
951	190.000, 0.259	190.000, 0.205
952	190.200, 0.258	190.200, 0.205
953	190.400, 0.258	190.400, 0.205
954	190.600, 0.258	190.600, 0.205
955	190.800, 0.258	190.800, 0.206
956	191.000, 0.258	191.000, 0.206
957	191.200, 0.258	191.200, 0.206
958	191.400, 0.257	191.400, 0.206
959	191.600, 0.257	191.600, 0.206
960	191.800, 0.257	191.800, 0.206
961	192.000, 0.257	192.000, 0.206
962	192.200, 0.257	192.200, 0.207
963	192.400, 0.257	192.400, 0.207
964	192.600, 0.257	192.600, 0.207
965	192.800, 0.257	192.800, 0.207
966	193.000, 0.257	193.000, 0.207
967	193.200, 0.257	193.200, 0.207
968	193.400, 0.257	193.400, 0.207
969	193.600, 0.257	193.600, 0.206
970	193.800, 0.257	193.800, 0.206
971	194.000, 0.257	194.000, 0.206
972	194.200, 0.257	194.200, 0.206
973	194.400, 0.257	194.400, 0.206
974	194.600, 0.256	194.600, 0.206
975	194.800, 0.256	194.800, 0.206
976	195.000, 0.256	195.000, 0.206
977	195.200, 0.256	195.200, 0.205
978	195.400, 0.255	195.400, 0.205
979	195.600, 0.255	195.600, 0.205
980	195.800, 0.255	195.800, 0.205
981	196.000, 0.255	196.000, 0.205
982	196.200, 0.255	196.200, 0.206
983	196.400, 0.255	196.400, 0.206
984	196.600, 0.255	196.600, 0.206
985	196.800, 0.255	196.800, 0.206
986	197.000, 0.255	197.000, 0.207
987	197.200, 0.255	197.200, 0.207
988	197.400, 0.255	197.400, 0.207
989	197.600, 0.254	197.600, 0.207
990	197.800, 0.254	197.800, 0.207
991	198.000, 0.254	198.000, 0.207
992	198.200, 0.254	198.200, 0.207
993	198.400, 0.254	198.400, 0.207
994	198.600, 0.253	198.600, 0.207
995	198.800, 0.253	198.800, 0.207
996	199.000, 0.253	199.000, 0.207
997	199.200, 0.253	199.200, 0.207
998	199.400, 0.253	199.400, 0.206
999	199.600, 0.253	199.600, 0.206
1000	199.800, 0.253	199.800, 0.206
1001	200.000, 0.253	200.000, 0.205
1002	200.200, 0.253	200.200, 0.205
1003	200.400, 0.253	200.400, 0.205
1004	200.600, 0.253	200.600, 0.204
1005	200.800, 0.253	200.800, 0.204
1006	201.000, 0.253	201.000, 0.204
1007	201.200, 0.253	201.200, 0.204
1008	201.400, 0.253	201.400, 0.204
1009	201.600, 0.252	201.600, 0.204
1010	201.800, 0.252	201.800, 0.204
1011	202.000, 0.252	202.000, 0.204
1012	202.200, 0.252	202.200, 0.204
1013	202.400, 0.252	202.400, 0.204
1014	202.600, 0.252	202.600, 0.205
1015	202.800, 0.252	202.800, 0.205
1016	203.000, 0.251	203.000, 0.205
1017	203.200, 0.251	203.200, 0.205
1018	203.400, 0.251	203.400, 0.205
1019	203.600, 0.251	203.600, 0.205
1020	203.800, 0.252	203.800, 0.205
1021	204.000, 0.252	204.000, 0.204
1022	204.200, 0.252	204.200, 0.204
1023	204.400, 0.252	204.400, 0.204
1024	204.600, 0.251	204.600, 0.204
1025	204.800, 0.251	204.800, 0.203
1026	205.000, 0.251	205.000, 0.203
1027	205.200, 0.251	205.200, 0.203
1028	205.400, 0.251	205.400, 0.203
1029	205.600, 0.250	205.600, 0.202
1030	205.800, 0.250	205.800, 0.202
1031	206.000, 0.250	206.000, 0.202
1032	206.200, 0.250	206.200, 0.202
1033	206.400, 0.250	206.400, 0.202
1034	206.600, 0.250	206.600, 0.203
1035	206.800, 0.250	206.800, 0.203
1036	207.000, 0.250	207.000, 0.203
1037	207.200, 0.250	207.200, 0.203
1038	207.400, 0.250	207.400, 0.203
1039	207.600, 0.250	207.600, 0.203
1040	207.800, 0.250	207.800, 0.204
1041	208.000, 0.250	208.000, 0.204
1042	208.200, 0.250	208.200, 0.204
1043	208.400, 0.250	208.400, 0.204
1044	208.600, 0.250	208.600, 0.204
1045	208.800, 0.250	208.800, 0.204
1046	209.000, 0.250	209.000, 0.204
1047	209.200, 0.250	209.200, 0.203
1048	209.400, 0.250	209.400, 0.203
1049	209.600, 0.250	209.600, 0.203
1050	209.800, 0.250	209.800, 0.202
1051	210.000, 0.250	210.000, 0.202
1052	210.200, 0.250	210.200, 0.202
1053	210.400, 0.249	210.400, 0.202
1054	210.600, 0.249	210.600, 0.202
1055	210.800, 0.249	210.800, 0.202
1056	211.000, 0.249	211.000, 0.202
1057	211.200, 0.249	211.200, 0.202
1058	211.400, 0.249	211.400, 0.202
1059	211.600, 0.249	211.600, 0.202
1060	211.800, 0.248	211.800, 0.202
1061	212.000, 0.248	212.000, 0.202
1062	212.200, 0.248	212.200, 0.202
1063	212.400, 0.248	212.400, 0.201
1064	212.600, 0.248	212.600, 0.201
1065	212.800, 0.248	212.800, 0.201
1066	213.000, 0.249	213.000, 0.201
1067	213.200, 0.249	213.200, 0.200
1068	213.400, 0.249	213.400, 0.200
1069	213.600, 0.249	213.600, 0.200
1070	213.800, 0.249	213.800, 0.200
1071	214.000, 0.248	214.000, 0.199
1072	214.200, 0.248	214.200, 0.199
1073	214.400, 0.248	214.400, 0.200
1074	214.600, 0.248	214.600, 0.200
1075	214.800, 0.248	214.800, 0.200
1076	215.000, 0.248	215.000, 0.200
1077	215.200, 0.248	215.200, 0.200
1078	215.400, 0.248	215.400, 0.200
1079	215.600, 0.248	215.600, 0.199
1080	215.800, 0.248	215.800, 0.199
1081	216.000, 0.248	216.000, 0.199
1082	216.200, 0.248	216.200, 0.199
1083	216.400, 0.248	216.400, 0.199
1084	216.600, 0.248	216.600, 0.199
1085	216.800, 0.248	216.800, 0.199
1086	217.000, 0.248	217.000, 0.199
1087	217.200, 0.249	217.200, 0.199
1088	217.400, 0.248	217.400, 0.199
1089	217.600, 0.248	217.600, 0.200
1090	217.800, 0.248	217.800, 0.200
1091	218.000, 0.247	218.000, 0.200
1092	218.200, 0.247	218.200, 0.200
1093	218.400, 0.247	218.400, 0.200
1094	218.600, 0.247	218.600, 0.201
1095	218.800, 0.247	218.800, 0.201
1096	219.000, 0.246	219.000, 0.201
1097	219.200, 0.246	219.200, 0.201
1098	219.400, 0.246	219.400, 0.200
1099	219.600, 0.246	219.600, 0.200
1100	219.800, 0.246	219.800, 0.200
1101	220.000, 0.246	220.000, 0.200
1102	220.200, 0.247	220.200, 0.200
1103	220.400, 0.247	220.400, 0.200
1104	220.600, 0.247	220.600, 0.200
1105	220.800, 0.247	220.800, 0.200
1106	221.000, 0.247	221.000, 0.199
1107	221.200, 0.247	221.200, 0.199
1108	221.400, 0.247	221.400, 0.199
1109	221.600, 0.246	221.600, 0.199
1110	221.800, 0.246	221.800, 0.199
1111	222.000, 0.245	222.000, 0.198
1112	222.200, 0.245	222.200, 0.198
1113	222.400, 0.245	222.400, 0.198
1114	222.600, 0.245	222.600, 0.198
1115	222.800, 0.245	222.800, 0.197
1116	223.000, 0.245	223.000, 0.197
1117	223.200, 0.245	223.200, 0.197
1118	223.400, 0.245	223.400, 0.197
1119	223.600, 0.245	223.600, 0.197
1120	223.800, 0.245	223.800, 0.197
1121	224.000, 0.245	224.000, 0.197
1122	224.200, 0.245	224.200, 0.197
1123	224.400, 0.245	224.400, 0.197
1124	224.600, 0.245	224.600, 0.198
1125	224.800, 0.245	224.800, 0.198
1126	225.000, 0.245	225.000, 0.198
1127	225.200, 0.245	225.200, 0.198
1128	225.400, 0.245	225.400, 0.198
1129	225.600, 0.245	225.600, 0.198
1130	225.800, 0.245	225.800, 0.198
1131	226.000, 0.245	226.000, 0.198
1132	226.200, 0.245	226.200, 0.198
1133	226.400, 0.245	226.400, 0.198
1134	226.600, 0.245	226.600, 0.198
1135	226.800, 0.245	226.800, 0.198
1136	227.000, 0.245	227.000, 0.199
1137	227.200, 0.245	227.200, 0.199
1138	227.400, 0.245	227.400, 0.199
1139	227.600, 0.245	227.600, 0.199
1140	227.800, 0.245	227.800, 0.199
1141	228.000, 0.245	228.000, 0.198
1142	228.200, 0.245	228.200, 0.198
1143	228.400, 0.244	228.400, 0.198
1144	228.600, 0.244	228.600, 0.198
1145	228.800, 0.244	228.800, 0.198
1146	229.000, 0.244	229.000, 0.197
1147	229.200, 0.244	229.200, 0.197
1148	229.400, 0.244	229.400, 0.197
1149	229.600, 0.243	229.600, 0.197
1150	229.800, 0.243	229.800, 0.197
1151	230.000, 0.243	230.000, 0.197
1152	230.200, 0.243	230.200, 0.197
1153	230.400, 0.243	230.400, 0.197
1154	230.600, 0.243	230.600, 0.197
1155	230.800, 0.243	230.800, 0.197
1156	231.000, 0.243	231.000, 0.197
1157	231.200, 0.243	231.200, 0.197
1158	231.400, 0.243	231.400, 0.197
1159	231.600, 0.243	231.600, 0.197
1160	231.800, 0.244	231.800, 0.197
1161	232.000, 0.244	232.000, 0.197
1162	232.200, 0.244	232.200, 0.197
1163	232.400, 0.244	232.400, 0.197
1164	232.600, 0.243	232.600, 0.197
1165	232.800, 0.243	232.800, 0.198
1166	233.000, 0.243	233.000, 0.198
1167	233.200, 0.243	233.200, 0.198
1168	233.400, 0.243	233.400, 0.198
1169	233.600, 0.243	233.600, 0.198
1170	233.800, 0.243	233.800, 0.198
1171	234.000, 0.243	234.000, 0.198
1172	234.200, 0.243	234.200, 0.197
1173	234.400, 0.244	234.400, 0.197
1174	234.600, 0.244	234.600, 0.197
1175	234.800, 0.244	234.800, 0.197
1176	235.000, 0.243	235.000, 0.197
1177	235.200, 0.243	235.200, 0.197
1178	235.400, 0.243	235.400, 0.197
1179	235.600, 0.243	235.600, 0.197
1180	235.800, 0.243	235.800, 0.197
1181	236.000, 0.242	236.000, 0.197
1182	236.200, 0.242	236.200, 0.196
1183	236.400, 0.242	236.400, 0.196
1184	236.600, 0.242	236.600, 0.196
1185	236.800, 0.242	236.800, 0.196
1186	237.000, 0.241	237.000, 0.196
1187	237.200, 0.241	237.200, 0.196
1188	237.400, 0.241	237.400, 0.196
1189	237.600, 0.241	237.600, 0.197
1190	237.800, 0.242	237.800, 0.197
1191	238.000, 0.242	238.000, 0.197
1192	238.200, 0.242	238.200, 0.197
1193	238.400, 0.242	238.400, 0.198
1194	238.600, 0.242	238.600, 0.198
1195	238.800, 0.242	238.800, 0.198
1196	239.000, 0.242	239.000, 0.198
1197	239.200, 0.242	239.200, 0.198
1198	239.400, 0.242	239.400, 0.198
1199	239.600, 0.242	239.600, 0.198
1200	239.800, 0.242	239.800, 0.197
1201	240.000, 0.242	240.000, 0.197
1202	240.200, 0.241	240.200, 0.197
1203	240.400, 0.241	240.400, 0.196
1204	240.600, 0.241	240.600, 0.196
1205	240.800, 0.241	240.800, 0.195
1206	241.000, 0.241	241.000, 0.195
1207	241.200, 0.240	241.200, 0.195
1208	241.400, 0.240	241.400, 0.195
1209	241.600, 0.240	241.600, 0.195
1210	241.800, 0.241	241.800, 0.195
1211	242.000, 0.241	242.000, 0.195
1212	242.200, 0.241	242.200, 0.195
1213	242.400, 0.240	242.400, 0.195
1214	242.600, 0.240	242.600, 0.195
1215	242.800, 0.240	242.800, 0.195
1216	243.000, 0.240	243.000, 0.195
1217	243.200, 0.240	243.200, 0.195
1218	243.400, 0.240	243.400, 0.195
1219	243.600, 0.240	243.600, 0.195
1220	243.800, 0.240	243.800, 0.195
1221	244.000, 0.240	244.000, 0.195
1222	244.200, 0.240	244.200, 0.195
1223	244.400, 0.239	244.400, 0.195
1224	244.600, 0.239	244.600, 0.195
1225	244.800, 0.239	244.800, 0.195
1226	245.000, 0.239	245.000, 0.195
1227	245.200, 0.239	245.200, 0.195
1228	245.400, 0.239	245.400, 0.195
1229	245.600, 0.239	245.600, 0.195
1230	245.800, 0.239	245.800, 0.195
1231	246.000, 0.239	246.000, 0.195
1232	246.200, 0.240	246.200, 0.195
1233	246.400, 0.240	246.400, 0.195
1234	246.600, 0.240	246.600, 0.195
1235	246.800, 0.240	246.800, 0.195
1236	247.000, 0.240	247.000, 0.195
1237	247.200, 0.240	247.200, 0.195
1238	247.400, 0.240	247.400, 0.195
1239	247.600, 0.240	247.600, 0.195
1240	247.800, 0.240	247.800, 0.195
1241	248.000, 0.239	248.000, 0.196
1242	248.200, 0.239	248.200, 0.196
1243	248.400, 0.239	248.400, 0.195
1244	248.600, 0.239	248.600, 0.195
1245	248.800, 0.239	248.800, 0.195
1246	249.000, 0.239	249.000, 0.195
1247	249.200, 0.239	249.200, 0.195
1248	249.400, 0.239	249.400, 0.196
1249	249.600, 0.239	249.600, 0.196
1250	249.800, 0.239	249.800, 0.195
1251	250.000, 0.240	250.000, 0.195
1252	250.200, 0.240	250.200, 0.195
1253	250.400, 0.240	250.400, 0.195
1254	250.600, 0.240	250.600, 0.195
1255	250.800, 0.239	250.800, 0.194
1256	251.000, 0.239	251.000, 0.195
1257	251.200, 0.239	251.200, 0.195
1258	251.400, 0.239	251.400, 0.195
1259	251.600, 0.239	251.600, 0.195
1260	251.800, 0.239	251.800, 0.195
1261	252.000, 0.239	252.000, 0.195
1262	252.200, 0.239	252.200, 0.195
1263	252.400, 0.239	252.400, 0.195
1264	252.600, 0.238	252.600, 0.195
1265	252.800, 0.238	252.800, 0.195
1266	253.000, 0.238	253.000, 0.195
1267	253.200, 0.238	253.200, 0.195
1268	253.400, 0.238	253.400, 0.195
1269	253.600, 0.238	253.600, 0.195
1270	253.800, 0.238	253.800, 0.195
1271	254.000, 0.238	254.000, 0.195
1272	254.200, 0.239	254.200, 0.195
1273	254.400, 0.239	254.400, 0.195
1274	254.600, 0.239	254.600, 0.195
1275	254.800, 0.239	254.800, 0.195
1276	255.000, 0.239	255.000, 0.194
1277	255.200, 0.239	255.200, 0.194
1278	255.400, 0.238	255.400, 0.194
1279	255.600, 0.238	255.600, 0.194
1280	255.800, 0.238	255.800, 0.193
1281	256.000, 0.238	256.000, 0.193
1282	256.200, 0.238	256.200, 0.193
1283	256.400, 0.237	256.400, 0.194
1284	256.600, 0.237	256.600, 0.194
1285	256.800, 0.236	256.800, 0.194
1286	257.000, 0.236	257.000, 0.194
1287	257.200, 0.236	257.200, 0.194
1288	257.400, 0.235	257.400, 0.194
1289	257.600, 0.235	257.600, 0.194
1290	257.800, 0.235	257.800, 0.194
1291	258.000, 0.235	258.000, 0.194
1292	258.200, 0.235	258.200, 0.193
1293	258.400, 0.235	258.400, 0.193
1294	258.600, 0.235	258.600, 0.193
1295	258.800, 0.235	258.800, 0.193
1296	259.000, 0.236	259.000, 0.192
1297	259.200, 0.236	259.200, 0.192
1298	259.400, 0.236	259.400, 0.192
1299	259.600, 0.236	259.600, 0.192
1300	259.800, 0.236	259.800, 0.192
1301	260.000, 0.236	260.000, 0.192
1302	260.200, 0.236	260.200, 0.193
1303	260.400, 0.236	260.400, 0.193
1304	260.600, 0.236	260.600, 0.193
1305	260.800, 0.235	260.800, 0.192
1306	261.000, 0.235	261.000, 0.192
1307	261.200, 0.235	261.200, 0.192
1308	261.400, 0.234	261.400, 0.192
1309	261.600, 0.234	261.600, 0.192
1310	261.800, 0.234	261.800, 0.192
1311	262.000, 0.234	262.000, 0.192
1312	262.200, 0.234	262.200, 0.192
1313	262.400, 0.234	262.400, 0.192
1314	262.600, 0.234	262.600, 0.192
1315	262.800, 0.233	262.800, 0.192
1316	263.000, 0.233	263.000, 0.192
1317	263.200, 0.234	263.200, 0.192
1318	263.400, 0.234	263.400, 0.193
1319	263.600, 0.234	263.600, 0.193
1320	263.800, 0.234	263.800, 0.193
1321	264.000, 0.234	264.000, 0.193
1322	264.200, 0.234	264.200, 0.193
1323	264.400, 0.234	264.400, 0.193
1324	264.600, 0.234	264.600, 0.192
1325	264.800, 0.234	264.800, 0.192
1326	265.000, 0.235	265.000, 0.192
1327	265.200, 0.235	265.200, 0.192
1328	265.400, 0.235	265.400, 0.191
1329	265.600, 0.235	265.600, 0.191
1330	265.800, 0.235	265.800, 0.191
1331	266.000, 0.234	266.000, 0.190
1332	266.200, 0.235	266.200, 0.190
1333	266.400, 0.235	266.400, 0.190
1334	266.600, 0.235	266.600, 0.190
1335	266.800, 0.235	266.800, 0.190
1336	267.000, 0.235	267.000, 0.190
1337	267.200, 0.235	267.200, 0.190
1338	267.400, 0.235	267.400, 0.190
1339	267.600, 0.235	267.600, 0.190
1340	267.800, 0.235	267.800, 0.190
1341	268.000, 0.234	268.000, 0.190
1342	268.200, 0.234	268.200, 0.191
1343	268.400, 0.234	268.400, 0.191
1344	268.600, 0.234	268.600, 0.191
1345	268.800, 0.234	268.800, 0.191
1346	269.000, 0.234	269.000, 0.191
1347	269.200, 0.234	269.200, 0.192
1348	269.400, 0.234	269.400, 0.192
1349	269.600, 0.234	269.600, 0.192
1350	269.800, 0.234	269.800, 0.192
1351	,	,
1352	,	,
1353	,	,
1354	,	,
1355	,	,
1356	,	,
1357	,	,
1358	,	,
1359	,	,
1360	,	,
1361	,	,
1362	,	,
1363	,	,
1364	,	,
1365	,	,
1366	,	,
1367	,	,
1368	,	,
1369	,	,
1370	,	,
1371	,	,
1372	,	,
1373	,	,
1374	,	,
1375	,	,
1376	,	,
1377	,	,
1378	,	,
1379	,	,
1380	,	,
1381	,	,
1382	,	,
1383	,	,
1384	,	,
1385	,	,
1386	,	,
1387	,	,
1388	,	,
1389	,	,
1390	,	,
1391	,	,
1392	,	,
1393	,	,
1394	,	,
1395	,	,
1396	,	,
1397	,	,
1398	,	,
1399	,	,
1400	,	,
1401	,	,
1402	,	,
1403	,	,
1404	,	,
1405	,	,
1406	,	,
1407	,	,
1408	,	,
1409	,	,
1410	,	,
1411	,	,
1412	,	,
1413	,	,
1414	,	,
1415	,	,
1416	,	,
1417	,	,
1418	,	,
1419	,	,
1420	,	,
1421	,	,
1422	,	,
1423	,	,
1424	,	,
1425	,	,
1426	,	,
1427	,	,
1428	,	,
1429	,	,
1430	,	,
1431	,	,
1432	,	,
1433	,	,
1434	,	,
1435	,	,
1436	,	,
1437	,	,
1438	,	,
1439	,	,
1440	,	,
1441	,	,
1442	,	,
1443	,	,
1444	,	,
1445	,	,
1446	,	,
1447	,	,
1448	,	,
1449	,	,
1450	,	,
1451	,	,
1452	,	,
1453	,	,
1454	,	,
1455	,	,
1456	,	,
1457	,	,
1458	,	,
1459	,	,
1460	,	,
1461	,	,
1462	,	,
1463	,	,
1464	,	,
1465	,	,
1466	,	,
1467	,	,
1468	,	,
1469	,	,
1470	,	,
1471	,	,
1472	,	,
1473	,	,
1474	,	,
1475	,	,
1476	,	,
1477	,	,
1478	,	,
1479	,	,
1480	,	,
1481	,	,
1482	,	,
1483	,	,
1484	,	,
1485	,	,
1486	,	,
1487	,	,
1488	,	,
1489	,	,
1490	,	,
1491	,	,
1492	,	,
1493	,	,
1494	,	,
1495	,	,
1496	,	,
1497	,	,
1498	,	,
1499	,	,
1500	,	,
1501	,	,
1502	,	,
1503	,	,
1504	,	,
1505	,	,
1506	,	,
1507	,	,
1508	,	,
1509	,	,
1510	,	,
1511	,	,
1512	,	,
1513	,	,
1514	,	,
1515	,	,
1516	,	,
1517	,	,
1518	,	,
1519	,	,
1520	,	,
1521	,	,
1522	,	,
1523	,	,
1524	,	,
1525	,	,
1526	,	,
1527	,	,
1528	,	,
1529	,	,
1530	,	,
1531	,	,
1532	,	,
1533	,	,
1534	,	,
1535	,	,
1536	,	,
1537	,	,
1538	,	,
1539	,	,
1540	,	,
1541	,	,
1542	,	,
1543	,	,
1544	,	,
1545	,	,
1546	,	,
1547	,	,
1548	,	,
1549	,	,
1550	,	,
1551	,	,
1552	,	,
1553	,	,
1554	,	,
1555	,	,
1556	,	,
1557	,	,
1558	,	,
1559	,	,
1560	,	,
1561	,	,
1562	,	,
1563	,	,
1564	,	,
1565	,	,
1566	,	,
1567	,	,
1568	,	,
1569	,	,
1570	,	,
1571	,	,
1572	,	,
1573	,	,
1574	,	,
1575	,	,
1576	,	,
1577	,	,
1578	,	,
1579	,	,
1580	,	,
1581	,	,
1582	,	,
1583	,	,
1584	,	,
1585	,	,
1586	,	,
1587	,	,
1588	,	,
1589	,	,
1590	,	,
1591	,	,
1592	,	,
1593	,	,
1594	,	,
1595	,	,
1596	,	,
1597	,	,
1598	,	,
1599	,	,
1600	,	,
1601	,	,
1602	,	,
1603	,	,
1604	,	,
1605	,	,
1606	,	,
1607	,	,
1608	,	,
1609	,	,
1610	,	,
1611	,	,
1612	,	,
1613	,	,
1614	,	,
1615	,	,
1616	,	,
1617	,	,
1618	,	,
1619	,	,
1620	,	,
1621	,	,
1622	,	,
1623	,	,
1624	,	,
1625	,	,
1626	,	,
1627	,	,
1628	,	,
1629	,	,
1630	,	,
1631	,	,
1632	,	,
1633	,	,
1634	,	,
1635	,	,
1636	,	,
1637	,	,
1638	,	,
1639	,	,
1640	,	,
1641	,	,
1642	,	,
1643	,	,
1644	,	,
1645	,	,
1646	,	,
1647	,	,
1648	,	,
1649	,	,
1650	,	,
1651	,	,
1652	,	,
1653	,	,
1654	,	,
1655	,	,
1656	,	,
1657	,	,
1658	,	,
1659	,	,
1660	,	,
1661	,	,
1662	,	,
1663	,	,
1664	,	,
1665	,	,
1666	,	,
1667	,	,
1668	,	,
1669	,	,
1670	,	,
1671	,	,
1672	,	,
1673	,	,
1674	,	,
1675	,	,
1676	,	,
1677	,	,
1678	,	,
1679	,	,
1680	,	,
1681	,	,
1682	,	,
1683	,	,
1684	,	,
1685	,	,
1686	,	,
1687	,	,
1688	,	,
1689	,	,
1690	,	,
1691	,	,
1692	,	,
1693	,	,
1694	,	,
1695	,	,
1696	,	,
1697	,	,
1698	,	,
1699	,	,
1700	,	,
1701	,	,
1702	,	,
1703	,	,
1704	,	,
1705	,	,
1706	,	,
1707	,	,
1708	,	,
1709	,	,
1710	,	,
1711	,	,
1712	,	,
1713	,	,
1714	,	,
1715	,	,
1716	,	,
1717	,	,
1718	,	,
1719	,	,
1720	,	,
1721	,	,
1722	,	,
1723	,	,
1724	,	,
1725	,	,
1726	,	,
1727	,	,
1728	,	,
1729	,	,
1730	,	,
1731	,	,
1732	,	,
1733	,	,
1734	,	,
1735	,	,
1736	,	,
1737	,	,
1738	,	,
1739	,	,
1740	,	,
1741	,	,
1742	,	,
1743	,	,
1744	,	,
1745	,	,
1746	,	,
1747	,	,
1748	,	,
1749	,	,
1750	,	,
1751	,	,
1752	,	,
1753	,	,
1754	,	,
1755	,	,
1756	,	,
1757	,	,
1758	,	,
1759	,	,
1760	,	,
1761	,	,
1762	,	,
1763	,	,
1764	,	,
1765	,	,
1766	,	,
1767	,	,
1768	,	,
1769	,	,
1770	,	,
1771	,	,
1772	,	,
1773	,	,
1774	,	,
1775	,	,
1776	,	,
1777	,	,
1778	,	,
1779	,	,
1780	,	,
1781	,	,
1782	,	,
1783	,	,
1784	,	,
1785	,	,
1786	,	,
1787	,	,
1788	,	,
1789	,	,
1790	,	,
1791	,	,
1792	,	,
1793	,	,
1794	,	,
1795	,	,
1796	,	,
1797	,	,
1798	,	,
1799	,	,
1800	,	,
1801	,	,
1802	,	,
1803	,	,
1804	,	,
1805	,	,
1806	,	,
1807	,	,
1808	,	,
1809	,	,
1810	,	,
1811	,	,
1812	,	,
1813	,	,
1814	,	,
1815	,	,
1816	,	,
1817	,	,
1818	,	,
1819	,	,
1820	,	,
1821	,	,
1822	,	,
1823	,	,
1824	,	,
1825	,	,
1826	,	,
1827	,	,
1828	,	,
1829	,	,
1830	,	,
1831	,	,
1832	,	,
1833	,	,
1834	,	,
1835	,	,
1836	,	,
1837	,	,
1838	,	,
1839	,	,
1840	,	,
1841	,	,
1842	,	,
1843	,	,
1844	,	,
1845	,	,
1846	,	,
1847	,	,
1848	,	,
1849	,	,
1850	,	,
1851	,	,
1852	,	,
1853	,	,
1854	,	,
1855	,	,
1856	,	,
1857	,	,
1858	,	,
1859	,	,
1860	,	,
1861	,	,
1862	,	,
1863	,	,
1864	,	,
1865	,	,
1866	,	,
1867	,	,
1868	,	,
1869	,	,
1870	,	,
1871	,	,
1872	,	,
1873	,	,
1874	,	,
1875	,	,
1876	,	,
1877	,	,
1878	,	,
1879	,	,
1880	,	,
1881	,	,
1882	,	,
1883	,	,
1884	,	,
1885	,	,
1886	,	,
1887	,	,
1888	,	,
1889	,	,
1890	,	,
1891	,	,
1892	,	,
1893	,	,
1894	,	,
1895	,	,
1896	,	,
1897	,	,
1898	,	,
1899	,	,
1900	,	,
1901	,	,
1902	,	,
1903	,	,
1904	,	,
1905	,	,
1906	,	,
1907	,	,
1908	,	,
1909	,	,
1910	,	,
1911	,	,
1912	,	,
1913	,	,
1914	,	,
1915	,	,
1916	,	,
1917	,	,
1918	,	,
1919	,	,
1920	,	,
1921	,	,
1922	,	,
1923	,	,
1924	,	,
1925	,	,
1926	,	,
1927	,	,
1928	,	,
1929	,	,
1930	,	,
1931	,	,
1932	,	,
1933	,	,
1934	,	,
1935	,	,
1936	,	,
1937	,	,
1938	,	,
1939	,	,
1940	,	,
1941	,	,
1942	,	,
1943	,	,
1944	,	,
1945	,	,
1946	,	,
1947	,	,
1948	,	,
1949	,	,
1950	,	,
1951	,	,
1952	,	,
1953	,	,
1954	,	,
1955	,	,
1956	,	,
1957	,	,
1958	,	,
1959	,	,
1960	,	,
1961	,	,
1962	,	,
1963	,	,
1964	,	,
1965	,	,
1966	,	,
1967	,	,
1968	,	,
1969	,	,
1970	,	,
1971	,	,
1972	,	,
1973	,	,
1974	,	,
1975	,	,
1976	,	,
1977	,	,
1978	,	,
1979	,	,
1980	,	,
1981	,	,
1982	,	,
1983	,	,
1984	,	,
1985	,	,
1986	,	,
1987	,	,
1988	,	,
1989	,	,
1990	,	,
1991	,	,
1992	,	,
1993	,	,
1994	,	,
1995	,	,
1996	,	,
1997	,	,
1998	,	,
1999	,	,
[truncated: 13,001 more rows]

## Sheet: Fig2_panelB_rep4
	169bp closed parS DNA ParB (R104A)	169bp closed parS DNA ParB (R104A) CTP
1	0.000, 0.011	0.000, -0.014
2	0.200, 0.010	0.200, -0.015
3	0.400, 0.010	0.400, -0.016
4	0.600, 0.009	0.600, -0.017
5	0.800, 0.009	0.800, -0.017
6	1.000, 0.008	1.000, -0.018
7	1.200, 0.008	1.200, -0.019
8	1.400, 0.007	1.400, -0.020
9	1.600, 0.006	1.600, -0.021
10	1.800, 0.005	1.800, -0.021
11	2.000, 0.004	2.000, -0.021
12	2.200, 0.004	2.200, -0.021
13	2.400, 0.003	2.400, -0.021
14	2.600, 0.002	2.600, -0.021
15	2.800, 0.001	2.800, -0.021
16	3.000, 0.001	3.000, -0.021
17	3.200, 0.000	3.200, -0.021
18	3.400, 0.000	3.400, -0.020
19	3.600, -0.000	3.600, -0.020
20	3.800, -0.001	3.800, -0.020
21	4.000, -0.001	4.000, -0.021
22	4.200, -0.001	4.200, -0.021
23	4.400, -0.001	4.400, -0.021
24	4.600, -0.001	4.600, -0.020
25	4.800, -0.000	4.800, -0.020
26	5.000, -0.000	5.000, -0.020
27	5.200, -0.000	5.200, -0.020
28	5.400, -0.000	5.400, -0.020
29	5.600, -0.000	5.600, -0.020
30	5.800, -0.000	5.800, -0.020
31	6.000, 0.000	6.000, -0.020
32	6.200, 0.000	6.200, -0.020
33	6.400, 0.000	6.400, -0.019
34	6.600, 0.000	6.600, -0.019
35	6.800, 0.000	6.800, -0.019
36	7.000, 0.001	7.000, -0.018
37	7.200, 0.000	7.200, -0.018
38	7.400, 0.000	7.400, -0.018
39	7.600, 0.000	7.600, -0.018
40	7.800, -0.000	7.800, -0.018
41	8.000, -0.000	8.000, -0.018
42	8.200, -0.000	8.200, -0.017
43	8.400, -0.000	8.400, -0.017
44	8.600, -0.000	8.600, -0.017
45	8.800, -0.000	8.800, -0.017
46	9.000, -0.000	9.000, -0.016
47	9.200, -0.000	9.200, -0.016
48	9.400, -0.000	9.400, -0.016
49	9.600, -0.000	9.600, -0.016
50	9.800, -0.000	9.800, -0.016
51	10.000, -0.001	10.000, -0.015
52	10.200, -0.001	10.200, -0.016
53	10.400, -0.001	10.400, -0.016
54	10.600, -0.001	10.600, -0.016
55	10.800, -0.001	10.800, -0.016
56	11.000, -0.001	11.000, -0.016
57	11.200, -0.001	11.200, -0.016
58	11.400, -0.002	11.400, -0.016
59	11.600, -0.002	11.600, -0.016
60	11.800, -0.002	11.800, -0.016
61	12.000, -0.002	12.000, -0.015
62	12.200, -0.002	12.200, -0.015
63	12.400, -0.001	12.400, -0.015
64	12.600, -0.001	12.600, -0.014
65	12.800, -0.001	12.800, -0.014
66	13.000, -0.001	13.000, -0.013
67	13.200, -0.001	13.200, -0.013
68	13.400, -0.000	13.400, -0.012
69	13.600, -0.000	13.600, -0.012
70	13.800, -0.000	13.800, -0.012
71	14.000, -0.000	14.000, -0.012
72	14.200, -0.000	14.200, -0.012
73	14.400, -0.000	14.400, -0.012
74	14.600, -0.000	14.600, -0.012
75	14.800, -0.000	14.800, -0.012
76	15.000, -0.000	15.000, -0.012
77	15.200, -0.000	15.200, -0.012
78	15.400, -0.000	15.400, -0.012
79	15.600, -0.000	15.600, -0.012
80	15.800, -0.000	15.800, -0.011
81	16.000, -0.000	16.000, -0.011
82	16.200, -0.000	16.200, -0.011
83	16.400, -0.000	16.400, -0.010
84	16.600, -0.000	16.600, -0.010
85	16.800, -0.001	16.800, -0.009
86	17.000, -0.001	17.000, -0.009
87	17.200, -0.001	17.200, -0.009
88	17.400, -0.001	17.400, -0.008
89	17.600, -0.000	17.600, -0.008
90	17.800, -0.000	17.800, -0.008
91	18.000, 0.000	18.000, -0.008
92	18.200, 0.000	18.200, -0.008
93	18.400, 0.001	18.400, -0.007
94	18.600, 0.001	18.600, -0.007
95	18.800, 0.001	18.800, -0.007
96	19.000, 0.002	19.000, -0.007
97	19.200, 0.002	19.200, -0.007
98	19.400, 0.002	19.400, -0.007
99	19.600, 0.002	19.600, -0.007
100	19.800, 0.002	19.800, -0.007
101	20.000, 0.001	20.000, -0.007
102	20.200, 0.001	20.200, -0.006
103	20.400, 0.001	20.400, -0.006
104	20.600, 0.001	20.600, -0.006
105	20.800, 0.000	20.800, -0.006
106	21.000, 0.000	21.000, -0.006
107	21.200, 0.000	21.200, -0.006
108	21.400, 0.000	21.400, -0.006
109	21.600, 0.000	21.600, -0.006
110	21.800, 0.001	21.800, -0.006
111	22.000, 0.001	22.000, -0.005
112	22.200, 0.001	22.200, -0.005
113	22.400, 0.001	22.400, -0.005
114	22.600, 0.001	22.600, -0.004
115	22.800, 0.001	22.800, -0.004
116	23.000, 0.002	23.000, -0.004
117	23.200, 0.002	23.200, -0.004
118	23.400, 0.002	23.400, -0.004
119	23.600, 0.002	23.600, -0.004
120	23.800, 0.002	23.800, -0.003
121	24.000, 0.002	24.000, -0.003
122	24.200, 0.002	24.200, -0.003
123	24.400, 0.002	24.400, -0.003
124	24.600, 0.002	24.600, -0.002
125	24.800, 0.002	24.800, -0.002
126	25.000, 0.002	25.000, -0.002
127	25.200, 0.002	25.200, -0.002
128	25.400, 0.002	25.400, -0.002
129	25.600, 0.002	25.600, -0.002
130	25.800, 0.002	25.800, -0.001
131	26.000, 0.002	26.000, -0.001
132	26.200, 0.002	26.200, -0.001
133	26.400, 0.002	26.400, -0.001
134	26.600, 0.001	26.600, -0.001
135	26.800, 0.001	26.800, -0.001
136	27.000, 0.001	27.000, -0.001
137	27.200, 0.001	27.200, -0.001
138	27.400, 0.000	27.400, -0.001
139	27.600, 0.000	27.600, -0.001
140	27.800, -0.000	27.800, -0.001
141	28.000, -0.000	28.000, -0.000
142	28.200, -0.000	28.200, -0.000
143	28.400, -0.000	28.400, 0.000
144	28.600, -0.000	28.600, 0.000
145	28.800, -0.000	28.800, 0.000
146	29.000, -0.000	29.000, 0.001
147	29.200, -0.000	29.200, 0.001
148	29.400, -0.000	29.400, 0.001
149	29.600, 0.000	29.600, 0.001
150	29.800, 0.000	29.800, 0.001
151	30.000, 0.000	30.000, 0.000
152	30.200, 0.010	30.200, 0.008
153	30.400, 0.021	30.400, 0.018
154	30.600, 0.034	30.600, 0.029
155	30.800, 0.049	30.800, 0.042
156	31.000, 0.065	31.000, 0.057
157	31.200, 0.083	31.200, 0.073
158	31.400, 0.101	31.400, 0.090
159	31.600, 0.119	31.600, 0.108
160	31.800, 0.136	31.800, 0.125
161	32.000, 0.153	32.000, 0.143
162	32.200, 0.168	32.200, 0.159
163	32.400, 0.182	32.400, 0.174
164	32.600, 0.195	32.600, 0.189
165	32.800, 0.208	32.800, 0.203
166	33.000, 0.218	33.000, 0.216
167	33.200, 0.228	33.200, 0.228
168	33.400, 0.237	33.400, 0.239
169	33.600, 0.245	33.600, 0.249
170	33.800, 0.252	33.800, 0.258
171	34.000, 0.257	34.000, 0.266
172	34.200, 0.263	34.200, 0.273
173	34.400, 0.267	34.400, 0.279
174	34.600, 0.271	34.600, 0.285
175	34.800, 0.274	34.800, 0.290
176	35.000, 0.277	35.000, 0.294
177	35.200, 0.279	35.200, 0.298
178	35.400, 0.281	35.400, 0.301
179	35.600, 0.283	35.600, 0.304
180	35.800, 0.285	35.800, 0.307
181	36.000, 0.286	36.000, 0.309
182	36.200, 0.287	36.200, 0.311
183	36.400, 0.289	36.400, 0.313
184	36.600, 0.290	36.600, 0.315
185	36.800, 0.291	36.800, 0.316
186	37.000, 0.292	37.000, 0.318
187	37.200, 0.292	37.200, 0.319
188	37.400, 0.293	37.400, 0.320
189	37.600, 0.294	37.600, 0.321
190	37.800, 0.294	37.800, 0.322
191	38.000, 0.295	38.000, 0.322
192	38.200, 0.295	38.200, 0.323
193	38.400, 0.296	38.400, 0.324
194	38.600, 0.296	38.600, 0.324
195	38.800, 0.297	38.800, 0.325
196	39.000, 0.297	39.000, 0.326
197	39.200, 0.298	39.200, 0.326
198	39.400, 0.298	39.400, 0.327
199	39.600, 0.298	39.600, 0.327
200	39.800, 0.299	39.800, 0.328
201	40.000, 0.299	40.000, 0.328
202	40.200, 0.299	40.200, 0.329
203	40.400, 0.300	40.400, 0.329
204	40.600, 0.300	40.600, 0.330
205	40.800, 0.300	40.800, 0.330
206	41.000, 0.300	41.000, 0.331
207	41.200, 0.301	41.200, 0.331
208	41.400, 0.301	41.400, 0.332
209	41.600, 0.301	41.600, 0.332
210	41.800, 0.301	41.800, 0.333
211	42.000, 0.302	42.000, 0.333
212	42.200, 0.302	42.200, 0.333
213	42.400, 0.302	42.400, 0.333
214	42.600, 0.302	42.600, 0.333
215	42.800, 0.303	42.800, 0.333
216	43.000, 0.303	43.000, 0.333
217	43.200, 0.303	43.200, 0.333
218	43.400, 0.303	43.400, 0.334
219	43.600, 0.304	43.600, 0.334
220	43.800, 0.304	43.800, 0.334
221	44.000, 0.304	44.000, 0.334
222	44.200, 0.304	44.200, 0.334
223	44.400, 0.304	44.400, 0.334
224	44.600, 0.304	44.600, 0.334
225	44.800, 0.304	44.800, 0.335
226	45.000, 0.304	45.000, 0.335
227	45.200, 0.305	45.200, 0.335
228	45.400, 0.305	45.400, 0.336
229	45.600, 0.305	45.600, 0.336
230	45.800, 0.305	45.800, 0.336
231	46.000, 0.305	46.000, 0.336
232	46.200, 0.305	46.200, 0.336
233	46.400, 0.305	46.400, 0.335
234	46.600, 0.305	46.600, 0.335
235	46.800, 0.306	46.800, 0.335
236	47.000, 0.306	47.000, 0.335
237	47.200, 0.306	47.200, 0.335
238	47.400, 0.306	47.400, 0.336
239	47.600, 0.306	47.600, 0.335
240	47.800, 0.305	47.800, 0.336
241	48.000, 0.305	48.000, 0.335
242	48.200, 0.305	48.200, 0.336
243	48.400, 0.305	48.400, 0.336
244	48.600, 0.305	48.600, 0.336
245	48.800, 0.305	48.800, 0.336
246	49.000, 0.305	49.000, 0.336
247	49.200, 0.305	49.200, 0.336
248	49.400, 0.305	49.400, 0.336
249	49.600, 0.305	49.600, 0.336
250	49.800, 0.306	49.800, 0.336
251	50.000, 0.306	50.000, 0.336
252	50.200, 0.306	50.200, 0.336
253	50.400, 0.306	50.400, 0.336
254	50.600, 0.306	50.600, 0.335
255	50.800, 0.306	50.800, 0.335
256	51.000, 0.306	51.000, 0.335
257	51.200, 0.306	51.200, 0.335
258	51.400, 0.306	51.400, 0.335
259	51.600, 0.307	51.600, 0.335
260	51.800, 0.307	51.800, 0.335
261	52.000, 0.307	52.000, 0.335
262	52.200, 0.307	52.200, 0.336
263	52.400, 0.307	52.400, 0.336
264	52.600, 0.307	52.600, 0.336
265	52.800, 0.307	52.800, 0.336
266	53.000, 0.307	53.000, 0.335
267	53.200, 0.307	53.200, 0.335
268	53.400, 0.307	53.400, 0.335
269	53.600, 0.308	53.600, 0.335
270	53.800, 0.308	53.800, 0.335
271	54.000, 0.308	54.000, 0.335
272	54.200, 0.308	54.200, 0.335
273	54.400, 0.309	54.400, 0.335
274	54.600, 0.309	54.600, 0.334
275	54.800, 0.309	54.800, 0.334
276	55.000, 0.309	55.000, 0.334
277	55.200, 0.309	55.200, 0.333
278	55.400, 0.310	55.400, 0.333
279	55.600, 0.310	55.600, 0.333
280	55.800, 0.310	55.800, 0.333
281	56.000, 0.310	56.000, 0.333
282	56.200, 0.310	56.200, 0.333
283	56.400, 0.310	56.400, 0.333
284	56.600, 0.309	56.600, 0.333
285	56.800, 0.309	56.800, 0.333
286	57.000, 0.309	57.000, 0.333
287	57.200, 0.309	57.200, 0.333
288	57.400, 0.309	57.400, 0.333
289	57.600, 0.309	57.600, 0.333
290	57.800, 0.309	57.800, 0.333
291	58.000, 0.309	58.000, 0.333
292	58.200, 0.309	58.200, 0.333
293	58.400, 0.309	58.400, 0.333
294	58.600, 0.309	58.600, 0.333
295	58.800, 0.309	58.800, 0.333
296	59.000, 0.309	59.000, 0.333
297	59.200, 0.309	59.200, 0.333
298	59.400, 0.308	59.400, 0.333
299	59.600, 0.308	59.600, 0.333
300	59.800, 0.308	59.800, 0.333
301	60.000, 0.308	60.000, 0.332
302	60.200, 0.308	60.200, 0.332
303	60.400, 0.308	60.400, 0.332
304	60.600, 0.308	60.600, 0.332
305	60.800, 0.308	60.800, 0.332
306	61.000, 0.307	61.000, 0.332
307	61.200, 0.308	61.200, 0.331
308	61.400, 0.308	61.400, 0.331
309	61.600, 0.307	61.600, 0.331
310	61.800, 0.308	61.800, 0.331
311	62.000, 0.308	62.000, 0.331
312	62.200, 0.308	62.200, 0.330
313	62.400, 0.308	62.400, 0.330
314	62.600, 0.308	62.600, 0.330
315	62.800, 0.308	62.800, 0.330
316	63.000, 0.308	63.000, 0.330
317	63.200, 0.308	63.200, 0.330
318	63.400, 0.308	63.400, 0.330
319	63.600, 0.308	63.600, 0.330
320	63.800, 0.309	63.800, 0.330
321	64.000, 0.309	64.000, 0.330
322	64.200, 0.309	64.200, 0.330
323	64.400, 0.309	64.400, 0.330
324	64.600, 0.309	64.600, 0.330
325	64.800, 0.309	64.800, 0.330
326	65.000, 0.309	65.000, 0.330
327	65.200, 0.309	65.200, 0.330
328	65.400, 0.309	65.400, 0.330
329	65.600, 0.310	65.600, 0.330
330	65.800, 0.310	65.800, 0.330
331	66.000, 0.310	66.000, 0.330
332	66.200, 0.310	66.200, 0.330
333	66.400, 0.310	66.400, 0.330
334	66.600, 0.310	66.600, 0.330
335	66.800, 0.310	66.800, 0.330
336	67.000, 0.310	67.000, 0.329
337	67.200, 0.310	67.200, 0.329
338	67.400, 0.310	67.400, 0.329
339	67.600, 0.310	67.600, 0.329
340	67.800, 0.310	67.800, 0.329
341	68.000, 0.310	68.000, 0.329
342	68.200, 0.310	68.200, 0.329
343	68.400, 0.310	68.400, 0.328
344	68.600, 0.310	68.600, 0.328
345	68.800, 0.310	68.800, 0.328
346	69.000, 0.310	69.000, 0.328
347	69.200, 0.310	69.200, 0.328
348	69.400, 0.309	69.400, 0.328
349	69.600, 0.309	69.600, 0.329
350	69.800, 0.309	69.800, 0.329
351	70.000, 0.309	70.000, 0.329
352	70.200, 0.308	70.200, 0.329
353	70.400, 0.308	70.400, 0.329
354	70.600, 0.308	70.600, 0.329
355	70.800, 0.308	70.800, 0.329
356	71.000, 0.308	71.000, 0.329
357	71.200, 0.308	71.200, 0.329
358	71.400, 0.309	71.400, 0.329
359	71.600, 0.309	71.600, 0.329
360	71.800, 0.309	71.800, 0.329
361	72.000, 0.309	72.000, 0.328
362	72.200, 0.310	72.200, 0.328
363	72.400, 0.310	72.400, 0.328
364	72.600, 0.310	72.600, 0.327
365	72.800, 0.310	72.800, 0.327
366	73.000, 0.310	73.000, 0.327
367	73.200, 0.310	73.200, 0.327
368	73.400, 0.310	73.400, 0.327
369	73.600, 0.309	73.600, 0.326
370	73.800, 0.309	73.800, 0.326
371	74.000, 0.309	74.000, 0.326
372	74.200, 0.309	74.200, 0.326
373	74.400, 0.309	74.400, 0.326
374	74.600, 0.309	74.600, 0.326
375	74.800, 0.309	74.800, 0.326
376	75.000, 0.310	75.000, 0.326
377	75.200, 0.310	75.200, 0.326
378	75.400, 0.310	75.400, 0.326
379	75.600, 0.310	75.600, 0.326
380	75.800, 0.310	75.800, 0.326
381	76.000, 0.310	76.000, 0.326
382	76.200, 0.310	76.200, 0.326
383	76.400, 0.310	76.400, 0.326
384	76.600, 0.310	76.600, 0.326
385	76.800, 0.310	76.800, 0.326
386	77.000, 0.310	77.000, 0.326
387	77.200, 0.310	77.200, 0.326
388	77.400, 0.310	77.400, 0.326
389	77.600, 0.310	77.600, 0.326
390	77.800, 0.310	77.800, 0.326
391	78.000, 0.310	78.000, 0.325
392	78.200, 0.310	78.200, 0.325
393	78.400, 0.310	78.400, 0.325
394	78.600, 0.310	78.600, 0.325
395	78.800, 0.310	78.800, 0.325
396	79.000, 0.310	79.000, 0.325
397	79.200, 0.310	79.200, 0.325
398	79.400, 0.310	79.400, 0.325
399	79.600, 0.310	79.600, 0.325
400	79.800, 0.310	79.800, 0.324
401	80.000, 0.310	80.000, 0.324
402	80.200, 0.310	80.200, 0.324
403	80.400, 0.310	80.400, 0.324
404	80.600, 0.310	80.600, 0.324
405	80.800, 0.310	80.800, 0.324
406	81.000, 0.310	81.000, 0.324
407	81.200, 0.310	81.200, 0.324
408	81.400, 0.309	81.400, 0.324
409	81.600, 0.309	81.600, 0.324
410	81.800, 0.309	81.800, 0.324
411	82.000, 0.309	82.000, 0.324
412	82.200, 0.309	82.200, 0.324
413	82.400, 0.309	82.400, 0.325
414	82.600, 0.309	82.600, 0.325
415	82.800, 0.309	82.800, 0.324
416	83.000, 0.310	83.000, 0.324
417	83.200, 0.310	83.200, 0.324
418	83.400, 0.311	83.400, 0.324
419	83.600, 0.311	83.600, 0.324
420	83.800, 0.311	83.800, 0.324
421	84.000, 0.311	84.000, 0.324
422	84.200, 0.311	84.200, 0.324
423	84.400, 0.312	84.400, 0.324
424	84.600, 0.312	84.600, 0.324
425	84.800, 0.312	84.800, 0.324
426	85.000, 0.312	85.000, 0.323
427	85.200, 0.312	85.200, 0.323
428	85.400, 0.312	85.400, 0.323
429	85.600, 0.312	85.600, 0.323
430	85.800, 0.312	85.800, 0.323
431	86.000, 0.312	86.000, 0.323
432	86.200, 0.312	86.200, 0.323
433	86.400, 0.312	86.400, 0.323
434	86.600, 0.312	86.600, 0.323
435	86.800, 0.312	86.800, 0.323
436	87.000, 0.312	87.000, 0.323
437	87.200, 0.312	87.200, 0.323
438	87.400, 0.312	87.400, 0.323
439	87.600, 0.312	87.600, 0.323
440	87.800, 0.312	87.800, 0.323
441	88.000, 0.312	88.000, 0.323
442	88.200, 0.312	88.200, 0.324
443	88.400, 0.312	88.400, 0.324
444	88.600, 0.312	88.600, 0.324
445	88.800, 0.312	88.800, 0.324
446	89.000, 0.312	89.000, 0.324
447	89.200, 0.312	89.200, 0.323
448	89.400, 0.312	89.400, 0.323
449	89.600, 0.312	89.600, 0.323
450	89.800, 0.313	89.800, 0.322
451	90.000, 0.313	90.000, 0.322
452	90.200, 0.313	90.200, 0.322
453	90.400, 0.313	90.400, 0.322
454	90.600, 0.313	90.600, 0.321
455	90.800, 0.313	90.800, 0.321
456	91.000, 0.313	91.000, 0.321
457	91.200, 0.313	91.200, 0.320
458	91.400, 0.313	91.400, 0.320
459	91.600, 0.313	91.600, 0.321
460	91.800, 0.312	91.800, 0.321
461	92.000, 0.312	92.000, 0.321
462	92.200, 0.312	92.200, 0.321
463	92.400, 0.312	92.400, 0.321
464	92.600, 0.312	92.600, 0.321
465	92.800, 0.312	92.800, 0.321
466	93.000, 0.312	93.000, 0.321
467	93.200, 0.312	93.200, 0.321
468	93.400, 0.312	93.400, 0.320
469	93.600, 0.313	93.600, 0.321
470	93.800, 0.313	93.800, 0.321
471	94.000, 0.313	94.000, 0.321
472	94.200, 0.313	94.200, 0.321
473	94.400, 0.313	94.400, 0.321
474	94.600, 0.313	94.600, 0.321
475	94.800, 0.314	94.800, 0.321
476	95.000, 0.314	95.000, 0.321
477	95.200, 0.314	95.200, 0.321
478	95.400, 0.314	95.400, 0.322
479	95.600, 0.314	95.600, 0.322
480	95.800, 0.314	95.800, 0.322
481	96.000, 0.314	96.000, 0.322
482	96.200, 0.314	96.200, 0.322
483	96.400, 0.314	96.400, 0.322
484	96.600, 0.314	96.600, 0.321
485	96.800, 0.314	96.800, 0.321
486	97.000, 0.314	97.000, 0.321
487	97.200, 0.314	97.200, 0.321
488	97.400, 0.314	97.400, 0.321
489	97.600, 0.314	97.600, 0.321
490	97.800, 0.314	97.800, 0.320
491	98.000, 0.314	98.000, 0.321
492	98.200, 0.314	98.200, 0.320
493	98.400, 0.314	98.400, 0.321
494	98.600, 0.314	98.600, 0.321
495	98.800, 0.313	98.800, 0.321
496	99.000, 0.313	99.000, 0.321
497	99.200, 0.313	99.200, 0.321
498	99.400, 0.313	99.400, 0.321
499	99.600, 0.313	99.600, 0.321
500	99.800, 0.314	99.800, 0.321
501	100.000, 0.314	100.000, 0.321
502	100.200, 0.314	100.200, 0.320
503	100.400, 0.314	100.400, 0.320
504	100.600, 0.314	100.600, 0.320
505	100.800, 0.314	100.800, 0.320
506	101.000, 0.314	101.000, 0.319
507	101.200, 0.315	101.200, 0.319
508	101.400, 0.314	101.400, 0.319
509	101.600, 0.314	101.600, 0.318
510	101.800, 0.314	101.800, 0.318
511	102.000, 0.313	102.000, 0.318
512	102.200, 0.313	102.200, 0.317
513	102.400, 0.313	102.400, 0.317
514	102.600, 0.313	102.600, 0.317
515	102.800, 0.313	102.800, 0.317
516	103.000, 0.313	103.000, 0.317
517	103.200, 0.313	103.200, 0.317
518	103.400, 0.313	103.400, 0.317
519	103.600, 0.313	103.600, 0.317
520	103.800, 0.313	103.800, 0.318
521	104.000, 0.314	104.000, 0.318
522	104.200, 0.314	104.200, 0.318
523	104.400, 0.314	104.400, 0.318
524	104.600, 0.315	104.600, 0.318
525	104.800, 0.315	104.800, 0.318
526	105.000, 0.315	105.000, 0.319
527	105.200, 0.315	105.200, 0.319
528	105.400, 0.315	105.400, 0.319
529	105.600, 0.316	105.600, 0.319
530	105.800, 0.316	105.800, 0.319
531	106.000, 0.316	106.000, 0.319
532	106.200, 0.316	106.200, 0.319
533	106.400, 0.316	106.400, 0.320
534	106.600, 0.316	106.600, 0.320
535	106.800, 0.316	106.800, 0.320
536	107.000, 0.316	107.000, 0.320
537	107.200, 0.315	107.200, 0.320
538	107.400, 0.315	107.400, 0.319
539	107.600, 0.315	107.600, 0.319
540	107.800, 0.315	107.800, 0.319
541	108.000, 0.315	108.000, 0.319
542	108.200, 0.315	108.200, 0.318
543	108.400, 0.315	108.400, 0.318
544	108.600, 0.314	108.600, 0.318
545	108.800, 0.314	108.800, 0.318
546	109.000, 0.314	109.000, 0.318
547	109.200, 0.314	109.200, 0.318
548	109.400, 0.314	109.400, 0.318
549	109.600, 0.315	109.600, 0.318
550	109.800, 0.315	109.800, 0.318
551	110.000, 0.315	110.000, 0.318
552	110.200, 0.315	110.200, 0.318
553	110.400, 0.315	110.400, 0.318
554	110.600, 0.315	110.600, 0.318
555	110.800, 0.316	110.800, 0.319
556	111.000, 0.316	111.000, 0.319
557	111.200, 0.316	111.200, 0.319
558	111.400, 0.316	111.400, 0.319
559	111.600, 0.316	111.600, 0.319
560	111.800, 0.315	111.800, 0.319
561	112.000, 0.315	112.000, 0.319
562	112.200, 0.315	112.200, 0.318
563	112.400, 0.315	112.400, 0.318
564	112.600, 0.315	112.600, 0.318
565	112.800, 0.315	112.800, 0.318
566	113.000, 0.315	113.000, 0.318
567	113.200, 0.315	113.200, 0.318
568	113.400, 0.315	113.400, 0.318
569	113.600, 0.315	113.600, 0.319
570	113.800, 0.315	113.800, 0.319
571	114.000, 0.315	114.000, 0.319
572	114.200, 0.315	114.200, 0.320
573	114.400, 0.315	114.400, 0.320
574	114.600, 0.316	114.600, 0.320
575	114.800, 0.316	114.800, 0.320
576	115.000, 0.316	115.000, 0.320
577	115.200, 0.316	115.200, 0.320
578	115.400, 0.315	115.400, 0.320
579	115.600, 0.315	115.600, 0.320
580	115.800, 0.315	115.800, 0.320
581	116.000, 0.315	116.000, 0.320
582	116.200, 0.315	116.200, 0.319
583	116.400, 0.316	116.400, 0.319
584	116.600, 0.316	116.600, 0.319
585	116.800, 0.316	116.800, 0.319
586	117.000, 0.316	117.000, 0.319
587	117.200, 0.316	117.200, 0.319
588	117.400, 0.316	117.400, 0.319
589	117.600, 0.317	117.600, 0.320
590	117.800, 0.317	117.800, 0.320
591	118.000, 0.317	118.000, 0.320
592	118.200, 0.317	118.200, 0.320
593	118.400, 0.317	118.400, 0.320
594	118.600, 0.318	118.600, 0.320
595	118.800, 0.318	118.800, 0.320
596	119.000, 0.318	119.000, 0.320
597	119.200, 0.318	119.200, 0.321
598	119.400, 0.318	119.400, 0.321
599	119.600, 0.318	119.600, 0.321
600	119.800, 0.318	119.800, 0.321
601	120.000, 0.318	120.000, 0.321
602	120.200, 0.318	120.200, 0.320
603	120.400, 0.319	120.400, 0.320
604	120.600, 0.319	120.600, 0.320
605	120.800, 0.319	120.800, 0.320
606	121.000, 0.319	121.000, 0.320
607	121.200, 0.319	121.200, 0.319
608	121.400, 0.319	121.400, 0.319
609	121.600, 0.319	121.600, 0.319
610	121.800, 0.319	121.800, 0.318
611	122.000, 0.319	122.000, 0.318
612	122.200, 0.319	122.200, 0.318
613	122.400, 0.319	122.400, 0.318
614	122.600, 0.319	122.600, 0.318
615	122.800, 0.319	122.800, 0.318
616	123.000, 0.319	123.000, 0.318
617	123.200, 0.319	123.200, 0.318
618	123.400, 0.320	123.400, 0.319
619	123.600, 0.320	123.600, 0.319
620	123.800, 0.320	123.800, 0.319
621	124.000, 0.320	124.000, 0.319
622	124.200, 0.320	124.200, 0.320
623	124.400, 0.320	124.400, 0.320
624	124.600, 0.320	124.600, 0.320
625	124.800, 0.320	124.800, 0.320
626	125.000, 0.320	125.000, 0.320
627	125.200, 0.320	125.200, 0.320
628	125.400, 0.320	125.400, 0.320
629	125.600, 0.320	125.600, 0.320
630	125.800, 0.320	125.800, 0.321
631	126.000, 0.320	126.000, 0.321
632	126.200, 0.320	126.200, 0.321
633	126.400, 0.321	126.400, 0.321
634	126.600, 0.321	126.600, 0.321
635	126.800, 0.321	126.800, 0.321
636	127.000, 0.321	127.000, 0.320
637	127.200, 0.321	127.200, 0.320
638	127.400, 0.321	127.400, 0.320
639	127.600, 0.321	127.600, 0.321
640	127.800, 0.321	127.800, 0.320
641	128.000, 0.321	128.000, 0.320
642	128.200, 0.321	128.200, 0.320
643	128.400, 0.321	128.400, 0.320
644	128.600, 0.321	128.600, 0.319
645	128.800, 0.321	128.800, 0.319
646	129.000, 0.321	129.000, 0.319
647	129.200, 0.320	129.200, 0.319
648	129.400, 0.320	129.400, 0.319
649	129.600, 0.320	129.600, 0.319
650	129.800, 0.320	129.800, 0.319
651	130.000, 0.320	130.000, 0.319
652	130.200, 0.320	130.200, 0.319
653	130.400, 0.320	130.400, 0.319
654	130.600, 0.320	130.600, 0.319
655	130.800, 0.320	130.800, 0.319
656	131.000, 0.320	131.000, 0.320
657	131.200, 0.320	131.200, 0.320
658	131.400, 0.320	131.400, 0.320
659	131.600, 0.320	131.600, 0.320
660	131.800, 0.321	131.800, 0.320
661	132.000, 0.321	132.000, 0.319
662	132.200, 0.321	132.200, 0.319
663	132.400, 0.321	132.400, 0.319
664	132.600, 0.321	132.600, 0.319
665	132.800, 0.321	132.800, 0.320
666	133.000, 0.321	133.000, 0.320
667	133.200, 0.320	133.200, 0.320
668	133.400, 0.320	133.400, 0.320
669	133.600, 0.320	133.600, 0.320
670	133.800, 0.320	133.800, 0.320
671	134.000, 0.320	134.000, 0.321
672	134.200, 0.320	134.200, 0.321
673	134.400, 0.320	134.400, 0.321
674	134.600, 0.320	134.600, 0.321
675	134.800, 0.320	134.800, 0.321
676	135.000, 0.320	135.000, 0.321
677	135.200, 0.321	135.200, 0.321
678	135.400, 0.321	135.400, 0.320
679	135.600, 0.321	135.600, 0.320
680	135.800, 0.321	135.800, 0.320
681	136.000, 0.321	136.000, 0.320
682	136.200, 0.322	136.200, 0.320
683	136.400, 0.322	136.400, 0.320
684	136.600, 0.322	136.600, 0.320
685	136.800, 0.322	136.800, 0.320
686	137.000, 0.322	137.000, 0.321
687	137.200, 0.322	137.200, 0.321
688	137.400, 0.322	137.400, 0.321
689	137.600, 0.322	137.600, 0.321
690	137.800, 0.322	137.800, 0.321
691	138.000, 0.322	138.000, 0.322
692	138.200, 0.323	138.200, 0.322
693	138.400, 0.323	138.400, 0.322
694	138.600, 0.323	138.600, 0.322
695	138.800, 0.323	138.800, 0.322
696	139.000, 0.323	139.000, 0.322
697	139.200, 0.323	139.200, 0.322
698	139.400, 0.323	139.400, 0.322
699	139.600, 0.323	139.600, 0.322
700	139.800, 0.323	139.800, 0.322
701	140.000, 0.323	140.000, 0.322
702	140.200, 0.323	140.200, 0.321
703	140.400, 0.323	140.400, 0.321
704	140.600, 0.323	140.600, 0.321
705	140.800, 0.323	140.800, 0.321
706	141.000, 0.323	141.000, 0.321
707	141.200, 0.323	141.200, 0.321
708	141.400, 0.323	141.400, 0.321
709	141.600, 0.323	141.600, 0.321
710	141.800, 0.323	141.800, 0.321
711	142.000, 0.323	142.000, 0.321
712	142.200, 0.323	142.200, 0.321
713	142.400, 0.323	142.400, 0.321
714	142.600, 0.323	142.600, 0.321
715	142.800, 0.323	142.800, 0.321
716	143.000, 0.323	143.000, 0.321
717	143.200, 0.322	143.200, 0.321
718	143.400, 0.322	143.400, 0.321
719	143.600, 0.322	143.600, 0.320
720	143.800, 0.322	143.800, 0.320
721	144.000, 0.323	144.000, 0.320
722	144.200, 0.323	144.200, 0.320
723	144.400, 0.323	144.400, 0.319
724	144.600, 0.323	144.600, 0.319
725	144.800, 0.323	144.800, 0.320
726	145.000, 0.323	145.000, 0.320
727	145.200, 0.323	145.200, 0.320
728	145.400, 0.323	145.400, 0.320
729	145.600, 0.322	145.600, 0.320
730	145.800, 0.322	145.800, 0.321
731	146.000, 0.322	146.000, 0.321
732	146.200, 0.322	146.200, 0.321
733	146.400, 0.323	146.400, 0.322
734	146.600, 0.323	146.600, 0.322
735	146.800, 0.323	146.800, 0.322
736	147.000, 0.324	147.000, 0.322
737	147.200, 0.324	147.200, 0.322
738	147.400, 0.324	147.400, 0.322
739	147.600, 0.324	147.600, 0.322
740	147.800, 0.324	147.800, 0.322
741	148.000, 0.324	148.000, 0.322
742	148.200, 0.324	148.200, 0.322
743	148.400, 0.324	148.400, 0.322
744	148.600, 0.324	148.600, 0.322
745	148.800, 0.324	148.800, 0.322
746	149.000, 0.324	149.000, 0.322
747	149.200, 0.324	149.200, 0.322
748	149.400, 0.324	149.400, 0.322
749	149.600, 0.324	149.600, 0.322
750	149.800, 0.324	149.800, 0.322
751	150.000, 0.324	150.000, 0.322
752	150.200, 0.323	150.200, 0.320
753	150.400, 0.321	150.400, 0.317
754	150.600, 0.319	150.600, 0.315
755	150.800, 0.317	150.800, 0.312
756	151.000, 0.314	151.000, 0.309
757	151.200, 0.312	151.200, 0.307
758	151.400, 0.310	151.400, 0.304
759	151.600, 0.308	151.600, 0.302
760	151.800, 0.306	151.800, 0.299
761	152.000, 0.305	152.000, 0.297
762	152.200, 0.303	152.200, 0.296
763	152.400, 0.302	152.400, 0.294
764	152.600, 0.301	152.600, 0.293
765	152.800, 0.300	152.800, 0.291
766	153.000, 0.299	153.000, 0.290
767	153.200, 0.298	153.200, 0.288
768	153.400, 0.297	153.400, 0.287
769	153.600, 0.296	153.600, 0.285
770	153.800, 0.295	153.800, 0.284
771	154.000, 0.294	154.000, 0.283
772	154.200, 0.294	154.200, 0.282
773	154.400, 0.293	154.400, 0.281
774	154.600, 0.292	154.600, 0.280
775	154.800, 0.292	154.800, 0.279
776	155.000, 0.291	155.000, 0.278
777	155.200, 0.290	155.200, 0.277
778	155.400, 0.290	155.400, 0.276
779	155.600, 0.289	155.600, 0.275
780	155.800, 0.289	155.800, 0.274
781	156.000, 0.288	156.000, 0.274
782	156.200, 0.288	156.200, 0.273
783	156.400, 0.287	156.400, 0.272
784	156.600, 0.287	156.600, 0.271
785	156.800, 0.286	156.800, 0.271
786	157.000, 0.286	157.000, 0.270
787	157.200, 0.286	157.200, 0.269
788	157.400, 0.286	157.400, 0.269
789	157.600, 0.286	157.600, 0.268
790	157.800, 0.286	157.800, 0.267
791	158.000, 0.285	158.000, 0.266
792	158.200, 0.285	158.200, 0.266
793	158.400, 0.285	158.400, 0.264
794	158.600, 0.285	158.600, 0.263
795	158.800, 0.285	158.800, 0.262
796	159.000, 0.284	159.000, 0.262
797	159.200, 0.284	159.200, 0.261
798	159.400, 0.284	159.400, 0.260
799	159.600, 0.284	159.600, 0.259
800	159.800, 0.283	159.800, 0.259
801	160.000, 0.283	160.000, 0.258
802	160.200, 0.283	160.200, 0.257
803	160.400, 0.283	160.400, 0.256
804	160.600, 0.282	160.600, 0.256
805	160.800, 0.282	160.800, 0.255
806	161.000, 0.282	161.000, 0.254
807	161.200, 0.282	161.200, 0.254
808	161.400, 0.282	161.400, 0.253
809	161.600, 0.281	161.600, 0.253
810	161.800, 0.281	161.800, 0.252
811	162.000, 0.281	162.000, 0.251
812	162.200, 0.281	162.200, 0.250
813	162.400, 0.281	162.400, 0.249
814	162.600, 0.280	162.600, 0.248
815	162.800, 0.280	162.800, 0.248
816	163.000, 0.279	163.000, 0.247
817	163.200, 0.279	163.200, 0.247
818	163.400, 0.279	163.400, 0.246
819	163.600, 0.278	163.600, 0.246
820	163.800, 0.278	163.800, 0.246
821	164.000, 0.277	164.000, 0.245
822	164.200, 0.277	164.200, 0.245
823	164.400, 0.277	164.400, 0.244
824	164.600, 0.276	164.600, 0.244
825	164.800, 0.276	164.800, 0.243
826	165.000, 0.276	165.000, 0.243
827	165.200, 0.276	165.200, 0.242
828	165.400, 0.276	165.400, 0.242
829	165.600, 0.276	165.600, 0.241
830	165.800, 0.276	165.800, 0.241
831	166.000, 0.276	166.000, 0.240
832	166.200, 0.276	166.200, 0.240
833	166.400, 0.276	166.400, 0.239
834	166.600, 0.276	166.600, 0.238
835	166.800, 0.276	166.800, 0.238
836	167.000, 0.276	167.000, 0.238
837	167.200, 0.276	167.200, 0.237
838	167.400, 0.276	167.400, 0.237
839	167.600, 0.275	167.600, 0.236
840	167.800, 0.275	167.800, 0.236
841	168.000, 0.275	168.000, 0.235
842	168.200, 0.275	168.200, 0.235
843	168.400, 0.275	168.400, 0.235
844	168.600, 0.275	168.600, 0.234
845	168.800, 0.274	168.800, 0.234
846	169.000, 0.274	169.000, 0.234
847	169.200, 0.274	169.200, 0.233
848	169.400, 0.273	169.400, 0.232
849	169.600, 0.273	169.600, 0.232
850	169.800, 0.273	169.800, 0.231
851	170.000, 0.273	170.000, 0.231
852	170.200, 0.273	170.200, 0.230
853	170.400, 0.273	170.400, 0.230
854	170.600, 0.273	170.600, 0.229
855	170.800, 0.273	170.800, 0.229
856	171.000, 0.273	171.000, 0.228
857	171.200, 0.273	171.200, 0.227
858	171.400, 0.273	171.400, 0.227
859	171.600, 0.273	171.600, 0.227
860	171.800, 0.273	171.800, 0.226
861	172.000, 0.273	172.000, 0.226
862	172.200, 0.273	172.200, 0.225
863	172.400, 0.273	172.400, 0.225
864	172.600, 0.273	172.600, 0.225
865	172.800, 0.273	172.800, 0.224
866	173.000, 0.273	173.000, 0.223
867	173.200, 0.273	173.200, 0.223
868	173.400, 0.273	173.400, 0.222
869	173.600, 0.272	173.600, 0.222
870	173.800, 0.272	173.800, 0.221
871	174.000, 0.271	174.000, 0.220
872	174.200, 0.271	174.200, 0.220
873	174.400, 0.270	174.400, 0.219
874	174.600, 0.269	174.600, 0.219
875	174.800, 0.269	174.800, 0.218
876	175.000, 0.269	175.000, 0.218
877	175.200, 0.268	175.200, 0.218
878	175.400, 0.268	175.400, 0.217
879	175.600, 0.267	175.600, 0.217
880	175.800, 0.267	175.800, 0.217
881	176.000, 0.267	176.000, 0.216
882	176.200, 0.267	176.200, 0.216
883	176.400, 0.267	176.400, 0.216
884	176.600, 0.267	176.600, 0.215
885	176.800, 0.267	176.800, 0.215
886	177.000, 0.267	177.000, 0.215
887	177.200, 0.267	177.200, 0.215
888	177.400, 0.267	177.400, 0.215
889	177.600, 0.266	177.600, 0.215
890	177.800, 0.266	177.800, 0.214
891	178.000, 0.266	178.000, 0.214
892	178.200, 0.266	178.200, 0.214
893	178.400, 0.266	178.400, 0.214
894	178.600, 0.265	178.600, 0.214
895	178.800, 0.265	178.800, 0.213
896	179.000, 0.266	179.000, 0.213
897	179.200, 0.266	179.200, 0.212
898	179.400, 0.266	179.400, 0.212
899	179.600, 0.266	179.600, 0.211
900	179.800, 0.266	179.800, 0.210
901	180.000, 0.266	180.000, 0.210
902	180.200, 0.266	180.200, 0.210
903	180.400, 0.266	180.400, 0.209
904	180.600, 0.266	180.600, 0.209
905	180.800, 0.266	180.800, 0.208
906	181.000, 0.266	181.000, 0.208
907	181.200, 0.265	181.200, 0.208
908	181.400, 0.265	181.400, 0.208
909	181.600, 0.265	181.600, 0.208
910	181.800, 0.265	181.800, 0.208
911	182.000, 0.265	182.000, 0.207
912	182.200, 0.264	182.200, 0.207
913	182.400, 0.264	182.400, 0.206
914	182.600, 0.264	182.600, 0.206
915	182.800, 0.264	182.800, 0.205
916	183.000, 0.264	183.000, 0.205
917	183.200, 0.264	183.200, 0.204
918	183.400, 0.264	183.400, 0.204
919	183.600, 0.264	183.600, 0.203
920	183.800, 0.264	183.800, 0.203
921	184.000, 0.264	184.000, 0.203
922	184.200, 0.264	184.200, 0.202
923	184.400, 0.264	184.400, 0.202
924	184.600, 0.264	184.600, 0.202
925	184.800, 0.264	184.800, 0.202
926	185.000, 0.264	185.000, 0.201
927	185.200, 0.264	185.200, 0.201
928	185.400, 0.264	185.400, 0.201
929	185.600, 0.263	185.600, 0.201
930	185.800, 0.263	185.800, 0.201
931	186.000, 0.262	186.000, 0.200
932	186.200, 0.262	186.200, 0.200
933	186.400, 0.262	186.400, 0.200
934	186.600, 0.261	186.600, 0.199
935	186.800, 0.261	186.800, 0.199
936	187.000, 0.261	187.000, 0.199
937	187.200, 0.261	187.200, 0.199
938	187.400, 0.261	187.400, 0.199
939	187.600, 0.261	187.600, 0.198
940	187.800, 0.261	187.800, 0.198
941	188.000, 0.261	188.000, 0.198
942	188.200, 0.261	188.200, 0.198
943	188.400, 0.261	188.400, 0.197
944	188.600, 0.261	188.600, 0.197
945	188.800, 0.260	188.800, 0.197
946	189.000, 0.260	189.000, 0.196
947	189.200, 0.260	189.200, 0.196
948	189.400, 0.260	189.400, 0.196
949	189.600, 0.260	189.600, 0.195
950	189.800, 0.260	189.800, 0.195
951	190.000, 0.260	190.000, 0.195
952	190.200, 0.259	190.200, 0.195
953	190.400, 0.259	190.400, 0.195
954	190.600, 0.258	190.600, 0.194
955	190.800, 0.258	190.800, 0.194
956	191.000, 0.258	191.000, 0.194
957	191.200, 0.258	191.200, 0.194
958	191.400, 0.258	191.400, 0.194
959	191.600, 0.258	191.600, 0.194
960	191.800, 0.258	191.800, 0.194
961	192.000, 0.258	192.000, 0.194
962	192.200, 0.258	192.200, 0.193
963	192.400, 0.258	192.400, 0.193
964	192.600, 0.258	192.600, 0.193
965	192.800, 0.258	192.800, 0.192
966	193.000, 0.258	193.000, 0.191
967	193.200, 0.258	193.200, 0.191
968	193.400, 0.258	193.400, 0.190
969	193.600, 0.258	193.600, 0.190
970	193.800, 0.258	193.800, 0.189
971	194.000, 0.257	194.000, 0.189
972	194.200, 0.257	194.200, 0.188
973	194.400, 0.257	194.400, 0.188
974	194.600, 0.256	194.600, 0.188
975	194.800, 0.256	194.800, 0.188
976	195.000, 0.256	195.000, 0.188
977	195.200, 0.256	195.200, 0.188
978	195.400, 0.257	195.400, 0.188
979	195.600, 0.257	195.600, 0.189
980	195.800, 0.257	195.800, 0.189
981	196.000, 0.257	196.000, 0.189
982	196.200, 0.257	196.200, 0.189
983	196.400, 0.256	196.400, 0.189
984	196.600, 0.256	196.600, 0.189
985	196.800, 0.256	196.800, 0.188
986	197.000, 0.256	197.000, 0.188
987	197.200, 0.256	197.200, 0.188
988	197.400, 0.256	197.400, 0.187
989	197.600, 0.256	197.600, 0.187
990	197.800, 0.255	197.800, 0.186
991	198.000, 0.255	198.000, 0.186
992	198.200, 0.255	198.200, 0.185
993	198.400, 0.255	198.400, 0.185
994	198.600, 0.255	198.600, 0.185
995	198.800, 0.255	198.800, 0.185
996	199.000, 0.255	199.000, 0.185
997	199.200, 0.255	199.200, 0.185
998	199.400, 0.255	199.400, 0.184
999	199.600, 0.255	199.600, 0.184
1000	199.800, 0.255	199.800, 0.184
1001	200.000, 0.255	200.000, 0.184
1002	200.200, 0.255	200.200, 0.184
1003	200.400, 0.255	200.400, 0.184
1004	200.600, 0.254	200.600, 0.184
1005	200.800, 0.254	200.800, 0.184
1006	201.000, 0.254	201.000, 0.184
1007	201.200, 0.254	201.200, 0.183
1008	201.400, 0.253	201.400, 0.183
1009	201.600, 0.253	201.600, 0.183
1010	201.800, 0.253	201.800, 0.183
1011	202.000, 0.252	202.000, 0.183
1012	202.200, 0.252	202.200, 0.183
1013	202.400, 0.252	202.400, 0.183
1014	202.600, 0.252	202.600, 0.182
1015	202.800, 0.251	202.800, 0.182
1016	203.000, 0.251	203.000, 0.182
1017	203.200, 0.251	203.200, 0.182
1018	203.400, 0.251	203.400, 0.181
1019	203.600, 0.251	203.600, 0.181
1020	203.800, 0.252	203.800, 0.181
1021	204.000, 0.251	204.000, 0.181
1022	204.200, 0.251	204.200, 0.181
1023	204.400, 0.251	204.400, 0.181
1024	204.600, 0.251	204.600, 0.181
1025	204.800, 0.251	204.800, 0.181
1026	205.000, 0.251	205.000, 0.180
1027	205.200, 0.251	205.200, 0.180
1028	205.400, 0.251	205.400, 0.180
1029	205.600, 0.251	205.600, 0.180
1030	205.800, 0.251	205.800, 0.180
1031	206.000, 0.251	206.000, 0.180
1032	206.200, 0.251	206.200, 0.180
1033	206.400, 0.251	206.400, 0.180
1034	206.600, 0.251	206.600, 0.180
1035	206.800, 0.251	206.800, 0.180
1036	207.000, 0.251	207.000, 0.180
1037	207.200, 0.251	207.200, 0.180
1038	207.400, 0.251	207.400, 0.180
1039	207.600, 0.251	207.600, 0.180
1040	207.800, 0.251	207.800, 0.179
1041	208.000, 0.251	208.000, 0.179
1042	208.200, 0.251	208.200, 0.179
1043	208.400, 0.251	208.400, 0.178
1044	208.600, 0.251	208.600, 0.178
1045	208.800, 0.251	208.800, 0.178
1046	209.000, 0.251	209.000, 0.177
1047	209.200, 0.251	209.200, 0.177
1048	209.400, 0.251	209.400, 0.177
1049	209.600, 0.251	209.600, 0.177
1050	209.800, 0.251	209.800, 0.177
1051	210.000, 0.251	210.000, 0.177
1052	210.200, 0.251	210.200, 0.177
1053	210.400, 0.250	210.400, 0.177
1054	210.600, 0.250	210.600, 0.177
1055	210.800, 0.249	210.800, 0.177
1056	211.000, 0.249	211.000, 0.177
1057	211.200, 0.249	211.200, 0.177
1058	211.400, 0.248	211.400, 0.177
1059	211.600, 0.248	211.600, 0.177
1060	211.800, 0.247	211.800, 0.176
1061	212.000, 0.247	212.000, 0.176
1062	212.200, 0.246	212.200, 0.176
1063	212.400, 0.246	212.400, 0.176
1064	212.600, 0.246	212.600, 0.176
1065	212.800, 0.246	212.800, 0.176
1066	213.000, 0.246	213.000, 0.176
1067	213.200, 0.246	213.200, 0.175
1068	213.400, 0.246	213.400, 0.175
1069	213.600, 0.246	213.600, 0.175
1070	213.800, 0.246	213.800, 0.175
1071	214.000, 0.246	214.000, 0.174
1072	214.200, 0.245	214.200, 0.174
1073	214.400, 0.245	214.400, 0.174
1074	214.600, 0.246	214.600, 0.174
1075	214.800, 0.246	214.800, 0.174
1076	215.000, 0.247	215.000, 0.174
1077	215.200, 0.247	215.200, 0.174
1078	215.400, 0.247	215.400, 0.174
1079	215.600, 0.247	215.600, 0.174
1080	215.800, 0.248	215.800, 0.174
1081	216.000, 0.248	216.000, 0.174
1082	216.200, 0.248	216.200, 0.174
1083	216.400, 0.248	216.400, 0.174
1084	216.600, 0.248	216.600, 0.174
1085	216.800, 0.247	216.800, 0.174
1086	217.000, 0.247	217.000, 0.174
1087	217.200, 0.247	217.200, 0.173
1088	217.400, 0.247	217.400, 0.173
1089	217.600, 0.246	217.600, 0.173
1090	217.800, 0.246	217.800, 0.172
1091	218.000, 0.245	218.000, 0.172
1092	218.200, 0.245	218.200, 0.172
1093	218.400, 0.245	218.400, 0.172
1094	218.600, 0.245	218.600, 0.172
1095	218.800, 0.244	218.800, 0.171
1096	219.000, 0.244	219.000, 0.171
1097	219.200, 0.244	219.200, 0.172
1098	219.400, 0.244	219.400, 0.172
1099	219.600, 0.245	219.600, 0.172
1100	219.800, 0.244	219.800, 0.171
1101	220.000, 0.244	220.000, 0.171
1102	220.200, 0.244	220.200, 0.171
1103	220.400, 0.244	220.400, 0.171
1104	220.600, 0.244	220.600, 0.171
1105	220.800, 0.244	220.800, 0.171
1106	221.000, 0.244	221.000, 0.171
1107	221.200, 0.244	221.200, 0.172
1108	221.400, 0.244	221.400, 0.172
1109	221.600, 0.244	221.600, 0.172
1110	221.800, 0.244	221.800, 0.172
1111	222.000, 0.244	222.000, 0.172
1112	222.200, 0.244	222.200, 0.171
1113	222.400, 0.244	222.400, 0.171
1114	222.600, 0.243	222.600, 0.171
1115	222.800, 0.243	222.800, 0.171
1116	223.000, 0.243	223.000, 0.170
1117	223.200, 0.243	223.200, 0.170
1118	223.400, 0.243	223.400, 0.170
1119	223.600, 0.243	223.600, 0.170
1120	223.800, 0.243	223.800, 0.170
1121	224.000, 0.244	224.000, 0.170
1122	224.200, 0.244	224.200, 0.170
1123	224.400, 0.244	224.400, 0.170
1124	224.600, 0.244	224.600, 0.170
1125	224.800, 0.244	224.800, 0.170
1126	225.000, 0.244	225.000, 0.170
1127	225.200, 0.244	225.200, 0.170
1128	225.400, 0.244	225.400, 0.170
1129	225.600, 0.244	225.600, 0.169
1130	225.800, 0.244	225.800, 0.169
1131	226.000, 0.244	226.000, 0.169
1132	226.200, 0.243	226.200, 0.168
1133	226.400, 0.243	226.400, 0.168
1134	226.600, 0.243	226.600, 0.168
1135	226.800, 0.243	226.800, 0.168
1136	227.000, 0.243	227.000, 0.168
1137	227.200, 0.242	227.200, 0.168
1138	227.400, 0.242	227.400, 0.168
1139	227.600, 0.242	227.600, 0.168
1140	227.800, 0.241	227.800, 0.168
1141	228.000, 0.241	228.000, 0.168
1142	228.200, 0.241	228.200, 0.168
1143	228.400, 0.240	228.400, 0.168
1144	228.600, 0.240	228.600, 0.168
1145	228.800, 0.240	228.800, 0.169
1146	229.000, 0.240	229.000, 0.169
1147	229.200, 0.240	229.200, 0.169
1148	229.400, 0.240	229.400, 0.168
1149	229.600, 0.240	229.600, 0.168
1150	229.800, 0.240	229.800, 0.168
1151	230.000, 0.240	230.000, 0.168
1152	230.200, 0.240	230.200, 0.167
1153	230.400, 0.240	230.400, 0.167
1154	230.600, 0.240	230.600, 0.167
1155	230.800, 0.241	230.800, 0.167
1156	231.000, 0.241	231.000, 0.167
1157	231.200, 0.241	231.200, 0.167
1158	231.400, 0.241	231.400, 0.167
1159	231.600, 0.241	231.600, 0.167
1160	231.800, 0.241	231.800, 0.167
1161	232.000, 0.241	232.000, 0.167
1162	232.200, 0.241	232.200, 0.167
1163	232.400, 0.241	232.400, 0.167
1164	232.600, 0.241	232.600, 0.167
1165	232.800, 0.241	232.800, 0.167
1166	233.000, 0.241	233.000, 0.167
1167	233.200, 0.241	233.200, 0.167
1168	233.400, 0.241	233.400, 0.167
1169	233.600, 0.240	233.600, 0.167
1170	233.800, 0.240	233.800, 0.167
1171	234.000, 0.240	234.000, 0.166
1172	234.200, 0.239	234.200, 0.166
1173	234.400, 0.239	234.400, 0.166
1174	234.600, 0.239	234.600, 0.166
1175	234.800, 0.239	234.800, 0.166
1176	235.000, 0.239	235.000, 0.166
1177	235.200, 0.239	235.200, 0.165
1178	235.400, 0.239	235.400, 0.165
1179	235.600, 0.239	235.600, 0.165
1180	235.800, 0.239	235.800, 0.165
1181	236.000, 0.239	236.000, 0.165
1182	236.200, 0.239	236.200, 0.165
1183	236.400, 0.239	236.400, 0.165
1184	236.600, 0.239	236.600, 0.165
1185	236.800, 0.239	236.800, 0.164
1186	237.000, 0.239	237.000, 0.164
1187	237.200, 0.239	237.200, 0.164
1188	237.400, 0.239	237.400, 0.164
1189	237.600, 0.239	237.600, 0.164
1190	237.800, 0.239	237.800, 0.163
1191	238.000, 0.239	238.000, 0.163
1192	238.200, 0.239	238.200, 0.163
1193	238.400, 0.239	238.400, 0.164
1194	238.600, 0.239	238.600, 0.164
1195	238.800, 0.238	238.800, 0.164
1196	239.000, 0.238	239.000, 0.164
1197	239.200, 0.238	239.200, 0.164
1198	239.400, 0.238	239.400, 0.164
1199	239.600, 0.238	239.600, 0.164
1200	239.800, 0.238	239.800, 0.164
1201	240.000, 0.238	240.000, 0.164
1202	240.200, 0.237	240.200, 0.164
1203	240.400, 0.237	240.400, 0.164
1204	240.600, 0.237	240.600, 0.164
1205	240.800, 0.237	240.800, 0.164
1206	241.000, 0.237	241.000, 0.164
1207	241.200, 0.236	241.200, 0.164
1208	241.400, 0.236	241.400, 0.164
1209	241.600, 0.236	241.600, 0.164
1210	241.800, 0.236	241.800, 0.164
1211	242.000, 0.236	242.000, 0.164
1212	242.200, 0.236	242.200, 0.164
1213	242.400, 0.236	242.400, 0.164
1214	242.600, 0.236	242.600, 0.164
1215	242.800, 0.236	242.800, 0.164
1216	243.000, 0.236	243.000, 0.164
1217	243.200, 0.236	243.200, 0.164
1218	243.400, 0.236	243.400, 0.164
1219	243.600, 0.236	243.600, 0.164
1220	243.800, 0.236	243.800, 0.164
1221	244.000, 0.237	244.000, 0.163
1222	244.200, 0.237	244.200, 0.163
1223	244.400, 0.237	244.400, 0.163
1224	244.600, 0.237	244.600, 0.163
1225	244.800, 0.237	244.800, 0.163
1226	245.000, 0.237	245.000, 0.163
1227	245.200, 0.237	245.200, 0.162
1228	245.400, 0.237	245.400, 0.162
1229	245.600, 0.237	245.600, 0.162
1230	245.800, 0.236	245.800, 0.162
1231	246.000, 0.236	246.000, 0.161
1232	246.200, 0.236	246.200, 0.161
1233	246.400, 0.235	246.400, 0.161
1234	246.600, 0.235	246.600, 0.161
1235	246.800, 0.235	246.800, 0.161
1236	247.000, 0.235	247.000, 0.161
1237	247.200, 0.234	247.200, 0.162
1238	247.400, 0.234	247.400, 0.162
1239	247.600, 0.234	247.600, 0.162
1240	247.800, 0.234	247.800, 0.161
1241	248.000, 0.234	248.000, 0.161
1242	248.200, 0.234	248.200, 0.161
1243	248.400, 0.234	248.400, 0.161
1244	248.600, 0.234	248.600, 0.161
1245	248.800, 0.234	248.800, 0.161
1246	249.000, 0.234	249.000, 0.161
1247	249.200, 0.234	249.200, 0.161
1248	249.400, 0.234	249.400, 0.160
1249	249.600, 0.234	249.600, 0.160
1250	249.800, 0.234	249.800, 0.160
1251	250.000, 0.234	250.000, 0.160
1252	250.200, 0.234	250.200, 0.160
1253	250.400, 0.234	250.400, 0.161
1254	250.600, 0.234	250.600, 0.161
1255	250.800, 0.234	250.800, 0.161
1256	251.000, 0.233	251.000, 0.161
1257	251.200, 0.233	251.200, 0.161
1258	251.400, 0.233	251.400, 0.161
1259	251.600, 0.233	251.600, 0.161
1260	251.800, 0.233	251.800, 0.161
1261	252.000, 0.232	252.000, 0.161
1262	252.200, 0.232	252.200, 0.161
1263	252.400, 0.232	252.400, 0.161
1264	252.600, 0.232	252.600, 0.161
1265	252.800, 0.232	252.800, 0.161
1266	253.000, 0.233	253.000, 0.161
1267	253.200, 0.233	253.200, 0.161
1268	253.400, 0.233	253.400, 0.161
1269	253.600, 0.234	253.600, 0.161
1270	253.800, 0.234	253.800, 0.161
1271	254.000, 0.234	254.000, 0.161
1272	254.200, 0.234	254.200, 0.161
1273	254.400, 0.234	254.400, 0.161
1274	254.600, 0.234	254.600, 0.161
1275	254.800, 0.234	254.800, 0.160
1276	255.000, 0.234	255.000, 0.160
1277	255.200, 0.234	255.200, 0.160
1278	255.400, 0.234	255.400, 0.159
1279	255.600, 0.233	255.600, 0.159
1280	255.800, 0.233	255.800, 0.159
1281	256.000, 0.233	256.000, 0.158
1282	256.200, 0.233	256.200, 0.158
1283	256.400, 0.232	256.400, 0.158
1284	256.600, 0.232	256.600, 0.158
1285	256.800, 0.232	256.800, 0.158
1286	257.000, 0.232	257.000, 0.158
1287	257.200, 0.232	257.200, 0.158
1288	257.400, 0.232	257.400, 0.158
1289	257.600, 0.232	257.600, 0.158
1290	257.800, 0.232	257.800, 0.158
1291	258.000, 0.232	258.000, 0.158
1292	258.200, 0.232	258.200, 0.157
1293	258.400, 0.232	258.400, 0.157
1294	258.600, 0.232	258.600, 0.158
1295	258.800, 0.232	258.800, 0.158
1296	259.000, 0.232	259.000, 0.158
1297	259.200, 0.232	259.200, 0.159
1298	259.400, 0.231	259.400, 0.159
1299	259.600, 0.231	259.600, 0.159
1300	259.800, 0.231	259.800, 0.159
1301	260.000, 0.231	260.000, 0.160
1302	260.200, 0.231	260.200, 0.160
1303	260.400, 0.231	260.400, 0.160
1304	260.600, 0.231	260.600, 0.160
1305	260.800, 0.231	260.800, 0.160
1306	261.000, 0.231	261.000, 0.159
1307	261.200, 0.231	261.200, 0.159
1308	261.400, 0.231	261.400, 0.159
1309	261.600, 0.232	261.600, 0.158
1310	261.800, 0.232	261.800, 0.158
1311	262.000, 0.232	262.000, 0.158
1312	262.200, 0.231	262.200, 0.158
1313	262.400, 0.231	262.400, 0.158
1314	262.600, 0.231	262.600, 0.158
1315	262.800, 0.230	262.800, 0.158
1316	263.000, 0.230	263.000, 0.158
1317	263.200, 0.230	263.200, 0.158
1318	263.400, 0.230	263.400, 0.158
1319	263.600, 0.230	263.600, 0.158
1320	263.800, 0.230	263.800, 0.158
1321	264.000, 0.230	264.000, 0.158
1322	264.200, 0.230	264.200, 0.158
1323	264.400, 0.229	264.400, 0.158
1324	264.600, 0.229	264.600, 0.158
1325	264.800, 0.229	264.800, 0.158
1326	265.000, 0.229	265.000, 0.157
1327	265.200, 0.229	265.200, 0.157
1328	265.400, 0.229	265.400, 0.157
1329	265.600, 0.229	265.600, 0.157
1330	265.800, 0.229	265.800, 0.157
1331	266.000, 0.229	266.000, 0.157
1332	266.200, 0.229	266.200, 0.157
1333	266.400, 0.229	266.400, 0.157
1334	266.600, 0.229	266.600, 0.157
1335	266.800, 0.229	266.800, 0.157
1336	267.000, 0.229	267.000, 0.157
1337	267.200, 0.229	267.200, 0.157
1338	267.400, 0.229	267.400, 0.157
1339	267.600, 0.229	267.600, 0.157
1340	267.800, 0.229	267.800, 0.157
1341	268.000, 0.229	268.000, 0.157
1342	268.200, 0.228	268.200, 0.157
1343	268.400, 0.228	268.400, 0.157
1344	268.600, 0.228	268.600, 0.157
1345	268.800, 0.228	268.800, 0.157
1346	269.000, 0.228	269.000, 0.157
1347	269.200, 0.228	269.200, 0.157
1348	269.400, 0.228	269.400, 0.157
1349	269.600, 0.228	269.600, 0.157
1350	269.800, 0.228	269.800, 0.157
1351	,	,
1352	,	,
1353	,	,
1354	,	,
1355	,	,
1356	,	,
1357	,	,
1358	,	,
1359	,	,
1360	,	,
1361	,	,
1362	,	,
1363	,	,
1364	,	,
1365	,	,
1366	,	,
1367	,	,
1368	,	,
1369	,	,
1370	,	,
1371	,	,
1372	,	,
1373	,	,
1374	,	,
1375	,	,
1376	,	,
1377	,	,
1378	,	,
1379	,	,
1380	,	,
1381	,	,
1382	,	,
1383	,	,
1384	,	,
1385	,	,
1386	,	,
1387	,	,
1388	,	,
1389	,	,
1390	,	,
1391	,	,
1392	,	,
1393	,	,
1394	,	,
1395	,	,
1396	,	,
1397	,	,
1398	,	,
1399	,	,
1400	,	,
1401	,	,
1402	,	,
1403	,	,
1404	,	,
1405	,	,
1406	,	,
1407	,	,
1408	,	,
1409	,	,
1410	,	,
1411	,	,
1412	,	,
1413	,	,
1414	,	,
1415	,	,
1416	,	,
1417	,	,
1418	,	,
1419	,	,
1420	,	,
1421	,	,
1422	,	,
1423	,	,
1424	,	,
1425	,	,
1426	,	,
1427	,	,
1428	,	,
1429	,	,
1430	,	,
1431	,	,
1432	,	,
1433	,	,
1434	,	,
1435	,	,
1436	,	,
1437	,	,
1438	,	,
1439	,	,
1440	,	,
1441	,	,
1442	,	,
1443	,	,
1444	,	,
1445	,	,
1446	,	,
1447	,	,
1448	,	,
1449	,	,
1450	,	,
1451	,	,
1452	,	,
1453	,	,
1454	,	,
1455	,	,
1456	,	,
1457	,	,
1458	,	,
1459	,	,
1460	,	,
1461	,	,
1462	,	,
1463	,	,
1464	,	,
1465	,	,
1466	,	,
1467	,	,
1468	,	,
1469	,	,
1470	,	,
1471	,	,
1472	,	,
1473	,	,
1474	,	,
1475	,	,
1476	,	,
1477	,	,
1478	,	,
1479	,	,
1480	,	,
1481	,	,
1482	,	,
1483	,	,
1484	,	,
1485	,	,
1486	,	,
1487	,	,
1488	,	,
1489	,	,
1490	,	,
1491	,	,
1492	,	,
1493	,	,
1494	,	,
1495	,	,
1496	,	,
1497	,	,
1498	,	,
1499	,	,
1500	,	,
1501	,	,
1502	,	,
1503	,	,
1504	,	,
1505	,	,
1506	,	,
1507	,	,
1508	,	,
1509	,	,
1510	,	,
1511	,	,
1512	,	,
1513	,	,
1514	,	,
1515	,	,
1516	,	,
1517	,	,
1518	,	,
1519	,	,
1520	,	,
1521	,	,
1522	,	,
1523	,	,
1524	,	,
1525	,	,
1526	,	,
1527	,	,
1528	,	,
1529	,	,
1530	,	,
1531	,	,
1532	,	,
1533	,	,
1534	,	,
1535	,	,
1536	,	,
1537	,	,
1538	,	,
1539	,	,
1540	,	,
1541	,	,
1542	,	,
1543	,	,
1544	,	,
1545	,	,
1546	,	,
1547	,	,
1548	,	,
1549	,	,
1550	,	,
1551	,	,
1552	,	,
1553	,	,
1554	,	,
1555	,	,
1556	,	,
1557	,	,
1558	,	,
1559	,	,
1560	,	,
1561	,	,
1562	,	,
1563	,	,
1564	,	,
1565	,	,
1566	,	,
1567	,	,
1568	,	,
1569	,	,
1570	,	,
1571	,	,
1572	,	,
1573	,	,
1574	,	,
1575	,	,
1576	,	,
1577	,	,
1578	,	,
1579	,	,
1580	,	,
1581	,	,
1582	,	,
1583	,	,
1584	,	,
1585	,	,
1586	,	,
1587	,	,
1588	,	,
1589	,	,
1590	,	,
1591	,	,
1592	,	,
1593	,	,
1594	,	,
1595	,	,
1596	,	,
1597	,	,
1598	,	,
1599	,	,
1600	,	,
1601	,	,
1602	,	,
1603	,	,
1604	,	,
1605	,	,
1606	,	,
1607	,	,
1608	,	,
1609	,	,
1610	,	,
1611	,	,
1612	,	,
1613	,	,
1614	,	,
1615	,	,
1616	,	,
1617	,	,
1618	,	,
1619	,	,
1620	,	,
1621	,	,
1622	,	,
1623	,	,
1624	,	,
1625	,	,
1626	,	,
1627	,	,
1628	,	,
1629	,	,
1630	,	,
1631	,	,
1632	,	,
1633	,	,
1634	,	,
1635	,	,
1636	,	,
1637	,	,
1638	,	,
1639	,	,
1640	,	,
1641	,	,
1642	,	,
1643	,	,
1644	,	,
1645	,	,
1646	,	,
1647	,	,
1648	,	,
1649	,	,
1650	,	,
1651	,	,
1652	,	,
1653	,	,
1654	,	,
1655	,	,
1656	,	,
1657	,	,
1658	,	,
1659	,	,
1660	,	,
1661	,	,
1662	,	,
1663	,	,
1664	,	,
1665	,	,
1666	,	,
1667	,	,
1668	,	,
1669	,	,
1670	,	,
1671	,	,
1672	,	,
1673	,	,
1674	,	,
1675	,	,
1676	,	,
1677	,	,
1678	,	,
1679	,	,
1680	,	,
1681	,	,
1682	,	,
1683	,	,
1684	,	,
1685	,	,
1686	,	,
1687	,	,
1688	,	,
1689	,	,
1690	,	,
1691	,	,
1692	,	,
1693	,	,
1694	,	,
1695	,	,
1696	,	,
1697	,	,
1698	,	,
1699	,	,
1700	,	,
1701	,	,
1702	,	,
1703	,	,
1704	,	,
1705	,	,
1706	,	,
1707	,	,
1708	,	,
1709	,	,
1710	,	,
1711	,	,
1712	,	,
1713	,	,
1714	,	,
1715	,	,
1716	,	,
1717	,	,
1718	,	,
1719	,	,
1720	,	,
1721	,	,
1722	,	,
1723	,	,
1724	,	,
1725	,	,
1726	,	,
1727	,	,
1728	,	,
1729	,	,
1730	,	,
1731	,	,
1732	,	,
1733	,	,
1734	,	,
1735	,	,
1736	,	,
1737	,	,
1738	,	,
1739	,	,
1740	,	,
1741	,	,
1742	,	,
1743	,	,
1744	,	,
1745	,	,
1746	,	,
1747	,	,
1748	,	,
1749	,	,
1750	,	,
1751	,	,
1752	,	,
1753	,	,
1754	,	,
1755	,	,
1756	,	,
1757	,	,
1758	,	,
1759	,	,
1760	,	,
1761	,	,
1762	,	,
1763	,	,
1764	,	,
1765	,	,
1766	,	,
1767	,	,
1768	,	,
1769	,	,
1770	,	,
1771	,	,
1772	,	,
1773	,	,
1774	,	,
1775	,	,
1776	,	,
1777	,	,
1778	,	,
1779	,	,
1780	,	,
1781	,	,
1782	,	,
1783	,	,
1784	,	,
1785	,	,
1786	,	,
1787	,	,
1788	,	,
1789	,	,
1790	,	,
1791	,	,
1792	,	,
1793	,	,
1794	,	,
1795	,	,
1796	,	,
1797	,	,
1798	,	,
1799	,	,
1800	,	,
1801	,	,
1802	,	,
1803	,	,
1804	,	,
1805	,	,
1806	,	,
1807	,	,
1808	,	,
1809	,	,
1810	,	,
1811	,	,
1812	,	,
1813	,	,
1814	,	,
1815	,	,
1816	,	,
1817	,	,
1818	,	,
1819	,	,
1820	,	,
1821	,	,
1822	,	,
1823	,	,
1824	,	,
1825	,	,
1826	,	,
1827	,	,
1828	,	,
1829	,	,
1830	,	,
1831	,	,
1832	,	,
1833	,	,
1834	,	,
1835	,	,
1836	,	,
1837	,	,
1838	,	,
1839	,	,
1840	,	,
1841	,	,
1842	,	,
1843	,	,
1844	,	,
1845	,	,
1846	,	,
1847	,	,
1848	,	,
1849	,	,
1850	,	,
1851	,	,
1852	,	,
1853	,	,
1854	,	,
1855	,	,
1856	,	,
1857	,	,
1858	,	,
1859	,	,
1860	,	,
1861	,	,
1862	,	,
1863	,	,
1864	,	,
1865	,	,
1866	,	,
1867	,	,
1868	,	,
1869	,	,
1870	,	,
1871	,	,
1872	,	,
1873	,	,
1874	,	,
1875	,	,
1876	,	,
1877	,	,
1878	,	,
1879	,	,
1880	,	,
1881	,	,
1882	,	,
1883	,	,
1884	,	,
1885	,	,
1886	,	,
1887	,	,
1888	,	,
1889	,	,
1890	,	,
1891	,	,
1892	,	,
1893	,	,
1894	,	,
1895	,	,
1896	,	,
1897	,	,
1898	,	,
1899	,	,
1900	,	,
1901	,	,
1902	,	,
1903	,	,
1904	,	,
1905	,	,
1906	,	,
1907	,	,
1908	,	,
1909	,	,
1910	,	,
1911	,	,
1912	,	,
1913	,	,
1914	,	,
1915	,	,
1916	,	,
1917	,	,
1918	,	,
1919	,	,
1920	,	,
1921	,	,
1922	,	,
1923	,	,
1924	,	,
1925	,	,
1926	,	,
1927	,	,
1928	,	,
1929	,	,
1930	,	,
1931	,	,
1932	,	,
1933	,	,
1934	,	,
1935	,	,
1936	,	,
1937	,	,
1938	,	,
1939	,	,
1940	,	,
1941	,	,
1942	,	,
1943	,	,
1944	,	,
1945	,	,
1946	,	,
1947	,	,
1948	,	,
1949	,	,
1950	,	,
1951	,	,
1952	,	,
1953	,	,
1954	,	,
1955	,	,
1956	,	,
1957	,	,
1958	,	,
1959	,	,
1960	,	,
1961	,	,
1962	,	,
1963	,	,
1964	,	,
1965	,	,
1966	,	,
1967	,	,
1968	,	,
1969	,	,
1970	,	,
1971	,	,
1972	,	,
1973	,	,
1974	,	,
1975	,	,
1976	,	,
1977	,	,
1978	,	,
1979	,	,
1980	,	,
1981	,	,
1982	,	,
1983	,	,
1984	,	,
1985	,	,
1986	,	,
1987	,	,
1988	,	,
1989	,	,
1990	,	,
1991	,	,
1992	,	,
1993	,	,
1994	,	,
1995	,	,
1996	,	,
1997	,	,
1998	,	,
1999	,	,
[truncated: 13,001 more rows]
