# Supplementary material for: ParB spreading on DNA requires cytidine triphosphate in vitro
Source: eLife journal article supplement (doi:10.7554/elife.53515), 2020-02-20
Supplement: fig2-figsupp3-data1 [file Fig2_supp3_Dechloromonas_ParB_rep1_2_3.xlsx]

## Sheet: FORMAT
	sample ID #1	sample ID #2	sample ID #3
data point	time point (sec), wavelength shift (nm)	time point (sec), wavelength shift (nm)	time point (sec), wavelength shift (nm)
1
2
3
.
.
.

## Sheet: Fig2_supp3_Dechloromonas_B_123
	169bp closed parS DNA and Dechloromonas ParB	169bp closed parS DNA and Dechloromonas ParB	169bp closed parS DNA and Dechloromonas ParB	169bp closed parS DNA and Dechloromonas ParB 1mM ATP	169bp closed parS DNA and Dechloromonas ParB 1mM GTP	169bp closed parS DNA and Dechloromonas ParB 1mM UTP	169bp closed parS DNA and Dechloromonas ParB 1mM ATP	169bp closed parS DNA and Dechloromonas ParB 1mM GTP	169bp closed parS DNA and Dechloromonas ParB 1mM UTP	169bp closed parS DNA and Dechloromonas ParB 1mM ATP	169bp closed parS DNA and Dechloromonas ParB 1mM GTP	169bp closed parS DNA and Dechloromonas ParB 1mM UTP	169bp closed parS DNA and Dechloromonas ParB 1mM CTP	169bp closed parS DNA and Dechloromonas ParB 1mM CTP	169bp closed parS DNA and Dechloromonas ParB 1mM CTP
1	0.000, -0.004	0.000, -0.026	0.000, -0.024	0.000, -0.021	0.000, -0.005	0.000, -0.013	0.000, -0.007	0.000, -0.017	0.000, -0.025	0.000, -0.010	0.000, -0.014	0.000, -0.018	0.000, -0.022	0.000, -0.003	0.000, -0.020
2	0.200, -0.004	0.200, -0.026	0.200, -0.024	0.200, -0.021	0.200, -0.006	0.200, -0.013	0.200, -0.007	0.200, -0.017	0.200, -0.025	0.200, -0.010	0.200, -0.014	0.200, -0.019	0.200, -0.022	0.200, -0.003	0.200, -0.021
3	0.400, -0.004	0.400, -0.025	0.400, -0.024	0.400, -0.021	0.400, -0.007	0.400, -0.013	0.400, -0.008	0.400, -0.017	0.400, -0.025	0.400, -0.011	0.400, -0.014	0.400, -0.020	0.400, -0.022	0.400, -0.003	0.400, -0.022
4	0.600, -0.004	0.600, -0.025	0.600, -0.024	0.600, -0.021	0.600, -0.007	0.600, -0.014	0.600, -0.008	0.600, -0.017	0.600, -0.025	0.600, -0.012	0.600, -0.013	0.600, -0.021	0.600, -0.022	0.600, -0.003	0.600, -0.023
5	0.800, -0.003	0.800, -0.024	0.800, -0.024	0.800, -0.021	0.800, -0.008	0.800, -0.014	0.800, -0.009	0.800, -0.017	0.800, -0.024	0.800, -0.012	0.800, -0.013	0.800, -0.021	0.800, -0.022	0.800, -0.003	0.800, -0.023
6	1.000, -0.003	1.000, -0.024	1.000, -0.025	1.000, -0.021	1.000, -0.009	1.000, -0.015	1.000, -0.009	1.000, -0.017	1.000, -0.024	1.000, -0.012	1.000, -0.012	1.000, -0.022	1.000, -0.022	1.000, -0.003	1.000, -0.024
7	1.200, -0.002	1.200, -0.024	1.200, -0.025	1.200, -0.021	1.200, -0.009	1.200, -0.015	1.200, -0.010	1.200, -0.017	1.200, -0.024	1.200, -0.013	1.200, -0.012	1.200, -0.023	1.200, -0.022	1.200, -0.003	1.200, -0.024
8	1.400, -0.002	1.400, -0.023	1.400, -0.026	1.400, -0.021	1.400, -0.010	1.400, -0.015	1.400, -0.010	1.400, -0.017	1.400, -0.024	1.400, -0.013	1.400, -0.011	1.400, -0.024	1.400, -0.021	1.400, -0.003	1.400, -0.025
9	1.600, -0.001	1.600, -0.023	1.600, -0.026	1.600, -0.021	1.600, -0.010	1.600, -0.016	1.600, -0.011	1.600, -0.017	1.600, -0.024	1.600, -0.013	1.600, -0.010	1.600, -0.024	1.600, -0.021	1.600, -0.003	1.600, -0.025
10	1.800, -0.001	1.800, -0.023	1.800, -0.026	1.800, -0.021	1.800, -0.011	1.800, -0.016	1.800, -0.011	1.800, -0.017	1.800, -0.024	1.800, -0.013	1.800, -0.010	1.800, -0.025	1.800, -0.021	1.800, -0.003	1.800, -0.024
11	2.000, -0.001	2.000, -0.023	2.000, -0.027	2.000, -0.020	2.000, -0.011	2.000, -0.016	2.000, -0.011	2.000, -0.018	2.000, -0.024	2.000, -0.013	2.000, -0.010	2.000, -0.025	2.000, -0.020	2.000, -0.003	2.000, -0.024
12	2.200, -0.001	2.200, -0.024	2.200, -0.027	2.200, -0.020	2.200, -0.012	2.200, -0.016	2.200, -0.011	2.200, -0.018	2.200, -0.023	2.200, -0.012	2.200, -0.010	2.200, -0.024	2.200, -0.020	2.200, -0.003	2.200, -0.023
13	2.400, -0.001	2.400, -0.024	2.400, -0.027	2.400, -0.020	2.400, -0.012	2.400, -0.015	2.400, -0.011	2.400, -0.018	2.400, -0.023	2.400, -0.012	2.400, -0.009	2.400, -0.024	2.400, -0.020	2.400, -0.003	2.400, -0.022
14	2.600, -0.000	2.600, -0.023	2.600, -0.027	2.600, -0.020	2.600, -0.012	2.600, -0.015	2.600, -0.011	2.600, -0.018	2.600, -0.023	2.600, -0.012	2.600, -0.009	2.600, -0.024	2.600, -0.020	2.600, -0.003	2.600, -0.022
15	2.800, -0.000	2.800, -0.023	2.800, -0.027	2.800, -0.019	2.800, -0.012	2.800, -0.015	2.800, -0.011	2.800, -0.017	2.800, -0.022	2.800, -0.012	2.800, -0.009	2.800, -0.023	2.800, -0.020	2.800, -0.003	2.800, -0.021
16	3.000, 0.000	3.000, -0.023	3.000, -0.026	3.000, -0.019	3.000, -0.013	3.000, -0.014	3.000, -0.010	3.000, -0.017	3.000, -0.022	3.000, -0.012	3.000, -0.009	3.000, -0.023	3.000, -0.020	3.000, -0.003	3.000, -0.021
17	3.200, 0.000	3.200, -0.022	3.200, -0.026	3.200, -0.019	3.200, -0.013	3.200, -0.014	3.200, -0.010	3.200, -0.017	3.200, -0.021	3.200, -0.012	3.200, -0.009	3.200, -0.023	3.200, -0.020	3.200, -0.003	3.200, -0.020
18	3.400, 0.001	3.400, -0.022	3.400, -0.025	3.400, -0.018	3.400, -0.013	3.400, -0.014	3.400, -0.009	3.400, -0.016	3.400, -0.021	3.400, -0.012	3.400, -0.009	3.400, -0.023	3.400, -0.020	3.400, -0.003	3.400, -0.020
19	3.600, 0.001	3.600, -0.022	3.600, -0.025	3.600, -0.018	3.600, -0.013	3.600, -0.014	3.600, -0.008	3.600, -0.016	3.600, -0.020	3.600, -0.012	3.600, -0.008	3.600, -0.023	3.600, -0.019	3.600, -0.003	3.600, -0.019
20	3.800, 0.001	3.800, -0.022	3.800, -0.024	3.800, -0.018	3.800, -0.013	3.800, -0.014	3.800, -0.008	3.800, -0.015	3.800, -0.020	3.800, -0.012	3.800, -0.008	3.800, -0.023	3.800, -0.019	3.800, -0.003	3.800, -0.019
21	4.000, 0.001	4.000, -0.021	4.000, -0.024	4.000, -0.017	4.000, -0.013	4.000, -0.014	4.000, -0.007	4.000, -0.015	4.000, -0.019	4.000, -0.012	4.000, -0.008	4.000, -0.023	4.000, -0.019	4.000, -0.003	4.000, -0.018
22	4.200, 0.001	4.200, -0.021	4.200, -0.023	4.200, -0.017	4.200, -0.013	4.200, -0.014	4.200, -0.007	4.200, -0.015	4.200, -0.019	4.200, -0.012	4.200, -0.008	4.200, -0.022	4.200, -0.018	4.200, -0.003	4.200, -0.018
23	4.400, 0.001	4.400, -0.021	4.400, -0.023	4.400, -0.017	4.400, -0.013	4.400, -0.014	4.400, -0.006	4.400, -0.015	4.400, -0.019	4.400, -0.012	4.400, -0.008	4.400, -0.022	4.400, -0.018	4.400, -0.003	4.400, -0.018
24	4.600, 0.001	4.600, -0.020	4.600, -0.022	4.600, -0.017	4.600, -0.013	4.600, -0.014	4.600, -0.006	4.600, -0.014	4.600, -0.018	4.600, -0.012	4.600, -0.007	4.600, -0.022	4.600, -0.018	4.600, -0.003	4.600, -0.017
25	4.800, 0.001	4.800, -0.020	4.800, -0.021	4.800, -0.017	4.800, -0.013	4.800, -0.014	4.800, -0.006	4.800, -0.014	4.800, -0.018	4.800, -0.012	4.800, -0.007	4.800, -0.021	4.800, -0.017	4.800, -0.003	4.800, -0.017
26	5.000, 0.001	5.000, -0.020	5.000, -0.021	5.000, -0.017	5.000, -0.013	5.000, -0.014	5.000, -0.005	5.000, -0.014	5.000, -0.018	5.000, -0.012	5.000, -0.007	5.000, -0.021	5.000, -0.017	5.000, -0.003	5.000, -0.017
27	5.200, 0.001	5.200, -0.019	5.200, -0.020	5.200, -0.017	5.200, -0.012	5.200, -0.014	5.200, -0.005	5.200, -0.014	5.200, -0.018	5.200, -0.012	5.200, -0.007	5.200, -0.020	5.200, -0.016	5.200, -0.003	5.200, -0.017
28	5.400, 0.001	5.400, -0.019	5.400, -0.020	5.400, -0.016	5.400, -0.012	5.400, -0.014	5.400, -0.005	5.400, -0.014	5.400, -0.017	5.400, -0.012	5.400, -0.006	5.400, -0.020	5.400, -0.016	5.400, -0.003	5.400, -0.016
29	5.600, 0.001	5.600, -0.019	5.600, -0.019	5.600, -0.016	5.600, -0.012	5.600, -0.014	5.600, -0.005	5.600, -0.014	5.600, -0.017	5.600, -0.011	5.600, -0.006	5.600, -0.019	5.600, -0.015	5.600, -0.003	5.600, -0.016
30	5.800, 0.001	5.800, -0.019	5.800, -0.019	5.800, -0.016	5.800, -0.011	5.800, -0.014	5.800, -0.005	5.800, -0.013	5.800, -0.017	5.800, -0.011	5.800, -0.006	5.800, -0.018	5.800, -0.015	5.800, -0.003	5.800, -0.016
31	6.000, 0.001	6.000, -0.019	6.000, -0.018	6.000, -0.015	6.000, -0.011	6.000, -0.014	6.000, -0.005	6.000, -0.013	6.000, -0.016	6.000, -0.010	6.000, -0.006	6.000, -0.018	6.000, -0.015	6.000, -0.003	6.000, -0.016
32	6.200, 0.001	6.200, -0.019	6.200, -0.018	6.200, -0.015	6.200, -0.011	6.200, -0.013	6.200, -0.005	6.200, -0.013	6.200, -0.016	6.200, -0.010	6.200, -0.006	6.200, -0.017	6.200, -0.015	6.200, -0.003	6.200, -0.016
33	6.400, 0.001	6.400, -0.018	6.400, -0.017	6.400, -0.015	6.400, -0.010	6.400, -0.013	6.400, -0.005	6.400, -0.013	6.400, -0.016	6.400, -0.009	6.400, -0.006	6.400, -0.017	6.400, -0.014	6.400, -0.003	6.400, -0.015
34	6.600, 0.002	6.600, -0.018	6.600, -0.017	6.600, -0.014	6.600, -0.010	6.600, -0.013	6.600, -0.005	6.600, -0.012	6.600, -0.016	6.600, -0.009	6.600, -0.006	6.600, -0.016	6.600, -0.014	6.600, -0.003	6.600, -0.015
35	6.800, 0.002	6.800, -0.018	6.800, -0.016	6.800, -0.014	6.800, -0.010	6.800, -0.012	6.800, -0.006	6.800, -0.012	6.800, -0.016	6.800, -0.009	6.800, -0.006	6.800, -0.016	6.800, -0.014	6.800, -0.003	6.800, -0.015
36	7.000, 0.002	7.000, -0.017	7.000, -0.016	7.000, -0.013	7.000, -0.010	7.000, -0.012	7.000, -0.006	7.000, -0.012	7.000, -0.015	7.000, -0.009	7.000, -0.006	7.000, -0.016	7.000, -0.014	7.000, -0.003	7.000, -0.014
37	7.200, 0.002	7.200, -0.017	7.200, -0.016	7.200, -0.013	7.200, -0.010	7.200, -0.011	7.200, -0.006	7.200, -0.011	7.200, -0.015	7.200, -0.009	7.200, -0.006	7.200, -0.016	7.200, -0.014	7.200, -0.003	7.200, -0.014
38	7.400, 0.003	7.400, -0.017	7.400, -0.016	7.400, -0.012	7.400, -0.010	7.400, -0.011	7.400, -0.006	7.400, -0.011	7.400, -0.015	7.400, -0.009	7.400, -0.006	7.400, -0.016	7.400, -0.014	7.400, -0.002	7.400, -0.014
39	7.600, 0.002	7.600, -0.016	7.600, -0.016	7.600, -0.012	7.600, -0.010	7.600, -0.011	7.600, -0.006	7.600, -0.011	7.600, -0.015	7.600, -0.009	7.600, -0.006	7.600, -0.016	7.600, -0.014	7.600, -0.002	7.600, -0.013
40	7.800, 0.002	7.800, -0.016	7.800, -0.016	7.800, -0.012	7.800, -0.010	7.800, -0.010	7.800, -0.006	7.800, -0.011	7.800, -0.015	7.800, -0.009	7.800, -0.006	7.800, -0.016	7.800, -0.013	7.800, -0.002	7.800, -0.013
41	8.000, 0.002	8.000, -0.015	8.000, -0.015	8.000, -0.012	8.000, -0.010	8.000, -0.010	8.000, -0.006	8.000, -0.011	8.000, -0.014	8.000, -0.009	8.000, -0.006	8.000, -0.016	8.000, -0.013	8.000, -0.002	8.000, -0.013
42	8.200, 0.002	8.200, -0.015	8.200, -0.015	8.200, -0.011	8.200, -0.010	8.200, -0.010	8.200, -0.005	8.200, -0.010	8.200, -0.014	8.200, -0.009	8.200, -0.006	8.200, -0.016	8.200, -0.013	8.200, -0.002	8.200, -0.013
43	8.400, 0.001	8.400, -0.015	8.400, -0.015	8.400, -0.011	8.400, -0.009	8.400, -0.009	8.400, -0.005	8.400, -0.010	8.400, -0.014	8.400, -0.009	8.400, -0.006	8.400, -0.015	8.400, -0.013	8.400, -0.002	8.400, -0.013
44	8.600, 0.001	8.600, -0.014	8.600, -0.015	8.600, -0.011	8.600, -0.009	8.600, -0.009	8.600, -0.005	8.600, -0.010	8.600, -0.013	8.600, -0.009	8.600, -0.006	8.600, -0.015	8.600, -0.013	8.600, -0.002	8.600, -0.012
45	8.800, 0.001	8.800, -0.014	8.800, -0.014	8.800, -0.011	8.800, -0.009	8.800, -0.009	8.800, -0.004	8.800, -0.009	8.800, -0.013	8.800, -0.009	8.800, -0.006	8.800, -0.015	8.800, -0.013	8.800, -0.002	8.800, -0.012
46	9.000, 0.001	9.000, -0.014	9.000, -0.014	9.000, -0.010	9.000, -0.009	9.000, -0.008	9.000, -0.004	9.000, -0.009	9.000, -0.012	9.000, -0.009	9.000, -0.006	9.000, -0.014	9.000, -0.013	9.000, -0.002	9.000, -0.012
47	9.200, 0.001	9.200, -0.013	9.200, -0.014	9.200, -0.010	9.200, -0.009	9.200, -0.008	9.200, -0.003	9.200, -0.009	9.200, -0.012	9.200, -0.009	9.200, -0.006	9.200, -0.014	9.200, -0.012	9.200, -0.002	9.200, -0.012
48	9.400, 0.001	9.400, -0.013	9.400, -0.014	9.400, -0.010	9.400, -0.009	9.400, -0.008	9.400, -0.003	9.400, -0.008	9.400, -0.011	9.400, -0.008	9.400, -0.006	9.400, -0.014	9.400, -0.012	9.400, -0.002	9.400, -0.011
49	9.600, 0.001	9.600, -0.013	9.600, -0.014	9.600, -0.010	9.600, -0.009	9.600, -0.009	9.600, -0.003	9.600, -0.008	9.600, -0.011	9.600, -0.008	9.600, -0.006	9.600, -0.013	9.600, -0.012	9.600, -0.002	9.600, -0.011
50	9.800, 0.001	9.800, -0.013	9.800, -0.013	9.800, -0.010	9.800, -0.009	9.800, -0.009	9.800, -0.002	9.800, -0.008	9.800, -0.010	9.800, -0.007	9.800, -0.006	9.800, -0.013	9.800, -0.012	9.800, -0.002	9.800, -0.011
51	10.000, 0.001	10.000, -0.013	10.000, -0.013	10.000, -0.009	10.000, -0.009	10.000, -0.009	10.000, -0.002	10.000, -0.008	10.000, -0.010	10.000, -0.007	10.000, -0.006	10.000, -0.013	10.000, -0.012	10.000, -0.002	10.000, -0.010
52	10.200, 0.001	10.200, -0.013	10.200, -0.012	10.200, -0.009	10.200, -0.008	10.200, -0.009	10.200, -0.002	10.200, -0.008	10.200, -0.010	10.200, -0.007	10.200, -0.006	10.200, -0.013	10.200, -0.012	10.200, -0.002	10.200, -0.010
53	10.400, 0.001	10.400, -0.013	10.400, -0.012	10.400, -0.009	10.400, -0.008	10.400, -0.008	10.400, -0.002	10.400, -0.008	10.400, -0.010	10.400, -0.007	10.400, -0.006	10.400, -0.013	10.400, -0.012	10.400, -0.001	10.400, -0.009
54	10.600, 0.001	10.600, -0.013	10.600, -0.012	10.600, -0.009	10.600, -0.008	10.600, -0.008	10.600, -0.001	10.600, -0.008	10.600, -0.010	10.600, -0.007	10.600, -0.006	10.600, -0.012	10.600, -0.012	10.600, -0.001	10.600, -0.009
55	10.800, 0.001	10.800, -0.013	10.800, -0.011	10.800, -0.009	10.800, -0.008	10.800, -0.008	10.800, -0.001	10.800, -0.008	10.800, -0.010	10.800, -0.007	10.800, -0.006	10.800, -0.012	10.800, -0.011	10.800, -0.001	10.800, -0.009
56	11.000, 0.001	11.000, -0.013	11.000, -0.011	11.000, -0.009	11.000, -0.008	11.000, -0.008	11.000, -0.001	11.000, -0.008	11.000, -0.010	11.000, -0.007	11.000, -0.005	11.000, -0.012	11.000, -0.011	11.000, -0.001	11.000, -0.009
57	11.200, 0.001	11.200, -0.012	11.200, -0.011	11.200, -0.009	11.200, -0.008	11.200, -0.007	11.200, -0.001	11.200, -0.007	11.200, -0.010	11.200, -0.007	11.200, -0.005	11.200, -0.012	11.200, -0.010	11.200, -0.001	11.200, -0.008
58	11.400, 0.001	11.400, -0.012	11.400, -0.011	11.400, -0.009	11.400, -0.007	11.400, -0.007	11.400, -0.001	11.400, -0.007	11.400, -0.010	11.400, -0.007	11.400, -0.005	11.400, -0.012	11.400, -0.010	11.400, -0.001	11.400, -0.008
59	11.600, 0.000	11.600, -0.012	11.600, -0.010	11.600, -0.009	11.600, -0.007	11.600, -0.007	11.600, -0.001	11.600, -0.007	11.600, -0.010	11.600, -0.007	11.600, -0.005	11.600, -0.012	11.600, -0.009	11.600, -0.001	11.600, -0.008
60	11.800, 0.000	11.800, -0.012	11.800, -0.010	11.800, -0.009	11.800, -0.007	11.800, -0.007	11.800, -0.001	11.800, -0.007	11.800, -0.011	11.800, -0.007	11.800, -0.005	11.800, -0.011	11.800, -0.009	11.800, -0.001	11.800, -0.008
61	12.000, -0.000	12.000, -0.012	12.000, -0.010	12.000, -0.009	12.000, -0.006	12.000, -0.007	12.000, -0.001	12.000, -0.007	12.000, -0.011	12.000, -0.007	12.000, -0.005	12.000, -0.011	12.000, -0.009	12.000, -0.001	12.000, -0.007
62	12.200, -0.000	12.200, -0.012	12.200, -0.010	12.200, -0.009	12.200, -0.006	12.200, -0.007	12.200, -0.001	12.200, -0.006	12.200, -0.011	12.200, -0.007	12.200, -0.005	12.200, -0.011	12.200, -0.008	12.200, -0.001	12.200, -0.007
63	12.400, -0.001	12.400, -0.012	12.400, -0.010	12.400, -0.009	12.400, -0.005	12.400, -0.007	12.400, -0.001	12.400, -0.006	12.400, -0.010	12.400, -0.007	12.400, -0.005	12.400, -0.011	12.400, -0.008	12.400, -0.001	12.400, -0.007
64	12.600, -0.001	12.600, -0.011	12.600, -0.010	12.600, -0.009	12.600, -0.005	12.600, -0.007	12.600, -0.002	12.600, -0.006	12.600, -0.010	12.600, -0.007	12.600, -0.005	12.600, -0.010	12.600, -0.008	12.600, -0.001	12.600, -0.007
65	12.800, -0.001	12.800, -0.011	12.800, -0.010	12.800, -0.009	12.800, -0.005	12.800, -0.008	12.800, -0.002	12.800, -0.005	12.800, -0.010	12.800, -0.007	12.800, -0.005	12.800, -0.010	12.800, -0.007	12.800, -0.001	12.800, -0.007
66	13.000, -0.001	13.000, -0.011	13.000, -0.010	13.000, -0.009	13.000, -0.005	13.000, -0.008	13.000, -0.002	13.000, -0.005	13.000, -0.009	13.000, -0.007	13.000, -0.005	13.000, -0.010	13.000, -0.007	13.000, -0.001	13.000, -0.006
67	13.200, -0.001	13.200, -0.011	13.200, -0.010	13.200, -0.008	13.200, -0.005	13.200, -0.008	13.200, -0.002	13.200, -0.005	13.200, -0.009	13.200, -0.007	13.200, -0.005	13.200, -0.010	13.200, -0.007	13.200, -0.001	13.200, -0.006
68	13.400, -0.001	13.400, -0.011	13.400, -0.010	13.400, -0.008	13.400, -0.005	13.400, -0.008	13.400, -0.002	13.400, -0.005	13.400, -0.009	13.400, -0.007	13.400, -0.004	13.400, -0.010	13.400, -0.007	13.400, -0.001	13.400, -0.006
69	13.600, -0.001	13.600, -0.011	13.600, -0.010	13.600, -0.008	13.600, -0.005	13.600, -0.007	13.600, -0.002	13.600, -0.005	13.600, -0.008	13.600, -0.007	13.600, -0.004	13.600, -0.009	13.600, -0.007	13.600, -0.001	13.600, -0.006
70	13.800, -0.001	13.800, -0.010	13.800, -0.010	13.800, -0.007	13.800, -0.005	13.800, -0.007	13.800, -0.002	13.800, -0.006	13.800, -0.008	13.800, -0.006	13.800, -0.004	13.800, -0.009	13.800, -0.007	13.800, -0.000	13.800, -0.005
71	14.000, -0.001	14.000, -0.010	14.000, -0.010	14.000, -0.007	14.000, -0.005	14.000, -0.007	14.000, -0.002	14.000, -0.006	14.000, -0.008	14.000, -0.006	14.000, -0.004	14.000, -0.009	14.000, -0.007	14.000, -0.000	14.000, -0.005
72	14.200, -0.001	14.200, -0.010	14.200, -0.010	14.200, -0.007	14.200, -0.005	14.200, -0.007	14.200, -0.002	14.200, -0.006	14.200, -0.007	14.200, -0.006	14.200, -0.004	14.200, -0.009	14.200, -0.007	14.200, 0.000	14.200, -0.005
73	14.400, -0.001	14.400, -0.009	14.400, -0.010	14.400, -0.006	14.400, -0.005	14.400, -0.006	14.400, -0.002	14.400, -0.006	14.400, -0.007	14.400, -0.006	14.400, -0.004	14.400, -0.008	14.400, -0.006	14.400, 0.000	14.400, -0.004
74	14.600, -0.001	14.600, -0.009	14.600, -0.009	14.600, -0.006	14.600, -0.005	14.600, -0.006	14.600, -0.002	14.600, -0.006	14.600, -0.007	14.600, -0.006	14.600, -0.004	14.600, -0.008	14.600, -0.006	14.600, 0.000	14.600, -0.004
75	14.800, -0.001	14.800, -0.009	14.800, -0.009	14.800, -0.006	14.800, -0.004	14.800, -0.006	14.800, -0.001	14.800, -0.006	14.800, -0.007	14.800, -0.006	14.800, -0.004	14.800, -0.008	14.800, -0.006	14.800, 0.000	14.800, -0.004
76	15.000, -0.001	15.000, -0.009	15.000, -0.009	15.000, -0.006	15.000, -0.004	15.000, -0.006	15.000, -0.001	15.000, -0.007	15.000, -0.007	15.000, -0.006	15.000, -0.004	15.000, -0.008	15.000, -0.006	15.000, 0.000	15.000, -0.004
77	15.200, -0.001	15.200, -0.009	15.200, -0.009	15.200, -0.006	15.200, -0.004	15.200, -0.006	15.200, -0.001	15.200, -0.007	15.200, -0.007	15.200, -0.006	15.200, -0.004	15.200, -0.008	15.200, -0.005	15.200, 0.001	15.200, -0.004
78	15.400, -0.001	15.400, -0.009	15.400, -0.009	15.400, -0.006	15.400, -0.003	15.400, -0.005	15.400, -0.001	15.400, -0.006	15.400, -0.006	15.400, -0.006	15.400, -0.004	15.400, -0.008	15.400, -0.005	15.400, 0.000	15.400, -0.004
79	15.600, -0.001	15.600, -0.009	15.600, -0.008	15.600, -0.005	15.600, -0.003	15.600, -0.005	15.600, -0.001	15.600, -0.006	15.600, -0.007	15.600, -0.006	15.600, -0.004	15.600, -0.007	15.600, -0.005	15.600, 0.000	15.600, -0.004
80	15.800, -0.001	15.800, -0.009	15.800, -0.008	15.800, -0.005	15.800, -0.003	15.800, -0.005	15.800, -0.001	15.800, -0.006	15.800, -0.007	15.800, -0.006	15.800, -0.004	15.800, -0.007	15.800, -0.005	15.800, 0.000	15.800, -0.004
81	16.000, -0.001	16.000, -0.009	16.000, -0.008	16.000, -0.005	16.000, -0.002	16.000, -0.005	16.000, -0.001	16.000, -0.006	16.000, -0.007	16.000, -0.006	16.000, -0.004	16.000, -0.007	16.000, -0.005	16.000, -0.000	16.000, -0.004
82	16.200, -0.000	16.200, -0.009	16.200, -0.008	16.200, -0.005	16.200, -0.002	16.200, -0.005	16.200, -0.001	16.200, -0.005	16.200, -0.007	16.200, -0.005	16.200, -0.003	16.200, -0.007	16.200, -0.005	16.200, -0.000	16.200, -0.004
83	16.400, -0.000	16.400, -0.008	16.400, -0.008	16.400, -0.005	16.400, -0.002	16.400, -0.005	16.400, -0.001	16.400, -0.005	16.400, -0.007	16.400, -0.005	16.400, -0.003	16.400, -0.007	16.400, -0.005	16.400, -0.000	16.400, -0.004
84	16.600, -0.000	16.600, -0.008	16.600, -0.008	16.600, -0.005	16.600, -0.002	16.600, -0.005	16.600, -0.000	16.600, -0.004	16.600, -0.007	16.600, -0.005	16.600, -0.003	16.600, -0.007	16.600, -0.005	16.600, -0.001	16.600, -0.004
85	16.800, -0.000	16.800, -0.008	16.800, -0.007	16.800, -0.004	16.800, -0.002	16.800, -0.005	16.800, -0.000	16.800, -0.004	16.800, -0.007	16.800, -0.005	16.800, -0.003	16.800, -0.007	16.800, -0.005	16.800, -0.001	16.800, -0.004
86	17.000, -0.000	17.000, -0.008	17.000, -0.007	17.000, -0.004	17.000, -0.002	17.000, -0.005	17.000, 0.000	17.000, -0.004	17.000, -0.006	17.000, -0.005	17.000, -0.003	17.000, -0.007	17.000, -0.006	17.000, -0.001	17.000, -0.004
87	17.200, -0.000	17.200, -0.008	17.200, -0.007	17.200, -0.004	17.200, -0.003	17.200, -0.005	17.200, 0.000	17.200, -0.004	17.200, -0.006	17.200, -0.004	17.200, -0.003	17.200, -0.007	17.200, -0.006	17.200, -0.001	17.200, -0.004
88	17.400, 0.000	17.400, -0.007	17.400, -0.007	17.400, -0.004	17.400, -0.003	17.400, -0.004	17.400, 0.000	17.400, -0.004	17.400, -0.006	17.400, -0.004	17.400, -0.003	17.400, -0.006	17.400, -0.006	17.400, -0.001	17.400, -0.004
89	17.600, 0.000	17.600, -0.007	17.600, -0.006	17.600, -0.003	17.600, -0.003	17.600, -0.004	17.600, 0.000	17.600, -0.004	17.600, -0.006	17.600, -0.004	17.600, -0.003	17.600, -0.006	17.600, -0.005	17.600, -0.001	17.600, -0.004
90	17.800, 0.000	17.800, -0.007	17.800, -0.006	17.800, -0.003	17.800, -0.003	17.800, -0.004	17.800, 0.000	17.800, -0.004	17.800, -0.006	17.800, -0.004	17.800, -0.003	17.800, -0.006	17.800, -0.005	17.800, -0.001	17.800, -0.004
91	18.000, 0.000	18.000, -0.006	18.000, -0.006	18.000, -0.003	18.000, -0.003	18.000, -0.004	18.000, 0.000	18.000, -0.004	18.000, -0.006	18.000, -0.005	18.000, -0.003	18.000, -0.006	18.000, -0.005	18.000, -0.001	18.000, -0.003
92	18.200, 0.000	18.200, -0.006	18.200, -0.006	18.200, -0.003	18.200, -0.003	18.200, -0.004	18.200, 0.000	18.200, -0.004	18.200, -0.005	18.200, -0.005	18.200, -0.004	18.200, -0.005	18.200, -0.005	18.200, -0.001	18.200, -0.003
93	18.400, 0.000	18.400, -0.005	18.400, -0.006	18.400, -0.003	18.400, -0.003	18.400, -0.003	18.400, 0.000	18.400, -0.005	18.400, -0.005	18.400, -0.005	18.400, -0.004	18.400, -0.005	18.400, -0.005	18.400, -0.001	18.400, -0.003
94	18.600, -0.000	18.600, -0.005	18.600, -0.005	18.600, -0.003	18.600, -0.003	18.600, -0.003	18.600, 0.001	18.600, -0.005	18.600, -0.005	18.600, -0.005	18.600, -0.004	18.600, -0.005	18.600, -0.005	18.600, -0.001	18.600, -0.003
95	18.800, -0.000	18.800, -0.005	18.800, -0.005	18.800, -0.003	18.800, -0.003	18.800, -0.003	18.800, 0.001	18.800, -0.005	18.800, -0.005	18.800, -0.005	18.800, -0.004	18.800, -0.005	18.800, -0.005	18.800, -0.001	18.800, -0.003
96	19.000, -0.000	19.000, -0.005	19.000, -0.006	19.000, -0.003	19.000, -0.003	19.000, -0.003	19.000, 0.001	19.000, -0.005	19.000, -0.005	19.000, -0.005	19.000, -0.004	19.000, -0.005	19.000, -0.005	19.000, -0.001	19.000, -0.003
97	19.200, -0.000	19.200, -0.005	19.200, -0.005	19.200, -0.003	19.200, -0.002	19.200, -0.002	19.200, 0.001	19.200, -0.005	19.200, -0.005	19.200, -0.005	19.200, -0.004	19.200, -0.004	19.200, -0.005	19.200, -0.001	19.200, -0.003
98	19.400, -0.001	19.400, -0.005	19.400, -0.005	19.400, -0.003	19.400, -0.002	19.400, -0.002	19.400, 0.001	19.400, -0.004	19.400, -0.005	19.400, -0.005	19.400, -0.004	19.400, -0.004	19.400, -0.005	19.400, -0.002	19.400, -0.003
99	19.600, -0.001	19.600, -0.005	19.600, -0.005	19.600, -0.003	19.600, -0.002	19.600, -0.002	19.600, 0.001	19.600, -0.004	19.600, -0.004	19.600, -0.004	19.600, -0.004	19.600, -0.004	19.600, -0.004	19.600, -0.002	19.600, -0.003
100	19.800, -0.001	19.800, -0.005	19.800, -0.005	19.800, -0.003	19.800, -0.002	19.800, -0.003	19.800, 0.001	19.800, -0.004	19.800, -0.004	19.800, -0.004	19.800, -0.004	19.800, -0.004	19.800, -0.004	19.800, -0.002	19.800, -0.003
101	20.000, -0.001	20.000, -0.005	20.000, -0.005	20.000, -0.003	20.000, -0.002	20.000, -0.003	20.000, 0.001	20.000, -0.004	20.000, -0.004	20.000, -0.004	20.000, -0.003	20.000, -0.004	20.000, -0.004	20.000, -0.002	20.000, -0.002
102	20.200, -0.001	20.200, -0.005	20.200, -0.005	20.200, -0.003	20.200, -0.002	20.200, -0.003	20.200, 0.002	20.200, -0.003	20.200, -0.004	20.200, -0.004	20.200, -0.003	20.200, -0.004	20.200, -0.004	20.200, -0.002	20.200, -0.002
103	20.400, -0.001	20.400, -0.005	20.400, -0.005	20.400, -0.003	20.400, -0.002	20.400, -0.003	20.400, 0.002	20.400, -0.003	20.400, -0.004	20.400, -0.003	20.400, -0.003	20.400, -0.003	20.400, -0.004	20.400, -0.002	20.400, -0.002
104	20.600, -0.001	20.600, -0.004	20.600, -0.005	20.600, -0.003	20.600, -0.002	20.600, -0.004	20.600, 0.002	20.600, -0.003	20.600, -0.004	20.600, -0.003	20.600, -0.003	20.600, -0.003	20.600, -0.004	20.600, -0.002	20.600, -0.002
105	20.800, -0.002	20.800, -0.004	20.800, -0.005	20.800, -0.002	20.800, -0.002	20.800, -0.004	20.800, 0.001	20.800, -0.003	20.800, -0.003	20.800, -0.003	20.800, -0.002	20.800, -0.003	20.800, -0.004	20.800, -0.002	20.800, -0.002
106	21.000, -0.002	21.000, -0.004	21.000, -0.005	21.000, -0.002	21.000, -0.002	21.000, -0.004	21.000, 0.001	21.000, -0.003	21.000, -0.003	21.000, -0.003	21.000, -0.002	21.000, -0.003	21.000, -0.004	21.000, -0.002	21.000, -0.002
107	21.200, -0.002	21.200, -0.004	21.200, -0.005	21.200, -0.002	21.200, -0.002	21.200, -0.004	21.200, 0.001	21.200, -0.003	21.200, -0.003	21.200, -0.003	21.200, -0.002	21.200, -0.003	21.200, -0.003	21.200, -0.002	21.200, -0.002
108	21.400, -0.002	21.400, -0.004	21.400, -0.005	21.400, -0.002	21.400, -0.002	21.400, -0.004	21.400, 0.001	21.400, -0.003	21.400, -0.003	21.400, -0.003	21.400, -0.002	21.400, -0.003	21.400, -0.003	21.400, -0.002	21.400, -0.002
109	21.600, -0.002	21.600, -0.004	21.600, -0.005	21.600, -0.002	21.600, -0.001	21.600, -0.004	21.600, 0.001	21.600, -0.003	21.600, -0.003	21.600, -0.003	21.600, -0.002	21.600, -0.003	21.600, -0.002	21.600, -0.001	21.600, -0.002
110	21.800, -0.002	21.800, -0.004	21.800, -0.005	21.800, -0.002	21.800, -0.001	21.800, -0.004	21.800, 0.001	21.800, -0.003	21.800, -0.003	21.800, -0.003	21.800, -0.002	21.800, -0.003	21.800, -0.002	21.800, -0.001	21.800, -0.002
111	22.000, -0.002	22.000, -0.004	22.000, -0.005	22.000, -0.001	22.000, -0.001	22.000, -0.004	22.000, 0.001	22.000, -0.003	22.000, -0.003	22.000, -0.003	22.000, -0.002	22.000, -0.003	22.000, -0.002	22.000, -0.001	22.000, -0.002
112	22.200, -0.002	22.200, -0.003	22.200, -0.005	22.200, -0.001	22.200, -0.001	22.200, -0.003	22.200, 0.001	22.200, -0.003	22.200, -0.003	22.200, -0.003	22.200, -0.002	22.200, -0.003	22.200, -0.001	22.200, -0.001	22.200, -0.002
113	22.400, -0.002	22.400, -0.003	22.400, -0.005	22.400, -0.002	22.400, -0.001	22.400, -0.003	22.400, 0.002	22.400, -0.003	22.400, -0.003	22.400, -0.004	22.400, -0.002	22.400, -0.003	22.400, -0.001	22.400, -0.000	22.400, -0.002
114	22.600, -0.002	22.600, -0.003	22.600, -0.005	22.600, -0.002	22.600, -0.001	22.600, -0.003	22.600, 0.002	22.600, -0.003	22.600, -0.003	22.600, -0.003	22.600, -0.002	22.600, -0.002	22.600, -0.001	22.600, -0.000	22.600, -0.002
115	22.800, -0.002	22.800, -0.003	22.800, -0.005	22.800, -0.002	22.800, -0.001	22.800, -0.002	22.800, 0.002	22.800, -0.003	22.800, -0.003	22.800, -0.003	22.800, -0.002	22.800, -0.002	22.800, -0.001	22.800, -0.000	22.800, -0.002
116	23.000, -0.002	23.000, -0.003	23.000, -0.005	23.000, -0.002	23.000, -0.001	23.000, -0.002	23.000, 0.001	23.000, -0.002	23.000, -0.003	23.000, -0.003	23.000, -0.002	23.000, -0.002	23.000, -0.001	23.000, -0.000	23.000, -0.002
117	23.200, -0.002	23.200, -0.004	23.200, -0.004	23.200, -0.002	23.200, -0.001	23.200, -0.002	23.200, 0.001	23.200, -0.002	23.200, -0.003	23.200, -0.003	23.200, -0.002	23.200, -0.002	23.200, -0.002	23.200, -0.000	23.200, -0.002
118	23.400, -0.002	23.400, -0.004	23.400, -0.004	23.400, -0.002	23.400, -0.001	23.400, -0.002	23.400, 0.001	23.400, -0.002	23.400, -0.002	23.400, -0.003	23.400, -0.002	23.400, -0.002	23.400, -0.002	23.400, -0.000	23.400, -0.002
119	23.600, -0.002	23.600, -0.003	23.600, -0.004	23.600, -0.002	23.600, -0.001	23.600, -0.002	23.600, 0.001	23.600, -0.002	23.600, -0.002	23.600, -0.003	23.600, -0.001	23.600, -0.001	23.600, -0.002	23.600, -0.000	23.600, -0.002
120	23.800, -0.002	23.800, -0.003	23.800, -0.003	23.800, -0.002	23.800, -0.001	23.800, -0.002	23.800, 0.000	23.800, -0.002	23.800, -0.002	23.800, -0.003	23.800, -0.001	23.800, -0.001	23.800, -0.002	23.800, 0.000	23.800, -0.002
121	24.000, -0.002	24.000, -0.003	24.000, -0.003	24.000, -0.002	24.000, -0.001	24.000, -0.002	24.000, 0.000	24.000, -0.002	24.000, -0.002	24.000, -0.003	24.000, -0.001	24.000, -0.001	24.000, -0.002	24.000, 0.001	24.000, -0.001
122	24.200, -0.002	24.200, -0.003	24.200, -0.003	24.200, -0.002	24.200, -0.001	24.200, -0.003	24.200, -0.000	24.200, -0.002	24.200, -0.002	24.200, -0.002	24.200, -0.001	24.200, -0.001	24.200, -0.002	24.200, 0.001	24.200, -0.001
123	24.400, -0.002	24.400, -0.003	24.400, -0.003	24.400, -0.002	24.400, -0.001	24.400, -0.003	24.400, -0.000	24.400, -0.002	24.400, -0.002	24.400, -0.002	24.400, -0.001	24.400, -0.001	24.400, -0.002	24.400, 0.001	24.400, -0.001
124	24.600, -0.002	24.600, -0.003	24.600, -0.003	24.600, -0.002	24.600, -0.001	24.600, -0.003	24.600, -0.001	24.600, -0.002	24.600, -0.002	24.600, -0.002	24.600, -0.001	24.600, -0.001	24.600, -0.002	24.600, 0.002	24.600, -0.001
125	24.800, -0.002	24.800, -0.003	24.800, -0.003	24.800, -0.002	24.800, -0.001	24.800, -0.003	24.800, -0.001	24.800, -0.002	24.800, -0.001	24.800, -0.003	24.800, -0.001	24.800, -0.001	24.800, -0.002	24.800, 0.002	24.800, -0.001
126	25.000, -0.002	25.000, -0.003	25.000, -0.003	25.000, -0.002	25.000, -0.000	25.000, -0.003	25.000, -0.001	25.000, -0.002	25.000, -0.001	25.000, -0.003	25.000, -0.001	25.000, -0.002	25.000, -0.002	25.000, 0.002	25.000, -0.001
127	25.200, -0.002	25.200, -0.003	25.200, -0.003	25.200, -0.002	25.200, -0.000	25.200, -0.003	25.200, -0.001	25.200, -0.002	25.200, -0.001	25.200, -0.003	25.200, -0.001	25.200, -0.002	25.200, -0.001	25.200, 0.002	25.200, -0.001
128	25.400, -0.002	25.400, -0.003	25.400, -0.003	25.400, -0.002	25.400, 0.000	25.400, -0.003	25.400, -0.000	25.400, -0.001	25.400, -0.001	25.400, -0.002	25.400, -0.001	25.400, -0.002	25.400, -0.001	25.400, 0.002	25.400, -0.001
129	25.600, -0.001	25.600, -0.003	25.600, -0.003	25.600, -0.001	25.600, 0.001	25.600, -0.003	25.600, 0.000	25.600, -0.001	25.600, -0.001	25.600, -0.002	25.600, -0.001	25.600, -0.003	25.600, -0.001	25.600, 0.002	25.600, -0.001
130	25.800, -0.001	25.800, -0.002	25.800, -0.003	25.800, -0.001	25.800, 0.001	25.800, -0.003	25.800, 0.001	25.800, -0.001	25.800, -0.001	25.800, -0.002	25.800, -0.001	25.800, -0.003	25.800, -0.000	25.800, 0.002	25.800, -0.001
131	26.000, -0.001	26.000, -0.002	26.000, -0.003	26.000, -0.001	26.000, 0.001	26.000, -0.003	26.000, 0.001	26.000, -0.001	26.000, -0.001	26.000, -0.002	26.000, -0.001	26.000, -0.002	26.000, -0.000	26.000, 0.002	26.000, -0.001
132	26.200, -0.001	26.200, -0.002	26.200, -0.002	26.200, -0.001	26.200, 0.001	26.200, -0.003	26.200, 0.001	26.200, -0.000	26.200, -0.001	26.200, -0.002	26.200, -0.002	26.200, -0.002	26.200, -0.000	26.200, 0.002	26.200, -0.001
133	26.400, -0.001	26.400, -0.002	26.400, -0.002	26.400, -0.001	26.400, 0.001	26.400, -0.002	26.400, 0.002	26.400, 0.000	26.400, -0.000	26.400, -0.002	26.400, -0.001	26.400, -0.002	26.400, -0.000	26.400, 0.002	26.400, -0.001
134	26.600, -0.001	26.600, -0.002	26.600, -0.002	26.600, -0.000	26.600, 0.001	26.600, -0.002	26.600, 0.002	26.600, 0.001	26.600, -0.000	26.600, -0.001	26.600, -0.001	26.600, -0.001	26.600, 0.000	26.600, 0.001	26.600, -0.001
135	26.800, -0.001	26.800, -0.002	26.800, -0.002	26.800, -0.000	26.800, 0.001	26.800, -0.001	26.800, 0.002	26.800, 0.001	26.800, -0.000	26.800, -0.001	26.800, -0.001	26.800, -0.001	26.800, 0.000	26.800, 0.001	26.800, -0.001
136	27.000, -0.001	27.000, -0.002	27.000, -0.002	27.000, -0.000	27.000, 0.001	27.000, -0.001	27.000, 0.002	27.000, 0.001	27.000, -0.000	27.000, -0.001	27.000, -0.001	27.000, -0.001	27.000, 0.000	27.000, 0.000	27.000, -0.001
137	27.200, -0.001	27.200, -0.002	27.200, -0.001	27.200, -0.000	27.200, 0.001	27.200, -0.001	27.200, 0.002	27.200, 0.001	27.200, 0.000	27.200, -0.001	27.200, -0.001	27.200, -0.001	27.200, 0.000	27.200, -0.000	27.200, -0.000
138	27.400, -0.000	27.400, -0.001	27.400, -0.001	27.400, -0.000	27.400, 0.001	27.400, -0.000	27.400, 0.001	27.400, 0.001	27.400, 0.000	27.400, -0.000	27.400, -0.001	27.400, -0.001	27.400, -0.000	27.400, -0.000	27.400, -0.000
139	27.600, -0.000	27.600, -0.001	27.600, -0.001	27.600, -0.000	27.600, 0.001	27.600, -0.000	27.600, 0.001	27.600, 0.000	27.600, 0.000	27.600, -0.000	27.600, -0.000	27.600, -0.000	27.600, -0.000	27.600, -0.001	27.600, -0.000
140	27.800, -0.000	27.800, -0.001	27.800, -0.000	27.800, -0.000	27.800, 0.000	27.800, -0.000	27.800, 0.001	27.800, 0.000	27.800, 0.000	27.800, -0.000	27.800, -0.000	27.800, -0.001	27.800, -0.000	27.800, -0.001	27.800, 0.000
141	28.000, -0.000	28.000, -0.001	28.000, -0.000	28.000, -0.000	28.000, 0.000	28.000, -0.000	28.000, 0.000	28.000, -0.000	28.000, 0.000	28.000, 0.000	28.000, 0.000	28.000, -0.000	28.000, -0.000	28.000, -0.000	28.000, 0.000
142	28.200, -0.000	28.200, -0.000	28.200, 0.000	28.200, -0.000	28.200, -0.000	28.200, 0.000	28.200, 0.000	28.200, -0.000	28.200, 0.000	28.200, 0.000	28.200, 0.000	28.200, -0.000	28.200, -0.000	28.200, -0.000	28.200, 0.000
143	28.400, -0.000	28.400, -0.000	28.400, 0.000	28.400, -0.000	28.400, -0.000	28.400, 0.000	28.400, -0.000	28.400, -0.000	28.400, -0.000	28.400, 0.000	28.400, 0.000	28.400, -0.000	28.400, -0.000	28.400, -0.000	28.400, 0.000
144	28.600, 0.000	28.600, 0.000	28.600, 0.001	28.600, -0.000	28.600, -0.001	28.600, 0.000	28.600, -0.000	28.600, -0.000	28.600, -0.000	28.600, 0.000	28.600, 0.000	28.600, -0.000	28.600, -0.000	28.600, -0.000	28.600, 0.000
145	28.800, 0.000	28.800, 0.001	28.800, 0.001	28.800, -0.000	28.800, -0.001	28.800, 0.000	28.800, -0.001	28.800, -0.000	28.800, -0.000	28.800, 0.000	28.800, 0.000	28.800, 0.000	28.800, -0.000	28.800, -0.000	28.800, 0.000
146	29.000, 0.000	29.000, 0.001	29.000, 0.001	29.000, 0.000	29.000, -0.001	29.000, 0.000	29.000, -0.001	29.000, -0.000	29.000, -0.000	29.000, 0.000	29.000, 0.000	29.000, 0.000	29.000, -0.000	29.000, 0.000	29.000, 0.000
147	29.200, 0.000	29.200, 0.001	29.200, 0.001	29.200, 0.000	29.200, -0.001	29.200, 0.000	29.200, -0.001	29.200, -0.000	29.200, -0.000	29.200, 0.000	29.200, 0.000	29.200, 0.000	29.200, -0.000	29.200, 0.000	29.200, -0.000
148	29.400, 0.001	29.400, 0.001	29.400, 0.001	29.400, 0.000	29.400, -0.000	29.400, 0.000	29.400, -0.001	29.400, -0.001	29.400, -0.000	29.400, 0.000	29.400, 0.000	29.400, 0.001	29.400, 0.000	29.400, 0.001	29.400, -0.000
149	29.600, 0.001	29.600, 0.002	29.600, 0.001	29.600, 0.001	29.600, -0.000	29.600, 0.000	29.600, -0.001	29.600, -0.000	29.600, -0.000	29.600, 0.000	29.600, 0.000	29.600, 0.001	29.600, 0.000	29.600, 0.001	29.600, -0.000
150	29.800, 0.001	29.800, 0.002	29.800, 0.001	29.800, 0.001	29.800, -0.000	29.800, 0.000	29.800, -0.001	29.800, -0.000	29.800, -0.000	29.800, 0.000	29.800, 0.000	29.800, 0.002	29.800, 0.000	29.800, 0.001	29.800, -0.000
151	30.000, 0.000	30.000, 0.000	30.000, 0.000	30.000, 0.000	30.000, 0.000	30.000, 0.000	30.000, 0.000	30.000, 0.000	30.000, 0.000	30.000, 0.000	30.000, 0.000	30.000, 0.000	30.000, 0.000	30.000, 0.000	30.000, 0.000
152	30.200, 0.003	30.200, 0.006	30.200, 0.006	30.200, 0.006	30.200, 0.003	30.200, 0.005	30.200, 0.007	30.200, 0.005	30.200, 0.005	30.200, 0.004	30.200, 0.006	30.200, 0.005	30.200, 0.011	30.200, 0.007	30.200, 0.013
153	30.400, 0.008	30.400, 0.015	30.400, 0.014	30.400, 0.014	30.400, 0.008	30.400, 0.012	30.400, 0.017	30.400, 0.013	30.400, 0.013	30.400, 0.011	30.400, 0.016	30.400, 0.013	30.400, 0.026	30.400, 0.016	30.400, 0.029
154	30.600, 0.016	30.600, 0.028	30.600, 0.025	30.600, 0.025	30.600, 0.016	30.600, 0.023	30.600, 0.031	30.600, 0.023	30.600, 0.025	30.600, 0.021	30.600, 0.028	30.600, 0.025	30.600, 0.044	30.600, 0.028	30.600, 0.050
155	30.800, 0.026	30.800, 0.043	30.800, 0.040	30.800, 0.040	30.800, 0.027	30.800, 0.037	30.800, 0.047	30.800, 0.037	30.800, 0.039	30.800, 0.035	30.800, 0.044	30.800, 0.040	30.800, 0.066	30.800, 0.043	30.800, 0.074
156	31.000, 0.040	31.000, 0.062	31.000, 0.057	31.000, 0.059	31.000, 0.041	31.000, 0.055	31.000, 0.067	31.000, 0.055	31.000, 0.057	31.000, 0.052	31.000, 0.062	31.000, 0.058	31.000, 0.092	31.000, 0.060	31.000, 0.103
157	31.200, 0.057	31.200, 0.085	31.200, 0.078	31.200, 0.080	31.200, 0.059	31.200, 0.076	31.200, 0.091	31.200, 0.075	31.200, 0.079	31.200, 0.072	31.200, 0.084	31.200, 0.080	31.200, 0.120	31.200, 0.081	31.200, 0.134
158	31.400, 0.077	31.400, 0.111	31.400, 0.102	31.400, 0.106	31.400, 0.079	31.400, 0.101	31.400, 0.117	31.400, 0.099	31.400, 0.103	31.400, 0.096	31.400, 0.110	31.400, 0.106	31.400, 0.152	31.400, 0.103	31.400, 0.168
159	31.600, 0.100	31.600, 0.139	31.600, 0.129	31.600, 0.134	31.600, 0.103	31.600, 0.128	31.600, 0.146	31.600, 0.125	31.600, 0.130	31.600, 0.124	31.600, 0.137	31.600, 0.134	31.600, 0.185	31.600, 0.127	31.600, 0.205
160	31.800, 0.126	31.800, 0.171	31.800, 0.159	31.800, 0.165	31.800, 0.129	31.800, 0.158	31.800, 0.177	31.800, 0.155	31.800, 0.159	31.800, 0.154	31.800, 0.167	31.800, 0.165	31.800, 0.221	31.800, 0.154	31.800, 0.244
161	32.000, 0.155	32.000, 0.204	32.000, 0.190	32.000, 0.197	32.000, 0.158	32.000, 0.191	32.000, 0.209	32.000, 0.186	32.000, 0.191	32.000, 0.186	32.000, 0.198	32.000, 0.198	32.000, 0.257	32.000, 0.181	32.000, 0.283
162	32.200, 0.186	32.200, 0.239	32.200, 0.223	32.200, 0.231	32.200, 0.188	32.200, 0.225	32.200, 0.242	32.200, 0.218	32.200, 0.223	32.200, 0.220	32.200, 0.230	32.200, 0.232	32.200, 0.293	32.200, 0.208	32.200, 0.322
163	32.400, 0.217	32.400, 0.274	32.400, 0.257	32.400, 0.264	32.400, 0.219	32.400, 0.259	32.400, 0.274	32.400, 0.250	32.400, 0.254	32.400, 0.253	32.400, 0.261	32.400, 0.265	32.400, 0.330	32.400, 0.236	32.400, 0.360
164	32.600, 0.250	32.600, 0.310	32.600, 0.291	32.600, 0.297	32.600, 0.249	32.600, 0.292	32.600, 0.305	32.600, 0.282	32.600, 0.285	32.600, 0.287	32.600, 0.292	32.600, 0.298	32.600, 0.365	32.600, 0.263	32.600, 0.397
165	32.800, 0.284	32.800, 0.345	32.800, 0.324	32.800, 0.330	32.800, 0.278	32.800, 0.325	32.800, 0.336	32.800, 0.313	32.800, 0.314	32.800, 0.320	32.800, 0.321	32.800, 0.330	32.800, 0.401	32.800, 0.290	32.800, 0.433
166	33.000, 0.318	33.000, 0.380	33.000, 0.358	33.000, 0.362	33.000, 0.308	33.000, 0.358	33.000, 0.365	33.000, 0.344	33.000, 0.343	33.000, 0.353	33.000, 0.350	33.000, 0.361	33.000, 0.436	33.000, 0.317	33.000, 0.469
167	33.200, 0.351	33.200, 0.413	33.200, 0.391	33.200, 0.392	33.200, 0.336	33.200, 0.389	33.200, 0.393	33.200, 0.372	33.200, 0.369	33.200, 0.384	33.200, 0.376	33.200, 0.391	33.200, 0.470	33.200, 0.343	33.200, 0.504
168	33.400, 0.383	33.400, 0.445	33.400, 0.423	33.400, 0.421	33.400, 0.363	33.400, 0.419	33.400, 0.420	33.400, 0.400	33.400, 0.394	33.400, 0.414	33.400, 0.401	33.400, 0.419	33.400, 0.504	33.400, 0.369	33.400, 0.537
169	33.600, 0.415	33.600, 0.476	33.600, 0.453	33.600, 0.449	33.600, 0.390	33.600, 0.447	33.600, 0.444	33.600, 0.426	33.600, 0.418	33.600, 0.443	33.600, 0.424	33.600, 0.445	33.600, 0.537	33.600, 0.395	33.600, 0.571
170	33.800, 0.445	33.800, 0.505	33.800, 0.481	33.800, 0.475	33.800, 0.415	33.800, 0.473	33.800, 0.467	33.800, 0.450	33.800, 0.439	33.800, 0.470	33.800, 0.446	33.800, 0.469	33.800, 0.570	33.800, 0.421	33.800, 0.604
171	34.000, 0.474	34.000, 0.532	34.000, 0.508	34.000, 0.499	34.000, 0.439	34.000, 0.498	34.000, 0.489	34.000, 0.473	34.000, 0.459	34.000, 0.496	34.000, 0.466	34.000, 0.492	34.000, 0.603	34.000, 0.447	34.000, 0.636
172	34.200, 0.502	34.200, 0.558	34.200, 0.534	34.200, 0.522	34.200, 0.461	34.200, 0.521	34.200, 0.509	34.200, 0.494	34.200, 0.478	34.200, 0.520	34.200, 0.485	34.200, 0.513	34.200, 0.635	34.200, 0.472	34.200, 0.667
173	34.400, 0.528	34.400, 0.582	34.400, 0.557	34.400, 0.543	34.400, 0.483	34.400, 0.543	34.400, 0.527	34.400, 0.514	34.400, 0.495	34.400, 0.542	34.400, 0.502	34.400, 0.532	34.400, 0.666	34.400, 0.497	34.400, 0.699
174	34.600, 0.553	34.600, 0.604	34.600, 0.580	34.600, 0.563	34.600, 0.504	34.600, 0.563	34.600, 0.544	34.600, 0.533	34.600, 0.511	34.600, 0.563	34.600, 0.517	34.600, 0.551	34.600, 0.697	34.600, 0.521	34.600, 0.729
175	34.800, 0.577	34.800, 0.625	34.800, 0.601	34.800, 0.581	34.800, 0.523	34.800, 0.581	34.800, 0.560	34.800, 0.550	34.800, 0.526	34.800, 0.583	34.800, 0.532	34.800, 0.567	34.800, 0.728	34.800, 0.546	34.800, 0.759
176	35.000, 0.599	35.000, 0.644	35.000, 0.620	35.000, 0.598	35.000, 0.542	35.000, 0.598	35.000, 0.574	35.000, 0.566	35.000, 0.539	35.000, 0.600	35.000, 0.545	35.000, 0.582	35.000, 0.759	35.000, 0.570	35.000, 0.789
177	35.200, 0.619	35.200, 0.661	35.200, 0.637	35.200, 0.614	35.200, 0.559	35.200, 0.613	35.200, 0.587	35.200, 0.580	35.200, 0.551	35.200, 0.617	35.200, 0.557	35.200, 0.596	35.200, 0.788	35.200, 0.593	35.200, 0.818
178	35.400, 0.638	35.400, 0.677	35.400, 0.654	35.400, 0.628	35.400, 0.575	35.400, 0.627	35.400, 0.600	35.400, 0.593	35.400, 0.562	35.400, 0.632	35.400, 0.567	35.400, 0.609	35.400, 0.818	35.400, 0.616	35.400, 0.847
179	35.600, 0.655	35.600, 0.692	35.600, 0.669	35.600, 0.641	35.600, 0.590	35.600, 0.640	35.600, 0.611	35.600, 0.606	35.600, 0.573	35.600, 0.646	35.600, 0.577	35.600, 0.621	35.600, 0.847	35.600, 0.639	35.600, 0.875
180	35.800, 0.671	35.800, 0.705	35.800, 0.683	35.800, 0.653	35.800, 0.604	35.800, 0.651	35.800, 0.621	35.800, 0.617	35.800, 0.582	35.800, 0.658	35.800, 0.586	35.800, 0.631	35.800, 0.876	35.800, 0.662	35.800, 0.903
181	36.000, 0.686	36.000, 0.717	36.000, 0.695	36.000, 0.663	36.000, 0.616	36.000, 0.661	36.000, 0.630	36.000, 0.627	36.000, 0.591	36.000, 0.670	36.000, 0.594	36.000, 0.641	36.000, 0.904	36.000, 0.684	36.000, 0.930
182	36.200, 0.700	36.200, 0.728	36.200, 0.707	36.200, 0.673	36.200, 0.628	36.200, 0.671	36.200, 0.638	36.200, 0.636	36.200, 0.599	36.200, 0.680	36.200, 0.601	36.200, 0.650	36.200, 0.932	36.200, 0.706	36.200, 0.957
183	36.400, 0.713	36.400, 0.739	36.400, 0.718	36.400, 0.681	36.400, 0.639	36.400, 0.680	36.400, 0.646	36.400, 0.645	36.400, 0.606	36.400, 0.689	36.400, 0.608	36.400, 0.658	36.400, 0.960	36.400, 0.728	36.400, 0.984
184	36.600, 0.724	36.600, 0.748	36.600, 0.727	36.600, 0.689	36.600, 0.649	36.600, 0.688	36.600, 0.653	36.600, 0.652	36.600, 0.612	36.600, 0.698	36.600, 0.613	36.600, 0.665	36.600, 0.987	36.600, 0.750	36.600, 1.010
185	36.800, 0.735	36.800, 0.757	36.800, 0.736	36.800, 0.696	36.800, 0.659	36.800, 0.696	36.800, 0.660	36.800, 0.659	36.800, 0.618	36.800, 0.706	36.800, 0.618	36.800, 0.672	36.800, 1.014	36.800, 0.772	36.800, 1.035
186	37.000, 0.745	37.000, 0.764	37.000, 0.744	37.000, 0.703	37.000, 0.668	37.000, 0.703	37.000, 0.666	37.000, 0.665	37.000, 0.623	37.000, 0.714	37.000, 0.623	37.000, 0.678	37.000, 1.040	37.000, 0.793	37.000, 1.060
187	37.200, 0.754	37.200, 0.771	37.200, 0.752	37.200, 0.709	37.200, 0.676	37.200, 0.709	37.200, 0.671	37.200, 0.671	37.200, 0.628	37.200, 0.721	37.200, 0.627	37.200, 0.684	37.200, 1.066	37.200, 0.814	37.200, 1.085
188	37.400, 0.762	37.400, 0.778	37.400, 0.758	37.400, 0.715	37.400, 0.684	37.400, 0.715	37.400, 0.676	37.400, 0.676	37.400, 0.632	37.400, 0.727	37.400, 0.631	37.400, 0.690	37.400, 1.091	37.400, 0.834	37.400, 1.109
189	37.600, 0.769	37.600, 0.784	37.600, 0.764	37.600, 0.720	37.600, 0.691	37.600, 0.720	37.600, 0.681	37.600, 0.681	37.600, 0.636	37.600, 0.733	37.600, 0.635	37.600, 0.695	37.600, 1.116	37.600, 0.855	37.600, 1.133
190	37.800, 0.776	37.800, 0.790	37.800, 0.769	37.800, 0.725	37.800, 0.697	37.800, 0.725	37.800, 0.686	37.800, 0.685	37.800, 0.639	37.800, 0.739	37.800, 0.638	37.800, 0.699	37.800, 1.141	37.800, 0.875	37.800, 1.157
191	38.000, 0.782	38.000, 0.795	38.000, 0.775	38.000, 0.729	38.000, 0.703	38.000, 0.730	38.000, 0.690	38.000, 0.689	38.000, 0.643	38.000, 0.744	38.000, 0.642	38.000, 0.704	38.000, 1.165	38.000, 0.895	38.000, 1.180
192	38.200, 0.787	38.200, 0.800	38.200, 0.779	38.200, 0.733	38.200, 0.709	38.200, 0.735	38.200, 0.693	38.200, 0.693	38.200, 0.646	38.200, 0.748	38.200, 0.645	38.200, 0.708	38.200, 1.189	38.200, 0.914	38.200, 1.203
193	38.400, 0.792	38.400, 0.804	38.400, 0.784	38.400, 0.737	38.400, 0.714	38.400, 0.739	38.400, 0.697	38.400, 0.697	38.400, 0.649	38.400, 0.752	38.400, 0.648	38.400, 0.712	38.400, 1.213	38.400, 0.933	38.400, 1.226
194	38.600, 0.797	38.600, 0.809	38.600, 0.788	38.600, 0.740	38.600, 0.720	38.600, 0.743	38.600, 0.700	38.600, 0.700	38.600, 0.652	38.600, 0.756	38.600, 0.651	38.600, 0.716	38.600, 1.237	38.600, 0.953	38.600, 1.249
195	38.800, 0.801	38.800, 0.813	38.800, 0.792	38.800, 0.744	38.800, 0.724	38.800, 0.746	38.800, 0.703	38.800, 0.703	38.800, 0.655	38.800, 0.760	38.800, 0.654	38.800, 0.719	38.800, 1.261	38.800, 0.971	38.800, 1.271
196	39.000, 0.805	39.000, 0.816	39.000, 0.795	39.000, 0.747	39.000, 0.729	39.000, 0.749	39.000, 0.706	39.000, 0.706	39.000, 0.657	39.000, 0.763	39.000, 0.657	39.000, 0.722	39.000, 1.284	39.000, 0.990	39.000, 1.292
197	39.200, 0.809	39.200, 0.820	39.200, 0.799	39.200, 0.750	39.200, 0.733	39.200, 0.752	39.200, 0.709	39.200, 0.709	39.200, 0.660	39.200, 0.766	39.200, 0.660	39.200, 0.726	39.200, 1.307	39.200, 1.008	39.200, 1.314
198	39.400, 0.813	39.400, 0.824	39.400, 0.802	39.400, 0.753	39.400, 0.736	39.400, 0.755	39.400, 0.711	39.400, 0.712	39.400, 0.662	39.400, 0.769	39.400, 0.662	39.400, 0.728	39.400, 1.330	39.400, 1.027	39.400, 1.335
199	39.600, 0.817	39.600, 0.827	39.600, 0.806	39.600, 0.755	39.600, 0.740	39.600, 0.758	39.600, 0.714	39.600, 0.715	39.600, 0.665	39.600, 0.772	39.600, 0.665	39.600, 0.731	39.600, 1.354	39.600, 1.046	39.600, 1.355
200	39.800, 0.820	39.800, 0.831	39.800, 0.809	39.800, 0.758	39.800, 0.743	39.800, 0.760	39.800, 0.716	39.800, 0.717	39.800, 0.667	39.800, 0.774	39.800, 0.667	39.800, 0.733	39.800, 1.376	39.800, 1.064	39.800, 1.376
201	40.000, 0.823	40.000, 0.834	40.000, 0.812	40.000, 0.760	40.000, 0.746	40.000, 0.763	40.000, 0.718	40.000, 0.720	40.000, 0.669	40.000, 0.776	40.000, 0.670	40.000, 0.736	40.000, 1.399	40.000, 1.083	40.000, 1.396
202	40.200, 0.827	40.200, 0.837	40.200, 0.815	40.200, 0.763	40.200, 0.750	40.200, 0.765	40.200, 0.720	40.200, 0.723	40.200, 0.671	40.200, 0.778	40.200, 0.672	40.200, 0.738	40.200, 1.421	40.200, 1.101	40.200, 1.416
203	40.400, 0.830	40.400, 0.841	40.400, 0.818	40.400, 0.765	40.400, 0.753	40.400, 0.767	40.400, 0.722	40.400, 0.725	40.400, 0.672	40.400, 0.780	40.400, 0.674	40.400, 0.740	40.400, 1.443	40.400, 1.119	40.400, 1.435
204	40.600, 0.833	40.600, 0.844	40.600, 0.820	40.600, 0.768	40.600, 0.756	40.600, 0.769	40.600, 0.724	40.600, 0.727	40.600, 0.674	40.600, 0.782	40.600, 0.676	40.600, 0.742	40.600, 1.464	40.600, 1.137	40.600, 1.455
205	40.800, 0.836	40.800, 0.847	40.800, 0.823	40.800, 0.771	40.800, 0.759	40.800, 0.771	40.800, 0.726	40.800, 0.730	40.800, 0.675	40.800, 0.784	40.800, 0.679	40.800, 0.743	40.800, 1.485	40.800, 1.155	40.800, 1.473
206	41.000, 0.839	41.000, 0.849	41.000, 0.825	41.000, 0.774	41.000, 0.762	41.000, 0.773	41.000, 0.728	41.000, 0.733	41.000, 0.677	41.000, 0.787	41.000, 0.681	41.000, 0.745	41.000, 1.505	41.000, 1.172	41.000, 1.492
207	41.200, 0.842	41.200, 0.852	41.200, 0.827	41.200, 0.777	41.200, 0.764	41.200, 0.775	41.200, 0.730	41.200, 0.735	41.200, 0.679	41.200, 0.789	41.200, 0.683	41.200, 0.747	41.200, 1.526	41.200, 1.189	41.200, 1.510
208	41.400, 0.844	41.400, 0.855	41.400, 0.829	41.400, 0.779	41.400, 0.767	41.400, 0.777	41.400, 0.732	41.400, 0.738	41.400, 0.681	41.400, 0.791	41.400, 0.685	41.400, 0.749	41.400, 1.546	41.400, 1.206	41.400, 1.528
209	41.600, 0.847	41.600, 0.857	41.600, 0.832	41.600, 0.782	41.600, 0.769	41.600, 0.780	41.600, 0.733	41.600, 0.740	41.600, 0.683	41.600, 0.793	41.600, 0.686	41.600, 0.751	41.600, 1.566	41.600, 1.223	41.600, 1.546
210	41.800, 0.849	41.800, 0.859	41.800, 0.834	41.800, 0.784	41.800, 0.771	41.800, 0.782	41.800, 0.735	41.800, 0.742	41.800, 0.685	41.800, 0.795	41.800, 0.688	41.800, 0.753	41.800, 1.586	41.800, 1.239	41.800, 1.564
211	42.000, 0.851	42.000, 0.862	42.000, 0.836	42.000, 0.786	42.000, 0.773	42.000, 0.784	42.000, 0.737	42.000, 0.743	42.000, 0.687	42.000, 0.796	42.000, 0.689	42.000, 0.755	42.000, 1.606	42.000, 1.256	42.000, 1.581
212	42.200, 0.853	42.200, 0.864	42.200, 0.838	42.200, 0.787	42.200, 0.775	42.200, 0.786	42.200, 0.739	42.200, 0.745	42.200, 0.689	42.200, 0.798	42.200, 0.691	42.200, 0.757	42.200, 1.626	42.200, 1.272	42.200, 1.599
213	42.400, 0.856	42.400, 0.866	42.400, 0.841	42.400, 0.789	42.400, 0.777	42.400, 0.788	42.400, 0.740	42.400, 0.746	42.400, 0.691	42.400, 0.800	42.400, 0.692	42.400, 0.758	42.400, 1.646	42.400, 1.288	42.400, 1.616
214	42.600, 0.858	42.600, 0.868	42.600, 0.843	42.600, 0.791	42.600, 0.779	42.600, 0.790	42.600, 0.742	42.600, 0.748	42.600, 0.693	42.600, 0.802	42.600, 0.694	42.600, 0.760	42.600, 1.665	42.600, 1.305	42.600, 1.633
215	42.800, 0.860	42.800, 0.870	42.800, 0.845	42.800, 0.792	42.800, 0.780	42.800, 0.792	42.800, 0.743	42.800, 0.749	42.800, 0.694	42.800, 0.804	42.800, 0.695	42.800, 0.762	42.800, 1.685	42.800, 1.321	42.800, 1.649
216	43.000, 0.862	43.000, 0.872	43.000, 0.847	43.000, 0.794	43.000, 0.782	43.000, 0.794	43.000, 0.745	43.000, 0.751	43.000, 0.696	43.000, 0.805	43.000, 0.696	43.000, 0.764	43.000, 1.703	43.000, 1.337	43.000, 1.666
217	43.200, 0.864	43.200, 0.874	43.200, 0.849	43.200, 0.795	43.200, 0.783	43.200, 0.796	43.200, 0.746	43.200, 0.753	43.200, 0.698	43.200, 0.807	43.200, 0.698	43.200, 0.766	43.200, 1.722	43.200, 1.353	43.200, 1.682
218	43.400, 0.865	43.400, 0.876	43.400, 0.851	43.400, 0.796	43.400, 0.785	43.400, 0.798	43.400, 0.748	43.400, 0.754	43.400, 0.700	43.400, 0.809	43.400, 0.699	43.400, 0.767	43.400, 1.740	43.400, 1.369	43.400, 1.698
219	43.600, 0.867	43.600, 0.879	43.600, 0.853	43.600, 0.798	43.600, 0.787	43.600, 0.800	43.600, 0.749	43.600, 0.755	43.600, 0.701	43.600, 0.811	43.600, 0.700	43.600, 0.769	43.600, 1.758	43.600, 1.385	43.600, 1.713
220	43.800, 0.869	43.800, 0.881	43.800, 0.855	43.800, 0.799	43.800, 0.789	43.800, 0.801	43.800, 0.751	43.800, 0.757	43.800, 0.703	43.800, 0.813	43.800, 0.701	43.800, 0.770	43.800, 1.776	43.800, 1.400	43.800, 1.729
221	44.000, 0.870	44.000, 0.883	44.000, 0.856	44.000, 0.800	44.000, 0.791	44.000, 0.803	44.000, 0.752	44.000, 0.758	44.000, 0.704	44.000, 0.814	44.000, 0.703	44.000, 0.771	44.000, 1.793	44.000, 1.415	44.000, 1.745
222	44.200, 0.872	44.200, 0.885	44.200, 0.858	44.200, 0.802	44.200, 0.793	44.200, 0.804	44.200, 0.754	44.200, 0.759	44.200, 0.706	44.200, 0.816	44.200, 0.704	44.200, 0.773	44.200, 1.811	44.200, 1.430	44.200, 1.760
223	44.400, 0.874	44.400, 0.887	44.400, 0.860	44.400, 0.804	44.400, 0.795	44.400, 0.806	44.400, 0.755	44.400, 0.760	44.400, 0.707	44.400, 0.817	44.400, 0.706	44.400, 0.774	44.400, 1.828	44.400, 1.444	44.400, 1.775
224	44.600, 0.875	44.600, 0.889	44.600, 0.861	44.600, 0.805	44.600, 0.796	44.600, 0.807	44.600, 0.756	44.600, 0.762	44.600, 0.708	44.600, 0.819	44.600, 0.707	44.600, 0.776	44.600, 1.844	44.600, 1.459	44.600, 1.790
225	44.800, 0.876	44.800, 0.891	44.800, 0.863	44.800, 0.807	44.800, 0.798	44.800, 0.809	44.800, 0.758	44.800, 0.764	44.800, 0.710	44.800, 0.821	44.800, 0.709	44.800, 0.777	44.800, 1.861	44.800, 1.473	44.800, 1.804
226	45.000, 0.878	45.000, 0.893	45.000, 0.864	45.000, 0.809	45.000, 0.800	45.000, 0.810	45.000, 0.759	45.000, 0.766	45.000, 0.711	45.000, 0.822	45.000, 0.711	45.000, 0.779	45.000, 1.877	45.000, 1.487	45.000, 1.819
227	45.200, 0.879	45.200, 0.895	45.200, 0.865	45.200, 0.810	45.200, 0.801	45.200, 0.812	45.200, 0.761	45.200, 0.767	45.200, 0.712	45.200, 0.824	45.200, 0.712	45.200, 0.780	45.200, 1.893	45.200, 1.501	45.200, 1.833
228	45.400, 0.881	45.400, 0.897	45.400, 0.867	45.400, 0.812	45.400, 0.803	45.400, 0.814	45.400, 0.762	45.400, 0.769	45.400, 0.714	45.400, 0.825	45.400, 0.713	45.400, 0.782	45.400, 1.910	45.400, 1.515	45.400, 1.847
229	45.600, 0.883	45.600, 0.898	45.600, 0.869	45.600, 0.813	45.600, 0.804	45.600, 0.815	45.600, 0.764	45.600, 0.771	45.600, 0.715	45.600, 0.826	45.600, 0.715	45.600, 0.783	45.600, 1.925	45.600, 1.528	45.600, 1.860
230	45.800, 0.885	45.800, 0.900	45.800, 0.871	45.800, 0.815	45.800, 0.805	45.800, 0.817	45.800, 0.765	45.800, 0.772	45.800, 0.717	45.800, 0.828	45.800, 0.716	45.800, 0.785	45.800, 1.941	45.800, 1.542	45.800, 1.874
231	46.000, 0.887	46.000, 0.902	46.000, 0.873	46.000, 0.816	46.000, 0.806	46.000, 0.818	46.000, 0.766	46.000, 0.774	46.000, 0.718	46.000, 0.829	46.000, 0.717	46.000, 0.787	46.000, 1.957	46.000, 1.555	46.000, 1.887
232	46.200, 0.888	46.200, 0.904	46.200, 0.875	46.200, 0.818	46.200, 0.807	46.200, 0.819	46.200, 0.767	46.200, 0.775	46.200, 0.719	46.200, 0.830	46.200, 0.718	46.200, 0.789	46.200, 1.973	46.200, 1.569	46.200, 1.901
233	46.400, 0.890	46.400, 0.906	46.400, 0.876	46.400, 0.819	46.400, 0.808	46.400, 0.820	46.400, 0.769	46.400, 0.777	46.400, 0.720	46.400, 0.832	46.400, 0.719	46.400, 0.791	46.400, 1.988	46.400, 1.582	46.400, 1.914
234	46.600, 0.891	46.600, 0.907	46.600, 0.878	46.600, 0.821	46.600, 0.810	46.600, 0.822	46.600, 0.770	46.600, 0.779	46.600, 0.721	46.600, 0.833	46.600, 0.720	46.600, 0.792	46.600, 2.004	46.600, 1.595	46.600, 1.927
235	46.800, 0.893	46.800, 0.909	46.800, 0.880	46.800, 0.822	46.800, 0.811	46.800, 0.823	46.800, 0.772	46.800, 0.780	46.800, 0.722	46.800, 0.835	46.800, 0.721	46.800, 0.794	46.800, 2.018	46.800, 1.609	46.800, 1.940
236	47.000, 0.894	47.000, 0.911	47.000, 0.881	47.000, 0.824	47.000, 0.812	47.000, 0.825	47.000, 0.773	47.000, 0.781	47.000, 0.723	47.000, 0.836	47.000, 0.722	47.000, 0.796	47.000, 2.033	47.000, 1.622	47.000, 1.952
237	47.200, 0.896	47.200, 0.912	47.200, 0.883	47.200, 0.825	47.200, 0.813	47.200, 0.826	47.200, 0.774	47.200, 0.783	47.200, 0.724	47.200, 0.838	47.200, 0.723	47.200, 0.797	47.200, 2.048	47.200, 1.635	47.200, 1.965
238	47.400, 0.897	47.400, 0.913	47.400, 0.885	47.400, 0.827	47.400, 0.815	47.400, 0.827	47.400, 0.775	47.400, 0.784	47.400, 0.725	47.400, 0.839	47.400, 0.724	47.400, 0.799	47.400, 2.062	47.400, 1.647	47.400, 1.977
239	47.600, 0.898	47.600, 0.915	47.600, 0.886	47.600, 0.828	47.600, 0.817	47.600, 0.829	47.600, 0.776	47.600, 0.784	47.600, 0.726	47.600, 0.840	47.600, 0.724	47.600, 0.800	47.600, 2.077	47.600, 1.660	47.600, 1.989
240	47.800, 0.899	47.800, 0.916	47.800, 0.888	47.800, 0.830	47.800, 0.819	47.800, 0.830	47.800, 0.778	47.800, 0.785	47.800, 0.728	47.800, 0.842	47.800, 0.725	47.800, 0.802	47.800, 2.091	47.800, 1.672	47.800, 2.001
241	48.000, 0.901	48.000, 0.918	48.000, 0.890	48.000, 0.832	48.000, 0.820	48.000, 0.831	48.000, 0.779	48.000, 0.786	48.000, 0.729	48.000, 0.843	48.000, 0.726	48.000, 0.803	48.000, 2.105	48.000, 1.684	48.000, 2.013
242	48.200, 0.902	48.200, 0.919	48.200, 0.891	48.200, 0.834	48.200, 0.822	48.200, 0.832	48.200, 0.780	48.200, 0.787	48.200, 0.731	48.200, 0.845	48.200, 0.728	48.200, 0.805	48.200, 2.120	48.200, 1.696	48.200, 2.024
243	48.400, 0.903	48.400, 0.921	48.400, 0.893	48.400, 0.835	48.400, 0.824	48.400, 0.833	48.400, 0.781	48.400, 0.788	48.400, 0.732	48.400, 0.846	48.400, 0.729	48.400, 0.806	48.400, 2.134	48.400, 1.707	48.400, 2.036
244	48.600, 0.904	48.600, 0.922	48.600, 0.894	48.600, 0.837	48.600, 0.826	48.600, 0.835	48.600, 0.783	48.600, 0.790	48.600, 0.734	48.600, 0.848	48.600, 0.731	48.600, 0.807	48.600, 2.148	48.600, 1.719	48.600, 2.047
245	48.800, 0.906	48.800, 0.924	48.800, 0.895	48.800, 0.838	48.800, 0.827	48.800, 0.836	48.800, 0.784	48.800, 0.791	48.800, 0.736	48.800, 0.849	48.800, 0.732	48.800, 0.808	48.800, 2.162	48.800, 1.730	48.800, 2.058
246	49.000, 0.907	49.000, 0.926	49.000, 0.897	49.000, 0.840	49.000, 0.828	49.000, 0.837	49.000, 0.785	49.000, 0.792	49.000, 0.737	49.000, 0.850	49.000, 0.733	49.000, 0.809	49.000, 2.175	49.000, 1.741	49.000, 2.069
247	49.200, 0.909	49.200, 0.927	49.200, 0.898	49.200, 0.841	49.200, 0.830	49.200, 0.838	49.200, 0.786	49.200, 0.794	49.200, 0.738	49.200, 0.851	49.200, 0.735	49.200, 0.810	49.200, 2.188	49.200, 1.752	49.200, 2.080
248	49.400, 0.911	49.400, 0.929	49.400, 0.900	49.400, 0.842	49.400, 0.831	49.400, 0.840	49.400, 0.787	49.400, 0.795	49.400, 0.740	49.400, 0.852	49.400, 0.736	49.400, 0.812	49.400, 2.201	49.400, 1.764	49.400, 2.090
249	49.600, 0.913	49.600, 0.931	49.600, 0.901	49.600, 0.844	49.600, 0.832	49.600, 0.841	49.600, 0.788	49.600, 0.796	49.600, 0.741	49.600, 0.853	49.600, 0.738	49.600, 0.813	49.600, 2.213	49.600, 1.775	49.600, 2.101
250	49.800, 0.915	49.800, 0.932	49.800, 0.902	49.800, 0.845	49.800, 0.833	49.800, 0.842	49.800, 0.789	49.800, 0.797	49.800, 0.742	49.800, 0.854	49.800, 0.739	49.800, 0.815	49.800, 2.226	49.800, 1.786	49.800, 2.111
251	50.000, 0.917	50.000, 0.934	50.000, 0.903	50.000, 0.846	50.000, 0.834	50.000, 0.843	50.000, 0.790	50.000, 0.799	50.000, 0.744	50.000, 0.856	50.000, 0.740	50.000, 0.816	50.000, 2.238	50.000, 1.797	50.000, 2.122
252	50.200, 0.919	50.200, 0.936	50.200, 0.904	50.200, 0.847	50.200, 0.835	50.200, 0.845	50.200, 0.791	50.200, 0.800	50.200, 0.745	50.200, 0.857	50.200, 0.741	50.200, 0.818	50.200, 2.250	50.200, 1.808	50.200, 2.132
253	50.400, 0.920	50.400, 0.937	50.400, 0.905	50.400, 0.848	50.400, 0.836	50.400, 0.846	50.400, 0.792	50.400, 0.801	50.400, 0.745	50.400, 0.858	50.400, 0.742	50.400, 0.819	50.400, 2.263	50.400, 1.819	50.400, 2.142
254	50.600, 0.922	50.600, 0.939	50.600, 0.906	50.600, 0.849	50.600, 0.837	50.600, 0.847	50.600, 0.794	50.600, 0.803	50.600, 0.746	50.600, 0.859	50.600, 0.744	50.600, 0.820	50.600, 2.275	50.600, 1.830	50.600, 2.152
255	50.800, 0.923	50.800, 0.940	50.800, 0.908	50.800, 0.850	50.800, 0.838	50.800, 0.849	50.800, 0.795	50.800, 0.804	50.800, 0.747	50.800, 0.860	50.800, 0.745	50.800, 0.821	50.800, 2.287	50.800, 1.841	50.800, 2.162
256	51.000, 0.925	51.000, 0.942	51.000, 0.909	51.000, 0.851	51.000, 0.839	51.000, 0.850	51.000, 0.796	51.000, 0.805	51.000, 0.748	51.000, 0.861	51.000, 0.746	51.000, 0.822	51.000, 2.299	51.000, 1.851	51.000, 2.172
257	51.200, 0.926	51.200, 0.943	51.200, 0.911	51.200, 0.852	51.200, 0.840	51.200, 0.851	51.200, 0.797	51.200, 0.806	51.200, 0.749	51.200, 0.862	51.200, 0.747	51.200, 0.824	51.200, 2.311	51.200, 1.862	51.200, 2.181
258	51.400, 0.928	51.400, 0.945	51.400, 0.912	51.400, 0.853	51.400, 0.842	51.400, 0.852	51.400, 0.798	51.400, 0.807	51.400, 0.750	51.400, 0.863	51.400, 0.747	51.400, 0.825	51.400, 2.323	51.400, 1.872	51.400, 2.191
259	51.600, 0.929	51.600, 0.946	51.600, 0.914	51.600, 0.854	51.600, 0.843	51.600, 0.853	51.600, 0.799	51.600, 0.807	51.600, 0.751	51.600, 0.864	51.600, 0.748	51.600, 0.826	51.600, 2.334	51.600, 1.883	51.600, 2.201
260	51.800, 0.931	51.800, 0.948	51.800, 0.915	51.800, 0.856	51.800, 0.845	51.800, 0.854	51.800, 0.800	51.800, 0.808	51.800, 0.752	51.800, 0.866	51.800, 0.749	51.800, 0.827	51.800, 2.346	51.800, 1.893	51.800, 2.210
261	52.000, 0.932	52.000, 0.950	52.000, 0.917	52.000, 0.857	52.000, 0.846	52.000, 0.855	52.000, 0.801	52.000, 0.810	52.000, 0.754	52.000, 0.867	52.000, 0.750	52.000, 0.828	52.000, 2.357	52.000, 1.903	52.000, 2.219
262	52.200, 0.934	52.200, 0.951	52.200, 0.918	52.200, 0.858	52.200, 0.848	52.200, 0.857	52.200, 0.803	52.200, 0.811	52.200, 0.755	52.200, 0.868	52.200, 0.751	52.200, 0.829	52.200, 2.369	52.200, 1.912	52.200, 2.229
263	52.400, 0.936	52.400, 0.953	52.400, 0.920	52.400, 0.860	52.400, 0.849	52.400, 0.858	52.400, 0.803	52.400, 0.812	52.400, 0.756	52.400, 0.870	52.400, 0.752	52.400, 0.831	52.400, 2.380	52.400, 1.922	52.400, 2.237
264	52.600, 0.937	52.600, 0.954	52.600, 0.921	52.600, 0.861	52.600, 0.850	52.600, 0.859	52.600, 0.804	52.600, 0.814	52.600, 0.757	52.600, 0.871	52.600, 0.753	52.600, 0.832	52.600, 2.391	52.600, 1.931	52.600, 2.246
265	52.800, 0.939	52.800, 0.956	52.800, 0.922	52.800, 0.862	52.800, 0.851	52.800, 0.860	52.800, 0.805	52.800, 0.815	52.800, 0.758	52.800, 0.872	52.800, 0.754	52.800, 0.833	52.800, 2.402	52.800, 1.941	52.800, 2.255
266	53.000, 0.941	53.000, 0.957	53.000, 0.923	53.000, 0.864	53.000, 0.852	53.000, 0.861	53.000, 0.806	53.000, 0.816	53.000, 0.758	53.000, 0.873	53.000, 0.755	53.000, 0.834	53.000, 2.413	53.000, 1.950	53.000, 2.264
267	53.200, 0.942	53.200, 0.958	53.200, 0.924	53.200, 0.865	53.200, 0.853	53.200, 0.863	53.200, 0.807	53.200, 0.818	53.200, 0.759	53.200, 0.874	53.200, 0.756	53.200, 0.835	53.200, 2.424	53.200, 1.959	53.200, 2.273
268	53.400, 0.944	53.400, 0.959	53.400, 0.925	53.400, 0.866	53.400, 0.854	53.400, 0.864	53.400, 0.808	53.400, 0.819	53.400, 0.760	53.400, 0.875	53.400, 0.757	53.400, 0.836	53.400, 2.434	53.400, 1.969	53.400, 2.281
269	53.600, 0.945	53.600, 0.960	53.600, 0.927	53.600, 0.868	53.600, 0.855	53.600, 0.866	53.600, 0.809	53.600, 0.820	53.600, 0.761	53.600, 0.876	53.600, 0.758	53.600, 0.837	53.600, 2.445	53.600, 1.978	53.600, 2.290
270	53.800, 0.946	53.800, 0.961	53.800, 0.928	53.800, 0.869	53.800, 0.856	53.800, 0.867	53.800, 0.809	53.800, 0.821	53.800, 0.762	53.800, 0.877	53.800, 0.759	53.800, 0.838	53.800, 2.455	53.800, 1.986	53.800, 2.298
271	54.000, 0.947	54.000, 0.962	54.000, 0.929	54.000, 0.870	54.000, 0.857	54.000, 0.868	54.000, 0.810	54.000, 0.822	54.000, 0.763	54.000, 0.878	54.000, 0.760	54.000, 0.839	54.000, 2.466	54.000, 1.995	54.000, 2.306
272	54.200, 0.948	54.200, 0.964	54.200, 0.930	54.200, 0.871	54.200, 0.858	54.200, 0.869	54.200, 0.811	54.200, 0.823	54.200, 0.763	54.200, 0.879	54.200, 0.761	54.200, 0.841	54.200, 2.476	54.200, 2.004	54.200, 2.314
273	54.400, 0.949	54.400, 0.965	54.400, 0.931	54.400, 0.872	54.400, 0.859	54.400, 0.870	54.400, 0.812	54.400, 0.824	54.400, 0.764	54.400, 0.880	54.400, 0.762	54.400, 0.842	54.400, 2.486	54.400, 2.012	54.400, 2.323
274	54.600, 0.950	54.600, 0.965	54.600, 0.932	54.600, 0.873	54.600, 0.860	54.600, 0.871	54.600, 0.813	54.600, 0.825	54.600, 0.765	54.600, 0.882	54.600, 0.763	54.600, 0.843	54.600, 2.496	54.600, 2.021	54.600, 2.331
275	54.800, 0.951	54.800, 0.967	54.800, 0.934	54.800, 0.874	54.800, 0.861	54.800, 0.872	54.800, 0.814	54.800, 0.826	54.800, 0.766	54.800, 0.883	54.800, 0.763	54.800, 0.844	54.800, 2.506	54.800, 2.029	54.800, 2.339
276	55.000, 0.952	55.000, 0.967	55.000, 0.936	55.000, 0.875	55.000, 0.863	55.000, 0.873	55.000, 0.815	55.000, 0.827	55.000, 0.767	55.000, 0.884	55.000, 0.764	55.000, 0.845	55.000, 2.516	55.000, 2.038	55.000, 2.346
277	55.200, 0.953	55.200, 0.969	55.200, 0.937	55.200, 0.876	55.200, 0.864	55.200, 0.874	55.200, 0.816	55.200, 0.828	55.200, 0.768	55.200, 0.885	55.200, 0.765	55.200, 0.847	55.200, 2.525	55.200, 2.046	55.200, 2.354
278	55.400, 0.954	55.400, 0.970	55.400, 0.938	55.400, 0.877	55.400, 0.866	55.400, 0.875	55.400, 0.817	55.400, 0.829	55.400, 0.769	55.400, 0.886	55.400, 0.766	55.400, 0.848	55.400, 2.534	55.400, 2.054	55.400, 2.362
279	55.600, 0.955	55.600, 0.972	55.600, 0.940	55.600, 0.878	55.600, 0.867	55.600, 0.876	55.600, 0.819	55.600, 0.830	55.600, 0.770	55.600, 0.888	55.600, 0.767	55.600, 0.850	55.600, 2.543	55.600, 2.063	55.600, 2.370
280	55.800, 0.956	55.800, 0.973	55.800, 0.941	55.800, 0.879	55.800, 0.868	55.800, 0.877	55.800, 0.820	55.800, 0.831	55.800, 0.771	55.800, 0.889	55.800, 0.768	55.800, 0.851	55.800, 2.552	55.800, 2.071	55.800, 2.378
281	56.000, 0.957	56.000, 0.975	56.000, 0.942	56.000, 0.880	56.000, 0.869	56.000, 0.878	56.000, 0.821	56.000, 0.832	56.000, 0.772	56.000, 0.891	56.000, 0.769	56.000, 0.853	56.000, 2.561	56.000, 2.080	56.000, 2.386
282	56.200, 0.958	56.200, 0.977	56.200, 0.943	56.200, 0.881	56.200, 0.870	56.200, 0.879	56.200, 0.822	56.200, 0.833	56.200, 0.773	56.200, 0.892	56.200, 0.770	56.200, 0.854	56.200, 2.569	56.200, 2.088	56.200, 2.393
283	56.400, 0.960	56.400, 0.979	56.400, 0.944	56.400, 0.882	56.400, 0.871	56.400, 0.880	56.400, 0.823	56.400, 0.835	56.400, 0.774	56.400, 0.893	56.400, 0.772	56.400, 0.856	56.400, 2.578	56.400, 2.096	56.400, 2.400
284	56.600, 0.961	56.600, 0.980	56.600, 0.945	56.600, 0.883	56.600, 0.871	56.600, 0.881	56.600, 0.825	56.600, 0.836	56.600, 0.775	56.600, 0.894	56.600, 0.773	56.600, 0.857	56.600, 2.587	56.600, 2.105	56.600, 2.407
285	56.800, 0.962	56.800, 0.982	56.800, 0.945	56.800, 0.884	56.800, 0.872	56.800, 0.882	56.800, 0.826	56.800, 0.837	56.800, 0.776	56.800, 0.895	56.800, 0.774	56.800, 0.858	56.800, 2.596	56.800, 2.113	56.800, 2.414
286	57.000, 0.964	57.000, 0.983	57.000, 0.946	57.000, 0.885	57.000, 0.874	57.000, 0.883	57.000, 0.827	57.000, 0.838	57.000, 0.777	57.000, 0.896	57.000, 0.774	57.000, 0.859	57.000, 2.605	57.000, 2.121	57.000, 2.421
287	57.200, 0.965	57.200, 0.984	57.200, 0.947	57.200, 0.886	57.200, 0.875	57.200, 0.884	57.200, 0.828	57.200, 0.840	57.200, 0.778	57.200, 0.897	57.200, 0.775	57.200, 0.860	57.200, 2.614	57.200, 2.129	57.200, 2.428
288	57.400, 0.966	57.400, 0.985	57.400, 0.948	57.400, 0.887	57.400, 0.876	57.400, 0.886	57.400, 0.829	57.400, 0.841	57.400, 0.779	57.400, 0.898	57.400, 0.776	57.400, 0.861	57.400, 2.622	57.400, 2.136	57.400, 2.435
289	57.600, 0.967	57.600, 0.986	57.600, 0.949	57.600, 0.889	57.600, 0.877	57.600, 0.887	57.600, 0.830	57.600, 0.842	57.600, 0.780	57.600, 0.899	57.600, 0.777	57.600, 0.862	57.600, 2.631	57.600, 2.144	57.600, 2.442
290	57.800, 0.968	57.800, 0.987	57.800, 0.950	57.800, 0.890	57.800, 0.878	57.800, 0.888	57.800, 0.831	57.800, 0.843	57.800, 0.781	57.800, 0.900	57.800, 0.777	57.800, 0.863	57.800, 2.640	57.800, 2.151	57.800, 2.450
291	58.000, 0.970	58.000, 0.989	58.000, 0.951	58.000, 0.891	58.000, 0.879	58.000, 0.889	58.000, 0.832	58.000, 0.844	58.000, 0.782	58.000, 0.902	58.000, 0.778	58.000, 0.864	58.000, 2.648	58.000, 2.158	58.000, 2.457
292	58.200, 0.971	58.200, 0.990	58.200, 0.953	58.200, 0.892	58.200, 0.880	58.200, 0.890	58.200, 0.833	58.200, 0.845	58.200, 0.783	58.200, 0.903	58.200, 0.779	58.200, 0.865	58.200, 2.657	58.200, 2.165	58.200, 2.464
293	58.400, 0.972	58.400, 0.991	58.400, 0.954	58.400, 0.893	58.400, 0.881	58.400, 0.891	58.400, 0.834	58.400, 0.845	58.400, 0.784	58.400, 0.904	58.400, 0.780	58.400, 0.865	58.400, 2.665	58.400, 2.172	58.400, 2.471
294	58.600, 0.974	58.600, 0.992	58.600, 0.955	58.600, 0.895	58.600, 0.883	58.600, 0.892	58.600, 0.835	58.600, 0.846	58.600, 0.785	58.600, 0.905	58.600, 0.780	58.600, 0.866	58.600, 2.673	58.600, 2.179	58.600, 2.477
295	58.800, 0.975	58.800, 0.994	58.800, 0.957	58.800, 0.896	58.800, 0.884	58.800, 0.894	58.800, 0.837	58.800, 0.847	58.800, 0.786	58.800, 0.906	58.800, 0.781	58.800, 0.867	58.800, 2.681	58.800, 2.186	58.800, 2.484
296	59.000, 0.976	59.000, 0.995	59.000, 0.958	59.000, 0.897	59.000, 0.886	59.000, 0.895	59.000, 0.838	59.000, 0.848	59.000, 0.787	59.000, 0.907	59.000, 0.782	59.000, 0.868	59.000, 2.689	59.000, 2.193	59.000, 2.491
297	59.200, 0.978	59.200, 0.996	59.200, 0.960	59.200, 0.898	59.200, 0.887	59.200, 0.896	59.200, 0.839	59.200, 0.849	59.200, 0.788	59.200, 0.908	59.200, 0.783	59.200, 0.869	59.200, 2.697	59.200, 2.200	59.200, 2.497
298	59.400, 0.979	59.400, 0.998	59.400, 0.961	59.400, 0.899	59.400, 0.888	59.400, 0.897	59.400, 0.840	59.400, 0.850	59.400, 0.789	59.400, 0.909	59.400, 0.784	59.400, 0.871	59.400, 2.705	59.400, 2.206	59.400, 2.504
299	59.600, 0.981	59.600, 0.999	59.600, 0.962	59.600, 0.900	59.600, 0.889	59.600, 0.898	59.600, 0.842	59.600, 0.851	59.600, 0.790	59.600, 0.910	59.600, 0.785	59.600, 0.872	59.600, 2.713	59.600, 2.213	59.600, 2.511
300	59.800, 0.982	59.800, 1.000	59.800, 0.963	59.800, 0.901	59.800, 0.891	59.800, 0.899	59.800, 0.843	59.800, 0.852	59.800, 0.791	59.800, 0.910	59.800, 0.786	59.800, 0.874	59.800, 2.721	59.800, 2.220	59.800, 2.517
301	60.000, 0.984	60.000, 1.001	60.000, 0.964	60.000, 0.902	60.000, 0.892	60.000, 0.900	60.000, 0.844	60.000, 0.853	60.000, 0.792	60.000, 0.910	60.000, 0.787	60.000, 0.875	60.000, 2.728	60.000, 2.226	60.000, 2.523
302	60.200, 0.985	60.200, 1.003	60.200, 0.965	60.200, 0.903	60.200, 0.893	60.200, 0.901	60.200, 0.845	60.200, 0.854	60.200, 0.793	60.200, 0.911	60.200, 0.788	60.200, 0.876	60.200, 2.736	60.200, 2.233	60.200, 2.529
303	60.400, 0.986	60.400, 1.004	60.400, 0.965	60.400, 0.904	60.400, 0.894	60.400, 0.901	60.400, 0.846	60.400, 0.855	60.400, 0.793	60.400, 0.911	60.400, 0.789	60.400, 0.878	60.400, 2.744	60.400, 2.240	60.400, 2.535
304	60.600, 0.987	60.600, 1.005	60.600, 0.966	60.600, 0.905	60.600, 0.895	60.600, 0.902	60.600, 0.847	60.600, 0.856	60.600, 0.794	60.600, 0.912	60.600, 0.790	60.600, 0.879	60.600, 2.752	60.600, 2.247	60.600, 2.540
305	60.800, 0.988	60.800, 1.006	60.800, 0.967	60.800, 0.907	60.800, 0.896	60.800, 0.903	60.800, 0.848	60.800, 0.857	60.800, 0.795	60.800, 0.913	60.800, 0.791	60.800, 0.880	60.800, 2.759	60.800, 2.254	60.800, 2.545
306	61.000, 0.989	61.000, 1.007	61.000, 0.967	61.000, 0.907	61.000, 0.897	61.000, 0.904	61.000, 0.849	61.000, 0.858	61.000, 0.796	61.000, 0.914	61.000, 0.791	61.000, 0.882	61.000, 2.766	61.000, 2.260	61.000, 2.550
307	61.200, 0.990	61.200, 1.008	61.200, 0.968	61.200, 0.908	61.200, 0.898	61.200, 0.905	61.200, 0.849	61.200, 0.859	61.200, 0.796	61.200, 0.915	61.200, 0.792	61.200, 0.883	61.200, 2.773	61.200, 2.267	61.200, 2.555
308	61.400, 0.991	61.400, 1.009	61.400, 0.969	61.400, 0.909	61.400, 0.898	61.400, 0.906	61.400, 0.850	61.400, 0.860	61.400, 0.797	61.400, 0.916	61.400, 0.793	61.400, 0.884	61.400, 2.780	61.400, 2.273	61.400, 2.560
309	61.600, 0.992	61.600, 1.010	61.600, 0.970	61.600, 0.910	61.600, 0.899	61.600, 0.907	61.600, 0.851	61.600, 0.860	61.600, 0.798	61.600, 0.918	61.600, 0.794	61.600, 0.885	61.600, 2.787	61.600, 2.279	61.600, 2.565
310	61.800, 0.993	61.800, 1.011	61.800, 0.971	61.800, 0.911	61.800, 0.899	61.800, 0.908	61.800, 0.852	61.800, 0.861	61.800, 0.799	61.800, 0.919	61.800, 0.795	61.800, 0.886	61.800, 2.794	61.800, 2.286	61.800, 2.571
311	62.000, 0.994	62.000, 1.012	62.000, 0.972	62.000, 0.912	62.000, 0.900	62.000, 0.909	62.000, 0.852	62.000, 0.861	62.000, 0.800	62.000, 0.920	62.000, 0.795	62.000, 0.886	62.000, 2.801	62.000, 2.292	62.000, 2.576
312	62.200, 0.994	62.200, 1.013	62.200, 0.973	62.200, 0.913	62.200, 0.901	62.200, 0.910	62.200, 0.853	62.200, 0.862	62.200, 0.800	62.200, 0.922	62.200, 0.796	62.200, 0.887	62.200, 2.808	62.200, 2.297	62.200, 2.581
313	62.400, 0.995	62.400, 1.014	62.400, 0.975	62.400, 0.914	62.400, 0.901	62.400, 0.911	62.400, 0.854	62.400, 0.863	62.400, 0.801	62.400, 0.923	62.400, 0.797	62.400, 0.887	62.400, 2.815	62.400, 2.303	62.400, 2.587
314	62.600, 0.996	62.600, 1.015	62.600, 0.976	62.600, 0.915	62.600, 0.902	62.600, 0.913	62.600, 0.855	62.600, 0.864	62.600, 0.802	62.600, 0.924	62.600, 0.798	62.600, 0.888	62.600, 2.822	62.600, 2.309	62.600, 2.592
315	62.800, 0.996	62.800, 1.016	62.800, 0.977	62.800, 0.916	62.800, 0.903	62.800, 0.913	62.800, 0.856	62.800, 0.865	62.800, 0.803	62.800, 0.926	62.800, 0.799	62.800, 0.889	62.800, 2.829	62.800, 2.314	62.800, 2.598
316	63.000, 0.997	63.000, 1.017	63.000, 0.978	63.000, 0.917	63.000, 0.904	63.000, 0.914	63.000, 0.857	63.000, 0.866	63.000, 0.804	63.000, 0.927	63.000, 0.799	63.000, 0.890	63.000, 2.836	63.000, 2.319	63.000, 2.603
317	63.200, 0.998	63.200, 1.018	63.200, 0.980	63.200, 0.918	63.200, 0.905	63.200, 0.915	63.200, 0.857	63.200, 0.867	63.200, 0.805	63.200, 0.928	63.200, 0.800	63.200, 0.891	63.200, 2.843	63.200, 2.325	63.200, 2.609
318	63.400, 0.998	63.400, 1.019	63.400, 0.981	63.400, 0.919	63.400, 0.906	63.400, 0.916	63.400, 0.858	63.400, 0.868	63.400, 0.806	63.400, 0.929	63.400, 0.801	63.400, 0.892	63.400, 2.849	63.400, 2.330	63.400, 2.614
319	63.600, 0.999	63.600, 1.020	63.600, 0.982	63.600, 0.920	63.600, 0.907	63.600, 0.917	63.600, 0.859	63.600, 0.869	63.600, 0.807	63.600, 0.930	63.600, 0.802	63.600, 0.893	63.600, 2.856	63.600, 2.336	63.600, 2.620
320	63.800, 1.000	63.800, 1.021	63.800, 0.983	63.800, 0.922	63.800, 0.908	63.800, 0.918	63.800, 0.860	63.800, 0.870	63.800, 0.808	63.800, 0.930	63.800, 0.803	63.800, 0.894	63.800, 2.862	63.800, 2.341	63.800, 2.626
321	64.000, 1.001	64.000, 1.023	64.000, 0.984	64.000, 0.923	64.000, 0.909	64.000, 0.919	64.000, 0.861	64.000, 0.871	64.000, 0.809	64.000, 0.931	64.000, 0.804	64.000, 0.895	64.000, 2.869	64.000, 2.347	64.000, 2.631
322	64.200, 1.002	64.200, 1.024	64.200, 0.984	64.200, 0.924	64.200, 0.910	64.200, 0.920	64.200, 0.862	64.200, 0.872	64.200, 0.810	64.200, 0.931	64.200, 0.804	64.200, 0.896	64.200, 2.875	64.200, 2.353	64.200, 2.636
323	64.400, 1.003	64.400, 1.025	64.400, 0.985	64.400, 0.925	64.400, 0.911	64.400, 0.920	64.400, 0.863	64.400, 0.873	64.400, 0.811	64.400, 0.932	64.400, 0.805	64.400, 0.897	64.400, 2.881	64.400, 2.358	64.400, 2.641
324	64.600, 1.004	64.600, 1.027	64.600, 0.986	64.600, 0.926	64.600, 0.912	64.600, 0.921	64.600, 0.864	64.600, 0.874	64.600, 0.812	64.600, 0.932	64.600, 0.806	64.600, 0.898	64.600, 2.886	64.600, 2.364	64.600, 2.646
325	64.800, 1.006	64.800, 1.028	64.800, 0.987	64.800, 0.927	64.800, 0.913	64.800, 0.922	64.800, 0.865	64.800, 0.874	64.800, 0.813	64.800, 0.933	64.800, 0.807	64.800, 0.899	64.800, 2.892	64.800, 2.371	64.800, 2.651
326	65.000, 1.007	65.000, 1.029	65.000, 0.988	65.000, 0.928	65.000, 0.914	65.000, 0.923	65.000, 0.866	65.000, 0.875	65.000, 0.814	65.000, 0.934	65.000, 0.808	65.000, 0.900	65.000, 2.898	65.000, 2.377	65.000, 2.656
327	65.200, 1.008	65.200, 1.030	65.200, 0.989	65.200, 0.928	65.200, 0.915	65.200, 0.924	65.200, 0.866	65.200, 0.875	65.200, 0.815	65.200, 0.935	65.200, 0.809	65.200, 0.901	65.200, 2.903	65.200, 2.382	65.200, 2.660
328	65.400, 1.009	65.400, 1.031	65.400, 0.990	65.400, 0.929	65.400, 0.916	65.400, 0.925	65.400, 0.867	65.400, 0.876	65.400, 0.815	65.400, 0.936	65.400, 0.810	65.400, 0.903	65.400, 2.909	65.400, 2.388	65.400, 2.665
329	65.600, 1.010	65.600, 1.032	65.600, 0.991	65.600, 0.930	65.600, 0.917	65.600, 0.926	65.600, 0.868	65.600, 0.877	65.600, 0.816	65.600, 0.937	65.600, 0.811	65.600, 0.903	65.600, 2.915	65.600, 2.394	65.600, 2.669
330	65.800, 1.011	65.800, 1.033	65.800, 0.992	65.800, 0.931	65.800, 0.918	65.800, 0.927	65.800, 0.869	65.800, 0.878	65.800, 0.817	65.800, 0.938	65.800, 0.812	65.800, 0.904	65.800, 2.920	65.800, 2.399	65.800, 2.674
331	66.000, 1.013	66.000, 1.034	66.000, 0.993	66.000, 0.932	66.000, 0.919	66.000, 0.927	66.000, 0.871	66.000, 0.879	66.000, 0.817	66.000, 0.939	66.000, 0.813	66.000, 0.905	66.000, 2.926	66.000, 2.405	66.000, 2.679
332	66.200, 1.014	66.200, 1.035	66.200, 0.994	66.200, 0.933	66.200, 0.921	66.200, 0.928	66.200, 0.872	66.200, 0.880	66.200, 0.818	66.200, 0.940	66.200, 0.814	66.200, 0.906	66.200, 2.932	66.200, 2.410	66.200, 2.684
333	66.400, 1.015	66.400, 1.036	66.400, 0.995	66.400, 0.934	66.400, 0.922	66.400, 0.929	66.400, 0.873	66.400, 0.881	66.400, 0.818	66.400, 0.941	66.400, 0.815	66.400, 0.907	66.400, 2.939	66.400, 2.415	66.400, 2.688
334	66.600, 1.016	66.600, 1.037	66.600, 0.996	66.600, 0.934	66.600, 0.923	66.600, 0.930	66.600, 0.874	66.600, 0.882	66.600, 0.819	66.600, 0.942	66.600, 0.815	66.600, 0.908	66.600, 2.945	66.600, 2.421	66.600, 2.693
335	66.800, 1.017	66.800, 1.038	66.800, 0.997	66.800, 0.936	66.800, 0.924	66.800, 0.931	66.800, 0.875	66.800, 0.884	66.800, 0.820	66.800, 0.943	66.800, 0.816	66.800, 0.909	66.800, 2.951	66.800, 2.426	66.800, 2.697
336	67.000, 1.018	67.000, 1.038	67.000, 0.998	67.000, 0.937	67.000, 0.925	67.000, 0.932	67.000, 0.875	67.000, 0.884	67.000, 0.820	67.000, 0.943	67.000, 0.817	67.000, 0.910	67.000, 2.957	67.000, 2.431	67.000, 2.702
337	67.200, 1.019	67.200, 1.039	67.200, 0.998	67.200, 0.938	67.200, 0.926	67.200, 0.933	67.200, 0.876	67.200, 0.885	67.200, 0.821	67.200, 0.944	67.200, 0.818	67.200, 0.911	67.200, 2.963	67.200, 2.437	67.200, 2.706
338	67.400, 1.020	67.400, 1.040	67.400, 0.999	67.400, 0.939	67.400, 0.927	67.400, 0.934	67.400, 0.876	67.400, 0.886	67.400, 0.822	67.400, 0.945	67.400, 0.819	67.400, 0.912	67.400, 2.969	67.400, 2.442	67.400, 2.711
339	67.600, 1.021	67.600, 1.040	67.600, 1.000	67.600, 0.940	67.600, 0.928	67.600, 0.935	67.600, 0.877	67.600, 0.887	67.600, 0.823	67.600, 0.946	67.600, 0.819	67.600, 0.913	67.600, 2.975	67.600, 2.447	67.600, 2.715
340	67.800, 1.022	67.800, 1.041	67.800, 1.001	67.800, 0.941	67.800, 0.929	67.800, 0.936	67.800, 0.878	67.800, 0.888	67.800, 0.824	67.800, 0.947	67.800, 0.820	67.800, 0.914	67.800, 2.981	67.800, 2.452	67.800, 2.720
341	68.000, 1.023	68.000, 1.042	68.000, 1.002	68.000, 0.942	68.000, 0.929	68.000, 0.937	68.000, 0.879	68.000, 0.889	68.000, 0.825	68.000, 0.948	68.000, 0.821	68.000, 0.915	68.000, 2.986	68.000, 2.457	68.000, 2.724
342	68.200, 1.024	68.200, 1.044	68.200, 1.002	68.200, 0.943	68.200, 0.930	68.200, 0.938	68.200, 0.879	68.200, 0.890	68.200, 0.826	68.200, 0.949	68.200, 0.821	68.200, 0.916	68.200, 2.991	68.200, 2.461	68.200, 2.728
343	68.400, 1.025	68.400, 1.045	68.400, 1.003	68.400, 0.944	68.400, 0.931	68.400, 0.939	68.400, 0.880	68.400, 0.891	68.400, 0.827	68.400, 0.950	68.400, 0.822	68.400, 0.917	68.400, 2.996	68.400, 2.466	68.400, 2.732
344	68.600, 1.026	68.600, 1.046	68.600, 1.004	68.600, 0.945	68.600, 0.931	68.600, 0.940	68.600, 0.881	68.600, 0.892	68.600, 0.828	68.600, 0.951	68.600, 0.823	68.600, 0.918	68.600, 3.001	68.600, 2.470	68.600, 2.736
345	68.800, 1.027	68.800, 1.048	68.800, 1.005	68.800, 0.946	68.800, 0.932	68.800, 0.941	68.800, 0.882	68.800, 0.892	68.800, 0.829	68.800, 0.952	68.800, 0.824	68.800, 0.918	68.800, 3.006	68.800, 2.475	68.800, 2.740
346	69.000, 1.028	69.000, 1.049	69.000, 1.006	69.000, 0.947	69.000, 0.933	69.000, 0.941	69.000, 0.883	69.000, 0.893	69.000, 0.829	69.000, 0.953	69.000, 0.825	69.000, 0.919	69.000, 3.011	69.000, 2.479	69.000, 2.744
347	69.200, 1.029	69.200, 1.051	69.200, 1.007	69.200, 0.948	69.200, 0.933	69.200, 0.942	69.200, 0.884	69.200, 0.894	69.200, 0.830	69.200, 0.954	69.200, 0.826	69.200, 0.920	69.200, 3.016	69.200, 2.483	69.200, 2.748
348	69.400, 1.030	69.400, 1.052	69.400, 1.008	69.400, 0.949	69.400, 0.934	69.400, 0.943	69.400, 0.885	69.400, 0.894	69.400, 0.831	69.400, 0.956	69.400, 0.826	69.400, 0.921	69.400, 3.021	69.400, 2.487	69.400, 2.752
349	69.600, 1.031	69.600, 1.053	69.600, 1.009	69.600, 0.950	69.600, 0.935	69.600, 0.943	69.600, 0.886	69.600, 0.895	69.600, 0.832	69.600, 0.957	69.600, 0.827	69.600, 0.922	69.600, 3.026	69.600, 2.491	69.600, 2.756
350	69.800, 1.032	69.800, 1.054	69.800, 1.010	69.800, 0.951	69.800, 0.936	69.800, 0.944	69.800, 0.888	69.800, 0.896	69.800, 0.832	69.800, 0.958	69.800, 0.828	69.800, 0.923	69.800, 3.031	69.800, 2.495	69.800, 2.760
351	70.000, 1.033	70.000, 1.055	70.000, 1.011	70.000, 0.952	70.000, 0.937	70.000, 0.945	70.000, 0.889	70.000, 0.897	70.000, 0.833	70.000, 0.959	70.000, 0.829	70.000, 0.923	70.000, 3.036	70.000, 2.499	70.000, 2.765
352	70.200, 1.034	70.200, 1.056	70.200, 1.012	70.200, 0.953	70.200, 0.938	70.200, 0.945	70.200, 0.890	70.200, 0.898	70.200, 0.834	70.200, 0.960	70.200, 0.830	70.200, 0.924	70.200, 3.041	70.200, 2.503	70.200, 2.768
353	70.400, 1.035	70.400, 1.057	70.400, 1.013	70.400, 0.954	70.400, 0.939	70.400, 0.946	70.400, 0.891	70.400, 0.899	70.400, 0.834	70.400, 0.961	70.400, 0.830	70.400, 0.925	70.400, 3.047	70.400, 2.507	70.400, 2.772
354	70.600, 1.035	70.600, 1.058	70.600, 1.014	70.600, 0.954	70.600, 0.940	70.600, 0.947	70.600, 0.892	70.600, 0.900	70.600, 0.835	70.600, 0.962	70.600, 0.831	70.600, 0.926	70.600, 3.052	70.600, 2.511	70.600, 2.776
355	70.800, 1.036	70.800, 1.059	70.800, 1.015	70.800, 0.955	70.800, 0.941	70.800, 0.948	70.800, 0.893	70.800, 0.900	70.800, 0.836	70.800, 0.962	70.800, 0.832	70.800, 0.926	70.800, 3.058	70.800, 2.515	70.800, 2.780
356	71.000, 1.037	71.000, 1.060	71.000, 1.016	71.000, 0.955	71.000, 0.942	71.000, 0.948	71.000, 0.893	71.000, 0.901	71.000, 0.837	71.000, 0.963	71.000, 0.833	71.000, 0.927	71.000, 3.063	71.000, 2.520	71.000, 2.785
357	71.200, 1.038	71.200, 1.060	71.200, 1.017	71.200, 0.956	71.200, 0.943	71.200, 0.949	71.200, 0.894	71.200, 0.902	71.200, 0.837	71.200, 0.964	71.200, 0.834	71.200, 0.928	71.200, 3.068	71.200, 2.525	71.200, 2.789
358	71.400, 1.039	71.400, 1.061	71.400, 1.017	71.400, 0.957	71.400, 0.943	71.400, 0.950	71.400, 0.894	71.400, 0.902	71.400, 0.838	71.400, 0.964	71.400, 0.834	71.400, 0.929	71.400, 3.074	71.400, 2.529	71.400, 2.793
359	71.600, 1.040	71.600, 1.062	71.600, 1.018	71.600, 0.957	71.600, 0.944	71.600, 0.951	71.600, 0.895	71.600, 0.903	71.600, 0.839	71.600, 0.965	71.600, 0.835	71.600, 0.929	71.600, 3.079	71.600, 2.533	71.600, 2.797
360	71.800, 1.041	71.800, 1.063	71.800, 1.019	71.800, 0.958	71.800, 0.944	71.800, 0.952	71.800, 0.895	71.800, 0.904	71.800, 0.840	71.800, 0.965	71.800, 0.836	71.800, 0.930	71.800, 3.084	71.800, 2.538	71.800, 2.800
361	72.000, 1.041	72.000, 1.063	72.000, 1.019	72.000, 0.959	72.000, 0.945	72.000, 0.953	72.000, 0.896	72.000, 0.905	72.000, 0.841	72.000, 0.966	72.000, 0.836	72.000, 0.931	72.000, 3.089	72.000, 2.542	72.000, 2.804
362	72.200, 1.042	72.200, 1.064	72.200, 1.019	72.200, 0.960	72.200, 0.946	72.200, 0.953	72.200, 0.897	72.200, 0.906	72.200, 0.842	72.200, 0.967	72.200, 0.837	72.200, 0.932	72.200, 3.093	72.200, 2.547	72.200, 2.807
363	72.400, 1.042	72.400, 1.065	72.400, 1.020	72.400, 0.961	72.400, 0.946	72.400, 0.954	72.400, 0.898	72.400, 0.907	72.400, 0.843	72.400, 0.968	72.400, 0.837	72.400, 0.932	72.400, 3.098	72.400, 2.551	72.400, 2.811
364	72.600, 1.043	72.600, 1.065	72.600, 1.021	72.600, 0.962	72.600, 0.947	72.600, 0.955	72.600, 0.899	72.600, 0.908	72.600, 0.844	72.600, 0.968	72.600, 0.838	72.600, 0.933	72.600, 3.102	72.600, 2.556	72.600, 2.815
365	72.800, 1.043	72.800, 1.066	72.800, 1.022	72.800, 0.963	72.800, 0.948	72.800, 0.956	72.800, 0.900	72.800, 0.909	72.800, 0.844	72.800, 0.969	72.800, 0.838	72.800, 0.934	72.800, 3.107	72.800, 2.560	72.800, 2.818
366	73.000, 1.044	73.000, 1.067	73.000, 1.023	73.000, 0.964	73.000, 0.949	73.000, 0.957	73.000, 0.901	73.000, 0.909	73.000, 0.845	73.000, 0.970	73.000, 0.838	73.000, 0.936	73.000, 3.112	73.000, 2.564	73.000, 2.822
367	73.200, 1.045	73.200, 1.068	73.200, 1.024	73.200, 0.965	73.200, 0.950	73.200, 0.958	73.200, 0.901	73.200, 0.910	73.200, 0.845	73.200, 0.970	73.200, 0.839	73.200, 0.937	73.200, 3.116	73.200, 2.568	73.200, 2.826
368	73.400, 1.046	73.400, 1.069	73.400, 1.025	73.400, 0.966	73.400, 0.951	73.400, 0.959	73.400, 0.902	73.400, 0.911	73.400, 0.846	73.400, 0.971	73.400, 0.839	73.400, 0.938	73.400, 3.121	73.400, 2.572	73.400, 2.829
369	73.600, 1.046	73.600, 1.070	73.600, 1.026	73.600, 0.966	73.600, 0.951	73.600, 0.960	73.600, 0.903	73.600, 0.911	73.600, 0.846	73.600, 0.972	73.600, 0.839	73.600, 0.939	73.600, 3.126	73.600, 2.576	73.600, 2.832
370	73.800, 1.047	73.800, 1.071	73.800, 1.027	73.800, 0.967	73.800, 0.952	73.800, 0.961	73.800, 0.904	73.800, 0.913	73.800, 0.846	73.800, 0.973	73.800, 0.840	73.800, 0.939	73.800, 3.130	73.800, 2.580	73.800, 2.836
371	74.000, 1.048	74.000, 1.072	74.000, 1.029	74.000, 0.968	74.000, 0.953	74.000, 0.962	74.000, 0.905	74.000, 0.914	74.000, 0.847	74.000, 0.974	74.000, 0.841	74.000, 0.940	74.000, 3.134	74.000, 2.584	74.000, 2.839
372	74.200, 1.049	74.200, 1.072	74.200, 1.030	74.200, 0.969	74.200, 0.954	74.200, 0.963	74.200, 0.906	74.200, 0.915	74.200, 0.847	74.200, 0.974	74.200, 0.842	74.200, 0.941	74.200, 3.139	74.200, 2.588	74.200, 2.841
373	74.400, 1.050	74.400, 1.073	74.400, 1.031	74.400, 0.969	74.400, 0.955	74.400, 0.964	74.400, 0.907	74.400, 0.915	74.400, 0.848	74.400, 0.975	74.400, 0.843	74.400, 0.942	74.400, 3.143	74.400, 2.592	74.400, 2.844
374	74.600, 1.051	74.600, 1.074	74.600, 1.032	74.600, 0.970	74.600, 0.956	74.600, 0.965	74.600, 0.908	74.600, 0.916	74.600, 0.848	74.600, 0.976	74.600, 0.844	74.600, 0.943	74.600, 3.147	74.600, 2.595	74.600, 2.847
375	74.800, 1.053	74.800, 1.075	74.800, 1.033	74.800, 0.971	74.800, 0.957	74.800, 0.966	74.800, 0.908	74.800, 0.916	74.800, 0.849	74.800, 0.976	74.800, 0.846	74.800, 0.943	74.800, 3.152	74.800, 2.599	74.800, 2.850
376	75.000, 1.054	75.000, 1.075	75.000, 1.034	75.000, 0.971	75.000, 0.958	75.000, 0.967	75.000, 0.909	75.000, 0.916	75.000, 0.849	75.000, 0.977	75.000, 0.847	75.000, 0.944	75.000, 3.156	75.000, 2.603	75.000, 2.854
377	75.200, 1.055	75.200, 1.076	75.200, 1.034	75.200, 0.972	75.200, 0.958	75.200, 0.968	75.200, 0.909	75.200, 0.917	75.200, 0.850	75.200, 0.978	75.200, 0.848	75.200, 0.945	75.200, 3.160	75.200, 2.606	75.200, 2.857
378	75.400, 1.056	75.400, 1.077	75.400, 1.035	75.400, 0.973	75.400, 0.959	75.400, 0.968	75.400, 0.909	75.400, 0.917	75.400, 0.850	75.400, 0.979	75.400, 0.848	75.400, 0.945	75.400, 3.165	75.400, 2.610	75.400, 2.860
379	75.600, 1.057	75.600, 1.078	75.600, 1.035	75.600, 0.974	75.600, 0.959	75.600, 0.969	75.600, 0.910	75.600, 0.918	75.600, 0.851	75.600, 0.980	75.600, 0.849	75.600, 0.946	75.600, 3.169	75.600, 2.613	75.600, 2.863
380	75.800, 1.058	75.800, 1.079	75.800, 1.035	75.800, 0.975	75.800, 0.960	75.800, 0.969	75.800, 0.910	75.800, 0.918	75.800, 0.852	75.800, 0.981	75.800, 0.849	75.800, 0.947	75.800, 3.172	75.800, 2.617	75.800, 2.866
381	76.000, 1.059	76.000, 1.080	76.000, 1.035	76.000, 0.976	76.000, 0.960	76.000, 0.970	76.000, 0.911	76.000, 0.919	76.000, 0.853	76.000, 0.982	76.000, 0.850	76.000, 0.947	76.000, 3.176	76.000, 2.620	76.000, 2.869
382	76.200, 1.059	76.200, 1.080	76.200, 1.036	76.200, 0.976	76.200, 0.961	76.200, 0.971	76.200, 0.912	76.200, 0.919	76.200, 0.854	76.200, 0.983	76.200, 0.850	76.200, 0.949	76.200, 3.180	76.200, 2.624	76.200, 2.873
383	76.400, 1.060	76.400, 1.081	76.400, 1.036	76.400, 0.977	76.400, 0.961	76.400, 0.971	76.400, 0.913	76.400, 0.920	76.400, 0.855	76.400, 0.983	76.400, 0.851	76.400, 0.950	76.400, 3.184	76.400, 2.628	76.400, 2.876
384	76.600, 1.061	76.600, 1.082	76.600, 1.036	76.600, 0.977	76.600, 0.962	76.600, 0.972	76.600, 0.913	76.600, 0.921	76.600, 0.856	76.600, 0.984	76.600, 0.851	76.600, 0.951	76.600, 3.188	76.600, 2.632	76.600, 2.880
385	76.800, 1.062	76.800, 1.083	76.800, 1.037	76.800, 0.978	76.800, 0.962	76.800, 0.973	76.800, 0.914	76.800, 0.921	76.800, 0.857	76.800, 0.985	76.800, 0.851	76.800, 0.952	76.800, 3.192	76.800, 2.636	76.800, 2.884
386	77.000, 1.063	77.000, 1.084	77.000, 1.037	77.000, 0.979	77.000, 0.962	77.000, 0.973	77.000, 0.914	77.000, 0.922	77.000, 0.858	77.000, 0.986	77.000, 0.852	77.000, 0.953	77.000, 3.196	77.000, 2.640	77.000, 2.887
387	77.200, 1.063	77.200, 1.085	77.200, 1.038	77.200, 0.979	77.200, 0.963	77.200, 0.974	77.200, 0.915	77.200, 0.923	77.200, 0.859	77.200, 0.987	77.200, 0.852	77.200, 0.953	77.200, 3.200	77.200, 2.644	77.200, 2.891
388	77.400, 1.064	77.400, 1.086	77.400, 1.039	77.400, 0.980	77.400, 0.963	77.400, 0.975	77.400, 0.915	77.400, 0.923	77.400, 0.859	77.400, 0.987	77.400, 0.853	77.400, 0.954	77.400, 3.204	77.400, 2.648	77.400, 2.894
389	77.600, 1.065	77.600, 1.087	77.600, 1.040	77.600, 0.981	77.600, 0.964	77.600, 0.976	77.600, 0.916	77.600, 0.924	77.600, 0.860	77.600, 0.988	77.600, 0.853	77.600, 0.955	77.600, 3.208	77.600, 2.652	77.600, 2.898
390	77.800, 1.065	77.800, 1.088	77.800, 1.041	77.800, 0.982	77.800, 0.965	77.800, 0.976	77.800, 0.918	77.800, 0.925	77.800, 0.861	77.800, 0.989	77.800, 0.854	77.800, 0.956	77.800, 3.212	77.800, 2.656	77.800, 2.901
391	78.000, 1.066	78.000, 1.089	78.000, 1.042	78.000, 0.982	78.000, 0.966	78.000, 0.977	78.000, 0.919	78.000, 0.926	78.000, 0.861	78.000, 0.989	78.000, 0.855	78.000, 0.957	78.000, 3.215	78.000, 2.659	78.000, 2.904
392	78.200, 1.067	78.200, 1.090	78.200, 1.042	78.200, 0.983	78.200, 0.967	78.200, 0.978	78.200, 0.920	78.200, 0.926	78.200, 0.862	78.200, 0.990	78.200, 0.856	78.200, 0.957	78.200, 3.219	78.200, 2.663	78.200, 2.907
393	78.400, 1.068	78.400, 1.090	78.400, 1.043	78.400, 0.984	78.400, 0.968	78.400, 0.979	78.400, 0.921	78.400, 0.927	78.400, 0.862	78.400, 0.990	78.400, 0.857	78.400, 0.958	78.400, 3.223	78.400, 2.667	78.400, 2.910
394	78.600, 1.068	78.600, 1.091	78.600, 1.044	78.600, 0.985	78.600, 0.969	78.600, 0.979	78.600, 0.922	78.600, 0.927	78.600, 0.863	78.600, 0.991	78.600, 0.858	78.600, 0.959	78.600, 3.227	78.600, 2.671	78.600, 2.912
395	78.800, 1.069	78.800, 1.092	78.800, 1.045	78.800, 0.986	78.800, 0.971	78.800, 0.980	78.800, 0.923	78.800, 0.928	78.800, 0.864	78.800, 0.992	78.800, 0.859	78.800, 0.960	78.800, 3.231	78.800, 2.674	78.800, 2.915
396	79.000, 1.069	79.000, 1.092	79.000, 1.046	79.000, 0.987	79.000, 0.972	79.000, 0.981	79.000, 0.923	79.000, 0.929	79.000, 0.864	79.000, 0.993	79.000, 0.859	79.000, 0.960	79.000, 3.235	79.000, 2.678	79.000, 2.918
397	79.200, 1.070	79.200, 1.093	79.200, 1.047	79.200, 0.988	79.200, 0.973	79.200, 0.982	79.200, 0.924	79.200, 0.930	79.200, 0.864	79.200, 0.994	79.200, 0.860	79.200, 0.961	79.200, 3.239	79.200, 2.681	79.200, 2.920
398	79.400, 1.070	79.400, 1.094	79.400, 1.048	79.400, 0.989	79.400, 0.974	79.400, 0.983	79.400, 0.925	79.400, 0.931	79.400, 0.865	79.400, 0.995	79.400, 0.861	79.400, 0.962	79.400, 3.242	79.400, 2.684	79.400, 2.923
399	79.600, 1.071	79.600, 1.094	79.600, 1.049	79.600, 0.990	79.600, 0.975	79.600, 0.983	79.600, 0.926	79.600, 0.931	79.600, 0.865	79.600, 0.996	79.600, 0.861	79.600, 0.963	79.600, 3.246	79.600, 2.687	79.600, 2.925
400	79.800, 1.071	79.800, 1.095	79.800, 1.050	79.800, 0.991	79.800, 0.976	79.800, 0.984	79.800, 0.926	79.800, 0.932	79.800, 0.865	79.800, 0.996	79.800, 0.862	79.800, 0.964	79.800, 3.249	79.800, 2.691	79.800, 2.928
401	80.000, 1.072	80.000, 1.096	80.000, 1.050	80.000, 0.992	80.000, 0.976	80.000, 0.985	80.000, 0.927	80.000, 0.933	80.000, 0.866	80.000, 0.997	80.000, 0.863	80.000, 0.965	80.000, 3.253	80.000, 2.694	80.000, 2.931
402	80.200, 1.073	80.200, 1.096	80.200, 1.051	80.200, 0.992	80.200, 0.977	80.200, 0.986	80.200, 0.927	80.200, 0.934	80.200, 0.867	80.200, 0.998	80.200, 0.864	80.200, 0.965	80.200, 3.256	80.200, 2.698	80.200, 2.934
403	80.400, 1.074	80.400, 1.097	80.400, 1.052	80.400, 0.993	80.400, 0.978	80.400, 0.986	80.400, 0.928	80.400, 0.935	80.400, 0.867	80.400, 0.998	80.400, 0.865	80.400, 0.966	80.400, 3.260	80.400, 2.701	80.400, 2.937
404	80.600, 1.075	80.600, 1.098	80.600, 1.053	80.600, 0.994	80.600, 0.978	80.600, 0.987	80.600, 0.928	80.600, 0.935	80.600, 0.868	80.600, 0.999	80.600, 0.866	80.600, 0.967	80.600, 3.264	80.600, 2.704	80.600, 2.939
405	80.800, 1.075	80.800, 1.099	80.800, 1.054	80.800, 0.994	80.800, 0.979	80.800, 0.988	80.800, 0.929	80.800, 0.936	80.800, 0.869	80.800, 0.999	80.800, 0.866	80.800, 0.968	80.800, 3.267	80.800, 2.708	80.800, 2.942
406	81.000, 1.076	81.000, 1.100	81.000, 1.055	81.000, 0.995	81.000, 0.980	81.000, 0.988	81.000, 0.930	81.000, 0.937	81.000, 0.869	81.000, 0.999	81.000, 0.867	81.000, 0.969	81.000, 3.271	81.000, 2.711	81.000, 2.945
407	81.200, 1.077	81.200, 1.101	81.200, 1.056	81.200, 0.995	81.200, 0.980	81.200, 0.988	81.200, 0.931	81.200, 0.938	81.200, 0.870	81.200, 0.999	81.200, 0.868	81.200, 0.970	81.200, 3.274	81.200, 2.715	81.200, 2.947
408	81.400, 1.078	81.400, 1.102	81.400, 1.056	81.400, 0.995	81.400, 0.981	81.400, 0.989	81.400, 0.931	81.400, 0.938	81.400, 0.870	81.400, 1.000	81.400, 0.868	81.400, 0.971	81.400, 3.278	81.400, 2.718	81.400, 2.950
409	81.600, 1.078	81.600, 1.103	81.600, 1.057	81.600, 0.995	81.600, 0.982	81.600, 0.989	81.600, 0.932	81.600, 0.939	81.600, 0.871	81.600, 1.000	81.600, 0.869	81.600, 0.972	81.600, 3.281	81.600, 2.722	81.600, 2.953
410	81.800, 1.079	81.800, 1.104	81.800, 1.057	81.800, 0.995	81.800, 0.982	81.800, 0.989	81.800, 0.932	81.800, 0.939	81.800, 0.871	81.800, 1.000	81.800, 0.870	81.800, 0.972	81.800, 3.284	81.800, 2.725	81.800, 2.956
411	82.000, 1.080	82.000, 1.105	82.000, 1.058	82.000, 0.996	82.000, 0.983	82.000, 0.990	82.000, 0.933	82.000, 0.940	82.000, 0.872	82.000, 1.001	82.000, 0.870	82.000, 0.973	82.000, 3.288	82.000, 2.728	82.000, 2.959
412	82.200, 1.081	82.200, 1.106	82.200, 1.058	82.200, 0.997	82.200, 0.984	82.200, 0.990	82.200, 0.933	82.200, 0.941	82.200, 0.872	82.200, 1.002	82.200, 0.870	82.200, 0.974	82.200, 3.291	82.200, 2.732	82.200, 2.961
413	82.400, 1.082	82.400, 1.107	82.400, 1.058	82.400, 0.998	82.400, 0.985	82.400, 0.991	82.400, 0.934	82.400, 0.942	82.400, 0.873	82.400, 1.002	82.400, 0.871	82.400, 0.975	82.400, 3.294	82.400, 2.735	82.400, 2.964
414	82.600, 1.083	82.600, 1.108	82.600, 1.059	82.600, 0.999	82.600, 0.986	82.600, 0.991	82.600, 0.935	82.600, 0.942	82.600, 0.874	82.600, 1.003	82.600, 0.871	82.600, 0.975	82.600, 3.298	82.600, 2.738	82.600, 2.966
415	82.800, 1.084	82.800, 1.109	82.800, 1.059	82.800, 1.000	82.800, 0.987	82.800, 0.992	82.800, 0.936	82.800, 0.943	82.800, 0.875	82.800, 1.005	82.800, 0.872	82.800, 0.976	82.800, 3.301	82.800, 2.741	82.800, 2.968
416	83.000, 1.084	83.000, 1.109	83.000, 1.060	83.000, 1.001	83.000, 0.987	83.000, 0.993	83.000, 0.936	83.000, 0.944	83.000, 0.875	83.000, 1.006	83.000, 0.872	83.000, 0.977	83.000, 3.304	83.000, 2.744	83.000, 2.971
417	83.200, 1.085	83.200, 1.110	83.200, 1.060	83.200, 1.002	83.200, 0.988	83.200, 0.994	83.200, 0.937	83.200, 0.944	83.200, 0.876	83.200, 1.007	83.200, 0.873	83.200, 0.978	83.200, 3.307	83.200, 2.747	83.200, 2.973
418	83.400, 1.086	83.400, 1.110	83.400, 1.061	83.400, 1.003	83.400, 0.989	83.400, 0.995	83.400, 0.938	83.400, 0.945	83.400, 0.876	83.400, 1.008	83.400, 0.874	83.400, 0.978	83.400, 3.309	83.400, 2.750	83.400, 2.976
419	83.600, 1.087	83.600, 1.111	83.600, 1.061	83.600, 1.004	83.600, 0.989	83.600, 0.996	83.600, 0.938	83.600, 0.945	83.600, 0.877	83.600, 1.009	83.600, 0.875	83.600, 0.979	83.600, 3.313	83.600, 2.753	83.600, 2.978
420	83.800, 1.088	83.800, 1.112	83.800, 1.061	83.800, 1.005	83.800, 0.990	83.800, 0.997	83.800, 0.939	83.800, 0.946	83.800, 0.877	83.800, 1.010	83.800, 0.875	83.800, 0.979	83.800, 3.316	83.800, 2.756	83.800, 2.981
421	84.000, 1.088	84.000, 1.113	84.000, 1.062	84.000, 1.006	84.000, 0.990	84.000, 0.997	84.000, 0.939	84.000, 0.947	84.000, 0.878	84.000, 1.011	84.000, 0.876	84.000, 0.979	84.000, 3.320	84.000, 2.759	84.000, 2.984
422	84.200, 1.089	84.200, 1.114	84.200, 1.062	84.200, 1.008	84.200, 0.991	84.200, 0.998	84.200, 0.940	84.200, 0.947	84.200, 0.878	84.200, 1.011	84.200, 0.876	84.200, 0.980	84.200, 3.323	84.200, 2.762	84.200, 2.986
423	84.400, 1.089	84.400, 1.115	84.400, 1.063	84.400, 1.008	84.400, 0.992	84.400, 0.998	84.400, 0.941	84.400, 0.948	84.400, 0.879	84.400, 1.012	84.400, 0.877	84.400, 0.980	84.400, 3.327	84.400, 2.765	84.400, 2.989
424	84.600, 1.090	84.600, 1.116	84.600, 1.063	84.600, 1.009	84.600, 0.992	84.600, 0.998	84.600, 0.942	84.600, 0.948	84.600, 0.879	84.600, 1.013	84.600, 0.877	84.600, 0.980	84.600, 3.331	84.600, 2.768	84.600, 2.992
425	84.800, 1.090	84.800, 1.117	84.800, 1.064	84.800, 1.010	84.800, 0.993	84.800, 0.998	84.800, 0.943	84.800, 0.949	84.800, 0.880	84.800, 1.013	84.800, 0.877	84.800, 0.981	84.800, 3.335	84.800, 2.771	84.800, 2.995
426	85.000, 1.091	85.000, 1.117	85.000, 1.065	85.000, 1.010	85.000, 0.993	85.000, 0.999	85.000, 0.943	85.000, 0.949	85.000, 0.880	85.000, 1.014	85.000, 0.878	85.000, 0.981	85.000, 3.338	85.000, 2.774	85.000, 2.998
427	85.200, 1.092	85.200, 1.118	85.200, 1.066	85.200, 1.010	85.200, 0.994	85.200, 0.999	85.200, 0.944	85.200, 0.950	85.200, 0.881	85.200, 1.015	85.200, 0.878	85.200, 0.982	85.200, 3.341	85.200, 2.776	85.200, 3.001
428	85.400, 1.092	85.400, 1.119	85.400, 1.068	85.400, 1.011	85.400, 0.994	85.400, 0.999	85.400, 0.944	85.400, 0.950	85.400, 0.881	85.400, 1.015	85.400, 0.878	85.400, 0.983	85.400, 3.345	85.400, 2.779	85.400, 3.004
429	85.600, 1.092	85.600, 1.120	85.600, 1.069	85.600, 1.011	85.600, 0.995	85.600, 0.999	85.600, 0.944	85.600, 0.951	85.600, 0.882	85.600, 1.016	85.600, 0.879	85.600, 0.984	85.600, 3.348	85.600, 2.782	85.600, 3.006
430	85.800, 1.093	85.800, 1.120	85.800, 1.070	85.800, 1.011	85.800, 0.995	85.800, 1.000	85.800, 0.945	85.800, 0.951	85.800, 0.883	85.800, 1.017	85.800, 0.879	85.800, 0.984	85.800, 3.352	85.800, 2.784	85.800, 3.008
431	86.000, 1.093	86.000, 1.121	86.000, 1.071	86.000, 1.012	86.000, 0.996	86.000, 1.001	86.000, 0.945	86.000, 0.952	86.000, 0.883	86.000, 1.017	86.000, 0.880	86.000, 0.985	86.000, 3.355	86.000, 2.787	86.000, 3.011
432	86.200, 1.094	86.200, 1.122	86.200, 1.072	86.200, 1.012	86.200, 0.997	86.200, 1.001	86.200, 0.946	86.200, 0.953	86.200, 0.884	86.200, 1.018	86.200, 0.881	86.200, 0.986	86.200, 3.358	86.200, 2.789	86.200, 3.013
433	86.400, 1.094	86.400, 1.123	86.400, 1.073	86.400, 1.012	86.400, 0.998	86.400, 1.002	86.400, 0.947	86.400, 0.954	86.400, 0.885	86.400, 1.019	86.400, 0.881	86.400, 0.987	86.400, 3.361	86.400, 2.792	86.400, 3.014
434	86.600, 1.095	86.600, 1.123	86.600, 1.074	86.600, 1.013	86.600, 0.999	86.600, 1.003	86.600, 0.947	86.600, 0.955	86.600, 0.886	86.600, 1.019	86.600, 0.882	86.600, 0.988	86.600, 3.364	86.600, 2.794	86.600, 3.016
435	86.800, 1.096	86.800, 1.124	86.800, 1.074	86.800, 1.013	86.800, 1.000	86.800, 1.004	86.800, 0.948	86.800, 0.955	86.800, 0.886	86.800, 1.020	86.800, 0.883	86.800, 0.989	86.800, 3.367	86.800, 2.797	86.800, 3.018
436	87.000, 1.096	87.000, 1.124	87.000, 1.075	87.000, 1.014	87.000, 1.000	87.000, 1.005	87.000, 0.948	87.000, 0.956	87.000, 0.887	87.000, 1.020	87.000, 0.883	87.000, 0.989	87.000, 3.369	87.000, 2.799	87.000, 3.020
437	87.200, 1.097	87.200, 1.124	87.200, 1.075	87.200, 1.015	87.200, 1.001	87.200, 1.006	87.200, 0.949	87.200, 0.957	87.200, 0.887	87.200, 1.021	87.200, 0.884	87.200, 0.990	87.200, 3.372	87.200, 2.802	87.200, 3.021
438	87.400, 1.097	87.400, 1.125	87.400, 1.076	87.400, 1.016	87.400, 1.002	87.400, 1.007	87.400, 0.950	87.400, 0.957	87.400, 0.887	87.400, 1.021	87.400, 0.885	87.400, 0.990	87.400, 3.375	87.400, 2.805	87.400, 3.023
439	87.600, 1.098	87.600, 1.125	87.600, 1.076	87.600, 1.017	87.600, 1.002	87.600, 1.008	87.600, 0.951	87.600, 0.958	87.600, 0.887	87.600, 1.022	87.600, 0.885	87.600, 0.991	87.600, 3.378	87.600, 2.808	87.600, 3.025
440	87.800, 1.098	87.800, 1.126	87.800, 1.077	87.800, 1.018	87.800, 1.003	87.800, 1.008	87.800, 0.952	87.800, 0.958	87.800, 0.887	87.800, 1.022	87.800, 0.886	87.800, 0.991	87.800, 3.381	87.800, 2.811	87.800, 3.027
441	88.000, 1.099	88.000, 1.126	88.000, 1.077	88.000, 1.019	88.000, 1.004	88.000, 1.009	88.000, 0.953	88.000, 0.959	88.000, 0.888	88.000, 1.023	88.000, 0.886	88.000, 0.992	88.000, 3.384	88.000, 2.814	88.000, 3.028
442	88.200, 1.100	88.200, 1.127	88.200, 1.078	88.200, 1.020	88.200, 1.004	88.200, 1.010	88.200, 0.954	88.200, 0.959	88.200, 0.888	88.200, 1.023	88.200, 0.887	88.200, 0.993	88.200, 3.387	88.200, 2.818	88.200, 3.030
443	88.400, 1.100	88.400, 1.128	88.400, 1.079	88.400, 1.021	88.400, 1.005	88.400, 1.010	88.400, 0.955	88.400, 0.959	88.400, 0.889	88.400, 1.024	88.400, 0.887	88.400, 0.993	88.400, 3.390	88.400, 2.821	88.400, 3.033
444	88.600, 1.101	88.600, 1.128	88.600, 1.079	88.600, 1.021	88.600, 1.005	88.600, 1.011	88.600, 0.955	88.600, 0.959	88.600, 0.889	88.600, 1.025	88.600, 0.888	88.600, 0.994	88.600, 3.393	88.600, 2.824	88.600, 3.035
445	88.800, 1.102	88.800, 1.129	88.800, 1.080	88.800, 1.022	88.800, 1.006	88.800, 1.011	88.800, 0.956	88.800, 0.959	88.800, 0.890	88.800, 1.025	88.800, 0.889	88.800, 0.994	88.800, 3.397	88.800, 2.827	88.800, 3.037
446	89.000, 1.103	89.000, 1.129	89.000, 1.081	89.000, 1.022	89.000, 1.006	89.000, 1.012	89.000, 0.957	89.000, 0.959	89.000, 0.890	89.000, 1.026	89.000, 0.889	89.000, 0.995	89.000, 3.400	89.000, 2.830	89.000, 3.040
447	89.200, 1.104	89.200, 1.130	89.200, 1.082	89.200, 1.023	89.200, 1.007	89.200, 1.012	89.200, 0.957	89.200, 0.959	89.200, 0.891	89.200, 1.027	89.200, 0.890	89.200, 0.995	89.200, 3.403	89.200, 2.833	89.200, 3.042
448	89.400, 1.104	89.400, 1.131	89.400, 1.082	89.400, 1.023	89.400, 1.008	89.400, 1.013	89.400, 0.958	89.400, 0.959	89.400, 0.891	89.400, 1.027	89.400, 0.890	89.400, 0.996	89.400, 3.406	89.400, 2.836	89.400, 3.044
449	89.600, 1.104	89.600, 1.132	89.600, 1.083	89.600, 1.024	89.600, 1.008	89.600, 1.014	89.600, 0.958	89.600, 0.959	89.600, 0.892	89.600, 1.028	89.600, 0.891	89.600, 0.997	89.600, 3.409	89.600, 2.839	89.600, 3.046
450	89.800, 1.105	89.800, 1.132	89.800, 1.083	89.800, 1.024	89.800, 1.009	89.800, 1.015	89.800, 0.959	89.800, 0.960	89.800, 0.893	89.800, 1.028	89.800, 0.891	89.800, 0.997	89.800, 3.412	89.800, 2.841	89.800, 3.048
451	90.000, 1.105	90.000, 1.133	90.000, 1.084	90.000, 1.024	90.000, 1.010	90.000, 1.016	90.000, 0.959	90.000, 0.961	90.000, 0.894	90.000, 1.029	90.000, 0.892	90.000, 0.998	90.000, 3.414	90.000, 2.844	90.000, 3.051
452	90.200, 1.106	90.200, 1.133	90.200, 1.084	90.200, 1.025	90.200, 1.011	90.200, 1.016	90.200, 0.959	90.200, 0.962	90.200, 0.894	90.200, 1.030	90.200, 0.893	90.200, 0.999	90.200, 3.417	90.200, 2.847	90.200, 3.053
453	90.400, 1.106	90.400, 1.134	90.400, 1.084	90.400, 1.025	90.400, 1.012	90.400, 1.017	90.400, 0.959	90.400, 0.963	90.400, 0.895	90.400, 1.030	90.400, 0.893	90.400, 1.000	90.400, 3.419	90.400, 2.850	90.400, 3.056
454	90.600, 1.107	90.600, 1.134	90.600, 1.084	90.600, 1.025	90.600, 1.013	90.600, 1.018	90.600, 0.959	90.600, 0.964	90.600, 0.895	90.600, 1.031	90.600, 0.894	90.600, 1.000	90.600, 3.421	90.600, 2.853	90.600, 3.058
455	90.800, 1.107	90.800, 1.134	90.800, 1.085	90.800, 1.026	90.800, 1.013	90.800, 1.018	90.800, 0.960	90.800, 0.965	90.800, 0.895	90.800, 1.032	90.800, 0.894	90.800, 1.001	90.800, 3.423	90.800, 2.856	90.800, 3.061
456	91.000, 1.108	91.000, 1.134	91.000, 1.085	91.000, 1.027	91.000, 1.014	91.000, 1.019	91.000, 0.960	91.000, 0.966	91.000, 0.896	91.000, 1.033	91.000, 0.895	91.000, 1.001	91.000, 3.425	91.000, 2.859	91.000, 3.063
457	91.200, 1.108	91.200, 1.135	91.200, 1.086	91.200, 1.027	91.200, 1.014	91.200, 1.019	91.200, 0.960	91.200, 0.967	91.200, 0.896	91.200, 1.033	91.200, 0.895	91.200, 1.002	91.200, 3.428	91.200, 2.862	91.200, 3.065
458	91.400, 1.109	91.400, 1.135	91.400, 1.087	91.400, 1.028	91.400, 1.015	91.400, 1.019	91.400, 0.960	91.400, 0.967	91.400, 0.897	91.400, 1.034	91.400, 0.896	91.400, 1.002	91.400, 3.430	91.400, 2.865	91.400, 3.067
459	91.600, 1.109	91.600, 1.136	91.600, 1.088	91.600, 1.029	91.600, 1.016	91.600, 1.020	91.600, 0.961	91.600, 0.968	91.600, 0.897	91.600, 1.034	91.600, 0.896	91.600, 1.003	91.600, 3.432	91.600, 2.867	91.600, 3.068
460	91.800, 1.109	91.800, 1.137	91.800, 1.089	91.800, 1.030	91.800, 1.016	91.800, 1.020	91.800, 0.961	91.800, 0.969	91.800, 0.897	91.800, 1.035	91.800, 0.896	91.800, 1.003	91.800, 3.435	91.800, 2.870	91.800, 3.070
461	92.000, 1.110	92.000, 1.137	92.000, 1.089	92.000, 1.031	92.000, 1.017	92.000, 1.021	92.000, 0.962	92.000, 0.969	92.000, 0.898	92.000, 1.035	92.000, 0.896	92.000, 1.004	92.000, 3.438	92.000, 2.873	92.000, 3.072
462	92.200, 1.110	92.200, 1.138	92.200, 1.090	92.200, 1.032	92.200, 1.017	92.200, 1.021	92.200, 0.962	92.200, 0.970	92.200, 0.898	92.200, 1.036	92.200, 0.897	92.200, 1.005	92.200, 3.440	92.200, 2.875	92.200, 3.074
463	92.400, 1.111	92.400, 1.140	92.400, 1.091	92.400, 1.033	92.400, 1.017	92.400, 1.022	92.400, 0.963	92.400, 0.970	92.400, 0.898	92.400, 1.037	92.400, 0.897	92.400, 1.005	92.400, 3.443	92.400, 2.878	92.400, 3.076
464	92.600, 1.111	92.600, 1.141	92.600, 1.091	92.600, 1.033	92.600, 1.018	92.600, 1.022	92.600, 0.964	92.600, 0.971	92.600, 0.899	92.600, 1.037	92.600, 0.897	92.600, 1.005	92.600, 3.446	92.600, 2.881	92.600, 3.078
465	92.800, 1.112	92.800, 1.142	92.800, 1.092	92.800, 1.034	92.800, 1.019	92.800, 1.023	92.800, 0.964	92.800, 0.971	92.800, 0.900	92.800, 1.038	92.800, 0.897	92.800, 1.006	92.800, 3.449	92.800, 2.884	92.800, 3.081
466	93.000, 1.112	93.000, 1.144	93.000, 1.092	93.000, 1.034	93.000, 1.019	93.000, 1.023	93.000, 0.965	93.000, 0.971	93.000, 0.901	93.000, 1.039	93.000, 0.898	93.000, 1.006	93.000, 3.453	93.000, 2.886	93.000, 3.083
467	93.200, 1.113	93.200, 1.145	93.200, 1.093	93.200, 1.035	93.200, 1.020	93.200, 1.024	93.200, 0.966	93.200, 0.972	93.200, 0.901	93.200, 1.039	93.200, 0.898	93.200, 1.006	93.200, 3.456	93.200, 2.889	93.200, 3.084
468	93.400, 1.113	93.400, 1.146	93.400, 1.093	93.400, 1.035	93.400, 1.020	93.400, 1.025	93.400, 0.967	93.400, 0.972	93.400, 0.902	93.400, 1.040	93.400, 0.898	93.400, 1.006	93.400, 3.459	93.400, 2.891	93.400, 3.087
469	93.600, 1.114	93.600, 1.147	93.600, 1.094	93.600, 1.035	93.600, 1.021	93.600, 1.025	93.600, 0.967	93.600, 0.973	93.600, 0.903	93.600, 1.041	93.600, 0.899	93.600, 1.007	93.600, 3.461	93.600, 2.894	93.600, 3.089
470	93.800, 1.114	93.800, 1.148	93.800, 1.094	93.800, 1.035	93.800, 1.021	93.800, 1.026	93.800, 0.968	93.800, 0.973	93.800, 0.904	93.800, 1.041	93.800, 0.899	93.800, 1.008	93.800, 3.464	93.800, 2.896	93.800, 3.091
471	94.000, 1.115	94.000, 1.148	94.000, 1.094	94.000, 1.035	94.000, 1.022	94.000, 1.026	94.000, 0.969	94.000, 0.974	94.000, 0.904	94.000, 1.042	94.000, 0.900	94.000, 1.008	94.000, 3.467	94.000, 2.899	94.000, 3.093
472	94.200, 1.116	94.200, 1.149	94.200, 1.094	94.200, 1.035	94.200, 1.022	94.200, 1.027	94.200, 0.970	94.200, 0.974	94.200, 0.905	94.200, 1.043	94.200, 0.901	94.200, 1.009	94.200, 3.469	94.200, 2.902	94.200, 3.095
473	94.400, 1.116	94.400, 1.149	94.400, 1.095	94.400, 1.036	94.400, 1.022	94.400, 1.027	94.400, 0.970	94.400, 0.975	94.400, 0.905	94.400, 1.043	94.400, 0.902	94.400, 1.010	94.400, 3.471	94.400, 2.904	94.400, 3.098
474	94.600, 1.117	94.600, 1.149	94.600, 1.095	94.600, 1.036	94.600, 1.023	94.600, 1.028	94.600, 0.971	94.600, 0.975	94.600, 0.906	94.600, 1.044	94.600, 0.902	94.600, 1.011	94.600, 3.474	94.600, 2.907	94.600, 3.100
475	94.800, 1.118	94.800, 1.149	94.800, 1.095	94.800, 1.036	94.800, 1.023	94.800, 1.028	94.800, 0.971	94.800, 0.976	94.800, 0.906	94.800, 1.044	94.800, 0.903	94.800, 1.012	94.800, 3.476	94.800, 2.909	94.800, 3.101
476	95.000, 1.119	95.000, 1.149	95.000, 1.095	95.000, 1.037	95.000, 1.023	95.000, 1.029	95.000, 0.971	95.000, 0.976	95.000, 0.906	95.000, 1.044	95.000, 0.903	95.000, 1.013	95.000, 3.478	95.000, 2.912	95.000, 3.103
477	95.200, 1.120	95.200, 1.149	95.200, 1.096	95.200, 1.038	95.200, 1.024	95.200, 1.029	95.200, 0.972	95.200, 0.977	95.200, 0.907	95.200, 1.045	95.200, 0.904	95.200, 1.014	95.200, 3.480	95.200, 2.914	95.200, 3.105
478	95.400, 1.120	95.400, 1.149	95.400, 1.097	95.400, 1.038	95.400, 1.024	95.400, 1.030	95.400, 0.972	95.400, 0.977	95.400, 0.907	95.400, 1.045	95.400, 0.905	95.400, 1.015	95.400, 3.483	95.400, 2.916	95.400, 3.106
479	95.600, 1.121	95.600, 1.149	95.600, 1.097	95.600, 1.039	95.600, 1.024	95.600, 1.031	95.600, 0.973	95.600, 0.978	95.600, 0.907	95.600, 1.045	95.600, 0.905	95.600, 1.016	95.600, 3.485	95.600, 2.918	95.600, 3.108
480	95.800, 1.122	95.800, 1.150	95.800, 1.098	95.800, 1.040	95.800, 1.025	95.800, 1.031	95.800, 0.973	95.800, 0.978	95.800, 0.907	95.800, 1.046	95.800, 0.906	95.800, 1.017	95.800, 3.487	95.800, 2.920	95.800, 3.110
481	96.000, 1.122	96.000, 1.150	96.000, 1.099	96.000, 1.041	96.000, 1.025	96.000, 1.032	96.000, 0.974	96.000, 0.978	96.000, 0.907	96.000, 1.046	96.000, 0.907	96.000, 1.018	96.000, 3.490	96.000, 2.922	96.000, 3.112
482	96.200, 1.122	96.200, 1.150	96.200, 1.100	96.200, 1.041	96.200, 1.025	96.200, 1.032	96.200, 0.975	96.200, 0.979	96.200, 0.908	96.200, 1.047	96.200, 0.907	96.200, 1.019	96.200, 3.492	96.200, 2.925	96.200, 3.114
483	96.400, 1.123	96.400, 1.151	96.400, 1.100	96.400, 1.042	96.400, 1.026	96.400, 1.033	96.400, 0.975	96.400, 0.979	96.400, 0.908	96.400, 1.047	96.400, 0.908	96.400, 1.020	96.400, 3.495	96.400, 2.927	96.400, 3.115
484	96.600, 1.123	96.600, 1.151	96.600, 1.101	96.600, 1.043	96.600, 1.027	96.600, 1.034	96.600, 0.976	96.600, 0.980	96.600, 0.909	96.600, 1.048	96.600, 0.908	96.600, 1.020	96.600, 3.498	96.600, 2.930	96.600, 3.117
485	96.800, 1.123	96.800, 1.152	96.800, 1.101	96.800, 1.043	96.800, 1.027	96.800, 1.034	96.800, 0.976	96.800, 0.980	96.800, 0.910	96.800, 1.049	96.800, 0.909	96.800, 1.021	96.800, 3.500	96.800, 2.933	96.800, 3.119
486	97.000, 1.123	97.000, 1.153	97.000, 1.102	97.000, 1.044	97.000, 1.028	97.000, 1.035	97.000, 0.977	97.000, 0.981	97.000, 0.910	97.000, 1.049	97.000, 0.909	97.000, 1.022	97.000, 3.503	97.000, 2.935	97.000, 3.121
487	97.200, 1.124	97.200, 1.154	97.200, 1.102	97.200, 1.045	97.200, 1.029	97.200, 1.035	97.200, 0.977	97.200, 0.982	97.200, 0.911	97.200, 1.050	97.200, 0.910	97.200, 1.022	97.200, 3.505	97.200, 2.937	97.200, 3.123
488	97.400, 1.124	97.400, 1.154	97.400, 1.103	97.400, 1.045	97.400, 1.029	97.400, 1.036	97.400, 0.977	97.400, 0.982	97.400, 0.911	97.400, 1.051	97.400, 0.910	97.400, 1.023	97.400, 3.508	97.400, 2.940	97.400, 3.124
489	97.600, 1.125	97.600, 1.155	97.600, 1.104	97.600, 1.046	97.600, 1.030	97.600, 1.036	97.600, 0.978	97.600, 0.983	97.600, 0.912	97.600, 1.051	97.600, 0.911	97.600, 1.023	97.600, 3.510	97.600, 2.942	97.600, 3.126
490	97.800, 1.126	97.800, 1.155	97.800, 1.104	97.800, 1.046	97.800, 1.031	97.800, 1.036	97.800, 0.978	97.800, 0.984	97.800, 0.912	97.800, 1.052	97.800, 0.911	97.800, 1.023	97.800, 3.512	97.800, 2.944	97.800, 3.128
491	98.000, 1.126	98.000, 1.156	98.000, 1.105	98.000, 1.047	98.000, 1.032	98.000, 1.037	98.000, 0.979	98.000, 0.984	98.000, 0.913	98.000, 1.052	98.000, 0.911	98.000, 1.023	98.000, 3.514	98.000, 2.946	98.000, 3.130
492	98.200, 1.127	98.200, 1.157	98.200, 1.105	98.200, 1.047	98.200, 1.033	98.200, 1.037	98.200, 0.979	98.200, 0.984	98.200, 0.913	98.200, 1.053	98.200, 0.912	98.200, 1.024	98.200, 3.517	98.200, 2.949	98.200, 3.132
493	98.400, 1.128	98.400, 1.158	98.400, 1.106	98.400, 1.047	98.400, 1.034	98.400, 1.038	98.400, 0.980	98.400, 0.985	98.400, 0.914	98.400, 1.053	98.400, 0.912	98.400, 1.024	98.400, 3.519	98.400, 2.951	98.400, 3.133
494	98.600, 1.129	98.600, 1.159	98.600, 1.106	98.600, 1.048	98.600, 1.035	98.600, 1.038	98.600, 0.980	98.600, 0.985	98.600, 0.914	98.600, 1.054	98.600, 0.912	98.600, 1.024	98.600, 3.521	98.600, 2.954	98.600, 3.135
495	98.800, 1.130	98.800, 1.160	98.800, 1.107	98.800, 1.048	98.800, 1.036	98.800, 1.039	98.800, 0.980	98.800, 0.986	98.800, 0.915	98.800, 1.054	98.800, 0.912	98.800, 1.024	98.800, 3.524	98.800, 2.956	98.800, 3.136
496	99.000, 1.131	99.000, 1.161	99.000, 1.108	99.000, 1.049	99.000, 1.037	99.000, 1.039	99.000, 0.981	99.000, 0.986	99.000, 0.915	99.000, 1.055	99.000, 0.913	99.000, 1.024	99.000, 3.526	99.000, 2.958	99.000, 3.138
497	99.200, 1.132	99.200, 1.162	99.200, 1.108	99.200, 1.049	99.200, 1.038	99.200, 1.039	99.200, 0.981	99.200, 0.986	99.200, 0.916	99.200, 1.055	99.200, 0.913	99.200, 1.025	99.200, 3.528	99.200, 2.961	99.200, 3.139
498	99.400, 1.132	99.400, 1.162	99.400, 1.109	99.400, 1.050	99.400, 1.039	99.400, 1.040	99.400, 0.982	99.400, 0.986	99.400, 0.916	99.400, 1.056	99.400, 0.913	99.400, 1.025	99.400, 3.530	99.400, 2.963	99.400, 3.141
499	99.600, 1.133	99.600, 1.163	99.600, 1.109	99.600, 1.050	99.600, 1.040	99.600, 1.041	99.600, 0.982	99.600, 0.987	99.600, 0.916	99.600, 1.056	99.600, 0.914	99.600, 1.025	99.600, 3.532	99.600, 2.965	99.600, 3.142
500	99.800, 1.133	99.800, 1.164	99.800, 1.110	99.800, 1.051	99.800, 1.041	99.800, 1.041	99.800, 0.983	99.800, 0.987	99.800, 0.917	99.800, 1.057	99.800, 0.914	99.800, 1.026	99.800, 3.535	99.800, 2.968	99.800, 3.144
501	100.000, 1.134	100.000, 1.165	100.000, 1.110	100.000, 1.051	100.000, 1.041	100.000, 1.042	100.000, 0.984	100.000, 0.987	100.000, 0.917	100.000, 1.057	100.000, 0.915	100.000, 1.026	100.000, 3.537	100.000, 2.970	100.000, 3.145
502	100.200, 1.134	100.200, 1.166	100.200, 1.111	100.200, 1.052	100.200, 1.042	100.200, 1.042	100.200, 0.984	100.200, 0.988	100.200, 0.917	100.200, 1.058	100.200, 0.916	100.200, 1.027	100.200, 3.539	100.200, 2.973	100.200, 3.147
503	100.400, 1.135	100.400, 1.166	100.400, 1.111	100.400, 1.052	100.400, 1.042	100.400, 1.043	100.400, 0.985	100.400, 0.988	100.400, 0.917	100.400, 1.058	100.400, 0.917	100.400, 1.028	100.400, 3.541	100.400, 2.975	100.400, 3.149
504	100.600, 1.135	100.600, 1.167	100.600, 1.112	100.600, 1.052	100.600, 1.042	100.600, 1.043	100.600, 0.986	100.600, 0.989	100.600, 0.917	100.600, 1.059	100.600, 0.918	100.600, 1.028	100.600, 3.543	100.600, 2.977	100.600, 3.150
505	100.800, 1.135	100.800, 1.168	100.800, 1.112	100.800, 1.053	100.800, 1.042	100.800, 1.044	100.800, 0.986	100.800, 0.989	100.800, 0.918	100.800, 1.059	100.800, 0.918	100.800, 1.029	100.800, 3.545	100.800, 2.980	100.800, 3.152
506	101.000, 1.136	101.000, 1.168	101.000, 1.112	101.000, 1.053	101.000, 1.043	101.000, 1.044	101.000, 0.987	101.000, 0.990	101.000, 0.918	101.000, 1.059	101.000, 0.919	101.000, 1.030	101.000, 3.547	101.000, 2.982	101.000, 3.153
507	101.200, 1.136	101.200, 1.169	101.200, 1.112	101.200, 1.054	101.200, 1.043	101.200, 1.045	101.200, 0.987	101.200, 0.991	101.200, 0.918	101.200, 1.060	101.200, 0.919	101.200, 1.030	101.200, 3.549	101.200, 2.984	101.200, 3.154
508	101.400, 1.137	101.400, 1.169	101.400, 1.113	101.400, 1.054	101.400, 1.043	101.400, 1.045	101.400, 0.987	101.400, 0.991	101.400, 0.918	101.400, 1.060	101.400, 0.920	101.400, 1.031	101.400, 3.552	101.400, 2.986	101.400, 3.156
509	101.600, 1.137	101.600, 1.169	101.600, 1.113	101.600, 1.054	101.600, 1.043	101.600, 1.046	101.600, 0.988	101.600, 0.992	101.600, 0.919	101.600, 1.060	101.600, 0.920	101.600, 1.031	101.600, 3.554	101.600, 2.988	101.600, 3.158
510	101.800, 1.137	101.800, 1.169	101.800, 1.114	101.800, 1.055	101.800, 1.044	101.800, 1.046	101.800, 0.988	101.800, 0.993	101.800, 0.919	101.800, 1.061	101.800, 0.920	101.800, 1.032	101.800, 3.556	101.800, 2.991	101.800, 3.159
511	102.000, 1.137	102.000, 1.170	102.000, 1.114	102.000, 1.055	102.000, 1.044	102.000, 1.046	102.000, 0.989	102.000, 0.993	102.000, 0.920	102.000, 1.061	102.000, 0.920	102.000, 1.033	102.000, 3.559	102.000, 2.993	102.000, 3.161
512	102.200, 1.138	102.200, 1.170	102.200, 1.115	102.200, 1.056	102.200, 1.044	102.200, 1.046	102.200, 0.989	102.200, 0.994	102.200, 0.920	102.200, 1.062	102.200, 0.921	102.200, 1.034	102.200, 3.561	102.200, 2.995	102.200, 3.162
513	102.400, 1.138	102.400, 1.170	102.400, 1.116	102.400, 1.057	102.400, 1.045	102.400, 1.047	102.400, 0.989	102.400, 0.994	102.400, 0.921	102.400, 1.062	102.400, 0.921	102.400, 1.035	102.400, 3.563	102.400, 2.998	102.400, 3.164
514	102.600, 1.138	102.600, 1.171	102.600, 1.116	102.600, 1.057	102.600, 1.045	102.600, 1.047	102.600, 0.990	102.600, 0.995	102.600, 0.922	102.600, 1.062	102.600, 0.922	102.600, 1.035	102.600, 3.565	102.600, 3.000	102.600, 3.166
515	102.800, 1.138	102.800, 1.171	102.800, 1.117	102.800, 1.058	102.800, 1.046	102.800, 1.047	102.800, 0.990	102.800, 0.995	102.800, 0.923	102.800, 1.062	102.800, 0.922	102.800, 1.036	102.800, 3.567	102.800, 3.002	102.800, 3.167
516	103.000, 1.139	103.000, 1.171	103.000, 1.117	103.000, 1.058	103.000, 1.046	103.000, 1.048	103.000, 0.991	103.000, 0.995	103.000, 0.924	103.000, 1.063	103.000, 0.922	103.000, 1.036	103.000, 3.569	103.000, 3.004	103.000, 3.169
517	103.200, 1.139	103.200, 1.172	103.200, 1.118	103.200, 1.059	103.200, 1.047	103.200, 1.048	103.200, 0.991	103.200, 0.996	103.200, 0.924	103.200, 1.063	103.200, 0.923	103.200, 1.036	103.200, 3.571	103.200, 3.006	103.200, 3.170
518	103.400, 1.139	103.400, 1.172	103.400, 1.119	103.400, 1.060	103.400, 1.047	103.400, 1.048	103.400, 0.991	103.400, 0.996	103.400, 0.925	103.400, 1.064	103.400, 0.924	103.400, 1.037	103.400, 3.573	103.400, 3.009	103.400, 3.172
519	103.600, 1.139	103.600, 1.173	103.600, 1.119	103.600, 1.061	103.600, 1.048	103.600, 1.049	103.600, 0.992	103.600, 0.996	103.600, 0.926	103.600, 1.064	103.600, 0.924	103.600, 1.037	103.600, 3.575	103.600, 3.011	103.600, 3.173
520	103.800, 1.139	103.800, 1.173	103.800, 1.120	103.800, 1.061	103.800, 1.049	103.800, 1.049	103.800, 0.992	103.800, 0.997	103.800, 0.926	103.800, 1.065	103.800, 0.925	103.800, 1.037	103.800, 3.577	103.800, 3.014	103.800, 3.175
521	104.000, 1.140	104.000, 1.174	104.000, 1.120	104.000, 1.062	104.000, 1.049	104.000, 1.050	104.000, 0.993	104.000, 0.997	104.000, 0.927	104.000, 1.065	104.000, 0.926	104.000, 1.037	104.000, 3.580	104.000, 3.016	104.000, 3.176
522	104.200, 1.141	104.200, 1.174	104.200, 1.121	104.200, 1.063	104.200, 1.050	104.200, 1.050	104.200, 0.994	104.200, 0.997	104.200, 0.928	104.200, 1.065	104.200, 0.927	104.200, 1.038	104.200, 3.582	104.200, 3.018	104.200, 3.178
523	104.400, 1.141	104.400, 1.175	104.400, 1.121	104.400, 1.063	104.400, 1.050	104.400, 1.050	104.400, 0.995	104.400, 0.998	104.400, 0.928	104.400, 1.065	104.400, 0.927	104.400, 1.038	104.400, 3.584	104.400, 3.020	104.400, 3.179
524	104.600, 1.142	104.600, 1.176	104.600, 1.122	104.600, 1.063	104.600, 1.051	104.600, 1.051	104.600, 0.995	104.600, 0.998	104.600, 0.929	104.600, 1.066	104.600, 0.928	104.600, 1.038	104.600, 3.586	104.600, 3.023	104.600, 3.180
525	104.800, 1.143	104.800, 1.176	104.800, 1.122	104.800, 1.063	104.800, 1.051	104.800, 1.051	104.800, 0.996	104.800, 0.999	104.800, 0.929	104.800, 1.066	104.800, 0.928	104.800, 1.039	104.800, 3.588	104.800, 3.025	104.800, 3.182
526	105.000, 1.143	105.000, 1.177	105.000, 1.122	105.000, 1.063	105.000, 1.052	105.000, 1.052	105.000, 0.996	105.000, 0.999	105.000, 0.929	105.000, 1.067	105.000, 0.928	105.000, 1.039	105.000, 3.590	105.000, 3.028	105.000, 3.183
527	105.200, 1.144	105.200, 1.177	105.200, 1.123	105.200, 1.063	105.200, 1.052	105.200, 1.052	105.200, 0.996	105.200, 1.000	105.200, 0.929	105.200, 1.068	105.200, 0.929	105.200, 1.040	105.200, 3.592	105.200, 3.030	105.200, 3.185
528	105.400, 1.145	105.400, 1.177	105.400, 1.123	105.400, 1.063	105.400, 1.053	105.400, 1.053	105.400, 0.997	105.400, 1.000	105.400, 0.929	105.400, 1.068	105.400, 0.929	105.400, 1.041	105.400, 3.595	105.400, 3.033	105.400, 3.187
529	105.600, 1.145	105.600, 1.178	105.600, 1.123	105.600, 1.063	105.600, 1.053	105.600, 1.053	105.600, 0.997	105.600, 1.001	105.600, 0.929	105.600, 1.069	105.600, 0.929	105.600, 1.042	105.600, 3.597	105.600, 3.036	105.600, 3.188
530	105.800, 1.146	105.800, 1.178	105.800, 1.124	105.800, 1.064	105.800, 1.054	105.800, 1.054	105.800, 0.998	105.800, 1.001	105.800, 0.930	105.800, 1.070	105.800, 0.929	105.800, 1.043	105.800, 3.599	105.800, 3.039	105.800, 3.190
531	106.000, 1.147	106.000, 1.178	106.000, 1.124	106.000, 1.064	106.000, 1.054	106.000, 1.054	106.000, 0.998	106.000, 1.002	106.000, 0.930	106.000, 1.070	106.000, 0.930	106.000, 1.043	106.000, 3.601	106.000, 3.041	106.000, 3.192
532	106.200, 1.147	106.200, 1.178	106.200, 1.124	106.200, 1.064	106.200, 1.055	106.200, 1.055	106.200, 0.999	106.200, 1.002	106.200, 0.930	106.200, 1.071	106.200, 0.930	106.200, 1.044	106.200, 3.603	106.200, 3.043	106.200, 3.194
533	106.400, 1.148	106.400, 1.179	106.400, 1.124	106.400, 1.065	106.400, 1.055	106.400, 1.055	106.400, 0.999	106.400, 1.002	106.400, 0.930	106.400, 1.071	106.400, 0.930	106.400, 1.045	106.400, 3.605	106.400, 3.045	106.400, 3.196
534	106.600, 1.148	106.600, 1.179	106.600, 1.125	106.600, 1.066	106.600, 1.055	106.600, 1.056	106.600, 1.000	106.600, 1.002	106.600, 0.930	106.600, 1.072	106.600, 0.931	106.600, 1.046	106.600, 3.608	106.600, 3.047	106.600, 3.197
535	106.800, 1.148	106.800, 1.179	106.800, 1.125	106.800, 1.066	106.800, 1.056	106.800, 1.056	106.800, 1.000	106.800, 1.002	106.800, 0.930	106.800, 1.072	106.800, 0.931	106.800, 1.046	106.800, 3.610	106.800, 3.049	106.800, 3.199
536	107.000, 1.149	107.000, 1.180	107.000, 1.125	107.000, 1.067	107.000, 1.056	107.000, 1.057	107.000, 1.001	107.000, 1.002	107.000, 0.930	107.000, 1.073	107.000, 0.931	107.000, 1.047	107.000, 3.612	107.000, 3.052	107.000, 3.200
537	107.200, 1.149	107.200, 1.180	107.200, 1.125	107.200, 1.068	107.200, 1.057	107.200, 1.057	107.200, 1.002	107.200, 1.003	107.200, 0.931	107.200, 1.074	107.200, 0.931	107.200, 1.048	107.200, 3.614	107.200, 3.054	107.200, 3.201
538	107.400, 1.150	107.400, 1.180	107.400, 1.126	107.400, 1.069	107.400, 1.057	107.400, 1.058	107.400, 1.002	107.400, 1.003	107.400, 0.931	107.400, 1.074	107.400, 0.931	107.400, 1.048	107.400, 3.616	107.400, 3.056	107.400, 3.203
539	107.600, 1.150	107.600, 1.181	107.600, 1.126	107.600, 1.070	107.600, 1.058	107.600, 1.058	107.600, 1.003	107.600, 1.003	107.600, 0.931	107.600, 1.075	107.600, 0.932	107.600, 1.049	107.600, 3.618	107.600, 3.058	107.600, 3.204
540	107.800, 1.151	107.800, 1.181	107.800, 1.126	107.800, 1.070	107.800, 1.058	107.800, 1.059	107.800, 1.003	107.800, 1.004	107.800, 0.932	107.800, 1.075	107.800, 0.932	107.800, 1.049	107.800, 3.620	107.800, 3.060	107.800, 3.206
541	108.000, 1.151	108.000, 1.182	108.000, 1.126	108.000, 1.071	108.000, 1.059	108.000, 1.060	108.000, 1.004	108.000, 1.004	108.000, 0.932	108.000, 1.076	108.000, 0.932	108.000, 1.050	108.000, 3.622	108.000, 3.062	108.000, 3.207
542	108.200, 1.152	108.200, 1.183	108.200, 1.126	108.200, 1.071	108.200, 1.059	108.200, 1.060	108.200, 1.004	108.200, 1.005	108.200, 0.933	108.200, 1.076	108.200, 0.933	108.200, 1.050	108.200, 3.623	108.200, 3.064	108.200, 3.208
543	108.400, 1.152	108.400, 1.184	108.400, 1.126	108.400, 1.071	108.400, 1.060	108.400, 1.061	108.400, 1.004	108.400, 1.006	108.400, 0.933	108.400, 1.076	108.400, 0.933	108.400, 1.051	108.400, 3.625	108.400, 3.066	108.400, 3.210
544	108.600, 1.153	108.600, 1.184	108.600, 1.126	108.600, 1.072	108.600, 1.060	108.600, 1.061	108.600, 1.005	108.600, 1.006	108.600, 0.933	108.600, 1.077	108.600, 0.933	108.600, 1.051	108.600, 3.627	108.600, 3.068	108.600, 3.211
545	108.800, 1.153	108.800, 1.185	108.800, 1.127	108.800, 1.072	108.800, 1.061	108.800, 1.062	108.800, 1.005	108.800, 1.007	108.800, 0.934	108.800, 1.077	108.800, 0.933	108.800, 1.051	108.800, 3.629	108.800, 3.070	108.800, 3.212
546	109.000, 1.153	109.000, 1.186	109.000, 1.127	109.000, 1.072	109.000, 1.061	109.000, 1.062	109.000, 1.006	109.000, 1.008	109.000, 0.934	109.000, 1.077	109.000, 0.934	109.000, 1.052	109.000, 3.631	109.000, 3.072	109.000, 3.213
547	109.200, 1.153	109.200, 1.186	109.200, 1.127	109.200, 1.072	109.200, 1.062	109.200, 1.063	109.200, 1.006	109.200, 1.009	109.200, 0.935	109.200, 1.078	109.200, 0.934	109.200, 1.052	109.200, 3.633	109.200, 3.074	109.200, 3.214
548	109.400, 1.153	109.400, 1.186	109.400, 1.128	109.400, 1.072	109.400, 1.063	109.400, 1.063	109.400, 1.006	109.400, 1.009	109.400, 0.936	109.400, 1.078	109.400, 0.934	109.400, 1.053	109.400, 3.635	109.400, 3.076	109.400, 3.216
549	109.600, 1.153	109.600, 1.187	109.600, 1.128	109.600, 1.073	109.600, 1.063	109.600, 1.064	109.600, 1.006	109.600, 1.010	109.600, 0.936	109.600, 1.079	109.600, 0.934	109.600, 1.053	109.600, 3.636	109.600, 3.078	109.600, 3.217
550	109.800, 1.153	109.800, 1.187	109.800, 1.129	109.800, 1.073	109.800, 1.064	109.800, 1.064	109.800, 1.007	109.800, 1.010	109.800, 0.937	109.800, 1.079	109.800, 0.935	109.800, 1.053	109.800, 3.638	109.800, 3.081	109.800, 3.218
551	110.000, 1.153	110.000, 1.188	110.000, 1.129	110.000, 1.074	110.000, 1.064	110.000, 1.064	110.000, 1.007	110.000, 1.010	110.000, 0.938	110.000, 1.079	110.000, 0.935	110.000, 1.053	110.000, 3.640	110.000, 3.083	110.000, 3.219
552	110.200, 1.153	110.200, 1.188	110.200, 1.130	110.200, 1.074	110.200, 1.064	110.200, 1.064	110.200, 1.007	110.200, 1.011	110.200, 0.938	110.200, 1.080	110.200, 0.935	110.200, 1.053	110.200, 3.641	110.200, 3.085	110.200, 3.220
553	110.400, 1.154	110.400, 1.189	110.400, 1.131	110.400, 1.075	110.400, 1.065	110.400, 1.065	110.400, 1.007	110.400, 1.011	110.400, 0.939	110.400, 1.081	110.400, 0.935	110.400, 1.054	110.400, 3.643	110.400, 3.087	110.400, 3.221
554	110.600, 1.154	110.600, 1.190	110.600, 1.132	110.600, 1.075	110.600, 1.065	110.600, 1.065	110.600, 1.007	110.600, 1.011	110.600, 0.939	110.600, 1.081	110.600, 0.935	110.600, 1.054	110.600, 3.645	110.600, 3.090	110.600, 3.222
555	110.800, 1.154	110.800, 1.190	110.800, 1.133	110.800, 1.076	110.800, 1.065	110.800, 1.065	110.800, 1.008	110.800, 1.012	110.800, 0.940	110.800, 1.082	110.800, 0.935	110.800, 1.054	110.800, 3.646	110.800, 3.092	110.800, 3.223
556	111.000, 1.155	111.000, 1.191	111.000, 1.134	111.000, 1.076	111.000, 1.065	111.000, 1.066	111.000, 1.008	111.000, 1.012	111.000, 0.940	111.000, 1.083	111.000, 0.936	111.000, 1.054	111.000, 3.648	111.000, 3.094	111.000, 3.224
557	111.200, 1.156	111.200, 1.191	111.200, 1.134	111.200, 1.077	111.200, 1.066	111.200, 1.066	111.200, 1.008	111.200, 1.012	111.200, 0.940	111.200, 1.084	111.200, 0.936	111.200, 1.055	111.200, 3.649	111.200, 3.096	111.200, 3.226
558	111.400, 1.157	111.400, 1.191	111.400, 1.135	111.400, 1.077	111.400, 1.066	111.400, 1.066	111.400, 1.008	111.400, 1.013	111.400, 0.940	111.400, 1.085	111.400, 0.936	111.400, 1.055	111.400, 3.650	111.400, 3.098	111.400, 3.227
559	111.600, 1.157	111.600, 1.192	111.600, 1.136	111.600, 1.077	111.600, 1.066	111.600, 1.066	111.600, 1.008	111.600, 1.013	111.600, 0.940	111.600, 1.086	111.600, 0.937	111.600, 1.056	111.600, 3.652	111.600, 3.100	111.600, 3.229
560	111.800, 1.158	111.800, 1.193	111.800, 1.136	111.800, 1.078	111.800, 1.066	111.800, 1.067	111.800, 1.008	111.800, 1.013	111.800, 0.941	111.800, 1.086	111.800, 0.937	111.800, 1.056	111.800, 3.653	111.800, 3.101	111.800, 3.231
561	112.000, 1.159	112.000, 1.194	112.000, 1.136	112.000, 1.078	112.000, 1.066	112.000, 1.067	112.000, 1.009	112.000, 1.014	112.000, 0.941	112.000, 1.086	112.000, 0.938	112.000, 1.057	112.000, 3.655	112.000, 3.103	112.000, 3.233
562	112.200, 1.160	112.200, 1.194	112.200, 1.137	112.200, 1.078	112.200, 1.066	112.200, 1.067	112.200, 1.009	112.200, 1.014	112.200, 0.941	112.200, 1.087	112.200, 0.938	112.200, 1.057	112.200, 3.656	112.200, 3.105	112.200, 3.234
563	112.400, 1.160	112.400, 1.195	112.400, 1.137	112.400, 1.078	112.400, 1.067	112.400, 1.068	112.400, 1.010	112.400, 1.015	112.400, 0.942	112.400, 1.087	112.400, 0.939	112.400, 1.058	112.400, 3.658	112.400, 3.106	112.400, 3.236
564	112.600, 1.161	112.600, 1.195	112.600, 1.137	112.600, 1.079	112.600, 1.068	112.600, 1.068	112.600, 1.010	112.600, 1.015	112.600, 0.942	112.600, 1.087	112.600, 0.939	112.600, 1.058	112.600, 3.659	112.600, 3.108	112.600, 3.237
565	112.800, 1.161	112.800, 1.195	112.800, 1.138	112.800, 1.079	112.800, 1.069	112.800, 1.068	112.800, 1.011	112.800, 1.016	112.800, 0.943	112.800, 1.087	112.800, 0.940	112.800, 1.059	112.800, 3.661	112.800, 3.109	112.800, 3.238
566	113.000, 1.162	113.000, 1.196	113.000, 1.138	113.000, 1.080	113.000, 1.070	113.000, 1.069	113.000, 1.012	113.000, 1.016	113.000, 0.943	113.000, 1.087	113.000, 0.940	113.000, 1.059	113.000, 3.662	113.000, 3.111	113.000, 3.239
567	113.200, 1.162	113.200, 1.196	113.200, 1.138	113.200, 1.080	113.200, 1.071	113.200, 1.069	113.200, 1.012	113.200, 1.016	113.200, 0.944	113.200, 1.088	113.200, 0.941	113.200, 1.060	113.200, 3.664	113.200, 3.113	113.200, 3.241
568	113.400, 1.162	113.400, 1.196	113.400, 1.139	113.400, 1.081	113.400, 1.072	113.400, 1.069	113.400, 1.013	113.400, 1.016	113.400, 0.944	113.400, 1.088	113.400, 0.941	113.400, 1.060	113.400, 3.665	113.400, 3.115	113.400, 3.242
569	113.600, 1.162	113.600, 1.196	113.600, 1.139	113.600, 1.081	113.600, 1.073	113.600, 1.069	113.600, 1.013	113.600, 1.017	113.600, 0.945	113.600, 1.088	113.600, 0.942	113.600, 1.060	113.600, 3.667	113.600, 3.117	113.600, 3.243
570	113.800, 1.163	113.800, 1.197	113.800, 1.139	113.800, 1.081	113.800, 1.074	113.800, 1.069	113.800, 1.014	113.800, 1.017	113.800, 0.945	113.800, 1.088	113.800, 0.942	113.800, 1.061	113.800, 3.668	113.800, 3.120	113.800, 3.244
571	114.000, 1.163	114.000, 1.197	114.000, 1.140	114.000, 1.082	114.000, 1.074	114.000, 1.070	114.000, 1.014	114.000, 1.017	114.000, 0.945	114.000, 1.089	114.000, 0.942	114.000, 1.061	114.000, 3.670	114.000, 3.122	114.000, 3.245
572	114.200, 1.163	114.200, 1.197	114.200, 1.141	114.200, 1.082	114.200, 1.074	114.200, 1.070	114.200, 1.015	114.200, 1.018	114.200, 0.945	114.200, 1.089	114.200, 0.943	114.200, 1.062	114.200, 3.671	114.200, 3.124	114.200, 3.246
573	114.400, 1.163	114.400, 1.197	114.400, 1.141	114.400, 1.083	114.400, 1.075	114.400, 1.071	114.400, 1.015	114.400, 1.018	114.400, 0.946	114.400, 1.089	114.400, 0.943	114.400, 1.062	114.400, 3.673	114.400, 3.126	114.400, 3.247
574	114.600, 1.163	114.600, 1.197	114.600, 1.142	114.600, 1.083	114.600, 1.075	114.600, 1.071	114.600, 1.015	114.600, 1.018	114.600, 0.946	114.600, 1.089	114.600, 0.944	114.600, 1.062	114.600, 3.675	114.600, 3.129	114.600, 3.248
575	114.800, 1.163	114.800, 1.197	114.800, 1.142	114.800, 1.083	114.800, 1.075	114.800, 1.072	114.800, 1.016	114.800, 1.019	114.800, 0.946	114.800, 1.090	114.800, 0.944	114.800, 1.063	114.800, 3.676	114.800, 3.131	114.800, 3.250
576	115.000, 1.163	115.000, 1.197	115.000, 1.142	115.000, 1.084	115.000, 1.075	115.000, 1.073	115.000, 1.016	115.000, 1.019	115.000, 0.946	115.000, 1.090	115.000, 0.945	115.000, 1.063	115.000, 3.678	115.000, 3.132	115.000, 3.251
577	115.200, 1.164	115.200, 1.198	115.200, 1.143	115.200, 1.084	115.200, 1.075	115.200, 1.073	115.200, 1.017	115.200, 1.019	115.200, 0.947	115.200, 1.090	115.200, 0.945	115.200, 1.064	115.200, 3.680	115.200, 3.134	115.200, 3.252
578	115.400, 1.164	115.400, 1.198	115.400, 1.143	115.400, 1.084	115.400, 1.075	115.400, 1.074	115.400, 1.017	115.400, 1.020	115.400, 0.947	115.400, 1.091	115.400, 0.945	115.400, 1.064	115.400, 3.681	115.400, 3.136	115.400, 3.253
579	115.600, 1.165	115.600, 1.199	115.600, 1.143	115.600, 1.084	115.600, 1.075	115.600, 1.074	115.600, 1.018	115.600, 1.020	115.600, 0.947	115.600, 1.091	115.600, 0.946	115.600, 1.065	115.600, 3.683	115.600, 3.138	115.600, 3.255
580	115.800, 1.165	115.800, 1.200	115.800, 1.143	115.800, 1.084	115.800, 1.076	115.800, 1.075	115.800, 1.019	115.800, 1.021	115.800, 0.948	115.800, 1.091	115.800, 0.946	115.800, 1.065	115.800, 3.685	115.800, 3.140	115.800, 3.256
581	116.000, 1.165	116.000, 1.201	116.000, 1.144	116.000, 1.085	116.000, 1.076	116.000, 1.075	116.000, 1.019	116.000, 1.021	116.000, 0.948	116.000, 1.091	116.000, 0.947	116.000, 1.065	116.000, 3.687	116.000, 3.141	116.000, 3.257
582	116.200, 1.166	116.200, 1.201	116.200, 1.144	116.200, 1.085	116.200, 1.077	116.200, 1.075	116.200, 1.020	116.200, 1.022	116.200, 0.949	116.200, 1.091	116.200, 0.947	116.200, 1.066	116.200, 3.688	116.200, 3.143	116.200, 3.257
583	116.400, 1.166	116.400, 1.202	116.400, 1.145	116.400, 1.086	116.400, 1.077	116.400, 1.076	116.400, 1.021	116.400, 1.022	116.400, 0.949	116.400, 1.091	116.400, 0.947	116.400, 1.066	116.400, 3.690	116.400, 3.145	116.400, 3.258
584	116.600, 1.167	116.600, 1.203	116.600, 1.145	116.600, 1.087	116.600, 1.078	116.600, 1.076	116.600, 1.021	116.600, 1.022	116.600, 0.950	116.600, 1.091	116.600, 0.947	116.600, 1.067	116.600, 3.691	116.600, 3.146	116.600, 3.259
585	116.800, 1.168	116.800, 1.203	116.800, 1.146	116.800, 1.087	116.800, 1.079	116.800, 1.076	116.800, 1.022	116.800, 1.022	116.800, 0.950	116.800, 1.092	116.800, 0.947	116.800, 1.067	116.800, 3.692	116.800, 3.148	116.800, 3.260
586	117.000, 1.168	117.000, 1.204	117.000, 1.147	117.000, 1.088	117.000, 1.080	117.000, 1.077	117.000, 1.023	117.000, 1.022	117.000, 0.950	117.000, 1.092	117.000, 0.948	117.000, 1.067	117.000, 3.693	117.000, 3.150	117.000, 3.261
587	117.200, 1.168	117.200, 1.204	117.200, 1.147	117.200, 1.089	117.200, 1.080	117.200, 1.077	117.200, 1.023	117.200, 1.022	117.200, 0.950	117.200, 1.092	117.200, 0.948	117.200, 1.068	117.200, 3.695	117.200, 3.152	117.200, 3.262
588	117.400, 1.169	117.400, 1.204	117.400, 1.148	117.400, 1.089	117.400, 1.081	117.400, 1.077	117.400, 1.023	117.400, 1.022	117.400, 0.950	117.400, 1.093	117.400, 0.948	117.400, 1.068	117.400, 3.696	117.400, 3.154	117.400, 3.263
589	117.600, 1.169	117.600, 1.204	117.600, 1.149	117.600, 1.090	117.600, 1.081	117.600, 1.077	117.600, 1.024	117.600, 1.023	117.600, 0.950	117.600, 1.093	117.600, 0.948	117.600, 1.068	117.600, 3.697	117.600, 3.156	117.600, 3.265
590	117.800, 1.170	117.800, 1.204	117.800, 1.150	117.800, 1.090	117.800, 1.081	117.800, 1.077	117.800, 1.024	117.800, 1.023	117.800, 0.951	117.800, 1.094	117.800, 0.948	117.800, 1.068	117.800, 3.698	117.800, 3.158	117.800, 3.266
591	118.000, 1.170	118.000, 1.205	118.000, 1.150	118.000, 1.091	118.000, 1.081	118.000, 1.077	118.000, 1.024	118.000, 1.023	118.000, 0.951	118.000, 1.094	118.000, 0.949	118.000, 1.068	118.000, 3.700	118.000, 3.160	118.000, 3.267
592	118.200, 1.171	118.200, 1.205	118.200, 1.150	118.200, 1.091	118.200, 1.081	118.200, 1.077	118.200, 1.024	118.200, 1.023	118.200, 0.951	118.200, 1.095	118.200, 0.950	118.200, 1.068	118.200, 3.701	118.200, 3.162	118.200, 3.268
593	118.400, 1.171	118.400, 1.206	118.400, 1.150	118.400, 1.092	118.400, 1.082	118.400, 1.078	118.400, 1.023	118.400, 1.023	118.400, 0.951	118.400, 1.096	118.400, 0.950	118.400, 1.069	118.400, 3.702	118.400, 3.164	118.400, 3.269
594	118.600, 1.171	118.600, 1.206	118.600, 1.150	118.600, 1.092	118.600, 1.082	118.600, 1.079	118.600, 1.023	118.600, 1.024	118.600, 0.952	118.600, 1.096	118.600, 0.951	118.600, 1.069	118.600, 3.704	118.600, 3.166	118.600, 3.270
595	118.800, 1.172	118.800, 1.206	118.800, 1.150	118.800, 1.092	118.800, 1.082	118.800, 1.079	118.800, 1.024	118.800, 1.024	118.800, 0.952	118.800, 1.097	118.800, 0.951	118.800, 1.070	118.800, 3.705	118.800, 3.168	118.800, 3.272
596	119.000, 1.172	119.000, 1.206	119.000, 1.150	119.000, 1.092	119.000, 1.082	119.000, 1.080	119.000, 1.024	119.000, 1.025	119.000, 0.952	119.000, 1.098	119.000, 0.952	119.000, 1.070	119.000, 3.706	119.000, 3.170	119.000, 3.273
597	119.200, 1.172	119.200, 1.206	119.200, 1.150	119.200, 1.093	119.200, 1.083	119.200, 1.081	119.200, 1.024	119.200, 1.025	119.200, 0.952	119.200, 1.099	119.200, 0.952	119.200, 1.071	119.200, 3.708	119.200, 3.172	119.200, 3.274
598	119.400, 1.172	119.400, 1.206	119.400, 1.149	119.400, 1.093	119.400, 1.083	119.400, 1.081	119.400, 1.024	119.400, 1.026	119.400, 0.952	119.400, 1.099	119.400, 0.952	119.400, 1.071	119.400, 3.709	119.400, 3.174	119.400, 3.275
599	119.600, 1.172	119.600, 1.207	119.600, 1.149	119.600, 1.093	119.600, 1.083	119.600, 1.082	119.600, 1.024	119.600, 1.026	119.600, 0.953	119.600, 1.100	119.600, 0.952	119.600, 1.072	119.600, 3.711	119.600, 3.176	119.600, 3.276
600	119.800, 1.172	119.800, 1.207	119.800, 1.150	119.800, 1.094	119.800, 1.083	119.800, 1.083	119.800, 1.025	119.800, 1.026	119.800, 0.953	119.800, 1.100	119.800, 0.953	119.800, 1.072	119.800, 3.712	119.800, 3.178	119.800, 3.277
601	120.000, 1.173	120.000, 1.208	120.000, 1.150	120.000, 1.094	120.000, 1.083	120.000, 1.083	120.000, 1.025	120.000, 1.027	120.000, 0.953	120.000, 1.100	120.000, 0.953	120.000, 1.073	120.000, 3.714	120.000, 3.180	120.000, 3.278
602	120.200, 1.173	120.200, 1.208	120.200, 1.150	120.200, 1.095	120.200, 1.084	120.200, 1.084	120.200, 1.026	120.200, 1.027	120.200, 0.954	120.200, 1.101	120.200, 0.953	120.200, 1.073	120.200, 3.716	120.200, 3.182	120.200, 3.279
603	120.400, 1.173	120.400, 1.208	120.400, 1.151	120.400, 1.095	120.400, 1.084	120.400, 1.085	120.400, 1.027	120.400, 1.027	120.400, 0.954	120.400, 1.101	120.400, 0.953	120.400, 1.074	120.400, 3.717	120.400, 3.183	120.400, 3.280
604	120.600, 1.174	120.600, 1.209	120.600, 1.152	120.600, 1.095	120.600, 1.085	120.600, 1.085	120.600, 1.027	120.600, 1.028	120.600, 0.955	120.600, 1.102	120.600, 0.953	120.600, 1.074	120.600, 3.719	120.600, 3.185	120.600, 3.281
605	120.800, 1.174	120.800, 1.209	120.800, 1.152	120.800, 1.096	120.800, 1.085	120.800, 1.086	120.800, 1.028	120.800, 1.028	120.800, 0.956	120.800, 1.102	120.800, 0.953	120.800, 1.074	120.800, 3.721	120.800, 3.187	120.800, 3.282
606	121.000, 1.175	121.000, 1.209	121.000, 1.153	121.000, 1.096	121.000, 1.085	121.000, 1.086	121.000, 1.028	121.000, 1.029	121.000, 0.956	121.000, 1.103	121.000, 0.953	121.000, 1.075	121.000, 3.723	121.000, 3.189	121.000, 3.282
607	121.200, 1.175	121.200, 1.210	121.200, 1.154	121.200, 1.096	121.200, 1.086	121.200, 1.086	121.200, 1.028	121.200, 1.030	121.200, 0.957	121.200, 1.103	121.200, 0.954	121.200, 1.075	121.200, 3.725	121.200, 3.190	121.200, 3.283
608	121.400, 1.175	121.400, 1.211	121.400, 1.154	121.400, 1.096	121.400, 1.086	121.400, 1.086	121.400, 1.029	121.400, 1.030	121.400, 0.958	121.400, 1.104	121.400, 0.954	121.400, 1.075	121.400, 3.727	121.400, 3.192	121.400, 3.284
609	121.600, 1.176	121.600, 1.211	121.600, 1.155	121.600, 1.096	121.600, 1.086	121.600, 1.086	121.600, 1.029	121.600, 1.031	121.600, 0.958	121.600, 1.104	121.600, 0.954	121.600, 1.076	121.600, 3.728	121.600, 3.194	121.600, 3.284
610	121.800, 1.176	121.800, 1.212	121.800, 1.155	121.800, 1.097	121.800, 1.087	121.800, 1.086	121.800, 1.030	121.800, 1.031	121.800, 0.958	121.800, 1.104	121.800, 0.955	121.800, 1.076	121.800, 3.730	121.800, 3.195	121.800, 3.285
611	122.000, 1.177	122.000, 1.213	122.000, 1.155	122.000, 1.097	122.000, 1.087	122.000, 1.086	122.000, 1.030	122.000, 1.032	122.000, 0.959	122.000, 1.104	122.000, 0.955	122.000, 1.076	122.000, 3.732	122.000, 3.197	122.000, 3.285
612	122.200, 1.177	122.200, 1.214	122.200, 1.155	122.200, 1.098	122.200, 1.087	122.200, 1.086	122.200, 1.030	122.200, 1.032	122.200, 0.959	122.200, 1.105	122.200, 0.955	122.200, 1.077	122.200, 3.733	122.200, 3.199	122.200, 3.286
613	122.400, 1.177	122.400, 1.214	122.400, 1.155	122.400, 1.098	122.400, 1.088	122.400, 1.086	122.400, 1.030	122.400, 1.032	122.400, 0.960	122.400, 1.105	122.400, 0.955	122.400, 1.077	122.400, 3.734	122.400, 3.201	122.400, 3.287
614	122.600, 1.178	122.600, 1.214	122.600, 1.155	122.600, 1.098	122.600, 1.089	122.600, 1.086	122.600, 1.030	122.600, 1.033	122.600, 0.960	122.600, 1.105	122.600, 0.955	122.600, 1.078	122.600, 3.736	122.600, 3.202	122.600, 3.288
615	122.800, 1.178	122.800, 1.215	122.800, 1.155	122.800, 1.098	122.800, 1.089	122.800, 1.086	122.800, 1.031	122.800, 1.033	122.800, 0.961	122.800, 1.105	122.800, 0.955	122.800, 1.078	122.800, 3.737	122.800, 3.204	122.800, 3.289
616	123.000, 1.178	123.000, 1.215	123.000, 1.155	123.000, 1.098	123.000, 1.090	123.000, 1.087	123.000, 1.031	123.000, 1.033	123.000, 0.961	123.000, 1.105	123.000, 0.956	123.000, 1.078	123.000, 3.738	123.000, 3.206	123.000, 3.290
617	123.200, 1.178	123.200, 1.215	123.200, 1.155	123.200, 1.098	123.200, 1.090	123.200, 1.087	123.200, 1.031	123.200, 1.033	123.200, 0.961	123.200, 1.105	123.200, 0.956	123.200, 1.079	123.200, 3.739	123.200, 3.208	123.200, 3.292
618	123.400, 1.178	123.400, 1.216	123.400, 1.155	123.400, 1.099	123.400, 1.091	123.400, 1.087	123.400, 1.032	123.400, 1.033	123.400, 0.961	123.400, 1.105	123.400, 0.957	123.400, 1.079	123.400, 3.740	123.400, 3.209	123.400, 3.293
619	123.600, 1.178	123.600, 1.216	123.600, 1.156	123.600, 1.099	123.600, 1.091	123.600, 1.088	123.600, 1.032	123.600, 1.032	123.600, 0.961	123.600, 1.105	123.600, 0.957	123.600, 1.080	123.600, 3.742	123.600, 3.211	123.600, 3.295
620	123.800, 1.179	123.800, 1.216	123.800, 1.156	123.800, 1.100	123.800, 1.092	123.800, 1.089	123.800, 1.033	123.800, 1.032	123.800, 0.961	123.800, 1.106	123.800, 0.958	123.800, 1.080	123.800, 3.743	123.800, 3.213	123.800, 3.296
621	124.000, 1.179	124.000, 1.216	124.000, 1.156	124.000, 1.100	124.000, 1.093	124.000, 1.090	124.000, 1.033	124.000, 1.032	124.000, 0.962	124.000, 1.106	124.000, 0.958	124.000, 1.081	124.000, 3.744	124.000, 3.215	124.000, 3.298
622	124.200, 1.179	124.200, 1.217	124.200, 1.157	124.200, 1.100	124.200, 1.093	124.200, 1.091	124.200, 1.033	124.200, 1.033	124.200, 0.962	124.200, 1.107	124.200, 0.959	124.200, 1.081	124.200, 3.745	124.200, 3.217	124.200, 3.299
623	124.400, 1.180	124.400, 1.217	124.400, 1.157	124.400, 1.100	124.400, 1.094	124.400, 1.091	124.400, 1.033	124.400, 1.033	124.400, 0.963	124.400, 1.107	124.400, 0.960	124.400, 1.082	124.400, 3.746	124.400, 3.220	124.400, 3.300
624	124.600, 1.180	124.600, 1.217	124.600, 1.157	124.600, 1.101	124.600, 1.095	124.600, 1.092	124.600, 1.033	124.600, 1.033	124.600, 0.963	124.600, 1.108	124.600, 0.960	124.600, 1.082	124.600, 3.747	124.600, 3.222	124.600, 3.301
625	124.800, 1.181	124.800, 1.217	124.800, 1.157	124.800, 1.101	124.800, 1.095	124.800, 1.092	124.800, 1.033	124.800, 1.034	124.800, 0.963	124.800, 1.108	124.800, 0.961	124.800, 1.083	124.800, 3.749	124.800, 3.224	124.800, 3.302
626	125.000, 1.181	125.000, 1.217	125.000, 1.157	125.000, 1.102	125.000, 1.095	125.000, 1.093	125.000, 1.033	125.000, 1.035	125.000, 0.964	125.000, 1.108	125.000, 0.961	125.000, 1.083	125.000, 3.750	125.000, 3.226	125.000, 3.302
627	125.200, 1.182	125.200, 1.217	125.200, 1.158	125.200, 1.102	125.200, 1.096	125.200, 1.093	125.200, 1.033	125.200, 1.035	125.200, 0.964	125.200, 1.108	125.200, 0.962	125.200, 1.084	125.200, 3.751	125.200, 3.228	125.200, 3.303
628	125.400, 1.182	125.400, 1.216	125.400, 1.158	125.400, 1.103	125.400, 1.096	125.400, 1.093	125.400, 1.034	125.400, 1.036	125.400, 0.964	125.400, 1.109	125.400, 0.962	125.400, 1.084	125.400, 3.753	125.400, 3.231	125.400, 3.304
629	125.600, 1.182	125.600, 1.216	125.600, 1.158	125.600, 1.104	125.600, 1.096	125.600, 1.093	125.600, 1.034	125.600, 1.036	125.600, 0.964	125.600, 1.109	125.600, 0.962	125.600, 1.084	125.600, 3.754	125.600, 3.233	125.600, 3.304
630	125.800, 1.183	125.800, 1.216	125.800, 1.159	125.800, 1.104	125.800, 1.096	125.800, 1.093	125.800, 1.035	125.800, 1.037	125.800, 0.964	125.800, 1.109	125.800, 0.963	125.800, 1.085	125.800, 3.755	125.800, 3.235	125.800, 3.304
631	126.000, 1.183	126.000, 1.217	126.000, 1.159	126.000, 1.105	126.000, 1.096	126.000, 1.092	126.000, 1.035	126.000, 1.037	126.000, 0.964	126.000, 1.109	126.000, 0.963	126.000, 1.085	126.000, 3.757	126.000, 3.236	126.000, 3.305
632	126.200, 1.184	126.200, 1.217	126.200, 1.159	126.200, 1.105	126.200, 1.096	126.200, 1.092	126.200, 1.036	126.200, 1.037	126.200, 0.964	126.200, 1.110	126.200, 0.963	126.200, 1.085	126.200, 3.758	126.200, 3.238	126.200, 3.306
633	126.400, 1.185	126.400, 1.217	126.400, 1.159	126.400, 1.105	126.400, 1.096	126.400, 1.093	126.400, 1.036	126.400, 1.038	126.400, 0.965	126.400, 1.110	126.400, 0.963	126.400, 1.086	126.400, 3.760	126.400, 3.239	126.400, 3.307
634	126.600, 1.185	126.600, 1.218	126.600, 1.160	126.600, 1.105	126.600, 1.097	126.600, 1.093	126.600, 1.037	126.600, 1.038	126.600, 0.965	126.600, 1.110	126.600, 0.964	126.600, 1.086	126.600, 3.761	126.600, 3.240	126.600, 3.308
635	126.800, 1.185	126.800, 1.218	126.800, 1.160	126.800, 1.105	126.800, 1.097	126.800, 1.093	126.800, 1.038	126.800, 1.038	126.800, 0.965	126.800, 1.110	126.800, 0.964	126.800, 1.086	126.800, 3.763	126.800, 3.241	126.800, 3.309
636	127.000, 1.186	127.000, 1.219	127.000, 1.161	127.000, 1.105	127.000, 1.097	127.000, 1.094	127.000, 1.038	127.000, 1.038	127.000, 0.965	127.000, 1.110	127.000, 0.964	127.000, 1.087	127.000, 3.764	127.000, 3.242	127.000, 3.310
637	127.200, 1.186	127.200, 1.219	127.200, 1.161	127.200, 1.106	127.200, 1.097	127.200, 1.094	127.200, 1.039	127.200, 1.038	127.200, 0.966	127.200, 1.110	127.200, 0.965	127.200, 1.087	127.200, 3.766	127.200, 3.243	127.200, 3.312
638	127.400, 1.186	127.400, 1.220	127.400, 1.162	127.400, 1.106	127.400, 1.097	127.400, 1.095	127.400, 1.039	127.400, 1.038	127.400, 0.966	127.400, 1.111	127.400, 0.965	127.400, 1.088	127.400, 3.767	127.400, 3.245	127.400, 3.313
639	127.600, 1.186	127.600, 1.221	127.600, 1.162	127.600, 1.107	127.600, 1.098	127.600, 1.095	127.600, 1.039	127.600, 1.039	127.600, 0.966	127.600, 1.111	127.600, 0.965	127.600, 1.088	127.600, 3.768	127.600, 3.247	127.600, 3.314
640	127.800, 1.186	127.800, 1.221	127.800, 1.163	127.800, 1.107	127.800, 1.098	127.800, 1.096	127.800, 1.039	127.800, 1.039	127.800, 0.966	127.800, 1.112	127.800, 0.965	127.800, 1.089	127.800, 3.769	127.800, 3.249	127.800, 3.315
641	128.000, 1.186	128.000, 1.222	128.000, 1.163	128.000, 1.107	128.000, 1.099	128.000, 1.096	128.000, 1.039	128.000, 1.039	128.000, 0.967	128.000, 1.112	128.000, 0.965	128.000, 1.090	128.000, 3.770	128.000, 3.251	128.000, 3.316
642	128.200, 1.186	128.200, 1.222	128.200, 1.164	128.200, 1.108	128.200, 1.099	128.200, 1.096	128.200, 1.039	128.200, 1.039	128.200, 0.968	128.200, 1.113	128.200, 0.965	128.200, 1.090	128.200, 3.771	128.200, 3.253	128.200, 3.316
643	128.400, 1.187	128.400, 1.223	128.400, 1.164	128.400, 1.108	128.400, 1.100	128.400, 1.097	128.400, 1.039	128.400, 1.040	128.400, 0.968	128.400, 1.113	128.400, 0.964	128.400, 1.091	128.400, 3.772	128.400, 3.255	128.400, 3.317
644	128.600, 1.187	128.600, 1.223	128.600, 1.164	128.600, 1.108	128.600, 1.100	128.600, 1.097	128.600, 1.039	128.600, 1.040	128.600, 0.968	128.600, 1.113	128.600, 0.965	128.600, 1.091	128.600, 3.773	128.600, 3.257	128.600, 3.318
645	128.800, 1.188	128.800, 1.223	128.800, 1.165	128.800, 1.109	128.800, 1.101	128.800, 1.097	128.800, 1.040	128.800, 1.040	128.800, 0.969	128.800, 1.114	128.800, 0.965	128.800, 1.091	128.800, 3.774	128.800, 3.259	128.800, 3.319
646	129.000, 1.188	129.000, 1.223	129.000, 1.165	129.000, 1.109	129.000, 1.101	129.000, 1.097	129.000, 1.040	129.000, 1.041	129.000, 0.969	129.000, 1.114	129.000, 0.965	129.000, 1.091	129.000, 3.775	129.000, 3.261	129.000, 3.320
647	129.200, 1.189	129.200, 1.224	129.200, 1.165	129.200, 1.110	129.200, 1.101	129.200, 1.097	129.200, 1.040	129.200, 1.041	129.200, 0.969	129.200, 1.114	129.200, 0.966	129.200, 1.091	129.200, 3.776	129.200, 3.264	129.200, 3.320
648	129.400, 1.190	129.400, 1.224	129.400, 1.165	129.400, 1.110	129.400, 1.102	129.400, 1.097	129.400, 1.040	129.400, 1.041	129.400, 0.969	129.400, 1.115	129.400, 0.966	129.400, 1.091	129.400, 3.777	129.400, 3.266	129.400, 3.321
649	129.600, 1.190	129.600, 1.224	129.600, 1.166	129.600, 1.110	129.600, 1.102	129.600, 1.098	129.600, 1.041	129.600, 1.041	129.600, 0.969	129.600, 1.115	129.600, 0.967	129.600, 1.091	129.600, 3.778	129.600, 3.269	129.600, 3.322
650	129.800, 1.190	129.800, 1.224	129.800, 1.166	129.800, 1.111	129.800, 1.102	129.800, 1.098	129.800, 1.041	129.800, 1.041	129.800, 0.969	129.800, 1.116	129.800, 0.967	129.800, 1.091	129.800, 3.779	129.800, 3.271	129.800, 3.322
651	130.000, 1.191	130.000, 1.224	130.000, 1.166	130.000, 1.111	130.000, 1.102	130.000, 1.098	130.000, 1.041	130.000, 1.041	130.000, 0.969	130.000, 1.116	130.000, 0.968	130.000, 1.091	130.000, 3.780	130.000, 3.273	130.000, 3.323
652	130.200, 1.191	130.200, 1.224	130.200, 1.166	130.200, 1.111	130.200, 1.102	130.200, 1.098	130.200, 1.041	130.200, 1.042	130.200, 0.969	130.200, 1.117	130.200, 0.969	130.200, 1.091	130.200, 3.782	130.200, 3.274	130.200, 3.324
653	130.400, 1.192	130.400, 1.225	130.400, 1.167	130.400, 1.111	130.400, 1.102	130.400, 1.099	130.400, 1.041	130.400, 1.042	130.400, 0.970	130.400, 1.117	130.400, 0.969	130.400, 1.091	130.400, 3.783	130.400, 3.276	130.400, 3.325
654	130.600, 1.192	130.600, 1.225	130.600, 1.167	130.600, 1.111	130.600, 1.102	130.600, 1.099	130.600, 1.041	130.600, 1.042	130.600, 0.970	130.600, 1.118	130.600, 0.970	130.600, 1.091	130.600, 3.784	130.600, 3.277	130.600, 3.326
655	130.800, 1.192	130.800, 1.225	130.800, 1.167	130.800, 1.111	130.800, 1.103	130.800, 1.100	130.800, 1.042	130.800, 1.042	130.800, 0.970	130.800, 1.118	130.800, 0.970	130.800, 1.092	130.800, 3.786	130.800, 3.278	130.800, 3.327
656	131.000, 1.192	131.000, 1.226	131.000, 1.167	131.000, 1.111	131.000, 1.103	131.000, 1.100	131.000, 1.042	131.000, 1.042	131.000, 0.970	131.000, 1.118	131.000, 0.970	131.000, 1.092	131.000, 3.787	131.000, 3.280	131.000, 3.327
657	131.200, 1.192	131.200, 1.226	131.200, 1.167	131.200, 1.111	131.200, 1.103	131.200, 1.101	131.200, 1.043	131.200, 1.043	131.200, 0.970	131.200, 1.118	131.200, 0.970	131.200, 1.093	131.200, 3.788	131.200, 3.281	131.200, 3.328
658	131.400, 1.192	131.400, 1.227	131.400, 1.167	131.400, 1.112	131.400, 1.104	131.400, 1.101	131.400, 1.043	131.400, 1.043	131.400, 0.971	131.400, 1.119	131.400, 0.970	131.400, 1.094	131.400, 3.789	131.400, 3.282	131.400, 3.329
659	131.600, 1.193	131.600, 1.227	131.600, 1.168	131.600, 1.112	131.600, 1.104	131.600, 1.102	131.600, 1.044	131.600, 1.043	131.600, 0.972	131.600, 1.118	131.600, 0.970	131.600, 1.095	131.600, 3.790	131.600, 3.284	131.600, 3.329
660	131.800, 1.193	131.800, 1.228	131.800, 1.168	131.800, 1.112	131.800, 1.105	131.800, 1.102	131.800, 1.045	131.800, 1.044	131.800, 0.972	131.800, 1.119	131.800, 0.970	131.800, 1.095	131.800, 3.792	131.800, 3.285	131.800, 3.330
661	132.000, 1.193	132.000, 1.228	132.000, 1.168	132.000, 1.112	132.000, 1.105	132.000, 1.102	132.000, 1.046	132.000, 1.044	132.000, 0.973	132.000, 1.119	132.000, 0.970	132.000, 1.096	132.000, 3.793	132.000, 3.286	132.000, 3.331
662	132.200, 1.194	132.200, 1.229	132.200, 1.168	132.200, 1.112	132.200, 1.106	132.200, 1.103	132.200, 1.047	132.200, 1.044	132.200, 0.974	132.200, 1.119	132.200, 0.969	132.200, 1.096	132.200, 3.795	132.200, 3.287	132.200, 3.332
663	132.400, 1.194	132.400, 1.229	132.400, 1.168	132.400, 1.112	132.400, 1.106	132.400, 1.103	132.400, 1.047	132.400, 1.045	132.400, 0.974	132.400, 1.119	132.400, 0.969	132.400, 1.097	132.400, 3.796	132.400, 3.289	132.400, 3.333
664	132.600, 1.195	132.600, 1.230	132.600, 1.169	132.600, 1.112	132.600, 1.107	132.600, 1.103	132.600, 1.048	132.600, 1.045	132.600, 0.974	132.600, 1.119	132.600, 0.970	132.600, 1.097	132.600, 3.797	132.600, 3.291	132.600, 3.334
665	132.800, 1.195	132.800, 1.231	132.800, 1.169	132.800, 1.112	132.800, 1.107	132.800, 1.103	132.800, 1.048	132.800, 1.045	132.800, 0.974	132.800, 1.119	132.800, 0.970	132.800, 1.097	132.800, 3.798	132.800, 3.292	132.800, 3.335
666	133.000, 1.195	133.000, 1.232	133.000, 1.169	133.000, 1.113	133.000, 1.107	133.000, 1.104	133.000, 1.049	133.000, 1.046	133.000, 0.975	133.000, 1.120	133.000, 0.970	133.000, 1.098	133.000, 3.800	133.000, 3.294	133.000, 3.336
667	133.200, 1.196	133.200, 1.232	133.200, 1.170	133.200, 1.113	133.200, 1.108	133.200, 1.104	133.200, 1.049	133.200, 1.046	133.200, 0.975	133.200, 1.120	133.200, 0.970	133.200, 1.098	133.200, 3.801	133.200, 3.296	133.200, 3.337
668	133.400, 1.196	133.400, 1.233	133.400, 1.170	133.400, 1.114	133.400, 1.108	133.400, 1.104	133.400, 1.049	133.400, 1.046	133.400, 0.975	133.400, 1.121	133.400, 0.971	133.400, 1.098	133.400, 3.802	133.400, 3.298	133.400, 3.338
669	133.600, 1.196	133.600, 1.233	133.600, 1.171	133.600, 1.115	133.600, 1.108	133.600, 1.104	133.600, 1.049	133.600, 1.046	133.600, 0.975	133.600, 1.121	133.600, 0.971	133.600, 1.098	133.600, 3.804	133.600, 3.300	133.600, 3.338
670	133.800, 1.197	133.800, 1.233	133.800, 1.171	133.800, 1.115	133.800, 1.108	133.800, 1.104	133.800, 1.049	133.800, 1.047	133.800, 0.975	133.800, 1.122	133.800, 0.971	133.800, 1.098	133.800, 3.805	133.800, 3.301	133.800, 3.339
671	134.000, 1.197	134.000, 1.233	134.000, 1.172	134.000, 1.116	134.000, 1.108	134.000, 1.104	134.000, 1.049	134.000, 1.047	134.000, 0.975	134.000, 1.122	134.000, 0.972	134.000, 1.098	134.000, 3.807	134.000, 3.303	134.000, 3.339
672	134.200, 1.198	134.200, 1.233	134.200, 1.173	134.200, 1.117	134.200, 1.108	134.200, 1.104	134.200, 1.049	134.200, 1.047	134.200, 0.975	134.200, 1.123	134.200, 0.972	134.200, 1.098	134.200, 3.808	134.200, 3.304	134.200, 3.340
673	134.400, 1.198	134.400, 1.233	134.400, 1.174	134.400, 1.117	134.400, 1.108	134.400, 1.104	134.400, 1.049	134.400, 1.047	134.400, 0.975	134.400, 1.123	134.400, 0.972	134.400, 1.098	134.400, 3.809	134.400, 3.306	134.400, 3.340
674	134.600, 1.198	134.600, 1.234	134.600, 1.174	134.600, 1.118	134.600, 1.108	134.600, 1.104	134.600, 1.049	134.600, 1.047	134.600, 0.975	134.600, 1.124	134.600, 0.972	134.600, 1.098	134.600, 3.811	134.600, 3.307	134.600, 3.341
675	134.800, 1.198	134.800, 1.234	134.800, 1.175	134.800, 1.118	134.800, 1.109	134.800, 1.104	134.800, 1.049	134.800, 1.047	134.800, 0.976	134.800, 1.124	134.800, 0.972	134.800, 1.099	134.800, 3.812	134.800, 3.309	134.800, 3.342
676	135.000, 1.198	135.000, 1.234	135.000, 1.175	135.000, 1.119	135.000, 1.109	135.000, 1.104	135.000, 1.049	135.000, 1.047	135.000, 0.976	135.000, 1.125	135.000, 0.973	135.000, 1.099	135.000, 3.813	135.000, 3.310	135.000, 3.342
677	135.200, 1.198	135.200, 1.234	135.200, 1.176	135.200, 1.119	135.200, 1.109	135.200, 1.105	135.200, 1.049	135.200, 1.048	135.200, 0.976	135.200, 1.125	135.200, 0.973	135.200, 1.099	135.200, 3.814	135.200, 3.312	135.200, 3.342
678	135.400, 1.198	135.400, 1.235	135.400, 1.176	135.400, 1.120	135.400, 1.110	135.400, 1.105	135.400, 1.049	135.400, 1.048	135.400, 0.977	135.400, 1.126	135.400, 0.973	135.400, 1.099	135.400, 3.815	135.400, 3.313	135.400, 3.343
679	135.600, 1.198	135.600, 1.235	135.600, 1.176	135.600, 1.120	135.600, 1.110	135.600, 1.105	135.600, 1.050	135.600, 1.049	135.600, 0.977	135.600, 1.126	135.600, 0.974	135.600, 1.100	135.600, 3.816	135.600, 3.315	135.600, 3.343
680	135.800, 1.198	135.800, 1.235	135.800, 1.176	135.800, 1.120	135.800, 1.111	135.800, 1.106	135.800, 1.050	135.800, 1.049	135.800, 0.977	135.800, 1.126	135.800, 0.974	135.800, 1.100	135.800, 3.816	135.800, 3.317	135.800, 3.344
681	136.000, 1.198	136.000, 1.235	136.000, 1.176	136.000, 1.120	136.000, 1.112	136.000, 1.106	136.000, 1.050	136.000, 1.050	136.000, 0.977	136.000, 1.127	136.000, 0.974	136.000, 1.100	136.000, 3.817	136.000, 3.319	136.000, 3.345
682	136.200, 1.198	136.200, 1.235	136.200, 1.176	136.200, 1.121	136.200, 1.112	136.200, 1.107	136.200, 1.050	136.200, 1.051	136.200, 0.977	136.200, 1.127	136.200, 0.974	136.200, 1.101	136.200, 3.818	136.200, 3.321	136.200, 3.345
683	136.400, 1.198	136.400, 1.235	136.400, 1.176	136.400, 1.121	136.400, 1.113	136.400, 1.107	136.400, 1.050	136.400, 1.051	136.400, 0.978	136.400, 1.128	136.400, 0.974	136.400, 1.102	136.400, 3.818	136.400, 3.323	136.400, 3.346
684	136.600, 1.198	136.600, 1.235	136.600, 1.176	136.600, 1.121	136.600, 1.113	136.600, 1.108	136.600, 1.050	136.600, 1.051	136.600, 0.978	136.600, 1.128	136.600, 0.975	136.600, 1.102	136.600, 3.819	136.600, 3.325	136.600, 3.347
685	136.800, 1.199	136.800, 1.235	136.800, 1.176	136.800, 1.122	136.800, 1.114	136.800, 1.109	136.800, 1.051	136.800, 1.052	136.800, 0.978	136.800, 1.128	136.800, 0.975	136.800, 1.103	136.800, 3.820	136.800, 3.327	136.800, 3.347
686	137.000, 1.199	137.000, 1.236	137.000, 1.176	137.000, 1.122	137.000, 1.114	137.000, 1.109	137.000, 1.051	137.000, 1.052	137.000, 0.978	137.000, 1.129	137.000, 0.976	137.000, 1.103	137.000, 3.821	137.000, 3.328	137.000, 3.348
687	137.200, 1.200	137.200, 1.236	137.200, 1.176	137.200, 1.123	137.200, 1.114	137.200, 1.110	137.200, 1.052	137.200, 1.052	137.200, 0.978	137.200, 1.129	137.200, 0.976	137.200, 1.104	137.200, 3.821	137.200, 3.330	137.200, 3.348
688	137.400, 1.200	137.400, 1.236	137.400, 1.176	137.400, 1.123	137.400, 1.114	137.400, 1.111	137.400, 1.052	137.400, 1.052	137.400, 0.979	137.400, 1.128	137.400, 0.977	137.400, 1.104	137.400, 3.822	137.400, 3.331	137.400, 3.349
689	137.600, 1.201	137.600, 1.236	137.600, 1.177	137.600, 1.123	137.600, 1.114	137.600, 1.111	137.600, 1.052	137.600, 1.052	137.600, 0.979	137.600, 1.128	137.600, 0.977	137.600, 1.105	137.600, 3.822	137.600, 3.333	137.600, 3.349
690	137.800, 1.201	137.800, 1.237	137.800, 1.177	137.800, 1.124	137.800, 1.115	137.800, 1.111	137.800, 1.053	137.800, 1.053	137.800, 0.980	137.800, 1.128	137.800, 0.978	137.800, 1.105	137.800, 3.823	137.800, 3.334	137.800, 3.350
691	138.000, 1.202	138.000, 1.237	138.000, 1.178	138.000, 1.124	138.000, 1.115	138.000, 1.112	138.000, 1.053	138.000, 1.053	138.000, 0.980	138.000, 1.128	138.000, 0.978	138.000, 1.105	138.000, 3.824	138.000, 3.336	138.000, 3.350
692	138.200, 1.203	138.200, 1.238	138.200, 1.179	138.200, 1.124	138.200, 1.115	138.200, 1.112	138.200, 1.054	138.200, 1.053	138.200, 0.981	138.200, 1.128	138.200, 0.978	138.200, 1.105	138.200, 3.826	138.200, 3.337	138.200, 3.351
693	138.400, 1.203	138.400, 1.239	138.400, 1.179	138.400, 1.124	138.400, 1.115	138.400, 1.112	138.400, 1.054	138.400, 1.053	138.400, 0.981	138.400, 1.128	138.400, 0.979	138.400, 1.106	138.400, 3.827	138.400, 3.338	138.400, 3.351
694	138.600, 1.203	138.600, 1.239	138.600, 1.180	138.600, 1.124	138.600, 1.115	138.600, 1.111	138.600, 1.054	138.600, 1.054	138.600, 0.981	138.600, 1.128	138.600, 0.979	138.600, 1.106	138.600, 3.828	138.600, 3.340	138.600, 3.352
695	138.800, 1.204	138.800, 1.240	138.800, 1.180	138.800, 1.124	138.800, 1.115	138.800, 1.111	138.800, 1.055	138.800, 1.054	138.800, 0.981	138.800, 1.129	138.800, 0.979	138.800, 1.106	138.800, 3.829	138.800, 3.341	138.800, 3.353
696	139.000, 1.204	139.000, 1.240	139.000, 1.181	139.000, 1.124	139.000, 1.115	139.000, 1.111	139.000, 1.055	139.000, 1.054	139.000, 0.981	139.000, 1.129	139.000, 0.979	139.000, 1.106	139.000, 3.831	139.000, 3.343	139.000, 3.353
697	139.200, 1.204	139.200, 1.240	139.200, 1.181	139.200, 1.124	139.200, 1.116	139.200, 1.111	139.200, 1.056	139.200, 1.055	139.200, 0.981	139.200, 1.129	139.200, 0.979	139.200, 1.107	139.200, 3.832	139.200, 3.344	139.200, 3.354
698	139.400, 1.205	139.400, 1.240	139.400, 1.181	139.400, 1.124	139.400, 1.116	139.400, 1.111	139.400, 1.056	139.400, 1.055	139.400, 0.981	139.400, 1.130	139.400, 0.979	139.400, 1.107	139.400, 3.833	139.400, 3.345	139.400, 3.355
699	139.600, 1.205	139.600, 1.240	139.600, 1.181	139.600, 1.124	139.600, 1.117	139.600, 1.110	139.600, 1.056	139.600, 1.056	139.600, 0.982	139.600, 1.130	139.600, 0.978	139.600, 1.107	139.600, 3.835	139.600, 3.347	139.600, 3.357
700	139.800, 1.205	139.800, 1.240	139.800, 1.181	139.800, 1.125	139.800, 1.117	139.800, 1.110	139.800, 1.057	139.800, 1.057	139.800, 0.982	139.800, 1.130	139.800, 0.978	139.800, 1.107	139.800, 3.836	139.800, 3.349	139.800, 3.358
701	140.000, 1.205	140.000, 1.240	140.000, 1.181	140.000, 1.125	140.000, 1.118	140.000, 1.111	140.000, 1.057	140.000, 1.057	140.000, 0.982	140.000, 1.131	140.000, 0.978	140.000, 1.108	140.000, 3.838	140.000, 3.350	140.000, 3.359
702	140.200, 1.206	140.200, 1.241	140.200, 1.181	140.200, 1.125	140.200, 1.118	140.200, 1.111	140.200, 1.058	140.200, 1.057	140.200, 0.983	140.200, 1.132	140.200, 0.978	140.200, 1.108	140.200, 3.839	140.200, 3.352	140.200, 3.360
703	140.400, 1.206	140.400, 1.241	140.400, 1.181	140.400, 1.126	140.400, 1.118	140.400, 1.111	140.400, 1.058	140.400, 1.057	140.400, 0.983	140.400, 1.132	140.400, 0.978	140.400, 1.109	140.400, 3.841	140.400, 3.354	140.400, 3.361
704	140.600, 1.206	140.600, 1.241	140.600, 1.182	140.600, 1.126	140.600, 1.119	140.600, 1.111	140.600, 1.058	140.600, 1.058	140.600, 0.983	140.600, 1.133	140.600, 0.978	140.600, 1.109	140.600, 3.842	140.600, 3.356	140.600, 3.362
705	140.800, 1.207	140.800, 1.242	140.800, 1.182	140.800, 1.126	140.800, 1.119	140.800, 1.112	140.800, 1.059	140.800, 1.058	140.800, 0.983	140.800, 1.133	140.800, 0.978	140.800, 1.109	140.800, 3.842	140.800, 3.358	140.800, 3.362
706	141.000, 1.207	141.000, 1.242	141.000, 1.182	141.000, 1.127	141.000, 1.119	141.000, 1.112	141.000, 1.059	141.000, 1.058	141.000, 0.984	141.000, 1.134	141.000, 0.978	141.000, 1.109	141.000, 3.843	141.000, 3.359	141.000, 3.363
707	141.200, 1.208	141.200, 1.242	141.200, 1.182	141.200, 1.127	141.200, 1.120	141.200, 1.113	141.200, 1.059	141.200, 1.058	141.200, 0.984	141.200, 1.134	141.200, 0.978	141.200, 1.110	141.200, 3.844	141.200, 3.361	141.200, 3.363
708	141.400, 1.208	141.400, 1.243	141.400, 1.182	141.400, 1.127	141.400, 1.120	141.400, 1.114	141.400, 1.059	141.400, 1.058	141.400, 0.984	141.400, 1.134	141.400, 0.979	141.400, 1.110	141.400, 3.844	141.400, 3.363	141.400, 3.363
709	141.600, 1.209	141.600, 1.243	141.600, 1.182	141.600, 1.127	141.600, 1.120	141.600, 1.114	141.600, 1.059	141.600, 1.058	141.600, 0.985	141.600, 1.134	141.600, 0.979	141.600, 1.110	141.600, 3.845	141.600, 3.365	141.600, 3.364
710	141.800, 1.209	141.800, 1.244	141.800, 1.182	141.800, 1.127	141.800, 1.120	141.800, 1.115	141.800, 1.059	141.800, 1.059	141.800, 0.985	141.800, 1.134	141.800, 0.980	141.800, 1.110	141.800, 3.846	141.800, 3.367	141.800, 3.365
711	142.000, 1.210	142.000, 1.245	142.000, 1.182	142.000, 1.127	142.000, 1.120	142.000, 1.115	142.000, 1.059	142.000, 1.059	142.000, 0.985	142.000, 1.134	142.000, 0.980	142.000, 1.110	142.000, 3.847	142.000, 3.368	142.000, 3.366
712	142.200, 1.210	142.200, 1.245	142.200, 1.182	142.200, 1.126	142.200, 1.120	142.200, 1.116	142.200, 1.059	142.200, 1.059	142.200, 0.986	142.200, 1.134	142.200, 0.981	142.200, 1.110	142.200, 3.848	142.200, 3.370	142.200, 3.367
713	142.400, 1.211	142.400, 1.246	142.400, 1.183	142.400, 1.126	142.400, 1.121	142.400, 1.116	142.400, 1.059	142.400, 1.059	142.400, 0.986	142.400, 1.134	142.400, 0.982	142.400, 1.111	142.400, 3.849	142.400, 3.371	142.400, 3.368
714	142.600, 1.211	142.600, 1.246	142.600, 1.183	142.600, 1.127	142.600, 1.121	142.600, 1.116	142.600, 1.059	142.600, 1.059	142.600, 0.986	142.600, 1.133	142.600, 0.982	142.600, 1.111	142.600, 3.850	142.600, 3.373	142.600, 3.369
715	142.800, 1.211	142.800, 1.246	142.800, 1.184	142.800, 1.127	142.800, 1.121	142.800, 1.116	142.800, 1.059	142.800, 1.058	142.800, 0.986	142.800, 1.133	142.800, 0.983	142.800, 1.111	142.800, 3.851	142.800, 3.374	142.800, 3.369
716	143.000, 1.212	143.000, 1.247	143.000, 1.184	143.000, 1.127	143.000, 1.122	143.000, 1.117	143.000, 1.059	143.000, 1.058	143.000, 0.987	143.000, 1.133	143.000, 0.983	143.000, 1.111	143.000, 3.853	143.000, 3.376	143.000, 3.370
717	143.200, 1.212	143.200, 1.246	143.200, 1.184	143.200, 1.127	143.200, 1.122	143.200, 1.117	143.200, 1.060	143.200, 1.059	143.200, 0.987	143.200, 1.133	143.200, 0.984	143.200, 1.112	143.200, 3.855	143.200, 3.377	143.200, 3.370
718	143.400, 1.212	143.400, 1.246	143.400, 1.185	143.400, 1.127	143.400, 1.123	143.400, 1.118	143.400, 1.060	143.400, 1.059	143.400, 0.987	143.400, 1.133	143.400, 0.984	143.400, 1.112	143.400, 3.856	143.400, 3.378	143.400, 3.370
719	143.600, 1.212	143.600, 1.247	143.600, 1.185	143.600, 1.127	143.600, 1.123	143.600, 1.118	143.600, 1.061	143.600, 1.059	143.600, 0.987	143.600, 1.133	143.600, 0.985	143.600, 1.112	143.600, 3.857	143.600, 3.380	143.600, 3.370
720	143.800, 1.212	143.800, 1.246	143.800, 1.186	143.800, 1.128	143.800, 1.123	143.800, 1.119	143.800, 1.061	143.800, 1.059	143.800, 0.987	143.800, 1.134	143.800, 0.985	143.800, 1.113	143.800, 3.859	143.800, 3.381	143.800, 3.370
721	144.000, 1.212	144.000, 1.246	144.000, 1.186	144.000, 1.128	144.000, 1.124	144.000, 1.119	144.000, 1.061	144.000, 1.059	144.000, 0.987	144.000, 1.134	144.000, 0.985	144.000, 1.113	144.000, 3.860	144.000, 3.382	144.000, 3.370
722	144.200, 1.212	144.200, 1.246	144.200, 1.187	144.200, 1.128	144.200, 1.124	144.200, 1.120	144.200, 1.062	144.200, 1.060	144.200, 0.988	144.200, 1.135	144.200, 0.985	144.200, 1.113	144.200, 3.860	144.200, 3.383	144.200, 3.370
723	144.400, 1.212	144.400, 1.246	144.400, 1.187	144.400, 1.129	144.400, 1.124	144.400, 1.120	144.400, 1.062	144.400, 1.060	144.400, 0.988	144.400, 1.136	144.400, 0.985	144.400, 1.113	144.400, 3.861	144.400, 3.385	144.400, 3.369
724	144.600, 1.212	144.600, 1.246	144.600, 1.187	144.600, 1.129	144.600, 1.125	144.600, 1.121	144.600, 1.063	144.600, 1.060	144.600, 0.987	144.600, 1.137	144.600, 0.985	144.600, 1.113	144.600, 3.861	144.600, 3.386	144.600, 3.369
725	144.800, 1.212	144.800, 1.246	144.800, 1.188	144.800, 1.130	144.800, 1.125	144.800, 1.121	144.800, 1.063	144.800, 1.060	144.800, 0.987	144.800, 1.137	144.800, 0.985	144.800, 1.114	144.800, 3.861	144.800, 3.387	144.800, 3.369
726	145.000, 1.212	145.000, 1.246	145.000, 1.188	145.000, 1.130	145.000, 1.126	145.000, 1.121	145.000, 1.063	145.000, 1.061	145.000, 0.988	145.000, 1.138	145.000, 0.984	145.000, 1.114	145.000, 3.862	145.000, 3.388	145.000, 3.369
727	145.200, 1.212	145.200, 1.246	145.200, 1.188	145.200, 1.131	145.200, 1.126	145.200, 1.122	145.200, 1.064	145.200, 1.061	145.200, 0.988	145.200, 1.139	145.200, 0.984	145.200, 1.114	145.200, 3.862	145.200, 3.390	145.200, 3.370
728	145.400, 1.212	145.400, 1.247	145.400, 1.188	145.400, 1.131	145.400, 1.127	145.400, 1.122	145.400, 1.064	145.400, 1.062	145.400, 0.988	145.400, 1.139	145.400, 0.984	145.400, 1.115	145.400, 3.863	145.400, 3.391	145.400, 3.371
729	145.600, 1.212	145.600, 1.248	145.600, 1.188	145.600, 1.132	145.600, 1.127	145.600, 1.122	145.600, 1.064	145.600, 1.063	145.600, 0.988	145.600, 1.140	145.600, 0.984	145.600, 1.115	145.600, 3.863	145.600, 3.393	145.600, 3.373
730	145.800, 1.212	145.800, 1.248	145.800, 1.188	145.800, 1.132	145.800, 1.127	145.800, 1.122	145.800, 1.065	145.800, 1.064	145.800, 0.988	145.800, 1.140	145.800, 0.984	145.800, 1.115	145.800, 3.864	145.800, 3.395	145.800, 3.374
731	146.000, 1.213	146.000, 1.249	146.000, 1.188	146.000, 1.132	146.000, 1.127	146.000, 1.122	146.000, 1.065	146.000, 1.064	146.000, 0.988	146.000, 1.140	146.000, 0.985	146.000, 1.115	146.000, 3.865	146.000, 3.396	146.000, 3.376
732	146.200, 1.213	146.200, 1.250	146.200, 1.189	146.200, 1.132	146.200, 1.127	146.200, 1.122	146.200, 1.065	146.200, 1.064	146.200, 0.988	146.200, 1.140	146.200, 0.985	146.200, 1.115	146.200, 3.866	146.200, 3.398	146.200, 3.377
733	146.400, 1.213	146.400, 1.250	146.400, 1.189	146.400, 1.133	146.400, 1.128	146.400, 1.121	146.400, 1.065	146.400, 1.064	146.400, 0.988	146.400, 1.140	146.400, 0.986	146.400, 1.116	146.400, 3.868	146.400, 3.399	146.400, 3.378
734	146.600, 1.213	146.600, 1.251	146.600, 1.190	146.600, 1.133	146.600, 1.128	146.600, 1.121	146.600, 1.065	146.600, 1.064	146.600, 0.989	146.600, 1.140	146.600, 0.986	146.600, 1.116	146.600, 3.869	146.600, 3.401	146.600, 3.380
735	146.800, 1.213	146.800, 1.252	146.800, 1.190	146.800, 1.133	146.800, 1.129	146.800, 1.121	146.800, 1.065	146.800, 1.064	146.800, 0.989	146.800, 1.140	146.800, 0.986	146.800, 1.116	146.800, 3.870	146.800, 3.403	146.800, 3.381
736	147.000, 1.214	147.000, 1.252	147.000, 1.190	147.000, 1.133	147.000, 1.129	147.000, 1.121	147.000, 1.065	147.000, 1.064	147.000, 0.989	147.000, 1.140	147.000, 0.987	147.000, 1.117	147.000, 3.871	147.000, 3.405	147.000, 3.381
737	147.200, 1.214	147.200, 1.252	147.200, 1.191	147.200, 1.132	147.200, 1.129	147.200, 1.121	147.200, 1.065	147.200, 1.064	147.200, 0.990	147.200, 1.140	147.200, 0.987	147.200, 1.117	147.200, 3.872	147.200, 3.406	147.200, 3.382
738	147.400, 1.214	147.400, 1.252	147.400, 1.191	147.400, 1.132	147.400, 1.130	147.400, 1.121	147.400, 1.065	147.400, 1.064	147.400, 0.990	147.400, 1.140	147.400, 0.987	147.400, 1.118	147.400, 3.873	147.400, 3.408	147.400, 3.383
739	147.600, 1.214	147.600, 1.252	147.600, 1.191	147.600, 1.132	147.600, 1.130	147.600, 1.122	147.600, 1.065	147.600, 1.064	147.600, 0.990	147.600, 1.140	147.600, 0.988	147.600, 1.118	147.600, 3.873	147.600, 3.409	147.600, 3.383
740	147.800, 1.215	147.800, 1.252	147.800, 1.191	147.800, 1.133	147.800, 1.130	147.800, 1.122	147.800, 1.065	147.800, 1.064	147.800, 0.990	147.800, 1.140	147.800, 0.988	147.800, 1.118	147.800, 3.873	147.800, 3.410	147.800, 3.384
741	148.000, 1.215	148.000, 1.253	148.000, 1.192	148.000, 1.133	148.000, 1.130	148.000, 1.122	148.000, 1.065	148.000, 1.064	148.000, 0.991	148.000, 1.140	148.000, 0.988	148.000, 1.119	148.000, 3.874	148.000, 3.412	148.000, 3.384
742	148.200, 1.215	148.200, 1.253	148.200, 1.192	148.200, 1.134	148.200, 1.130	148.200, 1.122	148.200, 1.065	148.200, 1.065	148.200, 0.991	148.200, 1.140	148.200, 0.988	148.200, 1.119	148.200, 3.874	148.200, 3.413	148.200, 3.385
743	148.400, 1.216	148.400, 1.253	148.400, 1.193	148.400, 1.134	148.400, 1.130	148.400, 1.123	148.400, 1.065	148.400, 1.065	148.400, 0.992	148.400, 1.140	148.400, 0.989	148.400, 1.119	148.400, 3.874	148.400, 3.414	148.400, 3.385
744	148.600, 1.216	148.600, 1.253	148.600, 1.193	148.600, 1.135	148.600, 1.130	148.600, 1.123	148.600, 1.066	148.600, 1.066	148.600, 0.992	148.600, 1.140	148.600, 0.989	148.600, 1.119	148.600, 3.875	148.600, 3.415	148.600, 3.385
745	148.800, 1.216	148.800, 1.253	148.800, 1.194	148.800, 1.135	148.800, 1.130	148.800, 1.123	148.800, 1.066	148.800, 1.066	148.800, 0.992	148.800, 1.141	148.800, 0.989	148.800, 1.120	148.800, 3.876	148.800, 3.416	148.800, 3.386
746	149.000, 1.217	149.000, 1.253	149.000, 1.194	149.000, 1.136	149.000, 1.131	149.000, 1.124	149.000, 1.067	149.000, 1.067	149.000, 0.993	149.000, 1.141	149.000, 0.989	149.000, 1.120	149.000, 3.877	149.000, 3.417	149.000, 3.386
747	149.200, 1.217	149.200, 1.253	149.200, 1.194	149.200, 1.136	149.200, 1.131	149.200, 1.124	149.200, 1.067	149.200, 1.068	149.200, 0.993	149.200, 1.141	149.200, 0.989	149.200, 1.120	149.200, 3.877	149.200, 3.418	149.200, 3.387
748	149.400, 1.218	149.400, 1.253	149.400, 1.194	149.400, 1.137	149.400, 1.131	149.400, 1.125	149.400, 1.068	149.400, 1.069	149.400, 0.993	149.400, 1.142	149.400, 0.989	149.400, 1.121	149.400, 3.878	149.400, 3.419	149.400, 3.387
749	149.600, 1.218	149.600, 1.253	149.600, 1.194	149.600, 1.137	149.600, 1.131	149.600, 1.125	149.600, 1.068	149.600, 1.069	149.600, 0.994	149.600, 1.142	149.600, 0.989	149.600, 1.121	149.600, 3.879	149.600, 3.419	149.600, 3.388
750	149.800, 1.218	149.800, 1.253	149.800, 1.195	149.800, 1.137	149.800, 1.131	149.800, 1.125	149.800, 1.069	149.800, 1.069	149.800, 0.994	149.800, 1.143	149.800, 0.989	149.800, 1.121	149.800, 3.880	149.800, 3.420	149.800, 3.388
751	150.000, 1.218	150.000, 1.253	150.000, 1.195	150.000, 1.137	150.000, 1.131	150.000, 1.125	150.000, 1.069	150.000, 1.069	150.000, 0.994	150.000, 1.143	150.000, 0.989	150.000, 1.121	150.000, 3.880	150.000, 3.420	150.000, 3.388
752	150.200, 1.219	150.200, 1.252	150.200, 1.194	150.200, 1.139	150.200, 1.132	150.200, 1.126	150.200, 1.070	150.200, 1.070	150.200, 0.994	150.200, 1.144	150.200, 0.990	150.200, 1.123	150.200, 3.884	150.200, 3.426	150.200, 3.392
753	150.400, 1.219	150.400, 1.251	150.400, 1.194	150.400, 1.141	150.400, 1.133	150.400, 1.127	150.400, 1.071	150.400, 1.071	150.400, 0.995	150.400, 1.144	150.400, 0.990	150.400, 1.124	150.400, 3.889	150.400, 3.432	150.400, 3.397
754	150.600, 1.219	150.600, 1.249	150.600, 1.193	150.600, 1.143	150.600, 1.134	150.600, 1.127	150.600, 1.072	150.600, 1.072	150.600, 0.996	150.600, 1.145	150.600, 0.991	150.600, 1.126	150.600, 3.894	150.600, 3.439	150.600, 3.402
755	150.800, 1.219	150.800, 1.248	150.800, 1.192	150.800, 1.144	150.800, 1.135	150.800, 1.128	150.800, 1.073	150.800, 1.072	150.800, 0.996	150.800, 1.145	150.800, 0.991	150.800, 1.127	150.800, 3.899	150.800, 3.447	150.800, 3.407
756	151.000, 1.219	151.000, 1.245	151.000, 1.191	151.000, 1.145	151.000, 1.135	151.000, 1.128	151.000, 1.073	151.000, 1.072	151.000, 0.996	151.000, 1.145	151.000, 0.991	151.000, 1.128	151.000, 3.904	151.000, 3.454	151.000, 3.411
757	151.200, 1.219	151.200, 1.243	151.200, 1.189	151.200, 1.146	151.200, 1.135	151.200, 1.128	151.200, 1.073	151.200, 1.072	151.200, 0.996	151.200, 1.144	151.200, 0.991	151.200, 1.128	151.200, 3.909	151.200, 3.460	151.200, 3.416
758	151.400, 1.219	151.400, 1.241	151.400, 1.188	151.400, 1.146	151.400, 1.134	151.400, 1.128	151.400, 1.073	151.400, 1.072	151.400, 0.996	151.400, 1.143	151.400, 0.990	151.400, 1.128	151.400, 3.913	151.400, 3.467	151.400, 3.420
759	151.600, 1.219	151.600, 1.238	151.600, 1.186	151.600, 1.146	151.600, 1.133	151.600, 1.127	151.600, 1.072	151.600, 1.071	151.600, 0.995	151.600, 1.142	151.600, 0.989	151.600, 1.128	151.600, 3.917	151.600, 3.473	151.600, 3.423
760	151.800, 1.219	151.800, 1.236	151.800, 1.184	151.800, 1.146	151.800, 1.131	151.800, 1.126	151.800, 1.071	151.800, 1.070	151.800, 0.993	151.800, 1.140	151.800, 0.988	151.800, 1.127	151.800, 3.920	151.800, 3.478	151.800, 3.426
761	152.000, 1.219	152.000, 1.233	152.000, 1.182	152.000, 1.144	152.000, 1.129	152.000, 1.125	152.000, 1.069	152.000, 1.068	152.000, 0.992	152.000, 1.137	152.000, 0.986	152.000, 1.125	152.000, 3.922	152.000, 3.482	152.000, 3.428
762	152.200, 1.219	152.200, 1.231	152.200, 1.180	152.200, 1.143	152.200, 1.127	152.200, 1.124	152.200, 1.066	152.200, 1.067	152.200, 0.990	152.200, 1.135	152.200, 0.984	152.200, 1.123	152.200, 3.923	152.200, 3.484	152.200, 3.429
763	152.400, 1.219	152.400, 1.228	152.400, 1.178	152.400, 1.141	152.400, 1.124	152.400, 1.123	152.400, 1.064	152.400, 1.065	152.400, 0.988	152.400, 1.132	152.400, 0.982	152.400, 1.121	152.400, 3.924	152.400, 3.486	152.400, 3.429
764	152.600, 1.218	152.600, 1.225	152.600, 1.177	152.600, 1.140	152.600, 1.123	152.600, 1.121	152.600, 1.062	152.600, 1.063	152.600, 0.987	152.600, 1.130	152.600, 0.981	152.600, 1.119	152.600, 3.924	152.600, 3.488	152.600, 3.429
765	152.800, 1.217	152.800, 1.223	152.800, 1.175	152.800, 1.138	152.800, 1.121	152.800, 1.119	152.800, 1.060	152.800, 1.062	152.800, 0.985	152.800, 1.129	152.800, 0.979	152.800, 1.117	152.800, 3.924	152.800, 3.490	152.800, 3.430
766	153.000, 1.217	153.000, 1.221	153.000, 1.173	153.000, 1.137	153.000, 1.119	153.000, 1.118	153.000, 1.058	153.000, 1.060	153.000, 0.984	153.000, 1.127	153.000, 0.978	153.000, 1.116	153.000, 3.923	153.000, 3.491	153.000, 3.430
767	153.200, 1.217	153.200, 1.218	153.200, 1.172	153.200, 1.135	153.200, 1.117	153.200, 1.116	153.200, 1.057	153.200, 1.059	153.200, 0.983	153.200, 1.125	153.200, 0.976	153.200, 1.114	153.200, 3.923	153.200, 3.493	153.200, 3.430
768	153.400, 1.217	153.400, 1.216	153.400, 1.171	153.400, 1.134	153.400, 1.115	153.400, 1.114	153.400, 1.055	153.400, 1.058	153.400, 0.982	153.400, 1.124	153.400, 0.975	153.400, 1.113	153.400, 3.922	153.400, 3.494	153.400, 3.430
769	153.600, 1.217	153.600, 1.215	153.600, 1.170	153.600, 1.133	153.600, 1.114	153.600, 1.113	153.600, 1.053	153.600, 1.057	153.600, 0.980	153.600, 1.122	153.600, 0.973	153.600, 1.112	153.600, 3.922	153.600, 3.495	153.600, 3.430
770	153.800, 1.217	153.800, 1.213	153.800, 1.168	153.800, 1.133	153.800, 1.112	153.800, 1.112	153.800, 1.052	153.800, 1.055	153.800, 0.979	153.800, 1.121	153.800, 0.972	153.800, 1.110	153.800, 3.921	153.800, 3.496	153.800, 3.430
771	154.000, 1.217	154.000, 1.211	154.000, 1.167	154.000, 1.132	154.000, 1.111	154.000, 1.110	154.000, 1.051	154.000, 1.054	154.000, 0.978	154.000, 1.120	154.000, 0.970	154.000, 1.109	154.000, 3.920	154.000, 3.497	154.000, 3.429
772	154.200, 1.216	154.200, 1.210	154.200, 1.165	154.200, 1.131	154.200, 1.110	154.200, 1.109	154.200, 1.050	154.200, 1.053	154.200, 0.977	154.200, 1.119	154.200, 0.969	154.200, 1.108	154.200, 3.919	154.200, 3.498	154.200, 3.429
773	154.400, 1.216	154.400, 1.208	154.400, 1.163	154.400, 1.130	154.400, 1.108	154.400, 1.108	154.400, 1.049	154.400, 1.052	154.400, 0.976	154.400, 1.118	154.400, 0.968	154.400, 1.107	154.400, 3.919	154.400, 3.498	154.400, 3.428
774	154.600, 1.215	154.600, 1.207	154.600, 1.162	154.600, 1.130	154.600, 1.107	154.600, 1.106	154.600, 1.047	154.600, 1.051	154.600, 0.974	154.600, 1.117	154.600, 0.967	154.600, 1.105	154.600, 3.918	154.600, 3.498	154.600, 3.427
775	154.800, 1.215	154.800, 1.206	154.800, 1.161	154.800, 1.129	154.800, 1.106	154.800, 1.105	154.800, 1.047	154.800, 1.050	154.800, 0.973	154.800, 1.116	154.800, 0.966	154.800, 1.104	154.800, 3.917	154.800, 3.499	154.800, 3.425
776	155.000, 1.214	155.000, 1.204	155.000, 1.159	155.000, 1.128	155.000, 1.104	155.000, 1.104	155.000, 1.046	155.000, 1.049	155.000, 0.972	155.000, 1.115	155.000, 0.965	155.000, 1.103	155.000, 3.917	155.000, 3.499	155.000, 3.424
777	155.200, 1.214	155.200, 1.203	155.200, 1.158	155.200, 1.127	155.200, 1.103	155.200, 1.104	155.200, 1.045	155.200, 1.048	155.200, 0.971	155.200, 1.114	155.200, 0.963	155.200, 1.101	155.200, 3.916	155.200, 3.499	155.200, 3.423
778	155.400, 1.214	155.400, 1.202	155.400, 1.157	155.400, 1.126	155.400, 1.102	155.400, 1.103	155.400, 1.044	155.400, 1.047	155.400, 0.970	155.400, 1.113	155.400, 0.962	155.400, 1.099	155.400, 3.915	155.400, 3.500	155.400, 3.421
779	155.600, 1.213	155.600, 1.201	155.600, 1.155	155.600, 1.125	155.600, 1.100	155.600, 1.102	155.600, 1.044	155.600, 1.045	155.600, 0.969	155.600, 1.112	155.600, 0.961	155.600, 1.098	155.600, 3.914	155.600, 3.500	155.600, 3.420
780	155.800, 1.213	155.800, 1.200	155.800, 1.154	155.800, 1.124	155.800, 1.099	155.800, 1.101	155.800, 1.043	155.800, 1.044	155.800, 0.969	155.800, 1.110	155.800, 0.960	155.800, 1.097	155.800, 3.913	155.800, 3.501	155.800, 3.418
781	156.000, 1.213	156.000, 1.199	156.000, 1.153	156.000, 1.123	156.000, 1.097	156.000, 1.101	156.000, 1.042	156.000, 1.043	156.000, 0.968	156.000, 1.109	156.000, 0.958	156.000, 1.095	156.000, 3.911	156.000, 3.501	156.000, 3.416
782	156.200, 1.212	156.200, 1.198	156.200, 1.152	156.200, 1.122	156.200, 1.096	156.200, 1.100	156.200, 1.042	156.200, 1.042	156.200, 0.967	156.200, 1.108	156.200, 0.957	156.200, 1.094	156.200, 3.910	156.200, 3.501	156.200, 3.414
783	156.400, 1.212	156.400, 1.196	156.400, 1.150	156.400, 1.121	156.400, 1.095	156.400, 1.099	156.400, 1.041	156.400, 1.041	156.400, 0.966	156.400, 1.107	156.400, 0.956	156.400, 1.093	156.400, 3.908	156.400, 3.501	156.400, 3.412
784	156.600, 1.212	156.600, 1.195	156.600, 1.149	156.600, 1.120	156.600, 1.093	156.600, 1.098	156.600, 1.041	156.600, 1.041	156.600, 0.965	156.600, 1.105	156.600, 0.955	156.600, 1.092	156.600, 3.907	156.600, 3.501	156.600, 3.410
785	156.800, 1.212	156.800, 1.194	156.800, 1.148	156.800, 1.119	156.800, 1.092	156.800, 1.097	156.800, 1.041	156.800, 1.040	156.800, 0.964	156.800, 1.104	156.800, 0.954	156.800, 1.091	156.800, 3.905	156.800, 3.501	156.800, 3.408
786	157.000, 1.212	157.000, 1.193	157.000, 1.147	157.000, 1.118	157.000, 1.091	157.000, 1.096	157.000, 1.040	157.000, 1.039	157.000, 0.963	157.000, 1.103	157.000, 0.953	157.000, 1.090	157.000, 3.902	157.000, 3.501	157.000, 3.406
787	157.200, 1.212	157.200, 1.191	157.200, 1.147	157.200, 1.117	157.200, 1.090	157.200, 1.094	157.200, 1.040	157.200, 1.038	157.200, 0.963	157.200, 1.102	157.200, 0.952	157.200, 1.089	157.200, 3.900	157.200, 3.501	157.200, 3.404
788	157.400, 1.212	157.400, 1.190	157.400, 1.146	157.400, 1.116	157.400, 1.089	157.400, 1.093	157.400, 1.039	157.400, 1.037	157.400, 0.962	157.400, 1.101	157.400, 0.951	157.400, 1.089	157.400, 3.898	157.400, 3.500	157.400, 3.402
789	157.600, 1.213	157.600, 1.189	157.600, 1.145	157.600, 1.116	157.600, 1.088	157.600, 1.092	157.600, 1.039	157.600, 1.037	157.600, 0.962	157.600, 1.100	157.600, 0.950	157.600, 1.088	157.600, 3.896	157.600, 3.500	157.600, 3.400
790	157.800, 1.213	157.800, 1.188	157.800, 1.144	157.800, 1.115	157.800, 1.087	157.800, 1.091	157.800, 1.038	157.800, 1.036	157.800, 0.961	157.800, 1.099	157.800, 0.950	157.800, 1.088	157.800, 3.894	157.800, 3.499	157.800, 3.398
791	158.000, 1.213	158.000, 1.186	158.000, 1.143	158.000, 1.115	158.000, 1.086	158.000, 1.090	158.000, 1.038	158.000, 1.035	158.000, 0.961	158.000, 1.098	158.000, 0.950	158.000, 1.087	158.000, 3.891	158.000, 3.498	158.000, 3.395
792	158.200, 1.213	158.200, 1.185	158.200, 1.142	158.200, 1.115	158.200, 1.085	158.200, 1.089	158.200, 1.037	158.200, 1.035	158.200, 0.960	158.200, 1.097	158.200, 0.949	158.200, 1.087	158.200, 3.889	158.200, 3.498	158.200, 3.393
793	158.400, 1.213	158.400, 1.185	158.400, 1.141	158.400, 1.114	158.400, 1.085	158.400, 1.088	158.400, 1.036	158.400, 1.034	158.400, 0.959	158.400, 1.097	158.400, 0.949	158.400, 1.086	158.400, 3.887	158.400, 3.497	158.400, 3.391
794	158.600, 1.213	158.600, 1.184	158.600, 1.140	158.600, 1.114	158.600, 1.084	158.600, 1.087	158.600, 1.036	158.600, 1.034	158.600, 0.958	158.600, 1.096	158.600, 0.949	158.600, 1.085	158.600, 3.884	158.600, 3.496	158.600, 3.388
795	158.800, 1.213	158.800, 1.183	158.800, 1.140	158.800, 1.113	158.800, 1.084	158.800, 1.086	158.800, 1.035	158.800, 1.033	158.800, 0.957	158.800, 1.095	158.800, 0.948	158.800, 1.084	158.800, 3.882	158.800, 3.495	158.800, 3.386
796	159.000, 1.213	159.000, 1.182	159.000, 1.139	159.000, 1.113	159.000, 1.083	159.000, 1.086	159.000, 1.034	159.000, 1.033	159.000, 0.956	159.000, 1.094	159.000, 0.947	159.000, 1.083	159.000, 3.879	159.000, 3.494	159.000, 3.384
797	159.200, 1.213	159.200, 1.181	159.200, 1.138	159.200, 1.112	159.200, 1.082	159.200, 1.085	159.200, 1.033	159.200, 1.032	159.200, 0.955	159.200, 1.094	159.200, 0.947	159.200, 1.082	159.200, 3.877	159.200, 3.493	159.200, 3.381
798	159.400, 1.213	159.400, 1.179	159.400, 1.137	159.400, 1.111	159.400, 1.082	159.400, 1.085	159.400, 1.033	159.400, 1.032	159.400, 0.954	159.400, 1.093	159.400, 0.946	159.400, 1.082	159.400, 3.874	159.400, 3.491	159.400, 3.379
799	159.600, 1.212	159.600, 1.178	159.600, 1.136	159.600, 1.110	159.600, 1.081	159.600, 1.084	159.600, 1.032	159.600, 1.031	159.600, 0.954	159.600, 1.092	159.600, 0.945	159.600, 1.081	159.600, 3.871	159.600, 3.490	159.600, 3.376
800	159.800, 1.212	159.800, 1.177	159.800, 1.135	159.800, 1.109	159.800, 1.080	159.800, 1.084	159.800, 1.031	159.800, 1.030	159.800, 0.953	159.800, 1.092	159.800, 0.945	159.800, 1.080	159.800, 3.868	159.800, 3.488	159.800, 3.373
801	160.000, 1.212	160.000, 1.176	160.000, 1.134	160.000, 1.109	160.000, 1.079	160.000, 1.083	160.000, 1.031	160.000, 1.030	160.000, 0.952	160.000, 1.091	160.000, 0.944	160.000, 1.080	160.000, 3.865	160.000, 3.486	160.000, 3.371
802	160.200, 1.211	160.200, 1.175	160.200, 1.133	160.200, 1.108	160.200, 1.078	160.200, 1.083	160.200, 1.030	160.200, 1.029	160.200, 0.951	160.200, 1.090	160.200, 0.943	160.200, 1.079	160.200, 3.863	160.200, 3.484	160.200, 3.368
803	160.400, 1.211	160.400, 1.174	160.400, 1.132	160.400, 1.107	160.400, 1.077	160.400, 1.082	160.400, 1.029	160.400, 1.029	160.400, 0.951	160.400, 1.089	160.400, 0.942	160.400, 1.078	160.400, 3.860	160.400, 3.482	160.400, 3.366
804	160.600, 1.211	160.600, 1.173	160.600, 1.131	160.600, 1.106	160.600, 1.076	160.600, 1.082	160.600, 1.029	160.600, 1.028	160.600, 0.950	160.600, 1.088	160.600, 0.941	160.600, 1.077	160.600, 3.857	160.600, 3.480	160.600, 3.363
805	160.800, 1.211	160.800, 1.172	160.800, 1.131	160.800, 1.106	160.800, 1.075	160.800, 1.081	160.800, 1.028	160.800, 1.027	160.800, 0.950	160.800, 1.087	160.800, 0.940	160.800, 1.077	160.800, 3.854	160.800, 3.478	160.800, 3.361
806	161.000, 1.211	161.000, 1.171	161.000, 1.130	161.000, 1.105	161.000, 1.074	161.000, 1.081	161.000, 1.027	161.000, 1.027	161.000, 0.949	161.000, 1.086	161.000, 0.939	161.000, 1.076	161.000, 3.852	161.000, 3.477	161.000, 3.359
807	161.200, 1.211	161.200, 1.171	161.200, 1.130	161.200, 1.104	161.200, 1.074	161.200, 1.080	161.200, 1.027	161.200, 1.026	161.200, 0.949	161.200, 1.085	161.200, 0.939	161.200, 1.075	161.200, 3.849	161.200, 3.475	161.200, 3.356
808	161.400, 1.211	161.400, 1.170	161.400, 1.129	161.400, 1.103	161.400, 1.073	161.400, 1.079	161.400, 1.026	161.400, 1.025	161.400, 0.949	161.400, 1.084	161.400, 0.938	161.400, 1.074	161.400, 3.846	161.400, 3.474	161.400, 3.354
809	161.600, 1.211	161.600, 1.170	161.600, 1.129	161.600, 1.103	161.600, 1.072	161.600, 1.078	161.600, 1.025	161.600, 1.025	161.600, 0.948	161.600, 1.083	161.600, 0.937	161.600, 1.074	161.600, 3.844	161.600, 3.472	161.600, 3.351
810	161.800, 1.211	161.800, 1.169	161.800, 1.128	161.800, 1.103	161.800, 1.071	161.800, 1.077	161.800, 1.025	161.800, 1.025	161.800, 0.948	161.800, 1.083	161.800, 0.937	161.800, 1.073	161.800, 3.841	161.800, 3.471	161.800, 3.348
811	162.000, 1.211	162.000, 1.169	162.000, 1.128	162.000, 1.102	162.000, 1.070	162.000, 1.076	162.000, 1.024	162.000, 1.024	162.000, 0.947	162.000, 1.082	162.000, 0.936	162.000, 1.071	162.000, 3.838	162.000, 3.469	162.000, 3.345
812	162.200, 1.211	162.200, 1.169	162.200, 1.128	162.200, 1.102	162.200, 1.070	162.200, 1.075	162.200, 1.023	162.200, 1.024	162.200, 0.947	162.200, 1.081	162.200, 0.936	162.200, 1.070	162.200, 3.835	162.200, 3.468	162.200, 3.343
813	162.400, 1.212	162.400, 1.168	162.400, 1.127	162.400, 1.101	162.400, 1.069	162.400, 1.074	162.400, 1.022	162.400, 1.024	162.400, 0.947	162.400, 1.080	162.400, 0.935	162.400, 1.070	162.400, 3.832	162.400, 3.466	162.400, 3.340
814	162.600, 1.212	162.600, 1.168	162.600, 1.127	162.600, 1.101	162.600, 1.068	162.600, 1.074	162.600, 1.022	162.600, 1.024	162.600, 0.946	162.600, 1.079	162.600, 0.934	162.600, 1.069	162.600, 3.829	162.600, 3.465	162.600, 3.337
815	162.800, 1.211	162.800, 1.168	162.800, 1.126	162.800, 1.100	162.800, 1.068	162.800, 1.073	162.800, 1.021	162.800, 1.023	162.800, 0.946	162.800, 1.078	162.800, 0.933	162.800, 1.068	162.800, 3.826	162.800, 3.463	162.800, 3.334
816	163.000, 1.211	163.000, 1.167	163.000, 1.126	163.000, 1.100	163.000, 1.067	163.000, 1.072	163.000, 1.020	163.000, 1.023	163.000, 0.945	163.000, 1.078	163.000, 0.933	163.000, 1.067	163.000, 3.822	163.000, 3.461	163.000, 3.331
817	163.200, 1.211	163.200, 1.166	163.200, 1.125	163.200, 1.099	163.200, 1.066	163.200, 1.072	163.200, 1.020	163.200, 1.022	163.200, 0.945	163.200, 1.077	163.200, 0.932	163.200, 1.066	163.200, 3.819	163.200, 3.460	163.200, 3.328
818	163.400, 1.211	163.400, 1.166	163.400, 1.124	163.400, 1.099	163.400, 1.066	163.400, 1.071	163.400, 1.019	163.400, 1.022	163.400, 0.945	163.400, 1.077	163.400, 0.931	163.400, 1.066	163.400, 3.816	163.400, 3.458	163.400, 3.325
819	163.600, 1.211	163.600, 1.165	163.600, 1.124	163.600, 1.098	163.600, 1.065	163.600, 1.070	163.600, 1.019	163.600, 1.021	163.600, 0.945	163.600, 1.076	163.600, 0.930	163.600, 1.065	163.600, 3.813	163.600, 3.456	163.600, 3.322
820	163.800, 1.210	163.800, 1.164	163.800, 1.123	163.800, 1.098	163.800, 1.065	163.800, 1.070	163.800, 1.019	163.800, 1.021	163.800, 0.944	163.800, 1.076	163.800, 0.930	163.800, 1.065	163.800, 3.810	163.800, 3.454	163.800, 3.319
821	164.000, 1.210	164.000, 1.164	164.000, 1.122	164.000, 1.098	164.000, 1.065	164.000, 1.069	164.000, 1.018	164.000, 1.020	164.000, 0.944	164.000, 1.076	164.000, 0.930	164.000, 1.064	164.000, 3.807	164.000, 3.452	164.000, 3.317
822	164.200, 1.210	164.200, 1.163	164.200, 1.122	164.200, 1.097	164.200, 1.064	164.200, 1.068	164.200, 1.017	164.200, 1.019	164.200, 0.943	164.200, 1.075	164.200, 0.929	164.200, 1.063	164.200, 3.804	164.200, 3.450	164.200, 3.314
823	164.400, 1.210	164.400, 1.162	164.400, 1.121	164.400, 1.097	164.400, 1.064	164.400, 1.068	164.400, 1.017	164.400, 1.019	164.400, 0.943	164.400, 1.075	164.400, 0.929	164.400, 1.063	164.400, 3.801	164.400, 3.448	164.400, 3.311
824	164.600, 1.209	164.600, 1.162	164.600, 1.120	164.600, 1.097	164.600, 1.063	164.600, 1.068	164.600, 1.016	164.600, 1.018	164.600, 0.942	164.600, 1.074	164.600, 0.928	164.600, 1.062	164.600, 3.798	164.600, 3.446	164.600, 3.308
825	164.800, 1.209	164.800, 1.161	164.800, 1.119	164.800, 1.096	164.800, 1.062	164.800, 1.067	164.800, 1.015	164.800, 1.017	164.800, 0.942	164.800, 1.073	164.800, 0.928	164.800, 1.061	164.800, 3.795	164.800, 3.443	164.800, 3.304
826	165.000, 1.209	165.000, 1.160	165.000, 1.118	165.000, 1.095	165.000, 1.061	165.000, 1.067	165.000, 1.015	165.000, 1.016	165.000, 0.941	165.000, 1.073	165.000, 0.927	165.000, 1.061	165.000, 3.791	165.000, 3.441	165.000, 3.301
827	165.200, 1.209	165.200, 1.160	165.200, 1.117	165.200, 1.095	165.200, 1.060	165.200, 1.066	165.200, 1.014	165.200, 1.016	165.200, 0.940	165.200, 1.072	165.200, 0.927	165.200, 1.060	165.200, 3.788	165.200, 3.438	165.200, 3.298
828	165.400, 1.210	165.400, 1.159	165.400, 1.116	165.400, 1.094	165.400, 1.059	165.400, 1.065	165.400, 1.013	165.400, 1.015	165.400, 0.939	165.400, 1.072	165.400, 0.926	165.400, 1.059	165.400, 3.784	165.400, 3.436	165.400, 3.295
829	165.600, 1.210	165.600, 1.158	165.600, 1.115	165.600, 1.093	165.600, 1.058	165.600, 1.064	165.600, 1.013	165.600, 1.015	165.600, 0.939	165.600, 1.071	165.600, 0.926	165.600, 1.058	165.600, 3.780	165.600, 3.433	165.600, 3.292
830	165.800, 1.210	165.800, 1.158	165.800, 1.115	165.800, 1.093	165.800, 1.057	165.800, 1.063	165.800, 1.012	165.800, 1.014	165.800, 0.938	165.800, 1.071	165.800, 0.925	165.800, 1.057	165.800, 3.776	165.800, 3.431	165.800, 3.289
831	166.000, 1.210	166.000, 1.157	166.000, 1.115	166.000, 1.092	166.000, 1.056	166.000, 1.063	166.000, 1.012	166.000, 1.013	166.000, 0.938	166.000, 1.070	166.000, 0.924	166.000, 1.057	166.000, 3.773	166.000, 3.428	166.000, 3.286
832	166.200, 1.210	166.200, 1.157	166.200, 1.115	166.200, 1.091	166.200, 1.056	166.200, 1.062	166.200, 1.011	166.200, 1.013	166.200, 0.937	166.200, 1.069	166.200, 0.924	166.200, 1.056	166.200, 3.769	166.200, 3.426	166.200, 3.283
833	166.400, 1.209	166.400, 1.156	166.400, 1.114	166.400, 1.090	166.400, 1.055	166.400, 1.062	166.400, 1.011	166.400, 1.012	166.400, 0.937	166.400, 1.068	166.400, 0.923	166.400, 1.055	166.400, 3.765	166.400, 3.424	166.400, 3.280
834	166.600, 1.209	166.600, 1.156	166.600, 1.114	166.600, 1.090	166.600, 1.054	166.600, 1.061	166.600, 1.011	166.600, 1.011	166.600, 0.936	166.600, 1.067	166.600, 0.922	166.600, 1.055	166.600, 3.762	166.600, 3.421	166.600, 3.276
835	166.800, 1.209	166.800, 1.155	166.800, 1.114	166.800, 1.089	166.800, 1.054	166.800, 1.061	166.800, 1.011	166.800, 1.011	166.800, 0.936	166.800, 1.067	166.800, 0.921	166.800, 1.054	166.800, 3.758	166.800, 3.419	166.800, 3.273
836	167.000, 1.208	167.000, 1.155	167.000, 1.113	167.000, 1.088	167.000, 1.053	167.000, 1.061	167.000, 1.010	167.000, 1.010	167.000, 0.935	167.000, 1.066	167.000, 0.921	167.000, 1.054	167.000, 3.755	167.000, 3.417	167.000, 3.270
837	167.200, 1.208	167.200, 1.154	167.200, 1.113	167.200, 1.088	167.200, 1.052	167.200, 1.060	167.200, 1.010	167.200, 1.010	167.200, 0.935	167.200, 1.066	167.200, 0.920	167.200, 1.053	167.200, 3.751	167.200, 3.415	167.200, 3.266
838	167.400, 1.208	167.400, 1.154	167.400, 1.113	167.400, 1.088	167.400, 1.052	167.400, 1.060	167.400, 1.010	167.400, 1.009	167.400, 0.935	167.400, 1.066	167.400, 0.920	167.400, 1.053	167.400, 3.748	167.400, 3.412	167.400, 3.263
839	167.600, 1.208	167.600, 1.153	167.600, 1.112	167.600, 1.088	167.600, 1.052	167.600, 1.059	167.600, 1.010	167.600, 1.009	167.600, 0.934	167.600, 1.065	167.600, 0.920	167.600, 1.052	167.600, 3.745	167.600, 3.411	167.600, 3.260
840	167.800, 1.208	167.800, 1.152	167.800, 1.112	167.800, 1.088	167.800, 1.051	167.800, 1.059	167.800, 1.009	167.800, 1.008	167.800, 0.934	167.800, 1.065	167.800, 0.920	167.800, 1.052	167.800, 3.742	167.800, 3.408	167.800, 3.256
841	168.000, 1.207	168.000, 1.152	168.000, 1.112	168.000, 1.087	168.000, 1.051	168.000, 1.059	168.000, 1.009	168.000, 1.008	168.000, 0.934	168.000, 1.065	168.000, 0.920	168.000, 1.051	168.000, 3.739	168.000, 3.406	168.000, 3.253
842	168.200, 1.207	168.200, 1.151	168.200, 1.111	168.200, 1.087	168.200, 1.050	168.200, 1.058	168.200, 1.009	168.200, 1.008	168.200, 0.933	168.200, 1.065	168.200, 0.920	168.200, 1.051	168.200, 3.736	168.200, 3.404	168.200, 3.250
843	168.400, 1.208	168.400, 1.150	168.400, 1.111	168.400, 1.087	168.400, 1.050	168.400, 1.058	168.400, 1.008	168.400, 1.008	168.400, 0.933	168.400, 1.064	168.400, 0.920	168.400, 1.050	168.400, 3.733	168.400, 3.401	168.400, 3.246
844	168.600, 1.208	168.600, 1.149	168.600, 1.110	168.600, 1.087	168.600, 1.049	168.600, 1.057	168.600, 1.008	168.600, 1.007	168.600, 0.933	168.600, 1.064	168.600, 0.920	168.600, 1.049	168.600, 3.730	168.600, 3.398	168.600, 3.243
845	168.800, 1.208	168.800, 1.149	168.800, 1.109	168.800, 1.086	168.800, 1.048	168.800, 1.057	168.800, 1.008	168.800, 1.007	168.800, 0.932	168.800, 1.063	168.800, 0.919	168.800, 1.049	168.800, 3.727	168.800, 3.395	168.800, 3.239
846	169.000, 1.208	169.000, 1.148	169.000, 1.109	169.000, 1.086	169.000, 1.048	169.000, 1.057	169.000, 1.008	169.000, 1.007	169.000, 0.932	169.000, 1.062	169.000, 0.918	169.000, 1.048	169.000, 3.723	169.000, 3.392	169.000, 3.236
847	169.200, 1.208	169.200, 1.147	169.200, 1.108	169.200, 1.086	169.200, 1.047	169.200, 1.056	169.200, 1.007	169.200, 1.007	169.200, 0.931	169.200, 1.062	169.200, 0.918	169.200, 1.048	169.200, 3.719	169.200, 3.389	169.200, 3.233
848	169.400, 1.208	169.400, 1.147	169.400, 1.108	169.400, 1.085	169.400, 1.047	169.400, 1.056	169.400, 1.007	169.400, 1.006	169.400, 0.931	169.400, 1.061	169.400, 0.917	169.400, 1.048	169.400, 3.715	169.400, 3.386	169.400, 3.230
849	169.600, 1.208	169.600, 1.146	169.600, 1.107	169.600, 1.085	169.600, 1.046	169.600, 1.056	169.600, 1.006	169.600, 1.006	169.600, 0.931	169.600, 1.060	169.600, 0.916	169.600, 1.048	169.600, 3.711	169.600, 3.383	169.600, 3.227
850	169.800, 1.208	169.800, 1.146	169.800, 1.107	169.800, 1.084	169.800, 1.046	169.800, 1.055	169.800, 1.005	169.800, 1.006	169.800, 0.930	169.800, 1.060	169.800, 0.915	169.800, 1.048	169.800, 3.708	169.800, 3.380	169.800, 3.224
851	170.000, 1.208	170.000, 1.146	170.000, 1.106	170.000, 1.083	170.000, 1.045	170.000, 1.055	170.000, 1.004	170.000, 1.005	170.000, 0.930	170.000, 1.059	170.000, 0.914	170.000, 1.047	170.000, 3.704	170.000, 3.377	170.000, 3.221
852	170.200, 1.208	170.200, 1.145	170.200, 1.105	170.200, 1.083	170.200, 1.045	170.200, 1.054	170.200, 1.003	170.200, 1.005	170.200, 0.929	170.200, 1.058	170.200, 0.914	170.200, 1.047	170.200, 3.701	170.200, 3.374	170.200, 3.218
853	170.400, 1.207	170.400, 1.145	170.400, 1.105	170.400, 1.082	170.400, 1.044	170.400, 1.054	170.400, 1.003	170.400, 1.004	170.400, 0.929	170.400, 1.058	170.400, 0.913	170.400, 1.047	170.400, 3.697	170.400, 3.371	170.400, 3.215
854	170.600, 1.207	170.600, 1.145	170.600, 1.104	170.600, 1.081	170.600, 1.043	170.600, 1.053	170.600, 1.002	170.600, 1.004	170.600, 0.928	170.600, 1.057	170.600, 0.912	170.600, 1.046	170.600, 3.694	170.600, 3.368	170.600, 3.212
855	170.800, 1.207	170.800, 1.144	170.800, 1.103	170.800, 1.081	170.800, 1.043	170.800, 1.053	170.800, 1.001	170.800, 1.003	170.800, 0.928	170.800, 1.057	170.800, 0.912	170.800, 1.046	170.800, 3.690	170.800, 3.365	170.800, 3.209
856	171.000, 1.207	171.000, 1.144	171.000, 1.103	171.000, 1.080	171.000, 1.043	171.000, 1.053	171.000, 1.001	171.000, 1.003	171.000, 0.928	171.000, 1.056	171.000, 0.911	171.000, 1.046	171.000, 3.687	171.000, 3.363	171.000, 3.206
857	171.200, 1.207	171.200, 1.143	171.200, 1.102	171.200, 1.080	171.200, 1.042	171.200, 1.052	171.200, 1.000	171.200, 1.002	171.200, 0.928	171.200, 1.056	171.200, 0.911	171.200, 1.045	171.200, 3.683	171.200, 3.360	171.200, 3.202
858	171.400, 1.207	171.400, 1.143	171.400, 1.102	171.400, 1.080	171.400, 1.042	171.400, 1.052	171.400, 1.000	171.400, 1.002	171.400, 0.927	171.400, 1.056	171.400, 0.911	171.400, 1.045	171.400, 3.680	171.400, 3.357	171.400, 3.198
859	171.600, 1.207	171.600, 1.142	171.600, 1.101	171.600, 1.079	171.600, 1.042	171.600, 1.051	171.600, 0.999	171.600, 1.002	171.600, 0.927	171.600, 1.056	171.600, 0.911	171.600, 1.044	171.600, 3.676	171.600, 3.354	171.600, 3.195
860	171.800, 1.207	171.800, 1.142	171.800, 1.101	171.800, 1.079	171.800, 1.041	171.800, 1.051	171.800, 0.999	171.800, 1.001	171.800, 0.927	171.800, 1.055	171.800, 0.910	171.800, 1.044	171.800, 3.673	171.800, 3.351	171.800, 3.192
861	172.000, 1.207	172.000, 1.141	172.000, 1.101	172.000, 1.078	172.000, 1.041	172.000, 1.050	172.000, 0.999	172.000, 1.001	172.000, 0.927	172.000, 1.055	172.000, 0.910	172.000, 1.043	172.000, 3.669	172.000, 3.348	172.000, 3.188
862	172.200, 1.207	172.200, 1.141	172.200, 1.101	172.200, 1.078	172.200, 1.041	172.200, 1.049	172.200, 0.998	172.200, 1.001	172.200, 0.927	172.200, 1.055	172.200, 0.909	172.200, 1.042	172.200, 3.666	172.200, 3.345	172.200, 3.185
863	172.400, 1.207	172.400, 1.140	172.400, 1.100	172.400, 1.077	172.400, 1.041	172.400, 1.048	172.400, 0.998	172.400, 1.001	172.400, 0.926	172.400, 1.054	172.400, 0.908	172.400, 1.042	172.400, 3.662	172.400, 3.343	172.400, 3.182
864	172.600, 1.207	172.600, 1.139	172.600, 1.100	172.600, 1.077	172.600, 1.040	172.600, 1.048	172.600, 0.998	172.600, 1.001	172.600, 0.926	172.600, 1.054	172.600, 0.908	172.600, 1.041	172.600, 3.659	172.600, 3.340	172.600, 3.179
865	172.800, 1.207	172.800, 1.139	172.800, 1.100	172.800, 1.077	172.800, 1.040	172.800, 1.047	172.800, 0.997	172.800, 1.000	172.800, 0.925	172.800, 1.054	172.800, 0.907	172.800, 1.041	172.800, 3.655	172.800, 3.337	172.800, 3.176
866	173.000, 1.207	173.000, 1.138	173.000, 1.100	173.000, 1.077	173.000, 1.039	173.000, 1.047	173.000, 0.997	173.000, 1.000	173.000, 0.925	173.000, 1.053	173.000, 0.907	173.000, 1.040	173.000, 3.651	173.000, 3.334	173.000, 3.172
867	173.200, 1.207	173.200, 1.138	173.200, 1.100	173.200, 1.076	173.200, 1.039	173.200, 1.047	173.200, 0.997	173.200, 1.000	173.200, 0.924	173.200, 1.053	173.200, 0.907	173.200, 1.040	173.200, 3.647	173.200, 3.331	173.200, 3.169
868	173.400, 1.207	173.400, 1.138	173.400, 1.100	173.400, 1.076	173.400, 1.038	173.400, 1.046	173.400, 0.996	173.400, 0.999	173.400, 0.923	173.400, 1.052	173.400, 0.906	173.400, 1.040	173.400, 3.644	173.400, 3.329	173.400, 3.166
869	173.600, 1.207	173.600, 1.137	173.600, 1.099	173.600, 1.076	173.600, 1.037	173.600, 1.046	173.600, 0.996	173.600, 0.999	173.600, 0.923	173.600, 1.052	173.600, 0.906	173.600, 1.039	173.600, 3.640	173.600, 3.326	173.600, 3.163
870	173.800, 1.206	173.800, 1.137	173.800, 1.099	173.800, 1.076	173.800, 1.037	173.800, 1.046	173.800, 0.995	173.800, 0.999	173.800, 0.922	173.800, 1.051	173.800, 0.905	173.800, 1.039	173.800, 3.637	173.800, 3.323	173.800, 3.160
871	174.000, 1.206	174.000, 1.137	174.000, 1.099	174.000, 1.075	174.000, 1.036	174.000, 1.045	174.000, 0.995	174.000, 0.999	174.000, 0.921	174.000, 1.051	174.000, 0.905	174.000, 1.038	174.000, 3.633	174.000, 3.320	174.000, 3.157
872	174.200, 1.206	174.200, 1.136	174.200, 1.099	174.200, 1.074	174.200, 1.035	174.200, 1.045	174.200, 0.995	174.200, 0.998	174.200, 0.921	174.200, 1.050	174.200, 0.905	174.200, 1.038	174.200, 3.630	174.200, 3.317	174.200, 3.154
873	174.400, 1.206	174.400, 1.136	174.400, 1.098	174.400, 1.074	174.400, 1.035	174.400, 1.044	174.400, 0.994	174.400, 0.998	174.400, 0.920	174.400, 1.049	174.400, 0.905	174.400, 1.037	174.400, 3.626	174.400, 3.314	174.400, 3.151
874	174.600, 1.206	174.600, 1.135	174.600, 1.098	174.600, 1.073	174.600, 1.034	174.600, 1.044	174.600, 0.994	174.600, 0.997	174.600, 0.920	174.600, 1.048	174.600, 0.905	174.600, 1.037	174.600, 3.622	174.600, 3.311	174.600, 3.148
875	174.800, 1.205	174.800, 1.135	174.800, 1.097	174.800, 1.073	174.800, 1.034	174.800, 1.044	174.800, 0.994	174.800, 0.997	174.800, 0.919	174.800, 1.048	174.800, 0.905	174.800, 1.037	174.800, 3.619	174.800, 3.308	174.800, 3.144
876	175.000, 1.205	175.000, 1.135	175.000, 1.096	175.000, 1.072	175.000, 1.034	175.000, 1.043	175.000, 0.994	175.000, 0.996	175.000, 0.919	175.000, 1.047	175.000, 0.904	175.000, 1.036	175.000, 3.615	175.000, 3.304	175.000, 3.141
877	175.200, 1.204	175.200, 1.135	175.200, 1.095	175.200, 1.072	175.200, 1.033	175.200, 1.043	175.200, 0.994	175.200, 0.996	175.200, 0.918	175.200, 1.046	175.200, 0.904	175.200, 1.036	175.200, 3.610	175.200, 3.301	175.200, 3.137
878	175.400, 1.204	175.400, 1.134	175.400, 1.095	175.400, 1.071	175.400, 1.033	175.400, 1.043	175.400, 0.993	175.400, 0.996	175.400, 0.918	175.400, 1.046	175.400, 0.904	175.400, 1.035	175.400, 3.606	175.400, 3.298	175.400, 3.134
879	175.600, 1.204	175.600, 1.134	175.600, 1.094	175.600, 1.071	175.600, 1.033	175.600, 1.042	175.600, 0.993	175.600, 0.995	175.600, 0.917	175.600, 1.045	175.600, 0.903	175.600, 1.034	175.600, 3.602	175.600, 3.294	175.600, 3.130
880	175.800, 1.203	175.800, 1.134	175.800, 1.094	175.800, 1.070	175.800, 1.033	175.800, 1.042	175.800, 0.992	175.800, 0.995	175.800, 0.917	175.800, 1.044	175.800, 0.902	175.800, 1.034	175.800, 3.598	175.800, 3.291	175.800, 3.127
881	176.000, 1.203	176.000, 1.133	176.000, 1.094	176.000, 1.070	176.000, 1.033	176.000, 1.042	176.000, 0.992	176.000, 0.995	176.000, 0.917	176.000, 1.044	176.000, 0.902	176.000, 1.033	176.000, 3.594	176.000, 3.288	176.000, 3.123
882	176.200, 1.203	176.200, 1.133	176.200, 1.094	176.200, 1.069	176.200, 1.033	176.200, 1.041	176.200, 0.991	176.200, 0.995	176.200, 0.917	176.200, 1.043	176.200, 0.901	176.200, 1.032	176.200, 3.590	176.200, 3.285	176.200, 3.120
883	176.400, 1.203	176.400, 1.132	176.400, 1.093	176.400, 1.069	176.400, 1.033	176.400, 1.041	176.400, 0.991	176.400, 0.994	176.400, 0.917	176.400, 1.042	176.400, 0.901	176.400, 1.032	176.400, 3.586	176.400, 3.282	176.400, 3.116
884	176.600, 1.203	176.600, 1.131	176.600, 1.093	176.600, 1.069	176.600, 1.033	176.600, 1.041	176.600, 0.990	176.600, 0.994	176.600, 0.917	176.600, 1.042	176.600, 0.901	176.600, 1.032	176.600, 3.583	176.600, 3.280	176.600, 3.113
885	176.800, 1.204	176.800, 1.131	176.800, 1.093	176.800, 1.069	176.800, 1.032	176.800, 1.040	176.800, 0.990	176.800, 0.994	176.800, 0.916	176.800, 1.042	176.800, 0.900	176.800, 1.031	176.800, 3.579	176.800, 3.277	176.800, 3.109
886	177.000, 1.204	177.000, 1.130	177.000, 1.092	177.000, 1.069	177.000, 1.032	177.000, 1.040	177.000, 0.989	177.000, 0.993	177.000, 0.916	177.000, 1.042	177.000, 0.900	177.000, 1.031	177.000, 3.575	177.000, 3.274	177.000, 3.105
887	177.200, 1.203	177.200, 1.130	177.200, 1.092	177.200, 1.068	177.200, 1.031	177.200, 1.040	177.200, 0.989	177.200, 0.993	177.200, 0.916	177.200, 1.042	177.200, 0.899	177.200, 1.030	177.200, 3.571	177.200, 3.271	177.200, 3.102
888	177.400, 1.204	177.400, 1.129	177.400, 1.092	177.400, 1.068	177.400, 1.031	177.400, 1.039	177.400, 0.988	177.400, 0.992	177.400, 0.916	177.400, 1.042	177.400, 0.899	177.400, 1.030	177.400, 3.567	177.400, 3.269	177.400, 3.098
889	177.600, 1.203	177.600, 1.129	177.600, 1.092	177.600, 1.068	177.600, 1.030	177.600, 1.039	177.600, 0.988	177.600, 0.992	177.600, 0.915	177.600, 1.042	177.600, 0.898	177.600, 1.029	177.600, 3.563	177.600, 3.266	177.600, 3.095
890	177.800, 1.204	177.800, 1.129	177.800, 1.091	177.800, 1.068	177.800, 1.030	177.800, 1.039	177.800, 0.988	177.800, 0.991	177.800, 0.915	177.800, 1.042	177.800, 0.898	177.800, 1.029	177.800, 3.560	177.800, 3.262	177.800, 3.091
891	178.000, 1.204	178.000, 1.128	178.000, 1.091	178.000, 1.068	178.000, 1.029	178.000, 1.038	178.000, 0.987	178.000, 0.991	178.000, 0.915	178.000, 1.041	178.000, 0.898	178.000, 1.029	178.000, 3.556	178.000, 3.259	178.000, 3.087
892	178.200, 1.203	178.200, 1.128	178.200, 1.090	178.200, 1.067	178.200, 1.028	178.200, 1.038	178.200, 0.987	178.200, 0.990	178.200, 0.914	178.200, 1.041	178.200, 0.897	178.200, 1.028	178.200, 3.552	178.200, 3.255	178.200, 3.084
893	178.400, 1.203	178.400, 1.128	178.400, 1.090	178.400, 1.067	178.400, 1.028	178.400, 1.037	178.400, 0.987	178.400, 0.989	178.400, 0.914	178.400, 1.041	178.400, 0.897	178.400, 1.028	178.400, 3.548	178.400, 3.252	178.400, 3.080
894	178.600, 1.203	178.600, 1.127	178.600, 1.089	178.600, 1.067	178.600, 1.027	178.600, 1.037	178.600, 0.986	178.600, 0.988	178.600, 0.914	178.600, 1.041	178.600, 0.896	178.600, 1.028	178.600, 3.544	178.600, 3.248	178.600, 3.077
895	178.800, 1.203	178.800, 1.127	178.800, 1.089	178.800, 1.066	178.800, 1.027	178.800, 1.036	178.800, 0.986	178.800, 0.988	178.800, 0.913	178.800, 1.041	178.800, 0.896	178.800, 1.027	178.800, 3.540	178.800, 3.245	178.800, 3.074
896	179.000, 1.202	179.000, 1.127	179.000, 1.089	179.000, 1.066	179.000, 1.026	179.000, 1.036	179.000, 0.986	179.000, 0.987	179.000, 0.913	179.000, 1.040	179.000, 0.896	179.000, 1.027	179.000, 3.536	179.000, 3.241	179.000, 3.070
897	179.200, 1.202	179.200, 1.127	179.200, 1.088	179.200, 1.065	179.200, 1.026	179.200, 1.035	179.200, 0.986	179.200, 0.986	179.200, 0.912	179.200, 1.040	179.200, 0.895	179.200, 1.026	179.200, 3.532	179.200, 3.238	179.200, 3.067
898	179.400, 1.202	179.400, 1.127	179.400, 1.088	179.400, 1.065	179.400, 1.025	179.400, 1.035	179.400, 0.986	179.400, 0.986	179.400, 0.912	179.400, 1.040	179.400, 0.895	179.400, 1.026	179.400, 3.528	179.400, 3.234	179.400, 3.064
899	179.600, 1.202	179.600, 1.126	179.600, 1.088	179.600, 1.064	179.600, 1.025	179.600, 1.035	179.600, 0.985	179.600, 0.986	179.600, 0.912	179.600, 1.039	179.600, 0.895	179.600, 1.025	179.600, 3.524	179.600, 3.231	179.600, 3.060
900	179.800, 1.202	179.800, 1.126	179.800, 1.088	179.800, 1.063	179.800, 1.024	179.800, 1.034	179.800, 0.985	179.800, 0.985	179.800, 0.912	179.800, 1.038	179.800, 0.894	179.800, 1.025	179.800, 3.521	179.800, 3.228	179.800, 3.057
901	180.000, 1.203	180.000, 1.125	180.000, 1.088	180.000, 1.063	180.000, 1.024	180.000, 1.034	180.000, 0.985	180.000, 0.985	180.000, 0.911	180.000, 1.038	180.000, 0.894	180.000, 1.024	180.000, 3.517	180.000, 3.224	180.000, 3.054
902	180.200, 1.202	180.200, 1.124	180.200, 1.088	180.200, 1.063	180.200, 1.024	180.200, 1.034	180.200, 0.985	180.200, 0.985	180.200, 0.911	180.200, 1.037	180.200, 0.893	180.200, 1.024	180.200, 3.513	180.200, 3.221	180.200, 3.050
903	180.400, 1.202	180.400, 1.124	180.400, 1.088	180.400, 1.062	180.400, 1.023	180.400, 1.033	180.400, 0.985	180.400, 0.985	180.400, 0.911	180.400, 1.037	180.400, 0.893	180.400, 1.023	180.400, 3.510	180.400, 3.218	180.400, 3.047
904	180.600, 1.202	180.600, 1.123	180.600, 1.087	180.600, 1.062	180.600, 1.023	180.600, 1.033	180.600, 0.984	180.600, 0.985	180.600, 0.911	180.600, 1.036	180.600, 0.892	180.600, 1.023	180.600, 3.506	180.600, 3.215	180.600, 3.044
905	180.800, 1.202	180.800, 1.123	180.800, 1.087	180.800, 1.061	180.800, 1.023	180.800, 1.033	180.800, 0.984	180.800, 0.985	180.800, 0.910	180.800, 1.036	180.800, 0.892	180.800, 1.022	180.800, 3.502	180.800, 3.212	180.800, 3.041
906	181.000, 1.202	181.000, 1.122	181.000, 1.086	181.000, 1.061	181.000, 1.023	181.000, 1.032	181.000, 0.984	181.000, 0.985	181.000, 0.910	181.000, 1.036	181.000, 0.891	181.000, 1.022	181.000, 3.498	181.000, 3.209	181.000, 3.038
907	181.200, 1.202	181.200, 1.122	181.200, 1.086	181.200, 1.060	181.200, 1.022	181.200, 1.031	181.200, 0.984	181.200, 0.986	181.200, 0.910	181.200, 1.036	181.200, 0.891	181.200, 1.022	181.200, 3.494	181.200, 3.206	181.200, 3.034
908	181.400, 1.202	181.400, 1.121	181.400, 1.085	181.400, 1.060	181.400, 1.022	181.400, 1.031	181.400, 0.983	181.400, 0.986	181.400, 0.909	181.400, 1.035	181.400, 0.890	181.400, 1.022	181.400, 3.490	181.400, 3.202	181.400, 3.031
909	181.600, 1.202	181.600, 1.121	181.600, 1.085	181.600, 1.060	181.600, 1.022	181.600, 1.030	181.600, 0.983	181.600, 0.986	181.600, 0.909	181.600, 1.034	181.600, 0.890	181.600, 1.022	181.600, 3.485	181.600, 3.199	181.600, 3.027
910	181.800, 1.201	181.800, 1.120	181.800, 1.084	181.800, 1.060	181.800, 1.022	181.800, 1.030	181.800, 0.983	181.800, 0.986	181.800, 0.909	181.800, 1.033	181.800, 0.889	181.800, 1.022	181.800, 3.481	181.800, 3.196	181.800, 3.023
911	182.000, 1.201	182.000, 1.120	182.000, 1.084	182.000, 1.060	182.000, 1.021	182.000, 1.029	182.000, 0.982	182.000, 0.986	182.000, 0.908	182.000, 1.033	182.000, 0.889	182.000, 1.021	182.000, 3.477	182.000, 3.192	182.000, 3.019
912	182.200, 1.201	182.200, 1.119	182.200, 1.083	182.200, 1.060	182.200, 1.021	182.200, 1.028	182.200, 0.981	182.200, 0.985	182.200, 0.908	182.200, 1.032	182.200, 0.889	182.200, 1.021	182.200, 3.472	182.200, 3.189	182.200, 3.016
913	182.400, 1.200	182.400, 1.119	182.400, 1.083	182.400, 1.060	182.400, 1.021	182.400, 1.028	182.400, 0.981	182.400, 0.985	182.400, 0.908	182.400, 1.031	182.400, 0.889	182.400, 1.021	182.400, 3.468	182.400, 3.185	182.400, 3.012
914	182.600, 1.200	182.600, 1.119	182.600, 1.082	182.600, 1.059	182.600, 1.021	182.600, 1.027	182.600, 0.980	182.600, 0.985	182.600, 0.907	182.600, 1.031	182.600, 0.889	182.600, 1.020	182.600, 3.465	182.600, 3.182	182.600, 3.008
915	182.800, 1.200	182.800, 1.118	182.800, 1.082	182.800, 1.059	182.800, 1.021	182.800, 1.027	182.800, 0.980	182.800, 0.985	182.800, 0.907	182.800, 1.031	182.800, 0.889	182.800, 1.019	182.800, 3.461	182.800, 3.179	182.800, 3.005
916	183.000, 1.199	183.000, 1.118	183.000, 1.082	183.000, 1.059	183.000, 1.021	183.000, 1.027	183.000, 0.980	183.000, 0.984	183.000, 0.907	183.000, 1.031	183.000, 0.889	183.000, 1.019	183.000, 3.457	183.000, 3.176	183.000, 3.001
917	183.200, 1.199	183.200, 1.118	183.200, 1.082	183.200, 1.058	183.200, 1.020	183.200, 1.027	183.200, 0.979	183.200, 0.984	183.200, 0.907	183.200, 1.030	183.200, 0.889	183.200, 1.018	183.200, 3.454	183.200, 3.172	183.200, 2.998
918	183.400, 1.199	183.400, 1.118	183.400, 1.082	183.400, 1.058	183.400, 1.020	183.400, 1.027	183.400, 0.979	183.400, 0.983	183.400, 0.906	183.400, 1.030	183.400, 0.889	183.400, 1.017	183.400, 3.450	183.400, 3.169	183.400, 2.994
919	183.600, 1.199	183.600, 1.118	183.600, 1.081	183.600, 1.058	183.600, 1.019	183.600, 1.027	183.600, 0.979	183.600, 0.983	183.600, 0.906	183.600, 1.030	183.600, 0.889	183.600, 1.017	183.600, 3.447	183.600, 3.165	183.600, 2.991
920	183.800, 1.199	183.800, 1.118	183.800, 1.081	183.800, 1.057	183.800, 1.019	183.800, 1.027	183.800, 0.979	183.800, 0.983	183.800, 0.906	183.800, 1.030	183.800, 0.889	183.800, 1.017	183.800, 3.443	183.800, 3.162	183.800, 2.988
921	184.000, 1.199	184.000, 1.118	184.000, 1.081	184.000, 1.057	184.000, 1.018	184.000, 1.027	184.000, 0.979	184.000, 0.982	184.000, 0.906	184.000, 1.030	184.000, 0.889	184.000, 1.016	184.000, 3.440	184.000, 3.159	184.000, 2.985
922	184.200, 1.199	184.200, 1.118	184.200, 1.081	184.200, 1.057	184.200, 1.017	184.200, 1.027	184.200, 0.979	184.200, 0.982	184.200, 0.905	184.200, 1.030	184.200, 0.889	184.200, 1.016	184.200, 3.436	184.200, 3.156	184.200, 2.982
923	184.400, 1.198	184.400, 1.117	184.400, 1.081	184.400, 1.057	184.400, 1.017	184.400, 1.027	184.400, 0.979	184.400, 0.982	184.400, 0.905	184.400, 1.030	184.400, 0.888	184.400, 1.015	184.400, 3.433	184.400, 3.153	184.400, 2.979
924	184.600, 1.198	184.600, 1.117	184.600, 1.080	184.600, 1.056	184.600, 1.017	184.600, 1.026	184.600, 0.979	184.600, 0.982	184.600, 0.905	184.600, 1.029	184.600, 0.888	184.600, 1.015	184.600, 3.429	184.600, 3.149	184.600, 2.976
925	184.800, 1.198	184.800, 1.117	184.800, 1.080	184.800, 1.056	184.800, 1.016	184.800, 1.026	184.800, 0.979	184.800, 0.982	184.800, 0.905	184.800, 1.029	184.800, 0.888	184.800, 1.015	184.800, 3.425	184.800, 3.146	184.800, 2.973
926	185.000, 1.198	185.000, 1.117	185.000, 1.080	185.000, 1.056	185.000, 1.016	185.000, 1.025	185.000, 0.978	185.000, 0.981	185.000, 0.904	185.000, 1.029	185.000, 0.887	185.000, 1.014	185.000, 3.421	185.000, 3.143	185.000, 2.969
927	185.200, 1.198	185.200, 1.116	185.200, 1.080	185.200, 1.055	185.200, 1.016	185.200, 1.025	185.200, 0.978	185.200, 0.981	185.200, 0.904	185.200, 1.028	185.200, 0.887	185.200, 1.014	185.200, 3.417	185.200, 3.139	185.200, 2.966
928	185.400, 1.198	185.400, 1.116	185.400, 1.079	185.400, 1.055	185.400, 1.016	185.400, 1.024	185.400, 0.978	185.400, 0.981	185.400, 0.904	185.400, 1.028	185.400, 0.886	185.400, 1.014	185.400, 3.413	185.400, 3.135	185.400, 2.962
929	185.600, 1.198	185.600, 1.116	185.600, 1.079	185.600, 1.054	185.600, 1.016	185.600, 1.024	185.600, 0.978	185.600, 0.980	185.600, 0.904	185.600, 1.027	185.600, 0.886	185.600, 1.014	185.600, 3.409	185.600, 3.132	185.600, 2.958
930	185.800, 1.198	185.800, 1.115	185.800, 1.079	185.800, 1.054	185.800, 1.015	185.800, 1.023	185.800, 0.977	185.800, 0.980	185.800, 0.904	185.800, 1.026	185.800, 0.886	185.800, 1.014	185.800, 3.405	185.800, 3.128	185.800, 2.954
931	186.000, 1.198	186.000, 1.115	186.000, 1.079	186.000, 1.054	186.000, 1.015	186.000, 1.023	186.000, 0.977	186.000, 0.980	186.000, 0.904	186.000, 1.026	186.000, 0.885	186.000, 1.013	186.000, 3.401	186.000, 3.124	186.000, 2.950
932	186.200, 1.198	186.200, 1.115	186.200, 1.079	186.200, 1.054	186.200, 1.015	186.200, 1.023	186.200, 0.977	186.200, 0.980	186.200, 0.903	186.200, 1.025	186.200, 0.885	186.200, 1.013	186.200, 3.397	186.200, 3.121	186.200, 2.946
933	186.400, 1.197	186.400, 1.114	186.400, 1.079	186.400, 1.053	186.400, 1.015	186.400, 1.022	186.400, 0.976	186.400, 0.979	186.400, 0.903	186.400, 1.025	186.400, 0.885	186.400, 1.012	186.400, 3.393	186.400, 3.118	186.400, 2.942
934	186.600, 1.197	186.600, 1.114	186.600, 1.079	186.600, 1.053	186.600, 1.014	186.600, 1.022	186.600, 0.976	186.600, 0.979	186.600, 0.903	186.600, 1.025	186.600, 0.885	186.600, 1.012	186.600, 3.389	186.600, 3.114	186.600, 2.939
935	186.800, 1.197	186.800, 1.114	186.800, 1.078	186.800, 1.053	186.800, 1.014	186.800, 1.022	186.800, 0.976	186.800, 0.978	186.800, 0.902	186.800, 1.025	186.800, 0.884	186.800, 1.011	186.800, 3.385	186.800, 3.111	186.800, 2.935
936	187.000, 1.197	187.000, 1.114	187.000, 1.078	187.000, 1.053	187.000, 1.014	187.000, 1.022	187.000, 0.975	187.000, 0.978	187.000, 0.902	187.000, 1.025	187.000, 0.884	187.000, 1.011	187.000, 3.381	187.000, 3.107	187.000, 2.931
937	187.200, 1.197	187.200, 1.113	187.200, 1.078	187.200, 1.052	187.200, 1.013	187.200, 1.022	187.200, 0.975	187.200, 0.977	187.200, 0.901	187.200, 1.024	187.200, 0.883	187.200, 1.011	187.200, 3.378	187.200, 3.104	187.200, 2.928
938	187.400, 1.197	187.400, 1.113	187.400, 1.077	187.400, 1.052	187.400, 1.013	187.400, 1.022	187.400, 0.975	187.400, 0.977	187.400, 0.900	187.400, 1.024	187.400, 0.883	187.400, 1.011	187.400, 3.374	187.400, 3.100	187.400, 2.925
939	187.600, 1.197	187.600, 1.113	187.600, 1.077	187.600, 1.052	187.600, 1.012	187.600, 1.022	187.600, 0.974	187.600, 0.976	187.600, 0.900	187.600, 1.024	187.600, 0.882	187.600, 1.011	187.600, 3.370	187.600, 3.097	187.600, 2.921
940	187.800, 1.197	187.800, 1.112	187.800, 1.076	187.800, 1.052	187.800, 1.011	187.800, 1.022	187.800, 0.973	187.800, 0.976	187.800, 0.899	187.800, 1.023	187.800, 0.882	187.800, 1.010	187.800, 3.366	187.800, 3.094	187.800, 2.918
941	188.000, 1.197	188.000, 1.112	188.000, 1.076	188.000, 1.052	188.000, 1.011	188.000, 1.022	188.000, 0.973	188.000, 0.976	188.000, 0.899	188.000, 1.023	188.000, 0.881	188.000, 1.010	188.000, 3.362	188.000, 3.091	188.000, 2.915
942	188.200, 1.197	188.200, 1.111	188.200, 1.075	188.200, 1.052	188.200, 1.010	188.200, 1.021	188.200, 0.972	188.200, 0.976	188.200, 0.898	188.200, 1.023	188.200, 0.881	188.200, 1.010	188.200, 3.358	188.200, 3.087	188.200, 2.912
943	188.400, 1.197	188.400, 1.111	188.400, 1.075	188.400, 1.052	188.400, 1.010	188.400, 1.021	188.400, 0.972	188.400, 0.976	188.400, 0.898	188.400, 1.022	188.400, 0.880	188.400, 1.009	188.400, 3.355	188.400, 3.084	188.400, 2.908
944	188.600, 1.197	188.600, 1.110	188.600, 1.074	188.600, 1.051	188.600, 1.010	188.600, 1.021	188.600, 0.971	188.600, 0.975	188.600, 0.898	188.600, 1.022	188.600, 0.880	188.600, 1.009	188.600, 3.350	188.600, 3.080	188.600, 2.905
945	188.800, 1.196	188.800, 1.110	188.800, 1.074	188.800, 1.051	188.800, 1.009	188.800, 1.020	188.800, 0.971	188.800, 0.975	188.800, 0.899	188.800, 1.021	188.800, 0.880	188.800, 1.009	188.800, 3.346	188.800, 3.076	188.800, 2.902
946	189.000, 1.196	189.000, 1.109	189.000, 1.073	189.000, 1.050	189.000, 1.009	189.000, 1.020	189.000, 0.971	189.000, 0.975	189.000, 0.899	189.000, 1.021	189.000, 0.880	189.000, 1.008	189.000, 3.342	189.000, 3.072	189.000, 2.898
947	189.200, 1.196	189.200, 1.109	189.200, 1.072	189.200, 1.050	189.200, 1.009	189.200, 1.020	189.200, 0.970	189.200, 0.975	189.200, 0.899	189.200, 1.021	189.200, 0.880	189.200, 1.008	189.200, 3.337	189.200, 3.069	189.200, 2.894
948	189.400, 1.196	189.400, 1.109	189.400, 1.072	189.400, 1.049	189.400, 1.008	189.400, 1.020	189.400, 0.970	189.400, 0.975	189.400, 0.899	189.400, 1.020	189.400, 0.879	189.400, 1.008	189.400, 3.333	189.400, 3.065	189.400, 2.891
949	189.600, 1.196	189.600, 1.108	189.600, 1.072	189.600, 1.049	189.600, 1.008	189.600, 1.019	189.600, 0.970	189.600, 0.975	189.600, 0.898	189.600, 1.020	189.600, 0.879	189.600, 1.008	189.600, 3.329	189.600, 3.061	189.600, 2.887
950	189.800, 1.196	189.800, 1.108	189.800, 1.072	189.800, 1.049	189.800, 1.007	189.800, 1.019	189.800, 0.970	189.800, 0.975	189.800, 0.898	189.800, 1.020	189.800, 0.879	189.800, 1.007	189.800, 3.325	189.800, 3.057	189.800, 2.883
951	190.000, 1.196	190.000, 1.107	190.000, 1.072	190.000, 1.048	190.000, 1.007	190.000, 1.019	190.000, 0.970	190.000, 0.974	190.000, 0.898	190.000, 1.020	190.000, 0.879	190.000, 1.007	190.000, 3.321	190.000, 3.054	190.000, 2.880
952	190.200, 1.195	190.200, 1.107	190.200, 1.071	190.200, 1.048	190.200, 1.007	190.200, 1.018	190.200, 0.970	190.200, 0.974	190.200, 0.898	190.200, 1.020	190.200, 0.879	190.200, 1.007	190.200, 3.317	190.200, 3.050	190.200, 2.876
953	190.400, 1.195	190.400, 1.107	190.400, 1.071	190.400, 1.048	190.400, 1.006	190.400, 1.018	190.400, 0.969	190.400, 0.974	190.400, 0.898	190.400, 1.020	190.400, 0.879	190.400, 1.006	190.400, 3.313	190.400, 3.047	190.400, 2.872
954	190.600, 1.195	190.600, 1.106	190.600, 1.071	190.600, 1.048	190.600, 1.006	190.600, 1.018	190.600, 0.970	190.600, 0.974	190.600, 0.898	190.600, 1.020	190.600, 0.879	190.600, 1.006	190.600, 3.309	190.600, 3.043	190.600, 2.869
955	190.800, 1.195	190.800, 1.106	190.800, 1.071	190.800, 1.047	190.800, 1.006	190.800, 1.018	190.800, 0.970	190.800, 0.973	190.800, 0.897	190.800, 1.020	190.800, 0.879	190.800, 1.006	190.800, 3.305	190.800, 3.040	190.800, 2.866
956	191.000, 1.196	191.000, 1.105	191.000, 1.071	191.000, 1.047	191.000, 1.006	191.000, 1.018	191.000, 0.970	191.000, 0.973	191.000, 0.897	191.000, 1.019	191.000, 0.878	191.000, 1.006	191.000, 3.301	191.000, 3.037	191.000, 2.862
957	191.200, 1.196	191.200, 1.105	191.200, 1.071	191.200, 1.047	191.200, 1.006	191.200, 1.017	191.200, 0.970	191.200, 0.973	191.200, 0.896	191.200, 1.019	191.200, 0.878	191.200, 1.005	191.200, 3.298	191.200, 3.034	191.200, 2.859
958	191.400, 1.196	191.400, 1.105	191.400, 1.071	191.400, 1.047	191.400, 1.006	191.400, 1.017	191.400, 0.970	191.400, 0.972	191.400, 0.895	191.400, 1.018	191.400, 0.878	191.400, 1.005	191.400, 3.294	191.400, 3.030	191.400, 2.855
959	191.600, 1.196	191.600, 1.104	191.600, 1.071	191.600, 1.046	191.600, 1.005	191.600, 1.017	191.600, 0.970	191.600, 0.972	191.600, 0.895	191.600, 1.018	191.600, 0.877	191.600, 1.005	191.600, 3.291	191.600, 3.027	191.600, 2.852
960	191.800, 1.196	191.800, 1.104	191.800, 1.070	191.800, 1.046	191.800, 1.006	191.800, 1.016	191.800, 0.970	191.800, 0.972	191.800, 0.895	191.800, 1.017	191.800, 0.877	191.800, 1.005	191.800, 3.287	191.800, 3.024	191.800, 2.849
961	192.000, 1.196	192.000, 1.104	192.000, 1.070	192.000, 1.046	192.000, 1.006	192.000, 1.016	192.000, 0.969	192.000, 0.972	192.000, 0.894	192.000, 1.017	192.000, 0.876	192.000, 1.004	192.000, 3.284	192.000, 3.021	192.000, 2.845
962	192.200, 1.197	192.200, 1.104	192.200, 1.070	192.200, 1.045	192.200, 1.006	192.200, 1.016	192.200, 0.969	192.200, 0.972	192.200, 0.895	192.200, 1.016	192.200, 0.876	192.200, 1.004	192.200, 3.280	192.200, 3.018	192.200, 2.842
963	192.400, 1.197	192.400, 1.104	192.400, 1.069	192.400, 1.045	192.400, 1.006	192.400, 1.016	192.400, 0.969	192.400, 0.972	192.400, 0.895	192.400, 1.016	192.400, 0.876	192.400, 1.004	192.400, 3.277	192.400, 3.015	192.400, 2.839
964	192.600, 1.197	192.600, 1.103	192.600, 1.068	192.600, 1.045	192.600, 1.006	192.600, 1.015	192.600, 0.968	192.600, 0.971	192.600, 0.895	192.600, 1.015	192.600, 0.875	192.600, 1.004	192.600, 3.273	192.600, 3.012	192.600, 2.835
965	192.800, 1.197	192.800, 1.103	192.800, 1.068	192.800, 1.044	192.800, 1.005	192.800, 1.015	192.800, 0.968	192.800, 0.971	192.800, 0.895	192.800, 1.015	192.800, 0.875	192.800, 1.004	192.800, 3.270	192.800, 3.008	192.800, 2.832
966	193.000, 1.197	193.000, 1.103	193.000, 1.068	193.000, 1.044	193.000, 1.004	193.000, 1.014	193.000, 0.967	193.000, 0.971	193.000, 0.895	193.000, 1.015	193.000, 0.875	193.000, 1.003	193.000, 3.266	193.000, 3.005	193.000, 2.828
967	193.200, 1.197	193.200, 1.103	193.200, 1.067	193.200, 1.044	193.200, 1.004	193.200, 1.014	193.200, 0.967	193.200, 0.971	193.200, 0.895	193.200, 1.014	193.200, 0.875	193.200, 1.003	193.200, 3.263	193.200, 3.001	193.200, 2.824
968	193.400, 1.197	193.400, 1.103	193.400, 1.067	193.400, 1.043	193.400, 1.003	193.400, 1.013	193.400, 0.967	193.400, 0.972	193.400, 0.895	193.400, 1.014	193.400, 0.874	193.400, 1.003	193.400, 3.259	193.400, 2.997	193.400, 2.821
969	193.600, 1.196	193.600, 1.103	193.600, 1.067	193.600, 1.043	193.600, 1.003	193.600, 1.012	193.600, 0.967	193.600, 0.972	193.600, 0.894	193.600, 1.014	193.600, 0.874	193.600, 1.003	193.600, 3.255	193.600, 2.994	193.600, 2.817
970	193.800, 1.196	193.800, 1.103	193.800, 1.067	193.800, 1.043	193.800, 1.002	193.800, 1.012	193.800, 0.966	193.800, 0.972	193.800, 0.894	193.800, 1.014	193.800, 0.874	193.800, 1.002	193.800, 3.252	193.800, 2.990	193.800, 2.813
971	194.000, 1.196	194.000, 1.102	194.000, 1.067	194.000, 1.043	194.000, 1.002	194.000, 1.011	194.000, 0.966	194.000, 0.972	194.000, 0.894	194.000, 1.014	194.000, 0.873	194.000, 1.002	194.000, 3.248	194.000, 2.986	194.000, 2.810
972	194.200, 1.196	194.200, 1.102	194.200, 1.066	194.200, 1.042	194.200, 1.002	194.200, 1.011	194.200, 0.966	194.200, 0.971	194.200, 0.894	194.200, 1.014	194.200, 0.873	194.200, 1.002	194.200, 3.244	194.200, 2.983	194.200, 2.807
973	194.400, 1.195	194.400, 1.102	194.400, 1.066	194.400, 1.042	194.400, 1.001	194.400, 1.010	194.400, 0.965	194.400, 0.971	194.400, 0.893	194.400, 1.014	194.400, 0.873	194.400, 1.001	194.400, 3.239	194.400, 2.979	194.400, 2.803
974	194.600, 1.195	194.600, 1.102	194.600, 1.066	194.600, 1.042	194.600, 1.001	194.600, 1.010	194.600, 0.965	194.600, 0.971	194.600, 0.893	194.600, 1.013	194.600, 0.872	194.600, 1.001	194.600, 3.235	194.600, 2.976	194.600, 2.800
975	194.800, 1.195	194.800, 1.101	194.800, 1.066	194.800, 1.042	194.800, 1.001	194.800, 1.010	194.800, 0.965	194.800, 0.971	194.800, 0.892	194.800, 1.013	194.800, 0.872	194.800, 1.001	194.800, 3.231	194.800, 2.972	194.800, 2.797
976	195.000, 1.195	195.000, 1.101	195.000, 1.066	195.000, 1.042	195.000, 1.001	195.000, 1.009	195.000, 0.965	195.000, 0.970	195.000, 0.892	195.000, 1.013	195.000, 0.872	195.000, 1.000	195.000, 3.227	195.000, 2.969	195.000, 2.793
977	195.200, 1.195	195.200, 1.101	195.200, 1.066	195.200, 1.041	195.200, 1.001	195.200, 1.009	195.200, 0.965	195.200, 0.970	195.200, 0.891	195.200, 1.013	195.200, 0.871	195.200, 1.000	195.200, 3.223	195.200, 2.965	195.200, 2.790
978	195.400, 1.195	195.400, 1.100	195.400, 1.066	195.400, 1.040	195.400, 1.001	195.400, 1.009	195.400, 0.964	195.400, 0.970	195.400, 0.891	195.400, 1.012	195.400, 0.871	195.400, 0.999	195.400, 3.218	195.400, 2.962	195.400, 2.787
979	195.600, 1.195	195.600, 1.100	195.600, 1.066	195.600, 1.040	195.600, 1.001	195.600, 1.008	195.600, 0.964	195.600, 0.969	195.600, 0.890	195.600, 1.012	195.600, 0.871	195.600, 0.999	195.600, 3.214	195.600, 2.958	195.600, 2.783
980	195.800, 1.195	195.800, 1.100	195.800, 1.066	195.800, 1.040	195.800, 1.001	195.800, 1.008	195.800, 0.964	195.800, 0.969	195.800, 0.890	195.800, 1.012	195.800, 0.870	195.800, 0.999	195.800, 3.210	195.800, 2.954	195.800, 2.780
981	196.000, 1.194	196.000, 1.099	196.000, 1.066	196.000, 1.039	196.000, 1.001	196.000, 1.008	196.000, 0.964	196.000, 0.968	196.000, 0.890	196.000, 1.012	196.000, 0.870	196.000, 0.998	196.000, 3.206	196.000, 2.951	196.000, 2.777
982	196.200, 1.194	196.200, 1.099	196.200, 1.065	196.200, 1.039	196.200, 1.001	196.200, 1.008	196.200, 0.964	196.200, 0.968	196.200, 0.890	196.200, 1.011	196.200, 0.870	196.200, 0.998	196.200, 3.202	196.200, 2.948	196.200, 2.773
983	196.400, 1.194	196.400, 1.098	196.400, 1.065	196.400, 1.039	196.400, 1.001	196.400, 1.007	196.400, 0.964	196.400, 0.967	196.400, 0.890	196.400, 1.011	196.400, 0.870	196.400, 0.998	196.400, 3.198	196.400, 2.944	196.400, 2.770
984	196.600, 1.194	196.600, 1.098	196.600, 1.064	196.600, 1.039	196.600, 1.000	196.600, 1.007	196.600, 0.964	196.600, 0.967	196.600, 0.890	196.600, 1.011	196.600, 0.870	196.600, 0.997	196.600, 3.194	196.600, 2.941	196.600, 2.767
985	196.800, 1.194	196.800, 1.098	196.800, 1.064	196.800, 1.039	196.800, 1.000	196.800, 1.007	196.800, 0.964	196.800, 0.967	196.800, 0.890	196.800, 1.010	196.800, 0.870	196.800, 0.997	196.800, 3.191	196.800, 2.937	196.800, 2.763
986	197.000, 1.193	197.000, 1.097	197.000, 1.064	197.000, 1.039	197.000, 0.999	197.000, 1.007	197.000, 0.964	197.000, 0.967	197.000, 0.890	197.000, 1.010	197.000, 0.870	197.000, 0.997	197.000, 3.187	197.000, 2.934	197.000, 2.760
987	197.200, 1.193	197.200, 1.097	197.200, 1.063	197.200, 1.039	197.200, 0.999	197.200, 1.007	197.200, 0.964	197.200, 0.967	197.200, 0.891	197.200, 1.010	197.200, 0.870	197.200, 0.996	197.200, 3.184	197.200, 2.931	197.200, 2.757
988	197.400, 1.193	197.400, 1.097	197.400, 1.063	197.400, 1.039	197.400, 0.998	197.400, 1.006	197.400, 0.964	197.400, 0.967	197.400, 0.891	197.400, 1.010	197.400, 0.870	197.400, 0.996	197.400, 3.180	197.400, 2.927	197.400, 2.753
989	197.600, 1.193	197.600, 1.097	197.600, 1.063	197.600, 1.039	197.600, 0.998	197.600, 1.006	197.600, 0.963	197.600, 0.966	197.600, 0.891	197.600, 1.009	197.600, 0.870	197.600, 0.995	197.600, 3.176	197.600, 2.924	197.600, 2.750
990	197.800, 1.193	197.800, 1.097	197.800, 1.062	197.800, 1.038	197.800, 0.997	197.800, 1.005	197.800, 0.963	197.800, 0.966	197.800, 0.891	197.800, 1.009	197.800, 0.870	197.800, 0.995	197.800, 3.173	197.800, 2.921	197.800, 2.746
991	198.000, 1.193	198.000, 1.097	198.000, 1.062	198.000, 1.038	198.000, 0.997	198.000, 1.005	198.000, 0.962	198.000, 0.965	198.000, 0.891	198.000, 1.009	198.000, 0.869	198.000, 0.995	198.000, 3.169	198.000, 2.918	198.000, 2.743
992	198.200, 1.193	198.200, 1.097	198.200, 1.062	198.200, 1.038	198.200, 0.997	198.200, 1.005	198.200, 0.961	198.200, 0.965	198.200, 0.890	198.200, 1.009	198.200, 0.869	198.200, 0.995	198.200, 3.165	198.200, 2.915	198.200, 2.740
993	198.400, 1.192	198.400, 1.097	198.400, 1.062	198.400, 1.038	198.400, 0.996	198.400, 1.005	198.400, 0.961	198.400, 0.965	198.400, 0.890	198.400, 1.009	198.400, 0.869	198.400, 0.995	198.400, 3.162	198.400, 2.911	198.400, 2.737
994	198.600, 1.192	198.600, 1.097	198.600, 1.061	198.600, 1.038	198.600, 0.996	198.600, 1.005	198.600, 0.960	198.600, 0.964	198.600, 0.889	198.600, 1.008	198.600, 0.868	198.600, 0.995	198.600, 3.158	198.600, 2.908	198.600, 2.733
995	198.800, 1.192	198.800, 1.097	198.800, 1.061	198.800, 1.037	198.800, 0.995	198.800, 1.005	198.800, 0.960	198.800, 0.964	198.800, 0.889	198.800, 1.008	198.800, 0.868	198.800, 0.994	198.800, 3.155	198.800, 2.905	198.800, 2.730
996	199.000, 1.193	199.000, 1.096	199.000, 1.061	199.000, 1.037	199.000, 0.995	199.000, 1.005	199.000, 0.960	199.000, 0.964	199.000, 0.888	199.000, 1.008	199.000, 0.867	199.000, 0.994	199.000, 3.151	199.000, 2.901	199.000, 2.726
997	199.200, 1.193	199.200, 1.096	199.200, 1.061	199.200, 1.037	199.200, 0.995	199.200, 1.005	199.200, 0.959	199.200, 0.963	199.200, 0.887	199.200, 1.007	199.200, 0.867	199.200, 0.994	199.200, 3.147	199.200, 2.898	199.200, 2.723
998	199.400, 1.192	199.400, 1.095	199.400, 1.061	199.400, 1.037	199.400, 0.995	199.400, 1.005	199.400, 0.959	199.400, 0.962	199.400, 0.887	199.400, 1.007	199.400, 0.866	199.400, 0.993	199.400, 3.143	199.400, 2.894	199.400, 2.719
999	199.600, 1.192	199.600, 1.094	199.600, 1.061	199.600, 1.037	199.600, 0.995	199.600, 1.005	199.600, 0.959	199.600, 0.962	199.600, 0.887	199.600, 1.007	199.600, 0.866	199.600, 0.993	199.600, 3.139	199.600, 2.890	199.600, 2.715
1000	199.800, 1.192	199.800, 1.094	199.800, 1.061	199.800, 1.037	199.800, 0.995	199.800, 1.005	199.800, 0.959	199.800, 0.962	199.800, 0.886	199.800, 1.007	199.800, 0.866	199.800, 0.992	199.800, 3.135	199.800, 2.887	199.800, 2.712
1001	200.000, 1.192	200.000, 1.093	200.000, 1.061	200.000, 1.037	200.000, 0.995	200.000, 1.005	200.000, 0.959	200.000, 0.961	200.000, 0.886	200.000, 1.007	200.000, 0.865	200.000, 0.992	200.000, 3.131	200.000, 2.883	200.000, 2.709
1002	200.200, 1.192	200.200, 1.093	200.200, 1.061	200.200, 1.036	200.200, 0.995	200.200, 1.005	200.200, 0.959	200.200, 0.961	200.200, 0.886	200.200, 1.006	200.200, 0.865	200.200, 0.991	200.200, 3.127	200.200, 2.880	200.200, 2.706
1003	200.400, 1.192	200.400, 1.092	200.400, 1.060	200.400, 1.036	200.400, 0.995	200.400, 1.005	200.400, 0.959	200.400, 0.961	200.400, 0.885	200.400, 1.006	200.400, 0.865	200.400, 0.991	200.400, 3.123	200.400, 2.877	200.400, 2.703
1004	200.600, 1.191	200.600, 1.091	200.600, 1.060	200.600, 1.035	200.600, 0.995	200.600, 1.005	200.600, 0.959	200.600, 0.961	200.600, 0.885	200.600, 1.006	200.600, 0.864	200.600, 0.990	200.600, 3.119	200.600, 2.873	200.600, 2.700
1005	200.800, 1.191	200.800, 1.091	200.800, 1.060	200.800, 1.035	200.800, 0.995	200.800, 1.005	200.800, 0.958	200.800, 0.961	200.800, 0.885	200.800, 1.006	200.800, 0.864	200.800, 0.990	200.800, 3.115	200.800, 2.870	200.800, 2.697
1006	201.000, 1.191	201.000, 1.091	201.000, 1.060	201.000, 1.034	201.000, 0.995	201.000, 1.005	201.000, 0.958	201.000, 0.961	201.000, 0.884	201.000, 1.005	201.000, 0.864	201.000, 0.989	201.000, 3.112	201.000, 2.867	201.000, 2.694
1007	201.200, 1.191	201.200, 1.090	201.200, 1.060	201.200, 1.034	201.200, 0.994	201.200, 1.004	201.200, 0.958	201.200, 0.961	201.200, 0.884	201.200, 1.005	201.200, 0.864	201.200, 0.989	201.200, 3.108	201.200, 2.863	201.200, 2.691
1008	201.400, 1.191	201.400, 1.090	201.400, 1.059	201.400, 1.033	201.400, 0.994	201.400, 1.004	201.400, 0.957	201.400, 0.961	201.400, 0.884	201.400, 1.005	201.400, 0.864	201.400, 0.989	201.400, 3.104	201.400, 2.860	201.400, 2.688
1009	201.600, 1.191	201.600, 1.090	201.600, 1.059	201.600, 1.033	201.600, 0.994	201.600, 1.003	201.600, 0.957	201.600, 0.961	201.600, 0.884	201.600, 1.005	201.600, 0.863	201.600, 0.988	201.600, 3.100	201.600, 2.857	201.600, 2.685
1010	201.800, 1.191	201.800, 1.090	201.800, 1.059	201.800, 1.032	201.800, 0.994	201.800, 1.002	201.800, 0.957	201.800, 0.961	201.800, 0.884	201.800, 1.004	201.800, 0.863	201.800, 0.988	201.800, 3.097	201.800, 2.853	201.800, 2.681
1011	202.000, 1.191	202.000, 1.091	202.000, 1.059	202.000, 1.032	202.000, 0.993	202.000, 1.002	202.000, 0.957	202.000, 0.961	202.000, 0.884	202.000, 1.004	202.000, 0.863	202.000, 0.988	202.000, 3.093	202.000, 2.850	202.000, 2.678
1012	202.200, 1.191	202.200, 1.091	202.200, 1.058	202.200, 1.031	202.200, 0.993	202.200, 1.001	202.200, 0.957	202.200, 0.961	202.200, 0.884	202.200, 1.003	202.200, 0.863	202.200, 0.988	202.200, 3.089	202.200, 2.848	202.200, 2.674
1013	202.400, 1.191	202.400, 1.091	202.400, 1.058	202.400, 1.031	202.400, 0.992	202.400, 1.001	202.400, 0.957	202.400, 0.960	202.400, 0.884	202.400, 1.003	202.400, 0.863	202.400, 0.988	202.400, 3.086	202.400, 2.844	202.400, 2.671
1014	202.600, 1.191	202.600, 1.091	202.600, 1.058	202.600, 1.030	202.600, 0.992	202.600, 1.000	202.600, 0.956	202.600, 0.960	202.600, 0.883	202.600, 1.003	202.600, 0.863	202.600, 0.988	202.600, 3.082	202.600, 2.841	202.600, 2.667
1015	202.800, 1.191	202.800, 1.091	202.800, 1.058	202.800, 1.030	202.800, 0.992	202.800, 1.000	202.800, 0.956	202.800, 0.960	202.800, 0.883	202.800, 1.003	202.800, 0.864	202.800, 0.988	202.800, 3.078	202.800, 2.838	202.800, 2.664
1016	203.000, 1.191	203.000, 1.091	203.000, 1.058	203.000, 1.030	203.000, 0.992	203.000, 0.999	203.000, 0.956	203.000, 0.959	203.000, 0.883	203.000, 1.003	203.000, 0.864	203.000, 0.988	203.000, 3.074	203.000, 2.835	203.000, 2.660
1017	203.200, 1.191	203.200, 1.091	203.200, 1.058	203.200, 1.031	203.200, 0.991	203.200, 0.998	203.200, 0.956	203.200, 0.959	203.200, 0.883	203.200, 1.003	203.200, 0.864	203.200, 0.988	203.200, 3.071	203.200, 2.832	203.200, 2.656
1018	203.400, 1.191	203.400, 1.091	203.400, 1.057	203.400, 1.031	203.400, 0.991	203.400, 0.998	203.400, 0.956	203.400, 0.959	203.400, 0.882	203.400, 1.003	203.400, 0.863	203.400, 0.988	203.400, 3.067	203.400, 2.829	203.400, 2.653
1019	203.600, 1.192	203.600, 1.091	203.600, 1.057	203.600, 1.031	203.600, 0.991	203.600, 0.998	203.600, 0.955	203.600, 0.959	203.600, 0.882	203.600, 1.002	203.600, 0.863	203.600, 0.988	203.600, 3.063	203.600, 2.825	203.600, 2.649
1020	203.800, 1.191	203.800, 1.091	203.800, 1.057	203.800, 1.031	203.800, 0.990	203.800, 0.998	203.800, 0.955	203.800, 0.958	203.800, 0.882	203.800, 1.002	203.800, 0.863	203.800, 0.987	203.800, 3.060	203.800, 2.822	203.800, 2.645
1021	204.000, 1.191	204.000, 1.090	204.000, 1.057	204.000, 1.031	204.000, 0.990	204.000, 0.998	204.000, 0.955	204.000, 0.958	204.000, 0.881	204.000, 1.002	204.000, 0.862	204.000, 0.987	204.000, 3.056	204.000, 2.818	204.000, 2.642
1022	204.200, 1.191	204.200, 1.089	204.200, 1.058	204.200, 1.031	204.200, 0.989	204.200, 0.998	204.200, 0.955	204.200, 0.958	204.200, 0.881	204.200, 1.001	204.200, 0.862	204.200, 0.987	204.200, 3.053	204.200, 2.815	204.200, 2.638
1023	204.400, 1.191	204.400, 1.089	204.400, 1.058	204.400, 1.031	204.400, 0.989	204.400, 0.998	204.400, 0.955	204.400, 0.958	204.400, 0.880	204.400, 1.001	204.400, 0.862	204.400, 0.986	204.400, 3.050	204.400, 2.811	204.400, 2.635
1024	204.600, 1.190	204.600, 1.088	204.600, 1.057	204.600, 1.031	204.600, 0.989	204.600, 0.998	204.600, 0.954	204.600, 0.957	204.600, 0.880	204.600, 1.001	204.600, 0.861	204.600, 0.986	204.600, 3.047	204.600, 2.806	204.600, 2.632
1025	204.800, 1.190	204.800, 1.087	204.800, 1.057	204.800, 1.030	204.800, 0.988	204.800, 0.998	204.800, 0.954	204.800, 0.957	204.800, 0.880	204.800, 1.001	204.800, 0.861	204.800, 0.986	204.800, 3.043	204.800, 2.802	204.800, 2.629
1026	205.000, 1.190	205.000, 1.086	205.000, 1.057	205.000, 1.030	205.000, 0.988	205.000, 0.998	205.000, 0.954	205.000, 0.957	205.000, 0.879	205.000, 1.001	205.000, 0.861	205.000, 0.986	205.000, 3.040	205.000, 2.798	205.000, 2.626
1027	205.200, 1.189	205.200, 1.086	205.200, 1.057	205.200, 1.030	205.200, 0.988	205.200, 0.997	205.200, 0.953	205.200, 0.956	205.200, 0.879	205.200, 1.001	205.200, 0.860	205.200, 0.986	205.200, 3.036	205.200, 2.794	205.200, 2.623
1028	205.400, 1.189	205.400, 1.085	205.400, 1.057	205.400, 1.030	205.400, 0.987	205.400, 0.997	205.400, 0.953	205.400, 0.956	205.400, 0.879	205.400, 1.001	205.400, 0.860	205.400, 0.985	205.400, 3.032	205.400, 2.790	205.400, 2.620
1029	205.600, 1.189	205.600, 1.085	205.600, 1.057	205.600, 1.030	205.600, 0.987	205.600, 0.997	205.600, 0.953	205.600, 0.956	205.600, 0.879	205.600, 1.000	205.600, 0.860	205.600, 0.985	205.600, 3.028	205.600, 2.787	205.600, 2.617
1030	205.800, 1.188	205.800, 1.085	205.800, 1.056	205.800, 1.029	205.800, 0.987	205.800, 0.996	205.800, 0.953	205.800, 0.956	205.800, 0.879	205.800, 1.000	205.800, 0.860	205.800, 0.985	205.800, 3.024	205.800, 2.783	205.800, 2.613
1031	206.000, 1.188	206.000, 1.085	206.000, 1.056	206.000, 1.029	206.000, 0.986	206.000, 0.996	206.000, 0.952	206.000, 0.956	206.000, 0.879	206.000, 1.000	206.000, 0.859	206.000, 0.984	206.000, 3.020	206.000, 2.780	206.000, 2.610
1032	206.200, 1.187	206.200, 1.085	206.200, 1.055	206.200, 1.028	206.200, 0.986	206.200, 0.996	206.200, 0.952	206.200, 0.956	206.200, 0.879	206.200, 1.000	206.200, 0.859	206.200, 0.984	206.200, 3.016	206.200, 2.777	206.200, 2.607
1033	206.400, 1.187	206.400, 1.085	206.400, 1.055	206.400, 1.028	206.400, 0.986	206.400, 0.996	206.400, 0.952	206.400, 0.956	206.400, 0.879	206.400, 1.000	206.400, 0.859	206.400, 0.984	206.400, 3.012	206.400, 2.773	206.400, 2.604
1034	206.600, 1.187	206.600, 1.085	206.600, 1.054	206.600, 1.027	206.600, 0.986	206.600, 0.996	206.600, 0.952	206.600, 0.956	206.600, 0.878	206.600, 1.000	206.600, 0.859	206.600, 0.983	206.600, 3.008	206.600, 2.770	206.600, 2.601
1035	206.800, 1.187	206.800, 1.085	206.800, 1.054	206.800, 1.027	206.800, 0.986	206.800, 0.996	206.800, 0.952	206.800, 0.955	206.800, 0.878	206.800, 1.000	206.800, 0.859	206.800, 0.983	206.800, 3.004	206.800, 2.767	206.800, 2.597
1036	207.000, 1.187	207.000, 1.085	207.000, 1.053	207.000, 1.027	207.000, 0.986	207.000, 0.995	207.000, 0.952	207.000, 0.955	207.000, 0.878	207.000, 1.000	207.000, 0.859	207.000, 0.983	207.000, 3.000	207.000, 2.764	207.000, 2.594
1037	207.200, 1.187	207.200, 1.085	207.200, 1.053	207.200, 1.027	207.200, 0.986	207.200, 0.995	207.200, 0.952	207.200, 0.955	207.200, 0.878	207.200, 0.999	207.200, 0.859	207.200, 0.983	207.200, 2.996	207.200, 2.761	207.200, 2.590
1038	207.400, 1.188	207.400, 1.085	207.400, 1.052	207.400, 1.026	207.400, 0.986	207.400, 0.995	207.400, 0.952	207.400, 0.955	207.400, 0.878	207.400, 0.999	207.400, 0.858	207.400, 0.983	207.400, 2.992	207.400, 2.759	207.400, 2.586
1039	207.600, 1.188	207.600, 1.085	207.600, 1.052	207.600, 1.026	207.600, 0.986	207.600, 0.995	207.600, 0.952	207.600, 0.955	207.600, 0.878	207.600, 0.998	207.600, 0.858	207.600, 0.983	207.600, 2.988	207.600, 2.755	207.600, 2.583
1040	207.800, 1.188	207.800, 1.085	207.800, 1.052	207.800, 1.026	207.800, 0.986	207.800, 0.995	207.800, 0.952	207.800, 0.954	207.800, 0.878	207.800, 0.998	207.800, 0.858	207.800, 0.983	207.800, 2.985	207.800, 2.752	207.800, 2.579
1041	208.000, 1.188	208.000, 1.085	208.000, 1.051	208.000, 1.025	208.000, 0.986	208.000, 0.995	208.000, 0.951	208.000, 0.954	208.000, 0.878	208.000, 0.997	208.000, 0.858	208.000, 0.982	208.000, 2.981	208.000, 2.749	208.000, 2.576
1042	208.200, 1.188	208.200, 1.085	208.200, 1.051	208.200, 1.025	208.200, 0.986	208.200, 0.994	208.200, 0.951	208.200, 0.954	208.200, 0.878	208.200, 0.997	208.200, 0.858	208.200, 0.982	208.200, 2.978	208.200, 2.746	208.200, 2.572
1043	208.400, 1.188	208.400, 1.084	208.400, 1.051	208.400, 1.024	208.400, 0.986	208.400, 0.994	208.400, 0.950	208.400, 0.954	208.400, 0.877	208.400, 0.997	208.400, 0.858	208.400, 0.982	208.400, 2.975	208.400, 2.742	208.400, 2.569
1044	208.600, 1.188	208.600, 1.084	208.600, 1.051	208.600, 1.024	208.600, 0.986	208.600, 0.994	208.600, 0.950	208.600, 0.954	208.600, 0.877	208.600, 0.996	208.600, 0.858	208.600, 0.982	208.600, 2.972	208.600, 2.739	208.600, 2.566
1045	208.800, 1.188	208.800, 1.084	208.800, 1.051	208.800, 1.024	208.800, 0.985	208.800, 0.993	208.800, 0.949	208.800, 0.953	208.800, 0.877	208.800, 0.996	208.800, 0.858	208.800, 0.982	208.800, 2.968	208.800, 2.735	208.800, 2.562
1046	209.000, 1.188	209.000, 1.083	209.000, 1.051	209.000, 1.024	209.000, 0.985	209.000, 0.993	209.000, 0.949	209.000, 0.953	209.000, 0.877	209.000, 0.995	209.000, 0.857	209.000, 0.982	209.000, 2.965	209.000, 2.732	209.000, 2.559
1047	209.200, 1.188	209.200, 1.083	209.200, 1.051	209.200, 1.024	209.200, 0.985	209.200, 0.993	209.200, 0.949	209.200, 0.953	209.200, 0.877	209.200, 0.995	209.200, 0.857	209.200, 0.982	209.200, 2.961	209.200, 2.729	209.200, 2.556
1048	209.400, 1.188	209.400, 1.083	209.400, 1.051	209.400, 1.024	209.400, 0.984	209.400, 0.993	209.400, 0.948	209.400, 0.953	209.400, 0.877	209.400, 0.995	209.400, 0.857	209.400, 0.981	209.400, 2.957	209.400, 2.725	209.400, 2.553
1049	209.600, 1.188	209.600, 1.082	209.600, 1.051	209.600, 1.024	209.600, 0.984	209.600, 0.993	209.600, 0.948	209.600, 0.953	209.600, 0.877	209.600, 0.994	209.600, 0.856	209.600, 0.981	209.600, 2.954	209.600, 2.722	209.600, 2.550
1050	209.800, 1.187	209.800, 1.082	209.800, 1.051	209.800, 1.024	209.800, 0.983	209.800, 0.993	209.800, 0.948	209.800, 0.953	209.800, 0.877	209.800, 0.994	209.800, 0.856	209.800, 0.981	209.800, 2.950	209.800, 2.718	209.800, 2.547
1051	210.000, 1.187	210.000, 1.082	210.000, 1.051	210.000, 1.023	210.000, 0.982	210.000, 0.993	210.000, 0.948	210.000, 0.953	210.000, 0.877	210.000, 0.993	210.000, 0.856	210.000, 0.980	210.000, 2.946	210.000, 2.715	210.000, 2.544
1052	210.200, 1.187	210.200, 1.082	210.200, 1.051	210.200, 1.023	210.200, 0.982	210.200, 0.993	210.200, 0.948	210.200, 0.953	210.200, 0.877	210.200, 0.993	210.200, 0.855	210.200, 0.980	210.200, 2.943	210.200, 2.711	210.200, 2.541
1053	210.400, 1.187	210.400, 1.082	210.400, 1.050	210.400, 1.023	210.400, 0.982	210.400, 0.993	210.400, 0.948	210.400, 0.954	210.400, 0.877	210.400, 0.993	210.400, 0.855	210.400, 0.980	210.400, 2.939	210.400, 2.708	210.400, 2.538
1054	210.600, 1.187	210.600, 1.081	210.600, 1.050	210.600, 1.023	210.600, 0.981	210.600, 0.993	210.600, 0.948	210.600, 0.954	210.600, 0.877	210.600, 0.993	210.600, 0.855	210.600, 0.980	210.600, 2.935	210.600, 2.705	210.600, 2.535
1055	210.800, 1.187	210.800, 1.081	210.800, 1.050	210.800, 1.022	210.800, 0.981	210.800, 0.993	210.800, 0.948	210.800, 0.953	210.800, 0.876	210.800, 0.993	210.800, 0.855	210.800, 0.979	210.800, 2.932	210.800, 2.702	210.800, 2.532
1056	211.000, 1.187	211.000, 1.081	211.000, 1.049	211.000, 1.022	211.000, 0.981	211.000, 0.993	211.000, 0.948	211.000, 0.953	211.000, 0.876	211.000, 0.993	211.000, 0.855	211.000, 0.979	211.000, 2.928	211.000, 2.699	211.000, 2.529
1057	211.200, 1.188	211.200, 1.081	211.200, 1.049	211.200, 1.022	211.200, 0.981	211.200, 0.993	211.200, 0.948	211.200, 0.953	211.200, 0.876	211.200, 0.993	211.200, 0.855	211.200, 0.979	211.200, 2.924	211.200, 2.696	211.200, 2.525
1058	211.400, 1.188	211.400, 1.081	211.400, 1.049	211.400, 1.022	211.400, 0.981	211.400, 0.993	211.400, 0.948	211.400, 0.953	211.400, 0.875	211.400, 0.993	211.400, 0.855	211.400, 0.979	211.400, 2.921	211.400, 2.693	211.400, 2.522
1059	211.600, 1.188	211.600, 1.081	211.600, 1.049	211.600, 1.022	211.600, 0.981	211.600, 0.992	211.600, 0.947	211.600, 0.952	211.600, 0.875	211.600, 0.993	211.600, 0.855	211.600, 0.978	211.600, 2.917	211.600, 2.689	211.600, 2.519
1060	211.800, 1.188	211.800, 1.081	211.800, 1.049	211.800, 1.021	211.800, 0.981	211.800, 0.992	211.800, 0.947	211.800, 0.952	211.800, 0.875	211.800, 0.992	211.800, 0.854	211.800, 0.978	211.800, 2.914	211.800, 2.686	211.800, 2.516
1061	212.000, 1.188	212.000, 1.081	212.000, 1.049	212.000, 1.021	212.000, 0.981	212.000, 0.992	212.000, 0.947	212.000, 0.952	212.000, 0.874	212.000, 0.992	212.000, 0.854	212.000, 0.978	212.000, 2.911	212.000, 2.682	212.000, 2.512
1062	212.200, 1.187	212.200, 1.081	212.200, 1.048	212.200, 1.021	212.200, 0.981	212.200, 0.991	212.200, 0.946	212.200, 0.951	212.200, 0.874	212.200, 0.992	212.200, 0.853	212.200, 0.978	212.200, 2.908	212.200, 2.679	212.200, 2.509
1063	212.400, 1.187	212.400, 1.081	212.400, 1.048	212.400, 1.021	212.400, 0.981	212.400, 0.991	212.400, 0.946	212.400, 0.951	212.400, 0.873	212.400, 0.992	212.400, 0.853	212.400, 0.977	212.400, 2.904	212.400, 2.676	212.400, 2.505
1064	212.600, 1.187	212.600, 1.080	212.600, 1.048	212.600, 1.021	212.600, 0.980	212.600, 0.990	212.600, 0.945	212.600, 0.951	212.600, 0.873	212.600, 0.992	212.600, 0.853	212.600, 0.977	212.600, 2.901	212.600, 2.672	212.600, 2.502
1065	212.800, 1.187	212.800, 1.080	212.800, 1.048	212.800, 1.021	212.800, 0.980	212.800, 0.989	212.800, 0.945	212.800, 0.950	212.800, 0.873	212.800, 0.992	212.800, 0.852	212.800, 0.977	212.800, 2.897	212.800, 2.669	212.800, 2.499
1066	213.000, 1.187	213.000, 1.080	213.000, 1.048	213.000, 1.021	213.000, 0.980	213.000, 0.989	213.000, 0.945	213.000, 0.950	213.000, 0.872	213.000, 0.992	213.000, 0.852	213.000, 0.976	213.000, 2.893	213.000, 2.666	213.000, 2.496
1067	213.200, 1.186	213.200, 1.080	213.200, 1.048	213.200, 1.021	213.200, 0.980	213.200, 0.989	213.200, 0.945	213.200, 0.950	213.200, 0.873	213.200, 0.992	213.200, 0.852	213.200, 0.976	213.200, 2.889	213.200, 2.662	213.200, 2.493
1068	213.400, 1.186	213.400, 1.080	213.400, 1.048	213.400, 1.021	213.400, 0.980	213.400, 0.988	213.400, 0.945	213.400, 0.950	213.400, 0.873	213.400, 0.992	213.400, 0.852	213.400, 0.975	213.400, 2.886	213.400, 2.659	213.400, 2.490
1069	213.600, 1.186	213.600, 1.080	213.600, 1.048	213.600, 1.020	213.600, 0.979	213.600, 0.988	213.600, 0.944	213.600, 0.950	213.600, 0.873	213.600, 0.992	213.600, 0.852	213.600, 0.975	213.600, 2.882	213.600, 2.656	213.600, 2.487
1070	213.800, 1.186	213.800, 1.080	213.800, 1.048	213.800, 1.020	213.800, 0.979	213.800, 0.988	213.800, 0.944	213.800, 0.950	213.800, 0.873	213.800, 0.991	213.800, 0.852	213.800, 0.974	213.800, 2.878	213.800, 2.652	213.800, 2.484
1071	214.000, 1.186	214.000, 1.079	214.000, 1.048	214.000, 1.020	214.000, 0.979	214.000, 0.987	214.000, 0.944	214.000, 0.950	214.000, 0.873	214.000, 0.991	214.000, 0.852	214.000, 0.974	214.000, 2.875	214.000, 2.649	214.000, 2.481
1072	214.200, 1.186	214.200, 1.079	214.200, 1.047	214.200, 1.020	214.200, 0.978	214.200, 0.987	214.200, 0.944	214.200, 0.950	214.200, 0.873	214.200, 0.991	214.200, 0.852	214.200, 0.973	214.200, 2.871	214.200, 2.646	214.200, 2.477
1073	214.400, 1.186	214.400, 1.079	214.400, 1.047	214.400, 1.020	214.400, 0.978	214.400, 0.986	214.400, 0.944	214.400, 0.950	214.400, 0.873	214.400, 0.991	214.400, 0.852	214.400, 0.973	214.400, 2.867	214.400, 2.643	214.400, 2.474
1074	214.600, 1.186	214.600, 1.078	214.600, 1.047	214.600, 1.020	214.600, 0.978	214.600, 0.986	214.600, 0.944	214.600, 0.950	214.600, 0.873	214.600, 0.991	214.600, 0.852	214.600, 0.973	214.600, 2.863	214.600, 2.640	214.600, 2.471
1075	214.800, 1.185	214.800, 1.078	214.800, 1.046	214.800, 1.019	214.800, 0.978	214.800, 0.986	214.800, 0.943	214.800, 0.949	214.800, 0.873	214.800, 0.991	214.800, 0.852	214.800, 0.972	214.800, 2.859	214.800, 2.637	214.800, 2.468
1076	215.000, 1.185	215.000, 1.077	215.000, 1.046	215.000, 1.019	215.000, 0.977	215.000, 0.986	215.000, 0.943	215.000, 0.949	215.000, 0.873	215.000, 0.991	215.000, 0.852	215.000, 0.972	215.000, 2.855	215.000, 2.634	215.000, 2.465
1077	215.200, 1.185	215.200, 1.077	215.200, 1.045	215.200, 1.019	215.200, 0.977	215.200, 0.986	215.200, 0.943	215.200, 0.949	215.200, 0.873	215.200, 0.991	215.200, 0.852	215.200, 0.973	215.200, 2.852	215.200, 2.631	215.200, 2.462
1078	215.400, 1.185	215.400, 1.077	215.400, 1.045	215.400, 1.019	215.400, 0.977	215.400, 0.986	215.400, 0.943	215.400, 0.948	215.400, 0.873	215.400, 0.990	215.400, 0.851	215.400, 0.973	215.400, 2.848	215.400, 2.628	215.400, 2.460
1079	215.600, 1.185	215.600, 1.077	215.600, 1.045	215.600, 1.019	215.600, 0.977	215.600, 0.986	215.600, 0.942	215.600, 0.948	215.600, 0.872	215.600, 0.990	215.600, 0.851	215.600, 0.973	215.600, 2.845	215.600, 2.624	215.600, 2.457
1080	215.800, 1.185	215.800, 1.076	215.800, 1.044	215.800, 1.019	215.800, 0.977	215.800, 0.986	215.800, 0.942	215.800, 0.948	215.800, 0.872	215.800, 0.990	215.800, 0.851	215.800, 0.973	215.800, 2.841	215.800, 2.621	215.800, 2.454
1081	216.000, 1.185	216.000, 1.076	216.000, 1.044	216.000, 1.019	216.000, 0.977	216.000, 0.986	216.000, 0.942	216.000, 0.947	216.000, 0.871	216.000, 0.990	216.000, 0.850	216.000, 0.973	216.000, 2.838	216.000, 2.618	216.000, 2.451
1082	216.200, 1.184	216.200, 1.076	216.200, 1.044	216.200, 1.019	216.200, 0.977	216.200, 0.986	216.200, 0.941	216.200, 0.947	216.200, 0.870	216.200, 0.989	216.200, 0.850	216.200, 0.973	216.200, 2.834	216.200, 2.615	216.200, 2.448
1083	216.400, 1.184	216.400, 1.076	216.400, 1.043	216.400, 1.019	216.400, 0.977	216.400, 0.985	216.400, 0.941	216.400, 0.946	216.400, 0.870	216.400, 0.989	216.400, 0.850	216.400, 0.973	216.400, 2.830	216.400, 2.612	216.400, 2.445
1084	216.600, 1.185	216.600, 1.075	216.600, 1.043	216.600, 1.019	216.600, 0.977	216.600, 0.985	216.600, 0.941	216.600, 0.946	216.600, 0.869	216.600, 0.989	216.600, 0.850	216.600, 0.973	216.600, 2.827	216.600, 2.608	216.600, 2.442
1085	216.800, 1.185	216.800, 1.075	216.800, 1.043	216.800, 1.019	216.800, 0.976	216.800, 0.985	216.800, 0.941	216.800, 0.946	216.800, 0.869	216.800, 0.989	216.800, 0.850	216.800, 0.973	216.800, 2.823	216.800, 2.605	216.800, 2.439
1086	217.000, 1.185	217.000, 1.075	217.000, 1.043	217.000, 1.020	217.000, 0.976	217.000, 0.985	217.000, 0.941	217.000, 0.946	217.000, 0.868	217.000, 0.989	217.000, 0.850	217.000, 0.973	217.000, 2.820	217.000, 2.602	217.000, 2.436
1087	217.200, 1.184	217.200, 1.075	217.200, 1.043	217.200, 1.019	217.200, 0.976	217.200, 0.985	217.200, 0.941	217.200, 0.946	217.200, 0.868	217.200, 0.989	217.200, 0.850	217.200, 0.972	217.200, 2.817	217.200, 2.598	217.200, 2.432
1088	217.400, 1.184	217.400, 1.074	217.400, 1.043	217.400, 1.019	217.400, 0.976	217.400, 0.985	217.400, 0.942	217.400, 0.946	217.400, 0.868	217.400, 0.988	217.400, 0.850	217.400, 0.972	217.400, 2.814	217.400, 2.595	217.400, 2.429
1089	217.600, 1.184	217.600, 1.074	217.600, 1.043	217.600, 1.019	217.600, 0.976	217.600, 0.984	217.600, 0.942	217.600, 0.946	217.600, 0.868	217.600, 0.988	217.600, 0.850	217.600, 0.972	217.600, 2.810	217.600, 2.592	217.600, 2.426
1090	217.800, 1.184	217.800, 1.074	217.800, 1.043	217.800, 1.019	217.800, 0.976	217.800, 0.984	217.800, 0.942	217.800, 0.946	217.800, 0.868	217.800, 0.988	217.800, 0.850	217.800, 0.972	217.800, 2.807	217.800, 2.589	217.800, 2.422
1091	218.000, 1.183	218.000, 1.073	218.000, 1.043	218.000, 1.018	218.000, 0.975	218.000, 0.984	218.000, 0.942	218.000, 0.945	218.000, 0.868	218.000, 0.988	218.000, 0.850	218.000, 0.971	218.000, 2.804	218.000, 2.586	218.000, 2.419
1092	218.200, 1.183	218.200, 1.073	218.200, 1.043	218.200, 1.018	218.200, 0.976	218.200, 0.983	218.200, 0.942	218.200, 0.945	218.200, 0.868	218.200, 0.988	218.200, 0.850	218.200, 0.971	218.200, 2.800	218.200, 2.582	218.200, 2.416
1093	218.400, 1.183	218.400, 1.072	218.400, 1.043	218.400, 1.017	218.400, 0.976	218.400, 0.983	218.400, 0.942	218.400, 0.945	218.400, 0.868	218.400, 0.988	218.400, 0.849	218.400, 0.971	218.400, 2.796	218.400, 2.579	218.400, 2.413
1094	218.600, 1.183	218.600, 1.072	218.600, 1.043	218.600, 1.017	218.600, 0.976	218.600, 0.983	218.600, 0.942	218.600, 0.945	218.600, 0.868	218.600, 0.987	218.600, 0.849	218.600, 0.970	218.600, 2.793	218.600, 2.576	218.600, 2.410
1095	218.800, 1.183	218.800, 1.072	218.800, 1.042	218.800, 1.016	218.800, 0.976	218.800, 0.983	218.800, 0.941	218.800, 0.945	218.800, 0.869	218.800, 0.987	218.800, 0.849	218.800, 0.970	218.800, 2.789	218.800, 2.573	218.800, 2.407
1096	219.000, 1.183	219.000, 1.072	219.000, 1.042	219.000, 1.016	219.000, 0.975	219.000, 0.983	219.000, 0.941	219.000, 0.944	219.000, 0.868	219.000, 0.986	219.000, 0.849	219.000, 0.970	219.000, 2.785	219.000, 2.570	219.000, 2.403
1097	219.200, 1.183	219.200, 1.072	219.200, 1.042	219.200, 1.016	219.200, 0.975	219.200, 0.983	219.200, 0.940	219.200, 0.944	219.200, 0.868	219.200, 0.986	219.200, 0.848	219.200, 0.970	219.200, 2.782	219.200, 2.567	219.200, 2.400
1098	219.400, 1.183	219.400, 1.073	219.400, 1.042	219.400, 1.016	219.400, 0.975	219.400, 0.983	219.400, 0.939	219.400, 0.944	219.400, 0.868	219.400, 0.986	219.400, 0.848	219.400, 0.969	219.400, 2.778	219.400, 2.563	219.400, 2.397
1099	219.600, 1.183	219.600, 1.073	219.600, 1.041	219.600, 1.015	219.600, 0.975	219.600, 0.983	219.600, 0.939	219.600, 0.943	219.600, 0.867	219.600, 0.986	219.600, 0.848	219.600, 0.969	219.600, 2.775	219.600, 2.560	219.600, 2.394
1100	219.800, 1.183	219.800, 1.073	219.800, 1.041	219.800, 1.015	219.800, 0.975	219.800, 0.983	219.800, 0.938	219.800, 0.943	219.800, 0.867	219.800, 0.986	219.800, 0.847	219.800, 0.969	219.800, 2.771	219.800, 2.557	219.800, 2.391
1101	220.000, 1.183	220.000, 1.073	220.000, 1.041	220.000, 1.015	220.000, 0.975	220.000, 0.983	220.000, 0.937	220.000, 0.943	220.000, 0.866	220.000, 0.986	220.000, 0.847	220.000, 0.968	220.000, 2.768	220.000, 2.554	220.000, 2.388
1102	220.200, 1.183	220.200, 1.073	220.200, 1.040	220.200, 1.015	220.200, 0.974	220.200, 0.983	220.200, 0.936	220.200, 0.943	220.200, 0.866	220.200, 0.986	220.200, 0.847	220.200, 0.968	220.200, 2.764	220.200, 2.550	220.200, 2.385
1103	220.400, 1.183	220.400, 1.073	220.400, 1.040	220.400, 1.015	220.400, 0.974	220.400, 0.984	220.400, 0.936	220.400, 0.943	220.400, 0.865	220.400, 0.986	220.400, 0.846	220.400, 0.968	220.400, 2.761	220.400, 2.547	220.400, 2.382
1104	220.600, 1.183	220.600, 1.073	220.600, 1.040	220.600, 1.014	220.600, 0.974	220.600, 0.984	220.600, 0.935	220.600, 0.944	220.600, 0.865	220.600, 0.986	220.600, 0.846	220.600, 0.968	220.600, 2.757	220.600, 2.544	220.600, 2.379
1105	220.800, 1.183	220.800, 1.072	220.800, 1.040	220.800, 1.014	220.800, 0.973	220.800, 0.984	220.800, 0.935	220.800, 0.944	220.800, 0.864	220.800, 0.986	220.800, 0.846	220.800, 0.968	220.800, 2.754	220.800, 2.541	220.800, 2.377
1106	221.000, 1.183	221.000, 1.072	221.000, 1.040	221.000, 1.014	221.000, 0.973	221.000, 0.984	221.000, 0.935	221.000, 0.944	221.000, 0.864	221.000, 0.986	221.000, 0.846	221.000, 0.967	221.000, 2.750	221.000, 2.537	221.000, 2.374
1107	221.200, 1.183	221.200, 1.072	221.200, 1.040	221.200, 1.014	221.200, 0.973	221.200, 0.984	221.200, 0.935	221.200, 0.945	221.200, 0.864	221.200, 0.985	221.200, 0.846	221.200, 0.967	221.200, 2.747	221.200, 2.534	221.200, 2.371
1108	221.400, 1.183	221.400, 1.071	221.400, 1.039	221.400, 1.013	221.400, 0.973	221.400, 0.984	221.400, 0.935	221.400, 0.945	221.400, 0.864	221.400, 0.985	221.400, 0.846	221.400, 0.967	221.400, 2.744	221.400, 2.531	221.400, 2.369
1109	221.600, 1.183	221.600, 1.071	221.600, 1.039	221.600, 1.013	221.600, 0.972	221.600, 0.983	221.600, 0.935	221.600, 0.945	221.600, 0.864	221.600, 0.985	221.600, 0.845	221.600, 0.967	221.600, 2.740	221.600, 2.528	221.600, 2.366
1110	221.800, 1.183	221.800, 1.070	221.800, 1.039	221.800, 1.013	221.800, 0.972	221.800, 0.983	221.800, 0.935	221.800, 0.944	221.800, 0.864	221.800, 0.985	221.800, 0.844	221.800, 0.966	221.800, 2.737	221.800, 2.525	221.800, 2.363
1111	222.000, 1.183	222.000, 1.070	222.000, 1.039	222.000, 1.013	222.000, 0.972	222.000, 0.983	222.000, 0.935	222.000, 0.944	222.000, 0.864	222.000, 0.985	222.000, 0.844	222.000, 0.966	222.000, 2.733	222.000, 2.522	222.000, 2.361
1112	222.200, 1.183	222.200, 1.070	222.200, 1.039	222.200, 1.013	222.200, 0.972	222.200, 0.982	222.200, 0.936	222.200, 0.944	222.200, 0.865	222.200, 0.984	222.200, 0.843	222.200, 0.966	222.200, 2.730	222.200, 2.519	222.200, 2.358
1113	222.400, 1.183	222.400, 1.069	222.400, 1.039	222.400, 1.012	222.400, 0.971	222.400, 0.982	222.400, 0.936	222.400, 0.943	222.400, 0.865	222.400, 0.984	222.400, 0.843	222.400, 0.966	222.400, 2.727	222.400, 2.517	222.400, 2.355
1114	222.600, 1.183	222.600, 1.069	222.600, 1.039	222.600, 1.012	222.600, 0.971	222.600, 0.981	222.600, 0.936	222.600, 0.943	222.600, 0.865	222.600, 0.984	222.600, 0.843	222.600, 0.966	222.600, 2.724	222.600, 2.514	222.600, 2.352
1115	222.800, 1.183	222.800, 1.069	222.800, 1.039	222.800, 1.012	222.800, 0.971	222.800, 0.981	222.800, 0.936	222.800, 0.943	222.800, 0.865	222.800, 0.984	222.800, 0.843	222.800, 0.966	222.800, 2.720	222.800, 2.511	222.800, 2.349
1116	223.000, 1.183	223.000, 1.069	223.000, 1.039	223.000, 1.012	223.000, 0.971	223.000, 0.981	223.000, 0.936	223.000, 0.942	223.000, 0.865	223.000, 0.983	223.000, 0.843	223.000, 0.966	223.000, 2.717	223.000, 2.508	223.000, 2.346
1117	223.200, 1.183	223.200, 1.070	223.200, 1.039	223.200, 1.012	223.200, 0.970	223.200, 0.980	223.200, 0.936	223.200, 0.942	223.200, 0.864	223.200, 0.983	223.200, 0.843	223.200, 0.966	223.200, 2.714	223.200, 2.505	223.200, 2.343
1118	223.400, 1.182	223.400, 1.070	223.400, 1.039	223.400, 1.012	223.400, 0.970	223.400, 0.980	223.400, 0.936	223.400, 0.942	223.400, 0.864	223.400, 0.983	223.400, 0.843	223.400, 0.966	223.400, 2.710	223.400, 2.502	223.400, 2.340
1119	223.600, 1.182	223.600, 1.070	223.600, 1.039	223.600, 1.012	223.600, 0.970	223.600, 0.980	223.600, 0.936	223.600, 0.941	223.600, 0.864	223.600, 0.983	223.600, 0.843	223.600, 0.966	223.600, 2.707	223.600, 2.499	223.600, 2.337
1120	223.800, 1.181	223.800, 1.070	223.800, 1.038	223.800, 1.012	223.800, 0.969	223.800, 0.980	223.800, 0.936	223.800, 0.941	223.800, 0.864	223.800, 0.983	223.800, 0.842	223.800, 0.966	223.800, 2.704	223.800, 2.497	223.800, 2.334
1121	224.000, 1.181	224.000, 1.070	224.000, 1.038	224.000, 1.012	224.000, 0.969	224.000, 0.980	224.000, 0.935	224.000, 0.941	224.000, 0.864	224.000, 0.983	224.000, 0.842	224.000, 0.966	224.000, 2.701	224.000, 2.494	224.000, 2.331
1122	224.200, 1.181	224.200, 1.070	224.200, 1.038	224.200, 1.012	224.200, 0.969	224.200, 0.980	224.200, 0.935	224.200, 0.941	224.200, 0.863	224.200, 0.982	224.200, 0.842	224.200, 0.967	224.200, 2.697	224.200, 2.491	224.200, 2.328
1123	224.400, 1.181	224.400, 1.069	224.400, 1.038	224.400, 1.012	224.400, 0.969	224.400, 0.980	224.400, 0.935	224.400, 0.942	224.400, 0.863	224.400, 0.982	224.400, 0.842	224.400, 0.967	224.400, 2.694	224.400, 2.487	224.400, 2.325
1124	224.600, 1.181	224.600, 1.069	224.600, 1.038	224.600, 1.012	224.600, 0.969	224.600, 0.979	224.600, 0.935	224.600, 0.942	224.600, 0.863	224.600, 0.982	224.600, 0.842	224.600, 0.966	224.600, 2.691	224.600, 2.484	224.600, 2.322
1125	224.800, 1.181	224.800, 1.069	224.800, 1.038	224.800, 1.012	224.800, 0.969	224.800, 0.979	224.800, 0.934	224.800, 0.942	224.800, 0.862	224.800, 0.981	224.800, 0.842	224.800, 0.966	224.800, 2.688	224.800, 2.480	224.800, 2.319
1126	225.000, 1.182	225.000, 1.069	225.000, 1.037	225.000, 1.012	225.000, 0.969	225.000, 0.979	225.000, 0.934	225.000, 0.942	225.000, 0.862	225.000, 0.981	225.000, 0.842	225.000, 0.966	225.000, 2.685	225.000, 2.477	225.000, 2.316
1127	225.200, 1.182	225.200, 1.068	225.200, 1.037	225.200, 1.012	225.200, 0.969	225.200, 0.978	225.200, 0.934	225.200, 0.942	225.200, 0.862	225.200, 0.981	225.200, 0.842	225.200, 0.965	225.200, 2.682	225.200, 2.473	225.200, 2.313
1128	225.400, 1.182	225.400, 1.068	225.400, 1.036	225.400, 1.012	225.400, 0.969	225.400, 0.978	225.400, 0.934	225.400, 0.942	225.400, 0.862	225.400, 0.980	225.400, 0.842	225.400, 0.965	225.400, 2.679	225.400, 2.470	225.400, 2.310
1129	225.600, 1.182	225.600, 1.067	225.600, 1.036	225.600, 1.012	225.600, 0.968	225.600, 0.977	225.600, 0.934	225.600, 0.941	225.600, 0.862	225.600, 0.980	225.600, 0.841	225.600, 0.964	225.600, 2.676	225.600, 2.467	225.600, 2.307
1130	225.800, 1.182	225.800, 1.066	225.800, 1.036	225.800, 1.011	225.800, 0.968	225.800, 0.977	225.800, 0.934	225.800, 0.941	225.800, 0.862	225.800, 0.980	225.800, 0.841	225.800, 0.964	225.800, 2.672	225.800, 2.464	225.800, 2.304
1131	226.000, 1.182	226.000, 1.066	226.000, 1.036	226.000, 1.011	226.000, 0.968	226.000, 0.976	226.000, 0.934	226.000, 0.941	226.000, 0.861	226.000, 0.980	226.000, 0.841	226.000, 0.963	226.000, 2.669	226.000, 2.461	226.000, 2.301
1132	226.200, 1.182	226.200, 1.065	226.200, 1.036	226.200, 1.011	226.200, 0.968	226.200, 0.976	226.200, 0.934	226.200, 0.940	226.200, 0.861	226.200, 0.979	226.200, 0.841	226.200, 0.963	226.200, 2.666	226.200, 2.457	226.200, 2.299
1133	226.400, 1.182	226.400, 1.065	226.400, 1.036	226.400, 1.010	226.400, 0.968	226.400, 0.976	226.400, 0.934	226.400, 0.940	226.400, 0.861	226.400, 0.979	226.400, 0.842	226.400, 0.962	226.400, 2.663	226.400, 2.455	226.400, 2.296
1134	226.600, 1.181	226.600, 1.064	226.600, 1.035	226.600, 1.010	226.600, 0.967	226.600, 0.976	226.600, 0.934	226.600, 0.939	226.600, 0.862	226.600, 0.979	226.600, 0.842	226.600, 0.962	226.600, 2.660	226.600, 2.452	226.600, 2.293
1135	226.800, 1.181	226.800, 1.064	226.800, 1.036	226.800, 1.010	226.800, 0.967	226.800, 0.975	226.800, 0.934	226.800, 0.939	226.800, 0.862	226.800, 0.978	226.800, 0.842	226.800, 0.962	226.800, 2.657	226.800, 2.449	226.800, 2.290
1136	227.000, 1.181	227.000, 1.064	227.000, 1.035	227.000, 1.009	227.000, 0.967	227.000, 0.975	227.000, 0.933	227.000, 0.939	227.000, 0.862	227.000, 0.978	227.000, 0.842	227.000, 0.961	227.000, 2.653	227.000, 2.446	227.000, 2.287
1137	227.200, 1.181	227.200, 1.064	227.200, 1.035	227.200, 1.009	227.200, 0.967	227.200, 0.976	227.200, 0.933	227.200, 0.938	227.200, 0.861	227.200, 0.978	227.200, 0.841	227.200, 0.961	227.200, 2.650	227.200, 2.443	227.200, 2.284
1138	227.400, 1.181	227.400, 1.064	227.400, 1.035	227.400, 1.009	227.400, 0.967	227.400, 0.976	227.400, 0.933	227.400, 0.938	227.400, 0.861	227.400, 0.978	227.400, 0.841	227.400, 0.961	227.400, 2.647	227.400, 2.441	227.400, 2.281
1139	227.600, 1.181	227.600, 1.064	227.600, 1.035	227.600, 1.009	227.600, 0.967	227.600, 0.976	227.600, 0.932	227.600, 0.938	227.600, 0.861	227.600, 0.978	227.600, 0.841	227.600, 0.961	227.600, 2.643	227.600, 2.438	227.600, 2.278
1140	227.800, 1.181	227.800, 1.064	227.800, 1.035	227.800, 1.009	227.800, 0.967	227.800, 0.976	227.800, 0.932	227.800, 0.938	227.800, 0.861	227.800, 0.978	227.800, 0.841	227.800, 0.960	227.800, 2.640	227.800, 2.435	227.800, 2.275
1141	228.000, 1.181	228.000, 1.064	228.000, 1.035	228.000, 1.009	228.000, 0.967	228.000, 0.976	228.000, 0.932	228.000, 0.938	228.000, 0.861	228.000, 0.978	228.000, 0.840	228.000, 0.960	228.000, 2.636	228.000, 2.432	228.000, 2.273
1142	228.200, 1.181	228.200, 1.065	228.200, 1.035	228.200, 1.009	228.200, 0.967	228.200, 0.976	228.200, 0.932	228.200, 0.938	228.200, 0.861	228.200, 0.978	228.200, 0.840	228.200, 0.960	228.200, 2.633	228.200, 2.429	228.200, 2.270
1143	228.400, 1.181	228.400, 1.065	228.400, 1.035	228.400, 1.009	228.400, 0.966	228.400, 0.976	228.400, 0.931	228.400, 0.938	228.400, 0.860	228.400, 0.977	228.400, 0.840	228.400, 0.959	228.400, 2.630	228.400, 2.426	228.400, 2.267
1144	228.600, 1.181	228.600, 1.065	228.600, 1.035	228.600, 1.008	228.600, 0.966	228.600, 0.976	228.600, 0.931	228.600, 0.938	228.600, 0.861	228.600, 0.977	228.600, 0.840	228.600, 0.959	228.600, 2.626	228.600, 2.423	228.600, 2.265
1145	228.800, 1.181	228.800, 1.064	228.800, 1.035	228.800, 1.008	228.800, 0.966	228.800, 0.976	228.800, 0.931	228.800, 0.938	228.800, 0.861	228.800, 0.977	228.800, 0.841	228.800, 0.959	228.800, 2.622	228.800, 2.420	228.800, 2.262
1146	229.000, 1.181	229.000, 1.064	229.000, 1.034	229.000, 1.008	229.000, 0.966	229.000, 0.976	229.000, 0.931	229.000, 0.938	229.000, 0.861	229.000, 0.977	229.000, 0.841	229.000, 0.959	229.000, 2.619	229.000, 2.417	229.000, 2.259
1147	229.200, 1.181	229.200, 1.064	229.200, 1.034	229.200, 1.008	229.200, 0.965	229.200, 0.976	229.200, 0.931	229.200, 0.937	229.200, 0.861	229.200, 0.977	229.200, 0.841	229.200, 0.958	229.200, 2.615	229.200, 2.413	229.200, 2.257
1148	229.400, 1.181	229.400, 1.064	229.400, 1.034	229.400, 1.008	229.400, 0.965	229.400, 0.976	229.400, 0.931	229.400, 0.937	229.400, 0.861	229.400, 0.977	229.400, 0.840	229.400, 0.958	229.400, 2.611	229.400, 2.410	229.400, 2.254
1149	229.600, 1.181	229.600, 1.063	229.600, 1.034	229.600, 1.007	229.600, 0.965	229.600, 0.975	229.600, 0.931	229.600, 0.938	229.600, 0.861	229.600, 0.977	229.600, 0.840	229.600, 0.958	229.600, 2.608	229.600, 2.407	229.600, 2.251
1150	229.800, 1.181	229.800, 1.063	229.800, 1.033	229.800, 1.007	229.800, 0.965	229.800, 0.975	229.800, 0.931	229.800, 0.937	229.800, 0.861	229.800, 0.977	229.800, 0.840	229.800, 0.958	229.800, 2.605	229.800, 2.404	229.800, 2.249
1151	230.000, 1.181	230.000, 1.063	230.000, 1.033	230.000, 1.007	230.000, 0.965	230.000, 0.975	230.000, 0.930	230.000, 0.937	230.000, 0.860	230.000, 0.977	230.000, 0.840	230.000, 0.957	230.000, 2.601	230.000, 2.402	230.000, 2.246
1152	230.200, 1.181	230.200, 1.063	230.200, 1.033	230.200, 1.007	230.200, 0.965	230.200, 0.975	230.200, 0.930	230.200, 0.937	230.200, 0.860	230.200, 0.977	230.200, 0.840	230.200, 0.957	230.200, 2.598	230.200, 2.399	230.200, 2.243
1153	230.400, 1.181	230.400, 1.062	230.400, 1.033	230.400, 1.006	230.400, 0.965	230.400, 0.974	230.400, 0.930	230.400, 0.937	230.400, 0.860	230.400, 0.976	230.400, 0.840	230.400, 0.957	230.400, 2.596	230.400, 2.396	230.400, 2.240
1154	230.600, 1.181	230.600, 1.062	230.600, 1.033	230.600, 1.006	230.600, 0.965	230.600, 0.974	230.600, 0.929	230.600, 0.937	230.600, 0.860	230.600, 0.976	230.600, 0.840	230.600, 0.957	230.600, 2.593	230.600, 2.392	230.600, 2.237
1155	230.800, 1.181	230.800, 1.062	230.800, 1.033	230.800, 1.006	230.800, 0.965	230.800, 0.974	230.800, 0.929	230.800, 0.936	230.800, 0.859	230.800, 0.976	230.800, 0.839	230.800, 0.957	230.800, 2.590	230.800, 2.389	230.800, 2.234
1156	231.000, 1.181	231.000, 1.062	231.000, 1.033	231.000, 1.006	231.000, 0.965	231.000, 0.974	231.000, 0.929	231.000, 0.936	231.000, 0.859	231.000, 0.976	231.000, 0.839	231.000, 0.957	231.000, 2.587	231.000, 2.386	231.000, 2.231
1157	231.200, 1.181	231.200, 1.063	231.200, 1.032	231.200, 1.005	231.200, 0.965	231.200, 0.973	231.200, 0.929	231.200, 0.936	231.200, 0.858	231.200, 0.976	231.200, 0.838	231.200, 0.957	231.200, 2.584	231.200, 2.383	231.200, 2.227
1158	231.400, 1.181	231.400, 1.063	231.400, 1.032	231.400, 1.005	231.400, 0.964	231.400, 0.973	231.400, 0.929	231.400, 0.936	231.400, 0.858	231.400, 0.976	231.400, 0.838	231.400, 0.956	231.400, 2.581	231.400, 2.381	231.400, 2.225
1159	231.600, 1.181	231.600, 1.063	231.600, 1.032	231.600, 1.005	231.600, 0.964	231.600, 0.972	231.600, 0.929	231.600, 0.936	231.600, 0.858	231.600, 0.976	231.600, 0.838	231.600, 0.956	231.600, 2.578	231.600, 2.378	231.600, 2.222
1160	231.800, 1.181	231.800, 1.063	231.800, 1.032	231.800, 1.004	231.800, 0.964	231.800, 0.972	231.800, 0.929	231.800, 0.936	231.800, 0.857	231.800, 0.975	231.800, 0.837	231.800, 0.956	231.800, 2.575	231.800, 2.375	231.800, 2.219
1161	232.000, 1.181	232.000, 1.063	232.000, 1.032	232.000, 1.004	232.000, 0.963	232.000, 0.971	232.000, 0.929	232.000, 0.935	232.000, 0.857	232.000, 0.975	232.000, 0.837	232.000, 0.955	232.000, 2.571	232.000, 2.372	232.000, 2.217
1162	232.200, 1.180	232.200, 1.063	232.200, 1.032	232.200, 1.004	232.200, 0.963	232.200, 0.971	232.200, 0.929	232.200, 0.935	232.200, 0.857	232.200, 0.974	232.200, 0.837	232.200, 0.955	232.200, 2.568	232.200, 2.369	232.200, 2.214
1163	232.400, 1.180	232.400, 1.062	232.400, 1.032	232.400, 1.004	232.400, 0.963	232.400, 0.971	232.400, 0.929	232.400, 0.935	232.400, 0.857	232.400, 0.974	232.400, 0.836	232.400, 0.955	232.400, 2.565	232.400, 2.367	232.400, 2.212
1164	232.600, 1.180	232.600, 1.062	232.600, 1.032	232.600, 1.004	232.600, 0.962	232.600, 0.971	232.600, 0.929	232.600, 0.935	232.600, 0.857	232.600, 0.974	232.600, 0.836	232.600, 0.954	232.600, 2.562	232.600, 2.364	232.600, 2.209
1165	232.800, 1.180	232.800, 1.061	232.800, 1.032	232.800, 1.003	232.800, 0.962	232.800, 0.971	232.800, 0.929	232.800, 0.934	232.800, 0.857	232.800, 0.973	232.800, 0.836	232.800, 0.954	232.800, 2.558	232.800, 2.361	232.800, 2.207
1166	233.000, 1.179	233.000, 1.061	233.000, 1.032	233.000, 1.003	233.000, 0.962	233.000, 0.971	233.000, 0.929	233.000, 0.934	233.000, 0.857	233.000, 0.973	233.000, 0.835	233.000, 0.954	233.000, 2.555	233.000, 2.358	233.000, 2.204
1167	233.200, 1.179	233.200, 1.060	233.200, 1.031	233.200, 1.003	233.200, 0.962	233.200, 0.971	233.200, 0.929	233.200, 0.934	233.200, 0.857	233.200, 0.973	233.200, 0.835	233.200, 0.954	233.200, 2.551	233.200, 2.355	233.200, 2.201
1168	233.400, 1.179	233.400, 1.060	233.400, 1.031	233.400, 1.003	233.400, 0.962	233.400, 0.971	233.400, 0.929	233.400, 0.934	233.400, 0.856	233.400, 0.973	233.400, 0.835	233.400, 0.954	233.400, 2.548	233.400, 2.352	233.400, 2.199
1169	233.600, 1.179	233.600, 1.060	233.600, 1.031	233.600, 1.003	233.600, 0.962	233.600, 0.971	233.600, 0.928	233.600, 0.935	233.600, 0.856	233.600, 0.973	233.600, 0.835	233.600, 0.954	233.600, 2.545	233.600, 2.349	233.600, 2.196
1170	233.800, 1.178	233.800, 1.059	233.800, 1.031	233.800, 1.003	233.800, 0.962	233.800, 0.971	233.800, 0.928	233.800, 0.934	233.800, 0.856	233.800, 0.973	233.800, 0.835	233.800, 0.954	233.800, 2.542	233.800, 2.347	233.800, 2.194
1171	234.000, 1.178	234.000, 1.059	234.000, 1.031	234.000, 1.004	234.000, 0.961	234.000, 0.971	234.000, 0.928	234.000, 0.934	234.000, 0.856	234.000, 0.972	234.000, 0.835	234.000, 0.954	234.000, 2.539	234.000, 2.344	234.000, 2.191
1172	234.200, 1.178	234.200, 1.059	234.200, 1.031	234.200, 1.004	234.200, 0.961	234.200, 0.971	234.200, 0.927	234.200, 0.934	234.200, 0.856	234.200, 0.972	234.200, 0.835	234.200, 0.954	234.200, 2.536	234.200, 2.341	234.200, 2.188
1173	234.400, 1.178	234.400, 1.059	234.400, 1.031	234.400, 1.004	234.400, 0.961	234.400, 0.971	234.400, 0.927	234.400, 0.934	234.400, 0.856	234.400, 0.972	234.400, 0.835	234.400, 0.955	234.400, 2.534	234.400, 2.338	234.400, 2.185
1174	234.600, 1.178	234.600, 1.058	234.600, 1.031	234.600, 1.004	234.600, 0.961	234.600, 0.971	234.600, 0.926	234.600, 0.933	234.600, 0.856	234.600, 0.972	234.600, 0.835	234.600, 0.955	234.600, 2.531	234.600, 2.334	234.600, 2.182
1175	234.800, 1.178	234.800, 1.058	234.800, 1.030	234.800, 1.003	234.800, 0.961	234.800, 0.971	234.800, 0.926	234.800, 0.933	234.800, 0.856	234.800, 0.972	234.800, 0.835	234.800, 0.955	234.800, 2.528	234.800, 2.331	234.800, 2.179
1176	235.000, 1.178	235.000, 1.059	235.000, 1.030	235.000, 1.003	235.000, 0.960	235.000, 0.971	235.000, 0.926	235.000, 0.932	235.000, 0.856	235.000, 0.972	235.000, 0.835	235.000, 0.955	235.000, 2.525	235.000, 2.328	235.000, 2.176
1177	235.200, 1.178	235.200, 1.059	235.200, 1.030	235.200, 1.003	235.200, 0.960	235.200, 0.970	235.200, 0.926	235.200, 0.932	235.200, 0.856	235.200, 0.972	235.200, 0.835	235.200, 0.955	235.200, 2.522	235.200, 2.325	235.200, 2.173
1178	235.400, 1.177	235.400, 1.059	235.400, 1.030	235.400, 1.002	235.400, 0.960	235.400, 0.970	235.400, 0.925	235.400, 0.932	235.400, 0.856	235.400, 0.972	235.400, 0.835	235.400, 0.955	235.400, 2.519	235.400, 2.321	235.400, 2.170
1179	235.600, 1.177	235.600, 1.059	235.600, 1.029	235.600, 1.002	235.600, 0.959	235.600, 0.970	235.600, 0.925	235.600, 0.932	235.600, 0.856	235.600, 0.972	235.600, 0.835	235.600, 0.955	235.600, 2.515	235.600, 2.318	235.600, 2.168
1180	235.800, 1.178	235.800, 1.059	235.800, 1.029	235.800, 1.002	235.800, 0.959	235.800, 0.970	235.800, 0.925	235.800, 0.932	235.800, 0.856	235.800, 0.971	235.800, 0.835	235.800, 0.954	235.800, 2.512	235.800, 2.315	235.800, 2.165
1181	236.000, 1.178	236.000, 1.058	236.000, 1.029	236.000, 1.002	236.000, 0.958	236.000, 0.970	236.000, 0.925	236.000, 0.932	236.000, 0.856	236.000, 0.971	236.000, 0.835	236.000, 0.954	236.000, 2.509	236.000, 2.312	236.000, 2.162
1182	236.200, 1.178	236.200, 1.058	236.200, 1.029	236.200, 1.002	236.200, 0.958	236.200, 0.970	236.200, 0.925	236.200, 0.931	236.200, 0.855	236.200, 0.971	236.200, 0.835	236.200, 0.954	236.200, 2.506	236.200, 2.309	236.200, 2.160
1183	236.400, 1.178	236.400, 1.058	236.400, 1.029	236.400, 1.002	236.400, 0.958	236.400, 0.970	236.400, 0.925	236.400, 0.931	236.400, 0.855	236.400, 0.971	236.400, 0.835	236.400, 0.954	236.400, 2.503	236.400, 2.307	236.400, 2.157
1184	236.600, 1.178	236.600, 1.058	236.600, 1.029	236.600, 1.001	236.600, 0.959	236.600, 0.969	236.600, 0.925	236.600, 0.931	236.600, 0.855	236.600, 0.970	236.600, 0.835	236.600, 0.954	236.600, 2.500	236.600, 2.304	236.600, 2.154
1185	236.800, 1.178	236.800, 1.058	236.800, 1.029	236.800, 1.001	236.800, 0.959	236.800, 0.969	236.800, 0.925	236.800, 0.931	236.800, 0.855	236.800, 0.970	236.800, 0.834	236.800, 0.954	236.800, 2.496	236.800, 2.301	236.800, 2.152
1186	237.000, 1.178	237.000, 1.058	237.000, 1.029	237.000, 1.001	237.000, 0.959	237.000, 0.969	237.000, 0.925	237.000, 0.931	237.000, 0.854	237.000, 0.970	237.000, 0.834	237.000, 0.954	237.000, 2.493	237.000, 2.299	237.000, 2.149
1187	237.200, 1.178	237.200, 1.058	237.200, 1.029	237.200, 1.001	237.200, 0.959	237.200, 0.969	237.200, 0.925	237.200, 0.932	237.200, 0.854	237.200, 0.970	237.200, 0.834	237.200, 0.954	237.200, 2.490	237.200, 2.296	237.200, 2.147
1188	237.400, 1.178	237.400, 1.058	237.400, 1.029	237.400, 1.002	237.400, 0.959	237.400, 0.969	237.400, 0.925	237.400, 0.932	237.400, 0.854	237.400, 0.970	237.400, 0.834	237.400, 0.954	237.400, 2.487	237.400, 2.294	237.400, 2.144
1189	237.600, 1.178	237.600, 1.058	237.600, 1.029	237.600, 1.002	237.600, 0.959	237.600, 0.969	237.600, 0.925	237.600, 0.932	237.600, 0.854	237.600, 0.970	237.600, 0.834	237.600, 0.954	237.600, 2.484	237.600, 2.291	237.600, 2.142
1190	237.800, 1.178	237.800, 1.058	237.800, 1.029	237.800, 1.002	237.800, 0.960	237.800, 0.969	237.800, 0.924	237.800, 0.932	237.800, 0.854	237.800, 0.970	237.800, 0.834	237.800, 0.953	237.800, 2.481	237.800, 2.289	237.800, 2.139
1191	238.000, 1.178	238.000, 1.057	238.000, 1.029	238.000, 1.002	238.000, 0.960	238.000, 0.968	238.000, 0.924	238.000, 0.932	238.000, 0.853	238.000, 0.970	238.000, 0.833	238.000, 0.953	238.000, 2.478	238.000, 2.286	238.000, 2.137
1192	238.200, 1.178	238.200, 1.058	238.200, 1.029	238.200, 1.002	238.200, 0.960	238.200, 0.968	238.200, 0.924	238.200, 0.932	238.200, 0.853	238.200, 0.970	238.200, 0.833	238.200, 0.953	238.200, 2.475	238.200, 2.284	238.200, 2.134
1193	238.400, 1.178	238.400, 1.057	238.400, 1.029	238.400, 1.002	238.400, 0.960	238.400, 0.968	238.400, 0.923	238.400, 0.932	238.400, 0.853	238.400, 0.970	238.400, 0.833	238.400, 0.952	238.400, 2.473	238.400, 2.281	238.400, 2.132
1194	238.600, 1.178	238.600, 1.057	238.600, 1.029	238.600, 1.002	238.600, 0.959	238.600, 0.968	238.600, 0.923	238.600, 0.931	238.600, 0.852	238.600, 0.969	238.600, 0.833	238.600, 0.952	238.600, 2.470	238.600, 2.278	238.600, 2.129
1195	238.800, 1.178	238.800, 1.057	238.800, 1.029	238.800, 1.002	238.800, 0.959	238.800, 0.968	238.800, 0.923	238.800, 0.931	238.800, 0.852	238.800, 0.969	238.800, 0.833	238.800, 0.952	238.800, 2.467	238.800, 2.276	238.800, 2.127
1196	239.000, 1.178	239.000, 1.057	239.000, 1.029	239.000, 1.001	239.000, 0.959	239.000, 0.968	239.000, 0.923	239.000, 0.931	239.000, 0.852	239.000, 0.969	239.000, 0.832	239.000, 0.952	239.000, 2.464	239.000, 2.273	239.000, 2.124
1197	239.200, 1.177	239.200, 1.057	239.200, 1.029	239.200, 1.001	239.200, 0.959	239.200, 0.968	239.200, 0.923	239.200, 0.930	239.200, 0.853	239.200, 0.969	239.200, 0.832	239.200, 0.952	239.200, 2.461	239.200, 2.270	239.200, 2.121
1198	239.400, 1.177	239.400, 1.057	239.400, 1.029	239.400, 1.001	239.400, 0.958	239.400, 0.968	239.400, 0.923	239.400, 0.930	239.400, 0.853	239.400, 0.969	239.400, 0.831	239.400, 0.952	239.400, 2.458	239.400, 2.267	239.400, 2.118
1199	239.600, 1.177	239.600, 1.056	239.600, 1.028	239.600, 1.001	239.600, 0.958	239.600, 0.967	239.600, 0.923	239.600, 0.930	239.600, 0.853	239.600, 0.969	239.600, 0.831	239.600, 0.952	239.600, 2.454	239.600, 2.264	239.600, 2.116
1200	239.800, 1.177	239.800, 1.056	239.800, 1.028	239.800, 1.000	239.800, 0.958	239.800, 0.967	239.800, 0.923	239.800, 0.929	239.800, 0.852	239.800, 0.969	239.800, 0.831	239.800, 0.951	239.800, 2.451	239.800, 2.261	239.800, 2.113
1201	240.000, 1.177	240.000, 1.055	240.000, 1.028	240.000, 1.000	240.000, 0.958	240.000, 0.967	240.000, 0.922	240.000, 0.929	240.000, 0.852	240.000, 0.968	240.000, 0.830	240.000, 0.951	240.000, 2.449	240.000, 2.259	240.000, 2.110
1202	240.200, 1.177	240.200, 1.055	240.200, 1.027	240.200, 0.999	240.200, 0.958	240.200, 0.967	240.200, 0.922	240.200, 0.929	240.200, 0.852	240.200, 0.968	240.200, 0.830	240.200, 0.951	240.200, 2.446	240.200, 2.256	240.200, 2.107
1203	240.400, 1.178	240.400, 1.054	240.400, 1.027	240.400, 0.999	240.400, 0.958	240.400, 0.967	240.400, 0.922	240.400, 0.929	240.400, 0.852	240.400, 0.968	240.400, 0.830	240.400, 0.951	240.400, 2.443	240.400, 2.253	240.400, 2.104
1204	240.600, 1.178	240.600, 1.054	240.600, 1.026	240.600, 0.999	240.600, 0.958	240.600, 0.966	240.600, 0.922	240.600, 0.929	240.600, 0.852	240.600, 0.968	240.600, 0.829	240.600, 0.950	240.600, 2.440	240.600, 2.250	240.600, 2.101
1205	240.800, 1.178	240.800, 1.054	240.800, 1.026	240.800, 0.998	240.800, 0.958	240.800, 0.966	240.800, 0.921	240.800, 0.929	240.800, 0.852	240.800, 0.968	240.800, 0.829	240.800, 0.950	240.800, 2.436	240.800, 2.247	240.800, 2.098
1206	241.000, 1.178	241.000, 1.054	241.000, 1.025	241.000, 0.998	241.000, 0.958	241.000, 0.966	241.000, 0.921	241.000, 0.929	241.000, 0.852	241.000, 0.968	241.000, 0.829	241.000, 0.950	241.000, 2.433	241.000, 2.244	241.000, 2.095
1207	241.200, 1.178	241.200, 1.054	241.200, 1.025	241.200, 0.998	241.200, 0.958	241.200, 0.966	241.200, 0.921	241.200, 0.929	241.200, 0.852	241.200, 0.968	241.200, 0.829	241.200, 0.950	241.200, 2.430	241.200, 2.241	241.200, 2.092
1208	241.400, 1.178	241.400, 1.054	241.400, 1.024	241.400, 0.998	241.400, 0.958	241.400, 0.966	241.400, 0.921	241.400, 0.929	241.400, 0.851	241.400, 0.967	241.400, 0.829	241.400, 0.949	241.400, 2.427	241.400, 2.238	241.400, 2.090
1209	241.600, 1.178	241.600, 1.054	241.600, 1.024	241.600, 0.998	241.600, 0.957	241.600, 0.965	241.600, 0.921	241.600, 0.929	241.600, 0.851	241.600, 0.967	241.600, 0.829	241.600, 0.949	241.600, 2.424	241.600, 2.236	241.600, 2.087
1210	241.800, 1.178	241.800, 1.054	241.800, 1.024	241.800, 0.998	241.800, 0.957	241.800, 0.965	241.800, 0.921	241.800, 0.929	241.800, 0.851	241.800, 0.966	241.800, 0.829	241.800, 0.949	241.800, 2.421	241.800, 2.233	241.800, 2.084
1211	242.000, 1.178	242.000, 1.054	242.000, 1.024	242.000, 0.997	242.000, 0.957	242.000, 0.965	242.000, 0.921	242.000, 0.929	242.000, 0.851	242.000, 0.966	242.000, 0.829	242.000, 0.950	242.000, 2.418	242.000, 2.231	242.000, 2.082
1212	242.200, 1.178	242.200, 1.054	242.200, 1.024	242.200, 0.997	242.200, 0.957	242.200, 0.965	242.200, 0.921	242.200, 0.929	242.200, 0.851	242.200, 0.966	242.200, 0.829	242.200, 0.950	242.200, 2.415	242.200, 2.228	242.200, 2.080
1213	242.400, 1.178	242.400, 1.054	242.400, 1.024	242.400, 0.997	242.400, 0.956	242.400, 0.965	242.400, 0.922	242.400, 0.929	242.400, 0.851	242.400, 0.966	242.400, 0.829	242.400, 0.950	242.400, 2.411	242.400, 2.225	242.400, 2.078
1214	242.600, 1.178	242.600, 1.054	242.600, 1.024	242.600, 0.996	242.600, 0.956	242.600, 0.965	242.600, 0.922	242.600, 0.929	242.600, 0.851	242.600, 0.966	242.600, 0.829	242.600, 0.950	242.600, 2.408	242.600, 2.222	242.600, 2.076
1215	242.800, 1.177	242.800, 1.054	242.800, 1.024	242.800, 0.996	242.800, 0.956	242.800, 0.965	242.800, 0.921	242.800, 0.929	242.800, 0.850	242.800, 0.966	242.800, 0.829	242.800, 0.950	242.800, 2.405	242.800, 2.219	242.800, 2.073
1216	243.000, 1.177	243.000, 1.053	243.000, 1.023	243.000, 0.996	243.000, 0.956	243.000, 0.965	243.000, 0.921	243.000, 0.929	243.000, 0.850	243.000, 0.965	243.000, 0.829	243.000, 0.950	243.000, 2.402	243.000, 2.216	243.000, 2.071
1217	243.200, 1.176	243.200, 1.053	243.200, 1.023	243.200, 0.996	243.200, 0.956	243.200, 0.964	243.200, 0.921	243.200, 0.928	243.200, 0.850	243.200, 0.965	243.200, 0.829	243.200, 0.950	243.200, 2.399	243.200, 2.214	243.200, 2.069
1218	243.400, 1.176	243.400, 1.052	243.400, 1.023	243.400, 0.996	243.400, 0.956	243.400, 0.964	243.400, 0.920	243.400, 0.928	243.400, 0.851	243.400, 0.965	243.400, 0.829	243.400, 0.950	243.400, 2.396	243.400, 2.211	243.400, 2.066
1219	243.600, 1.175	243.600, 1.052	243.600, 1.023	243.600, 0.996	243.600, 0.956	243.600, 0.964	243.600, 0.920	243.600, 0.928	243.600, 0.851	243.600, 0.965	243.600, 0.829	243.600, 0.949	243.600, 2.394	243.600, 2.208	243.600, 2.064
1220	243.800, 1.175	243.800, 1.051	243.800, 1.023	243.800, 0.996	243.800, 0.956	243.800, 0.963	243.800, 0.919	243.800, 0.928	243.800, 0.851	243.800, 0.965	243.800, 0.828	243.800, 0.949	243.800, 2.391	243.800, 2.205	243.800, 2.062
1221	244.000, 1.175	244.000, 1.051	244.000, 1.023	244.000, 0.995	244.000, 0.955	244.000, 0.963	244.000, 0.919	244.000, 0.928	244.000, 0.851	244.000, 0.965	244.000, 0.829	244.000, 0.948	244.000, 2.388	244.000, 2.203	244.000, 2.059
1222	244.200, 1.174	244.200, 1.051	244.200, 1.023	244.200, 0.995	244.200, 0.955	244.200, 0.963	244.200, 0.918	244.200, 0.928	244.200, 0.850	244.200, 0.965	244.200, 0.829	244.200, 0.948	244.200, 2.385	244.200, 2.200	244.200, 2.057
1223	244.400, 1.174	244.400, 1.051	244.400, 1.023	244.400, 0.995	244.400, 0.955	244.400, 0.962	244.400, 0.918	244.400, 0.928	244.400, 0.850	244.400, 0.966	244.400, 0.829	244.400, 0.947	244.400, 2.382	244.400, 2.197	244.400, 2.055
1224	244.600, 1.174	244.600, 1.051	244.600, 1.023	244.600, 0.995	244.600, 0.955	244.600, 0.962	244.600, 0.918	244.600, 0.928	244.600, 0.850	244.600, 0.966	244.600, 0.829	244.600, 0.947	244.600, 2.379	244.600, 2.195	244.600, 2.052
1225	244.800, 1.174	244.800, 1.051	244.800, 1.023	244.800, 0.994	244.800, 0.954	244.800, 0.962	244.800, 0.918	244.800, 0.928	244.800, 0.850	244.800, 0.966	244.800, 0.829	244.800, 0.947	244.800, 2.376	244.800, 2.192	244.800, 2.050
1226	245.000, 1.174	245.000, 1.051	245.000, 1.023	245.000, 0.994	245.000, 0.954	245.000, 0.962	245.000, 0.917	245.000, 0.928	245.000, 0.849	245.000, 0.966	245.000, 0.829	245.000, 0.946	245.000, 2.374	245.000, 2.190	245.000, 2.048
1227	245.200, 1.174	245.200, 1.052	245.200, 1.023	245.200, 0.994	245.200, 0.954	245.200, 0.962	245.200, 0.917	245.200, 0.927	245.200, 0.849	245.200, 0.966	245.200, 0.829	245.200, 0.946	245.200, 2.371	245.200, 2.188	245.200, 2.046
1228	245.400, 1.174	245.400, 1.052	245.400, 1.023	245.400, 0.994	245.400, 0.954	245.400, 0.962	245.400, 0.917	245.400, 0.927	245.400, 0.849	245.400, 0.965	245.400, 0.829	245.400, 0.946	245.400, 2.369	245.400, 2.185	245.400, 2.043
1229	245.600, 1.174	245.600, 1.052	245.600, 1.023	245.600, 0.994	245.600, 0.954	245.600, 0.962	245.600, 0.917	245.600, 0.927	245.600, 0.848	245.600, 0.965	245.600, 0.829	245.600, 0.946	245.600, 2.366	245.600, 2.183	245.600, 2.041
1230	245.800, 1.175	245.800, 1.052	245.800, 1.023	245.800, 0.994	245.800, 0.954	245.800, 0.962	245.800, 0.917	245.800, 0.927	245.800, 0.848	245.800, 0.965	245.800, 0.829	245.800, 0.946	245.800, 2.363	245.800, 2.180	245.800, 2.038
1231	246.000, 1.175	246.000, 1.052	246.000, 1.023	246.000, 0.994	246.000, 0.953	246.000, 0.962	246.000, 0.917	246.000, 0.926	246.000, 0.848	246.000, 0.966	246.000, 0.828	246.000, 0.946	246.000, 2.360	246.000, 2.177	246.000, 2.035
1232	246.200, 1.175	246.200, 1.051	246.200, 1.023	246.200, 0.993	246.200, 0.953	246.200, 0.962	246.200, 0.918	246.200, 0.926	246.200, 0.848	246.200, 0.966	246.200, 0.828	246.200, 0.946	246.200, 2.357	246.200, 2.174	246.200, 2.033
1233	246.400, 1.175	246.400, 1.051	246.400, 1.023	246.400, 0.993	246.400, 0.953	246.400, 0.962	246.400, 0.917	246.400, 0.926	246.400, 0.848	246.400, 0.965	246.400, 0.828	246.400, 0.946	246.400, 2.354	246.400, 2.172	246.400, 2.030
1234	246.600, 1.175	246.600, 1.051	246.600, 1.023	246.600, 0.993	246.600, 0.953	246.600, 0.962	246.600, 0.917	246.600, 0.926	246.600, 0.848	246.600, 0.965	246.600, 0.827	246.600, 0.946	246.600, 2.351	246.600, 2.169	246.600, 2.027
1235	246.800, 1.175	246.800, 1.050	246.800, 1.023	246.800, 0.993	246.800, 0.953	246.800, 0.963	246.800, 0.917	246.800, 0.926	246.800, 0.848	246.800, 0.965	246.800, 0.827	246.800, 0.946	246.800, 2.348	246.800, 2.166	246.800, 2.025
1236	247.000, 1.176	247.000, 1.050	247.000, 1.023	247.000, 0.993	247.000, 0.953	247.000, 0.963	247.000, 0.917	247.000, 0.926	247.000, 0.848	247.000, 0.964	247.000, 0.827	247.000, 0.946	247.000, 2.345	247.000, 2.163	247.000, 2.022
1237	247.200, 1.175	247.200, 1.049	247.200, 1.022	247.200, 0.993	247.200, 0.953	247.200, 0.963	247.200, 0.917	247.200, 0.926	247.200, 0.848	247.200, 0.964	247.200, 0.827	247.200, 0.946	247.200, 2.343	247.200, 2.161	247.200, 2.019
1238	247.400, 1.175	247.400, 1.049	247.400, 1.022	247.400, 0.993	247.400, 0.953	247.400, 0.963	247.400, 0.916	247.400, 0.926	247.400, 0.848	247.400, 0.964	247.400, 0.826	247.400, 0.946	247.400, 2.340	247.400, 2.158	247.400, 2.016
1239	247.600, 1.175	247.600, 1.049	247.600, 1.022	247.600, 0.993	247.600, 0.952	247.600, 0.963	247.600, 0.916	247.600, 0.926	247.600, 0.848	247.600, 0.964	247.600, 0.826	247.600, 0.946	247.600, 2.336	247.600, 2.155	247.600, 2.013
1240	247.800, 1.175	247.800, 1.048	247.800, 1.021	247.800, 0.993	247.800, 0.952	247.800, 0.963	247.800, 0.916	247.800, 0.926	247.800, 0.849	247.800, 0.963	247.800, 0.826	247.800, 0.946	247.800, 2.333	247.800, 2.152	247.800, 2.011
1241	248.000, 1.175	248.000, 1.048	248.000, 1.021	248.000, 0.993	248.000, 0.952	248.000, 0.963	248.000, 0.916	248.000, 0.926	248.000, 0.849	248.000, 0.963	248.000, 0.826	248.000, 0.946	248.000, 2.330	248.000, 2.149	248.000, 2.008
1242	248.200, 1.175	248.200, 1.048	248.200, 1.021	248.200, 0.993	248.200, 0.952	248.200, 0.963	248.200, 0.916	248.200, 0.925	248.200, 0.849	248.200, 0.963	248.200, 0.826	248.200, 0.947	248.200, 2.327	248.200, 2.147	248.200, 2.006
1243	248.400, 1.175	248.400, 1.048	248.400, 1.020	248.400, 0.993	248.400, 0.952	248.400, 0.963	248.400, 0.917	248.400, 0.925	248.400, 0.849	248.400, 0.963	248.400, 0.826	248.400, 0.947	248.400, 2.324	248.400, 2.144	248.400, 2.004
1244	248.600, 1.174	248.600, 1.048	248.600, 1.020	248.600, 0.993	248.600, 0.952	248.600, 0.962	248.600, 0.917	248.600, 0.925	248.600, 0.848	248.600, 0.963	248.600, 0.826	248.600, 0.947	248.600, 2.321	248.600, 2.141	248.600, 2.002
1245	248.800, 1.174	248.800, 1.048	248.800, 1.020	248.800, 0.993	248.800, 0.952	248.800, 0.962	248.800, 0.917	248.800, 0.925	248.800, 0.848	248.800, 0.963	248.800, 0.826	248.800, 0.946	248.800, 2.318	248.800, 2.139	248.800, 2.000
1246	249.000, 1.174	249.000, 1.048	249.000, 1.020	249.000, 0.993	249.000, 0.951	249.000, 0.962	249.000, 0.917	249.000, 0.924	249.000, 0.848	249.000, 0.962	249.000, 0.826	249.000, 0.946	249.000, 2.316	249.000, 2.136	249.000, 1.998
1247	249.200, 1.174	249.200, 1.048	249.200, 1.020	249.200, 0.993	249.200, 0.951	249.200, 0.961	249.200, 0.917	249.200, 0.924	249.200, 0.848	249.200, 0.962	249.200, 0.826	249.200, 0.946	249.200, 2.313	249.200, 2.134	249.200, 1.996
1248	249.400, 1.174	249.400, 1.048	249.400, 1.020	249.400, 0.993	249.400, 0.951	249.400, 0.961	249.400, 0.917	249.400, 0.924	249.400, 0.847	249.400, 0.962	249.400, 0.826	249.400, 0.946	249.400, 2.311	249.400, 2.131	249.400, 1.993
1249	249.600, 1.174	249.600, 1.048	249.600, 1.020	249.600, 0.993	249.600, 0.951	249.600, 0.961	249.600, 0.916	249.600, 0.923	249.600, 0.847	249.600, 0.962	249.600, 0.826	249.600, 0.945	249.600, 2.308	249.600, 2.128	249.600, 1.991
1250	249.800, 1.174	249.800, 1.048	249.800, 1.020	249.800, 0.992	249.800, 0.951	249.800, 0.961	249.800, 0.916	249.800, 0.923	249.800, 0.847	249.800, 0.962	249.800, 0.826	249.800, 0.945	249.800, 2.306	249.800, 2.125	249.800, 1.989
1251	250.000, 1.173	250.000, 1.049	250.000, 1.020	250.000, 0.992	250.000, 0.951	250.000, 0.961	250.000, 0.916	250.000, 0.923	250.000, 0.846	250.000, 0.962	250.000, 0.826	250.000, 0.944	250.000, 2.303	250.000, 2.123	250.000, 1.986
1252	250.200, 1.173	250.200, 1.049	250.200, 1.021	250.200, 0.992	250.200, 0.951	250.200, 0.961	250.200, 0.916	250.200, 0.922	250.200, 0.846	250.200, 0.962	250.200, 0.826	250.200, 0.944	250.200, 2.300	250.200, 2.120	250.200, 1.984
1253	250.400, 1.173	250.400, 1.049	250.400, 1.021	250.400, 0.991	250.400, 0.950	250.400, 0.961	250.400, 0.916	250.400, 0.922	250.400, 0.845	250.400, 0.962	250.400, 0.826	250.400, 0.943	250.400, 2.298	250.400, 2.118	250.400, 1.982
1254	250.600, 1.173	250.600, 1.049	250.600, 1.021	250.600, 0.991	250.600, 0.950	250.600, 0.961	250.600, 0.915	250.600, 0.922	250.600, 0.845	250.600, 0.961	250.600, 0.826	250.600, 0.943	250.600, 2.295	250.600, 2.116	250.600, 1.979
1255	250.800, 1.172	250.800, 1.048	250.800, 1.021	250.800, 0.991	250.800, 0.950	250.800, 0.961	250.800, 0.915	250.800, 0.922	250.800, 0.845	250.800, 0.961	250.800, 0.826	250.800, 0.943	250.800, 2.292	250.800, 2.113	250.800, 1.977
1256	251.000, 1.172	251.000, 1.048	251.000, 1.021	251.000, 0.991	251.000, 0.950	251.000, 0.961	251.000, 0.915	251.000, 0.922	251.000, 0.845	251.000, 0.961	251.000, 0.826	251.000, 0.942	251.000, 2.290	251.000, 2.111	251.000, 1.975
1257	251.200, 1.172	251.200, 1.048	251.200, 1.020	251.200, 0.991	251.200, 0.951	251.200, 0.961	251.200, 0.914	251.200, 0.921	251.200, 0.845	251.200, 0.960	251.200, 0.826	251.200, 0.942	251.200, 2.287	251.200, 2.109	251.200, 1.972
1258	251.400, 1.172	251.400, 1.047	251.400, 1.020	251.400, 0.991	251.400, 0.951	251.400, 0.961	251.400, 0.914	251.400, 0.921	251.400, 0.845	251.400, 0.960	251.400, 0.826	251.400, 0.942	251.400, 2.284	251.400, 2.107	251.400, 1.970
1259	251.600, 1.172	251.600, 1.047	251.600, 1.020	251.600, 0.991	251.600, 0.951	251.600, 0.961	251.600, 0.914	251.600, 0.922	251.600, 0.846	251.600, 0.960	251.600, 0.826	251.600, 0.942	251.600, 2.281	251.600, 2.104	251.600, 1.967
1260	251.800, 1.171	251.800, 1.047	251.800, 1.019	251.800, 0.991	251.800, 0.951	251.800, 0.960	251.800, 0.914	251.800, 0.922	251.800, 0.846	251.800, 0.959	251.800, 0.825	251.800, 0.942	251.800, 2.278	251.800, 2.102	251.800, 1.965
1261	252.000, 1.171	252.000, 1.047	252.000, 1.019	252.000, 0.991	252.000, 0.950	252.000, 0.960	252.000, 0.914	252.000, 0.922	252.000, 0.846	252.000, 0.959	252.000, 0.825	252.000, 0.942	252.000, 2.275	252.000, 2.099	252.000, 1.962
1262	252.200, 1.171	252.200, 1.046	252.200, 1.019	252.200, 0.991	252.200, 0.950	252.200, 0.959	252.200, 0.914	252.200, 0.922	252.200, 0.846	252.200, 0.959	252.200, 0.825	252.200, 0.942	252.200, 2.273	252.200, 2.097	252.200, 1.960
1263	252.400, 1.171	252.400, 1.046	252.400, 1.019	252.400, 0.991	252.400, 0.950	252.400, 0.959	252.400, 0.915	252.400, 0.922	252.400, 0.846	252.400, 0.959	252.400, 0.824	252.400, 0.942	252.400, 2.270	252.400, 2.094	252.400, 1.958
1264	252.600, 1.171	252.600, 1.046	252.600, 1.019	252.600, 0.991	252.600, 0.950	252.600, 0.959	252.600, 0.914	252.600, 0.922	252.600, 0.846	252.600, 0.958	252.600, 0.824	252.600, 0.942	252.600, 2.267	252.600, 2.092	252.600, 1.956
1265	252.800, 1.171	252.800, 1.046	252.800, 1.019	252.800, 0.991	252.800, 0.949	252.800, 0.958	252.800, 0.914	252.800, 0.922	252.800, 0.846	252.800, 0.958	252.800, 0.824	252.800, 0.942	252.800, 2.265	252.800, 2.089	252.800, 1.954
1266	253.000, 1.171	253.000, 1.046	253.000, 1.019	253.000, 0.991	253.000, 0.949	253.000, 0.958	253.000, 0.914	253.000, 0.922	253.000, 0.845	253.000, 0.958	253.000, 0.824	253.000, 0.942	253.000, 2.262	253.000, 2.086	253.000, 1.951
1267	253.200, 1.171	253.200, 1.046	253.200, 1.019	253.200, 0.990	253.200, 0.949	253.200, 0.958	253.200, 0.914	253.200, 0.922	253.200, 0.845	253.200, 0.958	253.200, 0.823	253.200, 0.943	253.200, 2.259	253.200, 2.084	253.200, 1.949
1268	253.400, 1.172	253.400, 1.045	253.400, 1.019	253.400, 0.990	253.400, 0.949	253.400, 0.957	253.400, 0.914	253.400, 0.922	253.400, 0.844	253.400, 0.958	253.400, 0.823	253.400, 0.943	253.400, 2.256	253.400, 2.081	253.400, 1.947
1269	253.600, 1.172	253.600, 1.045	253.600, 1.019	253.600, 0.990	253.600, 0.949	253.600, 0.957	253.600, 0.914	253.600, 0.922	253.600, 0.844	253.600, 0.958	253.600, 0.823	253.600, 0.943	253.600, 2.253	253.600, 2.078	253.600, 1.945
1270	253.800, 1.172	253.800, 1.046	253.800, 1.019	253.800, 0.990	253.800, 0.949	253.800, 0.957	253.800, 0.914	253.800, 0.922	253.800, 0.843	253.800, 0.958	253.800, 0.823	253.800, 0.943	253.800, 2.251	253.800, 2.076	253.800, 1.943
1271	254.000, 1.172	254.000, 1.046	254.000, 1.019	254.000, 0.990	254.000, 0.948	254.000, 0.956	254.000, 0.913	254.000, 0.922	254.000, 0.843	254.000, 0.959	254.000, 0.823	254.000, 0.943	254.000, 2.248	254.000, 2.073	254.000, 1.941
1272	254.200, 1.172	254.200, 1.045	254.200, 1.018	254.200, 0.989	254.200, 0.948	254.200, 0.956	254.200, 0.913	254.200, 0.922	254.200, 0.842	254.200, 0.959	254.200, 0.823	254.200, 0.943	254.200, 2.245	254.200, 2.070	254.200, 1.938
1273	254.400, 1.172	254.400, 1.045	254.400, 1.018	254.400, 0.989	254.400, 0.948	254.400, 0.956	254.400, 0.913	254.400, 0.922	254.400, 0.842	254.400, 0.959	254.400, 0.823	254.400, 0.943	254.400, 2.243	254.400, 2.068	254.400, 1.936
1274	254.600, 1.172	254.600, 1.045	254.600, 1.018	254.600, 0.989	254.600, 0.948	254.600, 0.956	254.600, 0.913	254.600, 0.921	254.600, 0.842	254.600, 0.959	254.600, 0.823	254.600, 0.942	254.600, 2.240	254.600, 2.066	254.600, 1.934
1275	254.800, 1.171	254.800, 1.045	254.800, 1.018	254.800, 0.989	254.800, 0.947	254.800, 0.957	254.800, 0.912	254.800, 0.921	254.800, 0.842	254.800, 0.959	254.800, 0.823	254.800, 0.942	254.800, 2.238	254.800, 2.063	254.800, 1.931
1276	255.000, 1.171	255.000, 1.044	255.000, 1.018	255.000, 0.989	255.000, 0.947	255.000, 0.957	255.000, 0.912	255.000, 0.921	255.000, 0.842	255.000, 0.959	255.000, 0.823	255.000, 0.942	255.000, 2.235	255.000, 2.061	255.000, 1.929
1277	255.200, 1.171	255.200, 1.044	255.200, 1.017	255.200, 0.989	255.200, 0.947	255.200, 0.957	255.200, 0.912	255.200, 0.921	255.200, 0.842	255.200, 0.958	255.200, 0.823	255.200, 0.941	255.200, 2.233	255.200, 2.059	255.200, 1.926
1278	255.400, 1.171	255.400, 1.044	255.400, 1.017	255.400, 0.989	255.400, 0.947	255.400, 0.957	255.400, 0.912	255.400, 0.920	255.400, 0.842	255.400, 0.958	255.400, 0.823	255.400, 0.941	255.400, 2.231	255.400, 2.056	255.400, 1.924
1279	255.600, 1.171	255.600, 1.044	255.600, 1.017	255.600, 0.988	255.600, 0.947	255.600, 0.957	255.600, 0.911	255.600, 0.920	255.600, 0.842	255.600, 0.958	255.600, 0.823	255.600, 0.941	255.600, 2.228	255.600, 2.054	255.600, 1.921
1280	255.800, 1.171	255.800, 1.044	255.800, 1.016	255.800, 0.988	255.800, 0.947	255.800, 0.957	255.800, 0.911	255.800, 0.920	255.800, 0.842	255.800, 0.958	255.800, 0.822	255.800, 0.941	255.800, 2.226	255.800, 2.051	255.800, 1.919
1281	256.000, 1.171	256.000, 1.044	256.000, 1.016	256.000, 0.988	256.000, 0.947	256.000, 0.958	256.000, 0.911	256.000, 0.920	256.000, 0.843	256.000, 0.958	256.000, 0.822	256.000, 0.940	256.000, 2.223	256.000, 2.048	256.000, 1.916
1282	256.200, 1.171	256.200, 1.044	256.200, 1.016	256.200, 0.988	256.200, 0.946	256.200, 0.958	256.200, 0.911	256.200, 0.919	256.200, 0.843	256.200, 0.957	256.200, 0.822	256.200, 0.940	256.200, 2.221	256.200, 2.045	256.200, 1.914
1283	256.400, 1.171	256.400, 1.044	256.400, 1.016	256.400, 0.987	256.400, 0.946	256.400, 0.957	256.400, 0.911	256.400, 0.919	256.400, 0.843	256.400, 0.957	256.400, 0.822	256.400, 0.940	256.400, 2.218	256.400, 2.043	256.400, 1.911
1284	256.600, 1.170	256.600, 1.044	256.600, 1.016	256.600, 0.987	256.600, 0.946	256.600, 0.957	256.600, 0.911	256.600, 0.919	256.600, 0.843	256.600, 0.957	256.600, 0.822	256.600, 0.939	256.600, 2.216	256.600, 2.040	256.600, 1.909
1285	256.800, 1.170	256.800, 1.043	256.800, 1.016	256.800, 0.987	256.800, 0.946	256.800, 0.957	256.800, 0.911	256.800, 0.919	256.800, 0.843	256.800, 0.957	256.800, 0.822	256.800, 0.939	256.800, 2.213	256.800, 2.037	256.800, 1.906
1286	257.000, 1.171	257.000, 1.043	257.000, 1.016	257.000, 0.987	257.000, 0.946	257.000, 0.957	257.000, 0.912	257.000, 0.919	257.000, 0.843	257.000, 0.957	257.000, 0.821	257.000, 0.939	257.000, 2.210	257.000, 2.035	257.000, 1.904
1287	257.200, 1.171	257.200, 1.043	257.200, 1.016	257.200, 0.987	257.200, 0.946	257.200, 0.956	257.200, 0.912	257.200, 0.919	257.200, 0.843	257.200, 0.957	257.200, 0.821	257.200, 0.939	257.200, 2.208	257.200, 2.032	257.200, 1.902
1288	257.400, 1.171	257.400, 1.043	257.400, 1.016	257.400, 0.987	257.400, 0.946	257.400, 0.956	257.400, 0.912	257.400, 0.919	257.400, 0.842	257.400, 0.957	257.400, 0.821	257.400, 0.938	257.400, 2.205	257.400, 2.030	257.400, 1.900
1289	257.600, 1.171	257.600, 1.043	257.600, 1.016	257.600, 0.988	257.600, 0.946	257.600, 0.956	257.600, 0.913	257.600, 0.918	257.600, 0.842	257.600, 0.957	257.600, 0.821	257.600, 0.938	257.600, 2.202	257.600, 2.027	257.600, 1.898
1290	257.800, 1.172	257.800, 1.042	257.800, 1.016	257.800, 0.988	257.800, 0.946	257.800, 0.955	257.800, 0.913	257.800, 0.918	257.800, 0.842	257.800, 0.957	257.800, 0.822	257.800, 0.937	257.800, 2.200	257.800, 2.025	257.800, 1.896
1291	258.000, 1.172	258.000, 1.042	258.000, 1.016	258.000, 0.988	258.000, 0.946	258.000, 0.955	258.000, 0.913	258.000, 0.918	258.000, 0.842	258.000, 0.957	258.000, 0.822	258.000, 0.937	258.000, 2.197	258.000, 2.023	258.000, 1.894
1292	258.200, 1.172	258.200, 1.042	258.200, 1.016	258.200, 0.988	258.200, 0.946	258.200, 0.955	258.200, 0.913	258.200, 0.918	258.200, 0.842	258.200, 0.957	258.200, 0.822	258.200, 0.937	258.200, 2.194	258.200, 2.021	258.200, 1.892
1293	258.400, 1.172	258.400, 1.042	258.400, 1.015	258.400, 0.988	258.400, 0.945	258.400, 0.955	258.400, 0.912	258.400, 0.918	258.400, 0.842	258.400, 0.957	258.400, 0.822	258.400, 0.937	258.400, 2.192	258.400, 2.019	258.400, 1.890
1294	258.600, 1.172	258.600, 1.041	258.600, 1.015	258.600, 0.988	258.600, 0.945	258.600, 0.955	258.600, 0.912	258.600, 0.918	258.600, 0.842	258.600, 0.957	258.600, 0.821	258.600, 0.937	258.600, 2.190	258.600, 2.017	258.600, 1.888
1295	258.800, 1.171	258.800, 1.041	258.800, 1.015	258.800, 0.988	258.800, 0.945	258.800, 0.955	258.800, 0.911	258.800, 0.918	258.800, 0.842	258.800, 0.957	258.800, 0.821	258.800, 0.937	258.800, 2.187	258.800, 2.015	258.800, 1.886
1296	259.000, 1.171	259.000, 1.041	259.000, 1.015	259.000, 0.988	259.000, 0.945	259.000, 0.954	259.000, 0.911	259.000, 0.918	259.000, 0.841	259.000, 0.957	259.000, 0.821	259.000, 0.937	259.000, 2.184	259.000, 2.012	259.000, 1.884
1297	259.200, 1.171	259.200, 1.041	259.200, 1.015	259.200, 0.988	259.200, 0.945	259.200, 0.954	259.200, 0.910	259.200, 0.918	259.200, 0.841	259.200, 0.956	259.200, 0.820	259.200, 0.937	259.200, 2.182	259.200, 2.010	259.200, 1.882
1298	259.400, 1.171	259.400, 1.041	259.400, 1.015	259.400, 0.988	259.400, 0.945	259.400, 0.954	259.400, 0.910	259.400, 0.918	259.400, 0.841	259.400, 0.956	259.400, 0.820	259.400, 0.937	259.400, 2.179	259.400, 2.008	259.400, 1.879
1299	259.600, 1.171	259.600, 1.041	259.600, 1.014	259.600, 0.988	259.600, 0.945	259.600, 0.954	259.600, 0.909	259.600, 0.918	259.600, 0.841	259.600, 0.956	259.600, 0.820	259.600, 0.937	259.600, 2.177	259.600, 2.005	259.600, 1.877
1300	259.800, 1.171	259.800, 1.041	259.800, 1.014	259.800, 0.988	259.800, 0.945	259.800, 0.954	259.800, 0.909	259.800, 0.919	259.800, 0.841	259.800, 0.956	259.800, 0.820	259.800, 0.937	259.800, 2.174	259.800, 2.003	259.800, 1.875
1301	260.000, 1.170	260.000, 1.040	260.000, 1.014	260.000, 0.987	260.000, 0.945	260.000, 0.954	260.000, 0.909	260.000, 0.919	260.000, 0.840	260.000, 0.955	260.000, 0.819	260.000, 0.937	260.000, 2.171	260.000, 2.000	260.000, 1.872
1302	260.200, 1.170	260.200, 1.040	260.200, 1.015	260.200, 0.987	260.200, 0.945	260.200, 0.954	260.200, 0.908	260.200, 0.919	260.200, 0.840	260.200, 0.955	260.200, 0.819	260.200, 0.937	260.200, 2.168	260.200, 1.998	260.200, 1.870
1303	260.400, 1.170	260.400, 1.040	260.400, 1.015	260.400, 0.987	260.400, 0.945	260.400, 0.954	260.400, 0.908	260.400, 0.919	260.400, 0.840	260.400, 0.955	260.400, 0.819	260.400, 0.936	260.400, 2.166	260.400, 1.995	260.400, 1.867
1304	260.600, 1.170	260.600, 1.040	260.600, 1.015	260.600, 0.986	260.600, 0.945	260.600, 0.954	260.600, 0.908	260.600, 0.918	260.600, 0.840	260.600, 0.955	260.600, 0.819	260.600, 0.936	260.600, 2.163	260.600, 1.993	260.600, 1.865
1305	260.800, 1.170	260.800, 1.040	260.800, 1.015	260.800, 0.986	260.800, 0.945	260.800, 0.954	260.800, 0.908	260.800, 0.918	260.800, 0.840	260.800, 0.954	260.800, 0.819	260.800, 0.936	260.800, 2.161	260.800, 1.990	260.800, 1.863
1306	261.000, 1.170	261.000, 1.040	261.000, 1.015	261.000, 0.986	261.000, 0.945	261.000, 0.955	261.000, 0.908	261.000, 0.918	261.000, 0.840	261.000, 0.954	261.000, 0.819	261.000, 0.936	261.000, 2.158	261.000, 1.988	261.000, 1.860
1307	261.200, 1.170	261.200, 1.040	261.200, 1.015	261.200, 0.986	261.200, 0.945	261.200, 0.955	261.200, 0.908	261.200, 0.918	261.200, 0.840	261.200, 0.954	261.200, 0.819	261.200, 0.936	261.200, 2.155	261.200, 1.985	261.200, 1.858
1308	261.400, 1.170	261.400, 1.040	261.400, 1.015	261.400, 0.986	261.400, 0.945	261.400, 0.955	261.400, 0.908	261.400, 0.918	261.400, 0.840	261.400, 0.954	261.400, 0.820	261.400, 0.936	261.400, 2.153	261.400, 1.982	261.400, 1.856
1309	261.600, 1.170	261.600, 1.040	261.600, 1.015	261.600, 0.986	261.600, 0.945	261.600, 0.955	261.600, 0.908	261.600, 0.918	261.600, 0.840	261.600, 0.954	261.600, 0.820	261.600, 0.936	261.600, 2.150	261.600, 1.980	261.600, 1.853
1310	261.800, 1.170	261.800, 1.039	261.800, 1.015	261.800, 0.986	261.800, 0.945	261.800, 0.955	261.800, 0.908	261.800, 0.918	261.800, 0.840	261.800, 0.954	261.800, 0.820	261.800, 0.936	261.800, 2.148	261.800, 1.977	261.800, 1.851
1311	262.000, 1.169	262.000, 1.039	262.000, 1.014	262.000, 0.986	262.000, 0.945	262.000, 0.954	262.000, 0.908	262.000, 0.918	262.000, 0.840	262.000, 0.954	262.000, 0.820	262.000, 0.936	262.000, 2.145	262.000, 1.974	262.000, 1.848
1312	262.200, 1.169	262.200, 1.039	262.200, 1.014	262.200, 0.985	262.200, 0.945	262.200, 0.954	262.200, 0.908	262.200, 0.918	262.200, 0.840	262.200, 0.954	262.200, 0.820	262.200, 0.936	262.200, 2.143	262.200, 1.972	262.200, 1.846
1313	262.400, 1.169	262.400, 1.039	262.400, 1.014	262.400, 0.985	262.400, 0.944	262.400, 0.953	262.400, 0.907	262.400, 0.917	262.400, 0.839	262.400, 0.954	262.400, 0.820	262.400, 0.936	262.400, 2.141	262.400, 1.970	262.400, 1.844
1314	262.600, 1.168	262.600, 1.039	262.600, 1.013	262.600, 0.985	262.600, 0.944	262.600, 0.953	262.600, 0.907	262.600, 0.917	262.600, 0.839	262.600, 0.955	262.600, 0.819	262.600, 0.936	262.600, 2.138	262.600, 1.967	262.600, 1.842
1315	262.800, 1.168	262.800, 1.038	262.800, 1.013	262.800, 0.985	262.800, 0.944	262.800, 0.952	262.800, 0.907	262.800, 0.917	262.800, 0.839	262.800, 0.955	262.800, 0.819	262.800, 0.936	262.800, 2.136	262.800, 1.965	262.800, 1.840
1316	263.000, 1.168	263.000, 1.038	263.000, 1.013	263.000, 0.985	263.000, 0.944	263.000, 0.952	263.000, 0.907	263.000, 0.917	263.000, 0.839	263.000, 0.955	263.000, 0.819	263.000, 0.936	263.000, 2.133	263.000, 1.963	263.000, 1.838
1317	263.200, 1.168	263.200, 1.038	263.200, 1.012	263.200, 0.985	263.200, 0.944	263.200, 0.952	263.200, 0.907	263.200, 0.917	263.200, 0.839	263.200, 0.955	263.200, 0.818	263.200, 0.936	263.200, 2.131	263.200, 1.960	263.200, 1.836
1318	263.400, 1.169	263.400, 1.038	263.400, 1.012	263.400, 0.985	263.400, 0.944	263.400, 0.952	263.400, 0.907	263.400, 0.917	263.400, 0.839	263.400, 0.955	263.400, 0.818	263.400, 0.935	263.400, 2.128	263.400, 1.958	263.400, 1.834
1319	263.600, 1.169	263.600, 1.037	263.600, 1.012	263.600, 0.985	263.600, 0.943	263.600, 0.952	263.600, 0.908	263.600, 0.917	263.600, 0.838	263.600, 0.955	263.600, 0.818	263.600, 0.935	263.600, 2.126	263.600, 1.956	263.600, 1.832
1320	263.800, 1.169	263.800, 1.037	263.800, 1.012	263.800, 0.985	263.800, 0.943	263.800, 0.951	263.800, 0.908	263.800, 0.917	263.800, 0.838	263.800, 0.955	263.800, 0.818	263.800, 0.935	263.800, 2.123	263.800, 1.954	263.800, 1.830
1321	264.000, 1.169	264.000, 1.038	264.000, 1.012	264.000, 0.984	264.000, 0.943	264.000, 0.951	264.000, 0.908	264.000, 0.917	264.000, 0.838	264.000, 0.955	264.000, 0.818	264.000, 0.935	264.000, 2.121	264.000, 1.952	264.000, 1.828
1322	264.200, 1.170	264.200, 1.038	264.200, 1.012	264.200, 0.984	264.200, 0.942	264.200, 0.951	264.200, 0.908	264.200, 0.916	264.200, 0.838	264.200, 0.954	264.200, 0.817	264.200, 0.934	264.200, 2.119	264.200, 1.949	264.200, 1.826
1323	264.400, 1.170	264.400, 1.038	264.400, 1.012	264.400, 0.984	264.400, 0.942	264.400, 0.951	264.400, 0.908	264.400, 0.916	264.400, 0.838	264.400, 0.954	264.400, 0.817	264.400, 0.934	264.400, 2.117	264.400, 1.947	264.400, 1.824
1324	264.600, 1.170	264.600, 1.039	264.600, 1.012	264.600, 0.984	264.600, 0.941	264.600, 0.951	264.600, 0.907	264.600, 0.916	264.600, 0.838	264.600, 0.954	264.600, 0.817	264.600, 0.934	264.600, 2.114	264.600, 1.945	264.600, 1.822
1325	264.800, 1.170	264.800, 1.039	264.800, 1.012	264.800, 0.984	264.800, 0.941	264.800, 0.951	264.800, 0.907	264.800, 0.916	264.800, 0.838	264.800, 0.954	264.800, 0.817	264.800, 0.934	264.800, 2.112	264.800, 1.943	264.800, 1.820
1326	265.000, 1.170	265.000, 1.039	265.000, 1.012	265.000, 0.984	265.000, 0.941	265.000, 0.951	265.000, 0.907	265.000, 0.916	265.000, 0.838	265.000, 0.953	265.000, 0.817	265.000, 0.934	265.000, 2.110	265.000, 1.941	265.000, 1.818
1327	265.200, 1.170	265.200, 1.039	265.200, 1.012	265.200, 0.983	265.200, 0.940	265.200, 0.951	265.200, 0.907	265.200, 0.915	265.200, 0.838	265.200, 0.953	265.200, 0.817	265.200, 0.934	265.200, 2.107	265.200, 1.939	265.200, 1.816
1328	265.400, 1.170	265.400, 1.040	265.400, 1.012	265.400, 0.983	265.400, 0.940	265.400, 0.951	265.400, 0.907	265.400, 0.915	265.400, 0.838	265.400, 0.952	265.400, 0.817	265.400, 0.934	265.400, 2.105	265.400, 1.937	265.400, 1.814
1329	265.600, 1.170	265.600, 1.040	265.600, 1.012	265.600, 0.983	265.600, 0.940	265.600, 0.951	265.600, 0.907	265.600, 0.915	265.600, 0.837	265.600, 0.952	265.600, 0.817	265.600, 0.933	265.600, 2.102	265.600, 1.934	265.600, 1.812
1330	265.800, 1.169	265.800, 1.039	265.800, 1.012	265.800, 0.983	265.800, 0.940	265.800, 0.951	265.800, 0.906	265.800, 0.914	265.800, 0.837	265.800, 0.952	265.800, 0.817	265.800, 0.933	265.800, 2.100	265.800, 1.932	265.800, 1.810
1331	266.000, 1.169	266.000, 1.039	266.000, 1.012	266.000, 0.983	266.000, 0.941	266.000, 0.951	266.000, 0.906	266.000, 0.914	266.000, 0.837	266.000, 0.952	266.000, 0.817	266.000, 0.933	266.000, 2.097	266.000, 1.929	266.000, 1.807
1332	266.200, 1.169	266.200, 1.039	266.200, 1.012	266.200, 0.983	266.200, 0.941	266.200, 0.951	266.200, 0.906	266.200, 0.914	266.200, 0.837	266.200, 0.952	266.200, 0.817	266.200, 0.933	266.200, 2.094	266.200, 1.927	266.200, 1.806
1333	266.400, 1.169	266.400, 1.039	266.400, 1.012	266.400, 0.983	266.400, 0.941	266.400, 0.951	266.400, 0.906	266.400, 0.914	266.400, 0.837	266.400, 0.952	266.400, 0.817	266.400, 0.933	266.400, 2.092	266.400, 1.924	266.400, 1.804
1334	266.600, 1.169	266.600, 1.038	266.600, 1.012	266.600, 0.983	266.600, 0.941	266.600, 0.951	266.600, 0.906	266.600, 0.915	266.600, 0.837	266.600, 0.952	266.600, 0.817	266.600, 0.932	266.600, 2.089	266.600, 1.921	266.600, 1.802
1335	266.800, 1.169	266.800, 1.038	266.800, 1.012	266.800, 0.983	266.800, 0.941	266.800, 0.950	266.800, 0.906	266.800, 0.915	266.800, 0.837	266.800, 0.952	266.800, 0.817	266.800, 0.932	266.800, 2.086	266.800, 1.919	266.800, 1.800
1336	267.000, 1.169	267.000, 1.037	267.000, 1.011	267.000, 0.983	267.000, 0.941	267.000, 0.950	267.000, 0.906	267.000, 0.915	267.000, 0.837	267.000, 0.952	267.000, 0.817	267.000, 0.932	267.000, 2.083	267.000, 1.916	267.000, 1.798
1337	267.200, 1.169	267.200, 1.037	267.200, 1.011	267.200, 0.983	267.200, 0.941	267.200, 0.950	267.200, 0.906	267.200, 0.915	267.200, 0.837	267.200, 0.952	267.200, 0.817	267.200, 0.932	267.200, 2.080	267.200, 1.914	267.200, 1.796
1338	267.400, 1.169	267.400, 1.036	267.400, 1.011	267.400, 0.982	267.400, 0.941	267.400, 0.950	267.400, 0.906	267.400, 0.916	267.400, 0.837	267.400, 0.953	267.400, 0.816	267.400, 0.931	267.400, 2.077	267.400, 1.911	267.400, 1.794
1339	267.600, 1.169	267.600, 1.036	267.600, 1.010	267.600, 0.982	267.600, 0.940	267.600, 0.950	267.600, 0.906	267.600, 0.916	267.600, 0.837	267.600, 0.953	267.600, 0.816	267.600, 0.931	267.600, 2.075	267.600, 1.909	267.600, 1.792
1340	267.800, 1.169	267.800, 1.035	267.800, 1.010	267.800, 0.982	267.800, 0.940	267.800, 0.950	267.800, 0.906	267.800, 0.916	267.800, 0.837	267.800, 0.953	267.800, 0.816	267.800, 0.931	267.800, 2.072	267.800, 1.907	267.800, 1.790
1341	268.000, 1.169	268.000, 1.035	268.000, 1.009	268.000, 0.982	268.000, 0.939	268.000, 0.950	268.000, 0.906	268.000, 0.916	268.000, 0.837	268.000, 0.953	268.000, 0.816	268.000, 0.931	268.000, 2.070	268.000, 1.904	268.000, 1.787
1342	268.200, 1.169	268.200, 1.035	268.200, 1.009	268.200, 0.981	268.200, 0.939	268.200, 0.950	268.200, 0.905	268.200, 0.915	268.200, 0.836	268.200, 0.953	268.200, 0.816	268.200, 0.931	268.200, 2.067	268.200, 1.902	268.200, 1.785
1343	268.400, 1.169	268.400, 1.035	268.400, 1.009	268.400, 0.981	268.400, 0.939	268.400, 0.950	268.400, 0.905	268.400, 0.915	268.400, 0.836	268.400, 0.953	268.400, 0.815	268.400, 0.931	268.400, 2.065	268.400, 1.900	268.400, 1.783
1344	268.600, 1.169	268.600, 1.035	268.600, 1.009	268.600, 0.981	268.600, 0.938	268.600, 0.950	268.600, 0.905	268.600, 0.915	268.600, 0.836	268.600, 0.952	268.600, 0.815	268.600, 0.930	268.600, 2.063	268.600, 1.898	268.600, 1.780
1345	268.800, 1.168	268.800, 1.035	268.800, 1.010	268.800, 0.981	268.800, 0.938	268.800, 0.950	268.800, 0.905	268.800, 0.914	268.800, 0.836	268.800, 0.952	268.800, 0.815	268.800, 0.930	268.800, 2.061	268.800, 1.896	268.800, 1.778
1346	269.000, 1.168	269.000, 1.035	269.000, 1.010	269.000, 0.980	269.000, 0.938	269.000, 0.950	269.000, 0.904	269.000, 0.914	269.000, 0.835	269.000, 0.952	269.000, 0.815	269.000, 0.930	269.000, 2.059	269.000, 1.895	269.000, 1.777
1347	269.200, 1.167	269.200, 1.035	269.200, 1.010	269.200, 0.980	269.200, 0.938	269.200, 0.950	269.200, 0.904	269.200, 0.913	269.200, 0.835	269.200, 0.951	269.200, 0.815	269.200, 0.930	269.200, 2.058	269.200, 1.893	269.200, 1.775
1348	269.400, 1.167	269.400, 1.035	269.400, 1.010	269.400, 0.980	269.400, 0.938	269.400, 0.950	269.400, 0.903	269.400, 0.913	269.400, 0.835	269.400, 0.951	269.400, 0.816	269.400, 0.929	269.400, 2.056	269.400, 1.892	269.400, 1.774
1349	269.600, 1.167	269.600, 1.035	269.600, 1.010	269.600, 0.980	269.600, 0.938	269.600, 0.950	269.600, 0.903	269.600, 0.913	269.600, 0.835	269.600, 0.951	269.600, 0.816	269.600, 0.929	269.600, 2.055	269.600, 1.891	269.600, 1.773
1350	269.800, 1.167	269.800, 1.035	269.800, 1.010	269.800, 0.980	269.800, 0.939	269.800, 0.950	269.800, 0.903	269.800, 0.912	269.800, 0.835	269.800, 0.950	269.800, 0.816	269.800, 0.929	269.800, 2.055	269.800, 1.890	269.800, 1.772
1351	,	,	,	,	,	,	,	,	,	,	,	,	,	,	,
1352	,	,	,	,	,	,	,	,	,	,	,	,	,	,	,
1353	,	,	,	,	,	,	,	,	,	,	,	,	,	,	,
1354	,	,	,	,	,	,	,	,	,	,	,	,	,	,	,
1355	,	,	,	,	,	,	,	,	,	,	,	,	,	,	,
1356	,	,	,	,	,	,	,	,	,	,	,	,	,	,	,
1357	,	,	,	,	,	,	,	,	,	,	,	,	,	,	,
1358	,	,	,	,	,	,	,	,	,	,	,	,	,	,	,
1359	,	,	,	,	,	,	,	,	,	,	,	,	,	,	,
1360	,	,	,	,	,	,	,	,	,	,	,	,	,	,	,
1361	,	,	,	,	,	,	,	,	,	,	,	,	,	,	,
1362	,	,	,	,	,	,	,	,	,	,	,	,	,	,	,
1363	,	,	,	,	,	,	,	,	,	,	,	,	,	,	,
1364	,	,	,	,	,	,	,	,	,	,	,	,	,	,	,
1365	,	,	,	,	,	,	,	,	,	,	,	,	,	,	,
1366	,	,	,	,	,	,	,	,	,	,	,	,	,	,	,
1367	,	,	,	,	,	,	,	,	,	,	,	,	,	,	,
1368	,	,	,	,	,	,	,	,	,	,	,	,	,	,	,
1369	,	,	,	,	,	,	,	,	,	,	,	,	,	,	,
1370	,	,	,	,	,	,	,	,	,	,	,	,	,	,	,
1371	,	,	,	,	,	,	,	,	,	,	,	,	,	,	,
1372	,	,	,	,	,	,	,	,	,	,	,	,	,	,	,
1373	,	,	,	,	,	,	,	,	,	,	,	,	,	,	,
1374	,	,	,	,	,	,	,	,	,	,	,	,	,	,	,
1375	,	,	,	,	,	,	,	,	,	,	,	,	,	,	,
1376	,	,	,	,	,	,	,	,	,	,	,	,	,	,	,
1377	,	,	,	,	,	,	,	,	,	,	,	,	,	,	,
1378	,	,	,	,	,	,	,	,	,	,	,	,	,	,	,
1379	,	,	,	,	,	,	,	,	,	,	,	,	,	,	,
1380	,	,	,	,	,	,	,	,	,	,	,	,	,	,	,
1381	,	,	,	,	,	,	,	,	,	,	,	,	,	,	,
1382	,	,	,	,	,	,	,	,	,	,	,	,	,	,	,
1383	,	,	,	,	,	,	,	,	,	,	,	,	,	,	,
1384	,	,	,	,	,	,	,	,	,	,	,	,	,	,	,
1385	,	,	,	,	,	,	,	,	,	,	,	,	,	,	,
1386	,	,	,	,	,	,	,	,	,	,	,	,	,	,	,
1387	,	,	,	,	,	,	,	,	,	,	,	,	,	,	,
1388	,	,	,	,	,	,	,	,	,	,	,	,	,	,	,
1389	,	,	,	,	,	,	,	,	,	,	,	,	,	,	,
1390	,	,	,	,	,	,	,	,	,	,	,	,	,	,	,
1391	,	,	,	,	,	,	,	,	,	,	,	,	,	,	,
1392	,	,	,	,	,	,	,	,	,	,	,	,	,	,	,
1393	,	,	,	,	,	,	,	,	,	,	,	,	,	,	,
1394	,	,	,	,	,	,	,	,	,	,	,	,	,	,	,
1395	,	,	,	,	,	,	,	,	,	,	,	,	,	,	,
1396	,	,	,	,	,	,	,	,	,	,	,	,	,	,	,
1397	,	,	,	,	,	,	,	,	,	,	,	,	,	,	,
1398	,	,	,	,	,	,	,	,	,	,	,	,	,	,	,
1399	,	,	,	,	,	,	,	,	,	,	,	,	,	,	,
1400	,	,	,	,	,	,	,	,	,	,	,	,	,	,	,
1401	,	,	,	,	,	,	,	,	,	,	,	,	,	,	,
1402	,	,	,	,	,	,	,	,	,	,	,	,	,	,	,
1403	,	,	,	,	,	,	,	,	,	,	,	,	,	,	,
1404	,	,	,	,	,	,	,	,	,	,	,	,	,	,	,
1405	,	,	,	,	,	,	,	,	,	,	,	,	,	,	,
1406	,	,	,	,	,	,	,	,	,	,	,	,	,	,	,
1407	,	,	,	,	,	,	,	,	,	,	,	,	,	,	,
1408	,	,	,	,	,	,	,	,	,	,	,	,	,	,	,
1409	,	,	,	,	,	,	,	,	,	,	,	,	,	,	,
1410	,	,	,	,	,	,	,	,	,	,	,	,	,	,	,
1411	,	,	,	,	,	,	,	,	,	,	,	,	,	,	,
1412	,	,	,	,	,	,	,	,	,	,	,	,	,	,	,
1413	,	,	,	,	,	,	,	,	,	,	,	,	,	,	,
1414	,	,	,	,	,	,	,	,	,	,	,	,	,	,	,
1415	,	,	,	,	,	,	,	,	,	,	,	,	,	,	,
1416	,	,	,	,	,	,	,	,	,	,	,	,	,	,	,
1417	,	,	,	,	,	,	,	,	,	,	,	,	,	,	,
1418	,	,	,	,	,	,	,	,	,	,	,	,	,	,	,
1419	,	,	,	,	,	,	,	,	,	,	,	,	,	,	,
1420	,	,	,	,	,	,	,	,	,	,	,	,	,	,	,
1421	,	,	,	,	,	,	,	,	,	,	,	,	,	,	,
1422	,	,	,	,	,	,	,	,	,	,	,	,	,	,	,
1423	,	,	,	,	,	,	,	,	,	,	,	,	,	,	,
1424	,	,	,	,	,	,	,	,	,	,	,	,	,	,	,
1425	,	,	,	,	,	,	,	,	,	,	,	,	,	,	,
1426	,	,	,	,	,	,	,	,	,	,	,	,	,	,	,
1427	,	,	,	,	,	,	,	,	,	,	,	,	,	,	,
1428	,	,	,	,	,	,	,	,	,	,	,	,	,	,	,
1429	,	,	,	,	,	,	,	,	,	,	,	,	,	,	,
1430	,	,	,	,	,	,	,	,	,	,	,	,	,	,	,
1431	,	,	,	,	,	,	,	,	,	,	,	,	,	,	,
1432	,	,	,	,	,	,	,	,	,	,	,	,	,	,	,
1433	,	,	,	,	,	,	,	,	,	,	,	,	,	,	,
1434	,	,	,	,	,	,	,	,	,	,	,	,	,	,	,
1435	,	,	,	,	,	,	,	,	,	,	,	,	,	,	,
1436	,	,	,	,	,	,	,	,	,	,	,	,	,	,	,
1437	,	,	,	,	,	,	,	,	,	,	,	,	,	,	,
1438	,	,	,	,	,	,	,	,	,	,	,	,	,	,	,
1439	,	,	,	,	,	,	,	,	,	,	,	,	,	,	,
1440	,	,	,	,	,	,	,	,	,	,	,	,	,	,	,
1441	,	,	,	,	,	,	,	,	,	,	,	,	,	,	,
1442	,	,	,	,	,	,	,	,	,	,	,	,	,	,	,
1443	,	,	,	,	,	,	,	,	,	,	,	,	,	,	,
1444	,	,	,	,	,	,	,	,	,	,	,	,	,	,	,
1445	,	,	,	,	,	,	,	,	,	,	,	,	,	,	,
1446	,	,	,	,	,	,	,	,	,	,	,	,	,	,	,
1447	,	,	,	,	,	,	,	,	,	,	,	,	,	,	,
1448	,	,	,	,	,	,	,	,	,	,	,	,	,	,	,
1449	,	,	,	,	,	,	,	,	,	,	,	,	,	,	,
1450	,	,	,	,	,	,	,	,	,	,	,	,	,	,	,
1451	,	,	,	,	,	,	,	,	,	,	,	,	,	,	,
1452	,	,	,	,	,	,	,	,	,	,	,	,	,	,	,
1453	,	,	,	,	,	,	,	,	,	,	,	,	,	,	,
1454	,	,	,	,	,	,	,	,	,	,	,	,	,	,	,
1455	,	,	,	,	,	,	,	,	,	,	,	,	,	,	,
1456	,	,	,	,	,	,	,	,	,	,	,	,	,	,	,
1457	,	,	,	,	,	,	,	,	,	,	,	,	,	,	,
1458	,	,	,	,	,	,	,	,	,	,	,	,	,	,	,
1459	,	,	,	,	,	,	,	,	,	,	,	,	,	,	,
1460	,	,	,	,	,	,	,	,	,	,	,	,	,	,	,
1461	,	,	,	,	,	,	,	,	,	,	,	,	,	,	,
1462	,	,	,	,	,	,	,	,	,	,	,	,	,	,	,
1463	,	,	,	,	,	,	,	,	,	,	,	,	,	,	,
1464	,	,	,	,	,	,	,	,	,	,	,	,	,	,	,
1465	,	,	,	,	,	,	,	,	,	,	,	,	,	,	,
1466	,	,	,	,	,	,	,	,	,	,	,	,	,	,	,
1467	,	,	,	,	,	,	,	,	,	,	,	,	,	,	,
1468	,	,	,	,	,	,	,	,	,	,	,	,	,	,	,
1469	,	,	,	,	,	,	,	,	,	,	,	,	,	,	,
1470	,	,	,	,	,	,	,	,	,	,	,	,	,	,	,
1471	,	,	,	,	,	,	,	,	,	,	,	,	,	,	,
1472	,	,	,	,	,	,	,	,	,	,	,	,	,	,	,
1473	,	,	,	,	,	,	,	,	,	,	,	,	,	,	,
1474	,	,	,	,	,	,	,	,	,	,	,	,	,	,	,
1475	,	,	,	,	,	,	,	,	,	,	,	,	,	,	,
1476	,	,	,	,	,	,	,	,	,	,	,	,	,	,	,
1477	,	,	,	,	,	,	,	,	,	,	,	,	,	,	,
1478	,	,	,	,	,	,	,	,	,	,	,	,	,	,	,
1479	,	,	,	,	,	,	,	,	,	,	,	,	,	,	,
1480	,	,	,	,	,	,	,	,	,	,	,	,	,	,	,
1481	,	,	,	,	,	,	,	,	,	,	,	,	,	,	,
1482	,	,	,	,	,	,	,	,	,	,	,	,	,	,	,
1483	,	,	,	,	,	,	,	,	,	,	,	,	,	,	,
1484	,	,	,	,	,	,	,	,	,	,	,	,	,	,	,
1485	,	,	,	,	,	,	,	,	,	,	,	,	,	,	,
1486	,	,	,	,	,	,	,	,	,	,	,	,	,	,	,
1487	,	,	,	,	,	,	,	,	,	,	,	,	,	,	,
1488	,	,	,	,	,	,	,	,	,	,	,	,	,	,	,
1489	,	,	,	,	,	,	,	,	,	,	,	,	,	,	,
1490	,	,	,	,	,	,	,	,	,	,	,	,	,	,	,
1491	,	,	,	,	,	,	,	,	,	,	,	,	,	,	,
1492	,	,	,	,	,	,	,	,	,	,	,	,	,	,	,
1493	,	,	,	,	,	,	,	,	,	,	,	,	,	,	,
1494	,	,	,	,	,	,	,	,	,	,	,	,	,	,	,
1495	,	,	,	,	,	,	,	,	,	,	,	,	,	,	,
1496	,	,	,	,	,	,	,	,	,	,	,	,	,	,	,
1497	,	,	,	,	,	,	,	,	,	,	,	,	,	,	,
1498	,	,	,	,	,	,	,	,	,	,	,	,	,	,	,
1499	,	,	,	,	,	,	,	,	,	,	,	,	,	,	,
1500	,	,	,	,	,	,	,	,	,	,	,	,	,	,	,
1501	,	,	,	,	,	,	,	,	,	,	,	,	,	,	,
1502	,	,	,	,	,	,	,	,	,	,	,	,	,	,	,
1503	,	,	,	,	,	,	,	,	,	,	,	,	,	,	,
1504	,	,	,	,	,	,	,	,	,	,	,	,	,	,	,
1505	,	,	,	,	,	,	,	,	,	,	,	,	,	,	,
1506	,	,	,	,	,	,	,	,	,	,	,	,	,	,	,
1507	,	,	,	,	,	,	,	,	,	,	,	,	,	,	,
1508	,	,	,	,	,	,	,	,	,	,	,	,	,	,	,
1509	,	,	,	,	,	,	,	,	,	,	,	,	,	,	,
1510	,	,	,	,	,	,	,	,	,	,	,	,	,	,	,
1511	,	,	,	,	,	,	,	,	,	,	,	,	,	,	,
1512	,	,	,	,	,	,	,	,	,	,	,	,	,	,	,
1513	,	,	,	,	,	,	,	,	,	,	,	,	,	,	,
1514	,	,	,	,	,	,	,	,	,	,	,	,	,	,	,
1515	,	,	,	,	,	,	,	,	,	,	,	,	,	,	,
1516	,	,	,	,	,	,	,	,	,	,	,	,	,	,	,
1517	,	,	,	,	,	,	,	,	,	,	,	,	,	,	,
1518	,	,	,	,	,	,	,	,	,	,	,	,	,	,	,
1519	,	,	,	,	,	,	,	,	,	,	,	,	,	,	,
1520	,	,	,	,	,	,	,	,	,	,	,	,	,	,	,
1521	,	,	,	,	,	,	,	,	,	,	,	,	,	,	,
1522	,	,	,	,	,	,	,	,	,	,	,	,	,	,	,
1523	,	,	,	,	,	,	,	,	,	,	,	,	,	,	,
1524	,	,	,	,	,	,	,	,	,	,	,	,	,	,	,
1525	,	,	,	,	,	,	,	,	,	,	,	,	,	,	,
1526	,	,	,	,	,	,	,	,	,	,	,	,	,	,	,
1527	,	,	,	,	,	,	,	,	,	,	,	,	,	,	,
1528	,	,	,	,	,	,	,	,	,	,	,	,	,	,	,
1529	,	,	,	,	,	,	,	,	,	,	,	,	,	,	,
1530	,	,	,	,	,	,	,	,	,	,	,	,	,	,	,
1531	,	,	,	,	,	,	,	,	,	,	,	,	,	,	,
1532	,	,	,	,	,	,	,	,	,	,	,	,	,	,	,
1533	,	,	,	,	,	,	,	,	,	,	,	,	,	,	,
1534	,	,	,	,	,	,	,	,	,	,	,	,	,	,	,
1535	,	,	,	,	,	,	,	,	,	,	,	,	,	,	,
1536	,	,	,	,	,	,	,	,	,	,	,	,	,	,	,
1537	,	,	,	,	,	,	,	,	,	,	,	,	,	,	,
1538	,	,	,	,	,	,	,	,	,	,	,	,	,	,	,
1539	,	,	,	,	,	,	,	,	,	,	,	,	,	,	,
1540	,	,	,	,	,	,	,	,	,	,	,	,	,	,	,
1541	,	,	,	,	,	,	,	,	,	,	,	,	,	,	,
1542	,	,	,	,	,	,	,	,	,	,	,	,	,	,	,
1543	,	,	,	,	,	,	,	,	,	,	,	,	,	,	,
1544	,	,	,	,	,	,	,	,	,	,	,	,	,	,	,
1545	,	,	,	,	,	,	,	,	,	,	,	,	,	,	,
1546	,	,	,	,	,	,	,	,	,	,	,	,	,	,	,
1547	,	,	,	,	,	,	,	,	,	,	,	,	,	,	,
1548	,	,	,	,	,	,	,	,	,	,	,	,	,	,	,
1549	,	,	,	,	,	,	,	,	,	,	,	,	,	,	,
1550	,	,	,	,	,	,	,	,	,	,	,	,	,	,	,
1551	,	,	,	,	,	,	,	,	,	,	,	,	,	,	,
1552	,	,	,	,	,	,	,	,	,	,	,	,	,	,	,
1553	,	,	,	,	,	,	,	,	,	,	,	,	,	,	,
1554	,	,	,	,	,	,	,	,	,	,	,	,	,	,	,
1555	,	,	,	,	,	,	,	,	,	,	,	,	,	,	,
1556	,	,	,	,	,	,	,	,	,	,	,	,	,	,	,
1557	,	,	,	,	,	,	,	,	,	,	,	,	,	,	,
1558	,	,	,	,	,	,	,	,	,	,	,	,	,	,	,
1559	,	,	,	,	,	,	,	,	,	,	,	,	,	,	,
1560	,	,	,	,	,	,	,	,	,	,	,	,	,	,	,
1561	,	,	,	,	,	,	,	,	,	,	,	,	,	,	,
1562	,	,	,	,	,	,	,	,	,	,	,	,	,	,	,
1563	,	,	,	,	,	,	,	,	,	,	,	,	,	,	,
1564	,	,	,	,	,	,	,	,	,	,	,	,	,	,	,
1565	,	,	,	,	,	,	,	,	,	,	,	,	,	,	,
1566	,	,	,	,	,	,	,	,	,	,	,	,	,	,	,
1567	,	,	,	,	,	,	,	,	,	,	,	,	,	,	,
1568	,	,	,	,	,	,	,	,	,	,	,	,	,	,	,
1569	,	,	,	,	,	,	,	,	,	,	,	,	,	,	,
1570	,	,	,	,	,	,	,	,	,	,	,	,	,	,	,
1571	,	,	,	,	,	,	,	,	,	,	,	,	,	,	,
1572	,	,	,	,	,	,	,	,	,	,	,	,	,	,	,
1573	,	,	,	,	,	,	,	,	,	,	,	,	,	,	,
1574	,	,	,	,	,	,	,	,	,	,	,	,	,	,	,
1575	,	,	,	,	,	,	,	,	,	,	,	,	,	,	,
1576	,	,	,	,	,	,	,	,	,	,	,	,	,	,	,
1577	,	,	,	,	,	,	,	,	,	,	,	,	,	,	,
1578	,	,	,	,	,	,	,	,	,	,	,	,	,	,	,
1579	,	,	,	,	,	,	,	,	,	,	,	,	,	,	,
1580	,	,	,	,	,	,	,	,	,	,	,	,	,	,	,
1581	,	,	,	,	,	,	,	,	,	,	,	,	,	,	,
1582	,	,	,	,	,	,	,	,	,	,	,	,	,	,	,
1583	,	,	,	,	,	,	,	,	,	,	,	,	,	,	,
1584	,	,	,	,	,	,	,	,	,	,	,	,	,	,	,
1585	,	,	,	,	,	,	,	,	,	,	,	,	,	,	,
1586	,	,	,	,	,	,	,	,	,	,	,	,	,	,	,
1587	,	,	,	,	,	,	,	,	,	,	,	,	,	,	,
1588	,	,	,	,	,	,	,	,	,	,	,	,	,	,	,
1589	,	,	,	,	,	,	,	,	,	,	,	,	,	,	,
1590	,	,	,	,	,	,	,	,	,	,	,	,	,	,	,
1591	,	,	,	,	,	,	,	,	,	,	,	,	,	,	,
1592	,	,	,	,	,	,	,	,	,	,	,	,	,	,	,
1593	,	,	,	,	,	,	,	,	,	,	,	,	,	,	,
1594	,	,	,	,	,	,	,	,	,	,	,	,	,	,	,
1595	,	,	,	,	,	,	,	,	,	,	,	,	,	,	,
1596	,	,	,	,	,	,	,	,	,	,	,	,	,	,	,
1597	,	,	,	,	,	,	,	,	,	,	,	,	,	,	,
1598	,	,	,	,	,	,	,	,	,	,	,	,	,	,	,
1599	,	,	,	,	,	,	,	,	,	,	,	,	,	,	,
1600	,	,	,	,	,	,	,	,	,	,	,	,	,	,	,
1601	,	,	,	,	,	,	,	,	,	,	,	,	,	,	,
1602	,	,	,	,	,	,	,	,	,	,	,	,	,	,	,
1603	,	,	,	,	,	,	,	,	,	,	,	,	,	,	,
1604	,	,	,	,	,	,	,	,	,	,	,	,	,	,	,
1605	,	,	,	,	,	,	,	,	,	,	,	,	,	,	,
1606	,	,	,	,	,	,	,	,	,	,	,	,	,	,	,
1607	,	,	,	,	,	,	,	,	,	,	,	,	,	,	,
1608	,	,	,	,	,	,	,	,	,	,	,	,	,	,	,
1609	,	,	,	,	,	,	,	,	,	,	,	,	,	,	,
1610	,	,	,	,	,	,	,	,	,	,	,	,	,	,	,
1611	,	,	,	,	,	,	,	,	,	,	,	,	,	,	,
1612	,	,	,	,	,	,	,	,	,	,	,	,	,	,	,
1613	,	,	,	,	,	,	,	,	,	,	,	,	,	,	,
1614	,	,	,	,	,	,	,	,	,	,	,	,	,	,	,
1615	,	,	,	,	,	,	,	,	,	,	,	,	,	,	,
1616	,	,	,	,	,	,	,	,	,	,	,	,	,	,	,
1617	,	,	,	,	,	,	,	,	,	,	,	,	,	,	,
1618	,	,	,	,	,	,	,	,	,	,	,	,	,	,	,
1619	,	,	,	,	,	,	,	,	,	,	,	,	,	,	,
1620	,	,	,	,	,	,	,	,	,	,	,	,	,	,	,
1621	,	,	,	,	,	,	,	,	,	,	,	,	,	,	,
1622	,	,	,	,	,	,	,	,	,	,	,	,	,	,	,
1623	,	,	,	,	,	,	,	,	,	,	,	,	,	,	,
1624	,	,	,	,	,	,	,	,	,	,	,	,	,	,	,
1625	,	,	,	,	,	,	,	,	,	,	,	,	,	,	,
1626	,	,	,	,	,	,	,	,	,	,	,	,	,	,	,
1627	,	,	,	,	,	,	,	,	,	,	,	,	,	,	,
1628	,	,	,	,	,	,	,	,	,	,	,	,	,	,	,
1629	,	,	,	,	,	,	,	,	,	,	,	,	,	,	,
1630	,	,	,	,	,	,	,	,	,	,	,	,	,	,	,
1631	,	,	,	,	,	,	,	,	,	,	,	,	,	,	,
1632	,	,	,	,	,	,	,	,	,	,	,	,	,	,	,
1633	,	,	,	,	,	,	,	,	,	,	,	,	,	,	,
1634	,	,	,	,	,	,	,	,	,	,	,	,	,	,	,
1635	,	,	,	,	,	,	,	,	,	,	,	,	,	,	,
1636	,	,	,	,	,	,	,	,	,	,	,	,	,	,	,
1637	,	,	,	,	,	,	,	,	,	,	,	,	,	,	,
1638	,	,	,	,	,	,	,	,	,	,	,	,	,	,	,
1639	,	,	,	,	,	,	,	,	,	,	,	,	,	,	,
1640	,	,	,	,	,	,	,	,	,	,	,	,	,	,	,
1641	,	,	,	,	,	,	,	,	,	,	,	,	,	,	,
1642	,	,	,	,	,	,	,	,	,	,	,	,	,	,	,
1643	,	,	,	,	,	,	,	,	,	,	,	,	,	,	,
1644	,	,	,	,	,	,	,	,	,	,	,	,	,	,	,
1645	,	,	,	,	,	,	,	,	,	,	,	,	,	,	,
1646	,	,	,	,	,	,	,	,	,	,	,	,	,	,	,
1647	,	,	,	,	,	,	,	,	,	,	,	,	,	,	,
1648	,	,	,	,	,	,	,	,	,	,	,	,	,	,	,
1649	,	,	,	,	,	,	,	,	,	,	,	,	,	,	,
1650	,	,	,	,	,	,	,	,	,	,	,	,	,	,	,
1651	,	,	,	,	,	,	,	,	,	,	,	,	,	,	,
1652	,	,	,	,	,	,	,	,	,	,	,	,	,	,	,
1653	,	,	,	,	,	,	,	,	,	,	,	,	,	,	,
1654	,	,	,	,	,	,	,	,	,	,	,	,	,	,	,
1655	,	,	,	,	,	,	,	,	,	,	,	,	,	,	,
1656	,	,	,	,	,	,	,	,	,	,	,	,	,	,	,
1657	,	,	,	,	,	,	,	,	,	,	,	,	,	,	,
1658	,	,	,	,	,	,	,	,	,	,	,	,	,	,	,
1659	,	,	,	,	,	,	,	,	,	,	,	,	,	,	,
1660	,	,	,	,	,	,	,	,	,	,	,	,	,	,	,
1661	,	,	,	,	,	,	,	,	,	,	,	,	,	,	,
1662	,	,	,	,	,	,	,	,	,	,	,	,	,	,	,
1663	,	,	,	,	,	,	,	,	,	,	,	,	,	,	,
1664	,	,	,	,	,	,	,	,	,	,	,	,	,	,	,
1665	,	,	,	,	,	,	,	,	,	,	,	,	,	,	,
1666	,	,	,	,	,	,	,	,	,	,	,	,	,	,	,
1667	,	,	,	,	,	,	,	,	,	,	,	,	,	,	,
1668	,	,	,	,	,	,	,	,	,	,	,	,	,	,	,
1669	,	,	,	,	,	,	,	,	,	,	,	,	,	,	,
1670	,	,	,	,	,	,	,	,	,	,	,	,	,	,	,
1671	,	,	,	,	,	,	,	,	,	,	,	,	,	,	,
1672	,	,	,	,	,	,	,	,	,	,	,	,	,	,	,
1673	,	,	,	,	,	,	,	,	,	,	,	,	,	,	,
1674	,	,	,	,	,	,	,	,	,	,	,	,	,	,	,
1675	,	,	,	,	,	,	,	,	,	,	,	,	,	,	,
1676	,	,	,	,	,	,	,	,	,	,	,	,	,	,	,
1677	,	,	,	,	,	,	,	,	,	,	,	,	,	,	,
1678	,	,	,	,	,	,	,	,	,	,	,	,	,	,	,
1679	,	,	,	,	,	,	,	,	,	,	,	,	,	,	,
1680	,	,	,	,	,	,	,	,	,	,	,	,	,	,	,
1681	,	,	,	,	,	,	,	,	,	,	,	,	,	,	,
1682	,	,	,	,	,	,	,	,	,	,	,	,	,	,	,
1683	,	,	,	,	,	,	,	,	,	,	,	,	,	,	,
1684	,	,	,	,	,	,	,	,	,	,	,	,	,	,	,
1685	,	,	,	,	,	,	,	,	,	,	,	,	,	,	,
1686	,	,	,	,	,	,	,	,	,	,	,	,	,	,	,
1687	,	,	,	,	,	,	,	,	,	,	,	,	,	,	,
1688	,	,	,	,	,	,	,	,	,	,	,	,	,	,	,
1689	,	,	,	,	,	,	,	,	,	,	,	,	,	,	,
1690	,	,	,	,	,	,	,	,	,	,	,	,	,	,	,
1691	,	,	,	,	,	,	,	,	,	,	,	,	,	,	,
1692	,	,	,	,	,	,	,	,	,	,	,	,	,	,	,
1693	,	,	,	,	,	,	,	,	,	,	,	,	,	,	,
1694	,	,	,	,	,	,	,	,	,	,	,	,	,	,	,
1695	,	,	,	,	,	,	,	,	,	,	,	,	,	,	,
1696	,	,	,	,	,	,	,	,	,	,	,	,	,	,	,
1697	,	,	,	,	,	,	,	,	,	,	,	,	,	,	,
1698	,	,	,	,	,	,	,	,	,	,	,	,	,	,	,
1699	,	,	,	,	,	,	,	,	,	,	,	,	,	,	,
1700	,	,	,	,	,	,	,	,	,	,	,	,	,	,	,
1701	,	,	,	,	,	,	,	,	,	,	,	,	,	,	,
1702	,	,	,	,	,	,	,	,	,	,	,	,	,	,	,
1703	,	,	,	,	,	,	,	,	,	,	,	,	,	,	,
1704	,	,	,	,	,	,	,	,	,	,	,	,	,	,	,
1705	,	,	,	,	,	,	,	,	,	,	,	,	,	,	,
1706	,	,	,	,	,	,	,	,	,	,	,	,	,	,	,
1707	,	,	,	,	,	,	,	,	,	,	,	,	,	,	,
1708	,	,	,	,	,	,	,	,	,	,	,	,	,	,	,
1709	,	,	,	,	,	,	,	,	,	,	,	,	,	,	,
1710	,	,	,	,	,	,	,	,	,	,	,	,	,	,	,
1711	,	,	,	,	,	,	,	,	,	,	,	,	,	,	,
1712	,	,	,	,	,	,	,	,	,	,	,	,	,	,	,
1713	,	,	,	,	,	,	,	,	,	,	,	,	,	,	,
1714	,	,	,	,	,	,	,	,	,	,	,	,	,	,	,
1715	,	,	,	,	,	,	,	,	,	,	,	,	,	,	,
1716	,	,	,	,	,	,	,	,	,	,	,	,	,	,	,
1717	,	,	,	,	,	,	,	,	,	,	,	,	,	,	,
1718	,	,	,	,	,	,	,	,	,	,	,	,	,	,	,
1719	,	,	,	,	,	,	,	,	,	,	,	,	,	,	,
1720	,	,	,	,	,	,	,	,	,	,	,	,	,	,	,
1721	,	,	,	,	,	,	,	,	,	,	,	,	,	,	,
1722	,	,	,	,	,	,	,	,	,	,	,	,	,	,	,
1723	,	,	,	,	,	,	,	,	,	,	,	,	,	,	,
1724	,	,	,	,	,	,	,	,	,	,	,	,	,	,	,
1725	,	,	,	,	,	,	,	,	,	,	,	,	,	,	,
1726	,	,	,	,	,	,	,	,	,	,	,	,	,	,	,
1727	,	,	,	,	,	,	,	,	,	,	,	,	,	,	,
1728	,	,	,	,	,	,	,	,	,	,	,	,	,	,	,
1729	,	,	,	,	,	,	,	,	,	,	,	,	,	,	,
1730	,	,	,	,	,	,	,	,	,	,	,	,	,	,	,
1731	,	,	,	,	,	,	,	,	,	,	,	,	,	,	,
1732	,	,	,	,	,	,	,	,	,	,	,	,	,	,	,
1733	,	,	,	,	,	,	,	,	,	,	,	,	,	,	,
1734	,	,	,	,	,	,	,	,	,	,	,	,	,	,	,
1735	,	,	,	,	,	,	,	,	,	,	,	,	,	,	,
1736	,	,	,	,	,	,	,	,	,	,	,	,	,	,	,
1737	,	,	,	,	,	,	,	,	,	,	,	,	,	,	,
1738	,	,	,	,	,	,	,	,	,	,	,	,	,	,	,
1739	,	,	,	,	,	,	,	,	,	,	,	,	,	,	,
1740	,	,	,	,	,	,	,	,	,	,	,	,	,	,	,
1741	,	,	,	,	,	,	,	,	,	,	,	,	,	,	,
1742	,	,	,	,	,	,	,	,	,	,	,	,	,	,	,
1743	,	,	,	,	,	,	,	,	,	,	,	,	,	,	,
1744	,	,	,	,	,	,	,	,	,	,	,	,	,	,	,
1745	,	,	,	,	,	,	,	,	,	,	,	,	,	,	,
1746	,	,	,	,	,	,	,	,	,	,	,	,	,	,	,
1747	,	,	,	,	,	,	,	,	,	,	,	,	,	,	,
1748	,	,	,	,	,	,	,	,	,	,	,	,	,	,	,
1749	,	,	,	,	,	,	,	,	,	,	,	,	,	,	,
1750	,	,	,	,	,	,	,	,	,	,	,	,	,	,	,
1751	,	,	,	,	,	,	,	,	,	,	,	,	,	,	,
1752	,	,	,	,	,	,	,	,	,	,	,	,	,	,	,
1753	,	,	,	,	,	,	,	,	,	,	,	,	,	,	,
1754	,	,	,	,	,	,	,	,	,	,	,	,	,	,	,
1755	,	,	,	,	,	,	,	,	,	,	,	,	,	,	,
1756	,	,	,	,	,	,	,	,	,	,	,	,	,	,	,
1757	,	,	,	,	,	,	,	,	,	,	,	,	,	,	,
1758	,	,	,	,	,	,	,	,	,	,	,	,	,	,	,
1759	,	,	,	,	,	,	,	,	,	,	,	,	,	,	,
1760	,	,	,	,	,	,	,	,	,	,	,	,	,	,	,
1761	,	,	,	,	,	,	,	,	,	,	,	,	,	,	,
1762	,	,	,	,	,	,	,	,	,	,	,	,	,	,	,
1763	,	,	,	,	,	,	,	,	,	,	,	,	,	,	,
1764	,	,	,	,	,	,	,	,	,	,	,	,	,	,	,
1765	,	,	,	,	,	,	,	,	,	,	,	,	,	,	,
1766	,	,	,	,	,	,	,	,	,	,	,	,	,	,	,
1767	,	,	,	,	,	,	,	,	,	,	,	,	,	,	,
1768	,	,	,	,	,	,	,	,	,	,	,	,	,	,	,
1769	,	,	,	,	,	,	,	,	,	,	,	,	,	,	,
1770	,	,	,	,	,	,	,	,	,	,	,	,	,	,	,
1771	,	,	,	,	,	,	,	,	,	,	,	,	,	,	,
1772	,	,	,	,	,	,	,	,	,	,	,	,	,	,	,
1773	,	,	,	,	,	,	,	,	,	,	,	,	,	,	,
1774	,	,	,	,	,	,	,	,	,	,	,	,	,	,	,
1775	,	,	,	,	,	,	,	,	,	,	,	,	,	,	,
1776	,	,	,	,	,	,	,	,	,	,	,	,	,	,	,
1777	,	,	,	,	,	,	,	,	,	,	,	,	,	,	,
1778	,	,	,	,	,	,	,	,	,	,	,	,	,	,	,
1779	,	,	,	,	,	,	,	,	,	,	,	,	,	,	,
1780	,	,	,	,	,	,	,	,	,	,	,	,	,	,	,
1781	,	,	,	,	,	,	,	,	,	,	,	,	,	,	,
1782	,	,	,	,	,	,	,	,	,	,	,	,	,	,	,
1783	,	,	,	,	,	,	,	,	,	,	,	,	,	,	,
1784	,	,	,	,	,	,	,	,	,	,	,	,	,	,	,
1785	,	,	,	,	,	,	,	,	,	,	,	,	,	,	,
1786	,	,	,	,	,	,	,	,	,	,	,	,	,	,	,
1787	,	,	,	,	,	,	,	,	,	,	,	,	,	,	,
1788	,	,	,	,	,	,	,	,	,	,	,	,	,	,	,
1789	,	,	,	,	,	,	,	,	,	,	,	,	,	,	,
1790	,	,	,	,	,	,	,	,	,	,	,	,	,	,	,
1791	,	,	,	,	,	,	,	,	,	,	,	,	,	,	,
1792	,	,	,	,	,	,	,	,	,	,	,	,	,	,	,
1793	,	,	,	,	,	,	,	,	,	,	,	,	,	,	,
1794	,	,	,	,	,	,	,	,	,	,	,	,	,	,	,
1795	,	,	,	,	,	,	,	,	,	,	,	,	,	,	,
1796	,	,	,	,	,	,	,	,	,	,	,	,	,	,	,
1797	,	,	,	,	,	,	,	,	,	,	,	,	,	,	,
1798	,	,	,	,	,	,	,	,	,	,	,	,	,	,	,
1799	,	,	,	,	,	,	,	,	,	,	,	,	,	,	,
1800	,	,	,	,	,	,	,	,	,	,	,	,	,	,	,
1801	,	,	,	,	,	,	,	,	,	,	,	,	,	,	,
1802	,	,	,	,	,	,	,	,	,	,	,	,	,	,	,
1803	,	,	,	,	,	,	,	,	,	,	,	,	,	,	,
1804	,	,	,	,	,	,	,	,	,	,	,	,	,	,	,
1805	,	,	,	,	,	,	,	,	,	,	,	,	,	,	,
1806	,	,	,	,	,	,	,	,	,	,	,	,	,	,	,
1807	,	,	,	,	,	,	,	,	,	,	,	,	,	,	,
1808	,	,	,	,	,	,	,	,	,	,	,	,	,	,	,
1809	,	,	,	,	,	,	,	,	,	,	,	,	,	,	,
1810	,	,	,	,	,	,	,	,	,	,	,	,	,	,	,
1811	,	,	,	,	,	,	,	,	,	,	,	,	,	,	,
1812	,	,	,	,	,	,	,	,	,	,	,	,	,	,	,
1813	,	,	,	,	,	,	,	,	,	,	,	,	,	,	,
1814	,	,	,	,	,	,	,	,	,	,	,	,	,	,	,
1815	,	,	,	,	,	,	,	,	,	,	,	,	,	,	,
1816	,	,	,	,	,	,	,	,	,	,	,	,	,	,	,
1817	,	,	,	,	,	,	,	,	,	,	,	,	,	,	,
1818	,	,	,	,	,	,	,	,	,	,	,	,	,	,	,
1819	,	,	,	,	,	,	,	,	,	,	,	,	,	,	,
1820	,	,	,	,	,	,	,	,	,	,	,	,	,	,	,
1821	,	,	,	,	,	,	,	,	,	,	,	,	,	,	,
1822	,	,	,	,	,	,	,	,	,	,	,	,	,	,	,
1823	,	,	,	,	,	,	,	,	,	,	,	,	,	,	,
1824	,	,	,	,	,	,	,	,	,	,	,	,	,	,	,
1825	,	,	,	,	,	,	,	,	,	,	,	,	,	,	,
1826	,	,	,	,	,	,	,	,	,	,	,	,	,	,	,
1827	,	,	,	,	,	,	,	,	,	,	,	,	,	,	,
1828	,	,	,	,	,	,	,	,	,	,	,	,	,	,	,
1829	,	,	,	,	,	,	,	,	,	,	,	,	,	,	,
1830	,	,	,	,	,	,	,	,	,	,	,	,	,	,	,
1831	,	,	,	,	,	,	,	,	,	,	,	,	,	,	,
1832	,	,	,	,	,	,	,	,	,	,	,	,	,	,	,
1833	,	,	,	,	,	,	,	,	,	,	,	,	,	,	,
1834	,	,	,	,	,	,	,	,	,	,	,	,	,	,	,
1835	,	,	,	,	,	,	,	,	,	,	,	,	,	,	,
1836	,	,	,	,	,	,	,	,	,	,	,	,	,	,	,
1837	,	,	,	,	,	,	,	,	,	,	,	,	,	,	,
1838	,	,	,	,	,	,	,	,	,	,	,	,	,	,	,
1839	,	,	,	,	,	,	,	,	,	,	,	,	,	,	,
1840	,	,	,	,	,	,	,	,	,	,	,	,	,	,	,
1841	,	,	,	,	,	,	,	,	,	,	,	,	,	,	,
1842	,	,	,	,	,	,	,	,	,	,	,	,	,	,	,
1843	,	,	,	,	,	,	,	,	,	,	,	,	,	,	,
1844	,	,	,	,	,	,	,	,	,	,	,	,	,	,	,
1845	,	,	,	,	,	,	,	,	,	,	,	,	,	,	,
1846	,	,	,	,	,	,	,	,	,	,	,	,	,	,	,
1847	,	,	,	,	,	,	,	,	,	,	,	,	,	,	,
1848	,	,	,	,	,	,	,	,	,	,	,	,	,	,	,
1849	,	,	,	,	,	,	,	,	,	,	,	,	,	,	,
1850	,	,	,	,	,	,	,	,	,	,	,	,	,	,	,
1851	,	,	,	,	,	,	,	,	,	,	,	,	,	,	,
1852	,	,	,	,	,	,	,	,	,	,	,	,	,	,	,
1853	,	,	,	,	,	,	,	,	,	,	,	,	,	,	,
1854	,	,	,	,	,	,	,	,	,	,	,	,	,	,	,
1855	,	,	,	,	,	,	,	,	,	,	,	,	,	,	,
1856	,	,	,	,	,	,	,	,	,	,	,	,	,	,	,
1857	,	,	,	,	,	,	,	,	,	,	,	,	,	,	,
1858	,	,	,	,	,	,	,	,	,	,	,	,	,	,	,
1859	,	,	,	,	,	,	,	,	,	,	,	,	,	,	,
1860	,	,	,	,	,	,	,	,	,	,	,	,	,	,	,
1861	,	,	,	,	,	,	,	,	,	,	,	,	,	,	,
1862	,	,	,	,	,	,	,	,	,	,	,	,	,	,	,
1863	,	,	,	,	,	,	,	,	,	,	,	,	,	,	,
1864	,	,	,	,	,	,	,	,	,	,	,	,	,	,	,
1865	,	,	,	,	,	,	,	,	,	,	,	,	,	,	,
1866	,	,	,	,	,	,	,	,	,	,	,	,	,	,	,
1867	,	,	,	,	,	,	,	,	,	,	,	,	,	,	,
1868	,	,	,	,	,	,	,	,	,	,	,	,	,	,	,
1869	,	,	,	,	,	,	,	,	,	,	,	,	,	,	,
1870	,	,	,	,	,	,	,	,	,	,	,	,	,	,	,
1871	,	,	,	,	,	,	,	,	,	,	,	,	,	,	,
1872	,	,	,	,	,	,	,	,	,	,	,	,	,	,	,
1873	,	,	,	,	,	,	,	,	,	,	,	,	,	,	,
1874	,	,	,	,	,	,	,	,	,	,	,	,	,	,	,
1875	,	,	,	,	,	,	,	,	,	,	,	,	,	,	,
1876	,	,	,	,	,	,	,	,	,	,	,	,	,	,	,
1877	,	,	,	,	,	,	,	,	,	,	,	,	,	,	,
1878	,	,	,	,	,	,	,	,	,	,	,	,	,	,	,
1879	,	,	,	,	,	,	,	,	,	,	,	,	,	,	,
1880	,	,	,	,	,	,	,	,	,	,	,	,	,	,	,
1881	,	,	,	,	,	,	,	,	,	,	,	,	,	,	,
1882	,	,	,	,	,	,	,	,	,	,	,	,	,	,	,
1883	,	,	,	,	,	,	,	,	,	,	,	,	,	,	,
1884	,	,	,	,	,	,	,	,	,	,	,	,	,	,	,
1885	,	,	,	,	,	,	,	,	,	,	,	,	,	,	,
1886	,	,	,	,	,	,	,	,	,	,	,	,	,	,	,
1887	,	,	,	,	,	,	,	,	,	,	,	,	,	,	,
1888	,	,	,	,	,	,	,	,	,	,	,	,	,	,	,
1889	,	,	,	,	,	,	,	,	,	,	,	,	,	,	,
1890	,	,	,	,	,	,	,	,	,	,	,	,	,	,	,
1891	,	,	,	,	,	,	,	,	,	,	,	,	,	,	,
1892	,	,	,	,	,	,	,	,	,	,	,	,	,	,	,
1893	,	,	,	,	,	,	,	,	,	,	,	,	,	,	,
1894	,	,	,	,	,	,	,	,	,	,	,	,	,	,	,
1895	,	,	,	,	,	,	,	,	,	,	,	,	,	,	,
1896	,	,	,	,	,	,	,	,	,	,	,	,	,	,	,
1897	,	,	,	,	,	,	,	,	,	,	,	,	,	,	,
1898	,	,	,	,	,	,	,	,	,	,	,	,	,	,	,
1899	,	,	,	,	,	,	,	,	,	,	,	,	,	,	,
1900	,	,	,	,	,	,	,	,	,	,	,	,	,	,	,
1901	,	,	,	,	,	,	,	,	,	,	,	,	,	,	,
1902	,	,	,	,	,	,	,	,	,	,	,	,	,	,	,
1903	,	,	,	,	,	,	,	,	,	,	,	,	,	,	,
1904	,	,	,	,	,	,	,	,	,	,	,	,	,	,	,
1905	,	,	,	,	,	,	,	,	,	,	,	,	,	,	,
1906	,	,	,	,	,	,	,	,	,	,	,	,	,	,	,
1907	,	,	,	,	,	,	,	,	,	,	,	,	,	,	,
1908	,	,	,	,	,	,	,	,	,	,	,	,	,	,	,
1909	,	,	,	,	,	,	,	,	,	,	,	,	,	,	,
1910	,	,	,	,	,	,	,	,	,	,	,	,	,	,	,
1911	,	,	,	,	,	,	,	,	,	,	,	,	,	,	,
1912	,	,	,	,	,	,	,	,	,	,	,	,	,	,	,
1913	,	,	,	,	,	,	,	,	,	,	,	,	,	,	,
1914	,	,	,	,	,	,	,	,	,	,	,	,	,	,	,
1915	,	,	,	,	,	,	,	,	,	,	,	,	,	,	,
1916	,	,	,	,	,	,	,	,	,	,	,	,	,	,	,
1917	,	,	,	,	,	,	,	,	,	,	,	,	,	,	,
1918	,	,	,	,	,	,	,	,	,	,	,	,	,	,	,
1919	,	,	,	,	,	,	,	,	,	,	,	,	,	,	,
1920	,	,	,	,	,	,	,	,	,	,	,	,	,	,	,
1921	,	,	,	,	,	,	,	,	,	,	,	,	,	,	,
1922	,	,	,	,	,	,	,	,	,	,	,	,	,	,	,
1923	,	,	,	,	,	,	,	,	,	,	,	,	,	,	,
1924	,	,	,	,	,	,	,	,	,	,	,	,	,	,	,
1925	,	,	,	,	,	,	,	,	,	,	,	,	,	,	,
1926	,	,	,	,	,	,	,	,	,	,	,	,	,	,	,
1927	,	,	,	,	,	,	,	,	,	,	,	,	,	,	,
1928	,	,	,	,	,	,	,	,	,	,	,	,	,	,	,
1929	,	,	,	,	,	,	,	,	,	,	,	,	,	,	,
1930	,	,	,	,	,	,	,	,	,	,	,	,	,	,	,
1931	,	,	,	,	,	,	,	,	,	,	,	,	,	,	,
1932	,	,	,	,	,	,	,	,	,	,	,	,	,	,	,
1933	,	,	,	,	,	,	,	,	,	,	,	,	,	,	,
1934	,	,	,	,	,	,	,	,	,	,	,	,	,	,	,
1935	,	,	,	,	,	,	,	,	,	,	,	,	,	,	,
1936	,	,	,	,	,	,	,	,	,	,	,	,	,	,	,
1937	,	,	,	,	,	,	,	,	,	,	,	,	,	,	,
1938	,	,	,	,	,	,	,	,	,	,	,	,	,	,	,
1939	,	,	,	,	,	,	,	,	,	,	,	,	,	,	,
1940	,	,	,	,	,	,	,	,	,	,	,	,	,	,	,
1941	,	,	,	,	,	,	,	,	,	,	,	,	,	,	,
1942	,	,	,	,	,	,	,	,	,	,	,	,	,	,	,
1943	,	,	,	,	,	,	,	,	,	,	,	,	,	,	,
1944	,	,	,	,	,	,	,	,	,	,	,	,	,	,	,
1945	,	,	,	,	,	,	,	,	,	,	,	,	,	,	,
1946	,	,	,	,	,	,	,	,	,	,	,	,	,	,	,
1947	,	,	,	,	,	,	,	,	,	,	,	,	,	,	,
1948	,	,	,	,	,	,	,	,	,	,	,	,	,	,	,
1949	,	,	,	,	,	,	,	,	,	,	,	,	,	,	,
1950	,	,	,	,	,	,	,	,	,	,	,	,	,	,	,
1951	,	,	,	,	,	,	,	,	,	,	,	,	,	,	,
1952	,	,	,	,	,	,	,	,	,	,	,	,	,	,	,
1953	,	,	,	,	,	,	,	,	,	,	,	,	,	,	,
1954	,	,	,	,	,	,	,	,	,	,	,	,	,	,	,
1955	,	,	,	,	,	,	,	,	,	,	,	,	,	,	,
1956	,	,	,	,	,	,	,	,	,	,	,	,	,	,	,
1957	,	,	,	,	,	,	,	,	,	,	,	,	,	,	,
1958	,	,	,	,	,	,	,	,	,	,	,	,	,	,	,
1959	,	,	,	,	,	,	,	,	,	,	,	,	,	,	,
1960	,	,	,	,	,	,	,	,	,	,	,	,	,	,	,
1961	,	,	,	,	,	,	,	,	,	,	,	,	,	,	,
1962	,	,	,	,	,	,	,	,	,	,	,	,	,	,	,
1963	,	,	,	,	,	,	,	,	,	,	,	,	,	,	,
1964	,	,	,	,	,	,	,	,	,	,	,	,	,	,	,
1965	,	,	,	,	,	,	,	,	,	,	,	,	,	,	,
1966	,	,	,	,	,	,	,	,	,	,	,	,	,	,	,
1967	,	,	,	,	,	,	,	,	,	,	,	,	,	,	,
1968	,	,	,	,	,	,	,	,	,	,	,	,	,	,	,
1969	,	,	,	,	,	,	,	,	,	,	,	,	,	,	,
1970	,	,	,	,	,	,	,	,	,	,	,	,	,	,	,
1971	,	,	,	,	,	,	,	,	,	,	,	,	,	,	,
1972	,	,	,	,	,	,	,	,	,	,	,	,	,	,	,
1973	,	,	,	,	,	,	,	,	,	,	,	,	,	,	,
1974	,	,	,	,	,	,	,	,	,	,	,	,	,	,	,
1975	,	,	,	,	,	,	,	,	,	,	,	,	,	,	,
1976	,	,	,	,	,	,	,	,	,	,	,	,	,	,	,
1977	,	,	,	,	,	,	,	,	,	,	,	,	,	,	,
1978	,	,	,	,	,	,	,	,	,	,	,	,	,	,	,
1979	,	,	,	,	,	,	,	,	,	,	,	,	,	,	,
1980	,	,	,	,	,	,	,	,	,	,	,	,	,	,	,
1981	,	,	,	,	,	,	,	,	,	,	,	,	,	,	,
1982	,	,	,	,	,	,	,	,	,	,	,	,	,	,	,
1983	,	,	,	,	,	,	,	,	,	,	,	,	,	,	,
1984	,	,	,	,	,	,	,	,	,	,	,	,	,	,	,
1985	,	,	,	,	,	,	,	,	,	,	,	,	,	,	,
1986	,	,	,	,	,	,	,	,	,	,	,	,	,	,	,
1987	,	,	,	,	,	,	,	,	,	,	,	,	,	,	,
1988	,	,	,	,	,	,	,	,	,	,	,	,	,	,	,
1989	,	,	,	,	,	,	,	,	,	,	,	,	,	,	,
1990	,	,	,	,	,	,	,	,	,	,	,	,	,	,	,
1991	,	,	,	,	,	,	,	,	,	,	,	,	,	,	,
1992	,	,	,	,	,	,	,	,	,	,	,	,	,	,	,
1993	,	,	,	,	,	,	,	,	,	,	,	,	,	,	,
1994	,	,	,	,	,	,	,	,	,	,	,	,	,	,	,
1995	,	,	,	,	,	,	,	,	,	,	,	,	,	,	,
1996	,	,	,	,	,	,	,	,	,	,	,	,	,	,	,
1997	,	,	,	,	,	,	,	,	,	,	,	,	,	,	,
1998	,	,	,	,	,	,	,	,	,	,	,	,	,	,	,
1999	,	,	,	,	,	,	,	,	,	,	,	,	,	,	,
[truncated: 13,001 more rows]
