# Supplementary material for: ParB spreading on DNA requires cytidine triphosphate in vitro
Source: eLife journal article supplement (doi:10.7554/elife.53515), 2020-02-20
Supplement: fig2-figsupp3-data1 [file Fig2_supp3_Psychrobacter_ParB_rep1_2_3.xlsx]

## Sheet: FORMAT
	sample ID #1	sample ID #2	sample ID #3
data point	time point (sec), wavelength shift (nm)	time point (sec), wavelength shift (nm)	time point (sec), wavelength shift (nm)
1
2
3
.
.
.

## Sheet: Fig2_supp3_Psychrobacter_B_123
	169bp closed parS DNA and Psychrobacter ParB	169bp closed parS DNA and Psychrobacter ParB 1mM CTP	169bp closed parS DNA and Psychrobacter ParB 1mM ATP	169bp closed parS DNA and Psychrobacter ParB 1mM GTP	169bp closed parS DNA and Psychrobacter ParB 1mM UTP	169bp closed parS DNA and Psychrobacter ParB	169bp closed parS DNA and Psychrobacter ParB 1mM CTP	169bp closed parS DNA and Psychrobacter ParB 1mM ATP	169bp closed parS DNA and Psychrobacter ParB 1mM GTP	169bp closed parS DNA and Psychrobacter ParB 1mM UTP	169bp closed parS DNA and Psychrobacter ParB	169bp closed parS DNA and Psychrobacter ParB 1mM ATP	169bp closed parS DNA and Psychrobacter ParB 1mM GTP	169bp closed parS DNA and Psychrobacter ParB 1mM UTP	169bp closed parS DNA and Psychrobacter ParB 1mM CTP
1	0.000, -0.009	0.000, -0.012	0.000, -0.015	0.000, -0.011	0.000, -0.021	0.000, -0.023	0.000, -0.037	0.000, -0.027	0.000, -0.028	0.000, -0.027	0.000, -0.017	0.000, -0.049	0.000, -0.014	0.000, -0.015	0.000, -0.022
2	0.200, -0.008	0.200, -0.012	0.200, -0.015	0.200, -0.011	0.200, -0.020	0.200, -0.023	0.200, -0.035	0.200, -0.027	0.200, -0.028	0.200, -0.028	0.200, -0.018	0.200, -0.048	0.200, -0.014	0.200, -0.016	0.200, -0.022
3	0.400, -0.007	0.400, -0.013	0.400, -0.015	0.400, -0.011	0.400, -0.020	0.400, -0.024	0.400, -0.034	0.400, -0.028	0.400, -0.028	0.400, -0.028	0.400, -0.018	0.400, -0.046	0.400, -0.014	0.400, -0.016	0.400, -0.023
4	0.600, -0.007	0.600, -0.013	0.600, -0.014	0.600, -0.011	0.600, -0.020	0.600, -0.024	0.600, -0.033	0.600, -0.028	0.600, -0.028	0.600, -0.029	0.600, -0.019	0.600, -0.045	0.600, -0.015	0.600, -0.016	0.600, -0.023
5	0.800, -0.006	0.800, -0.013	0.800, -0.014	0.800, -0.012	0.800, -0.019	0.800, -0.025	0.800, -0.032	0.800, -0.029	0.800, -0.028	0.800, -0.029	0.800, -0.019	0.800, -0.043	0.800, -0.015	0.800, -0.016	0.800, -0.024
6	1.000, -0.006	1.000, -0.013	1.000, -0.014	1.000, -0.012	1.000, -0.019	1.000, -0.025	1.000, -0.031	1.000, -0.029	1.000, -0.028	1.000, -0.030	1.000, -0.020	1.000, -0.042	1.000, -0.015	1.000, -0.016	1.000, -0.024
7	1.200, -0.005	1.200, -0.013	1.200, -0.013	1.200, -0.012	1.200, -0.018	1.200, -0.026	1.200, -0.030	1.200, -0.029	1.200, -0.028	1.200, -0.030	1.200, -0.020	1.200, -0.040	1.200, -0.015	1.200, -0.017	1.200, -0.024
8	1.400, -0.004	1.400, -0.013	1.400, -0.012	1.400, -0.012	1.400, -0.018	1.400, -0.026	1.400, -0.029	1.400, -0.029	1.400, -0.028	1.400, -0.030	1.400, -0.021	1.400, -0.039	1.400, -0.016	1.400, -0.017	1.400, -0.024
9	1.600, -0.004	1.600, -0.013	1.600, -0.012	1.600, -0.012	1.600, -0.018	1.600, -0.026	1.600, -0.028	1.600, -0.030	1.600, -0.028	1.600, -0.030	1.600, -0.021	1.600, -0.038	1.600, -0.016	1.600, -0.017	1.600, -0.024
10	1.800, -0.004	1.800, -0.012	1.800, -0.011	1.800, -0.012	1.800, -0.017	1.800, -0.026	1.800, -0.028	1.800, -0.030	1.800, -0.027	1.800, -0.030	1.800, -0.021	1.800, -0.037	1.800, -0.016	1.800, -0.018	1.800, -0.023
11	2.000, -0.004	2.000, -0.012	2.000, -0.011	2.000, -0.012	2.000, -0.017	2.000, -0.026	2.000, -0.028	2.000, -0.030	2.000, -0.027	2.000, -0.029	2.000, -0.021	2.000, -0.036	2.000, -0.016	2.000, -0.018	2.000, -0.023
12	2.200, -0.004	2.200, -0.011	2.200, -0.010	2.200, -0.012	2.200, -0.017	2.200, -0.026	2.200, -0.028	2.200, -0.029	2.200, -0.026	2.200, -0.029	2.200, -0.021	2.200, -0.035	2.200, -0.016	2.200, -0.018	2.200, -0.023
13	2.400, -0.004	2.400, -0.011	2.400, -0.010	2.400, -0.011	2.400, -0.017	2.400, -0.026	2.400, -0.027	2.400, -0.029	2.400, -0.026	2.400, -0.028	2.400, -0.021	2.400, -0.034	2.400, -0.016	2.400, -0.018	2.400, -0.022
14	2.600, -0.004	2.600, -0.011	2.600, -0.010	2.600, -0.011	2.600, -0.016	2.600, -0.025	2.600, -0.027	2.600, -0.029	2.600, -0.025	2.600, -0.028	2.600, -0.021	2.600, -0.033	2.600, -0.015	2.600, -0.018	2.600, -0.022
15	2.800, -0.004	2.800, -0.011	2.800, -0.010	2.800, -0.011	2.800, -0.016	2.800, -0.025	2.800, -0.027	2.800, -0.028	2.800, -0.024	2.800, -0.028	2.800, -0.021	2.800, -0.033	2.800, -0.015	2.800, -0.018	2.800, -0.022
16	3.000, -0.004	3.000, -0.011	3.000, -0.010	3.000, -0.010	3.000, -0.016	3.000, -0.024	3.000, -0.027	3.000, -0.028	3.000, -0.024	3.000, -0.027	3.000, -0.021	3.000, -0.032	3.000, -0.014	3.000, -0.018	3.000, -0.021
17	3.200, -0.004	3.200, -0.011	3.200, -0.010	3.200, -0.010	3.200, -0.015	3.200, -0.023	3.200, -0.026	3.200, -0.027	3.200, -0.023	3.200, -0.027	3.200, -0.021	3.200, -0.031	3.200, -0.014	3.200, -0.017	3.200, -0.021
18	3.400, -0.004	3.400, -0.011	3.400, -0.010	3.400, -0.010	3.400, -0.015	3.400, -0.023	3.400, -0.026	3.400, -0.026	3.400, -0.023	3.400, -0.027	3.400, -0.020	3.400, -0.031	3.400, -0.013	3.400, -0.017	3.400, -0.021
19	3.600, -0.004	3.600, -0.011	3.600, -0.010	3.600, -0.009	3.600, -0.015	3.600, -0.022	3.600, -0.025	3.600, -0.026	3.600, -0.022	3.600, -0.027	3.600, -0.020	3.600, -0.030	3.600, -0.012	3.600, -0.016	3.600, -0.021
20	3.800, -0.004	3.800, -0.011	3.800, -0.010	3.800, -0.009	3.800, -0.015	3.800, -0.021	3.800, -0.025	3.800, -0.025	3.800, -0.022	3.800, -0.026	3.800, -0.020	3.800, -0.030	3.800, -0.012	3.800, -0.016	3.800, -0.021
21	4.000, -0.004	4.000, -0.012	4.000, -0.010	4.000, -0.009	4.000, -0.015	4.000, -0.021	4.000, -0.024	4.000, -0.024	4.000, -0.022	4.000, -0.026	4.000, -0.020	4.000, -0.029	4.000, -0.011	4.000, -0.016	4.000, -0.020
22	4.200, -0.004	4.200, -0.012	4.200, -0.010	4.200, -0.009	4.200, -0.014	4.200, -0.021	4.200, -0.024	4.200, -0.024	4.200, -0.022	4.200, -0.025	4.200, -0.019	4.200, -0.028	4.200, -0.011	4.200, -0.016	4.200, -0.020
23	4.400, -0.004	4.400, -0.012	4.400, -0.010	4.400, -0.008	4.400, -0.014	4.400, -0.020	4.400, -0.023	4.400, -0.023	4.400, -0.022	4.400, -0.025	4.400, -0.019	4.400, -0.028	4.400, -0.011	4.400, -0.016	4.400, -0.020
24	4.600, -0.004	4.600, -0.012	4.600, -0.010	4.600, -0.008	4.600, -0.014	4.600, -0.020	4.600, -0.023	4.600, -0.023	4.600, -0.022	4.600, -0.024	4.600, -0.019	4.600, -0.027	4.600, -0.011	4.600, -0.016	4.600, -0.019
25	4.800, -0.004	4.800, -0.012	4.800, -0.010	4.800, -0.008	4.800, -0.014	4.800, -0.020	4.800, -0.022	4.800, -0.022	4.800, -0.022	4.800, -0.024	4.800, -0.018	4.800, -0.027	4.800, -0.011	4.800, -0.016	4.800, -0.018
26	5.000, -0.004	5.000, -0.011	5.000, -0.010	5.000, -0.008	5.000, -0.013	5.000, -0.020	5.000, -0.022	5.000, -0.021	5.000, -0.022	5.000, -0.023	5.000, -0.018	5.000, -0.026	5.000, -0.011	5.000, -0.016	5.000, -0.018
27	5.200, -0.003	5.200, -0.011	5.200, -0.010	5.200, -0.008	5.200, -0.013	5.200, -0.020	5.200, -0.022	5.200, -0.021	5.200, -0.022	5.200, -0.023	5.200, -0.017	5.200, -0.026	5.200, -0.011	5.200, -0.016	5.200, -0.018
28	5.400, -0.003	5.400, -0.011	5.400, -0.010	5.400, -0.008	5.400, -0.013	5.400, -0.019	5.400, -0.021	5.400, -0.020	5.400, -0.021	5.400, -0.022	5.400, -0.017	5.400, -0.025	5.400, -0.011	5.400, -0.016	5.400, -0.017
29	5.600, -0.003	5.600, -0.010	5.600, -0.009	5.600, -0.008	5.600, -0.012	5.600, -0.019	5.600, -0.021	5.600, -0.020	5.600, -0.021	5.600, -0.022	5.600, -0.017	5.600, -0.025	5.600, -0.010	5.600, -0.015	5.600, -0.017
30	5.800, -0.002	5.800, -0.010	5.800, -0.010	5.800, -0.008	5.800, -0.012	5.800, -0.019	5.800, -0.020	5.800, -0.019	5.800, -0.021	5.800, -0.021	5.800, -0.017	5.800, -0.024	5.800, -0.010	5.800, -0.015	5.800, -0.017
31	6.000, -0.002	6.000, -0.009	6.000, -0.009	6.000, -0.008	6.000, -0.012	6.000, -0.019	6.000, -0.020	6.000, -0.019	6.000, -0.020	6.000, -0.021	6.000, -0.017	6.000, -0.023	6.000, -0.010	6.000, -0.015	6.000, -0.017
32	6.200, -0.002	6.200, -0.009	6.200, -0.010	6.200, -0.009	6.200, -0.011	6.200, -0.019	6.200, -0.020	6.200, -0.019	6.200, -0.020	6.200, -0.020	6.200, -0.016	6.200, -0.023	6.200, -0.010	6.200, -0.015	6.200, -0.017
33	6.400, -0.001	6.400, -0.009	6.400, -0.010	6.400, -0.009	6.400, -0.011	6.400, -0.019	6.400, -0.019	6.400, -0.019	6.400, -0.019	6.400, -0.020	6.400, -0.016	6.400, -0.022	6.400, -0.010	6.400, -0.015	6.400, -0.016
34	6.600, -0.001	6.600, -0.009	6.600, -0.010	6.600, -0.009	6.600, -0.011	6.600, -0.018	6.600, -0.019	6.600, -0.018	6.600, -0.019	6.600, -0.020	6.600, -0.016	6.600, -0.022	6.600, -0.009	6.600, -0.014	6.600, -0.017
35	6.800, -0.001	6.800, -0.008	6.800, -0.009	6.800, -0.009	6.800, -0.011	6.800, -0.018	6.800, -0.018	6.800, -0.018	6.800, -0.018	6.800, -0.019	6.800, -0.015	6.800, -0.021	6.800, -0.009	6.800, -0.014	6.800, -0.017
36	7.000, -0.001	7.000, -0.008	7.000, -0.009	7.000, -0.009	7.000, -0.011	7.000, -0.018	7.000, -0.018	7.000, -0.018	7.000, -0.018	7.000, -0.019	7.000, -0.015	7.000, -0.021	7.000, -0.009	7.000, -0.013	7.000, -0.016
37	7.200, -0.001	7.200, -0.008	7.200, -0.009	7.200, -0.009	7.200, -0.011	7.200, -0.018	7.200, -0.018	7.200, -0.018	7.200, -0.017	7.200, -0.019	7.200, -0.014	7.200, -0.020	7.200, -0.009	7.200, -0.013	7.200, -0.016
38	7.400, -0.001	7.400, -0.008	7.400, -0.009	7.400, -0.009	7.400, -0.011	7.400, -0.018	7.400, -0.018	7.400, -0.017	7.400, -0.016	7.400, -0.019	7.400, -0.014	7.400, -0.020	7.400, -0.008	7.400, -0.012	7.400, -0.016
39	7.600, -0.001	7.600, -0.008	7.600, -0.009	7.600, -0.008	7.600, -0.011	7.600, -0.017	7.600, -0.017	7.600, -0.017	7.600, -0.016	7.600, -0.019	7.600, -0.014	7.600, -0.019	7.600, -0.008	7.600, -0.012	7.600, -0.016
40	7.800, -0.001	7.800, -0.008	7.800, -0.008	7.800, -0.008	7.800, -0.011	7.800, -0.017	7.800, -0.017	7.800, -0.016	7.800, -0.015	7.800, -0.018	7.800, -0.014	7.800, -0.019	7.800, -0.008	7.800, -0.012	7.800, -0.015
41	8.000, -0.001	8.000, -0.008	8.000, -0.008	8.000, -0.008	8.000, -0.010	8.000, -0.017	8.000, -0.016	8.000, -0.016	8.000, -0.015	8.000, -0.018	8.000, -0.013	8.000, -0.018	8.000, -0.007	8.000, -0.012	8.000, -0.015
42	8.200, -0.001	8.200, -0.008	8.200, -0.008	8.200, -0.008	8.200, -0.010	8.200, -0.017	8.200, -0.016	8.200, -0.016	8.200, -0.014	8.200, -0.018	8.200, -0.013	8.200, -0.018	8.200, -0.007	8.200, -0.011	8.200, -0.014
43	8.400, -0.001	8.400, -0.008	8.400, -0.008	8.400, -0.008	8.400, -0.010	8.400, -0.017	8.400, -0.016	8.400, -0.015	8.400, -0.014	8.400, -0.017	8.400, -0.013	8.400, -0.018	8.400, -0.007	8.400, -0.011	8.400, -0.014
44	8.600, -0.000	8.600, -0.008	8.600, -0.008	8.600, -0.008	8.600, -0.010	8.600, -0.017	8.600, -0.016	8.600, -0.014	8.600, -0.014	8.600, -0.017	8.600, -0.012	8.600, -0.017	8.600, -0.007	8.600, -0.011	8.600, -0.013
45	8.800, -0.001	8.800, -0.008	8.800, -0.007	8.800, -0.008	8.800, -0.010	8.800, -0.016	8.800, -0.016	8.800, -0.014	8.800, -0.014	8.800, -0.017	8.800, -0.012	8.800, -0.017	8.800, -0.007	8.800, -0.010	8.800, -0.013
46	9.000, -0.001	9.000, -0.008	9.000, -0.007	9.000, -0.008	9.000, -0.009	9.000, -0.016	9.000, -0.015	9.000, -0.013	9.000, -0.014	9.000, -0.017	9.000, -0.012	9.000, -0.017	9.000, -0.006	9.000, -0.010	9.000, -0.013
47	9.200, -0.001	9.200, -0.007	9.200, -0.007	9.200, -0.008	9.200, -0.009	9.200, -0.016	9.200, -0.015	9.200, -0.013	9.200, -0.014	9.200, -0.017	9.200, -0.012	9.200, -0.017	9.200, -0.006	9.200, -0.010	9.200, -0.013
48	9.400, -0.001	9.400, -0.007	9.400, -0.007	9.400, -0.008	9.400, -0.009	9.400, -0.016	9.400, -0.015	9.400, -0.013	9.400, -0.014	9.400, -0.016	9.400, -0.011	9.400, -0.017	9.400, -0.006	9.400, -0.009	9.400, -0.012
49	9.600, -0.001	9.600, -0.007	9.600, -0.007	9.600, -0.008	9.600, -0.009	9.600, -0.016	9.600, -0.015	9.600, -0.012	9.600, -0.014	9.600, -0.016	9.600, -0.011	9.600, -0.016	9.600, -0.006	9.600, -0.009	9.600, -0.012
50	9.800, -0.001	9.800, -0.007	9.800, -0.007	9.800, -0.008	9.800, -0.009	9.800, -0.016	9.800, -0.015	9.800, -0.012	9.800, -0.015	9.800, -0.015	9.800, -0.011	9.800, -0.016	9.800, -0.006	9.800, -0.009	9.800, -0.012
51	10.000, -0.001	10.000, -0.007	10.000, -0.006	10.000, -0.008	10.000, -0.009	10.000, -0.015	10.000, -0.014	10.000, -0.012	10.000, -0.015	10.000, -0.015	10.000, -0.010	10.000, -0.016	10.000, -0.006	10.000, -0.009	10.000, -0.012
52	10.200, -0.001	10.200, -0.007	10.200, -0.006	10.200, -0.008	10.200, -0.009	10.200, -0.015	10.200, -0.014	10.200, -0.012	10.200, -0.015	10.200, -0.015	10.200, -0.010	10.200, -0.016	10.200, -0.005	10.200, -0.008	10.200, -0.011
53	10.400, -0.001	10.400, -0.007	10.400, -0.006	10.400, -0.008	10.400, -0.009	10.400, -0.015	10.400, -0.014	10.400, -0.012	10.400, -0.016	10.400, -0.014	10.400, -0.010	10.400, -0.015	10.400, -0.005	10.400, -0.008	10.400, -0.011
54	10.600, -0.001	10.600, -0.007	10.600, -0.006	10.600, -0.008	10.600, -0.009	10.600, -0.015	10.600, -0.013	10.600, -0.012	10.600, -0.016	10.600, -0.014	10.600, -0.010	10.600, -0.015	10.600, -0.005	10.600, -0.008	10.600, -0.011
55	10.800, -0.001	10.800, -0.006	10.800, -0.006	10.800, -0.008	10.800, -0.009	10.800, -0.014	10.800, -0.013	10.800, -0.011	10.800, -0.015	10.800, -0.014	10.800, -0.009	10.800, -0.015	10.800, -0.005	10.800, -0.008	10.800, -0.011
56	11.000, -0.001	11.000, -0.006	11.000, -0.006	11.000, -0.008	11.000, -0.009	11.000, -0.014	11.000, -0.012	11.000, -0.011	11.000, -0.015	11.000, -0.013	11.000, -0.009	11.000, -0.015	11.000, -0.005	11.000, -0.008	11.000, -0.010
57	11.200, -0.001	11.200, -0.006	11.200, -0.006	11.200, -0.008	11.200, -0.009	11.200, -0.014	11.200, -0.012	11.200, -0.011	11.200, -0.015	11.200, -0.013	11.200, -0.009	11.200, -0.015	11.200, -0.006	11.200, -0.008	11.200, -0.010
58	11.400, -0.001	11.400, -0.006	11.400, -0.006	11.400, -0.007	11.400, -0.009	11.400, -0.013	11.400, -0.011	11.400, -0.010	11.400, -0.014	11.400, -0.013	11.400, -0.009	11.400, -0.014	11.400, -0.006	11.400, -0.008	11.400, -0.010
59	11.600, -0.000	11.600, -0.006	11.600, -0.006	11.600, -0.007	11.600, -0.008	11.600, -0.013	11.600, -0.011	11.600, -0.010	11.600, -0.014	11.600, -0.013	11.600, -0.009	11.600, -0.014	11.600, -0.006	11.600, -0.008	11.600, -0.009
60	11.800, 0.000	11.800, -0.006	11.800, -0.006	11.800, -0.007	11.800, -0.008	11.800, -0.012	11.800, -0.010	11.800, -0.010	11.800, -0.013	11.800, -0.013	11.800, -0.009	11.800, -0.014	11.800, -0.006	11.800, -0.008	11.800, -0.009
61	12.000, 0.000	12.000, -0.006	12.000, -0.005	12.000, -0.007	12.000, -0.008	12.000, -0.012	12.000, -0.010	12.000, -0.010	12.000, -0.012	12.000, -0.013	12.000, -0.009	12.000, -0.014	12.000, -0.006	12.000, -0.008	12.000, -0.009
62	12.200, 0.001	12.200, -0.006	12.200, -0.005	12.200, -0.007	12.200, -0.007	12.200, -0.011	12.200, -0.009	12.200, -0.009	12.200, -0.012	12.200, -0.013	12.200, -0.010	12.200, -0.014	12.200, -0.007	12.200, -0.008	12.200, -0.009
63	12.400, 0.001	12.400, -0.006	12.400, -0.005	12.400, -0.007	12.400, -0.007	12.400, -0.011	12.400, -0.009	12.400, -0.009	12.400, -0.011	12.400, -0.012	12.400, -0.010	12.400, -0.014	12.400, -0.007	12.400, -0.008	12.400, -0.009
64	12.600, 0.001	12.600, -0.005	12.600, -0.005	12.600, -0.007	12.600, -0.007	12.600, -0.011	12.600, -0.009	12.600, -0.008	12.600, -0.011	12.600, -0.012	12.600, -0.010	12.600, -0.013	12.600, -0.007	12.600, -0.007	12.600, -0.009
65	12.800, 0.001	12.800, -0.005	12.800, -0.005	12.800, -0.007	12.800, -0.007	12.800, -0.010	12.800, -0.009	12.800, -0.008	12.800, -0.011	12.800, -0.012	12.800, -0.010	12.800, -0.013	12.800, -0.007	12.800, -0.007	12.800, -0.009
66	13.000, 0.001	13.000, -0.005	13.000, -0.005	13.000, -0.006	13.000, -0.007	13.000, -0.010	13.000, -0.009	13.000, -0.008	13.000, -0.010	13.000, -0.011	13.000, -0.009	13.000, -0.013	13.000, -0.006	13.000, -0.007	13.000, -0.008
67	13.200, 0.001	13.200, -0.005	13.200, -0.004	13.200, -0.006	13.200, -0.007	13.200, -0.010	13.200, -0.009	13.200, -0.008	13.200, -0.010	13.200, -0.011	13.200, -0.009	13.200, -0.013	13.200, -0.006	13.200, -0.007	13.200, -0.008
68	13.400, 0.001	13.400, -0.004	13.400, -0.004	13.400, -0.006	13.400, -0.007	13.400, -0.009	13.400, -0.009	13.400, -0.008	13.400, -0.010	13.400, -0.011	13.400, -0.009	13.400, -0.012	13.400, -0.006	13.400, -0.006	13.400, -0.008
69	13.600, 0.001	13.600, -0.004	13.600, -0.004	13.600, -0.006	13.600, -0.007	13.600, -0.009	13.600, -0.009	13.600, -0.008	13.600, -0.009	13.600, -0.010	13.600, -0.009	13.600, -0.012	13.600, -0.005	13.600, -0.006	13.600, -0.008
70	13.800, 0.001	13.800, -0.004	13.800, -0.004	13.800, -0.006	13.800, -0.007	13.800, -0.009	13.800, -0.009	13.800, -0.008	13.800, -0.009	13.800, -0.010	13.800, -0.008	13.800, -0.012	13.800, -0.005	13.800, -0.006	13.800, -0.008
71	14.000, 0.001	14.000, -0.004	14.000, -0.004	14.000, -0.006	14.000, -0.007	14.000, -0.009	14.000, -0.009	14.000, -0.008	14.000, -0.009	14.000, -0.010	14.000, -0.008	14.000, -0.012	14.000, -0.004	14.000, -0.006	14.000, -0.008
72	14.200, 0.000	14.200, -0.004	14.200, -0.004	14.200, -0.006	14.200, -0.007	14.200, -0.009	14.200, -0.009	14.200, -0.008	14.200, -0.008	14.200, -0.010	14.200, -0.008	14.200, -0.012	14.200, -0.004	14.200, -0.006	14.200, -0.008
73	14.400, 0.000	14.400, -0.004	14.400, -0.004	14.400, -0.005	14.400, -0.007	14.400, -0.010	14.400, -0.009	14.400, -0.008	14.400, -0.008	14.400, -0.010	14.400, -0.008	14.400, -0.012	14.400, -0.003	14.400, -0.006	14.400, -0.008
74	14.600, 0.000	14.600, -0.004	14.600, -0.004	14.600, -0.005	14.600, -0.007	14.600, -0.010	14.600, -0.009	14.600, -0.008	14.600, -0.008	14.600, -0.010	14.600, -0.008	14.600, -0.012	14.600, -0.003	14.600, -0.005	14.600, -0.007
75	14.800, 0.000	14.800, -0.004	14.800, -0.004	14.800, -0.005	14.800, -0.007	14.800, -0.010	14.800, -0.009	14.800, -0.008	14.800, -0.008	14.800, -0.010	14.800, -0.007	14.800, -0.011	14.800, -0.003	14.800, -0.005	14.800, -0.007
76	15.000, -0.000	15.000, -0.005	15.000, -0.004	15.000, -0.005	15.000, -0.006	15.000, -0.010	15.000, -0.009	15.000, -0.008	15.000, -0.008	15.000, -0.010	15.000, -0.007	15.000, -0.011	15.000, -0.003	15.000, -0.005	15.000, -0.007
77	15.200, -0.000	15.200, -0.005	15.200, -0.004	15.200, -0.005	15.200, -0.006	15.200, -0.010	15.200, -0.009	15.200, -0.008	15.200, -0.007	15.200, -0.011	15.200, -0.007	15.200, -0.011	15.200, -0.003	15.200, -0.005	15.200, -0.006
78	15.400, -0.000	15.400, -0.005	15.400, -0.004	15.400, -0.005	15.400, -0.005	15.400, -0.010	15.400, -0.009	15.400, -0.008	15.400, -0.007	15.400, -0.011	15.400, -0.007	15.400, -0.011	15.400, -0.003	15.400, -0.005	15.400, -0.006
79	15.600, -0.001	15.600, -0.005	15.600, -0.004	15.600, -0.005	15.600, -0.005	15.600, -0.010	15.600, -0.009	15.600, -0.008	15.600, -0.007	15.600, -0.010	15.600, -0.007	15.600, -0.011	15.600, -0.002	15.600, -0.006	15.600, -0.006
80	15.800, -0.001	15.800, -0.005	15.800, -0.003	15.800, -0.004	15.800, -0.004	15.800, -0.010	15.800, -0.008	15.800, -0.007	15.800, -0.007	15.800, -0.010	15.800, -0.007	15.800, -0.010	15.800, -0.002	15.800, -0.006	15.800, -0.005
81	16.000, -0.001	16.000, -0.004	16.000, -0.003	16.000, -0.004	16.000, -0.004	16.000, -0.010	16.000, -0.008	16.000, -0.007	16.000, -0.007	16.000, -0.010	16.000, -0.006	16.000, -0.010	16.000, -0.003	16.000, -0.006	16.000, -0.005
82	16.200, -0.000	16.200, -0.004	16.200, -0.003	16.200, -0.004	16.200, -0.004	16.200, -0.010	16.200, -0.008	16.200, -0.007	16.200, -0.007	16.200, -0.010	16.200, -0.006	16.200, -0.009	16.200, -0.003	16.200, -0.006	16.200, -0.005
83	16.400, -0.000	16.400, -0.004	16.400, -0.002	16.400, -0.004	16.400, -0.003	16.400, -0.010	16.400, -0.007	16.400, -0.007	16.400, -0.007	16.400, -0.009	16.400, -0.006	16.400, -0.009	16.400, -0.003	16.400, -0.005	16.400, -0.005
84	16.600, -0.000	16.600, -0.004	16.600, -0.002	16.600, -0.004	16.600, -0.003	16.600, -0.009	16.600, -0.007	16.600, -0.007	16.600, -0.007	16.600, -0.009	16.600, -0.006	16.600, -0.008	16.600, -0.003	16.600, -0.005	16.600, -0.005
85	16.800, -0.000	16.800, -0.003	16.800, -0.002	16.800, -0.004	16.800, -0.003	16.800, -0.009	16.800, -0.007	16.800, -0.007	16.800, -0.007	16.800, -0.008	16.800, -0.006	16.800, -0.008	16.800, -0.003	16.800, -0.005	16.800, -0.005
86	17.000, -0.000	17.000, -0.003	17.000, -0.002	17.000, -0.003	17.000, -0.003	17.000, -0.009	17.000, -0.007	17.000, -0.006	17.000, -0.006	17.000, -0.008	17.000, -0.006	17.000, -0.008	17.000, -0.003	17.000, -0.005	17.000, -0.005
87	17.200, -0.000	17.200, -0.003	17.200, -0.002	17.200, -0.003	17.200, -0.003	17.200, -0.008	17.200, -0.006	17.200, -0.006	17.200, -0.006	17.200, -0.007	17.200, -0.006	17.200, -0.008	17.200, -0.004	17.200, -0.005	17.200, -0.005
88	17.400, -0.000	17.400, -0.003	17.400, -0.002	17.400, -0.003	17.400, -0.003	17.400, -0.008	17.400, -0.006	17.400, -0.005	17.400, -0.006	17.400, -0.007	17.400, -0.005	17.400, -0.008	17.400, -0.004	17.400, -0.005	17.400, -0.005
89	17.600, -0.000	17.600, -0.003	17.600, -0.002	17.600, -0.003	17.600, -0.003	17.600, -0.007	17.600, -0.006	17.600, -0.005	17.600, -0.006	17.600, -0.007	17.600, -0.005	17.600, -0.008	17.600, -0.004	17.600, -0.005	17.600, -0.006
90	17.800, -0.000	17.800, -0.002	17.800, -0.003	17.800, -0.003	17.800, -0.003	17.800, -0.007	17.800, -0.005	17.800, -0.005	17.800, -0.006	17.800, -0.006	17.800, -0.005	17.800, -0.008	17.800, -0.003	17.800, -0.004	17.800, -0.006
91	18.000, -0.001	18.000, -0.002	18.000, -0.003	18.000, -0.004	18.000, -0.003	18.000, -0.007	18.000, -0.005	18.000, -0.004	18.000, -0.006	18.000, -0.006	18.000, -0.005	18.000, -0.008	18.000, -0.003	18.000, -0.004	18.000, -0.006
92	18.200, -0.001	18.200, -0.002	18.200, -0.003	18.200, -0.004	18.200, -0.003	18.200, -0.006	18.200, -0.005	18.200, -0.004	18.200, -0.005	18.200, -0.006	18.200, -0.005	18.200, -0.008	18.200, -0.003	18.200, -0.003	18.200, -0.006
93	18.400, -0.001	18.400, -0.002	18.400, -0.004	18.400, -0.004	18.400, -0.003	18.400, -0.006	18.400, -0.005	18.400, -0.004	18.400, -0.005	18.400, -0.006	18.400, -0.005	18.400, -0.008	18.400, -0.002	18.400, -0.003	18.400, -0.006
94	18.600, -0.001	18.600, -0.002	18.600, -0.004	18.600, -0.004	18.600, -0.003	18.600, -0.006	18.600, -0.005	18.600, -0.004	18.600, -0.005	18.600, -0.006	18.600, -0.005	18.600, -0.007	18.600, -0.002	18.600, -0.002	18.600, -0.005
95	18.800, -0.001	18.800, -0.002	18.800, -0.004	18.800, -0.004	18.800, -0.003	18.800, -0.006	18.800, -0.005	18.800, -0.004	18.800, -0.004	18.800, -0.006	18.800, -0.004	18.800, -0.007	18.800, -0.002	18.800, -0.002	18.800, -0.005
96	19.000, -0.000	19.000, -0.002	19.000, -0.004	19.000, -0.004	19.000, -0.003	19.000, -0.006	19.000, -0.005	19.000, -0.004	19.000, -0.004	19.000, -0.006	19.000, -0.004	19.000, -0.007	19.000, -0.001	19.000, -0.002	19.000, -0.005
97	19.200, -0.000	19.200, -0.002	19.200, -0.004	19.200, -0.003	19.200, -0.003	19.200, -0.006	19.200, -0.005	19.200, -0.004	19.200, -0.004	19.200, -0.006	19.200, -0.004	19.200, -0.007	19.200, -0.001	19.200, -0.002	19.200, -0.004
98	19.400, 0.000	19.400, -0.002	19.400, -0.004	19.400, -0.003	19.400, -0.003	19.400, -0.006	19.400, -0.005	19.400, -0.004	19.400, -0.003	19.400, -0.006	19.400, -0.004	19.400, -0.006	19.400, -0.001	19.400, -0.002	19.400, -0.004
99	19.600, 0.000	19.600, -0.002	19.600, -0.003	19.600, -0.003	19.600, -0.002	19.600, -0.006	19.600, -0.004	19.600, -0.004	19.600, -0.003	19.600, -0.005	19.600, -0.004	19.600, -0.006	19.600, -0.001	19.600, -0.002	19.600, -0.004
100	19.800, 0.001	19.800, -0.002	19.800, -0.003	19.800, -0.003	19.800, -0.002	19.800, -0.006	19.800, -0.004	19.800, -0.005	19.800, -0.003	19.800, -0.005	19.800, -0.004	19.800, -0.006	19.800, -0.001	19.800, -0.001	19.800, -0.004
101	20.000, 0.001	20.000, -0.002	20.000, -0.003	20.000, -0.003	20.000, -0.002	20.000, -0.006	20.000, -0.004	20.000, -0.005	20.000, -0.003	20.000, -0.005	20.000, -0.004	20.000, -0.006	20.000, -0.001	20.000, -0.001	20.000, -0.004
102	20.200, 0.001	20.200, -0.002	20.200, -0.003	20.200, -0.002	20.200, -0.001	20.200, -0.006	20.200, -0.004	20.200, -0.005	20.200, -0.003	20.200, -0.005	20.200, -0.004	20.200, -0.006	20.200, -0.002	20.200, -0.001	20.200, -0.004
103	20.400, 0.001	20.400, -0.002	20.400, -0.003	20.400, -0.002	20.400, -0.001	20.400, -0.006	20.400, -0.003	20.400, -0.005	20.400, -0.003	20.400, -0.004	20.400, -0.003	20.400, -0.006	20.400, -0.002	20.400, -0.001	20.400, -0.004
104	20.600, 0.001	20.600, -0.002	20.600, -0.003	20.600, -0.002	20.600, -0.001	20.600, -0.006	20.600, -0.003	20.600, -0.005	20.600, -0.003	20.600, -0.004	20.600, -0.003	20.600, -0.006	20.600, -0.003	20.600, -0.001	20.600, -0.004
105	20.800, 0.001	20.800, -0.002	20.800, -0.003	20.800, -0.001	20.800, -0.000	20.800, -0.005	20.800, -0.003	20.800, -0.005	20.800, -0.003	20.800, -0.004	20.800, -0.003	20.800, -0.006	20.800, -0.003	20.800, -0.001	20.800, -0.003
106	21.000, 0.000	21.000, -0.003	21.000, -0.003	21.000, -0.001	21.000, -0.000	21.000, -0.005	21.000, -0.002	21.000, -0.005	21.000, -0.003	21.000, -0.003	21.000, -0.003	21.000, -0.006	21.000, -0.003	21.000, -0.001	21.000, -0.003
107	21.200, 0.000	21.200, -0.003	21.200, -0.002	21.200, -0.001	21.200, 0.000	21.200, -0.005	21.200, -0.002	21.200, -0.005	21.200, -0.003	21.200, -0.003	21.200, -0.003	21.200, -0.006	21.200, -0.003	21.200, -0.000	21.200, -0.003
108	21.400, -0.000	21.400, -0.003	21.400, -0.002	21.400, -0.001	21.400, 0.000	21.400, -0.004	21.400, -0.002	21.400, -0.004	21.400, -0.003	21.400, -0.003	21.400, -0.003	21.400, -0.006	21.400, -0.003	21.400, -0.000	21.400, -0.003
109	21.600, -0.001	21.600, -0.003	21.600, -0.002	21.600, -0.001	21.600, 0.000	21.600, -0.004	21.600, -0.001	21.600, -0.004	21.600, -0.003	21.600, -0.002	21.600, -0.003	21.600, -0.005	21.600, -0.003	21.600, -0.000	21.600, -0.002
110	21.800, -0.001	21.800, -0.003	21.800, -0.002	21.800, -0.002	21.800, 0.000	21.800, -0.004	21.800, -0.001	21.800, -0.004	21.800, -0.003	21.800, -0.002	21.800, -0.003	21.800, -0.005	21.800, -0.002	21.800, 0.000	21.800, -0.002
111	22.000, -0.001	22.000, -0.003	22.000, -0.002	22.000, -0.002	22.000, 0.000	22.000, -0.003	22.000, -0.001	22.000, -0.003	22.000, -0.003	22.000, -0.002	22.000, -0.002	22.000, -0.005	22.000, -0.002	22.000, 0.000	22.000, -0.002
112	22.200, -0.002	22.200, -0.003	22.200, -0.001	22.200, -0.002	22.200, -0.000	22.200, -0.003	22.200, -0.001	22.200, -0.003	22.200, -0.003	22.200, -0.002	22.200, -0.002	22.200, -0.004	22.200, -0.002	22.200, -0.000	22.200, -0.002
113	22.400, -0.002	22.400, -0.003	22.400, -0.001	22.400, -0.002	22.400, -0.000	22.400, -0.003	22.400, -0.001	22.400, -0.003	22.400, -0.003	22.400, -0.003	22.400, -0.002	22.400, -0.004	22.400, -0.002	22.400, -0.000	22.400, -0.001
114	22.600, -0.002	22.600, -0.003	22.600, -0.001	22.600, -0.002	22.600, -0.000	22.600, -0.003	22.600, -0.001	22.600, -0.003	22.600, -0.002	22.600, -0.003	22.600, -0.002	22.600, -0.004	22.600, -0.002	22.600, -0.000	22.600, -0.001
115	22.800, -0.002	22.800, -0.002	22.800, -0.001	22.800, -0.002	22.800, -0.001	22.800, -0.002	22.800, -0.000	22.800, -0.003	22.800, -0.002	22.800, -0.003	22.800, -0.002	22.800, -0.003	22.800, -0.002	22.800, -0.000	22.800, -0.001
116	23.000, -0.002	23.000, -0.002	23.000, -0.001	23.000, -0.002	23.000, -0.001	23.000, -0.002	23.000, -0.000	23.000, -0.003	23.000, -0.002	23.000, -0.003	23.000, -0.001	23.000, -0.003	23.000, -0.002	23.000, -0.000	23.000, -0.001
117	23.200, -0.002	23.200, -0.002	23.200, -0.001	23.200, -0.002	23.200, -0.001	23.200, -0.002	23.200, -0.000	23.200, -0.003	23.200, -0.002	23.200, -0.003	23.200, -0.001	23.200, -0.003	23.200, -0.002	23.200, 0.000	23.200, -0.001
118	23.400, -0.002	23.400, -0.002	23.400, -0.001	23.400, -0.002	23.400, -0.000	23.400, -0.002	23.400, -0.001	23.400, -0.003	23.400, -0.002	23.400, -0.003	23.400, -0.001	23.400, -0.003	23.400, -0.002	23.400, 0.000	23.400, -0.001
119	23.600, -0.002	23.600, -0.002	23.600, -0.001	23.600, -0.002	23.600, -0.000	23.600, -0.002	23.600, -0.001	23.600, -0.003	23.600, -0.002	23.600, -0.003	23.600, -0.001	23.600, -0.003	23.600, -0.001	23.600, 0.000	23.600, -0.001
120	23.800, -0.002	23.800, -0.002	23.800, -0.001	23.800, -0.002	23.800, -0.000	23.800, -0.002	23.800, -0.001	23.800, -0.003	23.800, -0.001	23.800, -0.003	23.800, -0.001	23.800, -0.003	23.800, -0.001	23.800, 0.000	23.800, -0.001
121	24.000, -0.001	24.000, -0.002	24.000, -0.001	24.000, -0.002	24.000, -0.000	24.000, -0.002	24.000, -0.001	24.000, -0.002	24.000, -0.001	24.000, -0.003	24.000, -0.001	24.000, -0.003	24.000, -0.001	24.000, 0.001	24.000, -0.001
122	24.200, -0.001	24.200, -0.002	24.200, -0.001	24.200, -0.002	24.200, 0.000	24.200, -0.002	24.200, -0.001	24.200, -0.002	24.200, -0.001	24.200, -0.003	24.200, -0.001	24.200, -0.004	24.200, -0.001	24.200, 0.001	24.200, -0.001
123	24.400, -0.001	24.400, -0.002	24.400, -0.001	24.400, -0.002	24.400, 0.000	24.400, -0.002	24.400, -0.001	24.400, -0.002	24.400, -0.001	24.400, -0.003	24.400, -0.001	24.400, -0.004	24.400, -0.001	24.400, 0.001	24.400, -0.000
124	24.600, -0.001	24.600, -0.002	24.600, -0.001	24.600, -0.002	24.600, 0.000	24.600, -0.002	24.600, -0.001	24.600, -0.002	24.600, -0.001	24.600, -0.003	24.600, -0.001	24.600, -0.004	24.600, -0.001	24.600, 0.001	24.600, -0.000
125	24.800, -0.001	24.800, -0.002	24.800, -0.000	24.800, -0.002	24.800, 0.000	24.800, -0.002	24.800, -0.001	24.800, -0.002	24.800, -0.001	24.800, -0.002	24.800, -0.000	24.800, -0.004	24.800, -0.001	24.800, 0.001	24.800, 0.000
126	25.000, -0.001	25.000, -0.002	25.000, -0.000	25.000, -0.002	25.000, 0.000	25.000, -0.002	25.000, -0.000	25.000, -0.001	25.000, -0.001	25.000, -0.002	25.000, -0.000	25.000, -0.004	25.000, -0.001	25.000, 0.001	25.000, 0.000
127	25.200, -0.001	25.200, -0.002	25.200, -0.001	25.200, -0.001	25.200, 0.000	25.200, -0.002	25.200, -0.000	25.200, -0.001	25.200, -0.001	25.200, -0.001	25.200, -0.000	25.200, -0.004	25.200, -0.000	25.200, 0.001	25.200, 0.001
128	25.400, -0.001	25.400, -0.001	25.400, -0.001	25.400, -0.001	25.400, 0.000	25.400, -0.002	25.400, -0.000	25.400, -0.001	25.400, -0.001	25.400, -0.001	25.400, 0.000	25.400, -0.004	25.400, -0.001	25.400, 0.001	25.400, 0.001
129	25.600, -0.001	25.600, -0.001	25.600, -0.001	25.600, -0.001	25.600, 0.001	25.600, -0.002	25.600, 0.000	25.600, -0.001	25.600, -0.001	25.600, -0.001	25.600, 0.000	25.600, -0.003	25.600, -0.001	25.600, 0.001	25.600, 0.001
130	25.800, -0.001	25.800, -0.001	25.800, -0.001	25.800, -0.001	25.800, 0.000	25.800, -0.002	25.800, 0.000	25.800, -0.001	25.800, -0.001	25.800, -0.000	25.800, 0.000	25.800, -0.003	25.800, -0.001	25.800, 0.001	25.800, 0.001
131	26.000, -0.001	26.000, -0.000	26.000, -0.001	26.000, -0.001	26.000, 0.000	26.000, -0.002	26.000, 0.000	26.000, -0.001	26.000, -0.001	26.000, -0.000	26.000, 0.000	26.000, -0.002	26.000, -0.001	26.000, 0.001	26.000, 0.000
132	26.200, -0.001	26.200, 0.000	26.200, -0.001	26.200, -0.001	26.200, 0.000	26.200, -0.002	26.200, 0.000	26.200, -0.001	26.200, -0.001	26.200, -0.000	26.200, 0.000	26.200, -0.002	26.200, -0.001	26.200, 0.001	26.200, 0.000
133	26.400, -0.001	26.400, 0.001	26.400, -0.001	26.400, -0.001	26.400, 0.000	26.400, -0.002	26.400, 0.001	26.400, -0.001	26.400, -0.001	26.400, -0.001	26.400, 0.000	26.400, -0.002	26.400, -0.001	26.400, 0.001	26.400, 0.000
134	26.600, -0.000	26.600, 0.001	26.600, -0.001	26.600, -0.001	26.600, 0.000	26.600, -0.002	26.600, 0.001	26.600, -0.001	26.600, -0.001	26.600, -0.001	26.600, 0.000	26.600, -0.001	26.600, -0.001	26.600, 0.000	26.600, 0.000
135	26.800, -0.000	26.800, 0.000	26.800, -0.001	26.800, -0.001	26.800, 0.000	26.800, -0.001	26.800, 0.001	26.800, -0.001	26.800, -0.001	26.800, -0.001	26.800, 0.000	26.800, -0.001	26.800, -0.001	26.800, 0.000	26.800, 0.000
136	27.000, 0.000	27.000, 0.000	27.000, -0.001	27.000, -0.001	27.000, 0.000	27.000, -0.001	27.000, 0.001	27.000, -0.001	27.000, -0.001	27.000, -0.001	27.000, 0.000	27.000, -0.001	27.000, -0.001	27.000, 0.000	27.000, 0.000
137	27.200, 0.000	27.200, 0.000	27.200, -0.001	27.200, -0.001	27.200, 0.000	27.200, -0.001	27.200, 0.001	27.200, -0.001	27.200, -0.001	27.200, -0.001	27.200, -0.000	27.200, -0.000	27.200, -0.001	27.200, 0.001	27.200, 0.000
138	27.400, 0.001	27.400, -0.000	27.400, -0.000	27.400, -0.000	27.400, 0.000	27.400, -0.001	27.400, 0.000	27.400, -0.001	27.400, -0.001	27.400, -0.001	27.400, -0.000	27.400, -0.000	27.400, -0.001	27.400, 0.001	27.400, 0.001
139	27.600, 0.001	27.600, -0.000	27.600, -0.000	27.600, -0.000	27.600, 0.000	27.600, -0.001	27.600, 0.000	27.600, -0.001	27.600, -0.001	27.600, -0.001	27.600, -0.000	27.600, 0.000	27.600, -0.001	27.600, 0.000	27.600, 0.000
140	27.800, 0.001	27.800, -0.000	27.800, -0.000	27.800, -0.000	27.800, 0.000	27.800, -0.000	27.800, -0.000	27.800, -0.000	27.800, -0.001	27.800, -0.001	27.800, -0.000	27.800, 0.000	27.800, -0.000	27.800, 0.000	27.800, 0.000
141	28.000, 0.001	28.000, -0.000	28.000, 0.000	28.000, -0.000	28.000, 0.000	28.000, 0.000	28.000, -0.000	28.000, 0.000	28.000, -0.001	28.000, -0.001	28.000, -0.000	28.000, 0.000	28.000, -0.000	28.000, 0.000	28.000, 0.000
142	28.200, 0.001	28.200, -0.000	28.200, 0.000	28.200, 0.000	28.200, 0.000	28.200, 0.000	28.200, -0.000	28.200, 0.000	28.200, -0.000	28.200, -0.000	28.200, 0.000	28.200, 0.000	28.200, 0.000	28.200, 0.000	28.200, 0.000
143	28.400, 0.000	28.400, -0.000	28.400, 0.000	28.400, 0.000	28.400, -0.000	28.400, 0.000	28.400, -0.000	28.400, 0.000	28.400, -0.000	28.400, -0.000	28.400, 0.000	28.400, 0.000	28.400, 0.000	28.400, -0.000	28.400, 0.000
144	28.600, 0.000	28.600, -0.000	28.600, 0.000	28.600, 0.000	28.600, -0.000	28.600, 0.001	28.600, -0.000	28.600, 0.001	28.600, 0.000	28.600, -0.000	28.600, 0.000	28.600, -0.000	28.600, 0.001	28.600, -0.000	28.600, 0.000
145	28.800, -0.000	28.800, -0.000	28.800, 0.000	28.800, 0.000	28.800, -0.000	28.800, 0.001	28.800, -0.000	28.800, 0.001	28.800, 0.001	28.800, 0.000	28.800, 0.000	28.800, 0.000	28.800, 0.001	28.800, -0.000	28.800, -0.000
146	29.000, -0.000	29.000, -0.000	29.000, 0.000	29.000, 0.000	29.000, -0.000	29.000, 0.000	29.000, -0.000	29.000, 0.001	29.000, 0.001	29.000, 0.001	29.000, 0.000	29.000, 0.000	29.000, 0.001	29.000, -0.000	29.000, -0.000
147	29.200, -0.001	29.200, -0.000	29.200, 0.000	29.200, 0.000	29.200, -0.000	29.200, 0.000	29.200, 0.000	29.200, 0.001	29.200, 0.001	29.200, 0.001	29.200, 0.000	29.200, 0.000	29.200, 0.001	29.200, -0.000	29.200, -0.001
148	29.400, -0.001	29.400, 0.000	29.400, 0.000	29.400, 0.000	29.400, -0.000	29.400, 0.000	29.400, -0.000	29.400, 0.000	29.400, 0.001	29.400, 0.001	29.400, 0.000	29.400, 0.000	29.400, 0.001	29.400, -0.000	29.400, -0.001
149	29.600, -0.001	29.600, 0.001	29.600, 0.000	29.600, 0.000	29.600, -0.000	29.600, 0.000	29.600, -0.000	29.600, 0.000	29.600, 0.001	29.600, 0.001	29.600, -0.000	29.600, -0.000	29.600, 0.000	29.600, -0.000	29.600, -0.001
150	29.800, -0.001	29.800, 0.001	29.800, 0.000	29.800, 0.000	29.800, -0.000	29.800, 0.000	29.800, -0.000	29.800, 0.000	29.800, 0.001	29.800, 0.001	29.800, -0.000	29.800, -0.000	29.800, 0.000	29.800, -0.001	29.800, -0.001
151	30.000, 0.000	30.000, 0.000	30.000, 0.000	30.000, 0.000	30.000, 0.000	30.000, 0.000	30.000, 0.000	30.000, 0.000	30.000, 0.000	30.000, 0.000	30.000, 0.000	30.000, 0.000	30.000, 0.000	30.000, 0.000	30.000, 0.000
152	30.200, -0.008	30.200, -0.010	30.200, -0.010	30.200, -0.013	30.200, -0.012	30.200, -0.008	30.200, -0.008	30.200, -0.010	30.200, -0.010	30.200, -0.010	30.200, -0.006	30.200, -0.007	30.200, -0.010	30.200, -0.011	30.200, -0.010
153	30.400, -0.015	30.400, -0.020	30.400, -0.018	30.400, -0.025	30.400, -0.024	30.400, -0.014	30.400, -0.017	30.400, -0.018	30.400, -0.020	30.400, -0.018	30.400, -0.011	30.400, -0.012	30.400, -0.021	30.400, -0.021	30.400, -0.021
154	30.600, -0.020	30.600, -0.031	30.600, -0.024	30.600, -0.036	30.600, -0.034	30.600, -0.018	30.600, -0.026	30.600, -0.025	30.600, -0.029	30.600, -0.025	30.600, -0.013	30.600, -0.015	30.600, -0.030	30.600, -0.028	30.600, -0.033
155	30.800, -0.021	30.800, -0.040	30.800, -0.027	30.800, -0.044	30.800, -0.042	30.800, -0.019	30.800, -0.035	30.800, -0.029	30.800, -0.036	30.800, -0.028	30.800, -0.012	30.800, -0.014	30.800, -0.038	30.800, -0.033	30.800, -0.044
156	31.000, -0.018	31.000, -0.050	31.000, -0.026	31.000, -0.050	31.000, -0.047	31.000, -0.016	31.000, -0.043	31.000, -0.029	31.000, -0.041	31.000, -0.028	31.000, -0.007	31.000, -0.009	31.000, -0.043	31.000, -0.034	31.000, -0.055
157	31.200, -0.010	31.200, -0.057	31.200, -0.020	31.200, -0.051	31.200, -0.047	31.200, -0.008	31.200, -0.051	31.200, -0.024	31.200, -0.042	31.200, -0.024	31.200, 0.002	31.200, 0.001	31.200, -0.045	31.200, -0.029	31.200, -0.064
158	31.400, 0.004	31.400, -0.062	31.400, -0.008	31.400, -0.047	31.400, -0.042	31.400, 0.004	31.400, -0.057	31.400, -0.014	31.400, -0.039	31.400, -0.014	31.400, 0.018	31.400, 0.018	31.400, -0.043	31.400, -0.019	31.400, -0.072
159	31.600, 0.025	31.600, -0.065	31.600, 0.010	31.600, -0.037	31.600, -0.031	31.600, 0.023	31.600, -0.061	31.600, 0.003	31.600, -0.031	31.600, 0.002	31.600, 0.039	31.600, 0.040	31.600, -0.036	31.600, -0.003	31.600, -0.078
160	31.800, 0.052	31.800, -0.064	31.800, 0.036	31.800, -0.020	31.800, -0.012	31.800, 0.049	31.800, -0.064	31.800, 0.026	31.800, -0.018	31.800, 0.025	31.800, 0.067	31.800, 0.070	31.800, -0.024	31.800, 0.021	31.800, -0.080
161	32.000, 0.086	32.000, -0.060	32.000, 0.068	32.000, 0.003	32.000, 0.014	32.000, 0.081	32.000, -0.063	32.000, 0.055	32.000, 0.002	32.000, 0.054	32.000, 0.100	32.000, 0.106	32.000, -0.005	32.000, 0.052	32.000, -0.080
162	32.200, 0.127	32.200, -0.052	32.200, 0.108	32.200, 0.034	32.200, 0.048	32.200, 0.119	32.200, -0.060	32.200, 0.093	32.200, 0.027	32.200, 0.091	32.200, 0.141	32.200, 0.149	32.200, 0.019	32.200, 0.090	32.200, -0.075
163	32.400, 0.172	32.400, -0.042	32.400, 0.152	32.400, 0.069	32.400, 0.088	32.400, 0.163	32.400, -0.055	32.400, 0.134	32.400, 0.057	32.400, 0.133	32.400, 0.185	32.400, 0.196	32.400, 0.048	32.400, 0.133	32.400, -0.069
164	32.600, 0.221	32.600, -0.030	32.600, 0.200	32.600, 0.107	32.600, 0.132	32.600, 0.210	32.600, -0.048	32.600, 0.179	32.600, 0.091	32.600, 0.179	32.600, 0.232	32.600, 0.245	32.600, 0.080	32.600, 0.180	32.600, -0.061
165	32.800, 0.274	32.800, -0.016	32.800, 0.251	32.800, 0.150	32.800, 0.180	32.800, 0.261	32.800, -0.040	32.800, 0.227	32.800, 0.128	32.800, 0.228	32.800, 0.283	32.800, 0.297	32.800, 0.116	32.800, 0.230	32.800, -0.052
166	33.000, 0.329	33.000, -0.000	33.000, 0.305	33.000, 0.195	33.000, 0.232	33.000, 0.315	33.000, -0.031	33.000, 0.278	33.000, 0.168	33.000, 0.281	33.000, 0.335	33.000, 0.352	33.000, 0.154	33.000, 0.283	33.000, -0.040
167	33.200, 0.386	33.200, 0.017	33.200, 0.360	33.200, 0.242	33.200, 0.286	33.200, 0.371	33.200, -0.020	33.200, 0.331	33.200, 0.210	33.200, 0.335	33.200, 0.389	33.200, 0.408	33.200, 0.195	33.200, 0.337	33.200, -0.028
168	33.400, 0.445	33.400, 0.035	33.400, 0.416	33.400, 0.290	33.400, 0.342	33.400, 0.427	33.400, -0.009	33.400, 0.384	33.400, 0.253	33.400, 0.390	33.400, 0.443	33.400, 0.464	33.400, 0.236	33.400, 0.392	33.400, -0.014
169	33.600, 0.504	33.600, 0.053	33.600, 0.472	33.600, 0.340	33.600, 0.399	33.600, 0.485	33.600, 0.002	33.600, 0.438	33.600, 0.298	33.600, 0.445	33.600, 0.498	33.600, 0.519	33.600, 0.280	33.600, 0.447	33.600, 0.000
170	33.800, 0.563	33.800, 0.073	33.800, 0.529	33.800, 0.390	33.800, 0.456	33.800, 0.542	33.800, 0.015	33.800, 0.492	33.800, 0.344	33.800, 0.501	33.800, 0.552	33.800, 0.574	33.800, 0.324	33.800, 0.502	33.800, 0.016
171	34.000, 0.623	34.000, 0.093	34.000, 0.584	34.000, 0.441	34.000, 0.514	34.000, 0.598	34.000, 0.028	34.000, 0.545	34.000, 0.391	34.000, 0.556	34.000, 0.604	34.000, 0.628	34.000, 0.369	34.000, 0.555	34.000, 0.032
172	34.200, 0.681	34.200, 0.114	34.200, 0.640	34.200, 0.491	34.200, 0.570	34.200, 0.654	34.200, 0.042	34.200, 0.598	34.200, 0.439	34.200, 0.610	34.200, 0.656	34.200, 0.681	34.200, 0.413	34.200, 0.607	34.200, 0.049
173	34.400, 0.739	34.400, 0.135	34.400, 0.693	34.400, 0.541	34.400, 0.626	34.400, 0.708	34.400, 0.056	34.400, 0.648	34.400, 0.486	34.400, 0.664	34.400, 0.706	34.400, 0.731	34.400, 0.458	34.400, 0.657	34.400, 0.066
174	34.600, 0.795	34.600, 0.157	34.600, 0.745	34.600, 0.590	34.600, 0.680	34.600, 0.760	34.600, 0.071	34.600, 0.697	34.600, 0.533	34.600, 0.715	34.600, 0.753	34.600, 0.778	34.600, 0.503	34.600, 0.705	34.600, 0.084
175	34.800, 0.849	34.800, 0.180	34.800, 0.795	34.800, 0.638	34.800, 0.732	34.800, 0.810	34.800, 0.087	34.800, 0.743	34.800, 0.580	34.800, 0.764	34.800, 0.797	34.800, 0.821	34.800, 0.546	34.800, 0.750	34.800, 0.102
176	35.000, 0.900	35.000, 0.203	35.000, 0.841	35.000, 0.683	35.000, 0.781	35.000, 0.857	35.000, 0.102	35.000, 0.787	35.000, 0.625	35.000, 0.810	35.000, 0.839	35.000, 0.862	35.000, 0.588	35.000, 0.792	35.000, 0.121
177	35.200, 0.949	35.200, 0.226	35.200, 0.885	35.200, 0.727	35.200, 0.828	35.200, 0.900	35.200, 0.118	35.200, 0.828	35.200, 0.669	35.200, 0.853	35.200, 0.877	35.200, 0.899	35.200, 0.629	35.200, 0.830	35.200, 0.140
178	35.400, 0.994	35.400, 0.250	35.400, 0.925	35.400, 0.768	35.400, 0.872	35.400, 0.941	35.400, 0.135	35.400, 0.865	35.400, 0.711	35.400, 0.893	35.400, 0.913	35.400, 0.932	35.400, 0.668	35.400, 0.865	35.400, 0.159
179	35.600, 1.036	35.600, 0.274	35.600, 0.962	35.600, 0.806	35.600, 0.913	35.600, 0.978	35.600, 0.151	35.600, 0.900	35.600, 0.750	35.600, 0.929	35.600, 0.945	35.600, 0.962	35.600, 0.705	35.600, 0.896	35.600, 0.178
180	35.800, 1.074	35.800, 0.298	35.800, 0.995	35.800, 0.841	35.800, 0.950	35.800, 1.011	35.800, 0.168	35.800, 0.930	35.800, 0.788	35.800, 0.962	35.800, 0.973	35.800, 0.989	35.800, 0.739	35.800, 0.924	35.800, 0.198
181	36.000, 1.108	36.000, 0.323	36.000, 1.025	36.000, 0.873	36.000, 0.983	36.000, 1.041	36.000, 0.185	36.000, 0.958	36.000, 0.823	36.000, 0.992	36.000, 0.999	36.000, 1.012	36.000, 0.771	36.000, 0.949	36.000, 0.217
182	36.200, 1.139	36.200, 0.347	36.200, 1.052	36.200, 0.901	36.200, 1.014	36.200, 1.067	36.200, 0.202	36.200, 0.982	36.200, 0.855	36.200, 1.019	36.200, 1.021	36.200, 1.033	36.200, 0.801	36.200, 0.971	36.200, 0.236
183	36.400, 1.166	36.400, 0.371	36.400, 1.076	36.400, 0.927	36.400, 1.041	36.400, 1.091	36.400, 0.219	36.400, 1.004	36.400, 0.885	36.400, 1.043	36.400, 1.041	36.400, 1.051	36.400, 0.827	36.400, 0.989	36.400, 0.256
184	36.600, 1.190	36.600, 0.396	36.600, 1.096	36.600, 0.949	36.600, 1.064	36.600, 1.112	36.600, 0.236	36.600, 1.023	36.600, 0.912	36.600, 1.064	36.600, 1.058	36.600, 1.066	36.600, 0.851	36.600, 1.006	36.600, 0.275
185	36.800, 1.212	36.800, 0.420	36.800, 1.114	36.800, 0.968	36.800, 1.085	36.800, 1.129	36.800, 0.254	36.800, 1.039	36.800, 0.936	36.800, 1.082	36.800, 1.074	36.800, 1.079	36.800, 0.872	36.800, 1.020	36.800, 0.294
186	37.000, 1.230	37.000, 0.445	37.000, 1.129	37.000, 0.985	37.000, 1.103	37.000, 1.144	37.000, 0.271	37.000, 1.053	37.000, 0.958	37.000, 1.098	37.000, 1.086	37.000, 1.091	37.000, 0.891	37.000, 1.032	37.000, 0.314
187	37.200, 1.246	37.200, 0.469	37.200, 1.142	37.200, 1.000	37.200, 1.118	37.200, 1.157	37.200, 0.288	37.200, 1.066	37.200, 0.977	37.200, 1.111	37.200, 1.098	37.200, 1.100	37.200, 0.907	37.200, 1.042	37.200, 0.333
188	37.400, 1.260	37.400, 0.493	37.400, 1.153	37.400, 1.012	37.400, 1.132	37.400, 1.169	37.400, 0.305	37.400, 1.077	37.400, 0.994	37.400, 1.122	37.400, 1.108	37.400, 1.109	37.400, 0.922	37.400, 1.052	37.400, 0.352
189	37.600, 1.273	37.600, 0.517	37.600, 1.162	37.600, 1.023	37.600, 1.143	37.600, 1.178	37.600, 0.322	37.600, 1.086	37.600, 1.009	37.600, 1.132	37.600, 1.116	37.600, 1.116	37.600, 0.935	37.600, 1.059	37.600, 0.371
190	37.800, 1.284	37.800, 0.540	37.800, 1.171	37.800, 1.032	37.800, 1.153	37.800, 1.187	37.800, 0.339	37.800, 1.094	37.800, 1.021	37.800, 1.141	37.800, 1.123	37.800, 1.123	37.800, 0.946	37.800, 1.066	37.800, 0.389
191	38.000, 1.293	38.000, 0.563	38.000, 1.179	38.000, 1.040	38.000, 1.162	38.000, 1.194	38.000, 0.356	38.000, 1.102	38.000, 1.033	38.000, 1.149	38.000, 1.130	38.000, 1.129	38.000, 0.956	38.000, 1.072	38.000, 0.408
192	38.200, 1.302	38.200, 0.586	38.200, 1.185	38.200, 1.047	38.200, 1.169	38.200, 1.201	38.200, 0.374	38.200, 1.108	38.200, 1.042	38.200, 1.156	38.200, 1.136	38.200, 1.135	38.200, 0.964	38.200, 1.078	38.200, 0.427
193	38.400, 1.310	38.400, 0.608	38.400, 1.191	38.400, 1.053	38.400, 1.176	38.400, 1.207	38.400, 0.391	38.400, 1.114	38.400, 1.051	38.400, 1.162	38.400, 1.141	38.400, 1.140	38.400, 0.972	38.400, 1.083	38.400, 0.446
194	38.600, 1.317	38.600, 0.631	38.600, 1.197	38.600, 1.058	38.600, 1.182	38.600, 1.213	38.600, 0.408	38.600, 1.120	38.600, 1.058	38.600, 1.168	38.600, 1.146	38.600, 1.145	38.600, 0.979	38.600, 1.087	38.600, 0.464
195	38.800, 1.323	38.800, 0.653	38.800, 1.202	38.800, 1.063	38.800, 1.187	38.800, 1.218	38.800, 0.425	38.800, 1.124	38.800, 1.065	38.800, 1.173	38.800, 1.151	38.800, 1.149	38.800, 0.985	38.800, 1.091	38.800, 0.482
196	39.000, 1.329	39.000, 0.675	39.000, 1.207	39.000, 1.067	39.000, 1.192	39.000, 1.222	39.000, 0.442	39.000, 1.128	39.000, 1.070	39.000, 1.177	39.000, 1.155	39.000, 1.153	39.000, 0.990	39.000, 1.095	39.000, 0.501
197	39.200, 1.334	39.200, 0.696	39.200, 1.211	39.200, 1.071	39.200, 1.197	39.200, 1.227	39.200, 0.459	39.200, 1.132	39.200, 1.075	39.200, 1.182	39.200, 1.159	39.200, 1.156	39.200, 0.995	39.200, 1.098	39.200, 0.518
198	39.400, 1.339	39.400, 0.718	39.400, 1.215	39.400, 1.075	39.400, 1.201	39.400, 1.231	39.400, 0.476	39.400, 1.135	39.400, 1.079	39.400, 1.185	39.400, 1.163	39.400, 1.160	39.400, 0.999	39.400, 1.101	39.400, 0.536
199	39.600, 1.344	39.600, 0.739	39.600, 1.219	39.600, 1.079	39.600, 1.205	39.600, 1.235	39.600, 0.493	39.600, 1.138	39.600, 1.083	39.600, 1.189	39.600, 1.166	39.600, 1.163	39.600, 1.002	39.600, 1.103	39.600, 0.553
200	39.800, 1.348	39.800, 0.760	39.800, 1.222	39.800, 1.082	39.800, 1.209	39.800, 1.238	39.800, 0.509	39.800, 1.141	39.800, 1.087	39.800, 1.192	39.800, 1.169	39.800, 1.166	39.800, 1.006	39.800, 1.106	39.800, 0.570
201	40.000, 1.351	40.000, 0.780	40.000, 1.225	40.000, 1.085	40.000, 1.213	40.000, 1.242	40.000, 0.525	40.000, 1.143	40.000, 1.090	40.000, 1.195	40.000, 1.173	40.000, 1.169	40.000, 1.009	40.000, 1.108	40.000, 0.587
202	40.200, 1.355	40.200, 0.800	40.200, 1.228	40.200, 1.087	40.200, 1.216	40.200, 1.245	40.200, 0.542	40.200, 1.146	40.200, 1.094	40.200, 1.198	40.200, 1.175	40.200, 1.172	40.200, 1.012	40.200, 1.110	40.200, 0.604
203	40.400, 1.358	40.400, 0.820	40.400, 1.231	40.400, 1.090	40.400, 1.219	40.400, 1.248	40.400, 0.558	40.400, 1.148	40.400, 1.097	40.400, 1.200	40.400, 1.178	40.400, 1.174	40.400, 1.014	40.400, 1.112	40.400, 0.620
204	40.600, 1.361	40.600, 0.839	40.600, 1.233	40.600, 1.092	40.600, 1.222	40.600, 1.250	40.600, 0.574	40.600, 1.150	40.600, 1.100	40.600, 1.203	40.600, 1.181	40.600, 1.177	40.600, 1.017	40.600, 1.113	40.600, 0.636
205	40.800, 1.364	40.800, 0.859	40.800, 1.235	40.800, 1.094	40.800, 1.224	40.800, 1.252	40.800, 0.589	40.800, 1.153	40.800, 1.102	40.800, 1.205	40.800, 1.183	40.800, 1.178	40.800, 1.019	40.800, 1.115	40.800, 0.651
206	41.000, 1.367	41.000, 0.878	41.000, 1.237	41.000, 1.096	41.000, 1.227	41.000, 1.254	41.000, 0.605	41.000, 1.155	41.000, 1.105	41.000, 1.207	41.000, 1.185	41.000, 1.180	41.000, 1.021	41.000, 1.116	41.000, 0.667
207	41.200, 1.369	41.200, 0.896	41.200, 1.239	41.200, 1.098	41.200, 1.229	41.200, 1.256	41.200, 0.620	41.200, 1.157	41.200, 1.107	41.200, 1.209	41.200, 1.186	41.200, 1.182	41.200, 1.023	41.200, 1.117	41.200, 0.682
208	41.400, 1.371	41.400, 0.915	41.400, 1.240	41.400, 1.099	41.400, 1.231	41.400, 1.258	41.400, 0.635	41.400, 1.159	41.400, 1.110	41.400, 1.210	41.400, 1.188	41.400, 1.184	41.400, 1.025	41.400, 1.118	41.400, 0.696
209	41.600, 1.373	41.600, 0.933	41.600, 1.242	41.600, 1.101	41.600, 1.233	41.600, 1.260	41.600, 0.650	41.600, 1.161	41.600, 1.112	41.600, 1.211	41.600, 1.189	41.600, 1.185	41.600, 1.027	41.600, 1.120	41.600, 0.711
210	41.800, 1.375	41.800, 0.950	41.800, 1.243	41.800, 1.102	41.800, 1.234	41.800, 1.262	41.800, 0.665	41.800, 1.162	41.800, 1.114	41.800, 1.213	41.800, 1.191	41.800, 1.186	41.800, 1.028	41.800, 1.121	41.800, 0.725
211	42.000, 1.377	42.000, 0.967	42.000, 1.244	42.000, 1.103	42.000, 1.235	42.000, 1.263	42.000, 0.679	42.000, 1.163	42.000, 1.116	42.000, 1.214	42.000, 1.192	42.000, 1.187	42.000, 1.030	42.000, 1.122	42.000, 0.739
212	42.200, 1.378	42.200, 0.984	42.200, 1.245	42.200, 1.104	42.200, 1.236	42.200, 1.265	42.200, 0.694	42.200, 1.164	42.200, 1.118	42.200, 1.216	42.200, 1.193	42.200, 1.189	42.200, 1.031	42.200, 1.123	42.200, 0.753
213	42.400, 1.380	42.400, 1.001	42.400, 1.246	42.400, 1.105	42.400, 1.238	42.400, 1.266	42.400, 0.708	42.400, 1.165	42.400, 1.120	42.400, 1.217	42.400, 1.194	42.400, 1.190	42.400, 1.032	42.400, 1.124	42.400, 0.767
214	42.600, 1.381	42.600, 1.017	42.600, 1.247	42.600, 1.105	42.600, 1.239	42.600, 1.268	42.600, 0.722	42.600, 1.166	42.600, 1.121	42.600, 1.218	42.600, 1.196	42.600, 1.190	42.600, 1.034	42.600, 1.124	42.600, 0.780
215	42.800, 1.383	42.800, 1.033	42.800, 1.249	42.800, 1.106	42.800, 1.240	42.800, 1.269	42.800, 0.736	42.800, 1.167	42.800, 1.123	42.800, 1.220	42.800, 1.196	42.800, 1.191	42.800, 1.035	42.800, 1.125	42.800, 0.793
216	43.000, 1.384	43.000, 1.049	43.000, 1.250	43.000, 1.106	43.000, 1.241	43.000, 1.270	43.000, 0.749	43.000, 1.168	43.000, 1.124	43.000, 1.221	43.000, 1.197	43.000, 1.191	43.000, 1.036	43.000, 1.126	43.000, 0.806
217	43.200, 1.386	43.200, 1.064	43.200, 1.251	43.200, 1.107	43.200, 1.242	43.200, 1.272	43.200, 0.763	43.200, 1.169	43.200, 1.125	43.200, 1.222	43.200, 1.198	43.200, 1.192	43.200, 1.037	43.200, 1.126	43.200, 0.819
218	43.400, 1.387	43.400, 1.079	43.400, 1.252	43.400, 1.107	43.400, 1.244	43.400, 1.273	43.400, 0.777	43.400, 1.169	43.400, 1.126	43.400, 1.223	43.400, 1.199	43.400, 1.192	43.400, 1.038	43.400, 1.127	43.400, 0.831
219	43.600, 1.388	43.600, 1.094	43.600, 1.253	43.600, 1.107	43.600, 1.245	43.600, 1.274	43.600, 0.790	43.600, 1.170	43.600, 1.127	43.600, 1.224	43.600, 1.200	43.600, 1.192	43.600, 1.039	43.600, 1.128	43.600, 0.843
220	43.800, 1.389	43.800, 1.108	43.800, 1.254	43.800, 1.107	43.800, 1.246	43.800, 1.276	43.800, 0.804	43.800, 1.170	43.800, 1.128	43.800, 1.225	43.800, 1.201	43.800, 1.193	43.800, 1.039	43.800, 1.129	43.800, 0.855
221	44.000, 1.390	44.000, 1.122	44.000, 1.255	44.000, 1.108	44.000, 1.248	44.000, 1.277	44.000, 0.817	44.000, 1.171	44.000, 1.129	44.000, 1.225	44.000, 1.202	44.000, 1.193	44.000, 1.040	44.000, 1.129	44.000, 0.867
222	44.200, 1.390	44.200, 1.136	44.200, 1.255	44.200, 1.108	44.200, 1.249	44.200, 1.278	44.200, 0.830	44.200, 1.172	44.200, 1.130	44.200, 1.226	44.200, 1.203	44.200, 1.194	44.200, 1.041	44.200, 1.130	44.200, 0.879
223	44.400, 1.391	44.400, 1.150	44.400, 1.256	44.400, 1.108	44.400, 1.251	44.400, 1.279	44.400, 0.843	44.400, 1.172	44.400, 1.130	44.400, 1.226	44.400, 1.204	44.400, 1.195	44.400, 1.042	44.400, 1.131	44.400, 0.890
224	44.600, 1.392	44.600, 1.163	44.600, 1.257	44.600, 1.109	44.600, 1.252	44.600, 1.279	44.600, 0.856	44.600, 1.173	44.600, 1.131	44.600, 1.226	44.600, 1.205	44.600, 1.196	44.600, 1.043	44.600, 1.131	44.600, 0.901
225	44.800, 1.393	44.800, 1.176	44.800, 1.258	44.800, 1.109	44.800, 1.253	44.800, 1.280	44.800, 0.869	44.800, 1.174	44.800, 1.132	44.800, 1.226	44.800, 1.206	44.800, 1.198	44.800, 1.044	44.800, 1.132	44.800, 0.912
226	45.000, 1.394	45.000, 1.189	45.000, 1.259	45.000, 1.109	45.000, 1.254	45.000, 1.281	45.000, 0.881	45.000, 1.174	45.000, 1.132	45.000, 1.226	45.000, 1.207	45.000, 1.199	45.000, 1.044	45.000, 1.132	45.000, 0.923
227	45.200, 1.395	45.200, 1.202	45.200, 1.260	45.200, 1.110	45.200, 1.254	45.200, 1.282	45.200, 0.893	45.200, 1.175	45.200, 1.133	45.200, 1.226	45.200, 1.208	45.200, 1.200	45.200, 1.045	45.200, 1.133	45.200, 0.934
228	45.400, 1.395	45.400, 1.214	45.400, 1.261	45.400, 1.110	45.400, 1.255	45.400, 1.283	45.400, 0.905	45.400, 1.175	45.400, 1.133	45.400, 1.227	45.400, 1.209	45.400, 1.201	45.400, 1.045	45.400, 1.134	45.400, 0.944
229	45.600, 1.396	45.600, 1.226	45.600, 1.261	45.600, 1.111	45.600, 1.255	45.600, 1.284	45.600, 0.917	45.600, 1.176	45.600, 1.134	45.600, 1.227	45.600, 1.210	45.600, 1.202	45.600, 1.045	45.600, 1.134	45.600, 0.955
230	45.800, 1.397	45.800, 1.237	45.800, 1.262	45.800, 1.112	45.800, 1.255	45.800, 1.285	45.800, 0.929	45.800, 1.176	45.800, 1.134	45.800, 1.227	45.800, 1.210	45.800, 1.203	45.800, 1.045	45.800, 1.135	45.800, 0.965
231	46.000, 1.398	46.000, 1.249	46.000, 1.262	46.000, 1.113	46.000, 1.256	46.000, 1.285	46.000, 0.941	46.000, 1.177	46.000, 1.135	46.000, 1.228	46.000, 1.211	46.000, 1.204	46.000, 1.045	46.000, 1.135	46.000, 0.975
232	46.200, 1.399	46.200, 1.260	46.200, 1.262	46.200, 1.113	46.200, 1.256	46.200, 1.286	46.200, 0.952	46.200, 1.178	46.200, 1.136	46.200, 1.228	46.200, 1.212	46.200, 1.205	46.200, 1.045	46.200, 1.135	46.200, 0.984
233	46.400, 1.400	46.400, 1.272	46.400, 1.262	46.400, 1.114	46.400, 1.256	46.400, 1.286	46.400, 0.964	46.400, 1.179	46.400, 1.136	46.400, 1.228	46.400, 1.212	46.400, 1.206	46.400, 1.045	46.400, 1.135	46.400, 0.994
234	46.600, 1.401	46.600, 1.283	46.600, 1.262	46.600, 1.114	46.600, 1.257	46.600, 1.287	46.600, 0.975	46.600, 1.180	46.600, 1.137	46.600, 1.229	46.600, 1.212	46.600, 1.206	46.600, 1.045	46.600, 1.136	46.600, 1.003
235	46.800, 1.403	46.800, 1.293	46.800, 1.263	46.800, 1.114	46.800, 1.257	46.800, 1.287	46.800, 0.986	46.800, 1.181	46.800, 1.137	46.800, 1.230	46.800, 1.213	46.800, 1.206	46.800, 1.045	46.800, 1.136	46.800, 1.012
236	47.000, 1.404	47.000, 1.304	47.000, 1.263	47.000, 1.114	47.000, 1.257	47.000, 1.288	47.000, 0.997	47.000, 1.181	47.000, 1.137	47.000, 1.230	47.000, 1.213	47.000, 1.206	47.000, 1.045	47.000, 1.137	47.000, 1.021
237	47.200, 1.405	47.200, 1.315	47.200, 1.263	47.200, 1.115	47.200, 1.258	47.200, 1.288	47.200, 1.007	47.200, 1.182	47.200, 1.138	47.200, 1.231	47.200, 1.213	47.200, 1.205	47.200, 1.045	47.200, 1.137	47.200, 1.029
238	47.400, 1.406	47.400, 1.325	47.400, 1.263	47.400, 1.115	47.400, 1.258	47.400, 1.289	47.400, 1.017	47.400, 1.182	47.400, 1.138	47.400, 1.231	47.400, 1.214	47.400, 1.205	47.400, 1.046	47.400, 1.137	47.400, 1.038
239	47.600, 1.407	47.600, 1.335	47.600, 1.264	47.600, 1.115	47.600, 1.259	47.600, 1.289	47.600, 1.028	47.600, 1.183	47.600, 1.139	47.600, 1.232	47.600, 1.214	47.600, 1.206	47.600, 1.046	47.600, 1.137	47.600, 1.046
240	47.800, 1.408	47.800, 1.345	47.800, 1.264	47.800, 1.116	47.800, 1.260	47.800, 1.289	47.800, 1.038	47.800, 1.183	47.800, 1.139	47.800, 1.233	47.800, 1.215	47.800, 1.206	47.800, 1.046	47.800, 1.137	47.800, 1.055
241	48.000, 1.408	48.000, 1.355	48.000, 1.264	48.000, 1.116	48.000, 1.260	48.000, 1.290	48.000, 1.047	48.000, 1.184	48.000, 1.140	48.000, 1.233	48.000, 1.215	48.000, 1.206	48.000, 1.046	48.000, 1.137	48.000, 1.063
242	48.200, 1.409	48.200, 1.364	48.200, 1.264	48.200, 1.116	48.200, 1.261	48.200, 1.290	48.200, 1.057	48.200, 1.185	48.200, 1.140	48.200, 1.233	48.200, 1.216	48.200, 1.207	48.200, 1.047	48.200, 1.137	48.200, 1.072
243	48.400, 1.409	48.400, 1.373	48.400, 1.265	48.400, 1.117	48.400, 1.261	48.400, 1.291	48.400, 1.067	48.400, 1.185	48.400, 1.140	48.400, 1.233	48.400, 1.216	48.400, 1.207	48.400, 1.047	48.400, 1.137	48.400, 1.080
244	48.600, 1.410	48.600, 1.382	48.600, 1.265	48.600, 1.117	48.600, 1.262	48.600, 1.291	48.600, 1.076	48.600, 1.186	48.600, 1.140	48.600, 1.233	48.600, 1.217	48.600, 1.208	48.600, 1.048	48.600, 1.136	48.600, 1.088
245	48.800, 1.410	48.800, 1.391	48.800, 1.265	48.800, 1.117	48.800, 1.262	48.800, 1.292	48.800, 1.086	48.800, 1.186	48.800, 1.140	48.800, 1.233	48.800, 1.217	48.800, 1.208	48.800, 1.048	48.800, 1.136	48.800, 1.096
246	49.000, 1.410	49.000, 1.400	49.000, 1.266	49.000, 1.117	49.000, 1.262	49.000, 1.293	49.000, 1.095	49.000, 1.187	49.000, 1.139	49.000, 1.233	49.000, 1.218	49.000, 1.209	49.000, 1.049	49.000, 1.136	49.000, 1.103
247	49.200, 1.410	49.200, 1.409	49.200, 1.266	49.200, 1.118	49.200, 1.263	49.200, 1.293	49.200, 1.104	49.200, 1.187	49.200, 1.139	49.200, 1.233	49.200, 1.218	49.200, 1.209	49.200, 1.049	49.200, 1.137	49.200, 1.111
248	49.400, 1.410	49.400, 1.417	49.400, 1.267	49.400, 1.118	49.400, 1.263	49.400, 1.294	49.400, 1.113	49.400, 1.188	49.400, 1.139	49.400, 1.234	49.400, 1.219	49.400, 1.209	49.400, 1.049	49.400, 1.137	49.400, 1.118
249	49.600, 1.410	49.600, 1.426	49.600, 1.268	49.600, 1.118	49.600, 1.263	49.600, 1.295	49.600, 1.123	49.600, 1.188	49.600, 1.139	49.600, 1.234	49.600, 1.220	49.600, 1.210	49.600, 1.049	49.600, 1.137	49.600, 1.125
250	49.800, 1.410	49.800, 1.434	49.800, 1.268	49.800, 1.119	49.800, 1.264	49.800, 1.296	49.800, 1.132	49.800, 1.188	49.800, 1.140	49.800, 1.234	49.800, 1.220	49.800, 1.210	49.800, 1.048	49.800, 1.137	49.800, 1.132
251	50.000, 1.411	50.000, 1.442	50.000, 1.268	50.000, 1.119	50.000, 1.264	50.000, 1.296	50.000, 1.141	50.000, 1.188	50.000, 1.140	50.000, 1.235	50.000, 1.221	50.000, 1.211	50.000, 1.048	50.000, 1.138	50.000, 1.139
252	50.200, 1.411	50.200, 1.450	50.200, 1.269	50.200, 1.119	50.200, 1.264	50.200, 1.297	50.200, 1.150	50.200, 1.188	50.200, 1.140	50.200, 1.235	50.200, 1.221	50.200, 1.211	50.200, 1.048	50.200, 1.138	50.200, 1.146
253	50.400, 1.412	50.400, 1.458	50.400, 1.269	50.400, 1.118	50.400, 1.265	50.400, 1.298	50.400, 1.160	50.400, 1.188	50.400, 1.141	50.400, 1.235	50.400, 1.221	50.400, 1.211	50.400, 1.048	50.400, 1.139	50.400, 1.152
254	50.600, 1.413	50.600, 1.466	50.600, 1.269	50.600, 1.118	50.600, 1.265	50.600, 1.299	50.600, 1.169	50.600, 1.189	50.600, 1.141	50.600, 1.236	50.600, 1.222	50.600, 1.211	50.600, 1.048	50.600, 1.139	50.600, 1.159
255	50.800, 1.414	50.800, 1.473	50.800, 1.270	50.800, 1.118	50.800, 1.265	50.800, 1.299	50.800, 1.177	50.800, 1.189	50.800, 1.142	50.800, 1.236	50.800, 1.222	50.800, 1.211	50.800, 1.048	50.800, 1.140	50.800, 1.166
256	51.000, 1.415	51.000, 1.481	51.000, 1.270	51.000, 1.118	51.000, 1.265	51.000, 1.299	51.000, 1.186	51.000, 1.189	51.000, 1.142	51.000, 1.237	51.000, 1.222	51.000, 1.211	51.000, 1.049	51.000, 1.140	51.000, 1.172
257	51.200, 1.416	51.200, 1.489	51.200, 1.270	51.200, 1.118	51.200, 1.265	51.200, 1.300	51.200, 1.194	51.200, 1.189	51.200, 1.143	51.200, 1.237	51.200, 1.223	51.200, 1.210	51.200, 1.049	51.200, 1.141	51.200, 1.179
258	51.400, 1.416	51.400, 1.496	51.400, 1.270	51.400, 1.118	51.400, 1.266	51.400, 1.300	51.400, 1.203	51.400, 1.190	51.400, 1.143	51.400, 1.238	51.400, 1.224	51.400, 1.210	51.400, 1.049	51.400, 1.141	51.400, 1.185
259	51.600, 1.417	51.600, 1.504	51.600, 1.270	51.600, 1.117	51.600, 1.266	51.600, 1.300	51.600, 1.211	51.600, 1.191	51.600, 1.144	51.600, 1.238	51.600, 1.224	51.600, 1.211	51.600, 1.049	51.600, 1.141	51.600, 1.192
260	51.800, 1.418	51.800, 1.511	51.800, 1.270	51.800, 1.117	51.800, 1.266	51.800, 1.300	51.800, 1.219	51.800, 1.192	51.800, 1.144	51.800, 1.238	51.800, 1.225	51.800, 1.211	51.800, 1.049	51.800, 1.141	51.800, 1.198
261	52.000, 1.418	52.000, 1.518	52.000, 1.270	52.000, 1.117	52.000, 1.267	52.000, 1.301	52.000, 1.227	52.000, 1.192	52.000, 1.144	52.000, 1.238	52.000, 1.226	52.000, 1.211	52.000, 1.050	52.000, 1.141	52.000, 1.205
262	52.200, 1.419	52.200, 1.525	52.200, 1.270	52.200, 1.117	52.200, 1.267	52.200, 1.302	52.200, 1.234	52.200, 1.193	52.200, 1.144	52.200, 1.238	52.200, 1.226	52.200, 1.212	52.200, 1.050	52.200, 1.141	52.200, 1.211
263	52.400, 1.419	52.400, 1.532	52.400, 1.270	52.400, 1.116	52.400, 1.267	52.400, 1.302	52.400, 1.242	52.400, 1.194	52.400, 1.145	52.400, 1.238	52.400, 1.227	52.400, 1.212	52.400, 1.050	52.400, 1.142	52.400, 1.217
264	52.600, 1.419	52.600, 1.539	52.600, 1.270	52.600, 1.116	52.600, 1.267	52.600, 1.303	52.600, 1.250	52.600, 1.194	52.600, 1.145	52.600, 1.239	52.600, 1.228	52.600, 1.212	52.600, 1.050	52.600, 1.142	52.600, 1.223
265	52.800, 1.419	52.800, 1.546	52.800, 1.270	52.800, 1.116	52.800, 1.267	52.800, 1.304	52.800, 1.257	52.800, 1.194	52.800, 1.145	52.800, 1.239	52.800, 1.228	52.800, 1.213	52.800, 1.050	52.800, 1.142	52.800, 1.229
266	53.000, 1.419	53.000, 1.552	53.000, 1.270	53.000, 1.115	53.000, 1.267	53.000, 1.305	53.000, 1.264	53.000, 1.194	53.000, 1.145	53.000, 1.239	53.000, 1.229	53.000, 1.213	53.000, 1.050	53.000, 1.143	53.000, 1.234
267	53.200, 1.419	53.200, 1.559	53.200, 1.270	53.200, 1.115	53.200, 1.267	53.200, 1.306	53.200, 1.271	53.200, 1.194	53.200, 1.145	53.200, 1.240	53.200, 1.229	53.200, 1.213	53.200, 1.050	53.200, 1.143	53.200, 1.240
268	53.400, 1.419	53.400, 1.565	53.400, 1.271	53.400, 1.115	53.400, 1.267	53.400, 1.306	53.400, 1.278	53.400, 1.194	53.400, 1.145	53.400, 1.240	53.400, 1.230	53.400, 1.213	53.400, 1.050	53.400, 1.143	53.400, 1.246
269	53.600, 1.419	53.600, 1.571	53.600, 1.270	53.600, 1.116	53.600, 1.267	53.600, 1.307	53.600, 1.286	53.600, 1.194	53.600, 1.146	53.600, 1.241	53.600, 1.230	53.600, 1.214	53.600, 1.050	53.600, 1.143	53.600, 1.251
270	53.800, 1.419	53.800, 1.577	53.800, 1.270	53.800, 1.116	53.800, 1.267	53.800, 1.307	53.800, 1.293	53.800, 1.194	53.800, 1.146	53.800, 1.241	53.800, 1.230	53.800, 1.214	53.800, 1.050	53.800, 1.143	53.800, 1.257
271	54.000, 1.419	54.000, 1.584	54.000, 1.270	54.000, 1.116	54.000, 1.267	54.000, 1.307	54.000, 1.300	54.000, 1.194	54.000, 1.146	54.000, 1.241	54.000, 1.230	54.000, 1.215	54.000, 1.050	54.000, 1.142	54.000, 1.262
272	54.200, 1.419	54.200, 1.589	54.200, 1.270	54.200, 1.116	54.200, 1.267	54.200, 1.308	54.200, 1.307	54.200, 1.194	54.200, 1.146	54.200, 1.242	54.200, 1.230	54.200, 1.215	54.200, 1.050	54.200, 1.142	54.200, 1.268
273	54.400, 1.420	54.400, 1.596	54.400, 1.271	54.400, 1.117	54.400, 1.268	54.400, 1.308	54.400, 1.314	54.400, 1.195	54.400, 1.147	54.400, 1.242	54.400, 1.230	54.400, 1.216	54.400, 1.050	54.400, 1.141	54.400, 1.274
274	54.600, 1.420	54.600, 1.602	54.600, 1.271	54.600, 1.117	54.600, 1.268	54.600, 1.308	54.600, 1.321	54.600, 1.195	54.600, 1.147	54.600, 1.243	54.600, 1.230	54.600, 1.216	54.600, 1.051	54.600, 1.141	54.600, 1.280
275	54.800, 1.421	54.800, 1.608	54.800, 1.271	54.800, 1.118	54.800, 1.268	54.800, 1.308	54.800, 1.328	54.800, 1.195	54.800, 1.147	54.800, 1.243	54.800, 1.230	54.800, 1.216	54.800, 1.051	54.800, 1.140	54.800, 1.286
276	55.000, 1.421	55.000, 1.614	55.000, 1.271	55.000, 1.118	55.000, 1.268	55.000, 1.309	55.000, 1.335	55.000, 1.196	55.000, 1.148	55.000, 1.243	55.000, 1.230	55.000, 1.216	55.000, 1.051	55.000, 1.140	55.000, 1.291
277	55.200, 1.422	55.200, 1.620	55.200, 1.272	55.200, 1.118	55.200, 1.269	55.200, 1.309	55.200, 1.342	55.200, 1.196	55.200, 1.148	55.200, 1.243	55.200, 1.231	55.200, 1.216	55.200, 1.051	55.200, 1.140	55.200, 1.297
278	55.400, 1.423	55.400, 1.626	55.400, 1.272	55.400, 1.119	55.400, 1.269	55.400, 1.309	55.400, 1.348	55.400, 1.197	55.400, 1.149	55.400, 1.243	55.400, 1.231	55.400, 1.216	55.400, 1.051	55.400, 1.140	55.400, 1.302
279	55.600, 1.424	55.600, 1.632	55.600, 1.273	55.600, 1.119	55.600, 1.270	55.600, 1.309	55.600, 1.355	55.600, 1.197	55.600, 1.149	55.600, 1.243	55.600, 1.232	55.600, 1.216	55.600, 1.051	55.600, 1.140	55.600, 1.307
280	55.800, 1.424	55.800, 1.638	55.800, 1.273	55.800, 1.119	55.800, 1.270	55.800, 1.310	55.800, 1.362	55.800, 1.197	55.800, 1.149	55.800, 1.243	55.800, 1.232	55.800, 1.216	55.800, 1.051	55.800, 1.140	55.800, 1.312
281	56.000, 1.425	56.000, 1.644	56.000, 1.274	56.000, 1.120	56.000, 1.270	56.000, 1.310	56.000, 1.368	56.000, 1.198	56.000, 1.150	56.000, 1.243	56.000, 1.233	56.000, 1.216	56.000, 1.051	56.000, 1.140	56.000, 1.316
282	56.200, 1.425	56.200, 1.650	56.200, 1.274	56.200, 1.120	56.200, 1.270	56.200, 1.311	56.200, 1.374	56.200, 1.198	56.200, 1.150	56.200, 1.243	56.200, 1.234	56.200, 1.216	56.200, 1.051	56.200, 1.141	56.200, 1.321
283	56.400, 1.425	56.400, 1.656	56.400, 1.274	56.400, 1.120	56.400, 1.271	56.400, 1.311	56.400, 1.380	56.400, 1.198	56.400, 1.150	56.400, 1.243	56.400, 1.235	56.400, 1.217	56.400, 1.051	56.400, 1.141	56.400, 1.325
284	56.600, 1.426	56.600, 1.661	56.600, 1.274	56.600, 1.120	56.600, 1.271	56.600, 1.312	56.600, 1.386	56.600, 1.199	56.600, 1.150	56.600, 1.243	56.600, 1.235	56.600, 1.217	56.600, 1.051	56.600, 1.142	56.600, 1.329
285	56.800, 1.426	56.800, 1.667	56.800, 1.275	56.800, 1.120	56.800, 1.271	56.800, 1.312	56.800, 1.391	56.800, 1.199	56.800, 1.150	56.800, 1.243	56.800, 1.236	56.800, 1.217	56.800, 1.051	56.800, 1.142	56.800, 1.333
286	57.000, 1.426	57.000, 1.672	57.000, 1.275	57.000, 1.120	57.000, 1.271	57.000, 1.313	57.000, 1.397	57.000, 1.199	57.000, 1.150	57.000, 1.243	57.000, 1.236	57.000, 1.217	57.000, 1.050	57.000, 1.142	57.000, 1.338
287	57.200, 1.426	57.200, 1.678	57.200, 1.275	57.200, 1.120	57.200, 1.271	57.200, 1.313	57.200, 1.402	57.200, 1.200	57.200, 1.150	57.200, 1.243	57.200, 1.237	57.200, 1.217	57.200, 1.050	57.200, 1.143	57.200, 1.342
288	57.400, 1.426	57.400, 1.683	57.400, 1.274	57.400, 1.121	57.400, 1.271	57.400, 1.314	57.400, 1.408	57.400, 1.200	57.400, 1.149	57.400, 1.243	57.400, 1.237	57.400, 1.217	57.400, 1.050	57.400, 1.143	57.400, 1.346
289	57.600, 1.427	57.600, 1.688	57.600, 1.274	57.600, 1.121	57.600, 1.271	57.600, 1.314	57.600, 1.413	57.600, 1.201	57.600, 1.149	57.600, 1.243	57.600, 1.237	57.600, 1.217	57.600, 1.050	57.600, 1.143	57.600, 1.350
290	57.800, 1.427	57.800, 1.693	57.800, 1.274	57.800, 1.121	57.800, 1.271	57.800, 1.315	57.800, 1.419	57.800, 1.201	57.800, 1.149	57.800, 1.244	57.800, 1.237	57.800, 1.217	57.800, 1.050	57.800, 1.143	57.800, 1.355
291	58.000, 1.427	58.000, 1.698	58.000, 1.274	58.000, 1.120	58.000, 1.272	58.000, 1.315	58.000, 1.425	58.000, 1.201	58.000, 1.149	58.000, 1.244	58.000, 1.237	58.000, 1.218	58.000, 1.050	58.000, 1.143	58.000, 1.359
292	58.200, 1.428	58.200, 1.702	58.200, 1.274	58.200, 1.120	58.200, 1.272	58.200, 1.316	58.200, 1.431	58.200, 1.201	58.200, 1.149	58.200, 1.244	58.200, 1.237	58.200, 1.218	58.200, 1.050	58.200, 1.143	58.200, 1.364
293	58.400, 1.428	58.400, 1.707	58.400, 1.274	58.400, 1.120	58.400, 1.272	58.400, 1.316	58.400, 1.437	58.400, 1.202	58.400, 1.150	58.400, 1.244	58.400, 1.237	58.400, 1.218	58.400, 1.050	58.400, 1.143	58.400, 1.368
294	58.600, 1.429	58.600, 1.712	58.600, 1.275	58.600, 1.119	58.600, 1.273	58.600, 1.317	58.600, 1.442	58.600, 1.202	58.600, 1.150	58.600, 1.244	58.600, 1.237	58.600, 1.219	58.600, 1.050	58.600, 1.143	58.600, 1.373
295	58.800, 1.429	58.800, 1.716	58.800, 1.275	58.800, 1.119	58.800, 1.273	58.800, 1.317	58.800, 1.448	58.800, 1.202	58.800, 1.150	58.800, 1.244	58.800, 1.237	58.800, 1.219	58.800, 1.050	58.800, 1.144	58.800, 1.378
296	59.000, 1.430	59.000, 1.721	59.000, 1.276	59.000, 1.119	59.000, 1.274	59.000, 1.317	59.000, 1.454	59.000, 1.202	59.000, 1.151	59.000, 1.244	59.000, 1.237	59.000, 1.220	59.000, 1.050	59.000, 1.144	59.000, 1.382
297	59.200, 1.431	59.200, 1.726	59.200, 1.276	59.200, 1.119	59.200, 1.274	59.200, 1.317	59.200, 1.460	59.200, 1.202	59.200, 1.151	59.200, 1.245	59.200, 1.237	59.200, 1.220	59.200, 1.050	59.200, 1.144	59.200, 1.387
298	59.400, 1.432	59.400, 1.730	59.400, 1.277	59.400, 1.119	59.400, 1.274	59.400, 1.318	59.400, 1.465	59.400, 1.202	59.400, 1.151	59.400, 1.245	59.400, 1.237	59.400, 1.220	59.400, 1.050	59.400, 1.144	59.400, 1.391
299	59.600, 1.433	59.600, 1.734	59.600, 1.278	59.600, 1.118	59.600, 1.274	59.600, 1.318	59.600, 1.471	59.600, 1.202	59.600, 1.152	59.600, 1.245	59.600, 1.238	59.600, 1.220	59.600, 1.050	59.600, 1.144	59.600, 1.395
300	59.800, 1.433	59.800, 1.739	59.800, 1.278	59.800, 1.118	59.800, 1.274	59.800, 1.318	59.800, 1.476	59.800, 1.202	59.800, 1.152	59.800, 1.245	59.800, 1.238	59.800, 1.220	59.800, 1.050	59.800, 1.144	59.800, 1.399
301	60.000, 1.434	60.000, 1.743	60.000, 1.278	60.000, 1.118	60.000, 1.275	60.000, 1.318	60.000, 1.481	60.000, 1.202	60.000, 1.152	60.000, 1.246	60.000, 1.239	60.000, 1.220	60.000, 1.051	60.000, 1.145	60.000, 1.403
302	60.200, 1.434	60.200, 1.748	60.200, 1.279	60.200, 1.119	60.200, 1.274	60.200, 1.318	60.200, 1.486	60.200, 1.202	60.200, 1.153	60.200, 1.246	60.200, 1.240	60.200, 1.221	60.200, 1.051	60.200, 1.145	60.200, 1.406
303	60.400, 1.435	60.400, 1.752	60.400, 1.279	60.400, 1.119	60.400, 1.274	60.400, 1.318	60.400, 1.491	60.400, 1.203	60.400, 1.153	60.400, 1.247	60.400, 1.240	60.400, 1.221	60.400, 1.051	60.400, 1.145	60.400, 1.410
304	60.600, 1.435	60.600, 1.757	60.600, 1.280	60.600, 1.119	60.600, 1.274	60.600, 1.318	60.600, 1.496	60.600, 1.203	60.600, 1.153	60.600, 1.247	60.600, 1.241	60.600, 1.221	60.600, 1.051	60.600, 1.146	60.600, 1.413
305	60.800, 1.435	60.800, 1.762	60.800, 1.280	60.800, 1.119	60.800, 1.274	60.800, 1.318	60.800, 1.501	60.800, 1.204	60.800, 1.153	60.800, 1.247	60.800, 1.241	60.800, 1.221	60.800, 1.051	60.800, 1.146	60.800, 1.417
306	61.000, 1.435	61.000, 1.767	61.000, 1.280	61.000, 1.119	61.000, 1.274	61.000, 1.318	61.000, 1.506	61.000, 1.204	61.000, 1.153	61.000, 1.248	61.000, 1.242	61.000, 1.221	61.000, 1.052	61.000, 1.146	61.000, 1.420
307	61.200, 1.436	61.200, 1.771	61.200, 1.280	61.200, 1.119	61.200, 1.274	61.200, 1.318	61.200, 1.511	61.200, 1.205	61.200, 1.153	61.200, 1.248	61.200, 1.242	61.200, 1.221	61.200, 1.052	61.200, 1.145	61.200, 1.424
308	61.400, 1.436	61.400, 1.776	61.400, 1.280	61.400, 1.119	61.400, 1.274	61.400, 1.318	61.400, 1.515	61.400, 1.205	61.400, 1.153	61.400, 1.248	61.400, 1.243	61.400, 1.221	61.400, 1.052	61.400, 1.145	61.400, 1.427
309	61.600, 1.436	61.600, 1.780	61.600, 1.280	61.600, 1.120	61.600, 1.275	61.600, 1.319	61.600, 1.520	61.600, 1.205	61.600, 1.154	61.600, 1.248	61.600, 1.243	61.600, 1.221	61.600, 1.052	61.600, 1.145	61.600, 1.431
310	61.800, 1.436	61.800, 1.785	61.800, 1.281	61.800, 1.119	61.800, 1.275	61.800, 1.319	61.800, 1.525	61.800, 1.205	61.800, 1.154	61.800, 1.249	61.800, 1.243	61.800, 1.221	61.800, 1.052	61.800, 1.145	61.800, 1.434
311	62.000, 1.437	62.000, 1.789	62.000, 1.281	62.000, 1.119	62.000, 1.276	62.000, 1.320	62.000, 1.530	62.000, 1.205	62.000, 1.154	62.000, 1.249	62.000, 1.243	62.000, 1.221	62.000, 1.052	62.000, 1.144	62.000, 1.437
312	62.200, 1.437	62.200, 1.793	62.200, 1.281	62.200, 1.119	62.200, 1.276	62.200, 1.320	62.200, 1.534	62.200, 1.206	62.200, 1.154	62.200, 1.249	62.200, 1.244	62.200, 1.222	62.200, 1.052	62.200, 1.144	62.200, 1.441
313	62.400, 1.437	62.400, 1.797	62.400, 1.281	62.400, 1.119	62.400, 1.277	62.400, 1.321	62.400, 1.539	62.400, 1.206	62.400, 1.154	62.400, 1.249	62.400, 1.244	62.400, 1.222	62.400, 1.053	62.400, 1.144	62.400, 1.445
314	62.600, 1.438	62.600, 1.801	62.600, 1.281	62.600, 1.119	62.600, 1.277	62.600, 1.321	62.600, 1.543	62.600, 1.206	62.600, 1.154	62.600, 1.249	62.600, 1.244	62.600, 1.223	62.600, 1.053	62.600, 1.143	62.600, 1.449
315	62.800, 1.438	62.800, 1.805	62.800, 1.280	62.800, 1.119	62.800, 1.278	62.800, 1.322	62.800, 1.547	62.800, 1.207	62.800, 1.154	62.800, 1.250	62.800, 1.244	62.800, 1.223	62.800, 1.053	62.800, 1.143	62.800, 1.452
316	63.000, 1.439	63.000, 1.809	63.000, 1.280	63.000, 1.120	63.000, 1.278	63.000, 1.323	63.000, 1.552	63.000, 1.207	63.000, 1.154	63.000, 1.250	63.000, 1.244	63.000, 1.224	63.000, 1.053	63.000, 1.143	63.000, 1.456
317	63.200, 1.440	63.200, 1.813	63.200, 1.280	63.200, 1.120	63.200, 1.279	63.200, 1.323	63.200, 1.557	63.200, 1.207	63.200, 1.154	63.200, 1.251	63.200, 1.244	63.200, 1.224	63.200, 1.052	63.200, 1.143	63.200, 1.459
318	63.400, 1.440	63.400, 1.817	63.400, 1.280	63.400, 1.120	63.400, 1.279	63.400, 1.323	63.400, 1.561	63.400, 1.207	63.400, 1.155	63.400, 1.251	63.400, 1.244	63.400, 1.225	63.400, 1.052	63.400, 1.142	63.400, 1.463
319	63.600, 1.441	63.600, 1.821	63.600, 1.280	63.600, 1.121	63.600, 1.279	63.600, 1.323	63.600, 1.566	63.600, 1.207	63.600, 1.155	63.600, 1.251	63.600, 1.245	63.600, 1.225	63.600, 1.052	63.600, 1.142	63.600, 1.467
320	63.800, 1.441	63.800, 1.825	63.800, 1.280	63.800, 1.121	63.800, 1.280	63.800, 1.323	63.800, 1.571	63.800, 1.208	63.800, 1.155	63.800, 1.251	63.800, 1.245	63.800, 1.225	63.800, 1.052	63.800, 1.143	63.800, 1.470
321	64.000, 1.442	64.000, 1.829	64.000, 1.280	64.000, 1.121	64.000, 1.280	64.000, 1.323	64.000, 1.575	64.000, 1.208	64.000, 1.156	64.000, 1.252	64.000, 1.245	64.000, 1.225	64.000, 1.052	64.000, 1.143	64.000, 1.474
322	64.200, 1.442	64.200, 1.833	64.200, 1.280	64.200, 1.122	64.200, 1.280	64.200, 1.323	64.200, 1.580	64.200, 1.209	64.200, 1.156	64.200, 1.252	64.200, 1.245	64.200, 1.225	64.200, 1.052	64.200, 1.143	64.200, 1.477
323	64.400, 1.442	64.400, 1.837	64.400, 1.281	64.400, 1.122	64.400, 1.280	64.400, 1.323	64.400, 1.584	64.400, 1.209	64.400, 1.156	64.400, 1.252	64.400, 1.246	64.400, 1.225	64.400, 1.051	64.400, 1.144	64.400, 1.481
324	64.600, 1.443	64.600, 1.841	64.600, 1.281	64.600, 1.122	64.600, 1.280	64.600, 1.323	64.600, 1.589	64.600, 1.210	64.600, 1.157	64.600, 1.252	64.600, 1.246	64.600, 1.225	64.600, 1.051	64.600, 1.144	64.600, 1.484
325	64.800, 1.443	64.800, 1.845	64.800, 1.281	64.800, 1.122	64.800, 1.280	64.800, 1.324	64.800, 1.594	64.800, 1.210	64.800, 1.157	64.800, 1.252	64.800, 1.246	64.800, 1.225	64.800, 1.051	64.800, 1.144	64.800, 1.487
326	65.000, 1.443	65.000, 1.848	65.000, 1.281	65.000, 1.122	65.000, 1.280	65.000, 1.324	65.000, 1.598	65.000, 1.210	65.000, 1.157	65.000, 1.252	65.000, 1.246	65.000, 1.225	65.000, 1.051	65.000, 1.144	65.000, 1.490
327	65.200, 1.443	65.200, 1.852	65.200, 1.282	65.200, 1.122	65.200, 1.280	65.200, 1.325	65.200, 1.602	65.200, 1.210	65.200, 1.157	65.200, 1.252	65.200, 1.246	65.200, 1.225	65.200, 1.051	65.200, 1.144	65.200, 1.494
328	65.400, 1.443	65.400, 1.856	65.400, 1.282	65.400, 1.122	65.400, 1.280	65.400, 1.325	65.400, 1.607	65.400, 1.210	65.400, 1.158	65.400, 1.252	65.400, 1.246	65.400, 1.225	65.400, 1.051	65.400, 1.144	65.400, 1.497
329	65.600, 1.443	65.600, 1.860	65.600, 1.282	65.600, 1.122	65.600, 1.280	65.600, 1.326	65.600, 1.611	65.600, 1.210	65.600, 1.158	65.600, 1.252	65.600, 1.246	65.600, 1.225	65.600, 1.050	65.600, 1.144	65.600, 1.500
330	65.800, 1.443	65.800, 1.863	65.800, 1.283	65.800, 1.122	65.800, 1.281	65.800, 1.327	65.800, 1.615	65.800, 1.210	65.800, 1.157	65.800, 1.253	65.800, 1.246	65.800, 1.225	65.800, 1.050	65.800, 1.145	65.800, 1.503
331	66.000, 1.443	66.000, 1.867	66.000, 1.283	66.000, 1.121	66.000, 1.281	66.000, 1.328	66.000, 1.619	66.000, 1.210	66.000, 1.157	66.000, 1.253	66.000, 1.247	66.000, 1.225	66.000, 1.050	66.000, 1.144	66.000, 1.506
332	66.200, 1.443	66.200, 1.870	66.200, 1.284	66.200, 1.121	66.200, 1.281	66.200, 1.329	66.200, 1.623	66.200, 1.210	66.200, 1.157	66.200, 1.253	66.200, 1.247	66.200, 1.225	66.200, 1.050	66.200, 1.145	66.200, 1.509
333	66.400, 1.444	66.400, 1.874	66.400, 1.284	66.400, 1.121	66.400, 1.281	66.400, 1.330	66.400, 1.627	66.400, 1.210	66.400, 1.157	66.400, 1.253	66.400, 1.247	66.400, 1.226	66.400, 1.051	66.400, 1.145	66.400, 1.513
334	66.600, 1.444	66.600, 1.877	66.600, 1.285	66.600, 1.120	66.600, 1.281	66.600, 1.331	66.600, 1.631	66.600, 1.210	66.600, 1.157	66.600, 1.253	66.600, 1.247	66.600, 1.226	66.600, 1.051	66.600, 1.145	66.600, 1.516
335	66.800, 1.444	66.800, 1.881	66.800, 1.285	66.800, 1.120	66.800, 1.281	66.800, 1.331	66.800, 1.635	66.800, 1.211	66.800, 1.157	66.800, 1.254	66.800, 1.248	66.800, 1.226	66.800, 1.051	66.800, 1.145	66.800, 1.519
336	67.000, 1.445	67.000, 1.885	67.000, 1.285	67.000, 1.120	67.000, 1.282	67.000, 1.331	67.000, 1.639	67.000, 1.211	67.000, 1.157	67.000, 1.254	67.000, 1.248	67.000, 1.227	67.000, 1.051	67.000, 1.145	67.000, 1.523
337	67.200, 1.445	67.200, 1.888	67.200, 1.286	67.200, 1.120	67.200, 1.282	67.200, 1.331	67.200, 1.642	67.200, 1.211	67.200, 1.157	67.200, 1.255	67.200, 1.249	67.200, 1.227	67.200, 1.051	67.200, 1.145	67.200, 1.526
338	67.400, 1.445	67.400, 1.892	67.400, 1.286	67.400, 1.120	67.400, 1.282	67.400, 1.331	67.400, 1.646	67.400, 1.212	67.400, 1.157	67.400, 1.255	67.400, 1.250	67.400, 1.228	67.400, 1.052	67.400, 1.145	67.400, 1.529
339	67.600, 1.446	67.600, 1.896	67.600, 1.286	67.600, 1.120	67.600, 1.282	67.600, 1.331	67.600, 1.650	67.600, 1.212	67.600, 1.157	67.600, 1.255	67.600, 1.251	67.600, 1.228	67.600, 1.052	67.600, 1.145	67.600, 1.533
340	67.800, 1.446	67.800, 1.899	67.800, 1.286	67.800, 1.120	67.800, 1.283	67.800, 1.331	67.800, 1.653	67.800, 1.213	67.800, 1.158	67.800, 1.255	67.800, 1.251	67.800, 1.228	67.800, 1.051	67.800, 1.145	67.800, 1.536
341	68.000, 1.446	68.000, 1.903	68.000, 1.286	68.000, 1.120	68.000, 1.283	68.000, 1.331	68.000, 1.657	68.000, 1.214	68.000, 1.158	68.000, 1.255	68.000, 1.252	68.000, 1.228	68.000, 1.051	68.000, 1.146	68.000, 1.539
342	68.200, 1.446	68.200, 1.906	68.200, 1.286	68.200, 1.120	68.200, 1.283	68.200, 1.330	68.200, 1.660	68.200, 1.215	68.200, 1.158	68.200, 1.255	68.200, 1.253	68.200, 1.227	68.200, 1.051	68.200, 1.146	68.200, 1.542
343	68.400, 1.447	68.400, 1.910	68.400, 1.287	68.400, 1.120	68.400, 1.283	68.400, 1.330	68.400, 1.664	68.400, 1.216	68.400, 1.158	68.400, 1.256	68.400, 1.253	68.400, 1.227	68.400, 1.051	68.400, 1.146	68.400, 1.545
344	68.600, 1.447	68.600, 1.913	68.600, 1.287	68.600, 1.120	68.600, 1.284	68.600, 1.331	68.600, 1.668	68.600, 1.216	68.600, 1.158	68.600, 1.256	68.600, 1.253	68.600, 1.227	68.600, 1.051	68.600, 1.146	68.600, 1.547
345	68.800, 1.447	68.800, 1.916	68.800, 1.287	68.800, 1.121	68.800, 1.284	68.800, 1.331	68.800, 1.671	68.800, 1.217	68.800, 1.158	68.800, 1.256	68.800, 1.254	68.800, 1.227	68.800, 1.051	68.800, 1.146	68.800, 1.550
346	69.000, 1.447	69.000, 1.920	69.000, 1.287	69.000, 1.121	69.000, 1.284	69.000, 1.331	69.000, 1.675	69.000, 1.217	69.000, 1.158	69.000, 1.256	69.000, 1.254	69.000, 1.228	69.000, 1.051	69.000, 1.146	69.000, 1.553
347	69.200, 1.447	69.200, 1.923	69.200, 1.287	69.200, 1.122	69.200, 1.284	69.200, 1.332	69.200, 1.679	69.200, 1.217	69.200, 1.158	69.200, 1.256	69.200, 1.255	69.200, 1.228	69.200, 1.051	69.200, 1.146	69.200, 1.555
348	69.400, 1.448	69.400, 1.926	69.400, 1.287	69.400, 1.122	69.400, 1.285	69.400, 1.332	69.400, 1.683	69.400, 1.218	69.400, 1.158	69.400, 1.256	69.400, 1.255	69.400, 1.228	69.400, 1.051	69.400, 1.146	69.400, 1.558
349	69.600, 1.448	69.600, 1.928	69.600, 1.287	69.600, 1.122	69.600, 1.285	69.600, 1.333	69.600, 1.686	69.600, 1.218	69.600, 1.158	69.600, 1.256	69.600, 1.255	69.600, 1.227	69.600, 1.051	69.600, 1.146	69.600, 1.561
350	69.800, 1.448	69.800, 1.931	69.800, 1.287	69.800, 1.122	69.800, 1.285	69.800, 1.334	69.800, 1.690	69.800, 1.218	69.800, 1.158	69.800, 1.255	69.800, 1.255	69.800, 1.227	69.800, 1.052	69.800, 1.145	69.800, 1.563
351	70.000, 1.448	70.000, 1.934	70.000, 1.287	70.000, 1.123	70.000, 1.286	70.000, 1.334	70.000, 1.694	70.000, 1.218	70.000, 1.159	70.000, 1.255	70.000, 1.256	70.000, 1.227	70.000, 1.052	70.000, 1.145	70.000, 1.566
352	70.200, 1.449	70.200, 1.937	70.200, 1.287	70.200, 1.122	70.200, 1.286	70.200, 1.335	70.200, 1.698	70.200, 1.218	70.200, 1.159	70.200, 1.255	70.200, 1.256	70.200, 1.227	70.200, 1.053	70.200, 1.145	70.200, 1.568
353	70.400, 1.450	70.400, 1.939	70.400, 1.287	70.400, 1.123	70.400, 1.286	70.400, 1.335	70.400, 1.701	70.400, 1.218	70.400, 1.159	70.400, 1.254	70.400, 1.256	70.400, 1.227	70.400, 1.053	70.400, 1.145	70.400, 1.571
354	70.600, 1.450	70.600, 1.942	70.600, 1.288	70.600, 1.122	70.600, 1.286	70.600, 1.336	70.600, 1.705	70.600, 1.218	70.600, 1.160	70.600, 1.254	70.600, 1.256	70.600, 1.227	70.600, 1.053	70.600, 1.145	70.600, 1.573
355	70.800, 1.451	70.800, 1.945	70.800, 1.288	70.800, 1.122	70.800, 1.286	70.800, 1.336	70.800, 1.708	70.800, 1.218	70.800, 1.160	70.800, 1.254	70.800, 1.257	70.800, 1.227	70.800, 1.053	70.800, 1.145	70.800, 1.576
356	71.000, 1.451	71.000, 1.948	71.000, 1.288	71.000, 1.122	71.000, 1.286	71.000, 1.336	71.000, 1.711	71.000, 1.218	71.000, 1.160	71.000, 1.254	71.000, 1.257	71.000, 1.228	71.000, 1.054	71.000, 1.145	71.000, 1.579
357	71.200, 1.451	71.200, 1.952	71.200, 1.288	71.200, 1.122	71.200, 1.286	71.200, 1.337	71.200, 1.714	71.200, 1.217	71.200, 1.160	71.200, 1.254	71.200, 1.257	71.200, 1.228	71.200, 1.053	71.200, 1.145	71.200, 1.582
358	71.400, 1.452	71.400, 1.955	71.400, 1.288	71.400, 1.122	71.400, 1.286	71.400, 1.337	71.400, 1.718	71.400, 1.217	71.400, 1.161	71.400, 1.254	71.400, 1.257	71.400, 1.229	71.400, 1.053	71.400, 1.145	71.400, 1.585
359	71.600, 1.452	71.600, 1.958	71.600, 1.288	71.600, 1.122	71.600, 1.286	71.600, 1.338	71.600, 1.721	71.600, 1.217	71.600, 1.161	71.600, 1.254	71.600, 1.257	71.600, 1.229	71.600, 1.053	71.600, 1.145	71.600, 1.588
360	71.800, 1.452	71.800, 1.961	71.800, 1.288	71.800, 1.122	71.800, 1.285	71.800, 1.338	71.800, 1.724	71.800, 1.218	71.800, 1.161	71.800, 1.255	71.800, 1.257	71.800, 1.230	71.800, 1.052	71.800, 1.144	71.800, 1.591
361	72.000, 1.452	72.000, 1.964	72.000, 1.288	72.000, 1.122	72.000, 1.285	72.000, 1.338	72.000, 1.727	72.000, 1.218	72.000, 1.162	72.000, 1.255	72.000, 1.257	72.000, 1.230	72.000, 1.052	72.000, 1.144	72.000, 1.593
362	72.200, 1.452	72.200, 1.967	72.200, 1.289	72.200, 1.123	72.200, 1.285	72.200, 1.339	72.200, 1.731	72.200, 1.218	72.200, 1.162	72.200, 1.255	72.200, 1.257	72.200, 1.230	72.200, 1.052	72.200, 1.144	72.200, 1.595
363	72.400, 1.452	72.400, 1.970	72.400, 1.289	72.400, 1.123	72.400, 1.286	72.400, 1.339	72.400, 1.734	72.400, 1.218	72.400, 1.162	72.400, 1.256	72.400, 1.257	72.400, 1.231	72.400, 1.051	72.400, 1.144	72.400, 1.598
364	72.600, 1.452	72.600, 1.974	72.600, 1.289	72.600, 1.123	72.600, 1.286	72.600, 1.340	72.600, 1.737	72.600, 1.219	72.600, 1.162	72.600, 1.256	72.600, 1.258	72.600, 1.231	72.600, 1.051	72.600, 1.144	72.600, 1.600
365	72.800, 1.452	72.800, 1.977	72.800, 1.289	72.800, 1.123	72.800, 1.286	72.800, 1.340	72.800, 1.740	72.800, 1.219	72.800, 1.162	72.800, 1.256	72.800, 1.258	72.800, 1.231	72.800, 1.051	72.800, 1.145	72.800, 1.602
366	73.000, 1.452	73.000, 1.980	73.000, 1.288	73.000, 1.124	73.000, 1.286	73.000, 1.341	73.000, 1.743	73.000, 1.219	73.000, 1.162	73.000, 1.256	73.000, 1.259	73.000, 1.231	73.000, 1.051	73.000, 1.145	73.000, 1.604
367	73.200, 1.452	73.200, 1.984	73.200, 1.288	73.200, 1.124	73.200, 1.287	73.200, 1.341	73.200, 1.747	73.200, 1.219	73.200, 1.162	73.200, 1.257	73.200, 1.259	73.200, 1.231	73.200, 1.052	73.200, 1.145	73.200, 1.606
368	73.400, 1.453	73.400, 1.987	73.400, 1.289	73.400, 1.124	73.400, 1.287	73.400, 1.342	73.400, 1.750	73.400, 1.219	73.400, 1.162	73.400, 1.257	73.400, 1.259	73.400, 1.231	73.400, 1.052	73.400, 1.145	73.400, 1.609
369	73.600, 1.453	73.600, 1.990	73.600, 1.289	73.600, 1.125	73.600, 1.287	73.600, 1.342	73.600, 1.754	73.600, 1.219	73.600, 1.162	73.600, 1.258	73.600, 1.260	73.600, 1.230	73.600, 1.052	73.600, 1.145	73.600, 1.611
370	73.800, 1.454	73.800, 1.992	73.800, 1.289	73.800, 1.125	73.800, 1.288	73.800, 1.342	73.800, 1.757	73.800, 1.220	73.800, 1.162	73.800, 1.258	73.800, 1.260	73.800, 1.230	73.800, 1.052	73.800, 1.146	73.800, 1.614
371	74.000, 1.454	74.000, 1.995	74.000, 1.289	74.000, 1.126	74.000, 1.288	74.000, 1.343	74.000, 1.760	74.000, 1.220	74.000, 1.162	74.000, 1.258	74.000, 1.260	74.000, 1.230	74.000, 1.052	74.000, 1.146	74.000, 1.616
372	74.200, 1.455	74.200, 1.998	74.200, 1.289	74.200, 1.126	74.200, 1.288	74.200, 1.343	74.200, 1.763	74.200, 1.220	74.200, 1.162	74.200, 1.258	74.200, 1.260	74.200, 1.230	74.200, 1.053	74.200, 1.146	74.200, 1.618
373	74.400, 1.455	74.400, 2.000	74.400, 1.290	74.400, 1.127	74.400, 1.287	74.400, 1.343	74.400, 1.766	74.400, 1.220	74.400, 1.162	74.400, 1.259	74.400, 1.260	74.400, 1.231	74.400, 1.053	74.400, 1.146	74.400, 1.621
374	74.600, 1.455	74.600, 2.003	74.600, 1.290	74.600, 1.127	74.600, 1.287	74.600, 1.344	74.600, 1.769	74.600, 1.221	74.600, 1.162	74.600, 1.259	74.600, 1.260	74.600, 1.231	74.600, 1.053	74.600, 1.146	74.600, 1.623
375	74.800, 1.455	74.800, 2.006	74.800, 1.290	74.800, 1.127	74.800, 1.287	74.800, 1.344	74.800, 1.772	74.800, 1.221	74.800, 1.163	74.800, 1.260	74.800, 1.260	74.800, 1.231	74.800, 1.053	74.800, 1.146	74.800, 1.625
376	75.000, 1.455	75.000, 2.009	75.000, 1.291	75.000, 1.127	75.000, 1.287	75.000, 1.343	75.000, 1.775	75.000, 1.221	75.000, 1.163	75.000, 1.260	75.000, 1.260	75.000, 1.232	75.000, 1.054	75.000, 1.146	75.000, 1.627
377	75.200, 1.456	75.200, 2.011	75.200, 1.291	75.200, 1.127	75.200, 1.287	75.200, 1.343	75.200, 1.778	75.200, 1.222	75.200, 1.163	75.200, 1.260	75.200, 1.260	75.200, 1.232	75.200, 1.054	75.200, 1.146	75.200, 1.629
378	75.400, 1.456	75.400, 2.014	75.400, 1.291	75.400, 1.127	75.400, 1.287	75.400, 1.344	75.400, 1.781	75.400, 1.222	75.400, 1.163	75.400, 1.261	75.400, 1.260	75.400, 1.232	75.400, 1.054	75.400, 1.146	75.400, 1.631
379	75.600, 1.456	75.600, 2.016	75.600, 1.292	75.600, 1.127	75.600, 1.287	75.600, 1.344	75.600, 1.784	75.600, 1.223	75.600, 1.163	75.600, 1.261	75.600, 1.261	75.600, 1.232	75.600, 1.053	75.600, 1.145	75.600, 1.633
380	75.800, 1.456	75.800, 2.019	75.800, 1.292	75.800, 1.127	75.800, 1.287	75.800, 1.344	75.800, 1.787	75.800, 1.223	75.800, 1.163	75.800, 1.261	75.800, 1.261	75.800, 1.232	75.800, 1.053	75.800, 1.145	75.800, 1.635
381	76.000, 1.457	76.000, 2.022	76.000, 1.292	76.000, 1.127	76.000, 1.287	76.000, 1.344	76.000, 1.790	76.000, 1.224	76.000, 1.164	76.000, 1.261	76.000, 1.261	76.000, 1.232	76.000, 1.053	76.000, 1.145	76.000, 1.636
382	76.200, 1.457	76.200, 2.024	76.200, 1.293	76.200, 1.127	76.200, 1.287	76.200, 1.345	76.200, 1.792	76.200, 1.224	76.200, 1.164	76.200, 1.261	76.200, 1.261	76.200, 1.232	76.200, 1.053	76.200, 1.145	76.200, 1.638
383	76.400, 1.457	76.400, 2.027	76.400, 1.293	76.400, 1.126	76.400, 1.287	76.400, 1.346	76.400, 1.795	76.400, 1.223	76.400, 1.164	76.400, 1.262	76.400, 1.262	76.400, 1.232	76.400, 1.053	76.400, 1.145	76.400, 1.640
384	76.600, 1.458	76.600, 2.030	76.600, 1.293	76.600, 1.126	76.600, 1.288	76.600, 1.346	76.600, 1.798	76.600, 1.223	76.600, 1.164	76.600, 1.262	76.600, 1.263	76.600, 1.231	76.600, 1.053	76.600, 1.145	76.600, 1.642
385	76.800, 1.458	76.800, 2.033	76.800, 1.293	76.800, 1.126	76.800, 1.288	76.800, 1.347	76.800, 1.801	76.800, 1.223	76.800, 1.164	76.800, 1.262	76.800, 1.263	76.800, 1.231	76.800, 1.054	76.800, 1.145	76.800, 1.644
386	77.000, 1.459	77.000, 2.036	77.000, 1.294	77.000, 1.125	77.000, 1.289	77.000, 1.347	77.000, 1.804	77.000, 1.223	77.000, 1.164	77.000, 1.263	77.000, 1.264	77.000, 1.231	77.000, 1.054	77.000, 1.146	77.000, 1.646
387	77.200, 1.460	77.200, 2.038	77.200, 1.294	77.200, 1.125	77.200, 1.289	77.200, 1.348	77.200, 1.807	77.200, 1.223	77.200, 1.164	77.200, 1.263	77.200, 1.264	77.200, 1.231	77.200, 1.054	77.200, 1.146	77.200, 1.648
388	77.400, 1.460	77.400, 2.040	77.400, 1.293	77.400, 1.125	77.400, 1.290	77.400, 1.348	77.400, 1.809	77.400, 1.223	77.400, 1.164	77.400, 1.263	77.400, 1.265	77.400, 1.232	77.400, 1.054	77.400, 1.146	77.400, 1.651
389	77.600, 1.461	77.600, 2.042	77.600, 1.294	77.600, 1.125	77.600, 1.290	77.600, 1.349	77.600, 1.813	77.600, 1.223	77.600, 1.164	77.600, 1.263	77.600, 1.265	77.600, 1.232	77.600, 1.053	77.600, 1.147	77.600, 1.653
390	77.800, 1.461	77.800, 2.044	77.800, 1.294	77.800, 1.125	77.800, 1.291	77.800, 1.349	77.800, 1.815	77.800, 1.223	77.800, 1.164	77.800, 1.263	77.800, 1.265	77.800, 1.232	77.800, 1.053	77.800, 1.147	77.800, 1.655
391	78.000, 1.462	78.000, 2.046	78.000, 1.294	78.000, 1.125	78.000, 1.291	78.000, 1.350	78.000, 1.818	78.000, 1.224	78.000, 1.164	78.000, 1.263	78.000, 1.265	78.000, 1.233	78.000, 1.053	78.000, 1.147	78.000, 1.657
392	78.200, 1.462	78.200, 2.048	78.200, 1.294	78.200, 1.125	78.200, 1.291	78.200, 1.350	78.200, 1.821	78.200, 1.225	78.200, 1.164	78.200, 1.263	78.200, 1.265	78.200, 1.233	78.200, 1.053	78.200, 1.147	78.200, 1.660
393	78.400, 1.462	78.400, 2.051	78.400, 1.294	78.400, 1.125	78.400, 1.291	78.400, 1.350	78.400, 1.824	78.400, 1.225	78.400, 1.164	78.400, 1.264	78.400, 1.265	78.400, 1.233	78.400, 1.053	78.400, 1.147	78.400, 1.662
394	78.600, 1.462	78.600, 2.053	78.600, 1.294	78.600, 1.125	78.600, 1.291	78.600, 1.350	78.600, 1.826	78.600, 1.226	78.600, 1.164	78.600, 1.263	78.600, 1.265	78.600, 1.233	78.600, 1.053	78.600, 1.147	78.600, 1.664
395	78.800, 1.462	78.800, 2.055	78.800, 1.294	78.800, 1.125	78.800, 1.291	78.800, 1.350	78.800, 1.829	78.800, 1.227	78.800, 1.164	78.800, 1.263	78.800, 1.266	78.800, 1.234	78.800, 1.053	78.800, 1.146	78.800, 1.666
396	79.000, 1.462	79.000, 2.057	79.000, 1.294	79.000, 1.125	79.000, 1.291	79.000, 1.350	79.000, 1.832	79.000, 1.228	79.000, 1.164	79.000, 1.263	79.000, 1.266	79.000, 1.234	79.000, 1.053	79.000, 1.146	79.000, 1.668
397	79.200, 1.462	79.200, 2.060	79.200, 1.294	79.200, 1.125	79.200, 1.291	79.200, 1.350	79.200, 1.835	79.200, 1.228	79.200, 1.165	79.200, 1.262	79.200, 1.266	79.200, 1.234	79.200, 1.053	79.200, 1.146	79.200, 1.670
398	79.400, 1.463	79.400, 2.061	79.400, 1.294	79.400, 1.126	79.400, 1.291	79.400, 1.351	79.400, 1.838	79.400, 1.229	79.400, 1.165	79.400, 1.262	79.400, 1.267	79.400, 1.234	79.400, 1.053	79.400, 1.146	79.400, 1.672
399	79.600, 1.463	79.600, 2.063	79.600, 1.294	79.600, 1.126	79.600, 1.291	79.600, 1.351	79.600, 1.840	79.600, 1.229	79.600, 1.165	79.600, 1.262	79.600, 1.267	79.600, 1.234	79.600, 1.053	79.600, 1.145	79.600, 1.674
400	79.800, 1.463	79.800, 2.066	79.800, 1.294	79.800, 1.125	79.800, 1.291	79.800, 1.351	79.800, 1.843	79.800, 1.229	79.800, 1.165	79.800, 1.262	79.800, 1.267	79.800, 1.234	79.800, 1.053	79.800, 1.145	79.800, 1.676
401	80.000, 1.463	80.000, 2.068	80.000, 1.294	80.000, 1.125	80.000, 1.291	80.000, 1.351	80.000, 1.845	80.000, 1.229	80.000, 1.166	80.000, 1.262	80.000, 1.267	80.000, 1.234	80.000, 1.053	80.000, 1.145	80.000, 1.678
402	80.200, 1.464	80.200, 2.070	80.200, 1.294	80.200, 1.125	80.200, 1.291	80.200, 1.351	80.200, 1.848	80.200, 1.229	80.200, 1.166	80.200, 1.263	80.200, 1.267	80.200, 1.234	80.200, 1.053	80.200, 1.144	80.200, 1.680
403	80.400, 1.464	80.400, 2.072	80.400, 1.294	80.400, 1.125	80.400, 1.291	80.400, 1.351	80.400, 1.850	80.400, 1.229	80.400, 1.166	80.400, 1.263	80.400, 1.267	80.400, 1.234	80.400, 1.053	80.400, 1.144	80.400, 1.682
404	80.600, 1.464	80.600, 2.075	80.600, 1.294	80.600, 1.126	80.600, 1.291	80.600, 1.351	80.600, 1.853	80.600, 1.229	80.600, 1.166	80.600, 1.263	80.600, 1.268	80.600, 1.234	80.600, 1.053	80.600, 1.144	80.600, 1.684
405	80.800, 1.465	80.800, 2.077	80.800, 1.294	80.800, 1.126	80.800, 1.292	80.800, 1.351	80.800, 1.856	80.800, 1.229	80.800, 1.166	80.800, 1.264	80.800, 1.268	80.800, 1.234	80.800, 1.053	80.800, 1.144	80.800, 1.686
406	81.000, 1.465	81.000, 2.079	81.000, 1.294	81.000, 1.125	81.000, 1.292	81.000, 1.351	81.000, 1.858	81.000, 1.230	81.000, 1.166	81.000, 1.264	81.000, 1.268	81.000, 1.234	81.000, 1.053	81.000, 1.145	81.000, 1.687
407	81.200, 1.466	81.200, 2.082	81.200, 1.294	81.200, 1.125	81.200, 1.292	81.200, 1.351	81.200, 1.861	81.200, 1.230	81.200, 1.166	81.200, 1.265	81.200, 1.268	81.200, 1.234	81.200, 1.053	81.200, 1.145	81.200, 1.689
408	81.400, 1.466	81.400, 2.084	81.400, 1.294	81.400, 1.125	81.400, 1.293	81.400, 1.351	81.400, 1.864	81.400, 1.230	81.400, 1.166	81.400, 1.265	81.400, 1.269	81.400, 1.235	81.400, 1.053	81.400, 1.145	81.400, 1.691
409	81.600, 1.466	81.600, 2.086	81.600, 1.294	81.600, 1.125	81.600, 1.293	81.600, 1.352	81.600, 1.867	81.600, 1.230	81.600, 1.167	81.600, 1.266	81.600, 1.269	81.600, 1.235	81.600, 1.053	81.600, 1.146	81.600, 1.693
410	81.800, 1.466	81.800, 2.089	81.800, 1.294	81.800, 1.125	81.800, 1.293	81.800, 1.353	81.800, 1.869	81.800, 1.230	81.800, 1.167	81.800, 1.266	81.800, 1.269	81.800, 1.235	81.800, 1.054	81.800, 1.146	81.800, 1.695
411	82.000, 1.467	82.000, 2.091	82.000, 1.294	82.000, 1.126	82.000, 1.294	82.000, 1.353	82.000, 1.872	82.000, 1.231	82.000, 1.167	82.000, 1.267	82.000, 1.270	82.000, 1.235	82.000, 1.054	82.000, 1.146	82.000, 1.697
412	82.200, 1.467	82.200, 2.094	82.200, 1.294	82.200, 1.126	82.200, 1.294	82.200, 1.354	82.200, 1.874	82.200, 1.231	82.200, 1.167	82.200, 1.267	82.200, 1.270	82.200, 1.235	82.200, 1.054	82.200, 1.146	82.200, 1.699
413	82.400, 1.467	82.400, 2.096	82.400, 1.295	82.400, 1.126	82.400, 1.294	82.400, 1.355	82.400, 1.876	82.400, 1.232	82.400, 1.167	82.400, 1.267	82.400, 1.270	82.400, 1.236	82.400, 1.054	82.400, 1.146	82.400, 1.701
414	82.600, 1.467	82.600, 2.098	82.600, 1.295	82.600, 1.127	82.600, 1.294	82.600, 1.355	82.600, 1.878	82.600, 1.232	82.600, 1.167	82.600, 1.267	82.600, 1.271	82.600, 1.236	82.600, 1.054	82.600, 1.146	82.600, 1.702
415	82.800, 1.467	82.800, 2.101	82.800, 1.295	82.800, 1.127	82.800, 1.294	82.800, 1.356	82.800, 1.881	82.800, 1.233	82.800, 1.168	82.800, 1.266	82.800, 1.271	82.800, 1.236	82.800, 1.054	82.800, 1.146	82.800, 1.704
416	83.000, 1.467	83.000, 2.103	83.000, 1.296	83.000, 1.128	83.000, 1.294	83.000, 1.356	83.000, 1.883	83.000, 1.233	83.000, 1.168	83.000, 1.266	83.000, 1.271	83.000, 1.236	83.000, 1.054	83.000, 1.146	83.000, 1.706
417	83.200, 1.467	83.200, 2.105	83.200, 1.296	83.200, 1.128	83.200, 1.294	83.200, 1.356	83.200, 1.885	83.200, 1.233	83.200, 1.168	83.200, 1.266	83.200, 1.272	83.200, 1.236	83.200, 1.054	83.200, 1.147	83.200, 1.707
418	83.400, 1.468	83.400, 2.107	83.400, 1.297	83.400, 1.128	83.400, 1.294	83.400, 1.357	83.400, 1.887	83.400, 1.232	83.400, 1.169	83.400, 1.265	83.400, 1.272	83.400, 1.237	83.400, 1.054	83.400, 1.147	83.400, 1.709
419	83.600, 1.468	83.600, 2.109	83.600, 1.297	83.600, 1.128	83.600, 1.294	83.600, 1.357	83.600, 1.889	83.600, 1.232	83.600, 1.169	83.600, 1.265	83.600, 1.272	83.600, 1.237	83.600, 1.054	83.600, 1.147	83.600, 1.711
420	83.800, 1.469	83.800, 2.110	83.800, 1.298	83.800, 1.128	83.800, 1.294	83.800, 1.358	83.800, 1.891	83.800, 1.232	83.800, 1.169	83.800, 1.265	83.800, 1.273	83.800, 1.238	83.800, 1.054	83.800, 1.147	83.800, 1.712
421	84.000, 1.469	84.000, 2.112	84.000, 1.298	84.000, 1.129	84.000, 1.294	84.000, 1.358	84.000, 1.893	84.000, 1.232	84.000, 1.169	84.000, 1.264	84.000, 1.273	84.000, 1.238	84.000, 1.054	84.000, 1.147	84.000, 1.714
422	84.200, 1.470	84.200, 2.114	84.200, 1.298	84.200, 1.129	84.200, 1.294	84.200, 1.358	84.200, 1.896	84.200, 1.231	84.200, 1.169	84.200, 1.264	84.200, 1.273	84.200, 1.239	84.200, 1.054	84.200, 1.146	84.200, 1.715
423	84.400, 1.470	84.400, 2.116	84.400, 1.298	84.400, 1.130	84.400, 1.295	84.400, 1.358	84.400, 1.898	84.400, 1.231	84.400, 1.169	84.400, 1.265	84.400, 1.272	84.400, 1.239	84.400, 1.054	84.400, 1.146	84.400, 1.717
424	84.600, 1.470	84.600, 2.117	84.600, 1.298	84.600, 1.130	84.600, 1.295	84.600, 1.358	84.600, 1.901	84.600, 1.231	84.600, 1.169	84.600, 1.265	84.600, 1.272	84.600, 1.239	84.600, 1.054	84.600, 1.146	84.600, 1.719
425	84.800, 1.470	84.800, 2.119	84.800, 1.299	84.800, 1.130	84.800, 1.295	84.800, 1.359	84.800, 1.903	84.800, 1.231	84.800, 1.169	84.800, 1.266	84.800, 1.272	84.800, 1.239	84.800, 1.054	84.800, 1.146	84.800, 1.720
426	85.000, 1.470	85.000, 2.121	85.000, 1.299	85.000, 1.130	85.000, 1.295	85.000, 1.359	85.000, 1.906	85.000, 1.232	85.000, 1.169	85.000, 1.266	85.000, 1.273	85.000, 1.239	85.000, 1.054	85.000, 1.146	85.000, 1.722
427	85.200, 1.471	85.200, 2.122	85.200, 1.300	85.200, 1.130	85.200, 1.295	85.200, 1.359	85.200, 1.909	85.200, 1.232	85.200, 1.170	85.200, 1.267	85.200, 1.273	85.200, 1.238	85.200, 1.054	85.200, 1.146	85.200, 1.724
428	85.400, 1.471	85.400, 2.124	85.400, 1.300	85.400, 1.129	85.400, 1.296	85.400, 1.360	85.400, 1.911	85.400, 1.232	85.400, 1.170	85.400, 1.268	85.400, 1.273	85.400, 1.238	85.400, 1.054	85.400, 1.146	85.400, 1.726
429	85.600, 1.471	85.600, 2.125	85.600, 1.300	85.600, 1.129	85.600, 1.296	85.600, 1.360	85.600, 1.914	85.600, 1.232	85.600, 1.170	85.600, 1.268	85.600, 1.273	85.600, 1.238	85.600, 1.054	85.600, 1.146	85.600, 1.728
430	85.800, 1.471	85.800, 2.127	85.800, 1.300	85.800, 1.130	85.800, 1.297	85.800, 1.360	85.800, 1.916	85.800, 1.232	85.800, 1.170	85.800, 1.269	85.800, 1.274	85.800, 1.238	85.800, 1.054	85.800, 1.146	85.800, 1.729
431	86.000, 1.472	86.000, 2.129	86.000, 1.300	86.000, 1.130	86.000, 1.297	86.000, 1.359	86.000, 1.918	86.000, 1.232	86.000, 1.170	86.000, 1.269	86.000, 1.274	86.000, 1.238	86.000, 1.054	86.000, 1.146	86.000, 1.731
432	86.200, 1.472	86.200, 2.130	86.200, 1.300	86.200, 1.130	86.200, 1.297	86.200, 1.359	86.200, 1.920	86.200, 1.233	86.200, 1.170	86.200, 1.270	86.200, 1.274	86.200, 1.238	86.200, 1.054	86.200, 1.146	86.200, 1.733
433	86.400, 1.472	86.400, 2.132	86.400, 1.300	86.400, 1.130	86.400, 1.297	86.400, 1.359	86.400, 1.922	86.400, 1.233	86.400, 1.170	86.400, 1.270	86.400, 1.274	86.400, 1.238	86.400, 1.054	86.400, 1.146	86.400, 1.734
434	86.600, 1.472	86.600, 2.134	86.600, 1.300	86.600, 1.131	86.600, 1.297	86.600, 1.359	86.600, 1.924	86.600, 1.233	86.600, 1.171	86.600, 1.270	86.600, 1.274	86.600, 1.238	86.600, 1.054	86.600, 1.146	86.600, 1.736
435	86.800, 1.472	86.800, 2.136	86.800, 1.300	86.800, 1.131	86.800, 1.297	86.800, 1.360	86.800, 1.926	86.800, 1.233	86.800, 1.171	86.800, 1.270	86.800, 1.275	86.800, 1.238	86.800, 1.054	86.800, 1.146	86.800, 1.737
436	87.000, 1.472	87.000, 2.138	87.000, 1.300	87.000, 1.131	87.000, 1.297	87.000, 1.360	87.000, 1.928	87.000, 1.234	87.000, 1.171	87.000, 1.270	87.000, 1.275	87.000, 1.238	87.000, 1.054	87.000, 1.146	87.000, 1.739
437	87.200, 1.473	87.200, 2.140	87.200, 1.300	87.200, 1.131	87.200, 1.297	87.200, 1.361	87.200, 1.930	87.200, 1.234	87.200, 1.172	87.200, 1.270	87.200, 1.276	87.200, 1.238	87.200, 1.054	87.200, 1.146	87.200, 1.740
438	87.400, 1.473	87.400, 2.142	87.400, 1.300	87.400, 1.131	87.400, 1.297	87.400, 1.361	87.400, 1.932	87.400, 1.233	87.400, 1.172	87.400, 1.270	87.400, 1.276	87.400, 1.239	87.400, 1.054	87.400, 1.146	87.400, 1.742
439	87.600, 1.474	87.600, 2.144	87.600, 1.300	87.600, 1.131	87.600, 1.297	87.600, 1.362	87.600, 1.934	87.600, 1.233	87.600, 1.172	87.600, 1.270	87.600, 1.276	87.600, 1.239	87.600, 1.054	87.600, 1.146	87.600, 1.743
440	87.800, 1.475	87.800, 2.146	87.800, 1.300	87.800, 1.131	87.800, 1.297	87.800, 1.362	87.800, 1.936	87.800, 1.233	87.800, 1.172	87.800, 1.269	87.800, 1.276	87.800, 1.239	87.800, 1.054	87.800, 1.146	87.800, 1.744
441	88.000, 1.475	88.000, 2.148	88.000, 1.300	88.000, 1.131	88.000, 1.297	88.000, 1.363	88.000, 1.938	88.000, 1.233	88.000, 1.172	88.000, 1.269	88.000, 1.277	88.000, 1.239	88.000, 1.054	88.000, 1.147	88.000, 1.746
442	88.200, 1.475	88.200, 2.150	88.200, 1.300	88.200, 1.131	88.200, 1.296	88.200, 1.363	88.200, 1.940	88.200, 1.234	88.200, 1.173	88.200, 1.270	88.200, 1.277	88.200, 1.239	88.200, 1.054	88.200, 1.147	88.200, 1.747
443	88.400, 1.475	88.400, 2.152	88.400, 1.301	88.400, 1.131	88.400, 1.296	88.400, 1.363	88.400, 1.942	88.400, 1.234	88.400, 1.172	88.400, 1.270	88.400, 1.277	88.400, 1.240	88.400, 1.054	88.400, 1.147	88.400, 1.748
444	88.600, 1.475	88.600, 2.153	88.600, 1.301	88.600, 1.131	88.600, 1.296	88.600, 1.364	88.600, 1.944	88.600, 1.234	88.600, 1.172	88.600, 1.270	88.600, 1.277	88.600, 1.240	88.600, 1.053	88.600, 1.147	88.600, 1.750
445	88.800, 1.475	88.800, 2.155	88.800, 1.302	88.800, 1.131	88.800, 1.296	88.800, 1.364	88.800, 1.947	88.800, 1.235	88.800, 1.172	88.800, 1.271	88.800, 1.278	88.800, 1.240	88.800, 1.053	88.800, 1.147	88.800, 1.752
446	89.000, 1.476	89.000, 2.157	89.000, 1.302	89.000, 1.130	89.000, 1.296	89.000, 1.365	89.000, 1.949	89.000, 1.235	89.000, 1.172	89.000, 1.271	89.000, 1.278	89.000, 1.240	89.000, 1.053	89.000, 1.147	89.000, 1.753
447	89.200, 1.476	89.200, 2.159	89.200, 1.302	89.200, 1.130	89.200, 1.296	89.200, 1.365	89.200, 1.951	89.200, 1.235	89.200, 1.172	89.200, 1.271	89.200, 1.279	89.200, 1.240	89.200, 1.053	89.200, 1.148	89.200, 1.755
448	89.400, 1.477	89.400, 2.161	89.400, 1.303	89.400, 1.130	89.400, 1.297	89.400, 1.365	89.400, 1.953	89.400, 1.235	89.400, 1.171	89.400, 1.271	89.400, 1.279	89.400, 1.240	89.400, 1.053	89.400, 1.148	89.400, 1.756
449	89.600, 1.477	89.600, 2.162	89.600, 1.303	89.600, 1.130	89.600, 1.296	89.600, 1.365	89.600, 1.955	89.600, 1.235	89.600, 1.171	89.600, 1.272	89.600, 1.279	89.600, 1.240	89.600, 1.053	89.600, 1.148	89.600, 1.758
450	89.800, 1.477	89.800, 2.164	89.800, 1.302	89.800, 1.130	89.800, 1.296	89.800, 1.365	89.800, 1.957	89.800, 1.235	89.800, 1.171	89.800, 1.272	89.800, 1.279	89.800, 1.240	89.800, 1.053	89.800, 1.148	89.800, 1.759
451	90.000, 1.478	90.000, 2.166	90.000, 1.302	90.000, 1.130	90.000, 1.296	90.000, 1.365	90.000, 1.959	90.000, 1.235	90.000, 1.170	90.000, 1.272	90.000, 1.279	90.000, 1.240	90.000, 1.053	90.000, 1.148	90.000, 1.760
452	90.200, 1.478	90.200, 2.167	90.200, 1.302	90.200, 1.130	90.200, 1.296	90.200, 1.365	90.200, 1.961	90.200, 1.236	90.200, 1.170	90.200, 1.272	90.200, 1.279	90.200, 1.240	90.200, 1.053	90.200, 1.147	90.200, 1.761
453	90.400, 1.478	90.400, 2.169	90.400, 1.301	90.400, 1.131	90.400, 1.297	90.400, 1.366	90.400, 1.963	90.400, 1.235	90.400, 1.170	90.400, 1.272	90.400, 1.280	90.400, 1.240	90.400, 1.053	90.400, 1.147	90.400, 1.762
454	90.600, 1.478	90.600, 2.170	90.600, 1.301	90.600, 1.131	90.600, 1.297	90.600, 1.366	90.600, 1.965	90.600, 1.236	90.600, 1.170	90.600, 1.272	90.600, 1.280	90.600, 1.240	90.600, 1.053	90.600, 1.147	90.600, 1.764
455	90.800, 1.478	90.800, 2.172	90.800, 1.301	90.800, 1.131	90.800, 1.297	90.800, 1.367	90.800, 1.967	90.800, 1.236	90.800, 1.170	90.800, 1.272	90.800, 1.280	90.800, 1.240	90.800, 1.054	90.800, 1.146	90.800, 1.765
456	91.000, 1.478	91.000, 2.173	91.000, 1.301	91.000, 1.131	91.000, 1.297	91.000, 1.367	91.000, 1.969	91.000, 1.236	91.000, 1.170	91.000, 1.272	91.000, 1.280	91.000, 1.240	91.000, 1.054	91.000, 1.146	91.000, 1.767
457	91.200, 1.478	91.200, 2.175	91.200, 1.301	91.200, 1.131	91.200, 1.297	91.200, 1.368	91.200, 1.970	91.200, 1.236	91.200, 1.170	91.200, 1.271	91.200, 1.280	91.200, 1.240	91.200, 1.054	91.200, 1.146	91.200, 1.769
458	91.400, 1.478	91.400, 2.176	91.400, 1.301	91.400, 1.131	91.400, 1.297	91.400, 1.368	91.400, 1.972	91.400, 1.236	91.400, 1.171	91.400, 1.271	91.400, 1.281	91.400, 1.239	91.400, 1.054	91.400, 1.146	91.400, 1.770
459	91.600, 1.479	91.600, 2.178	91.600, 1.301	91.600, 1.131	91.600, 1.298	91.600, 1.368	91.600, 1.974	91.600, 1.236	91.600, 1.171	91.600, 1.271	91.600, 1.281	91.600, 1.239	91.600, 1.054	91.600, 1.146	91.600, 1.772
460	91.800, 1.479	91.800, 2.179	91.800, 1.300	91.800, 1.132	91.800, 1.298	91.800, 1.368	91.800, 1.975	91.800, 1.237	91.800, 1.172	91.800, 1.272	91.800, 1.281	91.800, 1.239	91.800, 1.054	91.800, 1.146	91.800, 1.773
461	92.000, 1.479	92.000, 2.180	92.000, 1.300	92.000, 1.132	92.000, 1.299	92.000, 1.368	92.000, 1.977	92.000, 1.237	92.000, 1.172	92.000, 1.272	92.000, 1.282	92.000, 1.239	92.000, 1.054	92.000, 1.146	92.000, 1.775
462	92.200, 1.479	92.200, 2.182	92.200, 1.301	92.200, 1.132	92.200, 1.300	92.200, 1.368	92.200, 1.979	92.200, 1.238	92.200, 1.173	92.200, 1.272	92.200, 1.282	92.200, 1.239	92.200, 1.054	92.200, 1.146	92.200, 1.776
463	92.400, 1.479	92.400, 2.183	92.400, 1.301	92.400, 1.132	92.400, 1.301	92.400, 1.369	92.400, 1.981	92.400, 1.239	92.400, 1.173	92.400, 1.272	92.400, 1.283	92.400, 1.239	92.400, 1.054	92.400, 1.146	92.400, 1.778
464	92.600, 1.479	92.600, 2.185	92.600, 1.302	92.600, 1.132	92.600, 1.301	92.600, 1.369	92.600, 1.983	92.600, 1.239	92.600, 1.173	92.600, 1.272	92.600, 1.283	92.600, 1.240	92.600, 1.053	92.600, 1.146	92.600, 1.780
465	92.800, 1.480	92.800, 2.186	92.800, 1.302	92.800, 1.132	92.800, 1.302	92.800, 1.369	92.800, 1.985	92.800, 1.239	92.800, 1.173	92.800, 1.272	92.800, 1.284	92.800, 1.240	92.800, 1.053	92.800, 1.147	92.800, 1.781
466	93.000, 1.480	93.000, 2.188	93.000, 1.303	93.000, 1.132	93.000, 1.303	93.000, 1.369	93.000, 1.987	93.000, 1.240	93.000, 1.174	93.000, 1.272	93.000, 1.284	93.000, 1.240	93.000, 1.053	93.000, 1.147	93.000, 1.782
467	93.200, 1.480	93.200, 2.189	93.200, 1.303	93.200, 1.133	93.200, 1.303	93.200, 1.369	93.200, 1.990	93.200, 1.240	93.200, 1.174	93.200, 1.272	93.200, 1.284	93.200, 1.240	93.200, 1.053	93.200, 1.147	93.200, 1.783
468	93.400, 1.480	93.400, 2.191	93.400, 1.304	93.400, 1.133	93.400, 1.304	93.400, 1.369	93.400, 1.991	93.400, 1.241	93.400, 1.174	93.400, 1.272	93.400, 1.284	93.400, 1.240	93.400, 1.054	93.400, 1.147	93.400, 1.784
469	93.600, 1.481	93.600, 2.193	93.600, 1.304	93.600, 1.133	93.600, 1.304	93.600, 1.368	93.600, 1.993	93.600, 1.241	93.600, 1.175	93.600, 1.273	93.600, 1.284	93.600, 1.240	93.600, 1.053	93.600, 1.147	93.600, 1.785
470	93.800, 1.481	93.800, 2.195	93.800, 1.304	93.800, 1.134	93.800, 1.304	93.800, 1.368	93.800, 1.995	93.800, 1.241	93.800, 1.175	93.800, 1.273	93.800, 1.284	93.800, 1.240	93.800, 1.053	93.800, 1.147	93.800, 1.785
471	94.000, 1.481	94.000, 2.196	94.000, 1.305	94.000, 1.134	94.000, 1.304	94.000, 1.369	94.000, 1.996	94.000, 1.242	94.000, 1.175	94.000, 1.273	94.000, 1.285	94.000, 1.240	94.000, 1.053	94.000, 1.147	94.000, 1.786
472	94.200, 1.481	94.200, 2.198	94.200, 1.305	94.200, 1.134	94.200, 1.304	94.200, 1.369	94.200, 1.998	94.200, 1.242	94.200, 1.175	94.200, 1.273	94.200, 1.285	94.200, 1.241	94.200, 1.053	94.200, 1.146	94.200, 1.787
473	94.400, 1.481	94.400, 2.200	94.400, 1.305	94.400, 1.135	94.400, 1.303	94.400, 1.369	94.400, 1.999	94.400, 1.242	94.400, 1.175	94.400, 1.273	94.400, 1.285	94.400, 1.241	94.400, 1.053	94.400, 1.146	94.400, 1.788
474	94.600, 1.481	94.600, 2.201	94.600, 1.305	94.600, 1.134	94.600, 1.303	94.600, 1.370	94.600, 2.001	94.600, 1.242	94.600, 1.175	94.600, 1.273	94.600, 1.285	94.600, 1.241	94.600, 1.053	94.600, 1.146	94.600, 1.789
475	94.800, 1.481	94.800, 2.203	94.800, 1.305	94.800, 1.134	94.800, 1.302	94.800, 1.370	94.800, 2.003	94.800, 1.242	94.800, 1.176	94.800, 1.273	94.800, 1.285	94.800, 1.241	94.800, 1.054	94.800, 1.146	94.800, 1.790
476	95.000, 1.481	95.000, 2.204	95.000, 1.305	95.000, 1.135	95.000, 1.302	95.000, 1.371	95.000, 2.004	95.000, 1.242	95.000, 1.176	95.000, 1.274	95.000, 1.285	95.000, 1.242	95.000, 1.054	95.000, 1.146	95.000, 1.791
477	95.200, 1.481	95.200, 2.205	95.200, 1.305	95.200, 1.134	95.200, 1.302	95.200, 1.371	95.200, 2.006	95.200, 1.242	95.200, 1.176	95.200, 1.274	95.200, 1.285	95.200, 1.242	95.200, 1.054	95.200, 1.146	95.200, 1.792
478	95.400, 1.482	95.400, 2.205	95.400, 1.305	95.400, 1.134	95.400, 1.302	95.400, 1.372	95.400, 2.007	95.400, 1.242	95.400, 1.176	95.400, 1.274	95.400, 1.285	95.400, 1.243	95.400, 1.053	95.400, 1.146	95.400, 1.794
479	95.600, 1.482	95.600, 2.206	95.600, 1.305	95.600, 1.134	95.600, 1.302	95.600, 1.372	95.600, 2.009	95.600, 1.242	95.600, 1.176	95.600, 1.275	95.600, 1.286	95.600, 1.243	95.600, 1.053	95.600, 1.146	95.600, 1.795
480	95.800, 1.482	95.800, 2.207	95.800, 1.305	95.800, 1.134	95.800, 1.302	95.800, 1.372	95.800, 2.010	95.800, 1.242	95.800, 1.176	95.800, 1.275	95.800, 1.286	95.800, 1.243	95.800, 1.053	95.800, 1.147	95.800, 1.796
481	96.000, 1.482	96.000, 2.207	96.000, 1.305	96.000, 1.133	96.000, 1.302	96.000, 1.372	96.000, 2.012	96.000, 1.242	96.000, 1.176	96.000, 1.276	96.000, 1.286	96.000, 1.244	96.000, 1.053	96.000, 1.147	96.000, 1.798
482	96.200, 1.482	96.200, 2.208	96.200, 1.306	96.200, 1.133	96.200, 1.302	96.200, 1.372	96.200, 2.013	96.200, 1.242	96.200, 1.176	96.200, 1.276	96.200, 1.287	96.200, 1.244	96.200, 1.053	96.200, 1.147	96.200, 1.799
483	96.400, 1.483	96.400, 2.208	96.400, 1.306	96.400, 1.133	96.400, 1.303	96.400, 1.373	96.400, 2.015	96.400, 1.242	96.400, 1.177	96.400, 1.276	96.400, 1.287	96.400, 1.244	96.400, 1.053	96.400, 1.147	96.400, 1.801
484	96.600, 1.483	96.600, 2.209	96.600, 1.306	96.600, 1.132	96.600, 1.303	96.600, 1.373	96.600, 2.017	96.600, 1.242	96.600, 1.177	96.600, 1.276	96.600, 1.287	96.600, 1.245	96.600, 1.054	96.600, 1.147	96.600, 1.802
485	96.800, 1.483	96.800, 2.210	96.800, 1.306	96.800, 1.132	96.800, 1.303	96.800, 1.373	96.800, 2.019	96.800, 1.242	96.800, 1.177	96.800, 1.276	96.800, 1.287	96.800, 1.245	96.800, 1.054	96.800, 1.147	96.800, 1.804
486	97.000, 1.483	97.000, 2.211	97.000, 1.306	97.000, 1.132	97.000, 1.303	97.000, 1.373	97.000, 2.021	97.000, 1.243	97.000, 1.178	97.000, 1.276	97.000, 1.287	97.000, 1.245	97.000, 1.054	97.000, 1.147	97.000, 1.805
487	97.200, 1.484	97.200, 2.212	97.200, 1.306	97.200, 1.132	97.200, 1.303	97.200, 1.374	97.200, 2.023	97.200, 1.243	97.200, 1.178	97.200, 1.276	97.200, 1.288	97.200, 1.245	97.200, 1.054	97.200, 1.147	97.200, 1.806
488	97.400, 1.484	97.400, 2.213	97.400, 1.306	97.400, 1.132	97.400, 1.304	97.400, 1.374	97.400, 2.024	97.400, 1.243	97.400, 1.179	97.400, 1.276	97.400, 1.288	97.400, 1.245	97.400, 1.054	97.400, 1.146	97.400, 1.808
489	97.600, 1.485	97.600, 2.215	97.600, 1.306	97.600, 1.132	97.600, 1.304	97.600, 1.374	97.600, 2.026	97.600, 1.244	97.600, 1.179	97.600, 1.276	97.600, 1.288	97.600, 1.244	97.600, 1.054	97.600, 1.146	97.600, 1.809
490	97.800, 1.485	97.800, 2.216	97.800, 1.306	97.800, 1.132	97.800, 1.303	97.800, 1.374	97.800, 2.027	97.800, 1.244	97.800, 1.179	97.800, 1.276	97.800, 1.288	97.800, 1.244	97.800, 1.054	97.800, 1.145	97.800, 1.810
491	98.000, 1.486	98.000, 2.218	98.000, 1.307	98.000, 1.132	98.000, 1.303	98.000, 1.375	98.000, 2.029	98.000, 1.244	98.000, 1.180	98.000, 1.276	98.000, 1.288	98.000, 1.244	98.000, 1.055	98.000, 1.145	98.000, 1.811
492	98.200, 1.486	98.200, 2.219	98.200, 1.307	98.200, 1.132	98.200, 1.302	98.200, 1.375	98.200, 2.030	98.200, 1.244	98.200, 1.180	98.200, 1.276	98.200, 1.288	98.200, 1.243	98.200, 1.055	98.200, 1.144	98.200, 1.812
493	98.400, 1.487	98.400, 2.221	98.400, 1.307	98.400, 1.132	98.400, 1.302	98.400, 1.376	98.400, 2.032	98.400, 1.244	98.400, 1.180	98.400, 1.276	98.400, 1.288	98.400, 1.243	98.400, 1.055	98.400, 1.144	98.400, 1.813
494	98.600, 1.487	98.600, 2.222	98.600, 1.307	98.600, 1.132	98.600, 1.302	98.600, 1.376	98.600, 2.034	98.600, 1.244	98.600, 1.180	98.600, 1.276	98.600, 1.288	98.600, 1.243	98.600, 1.055	98.600, 1.144	98.600, 1.814
495	98.800, 1.488	98.800, 2.223	98.800, 1.307	98.800, 1.133	98.800, 1.302	98.800, 1.377	98.800, 2.035	98.800, 1.244	98.800, 1.179	98.800, 1.277	98.800, 1.288	98.800, 1.243	98.800, 1.055	98.800, 1.143	98.800, 1.816
496	99.000, 1.488	99.000, 2.224	99.000, 1.307	99.000, 1.133	99.000, 1.302	99.000, 1.377	99.000, 2.037	99.000, 1.244	99.000, 1.179	99.000, 1.277	99.000, 1.288	99.000, 1.243	99.000, 1.055	99.000, 1.143	99.000, 1.817
497	99.200, 1.488	99.200, 2.226	99.200, 1.307	99.200, 1.133	99.200, 1.302	99.200, 1.378	99.200, 2.038	99.200, 1.244	99.200, 1.179	99.200, 1.277	99.200, 1.289	99.200, 1.243	99.200, 1.055	99.200, 1.144	99.200, 1.818
498	99.400, 1.488	99.400, 2.227	99.400, 1.307	99.400, 1.134	99.400, 1.302	99.400, 1.378	99.400, 2.040	99.400, 1.244	99.400, 1.179	99.400, 1.278	99.400, 1.289	99.400, 1.243	99.400, 1.055	99.400, 1.144	99.400, 1.819
499	99.600, 1.489	99.600, 2.228	99.600, 1.307	99.600, 1.134	99.600, 1.303	99.600, 1.378	99.600, 2.041	99.600, 1.243	99.600, 1.179	99.600, 1.278	99.600, 1.289	99.600, 1.244	99.600, 1.055	99.600, 1.144	99.600, 1.819
500	99.800, 1.489	99.800, 2.230	99.800, 1.308	99.800, 1.134	99.800, 1.303	99.800, 1.378	99.800, 2.042	99.800, 1.243	99.800, 1.179	99.800, 1.278	99.800, 1.289	99.800, 1.244	99.800, 1.055	99.800, 1.145	99.800, 1.820
501	100.000, 1.488	100.000, 2.231	100.000, 1.308	100.000, 1.134	100.000, 1.303	100.000, 1.378	100.000, 2.044	100.000, 1.243	100.000, 1.179	100.000, 1.278	100.000, 1.289	100.000, 1.245	100.000, 1.055	100.000, 1.145	100.000, 1.821
502	100.200, 1.488	100.200, 2.232	100.200, 1.308	100.200, 1.134	100.200, 1.304	100.200, 1.379	100.200, 2.046	100.200, 1.243	100.200, 1.179	100.200, 1.278	100.200, 1.289	100.200, 1.245	100.200, 1.055	100.200, 1.146	100.200, 1.822
503	100.400, 1.488	100.400, 2.233	100.400, 1.308	100.400, 1.135	100.400, 1.304	100.400, 1.379	100.400, 2.047	100.400, 1.244	100.400, 1.179	100.400, 1.279	100.400, 1.289	100.400, 1.246	100.400, 1.055	100.400, 1.147	100.400, 1.822
504	100.600, 1.488	100.600, 2.234	100.600, 1.308	100.600, 1.135	100.600, 1.305	100.600, 1.379	100.600, 2.049	100.600, 1.244	100.600, 1.179	100.600, 1.278	100.600, 1.290	100.600, 1.246	100.600, 1.055	100.600, 1.147	100.600, 1.824
505	100.800, 1.487	100.800, 2.235	100.800, 1.308	100.800, 1.135	100.800, 1.306	100.800, 1.379	100.800, 2.051	100.800, 1.245	100.800, 1.179	100.800, 1.278	100.800, 1.290	100.800, 1.247	100.800, 1.054	100.800, 1.147	100.800, 1.825
506	101.000, 1.487	101.000, 2.237	101.000, 1.308	101.000, 1.135	101.000, 1.306	101.000, 1.379	101.000, 2.052	101.000, 1.245	101.000, 1.179	101.000, 1.278	101.000, 1.290	101.000, 1.247	101.000, 1.054	101.000, 1.148	101.000, 1.826
507	101.200, 1.487	101.200, 2.238	101.200, 1.308	101.200, 1.135	101.200, 1.307	101.200, 1.379	101.200, 2.053	101.200, 1.246	101.200, 1.180	101.200, 1.278	101.200, 1.291	101.200, 1.247	101.200, 1.054	101.200, 1.148	101.200, 1.827
508	101.400, 1.487	101.400, 2.239	101.400, 1.309	101.400, 1.135	101.400, 1.307	101.400, 1.379	101.400, 2.055	101.400, 1.246	101.400, 1.180	101.400, 1.278	101.400, 1.291	101.400, 1.247	101.400, 1.054	101.400, 1.148	101.400, 1.827
509	101.600, 1.487	101.600, 2.240	101.600, 1.309	101.600, 1.135	101.600, 1.308	101.600, 1.379	101.600, 2.056	101.600, 1.246	101.600, 1.180	101.600, 1.278	101.600, 1.291	101.600, 1.247	101.600, 1.053	101.600, 1.148	101.600, 1.828
510	101.800, 1.488	101.800, 2.241	101.800, 1.309	101.800, 1.135	101.800, 1.308	101.800, 1.380	101.800, 2.057	101.800, 1.246	101.800, 1.181	101.800, 1.278	101.800, 1.291	101.800, 1.247	101.800, 1.053	101.800, 1.148	101.800, 1.829
511	102.000, 1.488	102.000, 2.243	102.000, 1.310	102.000, 1.135	102.000, 1.308	102.000, 1.380	102.000, 2.058	102.000, 1.246	102.000, 1.181	102.000, 1.279	102.000, 1.292	102.000, 1.246	102.000, 1.053	102.000, 1.147	102.000, 1.830
512	102.200, 1.488	102.200, 2.244	102.200, 1.310	102.200, 1.135	102.200, 1.308	102.200, 1.381	102.200, 2.059	102.200, 1.246	102.200, 1.181	102.200, 1.279	102.200, 1.292	102.200, 1.246	102.200, 1.053	102.200, 1.147	102.200, 1.831
513	102.400, 1.489	102.400, 2.245	102.400, 1.310	102.400, 1.134	102.400, 1.307	102.400, 1.381	102.400, 2.060	102.400, 1.247	102.400, 1.181	102.400, 1.279	102.400, 1.293	102.400, 1.246	102.400, 1.053	102.400, 1.146	102.400, 1.832
514	102.600, 1.489	102.600, 2.246	102.600, 1.310	102.600, 1.134	102.600, 1.307	102.600, 1.381	102.600, 2.061	102.600, 1.247	102.600, 1.181	102.600, 1.279	102.600, 1.294	102.600, 1.245	102.600, 1.054	102.600, 1.146	102.600, 1.833
515	102.800, 1.490	102.800, 2.247	102.800, 1.309	102.800, 1.134	102.800, 1.307	102.800, 1.382	102.800, 2.062	102.800, 1.248	102.800, 1.181	102.800, 1.279	102.800, 1.294	102.800, 1.245	102.800, 1.054	102.800, 1.145	102.800, 1.835
516	103.000, 1.490	103.000, 2.249	103.000, 1.309	103.000, 1.134	103.000, 1.307	103.000, 1.382	103.000, 2.063	103.000, 1.248	103.000, 1.181	103.000, 1.279	103.000, 1.294	103.000, 1.245	103.000, 1.054	103.000, 1.145	103.000, 1.836
517	103.200, 1.491	103.200, 2.250	103.200, 1.309	103.200, 1.133	103.200, 1.307	103.200, 1.383	103.200, 2.064	103.200, 1.249	103.200, 1.181	103.200, 1.279	103.200, 1.295	103.200, 1.245	103.200, 1.054	103.200, 1.144	103.200, 1.837
518	103.400, 1.491	103.400, 2.251	103.400, 1.309	103.400, 1.133	103.400, 1.307	103.400, 1.383	103.400, 2.065	103.400, 1.249	103.400, 1.180	103.400, 1.279	103.400, 1.295	103.400, 1.245	103.400, 1.055	103.400, 1.144	103.400, 1.838
519	103.600, 1.492	103.600, 2.252	103.600, 1.309	103.600, 1.133	103.600, 1.308	103.600, 1.384	103.600, 2.066	103.600, 1.249	103.600, 1.180	103.600, 1.280	103.600, 1.295	103.600, 1.246	103.600, 1.055	103.600, 1.144	103.600, 1.839
520	103.800, 1.492	103.800, 2.253	103.800, 1.309	103.800, 1.133	103.800, 1.308	103.800, 1.384	103.800, 2.068	103.800, 1.250	103.800, 1.180	103.800, 1.280	103.800, 1.295	103.800, 1.246	103.800, 1.056	103.800, 1.144	103.800, 1.840
521	104.000, 1.493	104.000, 2.254	104.000, 1.309	104.000, 1.133	104.000, 1.308	104.000, 1.385	104.000, 2.069	104.000, 1.250	104.000, 1.180	104.000, 1.280	104.000, 1.295	104.000, 1.247	104.000, 1.056	104.000, 1.144	104.000, 1.841
522	104.200, 1.493	104.200, 2.255	104.200, 1.309	104.200, 1.133	104.200, 1.308	104.200, 1.385	104.200, 2.071	104.200, 1.250	104.200, 1.181	104.200, 1.280	104.200, 1.295	104.200, 1.247	104.200, 1.056	104.200, 1.145	104.200, 1.842
523	104.400, 1.493	104.400, 2.256	104.400, 1.309	104.400, 1.134	104.400, 1.308	104.400, 1.385	104.400, 2.073	104.400, 1.250	104.400, 1.181	104.400, 1.280	104.400, 1.295	104.400, 1.248	104.400, 1.056	104.400, 1.145	104.400, 1.843
524	104.600, 1.493	104.600, 2.257	104.600, 1.309	104.600, 1.134	104.600, 1.308	104.600, 1.385	104.600, 2.074	104.600, 1.250	104.600, 1.181	104.600, 1.280	104.600, 1.295	104.600, 1.248	104.600, 1.056	104.600, 1.146	104.600, 1.844
525	104.800, 1.493	104.800, 2.259	104.800, 1.309	104.800, 1.135	104.800, 1.308	104.800, 1.385	104.800, 2.076	104.800, 1.250	104.800, 1.181	104.800, 1.280	104.800, 1.295	104.800, 1.249	104.800, 1.056	104.800, 1.146	104.800, 1.844
526	105.000, 1.493	105.000, 2.260	105.000, 1.309	105.000, 1.135	105.000, 1.307	105.000, 1.386	105.000, 2.078	105.000, 1.250	105.000, 1.181	105.000, 1.280	105.000, 1.296	105.000, 1.249	105.000, 1.057	105.000, 1.146	105.000, 1.845
527	105.200, 1.493	105.200, 2.261	105.200, 1.309	105.200, 1.135	105.200, 1.307	105.200, 1.386	105.200, 2.079	105.200, 1.249	105.200, 1.181	105.200, 1.281	105.200, 1.296	105.200, 1.249	105.200, 1.056	105.200, 1.147	105.200, 1.845
528	105.400, 1.492	105.400, 2.262	105.400, 1.310	105.400, 1.136	105.400, 1.307	105.400, 1.386	105.400, 2.081	105.400, 1.249	105.400, 1.181	105.400, 1.281	105.400, 1.296	105.400, 1.249	105.400, 1.056	105.400, 1.147	105.400, 1.846
529	105.600, 1.492	105.600, 2.263	105.600, 1.310	105.600, 1.136	105.600, 1.307	105.600, 1.386	105.600, 2.082	105.600, 1.249	105.600, 1.182	105.600, 1.281	105.600, 1.297	105.600, 1.249	105.600, 1.057	105.600, 1.147	105.600, 1.846
530	105.800, 1.492	105.800, 2.264	105.800, 1.311	105.800, 1.137	105.800, 1.307	105.800, 1.386	105.800, 2.084	105.800, 1.249	105.800, 1.182	105.800, 1.282	105.800, 1.298	105.800, 1.249	105.800, 1.057	105.800, 1.147	105.800, 1.847
531	106.000, 1.492	106.000, 2.265	106.000, 1.311	106.000, 1.137	106.000, 1.307	106.000, 1.387	106.000, 2.085	106.000, 1.249	106.000, 1.183	106.000, 1.282	106.000, 1.298	106.000, 1.249	106.000, 1.057	106.000, 1.147	106.000, 1.847
532	106.200, 1.493	106.200, 2.266	106.200, 1.312	106.200, 1.137	106.200, 1.306	106.200, 1.387	106.200, 2.087	106.200, 1.249	106.200, 1.183	106.200, 1.281	106.200, 1.299	106.200, 1.249	106.200, 1.057	106.200, 1.146	106.200, 1.848
533	106.400, 1.493	106.400, 2.267	106.400, 1.312	106.400, 1.138	106.400, 1.306	106.400, 1.387	106.400, 2.088	106.400, 1.249	106.400, 1.183	106.400, 1.281	106.400, 1.299	106.400, 1.249	106.400, 1.057	106.400, 1.146	106.400, 1.849
534	106.600, 1.493	106.600, 2.269	106.600, 1.313	106.600, 1.138	106.600, 1.306	106.600, 1.387	106.600, 2.090	106.600, 1.250	106.600, 1.183	106.600, 1.281	106.600, 1.299	106.600, 1.249	106.600, 1.057	106.600, 1.146	106.600, 1.849
535	106.800, 1.494	106.800, 2.270	106.800, 1.313	106.800, 1.138	106.800, 1.306	106.800, 1.388	106.800, 2.091	106.800, 1.250	106.800, 1.183	106.800, 1.281	106.800, 1.299	106.800, 1.249	106.800, 1.057	106.800, 1.145	106.800, 1.850
536	107.000, 1.495	107.000, 2.270	107.000, 1.313	107.000, 1.138	107.000, 1.307	107.000, 1.388	107.000, 2.092	107.000, 1.251	107.000, 1.183	107.000, 1.281	107.000, 1.300	107.000, 1.249	107.000, 1.056	107.000, 1.145	107.000, 1.851
537	107.200, 1.495	107.200, 2.271	107.200, 1.314	107.200, 1.138	107.200, 1.307	107.200, 1.388	107.200, 2.093	107.200, 1.252	107.200, 1.182	107.200, 1.281	107.200, 1.299	107.200, 1.249	107.200, 1.056	107.200, 1.144	107.200, 1.852
538	107.400, 1.496	107.400, 2.272	107.400, 1.314	107.400, 1.138	107.400, 1.308	107.400, 1.389	107.400, 2.094	107.400, 1.252	107.400, 1.182	107.400, 1.281	107.400, 1.300	107.400, 1.250	107.400, 1.056	107.400, 1.144	107.400, 1.853
539	107.600, 1.497	107.600, 2.273	107.600, 1.314	107.600, 1.138	107.600, 1.308	107.600, 1.389	107.600, 2.095	107.600, 1.252	107.600, 1.182	107.600, 1.281	107.600, 1.300	107.600, 1.250	107.600, 1.056	107.600, 1.144	107.600, 1.855
540	107.800, 1.497	107.800, 2.273	107.800, 1.314	107.800, 1.138	107.800, 1.309	107.800, 1.390	107.800, 2.096	107.800, 1.252	107.800, 1.182	107.800, 1.281	107.800, 1.300	107.800, 1.250	107.800, 1.056	107.800, 1.144	107.800, 1.856
541	108.000, 1.498	108.000, 2.274	108.000, 1.314	108.000, 1.138	108.000, 1.309	108.000, 1.390	108.000, 2.097	108.000, 1.253	108.000, 1.182	108.000, 1.281	108.000, 1.300	108.000, 1.250	108.000, 1.056	108.000, 1.144	108.000, 1.857
542	108.200, 1.498	108.200, 2.275	108.200, 1.314	108.200, 1.138	108.200, 1.309	108.200, 1.390	108.200, 2.098	108.200, 1.252	108.200, 1.182	108.200, 1.282	108.200, 1.300	108.200, 1.250	108.200, 1.056	108.200, 1.144	108.200, 1.858
543	108.400, 1.498	108.400, 2.276	108.400, 1.314	108.400, 1.138	108.400, 1.310	108.400, 1.391	108.400, 2.099	108.400, 1.252	108.400, 1.182	108.400, 1.282	108.400, 1.300	108.400, 1.250	108.400, 1.056	108.400, 1.144	108.400, 1.859
544	108.600, 1.498	108.600, 2.277	108.600, 1.314	108.600, 1.138	108.600, 1.310	108.600, 1.391	108.600, 2.100	108.600, 1.252	108.600, 1.183	108.600, 1.282	108.600, 1.300	108.600, 1.250	108.600, 1.056	108.600, 1.145	108.600, 1.860
545	108.800, 1.498	108.800, 2.279	108.800, 1.314	108.800, 1.138	108.800, 1.310	108.800, 1.391	108.800, 2.102	108.800, 1.251	108.800, 1.183	108.800, 1.283	108.800, 1.300	108.800, 1.250	108.800, 1.056	108.800, 1.145	108.800, 1.860
546	109.000, 1.498	109.000, 2.280	109.000, 1.314	109.000, 1.138	109.000, 1.310	109.000, 1.392	109.000, 2.103	109.000, 1.251	109.000, 1.184	109.000, 1.283	109.000, 1.300	109.000, 1.250	109.000, 1.056	109.000, 1.145	109.000, 1.861
547	109.200, 1.498	109.200, 2.281	109.200, 1.314	109.200, 1.138	109.200, 1.310	109.200, 1.392	109.200, 2.104	109.200, 1.251	109.200, 1.184	109.200, 1.283	109.200, 1.300	109.200, 1.250	109.200, 1.055	109.200, 1.145	109.200, 1.862
548	109.400, 1.497	109.400, 2.282	109.400, 1.314	109.400, 1.138	109.400, 1.309	109.400, 1.392	109.400, 2.105	109.400, 1.251	109.400, 1.185	109.400, 1.283	109.400, 1.300	109.400, 1.250	109.400, 1.055	109.400, 1.146	109.400, 1.863
549	109.600, 1.497	109.600, 2.283	109.600, 1.314	109.600, 1.138	109.600, 1.309	109.600, 1.393	109.600, 2.106	109.600, 1.251	109.600, 1.186	109.600, 1.284	109.600, 1.301	109.600, 1.250	109.600, 1.055	109.600, 1.146	109.600, 1.863
550	109.800, 1.497	109.800, 2.285	109.800, 1.314	109.800, 1.138	109.800, 1.309	109.800, 1.393	109.800, 2.108	109.800, 1.251	109.800, 1.186	109.800, 1.283	109.800, 1.301	109.800, 1.250	109.800, 1.055	109.800, 1.146	109.800, 1.864
551	110.000, 1.497	110.000, 2.286	110.000, 1.313	110.000, 1.138	110.000, 1.308	110.000, 1.393	110.000, 2.109	110.000, 1.251	110.000, 1.186	110.000, 1.284	110.000, 1.301	110.000, 1.249	110.000, 1.055	110.000, 1.146	110.000, 1.865
552	110.200, 1.497	110.200, 2.287	110.200, 1.313	110.200, 1.139	110.200, 1.308	110.200, 1.394	110.200, 2.111	110.200, 1.252	110.200, 1.186	110.200, 1.284	110.200, 1.301	110.200, 1.249	110.200, 1.055	110.200, 1.146	110.200, 1.866
553	110.400, 1.497	110.400, 2.289	110.400, 1.313	110.400, 1.139	110.400, 1.308	110.400, 1.394	110.400, 2.112	110.400, 1.252	110.400, 1.186	110.400, 1.284	110.400, 1.301	110.400, 1.249	110.400, 1.055	110.400, 1.146	110.400, 1.867
554	110.600, 1.497	110.600, 2.291	110.600, 1.313	110.600, 1.139	110.600, 1.308	110.600, 1.394	110.600, 2.113	110.600, 1.253	110.600, 1.186	110.600, 1.284	110.600, 1.301	110.600, 1.248	110.600, 1.055	110.600, 1.146	110.600, 1.868
555	110.800, 1.497	110.800, 2.292	110.800, 1.314	110.800, 1.139	110.800, 1.309	110.800, 1.394	110.800, 2.114	110.800, 1.253	110.800, 1.186	110.800, 1.284	110.800, 1.301	110.800, 1.247	110.800, 1.055	110.800, 1.146	110.800, 1.869
556	111.000, 1.497	111.000, 2.293	111.000, 1.314	111.000, 1.139	111.000, 1.309	111.000, 1.394	111.000, 2.115	111.000, 1.254	111.000, 1.186	111.000, 1.285	111.000, 1.301	111.000, 1.247	111.000, 1.055	111.000, 1.145	111.000, 1.869
557	111.200, 1.498	111.200, 2.294	111.200, 1.314	111.200, 1.139	111.200, 1.310	111.200, 1.394	111.200, 2.116	111.200, 1.254	111.200, 1.186	111.200, 1.285	111.200, 1.301	111.200, 1.247	111.200, 1.055	111.200, 1.145	111.200, 1.870
558	111.400, 1.498	111.400, 2.294	111.400, 1.314	111.400, 1.139	111.400, 1.311	111.400, 1.394	111.400, 2.117	111.400, 1.255	111.400, 1.186	111.400, 1.286	111.400, 1.302	111.400, 1.247	111.400, 1.056	111.400, 1.145	111.400, 1.871
559	111.600, 1.498	111.600, 2.295	111.600, 1.314	111.600, 1.139	111.600, 1.312	111.600, 1.394	111.600, 2.118	111.600, 1.255	111.600, 1.186	111.600, 1.286	111.600, 1.302	111.600, 1.247	111.600, 1.056	111.600, 1.145	111.600, 1.871
560	111.800, 1.499	111.800, 2.295	111.800, 1.315	111.800, 1.140	111.800, 1.313	111.800, 1.393	111.800, 2.119	111.800, 1.256	111.800, 1.185	111.800, 1.286	111.800, 1.302	111.800, 1.247	111.800, 1.056	111.800, 1.145	111.800, 1.871
561	112.000, 1.499	112.000, 2.296	112.000, 1.315	112.000, 1.140	112.000, 1.313	112.000, 1.393	112.000, 2.120	112.000, 1.256	112.000, 1.185	112.000, 1.287	112.000, 1.302	112.000, 1.247	112.000, 1.056	112.000, 1.145	112.000, 1.872
562	112.200, 1.500	112.200, 2.297	112.200, 1.316	112.200, 1.140	112.200, 1.314	112.200, 1.393	112.200, 2.121	112.200, 1.256	112.200, 1.185	112.200, 1.287	112.200, 1.302	112.200, 1.247	112.200, 1.056	112.200, 1.145	112.200, 1.872
563	112.400, 1.500	112.400, 2.297	112.400, 1.316	112.400, 1.140	112.400, 1.314	112.400, 1.393	112.400, 2.122	112.400, 1.256	112.400, 1.185	112.400, 1.287	112.400, 1.302	112.400, 1.248	112.400, 1.056	112.400, 1.145	112.400, 1.873
564	112.600, 1.501	112.600, 2.298	112.600, 1.316	112.600, 1.141	112.600, 1.314	112.600, 1.392	112.600, 2.124	112.600, 1.256	112.600, 1.185	112.600, 1.287	112.600, 1.302	112.600, 1.249	112.600, 1.056	112.600, 1.145	112.600, 1.873
565	112.800, 1.501	112.800, 2.298	112.800, 1.316	112.800, 1.141	112.800, 1.314	112.800, 1.392	112.800, 2.125	112.800, 1.257	112.800, 1.185	112.800, 1.287	112.800, 1.302	112.800, 1.249	112.800, 1.056	112.800, 1.145	112.800, 1.874
566	113.000, 1.502	113.000, 2.299	113.000, 1.316	113.000, 1.141	113.000, 1.314	113.000, 1.392	113.000, 2.126	113.000, 1.257	113.000, 1.185	113.000, 1.287	113.000, 1.302	113.000, 1.250	113.000, 1.056	113.000, 1.145	113.000, 1.875
567	113.200, 1.503	113.200, 2.299	113.200, 1.316	113.200, 1.141	113.200, 1.314	113.200, 1.393	113.200, 2.127	113.200, 1.258	113.200, 1.185	113.200, 1.287	113.200, 1.302	113.200, 1.251	113.200, 1.056	113.200, 1.145	113.200, 1.876
568	113.400, 1.503	113.400, 2.300	113.400, 1.316	113.400, 1.141	113.400, 1.314	113.400, 1.393	113.400, 2.128	113.400, 1.258	113.400, 1.185	113.400, 1.286	113.400, 1.301	113.400, 1.252	113.400, 1.056	113.400, 1.145	113.400, 1.878
569	113.600, 1.504	113.600, 2.300	113.600, 1.316	113.600, 1.141	113.600, 1.314	113.600, 1.393	113.600, 2.129	113.600, 1.258	113.600, 1.185	113.600, 1.286	113.600, 1.301	113.600, 1.252	113.600, 1.056	113.600, 1.146	113.600, 1.879
570	113.800, 1.504	113.800, 2.301	113.800, 1.316	113.800, 1.141	113.800, 1.313	113.800, 1.393	113.800, 2.130	113.800, 1.258	113.800, 1.185	113.800, 1.286	113.800, 1.301	113.800, 1.252	113.800, 1.056	113.800, 1.146	113.800, 1.880
571	114.000, 1.504	114.000, 2.302	114.000, 1.316	114.000, 1.140	114.000, 1.313	114.000, 1.394	114.000, 2.131	114.000, 1.258	114.000, 1.185	114.000, 1.286	114.000, 1.301	114.000, 1.253	114.000, 1.056	114.000, 1.146	114.000, 1.881
572	114.200, 1.504	114.200, 2.303	114.200, 1.316	114.200, 1.140	114.200, 1.313	114.200, 1.394	114.200, 2.132	114.200, 1.258	114.200, 1.185	114.200, 1.286	114.200, 1.301	114.200, 1.253	114.200, 1.056	114.200, 1.146	114.200, 1.883
573	114.400, 1.504	114.400, 2.304	114.400, 1.317	114.400, 1.140	114.400, 1.313	114.400, 1.394	114.400, 2.133	114.400, 1.258	114.400, 1.185	114.400, 1.287	114.400, 1.301	114.400, 1.253	114.400, 1.056	114.400, 1.145	114.400, 1.884
574	114.600, 1.504	114.600, 2.305	114.600, 1.317	114.600, 1.140	114.600, 1.313	114.600, 1.395	114.600, 2.134	114.600, 1.258	114.600, 1.186	114.600, 1.287	114.600, 1.301	114.600, 1.252	114.600, 1.056	114.600, 1.145	114.600, 1.885
575	114.800, 1.504	114.800, 2.306	114.800, 1.317	114.800, 1.139	114.800, 1.313	114.800, 1.395	114.800, 2.135	114.800, 1.258	114.800, 1.186	114.800, 1.287	114.800, 1.302	114.800, 1.252	114.800, 1.057	114.800, 1.145	114.800, 1.885
576	115.000, 1.505	115.000, 2.307	115.000, 1.317	115.000, 1.140	115.000, 1.313	115.000, 1.395	115.000, 2.136	115.000, 1.258	115.000, 1.186	115.000, 1.288	115.000, 1.302	115.000, 1.251	115.000, 1.057	115.000, 1.145	115.000, 1.886
577	115.200, 1.505	115.200, 2.308	115.200, 1.317	115.200, 1.140	115.200, 1.313	115.200, 1.395	115.200, 2.137	115.200, 1.258	115.200, 1.187	115.200, 1.288	115.200, 1.302	115.200, 1.251	115.200, 1.057	115.200, 1.145	115.200, 1.886
578	115.400, 1.504	115.400, 2.309	115.400, 1.317	115.400, 1.140	115.400, 1.313	115.400, 1.395	115.400, 2.137	115.400, 1.257	115.400, 1.187	115.400, 1.288	115.400, 1.303	115.400, 1.250	115.400, 1.056	115.400, 1.144	115.400, 1.886
579	115.600, 1.504	115.600, 2.310	115.600, 1.318	115.600, 1.140	115.600, 1.312	115.600, 1.395	115.600, 2.138	115.600, 1.257	115.600, 1.188	115.600, 1.289	115.600, 1.303	115.600, 1.249	115.600, 1.056	115.600, 1.144	115.600, 1.886
580	115.800, 1.504	115.800, 2.311	115.800, 1.318	115.800, 1.141	115.800, 1.312	115.800, 1.396	115.800, 2.139	115.800, 1.257	115.800, 1.188	115.800, 1.289	115.800, 1.304	115.800, 1.249	115.800, 1.056	115.800, 1.144	115.800, 1.887
581	116.000, 1.504	116.000, 2.312	116.000, 1.318	116.000, 1.141	116.000, 1.312	116.000, 1.396	116.000, 2.140	116.000, 1.257	116.000, 1.189	116.000, 1.289	116.000, 1.304	116.000, 1.248	116.000, 1.056	116.000, 1.144	116.000, 1.887
582	116.200, 1.504	116.200, 2.312	116.200, 1.318	116.200, 1.142	116.200, 1.312	116.200, 1.397	116.200, 2.141	116.200, 1.257	116.200, 1.189	116.200, 1.289	116.200, 1.305	116.200, 1.248	116.200, 1.056	116.200, 1.144	116.200, 1.887
583	116.400, 1.505	116.400, 2.313	116.400, 1.318	116.400, 1.142	116.400, 1.312	116.400, 1.397	116.400, 2.142	116.400, 1.256	116.400, 1.190	116.400, 1.290	116.400, 1.305	116.400, 1.248	116.400, 1.056	116.400, 1.145	116.400, 1.888
584	116.600, 1.505	116.600, 2.314	116.600, 1.318	116.600, 1.143	116.600, 1.313	116.600, 1.398	116.600, 2.143	116.600, 1.256	116.600, 1.190	116.600, 1.290	116.600, 1.306	116.600, 1.248	116.600, 1.056	116.600, 1.145	116.600, 1.889
585	116.800, 1.505	116.800, 2.314	116.800, 1.318	116.800, 1.143	116.800, 1.313	116.800, 1.399	116.800, 2.144	116.800, 1.256	116.800, 1.190	116.800, 1.290	116.800, 1.307	116.800, 1.248	116.800, 1.056	116.800, 1.145	116.800, 1.890
586	117.000, 1.505	117.000, 2.315	117.000, 1.318	117.000, 1.143	117.000, 1.313	117.000, 1.400	117.000, 2.145	117.000, 1.256	117.000, 1.190	117.000, 1.290	117.000, 1.307	117.000, 1.248	117.000, 1.057	117.000, 1.145	117.000, 1.890
587	117.200, 1.505	117.200, 2.316	117.200, 1.317	117.200, 1.143	117.200, 1.313	117.200, 1.400	117.200, 2.146	117.200, 1.256	117.200, 1.189	117.200, 1.289	117.200, 1.308	117.200, 1.248	117.200, 1.057	117.200, 1.145	117.200, 1.891
588	117.400, 1.506	117.400, 2.317	117.400, 1.317	117.400, 1.143	117.400, 1.312	117.400, 1.401	117.400, 2.147	117.400, 1.256	117.400, 1.189	117.400, 1.289	117.400, 1.308	117.400, 1.248	117.400, 1.057	117.400, 1.145	117.400, 1.892
589	117.600, 1.506	117.600, 2.318	117.600, 1.317	117.600, 1.143	117.600, 1.312	117.600, 1.402	117.600, 2.148	117.600, 1.256	117.600, 1.189	117.600, 1.289	117.600, 1.309	117.600, 1.249	117.600, 1.057	117.600, 1.145	117.600, 1.892
590	117.800, 1.506	117.800, 2.318	117.800, 1.317	117.800, 1.143	117.800, 1.312	117.800, 1.403	117.800, 2.148	117.800, 1.256	117.800, 1.189	117.800, 1.289	117.800, 1.309	117.800, 1.249	117.800, 1.057	117.800, 1.145	117.800, 1.892
591	118.000, 1.506	118.000, 2.319	118.000, 1.317	118.000, 1.143	118.000, 1.312	118.000, 1.403	118.000, 2.149	118.000, 1.256	118.000, 1.189	118.000, 1.289	118.000, 1.309	118.000, 1.250	118.000, 1.057	118.000, 1.145	118.000, 1.893
592	118.200, 1.506	118.200, 2.320	118.200, 1.317	118.200, 1.143	118.200, 1.312	118.200, 1.404	118.200, 2.150	118.200, 1.257	118.200, 1.189	118.200, 1.289	118.200, 1.309	118.200, 1.250	118.200, 1.057	118.200, 1.145	118.200, 1.893
593	118.400, 1.506	118.400, 2.321	118.400, 1.317	118.400, 1.143	118.400, 1.312	118.400, 1.404	118.400, 2.151	118.400, 1.257	118.400, 1.189	118.400, 1.290	118.400, 1.309	118.400, 1.251	118.400, 1.057	118.400, 1.145	118.400, 1.893
594	118.600, 1.506	118.600, 2.322	118.600, 1.317	118.600, 1.142	118.600, 1.312	118.600, 1.403	118.600, 2.152	118.600, 1.258	118.600, 1.189	118.600, 1.290	118.600, 1.309	118.600, 1.251	118.600, 1.057	118.600, 1.145	118.600, 1.894
595	118.800, 1.506	118.800, 2.322	118.800, 1.318	118.800, 1.142	118.800, 1.312	118.800, 1.403	118.800, 2.153	118.800, 1.259	118.800, 1.190	118.800, 1.290	118.800, 1.309	118.800, 1.251	118.800, 1.057	118.800, 1.145	118.800, 1.894
596	119.000, 1.506	119.000, 2.323	119.000, 1.318	119.000, 1.142	119.000, 1.312	119.000, 1.403	119.000, 2.153	119.000, 1.259	119.000, 1.190	119.000, 1.291	119.000, 1.309	119.000, 1.251	119.000, 1.057	119.000, 1.145	119.000, 1.894
597	119.200, 1.506	119.200, 2.324	119.200, 1.318	119.200, 1.142	119.200, 1.312	119.200, 1.403	119.200, 2.154	119.200, 1.259	119.200, 1.190	119.200, 1.291	119.200, 1.309	119.200, 1.251	119.200, 1.057	119.200, 1.145	119.200, 1.895
598	119.400, 1.506	119.400, 2.325	119.400, 1.319	119.400, 1.142	119.400, 1.312	119.400, 1.403	119.400, 2.155	119.400, 1.260	119.400, 1.190	119.400, 1.291	119.400, 1.309	119.400, 1.250	119.400, 1.057	119.400, 1.145	119.400, 1.895
599	119.600, 1.506	119.600, 2.325	119.600, 1.320	119.600, 1.142	119.600, 1.313	119.600, 1.403	119.600, 2.155	119.600, 1.260	119.600, 1.190	119.600, 1.291	119.600, 1.308	119.600, 1.250	119.600, 1.057	119.600, 1.146	119.600, 1.896
600	119.800, 1.506	119.800, 2.326	119.800, 1.320	119.800, 1.142	119.800, 1.313	119.800, 1.403	119.800, 2.156	119.800, 1.260	119.800, 1.191	119.800, 1.291	119.800, 1.308	119.800, 1.250	119.800, 1.057	119.800, 1.146	119.800, 1.896
601	120.000, 1.506	120.000, 2.327	120.000, 1.321	120.000, 1.142	120.000, 1.314	120.000, 1.403	120.000, 2.157	120.000, 1.260	120.000, 1.191	120.000, 1.291	120.000, 1.308	120.000, 1.250	120.000, 1.057	120.000, 1.146	120.000, 1.897
602	120.200, 1.506	120.200, 2.328	120.200, 1.321	120.200, 1.142	120.200, 1.315	120.200, 1.402	120.200, 2.158	120.200, 1.260	120.200, 1.191	120.200, 1.291	120.200, 1.308	120.200, 1.251	120.200, 1.057	120.200, 1.146	120.200, 1.898
603	120.400, 1.506	120.400, 2.328	120.400, 1.321	120.400, 1.142	120.400, 1.315	120.400, 1.402	120.400, 2.159	120.400, 1.261	120.400, 1.191	120.400, 1.292	120.400, 1.308	120.400, 1.251	120.400, 1.056	120.400, 1.146	120.400, 1.899
604	120.600, 1.506	120.600, 2.329	120.600, 1.322	120.600, 1.142	120.600, 1.316	120.600, 1.402	120.600, 2.160	120.600, 1.261	120.600, 1.191	120.600, 1.292	120.600, 1.308	120.600, 1.251	120.600, 1.056	120.600, 1.146	120.600, 1.900
605	120.800, 1.507	120.800, 2.330	120.800, 1.322	120.800, 1.142	120.800, 1.316	120.800, 1.402	120.800, 2.161	120.800, 1.261	120.800, 1.191	120.800, 1.292	120.800, 1.308	120.800, 1.252	120.800, 1.056	120.800, 1.147	120.800, 1.900
606	121.000, 1.507	121.000, 2.331	121.000, 1.322	121.000, 1.142	121.000, 1.317	121.000, 1.402	121.000, 2.163	121.000, 1.261	121.000, 1.191	121.000, 1.291	121.000, 1.308	121.000, 1.252	121.000, 1.056	121.000, 1.147	121.000, 1.901
607	121.200, 1.507	121.200, 2.331	121.200, 1.321	121.200, 1.142	121.200, 1.317	121.200, 1.402	121.200, 2.164	121.200, 1.261	121.200, 1.191	121.200, 1.291	121.200, 1.308	121.200, 1.252	121.200, 1.056	121.200, 1.147	121.200, 1.902
608	121.400, 1.508	121.400, 2.332	121.400, 1.321	121.400, 1.142	121.400, 1.317	121.400, 1.402	121.400, 2.166	121.400, 1.261	121.400, 1.191	121.400, 1.291	121.400, 1.309	121.400, 1.252	121.400, 1.056	121.400, 1.146	121.400, 1.903
609	121.600, 1.508	121.600, 2.333	121.600, 1.321	121.600, 1.143	121.600, 1.317	121.600, 1.402	121.600, 2.167	121.600, 1.261	121.600, 1.191	121.600, 1.291	121.600, 1.309	121.600, 1.252	121.600, 1.056	121.600, 1.146	121.600, 1.904
610	121.800, 1.509	121.800, 2.333	121.800, 1.321	121.800, 1.143	121.800, 1.318	121.800, 1.402	121.800, 2.168	121.800, 1.262	121.800, 1.191	121.800, 1.291	121.800, 1.309	121.800, 1.252	121.800, 1.056	121.800, 1.146	121.800, 1.904
611	122.000, 1.509	122.000, 2.334	122.000, 1.320	122.000, 1.143	122.000, 1.318	122.000, 1.403	122.000, 2.169	122.000, 1.262	122.000, 1.192	122.000, 1.291	122.000, 1.309	122.000, 1.253	122.000, 1.055	122.000, 1.146	122.000, 1.905
612	122.200, 1.510	122.200, 2.335	122.200, 1.320	122.200, 1.143	122.200, 1.317	122.200, 1.403	122.200, 2.171	122.200, 1.262	122.200, 1.192	122.200, 1.291	122.200, 1.310	122.200, 1.253	122.200, 1.055	122.200, 1.146	122.200, 1.906
613	122.400, 1.510	122.400, 2.335	122.400, 1.320	122.400, 1.143	122.400, 1.317	122.400, 1.403	122.400, 2.172	122.400, 1.262	122.400, 1.192	122.400, 1.292	122.400, 1.310	122.400, 1.253	122.400, 1.055	122.400, 1.145	122.400, 1.906
614	122.600, 1.510	122.600, 2.336	122.600, 1.321	122.600, 1.143	122.600, 1.317	122.600, 1.403	122.600, 2.173	122.600, 1.262	122.600, 1.192	122.600, 1.292	122.600, 1.310	122.600, 1.253	122.600, 1.055	122.600, 1.145	122.600, 1.906
615	122.800, 1.510	122.800, 2.336	122.800, 1.321	122.800, 1.142	122.800, 1.316	122.800, 1.404	122.800, 2.173	122.800, 1.261	122.800, 1.192	122.800, 1.292	122.800, 1.310	122.800, 1.252	122.800, 1.055	122.800, 1.145	122.800, 1.907
616	123.000, 1.510	123.000, 2.337	123.000, 1.321	123.000, 1.142	123.000, 1.316	123.000, 1.404	123.000, 2.174	123.000, 1.262	123.000, 1.192	123.000, 1.292	123.000, 1.310	123.000, 1.252	123.000, 1.055	123.000, 1.145	123.000, 1.907
617	123.200, 1.510	123.200, 2.337	123.200, 1.321	123.200, 1.142	123.200, 1.316	123.200, 1.405	123.200, 2.175	123.200, 1.262	123.200, 1.192	123.200, 1.291	123.200, 1.311	123.200, 1.252	123.200, 1.055	123.200, 1.145	123.200, 1.907
618	123.400, 1.510	123.400, 2.338	123.400, 1.321	123.400, 1.142	123.400, 1.316	123.400, 1.405	123.400, 2.176	123.400, 1.262	123.400, 1.192	123.400, 1.291	123.400, 1.311	123.400, 1.252	123.400, 1.056	123.400, 1.145	123.400, 1.908
619	123.600, 1.510	123.600, 2.339	123.600, 1.321	123.600, 1.142	123.600, 1.316	123.600, 1.406	123.600, 2.176	123.600, 1.262	123.600, 1.192	123.600, 1.290	123.600, 1.311	123.600, 1.252	123.600, 1.056	123.600, 1.144	123.600, 1.908
620	123.800, 1.510	123.800, 2.339	123.800, 1.321	123.800, 1.142	123.800, 1.316	123.800, 1.406	123.800, 2.177	123.800, 1.262	123.800, 1.192	123.800, 1.290	123.800, 1.311	123.800, 1.252	123.800, 1.056	123.800, 1.144	123.800, 1.908
621	124.000, 1.510	124.000, 2.340	124.000, 1.321	124.000, 1.141	124.000, 1.316	124.000, 1.407	124.000, 2.178	124.000, 1.262	124.000, 1.192	124.000, 1.290	124.000, 1.311	124.000, 1.252	124.000, 1.056	124.000, 1.144	124.000, 1.908
622	124.200, 1.510	124.200, 2.341	124.200, 1.321	124.200, 1.141	124.200, 1.316	124.200, 1.407	124.200, 2.178	124.200, 1.263	124.200, 1.191	124.200, 1.290	124.200, 1.311	124.200, 1.252	124.200, 1.055	124.200, 1.144	124.200, 1.908
623	124.400, 1.510	124.400, 2.341	124.400, 1.320	124.400, 1.141	124.400, 1.316	124.400, 1.407	124.400, 2.179	124.400, 1.263	124.400, 1.192	124.400, 1.290	124.400, 1.311	124.400, 1.253	124.400, 1.055	124.400, 1.144	124.400, 1.909
624	124.600, 1.510	124.600, 2.342	124.600, 1.321	124.600, 1.141	124.600, 1.316	124.600, 1.407	124.600, 2.180	124.600, 1.263	124.600, 1.192	124.600, 1.290	124.600, 1.311	124.600, 1.253	124.600, 1.055	124.600, 1.144	124.600, 1.909
625	124.800, 1.510	124.800, 2.343	124.800, 1.320	124.800, 1.141	124.800, 1.316	124.800, 1.408	124.800, 2.181	124.800, 1.264	124.800, 1.192	124.800, 1.290	124.800, 1.311	124.800, 1.253	124.800, 1.055	124.800, 1.144	124.800, 1.910
626	125.000, 1.511	125.000, 2.343	125.000, 1.320	125.000, 1.141	125.000, 1.316	125.000, 1.408	125.000, 2.181	125.000, 1.264	125.000, 1.192	125.000, 1.290	125.000, 1.311	125.000, 1.252	125.000, 1.055	125.000, 1.144	125.000, 1.911
627	125.200, 1.511	125.200, 2.344	125.200, 1.320	125.200, 1.142	125.200, 1.316	125.200, 1.408	125.200, 2.182	125.200, 1.264	125.200, 1.193	125.200, 1.290	125.200, 1.311	125.200, 1.252	125.200, 1.055	125.200, 1.144	125.200, 1.912
628	125.400, 1.512	125.400, 2.344	125.400, 1.319	125.400, 1.142	125.400, 1.316	125.400, 1.408	125.400, 2.183	125.400, 1.264	125.400, 1.193	125.400, 1.291	125.400, 1.311	125.400, 1.252	125.400, 1.055	125.400, 1.144	125.400, 1.913
629	125.600, 1.512	125.600, 2.345	125.600, 1.319	125.600, 1.142	125.600, 1.316	125.600, 1.408	125.600, 2.184	125.600, 1.264	125.600, 1.193	125.600, 1.292	125.600, 1.311	125.600, 1.252	125.600, 1.055	125.600, 1.144	125.600, 1.913
630	125.800, 1.512	125.800, 2.346	125.800, 1.319	125.800, 1.142	125.800, 1.316	125.800, 1.408	125.800, 2.184	125.800, 1.265	125.800, 1.193	125.800, 1.293	125.800, 1.311	125.800, 1.252	125.800, 1.055	125.800, 1.144	125.800, 1.914
631	126.000, 1.512	126.000, 2.346	126.000, 1.320	126.000, 1.142	126.000, 1.316	126.000, 1.407	126.000, 2.185	126.000, 1.265	126.000, 1.193	126.000, 1.293	126.000, 1.311	126.000, 1.253	126.000, 1.056	126.000, 1.144	126.000, 1.915
632	126.200, 1.513	126.200, 2.347	126.200, 1.320	126.200, 1.142	126.200, 1.316	126.200, 1.407	126.200, 2.186	126.200, 1.265	126.200, 1.193	126.200, 1.294	126.200, 1.312	126.200, 1.253	126.200, 1.056	126.200, 1.144	126.200, 1.915
633	126.400, 1.513	126.400, 2.347	126.400, 1.321	126.400, 1.142	126.400, 1.316	126.400, 1.407	126.400, 2.187	126.400, 1.265	126.400, 1.193	126.400, 1.294	126.400, 1.312	126.400, 1.253	126.400, 1.056	126.400, 1.145	126.400, 1.916
634	126.600, 1.513	126.600, 2.348	126.600, 1.321	126.600, 1.142	126.600, 1.316	126.600, 1.407	126.600, 2.188	126.600, 1.265	126.600, 1.193	126.600, 1.294	126.600, 1.312	126.600, 1.253	126.600, 1.056	126.600, 1.145	126.600, 1.917
635	126.800, 1.513	126.800, 2.349	126.800, 1.321	126.800, 1.142	126.800, 1.316	126.800, 1.407	126.800, 2.189	126.800, 1.265	126.800, 1.193	126.800, 1.295	126.800, 1.312	126.800, 1.253	126.800, 1.056	126.800, 1.145	126.800, 1.917
636	127.000, 1.513	127.000, 2.350	127.000, 1.322	127.000, 1.142	127.000, 1.315	127.000, 1.407	127.000, 2.189	127.000, 1.265	127.000, 1.193	127.000, 1.294	127.000, 1.312	127.000, 1.253	127.000, 1.056	127.000, 1.145	127.000, 1.918
637	127.200, 1.514	127.200, 2.351	127.200, 1.322	127.200, 1.142	127.200, 1.315	127.200, 1.407	127.200, 2.190	127.200, 1.264	127.200, 1.193	127.200, 1.294	127.200, 1.312	127.200, 1.254	127.200, 1.056	127.200, 1.145	127.200, 1.919
638	127.400, 1.513	127.400, 2.352	127.400, 1.322	127.400, 1.142	127.400, 1.316	127.400, 1.407	127.400, 2.191	127.400, 1.264	127.400, 1.194	127.400, 1.294	127.400, 1.313	127.400, 1.254	127.400, 1.057	127.400, 1.145	127.400, 1.919
639	127.600, 1.514	127.600, 2.353	127.600, 1.322	127.600, 1.142	127.600, 1.316	127.600, 1.408	127.600, 2.192	127.600, 1.264	127.600, 1.194	127.600, 1.294	127.600, 1.313	127.600, 1.254	127.600, 1.057	127.600, 1.145	127.600, 1.920
640	127.800, 1.514	127.800, 2.353	127.800, 1.323	127.800, 1.142	127.800, 1.316	127.800, 1.408	127.800, 2.193	127.800, 1.264	127.800, 1.194	127.800, 1.294	127.800, 1.313	127.800, 1.254	127.800, 1.057	127.800, 1.145	127.800, 1.920
641	128.000, 1.514	128.000, 2.354	128.000, 1.323	128.000, 1.143	128.000, 1.316	128.000, 1.409	128.000, 2.194	128.000, 1.265	128.000, 1.194	128.000, 1.294	128.000, 1.314	128.000, 1.254	128.000, 1.057	128.000, 1.146	128.000, 1.921
642	128.200, 1.514	128.200, 2.355	128.200, 1.323	128.200, 1.143	128.200, 1.316	128.200, 1.409	128.200, 2.195	128.200, 1.265	128.200, 1.194	128.200, 1.294	128.200, 1.314	128.200, 1.254	128.200, 1.058	128.200, 1.146	128.200, 1.921
643	128.400, 1.514	128.400, 2.356	128.400, 1.322	128.400, 1.143	128.400, 1.316	128.400, 1.410	128.400, 2.196	128.400, 1.265	128.400, 1.194	128.400, 1.294	128.400, 1.314	128.400, 1.254	128.400, 1.058	128.400, 1.146	128.400, 1.922
644	128.600, 1.515	128.600, 2.356	128.600, 1.322	128.600, 1.144	128.600, 1.316	128.600, 1.411	128.600, 2.197	128.600, 1.265	128.600, 1.195	128.600, 1.294	128.600, 1.315	128.600, 1.255	128.600, 1.058	128.600, 1.147	128.600, 1.922
645	128.800, 1.515	128.800, 2.357	128.800, 1.322	128.800, 1.144	128.800, 1.316	128.800, 1.411	128.800, 2.198	128.800, 1.265	128.800, 1.195	128.800, 1.294	128.800, 1.315	128.800, 1.255	128.800, 1.058	128.800, 1.147	128.800, 1.923
646	129.000, 1.515	129.000, 2.357	129.000, 1.321	129.000, 1.144	129.000, 1.316	129.000, 1.411	129.000, 2.199	129.000, 1.265	129.000, 1.195	129.000, 1.294	129.000, 1.315	129.000, 1.255	129.000, 1.057	129.000, 1.146	129.000, 1.923
647	129.200, 1.516	129.200, 2.358	129.200, 1.321	129.200, 1.145	129.200, 1.316	129.200, 1.412	129.200, 2.199	129.200, 1.265	129.200, 1.195	129.200, 1.294	129.200, 1.316	129.200, 1.256	129.200, 1.057	129.200, 1.146	129.200, 1.923
648	129.400, 1.516	129.400, 2.358	129.400, 1.322	129.400, 1.145	129.400, 1.317	129.400, 1.412	129.400, 2.200	129.400, 1.265	129.400, 1.195	129.400, 1.294	129.400, 1.316	129.400, 1.256	129.400, 1.057	129.400, 1.146	129.400, 1.924
649	129.600, 1.516	129.600, 2.358	129.600, 1.322	129.600, 1.145	129.600, 1.317	129.600, 1.412	129.600, 2.200	129.600, 1.265	129.600, 1.195	129.600, 1.294	129.600, 1.316	129.600, 1.256	129.600, 1.057	129.600, 1.146	129.600, 1.924
650	129.800, 1.516	129.800, 2.359	129.800, 1.322	129.800, 1.145	129.800, 1.317	129.800, 1.412	129.800, 2.201	129.800, 1.265	129.800, 1.195	129.800, 1.294	129.800, 1.317	129.800, 1.256	129.800, 1.057	129.800, 1.146	129.800, 1.924
651	130.000, 1.517	130.000, 2.359	130.000, 1.323	130.000, 1.145	130.000, 1.318	130.000, 1.412	130.000, 2.201	130.000, 1.265	130.000, 1.195	130.000, 1.294	130.000, 1.317	130.000, 1.256	130.000, 1.057	130.000, 1.146	130.000, 1.924
652	130.200, 1.517	130.200, 2.359	130.200, 1.323	130.200, 1.146	130.200, 1.318	130.200, 1.412	130.200, 2.201	130.200, 1.265	130.200, 1.195	130.200, 1.294	130.200, 1.317	130.200, 1.256	130.200, 1.058	130.200, 1.146	130.200, 1.924
653	130.400, 1.517	130.400, 2.360	130.400, 1.323	130.400, 1.146	130.400, 1.318	130.400, 1.412	130.400, 2.202	130.400, 1.266	130.400, 1.195	130.400, 1.294	130.400, 1.317	130.400, 1.256	130.400, 1.057	130.400, 1.146	130.400, 1.924
654	130.600, 1.517	130.600, 2.360	130.600, 1.324	130.600, 1.146	130.600, 1.318	130.600, 1.412	130.600, 2.202	130.600, 1.266	130.600, 1.195	130.600, 1.294	130.600, 1.317	130.600, 1.256	130.600, 1.057	130.600, 1.146	130.600, 1.924
655	130.800, 1.517	130.800, 2.360	130.800, 1.324	130.800, 1.146	130.800, 1.318	130.800, 1.412	130.800, 2.202	130.800, 1.266	130.800, 1.196	130.800, 1.295	130.800, 1.316	130.800, 1.256	130.800, 1.057	130.800, 1.146	130.800, 1.924
656	131.000, 1.517	131.000, 2.361	131.000, 1.325	131.000, 1.146	131.000, 1.318	131.000, 1.412	131.000, 2.203	131.000, 1.266	131.000, 1.196	131.000, 1.295	131.000, 1.316	131.000, 1.256	131.000, 1.057	131.000, 1.146	131.000, 1.924
657	131.200, 1.517	131.200, 2.361	131.200, 1.326	131.200, 1.146	131.200, 1.318	131.200, 1.411	131.200, 2.204	131.200, 1.266	131.200, 1.196	131.200, 1.295	131.200, 1.316	131.200, 1.256	131.200, 1.057	131.200, 1.145	131.200, 1.925
658	131.400, 1.516	131.400, 2.362	131.400, 1.326	131.400, 1.146	131.400, 1.318	131.400, 1.411	131.400, 2.204	131.400, 1.266	131.400, 1.196	131.400, 1.295	131.400, 1.316	131.400, 1.256	131.400, 1.057	131.400, 1.145	131.400, 1.925
659	131.600, 1.516	131.600, 2.363	131.600, 1.326	131.600, 1.146	131.600, 1.318	131.600, 1.411	131.600, 2.205	131.600, 1.266	131.600, 1.195	131.600, 1.296	131.600, 1.316	131.600, 1.255	131.600, 1.057	131.600, 1.145	131.600, 1.925
660	131.800, 1.516	131.800, 2.363	131.800, 1.326	131.800, 1.146	131.800, 1.319	131.800, 1.411	131.800, 2.206	131.800, 1.267	131.800, 1.195	131.800, 1.295	131.800, 1.316	131.800, 1.255	131.800, 1.057	131.800, 1.145	131.800, 1.926
661	132.000, 1.517	132.000, 2.364	132.000, 1.326	132.000, 1.147	132.000, 1.319	132.000, 1.411	132.000, 2.207	132.000, 1.267	132.000, 1.194	132.000, 1.296	132.000, 1.316	132.000, 1.255	132.000, 1.057	132.000, 1.145	132.000, 1.926
662	132.200, 1.517	132.200, 2.365	132.200, 1.326	132.200, 1.147	132.200, 1.319	132.200, 1.411	132.200, 2.208	132.200, 1.267	132.200, 1.194	132.200, 1.296	132.200, 1.316	132.200, 1.255	132.200, 1.057	132.200, 1.145	132.200, 1.927
663	132.400, 1.518	132.400, 2.365	132.400, 1.326	132.400, 1.147	132.400, 1.320	132.400, 1.411	132.400, 2.209	132.400, 1.268	132.400, 1.194	132.400, 1.296	132.400, 1.316	132.400, 1.255	132.400, 1.056	132.400, 1.144	132.400, 1.927
664	132.600, 1.518	132.600, 2.366	132.600, 1.326	132.600, 1.148	132.600, 1.320	132.600, 1.411	132.600, 2.210	132.600, 1.268	132.600, 1.194	132.600, 1.295	132.600, 1.317	132.600, 1.255	132.600, 1.056	132.600, 1.144	132.600, 1.928
665	132.800, 1.518	132.800, 2.367	132.800, 1.326	132.800, 1.148	132.800, 1.320	132.800, 1.411	132.800, 2.211	132.800, 1.268	132.800, 1.194	132.800, 1.295	132.800, 1.317	132.800, 1.255	132.800, 1.056	132.800, 1.144	132.800, 1.929
666	133.000, 1.518	133.000, 2.367	133.000, 1.327	133.000, 1.148	133.000, 1.321	133.000, 1.411	133.000, 2.212	133.000, 1.268	133.000, 1.194	133.000, 1.295	133.000, 1.318	133.000, 1.255	133.000, 1.055	133.000, 1.144	133.000, 1.930
667	133.200, 1.519	133.200, 2.367	133.200, 1.327	133.200, 1.148	133.200, 1.321	133.200, 1.412	133.200, 2.212	133.200, 1.268	133.200, 1.194	133.200, 1.295	133.200, 1.318	133.200, 1.255	133.200, 1.055	133.200, 1.144	133.200, 1.930
668	133.400, 1.519	133.400, 2.368	133.400, 1.327	133.400, 1.148	133.400, 1.321	133.400, 1.412	133.400, 2.213	133.400, 1.268	133.400, 1.195	133.400, 1.294	133.400, 1.319	133.400, 1.255	133.400, 1.055	133.400, 1.144	133.400, 1.931
669	133.600, 1.519	133.600, 2.368	133.600, 1.327	133.600, 1.148	133.600, 1.322	133.600, 1.413	133.600, 2.213	133.600, 1.268	133.600, 1.195	133.600, 1.294	133.600, 1.319	133.600, 1.256	133.600, 1.055	133.600, 1.144	133.600, 1.931
670	133.800, 1.520	133.800, 2.368	133.800, 1.328	133.800, 1.148	133.800, 1.322	133.800, 1.414	133.800, 2.213	133.800, 1.268	133.800, 1.195	133.800, 1.294	133.800, 1.319	133.800, 1.256	133.800, 1.055	133.800, 1.144	133.800, 1.931
671	134.000, 1.520	134.000, 2.368	134.000, 1.328	134.000, 1.148	134.000, 1.322	134.000, 1.415	134.000, 2.213	134.000, 1.268	134.000, 1.196	134.000, 1.293	134.000, 1.319	134.000, 1.256	134.000, 1.055	134.000, 1.144	134.000, 1.931
672	134.200, 1.520	134.200, 2.368	134.200, 1.328	134.200, 1.148	134.200, 1.322	134.200, 1.415	134.200, 2.214	134.200, 1.267	134.200, 1.196	134.200, 1.293	134.200, 1.319	134.200, 1.257	134.200, 1.055	134.200, 1.145	134.200, 1.931
673	134.400, 1.520	134.400, 2.369	134.400, 1.328	134.400, 1.148	134.400, 1.321	134.400, 1.416	134.400, 2.214	134.400, 1.267	134.400, 1.196	134.400, 1.293	134.400, 1.319	134.400, 1.257	134.400, 1.055	134.400, 1.145	134.400, 1.932
674	134.600, 1.520	134.600, 2.369	134.600, 1.329	134.600, 1.147	134.600, 1.321	134.600, 1.417	134.600, 2.214	134.600, 1.267	134.600, 1.197	134.600, 1.293	134.600, 1.319	134.600, 1.257	134.600, 1.055	134.600, 1.145	134.600, 1.932
675	134.800, 1.520	134.800, 2.370	134.800, 1.329	134.800, 1.147	134.800, 1.321	134.800, 1.418	134.800, 2.215	134.800, 1.267	134.800, 1.197	134.800, 1.294	134.800, 1.319	134.800, 1.258	134.800, 1.055	134.800, 1.145	134.800, 1.933
676	135.000, 1.520	135.000, 2.371	135.000, 1.329	135.000, 1.147	135.000, 1.321	135.000, 1.418	135.000, 2.216	135.000, 1.267	135.000, 1.197	135.000, 1.294	135.000, 1.319	135.000, 1.258	135.000, 1.056	135.000, 1.146	135.000, 1.933
677	135.200, 1.520	135.200, 2.372	135.200, 1.328	135.200, 1.147	135.200, 1.321	135.200, 1.418	135.200, 2.216	135.200, 1.267	135.200, 1.197	135.200, 1.294	135.200, 1.319	135.200, 1.258	135.200, 1.056	135.200, 1.146	135.200, 1.934
678	135.400, 1.520	135.400, 2.373	135.400, 1.328	135.400, 1.146	135.400, 1.321	135.400, 1.419	135.400, 2.217	135.400, 1.267	135.400, 1.197	135.400, 1.294	135.400, 1.319	135.400, 1.259	135.400, 1.056	135.400, 1.146	135.400, 1.934
679	135.600, 1.520	135.600, 2.374	135.600, 1.327	135.600, 1.146	135.600, 1.321	135.600, 1.418	135.600, 2.218	135.600, 1.267	135.600, 1.197	135.600, 1.294	135.600, 1.319	135.600, 1.259	135.600, 1.056	135.600, 1.146	135.600, 1.934
680	135.800, 1.520	135.800, 2.374	135.800, 1.327	135.800, 1.146	135.800, 1.322	135.800, 1.418	135.800, 2.219	135.800, 1.268	135.800, 1.197	135.800, 1.295	135.800, 1.319	135.800, 1.259	135.800, 1.056	135.800, 1.146	135.800, 1.934
681	136.000, 1.521	136.000, 2.375	136.000, 1.326	136.000, 1.146	136.000, 1.322	136.000, 1.418	136.000, 2.219	136.000, 1.268	136.000, 1.197	136.000, 1.295	136.000, 1.319	136.000, 1.258	136.000, 1.056	136.000, 1.145	136.000, 1.935
682	136.200, 1.521	136.200, 2.376	136.200, 1.326	136.200, 1.146	136.200, 1.322	136.200, 1.418	136.200, 2.220	136.200, 1.269	136.200, 1.197	136.200, 1.296	136.200, 1.319	136.200, 1.258	136.200, 1.056	136.200, 1.144	136.200, 1.935
683	136.400, 1.521	136.400, 2.376	136.400, 1.326	136.400, 1.146	136.400, 1.321	136.400, 1.417	136.400, 2.221	136.400, 1.269	136.400, 1.196	136.400, 1.296	136.400, 1.319	136.400, 1.258	136.400, 1.056	136.400, 1.144	136.400, 1.936
684	136.600, 1.521	136.600, 2.377	136.600, 1.326	136.600, 1.146	136.600, 1.321	136.600, 1.417	136.600, 2.222	136.600, 1.270	136.600, 1.196	136.600, 1.296	136.600, 1.319	136.600, 1.258	136.600, 1.057	136.600, 1.144	136.600, 1.936
685	136.800, 1.521	136.800, 2.377	136.800, 1.327	136.800, 1.146	136.800, 1.321	136.800, 1.416	136.800, 2.223	136.800, 1.271	136.800, 1.196	136.800, 1.296	136.800, 1.319	136.800, 1.257	136.800, 1.057	136.800, 1.143	136.800, 1.937
686	137.000, 1.521	137.000, 2.377	137.000, 1.327	137.000, 1.147	137.000, 1.321	137.000, 1.416	137.000, 2.224	137.000, 1.271	137.000, 1.197	137.000, 1.296	137.000, 1.319	137.000, 1.257	137.000, 1.057	137.000, 1.143	137.000, 1.937
687	137.200, 1.521	137.200, 2.378	137.200, 1.328	137.200, 1.147	137.200, 1.321	137.200, 1.416	137.200, 2.224	137.200, 1.271	137.200, 1.197	137.200, 1.296	137.200, 1.319	137.200, 1.257	137.200, 1.057	137.200, 1.143	137.200, 1.938
688	137.400, 1.521	137.400, 2.378	137.400, 1.328	137.400, 1.147	137.400, 1.322	137.400, 1.416	137.400, 2.225	137.400, 1.272	137.400, 1.197	137.400, 1.296	137.400, 1.319	137.400, 1.257	137.400, 1.057	137.400, 1.143	137.400, 1.938
689	137.600, 1.521	137.600, 2.378	137.600, 1.329	137.600, 1.147	137.600, 1.322	137.600, 1.416	137.600, 2.225	137.600, 1.272	137.600, 1.197	137.600, 1.296	137.600, 1.319	137.600, 1.257	137.600, 1.057	137.600, 1.142	137.600, 1.939
690	137.800, 1.520	137.800, 2.379	137.800, 1.329	137.800, 1.147	137.800, 1.322	137.800, 1.416	137.800, 2.225	137.800, 1.272	137.800, 1.197	137.800, 1.296	137.800, 1.320	137.800, 1.257	137.800, 1.057	137.800, 1.142	137.800, 1.939
691	138.000, 1.520	138.000, 2.379	138.000, 1.330	138.000, 1.147	138.000, 1.322	138.000, 1.416	138.000, 2.226	138.000, 1.272	138.000, 1.197	138.000, 1.296	138.000, 1.320	138.000, 1.258	138.000, 1.057	138.000, 1.143	138.000, 1.940
692	138.200, 1.520	138.200, 2.380	138.200, 1.330	138.200, 1.147	138.200, 1.322	138.200, 1.417	138.200, 2.226	138.200, 1.272	138.200, 1.197	138.200, 1.296	138.200, 1.320	138.200, 1.258	138.200, 1.057	138.200, 1.143	138.200, 1.940
693	138.400, 1.520	138.400, 2.380	138.400, 1.330	138.400, 1.147	138.400, 1.322	138.400, 1.417	138.400, 2.226	138.400, 1.272	138.400, 1.197	138.400, 1.296	138.400, 1.320	138.400, 1.258	138.400, 1.057	138.400, 1.143	138.400, 1.941
694	138.600, 1.521	138.600, 2.381	138.600, 1.331	138.600, 1.148	138.600, 1.322	138.600, 1.418	138.600, 2.227	138.600, 1.273	138.600, 1.197	138.600, 1.296	138.600, 1.321	138.600, 1.258	138.600, 1.057	138.600, 1.143	138.600, 1.941
695	138.800, 1.521	138.800, 2.381	138.800, 1.330	138.800, 1.148	138.800, 1.322	138.800, 1.419	138.800, 2.227	138.800, 1.273	138.800, 1.197	138.800, 1.296	138.800, 1.321	138.800, 1.259	138.800, 1.057	138.800, 1.144	138.800, 1.942
696	139.000, 1.521	139.000, 2.382	139.000, 1.330	139.000, 1.148	139.000, 1.322	139.000, 1.419	139.000, 2.227	139.000, 1.273	139.000, 1.197	139.000, 1.296	139.000, 1.322	139.000, 1.259	139.000, 1.057	139.000, 1.144	139.000, 1.941
697	139.200, 1.521	139.200, 2.382	139.200, 1.330	139.200, 1.148	139.200, 1.322	139.200, 1.419	139.200, 2.228	139.200, 1.273	139.200, 1.197	139.200, 1.296	139.200, 1.322	139.200, 1.258	139.200, 1.056	139.200, 1.144	139.200, 1.941
698	139.400, 1.522	139.400, 2.382	139.400, 1.330	139.400, 1.148	139.400, 1.322	139.400, 1.419	139.400, 2.228	139.400, 1.273	139.400, 1.197	139.400, 1.296	139.400, 1.322	139.400, 1.258	139.400, 1.056	139.400, 1.144	139.400, 1.941
699	139.600, 1.522	139.600, 2.382	139.600, 1.330	139.600, 1.148	139.600, 1.322	139.600, 1.419	139.600, 2.229	139.600, 1.273	139.600, 1.197	139.600, 1.296	139.600, 1.322	139.600, 1.259	139.600, 1.056	139.600, 1.144	139.600, 1.941
700	139.800, 1.523	139.800, 2.383	139.800, 1.330	139.800, 1.149	139.800, 1.322	139.800, 1.419	139.800, 2.229	139.800, 1.273	139.800, 1.197	139.800, 1.296	139.800, 1.322	139.800, 1.259	139.800, 1.056	139.800, 1.144	139.800, 1.941
701	140.000, 1.523	140.000, 2.383	140.000, 1.330	140.000, 1.149	140.000, 1.322	140.000, 1.419	140.000, 2.230	140.000, 1.273	140.000, 1.196	140.000, 1.296	140.000, 1.321	140.000, 1.259	140.000, 1.056	140.000, 1.144	140.000, 1.941
702	140.200, 1.524	140.200, 2.383	140.200, 1.330	140.200, 1.149	140.200, 1.321	140.200, 1.420	140.200, 2.230	140.200, 1.272	140.200, 1.196	140.200, 1.297	140.200, 1.321	140.200, 1.260	140.200, 1.056	140.200, 1.144	140.200, 1.942
703	140.400, 1.525	140.400, 2.384	140.400, 1.330	140.400, 1.149	140.400, 1.321	140.400, 1.420	140.400, 2.231	140.400, 1.272	140.400, 1.196	140.400, 1.297	140.400, 1.321	140.400, 1.260	140.400, 1.056	140.400, 1.144	140.400, 1.942
704	140.600, 1.525	140.600, 2.384	140.600, 1.330	140.600, 1.149	140.600, 1.321	140.600, 1.420	140.600, 2.231	140.600, 1.272	140.600, 1.196	140.600, 1.297	140.600, 1.321	140.600, 1.261	140.600, 1.056	140.600, 1.144	140.600, 1.942
705	140.800, 1.526	140.800, 2.384	140.800, 1.330	140.800, 1.149	140.800, 1.320	140.800, 1.421	140.800, 2.232	140.800, 1.272	140.800, 1.197	140.800, 1.297	140.800, 1.322	140.800, 1.261	140.800, 1.056	140.800, 1.145	140.800, 1.943
706	141.000, 1.526	141.000, 2.385	141.000, 1.330	141.000, 1.150	141.000, 1.321	141.000, 1.421	141.000, 2.233	141.000, 1.272	141.000, 1.197	141.000, 1.297	141.000, 1.322	141.000, 1.261	141.000, 1.056	141.000, 1.144	141.000, 1.944
707	141.200, 1.526	141.200, 2.386	141.200, 1.330	141.200, 1.150	141.200, 1.321	141.200, 1.421	141.200, 2.233	141.200, 1.272	141.200, 1.197	141.200, 1.298	141.200, 1.323	141.200, 1.261	141.200, 1.056	141.200, 1.144	141.200, 1.945
708	141.400, 1.526	141.400, 2.386	141.400, 1.330	141.400, 1.150	141.400, 1.321	141.400, 1.421	141.400, 2.234	141.400, 1.272	141.400, 1.197	141.400, 1.298	141.400, 1.323	141.400, 1.261	141.400, 1.056	141.400, 1.144	141.400, 1.946
709	141.600, 1.525	141.600, 2.386	141.600, 1.330	141.600, 1.150	141.600, 1.321	141.600, 1.421	141.600, 2.235	141.600, 1.272	141.600, 1.197	141.600, 1.297	141.600, 1.324	141.600, 1.261	141.600, 1.056	141.600, 1.144	141.600, 1.946
710	141.800, 1.525	141.800, 2.387	141.800, 1.330	141.800, 1.150	141.800, 1.322	141.800, 1.422	141.800, 2.236	141.800, 1.272	141.800, 1.198	141.800, 1.297	141.800, 1.324	141.800, 1.261	141.800, 1.056	141.800, 1.145	141.800, 1.946
711	142.000, 1.524	142.000, 2.387	142.000, 1.330	142.000, 1.150	142.000, 1.322	142.000, 1.422	142.000, 2.236	142.000, 1.273	142.000, 1.198	142.000, 1.297	142.000, 1.325	142.000, 1.261	142.000, 1.056	142.000, 1.145	142.000, 1.947
712	142.200, 1.524	142.200, 2.387	142.200, 1.330	142.200, 1.150	142.200, 1.322	142.200, 1.423	142.200, 2.237	142.200, 1.273	142.200, 1.199	142.200, 1.297	142.200, 1.325	142.200, 1.261	142.200, 1.056	142.200, 1.145	142.200, 1.947
713	142.400, 1.523	142.400, 2.387	142.400, 1.331	142.400, 1.151	142.400, 1.322	142.400, 1.424	142.400, 2.237	142.400, 1.273	142.400, 1.199	142.400, 1.297	142.400, 1.326	142.400, 1.260	142.400, 1.056	142.400, 1.145	142.400, 1.947
714	142.600, 1.523	142.600, 2.388	142.600, 1.331	142.600, 1.151	142.600, 1.322	142.600, 1.424	142.600, 2.238	142.600, 1.273	142.600, 1.199	142.600, 1.297	142.600, 1.326	142.600, 1.259	142.600, 1.056	142.600, 1.145	142.600, 1.948
715	142.800, 1.522	142.800, 2.388	142.800, 1.331	142.800, 1.151	142.800, 1.322	142.800, 1.424	142.800, 2.238	142.800, 1.273	142.800, 1.200	142.800, 1.298	142.800, 1.326	142.800, 1.259	142.800, 1.056	142.800, 1.144	142.800, 1.948
716	143.000, 1.522	143.000, 2.388	143.000, 1.331	143.000, 1.151	143.000, 1.322	143.000, 1.425	143.000, 2.239	143.000, 1.274	143.000, 1.200	143.000, 1.298	143.000, 1.326	143.000, 1.258	143.000, 1.056	143.000, 1.144	143.000, 1.948
717	143.200, 1.522	143.200, 2.388	143.200, 1.331	143.200, 1.152	143.200, 1.322	143.200, 1.425	143.200, 2.239	143.200, 1.274	143.200, 1.200	143.200, 1.298	143.200, 1.326	143.200, 1.258	143.200, 1.056	143.200, 1.145	143.200, 1.948
718	143.400, 1.522	143.400, 2.389	143.400, 1.331	143.400, 1.152	143.400, 1.322	143.400, 1.425	143.400, 2.240	143.400, 1.274	143.400, 1.200	143.400, 1.299	143.400, 1.325	143.400, 1.258	143.400, 1.056	143.400, 1.145	143.400, 1.948
719	143.600, 1.522	143.600, 2.389	143.600, 1.332	143.600, 1.152	143.600, 1.322	143.600, 1.425	143.600, 2.240	143.600, 1.274	143.600, 1.200	143.600, 1.299	143.600, 1.325	143.600, 1.258	143.600, 1.056	143.600, 1.145	143.600, 1.948
720	143.800, 1.522	143.800, 2.390	143.800, 1.332	143.800, 1.152	143.800, 1.322	143.800, 1.425	143.800, 2.241	143.800, 1.274	143.800, 1.200	143.800, 1.299	143.800, 1.324	143.800, 1.259	143.800, 1.057	143.800, 1.145	143.800, 1.948
721	144.000, 1.523	144.000, 2.390	144.000, 1.332	144.000, 1.153	144.000, 1.322	144.000, 1.426	144.000, 2.241	144.000, 1.273	144.000, 1.200	144.000, 1.298	144.000, 1.324	144.000, 1.259	144.000, 1.057	144.000, 1.146	144.000, 1.948
722	144.200, 1.523	144.200, 2.391	144.200, 1.332	144.200, 1.153	144.200, 1.322	144.200, 1.426	144.200, 2.242	144.200, 1.273	144.200, 1.200	144.200, 1.298	144.200, 1.324	144.200, 1.260	144.200, 1.058	144.200, 1.146	144.200, 1.949
723	144.400, 1.524	144.400, 2.391	144.400, 1.332	144.400, 1.153	144.400, 1.322	144.400, 1.426	144.400, 2.242	144.400, 1.273	144.400, 1.200	144.400, 1.298	144.400, 1.324	144.400, 1.260	144.400, 1.058	144.400, 1.146	144.400, 1.949
724	144.600, 1.524	144.600, 2.392	144.600, 1.332	144.600, 1.153	144.600, 1.323	144.600, 1.426	144.600, 2.243	144.600, 1.273	144.600, 1.199	144.600, 1.298	144.600, 1.324	144.600, 1.261	144.600, 1.058	144.600, 1.146	144.600, 1.950
725	144.800, 1.525	144.800, 2.392	144.800, 1.332	144.800, 1.153	144.800, 1.323	144.800, 1.426	144.800, 2.243	144.800, 1.273	144.800, 1.199	144.800, 1.298	144.800, 1.324	144.800, 1.261	144.800, 1.058	144.800, 1.146	144.800, 1.951
726	145.000, 1.525	145.000, 2.392	145.000, 1.332	145.000, 1.153	145.000, 1.324	145.000, 1.426	145.000, 2.244	145.000, 1.273	145.000, 1.199	145.000, 1.297	145.000, 1.324	145.000, 1.261	145.000, 1.058	145.000, 1.146	145.000, 1.951
727	145.200, 1.526	145.200, 2.393	145.200, 1.332	145.200, 1.152	145.200, 1.324	145.200, 1.427	145.200, 2.244	145.200, 1.273	145.200, 1.199	145.200, 1.297	145.200, 1.325	145.200, 1.261	145.200, 1.058	145.200, 1.145	145.200, 1.951
728	145.400, 1.527	145.400, 2.393	145.400, 1.332	145.400, 1.152	145.400, 1.325	145.400, 1.427	145.400, 2.245	145.400, 1.274	145.400, 1.200	145.400, 1.297	145.400, 1.325	145.400, 1.261	145.400, 1.058	145.400, 1.145	145.400, 1.951
729	145.600, 1.527	145.600, 2.393	145.600, 1.333	145.600, 1.152	145.600, 1.325	145.600, 1.427	145.600, 2.245	145.600, 1.274	145.600, 1.200	145.600, 1.296	145.600, 1.325	145.600, 1.261	145.600, 1.057	145.600, 1.145	145.600, 1.951
730	145.800, 1.527	145.800, 2.393	145.800, 1.332	145.800, 1.151	145.800, 1.325	145.800, 1.427	145.800, 2.245	145.800, 1.274	145.800, 1.200	145.800, 1.296	145.800, 1.325	145.800, 1.261	145.800, 1.057	145.800, 1.144	145.800, 1.951
731	146.000, 1.528	146.000, 2.393	146.000, 1.332	146.000, 1.151	146.000, 1.326	146.000, 1.427	146.000, 2.246	146.000, 1.274	146.000, 1.200	146.000, 1.296	146.000, 1.325	146.000, 1.260	146.000, 1.057	146.000, 1.144	146.000, 1.951
732	146.200, 1.528	146.200, 2.393	146.200, 1.332	146.200, 1.151	146.200, 1.326	146.200, 1.428	146.200, 2.246	146.200, 1.274	146.200, 1.200	146.200, 1.296	146.200, 1.326	146.200, 1.260	146.200, 1.056	146.200, 1.144	146.200, 1.951
733	146.400, 1.528	146.400, 2.394	146.400, 1.332	146.400, 1.150	146.400, 1.326	146.400, 1.428	146.400, 2.246	146.400, 1.274	146.400, 1.200	146.400, 1.296	146.400, 1.326	146.400, 1.259	146.400, 1.056	146.400, 1.144	146.400, 1.951
734	146.600, 1.528	146.600, 2.394	146.600, 1.332	146.600, 1.150	146.600, 1.326	146.600, 1.428	146.600, 2.247	146.600, 1.274	146.600, 1.201	146.600, 1.296	146.600, 1.326	146.600, 1.259	146.600, 1.056	146.600, 1.144	146.600, 1.951
735	146.800, 1.528	146.800, 2.395	146.800, 1.332	146.800, 1.150	146.800, 1.326	146.800, 1.428	146.800, 2.247	146.800, 1.273	146.800, 1.201	146.800, 1.297	146.800, 1.326	146.800, 1.259	146.800, 1.055	146.800, 1.143	146.800, 1.951
736	147.000, 1.528	147.000, 2.395	147.000, 1.332	147.000, 1.150	147.000, 1.326	147.000, 1.429	147.000, 2.247	147.000, 1.273	147.000, 1.201	147.000, 1.297	147.000, 1.326	147.000, 1.259	147.000, 1.055	147.000, 1.143	147.000, 1.951
737	147.200, 1.528	147.200, 2.396	147.200, 1.332	147.200, 1.150	147.200, 1.326	147.200, 1.429	147.200, 2.248	147.200, 1.273	147.200, 1.202	147.200, 1.297	147.200, 1.327	147.200, 1.259	147.200, 1.055	147.200, 1.143	147.200, 1.951
738	147.400, 1.528	147.400, 2.396	147.400, 1.332	147.400, 1.150	147.400, 1.326	147.400, 1.428	147.400, 2.248	147.400, 1.273	147.400, 1.202	147.400, 1.297	147.400, 1.327	147.400, 1.259	147.400, 1.055	147.400, 1.143	147.400, 1.951
739	147.600, 1.528	147.600, 2.397	147.600, 1.333	147.600, 1.150	147.600, 1.326	147.600, 1.428	147.600, 2.248	147.600, 1.273	147.600, 1.202	147.600, 1.296	147.600, 1.327	147.600, 1.259	147.600, 1.056	147.600, 1.144	147.600, 1.952
740	147.800, 1.528	147.800, 2.397	147.800, 1.333	147.800, 1.151	147.800, 1.326	147.800, 1.428	147.800, 2.249	147.800, 1.274	147.800, 1.202	147.800, 1.296	147.800, 1.327	147.800, 1.260	147.800, 1.056	147.800, 1.144	147.800, 1.952
741	148.000, 1.528	148.000, 2.397	148.000, 1.333	148.000, 1.151	148.000, 1.326	148.000, 1.428	148.000, 2.250	148.000, 1.274	148.000, 1.202	148.000, 1.296	148.000, 1.328	148.000, 1.260	148.000, 1.056	148.000, 1.144	148.000, 1.953
742	148.200, 1.528	148.200, 2.397	148.200, 1.333	148.200, 1.152	148.200, 1.327	148.200, 1.427	148.200, 2.250	148.200, 1.274	148.200, 1.202	148.200, 1.296	148.200, 1.328	148.200, 1.260	148.200, 1.056	148.200, 1.144	148.200, 1.953
743	148.400, 1.528	148.400, 2.398	148.400, 1.334	148.400, 1.153	148.400, 1.327	148.400, 1.427	148.400, 2.251	148.400, 1.274	148.400, 1.202	148.400, 1.297	148.400, 1.328	148.400, 1.261	148.400, 1.057	148.400, 1.144	148.400, 1.954
744	148.600, 1.528	148.600, 2.398	148.600, 1.334	148.600, 1.153	148.600, 1.327	148.600, 1.427	148.600, 2.251	148.600, 1.275	148.600, 1.201	148.600, 1.297	148.600, 1.328	148.600, 1.261	148.600, 1.057	148.600, 1.144	148.600, 1.954
745	148.800, 1.528	148.800, 2.398	148.800, 1.334	148.800, 1.154	148.800, 1.327	148.800, 1.427	148.800, 2.251	148.800, 1.275	148.800, 1.201	148.800, 1.298	148.800, 1.328	148.800, 1.262	148.800, 1.057	148.800, 1.144	148.800, 1.954
746	149.000, 1.529	149.000, 2.398	149.000, 1.334	149.000, 1.154	149.000, 1.327	149.000, 1.427	149.000, 2.251	149.000, 1.276	149.000, 1.201	149.000, 1.298	149.000, 1.328	149.000, 1.262	149.000, 1.058	149.000, 1.144	149.000, 1.955
747	149.200, 1.529	149.200, 2.398	149.200, 1.335	149.200, 1.154	149.200, 1.327	149.200, 1.427	149.200, 2.251	149.200, 1.276	149.200, 1.201	149.200, 1.299	149.200, 1.328	149.200, 1.262	149.200, 1.058	149.200, 1.144	149.200, 1.955
748	149.400, 1.529	149.400, 2.398	149.400, 1.335	149.400, 1.155	149.400, 1.327	149.400, 1.428	149.400, 2.251	149.400, 1.276	149.400, 1.201	149.400, 1.300	149.400, 1.328	149.400, 1.263	149.400, 1.058	149.400, 1.144	149.400, 1.955
749	149.600, 1.529	149.600, 2.398	149.600, 1.335	149.600, 1.155	149.600, 1.327	149.600, 1.428	149.600, 2.251	149.600, 1.277	149.600, 1.201	149.600, 1.301	149.600, 1.328	149.600, 1.263	149.600, 1.058	149.600, 1.144	149.600, 1.954
750	149.800, 1.530	149.800, 2.398	149.800, 1.335	149.800, 1.155	149.800, 1.327	149.800, 1.428	149.800, 2.251	149.800, 1.277	149.800, 1.200	149.800, 1.301	149.800, 1.328	149.800, 1.263	149.800, 1.058	149.800, 1.144	149.800, 1.954
751	150.000, 1.530	150.000, 2.398	150.000, 1.335	150.000, 1.155	150.000, 1.327	150.000, 1.428	150.000, 2.251	150.000, 1.277	150.000, 1.200	150.000, 1.301	150.000, 1.328	150.000, 1.263	150.000, 1.058	150.000, 1.144	150.000, 1.954
752	150.200, 1.531	150.200, 2.401	150.200, 1.338	150.200, 1.158	150.200, 1.330	150.200, 1.430	150.200, 2.252	150.200, 1.280	150.200, 1.202	150.200, 1.305	150.200, 1.330	150.200, 1.266	150.200, 1.061	150.200, 1.147	150.200, 1.959
753	150.400, 1.532	150.400, 2.403	150.400, 1.341	150.400, 1.161	150.400, 1.334	150.400, 1.432	150.400, 2.254	150.400, 1.284	150.400, 1.204	150.400, 1.308	150.400, 1.333	150.400, 1.269	150.400, 1.063	150.400, 1.150	150.400, 1.963
754	150.600, 1.534	150.600, 2.404	150.600, 1.345	150.600, 1.164	150.600, 1.338	150.600, 1.434	150.600, 2.254	150.600, 1.287	150.600, 1.205	150.600, 1.312	150.600, 1.335	150.600, 1.272	150.600, 1.066	150.600, 1.153	150.600, 1.966
755	150.800, 1.535	150.800, 2.405	150.800, 1.349	150.800, 1.168	150.800, 1.342	150.800, 1.436	150.800, 2.253	150.800, 1.291	150.800, 1.207	150.800, 1.316	150.800, 1.337	150.800, 1.275	150.800, 1.068	150.800, 1.155	150.800, 1.969
756	151.000, 1.535	151.000, 2.404	151.000, 1.353	151.000, 1.171	151.000, 1.346	151.000, 1.437	151.000, 2.251	151.000, 1.294	151.000, 1.209	151.000, 1.319	151.000, 1.340	151.000, 1.278	151.000, 1.071	151.000, 1.158	151.000, 1.970
757	151.200, 1.536	151.200, 2.403	151.200, 1.356	151.200, 1.174	151.200, 1.349	151.200, 1.439	151.200, 2.248	151.200, 1.297	151.200, 1.210	151.200, 1.322	151.200, 1.341	151.200, 1.281	151.200, 1.073	151.200, 1.160	151.200, 1.970
758	151.400, 1.536	151.400, 2.400	151.400, 1.359	151.400, 1.177	151.400, 1.352	151.400, 1.440	151.400, 2.244	151.400, 1.299	151.400, 1.211	151.400, 1.325	151.400, 1.343	151.400, 1.283	151.400, 1.075	151.400, 1.161	151.400, 1.969
759	151.600, 1.536	151.600, 2.396	151.600, 1.362	151.600, 1.180	151.600, 1.354	151.600, 1.441	151.600, 2.240	151.600, 1.301	151.600, 1.212	151.600, 1.327	151.600, 1.344	151.600, 1.284	151.600, 1.077	151.600, 1.162	151.600, 1.967
760	151.800, 1.536	151.800, 2.390	151.800, 1.363	151.800, 1.182	151.800, 1.356	151.800, 1.441	151.800, 2.234	151.800, 1.303	151.800, 1.212	151.800, 1.329	151.800, 1.344	151.800, 1.285	151.800, 1.078	151.800, 1.163	151.800, 1.963
761	152.000, 1.535	152.000, 2.383	152.000, 1.364	152.000, 1.183	152.000, 1.357	152.000, 1.441	152.000, 2.227	152.000, 1.303	152.000, 1.212	152.000, 1.330	152.000, 1.344	152.000, 1.285	152.000, 1.079	152.000, 1.163	152.000, 1.957
762	152.200, 1.534	152.200, 2.375	152.200, 1.364	152.200, 1.183	152.200, 1.356	152.200, 1.441	152.200, 2.219	152.200, 1.303	152.200, 1.212	152.200, 1.330	152.200, 1.344	152.200, 1.284	152.200, 1.078	152.200, 1.162	152.200, 1.950
763	152.400, 1.533	152.400, 2.367	152.400, 1.364	152.400, 1.183	152.400, 1.356	152.400, 1.440	152.400, 2.211	152.400, 1.302	152.400, 1.212	152.400, 1.329	152.400, 1.343	152.400, 1.284	152.400, 1.078	152.400, 1.161	152.400, 1.943
764	152.600, 1.532	152.600, 2.359	152.600, 1.364	152.600, 1.184	152.600, 1.356	152.600, 1.439	152.600, 2.203	152.600, 1.301	152.600, 1.211	152.600, 1.329	152.600, 1.342	152.600, 1.283	152.600, 1.078	152.600, 1.161	152.600, 1.936
765	152.800, 1.530	152.800, 2.351	152.800, 1.364	152.800, 1.184	152.800, 1.355	152.800, 1.438	152.800, 2.196	152.800, 1.300	152.800, 1.211	152.800, 1.328	152.800, 1.341	152.800, 1.282	152.800, 1.077	152.800, 1.160	152.800, 1.929
766	153.000, 1.529	153.000, 2.343	153.000, 1.363	153.000, 1.184	153.000, 1.354	153.000, 1.437	153.000, 2.188	153.000, 1.299	153.000, 1.210	153.000, 1.327	153.000, 1.341	153.000, 1.282	153.000, 1.077	153.000, 1.159	153.000, 1.922
767	153.200, 1.528	153.200, 2.335	153.200, 1.362	153.200, 1.184	153.200, 1.353	153.200, 1.436	153.200, 2.181	153.200, 1.298	153.200, 1.209	153.200, 1.327	153.200, 1.340	153.200, 1.281	153.200, 1.076	153.200, 1.159	153.200, 1.916
768	153.400, 1.527	153.400, 2.327	153.400, 1.361	153.400, 1.184	153.400, 1.353	153.400, 1.435	153.400, 2.174	153.400, 1.297	153.400, 1.208	153.400, 1.326	153.400, 1.339	153.400, 1.280	153.400, 1.076	153.400, 1.158	153.400, 1.910
769	153.600, 1.526	153.600, 2.320	153.600, 1.361	153.600, 1.185	153.600, 1.352	153.600, 1.433	153.600, 2.168	153.600, 1.296	153.600, 1.207	153.600, 1.325	153.600, 1.338	153.600, 1.280	153.600, 1.075	153.600, 1.158	153.600, 1.904
770	153.800, 1.524	153.800, 2.312	153.800, 1.360	153.800, 1.185	153.800, 1.351	153.800, 1.432	153.800, 2.161	153.800, 1.295	153.800, 1.207	153.800, 1.325	153.800, 1.337	153.800, 1.279	153.800, 1.074	153.800, 1.157	153.800, 1.898
771	154.000, 1.523	154.000, 2.305	154.000, 1.360	154.000, 1.185	154.000, 1.351	154.000, 1.431	154.000, 2.154	154.000, 1.294	154.000, 1.206	154.000, 1.324	154.000, 1.337	154.000, 1.278	154.000, 1.073	154.000, 1.156	154.000, 1.892
772	154.200, 1.522	154.200, 2.298	154.200, 1.359	154.200, 1.186	154.200, 1.350	154.200, 1.430	154.200, 2.147	154.200, 1.293	154.200, 1.205	154.200, 1.323	154.200, 1.336	154.200, 1.278	154.200, 1.073	154.200, 1.156	154.200, 1.886
773	154.400, 1.521	154.400, 2.290	154.400, 1.359	154.400, 1.186	154.400, 1.349	154.400, 1.429	154.400, 2.140	154.400, 1.292	154.400, 1.205	154.400, 1.322	154.400, 1.335	154.400, 1.277	154.400, 1.072	154.400, 1.155	154.400, 1.880
774	154.600, 1.520	154.600, 2.283	154.600, 1.359	154.600, 1.186	154.600, 1.349	154.600, 1.428	154.600, 2.133	154.600, 1.291	154.600, 1.204	154.600, 1.321	154.600, 1.334	154.600, 1.277	154.600, 1.071	154.600, 1.155	154.600, 1.874
775	154.800, 1.518	154.800, 2.276	154.800, 1.358	154.800, 1.186	154.800, 1.348	154.800, 1.426	154.800, 2.125	154.800, 1.291	154.800, 1.203	154.800, 1.320	154.800, 1.333	154.800, 1.276	154.800, 1.070	154.800, 1.154	154.800, 1.868
776	155.000, 1.517	155.000, 2.269	155.000, 1.358	155.000, 1.185	155.000, 1.347	155.000, 1.425	155.000, 2.118	155.000, 1.290	155.000, 1.203	155.000, 1.319	155.000, 1.332	155.000, 1.275	155.000, 1.069	155.000, 1.153	155.000, 1.862
777	155.200, 1.516	155.200, 2.262	155.200, 1.357	155.200, 1.185	155.200, 1.346	155.200, 1.425	155.200, 2.111	155.200, 1.290	155.200, 1.202	155.200, 1.318	155.200, 1.331	155.200, 1.274	155.200, 1.068	155.200, 1.152	155.200, 1.856
778	155.400, 1.515	155.400, 2.255	155.400, 1.357	155.400, 1.185	155.400, 1.345	155.400, 1.424	155.400, 2.103	155.400, 1.289	155.400, 1.201	155.400, 1.317	155.400, 1.330	155.400, 1.274	155.400, 1.067	155.400, 1.151	155.400, 1.850
779	155.600, 1.513	155.600, 2.248	155.600, 1.356	155.600, 1.185	155.600, 1.345	155.600, 1.423	155.600, 2.096	155.600, 1.289	155.600, 1.201	155.600, 1.317	155.600, 1.328	155.600, 1.272	155.600, 1.066	155.600, 1.150	155.600, 1.844
780	155.800, 1.512	155.800, 2.241	155.800, 1.356	155.800, 1.184	155.800, 1.344	155.800, 1.422	155.800, 2.089	155.800, 1.288	155.800, 1.200	155.800, 1.316	155.800, 1.327	155.800, 1.271	155.800, 1.065	155.800, 1.149	155.800, 1.838
781	156.000, 1.511	156.000, 2.234	156.000, 1.355	156.000, 1.183	156.000, 1.343	156.000, 1.421	156.000, 2.082	156.000, 1.288	156.000, 1.199	156.000, 1.315	156.000, 1.326	156.000, 1.270	156.000, 1.064	156.000, 1.148	156.000, 1.832
782	156.200, 1.510	156.200, 2.228	156.200, 1.354	156.200, 1.183	156.200, 1.342	156.200, 1.419	156.200, 2.076	156.200, 1.287	156.200, 1.198	156.200, 1.314	156.200, 1.325	156.200, 1.269	156.200, 1.063	156.200, 1.147	156.200, 1.826
783	156.400, 1.508	156.400, 2.221	156.400, 1.354	156.400, 1.182	156.400, 1.341	156.400, 1.418	156.400, 2.069	156.400, 1.286	156.400, 1.198	156.400, 1.313	156.400, 1.324	156.400, 1.268	156.400, 1.063	156.400, 1.146	156.400, 1.820
784	156.600, 1.507	156.600, 2.214	156.600, 1.353	156.600, 1.182	156.600, 1.340	156.600, 1.417	156.600, 2.062	156.600, 1.285	156.600, 1.197	156.600, 1.313	156.600, 1.323	156.600, 1.266	156.600, 1.062	156.600, 1.145	156.600, 1.814
785	156.800, 1.506	156.800, 2.207	156.800, 1.352	156.800, 1.182	156.800, 1.339	156.800, 1.416	156.800, 2.056	156.800, 1.284	156.800, 1.196	156.800, 1.312	156.800, 1.322	156.800, 1.265	156.800, 1.061	156.800, 1.145	156.800, 1.809
786	157.000, 1.505	157.000, 2.200	157.000, 1.351	157.000, 1.182	157.000, 1.338	157.000, 1.415	157.000, 2.049	157.000, 1.283	157.000, 1.195	157.000, 1.311	157.000, 1.321	157.000, 1.264	157.000, 1.060	157.000, 1.144	157.000, 1.803
787	157.200, 1.504	157.200, 2.193	157.200, 1.350	157.200, 1.181	157.200, 1.337	157.200, 1.414	157.200, 2.043	157.200, 1.282	157.200, 1.194	157.200, 1.310	157.200, 1.320	157.200, 1.263	157.200, 1.059	157.200, 1.144	157.200, 1.797
788	157.400, 1.503	157.400, 2.187	157.400, 1.349	157.400, 1.181	157.400, 1.336	157.400, 1.414	157.400, 2.036	157.400, 1.281	157.400, 1.193	157.400, 1.310	157.400, 1.319	157.400, 1.262	157.400, 1.059	157.400, 1.143	157.400, 1.792
789	157.600, 1.502	157.600, 2.180	157.600, 1.348	157.600, 1.181	157.600, 1.335	157.600, 1.413	157.600, 2.030	157.600, 1.280	157.600, 1.193	157.600, 1.309	157.600, 1.318	157.600, 1.261	157.600, 1.058	157.600, 1.142	157.600, 1.786
790	157.800, 1.501	157.800, 2.173	157.800, 1.347	157.800, 1.181	157.800, 1.334	157.800, 1.412	157.800, 2.023	157.800, 1.279	157.800, 1.192	157.800, 1.309	157.800, 1.318	157.800, 1.260	157.800, 1.058	157.800, 1.142	157.800, 1.781
791	158.000, 1.500	158.000, 2.167	158.000, 1.346	158.000, 1.180	158.000, 1.333	158.000, 1.411	158.000, 2.017	158.000, 1.278	158.000, 1.191	158.000, 1.308	158.000, 1.317	158.000, 1.259	158.000, 1.057	158.000, 1.141	158.000, 1.775
792	158.200, 1.499	158.200, 2.160	158.200, 1.345	158.200, 1.180	158.200, 1.332	158.200, 1.410	158.200, 2.010	158.200, 1.277	158.200, 1.190	158.200, 1.308	158.200, 1.316	158.200, 1.258	158.200, 1.057	158.200, 1.141	158.200, 1.769
793	158.400, 1.498	158.400, 2.154	158.400, 1.344	158.400, 1.179	158.400, 1.331	158.400, 1.409	158.400, 2.003	158.400, 1.276	158.400, 1.189	158.400, 1.307	158.400, 1.316	158.400, 1.257	158.400, 1.057	158.400, 1.140	158.400, 1.764
794	158.600, 1.497	158.600, 2.147	158.600, 1.344	158.600, 1.179	158.600, 1.330	158.600, 1.408	158.600, 1.996	158.600, 1.276	158.600, 1.189	158.600, 1.306	158.600, 1.315	158.600, 1.256	158.600, 1.057	158.600, 1.139	158.600, 1.758
795	158.800, 1.496	158.800, 2.140	158.800, 1.343	158.800, 1.178	158.800, 1.329	158.800, 1.407	158.800, 1.989	158.800, 1.275	158.800, 1.188	158.800, 1.306	158.800, 1.314	158.800, 1.255	158.800, 1.056	158.800, 1.138	158.800, 1.753
796	159.000, 1.496	159.000, 2.134	159.000, 1.342	159.000, 1.178	159.000, 1.328	159.000, 1.407	159.000, 1.982	159.000, 1.274	159.000, 1.187	159.000, 1.305	159.000, 1.313	159.000, 1.254	159.000, 1.056	159.000, 1.137	159.000, 1.747
797	159.200, 1.495	159.200, 2.127	159.200, 1.342	159.200, 1.177	159.200, 1.328	159.200, 1.406	159.200, 1.976	159.200, 1.273	159.200, 1.187	159.200, 1.304	159.200, 1.312	159.200, 1.253	159.200, 1.056	159.200, 1.136	159.200, 1.742
798	159.400, 1.494	159.400, 2.121	159.400, 1.341	159.400, 1.177	159.400, 1.327	159.400, 1.405	159.400, 1.969	159.400, 1.273	159.400, 1.186	159.400, 1.303	159.400, 1.312	159.400, 1.252	159.400, 1.056	159.400, 1.135	159.400, 1.736
799	159.600, 1.493	159.600, 2.115	159.600, 1.340	159.600, 1.176	159.600, 1.327	159.600, 1.404	159.600, 1.963	159.600, 1.272	159.600, 1.185	159.600, 1.302	159.600, 1.311	159.600, 1.251	159.600, 1.055	159.600, 1.135	159.600, 1.730
800	159.800, 1.492	159.800, 2.108	159.800, 1.340	159.800, 1.176	159.800, 1.326	159.800, 1.403	159.800, 1.957	159.800, 1.271	159.800, 1.185	159.800, 1.302	159.800, 1.310	159.800, 1.250	159.800, 1.055	159.800, 1.134	159.800, 1.725
801	160.000, 1.491	160.000, 2.102	160.000, 1.339	160.000, 1.176	160.000, 1.325	160.000, 1.402	160.000, 1.952	160.000, 1.271	160.000, 1.184	160.000, 1.301	160.000, 1.309	160.000, 1.249	160.000, 1.054	160.000, 1.134	160.000, 1.719
802	160.200, 1.490	160.200, 2.096	160.200, 1.339	160.200, 1.175	160.200, 1.325	160.200, 1.401	160.200, 1.946	160.200, 1.270	160.200, 1.183	160.200, 1.300	160.200, 1.308	160.200, 1.248	160.200, 1.053	160.200, 1.133	160.200, 1.714
803	160.400, 1.489	160.400, 2.090	160.400, 1.338	160.400, 1.175	160.400, 1.324	160.400, 1.400	160.400, 1.940	160.400, 1.270	160.400, 1.183	160.400, 1.299	160.400, 1.307	160.400, 1.247	160.400, 1.052	160.400, 1.133	160.400, 1.709
804	160.600, 1.488	160.600, 2.084	160.600, 1.337	160.600, 1.175	160.600, 1.324	160.600, 1.399	160.600, 1.935	160.600, 1.269	160.600, 1.182	160.600, 1.298	160.600, 1.306	160.600, 1.247	160.600, 1.051	160.600, 1.132	160.600, 1.703
805	160.800, 1.487	160.800, 2.078	160.800, 1.337	160.800, 1.174	160.800, 1.323	160.800, 1.398	160.800, 1.930	160.800, 1.269	160.800, 1.182	160.800, 1.297	160.800, 1.306	160.800, 1.246	160.800, 1.051	160.800, 1.132	160.800, 1.698
806	161.000, 1.486	161.000, 2.072	161.000, 1.336	161.000, 1.174	161.000, 1.322	161.000, 1.397	161.000, 1.925	161.000, 1.268	161.000, 1.181	161.000, 1.296	161.000, 1.305	161.000, 1.245	161.000, 1.050	161.000, 1.131	161.000, 1.693
807	161.200, 1.485	161.200, 2.065	161.200, 1.335	161.200, 1.173	161.200, 1.321	161.200, 1.396	161.200, 1.919	161.200, 1.268	161.200, 1.181	161.200, 1.295	161.200, 1.304	161.200, 1.245	161.200, 1.049	161.200, 1.131	161.200, 1.689
808	161.400, 1.484	161.400, 2.059	161.400, 1.334	161.400, 1.173	161.400, 1.320	161.400, 1.395	161.400, 1.914	161.400, 1.267	161.400, 1.180	161.400, 1.295	161.400, 1.304	161.400, 1.244	161.400, 1.049	161.400, 1.130	161.400, 1.684
809	161.600, 1.483	161.600, 2.053	161.600, 1.333	161.600, 1.173	161.600, 1.320	161.600, 1.395	161.600, 1.908	161.600, 1.266	161.600, 1.180	161.600, 1.294	161.600, 1.303	161.600, 1.243	161.600, 1.048	161.600, 1.130	161.600, 1.679
810	161.800, 1.482	161.800, 2.047	161.800, 1.332	161.800, 1.172	161.800, 1.319	161.800, 1.394	161.800, 1.902	161.800, 1.266	161.800, 1.179	161.800, 1.294	161.800, 1.302	161.800, 1.243	161.800, 1.047	161.800, 1.129	161.800, 1.674
811	162.000, 1.481	162.000, 2.041	162.000, 1.332	162.000, 1.172	162.000, 1.318	162.000, 1.393	162.000, 1.896	162.000, 1.265	162.000, 1.178	162.000, 1.293	162.000, 1.301	162.000, 1.242	162.000, 1.047	162.000, 1.128	162.000, 1.669
812	162.200, 1.480	162.200, 2.035	162.200, 1.331	162.200, 1.171	162.200, 1.317	162.200, 1.392	162.200, 1.890	162.200, 1.264	162.200, 1.178	162.200, 1.292	162.200, 1.300	162.200, 1.241	162.200, 1.047	162.200, 1.128	162.200, 1.665
813	162.400, 1.479	162.400, 2.029	162.400, 1.330	162.400, 1.170	162.400, 1.317	162.400, 1.392	162.400, 1.884	162.400, 1.264	162.400, 1.177	162.400, 1.292	162.400, 1.299	162.400, 1.241	162.400, 1.046	162.400, 1.127	162.400, 1.660
814	162.600, 1.478	162.600, 2.023	162.600, 1.330	162.600, 1.169	162.600, 1.316	162.600, 1.391	162.600, 1.878	162.600, 1.263	162.600, 1.177	162.600, 1.291	162.600, 1.298	162.600, 1.240	162.600, 1.046	162.600, 1.126	162.600, 1.655
815	162.800, 1.477	162.800, 2.017	162.800, 1.329	162.800, 1.169	162.800, 1.315	162.800, 1.390	162.800, 1.872	162.800, 1.262	162.800, 1.176	162.800, 1.290	162.800, 1.297	162.800, 1.240	162.800, 1.045	162.800, 1.125	162.800, 1.650
816	163.000, 1.476	163.000, 2.012	163.000, 1.328	163.000, 1.168	163.000, 1.315	163.000, 1.389	163.000, 1.866	163.000, 1.262	163.000, 1.176	163.000, 1.290	163.000, 1.296	163.000, 1.239	163.000, 1.045	163.000, 1.125	163.000, 1.645
817	163.200, 1.475	163.200, 2.006	163.200, 1.328	163.200, 1.168	163.200, 1.314	163.200, 1.388	163.200, 1.861	163.200, 1.261	163.200, 1.175	163.200, 1.289	163.200, 1.295	163.200, 1.238	163.200, 1.044	163.200, 1.124	163.200, 1.640
818	163.400, 1.474	163.400, 2.000	163.400, 1.327	163.400, 1.167	163.400, 1.313	163.400, 1.388	163.400, 1.855	163.400, 1.260	163.400, 1.175	163.400, 1.289	163.400, 1.294	163.400, 1.237	163.400, 1.044	163.400, 1.123	163.400, 1.635
819	163.600, 1.473	163.600, 1.995	163.600, 1.327	163.600, 1.167	163.600, 1.313	163.600, 1.387	163.600, 1.850	163.600, 1.259	163.600, 1.175	163.600, 1.288	163.600, 1.293	163.600, 1.236	163.600, 1.043	163.600, 1.123	163.600, 1.630
820	163.800, 1.472	163.800, 1.989	163.800, 1.326	163.800, 1.166	163.800, 1.312	163.800, 1.386	163.800, 1.845	163.800, 1.259	163.800, 1.175	163.800, 1.287	163.800, 1.292	163.800, 1.235	163.800, 1.042	163.800, 1.122	163.800, 1.625
821	164.000, 1.471	164.000, 1.984	164.000, 1.326	164.000, 1.166	164.000, 1.311	164.000, 1.385	164.000, 1.840	164.000, 1.258	164.000, 1.174	164.000, 1.287	164.000, 1.291	164.000, 1.235	164.000, 1.041	164.000, 1.121	164.000, 1.620
822	164.200, 1.471	164.200, 1.978	164.200, 1.325	164.200, 1.166	164.200, 1.311	164.200, 1.385	164.200, 1.835	164.200, 1.257	164.200, 1.174	164.200, 1.286	164.200, 1.291	164.200, 1.234	164.200, 1.041	164.200, 1.121	164.200, 1.616
823	164.400, 1.470	164.400, 1.973	164.400, 1.325	164.400, 1.166	164.400, 1.310	164.400, 1.384	164.400, 1.830	164.400, 1.257	164.400, 1.174	164.400, 1.285	164.400, 1.290	164.400, 1.233	164.400, 1.040	164.400, 1.120	164.400, 1.611
824	164.600, 1.470	164.600, 1.967	164.600, 1.325	164.600, 1.165	164.600, 1.310	164.600, 1.383	164.600, 1.825	164.600, 1.256	164.600, 1.173	164.600, 1.284	164.600, 1.290	164.600, 1.233	164.600, 1.040	164.600, 1.119	164.600, 1.606
825	164.800, 1.469	164.800, 1.962	164.800, 1.324	164.800, 1.165	164.800, 1.309	164.800, 1.382	164.800, 1.820	164.800, 1.255	164.800, 1.173	164.800, 1.284	164.800, 1.289	164.800, 1.232	164.800, 1.039	164.800, 1.119	164.800, 1.602
826	165.000, 1.469	165.000, 1.956	165.000, 1.324	165.000, 1.165	165.000, 1.308	165.000, 1.381	165.000, 1.815	165.000, 1.255	165.000, 1.172	165.000, 1.283	165.000, 1.289	165.000, 1.232	165.000, 1.039	165.000, 1.118	165.000, 1.597
827	165.200, 1.468	165.200, 1.951	165.200, 1.323	165.200, 1.165	165.200, 1.308	165.200, 1.380	165.200, 1.810	165.200, 1.254	165.200, 1.172	165.200, 1.283	165.200, 1.288	165.200, 1.231	165.200, 1.039	165.200, 1.118	165.200, 1.593
828	165.400, 1.467	165.400, 1.945	165.400, 1.323	165.400, 1.165	165.400, 1.307	165.400, 1.379	165.400, 1.805	165.400, 1.253	165.400, 1.171	165.400, 1.282	165.400, 1.288	165.400, 1.230	165.400, 1.038	165.400, 1.117	165.400, 1.588
829	165.600, 1.466	165.600, 1.939	165.600, 1.322	165.600, 1.164	165.600, 1.306	165.600, 1.379	165.600, 1.800	165.600, 1.253	165.600, 1.170	165.600, 1.282	165.600, 1.287	165.600, 1.229	165.600, 1.038	165.600, 1.117	165.600, 1.584
830	165.800, 1.465	165.800, 1.934	165.800, 1.321	165.800, 1.164	165.800, 1.305	165.800, 1.378	165.800, 1.795	165.800, 1.252	165.800, 1.170	165.800, 1.281	165.800, 1.286	165.800, 1.229	165.800, 1.038	165.800, 1.117	165.800, 1.579
831	166.000, 1.464	166.000, 1.928	166.000, 1.320	166.000, 1.163	166.000, 1.305	166.000, 1.377	166.000, 1.790	166.000, 1.252	166.000, 1.169	166.000, 1.281	166.000, 1.285	166.000, 1.228	166.000, 1.037	166.000, 1.116	166.000, 1.575
832	166.200, 1.464	166.200, 1.923	166.200, 1.320	166.200, 1.162	166.200, 1.304	166.200, 1.376	166.200, 1.785	166.200, 1.251	166.200, 1.169	166.200, 1.280	166.200, 1.285	166.200, 1.227	166.200, 1.037	166.200, 1.116	166.200, 1.571
833	166.400, 1.463	166.400, 1.918	166.400, 1.319	166.400, 1.161	166.400, 1.303	166.400, 1.376	166.400, 1.780	166.400, 1.251	166.400, 1.168	166.400, 1.279	166.400, 1.284	166.400, 1.227	166.400, 1.037	166.400, 1.115	166.400, 1.566
834	166.600, 1.462	166.600, 1.913	166.600, 1.318	166.600, 1.161	166.600, 1.302	166.600, 1.375	166.600, 1.775	166.600, 1.250	166.600, 1.167	166.600, 1.279	166.600, 1.283	166.600, 1.226	166.600, 1.036	166.600, 1.115	166.600, 1.562
835	166.800, 1.461	166.800, 1.907	166.800, 1.318	166.800, 1.160	166.800, 1.301	166.800, 1.375	166.800, 1.770	166.800, 1.250	166.800, 1.167	166.800, 1.278	166.800, 1.283	166.800, 1.225	166.800, 1.036	166.800, 1.114	166.800, 1.557
836	167.000, 1.461	167.000, 1.902	167.000, 1.317	167.000, 1.160	167.000, 1.301	167.000, 1.374	167.000, 1.766	167.000, 1.249	167.000, 1.166	167.000, 1.277	167.000, 1.282	167.000, 1.224	167.000, 1.036	167.000, 1.114	167.000, 1.553
837	167.200, 1.460	167.200, 1.897	167.200, 1.316	167.200, 1.160	167.200, 1.300	167.200, 1.374	167.200, 1.761	167.200, 1.249	167.200, 1.166	167.200, 1.276	167.200, 1.281	167.200, 1.224	167.200, 1.035	167.200, 1.113	167.200, 1.548
838	167.400, 1.459	167.400, 1.892	167.400, 1.316	167.400, 1.160	167.400, 1.300	167.400, 1.373	167.400, 1.756	167.400, 1.249	167.400, 1.165	167.400, 1.276	167.400, 1.281	167.400, 1.223	167.400, 1.035	167.400, 1.113	167.400, 1.544
839	167.600, 1.458	167.600, 1.887	167.600, 1.315	167.600, 1.159	167.600, 1.299	167.600, 1.372	167.600, 1.751	167.600, 1.248	167.600, 1.165	167.600, 1.275	167.600, 1.280	167.600, 1.222	167.600, 1.034	167.600, 1.113	167.600, 1.540
840	167.800, 1.458	167.800, 1.883	167.800, 1.314	167.800, 1.159	167.800, 1.299	167.800, 1.372	167.800, 1.746	167.800, 1.247	167.800, 1.165	167.800, 1.275	167.800, 1.279	167.800, 1.222	167.800, 1.034	167.800, 1.112	167.800, 1.536
841	168.000, 1.457	168.000, 1.878	168.000, 1.314	168.000, 1.159	168.000, 1.298	168.000, 1.371	168.000, 1.742	168.000, 1.247	168.000, 1.164	168.000, 1.274	168.000, 1.279	168.000, 1.221	168.000, 1.033	168.000, 1.112	168.000, 1.531
842	168.200, 1.457	168.200, 1.873	168.200, 1.313	168.200, 1.159	168.200, 1.298	168.200, 1.370	168.200, 1.737	168.200, 1.246	168.200, 1.164	168.200, 1.274	168.200, 1.278	168.200, 1.221	168.200, 1.033	168.200, 1.111	168.200, 1.528
843	168.400, 1.456	168.400, 1.869	168.400, 1.313	168.400, 1.159	168.400, 1.297	168.400, 1.369	168.400, 1.732	168.400, 1.245	168.400, 1.163	168.400, 1.273	168.400, 1.278	168.400, 1.221	168.400, 1.032	168.400, 1.111	168.400, 1.524
844	168.600, 1.456	168.600, 1.864	168.600, 1.312	168.600, 1.158	168.600, 1.297	168.600, 1.369	168.600, 1.727	168.600, 1.245	168.600, 1.163	168.600, 1.273	168.600, 1.277	168.600, 1.220	168.600, 1.032	168.600, 1.110	168.600, 1.519
845	168.800, 1.455	168.800, 1.860	168.800, 1.312	168.800, 1.158	168.800, 1.296	168.800, 1.368	168.800, 1.723	168.800, 1.244	168.800, 1.162	168.800, 1.272	168.800, 1.277	168.800, 1.220	168.800, 1.032	168.800, 1.110	168.800, 1.515
846	169.000, 1.454	169.000, 1.855	169.000, 1.311	169.000, 1.158	169.000, 1.296	169.000, 1.368	169.000, 1.719	169.000, 1.243	169.000, 1.162	169.000, 1.272	169.000, 1.276	169.000, 1.219	169.000, 1.031	169.000, 1.109	169.000, 1.511
847	169.200, 1.454	169.200, 1.851	169.200, 1.310	169.200, 1.158	169.200, 1.295	169.200, 1.367	169.200, 1.714	169.200, 1.243	169.200, 1.161	169.200, 1.271	169.200, 1.276	169.200, 1.219	169.200, 1.031	169.200, 1.108	169.200, 1.507
848	169.400, 1.453	169.400, 1.846	169.400, 1.309	169.400, 1.157	169.400, 1.294	169.400, 1.366	169.400, 1.710	169.400, 1.242	169.400, 1.161	169.400, 1.270	169.400, 1.275	169.400, 1.218	169.400, 1.030	169.400, 1.108	169.400, 1.503
849	169.600, 1.452	169.600, 1.841	169.600, 1.309	169.600, 1.157	169.600, 1.294	169.600, 1.366	169.600, 1.705	169.600, 1.241	169.600, 1.160	169.600, 1.270	169.600, 1.275	169.600, 1.217	169.600, 1.030	169.600, 1.107	169.600, 1.500
850	169.800, 1.451	169.800, 1.836	169.800, 1.308	169.800, 1.156	169.800, 1.293	169.800, 1.365	169.800, 1.700	169.800, 1.241	169.800, 1.160	169.800, 1.269	169.800, 1.274	169.800, 1.217	169.800, 1.030	169.800, 1.107	169.800, 1.496
851	170.000, 1.450	170.000, 1.831	170.000, 1.308	170.000, 1.155	170.000, 1.292	170.000, 1.365	170.000, 1.696	170.000, 1.241	170.000, 1.159	170.000, 1.268	170.000, 1.273	170.000, 1.216	170.000, 1.030	170.000, 1.106	170.000, 1.492
852	170.200, 1.450	170.200, 1.826	170.200, 1.307	170.200, 1.155	170.200, 1.292	170.200, 1.364	170.200, 1.692	170.200, 1.240	170.200, 1.158	170.200, 1.267	170.200, 1.273	170.200, 1.216	170.200, 1.030	170.200, 1.106	170.200, 1.489
853	170.400, 1.449	170.400, 1.822	170.400, 1.307	170.400, 1.155	170.400, 1.291	170.400, 1.364	170.400, 1.687	170.400, 1.240	170.400, 1.158	170.400, 1.267	170.400, 1.272	170.400, 1.215	170.400, 1.029	170.400, 1.105	170.400, 1.485
854	170.600, 1.448	170.600, 1.817	170.600, 1.307	170.600, 1.154	170.600, 1.291	170.600, 1.363	170.600, 1.683	170.600, 1.239	170.600, 1.157	170.600, 1.266	170.600, 1.272	170.600, 1.215	170.600, 1.030	170.600, 1.105	170.600, 1.481
855	170.800, 1.447	170.800, 1.813	170.800, 1.306	170.800, 1.154	170.800, 1.290	170.800, 1.363	170.800, 1.679	170.800, 1.239	170.800, 1.157	170.800, 1.265	170.800, 1.271	170.800, 1.214	170.800, 1.029	170.800, 1.104	170.800, 1.478
856	171.000, 1.447	171.000, 1.808	171.000, 1.306	171.000, 1.154	171.000, 1.290	171.000, 1.362	171.000, 1.675	171.000, 1.238	171.000, 1.156	171.000, 1.265	171.000, 1.270	171.000, 1.213	171.000, 1.029	171.000, 1.104	171.000, 1.474
857	171.200, 1.446	171.200, 1.803	171.200, 1.306	171.200, 1.153	171.200, 1.290	171.200, 1.361	171.200, 1.671	171.200, 1.238	171.200, 1.156	171.200, 1.264	171.200, 1.269	171.200, 1.213	171.200, 1.029	171.200, 1.104	171.200, 1.470
858	171.400, 1.446	171.400, 1.799	171.400, 1.305	171.400, 1.153	171.400, 1.289	171.400, 1.360	171.400, 1.666	171.400, 1.237	171.400, 1.156	171.400, 1.264	171.400, 1.268	171.400, 1.212	171.400, 1.029	171.400, 1.104	171.400, 1.467
859	171.600, 1.445	171.600, 1.795	171.600, 1.305	171.600, 1.152	171.600, 1.289	171.600, 1.359	171.600, 1.662	171.600, 1.237	171.600, 1.155	171.600, 1.263	171.600, 1.268	171.600, 1.211	171.600, 1.029	171.600, 1.103	171.600, 1.463
860	171.800, 1.444	171.800, 1.791	171.800, 1.305	171.800, 1.152	171.800, 1.288	171.800, 1.358	171.800, 1.658	171.800, 1.236	171.800, 1.155	171.800, 1.263	171.800, 1.267	171.800, 1.210	171.800, 1.028	171.800, 1.103	171.800, 1.459
861	172.000, 1.443	172.000, 1.787	172.000, 1.304	172.000, 1.151	172.000, 1.288	172.000, 1.358	172.000, 1.654	172.000, 1.235	172.000, 1.155	172.000, 1.263	172.000, 1.266	172.000, 1.210	172.000, 1.027	172.000, 1.103	172.000, 1.456
862	172.200, 1.442	172.200, 1.783	172.200, 1.304	172.200, 1.151	172.200, 1.287	172.200, 1.357	172.200, 1.651	172.200, 1.235	172.200, 1.154	172.200, 1.263	172.200, 1.266	172.200, 1.209	172.200, 1.027	172.200, 1.102	172.200, 1.452
863	172.400, 1.442	172.400, 1.779	172.400, 1.303	172.400, 1.150	172.400, 1.287	172.400, 1.356	172.400, 1.647	172.400, 1.234	172.400, 1.154	172.400, 1.262	172.400, 1.265	172.400, 1.208	172.400, 1.026	172.400, 1.102	172.400, 1.449
864	172.600, 1.441	172.600, 1.774	172.600, 1.303	172.600, 1.150	172.600, 1.286	172.600, 1.355	172.600, 1.643	172.600, 1.233	172.600, 1.153	172.600, 1.262	172.600, 1.265	172.600, 1.208	172.600, 1.025	172.600, 1.101	172.600, 1.445
865	172.800, 1.440	172.800, 1.770	172.800, 1.302	172.800, 1.149	172.800, 1.286	172.800, 1.355	172.800, 1.640	172.800, 1.233	172.800, 1.153	172.800, 1.262	172.800, 1.264	172.800, 1.207	172.800, 1.025	172.800, 1.100	172.800, 1.442
866	173.000, 1.440	173.000, 1.766	173.000, 1.301	173.000, 1.149	173.000, 1.285	173.000, 1.354	173.000, 1.636	173.000, 1.232	173.000, 1.153	173.000, 1.261	173.000, 1.264	173.000, 1.206	173.000, 1.024	173.000, 1.100	173.000, 1.438
867	173.200, 1.439	173.200, 1.762	173.200, 1.300	173.200, 1.149	173.200, 1.285	173.200, 1.354	173.200, 1.632	173.200, 1.232	173.200, 1.152	173.200, 1.261	173.200, 1.263	173.200, 1.205	173.200, 1.023	173.200, 1.099	173.200, 1.435
868	173.400, 1.438	173.400, 1.758	173.400, 1.300	173.400, 1.149	173.400, 1.284	173.400, 1.353	173.400, 1.629	173.400, 1.231	173.400, 1.152	173.400, 1.260	173.400, 1.263	173.400, 1.205	173.400, 1.023	173.400, 1.099	173.400, 1.431
869	173.600, 1.438	173.600, 1.754	173.600, 1.300	173.600, 1.149	173.600, 1.283	173.600, 1.353	173.600, 1.626	173.600, 1.231	173.600, 1.151	173.600, 1.260	173.600, 1.262	173.600, 1.204	173.600, 1.022	173.600, 1.098	173.600, 1.428
870	173.800, 1.437	173.800, 1.750	173.800, 1.299	173.800, 1.149	173.800, 1.283	173.800, 1.353	173.800, 1.622	173.800, 1.231	173.800, 1.151	173.800, 1.259	173.800, 1.261	173.800, 1.204	173.800, 1.022	173.800, 1.098	173.800, 1.424
871	174.000, 1.437	174.000, 1.746	174.000, 1.299	174.000, 1.149	174.000, 1.282	174.000, 1.353	174.000, 1.619	174.000, 1.230	174.000, 1.150	174.000, 1.259	174.000, 1.261	174.000, 1.203	174.000, 1.021	174.000, 1.097	174.000, 1.421
872	174.200, 1.436	174.200, 1.742	174.200, 1.299	174.200, 1.149	174.200, 1.282	174.200, 1.352	174.200, 1.616	174.200, 1.230	174.200, 1.150	174.200, 1.259	174.200, 1.260	174.200, 1.203	174.200, 1.021	174.200, 1.097	174.200, 1.418
873	174.400, 1.436	174.400, 1.739	174.400, 1.299	174.400, 1.148	174.400, 1.281	174.400, 1.352	174.400, 1.612	174.400, 1.229	174.400, 1.149	174.400, 1.258	174.400, 1.260	174.400, 1.203	174.400, 1.021	174.400, 1.096	174.400, 1.415
874	174.600, 1.435	174.600, 1.735	174.600, 1.298	174.600, 1.148	174.600, 1.281	174.600, 1.352	174.600, 1.609	174.600, 1.229	174.600, 1.149	174.600, 1.257	174.600, 1.259	174.600, 1.203	174.600, 1.020	174.600, 1.096	174.600, 1.412
875	174.800, 1.435	174.800, 1.731	174.800, 1.298	174.800, 1.148	174.800, 1.280	174.800, 1.351	174.800, 1.605	174.800, 1.229	174.800, 1.149	174.800, 1.257	174.800, 1.259	174.800, 1.202	174.800, 1.020	174.800, 1.096	174.800, 1.408
876	175.000, 1.434	175.000, 1.728	175.000, 1.298	175.000, 1.148	175.000, 1.280	175.000, 1.351	175.000, 1.601	175.000, 1.229	175.000, 1.148	175.000, 1.256	175.000, 1.258	175.000, 1.202	175.000, 1.019	175.000, 1.096	175.000, 1.405
877	175.200, 1.433	175.200, 1.724	175.200, 1.298	175.200, 1.147	175.200, 1.279	175.200, 1.350	175.200, 1.598	175.200, 1.228	175.200, 1.148	175.200, 1.255	175.200, 1.257	175.200, 1.202	175.200, 1.019	175.200, 1.096	175.200, 1.402
878	175.400, 1.433	175.400, 1.720	175.400, 1.297	175.400, 1.147	175.400, 1.279	175.400, 1.350	175.400, 1.594	175.400, 1.228	175.400, 1.148	175.400, 1.255	175.400, 1.257	175.400, 1.202	175.400, 1.018	175.400, 1.096	175.400, 1.399
879	175.600, 1.432	175.600, 1.716	175.600, 1.297	175.600, 1.147	175.600, 1.278	175.600, 1.349	175.600, 1.590	175.600, 1.227	175.600, 1.147	175.600, 1.254	175.600, 1.256	175.600, 1.201	175.600, 1.018	175.600, 1.095	175.600, 1.396
880	175.800, 1.431	175.800, 1.713	175.800, 1.297	175.800, 1.146	175.800, 1.278	175.800, 1.348	175.800, 1.587	175.800, 1.227	175.800, 1.147	175.800, 1.254	175.800, 1.256	175.800, 1.201	175.800, 1.018	175.800, 1.095	175.800, 1.393
881	176.000, 1.431	176.000, 1.709	176.000, 1.297	176.000, 1.146	176.000, 1.277	176.000, 1.347	176.000, 1.584	176.000, 1.226	176.000, 1.147	176.000, 1.254	176.000, 1.256	176.000, 1.200	176.000, 1.017	176.000, 1.095	176.000, 1.391
882	176.200, 1.430	176.200, 1.705	176.200, 1.296	176.200, 1.146	176.200, 1.277	176.200, 1.346	176.200, 1.581	176.200, 1.226	176.200, 1.147	176.200, 1.253	176.200, 1.255	176.200, 1.200	176.200, 1.017	176.200, 1.095	176.200, 1.388
883	176.400, 1.429	176.400, 1.701	176.400, 1.296	176.400, 1.145	176.400, 1.277	176.400, 1.345	176.400, 1.577	176.400, 1.225	176.400, 1.146	176.400, 1.253	176.400, 1.255	176.400, 1.199	176.400, 1.016	176.400, 1.095	176.400, 1.385
884	176.600, 1.429	176.600, 1.698	176.600, 1.295	176.600, 1.145	176.600, 1.276	176.600, 1.344	176.600, 1.574	176.600, 1.225	176.600, 1.146	176.600, 1.253	176.600, 1.255	176.600, 1.198	176.600, 1.016	176.600, 1.094	176.600, 1.381
885	176.800, 1.428	176.800, 1.694	176.800, 1.294	176.800, 1.144	176.800, 1.276	176.800, 1.343	176.800, 1.571	176.800, 1.224	176.800, 1.146	176.800, 1.252	176.800, 1.255	176.800, 1.198	176.800, 1.016	176.800, 1.094	176.800, 1.378
886	177.000, 1.428	177.000, 1.690	177.000, 1.294	177.000, 1.143	177.000, 1.276	177.000, 1.343	177.000, 1.567	177.000, 1.224	177.000, 1.146	177.000, 1.252	177.000, 1.254	177.000, 1.197	177.000, 1.015	177.000, 1.094	177.000, 1.375
887	177.200, 1.427	177.200, 1.686	177.200, 1.293	177.200, 1.143	177.200, 1.275	177.200, 1.342	177.200, 1.564	177.200, 1.223	177.200, 1.146	177.200, 1.252	177.200, 1.254	177.200, 1.197	177.200, 1.015	177.200, 1.093	177.200, 1.372
888	177.400, 1.427	177.400, 1.683	177.400, 1.293	177.400, 1.142	177.400, 1.275	177.400, 1.342	177.400, 1.561	177.400, 1.222	177.400, 1.145	177.400, 1.251	177.400, 1.253	177.400, 1.196	177.400, 1.015	177.400, 1.093	177.400, 1.369
889	177.600, 1.427	177.600, 1.680	177.600, 1.292	177.600, 1.142	177.600, 1.275	177.600, 1.342	177.600, 1.558	177.600, 1.222	177.600, 1.145	177.600, 1.251	177.600, 1.253	177.600, 1.196	177.600, 1.015	177.600, 1.092	177.600, 1.366
890	177.800, 1.426	177.800, 1.676	177.800, 1.291	177.800, 1.141	177.800, 1.274	177.800, 1.341	177.800, 1.555	177.800, 1.221	177.800, 1.145	177.800, 1.251	177.800, 1.252	177.800, 1.196	177.800, 1.015	177.800, 1.091	177.800, 1.363
891	178.000, 1.426	178.000, 1.673	178.000, 1.291	178.000, 1.141	178.000, 1.274	178.000, 1.341	178.000, 1.552	178.000, 1.221	178.000, 1.144	178.000, 1.251	178.000, 1.251	178.000, 1.195	178.000, 1.015	178.000, 1.090	178.000, 1.360
892	178.200, 1.426	178.200, 1.670	178.200, 1.290	178.200, 1.141	178.200, 1.273	178.200, 1.341	178.200, 1.549	178.200, 1.220	178.200, 1.144	178.200, 1.250	178.200, 1.251	178.200, 1.195	178.200, 1.014	178.200, 1.090	178.200, 1.357
893	178.400, 1.425	178.400, 1.667	178.400, 1.289	178.400, 1.140	178.400, 1.273	178.400, 1.341	178.400, 1.546	178.400, 1.220	178.400, 1.144	178.400, 1.250	178.400, 1.250	178.400, 1.194	178.400, 1.014	178.400, 1.089	178.400, 1.354
894	178.600, 1.425	178.600, 1.664	178.600, 1.289	178.600, 1.140	178.600, 1.272	178.600, 1.340	178.600, 1.543	178.600, 1.220	178.600, 1.143	178.600, 1.250	178.600, 1.250	178.600, 1.193	178.600, 1.014	178.600, 1.088	178.600, 1.351
895	178.800, 1.424	178.800, 1.660	178.800, 1.288	178.800, 1.140	178.800, 1.271	178.800, 1.340	178.800, 1.540	178.800, 1.220	178.800, 1.143	178.800, 1.249	178.800, 1.249	178.800, 1.192	178.800, 1.013	178.800, 1.088	178.800, 1.348
896	179.000, 1.424	179.000, 1.657	179.000, 1.288	179.000, 1.140	179.000, 1.271	179.000, 1.340	179.000, 1.537	179.000, 1.220	179.000, 1.143	179.000, 1.249	179.000, 1.248	179.000, 1.192	179.000, 1.013	179.000, 1.087	179.000, 1.346
897	179.200, 1.423	179.200, 1.654	179.200, 1.288	179.200, 1.140	179.200, 1.270	179.200, 1.339	179.200, 1.535	179.200, 1.219	179.200, 1.142	179.200, 1.248	179.200, 1.248	179.200, 1.191	179.200, 1.013	179.200, 1.087	179.200, 1.343
898	179.400, 1.423	179.400, 1.650	179.400, 1.287	179.400, 1.140	179.400, 1.270	179.400, 1.339	179.400, 1.532	179.400, 1.219	179.400, 1.142	179.400, 1.248	179.400, 1.247	179.400, 1.190	179.400, 1.012	179.400, 1.087	179.400, 1.341
899	179.600, 1.423	179.600, 1.647	179.600, 1.288	179.600, 1.140	179.600, 1.269	179.600, 1.338	179.600, 1.530	179.600, 1.219	179.600, 1.141	179.600, 1.247	179.600, 1.247	179.600, 1.190	179.600, 1.012	179.600, 1.086	179.600, 1.338
900	179.800, 1.422	179.800, 1.644	179.800, 1.287	179.800, 1.140	179.800, 1.269	179.800, 1.338	179.800, 1.527	179.800, 1.218	179.800, 1.141	179.800, 1.247	179.800, 1.247	179.800, 1.189	179.800, 1.012	179.800, 1.086	179.800, 1.336
901	180.000, 1.422	180.000, 1.640	180.000, 1.287	180.000, 1.139	180.000, 1.268	180.000, 1.337	180.000, 1.525	180.000, 1.217	180.000, 1.141	180.000, 1.246	180.000, 1.246	180.000, 1.189	180.000, 1.011	180.000, 1.086	180.000, 1.333
902	180.200, 1.421	180.200, 1.637	180.200, 1.287	180.200, 1.139	180.200, 1.268	180.200, 1.337	180.200, 1.522	180.200, 1.217	180.200, 1.140	180.200, 1.246	180.200, 1.246	180.200, 1.189	180.200, 1.011	180.200, 1.086	180.200, 1.330
903	180.400, 1.421	180.400, 1.634	180.400, 1.287	180.400, 1.138	180.400, 1.268	180.400, 1.336	180.400, 1.519	180.400, 1.216	180.400, 1.140	180.400, 1.245	180.400, 1.246	180.400, 1.188	180.400, 1.011	180.400, 1.086	180.400, 1.327
904	180.600, 1.420	180.600, 1.631	180.600, 1.286	180.600, 1.138	180.600, 1.267	180.600, 1.335	180.600, 1.516	180.600, 1.215	180.600, 1.140	180.600, 1.244	180.600, 1.245	180.600, 1.188	180.600, 1.010	180.600, 1.086	180.600, 1.325
905	180.800, 1.420	180.800, 1.628	180.800, 1.286	180.800, 1.137	180.800, 1.267	180.800, 1.335	180.800, 1.513	180.800, 1.214	180.800, 1.139	180.800, 1.244	180.800, 1.245	180.800, 1.188	180.800, 1.010	180.800, 1.086	180.800, 1.322
906	181.000, 1.419	181.000, 1.625	181.000, 1.286	181.000, 1.137	181.000, 1.267	181.000, 1.334	181.000, 1.510	181.000, 1.213	181.000, 1.139	181.000, 1.243	181.000, 1.244	181.000, 1.188	181.000, 1.010	181.000, 1.085	181.000, 1.320
907	181.200, 1.419	181.200, 1.622	181.200, 1.285	181.200, 1.137	181.200, 1.267	181.200, 1.334	181.200, 1.507	181.200, 1.212	181.200, 1.138	181.200, 1.242	181.200, 1.243	181.200, 1.188	181.200, 1.010	181.200, 1.085	181.200, 1.317
908	181.400, 1.418	181.400, 1.620	181.400, 1.285	181.400, 1.136	181.400, 1.266	181.400, 1.333	181.400, 1.504	181.400, 1.212	181.400, 1.137	181.400, 1.241	181.400, 1.243	181.400, 1.188	181.400, 1.010	181.400, 1.084	181.400, 1.315
909	181.600, 1.418	181.600, 1.617	181.600, 1.284	181.600, 1.136	181.600, 1.266	181.600, 1.332	181.600, 1.501	181.600, 1.211	181.600, 1.137	181.600, 1.241	181.600, 1.242	181.600, 1.188	181.600, 1.010	181.600, 1.083	181.600, 1.313
910	181.800, 1.418	181.800, 1.614	181.800, 1.284	181.800, 1.136	181.800, 1.266	181.800, 1.332	181.800, 1.498	181.800, 1.211	181.800, 1.136	181.800, 1.240	181.800, 1.242	181.800, 1.188	181.800, 1.009	181.800, 1.083	181.800, 1.310
911	182.000, 1.417	182.000, 1.611	182.000, 1.283	182.000, 1.135	182.000, 1.265	182.000, 1.331	182.000, 1.495	182.000, 1.211	182.000, 1.136	182.000, 1.240	182.000, 1.241	182.000, 1.188	182.000, 1.009	182.000, 1.082	182.000, 1.308
912	182.200, 1.417	182.200, 1.608	182.200, 1.283	182.200, 1.135	182.200, 1.265	182.200, 1.331	182.200, 1.493	182.200, 1.210	182.200, 1.135	182.200, 1.240	182.200, 1.241	182.200, 1.187	182.200, 1.008	182.200, 1.082	182.200, 1.305
913	182.400, 1.416	182.400, 1.605	182.400, 1.282	182.400, 1.135	182.400, 1.264	182.400, 1.330	182.400, 1.490	182.400, 1.210	182.400, 1.135	182.400, 1.239	182.400, 1.240	182.400, 1.187	182.400, 1.007	182.400, 1.081	182.400, 1.303
914	182.600, 1.416	182.600, 1.603	182.600, 1.282	182.600, 1.134	182.600, 1.263	182.600, 1.330	182.600, 1.487	182.600, 1.210	182.600, 1.135	182.600, 1.239	182.600, 1.240	182.600, 1.186	182.600, 1.007	182.600, 1.081	182.600, 1.301
915	182.800, 1.415	182.800, 1.600	182.800, 1.281	182.800, 1.134	182.800, 1.263	182.800, 1.329	182.800, 1.485	182.800, 1.210	182.800, 1.134	182.800, 1.239	182.800, 1.240	182.800, 1.185	182.800, 1.006	182.800, 1.081	182.800, 1.298
916	183.000, 1.415	183.000, 1.597	183.000, 1.281	183.000, 1.134	183.000, 1.262	183.000, 1.329	183.000, 1.483	183.000, 1.210	183.000, 1.134	183.000, 1.239	183.000, 1.239	183.000, 1.185	183.000, 1.006	183.000, 1.081	183.000, 1.296
917	183.200, 1.414	183.200, 1.594	183.200, 1.280	183.200, 1.134	183.200, 1.262	183.200, 1.329	183.200, 1.480	183.200, 1.210	183.200, 1.134	183.200, 1.239	183.200, 1.239	183.200, 1.184	183.200, 1.006	183.200, 1.081	183.200, 1.294
918	183.400, 1.414	183.400, 1.591	183.400, 1.280	183.400, 1.133	183.400, 1.261	183.400, 1.329	183.400, 1.478	183.400, 1.210	183.400, 1.134	183.400, 1.239	183.400, 1.239	183.400, 1.184	183.400, 1.005	183.400, 1.080	183.400, 1.292
919	183.600, 1.413	183.600, 1.589	183.600, 1.280	183.600, 1.133	183.600, 1.261	183.600, 1.328	183.600, 1.476	183.600, 1.210	183.600, 1.134	183.600, 1.239	183.600, 1.238	183.600, 1.184	183.600, 1.005	183.600, 1.080	183.600, 1.289
920	183.800, 1.413	183.800, 1.586	183.800, 1.279	183.800, 1.133	183.800, 1.260	183.800, 1.328	183.800, 1.474	183.800, 1.209	183.800, 1.134	183.800, 1.239	183.800, 1.238	183.800, 1.183	183.800, 1.005	183.800, 1.080	183.800, 1.287
921	184.000, 1.412	184.000, 1.584	184.000, 1.279	184.000, 1.133	184.000, 1.259	184.000, 1.328	184.000, 1.471	184.000, 1.209	184.000, 1.134	184.000, 1.238	184.000, 1.237	184.000, 1.183	184.000, 1.005	184.000, 1.080	184.000, 1.284
922	184.200, 1.412	184.200, 1.582	184.200, 1.278	184.200, 1.133	184.200, 1.258	184.200, 1.327	184.200, 1.469	184.200, 1.209	184.200, 1.134	184.200, 1.238	184.200, 1.237	184.200, 1.182	184.200, 1.005	184.200, 1.080	184.200, 1.282
923	184.400, 1.411	184.400, 1.579	184.400, 1.278	184.400, 1.133	184.400, 1.258	184.400, 1.327	184.400, 1.467	184.400, 1.209	184.400, 1.134	184.400, 1.237	184.400, 1.236	184.400, 1.182	184.400, 1.004	184.400, 1.079	184.400, 1.279
924	184.600, 1.410	184.600, 1.577	184.600, 1.278	184.600, 1.133	184.600, 1.257	184.600, 1.327	184.600, 1.465	184.600, 1.208	184.600, 1.134	184.600, 1.237	184.600, 1.236	184.600, 1.181	184.600, 1.004	184.600, 1.079	184.600, 1.277
925	184.800, 1.410	184.800, 1.575	184.800, 1.277	184.800, 1.133	184.800, 1.257	184.800, 1.326	184.800, 1.462	184.800, 1.208	184.800, 1.134	184.800, 1.237	184.800, 1.235	184.800, 1.181	184.800, 1.004	184.800, 1.078	184.800, 1.275
926	185.000, 1.410	185.000, 1.572	185.000, 1.277	185.000, 1.132	185.000, 1.257	185.000, 1.326	185.000, 1.460	185.000, 1.207	185.000, 1.133	185.000, 1.236	185.000, 1.235	185.000, 1.180	185.000, 1.004	185.000, 1.078	185.000, 1.273
927	185.200, 1.409	185.200, 1.570	185.200, 1.277	185.200, 1.132	185.200, 1.257	185.200, 1.326	185.200, 1.458	185.200, 1.207	185.200, 1.133	185.200, 1.236	185.200, 1.235	185.200, 1.180	185.200, 1.004	185.200, 1.077	185.200, 1.271
928	185.400, 1.408	185.400, 1.567	185.400, 1.277	185.400, 1.132	185.400, 1.257	185.400, 1.325	185.400, 1.456	185.400, 1.207	185.400, 1.133	185.400, 1.236	185.400, 1.235	185.400, 1.180	185.400, 1.003	185.400, 1.077	185.400, 1.269
929	185.600, 1.408	185.600, 1.565	185.600, 1.277	185.600, 1.131	185.600, 1.257	185.600, 1.325	185.600, 1.453	185.600, 1.206	185.600, 1.132	185.600, 1.235	185.600, 1.235	185.600, 1.179	185.600, 1.003	185.600, 1.076	185.600, 1.267
930	185.800, 1.407	185.800, 1.562	185.800, 1.277	185.800, 1.131	185.800, 1.257	185.800, 1.324	185.800, 1.451	185.800, 1.205	185.800, 1.132	185.800, 1.234	185.800, 1.234	185.800, 1.179	185.800, 1.003	185.800, 1.076	185.800, 1.264
931	186.000, 1.407	186.000, 1.560	186.000, 1.277	186.000, 1.131	186.000, 1.256	186.000, 1.324	186.000, 1.449	186.000, 1.205	186.000, 1.132	186.000, 1.233	186.000, 1.234	186.000, 1.178	186.000, 1.002	186.000, 1.076	186.000, 1.262
932	186.200, 1.406	186.200, 1.557	186.200, 1.277	186.200, 1.130	186.200, 1.256	186.200, 1.324	186.200, 1.446	186.200, 1.204	186.200, 1.131	186.200, 1.233	186.200, 1.234	186.200, 1.178	186.200, 1.002	186.200, 1.075	186.200, 1.260
933	186.400, 1.406	186.400, 1.555	186.400, 1.276	186.400, 1.130	186.400, 1.256	186.400, 1.323	186.400, 1.443	186.400, 1.203	186.400, 1.131	186.400, 1.232	186.400, 1.233	186.400, 1.178	186.400, 1.002	186.400, 1.075	186.400, 1.258
934	186.600, 1.405	186.600, 1.552	186.600, 1.276	186.600, 1.129	186.600, 1.255	186.600, 1.323	186.600, 1.441	186.600, 1.203	186.600, 1.131	186.600, 1.231	186.600, 1.233	186.600, 1.178	186.600, 1.001	186.600, 1.075	186.600, 1.256
935	186.800, 1.405	186.800, 1.549	186.800, 1.276	186.800, 1.129	186.800, 1.255	186.800, 1.323	186.800, 1.439	186.800, 1.202	186.800, 1.131	186.800, 1.231	186.800, 1.232	186.800, 1.178	186.800, 1.001	186.800, 1.075	186.800, 1.254
936	187.000, 1.405	187.000, 1.547	187.000, 1.275	187.000, 1.128	187.000, 1.255	187.000, 1.322	187.000, 1.436	187.000, 1.202	187.000, 1.130	187.000, 1.230	187.000, 1.232	187.000, 1.177	187.000, 1.001	187.000, 1.074	187.000, 1.252
937	187.200, 1.404	187.200, 1.544	187.200, 1.275	187.200, 1.128	187.200, 1.254	187.200, 1.322	187.200, 1.434	187.200, 1.202	187.200, 1.130	187.200, 1.230	187.200, 1.231	187.200, 1.177	187.200, 1.001	187.200, 1.074	187.200, 1.250
938	187.400, 1.404	187.400, 1.542	187.400, 1.274	187.400, 1.128	187.400, 1.253	187.400, 1.321	187.400, 1.432	187.400, 1.202	187.400, 1.129	187.400, 1.229	187.400, 1.231	187.400, 1.177	187.400, 1.001	187.400, 1.074	187.400, 1.248
939	187.600, 1.403	187.600, 1.540	187.600, 1.274	187.600, 1.128	187.600, 1.253	187.600, 1.321	187.600, 1.430	187.600, 1.202	187.600, 1.129	187.600, 1.229	187.600, 1.230	187.600, 1.177	187.600, 1.000	187.600, 1.074	187.600, 1.246
940	187.800, 1.403	187.800, 1.537	187.800, 1.274	187.800, 1.128	187.800, 1.252	187.800, 1.320	187.800, 1.428	187.800, 1.202	187.800, 1.128	187.800, 1.229	187.800, 1.230	187.800, 1.177	187.800, 1.000	187.800, 1.074	187.800, 1.244
941	188.000, 1.402	188.000, 1.535	188.000, 1.273	188.000, 1.128	188.000, 1.252	188.000, 1.319	188.000, 1.426	188.000, 1.202	188.000, 1.128	188.000, 1.229	188.000, 1.229	188.000, 1.177	188.000, 0.999	188.000, 1.074	188.000, 1.242
942	188.200, 1.402	188.200, 1.533	188.200, 1.273	188.200, 1.128	188.200, 1.252	188.200, 1.319	188.200, 1.424	188.200, 1.202	188.200, 1.128	188.200, 1.229	188.200, 1.229	188.200, 1.176	188.200, 0.999	188.200, 1.074	188.200, 1.241
943	188.400, 1.401	188.400, 1.531	188.400, 1.273	188.400, 1.128	188.400, 1.252	188.400, 1.318	188.400, 1.422	188.400, 1.201	188.400, 1.127	188.400, 1.229	188.400, 1.228	188.400, 1.176	188.400, 0.999	188.400, 1.074	188.400, 1.239
944	188.600, 1.401	188.600, 1.529	188.600, 1.272	188.600, 1.128	188.600, 1.252	188.600, 1.317	188.600, 1.420	188.600, 1.201	188.600, 1.127	188.600, 1.229	188.600, 1.228	188.600, 1.175	188.600, 0.998	188.600, 1.074	188.600, 1.237
945	188.800, 1.400	188.800, 1.527	188.800, 1.272	188.800, 1.127	188.800, 1.251	188.800, 1.317	188.800, 1.418	188.800, 1.201	188.800, 1.126	188.800, 1.229	188.800, 1.228	188.800, 1.175	188.800, 0.998	188.800, 1.074	188.800, 1.235
946	189.000, 1.400	189.000, 1.525	189.000, 1.271	189.000, 1.127	189.000, 1.251	189.000, 1.316	189.000, 1.417	189.000, 1.201	189.000, 1.126	189.000, 1.229	189.000, 1.227	189.000, 1.174	189.000, 0.997	189.000, 1.074	189.000, 1.234
947	189.200, 1.399	189.200, 1.523	189.200, 1.271	189.200, 1.127	189.200, 1.251	189.200, 1.316	189.200, 1.415	189.200, 1.200	189.200, 1.125	189.200, 1.229	189.200, 1.227	189.200, 1.174	189.200, 0.997	189.200, 1.073	189.200, 1.232
948	189.400, 1.399	189.400, 1.521	189.400, 1.270	189.400, 1.126	189.400, 1.250	189.400, 1.315	189.400, 1.413	189.400, 1.200	189.400, 1.125	189.400, 1.229	189.400, 1.227	189.400, 1.173	189.400, 0.996	189.400, 1.073	189.400, 1.230
949	189.600, 1.398	189.600, 1.519	189.600, 1.270	189.600, 1.126	189.600, 1.250	189.600, 1.315	189.600, 1.412	189.600, 1.199	189.600, 1.125	189.600, 1.229	189.600, 1.227	189.600, 1.172	189.600, 0.996	189.600, 1.073	189.600, 1.229
950	189.800, 1.398	189.800, 1.517	189.800, 1.270	189.800, 1.126	189.800, 1.249	189.800, 1.314	189.800, 1.411	189.800, 1.199	189.800, 1.125	189.800, 1.228	189.800, 1.227	189.800, 1.172	189.800, 0.996	189.800, 1.072	189.800, 1.227
951	190.000, 1.398	190.000, 1.515	190.000, 1.269	190.000, 1.125	190.000, 1.249	190.000, 1.314	190.000, 1.409	190.000, 1.198	190.000, 1.125	190.000, 1.228	190.000, 1.226	190.000, 1.171	190.000, 0.995	190.000, 1.072	190.000, 1.225
952	190.200, 1.398	190.200, 1.513	190.200, 1.269	190.200, 1.125	190.200, 1.248	190.200, 1.314	190.200, 1.408	190.200, 1.198	190.200, 1.125	190.200, 1.227	190.200, 1.226	190.200, 1.171	190.200, 0.995	190.200, 1.071	190.200, 1.223
953	190.400, 1.397	190.400, 1.511	190.400, 1.268	190.400, 1.125	190.400, 1.248	190.400, 1.313	190.400, 1.406	190.400, 1.197	190.400, 1.125	190.400, 1.226	190.400, 1.225	190.400, 1.171	190.400, 0.995	190.400, 1.071	190.400, 1.222
954	190.600, 1.397	190.600, 1.508	190.600, 1.268	190.600, 1.124	190.600, 1.247	190.600, 1.313	190.600, 1.404	190.600, 1.197	190.600, 1.124	190.600, 1.226	190.600, 1.225	190.600, 1.170	190.600, 0.995	190.600, 1.070	190.600, 1.220
955	190.800, 1.397	190.800, 1.506	190.800, 1.267	190.800, 1.124	190.800, 1.246	190.800, 1.312	190.800, 1.403	190.800, 1.196	190.800, 1.124	190.800, 1.225	190.800, 1.224	190.800, 1.170	190.800, 0.995	190.800, 1.069	190.800, 1.219
956	191.000, 1.397	191.000, 1.505	191.000, 1.267	191.000, 1.124	191.000, 1.246	191.000, 1.312	191.000, 1.401	191.000, 1.196	191.000, 1.123	191.000, 1.224	191.000, 1.224	191.000, 1.170	191.000, 0.995	191.000, 1.069	191.000, 1.217
957	191.200, 1.396	191.200, 1.502	191.200, 1.266	191.200, 1.123	191.200, 1.246	191.200, 1.312	191.200, 1.399	191.200, 1.195	191.200, 1.123	191.200, 1.223	191.200, 1.223	191.200, 1.170	191.200, 0.995	191.200, 1.069	191.200, 1.216
958	191.400, 1.396	191.400, 1.500	191.400, 1.266	191.400, 1.123	191.400, 1.245	191.400, 1.311	191.400, 1.397	191.400, 1.195	191.400, 1.122	191.400, 1.223	191.400, 1.222	191.400, 1.170	191.400, 0.995	191.400, 1.068	191.400, 1.214
959	191.600, 1.395	191.600, 1.498	191.600, 1.266	191.600, 1.123	191.600, 1.245	191.600, 1.311	191.600, 1.395	191.600, 1.194	191.600, 1.122	191.600, 1.222	191.600, 1.222	191.600, 1.170	191.600, 0.994	191.600, 1.068	191.600, 1.213
960	191.800, 1.394	191.800, 1.496	191.800, 1.265	191.800, 1.123	191.800, 1.245	191.800, 1.311	191.800, 1.393	191.800, 1.194	191.800, 1.121	191.800, 1.222	191.800, 1.221	191.800, 1.170	191.800, 0.994	191.800, 1.067	191.800, 1.211
961	192.000, 1.394	192.000, 1.495	192.000, 1.265	192.000, 1.123	192.000, 1.245	192.000, 1.310	192.000, 1.391	192.000, 1.193	192.000, 1.121	192.000, 1.222	192.000, 1.220	192.000, 1.169	192.000, 0.994	192.000, 1.067	192.000, 1.210
962	192.200, 1.393	192.200, 1.493	192.200, 1.265	192.200, 1.123	192.200, 1.245	192.200, 1.310	192.200, 1.389	192.200, 1.193	192.200, 1.120	192.200, 1.222	192.200, 1.220	192.200, 1.169	192.200, 0.994	192.200, 1.066	192.200, 1.208
963	192.400, 1.392	192.400, 1.490	192.400, 1.265	192.400, 1.123	192.400, 1.245	192.400, 1.310	192.400, 1.387	192.400, 1.193	192.400, 1.120	192.400, 1.221	192.400, 1.220	192.400, 1.168	192.400, 0.994	192.400, 1.065	192.400, 1.207
964	192.600, 1.392	192.600, 1.488	192.600, 1.264	192.600, 1.122	192.600, 1.245	192.600, 1.309	192.600, 1.385	192.600, 1.192	192.600, 1.119	192.600, 1.221	192.600, 1.219	192.600, 1.168	192.600, 0.994	192.600, 1.065	192.600, 1.205
965	192.800, 1.391	192.800, 1.486	192.800, 1.264	192.800, 1.122	192.800, 1.245	192.800, 1.309	192.800, 1.384	192.800, 1.192	192.800, 1.119	192.800, 1.221	192.800, 1.219	192.800, 1.167	192.800, 0.993	192.800, 1.065	192.800, 1.204
966	193.000, 1.391	193.000, 1.485	193.000, 1.264	193.000, 1.122	193.000, 1.245	193.000, 1.308	193.000, 1.382	193.000, 1.191	193.000, 1.119	193.000, 1.221	193.000, 1.219	193.000, 1.167	193.000, 0.993	193.000, 1.065	193.000, 1.202
967	193.200, 1.390	193.200, 1.483	193.200, 1.264	193.200, 1.121	193.200, 1.244	193.200, 1.307	193.200, 1.381	193.200, 1.191	193.200, 1.119	193.200, 1.221	193.200, 1.219	193.200, 1.166	193.200, 0.993	193.200, 1.065	193.200, 1.201
968	193.400, 1.390	193.400, 1.481	193.400, 1.264	193.400, 1.121	193.400, 1.244	193.400, 1.307	193.400, 1.379	193.400, 1.191	193.400, 1.119	193.400, 1.221	193.400, 1.219	193.400, 1.166	193.400, 0.992	193.400, 1.064	193.400, 1.199
969	193.600, 1.390	193.600, 1.479	193.600, 1.264	193.600, 1.121	193.600, 1.244	193.600, 1.306	193.600, 1.378	193.600, 1.190	193.600, 1.119	193.600, 1.221	193.600, 1.219	193.600, 1.165	193.600, 0.992	193.600, 1.064	193.600, 1.197
970	193.800, 1.390	193.800, 1.478	193.800, 1.264	193.800, 1.120	193.800, 1.244	193.800, 1.306	193.800, 1.376	193.800, 1.190	193.800, 1.119	193.800, 1.221	193.800, 1.219	193.800, 1.165	193.800, 0.992	193.800, 1.064	193.800, 1.196
971	194.000, 1.390	194.000, 1.476	194.000, 1.264	194.000, 1.120	194.000, 1.243	194.000, 1.306	194.000, 1.374	194.000, 1.190	194.000, 1.119	194.000, 1.221	194.000, 1.219	194.000, 1.165	194.000, 0.992	194.000, 1.064	194.000, 1.194
972	194.200, 1.389	194.200, 1.475	194.200, 1.264	194.200, 1.119	194.200, 1.243	194.200, 1.305	194.200, 1.373	194.200, 1.190	194.200, 1.119	194.200, 1.220	194.200, 1.219	194.200, 1.165	194.200, 0.992	194.200, 1.064	194.200, 1.193
973	194.400, 1.389	194.400, 1.473	194.400, 1.264	194.400, 1.119	194.400, 1.243	194.400, 1.305	194.400, 1.371	194.400, 1.190	194.400, 1.119	194.400, 1.220	194.400, 1.218	194.400, 1.164	194.400, 0.991	194.400, 1.064	194.400, 1.191
974	194.600, 1.389	194.600, 1.472	194.600, 1.263	194.600, 1.119	194.600, 1.243	194.600, 1.305	194.600, 1.369	194.600, 1.189	194.600, 1.118	194.600, 1.219	194.600, 1.218	194.600, 1.164	194.600, 0.991	194.600, 1.064	194.600, 1.190
975	194.800, 1.388	194.800, 1.470	194.800, 1.263	194.800, 1.119	194.800, 1.242	194.800, 1.304	194.800, 1.368	194.800, 1.189	194.800, 1.118	194.800, 1.218	194.800, 1.217	194.800, 1.163	194.800, 0.991	194.800, 1.063	194.800, 1.188
976	195.000, 1.388	195.000, 1.469	195.000, 1.262	195.000, 1.118	195.000, 1.242	195.000, 1.304	195.000, 1.366	195.000, 1.188	195.000, 1.118	195.000, 1.218	195.000, 1.217	195.000, 1.163	195.000, 0.990	195.000, 1.063	195.000, 1.187
977	195.200, 1.388	195.200, 1.467	195.200, 1.262	195.200, 1.118	195.200, 1.241	195.200, 1.304	195.200, 1.364	195.200, 1.188	195.200, 1.117	195.200, 1.217	195.200, 1.216	195.200, 1.163	195.200, 0.989	195.200, 1.063	195.200, 1.185
978	195.400, 1.388	195.400, 1.465	195.400, 1.261	195.400, 1.118	195.400, 1.241	195.400, 1.304	195.400, 1.363	195.400, 1.188	195.400, 1.117	195.400, 1.216	195.400, 1.216	195.400, 1.162	195.400, 0.989	195.400, 1.062	195.400, 1.184
979	195.600, 1.388	195.600, 1.464	195.600, 1.261	195.600, 1.119	195.600, 1.240	195.600, 1.303	195.600, 1.362	195.600, 1.188	195.600, 1.116	195.600, 1.216	195.600, 1.215	195.600, 1.162	195.600, 0.988	195.600, 1.062	195.600, 1.182
980	195.800, 1.387	195.800, 1.462	195.800, 1.260	195.800, 1.119	195.800, 1.240	195.800, 1.303	195.800, 1.360	195.800, 1.188	195.800, 1.116	195.800, 1.215	195.800, 1.214	195.800, 1.162	195.800, 0.988	195.800, 1.061	195.800, 1.181
981	196.000, 1.387	196.000, 1.460	196.000, 1.260	196.000, 1.119	196.000, 1.239	196.000, 1.303	196.000, 1.359	196.000, 1.187	196.000, 1.116	196.000, 1.215	196.000, 1.214	196.000, 1.161	196.000, 0.987	196.000, 1.060	196.000, 1.179
982	196.200, 1.387	196.200, 1.458	196.200, 1.260	196.200, 1.118	196.200, 1.239	196.200, 1.303	196.200, 1.358	196.200, 1.187	196.200, 1.115	196.200, 1.214	196.200, 1.214	196.200, 1.161	196.200, 0.987	196.200, 1.060	196.200, 1.178
983	196.400, 1.386	196.400, 1.457	196.400, 1.259	196.400, 1.118	196.400, 1.239	196.400, 1.303	196.400, 1.357	196.400, 1.187	196.400, 1.115	196.400, 1.214	196.400, 1.213	196.400, 1.160	196.400, 0.986	196.400, 1.059	196.400, 1.176
984	196.600, 1.386	196.600, 1.455	196.600, 1.259	196.600, 1.118	196.600, 1.238	196.600, 1.302	196.600, 1.356	196.600, 1.187	196.600, 1.114	196.600, 1.214	196.600, 1.213	196.600, 1.160	196.600, 0.986	196.600, 1.059	196.600, 1.175
985	196.800, 1.386	196.800, 1.453	196.800, 1.259	196.800, 1.118	196.800, 1.238	196.800, 1.302	196.800, 1.355	196.800, 1.186	196.800, 1.114	196.800, 1.213	196.800, 1.212	196.800, 1.160	196.800, 0.985	196.800, 1.059	196.800, 1.173
986	197.000, 1.386	197.000, 1.452	197.000, 1.258	197.000, 1.117	197.000, 1.238	197.000, 1.302	197.000, 1.353	197.000, 1.186	197.000, 1.114	197.000, 1.213	197.000, 1.212	197.000, 1.159	197.000, 0.985	197.000, 1.059	197.000, 1.172
987	197.200, 1.385	197.200, 1.450	197.200, 1.258	197.200, 1.117	197.200, 1.238	197.200, 1.302	197.200, 1.352	197.200, 1.186	197.200, 1.114	197.200, 1.213	197.200, 1.212	197.200, 1.159	197.200, 0.985	197.200, 1.059	197.200, 1.170
988	197.400, 1.385	197.400, 1.448	197.400, 1.257	197.400, 1.117	197.400, 1.238	197.400, 1.302	197.400, 1.351	197.400, 1.185	197.400, 1.114	197.400, 1.213	197.400, 1.211	197.400, 1.159	197.400, 0.984	197.400, 1.059	197.400, 1.169
989	197.600, 1.384	197.600, 1.447	197.600, 1.257	197.600, 1.116	197.600, 1.237	197.600, 1.301	197.600, 1.349	197.600, 1.185	197.600, 1.114	197.600, 1.212	197.600, 1.211	197.600, 1.159	197.600, 0.984	197.600, 1.059	197.600, 1.167
990	197.800, 1.384	197.800, 1.445	197.800, 1.256	197.800, 1.116	197.800, 1.237	197.800, 1.301	197.800, 1.348	197.800, 1.184	197.800, 1.113	197.800, 1.212	197.800, 1.211	197.800, 1.158	197.800, 0.984	197.800, 1.058	197.800, 1.166
991	198.000, 1.384	198.000, 1.444	198.000, 1.256	198.000, 1.116	198.000, 1.236	198.000, 1.300	198.000, 1.347	198.000, 1.184	198.000, 1.113	198.000, 1.212	198.000, 1.211	198.000, 1.158	198.000, 0.985	198.000, 1.058	198.000, 1.165
992	198.200, 1.383	198.200, 1.442	198.200, 1.255	198.200, 1.115	198.200, 1.235	198.200, 1.299	198.200, 1.345	198.200, 1.183	198.200, 1.113	198.200, 1.212	198.200, 1.211	198.200, 1.158	198.200, 0.985	198.200, 1.058	198.200, 1.164
993	198.400, 1.383	198.400, 1.440	198.400, 1.255	198.400, 1.115	198.400, 1.235	198.400, 1.299	198.400, 1.344	198.400, 1.183	198.400, 1.112	198.400, 1.211	198.400, 1.210	198.400, 1.157	198.400, 0.985	198.400, 1.058	198.400, 1.163
994	198.600, 1.382	198.600, 1.439	198.600, 1.254	198.600, 1.115	198.600, 1.234	198.600, 1.298	198.600, 1.342	198.600, 1.182	198.600, 1.112	198.600, 1.211	198.600, 1.210	198.600, 1.157	198.600, 0.985	198.600, 1.058	198.600, 1.161
995	198.800, 1.382	198.800, 1.437	198.800, 1.254	198.800, 1.114	198.800, 1.233	198.800, 1.298	198.800, 1.341	198.800, 1.182	198.800, 1.112	198.800, 1.210	198.800, 1.209	198.800, 1.157	198.800, 0.985	198.800, 1.057	198.800, 1.160
996	199.000, 1.381	199.000, 1.436	199.000, 1.254	199.000, 1.114	199.000, 1.233	199.000, 1.297	199.000, 1.340	199.000, 1.182	199.000, 1.112	199.000, 1.210	199.000, 1.209	199.000, 1.157	199.000, 0.985	199.000, 1.057	199.000, 1.159
997	199.200, 1.381	199.200, 1.434	199.200, 1.254	199.200, 1.114	199.200, 1.232	199.200, 1.297	199.200, 1.338	199.200, 1.182	199.200, 1.111	199.200, 1.209	199.200, 1.208	199.200, 1.156	199.200, 0.984	199.200, 1.057	199.200, 1.158
998	199.400, 1.381	199.400, 1.433	199.400, 1.254	199.400, 1.113	199.400, 1.232	199.400, 1.297	199.400, 1.337	199.400, 1.181	199.400, 1.111	199.400, 1.209	199.400, 1.208	199.400, 1.156	199.400, 0.984	199.400, 1.056	199.400, 1.157
999	199.600, 1.381	199.600, 1.431	199.600, 1.254	199.600, 1.113	199.600, 1.231	199.600, 1.297	199.600, 1.336	199.600, 1.181	199.600, 1.111	199.600, 1.208	199.600, 1.207	199.600, 1.156	199.600, 0.984	199.600, 1.056	199.600, 1.156
1000	199.800, 1.381	199.800, 1.430	199.800, 1.254	199.800, 1.113	199.800, 1.231	199.800, 1.297	199.800, 1.335	199.800, 1.181	199.800, 1.111	199.800, 1.207	199.800, 1.207	199.800, 1.156	199.800, 0.983	199.800, 1.055	199.800, 1.155
1001	200.000, 1.380	200.000, 1.429	200.000, 1.254	200.000, 1.112	200.000, 1.231	200.000, 1.296	200.000, 1.334	200.000, 1.181	200.000, 1.110	200.000, 1.207	200.000, 1.207	200.000, 1.156	200.000, 0.983	200.000, 1.055	200.000, 1.154
1002	200.200, 1.380	200.200, 1.428	200.200, 1.254	200.200, 1.112	200.200, 1.231	200.200, 1.296	200.200, 1.333	200.200, 1.181	200.200, 1.110	200.200, 1.207	200.200, 1.206	200.200, 1.156	200.200, 0.982	200.200, 1.054	200.200, 1.153
1003	200.400, 1.380	200.400, 1.427	200.400, 1.254	200.400, 1.111	200.400, 1.230	200.400, 1.296	200.400, 1.331	200.400, 1.181	200.400, 1.110	200.400, 1.206	200.400, 1.206	200.400, 1.156	200.400, 0.982	200.400, 1.054	200.400, 1.152
1004	200.600, 1.380	200.600, 1.426	200.600, 1.254	200.600, 1.111	200.600, 1.230	200.600, 1.296	200.600, 1.330	200.600, 1.181	200.600, 1.109	200.600, 1.206	200.600, 1.206	200.600, 1.155	200.600, 0.981	200.600, 1.053	200.600, 1.151
1005	200.800, 1.379	200.800, 1.425	200.800, 1.253	200.800, 1.111	200.800, 1.231	200.800, 1.295	200.800, 1.329	200.800, 1.181	200.800, 1.109	200.800, 1.206	200.800, 1.206	200.800, 1.155	200.800, 0.981	200.800, 1.053	200.800, 1.150
1006	201.000, 1.379	201.000, 1.424	201.000, 1.253	201.000, 1.111	201.000, 1.231	201.000, 1.295	201.000, 1.328	201.000, 1.181	201.000, 1.108	201.000, 1.206	201.000, 1.206	201.000, 1.155	201.000, 0.981	201.000, 1.053	201.000, 1.148
1007	201.200, 1.378	201.200, 1.423	201.200, 1.252	201.200, 1.111	201.200, 1.231	201.200, 1.295	201.200, 1.327	201.200, 1.181	201.200, 1.108	201.200, 1.206	201.200, 1.206	201.200, 1.155	201.200, 0.980	201.200, 1.053	201.200, 1.147
1008	201.400, 1.378	201.400, 1.422	201.400, 1.251	201.400, 1.110	201.400, 1.231	201.400, 1.295	201.400, 1.326	201.400, 1.180	201.400, 1.107	201.400, 1.206	201.400, 1.206	201.400, 1.154	201.400, 0.980	201.400, 1.053	201.400, 1.146
1009	201.600, 1.377	201.600, 1.420	201.600, 1.251	201.600, 1.110	201.600, 1.230	201.600, 1.294	201.600, 1.325	201.600, 1.180	201.600, 1.107	201.600, 1.206	201.600, 1.206	201.600, 1.154	201.600, 0.980	201.600, 1.053	201.600, 1.145
1010	201.800, 1.377	201.800, 1.419	201.800, 1.250	201.800, 1.110	201.800, 1.230	201.800, 1.294	201.800, 1.324	201.800, 1.179	201.800, 1.106	201.800, 1.206	201.800, 1.206	201.800, 1.153	201.800, 0.980	201.800, 1.053	201.800, 1.144
1011	202.000, 1.377	202.000, 1.417	202.000, 1.250	202.000, 1.110	202.000, 1.230	202.000, 1.293	202.000, 1.322	202.000, 1.179	202.000, 1.105	202.000, 1.206	202.000, 1.206	202.000, 1.153	202.000, 0.980	202.000, 1.053	202.000, 1.142
1012	202.200, 1.377	202.200, 1.416	202.200, 1.250	202.200, 1.110	202.200, 1.230	202.200, 1.293	202.200, 1.321	202.200, 1.178	202.200, 1.105	202.200, 1.206	202.200, 1.206	202.200, 1.152	202.200, 0.979	202.200, 1.053	202.200, 1.141
1013	202.400, 1.376	202.400, 1.414	202.400, 1.249	202.400, 1.110	202.400, 1.230	202.400, 1.293	202.400, 1.320	202.400, 1.178	202.400, 1.105	202.400, 1.206	202.400, 1.205	202.400, 1.152	202.400, 0.979	202.400, 1.053	202.400, 1.140
1014	202.600, 1.376	202.600, 1.413	202.600, 1.249	202.600, 1.110	202.600, 1.230	202.600, 1.292	202.600, 1.319	202.600, 1.178	202.600, 1.105	202.600, 1.205	202.600, 1.205	202.600, 1.151	202.600, 0.979	202.600, 1.053	202.600, 1.138
1015	202.800, 1.376	202.800, 1.412	202.800, 1.249	202.800, 1.110	202.800, 1.230	202.800, 1.292	202.800, 1.318	202.800, 1.177	202.800, 1.105	202.800, 1.205	202.800, 1.205	202.800, 1.151	202.800, 0.979	202.800, 1.053	202.800, 1.137
1016	203.000, 1.375	203.000, 1.410	203.000, 1.249	203.000, 1.110	203.000, 1.229	203.000, 1.292	203.000, 1.317	203.000, 1.177	203.000, 1.105	203.000, 1.204	203.000, 1.204	203.000, 1.150	203.000, 0.978	203.000, 1.053	203.000, 1.136
1017	203.200, 1.375	203.200, 1.409	203.200, 1.249	203.200, 1.109	203.200, 1.229	203.200, 1.292	203.200, 1.316	203.200, 1.177	203.200, 1.105	203.200, 1.204	203.200, 1.204	203.200, 1.150	203.200, 0.978	203.200, 1.053	203.200, 1.135
1018	203.400, 1.375	203.400, 1.408	203.400, 1.249	203.400, 1.109	203.400, 1.229	203.400, 1.291	203.400, 1.315	203.400, 1.176	203.400, 1.105	203.400, 1.204	203.400, 1.203	203.400, 1.149	203.400, 0.978	203.400, 1.053	203.400, 1.134
1019	203.600, 1.375	203.600, 1.407	203.600, 1.249	203.600, 1.108	203.600, 1.228	203.600, 1.291	203.600, 1.314	203.600, 1.176	203.600, 1.105	203.600, 1.203	203.600, 1.203	203.600, 1.149	203.600, 0.977	203.600, 1.052	203.600, 1.133
1020	203.800, 1.374	203.800, 1.405	203.800, 1.249	203.800, 1.108	203.800, 1.228	203.800, 1.290	203.800, 1.313	203.800, 1.176	203.800, 1.105	203.800, 1.203	203.800, 1.202	203.800, 1.149	203.800, 0.978	203.800, 1.052	203.800, 1.132
1021	204.000, 1.374	204.000, 1.404	204.000, 1.248	204.000, 1.107	204.000, 1.228	204.000, 1.289	204.000, 1.312	204.000, 1.177	204.000, 1.105	204.000, 1.203	204.000, 1.202	204.000, 1.148	204.000, 0.978	204.000, 1.052	204.000, 1.131
1022	204.200, 1.374	204.200, 1.403	204.200, 1.248	204.200, 1.107	204.200, 1.228	204.200, 1.289	204.200, 1.311	204.200, 1.177	204.200, 1.105	204.200, 1.202	204.200, 1.201	204.200, 1.148	204.200, 0.978	204.200, 1.051	204.200, 1.131
1023	204.400, 1.373	204.400, 1.402	204.400, 1.247	204.400, 1.106	204.400, 1.227	204.400, 1.288	204.400, 1.310	204.400, 1.177	204.400, 1.105	204.400, 1.202	204.400, 1.201	204.400, 1.148	204.400, 0.978	204.400, 1.050	204.400, 1.130
1024	204.600, 1.373	204.600, 1.400	204.600, 1.247	204.600, 1.106	204.600, 1.227	204.600, 1.288	204.600, 1.309	204.600, 1.176	204.600, 1.104	204.600, 1.202	204.600, 1.201	204.600, 1.148	204.600, 0.979	204.600, 1.050	204.600, 1.129
1025	204.800, 1.373	204.800, 1.399	204.800, 1.246	204.800, 1.106	204.800, 1.227	204.800, 1.288	204.800, 1.308	204.800, 1.176	204.800, 1.104	204.800, 1.202	204.800, 1.201	204.800, 1.147	204.800, 0.979	204.800, 1.049	204.800, 1.128
1026	205.000, 1.372	205.000, 1.398	205.000, 1.246	205.000, 1.106	205.000, 1.227	205.000, 1.288	205.000, 1.307	205.000, 1.176	205.000, 1.104	205.000, 1.202	205.000, 1.200	205.000, 1.147	205.000, 0.979	205.000, 1.049	205.000, 1.128
1027	205.200, 1.372	205.200, 1.396	205.200, 1.246	205.200, 1.105	205.200, 1.227	205.200, 1.288	205.200, 1.306	205.200, 1.176	205.200, 1.104	205.200, 1.202	205.200, 1.200	205.200, 1.147	205.200, 0.979	205.200, 1.048	205.200, 1.127
1028	205.400, 1.371	205.400, 1.395	205.400, 1.245	205.400, 1.105	205.400, 1.227	205.400, 1.287	205.400, 1.305	205.400, 1.176	205.400, 1.104	205.400, 1.202	205.400, 1.199	205.400, 1.146	205.400, 0.979	205.400, 1.048	205.400, 1.126
1029	205.600, 1.371	205.600, 1.394	205.600, 1.245	205.600, 1.105	205.600, 1.227	205.600, 1.287	205.600, 1.304	205.600, 1.175	205.600, 1.104	205.600, 1.201	205.600, 1.199	205.600, 1.146	205.600, 0.979	205.600, 1.048	205.600, 1.125
1030	205.800, 1.371	205.800, 1.393	205.800, 1.245	205.800, 1.105	205.800, 1.227	205.800, 1.286	205.800, 1.303	205.800, 1.175	205.800, 1.104	205.800, 1.201	205.800, 1.198	205.800, 1.146	205.800, 0.979	205.800, 1.048	205.800, 1.124
1031	206.000, 1.370	206.000, 1.392	206.000, 1.245	206.000, 1.105	206.000, 1.227	206.000, 1.286	206.000, 1.302	206.000, 1.174	206.000, 1.104	206.000, 1.200	206.000, 1.198	206.000, 1.146	206.000, 0.979	206.000, 1.048	206.000, 1.123
1032	206.200, 1.370	206.200, 1.391	206.200, 1.244	206.200, 1.105	206.200, 1.226	206.200, 1.286	206.200, 1.301	206.200, 1.174	206.200, 1.104	206.200, 1.200	206.200, 1.198	206.200, 1.145	206.200, 0.978	206.200, 1.048	206.200, 1.122
1033	206.400, 1.370	206.400, 1.390	206.400, 1.244	206.400, 1.105	206.400, 1.226	206.400, 1.285	206.400, 1.300	206.400, 1.173	206.400, 1.104	206.400, 1.199	206.400, 1.197	206.400, 1.145	206.400, 0.978	206.400, 1.048	206.400, 1.122
1034	206.600, 1.369	206.600, 1.389	206.600, 1.244	206.600, 1.105	206.600, 1.225	206.600, 1.285	206.600, 1.300	206.600, 1.172	206.600, 1.104	206.600, 1.198	206.600, 1.197	206.600, 1.145	206.600, 0.977	206.600, 1.048	206.600, 1.120
1035	206.800, 1.369	206.800, 1.389	206.800, 1.244	206.800, 1.105	206.800, 1.224	206.800, 1.285	206.800, 1.299	206.800, 1.171	206.800, 1.103	206.800, 1.198	206.800, 1.197	206.800, 1.144	206.800, 0.977	206.800, 1.048	206.800, 1.120
1036	207.000, 1.369	207.000, 1.388	207.000, 1.244	207.000, 1.105	207.000, 1.224	207.000, 1.284	207.000, 1.298	207.000, 1.170	207.000, 1.103	207.000, 1.197	207.000, 1.196	207.000, 1.143	207.000, 0.976	207.000, 1.048	207.000, 1.119
1037	207.200, 1.368	207.200, 1.387	207.200, 1.244	207.200, 1.105	207.200, 1.223	207.200, 1.284	207.200, 1.297	207.200, 1.170	207.200, 1.103	207.200, 1.197	207.200, 1.196	207.200, 1.143	207.200, 0.975	207.200, 1.048	207.200, 1.118
1038	207.400, 1.368	207.400, 1.387	207.400, 1.244	207.400, 1.105	207.400, 1.222	207.400, 1.284	207.400, 1.296	207.400, 1.169	207.400, 1.102	207.400, 1.196	207.400, 1.196	207.400, 1.142	207.400, 0.975	207.400, 1.048	207.400, 1.117
1039	207.600, 1.367	207.600, 1.386	207.600, 1.244	207.600, 1.105	207.600, 1.222	207.600, 1.284	207.600, 1.294	207.600, 1.168	207.600, 1.102	207.600, 1.196	207.600, 1.195	207.600, 1.142	207.600, 0.975	207.600, 1.047	207.600, 1.116
1040	207.800, 1.367	207.800, 1.385	207.800, 1.244	207.800, 1.104	207.800, 1.222	207.800, 1.284	207.800, 1.293	207.800, 1.168	207.800, 1.102	207.800, 1.196	207.800, 1.195	207.800, 1.142	207.800, 0.975	207.800, 1.047	207.800, 1.115
1041	208.000, 1.367	208.000, 1.383	208.000, 1.244	208.000, 1.104	208.000, 1.222	208.000, 1.284	208.000, 1.292	208.000, 1.167	208.000, 1.102	208.000, 1.196	208.000, 1.195	208.000, 1.142	208.000, 0.974	208.000, 1.046	208.000, 1.114
1042	208.200, 1.366	208.200, 1.382	208.200, 1.244	208.200, 1.104	208.200, 1.222	208.200, 1.284	208.200, 1.291	208.200, 1.167	208.200, 1.101	208.200, 1.195	208.200, 1.195	208.200, 1.141	208.200, 0.974	208.200, 1.046	208.200, 1.113
1043	208.400, 1.366	208.400, 1.381	208.400, 1.243	208.400, 1.104	208.400, 1.222	208.400, 1.283	208.400, 1.290	208.400, 1.167	208.400, 1.101	208.400, 1.195	208.400, 1.195	208.400, 1.141	208.400, 0.974	208.400, 1.045	208.400, 1.112
1044	208.600, 1.365	208.600, 1.379	208.600, 1.243	208.600, 1.104	208.600, 1.222	208.600, 1.283	208.600, 1.289	208.600, 1.166	208.600, 1.101	208.600, 1.195	208.600, 1.194	208.600, 1.141	208.600, 0.973	208.600, 1.045	208.600, 1.111
1045	208.800, 1.365	208.800, 1.378	208.800, 1.242	208.800, 1.103	208.800, 1.222	208.800, 1.283	208.800, 1.289	208.800, 1.166	208.800, 1.101	208.800, 1.195	208.800, 1.194	208.800, 1.140	208.800, 0.973	208.800, 1.044	208.800, 1.111
1046	209.000, 1.365	209.000, 1.376	209.000, 1.242	209.000, 1.103	209.000, 1.221	209.000, 1.283	209.000, 1.288	209.000, 1.166	209.000, 1.100	209.000, 1.195	209.000, 1.193	209.000, 1.140	209.000, 0.973	209.000, 1.044	209.000, 1.110
1047	209.200, 1.364	209.200, 1.375	209.200, 1.241	209.200, 1.102	209.200, 1.221	209.200, 1.283	209.200, 1.287	209.200, 1.167	209.200, 1.100	209.200, 1.195	209.200, 1.193	209.200, 1.140	209.200, 0.973	209.200, 1.043	209.200, 1.108
1048	209.400, 1.364	209.400, 1.373	209.400, 1.241	209.400, 1.102	209.400, 1.221	209.400, 1.282	209.400, 1.286	209.400, 1.167	209.400, 1.100	209.400, 1.194	209.400, 1.192	209.400, 1.140	209.400, 0.972	209.400, 1.043	209.400, 1.107
1049	209.600, 1.364	209.600, 1.372	209.600, 1.241	209.600, 1.102	209.600, 1.220	209.600, 1.282	209.600, 1.285	209.600, 1.167	209.600, 1.100	209.600, 1.194	209.600, 1.192	209.600, 1.140	209.600, 0.972	209.600, 1.043	209.600, 1.106
1050	209.800, 1.364	209.800, 1.371	209.800, 1.241	209.800, 1.101	209.800, 1.220	209.800, 1.282	209.800, 1.284	209.800, 1.167	209.800, 1.099	209.800, 1.194	209.800, 1.192	209.800, 1.141	209.800, 0.972	209.800, 1.042	209.800, 1.105
1051	210.000, 1.363	210.000, 1.370	210.000, 1.240	210.000, 1.101	210.000, 1.219	210.000, 1.281	210.000, 1.283	210.000, 1.167	210.000, 1.099	210.000, 1.193	210.000, 1.191	210.000, 1.141	210.000, 0.972	210.000, 1.042	210.000, 1.104
1052	210.200, 1.363	210.200, 1.369	210.200, 1.240	210.200, 1.100	210.200, 1.219	210.200, 1.281	210.200, 1.282	210.200, 1.167	210.200, 1.099	210.200, 1.193	210.200, 1.191	210.200, 1.141	210.200, 0.972	210.200, 1.042	210.200, 1.103
1053	210.400, 1.362	210.400, 1.368	210.400, 1.240	210.400, 1.100	210.400, 1.218	210.400, 1.280	210.400, 1.281	210.400, 1.167	210.400, 1.098	210.400, 1.193	210.400, 1.191	210.400, 1.140	210.400, 0.972	210.400, 1.042	210.400, 1.102
1054	210.600, 1.362	210.600, 1.367	210.600, 1.240	210.600, 1.100	210.600, 1.218	210.600, 1.280	210.600, 1.280	210.600, 1.167	210.600, 1.098	210.600, 1.192	210.600, 1.191	210.600, 1.140	210.600, 0.972	210.600, 1.042	210.600, 1.101
1055	210.800, 1.362	210.800, 1.366	210.800, 1.239	210.800, 1.099	210.800, 1.217	210.800, 1.280	210.800, 1.280	210.800, 1.167	210.800, 1.097	210.800, 1.192	210.800, 1.191	210.800, 1.140	210.800, 0.971	210.800, 1.042	210.800, 1.101
1056	211.000, 1.361	211.000, 1.366	211.000, 1.239	211.000, 1.099	211.000, 1.217	211.000, 1.280	211.000, 1.279	211.000, 1.167	211.000, 1.097	211.000, 1.192	211.000, 1.191	211.000, 1.139	211.000, 0.971	211.000, 1.041	211.000, 1.100
1057	211.200, 1.361	211.200, 1.365	211.200, 1.239	211.200, 1.099	211.200, 1.216	211.200, 1.279	211.200, 1.278	211.200, 1.166	211.200, 1.097	211.200, 1.192	211.200, 1.190	211.200, 1.139	211.200, 0.971	211.200, 1.041	211.200, 1.099
1058	211.400, 1.361	211.400, 1.364	211.400, 1.239	211.400, 1.099	211.400, 1.216	211.400, 1.279	211.400, 1.277	211.400, 1.166	211.400, 1.096	211.400, 1.192	211.400, 1.190	211.400, 1.139	211.400, 0.971	211.400, 1.041	211.400, 1.098
1059	211.600, 1.360	211.600, 1.364	211.600, 1.239	211.600, 1.099	211.600, 1.216	211.600, 1.279	211.600, 1.276	211.600, 1.166	211.600, 1.096	211.600, 1.191	211.600, 1.190	211.600, 1.139	211.600, 0.971	211.600, 1.041	211.600, 1.097
1060	211.800, 1.360	211.800, 1.363	211.800, 1.239	211.800, 1.099	211.800, 1.216	211.800, 1.279	211.800, 1.276	211.800, 1.166	211.800, 1.096	211.800, 1.191	211.800, 1.190	211.800, 1.139	211.800, 0.971	211.800, 1.041	211.800, 1.096
1061	212.000, 1.360	212.000, 1.363	212.000, 1.238	212.000, 1.099	212.000, 1.216	212.000, 1.278	212.000, 1.275	212.000, 1.165	212.000, 1.096	212.000, 1.191	212.000, 1.190	212.000, 1.139	212.000, 0.971	212.000, 1.041	212.000, 1.096
1062	212.200, 1.360	212.200, 1.362	212.200, 1.238	212.200, 1.099	212.200, 1.216	212.200, 1.278	212.200, 1.274	212.200, 1.165	212.200, 1.096	212.200, 1.191	212.200, 1.190	212.200, 1.139	212.200, 0.971	212.200, 1.041	212.200, 1.095
1063	212.400, 1.360	212.400, 1.362	212.400, 1.238	212.400, 1.099	212.400, 1.215	212.400, 1.277	212.400, 1.273	212.400, 1.164	212.400, 1.096	212.400, 1.191	212.400, 1.189	212.400, 1.138	212.400, 0.971	212.400, 1.041	212.400, 1.094
1064	212.600, 1.360	212.600, 1.361	212.600, 1.237	212.600, 1.099	212.600, 1.215	212.600, 1.276	212.600, 1.273	212.600, 1.164	212.600, 1.096	212.600, 1.191	212.600, 1.188	212.600, 1.138	212.600, 0.970	212.600, 1.040	212.600, 1.094
1065	212.800, 1.360	212.800, 1.361	212.800, 1.237	212.800, 1.099	212.800, 1.215	212.800, 1.276	212.800, 1.272	212.800, 1.164	212.800, 1.096	212.800, 1.191	212.800, 1.188	212.800, 1.138	212.800, 0.970	212.800, 1.040	212.800, 1.093
1066	213.000, 1.360	213.000, 1.360	213.000, 1.237	213.000, 1.099	213.000, 1.214	213.000, 1.275	213.000, 1.271	213.000, 1.163	213.000, 1.096	213.000, 1.190	213.000, 1.187	213.000, 1.137	213.000, 0.969	213.000, 1.040	213.000, 1.092
1067	213.200, 1.360	213.200, 1.360	213.200, 1.236	213.200, 1.098	213.200, 1.214	213.200, 1.274	213.200, 1.271	213.200, 1.163	213.200, 1.096	213.200, 1.190	213.200, 1.187	213.200, 1.137	213.200, 0.969	213.200, 1.040	213.200, 1.091
1068	213.400, 1.359	213.400, 1.359	213.400, 1.236	213.400, 1.098	213.400, 1.213	213.400, 1.274	213.400, 1.270	213.400, 1.163	213.400, 1.095	213.400, 1.189	213.400, 1.186	213.400, 1.136	213.400, 0.969	213.400, 1.039	213.400, 1.091
1069	213.600, 1.359	213.600, 1.358	213.600, 1.236	213.600, 1.097	213.600, 1.213	213.600, 1.273	213.600, 1.269	213.600, 1.163	213.600, 1.095	213.600, 1.189	213.600, 1.186	213.600, 1.136	213.600, 0.968	213.600, 1.039	213.600, 1.090
1070	213.800, 1.358	213.800, 1.358	213.800, 1.235	213.800, 1.097	213.800, 1.213	213.800, 1.273	213.800, 1.268	213.800, 1.162	213.800, 1.094	213.800, 1.189	213.800, 1.186	213.800, 1.136	213.800, 0.968	213.800, 1.038	213.800, 1.090
1071	214.000, 1.358	214.000, 1.356	214.000, 1.235	214.000, 1.096	214.000, 1.212	214.000, 1.273	214.000, 1.268	214.000, 1.162	214.000, 1.094	214.000, 1.189	214.000, 1.185	214.000, 1.135	214.000, 0.968	214.000, 1.038	214.000, 1.089
1072	214.200, 1.357	214.200, 1.355	214.200, 1.235	214.200, 1.095	214.200, 1.212	214.200, 1.272	214.200, 1.267	214.200, 1.162	214.200, 1.093	214.200, 1.189	214.200, 1.185	214.200, 1.135	214.200, 0.967	214.200, 1.038	214.200, 1.089
1073	214.400, 1.356	214.400, 1.354	214.400, 1.234	214.400, 1.095	214.400, 1.212	214.400, 1.272	214.400, 1.266	214.400, 1.161	214.400, 1.093	214.400, 1.188	214.400, 1.185	214.400, 1.134	214.400, 0.967	214.400, 1.037	214.400, 1.088
1074	214.600, 1.356	214.600, 1.352	214.600, 1.234	214.600, 1.095	214.600, 1.212	214.600, 1.272	214.600, 1.266	214.600, 1.161	214.600, 1.092	214.600, 1.188	214.600, 1.185	214.600, 1.134	214.600, 0.967	214.600, 1.037	214.600, 1.088
1075	214.800, 1.355	214.800, 1.351	214.800, 1.234	214.800, 1.094	214.800, 1.212	214.800, 1.272	214.800, 1.265	214.800, 1.161	214.800, 1.092	214.800, 1.188	214.800, 1.185	214.800, 1.133	214.800, 0.966	214.800, 1.036	214.800, 1.087
1076	215.000, 1.355	215.000, 1.350	215.000, 1.234	215.000, 1.094	215.000, 1.212	215.000, 1.272	215.000, 1.264	215.000, 1.161	215.000, 1.092	215.000, 1.188	215.000, 1.184	215.000, 1.133	215.000, 0.966	215.000, 1.036	215.000, 1.087
1077	215.200, 1.355	215.200, 1.349	215.200, 1.234	215.200, 1.094	215.200, 1.212	215.200, 1.272	215.200, 1.263	215.200, 1.160	215.200, 1.092	215.200, 1.188	215.200, 1.184	215.200, 1.133	215.200, 0.966	215.200, 1.036	215.200, 1.086
1078	215.400, 1.354	215.400, 1.348	215.400, 1.234	215.400, 1.094	215.400, 1.212	215.400, 1.272	215.400, 1.262	215.400, 1.160	215.400, 1.091	215.400, 1.187	215.400, 1.184	215.400, 1.132	215.400, 0.966	215.400, 1.035	215.400, 1.085
1079	215.600, 1.354	215.600, 1.347	215.600, 1.234	215.600, 1.094	215.600, 1.212	215.600, 1.272	215.600, 1.261	215.600, 1.160	215.600, 1.091	215.600, 1.187	215.600, 1.184	215.600, 1.132	215.600, 0.966	215.600, 1.035	215.600, 1.084
1080	215.800, 1.354	215.800, 1.346	215.800, 1.234	215.800, 1.094	215.800, 1.212	215.800, 1.272	215.800, 1.260	215.800, 1.159	215.800, 1.091	215.800, 1.187	215.800, 1.184	215.800, 1.132	215.800, 0.965	215.800, 1.035	215.800, 1.084
1081	216.000, 1.354	216.000, 1.345	216.000, 1.234	216.000, 1.095	216.000, 1.212	216.000, 1.272	216.000, 1.259	216.000, 1.159	216.000, 1.091	216.000, 1.187	216.000, 1.183	216.000, 1.132	216.000, 0.965	216.000, 1.035	216.000, 1.083
1082	216.200, 1.354	216.200, 1.344	216.200, 1.234	216.200, 1.095	216.200, 1.212	216.200, 1.271	216.200, 1.259	216.200, 1.158	216.200, 1.091	216.200, 1.186	216.200, 1.183	216.200, 1.132	216.200, 0.965	216.200, 1.034	216.200, 1.083
1083	216.400, 1.355	216.400, 1.344	216.400, 1.233	216.400, 1.095	216.400, 1.212	216.400, 1.271	216.400, 1.258	216.400, 1.158	216.400, 1.091	216.400, 1.186	216.400, 1.182	216.400, 1.132	216.400, 0.965	216.400, 1.034	216.400, 1.082
1084	216.600, 1.355	216.600, 1.343	216.600, 1.233	216.600, 1.095	216.600, 1.211	216.600, 1.270	216.600, 1.257	216.600, 1.158	216.600, 1.090	216.600, 1.186	216.600, 1.182	216.600, 1.131	216.600, 0.964	216.600, 1.034	216.600, 1.081
1085	216.800, 1.354	216.800, 1.343	216.800, 1.233	216.800, 1.094	216.800, 1.211	216.800, 1.270	216.800, 1.257	216.800, 1.157	216.800, 1.090	216.800, 1.186	216.800, 1.181	216.800, 1.131	216.800, 0.964	216.800, 1.034	216.800, 1.081
1086	217.000, 1.354	217.000, 1.342	217.000, 1.232	217.000, 1.094	217.000, 1.211	217.000, 1.270	217.000, 1.257	217.000, 1.157	217.000, 1.090	217.000, 1.185	217.000, 1.181	217.000, 1.131	217.000, 0.964	217.000, 1.034	217.000, 1.080
1087	217.200, 1.354	217.200, 1.342	217.200, 1.232	217.200, 1.094	217.200, 1.210	217.200, 1.269	217.200, 1.256	217.200, 1.157	217.200, 1.090	217.200, 1.185	217.200, 1.181	217.200, 1.131	217.200, 0.964	217.200, 1.034	217.200, 1.079
1088	217.400, 1.353	217.400, 1.341	217.400, 1.232	217.400, 1.093	217.400, 1.210	217.400, 1.269	217.400, 1.256	217.400, 1.156	217.400, 1.090	217.400, 1.185	217.400, 1.181	217.400, 1.131	217.400, 0.963	217.400, 1.034	217.400, 1.079
1089	217.600, 1.353	217.600, 1.341	217.600, 1.232	217.600, 1.093	217.600, 1.209	217.600, 1.268	217.600, 1.255	217.600, 1.156	217.600, 1.089	217.600, 1.185	217.600, 1.181	217.600, 1.131	217.600, 0.963	217.600, 1.034	217.600, 1.078
1090	217.800, 1.352	217.800, 1.340	217.800, 1.231	217.800, 1.093	217.800, 1.209	217.800, 1.268	217.800, 1.255	217.800, 1.156	217.800, 1.089	217.800, 1.184	217.800, 1.181	217.800, 1.131	217.800, 0.963	217.800, 1.034	217.800, 1.078
1091	218.000, 1.352	218.000, 1.339	218.000, 1.231	218.000, 1.093	218.000, 1.208	218.000, 1.267	218.000, 1.254	218.000, 1.156	218.000, 1.089	218.000, 1.184	218.000, 1.180	218.000, 1.131	218.000, 0.963	218.000, 1.034	218.000, 1.077
1092	218.200, 1.351	218.200, 1.339	218.200, 1.231	218.200, 1.092	218.200, 1.208	218.200, 1.267	218.200, 1.253	218.200, 1.156	218.200, 1.088	218.200, 1.184	218.200, 1.180	218.200, 1.131	218.200, 0.963	218.200, 1.034	218.200, 1.076
1093	218.400, 1.350	218.400, 1.338	218.400, 1.231	218.400, 1.092	218.400, 1.207	218.400, 1.267	218.400, 1.253	218.400, 1.155	218.400, 1.088	218.400, 1.184	218.400, 1.180	218.400, 1.131	218.400, 0.963	218.400, 1.034	218.400, 1.075
1094	218.600, 1.350	218.600, 1.337	218.600, 1.231	218.600, 1.092	218.600, 1.207	218.600, 1.266	218.600, 1.252	218.600, 1.155	218.600, 1.087	218.600, 1.183	218.600, 1.179	218.600, 1.131	218.600, 0.963	218.600, 1.034	218.600, 1.075
1095	218.800, 1.349	218.800, 1.336	218.800, 1.231	218.800, 1.092	218.800, 1.207	218.800, 1.266	218.800, 1.251	218.800, 1.155	218.800, 1.087	218.800, 1.183	218.800, 1.179	218.800, 1.131	218.800, 0.962	218.800, 1.034	218.800, 1.074
1096	219.000, 1.349	219.000, 1.335	219.000, 1.231	219.000, 1.091	219.000, 1.206	219.000, 1.266	219.000, 1.251	219.000, 1.155	219.000, 1.087	219.000, 1.183	219.000, 1.179	219.000, 1.130	219.000, 0.962	219.000, 1.034	219.000, 1.073
1097	219.200, 1.349	219.200, 1.334	219.200, 1.231	219.200, 1.091	219.200, 1.206	219.200, 1.265	219.200, 1.250	219.200, 1.155	219.200, 1.086	219.200, 1.182	219.200, 1.178	219.200, 1.130	219.200, 0.962	219.200, 1.034	219.200, 1.073
1098	219.400, 1.348	219.400, 1.334	219.400, 1.230	219.400, 1.091	219.400, 1.206	219.400, 1.265	219.400, 1.249	219.400, 1.155	219.400, 1.086	219.400, 1.182	219.400, 1.178	219.400, 1.130	219.400, 0.962	219.400, 1.033	219.400, 1.072
1099	219.600, 1.348	219.600, 1.333	219.600, 1.230	219.600, 1.091	219.600, 1.207	219.600, 1.265	219.600, 1.248	219.600, 1.155	219.600, 1.086	219.600, 1.182	219.600, 1.178	219.600, 1.129	219.600, 0.962	219.600, 1.033	219.600, 1.072
1100	219.800, 1.348	219.800, 1.332	219.800, 1.230	219.800, 1.091	219.800, 1.207	219.800, 1.265	219.800, 1.248	219.800, 1.154	219.800, 1.086	219.800, 1.181	219.800, 1.177	219.800, 1.129	219.800, 0.962	219.800, 1.032	219.800, 1.071
1101	220.000, 1.348	220.000, 1.332	220.000, 1.229	220.000, 1.091	220.000, 1.207	220.000, 1.265	220.000, 1.247	220.000, 1.154	220.000, 1.086	220.000, 1.181	220.000, 1.177	220.000, 1.128	220.000, 0.962	220.000, 1.032	220.000, 1.071
1102	220.200, 1.348	220.200, 1.331	220.200, 1.229	220.200, 1.091	220.200, 1.207	220.200, 1.264	220.200, 1.247	220.200, 1.154	220.200, 1.086	220.200, 1.181	220.200, 1.177	220.200, 1.128	220.200, 0.962	220.200, 1.031	220.200, 1.070
1103	220.400, 1.348	220.400, 1.330	220.400, 1.228	220.400, 1.090	220.400, 1.206	220.400, 1.264	220.400, 1.246	220.400, 1.154	220.400, 1.085	220.400, 1.180	220.400, 1.177	220.400, 1.127	220.400, 0.962	220.400, 1.031	220.400, 1.069
1104	220.600, 1.347	220.600, 1.330	220.600, 1.227	220.600, 1.090	220.600, 1.206	220.600, 1.264	220.600, 1.246	220.600, 1.154	220.600, 1.085	220.600, 1.180	220.600, 1.176	220.600, 1.127	220.600, 0.962	220.600, 1.030	220.600, 1.069
1105	220.800, 1.347	220.800, 1.329	220.800, 1.227	220.800, 1.090	220.800, 1.206	220.800, 1.264	220.800, 1.245	220.800, 1.153	220.800, 1.085	220.800, 1.180	220.800, 1.176	220.800, 1.127	220.800, 0.962	220.800, 1.030	220.800, 1.068
1106	221.000, 1.347	221.000, 1.328	221.000, 1.226	221.000, 1.090	221.000, 1.206	221.000, 1.263	221.000, 1.244	221.000, 1.153	221.000, 1.085	221.000, 1.180	221.000, 1.176	221.000, 1.126	221.000, 0.961	221.000, 1.030	221.000, 1.068
1107	221.200, 1.347	221.200, 1.328	221.200, 1.226	221.200, 1.090	221.200, 1.205	221.200, 1.263	221.200, 1.243	221.200, 1.153	221.200, 1.085	221.200, 1.180	221.200, 1.175	221.200, 1.126	221.200, 0.961	221.200, 1.030	221.200, 1.067
1108	221.400, 1.347	221.400, 1.328	221.400, 1.226	221.400, 1.090	221.400, 1.205	221.400, 1.263	221.400, 1.243	221.400, 1.152	221.400, 1.084	221.400, 1.179	221.400, 1.175	221.400, 1.126	221.400, 0.961	221.400, 1.030	221.400, 1.067
1109	221.600, 1.347	221.600, 1.327	221.600, 1.226	221.600, 1.090	221.600, 1.205	221.600, 1.262	221.600, 1.242	221.600, 1.152	221.600, 1.084	221.600, 1.179	221.600, 1.175	221.600, 1.126	221.600, 0.961	221.600, 1.030	221.600, 1.066
1110	221.800, 1.347	221.800, 1.327	221.800, 1.226	221.800, 1.091	221.800, 1.204	221.800, 1.262	221.800, 1.241	221.800, 1.152	221.800, 1.084	221.800, 1.178	221.800, 1.174	221.800, 1.126	221.800, 0.961	221.800, 1.030	221.800, 1.065
1111	222.000, 1.347	222.000, 1.327	222.000, 1.227	222.000, 1.090	222.000, 1.204	222.000, 1.262	222.000, 1.241	222.000, 1.152	222.000, 1.083	222.000, 1.178	222.000, 1.174	222.000, 1.126	222.000, 0.961	222.000, 1.030	222.000, 1.065
1112	222.200, 1.347	222.200, 1.326	222.200, 1.227	222.200, 1.090	222.200, 1.203	222.200, 1.261	222.200, 1.240	222.200, 1.152	222.200, 1.083	222.200, 1.177	222.200, 1.174	222.200, 1.125	222.200, 0.960	222.200, 1.030	222.200, 1.064
1113	222.400, 1.346	222.400, 1.326	222.400, 1.227	222.400, 1.090	222.400, 1.203	222.400, 1.261	222.400, 1.240	222.400, 1.152	222.400, 1.083	222.400, 1.177	222.400, 1.174	222.400, 1.125	222.400, 0.960	222.400, 1.030	222.400, 1.064
1114	222.600, 1.346	222.600, 1.325	222.600, 1.227	222.600, 1.090	222.600, 1.202	222.600, 1.261	222.600, 1.239	222.600, 1.152	222.600, 1.083	222.600, 1.177	222.600, 1.173	222.600, 1.124	222.600, 0.960	222.600, 1.030	222.600, 1.063
1115	222.800, 1.346	222.800, 1.325	222.800, 1.227	222.800, 1.089	222.800, 1.202	222.800, 1.260	222.800, 1.239	222.800, 1.151	222.800, 1.083	222.800, 1.177	222.800, 1.173	222.800, 1.124	222.800, 0.960	222.800, 1.030	222.800, 1.062
1116	223.000, 1.345	223.000, 1.324	223.000, 1.228	223.000, 1.089	223.000, 1.202	223.000, 1.260	223.000, 1.238	223.000, 1.151	223.000, 1.083	223.000, 1.177	223.000, 1.173	223.000, 1.124	223.000, 0.960	223.000, 1.030	223.000, 1.062
1117	223.200, 1.345	223.200, 1.323	223.200, 1.227	223.200, 1.088	223.200, 1.202	223.200, 1.260	223.200, 1.237	223.200, 1.151	223.200, 1.084	223.200, 1.177	223.200, 1.173	223.200, 1.123	223.200, 0.959	223.200, 1.029	223.200, 1.061
1118	223.400, 1.345	223.400, 1.323	223.400, 1.227	223.400, 1.088	223.400, 1.202	223.400, 1.260	223.400, 1.237	223.400, 1.150	223.400, 1.084	223.400, 1.177	223.400, 1.173	223.400, 1.123	223.400, 0.959	223.400, 1.029	223.400, 1.061
1119	223.600, 1.344	223.600, 1.322	223.600, 1.227	223.600, 1.088	223.600, 1.202	223.600, 1.260	223.600, 1.236	223.600, 1.150	223.600, 1.084	223.600, 1.176	223.600, 1.173	223.600, 1.123	223.600, 0.959	223.600, 1.029	223.600, 1.060
1120	223.800, 1.344	223.800, 1.321	223.800, 1.227	223.800, 1.088	223.800, 1.202	223.800, 1.260	223.800, 1.235	223.800, 1.150	223.800, 1.083	223.800, 1.176	223.800, 1.172	223.800, 1.122	223.800, 0.959	223.800, 1.029	223.800, 1.060
1121	224.000, 1.344	224.000, 1.320	224.000, 1.226	224.000, 1.087	224.000, 1.202	224.000, 1.260	224.000, 1.235	224.000, 1.149	224.000, 1.083	224.000, 1.176	224.000, 1.172	224.000, 1.122	224.000, 0.958	224.000, 1.028	224.000, 1.059
1122	224.200, 1.344	224.200, 1.319	224.200, 1.226	224.200, 1.087	224.200, 1.202	224.200, 1.260	224.200, 1.234	224.200, 1.149	224.200, 1.083	224.200, 1.176	224.200, 1.172	224.200, 1.122	224.200, 0.958	224.200, 1.028	224.200, 1.059
1123	224.400, 1.344	224.400, 1.318	224.400, 1.225	224.400, 1.087	224.400, 1.201	224.400, 1.259	224.400, 1.233	224.400, 1.149	224.400, 1.083	224.400, 1.176	224.400, 1.172	224.400, 1.122	224.400, 0.958	224.400, 1.028	224.400, 1.058
1124	224.600, 1.343	224.600, 1.317	224.600, 1.225	224.600, 1.087	224.600, 1.201	224.600, 1.259	224.600, 1.232	224.600, 1.148	224.600, 1.083	224.600, 1.176	224.600, 1.172	224.600, 1.122	224.600, 0.957	224.600, 1.028	224.600, 1.058
1125	224.800, 1.343	224.800, 1.317	224.800, 1.224	224.800, 1.087	224.800, 1.201	224.800, 1.259	224.800, 1.231	224.800, 1.148	224.800, 1.083	224.800, 1.176	224.800, 1.172	224.800, 1.122	224.800, 0.957	224.800, 1.028	224.800, 1.058
1126	225.000, 1.343	225.000, 1.316	225.000, 1.223	225.000, 1.087	225.000, 1.201	225.000, 1.259	225.000, 1.231	225.000, 1.148	225.000, 1.082	225.000, 1.175	225.000, 1.171	225.000, 1.122	225.000, 0.956	225.000, 1.028	225.000, 1.057
1127	225.200, 1.343	225.200, 1.315	225.200, 1.223	225.200, 1.087	225.200, 1.201	225.200, 1.258	225.200, 1.230	225.200, 1.148	225.200, 1.082	225.200, 1.175	225.200, 1.171	225.200, 1.122	225.200, 0.956	225.200, 1.027	225.200, 1.057
1128	225.400, 1.342	225.400, 1.315	225.400, 1.222	225.400, 1.086	225.400, 1.201	225.400, 1.258	225.400, 1.230	225.400, 1.147	225.400, 1.082	225.400, 1.175	225.400, 1.171	225.400, 1.122	225.400, 0.956	225.400, 1.027	225.400, 1.056
1129	225.600, 1.342	225.600, 1.314	225.600, 1.222	225.600, 1.086	225.600, 1.201	225.600, 1.258	225.600, 1.230	225.600, 1.147	225.600, 1.081	225.600, 1.174	225.600, 1.171	225.600, 1.121	225.600, 0.956	225.600, 1.026	225.600, 1.056
1130	225.800, 1.341	225.800, 1.314	225.800, 1.222	225.800, 1.086	225.800, 1.200	225.800, 1.258	225.800, 1.229	225.800, 1.147	225.800, 1.081	225.800, 1.174	225.800, 1.171	225.800, 1.121	225.800, 0.955	225.800, 1.026	225.800, 1.056
1131	226.000, 1.341	226.000, 1.313	226.000, 1.222	226.000, 1.086	226.000, 1.200	226.000, 1.257	226.000, 1.229	226.000, 1.148	226.000, 1.081	226.000, 1.173	226.000, 1.171	226.000, 1.120	226.000, 0.955	226.000, 1.026	226.000, 1.055
1132	226.200, 1.340	226.200, 1.312	226.200, 1.222	226.200, 1.086	226.200, 1.200	226.200, 1.257	226.200, 1.228	226.200, 1.148	226.200, 1.081	226.200, 1.173	226.200, 1.171	226.200, 1.120	226.200, 0.955	226.200, 1.025	226.200, 1.055
1133	226.400, 1.340	226.400, 1.312	226.400, 1.222	226.400, 1.086	226.400, 1.199	226.400, 1.257	226.400, 1.228	226.400, 1.148	226.400, 1.080	226.400, 1.173	226.400, 1.170	226.400, 1.119	226.400, 0.955	226.400, 1.025	226.400, 1.054
1134	226.600, 1.339	226.600, 1.311	226.600, 1.222	226.600, 1.086	226.600, 1.199	226.600, 1.257	226.600, 1.228	226.600, 1.148	226.600, 1.080	226.600, 1.172	226.600, 1.170	226.600, 1.119	226.600, 0.955	226.600, 1.024	226.600, 1.054
1135	226.800, 1.338	226.800, 1.310	226.800, 1.222	226.800, 1.086	226.800, 1.198	226.800, 1.257	226.800, 1.227	226.800, 1.147	226.800, 1.080	226.800, 1.172	226.800, 1.169	226.800, 1.119	226.800, 0.956	226.800, 1.024	226.800, 1.053
1136	227.000, 1.338	227.000, 1.310	227.000, 1.222	227.000, 1.086	227.000, 1.198	227.000, 1.257	227.000, 1.227	227.000, 1.147	227.000, 1.080	227.000, 1.172	227.000, 1.169	227.000, 1.119	227.000, 0.956	227.000, 1.023	227.000, 1.052
1137	227.200, 1.338	227.200, 1.309	227.200, 1.222	227.200, 1.086	227.200, 1.197	227.200, 1.257	227.200, 1.226	227.200, 1.147	227.200, 1.080	227.200, 1.172	227.200, 1.169	227.200, 1.118	227.200, 0.956	227.200, 1.023	227.200, 1.051
1138	227.400, 1.338	227.400, 1.309	227.400, 1.222	227.400, 1.086	227.400, 1.197	227.400, 1.257	227.400, 1.226	227.400, 1.147	227.400, 1.080	227.400, 1.171	227.400, 1.168	227.400, 1.118	227.400, 0.956	227.400, 1.022	227.400, 1.051
1139	227.600, 1.337	227.600, 1.308	227.600, 1.222	227.600, 1.086	227.600, 1.197	227.600, 1.256	227.600, 1.225	227.600, 1.146	227.600, 1.080	227.600, 1.171	227.600, 1.168	227.600, 1.118	227.600, 0.956	227.600, 1.022	227.600, 1.050
1140	227.800, 1.337	227.800, 1.307	227.800, 1.222	227.800, 1.086	227.800, 1.196	227.800, 1.256	227.800, 1.224	227.800, 1.146	227.800, 1.080	227.800, 1.171	227.800, 1.168	227.800, 1.118	227.800, 0.955	227.800, 1.022	227.800, 1.050
1141	228.000, 1.337	228.000, 1.307	228.000, 1.222	228.000, 1.086	228.000, 1.196	228.000, 1.255	228.000, 1.224	228.000, 1.146	228.000, 1.080	228.000, 1.171	228.000, 1.167	228.000, 1.118	228.000, 0.955	228.000, 1.021	228.000, 1.049
1142	228.200, 1.338	228.200, 1.306	228.200, 1.222	228.200, 1.085	228.200, 1.195	228.200, 1.255	228.200, 1.223	228.200, 1.145	228.200, 1.080	228.200, 1.170	228.200, 1.167	228.200, 1.118	228.200, 0.954	228.200, 1.021	228.200, 1.049
1143	228.400, 1.338	228.400, 1.306	228.400, 1.222	228.400, 1.085	228.400, 1.195	228.400, 1.255	228.400, 1.223	228.400, 1.145	228.400, 1.080	228.400, 1.171	228.400, 1.167	228.400, 1.118	228.400, 0.954	228.400, 1.021	228.400, 1.048
1144	228.600, 1.338	228.600, 1.305	228.600, 1.221	228.600, 1.085	228.600, 1.195	228.600, 1.254	228.600, 1.222	228.600, 1.145	228.600, 1.080	228.600, 1.171	228.600, 1.167	228.600, 1.117	228.600, 0.954	228.600, 1.021	228.600, 1.047
1145	228.800, 1.337	228.800, 1.305	228.800, 1.221	228.800, 1.085	228.800, 1.195	228.800, 1.254	228.800, 1.222	228.800, 1.144	228.800, 1.080	228.800, 1.171	228.800, 1.167	228.800, 1.117	228.800, 0.953	228.800, 1.021	228.800, 1.046
1146	229.000, 1.337	229.000, 1.304	229.000, 1.220	229.000, 1.085	229.000, 1.194	229.000, 1.254	229.000, 1.221	229.000, 1.144	229.000, 1.079	229.000, 1.171	229.000, 1.167	229.000, 1.117	229.000, 0.953	229.000, 1.021	229.000, 1.045
1147	229.200, 1.337	229.200, 1.304	229.200, 1.220	229.200, 1.084	229.200, 1.194	229.200, 1.253	229.200, 1.221	229.200, 1.144	229.200, 1.079	229.200, 1.171	229.200, 1.166	229.200, 1.117	229.200, 0.953	229.200, 1.021	229.200, 1.045
1148	229.400, 1.336	229.400, 1.303	229.400, 1.219	229.400, 1.084	229.400, 1.194	229.400, 1.253	229.400, 1.220	229.400, 1.144	229.400, 1.078	229.400, 1.171	229.400, 1.166	229.400, 1.116	229.400, 0.953	229.400, 1.021	229.400, 1.044
1149	229.600, 1.336	229.600, 1.303	229.600, 1.219	229.600, 1.084	229.600, 1.194	229.600, 1.253	229.600, 1.220	229.600, 1.144	229.600, 1.078	229.600, 1.171	229.600, 1.166	229.600, 1.116	229.600, 0.953	229.600, 1.021	229.600, 1.044
1150	229.800, 1.335	229.800, 1.302	229.800, 1.219	229.800, 1.084	229.800, 1.195	229.800, 1.252	229.800, 1.220	229.800, 1.144	229.800, 1.077	229.800, 1.171	229.800, 1.166	229.800, 1.116	229.800, 0.952	229.800, 1.021	229.800, 1.043
1151	230.000, 1.335	230.000, 1.302	230.000, 1.218	230.000, 1.084	230.000, 1.194	230.000, 1.252	230.000, 1.219	230.000, 1.144	230.000, 1.077	230.000, 1.171	230.000, 1.166	230.000, 1.115	230.000, 0.952	230.000, 1.022	230.000, 1.043
1152	230.200, 1.335	230.200, 1.301	230.200, 1.218	230.200, 1.084	230.200, 1.194	230.200, 1.252	230.200, 1.219	230.200, 1.144	230.200, 1.077	230.200, 1.171	230.200, 1.166	230.200, 1.115	230.200, 0.952	230.200, 1.022	230.200, 1.042
1153	230.400, 1.334	230.400, 1.301	230.400, 1.218	230.400, 1.083	230.400, 1.194	230.400, 1.252	230.400, 1.218	230.400, 1.144	230.400, 1.077	230.400, 1.170	230.400, 1.165	230.400, 1.115	230.400, 0.951	230.400, 1.022	230.400, 1.042
1154	230.600, 1.334	230.600, 1.300	230.600, 1.218	230.600, 1.083	230.600, 1.194	230.600, 1.251	230.600, 1.218	230.600, 1.143	230.600, 1.077	230.600, 1.170	230.600, 1.165	230.600, 1.114	230.600, 0.951	230.600, 1.022	230.600, 1.041
1155	230.800, 1.334	230.800, 1.300	230.800, 1.218	230.800, 1.083	230.800, 1.194	230.800, 1.251	230.800, 1.218	230.800, 1.143	230.800, 1.077	230.800, 1.169	230.800, 1.165	230.800, 1.114	230.800, 0.951	230.800, 1.022	230.800, 1.041
1156	231.000, 1.334	231.000, 1.300	231.000, 1.218	231.000, 1.083	231.000, 1.194	231.000, 1.251	231.000, 1.217	231.000, 1.143	231.000, 1.077	231.000, 1.169	231.000, 1.165	231.000, 1.114	231.000, 0.951	231.000, 1.022	231.000, 1.040
1157	231.200, 1.334	231.200, 1.299	231.200, 1.217	231.200, 1.083	231.200, 1.193	231.200, 1.251	231.200, 1.216	231.200, 1.142	231.200, 1.077	231.200, 1.168	231.200, 1.164	231.200, 1.114	231.200, 0.951	231.200, 1.021	231.200, 1.040
1158	231.400, 1.333	231.400, 1.298	231.400, 1.217	231.400, 1.082	231.400, 1.193	231.400, 1.250	231.400, 1.216	231.400, 1.142	231.400, 1.077	231.400, 1.167	231.400, 1.164	231.400, 1.114	231.400, 0.950	231.400, 1.021	231.400, 1.040
1159	231.600, 1.333	231.600, 1.298	231.600, 1.217	231.600, 1.082	231.600, 1.193	231.600, 1.250	231.600, 1.216	231.600, 1.141	231.600, 1.077	231.600, 1.167	231.600, 1.164	231.600, 1.114	231.600, 0.950	231.600, 1.021	231.600, 1.040
1160	231.800, 1.333	231.800, 1.297	231.800, 1.216	231.800, 1.082	231.800, 1.193	231.800, 1.250	231.800, 1.215	231.800, 1.141	231.800, 1.077	231.800, 1.166	231.800, 1.164	231.800, 1.114	231.800, 0.950	231.800, 1.020	231.800, 1.039
1161	232.000, 1.332	232.000, 1.297	232.000, 1.216	232.000, 1.081	232.000, 1.192	232.000, 1.250	232.000, 1.215	232.000, 1.140	232.000, 1.077	232.000, 1.165	232.000, 1.164	232.000, 1.113	232.000, 0.949	232.000, 1.020	232.000, 1.039
1162	232.200, 1.332	232.200, 1.296	232.200, 1.216	232.200, 1.081	232.200, 1.192	232.200, 1.250	232.200, 1.215	232.200, 1.140	232.200, 1.076	232.200, 1.165	232.200, 1.164	232.200, 1.113	232.200, 0.949	232.200, 1.020	232.200, 1.039
1163	232.400, 1.332	232.400, 1.296	232.400, 1.216	232.400, 1.081	232.400, 1.192	232.400, 1.249	232.400, 1.214	232.400, 1.140	232.400, 1.076	232.400, 1.165	232.400, 1.163	232.400, 1.113	232.400, 0.949	232.400, 1.019	232.400, 1.038
1164	232.600, 1.331	232.600, 1.296	232.600, 1.215	232.600, 1.080	232.600, 1.192	232.600, 1.249	232.600, 1.213	232.600, 1.140	232.600, 1.076	232.600, 1.165	232.600, 1.163	232.600, 1.113	232.600, 0.949	232.600, 1.019	232.600, 1.038
1165	232.800, 1.331	232.800, 1.295	232.800, 1.215	232.800, 1.080	232.800, 1.192	232.800, 1.249	232.800, 1.213	232.800, 1.140	232.800, 1.075	232.800, 1.165	232.800, 1.163	232.800, 1.113	232.800, 0.949	232.800, 1.018	232.800, 1.037
1166	233.000, 1.331	233.000, 1.295	233.000, 1.215	233.000, 1.080	233.000, 1.192	233.000, 1.249	233.000, 1.212	233.000, 1.140	233.000, 1.075	233.000, 1.166	233.000, 1.163	233.000, 1.113	233.000, 0.949	233.000, 1.018	233.000, 1.037
1167	233.200, 1.331	233.200, 1.294	233.200, 1.215	233.200, 1.080	233.200, 1.192	233.200, 1.249	233.200, 1.211	233.200, 1.140	233.200, 1.074	233.200, 1.166	233.200, 1.162	233.200, 1.113	233.200, 0.949	233.200, 1.018	233.200, 1.037
1168	233.400, 1.330	233.400, 1.294	233.400, 1.215	233.400, 1.080	233.400, 1.192	233.400, 1.249	233.400, 1.211	233.400, 1.140	233.400, 1.074	233.400, 1.166	233.400, 1.162	233.400, 1.113	233.400, 0.949	233.400, 1.018	233.400, 1.036
1169	233.600, 1.330	233.600, 1.293	233.600, 1.215	233.600, 1.080	233.600, 1.192	233.600, 1.249	233.600, 1.210	233.600, 1.140	233.600, 1.074	233.600, 1.166	233.600, 1.162	233.600, 1.113	233.600, 0.949	233.600, 1.017	233.600, 1.036
1170	233.800, 1.330	233.800, 1.293	233.800, 1.214	233.800, 1.080	233.800, 1.191	233.800, 1.249	233.800, 1.210	233.800, 1.140	233.800, 1.074	233.800, 1.166	233.800, 1.161	233.800, 1.113	233.800, 0.949	233.800, 1.017	233.800, 1.036
1171	234.000, 1.330	234.000, 1.292	234.000, 1.214	234.000, 1.080	234.000, 1.191	234.000, 1.248	234.000, 1.209	234.000, 1.140	234.000, 1.073	234.000, 1.166	234.000, 1.161	234.000, 1.112	234.000, 0.949	234.000, 1.017	234.000, 1.036
1172	234.200, 1.330	234.200, 1.292	234.200, 1.214	234.200, 1.080	234.200, 1.191	234.200, 1.248	234.200, 1.209	234.200, 1.140	234.200, 1.073	234.200, 1.165	234.200, 1.160	234.200, 1.112	234.200, 0.949	234.200, 1.017	234.200, 1.035
1173	234.400, 1.330	234.400, 1.291	234.400, 1.214	234.400, 1.079	234.400, 1.190	234.400, 1.248	234.400, 1.209	234.400, 1.140	234.400, 1.073	234.400, 1.165	234.400, 1.159	234.400, 1.112	234.400, 0.949	234.400, 1.016	234.400, 1.035
1174	234.600, 1.330	234.600, 1.290	234.600, 1.214	234.600, 1.079	234.600, 1.190	234.600, 1.248	234.600, 1.209	234.600, 1.139	234.600, 1.073	234.600, 1.165	234.600, 1.159	234.600, 1.112	234.600, 0.948	234.600, 1.016	234.600, 1.035
1175	234.800, 1.330	234.800, 1.290	234.800, 1.213	234.800, 1.078	234.800, 1.190	234.800, 1.247	234.800, 1.208	234.800, 1.139	234.800, 1.072	234.800, 1.164	234.800, 1.159	234.800, 1.111	234.800, 0.948	234.800, 1.015	234.800, 1.035
1176	235.000, 1.330	235.000, 1.289	235.000, 1.213	235.000, 1.078	235.000, 1.189	235.000, 1.247	235.000, 1.208	235.000, 1.139	235.000, 1.072	235.000, 1.164	235.000, 1.158	235.000, 1.111	235.000, 0.948	235.000, 1.015	235.000, 1.034
1177	235.200, 1.329	235.200, 1.288	235.200, 1.213	235.200, 1.077	235.200, 1.189	235.200, 1.247	235.200, 1.208	235.200, 1.138	235.200, 1.072	235.200, 1.164	235.200, 1.158	235.200, 1.111	235.200, 0.948	235.200, 1.015	235.200, 1.034
1178	235.400, 1.329	235.400, 1.287	235.400, 1.213	235.400, 1.077	235.400, 1.189	235.400, 1.246	235.400, 1.207	235.400, 1.138	235.400, 1.072	235.400, 1.163	235.400, 1.158	235.400, 1.110	235.400, 0.947	235.400, 1.014	235.400, 1.033
1179	235.600, 1.328	235.600, 1.287	235.600, 1.213	235.600, 1.076	235.600, 1.188	235.600, 1.246	235.600, 1.207	235.600, 1.138	235.600, 1.071	235.600, 1.163	235.600, 1.158	235.600, 1.110	235.600, 0.947	235.600, 1.014	235.600, 1.033
1180	235.800, 1.327	235.800, 1.287	235.800, 1.213	235.800, 1.076	235.800, 1.188	235.800, 1.246	235.800, 1.206	235.800, 1.137	235.800, 1.071	235.800, 1.162	235.800, 1.158	235.800, 1.110	235.800, 0.947	235.800, 1.014	235.800, 1.032
1181	236.000, 1.327	236.000, 1.286	236.000, 1.213	236.000, 1.076	236.000, 1.188	236.000, 1.245	236.000, 1.206	236.000, 1.137	236.000, 1.071	236.000, 1.162	236.000, 1.158	236.000, 1.110	236.000, 0.946	236.000, 1.014	236.000, 1.032
1182	236.200, 1.327	236.200, 1.286	236.200, 1.213	236.200, 1.076	236.200, 1.187	236.200, 1.245	236.200, 1.205	236.200, 1.136	236.200, 1.071	236.200, 1.162	236.200, 1.158	236.200, 1.110	236.200, 0.946	236.200, 1.014	236.200, 1.031
1183	236.400, 1.326	236.400, 1.286	236.400, 1.213	236.400, 1.075	236.400, 1.187	236.400, 1.245	236.400, 1.204	236.400, 1.136	236.400, 1.070	236.400, 1.161	236.400, 1.158	236.400, 1.110	236.400, 0.946	236.400, 1.014	236.400, 1.031
1184	236.600, 1.326	236.600, 1.285	236.600, 1.213	236.600, 1.075	236.600, 1.187	236.600, 1.245	236.600, 1.204	236.600, 1.135	236.600, 1.070	236.600, 1.161	236.600, 1.158	236.600, 1.110	236.600, 0.946	236.600, 1.014	236.600, 1.030
1185	236.800, 1.326	236.800, 1.285	236.800, 1.213	236.800, 1.075	236.800, 1.187	236.800, 1.245	236.800, 1.203	236.800, 1.135	236.800, 1.070	236.800, 1.161	236.800, 1.158	236.800, 1.109	236.800, 0.946	236.800, 1.013	236.800, 1.030
1186	237.000, 1.326	237.000, 1.285	237.000, 1.213	237.000, 1.075	237.000, 1.187	237.000, 1.245	237.000, 1.202	237.000, 1.135	237.000, 1.069	237.000, 1.160	237.000, 1.157	237.000, 1.109	237.000, 0.946	237.000, 1.013	237.000, 1.029
1187	237.200, 1.326	237.200, 1.284	237.200, 1.213	237.200, 1.075	237.200, 1.187	237.200, 1.244	237.200, 1.202	237.200, 1.135	237.200, 1.069	237.200, 1.160	237.200, 1.157	237.200, 1.109	237.200, 0.945	237.200, 1.013	237.200, 1.028
1188	237.400, 1.327	237.400, 1.284	237.400, 1.212	237.400, 1.075	237.400, 1.186	237.400, 1.244	237.400, 1.201	237.400, 1.134	237.400, 1.068	237.400, 1.160	237.400, 1.157	237.400, 1.109	237.400, 0.945	237.400, 1.013	237.400, 1.028
1189	237.600, 1.327	237.600, 1.283	237.600, 1.212	237.600, 1.076	237.600, 1.186	237.600, 1.244	237.600, 1.201	237.600, 1.134	237.600, 1.068	237.600, 1.160	237.600, 1.156	237.600, 1.109	237.600, 0.945	237.600, 1.013	237.600, 1.027
1190	237.800, 1.326	237.800, 1.283	237.800, 1.211	237.800, 1.076	237.800, 1.186	237.800, 1.243	237.800, 1.200	237.800, 1.134	237.800, 1.068	237.800, 1.159	237.800, 1.156	237.800, 1.108	237.800, 0.945	237.800, 1.013	237.800, 1.027
1191	238.000, 1.326	238.000, 1.282	238.000, 1.211	238.000, 1.076	238.000, 1.186	238.000, 1.243	238.000, 1.200	238.000, 1.134	238.000, 1.068	238.000, 1.159	238.000, 1.155	238.000, 1.108	238.000, 0.945	238.000, 1.012	238.000, 1.026
1192	238.200, 1.326	238.200, 1.282	238.200, 1.211	238.200, 1.076	238.200, 1.186	238.200, 1.243	238.200, 1.199	238.200, 1.134	238.200, 1.067	238.200, 1.159	238.200, 1.154	238.200, 1.107	238.200, 0.945	238.200, 1.012	238.200, 1.026
1193	238.400, 1.326	238.400, 1.281	238.400, 1.211	238.400, 1.075	238.400, 1.186	238.400, 1.242	238.400, 1.199	238.400, 1.134	238.400, 1.067	238.400, 1.159	238.400, 1.154	238.400, 1.106	238.400, 0.945	238.400, 1.012	238.400, 1.026
1194	238.600, 1.326	238.600, 1.281	238.600, 1.210	238.600, 1.075	238.600, 1.186	238.600, 1.242	238.600, 1.198	238.600, 1.133	238.600, 1.067	238.600, 1.159	238.600, 1.154	238.600, 1.106	238.600, 0.945	238.600, 1.012	238.600, 1.025
1195	238.800, 1.325	238.800, 1.281	238.800, 1.210	238.800, 1.075	238.800, 1.186	238.800, 1.241	238.800, 1.198	238.800, 1.133	238.800, 1.067	238.800, 1.159	238.800, 1.153	238.800, 1.105	238.800, 0.945	238.800, 1.012	238.800, 1.025
1196	239.000, 1.325	239.000, 1.280	239.000, 1.210	239.000, 1.074	239.000, 1.186	239.000, 1.241	239.000, 1.198	239.000, 1.133	239.000, 1.067	239.000, 1.159	239.000, 1.153	239.000, 1.105	239.000, 0.945	239.000, 1.012	239.000, 1.025
1197	239.200, 1.324	239.200, 1.280	239.200, 1.210	239.200, 1.074	239.200, 1.186	239.200, 1.241	239.200, 1.198	239.200, 1.133	239.200, 1.067	239.200, 1.159	239.200, 1.153	239.200, 1.105	239.200, 0.945	239.200, 1.012	239.200, 1.024
1198	239.400, 1.324	239.400, 1.279	239.400, 1.210	239.400, 1.074	239.400, 1.186	239.400, 1.240	239.400, 1.197	239.400, 1.132	239.400, 1.067	239.400, 1.158	239.400, 1.153	239.400, 1.105	239.400, 0.945	239.400, 1.012	239.400, 1.024
1199	239.600, 1.323	239.600, 1.279	239.600, 1.210	239.600, 1.073	239.600, 1.186	239.600, 1.240	239.600, 1.197	239.600, 1.132	239.600, 1.067	239.600, 1.158	239.600, 1.152	239.600, 1.105	239.600, 0.945	239.600, 1.012	239.600, 1.023
1200	239.800, 1.323	239.800, 1.278	239.800, 1.210	239.800, 1.073	239.800, 1.186	239.800, 1.240	239.800, 1.196	239.800, 1.132	239.800, 1.066	239.800, 1.158	239.800, 1.152	239.800, 1.105	239.800, 0.945	239.800, 1.013	239.800, 1.023
1201	240.000, 1.323	240.000, 1.278	240.000, 1.210	240.000, 1.073	240.000, 1.185	240.000, 1.239	240.000, 1.196	240.000, 1.132	240.000, 1.066	240.000, 1.158	240.000, 1.152	240.000, 1.105	240.000, 0.945	240.000, 1.012	240.000, 1.023
1202	240.200, 1.323	240.200, 1.277	240.200, 1.209	240.200, 1.073	240.200, 1.185	240.200, 1.239	240.200, 1.195	240.200, 1.132	240.200, 1.066	240.200, 1.158	240.200, 1.153	240.200, 1.105	240.200, 0.945	240.200, 1.012	240.200, 1.023
1203	240.400, 1.323	240.400, 1.277	240.400, 1.209	240.400, 1.073	240.400, 1.184	240.400, 1.239	240.400, 1.195	240.400, 1.131	240.400, 1.065	240.400, 1.157	240.400, 1.153	240.400, 1.105	240.400, 0.944	240.400, 1.012	240.400, 1.023
1204	240.600, 1.323	240.600, 1.276	240.600, 1.209	240.600, 1.073	240.600, 1.184	240.600, 1.239	240.600, 1.195	240.600, 1.131	240.600, 1.065	240.600, 1.157	240.600, 1.153	240.600, 1.105	240.600, 0.944	240.600, 1.012	240.600, 1.023
1205	240.800, 1.323	240.800, 1.276	240.800, 1.209	240.800, 1.072	240.800, 1.183	240.800, 1.239	240.800, 1.195	240.800, 1.131	240.800, 1.065	240.800, 1.157	240.800, 1.153	240.800, 1.105	240.800, 0.944	240.800, 1.011	240.800, 1.022
1206	241.000, 1.323	241.000, 1.275	241.000, 1.208	241.000, 1.072	241.000, 1.183	241.000, 1.238	241.000, 1.194	241.000, 1.130	241.000, 1.065	241.000, 1.156	241.000, 1.153	241.000, 1.105	241.000, 0.943	241.000, 1.011	241.000, 1.022
1207	241.200, 1.322	241.200, 1.274	241.200, 1.208	241.200, 1.072	241.200, 1.182	241.200, 1.238	241.200, 1.194	241.200, 1.130	241.200, 1.065	241.200, 1.156	241.200, 1.153	241.200, 1.104	241.200, 0.943	241.200, 1.011	241.200, 1.022
1208	241.400, 1.322	241.400, 1.274	241.400, 1.208	241.400, 1.072	241.400, 1.182	241.400, 1.238	241.400, 1.193	241.400, 1.130	241.400, 1.065	241.400, 1.155	241.400, 1.153	241.400, 1.104	241.400, 0.942	241.400, 1.011	241.400, 1.022
1209	241.600, 1.322	241.600, 1.273	241.600, 1.207	241.600, 1.073	241.600, 1.182	241.600, 1.237	241.600, 1.193	241.600, 1.130	241.600, 1.065	241.600, 1.155	241.600, 1.153	241.600, 1.104	241.600, 0.942	241.600, 1.010	241.600, 1.021
1210	241.800, 1.322	241.800, 1.273	241.800, 1.207	241.800, 1.073	241.800, 1.182	241.800, 1.237	241.800, 1.192	241.800, 1.130	241.800, 1.065	241.800, 1.155	241.800, 1.152	241.800, 1.104	241.800, 0.942	241.800, 1.010	241.800, 1.021
1211	242.000, 1.322	242.000, 1.273	242.000, 1.207	242.000, 1.073	242.000, 1.182	242.000, 1.237	242.000, 1.192	242.000, 1.130	242.000, 1.065	242.000, 1.155	242.000, 1.152	242.000, 1.103	242.000, 0.942	242.000, 1.010	242.000, 1.021
1212	242.200, 1.322	242.200, 1.273	242.200, 1.206	242.200, 1.073	242.200, 1.182	242.200, 1.237	242.200, 1.191	242.200, 1.130	242.200, 1.065	242.200, 1.155	242.200, 1.152	242.200, 1.103	242.200, 0.942	242.200, 1.009	242.200, 1.020
1213	242.400, 1.322	242.400, 1.273	242.400, 1.206	242.400, 1.073	242.400, 1.182	242.400, 1.237	242.400, 1.191	242.400, 1.130	242.400, 1.065	242.400, 1.155	242.400, 1.152	242.400, 1.103	242.400, 0.942	242.400, 1.009	242.400, 1.020
1214	242.600, 1.321	242.600, 1.272	242.600, 1.206	242.600, 1.072	242.600, 1.182	242.600, 1.237	242.600, 1.190	242.600, 1.130	242.600, 1.065	242.600, 1.155	242.600, 1.151	242.600, 1.102	242.600, 0.942	242.600, 1.009	242.600, 1.020
1215	242.800, 1.321	242.800, 1.272	242.800, 1.205	242.800, 1.072	242.800, 1.182	242.800, 1.237	242.800, 1.190	242.800, 1.130	242.800, 1.065	242.800, 1.155	242.800, 1.151	242.800, 1.102	242.800, 0.942	242.800, 1.008	242.800, 1.019
1216	243.000, 1.321	243.000, 1.272	243.000, 1.205	243.000, 1.072	243.000, 1.182	243.000, 1.236	243.000, 1.189	243.000, 1.130	243.000, 1.065	243.000, 1.155	243.000, 1.150	243.000, 1.102	243.000, 0.941	243.000, 1.008	243.000, 1.018
1217	243.200, 1.320	243.200, 1.271	243.200, 1.205	243.200, 1.072	243.200, 1.182	243.200, 1.236	243.200, 1.189	243.200, 1.130	243.200, 1.065	243.200, 1.154	243.200, 1.150	243.200, 1.101	243.200, 0.941	243.200, 1.007	243.200, 1.018
1218	243.400, 1.320	243.400, 1.271	243.400, 1.205	243.400, 1.072	243.400, 1.182	243.400, 1.236	243.400, 1.188	243.400, 1.130	243.400, 1.065	243.400, 1.154	243.400, 1.150	243.400, 1.101	243.400, 0.941	243.400, 1.007	243.400, 1.017
1219	243.600, 1.320	243.600, 1.270	243.600, 1.205	243.600, 1.072	243.600, 1.181	243.600, 1.236	243.600, 1.188	243.600, 1.130	243.600, 1.065	243.600, 1.154	243.600, 1.150	243.600, 1.100	243.600, 0.940	243.600, 1.006	243.600, 1.017
1220	243.800, 1.320	243.800, 1.270	243.800, 1.205	243.800, 1.072	243.800, 1.181	243.800, 1.235	243.800, 1.187	243.800, 1.129	243.800, 1.064	243.800, 1.154	243.800, 1.150	243.800, 1.100	243.800, 0.940	243.800, 1.006	243.800, 1.017
1221	244.000, 1.319	244.000, 1.269	244.000, 1.205	244.000, 1.072	244.000, 1.181	244.000, 1.235	244.000, 1.187	244.000, 1.129	244.000, 1.064	244.000, 1.154	244.000, 1.150	244.000, 1.100	244.000, 0.939	244.000, 1.005	244.000, 1.016
1222	244.200, 1.319	244.200, 1.269	244.200, 1.205	244.200, 1.071	244.200, 1.180	244.200, 1.235	244.200, 1.187	244.200, 1.129	244.200, 1.063	244.200, 1.153	244.200, 1.150	244.200, 1.100	244.200, 0.939	244.200, 1.005	244.200, 1.016
1223	244.400, 1.318	244.400, 1.269	244.400, 1.204	244.400, 1.071	244.400, 1.180	244.400, 1.235	244.400, 1.186	244.400, 1.128	244.400, 1.063	244.400, 1.153	244.400, 1.150	244.400, 1.100	244.400, 0.939	244.400, 1.005	244.400, 1.015
1224	244.600, 1.318	244.600, 1.268	244.600, 1.204	244.600, 1.071	244.600, 1.180	244.600, 1.234	244.600, 1.186	244.600, 1.127	244.600, 1.063	244.600, 1.153	244.600, 1.150	244.600, 1.099	244.600, 0.939	244.600, 1.005	244.600, 1.015
1225	244.800, 1.318	244.800, 1.268	244.800, 1.204	244.800, 1.070	244.800, 1.179	244.800, 1.234	244.800, 1.185	244.800, 1.127	244.800, 1.063	244.800, 1.153	244.800, 1.149	244.800, 1.099	244.800, 0.938	244.800, 1.005	244.800, 1.014
1226	245.000, 1.317	245.000, 1.268	245.000, 1.203	245.000, 1.070	245.000, 1.179	245.000, 1.233	245.000, 1.185	245.000, 1.127	245.000, 1.062	245.000, 1.153	245.000, 1.149	245.000, 1.099	245.000, 0.938	245.000, 1.005	245.000, 1.014
1227	245.200, 1.317	245.200, 1.267	245.200, 1.203	245.200, 1.069	245.200, 1.179	245.200, 1.233	245.200, 1.185	245.200, 1.126	245.200, 1.062	245.200, 1.153	245.200, 1.149	245.200, 1.099	245.200, 0.937	245.200, 1.005	245.200, 1.013
1228	245.400, 1.317	245.400, 1.267	245.400, 1.203	245.400, 1.069	245.400, 1.179	245.400, 1.233	245.400, 1.185	245.400, 1.126	245.400, 1.061	245.400, 1.153	245.400, 1.148	245.400, 1.099	245.400, 0.937	245.400, 1.005	245.400, 1.013
1229	245.600, 1.317	245.600, 1.267	245.600, 1.202	245.600, 1.069	245.600, 1.179	245.600, 1.232	245.600, 1.184	245.600, 1.126	245.600, 1.061	245.600, 1.153	245.600, 1.148	245.600, 1.099	245.600, 0.937	245.600, 1.005	245.600, 1.013
1230	245.800, 1.316	245.800, 1.266	245.800, 1.202	245.800, 1.068	245.800, 1.179	245.800, 1.232	245.800, 1.184	245.800, 1.126	245.800, 1.061	245.800, 1.153	245.800, 1.147	245.800, 1.098	245.800, 0.937	245.800, 1.005	245.800, 1.012
1231	246.000, 1.316	246.000, 1.266	246.000, 1.202	246.000, 1.068	246.000, 1.178	246.000, 1.233	246.000, 1.184	246.000, 1.126	246.000, 1.061	246.000, 1.153	246.000, 1.147	246.000, 1.098	246.000, 0.937	246.000, 1.005	246.000, 1.012
1232	246.200, 1.316	246.200, 1.266	246.200, 1.202	246.200, 1.068	246.200, 1.178	246.200, 1.233	246.200, 1.183	246.200, 1.126	246.200, 1.061	246.200, 1.153	246.200, 1.146	246.200, 1.098	246.200, 0.937	246.200, 1.005	246.200, 1.011
1233	246.400, 1.316	246.400, 1.265	246.400, 1.202	246.400, 1.068	246.400, 1.178	246.400, 1.233	246.400, 1.183	246.400, 1.126	246.400, 1.061	246.400, 1.153	246.400, 1.146	246.400, 1.098	246.400, 0.937	246.400, 1.005	246.400, 1.011
1234	246.600, 1.316	246.600, 1.265	246.600, 1.202	246.600, 1.068	246.600, 1.178	246.600, 1.233	246.600, 1.182	246.600, 1.125	246.600, 1.061	246.600, 1.152	246.600, 1.145	246.600, 1.098	246.600, 0.937	246.600, 1.005	246.600, 1.011
1235	246.800, 1.316	246.800, 1.264	246.800, 1.202	246.800, 1.068	246.800, 1.177	246.800, 1.233	246.800, 1.182	246.800, 1.125	246.800, 1.061	246.800, 1.152	246.800, 1.145	246.800, 1.098	246.800, 0.937	246.800, 1.005	246.800, 1.010
1236	247.000, 1.316	247.000, 1.264	247.000, 1.203	247.000, 1.068	247.000, 1.177	247.000, 1.233	247.000, 1.181	247.000, 1.125	247.000, 1.061	247.000, 1.151	247.000, 1.145	247.000, 1.098	247.000, 0.937	247.000, 1.005	247.000, 1.010
1237	247.200, 1.316	247.200, 1.263	247.200, 1.203	247.200, 1.068	247.200, 1.177	247.200, 1.232	247.200, 1.181	247.200, 1.125	247.200, 1.061	247.200, 1.151	247.200, 1.145	247.200, 1.098	247.200, 0.937	247.200, 1.005	247.200, 1.010
1238	247.400, 1.316	247.400, 1.263	247.400, 1.203	247.400, 1.068	247.400, 1.177	247.400, 1.232	247.400, 1.181	247.400, 1.124	247.400, 1.061	247.400, 1.150	247.400, 1.145	247.400, 1.097	247.400, 0.937	247.400, 1.005	247.400, 1.010
1239	247.600, 1.316	247.600, 1.262	247.600, 1.203	247.600, 1.068	247.600, 1.177	247.600, 1.232	247.600, 1.181	247.600, 1.124	247.600, 1.061	247.600, 1.150	247.600, 1.145	247.600, 1.097	247.600, 0.937	247.600, 1.004	247.600, 1.010
1240	247.800, 1.316	247.800, 1.262	247.800, 1.203	247.800, 1.067	247.800, 1.177	247.800, 1.231	247.800, 1.180	247.800, 1.124	247.800, 1.060	247.800, 1.150	247.800, 1.145	247.800, 1.097	247.800, 0.937	247.800, 1.004	247.800, 1.009
1241	248.000, 1.316	248.000, 1.261	248.000, 1.203	248.000, 1.067	248.000, 1.177	248.000, 1.231	248.000, 1.180	248.000, 1.124	248.000, 1.060	248.000, 1.149	248.000, 1.145	248.000, 1.097	248.000, 0.937	248.000, 1.004	248.000, 1.009
1242	248.200, 1.316	248.200, 1.261	248.200, 1.203	248.200, 1.067	248.200, 1.176	248.200, 1.230	248.200, 1.180	248.200, 1.124	248.200, 1.060	248.200, 1.149	248.200, 1.145	248.200, 1.097	248.200, 0.938	248.200, 1.003	248.200, 1.009
1243	248.400, 1.316	248.400, 1.260	248.400, 1.203	248.400, 1.067	248.400, 1.176	248.400, 1.230	248.400, 1.180	248.400, 1.123	248.400, 1.059	248.400, 1.149	248.400, 1.145	248.400, 1.096	248.400, 0.937	248.400, 1.003	248.400, 1.008
1244	248.600, 1.315	248.600, 1.260	248.600, 1.202	248.600, 1.066	248.600, 1.176	248.600, 1.229	248.600, 1.179	248.600, 1.123	248.600, 1.059	248.600, 1.149	248.600, 1.145	248.600, 1.096	248.600, 0.937	248.600, 1.003	248.600, 1.008
1245	248.800, 1.315	248.800, 1.259	248.800, 1.202	248.800, 1.066	248.800, 1.176	248.800, 1.228	248.800, 1.179	248.800, 1.123	248.800, 1.059	248.800, 1.148	248.800, 1.145	248.800, 1.096	248.800, 0.937	248.800, 1.002	248.800, 1.008
1246	249.000, 1.314	249.000, 1.258	249.000, 1.202	249.000, 1.066	249.000, 1.176	249.000, 1.228	249.000, 1.178	249.000, 1.123	249.000, 1.058	249.000, 1.148	249.000, 1.144	249.000, 1.096	249.000, 0.937	249.000, 1.002	249.000, 1.007
1247	249.200, 1.314	249.200, 1.258	249.200, 1.201	249.200, 1.066	249.200, 1.176	249.200, 1.228	249.200, 1.178	249.200, 1.123	249.200, 1.058	249.200, 1.148	249.200, 1.144	249.200, 1.095	249.200, 0.936	249.200, 1.002	249.200, 1.007
1248	249.400, 1.313	249.400, 1.257	249.400, 1.201	249.400, 1.066	249.400, 1.176	249.400, 1.228	249.400, 1.178	249.400, 1.124	249.400, 1.058	249.400, 1.148	249.400, 1.144	249.400, 1.095	249.400, 0.936	249.400, 1.002	249.400, 1.007
1249	249.600, 1.313	249.600, 1.257	249.600, 1.200	249.600, 1.066	249.600, 1.176	249.600, 1.228	249.600, 1.178	249.600, 1.124	249.600, 1.058	249.600, 1.148	249.600, 1.143	249.600, 1.095	249.600, 0.935	249.600, 1.002	249.600, 1.007
1250	249.800, 1.313	249.800, 1.256	249.800, 1.200	249.800, 1.066	249.800, 1.176	249.800, 1.228	249.800, 1.177	249.800, 1.124	249.800, 1.058	249.800, 1.148	249.800, 1.143	249.800, 1.095	249.800, 0.935	249.800, 1.002	249.800, 1.006
1251	250.000, 1.312	250.000, 1.256	250.000, 1.200	250.000, 1.066	250.000, 1.176	250.000, 1.228	250.000, 1.177	250.000, 1.124	250.000, 1.058	250.000, 1.148	250.000, 1.143	250.000, 1.095	250.000, 0.935	250.000, 1.001	250.000, 1.006
1252	250.200, 1.312	250.200, 1.256	250.200, 1.200	250.200, 1.066	250.200, 1.176	250.200, 1.228	250.200, 1.176	250.200, 1.124	250.200, 1.057	250.200, 1.148	250.200, 1.143	250.200, 1.095	250.200, 0.934	250.200, 1.001	250.200, 1.005
1253	250.400, 1.312	250.400, 1.255	250.400, 1.200	250.400, 1.066	250.400, 1.175	250.400, 1.228	250.400, 1.176	250.400, 1.123	250.400, 1.057	250.400, 1.147	250.400, 1.143	250.400, 1.095	250.400, 0.934	250.400, 1.001	250.400, 1.005
1254	250.600, 1.311	250.600, 1.255	250.600, 1.200	250.600, 1.066	250.600, 1.175	250.600, 1.228	250.600, 1.175	250.600, 1.123	250.600, 1.057	250.600, 1.147	250.600, 1.142	250.600, 1.095	250.600, 0.934	250.600, 1.001	250.600, 1.004
1255	250.800, 1.311	250.800, 1.255	250.800, 1.200	250.800, 1.066	250.800, 1.175	250.800, 1.228	250.800, 1.175	250.800, 1.123	250.800, 1.057	250.800, 1.147	250.800, 1.142	250.800, 1.095	250.800, 0.933	250.800, 1.001	250.800, 1.004
1256	251.000, 1.311	251.000, 1.255	251.000, 1.200	251.000, 1.066	251.000, 1.175	251.000, 1.228	251.000, 1.175	251.000, 1.123	251.000, 1.057	251.000, 1.147	251.000, 1.142	251.000, 1.094	251.000, 0.933	251.000, 1.001	251.000, 1.004
1257	251.200, 1.311	251.200, 1.255	251.200, 1.200	251.200, 1.065	251.200, 1.175	251.200, 1.228	251.200, 1.175	251.200, 1.122	251.200, 1.057	251.200, 1.147	251.200, 1.142	251.200, 1.094	251.200, 0.933	251.200, 1.001	251.200, 1.003
1258	251.400, 1.311	251.400, 1.254	251.400, 1.200	251.400, 1.065	251.400, 1.175	251.400, 1.228	251.400, 1.174	251.400, 1.122	251.400, 1.057	251.400, 1.147	251.400, 1.142	251.400, 1.094	251.400, 0.933	251.400, 1.001	251.400, 1.003
1259	251.600, 1.312	251.600, 1.254	251.600, 1.199	251.600, 1.065	251.600, 1.174	251.600, 1.228	251.600, 1.174	251.600, 1.122	251.600, 1.057	251.600, 1.147	251.600, 1.142	251.600, 1.094	251.600, 0.933	251.600, 1.000	251.600, 1.003
1260	251.800, 1.312	251.800, 1.254	251.800, 1.199	251.800, 1.065	251.800, 1.173	251.800, 1.227	251.800, 1.174	251.800, 1.122	251.800, 1.057	251.800, 1.147	251.800, 1.142	251.800, 1.093	251.800, 0.933	251.800, 1.000	251.800, 1.002
1261	252.000, 1.311	252.000, 1.254	252.000, 1.198	252.000, 1.065	252.000, 1.173	252.000, 1.227	252.000, 1.173	252.000, 1.122	252.000, 1.057	252.000, 1.147	252.000, 1.142	252.000, 1.093	252.000, 0.933	252.000, 1.000	252.000, 1.002
1262	252.200, 1.311	252.200, 1.253	252.200, 1.198	252.200, 1.065	252.200, 1.172	252.200, 1.226	252.200, 1.173	252.200, 1.121	252.200, 1.057	252.200, 1.147	252.200, 1.141	252.200, 1.093	252.200, 0.933	252.200, 0.999	252.200, 1.002
1263	252.400, 1.311	252.400, 1.253	252.400, 1.197	252.400, 1.065	252.400, 1.172	252.400, 1.226	252.400, 1.173	252.400, 1.121	252.400, 1.057	252.400, 1.146	252.400, 1.141	252.400, 1.093	252.400, 0.933	252.400, 0.999	252.400, 1.001
1264	252.600, 1.311	252.600, 1.252	252.600, 1.197	252.600, 1.064	252.600, 1.171	252.600, 1.225	252.600, 1.172	252.600, 1.120	252.600, 1.056	252.600, 1.146	252.600, 1.141	252.600, 1.092	252.600, 0.933	252.600, 0.999	252.600, 1.001
1265	252.800, 1.311	252.800, 1.252	252.800, 1.196	252.800, 1.064	252.800, 1.171	252.800, 1.225	252.800, 1.172	252.800, 1.120	252.800, 1.056	252.800, 1.146	252.800, 1.141	252.800, 1.092	252.800, 0.933	252.800, 0.998	252.800, 1.001
1266	253.000, 1.311	253.000, 1.251	253.000, 1.196	253.000, 1.064	253.000, 1.171	253.000, 1.225	253.000, 1.172	253.000, 1.120	253.000, 1.056	253.000, 1.145	253.000, 1.141	253.000, 1.091	253.000, 0.932	253.000, 0.998	253.000, 1.000
1267	253.200, 1.311	253.200, 1.251	253.200, 1.196	253.200, 1.064	253.200, 1.171	253.200, 1.225	253.200, 1.171	253.200, 1.120	253.200, 1.056	253.200, 1.145	253.200, 1.140	253.200, 1.091	253.200, 0.932	253.200, 0.998	253.200, 1.000
1268	253.400, 1.310	253.400, 1.250	253.400, 1.196	253.400, 1.064	253.400, 1.171	253.400, 1.225	253.400, 1.171	253.400, 1.119	253.400, 1.055	253.400, 1.144	253.400, 1.140	253.400, 1.091	253.400, 0.932	253.400, 0.997	253.400, 1.000
1269	253.600, 1.310	253.600, 1.250	253.600, 1.196	253.600, 1.064	253.600, 1.171	253.600, 1.225	253.600, 1.171	253.600, 1.119	253.600, 1.055	253.600, 1.144	253.600, 1.140	253.600, 1.090	253.600, 0.932	253.600, 0.997	253.600, 1.000
1270	253.800, 1.309	253.800, 1.250	253.800, 1.196	253.800, 1.064	253.800, 1.171	253.800, 1.225	253.800, 1.171	253.800, 1.119	253.800, 1.054	253.800, 1.144	253.800, 1.139	253.800, 1.090	253.800, 0.932	253.800, 0.997	253.800, 1.000
1271	254.000, 1.309	254.000, 1.249	254.000, 1.196	254.000, 1.064	254.000, 1.171	254.000, 1.224	254.000, 1.170	254.000, 1.119	254.000, 1.054	254.000, 1.144	254.000, 1.139	254.000, 1.090	254.000, 0.932	254.000, 0.996	254.000, 1.000
1272	254.200, 1.308	254.200, 1.249	254.200, 1.196	254.200, 1.063	254.200, 1.171	254.200, 1.224	254.200, 1.170	254.200, 1.118	254.200, 1.053	254.200, 1.144	254.200, 1.138	254.200, 1.090	254.200, 0.932	254.200, 0.996	254.200, 1.000
1273	254.400, 1.308	254.400, 1.249	254.400, 1.196	254.400, 1.063	254.400, 1.170	254.400, 1.224	254.400, 1.170	254.400, 1.118	254.400, 1.053	254.400, 1.144	254.400, 1.137	254.400, 1.090	254.400, 0.931	254.400, 0.996	254.400, 1.000
1274	254.600, 1.308	254.600, 1.249	254.600, 1.196	254.600, 1.063	254.600, 1.171	254.600, 1.224	254.600, 1.170	254.600, 1.118	254.600, 1.053	254.600, 1.143	254.600, 1.137	254.600, 1.090	254.600, 0.931	254.600, 0.996	254.600, 1.000
1275	254.800, 1.307	254.800, 1.249	254.800, 1.196	254.800, 1.063	254.800, 1.170	254.800, 1.224	254.800, 1.169	254.800, 1.118	254.800, 1.053	254.800, 1.143	254.800, 1.136	254.800, 1.090	254.800, 0.931	254.800, 0.997	254.800, 1.000
1276	255.000, 1.307	255.000, 1.249	255.000, 1.196	255.000, 1.063	255.000, 1.170	255.000, 1.224	255.000, 1.169	255.000, 1.117	255.000, 1.053	255.000, 1.143	255.000, 1.136	255.000, 1.089	255.000, 0.931	255.000, 0.997	255.000, 0.999
1277	255.200, 1.306	255.200, 1.249	255.200, 1.196	255.200, 1.063	255.200, 1.170	255.200, 1.223	255.200, 1.168	255.200, 1.117	255.200, 1.053	255.200, 1.143	255.200, 1.136	255.200, 1.089	255.200, 0.931	255.200, 0.997	255.200, 0.999
1278	255.400, 1.306	255.400, 1.249	255.400, 1.196	255.400, 1.063	255.400, 1.170	255.400, 1.223	255.400, 1.168	255.400, 1.117	255.400, 1.053	255.400, 1.143	255.400, 1.136	255.400, 1.089	255.400, 0.931	255.400, 0.997	255.400, 0.999
1279	255.600, 1.305	255.600, 1.248	255.600, 1.196	255.600, 1.063	255.600, 1.170	255.600, 1.223	255.600, 1.168	255.600, 1.117	255.600, 1.053	255.600, 1.143	255.600, 1.136	255.600, 1.089	255.600, 0.931	255.600, 0.997	255.600, 0.998
1280	255.800, 1.305	255.800, 1.248	255.800, 1.196	255.800, 1.063	255.800, 1.170	255.800, 1.222	255.800, 1.167	255.800, 1.116	255.800, 1.053	255.800, 1.142	255.800, 1.136	255.800, 1.088	255.800, 0.931	255.800, 0.997	255.800, 0.998
1281	256.000, 1.305	256.000, 1.247	256.000, 1.196	256.000, 1.062	256.000, 1.170	256.000, 1.222	256.000, 1.167	256.000, 1.116	256.000, 1.053	256.000, 1.142	256.000, 1.137	256.000, 1.088	256.000, 0.930	256.000, 0.997	256.000, 0.997
1282	256.200, 1.305	256.200, 1.247	256.200, 1.195	256.200, 1.062	256.200, 1.169	256.200, 1.222	256.200, 1.167	256.200, 1.116	256.200, 1.053	256.200, 1.142	256.200, 1.137	256.200, 1.088	256.200, 0.930	256.200, 0.997	256.200, 0.996
1283	256.400, 1.306	256.400, 1.247	256.400, 1.195	256.400, 1.062	256.400, 1.169	256.400, 1.222	256.400, 1.167	256.400, 1.116	256.400, 1.053	256.400, 1.141	256.400, 1.138	256.400, 1.088	256.400, 0.930	256.400, 0.996	256.400, 0.996
1284	256.600, 1.306	256.600, 1.246	256.600, 1.195	256.600, 1.061	256.600, 1.169	256.600, 1.221	256.600, 1.167	256.600, 1.115	256.600, 1.053	256.600, 1.141	256.600, 1.138	256.600, 1.088	256.600, 0.929	256.600, 0.996	256.600, 0.995
1285	256.800, 1.306	256.800, 1.246	256.800, 1.195	256.800, 1.061	256.800, 1.169	256.800, 1.221	256.800, 1.166	256.800, 1.115	256.800, 1.053	256.800, 1.141	256.800, 1.138	256.800, 1.088	256.800, 0.929	256.800, 0.996	256.800, 0.994
1286	257.000, 1.306	257.000, 1.246	257.000, 1.195	257.000, 1.061	257.000, 1.169	257.000, 1.221	257.000, 1.166	257.000, 1.115	257.000, 1.053	257.000, 1.141	257.000, 1.138	257.000, 1.088	257.000, 0.929	257.000, 0.996	257.000, 0.994
1287	257.200, 1.306	257.200, 1.246	257.200, 1.194	257.200, 1.061	257.200, 1.168	257.200, 1.221	257.200, 1.165	257.200, 1.115	257.200, 1.053	257.200, 1.141	257.200, 1.138	257.200, 1.088	257.200, 0.929	257.200, 0.995	257.200, 0.993
1288	257.400, 1.306	257.400, 1.246	257.400, 1.194	257.400, 1.061	257.400, 1.168	257.400, 1.221	257.400, 1.165	257.400, 1.115	257.400, 1.053	257.400, 1.141	257.400, 1.138	257.400, 1.087	257.400, 0.929	257.400, 0.995	257.400, 0.993
1289	257.600, 1.306	257.600, 1.245	257.600, 1.194	257.600, 1.061	257.600, 1.168	257.600, 1.221	257.600, 1.164	257.600, 1.115	257.600, 1.053	257.600, 1.141	257.600, 1.138	257.600, 1.087	257.600, 0.929	257.600, 0.995	257.600, 0.992
1290	257.800, 1.306	257.800, 1.245	257.800, 1.194	257.800, 1.060	257.800, 1.167	257.800, 1.220	257.800, 1.164	257.800, 1.114	257.800, 1.052	257.800, 1.141	257.800, 1.137	257.800, 1.087	257.800, 0.929	257.800, 0.995	257.800, 0.992
1291	258.000, 1.305	258.000, 1.245	258.000, 1.194	258.000, 1.060	258.000, 1.167	258.000, 1.220	258.000, 1.163	258.000, 1.114	258.000, 1.052	258.000, 1.141	258.000, 1.137	258.000, 1.087	258.000, 0.929	258.000, 0.995	258.000, 0.992
1292	258.200, 1.305	258.200, 1.244	258.200, 1.193	258.200, 1.060	258.200, 1.167	258.200, 1.220	258.200, 1.163	258.200, 1.114	258.200, 1.052	258.200, 1.141	258.200, 1.136	258.200, 1.087	258.200, 0.928	258.200, 0.995	258.200, 0.991
1293	258.400, 1.305	258.400, 1.244	258.400, 1.193	258.400, 1.060	258.400, 1.167	258.400, 1.220	258.400, 1.162	258.400, 1.114	258.400, 1.052	258.400, 1.140	258.400, 1.135	258.400, 1.086	258.400, 0.928	258.400, 0.995	258.400, 0.991
1294	258.600, 1.305	258.600, 1.243	258.600, 1.193	258.600, 1.060	258.600, 1.167	258.600, 1.220	258.600, 1.162	258.600, 1.114	258.600, 1.052	258.600, 1.140	258.600, 1.135	258.600, 1.086	258.600, 0.928	258.600, 0.995	258.600, 0.991
1295	258.800, 1.304	258.800, 1.243	258.800, 1.192	258.800, 1.060	258.800, 1.167	258.800, 1.220	258.800, 1.161	258.800, 1.114	258.800, 1.052	258.800, 1.140	258.800, 1.134	258.800, 1.086	258.800, 0.928	258.800, 0.995	258.800, 0.990
1296	259.000, 1.304	259.000, 1.242	259.000, 1.192	259.000, 1.060	259.000, 1.167	259.000, 1.219	259.000, 1.161	259.000, 1.114	259.000, 1.051	259.000, 1.140	259.000, 1.134	259.000, 1.086	259.000, 0.927	259.000, 0.995	259.000, 0.990
1297	259.200, 1.303	259.200, 1.241	259.200, 1.192	259.200, 1.060	259.200, 1.167	259.200, 1.219	259.200, 1.160	259.200, 1.114	259.200, 1.051	259.200, 1.140	259.200, 1.134	259.200, 1.086	259.200, 0.927	259.200, 0.995	259.200, 0.990
1298	259.400, 1.303	259.400, 1.241	259.400, 1.192	259.400, 1.059	259.400, 1.166	259.400, 1.219	259.400, 1.160	259.400, 1.114	259.400, 1.051	259.400, 1.139	259.400, 1.133	259.400, 1.085	259.400, 0.927	259.400, 0.995	259.400, 0.990
1299	259.600, 1.303	259.600, 1.240	259.600, 1.191	259.600, 1.059	259.600, 1.166	259.600, 1.218	259.600, 1.160	259.600, 1.113	259.600, 1.050	259.600, 1.139	259.600, 1.133	259.600, 1.085	259.600, 0.927	259.600, 0.995	259.600, 0.989
1300	259.800, 1.303	259.800, 1.240	259.800, 1.191	259.800, 1.059	259.800, 1.166	259.800, 1.218	259.800, 1.159	259.800, 1.113	259.800, 1.050	259.800, 1.138	259.800, 1.133	259.800, 1.085	259.800, 0.927	259.800, 0.994	259.800, 0.989
1301	260.000, 1.303	260.000, 1.239	260.000, 1.191	260.000, 1.059	260.000, 1.166	260.000, 1.218	260.000, 1.159	260.000, 1.113	260.000, 1.050	260.000, 1.138	260.000, 1.133	260.000, 1.085	260.000, 0.926	260.000, 0.994	260.000, 0.989
1302	260.200, 1.303	260.200, 1.239	260.200, 1.191	260.200, 1.059	260.200, 1.165	260.200, 1.217	260.200, 1.159	260.200, 1.113	260.200, 1.050	260.200, 1.138	260.200, 1.133	260.200, 1.085	260.200, 0.926	260.200, 0.994	260.200, 0.989
1303	260.400, 1.303	260.400, 1.239	260.400, 1.190	260.400, 1.059	260.400, 1.165	260.400, 1.217	260.400, 1.158	260.400, 1.113	260.400, 1.049	260.400, 1.138	260.400, 1.132	260.400, 1.085	260.400, 0.926	260.400, 0.994	260.400, 0.989
1304	260.600, 1.302	260.600, 1.239	260.600, 1.190	260.600, 1.059	260.600, 1.165	260.600, 1.217	260.600, 1.158	260.600, 1.113	260.600, 1.049	260.600, 1.137	260.600, 1.132	260.600, 1.085	260.600, 0.926	260.600, 0.994	260.600, 0.989
1305	260.800, 1.302	260.800, 1.239	260.800, 1.190	260.800, 1.059	260.800, 1.164	260.800, 1.217	260.800, 1.157	260.800, 1.112	260.800, 1.049	260.800, 1.137	260.800, 1.132	260.800, 1.084	260.800, 0.926	260.800, 0.994	260.800, 0.989
1306	261.000, 1.302	261.000, 1.238	261.000, 1.190	261.000, 1.059	261.000, 1.164	261.000, 1.216	261.000, 1.157	261.000, 1.112	261.000, 1.048	261.000, 1.137	261.000, 1.132	261.000, 1.084	261.000, 0.925	261.000, 0.994	261.000, 0.989
1307	261.200, 1.302	261.200, 1.238	261.200, 1.190	261.200, 1.059	261.200, 1.164	261.200, 1.216	261.200, 1.157	261.200, 1.112	261.200, 1.048	261.200, 1.137	261.200, 1.132	261.200, 1.084	261.200, 0.925	261.200, 0.993	261.200, 0.989
1308	261.400, 1.301	261.400, 1.237	261.400, 1.190	261.400, 1.059	261.400, 1.164	261.400, 1.216	261.400, 1.156	261.400, 1.112	261.400, 1.048	261.400, 1.137	261.400, 1.131	261.400, 1.084	261.400, 0.925	261.400, 0.993	261.400, 0.989
1309	261.600, 1.301	261.600, 1.237	261.600, 1.190	261.600, 1.059	261.600, 1.163	261.600, 1.216	261.600, 1.156	261.600, 1.112	261.600, 1.047	261.600, 1.137	261.600, 1.131	261.600, 1.083	261.600, 0.924	261.600, 0.993	261.600, 0.989
1310	261.800, 1.300	261.800, 1.236	261.800, 1.190	261.800, 1.059	261.800, 1.163	261.800, 1.216	261.800, 1.156	261.800, 1.111	261.800, 1.047	261.800, 1.137	261.800, 1.131	261.800, 1.083	261.800, 0.924	261.800, 0.992	261.800, 0.989
1311	262.000, 1.300	262.000, 1.236	262.000, 1.190	262.000, 1.059	262.000, 1.163	262.000, 1.215	262.000, 1.156	262.000, 1.111	262.000, 1.047	262.000, 1.137	262.000, 1.131	262.000, 1.082	262.000, 0.923	262.000, 0.992	262.000, 0.988
1312	262.200, 1.300	262.200, 1.235	262.200, 1.190	262.200, 1.059	262.200, 1.163	262.200, 1.215	262.200, 1.156	262.200, 1.111	262.200, 1.047	262.200, 1.137	262.200, 1.131	262.200, 1.082	262.200, 0.923	262.200, 0.992	262.200, 0.988
1313	262.400, 1.299	262.400, 1.235	262.400, 1.190	262.400, 1.059	262.400, 1.163	262.400, 1.215	262.400, 1.156	262.400, 1.111	262.400, 1.047	262.400, 1.137	262.400, 1.131	262.400, 1.082	262.400, 0.923	262.400, 0.991	262.400, 0.988
1314	262.600, 1.299	262.600, 1.234	262.600, 1.190	262.600, 1.058	262.600, 1.163	262.600, 1.215	262.600, 1.156	262.600, 1.111	262.600, 1.046	262.600, 1.137	262.600, 1.130	262.600, 1.082	262.600, 0.923	262.600, 0.991	262.600, 0.988
1315	262.800, 1.299	262.800, 1.234	262.800, 1.190	262.800, 1.058	262.800, 1.163	262.800, 1.215	262.800, 1.155	262.800, 1.111	262.800, 1.046	262.800, 1.137	262.800, 1.130	262.800, 1.082	262.800, 0.923	262.800, 0.991	262.800, 0.987
1316	263.000, 1.299	263.000, 1.234	263.000, 1.189	263.000, 1.057	263.000, 1.163	263.000, 1.215	263.000, 1.155	263.000, 1.111	263.000, 1.046	263.000, 1.137	263.000, 1.130	263.000, 1.082	263.000, 0.923	263.000, 0.991	263.000, 0.987
1317	263.200, 1.299	263.200, 1.234	263.200, 1.189	263.200, 1.057	263.200, 1.163	263.200, 1.215	263.200, 1.155	263.200, 1.111	263.200, 1.046	263.200, 1.137	263.200, 1.130	263.200, 1.082	263.200, 0.923	263.200, 0.991	263.200, 0.987
1318	263.400, 1.299	263.400, 1.234	263.400, 1.188	263.400, 1.057	263.400, 1.163	263.400, 1.215	263.400, 1.154	263.400, 1.110	263.400, 1.045	263.400, 1.136	263.400, 1.130	263.400, 1.082	263.400, 0.924	263.400, 0.991	263.400, 0.986
1319	263.600, 1.299	263.600, 1.234	263.600, 1.188	263.600, 1.056	263.600, 1.163	263.600, 1.215	263.600, 1.154	263.600, 1.110	263.600, 1.045	263.600, 1.136	263.600, 1.130	263.600, 1.082	263.600, 0.924	263.600, 0.991	263.600, 0.986
1320	263.800, 1.299	263.800, 1.234	263.800, 1.187	263.800, 1.056	263.800, 1.163	263.800, 1.214	263.800, 1.153	263.800, 1.110	263.800, 1.045	263.800, 1.136	263.800, 1.130	263.800, 1.082	263.800, 0.925	263.800, 0.991	263.800, 0.985
1321	264.000, 1.299	264.000, 1.234	264.000, 1.187	264.000, 1.056	264.000, 1.162	264.000, 1.214	264.000, 1.153	264.000, 1.109	264.000, 1.045	264.000, 1.136	264.000, 1.130	264.000, 1.082	264.000, 0.925	264.000, 0.991	264.000, 0.985
1322	264.200, 1.299	264.200, 1.234	264.200, 1.186	264.200, 1.055	264.200, 1.162	264.200, 1.214	264.200, 1.153	264.200, 1.109	264.200, 1.045	264.200, 1.135	264.200, 1.130	264.200, 1.082	264.200, 0.925	264.200, 0.991	264.200, 0.984
1323	264.400, 1.298	264.400, 1.234	264.400, 1.186	264.400, 1.055	264.400, 1.162	264.400, 1.214	264.400, 1.152	264.400, 1.108	264.400, 1.045	264.400, 1.135	264.400, 1.130	264.400, 1.082	264.400, 0.926	264.400, 0.990	264.400, 0.984
1324	264.600, 1.298	264.600, 1.234	264.600, 1.185	264.600, 1.055	264.600, 1.162	264.600, 1.214	264.600, 1.152	264.600, 1.108	264.600, 1.045	264.600, 1.135	264.600, 1.130	264.600, 1.082	264.600, 0.926	264.600, 0.990	264.600, 0.984
1325	264.800, 1.298	264.800, 1.233	264.800, 1.185	264.800, 1.055	264.800, 1.162	264.800, 1.214	264.800, 1.151	264.800, 1.108	264.800, 1.044	264.800, 1.135	264.800, 1.130	264.800, 1.082	264.800, 0.926	264.800, 0.990	264.800, 0.983
1326	265.000, 1.297	265.000, 1.233	265.000, 1.185	265.000, 1.055	265.000, 1.162	265.000, 1.214	265.000, 1.151	265.000, 1.108	265.000, 1.044	265.000, 1.134	265.000, 1.130	265.000, 1.081	265.000, 0.925	265.000, 0.990	265.000, 0.983
1327	265.200, 1.297	265.200, 1.232	265.200, 1.185	265.200, 1.055	265.200, 1.162	265.200, 1.214	265.200, 1.151	265.200, 1.107	265.200, 1.044	265.200, 1.134	265.200, 1.129	265.200, 1.081	265.200, 0.925	265.200, 0.990	265.200, 0.983
1328	265.400, 1.297	265.400, 1.231	265.400, 1.186	265.400, 1.055	265.400, 1.162	265.400, 1.214	265.400, 1.151	265.400, 1.107	265.400, 1.044	265.400, 1.134	265.400, 1.129	265.400, 1.081	265.400, 0.925	265.400, 0.989	265.400, 0.982
1329	265.600, 1.297	265.600, 1.231	265.600, 1.186	265.600, 1.055	265.600, 1.161	265.600, 1.214	265.600, 1.151	265.600, 1.107	265.600, 1.044	265.600, 1.134	265.600, 1.129	265.600, 1.080	265.600, 0.924	265.600, 0.989	265.600, 0.982
1330	265.800, 1.297	265.800, 1.231	265.800, 1.186	265.800, 1.055	265.800, 1.161	265.800, 1.213	265.800, 1.151	265.800, 1.107	265.800, 1.043	265.800, 1.134	265.800, 1.128	265.800, 1.080	265.800, 0.923	265.800, 0.989	265.800, 0.981
1331	266.000, 1.297	266.000, 1.230	266.000, 1.187	266.000, 1.054	266.000, 1.161	266.000, 1.213	266.000, 1.151	266.000, 1.107	266.000, 1.043	266.000, 1.134	266.000, 1.128	266.000, 1.080	266.000, 0.923	266.000, 0.988	266.000, 0.981
1332	266.200, 1.296	266.200, 1.230	266.200, 1.187	266.200, 1.054	266.200, 1.161	266.200, 1.213	266.200, 1.151	266.200, 1.107	266.200, 1.043	266.200, 1.133	266.200, 1.127	266.200, 1.079	266.200, 0.922	266.200, 0.988	266.200, 0.981
1333	266.400, 1.296	266.400, 1.230	266.400, 1.187	266.400, 1.054	266.400, 1.161	266.400, 1.212	266.400, 1.150	266.400, 1.106	266.400, 1.043	266.400, 1.133	266.400, 1.127	266.400, 1.079	266.400, 0.922	266.400, 0.988	266.400, 0.980
1334	266.600, 1.296	266.600, 1.230	266.600, 1.188	266.600, 1.053	266.600, 1.161	266.600, 1.212	266.600, 1.150	266.600, 1.106	266.600, 1.043	266.600, 1.133	266.600, 1.127	266.600, 1.079	266.600, 0.921	266.600, 0.987	266.600, 0.980
1335	266.800, 1.296	266.800, 1.229	266.800, 1.187	266.800, 1.053	266.800, 1.160	266.800, 1.212	266.800, 1.149	266.800, 1.106	266.800, 1.043	266.800, 1.133	266.800, 1.126	266.800, 1.078	266.800, 0.921	266.800, 0.987	266.800, 0.980
1336	267.000, 1.296	267.000, 1.229	267.000, 1.187	267.000, 1.053	267.000, 1.160	267.000, 1.211	267.000, 1.149	267.000, 1.106	267.000, 1.043	267.000, 1.132	267.000, 1.126	267.000, 1.078	267.000, 0.921	267.000, 0.986	267.000, 0.980
1337	267.200, 1.296	267.200, 1.229	267.200, 1.187	267.200, 1.053	267.200, 1.160	267.200, 1.211	267.200, 1.148	267.200, 1.106	267.200, 1.043	267.200, 1.132	267.200, 1.126	267.200, 1.078	267.200, 0.921	267.200, 0.986	267.200, 0.979
1338	267.400, 1.295	267.400, 1.229	267.400, 1.186	267.400, 1.053	267.400, 1.160	267.400, 1.211	267.400, 1.147	267.400, 1.106	267.400, 1.043	267.400, 1.132	267.400, 1.126	267.400, 1.078	267.400, 0.921	267.400, 0.986	267.400, 0.979
1339	267.600, 1.295	267.600, 1.229	267.600, 1.186	267.600, 1.052	267.600, 1.159	267.600, 1.210	267.600, 1.147	267.600, 1.105	267.600, 1.043	267.600, 1.132	267.600, 1.126	267.600, 1.077	267.600, 0.921	267.600, 0.986	267.600, 0.979
1340	267.800, 1.295	267.800, 1.229	267.800, 1.186	267.800, 1.052	267.800, 1.159	267.800, 1.210	267.800, 1.146	267.800, 1.105	267.800, 1.043	267.800, 1.132	267.800, 1.125	267.800, 1.077	267.800, 0.921	267.800, 0.986	267.800, 0.979
1341	268.000, 1.294	268.000, 1.229	268.000, 1.185	268.000, 1.052	268.000, 1.159	268.000, 1.210	268.000, 1.146	268.000, 1.105	268.000, 1.043	268.000, 1.132	268.000, 1.125	268.000, 1.077	268.000, 0.921	268.000, 0.986	268.000, 0.979
1342	268.200, 1.294	268.200, 1.229	268.200, 1.185	268.200, 1.052	268.200, 1.159	268.200, 1.209	268.200, 1.145	268.200, 1.104	268.200, 1.043	268.200, 1.132	268.200, 1.125	268.200, 1.077	268.200, 0.921	268.200, 0.985	268.200, 0.979
1343	268.400, 1.294	268.400, 1.229	268.400, 1.185	268.400, 1.052	268.400, 1.159	268.400, 1.209	268.400, 1.145	268.400, 1.104	268.400, 1.043	268.400, 1.131	268.400, 1.125	268.400, 1.077	268.400, 0.921	268.400, 0.985	268.400, 0.979
1344	268.600, 1.293	268.600, 1.229	268.600, 1.185	268.600, 1.052	268.600, 1.158	268.600, 1.209	268.600, 1.144	268.600, 1.104	268.600, 1.043	268.600, 1.131	268.600, 1.125	268.600, 1.077	268.600, 0.921	268.600, 0.985	268.600, 0.978
1345	268.800, 1.293	268.800, 1.229	268.800, 1.185	268.800, 1.052	268.800, 1.158	268.800, 1.209	268.800, 1.144	268.800, 1.104	268.800, 1.043	268.800, 1.130	268.800, 1.125	268.800, 1.077	268.800, 0.921	268.800, 0.985	268.800, 0.978
1346	269.000, 1.293	269.000, 1.228	269.000, 1.185	269.000, 1.052	269.000, 1.158	269.000, 1.209	269.000, 1.144	269.000, 1.104	269.000, 1.042	269.000, 1.130	269.000, 1.125	269.000, 1.077	269.000, 0.921	269.000, 0.985	269.000, 0.978
1347	269.200, 1.294	269.200, 1.228	269.200, 1.185	269.200, 1.052	269.200, 1.158	269.200, 1.209	269.200, 1.144	269.200, 1.103	269.200, 1.042	269.200, 1.130	269.200, 1.125	269.200, 1.077	269.200, 0.921	269.200, 0.985	269.200, 0.978
1348	269.400, 1.294	269.400, 1.228	269.400, 1.185	269.400, 1.051	269.400, 1.158	269.400, 1.209	269.400, 1.144	269.400, 1.103	269.400, 1.042	269.400, 1.129	269.400, 1.125	269.400, 1.077	269.400, 0.921	269.400, 0.985	269.400, 0.978
1349	269.600, 1.294	269.600, 1.228	269.600, 1.185	269.600, 1.051	269.600, 1.158	269.600, 1.209	269.600, 1.144	269.600, 1.103	269.600, 1.042	269.600, 1.129	269.600, 1.124	269.600, 1.077	269.600, 0.921	269.600, 0.985	269.600, 0.978
1350	269.800, 1.294	269.800, 1.228	269.800, 1.186	269.800, 1.051	269.800, 1.158	269.800, 1.209	269.800, 1.144	269.800, 1.103	269.800, 1.042	269.800, 1.129	269.800, 1.124	269.800, 1.077	269.800, 0.921	269.800, 0.985	269.800, 0.978
1351	,	,	,	,	,	,	,	,	,	,	,	,	,	,	,
1352	,	,	,	,	,	,	,	,	,	,	,	,	,	,	,
1353	,	,	,	,	,	,	,	,	,	,	,	,	,	,	,
1354	,	,	,	,	,	,	,	,	,	,	,	,	,	,	,
1355	,	,	,	,	,	,	,	,	,	,	,	,	,	,	,
1356	,	,	,	,	,	,	,	,	,	,	,	,	,	,	,
1357	,	,	,	,	,	,	,	,	,	,	,	,	,	,	,
1358	,	,	,	,	,	,	,	,	,	,	,	,	,	,	,
1359	,	,	,	,	,	,	,	,	,	,	,	,	,	,	,
1360	,	,	,	,	,	,	,	,	,	,	,	,	,	,	,
1361	,	,	,	,	,	,	,	,	,	,	,	,	,	,	,
1362	,	,	,	,	,	,	,	,	,	,	,	,	,	,	,
1363	,	,	,	,	,	,	,	,	,	,	,	,	,	,	,
1364	,	,	,	,	,	,	,	,	,	,	,	,	,	,	,
1365	,	,	,	,	,	,	,	,	,	,	,	,	,	,	,
1366	,	,	,	,	,	,	,	,	,	,	,	,	,	,	,
1367	,	,	,	,	,	,	,	,	,	,	,	,	,	,	,
1368	,	,	,	,	,	,	,	,	,	,	,	,	,	,	,
1369	,	,	,	,	,	,	,	,	,	,	,	,	,	,	,
1370	,	,	,	,	,	,	,	,	,	,	,	,	,	,	,
1371	,	,	,	,	,	,	,	,	,	,	,	,	,	,	,
1372	,	,	,	,	,	,	,	,	,	,	,	,	,	,	,
1373	,	,	,	,	,	,	,	,	,	,	,	,	,	,	,
1374	,	,	,	,	,	,	,	,	,	,	,	,	,	,	,
1375	,	,	,	,	,	,	,	,	,	,	,	,	,	,	,
1376	,	,	,	,	,	,	,	,	,	,	,	,	,	,	,
1377	,	,	,	,	,	,	,	,	,	,	,	,	,	,	,
1378	,	,	,	,	,	,	,	,	,	,	,	,	,	,	,
1379	,	,	,	,	,	,	,	,	,	,	,	,	,	,	,
1380	,	,	,	,	,	,	,	,	,	,	,	,	,	,	,
1381	,	,	,	,	,	,	,	,	,	,	,	,	,	,	,
1382	,	,	,	,	,	,	,	,	,	,	,	,	,	,	,
1383	,	,	,	,	,	,	,	,	,	,	,	,	,	,	,
1384	,	,	,	,	,	,	,	,	,	,	,	,	,	,	,
1385	,	,	,	,	,	,	,	,	,	,	,	,	,	,	,
1386	,	,	,	,	,	,	,	,	,	,	,	,	,	,	,
1387	,	,	,	,	,	,	,	,	,	,	,	,	,	,	,
1388	,	,	,	,	,	,	,	,	,	,	,	,	,	,	,
1389	,	,	,	,	,	,	,	,	,	,	,	,	,	,	,
1390	,	,	,	,	,	,	,	,	,	,	,	,	,	,	,
1391	,	,	,	,	,	,	,	,	,	,	,	,	,	,	,
1392	,	,	,	,	,	,	,	,	,	,	,	,	,	,	,
1393	,	,	,	,	,	,	,	,	,	,	,	,	,	,	,
1394	,	,	,	,	,	,	,	,	,	,	,	,	,	,	,
1395	,	,	,	,	,	,	,	,	,	,	,	,	,	,	,
1396	,	,	,	,	,	,	,	,	,	,	,	,	,	,	,
1397	,	,	,	,	,	,	,	,	,	,	,	,	,	,	,
1398	,	,	,	,	,	,	,	,	,	,	,	,	,	,	,
1399	,	,	,	,	,	,	,	,	,	,	,	,	,	,	,
1400	,	,	,	,	,	,	,	,	,	,	,	,	,	,	,
1401	,	,	,	,	,	,	,	,	,	,	,	,	,	,	,
1402	,	,	,	,	,	,	,	,	,	,	,	,	,	,	,
1403	,	,	,	,	,	,	,	,	,	,	,	,	,	,	,
1404	,	,	,	,	,	,	,	,	,	,	,	,	,	,	,
1405	,	,	,	,	,	,	,	,	,	,	,	,	,	,	,
1406	,	,	,	,	,	,	,	,	,	,	,	,	,	,	,
1407	,	,	,	,	,	,	,	,	,	,	,	,	,	,	,
1408	,	,	,	,	,	,	,	,	,	,	,	,	,	,	,
1409	,	,	,	,	,	,	,	,	,	,	,	,	,	,	,
1410	,	,	,	,	,	,	,	,	,	,	,	,	,	,	,
1411	,	,	,	,	,	,	,	,	,	,	,	,	,	,	,
1412	,	,	,	,	,	,	,	,	,	,	,	,	,	,	,
1413	,	,	,	,	,	,	,	,	,	,	,	,	,	,	,
1414	,	,	,	,	,	,	,	,	,	,	,	,	,	,	,
1415	,	,	,	,	,	,	,	,	,	,	,	,	,	,	,
1416	,	,	,	,	,	,	,	,	,	,	,	,	,	,	,
1417	,	,	,	,	,	,	,	,	,	,	,	,	,	,	,
1418	,	,	,	,	,	,	,	,	,	,	,	,	,	,	,
1419	,	,	,	,	,	,	,	,	,	,	,	,	,	,	,
1420	,	,	,	,	,	,	,	,	,	,	,	,	,	,	,
1421	,	,	,	,	,	,	,	,	,	,	,	,	,	,	,
1422	,	,	,	,	,	,	,	,	,	,	,	,	,	,	,
1423	,	,	,	,	,	,	,	,	,	,	,	,	,	,	,
1424	,	,	,	,	,	,	,	,	,	,	,	,	,	,	,
1425	,	,	,	,	,	,	,	,	,	,	,	,	,	,	,
1426	,	,	,	,	,	,	,	,	,	,	,	,	,	,	,
1427	,	,	,	,	,	,	,	,	,	,	,	,	,	,	,
1428	,	,	,	,	,	,	,	,	,	,	,	,	,	,	,
1429	,	,	,	,	,	,	,	,	,	,	,	,	,	,	,
1430	,	,	,	,	,	,	,	,	,	,	,	,	,	,	,
1431	,	,	,	,	,	,	,	,	,	,	,	,	,	,	,
1432	,	,	,	,	,	,	,	,	,	,	,	,	,	,	,
1433	,	,	,	,	,	,	,	,	,	,	,	,	,	,	,
1434	,	,	,	,	,	,	,	,	,	,	,	,	,	,	,
1435	,	,	,	,	,	,	,	,	,	,	,	,	,	,	,
1436	,	,	,	,	,	,	,	,	,	,	,	,	,	,	,
1437	,	,	,	,	,	,	,	,	,	,	,	,	,	,	,
1438	,	,	,	,	,	,	,	,	,	,	,	,	,	,	,
1439	,	,	,	,	,	,	,	,	,	,	,	,	,	,	,
1440	,	,	,	,	,	,	,	,	,	,	,	,	,	,	,
1441	,	,	,	,	,	,	,	,	,	,	,	,	,	,	,
1442	,	,	,	,	,	,	,	,	,	,	,	,	,	,	,
1443	,	,	,	,	,	,	,	,	,	,	,	,	,	,	,
1444	,	,	,	,	,	,	,	,	,	,	,	,	,	,	,
1445	,	,	,	,	,	,	,	,	,	,	,	,	,	,	,
1446	,	,	,	,	,	,	,	,	,	,	,	,	,	,	,
1447	,	,	,	,	,	,	,	,	,	,	,	,	,	,	,
1448	,	,	,	,	,	,	,	,	,	,	,	,	,	,	,
1449	,	,	,	,	,	,	,	,	,	,	,	,	,	,	,
1450	,	,	,	,	,	,	,	,	,	,	,	,	,	,	,
1451	,	,	,	,	,	,	,	,	,	,	,	,	,	,	,
1452	,	,	,	,	,	,	,	,	,	,	,	,	,	,	,
1453	,	,	,	,	,	,	,	,	,	,	,	,	,	,	,
1454	,	,	,	,	,	,	,	,	,	,	,	,	,	,	,
1455	,	,	,	,	,	,	,	,	,	,	,	,	,	,	,
1456	,	,	,	,	,	,	,	,	,	,	,	,	,	,	,
1457	,	,	,	,	,	,	,	,	,	,	,	,	,	,	,
1458	,	,	,	,	,	,	,	,	,	,	,	,	,	,	,
1459	,	,	,	,	,	,	,	,	,	,	,	,	,	,	,
1460	,	,	,	,	,	,	,	,	,	,	,	,	,	,	,
1461	,	,	,	,	,	,	,	,	,	,	,	,	,	,	,
1462	,	,	,	,	,	,	,	,	,	,	,	,	,	,	,
1463	,	,	,	,	,	,	,	,	,	,	,	,	,	,	,
1464	,	,	,	,	,	,	,	,	,	,	,	,	,	,	,
1465	,	,	,	,	,	,	,	,	,	,	,	,	,	,	,
1466	,	,	,	,	,	,	,	,	,	,	,	,	,	,	,
1467	,	,	,	,	,	,	,	,	,	,	,	,	,	,	,
1468	,	,	,	,	,	,	,	,	,	,	,	,	,	,	,
1469	,	,	,	,	,	,	,	,	,	,	,	,	,	,	,
1470	,	,	,	,	,	,	,	,	,	,	,	,	,	,	,
1471	,	,	,	,	,	,	,	,	,	,	,	,	,	,	,
1472	,	,	,	,	,	,	,	,	,	,	,	,	,	,	,
1473	,	,	,	,	,	,	,	,	,	,	,	,	,	,	,
1474	,	,	,	,	,	,	,	,	,	,	,	,	,	,	,
1475	,	,	,	,	,	,	,	,	,	,	,	,	,	,	,
1476	,	,	,	,	,	,	,	,	,	,	,	,	,	,	,
1477	,	,	,	,	,	,	,	,	,	,	,	,	,	,	,
1478	,	,	,	,	,	,	,	,	,	,	,	,	,	,	,
1479	,	,	,	,	,	,	,	,	,	,	,	,	,	,	,
1480	,	,	,	,	,	,	,	,	,	,	,	,	,	,	,
1481	,	,	,	,	,	,	,	,	,	,	,	,	,	,	,
1482	,	,	,	,	,	,	,	,	,	,	,	,	,	,	,
1483	,	,	,	,	,	,	,	,	,	,	,	,	,	,	,
1484	,	,	,	,	,	,	,	,	,	,	,	,	,	,	,
1485	,	,	,	,	,	,	,	,	,	,	,	,	,	,	,
1486	,	,	,	,	,	,	,	,	,	,	,	,	,	,	,
1487	,	,	,	,	,	,	,	,	,	,	,	,	,	,	,
1488	,	,	,	,	,	,	,	,	,	,	,	,	,	,	,
1489	,	,	,	,	,	,	,	,	,	,	,	,	,	,	,
1490	,	,	,	,	,	,	,	,	,	,	,	,	,	,	,
1491	,	,	,	,	,	,	,	,	,	,	,	,	,	,	,
1492	,	,	,	,	,	,	,	,	,	,	,	,	,	,	,
1493	,	,	,	,	,	,	,	,	,	,	,	,	,	,	,
1494	,	,	,	,	,	,	,	,	,	,	,	,	,	,	,
1495	,	,	,	,	,	,	,	,	,	,	,	,	,	,	,
1496	,	,	,	,	,	,	,	,	,	,	,	,	,	,	,
1497	,	,	,	,	,	,	,	,	,	,	,	,	,	,	,
1498	,	,	,	,	,	,	,	,	,	,	,	,	,	,	,
1499	,	,	,	,	,	,	,	,	,	,	,	,	,	,	,
1500	,	,	,	,	,	,	,	,	,	,	,	,	,	,	,
1501	,	,	,	,	,	,	,	,	,	,	,	,	,	,	,
1502	,	,	,	,	,	,	,	,	,	,	,	,	,	,	,
1503	,	,	,	,	,	,	,	,	,	,	,	,	,	,	,
1504	,	,	,	,	,	,	,	,	,	,	,	,	,	,	,
1505	,	,	,	,	,	,	,	,	,	,	,	,	,	,	,
1506	,	,	,	,	,	,	,	,	,	,	,	,	,	,	,
1507	,	,	,	,	,	,	,	,	,	,	,	,	,	,	,
1508	,	,	,	,	,	,	,	,	,	,	,	,	,	,	,
1509	,	,	,	,	,	,	,	,	,	,	,	,	,	,	,
1510	,	,	,	,	,	,	,	,	,	,	,	,	,	,	,
1511	,	,	,	,	,	,	,	,	,	,	,	,	,	,	,
1512	,	,	,	,	,	,	,	,	,	,	,	,	,	,	,
1513	,	,	,	,	,	,	,	,	,	,	,	,	,	,	,
1514	,	,	,	,	,	,	,	,	,	,	,	,	,	,	,
1515	,	,	,	,	,	,	,	,	,	,	,	,	,	,	,
1516	,	,	,	,	,	,	,	,	,	,	,	,	,	,	,
1517	,	,	,	,	,	,	,	,	,	,	,	,	,	,	,
1518	,	,	,	,	,	,	,	,	,	,	,	,	,	,	,
1519	,	,	,	,	,	,	,	,	,	,	,	,	,	,	,
1520	,	,	,	,	,	,	,	,	,	,	,	,	,	,	,
1521	,	,	,	,	,	,	,	,	,	,	,	,	,	,	,
1522	,	,	,	,	,	,	,	,	,	,	,	,	,	,	,
1523	,	,	,	,	,	,	,	,	,	,	,	,	,	,	,
1524	,	,	,	,	,	,	,	,	,	,	,	,	,	,	,
1525	,	,	,	,	,	,	,	,	,	,	,	,	,	,	,
1526	,	,	,	,	,	,	,	,	,	,	,	,	,	,	,
1527	,	,	,	,	,	,	,	,	,	,	,	,	,	,	,
1528	,	,	,	,	,	,	,	,	,	,	,	,	,	,	,
1529	,	,	,	,	,	,	,	,	,	,	,	,	,	,	,
1530	,	,	,	,	,	,	,	,	,	,	,	,	,	,	,
1531	,	,	,	,	,	,	,	,	,	,	,	,	,	,	,
1532	,	,	,	,	,	,	,	,	,	,	,	,	,	,	,
1533	,	,	,	,	,	,	,	,	,	,	,	,	,	,	,
1534	,	,	,	,	,	,	,	,	,	,	,	,	,	,	,
1535	,	,	,	,	,	,	,	,	,	,	,	,	,	,	,
1536	,	,	,	,	,	,	,	,	,	,	,	,	,	,	,
1537	,	,	,	,	,	,	,	,	,	,	,	,	,	,	,
1538	,	,	,	,	,	,	,	,	,	,	,	,	,	,	,
1539	,	,	,	,	,	,	,	,	,	,	,	,	,	,	,
1540	,	,	,	,	,	,	,	,	,	,	,	,	,	,	,
1541	,	,	,	,	,	,	,	,	,	,	,	,	,	,	,
1542	,	,	,	,	,	,	,	,	,	,	,	,	,	,	,
1543	,	,	,	,	,	,	,	,	,	,	,	,	,	,	,
1544	,	,	,	,	,	,	,	,	,	,	,	,	,	,	,
1545	,	,	,	,	,	,	,	,	,	,	,	,	,	,	,
1546	,	,	,	,	,	,	,	,	,	,	,	,	,	,	,
1547	,	,	,	,	,	,	,	,	,	,	,	,	,	,	,
1548	,	,	,	,	,	,	,	,	,	,	,	,	,	,	,
1549	,	,	,	,	,	,	,	,	,	,	,	,	,	,	,
1550	,	,	,	,	,	,	,	,	,	,	,	,	,	,	,
1551	,	,	,	,	,	,	,	,	,	,	,	,	,	,	,
1552	,	,	,	,	,	,	,	,	,	,	,	,	,	,	,
1553	,	,	,	,	,	,	,	,	,	,	,	,	,	,	,
1554	,	,	,	,	,	,	,	,	,	,	,	,	,	,	,
1555	,	,	,	,	,	,	,	,	,	,	,	,	,	,	,
1556	,	,	,	,	,	,	,	,	,	,	,	,	,	,	,
1557	,	,	,	,	,	,	,	,	,	,	,	,	,	,	,
1558	,	,	,	,	,	,	,	,	,	,	,	,	,	,	,
1559	,	,	,	,	,	,	,	,	,	,	,	,	,	,	,
1560	,	,	,	,	,	,	,	,	,	,	,	,	,	,	,
1561	,	,	,	,	,	,	,	,	,	,	,	,	,	,	,
1562	,	,	,	,	,	,	,	,	,	,	,	,	,	,	,
1563	,	,	,	,	,	,	,	,	,	,	,	,	,	,	,
1564	,	,	,	,	,	,	,	,	,	,	,	,	,	,	,
1565	,	,	,	,	,	,	,	,	,	,	,	,	,	,	,
1566	,	,	,	,	,	,	,	,	,	,	,	,	,	,	,
1567	,	,	,	,	,	,	,	,	,	,	,	,	,	,	,
1568	,	,	,	,	,	,	,	,	,	,	,	,	,	,	,
1569	,	,	,	,	,	,	,	,	,	,	,	,	,	,	,
1570	,	,	,	,	,	,	,	,	,	,	,	,	,	,	,
1571	,	,	,	,	,	,	,	,	,	,	,	,	,	,	,
1572	,	,	,	,	,	,	,	,	,	,	,	,	,	,	,
1573	,	,	,	,	,	,	,	,	,	,	,	,	,	,	,
1574	,	,	,	,	,	,	,	,	,	,	,	,	,	,	,
1575	,	,	,	,	,	,	,	,	,	,	,	,	,	,	,
1576	,	,	,	,	,	,	,	,	,	,	,	,	,	,	,
1577	,	,	,	,	,	,	,	,	,	,	,	,	,	,	,
1578	,	,	,	,	,	,	,	,	,	,	,	,	,	,	,
1579	,	,	,	,	,	,	,	,	,	,	,	,	,	,	,
1580	,	,	,	,	,	,	,	,	,	,	,	,	,	,	,
1581	,	,	,	,	,	,	,	,	,	,	,	,	,	,	,
1582	,	,	,	,	,	,	,	,	,	,	,	,	,	,	,
1583	,	,	,	,	,	,	,	,	,	,	,	,	,	,	,
1584	,	,	,	,	,	,	,	,	,	,	,	,	,	,	,
1585	,	,	,	,	,	,	,	,	,	,	,	,	,	,	,
1586	,	,	,	,	,	,	,	,	,	,	,	,	,	,	,
1587	,	,	,	,	,	,	,	,	,	,	,	,	,	,	,
1588	,	,	,	,	,	,	,	,	,	,	,	,	,	,	,
1589	,	,	,	,	,	,	,	,	,	,	,	,	,	,	,
1590	,	,	,	,	,	,	,	,	,	,	,	,	,	,	,
1591	,	,	,	,	,	,	,	,	,	,	,	,	,	,	,
1592	,	,	,	,	,	,	,	,	,	,	,	,	,	,	,
1593	,	,	,	,	,	,	,	,	,	,	,	,	,	,	,
1594	,	,	,	,	,	,	,	,	,	,	,	,	,	,	,
1595	,	,	,	,	,	,	,	,	,	,	,	,	,	,	,
1596	,	,	,	,	,	,	,	,	,	,	,	,	,	,	,
1597	,	,	,	,	,	,	,	,	,	,	,	,	,	,	,
1598	,	,	,	,	,	,	,	,	,	,	,	,	,	,	,
1599	,	,	,	,	,	,	,	,	,	,	,	,	,	,	,
1600	,	,	,	,	,	,	,	,	,	,	,	,	,	,	,
1601	,	,	,	,	,	,	,	,	,	,	,	,	,	,	,
1602	,	,	,	,	,	,	,	,	,	,	,	,	,	,	,
1603	,	,	,	,	,	,	,	,	,	,	,	,	,	,	,
1604	,	,	,	,	,	,	,	,	,	,	,	,	,	,	,
1605	,	,	,	,	,	,	,	,	,	,	,	,	,	,	,
1606	,	,	,	,	,	,	,	,	,	,	,	,	,	,	,
1607	,	,	,	,	,	,	,	,	,	,	,	,	,	,	,
1608	,	,	,	,	,	,	,	,	,	,	,	,	,	,	,
1609	,	,	,	,	,	,	,	,	,	,	,	,	,	,	,
1610	,	,	,	,	,	,	,	,	,	,	,	,	,	,	,
1611	,	,	,	,	,	,	,	,	,	,	,	,	,	,	,
1612	,	,	,	,	,	,	,	,	,	,	,	,	,	,	,
1613	,	,	,	,	,	,	,	,	,	,	,	,	,	,	,
1614	,	,	,	,	,	,	,	,	,	,	,	,	,	,	,
1615	,	,	,	,	,	,	,	,	,	,	,	,	,	,	,
1616	,	,	,	,	,	,	,	,	,	,	,	,	,	,	,
1617	,	,	,	,	,	,	,	,	,	,	,	,	,	,	,
1618	,	,	,	,	,	,	,	,	,	,	,	,	,	,	,
1619	,	,	,	,	,	,	,	,	,	,	,	,	,	,	,
1620	,	,	,	,	,	,	,	,	,	,	,	,	,	,	,
1621	,	,	,	,	,	,	,	,	,	,	,	,	,	,	,
1622	,	,	,	,	,	,	,	,	,	,	,	,	,	,	,
1623	,	,	,	,	,	,	,	,	,	,	,	,	,	,	,
1624	,	,	,	,	,	,	,	,	,	,	,	,	,	,	,
1625	,	,	,	,	,	,	,	,	,	,	,	,	,	,	,
1626	,	,	,	,	,	,	,	,	,	,	,	,	,	,	,
1627	,	,	,	,	,	,	,	,	,	,	,	,	,	,	,
1628	,	,	,	,	,	,	,	,	,	,	,	,	,	,	,
1629	,	,	,	,	,	,	,	,	,	,	,	,	,	,	,
1630	,	,	,	,	,	,	,	,	,	,	,	,	,	,	,
1631	,	,	,	,	,	,	,	,	,	,	,	,	,	,	,
1632	,	,	,	,	,	,	,	,	,	,	,	,	,	,	,
1633	,	,	,	,	,	,	,	,	,	,	,	,	,	,	,
1634	,	,	,	,	,	,	,	,	,	,	,	,	,	,	,
1635	,	,	,	,	,	,	,	,	,	,	,	,	,	,	,
1636	,	,	,	,	,	,	,	,	,	,	,	,	,	,	,
1637	,	,	,	,	,	,	,	,	,	,	,	,	,	,	,
1638	,	,	,	,	,	,	,	,	,	,	,	,	,	,	,
1639	,	,	,	,	,	,	,	,	,	,	,	,	,	,	,
1640	,	,	,	,	,	,	,	,	,	,	,	,	,	,	,
1641	,	,	,	,	,	,	,	,	,	,	,	,	,	,	,
1642	,	,	,	,	,	,	,	,	,	,	,	,	,	,	,
1643	,	,	,	,	,	,	,	,	,	,	,	,	,	,	,
1644	,	,	,	,	,	,	,	,	,	,	,	,	,	,	,
1645	,	,	,	,	,	,	,	,	,	,	,	,	,	,	,
1646	,	,	,	,	,	,	,	,	,	,	,	,	,	,	,
1647	,	,	,	,	,	,	,	,	,	,	,	,	,	,	,
1648	,	,	,	,	,	,	,	,	,	,	,	,	,	,	,
1649	,	,	,	,	,	,	,	,	,	,	,	,	,	,	,
1650	,	,	,	,	,	,	,	,	,	,	,	,	,	,	,
1651	,	,	,	,	,	,	,	,	,	,	,	,	,	,	,
1652	,	,	,	,	,	,	,	,	,	,	,	,	,	,	,
1653	,	,	,	,	,	,	,	,	,	,	,	,	,	,	,
1654	,	,	,	,	,	,	,	,	,	,	,	,	,	,	,
1655	,	,	,	,	,	,	,	,	,	,	,	,	,	,	,
1656	,	,	,	,	,	,	,	,	,	,	,	,	,	,	,
1657	,	,	,	,	,	,	,	,	,	,	,	,	,	,	,
1658	,	,	,	,	,	,	,	,	,	,	,	,	,	,	,
1659	,	,	,	,	,	,	,	,	,	,	,	,	,	,	,
1660	,	,	,	,	,	,	,	,	,	,	,	,	,	,	,
1661	,	,	,	,	,	,	,	,	,	,	,	,	,	,	,
1662	,	,	,	,	,	,	,	,	,	,	,	,	,	,	,
1663	,	,	,	,	,	,	,	,	,	,	,	,	,	,	,
1664	,	,	,	,	,	,	,	,	,	,	,	,	,	,	,
1665	,	,	,	,	,	,	,	,	,	,	,	,	,	,	,
1666	,	,	,	,	,	,	,	,	,	,	,	,	,	,	,
1667	,	,	,	,	,	,	,	,	,	,	,	,	,	,	,
1668	,	,	,	,	,	,	,	,	,	,	,	,	,	,	,
1669	,	,	,	,	,	,	,	,	,	,	,	,	,	,	,
1670	,	,	,	,	,	,	,	,	,	,	,	,	,	,	,
1671	,	,	,	,	,	,	,	,	,	,	,	,	,	,	,
1672	,	,	,	,	,	,	,	,	,	,	,	,	,	,	,
1673	,	,	,	,	,	,	,	,	,	,	,	,	,	,	,
1674	,	,	,	,	,	,	,	,	,	,	,	,	,	,	,
1675	,	,	,	,	,	,	,	,	,	,	,	,	,	,	,
1676	,	,	,	,	,	,	,	,	,	,	,	,	,	,	,
1677	,	,	,	,	,	,	,	,	,	,	,	,	,	,	,
1678	,	,	,	,	,	,	,	,	,	,	,	,	,	,	,
1679	,	,	,	,	,	,	,	,	,	,	,	,	,	,	,
1680	,	,	,	,	,	,	,	,	,	,	,	,	,	,	,
1681	,	,	,	,	,	,	,	,	,	,	,	,	,	,	,
1682	,	,	,	,	,	,	,	,	,	,	,	,	,	,	,
1683	,	,	,	,	,	,	,	,	,	,	,	,	,	,	,
1684	,	,	,	,	,	,	,	,	,	,	,	,	,	,	,
1685	,	,	,	,	,	,	,	,	,	,	,	,	,	,	,
1686	,	,	,	,	,	,	,	,	,	,	,	,	,	,	,
1687	,	,	,	,	,	,	,	,	,	,	,	,	,	,	,
1688	,	,	,	,	,	,	,	,	,	,	,	,	,	,	,
1689	,	,	,	,	,	,	,	,	,	,	,	,	,	,	,
1690	,	,	,	,	,	,	,	,	,	,	,	,	,	,	,
1691	,	,	,	,	,	,	,	,	,	,	,	,	,	,	,
1692	,	,	,	,	,	,	,	,	,	,	,	,	,	,	,
1693	,	,	,	,	,	,	,	,	,	,	,	,	,	,	,
1694	,	,	,	,	,	,	,	,	,	,	,	,	,	,	,
1695	,	,	,	,	,	,	,	,	,	,	,	,	,	,	,
1696	,	,	,	,	,	,	,	,	,	,	,	,	,	,	,
1697	,	,	,	,	,	,	,	,	,	,	,	,	,	,	,
1698	,	,	,	,	,	,	,	,	,	,	,	,	,	,	,
1699	,	,	,	,	,	,	,	,	,	,	,	,	,	,	,
1700	,	,	,	,	,	,	,	,	,	,	,	,	,	,	,
1701	,	,	,	,	,	,	,	,	,	,	,	,	,	,	,
1702	,	,	,	,	,	,	,	,	,	,	,	,	,	,	,
1703	,	,	,	,	,	,	,	,	,	,	,	,	,	,	,
1704	,	,	,	,	,	,	,	,	,	,	,	,	,	,	,
1705	,	,	,	,	,	,	,	,	,	,	,	,	,	,	,
1706	,	,	,	,	,	,	,	,	,	,	,	,	,	,	,
1707	,	,	,	,	,	,	,	,	,	,	,	,	,	,	,
1708	,	,	,	,	,	,	,	,	,	,	,	,	,	,	,
1709	,	,	,	,	,	,	,	,	,	,	,	,	,	,	,
1710	,	,	,	,	,	,	,	,	,	,	,	,	,	,	,
1711	,	,	,	,	,	,	,	,	,	,	,	,	,	,	,
1712	,	,	,	,	,	,	,	,	,	,	,	,	,	,	,
1713	,	,	,	,	,	,	,	,	,	,	,	,	,	,	,
1714	,	,	,	,	,	,	,	,	,	,	,	,	,	,	,
1715	,	,	,	,	,	,	,	,	,	,	,	,	,	,	,
1716	,	,	,	,	,	,	,	,	,	,	,	,	,	,	,
1717	,	,	,	,	,	,	,	,	,	,	,	,	,	,	,
1718	,	,	,	,	,	,	,	,	,	,	,	,	,	,	,
1719	,	,	,	,	,	,	,	,	,	,	,	,	,	,	,
1720	,	,	,	,	,	,	,	,	,	,	,	,	,	,	,
1721	,	,	,	,	,	,	,	,	,	,	,	,	,	,	,
1722	,	,	,	,	,	,	,	,	,	,	,	,	,	,	,
1723	,	,	,	,	,	,	,	,	,	,	,	,	,	,	,
1724	,	,	,	,	,	,	,	,	,	,	,	,	,	,	,
1725	,	,	,	,	,	,	,	,	,	,	,	,	,	,	,
1726	,	,	,	,	,	,	,	,	,	,	,	,	,	,	,
1727	,	,	,	,	,	,	,	,	,	,	,	,	,	,	,
1728	,	,	,	,	,	,	,	,	,	,	,	,	,	,	,
1729	,	,	,	,	,	,	,	,	,	,	,	,	,	,	,
1730	,	,	,	,	,	,	,	,	,	,	,	,	,	,	,
1731	,	,	,	,	,	,	,	,	,	,	,	,	,	,	,
1732	,	,	,	,	,	,	,	,	,	,	,	,	,	,	,
1733	,	,	,	,	,	,	,	,	,	,	,	,	,	,	,
1734	,	,	,	,	,	,	,	,	,	,	,	,	,	,	,
1735	,	,	,	,	,	,	,	,	,	,	,	,	,	,	,
1736	,	,	,	,	,	,	,	,	,	,	,	,	,	,	,
1737	,	,	,	,	,	,	,	,	,	,	,	,	,	,	,
1738	,	,	,	,	,	,	,	,	,	,	,	,	,	,	,
1739	,	,	,	,	,	,	,	,	,	,	,	,	,	,	,
1740	,	,	,	,	,	,	,	,	,	,	,	,	,	,	,
1741	,	,	,	,	,	,	,	,	,	,	,	,	,	,	,
1742	,	,	,	,	,	,	,	,	,	,	,	,	,	,	,
1743	,	,	,	,	,	,	,	,	,	,	,	,	,	,	,
1744	,	,	,	,	,	,	,	,	,	,	,	,	,	,	,
1745	,	,	,	,	,	,	,	,	,	,	,	,	,	,	,
1746	,	,	,	,	,	,	,	,	,	,	,	,	,	,	,
1747	,	,	,	,	,	,	,	,	,	,	,	,	,	,	,
1748	,	,	,	,	,	,	,	,	,	,	,	,	,	,	,
1749	,	,	,	,	,	,	,	,	,	,	,	,	,	,	,
1750	,	,	,	,	,	,	,	,	,	,	,	,	,	,	,
1751	,	,	,	,	,	,	,	,	,	,	,	,	,	,	,
1752	,	,	,	,	,	,	,	,	,	,	,	,	,	,	,
1753	,	,	,	,	,	,	,	,	,	,	,	,	,	,	,
1754	,	,	,	,	,	,	,	,	,	,	,	,	,	,	,
1755	,	,	,	,	,	,	,	,	,	,	,	,	,	,	,
1756	,	,	,	,	,	,	,	,	,	,	,	,	,	,	,
1757	,	,	,	,	,	,	,	,	,	,	,	,	,	,	,
1758	,	,	,	,	,	,	,	,	,	,	,	,	,	,	,
1759	,	,	,	,	,	,	,	,	,	,	,	,	,	,	,
1760	,	,	,	,	,	,	,	,	,	,	,	,	,	,	,
1761	,	,	,	,	,	,	,	,	,	,	,	,	,	,	,
1762	,	,	,	,	,	,	,	,	,	,	,	,	,	,	,
1763	,	,	,	,	,	,	,	,	,	,	,	,	,	,	,
1764	,	,	,	,	,	,	,	,	,	,	,	,	,	,	,
1765	,	,	,	,	,	,	,	,	,	,	,	,	,	,	,
1766	,	,	,	,	,	,	,	,	,	,	,	,	,	,	,
1767	,	,	,	,	,	,	,	,	,	,	,	,	,	,	,
1768	,	,	,	,	,	,	,	,	,	,	,	,	,	,	,
1769	,	,	,	,	,	,	,	,	,	,	,	,	,	,	,
1770	,	,	,	,	,	,	,	,	,	,	,	,	,	,	,
1771	,	,	,	,	,	,	,	,	,	,	,	,	,	,	,
1772	,	,	,	,	,	,	,	,	,	,	,	,	,	,	,
1773	,	,	,	,	,	,	,	,	,	,	,	,	,	,	,
1774	,	,	,	,	,	,	,	,	,	,	,	,	,	,	,
1775	,	,	,	,	,	,	,	,	,	,	,	,	,	,	,
1776	,	,	,	,	,	,	,	,	,	,	,	,	,	,	,
1777	,	,	,	,	,	,	,	,	,	,	,	,	,	,	,
1778	,	,	,	,	,	,	,	,	,	,	,	,	,	,	,
1779	,	,	,	,	,	,	,	,	,	,	,	,	,	,	,
1780	,	,	,	,	,	,	,	,	,	,	,	,	,	,	,
1781	,	,	,	,	,	,	,	,	,	,	,	,	,	,	,
1782	,	,	,	,	,	,	,	,	,	,	,	,	,	,	,
1783	,	,	,	,	,	,	,	,	,	,	,	,	,	,	,
1784	,	,	,	,	,	,	,	,	,	,	,	,	,	,	,
1785	,	,	,	,	,	,	,	,	,	,	,	,	,	,	,
1786	,	,	,	,	,	,	,	,	,	,	,	,	,	,	,
1787	,	,	,	,	,	,	,	,	,	,	,	,	,	,	,
1788	,	,	,	,	,	,	,	,	,	,	,	,	,	,	,
1789	,	,	,	,	,	,	,	,	,	,	,	,	,	,	,
1790	,	,	,	,	,	,	,	,	,	,	,	,	,	,	,
1791	,	,	,	,	,	,	,	,	,	,	,	,	,	,	,
1792	,	,	,	,	,	,	,	,	,	,	,	,	,	,	,
1793	,	,	,	,	,	,	,	,	,	,	,	,	,	,	,
1794	,	,	,	,	,	,	,	,	,	,	,	,	,	,	,
1795	,	,	,	,	,	,	,	,	,	,	,	,	,	,	,
1796	,	,	,	,	,	,	,	,	,	,	,	,	,	,	,
1797	,	,	,	,	,	,	,	,	,	,	,	,	,	,	,
1798	,	,	,	,	,	,	,	,	,	,	,	,	,	,	,
1799	,	,	,	,	,	,	,	,	,	,	,	,	,	,	,
1800	,	,	,	,	,	,	,	,	,	,	,	,	,	,	,
1801	,	,	,	,	,	,	,	,	,	,	,	,	,	,	,
1802	,	,	,	,	,	,	,	,	,	,	,	,	,	,	,
1803	,	,	,	,	,	,	,	,	,	,	,	,	,	,	,
1804	,	,	,	,	,	,	,	,	,	,	,	,	,	,	,
1805	,	,	,	,	,	,	,	,	,	,	,	,	,	,	,
1806	,	,	,	,	,	,	,	,	,	,	,	,	,	,	,
1807	,	,	,	,	,	,	,	,	,	,	,	,	,	,	,
1808	,	,	,	,	,	,	,	,	,	,	,	,	,	,	,
1809	,	,	,	,	,	,	,	,	,	,	,	,	,	,	,
1810	,	,	,	,	,	,	,	,	,	,	,	,	,	,	,
1811	,	,	,	,	,	,	,	,	,	,	,	,	,	,	,
1812	,	,	,	,	,	,	,	,	,	,	,	,	,	,	,
1813	,	,	,	,	,	,	,	,	,	,	,	,	,	,	,
1814	,	,	,	,	,	,	,	,	,	,	,	,	,	,	,
1815	,	,	,	,	,	,	,	,	,	,	,	,	,	,	,
1816	,	,	,	,	,	,	,	,	,	,	,	,	,	,	,
1817	,	,	,	,	,	,	,	,	,	,	,	,	,	,	,
1818	,	,	,	,	,	,	,	,	,	,	,	,	,	,	,
1819	,	,	,	,	,	,	,	,	,	,	,	,	,	,	,
1820	,	,	,	,	,	,	,	,	,	,	,	,	,	,	,
1821	,	,	,	,	,	,	,	,	,	,	,	,	,	,	,
1822	,	,	,	,	,	,	,	,	,	,	,	,	,	,	,
1823	,	,	,	,	,	,	,	,	,	,	,	,	,	,	,
1824	,	,	,	,	,	,	,	,	,	,	,	,	,	,	,
1825	,	,	,	,	,	,	,	,	,	,	,	,	,	,	,
1826	,	,	,	,	,	,	,	,	,	,	,	,	,	,	,
1827	,	,	,	,	,	,	,	,	,	,	,	,	,	,	,
1828	,	,	,	,	,	,	,	,	,	,	,	,	,	,	,
1829	,	,	,	,	,	,	,	,	,	,	,	,	,	,	,
1830	,	,	,	,	,	,	,	,	,	,	,	,	,	,	,
1831	,	,	,	,	,	,	,	,	,	,	,	,	,	,	,
1832	,	,	,	,	,	,	,	,	,	,	,	,	,	,	,
1833	,	,	,	,	,	,	,	,	,	,	,	,	,	,	,
1834	,	,	,	,	,	,	,	,	,	,	,	,	,	,	,
1835	,	,	,	,	,	,	,	,	,	,	,	,	,	,	,
1836	,	,	,	,	,	,	,	,	,	,	,	,	,	,	,
1837	,	,	,	,	,	,	,	,	,	,	,	,	,	,	,
1838	,	,	,	,	,	,	,	,	,	,	,	,	,	,	,
1839	,	,	,	,	,	,	,	,	,	,	,	,	,	,	,
1840	,	,	,	,	,	,	,	,	,	,	,	,	,	,	,
1841	,	,	,	,	,	,	,	,	,	,	,	,	,	,	,
1842	,	,	,	,	,	,	,	,	,	,	,	,	,	,	,
1843	,	,	,	,	,	,	,	,	,	,	,	,	,	,	,
1844	,	,	,	,	,	,	,	,	,	,	,	,	,	,	,
1845	,	,	,	,	,	,	,	,	,	,	,	,	,	,	,
1846	,	,	,	,	,	,	,	,	,	,	,	,	,	,	,
1847	,	,	,	,	,	,	,	,	,	,	,	,	,	,	,
1848	,	,	,	,	,	,	,	,	,	,	,	,	,	,	,
1849	,	,	,	,	,	,	,	,	,	,	,	,	,	,	,
1850	,	,	,	,	,	,	,	,	,	,	,	,	,	,	,
1851	,	,	,	,	,	,	,	,	,	,	,	,	,	,	,
1852	,	,	,	,	,	,	,	,	,	,	,	,	,	,	,
1853	,	,	,	,	,	,	,	,	,	,	,	,	,	,	,
1854	,	,	,	,	,	,	,	,	,	,	,	,	,	,	,
1855	,	,	,	,	,	,	,	,	,	,	,	,	,	,	,
1856	,	,	,	,	,	,	,	,	,	,	,	,	,	,	,
1857	,	,	,	,	,	,	,	,	,	,	,	,	,	,	,
1858	,	,	,	,	,	,	,	,	,	,	,	,	,	,	,
1859	,	,	,	,	,	,	,	,	,	,	,	,	,	,	,
1860	,	,	,	,	,	,	,	,	,	,	,	,	,	,	,
1861	,	,	,	,	,	,	,	,	,	,	,	,	,	,	,
1862	,	,	,	,	,	,	,	,	,	,	,	,	,	,	,
1863	,	,	,	,	,	,	,	,	,	,	,	,	,	,	,
1864	,	,	,	,	,	,	,	,	,	,	,	,	,	,	,
1865	,	,	,	,	,	,	,	,	,	,	,	,	,	,	,
1866	,	,	,	,	,	,	,	,	,	,	,	,	,	,	,
1867	,	,	,	,	,	,	,	,	,	,	,	,	,	,	,
1868	,	,	,	,	,	,	,	,	,	,	,	,	,	,	,
1869	,	,	,	,	,	,	,	,	,	,	,	,	,	,	,
1870	,	,	,	,	,	,	,	,	,	,	,	,	,	,	,
1871	,	,	,	,	,	,	,	,	,	,	,	,	,	,	,
1872	,	,	,	,	,	,	,	,	,	,	,	,	,	,	,
1873	,	,	,	,	,	,	,	,	,	,	,	,	,	,	,
1874	,	,	,	,	,	,	,	,	,	,	,	,	,	,	,
1875	,	,	,	,	,	,	,	,	,	,	,	,	,	,	,
1876	,	,	,	,	,	,	,	,	,	,	,	,	,	,	,
1877	,	,	,	,	,	,	,	,	,	,	,	,	,	,	,
1878	,	,	,	,	,	,	,	,	,	,	,	,	,	,	,
1879	,	,	,	,	,	,	,	,	,	,	,	,	,	,	,
1880	,	,	,	,	,	,	,	,	,	,	,	,	,	,	,
1881	,	,	,	,	,	,	,	,	,	,	,	,	,	,	,
1882	,	,	,	,	,	,	,	,	,	,	,	,	,	,	,
1883	,	,	,	,	,	,	,	,	,	,	,	,	,	,	,
1884	,	,	,	,	,	,	,	,	,	,	,	,	,	,	,
1885	,	,	,	,	,	,	,	,	,	,	,	,	,	,	,
1886	,	,	,	,	,	,	,	,	,	,	,	,	,	,	,
1887	,	,	,	,	,	,	,	,	,	,	,	,	,	,	,
1888	,	,	,	,	,	,	,	,	,	,	,	,	,	,	,
1889	,	,	,	,	,	,	,	,	,	,	,	,	,	,	,
1890	,	,	,	,	,	,	,	,	,	,	,	,	,	,	,
1891	,	,	,	,	,	,	,	,	,	,	,	,	,	,	,
1892	,	,	,	,	,	,	,	,	,	,	,	,	,	,	,
1893	,	,	,	,	,	,	,	,	,	,	,	,	,	,	,
1894	,	,	,	,	,	,	,	,	,	,	,	,	,	,	,
1895	,	,	,	,	,	,	,	,	,	,	,	,	,	,	,
1896	,	,	,	,	,	,	,	,	,	,	,	,	,	,	,
1897	,	,	,	,	,	,	,	,	,	,	,	,	,	,	,
1898	,	,	,	,	,	,	,	,	,	,	,	,	,	,	,
1899	,	,	,	,	,	,	,	,	,	,	,	,	,	,	,
1900	,	,	,	,	,	,	,	,	,	,	,	,	,	,	,
1901	,	,	,	,	,	,	,	,	,	,	,	,	,	,	,
1902	,	,	,	,	,	,	,	,	,	,	,	,	,	,	,
1903	,	,	,	,	,	,	,	,	,	,	,	,	,	,	,
1904	,	,	,	,	,	,	,	,	,	,	,	,	,	,	,
1905	,	,	,	,	,	,	,	,	,	,	,	,	,	,	,
1906	,	,	,	,	,	,	,	,	,	,	,	,	,	,	,
1907	,	,	,	,	,	,	,	,	,	,	,	,	,	,	,
1908	,	,	,	,	,	,	,	,	,	,	,	,	,	,	,
1909	,	,	,	,	,	,	,	,	,	,	,	,	,	,	,
1910	,	,	,	,	,	,	,	,	,	,	,	,	,	,	,
1911	,	,	,	,	,	,	,	,	,	,	,	,	,	,	,
1912	,	,	,	,	,	,	,	,	,	,	,	,	,	,	,
1913	,	,	,	,	,	,	,	,	,	,	,	,	,	,	,
1914	,	,	,	,	,	,	,	,	,	,	,	,	,	,	,
1915	,	,	,	,	,	,	,	,	,	,	,	,	,	,	,
1916	,	,	,	,	,	,	,	,	,	,	,	,	,	,	,
1917	,	,	,	,	,	,	,	,	,	,	,	,	,	,	,
1918	,	,	,	,	,	,	,	,	,	,	,	,	,	,	,
1919	,	,	,	,	,	,	,	,	,	,	,	,	,	,	,
1920	,	,	,	,	,	,	,	,	,	,	,	,	,	,	,
1921	,	,	,	,	,	,	,	,	,	,	,	,	,	,	,
1922	,	,	,	,	,	,	,	,	,	,	,	,	,	,	,
1923	,	,	,	,	,	,	,	,	,	,	,	,	,	,	,
1924	,	,	,	,	,	,	,	,	,	,	,	,	,	,	,
1925	,	,	,	,	,	,	,	,	,	,	,	,	,	,	,
1926	,	,	,	,	,	,	,	,	,	,	,	,	,	,	,
1927	,	,	,	,	,	,	,	,	,	,	,	,	,	,	,
1928	,	,	,	,	,	,	,	,	,	,	,	,	,	,	,
1929	,	,	,	,	,	,	,	,	,	,	,	,	,	,	,
1930	,	,	,	,	,	,	,	,	,	,	,	,	,	,	,
1931	,	,	,	,	,	,	,	,	,	,	,	,	,	,	,
1932	,	,	,	,	,	,	,	,	,	,	,	,	,	,	,
1933	,	,	,	,	,	,	,	,	,	,	,	,	,	,	,
1934	,	,	,	,	,	,	,	,	,	,	,	,	,	,	,
1935	,	,	,	,	,	,	,	,	,	,	,	,	,	,	,
1936	,	,	,	,	,	,	,	,	,	,	,	,	,	,	,
1937	,	,	,	,	,	,	,	,	,	,	,	,	,	,	,
1938	,	,	,	,	,	,	,	,	,	,	,	,	,	,	,
1939	,	,	,	,	,	,	,	,	,	,	,	,	,	,	,
1940	,	,	,	,	,	,	,	,	,	,	,	,	,	,	,
1941	,	,	,	,	,	,	,	,	,	,	,	,	,	,	,
1942	,	,	,	,	,	,	,	,	,	,	,	,	,	,	,
1943	,	,	,	,	,	,	,	,	,	,	,	,	,	,	,
1944	,	,	,	,	,	,	,	,	,	,	,	,	,	,	,
1945	,	,	,	,	,	,	,	,	,	,	,	,	,	,	,
1946	,	,	,	,	,	,	,	,	,	,	,	,	,	,	,
1947	,	,	,	,	,	,	,	,	,	,	,	,	,	,	,
1948	,	,	,	,	,	,	,	,	,	,	,	,	,	,	,
1949	,	,	,	,	,	,	,	,	,	,	,	,	,	,	,
1950	,	,	,	,	,	,	,	,	,	,	,	,	,	,	,
1951	,	,	,	,	,	,	,	,	,	,	,	,	,	,	,
1952	,	,	,	,	,	,	,	,	,	,	,	,	,	,	,
1953	,	,	,	,	,	,	,	,	,	,	,	,	,	,	,
1954	,	,	,	,	,	,	,	,	,	,	,	,	,	,	,
1955	,	,	,	,	,	,	,	,	,	,	,	,	,	,	,
1956	,	,	,	,	,	,	,	,	,	,	,	,	,	,	,
1957	,	,	,	,	,	,	,	,	,	,	,	,	,	,	,
1958	,	,	,	,	,	,	,	,	,	,	,	,	,	,	,
1959	,	,	,	,	,	,	,	,	,	,	,	,	,	,	,
1960	,	,	,	,	,	,	,	,	,	,	,	,	,	,	,
1961	,	,	,	,	,	,	,	,	,	,	,	,	,	,	,
1962	,	,	,	,	,	,	,	,	,	,	,	,	,	,	,
1963	,	,	,	,	,	,	,	,	,	,	,	,	,	,	,
1964	,	,	,	,	,	,	,	,	,	,	,	,	,	,	,
1965	,	,	,	,	,	,	,	,	,	,	,	,	,	,	,
1966	,	,	,	,	,	,	,	,	,	,	,	,	,	,	,
1967	,	,	,	,	,	,	,	,	,	,	,	,	,	,	,
1968	,	,	,	,	,	,	,	,	,	,	,	,	,	,	,
1969	,	,	,	,	,	,	,	,	,	,	,	,	,	,	,
1970	,	,	,	,	,	,	,	,	,	,	,	,	,	,	,
1971	,	,	,	,	,	,	,	,	,	,	,	,	,	,	,
1972	,	,	,	,	,	,	,	,	,	,	,	,	,	,	,
1973	,	,	,	,	,	,	,	,	,	,	,	,	,	,	,
1974	,	,	,	,	,	,	,	,	,	,	,	,	,	,	,
1975	,	,	,	,	,	,	,	,	,	,	,	,	,	,	,
1976	,	,	,	,	,	,	,	,	,	,	,	,	,	,	,
1977	,	,	,	,	,	,	,	,	,	,	,	,	,	,	,
1978	,	,	,	,	,	,	,	,	,	,	,	,	,	,	,
1979	,	,	,	,	,	,	,	,	,	,	,	,	,	,	,
1980	,	,	,	,	,	,	,	,	,	,	,	,	,	,	,
1981	,	,	,	,	,	,	,	,	,	,	,	,	,	,	,
1982	,	,	,	,	,	,	,	,	,	,	,	,	,	,	,
1983	,	,	,	,	,	,	,	,	,	,	,	,	,	,	,
1984	,	,	,	,	,	,	,	,	,	,	,	,	,	,	,
1985	,	,	,	,	,	,	,	,	,	,	,	,	,	,	,
1986	,	,	,	,	,	,	,	,	,	,	,	,	,	,	,
1987	,	,	,	,	,	,	,	,	,	,	,	,	,	,	,
1988	,	,	,	,	,	,	,	,	,	,	,	,	,	,	,
1989	,	,	,	,	,	,	,	,	,	,	,	,	,	,	,
1990	,	,	,	,	,	,	,	,	,	,	,	,	,	,	,
1991	,	,	,	,	,	,	,	,	,	,	,	,	,	,	,
1992	,	,	,	,	,	,	,	,	,	,	,	,	,	,	,
1993	,	,	,	,	,	,	,	,	,	,	,	,	,	,	,
1994	,	,	,	,	,	,	,	,	,	,	,	,	,	,	,
1995	,	,	,	,	,	,	,	,	,	,	,	,	,	,	,
1996	,	,	,	,	,	,	,	,	,	,	,	,	,	,	,
1997	,	,	,	,	,	,	,	,	,	,	,	,	,	,	,
1998	,	,	,	,	,	,	,	,	,	,	,	,	,	,	,
1999	,	,	,	,	,	,	,	,	,	,	,	,	,	,	,
[truncated: 13,001 more rows]
