# Supplementary material for: ParB spreading on DNA requires cytidine triphosphate in vitro
Source: eLife journal article supplement (doi:10.7554/elife.53515), 2020-02-20
Supplement: fig2-figsupp3-data1 [file Fig2_supp3_Rhodobacter_ParB_rep1_2_3.xlsx]

## Sheet: FORMAT
	sample ID #1	sample ID #2	sample ID #3
data point	time point (sec), wavelength shift (nm)	time point (sec), wavelength shift (nm)	time point (sec), wavelength shift (nm)
1
2
3
.
.
.

## Sheet: Fig2_supp3_Rhodobacter_B_123
	169bp closed parS DNA and Rhodobacter ParB	169bp closed parS DNA and Rhodobacter ParB 1mM ATP	169bp closed parS DNA and Rhodobacter ParB 1mM GTP	169bp closed parS DNA and Rhodobacter ParB 1mM UTP	169bp closed parS DNA and Rhodobacter ParB	169bp closed parS DNA and Rhodobacter ParB 1mM ATP	169bp closed parS DNA and Rhodobacter ParB 1mM GTP	169bp closed parS DNA and Rhodobacter ParB 1mM UTP	169bp closed parS DNA and Rhodobacter ParB	169bp closed parS DNA and Rhodobacter ParB 1mM ATP	169bp closed parS DNA and Rhodobacter ParB 1mM GTP	169bp closed parS DNA and Rhodobacter ParB 1mM UTP	169bp closed parS DNA and Rhodobacter ParB 1mM CTP	169bp closed parS DNA and Rhodobacter ParB 1mM CTP	169bp closed parS DNA and Rhodobacter ParB 1mM CTP
1	0.000, -0.013	0.000, -0.010	0.000, -0.018	0.000, -0.013	0.000, -0.016	0.000, -0.016	0.000, -0.019	0.000, -0.020	0.000, -0.019	0.000, -0.019	0.000, -0.022	0.000, -0.012	0.000, -0.002	0.000, -0.012	0.000, -0.024
2	0.200, -0.013	0.200, -0.010	0.200, -0.017	0.200, -0.013	0.200, -0.016	0.200, -0.017	0.200, -0.019	0.200, -0.020	0.200, -0.019	0.200, -0.019	0.200, -0.022	0.200, -0.012	0.200, -0.003	0.200, -0.012	0.200, -0.023
3	0.400, -0.014	0.400, -0.009	0.400, -0.017	0.400, -0.013	0.400, -0.017	0.400, -0.017	0.400, -0.020	0.400, -0.020	0.400, -0.019	0.400, -0.019	0.400, -0.023	0.400, -0.013	0.400, -0.003	0.400, -0.011	0.400, -0.023
4	0.600, -0.014	0.600, -0.009	0.600, -0.016	0.600, -0.013	0.600, -0.018	0.600, -0.018	0.600, -0.020	0.600, -0.021	0.600, -0.019	0.600, -0.019	0.600, -0.023	0.600, -0.013	0.600, -0.003	0.600, -0.010	0.600, -0.022
5	0.800, -0.015	0.800, -0.008	0.800, -0.016	0.800, -0.012	0.800, -0.018	0.800, -0.018	0.800, -0.021	0.800, -0.021	0.800, -0.019	0.800, -0.019	0.800, -0.023	0.800, -0.013	0.800, -0.004	0.800, -0.010	0.800, -0.022
6	1.000, -0.015	1.000, -0.008	1.000, -0.015	1.000, -0.012	1.000, -0.019	1.000, -0.019	1.000, -0.022	1.000, -0.020	1.000, -0.018	1.000, -0.019	1.000, -0.023	1.000, -0.013	1.000, -0.004	1.000, -0.009	1.000, -0.021
7	1.200, -0.015	1.200, -0.008	1.200, -0.015	1.200, -0.012	1.200, -0.019	1.200, -0.019	1.200, -0.022	1.200, -0.020	1.200, -0.018	1.200, -0.019	1.200, -0.023	1.200, -0.014	1.200, -0.004	1.200, -0.009	1.200, -0.021
8	1.400, -0.016	1.400, -0.008	1.400, -0.014	1.400, -0.012	1.400, -0.020	1.400, -0.019	1.400, -0.023	1.400, -0.020	1.400, -0.018	1.400, -0.019	1.400, -0.023	1.400, -0.014	1.400, -0.004	1.400, -0.008	1.400, -0.020
9	1.600, -0.016	1.600, -0.008	1.600, -0.014	1.600, -0.011	1.600, -0.020	1.600, -0.019	1.600, -0.023	1.600, -0.020	1.600, -0.018	1.600, -0.019	1.600, -0.023	1.600, -0.014	1.600, -0.004	1.600, -0.008	1.600, -0.019
10	1.800, -0.016	1.800, -0.007	1.800, -0.014	1.800, -0.011	1.800, -0.020	1.800, -0.019	1.800, -0.023	1.800, -0.020	1.800, -0.018	1.800, -0.018	1.800, -0.023	1.800, -0.014	1.800, -0.004	1.800, -0.008	1.800, -0.019
11	2.000, -0.016	2.000, -0.007	2.000, -0.013	2.000, -0.010	2.000, -0.020	2.000, -0.019	2.000, -0.023	2.000, -0.019	2.000, -0.018	2.000, -0.018	2.000, -0.023	2.000, -0.014	2.000, -0.004	2.000, -0.008	2.000, -0.019
12	2.200, -0.015	2.200, -0.008	2.200, -0.013	2.200, -0.010	2.200, -0.020	2.200, -0.019	2.200, -0.023	2.200, -0.019	2.200, -0.018	2.200, -0.018	2.200, -0.022	2.200, -0.014	2.200, -0.004	2.200, -0.008	2.200, -0.018
13	2.400, -0.015	2.400, -0.008	2.400, -0.013	2.400, -0.010	2.400, -0.020	2.400, -0.019	2.400, -0.023	2.400, -0.019	2.400, -0.018	2.400, -0.018	2.400, -0.022	2.400, -0.014	2.400, -0.004	2.400, -0.009	2.400, -0.018
14	2.600, -0.015	2.600, -0.008	2.600, -0.012	2.600, -0.010	2.600, -0.020	2.600, -0.019	2.600, -0.023	2.600, -0.019	2.600, -0.017	2.600, -0.018	2.600, -0.022	2.600, -0.014	2.600, -0.004	2.600, -0.009	2.600, -0.018
15	2.800, -0.014	2.800, -0.008	2.800, -0.012	2.800, -0.010	2.800, -0.020	2.800, -0.019	2.800, -0.022	2.800, -0.018	2.800, -0.017	2.800, -0.018	2.800, -0.021	2.800, -0.014	2.800, -0.003	2.800, -0.009	2.800, -0.018
16	3.000, -0.014	3.000, -0.008	3.000, -0.011	3.000, -0.010	3.000, -0.020	3.000, -0.019	3.000, -0.022	3.000, -0.018	3.000, -0.017	3.000, -0.018	3.000, -0.021	3.000, -0.014	3.000, -0.003	3.000, -0.009	3.000, -0.018
17	3.200, -0.014	3.200, -0.008	3.200, -0.011	3.200, -0.010	3.200, -0.020	3.200, -0.019	3.200, -0.022	3.200, -0.018	3.200, -0.017	3.200, -0.017	3.200, -0.021	3.200, -0.014	3.200, -0.003	3.200, -0.008	3.200, -0.018
18	3.400, -0.013	3.400, -0.008	3.400, -0.010	3.400, -0.010	3.400, -0.020	3.400, -0.018	3.400, -0.022	3.400, -0.017	3.400, -0.017	3.400, -0.017	3.400, -0.021	3.400, -0.014	3.400, -0.003	3.400, -0.008	3.400, -0.018
19	3.600, -0.013	3.600, -0.008	3.600, -0.010	3.600, -0.010	3.600, -0.019	3.600, -0.018	3.600, -0.021	3.600, -0.017	3.600, -0.017	3.600, -0.017	3.600, -0.021	3.600, -0.014	3.600, -0.003	3.600, -0.008	3.600, -0.018
20	3.800, -0.013	3.800, -0.008	3.800, -0.010	3.800, -0.010	3.800, -0.019	3.800, -0.018	3.800, -0.021	3.800, -0.017	3.800, -0.017	3.800, -0.017	3.800, -0.021	3.800, -0.014	3.800, -0.003	3.800, -0.008	3.800, -0.018
21	4.000, -0.012	4.000, -0.008	4.000, -0.010	4.000, -0.010	4.000, -0.019	4.000, -0.017	4.000, -0.020	4.000, -0.017	4.000, -0.017	4.000, -0.016	4.000, -0.021	4.000, -0.014	4.000, -0.003	4.000, -0.008	4.000, -0.017
22	4.200, -0.012	4.200, -0.008	4.200, -0.010	4.200, -0.011	4.200, -0.019	4.200, -0.017	4.200, -0.020	4.200, -0.017	4.200, -0.017	4.200, -0.016	4.200, -0.021	4.200, -0.014	4.200, -0.003	4.200, -0.008	4.200, -0.017
23	4.400, -0.012	4.400, -0.008	4.400, -0.010	4.400, -0.011	4.400, -0.018	4.400, -0.016	4.400, -0.020	4.400, -0.016	4.400, -0.017	4.400, -0.016	4.400, -0.021	4.400, -0.014	4.400, -0.002	4.400, -0.008	4.400, -0.017
24	4.600, -0.012	4.600, -0.007	4.600, -0.010	4.600, -0.011	4.600, -0.018	4.600, -0.016	4.600, -0.019	4.600, -0.016	4.600, -0.017	4.600, -0.015	4.600, -0.021	4.600, -0.013	4.600, -0.002	4.600, -0.008	4.600, -0.017
25	4.800, -0.012	4.800, -0.007	4.800, -0.010	4.800, -0.011	4.800, -0.018	4.800, -0.015	4.800, -0.019	4.800, -0.016	4.800, -0.016	4.800, -0.015	4.800, -0.020	4.800, -0.013	4.800, -0.002	4.800, -0.008	4.800, -0.017
26	5.000, -0.011	5.000, -0.007	5.000, -0.010	5.000, -0.010	5.000, -0.017	5.000, -0.014	5.000, -0.019	5.000, -0.016	5.000, -0.016	5.000, -0.015	5.000, -0.020	5.000, -0.013	5.000, -0.002	5.000, -0.008	5.000, -0.017
27	5.200, -0.011	5.200, -0.007	5.200, -0.010	5.200, -0.010	5.200, -0.017	5.200, -0.013	5.200, -0.018	5.200, -0.015	5.200, -0.016	5.200, -0.015	5.200, -0.019	5.200, -0.012	5.200, -0.002	5.200, -0.008	5.200, -0.016
28	5.400, -0.011	5.400, -0.007	5.400, -0.010	5.400, -0.010	5.400, -0.017	5.400, -0.013	5.400, -0.018	5.400, -0.015	5.400, -0.015	5.400, -0.015	5.400, -0.019	5.400, -0.012	5.400, -0.002	5.400, -0.008	5.400, -0.016
29	5.600, -0.011	5.600, -0.007	5.600, -0.010	5.600, -0.010	5.600, -0.016	5.600, -0.012	5.600, -0.017	5.600, -0.014	5.600, -0.015	5.600, -0.014	5.600, -0.019	5.600, -0.012	5.600, -0.002	5.600, -0.008	5.600, -0.015
30	5.800, -0.011	5.800, -0.007	5.800, -0.010	5.800, -0.010	5.800, -0.016	5.800, -0.012	5.800, -0.017	5.800, -0.014	5.800, -0.014	5.800, -0.014	5.800, -0.018	5.800, -0.012	5.800, -0.002	5.800, -0.007	5.800, -0.015
31	6.000, -0.011	6.000, -0.007	6.000, -0.010	6.000, -0.010	6.000, -0.016	6.000, -0.012	6.000, -0.017	6.000, -0.013	6.000, -0.013	6.000, -0.014	6.000, -0.018	6.000, -0.012	6.000, -0.002	6.000, -0.007	6.000, -0.015
32	6.200, -0.011	6.200, -0.007	6.200, -0.010	6.200, -0.010	6.200, -0.015	6.200, -0.011	6.200, -0.016	6.200, -0.013	6.200, -0.013	6.200, -0.014	6.200, -0.018	6.200, -0.011	6.200, -0.003	6.200, -0.007	6.200, -0.015
33	6.400, -0.011	6.400, -0.007	6.400, -0.010	6.400, -0.010	6.400, -0.015	6.400, -0.012	6.400, -0.016	6.400, -0.012	6.400, -0.012	6.400, -0.014	6.400, -0.017	6.400, -0.011	6.400, -0.002	6.400, -0.007	6.400, -0.015
34	6.600, -0.011	6.600, -0.007	6.600, -0.009	6.600, -0.009	6.600, -0.015	6.600, -0.012	6.600, -0.016	6.600, -0.012	6.600, -0.012	6.600, -0.013	6.600, -0.017	6.600, -0.011	6.600, -0.002	6.600, -0.006	6.600, -0.015
35	6.800, -0.011	6.800, -0.008	6.800, -0.009	6.800, -0.009	6.800, -0.014	6.800, -0.012	6.800, -0.016	6.800, -0.012	6.800, -0.012	6.800, -0.013	6.800, -0.017	6.800, -0.011	6.800, -0.002	6.800, -0.006	6.800, -0.015
36	7.000, -0.011	7.000, -0.008	7.000, -0.008	7.000, -0.009	7.000, -0.014	7.000, -0.012	7.000, -0.016	7.000, -0.012	7.000, -0.011	7.000, -0.013	7.000, -0.016	7.000, -0.011	7.000, -0.002	7.000, -0.006	7.000, -0.015
37	7.200, -0.011	7.200, -0.008	7.200, -0.008	7.200, -0.009	7.200, -0.013	7.200, -0.012	7.200, -0.016	7.200, -0.012	7.200, -0.011	7.200, -0.013	7.200, -0.016	7.200, -0.011	7.200, -0.002	7.200, -0.006	7.200, -0.015
38	7.400, -0.011	7.400, -0.008	7.400, -0.008	7.400, -0.009	7.400, -0.013	7.400, -0.012	7.400, -0.016	7.400, -0.012	7.400, -0.011	7.400, -0.013	7.400, -0.016	7.400, -0.011	7.400, -0.002	7.400, -0.006	7.400, -0.016
39	7.600, -0.010	7.600, -0.007	7.600, -0.008	7.600, -0.009	7.600, -0.013	7.600, -0.011	7.600, -0.016	7.600, -0.012	7.600, -0.011	7.600, -0.013	7.600, -0.016	7.600, -0.010	7.600, -0.002	7.600, -0.006	7.600, -0.016
40	7.800, -0.010	7.800, -0.007	7.800, -0.008	7.800, -0.009	7.800, -0.013	7.800, -0.011	7.800, -0.016	7.800, -0.012	7.800, -0.011	7.800, -0.013	7.800, -0.015	7.800, -0.010	7.800, -0.003	7.800, -0.005	7.800, -0.015
41	8.000, -0.009	8.000, -0.007	8.000, -0.008	8.000, -0.009	8.000, -0.012	8.000, -0.010	8.000, -0.016	8.000, -0.012	8.000, -0.011	8.000, -0.013	8.000, -0.015	8.000, -0.010	8.000, -0.003	8.000, -0.005	8.000, -0.015
42	8.200, -0.009	8.200, -0.007	8.200, -0.008	8.200, -0.009	8.200, -0.012	8.200, -0.010	8.200, -0.016	8.200, -0.012	8.200, -0.011	8.200, -0.012	8.200, -0.015	8.200, -0.010	8.200, -0.003	8.200, -0.006	8.200, -0.016
43	8.400, -0.008	8.400, -0.007	8.400, -0.008	8.400, -0.009	8.400, -0.012	8.400, -0.010	8.400, -0.015	8.400, -0.012	8.400, -0.011	8.400, -0.012	8.400, -0.015	8.400, -0.010	8.400, -0.003	8.400, -0.006	8.400, -0.015
44	8.600, -0.008	8.600, -0.007	8.600, -0.008	8.600, -0.009	8.600, -0.012	8.600, -0.009	8.600, -0.015	8.600, -0.012	8.600, -0.011	8.600, -0.012	8.600, -0.015	8.600, -0.010	8.600, -0.003	8.600, -0.006	8.600, -0.015
45	8.800, -0.007	8.800, -0.007	8.800, -0.008	8.800, -0.009	8.800, -0.012	8.800, -0.008	8.800, -0.015	8.800, -0.012	8.800, -0.011	8.800, -0.012	8.800, -0.015	8.800, -0.010	8.800, -0.004	8.800, -0.006	8.800, -0.015
46	9.000, -0.007	9.000, -0.007	9.000, -0.009	9.000, -0.009	9.000, -0.012	9.000, -0.008	9.000, -0.015	9.000, -0.012	9.000, -0.010	9.000, -0.012	9.000, -0.015	9.000, -0.010	9.000, -0.004	9.000, -0.006	9.000, -0.015
47	9.200, -0.007	9.200, -0.007	9.200, -0.009	9.200, -0.009	9.200, -0.011	9.200, -0.007	9.200, -0.015	9.200, -0.012	9.200, -0.010	9.200, -0.011	9.200, -0.015	9.200, -0.010	9.200, -0.004	9.200, -0.006	9.200, -0.015
48	9.400, -0.007	9.400, -0.007	9.400, -0.009	9.400, -0.009	9.400, -0.011	9.400, -0.007	9.400, -0.014	9.400, -0.011	9.400, -0.010	9.400, -0.011	9.400, -0.015	9.400, -0.010	9.400, -0.004	9.400, -0.006	9.400, -0.014
49	9.600, -0.007	9.600, -0.007	9.600, -0.009	9.600, -0.009	9.600, -0.011	9.600, -0.007	9.600, -0.014	9.600, -0.011	9.600, -0.010	9.600, -0.011	9.600, -0.015	9.600, -0.009	9.600, -0.004	9.600, -0.007	9.600, -0.014
50	9.800, -0.007	9.800, -0.007	9.800, -0.009	9.800, -0.009	9.800, -0.011	9.800, -0.007	9.800, -0.014	9.800, -0.011	9.800, -0.009	9.800, -0.010	9.800, -0.015	9.800, -0.009	9.800, -0.004	9.800, -0.007	9.800, -0.013
51	10.000, -0.007	10.000, -0.007	10.000, -0.008	10.000, -0.009	10.000, -0.011	10.000, -0.007	10.000, -0.013	10.000, -0.010	10.000, -0.009	10.000, -0.010	10.000, -0.015	10.000, -0.009	10.000, -0.004	10.000, -0.007	10.000, -0.013
52	10.200, -0.007	10.200, -0.007	10.200, -0.008	10.200, -0.008	10.200, -0.011	10.200, -0.007	10.200, -0.013	10.200, -0.010	10.200, -0.009	10.200, -0.010	10.200, -0.015	10.200, -0.009	10.200, -0.004	10.200, -0.007	10.200, -0.013
53	10.400, -0.007	10.400, -0.007	10.400, -0.008	10.400, -0.008	10.400, -0.011	10.400, -0.007	10.400, -0.013	10.400, -0.010	10.400, -0.009	10.400, -0.009	10.400, -0.015	10.400, -0.008	10.400, -0.004	10.400, -0.006	10.400, -0.013
54	10.600, -0.007	10.600, -0.007	10.600, -0.008	10.600, -0.008	10.600, -0.010	10.600, -0.007	10.600, -0.013	10.600, -0.009	10.600, -0.009	10.600, -0.009	10.600, -0.015	10.600, -0.008	10.600, -0.003	10.600, -0.006	10.600, -0.013
55	10.800, -0.007	10.800, -0.007	10.800, -0.008	10.800, -0.008	10.800, -0.010	10.800, -0.007	10.800, -0.013	10.800, -0.009	10.800, -0.009	10.800, -0.009	10.800, -0.014	10.800, -0.008	10.800, -0.003	10.800, -0.006	10.800, -0.013
56	11.000, -0.007	11.000, -0.006	11.000, -0.008	11.000, -0.008	11.000, -0.009	11.000, -0.007	11.000, -0.013	11.000, -0.009	11.000, -0.009	11.000, -0.008	11.000, -0.014	11.000, -0.007	11.000, -0.003	11.000, -0.006	11.000, -0.012
57	11.200, -0.007	11.200, -0.006	11.200, -0.008	11.200, -0.008	11.200, -0.009	11.200, -0.007	11.200, -0.013	11.200, -0.009	11.200, -0.009	11.200, -0.008	11.200, -0.014	11.200, -0.007	11.200, -0.003	11.200, -0.006	11.200, -0.012
58	11.400, -0.007	11.400, -0.006	11.400, -0.007	11.400, -0.008	11.400, -0.009	11.400, -0.007	11.400, -0.013	11.400, -0.009	11.400, -0.009	11.400, -0.008	11.400, -0.013	11.400, -0.007	11.400, -0.003	11.400, -0.006	11.400, -0.012
59	11.600, -0.006	11.600, -0.006	11.600, -0.007	11.600, -0.008	11.600, -0.008	11.600, -0.007	11.600, -0.013	11.600, -0.008	11.600, -0.009	11.600, -0.008	11.600, -0.013	11.600, -0.006	11.600, -0.003	11.600, -0.006	11.600, -0.011
60	11.800, -0.006	11.800, -0.005	11.800, -0.007	11.800, -0.008	11.800, -0.008	11.800, -0.007	11.800, -0.013	11.800, -0.008	11.800, -0.008	11.800, -0.008	11.800, -0.013	11.800, -0.006	11.800, -0.003	11.800, -0.006	11.800, -0.011
61	12.000, -0.006	12.000, -0.005	12.000, -0.007	12.000, -0.008	12.000, -0.008	12.000, -0.007	12.000, -0.013	12.000, -0.008	12.000, -0.008	12.000, -0.008	12.000, -0.012	12.000, -0.006	12.000, -0.003	12.000, -0.006	12.000, -0.011
62	12.200, -0.006	12.200, -0.005	12.200, -0.007	12.200, -0.007	12.200, -0.008	12.200, -0.007	12.200, -0.013	12.200, -0.008	12.200, -0.008	12.200, -0.008	12.200, -0.012	12.200, -0.006	12.200, -0.003	12.200, -0.006	12.200, -0.011
63	12.400, -0.006	12.400, -0.005	12.400, -0.007	12.400, -0.007	12.400, -0.008	12.400, -0.007	12.400, -0.012	12.400, -0.008	12.400, -0.007	12.400, -0.008	12.400, -0.012	12.400, -0.006	12.400, -0.003	12.400, -0.006	12.400, -0.010
64	12.600, -0.006	12.600, -0.004	12.600, -0.007	12.600, -0.007	12.600, -0.008	12.600, -0.006	12.600, -0.012	12.600, -0.008	12.600, -0.007	12.600, -0.008	12.600, -0.011	12.600, -0.006	12.600, -0.004	12.600, -0.006	12.600, -0.010
65	12.800, -0.006	12.800, -0.004	12.800, -0.007	12.800, -0.007	12.800, -0.008	12.800, -0.006	12.800, -0.012	12.800, -0.008	12.800, -0.007	12.800, -0.008	12.800, -0.011	12.800, -0.006	12.800, -0.004	12.800, -0.006	12.800, -0.010
66	13.000, -0.006	13.000, -0.004	13.000, -0.007	13.000, -0.006	13.000, -0.007	13.000, -0.006	13.000, -0.011	13.000, -0.008	13.000, -0.006	13.000, -0.008	13.000, -0.011	13.000, -0.006	13.000, -0.004	13.000, -0.006	13.000, -0.009
67	13.200, -0.006	13.200, -0.004	13.200, -0.007	13.200, -0.006	13.200, -0.007	13.200, -0.005	13.200, -0.011	13.200, -0.007	13.200, -0.006	13.200, -0.008	13.200, -0.010	13.200, -0.006	13.200, -0.004	13.200, -0.006	13.200, -0.009
68	13.400, -0.006	13.400, -0.004	13.400, -0.007	13.400, -0.006	13.400, -0.007	13.400, -0.005	13.400, -0.011	13.400, -0.007	13.400, -0.006	13.400, -0.008	13.400, -0.010	13.400, -0.006	13.400, -0.004	13.400, -0.005	13.400, -0.008
69	13.600, -0.006	13.600, -0.004	13.600, -0.007	13.600, -0.005	13.600, -0.007	13.600, -0.005	13.600, -0.010	13.600, -0.007	13.600, -0.006	13.600, -0.007	13.600, -0.010	13.600, -0.006	13.600, -0.004	13.600, -0.005	13.600, -0.008
70	13.800, -0.006	13.800, -0.005	13.800, -0.007	13.800, -0.005	13.800, -0.007	13.800, -0.005	13.800, -0.010	13.800, -0.007	13.800, -0.006	13.800, -0.007	13.800, -0.010	13.800, -0.007	13.800, -0.003	13.800, -0.005	13.800, -0.008
71	14.000, -0.006	14.000, -0.005	14.000, -0.007	14.000, -0.005	14.000, -0.007	14.000, -0.005	14.000, -0.010	14.000, -0.007	14.000, -0.005	14.000, -0.007	14.000, -0.010	14.000, -0.007	14.000, -0.003	14.000, -0.005	14.000, -0.008
72	14.200, -0.006	14.200, -0.005	14.200, -0.007	14.200, -0.005	14.200, -0.007	14.200, -0.005	14.200, -0.010	14.200, -0.007	14.200, -0.005	14.200, -0.006	14.200, -0.010	14.200, -0.007	14.200, -0.003	14.200, -0.005	14.200, -0.008
73	14.400, -0.005	14.400, -0.005	14.400, -0.007	14.400, -0.005	14.400, -0.008	14.400, -0.005	14.400, -0.009	14.400, -0.006	14.400, -0.006	14.400, -0.006	14.400, -0.010	14.400, -0.007	14.400, -0.003	14.400, -0.004	14.400, -0.008
74	14.600, -0.005	14.600, -0.005	14.600, -0.007	14.600, -0.006	14.600, -0.008	14.600, -0.005	14.600, -0.009	14.600, -0.006	14.600, -0.006	14.600, -0.006	14.600, -0.010	14.600, -0.007	14.600, -0.003	14.600, -0.004	14.600, -0.008
75	14.800, -0.005	14.800, -0.005	14.800, -0.006	14.800, -0.006	14.800, -0.008	14.800, -0.005	14.800, -0.009	14.800, -0.006	14.800, -0.006	14.800, -0.006	14.800, -0.011	14.800, -0.007	14.800, -0.003	14.800, -0.004	14.800, -0.008
76	15.000, -0.005	15.000, -0.005	15.000, -0.006	15.000, -0.006	15.000, -0.008	15.000, -0.005	15.000, -0.009	15.000, -0.006	15.000, -0.006	15.000, -0.006	15.000, -0.011	15.000, -0.007	15.000, -0.003	15.000, -0.004	15.000, -0.008
77	15.200, -0.005	15.200, -0.005	15.200, -0.006	15.200, -0.006	15.200, -0.008	15.200, -0.005	15.200, -0.009	15.200, -0.005	15.200, -0.006	15.200, -0.006	15.200, -0.010	15.200, -0.007	15.200, -0.003	15.200, -0.004	15.200, -0.009
78	15.400, -0.005	15.400, -0.005	15.400, -0.005	15.400, -0.006	15.400, -0.008	15.400, -0.004	15.400, -0.008	15.400, -0.005	15.400, -0.006	15.400, -0.006	15.400, -0.010	15.400, -0.006	15.400, -0.003	15.400, -0.004	15.400, -0.009
79	15.600, -0.005	15.600, -0.005	15.600, -0.005	15.600, -0.006	15.600, -0.008	15.600, -0.004	15.600, -0.008	15.600, -0.005	15.600, -0.006	15.600, -0.006	15.600, -0.010	15.600, -0.006	15.600, -0.003	15.600, -0.004	15.600, -0.009
80	15.800, -0.005	15.800, -0.005	15.800, -0.004	15.800, -0.006	15.800, -0.008	15.800, -0.004	15.800, -0.008	15.800, -0.005	15.800, -0.006	15.800, -0.006	15.800, -0.010	15.800, -0.006	15.800, -0.003	15.800, -0.004	15.800, -0.009
81	16.000, -0.005	16.000, -0.005	16.000, -0.004	16.000, -0.006	16.000, -0.008	16.000, -0.003	16.000, -0.007	16.000, -0.005	16.000, -0.006	16.000, -0.006	16.000, -0.010	16.000, -0.006	16.000, -0.003	16.000, -0.004	16.000, -0.009
82	16.200, -0.005	16.200, -0.004	16.200, -0.004	16.200, -0.006	16.200, -0.008	16.200, -0.003	16.200, -0.007	16.200, -0.005	16.200, -0.005	16.200, -0.006	16.200, -0.009	16.200, -0.005	16.200, -0.003	16.200, -0.003	16.200, -0.009
83	16.400, -0.005	16.400, -0.004	16.400, -0.004	16.400, -0.006	16.400, -0.008	16.400, -0.002	16.400, -0.007	16.400, -0.005	16.400, -0.005	16.400, -0.006	16.400, -0.009	16.400, -0.005	16.400, -0.003	16.400, -0.003	16.400, -0.009
84	16.600, -0.004	16.600, -0.004	16.600, -0.003	16.600, -0.006	16.600, -0.007	16.600, -0.002	16.600, -0.007	16.600, -0.005	16.600, -0.005	16.600, -0.006	16.600, -0.009	16.600, -0.005	16.600, -0.003	16.600, -0.003	16.600, -0.009
85	16.800, -0.004	16.800, -0.004	16.800, -0.003	16.800, -0.006	16.800, -0.007	16.800, -0.001	16.800, -0.007	16.800, -0.005	16.800, -0.005	16.800, -0.006	16.800, -0.008	16.800, -0.004	16.800, -0.003	16.800, -0.003	16.800, -0.009
86	17.000, -0.004	17.000, -0.005	17.000, -0.003	17.000, -0.006	17.000, -0.006	17.000, -0.001	17.000, -0.007	17.000, -0.005	17.000, -0.005	17.000, -0.006	17.000, -0.008	17.000, -0.004	17.000, -0.003	17.000, -0.002	17.000, -0.008
87	17.200, -0.004	17.200, -0.005	17.200, -0.003	17.200, -0.005	17.200, -0.006	17.200, -0.001	17.200, -0.007	17.200, -0.006	17.200, -0.005	17.200, -0.006	17.200, -0.008	17.200, -0.004	17.200, -0.003	17.200, -0.002	17.200, -0.008
88	17.400, -0.004	17.400, -0.005	17.400, -0.003	17.400, -0.005	17.400, -0.006	17.400, -0.001	17.400, -0.007	17.400, -0.006	17.400, -0.004	17.400, -0.006	17.400, -0.008	17.400, -0.004	17.400, -0.002	17.400, -0.002	17.400, -0.007
89	17.600, -0.004	17.600, -0.005	17.600, -0.003	17.600, -0.005	17.600, -0.005	17.600, -0.001	17.600, -0.007	17.600, -0.006	17.600, -0.004	17.600, -0.006	17.600, -0.007	17.600, -0.003	17.600, -0.002	17.600, -0.002	17.600, -0.007
90	17.800, -0.004	17.800, -0.005	17.800, -0.004	17.800, -0.005	17.800, -0.005	17.800, -0.002	17.800, -0.007	17.800, -0.005	17.800, -0.004	17.800, -0.006	17.800, -0.007	17.800, -0.003	17.800, -0.002	17.800, -0.002	17.800, -0.006
91	18.000, -0.004	18.000, -0.004	18.000, -0.004	18.000, -0.005	18.000, -0.005	18.000, -0.002	18.000, -0.007	18.000, -0.005	18.000, -0.003	18.000, -0.005	18.000, -0.007	18.000, -0.003	18.000, -0.002	18.000, -0.002	18.000, -0.006
92	18.200, -0.004	18.200, -0.004	18.200, -0.004	18.200, -0.005	18.200, -0.005	18.200, -0.002	18.200, -0.007	18.200, -0.005	18.200, -0.003	18.200, -0.005	18.200, -0.007	18.200, -0.003	18.200, -0.002	18.200, -0.002	18.200, -0.005
93	18.400, -0.004	18.400, -0.004	18.400, -0.004	18.400, -0.005	18.400, -0.005	18.400, -0.003	18.400, -0.007	18.400, -0.005	18.400, -0.003	18.400, -0.005	18.400, -0.007	18.400, -0.003	18.400, -0.002	18.400, -0.002	18.400, -0.005
94	18.600, -0.004	18.600, -0.004	18.600, -0.004	18.600, -0.005	18.600, -0.004	18.600, -0.003	18.600, -0.007	18.600, -0.004	18.600, -0.003	18.600, -0.005	18.600, -0.007	18.600, -0.003	18.600, -0.002	18.600, -0.002	18.600, -0.005
95	18.800, -0.004	18.800, -0.003	18.800, -0.004	18.800, -0.005	18.800, -0.004	18.800, -0.003	18.800, -0.007	18.800, -0.004	18.800, -0.003	18.800, -0.005	18.800, -0.007	18.800, -0.003	18.800, -0.001	18.800, -0.002	18.800, -0.004
96	19.000, -0.004	19.000, -0.003	19.000, -0.004	19.000, -0.004	19.000, -0.004	19.000, -0.003	19.000, -0.007	19.000, -0.004	19.000, -0.003	19.000, -0.005	19.000, -0.007	19.000, -0.003	19.000, -0.001	19.000, -0.002	19.000, -0.004
97	19.200, -0.004	19.200, -0.003	19.200, -0.004	19.200, -0.004	19.200, -0.004	19.200, -0.003	19.200, -0.007	19.200, -0.004	19.200, -0.003	19.200, -0.005	19.200, -0.007	19.200, -0.003	19.200, -0.001	19.200, -0.002	19.200, -0.003
98	19.400, -0.004	19.400, -0.003	19.400, -0.004	19.400, -0.004	19.400, -0.004	19.400, -0.003	19.400, -0.007	19.400, -0.004	19.400, -0.003	19.400, -0.004	19.400, -0.006	19.400, -0.003	19.400, -0.001	19.400, -0.001	19.400, -0.003
99	19.600, -0.004	19.600, -0.002	19.600, -0.004	19.600, -0.003	19.600, -0.004	19.600, -0.003	19.600, -0.007	19.600, -0.004	19.600, -0.003	19.600, -0.004	19.600, -0.006	19.600, -0.003	19.600, -0.001	19.600, -0.001	19.600, -0.003
100	19.800, -0.004	19.800, -0.002	19.800, -0.003	19.800, -0.003	19.800, -0.004	19.800, -0.003	19.800, -0.006	19.800, -0.004	19.800, -0.003	19.800, -0.004	19.800, -0.006	19.800, -0.003	19.800, -0.001	19.800, -0.001	19.800, -0.003
101	20.000, -0.004	20.000, -0.002	20.000, -0.003	20.000, -0.003	20.000, -0.004	20.000, -0.003	20.000, -0.006	20.000, -0.003	20.000, -0.003	20.000, -0.003	20.000, -0.006	20.000, -0.003	20.000, -0.001	20.000, -0.001	20.000, -0.003
102	20.200, -0.003	20.200, -0.002	20.200, -0.003	20.200, -0.003	20.200, -0.003	20.200, -0.003	20.200, -0.006	20.200, -0.003	20.200, -0.003	20.200, -0.003	20.200, -0.006	20.200, -0.003	20.200, -0.001	20.200, -0.001	20.200, -0.003
103	20.400, -0.003	20.400, -0.002	20.400, -0.003	20.400, -0.003	20.400, -0.003	20.400, -0.003	20.400, -0.005	20.400, -0.003	20.400, -0.003	20.400, -0.003	20.400, -0.006	20.400, -0.003	20.400, -0.001	20.400, -0.001	20.400, -0.003
104	20.600, -0.002	20.600, -0.002	20.600, -0.003	20.600, -0.003	20.600, -0.003	20.600, -0.003	20.600, -0.005	20.600, -0.002	20.600, -0.004	20.600, -0.003	20.600, -0.006	20.600, -0.002	20.600, -0.000	20.600, -0.001	20.600, -0.004
105	20.800, -0.002	20.800, -0.002	20.800, -0.003	20.800, -0.003	20.800, -0.003	20.800, -0.003	20.800, -0.005	20.800, -0.002	20.800, -0.003	20.800, -0.003	20.800, -0.005	20.800, -0.002	20.800, -0.000	20.800, -0.001	20.800, -0.004
106	21.000, -0.001	21.000, -0.002	21.000, -0.003	21.000, -0.003	21.000, -0.003	21.000, -0.003	21.000, -0.004	21.000, -0.002	21.000, -0.003	21.000, -0.003	21.000, -0.005	21.000, -0.002	21.000, -0.000	21.000, -0.001	21.000, -0.004
107	21.200, -0.001	21.200, -0.002	21.200, -0.003	21.200, -0.003	21.200, -0.002	21.200, -0.003	21.200, -0.004	21.200, -0.001	21.200, -0.003	21.200, -0.003	21.200, -0.005	21.200, -0.002	21.200, -0.000	21.200, -0.001	21.200, -0.004
108	21.400, -0.001	21.400, -0.002	21.400, -0.004	21.400, -0.003	21.400, -0.002	21.400, -0.003	21.400, -0.004	21.400, -0.001	21.400, -0.003	21.400, -0.003	21.400, -0.005	21.400, -0.001	21.400, -0.000	21.400, -0.001	21.400, -0.004
109	21.600, -0.002	21.600, -0.002	21.600, -0.004	21.600, -0.003	21.600, -0.002	21.600, -0.004	21.600, -0.004	21.600, -0.001	21.600, -0.002	21.600, -0.002	21.600, -0.005	21.600, -0.001	21.600, -0.001	21.600, -0.001	21.600, -0.004
110	21.800, -0.002	21.800, -0.002	21.800, -0.004	21.800, -0.003	21.800, -0.002	21.800, -0.004	21.800, -0.004	21.800, -0.000	21.800, -0.002	21.800, -0.002	21.800, -0.005	21.800, -0.001	21.800, -0.001	21.800, -0.001	21.800, -0.004
111	22.000, -0.002	22.000, -0.002	22.000, -0.004	22.000, -0.003	22.000, -0.002	22.000, -0.003	22.000, -0.004	22.000, -0.000	22.000, -0.002	22.000, -0.002	22.000, -0.005	22.000, -0.000	22.000, -0.001	22.000, -0.001	22.000, -0.003
112	22.200, -0.002	22.200, -0.002	22.200, -0.004	22.200, -0.003	22.200, -0.002	22.200, -0.003	22.200, -0.003	22.200, -0.000	22.200, -0.002	22.200, -0.002	22.200, -0.005	22.200, -0.000	22.200, -0.001	22.200, -0.001	22.200, -0.003
113	22.400, -0.002	22.400, -0.002	22.400, -0.004	22.400, -0.003	22.400, -0.002	22.400, -0.003	22.400, -0.003	22.400, -0.001	22.400, -0.002	22.400, -0.002	22.400, -0.005	22.400, -0.000	22.400, -0.001	22.400, -0.001	22.400, -0.003
114	22.600, -0.002	22.600, -0.002	22.600, -0.004	22.600, -0.004	22.600, -0.002	22.600, -0.003	22.600, -0.003	22.600, -0.001	22.600, -0.001	22.600, -0.002	22.600, -0.005	22.600, -0.000	22.600, -0.001	22.600, -0.001	22.600, -0.003
115	22.800, -0.003	22.800, -0.002	22.800, -0.004	22.800, -0.004	22.800, -0.002	22.800, -0.002	22.800, -0.003	22.800, -0.001	22.800, -0.001	22.800, -0.002	22.800, -0.005	22.800, -0.000	22.800, -0.001	22.800, -0.001	22.800, -0.003
116	23.000, -0.003	23.000, -0.002	23.000, -0.004	23.000, -0.004	23.000, -0.002	23.000, -0.002	23.000, -0.003	23.000, -0.002	23.000, -0.001	23.000, -0.002	23.000, -0.005	23.000, -0.000	23.000, -0.001	23.000, -0.001	23.000, -0.002
117	23.200, -0.003	23.200, -0.002	23.200, -0.004	23.200, -0.003	23.200, -0.002	23.200, -0.002	23.200, -0.003	23.200, -0.002	23.200, -0.001	23.200, -0.002	23.200, -0.005	23.200, -0.000	23.200, -0.001	23.200, -0.001	23.200, -0.002
118	23.400, -0.003	23.400, -0.002	23.400, -0.003	23.400, -0.003	23.400, -0.002	23.400, -0.001	23.400, -0.003	23.400, -0.003	23.400, -0.001	23.400, -0.002	23.400, -0.004	23.400, -0.000	23.400, -0.001	23.400, -0.001	23.400, -0.002
119	23.600, -0.002	23.600, -0.002	23.600, -0.003	23.600, -0.003	23.600, -0.002	23.600, -0.001	23.600, -0.003	23.600, -0.003	23.600, -0.001	23.600, -0.002	23.600, -0.004	23.600, -0.000	23.600, -0.001	23.600, -0.002	23.600, -0.002
120	23.800, -0.002	23.800, -0.002	23.800, -0.003	23.800, -0.003	23.800, -0.002	23.800, -0.001	23.800, -0.003	23.800, -0.003	23.800, -0.001	23.800, -0.002	23.800, -0.003	23.800, -0.000	23.800, -0.001	23.800, -0.001	23.800, -0.002
121	24.000, -0.001	24.000, -0.001	24.000, -0.003	24.000, -0.003	24.000, -0.001	24.000, -0.001	24.000, -0.003	24.000, -0.003	24.000, -0.001	24.000, -0.001	24.000, -0.003	24.000, -0.000	24.000, -0.001	24.000, -0.001	24.000, -0.002
122	24.200, -0.001	24.200, -0.001	24.200, -0.003	24.200, -0.003	24.200, -0.001	24.200, -0.001	24.200, -0.003	24.200, -0.004	24.200, -0.001	24.200, -0.001	24.200, -0.002	24.200, 0.000	24.200, -0.000	24.200, -0.001	24.200, -0.002
123	24.400, -0.000	24.400, -0.001	24.400, -0.003	24.400, -0.003	24.400, -0.001	24.400, -0.001	24.400, -0.003	24.400, -0.004	24.400, -0.001	24.400, -0.001	24.400, -0.002	24.400, 0.000	24.400, -0.000	24.400, -0.001	24.400, -0.002
124	24.600, 0.000	24.600, -0.001	24.600, -0.003	24.600, -0.003	24.600, -0.001	24.600, -0.001	24.600, -0.002	24.600, -0.003	24.600, -0.001	24.600, -0.001	24.600, -0.002	24.600, 0.000	24.600, -0.000	24.600, -0.001	24.600, -0.002
125	24.800, 0.000	24.800, -0.001	24.800, -0.003	24.800, -0.002	24.800, -0.001	24.800, -0.001	24.800, -0.002	24.800, -0.003	24.800, -0.001	24.800, -0.001	24.800, -0.001	24.800, 0.000	24.800, -0.000	24.800, -0.000	24.800, -0.002
126	25.000, 0.001	25.000, -0.001	25.000, -0.003	25.000, -0.002	25.000, -0.000	25.000, -0.001	25.000, -0.002	25.000, -0.003	25.000, -0.001	25.000, -0.001	25.000, -0.001	25.000, 0.000	25.000, -0.001	25.000, -0.000	25.000, -0.002
127	25.200, 0.001	25.200, -0.001	25.200, -0.002	25.200, -0.002	25.200, -0.000	25.200, -0.001	25.200, -0.002	25.200, -0.003	25.200, -0.000	25.200, -0.001	25.200, -0.001	25.200, 0.000	25.200, -0.001	25.200, 0.000	25.200, -0.002
128	25.400, 0.001	25.400, -0.001	25.400, -0.002	25.400, -0.002	25.400, -0.000	25.400, -0.001	25.400, -0.002	25.400, -0.002	25.400, -0.000	25.400, -0.002	25.400, -0.001	25.400, 0.000	25.400, -0.001	25.400, 0.000	25.400, -0.002
129	25.600, 0.000	25.600, -0.001	25.600, -0.002	25.600, -0.001	25.600, -0.001	25.600, -0.001	25.600, -0.002	25.600, -0.002	25.600, -0.000	25.600, -0.002	25.600, -0.001	25.600, 0.001	25.600, -0.001	25.600, 0.001	25.600, -0.002
130	25.800, 0.000	25.800, -0.001	25.800, -0.001	25.800, -0.001	25.800, -0.001	25.800, -0.001	25.800, -0.001	25.800, -0.002	25.800, -0.000	25.800, -0.001	25.800, -0.001	25.800, 0.000	25.800, -0.001	25.800, 0.001	25.800, -0.001
131	26.000, 0.000	26.000, -0.001	26.000, -0.001	26.000, -0.001	26.000, -0.001	26.000, -0.001	26.000, -0.001	26.000, -0.002	26.000, -0.000	26.000, -0.001	26.000, -0.002	26.000, 0.000	26.000, -0.001	26.000, 0.001	26.000, -0.001
132	26.200, -0.000	26.200, -0.001	26.200, -0.001	26.200, -0.001	26.200, -0.001	26.200, -0.001	26.200, -0.001	26.200, -0.002	26.200, -0.000	26.200, -0.001	26.200, -0.002	26.200, 0.000	26.200, -0.001	26.200, 0.001	26.200, -0.001
133	26.400, -0.000	26.400, -0.001	26.400, -0.000	26.400, -0.001	26.400, -0.001	26.400, -0.001	26.400, -0.001	26.400, -0.001	26.400, 0.000	26.400, -0.001	26.400, -0.002	26.400, 0.000	26.400, -0.000	26.400, 0.001	26.400, -0.001
134	26.600, -0.000	26.600, -0.001	26.600, 0.000	26.600, -0.001	26.600, -0.001	26.600, -0.001	26.600, -0.001	26.600, -0.001	26.600, 0.000	26.600, -0.000	26.600, -0.002	26.600, -0.000	26.600, -0.000	26.600, 0.001	26.600, -0.001
135	26.800, -0.000	26.800, -0.001	26.800, 0.001	26.800, -0.001	26.800, -0.001	26.800, -0.001	26.800, -0.000	26.800, -0.001	26.800, 0.000	26.800, -0.000	26.800, -0.002	26.800, -0.000	26.800, -0.000	26.800, 0.000	26.800, -0.001
136	27.000, -0.000	27.000, -0.001	27.000, 0.001	27.000, -0.001	27.000, -0.001	27.000, -0.001	27.000, -0.000	27.000, -0.001	27.000, 0.000	27.000, 0.000	27.000, -0.001	27.000, -0.000	27.000, -0.000	27.000, 0.000	27.000, -0.000
137	27.200, 0.000	27.200, -0.000	27.200, 0.001	27.200, -0.001	27.200, -0.001	27.200, -0.001	27.200, -0.000	27.200, -0.001	27.200, 0.000	27.200, 0.000	27.200, -0.001	27.200, -0.000	27.200, 0.000	27.200, -0.000	27.200, -0.000
138	27.400, 0.000	27.400, -0.000	27.400, 0.001	27.400, -0.001	27.400, -0.001	27.400, -0.001	27.400, -0.000	27.400, -0.001	27.400, 0.000	27.400, 0.000	27.400, -0.001	27.400, -0.000	27.400, 0.000	27.400, -0.000	27.400, 0.000
139	27.600, 0.000	27.600, 0.000	27.600, 0.001	27.600, -0.001	27.600, -0.000	27.600, -0.000	27.600, -0.000	27.600, -0.000	27.600, 0.000	27.600, 0.001	27.600, -0.001	27.600, -0.000	27.600, 0.000	27.600, -0.000	27.600, 0.000
140	27.800, 0.000	27.800, 0.000	27.800, 0.001	27.800, -0.001	27.800, -0.000	27.800, -0.000	27.800, -0.001	27.800, -0.000	27.800, 0.000	27.800, 0.001	27.800, -0.001	27.800, -0.000	27.800, 0.000	27.800, -0.000	27.800, 0.000
141	28.000, 0.000	28.000, 0.000	28.000, 0.000	28.000, -0.001	28.000, -0.000	28.000, -0.000	28.000, -0.000	28.000, 0.000	28.000, 0.000	28.000, 0.001	28.000, -0.000	28.000, -0.000	28.000, 0.000	28.000, -0.000	28.000, 0.000
142	28.200, 0.000	28.200, 0.000	28.200, 0.000	28.200, -0.000	28.200, 0.000	28.200, -0.000	28.200, -0.000	28.200, 0.000	28.200, 0.000	28.200, 0.001	28.200, -0.000	28.200, -0.000	28.200, 0.000	28.200, -0.000	28.200, 0.000
143	28.400, 0.000	28.400, 0.000	28.400, -0.000	28.400, -0.000	28.400, 0.000	28.400, -0.000	28.400, -0.000	28.400, 0.000	28.400, 0.000	28.400, 0.000	28.400, 0.000	28.400, -0.000	28.400, 0.000	28.400, -0.000	28.400, -0.000
144	28.600, 0.000	28.600, 0.000	28.600, -0.000	28.600, 0.000	28.600, 0.000	28.600, 0.000	28.600, -0.000	28.600, 0.000	28.600, 0.000	28.600, 0.000	28.600, 0.000	28.600, 0.000	28.600, 0.000	28.600, -0.000	28.600, -0.000
145	28.800, 0.000	28.800, 0.000	28.800, -0.000	28.800, 0.000	28.800, 0.000	28.800, 0.000	28.800, 0.000	28.800, 0.000	28.800, -0.000	28.800, -0.000	28.800, 0.001	28.800, 0.000	28.800, -0.000	28.800, 0.000	28.800, -0.000
146	29.000, -0.000	29.000, 0.000	29.000, -0.001	29.000, 0.001	29.000, 0.001	29.000, 0.000	29.000, 0.000	29.000, 0.000	29.000, -0.000	29.000, -0.000	29.000, 0.001	29.000, 0.000	29.000, -0.000	29.000, 0.000	29.000, -0.000
147	29.200, -0.000	29.200, 0.000	29.200, -0.001	29.200, 0.001	29.200, 0.001	29.200, 0.001	29.200, 0.000	29.200, 0.000	29.200, -0.000	29.200, -0.001	29.200, 0.001	29.200, 0.000	29.200, -0.000	29.200, 0.000	29.200, -0.000
148	29.400, -0.000	29.400, -0.000	29.400, -0.001	29.400, 0.001	29.400, 0.000	29.400, 0.001	29.400, 0.001	29.400, 0.000	29.400, -0.000	29.400, -0.001	29.400, 0.001	29.400, 0.000	29.400, -0.000	29.400, 0.000	29.400, -0.000
149	29.600, -0.000	29.600, -0.000	29.600, -0.001	29.600, 0.001	29.600, 0.000	29.600, 0.001	29.600, 0.001	29.600, 0.000	29.600, -0.001	29.600, -0.001	29.600, 0.001	29.600, 0.000	29.600, -0.000	29.600, 0.000	29.600, -0.000
150	29.800, -0.000	29.800, -0.000	29.800, -0.001	29.800, 0.001	29.800, 0.000	29.800, 0.001	29.800, 0.001	29.800, 0.000	29.800, -0.001	29.800, -0.001	29.800, 0.001	29.800, 0.000	29.800, -0.001	29.800, 0.000	29.800, -0.000
151	30.000, 0.000	30.000, 0.000	30.000, 0.000	30.000, 0.000	30.000, 0.000	30.000, 0.000	30.000, 0.000	30.000, 0.000	30.000, 0.000	30.000, 0.000	30.000, 0.000	30.000, 0.000	30.000, 0.000	30.000, 0.000	30.000, 0.000
152	30.200, 0.001	30.200, -0.001	30.200, 0.004	30.200, 0.003	30.200, 0.000	30.200, 0.001	30.200, 0.005	30.200, 0.000	30.200, -0.000	30.200, 0.002	30.200, 0.005	30.200, 0.003	30.200, 0.001	30.200, -0.001	30.200, 0.001
153	30.400, 0.003	30.400, -0.000	30.400, 0.010	30.400, 0.008	30.400, 0.001	30.400, 0.003	30.400, 0.012	30.400, 0.002	30.400, 0.001	30.400, 0.006	30.400, 0.012	30.400, 0.007	30.400, 0.003	30.400, -0.002	30.400, 0.004
154	30.600, 0.006	30.600, 0.001	30.600, 0.018	30.600, 0.014	30.600, 0.004	30.600, 0.007	30.600, 0.020	30.600, 0.005	30.600, 0.003	30.600, 0.011	30.600, 0.020	30.600, 0.012	30.600, 0.006	30.600, -0.001	30.600, 0.009
155	30.800, 0.011	30.800, 0.004	30.800, 0.027	30.800, 0.023	30.800, 0.008	30.800, 0.012	30.800, 0.030	30.800, 0.009	30.800, 0.006	30.800, 0.017	30.800, 0.029	30.800, 0.020	30.800, 0.012	30.800, 0.001	30.800, 0.016
156	31.000, 0.016	31.000, 0.009	31.000, 0.038	31.000, 0.032	31.000, 0.013	31.000, 0.018	31.000, 0.042	31.000, 0.016	31.000, 0.010	31.000, 0.024	31.000, 0.040	31.000, 0.029	31.000, 0.018	31.000, 0.003	31.000, 0.025
157	31.200, 0.023	31.200, 0.015	31.200, 0.051	31.200, 0.044	31.200, 0.019	31.200, 0.026	31.200, 0.054	31.200, 0.024	31.200, 0.015	31.200, 0.031	31.200, 0.052	31.200, 0.039	31.200, 0.027	31.200, 0.008	31.200, 0.036
158	31.400, 0.031	31.400, 0.023	31.400, 0.064	31.400, 0.056	31.400, 0.027	31.400, 0.035	31.400, 0.068	31.400, 0.033	31.400, 0.021	31.400, 0.040	31.400, 0.065	31.400, 0.050	31.400, 0.037	31.400, 0.013	31.400, 0.049
159	31.600, 0.040	31.600, 0.032	31.600, 0.078	31.600, 0.070	31.600, 0.035	31.600, 0.046	31.600, 0.081	31.600, 0.044	31.600, 0.029	31.600, 0.049	31.600, 0.079	31.600, 0.062	31.600, 0.048	31.600, 0.020	31.600, 0.064
160	31.800, 0.050	31.800, 0.042	31.800, 0.093	31.800, 0.084	31.800, 0.045	31.800, 0.057	31.800, 0.096	31.800, 0.056	31.800, 0.037	31.800, 0.059	31.800, 0.092	31.800, 0.075	31.800, 0.061	31.800, 0.029	31.800, 0.081
161	32.000, 0.060	32.000, 0.053	32.000, 0.107	32.000, 0.098	32.000, 0.054	32.000, 0.068	32.000, 0.110	32.000, 0.069	32.000, 0.046	32.000, 0.069	32.000, 0.105	32.000, 0.088	32.000, 0.075	32.000, 0.038	32.000, 0.100
162	32.200, 0.070	32.200, 0.065	32.200, 0.121	32.200, 0.112	32.200, 0.065	32.200, 0.080	32.200, 0.123	32.200, 0.083	32.200, 0.055	32.200, 0.078	32.200, 0.118	32.200, 0.101	32.200, 0.090	32.200, 0.049	32.200, 0.119
163	32.400, 0.080	32.400, 0.075	32.400, 0.134	32.400, 0.124	32.400, 0.074	32.400, 0.091	32.400, 0.135	32.400, 0.095	32.400, 0.065	32.400, 0.087	32.400, 0.129	32.400, 0.113	32.400, 0.104	32.400, 0.060	32.400, 0.137
164	32.600, 0.088	32.600, 0.085	32.600, 0.144	32.600, 0.134	32.600, 0.082	32.600, 0.101	32.600, 0.145	32.600, 0.106	32.600, 0.073	32.600, 0.095	32.600, 0.139	32.600, 0.124	32.600, 0.117	32.600, 0.070	32.600, 0.155
165	32.800, 0.096	32.800, 0.094	32.800, 0.154	32.800, 0.144	32.800, 0.089	32.800, 0.110	32.800, 0.154	32.800, 0.115	32.800, 0.081	32.800, 0.102	32.800, 0.147	32.800, 0.133	32.800, 0.130	32.800, 0.080	32.800, 0.172
166	33.000, 0.103	33.000, 0.102	33.000, 0.163	33.000, 0.153	33.000, 0.096	33.000, 0.118	33.000, 0.162	33.000, 0.124	33.000, 0.089	33.000, 0.108	33.000, 0.155	33.000, 0.142	33.000, 0.143	33.000, 0.089	33.000, 0.190
167	33.200, 0.109	33.200, 0.109	33.200, 0.170	33.200, 0.160	33.200, 0.102	33.200, 0.125	33.200, 0.169	33.200, 0.131	33.200, 0.095	33.200, 0.113	33.200, 0.161	33.200, 0.149	33.200, 0.156	33.200, 0.099	33.200, 0.206
168	33.400, 0.114	33.400, 0.116	33.400, 0.176	33.400, 0.166	33.400, 0.106	33.400, 0.131	33.400, 0.175	33.400, 0.137	33.400, 0.101	33.400, 0.117	33.400, 0.166	33.400, 0.155	33.400, 0.169	33.400, 0.107	33.400, 0.222
169	33.600, 0.119	33.600, 0.121	33.600, 0.181	33.600, 0.171	33.600, 0.110	33.600, 0.136	33.600, 0.180	33.600, 0.142	33.600, 0.105	33.600, 0.120	33.600, 0.171	33.600, 0.160	33.600, 0.182	33.600, 0.116	33.600, 0.238
170	33.800, 0.122	33.800, 0.126	33.800, 0.185	33.800, 0.175	33.800, 0.114	33.800, 0.140	33.800, 0.185	33.800, 0.147	33.800, 0.110	33.800, 0.123	33.800, 0.175	33.800, 0.164	33.800, 0.194	33.800, 0.125	33.800, 0.253
171	34.000, 0.125	34.000, 0.130	34.000, 0.189	34.000, 0.178	34.000, 0.117	34.000, 0.144	34.000, 0.189	34.000, 0.151	34.000, 0.113	34.000, 0.126	34.000, 0.178	34.000, 0.168	34.000, 0.206	34.000, 0.134	34.000, 0.268
172	34.200, 0.128	34.200, 0.133	34.200, 0.192	34.200, 0.182	34.200, 0.119	34.200, 0.147	34.200, 0.193	34.200, 0.155	34.200, 0.116	34.200, 0.128	34.200, 0.180	34.200, 0.172	34.200, 0.218	34.200, 0.142	34.200, 0.282
173	34.400, 0.130	34.400, 0.137	34.400, 0.195	34.400, 0.184	34.400, 0.122	34.400, 0.149	34.400, 0.196	34.400, 0.158	34.400, 0.119	34.400, 0.130	34.400, 0.183	34.400, 0.174	34.400, 0.230	34.400, 0.151	34.400, 0.297
174	34.600, 0.132	34.600, 0.140	34.600, 0.198	34.600, 0.187	34.600, 0.124	34.600, 0.152	34.600, 0.198	34.600, 0.161	34.600, 0.121	34.600, 0.132	34.600, 0.184	34.600, 0.177	34.600, 0.241	34.600, 0.159	34.600, 0.311
175	34.800, 0.133	34.800, 0.142	34.800, 0.201	34.800, 0.189	34.800, 0.127	34.800, 0.154	34.800, 0.201	34.800, 0.163	34.800, 0.123	34.800, 0.133	34.800, 0.186	34.800, 0.179	34.800, 0.253	34.800, 0.167	34.800, 0.325
176	35.000, 0.135	35.000, 0.145	35.000, 0.203	35.000, 0.191	35.000, 0.128	35.000, 0.155	35.000, 0.203	35.000, 0.166	35.000, 0.125	35.000, 0.135	35.000, 0.187	35.000, 0.180	35.000, 0.264	35.000, 0.176	35.000, 0.339
177	35.200, 0.136	35.200, 0.147	35.200, 0.205	35.200, 0.193	35.200, 0.130	35.200, 0.157	35.200, 0.205	35.200, 0.168	35.200, 0.126	35.200, 0.136	35.200, 0.189	35.200, 0.182	35.200, 0.275	35.200, 0.184	35.200, 0.352
178	35.400, 0.137	35.400, 0.149	35.400, 0.207	35.400, 0.194	35.400, 0.131	35.400, 0.158	35.400, 0.206	35.400, 0.170	35.400, 0.127	35.400, 0.137	35.400, 0.190	35.400, 0.183	35.400, 0.286	35.400, 0.192	35.400, 0.366
179	35.600, 0.138	35.600, 0.151	35.600, 0.209	35.600, 0.196	35.600, 0.133	35.600, 0.159	35.600, 0.208	35.600, 0.172	35.600, 0.129	35.600, 0.138	35.600, 0.191	35.600, 0.184	35.600, 0.297	35.600, 0.201	35.600, 0.379
180	35.800, 0.139	35.800, 0.152	35.800, 0.210	35.800, 0.198	35.800, 0.134	35.800, 0.160	35.800, 0.209	35.800, 0.174	35.800, 0.130	35.800, 0.139	35.800, 0.191	35.800, 0.185	35.800, 0.307	35.800, 0.209	35.800, 0.391
181	36.000, 0.140	36.000, 0.154	36.000, 0.212	36.000, 0.199	36.000, 0.135	36.000, 0.161	36.000, 0.211	36.000, 0.175	36.000, 0.130	36.000, 0.140	36.000, 0.192	36.000, 0.185	36.000, 0.317	36.000, 0.217	36.000, 0.404
182	36.200, 0.141	36.200, 0.155	36.200, 0.214	36.200, 0.200	36.200, 0.137	36.200, 0.162	36.200, 0.212	36.200, 0.176	36.200, 0.131	36.200, 0.141	36.200, 0.193	36.200, 0.186	36.200, 0.327	36.200, 0.225	36.200, 0.416
183	36.400, 0.141	36.400, 0.156	36.400, 0.215	36.400, 0.202	36.400, 0.138	36.400, 0.163	36.400, 0.213	36.400, 0.178	36.400, 0.132	36.400, 0.141	36.400, 0.193	36.400, 0.187	36.400, 0.337	36.400, 0.232	36.400, 0.428
184	36.600, 0.142	36.600, 0.157	36.600, 0.216	36.600, 0.203	36.600, 0.139	36.600, 0.164	36.600, 0.214	36.600, 0.178	36.600, 0.133	36.600, 0.142	36.600, 0.194	36.600, 0.189	36.600, 0.346	36.600, 0.240	36.600, 0.440
185	36.800, 0.143	36.800, 0.158	36.800, 0.218	36.800, 0.204	36.800, 0.140	36.800, 0.165	36.800, 0.215	36.800, 0.179	36.800, 0.134	36.800, 0.142	36.800, 0.194	36.800, 0.190	36.800, 0.356	36.800, 0.248	36.800, 0.451
186	37.000, 0.144	37.000, 0.159	37.000, 0.219	37.000, 0.206	37.000, 0.141	37.000, 0.166	37.000, 0.216	37.000, 0.180	37.000, 0.135	37.000, 0.143	37.000, 0.194	37.000, 0.191	37.000, 0.365	37.000, 0.255	37.000, 0.462
187	37.200, 0.145	37.200, 0.160	37.200, 0.220	37.200, 0.207	37.200, 0.142	37.200, 0.167	37.200, 0.217	37.200, 0.181	37.200, 0.136	37.200, 0.143	37.200, 0.195	37.200, 0.192	37.200, 0.375	37.200, 0.263	37.200, 0.474
188	37.400, 0.146	37.400, 0.161	37.400, 0.221	37.400, 0.208	37.400, 0.143	37.400, 0.169	37.400, 0.219	37.400, 0.181	37.400, 0.136	37.400, 0.144	37.400, 0.195	37.400, 0.193	37.400, 0.384	37.400, 0.270	37.400, 0.484
189	37.600, 0.147	37.600, 0.162	37.600, 0.222	37.600, 0.208	37.600, 0.144	37.600, 0.169	37.600, 0.220	37.600, 0.182	37.600, 0.137	37.600, 0.145	37.600, 0.196	37.600, 0.195	37.600, 0.393	37.600, 0.278	37.600, 0.495
190	37.800, 0.147	37.800, 0.164	37.800, 0.223	37.800, 0.209	37.800, 0.145	37.800, 0.170	37.800, 0.221	37.800, 0.183	37.800, 0.138	37.800, 0.145	37.800, 0.197	37.800, 0.196	37.800, 0.402	37.800, 0.285	37.800, 0.506
191	38.000, 0.148	38.000, 0.165	38.000, 0.225	38.000, 0.210	38.000, 0.146	38.000, 0.171	38.000, 0.223	38.000, 0.183	38.000, 0.139	38.000, 0.146	38.000, 0.197	38.000, 0.198	38.000, 0.410	38.000, 0.292	38.000, 0.516
192	38.200, 0.149	38.200, 0.166	38.200, 0.226	38.200, 0.211	38.200, 0.146	38.200, 0.171	38.200, 0.224	38.200, 0.184	38.200, 0.140	38.200, 0.147	38.200, 0.198	38.200, 0.199	38.200, 0.418	38.200, 0.299	38.200, 0.525
193	38.400, 0.149	38.400, 0.167	38.400, 0.227	38.400, 0.212	38.400, 0.147	38.400, 0.172	38.400, 0.225	38.400, 0.185	38.400, 0.141	38.400, 0.148	38.400, 0.199	38.400, 0.201	38.400, 0.427	38.400, 0.305	38.400, 0.535
194	38.600, 0.150	38.600, 0.168	38.600, 0.228	38.600, 0.213	38.600, 0.148	38.600, 0.172	38.600, 0.226	38.600, 0.186	38.600, 0.142	38.600, 0.149	38.600, 0.201	38.600, 0.202	38.600, 0.435	38.600, 0.312	38.600, 0.545
195	38.800, 0.150	38.800, 0.169	38.800, 0.229	38.800, 0.214	38.800, 0.148	38.800, 0.173	38.800, 0.227	38.800, 0.187	38.800, 0.143	38.800, 0.150	38.800, 0.201	38.800, 0.203	38.800, 0.443	38.800, 0.318	38.800, 0.554
196	39.000, 0.151	39.000, 0.170	39.000, 0.230	39.000, 0.215	39.000, 0.149	39.000, 0.173	39.000, 0.228	39.000, 0.188	39.000, 0.144	39.000, 0.151	39.000, 0.202	39.000, 0.204	39.000, 0.451	39.000, 0.324	39.000, 0.564
197	39.200, 0.151	39.200, 0.170	39.200, 0.231	39.200, 0.216	39.200, 0.150	39.200, 0.174	39.200, 0.229	39.200, 0.188	39.200, 0.145	39.200, 0.152	39.200, 0.203	39.200, 0.205	39.200, 0.459	39.200, 0.330	39.200, 0.573
198	39.400, 0.151	39.400, 0.171	39.400, 0.232	39.400, 0.217	39.400, 0.150	39.400, 0.174	39.400, 0.230	39.400, 0.189	39.400, 0.146	39.400, 0.153	39.400, 0.204	39.400, 0.206	39.400, 0.467	39.400, 0.336	39.400, 0.583
199	39.600, 0.151	39.600, 0.172	39.600, 0.233	39.600, 0.218	39.600, 0.151	39.600, 0.175	39.600, 0.230	39.600, 0.190	39.600, 0.147	39.600, 0.154	39.600, 0.205	39.600, 0.207	39.600, 0.476	39.600, 0.343	39.600, 0.592
200	39.800, 0.152	39.800, 0.173	39.800, 0.233	39.800, 0.219	39.800, 0.152	39.800, 0.175	39.800, 0.231	39.800, 0.191	39.800, 0.147	39.800, 0.155	39.800, 0.206	39.800, 0.208	39.800, 0.484	39.800, 0.349	39.800, 0.601
201	40.000, 0.152	40.000, 0.173	40.000, 0.234	40.000, 0.220	40.000, 0.152	40.000, 0.176	40.000, 0.232	40.000, 0.192	40.000, 0.148	40.000, 0.156	40.000, 0.207	40.000, 0.208	40.000, 0.492	40.000, 0.355	40.000, 0.610
202	40.200, 0.152	40.200, 0.174	40.200, 0.234	40.200, 0.222	40.200, 0.153	40.200, 0.176	40.200, 0.233	40.200, 0.193	40.200, 0.149	40.200, 0.156	40.200, 0.208	40.200, 0.209	40.200, 0.500	40.200, 0.361	40.200, 0.620
203	40.400, 0.153	40.400, 0.174	40.400, 0.235	40.400, 0.223	40.400, 0.153	40.400, 0.177	40.400, 0.233	40.400, 0.194	40.400, 0.150	40.400, 0.157	40.400, 0.209	40.400, 0.210	40.400, 0.508	40.400, 0.367	40.400, 0.629
204	40.600, 0.153	40.600, 0.174	40.600, 0.236	40.600, 0.223	40.600, 0.154	40.600, 0.177	40.600, 0.234	40.600, 0.195	40.600, 0.150	40.600, 0.157	40.600, 0.209	40.600, 0.210	40.600, 0.516	40.600, 0.374	40.600, 0.638
205	40.800, 0.154	40.800, 0.174	40.800, 0.237	40.800, 0.224	40.800, 0.155	40.800, 0.178	40.800, 0.235	40.800, 0.196	40.800, 0.151	40.800, 0.158	40.800, 0.210	40.800, 0.211	40.800, 0.524	40.800, 0.380	40.800, 0.647
206	41.000, 0.155	41.000, 0.175	41.000, 0.238	41.000, 0.225	41.000, 0.156	41.000, 0.178	41.000, 0.236	41.000, 0.197	41.000, 0.151	41.000, 0.158	41.000, 0.211	41.000, 0.212	41.000, 0.532	41.000, 0.386	41.000, 0.655
207	41.200, 0.156	41.200, 0.175	41.200, 0.239	41.200, 0.226	41.200, 0.157	41.200, 0.179	41.200, 0.237	41.200, 0.198	41.200, 0.152	41.200, 0.158	41.200, 0.212	41.200, 0.213	41.200, 0.539	41.200, 0.392	41.200, 0.664
208	41.400, 0.156	41.400, 0.176	41.400, 0.240	41.400, 0.227	41.400, 0.157	41.400, 0.180	41.400, 0.238	41.400, 0.199	41.400, 0.152	41.400, 0.159	41.400, 0.213	41.400, 0.213	41.400, 0.546	41.400, 0.398	41.400, 0.673
209	41.600, 0.157	41.600, 0.177	41.600, 0.241	41.600, 0.228	41.600, 0.158	41.600, 0.180	41.600, 0.239	41.600, 0.199	41.600, 0.153	41.600, 0.159	41.600, 0.214	41.600, 0.215	41.600, 0.554	41.600, 0.404	41.600, 0.681
210	41.800, 0.158	41.800, 0.178	41.800, 0.242	41.800, 0.228	41.800, 0.159	41.800, 0.181	41.800, 0.240	41.800, 0.200	41.800, 0.154	41.800, 0.160	41.800, 0.215	41.800, 0.216	41.800, 0.561	41.800, 0.410	41.800, 0.690
211	42.000, 0.158	42.000, 0.179	42.000, 0.244	42.000, 0.229	42.000, 0.160	42.000, 0.181	42.000, 0.241	42.000, 0.201	42.000, 0.154	42.000, 0.161	42.000, 0.217	42.000, 0.216	42.000, 0.568	42.000, 0.415	42.000, 0.698
212	42.200, 0.159	42.200, 0.180	42.200, 0.245	42.200, 0.230	42.200, 0.161	42.200, 0.182	42.200, 0.242	42.200, 0.202	42.200, 0.155	42.200, 0.161	42.200, 0.218	42.200, 0.217	42.200, 0.574	42.200, 0.421	42.200, 0.705
213	42.400, 0.159	42.400, 0.181	42.400, 0.246	42.400, 0.231	42.400, 0.162	42.400, 0.183	42.400, 0.243	42.400, 0.203	42.400, 0.155	42.400, 0.162	42.400, 0.219	42.400, 0.218	42.400, 0.581	42.400, 0.426	42.400, 0.713
214	42.600, 0.160	42.600, 0.182	42.600, 0.247	42.600, 0.232	42.600, 0.162	42.600, 0.184	42.600, 0.244	42.600, 0.204	42.600, 0.156	42.600, 0.162	42.600, 0.221	42.600, 0.219	42.600, 0.587	42.600, 0.432	42.600, 0.721
215	42.800, 0.160	42.800, 0.183	42.800, 0.248	42.800, 0.233	42.800, 0.163	42.800, 0.185	42.800, 0.244	42.800, 0.204	42.800, 0.156	42.800, 0.163	42.800, 0.221	42.800, 0.220	42.800, 0.594	42.800, 0.437	42.800, 0.729
216	43.000, 0.161	43.000, 0.184	43.000, 0.249	43.000, 0.234	43.000, 0.164	43.000, 0.187	43.000, 0.245	43.000, 0.205	43.000, 0.157	43.000, 0.163	43.000, 0.222	43.000, 0.221	43.000, 0.600	43.000, 0.442	43.000, 0.737
217	43.200, 0.161	43.200, 0.185	43.200, 0.250	43.200, 0.235	43.200, 0.165	43.200, 0.188	43.200, 0.246	43.200, 0.206	43.200, 0.158	43.200, 0.164	43.200, 0.223	43.200, 0.222	43.200, 0.606	43.200, 0.448	43.200, 0.744
218	43.400, 0.162	43.400, 0.186	43.400, 0.251	43.400, 0.236	43.400, 0.165	43.400, 0.189	43.400, 0.247	43.400, 0.206	43.400, 0.159	43.400, 0.165	43.400, 0.224	43.400, 0.223	43.400, 0.612	43.400, 0.453	43.400, 0.751
219	43.600, 0.162	43.600, 0.187	43.600, 0.251	43.600, 0.237	43.600, 0.166	43.600, 0.190	43.600, 0.248	43.600, 0.207	43.600, 0.159	43.600, 0.166	43.600, 0.225	43.600, 0.225	43.600, 0.618	43.600, 0.458	43.600, 0.758
220	43.800, 0.163	43.800, 0.188	43.800, 0.252	43.800, 0.238	43.800, 0.166	43.800, 0.190	43.800, 0.249	43.800, 0.208	43.800, 0.160	43.800, 0.167	43.800, 0.226	43.800, 0.226	43.800, 0.624	43.800, 0.463	43.800, 0.765
221	44.000, 0.163	44.000, 0.188	44.000, 0.253	44.000, 0.239	44.000, 0.167	44.000, 0.191	44.000, 0.251	44.000, 0.209	44.000, 0.161	44.000, 0.168	44.000, 0.226	44.000, 0.227	44.000, 0.629	44.000, 0.468	44.000, 0.772
222	44.200, 0.164	44.200, 0.189	44.200, 0.254	44.200, 0.240	44.200, 0.167	44.200, 0.192	44.200, 0.252	44.200, 0.210	44.200, 0.161	44.200, 0.169	44.200, 0.227	44.200, 0.228	44.200, 0.635	44.200, 0.473	44.200, 0.779
223	44.400, 0.165	44.400, 0.189	44.400, 0.255	44.400, 0.241	44.400, 0.168	44.400, 0.193	44.400, 0.252	44.400, 0.211	44.400, 0.162	44.400, 0.169	44.400, 0.228	44.400, 0.229	44.400, 0.641	44.400, 0.478	44.400, 0.786
224	44.600, 0.165	44.600, 0.190	44.600, 0.256	44.600, 0.242	44.600, 0.169	44.600, 0.193	44.600, 0.253	44.600, 0.212	44.600, 0.163	44.600, 0.170	44.600, 0.229	44.600, 0.230	44.600, 0.647	44.600, 0.483	44.600, 0.792
225	44.800, 0.166	44.800, 0.190	44.800, 0.257	44.800, 0.243	44.800, 0.169	44.800, 0.194	44.800, 0.254	44.800, 0.213	44.800, 0.163	44.800, 0.171	44.800, 0.230	44.800, 0.230	44.800, 0.653	44.800, 0.487	44.800, 0.799
226	45.000, 0.167	45.000, 0.191	45.000, 0.258	45.000, 0.244	45.000, 0.170	45.000, 0.194	45.000, 0.255	45.000, 0.215	45.000, 0.164	45.000, 0.172	45.000, 0.230	45.000, 0.231	45.000, 0.659	45.000, 0.492	45.000, 0.805
227	45.200, 0.167	45.200, 0.191	45.200, 0.258	45.200, 0.245	45.200, 0.171	45.200, 0.194	45.200, 0.256	45.200, 0.216	45.200, 0.165	45.200, 0.172	45.200, 0.231	45.200, 0.232	45.200, 0.665	45.200, 0.496	45.200, 0.812
228	45.400, 0.168	45.400, 0.192	45.400, 0.259	45.400, 0.246	45.400, 0.172	45.400, 0.195	45.400, 0.257	45.400, 0.216	45.400, 0.166	45.400, 0.173	45.400, 0.232	45.400, 0.232	45.400, 0.671	45.400, 0.501	45.400, 0.818
229	45.600, 0.169	45.600, 0.192	45.600, 0.260	45.600, 0.246	45.600, 0.173	45.600, 0.195	45.600, 0.258	45.600, 0.217	45.600, 0.167	45.600, 0.173	45.600, 0.233	45.600, 0.233	45.600, 0.677	45.600, 0.505	45.600, 0.824
230	45.800, 0.169	45.800, 0.193	45.800, 0.261	45.800, 0.247	45.800, 0.173	45.800, 0.196	45.800, 0.258	45.800, 0.218	45.800, 0.167	45.800, 0.174	45.800, 0.234	45.800, 0.233	45.800, 0.682	45.800, 0.510	45.800, 0.831
231	46.000, 0.170	46.000, 0.194	46.000, 0.261	46.000, 0.248	46.000, 0.174	46.000, 0.197	46.000, 0.258	46.000, 0.219	46.000, 0.168	46.000, 0.175	46.000, 0.235	46.000, 0.234	46.000, 0.688	46.000, 0.514	46.000, 0.837
232	46.200, 0.171	46.200, 0.195	46.200, 0.262	46.200, 0.248	46.200, 0.175	46.200, 0.197	46.200, 0.259	46.200, 0.219	46.200, 0.169	46.200, 0.175	46.200, 0.236	46.200, 0.235	46.200, 0.694	46.200, 0.519	46.200, 0.843
233	46.400, 0.172	46.400, 0.196	46.400, 0.263	46.400, 0.249	46.400, 0.176	46.400, 0.198	46.400, 0.259	46.400, 0.220	46.400, 0.169	46.400, 0.176	46.400, 0.238	46.400, 0.235	46.400, 0.699	46.400, 0.523	46.400, 0.850
234	46.600, 0.172	46.600, 0.196	46.600, 0.263	46.600, 0.250	46.600, 0.176	46.600, 0.199	46.600, 0.260	46.600, 0.221	46.600, 0.170	46.600, 0.176	46.600, 0.239	46.600, 0.236	46.600, 0.704	46.600, 0.528	46.600, 0.856
235	46.800, 0.173	46.800, 0.197	46.800, 0.264	46.800, 0.250	46.800, 0.177	46.800, 0.200	46.800, 0.260	46.800, 0.221	46.800, 0.171	46.800, 0.177	46.800, 0.239	46.800, 0.237	46.800, 0.709	46.800, 0.532	46.800, 0.862
236	47.000, 0.174	47.000, 0.198	47.000, 0.265	47.000, 0.251	47.000, 0.177	47.000, 0.200	47.000, 0.261	47.000, 0.222	47.000, 0.173	47.000, 0.178	47.000, 0.240	47.000, 0.237	47.000, 0.714	47.000, 0.536	47.000, 0.868
237	47.200, 0.174	47.200, 0.198	47.200, 0.266	47.200, 0.252	47.200, 0.178	47.200, 0.201	47.200, 0.262	47.200, 0.223	47.200, 0.173	47.200, 0.179	47.200, 0.241	47.200, 0.238	47.200, 0.719	47.200, 0.540	47.200, 0.873
238	47.400, 0.175	47.400, 0.199	47.400, 0.267	47.400, 0.253	47.400, 0.178	47.400, 0.202	47.400, 0.263	47.400, 0.224	47.400, 0.174	47.400, 0.181	47.400, 0.242	47.400, 0.239	47.400, 0.724	47.400, 0.545	47.400, 0.879
239	47.600, 0.175	47.600, 0.200	47.600, 0.268	47.600, 0.254	47.600, 0.179	47.600, 0.203	47.600, 0.264	47.600, 0.225	47.600, 0.175	47.600, 0.182	47.600, 0.242	47.600, 0.240	47.600, 0.728	47.600, 0.549	47.600, 0.884
240	47.800, 0.176	47.800, 0.201	47.800, 0.269	47.800, 0.255	47.800, 0.179	47.800, 0.204	47.800, 0.266	47.800, 0.226	47.800, 0.176	47.800, 0.183	47.800, 0.243	47.800, 0.241	47.800, 0.733	47.800, 0.554	47.800, 0.890
241	48.000, 0.176	48.000, 0.202	48.000, 0.271	48.000, 0.256	48.000, 0.180	48.000, 0.205	48.000, 0.267	48.000, 0.227	48.000, 0.177	48.000, 0.184	48.000, 0.244	48.000, 0.241	48.000, 0.738	48.000, 0.558	48.000, 0.895
242	48.200, 0.177	48.200, 0.203	48.200, 0.272	48.200, 0.257	48.200, 0.181	48.200, 0.206	48.200, 0.268	48.200, 0.228	48.200, 0.178	48.200, 0.185	48.200, 0.244	48.200, 0.242	48.200, 0.742	48.200, 0.562	48.200, 0.901
243	48.400, 0.178	48.400, 0.203	48.400, 0.272	48.400, 0.258	48.400, 0.181	48.400, 0.207	48.400, 0.269	48.400, 0.229	48.400, 0.179	48.400, 0.186	48.400, 0.245	48.400, 0.243	48.400, 0.747	48.400, 0.566	48.400, 0.906
244	48.600, 0.178	48.600, 0.204	48.600, 0.273	48.600, 0.259	48.600, 0.182	48.600, 0.208	48.600, 0.270	48.600, 0.230	48.600, 0.180	48.600, 0.186	48.600, 0.246	48.600, 0.244	48.600, 0.752	48.600, 0.570	48.600, 0.911
245	48.800, 0.179	48.800, 0.205	48.800, 0.274	48.800, 0.259	48.800, 0.183	48.800, 0.209	48.800, 0.271	48.800, 0.232	48.800, 0.180	48.800, 0.187	48.800, 0.246	48.800, 0.245	48.800, 0.756	48.800, 0.574	48.800, 0.916
246	49.000, 0.179	49.000, 0.205	49.000, 0.274	49.000, 0.260	49.000, 0.184	49.000, 0.209	49.000, 0.272	49.000, 0.233	49.000, 0.181	49.000, 0.187	49.000, 0.247	49.000, 0.246	49.000, 0.761	49.000, 0.577	49.000, 0.922
247	49.200, 0.180	49.200, 0.206	49.200, 0.275	49.200, 0.261	49.200, 0.184	49.200, 0.210	49.200, 0.273	49.200, 0.233	49.200, 0.181	49.200, 0.188	49.200, 0.248	49.200, 0.247	49.200, 0.766	49.200, 0.581	49.200, 0.927
248	49.400, 0.180	49.400, 0.207	49.400, 0.275	49.400, 0.262	49.400, 0.185	49.400, 0.211	49.400, 0.273	49.400, 0.234	49.400, 0.182	49.400, 0.188	49.400, 0.248	49.400, 0.248	49.400, 0.770	49.400, 0.585	49.400, 0.932
249	49.600, 0.181	49.600, 0.207	49.600, 0.276	49.600, 0.262	49.600, 0.186	49.600, 0.212	49.600, 0.274	49.600, 0.235	49.600, 0.182	49.600, 0.189	49.600, 0.249	49.600, 0.249	49.600, 0.775	49.600, 0.589	49.600, 0.937
250	49.800, 0.182	49.800, 0.208	49.800, 0.276	49.800, 0.263	49.800, 0.187	49.800, 0.213	49.800, 0.275	49.800, 0.235	49.800, 0.182	49.800, 0.189	49.800, 0.250	49.800, 0.250	49.800, 0.780	49.800, 0.593	49.800, 0.942
251	50.000, 0.183	50.000, 0.209	50.000, 0.277	50.000, 0.264	50.000, 0.188	50.000, 0.213	50.000, 0.275	50.000, 0.236	50.000, 0.183	50.000, 0.190	50.000, 0.252	50.000, 0.251	50.000, 0.785	50.000, 0.596	50.000, 0.947
252	50.200, 0.184	50.200, 0.209	50.200, 0.277	50.200, 0.264	50.200, 0.189	50.200, 0.214	50.200, 0.276	50.200, 0.236	50.200, 0.183	50.200, 0.190	50.200, 0.252	50.200, 0.251	50.200, 0.789	50.200, 0.600	50.200, 0.953
253	50.400, 0.184	50.400, 0.210	50.400, 0.278	50.400, 0.265	50.400, 0.189	50.400, 0.214	50.400, 0.277	50.400, 0.237	50.400, 0.184	50.400, 0.191	50.400, 0.254	50.400, 0.252	50.400, 0.794	50.400, 0.604	50.400, 0.958
254	50.600, 0.185	50.600, 0.211	50.600, 0.279	50.600, 0.266	50.600, 0.190	50.600, 0.215	50.600, 0.277	50.600, 0.237	50.600, 0.184	50.600, 0.191	50.600, 0.254	50.600, 0.253	50.600, 0.798	50.600, 0.608	50.600, 0.962
255	50.800, 0.186	50.800, 0.211	50.800, 0.280	50.800, 0.267	50.800, 0.190	50.800, 0.215	50.800, 0.279	50.800, 0.238	50.800, 0.185	50.800, 0.191	50.800, 0.255	50.800, 0.253	50.800, 0.803	50.800, 0.612	50.800, 0.967
256	51.000, 0.186	51.000, 0.212	51.000, 0.281	51.000, 0.268	51.000, 0.191	51.000, 0.215	51.000, 0.280	51.000, 0.239	51.000, 0.185	51.000, 0.192	51.000, 0.255	51.000, 0.254	51.000, 0.807	51.000, 0.615	51.000, 0.971
257	51.200, 0.187	51.200, 0.212	51.200, 0.282	51.200, 0.269	51.200, 0.191	51.200, 0.216	51.200, 0.281	51.200, 0.240	51.200, 0.186	51.200, 0.192	51.200, 0.256	51.200, 0.254	51.200, 0.812	51.200, 0.619	51.200, 0.975
258	51.400, 0.187	51.400, 0.213	51.400, 0.283	51.400, 0.270	51.400, 0.192	51.400, 0.216	51.400, 0.282	51.400, 0.241	51.400, 0.186	51.400, 0.193	51.400, 0.257	51.400, 0.255	51.400, 0.816	51.400, 0.622	51.400, 0.980
259	51.600, 0.188	51.600, 0.214	51.600, 0.284	51.600, 0.270	51.600, 0.192	51.600, 0.217	51.600, 0.284	51.600, 0.241	51.600, 0.187	51.600, 0.193	51.600, 0.257	51.600, 0.255	51.600, 0.821	51.600, 0.626	51.600, 0.984
260	51.800, 0.188	51.800, 0.215	51.800, 0.285	51.800, 0.271	51.800, 0.193	51.800, 0.217	51.800, 0.285	51.800, 0.242	51.800, 0.188	51.800, 0.194	51.800, 0.258	51.800, 0.256	51.800, 0.825	51.800, 0.629	51.800, 0.988
261	52.000, 0.189	52.000, 0.216	52.000, 0.285	52.000, 0.272	52.000, 0.193	52.000, 0.218	52.000, 0.285	52.000, 0.243	52.000, 0.189	52.000, 0.194	52.000, 0.258	52.000, 0.257	52.000, 0.830	52.000, 0.633	52.000, 0.992
262	52.200, 0.189	52.200, 0.216	52.200, 0.286	52.200, 0.273	52.200, 0.194	52.200, 0.218	52.200, 0.286	52.200, 0.243	52.200, 0.189	52.200, 0.195	52.200, 0.259	52.200, 0.258	52.200, 0.834	52.200, 0.636	52.200, 0.996
263	52.400, 0.190	52.400, 0.217	52.400, 0.288	52.400, 0.274	52.400, 0.194	52.400, 0.219	52.400, 0.287	52.400, 0.244	52.400, 0.190	52.400, 0.196	52.400, 0.259	52.400, 0.258	52.400, 0.838	52.400, 0.639	52.400, 1.000
264	52.600, 0.190	52.600, 0.218	52.600, 0.289	52.600, 0.275	52.600, 0.194	52.600, 0.220	52.600, 0.288	52.600, 0.245	52.600, 0.190	52.600, 0.197	52.600, 0.260	52.600, 0.259	52.600, 0.843	52.600, 0.643	52.600, 1.005
265	52.800, 0.190	52.800, 0.218	52.800, 0.290	52.800, 0.275	52.800, 0.195	52.800, 0.221	52.800, 0.289	52.800, 0.246	52.800, 0.191	52.800, 0.198	52.800, 0.260	52.800, 0.260	52.800, 0.847	52.800, 0.646	52.800, 1.009
266	53.000, 0.191	53.000, 0.219	53.000, 0.291	53.000, 0.276	53.000, 0.195	53.000, 0.222	53.000, 0.290	53.000, 0.247	53.000, 0.191	53.000, 0.198	53.000, 0.261	53.000, 0.261	53.000, 0.851	53.000, 0.649	53.000, 1.013
267	53.200, 0.191	53.200, 0.220	53.200, 0.292	53.200, 0.277	53.200, 0.196	53.200, 0.222	53.200, 0.291	53.200, 0.247	53.200, 0.192	53.200, 0.200	53.200, 0.262	53.200, 0.263	53.200, 0.855	53.200, 0.653	53.200, 1.017
268	53.400, 0.192	53.400, 0.220	53.400, 0.293	53.400, 0.277	53.400, 0.197	53.400, 0.223	53.400, 0.292	53.400, 0.248	53.400, 0.193	53.400, 0.201	53.400, 0.262	53.400, 0.264	53.400, 0.858	53.400, 0.656	53.400, 1.022
269	53.600, 0.193	53.600, 0.221	53.600, 0.293	53.600, 0.278	53.600, 0.198	53.600, 0.223	53.600, 0.292	53.600, 0.249	53.600, 0.193	53.600, 0.202	53.600, 0.263	53.600, 0.264	53.600, 0.862	53.600, 0.659	53.600, 1.026
270	53.800, 0.193	53.800, 0.222	53.800, 0.294	53.800, 0.279	53.800, 0.199	53.800, 0.224	53.800, 0.293	53.800, 0.249	53.800, 0.194	53.800, 0.203	53.800, 0.264	53.800, 0.265	53.800, 0.865	53.800, 0.663	53.800, 1.031
271	54.000, 0.194	54.000, 0.223	54.000, 0.295	54.000, 0.280	54.000, 0.199	54.000, 0.224	54.000, 0.294	54.000, 0.250	54.000, 0.194	54.000, 0.204	54.000, 0.265	54.000, 0.266	54.000, 0.869	54.000, 0.666	54.000, 1.035
272	54.200, 0.195	54.200, 0.223	54.200, 0.295	54.200, 0.281	54.200, 0.200	54.200, 0.225	54.200, 0.294	54.200, 0.251	54.200, 0.195	54.200, 0.205	54.200, 0.266	54.200, 0.267	54.200, 0.872	54.200, 0.669	54.200, 1.040
273	54.400, 0.195	54.400, 0.224	54.400, 0.296	54.400, 0.282	54.400, 0.201	54.400, 0.226	54.400, 0.295	54.400, 0.252	54.400, 0.196	54.400, 0.205	54.400, 0.267	54.400, 0.267	54.400, 0.876	54.400, 0.673	54.400, 1.044
274	54.600, 0.196	54.600, 0.225	54.600, 0.297	54.600, 0.283	54.600, 0.202	54.600, 0.227	54.600, 0.296	54.600, 0.253	54.600, 0.196	54.600, 0.206	54.600, 0.267	54.600, 0.268	54.600, 0.879	54.600, 0.676	54.600, 1.048
275	54.800, 0.197	54.800, 0.226	54.800, 0.297	54.800, 0.284	54.800, 0.203	54.800, 0.227	54.800, 0.297	54.800, 0.255	54.800, 0.196	54.800, 0.206	54.800, 0.268	54.800, 0.268	54.800, 0.882	54.800, 0.679	54.800, 1.052
276	55.000, 0.197	55.000, 0.226	55.000, 0.298	55.000, 0.285	55.000, 0.204	55.000, 0.228	55.000, 0.298	55.000, 0.256	55.000, 0.197	55.000, 0.207	55.000, 0.269	55.000, 0.269	55.000, 0.886	55.000, 0.682	55.000, 1.056
277	55.200, 0.198	55.200, 0.227	55.200, 0.299	55.200, 0.285	55.200, 0.205	55.200, 0.229	55.200, 0.299	55.200, 0.257	55.200, 0.198	55.200, 0.207	55.200, 0.270	55.200, 0.269	55.200, 0.889	55.200, 0.685	55.200, 1.060
278	55.400, 0.199	55.400, 0.228	55.400, 0.300	55.400, 0.286	55.400, 0.205	55.400, 0.230	55.400, 0.299	55.400, 0.258	55.400, 0.198	55.400, 0.208	55.400, 0.271	55.400, 0.270	55.400, 0.892	55.400, 0.688	55.400, 1.064
279	55.600, 0.200	55.600, 0.228	55.600, 0.300	55.600, 0.287	55.600, 0.206	55.600, 0.231	55.600, 0.300	55.600, 0.259	55.600, 0.199	55.600, 0.209	55.600, 0.272	55.600, 0.271	55.600, 0.895	55.600, 0.691	55.600, 1.067
280	55.800, 0.201	55.800, 0.229	55.800, 0.301	55.800, 0.288	55.800, 0.206	55.800, 0.232	55.800, 0.300	55.800, 0.259	55.800, 0.200	55.800, 0.210	55.800, 0.273	55.800, 0.272	55.800, 0.898	55.800, 0.694	55.800, 1.071
281	56.000, 0.202	56.000, 0.229	56.000, 0.302	56.000, 0.289	56.000, 0.207	56.000, 0.233	56.000, 0.300	56.000, 0.260	56.000, 0.201	56.000, 0.210	56.000, 0.274	56.000, 0.273	56.000, 0.901	56.000, 0.697	56.000, 1.074
282	56.200, 0.203	56.200, 0.230	56.200, 0.303	56.200, 0.289	56.200, 0.207	56.200, 0.234	56.200, 0.301	56.200, 0.260	56.200, 0.201	56.200, 0.211	56.200, 0.275	56.200, 0.273	56.200, 0.904	56.200, 0.700	56.200, 1.078
283	56.400, 0.204	56.400, 0.231	56.400, 0.304	56.400, 0.290	56.400, 0.207	56.400, 0.234	56.400, 0.301	56.400, 0.261	56.400, 0.202	56.400, 0.212	56.400, 0.276	56.400, 0.274	56.400, 0.907	56.400, 0.704	56.400, 1.081
284	56.600, 0.205	56.600, 0.231	56.600, 0.305	56.600, 0.290	56.600, 0.208	56.600, 0.235	56.600, 0.302	56.600, 0.261	56.600, 0.203	56.600, 0.213	56.600, 0.277	56.600, 0.275	56.600, 0.910	56.600, 0.707	56.600, 1.085
285	56.800, 0.205	56.800, 0.232	56.800, 0.306	56.800, 0.291	56.800, 0.208	56.800, 0.236	56.800, 0.303	56.800, 0.262	56.800, 0.203	56.800, 0.214	56.800, 0.278	56.800, 0.276	56.800, 0.913	56.800, 0.710	56.800, 1.088
286	57.000, 0.206	57.000, 0.233	57.000, 0.306	57.000, 0.291	57.000, 0.209	57.000, 0.236	57.000, 0.303	57.000, 0.262	57.000, 0.203	57.000, 0.214	57.000, 0.279	57.000, 0.277	57.000, 0.916	57.000, 0.713	57.000, 1.092
287	57.200, 0.207	57.200, 0.233	57.200, 0.307	57.200, 0.292	57.200, 0.209	57.200, 0.237	57.200, 0.304	57.200, 0.262	57.200, 0.204	57.200, 0.215	57.200, 0.279	57.200, 0.278	57.200, 0.920	57.200, 0.716	57.200, 1.095
288	57.400, 0.207	57.400, 0.234	57.400, 0.308	57.400, 0.293	57.400, 0.210	57.400, 0.237	57.400, 0.305	57.400, 0.262	57.400, 0.204	57.400, 0.215	57.400, 0.280	57.400, 0.279	57.400, 0.923	57.400, 0.720	57.400, 1.099
289	57.600, 0.207	57.600, 0.234	57.600, 0.308	57.600, 0.294	57.600, 0.210	57.600, 0.238	57.600, 0.305	57.600, 0.262	57.600, 0.204	57.600, 0.216	57.600, 0.281	57.600, 0.280	57.600, 0.926	57.600, 0.723	57.600, 1.102
290	57.800, 0.208	57.800, 0.235	57.800, 0.309	57.800, 0.295	57.800, 0.211	57.800, 0.238	57.800, 0.306	57.800, 0.262	57.800, 0.204	57.800, 0.216	57.800, 0.281	57.800, 0.280	57.800, 0.929	57.800, 0.726	57.800, 1.106
291	58.000, 0.208	58.000, 0.236	58.000, 0.309	58.000, 0.296	58.000, 0.211	58.000, 0.238	58.000, 0.307	58.000, 0.262	58.000, 0.205	58.000, 0.216	58.000, 0.282	58.000, 0.281	58.000, 0.932	58.000, 0.729	58.000, 1.109
292	58.200, 0.209	58.200, 0.237	58.200, 0.310	58.200, 0.297	58.200, 0.212	58.200, 0.239	58.200, 0.309	58.200, 0.263	58.200, 0.205	58.200, 0.217	58.200, 0.282	58.200, 0.281	58.200, 0.936	58.200, 0.732	58.200, 1.113
293	58.400, 0.209	58.400, 0.238	58.400, 0.311	58.400, 0.297	58.400, 0.213	58.400, 0.239	58.400, 0.310	58.400, 0.264	58.400, 0.205	58.400, 0.217	58.400, 0.283	58.400, 0.282	58.400, 0.939	58.400, 0.735	58.400, 1.116
294	58.600, 0.209	58.600, 0.239	58.600, 0.312	58.600, 0.298	58.600, 0.214	58.600, 0.240	58.600, 0.311	58.600, 0.264	58.600, 0.205	58.600, 0.217	58.600, 0.283	58.600, 0.283	58.600, 0.943	58.600, 0.738	58.600, 1.120
295	58.800, 0.209	58.800, 0.240	58.800, 0.313	58.800, 0.299	58.800, 0.214	58.800, 0.241	58.800, 0.313	58.800, 0.265	58.800, 0.206	58.800, 0.217	58.800, 0.284	58.800, 0.283	58.800, 0.946	58.800, 0.741	58.800, 1.124
296	59.000, 0.210	59.000, 0.241	59.000, 0.314	59.000, 0.299	59.000, 0.215	59.000, 0.241	59.000, 0.314	59.000, 0.266	59.000, 0.206	59.000, 0.217	59.000, 0.285	59.000, 0.284	59.000, 0.949	59.000, 0.744	59.000, 1.128
297	59.200, 0.210	59.200, 0.241	59.200, 0.314	59.200, 0.300	59.200, 0.216	59.200, 0.242	59.200, 0.314	59.200, 0.267	59.200, 0.207	59.200, 0.218	59.200, 0.286	59.200, 0.285	59.200, 0.952	59.200, 0.747	59.200, 1.132
298	59.400, 0.211	59.400, 0.242	59.400, 0.315	59.400, 0.300	59.400, 0.217	59.400, 0.243	59.400, 0.316	59.400, 0.268	59.400, 0.208	59.400, 0.218	59.400, 0.287	59.400, 0.286	59.400, 0.955	59.400, 0.750	59.400, 1.136
299	59.600, 0.211	59.600, 0.243	59.600, 0.316	59.600, 0.301	59.600, 0.217	59.600, 0.244	59.600, 0.316	59.600, 0.270	59.600, 0.209	59.600, 0.219	59.600, 0.288	59.600, 0.287	59.600, 0.959	59.600, 0.753	59.600, 1.139
300	59.800, 0.212	59.800, 0.243	59.800, 0.317	59.800, 0.301	59.800, 0.218	59.800, 0.245	59.800, 0.317	59.800, 0.271	59.800, 0.210	59.800, 0.220	59.800, 0.289	59.800, 0.288	59.800, 0.962	59.800, 0.756	59.800, 1.142
301	60.000, 0.212	60.000, 0.243	60.000, 0.318	60.000, 0.302	60.000, 0.218	60.000, 0.245	60.000, 0.318	60.000, 0.272	60.000, 0.211	60.000, 0.221	60.000, 0.290	60.000, 0.289	60.000, 0.965	60.000, 0.758	60.000, 1.144
302	60.200, 0.213	60.200, 0.244	60.200, 0.318	60.200, 0.303	60.200, 0.219	60.200, 0.246	60.200, 0.318	60.200, 0.273	60.200, 0.212	60.200, 0.221	60.200, 0.290	60.200, 0.290	60.200, 0.968	60.200, 0.761	60.200, 1.147
303	60.400, 0.213	60.400, 0.245	60.400, 0.319	60.400, 0.304	60.400, 0.219	60.400, 0.247	60.400, 0.319	60.400, 0.274	60.400, 0.213	60.400, 0.222	60.400, 0.291	60.400, 0.290	60.400, 0.972	60.400, 0.763	60.400, 1.150
304	60.600, 0.214	60.600, 0.245	60.600, 0.320	60.600, 0.304	60.600, 0.220	60.600, 0.248	60.600, 0.319	60.600, 0.275	60.600, 0.213	60.600, 0.223	60.600, 0.291	60.600, 0.291	60.600, 0.975	60.600, 0.765	60.600, 1.153
305	60.800, 0.215	60.800, 0.245	60.800, 0.320	60.800, 0.305	60.800, 0.220	60.800, 0.248	60.800, 0.320	60.800, 0.275	60.800, 0.214	60.800, 0.224	60.800, 0.292	60.800, 0.292	60.800, 0.978	60.800, 0.767	60.800, 1.155
306	61.000, 0.215	61.000, 0.246	61.000, 0.321	61.000, 0.306	61.000, 0.221	61.000, 0.248	61.000, 0.320	61.000, 0.276	61.000, 0.214	61.000, 0.225	61.000, 0.292	61.000, 0.292	61.000, 0.981	61.000, 0.769	61.000, 1.158
307	61.200, 0.216	61.200, 0.246	61.200, 0.322	61.200, 0.307	61.200, 0.221	61.200, 0.249	61.200, 0.320	61.200, 0.277	61.200, 0.215	61.200, 0.226	61.200, 0.292	61.200, 0.293	61.200, 0.983	61.200, 0.771	61.200, 1.160
308	61.400, 0.217	61.400, 0.247	61.400, 0.322	61.400, 0.308	61.400, 0.222	61.400, 0.249	61.400, 0.321	61.400, 0.278	61.400, 0.216	61.400, 0.226	61.400, 0.293	61.400, 0.293	61.400, 0.986	61.400, 0.773	61.400, 1.162
309	61.600, 0.217	61.600, 0.247	61.600, 0.323	61.600, 0.309	61.600, 0.222	61.600, 0.250	61.600, 0.322	61.600, 0.279	61.600, 0.216	61.600, 0.227	61.600, 0.294	61.600, 0.294	61.600, 0.989	61.600, 0.775	61.600, 1.165
310	61.800, 0.218	61.800, 0.248	61.800, 0.323	61.800, 0.310	61.800, 0.223	61.800, 0.250	61.800, 0.322	61.800, 0.280	61.800, 0.217	61.800, 0.227	61.800, 0.294	61.800, 0.294	61.800, 0.991	61.800, 0.777	61.800, 1.167
311	62.000, 0.219	62.000, 0.249	62.000, 0.324	62.000, 0.311	62.000, 0.223	62.000, 0.251	62.000, 0.323	62.000, 0.281	62.000, 0.217	62.000, 0.228	62.000, 0.295	62.000, 0.294	62.000, 0.994	62.000, 0.779	62.000, 1.170
312	62.200, 0.219	62.200, 0.250	62.200, 0.324	62.200, 0.312	62.200, 0.224	62.200, 0.251	62.200, 0.324	62.200, 0.282	62.200, 0.218	62.200, 0.229	62.200, 0.295	62.200, 0.294	62.200, 0.997	62.200, 0.782	62.200, 1.173
313	62.400, 0.220	62.400, 0.251	62.400, 0.325	62.400, 0.313	62.400, 0.224	62.400, 0.252	62.400, 0.325	62.400, 0.283	62.400, 0.219	62.400, 0.229	62.400, 0.296	62.400, 0.295	62.400, 1.000	62.400, 0.784	62.400, 1.176
314	62.600, 0.220	62.600, 0.252	62.600, 0.326	62.600, 0.314	62.600, 0.225	62.600, 0.253	62.600, 0.325	62.600, 0.283	62.600, 0.219	62.600, 0.230	62.600, 0.296	62.600, 0.295	62.600, 1.002	62.600, 0.787	62.600, 1.179
315	62.800, 0.221	62.800, 0.252	62.800, 0.327	62.800, 0.314	62.800, 0.225	62.800, 0.254	62.800, 0.327	62.800, 0.284	62.800, 0.220	62.800, 0.230	62.800, 0.297	62.800, 0.296	62.800, 1.005	62.800, 0.790	62.800, 1.182
316	63.000, 0.221	63.000, 0.253	63.000, 0.328	63.000, 0.315	63.000, 0.225	63.000, 0.255	63.000, 0.328	63.000, 0.284	63.000, 0.220	63.000, 0.231	63.000, 0.298	63.000, 0.297	63.000, 1.007	63.000, 0.792	63.000, 1.185
317	63.200, 0.222	63.200, 0.253	63.200, 0.329	63.200, 0.315	63.200, 0.226	63.200, 0.256	63.200, 0.329	63.200, 0.285	63.200, 0.220	63.200, 0.231	63.200, 0.299	63.200, 0.298	63.200, 1.010	63.200, 0.795	63.200, 1.188
318	63.400, 0.222	63.400, 0.254	63.400, 0.330	63.400, 0.316	63.400, 0.226	63.400, 0.257	63.400, 0.330	63.400, 0.285	63.400, 0.221	63.400, 0.232	63.400, 0.300	63.400, 0.299	63.400, 1.012	63.400, 0.798	63.400, 1.191
319	63.600, 0.222	63.600, 0.255	63.600, 0.331	63.600, 0.317	63.600, 0.226	63.600, 0.257	63.600, 0.331	63.600, 0.286	63.600, 0.221	63.600, 0.233	63.600, 0.301	63.600, 0.299	63.600, 1.015	63.600, 0.801	63.600, 1.194
320	63.800, 0.223	63.800, 0.255	63.800, 0.332	63.800, 0.318	63.800, 0.227	63.800, 0.258	63.800, 0.332	63.800, 0.286	63.800, 0.222	63.800, 0.233	63.800, 0.302	63.800, 0.300	63.800, 1.017	63.800, 0.803	63.800, 1.196
321	64.000, 0.223	64.000, 0.256	64.000, 0.333	64.000, 0.318	64.000, 0.227	64.000, 0.258	64.000, 0.333	64.000, 0.286	64.000, 0.222	64.000, 0.234	64.000, 0.303	64.000, 0.301	64.000, 1.019	64.000, 0.806	64.000, 1.199
322	64.200, 0.223	64.200, 0.257	64.200, 0.334	64.200, 0.319	64.200, 0.227	64.200, 0.259	64.200, 0.335	64.200, 0.287	64.200, 0.223	64.200, 0.235	64.200, 0.304	64.200, 0.302	64.200, 1.022	64.200, 0.808	64.200, 1.202
323	64.400, 0.224	64.400, 0.257	64.400, 0.335	64.400, 0.320	64.400, 0.228	64.400, 0.259	64.400, 0.335	64.400, 0.287	64.400, 0.223	64.400, 0.236	64.400, 0.305	64.400, 0.303	64.400, 1.024	64.400, 0.810	64.400, 1.205
324	64.600, 0.225	64.600, 0.257	64.600, 0.336	64.600, 0.320	64.600, 0.228	64.600, 0.260	64.600, 0.336	64.600, 0.288	64.600, 0.223	64.600, 0.236	64.600, 0.305	64.600, 0.303	64.600, 1.026	64.600, 0.812	64.600, 1.208
325	64.800, 0.225	64.800, 0.258	64.800, 0.336	64.800, 0.321	64.800, 0.229	64.800, 0.261	64.800, 0.337	64.800, 0.289	64.800, 0.224	64.800, 0.237	64.800, 0.306	64.800, 0.304	64.800, 1.028	64.800, 0.814	64.800, 1.210
326	65.000, 0.226	65.000, 0.258	65.000, 0.337	65.000, 0.321	65.000, 0.230	65.000, 0.261	65.000, 0.337	65.000, 0.290	65.000, 0.224	65.000, 0.237	65.000, 0.307	65.000, 0.305	65.000, 1.031	65.000, 0.817	65.000, 1.212
327	65.200, 0.227	65.200, 0.259	65.200, 0.338	65.200, 0.322	65.200, 0.230	65.200, 0.262	65.200, 0.337	65.200, 0.291	65.200, 0.225	65.200, 0.238	65.200, 0.308	65.200, 0.305	65.200, 1.033	65.200, 0.819	65.200, 1.215
328	65.400, 0.227	65.400, 0.259	65.400, 0.338	65.400, 0.322	65.400, 0.231	65.400, 0.262	65.400, 0.338	65.400, 0.292	65.400, 0.226	65.400, 0.238	65.400, 0.308	65.400, 0.306	65.400, 1.035	65.400, 0.822	65.400, 1.218
329	65.600, 0.228	65.600, 0.260	65.600, 0.339	65.600, 0.323	65.600, 0.231	65.600, 0.263	65.600, 0.338	65.600, 0.293	65.600, 0.226	65.600, 0.238	65.600, 0.309	65.600, 0.306	65.600, 1.037	65.600, 0.824	65.600, 1.220
330	65.800, 0.229	65.800, 0.260	65.800, 0.339	65.800, 0.324	65.800, 0.232	65.800, 0.264	65.800, 0.338	65.800, 0.294	65.800, 0.227	65.800, 0.239	65.800, 0.309	65.800, 0.307	65.800, 1.039	65.800, 0.827	65.800, 1.223
331	66.000, 0.229	66.000, 0.261	66.000, 0.340	66.000, 0.324	66.000, 0.232	66.000, 0.265	66.000, 0.339	66.000, 0.295	66.000, 0.227	66.000, 0.239	66.000, 0.310	66.000, 0.308	66.000, 1.041	66.000, 0.829	66.000, 1.226
332	66.200, 0.230	66.200, 0.262	66.200, 0.341	66.200, 0.325	66.200, 0.232	66.200, 0.266	66.200, 0.339	66.200, 0.296	66.200, 0.228	66.200, 0.239	66.200, 0.310	66.200, 0.309	66.200, 1.044	66.200, 0.831	66.200, 1.228
333	66.400, 0.231	66.400, 0.263	66.400, 0.341	66.400, 0.326	66.400, 0.233	66.400, 0.267	66.400, 0.339	66.400, 0.297	66.400, 0.228	66.400, 0.240	66.400, 0.311	66.400, 0.310	66.400, 1.046	66.400, 0.833	66.400, 1.231
334	66.600, 0.232	66.600, 0.263	66.600, 0.342	66.600, 0.327	66.600, 0.233	66.600, 0.268	66.600, 0.340	66.600, 0.297	66.600, 0.228	66.600, 0.240	66.600, 0.311	66.600, 0.310	66.600, 1.048	66.600, 0.836	66.600, 1.233
335	66.800, 0.232	66.800, 0.264	66.800, 0.342	66.800, 0.328	66.800, 0.233	66.800, 0.268	66.800, 0.341	66.800, 0.298	66.800, 0.229	66.800, 0.241	66.800, 0.311	66.800, 0.311	66.800, 1.050	66.800, 0.838	66.800, 1.236
336	67.000, 0.233	67.000, 0.265	67.000, 0.343	67.000, 0.329	67.000, 0.233	67.000, 0.269	67.000, 0.341	67.000, 0.298	67.000, 0.229	67.000, 0.242	67.000, 0.312	67.000, 0.312	67.000, 1.053	67.000, 0.840	67.000, 1.238
337	67.200, 0.234	67.200, 0.266	67.200, 0.343	67.200, 0.329	67.200, 0.234	67.200, 0.269	67.200, 0.342	67.200, 0.298	67.200, 0.230	67.200, 0.243	67.200, 0.312	67.200, 0.313	67.200, 1.055	67.200, 0.842	67.200, 1.240
338	67.400, 0.234	67.400, 0.267	67.400, 0.344	67.400, 0.330	67.400, 0.234	67.400, 0.269	67.400, 0.343	67.400, 0.299	67.400, 0.230	67.400, 0.243	67.400, 0.313	67.400, 0.313	67.400, 1.058	67.400, 0.845	67.400, 1.242
339	67.600, 0.235	67.600, 0.268	67.600, 0.345	67.600, 0.331	67.600, 0.235	67.600, 0.269	67.600, 0.344	67.600, 0.299	67.600, 0.231	67.600, 0.244	67.600, 0.313	67.600, 0.314	67.600, 1.060	67.600, 0.847	67.600, 1.245
340	67.800, 0.235	67.800, 0.268	67.800, 0.346	67.800, 0.332	67.800, 0.236	67.800, 0.269	67.800, 0.345	67.800, 0.299	67.800, 0.231	67.800, 0.245	67.800, 0.314	67.800, 0.314	67.800, 1.063	67.800, 0.849	67.800, 1.247
341	68.000, 0.236	68.000, 0.269	68.000, 0.346	68.000, 0.333	68.000, 0.236	68.000, 0.270	68.000, 0.347	68.000, 0.300	68.000, 0.231	68.000, 0.245	68.000, 0.314	68.000, 0.314	68.000, 1.066	68.000, 0.851	68.000, 1.249
342	68.200, 0.236	68.200, 0.270	68.200, 0.347	68.200, 0.333	68.200, 0.237	68.200, 0.270	68.200, 0.348	68.200, 0.300	68.200, 0.232	68.200, 0.246	68.200, 0.315	68.200, 0.314	68.200, 1.068	68.200, 0.853	68.200, 1.251
343	68.400, 0.237	68.400, 0.270	68.400, 0.348	68.400, 0.334	68.400, 0.238	68.400, 0.271	68.400, 0.349	68.400, 0.301	68.400, 0.232	68.400, 0.246	68.400, 0.316	68.400, 0.315	68.400, 1.071	68.400, 0.855	68.400, 1.253
344	68.600, 0.237	68.600, 0.271	68.600, 0.348	68.600, 0.335	68.600, 0.238	68.600, 0.271	68.600, 0.349	68.600, 0.301	68.600, 0.232	68.600, 0.247	68.600, 0.316	68.600, 0.315	68.600, 1.073	68.600, 0.858	68.600, 1.255
345	68.800, 0.238	68.800, 0.271	68.800, 0.349	68.800, 0.335	68.800, 0.239	68.800, 0.272	68.800, 0.350	68.800, 0.301	68.800, 0.233	68.800, 0.248	68.800, 0.317	68.800, 0.315	68.800, 1.076	68.800, 0.860	68.800, 1.257
346	69.000, 0.238	69.000, 0.272	69.000, 0.350	69.000, 0.336	69.000, 0.240	69.000, 0.272	69.000, 0.351	69.000, 0.302	69.000, 0.233	69.000, 0.248	69.000, 0.318	69.000, 0.316	69.000, 1.078	69.000, 0.862	69.000, 1.260
347	69.200, 0.239	69.200, 0.272	69.200, 0.350	69.200, 0.336	69.200, 0.240	69.200, 0.272	69.200, 0.351	69.200, 0.303	69.200, 0.234	69.200, 0.248	69.200, 0.319	69.200, 0.316	69.200, 1.081	69.200, 0.864	69.200, 1.262
348	69.400, 0.240	69.400, 0.273	69.400, 0.351	69.400, 0.337	69.400, 0.241	69.400, 0.272	69.400, 0.352	69.400, 0.304	69.400, 0.234	69.400, 0.249	69.400, 0.320	69.400, 0.317	69.400, 1.083	69.400, 0.866	69.400, 1.265
349	69.600, 0.240	69.600, 0.273	69.600, 0.351	69.600, 0.338	69.600, 0.242	69.600, 0.272	69.600, 0.352	69.600, 0.305	69.600, 0.234	69.600, 0.249	69.600, 0.321	69.600, 0.318	69.600, 1.085	69.600, 0.868	69.600, 1.267
350	69.800, 0.241	69.800, 0.274	69.800, 0.352	69.800, 0.339	69.800, 0.242	69.800, 0.273	69.800, 0.353	69.800, 0.305	69.800, 0.235	69.800, 0.249	69.800, 0.322	69.800, 0.319	69.800, 1.087	69.800, 0.870	69.800, 1.269
351	70.000, 0.242	70.000, 0.274	70.000, 0.353	70.000, 0.339	70.000, 0.243	70.000, 0.273	70.000, 0.354	70.000, 0.306	70.000, 0.236	70.000, 0.249	70.000, 0.322	70.000, 0.320	70.000, 1.089	70.000, 0.872	70.000, 1.271
352	70.200, 0.242	70.200, 0.275	70.200, 0.353	70.200, 0.340	70.200, 0.243	70.200, 0.273	70.200, 0.354	70.200, 0.307	70.200, 0.236	70.200, 0.250	70.200, 0.323	70.200, 0.321	70.200, 1.091	70.200, 0.873	70.200, 1.274
353	70.400, 0.243	70.400, 0.275	70.400, 0.354	70.400, 0.341	70.400, 0.243	70.400, 0.274	70.400, 0.354	70.400, 0.308	70.400, 0.237	70.400, 0.250	70.400, 0.323	70.400, 0.322	70.400, 1.094	70.400, 0.875	70.400, 1.276
354	70.600, 0.244	70.600, 0.276	70.600, 0.355	70.600, 0.341	70.600, 0.243	70.600, 0.274	70.600, 0.355	70.600, 0.308	70.600, 0.238	70.600, 0.251	70.600, 0.323	70.600, 0.323	70.600, 1.096	70.600, 0.877	70.600, 1.279
355	70.800, 0.245	70.800, 0.276	70.800, 0.355	70.800, 0.342	70.800, 0.244	70.800, 0.275	70.800, 0.355	70.800, 0.309	70.800, 0.239	70.800, 0.251	70.800, 0.324	70.800, 0.323	70.800, 1.098	70.800, 0.879	70.800, 1.281
356	71.000, 0.245	71.000, 0.277	71.000, 0.356	71.000, 0.343	71.000, 0.244	71.000, 0.275	71.000, 0.356	71.000, 0.310	71.000, 0.239	71.000, 0.252	71.000, 0.324	71.000, 0.324	71.000, 1.101	71.000, 0.881	71.000, 1.284
357	71.200, 0.246	71.200, 0.277	71.200, 0.356	71.200, 0.343	71.200, 0.244	71.200, 0.276	71.200, 0.357	71.200, 0.310	71.200, 0.240	71.200, 0.253	71.200, 0.324	71.200, 0.325	71.200, 1.104	71.200, 0.883	71.200, 1.286
358	71.400, 0.246	71.400, 0.277	71.400, 0.357	71.400, 0.344	71.400, 0.244	71.400, 0.277	71.400, 0.357	71.400, 0.311	71.400, 0.240	71.400, 0.253	71.400, 0.325	71.400, 0.325	71.400, 1.106	71.400, 0.886	71.400, 1.288
359	71.600, 0.246	71.600, 0.278	71.600, 0.358	71.600, 0.344	71.600, 0.244	71.600, 0.277	71.600, 0.358	71.600, 0.312	71.600, 0.240	71.600, 0.254	71.600, 0.325	71.600, 0.325	71.600, 1.109	71.600, 0.888	71.600, 1.290
360	71.800, 0.247	71.800, 0.278	71.800, 0.358	71.800, 0.345	71.800, 0.244	71.800, 0.278	71.800, 0.359	71.800, 0.312	71.800, 0.240	71.800, 0.254	71.800, 0.326	71.800, 0.326	71.800, 1.111	71.800, 0.890	71.800, 1.292
361	72.000, 0.247	72.000, 0.279	72.000, 0.359	72.000, 0.345	72.000, 0.245	72.000, 0.279	72.000, 0.360	72.000, 0.313	72.000, 0.241	72.000, 0.254	72.000, 0.326	72.000, 0.326	72.000, 1.113	72.000, 0.892	72.000, 1.295
362	72.200, 0.248	72.200, 0.279	72.200, 0.359	72.200, 0.346	72.200, 0.245	72.200, 0.279	72.200, 0.360	72.200, 0.313	72.200, 0.241	72.200, 0.255	72.200, 0.327	72.200, 0.326	72.200, 1.115	72.200, 0.894	72.200, 1.297
363	72.400, 0.248	72.400, 0.280	72.400, 0.360	72.400, 0.346	72.400, 0.246	72.400, 0.280	72.400, 0.361	72.400, 0.313	72.400, 0.241	72.400, 0.256	72.400, 0.328	72.400, 0.327	72.400, 1.117	72.400, 0.895	72.400, 1.300
364	72.600, 0.248	72.600, 0.280	72.600, 0.360	72.600, 0.347	72.600, 0.246	72.600, 0.281	72.600, 0.361	72.600, 0.314	72.600, 0.242	72.600, 0.257	72.600, 0.330	72.600, 0.327	72.600, 1.119	72.600, 0.897	72.600, 1.302
365	72.800, 0.248	72.800, 0.281	72.800, 0.361	72.800, 0.348	72.800, 0.247	72.800, 0.281	72.800, 0.361	72.800, 0.314	72.800, 0.242	72.800, 0.257	72.800, 0.331	72.800, 0.328	72.800, 1.121	72.800, 0.899	72.800, 1.304
366	73.000, 0.249	73.000, 0.281	73.000, 0.362	73.000, 0.348	73.000, 0.248	73.000, 0.282	73.000, 0.362	73.000, 0.315	73.000, 0.242	73.000, 0.258	73.000, 0.332	73.000, 0.328	73.000, 1.122	73.000, 0.901	73.000, 1.306
367	73.200, 0.249	73.200, 0.282	73.200, 0.362	73.200, 0.349	73.200, 0.249	73.200, 0.282	73.200, 0.362	73.200, 0.315	73.200, 0.242	73.200, 0.259	73.200, 0.333	73.200, 0.329	73.200, 1.124	73.200, 0.903	73.200, 1.308
368	73.400, 0.250	73.400, 0.283	73.400, 0.363	73.400, 0.349	73.400, 0.249	73.400, 0.283	73.400, 0.363	73.400, 0.316	73.400, 0.242	73.400, 0.259	73.400, 0.334	73.400, 0.329	73.400, 1.125	73.400, 0.905	73.400, 1.310
369	73.600, 0.250	73.600, 0.283	73.600, 0.364	73.600, 0.350	73.600, 0.250	73.600, 0.284	73.600, 0.363	73.600, 0.316	73.600, 0.243	73.600, 0.260	73.600, 0.335	73.600, 0.330	73.600, 1.127	73.600, 0.907	73.600, 1.312
370	73.800, 0.251	73.800, 0.284	73.800, 0.364	73.800, 0.350	73.800, 0.251	73.800, 0.284	73.800, 0.364	73.800, 0.317	73.800, 0.243	73.800, 0.260	73.800, 0.336	73.800, 0.330	73.800, 1.128	73.800, 0.908	73.800, 1.314
371	74.000, 0.251	74.000, 0.284	74.000, 0.365	74.000, 0.350	74.000, 0.251	74.000, 0.285	74.000, 0.364	74.000, 0.318	74.000, 0.243	74.000, 0.261	74.000, 0.337	74.000, 0.331	74.000, 1.130	74.000, 0.910	74.000, 1.317
372	74.200, 0.252	74.200, 0.285	74.200, 0.366	74.200, 0.351	74.200, 0.252	74.200, 0.285	74.200, 0.365	74.200, 0.318	74.200, 0.244	74.200, 0.261	74.200, 0.338	74.200, 0.331	74.200, 1.131	74.200, 0.912	74.200, 1.319
373	74.400, 0.252	74.400, 0.285	74.400, 0.367	74.400, 0.351	74.400, 0.252	74.400, 0.286	74.400, 0.366	74.400, 0.319	74.400, 0.244	74.400, 0.262	74.400, 0.338	74.400, 0.332	74.400, 1.133	74.400, 0.913	74.400, 1.321
374	74.600, 0.252	74.600, 0.286	74.600, 0.367	74.600, 0.352	74.600, 0.252	74.600, 0.287	74.600, 0.367	74.600, 0.320	74.600, 0.245	74.600, 0.263	74.600, 0.339	74.600, 0.332	74.600, 1.135	74.600, 0.915	74.600, 1.323
375	74.800, 0.253	74.800, 0.286	74.800, 0.368	74.800, 0.353	74.800, 0.253	74.800, 0.287	74.800, 0.368	74.800, 0.320	74.800, 0.245	74.800, 0.264	74.800, 0.339	74.800, 0.332	74.800, 1.136	74.800, 0.917	74.800, 1.325
376	75.000, 0.254	75.000, 0.287	75.000, 0.369	75.000, 0.354	75.000, 0.253	75.000, 0.287	75.000, 0.369	75.000, 0.321	75.000, 0.246	75.000, 0.265	75.000, 0.340	75.000, 0.332	75.000, 1.138	75.000, 0.919	75.000, 1.327
377	75.200, 0.254	75.200, 0.288	75.200, 0.369	75.200, 0.354	75.200, 0.253	75.200, 0.288	75.200, 0.370	75.200, 0.321	75.200, 0.246	75.200, 0.266	75.200, 0.340	75.200, 0.333	75.200, 1.140	75.200, 0.921	75.200, 1.328
378	75.400, 0.255	75.400, 0.289	75.400, 0.370	75.400, 0.355	75.400, 0.253	75.400, 0.288	75.400, 0.370	75.400, 0.322	75.400, 0.247	75.400, 0.267	75.400, 0.340	75.400, 0.333	75.400, 1.142	75.400, 0.923	75.400, 1.330
379	75.600, 0.255	75.600, 0.290	75.600, 0.371	75.600, 0.356	75.600, 0.254	75.600, 0.288	75.600, 0.371	75.600, 0.322	75.600, 0.247	75.600, 0.267	75.600, 0.341	75.600, 0.334	75.600, 1.143	75.600, 0.925	75.600, 1.332
380	75.800, 0.256	75.800, 0.291	75.800, 0.371	75.800, 0.356	75.800, 0.254	75.800, 0.288	75.800, 0.372	75.800, 0.323	75.800, 0.248	75.800, 0.268	75.800, 0.342	75.800, 0.335	75.800, 1.145	75.800, 0.927	75.800, 1.334
381	76.000, 0.257	76.000, 0.292	76.000, 0.372	76.000, 0.357	76.000, 0.255	76.000, 0.288	76.000, 0.372	76.000, 0.323	76.000, 0.248	76.000, 0.269	76.000, 0.342	76.000, 0.336	76.000, 1.147	76.000, 0.929	76.000, 1.335
382	76.200, 0.257	76.200, 0.293	76.200, 0.372	76.200, 0.358	76.200, 0.256	76.200, 0.289	76.200, 0.372	76.200, 0.323	76.200, 0.249	76.200, 0.269	76.200, 0.343	76.200, 0.337	76.200, 1.149	76.200, 0.931	76.200, 1.336
383	76.400, 0.258	76.400, 0.293	76.400, 0.373	76.400, 0.358	76.400, 0.256	76.400, 0.289	76.400, 0.372	76.400, 0.324	76.400, 0.249	76.400, 0.270	76.400, 0.343	76.400, 0.338	76.400, 1.150	76.400, 0.932	76.400, 1.337
384	76.600, 0.258	76.600, 0.294	76.600, 0.374	76.600, 0.359	76.600, 0.257	76.600, 0.290	76.600, 0.373	76.600, 0.324	76.600, 0.250	76.600, 0.271	76.600, 0.344	76.600, 0.339	76.600, 1.152	76.600, 0.934	76.600, 1.339
385	76.800, 0.259	76.800, 0.294	76.800, 0.375	76.800, 0.359	76.800, 0.257	76.800, 0.290	76.800, 0.373	76.800, 0.325	76.800, 0.250	76.800, 0.271	76.800, 0.344	76.800, 0.340	76.800, 1.154	76.800, 0.936	76.800, 1.340
386	77.000, 0.259	77.000, 0.295	77.000, 0.375	77.000, 0.360	77.000, 0.257	77.000, 0.291	77.000, 0.374	77.000, 0.325	77.000, 0.250	77.000, 0.271	77.000, 0.345	77.000, 0.341	77.000, 1.156	77.000, 0.937	77.000, 1.341
387	77.200, 0.260	77.200, 0.295	77.200, 0.375	77.200, 0.360	77.200, 0.258	77.200, 0.292	77.200, 0.374	77.200, 0.325	77.200, 0.251	77.200, 0.271	77.200, 0.345	77.200, 0.341	77.200, 1.158	77.200, 0.938	77.200, 1.343
388	77.400, 0.261	77.400, 0.295	77.400, 0.376	77.400, 0.361	77.400, 0.258	77.400, 0.293	77.400, 0.375	77.400, 0.326	77.400, 0.251	77.400, 0.272	77.400, 0.345	77.400, 0.342	77.400, 1.160	77.400, 0.940	77.400, 1.344
389	77.600, 0.261	77.600, 0.296	77.600, 0.377	77.600, 0.361	77.600, 0.258	77.600, 0.294	77.600, 0.376	77.600, 0.326	77.600, 0.252	77.600, 0.272	77.600, 0.346	77.600, 0.343	77.600, 1.162	77.600, 0.941	77.600, 1.346
390	77.800, 0.262	77.800, 0.296	77.800, 0.377	77.800, 0.361	77.800, 0.258	77.800, 0.295	77.800, 0.377	77.800, 0.327	77.800, 0.252	77.800, 0.272	77.800, 0.346	77.800, 0.344	77.800, 1.164	77.800, 0.943	77.800, 1.348
391	78.000, 0.263	78.000, 0.296	78.000, 0.378	78.000, 0.362	78.000, 0.259	78.000, 0.296	78.000, 0.378	78.000, 0.327	78.000, 0.253	78.000, 0.272	78.000, 0.346	78.000, 0.344	78.000, 1.165	78.000, 0.944	78.000, 1.350
392	78.200, 0.263	78.200, 0.297	78.200, 0.379	78.200, 0.362	78.200, 0.259	78.200, 0.296	78.200, 0.378	78.200, 0.328	78.200, 0.253	78.200, 0.272	78.200, 0.347	78.200, 0.345	78.200, 1.167	78.200, 0.946	78.200, 1.352
393	78.400, 0.264	78.400, 0.297	78.400, 0.380	78.400, 0.363	78.400, 0.259	78.400, 0.297	78.400, 0.379	78.400, 0.329	78.400, 0.254	78.400, 0.272	78.400, 0.347	78.400, 0.345	78.400, 1.169	78.400, 0.948	78.400, 1.353
394	78.600, 0.264	78.600, 0.297	78.600, 0.380	78.600, 0.364	78.600, 0.259	78.600, 0.297	78.600, 0.380	78.600, 0.329	78.600, 0.254	78.600, 0.272	78.600, 0.348	78.600, 0.345	78.600, 1.171	78.600, 0.950	78.600, 1.355
395	78.800, 0.265	78.800, 0.297	78.800, 0.381	78.800, 0.364	78.800, 0.260	78.800, 0.298	78.800, 0.381	78.800, 0.330	78.800, 0.254	78.800, 0.273	78.800, 0.348	78.800, 0.346	78.800, 1.173	78.800, 0.952	78.800, 1.358
396	79.000, 0.265	79.000, 0.298	79.000, 0.381	79.000, 0.365	79.000, 0.260	79.000, 0.298	79.000, 0.382	79.000, 0.331	79.000, 0.254	79.000, 0.273	79.000, 0.349	79.000, 0.346	79.000, 1.174	79.000, 0.954	79.000, 1.360
397	79.200, 0.265	79.200, 0.298	79.200, 0.382	79.200, 0.366	79.200, 0.261	79.200, 0.299	79.200, 0.383	79.200, 0.332	79.200, 0.255	79.200, 0.274	79.200, 0.349	79.200, 0.346	79.200, 1.176	79.200, 0.956	79.200, 1.362
398	79.400, 0.265	79.400, 0.299	79.400, 0.382	79.400, 0.366	79.400, 0.261	79.400, 0.299	79.400, 0.383	79.400, 0.332	79.400, 0.255	79.400, 0.274	79.400, 0.350	79.400, 0.346	79.400, 1.177	79.400, 0.958	79.400, 1.364
399	79.600, 0.265	79.600, 0.300	79.600, 0.383	79.600, 0.367	79.600, 0.262	79.600, 0.300	79.600, 0.384	79.600, 0.333	79.600, 0.256	79.600, 0.275	79.600, 0.350	79.600, 0.347	79.600, 1.179	79.600, 0.960	79.600, 1.367
400	79.800, 0.265	79.800, 0.301	79.800, 0.383	79.800, 0.367	79.800, 0.262	79.800, 0.300	79.800, 0.384	79.800, 0.334	79.800, 0.257	79.800, 0.275	79.800, 0.351	79.800, 0.348	79.800, 1.181	79.800, 0.962	79.800, 1.368
401	80.000, 0.265	80.000, 0.301	80.000, 0.384	80.000, 0.368	80.000, 0.263	80.000, 0.301	80.000, 0.384	80.000, 0.334	80.000, 0.257	80.000, 0.276	80.000, 0.351	80.000, 0.348	80.000, 1.183	80.000, 0.963	80.000, 1.370
402	80.200, 0.265	80.200, 0.302	80.200, 0.384	80.200, 0.368	80.200, 0.263	80.200, 0.302	80.200, 0.385	80.200, 0.335	80.200, 0.257	80.200, 0.276	80.200, 0.352	80.200, 0.349	80.200, 1.184	80.200, 0.965	80.200, 1.372
403	80.400, 0.266	80.400, 0.303	80.400, 0.385	80.400, 0.369	80.400, 0.264	80.400, 0.303	80.400, 0.385	80.400, 0.336	80.400, 0.258	80.400, 0.276	80.400, 0.352	80.400, 0.349	80.400, 1.186	80.400, 0.967	80.400, 1.373
404	80.600, 0.266	80.600, 0.303	80.600, 0.385	80.600, 0.370	80.600, 0.264	80.600, 0.304	80.600, 0.386	80.600, 0.336	80.600, 0.258	80.600, 0.277	80.600, 0.353	80.600, 0.350	80.600, 1.188	80.600, 0.968	80.600, 1.375
405	80.800, 0.266	80.800, 0.304	80.800, 0.386	80.800, 0.370	80.800, 0.264	80.800, 0.304	80.800, 0.386	80.800, 0.336	80.800, 0.258	80.800, 0.277	80.800, 0.353	80.800, 0.350	80.800, 1.190	80.800, 0.970	80.800, 1.376
406	81.000, 0.267	81.000, 0.304	81.000, 0.386	81.000, 0.371	81.000, 0.265	81.000, 0.305	81.000, 0.387	81.000, 0.337	81.000, 0.259	81.000, 0.278	81.000, 0.354	81.000, 0.351	81.000, 1.192	81.000, 0.971	81.000, 1.378
407	81.200, 0.267	81.200, 0.305	81.200, 0.387	81.200, 0.372	81.200, 0.265	81.200, 0.305	81.200, 0.388	81.200, 0.338	81.200, 0.259	81.200, 0.279	81.200, 0.354	81.200, 0.351	81.200, 1.193	81.200, 0.973	81.200, 1.379
408	81.400, 0.267	81.400, 0.305	81.400, 0.387	81.400, 0.373	81.400, 0.266	81.400, 0.306	81.400, 0.388	81.400, 0.338	81.400, 0.260	81.400, 0.279	81.400, 0.355	81.400, 0.352	81.400, 1.195	81.400, 0.974	81.400, 1.381
409	81.600, 0.268	81.600, 0.306	81.600, 0.388	81.600, 0.373	81.600, 0.266	81.600, 0.306	81.600, 0.389	81.600, 0.339	81.600, 0.260	81.600, 0.280	81.600, 0.355	81.600, 0.353	81.600, 1.196	81.600, 0.976	81.600, 1.382
410	81.800, 0.269	81.800, 0.306	81.800, 0.389	81.800, 0.374	81.800, 0.266	81.800, 0.306	81.800, 0.389	81.800, 0.340	81.800, 0.260	81.800, 0.280	81.800, 0.356	81.800, 0.353	81.800, 1.197	81.800, 0.977	81.800, 1.384
411	82.000, 0.270	82.000, 0.306	82.000, 0.390	82.000, 0.374	82.000, 0.267	82.000, 0.306	82.000, 0.390	82.000, 0.340	82.000, 0.261	82.000, 0.281	82.000, 0.357	82.000, 0.354	82.000, 1.199	82.000, 0.978	82.000, 1.385
412	82.200, 0.271	82.200, 0.306	82.200, 0.390	82.200, 0.375	82.200, 0.267	82.200, 0.306	82.200, 0.390	82.200, 0.341	82.200, 0.261	82.200, 0.281	82.200, 0.358	82.200, 0.355	82.200, 1.200	82.200, 0.979	82.200, 1.387
413	82.400, 0.272	82.400, 0.307	82.400, 0.391	82.400, 0.376	82.400, 0.267	82.400, 0.307	82.400, 0.391	82.400, 0.342	82.400, 0.261	82.400, 0.282	82.400, 0.359	82.400, 0.355	82.400, 1.201	82.400, 0.980	82.400, 1.389
414	82.600, 0.272	82.600, 0.307	82.600, 0.392	82.600, 0.376	82.600, 0.268	82.600, 0.307	82.600, 0.391	82.600, 0.342	82.600, 0.261	82.600, 0.282	82.600, 0.360	82.600, 0.356	82.600, 1.202	82.600, 0.982	82.600, 1.391
415	82.800, 0.273	82.800, 0.307	82.800, 0.392	82.800, 0.377	82.800, 0.268	82.800, 0.307	82.800, 0.392	82.800, 0.343	82.800, 0.262	82.800, 0.283	82.800, 0.360	82.800, 0.356	82.800, 1.203	82.800, 0.983	82.800, 1.394
416	83.000, 0.274	83.000, 0.308	83.000, 0.393	83.000, 0.377	83.000, 0.269	83.000, 0.307	83.000, 0.392	83.000, 0.344	83.000, 0.262	83.000, 0.284	83.000, 0.361	83.000, 0.356	83.000, 1.204	83.000, 0.985	83.000, 1.396
417	83.200, 0.275	83.200, 0.308	83.200, 0.393	83.200, 0.378	83.200, 0.269	83.200, 0.307	83.200, 0.393	83.200, 0.344	83.200, 0.263	83.200, 0.284	83.200, 0.362	83.200, 0.356	83.200, 1.205	83.200, 0.986	83.200, 1.397
418	83.400, 0.275	83.400, 0.308	83.400, 0.394	83.400, 0.378	83.400, 0.270	83.400, 0.308	83.400, 0.393	83.400, 0.345	83.400, 0.263	83.400, 0.285	83.400, 0.362	83.400, 0.357	83.400, 1.207	83.400, 0.988	83.400, 1.399
419	83.600, 0.276	83.600, 0.309	83.600, 0.394	83.600, 0.379	83.600, 0.270	83.600, 0.308	83.600, 0.394	83.600, 0.345	83.600, 0.264	83.600, 0.285	83.600, 0.363	83.600, 0.358	83.600, 1.208	83.600, 0.989	83.600, 1.400
420	83.800, 0.276	83.800, 0.309	83.800, 0.395	83.800, 0.379	83.800, 0.271	83.800, 0.309	83.800, 0.394	83.800, 0.346	83.800, 0.264	83.800, 0.285	83.800, 0.363	83.800, 0.358	83.800, 1.210	83.800, 0.991	83.800, 1.401
421	84.000, 0.277	84.000, 0.310	84.000, 0.395	84.000, 0.380	84.000, 0.272	84.000, 0.309	84.000, 0.395	84.000, 0.346	84.000, 0.264	84.000, 0.286	84.000, 0.364	84.000, 0.359	84.000, 1.211	84.000, 0.993	84.000, 1.402
422	84.200, 0.277	84.200, 0.311	84.200, 0.396	84.200, 0.380	84.200, 0.272	84.200, 0.310	84.200, 0.396	84.200, 0.346	84.200, 0.265	84.200, 0.286	84.200, 0.364	84.200, 0.360	84.200, 1.213	84.200, 0.994	84.200, 1.404
423	84.400, 0.277	84.400, 0.311	84.400, 0.397	84.400, 0.381	84.400, 0.272	84.400, 0.311	84.400, 0.396	84.400, 0.347	84.400, 0.265	84.400, 0.286	84.400, 0.364	84.400, 0.360	84.400, 1.215	84.400, 0.996	84.400, 1.404
424	84.600, 0.278	84.600, 0.312	84.600, 0.397	84.600, 0.382	84.600, 0.273	84.600, 0.311	84.600, 0.397	84.600, 0.347	84.600, 0.266	84.600, 0.286	84.600, 0.365	84.600, 0.361	84.600, 1.216	84.600, 0.998	84.600, 1.405
425	84.800, 0.278	84.800, 0.312	84.800, 0.398	84.800, 0.383	84.800, 0.273	84.800, 0.311	84.800, 0.397	84.800, 0.348	84.800, 0.266	84.800, 0.286	84.800, 0.365	84.800, 0.361	84.800, 1.218	84.800, 1.000	84.800, 1.406
426	85.000, 0.278	85.000, 0.313	85.000, 0.399	85.000, 0.384	85.000, 0.273	85.000, 0.311	85.000, 0.398	85.000, 0.349	85.000, 0.267	85.000, 0.287	85.000, 0.365	85.000, 0.362	85.000, 1.220	85.000, 1.002	85.000, 1.407
427	85.200, 0.278	85.200, 0.314	85.200, 0.400	85.200, 0.385	85.200, 0.273	85.200, 0.312	85.200, 0.398	85.200, 0.349	85.200, 0.267	85.200, 0.287	85.200, 0.365	85.200, 0.363	85.200, 1.222	85.200, 1.003	85.200, 1.408
428	85.400, 0.278	85.400, 0.314	85.400, 0.400	85.400, 0.385	85.400, 0.273	85.400, 0.312	85.400, 0.398	85.400, 0.350	85.400, 0.267	85.400, 0.288	85.400, 0.365	85.400, 0.363	85.400, 1.224	85.400, 1.005	85.400, 1.409
429	85.600, 0.279	85.600, 0.315	85.600, 0.401	85.600, 0.386	85.600, 0.273	85.600, 0.313	85.600, 0.398	85.600, 0.350	85.600, 0.268	85.600, 0.288	85.600, 0.365	85.600, 0.364	85.600, 1.226	85.600, 1.007	85.600, 1.410
430	85.800, 0.279	85.800, 0.316	85.800, 0.402	85.800, 0.387	85.800, 0.273	85.800, 0.313	85.800, 0.398	85.800, 0.350	85.800, 0.268	85.800, 0.288	85.800, 0.366	85.800, 0.364	85.800, 1.228	85.800, 1.008	85.800, 1.412
431	86.000, 0.279	86.000, 0.316	86.000, 0.402	86.000, 0.387	86.000, 0.273	86.000, 0.314	86.000, 0.398	86.000, 0.351	86.000, 0.269	86.000, 0.289	86.000, 0.366	86.000, 0.365	86.000, 1.230	86.000, 1.010	86.000, 1.413
432	86.200, 0.280	86.200, 0.317	86.200, 0.403	86.200, 0.388	86.200, 0.274	86.200, 0.314	86.200, 0.399	86.200, 0.351	86.200, 0.269	86.200, 0.289	86.200, 0.366	86.200, 0.365	86.200, 1.232	86.200, 1.011	86.200, 1.415
433	86.400, 0.280	86.400, 0.318	86.400, 0.403	86.400, 0.388	86.400, 0.274	86.400, 0.315	86.400, 0.399	86.400, 0.352	86.400, 0.270	86.400, 0.290	86.400, 0.367	86.400, 0.366	86.400, 1.234	86.400, 1.013	86.400, 1.417
434	86.600, 0.281	86.600, 0.319	86.600, 0.404	86.600, 0.389	86.600, 0.274	86.600, 0.315	86.600, 0.400	86.600, 0.352	86.600, 0.271	86.600, 0.291	86.600, 0.367	86.600, 0.366	86.600, 1.235	86.600, 1.014	86.600, 1.418
435	86.800, 0.281	86.800, 0.319	86.800, 0.404	86.800, 0.389	86.800, 0.274	86.800, 0.316	86.800, 0.400	86.800, 0.353	86.800, 0.271	86.800, 0.291	86.800, 0.368	86.800, 0.366	86.800, 1.237	86.800, 1.015	86.800, 1.419
436	87.000, 0.281	87.000, 0.320	87.000, 0.404	87.000, 0.390	87.000, 0.275	87.000, 0.316	87.000, 0.401	87.000, 0.354	87.000, 0.272	87.000, 0.292	87.000, 0.368	87.000, 0.366	87.000, 1.238	87.000, 1.017	87.000, 1.421
437	87.200, 0.282	87.200, 0.320	87.200, 0.404	87.200, 0.390	87.200, 0.275	87.200, 0.317	87.200, 0.402	87.200, 0.354	87.200, 0.273	87.200, 0.292	87.200, 0.368	87.200, 0.367	87.200, 1.239	87.200, 1.018	87.200, 1.422
438	87.400, 0.282	87.400, 0.320	87.400, 0.405	87.400, 0.390	87.400, 0.275	87.400, 0.317	87.400, 0.403	87.400, 0.355	87.400, 0.273	87.400, 0.293	87.400, 0.369	87.400, 0.367	87.400, 1.241	87.400, 1.019	87.400, 1.423
439	87.600, 0.282	87.600, 0.320	87.600, 0.405	87.600, 0.391	87.600, 0.276	87.600, 0.318	87.600, 0.404	87.600, 0.355	87.600, 0.274	87.600, 0.293	87.600, 0.369	87.600, 0.368	87.600, 1.242	87.600, 1.021	87.600, 1.425
440	87.800, 0.282	87.800, 0.321	87.800, 0.406	87.800, 0.391	87.800, 0.277	87.800, 0.318	87.800, 0.405	87.800, 0.356	87.800, 0.274	87.800, 0.293	87.800, 0.369	87.800, 0.368	87.800, 1.243	87.800, 1.022	87.800, 1.426
441	88.000, 0.282	88.000, 0.321	88.000, 0.407	88.000, 0.392	88.000, 0.277	88.000, 0.319	88.000, 0.406	88.000, 0.356	88.000, 0.274	88.000, 0.294	88.000, 0.370	88.000, 0.369	88.000, 1.244	88.000, 1.023	88.000, 1.428
442	88.200, 0.283	88.200, 0.322	88.200, 0.407	88.200, 0.392	88.200, 0.278	88.200, 0.320	88.200, 0.407	88.200, 0.357	88.200, 0.274	88.200, 0.294	88.200, 0.370	88.200, 0.369	88.200, 1.246	88.200, 1.025	88.200, 1.429
443	88.400, 0.283	88.400, 0.322	88.400, 0.408	88.400, 0.393	88.400, 0.278	88.400, 0.321	88.400, 0.407	88.400, 0.357	88.400, 0.274	88.400, 0.295	88.400, 0.370	88.400, 0.369	88.400, 1.247	88.400, 1.026	88.400, 1.431
444	88.600, 0.284	88.600, 0.323	88.600, 0.409	88.600, 0.393	88.600, 0.278	88.600, 0.321	88.600, 0.408	88.600, 0.358	88.600, 0.274	88.600, 0.295	88.600, 0.371	88.600, 0.369	88.600, 1.248	88.600, 1.027	88.600, 1.433
445	88.800, 0.284	88.800, 0.324	88.800, 0.409	88.800, 0.394	88.800, 0.278	88.800, 0.322	88.800, 0.409	88.800, 0.358	88.800, 0.274	88.800, 0.295	88.800, 0.371	88.800, 0.369	88.800, 1.249	88.800, 1.028	88.800, 1.435
446	89.000, 0.285	89.000, 0.325	89.000, 0.410	89.000, 0.394	89.000, 0.279	89.000, 0.323	89.000, 0.409	89.000, 0.359	89.000, 0.274	89.000, 0.296	89.000, 0.372	89.000, 0.369	89.000, 1.250	89.000, 1.030	89.000, 1.436
447	89.200, 0.286	89.200, 0.326	89.200, 0.410	89.200, 0.395	89.200, 0.279	89.200, 0.323	89.200, 0.409	89.200, 0.359	89.200, 0.274	89.200, 0.296	89.200, 0.373	89.200, 0.370	89.200, 1.251	89.200, 1.031	89.200, 1.438
448	89.400, 0.287	89.400, 0.326	89.400, 0.411	89.400, 0.395	89.400, 0.280	89.400, 0.324	89.400, 0.409	89.400, 0.360	89.400, 0.274	89.400, 0.296	89.400, 0.373	89.400, 0.370	89.400, 1.252	89.400, 1.032	89.400, 1.440
449	89.600, 0.287	89.600, 0.327	89.600, 0.412	89.600, 0.395	89.600, 0.280	89.600, 0.325	89.600, 0.410	89.600, 0.360	89.600, 0.274	89.600, 0.296	89.600, 0.374	89.600, 0.370	89.600, 1.253	89.600, 1.033	89.600, 1.442
450	89.800, 0.288	89.800, 0.328	89.800, 0.412	89.800, 0.395	89.800, 0.280	89.800, 0.325	89.800, 0.410	89.800, 0.360	89.800, 0.274	89.800, 0.297	89.800, 0.374	89.800, 0.371	89.800, 1.254	89.800, 1.035	89.800, 1.444
451	90.000, 0.289	90.000, 0.328	90.000, 0.413	90.000, 0.395	90.000, 0.280	90.000, 0.325	90.000, 0.411	90.000, 0.361	90.000, 0.275	90.000, 0.297	90.000, 0.375	90.000, 0.371	90.000, 1.256	90.000, 1.036	90.000, 1.446
452	90.200, 0.289	90.200, 0.328	90.200, 0.413	90.200, 0.396	90.200, 0.281	90.200, 0.325	90.200, 0.411	90.200, 0.361	90.200, 0.275	90.200, 0.298	90.200, 0.376	90.200, 0.372	90.200, 1.257	90.200, 1.037	90.200, 1.447
453	90.400, 0.290	90.400, 0.329	90.400, 0.414	90.400, 0.396	90.400, 0.281	90.400, 0.325	90.400, 0.412	90.400, 0.362	90.400, 0.276	90.400, 0.298	90.400, 0.377	90.400, 0.373	90.400, 1.258	90.400, 1.039	90.400, 1.448
454	90.600, 0.290	90.600, 0.329	90.600, 0.414	90.600, 0.396	90.600, 0.281	90.600, 0.325	90.600, 0.413	90.600, 0.362	90.600, 0.277	90.600, 0.299	90.600, 0.378	90.600, 0.374	90.600, 1.259	90.600, 1.040	90.600, 1.449
455	90.800, 0.291	90.800, 0.329	90.800, 0.415	90.800, 0.396	90.800, 0.281	90.800, 0.325	90.800, 0.413	90.800, 0.363	90.800, 0.278	90.800, 0.299	90.800, 0.379	90.800, 0.375	90.800, 1.260	90.800, 1.042	90.800, 1.450
456	91.000, 0.292	91.000, 0.329	91.000, 0.415	91.000, 0.396	91.000, 0.282	91.000, 0.325	91.000, 0.414	91.000, 0.363	91.000, 0.279	91.000, 0.300	91.000, 0.379	91.000, 0.376	91.000, 1.261	91.000, 1.043	91.000, 1.451
457	91.200, 0.292	91.200, 0.329	91.200, 0.416	91.200, 0.397	91.200, 0.282	91.200, 0.325	91.200, 0.414	91.200, 0.364	91.200, 0.280	91.200, 0.301	91.200, 0.380	91.200, 0.377	91.200, 1.262	91.200, 1.045	91.200, 1.452
458	91.400, 0.293	91.400, 0.329	91.400, 0.416	91.400, 0.397	91.400, 0.283	91.400, 0.325	91.400, 0.414	91.400, 0.364	91.400, 0.281	91.400, 0.302	91.400, 0.380	91.400, 0.378	91.400, 1.263	91.400, 1.046	91.400, 1.453
459	91.600, 0.293	91.600, 0.330	91.600, 0.417	91.600, 0.397	91.600, 0.283	91.600, 0.325	91.600, 0.415	91.600, 0.364	91.600, 0.281	91.600, 0.302	91.600, 0.381	91.600, 0.378	91.600, 1.265	91.600, 1.047	91.600, 1.454
460	91.800, 0.293	91.800, 0.330	91.800, 0.418	91.800, 0.398	91.800, 0.283	91.800, 0.326	91.800, 0.415	91.800, 0.365	91.800, 0.281	91.800, 0.303	91.800, 0.382	91.800, 0.379	91.800, 1.267	91.800, 1.048	91.800, 1.455
461	92.000, 0.293	92.000, 0.330	92.000, 0.418	92.000, 0.399	92.000, 0.283	92.000, 0.326	92.000, 0.415	92.000, 0.365	92.000, 0.281	92.000, 0.304	92.000, 0.382	92.000, 0.380	92.000, 1.268	92.000, 1.049	92.000, 1.456
462	92.200, 0.293	92.200, 0.331	92.200, 0.419	92.200, 0.399	92.200, 0.283	92.200, 0.326	92.200, 0.416	92.200, 0.365	92.200, 0.282	92.200, 0.304	92.200, 0.383	92.200, 0.380	92.200, 1.270	92.200, 1.050	92.200, 1.458
463	92.400, 0.294	92.400, 0.331	92.400, 0.419	92.400, 0.400	92.400, 0.283	92.400, 0.327	92.400, 0.416	92.400, 0.365	92.400, 0.282	92.400, 0.305	92.400, 0.383	92.400, 0.380	92.400, 1.272	92.400, 1.051	92.400, 1.459
464	92.600, 0.294	92.600, 0.332	92.600, 0.420	92.600, 0.401	92.600, 0.283	92.600, 0.327	92.600, 0.416	92.600, 0.365	92.600, 0.282	92.600, 0.305	92.600, 0.384	92.600, 0.380	92.600, 1.273	92.600, 1.053	92.600, 1.460
465	92.800, 0.294	92.800, 0.332	92.800, 0.420	92.800, 0.402	92.800, 0.284	92.800, 0.328	92.800, 0.417	92.800, 0.366	92.800, 0.282	92.800, 0.305	92.800, 0.384	92.800, 0.380	92.800, 1.275	92.800, 1.054	92.800, 1.461
466	93.000, 0.294	93.000, 0.332	93.000, 0.421	93.000, 0.403	93.000, 0.284	93.000, 0.329	93.000, 0.417	93.000, 0.366	93.000, 0.282	93.000, 0.305	93.000, 0.384	93.000, 0.379	93.000, 1.276	93.000, 1.056	93.000, 1.462
467	93.200, 0.294	93.200, 0.332	93.200, 0.422	93.200, 0.403	93.200, 0.285	93.200, 0.329	93.200, 0.418	93.200, 0.366	93.200, 0.282	93.200, 0.305	93.200, 0.385	93.200, 0.379	93.200, 1.278	93.200, 1.058	93.200, 1.464
468	93.400, 0.295	93.400, 0.333	93.400, 0.422	93.400, 0.404	93.400, 0.285	93.400, 0.330	93.400, 0.418	93.400, 0.367	93.400, 0.283	93.400, 0.305	93.400, 0.386	93.400, 0.379	93.400, 1.280	93.400, 1.059	93.400, 1.465
469	93.600, 0.295	93.600, 0.333	93.600, 0.423	93.600, 0.404	93.600, 0.286	93.600, 0.330	93.600, 0.419	93.600, 0.367	93.600, 0.283	93.600, 0.305	93.600, 0.386	93.600, 0.378	93.600, 1.282	93.600, 1.061	93.600, 1.466
470	93.800, 0.295	93.800, 0.333	93.800, 0.423	93.800, 0.405	93.800, 0.286	93.800, 0.331	93.800, 0.420	93.800, 0.368	93.800, 0.283	93.800, 0.306	93.800, 0.387	93.800, 0.378	93.800, 1.283	93.800, 1.062	93.800, 1.468
471	94.000, 0.295	94.000, 0.334	94.000, 0.423	94.000, 0.406	94.000, 0.286	94.000, 0.331	94.000, 0.420	94.000, 0.368	94.000, 0.284	94.000, 0.306	94.000, 0.387	94.000, 0.378	94.000, 1.285	94.000, 1.064	94.000, 1.469
472	94.200, 0.296	94.200, 0.334	94.200, 0.423	94.200, 0.406	94.200, 0.287	94.200, 0.332	94.200, 0.421	94.200, 0.369	94.200, 0.285	94.200, 0.307	94.200, 0.388	94.200, 0.379	94.200, 1.287	94.200, 1.065	94.200, 1.471
473	94.400, 0.296	94.400, 0.335	94.400, 0.424	94.400, 0.406	94.400, 0.287	94.400, 0.332	94.400, 0.422	94.400, 0.370	94.400, 0.285	94.400, 0.308	94.400, 0.388	94.400, 0.379	94.400, 1.288	94.400, 1.067	94.400, 1.472
474	94.600, 0.297	94.600, 0.336	94.600, 0.424	94.600, 0.407	94.600, 0.288	94.600, 0.333	94.600, 0.422	94.600, 0.371	94.600, 0.286	94.600, 0.308	94.600, 0.388	94.600, 0.380	94.600, 1.289	94.600, 1.068	94.600, 1.473
475	94.800, 0.298	94.800, 0.336	94.800, 0.424	94.800, 0.407	94.800, 0.288	94.800, 0.333	94.800, 0.423	94.800, 0.372	94.800, 0.286	94.800, 0.309	94.800, 0.389	94.800, 0.381	94.800, 1.290	94.800, 1.069	94.800, 1.475
476	95.000, 0.298	95.000, 0.337	95.000, 0.425	95.000, 0.408	95.000, 0.289	95.000, 0.334	95.000, 0.423	95.000, 0.373	95.000, 0.286	95.000, 0.310	95.000, 0.389	95.000, 0.381	95.000, 1.291	95.000, 1.070	95.000, 1.476
477	95.200, 0.299	95.200, 0.338	95.200, 0.425	95.200, 0.408	95.200, 0.289	95.200, 0.334	95.200, 0.423	95.200, 0.374	95.200, 0.287	95.200, 0.310	95.200, 0.389	95.200, 0.382	95.200, 1.292	95.200, 1.071	95.200, 1.478
478	95.400, 0.299	95.400, 0.339	95.400, 0.425	95.400, 0.409	95.400, 0.289	95.400, 0.335	95.400, 0.424	95.400, 0.374	95.400, 0.287	95.400, 0.311	95.400, 0.390	95.400, 0.382	95.400, 1.293	95.400, 1.071	95.400, 1.479
479	95.600, 0.299	95.600, 0.339	95.600, 0.426	95.600, 0.409	95.600, 0.289	95.600, 0.335	95.600, 0.424	95.600, 0.375	95.600, 0.287	95.600, 0.311	95.600, 0.390	95.600, 0.383	95.600, 1.294	95.600, 1.072	95.600, 1.480
480	95.800, 0.300	95.800, 0.340	95.800, 0.426	95.800, 0.409	95.800, 0.289	95.800, 0.335	95.800, 0.425	95.800, 0.376	95.800, 0.287	95.800, 0.312	95.800, 0.390	95.800, 0.383	95.800, 1.295	95.800, 1.073	95.800, 1.481
481	96.000, 0.300	96.000, 0.340	96.000, 0.426	96.000, 0.410	96.000, 0.290	96.000, 0.336	96.000, 0.425	96.000, 0.376	96.000, 0.287	96.000, 0.312	96.000, 0.391	96.000, 0.384	96.000, 1.296	96.000, 1.074	96.000, 1.482
482	96.200, 0.301	96.200, 0.341	96.200, 0.427	96.200, 0.410	96.200, 0.290	96.200, 0.336	96.200, 0.426	96.200, 0.377	96.200, 0.287	96.200, 0.312	96.200, 0.391	96.200, 0.385	96.200, 1.297	96.200, 1.075	96.200, 1.483
483	96.400, 0.301	96.400, 0.341	96.400, 0.428	96.400, 0.410	96.400, 0.290	96.400, 0.336	96.400, 0.427	96.400, 0.378	96.400, 0.288	96.400, 0.312	96.400, 0.391	96.400, 0.385	96.400, 1.297	96.400, 1.077	96.400, 1.483
484	96.600, 0.302	96.600, 0.341	96.600, 0.428	96.600, 0.411	96.600, 0.290	96.600, 0.337	96.600, 0.427	96.600, 0.378	96.600, 0.288	96.600, 0.312	96.600, 0.391	96.600, 0.386	96.600, 1.299	96.600, 1.079	96.600, 1.484
485	96.800, 0.302	96.800, 0.341	96.800, 0.429	96.800, 0.411	96.800, 0.291	96.800, 0.338	96.800, 0.428	96.800, 0.378	96.800, 0.289	96.800, 0.312	96.800, 0.392	96.800, 0.387	96.800, 1.300	96.800, 1.080	96.800, 1.484
486	97.000, 0.303	97.000, 0.342	97.000, 0.429	97.000, 0.412	97.000, 0.291	97.000, 0.338	97.000, 0.428	97.000, 0.378	97.000, 0.289	97.000, 0.312	97.000, 0.392	97.000, 0.387	97.000, 1.300	97.000, 1.082	97.000, 1.485
487	97.200, 0.304	97.200, 0.342	97.200, 0.430	97.200, 0.412	97.200, 0.292	97.200, 0.339	97.200, 0.429	97.200, 0.378	97.200, 0.290	97.200, 0.312	97.200, 0.392	97.200, 0.388	97.200, 1.301	97.200, 1.083	97.200, 1.485
488	97.400, 0.304	97.400, 0.342	97.400, 0.430	97.400, 0.412	97.400, 0.293	97.400, 0.340	97.400, 0.430	97.400, 0.378	97.400, 0.290	97.400, 0.312	97.400, 0.393	97.400, 0.388	97.400, 1.302	97.400, 1.085	97.400, 1.486
489	97.600, 0.305	97.600, 0.343	97.600, 0.431	97.600, 0.413	97.600, 0.293	97.600, 0.341	97.600, 0.430	97.600, 0.378	97.600, 0.291	97.600, 0.312	97.600, 0.393	97.600, 0.389	97.600, 1.302	97.600, 1.086	97.600, 1.487
490	97.800, 0.305	97.800, 0.343	97.800, 0.431	97.800, 0.413	97.800, 0.293	97.800, 0.341	97.800, 0.431	97.800, 0.378	97.800, 0.291	97.800, 0.312	97.800, 0.393	97.800, 0.389	97.800, 1.303	97.800, 1.087	97.800, 1.488
491	98.000, 0.306	98.000, 0.344	98.000, 0.431	98.000, 0.414	98.000, 0.294	98.000, 0.341	98.000, 0.431	98.000, 0.378	98.000, 0.291	98.000, 0.312	98.000, 0.394	98.000, 0.390	98.000, 1.304	98.000, 1.088	98.000, 1.489
492	98.200, 0.306	98.200, 0.344	98.200, 0.432	98.200, 0.414	98.200, 0.295	98.200, 0.341	98.200, 0.431	98.200, 0.379	98.200, 0.291	98.200, 0.312	98.200, 0.394	98.200, 0.391	98.200, 1.305	98.200, 1.090	98.200, 1.490
493	98.400, 0.307	98.400, 0.345	98.400, 0.432	98.400, 0.414	98.400, 0.295	98.400, 0.342	98.400, 0.431	98.400, 0.379	98.400, 0.291	98.400, 0.313	98.400, 0.394	98.400, 0.391	98.400, 1.306	98.400, 1.091	98.400, 1.491
494	98.600, 0.307	98.600, 0.345	98.600, 0.433	98.600, 0.415	98.600, 0.296	98.600, 0.342	98.600, 0.431	98.600, 0.379	98.600, 0.292	98.600, 0.313	98.600, 0.395	98.600, 0.392	98.600, 1.307	98.600, 1.092	98.600, 1.492
495	98.800, 0.307	98.800, 0.346	98.800, 0.433	98.800, 0.416	98.800, 0.296	98.800, 0.342	98.800, 0.431	98.800, 0.380	98.800, 0.292	98.800, 0.314	98.800, 0.395	98.800, 0.392	98.800, 1.308	98.800, 1.093	98.800, 1.493
496	99.000, 0.307	99.000, 0.346	99.000, 0.433	99.000, 0.417	99.000, 0.296	99.000, 0.342	99.000, 0.431	99.000, 0.380	99.000, 0.292	99.000, 0.314	99.000, 0.396	99.000, 0.392	99.000, 1.309	99.000, 1.094	99.000, 1.494
497	99.200, 0.308	99.200, 0.347	99.200, 0.433	99.200, 0.418	99.200, 0.296	99.200, 0.343	99.200, 0.431	99.200, 0.381	99.200, 0.292	99.200, 0.315	99.200, 0.396	99.200, 0.392	99.200, 1.310	99.200, 1.094	99.200, 1.495
498	99.400, 0.308	99.400, 0.347	99.400, 0.433	99.400, 0.419	99.400, 0.296	99.400, 0.343	99.400, 0.432	99.400, 0.381	99.400, 0.292	99.400, 0.316	99.400, 0.397	99.400, 0.392	99.400, 1.312	99.400, 1.095	99.400, 1.496
499	99.600, 0.308	99.600, 0.347	99.600, 0.433	99.600, 0.420	99.600, 0.296	99.600, 0.343	99.600, 0.432	99.600, 0.382	99.600, 0.292	99.600, 0.316	99.600, 0.398	99.600, 0.392	99.600, 1.313	99.600, 1.096	99.600, 1.497
500	99.800, 0.308	99.800, 0.347	99.800, 0.433	99.800, 0.420	99.800, 0.296	99.800, 0.343	99.800, 0.433	99.800, 0.383	99.800, 0.292	99.800, 0.317	99.800, 0.398	99.800, 0.392	99.800, 1.314	99.800, 1.097	99.800, 1.498
501	100.000, 0.308	100.000, 0.348	100.000, 0.434	100.000, 0.421	100.000, 0.296	100.000, 0.343	100.000, 0.433	100.000, 0.383	100.000, 0.292	100.000, 0.317	100.000, 0.398	100.000, 0.393	100.000, 1.315	100.000, 1.099	100.000, 1.499
502	100.200, 0.308	100.200, 0.348	100.200, 0.434	100.200, 0.422	100.200, 0.296	100.200, 0.343	100.200, 0.434	100.200, 0.384	100.200, 0.292	100.200, 0.318	100.200, 0.398	100.200, 0.393	100.200, 1.317	100.200, 1.100	100.200, 1.499
503	100.400, 0.309	100.400, 0.348	100.400, 0.434	100.400, 0.422	100.400, 0.297	100.400, 0.343	100.400, 0.434	100.400, 0.384	100.400, 0.293	100.400, 0.318	100.400, 0.398	100.400, 0.394	100.400, 1.318	100.400, 1.101	100.400, 1.501
504	100.600, 0.309	100.600, 0.349	100.600, 0.435	100.600, 0.423	100.600, 0.297	100.600, 0.344	100.600, 0.435	100.600, 0.385	100.600, 0.293	100.600, 0.318	100.600, 0.399	100.600, 0.394	100.600, 1.320	100.600, 1.102	100.600, 1.502
505	100.800, 0.310	100.800, 0.349	100.800, 0.436	100.800, 0.423	100.800, 0.297	100.800, 0.344	100.800, 0.435	100.800, 0.385	100.800, 0.294	100.800, 0.318	100.800, 0.399	100.800, 0.395	100.800, 1.321	100.800, 1.103	100.800, 1.503
506	101.000, 0.310	101.000, 0.349	101.000, 0.436	101.000, 0.423	101.000, 0.297	101.000, 0.345	101.000, 0.436	101.000, 0.386	101.000, 0.295	101.000, 0.318	101.000, 0.398	101.000, 0.396	101.000, 1.322	101.000, 1.104	101.000, 1.504
507	101.200, 0.311	101.200, 0.350	101.200, 0.437	101.200, 0.424	101.200, 0.298	101.200, 0.345	101.200, 0.436	101.200, 0.386	101.200, 0.295	101.200, 0.319	101.200, 0.398	101.200, 0.396	101.200, 1.323	101.200, 1.104	101.200, 1.506
508	101.400, 0.312	101.400, 0.350	101.400, 0.437	101.400, 0.424	101.400, 0.298	101.400, 0.346	101.400, 0.437	101.400, 0.387	101.400, 0.296	101.400, 0.319	101.400, 0.399	101.400, 0.397	101.400, 1.323	101.400, 1.105	101.400, 1.507
509	101.600, 0.312	101.600, 0.351	101.600, 0.438	101.600, 0.424	101.600, 0.298	101.600, 0.346	101.600, 0.437	101.600, 0.387	101.600, 0.296	101.600, 0.319	101.600, 0.399	101.600, 0.398	101.600, 1.324	101.600, 1.106	101.600, 1.509
510	101.800, 0.312	101.800, 0.351	101.800, 0.439	101.800, 0.424	101.800, 0.299	101.800, 0.347	101.800, 0.438	101.800, 0.388	101.800, 0.297	101.800, 0.319	101.800, 0.400	101.800, 0.398	101.800, 1.325	101.800, 1.107	101.800, 1.510
511	102.000, 0.313	102.000, 0.351	102.000, 0.439	102.000, 0.424	102.000, 0.299	102.000, 0.347	102.000, 0.438	102.000, 0.389	102.000, 0.297	102.000, 0.319	102.000, 0.400	102.000, 0.399	102.000, 1.326	102.000, 1.109	102.000, 1.512
512	102.200, 0.313	102.200, 0.352	102.200, 0.440	102.200, 0.424	102.200, 0.300	102.200, 0.348	102.200, 0.438	102.200, 0.389	102.200, 0.298	102.200, 0.319	102.200, 0.401	102.200, 0.400	102.200, 1.327	102.200, 1.110	102.200, 1.513
513	102.400, 0.313	102.400, 0.352	102.400, 0.441	102.400, 0.424	102.400, 0.301	102.400, 0.348	102.400, 0.439	102.400, 0.390	102.400, 0.298	102.400, 0.319	102.400, 0.401	102.400, 0.400	102.400, 1.328	102.400, 1.111	102.400, 1.515
514	102.600, 0.314	102.600, 0.353	102.600, 0.442	102.600, 0.424	102.600, 0.301	102.600, 0.349	102.600, 0.439	102.600, 0.390	102.600, 0.299	102.600, 0.320	102.600, 0.402	102.600, 0.401	102.600, 1.329	102.600, 1.112	102.600, 1.516
515	102.800, 0.314	102.800, 0.353	102.800, 0.442	102.800, 0.424	102.800, 0.301	102.800, 0.349	102.800, 0.439	102.800, 0.391	102.800, 0.299	102.800, 0.320	102.800, 0.403	102.800, 0.401	102.800, 1.330	102.800, 1.113	102.800, 1.517
516	103.000, 0.315	103.000, 0.353	103.000, 0.443	103.000, 0.424	103.000, 0.301	103.000, 0.350	103.000, 0.440	103.000, 0.391	103.000, 0.299	103.000, 0.321	103.000, 0.403	103.000, 0.401	103.000, 1.331	103.000, 1.114	103.000, 1.518
517	103.200, 0.315	103.200, 0.354	103.200, 0.443	103.200, 0.425	103.200, 0.302	103.200, 0.350	103.200, 0.440	103.200, 0.391	103.200, 0.299	103.200, 0.321	103.200, 0.404	103.200, 0.401	103.200, 1.332	103.200, 1.116	103.200, 1.519
518	103.400, 0.316	103.400, 0.354	103.400, 0.443	103.400, 0.425	103.400, 0.302	103.400, 0.351	103.400, 0.440	103.400, 0.391	103.400, 0.299	103.400, 0.322	103.400, 0.404	103.400, 0.401	103.400, 1.333	103.400, 1.117	103.400, 1.521
519	103.600, 0.316	103.600, 0.354	103.600, 0.444	103.600, 0.426	103.600, 0.302	103.600, 0.351	103.600, 0.440	103.600, 0.391	103.600, 0.299	103.600, 0.323	103.600, 0.405	103.600, 0.401	103.600, 1.334	103.600, 1.118	103.600, 1.522
520	103.800, 0.316	103.800, 0.355	103.800, 0.444	103.800, 0.426	103.800, 0.302	103.800, 0.351	103.800, 0.440	103.800, 0.391	103.800, 0.299	103.800, 0.324	103.800, 0.405	103.800, 0.401	103.800, 1.335	103.800, 1.119	103.800, 1.523
521	104.000, 0.317	104.000, 0.355	104.000, 0.445	104.000, 0.427	104.000, 0.303	104.000, 0.352	104.000, 0.441	104.000, 0.391	104.000, 0.300	104.000, 0.324	104.000, 0.405	104.000, 0.402	104.000, 1.336	104.000, 1.119	104.000, 1.524
522	104.200, 0.317	104.200, 0.356	104.200, 0.445	104.200, 0.427	104.200, 0.303	104.200, 0.352	104.200, 0.441	104.200, 0.391	104.200, 0.300	104.200, 0.325	104.200, 0.405	104.200, 0.402	104.200, 1.337	104.200, 1.120	104.200, 1.525
523	104.400, 0.317	104.400, 0.356	104.400, 0.446	104.400, 0.428	104.400, 0.303	104.400, 0.353	104.400, 0.442	104.400, 0.392	104.400, 0.301	104.400, 0.326	104.400, 0.405	104.400, 0.402	104.400, 1.338	104.400, 1.121	104.400, 1.526
524	104.600, 0.318	104.600, 0.357	104.600, 0.447	104.600, 0.428	104.600, 0.304	104.600, 0.353	104.600, 0.442	104.600, 0.392	104.600, 0.301	104.600, 0.326	104.600, 0.405	104.600, 0.403	104.600, 1.339	104.600, 1.122	104.600, 1.527
525	104.800, 0.318	104.800, 0.358	104.800, 0.447	104.800, 0.429	104.800, 0.304	104.800, 0.354	104.800, 0.443	104.800, 0.392	104.800, 0.301	104.800, 0.327	104.800, 0.404	104.800, 0.403	104.800, 1.340	104.800, 1.123	104.800, 1.528
526	105.000, 0.318	105.000, 0.358	105.000, 0.447	105.000, 0.429	105.000, 0.304	105.000, 0.354	105.000, 0.444	105.000, 0.393	105.000, 0.302	105.000, 0.327	105.000, 0.404	105.000, 0.403	105.000, 1.341	105.000, 1.124	105.000, 1.529
527	105.200, 0.319	105.200, 0.359	105.200, 0.448	105.200, 0.430	105.200, 0.305	105.200, 0.355	105.200, 0.444	105.200, 0.393	105.200, 0.302	105.200, 0.328	105.200, 0.405	105.200, 0.404	105.200, 1.341	105.200, 1.126	105.200, 1.529
528	105.400, 0.319	105.400, 0.359	105.400, 0.448	105.400, 0.430	105.400, 0.305	105.400, 0.355	105.400, 0.445	105.400, 0.394	105.400, 0.302	105.400, 0.329	105.400, 0.405	105.400, 0.404	105.400, 1.342	105.400, 1.128	105.400, 1.530
529	105.600, 0.320	105.600, 0.360	105.600, 0.449	105.600, 0.431	105.600, 0.305	105.600, 0.355	105.600, 0.446	105.600, 0.394	105.600, 0.303	105.600, 0.329	105.600, 0.406	105.600, 0.404	105.600, 1.343	105.600, 1.129	105.600, 1.530
530	105.800, 0.320	105.800, 0.360	105.800, 0.449	105.800, 0.431	105.800, 0.305	105.800, 0.355	105.800, 0.447	105.800, 0.395	105.800, 0.303	105.800, 0.329	105.800, 0.406	105.800, 0.405	105.800, 1.343	105.800, 1.131	105.800, 1.531
531	106.000, 0.320	106.000, 0.360	106.000, 0.450	106.000, 0.431	106.000, 0.305	106.000, 0.355	106.000, 0.447	106.000, 0.395	106.000, 0.303	106.000, 0.329	106.000, 0.407	106.000, 0.405	106.000, 1.344	106.000, 1.132	106.000, 1.532
532	106.200, 0.321	106.200, 0.361	106.200, 0.450	106.200, 0.431	106.200, 0.305	106.200, 0.355	106.200, 0.448	106.200, 0.395	106.200, 0.303	106.200, 0.329	106.200, 0.408	106.200, 0.405	106.200, 1.345	106.200, 1.134	106.200, 1.532
533	106.400, 0.321	106.400, 0.361	106.400, 0.450	106.400, 0.431	106.400, 0.305	106.400, 0.354	106.400, 0.448	106.400, 0.396	106.400, 0.304	106.400, 0.329	106.400, 0.408	106.400, 0.406	106.400, 1.346	106.400, 1.135	106.400, 1.532
534	106.600, 0.321	106.600, 0.361	106.600, 0.450	106.600, 0.432	106.600, 0.306	106.600, 0.354	106.600, 0.449	106.600, 0.396	106.600, 0.304	106.600, 0.329	106.600, 0.409	106.600, 0.407	106.600, 1.347	106.600, 1.136	106.600, 1.533
535	106.800, 0.322	106.800, 0.361	106.800, 0.450	106.800, 0.432	106.800, 0.306	106.800, 0.354	106.800, 0.449	106.800, 0.396	106.800, 0.303	106.800, 0.329	106.800, 0.410	106.800, 0.407	106.800, 1.348	106.800, 1.137	106.800, 1.533
536	107.000, 0.322	107.000, 0.362	107.000, 0.450	107.000, 0.432	107.000, 0.306	107.000, 0.355	107.000, 0.449	107.000, 0.397	107.000, 0.303	107.000, 0.329	107.000, 0.410	107.000, 0.407	107.000, 1.349	107.000, 1.138	107.000, 1.534
537	107.200, 0.323	107.200, 0.362	107.200, 0.450	107.200, 0.432	107.200, 0.307	107.200, 0.355	107.200, 0.449	107.200, 0.397	107.200, 0.303	107.200, 0.329	107.200, 0.411	107.200, 0.408	107.200, 1.350	107.200, 1.139	107.200, 1.535
538	107.400, 0.323	107.400, 0.362	107.400, 0.450	107.400, 0.433	107.400, 0.307	107.400, 0.356	107.400, 0.449	107.400, 0.397	107.400, 0.303	107.400, 0.330	107.400, 0.411	107.400, 0.408	107.400, 1.350	107.400, 1.140	107.400, 1.536
539	107.600, 0.323	107.600, 0.362	107.600, 0.450	107.600, 0.433	107.600, 0.308	107.600, 0.356	107.600, 0.449	107.600, 0.398	107.600, 0.304	107.600, 0.330	107.600, 0.412	107.600, 0.409	107.600, 1.351	107.600, 1.141	107.600, 1.537
540	107.800, 0.324	107.800, 0.362	107.800, 0.451	107.800, 0.433	107.800, 0.308	107.800, 0.357	107.800, 0.450	107.800, 0.398	107.800, 0.304	107.800, 0.330	107.800, 0.412	107.800, 0.409	107.800, 1.352	107.800, 1.142	107.800, 1.538
541	108.000, 0.324	108.000, 0.363	108.000, 0.451	108.000, 0.434	108.000, 0.308	108.000, 0.357	108.000, 0.450	108.000, 0.399	108.000, 0.304	108.000, 0.330	108.000, 0.412	108.000, 0.410	108.000, 1.353	108.000, 1.142	108.000, 1.539
542	108.200, 0.323	108.200, 0.363	108.200, 0.452	108.200, 0.434	108.200, 0.309	108.200, 0.358	108.200, 0.450	108.200, 0.399	108.200, 0.305	108.200, 0.331	108.200, 0.412	108.200, 0.410	108.200, 1.354	108.200, 1.143	108.200, 1.540
543	108.400, 0.323	108.400, 0.363	108.400, 0.452	108.400, 0.435	108.400, 0.309	108.400, 0.358	108.400, 0.450	108.400, 0.400	108.400, 0.305	108.400, 0.331	108.400, 0.413	108.400, 0.410	108.400, 1.355	108.400, 1.143	108.400, 1.540
544	108.600, 0.323	108.600, 0.363	108.600, 0.453	108.600, 0.435	108.600, 0.309	108.600, 0.359	108.600, 0.451	108.600, 0.400	108.600, 0.306	108.600, 0.332	108.600, 0.413	108.600, 0.411	108.600, 1.356	108.600, 1.144	108.600, 1.541
545	108.800, 0.323	108.800, 0.364	108.800, 0.453	108.800, 0.436	108.800, 0.310	108.800, 0.360	108.800, 0.451	108.800, 0.401	108.800, 0.306	108.800, 0.332	108.800, 0.414	108.800, 0.411	108.800, 1.357	108.800, 1.145	108.800, 1.542
546	109.000, 0.323	109.000, 0.364	109.000, 0.454	109.000, 0.436	109.000, 0.310	109.000, 0.360	109.000, 0.451	109.000, 0.402	109.000, 0.307	109.000, 0.333	109.000, 0.415	109.000, 0.411	109.000, 1.358	109.000, 1.146	109.000, 1.543
547	109.200, 0.323	109.200, 0.364	109.200, 0.454	109.200, 0.437	109.200, 0.310	109.200, 0.361	109.200, 0.452	109.200, 0.402	109.200, 0.308	109.200, 0.333	109.200, 0.415	109.200, 0.411	109.200, 1.360	109.200, 1.146	109.200, 1.544
548	109.400, 0.324	109.400, 0.365	109.400, 0.455	109.400, 0.437	109.400, 0.310	109.400, 0.361	109.400, 0.452	109.400, 0.403	109.400, 0.308	109.400, 0.334	109.400, 0.416	109.400, 0.411	109.400, 1.361	109.400, 1.147	109.400, 1.545
549	109.600, 0.324	109.600, 0.365	109.600, 0.455	109.600, 0.438	109.600, 0.311	109.600, 0.362	109.600, 0.452	109.600, 0.403	109.600, 0.309	109.600, 0.334	109.600, 0.416	109.600, 0.411	109.600, 1.363	109.600, 1.148	109.600, 1.546
550	109.800, 0.324	109.800, 0.366	109.800, 0.456	109.800, 0.438	109.800, 0.311	109.800, 0.362	109.800, 0.452	109.800, 0.404	109.800, 0.309	109.800, 0.334	109.800, 0.417	109.800, 0.411	109.800, 1.364	109.800, 1.149	109.800, 1.547
551	110.000, 0.325	110.000, 0.366	110.000, 0.456	110.000, 0.439	110.000, 0.312	110.000, 0.362	110.000, 0.452	110.000, 0.404	110.000, 0.309	110.000, 0.334	110.000, 0.417	110.000, 0.412	110.000, 1.365	110.000, 1.150	110.000, 1.548
552	110.200, 0.325	110.200, 0.367	110.200, 0.457	110.200, 0.439	110.200, 0.313	110.200, 0.363	110.200, 0.452	110.200, 0.405	110.200, 0.309	110.200, 0.334	110.200, 0.417	110.200, 0.412	110.200, 1.367	110.200, 1.151	110.200, 1.550
553	110.400, 0.325	110.400, 0.368	110.400, 0.457	110.400, 0.439	110.400, 0.313	110.400, 0.363	110.400, 0.453	110.400, 0.405	110.400, 0.309	110.400, 0.334	110.400, 0.417	110.400, 0.413	110.400, 1.368	110.400, 1.152	110.400, 1.551
554	110.600, 0.326	110.600, 0.368	110.600, 0.457	110.600, 0.440	110.600, 0.314	110.600, 0.363	110.600, 0.453	110.600, 0.406	110.600, 0.309	110.600, 0.335	110.600, 0.417	110.600, 0.413	110.600, 1.369	110.600, 1.153	110.600, 1.552
555	110.800, 0.326	110.800, 0.369	110.800, 0.457	110.800, 0.440	110.800, 0.314	110.800, 0.363	110.800, 0.453	110.800, 0.406	110.800, 0.309	110.800, 0.335	110.800, 0.416	110.800, 0.414	110.800, 1.369	110.800, 1.154	110.800, 1.553
556	111.000, 0.327	111.000, 0.370	111.000, 0.458	111.000, 0.440	111.000, 0.314	111.000, 0.363	111.000, 0.454	111.000, 0.406	111.000, 0.309	111.000, 0.335	111.000, 0.416	111.000, 0.414	111.000, 1.370	111.000, 1.155	111.000, 1.554
557	111.200, 0.327	111.200, 0.370	111.200, 0.458	111.200, 0.441	111.200, 0.314	111.200, 0.363	111.200, 0.454	111.200, 0.406	111.200, 0.309	111.200, 0.335	111.200, 0.416	111.200, 0.414	111.200, 1.370	111.200, 1.156	111.200, 1.555
558	111.400, 0.328	111.400, 0.370	111.400, 0.459	111.400, 0.441	111.400, 0.314	111.400, 0.362	111.400, 0.454	111.400, 0.406	111.400, 0.309	111.400, 0.335	111.400, 0.416	111.400, 0.415	111.400, 1.371	111.400, 1.157	111.400, 1.556
559	111.600, 0.328	111.600, 0.371	111.600, 0.459	111.600, 0.441	111.600, 0.314	111.600, 0.362	111.600, 0.454	111.600, 0.406	111.600, 0.309	111.600, 0.335	111.600, 0.416	111.600, 0.415	111.600, 1.371	111.600, 1.158	111.600, 1.558
560	111.800, 0.328	111.800, 0.371	111.800, 0.460	111.800, 0.442	111.800, 0.314	111.800, 0.363	111.800, 0.454	111.800, 0.406	111.800, 0.309	111.800, 0.335	111.800, 0.416	111.800, 0.415	111.800, 1.371	111.800, 1.159	111.800, 1.559
561	112.000, 0.328	112.000, 0.371	112.000, 0.460	112.000, 0.442	112.000, 0.314	112.000, 0.363	112.000, 0.455	112.000, 0.406	112.000, 0.309	112.000, 0.336	112.000, 0.417	112.000, 0.415	112.000, 1.372	112.000, 1.159	112.000, 1.560
562	112.200, 0.328	112.200, 0.371	112.200, 0.460	112.200, 0.443	112.200, 0.313	112.200, 0.363	112.200, 0.456	112.200, 0.406	112.200, 0.309	112.200, 0.336	112.200, 0.417	112.200, 0.416	112.200, 1.372	112.200, 1.160	112.200, 1.561
563	112.400, 0.328	112.400, 0.372	112.400, 0.461	112.400, 0.443	112.400, 0.313	112.400, 0.364	112.400, 0.456	112.400, 0.406	112.400, 0.310	112.400, 0.336	112.400, 0.418	112.400, 0.416	112.400, 1.373	112.400, 1.161	112.400, 1.562
564	112.600, 0.329	112.600, 0.372	112.600, 0.461	112.600, 0.444	112.600, 0.313	112.600, 0.364	112.600, 0.457	112.600, 0.406	112.600, 0.310	112.600, 0.337	112.600, 0.419	112.600, 0.416	112.600, 1.374	112.600, 1.161	112.600, 1.563
565	112.800, 0.329	112.800, 0.372	112.800, 0.461	112.800, 0.444	112.800, 0.313	112.800, 0.365	112.800, 0.458	112.800, 0.406	112.800, 0.311	112.800, 0.337	112.800, 0.420	112.800, 0.417	112.800, 1.375	112.800, 1.162	112.800, 1.564
566	113.000, 0.329	113.000, 0.372	113.000, 0.461	113.000, 0.444	113.000, 0.314	113.000, 0.366	113.000, 0.459	113.000, 0.407	113.000, 0.312	113.000, 0.338	113.000, 0.421	113.000, 0.417	113.000, 1.376	113.000, 1.162	113.000, 1.565
567	113.200, 0.330	113.200, 0.372	113.200, 0.462	113.200, 0.445	113.200, 0.314	113.200, 0.367	113.200, 0.459	113.200, 0.407	113.200, 0.312	113.200, 0.338	113.200, 0.422	113.200, 0.417	113.200, 1.377	113.200, 1.163	113.200, 1.566
568	113.400, 0.330	113.400, 0.372	113.400, 0.462	113.400, 0.445	113.400, 0.315	113.400, 0.368	113.400, 0.460	113.400, 0.407	113.400, 0.313	113.400, 0.339	113.400, 0.422	113.400, 0.418	113.400, 1.378	113.400, 1.164	113.400, 1.567
569	113.600, 0.331	113.600, 0.372	113.600, 0.462	113.600, 0.445	113.600, 0.315	113.600, 0.369	113.600, 0.461	113.600, 0.408	113.600, 0.313	113.600, 0.339	113.600, 0.423	113.600, 0.418	113.600, 1.379	113.600, 1.165	113.600, 1.568
570	113.800, 0.331	113.800, 0.372	113.800, 0.462	113.800, 0.446	113.800, 0.316	113.800, 0.370	113.800, 0.461	113.800, 0.409	113.800, 0.314	113.800, 0.340	113.800, 0.423	113.800, 0.418	113.800, 1.379	113.800, 1.166	113.800, 1.569
571	114.000, 0.331	114.000, 0.373	114.000, 0.463	114.000, 0.446	114.000, 0.317	114.000, 0.371	114.000, 0.461	114.000, 0.409	114.000, 0.314	114.000, 0.340	114.000, 0.424	114.000, 0.419	114.000, 1.380	114.000, 1.167	114.000, 1.570
572	114.200, 0.331	114.200, 0.373	114.200, 0.463	114.200, 0.447	114.200, 0.317	114.200, 0.371	114.200, 0.462	114.200, 0.410	114.200, 0.314	114.200, 0.340	114.200, 0.424	114.200, 0.420	114.200, 1.381	114.200, 1.168	114.200, 1.571
573	114.400, 0.332	114.400, 0.373	114.400, 0.463	114.400, 0.447	114.400, 0.317	114.400, 0.371	114.400, 0.461	114.400, 0.410	114.400, 0.315	114.400, 0.341	114.400, 0.425	114.400, 0.420	114.400, 1.382	114.400, 1.169	114.400, 1.571
574	114.600, 0.332	114.600, 0.374	114.600, 0.463	114.600, 0.447	114.600, 0.317	114.600, 0.371	114.600, 0.461	114.600, 0.411	114.600, 0.315	114.600, 0.341	114.600, 0.425	114.600, 0.421	114.600, 1.383	114.600, 1.170	114.600, 1.572
575	114.800, 0.332	114.800, 0.374	114.800, 0.463	114.800, 0.448	114.800, 0.318	114.800, 0.371	114.800, 0.461	114.800, 0.411	114.800, 0.315	114.800, 0.341	114.800, 0.425	114.800, 0.422	114.800, 1.384	114.800, 1.171	114.800, 1.572
576	115.000, 0.332	115.000, 0.375	115.000, 0.463	115.000, 0.448	115.000, 0.318	115.000, 0.370	115.000, 0.461	115.000, 0.411	115.000, 0.315	115.000, 0.341	115.000, 0.425	115.000, 0.422	115.000, 1.385	115.000, 1.172	115.000, 1.572
577	115.200, 0.333	115.200, 0.375	115.200, 0.464	115.200, 0.448	115.200, 0.318	115.200, 0.370	115.200, 0.461	115.200, 0.411	115.200, 0.315	115.200, 0.341	115.200, 0.425	115.200, 0.422	115.200, 1.386	115.200, 1.173	115.200, 1.573
578	115.400, 0.333	115.400, 0.376	115.400, 0.464	115.400, 0.448	115.400, 0.318	115.400, 0.370	115.400, 0.461	115.400, 0.412	115.400, 0.315	115.400, 0.342	115.400, 0.425	115.400, 0.422	115.400, 1.387	115.400, 1.174	115.400, 1.573
579	115.600, 0.333	115.600, 0.377	115.600, 0.464	115.600, 0.448	115.600, 0.319	115.600, 0.371	115.600, 0.461	115.600, 0.412	115.600, 0.315	115.600, 0.342	115.600, 0.425	115.600, 0.422	115.600, 1.388	115.600, 1.174	115.600, 1.574
580	115.800, 0.334	115.800, 0.378	115.800, 0.465	115.800, 0.448	115.800, 0.319	115.800, 0.371	115.800, 0.461	115.800, 0.412	115.800, 0.315	115.800, 0.342	115.800, 0.425	115.800, 0.422	115.800, 1.389	115.800, 1.175	115.800, 1.575
581	116.000, 0.334	116.000, 0.378	116.000, 0.465	116.000, 0.449	116.000, 0.319	116.000, 0.371	116.000, 0.462	116.000, 0.413	116.000, 0.315	116.000, 0.342	116.000, 0.425	116.000, 0.422	116.000, 1.391	116.000, 1.176	116.000, 1.575
582	116.200, 0.334	116.200, 0.379	116.200, 0.466	116.200, 0.449	116.200, 0.319	116.200, 0.371	116.200, 0.462	116.200, 0.413	116.200, 0.314	116.200, 0.343	116.200, 0.425	116.200, 0.423	116.200, 1.392	116.200, 1.177	116.200, 1.576
583	116.400, 0.335	116.400, 0.380	116.400, 0.467	116.400, 0.449	116.400, 0.319	116.400, 0.372	116.400, 0.462	116.400, 0.413	116.400, 0.314	116.400, 0.343	116.400, 0.425	116.400, 0.423	116.400, 1.393	116.400, 1.178	116.400, 1.577
584	116.600, 0.335	116.600, 0.380	116.600, 0.467	116.600, 0.449	116.600, 0.319	116.600, 0.372	116.600, 0.462	116.600, 0.414	116.600, 0.315	116.600, 0.343	116.600, 0.425	116.600, 0.423	116.600, 1.394	116.600, 1.179	116.600, 1.577
585	116.800, 0.336	116.800, 0.381	116.800, 0.468	116.800, 0.449	116.800, 0.319	116.800, 0.373	116.800, 0.463	116.800, 0.414	116.800, 0.315	116.800, 0.344	116.800, 0.425	116.800, 0.423	116.800, 1.394	116.800, 1.180	116.800, 1.578
586	117.000, 0.336	117.000, 0.381	117.000, 0.468	117.000, 0.450	117.000, 0.319	117.000, 0.374	117.000, 0.463	117.000, 0.415	117.000, 0.315	117.000, 0.344	117.000, 0.426	117.000, 0.424	117.000, 1.395	117.000, 1.181	117.000, 1.579
587	117.200, 0.337	117.200, 0.381	117.200, 0.469	117.200, 0.450	117.200, 0.320	117.200, 0.374	117.200, 0.464	117.200, 0.415	117.200, 0.316	117.200, 0.344	117.200, 0.426	117.200, 0.424	117.200, 1.395	117.200, 1.182	117.200, 1.580
588	117.400, 0.337	117.400, 0.381	117.400, 0.469	117.400, 0.450	117.400, 0.320	117.400, 0.375	117.400, 0.464	117.400, 0.416	117.400, 0.317	117.400, 0.344	117.400, 0.427	117.400, 0.424	117.400, 1.395	117.400, 1.183	117.400, 1.581
589	117.600, 0.337	117.600, 0.382	117.600, 0.470	117.600, 0.451	117.600, 0.320	117.600, 0.375	117.600, 0.465	117.600, 0.417	117.600, 0.317	117.600, 0.345	117.600, 0.428	117.600, 0.424	117.600, 1.395	117.600, 1.184	117.600, 1.582
590	117.800, 0.338	117.800, 0.382	117.800, 0.470	117.800, 0.451	117.800, 0.320	117.800, 0.376	117.800, 0.465	117.800, 0.417	117.800, 0.318	117.800, 0.345	117.800, 0.429	117.800, 0.425	117.800, 1.395	117.800, 1.185	117.800, 1.583
591	118.000, 0.338	118.000, 0.382	118.000, 0.471	118.000, 0.451	118.000, 0.320	118.000, 0.376	118.000, 0.466	118.000, 0.418	118.000, 0.318	118.000, 0.344	118.000, 0.429	118.000, 0.425	118.000, 1.395	118.000, 1.185	118.000, 1.584
592	118.200, 0.338	118.200, 0.383	118.200, 0.471	118.200, 0.452	118.200, 0.320	118.200, 0.376	118.200, 0.466	118.200, 0.418	118.200, 0.319	118.200, 0.344	118.200, 0.430	118.200, 0.425	118.200, 1.396	118.200, 1.186	118.200, 1.585
593	118.400, 0.338	118.400, 0.383	118.400, 0.471	118.400, 0.452	118.400, 0.321	118.400, 0.376	118.400, 0.466	118.400, 0.419	118.400, 0.319	118.400, 0.345	118.400, 0.430	118.400, 0.425	118.400, 1.396	118.400, 1.187	118.400, 1.586
594	118.600, 0.338	118.600, 0.383	118.600, 0.471	118.600, 0.453	118.600, 0.321	118.600, 0.376	118.600, 0.467	118.600, 0.419	118.600, 0.320	118.600, 0.345	118.600, 0.430	118.600, 0.426	118.600, 1.397	118.600, 1.188	118.600, 1.586
595	118.800, 0.338	118.800, 0.383	118.800, 0.472	118.800, 0.453	118.800, 0.321	118.800, 0.376	118.800, 0.467	118.800, 0.420	118.800, 0.320	118.800, 0.345	118.800, 0.430	118.800, 0.425	118.800, 1.397	118.800, 1.188	118.800, 1.587
596	119.000, 0.339	119.000, 0.383	119.000, 0.472	119.000, 0.454	119.000, 0.322	119.000, 0.376	119.000, 0.468	119.000, 0.420	119.000, 0.320	119.000, 0.345	119.000, 0.430	119.000, 0.425	119.000, 1.398	119.000, 1.189	119.000, 1.588
597	119.200, 0.339	119.200, 0.383	119.200, 0.472	119.200, 0.454	119.200, 0.322	119.200, 0.376	119.200, 0.468	119.200, 0.420	119.200, 0.320	119.200, 0.346	119.200, 0.429	119.200, 0.426	119.200, 1.398	119.200, 1.190	119.200, 1.589
598	119.400, 0.339	119.400, 0.384	119.400, 0.473	119.400, 0.455	119.400, 0.322	119.400, 0.376	119.400, 0.468	119.400, 0.420	119.400, 0.321	119.400, 0.346	119.400, 0.429	119.400, 0.425	119.400, 1.399	119.400, 1.191	119.400, 1.589
599	119.600, 0.339	119.600, 0.384	119.600, 0.473	119.600, 0.455	119.600, 0.322	119.600, 0.376	119.600, 0.468	119.600, 0.420	119.600, 0.321	119.600, 0.346	119.600, 0.428	119.600, 0.426	119.600, 1.400	119.600, 1.191	119.600, 1.590
600	119.800, 0.339	119.800, 0.384	119.800, 0.473	119.800, 0.456	119.800, 0.323	119.800, 0.377	119.800, 0.469	119.800, 0.420	119.800, 0.321	119.800, 0.347	119.800, 0.428	119.800, 0.426	119.800, 1.401	119.800, 1.192	119.800, 1.590
601	120.000, 0.339	120.000, 0.384	120.000, 0.474	120.000, 0.456	120.000, 0.323	120.000, 0.377	120.000, 0.469	120.000, 0.421	120.000, 0.322	120.000, 0.347	120.000, 0.428	120.000, 0.426	120.000, 1.402	120.000, 1.193	120.000, 1.591
602	120.200, 0.340	120.200, 0.384	120.200, 0.474	120.200, 0.457	120.200, 0.323	120.200, 0.377	120.200, 0.469	120.200, 0.420	120.200, 0.322	120.200, 0.347	120.200, 0.428	120.200, 0.427	120.200, 1.402	120.200, 1.194	120.200, 1.591
603	120.400, 0.340	120.400, 0.385	120.400, 0.474	120.400, 0.457	120.400, 0.323	120.400, 0.377	120.400, 0.469	120.400, 0.420	120.400, 0.322	120.400, 0.348	120.400, 0.428	120.400, 0.427	120.400, 1.403	120.400, 1.195	120.400, 1.592
604	120.600, 0.341	120.600, 0.385	120.600, 0.474	120.600, 0.457	120.600, 0.323	120.600, 0.378	120.600, 0.469	120.600, 0.421	120.600, 0.322	120.600, 0.348	120.600, 0.428	120.600, 0.427	120.600, 1.403	120.600, 1.196	120.600, 1.593
605	120.800, 0.341	120.800, 0.385	120.800, 0.475	120.800, 0.458	120.800, 0.323	120.800, 0.378	120.800, 0.470	120.800, 0.421	120.800, 0.323	120.800, 0.348	120.800, 0.429	120.800, 0.428	120.800, 1.404	120.800, 1.196	120.800, 1.594
606	121.000, 0.341	121.000, 0.385	121.000, 0.475	121.000, 0.458	121.000, 0.323	121.000, 0.378	121.000, 0.470	121.000, 0.420	121.000, 0.323	121.000, 0.349	121.000, 0.429	121.000, 0.429	121.000, 1.405	121.000, 1.197	121.000, 1.595
607	121.200, 0.342	121.200, 0.386	121.200, 0.475	121.200, 0.458	121.200, 0.323	121.200, 0.379	121.200, 0.470	121.200, 0.421	121.200, 0.323	121.200, 0.349	121.200, 0.430	121.200, 0.430	121.200, 1.405	121.200, 1.198	121.200, 1.596
608	121.400, 0.342	121.400, 0.386	121.400, 0.475	121.400, 0.459	121.400, 0.323	121.400, 0.379	121.400, 0.471	121.400, 0.421	121.400, 0.323	121.400, 0.349	121.400, 0.431	121.400, 0.430	121.400, 1.406	121.400, 1.198	121.400, 1.597
609	121.600, 0.342	121.600, 0.386	121.600, 0.475	121.600, 0.459	121.600, 0.323	121.600, 0.379	121.600, 0.472	121.600, 0.421	121.600, 0.323	121.600, 0.349	121.600, 0.432	121.600, 0.431	121.600, 1.408	121.600, 1.199	121.600, 1.597
610	121.800, 0.342	121.800, 0.387	121.800, 0.475	121.800, 0.459	121.800, 0.324	121.800, 0.380	121.800, 0.472	121.800, 0.422	121.800, 0.323	121.800, 0.348	121.800, 0.433	121.800, 0.432	121.800, 1.409	121.800, 1.200	121.800, 1.598
611	122.000, 0.342	122.000, 0.387	122.000, 0.476	122.000, 0.459	122.000, 0.324	122.000, 0.380	122.000, 0.473	122.000, 0.422	122.000, 0.324	122.000, 0.349	122.000, 0.433	122.000, 0.432	122.000, 1.411	122.000, 1.201	122.000, 1.598
612	122.200, 0.342	122.200, 0.387	122.200, 0.476	122.200, 0.459	122.200, 0.324	122.200, 0.380	122.200, 0.474	122.200, 0.422	122.200, 0.324	122.200, 0.349	122.200, 0.434	122.200, 0.433	122.200, 1.412	122.200, 1.201	122.200, 1.599
613	122.400, 0.342	122.400, 0.388	122.400, 0.476	122.400, 0.460	122.400, 0.324	122.400, 0.380	122.400, 0.474	122.400, 0.423	122.400, 0.324	122.400, 0.349	122.400, 0.434	122.400, 0.434	122.400, 1.414	122.400, 1.202	122.400, 1.599
614	122.600, 0.342	122.600, 0.388	122.600, 0.476	122.600, 0.460	122.600, 0.324	122.600, 0.380	122.600, 0.474	122.600, 0.424	122.600, 0.324	122.600, 0.349	122.600, 0.434	122.600, 0.434	122.600, 1.415	122.600, 1.203	122.600, 1.600
615	122.800, 0.342	122.800, 0.388	122.800, 0.477	122.800, 0.461	122.800, 0.325	122.800, 0.380	122.800, 0.474	122.800, 0.424	122.800, 0.324	122.800, 0.349	122.800, 0.434	122.800, 0.434	122.800, 1.416	122.800, 1.204	122.800, 1.600
616	123.000, 0.342	123.000, 0.388	123.000, 0.477	123.000, 0.461	123.000, 0.325	123.000, 0.380	123.000, 0.475	123.000, 0.425	123.000, 0.324	123.000, 0.349	123.000, 0.435	123.000, 0.434	123.000, 1.417	123.000, 1.205	123.000, 1.600
617	123.200, 0.342	123.200, 0.388	123.200, 0.477	123.200, 0.462	123.200, 0.325	123.200, 0.379	123.200, 0.475	123.200, 0.425	123.200, 0.324	123.200, 0.349	123.200, 0.435	123.200, 0.434	123.200, 1.418	123.200, 1.206	123.200, 1.600
618	123.400, 0.342	123.400, 0.389	123.400, 0.477	123.400, 0.462	123.400, 0.326	123.400, 0.379	123.400, 0.475	123.400, 0.426	123.400, 0.325	123.400, 0.349	123.400, 0.434	123.400, 0.434	123.400, 1.419	123.400, 1.207	123.400, 1.601
619	123.600, 0.342	123.600, 0.389	123.600, 0.478	123.600, 0.462	123.600, 0.326	123.600, 0.379	123.600, 0.475	123.600, 0.426	123.600, 0.325	123.600, 0.350	123.600, 0.434	123.600, 0.434	123.600, 1.420	123.600, 1.209	123.600, 1.601
620	123.800, 0.343	123.800, 0.389	123.800, 0.478	123.800, 0.462	123.800, 0.327	123.800, 0.379	123.800, 0.476	123.800, 0.427	123.800, 0.326	123.800, 0.350	123.800, 0.434	123.800, 0.434	123.800, 1.420	123.800, 1.210	123.800, 1.601
621	124.000, 0.344	124.000, 0.390	124.000, 0.479	124.000, 0.463	124.000, 0.327	124.000, 0.379	124.000, 0.476	124.000, 0.427	124.000, 0.326	124.000, 0.351	124.000, 0.434	124.000, 0.434	124.000, 1.421	124.000, 1.211	124.000, 1.602
622	124.200, 0.344	124.200, 0.390	124.200, 0.479	124.200, 0.463	124.200, 0.328	124.200, 0.380	124.200, 0.476	124.200, 0.427	124.200, 0.326	124.200, 0.351	124.200, 0.434	124.200, 0.434	124.200, 1.421	124.200, 1.212	124.200, 1.603
623	124.400, 0.345	124.400, 0.390	124.400, 0.480	124.400, 0.463	124.400, 0.328	124.400, 0.380	124.400, 0.477	124.400, 0.427	124.400, 0.326	124.400, 0.352	124.400, 0.435	124.400, 0.434	124.400, 1.421	124.400, 1.213	124.400, 1.603
624	124.600, 0.346	124.600, 0.390	124.600, 0.480	124.600, 0.464	124.600, 0.328	124.600, 0.381	124.600, 0.477	124.600, 0.427	124.600, 0.326	124.600, 0.352	124.600, 0.435	124.600, 0.435	124.600, 1.421	124.600, 1.214	124.600, 1.604
625	124.800, 0.347	124.800, 0.391	124.800, 0.480	124.800, 0.464	124.800, 0.328	124.800, 0.381	124.800, 0.478	124.800, 0.427	124.800, 0.326	124.800, 0.352	124.800, 0.436	124.800, 0.435	124.800, 1.421	124.800, 1.215	124.800, 1.605
626	125.000, 0.347	125.000, 0.391	125.000, 0.481	125.000, 0.464	125.000, 0.329	125.000, 0.381	125.000, 0.478	125.000, 0.427	125.000, 0.326	125.000, 0.352	125.000, 0.436	125.000, 0.436	125.000, 1.421	125.000, 1.215	125.000, 1.606
627	125.200, 0.348	125.200, 0.391	125.200, 0.481	125.200, 0.464	125.200, 0.329	125.200, 0.382	125.200, 0.479	125.200, 0.428	125.200, 0.325	125.200, 0.353	125.200, 0.436	125.200, 0.436	125.200, 1.422	125.200, 1.216	125.200, 1.607
628	125.400, 0.349	125.400, 0.391	125.400, 0.481	125.400, 0.465	125.400, 0.329	125.400, 0.382	125.400, 0.479	125.400, 0.428	125.400, 0.325	125.400, 0.353	125.400, 0.437	125.400, 0.436	125.400, 1.422	125.400, 1.216	125.400, 1.608
629	125.600, 0.349	125.600, 0.392	125.600, 0.482	125.600, 0.465	125.600, 0.330	125.600, 0.382	125.600, 0.479	125.600, 0.428	125.600, 0.325	125.600, 0.354	125.600, 0.437	125.600, 0.436	125.600, 1.423	125.600, 1.216	125.600, 1.610
630	125.800, 0.349	125.800, 0.392	125.800, 0.482	125.800, 0.465	125.800, 0.330	125.800, 0.383	125.800, 0.479	125.800, 0.428	125.800, 0.325	125.800, 0.354	125.800, 0.437	125.800, 0.437	125.800, 1.423	125.800, 1.216	125.800, 1.611
631	126.000, 0.349	126.000, 0.392	126.000, 0.482	126.000, 0.465	126.000, 0.330	126.000, 0.384	126.000, 0.479	126.000, 0.428	126.000, 0.325	126.000, 0.354	126.000, 0.438	126.000, 0.437	126.000, 1.424	126.000, 1.216	126.000, 1.612
632	126.200, 0.349	126.200, 0.392	126.200, 0.483	126.200, 0.465	126.200, 0.330	126.200, 0.384	126.200, 0.479	126.200, 0.428	126.200, 0.325	126.200, 0.355	126.200, 0.438	126.200, 0.438	126.200, 1.425	126.200, 1.216	126.200, 1.613
633	126.400, 0.349	126.400, 0.392	126.400, 0.483	126.400, 0.466	126.400, 0.330	126.400, 0.385	126.400, 0.479	126.400, 0.429	126.400, 0.325	126.400, 0.355	126.400, 0.438	126.400, 0.438	126.400, 1.426	126.400, 1.216	126.400, 1.613
634	126.600, 0.350	126.600, 0.392	126.600, 0.483	126.600, 0.466	126.600, 0.330	126.600, 0.385	126.600, 0.479	126.600, 0.429	126.600, 0.326	126.600, 0.355	126.600, 0.438	126.600, 0.439	126.600, 1.427	126.600, 1.217	126.600, 1.614
635	126.800, 0.350	126.800, 0.392	126.800, 0.483	126.800, 0.467	126.800, 0.330	126.800, 0.385	126.800, 0.479	126.800, 0.430	126.800, 0.326	126.800, 0.355	126.800, 0.438	126.800, 0.439	126.800, 1.428	126.800, 1.218	126.800, 1.614
636	127.000, 0.350	127.000, 0.393	127.000, 0.484	127.000, 0.467	127.000, 0.331	127.000, 0.385	127.000, 0.480	127.000, 0.430	127.000, 0.326	127.000, 0.356	127.000, 0.438	127.000, 0.439	127.000, 1.429	127.000, 1.219	127.000, 1.615
637	127.200, 0.351	127.200, 0.394	127.200, 0.484	127.200, 0.467	127.200, 0.331	127.200, 0.385	127.200, 0.480	127.200, 0.431	127.200, 0.327	127.200, 0.356	127.200, 0.438	127.200, 0.440	127.200, 1.431	127.200, 1.219	127.200, 1.616
638	127.400, 0.351	127.400, 0.394	127.400, 0.484	127.400, 0.468	127.400, 0.331	127.400, 0.385	127.400, 0.481	127.400, 0.431	127.400, 0.327	127.400, 0.357	127.400, 0.438	127.400, 0.440	127.400, 1.432	127.400, 1.220	127.400, 1.616
639	127.600, 0.351	127.600, 0.395	127.600, 0.485	127.600, 0.468	127.600, 0.332	127.600, 0.386	127.600, 0.481	127.600, 0.432	127.600, 0.328	127.600, 0.357	127.600, 0.438	127.600, 0.440	127.600, 1.433	127.600, 1.222	127.600, 1.617
640	127.800, 0.351	127.800, 0.396	127.800, 0.485	127.800, 0.468	127.800, 0.332	127.800, 0.386	127.800, 0.482	127.800, 0.432	127.800, 0.328	127.800, 0.357	127.800, 0.438	127.800, 0.441	127.800, 1.434	127.800, 1.222	127.800, 1.618
641	128.000, 0.351	128.000, 0.396	128.000, 0.485	128.000, 0.468	128.000, 0.332	128.000, 0.386	128.000, 0.482	128.000, 0.432	128.000, 0.329	128.000, 0.357	128.000, 0.439	128.000, 0.441	128.000, 1.434	128.000, 1.224	128.000, 1.618
642	128.200, 0.351	128.200, 0.397	128.200, 0.486	128.200, 0.469	128.200, 0.332	128.200, 0.386	128.200, 0.483	128.200, 0.432	128.200, 0.329	128.200, 0.357	128.200, 0.439	128.200, 0.441	128.200, 1.435	128.200, 1.225	128.200, 1.619
643	128.400, 0.351	128.400, 0.397	128.400, 0.486	128.400, 0.469	128.400, 0.333	128.400, 0.386	128.400, 0.483	128.400, 0.432	128.400, 0.329	128.400, 0.357	128.400, 0.440	128.400, 0.441	128.400, 1.435	128.400, 1.226	128.400, 1.620
644	128.600, 0.351	128.600, 0.397	128.600, 0.486	128.600, 0.469	128.600, 0.333	128.600, 0.386	128.600, 0.483	128.600, 0.432	128.600, 0.329	128.600, 0.357	128.600, 0.441	128.600, 0.441	128.600, 1.435	128.600, 1.227	128.600, 1.620
645	128.800, 0.351	128.800, 0.398	128.800, 0.486	128.800, 0.469	128.800, 0.333	128.800, 0.386	128.800, 0.484	128.800, 0.432	128.800, 0.329	128.800, 0.357	128.800, 0.441	128.800, 0.441	128.800, 1.435	128.800, 1.228	128.800, 1.621
646	129.000, 0.352	129.000, 0.398	129.000, 0.486	129.000, 0.469	129.000, 0.333	129.000, 0.386	129.000, 0.484	129.000, 0.433	129.000, 0.329	129.000, 0.357	129.000, 0.442	129.000, 0.441	129.000, 1.436	129.000, 1.229	129.000, 1.622
647	129.200, 0.352	129.200, 0.398	129.200, 0.486	129.200, 0.469	129.200, 0.333	129.200, 0.386	129.200, 0.484	129.200, 0.433	129.200, 0.330	129.200, 0.357	129.200, 0.443	129.200, 0.441	129.200, 1.436	129.200, 1.230	129.200, 1.622
648	129.400, 0.352	129.400, 0.399	129.400, 0.486	129.400, 0.469	129.400, 0.333	129.400, 0.387	129.400, 0.484	129.400, 0.433	129.400, 0.330	129.400, 0.357	129.400, 0.443	129.400, 0.441	129.400, 1.436	129.400, 1.231	129.400, 1.623
649	129.600, 0.353	129.600, 0.399	129.600, 0.486	129.600, 0.470	129.600, 0.333	129.600, 0.387	129.600, 0.484	129.600, 0.434	129.600, 0.330	129.600, 0.357	129.600, 0.444	129.600, 0.441	129.600, 1.437	129.600, 1.231	129.600, 1.624
650	129.800, 0.353	129.800, 0.399	129.800, 0.486	129.800, 0.470	129.800, 0.333	129.800, 0.387	129.800, 0.484	129.800, 0.434	129.800, 0.330	129.800, 0.358	129.800, 0.444	129.800, 0.441	129.800, 1.437	129.800, 1.232	129.800, 1.624
651	130.000, 0.354	130.000, 0.399	130.000, 0.486	130.000, 0.470	130.000, 0.332	130.000, 0.388	130.000, 0.484	130.000, 0.435	130.000, 0.331	130.000, 0.358	130.000, 0.444	130.000, 0.441	130.000, 1.438	130.000, 1.233	130.000, 1.624
652	130.200, 0.354	130.200, 0.398	130.200, 0.487	130.200, 0.470	130.200, 0.332	130.200, 0.388	130.200, 0.484	130.200, 0.435	130.200, 0.331	130.200, 0.358	130.200, 0.444	130.200, 0.441	130.200, 1.439	130.200, 1.233	130.200, 1.624
653	130.400, 0.355	130.400, 0.398	130.400, 0.487	130.400, 0.470	130.400, 0.332	130.400, 0.388	130.400, 0.484	130.400, 0.436	130.400, 0.332	130.400, 0.358	130.400, 0.444	130.400, 0.442	130.400, 1.440	130.400, 1.234	130.400, 1.625
654	130.600, 0.355	130.600, 0.398	130.600, 0.488	130.600, 0.470	130.600, 0.333	130.600, 0.389	130.600, 0.484	130.600, 0.436	130.600, 0.332	130.600, 0.358	130.600, 0.444	130.600, 0.442	130.600, 1.441	130.600, 1.235	130.600, 1.625
655	130.800, 0.355	130.800, 0.398	130.800, 0.489	130.800, 0.470	130.800, 0.333	130.800, 0.389	130.800, 0.485	130.800, 0.436	130.800, 0.333	130.800, 0.359	130.800, 0.444	130.800, 0.442	130.800, 1.442	130.800, 1.235	130.800, 1.626
656	131.000, 0.355	131.000, 0.399	131.000, 0.489	131.000, 0.470	131.000, 0.333	131.000, 0.389	131.000, 0.485	131.000, 0.436	131.000, 0.333	131.000, 0.359	131.000, 0.444	131.000, 0.443	131.000, 1.443	131.000, 1.236	131.000, 1.626
657	131.200, 0.355	131.200, 0.399	131.200, 0.490	131.200, 0.471	131.200, 0.333	131.200, 0.390	131.200, 0.485	131.200, 0.436	131.200, 0.333	131.200, 0.359	131.200, 0.444	131.200, 0.443	131.200, 1.443	131.200, 1.237	131.200, 1.627
658	131.400, 0.355	131.400, 0.399	131.400, 0.490	131.400, 0.471	131.400, 0.334	131.400, 0.390	131.400, 0.486	131.400, 0.436	131.400, 0.334	131.400, 0.360	131.400, 0.444	131.400, 0.443	131.400, 1.444	131.400, 1.237	131.400, 1.628
659	131.600, 0.355	131.600, 0.399	131.600, 0.490	131.600, 0.471	131.600, 0.334	131.600, 0.391	131.600, 0.486	131.600, 0.436	131.600, 0.333	131.600, 0.360	131.600, 0.444	131.600, 0.443	131.600, 1.444	131.600, 1.237	131.600, 1.629
660	131.800, 0.355	131.800, 0.400	131.800, 0.490	131.800, 0.471	131.800, 0.334	131.800, 0.391	131.800, 0.487	131.800, 0.436	131.800, 0.333	131.800, 0.360	131.800, 0.444	131.800, 0.443	131.800, 1.445	131.800, 1.238	131.800, 1.630
661	132.000, 0.355	132.000, 0.400	132.000, 0.490	132.000, 0.471	132.000, 0.335	132.000, 0.392	132.000, 0.487	132.000, 0.436	132.000, 0.333	132.000, 0.360	132.000, 0.444	132.000, 0.443	132.000, 1.445	132.000, 1.238	132.000, 1.631
662	132.200, 0.355	132.200, 0.401	132.200, 0.491	132.200, 0.471	132.200, 0.335	132.200, 0.392	132.200, 0.487	132.200, 0.437	132.200, 0.333	132.200, 0.360	132.200, 0.444	132.200, 0.443	132.200, 1.445	132.200, 1.239	132.200, 1.632
663	132.400, 0.355	132.400, 0.401	132.400, 0.491	132.400, 0.471	132.400, 0.336	132.400, 0.393	132.400, 0.487	132.400, 0.437	132.400, 0.333	132.400, 0.360	132.400, 0.444	132.400, 0.444	132.400, 1.445	132.400, 1.239	132.400, 1.633
664	132.600, 0.355	132.600, 0.402	132.600, 0.491	132.600, 0.472	132.600, 0.336	132.600, 0.393	132.600, 0.487	132.600, 0.437	132.600, 0.333	132.600, 0.360	132.600, 0.445	132.600, 0.444	132.600, 1.445	132.600, 1.240	132.600, 1.633
665	132.800, 0.355	132.800, 0.402	132.800, 0.491	132.800, 0.472	132.800, 0.336	132.800, 0.394	132.800, 0.488	132.800, 0.438	132.800, 0.333	132.800, 0.361	132.800, 0.445	132.800, 0.444	132.800, 1.445	132.800, 1.240	132.800, 1.634
666	133.000, 0.355	133.000, 0.403	133.000, 0.491	133.000, 0.472	133.000, 0.337	133.000, 0.394	133.000, 0.488	133.000, 0.439	133.000, 0.333	133.000, 0.361	133.000, 0.446	133.000, 0.445	133.000, 1.445	133.000, 1.240	133.000, 1.635
667	133.200, 0.355	133.200, 0.403	133.200, 0.492	133.200, 0.473	133.200, 0.337	133.200, 0.395	133.200, 0.488	133.200, 0.439	133.200, 0.333	133.200, 0.361	133.200, 0.446	133.200, 0.445	133.200, 1.446	133.200, 1.241	133.200, 1.635
668	133.400, 0.355	133.400, 0.404	133.400, 0.492	133.400, 0.473	133.400, 0.337	133.400, 0.395	133.400, 0.488	133.400, 0.440	133.400, 0.333	133.400, 0.362	133.400, 0.446	133.400, 0.446	133.400, 1.446	133.400, 1.241	133.400, 1.636
669	133.600, 0.356	133.600, 0.404	133.600, 0.492	133.600, 0.474	133.600, 0.337	133.600, 0.395	133.600, 0.488	133.600, 0.440	133.600, 0.334	133.600, 0.363	133.600, 0.447	133.600, 0.446	133.600, 1.446	133.600, 1.242	133.600, 1.636
670	133.800, 0.356	133.800, 0.404	133.800, 0.493	133.800, 0.474	133.800, 0.337	133.800, 0.395	133.800, 0.489	133.800, 0.441	133.800, 0.334	133.800, 0.363	133.800, 0.447	133.800, 0.446	133.800, 1.446	133.800, 1.243	133.800, 1.636
671	134.000, 0.357	134.000, 0.404	134.000, 0.493	134.000, 0.474	134.000, 0.337	134.000, 0.395	134.000, 0.489	134.000, 0.441	134.000, 0.334	134.000, 0.364	134.000, 0.448	134.000, 0.447	134.000, 1.447	134.000, 1.244	134.000, 1.636
672	134.200, 0.357	134.200, 0.405	134.200, 0.493	134.200, 0.474	134.200, 0.337	134.200, 0.395	134.200, 0.489	134.200, 0.441	134.200, 0.334	134.200, 0.364	134.200, 0.448	134.200, 0.447	134.200, 1.447	134.200, 1.244	134.200, 1.637
673	134.400, 0.358	134.400, 0.405	134.400, 0.494	134.400, 0.475	134.400, 0.338	134.400, 0.395	134.400, 0.489	134.400, 0.441	134.400, 0.335	134.400, 0.364	134.400, 0.449	134.400, 0.447	134.400, 1.448	134.400, 1.245	134.400, 1.637
674	134.600, 0.358	134.600, 0.405	134.600, 0.494	134.600, 0.475	134.600, 0.338	134.600, 0.395	134.600, 0.490	134.600, 0.440	134.600, 0.335	134.600, 0.364	134.600, 0.449	134.600, 0.448	134.600, 1.448	134.600, 1.246	134.600, 1.637
675	134.800, 0.358	134.800, 0.405	134.800, 0.494	134.800, 0.475	134.800, 0.338	134.800, 0.395	134.800, 0.490	134.800, 0.440	134.800, 0.335	134.800, 0.363	134.800, 0.449	134.800, 0.448	134.800, 1.448	134.800, 1.246	134.800, 1.638
676	135.000, 0.358	135.000, 0.406	135.000, 0.494	135.000, 0.476	135.000, 0.338	135.000, 0.395	135.000, 0.490	135.000, 0.440	135.000, 0.335	135.000, 0.363	135.000, 0.449	135.000, 0.448	135.000, 1.449	135.000, 1.247	135.000, 1.638
677	135.200, 0.358	135.200, 0.406	135.200, 0.494	135.200, 0.476	135.200, 0.338	135.200, 0.395	135.200, 0.490	135.200, 0.440	135.200, 0.335	135.200, 0.363	135.200, 0.449	135.200, 0.447	135.200, 1.450	135.200, 1.248	135.200, 1.638
678	135.400, 0.359	135.400, 0.406	135.400, 0.494	135.400, 0.476	135.400, 0.338	135.400, 0.395	135.400, 0.490	135.400, 0.441	135.400, 0.335	135.400, 0.363	135.400, 0.449	135.400, 0.447	135.400, 1.451	135.400, 1.248	135.400, 1.638
679	135.600, 0.359	135.600, 0.407	135.600, 0.494	135.600, 0.477	135.600, 0.338	135.600, 0.396	135.600, 0.490	135.600, 0.441	135.600, 0.336	135.600, 0.364	135.600, 0.449	135.600, 0.447	135.600, 1.451	135.600, 1.249	135.600, 1.639
680	135.800, 0.359	135.800, 0.407	135.800, 0.494	135.800, 0.477	135.800, 0.338	135.800, 0.396	135.800, 0.490	135.800, 0.441	135.800, 0.336	135.800, 0.364	135.800, 0.449	135.800, 0.447	135.800, 1.452	135.800, 1.249	135.800, 1.639
681	136.000, 0.359	136.000, 0.407	136.000, 0.494	136.000, 0.477	136.000, 0.338	136.000, 0.396	136.000, 0.490	136.000, 0.441	136.000, 0.336	136.000, 0.364	136.000, 0.449	136.000, 0.447	136.000, 1.453	136.000, 1.250	136.000, 1.640
682	136.200, 0.359	136.200, 0.408	136.200, 0.495	136.200, 0.477	136.200, 0.338	136.200, 0.396	136.200, 0.490	136.200, 0.442	136.200, 0.336	136.200, 0.365	136.200, 0.449	136.200, 0.447	136.200, 1.454	136.200, 1.250	136.200, 1.640
683	136.400, 0.359	136.400, 0.408	136.400, 0.496	136.400, 0.477	136.400, 0.338	136.400, 0.397	136.400, 0.491	136.400, 0.442	136.400, 0.337	136.400, 0.365	136.400, 0.450	136.400, 0.448	136.400, 1.455	136.400, 1.251	136.400, 1.641
684	136.600, 0.359	136.600, 0.408	136.600, 0.496	136.600, 0.477	136.600, 0.338	136.600, 0.397	136.600, 0.491	136.600, 0.442	136.600, 0.337	136.600, 0.365	136.600, 0.450	136.600, 0.449	136.600, 1.456	136.600, 1.251	136.600, 1.642
685	136.800, 0.359	136.800, 0.409	136.800, 0.497	136.800, 0.477	136.800, 0.338	136.800, 0.397	136.800, 0.492	136.800, 0.442	136.800, 0.337	136.800, 0.366	136.800, 0.450	136.800, 0.450	136.800, 1.458	136.800, 1.251	136.800, 1.642
686	137.000, 0.359	137.000, 0.409	137.000, 0.498	137.000, 0.478	137.000, 0.338	137.000, 0.397	137.000, 0.492	137.000, 0.443	137.000, 0.337	137.000, 0.366	137.000, 0.451	137.000, 0.450	137.000, 1.459	137.000, 1.252	137.000, 1.643
687	137.200, 0.359	137.200, 0.409	137.200, 0.498	137.200, 0.478	137.200, 0.339	137.200, 0.397	137.200, 0.492	137.200, 0.443	137.200, 0.337	137.200, 0.366	137.200, 0.451	137.200, 0.451	137.200, 1.460	137.200, 1.253	137.200, 1.643
688	137.400, 0.359	137.400, 0.409	137.400, 0.499	137.400, 0.479	137.400, 0.339	137.400, 0.397	137.400, 0.493	137.400, 0.443	137.400, 0.337	137.400, 0.366	137.400, 0.451	137.400, 0.451	137.400, 1.461	137.400, 1.254	137.400, 1.643
689	137.600, 0.359	137.600, 0.410	137.600, 0.500	137.600, 0.479	137.600, 0.340	137.600, 0.397	137.600, 0.493	137.600, 0.444	137.600, 0.337	137.600, 0.366	137.600, 0.452	137.600, 0.452	137.600, 1.462	137.600, 1.254	137.600, 1.644
690	137.800, 0.359	137.800, 0.410	137.800, 0.500	137.800, 0.480	137.800, 0.340	137.800, 0.397	137.800, 0.494	137.800, 0.444	137.800, 0.337	137.800, 0.366	137.800, 0.452	137.800, 0.452	137.800, 1.462	137.800, 1.255	137.800, 1.644
691	138.000, 0.359	138.000, 0.410	138.000, 0.500	138.000, 0.480	138.000, 0.340	138.000, 0.398	138.000, 0.494	138.000, 0.444	138.000, 0.337	138.000, 0.366	138.000, 0.452	138.000, 0.453	138.000, 1.463	138.000, 1.256	138.000, 1.644
692	138.200, 0.360	138.200, 0.411	138.200, 0.500	138.200, 0.480	138.200, 0.341	138.200, 0.398	138.200, 0.495	138.200, 0.444	138.200, 0.337	138.200, 0.366	138.200, 0.452	138.200, 0.453	138.200, 1.464	138.200, 1.256	138.200, 1.645
693	138.400, 0.360	138.400, 0.411	138.400, 0.500	138.400, 0.481	138.400, 0.341	138.400, 0.399	138.400, 0.495	138.400, 0.444	138.400, 0.337	138.400, 0.366	138.400, 0.452	138.400, 0.453	138.400, 1.465	138.400, 1.257	138.400, 1.645
694	138.600, 0.360	138.600, 0.411	138.600, 0.500	138.600, 0.481	138.600, 0.341	138.600, 0.399	138.600, 0.495	138.600, 0.444	138.600, 0.337	138.600, 0.366	138.600, 0.452	138.600, 0.453	138.600, 1.465	138.600, 1.258	138.600, 1.645
695	138.800, 0.361	138.800, 0.412	138.800, 0.500	138.800, 0.482	138.800, 0.341	138.800, 0.399	138.800, 0.495	138.800, 0.444	138.800, 0.338	138.800, 0.366	138.800, 0.452	138.800, 0.453	138.800, 1.466	138.800, 1.258	138.800, 1.645
696	139.000, 0.361	139.000, 0.412	139.000, 0.500	139.000, 0.482	139.000, 0.342	139.000, 0.400	139.000, 0.495	139.000, 0.444	139.000, 0.338	139.000, 0.366	139.000, 0.452	139.000, 0.453	139.000, 1.466	139.000, 1.259	139.000, 1.646
697	139.200, 0.362	139.200, 0.412	139.200, 0.499	139.200, 0.482	139.200, 0.342	139.200, 0.400	139.200, 0.495	139.200, 0.445	139.200, 0.339	139.200, 0.367	139.200, 0.452	139.200, 0.453	139.200, 1.467	139.200, 1.260	139.200, 1.646
698	139.400, 0.362	139.400, 0.412	139.400, 0.499	139.400, 0.482	139.400, 0.342	139.400, 0.400	139.400, 0.495	139.400, 0.445	139.400, 0.339	139.400, 0.367	139.400, 0.452	139.400, 0.453	139.400, 1.467	139.400, 1.260	139.400, 1.646
699	139.600, 0.363	139.600, 0.412	139.600, 0.500	139.600, 0.482	139.600, 0.342	139.600, 0.401	139.600, 0.495	139.600, 0.445	139.600, 0.340	139.600, 0.367	139.600, 0.453	139.600, 0.453	139.600, 1.468	139.600, 1.261	139.600, 1.647
700	139.800, 0.363	139.800, 0.412	139.800, 0.500	139.800, 0.482	139.800, 0.342	139.800, 0.401	139.800, 0.495	139.800, 0.445	139.800, 0.340	139.800, 0.367	139.800, 0.453	139.800, 0.453	139.800, 1.468	139.800, 1.262	139.800, 1.648
701	140.000, 0.364	140.000, 0.412	140.000, 0.500	140.000, 0.482	140.000, 0.341	140.000, 0.401	140.000, 0.496	140.000, 0.446	140.000, 0.341	140.000, 0.367	140.000, 0.453	140.000, 0.453	140.000, 1.468	140.000, 1.262	140.000, 1.649
702	140.200, 0.364	140.200, 0.412	140.200, 0.501	140.200, 0.482	140.200, 0.341	140.200, 0.401	140.200, 0.496	140.200, 0.446	140.200, 0.341	140.200, 0.367	140.200, 0.453	140.200, 0.453	140.200, 1.468	140.200, 1.263	140.200, 1.649
703	140.400, 0.364	140.400, 0.412	140.400, 0.501	140.400, 0.483	140.400, 0.341	140.400, 0.401	140.400, 0.497	140.400, 0.446	140.400, 0.341	140.400, 0.367	140.400, 0.453	140.400, 0.454	140.400, 1.469	140.400, 1.264	140.400, 1.650
704	140.600, 0.364	140.600, 0.412	140.600, 0.501	140.600, 0.483	140.600, 0.341	140.600, 0.401	140.600, 0.497	140.600, 0.447	140.600, 0.341	140.600, 0.368	140.600, 0.454	140.600, 0.454	140.600, 1.469	140.600, 1.264	140.600, 1.651
705	140.800, 0.364	140.800, 0.411	140.800, 0.502	140.800, 0.483	140.800, 0.342	140.800, 0.401	140.800, 0.497	140.800, 0.447	140.800, 0.341	140.800, 0.368	140.800, 0.454	140.800, 0.455	140.800, 1.469	140.800, 1.265	140.800, 1.652
706	141.000, 0.364	141.000, 0.411	141.000, 0.502	141.000, 0.483	141.000, 0.342	141.000, 0.401	141.000, 0.497	141.000, 0.448	141.000, 0.341	141.000, 0.368	141.000, 0.454	141.000, 0.455	141.000, 1.469	141.000, 1.266	141.000, 1.652
707	141.200, 0.364	141.200, 0.412	141.200, 0.502	141.200, 0.484	141.200, 0.342	141.200, 0.401	141.200, 0.497	141.200, 0.448	141.200, 0.341	141.200, 0.369	141.200, 0.454	141.200, 0.455	141.200, 1.470	141.200, 1.266	141.200, 1.653
708	141.400, 0.364	141.400, 0.412	141.400, 0.503	141.400, 0.484	141.400, 0.343	141.400, 0.401	141.400, 0.498	141.400, 0.449	141.400, 0.341	141.400, 0.369	141.400, 0.454	141.400, 0.455	141.400, 1.470	141.400, 1.267	141.400, 1.654
709	141.600, 0.364	141.600, 0.412	141.600, 0.503	141.600, 0.484	141.600, 0.343	141.600, 0.401	141.600, 0.498	141.600, 0.449	141.600, 0.341	141.600, 0.369	141.600, 0.454	141.600, 0.455	141.600, 1.470	141.600, 1.267	141.600, 1.654
710	141.800, 0.364	141.800, 0.412	141.800, 0.503	141.800, 0.484	141.800, 0.343	141.800, 0.401	141.800, 0.498	141.800, 0.450	141.800, 0.341	141.800, 0.369	141.800, 0.454	141.800, 0.455	141.800, 1.471	141.800, 1.267	141.800, 1.655
711	142.000, 0.364	142.000, 0.413	142.000, 0.504	142.000, 0.485	142.000, 0.343	142.000, 0.401	142.000, 0.499	142.000, 0.450	142.000, 0.341	142.000, 0.370	142.000, 0.454	142.000, 0.456	142.000, 1.472	142.000, 1.268	142.000, 1.655
712	142.200, 0.365	142.200, 0.413	142.200, 0.504	142.200, 0.485	142.200, 0.344	142.200, 0.402	142.200, 0.499	142.200, 0.450	142.200, 0.341	142.200, 0.370	142.200, 0.454	142.200, 0.456	142.200, 1.472	142.200, 1.268	142.200, 1.655
713	142.400, 0.365	142.400, 0.413	142.400, 0.504	142.400, 0.485	142.400, 0.344	142.400, 0.402	142.400, 0.499	142.400, 0.450	142.400, 0.341	142.400, 0.370	142.400, 0.455	142.400, 0.457	142.400, 1.473	142.400, 1.268	142.400, 1.655
714	142.600, 0.365	142.600, 0.414	142.600, 0.504	142.600, 0.485	142.600, 0.344	142.600, 0.402	142.600, 0.499	142.600, 0.451	142.600, 0.342	142.600, 0.370	142.600, 0.455	142.600, 0.457	142.600, 1.474	142.600, 1.269	142.600, 1.655
715	142.800, 0.366	142.800, 0.415	142.800, 0.504	142.800, 0.485	142.800, 0.345	142.800, 0.402	142.800, 0.499	142.800, 0.450	142.800, 0.342	142.800, 0.371	142.800, 0.455	142.800, 0.457	142.800, 1.474	142.800, 1.270	142.800, 1.655
716	143.000, 0.366	143.000, 0.415	143.000, 0.504	143.000, 0.485	143.000, 0.345	143.000, 0.402	143.000, 0.499	143.000, 0.450	143.000, 0.342	143.000, 0.371	143.000, 0.456	143.000, 0.457	143.000, 1.475	143.000, 1.270	143.000, 1.655
717	143.200, 0.367	143.200, 0.415	143.200, 0.505	143.200, 0.485	143.200, 0.346	143.200, 0.402	143.200, 0.499	143.200, 0.450	143.200, 0.343	143.200, 0.370	143.200, 0.456	143.200, 0.457	143.200, 1.476	143.200, 1.271	143.200, 1.655
718	143.400, 0.367	143.400, 0.416	143.400, 0.505	143.400, 0.486	143.400, 0.346	143.400, 0.402	143.400, 0.499	143.400, 0.450	143.400, 0.343	143.400, 0.370	143.400, 0.457	143.400, 0.457	143.400, 1.477	143.400, 1.271	143.400, 1.655
719	143.600, 0.368	143.600, 0.416	143.600, 0.505	143.600, 0.486	143.600, 0.347	143.600, 0.402	143.600, 0.500	143.600, 0.450	143.600, 0.343	143.600, 0.370	143.600, 0.457	143.600, 0.457	143.600, 1.478	143.600, 1.272	143.600, 1.655
720	143.800, 0.368	143.800, 0.416	143.800, 0.505	143.800, 0.486	143.800, 0.347	143.800, 0.403	143.800, 0.500	143.800, 0.450	143.800, 0.343	143.800, 0.369	143.800, 0.458	143.800, 0.458	143.800, 1.479	143.800, 1.272	143.800, 1.655
721	144.000, 0.368	144.000, 0.416	144.000, 0.505	144.000, 0.486	144.000, 0.347	144.000, 0.403	144.000, 0.500	144.000, 0.450	144.000, 0.343	144.000, 0.369	144.000, 0.458	144.000, 0.458	144.000, 1.479	144.000, 1.273	144.000, 1.656
722	144.200, 0.368	144.200, 0.416	144.200, 0.505	144.200, 0.486	144.200, 0.347	144.200, 0.404	144.200, 0.501	144.200, 0.450	144.200, 0.344	144.200, 0.369	144.200, 0.459	144.200, 0.458	144.200, 1.479	144.200, 1.274	144.200, 1.657
723	144.400, 0.368	144.400, 0.416	144.400, 0.505	144.400, 0.486	144.400, 0.347	144.400, 0.404	144.400, 0.501	144.400, 0.451	144.400, 0.344	144.400, 0.369	144.400, 0.459	144.400, 0.459	144.400, 1.479	144.400, 1.274	144.400, 1.658
724	144.600, 0.368	144.600, 0.416	144.600, 0.505	144.600, 0.486	144.600, 0.347	144.600, 0.404	144.600, 0.501	144.600, 0.451	144.600, 0.344	144.600, 0.369	144.600, 0.459	144.600, 0.459	144.600, 1.479	144.600, 1.275	144.600, 1.659
725	144.800, 0.368	144.800, 0.416	144.800, 0.505	144.800, 0.486	144.800, 0.347	144.800, 0.405	144.800, 0.501	144.800, 0.451	144.800, 0.344	144.800, 0.369	144.800, 0.459	144.800, 0.459	144.800, 1.479	144.800, 1.276	144.800, 1.660
726	145.000, 0.368	145.000, 0.416	145.000, 0.505	145.000, 0.487	145.000, 0.347	145.000, 0.405	145.000, 0.501	145.000, 0.451	145.000, 0.344	145.000, 0.369	145.000, 0.459	145.000, 0.459	145.000, 1.479	145.000, 1.277	145.000, 1.660
727	145.200, 0.368	145.200, 0.416	145.200, 0.505	145.200, 0.487	145.200, 0.347	145.200, 0.405	145.200, 0.501	145.200, 0.452	145.200, 0.344	145.200, 0.370	145.200, 0.459	145.200, 0.459	145.200, 1.479	145.200, 1.277	145.200, 1.661
728	145.400, 0.368	145.400, 0.416	145.400, 0.505	145.400, 0.487	145.400, 0.347	145.400, 0.405	145.400, 0.501	145.400, 0.452	145.400, 0.344	145.400, 0.370	145.400, 0.459	145.400, 0.459	145.400, 1.479	145.400, 1.278	145.400, 1.661
729	145.600, 0.368	145.600, 0.416	145.600, 0.505	145.600, 0.488	145.600, 0.347	145.600, 0.405	145.600, 0.501	145.600, 0.452	145.600, 0.344	145.600, 0.370	145.600, 0.460	145.600, 0.459	145.600, 1.479	145.600, 1.279	145.600, 1.662
730	145.800, 0.368	145.800, 0.417	145.800, 0.506	145.800, 0.488	145.800, 0.347	145.800, 0.404	145.800, 0.502	145.800, 0.453	145.800, 0.344	145.800, 0.370	145.800, 0.460	145.800, 0.460	145.800, 1.480	145.800, 1.279	145.800, 1.662
731	146.000, 0.368	146.000, 0.417	146.000, 0.506	146.000, 0.489	146.000, 0.347	146.000, 0.404	146.000, 0.502	146.000, 0.453	146.000, 0.344	146.000, 0.371	146.000, 0.460	146.000, 0.460	146.000, 1.480	146.000, 1.280	146.000, 1.662
732	146.200, 0.369	146.200, 0.418	146.200, 0.506	146.200, 0.489	146.200, 0.347	146.200, 0.404	146.200, 0.502	146.200, 0.453	146.200, 0.344	146.200, 0.371	146.200, 0.460	146.200, 0.460	146.200, 1.481	146.200, 1.280	146.200, 1.662
733	146.400, 0.369	146.400, 0.418	146.400, 0.506	146.400, 0.489	146.400, 0.347	146.400, 0.404	146.400, 0.502	146.400, 0.453	146.400, 0.344	146.400, 0.372	146.400, 0.460	146.400, 0.460	146.400, 1.481	146.400, 1.281	146.400, 1.662
734	146.600, 0.369	146.600, 0.419	146.600, 0.507	146.600, 0.490	146.600, 0.348	146.600, 0.404	146.600, 0.502	146.600, 0.454	146.600, 0.344	146.600, 0.372	146.600, 0.460	146.600, 0.461	146.600, 1.482	146.600, 1.282	146.600, 1.662
735	146.800, 0.369	146.800, 0.419	146.800, 0.507	146.800, 0.490	146.800, 0.348	146.800, 0.404	146.800, 0.502	146.800, 0.454	146.800, 0.345	146.800, 0.373	146.800, 0.460	146.800, 0.461	146.800, 1.482	146.800, 1.282	146.800, 1.662
736	147.000, 0.370	147.000, 0.420	147.000, 0.508	147.000, 0.490	147.000, 0.348	147.000, 0.404	147.000, 0.502	147.000, 0.454	147.000, 0.345	147.000, 0.373	147.000, 0.460	147.000, 0.461	147.000, 1.483	147.000, 1.282	147.000, 1.662
737	147.200, 0.370	147.200, 0.420	147.200, 0.508	147.200, 0.490	147.200, 0.348	147.200, 0.404	147.200, 0.503	147.200, 0.454	147.200, 0.345	147.200, 0.373	147.200, 0.460	147.200, 0.461	147.200, 1.483	147.200, 1.283	147.200, 1.662
738	147.400, 0.371	147.400, 0.420	147.400, 0.508	147.400, 0.490	147.400, 0.348	147.400, 0.405	147.400, 0.503	147.400, 0.454	147.400, 0.345	147.400, 0.373	147.400, 0.460	147.400, 0.461	147.400, 1.483	147.400, 1.283	147.400, 1.663
739	147.600, 0.371	147.600, 0.420	147.600, 0.508	147.600, 0.490	147.600, 0.348	147.600, 0.405	147.600, 0.504	147.600, 0.454	147.600, 0.346	147.600, 0.373	147.600, 0.460	147.600, 0.461	147.600, 1.484	147.600, 1.284	147.600, 1.664
740	147.800, 0.371	147.800, 0.420	147.800, 0.509	147.800, 0.490	147.800, 0.348	147.800, 0.406	147.800, 0.504	147.800, 0.455	147.800, 0.346	147.800, 0.373	147.800, 0.461	147.800, 0.461	147.800, 1.484	147.800, 1.284	147.800, 1.665
741	148.000, 0.371	148.000, 0.420	148.000, 0.509	148.000, 0.490	148.000, 0.348	148.000, 0.407	148.000, 0.504	148.000, 0.455	148.000, 0.347	148.000, 0.374	148.000, 0.461	148.000, 0.461	148.000, 1.485	148.000, 1.284	148.000, 1.666
742	148.200, 0.372	148.200, 0.420	148.200, 0.509	148.200, 0.491	148.200, 0.348	148.200, 0.407	148.200, 0.505	148.200, 0.455	148.200, 0.347	148.200, 0.374	148.200, 0.460	148.200, 0.461	148.200, 1.485	148.200, 1.285	148.200, 1.668
743	148.400, 0.372	148.400, 0.420	148.400, 0.510	148.400, 0.491	148.400, 0.348	148.400, 0.408	148.400, 0.505	148.400, 0.455	148.400, 0.347	148.400, 0.374	148.400, 0.460	148.400, 0.461	148.400, 1.486	148.400, 1.285	148.400, 1.669
744	148.600, 0.372	148.600, 0.420	148.600, 0.510	148.600, 0.491	148.600, 0.348	148.600, 0.408	148.600, 0.505	148.600, 0.455	148.600, 0.347	148.600, 0.374	148.600, 0.460	148.600, 0.461	148.600, 1.487	148.600, 1.286	148.600, 1.669
745	148.800, 0.371	148.800, 0.420	148.800, 0.510	148.800, 0.491	148.800, 0.348	148.800, 0.409	148.800, 0.506	148.800, 0.455	148.800, 0.347	148.800, 0.375	148.800, 0.460	148.800, 0.461	148.800, 1.487	148.800, 1.286	148.800, 1.670
746	149.000, 0.371	149.000, 0.420	149.000, 0.510	149.000, 0.491	149.000, 0.349	149.000, 0.409	149.000, 0.506	149.000, 0.456	149.000, 0.346	149.000, 0.375	149.000, 0.461	149.000, 0.461	149.000, 1.488	149.000, 1.287	149.000, 1.670
747	149.200, 0.371	149.200, 0.420	149.200, 0.510	149.200, 0.491	149.200, 0.349	149.200, 0.409	149.200, 0.506	149.200, 0.456	149.200, 0.346	149.200, 0.375	149.200, 0.461	149.200, 0.461	149.200, 1.489	149.200, 1.287	149.200, 1.670
748	149.400, 0.371	149.400, 0.421	149.400, 0.510	149.400, 0.491	149.400, 0.349	149.400, 0.410	149.400, 0.506	149.400, 0.456	149.400, 0.346	149.400, 0.376	149.400, 0.461	149.400, 0.462	149.400, 1.490	149.400, 1.288	149.400, 1.670
749	149.600, 0.371	149.600, 0.421	149.600, 0.510	149.600, 0.491	149.600, 0.349	149.600, 0.410	149.600, 0.506	149.600, 0.456	149.600, 0.345	149.600, 0.376	149.600, 0.461	149.600, 0.462	149.600, 1.490	149.600, 1.288	149.600, 1.670
750	149.800, 0.371	149.800, 0.422	149.800, 0.510	149.800, 0.491	149.800, 0.350	149.800, 0.410	149.800, 0.506	149.800, 0.456	149.800, 0.345	149.800, 0.376	149.800, 0.462	149.800, 0.462	149.800, 1.491	149.800, 1.288	149.800, 1.670
751	150.000, 0.371	150.000, 0.422	150.000, 0.510	150.000, 0.491	150.000, 0.350	150.000, 0.410	150.000, 0.506	150.000, 0.456	150.000, 0.345	150.000, 0.376	150.000, 0.462	150.000, 0.462	150.000, 1.491	150.000, 1.288	150.000, 1.670
752	150.200, 0.370	150.200, 0.421	150.200, 0.508	150.200, 0.489	150.200, 0.348	150.200, 0.408	150.200, 0.504	150.200, 0.454	150.200, 0.344	150.200, 0.376	150.200, 0.461	150.200, 0.460	150.200, 1.493	150.200, 1.291	150.200, 1.672
753	150.400, 0.368	150.400, 0.420	150.400, 0.507	150.400, 0.488	150.400, 0.346	150.400, 0.406	150.400, 0.502	150.400, 0.452	150.400, 0.343	150.400, 0.375	150.400, 0.460	150.400, 0.458	150.400, 1.495	150.400, 1.294	150.400, 1.673
754	150.600, 0.365	150.600, 0.419	150.600, 0.504	150.600, 0.486	150.600, 0.344	150.600, 0.403	150.600, 0.499	150.600, 0.450	150.600, 0.342	150.600, 0.374	150.600, 0.458	150.600, 0.456	150.600, 1.497	150.600, 1.296	150.600, 1.674
755	150.800, 0.363	150.800, 0.417	150.800, 0.501	150.800, 0.483	150.800, 0.342	150.800, 0.400	150.800, 0.496	150.800, 0.448	150.800, 0.341	150.800, 0.373	150.800, 0.455	150.800, 0.453	150.800, 1.498	150.800, 1.298	150.800, 1.674
756	151.000, 0.360	151.000, 0.415	151.000, 0.498	151.000, 0.481	151.000, 0.339	151.000, 0.397	151.000, 0.492	151.000, 0.445	151.000, 0.339	151.000, 0.372	151.000, 0.453	151.000, 0.450	151.000, 1.499	151.000, 1.299	151.000, 1.674
757	151.200, 0.356	151.200, 0.413	151.200, 0.494	151.200, 0.478	151.200, 0.336	151.200, 0.393	151.200, 0.488	151.200, 0.442	151.200, 0.337	151.200, 0.370	151.200, 0.450	151.200, 0.446	151.200, 1.499	151.200, 1.300	151.200, 1.672
758	151.400, 0.353	151.400, 0.410	151.400, 0.490	151.400, 0.474	151.400, 0.333	151.400, 0.390	151.400, 0.484	151.400, 0.439	151.400, 0.335	151.400, 0.368	151.400, 0.446	151.400, 0.443	151.400, 1.498	151.400, 1.300	151.400, 1.670
759	151.600, 0.349	151.600, 0.406	151.600, 0.486	151.600, 0.471	151.600, 0.330	151.600, 0.386	151.600, 0.479	151.600, 0.436	151.600, 0.333	151.600, 0.366	151.600, 0.443	151.600, 0.439	151.600, 1.496	151.600, 1.298	151.600, 1.666
760	151.800, 0.346	151.800, 0.403	151.800, 0.482	151.800, 0.468	151.800, 0.327	151.800, 0.383	151.800, 0.475	151.800, 0.432	151.800, 0.331	151.800, 0.363	151.800, 0.439	151.800, 0.435	151.800, 1.492	151.800, 1.296	151.800, 1.661
761	152.000, 0.343	152.000, 0.399	152.000, 0.477	152.000, 0.465	152.000, 0.324	152.000, 0.380	152.000, 0.471	152.000, 0.429	152.000, 0.329	152.000, 0.360	152.000, 0.434	152.000, 0.431	152.000, 1.488	152.000, 1.292	152.000, 1.654
762	152.200, 0.339	152.200, 0.395	152.200, 0.473	152.200, 0.462	152.200, 0.321	152.200, 0.377	152.200, 0.467	152.200, 0.426	152.200, 0.327	152.200, 0.358	152.200, 0.430	152.200, 0.428	152.200, 1.482	152.200, 1.287	152.200, 1.647
763	152.400, 0.336	152.400, 0.392	152.400, 0.470	152.400, 0.459	152.400, 0.319	152.400, 0.375	152.400, 0.464	152.400, 0.423	152.400, 0.325	152.400, 0.355	152.400, 0.427	152.400, 0.425	152.400, 1.477	152.400, 1.282	152.400, 1.638
764	152.600, 0.334	152.600, 0.389	152.600, 0.467	152.600, 0.456	152.600, 0.317	152.600, 0.373	152.600, 0.461	152.600, 0.421	152.600, 0.324	152.600, 0.353	152.600, 0.424	152.600, 0.422	152.600, 1.470	152.600, 1.276	152.600, 1.629
765	152.800, 0.332	152.800, 0.386	152.800, 0.464	152.800, 0.454	152.800, 0.315	152.800, 0.371	152.800, 0.458	152.800, 0.418	152.800, 0.322	152.800, 0.351	152.800, 0.422	152.800, 0.419	152.800, 1.463	152.800, 1.270	152.800, 1.620
766	153.000, 0.330	153.000, 0.384	153.000, 0.462	153.000, 0.451	153.000, 0.313	153.000, 0.370	153.000, 0.455	153.000, 0.416	153.000, 0.321	153.000, 0.349	153.000, 0.419	153.000, 0.417	153.000, 1.456	153.000, 1.263	153.000, 1.610
767	153.200, 0.328	153.200, 0.382	153.200, 0.460	153.200, 0.449	153.200, 0.311	153.200, 0.368	153.200, 0.453	153.200, 0.414	153.200, 0.319	153.200, 0.347	153.200, 0.418	153.200, 0.415	153.200, 1.449	153.200, 1.257	153.200, 1.600
768	153.400, 0.327	153.400, 0.380	153.400, 0.458	153.400, 0.447	153.400, 0.309	153.400, 0.366	153.400, 0.451	153.400, 0.412	153.400, 0.318	153.400, 0.346	153.400, 0.416	153.400, 0.413	153.400, 1.441	153.400, 1.250	153.400, 1.590
769	153.600, 0.326	153.600, 0.379	153.600, 0.456	153.600, 0.445	153.600, 0.308	153.600, 0.365	153.600, 0.449	153.600, 0.411	153.600, 0.317	153.600, 0.344	153.600, 0.415	153.600, 0.412	153.600, 1.434	153.600, 1.244	153.600, 1.580
770	153.800, 0.324	153.800, 0.377	153.800, 0.454	153.800, 0.443	153.800, 0.306	153.800, 0.363	153.800, 0.447	153.800, 0.409	153.800, 0.316	153.800, 0.342	153.800, 0.414	153.800, 0.410	153.800, 1.426	153.800, 1.237	153.800, 1.570
771	154.000, 0.323	154.000, 0.376	154.000, 0.452	154.000, 0.442	154.000, 0.305	154.000, 0.361	154.000, 0.446	154.000, 0.407	154.000, 0.315	154.000, 0.341	154.000, 0.412	154.000, 0.409	154.000, 1.419	154.000, 1.231	154.000, 1.560
772	154.200, 0.322	154.200, 0.375	154.200, 0.450	154.200, 0.441	154.200, 0.304	154.200, 0.359	154.200, 0.444	154.200, 0.406	154.200, 0.314	154.200, 0.339	154.200, 0.411	154.200, 0.408	154.200, 1.411	154.200, 1.225	154.200, 1.550
773	154.400, 0.321	154.400, 0.373	154.400, 0.449	154.400, 0.439	154.400, 0.303	154.400, 0.358	154.400, 0.443	154.400, 0.404	154.400, 0.313	154.400, 0.338	154.400, 0.410	154.400, 0.407	154.400, 1.403	154.400, 1.218	154.400, 1.540
774	154.600, 0.320	154.600, 0.372	154.600, 0.448	154.600, 0.438	154.600, 0.302	154.600, 0.356	154.600, 0.442	154.600, 0.403	154.600, 0.311	154.600, 0.337	154.600, 0.409	154.600, 0.406	154.600, 1.395	154.600, 1.212	154.600, 1.530
775	154.800, 0.318	154.800, 0.371	154.800, 0.447	154.800, 0.437	154.800, 0.301	154.800, 0.355	154.800, 0.441	154.800, 0.401	154.800, 0.310	154.800, 0.336	154.800, 0.408	154.800, 0.405	154.800, 1.388	154.800, 1.205	154.800, 1.520
776	155.000, 0.317	155.000, 0.370	155.000, 0.446	155.000, 0.436	155.000, 0.300	155.000, 0.353	155.000, 0.439	155.000, 0.400	155.000, 0.309	155.000, 0.335	155.000, 0.407	155.000, 0.404	155.000, 1.380	155.000, 1.198	155.000, 1.510
777	155.200, 0.316	155.200, 0.368	155.200, 0.444	155.200, 0.435	155.200, 0.299	155.200, 0.352	155.200, 0.438	155.200, 0.399	155.200, 0.308	155.200, 0.334	155.200, 0.406	155.200, 0.403	155.200, 1.372	155.200, 1.191	155.200, 1.501
778	155.400, 0.315	155.400, 0.367	155.400, 0.443	155.400, 0.434	155.400, 0.298	155.400, 0.351	155.400, 0.437	155.400, 0.398	155.400, 0.307	155.400, 0.333	155.400, 0.405	155.400, 0.402	155.400, 1.364	155.400, 1.184	155.400, 1.491
779	155.600, 0.314	155.600, 0.366	155.600, 0.442	155.600, 0.433	155.600, 0.297	155.600, 0.350	155.600, 0.435	155.600, 0.397	155.600, 0.306	155.600, 0.332	155.600, 0.404	155.600, 0.401	155.600, 1.356	155.600, 1.177	155.600, 1.481
780	155.800, 0.313	155.800, 0.365	155.800, 0.440	155.800, 0.433	155.800, 0.296	155.800, 0.350	155.800, 0.434	155.800, 0.396	155.800, 0.305	155.800, 0.331	155.800, 0.403	155.800, 0.400	155.800, 1.349	155.800, 1.170	155.800, 1.471
781	156.000, 0.312	156.000, 0.364	156.000, 0.439	156.000, 0.432	156.000, 0.295	156.000, 0.349	156.000, 0.433	156.000, 0.395	156.000, 0.304	156.000, 0.330	156.000, 0.402	156.000, 0.399	156.000, 1.341	156.000, 1.163	156.000, 1.462
782	156.200, 0.311	156.200, 0.363	156.200, 0.438	156.200, 0.431	156.200, 0.295	156.200, 0.349	156.200, 0.432	156.200, 0.394	156.200, 0.304	156.200, 0.329	156.200, 0.401	156.200, 0.398	156.200, 1.333	156.200, 1.156	156.200, 1.452
783	156.400, 0.310	156.400, 0.362	156.400, 0.437	156.400, 0.430	156.400, 0.294	156.400, 0.348	156.400, 0.431	156.400, 0.393	156.400, 0.303	156.400, 0.328	156.400, 0.400	156.400, 0.397	156.400, 1.325	156.400, 1.149	156.400, 1.442
784	156.600, 0.309	156.600, 0.362	156.600, 0.436	156.600, 0.429	156.600, 0.293	156.600, 0.348	156.600, 0.430	156.600, 0.392	156.600, 0.302	156.600, 0.328	156.600, 0.399	156.600, 0.396	156.600, 1.318	156.600, 1.142	156.600, 1.432
785	156.800, 0.309	156.800, 0.361	156.800, 0.435	156.800, 0.428	156.800, 0.293	156.800, 0.347	156.800, 0.430	156.800, 0.392	156.800, 0.302	156.800, 0.327	156.800, 0.398	156.800, 0.396	156.800, 1.310	156.800, 1.135	156.800, 1.422
786	157.000, 0.308	157.000, 0.360	157.000, 0.434	157.000, 0.428	157.000, 0.292	157.000, 0.346	157.000, 0.429	157.000, 0.391	157.000, 0.301	157.000, 0.327	157.000, 0.398	157.000, 0.395	157.000, 1.302	157.000, 1.129	157.000, 1.412
787	157.200, 0.308	157.200, 0.360	157.200, 0.433	157.200, 0.427	157.200, 0.292	157.200, 0.346	157.200, 0.428	157.200, 0.390	157.200, 0.301	157.200, 0.326	157.200, 0.397	157.200, 0.395	157.200, 1.294	157.200, 1.122	157.200, 1.402
788	157.400, 0.307	157.400, 0.359	157.400, 0.432	157.400, 0.426	157.400, 0.291	157.400, 0.345	157.400, 0.428	157.400, 0.390	157.400, 0.300	157.400, 0.326	157.400, 0.396	157.400, 0.395	157.400, 1.287	157.400, 1.116	157.400, 1.393
789	157.600, 0.307	157.600, 0.358	157.600, 0.432	157.600, 0.425	157.600, 0.291	157.600, 0.344	157.600, 0.427	157.600, 0.390	157.600, 0.300	157.600, 0.326	157.600, 0.396	157.600, 0.394	157.600, 1.279	157.600, 1.109	157.600, 1.383
790	157.800, 0.306	157.800, 0.357	157.800, 0.431	157.800, 0.425	157.800, 0.291	157.800, 0.344	157.800, 0.427	157.800, 0.390	157.800, 0.299	157.800, 0.325	157.800, 0.396	157.800, 0.394	157.800, 1.271	157.800, 1.103	157.800, 1.373
791	158.000, 0.306	158.000, 0.357	158.000, 0.431	158.000, 0.424	158.000, 0.290	158.000, 0.343	158.000, 0.427	158.000, 0.389	158.000, 0.299	158.000, 0.325	158.000, 0.395	158.000, 0.394	158.000, 1.264	158.000, 1.097	158.000, 1.364
792	158.200, 0.305	158.200, 0.356	158.200, 0.431	158.200, 0.424	158.200, 0.290	158.200, 0.343	158.200, 0.426	158.200, 0.389	158.200, 0.299	158.200, 0.324	158.200, 0.395	158.200, 0.393	158.200, 1.256	158.200, 1.091	158.200, 1.354
793	158.400, 0.305	158.400, 0.355	158.400, 0.430	158.400, 0.423	158.400, 0.290	158.400, 0.342	158.400, 0.426	158.400, 0.389	158.400, 0.298	158.400, 0.324	158.400, 0.394	158.400, 0.393	158.400, 1.248	158.400, 1.084	158.400, 1.345
794	158.600, 0.304	158.600, 0.354	158.600, 0.430	158.600, 0.423	158.600, 0.289	158.600, 0.341	158.600, 0.425	158.600, 0.388	158.600, 0.297	158.600, 0.324	158.600, 0.394	158.600, 0.393	158.600, 1.241	158.600, 1.078	158.600, 1.336
795	158.800, 0.304	158.800, 0.353	158.800, 0.429	158.800, 0.423	158.800, 0.289	158.800, 0.341	158.800, 0.425	158.800, 0.388	158.800, 0.297	158.800, 0.323	158.800, 0.393	158.800, 0.392	158.800, 1.233	158.800, 1.071	158.800, 1.327
796	159.000, 0.303	159.000, 0.352	159.000, 0.429	159.000, 0.422	159.000, 0.288	159.000, 0.341	159.000, 0.424	159.000, 0.387	159.000, 0.296	159.000, 0.323	159.000, 0.393	159.000, 0.392	159.000, 1.226	159.000, 1.065	159.000, 1.318
797	159.200, 0.303	159.200, 0.351	159.200, 0.428	159.200, 0.422	159.200, 0.288	159.200, 0.340	159.200, 0.423	159.200, 0.387	159.200, 0.295	159.200, 0.323	159.200, 0.393	159.200, 0.391	159.200, 1.218	159.200, 1.058	159.200, 1.308
798	159.400, 0.303	159.400, 0.351	159.400, 0.428	159.400, 0.421	159.400, 0.287	159.400, 0.340	159.400, 0.423	159.400, 0.386	159.400, 0.294	159.400, 0.322	159.400, 0.393	159.400, 0.390	159.400, 1.210	159.400, 1.051	159.400, 1.299
799	159.600, 0.302	159.600, 0.350	159.600, 0.427	159.600, 0.421	159.600, 0.287	159.600, 0.340	159.600, 0.422	159.600, 0.385	159.600, 0.293	159.600, 0.322	159.600, 0.393	159.600, 0.390	159.600, 1.203	159.600, 1.045	159.600, 1.290
800	159.800, 0.302	159.800, 0.350	159.800, 0.426	159.800, 0.420	159.800, 0.286	159.800, 0.340	159.800, 0.422	159.800, 0.385	159.800, 0.293	159.800, 0.322	159.800, 0.393	159.800, 0.389	159.800, 1.195	159.800, 1.038	159.800, 1.282
801	160.000, 0.301	160.000, 0.349	160.000, 0.426	160.000, 0.420	160.000, 0.286	160.000, 0.339	160.000, 0.421	160.000, 0.384	160.000, 0.292	160.000, 0.322	160.000, 0.392	160.000, 0.389	160.000, 1.188	160.000, 1.032	160.000, 1.273
802	160.200, 0.301	160.200, 0.349	160.200, 0.425	160.200, 0.419	160.200, 0.286	160.200, 0.339	160.200, 0.421	160.200, 0.383	160.200, 0.292	160.200, 0.321	160.200, 0.392	160.200, 0.388	160.200, 1.180	160.200, 1.025	160.200, 1.264
803	160.400, 0.300	160.400, 0.348	160.400, 0.425	160.400, 0.419	160.400, 0.285	160.400, 0.339	160.400, 0.420	160.400, 0.383	160.400, 0.291	160.400, 0.321	160.400, 0.392	160.400, 0.388	160.400, 1.173	160.400, 1.019	160.400, 1.255
804	160.600, 0.300	160.600, 0.348	160.600, 0.424	160.600, 0.418	160.600, 0.285	160.600, 0.338	160.600, 0.420	160.600, 0.382	160.600, 0.291	160.600, 0.321	160.600, 0.391	160.600, 0.388	160.600, 1.166	160.600, 1.013	160.600, 1.247
805	160.800, 0.299	160.800, 0.347	160.800, 0.424	160.800, 0.418	160.800, 0.285	160.800, 0.338	160.800, 0.420	160.800, 0.382	160.800, 0.290	160.800, 0.321	160.800, 0.391	160.800, 0.387	160.800, 1.158	160.800, 1.007	160.800, 1.238
806	161.000, 0.299	161.000, 0.347	161.000, 0.423	161.000, 0.418	161.000, 0.285	161.000, 0.338	161.000, 0.420	161.000, 0.381	161.000, 0.290	161.000, 0.321	161.000, 0.390	161.000, 0.387	161.000, 1.151	161.000, 1.001	161.000, 1.230
807	161.200, 0.299	161.200, 0.347	161.200, 0.423	161.200, 0.417	161.200, 0.285	161.200, 0.338	161.200, 0.420	161.200, 0.381	161.200, 0.290	161.200, 0.321	161.200, 0.390	161.200, 0.386	161.200, 1.144	161.200, 0.995	161.200, 1.221
808	161.400, 0.299	161.400, 0.346	161.400, 0.422	161.400, 0.417	161.400, 0.285	161.400, 0.338	161.400, 0.420	161.400, 0.380	161.400, 0.290	161.400, 0.321	161.400, 0.390	161.400, 0.386	161.400, 1.138	161.400, 0.989	161.400, 1.213
809	161.600, 0.299	161.600, 0.346	161.600, 0.422	161.600, 0.417	161.600, 0.285	161.600, 0.337	161.600, 0.419	161.600, 0.380	161.600, 0.290	161.600, 0.321	161.600, 0.389	161.600, 0.385	161.600, 1.131	161.600, 0.983	161.600, 1.205
810	161.800, 0.298	161.800, 0.346	161.800, 0.422	161.800, 0.416	161.800, 0.284	161.800, 0.337	161.800, 0.419	161.800, 0.380	161.800, 0.290	161.800, 0.320	161.800, 0.389	161.800, 0.385	161.800, 1.124	161.800, 0.977	161.800, 1.197
811	162.000, 0.298	162.000, 0.345	162.000, 0.422	162.000, 0.416	162.000, 0.284	162.000, 0.337	162.000, 0.419	162.000, 0.379	162.000, 0.291	162.000, 0.320	162.000, 0.388	162.000, 0.384	162.000, 1.118	162.000, 0.971	162.000, 1.190
812	162.200, 0.298	162.200, 0.345	162.200, 0.421	162.200, 0.415	162.200, 0.284	162.200, 0.337	162.200, 0.418	162.200, 0.379	162.200, 0.290	162.200, 0.320	162.200, 0.388	162.200, 0.384	162.200, 1.111	162.200, 0.965	162.200, 1.182
813	162.400, 0.298	162.400, 0.345	162.400, 0.421	162.400, 0.415	162.400, 0.283	162.400, 0.336	162.400, 0.418	162.400, 0.379	162.400, 0.290	162.400, 0.319	162.400, 0.387	162.400, 0.384	162.400, 1.105	162.400, 0.959	162.400, 1.174
814	162.600, 0.298	162.600, 0.345	162.600, 0.420	162.600, 0.414	162.600, 0.283	162.600, 0.336	162.600, 0.417	162.600, 0.379	162.600, 0.290	162.600, 0.319	162.600, 0.387	162.600, 0.383	162.600, 1.098	162.600, 0.953	162.600, 1.166
815	162.800, 0.298	162.800, 0.344	162.800, 0.420	162.800, 0.414	162.800, 0.283	162.800, 0.336	162.800, 0.417	162.800, 0.379	162.800, 0.290	162.800, 0.319	162.800, 0.386	162.800, 0.383	162.800, 1.091	162.800, 0.947	162.800, 1.158
816	163.000, 0.298	163.000, 0.344	163.000, 0.419	163.000, 0.413	163.000, 0.282	163.000, 0.335	163.000, 0.416	163.000, 0.378	163.000, 0.289	163.000, 0.318	163.000, 0.386	163.000, 0.383	163.000, 1.084	163.000, 0.941	163.000, 1.150
817	163.200, 0.297	163.200, 0.344	163.200, 0.418	163.200, 0.413	163.200, 0.282	163.200, 0.335	163.200, 0.416	163.200, 0.378	163.200, 0.289	163.200, 0.318	163.200, 0.385	163.200, 0.382	163.200, 1.077	163.200, 0.935	163.200, 1.142
818	163.400, 0.297	163.400, 0.344	163.400, 0.418	163.400, 0.412	163.400, 0.281	163.400, 0.335	163.400, 0.415	163.400, 0.378	163.400, 0.288	163.400, 0.317	163.400, 0.385	163.400, 0.382	163.400, 1.071	163.400, 0.929	163.400, 1.135
819	163.600, 0.296	163.600, 0.344	163.600, 0.417	163.600, 0.412	163.600, 0.281	163.600, 0.335	163.600, 0.415	163.600, 0.378	163.600, 0.288	163.600, 0.317	163.600, 0.384	163.600, 0.382	163.600, 1.064	163.600, 0.923	163.600, 1.127
820	163.800, 0.296	163.800, 0.343	163.800, 0.417	163.800, 0.411	163.800, 0.280	163.800, 0.334	163.800, 0.415	163.800, 0.377	163.800, 0.287	163.800, 0.317	163.800, 0.384	163.800, 0.382	163.800, 1.057	163.800, 0.918	163.800, 1.120
821	164.000, 0.295	164.000, 0.343	164.000, 0.416	164.000, 0.411	164.000, 0.280	164.000, 0.334	164.000, 0.414	164.000, 0.377	164.000, 0.287	164.000, 0.316	164.000, 0.384	164.000, 0.382	164.000, 1.050	164.000, 0.912	164.000, 1.112
822	164.200, 0.295	164.200, 0.342	164.200, 0.416	164.200, 0.411	164.200, 0.280	164.200, 0.333	164.200, 0.414	164.200, 0.377	164.200, 0.286	164.200, 0.316	164.200, 0.383	164.200, 0.382	164.200, 1.044	164.200, 0.907	164.200, 1.105
823	164.400, 0.295	164.400, 0.342	164.400, 0.415	164.400, 0.410	164.400, 0.279	164.400, 0.333	164.400, 0.413	164.400, 0.377	164.400, 0.285	164.400, 0.316	164.400, 0.383	164.400, 0.382	164.400, 1.037	164.400, 0.901	164.400, 1.098
824	164.600, 0.294	164.600, 0.342	164.600, 0.415	164.600, 0.410	164.600, 0.279	164.600, 0.332	164.600, 0.413	164.600, 0.376	164.600, 0.285	164.600, 0.315	164.600, 0.383	164.600, 0.381	164.600, 1.031	164.600, 0.896	164.600, 1.091
825	164.800, 0.294	164.800, 0.341	164.800, 0.414	164.800, 0.409	164.800, 0.279	164.800, 0.332	164.800, 0.412	164.800, 0.376	164.800, 0.284	164.800, 0.315	164.800, 0.383	164.800, 0.381	164.800, 1.024	164.800, 0.890	164.800, 1.084
826	165.000, 0.294	165.000, 0.341	165.000, 0.414	165.000, 0.409	165.000, 0.279	165.000, 0.332	165.000, 0.412	165.000, 0.375	165.000, 0.284	165.000, 0.315	165.000, 0.383	165.000, 0.380	165.000, 1.018	165.000, 0.885	165.000, 1.076
827	165.200, 0.294	165.200, 0.340	165.200, 0.413	165.200, 0.409	165.200, 0.278	165.200, 0.331	165.200, 0.412	165.200, 0.375	165.200, 0.284	165.200, 0.315	165.200, 0.383	165.200, 0.380	165.200, 1.012	165.200, 0.880	165.200, 1.069
828	165.400, 0.293	165.400, 0.340	165.400, 0.413	165.400, 0.409	165.400, 0.278	165.400, 0.331	165.400, 0.411	165.400, 0.374	165.400, 0.283	165.400, 0.315	165.400, 0.383	165.400, 0.380	165.400, 1.006	165.400, 0.874	165.400, 1.062
829	165.600, 0.293	165.600, 0.339	165.600, 0.413	165.600, 0.409	165.600, 0.278	165.600, 0.331	165.600, 0.411	165.600, 0.374	165.600, 0.283	165.600, 0.314	165.600, 0.382	165.600, 0.379	165.600, 1.000	165.600, 0.869	165.600, 1.056
830	165.800, 0.293	165.800, 0.338	165.800, 0.413	165.800, 0.409	165.800, 0.277	165.800, 0.331	165.800, 0.411	165.800, 0.373	165.800, 0.283	165.800, 0.314	165.800, 0.382	165.800, 0.379	165.800, 0.994	165.800, 0.864	165.800, 1.049
831	166.000, 0.293	166.000, 0.338	166.000, 0.412	166.000, 0.409	166.000, 0.277	166.000, 0.331	166.000, 0.411	166.000, 0.373	166.000, 0.282	166.000, 0.314	166.000, 0.382	166.000, 0.378	166.000, 0.988	166.000, 0.859	166.000, 1.042
832	166.200, 0.293	166.200, 0.338	166.200, 0.412	166.200, 0.409	166.200, 0.277	166.200, 0.331	166.200, 0.411	166.200, 0.373	166.200, 0.282	166.200, 0.313	166.200, 0.382	166.200, 0.378	166.200, 0.983	166.200, 0.853	166.200, 1.035
833	166.400, 0.293	166.400, 0.337	166.400, 0.412	166.400, 0.408	166.400, 0.277	166.400, 0.331	166.400, 0.411	166.400, 0.373	166.400, 0.282	166.400, 0.313	166.400, 0.382	166.400, 0.377	166.400, 0.977	166.400, 0.848	166.400, 1.028
834	166.600, 0.293	166.600, 0.337	166.600, 0.411	166.600, 0.408	166.600, 0.277	166.600, 0.331	166.600, 0.410	166.600, 0.373	166.600, 0.282	166.600, 0.313	166.600, 0.382	166.600, 0.377	166.600, 0.971	166.600, 0.843	166.600, 1.021
835	166.800, 0.293	166.800, 0.337	166.800, 0.411	166.800, 0.408	166.800, 0.276	166.800, 0.331	166.800, 0.410	166.800, 0.373	166.800, 0.282	166.800, 0.313	166.800, 0.382	166.800, 0.377	166.800, 0.966	166.800, 0.838	166.800, 1.014
836	167.000, 0.292	167.000, 0.337	167.000, 0.411	167.000, 0.408	167.000, 0.276	167.000, 0.331	167.000, 0.410	167.000, 0.373	167.000, 0.282	167.000, 0.313	167.000, 0.382	167.000, 0.376	167.000, 0.960	167.000, 0.833	167.000, 1.008
837	167.200, 0.292	167.200, 0.337	167.200, 0.411	167.200, 0.408	167.200, 0.276	167.200, 0.331	167.200, 0.410	167.200, 0.373	167.200, 0.282	167.200, 0.313	167.200, 0.382	167.200, 0.376	167.200, 0.955	167.200, 0.828	167.200, 1.001
838	167.400, 0.291	167.400, 0.337	167.400, 0.411	167.400, 0.408	167.400, 0.276	167.400, 0.330	167.400, 0.409	167.400, 0.373	167.400, 0.282	167.400, 0.313	167.400, 0.382	167.400, 0.376	167.400, 0.949	167.400, 0.823	167.400, 0.995
839	167.600, 0.291	167.600, 0.337	167.600, 0.411	167.600, 0.408	167.600, 0.276	167.600, 0.330	167.600, 0.409	167.600, 0.373	167.600, 0.282	167.600, 0.313	167.600, 0.382	167.600, 0.376	167.600, 0.944	167.600, 0.819	167.600, 0.989
840	167.800, 0.291	167.800, 0.336	167.800, 0.411	167.800, 0.407	167.800, 0.276	167.800, 0.330	167.800, 0.409	167.800, 0.373	167.800, 0.282	167.800, 0.313	167.800, 0.382	167.800, 0.375	167.800, 0.938	167.800, 0.814	167.800, 0.983
841	168.000, 0.291	168.000, 0.336	168.000, 0.411	168.000, 0.407	168.000, 0.276	168.000, 0.329	168.000, 0.409	168.000, 0.373	168.000, 0.282	168.000, 0.313	168.000, 0.382	168.000, 0.375	168.000, 0.933	168.000, 0.809	168.000, 0.977
842	168.200, 0.291	168.200, 0.336	168.200, 0.411	168.200, 0.406	168.200, 0.276	168.200, 0.329	168.200, 0.408	168.200, 0.373	168.200, 0.282	168.200, 0.313	168.200, 0.381	168.200, 0.375	168.200, 0.927	168.200, 0.805	168.200, 0.970
843	168.400, 0.291	168.400, 0.336	168.400, 0.410	168.400, 0.406	168.400, 0.276	168.400, 0.329	168.400, 0.408	168.400, 0.373	168.400, 0.282	168.400, 0.313	168.400, 0.381	168.400, 0.375	168.400, 0.921	168.400, 0.800	168.400, 0.964
844	168.600, 0.291	168.600, 0.335	168.600, 0.410	168.600, 0.405	168.600, 0.276	168.600, 0.329	168.600, 0.408	168.600, 0.372	168.600, 0.282	168.600, 0.313	168.600, 0.380	168.600, 0.374	168.600, 0.915	168.600, 0.795	168.600, 0.958
845	168.800, 0.290	168.800, 0.335	168.800, 0.410	168.800, 0.405	168.800, 0.276	168.800, 0.328	168.800, 0.408	168.800, 0.372	168.800, 0.282	168.800, 0.313	168.800, 0.380	168.800, 0.374	168.800, 0.909	168.800, 0.790	168.800, 0.952
846	169.000, 0.290	169.000, 0.335	169.000, 0.409	169.000, 0.404	169.000, 0.275	169.000, 0.328	169.000, 0.407	169.000, 0.371	169.000, 0.282	169.000, 0.312	169.000, 0.379	169.000, 0.374	169.000, 0.904	169.000, 0.786	169.000, 0.946
847	169.200, 0.290	169.200, 0.335	169.200, 0.409	169.200, 0.404	169.200, 0.275	169.200, 0.328	169.200, 0.407	169.200, 0.371	169.200, 0.282	169.200, 0.312	169.200, 0.379	169.200, 0.373	169.200, 0.898	169.200, 0.781	169.200, 0.940
848	169.400, 0.290	169.400, 0.335	169.400, 0.409	169.400, 0.404	169.400, 0.275	169.400, 0.328	169.400, 0.407	169.400, 0.370	169.400, 0.281	169.400, 0.312	169.400, 0.378	169.400, 0.373	169.400, 0.893	169.400, 0.776	169.400, 0.934
849	169.600, 0.290	169.600, 0.334	169.600, 0.409	169.600, 0.404	169.600, 0.274	169.600, 0.327	169.600, 0.407	169.600, 0.370	169.600, 0.281	169.600, 0.312	169.600, 0.378	169.600, 0.373	169.600, 0.888	169.600, 0.772	169.600, 0.927
850	169.800, 0.290	169.800, 0.334	169.800, 0.409	169.800, 0.403	169.800, 0.274	169.800, 0.327	169.800, 0.407	169.800, 0.369	169.800, 0.280	169.800, 0.312	169.800, 0.377	169.800, 0.373	169.800, 0.882	169.800, 0.768	169.800, 0.921
851	170.000, 0.290	170.000, 0.334	170.000, 0.408	170.000, 0.403	170.000, 0.274	170.000, 0.327	170.000, 0.407	170.000, 0.369	170.000, 0.280	170.000, 0.311	170.000, 0.377	170.000, 0.373	170.000, 0.877	170.000, 0.763	170.000, 0.915
852	170.200, 0.290	170.200, 0.334	170.200, 0.408	170.200, 0.403	170.200, 0.274	170.200, 0.327	170.200, 0.407	170.200, 0.368	170.200, 0.280	170.200, 0.311	170.200, 0.376	170.200, 0.373	170.200, 0.872	170.200, 0.759	170.200, 0.909
853	170.400, 0.290	170.400, 0.333	170.400, 0.408	170.400, 0.403	170.400, 0.273	170.400, 0.326	170.400, 0.407	170.400, 0.368	170.400, 0.280	170.400, 0.311	170.400, 0.376	170.400, 0.373	170.400, 0.866	170.400, 0.754	170.400, 0.903
854	170.600, 0.289	170.600, 0.333	170.600, 0.408	170.600, 0.403	170.600, 0.273	170.600, 0.326	170.600, 0.407	170.600, 0.368	170.600, 0.280	170.600, 0.311	170.600, 0.376	170.600, 0.373	170.600, 0.861	170.600, 0.750	170.600, 0.897
855	170.800, 0.289	170.800, 0.333	170.800, 0.408	170.800, 0.403	170.800, 0.273	170.800, 0.325	170.800, 0.407	170.800, 0.367	170.800, 0.279	170.800, 0.311	170.800, 0.376	170.800, 0.373	170.800, 0.857	170.800, 0.746	170.800, 0.891
856	171.000, 0.289	171.000, 0.333	171.000, 0.408	171.000, 0.403	171.000, 0.273	171.000, 0.325	171.000, 0.406	171.000, 0.367	171.000, 0.279	171.000, 0.310	171.000, 0.376	171.000, 0.373	171.000, 0.852	171.000, 0.741	171.000, 0.885
857	171.200, 0.289	171.200, 0.332	171.200, 0.408	171.200, 0.402	171.200, 0.273	171.200, 0.325	171.200, 0.406	171.200, 0.367	171.200, 0.279	171.200, 0.310	171.200, 0.376	171.200, 0.373	171.200, 0.847	171.200, 0.737	171.200, 0.880
858	171.400, 0.289	171.400, 0.332	171.400, 0.408	171.400, 0.402	171.400, 0.273	171.400, 0.325	171.400, 0.405	171.400, 0.367	171.400, 0.279	171.400, 0.310	171.400, 0.376	171.400, 0.373	171.400, 0.842	171.400, 0.733	171.400, 0.874
859	171.600, 0.288	171.600, 0.332	171.600, 0.407	171.600, 0.402	171.600, 0.273	171.600, 0.325	171.600, 0.405	171.600, 0.367	171.600, 0.279	171.600, 0.310	171.600, 0.376	171.600, 0.372	171.600, 0.837	171.600, 0.729	171.600, 0.869
860	171.800, 0.288	171.800, 0.332	171.800, 0.407	171.800, 0.402	171.800, 0.273	171.800, 0.325	171.800, 0.404	171.800, 0.367	171.800, 0.279	171.800, 0.309	171.800, 0.376	171.800, 0.372	171.800, 0.832	171.800, 0.725	171.800, 0.864
861	172.000, 0.288	172.000, 0.331	172.000, 0.406	172.000, 0.401	172.000, 0.273	172.000, 0.325	172.000, 0.404	172.000, 0.366	172.000, 0.278	172.000, 0.309	172.000, 0.375	172.000, 0.371	172.000, 0.827	172.000, 0.721	172.000, 0.858
862	172.200, 0.287	172.200, 0.331	172.200, 0.406	172.200, 0.401	172.200, 0.273	172.200, 0.326	172.200, 0.403	172.200, 0.366	172.200, 0.278	172.200, 0.309	172.200, 0.375	172.200, 0.371	172.200, 0.822	172.200, 0.717	172.200, 0.853
863	172.400, 0.287	172.400, 0.331	172.400, 0.405	172.400, 0.401	172.400, 0.272	172.400, 0.326	172.400, 0.403	172.400, 0.366	172.400, 0.278	172.400, 0.309	172.400, 0.375	172.400, 0.370	172.400, 0.818	172.400, 0.714	172.400, 0.848
864	172.600, 0.286	172.600, 0.330	172.600, 0.405	172.600, 0.400	172.600, 0.272	172.600, 0.326	172.600, 0.403	172.600, 0.366	172.600, 0.278	172.600, 0.309	172.600, 0.375	172.600, 0.370	172.600, 0.813	172.600, 0.710	172.600, 0.843
865	172.800, 0.286	172.800, 0.330	172.800, 0.405	172.800, 0.400	172.800, 0.272	172.800, 0.326	172.800, 0.402	172.800, 0.366	172.800, 0.277	172.800, 0.309	172.800, 0.375	172.800, 0.369	172.800, 0.808	172.800, 0.706	172.800, 0.837
866	173.000, 0.286	173.000, 0.330	173.000, 0.404	173.000, 0.400	173.000, 0.272	173.000, 0.326	173.000, 0.402	173.000, 0.365	173.000, 0.277	173.000, 0.309	173.000, 0.375	173.000, 0.369	173.000, 0.804	173.000, 0.702	173.000, 0.832
867	173.200, 0.285	173.200, 0.330	173.200, 0.404	173.200, 0.400	173.200, 0.272	173.200, 0.326	173.200, 0.402	173.200, 0.365	173.200, 0.276	173.200, 0.309	173.200, 0.376	173.200, 0.369	173.200, 0.799	173.200, 0.698	173.200, 0.827
868	173.400, 0.285	173.400, 0.329	173.400, 0.404	173.400, 0.400	173.400, 0.272	173.400, 0.325	173.400, 0.402	173.400, 0.365	173.400, 0.276	173.400, 0.309	173.400, 0.376	173.400, 0.369	173.400, 0.795	173.400, 0.694	173.400, 0.822
869	173.600, 0.285	173.600, 0.329	173.600, 0.404	173.600, 0.400	173.600, 0.272	173.600, 0.325	173.600, 0.402	173.600, 0.365	173.600, 0.275	173.600, 0.308	173.600, 0.376	173.600, 0.368	173.600, 0.790	173.600, 0.690	173.600, 0.816
870	173.800, 0.285	173.800, 0.329	173.800, 0.404	173.800, 0.400	173.800, 0.271	173.800, 0.325	173.800, 0.402	173.800, 0.365	173.800, 0.275	173.800, 0.308	173.800, 0.376	173.800, 0.368	173.800, 0.786	173.800, 0.686	173.800, 0.811
871	174.000, 0.285	174.000, 0.329	174.000, 0.404	174.000, 0.399	174.000, 0.271	174.000, 0.324	174.000, 0.402	174.000, 0.365	174.000, 0.275	174.000, 0.308	174.000, 0.376	174.000, 0.368	174.000, 0.782	174.000, 0.682	174.000, 0.806
872	174.200, 0.285	174.200, 0.328	174.200, 0.404	174.200, 0.399	174.200, 0.271	174.200, 0.324	174.200, 0.402	174.200, 0.364	174.200, 0.275	174.200, 0.308	174.200, 0.376	174.200, 0.368	174.200, 0.777	174.200, 0.678	174.200, 0.801
873	174.400, 0.285	174.400, 0.328	174.400, 0.404	174.400, 0.398	174.400, 0.270	174.400, 0.323	174.400, 0.402	174.400, 0.364	174.400, 0.275	174.400, 0.308	174.400, 0.376	174.400, 0.368	174.400, 0.773	174.400, 0.674	174.400, 0.796
874	174.600, 0.285	174.600, 0.328	174.600, 0.404	174.600, 0.398	174.600, 0.270	174.600, 0.323	174.600, 0.402	174.600, 0.364	174.600, 0.275	174.600, 0.307	174.600, 0.376	174.600, 0.368	174.600, 0.769	174.600, 0.670	174.600, 0.791
875	174.800, 0.285	174.800, 0.328	174.800, 0.404	174.800, 0.397	174.800, 0.269	174.800, 0.322	174.800, 0.401	174.800, 0.363	174.800, 0.275	174.800, 0.307	174.800, 0.375	174.800, 0.368	174.800, 0.765	174.800, 0.667	174.800, 0.787
876	175.000, 0.285	175.000, 0.328	175.000, 0.403	175.000, 0.397	175.000, 0.269	175.000, 0.322	175.000, 0.401	175.000, 0.363	175.000, 0.275	175.000, 0.306	175.000, 0.374	175.000, 0.368	175.000, 0.761	175.000, 0.663	175.000, 0.782
877	175.200, 0.285	175.200, 0.327	175.200, 0.403	175.200, 0.397	175.200, 0.269	175.200, 0.322	175.200, 0.401	175.200, 0.363	175.200, 0.275	175.200, 0.306	175.200, 0.374	175.200, 0.367	175.200, 0.756	175.200, 0.659	175.200, 0.777
878	175.400, 0.284	175.400, 0.328	175.400, 0.403	175.400, 0.396	175.400, 0.269	175.400, 0.322	175.400, 0.400	175.400, 0.363	175.400, 0.275	175.400, 0.306	175.400, 0.373	175.400, 0.367	175.400, 0.752	175.400, 0.655	175.400, 0.772
879	175.600, 0.284	175.600, 0.328	175.600, 0.403	175.600, 0.396	175.600, 0.269	175.600, 0.322	175.600, 0.400	175.600, 0.362	175.600, 0.275	175.600, 0.306	175.600, 0.372	175.600, 0.367	175.600, 0.748	175.600, 0.652	175.600, 0.767
880	175.800, 0.284	175.800, 0.328	175.800, 0.402	175.800, 0.396	175.800, 0.268	175.800, 0.322	175.800, 0.400	175.800, 0.362	175.800, 0.275	175.800, 0.306	175.800, 0.372	175.800, 0.366	175.800, 0.744	175.800, 0.649	175.800, 0.763
881	176.000, 0.284	176.000, 0.328	176.000, 0.402	176.000, 0.395	176.000, 0.268	176.000, 0.322	176.000, 0.400	176.000, 0.362	176.000, 0.274	176.000, 0.306	176.000, 0.371	176.000, 0.366	176.000, 0.739	176.000, 0.645	176.000, 0.758
882	176.200, 0.284	176.200, 0.328	176.200, 0.401	176.200, 0.395	176.200, 0.268	176.200, 0.322	176.200, 0.400	176.200, 0.362	176.200, 0.274	176.200, 0.306	176.200, 0.371	176.200, 0.366	176.200, 0.735	176.200, 0.642	176.200, 0.754
883	176.400, 0.283	176.400, 0.327	176.400, 0.401	176.400, 0.395	176.400, 0.268	176.400, 0.322	176.400, 0.400	176.400, 0.362	176.400, 0.274	176.400, 0.306	176.400, 0.370	176.400, 0.366	176.400, 0.730	176.400, 0.638	176.400, 0.749
884	176.600, 0.283	176.600, 0.327	176.600, 0.400	176.600, 0.394	176.600, 0.268	176.600, 0.322	176.600, 0.400	176.600, 0.362	176.600, 0.274	176.600, 0.306	176.600, 0.370	176.600, 0.366	176.600, 0.726	176.600, 0.635	176.600, 0.745
885	176.800, 0.283	176.800, 0.327	176.800, 0.400	176.800, 0.394	176.800, 0.268	176.800, 0.322	176.800, 0.400	176.800, 0.362	176.800, 0.274	176.800, 0.306	176.800, 0.370	176.800, 0.366	176.800, 0.721	176.800, 0.631	176.800, 0.740
886	177.000, 0.283	177.000, 0.327	177.000, 0.399	177.000, 0.394	177.000, 0.268	177.000, 0.321	177.000, 0.400	177.000, 0.362	177.000, 0.273	177.000, 0.306	177.000, 0.370	177.000, 0.366	177.000, 0.717	177.000, 0.628	177.000, 0.736
887	177.200, 0.283	177.200, 0.327	177.200, 0.399	177.200, 0.394	177.200, 0.269	177.200, 0.321	177.200, 0.400	177.200, 0.362	177.200, 0.273	177.200, 0.306	177.200, 0.369	177.200, 0.366	177.200, 0.713	177.200, 0.624	177.200, 0.731
888	177.400, 0.283	177.400, 0.326	177.400, 0.399	177.400, 0.394	177.400, 0.269	177.400, 0.320	177.400, 0.400	177.400, 0.361	177.400, 0.272	177.400, 0.306	177.400, 0.369	177.400, 0.366	177.400, 0.709	177.400, 0.621	177.400, 0.727
889	177.600, 0.283	177.600, 0.326	177.600, 0.398	177.600, 0.394	177.600, 0.268	177.600, 0.320	177.600, 0.399	177.600, 0.361	177.600, 0.272	177.600, 0.305	177.600, 0.369	177.600, 0.365	177.600, 0.705	177.600, 0.617	177.600, 0.722
890	177.800, 0.283	177.800, 0.326	177.800, 0.398	177.800, 0.394	177.800, 0.268	177.800, 0.320	177.800, 0.399	177.800, 0.361	177.800, 0.272	177.800, 0.305	177.800, 0.369	177.800, 0.365	177.800, 0.702	177.800, 0.614	177.800, 0.718
891	178.000, 0.283	178.000, 0.325	178.000, 0.398	178.000, 0.393	178.000, 0.268	178.000, 0.319	178.000, 0.399	178.000, 0.361	178.000, 0.271	178.000, 0.305	178.000, 0.369	178.000, 0.365	178.000, 0.698	178.000, 0.611	178.000, 0.714
892	178.200, 0.282	178.200, 0.325	178.200, 0.397	178.200, 0.393	178.200, 0.268	178.200, 0.319	178.200, 0.399	178.200, 0.360	178.200, 0.271	178.200, 0.305	178.200, 0.369	178.200, 0.365	178.200, 0.694	178.200, 0.607	178.200, 0.709
893	178.400, 0.282	178.400, 0.325	178.400, 0.397	178.400, 0.393	178.400, 0.268	178.400, 0.319	178.400, 0.398	178.400, 0.360	178.400, 0.271	178.400, 0.305	178.400, 0.368	178.400, 0.365	178.400, 0.690	178.400, 0.604	178.400, 0.705
894	178.600, 0.282	178.600, 0.325	178.600, 0.397	178.600, 0.393	178.600, 0.268	178.600, 0.319	178.600, 0.398	178.600, 0.359	178.600, 0.271	178.600, 0.304	178.600, 0.368	178.600, 0.365	178.600, 0.687	178.600, 0.601	178.600, 0.701
895	178.800, 0.281	178.800, 0.325	178.800, 0.396	178.800, 0.393	178.800, 0.268	178.800, 0.319	178.800, 0.397	178.800, 0.359	178.800, 0.271	178.800, 0.304	178.800, 0.368	178.800, 0.364	178.800, 0.683	178.800, 0.598	178.800, 0.697
896	179.000, 0.281	179.000, 0.324	179.000, 0.396	179.000, 0.393	179.000, 0.267	179.000, 0.319	179.000, 0.397	179.000, 0.359	179.000, 0.271	179.000, 0.304	179.000, 0.367	179.000, 0.364	179.000, 0.679	179.000, 0.595	179.000, 0.692
897	179.200, 0.281	179.200, 0.324	179.200, 0.396	179.200, 0.393	179.200, 0.267	179.200, 0.319	179.200, 0.396	179.200, 0.359	179.200, 0.272	179.200, 0.304	179.200, 0.367	179.200, 0.363	179.200, 0.676	179.200, 0.592	179.200, 0.688
898	179.400, 0.281	179.400, 0.324	179.400, 0.396	179.400, 0.393	179.400, 0.267	179.400, 0.319	179.400, 0.396	179.400, 0.358	179.400, 0.272	179.400, 0.304	179.400, 0.367	179.400, 0.363	179.400, 0.672	179.400, 0.589	179.400, 0.684
899	179.600, 0.281	179.600, 0.323	179.600, 0.395	179.600, 0.392	179.600, 0.267	179.600, 0.319	179.600, 0.396	179.600, 0.358	179.600, 0.272	179.600, 0.303	179.600, 0.367	179.600, 0.363	179.600, 0.669	179.600, 0.586	179.600, 0.681
900	179.800, 0.281	179.800, 0.323	179.800, 0.395	179.800, 0.392	179.800, 0.266	179.800, 0.319	179.800, 0.396	179.800, 0.358	179.800, 0.272	179.800, 0.303	179.800, 0.366	179.800, 0.362	179.800, 0.665	179.800, 0.583	179.800, 0.677
901	180.000, 0.281	180.000, 0.322	180.000, 0.395	180.000, 0.392	180.000, 0.266	180.000, 0.319	180.000, 0.396	180.000, 0.358	180.000, 0.272	180.000, 0.303	180.000, 0.366	180.000, 0.362	180.000, 0.661	180.000, 0.581	180.000, 0.673
902	180.200, 0.281	180.200, 0.322	180.200, 0.394	180.200, 0.392	180.200, 0.266	180.200, 0.319	180.200, 0.396	180.200, 0.358	180.200, 0.271	180.200, 0.303	180.200, 0.366	180.200, 0.362	180.200, 0.657	180.200, 0.578	180.200, 0.670
903	180.400, 0.281	180.400, 0.321	180.400, 0.394	180.400, 0.391	180.400, 0.266	180.400, 0.319	180.400, 0.396	180.400, 0.358	180.400, 0.271	180.400, 0.303	180.400, 0.365	180.400, 0.361	180.400, 0.654	180.400, 0.575	180.400, 0.666
904	180.600, 0.281	180.600, 0.321	180.600, 0.394	180.600, 0.391	180.600, 0.266	180.600, 0.319	180.600, 0.396	180.600, 0.357	180.600, 0.271	180.600, 0.303	180.600, 0.365	180.600, 0.361	180.600, 0.650	180.600, 0.572	180.600, 0.662
905	180.800, 0.281	180.800, 0.321	180.800, 0.394	180.800, 0.391	180.800, 0.266	180.800, 0.319	180.800, 0.396	180.800, 0.357	180.800, 0.271	180.800, 0.303	180.800, 0.365	180.800, 0.361	180.800, 0.647	180.800, 0.570	180.800, 0.659
906	181.000, 0.281	181.000, 0.320	181.000, 0.394	181.000, 0.391	181.000, 0.266	181.000, 0.319	181.000, 0.396	181.000, 0.358	181.000, 0.270	181.000, 0.303	181.000, 0.365	181.000, 0.361	181.000, 0.643	181.000, 0.567	181.000, 0.655
907	181.200, 0.281	181.200, 0.320	181.200, 0.394	181.200, 0.391	181.200, 0.266	181.200, 0.319	181.200, 0.396	181.200, 0.358	181.200, 0.270	181.200, 0.303	181.200, 0.365	181.200, 0.360	181.200, 0.639	181.200, 0.564	181.200, 0.651
908	181.400, 0.281	181.400, 0.320	181.400, 0.394	181.400, 0.390	181.400, 0.266	181.400, 0.319	181.400, 0.396	181.400, 0.358	181.400, 0.269	181.400, 0.302	181.400, 0.365	181.400, 0.360	181.400, 0.636	181.400, 0.561	181.400, 0.648
909	181.600, 0.280	181.600, 0.320	181.600, 0.394	181.600, 0.390	181.600, 0.266	181.600, 0.318	181.600, 0.396	181.600, 0.358	181.600, 0.269	181.600, 0.302	181.600, 0.365	181.600, 0.360	181.600, 0.633	181.600, 0.558	181.600, 0.644
910	181.800, 0.280	181.800, 0.320	181.800, 0.394	181.800, 0.390	181.800, 0.266	181.800, 0.318	181.800, 0.396	181.800, 0.357	181.800, 0.268	181.800, 0.303	181.800, 0.365	181.800, 0.360	181.800, 0.630	181.800, 0.555	181.800, 0.640
911	182.000, 0.280	182.000, 0.320	182.000, 0.394	182.000, 0.390	182.000, 0.266	182.000, 0.318	182.000, 0.395	182.000, 0.357	182.000, 0.268	182.000, 0.303	182.000, 0.365	182.000, 0.360	182.000, 0.626	182.000, 0.552	182.000, 0.636
912	182.200, 0.280	182.200, 0.320	182.200, 0.394	182.200, 0.390	182.200, 0.266	182.200, 0.318	182.200, 0.395	182.200, 0.357	182.200, 0.268	182.200, 0.303	182.200, 0.365	182.200, 0.360	182.200, 0.623	182.200, 0.549	182.200, 0.632
913	182.400, 0.279	182.400, 0.321	182.400, 0.394	182.400, 0.390	182.400, 0.266	182.400, 0.318	182.400, 0.395	182.400, 0.357	182.400, 0.268	182.400, 0.303	182.400, 0.366	182.400, 0.359	182.400, 0.620	182.400, 0.546	182.400, 0.629
914	182.600, 0.279	182.600, 0.321	182.600, 0.394	182.600, 0.390	182.600, 0.266	182.600, 0.318	182.600, 0.395	182.600, 0.356	182.600, 0.268	182.600, 0.303	182.600, 0.366	182.600, 0.359	182.600, 0.617	182.600, 0.543	182.600, 0.625
915	182.800, 0.279	182.800, 0.321	182.800, 0.394	182.800, 0.390	182.800, 0.265	182.800, 0.317	182.800, 0.394	182.800, 0.356	182.800, 0.268	182.800, 0.303	182.800, 0.366	182.800, 0.359	182.800, 0.614	182.800, 0.540	182.800, 0.621
916	183.000, 0.279	183.000, 0.321	183.000, 0.394	183.000, 0.389	183.000, 0.265	183.000, 0.317	183.000, 0.394	183.000, 0.356	183.000, 0.267	183.000, 0.303	183.000, 0.366	183.000, 0.359	183.000, 0.611	183.000, 0.537	183.000, 0.617
917	183.200, 0.279	183.200, 0.320	183.200, 0.394	183.200, 0.389	183.200, 0.265	183.200, 0.317	183.200, 0.393	183.200, 0.356	183.200, 0.267	183.200, 0.303	183.200, 0.366	183.200, 0.359	183.200, 0.608	183.200, 0.535	183.200, 0.613
918	183.400, 0.279	183.400, 0.320	183.400, 0.394	183.400, 0.388	183.400, 0.265	183.400, 0.317	183.400, 0.393	183.400, 0.355	183.400, 0.267	183.400, 0.302	183.400, 0.365	183.400, 0.359	183.400, 0.605	183.400, 0.532	183.400, 0.610
919	183.600, 0.279	183.600, 0.320	183.600, 0.394	183.600, 0.388	183.600, 0.265	183.600, 0.317	183.600, 0.393	183.600, 0.355	183.600, 0.267	183.600, 0.302	183.600, 0.365	183.600, 0.358	183.600, 0.602	183.600, 0.530	183.600, 0.606
920	183.800, 0.279	183.800, 0.319	183.800, 0.394	183.800, 0.388	183.800, 0.265	183.800, 0.317	183.800, 0.393	183.800, 0.355	183.800, 0.267	183.800, 0.302	183.800, 0.365	183.800, 0.358	183.800, 0.599	183.800, 0.527	183.800, 0.603
921	184.000, 0.279	184.000, 0.319	184.000, 0.394	184.000, 0.388	184.000, 0.264	184.000, 0.317	184.000, 0.392	184.000, 0.354	184.000, 0.267	184.000, 0.302	184.000, 0.364	184.000, 0.358	184.000, 0.596	184.000, 0.524	184.000, 0.599
922	184.200, 0.279	184.200, 0.318	184.200, 0.394	184.200, 0.387	184.200, 0.264	184.200, 0.317	184.200, 0.392	184.200, 0.354	184.200, 0.267	184.200, 0.302	184.200, 0.364	184.200, 0.358	184.200, 0.593	184.200, 0.522	184.200, 0.596
923	184.400, 0.278	184.400, 0.318	184.400, 0.394	184.400, 0.387	184.400, 0.264	184.400, 0.317	184.400, 0.392	184.400, 0.354	184.400, 0.267	184.400, 0.301	184.400, 0.364	184.400, 0.358	184.400, 0.590	184.400, 0.519	184.400, 0.592
924	184.600, 0.278	184.600, 0.318	184.600, 0.394	184.600, 0.387	184.600, 0.264	184.600, 0.317	184.600, 0.392	184.600, 0.353	184.600, 0.267	184.600, 0.301	184.600, 0.364	184.600, 0.358	184.600, 0.587	184.600, 0.517	184.600, 0.589
925	184.800, 0.278	184.800, 0.317	184.800, 0.393	184.800, 0.387	184.800, 0.263	184.800, 0.317	184.800, 0.392	184.800, 0.353	184.800, 0.267	184.800, 0.301	184.800, 0.363	184.800, 0.358	184.800, 0.584	184.800, 0.514	184.800, 0.586
926	185.000, 0.278	185.000, 0.317	185.000, 0.393	185.000, 0.387	185.000, 0.263	185.000, 0.317	185.000, 0.392	185.000, 0.353	185.000, 0.267	185.000, 0.301	185.000, 0.363	185.000, 0.357	185.000, 0.581	185.000, 0.512	185.000, 0.582
927	185.200, 0.279	185.200, 0.316	185.200, 0.393	185.200, 0.386	185.200, 0.263	185.200, 0.317	185.200, 0.392	185.200, 0.353	185.200, 0.267	185.200, 0.301	185.200, 0.363	185.200, 0.357	185.200, 0.578	185.200, 0.510	185.200, 0.579
928	185.400, 0.279	185.400, 0.316	185.400, 0.393	185.400, 0.386	185.400, 0.263	185.400, 0.316	185.400, 0.392	185.400, 0.353	185.400, 0.267	185.400, 0.301	185.400, 0.362	185.400, 0.357	185.400, 0.575	185.400, 0.507	185.400, 0.576
929	185.600, 0.279	185.600, 0.315	185.600, 0.392	185.600, 0.386	185.600, 0.262	185.600, 0.316	185.600, 0.392	185.600, 0.353	185.600, 0.268	185.600, 0.301	185.600, 0.362	185.600, 0.357	185.600, 0.572	185.600, 0.505	185.600, 0.573
930	185.800, 0.279	185.800, 0.315	185.800, 0.392	185.800, 0.386	185.800, 0.262	185.800, 0.316	185.800, 0.392	185.800, 0.353	185.800, 0.268	185.800, 0.301	185.800, 0.362	185.800, 0.357	185.800, 0.569	185.800, 0.503	185.800, 0.570
931	186.000, 0.279	186.000, 0.314	186.000, 0.391	186.000, 0.386	186.000, 0.261	186.000, 0.316	186.000, 0.391	186.000, 0.352	186.000, 0.268	186.000, 0.301	186.000, 0.361	186.000, 0.357	186.000, 0.566	186.000, 0.500	186.000, 0.567
932	186.200, 0.279	186.200, 0.314	186.200, 0.391	186.200, 0.385	186.200, 0.261	186.200, 0.316	186.200, 0.391	186.200, 0.352	186.200, 0.268	186.200, 0.300	186.200, 0.361	186.200, 0.357	186.200, 0.563	186.200, 0.498	186.200, 0.564
933	186.400, 0.279	186.400, 0.314	186.400, 0.390	186.400, 0.385	186.400, 0.261	186.400, 0.316	186.400, 0.391	186.400, 0.352	186.400, 0.267	186.400, 0.300	186.400, 0.361	186.400, 0.357	186.400, 0.560	186.400, 0.495	186.400, 0.562
934	186.600, 0.278	186.600, 0.314	186.600, 0.389	186.600, 0.385	186.600, 0.261	186.600, 0.315	186.600, 0.391	186.600, 0.352	186.600, 0.267	186.600, 0.300	186.600, 0.361	186.600, 0.357	186.600, 0.557	186.600, 0.493	186.600, 0.559
935	186.800, 0.278	186.800, 0.315	186.800, 0.389	186.800, 0.385	186.800, 0.261	186.800, 0.315	186.800, 0.390	186.800, 0.353	186.800, 0.267	186.800, 0.300	186.800, 0.360	186.800, 0.356	186.800, 0.555	186.800, 0.491	186.800, 0.556
936	187.000, 0.278	187.000, 0.315	187.000, 0.388	187.000, 0.385	187.000, 0.261	187.000, 0.315	187.000, 0.390	187.000, 0.353	187.000, 0.266	187.000, 0.299	187.000, 0.360	187.000, 0.356	187.000, 0.552	187.000, 0.488	187.000, 0.553
937	187.200, 0.277	187.200, 0.315	187.200, 0.388	187.200, 0.385	187.200, 0.261	187.200, 0.314	187.200, 0.390	187.200, 0.353	187.200, 0.266	187.200, 0.299	187.200, 0.360	187.200, 0.356	187.200, 0.550	187.200, 0.486	187.200, 0.550
938	187.400, 0.277	187.400, 0.316	187.400, 0.388	187.400, 0.384	187.400, 0.261	187.400, 0.314	187.400, 0.390	187.400, 0.353	187.400, 0.265	187.400, 0.299	187.400, 0.361	187.400, 0.356	187.400, 0.547	187.400, 0.484	187.400, 0.547
939	187.600, 0.276	187.600, 0.316	187.600, 0.388	187.600, 0.384	187.600, 0.261	187.600, 0.314	187.600, 0.390	187.600, 0.353	187.600, 0.265	187.600, 0.298	187.600, 0.361	187.600, 0.356	187.600, 0.545	187.600, 0.482	187.600, 0.544
940	187.800, 0.276	187.800, 0.316	187.800, 0.388	187.800, 0.384	187.800, 0.261	187.800, 0.314	187.800, 0.390	187.800, 0.352	187.800, 0.265	187.800, 0.298	187.800, 0.361	187.800, 0.355	187.800, 0.542	187.800, 0.480	187.800, 0.541
941	188.000, 0.276	188.000, 0.317	188.000, 0.388	188.000, 0.384	188.000, 0.260	188.000, 0.314	188.000, 0.390	188.000, 0.352	188.000, 0.265	188.000, 0.298	188.000, 0.361	188.000, 0.355	188.000, 0.540	188.000, 0.477	188.000, 0.539
942	188.200, 0.275	188.200, 0.317	188.200, 0.388	188.200, 0.384	188.200, 0.261	188.200, 0.313	188.200, 0.389	188.200, 0.352	188.200, 0.265	188.200, 0.298	188.200, 0.361	188.200, 0.355	188.200, 0.537	188.200, 0.475	188.200, 0.536
943	188.400, 0.275	188.400, 0.317	188.400, 0.388	188.400, 0.383	188.400, 0.261	188.400, 0.313	188.400, 0.389	188.400, 0.352	188.400, 0.264	188.400, 0.298	188.400, 0.361	188.400, 0.354	188.400, 0.534	188.400, 0.472	188.400, 0.532
944	188.600, 0.275	188.600, 0.317	188.600, 0.389	188.600, 0.384	188.600, 0.261	188.600, 0.313	188.600, 0.389	188.600, 0.351	188.600, 0.265	188.600, 0.298	188.600, 0.361	188.600, 0.354	188.600, 0.532	188.600, 0.470	188.600, 0.529
945	188.800, 0.275	188.800, 0.317	188.800, 0.389	188.800, 0.384	188.800, 0.261	188.800, 0.313	188.800, 0.388	188.800, 0.351	188.800, 0.265	188.800, 0.298	188.800, 0.360	188.800, 0.354	188.800, 0.529	188.800, 0.468	188.800, 0.526
946	189.000, 0.275	189.000, 0.316	189.000, 0.389	189.000, 0.384	189.000, 0.262	189.000, 0.313	189.000, 0.388	189.000, 0.351	189.000, 0.265	189.000, 0.298	189.000, 0.360	189.000, 0.353	189.000, 0.526	189.000, 0.465	189.000, 0.523
947	189.200, 0.275	189.200, 0.316	189.200, 0.389	189.200, 0.384	189.200, 0.262	189.200, 0.313	189.200, 0.388	189.200, 0.351	189.200, 0.264	189.200, 0.298	189.200, 0.360	189.200, 0.353	189.200, 0.523	189.200, 0.463	189.200, 0.520
948	189.400, 0.275	189.400, 0.315	189.400, 0.389	189.400, 0.384	189.400, 0.262	189.400, 0.313	189.400, 0.388	189.400, 0.350	189.400, 0.265	189.400, 0.298	189.400, 0.360	189.400, 0.353	189.400, 0.521	189.400, 0.461	189.400, 0.517
949	189.600, 0.275	189.600, 0.315	189.600, 0.389	189.600, 0.383	189.600, 0.261	189.600, 0.313	189.600, 0.387	189.600, 0.350	189.600, 0.265	189.600, 0.298	189.600, 0.359	189.600, 0.353	189.600, 0.518	189.600, 0.459	189.600, 0.515
950	189.800, 0.275	189.800, 0.314	189.800, 0.389	189.800, 0.383	189.800, 0.261	189.800, 0.313	189.800, 0.387	189.800, 0.350	189.800, 0.264	189.800, 0.298	189.800, 0.359	189.800, 0.352	189.800, 0.515	189.800, 0.457	189.800, 0.512
951	190.000, 0.274	190.000, 0.314	190.000, 0.389	190.000, 0.383	190.000, 0.261	190.000, 0.313	190.000, 0.387	190.000, 0.349	190.000, 0.264	190.000, 0.298	190.000, 0.359	190.000, 0.352	190.000, 0.513	190.000, 0.455	190.000, 0.510
952	190.200, 0.274	190.200, 0.314	190.200, 0.388	190.200, 0.383	190.200, 0.260	190.200, 0.313	190.200, 0.387	190.200, 0.349	190.200, 0.264	190.200, 0.298	190.200, 0.358	190.200, 0.352	190.200, 0.510	190.200, 0.453	190.200, 0.508
953	190.400, 0.274	190.400, 0.314	190.400, 0.388	190.400, 0.383	190.400, 0.260	190.400, 0.313	190.400, 0.387	190.400, 0.349	190.400, 0.264	190.400, 0.297	190.400, 0.358	190.400, 0.352	190.400, 0.508	190.400, 0.451	190.400, 0.505
954	190.600, 0.274	190.600, 0.314	190.600, 0.388	190.600, 0.383	190.600, 0.260	190.600, 0.313	190.600, 0.387	190.600, 0.348	190.600, 0.264	190.600, 0.297	190.600, 0.358	190.600, 0.352	190.600, 0.506	190.600, 0.450	190.600, 0.503
955	190.800, 0.274	190.800, 0.314	190.800, 0.387	190.800, 0.383	190.800, 0.260	190.800, 0.312	190.800, 0.387	190.800, 0.348	190.800, 0.264	190.800, 0.297	190.800, 0.358	190.800, 0.352	190.800, 0.504	190.800, 0.448	190.800, 0.500
956	191.000, 0.274	191.000, 0.313	191.000, 0.387	191.000, 0.383	191.000, 0.260	191.000, 0.312	191.000, 0.387	191.000, 0.348	191.000, 0.263	191.000, 0.297	191.000, 0.358	191.000, 0.352	191.000, 0.502	191.000, 0.446	191.000, 0.498
957	191.200, 0.274	191.200, 0.313	191.200, 0.387	191.200, 0.383	191.200, 0.259	191.200, 0.312	191.200, 0.387	191.200, 0.348	191.200, 0.263	191.200, 0.296	191.200, 0.358	191.200, 0.352	191.200, 0.500	191.200, 0.444	191.200, 0.496
958	191.400, 0.273	191.400, 0.313	191.400, 0.386	191.400, 0.382	191.400, 0.259	191.400, 0.312	191.400, 0.387	191.400, 0.348	191.400, 0.263	191.400, 0.296	191.400, 0.358	191.400, 0.352	191.400, 0.498	191.400, 0.442	191.400, 0.493
959	191.600, 0.273	191.600, 0.313	191.600, 0.386	191.600, 0.382	191.600, 0.259	191.600, 0.312	191.600, 0.387	191.600, 0.348	191.600, 0.263	191.600, 0.296	191.600, 0.358	191.600, 0.352	191.600, 0.496	191.600, 0.440	191.600, 0.491
960	191.800, 0.273	191.800, 0.312	191.800, 0.386	191.800, 0.382	191.800, 0.258	191.800, 0.312	191.800, 0.387	191.800, 0.348	191.800, 0.263	191.800, 0.296	191.800, 0.358	191.800, 0.353	191.800, 0.493	191.800, 0.439	191.800, 0.488
961	192.000, 0.273	192.000, 0.312	192.000, 0.386	192.000, 0.381	192.000, 0.258	192.000, 0.312	192.000, 0.387	192.000, 0.348	192.000, 0.262	192.000, 0.296	192.000, 0.358	192.000, 0.353	192.000, 0.491	192.000, 0.437	192.000, 0.485
962	192.200, 0.272	192.200, 0.312	192.200, 0.386	192.200, 0.381	192.200, 0.258	192.200, 0.312	192.200, 0.387	192.200, 0.348	192.200, 0.262	192.200, 0.296	192.200, 0.358	192.200, 0.353	192.200, 0.489	192.200, 0.435	192.200, 0.482
963	192.400, 0.272	192.400, 0.312	192.400, 0.385	192.400, 0.381	192.400, 0.258	192.400, 0.312	192.400, 0.387	192.400, 0.348	192.400, 0.262	192.400, 0.296	192.400, 0.358	192.400, 0.353	192.400, 0.487	192.400, 0.433	192.400, 0.479
964	192.600, 0.272	192.600, 0.312	192.600, 0.385	192.600, 0.381	192.600, 0.258	192.600, 0.311	192.600, 0.386	192.600, 0.348	192.600, 0.262	192.600, 0.295	192.600, 0.358	192.600, 0.353	192.600, 0.484	192.600, 0.431	192.600, 0.475
965	192.800, 0.272	192.800, 0.312	192.800, 0.385	192.800, 0.381	192.800, 0.258	192.800, 0.311	192.800, 0.386	192.800, 0.349	192.800, 0.262	192.800, 0.295	192.800, 0.358	192.800, 0.353	192.800, 0.482	192.800, 0.429	192.800, 0.473
966	193.000, 0.272	193.000, 0.312	193.000, 0.384	193.000, 0.381	193.000, 0.258	193.000, 0.311	193.000, 0.386	193.000, 0.349	193.000, 0.262	193.000, 0.296	193.000, 0.358	193.000, 0.353	193.000, 0.480	193.000, 0.427	193.000, 0.470
967	193.200, 0.272	193.200, 0.312	193.200, 0.384	193.200, 0.381	193.200, 0.258	193.200, 0.310	193.200, 0.385	193.200, 0.349	193.200, 0.262	193.200, 0.295	193.200, 0.357	193.200, 0.353	193.200, 0.477	193.200, 0.426	193.200, 0.467
968	193.400, 0.272	193.400, 0.312	193.400, 0.384	193.400, 0.381	193.400, 0.258	193.400, 0.310	193.400, 0.385	193.400, 0.349	193.400, 0.261	193.400, 0.295	193.400, 0.357	193.400, 0.353	193.400, 0.475	193.400, 0.424	193.400, 0.465
969	193.600, 0.272	193.600, 0.312	193.600, 0.384	193.600, 0.380	193.600, 0.257	193.600, 0.310	193.600, 0.385	193.600, 0.348	193.600, 0.261	193.600, 0.295	193.600, 0.357	193.600, 0.352	193.600, 0.473	193.600, 0.422	193.600, 0.463
970	193.800, 0.272	193.800, 0.312	193.800, 0.384	193.800, 0.380	193.800, 0.257	193.800, 0.310	193.800, 0.385	193.800, 0.348	193.800, 0.261	193.800, 0.295	193.800, 0.356	193.800, 0.352	193.800, 0.470	193.800, 0.420	193.800, 0.461
971	194.000, 0.271	194.000, 0.312	194.000, 0.384	194.000, 0.380	194.000, 0.257	194.000, 0.310	194.000, 0.385	194.000, 0.348	194.000, 0.261	194.000, 0.295	194.000, 0.356	194.000, 0.352	194.000, 0.468	194.000, 0.418	194.000, 0.459
972	194.200, 0.271	194.200, 0.311	194.200, 0.384	194.200, 0.380	194.200, 0.257	194.200, 0.310	194.200, 0.385	194.200, 0.347	194.200, 0.261	194.200, 0.294	194.200, 0.356	194.200, 0.351	194.200, 0.466	194.200, 0.416	194.200, 0.457
973	194.400, 0.271	194.400, 0.311	194.400, 0.384	194.400, 0.380	194.400, 0.257	194.400, 0.310	194.400, 0.385	194.400, 0.347	194.400, 0.261	194.400, 0.294	194.400, 0.356	194.400, 0.351	194.400, 0.464	194.400, 0.414	194.400, 0.455
974	194.600, 0.271	194.600, 0.311	194.600, 0.384	194.600, 0.379	194.600, 0.256	194.600, 0.309	194.600, 0.385	194.600, 0.347	194.600, 0.261	194.600, 0.294	194.600, 0.355	194.600, 0.351	194.600, 0.462	194.600, 0.413	194.600, 0.453
975	194.800, 0.271	194.800, 0.311	194.800, 0.384	194.800, 0.379	194.800, 0.256	194.800, 0.309	194.800, 0.385	194.800, 0.346	194.800, 0.261	194.800, 0.294	194.800, 0.355	194.800, 0.351	194.800, 0.460	194.800, 0.411	194.800, 0.451
976	195.000, 0.271	195.000, 0.310	195.000, 0.383	195.000, 0.379	195.000, 0.256	195.000, 0.309	195.000, 0.385	195.000, 0.346	195.000, 0.261	195.000, 0.294	195.000, 0.355	195.000, 0.351	195.000, 0.459	195.000, 0.409	195.000, 0.450
977	195.200, 0.270	195.200, 0.310	195.200, 0.383	195.200, 0.379	195.200, 0.256	195.200, 0.309	195.200, 0.385	195.200, 0.346	195.200, 0.261	195.200, 0.294	195.200, 0.354	195.200, 0.351	195.200, 0.457	195.200, 0.408	195.200, 0.448
978	195.400, 0.270	195.400, 0.310	195.400, 0.383	195.400, 0.379	195.400, 0.256	195.400, 0.309	195.400, 0.384	195.400, 0.346	195.400, 0.261	195.400, 0.294	195.400, 0.354	195.400, 0.351	195.400, 0.455	195.400, 0.406	195.400, 0.446
979	195.600, 0.270	195.600, 0.310	195.600, 0.383	195.600, 0.379	195.600, 0.257	195.600, 0.309	195.600, 0.384	195.600, 0.345	195.600, 0.260	195.600, 0.294	195.600, 0.354	195.600, 0.351	195.600, 0.453	195.600, 0.404	195.600, 0.443
980	195.800, 0.270	195.800, 0.310	195.800, 0.383	195.800, 0.379	195.800, 0.256	195.800, 0.309	195.800, 0.384	195.800, 0.345	195.800, 0.261	195.800, 0.294	195.800, 0.354	195.800, 0.351	195.800, 0.451	195.800, 0.403	195.800, 0.441
981	196.000, 0.270	196.000, 0.310	196.000, 0.383	196.000, 0.378	196.000, 0.257	196.000, 0.309	196.000, 0.384	196.000, 0.345	196.000, 0.261	196.000, 0.294	196.000, 0.354	196.000, 0.350	196.000, 0.449	196.000, 0.401	196.000, 0.439
982	196.200, 0.269	196.200, 0.310	196.200, 0.383	196.200, 0.378	196.200, 0.257	196.200, 0.308	196.200, 0.384	196.200, 0.345	196.200, 0.261	196.200, 0.294	196.200, 0.354	196.200, 0.350	196.200, 0.447	196.200, 0.399	196.200, 0.437
983	196.400, 0.269	196.400, 0.310	196.400, 0.382	196.400, 0.378	196.400, 0.257	196.400, 0.308	196.400, 0.383	196.400, 0.345	196.400, 0.261	196.400, 0.294	196.400, 0.353	196.400, 0.350	196.400, 0.445	196.400, 0.398	196.400, 0.435
984	196.600, 0.269	196.600, 0.310	196.600, 0.382	196.600, 0.378	196.600, 0.256	196.600, 0.308	196.600, 0.383	196.600, 0.345	196.600, 0.261	196.600, 0.294	196.600, 0.354	196.600, 0.350	196.600, 0.444	196.600, 0.396	196.600, 0.433
985	196.800, 0.269	196.800, 0.310	196.800, 0.382	196.800, 0.377	196.800, 0.256	196.800, 0.307	196.800, 0.383	196.800, 0.345	196.800, 0.261	196.800, 0.294	196.800, 0.354	196.800, 0.349	196.800, 0.442	196.800, 0.395	196.800, 0.431
986	197.000, 0.269	197.000, 0.309	197.000, 0.382	197.000, 0.377	197.000, 0.256	197.000, 0.307	197.000, 0.382	197.000, 0.345	197.000, 0.261	197.000, 0.294	197.000, 0.354	197.000, 0.349	197.000, 0.440	197.000, 0.393	197.000, 0.429
987	197.200, 0.269	197.200, 0.309	197.200, 0.382	197.200, 0.377	197.200, 0.256	197.200, 0.307	197.200, 0.382	197.200, 0.345	197.200, 0.261	197.200, 0.294	197.200, 0.354	197.200, 0.349	197.200, 0.439	197.200, 0.392	197.200, 0.426
988	197.400, 0.269	197.400, 0.309	197.400, 0.381	197.400, 0.377	197.400, 0.256	197.400, 0.307	197.400, 0.382	197.400, 0.344	197.400, 0.261	197.400, 0.294	197.400, 0.353	197.400, 0.348	197.400, 0.437	197.400, 0.390	197.400, 0.424
989	197.600, 0.269	197.600, 0.309	197.600, 0.381	197.600, 0.377	197.600, 0.255	197.600, 0.307	197.600, 0.381	197.600, 0.344	197.600, 0.260	197.600, 0.294	197.600, 0.353	197.600, 0.348	197.600, 0.435	197.600, 0.388	197.600, 0.422
990	197.800, 0.269	197.800, 0.309	197.800, 0.381	197.800, 0.377	197.800, 0.255	197.800, 0.307	197.800, 0.381	197.800, 0.344	197.800, 0.260	197.800, 0.294	197.800, 0.353	197.800, 0.347	197.800, 0.433	197.800, 0.387	197.800, 0.420
991	198.000, 0.269	198.000, 0.309	198.000, 0.381	198.000, 0.376	198.000, 0.255	198.000, 0.307	198.000, 0.381	198.000, 0.343	198.000, 0.260	198.000, 0.294	198.000, 0.353	198.000, 0.347	198.000, 0.431	198.000, 0.385	198.000, 0.418
992	198.200, 0.269	198.200, 0.308	198.200, 0.381	198.200, 0.376	198.200, 0.255	198.200, 0.307	198.200, 0.381	198.200, 0.343	198.200, 0.260	198.200, 0.294	198.200, 0.353	198.200, 0.346	198.200, 0.429	198.200, 0.383	198.200, 0.416
993	198.400, 0.269	198.400, 0.308	198.400, 0.381	198.400, 0.376	198.400, 0.255	198.400, 0.307	198.400, 0.381	198.400, 0.343	198.400, 0.259	198.400, 0.294	198.400, 0.353	198.400, 0.346	198.400, 0.427	198.400, 0.382	198.400, 0.414
994	198.600, 0.269	198.600, 0.308	198.600, 0.381	198.600, 0.376	198.600, 0.254	198.600, 0.307	198.600, 0.381	198.600, 0.343	198.600, 0.259	198.600, 0.294	198.600, 0.353	198.600, 0.346	198.600, 0.425	198.600, 0.381	198.600, 0.412
995	198.800, 0.269	198.800, 0.308	198.800, 0.381	198.800, 0.376	198.800, 0.254	198.800, 0.307	198.800, 0.381	198.800, 0.342	198.800, 0.259	198.800, 0.294	198.800, 0.353	198.800, 0.345	198.800, 0.423	198.800, 0.379	198.800, 0.410
996	199.000, 0.269	199.000, 0.308	199.000, 0.380	199.000, 0.376	199.000, 0.254	199.000, 0.307	199.000, 0.380	199.000, 0.342	199.000, 0.259	199.000, 0.294	199.000, 0.353	199.000, 0.345	199.000, 0.421	199.000, 0.378	199.000, 0.408
997	199.200, 0.269	199.200, 0.309	199.200, 0.380	199.200, 0.376	199.200, 0.254	199.200, 0.307	199.200, 0.380	199.200, 0.342	199.200, 0.259	199.200, 0.294	199.200, 0.353	199.200, 0.344	199.200, 0.419	199.200, 0.376	199.200, 0.406
998	199.400, 0.269	199.400, 0.309	199.400, 0.380	199.400, 0.376	199.400, 0.254	199.400, 0.307	199.400, 0.380	199.400, 0.342	199.400, 0.259	199.400, 0.294	199.400, 0.354	199.400, 0.344	199.400, 0.417	199.400, 0.375	199.400, 0.404
999	199.600, 0.269	199.600, 0.309	199.600, 0.380	199.600, 0.376	199.600, 0.254	199.600, 0.307	199.600, 0.379	199.600, 0.341	199.600, 0.259	199.600, 0.294	199.600, 0.353	199.600, 0.344	199.600, 0.415	199.600, 0.374	199.600, 0.403
1000	199.800, 0.268	199.800, 0.309	199.800, 0.380	199.800, 0.376	199.800, 0.254	199.800, 0.307	199.800, 0.379	199.800, 0.341	199.800, 0.259	199.800, 0.293	199.800, 0.353	199.800, 0.344	199.800, 0.413	199.800, 0.373	199.800, 0.401
1001	200.000, 0.268	200.000, 0.308	200.000, 0.380	200.000, 0.376	200.000, 0.254	200.000, 0.306	200.000, 0.379	200.000, 0.341	200.000, 0.258	200.000, 0.293	200.000, 0.353	200.000, 0.344	200.000, 0.412	200.000, 0.371	200.000, 0.399
1002	200.200, 0.267	200.200, 0.308	200.200, 0.380	200.200, 0.376	200.200, 0.254	200.200, 0.306	200.200, 0.379	200.200, 0.341	200.200, 0.258	200.200, 0.293	200.200, 0.353	200.200, 0.344	200.200, 0.410	200.200, 0.370	200.200, 0.398
1003	200.400, 0.267	200.400, 0.308	200.400, 0.380	200.400, 0.376	200.400, 0.254	200.400, 0.306	200.400, 0.379	200.400, 0.340	200.400, 0.258	200.400, 0.293	200.400, 0.353	200.400, 0.344	200.400, 0.409	200.400, 0.369	200.400, 0.396
1004	200.600, 0.267	200.600, 0.308	200.600, 0.379	200.600, 0.376	200.600, 0.254	200.600, 0.305	200.600, 0.379	200.600, 0.340	200.600, 0.258	200.600, 0.293	200.600, 0.353	200.600, 0.345	200.600, 0.408	200.600, 0.368	200.600, 0.394
1005	200.800, 0.267	200.800, 0.308	200.800, 0.379	200.800, 0.375	200.800, 0.254	200.800, 0.305	200.800, 0.378	200.800, 0.340	200.800, 0.258	200.800, 0.293	200.800, 0.353	200.800, 0.345	200.800, 0.406	200.800, 0.367	200.800, 0.392
1006	201.000, 0.267	201.000, 0.307	201.000, 0.379	201.000, 0.375	201.000, 0.254	201.000, 0.304	201.000, 0.378	201.000, 0.340	201.000, 0.258	201.000, 0.292	201.000, 0.352	201.000, 0.345	201.000, 0.405	201.000, 0.366	201.000, 0.390
1007	201.200, 0.267	201.200, 0.307	201.200, 0.378	201.200, 0.375	201.200, 0.253	201.200, 0.304	201.200, 0.378	201.200, 0.340	201.200, 0.257	201.200, 0.292	201.200, 0.352	201.200, 0.345	201.200, 0.403	201.200, 0.365	201.200, 0.388
1008	201.400, 0.267	201.400, 0.307	201.400, 0.378	201.400, 0.375	201.400, 0.253	201.400, 0.303	201.400, 0.378	201.400, 0.340	201.400, 0.257	201.400, 0.292	201.400, 0.351	201.400, 0.345	201.400, 0.402	201.400, 0.363	201.400, 0.387
1009	201.600, 0.267	201.600, 0.307	201.600, 0.378	201.600, 0.375	201.600, 0.253	201.600, 0.303	201.600, 0.378	201.600, 0.340	201.600, 0.257	201.600, 0.291	201.600, 0.351	201.600, 0.345	201.600, 0.400	201.600, 0.362	201.600, 0.385
1010	201.800, 0.267	201.800, 0.306	201.800, 0.377	201.800, 0.374	201.800, 0.253	201.800, 0.303	201.800, 0.378	201.800, 0.340	201.800, 0.257	201.800, 0.291	201.800, 0.351	201.800, 0.345	201.800, 0.399	201.800, 0.361	201.800, 0.384
1011	202.000, 0.267	202.000, 0.306	202.000, 0.377	202.000, 0.374	202.000, 0.253	202.000, 0.303	202.000, 0.379	202.000, 0.340	202.000, 0.257	202.000, 0.291	202.000, 0.351	202.000, 0.345	202.000, 0.397	202.000, 0.359	202.000, 0.382
1012	202.200, 0.267	202.200, 0.306	202.200, 0.377	202.200, 0.374	202.200, 0.253	202.200, 0.303	202.200, 0.379	202.200, 0.340	202.200, 0.256	202.200, 0.291	202.200, 0.351	202.200, 0.344	202.200, 0.395	202.200, 0.358	202.200, 0.381
1013	202.400, 0.267	202.400, 0.306	202.400, 0.377	202.400, 0.374	202.400, 0.253	202.400, 0.304	202.400, 0.379	202.400, 0.340	202.400, 0.256	202.400, 0.290	202.400, 0.351	202.400, 0.344	202.400, 0.394	202.400, 0.357	202.400, 0.379
1014	202.600, 0.267	202.600, 0.306	202.600, 0.377	202.600, 0.373	202.600, 0.253	202.600, 0.304	202.600, 0.379	202.600, 0.340	202.600, 0.256	202.600, 0.290	202.600, 0.351	202.600, 0.344	202.600, 0.392	202.600, 0.355	202.600, 0.378
1015	202.800, 0.267	202.800, 0.306	202.800, 0.377	202.800, 0.373	202.800, 0.253	202.800, 0.304	202.800, 0.379	202.800, 0.339	202.800, 0.256	202.800, 0.290	202.800, 0.351	202.800, 0.343	202.800, 0.390	202.800, 0.354	202.800, 0.376
1016	203.000, 0.268	203.000, 0.306	203.000, 0.377	203.000, 0.373	203.000, 0.253	203.000, 0.305	203.000, 0.379	203.000, 0.339	203.000, 0.256	203.000, 0.289	203.000, 0.351	203.000, 0.343	203.000, 0.389	203.000, 0.352	203.000, 0.374
1017	203.200, 0.267	203.200, 0.306	203.200, 0.377	203.200, 0.373	203.200, 0.253	203.200, 0.305	203.200, 0.380	203.200, 0.339	203.200, 0.256	203.200, 0.289	203.200, 0.351	203.200, 0.343	203.200, 0.387	203.200, 0.351	203.200, 0.373
1018	203.400, 0.267	203.400, 0.306	203.400, 0.376	203.400, 0.373	203.400, 0.253	203.400, 0.305	203.400, 0.380	203.400, 0.338	203.400, 0.256	203.400, 0.288	203.400, 0.351	203.400, 0.343	203.400, 0.386	203.400, 0.350	203.400, 0.371
1019	203.600, 0.267	203.600, 0.306	203.600, 0.376	203.600, 0.373	203.600, 0.253	203.600, 0.306	203.600, 0.380	203.600, 0.338	203.600, 0.256	203.600, 0.288	203.600, 0.351	203.600, 0.343	203.600, 0.384	203.600, 0.348	203.600, 0.370
1020	203.800, 0.267	203.800, 0.306	203.800, 0.376	203.800, 0.373	203.800, 0.253	203.800, 0.306	203.800, 0.380	203.800, 0.338	203.800, 0.256	203.800, 0.288	203.800, 0.351	203.800, 0.343	203.800, 0.383	203.800, 0.347	203.800, 0.368
1021	204.000, 0.266	204.000, 0.306	204.000, 0.376	204.000, 0.373	204.000, 0.253	204.000, 0.306	204.000, 0.380	204.000, 0.338	204.000, 0.256	204.000, 0.289	204.000, 0.351	204.000, 0.342	204.000, 0.381	204.000, 0.346	204.000, 0.367
1022	204.200, 0.266	204.200, 0.306	204.200, 0.376	204.200, 0.373	204.200, 0.253	204.200, 0.306	204.200, 0.380	204.200, 0.337	204.200, 0.256	204.200, 0.289	204.200, 0.351	204.200, 0.342	204.200, 0.380	204.200, 0.345	204.200, 0.365
1023	204.400, 0.266	204.400, 0.306	204.400, 0.376	204.400, 0.373	204.400, 0.252	204.400, 0.306	204.400, 0.380	204.400, 0.337	204.400, 0.256	204.400, 0.289	204.400, 0.351	204.400, 0.342	204.400, 0.378	204.400, 0.344	204.400, 0.364
1024	204.600, 0.266	204.600, 0.306	204.600, 0.376	204.600, 0.373	204.600, 0.252	204.600, 0.306	204.600, 0.379	204.600, 0.337	204.600, 0.256	204.600, 0.289	204.600, 0.351	204.600, 0.343	204.600, 0.377	204.600, 0.343	204.600, 0.362
1025	204.800, 0.266	204.800, 0.306	204.800, 0.376	204.800, 0.373	204.800, 0.252	204.800, 0.305	204.800, 0.379	204.800, 0.337	204.800, 0.256	204.800, 0.289	204.800, 0.351	204.800, 0.343	204.800, 0.375	204.800, 0.341	204.800, 0.360
1026	205.000, 0.266	205.000, 0.305	205.000, 0.376	205.000, 0.373	205.000, 0.251	205.000, 0.305	205.000, 0.379	205.000, 0.337	205.000, 0.256	205.000, 0.289	205.000, 0.350	205.000, 0.343	205.000, 0.374	205.000, 0.340	205.000, 0.359
1027	205.200, 0.266	205.200, 0.305	205.200, 0.376	205.200, 0.373	205.200, 0.251	205.200, 0.304	205.200, 0.378	205.200, 0.338	205.200, 0.256	205.200, 0.289	205.200, 0.350	205.200, 0.343	205.200, 0.372	205.200, 0.339	205.200, 0.357
1028	205.400, 0.265	205.400, 0.304	205.400, 0.375	205.400, 0.373	205.400, 0.251	205.400, 0.304	205.400, 0.378	205.400, 0.338	205.400, 0.255	205.400, 0.289	205.400, 0.350	205.400, 0.343	205.400, 0.371	205.400, 0.338	205.400, 0.356
1029	205.600, 0.265	205.600, 0.304	205.600, 0.375	205.600, 0.372	205.600, 0.250	205.600, 0.304	205.600, 0.378	205.600, 0.338	205.600, 0.255	205.600, 0.289	205.600, 0.350	205.600, 0.342	205.600, 0.370	205.600, 0.337	205.600, 0.355
1030	205.800, 0.265	205.800, 0.304	205.800, 0.375	205.800, 0.372	205.800, 0.250	205.800, 0.303	205.800, 0.378	205.800, 0.338	205.800, 0.255	205.800, 0.289	205.800, 0.350	205.800, 0.342	205.800, 0.369	205.800, 0.336	205.800, 0.354
1031	206.000, 0.265	206.000, 0.304	206.000, 0.375	206.000, 0.372	206.000, 0.250	206.000, 0.303	206.000, 0.377	206.000, 0.338	206.000, 0.255	206.000, 0.289	206.000, 0.350	206.000, 0.342	206.000, 0.367	206.000, 0.336	206.000, 0.352
1032	206.200, 0.265	206.200, 0.304	206.200, 0.375	206.200, 0.371	206.200, 0.250	206.200, 0.303	206.200, 0.377	206.200, 0.338	206.200, 0.254	206.200, 0.290	206.200, 0.350	206.200, 0.342	206.200, 0.366	206.200, 0.335	206.200, 0.351
1033	206.400, 0.265	206.400, 0.304	206.400, 0.375	206.400, 0.371	206.400, 0.251	206.400, 0.303	206.400, 0.377	206.400, 0.338	206.400, 0.254	206.400, 0.290	206.400, 0.350	206.400, 0.342	206.400, 0.365	206.400, 0.334	206.400, 0.349
1034	206.600, 0.265	206.600, 0.304	206.600, 0.375	206.600, 0.371	206.600, 0.251	206.600, 0.303	206.600, 0.376	206.600, 0.338	206.600, 0.254	206.600, 0.290	206.600, 0.350	206.600, 0.341	206.600, 0.364	206.600, 0.333	206.600, 0.347
1035	206.800, 0.265	206.800, 0.304	206.800, 0.375	206.800, 0.370	206.800, 0.251	206.800, 0.303	206.800, 0.376	206.800, 0.338	206.800, 0.254	206.800, 0.289	206.800, 0.349	206.800, 0.341	206.800, 0.362	206.800, 0.332	206.800, 0.346
1036	207.000, 0.265	207.000, 0.304	207.000, 0.375	207.000, 0.370	207.000, 0.251	207.000, 0.303	207.000, 0.376	207.000, 0.338	207.000, 0.253	207.000, 0.289	207.000, 0.349	207.000, 0.341	207.000, 0.361	207.000, 0.331	207.000, 0.344
1037	207.200, 0.265	207.200, 0.304	207.200, 0.375	207.200, 0.370	207.200, 0.251	207.200, 0.303	207.200, 0.376	207.200, 0.338	207.200, 0.253	207.200, 0.289	207.200, 0.349	207.200, 0.340	207.200, 0.360	207.200, 0.330	207.200, 0.342
1038	207.400, 0.265	207.400, 0.304	207.400, 0.375	207.400, 0.370	207.400, 0.251	207.400, 0.303	207.400, 0.377	207.400, 0.338	207.400, 0.253	207.400, 0.289	207.400, 0.348	207.400, 0.340	207.400, 0.359	207.400, 0.329	207.400, 0.341
1039	207.600, 0.265	207.600, 0.304	207.600, 0.375	207.600, 0.370	207.600, 0.251	207.600, 0.303	207.600, 0.377	207.600, 0.337	207.600, 0.253	207.600, 0.289	207.600, 0.348	207.600, 0.340	207.600, 0.357	207.600, 0.328	207.600, 0.339
1040	207.800, 0.265	207.800, 0.304	207.800, 0.375	207.800, 0.370	207.800, 0.251	207.800, 0.303	207.800, 0.377	207.800, 0.337	207.800, 0.253	207.800, 0.290	207.800, 0.347	207.800, 0.339	207.800, 0.356	207.800, 0.327	207.800, 0.337
1041	208.000, 0.265	208.000, 0.303	208.000, 0.375	208.000, 0.370	208.000, 0.251	208.000, 0.303	208.000, 0.376	208.000, 0.337	208.000, 0.253	208.000, 0.290	208.000, 0.347	208.000, 0.339	208.000, 0.355	208.000, 0.327	208.000, 0.336
1042	208.200, 0.265	208.200, 0.303	208.200, 0.374	208.200, 0.370	208.200, 0.250	208.200, 0.303	208.200, 0.376	208.200, 0.337	208.200, 0.253	208.200, 0.290	208.200, 0.347	208.200, 0.339	208.200, 0.354	208.200, 0.326	208.200, 0.334
1043	208.400, 0.265	208.400, 0.303	208.400, 0.374	208.400, 0.371	208.400, 0.250	208.400, 0.302	208.400, 0.376	208.400, 0.336	208.400, 0.253	208.400, 0.289	208.400, 0.347	208.400, 0.339	208.400, 0.353	208.400, 0.325	208.400, 0.333
1044	208.600, 0.265	208.600, 0.303	208.600, 0.374	208.600, 0.371	208.600, 0.250	208.600, 0.302	208.600, 0.376	208.600, 0.336	208.600, 0.253	208.600, 0.289	208.600, 0.347	208.600, 0.339	208.600, 0.351	208.600, 0.324	208.600, 0.332
1045	208.800, 0.265	208.800, 0.302	208.800, 0.374	208.800, 0.371	208.800, 0.250	208.800, 0.302	208.800, 0.376	208.800, 0.336	208.800, 0.253	208.800, 0.289	208.800, 0.347	208.800, 0.339	208.800, 0.350	208.800, 0.322	208.800, 0.330
1046	209.000, 0.265	209.000, 0.302	209.000, 0.373	209.000, 0.371	209.000, 0.250	209.000, 0.301	209.000, 0.375	209.000, 0.336	209.000, 0.253	209.000, 0.289	209.000, 0.346	209.000, 0.339	209.000, 0.349	209.000, 0.321	209.000, 0.329
1047	209.200, 0.265	209.200, 0.302	209.200, 0.373	209.200, 0.370	209.200, 0.250	209.200, 0.301	209.200, 0.375	209.200, 0.336	209.200, 0.253	209.200, 0.289	209.200, 0.346	209.200, 0.339	209.200, 0.348	209.200, 0.320	209.200, 0.328
1048	209.400, 0.265	209.400, 0.301	209.400, 0.373	209.400, 0.370	209.400, 0.250	209.400, 0.301	209.400, 0.375	209.400, 0.336	209.400, 0.253	209.400, 0.289	209.400, 0.346	209.400, 0.339	209.400, 0.347	209.400, 0.319	209.400, 0.327
1049	209.600, 0.264	209.600, 0.301	209.600, 0.372	209.600, 0.370	209.600, 0.250	209.600, 0.301	209.600, 0.375	209.600, 0.335	209.600, 0.253	209.600, 0.289	209.600, 0.346	209.600, 0.339	209.600, 0.347	209.600, 0.318	209.600, 0.325
1050	209.800, 0.264	209.800, 0.301	209.800, 0.372	209.800, 0.369	209.800, 0.250	209.800, 0.301	209.800, 0.375	209.800, 0.335	209.800, 0.253	209.800, 0.288	209.800, 0.346	209.800, 0.340	209.800, 0.346	209.800, 0.317	209.800, 0.324
1051	210.000, 0.264	210.000, 0.302	210.000, 0.372	210.000, 0.369	210.000, 0.250	210.000, 0.301	210.000, 0.375	210.000, 0.335	210.000, 0.254	210.000, 0.288	210.000, 0.346	210.000, 0.340	210.000, 0.345	210.000, 0.316	210.000, 0.323
1052	210.200, 0.263	210.200, 0.302	210.200, 0.372	210.200, 0.368	210.200, 0.250	210.200, 0.301	210.200, 0.375	210.200, 0.335	210.200, 0.254	210.200, 0.288	210.200, 0.346	210.200, 0.340	210.200, 0.344	210.200, 0.315	210.200, 0.322
1053	210.400, 0.263	210.400, 0.302	210.400, 0.372	210.400, 0.368	210.400, 0.250	210.400, 0.301	210.400, 0.375	210.400, 0.335	210.400, 0.254	210.400, 0.288	210.400, 0.346	210.400, 0.340	210.400, 0.343	210.400, 0.313	210.400, 0.320
1054	210.600, 0.263	210.600, 0.302	210.600, 0.372	210.600, 0.368	210.600, 0.251	210.600, 0.300	210.600, 0.375	210.600, 0.335	210.600, 0.254	210.600, 0.288	210.600, 0.346	210.600, 0.340	210.600, 0.342	210.600, 0.312	210.600, 0.319
1055	210.800, 0.263	210.800, 0.302	210.800, 0.372	210.800, 0.368	210.800, 0.251	210.800, 0.300	210.800, 0.375	210.800, 0.334	210.800, 0.254	210.800, 0.288	210.800, 0.346	210.800, 0.340	210.800, 0.341	210.800, 0.311	210.800, 0.318
1056	211.000, 0.262	211.000, 0.302	211.000, 0.372	211.000, 0.368	211.000, 0.251	211.000, 0.300	211.000, 0.375	211.000, 0.334	211.000, 0.253	211.000, 0.288	211.000, 0.346	211.000, 0.340	211.000, 0.340	211.000, 0.310	211.000, 0.317
1057	211.200, 0.262	211.200, 0.302	211.200, 0.372	211.200, 0.368	211.200, 0.251	211.200, 0.300	211.200, 0.376	211.200, 0.334	211.200, 0.253	211.200, 0.288	211.200, 0.346	211.200, 0.339	211.200, 0.338	211.200, 0.309	211.200, 0.316
1058	211.400, 0.262	211.400, 0.302	211.400, 0.371	211.400, 0.368	211.400, 0.251	211.400, 0.299	211.400, 0.376	211.400, 0.334	211.400, 0.253	211.400, 0.288	211.400, 0.346	211.400, 0.339	211.400, 0.337	211.400, 0.308	211.400, 0.315
1059	211.600, 0.262	211.600, 0.301	211.600, 0.371	211.600, 0.368	211.600, 0.251	211.600, 0.299	211.600, 0.376	211.600, 0.334	211.600, 0.252	211.600, 0.287	211.600, 0.346	211.600, 0.338	211.600, 0.336	211.600, 0.308	211.600, 0.314
1060	211.800, 0.262	211.800, 0.301	211.800, 0.372	211.800, 0.367	211.800, 0.251	211.800, 0.299	211.800, 0.376	211.800, 0.334	211.800, 0.252	211.800, 0.287	211.800, 0.346	211.800, 0.338	211.800, 0.335	211.800, 0.307	211.800, 0.313
1061	212.000, 0.262	212.000, 0.301	212.000, 0.372	212.000, 0.367	212.000, 0.251	212.000, 0.299	212.000, 0.376	212.000, 0.334	212.000, 0.252	212.000, 0.287	212.000, 0.345	212.000, 0.338	212.000, 0.334	212.000, 0.307	212.000, 0.312
1062	212.200, 0.262	212.200, 0.301	212.200, 0.372	212.200, 0.368	212.200, 0.250	212.200, 0.299	212.200, 0.376	212.200, 0.334	212.200, 0.252	212.200, 0.286	212.200, 0.345	212.200, 0.338	212.200, 0.333	212.200, 0.306	212.200, 0.311
1063	212.400, 0.262	212.400, 0.300	212.400, 0.372	212.400, 0.368	212.400, 0.250	212.400, 0.299	212.400, 0.376	212.400, 0.334	212.400, 0.251	212.400, 0.286	212.400, 0.345	212.400, 0.338	212.400, 0.331	212.400, 0.305	212.400, 0.310
1064	212.600, 0.263	212.600, 0.300	212.600, 0.372	212.600, 0.368	212.600, 0.250	212.600, 0.299	212.600, 0.376	212.600, 0.334	212.600, 0.251	212.600, 0.285	212.600, 0.345	212.600, 0.338	212.600, 0.330	212.600, 0.305	212.600, 0.309
1065	212.800, 0.263	212.800, 0.300	212.800, 0.372	212.800, 0.368	212.800, 0.249	212.800, 0.299	212.800, 0.376	212.800, 0.334	212.800, 0.251	212.800, 0.285	212.800, 0.344	212.800, 0.338	212.800, 0.329	212.800, 0.304	212.800, 0.308
1066	213.000, 0.263	213.000, 0.300	213.000, 0.372	213.000, 0.368	213.000, 0.249	213.000, 0.299	213.000, 0.375	213.000, 0.333	213.000, 0.251	213.000, 0.285	213.000, 0.344	213.000, 0.338	213.000, 0.328	213.000, 0.303	213.000, 0.307
1067	213.200, 0.263	213.200, 0.300	213.200, 0.371	213.200, 0.368	213.200, 0.249	213.200, 0.299	213.200, 0.375	213.200, 0.333	213.200, 0.251	213.200, 0.285	213.200, 0.344	213.200, 0.338	213.200, 0.327	213.200, 0.303	213.200, 0.306
1068	213.400, 0.263	213.400, 0.300	213.400, 0.371	213.400, 0.367	213.400, 0.249	213.400, 0.299	213.400, 0.375	213.400, 0.333	213.400, 0.251	213.400, 0.285	213.400, 0.344	213.400, 0.338	213.400, 0.326	213.400, 0.302	213.400, 0.305
1069	213.600, 0.263	213.600, 0.300	213.600, 0.371	213.600, 0.367	213.600, 0.248	213.600, 0.299	213.600, 0.374	213.600, 0.332	213.600, 0.252	213.600, 0.285	213.600, 0.344	213.600, 0.338	213.600, 0.324	213.600, 0.301	213.600, 0.304
1070	213.800, 0.263	213.800, 0.300	213.800, 0.371	213.800, 0.367	213.800, 0.248	213.800, 0.299	213.800, 0.374	213.800, 0.332	213.800, 0.252	213.800, 0.285	213.800, 0.344	213.800, 0.338	213.800, 0.323	213.800, 0.300	213.800, 0.302
1071	214.000, 0.263	214.000, 0.300	214.000, 0.371	214.000, 0.366	214.000, 0.248	214.000, 0.299	214.000, 0.373	214.000, 0.332	214.000, 0.252	214.000, 0.285	214.000, 0.344	214.000, 0.338	214.000, 0.322	214.000, 0.299	214.000, 0.301
1072	214.200, 0.262	214.200, 0.300	214.200, 0.371	214.200, 0.366	214.200, 0.248	214.200, 0.299	214.200, 0.373	214.200, 0.332	214.200, 0.252	214.200, 0.285	214.200, 0.344	214.200, 0.338	214.200, 0.321	214.200, 0.298	214.200, 0.300
1073	214.400, 0.262	214.400, 0.300	214.400, 0.371	214.400, 0.365	214.400, 0.248	214.400, 0.299	214.400, 0.372	214.400, 0.331	214.400, 0.252	214.400, 0.285	214.400, 0.344	214.400, 0.338	214.400, 0.320	214.400, 0.296	214.400, 0.299
1074	214.600, 0.262	214.600, 0.300	214.600, 0.371	214.600, 0.365	214.600, 0.248	214.600, 0.299	214.600, 0.372	214.600, 0.331	214.600, 0.252	214.600, 0.285	214.600, 0.344	214.600, 0.337	214.600, 0.320	214.600, 0.295	214.600, 0.298
1075	214.800, 0.262	214.800, 0.300	214.800, 0.371	214.800, 0.365	214.800, 0.248	214.800, 0.299	214.800, 0.371	214.800, 0.331	214.800, 0.252	214.800, 0.285	214.800, 0.344	214.800, 0.337	214.800, 0.319	214.800, 0.294	214.800, 0.297
1076	215.000, 0.262	215.000, 0.300	215.000, 0.371	215.000, 0.365	215.000, 0.248	215.000, 0.299	215.000, 0.371	215.000, 0.331	215.000, 0.252	215.000, 0.285	215.000, 0.344	215.000, 0.337	215.000, 0.318	215.000, 0.293	215.000, 0.296
1077	215.200, 0.261	215.200, 0.300	215.200, 0.371	215.200, 0.364	215.200, 0.248	215.200, 0.299	215.200, 0.371	215.200, 0.331	215.200, 0.251	215.200, 0.285	215.200, 0.343	215.200, 0.336	215.200, 0.317	215.200, 0.293	215.200, 0.294
1078	215.400, 0.261	215.400, 0.300	215.400, 0.371	215.400, 0.364	215.400, 0.248	215.400, 0.298	215.400, 0.371	215.400, 0.330	215.400, 0.251	215.400, 0.285	215.400, 0.343	215.400, 0.336	215.400, 0.316	215.400, 0.292	215.400, 0.293
1079	215.600, 0.262	215.600, 0.300	215.600, 0.371	215.600, 0.364	215.600, 0.248	215.600, 0.298	215.600, 0.370	215.600, 0.330	215.600, 0.251	215.600, 0.284	215.600, 0.343	215.600, 0.335	215.600, 0.315	215.600, 0.292	215.600, 0.292
1080	215.800, 0.262	215.800, 0.299	215.800, 0.371	215.800, 0.364	215.800, 0.248	215.800, 0.298	215.800, 0.370	215.800, 0.330	215.800, 0.250	215.800, 0.285	215.800, 0.343	215.800, 0.335	215.800, 0.314	215.800, 0.291	215.800, 0.291
1081	216.000, 0.262	216.000, 0.299	216.000, 0.371	216.000, 0.364	216.000, 0.248	216.000, 0.298	216.000, 0.370	216.000, 0.330	216.000, 0.250	216.000, 0.285	216.000, 0.343	216.000, 0.335	216.000, 0.313	216.000, 0.290	216.000, 0.290
1082	216.200, 0.262	216.200, 0.298	216.200, 0.371	216.200, 0.364	216.200, 0.248	216.200, 0.297	216.200, 0.371	216.200, 0.330	216.200, 0.250	216.200, 0.285	216.200, 0.343	216.200, 0.335	216.200, 0.312	216.200, 0.290	216.200, 0.289
1083	216.400, 0.262	216.400, 0.298	216.400, 0.370	216.400, 0.365	216.400, 0.248	216.400, 0.297	216.400, 0.371	216.400, 0.330	216.400, 0.250	216.400, 0.285	216.400, 0.343	216.400, 0.335	216.400, 0.311	216.400, 0.289	216.400, 0.288
1084	216.600, 0.262	216.600, 0.298	216.600, 0.370	216.600, 0.365	216.600, 0.247	216.600, 0.297	216.600, 0.371	216.600, 0.331	216.600, 0.250	216.600, 0.285	216.600, 0.342	216.600, 0.335	216.600, 0.310	216.600, 0.288	216.600, 0.287
1085	216.800, 0.262	216.800, 0.298	216.800, 0.369	216.800, 0.365	216.800, 0.247	216.800, 0.296	216.800, 0.371	216.800, 0.331	216.800, 0.250	216.800, 0.285	216.800, 0.342	216.800, 0.335	216.800, 0.309	216.800, 0.288	216.800, 0.286
1086	217.000, 0.261	217.000, 0.297	217.000, 0.369	217.000, 0.365	217.000, 0.247	217.000, 0.296	217.000, 0.371	217.000, 0.331	217.000, 0.250	217.000, 0.285	217.000, 0.342	217.000, 0.335	217.000, 0.308	217.000, 0.287	217.000, 0.285
1087	217.200, 0.261	217.200, 0.297	217.200, 0.369	217.200, 0.364	217.200, 0.247	217.200, 0.296	217.200, 0.371	217.200, 0.331	217.200, 0.249	217.200, 0.285	217.200, 0.342	217.200, 0.335	217.200, 0.307	217.200, 0.287	217.200, 0.285
1088	217.400, 0.261	217.400, 0.297	217.400, 0.368	217.400, 0.364	217.400, 0.246	217.400, 0.296	217.400, 0.371	217.400, 0.331	217.400, 0.249	217.400, 0.285	217.400, 0.342	217.400, 0.335	217.400, 0.306	217.400, 0.286	217.400, 0.284
1089	217.600, 0.261	217.600, 0.297	217.600, 0.368	217.600, 0.364	217.600, 0.246	217.600, 0.296	217.600, 0.371	217.600, 0.331	217.600, 0.249	217.600, 0.285	217.600, 0.342	217.600, 0.335	217.600, 0.306	217.600, 0.286	217.600, 0.283
1090	217.800, 0.261	217.800, 0.297	217.800, 0.368	217.800, 0.364	217.800, 0.246	217.800, 0.296	217.800, 0.371	217.800, 0.331	217.800, 0.249	217.800, 0.285	217.800, 0.342	217.800, 0.335	217.800, 0.305	217.800, 0.285	217.800, 0.282
1091	218.000, 0.261	218.000, 0.297	218.000, 0.368	218.000, 0.363	218.000, 0.246	218.000, 0.297	218.000, 0.371	218.000, 0.331	218.000, 0.249	218.000, 0.284	218.000, 0.342	218.000, 0.335	218.000, 0.305	218.000, 0.285	218.000, 0.282
1092	218.200, 0.261	218.200, 0.297	218.200, 0.368	218.200, 0.363	218.200, 0.246	218.200, 0.297	218.200, 0.370	218.200, 0.331	218.200, 0.249	218.200, 0.284	218.200, 0.342	218.200, 0.335	218.200, 0.304	218.200, 0.284	218.200, 0.281
1093	218.400, 0.261	218.400, 0.297	218.400, 0.368	218.400, 0.363	218.400, 0.245	218.400, 0.297	218.400, 0.370	218.400, 0.330	218.400, 0.250	218.400, 0.284	218.400, 0.342	218.400, 0.335	218.400, 0.304	218.400, 0.284	218.400, 0.280
1094	218.600, 0.260	218.600, 0.297	218.600, 0.368	218.600, 0.363	218.600, 0.245	218.600, 0.297	218.600, 0.370	218.600, 0.330	218.600, 0.250	218.600, 0.283	218.600, 0.342	218.600, 0.334	218.600, 0.303	218.600, 0.283	218.600, 0.279
1095	218.800, 0.260	218.800, 0.297	218.800, 0.367	218.800, 0.363	218.800, 0.245	218.800, 0.298	218.800, 0.370	218.800, 0.330	218.800, 0.250	218.800, 0.283	218.800, 0.342	218.800, 0.334	218.800, 0.303	218.800, 0.283	218.800, 0.278
1096	219.000, 0.260	219.000, 0.297	219.000, 0.368	219.000, 0.363	219.000, 0.245	219.000, 0.298	219.000, 0.370	219.000, 0.330	219.000, 0.250	219.000, 0.283	219.000, 0.342	219.000, 0.334	219.000, 0.303	219.000, 0.282	219.000, 0.277
1097	219.200, 0.260	219.200, 0.297	219.200, 0.368	219.200, 0.363	219.200, 0.245	219.200, 0.298	219.200, 0.369	219.200, 0.330	219.200, 0.250	219.200, 0.283	219.200, 0.342	219.200, 0.333	219.200, 0.302	219.200, 0.281	219.200, 0.276
1098	219.400, 0.260	219.400, 0.297	219.400, 0.368	219.400, 0.363	219.400, 0.245	219.400, 0.298	219.400, 0.369	219.400, 0.330	219.400, 0.250	219.400, 0.283	219.400, 0.342	219.400, 0.333	219.400, 0.301	219.400, 0.281	219.400, 0.276
1099	219.600, 0.260	219.600, 0.297	219.600, 0.368	219.600, 0.363	219.600, 0.245	219.600, 0.298	219.600, 0.368	219.600, 0.329	219.600, 0.250	219.600, 0.283	219.600, 0.342	219.600, 0.333	219.600, 0.301	219.600, 0.280	219.600, 0.275
1100	219.800, 0.260	219.800, 0.297	219.800, 0.368	219.800, 0.362	219.800, 0.245	219.800, 0.298	219.800, 0.368	219.800, 0.329	219.800, 0.250	219.800, 0.283	219.800, 0.342	219.800, 0.332	219.800, 0.300	219.800, 0.279	219.800, 0.274
1101	220.000, 0.260	220.000, 0.297	220.000, 0.367	220.000, 0.362	220.000, 0.245	220.000, 0.298	220.000, 0.368	220.000, 0.329	220.000, 0.250	220.000, 0.283	220.000, 0.342	220.000, 0.332	220.000, 0.299	220.000, 0.278	220.000, 0.273
1102	220.200, 0.260	220.200, 0.297	220.200, 0.367	220.200, 0.362	220.200, 0.245	220.200, 0.297	220.200, 0.367	220.200, 0.329	220.200, 0.250	220.200, 0.283	220.200, 0.342	220.200, 0.332	220.200, 0.298	220.200, 0.277	220.200, 0.272
1103	220.400, 0.260	220.400, 0.297	220.400, 0.367	220.400, 0.362	220.400, 0.246	220.400, 0.297	220.400, 0.367	220.400, 0.329	220.400, 0.250	220.400, 0.283	220.400, 0.341	220.400, 0.331	220.400, 0.297	220.400, 0.277	220.400, 0.271
1104	220.600, 0.259	220.600, 0.297	220.600, 0.366	220.600, 0.362	220.600, 0.246	220.600, 0.297	220.600, 0.367	220.600, 0.328	220.600, 0.250	220.600, 0.283	220.600, 0.340	220.600, 0.331	220.600, 0.295	220.600, 0.276	220.600, 0.270
1105	220.800, 0.259	220.800, 0.297	220.800, 0.366	220.800, 0.361	220.800, 0.246	220.800, 0.296	220.800, 0.367	220.800, 0.328	220.800, 0.249	220.800, 0.283	220.800, 0.340	220.800, 0.331	220.800, 0.294	220.800, 0.275	220.800, 0.269
1106	221.000, 0.259	221.000, 0.297	221.000, 0.366	221.000, 0.361	221.000, 0.246	221.000, 0.296	221.000, 0.367	221.000, 0.328	221.000, 0.249	221.000, 0.284	221.000, 0.340	221.000, 0.332	221.000, 0.293	221.000, 0.275	221.000, 0.268
1107	221.200, 0.259	221.200, 0.297	221.200, 0.366	221.200, 0.361	221.200, 0.246	221.200, 0.296	221.200, 0.367	221.200, 0.327	221.200, 0.249	221.200, 0.284	221.200, 0.340	221.200, 0.332	221.200, 0.292	221.200, 0.274	221.200, 0.267
1108	221.400, 0.258	221.400, 0.296	221.400, 0.367	221.400, 0.361	221.400, 0.246	221.400, 0.296	221.400, 0.368	221.400, 0.327	221.400, 0.249	221.400, 0.284	221.400, 0.339	221.400, 0.332	221.400, 0.290	221.400, 0.273	221.400, 0.266
1109	221.600, 0.258	221.600, 0.296	221.600, 0.367	221.600, 0.361	221.600, 0.246	221.600, 0.296	221.600, 0.368	221.600, 0.327	221.600, 0.248	221.600, 0.284	221.600, 0.339	221.600, 0.332	221.600, 0.289	221.600, 0.273	221.600, 0.266
1110	221.800, 0.258	221.800, 0.296	221.800, 0.367	221.800, 0.361	221.800, 0.246	221.800, 0.296	221.800, 0.368	221.800, 0.327	221.800, 0.248	221.800, 0.284	221.800, 0.339	221.800, 0.332	221.800, 0.288	221.800, 0.272	221.800, 0.265
1111	222.000, 0.258	222.000, 0.296	222.000, 0.367	222.000, 0.361	222.000, 0.246	222.000, 0.296	222.000, 0.369	222.000, 0.326	222.000, 0.248	222.000, 0.284	222.000, 0.339	222.000, 0.332	222.000, 0.288	222.000, 0.272	222.000, 0.264
1112	222.200, 0.258	222.200, 0.296	222.200, 0.367	222.200, 0.361	222.200, 0.246	222.200, 0.296	222.200, 0.369	222.200, 0.326	222.200, 0.248	222.200, 0.283	222.200, 0.339	222.200, 0.332	222.200, 0.287	222.200, 0.271	222.200, 0.263
1113	222.400, 0.258	222.400, 0.296	222.400, 0.367	222.400, 0.361	222.400, 0.245	222.400, 0.296	222.400, 0.369	222.400, 0.326	222.400, 0.248	222.400, 0.283	222.400, 0.339	222.400, 0.332	222.400, 0.287	222.400, 0.270	222.400, 0.262
1114	222.600, 0.257	222.600, 0.296	222.600, 0.367	222.600, 0.361	222.600, 0.245	222.600, 0.296	222.600, 0.369	222.600, 0.325	222.600, 0.248	222.600, 0.283	222.600, 0.339	222.600, 0.331	222.600, 0.286	222.600, 0.270	222.600, 0.261
1115	222.800, 0.257	222.800, 0.296	222.800, 0.368	222.800, 0.361	222.800, 0.245	222.800, 0.296	222.800, 0.369	222.800, 0.325	222.800, 0.248	222.800, 0.283	222.800, 0.339	222.800, 0.331	222.800, 0.286	222.800, 0.270	222.800, 0.261
1116	223.000, 0.257	223.000, 0.296	223.000, 0.368	223.000, 0.361	223.000, 0.245	223.000, 0.296	223.000, 0.369	223.000, 0.325	223.000, 0.248	223.000, 0.282	223.000, 0.339	223.000, 0.331	223.000, 0.286	223.000, 0.269	223.000, 0.260
1117	223.200, 0.256	223.200, 0.296	223.200, 0.368	223.200, 0.360	223.200, 0.245	223.200, 0.296	223.200, 0.369	223.200, 0.325	223.200, 0.248	223.200, 0.282	223.200, 0.339	223.200, 0.331	223.200, 0.285	223.200, 0.269	223.200, 0.260
1118	223.400, 0.256	223.400, 0.296	223.400, 0.367	223.400, 0.360	223.400, 0.245	223.400, 0.296	223.400, 0.369	223.400, 0.325	223.400, 0.248	223.400, 0.282	223.400, 0.338	223.400, 0.330	223.400, 0.285	223.400, 0.268	223.400, 0.259
1119	223.600, 0.256	223.600, 0.296	223.600, 0.367	223.600, 0.360	223.600, 0.245	223.600, 0.296	223.600, 0.368	223.600, 0.325	223.600, 0.248	223.600, 0.282	223.600, 0.338	223.600, 0.330	223.600, 0.285	223.600, 0.267	223.600, 0.259
1120	223.800, 0.256	223.800, 0.296	223.800, 0.366	223.800, 0.360	223.800, 0.245	223.800, 0.296	223.800, 0.368	223.800, 0.325	223.800, 0.247	223.800, 0.282	223.800, 0.338	223.800, 0.330	223.800, 0.285	223.800, 0.267	223.800, 0.258
1121	224.000, 0.256	224.000, 0.296	224.000, 0.365	224.000, 0.360	224.000, 0.245	224.000, 0.296	224.000, 0.368	224.000, 0.325	224.000, 0.247	224.000, 0.282	224.000, 0.338	224.000, 0.329	224.000, 0.284	224.000, 0.266	224.000, 0.257
1122	224.200, 0.256	224.200, 0.296	224.200, 0.365	224.200, 0.360	224.200, 0.245	224.200, 0.296	224.200, 0.368	224.200, 0.325	224.200, 0.247	224.200, 0.282	224.200, 0.338	224.200, 0.329	224.200, 0.284	224.200, 0.266	224.200, 0.257
1123	224.400, 0.256	224.400, 0.295	224.400, 0.364	224.400, 0.360	224.400, 0.245	224.400, 0.296	224.400, 0.368	224.400, 0.325	224.400, 0.247	224.400, 0.281	224.400, 0.338	224.400, 0.329	224.400, 0.283	224.400, 0.265	224.400, 0.256
1124	224.600, 0.256	224.600, 0.295	224.600, 0.364	224.600, 0.360	224.600, 0.245	224.600, 0.296	224.600, 0.368	224.600, 0.325	224.600, 0.247	224.600, 0.281	224.600, 0.338	224.600, 0.329	224.600, 0.282	224.600, 0.265	224.600, 0.256
1125	224.800, 0.256	224.800, 0.295	224.800, 0.364	224.800, 0.360	224.800, 0.245	224.800, 0.296	224.800, 0.368	224.800, 0.326	224.800, 0.247	224.800, 0.281	224.800, 0.338	224.800, 0.330	224.800, 0.281	224.800, 0.264	224.800, 0.255
1126	225.000, 0.256	225.000, 0.295	225.000, 0.364	225.000, 0.360	225.000, 0.244	225.000, 0.295	225.000, 0.368	225.000, 0.326	225.000, 0.246	225.000, 0.282	225.000, 0.338	225.000, 0.330	225.000, 0.280	225.000, 0.263	225.000, 0.255
1127	225.200, 0.256	225.200, 0.295	225.200, 0.363	225.200, 0.360	225.200, 0.244	225.200, 0.295	225.200, 0.368	225.200, 0.326	225.200, 0.246	225.200, 0.282	225.200, 0.337	225.200, 0.330	225.200, 0.280	225.200, 0.263	225.200, 0.254
1128	225.400, 0.256	225.400, 0.294	225.400, 0.363	225.400, 0.361	225.400, 0.244	225.400, 0.294	225.400, 0.367	225.400, 0.326	225.400, 0.246	225.400, 0.282	225.400, 0.337	225.400, 0.330	225.400, 0.279	225.400, 0.262	225.400, 0.253
1129	225.600, 0.256	225.600, 0.294	225.600, 0.363	225.600, 0.361	225.600, 0.244	225.600, 0.294	225.600, 0.367	225.600, 0.325	225.600, 0.246	225.600, 0.282	225.600, 0.337	225.600, 0.330	225.600, 0.278	225.600, 0.261	225.600, 0.253
1130	225.800, 0.256	225.800, 0.294	225.800, 0.363	225.800, 0.361	225.800, 0.244	225.800, 0.294	225.800, 0.367	225.800, 0.325	225.800, 0.246	225.800, 0.283	225.800, 0.337	225.800, 0.330	225.800, 0.278	225.800, 0.261	225.800, 0.252
1131	226.000, 0.257	226.000, 0.293	226.000, 0.363	226.000, 0.361	226.000, 0.244	226.000, 0.293	226.000, 0.367	226.000, 0.325	226.000, 0.246	226.000, 0.283	226.000, 0.337	226.000, 0.330	226.000, 0.277	226.000, 0.260	226.000, 0.251
1132	226.200, 0.257	226.200, 0.293	226.200, 0.363	226.200, 0.361	226.200, 0.244	226.200, 0.293	226.200, 0.366	226.200, 0.324	226.200, 0.246	226.200, 0.283	226.200, 0.337	226.200, 0.330	226.200, 0.277	226.200, 0.260	226.200, 0.251
1133	226.400, 0.257	226.400, 0.293	226.400, 0.364	226.400, 0.361	226.400, 0.244	226.400, 0.293	226.400, 0.366	226.400, 0.324	226.400, 0.246	226.400, 0.283	226.400, 0.336	226.400, 0.330	226.400, 0.276	226.400, 0.260	226.400, 0.250
1134	226.600, 0.257	226.600, 0.293	226.600, 0.364	226.600, 0.360	226.600, 0.244	226.600, 0.293	226.600, 0.366	226.600, 0.324	226.600, 0.246	226.600, 0.283	226.600, 0.336	226.600, 0.330	226.600, 0.275	226.600, 0.259	226.600, 0.249
1135	226.800, 0.257	226.800, 0.293	226.800, 0.364	226.800, 0.360	226.800, 0.244	226.800, 0.293	226.800, 0.365	226.800, 0.324	226.800, 0.246	226.800, 0.283	226.800, 0.337	226.800, 0.330	226.800, 0.275	226.800, 0.259	226.800, 0.248
1136	227.000, 0.257	227.000, 0.293	227.000, 0.364	227.000, 0.360	227.000, 0.244	227.000, 0.293	227.000, 0.365	227.000, 0.323	227.000, 0.246	227.000, 0.283	227.000, 0.337	227.000, 0.330	227.000, 0.274	227.000, 0.258	227.000, 0.248
1137	227.200, 0.257	227.200, 0.293	227.200, 0.364	227.200, 0.360	227.200, 0.244	227.200, 0.293	227.200, 0.365	227.200, 0.323	227.200, 0.246	227.200, 0.283	227.200, 0.337	227.200, 0.330	227.200, 0.273	227.200, 0.258	227.200, 0.247
1138	227.400, 0.257	227.400, 0.293	227.400, 0.364	227.400, 0.359	227.400, 0.244	227.400, 0.293	227.400, 0.365	227.400, 0.323	227.400, 0.246	227.400, 0.283	227.400, 0.337	227.400, 0.330	227.400, 0.273	227.400, 0.258	227.400, 0.246
1139	227.600, 0.258	227.600, 0.293	227.600, 0.364	227.600, 0.359	227.600, 0.244	227.600, 0.293	227.600, 0.365	227.600, 0.323	227.600, 0.246	227.600, 0.282	227.600, 0.338	227.600, 0.330	227.600, 0.272	227.600, 0.257	227.600, 0.245
1140	227.800, 0.258	227.800, 0.293	227.800, 0.364	227.800, 0.359	227.800, 0.244	227.800, 0.293	227.800, 0.364	227.800, 0.323	227.800, 0.246	227.800, 0.282	227.800, 0.338	227.800, 0.330	227.800, 0.272	227.800, 0.257	227.800, 0.245
1141	228.000, 0.258	228.000, 0.293	228.000, 0.363	228.000, 0.359	228.000, 0.244	228.000, 0.293	228.000, 0.364	228.000, 0.323	228.000, 0.246	228.000, 0.282	228.000, 0.338	228.000, 0.330	228.000, 0.271	228.000, 0.256	228.000, 0.244
1142	228.200, 0.257	228.200, 0.293	228.200, 0.363	228.200, 0.358	228.200, 0.244	228.200, 0.293	228.200, 0.364	228.200, 0.323	228.200, 0.246	228.200, 0.281	228.200, 0.338	228.200, 0.330	228.200, 0.271	228.200, 0.256	228.200, 0.244
1143	228.400, 0.257	228.400, 0.293	228.400, 0.363	228.400, 0.358	228.400, 0.243	228.400, 0.293	228.400, 0.364	228.400, 0.323	228.400, 0.246	228.400, 0.281	228.400, 0.338	228.400, 0.329	228.400, 0.270	228.400, 0.255	228.400, 0.243
1144	228.600, 0.257	228.600, 0.293	228.600, 0.363	228.600, 0.358	228.600, 0.243	228.600, 0.293	228.600, 0.364	228.600, 0.323	228.600, 0.246	228.600, 0.280	228.600, 0.338	228.600, 0.329	228.600, 0.269	228.600, 0.254	228.600, 0.242
1145	228.800, 0.257	228.800, 0.293	228.800, 0.363	228.800, 0.358	228.800, 0.243	228.800, 0.293	228.800, 0.364	228.800, 0.323	228.800, 0.246	228.800, 0.280	228.800, 0.338	228.800, 0.329	228.800, 0.268	228.800, 0.254	228.800, 0.241
1146	229.000, 0.256	229.000, 0.293	229.000, 0.363	229.000, 0.358	229.000, 0.242	229.000, 0.293	229.000, 0.364	229.000, 0.323	229.000, 0.246	229.000, 0.279	229.000, 0.338	229.000, 0.329	229.000, 0.268	229.000, 0.253	229.000, 0.241
1147	229.200, 0.256	229.200, 0.293	229.200, 0.363	229.200, 0.359	229.200, 0.242	229.200, 0.293	229.200, 0.364	229.200, 0.323	229.200, 0.246	229.200, 0.279	229.200, 0.337	229.200, 0.329	229.200, 0.267	229.200, 0.252	229.200, 0.240
1148	229.400, 0.256	229.400, 0.293	229.400, 0.363	229.400, 0.359	229.400, 0.242	229.400, 0.293	229.400, 0.364	229.400, 0.323	229.400, 0.246	229.400, 0.279	229.400, 0.337	229.400, 0.328	229.400, 0.267	229.400, 0.252	229.400, 0.239
1149	229.600, 0.255	229.600, 0.293	229.600, 0.363	229.600, 0.359	229.600, 0.242	229.600, 0.293	229.600, 0.364	229.600, 0.323	229.600, 0.246	229.600, 0.279	229.600, 0.337	229.600, 0.328	229.600, 0.266	229.600, 0.251	229.600, 0.239
1150	229.800, 0.255	229.800, 0.293	229.800, 0.363	229.800, 0.359	229.800, 0.242	229.800, 0.293	229.800, 0.364	229.800, 0.323	229.800, 0.246	229.800, 0.279	229.800, 0.337	229.800, 0.328	229.800, 0.266	229.800, 0.251	229.800, 0.238
1151	230.000, 0.255	230.000, 0.292	230.000, 0.363	230.000, 0.359	230.000, 0.242	230.000, 0.293	230.000, 0.364	230.000, 0.323	230.000, 0.246	230.000, 0.279	230.000, 0.336	230.000, 0.327	230.000, 0.265	230.000, 0.250	230.000, 0.238
1152	230.200, 0.255	230.200, 0.292	230.200, 0.363	230.200, 0.359	230.200, 0.242	230.200, 0.293	230.200, 0.364	230.200, 0.323	230.200, 0.246	230.200, 0.279	230.200, 0.336	230.200, 0.327	230.200, 0.264	230.200, 0.250	230.200, 0.237
1153	230.400, 0.255	230.400, 0.292	230.400, 0.363	230.400, 0.359	230.400, 0.242	230.400, 0.293	230.400, 0.365	230.400, 0.323	230.400, 0.246	230.400, 0.279	230.400, 0.336	230.400, 0.327	230.400, 0.263	230.400, 0.250	230.400, 0.237
1154	230.600, 0.255	230.600, 0.292	230.600, 0.363	230.600, 0.359	230.600, 0.242	230.600, 0.293	230.600, 0.365	230.600, 0.323	230.600, 0.245	230.600, 0.280	230.600, 0.336	230.600, 0.327	230.600, 0.263	230.600, 0.250	230.600, 0.236
1155	230.800, 0.256	230.800, 0.292	230.800, 0.362	230.800, 0.359	230.800, 0.242	230.800, 0.292	230.800, 0.365	230.800, 0.323	230.800, 0.245	230.800, 0.280	230.800, 0.336	230.800, 0.327	230.800, 0.262	230.800, 0.250	230.800, 0.236
1156	231.000, 0.256	231.000, 0.292	231.000, 0.362	231.000, 0.359	231.000, 0.243	231.000, 0.292	231.000, 0.365	231.000, 0.323	231.000, 0.245	231.000, 0.280	231.000, 0.336	231.000, 0.327	231.000, 0.262	231.000, 0.249	231.000, 0.235
1157	231.200, 0.256	231.200, 0.292	231.200, 0.362	231.200, 0.358	231.200, 0.243	231.200, 0.291	231.200, 0.365	231.200, 0.323	231.200, 0.245	231.200, 0.280	231.200, 0.336	231.200, 0.327	231.200, 0.261	231.200, 0.249	231.200, 0.235
1158	231.400, 0.256	231.400, 0.291	231.400, 0.361	231.400, 0.358	231.400, 0.243	231.400, 0.291	231.400, 0.365	231.400, 0.322	231.400, 0.244	231.400, 0.280	231.400, 0.337	231.400, 0.327	231.400, 0.261	231.400, 0.249	231.400, 0.235
1159	231.600, 0.256	231.600, 0.291	231.600, 0.361	231.600, 0.358	231.600, 0.244	231.600, 0.290	231.600, 0.365	231.600, 0.322	231.600, 0.244	231.600, 0.279	231.600, 0.336	231.600, 0.327	231.600, 0.261	231.600, 0.248	231.600, 0.234
1160	231.800, 0.256	231.800, 0.291	231.800, 0.361	231.800, 0.357	231.800, 0.244	231.800, 0.290	231.800, 0.365	231.800, 0.322	231.800, 0.243	231.800, 0.279	231.800, 0.336	231.800, 0.327	231.800, 0.261	231.800, 0.248	231.800, 0.234
1161	232.000, 0.256	232.000, 0.291	232.000, 0.360	232.000, 0.357	232.000, 0.244	232.000, 0.290	232.000, 0.365	232.000, 0.322	232.000, 0.243	232.000, 0.279	232.000, 0.336	232.000, 0.326	232.000, 0.260	232.000, 0.247	232.000, 0.233
1162	232.200, 0.256	232.200, 0.290	232.200, 0.360	232.200, 0.356	232.200, 0.244	232.200, 0.290	232.200, 0.365	232.200, 0.322	232.200, 0.243	232.200, 0.279	232.200, 0.336	232.200, 0.326	232.200, 0.260	232.200, 0.247	232.200, 0.233
1163	232.400, 0.256	232.400, 0.290	232.400, 0.359	232.400, 0.356	232.400, 0.243	232.400, 0.290	232.400, 0.365	232.400, 0.322	232.400, 0.243	232.400, 0.278	232.400, 0.336	232.400, 0.326	232.400, 0.259	232.400, 0.246	232.400, 0.233
1164	232.600, 0.256	232.600, 0.290	232.600, 0.359	232.600, 0.356	232.600, 0.243	232.600, 0.290	232.600, 0.365	232.600, 0.322	232.600, 0.243	232.600, 0.278	232.600, 0.335	232.600, 0.326	232.600, 0.259	232.600, 0.245	232.600, 0.232
1165	232.800, 0.255	232.800, 0.290	232.800, 0.359	232.800, 0.356	232.800, 0.243	232.800, 0.291	232.800, 0.364	232.800, 0.322	232.800, 0.243	232.800, 0.277	232.800, 0.335	232.800, 0.326	232.800, 0.258	232.800, 0.245	232.800, 0.232
1166	233.000, 0.255	233.000, 0.290	233.000, 0.359	233.000, 0.356	233.000, 0.243	233.000, 0.291	233.000, 0.364	233.000, 0.322	233.000, 0.243	233.000, 0.277	233.000, 0.335	233.000, 0.326	233.000, 0.258	233.000, 0.245	233.000, 0.231
1167	233.200, 0.255	233.200, 0.290	233.200, 0.359	233.200, 0.356	233.200, 0.242	233.200, 0.291	233.200, 0.364	233.200, 0.321	233.200, 0.242	233.200, 0.277	233.200, 0.334	233.200, 0.326	233.200, 0.257	233.200, 0.245	233.200, 0.230
1168	233.400, 0.255	233.400, 0.290	233.400, 0.359	233.400, 0.356	233.400, 0.242	233.400, 0.291	233.400, 0.363	233.400, 0.321	233.400, 0.242	233.400, 0.277	233.400, 0.334	233.400, 0.326	233.400, 0.257	233.400, 0.244	233.400, 0.230
1169	233.600, 0.255	233.600, 0.290	233.600, 0.359	233.600, 0.356	233.600, 0.241	233.600, 0.291	233.600, 0.363	233.600, 0.321	233.600, 0.243	233.600, 0.278	233.600, 0.333	233.600, 0.326	233.600, 0.256	233.600, 0.244	233.600, 0.229
1170	233.800, 0.255	233.800, 0.290	233.800, 0.360	233.800, 0.356	233.800, 0.241	233.800, 0.291	233.800, 0.363	233.800, 0.321	233.800, 0.243	233.800, 0.278	233.800, 0.333	233.800, 0.326	233.800, 0.255	233.800, 0.244	233.800, 0.229
1171	234.000, 0.255	234.000, 0.291	234.000, 0.360	234.000, 0.355	234.000, 0.240	234.000, 0.291	234.000, 0.363	234.000, 0.321	234.000, 0.243	234.000, 0.278	234.000, 0.333	234.000, 0.326	234.000, 0.254	234.000, 0.244	234.000, 0.228
1172	234.200, 0.255	234.200, 0.291	234.200, 0.360	234.200, 0.355	234.200, 0.240	234.200, 0.291	234.200, 0.363	234.200, 0.321	234.200, 0.243	234.200, 0.278	234.200, 0.333	234.200, 0.326	234.200, 0.254	234.200, 0.244	234.200, 0.228
1173	234.400, 0.255	234.400, 0.291	234.400, 0.360	234.400, 0.355	234.400, 0.240	234.400, 0.291	234.400, 0.363	234.400, 0.320	234.400, 0.243	234.400, 0.279	234.400, 0.333	234.400, 0.326	234.400, 0.254	234.400, 0.243	234.400, 0.227
1174	234.600, 0.255	234.600, 0.291	234.600, 0.360	234.600, 0.356	234.600, 0.240	234.600, 0.291	234.600, 0.363	234.600, 0.320	234.600, 0.243	234.600, 0.279	234.600, 0.333	234.600, 0.326	234.600, 0.253	234.600, 0.243	234.600, 0.227
1175	234.800, 0.255	234.800, 0.290	234.800, 0.359	234.800, 0.356	234.800, 0.240	234.800, 0.291	234.800, 0.362	234.800, 0.320	234.800, 0.243	234.800, 0.279	234.800, 0.333	234.800, 0.326	234.800, 0.253	234.800, 0.242	234.800, 0.226
1176	235.000, 0.255	235.000, 0.290	235.000, 0.359	235.000, 0.356	235.000, 0.240	235.000, 0.291	235.000, 0.362	235.000, 0.319	235.000, 0.243	235.000, 0.278	235.000, 0.333	235.000, 0.326	235.000, 0.253	235.000, 0.242	235.000, 0.226
1177	235.200, 0.255	235.200, 0.290	235.200, 0.359	235.200, 0.356	235.200, 0.240	235.200, 0.291	235.200, 0.362	235.200, 0.319	235.200, 0.243	235.200, 0.278	235.200, 0.333	235.200, 0.326	235.200, 0.253	235.200, 0.241	235.200, 0.226
1178	235.400, 0.255	235.400, 0.290	235.400, 0.359	235.400, 0.356	235.400, 0.240	235.400, 0.290	235.400, 0.361	235.400, 0.319	235.400, 0.243	235.400, 0.278	235.400, 0.333	235.400, 0.325	235.400, 0.252	235.400, 0.241	235.400, 0.225
1179	235.600, 0.255	235.600, 0.290	235.600, 0.359	235.600, 0.356	235.600, 0.240	235.600, 0.290	235.600, 0.361	235.600, 0.319	235.600, 0.243	235.600, 0.278	235.600, 0.333	235.600, 0.325	235.600, 0.252	235.600, 0.240	235.600, 0.224
1180	235.800, 0.255	235.800, 0.290	235.800, 0.359	235.800, 0.356	235.800, 0.240	235.800, 0.290	235.800, 0.361	235.800, 0.319	235.800, 0.243	235.800, 0.277	235.800, 0.333	235.800, 0.325	235.800, 0.252	235.800, 0.240	235.800, 0.224
1181	236.000, 0.255	236.000, 0.290	236.000, 0.359	236.000, 0.355	236.000, 0.240	236.000, 0.291	236.000, 0.361	236.000, 0.319	236.000, 0.243	236.000, 0.277	236.000, 0.333	236.000, 0.325	236.000, 0.251	236.000, 0.240	236.000, 0.223
1182	236.200, 0.255	236.200, 0.290	236.200, 0.359	236.200, 0.355	236.200, 0.240	236.200, 0.291	236.200, 0.361	236.200, 0.319	236.200, 0.243	236.200, 0.277	236.200, 0.333	236.200, 0.325	236.200, 0.251	236.200, 0.240	236.200, 0.223
1183	236.400, 0.255	236.400, 0.290	236.400, 0.359	236.400, 0.355	236.400, 0.240	236.400, 0.291	236.400, 0.361	236.400, 0.319	236.400, 0.242	236.400, 0.276	236.400, 0.333	236.400, 0.325	236.400, 0.250	236.400, 0.240	236.400, 0.222
1184	236.600, 0.255	236.600, 0.290	236.600, 0.359	236.600, 0.355	236.600, 0.240	236.600, 0.291	236.600, 0.361	236.600, 0.319	236.600, 0.242	236.600, 0.276	236.600, 0.333	236.600, 0.324	236.600, 0.250	236.600, 0.240	236.600, 0.222
1185	236.800, 0.254	236.800, 0.290	236.800, 0.359	236.800, 0.355	236.800, 0.240	236.800, 0.291	236.800, 0.361	236.800, 0.319	236.800, 0.242	236.800, 0.276	236.800, 0.332	236.800, 0.324	236.800, 0.249	236.800, 0.240	236.800, 0.221
1186	237.000, 0.254	237.000, 0.290	237.000, 0.359	237.000, 0.354	237.000, 0.240	237.000, 0.291	237.000, 0.360	237.000, 0.319	237.000, 0.242	237.000, 0.276	237.000, 0.332	237.000, 0.325	237.000, 0.248	237.000, 0.240	237.000, 0.221
1187	237.200, 0.254	237.200, 0.290	237.200, 0.359	237.200, 0.354	237.200, 0.240	237.200, 0.290	237.200, 0.360	237.200, 0.319	237.200, 0.242	237.200, 0.276	237.200, 0.331	237.200, 0.325	237.200, 0.248	237.200, 0.240	237.200, 0.221
1188	237.400, 0.254	237.400, 0.290	237.400, 0.360	237.400, 0.354	237.400, 0.240	237.400, 0.290	237.400, 0.360	237.400, 0.320	237.400, 0.242	237.400, 0.276	237.400, 0.331	237.400, 0.325	237.400, 0.247	237.400, 0.240	237.400, 0.220
1189	237.600, 0.254	237.600, 0.289	237.600, 0.360	237.600, 0.353	237.600, 0.240	237.600, 0.290	237.600, 0.360	237.600, 0.320	237.600, 0.242	237.600, 0.277	237.600, 0.331	237.600, 0.325	237.600, 0.247	237.600, 0.240	237.600, 0.220
1190	237.800, 0.254	237.800, 0.289	237.800, 0.360	237.800, 0.353	237.800, 0.240	237.800, 0.289	237.800, 0.360	237.800, 0.320	237.800, 0.243	237.800, 0.277	237.800, 0.331	237.800, 0.325	237.800, 0.246	237.800, 0.240	237.800, 0.220
1191	238.000, 0.254	238.000, 0.289	238.000, 0.360	238.000, 0.353	238.000, 0.240	238.000, 0.289	238.000, 0.361	238.000, 0.320	238.000, 0.243	238.000, 0.277	238.000, 0.331	238.000, 0.325	238.000, 0.246	238.000, 0.240	238.000, 0.219
1192	238.200, 0.254	238.200, 0.288	238.200, 0.360	238.200, 0.353	238.200, 0.240	238.200, 0.289	238.200, 0.361	238.200, 0.320	238.200, 0.243	238.200, 0.277	238.200, 0.331	238.200, 0.325	238.200, 0.245	238.200, 0.239	238.200, 0.219
1193	238.400, 0.254	238.400, 0.288	238.400, 0.360	238.400, 0.353	238.400, 0.240	238.400, 0.288	238.400, 0.361	238.400, 0.320	238.400, 0.243	238.400, 0.277	238.400, 0.331	238.400, 0.325	238.400, 0.245	238.400, 0.238	238.400, 0.218
1194	238.600, 0.254	238.600, 0.288	238.600, 0.360	238.600, 0.353	238.600, 0.240	238.600, 0.288	238.600, 0.361	238.600, 0.319	238.600, 0.243	238.600, 0.277	238.600, 0.331	238.600, 0.324	238.600, 0.245	238.600, 0.237	238.600, 0.218
1195	238.800, 0.253	238.800, 0.287	238.800, 0.360	238.800, 0.353	238.800, 0.240	238.800, 0.288	238.800, 0.361	238.800, 0.319	238.800, 0.242	238.800, 0.277	238.800, 0.331	238.800, 0.324	238.800, 0.244	238.800, 0.236	238.800, 0.218
1196	239.000, 0.253	239.000, 0.287	239.000, 0.359	239.000, 0.353	239.000, 0.239	239.000, 0.287	239.000, 0.361	239.000, 0.318	239.000, 0.242	239.000, 0.277	239.000, 0.332	239.000, 0.324	239.000, 0.244	239.000, 0.236	239.000, 0.218
1197	239.200, 0.253	239.200, 0.287	239.200, 0.359	239.200, 0.352	239.200, 0.239	239.200, 0.287	239.200, 0.360	239.200, 0.318	239.200, 0.242	239.200, 0.277	239.200, 0.332	239.200, 0.324	239.200, 0.244	239.200, 0.235	239.200, 0.217
1198	239.400, 0.254	239.400, 0.287	239.400, 0.359	239.400, 0.352	239.400, 0.239	239.400, 0.287	239.400, 0.360	239.400, 0.318	239.400, 0.242	239.400, 0.277	239.400, 0.332	239.400, 0.323	239.400, 0.244	239.400, 0.234	239.400, 0.217
1199	239.600, 0.254	239.600, 0.288	239.600, 0.359	239.600, 0.352	239.600, 0.239	239.600, 0.287	239.600, 0.360	239.600, 0.317	239.600, 0.242	239.600, 0.277	239.600, 0.332	239.600, 0.323	239.600, 0.243	239.600, 0.234	239.600, 0.216
1200	239.800, 0.254	239.800, 0.288	239.800, 0.358	239.800, 0.351	239.800, 0.239	239.800, 0.287	239.800, 0.360	239.800, 0.317	239.800, 0.241	239.800, 0.277	239.800, 0.332	239.800, 0.322	239.800, 0.243	239.800, 0.234	239.800, 0.216
1201	240.000, 0.254	240.000, 0.288	240.000, 0.358	240.000, 0.351	240.000, 0.239	240.000, 0.287	240.000, 0.360	240.000, 0.317	240.000, 0.241	240.000, 0.276	240.000, 0.332	240.000, 0.322	240.000, 0.243	240.000, 0.233	240.000, 0.215
1202	240.200, 0.253	240.200, 0.288	240.200, 0.357	240.200, 0.351	240.200, 0.239	240.200, 0.287	240.200, 0.360	240.200, 0.317	240.200, 0.240	240.200, 0.276	240.200, 0.332	240.200, 0.322	240.200, 0.242	240.200, 0.233	240.200, 0.215
1203	240.400, 0.253	240.400, 0.288	240.400, 0.357	240.400, 0.351	240.400, 0.239	240.400, 0.288	240.400, 0.359	240.400, 0.317	240.400, 0.240	240.400, 0.276	240.400, 0.332	240.400, 0.322	240.400, 0.242	240.400, 0.233	240.400, 0.215
1204	240.600, 0.253	240.600, 0.288	240.600, 0.357	240.600, 0.351	240.600, 0.239	240.600, 0.288	240.600, 0.359	240.600, 0.317	240.600, 0.240	240.600, 0.276	240.600, 0.332	240.600, 0.322	240.600, 0.241	240.600, 0.233	240.600, 0.215
1205	240.800, 0.253	240.800, 0.289	240.800, 0.356	240.800, 0.351	240.800, 0.239	240.800, 0.288	240.800, 0.359	240.800, 0.318	240.800, 0.239	240.800, 0.276	240.800, 0.331	240.800, 0.322	240.800, 0.241	240.800, 0.233	240.800, 0.215
1206	241.000, 0.253	241.000, 0.289	241.000, 0.356	241.000, 0.352	241.000, 0.239	241.000, 0.288	241.000, 0.359	241.000, 0.318	241.000, 0.239	241.000, 0.276	241.000, 0.331	241.000, 0.323	241.000, 0.240	241.000, 0.233	241.000, 0.214
1207	241.200, 0.253	241.200, 0.289	241.200, 0.356	241.200, 0.352	241.200, 0.239	241.200, 0.288	241.200, 0.359	241.200, 0.318	241.200, 0.239	241.200, 0.276	241.200, 0.331	241.200, 0.323	241.200, 0.240	241.200, 0.233	241.200, 0.214
1208	241.400, 0.253	241.400, 0.289	241.400, 0.356	241.400, 0.352	241.400, 0.239	241.400, 0.288	241.400, 0.359	241.400, 0.318	241.400, 0.239	241.400, 0.276	241.400, 0.331	241.400, 0.323	241.400, 0.239	241.400, 0.233	241.400, 0.213
1209	241.600, 0.253	241.600, 0.288	241.600, 0.356	241.600, 0.352	241.600, 0.239	241.600, 0.289	241.600, 0.360	241.600, 0.318	241.600, 0.239	241.600, 0.276	241.600, 0.331	241.600, 0.323	241.600, 0.239	241.600, 0.232	241.600, 0.213
1210	241.800, 0.253	241.800, 0.288	241.800, 0.356	241.800, 0.352	241.800, 0.239	241.800, 0.289	241.800, 0.360	241.800, 0.318	241.800, 0.239	241.800, 0.276	241.800, 0.330	241.800, 0.323	241.800, 0.239	241.800, 0.232	241.800, 0.213
1211	242.000, 0.253	242.000, 0.288	242.000, 0.355	242.000, 0.352	242.000, 0.239	242.000, 0.289	242.000, 0.360	242.000, 0.317	242.000, 0.239	242.000, 0.276	242.000, 0.330	242.000, 0.322	242.000, 0.238	242.000, 0.232	242.000, 0.212
1212	242.200, 0.253	242.200, 0.288	242.200, 0.355	242.200, 0.352	242.200, 0.239	242.200, 0.289	242.200, 0.360	242.200, 0.317	242.200, 0.239	242.200, 0.276	242.200, 0.330	242.200, 0.322	242.200, 0.238	242.200, 0.231	242.200, 0.212
1213	242.400, 0.253	242.400, 0.287	242.400, 0.355	242.400, 0.352	242.400, 0.239	242.400, 0.288	242.400, 0.360	242.400, 0.317	242.400, 0.239	242.400, 0.276	242.400, 0.330	242.400, 0.322	242.400, 0.238	242.400, 0.231	242.400, 0.212
1214	242.600, 0.253	242.600, 0.287	242.600, 0.355	242.600, 0.352	242.600, 0.239	242.600, 0.288	242.600, 0.360	242.600, 0.317	242.600, 0.239	242.600, 0.276	242.600, 0.329	242.600, 0.322	242.600, 0.238	242.600, 0.230	242.600, 0.211
1215	242.800, 0.253	242.800, 0.287	242.800, 0.355	242.800, 0.351	242.800, 0.239	242.800, 0.288	242.800, 0.360	242.800, 0.317	242.800, 0.239	242.800, 0.276	242.800, 0.329	242.800, 0.321	242.800, 0.238	242.800, 0.230	242.800, 0.211
1216	243.000, 0.253	243.000, 0.287	243.000, 0.355	243.000, 0.351	243.000, 0.239	243.000, 0.287	243.000, 0.360	243.000, 0.316	243.000, 0.239	243.000, 0.276	243.000, 0.329	243.000, 0.321	243.000, 0.237	243.000, 0.229	243.000, 0.211
1217	243.200, 0.253	243.200, 0.287	243.200, 0.356	243.200, 0.351	243.200, 0.239	243.200, 0.287	243.200, 0.359	243.200, 0.316	243.200, 0.240	243.200, 0.276	243.200, 0.329	243.200, 0.321	243.200, 0.237	243.200, 0.229	243.200, 0.210
1218	243.400, 0.252	243.400, 0.287	243.400, 0.356	243.400, 0.351	243.400, 0.239	243.400, 0.287	243.400, 0.359	243.400, 0.316	243.400, 0.240	243.400, 0.276	243.400, 0.329	243.400, 0.320	243.400, 0.237	243.400, 0.229	243.400, 0.210
1219	243.600, 0.252	243.600, 0.287	243.600, 0.356	243.600, 0.351	243.600, 0.239	243.600, 0.287	243.600, 0.358	243.600, 0.316	243.600, 0.239	243.600, 0.276	243.600, 0.329	243.600, 0.320	243.600, 0.237	243.600, 0.228	243.600, 0.210
1220	243.800, 0.252	243.800, 0.287	243.800, 0.356	243.800, 0.350	243.800, 0.239	243.800, 0.286	243.800, 0.357	243.800, 0.316	243.800, 0.239	243.800, 0.276	243.800, 0.328	243.800, 0.320	243.800, 0.237	243.800, 0.228	243.800, 0.209
1221	244.000, 0.251	244.000, 0.287	244.000, 0.356	244.000, 0.350	244.000, 0.239	244.000, 0.286	244.000, 0.357	244.000, 0.316	244.000, 0.239	244.000, 0.276	244.000, 0.328	244.000, 0.320	244.000, 0.237	244.000, 0.228	244.000, 0.209
1222	244.200, 0.251	244.200, 0.287	244.200, 0.356	244.200, 0.350	244.200, 0.239	244.200, 0.286	244.200, 0.357	244.200, 0.316	244.200, 0.239	244.200, 0.276	244.200, 0.328	244.200, 0.320	244.200, 0.236	244.200, 0.227	244.200, 0.209
1223	244.400, 0.250	244.400, 0.287	244.400, 0.356	244.400, 0.350	244.400, 0.239	244.400, 0.286	244.400, 0.356	244.400, 0.316	244.400, 0.239	244.400, 0.276	244.400, 0.328	244.400, 0.320	244.400, 0.236	244.400, 0.227	244.400, 0.209
1224	244.600, 0.250	244.600, 0.287	244.600, 0.356	244.600, 0.350	244.600, 0.238	244.600, 0.286	244.600, 0.356	244.600, 0.316	244.600, 0.239	244.600, 0.276	244.600, 0.328	244.600, 0.320	244.600, 0.236	244.600, 0.227	244.600, 0.208
1225	244.800, 0.250	244.800, 0.286	244.800, 0.356	244.800, 0.350	244.800, 0.238	244.800, 0.286	244.800, 0.357	244.800, 0.316	244.800, 0.238	244.800, 0.275	244.800, 0.328	244.800, 0.320	244.800, 0.236	244.800, 0.227	244.800, 0.208
1226	245.000, 0.250	245.000, 0.286	245.000, 0.356	245.000, 0.350	245.000, 0.238	245.000, 0.286	245.000, 0.357	245.000, 0.316	245.000, 0.238	245.000, 0.275	245.000, 0.328	245.000, 0.320	245.000, 0.236	245.000, 0.226	245.000, 0.207
1227	245.200, 0.250	245.200, 0.286	245.200, 0.355	245.200, 0.350	245.200, 0.237	245.200, 0.287	245.200, 0.357	245.200, 0.316	245.200, 0.238	245.200, 0.275	245.200, 0.328	245.200, 0.320	245.200, 0.235	245.200, 0.226	245.200, 0.207
1228	245.400, 0.250	245.400, 0.286	245.400, 0.355	245.400, 0.350	245.400, 0.237	245.400, 0.287	245.400, 0.357	245.400, 0.316	245.400, 0.239	245.400, 0.275	245.400, 0.329	245.400, 0.320	245.400, 0.235	245.400, 0.226	245.400, 0.207
1229	245.600, 0.250	245.600, 0.286	245.600, 0.355	245.600, 0.351	245.600, 0.237	245.600, 0.287	245.600, 0.357	245.600, 0.315	245.600, 0.239	245.600, 0.274	245.600, 0.329	245.600, 0.320	245.600, 0.234	245.600, 0.226	245.600, 0.206
1230	245.800, 0.250	245.800, 0.286	245.800, 0.355	245.800, 0.351	245.800, 0.237	245.800, 0.287	245.800, 0.357	245.800, 0.315	245.800, 0.239	245.800, 0.274	245.800, 0.329	245.800, 0.320	245.800, 0.233	245.800, 0.226	245.800, 0.206
1231	246.000, 0.250	246.000, 0.286	246.000, 0.356	246.000, 0.351	246.000, 0.237	246.000, 0.287	246.000, 0.358	246.000, 0.315	246.000, 0.240	246.000, 0.274	246.000, 0.329	246.000, 0.320	246.000, 0.233	246.000, 0.226	246.000, 0.206
1232	246.200, 0.250	246.200, 0.286	246.200, 0.356	246.200, 0.350	246.200, 0.237	246.200, 0.287	246.200, 0.358	246.200, 0.314	246.200, 0.240	246.200, 0.274	246.200, 0.329	246.200, 0.320	246.200, 0.233	246.200, 0.225	246.200, 0.206
1233	246.400, 0.250	246.400, 0.286	246.400, 0.356	246.400, 0.350	246.400, 0.237	246.400, 0.287	246.400, 0.358	246.400, 0.314	246.400, 0.241	246.400, 0.274	246.400, 0.329	246.400, 0.319	246.400, 0.232	246.400, 0.225	246.400, 0.205
1234	246.600, 0.250	246.600, 0.286	246.600, 0.356	246.600, 0.350	246.600, 0.236	246.600, 0.287	246.600, 0.358	246.600, 0.314	246.600, 0.242	246.600, 0.274	246.600, 0.329	246.600, 0.319	246.600, 0.232	246.600, 0.225	246.600, 0.205
1235	246.800, 0.251	246.800, 0.285	246.800, 0.356	246.800, 0.350	246.800, 0.236	246.800, 0.287	246.800, 0.358	246.800, 0.313	246.800, 0.242	246.800, 0.274	246.800, 0.329	246.800, 0.319	246.800, 0.231	246.800, 0.225	246.800, 0.205
1236	247.000, 0.251	247.000, 0.285	247.000, 0.356	247.000, 0.350	247.000, 0.236	247.000, 0.287	247.000, 0.357	247.000, 0.313	247.000, 0.242	247.000, 0.274	247.000, 0.329	247.000, 0.319	247.000, 0.231	247.000, 0.225	247.000, 0.204
1237	247.200, 0.251	247.200, 0.285	247.200, 0.355	247.200, 0.350	247.200, 0.237	247.200, 0.287	247.200, 0.357	247.200, 0.313	247.200, 0.242	247.200, 0.274	247.200, 0.329	247.200, 0.319	247.200, 0.231	247.200, 0.225	247.200, 0.204
1238	247.400, 0.251	247.400, 0.285	247.400, 0.355	247.400, 0.350	247.400, 0.237	247.400, 0.286	247.400, 0.357	247.400, 0.313	247.400, 0.242	247.400, 0.273	247.400, 0.329	247.400, 0.319	247.400, 0.230	247.400, 0.225	247.400, 0.203
1239	247.600, 0.251	247.600, 0.284	247.600, 0.355	247.600, 0.350	247.600, 0.237	247.600, 0.286	247.600, 0.357	247.600, 0.313	247.600, 0.243	247.600, 0.273	247.600, 0.329	247.600, 0.319	247.600, 0.230	247.600, 0.224	247.600, 0.203
1240	247.800, 0.250	247.800, 0.284	247.800, 0.355	247.800, 0.350	247.800, 0.237	247.800, 0.286	247.800, 0.357	247.800, 0.313	247.800, 0.243	247.800, 0.273	247.800, 0.329	247.800, 0.319	247.800, 0.229	247.800, 0.224	247.800, 0.203
1241	248.000, 0.250	248.000, 0.283	248.000, 0.354	248.000, 0.350	248.000, 0.237	248.000, 0.285	248.000, 0.357	248.000, 0.313	248.000, 0.242	248.000, 0.273	248.000, 0.329	248.000, 0.319	248.000, 0.229	248.000, 0.224	248.000, 0.202
1242	248.200, 0.250	248.200, 0.283	248.200, 0.354	248.200, 0.350	248.200, 0.237	248.200, 0.285	248.200, 0.357	248.200, 0.313	248.200, 0.242	248.200, 0.273	248.200, 0.329	248.200, 0.319	248.200, 0.229	248.200, 0.223	248.200, 0.202
1243	248.400, 0.250	248.400, 0.283	248.400, 0.354	248.400, 0.350	248.400, 0.237	248.400, 0.285	248.400, 0.357	248.400, 0.313	248.400, 0.241	248.400, 0.273	248.400, 0.328	248.400, 0.319	248.400, 0.229	248.400, 0.223	248.400, 0.201
1244	248.600, 0.250	248.600, 0.283	248.600, 0.353	248.600, 0.350	248.600, 0.237	248.600, 0.285	248.600, 0.356	248.600, 0.313	248.600, 0.240	248.600, 0.273	248.600, 0.328	248.600, 0.319	248.600, 0.228	248.600, 0.223	248.600, 0.201
1245	248.800, 0.250	248.800, 0.282	248.800, 0.353	248.800, 0.350	248.800, 0.237	248.800, 0.285	248.800, 0.356	248.800, 0.313	248.800, 0.240	248.800, 0.272	248.800, 0.328	248.800, 0.319	248.800, 0.228	248.800, 0.223	248.800, 0.200
1246	249.000, 0.250	249.000, 0.282	249.000, 0.352	249.000, 0.350	249.000, 0.237	249.000, 0.285	249.000, 0.356	249.000, 0.313	249.000, 0.239	249.000, 0.272	249.000, 0.328	249.000, 0.319	249.000, 0.228	249.000, 0.223	249.000, 0.200
1247	249.200, 0.250	249.200, 0.283	249.200, 0.352	249.200, 0.350	249.200, 0.237	249.200, 0.285	249.200, 0.355	249.200, 0.314	249.200, 0.239	249.200, 0.272	249.200, 0.328	249.200, 0.319	249.200, 0.228	249.200, 0.223	249.200, 0.200
1248	249.400, 0.250	249.400, 0.283	249.400, 0.352	249.400, 0.350	249.400, 0.237	249.400, 0.285	249.400, 0.355	249.400, 0.314	249.400, 0.238	249.400, 0.272	249.400, 0.327	249.400, 0.319	249.400, 0.227	249.400, 0.223	249.400, 0.200
1249	249.600, 0.251	249.600, 0.283	249.600, 0.352	249.600, 0.350	249.600, 0.237	249.600, 0.285	249.600, 0.355	249.600, 0.313	249.600, 0.238	249.600, 0.272	249.600, 0.327	249.600, 0.319	249.600, 0.227	249.600, 0.222	249.600, 0.200
1250	249.800, 0.251	249.800, 0.283	249.800, 0.352	249.800, 0.350	249.800, 0.237	249.800, 0.285	249.800, 0.355	249.800, 0.313	249.800, 0.238	249.800, 0.272	249.800, 0.327	249.800, 0.319	249.800, 0.227	249.800, 0.222	249.800, 0.200
1251	250.000, 0.251	250.000, 0.283	250.000, 0.352	250.000, 0.350	250.000, 0.237	250.000, 0.285	250.000, 0.355	250.000, 0.313	250.000, 0.238	250.000, 0.272	250.000, 0.326	250.000, 0.319	250.000, 0.226	250.000, 0.222	250.000, 0.200
1252	250.200, 0.251	250.200, 0.283	250.200, 0.352	250.200, 0.349	250.200, 0.236	250.200, 0.285	250.200, 0.355	250.200, 0.313	250.200, 0.238	250.200, 0.272	250.200, 0.326	250.200, 0.319	250.200, 0.226	250.200, 0.222	250.200, 0.199
1253	250.400, 0.251	250.400, 0.283	250.400, 0.352	250.400, 0.349	250.400, 0.236	250.400, 0.285	250.400, 0.355	250.400, 0.313	250.400, 0.238	250.400, 0.273	250.400, 0.326	250.400, 0.319	250.400, 0.226	250.400, 0.222	250.400, 0.199
1254	250.600, 0.251	250.600, 0.283	250.600, 0.352	250.600, 0.349	250.600, 0.236	250.600, 0.285	250.600, 0.355	250.600, 0.312	250.600, 0.238	250.600, 0.273	250.600, 0.326	250.600, 0.319	250.600, 0.226	250.600, 0.221	250.600, 0.199
1255	250.800, 0.251	250.800, 0.283	250.800, 0.352	250.800, 0.349	250.800, 0.236	250.800, 0.285	250.800, 0.355	250.800, 0.312	250.800, 0.238	250.800, 0.273	250.800, 0.326	250.800, 0.318	250.800, 0.226	250.800, 0.221	250.800, 0.198
1256	251.000, 0.251	251.000, 0.283	251.000, 0.352	251.000, 0.348	251.000, 0.236	251.000, 0.285	251.000, 0.355	251.000, 0.312	251.000, 0.238	251.000, 0.273	251.000, 0.326	251.000, 0.318	251.000, 0.225	251.000, 0.221	251.000, 0.198
1257	251.200, 0.251	251.200, 0.283	251.200, 0.352	251.200, 0.348	251.200, 0.236	251.200, 0.284	251.200, 0.355	251.200, 0.312	251.200, 0.238	251.200, 0.273	251.200, 0.326	251.200, 0.318	251.200, 0.225	251.200, 0.221	251.200, 0.198
1258	251.400, 0.250	251.400, 0.283	251.400, 0.352	251.400, 0.348	251.400, 0.236	251.400, 0.284	251.400, 0.355	251.400, 0.312	251.400, 0.238	251.400, 0.273	251.400, 0.326	251.400, 0.318	251.400, 0.224	251.400, 0.221	251.400, 0.197
1259	251.600, 0.250	251.600, 0.283	251.600, 0.352	251.600, 0.348	251.600, 0.236	251.600, 0.284	251.600, 0.355	251.600, 0.312	251.600, 0.238	251.600, 0.273	251.600, 0.326	251.600, 0.318	251.600, 0.224	251.600, 0.221	251.600, 0.197
1260	251.800, 0.249	251.800, 0.283	251.800, 0.352	251.800, 0.348	251.800, 0.235	251.800, 0.283	251.800, 0.355	251.800, 0.312	251.800, 0.238	251.800, 0.273	251.800, 0.326	251.800, 0.317	251.800, 0.223	251.800, 0.220	251.800, 0.197
1261	252.000, 0.249	252.000, 0.283	252.000, 0.352	252.000, 0.348	252.000, 0.235	252.000, 0.283	252.000, 0.356	252.000, 0.312	252.000, 0.238	252.000, 0.273	252.000, 0.326	252.000, 0.317	252.000, 0.223	252.000, 0.220	252.000, 0.197
1262	252.200, 0.249	252.200, 0.283	252.200, 0.352	252.200, 0.347	252.200, 0.235	252.200, 0.283	252.200, 0.356	252.200, 0.312	252.200, 0.238	252.200, 0.273	252.200, 0.326	252.200, 0.317	252.200, 0.223	252.200, 0.220	252.200, 0.196
1263	252.400, 0.248	252.400, 0.283	252.400, 0.352	252.400, 0.347	252.400, 0.235	252.400, 0.282	252.400, 0.355	252.400, 0.313	252.400, 0.238	252.400, 0.273	252.400, 0.327	252.400, 0.317	252.400, 0.223	252.400, 0.220	252.400, 0.196
1264	252.600, 0.248	252.600, 0.283	252.600, 0.352	252.600, 0.347	252.600, 0.235	252.600, 0.282	252.600, 0.355	252.600, 0.313	252.600, 0.238	252.600, 0.273	252.600, 0.327	252.600, 0.317	252.600, 0.223	252.600, 0.220	252.600, 0.196
1265	252.800, 0.248	252.800, 0.284	252.800, 0.352	252.800, 0.347	252.800, 0.235	252.800, 0.283	252.800, 0.355	252.800, 0.313	252.800, 0.238	252.800, 0.272	252.800, 0.327	252.800, 0.317	252.800, 0.223	252.800, 0.220	252.800, 0.195
1266	253.000, 0.248	253.000, 0.284	253.000, 0.352	253.000, 0.347	253.000, 0.234	253.000, 0.283	253.000, 0.355	253.000, 0.314	253.000, 0.238	253.000, 0.272	253.000, 0.327	253.000, 0.317	253.000, 0.223	253.000, 0.219	253.000, 0.195
1267	253.200, 0.248	253.200, 0.284	253.200, 0.352	253.200, 0.347	253.200, 0.234	253.200, 0.283	253.200, 0.354	253.200, 0.314	253.200, 0.238	253.200, 0.272	253.200, 0.326	253.200, 0.317	253.200, 0.223	253.200, 0.219	253.200, 0.195
1268	253.400, 0.248	253.400, 0.284	253.400, 0.352	253.400, 0.347	253.400, 0.234	253.400, 0.283	253.400, 0.354	253.400, 0.314	253.400, 0.238	253.400, 0.272	253.400, 0.326	253.400, 0.317	253.400, 0.223	253.400, 0.219	253.400, 0.195
1269	253.600, 0.248	253.600, 0.284	253.600, 0.352	253.600, 0.347	253.600, 0.234	253.600, 0.283	253.600, 0.354	253.600, 0.314	253.600, 0.238	253.600, 0.272	253.600, 0.326	253.600, 0.317	253.600, 0.223	253.600, 0.219	253.600, 0.195
1270	253.800, 0.248	253.800, 0.284	253.800, 0.352	253.800, 0.347	253.800, 0.234	253.800, 0.283	253.800, 0.353	253.800, 0.314	253.800, 0.238	253.800, 0.271	253.800, 0.326	253.800, 0.317	253.800, 0.222	253.800, 0.219	253.800, 0.195
1271	254.000, 0.248	254.000, 0.284	254.000, 0.351	254.000, 0.347	254.000, 0.234	254.000, 0.283	254.000, 0.353	254.000, 0.313	254.000, 0.238	254.000, 0.271	254.000, 0.325	254.000, 0.317	254.000, 0.222	254.000, 0.219	254.000, 0.195
1272	254.200, 0.248	254.200, 0.283	254.200, 0.351	254.200, 0.347	254.200, 0.233	254.200, 0.283	254.200, 0.353	254.200, 0.313	254.200, 0.238	254.200, 0.271	254.200, 0.325	254.200, 0.317	254.200, 0.222	254.200, 0.218	254.200, 0.195
1273	254.400, 0.248	254.400, 0.283	254.400, 0.351	254.400, 0.346	254.400, 0.233	254.400, 0.283	254.400, 0.353	254.400, 0.313	254.400, 0.237	254.400, 0.271	254.400, 0.325	254.400, 0.317	254.400, 0.221	254.400, 0.218	254.400, 0.194
1274	254.600, 0.248	254.600, 0.283	254.600, 0.351	254.600, 0.346	254.600, 0.233	254.600, 0.283	254.600, 0.353	254.600, 0.312	254.600, 0.237	254.600, 0.271	254.600, 0.324	254.600, 0.317	254.600, 0.221	254.600, 0.218	254.600, 0.194
1275	254.800, 0.248	254.800, 0.283	254.800, 0.351	254.800, 0.346	254.800, 0.233	254.800, 0.283	254.800, 0.352	254.800, 0.312	254.800, 0.237	254.800, 0.271	254.800, 0.324	254.800, 0.316	254.800, 0.220	254.800, 0.217	254.800, 0.194
1276	255.000, 0.248	255.000, 0.283	255.000, 0.351	255.000, 0.346	255.000, 0.233	255.000, 0.282	255.000, 0.352	255.000, 0.312	255.000, 0.237	255.000, 0.271	255.000, 0.324	255.000, 0.316	255.000, 0.220	255.000, 0.217	255.000, 0.193
1277	255.200, 0.248	255.200, 0.283	255.200, 0.350	255.200, 0.346	255.200, 0.233	255.200, 0.282	255.200, 0.352	255.200, 0.312	255.200, 0.236	255.200, 0.271	255.200, 0.324	255.200, 0.316	255.200, 0.219	255.200, 0.217	255.200, 0.193
1278	255.400, 0.247	255.400, 0.283	255.400, 0.350	255.400, 0.346	255.400, 0.233	255.400, 0.282	255.400, 0.351	255.400, 0.311	255.400, 0.236	255.400, 0.271	255.400, 0.324	255.400, 0.316	255.400, 0.219	255.400, 0.216	255.400, 0.193
1279	255.600, 0.247	255.600, 0.283	255.600, 0.350	255.600, 0.346	255.600, 0.233	255.600, 0.282	255.600, 0.351	255.600, 0.311	255.600, 0.236	255.600, 0.271	255.600, 0.324	255.600, 0.315	255.600, 0.219	255.600, 0.216	255.600, 0.193
1280	255.800, 0.247	255.800, 0.283	255.800, 0.350	255.800, 0.345	255.800, 0.234	255.800, 0.282	255.800, 0.351	255.800, 0.311	255.800, 0.235	255.800, 0.271	255.800, 0.324	255.800, 0.315	255.800, 0.219	255.800, 0.215	255.800, 0.193
1281	256.000, 0.247	256.000, 0.283	256.000, 0.350	256.000, 0.345	256.000, 0.234	256.000, 0.282	256.000, 0.351	256.000, 0.310	256.000, 0.235	256.000, 0.271	256.000, 0.324	256.000, 0.315	256.000, 0.219	256.000, 0.215	256.000, 0.193
1282	256.200, 0.247	256.200, 0.283	256.200, 0.351	256.200, 0.345	256.200, 0.234	256.200, 0.282	256.200, 0.351	256.200, 0.310	256.200, 0.235	256.200, 0.271	256.200, 0.324	256.200, 0.315	256.200, 0.219	256.200, 0.215	256.200, 0.193
1283	256.400, 0.247	256.400, 0.283	256.400, 0.351	256.400, 0.345	256.400, 0.234	256.400, 0.282	256.400, 0.351	256.400, 0.310	256.400, 0.235	256.400, 0.272	256.400, 0.324	256.400, 0.315	256.400, 0.219	256.400, 0.214	256.400, 0.192
1284	256.600, 0.247	256.600, 0.283	256.600, 0.351	256.600, 0.345	256.600, 0.234	256.600, 0.283	256.600, 0.352	256.600, 0.310	256.600, 0.234	256.600, 0.272	256.600, 0.324	256.600, 0.315	256.600, 0.220	256.600, 0.214	256.600, 0.192
1285	256.800, 0.248	256.800, 0.284	256.800, 0.351	256.800, 0.345	256.800, 0.234	256.800, 0.283	256.800, 0.352	256.800, 0.310	256.800, 0.234	256.800, 0.272	256.800, 0.324	256.800, 0.315	256.800, 0.220	256.800, 0.214	256.800, 0.192
1286	257.000, 0.248	257.000, 0.283	257.000, 0.351	257.000, 0.345	257.000, 0.234	257.000, 0.283	257.000, 0.352	257.000, 0.310	257.000, 0.234	257.000, 0.272	257.000, 0.324	257.000, 0.315	257.000, 0.220	257.000, 0.214	257.000, 0.191
1287	257.200, 0.248	257.200, 0.283	257.200, 0.351	257.200, 0.345	257.200, 0.234	257.200, 0.283	257.200, 0.352	257.200, 0.310	257.200, 0.235	257.200, 0.272	257.200, 0.324	257.200, 0.315	257.200, 0.220	257.200, 0.214	257.200, 0.191
1288	257.400, 0.248	257.400, 0.283	257.400, 0.351	257.400, 0.345	257.400, 0.234	257.400, 0.282	257.400, 0.352	257.400, 0.310	257.400, 0.235	257.400, 0.272	257.400, 0.324	257.400, 0.315	257.400, 0.220	257.400, 0.214	257.400, 0.191
1289	257.600, 0.248	257.600, 0.283	257.600, 0.351	257.600, 0.345	257.600, 0.234	257.600, 0.282	257.600, 0.352	257.600, 0.310	257.600, 0.235	257.600, 0.272	257.600, 0.325	257.600, 0.315	257.600, 0.219	257.600, 0.214	257.600, 0.190
1290	257.800, 0.247	257.800, 0.283	257.800, 0.351	257.800, 0.345	257.800, 0.234	257.800, 0.282	257.800, 0.353	257.800, 0.310	257.800, 0.235	257.800, 0.272	257.800, 0.325	257.800, 0.315	257.800, 0.219	257.800, 0.214	257.800, 0.190
1291	258.000, 0.247	258.000, 0.282	258.000, 0.350	258.000, 0.345	258.000, 0.234	258.000, 0.282	258.000, 0.353	258.000, 0.309	258.000, 0.235	258.000, 0.272	258.000, 0.325	258.000, 0.314	258.000, 0.219	258.000, 0.214	258.000, 0.190
1292	258.200, 0.247	258.200, 0.282	258.200, 0.350	258.200, 0.345	258.200, 0.234	258.200, 0.282	258.200, 0.353	258.200, 0.309	258.200, 0.235	258.200, 0.271	258.200, 0.325	258.200, 0.314	258.200, 0.218	258.200, 0.214	258.200, 0.190
1293	258.400, 0.247	258.400, 0.281	258.400, 0.350	258.400, 0.345	258.400, 0.234	258.400, 0.282	258.400, 0.353	258.400, 0.309	258.400, 0.235	258.400, 0.271	258.400, 0.325	258.400, 0.314	258.400, 0.218	258.400, 0.214	258.400, 0.189
1294	258.600, 0.247	258.600, 0.281	258.600, 0.350	258.600, 0.345	258.600, 0.233	258.600, 0.282	258.600, 0.353	258.600, 0.309	258.600, 0.235	258.600, 0.271	258.600, 0.325	258.600, 0.314	258.600, 0.217	258.600, 0.213	258.600, 0.189
1295	258.800, 0.247	258.800, 0.281	258.800, 0.350	258.800, 0.345	258.800, 0.233	258.800, 0.283	258.800, 0.353	258.800, 0.309	258.800, 0.235	258.800, 0.270	258.800, 0.325	258.800, 0.314	258.800, 0.217	258.800, 0.213	258.800, 0.189
1296	259.000, 0.247	259.000, 0.281	259.000, 0.350	259.000, 0.345	259.000, 0.233	259.000, 0.282	259.000, 0.353	259.000, 0.309	259.000, 0.235	259.000, 0.270	259.000, 0.324	259.000, 0.314	259.000, 0.217	259.000, 0.213	259.000, 0.188
1297	259.200, 0.247	259.200, 0.280	259.200, 0.349	259.200, 0.346	259.200, 0.233	259.200, 0.282	259.200, 0.352	259.200, 0.309	259.200, 0.235	259.200, 0.270	259.200, 0.324	259.200, 0.314	259.200, 0.216	259.200, 0.213	259.200, 0.188
1298	259.400, 0.247	259.400, 0.280	259.400, 0.349	259.400, 0.346	259.400, 0.233	259.400, 0.282	259.400, 0.352	259.400, 0.309	259.400, 0.235	259.400, 0.270	259.400, 0.324	259.400, 0.314	259.400, 0.216	259.400, 0.212	259.400, 0.188
1299	259.600, 0.246	259.600, 0.281	259.600, 0.349	259.600, 0.346	259.600, 0.233	259.600, 0.282	259.600, 0.352	259.600, 0.308	259.600, 0.235	259.600, 0.269	259.600, 0.324	259.600, 0.314	259.600, 0.216	259.600, 0.212	259.600, 0.188
1300	259.800, 0.246	259.800, 0.281	259.800, 0.349	259.800, 0.346	259.800, 0.233	259.800, 0.282	259.800, 0.352	259.800, 0.308	259.800, 0.235	259.800, 0.269	259.800, 0.323	259.800, 0.314	259.800, 0.216	259.800, 0.211	259.800, 0.187
1301	260.000, 0.246	260.000, 0.281	260.000, 0.349	260.000, 0.346	260.000, 0.233	260.000, 0.281	260.000, 0.351	260.000, 0.308	260.000, 0.236	260.000, 0.269	260.000, 0.323	260.000, 0.314	260.000, 0.215	260.000, 0.211	260.000, 0.187
1302	260.200, 0.246	260.200, 0.281	260.200, 0.349	260.200, 0.345	260.200, 0.233	260.200, 0.281	260.200, 0.351	260.200, 0.308	260.200, 0.236	260.200, 0.269	260.200, 0.322	260.200, 0.314	260.200, 0.215	260.200, 0.211	260.200, 0.187
1303	260.400, 0.246	260.400, 0.281	260.400, 0.349	260.400, 0.345	260.400, 0.233	260.400, 0.281	260.400, 0.351	260.400, 0.308	260.400, 0.236	260.400, 0.270	260.400, 0.322	260.400, 0.314	260.400, 0.215	260.400, 0.210	260.400, 0.187
1304	260.600, 0.246	260.600, 0.282	260.600, 0.349	260.600, 0.345	260.600, 0.233	260.600, 0.281	260.600, 0.351	260.600, 0.308	260.600, 0.236	260.600, 0.270	260.600, 0.322	260.600, 0.314	260.600, 0.215	260.600, 0.210	260.600, 0.187
1305	260.800, 0.246	260.800, 0.282	260.800, 0.349	260.800, 0.345	260.800, 0.233	260.800, 0.281	260.800, 0.351	260.800, 0.308	260.800, 0.236	260.800, 0.270	260.800, 0.321	260.800, 0.314	260.800, 0.215	260.800, 0.210	260.800, 0.187
1306	261.000, 0.246	261.000, 0.282	261.000, 0.349	261.000, 0.345	261.000, 0.233	261.000, 0.280	261.000, 0.351	261.000, 0.307	261.000, 0.236	261.000, 0.270	261.000, 0.321	261.000, 0.314	261.000, 0.214	261.000, 0.210	261.000, 0.187
1307	261.200, 0.246	261.200, 0.282	261.200, 0.349	261.200, 0.345	261.200, 0.233	261.200, 0.280	261.200, 0.350	261.200, 0.308	261.200, 0.236	261.200, 0.270	261.200, 0.321	261.200, 0.314	261.200, 0.214	261.200, 0.210	261.200, 0.187
1308	261.400, 0.246	261.400, 0.281	261.400, 0.349	261.400, 0.345	261.400, 0.233	261.400, 0.280	261.400, 0.350	261.400, 0.307	261.400, 0.236	261.400, 0.270	261.400, 0.321	261.400, 0.314	261.400, 0.214	261.400, 0.210	261.400, 0.187
1309	261.600, 0.246	261.600, 0.281	261.600, 0.348	261.600, 0.345	261.600, 0.233	261.600, 0.280	261.600, 0.350	261.600, 0.307	261.600, 0.236	261.600, 0.270	261.600, 0.322	261.600, 0.314	261.600, 0.214	261.600, 0.210	261.600, 0.187
1310	261.800, 0.246	261.800, 0.281	261.800, 0.348	261.800, 0.345	261.800, 0.233	261.800, 0.280	261.800, 0.350	261.800, 0.307	261.800, 0.235	261.800, 0.270	261.800, 0.322	261.800, 0.314	261.800, 0.213	261.800, 0.210	261.800, 0.187
1311	262.000, 0.246	262.000, 0.281	262.000, 0.348	262.000, 0.345	262.000, 0.232	262.000, 0.280	262.000, 0.351	262.000, 0.307	262.000, 0.235	262.000, 0.270	262.000, 0.322	262.000, 0.313	262.000, 0.213	262.000, 0.210	262.000, 0.187
1312	262.200, 0.246	262.200, 0.281	262.200, 0.348	262.200, 0.345	262.200, 0.232	262.200, 0.280	262.200, 0.351	262.200, 0.307	262.200, 0.235	262.200, 0.270	262.200, 0.323	262.200, 0.313	262.200, 0.213	262.200, 0.210	262.200, 0.187
1313	262.400, 0.246	262.400, 0.281	262.400, 0.348	262.400, 0.345	262.400, 0.231	262.400, 0.280	262.400, 0.351	262.400, 0.307	262.400, 0.235	262.400, 0.270	262.400, 0.323	262.400, 0.313	262.400, 0.213	262.400, 0.210	262.400, 0.186
1314	262.600, 0.246	262.600, 0.281	262.600, 0.348	262.600, 0.345	262.600, 0.231	262.600, 0.280	262.600, 0.351	262.600, 0.307	262.600, 0.234	262.600, 0.270	262.600, 0.323	262.600, 0.313	262.600, 0.213	262.600, 0.210	262.600, 0.186
1315	262.800, 0.246	262.800, 0.281	262.800, 0.347	262.800, 0.346	262.800, 0.231	262.800, 0.280	262.800, 0.351	262.800, 0.307	262.800, 0.234	262.800, 0.270	262.800, 0.323	262.800, 0.312	262.800, 0.213	262.800, 0.210	262.800, 0.186
1316	263.000, 0.246	263.000, 0.281	263.000, 0.347	263.000, 0.346	263.000, 0.230	263.000, 0.280	263.000, 0.351	263.000, 0.307	263.000, 0.234	263.000, 0.269	263.000, 0.323	263.000, 0.312	263.000, 0.213	263.000, 0.210	263.000, 0.185
1317	263.200, 0.246	263.200, 0.281	263.200, 0.347	263.200, 0.346	263.200, 0.230	263.200, 0.280	263.200, 0.351	263.200, 0.307	263.200, 0.234	263.200, 0.269	263.200, 0.323	263.200, 0.312	263.200, 0.213	263.200, 0.209	263.200, 0.185
1318	263.400, 0.246	263.400, 0.281	263.400, 0.347	263.400, 0.346	263.400, 0.230	263.400, 0.280	263.400, 0.351	263.400, 0.308	263.400, 0.234	263.400, 0.269	263.400, 0.323	263.400, 0.312	263.400, 0.213	263.400, 0.209	263.400, 0.184
1319	263.600, 0.246	263.600, 0.281	263.600, 0.347	263.600, 0.346	263.600, 0.230	263.600, 0.280	263.600, 0.351	263.600, 0.307	263.600, 0.234	263.600, 0.269	263.600, 0.323	263.600, 0.311	263.600, 0.213	263.600, 0.209	263.600, 0.184
1320	263.800, 0.246	263.800, 0.281	263.800, 0.347	263.800, 0.345	263.800, 0.230	263.800, 0.280	263.800, 0.351	263.800, 0.307	263.800, 0.235	263.800, 0.269	263.800, 0.323	263.800, 0.312	263.800, 0.212	263.800, 0.209	263.800, 0.184
1321	264.000, 0.246	264.000, 0.281	264.000, 0.347	264.000, 0.345	264.000, 0.230	264.000, 0.280	264.000, 0.350	264.000, 0.307	264.000, 0.235	264.000, 0.268	264.000, 0.322	264.000, 0.312	264.000, 0.212	264.000, 0.209	264.000, 0.183
1322	264.200, 0.246	264.200, 0.281	264.200, 0.347	264.200, 0.345	264.200, 0.230	264.200, 0.280	264.200, 0.350	264.200, 0.307	264.200, 0.235	264.200, 0.268	264.200, 0.322	264.200, 0.312	264.200, 0.212	264.200, 0.209	264.200, 0.183
1323	264.400, 0.246	264.400, 0.280	264.400, 0.347	264.400, 0.345	264.400, 0.230	264.400, 0.281	264.400, 0.350	264.400, 0.307	264.400, 0.235	264.400, 0.268	264.400, 0.322	264.400, 0.312	264.400, 0.211	264.400, 0.209	264.400, 0.183
1324	264.600, 0.246	264.600, 0.280	264.600, 0.347	264.600, 0.344	264.600, 0.230	264.600, 0.281	264.600, 0.350	264.600, 0.307	264.600, 0.235	264.600, 0.268	264.600, 0.322	264.600, 0.312	264.600, 0.211	264.600, 0.209	264.600, 0.184
1325	264.800, 0.246	264.800, 0.280	264.800, 0.347	264.800, 0.344	264.800, 0.231	264.800, 0.281	264.800, 0.350	264.800, 0.306	264.800, 0.235	264.800, 0.268	264.800, 0.322	264.800, 0.312	264.800, 0.211	264.800, 0.208	264.800, 0.184
1326	265.000, 0.245	265.000, 0.280	265.000, 0.346	265.000, 0.344	265.000, 0.231	265.000, 0.281	265.000, 0.349	265.000, 0.306	265.000, 0.235	265.000, 0.268	265.000, 0.322	265.000, 0.312	265.000, 0.210	265.000, 0.208	265.000, 0.183
1327	265.200, 0.245	265.200, 0.280	265.200, 0.346	265.200, 0.344	265.200, 0.231	265.200, 0.281	265.200, 0.349	265.200, 0.306	265.200, 0.236	265.200, 0.268	265.200, 0.322	265.200, 0.312	265.200, 0.210	265.200, 0.208	265.200, 0.183
1328	265.400, 0.245	265.400, 0.279	265.400, 0.346	265.400, 0.344	265.400, 0.231	265.400, 0.281	265.400, 0.349	265.400, 0.306	265.400, 0.236	265.400, 0.268	265.400, 0.321	265.400, 0.312	265.400, 0.210	265.400, 0.208	265.400, 0.183
1329	265.600, 0.245	265.600, 0.279	265.600, 0.346	265.600, 0.344	265.600, 0.231	265.600, 0.281	265.600, 0.349	265.600, 0.306	265.600, 0.235	265.600, 0.268	265.600, 0.321	265.600, 0.312	265.600, 0.210	265.600, 0.208	265.600, 0.183
1330	265.800, 0.245	265.800, 0.279	265.800, 0.346	265.800, 0.344	265.800, 0.231	265.800, 0.281	265.800, 0.349	265.800, 0.306	265.800, 0.235	265.800, 0.268	265.800, 0.321	265.800, 0.312	265.800, 0.210	265.800, 0.208	265.800, 0.182
1331	266.000, 0.245	266.000, 0.279	266.000, 0.345	266.000, 0.344	266.000, 0.231	266.000, 0.280	266.000, 0.349	266.000, 0.306	266.000, 0.235	266.000, 0.268	266.000, 0.321	266.000, 0.312	266.000, 0.210	266.000, 0.208	266.000, 0.182
1332	266.200, 0.244	266.200, 0.280	266.200, 0.345	266.200, 0.343	266.200, 0.231	266.200, 0.280	266.200, 0.349	266.200, 0.306	266.200, 0.234	266.200, 0.268	266.200, 0.321	266.200, 0.312	266.200, 0.210	266.200, 0.208	266.200, 0.182
1333	266.400, 0.244	266.400, 0.280	266.400, 0.345	266.400, 0.343	266.400, 0.231	266.400, 0.280	266.400, 0.349	266.400, 0.306	266.400, 0.234	266.400, 0.268	266.400, 0.321	266.400, 0.312	266.400, 0.210	266.400, 0.208	266.400, 0.182
1334	266.600, 0.244	266.600, 0.280	266.600, 0.345	266.600, 0.343	266.600, 0.231	266.600, 0.280	266.600, 0.348	266.600, 0.306	266.600, 0.233	266.600, 0.268	266.600, 0.321	266.600, 0.311	266.600, 0.210	266.600, 0.208	266.600, 0.182
1335	266.800, 0.244	266.800, 0.280	266.800, 0.344	266.800, 0.343	266.800, 0.231	266.800, 0.280	266.800, 0.348	266.800, 0.306	266.800, 0.233	266.800, 0.268	266.800, 0.321	266.800, 0.311	266.800, 0.211	266.800, 0.207	266.800, 0.181
1336	267.000, 0.244	267.000, 0.280	267.000, 0.344	267.000, 0.343	267.000, 0.231	267.000, 0.279	267.000, 0.348	267.000, 0.306	267.000, 0.233	267.000, 0.268	267.000, 0.321	267.000, 0.310	267.000, 0.211	267.000, 0.207	267.000, 0.181
1337	267.200, 0.245	267.200, 0.280	267.200, 0.345	267.200, 0.343	267.200, 0.231	267.200, 0.279	267.200, 0.349	267.200, 0.306	267.200, 0.233	267.200, 0.268	267.200, 0.321	267.200, 0.310	267.200, 0.210	267.200, 0.207	267.200, 0.181
1338	267.400, 0.245	267.400, 0.280	267.400, 0.345	267.400, 0.342	267.400, 0.231	267.400, 0.279	267.400, 0.349	267.400, 0.306	267.400, 0.233	267.400, 0.268	267.400, 0.320	267.400, 0.310	267.400, 0.210	267.400, 0.207	267.400, 0.180
1339	267.600, 0.245	267.600, 0.280	267.600, 0.345	267.600, 0.342	267.600, 0.231	267.600, 0.279	267.600, 0.349	267.600, 0.306	267.600, 0.233	267.600, 0.268	267.600, 0.320	267.600, 0.310	267.600, 0.209	267.600, 0.207	267.600, 0.180
1340	267.800, 0.245	267.800, 0.280	267.800, 0.345	267.800, 0.342	267.800, 0.231	267.800, 0.279	267.800, 0.349	267.800, 0.306	267.800, 0.233	267.800, 0.268	267.800, 0.320	267.800, 0.310	267.800, 0.209	267.800, 0.207	267.800, 0.180
1341	268.000, 0.245	268.000, 0.279	268.000, 0.345	268.000, 0.342	268.000, 0.231	268.000, 0.279	268.000, 0.349	268.000, 0.305	268.000, 0.233	268.000, 0.267	268.000, 0.320	268.000, 0.310	268.000, 0.209	268.000, 0.207	268.000, 0.181
1342	268.200, 0.244	268.200, 0.279	268.200, 0.345	268.200, 0.341	268.200, 0.230	268.200, 0.279	268.200, 0.349	268.200, 0.305	268.200, 0.233	268.200, 0.267	268.200, 0.320	268.200, 0.310	268.200, 0.208	268.200, 0.207	268.200, 0.181
1343	268.400, 0.245	268.400, 0.279	268.400, 0.346	268.400, 0.341	268.400, 0.230	268.400, 0.279	268.400, 0.349	268.400, 0.305	268.400, 0.233	268.400, 0.267	268.400, 0.320	268.400, 0.310	268.400, 0.208	268.400, 0.206	268.400, 0.181
1344	268.600, 0.244	268.600, 0.279	268.600, 0.346	268.600, 0.341	268.600, 0.230	268.600, 0.279	268.600, 0.348	268.600, 0.305	268.600, 0.233	268.600, 0.267	268.600, 0.320	268.600, 0.310	268.600, 0.208	268.600, 0.206	268.600, 0.181
1345	268.800, 0.245	268.800, 0.279	268.800, 0.346	268.800, 0.341	268.800, 0.230	268.800, 0.279	268.800, 0.348	268.800, 0.304	268.800, 0.234	268.800, 0.267	268.800, 0.320	268.800, 0.310	268.800, 0.207	268.800, 0.206	268.800, 0.181
1346	269.000, 0.244	269.000, 0.278	269.000, 0.346	269.000, 0.341	269.000, 0.230	269.000, 0.279	269.000, 0.347	269.000, 0.304	269.000, 0.234	269.000, 0.267	269.000, 0.320	269.000, 0.310	269.000, 0.207	269.000, 0.206	269.000, 0.181
1347	269.200, 0.244	269.200, 0.278	269.200, 0.346	269.200, 0.340	269.200, 0.230	269.200, 0.279	269.200, 0.347	269.200, 0.304	269.200, 0.234	269.200, 0.267	269.200, 0.320	269.200, 0.310	269.200, 0.207	269.200, 0.206	269.200, 0.181
1348	269.400, 0.244	269.400, 0.278	269.400, 0.346	269.400, 0.340	269.400, 0.230	269.400, 0.279	269.400, 0.347	269.400, 0.304	269.400, 0.234	269.400, 0.267	269.400, 0.320	269.400, 0.310	269.400, 0.207	269.400, 0.206	269.400, 0.181
1349	269.600, 0.244	269.600, 0.278	269.600, 0.346	269.600, 0.340	269.600, 0.230	269.600, 0.279	269.600, 0.347	269.600, 0.304	269.600, 0.234	269.600, 0.267	269.600, 0.320	269.600, 0.311	269.600, 0.207	269.600, 0.206	269.600, 0.181
1350	269.800, 0.244	269.800, 0.278	269.800, 0.346	269.800, 0.340	269.800, 0.230	269.800, 0.278	269.800, 0.346	269.800, 0.304	269.800, 0.234	269.800, 0.267	269.800, 0.320	269.800, 0.311	269.800, 0.208	269.800, 0.206	269.800, 0.181
1351	,	,	,	,	,	,	,	,	,	,	,	,	,	,	,
1352	,	,	,	,	,	,	,	,	,	,	,	,	,	,	,
1353	,	,	,	,	,	,	,	,	,	,	,	,	,	,	,
1354	,	,	,	,	,	,	,	,	,	,	,	,	,	,	,
1355	,	,	,	,	,	,	,	,	,	,	,	,	,	,	,
1356	,	,	,	,	,	,	,	,	,	,	,	,	,	,	,
1357	,	,	,	,	,	,	,	,	,	,	,	,	,	,	,
1358	,	,	,	,	,	,	,	,	,	,	,	,	,	,	,
1359	,	,	,	,	,	,	,	,	,	,	,	,	,	,	,
1360	,	,	,	,	,	,	,	,	,	,	,	,	,	,	,
1361	,	,	,	,	,	,	,	,	,	,	,	,	,	,	,
1362	,	,	,	,	,	,	,	,	,	,	,	,	,	,	,
1363	,	,	,	,	,	,	,	,	,	,	,	,	,	,	,
1364	,	,	,	,	,	,	,	,	,	,	,	,	,	,	,
1365	,	,	,	,	,	,	,	,	,	,	,	,	,	,	,
1366	,	,	,	,	,	,	,	,	,	,	,	,	,	,	,
1367	,	,	,	,	,	,	,	,	,	,	,	,	,	,	,
1368	,	,	,	,	,	,	,	,	,	,	,	,	,	,	,
1369	,	,	,	,	,	,	,	,	,	,	,	,	,	,	,
1370	,	,	,	,	,	,	,	,	,	,	,	,	,	,	,
1371	,	,	,	,	,	,	,	,	,	,	,	,	,	,	,
1372	,	,	,	,	,	,	,	,	,	,	,	,	,	,	,
1373	,	,	,	,	,	,	,	,	,	,	,	,	,	,	,
1374	,	,	,	,	,	,	,	,	,	,	,	,	,	,	,
1375	,	,	,	,	,	,	,	,	,	,	,	,	,	,	,
1376	,	,	,	,	,	,	,	,	,	,	,	,	,	,	,
1377	,	,	,	,	,	,	,	,	,	,	,	,	,	,	,
1378	,	,	,	,	,	,	,	,	,	,	,	,	,	,	,
1379	,	,	,	,	,	,	,	,	,	,	,	,	,	,	,
1380	,	,	,	,	,	,	,	,	,	,	,	,	,	,	,
1381	,	,	,	,	,	,	,	,	,	,	,	,	,	,	,
1382	,	,	,	,	,	,	,	,	,	,	,	,	,	,	,
1383	,	,	,	,	,	,	,	,	,	,	,	,	,	,	,
1384	,	,	,	,	,	,	,	,	,	,	,	,	,	,	,
1385	,	,	,	,	,	,	,	,	,	,	,	,	,	,	,
1386	,	,	,	,	,	,	,	,	,	,	,	,	,	,	,
1387	,	,	,	,	,	,	,	,	,	,	,	,	,	,	,
1388	,	,	,	,	,	,	,	,	,	,	,	,	,	,	,
1389	,	,	,	,	,	,	,	,	,	,	,	,	,	,	,
1390	,	,	,	,	,	,	,	,	,	,	,	,	,	,	,
1391	,	,	,	,	,	,	,	,	,	,	,	,	,	,	,
1392	,	,	,	,	,	,	,	,	,	,	,	,	,	,	,
1393	,	,	,	,	,	,	,	,	,	,	,	,	,	,	,
1394	,	,	,	,	,	,	,	,	,	,	,	,	,	,	,
1395	,	,	,	,	,	,	,	,	,	,	,	,	,	,	,
1396	,	,	,	,	,	,	,	,	,	,	,	,	,	,	,
1397	,	,	,	,	,	,	,	,	,	,	,	,	,	,	,
1398	,	,	,	,	,	,	,	,	,	,	,	,	,	,	,
1399	,	,	,	,	,	,	,	,	,	,	,	,	,	,	,
1400	,	,	,	,	,	,	,	,	,	,	,	,	,	,	,
1401	,	,	,	,	,	,	,	,	,	,	,	,	,	,	,
1402	,	,	,	,	,	,	,	,	,	,	,	,	,	,	,
1403	,	,	,	,	,	,	,	,	,	,	,	,	,	,	,
1404	,	,	,	,	,	,	,	,	,	,	,	,	,	,	,
1405	,	,	,	,	,	,	,	,	,	,	,	,	,	,	,
1406	,	,	,	,	,	,	,	,	,	,	,	,	,	,	,
1407	,	,	,	,	,	,	,	,	,	,	,	,	,	,	,
1408	,	,	,	,	,	,	,	,	,	,	,	,	,	,	,
1409	,	,	,	,	,	,	,	,	,	,	,	,	,	,	,
1410	,	,	,	,	,	,	,	,	,	,	,	,	,	,	,
1411	,	,	,	,	,	,	,	,	,	,	,	,	,	,	,
1412	,	,	,	,	,	,	,	,	,	,	,	,	,	,	,
1413	,	,	,	,	,	,	,	,	,	,	,	,	,	,	,
1414	,	,	,	,	,	,	,	,	,	,	,	,	,	,	,
1415	,	,	,	,	,	,	,	,	,	,	,	,	,	,	,
1416	,	,	,	,	,	,	,	,	,	,	,	,	,	,	,
1417	,	,	,	,	,	,	,	,	,	,	,	,	,	,	,
1418	,	,	,	,	,	,	,	,	,	,	,	,	,	,	,
1419	,	,	,	,	,	,	,	,	,	,	,	,	,	,	,
1420	,	,	,	,	,	,	,	,	,	,	,	,	,	,	,
1421	,	,	,	,	,	,	,	,	,	,	,	,	,	,	,
1422	,	,	,	,	,	,	,	,	,	,	,	,	,	,	,
1423	,	,	,	,	,	,	,	,	,	,	,	,	,	,	,
1424	,	,	,	,	,	,	,	,	,	,	,	,	,	,	,
1425	,	,	,	,	,	,	,	,	,	,	,	,	,	,	,
1426	,	,	,	,	,	,	,	,	,	,	,	,	,	,	,
1427	,	,	,	,	,	,	,	,	,	,	,	,	,	,	,
1428	,	,	,	,	,	,	,	,	,	,	,	,	,	,	,
1429	,	,	,	,	,	,	,	,	,	,	,	,	,	,	,
1430	,	,	,	,	,	,	,	,	,	,	,	,	,	,	,
1431	,	,	,	,	,	,	,	,	,	,	,	,	,	,	,
1432	,	,	,	,	,	,	,	,	,	,	,	,	,	,	,
1433	,	,	,	,	,	,	,	,	,	,	,	,	,	,	,
1434	,	,	,	,	,	,	,	,	,	,	,	,	,	,	,
1435	,	,	,	,	,	,	,	,	,	,	,	,	,	,	,
1436	,	,	,	,	,	,	,	,	,	,	,	,	,	,	,
1437	,	,	,	,	,	,	,	,	,	,	,	,	,	,	,
1438	,	,	,	,	,	,	,	,	,	,	,	,	,	,	,
1439	,	,	,	,	,	,	,	,	,	,	,	,	,	,	,
1440	,	,	,	,	,	,	,	,	,	,	,	,	,	,	,
1441	,	,	,	,	,	,	,	,	,	,	,	,	,	,	,
1442	,	,	,	,	,	,	,	,	,	,	,	,	,	,	,
1443	,	,	,	,	,	,	,	,	,	,	,	,	,	,	,
1444	,	,	,	,	,	,	,	,	,	,	,	,	,	,	,
1445	,	,	,	,	,	,	,	,	,	,	,	,	,	,	,
1446	,	,	,	,	,	,	,	,	,	,	,	,	,	,	,
1447	,	,	,	,	,	,	,	,	,	,	,	,	,	,	,
1448	,	,	,	,	,	,	,	,	,	,	,	,	,	,	,
1449	,	,	,	,	,	,	,	,	,	,	,	,	,	,	,
1450	,	,	,	,	,	,	,	,	,	,	,	,	,	,	,
1451	,	,	,	,	,	,	,	,	,	,	,	,	,	,	,
1452	,	,	,	,	,	,	,	,	,	,	,	,	,	,	,
1453	,	,	,	,	,	,	,	,	,	,	,	,	,	,	,
1454	,	,	,	,	,	,	,	,	,	,	,	,	,	,	,
1455	,	,	,	,	,	,	,	,	,	,	,	,	,	,	,
1456	,	,	,	,	,	,	,	,	,	,	,	,	,	,	,
1457	,	,	,	,	,	,	,	,	,	,	,	,	,	,	,
1458	,	,	,	,	,	,	,	,	,	,	,	,	,	,	,
1459	,	,	,	,	,	,	,	,	,	,	,	,	,	,	,
1460	,	,	,	,	,	,	,	,	,	,	,	,	,	,	,
1461	,	,	,	,	,	,	,	,	,	,	,	,	,	,	,
1462	,	,	,	,	,	,	,	,	,	,	,	,	,	,	,
1463	,	,	,	,	,	,	,	,	,	,	,	,	,	,	,
1464	,	,	,	,	,	,	,	,	,	,	,	,	,	,	,
1465	,	,	,	,	,	,	,	,	,	,	,	,	,	,	,
1466	,	,	,	,	,	,	,	,	,	,	,	,	,	,	,
1467	,	,	,	,	,	,	,	,	,	,	,	,	,	,	,
1468	,	,	,	,	,	,	,	,	,	,	,	,	,	,	,
1469	,	,	,	,	,	,	,	,	,	,	,	,	,	,	,
1470	,	,	,	,	,	,	,	,	,	,	,	,	,	,	,
1471	,	,	,	,	,	,	,	,	,	,	,	,	,	,	,
1472	,	,	,	,	,	,	,	,	,	,	,	,	,	,	,
1473	,	,	,	,	,	,	,	,	,	,	,	,	,	,	,
1474	,	,	,	,	,	,	,	,	,	,	,	,	,	,	,
1475	,	,	,	,	,	,	,	,	,	,	,	,	,	,	,
1476	,	,	,	,	,	,	,	,	,	,	,	,	,	,	,
1477	,	,	,	,	,	,	,	,	,	,	,	,	,	,	,
1478	,	,	,	,	,	,	,	,	,	,	,	,	,	,	,
1479	,	,	,	,	,	,	,	,	,	,	,	,	,	,	,
1480	,	,	,	,	,	,	,	,	,	,	,	,	,	,	,
1481	,	,	,	,	,	,	,	,	,	,	,	,	,	,	,
1482	,	,	,	,	,	,	,	,	,	,	,	,	,	,	,
1483	,	,	,	,	,	,	,	,	,	,	,	,	,	,	,
1484	,	,	,	,	,	,	,	,	,	,	,	,	,	,	,
1485	,	,	,	,	,	,	,	,	,	,	,	,	,	,	,
1486	,	,	,	,	,	,	,	,	,	,	,	,	,	,	,
1487	,	,	,	,	,	,	,	,	,	,	,	,	,	,	,
1488	,	,	,	,	,	,	,	,	,	,	,	,	,	,	,
1489	,	,	,	,	,	,	,	,	,	,	,	,	,	,	,
1490	,	,	,	,	,	,	,	,	,	,	,	,	,	,	,
1491	,	,	,	,	,	,	,	,	,	,	,	,	,	,	,
1492	,	,	,	,	,	,	,	,	,	,	,	,	,	,	,
1493	,	,	,	,	,	,	,	,	,	,	,	,	,	,	,
1494	,	,	,	,	,	,	,	,	,	,	,	,	,	,	,
1495	,	,	,	,	,	,	,	,	,	,	,	,	,	,	,
1496	,	,	,	,	,	,	,	,	,	,	,	,	,	,	,
1497	,	,	,	,	,	,	,	,	,	,	,	,	,	,	,
1498	,	,	,	,	,	,	,	,	,	,	,	,	,	,	,
1499	,	,	,	,	,	,	,	,	,	,	,	,	,	,	,
1500	,	,	,	,	,	,	,	,	,	,	,	,	,	,	,
1501	,	,	,	,	,	,	,	,	,	,	,	,	,	,	,
1502	,	,	,	,	,	,	,	,	,	,	,	,	,	,	,
1503	,	,	,	,	,	,	,	,	,	,	,	,	,	,	,
1504	,	,	,	,	,	,	,	,	,	,	,	,	,	,	,
1505	,	,	,	,	,	,	,	,	,	,	,	,	,	,	,
1506	,	,	,	,	,	,	,	,	,	,	,	,	,	,	,
1507	,	,	,	,	,	,	,	,	,	,	,	,	,	,	,
1508	,	,	,	,	,	,	,	,	,	,	,	,	,	,	,
1509	,	,	,	,	,	,	,	,	,	,	,	,	,	,	,
1510	,	,	,	,	,	,	,	,	,	,	,	,	,	,	,
1511	,	,	,	,	,	,	,	,	,	,	,	,	,	,	,
1512	,	,	,	,	,	,	,	,	,	,	,	,	,	,	,
1513	,	,	,	,	,	,	,	,	,	,	,	,	,	,	,
1514	,	,	,	,	,	,	,	,	,	,	,	,	,	,	,
1515	,	,	,	,	,	,	,	,	,	,	,	,	,	,	,
1516	,	,	,	,	,	,	,	,	,	,	,	,	,	,	,
1517	,	,	,	,	,	,	,	,	,	,	,	,	,	,	,
1518	,	,	,	,	,	,	,	,	,	,	,	,	,	,	,
1519	,	,	,	,	,	,	,	,	,	,	,	,	,	,	,
1520	,	,	,	,	,	,	,	,	,	,	,	,	,	,	,
1521	,	,	,	,	,	,	,	,	,	,	,	,	,	,	,
1522	,	,	,	,	,	,	,	,	,	,	,	,	,	,	,
1523	,	,	,	,	,	,	,	,	,	,	,	,	,	,	,
1524	,	,	,	,	,	,	,	,	,	,	,	,	,	,	,
1525	,	,	,	,	,	,	,	,	,	,	,	,	,	,	,
1526	,	,	,	,	,	,	,	,	,	,	,	,	,	,	,
1527	,	,	,	,	,	,	,	,	,	,	,	,	,	,	,
1528	,	,	,	,	,	,	,	,	,	,	,	,	,	,	,
1529	,	,	,	,	,	,	,	,	,	,	,	,	,	,	,
1530	,	,	,	,	,	,	,	,	,	,	,	,	,	,	,
1531	,	,	,	,	,	,	,	,	,	,	,	,	,	,	,
1532	,	,	,	,	,	,	,	,	,	,	,	,	,	,	,
1533	,	,	,	,	,	,	,	,	,	,	,	,	,	,	,
1534	,	,	,	,	,	,	,	,	,	,	,	,	,	,	,
1535	,	,	,	,	,	,	,	,	,	,	,	,	,	,	,
1536	,	,	,	,	,	,	,	,	,	,	,	,	,	,	,
1537	,	,	,	,	,	,	,	,	,	,	,	,	,	,	,
1538	,	,	,	,	,	,	,	,	,	,	,	,	,	,	,
1539	,	,	,	,	,	,	,	,	,	,	,	,	,	,	,
1540	,	,	,	,	,	,	,	,	,	,	,	,	,	,	,
1541	,	,	,	,	,	,	,	,	,	,	,	,	,	,	,
1542	,	,	,	,	,	,	,	,	,	,	,	,	,	,	,
1543	,	,	,	,	,	,	,	,	,	,	,	,	,	,	,
1544	,	,	,	,	,	,	,	,	,	,	,	,	,	,	,
1545	,	,	,	,	,	,	,	,	,	,	,	,	,	,	,
1546	,	,	,	,	,	,	,	,	,	,	,	,	,	,	,
1547	,	,	,	,	,	,	,	,	,	,	,	,	,	,	,
1548	,	,	,	,	,	,	,	,	,	,	,	,	,	,	,
1549	,	,	,	,	,	,	,	,	,	,	,	,	,	,	,
1550	,	,	,	,	,	,	,	,	,	,	,	,	,	,	,
1551	,	,	,	,	,	,	,	,	,	,	,	,	,	,	,
1552	,	,	,	,	,	,	,	,	,	,	,	,	,	,	,
1553	,	,	,	,	,	,	,	,	,	,	,	,	,	,	,
1554	,	,	,	,	,	,	,	,	,	,	,	,	,	,	,
1555	,	,	,	,	,	,	,	,	,	,	,	,	,	,	,
1556	,	,	,	,	,	,	,	,	,	,	,	,	,	,	,
1557	,	,	,	,	,	,	,	,	,	,	,	,	,	,	,
1558	,	,	,	,	,	,	,	,	,	,	,	,	,	,	,
1559	,	,	,	,	,	,	,	,	,	,	,	,	,	,	,
1560	,	,	,	,	,	,	,	,	,	,	,	,	,	,	,
1561	,	,	,	,	,	,	,	,	,	,	,	,	,	,	,
1562	,	,	,	,	,	,	,	,	,	,	,	,	,	,	,
1563	,	,	,	,	,	,	,	,	,	,	,	,	,	,	,
1564	,	,	,	,	,	,	,	,	,	,	,	,	,	,	,
1565	,	,	,	,	,	,	,	,	,	,	,	,	,	,	,
1566	,	,	,	,	,	,	,	,	,	,	,	,	,	,	,
1567	,	,	,	,	,	,	,	,	,	,	,	,	,	,	,
1568	,	,	,	,	,	,	,	,	,	,	,	,	,	,	,
1569	,	,	,	,	,	,	,	,	,	,	,	,	,	,	,
1570	,	,	,	,	,	,	,	,	,	,	,	,	,	,	,
1571	,	,	,	,	,	,	,	,	,	,	,	,	,	,	,
1572	,	,	,	,	,	,	,	,	,	,	,	,	,	,	,
1573	,	,	,	,	,	,	,	,	,	,	,	,	,	,	,
1574	,	,	,	,	,	,	,	,	,	,	,	,	,	,	,
1575	,	,	,	,	,	,	,	,	,	,	,	,	,	,	,
1576	,	,	,	,	,	,	,	,	,	,	,	,	,	,	,
1577	,	,	,	,	,	,	,	,	,	,	,	,	,	,	,
1578	,	,	,	,	,	,	,	,	,	,	,	,	,	,	,
1579	,	,	,	,	,	,	,	,	,	,	,	,	,	,	,
1580	,	,	,	,	,	,	,	,	,	,	,	,	,	,	,
1581	,	,	,	,	,	,	,	,	,	,	,	,	,	,	,
1582	,	,	,	,	,	,	,	,	,	,	,	,	,	,	,
1583	,	,	,	,	,	,	,	,	,	,	,	,	,	,	,
1584	,	,	,	,	,	,	,	,	,	,	,	,	,	,	,
1585	,	,	,	,	,	,	,	,	,	,	,	,	,	,	,
1586	,	,	,	,	,	,	,	,	,	,	,	,	,	,	,
1587	,	,	,	,	,	,	,	,	,	,	,	,	,	,	,
1588	,	,	,	,	,	,	,	,	,	,	,	,	,	,	,
1589	,	,	,	,	,	,	,	,	,	,	,	,	,	,	,
1590	,	,	,	,	,	,	,	,	,	,	,	,	,	,	,
1591	,	,	,	,	,	,	,	,	,	,	,	,	,	,	,
1592	,	,	,	,	,	,	,	,	,	,	,	,	,	,	,
1593	,	,	,	,	,	,	,	,	,	,	,	,	,	,	,
1594	,	,	,	,	,	,	,	,	,	,	,	,	,	,	,
1595	,	,	,	,	,	,	,	,	,	,	,	,	,	,	,
1596	,	,	,	,	,	,	,	,	,	,	,	,	,	,	,
1597	,	,	,	,	,	,	,	,	,	,	,	,	,	,	,
1598	,	,	,	,	,	,	,	,	,	,	,	,	,	,	,
1599	,	,	,	,	,	,	,	,	,	,	,	,	,	,	,
1600	,	,	,	,	,	,	,	,	,	,	,	,	,	,	,
1601	,	,	,	,	,	,	,	,	,	,	,	,	,	,	,
1602	,	,	,	,	,	,	,	,	,	,	,	,	,	,	,
1603	,	,	,	,	,	,	,	,	,	,	,	,	,	,	,
1604	,	,	,	,	,	,	,	,	,	,	,	,	,	,	,
1605	,	,	,	,	,	,	,	,	,	,	,	,	,	,	,
1606	,	,	,	,	,	,	,	,	,	,	,	,	,	,	,
1607	,	,	,	,	,	,	,	,	,	,	,	,	,	,	,
1608	,	,	,	,	,	,	,	,	,	,	,	,	,	,	,
1609	,	,	,	,	,	,	,	,	,	,	,	,	,	,	,
1610	,	,	,	,	,	,	,	,	,	,	,	,	,	,	,
1611	,	,	,	,	,	,	,	,	,	,	,	,	,	,	,
1612	,	,	,	,	,	,	,	,	,	,	,	,	,	,	,
1613	,	,	,	,	,	,	,	,	,	,	,	,	,	,	,
1614	,	,	,	,	,	,	,	,	,	,	,	,	,	,	,
1615	,	,	,	,	,	,	,	,	,	,	,	,	,	,	,
1616	,	,	,	,	,	,	,	,	,	,	,	,	,	,	,
1617	,	,	,	,	,	,	,	,	,	,	,	,	,	,	,
1618	,	,	,	,	,	,	,	,	,	,	,	,	,	,	,
1619	,	,	,	,	,	,	,	,	,	,	,	,	,	,	,
1620	,	,	,	,	,	,	,	,	,	,	,	,	,	,	,
1621	,	,	,	,	,	,	,	,	,	,	,	,	,	,	,
1622	,	,	,	,	,	,	,	,	,	,	,	,	,	,	,
1623	,	,	,	,	,	,	,	,	,	,	,	,	,	,	,
1624	,	,	,	,	,	,	,	,	,	,	,	,	,	,	,
1625	,	,	,	,	,	,	,	,	,	,	,	,	,	,	,
1626	,	,	,	,	,	,	,	,	,	,	,	,	,	,	,
1627	,	,	,	,	,	,	,	,	,	,	,	,	,	,	,
1628	,	,	,	,	,	,	,	,	,	,	,	,	,	,	,
1629	,	,	,	,	,	,	,	,	,	,	,	,	,	,	,
1630	,	,	,	,	,	,	,	,	,	,	,	,	,	,	,
1631	,	,	,	,	,	,	,	,	,	,	,	,	,	,	,
1632	,	,	,	,	,	,	,	,	,	,	,	,	,	,	,
1633	,	,	,	,	,	,	,	,	,	,	,	,	,	,	,
1634	,	,	,	,	,	,	,	,	,	,	,	,	,	,	,
1635	,	,	,	,	,	,	,	,	,	,	,	,	,	,	,
1636	,	,	,	,	,	,	,	,	,	,	,	,	,	,	,
1637	,	,	,	,	,	,	,	,	,	,	,	,	,	,	,
1638	,	,	,	,	,	,	,	,	,	,	,	,	,	,	,
1639	,	,	,	,	,	,	,	,	,	,	,	,	,	,	,
1640	,	,	,	,	,	,	,	,	,	,	,	,	,	,	,
1641	,	,	,	,	,	,	,	,	,	,	,	,	,	,	,
1642	,	,	,	,	,	,	,	,	,	,	,	,	,	,	,
1643	,	,	,	,	,	,	,	,	,	,	,	,	,	,	,
1644	,	,	,	,	,	,	,	,	,	,	,	,	,	,	,
1645	,	,	,	,	,	,	,	,	,	,	,	,	,	,	,
1646	,	,	,	,	,	,	,	,	,	,	,	,	,	,	,
1647	,	,	,	,	,	,	,	,	,	,	,	,	,	,	,
1648	,	,	,	,	,	,	,	,	,	,	,	,	,	,	,
1649	,	,	,	,	,	,	,	,	,	,	,	,	,	,	,
1650	,	,	,	,	,	,	,	,	,	,	,	,	,	,	,
1651	,	,	,	,	,	,	,	,	,	,	,	,	,	,	,
1652	,	,	,	,	,	,	,	,	,	,	,	,	,	,	,
1653	,	,	,	,	,	,	,	,	,	,	,	,	,	,	,
1654	,	,	,	,	,	,	,	,	,	,	,	,	,	,	,
1655	,	,	,	,	,	,	,	,	,	,	,	,	,	,	,
1656	,	,	,	,	,	,	,	,	,	,	,	,	,	,	,
1657	,	,	,	,	,	,	,	,	,	,	,	,	,	,	,
1658	,	,	,	,	,	,	,	,	,	,	,	,	,	,	,
1659	,	,	,	,	,	,	,	,	,	,	,	,	,	,	,
1660	,	,	,	,	,	,	,	,	,	,	,	,	,	,	,
1661	,	,	,	,	,	,	,	,	,	,	,	,	,	,	,
1662	,	,	,	,	,	,	,	,	,	,	,	,	,	,	,
1663	,	,	,	,	,	,	,	,	,	,	,	,	,	,	,
1664	,	,	,	,	,	,	,	,	,	,	,	,	,	,	,
1665	,	,	,	,	,	,	,	,	,	,	,	,	,	,	,
1666	,	,	,	,	,	,	,	,	,	,	,	,	,	,	,
1667	,	,	,	,	,	,	,	,	,	,	,	,	,	,	,
1668	,	,	,	,	,	,	,	,	,	,	,	,	,	,	,
1669	,	,	,	,	,	,	,	,	,	,	,	,	,	,	,
1670	,	,	,	,	,	,	,	,	,	,	,	,	,	,	,
1671	,	,	,	,	,	,	,	,	,	,	,	,	,	,	,
1672	,	,	,	,	,	,	,	,	,	,	,	,	,	,	,
1673	,	,	,	,	,	,	,	,	,	,	,	,	,	,	,
1674	,	,	,	,	,	,	,	,	,	,	,	,	,	,	,
1675	,	,	,	,	,	,	,	,	,	,	,	,	,	,	,
1676	,	,	,	,	,	,	,	,	,	,	,	,	,	,	,
1677	,	,	,	,	,	,	,	,	,	,	,	,	,	,	,
1678	,	,	,	,	,	,	,	,	,	,	,	,	,	,	,
1679	,	,	,	,	,	,	,	,	,	,	,	,	,	,	,
1680	,	,	,	,	,	,	,	,	,	,	,	,	,	,	,
1681	,	,	,	,	,	,	,	,	,	,	,	,	,	,	,
1682	,	,	,	,	,	,	,	,	,	,	,	,	,	,	,
1683	,	,	,	,	,	,	,	,	,	,	,	,	,	,	,
1684	,	,	,	,	,	,	,	,	,	,	,	,	,	,	,
1685	,	,	,	,	,	,	,	,	,	,	,	,	,	,	,
1686	,	,	,	,	,	,	,	,	,	,	,	,	,	,	,
1687	,	,	,	,	,	,	,	,	,	,	,	,	,	,	,
1688	,	,	,	,	,	,	,	,	,	,	,	,	,	,	,
1689	,	,	,	,	,	,	,	,	,	,	,	,	,	,	,
1690	,	,	,	,	,	,	,	,	,	,	,	,	,	,	,
1691	,	,	,	,	,	,	,	,	,	,	,	,	,	,	,
1692	,	,	,	,	,	,	,	,	,	,	,	,	,	,	,
1693	,	,	,	,	,	,	,	,	,	,	,	,	,	,	,
1694	,	,	,	,	,	,	,	,	,	,	,	,	,	,	,
1695	,	,	,	,	,	,	,	,	,	,	,	,	,	,	,
1696	,	,	,	,	,	,	,	,	,	,	,	,	,	,	,
1697	,	,	,	,	,	,	,	,	,	,	,	,	,	,	,
1698	,	,	,	,	,	,	,	,	,	,	,	,	,	,	,
1699	,	,	,	,	,	,	,	,	,	,	,	,	,	,	,
1700	,	,	,	,	,	,	,	,	,	,	,	,	,	,	,
1701	,	,	,	,	,	,	,	,	,	,	,	,	,	,	,
1702	,	,	,	,	,	,	,	,	,	,	,	,	,	,	,
1703	,	,	,	,	,	,	,	,	,	,	,	,	,	,	,
1704	,	,	,	,	,	,	,	,	,	,	,	,	,	,	,
1705	,	,	,	,	,	,	,	,	,	,	,	,	,	,	,
1706	,	,	,	,	,	,	,	,	,	,	,	,	,	,	,
1707	,	,	,	,	,	,	,	,	,	,	,	,	,	,	,
1708	,	,	,	,	,	,	,	,	,	,	,	,	,	,	,
1709	,	,	,	,	,	,	,	,	,	,	,	,	,	,	,
1710	,	,	,	,	,	,	,	,	,	,	,	,	,	,	,
1711	,	,	,	,	,	,	,	,	,	,	,	,	,	,	,
1712	,	,	,	,	,	,	,	,	,	,	,	,	,	,	,
1713	,	,	,	,	,	,	,	,	,	,	,	,	,	,	,
1714	,	,	,	,	,	,	,	,	,	,	,	,	,	,	,
1715	,	,	,	,	,	,	,	,	,	,	,	,	,	,	,
1716	,	,	,	,	,	,	,	,	,	,	,	,	,	,	,
1717	,	,	,	,	,	,	,	,	,	,	,	,	,	,	,
1718	,	,	,	,	,	,	,	,	,	,	,	,	,	,	,
1719	,	,	,	,	,	,	,	,	,	,	,	,	,	,	,
1720	,	,	,	,	,	,	,	,	,	,	,	,	,	,	,
1721	,	,	,	,	,	,	,	,	,	,	,	,	,	,	,
1722	,	,	,	,	,	,	,	,	,	,	,	,	,	,	,
1723	,	,	,	,	,	,	,	,	,	,	,	,	,	,	,
1724	,	,	,	,	,	,	,	,	,	,	,	,	,	,	,
1725	,	,	,	,	,	,	,	,	,	,	,	,	,	,	,
1726	,	,	,	,	,	,	,	,	,	,	,	,	,	,	,
1727	,	,	,	,	,	,	,	,	,	,	,	,	,	,	,
1728	,	,	,	,	,	,	,	,	,	,	,	,	,	,	,
1729	,	,	,	,	,	,	,	,	,	,	,	,	,	,	,
1730	,	,	,	,	,	,	,	,	,	,	,	,	,	,	,
1731	,	,	,	,	,	,	,	,	,	,	,	,	,	,	,
1732	,	,	,	,	,	,	,	,	,	,	,	,	,	,	,
1733	,	,	,	,	,	,	,	,	,	,	,	,	,	,	,
1734	,	,	,	,	,	,	,	,	,	,	,	,	,	,	,
1735	,	,	,	,	,	,	,	,	,	,	,	,	,	,	,
1736	,	,	,	,	,	,	,	,	,	,	,	,	,	,	,
1737	,	,	,	,	,	,	,	,	,	,	,	,	,	,	,
1738	,	,	,	,	,	,	,	,	,	,	,	,	,	,	,
1739	,	,	,	,	,	,	,	,	,	,	,	,	,	,	,
1740	,	,	,	,	,	,	,	,	,	,	,	,	,	,	,
1741	,	,	,	,	,	,	,	,	,	,	,	,	,	,	,
1742	,	,	,	,	,	,	,	,	,	,	,	,	,	,	,
1743	,	,	,	,	,	,	,	,	,	,	,	,	,	,	,
1744	,	,	,	,	,	,	,	,	,	,	,	,	,	,	,
1745	,	,	,	,	,	,	,	,	,	,	,	,	,	,	,
1746	,	,	,	,	,	,	,	,	,	,	,	,	,	,	,
1747	,	,	,	,	,	,	,	,	,	,	,	,	,	,	,
1748	,	,	,	,	,	,	,	,	,	,	,	,	,	,	,
1749	,	,	,	,	,	,	,	,	,	,	,	,	,	,	,
1750	,	,	,	,	,	,	,	,	,	,	,	,	,	,	,
1751	,	,	,	,	,	,	,	,	,	,	,	,	,	,	,
1752	,	,	,	,	,	,	,	,	,	,	,	,	,	,	,
1753	,	,	,	,	,	,	,	,	,	,	,	,	,	,	,
1754	,	,	,	,	,	,	,	,	,	,	,	,	,	,	,
1755	,	,	,	,	,	,	,	,	,	,	,	,	,	,	,
1756	,	,	,	,	,	,	,	,	,	,	,	,	,	,	,
1757	,	,	,	,	,	,	,	,	,	,	,	,	,	,	,
1758	,	,	,	,	,	,	,	,	,	,	,	,	,	,	,
1759	,	,	,	,	,	,	,	,	,	,	,	,	,	,	,
1760	,	,	,	,	,	,	,	,	,	,	,	,	,	,	,
1761	,	,	,	,	,	,	,	,	,	,	,	,	,	,	,
1762	,	,	,	,	,	,	,	,	,	,	,	,	,	,	,
1763	,	,	,	,	,	,	,	,	,	,	,	,	,	,	,
1764	,	,	,	,	,	,	,	,	,	,	,	,	,	,	,
1765	,	,	,	,	,	,	,	,	,	,	,	,	,	,	,
1766	,	,	,	,	,	,	,	,	,	,	,	,	,	,	,
1767	,	,	,	,	,	,	,	,	,	,	,	,	,	,	,
1768	,	,	,	,	,	,	,	,	,	,	,	,	,	,	,
1769	,	,	,	,	,	,	,	,	,	,	,	,	,	,	,
1770	,	,	,	,	,	,	,	,	,	,	,	,	,	,	,
1771	,	,	,	,	,	,	,	,	,	,	,	,	,	,	,
1772	,	,	,	,	,	,	,	,	,	,	,	,	,	,	,
1773	,	,	,	,	,	,	,	,	,	,	,	,	,	,	,
1774	,	,	,	,	,	,	,	,	,	,	,	,	,	,	,
1775	,	,	,	,	,	,	,	,	,	,	,	,	,	,	,
1776	,	,	,	,	,	,	,	,	,	,	,	,	,	,	,
1777	,	,	,	,	,	,	,	,	,	,	,	,	,	,	,
1778	,	,	,	,	,	,	,	,	,	,	,	,	,	,	,
1779	,	,	,	,	,	,	,	,	,	,	,	,	,	,	,
1780	,	,	,	,	,	,	,	,	,	,	,	,	,	,	,
1781	,	,	,	,	,	,	,	,	,	,	,	,	,	,	,
1782	,	,	,	,	,	,	,	,	,	,	,	,	,	,	,
1783	,	,	,	,	,	,	,	,	,	,	,	,	,	,	,
1784	,	,	,	,	,	,	,	,	,	,	,	,	,	,	,
1785	,	,	,	,	,	,	,	,	,	,	,	,	,	,	,
1786	,	,	,	,	,	,	,	,	,	,	,	,	,	,	,
1787	,	,	,	,	,	,	,	,	,	,	,	,	,	,	,
1788	,	,	,	,	,	,	,	,	,	,	,	,	,	,	,
1789	,	,	,	,	,	,	,	,	,	,	,	,	,	,	,
1790	,	,	,	,	,	,	,	,	,	,	,	,	,	,	,
1791	,	,	,	,	,	,	,	,	,	,	,	,	,	,	,
1792	,	,	,	,	,	,	,	,	,	,	,	,	,	,	,
1793	,	,	,	,	,	,	,	,	,	,	,	,	,	,	,
1794	,	,	,	,	,	,	,	,	,	,	,	,	,	,	,
1795	,	,	,	,	,	,	,	,	,	,	,	,	,	,	,
1796	,	,	,	,	,	,	,	,	,	,	,	,	,	,	,
1797	,	,	,	,	,	,	,	,	,	,	,	,	,	,	,
1798	,	,	,	,	,	,	,	,	,	,	,	,	,	,	,
1799	,	,	,	,	,	,	,	,	,	,	,	,	,	,	,
1800	,	,	,	,	,	,	,	,	,	,	,	,	,	,	,
1801	,	,	,	,	,	,	,	,	,	,	,	,	,	,	,
1802	,	,	,	,	,	,	,	,	,	,	,	,	,	,	,
1803	,	,	,	,	,	,	,	,	,	,	,	,	,	,	,
1804	,	,	,	,	,	,	,	,	,	,	,	,	,	,	,
1805	,	,	,	,	,	,	,	,	,	,	,	,	,	,	,
1806	,	,	,	,	,	,	,	,	,	,	,	,	,	,	,
1807	,	,	,	,	,	,	,	,	,	,	,	,	,	,	,
1808	,	,	,	,	,	,	,	,	,	,	,	,	,	,	,
1809	,	,	,	,	,	,	,	,	,	,	,	,	,	,	,
1810	,	,	,	,	,	,	,	,	,	,	,	,	,	,	,
1811	,	,	,	,	,	,	,	,	,	,	,	,	,	,	,
1812	,	,	,	,	,	,	,	,	,	,	,	,	,	,	,
1813	,	,	,	,	,	,	,	,	,	,	,	,	,	,	,
1814	,	,	,	,	,	,	,	,	,	,	,	,	,	,	,
1815	,	,	,	,	,	,	,	,	,	,	,	,	,	,	,
1816	,	,	,	,	,	,	,	,	,	,	,	,	,	,	,
1817	,	,	,	,	,	,	,	,	,	,	,	,	,	,	,
1818	,	,	,	,	,	,	,	,	,	,	,	,	,	,	,
1819	,	,	,	,	,	,	,	,	,	,	,	,	,	,	,
1820	,	,	,	,	,	,	,	,	,	,	,	,	,	,	,
1821	,	,	,	,	,	,	,	,	,	,	,	,	,	,	,
1822	,	,	,	,	,	,	,	,	,	,	,	,	,	,	,
1823	,	,	,	,	,	,	,	,	,	,	,	,	,	,	,
1824	,	,	,	,	,	,	,	,	,	,	,	,	,	,	,
1825	,	,	,	,	,	,	,	,	,	,	,	,	,	,	,
1826	,	,	,	,	,	,	,	,	,	,	,	,	,	,	,
1827	,	,	,	,	,	,	,	,	,	,	,	,	,	,	,
1828	,	,	,	,	,	,	,	,	,	,	,	,	,	,	,
1829	,	,	,	,	,	,	,	,	,	,	,	,	,	,	,
1830	,	,	,	,	,	,	,	,	,	,	,	,	,	,	,
1831	,	,	,	,	,	,	,	,	,	,	,	,	,	,	,
1832	,	,	,	,	,	,	,	,	,	,	,	,	,	,	,
1833	,	,	,	,	,	,	,	,	,	,	,	,	,	,	,
1834	,	,	,	,	,	,	,	,	,	,	,	,	,	,	,
1835	,	,	,	,	,	,	,	,	,	,	,	,	,	,	,
1836	,	,	,	,	,	,	,	,	,	,	,	,	,	,	,
1837	,	,	,	,	,	,	,	,	,	,	,	,	,	,	,
1838	,	,	,	,	,	,	,	,	,	,	,	,	,	,	,
1839	,	,	,	,	,	,	,	,	,	,	,	,	,	,	,
1840	,	,	,	,	,	,	,	,	,	,	,	,	,	,	,
1841	,	,	,	,	,	,	,	,	,	,	,	,	,	,	,
1842	,	,	,	,	,	,	,	,	,	,	,	,	,	,	,
1843	,	,	,	,	,	,	,	,	,	,	,	,	,	,	,
1844	,	,	,	,	,	,	,	,	,	,	,	,	,	,	,
1845	,	,	,	,	,	,	,	,	,	,	,	,	,	,	,
1846	,	,	,	,	,	,	,	,	,	,	,	,	,	,	,
1847	,	,	,	,	,	,	,	,	,	,	,	,	,	,	,
1848	,	,	,	,	,	,	,	,	,	,	,	,	,	,	,
1849	,	,	,	,	,	,	,	,	,	,	,	,	,	,	,
1850	,	,	,	,	,	,	,	,	,	,	,	,	,	,	,
1851	,	,	,	,	,	,	,	,	,	,	,	,	,	,	,
1852	,	,	,	,	,	,	,	,	,	,	,	,	,	,	,
1853	,	,	,	,	,	,	,	,	,	,	,	,	,	,	,
1854	,	,	,	,	,	,	,	,	,	,	,	,	,	,	,
1855	,	,	,	,	,	,	,	,	,	,	,	,	,	,	,
1856	,	,	,	,	,	,	,	,	,	,	,	,	,	,	,
1857	,	,	,	,	,	,	,	,	,	,	,	,	,	,	,
1858	,	,	,	,	,	,	,	,	,	,	,	,	,	,	,
1859	,	,	,	,	,	,	,	,	,	,	,	,	,	,	,
1860	,	,	,	,	,	,	,	,	,	,	,	,	,	,	,
1861	,	,	,	,	,	,	,	,	,	,	,	,	,	,	,
1862	,	,	,	,	,	,	,	,	,	,	,	,	,	,	,
1863	,	,	,	,	,	,	,	,	,	,	,	,	,	,	,
1864	,	,	,	,	,	,	,	,	,	,	,	,	,	,	,
1865	,	,	,	,	,	,	,	,	,	,	,	,	,	,	,
1866	,	,	,	,	,	,	,	,	,	,	,	,	,	,	,
1867	,	,	,	,	,	,	,	,	,	,	,	,	,	,	,
1868	,	,	,	,	,	,	,	,	,	,	,	,	,	,	,
1869	,	,	,	,	,	,	,	,	,	,	,	,	,	,	,
1870	,	,	,	,	,	,	,	,	,	,	,	,	,	,	,
1871	,	,	,	,	,	,	,	,	,	,	,	,	,	,	,
1872	,	,	,	,	,	,	,	,	,	,	,	,	,	,	,
1873	,	,	,	,	,	,	,	,	,	,	,	,	,	,	,
1874	,	,	,	,	,	,	,	,	,	,	,	,	,	,	,
1875	,	,	,	,	,	,	,	,	,	,	,	,	,	,	,
1876	,	,	,	,	,	,	,	,	,	,	,	,	,	,	,
1877	,	,	,	,	,	,	,	,	,	,	,	,	,	,	,
1878	,	,	,	,	,	,	,	,	,	,	,	,	,	,	,
1879	,	,	,	,	,	,	,	,	,	,	,	,	,	,	,
1880	,	,	,	,	,	,	,	,	,	,	,	,	,	,	,
1881	,	,	,	,	,	,	,	,	,	,	,	,	,	,	,
1882	,	,	,	,	,	,	,	,	,	,	,	,	,	,	,
1883	,	,	,	,	,	,	,	,	,	,	,	,	,	,	,
1884	,	,	,	,	,	,	,	,	,	,	,	,	,	,	,
1885	,	,	,	,	,	,	,	,	,	,	,	,	,	,	,
1886	,	,	,	,	,	,	,	,	,	,	,	,	,	,	,
1887	,	,	,	,	,	,	,	,	,	,	,	,	,	,	,
1888	,	,	,	,	,	,	,	,	,	,	,	,	,	,	,
1889	,	,	,	,	,	,	,	,	,	,	,	,	,	,	,
1890	,	,	,	,	,	,	,	,	,	,	,	,	,	,	,
1891	,	,	,	,	,	,	,	,	,	,	,	,	,	,	,
1892	,	,	,	,	,	,	,	,	,	,	,	,	,	,	,
1893	,	,	,	,	,	,	,	,	,	,	,	,	,	,	,
1894	,	,	,	,	,	,	,	,	,	,	,	,	,	,	,
1895	,	,	,	,	,	,	,	,	,	,	,	,	,	,	,
1896	,	,	,	,	,	,	,	,	,	,	,	,	,	,	,
1897	,	,	,	,	,	,	,	,	,	,	,	,	,	,	,
1898	,	,	,	,	,	,	,	,	,	,	,	,	,	,	,
1899	,	,	,	,	,	,	,	,	,	,	,	,	,	,	,
1900	,	,	,	,	,	,	,	,	,	,	,	,	,	,	,
1901	,	,	,	,	,	,	,	,	,	,	,	,	,	,	,
1902	,	,	,	,	,	,	,	,	,	,	,	,	,	,	,
1903	,	,	,	,	,	,	,	,	,	,	,	,	,	,	,
1904	,	,	,	,	,	,	,	,	,	,	,	,	,	,	,
1905	,	,	,	,	,	,	,	,	,	,	,	,	,	,	,
1906	,	,	,	,	,	,	,	,	,	,	,	,	,	,	,
1907	,	,	,	,	,	,	,	,	,	,	,	,	,	,	,
1908	,	,	,	,	,	,	,	,	,	,	,	,	,	,	,
1909	,	,	,	,	,	,	,	,	,	,	,	,	,	,	,
1910	,	,	,	,	,	,	,	,	,	,	,	,	,	,	,
1911	,	,	,	,	,	,	,	,	,	,	,	,	,	,	,
1912	,	,	,	,	,	,	,	,	,	,	,	,	,	,	,
1913	,	,	,	,	,	,	,	,	,	,	,	,	,	,	,
1914	,	,	,	,	,	,	,	,	,	,	,	,	,	,	,
1915	,	,	,	,	,	,	,	,	,	,	,	,	,	,	,
1916	,	,	,	,	,	,	,	,	,	,	,	,	,	,	,
1917	,	,	,	,	,	,	,	,	,	,	,	,	,	,	,
1918	,	,	,	,	,	,	,	,	,	,	,	,	,	,	,
1919	,	,	,	,	,	,	,	,	,	,	,	,	,	,	,
1920	,	,	,	,	,	,	,	,	,	,	,	,	,	,	,
1921	,	,	,	,	,	,	,	,	,	,	,	,	,	,	,
1922	,	,	,	,	,	,	,	,	,	,	,	,	,	,	,
1923	,	,	,	,	,	,	,	,	,	,	,	,	,	,	,
1924	,	,	,	,	,	,	,	,	,	,	,	,	,	,	,
1925	,	,	,	,	,	,	,	,	,	,	,	,	,	,	,
1926	,	,	,	,	,	,	,	,	,	,	,	,	,	,	,
1927	,	,	,	,	,	,	,	,	,	,	,	,	,	,	,
1928	,	,	,	,	,	,	,	,	,	,	,	,	,	,	,
1929	,	,	,	,	,	,	,	,	,	,	,	,	,	,	,
1930	,	,	,	,	,	,	,	,	,	,	,	,	,	,	,
1931	,	,	,	,	,	,	,	,	,	,	,	,	,	,	,
1932	,	,	,	,	,	,	,	,	,	,	,	,	,	,	,
1933	,	,	,	,	,	,	,	,	,	,	,	,	,	,	,
1934	,	,	,	,	,	,	,	,	,	,	,	,	,	,	,
1935	,	,	,	,	,	,	,	,	,	,	,	,	,	,	,
1936	,	,	,	,	,	,	,	,	,	,	,	,	,	,	,
1937	,	,	,	,	,	,	,	,	,	,	,	,	,	,	,
1938	,	,	,	,	,	,	,	,	,	,	,	,	,	,	,
1939	,	,	,	,	,	,	,	,	,	,	,	,	,	,	,
1940	,	,	,	,	,	,	,	,	,	,	,	,	,	,	,
1941	,	,	,	,	,	,	,	,	,	,	,	,	,	,	,
1942	,	,	,	,	,	,	,	,	,	,	,	,	,	,	,
1943	,	,	,	,	,	,	,	,	,	,	,	,	,	,	,
1944	,	,	,	,	,	,	,	,	,	,	,	,	,	,	,
1945	,	,	,	,	,	,	,	,	,	,	,	,	,	,	,
1946	,	,	,	,	,	,	,	,	,	,	,	,	,	,	,
1947	,	,	,	,	,	,	,	,	,	,	,	,	,	,	,
1948	,	,	,	,	,	,	,	,	,	,	,	,	,	,	,
1949	,	,	,	,	,	,	,	,	,	,	,	,	,	,	,
1950	,	,	,	,	,	,	,	,	,	,	,	,	,	,	,
1951	,	,	,	,	,	,	,	,	,	,	,	,	,	,	,
1952	,	,	,	,	,	,	,	,	,	,	,	,	,	,	,
1953	,	,	,	,	,	,	,	,	,	,	,	,	,	,	,
1954	,	,	,	,	,	,	,	,	,	,	,	,	,	,	,
1955	,	,	,	,	,	,	,	,	,	,	,	,	,	,	,
1956	,	,	,	,	,	,	,	,	,	,	,	,	,	,	,
1957	,	,	,	,	,	,	,	,	,	,	,	,	,	,	,
1958	,	,	,	,	,	,	,	,	,	,	,	,	,	,	,
1959	,	,	,	,	,	,	,	,	,	,	,	,	,	,	,
1960	,	,	,	,	,	,	,	,	,	,	,	,	,	,	,
1961	,	,	,	,	,	,	,	,	,	,	,	,	,	,	,
1962	,	,	,	,	,	,	,	,	,	,	,	,	,	,	,
1963	,	,	,	,	,	,	,	,	,	,	,	,	,	,	,
1964	,	,	,	,	,	,	,	,	,	,	,	,	,	,	,
1965	,	,	,	,	,	,	,	,	,	,	,	,	,	,	,
1966	,	,	,	,	,	,	,	,	,	,	,	,	,	,	,
1967	,	,	,	,	,	,	,	,	,	,	,	,	,	,	,
1968	,	,	,	,	,	,	,	,	,	,	,	,	,	,	,
1969	,	,	,	,	,	,	,	,	,	,	,	,	,	,	,
1970	,	,	,	,	,	,	,	,	,	,	,	,	,	,	,
1971	,	,	,	,	,	,	,	,	,	,	,	,	,	,	,
1972	,	,	,	,	,	,	,	,	,	,	,	,	,	,	,
1973	,	,	,	,	,	,	,	,	,	,	,	,	,	,	,
1974	,	,	,	,	,	,	,	,	,	,	,	,	,	,	,
1975	,	,	,	,	,	,	,	,	,	,	,	,	,	,	,
1976	,	,	,	,	,	,	,	,	,	,	,	,	,	,	,
1977	,	,	,	,	,	,	,	,	,	,	,	,	,	,	,
1978	,	,	,	,	,	,	,	,	,	,	,	,	,	,	,
1979	,	,	,	,	,	,	,	,	,	,	,	,	,	,	,
1980	,	,	,	,	,	,	,	,	,	,	,	,	,	,	,
1981	,	,	,	,	,	,	,	,	,	,	,	,	,	,	,
1982	,	,	,	,	,	,	,	,	,	,	,	,	,	,	,
1983	,	,	,	,	,	,	,	,	,	,	,	,	,	,	,
1984	,	,	,	,	,	,	,	,	,	,	,	,	,	,	,
1985	,	,	,	,	,	,	,	,	,	,	,	,	,	,	,
1986	,	,	,	,	,	,	,	,	,	,	,	,	,	,	,
1987	,	,	,	,	,	,	,	,	,	,	,	,	,	,	,
1988	,	,	,	,	,	,	,	,	,	,	,	,	,	,	,
1989	,	,	,	,	,	,	,	,	,	,	,	,	,	,	,
1990	,	,	,	,	,	,	,	,	,	,	,	,	,	,	,
1991	,	,	,	,	,	,	,	,	,	,	,	,	,	,	,
1992	,	,	,	,	,	,	,	,	,	,	,	,	,	,	,
1993	,	,	,	,	,	,	,	,	,	,	,	,	,	,	,
1994	,	,	,	,	,	,	,	,	,	,	,	,	,	,	,
1995	,	,	,	,	,	,	,	,	,	,	,	,	,	,	,
1996	,	,	,	,	,	,	,	,	,	,	,	,	,	,	,
1997	,	,	,	,	,	,	,	,	,	,	,	,	,	,	,
1998	,	,	,	,	,	,	,	,	,	,	,	,	,	,	,
1999	,	,	,	,	,	,	,	,	,	,	,	,	,	,	,
[truncated: 13,001 more rows]
