# Supplementary material for: ParB spreading on DNA requires cytidine triphosphate in vitro
Source: eLife journal article supplement (doi:10.7554/elife.53515), 2020-02-20
Supplement: fig2-figsupp3-data1 [file Fig2_supp3_Sinorhizobium_ParB_rep1_2_3.xlsx]

## Sheet: FORMAT
	sample ID #1	sample ID #2	sample ID #3
data point	time point (sec), wavelength shift (nm)	time point (sec), wavelength shift (nm)	time point (sec), wavelength shift (nm)
1
2
3
.
.
.

## Sheet: Fig2_supp3_Sinorhizobium_B_123
	169bp closed parS DNA and Sinorhozobium ParB 1mM CTP	169bp closed parS DNA and Sinorhozobium ParB 1mM CTP	169bp closed parS DNA and Sinorhozobium ParB 1mM CTP	169bp closed parS DNA and Sinorhozobium ParB	169bp closed parS DNA and Sinorhozobium ParB	169bp closed parS DNA and Sinorhozobium ParB	169bp closed parS DNA and Sinorhozobium ParB 1mM ATP	169bp closed parS DNA and Sinorhozobium ParB 1mM GTP	169bp closed parS DNA and Sinorhozobium ParB 1mM UTP	169bp closed parS DNA and Sinorhozobium ParB 1mM ATP	169bp closed parS DNA and Sinorhozobium ParB 1mM GTP	169bp closed parS DNA and Sinorhozobium ParB 1mM UTP	169bp closed parS DNA and Sinorhozobium ParB 1mM ATP	169bp closed parS DNA and Sinorhozobium ParB 1mM GTP	169bp closed parS DNA and Sinorhozobium ParB 1mM UTP
1	0.000, -0.002	0.000, -0.016	0.000, -0.001	0.000, -0.011	0.000, 0.008	0.000, -0.009	0.000, -0.007	0.000, -0.007	0.000, -0.012	0.000, -0.010	0.000, -0.004	0.000, -0.017	0.000, 0.007	0.000, -0.004	0.000, -0.016
2	0.200, -0.002	0.200, -0.015	0.200, -0.001	0.200, -0.011	0.200, 0.008	0.200, -0.009	0.200, -0.007	0.200, -0.008	0.200, -0.013	0.200, -0.010	0.200, -0.005	0.200, -0.017	0.200, 0.005	0.200, -0.004	0.200, -0.017
3	0.400, -0.002	0.400, -0.014	0.400, -0.001	0.400, -0.011	0.400, 0.007	0.400, -0.009	0.400, -0.008	0.400, -0.009	0.400, -0.014	0.400, -0.010	0.400, -0.005	0.400, -0.016	0.400, 0.003	0.400, -0.004	0.400, -0.017
4	0.600, -0.001	0.600, -0.013	0.600, -0.001	0.600, -0.010	0.600, 0.006	0.600, -0.009	0.600, -0.009	0.600, -0.010	0.600, -0.014	0.600, -0.010	0.600, -0.005	0.600, -0.016	0.600, 0.001	0.600, -0.004	0.600, -0.017
5	0.800, -0.001	0.800, -0.012	0.800, -0.001	0.800, -0.010	0.800, 0.006	0.800, -0.009	0.800, -0.009	0.800, -0.011	0.800, -0.015	0.800, -0.010	0.800, -0.005	0.800, -0.016	0.800, -0.001	0.800, -0.004	0.800, -0.018
6	1.000, -0.001	1.000, -0.012	1.000, -0.001	1.000, -0.010	1.000, 0.005	1.000, -0.009	1.000, -0.010	1.000, -0.012	1.000, -0.015	1.000, -0.011	1.000, -0.005	1.000, -0.016	1.000, -0.002	1.000, -0.004	1.000, -0.018
7	1.200, -0.001	1.200, -0.011	1.200, -0.001	1.200, -0.010	1.200, 0.005	1.200, -0.009	1.200, -0.010	1.200, -0.013	1.200, -0.016	1.200, -0.011	1.200, -0.006	1.200, -0.016	1.200, -0.004	1.200, -0.004	1.200, -0.018
8	1.400, -0.001	1.400, -0.011	1.400, -0.001	1.400, -0.009	1.400, 0.004	1.400, -0.009	1.400, -0.011	1.400, -0.013	1.400, -0.016	1.400, -0.011	1.400, -0.006	1.400, -0.015	1.400, -0.005	1.400, -0.004	1.400, -0.018
9	1.600, -0.001	1.600, -0.011	1.600, -0.001	1.600, -0.009	1.600, 0.004	1.600, -0.009	1.600, -0.011	1.600, -0.014	1.600, -0.016	1.600, -0.011	1.600, -0.007	1.600, -0.015	1.600, -0.006	1.600, -0.004	1.600, -0.019
10	1.800, -0.001	1.800, -0.011	1.800, -0.001	1.800, -0.009	1.800, 0.003	1.800, -0.009	1.800, -0.011	1.800, -0.014	1.800, -0.016	1.800, -0.010	1.800, -0.007	1.800, -0.015	1.800, -0.006	1.800, -0.004	1.800, -0.019
11	2.000, -0.001	2.000, -0.011	2.000, -0.001	2.000, -0.009	2.000, 0.003	2.000, -0.009	2.000, -0.011	2.000, -0.015	2.000, -0.016	2.000, -0.010	2.000, -0.008	2.000, -0.015	2.000, -0.006	2.000, -0.005	2.000, -0.019
12	2.200, -0.001	2.200, -0.011	2.200, -0.002	2.200, -0.009	2.200, 0.003	2.200, -0.009	2.200, -0.011	2.200, -0.014	2.200, -0.016	2.200, -0.010	2.200, -0.008	2.200, -0.015	2.200, -0.005	2.200, -0.005	2.200, -0.018
13	2.400, -0.001	2.400, -0.011	2.400, -0.002	2.400, -0.009	2.400, 0.003	2.400, -0.009	2.400, -0.011	2.400, -0.014	2.400, -0.016	2.400, -0.010	2.400, -0.008	2.400, -0.015	2.400, -0.005	2.400, -0.005	2.400, -0.019
14	2.600, -0.001	2.600, -0.011	2.600, -0.002	2.600, -0.009	2.600, 0.004	2.600, -0.008	2.600, -0.011	2.600, -0.014	2.600, -0.015	2.600, -0.010	2.600, -0.008	2.600, -0.015	2.600, -0.004	2.600, -0.005	2.600, -0.019
15	2.800, -0.001	2.800, -0.011	2.800, -0.002	2.800, -0.009	2.800, 0.004	2.800, -0.008	2.800, -0.011	2.800, -0.014	2.800, -0.015	2.800, -0.010	2.800, -0.008	2.800, -0.015	2.800, -0.004	2.800, -0.005	2.800, -0.019
16	3.000, -0.001	3.000, -0.011	3.000, -0.002	3.000, -0.009	3.000, 0.004	3.000, -0.008	3.000, -0.010	3.000, -0.014	3.000, -0.014	3.000, -0.010	3.000, -0.008	3.000, -0.014	3.000, -0.004	3.000, -0.006	3.000, -0.019
17	3.200, -0.001	3.200, -0.011	3.200, -0.002	3.200, -0.009	3.200, 0.004	3.200, -0.008	3.200, -0.010	3.200, -0.013	3.200, -0.014	3.200, -0.010	3.200, -0.008	3.200, -0.014	3.200, -0.004	3.200, -0.006	3.200, -0.019
18	3.400, -0.001	3.400, -0.010	3.400, -0.002	3.400, -0.009	3.400, 0.004	3.400, -0.008	3.400, -0.010	3.400, -0.013	3.400, -0.014	3.400, -0.010	3.400, -0.008	3.400, -0.014	3.400, -0.004	3.400, -0.006	3.400, -0.019
19	3.600, -0.001	3.600, -0.010	3.600, -0.003	3.600, -0.009	3.600, 0.004	3.600, -0.008	3.600, -0.010	3.600, -0.013	3.600, -0.013	3.600, -0.010	3.600, -0.007	3.600, -0.014	3.600, -0.004	3.600, -0.006	3.600, -0.019
20	3.800, -0.001	3.800, -0.010	3.800, -0.003	3.800, -0.009	3.800, 0.004	3.800, -0.008	3.800, -0.010	3.800, -0.013	3.800, -0.013	3.800, -0.010	3.800, -0.007	3.800, -0.014	3.800, -0.004	3.800, -0.006	3.800, -0.019
21	4.000, -0.000	4.000, -0.010	4.000, -0.002	4.000, -0.008	4.000, 0.003	4.000, -0.007	4.000, -0.010	4.000, -0.013	4.000, -0.013	4.000, -0.010	4.000, -0.006	4.000, -0.014	4.000, -0.004	4.000, -0.005	4.000, -0.018
22	4.200, -0.000	4.200, -0.010	4.200, -0.002	4.200, -0.008	4.200, 0.003	4.200, -0.007	4.200, -0.010	4.200, -0.012	4.200, -0.013	4.200, -0.010	4.200, -0.006	4.200, -0.013	4.200, -0.004	4.200, -0.005	4.200, -0.018
23	4.400, -0.000	4.400, -0.010	4.400, -0.002	4.400, -0.008	4.400, 0.003	4.400, -0.007	4.400, -0.010	4.400, -0.012	4.400, -0.013	4.400, -0.010	4.400, -0.005	4.400, -0.013	4.400, -0.004	4.400, -0.005	4.400, -0.018
24	4.600, -0.000	4.600, -0.009	4.600, -0.002	4.600, -0.008	4.600, 0.003	4.600, -0.006	4.600, -0.010	4.600, -0.012	4.600, -0.013	4.600, -0.011	4.600, -0.005	4.600, -0.013	4.600, -0.003	4.600, -0.004	4.600, -0.017
25	4.800, -0.000	4.800, -0.009	4.800, -0.001	4.800, -0.008	4.800, 0.003	4.800, -0.006	4.800, -0.010	4.800, -0.012	4.800, -0.013	4.800, -0.011	4.800, -0.004	4.800, -0.013	4.800, -0.003	4.800, -0.004	4.800, -0.017
26	5.000, -0.000	5.000, -0.009	5.000, -0.001	5.000, -0.008	5.000, 0.003	5.000, -0.006	5.000, -0.010	5.000, -0.012	5.000, -0.013	5.000, -0.011	5.000, -0.004	5.000, -0.013	5.000, -0.003	5.000, -0.004	5.000, -0.017
27	5.200, 0.000	5.200, -0.009	5.200, -0.001	5.200, -0.008	5.200, 0.003	5.200, -0.006	5.200, -0.009	5.200, -0.013	5.200, -0.013	5.200, -0.010	5.200, -0.004	5.200, -0.013	5.200, -0.003	5.200, -0.004	5.200, -0.016
28	5.400, 0.000	5.400, -0.009	5.400, -0.001	5.400, -0.007	5.400, 0.002	5.400, -0.007	5.400, -0.009	5.400, -0.013	5.400, -0.013	5.400, -0.010	5.400, -0.004	5.400, -0.013	5.400, -0.002	5.400, -0.004	5.400, -0.016
29	5.600, 0.000	5.600, -0.009	5.600, -0.001	5.600, -0.007	5.600, 0.002	5.600, -0.007	5.600, -0.009	5.600, -0.013	5.600, -0.013	5.600, -0.010	5.600, -0.005	5.600, -0.013	5.600, -0.002	5.600, -0.005	5.600, -0.016
30	5.800, 0.000	5.800, -0.009	5.800, -0.001	5.800, -0.007	5.800, 0.002	5.800, -0.007	5.800, -0.009	5.800, -0.013	5.800, -0.013	5.800, -0.010	5.800, -0.005	5.800, -0.013	5.800, -0.002	5.800, -0.005	5.800, -0.016
31	6.000, -0.000	6.000, -0.009	6.000, -0.001	6.000, -0.007	6.000, 0.002	6.000, -0.007	6.000, -0.009	6.000, -0.013	6.000, -0.013	6.000, -0.010	6.000, -0.005	6.000, -0.013	6.000, -0.002	6.000, -0.005	6.000, -0.016
32	6.200, -0.000	6.200, -0.009	6.200, -0.001	6.200, -0.007	6.200, 0.002	6.200, -0.007	6.200, -0.009	6.200, -0.013	6.200, -0.014	6.200, -0.009	6.200, -0.005	6.200, -0.013	6.200, -0.002	6.200, -0.005	6.200, -0.016
33	6.400, -0.000	6.400, -0.009	6.400, -0.001	6.400, -0.007	6.400, 0.002	6.400, -0.007	6.400, -0.009	6.400, -0.013	6.400, -0.013	6.400, -0.009	6.400, -0.005	6.400, -0.012	6.400, -0.002	6.400, -0.005	6.400, -0.016
34	6.600, -0.000	6.600, -0.009	6.600, -0.001	6.600, -0.007	6.600, 0.002	6.600, -0.006	6.600, -0.008	6.600, -0.012	6.600, -0.013	6.600, -0.009	6.600, -0.006	6.600, -0.012	6.600, -0.002	6.600, -0.006	6.600, -0.016
35	6.800, -0.000	6.800, -0.009	6.800, -0.001	6.800, -0.007	6.800, 0.002	6.800, -0.006	6.800, -0.008	6.800, -0.012	6.800, -0.013	6.800, -0.008	6.800, -0.006	6.800, -0.012	6.800, -0.002	6.800, -0.006	6.800, -0.016
36	7.000, -0.000	7.000, -0.010	7.000, -0.002	7.000, -0.007	7.000, 0.002	7.000, -0.006	7.000, -0.008	7.000, -0.012	7.000, -0.013	7.000, -0.008	7.000, -0.006	7.000, -0.012	7.000, -0.003	7.000, -0.006	7.000, -0.016
37	7.200, -0.000	7.200, -0.010	7.200, -0.002	7.200, -0.007	7.200, 0.002	7.200, -0.006	7.200, -0.009	7.200, -0.012	7.200, -0.013	7.200, -0.008	7.200, -0.006	7.200, -0.011	7.200, -0.003	7.200, -0.006	7.200, -0.016
38	7.400, -0.000	7.400, -0.009	7.400, -0.002	7.400, -0.006	7.400, 0.002	7.400, -0.006	7.400, -0.009	7.400, -0.012	7.400, -0.012	7.400, -0.008	7.400, -0.006	7.400, -0.011	7.400, -0.003	7.400, -0.006	7.400, -0.016
39	7.600, -0.000	7.600, -0.009	7.600, -0.002	7.600, -0.006	7.600, 0.002	7.600, -0.005	7.600, -0.009	7.600, -0.011	7.600, -0.012	7.600, -0.008	7.600, -0.006	7.600, -0.011	7.600, -0.004	7.600, -0.006	7.600, -0.016
40	7.800, -0.000	7.800, -0.009	7.800, -0.002	7.800, -0.006	7.800, 0.001	7.800, -0.005	7.800, -0.009	7.800, -0.011	7.800, -0.012	7.800, -0.008	7.800, -0.006	7.800, -0.011	7.800, -0.004	7.800, -0.006	7.800, -0.015
41	8.000, -0.000	8.000, -0.009	8.000, -0.002	8.000, -0.006	8.000, 0.001	8.000, -0.005	8.000, -0.008	8.000, -0.011	8.000, -0.012	8.000, -0.007	8.000, -0.005	8.000, -0.010	8.000, -0.004	8.000, -0.005	8.000, -0.015
42	8.200, -0.000	8.200, -0.008	8.200, -0.002	8.200, -0.006	8.200, 0.001	8.200, -0.004	8.200, -0.008	8.200, -0.011	8.200, -0.012	8.200, -0.007	8.200, -0.005	8.200, -0.010	8.200, -0.005	8.200, -0.005	8.200, -0.014
43	8.400, -0.000	8.400, -0.008	8.400, -0.001	8.400, -0.006	8.400, 0.001	8.400, -0.004	8.400, -0.008	8.400, -0.011	8.400, -0.012	8.400, -0.007	8.400, -0.005	8.400, -0.010	8.400, -0.005	8.400, -0.005	8.400, -0.014
44	8.600, -0.001	8.600, -0.008	8.600, -0.001	8.600, -0.006	8.600, 0.001	8.600, -0.004	8.600, -0.008	8.600, -0.011	8.600, -0.012	8.600, -0.007	8.600, -0.005	8.600, -0.009	8.600, -0.005	8.600, -0.004	8.600, -0.013
45	8.800, -0.001	8.800, -0.007	8.800, -0.001	8.800, -0.006	8.800, 0.000	8.800, -0.003	8.800, -0.008	8.800, -0.010	8.800, -0.012	8.800, -0.008	8.800, -0.005	8.800, -0.009	8.800, -0.005	8.800, -0.004	8.800, -0.013
46	9.000, -0.001	9.000, -0.007	9.000, -0.001	9.000, -0.006	9.000, 0.000	9.000, -0.003	9.000, -0.008	9.000, -0.010	9.000, -0.012	9.000, -0.008	9.000, -0.005	9.000, -0.009	9.000, -0.005	9.000, -0.004	9.000, -0.012
47	9.200, -0.001	9.200, -0.007	9.200, -0.001	9.200, -0.006	9.200, 0.000	9.200, -0.003	9.200, -0.008	9.200, -0.010	9.200, -0.012	9.200, -0.008	9.200, -0.005	9.200, -0.009	9.200, -0.004	9.200, -0.004	9.200, -0.012
48	9.400, -0.000	9.400, -0.007	9.400, -0.001	9.400, -0.006	9.400, 0.000	9.400, -0.003	9.400, -0.008	9.400, -0.010	9.400, -0.012	9.400, -0.008	9.400, -0.005	9.400, -0.008	9.400, -0.004	9.400, -0.004	9.400, -0.012
49	9.600, -0.000	9.600, -0.007	9.600, -0.001	9.600, -0.006	9.600, -0.000	9.600, -0.003	9.600, -0.007	9.600, -0.010	9.600, -0.012	9.600, -0.008	9.600, -0.005	9.600, -0.008	9.600, -0.004	9.600, -0.004	9.600, -0.011
50	9.800, 0.000	9.800, -0.007	9.800, -0.001	9.800, -0.006	9.800, -0.000	9.800, -0.003	9.800, -0.007	9.800, -0.009	9.800, -0.012	9.800, -0.008	9.800, -0.005	9.800, -0.008	9.800, -0.003	9.800, -0.004	9.800, -0.011
51	10.000, 0.000	10.000, -0.006	10.000, -0.001	10.000, -0.006	10.000, -0.000	10.000, -0.003	10.000, -0.007	10.000, -0.009	10.000, -0.011	10.000, -0.008	10.000, -0.005	10.000, -0.008	10.000, -0.003	10.000, -0.003	10.000, -0.011
52	10.200, 0.000	10.200, -0.006	10.200, -0.001	10.200, -0.006	10.200, -0.000	10.200, -0.003	10.200, -0.007	10.200, -0.009	10.200, -0.011	10.200, -0.008	10.200, -0.005	10.200, -0.008	10.200, -0.003	10.200, -0.003	10.200, -0.011
53	10.400, 0.000	10.400, -0.006	10.400, -0.001	10.400, -0.006	10.400, -0.000	10.400, -0.003	10.400, -0.007	10.400, -0.009	10.400, -0.011	10.400, -0.008	10.400, -0.004	10.400, -0.008	10.400, -0.002	10.400, -0.003	10.400, -0.011
54	10.600, 0.000	10.600, -0.005	10.600, -0.002	10.600, -0.005	10.600, -0.000	10.600, -0.003	10.600, -0.007	10.600, -0.009	10.600, -0.011	10.600, -0.008	10.600, -0.004	10.600, -0.007	10.600, -0.002	10.600, -0.003	10.600, -0.011
55	10.800, 0.000	10.800, -0.005	10.800, -0.002	10.800, -0.005	10.800, -0.000	10.800, -0.002	10.800, -0.007	10.800, -0.009	10.800, -0.010	10.800, -0.008	10.800, -0.004	10.800, -0.007	10.800, -0.002	10.800, -0.003	10.800, -0.011
56	11.000, 0.000	11.000, -0.005	11.000, -0.002	11.000, -0.005	11.000, -0.000	11.000, -0.002	11.000, -0.007	11.000, -0.009	11.000, -0.010	11.000, -0.008	11.000, -0.004	11.000, -0.007	11.000, -0.002	11.000, -0.003	11.000, -0.011
57	11.200, 0.001	11.200, -0.005	11.200, -0.002	11.200, -0.005	11.200, -0.000	11.200, -0.002	11.200, -0.007	11.200, -0.009	11.200, -0.010	11.200, -0.008	11.200, -0.004	11.200, -0.006	11.200, -0.002	11.200, -0.003	11.200, -0.011
58	11.400, 0.001	11.400, -0.004	11.400, -0.002	11.400, -0.005	11.400, -0.000	11.400, -0.002	11.400, -0.007	11.400, -0.009	11.400, -0.010	11.400, -0.008	11.400, -0.003	11.400, -0.006	11.400, -0.002	11.400, -0.003	11.400, -0.011
59	11.600, 0.001	11.600, -0.004	11.600, -0.002	11.600, -0.005	11.600, -0.000	11.600, -0.002	11.600, -0.006	11.600, -0.009	11.600, -0.010	11.600, -0.008	11.600, -0.003	11.600, -0.006	11.600, -0.002	11.600, -0.003	11.600, -0.011
60	11.800, 0.000	11.800, -0.004	11.800, -0.002	11.800, -0.004	11.800, -0.001	11.800, -0.002	11.800, -0.006	11.800, -0.009	11.800, -0.009	11.800, -0.007	11.800, -0.003	11.800, -0.006	11.800, -0.002	11.800, -0.003	11.800, -0.011
61	12.000, 0.000	12.000, -0.004	12.000, -0.002	12.000, -0.004	12.000, -0.001	12.000, -0.002	12.000, -0.006	12.000, -0.009	12.000, -0.009	12.000, -0.007	12.000, -0.003	12.000, -0.006	12.000, -0.003	12.000, -0.003	12.000, -0.011
62	12.200, -0.000	12.200, -0.004	12.200, -0.002	12.200, -0.004	12.200, -0.001	12.200, -0.003	12.200, -0.006	12.200, -0.008	12.200, -0.009	12.200, -0.007	12.200, -0.003	12.200, -0.005	12.200, -0.003	12.200, -0.003	12.200, -0.011
63	12.400, -0.000	12.400, -0.004	12.400, -0.002	12.400, -0.003	12.400, -0.001	12.400, -0.003	12.400, -0.006	12.400, -0.008	12.400, -0.009	12.400, -0.007	12.400, -0.003	12.400, -0.005	12.400, -0.003	12.400, -0.003	12.400, -0.011
64	12.600, -0.000	12.600, -0.004	12.600, -0.002	12.600, -0.003	12.600, -0.001	12.600, -0.003	12.600, -0.006	12.600, -0.008	12.600, -0.009	12.600, -0.007	12.600, -0.003	12.600, -0.005	12.600, -0.003	12.600, -0.003	12.600, -0.011
65	12.800, -0.001	12.800, -0.004	12.800, -0.002	12.800, -0.003	12.800, -0.001	12.800, -0.003	12.800, -0.006	12.800, -0.007	12.800, -0.010	12.800, -0.007	12.800, -0.003	12.800, -0.004	12.800, -0.003	12.800, -0.003	12.800, -0.011
66	13.000, -0.000	13.000, -0.004	13.000, -0.002	13.000, -0.003	13.000, -0.001	13.000, -0.003	13.000, -0.006	13.000, -0.007	13.000, -0.010	13.000, -0.006	13.000, -0.003	13.000, -0.004	13.000, -0.003	13.000, -0.003	13.000, -0.010
67	13.200, -0.000	13.200, -0.004	13.200, -0.003	13.200, -0.003	13.200, -0.001	13.200, -0.003	13.200, -0.006	13.200, -0.007	13.200, -0.010	13.200, -0.006	13.200, -0.003	13.200, -0.004	13.200, -0.003	13.200, -0.004	13.200, -0.010
68	13.400, 0.000	13.400, -0.004	13.400, -0.003	13.400, -0.003	13.400, -0.001	13.400, -0.003	13.400, -0.006	13.400, -0.007	13.400, -0.009	13.400, -0.006	13.400, -0.004	13.400, -0.004	13.400, -0.003	13.400, -0.004	13.400, -0.010
69	13.600, 0.000	13.600, -0.004	13.600, -0.003	13.600, -0.003	13.600, -0.001	13.600, -0.002	13.600, -0.006	13.600, -0.006	13.600, -0.009	13.600, -0.006	13.600, -0.004	13.600, -0.004	13.600, -0.002	13.600, -0.003	13.600, -0.010
70	13.800, 0.001	13.800, -0.004	13.800, -0.003	13.800, -0.004	13.800, -0.001	13.800, -0.002	13.800, -0.006	13.800, -0.006	13.800, -0.009	13.800, -0.005	13.800, -0.003	13.800, -0.004	13.800, -0.002	13.800, -0.003	13.800, -0.009
71	14.000, 0.001	14.000, -0.003	14.000, -0.003	14.000, -0.004	14.000, -0.001	14.000, -0.002	14.000, -0.006	14.000, -0.006	14.000, -0.008	14.000, -0.005	14.000, -0.003	14.000, -0.004	14.000, -0.002	14.000, -0.003	14.000, -0.009
72	14.200, 0.001	14.200, -0.003	14.200, -0.003	14.200, -0.004	14.200, -0.001	14.200, -0.002	14.200, -0.006	14.200, -0.006	14.200, -0.008	14.200, -0.005	14.200, -0.003	14.200, -0.004	14.200, -0.001	14.200, -0.002	14.200, -0.008
73	14.400, 0.001	14.400, -0.003	14.400, -0.002	14.400, -0.004	14.400, -0.001	14.400, -0.002	14.400, -0.006	14.400, -0.006	14.400, -0.008	14.400, -0.005	14.400, -0.003	14.400, -0.004	14.400, -0.001	14.400, -0.002	14.400, -0.008
74	14.600, 0.001	14.600, -0.003	14.600, -0.002	14.600, -0.004	14.600, -0.001	14.600, -0.001	14.600, -0.006	14.600, -0.005	14.600, -0.008	14.600, -0.004	14.600, -0.003	14.600, -0.005	14.600, -0.001	14.600, -0.002	14.600, -0.007
75	14.800, 0.001	14.800, -0.003	14.800, -0.002	14.800, -0.004	14.800, -0.001	14.800, -0.001	14.800, -0.006	14.800, -0.005	14.800, -0.007	14.800, -0.004	14.800, -0.002	14.800, -0.005	14.800, -0.001	14.800, -0.002	14.800, -0.006
76	15.000, 0.001	15.000, -0.003	15.000, -0.002	15.000, -0.005	15.000, -0.001	15.000, -0.001	15.000, -0.006	15.000, -0.005	15.000, -0.007	15.000, -0.004	15.000, -0.002	15.000, -0.005	15.000, -0.001	15.000, -0.002	15.000, -0.006
77	15.200, 0.001	15.200, -0.003	15.200, -0.002	15.200, -0.005	15.200, -0.001	15.200, -0.001	15.200, -0.006	15.200, -0.005	15.200, -0.007	15.200, -0.004	15.200, -0.002	15.200, -0.005	15.200, -0.001	15.200, -0.002	15.200, -0.005
78	15.400, 0.001	15.400, -0.003	15.400, -0.002	15.400, -0.004	15.400, -0.001	15.400, -0.001	15.400, -0.005	15.400, -0.004	15.400, -0.007	15.400, -0.004	15.400, -0.002	15.400, -0.006	15.400, -0.001	15.400, -0.002	15.400, -0.005
79	15.600, 0.001	15.600, -0.003	15.600, -0.002	15.600, -0.004	15.600, -0.001	15.600, -0.001	15.600, -0.005	15.600, -0.004	15.600, -0.007	15.600, -0.004	15.600, -0.001	15.600, -0.006	15.600, -0.001	15.600, -0.002	15.600, -0.005
80	15.800, 0.000	15.800, -0.003	15.800, -0.002	15.800, -0.004	15.800, -0.001	15.800, -0.001	15.800, -0.005	15.800, -0.004	15.800, -0.007	15.800, -0.004	15.800, -0.001	15.800, -0.006	15.800, -0.001	15.800, -0.002	15.800, -0.004
81	16.000, 0.000	16.000, -0.003	16.000, -0.002	16.000, -0.003	16.000, -0.000	16.000, -0.001	16.000, -0.005	16.000, -0.004	16.000, -0.007	16.000, -0.004	16.000, -0.001	16.000, -0.006	16.000, -0.001	16.000, -0.002	16.000, -0.004
82	16.200, -0.000	16.200, -0.003	16.200, -0.002	16.200, -0.003	16.200, -0.000	16.200, -0.001	16.200, -0.005	16.200, -0.004	16.200, -0.007	16.200, -0.004	16.200, -0.001	16.200, -0.005	16.200, -0.001	16.200, -0.002	16.200, -0.004
83	16.400, -0.001	16.400, -0.003	16.400, -0.001	16.400, -0.002	16.400, 0.000	16.400, -0.001	16.400, -0.005	16.400, -0.004	16.400, -0.007	16.400, -0.004	16.400, -0.001	16.400, -0.005	16.400, -0.001	16.400, -0.002	16.400, -0.003
84	16.600, -0.001	16.600, -0.003	16.600, -0.001	16.600, -0.002	16.600, 0.000	16.600, -0.001	16.600, -0.004	16.600, -0.005	16.600, -0.007	16.600, -0.004	16.600, -0.001	16.600, -0.005	16.600, -0.001	16.600, -0.002	16.600, -0.003
85	16.800, -0.001	16.800, -0.003	16.800, -0.001	16.800, -0.002	16.800, 0.001	16.800, -0.001	16.800, -0.004	16.800, -0.005	16.800, -0.007	16.800, -0.004	16.800, -0.001	16.800, -0.005	16.800, -0.001	16.800, -0.002	16.800, -0.003
86	17.000, -0.001	17.000, -0.003	17.000, -0.001	17.000, -0.002	17.000, 0.001	17.000, -0.001	17.000, -0.004	17.000, -0.005	17.000, -0.006	17.000, -0.004	17.000, -0.001	17.000, -0.005	17.000, -0.000	17.000, -0.002	17.000, -0.003
87	17.200, -0.001	17.200, -0.003	17.200, -0.001	17.200, -0.002	17.200, 0.001	17.200, -0.001	17.200, -0.003	17.200, -0.005	17.200, -0.006	17.200, -0.005	17.200, -0.002	17.200, -0.004	17.200, -0.000	17.200, -0.002	17.200, -0.003
88	17.400, -0.001	17.400, -0.003	17.400, -0.001	17.400, -0.001	17.400, 0.001	17.400, -0.001	17.400, -0.003	17.400, -0.005	17.400, -0.006	17.400, -0.005	17.400, -0.002	17.400, -0.004	17.400, 0.000	17.400, -0.002	17.400, -0.003
89	17.600, -0.000	17.600, -0.003	17.600, -0.001	17.600, -0.001	17.600, 0.000	17.600, -0.001	17.600, -0.003	17.600, -0.005	17.600, -0.005	17.600, -0.005	17.600, -0.002	17.600, -0.004	17.600, 0.000	17.600, -0.002	17.600, -0.003
90	17.800, -0.001	17.800, -0.003	17.800, -0.001	17.800, -0.001	17.800, 0.000	17.800, -0.001	17.800, -0.003	17.800, -0.005	17.800, -0.005	17.800, -0.005	17.800, -0.002	17.800, -0.004	17.800, 0.000	17.800, -0.002	17.800, -0.003
91	18.000, -0.001	18.000, -0.003	18.000, -0.001	18.000, -0.001	18.000, 0.000	18.000, -0.001	18.000, -0.002	18.000, -0.006	18.000, -0.004	18.000, -0.005	18.000, -0.002	18.000, -0.004	18.000, -0.000	18.000, -0.002	18.000, -0.003
92	18.200, -0.001	18.200, -0.004	18.200, -0.001	18.200, -0.001	18.200, -0.000	18.200, -0.001	18.200, -0.002	18.200, -0.006	18.200, -0.004	18.200, -0.005	18.200, -0.002	18.200, -0.004	18.200, -0.000	18.200, -0.002	18.200, -0.003
93	18.400, -0.001	18.400, -0.004	18.400, -0.001	18.400, -0.001	18.400, -0.000	18.400, -0.001	18.400, -0.002	18.400, -0.005	18.400, -0.004	18.400, -0.005	18.400, -0.002	18.400, -0.003	18.400, -0.001	18.400, -0.002	18.400, -0.003
94	18.600, -0.001	18.600, -0.003	18.600, -0.001	18.600, -0.001	18.600, -0.001	18.600, -0.001	18.600, -0.002	18.600, -0.005	18.600, -0.004	18.600, -0.005	18.600, -0.002	18.600, -0.003	18.600, -0.001	18.600, -0.002	18.600, -0.003
95	18.800, -0.001	18.800, -0.003	18.800, -0.002	18.800, -0.001	18.800, -0.001	18.800, -0.001	18.800, -0.002	18.800, -0.005	18.800, -0.004	18.800, -0.005	18.800, -0.002	18.800, -0.003	18.800, -0.001	18.800, -0.001	18.800, -0.004
96	19.000, -0.001	19.000, -0.003	19.000, -0.002	19.000, -0.001	19.000, -0.001	19.000, -0.001	19.000, -0.002	19.000, -0.005	19.000, -0.004	19.000, -0.004	19.000, -0.002	19.000, -0.003	19.000, -0.002	19.000, -0.001	19.000, -0.004
97	19.200, -0.001	19.200, -0.003	19.200, -0.002	19.200, -0.001	19.200, -0.001	19.200, -0.002	19.200, -0.003	19.200, -0.005	19.200, -0.004	19.200, -0.004	19.200, -0.002	19.200, -0.003	19.200, -0.002	19.200, -0.001	19.200, -0.004
98	19.400, -0.001	19.400, -0.003	19.400, -0.002	19.400, -0.001	19.400, -0.001	19.400, -0.002	19.400, -0.003	19.400, -0.005	19.400, -0.004	19.400, -0.004	19.400, -0.002	19.400, -0.002	19.400, -0.002	19.400, -0.001	19.400, -0.004
99	19.600, -0.001	19.600, -0.003	19.600, -0.002	19.600, -0.001	19.600, -0.001	19.600, -0.002	19.600, -0.003	19.600, -0.005	19.600, -0.004	19.600, -0.004	19.600, -0.002	19.600, -0.002	19.600, -0.002	19.600, -0.001	19.600, -0.004
100	19.800, -0.001	19.800, -0.003	19.800, -0.003	19.800, -0.002	19.800, -0.001	19.800, -0.002	19.800, -0.003	19.800, -0.005	19.800, -0.004	19.800, -0.004	19.800, -0.002	19.800, -0.002	19.800, -0.002	19.800, -0.001	19.800, -0.004
101	20.000, -0.001	20.000, -0.002	20.000, -0.003	20.000, -0.002	20.000, -0.001	20.000, -0.002	20.000, -0.003	20.000, -0.005	20.000, -0.004	20.000, -0.004	20.000, -0.002	20.000, -0.002	20.000, -0.002	20.000, -0.001	20.000, -0.004
102	20.200, -0.001	20.200, -0.002	20.200, -0.003	20.200, -0.002	20.200, -0.000	20.200, -0.002	20.200, -0.003	20.200, -0.005	20.200, -0.005	20.200, -0.004	20.200, -0.002	20.200, -0.001	20.200, -0.002	20.200, -0.001	20.200, -0.004
103	20.400, -0.001	20.400, -0.002	20.400, -0.003	20.400, -0.002	20.400, -0.000	20.400, -0.002	20.400, -0.003	20.400, -0.005	20.400, -0.005	20.400, -0.004	20.400, -0.001	20.400, -0.001	20.400, -0.002	20.400, -0.001	20.400, -0.004
104	20.600, -0.000	20.600, -0.001	20.600, -0.003	20.600, -0.002	20.600, -0.000	20.600, -0.002	20.600, -0.003	20.600, -0.004	20.600, -0.005	20.600, -0.004	20.600, -0.001	20.600, -0.001	20.600, -0.002	20.600, -0.001	20.600, -0.004
105	20.800, -0.000	20.800, -0.001	20.800, -0.003	20.800, -0.001	20.800, -0.000	20.800, -0.002	20.800, -0.003	20.800, -0.004	20.800, -0.004	20.800, -0.004	20.800, -0.001	20.800, -0.001	20.800, -0.002	20.800, -0.001	20.800, -0.003
106	21.000, 0.000	21.000, -0.000	21.000, -0.003	21.000, -0.001	21.000, -0.000	21.000, -0.002	21.000, -0.003	21.000, -0.004	21.000, -0.004	21.000, -0.004	21.000, -0.001	21.000, -0.001	21.000, -0.002	21.000, -0.001	21.000, -0.003
107	21.200, 0.000	21.200, 0.000	21.200, -0.003	21.200, -0.001	21.200, -0.000	21.200, -0.001	21.200, -0.002	21.200, -0.004	21.200, -0.004	21.200, -0.003	21.200, -0.001	21.200, -0.001	21.200, -0.001	21.200, -0.001	21.200, -0.003
108	21.400, 0.000	21.400, 0.000	21.400, -0.003	21.400, -0.000	21.400, -0.000	21.400, -0.001	21.400, -0.002	21.400, -0.004	21.400, -0.004	21.400, -0.003	21.400, -0.001	21.400, -0.001	21.400, -0.001	21.400, -0.002	21.400, -0.002
109	21.600, -0.000	21.600, 0.000	21.600, -0.003	21.600, 0.000	21.600, -0.000	21.600, -0.001	21.600, -0.002	21.600, -0.004	21.600, -0.003	21.600, -0.003	21.600, -0.000	21.600, -0.001	21.600, -0.001	21.600, -0.002	21.600, -0.002
110	21.800, -0.000	21.800, 0.000	21.800, -0.002	21.800, 0.000	21.800, -0.000	21.800, -0.001	21.800, -0.002	21.800, -0.004	21.800, -0.003	21.800, -0.003	21.800, -0.000	21.800, -0.002	21.800, -0.001	21.800, -0.002	21.800, -0.002
111	22.000, -0.000	22.000, 0.000	22.000, -0.002	22.000, 0.000	22.000, -0.000	22.000, -0.001	22.000, -0.002	22.000, -0.004	22.000, -0.003	22.000, -0.003	22.000, -0.000	22.000, -0.002	22.000, -0.001	22.000, -0.002	22.000, -0.001
112	22.200, -0.001	22.200, 0.000	22.200, -0.002	22.200, 0.001	22.200, -0.000	22.200, -0.001	22.200, -0.001	22.200, -0.003	22.200, -0.003	22.200, -0.003	22.200, -0.000	22.200, -0.002	22.200, -0.002	22.200, -0.001	22.200, -0.001
113	22.400, -0.001	22.400, 0.000	22.400, -0.002	22.400, 0.001	22.400, -0.000	22.400, -0.001	22.400, -0.001	22.400, -0.003	22.400, -0.002	22.400, -0.002	22.400, -0.000	22.400, -0.002	22.400, -0.001	22.400, -0.001	22.400, -0.001
114	22.600, -0.001	22.600, 0.000	22.600, -0.002	22.600, 0.001	22.600, -0.000	22.600, -0.001	22.600, -0.001	22.600, -0.003	22.600, -0.002	22.600, -0.002	22.600, -0.000	22.600, -0.002	22.600, -0.001	22.600, -0.001	22.600, -0.001
115	22.800, -0.001	22.800, -0.000	22.800, -0.002	22.800, 0.001	22.800, -0.000	22.800, -0.001	22.800, -0.001	22.800, -0.003	22.800, -0.002	22.800, -0.002	22.800, -0.000	22.800, -0.002	22.800, -0.001	22.800, -0.001	22.800, -0.001
116	23.000, -0.001	23.000, -0.000	23.000, -0.002	23.000, 0.001	23.000, -0.000	23.000, -0.001	23.000, -0.001	23.000, -0.003	23.000, -0.002	23.000, -0.002	23.000, -0.001	23.000, -0.002	23.000, -0.001	23.000, -0.001	23.000, -0.001
117	23.200, -0.001	23.200, -0.000	23.200, -0.001	23.200, 0.001	23.200, -0.000	23.200, -0.001	23.200, -0.001	23.200, -0.003	23.200, -0.002	23.200, -0.003	23.200, -0.001	23.200, -0.002	23.200, -0.001	23.200, -0.001	23.200, -0.001
118	23.400, -0.001	23.400, -0.000	23.400, -0.001	23.400, 0.000	23.400, -0.000	23.400, -0.001	23.400, -0.001	23.400, -0.003	23.400, -0.002	23.400, -0.003	23.400, -0.001	23.400, -0.002	23.400, -0.001	23.400, -0.001	23.400, -0.001
119	23.600, -0.001	23.600, -0.000	23.600, -0.001	23.600, 0.000	23.600, -0.000	23.600, -0.001	23.600, -0.001	23.600, -0.003	23.600, -0.002	23.600, -0.003	23.600, -0.001	23.600, -0.002	23.600, -0.001	23.600, -0.001	23.600, -0.001
120	23.800, -0.000	23.800, -0.000	23.800, -0.001	23.800, -0.000	23.800, -0.000	23.800, -0.001	23.800, -0.001	23.800, -0.003	23.800, -0.002	23.800, -0.003	23.800, -0.002	23.800, -0.002	23.800, -0.001	23.800, -0.001	23.800, -0.001
121	24.000, -0.000	24.000, -0.000	24.000, -0.001	24.000, -0.000	24.000, -0.000	24.000, -0.001	24.000, -0.001	24.000, -0.002	24.000, -0.002	24.000, -0.003	24.000, -0.002	24.000, -0.001	24.000, -0.001	24.000, -0.000	24.000, -0.001
122	24.200, 0.000	24.200, -0.000	24.200, -0.001	24.200, -0.000	24.200, 0.000	24.200, -0.001	24.200, -0.001	24.200, -0.002	24.200, -0.002	24.200, -0.003	24.200, -0.002	24.200, -0.001	24.200, -0.001	24.200, -0.000	24.200, -0.001
123	24.400, 0.001	24.400, -0.000	24.400, -0.001	24.400, -0.000	24.400, -0.000	24.400, -0.001	24.400, -0.001	24.400, -0.002	24.400, -0.002	24.400, -0.003	24.400, -0.002	24.400, -0.001	24.400, -0.001	24.400, -0.000	24.400, -0.001
124	24.600, 0.001	24.600, -0.000	24.600, -0.001	24.600, -0.001	24.600, -0.000	24.600, -0.000	24.600, -0.001	24.600, -0.002	24.600, -0.002	24.600, -0.003	24.600, -0.002	24.600, -0.000	24.600, -0.001	24.600, -0.000	24.600, -0.001
125	24.800, 0.001	24.800, -0.000	24.800, -0.001	24.800, -0.001	24.800, -0.000	24.800, 0.000	24.800, -0.002	24.800, -0.002	24.800, -0.002	24.800, -0.002	24.800, -0.002	24.800, 0.000	24.800, -0.001	24.800, 0.000	24.800, -0.000
126	25.000, 0.001	25.000, 0.000	25.000, -0.001	25.000, -0.000	25.000, -0.001	25.000, 0.000	25.000, -0.002	25.000, -0.001	25.000, -0.002	25.000, -0.002	25.000, -0.001	25.000, 0.000	25.000, -0.001	25.000, 0.000	25.000, -0.000
127	25.200, 0.001	25.200, 0.000	25.200, -0.001	25.200, -0.000	25.200, -0.001	25.200, 0.000	25.200, -0.002	25.200, -0.001	25.200, -0.002	25.200, -0.002	25.200, -0.001	25.200, 0.000	25.200, -0.001	25.200, 0.001	25.200, 0.000
128	25.400, 0.000	25.400, 0.000	25.400, -0.000	25.400, -0.000	25.400, -0.001	25.400, 0.001	25.400, -0.002	25.400, -0.001	25.400, -0.002	25.400, -0.002	25.400, -0.001	25.400, 0.000	25.400, -0.001	25.400, 0.001	25.400, 0.000
129	25.600, 0.000	25.600, 0.001	25.600, -0.000	25.600, 0.000	25.600, -0.001	25.600, 0.001	25.600, -0.002	25.600, -0.001	25.600, -0.002	25.600, -0.001	25.600, -0.000	25.600, 0.000	25.600, -0.001	25.600, 0.001	25.600, 0.000
130	25.800, 0.000	25.800, 0.001	25.800, -0.000	25.800, 0.000	25.800, -0.001	25.800, 0.001	25.800, -0.002	25.800, -0.000	25.800, -0.002	25.800, -0.001	25.800, 0.000	25.800, 0.000	25.800, -0.002	25.800, 0.001	25.800, 0.000
131	26.000, 0.000	26.000, 0.001	26.000, -0.000	26.000, 0.000	26.000, -0.001	26.000, 0.001	26.000, -0.002	26.000, -0.000	26.000, -0.002	26.000, -0.001	26.000, 0.001	26.000, 0.000	26.000, -0.002	26.000, 0.001	26.000, 0.000
132	26.200, 0.000	26.200, 0.001	26.200, -0.000	26.200, 0.001	26.200, -0.001	26.200, 0.001	26.200, -0.002	26.200, -0.000	26.200, -0.001	26.200, -0.001	26.200, 0.001	26.200, 0.000	26.200, -0.002	26.200, 0.001	26.200, 0.000
133	26.400, -0.000	26.400, 0.001	26.400, -0.000	26.400, 0.001	26.400, -0.001	26.400, 0.001	26.400, -0.002	26.400, -0.000	26.400, -0.001	26.400, -0.000	26.400, 0.001	26.400, 0.000	26.400, -0.001	26.400, 0.001	26.400, 0.000
134	26.600, -0.000	26.600, 0.001	26.600, -0.000	26.600, 0.000	26.600, -0.001	26.600, 0.001	26.600, -0.002	26.600, -0.000	26.600, -0.001	26.600, -0.000	26.600, 0.001	26.600, 0.000	26.600, -0.001	26.600, 0.001	26.600, -0.000
135	26.800, -0.000	26.800, 0.000	26.800, -0.000	26.800, 0.000	26.800, -0.001	26.800, 0.001	26.800, -0.001	26.800, -0.001	26.800, -0.001	26.800, -0.000	26.800, 0.001	26.800, 0.000	26.800, -0.001	26.800, 0.001	26.800, -0.000
136	27.000, -0.000	27.000, 0.000	27.000, -0.000	27.000, 0.000	27.000, -0.001	27.000, 0.001	27.000, -0.001	27.000, -0.001	27.000, -0.000	27.000, -0.001	27.000, 0.001	27.000, 0.000	27.000, -0.000	27.000, 0.001	27.000, -0.001
137	27.200, -0.001	27.200, 0.000	27.200, -0.000	27.200, 0.000	27.200, -0.001	27.200, 0.001	27.200, -0.001	27.200, -0.001	27.200, -0.000	27.200, -0.001	27.200, 0.001	27.200, 0.000	27.200, -0.000	27.200, 0.001	27.200, -0.000
138	27.400, -0.001	27.400, 0.000	27.400, -0.000	27.400, -0.000	27.400, -0.000	27.400, 0.000	27.400, -0.001	27.400, -0.001	27.400, -0.000	27.400, -0.001	27.400, 0.000	27.400, 0.000	27.400, 0.000	27.400, 0.001	27.400, -0.000
139	27.600, -0.001	27.600, -0.000	27.600, -0.000	27.600, -0.000	27.600, -0.000	27.600, 0.000	27.600, -0.001	27.600, -0.001	27.600, 0.000	27.600, -0.001	27.600, 0.000	27.600, 0.000	27.600, 0.000	27.600, 0.001	27.600, -0.000
140	27.800, -0.001	27.800, -0.000	27.800, -0.000	27.800, -0.000	27.800, 0.000	27.800, -0.000	27.800, -0.001	27.800, -0.001	27.800, 0.000	27.800, -0.000	27.800, -0.000	27.800, -0.000	27.800, 0.000	27.800, 0.001	27.800, -0.000
141	28.000, -0.001	28.000, -0.000	28.000, 0.000	28.000, -0.000	28.000, 0.000	28.000, -0.000	28.000, -0.001	28.000, -0.001	28.000, 0.000	28.000, -0.000	28.000, -0.000	28.000, -0.000	28.000, 0.001	28.000, 0.000	28.000, 0.000
142	28.200, -0.000	28.200, -0.000	28.200, 0.000	28.200, -0.000	28.200, 0.000	28.200, -0.000	28.200, -0.000	28.200, -0.000	28.200, 0.000	28.200, -0.000	28.200, -0.000	28.200, -0.000	28.200, 0.001	28.200, 0.000	28.200, 0.000
143	28.400, -0.000	28.400, -0.000	28.400, 0.000	28.400, -0.000	28.400, 0.001	28.400, -0.000	28.400, -0.000	28.400, -0.000	28.400, 0.000	28.400, 0.000	28.400, -0.000	28.400, -0.000	28.400, 0.001	28.400, -0.000	28.400, 0.000
144	28.600, -0.000	28.600, -0.000	28.600, 0.000	28.600, -0.000	28.600, 0.000	28.600, -0.000	28.600, 0.000	28.600, 0.000	28.600, 0.000	28.600, 0.000	28.600, -0.000	28.600, -0.000	28.600, 0.001	28.600, -0.000	28.600, 0.000
145	28.800, 0.000	28.800, -0.000	28.800, 0.000	28.800, -0.000	28.800, 0.000	28.800, -0.000	28.800, 0.000	28.800, 0.000	28.800, -0.000	28.800, 0.000	28.800, -0.000	28.800, -0.000	28.800, 0.000	28.800, -0.000	28.800, 0.000
146	29.000, 0.000	29.000, 0.000	29.000, 0.000	29.000, -0.000	29.000, 0.000	29.000, -0.000	29.000, 0.001	29.000, 0.001	29.000, -0.000	29.000, 0.000	29.000, -0.000	29.000, -0.000	29.000, 0.000	29.000, -0.001	29.000, 0.000
147	29.200, 0.001	29.200, 0.000	29.200, 0.000	29.200, 0.000	29.200, 0.000	29.200, -0.000	29.200, 0.001	29.200, 0.001	29.200, -0.000	29.200, 0.000	29.200, -0.000	29.200, -0.000	29.200, -0.000	29.200, -0.001	29.200, 0.000
148	29.400, 0.001	29.400, 0.000	29.400, 0.000	29.400, 0.000	29.400, -0.000	29.400, -0.000	29.400, 0.001	29.400, 0.001	29.400, 0.000	29.400, 0.001	29.400, 0.000	29.400, -0.000	29.400, -0.000	29.400, -0.001	29.400, 0.000
149	29.600, 0.001	29.600, 0.000	29.600, -0.000	29.600, 0.000	29.600, -0.000	29.600, 0.000	29.600, 0.001	29.600, 0.001	29.600, 0.000	29.600, 0.001	29.600, 0.000	29.600, 0.000	29.600, -0.001	29.600, -0.001	29.600, -0.000
150	29.800, 0.001	29.800, 0.000	29.800, -0.000	29.800, 0.000	29.800, -0.000	29.800, 0.000	29.800, 0.002	29.800, 0.001	29.800, 0.000	29.800, 0.001	29.800, 0.000	29.800, 0.000	29.800, -0.001	29.800, -0.001	29.800, -0.000
151	30.000, 0.000	30.000, 0.000	30.000, 0.000	30.000, 0.000	30.000, 0.000	30.000, 0.000	30.000, 0.000	30.000, 0.000	30.000, 0.000	30.000, 0.000	30.000, 0.000	30.000, 0.000	30.000, 0.000	30.000, 0.000	30.000, 0.000
152	30.200, 0.004	30.200, 0.008	30.200, 0.005	30.200, 0.006	30.200, 0.004	30.200, 0.006	30.200, 0.004	30.200, 0.002	30.200, 0.001	30.200, 0.002	30.200, 0.001	30.200, 0.001	30.200, 0.004	30.200, 0.001	30.200, 0.001
153	30.400, 0.009	30.400, 0.018	30.400, 0.013	30.400, 0.014	30.400, 0.009	30.400, 0.014	30.400, 0.008	30.400, 0.005	30.400, 0.002	30.400, 0.005	30.400, 0.002	30.400, 0.002	30.400, 0.009	30.400, 0.003	30.400, 0.002
154	30.600, 0.015	30.600, 0.029	30.600, 0.021	30.600, 0.023	30.600, 0.015	30.600, 0.022	30.600, 0.014	30.600, 0.009	30.600, 0.005	30.600, 0.009	30.600, 0.003	30.600, 0.004	30.600, 0.014	30.600, 0.005	30.600, 0.004
155	30.800, 0.022	30.800, 0.041	30.800, 0.031	30.800, 0.033	30.800, 0.022	30.800, 0.032	30.800, 0.021	30.800, 0.013	30.800, 0.008	30.800, 0.014	30.800, 0.006	30.800, 0.006	30.800, 0.021	30.800, 0.007	30.800, 0.007
156	31.000, 0.030	31.000, 0.055	31.000, 0.042	31.000, 0.044	31.000, 0.030	31.000, 0.043	31.000, 0.029	31.000, 0.018	31.000, 0.012	31.000, 0.020	31.000, 0.009	31.000, 0.009	31.000, 0.028	31.000, 0.011	31.000, 0.011
157	31.200, 0.039	31.200, 0.069	31.200, 0.054	31.200, 0.056	31.200, 0.039	31.200, 0.055	31.200, 0.038	31.200, 0.024	31.200, 0.017	31.200, 0.027	31.200, 0.013	31.200, 0.013	31.200, 0.036	31.200, 0.015	31.200, 0.015
158	31.400, 0.048	31.400, 0.084	31.400, 0.067	31.400, 0.069	31.400, 0.049	31.400, 0.068	31.400, 0.047	31.400, 0.031	31.400, 0.023	31.400, 0.034	31.400, 0.018	31.400, 0.018	31.400, 0.044	31.400, 0.020	31.400, 0.020
159	31.600, 0.058	31.600, 0.099	31.600, 0.081	31.600, 0.082	31.600, 0.059	31.600, 0.080	31.600, 0.057	31.600, 0.039	31.600, 0.029	31.600, 0.042	31.600, 0.023	31.600, 0.023	31.600, 0.053	31.600, 0.025	31.600, 0.026
160	31.800, 0.069	31.800, 0.113	31.800, 0.095	31.800, 0.095	31.800, 0.070	31.800, 0.093	31.800, 0.068	31.800, 0.047	31.800, 0.036	31.800, 0.051	31.800, 0.029	31.800, 0.029	31.800, 0.061	31.800, 0.031	31.800, 0.032
161	32.000, 0.080	32.000, 0.128	32.000, 0.109	32.000, 0.108	32.000, 0.080	32.000, 0.106	32.000, 0.078	32.000, 0.055	32.000, 0.044	32.000, 0.060	32.000, 0.036	32.000, 0.035	32.000, 0.070	32.000, 0.037	32.000, 0.038
162	32.200, 0.090	32.200, 0.141	32.200, 0.122	32.200, 0.120	32.200, 0.090	32.200, 0.118	32.200, 0.088	32.200, 0.063	32.200, 0.053	32.200, 0.070	32.200, 0.043	32.200, 0.042	32.200, 0.077	32.200, 0.043	32.200, 0.045
163	32.400, 0.100	32.400, 0.154	32.400, 0.135	32.400, 0.131	32.400, 0.100	32.400, 0.129	32.400, 0.097	32.400, 0.071	32.400, 0.061	32.400, 0.078	32.400, 0.050	32.400, 0.049	32.400, 0.085	32.400, 0.050	32.400, 0.052
164	32.600, 0.111	32.600, 0.168	32.600, 0.147	32.600, 0.141	32.600, 0.109	32.600, 0.140	32.600, 0.107	32.600, 0.079	32.600, 0.068	32.600, 0.086	32.600, 0.057	32.600, 0.055	32.600, 0.093	32.600, 0.056	32.600, 0.058
165	32.800, 0.121	32.800, 0.180	32.800, 0.159	32.800, 0.152	32.800, 0.118	32.800, 0.151	32.800, 0.115	32.800, 0.086	32.800, 0.076	32.800, 0.094	32.800, 0.063	32.800, 0.062	32.800, 0.100	32.800, 0.062	32.800, 0.065
166	33.000, 0.130	33.000, 0.192	33.000, 0.171	33.000, 0.161	33.000, 0.127	33.000, 0.161	33.000, 0.124	33.000, 0.093	33.000, 0.084	33.000, 0.101	33.000, 0.070	33.000, 0.068	33.000, 0.107	33.000, 0.068	33.000, 0.071
167	33.200, 0.140	33.200, 0.205	33.200, 0.183	33.200, 0.171	33.200, 0.135	33.200, 0.171	33.200, 0.131	33.200, 0.101	33.200, 0.092	33.200, 0.108	33.200, 0.077	33.200, 0.074	33.200, 0.114	33.200, 0.074	33.200, 0.078
168	33.400, 0.149	33.400, 0.217	33.400, 0.195	33.400, 0.180	33.400, 0.143	33.400, 0.181	33.400, 0.139	33.400, 0.108	33.400, 0.099	33.400, 0.116	33.400, 0.083	33.400, 0.081	33.400, 0.121	33.400, 0.080	33.400, 0.084
169	33.600, 0.159	33.600, 0.229	33.600, 0.206	33.600, 0.188	33.600, 0.151	33.600, 0.190	33.600, 0.146	33.600, 0.115	33.600, 0.106	33.600, 0.123	33.600, 0.089	33.600, 0.087	33.600, 0.128	33.600, 0.087	33.600, 0.090
170	33.800, 0.168	33.800, 0.240	33.800, 0.218	33.800, 0.196	33.800, 0.159	33.800, 0.199	33.800, 0.153	33.800, 0.122	33.800, 0.113	33.800, 0.130	33.800, 0.095	33.800, 0.093	33.800, 0.134	33.800, 0.093	33.800, 0.097
171	34.000, 0.178	34.000, 0.252	34.000, 0.229	34.000, 0.204	34.000, 0.166	34.000, 0.207	34.000, 0.160	34.000, 0.129	34.000, 0.120	34.000, 0.136	34.000, 0.101	34.000, 0.099	34.000, 0.140	34.000, 0.098	34.000, 0.103
172	34.200, 0.187	34.200, 0.263	34.200, 0.240	34.200, 0.212	34.200, 0.173	34.200, 0.216	34.200, 0.166	34.200, 0.136	34.200, 0.127	34.200, 0.143	34.200, 0.106	34.200, 0.105	34.200, 0.146	34.200, 0.104	34.200, 0.110
173	34.400, 0.196	34.400, 0.274	34.400, 0.251	34.400, 0.219	34.400, 0.180	34.400, 0.224	34.400, 0.172	34.400, 0.143	34.400, 0.133	34.400, 0.149	34.400, 0.112	34.400, 0.111	34.400, 0.152	34.400, 0.109	34.400, 0.116
174	34.600, 0.204	34.600, 0.285	34.600, 0.262	34.600, 0.226	34.600, 0.186	34.600, 0.231	34.600, 0.178	34.600, 0.149	34.600, 0.139	34.600, 0.156	34.600, 0.117	34.600, 0.116	34.600, 0.157	34.600, 0.114	34.600, 0.121
175	34.800, 0.213	34.800, 0.296	34.800, 0.272	34.800, 0.233	34.800, 0.192	34.800, 0.239	34.800, 0.184	34.800, 0.156	34.800, 0.145	34.800, 0.161	34.800, 0.122	34.800, 0.121	34.800, 0.161	34.800, 0.119	34.800, 0.127
176	35.000, 0.221	35.000, 0.307	35.000, 0.283	35.000, 0.240	35.000, 0.198	35.000, 0.246	35.000, 0.189	35.000, 0.162	35.000, 0.150	35.000, 0.167	35.000, 0.128	35.000, 0.126	35.000, 0.166	35.000, 0.124	35.000, 0.132
177	35.200, 0.230	35.200, 0.318	35.200, 0.293	35.200, 0.247	35.200, 0.204	35.200, 0.253	35.200, 0.194	35.200, 0.168	35.200, 0.156	35.200, 0.172	35.200, 0.133	35.200, 0.131	35.200, 0.170	35.200, 0.128	35.200, 0.137
178	35.400, 0.238	35.400, 0.328	35.400, 0.303	35.400, 0.253	35.400, 0.209	35.400, 0.260	35.400, 0.199	35.400, 0.174	35.400, 0.161	35.400, 0.177	35.400, 0.138	35.400, 0.136	35.400, 0.174	35.400, 0.133	35.400, 0.141
179	35.600, 0.246	35.600, 0.339	35.600, 0.313	35.600, 0.259	35.600, 0.214	35.600, 0.267	35.600, 0.204	35.600, 0.179	35.600, 0.166	35.600, 0.181	35.600, 0.143	35.600, 0.141	35.600, 0.178	35.600, 0.137	35.600, 0.146
180	35.800, 0.254	35.800, 0.349	35.800, 0.322	35.800, 0.265	35.800, 0.219	35.800, 0.273	35.800, 0.209	35.800, 0.184	35.800, 0.171	35.800, 0.186	35.800, 0.147	35.800, 0.146	35.800, 0.182	35.800, 0.141	35.800, 0.150
181	36.000, 0.262	36.000, 0.359	36.000, 0.332	36.000, 0.270	36.000, 0.224	36.000, 0.279	36.000, 0.213	36.000, 0.189	36.000, 0.176	36.000, 0.190	36.000, 0.152	36.000, 0.151	36.000, 0.186	36.000, 0.145	36.000, 0.153
182	36.200, 0.270	36.200, 0.369	36.200, 0.341	36.200, 0.276	36.200, 0.229	36.200, 0.285	36.200, 0.218	36.200, 0.194	36.200, 0.181	36.200, 0.194	36.200, 0.156	36.200, 0.155	36.200, 0.189	36.200, 0.149	36.200, 0.157
183	36.400, 0.277	36.400, 0.379	36.400, 0.351	36.400, 0.281	36.400, 0.233	36.400, 0.290	36.400, 0.222	36.400, 0.199	36.400, 0.186	36.400, 0.198	36.400, 0.160	36.400, 0.159	36.400, 0.192	36.400, 0.153	36.400, 0.161
184	36.600, 0.285	36.600, 0.388	36.600, 0.360	36.600, 0.286	36.600, 0.238	36.600, 0.296	36.600, 0.225	36.600, 0.204	36.600, 0.190	36.600, 0.201	36.600, 0.163	36.600, 0.163	36.600, 0.196	36.600, 0.156	36.600, 0.164
185	36.800, 0.292	36.800, 0.398	36.800, 0.369	36.800, 0.290	36.800, 0.243	36.800, 0.301	36.800, 0.229	36.800, 0.208	36.800, 0.195	36.800, 0.204	36.800, 0.166	36.800, 0.167	36.800, 0.199	36.800, 0.160	36.800, 0.167
186	37.000, 0.299	37.000, 0.407	37.000, 0.379	37.000, 0.294	37.000, 0.247	37.000, 0.306	37.000, 0.232	37.000, 0.213	37.000, 0.199	37.000, 0.207	37.000, 0.170	37.000, 0.171	37.000, 0.202	37.000, 0.163	37.000, 0.171
187	37.200, 0.307	37.200, 0.417	37.200, 0.388	37.200, 0.299	37.200, 0.251	37.200, 0.311	37.200, 0.236	37.200, 0.217	37.200, 0.203	37.200, 0.210	37.200, 0.173	37.200, 0.175	37.200, 0.205	37.200, 0.166	37.200, 0.175
188	37.400, 0.314	37.400, 0.426	37.400, 0.397	37.400, 0.302	37.400, 0.255	37.400, 0.315	37.400, 0.239	37.400, 0.221	37.400, 0.207	37.400, 0.213	37.400, 0.175	37.400, 0.178	37.400, 0.207	37.400, 0.169	37.400, 0.179
189	37.600, 0.321	37.600, 0.435	37.600, 0.405	37.600, 0.306	37.600, 0.259	37.600, 0.320	37.600, 0.242	37.600, 0.225	37.600, 0.210	37.600, 0.216	37.600, 0.178	37.600, 0.182	37.600, 0.210	37.600, 0.172	37.600, 0.183
190	37.800, 0.328	37.800, 0.444	37.800, 0.414	37.800, 0.310	37.800, 0.263	37.800, 0.324	37.800, 0.246	37.800, 0.228	37.800, 0.214	37.800, 0.219	37.800, 0.181	37.800, 0.185	37.800, 0.212	37.800, 0.175	37.800, 0.187
191	38.000, 0.335	38.000, 0.453	38.000, 0.422	38.000, 0.314	38.000, 0.267	38.000, 0.328	38.000, 0.249	38.000, 0.232	38.000, 0.218	38.000, 0.222	38.000, 0.184	38.000, 0.189	38.000, 0.215	38.000, 0.178	38.000, 0.190
192	38.200, 0.342	38.200, 0.462	38.200, 0.430	38.200, 0.318	38.200, 0.270	38.200, 0.331	38.200, 0.251	38.200, 0.235	38.200, 0.221	38.200, 0.225	38.200, 0.187	38.200, 0.192	38.200, 0.217	38.200, 0.180	38.200, 0.194
193	38.400, 0.349	38.400, 0.471	38.400, 0.438	38.400, 0.321	38.400, 0.274	38.400, 0.335	38.400, 0.254	38.400, 0.237	38.400, 0.224	38.400, 0.228	38.400, 0.190	38.400, 0.195	38.400, 0.219	38.400, 0.183	38.400, 0.197
194	38.600, 0.356	38.600, 0.480	38.600, 0.446	38.600, 0.325	38.600, 0.277	38.600, 0.338	38.600, 0.257	38.600, 0.240	38.600, 0.228	38.600, 0.231	38.600, 0.193	38.600, 0.198	38.600, 0.221	38.600, 0.185	38.600, 0.199
195	38.800, 0.363	38.800, 0.489	38.800, 0.453	38.800, 0.328	38.800, 0.280	38.800, 0.342	38.800, 0.260	38.800, 0.242	38.800, 0.231	38.800, 0.234	38.800, 0.197	38.800, 0.201	38.800, 0.223	38.800, 0.187	38.800, 0.202
196	39.000, 0.370	39.000, 0.497	39.000, 0.461	39.000, 0.331	39.000, 0.283	39.000, 0.345	39.000, 0.263	39.000, 0.244	39.000, 0.234	39.000, 0.236	39.000, 0.200	39.000, 0.204	39.000, 0.225	39.000, 0.190	39.000, 0.205
197	39.200, 0.376	39.200, 0.506	39.200, 0.469	39.200, 0.334	39.200, 0.286	39.200, 0.349	39.200, 0.265	39.200, 0.246	39.200, 0.238	39.200, 0.239	39.200, 0.204	39.200, 0.207	39.200, 0.227	39.200, 0.192	39.200, 0.208
198	39.400, 0.383	39.400, 0.514	39.400, 0.476	39.400, 0.337	39.400, 0.289	39.400, 0.352	39.400, 0.268	39.400, 0.248	39.400, 0.241	39.400, 0.242	39.400, 0.207	39.400, 0.209	39.400, 0.229	39.400, 0.195	39.400, 0.210
199	39.600, 0.389	39.600, 0.522	39.600, 0.484	39.600, 0.341	39.600, 0.292	39.600, 0.355	39.600, 0.271	39.600, 0.250	39.600, 0.244	39.600, 0.244	39.600, 0.211	39.600, 0.212	39.600, 0.232	39.600, 0.197	39.600, 0.212
200	39.800, 0.395	39.800, 0.530	39.800, 0.491	39.800, 0.344	39.800, 0.295	39.800, 0.358	39.800, 0.273	39.800, 0.252	39.800, 0.248	39.800, 0.247	39.800, 0.214	39.800, 0.215	39.800, 0.234	39.800, 0.200	39.800, 0.214
201	40.000, 0.401	40.000, 0.539	40.000, 0.499	40.000, 0.347	40.000, 0.298	40.000, 0.361	40.000, 0.275	40.000, 0.255	40.000, 0.251	40.000, 0.249	40.000, 0.217	40.000, 0.217	40.000, 0.236	40.000, 0.202	40.000, 0.216
202	40.200, 0.407	40.200, 0.547	40.200, 0.506	40.200, 0.349	40.200, 0.300	40.200, 0.363	40.200, 0.277	40.200, 0.257	40.200, 0.254	40.200, 0.251	40.200, 0.219	40.200, 0.220	40.200, 0.238	40.200, 0.204	40.200, 0.218
203	40.400, 0.413	40.400, 0.555	40.400, 0.514	40.400, 0.352	40.400, 0.303	40.400, 0.366	40.400, 0.279	40.400, 0.260	40.400, 0.256	40.400, 0.253	40.400, 0.221	40.400, 0.222	40.400, 0.240	40.400, 0.207	40.400, 0.221
204	40.600, 0.419	40.600, 0.563	40.600, 0.521	40.600, 0.355	40.600, 0.306	40.600, 0.369	40.600, 0.281	40.600, 0.263	40.600, 0.259	40.600, 0.255	40.600, 0.223	40.600, 0.224	40.600, 0.242	40.600, 0.209	40.600, 0.223
205	40.800, 0.425	40.800, 0.571	40.800, 0.528	40.800, 0.357	40.800, 0.309	40.800, 0.372	40.800, 0.283	40.800, 0.266	40.800, 0.261	40.800, 0.257	40.800, 0.225	40.800, 0.226	40.800, 0.244	40.800, 0.211	40.800, 0.225
206	41.000, 0.431	41.000, 0.579	41.000, 0.535	41.000, 0.359	41.000, 0.311	41.000, 0.375	41.000, 0.285	41.000, 0.269	41.000, 0.263	41.000, 0.259	41.000, 0.227	41.000, 0.228	41.000, 0.246	41.000, 0.213	41.000, 0.228
207	41.200, 0.437	41.200, 0.587	41.200, 0.542	41.200, 0.362	41.200, 0.314	41.200, 0.378	41.200, 0.287	41.200, 0.271	41.200, 0.265	41.200, 0.261	41.200, 0.228	41.200, 0.231	41.200, 0.248	41.200, 0.216	41.200, 0.231
208	41.400, 0.442	41.400, 0.594	41.400, 0.549	41.400, 0.364	41.400, 0.316	41.400, 0.380	41.400, 0.289	41.400, 0.274	41.400, 0.267	41.400, 0.263	41.400, 0.230	41.400, 0.233	41.400, 0.250	41.400, 0.218	41.400, 0.233
209	41.600, 0.448	41.600, 0.602	41.600, 0.556	41.600, 0.367	41.600, 0.318	41.600, 0.383	41.600, 0.291	41.600, 0.276	41.600, 0.269	41.600, 0.265	41.600, 0.232	41.600, 0.235	41.600, 0.252	41.600, 0.220	41.600, 0.236
210	41.800, 0.454	41.800, 0.609	41.800, 0.563	41.800, 0.369	41.800, 0.321	41.800, 0.386	41.800, 0.293	41.800, 0.278	41.800, 0.271	41.800, 0.266	41.800, 0.233	41.800, 0.238	41.800, 0.254	41.800, 0.222	41.800, 0.238
211	42.000, 0.459	42.000, 0.617	42.000, 0.570	42.000, 0.371	42.000, 0.323	42.000, 0.389	42.000, 0.295	42.000, 0.280	42.000, 0.273	42.000, 0.268	42.000, 0.235	42.000, 0.240	42.000, 0.256	42.000, 0.224	42.000, 0.240
212	42.200, 0.464	42.200, 0.624	42.200, 0.576	42.200, 0.374	42.200, 0.325	42.200, 0.392	42.200, 0.297	42.200, 0.283	42.200, 0.275	42.200, 0.270	42.200, 0.237	42.200, 0.242	42.200, 0.257	42.200, 0.226	42.200, 0.242
213	42.400, 0.470	42.400, 0.630	42.400, 0.583	42.400, 0.376	42.400, 0.327	42.400, 0.394	42.400, 0.299	42.400, 0.285	42.400, 0.277	42.400, 0.272	42.400, 0.238	42.400, 0.244	42.400, 0.259	42.400, 0.227	42.400, 0.245
214	42.600, 0.475	42.600, 0.637	42.600, 0.589	42.600, 0.378	42.600, 0.328	42.600, 0.397	42.600, 0.301	42.600, 0.287	42.600, 0.279	42.600, 0.274	42.600, 0.240	42.600, 0.246	42.600, 0.261	42.600, 0.229	42.600, 0.246
215	42.800, 0.481	42.800, 0.644	42.800, 0.596	42.800, 0.380	42.800, 0.330	42.800, 0.399	42.800, 0.304	42.800, 0.289	42.800, 0.281	42.800, 0.275	42.800, 0.242	42.800, 0.248	42.800, 0.262	42.800, 0.231	42.800, 0.248
216	43.000, 0.486	43.000, 0.650	43.000, 0.602	43.000, 0.382	43.000, 0.332	43.000, 0.401	43.000, 0.306	43.000, 0.290	43.000, 0.284	43.000, 0.277	43.000, 0.244	43.000, 0.250	43.000, 0.264	43.000, 0.233	43.000, 0.250
217	43.200, 0.491	43.200, 0.656	43.200, 0.609	43.200, 0.383	43.200, 0.333	43.200, 0.404	43.200, 0.308	43.200, 0.292	43.200, 0.286	43.200, 0.279	43.200, 0.246	43.200, 0.252	43.200, 0.265	43.200, 0.235	43.200, 0.251
218	43.400, 0.496	43.400, 0.663	43.400, 0.615	43.400, 0.385	43.400, 0.335	43.400, 0.406	43.400, 0.310	43.400, 0.294	43.400, 0.288	43.400, 0.281	43.400, 0.247	43.400, 0.253	43.400, 0.267	43.400, 0.236	43.400, 0.253
219	43.600, 0.501	43.600, 0.669	43.600, 0.621	43.600, 0.387	43.600, 0.337	43.600, 0.408	43.600, 0.312	43.600, 0.295	43.600, 0.290	43.600, 0.282	43.600, 0.249	43.600, 0.255	43.600, 0.268	43.600, 0.238	43.600, 0.254
220	43.800, 0.506	43.800, 0.676	43.800, 0.627	43.800, 0.389	43.800, 0.339	43.800, 0.410	43.800, 0.313	43.800, 0.297	43.800, 0.292	43.800, 0.284	43.800, 0.251	43.800, 0.257	43.800, 0.269	43.800, 0.239	43.800, 0.255
221	44.000, 0.511	44.000, 0.682	44.000, 0.633	44.000, 0.391	44.000, 0.341	44.000, 0.412	44.000, 0.315	44.000, 0.299	44.000, 0.294	44.000, 0.285	44.000, 0.253	44.000, 0.258	44.000, 0.270	44.000, 0.240	44.000, 0.257
222	44.200, 0.516	44.200, 0.689	44.200, 0.639	44.200, 0.393	44.200, 0.343	44.200, 0.413	44.200, 0.317	44.200, 0.301	44.200, 0.295	44.200, 0.287	44.200, 0.254	44.200, 0.259	44.200, 0.271	44.200, 0.242	44.200, 0.258
223	44.400, 0.520	44.400, 0.695	44.400, 0.645	44.400, 0.395	44.400, 0.345	44.400, 0.415	44.400, 0.318	44.400, 0.303	44.400, 0.297	44.400, 0.289	44.400, 0.256	44.400, 0.261	44.400, 0.273	44.400, 0.243	44.400, 0.260
224	44.600, 0.525	44.600, 0.702	44.600, 0.651	44.600, 0.397	44.600, 0.346	44.600, 0.417	44.600, 0.319	44.600, 0.305	44.600, 0.299	44.600, 0.290	44.600, 0.258	44.600, 0.262	44.600, 0.274	44.600, 0.245	44.600, 0.261
225	44.800, 0.530	44.800, 0.708	44.800, 0.657	44.800, 0.398	44.800, 0.348	44.800, 0.418	44.800, 0.320	44.800, 0.307	44.800, 0.301	44.800, 0.292	44.800, 0.259	44.800, 0.264	44.800, 0.275	44.800, 0.246	44.800, 0.263
226	45.000, 0.535	45.000, 0.715	45.000, 0.662	45.000, 0.400	45.000, 0.349	45.000, 0.419	45.000, 0.321	45.000, 0.309	45.000, 0.303	45.000, 0.294	45.000, 0.260	45.000, 0.265	45.000, 0.277	45.000, 0.248	45.000, 0.265
227	45.200, 0.540	45.200, 0.721	45.200, 0.668	45.200, 0.402	45.200, 0.351	45.200, 0.421	45.200, 0.322	45.200, 0.310	45.200, 0.304	45.200, 0.295	45.200, 0.262	45.200, 0.266	45.200, 0.278	45.200, 0.249	45.200, 0.267
228	45.400, 0.545	45.400, 0.727	45.400, 0.674	45.400, 0.404	45.400, 0.353	45.400, 0.423	45.400, 0.324	45.400, 0.312	45.400, 0.305	45.400, 0.297	45.400, 0.263	45.400, 0.268	45.400, 0.280	45.400, 0.250	45.400, 0.269
229	45.600, 0.550	45.600, 0.733	45.600, 0.679	45.600, 0.406	45.600, 0.355	45.600, 0.424	45.600, 0.325	45.600, 0.314	45.600, 0.307	45.600, 0.299	45.600, 0.265	45.600, 0.269	45.600, 0.281	45.600, 0.252	45.600, 0.271
230	45.800, 0.555	45.800, 0.739	45.800, 0.685	45.800, 0.408	45.800, 0.356	45.800, 0.426	45.800, 0.327	45.800, 0.316	45.800, 0.308	45.800, 0.300	45.800, 0.266	45.800, 0.271	45.800, 0.283	45.800, 0.253	45.800, 0.272
231	46.000, 0.559	46.000, 0.745	46.000, 0.691	46.000, 0.410	46.000, 0.358	46.000, 0.428	46.000, 0.329	46.000, 0.318	46.000, 0.310	46.000, 0.302	46.000, 0.267	46.000, 0.272	46.000, 0.284	46.000, 0.255	46.000, 0.274
232	46.200, 0.564	46.200, 0.751	46.200, 0.696	46.200, 0.411	46.200, 0.360	46.200, 0.430	46.200, 0.331	46.200, 0.320	46.200, 0.311	46.200, 0.304	46.200, 0.268	46.200, 0.274	46.200, 0.286	46.200, 0.257	46.200, 0.276
233	46.400, 0.569	46.400, 0.757	46.400, 0.702	46.400, 0.413	46.400, 0.361	46.400, 0.431	46.400, 0.332	46.400, 0.322	46.400, 0.313	46.400, 0.305	46.400, 0.269	46.400, 0.275	46.400, 0.287	46.400, 0.258	46.400, 0.277
234	46.600, 0.573	46.600, 0.763	46.600, 0.707	46.600, 0.414	46.600, 0.363	46.600, 0.433	46.600, 0.334	46.600, 0.323	46.600, 0.314	46.600, 0.307	46.600, 0.271	46.600, 0.277	46.600, 0.289	46.600, 0.260	46.600, 0.279
235	46.800, 0.577	46.800, 0.769	46.800, 0.713	46.800, 0.415	46.800, 0.364	46.800, 0.435	46.800, 0.336	46.800, 0.324	46.800, 0.316	46.800, 0.308	46.800, 0.272	46.800, 0.278	46.800, 0.290	46.800, 0.262	46.800, 0.280
236	47.000, 0.582	47.000, 0.775	47.000, 0.718	47.000, 0.417	47.000, 0.366	47.000, 0.437	47.000, 0.338	47.000, 0.325	47.000, 0.317	47.000, 0.310	47.000, 0.273	47.000, 0.280	47.000, 0.291	47.000, 0.264	47.000, 0.281
237	47.200, 0.586	47.200, 0.780	47.200, 0.724	47.200, 0.418	47.200, 0.367	47.200, 0.440	47.200, 0.340	47.200, 0.326	47.200, 0.319	47.200, 0.311	47.200, 0.274	47.200, 0.281	47.200, 0.293	47.200, 0.265	47.200, 0.282
238	47.400, 0.591	47.400, 0.786	47.400, 0.729	47.400, 0.419	47.400, 0.369	47.400, 0.442	47.400, 0.342	47.400, 0.327	47.400, 0.320	47.400, 0.313	47.400, 0.276	47.400, 0.282	47.400, 0.294	47.400, 0.267	47.400, 0.283
239	47.600, 0.595	47.600, 0.791	47.600, 0.734	47.600, 0.420	47.600, 0.370	47.600, 0.444	47.600, 0.344	47.600, 0.328	47.600, 0.322	47.600, 0.314	47.600, 0.278	47.600, 0.284	47.600, 0.295	47.600, 0.268	47.600, 0.284
240	47.800, 0.599	47.800, 0.797	47.800, 0.740	47.800, 0.421	47.800, 0.372	47.800, 0.446	47.800, 0.345	47.800, 0.330	47.800, 0.324	47.800, 0.315	47.800, 0.279	47.800, 0.285	47.800, 0.296	47.800, 0.269	47.800, 0.285
241	48.000, 0.603	48.000, 0.802	48.000, 0.745	48.000, 0.422	48.000, 0.373	48.000, 0.447	48.000, 0.347	48.000, 0.331	48.000, 0.326	48.000, 0.316	48.000, 0.281	48.000, 0.287	48.000, 0.297	48.000, 0.270	48.000, 0.287
242	48.200, 0.607	48.200, 0.807	48.200, 0.751	48.200, 0.424	48.200, 0.374	48.200, 0.449	48.200, 0.348	48.200, 0.332	48.200, 0.327	48.200, 0.318	48.200, 0.283	48.200, 0.288	48.200, 0.298	48.200, 0.271	48.200, 0.288
243	48.400, 0.612	48.400, 0.812	48.400, 0.756	48.400, 0.425	48.400, 0.375	48.400, 0.451	48.400, 0.349	48.400, 0.333	48.400, 0.329	48.400, 0.319	48.400, 0.284	48.400, 0.290	48.400, 0.299	48.400, 0.272	48.400, 0.289
244	48.600, 0.616	48.600, 0.818	48.600, 0.762	48.600, 0.426	48.600, 0.376	48.600, 0.452	48.600, 0.350	48.600, 0.335	48.600, 0.331	48.600, 0.320	48.600, 0.286	48.600, 0.291	48.600, 0.300	48.600, 0.273	48.600, 0.290
245	48.800, 0.620	48.800, 0.823	48.800, 0.767	48.800, 0.428	48.800, 0.377	48.800, 0.453	48.800, 0.351	48.800, 0.336	48.800, 0.332	48.800, 0.321	48.800, 0.287	48.800, 0.293	48.800, 0.301	48.800, 0.274	48.800, 0.292
246	49.000, 0.624	49.000, 0.828	49.000, 0.772	49.000, 0.429	49.000, 0.378	49.000, 0.455	49.000, 0.352	49.000, 0.337	49.000, 0.334	49.000, 0.322	49.000, 0.289	49.000, 0.295	49.000, 0.302	49.000, 0.274	49.000, 0.293
247	49.200, 0.628	49.200, 0.833	49.200, 0.777	49.200, 0.430	49.200, 0.379	49.200, 0.456	49.200, 0.353	49.200, 0.339	49.200, 0.335	49.200, 0.323	49.200, 0.290	49.200, 0.296	49.200, 0.303	49.200, 0.275	49.200, 0.295
248	49.400, 0.631	49.400, 0.838	49.400, 0.782	49.400, 0.432	49.400, 0.381	49.400, 0.457	49.400, 0.354	49.400, 0.340	49.400, 0.337	49.400, 0.324	49.400, 0.292	49.400, 0.297	49.400, 0.304	49.400, 0.276	49.400, 0.296
249	49.600, 0.635	49.600, 0.844	49.600, 0.787	49.600, 0.434	49.600, 0.382	49.600, 0.459	49.600, 0.355	49.600, 0.342	49.600, 0.338	49.600, 0.326	49.600, 0.293	49.600, 0.299	49.600, 0.305	49.600, 0.277	49.600, 0.297
250	49.800, 0.639	49.800, 0.849	49.800, 0.792	49.800, 0.435	49.800, 0.383	49.800, 0.460	49.800, 0.357	49.800, 0.343	49.800, 0.339	49.800, 0.327	49.800, 0.294	49.800, 0.300	49.800, 0.306	49.800, 0.278	49.800, 0.299
251	50.000, 0.643	50.000, 0.854	50.000, 0.797	50.000, 0.436	50.000, 0.385	50.000, 0.461	50.000, 0.358	50.000, 0.345	50.000, 0.341	50.000, 0.328	50.000, 0.295	50.000, 0.301	50.000, 0.307	50.000, 0.279	50.000, 0.300
252	50.200, 0.647	50.200, 0.859	50.200, 0.801	50.200, 0.438	50.200, 0.386	50.200, 0.462	50.200, 0.359	50.200, 0.347	50.200, 0.342	50.200, 0.329	50.200, 0.297	50.200, 0.302	50.200, 0.307	50.200, 0.281	50.200, 0.301
253	50.400, 0.651	50.400, 0.864	50.400, 0.806	50.400, 0.439	50.400, 0.387	50.400, 0.463	50.400, 0.361	50.400, 0.348	50.400, 0.343	50.400, 0.330	50.400, 0.298	50.400, 0.303	50.400, 0.308	50.400, 0.282	50.400, 0.302
254	50.600, 0.655	50.600, 0.870	50.600, 0.810	50.600, 0.440	50.600, 0.388	50.600, 0.464	50.600, 0.362	50.600, 0.350	50.600, 0.344	50.600, 0.331	50.600, 0.299	50.600, 0.304	50.600, 0.309	50.600, 0.283	50.600, 0.303
255	50.800, 0.659	50.800, 0.875	50.800, 0.815	50.800, 0.442	50.800, 0.390	50.800, 0.465	50.800, 0.363	50.800, 0.351	50.800, 0.346	50.800, 0.332	50.800, 0.300	50.800, 0.305	50.800, 0.310	50.800, 0.284	50.800, 0.303
256	51.000, 0.663	51.000, 0.880	51.000, 0.819	51.000, 0.443	51.000, 0.391	51.000, 0.467	51.000, 0.364	51.000, 0.352	51.000, 0.347	51.000, 0.334	51.000, 0.302	51.000, 0.306	51.000, 0.311	51.000, 0.286	51.000, 0.304
257	51.200, 0.667	51.200, 0.884	51.200, 0.823	51.200, 0.444	51.200, 0.392	51.200, 0.468	51.200, 0.366	51.200, 0.354	51.200, 0.348	51.200, 0.335	51.200, 0.303	51.200, 0.307	51.200, 0.312	51.200, 0.287	51.200, 0.305
258	51.400, 0.671	51.400, 0.889	51.400, 0.827	51.400, 0.446	51.400, 0.394	51.400, 0.469	51.400, 0.367	51.400, 0.355	51.400, 0.350	51.400, 0.336	51.400, 0.304	51.400, 0.308	51.400, 0.313	51.400, 0.288	51.400, 0.306
259	51.600, 0.675	51.600, 0.894	51.600, 0.832	51.600, 0.447	51.600, 0.395	51.600, 0.471	51.600, 0.368	51.600, 0.357	51.600, 0.351	51.600, 0.338	51.600, 0.306	51.600, 0.309	51.600, 0.314	51.600, 0.289	51.600, 0.307
260	51.800, 0.679	51.800, 0.899	51.800, 0.836	51.800, 0.448	51.800, 0.396	51.800, 0.472	51.800, 0.369	51.800, 0.358	51.800, 0.352	51.800, 0.339	51.800, 0.307	51.800, 0.310	51.800, 0.314	51.800, 0.290	51.800, 0.308
261	52.000, 0.683	52.000, 0.904	52.000, 0.840	52.000, 0.450	52.000, 0.397	52.000, 0.474	52.000, 0.370	52.000, 0.359	52.000, 0.353	52.000, 0.340	52.000, 0.308	52.000, 0.311	52.000, 0.315	52.000, 0.291	52.000, 0.309
262	52.200, 0.686	52.200, 0.908	52.200, 0.844	52.200, 0.451	52.200, 0.398	52.200, 0.476	52.200, 0.371	52.200, 0.360	52.200, 0.355	52.200, 0.341	52.200, 0.309	52.200, 0.312	52.200, 0.316	52.200, 0.292	52.200, 0.311
263	52.400, 0.690	52.400, 0.913	52.400, 0.849	52.400, 0.452	52.400, 0.400	52.400, 0.477	52.400, 0.372	52.400, 0.361	52.400, 0.356	52.400, 0.343	52.400, 0.310	52.400, 0.313	52.400, 0.317	52.400, 0.293	52.400, 0.312
264	52.600, 0.694	52.600, 0.917	52.600, 0.853	52.600, 0.453	52.600, 0.401	52.600, 0.479	52.600, 0.373	52.600, 0.361	52.600, 0.357	52.600, 0.344	52.600, 0.311	52.600, 0.315	52.600, 0.318	52.600, 0.294	52.600, 0.313
265	52.800, 0.697	52.800, 0.922	52.800, 0.858	52.800, 0.455	52.800, 0.402	52.800, 0.480	52.800, 0.374	52.800, 0.362	52.800, 0.358	52.800, 0.345	52.800, 0.312	52.800, 0.316	52.800, 0.319	52.800, 0.295	52.800, 0.314
266	53.000, 0.701	53.000, 0.926	53.000, 0.862	53.000, 0.456	53.000, 0.403	53.000, 0.482	53.000, 0.375	53.000, 0.363	53.000, 0.359	53.000, 0.347	53.000, 0.313	53.000, 0.317	53.000, 0.320	53.000, 0.296	53.000, 0.316
267	53.200, 0.705	53.200, 0.931	53.200, 0.867	53.200, 0.457	53.200, 0.404	53.200, 0.483	53.200, 0.377	53.200, 0.364	53.200, 0.360	53.200, 0.348	53.200, 0.314	53.200, 0.319	53.200, 0.321	53.200, 0.297	53.200, 0.317
268	53.400, 0.708	53.400, 0.935	53.400, 0.871	53.400, 0.458	53.400, 0.406	53.400, 0.485	53.400, 0.378	53.400, 0.365	53.400, 0.361	53.400, 0.349	53.400, 0.315	53.400, 0.320	53.400, 0.323	53.400, 0.298	53.400, 0.318
269	53.600, 0.712	53.600, 0.940	53.600, 0.876	53.600, 0.459	53.600, 0.407	53.600, 0.486	53.600, 0.380	53.600, 0.366	53.600, 0.362	53.600, 0.350	53.600, 0.315	53.600, 0.321	53.600, 0.324	53.600, 0.299	53.600, 0.319
270	53.800, 0.715	53.800, 0.944	53.800, 0.880	53.800, 0.460	53.800, 0.408	53.800, 0.487	53.800, 0.381	53.800, 0.368	53.800, 0.363	53.800, 0.351	53.800, 0.316	53.800, 0.322	53.800, 0.325	53.800, 0.301	53.800, 0.320
271	54.000, 0.718	54.000, 0.949	54.000, 0.885	54.000, 0.461	54.000, 0.409	54.000, 0.488	54.000, 0.382	54.000, 0.369	54.000, 0.364	54.000, 0.351	54.000, 0.317	54.000, 0.323	54.000, 0.326	54.000, 0.302	54.000, 0.321
272	54.200, 0.722	54.200, 0.954	54.200, 0.889	54.200, 0.462	54.200, 0.409	54.200, 0.489	54.200, 0.383	54.200, 0.371	54.200, 0.365	54.200, 0.352	54.200, 0.317	54.200, 0.324	54.200, 0.327	54.200, 0.303	54.200, 0.323
273	54.400, 0.725	54.400, 0.959	54.400, 0.893	54.400, 0.463	54.400, 0.410	54.400, 0.490	54.400, 0.384	54.400, 0.372	54.400, 0.366	54.400, 0.353	54.400, 0.318	54.400, 0.325	54.400, 0.328	54.400, 0.304	54.400, 0.324
274	54.600, 0.729	54.600, 0.963	54.600, 0.898	54.600, 0.464	54.600, 0.411	54.600, 0.491	54.600, 0.385	54.600, 0.373	54.600, 0.367	54.600, 0.354	54.600, 0.319	54.600, 0.326	54.600, 0.329	54.600, 0.306	54.600, 0.325
275	54.800, 0.732	54.800, 0.968	54.800, 0.902	54.800, 0.465	54.800, 0.412	54.800, 0.492	54.800, 0.386	54.800, 0.375	54.800, 0.368	54.800, 0.354	54.800, 0.320	54.800, 0.327	54.800, 0.329	54.800, 0.307	54.800, 0.326
276	55.000, 0.735	55.000, 0.972	55.000, 0.906	55.000, 0.466	55.000, 0.412	55.000, 0.493	55.000, 0.387	55.000, 0.376	55.000, 0.369	55.000, 0.355	55.000, 0.322	55.000, 0.328	55.000, 0.330	55.000, 0.308	55.000, 0.326
277	55.200, 0.738	55.200, 0.977	55.200, 0.910	55.200, 0.467	55.200, 0.413	55.200, 0.494	55.200, 0.387	55.200, 0.378	55.200, 0.370	55.200, 0.356	55.200, 0.324	55.200, 0.329	55.200, 0.330	55.200, 0.308	55.200, 0.327
278	55.400, 0.741	55.400, 0.981	55.400, 0.914	55.400, 0.468	55.400, 0.414	55.400, 0.495	55.400, 0.388	55.400, 0.379	55.400, 0.371	55.400, 0.357	55.400, 0.325	55.400, 0.330	55.400, 0.331	55.400, 0.309	55.400, 0.328
279	55.600, 0.744	55.600, 0.986	55.600, 0.918	55.600, 0.470	55.600, 0.415	55.600, 0.496	55.600, 0.389	55.600, 0.380	55.600, 0.372	55.600, 0.358	55.600, 0.326	55.600, 0.331	55.600, 0.331	55.600, 0.310	55.600, 0.329
280	55.800, 0.747	55.800, 0.990	55.800, 0.922	55.800, 0.471	55.800, 0.416	55.800, 0.497	55.800, 0.389	55.800, 0.381	55.800, 0.374	55.800, 0.360	55.800, 0.327	55.800, 0.331	55.800, 0.332	55.800, 0.311	55.800, 0.330
281	56.000, 0.750	56.000, 0.994	56.000, 0.926	56.000, 0.472	56.000, 0.417	56.000, 0.499	56.000, 0.390	56.000, 0.382	56.000, 0.375	56.000, 0.360	56.000, 0.328	56.000, 0.332	56.000, 0.332	56.000, 0.312	56.000, 0.331
282	56.200, 0.753	56.200, 0.998	56.200, 0.929	56.200, 0.474	56.200, 0.418	56.200, 0.500	56.200, 0.391	56.200, 0.382	56.200, 0.376	56.200, 0.361	56.200, 0.329	56.200, 0.333	56.200, 0.333	56.200, 0.313	56.200, 0.332
283	56.400, 0.756	56.400, 1.001	56.400, 0.933	56.400, 0.475	56.400, 0.419	56.400, 0.501	56.400, 0.392	56.400, 0.383	56.400, 0.377	56.400, 0.362	56.400, 0.330	56.400, 0.334	56.400, 0.334	56.400, 0.314	56.400, 0.333
284	56.600, 0.759	56.600, 1.005	56.600, 0.937	56.600, 0.476	56.600, 0.420	56.600, 0.502	56.600, 0.393	56.600, 0.383	56.600, 0.378	56.600, 0.363	56.600, 0.331	56.600, 0.335	56.600, 0.335	56.600, 0.315	56.600, 0.334
285	56.800, 0.762	56.800, 1.009	56.800, 0.940	56.800, 0.477	56.800, 0.421	56.800, 0.503	56.800, 0.394	56.800, 0.384	56.800, 0.379	56.800, 0.363	56.800, 0.332	56.800, 0.336	56.800, 0.336	56.800, 0.316	56.800, 0.336
286	57.000, 0.765	57.000, 1.013	57.000, 0.944	57.000, 0.478	57.000, 0.422	57.000, 0.504	57.000, 0.395	57.000, 0.384	57.000, 0.379	57.000, 0.364	57.000, 0.333	57.000, 0.337	57.000, 0.338	57.000, 0.316	57.000, 0.337
287	57.200, 0.768	57.200, 1.017	57.200, 0.948	57.200, 0.479	57.200, 0.423	57.200, 0.506	57.200, 0.396	57.200, 0.385	57.200, 0.380	57.200, 0.364	57.200, 0.333	57.200, 0.338	57.200, 0.339	57.200, 0.317	57.200, 0.338
288	57.400, 0.771	57.400, 1.021	57.400, 0.952	57.400, 0.480	57.400, 0.424	57.400, 0.507	57.400, 0.398	57.400, 0.387	57.400, 0.381	57.400, 0.365	57.400, 0.334	57.400, 0.339	57.400, 0.340	57.400, 0.318	57.400, 0.340
289	57.600, 0.774	57.600, 1.025	57.600, 0.956	57.600, 0.481	57.600, 0.425	57.600, 0.508	57.600, 0.399	57.600, 0.388	57.600, 0.382	57.600, 0.366	57.600, 0.335	57.600, 0.340	57.600, 0.341	57.600, 0.319	57.600, 0.341
290	57.800, 0.777	57.800, 1.029	57.800, 0.960	57.800, 0.482	57.800, 0.426	57.800, 0.509	57.800, 0.400	57.800, 0.389	57.800, 0.383	57.800, 0.367	57.800, 0.335	57.800, 0.341	57.800, 0.342	57.800, 0.320	57.800, 0.342
291	58.000, 0.781	58.000, 1.033	58.000, 0.963	58.000, 0.482	58.000, 0.427	58.000, 0.510	58.000, 0.400	58.000, 0.389	58.000, 0.384	58.000, 0.367	58.000, 0.336	58.000, 0.342	58.000, 0.343	58.000, 0.321	58.000, 0.343
292	58.200, 0.784	58.200, 1.037	58.200, 0.967	58.200, 0.483	58.200, 0.428	58.200, 0.511	58.200, 0.401	58.200, 0.390	58.200, 0.385	58.200, 0.368	58.200, 0.337	58.200, 0.343	58.200, 0.343	58.200, 0.322	58.200, 0.344
293	58.400, 0.787	58.400, 1.041	58.400, 0.971	58.400, 0.484	58.400, 0.429	58.400, 0.512	58.400, 0.402	58.400, 0.391	58.400, 0.386	58.400, 0.369	58.400, 0.338	58.400, 0.344	58.400, 0.344	58.400, 0.323	58.400, 0.345
294	58.600, 0.791	58.600, 1.045	58.600, 0.975	58.600, 0.484	58.600, 0.430	58.600, 0.513	58.600, 0.402	58.600, 0.392	58.600, 0.386	58.600, 0.370	58.600, 0.339	58.600, 0.345	58.600, 0.345	58.600, 0.324	58.600, 0.346
295	58.800, 0.794	58.800, 1.049	58.800, 0.979	58.800, 0.485	58.800, 0.431	58.800, 0.514	58.800, 0.403	58.800, 0.392	58.800, 0.387	58.800, 0.371	58.800, 0.340	58.800, 0.346	58.800, 0.346	58.800, 0.325	58.800, 0.347
296	59.000, 0.797	59.000, 1.052	59.000, 0.982	59.000, 0.486	59.000, 0.432	59.000, 0.515	59.000, 0.403	59.000, 0.393	59.000, 0.389	59.000, 0.372	59.000, 0.341	59.000, 0.347	59.000, 0.346	59.000, 0.325	59.000, 0.347
297	59.200, 0.801	59.200, 1.056	59.200, 0.986	59.200, 0.486	59.200, 0.433	59.200, 0.516	59.200, 0.404	59.200, 0.394	59.200, 0.390	59.200, 0.373	59.200, 0.342	59.200, 0.348	59.200, 0.347	59.200, 0.326	59.200, 0.348
298	59.400, 0.804	59.400, 1.060	59.400, 0.990	59.400, 0.487	59.400, 0.434	59.400, 0.517	59.400, 0.404	59.400, 0.395	59.400, 0.391	59.400, 0.375	59.400, 0.342	59.400, 0.348	59.400, 0.348	59.400, 0.326	59.400, 0.349
299	59.600, 0.807	59.600, 1.064	59.600, 0.993	59.600, 0.488	59.600, 0.435	59.600, 0.518	59.600, 0.405	59.600, 0.397	59.600, 0.393	59.600, 0.376	59.600, 0.343	59.600, 0.349	59.600, 0.348	59.600, 0.327	59.600, 0.349
300	59.800, 0.810	59.800, 1.067	59.800, 0.997	59.800, 0.489	59.800, 0.436	59.800, 0.519	59.800, 0.406	59.800, 0.398	59.800, 0.394	59.800, 0.377	59.800, 0.344	59.800, 0.350	59.800, 0.349	59.800, 0.328	59.800, 0.350
301	60.000, 0.814	60.000, 1.071	60.000, 1.000	60.000, 0.490	60.000, 0.437	60.000, 0.520	60.000, 0.407	60.000, 0.398	60.000, 0.395	60.000, 0.377	60.000, 0.344	60.000, 0.350	60.000, 0.350	60.000, 0.329	60.000, 0.351
302	60.200, 0.817	60.200, 1.075	60.200, 1.003	60.200, 0.491	60.200, 0.438	60.200, 0.522	60.200, 0.408	60.200, 0.399	60.200, 0.396	60.200, 0.378	60.200, 0.345	60.200, 0.351	60.200, 0.351	60.200, 0.329	60.200, 0.351
303	60.400, 0.820	60.400, 1.079	60.400, 1.006	60.400, 0.492	60.400, 0.438	60.400, 0.523	60.400, 0.409	60.400, 0.400	60.400, 0.397	60.400, 0.379	60.400, 0.345	60.400, 0.352	60.400, 0.351	60.400, 0.330	60.400, 0.352
304	60.600, 0.823	60.600, 1.083	60.600, 1.010	60.600, 0.493	60.600, 0.439	60.600, 0.524	60.600, 0.410	60.600, 0.401	60.600, 0.398	60.600, 0.379	60.600, 0.346	60.600, 0.353	60.600, 0.352	60.600, 0.331	60.600, 0.353
305	60.800, 0.825	60.800, 1.086	60.800, 1.013	60.800, 0.494	60.800, 0.440	60.800, 0.525	60.800, 0.412	60.800, 0.402	60.800, 0.398	60.800, 0.380	60.800, 0.347	60.800, 0.354	60.800, 0.352	60.800, 0.332	60.800, 0.354
306	61.000, 0.828	61.000, 1.090	61.000, 1.017	61.000, 0.495	61.000, 0.441	61.000, 0.526	61.000, 0.413	61.000, 0.403	61.000, 0.399	61.000, 0.381	61.000, 0.348	61.000, 0.355	61.000, 0.353	61.000, 0.333	61.000, 0.355
307	61.200, 0.831	61.200, 1.094	61.200, 1.020	61.200, 0.496	61.200, 0.442	61.200, 0.527	61.200, 0.414	61.200, 0.404	61.200, 0.400	61.200, 0.381	61.200, 0.349	61.200, 0.356	61.200, 0.353	61.200, 0.333	61.200, 0.356
308	61.400, 0.834	61.400, 1.098	61.400, 1.023	61.400, 0.496	61.400, 0.443	61.400, 0.528	61.400, 0.415	61.400, 0.405	61.400, 0.401	61.400, 0.382	61.400, 0.350	61.400, 0.357	61.400, 0.354	61.400, 0.334	61.400, 0.356
309	61.600, 0.836	61.600, 1.101	61.600, 1.027	61.600, 0.497	61.600, 0.444	61.600, 0.529	61.600, 0.416	61.600, 0.406	61.600, 0.401	61.600, 0.383	61.600, 0.351	61.600, 0.358	61.600, 0.354	61.600, 0.335	61.600, 0.357
310	61.800, 0.839	61.800, 1.105	61.800, 1.030	61.800, 0.498	61.800, 0.445	61.800, 0.530	61.800, 0.417	61.800, 0.407	61.800, 0.402	61.800, 0.383	61.800, 0.351	61.800, 0.358	61.800, 0.355	61.800, 0.336	61.800, 0.358
311	62.000, 0.842	62.000, 1.109	62.000, 1.033	62.000, 0.499	62.000, 0.446	62.000, 0.530	62.000, 0.417	62.000, 0.408	62.000, 0.403	62.000, 0.384	62.000, 0.352	62.000, 0.359	62.000, 0.355	62.000, 0.336	62.000, 0.359
312	62.200, 0.844	62.200, 1.112	62.200, 1.036	62.200, 0.500	62.200, 0.447	62.200, 0.531	62.200, 0.418	62.200, 0.408	62.200, 0.404	62.200, 0.385	62.200, 0.354	62.200, 0.360	62.200, 0.356	62.200, 0.337	62.200, 0.360
313	62.400, 0.847	62.400, 1.116	62.400, 1.040	62.400, 0.501	62.400, 0.447	62.400, 0.532	62.400, 0.418	62.400, 0.409	62.400, 0.404	62.400, 0.385	62.400, 0.354	62.400, 0.361	62.400, 0.357	62.400, 0.338	62.400, 0.361
314	62.600, 0.850	62.600, 1.119	62.600, 1.043	62.600, 0.502	62.600, 0.448	62.600, 0.532	62.600, 0.419	62.600, 0.409	62.600, 0.405	62.600, 0.386	62.600, 0.355	62.600, 0.361	62.600, 0.357	62.600, 0.338	62.600, 0.362
315	62.800, 0.852	62.800, 1.123	62.800, 1.047	62.800, 0.503	62.800, 0.448	62.800, 0.533	62.800, 0.419	62.800, 0.410	62.800, 0.405	62.800, 0.386	62.800, 0.356	62.800, 0.362	62.800, 0.358	62.800, 0.339	62.800, 0.363
316	63.000, 0.855	63.000, 1.127	63.000, 1.050	63.000, 0.503	63.000, 0.449	63.000, 0.534	63.000, 0.419	63.000, 0.410	63.000, 0.406	63.000, 0.387	63.000, 0.357	63.000, 0.363	63.000, 0.359	63.000, 0.340	63.000, 0.363
317	63.200, 0.858	63.200, 1.130	63.200, 1.054	63.200, 0.504	63.200, 0.449	63.200, 0.535	63.200, 0.420	63.200, 0.411	63.200, 0.407	63.200, 0.387	63.200, 0.357	63.200, 0.363	63.200, 0.359	63.200, 0.340	63.200, 0.364
318	63.400, 0.861	63.400, 1.133	63.400, 1.057	63.400, 0.505	63.400, 0.450	63.400, 0.536	63.400, 0.420	63.400, 0.413	63.400, 0.408	63.400, 0.388	63.400, 0.358	63.400, 0.363	63.400, 0.360	63.400, 0.341	63.400, 0.365
319	63.600, 0.863	63.600, 1.137	63.600, 1.060	63.600, 0.506	63.600, 0.451	63.600, 0.537	63.600, 0.420	63.600, 0.414	63.600, 0.408	63.600, 0.389	63.600, 0.359	63.600, 0.364	63.600, 0.360	63.600, 0.341	63.600, 0.366
320	63.800, 0.866	63.800, 1.140	63.800, 1.063	63.800, 0.507	63.800, 0.451	63.800, 0.538	63.800, 0.421	63.800, 0.415	63.800, 0.409	63.800, 0.389	63.800, 0.359	63.800, 0.364	63.800, 0.361	63.800, 0.342	63.800, 0.366
321	64.000, 0.868	64.000, 1.143	64.000, 1.066	64.000, 0.508	64.000, 0.452	64.000, 0.539	64.000, 0.422	64.000, 0.416	64.000, 0.410	64.000, 0.390	64.000, 0.360	64.000, 0.365	64.000, 0.361	64.000, 0.342	64.000, 0.367
322	64.200, 0.871	64.200, 1.146	64.200, 1.069	64.200, 0.509	64.200, 0.453	64.200, 0.540	64.200, 0.423	64.200, 0.417	64.200, 0.411	64.200, 0.391	64.200, 0.361	64.200, 0.365	64.200, 0.362	64.200, 0.343	64.200, 0.368
323	64.400, 0.874	64.400, 1.148	64.400, 1.073	64.400, 0.510	64.400, 0.454	64.400, 0.541	64.400, 0.424	64.400, 0.418	64.400, 0.411	64.400, 0.391	64.400, 0.361	64.400, 0.366	64.400, 0.362	64.400, 0.344	64.400, 0.369
324	64.600, 0.876	64.600, 1.151	64.600, 1.076	64.600, 0.511	64.600, 0.455	64.600, 0.542	64.600, 0.425	64.600, 0.418	64.600, 0.412	64.600, 0.392	64.600, 0.362	64.600, 0.367	64.600, 0.363	64.600, 0.345	64.600, 0.369
325	64.800, 0.879	64.800, 1.155	64.800, 1.079	64.800, 0.512	64.800, 0.456	64.800, 0.544	64.800, 0.426	64.800, 0.419	64.800, 0.413	64.800, 0.392	64.800, 0.363	64.800, 0.368	64.800, 0.363	64.800, 0.346	64.800, 0.370
326	65.000, 0.881	65.000, 1.158	65.000, 1.082	65.000, 0.513	65.000, 0.457	65.000, 0.544	65.000, 0.427	65.000, 0.419	65.000, 0.414	65.000, 0.393	65.000, 0.364	65.000, 0.369	65.000, 0.364	65.000, 0.347	65.000, 0.371
327	65.200, 0.884	65.200, 1.161	65.200, 1.086	65.200, 0.514	65.200, 0.457	65.200, 0.545	65.200, 0.428	65.200, 0.420	65.200, 0.415	65.200, 0.394	65.200, 0.365	65.200, 0.370	65.200, 0.364	65.200, 0.348	65.200, 0.371
328	65.400, 0.887	65.400, 1.165	65.400, 1.089	65.400, 0.515	65.400, 0.458	65.400, 0.546	65.400, 0.429	65.400, 0.421	65.400, 0.416	65.400, 0.395	65.400, 0.366	65.400, 0.371	65.400, 0.365	65.400, 0.349	65.400, 0.372
329	65.600, 0.889	65.600, 1.168	65.600, 1.093	65.600, 0.515	65.600, 0.459	65.600, 0.546	65.600, 0.430	65.600, 0.422	65.600, 0.417	65.600, 0.396	65.600, 0.367	65.600, 0.372	65.600, 0.365	65.600, 0.349	65.600, 0.372
330	65.800, 0.892	65.800, 1.171	65.800, 1.096	65.800, 0.516	65.800, 0.460	65.800, 0.547	65.800, 0.431	65.800, 0.422	65.800, 0.419	65.800, 0.397	65.800, 0.367	65.800, 0.373	65.800, 0.366	65.800, 0.350	65.800, 0.373
331	66.000, 0.894	66.000, 1.175	66.000, 1.100	66.000, 0.517	66.000, 0.460	66.000, 0.548	66.000, 0.432	66.000, 0.423	66.000, 0.420	66.000, 0.398	66.000, 0.368	66.000, 0.374	66.000, 0.367	66.000, 0.351	66.000, 0.374
332	66.200, 0.897	66.200, 1.178	66.200, 1.103	66.200, 0.517	66.200, 0.461	66.200, 0.548	66.200, 0.432	66.200, 0.423	66.200, 0.421	66.200, 0.399	66.200, 0.369	66.200, 0.375	66.200, 0.367	66.200, 0.352	66.200, 0.374
333	66.400, 0.900	66.400, 1.182	66.400, 1.106	66.400, 0.518	66.400, 0.462	66.400, 0.549	66.400, 0.433	66.400, 0.424	66.400, 0.422	66.400, 0.400	66.400, 0.369	66.400, 0.376	66.400, 0.368	66.400, 0.353	66.400, 0.375
334	66.600, 0.902	66.600, 1.185	66.600, 1.110	66.600, 0.519	66.600, 0.462	66.600, 0.549	66.600, 0.433	66.600, 0.424	66.600, 0.422	66.600, 0.401	66.600, 0.370	66.600, 0.377	66.600, 0.369	66.600, 0.355	66.600, 0.376
335	66.800, 0.905	66.800, 1.189	66.800, 1.113	66.800, 0.519	66.800, 0.463	66.800, 0.550	66.800, 0.434	66.800, 0.425	66.800, 0.423	66.800, 0.401	66.800, 0.371	66.800, 0.377	66.800, 0.369	66.800, 0.356	66.800, 0.376
336	67.000, 0.907	67.000, 1.192	67.000, 1.116	67.000, 0.520	67.000, 0.464	67.000, 0.550	67.000, 0.434	67.000, 0.425	67.000, 0.424	67.000, 0.402	67.000, 0.371	67.000, 0.378	67.000, 0.370	67.000, 0.356	67.000, 0.377
337	67.200, 0.910	67.200, 1.195	67.200, 1.119	67.200, 0.521	67.200, 0.464	67.200, 0.551	67.200, 0.435	67.200, 0.427	67.200, 0.425	67.200, 0.403	67.200, 0.372	67.200, 0.378	67.200, 0.371	67.200, 0.357	67.200, 0.377
338	67.400, 0.912	67.400, 1.198	67.400, 1.122	67.400, 0.521	67.400, 0.465	67.400, 0.552	67.400, 0.435	67.400, 0.428	67.400, 0.426	67.400, 0.404	67.400, 0.372	67.400, 0.379	67.400, 0.372	67.400, 0.358	67.400, 0.378
339	67.600, 0.914	67.600, 1.202	67.600, 1.124	67.600, 0.522	67.600, 0.466	67.600, 0.553	67.600, 0.435	67.600, 0.429	67.600, 0.427	67.600, 0.404	67.600, 0.372	67.600, 0.379	67.600, 0.373	67.600, 0.358	67.600, 0.379
340	67.800, 0.917	67.800, 1.205	67.800, 1.127	67.800, 0.522	67.800, 0.467	67.800, 0.554	67.800, 0.436	67.800, 0.431	67.800, 0.428	67.800, 0.405	67.800, 0.373	67.800, 0.380	67.800, 0.373	67.800, 0.359	67.800, 0.380
341	68.000, 0.919	68.000, 1.208	68.000, 1.129	68.000, 0.523	68.000, 0.468	68.000, 0.555	68.000, 0.437	68.000, 0.432	68.000, 0.429	68.000, 0.405	68.000, 0.373	68.000, 0.381	68.000, 0.374	68.000, 0.359	68.000, 0.381
342	68.200, 0.921	68.200, 1.211	68.200, 1.132	68.200, 0.524	68.200, 0.469	68.200, 0.556	68.200, 0.437	68.200, 0.433	68.200, 0.429	68.200, 0.406	68.200, 0.374	68.200, 0.381	68.200, 0.374	68.200, 0.360	68.200, 0.382
343	68.400, 0.924	68.400, 1.214	68.400, 1.135	68.400, 0.525	68.400, 0.470	68.400, 0.557	68.400, 0.438	68.400, 0.433	68.400, 0.429	68.400, 0.407	68.400, 0.375	68.400, 0.382	68.400, 0.375	68.400, 0.360	68.400, 0.382
344	68.600, 0.926	68.600, 1.217	68.600, 1.137	68.600, 0.525	68.600, 0.470	68.600, 0.558	68.600, 0.438	68.600, 0.434	68.600, 0.430	68.600, 0.407	68.600, 0.375	68.600, 0.383	68.600, 0.375	68.600, 0.361	68.600, 0.383
345	68.800, 0.929	68.800, 1.220	68.800, 1.140	68.800, 0.526	68.800, 0.471	68.800, 0.558	68.800, 0.439	68.800, 0.435	68.800, 0.431	68.800, 0.408	68.800, 0.376	68.800, 0.384	68.800, 0.375	68.800, 0.362	68.800, 0.384
346	69.000, 0.931	69.000, 1.223	69.000, 1.143	69.000, 0.527	69.000, 0.472	69.000, 0.559	69.000, 0.439	69.000, 0.435	69.000, 0.431	69.000, 0.409	69.000, 0.377	69.000, 0.385	69.000, 0.376	69.000, 0.362	69.000, 0.384
347	69.200, 0.933	69.200, 1.226	69.200, 1.146	69.200, 0.528	69.200, 0.472	69.200, 0.560	69.200, 0.440	69.200, 0.436	69.200, 0.432	69.200, 0.409	69.200, 0.377	69.200, 0.386	69.200, 0.376	69.200, 0.362	69.200, 0.385
348	69.400, 0.935	69.400, 1.229	69.400, 1.149	69.400, 0.529	69.400, 0.473	69.400, 0.561	69.400, 0.440	69.400, 0.436	69.400, 0.433	69.400, 0.410	69.400, 0.378	69.400, 0.387	69.400, 0.377	69.400, 0.363	69.400, 0.386
349	69.600, 0.938	69.600, 1.232	69.600, 1.151	69.600, 0.529	69.600, 0.474	69.600, 0.562	69.600, 0.441	69.600, 0.437	69.600, 0.433	69.600, 0.411	69.600, 0.379	69.600, 0.388	69.600, 0.378	69.600, 0.363	69.600, 0.386
350	69.800, 0.940	69.800, 1.235	69.800, 1.154	69.800, 0.530	69.800, 0.474	69.800, 0.563	69.800, 0.441	69.800, 0.437	69.800, 0.434	69.800, 0.411	69.800, 0.380	69.800, 0.389	69.800, 0.379	69.800, 0.364	69.800, 0.387
351	70.000, 0.942	70.000, 1.238	70.000, 1.157	70.000, 0.531	70.000, 0.475	70.000, 0.564	70.000, 0.442	70.000, 0.437	70.000, 0.435	70.000, 0.412	70.000, 0.381	70.000, 0.389	70.000, 0.379	70.000, 0.365	70.000, 0.387
352	70.200, 0.945	70.200, 1.241	70.200, 1.160	70.200, 0.532	70.200, 0.475	70.200, 0.565	70.200, 0.442	70.200, 0.437	70.200, 0.436	70.200, 0.412	70.200, 0.382	70.200, 0.390	70.200, 0.380	70.200, 0.366	70.200, 0.388
353	70.400, 0.947	70.400, 1.244	70.400, 1.163	70.400, 0.532	70.400, 0.476	70.400, 0.566	70.400, 0.443	70.400, 0.437	70.400, 0.437	70.400, 0.412	70.400, 0.383	70.400, 0.391	70.400, 0.380	70.400, 0.367	70.400, 0.388
354	70.600, 0.949	70.600, 1.247	70.600, 1.166	70.600, 0.533	70.600, 0.477	70.600, 0.566	70.600, 0.444	70.600, 0.437	70.600, 0.437	70.600, 0.413	70.600, 0.383	70.600, 0.391	70.600, 0.380	70.600, 0.367	70.600, 0.388
355	70.800, 0.952	70.800, 1.250	70.800, 1.169	70.800, 0.533	70.800, 0.477	70.800, 0.567	70.800, 0.444	70.800, 0.437	70.800, 0.438	70.800, 0.413	70.800, 0.384	70.800, 0.392	70.800, 0.381	70.800, 0.368	70.800, 0.389
356	71.000, 0.954	71.000, 1.253	71.000, 1.172	71.000, 0.534	71.000, 0.478	71.000, 0.568	71.000, 0.445	71.000, 0.437	71.000, 0.439	71.000, 0.413	71.000, 0.384	71.000, 0.392	71.000, 0.381	71.000, 0.369	71.000, 0.389
357	71.200, 0.957	71.200, 1.256	71.200, 1.175	71.200, 0.534	71.200, 0.479	71.200, 0.569	71.200, 0.446	71.200, 0.438	71.200, 0.440	71.200, 0.413	71.200, 0.384	71.200, 0.393	71.200, 0.382	71.200, 0.369	71.200, 0.390
358	71.400, 0.959	71.400, 1.259	71.400, 1.178	71.400, 0.535	71.400, 0.479	71.400, 0.569	71.400, 0.446	71.400, 0.439	71.400, 0.441	71.400, 0.414	71.400, 0.385	71.400, 0.393	71.400, 0.382	71.400, 0.369	71.400, 0.391
359	71.600, 0.961	71.600, 1.262	71.600, 1.181	71.600, 0.536	71.600, 0.480	71.600, 0.570	71.600, 0.447	71.600, 0.440	71.600, 0.441	71.600, 0.414	71.600, 0.385	71.600, 0.393	71.600, 0.382	71.600, 0.369	71.600, 0.392
360	71.800, 0.964	71.800, 1.265	71.800, 1.184	71.800, 0.537	71.800, 0.481	71.800, 0.571	71.800, 0.448	71.800, 0.441	71.800, 0.442	71.800, 0.415	71.800, 0.385	71.800, 0.394	71.800, 0.383	71.800, 0.370	71.800, 0.393
361	72.000, 0.966	72.000, 1.268	72.000, 1.187	72.000, 0.538	72.000, 0.481	72.000, 0.572	72.000, 0.449	72.000, 0.442	72.000, 0.442	72.000, 0.415	72.000, 0.386	72.000, 0.395	72.000, 0.383	72.000, 0.370	72.000, 0.393
362	72.200, 0.969	72.200, 1.271	72.200, 1.189	72.200, 0.539	72.200, 0.482	72.200, 0.572	72.200, 0.449	72.200, 0.443	72.200, 0.443	72.200, 0.416	72.200, 0.387	72.200, 0.395	72.200, 0.383	72.200, 0.370	72.200, 0.394
363	72.400, 0.971	72.400, 1.274	72.400, 1.192	72.400, 0.540	72.400, 0.482	72.400, 0.573	72.400, 0.450	72.400, 0.444	72.400, 0.443	72.400, 0.416	72.400, 0.387	72.400, 0.396	72.400, 0.384	72.400, 0.371	72.400, 0.395
364	72.600, 0.974	72.600, 1.276	72.600, 1.195	72.600, 0.541	72.600, 0.483	72.600, 0.573	72.600, 0.451	72.600, 0.445	72.600, 0.444	72.600, 0.417	72.600, 0.387	72.600, 0.396	72.600, 0.384	72.600, 0.371	72.600, 0.396
365	72.800, 0.976	72.800, 1.279	72.800, 1.197	72.800, 0.542	72.800, 0.483	72.800, 0.574	72.800, 0.452	72.800, 0.446	72.800, 0.445	72.800, 0.418	72.800, 0.388	72.800, 0.397	72.800, 0.385	72.800, 0.371	72.800, 0.396
366	73.000, 0.978	73.000, 1.282	73.000, 1.200	73.000, 0.542	73.000, 0.484	73.000, 0.574	73.000, 0.452	73.000, 0.447	73.000, 0.446	73.000, 0.418	73.000, 0.389	73.000, 0.397	73.000, 0.385	73.000, 0.372	73.000, 0.397
367	73.200, 0.981	73.200, 1.284	73.200, 1.202	73.200, 0.543	73.200, 0.485	73.200, 0.575	73.200, 0.453	73.200, 0.448	73.200, 0.446	73.200, 0.419	73.200, 0.389	73.200, 0.398	73.200, 0.386	73.200, 0.372	73.200, 0.398
368	73.400, 0.983	73.400, 1.287	73.400, 1.205	73.400, 0.544	73.400, 0.486	73.400, 0.575	73.400, 0.454	73.400, 0.449	73.400, 0.447	73.400, 0.420	73.400, 0.390	73.400, 0.399	73.400, 0.387	73.400, 0.373	73.400, 0.399
369	73.600, 0.985	73.600, 1.289	73.600, 1.207	73.600, 0.544	73.600, 0.486	73.600, 0.576	73.600, 0.454	73.600, 0.450	73.600, 0.448	73.600, 0.420	73.600, 0.391	73.600, 0.400	73.600, 0.387	73.600, 0.373	73.600, 0.399
370	73.800, 0.988	73.800, 1.292	73.800, 1.210	73.800, 0.545	73.800, 0.487	73.800, 0.576	73.800, 0.455	73.800, 0.451	73.800, 0.449	73.800, 0.421	73.800, 0.392	73.800, 0.400	73.800, 0.387	73.800, 0.374	73.800, 0.400
371	74.000, 0.990	74.000, 1.295	74.000, 1.212	74.000, 0.545	74.000, 0.488	74.000, 0.577	74.000, 0.456	74.000, 0.452	74.000, 0.449	74.000, 0.422	74.000, 0.392	74.000, 0.401	74.000, 0.388	74.000, 0.375	74.000, 0.400
372	74.200, 0.992	74.200, 1.298	74.200, 1.215	74.200, 0.546	74.200, 0.489	74.200, 0.577	74.200, 0.456	74.200, 0.453	74.200, 0.450	74.200, 0.423	74.200, 0.393	74.200, 0.401	74.200, 0.388	74.200, 0.376	74.200, 0.400
373	74.400, 0.994	74.400, 1.301	74.400, 1.218	74.400, 0.546	74.400, 0.489	74.400, 0.578	74.400, 0.457	74.400, 0.454	74.400, 0.451	74.400, 0.424	74.400, 0.393	74.400, 0.402	74.400, 0.388	74.400, 0.376	74.400, 0.401
374	74.600, 0.996	74.600, 1.303	74.600, 1.221	74.600, 0.546	74.600, 0.490	74.600, 0.578	74.600, 0.457	74.600, 0.454	74.600, 0.451	74.600, 0.425	74.600, 0.394	74.600, 0.402	74.600, 0.388	74.600, 0.377	74.600, 0.401
375	74.800, 0.998	74.800, 1.306	74.800, 1.223	74.800, 0.547	74.800, 0.491	74.800, 0.579	74.800, 0.458	74.800, 0.454	74.800, 0.452	74.800, 0.425	74.800, 0.395	74.800, 0.402	74.800, 0.389	74.800, 0.378	74.800, 0.402
376	75.000, 1.000	75.000, 1.309	75.000, 1.225	75.000, 0.547	75.000, 0.491	75.000, 0.580	75.000, 0.459	75.000, 0.455	75.000, 0.452	75.000, 0.425	75.000, 0.396	75.000, 0.403	75.000, 0.389	75.000, 0.378	75.000, 0.403
377	75.200, 1.002	75.200, 1.311	75.200, 1.228	75.200, 0.548	75.200, 0.492	75.200, 0.581	75.200, 0.459	75.200, 0.455	75.200, 0.453	75.200, 0.426	75.200, 0.397	75.200, 0.404	75.200, 0.389	75.200, 0.379	75.200, 0.404
378	75.400, 1.004	75.400, 1.314	75.400, 1.230	75.400, 0.549	75.400, 0.492	75.400, 0.581	75.400, 0.460	75.400, 0.455	75.400, 0.453	75.400, 0.426	75.400, 0.398	75.400, 0.404	75.400, 0.389	75.400, 0.380	75.400, 0.404
379	75.600, 1.007	75.600, 1.317	75.600, 1.233	75.600, 0.549	75.600, 0.493	75.600, 0.582	75.600, 0.460	75.600, 0.455	75.600, 0.454	75.600, 0.427	75.600, 0.398	75.600, 0.405	75.600, 0.390	75.600, 0.381	75.600, 0.405
380	75.800, 1.009	75.800, 1.319	75.800, 1.236	75.800, 0.550	75.800, 0.493	75.800, 0.583	75.800, 0.461	75.800, 0.455	75.800, 0.454	75.800, 0.427	75.800, 0.399	75.800, 0.405	75.800, 0.390	75.800, 0.381	75.800, 0.406
381	76.000, 1.011	76.000, 1.322	76.000, 1.239	76.000, 0.551	76.000, 0.493	76.000, 0.584	76.000, 0.461	76.000, 0.455	76.000, 0.455	76.000, 0.427	76.000, 0.400	76.000, 0.406	76.000, 0.391	76.000, 0.382	76.000, 0.406
382	76.200, 1.013	76.200, 1.325	76.200, 1.242	76.200, 0.552	76.200, 0.494	76.200, 0.585	76.200, 0.462	76.200, 0.455	76.200, 0.455	76.200, 0.428	76.200, 0.400	76.200, 0.406	76.200, 0.391	76.200, 0.382	76.200, 0.407
383	76.400, 1.015	76.400, 1.327	76.400, 1.245	76.400, 0.553	76.400, 0.494	76.400, 0.585	76.400, 0.462	76.400, 0.455	76.400, 0.456	76.400, 0.428	76.400, 0.401	76.400, 0.407	76.400, 0.392	76.400, 0.383	76.400, 0.408
384	76.600, 1.017	76.600, 1.330	76.600, 1.248	76.600, 0.553	76.600, 0.495	76.600, 0.586	76.600, 0.463	76.600, 0.456	76.600, 0.456	76.600, 0.428	76.600, 0.401	76.600, 0.408	76.600, 0.392	76.600, 0.383	76.600, 0.408
385	76.800, 1.018	76.800, 1.332	76.800, 1.251	76.800, 0.554	76.800, 0.495	76.800, 0.587	76.800, 0.464	76.800, 0.456	76.800, 0.457	76.800, 0.429	76.800, 0.401	76.800, 0.409	76.800, 0.392	76.800, 0.383	76.800, 0.409
386	77.000, 1.020	77.000, 1.334	77.000, 1.254	77.000, 0.555	77.000, 0.495	77.000, 0.588	77.000, 0.464	77.000, 0.456	77.000, 0.457	77.000, 0.429	77.000, 0.401	77.000, 0.409	77.000, 0.393	77.000, 0.383	77.000, 0.409
387	77.200, 1.022	77.200, 1.337	77.200, 1.257	77.200, 0.555	77.200, 0.496	77.200, 0.589	77.200, 0.465	77.200, 0.457	77.200, 0.458	77.200, 0.429	77.200, 0.401	77.200, 0.410	77.200, 0.393	77.200, 0.384	77.200, 0.410
388	77.400, 1.024	77.400, 1.339	77.400, 1.260	77.400, 0.555	77.400, 0.496	77.400, 0.590	77.400, 0.465	77.400, 0.458	77.400, 0.458	77.400, 0.430	77.400, 0.401	77.400, 0.411	77.400, 0.393	77.400, 0.385	77.400, 0.410
389	77.600, 1.026	77.600, 1.342	77.600, 1.262	77.600, 0.556	77.600, 0.497	77.600, 0.591	77.600, 0.465	77.600, 0.459	77.600, 0.459	77.600, 0.430	77.600, 0.402	77.600, 0.412	77.600, 0.393	77.600, 0.385	77.600, 0.411
390	77.800, 1.028	77.800, 1.344	77.800, 1.265	77.800, 0.556	77.800, 0.497	77.800, 0.591	77.800, 0.465	77.800, 0.460	77.800, 0.460	77.800, 0.431	77.800, 0.402	77.800, 0.412	77.800, 0.394	77.800, 0.386	77.800, 0.411
391	78.000, 1.030	78.000, 1.347	78.000, 1.268	78.000, 0.557	78.000, 0.498	78.000, 0.592	78.000, 0.465	78.000, 0.461	78.000, 0.461	78.000, 0.431	78.000, 0.403	78.000, 0.413	78.000, 0.394	78.000, 0.386	78.000, 0.412
392	78.200, 1.032	78.200, 1.349	78.200, 1.270	78.200, 0.557	78.200, 0.498	78.200, 0.592	78.200, 0.465	78.200, 0.462	78.200, 0.461	78.200, 0.432	78.200, 0.404	78.200, 0.414	78.200, 0.394	78.200, 0.387	78.200, 0.412
393	78.400, 1.034	78.400, 1.351	78.400, 1.273	78.400, 0.558	78.400, 0.499	78.400, 0.593	78.400, 0.465	78.400, 0.463	78.400, 0.462	78.400, 0.432	78.400, 0.404	78.400, 0.414	78.400, 0.394	78.400, 0.387	78.400, 0.413
394	78.600, 1.036	78.600, 1.353	78.600, 1.275	78.600, 0.558	78.600, 0.499	78.600, 0.594	78.600, 0.465	78.600, 0.464	78.600, 0.462	78.600, 0.433	78.600, 0.405	78.600, 0.415	78.600, 0.395	78.600, 0.388	78.600, 0.414
395	78.800, 1.038	78.800, 1.356	78.800, 1.277	78.800, 0.558	78.800, 0.500	78.800, 0.595	78.800, 0.466	78.800, 0.464	78.800, 0.463	78.800, 0.433	78.800, 0.406	78.800, 0.415	78.800, 0.395	78.800, 0.389	78.800, 0.414
396	79.000, 1.041	79.000, 1.358	79.000, 1.280	79.000, 0.559	79.000, 0.500	79.000, 0.595	79.000, 0.466	79.000, 0.465	79.000, 0.463	79.000, 0.434	79.000, 0.408	79.000, 0.416	79.000, 0.396	79.000, 0.390	79.000, 0.415
397	79.200, 1.043	79.200, 1.360	79.200, 1.282	79.200, 0.559	79.200, 0.501	79.200, 0.596	79.200, 0.466	79.200, 0.465	79.200, 0.464	79.200, 0.434	79.200, 0.408	79.200, 0.416	79.200, 0.397	79.200, 0.390	79.200, 0.416
398	79.400, 1.046	79.400, 1.363	79.400, 1.284	79.400, 0.560	79.400, 0.502	79.400, 0.597	79.400, 0.466	79.400, 0.466	79.400, 0.464	79.400, 0.435	79.400, 0.409	79.400, 0.417	79.400, 0.398	79.400, 0.391	79.400, 0.416
399	79.600, 1.048	79.600, 1.365	79.600, 1.286	79.600, 0.561	79.600, 0.502	79.600, 0.597	79.600, 0.467	79.600, 0.466	79.600, 0.465	79.600, 0.435	79.600, 0.410	79.600, 0.417	79.600, 0.399	79.600, 0.392	79.600, 0.417
400	79.800, 1.051	79.800, 1.368	79.800, 1.289	79.800, 0.562	79.800, 0.503	79.800, 0.597	79.800, 0.468	79.800, 0.467	79.800, 0.466	79.800, 0.436	79.800, 0.410	79.800, 0.418	79.800, 0.399	79.800, 0.392	79.800, 0.417
401	80.000, 1.053	80.000, 1.371	80.000, 1.291	80.000, 0.563	80.000, 0.504	80.000, 0.598	80.000, 0.468	80.000, 0.468	80.000, 0.466	80.000, 0.436	80.000, 0.410	80.000, 0.418	80.000, 0.400	80.000, 0.392	80.000, 0.418
402	80.200, 1.055	80.200, 1.373	80.200, 1.293	80.200, 0.563	80.200, 0.504	80.200, 0.598	80.200, 0.469	80.200, 0.468	80.200, 0.467	80.200, 0.436	80.200, 0.410	80.200, 0.418	80.200, 0.401	80.200, 0.393	80.200, 0.418
403	80.400, 1.057	80.400, 1.376	80.400, 1.295	80.400, 0.564	80.400, 0.505	80.400, 0.599	80.400, 0.470	80.400, 0.469	80.400, 0.468	80.400, 0.437	80.400, 0.410	80.400, 0.419	80.400, 0.402	80.400, 0.393	80.400, 0.419
404	80.600, 1.058	80.600, 1.379	80.600, 1.298	80.600, 0.565	80.600, 0.505	80.600, 0.599	80.600, 0.471	80.600, 0.470	80.600, 0.469	80.600, 0.437	80.600, 0.410	80.600, 0.419	80.600, 0.402	80.600, 0.393	80.600, 0.419
405	80.800, 1.060	80.800, 1.382	80.800, 1.300	80.800, 0.566	80.800, 0.506	80.800, 0.600	80.800, 0.472	80.800, 0.470	80.800, 0.469	80.800, 0.437	80.800, 0.411	80.800, 0.419	80.800, 0.403	80.800, 0.393	80.800, 0.419
406	81.000, 1.062	81.000, 1.385	81.000, 1.302	81.000, 0.566	81.000, 0.506	81.000, 0.600	81.000, 0.472	81.000, 0.471	81.000, 0.470	81.000, 0.438	81.000, 0.411	81.000, 0.420	81.000, 0.403	81.000, 0.393	81.000, 0.420
407	81.200, 1.063	81.200, 1.387	81.200, 1.304	81.200, 0.566	81.200, 0.507	81.200, 0.600	81.200, 0.473	81.200, 0.471	81.200, 0.471	81.200, 0.439	81.200, 0.411	81.200, 0.421	81.200, 0.403	81.200, 0.393	81.200, 0.420
408	81.400, 1.065	81.400, 1.390	81.400, 1.307	81.400, 0.567	81.400, 0.507	81.400, 0.600	81.400, 0.473	81.400, 0.472	81.400, 0.472	81.400, 0.439	81.400, 0.411	81.400, 0.421	81.400, 0.403	81.400, 0.393	81.400, 0.420
409	81.600, 1.067	81.600, 1.392	81.600, 1.310	81.600, 0.567	81.600, 0.508	81.600, 0.600	81.600, 0.473	81.600, 0.472	81.600, 0.473	81.600, 0.440	81.600, 0.412	81.600, 0.422	81.600, 0.403	81.600, 0.393	81.600, 0.421
410	81.800, 1.069	81.800, 1.395	81.800, 1.312	81.800, 0.567	81.800, 0.508	81.800, 0.601	81.800, 0.474	81.800, 0.473	81.800, 0.473	81.800, 0.440	81.800, 0.412	81.800, 0.423	81.800, 0.403	81.800, 0.394	81.800, 0.421
411	82.000, 1.071	82.000, 1.397	82.000, 1.315	82.000, 0.568	82.000, 0.509	82.000, 0.601	82.000, 0.474	82.000, 0.474	82.000, 0.474	82.000, 0.441	82.000, 0.413	82.000, 0.423	82.000, 0.403	82.000, 0.394	82.000, 0.421
412	82.200, 1.072	82.200, 1.400	82.200, 1.319	82.200, 0.569	82.200, 0.509	82.200, 0.601	82.200, 0.474	82.200, 0.474	82.200, 0.474	82.200, 0.441	82.200, 0.414	82.200, 0.424	82.200, 0.404	82.200, 0.394	82.200, 0.422
413	82.400, 1.074	82.400, 1.402	82.400, 1.321	82.400, 0.570	82.400, 0.509	82.400, 0.602	82.400, 0.475	82.400, 0.475	82.400, 0.474	82.400, 0.442	82.400, 0.414	82.400, 0.425	82.400, 0.404	82.400, 0.395	82.400, 0.422
414	82.600, 1.076	82.600, 1.404	82.600, 1.324	82.600, 0.570	82.600, 0.510	82.600, 0.603	82.600, 0.475	82.600, 0.475	82.600, 0.474	82.600, 0.442	82.600, 0.415	82.600, 0.425	82.600, 0.404	82.600, 0.395	82.600, 0.423
415	82.800, 1.078	82.800, 1.406	82.800, 1.327	82.800, 0.571	82.800, 0.510	82.800, 0.603	82.800, 0.476	82.800, 0.476	82.800, 0.474	82.800, 0.443	82.800, 0.415	82.800, 0.425	82.800, 0.405	82.800, 0.396	82.800, 0.423
416	83.000, 1.080	83.000, 1.409	83.000, 1.329	83.000, 0.572	83.000, 0.511	83.000, 0.604	83.000, 0.477	83.000, 0.477	83.000, 0.474	83.000, 0.443	83.000, 0.416	83.000, 0.426	83.000, 0.405	83.000, 0.397	83.000, 0.424
417	83.200, 1.082	83.200, 1.411	83.200, 1.332	83.200, 0.572	83.200, 0.512	83.200, 0.605	83.200, 0.477	83.200, 0.477	83.200, 0.475	83.200, 0.444	83.200, 0.416	83.200, 0.426	83.200, 0.405	83.200, 0.397	83.200, 0.424
418	83.400, 1.083	83.400, 1.414	83.400, 1.334	83.400, 0.573	83.400, 0.512	83.400, 0.605	83.400, 0.478	83.400, 0.478	83.400, 0.475	83.400, 0.445	83.400, 0.416	83.400, 0.426	83.400, 0.406	83.400, 0.398	83.400, 0.425
419	83.600, 1.085	83.600, 1.416	83.600, 1.336	83.600, 0.573	83.600, 0.513	83.600, 0.606	83.600, 0.479	83.600, 0.479	83.600, 0.476	83.600, 0.445	83.600, 0.417	83.600, 0.426	83.600, 0.406	83.600, 0.399	83.600, 0.426
420	83.800, 1.087	83.800, 1.418	83.800, 1.338	83.800, 0.573	83.800, 0.514	83.800, 0.606	83.800, 0.480	83.800, 0.480	83.800, 0.476	83.800, 0.446	83.800, 0.417	83.800, 0.426	83.800, 0.407	83.800, 0.400	83.800, 0.426
421	84.000, 1.088	84.000, 1.421	84.000, 1.340	84.000, 0.574	84.000, 0.514	84.000, 0.606	84.000, 0.480	84.000, 0.481	84.000, 0.477	84.000, 0.447	84.000, 0.417	84.000, 0.427	84.000, 0.407	84.000, 0.401	84.000, 0.427
422	84.200, 1.090	84.200, 1.423	84.200, 1.342	84.200, 0.574	84.200, 0.515	84.200, 0.607	84.200, 0.481	84.200, 0.482	84.200, 0.477	84.200, 0.447	84.200, 0.418	84.200, 0.427	84.200, 0.408	84.200, 0.402	84.200, 0.427
423	84.400, 1.091	84.400, 1.426	84.400, 1.343	84.400, 0.574	84.400, 0.515	84.400, 0.607	84.400, 0.482	84.400, 0.482	84.400, 0.478	84.400, 0.447	84.400, 0.418	84.400, 0.427	84.400, 0.408	84.400, 0.402	84.400, 0.427
424	84.600, 1.093	84.600, 1.428	84.600, 1.345	84.600, 0.574	84.600, 0.516	84.600, 0.608	84.600, 0.482	84.600, 0.483	84.600, 0.478	84.600, 0.448	84.600, 0.418	84.600, 0.428	84.600, 0.409	84.600, 0.402	84.600, 0.427
425	84.800, 1.095	84.800, 1.430	84.800, 1.347	84.800, 0.575	84.800, 0.516	84.800, 0.609	84.800, 0.483	84.800, 0.484	84.800, 0.479	84.800, 0.448	84.800, 0.419	84.800, 0.428	84.800, 0.409	84.800, 0.403	84.800, 0.428
426	85.000, 1.097	85.000, 1.433	85.000, 1.349	85.000, 0.575	85.000, 0.517	85.000, 0.609	85.000, 0.483	85.000, 0.484	85.000, 0.480	85.000, 0.448	85.000, 0.419	85.000, 0.429	85.000, 0.410	85.000, 0.403	85.000, 0.428
427	85.200, 1.099	85.200, 1.435	85.200, 1.351	85.200, 0.576	85.200, 0.517	85.200, 0.610	85.200, 0.484	85.200, 0.484	85.200, 0.480	85.200, 0.449	85.200, 0.420	85.200, 0.430	85.200, 0.410	85.200, 0.403	85.200, 0.429
428	85.400, 1.100	85.400, 1.437	85.400, 1.354	85.400, 0.576	85.400, 0.517	85.400, 0.611	85.400, 0.484	85.400, 0.485	85.400, 0.481	85.400, 0.449	85.400, 0.421	85.400, 0.431	85.400, 0.411	85.400, 0.404	85.400, 0.429
429	85.600, 1.102	85.600, 1.439	85.600, 1.356	85.600, 0.577	85.600, 0.518	85.600, 0.612	85.600, 0.484	85.600, 0.485	85.600, 0.482	85.600, 0.449	85.600, 0.421	85.600, 0.431	85.600, 0.411	85.600, 0.404	85.600, 0.430
430	85.800, 1.104	85.800, 1.442	85.800, 1.358	85.800, 0.578	85.800, 0.518	85.800, 0.612	85.800, 0.485	85.800, 0.485	85.800, 0.483	85.800, 0.449	85.800, 0.422	85.800, 0.432	85.800, 0.411	85.800, 0.404	85.800, 0.430
431	86.000, 1.106	86.000, 1.444	86.000, 1.361	86.000, 0.579	86.000, 0.519	86.000, 0.613	86.000, 0.485	86.000, 0.485	86.000, 0.483	86.000, 0.449	86.000, 0.422	86.000, 0.433	86.000, 0.411	86.000, 0.405	86.000, 0.430
432	86.200, 1.108	86.200, 1.446	86.200, 1.363	86.200, 0.579	86.200, 0.519	86.200, 0.614	86.200, 0.485	86.200, 0.485	86.200, 0.484	86.200, 0.449	86.200, 0.423	86.200, 0.433	86.200, 0.412	86.200, 0.405	86.200, 0.431
433	86.400, 1.109	86.400, 1.448	86.400, 1.365	86.400, 0.580	86.400, 0.520	86.400, 0.614	86.400, 0.485	86.400, 0.486	86.400, 0.484	86.400, 0.449	86.400, 0.423	86.400, 0.434	86.400, 0.412	86.400, 0.405	86.400, 0.431
434	86.600, 1.111	86.600, 1.451	86.600, 1.367	86.600, 0.581	86.600, 0.520	86.600, 0.615	86.600, 0.486	86.600, 0.486	86.600, 0.485	86.600, 0.449	86.600, 0.424	86.600, 0.434	86.600, 0.413	86.600, 0.405	86.600, 0.432
435	86.800, 1.113	86.800, 1.453	86.800, 1.369	86.800, 0.581	86.800, 0.521	86.800, 0.616	86.800, 0.486	86.800, 0.487	86.800, 0.485	86.800, 0.450	86.800, 0.424	86.800, 0.434	86.800, 0.413	86.800, 0.405	86.800, 0.433
436	87.000, 1.114	87.000, 1.455	87.000, 1.371	87.000, 0.582	87.000, 0.521	87.000, 0.616	87.000, 0.486	87.000, 0.487	87.000, 0.486	87.000, 0.450	87.000, 0.425	87.000, 0.435	87.000, 0.413	87.000, 0.406	87.000, 0.434
437	87.200, 1.116	87.200, 1.457	87.200, 1.373	87.200, 0.582	87.200, 0.522	87.200, 0.617	87.200, 0.486	87.200, 0.487	87.200, 0.486	87.200, 0.451	87.200, 0.425	87.200, 0.436	87.200, 0.413	87.200, 0.406	87.200, 0.435
438	87.400, 1.118	87.400, 1.459	87.400, 1.375	87.400, 0.583	87.400, 0.522	87.400, 0.617	87.400, 0.487	87.400, 0.487	87.400, 0.486	87.400, 0.452	87.400, 0.426	87.400, 0.436	87.400, 0.414	87.400, 0.407	87.400, 0.436
439	87.600, 1.119	87.600, 1.461	87.600, 1.378	87.600, 0.584	87.600, 0.523	87.600, 0.617	87.600, 0.487	87.600, 0.487	87.600, 0.486	87.600, 0.453	87.600, 0.427	87.600, 0.437	87.600, 0.414	87.600, 0.408	87.600, 0.436
440	87.800, 1.121	87.800, 1.463	87.800, 1.380	87.800, 0.584	87.800, 0.523	87.800, 0.617	87.800, 0.488	87.800, 0.488	87.800, 0.487	87.800, 0.454	87.800, 0.427	87.800, 0.437	87.800, 0.414	87.800, 0.408	87.800, 0.436
441	88.000, 1.123	88.000, 1.465	88.000, 1.382	88.000, 0.585	88.000, 0.523	88.000, 0.617	88.000, 0.488	88.000, 0.488	88.000, 0.487	88.000, 0.455	88.000, 0.427	88.000, 0.438	88.000, 0.415	88.000, 0.409	88.000, 0.436
442	88.200, 1.125	88.200, 1.468	88.200, 1.384	88.200, 0.586	88.200, 0.524	88.200, 0.618	88.200, 0.488	88.200, 0.488	88.200, 0.487	88.200, 0.455	88.200, 0.428	88.200, 0.438	88.200, 0.415	88.200, 0.409	88.200, 0.436
443	88.400, 1.127	88.400, 1.470	88.400, 1.387	88.400, 0.586	88.400, 0.524	88.400, 0.618	88.400, 0.489	88.400, 0.489	88.400, 0.487	88.400, 0.456	88.400, 0.428	88.400, 0.438	88.400, 0.415	88.400, 0.410	88.400, 0.436
444	88.600, 1.129	88.600, 1.472	88.600, 1.389	88.600, 0.587	88.600, 0.524	88.600, 0.619	88.600, 0.489	88.600, 0.489	88.600, 0.488	88.600, 0.457	88.600, 0.429	88.600, 0.439	88.600, 0.415	88.600, 0.410	88.600, 0.436
445	88.800, 1.131	88.800, 1.474	88.800, 1.392	88.800, 0.588	88.800, 0.525	88.800, 0.619	88.800, 0.489	88.800, 0.489	88.800, 0.488	88.800, 0.458	88.800, 0.429	88.800, 0.439	88.800, 0.416	88.800, 0.410	88.800, 0.436
446	89.000, 1.133	89.000, 1.476	89.000, 1.394	89.000, 0.588	89.000, 0.525	89.000, 0.620	89.000, 0.490	89.000, 0.490	89.000, 0.489	89.000, 0.459	89.000, 0.430	89.000, 0.440	89.000, 0.416	89.000, 0.410	89.000, 0.436
447	89.200, 1.134	89.200, 1.478	89.200, 1.397	89.200, 0.589	89.200, 0.526	89.200, 0.620	89.200, 0.490	89.200, 0.490	89.200, 0.489	89.200, 0.460	89.200, 0.430	89.200, 0.440	89.200, 0.416	89.200, 0.411	89.200, 0.437
448	89.400, 1.136	89.400, 1.480	89.400, 1.399	89.400, 0.589	89.400, 0.526	89.400, 0.620	89.400, 0.491	89.400, 0.490	89.400, 0.490	89.400, 0.460	89.400, 0.430	89.400, 0.440	89.400, 0.416	89.400, 0.411	89.400, 0.437
449	89.600, 1.138	89.600, 1.482	89.600, 1.402	89.600, 0.589	89.600, 0.527	89.600, 0.621	89.600, 0.491	89.600, 0.491	89.600, 0.491	89.600, 0.461	89.600, 0.431	89.600, 0.440	89.600, 0.416	89.600, 0.411	89.600, 0.437
450	89.800, 1.140	89.800, 1.484	89.800, 1.404	89.800, 0.589	89.800, 0.528	89.800, 0.621	89.800, 0.492	89.800, 0.491	89.800, 0.491	89.800, 0.461	89.800, 0.431	89.800, 0.441	89.800, 0.416	89.800, 0.411	89.800, 0.437
451	90.000, 1.142	90.000, 1.486	90.000, 1.407	90.000, 0.589	90.000, 0.528	90.000, 0.621	90.000, 0.492	90.000, 0.492	90.000, 0.492	90.000, 0.462	90.000, 0.431	90.000, 0.441	90.000, 0.416	90.000, 0.411	90.000, 0.438
452	90.200, 1.144	90.200, 1.489	90.200, 1.408	90.200, 0.589	90.200, 0.529	90.200, 0.622	90.200, 0.493	90.200, 0.492	90.200, 0.492	90.200, 0.462	90.200, 0.432	90.200, 0.441	90.200, 0.417	90.200, 0.411	90.200, 0.438
453	90.400, 1.146	90.400, 1.491	90.400, 1.410	90.400, 0.589	90.400, 0.529	90.400, 0.623	90.400, 0.493	90.400, 0.493	90.400, 0.493	90.400, 0.462	90.400, 0.432	90.400, 0.442	90.400, 0.417	90.400, 0.411	90.400, 0.439
454	90.600, 1.148	90.600, 1.493	90.600, 1.412	90.600, 0.589	90.600, 0.530	90.600, 0.623	90.600, 0.493	90.600, 0.494	90.600, 0.493	90.600, 0.462	90.600, 0.432	90.600, 0.442	90.600, 0.418	90.600, 0.411	90.600, 0.439
455	90.800, 1.150	90.800, 1.495	90.800, 1.414	90.800, 0.590	90.800, 0.530	90.800, 0.624	90.800, 0.494	90.800, 0.495	90.800, 0.493	90.800, 0.463	90.800, 0.433	90.800, 0.442	90.800, 0.418	90.800, 0.412	90.800, 0.440
456	91.000, 1.152	91.000, 1.497	91.000, 1.416	91.000, 0.591	91.000, 0.531	91.000, 0.625	91.000, 0.494	91.000, 0.495	91.000, 0.494	91.000, 0.463	91.000, 0.433	91.000, 0.443	91.000, 0.419	91.000, 0.412	91.000, 0.441
457	91.200, 1.154	91.200, 1.499	91.200, 1.418	91.200, 0.591	91.200, 0.531	91.200, 0.626	91.200, 0.495	91.200, 0.496	91.200, 0.494	91.200, 0.463	91.200, 0.433	91.200, 0.443	91.200, 0.419	91.200, 0.413	91.200, 0.441
458	91.400, 1.156	91.400, 1.501	91.400, 1.420	91.400, 0.592	91.400, 0.531	91.400, 0.626	91.400, 0.496	91.400, 0.497	91.400, 0.494	91.400, 0.463	91.400, 0.434	91.400, 0.444	91.400, 0.419	91.400, 0.413	91.400, 0.442
459	91.600, 1.157	91.600, 1.503	91.600, 1.422	91.600, 0.593	91.600, 0.532	91.600, 0.627	91.600, 0.496	91.600, 0.497	91.600, 0.495	91.600, 0.463	91.600, 0.434	91.600, 0.444	91.600, 0.420	91.600, 0.413	91.600, 0.442
460	91.800, 1.159	91.800, 1.505	91.800, 1.424	91.800, 0.593	91.800, 0.532	91.800, 0.628	91.800, 0.497	91.800, 0.498	91.800, 0.495	91.800, 0.464	91.800, 0.434	91.800, 0.445	91.800, 0.420	91.800, 0.414	91.800, 0.442
461	92.000, 1.160	92.000, 1.508	92.000, 1.426	92.000, 0.594	92.000, 0.532	92.000, 0.628	92.000, 0.497	92.000, 0.499	92.000, 0.495	92.000, 0.464	92.000, 0.435	92.000, 0.445	92.000, 0.420	92.000, 0.414	92.000, 0.443
462	92.200, 1.162	92.200, 1.510	92.200, 1.428	92.200, 0.595	92.200, 0.533	92.200, 0.629	92.200, 0.498	92.200, 0.499	92.200, 0.496	92.200, 0.464	92.200, 0.435	92.200, 0.446	92.200, 0.421	92.200, 0.415	92.200, 0.443
463	92.400, 1.163	92.400, 1.513	92.400, 1.430	92.400, 0.596	92.400, 0.533	92.400, 0.629	92.400, 0.498	92.400, 0.499	92.400, 0.496	92.400, 0.464	92.400, 0.436	92.400, 0.446	92.400, 0.421	92.400, 0.415	92.400, 0.443
464	92.600, 1.165	92.600, 1.515	92.600, 1.432	92.600, 0.596	92.600, 0.533	92.600, 0.630	92.600, 0.498	92.600, 0.500	92.600, 0.496	92.600, 0.465	92.600, 0.436	92.600, 0.446	92.600, 0.422	92.600, 0.415	92.600, 0.444
465	92.800, 1.166	92.800, 1.517	92.800, 1.434	92.800, 0.597	92.800, 0.534	92.800, 0.630	92.800, 0.498	92.800, 0.500	92.800, 0.497	92.800, 0.465	92.800, 0.437	92.800, 0.447	92.800, 0.423	92.800, 0.416	92.800, 0.444
466	93.000, 1.167	93.000, 1.519	93.000, 1.436	93.000, 0.597	93.000, 0.534	93.000, 0.631	93.000, 0.499	93.000, 0.501	93.000, 0.497	93.000, 0.466	93.000, 0.437	93.000, 0.447	93.000, 0.423	93.000, 0.416	93.000, 0.445
467	93.200, 1.169	93.200, 1.521	93.200, 1.438	93.200, 0.598	93.200, 0.535	93.200, 0.631	93.200, 0.499	93.200, 0.501	93.200, 0.498	93.200, 0.466	93.200, 0.437	93.200, 0.447	93.200, 0.423	93.200, 0.416	93.200, 0.445
468	93.400, 1.171	93.400, 1.523	93.400, 1.440	93.400, 0.598	93.400, 0.535	93.400, 0.631	93.400, 0.500	93.400, 0.501	93.400, 0.499	93.400, 0.467	93.400, 0.438	93.400, 0.447	93.400, 0.424	93.400, 0.417	93.400, 0.446
469	93.600, 1.172	93.600, 1.525	93.600, 1.442	93.600, 0.598	93.600, 0.536	93.600, 0.632	93.600, 0.500	93.600, 0.502	93.600, 0.499	93.600, 0.467	93.600, 0.438	93.600, 0.448	93.600, 0.424	93.600, 0.418	93.600, 0.447
470	93.800, 1.174	93.800, 1.526	93.800, 1.444	93.800, 0.599	93.800, 0.536	93.800, 0.632	93.800, 0.501	93.800, 0.502	93.800, 0.500	93.800, 0.467	93.800, 0.438	93.800, 0.448	93.800, 0.424	93.800, 0.418	93.800, 0.447
471	94.000, 1.176	94.000, 1.528	94.000, 1.446	94.000, 0.599	94.000, 0.537	94.000, 0.632	94.000, 0.501	94.000, 0.503	94.000, 0.501	94.000, 0.468	94.000, 0.439	94.000, 0.448	94.000, 0.425	94.000, 0.419	94.000, 0.448
472	94.200, 1.178	94.200, 1.530	94.200, 1.448	94.200, 0.600	94.200, 0.537	94.200, 0.633	94.200, 0.502	94.200, 0.503	94.200, 0.501	94.200, 0.468	94.200, 0.440	94.200, 0.449	94.200, 0.425	94.200, 0.419	94.200, 0.448
473	94.400, 1.179	94.400, 1.531	94.400, 1.450	94.400, 0.600	94.400, 0.538	94.400, 0.633	94.400, 0.502	94.400, 0.504	94.400, 0.502	94.400, 0.468	94.400, 0.441	94.400, 0.449	94.400, 0.425	94.400, 0.420	94.400, 0.449
474	94.600, 1.181	94.600, 1.533	94.600, 1.452	94.600, 0.601	94.600, 0.538	94.600, 0.634	94.600, 0.503	94.600, 0.505	94.600, 0.503	94.600, 0.469	94.600, 0.441	94.600, 0.450	94.600, 0.426	94.600, 0.420	94.600, 0.449
475	94.800, 1.182	94.800, 1.535	94.800, 1.455	94.800, 0.601	94.800, 0.539	94.800, 0.634	94.800, 0.504	94.800, 0.506	94.800, 0.503	94.800, 0.469	94.800, 0.442	94.800, 0.451	94.800, 0.426	94.800, 0.420	94.800, 0.450
476	95.000, 1.184	95.000, 1.537	95.000, 1.457	95.000, 0.601	95.000, 0.539	95.000, 0.635	95.000, 0.505	95.000, 0.507	95.000, 0.504	95.000, 0.469	95.000, 0.442	95.000, 0.451	95.000, 0.426	95.000, 0.420	95.000, 0.450
477	95.200, 1.185	95.200, 1.539	95.200, 1.459	95.200, 0.601	95.200, 0.540	95.200, 0.635	95.200, 0.505	95.200, 0.508	95.200, 0.504	95.200, 0.470	95.200, 0.443	95.200, 0.452	95.200, 0.426	95.200, 0.420	95.200, 0.450
478	95.400, 1.186	95.400, 1.541	95.400, 1.461	95.400, 0.602	95.400, 0.540	95.400, 0.635	95.400, 0.506	95.400, 0.509	95.400, 0.504	95.400, 0.470	95.400, 0.443	95.400, 0.453	95.400, 0.426	95.400, 0.420	95.400, 0.451
479	95.600, 1.187	95.600, 1.544	95.600, 1.464	95.600, 0.602	95.600, 0.541	95.600, 0.636	95.600, 0.507	95.600, 0.509	95.600, 0.505	95.600, 0.470	95.600, 0.443	95.600, 0.453	95.600, 0.426	95.600, 0.420	95.600, 0.451
480	95.800, 1.189	95.800, 1.546	95.800, 1.466	95.800, 0.602	95.800, 0.541	95.800, 0.636	95.800, 0.507	95.800, 0.509	95.800, 0.505	95.800, 0.471	95.800, 0.443	95.800, 0.454	95.800, 0.427	95.800, 0.420	95.800, 0.451
481	96.000, 1.190	96.000, 1.548	96.000, 1.468	96.000, 0.603	96.000, 0.542	96.000, 0.637	96.000, 0.507	96.000, 0.509	96.000, 0.505	96.000, 0.471	96.000, 0.443	96.000, 0.454	96.000, 0.427	96.000, 0.420	96.000, 0.451
482	96.200, 1.191	96.200, 1.551	96.200, 1.470	96.200, 0.603	96.200, 0.542	96.200, 0.637	96.200, 0.507	96.200, 0.509	96.200, 0.505	96.200, 0.471	96.200, 0.443	96.200, 0.454	96.200, 0.428	96.200, 0.420	96.200, 0.452
483	96.400, 1.193	96.400, 1.553	96.400, 1.472	96.400, 0.604	96.400, 0.542	96.400, 0.637	96.400, 0.507	96.400, 0.510	96.400, 0.505	96.400, 0.472	96.400, 0.443	96.400, 0.455	96.400, 0.428	96.400, 0.420	96.400, 0.452
484	96.600, 1.194	96.600, 1.556	96.600, 1.474	96.600, 0.604	96.600, 0.543	96.600, 0.638	96.600, 0.507	96.600, 0.510	96.600, 0.506	96.600, 0.472	96.600, 0.444	96.600, 0.455	96.600, 0.429	96.600, 0.420	96.600, 0.452
485	96.800, 1.196	96.800, 1.558	96.800, 1.476	96.800, 0.604	96.800, 0.543	96.800, 0.638	96.800, 0.507	96.800, 0.510	96.800, 0.506	96.800, 0.472	96.800, 0.444	96.800, 0.455	96.800, 0.430	96.800, 0.420	96.800, 0.452
486	97.000, 1.197	97.000, 1.560	97.000, 1.478	97.000, 0.605	97.000, 0.543	97.000, 0.639	97.000, 0.507	97.000, 0.510	97.000, 0.506	97.000, 0.472	97.000, 0.444	97.000, 0.455	97.000, 0.430	97.000, 0.421	97.000, 0.452
487	97.200, 1.199	97.200, 1.562	97.200, 1.480	97.200, 0.605	97.200, 0.543	97.200, 0.640	97.200, 0.507	97.200, 0.510	97.200, 0.507	97.200, 0.473	97.200, 0.444	97.200, 0.456	97.200, 0.431	97.200, 0.421	97.200, 0.452
488	97.400, 1.201	97.400, 1.564	97.400, 1.482	97.400, 0.606	97.400, 0.543	97.400, 0.640	97.400, 0.507	97.400, 0.510	97.400, 0.507	97.400, 0.473	97.400, 0.444	97.400, 0.456	97.400, 0.431	97.400, 0.422	97.400, 0.452
489	97.600, 1.202	97.600, 1.566	97.600, 1.484	97.600, 0.607	97.600, 0.543	97.600, 0.641	97.600, 0.508	97.600, 0.510	97.600, 0.507	97.600, 0.473	97.600, 0.444	97.600, 0.456	97.600, 0.431	97.600, 0.423	97.600, 0.452
490	97.800, 1.204	97.800, 1.568	97.800, 1.486	97.800, 0.607	97.800, 0.543	97.800, 0.642	97.800, 0.508	97.800, 0.511	97.800, 0.508	97.800, 0.473	97.800, 0.445	97.800, 0.456	97.800, 0.431	97.800, 0.423	97.800, 0.452
491	98.000, 1.206	98.000, 1.570	98.000, 1.488	98.000, 0.608	98.000, 0.543	98.000, 0.642	98.000, 0.508	98.000, 0.511	98.000, 0.508	98.000, 0.473	98.000, 0.445	98.000, 0.456	98.000, 0.431	98.000, 0.424	98.000, 0.452
492	98.200, 1.208	98.200, 1.572	98.200, 1.489	98.200, 0.608	98.200, 0.543	98.200, 0.643	98.200, 0.508	98.200, 0.511	98.200, 0.509	98.200, 0.474	98.200, 0.446	98.200, 0.457	98.200, 0.431	98.200, 0.425	98.200, 0.453
493	98.400, 1.210	98.400, 1.574	98.400, 1.491	98.400, 0.608	98.400, 0.544	98.400, 0.643	98.400, 0.508	98.400, 0.512	98.400, 0.509	98.400, 0.474	98.400, 0.446	98.400, 0.457	98.400, 0.431	98.400, 0.425	98.400, 0.453
494	98.600, 1.212	98.600, 1.576	98.600, 1.493	98.600, 0.609	98.600, 0.544	98.600, 0.643	98.600, 0.509	98.600, 0.512	98.600, 0.510	98.600, 0.475	98.600, 0.447	98.600, 0.458	98.600, 0.431	98.600, 0.426	98.600, 0.454
495	98.800, 1.213	98.800, 1.577	98.800, 1.495	98.800, 0.609	98.800, 0.545	98.800, 0.643	98.800, 0.509	98.800, 0.512	98.800, 0.510	98.800, 0.475	98.800, 0.447	98.800, 0.459	98.800, 0.431	98.800, 0.426	98.800, 0.454
496	99.000, 1.215	99.000, 1.579	99.000, 1.497	99.000, 0.609	99.000, 0.545	99.000, 0.644	99.000, 0.510	99.000, 0.513	99.000, 0.511	99.000, 0.476	99.000, 0.447	99.000, 0.459	99.000, 0.431	99.000, 0.427	99.000, 0.455
497	99.200, 1.217	99.200, 1.581	99.200, 1.499	99.200, 0.610	99.200, 0.546	99.200, 0.644	99.200, 0.510	99.200, 0.513	99.200, 0.511	99.200, 0.476	99.200, 0.448	99.200, 0.460	99.200, 0.431	99.200, 0.427	99.200, 0.456
498	99.400, 1.219	99.400, 1.583	99.400, 1.500	99.400, 0.610	99.400, 0.547	99.400, 0.644	99.400, 0.511	99.400, 0.513	99.400, 0.512	99.400, 0.477	99.400, 0.448	99.400, 0.461	99.400, 0.431	99.400, 0.428	99.400, 0.456
499	99.600, 1.220	99.600, 1.585	99.600, 1.502	99.600, 0.611	99.600, 0.547	99.600, 0.644	99.600, 0.511	99.600, 0.513	99.600, 0.512	99.600, 0.477	99.600, 0.448	99.600, 0.462	99.600, 0.432	99.600, 0.428	99.600, 0.457
500	99.800, 1.222	99.800, 1.587	99.800, 1.503	99.800, 0.611	99.800, 0.548	99.800, 0.644	99.800, 0.512	99.800, 0.514	99.800, 0.513	99.800, 0.478	99.800, 0.449	99.800, 0.462	99.800, 0.432	99.800, 0.429	99.800, 0.458
501	100.000, 1.224	100.000, 1.589	100.000, 1.505	100.000, 0.611	100.000, 0.548	100.000, 0.644	100.000, 0.512	100.000, 0.514	100.000, 0.513	100.000, 0.478	100.000, 0.449	100.000, 0.463	100.000, 0.432	100.000, 0.429	100.000, 0.459
502	100.200, 1.225	100.200, 1.590	100.200, 1.506	100.200, 0.611	100.200, 0.549	100.200, 0.644	100.200, 0.512	100.200, 0.514	100.200, 0.514	100.200, 0.479	100.200, 0.449	100.200, 0.463	100.200, 0.432	100.200, 0.429	100.200, 0.459
503	100.400, 1.227	100.400, 1.592	100.400, 1.508	100.400, 0.612	100.400, 0.549	100.400, 0.644	100.400, 0.513	100.400, 0.514	100.400, 0.514	100.400, 0.479	100.400, 0.450	100.400, 0.463	100.400, 0.433	100.400, 0.429	100.400, 0.460
504	100.600, 1.229	100.600, 1.594	100.600, 1.509	100.600, 0.612	100.600, 0.550	100.600, 0.645	100.600, 0.513	100.600, 0.515	100.600, 0.515	100.600, 0.479	100.600, 0.450	100.600, 0.464	100.600, 0.433	100.600, 0.429	100.600, 0.460
505	100.800, 1.230	100.800, 1.595	100.800, 1.511	100.800, 0.613	100.800, 0.550	100.800, 0.645	100.800, 0.513	100.800, 0.515	100.800, 0.515	100.800, 0.479	100.800, 0.451	100.800, 0.464	100.800, 0.434	100.800, 0.429	100.800, 0.461
506	101.000, 1.231	101.000, 1.597	101.000, 1.513	101.000, 0.613	101.000, 0.550	101.000, 0.646	101.000, 0.514	101.000, 0.516	101.000, 0.516	101.000, 0.479	101.000, 0.451	101.000, 0.464	101.000, 0.434	101.000, 0.430	101.000, 0.461
507	101.200, 1.233	101.200, 1.599	101.200, 1.515	101.200, 0.613	101.200, 0.551	101.200, 0.646	101.200, 0.514	101.200, 0.517	101.200, 0.517	101.200, 0.479	101.200, 0.452	101.200, 0.464	101.200, 0.434	101.200, 0.430	101.200, 0.462
508	101.400, 1.234	101.400, 1.601	101.400, 1.517	101.400, 0.613	101.400, 0.551	101.400, 0.647	101.400, 0.515	101.400, 0.517	101.400, 0.518	101.400, 0.479	101.400, 0.452	101.400, 0.464	101.400, 0.435	101.400, 0.430	101.400, 0.462
509	101.600, 1.235	101.600, 1.603	101.600, 1.519	101.600, 0.613	101.600, 0.551	101.600, 0.648	101.600, 0.515	101.600, 0.518	101.600, 0.518	101.600, 0.479	101.600, 0.452	101.600, 0.464	101.600, 0.435	101.600, 0.431	101.600, 0.463
510	101.800, 1.236	101.800, 1.605	101.800, 1.521	101.800, 0.614	101.800, 0.551	101.800, 0.648	101.800, 0.515	101.800, 0.519	101.800, 0.519	101.800, 0.479	101.800, 0.452	101.800, 0.465	101.800, 0.435	101.800, 0.431	101.800, 0.463
511	102.000, 1.237	102.000, 1.607	102.000, 1.523	102.000, 0.614	102.000, 0.551	102.000, 0.649	102.000, 0.516	102.000, 0.520	102.000, 0.519	102.000, 0.479	102.000, 0.453	102.000, 0.465	102.000, 0.436	102.000, 0.431	102.000, 0.464
512	102.200, 1.238	102.200, 1.609	102.200, 1.525	102.200, 0.614	102.200, 0.551	102.200, 0.649	102.200, 0.516	102.200, 0.521	102.200, 0.519	102.200, 0.480	102.200, 0.453	102.200, 0.466	102.200, 0.437	102.200, 0.431	102.200, 0.464
513	102.400, 1.239	102.400, 1.611	102.400, 1.527	102.400, 0.614	102.400, 0.551	102.400, 0.650	102.400, 0.516	102.400, 0.522	102.400, 0.520	102.400, 0.480	102.400, 0.453	102.400, 0.466	102.400, 0.437	102.400, 0.432	102.400, 0.465
514	102.600, 1.240	102.600, 1.613	102.600, 1.529	102.600, 0.614	102.600, 0.551	102.600, 0.650	102.600, 0.517	102.600, 0.522	102.600, 0.520	102.600, 0.481	102.600, 0.454	102.600, 0.466	102.600, 0.438	102.600, 0.432	102.600, 0.465
515	102.800, 1.241	102.800, 1.615	102.800, 1.531	102.800, 0.615	102.800, 0.552	102.800, 0.651	102.800, 0.517	102.800, 0.522	102.800, 0.520	102.800, 0.481	102.800, 0.454	102.800, 0.467	102.800, 0.439	102.800, 0.433	102.800, 0.466
516	103.000, 1.243	103.000, 1.617	103.000, 1.533	103.000, 0.615	103.000, 0.552	103.000, 0.651	103.000, 0.517	103.000, 0.523	103.000, 0.520	103.000, 0.482	103.000, 0.454	103.000, 0.467	103.000, 0.439	103.000, 0.433	103.000, 0.466
517	103.200, 1.244	103.200, 1.618	103.200, 1.534	103.200, 0.616	103.200, 0.553	103.200, 0.652	103.200, 0.518	103.200, 0.523	103.200, 0.520	103.200, 0.482	103.200, 0.454	103.200, 0.468	103.200, 0.439	103.200, 0.433	103.200, 0.466
518	103.400, 1.246	103.400, 1.620	103.400, 1.536	103.400, 0.616	103.400, 0.553	103.400, 0.652	103.400, 0.518	103.400, 0.523	103.400, 0.521	103.400, 0.483	103.400, 0.455	103.400, 0.468	103.400, 0.439	103.400, 0.434	103.400, 0.466
519	103.600, 1.248	103.600, 1.622	103.600, 1.538	103.600, 0.617	103.600, 0.553	103.600, 0.653	103.600, 0.518	103.600, 0.523	103.600, 0.521	103.600, 0.483	103.600, 0.455	103.600, 0.469	103.600, 0.439	103.600, 0.434	103.600, 0.466
520	103.800, 1.249	103.800, 1.623	103.800, 1.539	103.800, 0.618	103.800, 0.553	103.800, 0.653	103.800, 0.518	103.800, 0.523	103.800, 0.521	103.800, 0.483	103.800, 0.455	103.800, 0.469	103.800, 0.439	103.800, 0.435	103.800, 0.466
521	104.000, 1.251	104.000, 1.625	104.000, 1.541	104.000, 0.619	104.000, 0.554	104.000, 0.654	104.000, 0.518	104.000, 0.524	104.000, 0.521	104.000, 0.484	104.000, 0.455	104.000, 0.469	104.000, 0.439	104.000, 0.435	104.000, 0.466
522	104.200, 1.253	104.200, 1.626	104.200, 1.543	104.200, 0.620	104.200, 0.554	104.200, 0.654	104.200, 0.519	104.200, 0.524	104.200, 0.521	104.200, 0.484	104.200, 0.455	104.200, 0.469	104.200, 0.439	104.200, 0.435	104.200, 0.466
523	104.400, 1.255	104.400, 1.628	104.400, 1.545	104.400, 0.620	104.400, 0.555	104.400, 0.655	104.400, 0.519	104.400, 0.524	104.400, 0.521	104.400, 0.484	104.400, 0.456	104.400, 0.469	104.400, 0.439	104.400, 0.436	104.400, 0.466
524	104.600, 1.256	104.600, 1.629	104.600, 1.547	104.600, 0.621	104.600, 0.555	104.600, 0.655	104.600, 0.519	104.600, 0.525	104.600, 0.521	104.600, 0.484	104.600, 0.456	104.600, 0.469	104.600, 0.439	104.600, 0.436	104.600, 0.466
525	104.800, 1.258	104.800, 1.631	104.800, 1.549	104.800, 0.621	104.800, 0.556	104.800, 0.656	104.800, 0.519	104.800, 0.525	104.800, 0.521	104.800, 0.484	104.800, 0.456	104.800, 0.469	104.800, 0.439	104.800, 0.436	104.800, 0.466
526	105.000, 1.259	105.000, 1.633	105.000, 1.551	105.000, 0.622	105.000, 0.556	105.000, 0.656	105.000, 0.520	105.000, 0.526	105.000, 0.522	105.000, 0.484	105.000, 0.457	105.000, 0.469	105.000, 0.439	105.000, 0.436	105.000, 0.466
527	105.200, 1.260	105.200, 1.634	105.200, 1.553	105.200, 0.622	105.200, 0.557	105.200, 0.656	105.200, 0.520	105.200, 0.527	105.200, 0.522	105.200, 0.485	105.200, 0.457	105.200, 0.469	105.200, 0.439	105.200, 0.436	105.200, 0.466
528	105.400, 1.262	105.400, 1.636	105.400, 1.555	105.400, 0.622	105.400, 0.557	105.400, 0.657	105.400, 0.521	105.400, 0.527	105.400, 0.523	105.400, 0.485	105.400, 0.457	105.400, 0.469	105.400, 0.440	105.400, 0.437	105.400, 0.467
529	105.600, 1.263	105.600, 1.638	105.600, 1.557	105.600, 0.622	105.600, 0.557	105.600, 0.657	105.600, 0.521	105.600, 0.528	105.600, 0.523	105.600, 0.485	105.600, 0.457	105.600, 0.470	105.600, 0.440	105.600, 0.437	105.600, 0.467
530	105.800, 1.265	105.800, 1.640	105.800, 1.559	105.800, 0.622	105.800, 0.558	105.800, 0.657	105.800, 0.522	105.800, 0.529	105.800, 0.523	105.800, 0.486	105.800, 0.457	105.800, 0.470	105.800, 0.440	105.800, 0.437	105.800, 0.467
531	106.000, 1.266	106.000, 1.641	106.000, 1.560	106.000, 0.623	106.000, 0.558	106.000, 0.657	106.000, 0.522	106.000, 0.529	106.000, 0.524	106.000, 0.486	106.000, 0.457	106.000, 0.470	106.000, 0.441	106.000, 0.437	106.000, 0.468
532	106.200, 1.267	106.200, 1.643	106.200, 1.562	106.200, 0.623	106.200, 0.559	106.200, 0.658	106.200, 0.522	106.200, 0.530	106.200, 0.525	106.200, 0.487	106.200, 0.457	106.200, 0.471	106.200, 0.441	106.200, 0.437	106.200, 0.468
533	106.400, 1.268	106.400, 1.645	106.400, 1.564	106.400, 0.623	106.400, 0.559	106.400, 0.658	106.400, 0.522	106.400, 0.531	106.400, 0.525	106.400, 0.487	106.400, 0.457	106.400, 0.471	106.400, 0.442	106.400, 0.437	106.400, 0.468
534	106.600, 1.269	106.600, 1.647	106.600, 1.565	106.600, 0.623	106.600, 0.560	106.600, 0.658	106.600, 0.523	106.600, 0.531	106.600, 0.526	106.600, 0.488	106.600, 0.458	106.600, 0.472	106.600, 0.443	106.600, 0.437	106.600, 0.469
535	106.800, 1.270	106.800, 1.649	106.800, 1.567	106.800, 0.623	106.800, 0.560	106.800, 0.658	106.800, 0.523	106.800, 0.531	106.800, 0.527	106.800, 0.488	106.800, 0.457	106.800, 0.472	106.800, 0.443	106.800, 0.437	106.800, 0.469
536	107.000, 1.272	107.000, 1.650	107.000, 1.569	107.000, 0.624	107.000, 0.561	107.000, 0.659	107.000, 0.523	107.000, 0.531	107.000, 0.528	107.000, 0.489	107.000, 0.458	107.000, 0.472	107.000, 0.443	107.000, 0.437	107.000, 0.470
537	107.200, 1.273	107.200, 1.652	107.200, 1.570	107.200, 0.624	107.200, 0.561	107.200, 0.659	107.200, 0.524	107.200, 0.532	107.200, 0.528	107.200, 0.489	107.200, 0.458	107.200, 0.473	107.200, 0.444	107.200, 0.437	107.200, 0.470
538	107.400, 1.275	107.400, 1.654	107.400, 1.572	107.400, 0.624	107.400, 0.562	107.400, 0.659	107.400, 0.524	107.400, 0.532	107.400, 0.529	107.400, 0.489	107.400, 0.458	107.400, 0.473	107.400, 0.444	107.400, 0.437	107.400, 0.471
539	107.600, 1.276	107.600, 1.656	107.600, 1.573	107.600, 0.625	107.600, 0.562	107.600, 0.659	107.600, 0.524	107.600, 0.532	107.600, 0.529	107.600, 0.489	107.600, 0.458	107.600, 0.474	107.600, 0.445	107.600, 0.438	107.600, 0.471
540	107.800, 1.277	107.800, 1.657	107.800, 1.575	107.800, 0.625	107.800, 0.562	107.800, 0.660	107.800, 0.524	107.800, 0.532	107.800, 0.530	107.800, 0.489	107.800, 0.459	107.800, 0.474	107.800, 0.445	107.800, 0.438	107.800, 0.472
541	108.000, 1.279	108.000, 1.659	108.000, 1.577	108.000, 0.625	108.000, 0.562	108.000, 0.660	108.000, 0.524	108.000, 0.532	108.000, 0.530	108.000, 0.489	108.000, 0.459	108.000, 0.475	108.000, 0.445	108.000, 0.439	108.000, 0.472
542	108.200, 1.280	108.200, 1.661	108.200, 1.578	108.200, 0.626	108.200, 0.563	108.200, 0.661	108.200, 0.525	108.200, 0.533	108.200, 0.530	108.200, 0.490	108.200, 0.459	108.200, 0.475	108.200, 0.445	108.200, 0.440	108.200, 0.473
543	108.400, 1.281	108.400, 1.662	108.400, 1.580	108.400, 0.626	108.400, 0.563	108.400, 0.661	108.400, 0.525	108.400, 0.533	108.400, 0.530	108.400, 0.490	108.400, 0.459	108.400, 0.475	108.400, 0.446	108.400, 0.440	108.400, 0.473
544	108.600, 1.283	108.600, 1.664	108.600, 1.581	108.600, 0.626	108.600, 0.563	108.600, 0.661	108.600, 0.526	108.600, 0.533	108.600, 0.530	108.600, 0.490	108.600, 0.459	108.600, 0.475	108.600, 0.446	108.600, 0.441	108.600, 0.474
545	108.800, 1.284	108.800, 1.666	108.800, 1.583	108.800, 0.626	108.800, 0.563	108.800, 0.661	108.800, 0.526	108.800, 0.533	108.800, 0.530	108.800, 0.490	108.800, 0.460	108.800, 0.475	108.800, 0.446	108.800, 0.442	108.800, 0.474
546	109.000, 1.285	109.000, 1.667	109.000, 1.585	109.000, 0.627	109.000, 0.563	109.000, 0.662	109.000, 0.527	109.000, 0.533	109.000, 0.530	109.000, 0.491	109.000, 0.460	109.000, 0.476	109.000, 0.446	109.000, 0.442	109.000, 0.474
547	109.200, 1.287	109.200, 1.669	109.200, 1.587	109.200, 0.627	109.200, 0.563	109.200, 0.662	109.200, 0.527	109.200, 0.533	109.200, 0.530	109.200, 0.491	109.200, 0.460	109.200, 0.476	109.200, 0.446	109.200, 0.443	109.200, 0.474
548	109.400, 1.288	109.400, 1.670	109.400, 1.588	109.400, 0.627	109.400, 0.563	109.400, 0.662	109.400, 0.528	109.400, 0.533	109.400, 0.530	109.400, 0.492	109.400, 0.461	109.400, 0.476	109.400, 0.446	109.400, 0.444	109.400, 0.475
549	109.600, 1.289	109.600, 1.672	109.600, 1.590	109.600, 0.627	109.600, 0.564	109.600, 0.663	109.600, 0.528	109.600, 0.534	109.600, 0.530	109.600, 0.492	109.600, 0.461	109.600, 0.477	109.600, 0.447	109.600, 0.444	109.600, 0.475
550	109.800, 1.290	109.800, 1.673	109.800, 1.592	109.800, 0.628	109.800, 0.564	109.800, 0.663	109.800, 0.529	109.800, 0.535	109.800, 0.531	109.800, 0.493	109.800, 0.462	109.800, 0.477	109.800, 0.447	109.800, 0.444	109.800, 0.475
551	110.000, 1.292	110.000, 1.675	110.000, 1.594	110.000, 0.628	110.000, 0.564	110.000, 0.664	110.000, 0.530	110.000, 0.535	110.000, 0.532	110.000, 0.493	110.000, 0.462	110.000, 0.477	110.000, 0.447	110.000, 0.444	110.000, 0.475
552	110.200, 1.293	110.200, 1.677	110.200, 1.596	110.200, 0.628	110.200, 0.564	110.200, 0.664	110.200, 0.530	110.200, 0.536	110.200, 0.532	110.200, 0.493	110.200, 0.463	110.200, 0.478	110.200, 0.447	110.200, 0.444	110.200, 0.475
553	110.400, 1.294	110.400, 1.679	110.400, 1.598	110.400, 0.629	110.400, 0.565	110.400, 0.665	110.400, 0.530	110.400, 0.536	110.400, 0.533	110.400, 0.494	110.400, 0.463	110.400, 0.478	110.400, 0.447	110.400, 0.444	110.400, 0.475
554	110.600, 1.296	110.600, 1.681	110.600, 1.600	110.600, 0.629	110.600, 0.565	110.600, 0.665	110.600, 0.531	110.600, 0.537	110.600, 0.533	110.600, 0.494	110.600, 0.464	110.600, 0.478	110.600, 0.448	110.600, 0.444	110.600, 0.476
555	110.800, 1.297	110.800, 1.683	110.800, 1.602	110.800, 0.630	110.800, 0.566	110.800, 0.666	110.800, 0.531	110.800, 0.537	110.800, 0.534	110.800, 0.495	110.800, 0.464	110.800, 0.479	110.800, 0.448	110.800, 0.444	110.800, 0.476
556	111.000, 1.299	111.000, 1.685	111.000, 1.604	111.000, 0.630	111.000, 0.566	111.000, 0.666	111.000, 0.531	111.000, 0.538	111.000, 0.534	111.000, 0.495	111.000, 0.464	111.000, 0.479	111.000, 0.448	111.000, 0.444	111.000, 0.476
557	111.200, 1.300	111.200, 1.687	111.200, 1.605	111.200, 0.631	111.200, 0.566	111.200, 0.667	111.200, 0.531	111.200, 0.539	111.200, 0.535	111.200, 0.495	111.200, 0.465	111.200, 0.480	111.200, 0.448	111.200, 0.444	111.200, 0.476
558	111.400, 1.302	111.400, 1.688	111.400, 1.607	111.400, 0.632	111.400, 0.567	111.400, 0.667	111.400, 0.532	111.400, 0.539	111.400, 0.535	111.400, 0.496	111.400, 0.465	111.400, 0.481	111.400, 0.449	111.400, 0.445	111.400, 0.476
559	111.600, 1.303	111.600, 1.690	111.600, 1.608	111.600, 0.632	111.600, 0.567	111.600, 0.668	111.600, 0.533	111.600, 0.540	111.600, 0.535	111.600, 0.496	111.600, 0.466	111.600, 0.481	111.600, 0.449	111.600, 0.445	111.600, 0.477
560	111.800, 1.305	111.800, 1.692	111.800, 1.610	111.800, 0.633	111.800, 0.567	111.800, 0.668	111.800, 0.533	111.800, 0.540	111.800, 0.536	111.800, 0.497	111.800, 0.466	111.800, 0.482	111.800, 0.449	111.800, 0.446	111.800, 0.477
561	112.000, 1.306	112.000, 1.693	112.000, 1.612	112.000, 0.634	112.000, 0.568	112.000, 0.668	112.000, 0.534	112.000, 0.540	112.000, 0.536	112.000, 0.497	112.000, 0.466	112.000, 0.482	112.000, 0.450	112.000, 0.446	112.000, 0.478
562	112.200, 1.307	112.200, 1.695	112.200, 1.614	112.200, 0.634	112.200, 0.568	112.200, 0.669	112.200, 0.534	112.200, 0.541	112.200, 0.536	112.200, 0.497	112.200, 0.467	112.200, 0.482	112.200, 0.450	112.200, 0.447	112.200, 0.478
563	112.400, 1.309	112.400, 1.697	112.400, 1.615	112.400, 0.635	112.400, 0.568	112.400, 0.669	112.400, 0.534	112.400, 0.541	112.400, 0.537	112.400, 0.497	112.400, 0.467	112.400, 0.483	112.400, 0.451	112.400, 0.447	112.400, 0.478
564	112.600, 1.310	112.600, 1.698	112.600, 1.617	112.600, 0.635	112.600, 0.569	112.600, 0.670	112.600, 0.534	112.600, 0.541	112.600, 0.537	112.600, 0.498	112.600, 0.467	112.600, 0.483	112.600, 0.451	112.600, 0.447	112.600, 0.479
565	112.800, 1.311	112.800, 1.700	112.800, 1.619	112.800, 0.635	112.800, 0.569	112.800, 0.670	112.800, 0.534	112.800, 0.541	112.800, 0.537	112.800, 0.498	112.800, 0.467	112.800, 0.483	112.800, 0.451	112.800, 0.448	112.800, 0.479
566	113.000, 1.313	113.000, 1.701	113.000, 1.620	113.000, 0.636	113.000, 0.569	113.000, 0.670	113.000, 0.534	113.000, 0.541	113.000, 0.538	113.000, 0.498	113.000, 0.468	113.000, 0.484	113.000, 0.452	113.000, 0.448	113.000, 0.480
567	113.200, 1.314	113.200, 1.703	113.200, 1.622	113.200, 0.636	113.200, 0.570	113.200, 0.670	113.200, 0.535	113.200, 0.542	113.200, 0.539	113.200, 0.499	113.200, 0.468	113.200, 0.484	113.200, 0.452	113.200, 0.448	113.200, 0.480
568	113.400, 1.315	113.400, 1.705	113.400, 1.624	113.400, 0.636	113.400, 0.570	113.400, 0.671	113.400, 0.535	113.400, 0.542	113.400, 0.539	113.400, 0.499	113.400, 0.468	113.400, 0.484	113.400, 0.452	113.400, 0.448	113.400, 0.481
569	113.600, 1.317	113.600, 1.707	113.600, 1.625	113.600, 0.636	113.600, 0.570	113.600, 0.671	113.600, 0.535	113.600, 0.543	113.600, 0.540	113.600, 0.499	113.600, 0.469	113.600, 0.484	113.600, 0.452	113.600, 0.448	113.600, 0.481
570	113.800, 1.318	113.800, 1.708	113.800, 1.627	113.800, 0.637	113.800, 0.571	113.800, 0.671	113.800, 0.536	113.800, 0.543	113.800, 0.540	113.800, 0.499	113.800, 0.469	113.800, 0.484	113.800, 0.452	113.800, 0.448	113.800, 0.482
571	114.000, 1.319	114.000, 1.710	114.000, 1.629	114.000, 0.637	114.000, 0.571	114.000, 0.671	114.000, 0.536	114.000, 0.543	114.000, 0.541	114.000, 0.500	114.000, 0.469	114.000, 0.485	114.000, 0.452	114.000, 0.448	114.000, 0.482
572	114.200, 1.320	114.200, 1.711	114.200, 1.630	114.200, 0.637	114.200, 0.571	114.200, 0.672	114.200, 0.536	114.200, 0.543	114.200, 0.541	114.200, 0.499	114.200, 0.469	114.200, 0.485	114.200, 0.452	114.200, 0.448	114.200, 0.482
573	114.400, 1.321	114.400, 1.713	114.400, 1.632	114.400, 0.637	114.400, 0.572	114.400, 0.672	114.400, 0.536	114.400, 0.543	114.400, 0.541	114.400, 0.499	114.400, 0.469	114.400, 0.485	114.400, 0.452	114.400, 0.448	114.400, 0.483
574	114.600, 1.323	114.600, 1.714	114.600, 1.634	114.600, 0.637	114.600, 0.572	114.600, 0.672	114.600, 0.536	114.600, 0.543	114.600, 0.541	114.600, 0.499	114.600, 0.470	114.600, 0.486	114.600, 0.452	114.600, 0.448	114.600, 0.483
575	114.800, 1.324	114.800, 1.716	114.800, 1.635	114.800, 0.638	114.800, 0.572	114.800, 0.672	114.800, 0.536	114.800, 0.543	114.800, 0.542	114.800, 0.499	114.800, 0.470	114.800, 0.486	114.800, 0.452	114.800, 0.448	114.800, 0.483
576	115.000, 1.325	115.000, 1.718	115.000, 1.637	115.000, 0.638	115.000, 0.572	115.000, 0.672	115.000, 0.536	115.000, 0.543	115.000, 0.542	115.000, 0.499	115.000, 0.470	115.000, 0.486	115.000, 0.452	115.000, 0.449	115.000, 0.483
577	115.200, 1.326	115.200, 1.719	115.200, 1.639	115.200, 0.638	115.200, 0.572	115.200, 0.672	115.200, 0.537	115.200, 0.543	115.200, 0.542	115.200, 0.499	115.200, 0.471	115.200, 0.486	115.200, 0.452	115.200, 0.449	115.200, 0.483
578	115.400, 1.328	115.400, 1.721	115.400, 1.641	115.400, 0.639	115.400, 0.573	115.400, 0.672	115.400, 0.537	115.400, 0.543	115.400, 0.543	115.400, 0.499	115.400, 0.471	115.400, 0.486	115.400, 0.452	115.400, 0.450	115.400, 0.483
579	115.600, 1.329	115.600, 1.723	115.600, 1.643	115.600, 0.639	115.600, 0.573	115.600, 0.673	115.600, 0.538	115.600, 0.543	115.600, 0.543	115.600, 0.499	115.600, 0.472	115.600, 0.486	115.600, 0.453	115.600, 0.450	115.600, 0.483
580	115.800, 1.330	115.800, 1.724	115.800, 1.644	115.800, 0.640	115.800, 0.574	115.800, 0.673	115.800, 0.538	115.800, 0.543	115.800, 0.544	115.800, 0.500	115.800, 0.472	115.800, 0.487	115.800, 0.453	115.800, 0.451	115.800, 0.483
581	116.000, 1.331	116.000, 1.726	116.000, 1.646	116.000, 0.641	116.000, 0.574	116.000, 0.673	116.000, 0.539	116.000, 0.543	116.000, 0.544	116.000, 0.500	116.000, 0.472	116.000, 0.487	116.000, 0.454	116.000, 0.451	116.000, 0.483
582	116.200, 1.332	116.200, 1.727	116.200, 1.648	116.200, 0.641	116.200, 0.574	116.200, 0.674	116.200, 0.539	116.200, 0.543	116.200, 0.545	116.200, 0.501	116.200, 0.473	116.200, 0.487	116.200, 0.454	116.200, 0.452	116.200, 0.484
583	116.400, 1.333	116.400, 1.729	116.400, 1.650	116.400, 0.642	116.400, 0.575	116.400, 0.674	116.400, 0.539	116.400, 0.543	116.400, 0.545	116.400, 0.501	116.400, 0.473	116.400, 0.487	116.400, 0.454	116.400, 0.452	116.400, 0.484
584	116.600, 1.334	116.600, 1.730	116.600, 1.651	116.600, 0.642	116.600, 0.575	116.600, 0.675	116.600, 0.539	116.600, 0.543	116.600, 0.546	116.600, 0.502	116.600, 0.473	116.600, 0.488	116.600, 0.454	116.600, 0.452	116.600, 0.484
585	116.800, 1.335	116.800, 1.732	116.800, 1.653	116.800, 0.643	116.800, 0.575	116.800, 0.675	116.800, 0.539	116.800, 0.543	116.800, 0.546	116.800, 0.503	116.800, 0.474	116.800, 0.488	116.800, 0.454	116.800, 0.452	116.800, 0.485
586	117.000, 1.337	117.000, 1.734	117.000, 1.654	117.000, 0.643	117.000, 0.576	117.000, 0.676	117.000, 0.539	117.000, 0.544	117.000, 0.546	117.000, 0.504	117.000, 0.474	117.000, 0.488	117.000, 0.455	117.000, 0.452	117.000, 0.485
587	117.200, 1.338	117.200, 1.735	117.200, 1.656	117.200, 0.644	117.200, 0.576	117.200, 0.676	117.200, 0.540	117.200, 0.544	117.200, 0.546	117.200, 0.504	117.200, 0.474	117.200, 0.488	117.200, 0.455	117.200, 0.452	117.200, 0.486
588	117.400, 1.339	117.400, 1.737	117.400, 1.657	117.400, 0.644	117.400, 0.576	117.400, 0.677	117.400, 0.540	117.400, 0.545	117.400, 0.546	117.400, 0.505	117.400, 0.475	117.400, 0.489	117.400, 0.455	117.400, 0.453	117.400, 0.486
589	117.600, 1.340	117.600, 1.738	117.600, 1.659	117.600, 0.644	117.600, 0.576	117.600, 0.677	117.600, 0.540	117.600, 0.545	117.600, 0.546	117.600, 0.506	117.600, 0.475	117.600, 0.489	117.600, 0.455	117.600, 0.453	117.600, 0.487
590	117.800, 1.341	117.800, 1.739	117.800, 1.660	117.800, 0.645	117.800, 0.576	117.800, 0.678	117.800, 0.540	117.800, 0.546	117.800, 0.546	117.800, 0.506	117.800, 0.475	117.800, 0.490	117.800, 0.456	117.800, 0.453	117.800, 0.487
591	118.000, 1.342	118.000, 1.740	118.000, 1.662	118.000, 0.645	118.000, 0.576	118.000, 0.678	118.000, 0.540	118.000, 0.546	118.000, 0.546	118.000, 0.506	118.000, 0.475	118.000, 0.490	118.000, 0.456	118.000, 0.454	118.000, 0.488
592	118.200, 1.344	118.200, 1.742	118.200, 1.663	118.200, 0.645	118.200, 0.577	118.200, 0.679	118.200, 0.540	118.200, 0.547	118.200, 0.547	118.200, 0.506	118.200, 0.475	118.200, 0.490	118.200, 0.456	118.200, 0.454	118.200, 0.488
593	118.400, 1.345	118.400, 1.743	118.400, 1.665	118.400, 0.645	118.400, 0.577	118.400, 0.679	118.400, 0.540	118.400, 0.548	118.400, 0.547	118.400, 0.506	118.400, 0.475	118.400, 0.490	118.400, 0.456	118.400, 0.454	118.400, 0.488
594	118.600, 1.346	118.600, 1.745	118.600, 1.666	118.600, 0.645	118.600, 0.577	118.600, 0.679	118.600, 0.540	118.600, 0.549	118.600, 0.547	118.600, 0.506	118.600, 0.475	118.600, 0.490	118.600, 0.457	118.600, 0.454	118.600, 0.488
595	118.800, 1.348	118.800, 1.747	118.800, 1.668	118.800, 0.644	118.800, 0.577	118.800, 0.679	118.800, 0.541	118.800, 0.549	118.800, 0.548	118.800, 0.506	118.800, 0.475	118.800, 0.490	118.800, 0.457	118.800, 0.455	118.800, 0.488
596	119.000, 1.349	119.000, 1.748	119.000, 1.669	119.000, 0.645	119.000, 0.578	119.000, 0.680	119.000, 0.541	119.000, 0.550	119.000, 0.548	119.000, 0.506	119.000, 0.476	119.000, 0.490	119.000, 0.457	119.000, 0.455	119.000, 0.488
597	119.200, 1.350	119.200, 1.750	119.200, 1.670	119.200, 0.645	119.200, 0.578	119.200, 0.680	119.200, 0.541	119.200, 0.551	119.200, 0.549	119.200, 0.507	119.200, 0.476	119.200, 0.490	119.200, 0.458	119.200, 0.456	119.200, 0.489
598	119.400, 1.352	119.400, 1.751	119.400, 1.671	119.400, 0.645	119.400, 0.579	119.400, 0.680	119.400, 0.541	119.400, 0.551	119.400, 0.549	119.400, 0.507	119.400, 0.476	119.400, 0.490	119.400, 0.458	119.400, 0.456	119.400, 0.489
599	119.600, 1.353	119.600, 1.753	119.600, 1.672	119.600, 0.645	119.600, 0.579	119.600, 0.681	119.600, 0.542	119.600, 0.551	119.600, 0.549	119.600, 0.507	119.600, 0.476	119.600, 0.490	119.600, 0.458	119.600, 0.457	119.600, 0.489
600	119.800, 1.354	119.800, 1.755	119.800, 1.674	119.800, 0.645	119.800, 0.580	119.800, 0.681	119.800, 0.542	119.800, 0.552	119.800, 0.550	119.800, 0.507	119.800, 0.476	119.800, 0.491	119.800, 0.459	119.800, 0.457	119.800, 0.489
601	120.000, 1.356	120.000, 1.756	120.000, 1.675	120.000, 0.645	120.000, 0.580	120.000, 0.682	120.000, 0.543	120.000, 0.552	120.000, 0.550	120.000, 0.508	120.000, 0.476	120.000, 0.491	120.000, 0.459	120.000, 0.458	120.000, 0.490
602	120.200, 1.357	120.200, 1.758	120.200, 1.676	120.200, 0.646	120.200, 0.581	120.200, 0.682	120.200, 0.543	120.200, 0.552	120.200, 0.550	120.200, 0.508	120.200, 0.476	120.200, 0.492	120.200, 0.459	120.200, 0.458	120.200, 0.490
603	120.400, 1.358	120.400, 1.759	120.400, 1.677	120.400, 0.646	120.400, 0.581	120.400, 0.683	120.400, 0.543	120.400, 0.552	120.400, 0.551	120.400, 0.508	120.400, 0.476	120.400, 0.492	120.400, 0.459	120.400, 0.459	120.400, 0.490
604	120.600, 1.359	120.600, 1.760	120.600, 1.679	120.600, 0.647	120.600, 0.582	120.600, 0.683	120.600, 0.544	120.600, 0.552	120.600, 0.551	120.600, 0.508	120.600, 0.476	120.600, 0.493	120.600, 0.460	120.600, 0.459	120.600, 0.490
605	120.800, 1.360	120.800, 1.762	120.800, 1.681	120.800, 0.647	120.800, 0.582	120.800, 0.683	120.800, 0.545	120.800, 0.552	120.800, 0.551	120.800, 0.509	120.800, 0.477	120.800, 0.493	120.800, 0.460	120.800, 0.459	120.800, 0.490
606	121.000, 1.361	121.000, 1.764	121.000, 1.682	121.000, 0.648	121.000, 0.583	121.000, 0.684	121.000, 0.545	121.000, 0.552	121.000, 0.551	121.000, 0.509	121.000, 0.477	121.000, 0.494	121.000, 0.460	121.000, 0.459	121.000, 0.491
607	121.200, 1.362	121.200, 1.765	121.200, 1.684	121.200, 0.648	121.200, 0.583	121.200, 0.684	121.200, 0.546	121.200, 0.552	121.200, 0.551	121.200, 0.509	121.200, 0.477	121.200, 0.494	121.200, 0.461	121.200, 0.460	121.200, 0.491
608	121.400, 1.364	121.400, 1.767	121.400, 1.686	121.400, 0.649	121.400, 0.583	121.400, 0.684	121.400, 0.547	121.400, 0.552	121.400, 0.552	121.400, 0.509	121.400, 0.478	121.400, 0.495	121.400, 0.461	121.400, 0.460	121.400, 0.491
609	121.600, 1.365	121.600, 1.768	121.600, 1.688	121.600, 0.649	121.600, 0.583	121.600, 0.685	121.600, 0.547	121.600, 0.553	121.600, 0.552	121.600, 0.509	121.600, 0.478	121.600, 0.495	121.600, 0.461	121.600, 0.460	121.600, 0.491
610	121.800, 1.366	121.800, 1.770	121.800, 1.690	121.800, 0.650	121.800, 0.583	121.800, 0.685	121.800, 0.548	121.800, 0.553	121.800, 0.553	121.800, 0.509	121.800, 0.478	121.800, 0.496	121.800, 0.461	121.800, 0.460	121.800, 0.491
611	122.000, 1.367	122.000, 1.771	122.000, 1.691	122.000, 0.650	122.000, 0.583	122.000, 0.685	122.000, 0.548	122.000, 0.553	122.000, 0.553	122.000, 0.509	122.000, 0.479	122.000, 0.496	122.000, 0.461	122.000, 0.461	122.000, 0.491
612	122.200, 1.368	122.200, 1.773	122.200, 1.693	122.200, 0.651	122.200, 0.583	122.200, 0.686	122.200, 0.549	122.200, 0.554	122.200, 0.554	122.200, 0.509	122.200, 0.479	122.200, 0.496	122.200, 0.462	122.200, 0.461	122.200, 0.491
613	122.400, 1.369	122.400, 1.774	122.400, 1.695	122.400, 0.651	122.400, 0.584	122.400, 0.686	122.400, 0.549	122.400, 0.554	122.400, 0.554	122.400, 0.510	122.400, 0.479	122.400, 0.496	122.400, 0.462	122.400, 0.461	122.400, 0.491
614	122.600, 1.370	122.600, 1.776	122.600, 1.697	122.600, 0.652	122.600, 0.584	122.600, 0.686	122.600, 0.550	122.600, 0.555	122.600, 0.554	122.600, 0.510	122.600, 0.479	122.600, 0.496	122.600, 0.462	122.600, 0.461	122.600, 0.491
615	122.800, 1.371	122.800, 1.777	122.800, 1.699	122.800, 0.652	122.800, 0.584	122.800, 0.686	122.800, 0.550	122.800, 0.555	122.800, 0.554	122.800, 0.510	122.800, 0.479	122.800, 0.496	122.800, 0.462	122.800, 0.462	122.800, 0.492
616	123.000, 1.373	123.000, 1.778	123.000, 1.700	123.000, 0.652	123.000, 0.584	123.000, 0.686	123.000, 0.550	123.000, 0.556	123.000, 0.554	123.000, 0.510	123.000, 0.480	123.000, 0.497	123.000, 0.462	123.000, 0.462	123.000, 0.492
617	123.200, 1.374	123.200, 1.779	123.200, 1.702	123.200, 0.652	123.200, 0.584	123.200, 0.687	123.200, 0.551	123.200, 0.556	123.200, 0.554	123.200, 0.511	123.200, 0.480	123.200, 0.497	123.200, 0.463	123.200, 0.462	123.200, 0.493
618	123.400, 1.375	123.400, 1.781	123.400, 1.704	123.400, 0.652	123.400, 0.584	123.400, 0.687	123.400, 0.551	123.400, 0.556	123.400, 0.554	123.400, 0.511	123.400, 0.481	123.400, 0.497	123.400, 0.463	123.400, 0.462	123.400, 0.493
619	123.600, 1.376	123.600, 1.782	123.600, 1.705	123.600, 0.652	123.600, 0.584	123.600, 0.687	123.600, 0.551	123.600, 0.557	123.600, 0.554	123.600, 0.511	123.600, 0.481	123.600, 0.497	123.600, 0.463	123.600, 0.462	123.600, 0.494
620	123.800, 1.378	123.800, 1.783	123.800, 1.707	123.800, 0.652	123.800, 0.584	123.800, 0.687	123.800, 0.551	123.800, 0.557	123.800, 0.554	123.800, 0.512	123.800, 0.482	123.800, 0.497	123.800, 0.464	123.800, 0.463	123.800, 0.494
621	124.000, 1.379	124.000, 1.784	124.000, 1.708	124.000, 0.652	124.000, 0.585	124.000, 0.687	124.000, 0.552	124.000, 0.558	124.000, 0.555	124.000, 0.512	124.000, 0.482	124.000, 0.498	124.000, 0.464	124.000, 0.463	124.000, 0.495
622	124.200, 1.380	124.200, 1.785	124.200, 1.710	124.200, 0.652	124.200, 0.585	124.200, 0.687	124.200, 0.552	124.200, 0.558	124.200, 0.555	124.200, 0.513	124.200, 0.482	124.200, 0.498	124.200, 0.465	124.200, 0.463	124.200, 0.495
623	124.400, 1.381	124.400, 1.787	124.400, 1.711	124.400, 0.652	124.400, 0.586	124.400, 0.687	124.400, 0.552	124.400, 0.559	124.400, 0.555	124.400, 0.513	124.400, 0.483	124.400, 0.498	124.400, 0.465	124.400, 0.463	124.400, 0.496
624	124.600, 1.382	124.600, 1.788	124.600, 1.712	124.600, 0.652	124.600, 0.586	124.600, 0.687	124.600, 0.552	124.600, 0.559	124.600, 0.556	124.600, 0.513	124.600, 0.483	124.600, 0.499	124.600, 0.466	124.600, 0.464	124.600, 0.496
625	124.800, 1.383	124.800, 1.790	124.800, 1.714	124.800, 0.653	124.800, 0.586	124.800, 0.687	124.800, 0.552	124.800, 0.559	124.800, 0.556	124.800, 0.514	124.800, 0.483	124.800, 0.499	124.800, 0.466	124.800, 0.464	124.800, 0.497
626	125.000, 1.385	125.000, 1.791	125.000, 1.715	125.000, 0.653	125.000, 0.587	125.000, 0.688	125.000, 0.553	125.000, 0.560	125.000, 0.556	125.000, 0.514	125.000, 0.484	125.000, 0.500	125.000, 0.466	125.000, 0.464	125.000, 0.497
627	125.200, 1.386	125.200, 1.793	125.200, 1.716	125.200, 0.653	125.200, 0.587	125.200, 0.688	125.200, 0.553	125.200, 0.560	125.200, 0.556	125.200, 0.514	125.200, 0.484	125.200, 0.500	125.200, 0.467	125.200, 0.464	125.200, 0.498
628	125.400, 1.387	125.400, 1.795	125.400, 1.718	125.400, 0.653	125.400, 0.587	125.400, 0.688	125.400, 0.553	125.400, 0.560	125.400, 0.557	125.400, 0.514	125.400, 0.484	125.400, 0.501	125.400, 0.467	125.400, 0.464	125.400, 0.498
629	125.600, 1.388	125.600, 1.796	125.600, 1.719	125.600, 0.654	125.600, 0.587	125.600, 0.689	125.600, 0.552	125.600, 0.560	125.600, 0.558	125.600, 0.515	125.600, 0.485	125.600, 0.501	125.600, 0.467	125.600, 0.464	125.600, 0.499
630	125.800, 1.389	125.800, 1.798	125.800, 1.720	125.800, 0.654	125.800, 0.588	125.800, 0.689	125.800, 0.552	125.800, 0.560	125.800, 0.558	125.800, 0.515	125.800, 0.485	125.800, 0.501	125.800, 0.467	125.800, 0.464	125.800, 0.499
631	126.000, 1.390	126.000, 1.800	126.000, 1.721	126.000, 0.654	126.000, 0.588	126.000, 0.689	126.000, 0.552	126.000, 0.560	126.000, 0.559	126.000, 0.515	126.000, 0.485	126.000, 0.501	126.000, 0.467	126.000, 0.464	126.000, 0.499
632	126.200, 1.391	126.200, 1.801	126.200, 1.723	126.200, 0.655	126.200, 0.588	126.200, 0.690	126.200, 0.552	126.200, 0.560	126.200, 0.559	126.200, 0.515	126.200, 0.485	126.200, 0.501	126.200, 0.467	126.200, 0.464	126.200, 0.499
633	126.400, 1.392	126.400, 1.803	126.400, 1.724	126.400, 0.655	126.400, 0.588	126.400, 0.690	126.400, 0.552	126.400, 0.560	126.400, 0.559	126.400, 0.515	126.400, 0.485	126.400, 0.501	126.400, 0.466	126.400, 0.464	126.400, 0.500
634	126.600, 1.393	126.600, 1.804	126.600, 1.725	126.600, 0.655	126.600, 0.588	126.600, 0.690	126.600, 0.552	126.600, 0.560	126.600, 0.559	126.600, 0.515	126.600, 0.485	126.600, 0.501	126.600, 0.466	126.600, 0.464	126.600, 0.500
635	126.800, 1.395	126.800, 1.805	126.800, 1.726	126.800, 0.656	126.800, 0.588	126.800, 0.690	126.800, 0.552	126.800, 0.560	126.800, 0.559	126.800, 0.515	126.800, 0.486	126.800, 0.502	126.800, 0.466	126.800, 0.464	126.800, 0.500
636	127.000, 1.396	127.000, 1.807	127.000, 1.727	127.000, 0.656	127.000, 0.589	127.000, 0.691	127.000, 0.553	127.000, 0.561	127.000, 0.559	127.000, 0.516	127.000, 0.486	127.000, 0.502	127.000, 0.466	127.000, 0.464	127.000, 0.500
637	127.200, 1.397	127.200, 1.808	127.200, 1.729	127.200, 0.656	127.200, 0.589	127.200, 0.691	127.200, 0.553	127.200, 0.561	127.200, 0.558	127.200, 0.516	127.200, 0.486	127.200, 0.502	127.200, 0.466	127.200, 0.465	127.200, 0.501
638	127.400, 1.398	127.400, 1.809	127.400, 1.730	127.400, 0.656	127.400, 0.590	127.400, 0.691	127.400, 0.553	127.400, 0.562	127.400, 0.558	127.400, 0.516	127.400, 0.487	127.400, 0.503	127.400, 0.466	127.400, 0.465	127.400, 0.501
639	127.600, 1.399	127.600, 1.811	127.600, 1.731	127.600, 0.657	127.600, 0.590	127.600, 0.691	127.600, 0.553	127.600, 0.562	127.600, 0.559	127.600, 0.517	127.600, 0.487	127.600, 0.503	127.600, 0.466	127.600, 0.465	127.600, 0.501
640	127.800, 1.400	127.800, 1.812	127.800, 1.733	127.800, 0.657	127.800, 0.590	127.800, 0.692	127.800, 0.553	127.800, 0.563	127.800, 0.559	127.800, 0.517	127.800, 0.486	127.800, 0.503	127.800, 0.467	127.800, 0.465	127.800, 0.501
641	128.000, 1.402	128.000, 1.813	128.000, 1.734	128.000, 0.658	128.000, 0.591	128.000, 0.692	128.000, 0.553	128.000, 0.564	128.000, 0.559	128.000, 0.518	128.000, 0.487	128.000, 0.504	128.000, 0.467	128.000, 0.466	128.000, 0.502
642	128.200, 1.403	128.200, 1.814	128.200, 1.735	128.200, 0.658	128.200, 0.591	128.200, 0.693	128.200, 0.554	128.200, 0.564	128.200, 0.559	128.200, 0.518	128.200, 0.486	128.200, 0.505	128.200, 0.467	128.200, 0.466	128.200, 0.502
643	128.400, 1.404	128.400, 1.815	128.400, 1.737	128.400, 0.659	128.400, 0.592	128.400, 0.693	128.400, 0.554	128.400, 0.565	128.400, 0.560	128.400, 0.518	128.400, 0.486	128.400, 0.505	128.400, 0.467	128.400, 0.466	128.400, 0.502
644	128.600, 1.405	128.600, 1.816	128.600, 1.738	128.600, 0.659	128.600, 0.592	128.600, 0.694	128.600, 0.554	128.600, 0.565	128.600, 0.560	128.600, 0.518	128.600, 0.486	128.600, 0.506	128.600, 0.467	128.600, 0.467	128.600, 0.502
645	128.800, 1.405	128.800, 1.818	128.800, 1.740	128.800, 0.660	128.800, 0.592	128.800, 0.694	128.800, 0.554	128.800, 0.565	128.800, 0.561	128.800, 0.519	128.800, 0.486	128.800, 0.506	128.800, 0.467	128.800, 0.467	128.800, 0.502
646	129.000, 1.406	129.000, 1.819	129.000, 1.741	129.000, 0.661	129.000, 0.593	129.000, 0.695	129.000, 0.554	129.000, 0.566	129.000, 0.561	129.000, 0.519	129.000, 0.486	129.000, 0.506	129.000, 0.467	129.000, 0.467	129.000, 0.502
647	129.200, 1.407	129.200, 1.820	129.200, 1.743	129.200, 0.661	129.200, 0.593	129.200, 0.695	129.200, 0.555	129.200, 0.566	129.200, 0.562	129.200, 0.519	129.200, 0.486	129.200, 0.507	129.200, 0.468	129.200, 0.467	129.200, 0.503
648	129.400, 1.408	129.400, 1.821	129.400, 1.745	129.400, 0.662	129.400, 0.593	129.400, 0.695	129.400, 0.555	129.400, 0.567	129.400, 0.562	129.400, 0.519	129.400, 0.486	129.400, 0.507	129.400, 0.468	129.400, 0.467	129.400, 0.503
649	129.600, 1.409	129.600, 1.822	129.600, 1.747	129.600, 0.662	129.600, 0.593	129.600, 0.696	129.600, 0.556	129.600, 0.567	129.600, 0.563	129.600, 0.519	129.600, 0.487	129.600, 0.507	129.600, 0.468	129.600, 0.467	129.600, 0.503
650	129.800, 1.411	129.800, 1.823	129.800, 1.749	129.800, 0.663	129.800, 0.593	129.800, 0.696	129.800, 0.556	129.800, 0.568	129.800, 0.564	129.800, 0.520	129.800, 0.487	129.800, 0.507	129.800, 0.469	129.800, 0.467	129.800, 0.504
651	130.000, 1.412	130.000, 1.824	130.000, 1.750	130.000, 0.663	130.000, 0.593	130.000, 0.696	130.000, 0.557	130.000, 0.567	130.000, 0.564	130.000, 0.520	130.000, 0.487	130.000, 0.507	130.000, 0.469	130.000, 0.467	130.000, 0.504
652	130.200, 1.413	130.200, 1.826	130.200, 1.751	130.200, 0.663	130.200, 0.593	130.200, 0.696	130.200, 0.558	130.200, 0.568	130.200, 0.565	130.200, 0.520	130.200, 0.487	130.200, 0.507	130.200, 0.469	130.200, 0.467	130.200, 0.504
653	130.400, 1.414	130.400, 1.828	130.400, 1.753	130.400, 0.663	130.400, 0.593	130.400, 0.697	130.400, 0.558	130.400, 0.568	130.400, 0.565	130.400, 0.521	130.400, 0.487	130.400, 0.507	130.400, 0.470	130.400, 0.467	130.400, 0.504
654	130.600, 1.415	130.600, 1.829	130.600, 1.754	130.600, 0.663	130.600, 0.594	130.600, 0.697	130.600, 0.558	130.600, 0.568	130.600, 0.566	130.600, 0.521	130.600, 0.488	130.600, 0.507	130.600, 0.470	130.600, 0.468	130.600, 0.505
655	130.800, 1.417	130.800, 1.831	130.800, 1.756	130.800, 0.663	130.800, 0.594	130.800, 0.697	130.800, 0.559	130.800, 0.568	130.800, 0.566	130.800, 0.521	130.800, 0.488	130.800, 0.507	130.800, 0.470	130.800, 0.468	130.800, 0.505
656	131.000, 1.418	131.000, 1.833	131.000, 1.757	131.000, 0.663	131.000, 0.595	131.000, 0.697	131.000, 0.559	131.000, 0.568	131.000, 0.566	131.000, 0.521	131.000, 0.488	131.000, 0.507	131.000, 0.470	131.000, 0.468	131.000, 0.505
657	131.200, 1.419	131.200, 1.835	131.200, 1.758	131.200, 0.662	131.200, 0.595	131.200, 0.697	131.200, 0.559	131.200, 0.568	131.200, 0.567	131.200, 0.522	131.200, 0.489	131.200, 0.507	131.200, 0.471	131.200, 0.468	131.200, 0.506
658	131.400, 1.420	131.400, 1.837	131.400, 1.760	131.400, 0.662	131.400, 0.596	131.400, 0.697	131.400, 0.559	131.400, 0.568	131.400, 0.567	131.400, 0.522	131.400, 0.489	131.400, 0.507	131.400, 0.471	131.400, 0.468	131.400, 0.506
659	131.600, 1.421	131.600, 1.838	131.600, 1.761	131.600, 0.663	131.600, 0.596	131.600, 0.698	131.600, 0.559	131.600, 0.569	131.600, 0.568	131.600, 0.522	131.600, 0.489	131.600, 0.507	131.600, 0.471	131.600, 0.468	131.600, 0.506
660	131.800, 1.423	131.800, 1.840	131.800, 1.762	131.800, 0.663	131.800, 0.596	131.800, 0.698	131.800, 0.559	131.800, 0.570	131.800, 0.568	131.800, 0.522	131.800, 0.490	131.800, 0.508	131.800, 0.471	131.800, 0.469	131.800, 0.506
661	132.000, 1.424	132.000, 1.841	132.000, 1.764	132.000, 0.663	132.000, 0.597	132.000, 0.698	132.000, 0.559	132.000, 0.570	132.000, 0.568	132.000, 0.522	132.000, 0.491	132.000, 0.508	132.000, 0.471	132.000, 0.470	132.000, 0.506
662	132.200, 1.425	132.200, 1.842	132.200, 1.765	132.200, 0.663	132.200, 0.597	132.200, 0.699	132.200, 0.559	132.200, 0.570	132.200, 0.568	132.200, 0.522	132.200, 0.491	132.200, 0.508	132.200, 0.471	132.200, 0.470	132.200, 0.506
663	132.400, 1.426	132.400, 1.844	132.400, 1.766	132.400, 0.664	132.400, 0.597	132.400, 0.699	132.400, 0.559	132.400, 0.571	132.400, 0.568	132.400, 0.523	132.400, 0.491	132.400, 0.508	132.400, 0.471	132.400, 0.471	132.400, 0.506
664	132.600, 1.427	132.600, 1.845	132.600, 1.768	132.600, 0.664	132.600, 0.597	132.600, 0.700	132.600, 0.560	132.600, 0.571	132.600, 0.568	132.600, 0.523	132.600, 0.492	132.600, 0.509	132.600, 0.472	132.600, 0.471	132.600, 0.505
665	132.800, 1.428	132.800, 1.846	132.800, 1.769	132.800, 0.665	132.800, 0.597	132.800, 0.700	132.800, 0.560	132.800, 0.571	132.800, 0.567	132.800, 0.523	132.800, 0.492	132.800, 0.509	132.800, 0.472	132.800, 0.472	132.800, 0.506
666	133.000, 1.429	133.000, 1.847	133.000, 1.770	133.000, 0.665	133.000, 0.597	133.000, 0.700	133.000, 0.560	133.000, 0.572	133.000, 0.567	133.000, 0.523	133.000, 0.492	133.000, 0.509	133.000, 0.473	133.000, 0.472	133.000, 0.506
667	133.200, 1.430	133.200, 1.848	133.200, 1.772	133.200, 0.666	133.200, 0.597	133.200, 0.700	133.200, 0.561	133.200, 0.573	133.200, 0.567	133.200, 0.523	133.200, 0.493	133.200, 0.510	133.200, 0.473	133.200, 0.472	133.200, 0.506
668	133.400, 1.431	133.400, 1.849	133.400, 1.773	133.400, 0.666	133.400, 0.597	133.400, 0.701	133.400, 0.561	133.400, 0.573	133.400, 0.567	133.400, 0.523	133.400, 0.493	133.400, 0.510	133.400, 0.473	133.400, 0.473	133.400, 0.506
669	133.600, 1.432	133.600, 1.851	133.600, 1.774	133.600, 0.666	133.600, 0.597	133.600, 0.701	133.600, 0.562	133.600, 0.574	133.600, 0.567	133.600, 0.524	133.600, 0.493	133.600, 0.510	133.600, 0.473	133.600, 0.473	133.600, 0.507
670	133.800, 1.433	133.800, 1.852	133.800, 1.775	133.800, 0.667	133.800, 0.597	133.800, 0.701	133.800, 0.562	133.800, 0.574	133.800, 0.567	133.800, 0.524	133.800, 0.494	133.800, 0.510	133.800, 0.474	133.800, 0.473	133.800, 0.507
671	134.000, 1.434	134.000, 1.853	134.000, 1.776	134.000, 0.667	134.000, 0.597	134.000, 0.701	134.000, 0.562	134.000, 0.574	134.000, 0.567	134.000, 0.525	134.000, 0.494	134.000, 0.510	134.000, 0.474	134.000, 0.473	134.000, 0.508
672	134.200, 1.435	134.200, 1.854	134.200, 1.777	134.200, 0.667	134.200, 0.597	134.200, 0.701	134.200, 0.563	134.200, 0.575	134.200, 0.567	134.200, 0.525	134.200, 0.494	134.200, 0.511	134.200, 0.474	134.200, 0.473	134.200, 0.508
673	134.400, 1.436	134.400, 1.856	134.400, 1.778	134.400, 0.667	134.400, 0.598	134.400, 0.701	134.400, 0.563	134.400, 0.575	134.400, 0.567	134.400, 0.526	134.400, 0.494	134.400, 0.511	134.400, 0.474	134.400, 0.473	134.400, 0.509
674	134.600, 1.437	134.600, 1.858	134.600, 1.780	134.600, 0.667	134.600, 0.598	134.600, 0.701	134.600, 0.563	134.600, 0.575	134.600, 0.568	134.600, 0.526	134.600, 0.494	134.600, 0.512	134.600, 0.475	134.600, 0.473	134.600, 0.509
675	134.800, 1.438	134.800, 1.859	134.800, 1.781	134.800, 0.668	134.800, 0.598	134.800, 0.701	134.800, 0.564	134.800, 0.575	134.800, 0.568	134.800, 0.526	134.800, 0.494	134.800, 0.512	134.800, 0.475	134.800, 0.472	134.800, 0.510
676	135.000, 1.439	135.000, 1.861	135.000, 1.783	135.000, 0.668	135.000, 0.599	135.000, 0.702	135.000, 0.564	135.000, 0.575	135.000, 0.569	135.000, 0.527	135.000, 0.495	135.000, 0.512	135.000, 0.475	135.000, 0.472	135.000, 0.510
677	135.200, 1.440	135.200, 1.862	135.200, 1.784	135.200, 0.668	135.200, 0.599	135.200, 0.702	135.200, 0.565	135.200, 0.575	135.200, 0.570	135.200, 0.527	135.200, 0.495	135.200, 0.512	135.200, 0.475	135.200, 0.473	135.200, 0.510
678	135.400, 1.441	135.400, 1.863	135.400, 1.786	135.400, 0.669	135.400, 0.599	135.400, 0.702	135.400, 0.565	135.400, 0.575	135.400, 0.570	135.400, 0.527	135.400, 0.495	135.400, 0.513	135.400, 0.474	135.400, 0.473	135.400, 0.510
679	135.600, 1.442	135.600, 1.864	135.600, 1.787	135.600, 0.669	135.600, 0.599	135.600, 0.702	135.600, 0.565	135.600, 0.575	135.600, 0.570	135.600, 0.528	135.600, 0.495	135.600, 0.513	135.600, 0.474	135.600, 0.473	135.600, 0.510
680	135.800, 1.443	135.800, 1.865	135.800, 1.789	135.800, 0.670	135.800, 0.600	135.800, 0.703	135.800, 0.566	135.800, 0.575	135.800, 0.571	135.800, 0.528	135.800, 0.495	135.800, 0.513	135.800, 0.474	135.800, 0.473	135.800, 0.511
681	136.000, 1.444	136.000, 1.867	136.000, 1.790	136.000, 0.670	136.000, 0.600	136.000, 0.704	136.000, 0.566	136.000, 0.575	136.000, 0.571	136.000, 0.528	136.000, 0.496	136.000, 0.513	136.000, 0.474	136.000, 0.474	136.000, 0.511
682	136.200, 1.445	136.200, 1.868	136.200, 1.791	136.200, 0.671	136.200, 0.600	136.200, 0.704	136.200, 0.566	136.200, 0.575	136.200, 0.572	136.200, 0.528	136.200, 0.496	136.200, 0.514	136.200, 0.474	136.200, 0.474	136.200, 0.511
683	136.400, 1.446	136.400, 1.869	136.400, 1.792	136.400, 0.671	136.400, 0.600	136.400, 0.705	136.400, 0.566	136.400, 0.575	136.400, 0.572	136.400, 0.528	136.400, 0.496	136.400, 0.514	136.400, 0.475	136.400, 0.474	136.400, 0.511
684	136.600, 1.447	136.600, 1.871	136.600, 1.793	136.600, 0.671	136.600, 0.601	136.600, 0.705	136.600, 0.566	136.600, 0.575	136.600, 0.572	136.600, 0.528	136.600, 0.496	136.600, 0.514	136.600, 0.475	136.600, 0.474	136.600, 0.511
685	136.800, 1.448	136.800, 1.872	136.800, 1.795	136.800, 0.672	136.800, 0.601	136.800, 0.706	136.800, 0.566	136.800, 0.575	136.800, 0.573	136.800, 0.527	136.800, 0.496	136.800, 0.515	136.800, 0.475	136.800, 0.475	136.800, 0.511
686	137.000, 1.449	137.000, 1.873	137.000, 1.796	137.000, 0.672	137.000, 0.601	137.000, 0.706	137.000, 0.566	137.000, 0.575	137.000, 0.573	137.000, 0.527	137.000, 0.496	137.000, 0.515	137.000, 0.475	137.000, 0.475	137.000, 0.511
687	137.200, 1.450	137.200, 1.874	137.200, 1.797	137.200, 0.672	137.200, 0.602	137.200, 0.706	137.200, 0.566	137.200, 0.575	137.200, 0.573	137.200, 0.527	137.200, 0.496	137.200, 0.515	137.200, 0.475	137.200, 0.475	137.200, 0.511
688	137.400, 1.451	137.400, 1.875	137.400, 1.798	137.400, 0.672	137.400, 0.602	137.400, 0.707	137.400, 0.566	137.400, 0.575	137.400, 0.573	137.400, 0.528	137.400, 0.496	137.400, 0.516	137.400, 0.475	137.400, 0.476	137.400, 0.511
689	137.600, 1.452	137.600, 1.876	137.600, 1.800	137.600, 0.673	137.600, 0.602	137.600, 0.707	137.600, 0.565	137.600, 0.575	137.600, 0.573	137.600, 0.528	137.600, 0.496	137.600, 0.516	137.600, 0.475	137.600, 0.476	137.600, 0.511
690	137.800, 1.453	137.800, 1.877	137.800, 1.801	137.800, 0.673	137.800, 0.603	137.800, 0.707	137.800, 0.565	137.800, 0.575	137.800, 0.573	137.800, 0.528	137.800, 0.496	137.800, 0.516	137.800, 0.476	137.800, 0.476	137.800, 0.512
691	138.000, 1.454	138.000, 1.878	138.000, 1.803	138.000, 0.673	138.000, 0.603	138.000, 0.707	138.000, 0.565	138.000, 0.575	138.000, 0.573	138.000, 0.529	138.000, 0.496	138.000, 0.516	138.000, 0.476	138.000, 0.476	138.000, 0.512
692	138.200, 1.456	138.200, 1.880	138.200, 1.804	138.200, 0.673	138.200, 0.603	138.200, 0.708	138.200, 0.566	138.200, 0.575	138.200, 0.573	138.200, 0.529	138.200, 0.496	138.200, 0.517	138.200, 0.477	138.200, 0.476	138.200, 0.512
693	138.400, 1.457	138.400, 1.881	138.400, 1.806	138.400, 0.673	138.400, 0.604	138.400, 0.708	138.400, 0.566	138.400, 0.575	138.400, 0.573	138.400, 0.530	138.400, 0.496	138.400, 0.517	138.400, 0.478	138.400, 0.476	138.400, 0.512
694	138.600, 1.458	138.600, 1.882	138.600, 1.807	138.600, 0.674	138.600, 0.604	138.600, 0.708	138.600, 0.567	138.600, 0.576	138.600, 0.573	138.600, 0.530	138.600, 0.496	138.600, 0.517	138.600, 0.478	138.600, 0.477	138.600, 0.512
695	138.800, 1.458	138.800, 1.884	138.800, 1.809	138.800, 0.674	138.800, 0.604	138.800, 0.708	138.800, 0.567	138.800, 0.576	138.800, 0.573	138.800, 0.530	138.800, 0.496	138.800, 0.518	138.800, 0.478	138.800, 0.477	138.800, 0.512
696	139.000, 1.459	139.000, 1.885	139.000, 1.811	139.000, 0.674	139.000, 0.604	139.000, 0.709	139.000, 0.568	139.000, 0.577	139.000, 0.573	139.000, 0.530	139.000, 0.497	139.000, 0.518	139.000, 0.478	139.000, 0.478	139.000, 0.512
697	139.200, 1.460	139.200, 1.887	139.200, 1.812	139.200, 0.674	139.200, 0.604	139.200, 0.709	139.200, 0.569	139.200, 0.577	139.200, 0.574	139.200, 0.531	139.200, 0.497	139.200, 0.518	139.200, 0.478	139.200, 0.478	139.200, 0.512
698	139.400, 1.461	139.400, 1.888	139.400, 1.813	139.400, 0.675	139.400, 0.605	139.400, 0.709	139.400, 0.570	139.400, 0.578	139.400, 0.574	139.400, 0.531	139.400, 0.497	139.400, 0.518	139.400, 0.478	139.400, 0.479	139.400, 0.513
699	139.600, 1.461	139.600, 1.889	139.600, 1.814	139.600, 0.675	139.600, 0.605	139.600, 0.709	139.600, 0.571	139.600, 0.579	139.600, 0.574	139.600, 0.531	139.600, 0.498	139.600, 0.518	139.600, 0.478	139.600, 0.479	139.600, 0.513
700	139.800, 1.462	139.800, 1.890	139.800, 1.815	139.800, 0.675	139.800, 0.605	139.800, 0.709	139.800, 0.571	139.800, 0.580	139.800, 0.574	139.800, 0.532	139.800, 0.498	139.800, 0.518	139.800, 0.479	139.800, 0.479	139.800, 0.513
701	140.000, 1.463	140.000, 1.891	140.000, 1.816	140.000, 0.675	140.000, 0.606	140.000, 0.709	140.000, 0.572	140.000, 0.581	140.000, 0.575	140.000, 0.532	140.000, 0.499	140.000, 0.518	140.000, 0.479	140.000, 0.478	140.000, 0.514
702	140.200, 1.464	140.200, 1.893	140.200, 1.817	140.200, 0.675	140.200, 0.606	140.200, 0.709	140.200, 0.572	140.200, 0.581	140.200, 0.575	140.200, 0.532	140.200, 0.499	140.200, 0.519	140.200, 0.479	140.200, 0.478	140.200, 0.514
703	140.400, 1.465	140.400, 1.894	140.400, 1.818	140.400, 0.675	140.400, 0.606	140.400, 0.709	140.400, 0.572	140.400, 0.582	140.400, 0.576	140.400, 0.532	140.400, 0.499	140.400, 0.519	140.400, 0.480	140.400, 0.478	140.400, 0.515
704	140.600, 1.465	140.600, 1.896	140.600, 1.819	140.600, 0.675	140.600, 0.606	140.600, 0.709	140.600, 0.573	140.600, 0.583	140.600, 0.576	140.600, 0.532	140.600, 0.499	140.600, 0.519	140.600, 0.480	140.600, 0.478	140.600, 0.515
705	140.800, 1.466	140.800, 1.897	140.800, 1.820	140.800, 0.675	140.800, 0.607	140.800, 0.709	140.800, 0.572	140.800, 0.583	140.800, 0.576	140.800, 0.532	140.800, 0.500	140.800, 0.519	140.800, 0.480	140.800, 0.478	140.800, 0.516
706	141.000, 1.467	141.000, 1.899	141.000, 1.822	141.000, 0.675	141.000, 0.607	141.000, 0.709	141.000, 0.572	141.000, 0.583	141.000, 0.576	141.000, 0.533	141.000, 0.500	141.000, 0.519	141.000, 0.481	141.000, 0.479	141.000, 0.517
707	141.200, 1.469	141.200, 1.900	141.200, 1.823	141.200, 0.675	141.200, 0.607	141.200, 0.709	141.200, 0.572	141.200, 0.584	141.200, 0.576	141.200, 0.533	141.200, 0.500	141.200, 0.520	141.200, 0.481	141.200, 0.479	141.200, 0.517
708	141.400, 1.470	141.400, 1.901	141.400, 1.825	141.400, 0.675	141.400, 0.608	141.400, 0.710	141.400, 0.572	141.400, 0.584	141.400, 0.576	141.400, 0.534	141.400, 0.501	141.400, 0.520	141.400, 0.482	141.400, 0.479	141.400, 0.518
709	141.600, 1.472	141.600, 1.902	141.600, 1.826	141.600, 0.676	141.600, 0.608	141.600, 0.710	141.600, 0.571	141.600, 0.583	141.600, 0.577	141.600, 0.534	141.600, 0.501	141.600, 0.520	141.600, 0.482	141.600, 0.479	141.600, 0.518
710	141.800, 1.474	141.800, 1.903	141.800, 1.828	141.800, 0.676	141.800, 0.608	141.800, 0.710	141.800, 0.571	141.800, 0.583	141.800, 0.577	141.800, 0.534	141.800, 0.500	141.800, 0.520	141.800, 0.482	141.800, 0.479	141.800, 0.519
711	142.000, 1.475	142.000, 1.905	142.000, 1.830	142.000, 0.676	142.000, 0.608	142.000, 0.710	142.000, 0.571	142.000, 0.583	142.000, 0.577	142.000, 0.534	142.000, 0.500	142.000, 0.521	142.000, 0.482	142.000, 0.479	142.000, 0.519
712	142.200, 1.476	142.200, 1.906	142.200, 1.831	142.200, 0.677	142.200, 0.608	142.200, 0.711	142.200, 0.571	142.200, 0.582	142.200, 0.578	142.200, 0.534	142.200, 0.500	142.200, 0.521	142.200, 0.483	142.200, 0.479	142.200, 0.519
713	142.400, 1.477	142.400, 1.907	142.400, 1.833	142.400, 0.677	142.400, 0.608	142.400, 0.711	142.400, 0.570	142.400, 0.582	142.400, 0.578	142.400, 0.534	142.400, 0.501	142.400, 0.521	142.400, 0.483	142.400, 0.480	142.400, 0.519
714	142.600, 1.479	142.600, 1.908	142.600, 1.835	142.600, 0.677	142.600, 0.608	142.600, 0.711	142.600, 0.571	142.600, 0.582	142.600, 0.578	142.600, 0.534	142.600, 0.501	142.600, 0.521	142.600, 0.483	142.600, 0.480	142.600, 0.519
715	142.800, 1.480	142.800, 1.909	142.800, 1.836	142.800, 0.678	142.800, 0.608	142.800, 0.712	142.800, 0.571	142.800, 0.582	142.800, 0.579	142.800, 0.534	142.800, 0.502	142.800, 0.521	142.800, 0.483	142.800, 0.481	142.800, 0.519
716	143.000, 1.481	143.000, 1.909	143.000, 1.837	143.000, 0.678	143.000, 0.608	143.000, 0.712	143.000, 0.571	143.000, 0.582	143.000, 0.579	143.000, 0.534	143.000, 0.502	143.000, 0.521	143.000, 0.483	143.000, 0.481	143.000, 0.518
717	143.200, 1.482	143.200, 1.910	143.200, 1.838	143.200, 0.679	143.200, 0.608	143.200, 0.712	143.200, 0.571	143.200, 0.582	143.200, 0.579	143.200, 0.534	143.200, 0.503	143.200, 0.521	143.200, 0.483	143.200, 0.482	143.200, 0.518
718	143.400, 1.483	143.400, 1.911	143.400, 1.839	143.400, 0.679	143.400, 0.609	143.400, 0.712	143.400, 0.571	143.400, 0.582	143.400, 0.579	143.400, 0.535	143.400, 0.504	143.400, 0.521	143.400, 0.483	143.400, 0.482	143.400, 0.518
719	143.600, 1.484	143.600, 1.912	143.600, 1.840	143.600, 0.679	143.600, 0.609	143.600, 0.713	143.600, 0.572	143.600, 0.582	143.600, 0.579	143.600, 0.535	143.600, 0.504	143.600, 0.521	143.600, 0.483	143.600, 0.482	143.600, 0.518
720	143.800, 1.485	143.800, 1.913	143.800, 1.841	143.800, 0.679	143.800, 0.609	143.800, 0.713	143.800, 0.572	143.800, 0.582	143.800, 0.579	143.800, 0.535	143.800, 0.505	143.800, 0.522	143.800, 0.484	143.800, 0.483	143.800, 0.518
721	144.000, 1.485	144.000, 1.914	144.000, 1.842	144.000, 0.680	144.000, 0.609	144.000, 0.713	144.000, 0.572	144.000, 0.582	144.000, 0.579	144.000, 0.535	144.000, 0.505	144.000, 0.522	144.000, 0.484	144.000, 0.483	144.000, 0.518
722	144.200, 1.486	144.200, 1.915	144.200, 1.843	144.200, 0.680	144.200, 0.609	144.200, 0.714	144.200, 0.572	144.200, 0.582	144.200, 0.579	144.200, 0.535	144.200, 0.505	144.200, 0.523	144.200, 0.485	144.200, 0.484	144.200, 0.518
723	144.400, 1.486	144.400, 1.916	144.400, 1.844	144.400, 0.679	144.400, 0.610	144.400, 0.714	144.400, 0.572	144.400, 0.583	144.400, 0.579	144.400, 0.536	144.400, 0.505	144.400, 0.523	144.400, 0.485	144.400, 0.484	144.400, 0.519
724	144.600, 1.487	144.600, 1.917	144.600, 1.845	144.600, 0.680	144.600, 0.610	144.600, 0.714	144.600, 0.573	144.600, 0.583	144.600, 0.579	144.600, 0.536	144.600, 0.505	144.600, 0.524	144.600, 0.485	144.600, 0.484	144.600, 0.519
725	144.800, 1.487	144.800, 1.919	144.800, 1.846	144.800, 0.680	144.800, 0.610	144.800, 0.715	144.800, 0.573	144.800, 0.584	144.800, 0.579	144.800, 0.536	144.800, 0.506	144.800, 0.524	144.800, 0.485	144.800, 0.484	144.800, 0.519
726	145.000, 1.488	145.000, 1.920	145.000, 1.847	145.000, 0.680	145.000, 0.611	145.000, 0.715	145.000, 0.573	145.000, 0.584	145.000, 0.579	145.000, 0.537	145.000, 0.506	145.000, 0.525	145.000, 0.485	145.000, 0.484	145.000, 0.519
727	145.200, 1.489	145.200, 1.921	145.200, 1.849	145.200, 0.680	145.200, 0.611	145.200, 0.715	145.200, 0.573	145.200, 0.585	145.200, 0.579	145.200, 0.537	145.200, 0.506	145.200, 0.525	145.200, 0.485	145.200, 0.484	145.200, 0.519
728	145.400, 1.490	145.400, 1.922	145.400, 1.850	145.400, 0.680	145.400, 0.611	145.400, 0.716	145.400, 0.573	145.400, 0.585	145.400, 0.580	145.400, 0.538	145.400, 0.506	145.400, 0.526	145.400, 0.485	145.400, 0.483	145.400, 0.520
729	145.600, 1.490	145.600, 1.923	145.600, 1.851	145.600, 0.680	145.600, 0.612	145.600, 0.716	145.600, 0.573	145.600, 0.586	145.600, 0.581	145.600, 0.538	145.600, 0.506	145.600, 0.526	145.600, 0.485	145.600, 0.483	145.600, 0.520
730	145.800, 1.491	145.800, 1.924	145.800, 1.852	145.800, 0.680	145.800, 0.612	145.800, 0.716	145.800, 0.574	145.800, 0.586	145.800, 0.581	145.800, 0.538	145.800, 0.506	145.800, 0.527	145.800, 0.485	145.800, 0.483	145.800, 0.520
731	146.000, 1.492	146.000, 1.926	146.000, 1.853	146.000, 0.680	146.000, 0.612	146.000, 0.716	146.000, 0.574	146.000, 0.587	146.000, 0.581	146.000, 0.538	146.000, 0.506	146.000, 0.527	146.000, 0.484	146.000, 0.483	146.000, 0.520
732	146.200, 1.494	146.200, 1.927	146.200, 1.854	146.200, 0.681	146.200, 0.612	146.200, 0.717	146.200, 0.574	146.200, 0.588	146.200, 0.582	146.200, 0.539	146.200, 0.506	146.200, 0.527	146.200, 0.484	146.200, 0.483	146.200, 0.520
733	146.400, 1.495	146.400, 1.928	146.400, 1.855	146.400, 0.681	146.400, 0.612	146.400, 0.717	146.400, 0.575	146.400, 0.588	146.400, 0.582	146.400, 0.539	146.400, 0.507	146.400, 0.527	146.400, 0.484	146.400, 0.483	146.400, 0.520
734	146.600, 1.495	146.600, 1.929	146.600, 1.856	146.600, 0.681	146.600, 0.613	146.600, 0.717	146.600, 0.575	146.600, 0.589	146.600, 0.582	146.600, 0.539	146.600, 0.507	146.600, 0.526	146.600, 0.485	146.600, 0.483	146.600, 0.520
735	146.800, 1.496	146.800, 1.930	146.800, 1.857	146.800, 0.682	146.800, 0.613	146.800, 0.717	146.800, 0.576	146.800, 0.589	146.800, 0.582	146.800, 0.539	146.800, 0.507	146.800, 0.526	146.800, 0.485	146.800, 0.483	146.800, 0.520
736	147.000, 1.497	147.000, 1.931	147.000, 1.858	147.000, 0.682	147.000, 0.613	147.000, 0.718	147.000, 0.576	147.000, 0.590	147.000, 0.583	147.000, 0.539	147.000, 0.507	147.000, 0.526	147.000, 0.485	147.000, 0.484	147.000, 0.520
737	147.200, 1.498	147.200, 1.932	147.200, 1.859	147.200, 0.682	147.200, 0.614	147.200, 0.718	147.200, 0.577	147.200, 0.590	147.200, 0.583	147.200, 0.540	147.200, 0.508	147.200, 0.526	147.200, 0.486	147.200, 0.484	147.200, 0.520
738	147.400, 1.499	147.400, 1.933	147.400, 1.860	147.400, 0.683	147.400, 0.614	147.400, 0.718	147.400, 0.577	147.400, 0.590	147.400, 0.583	147.400, 0.540	147.400, 0.508	147.400, 0.526	147.400, 0.486	147.400, 0.485	147.400, 0.521
739	147.600, 1.500	147.600, 1.935	147.600, 1.861	147.600, 0.683	147.600, 0.614	147.600, 0.719	147.600, 0.577	147.600, 0.590	147.600, 0.584	147.600, 0.540	147.600, 0.508	147.600, 0.526	147.600, 0.486	147.600, 0.485	147.600, 0.521
740	147.800, 1.501	147.800, 1.936	147.800, 1.862	147.800, 0.683	147.800, 0.614	147.800, 0.719	147.800, 0.577	147.800, 0.590	147.800, 0.584	147.800, 0.540	147.800, 0.508	147.800, 0.526	147.800, 0.487	147.800, 0.486	147.800, 0.521
741	148.000, 1.502	148.000, 1.937	148.000, 1.863	148.000, 0.684	148.000, 0.614	148.000, 0.719	148.000, 0.578	148.000, 0.590	148.000, 0.585	148.000, 0.541	148.000, 0.508	148.000, 0.526	148.000, 0.487	148.000, 0.486	148.000, 0.522
742	148.200, 1.503	148.200, 1.939	148.200, 1.865	148.200, 0.685	148.200, 0.614	148.200, 0.720	148.200, 0.578	148.200, 0.590	148.200, 0.585	148.200, 0.541	148.200, 0.508	148.200, 0.527	148.200, 0.487	148.200, 0.486	148.200, 0.522
743	148.400, 1.504	148.400, 1.940	148.400, 1.866	148.400, 0.685	148.400, 0.614	148.400, 0.720	148.400, 0.578	148.400, 0.590	148.400, 0.586	148.400, 0.541	148.400, 0.508	148.400, 0.527	148.400, 0.488	148.400, 0.487	148.400, 0.523
744	148.600, 1.505	148.600, 1.941	148.600, 1.868	148.600, 0.686	148.600, 0.614	148.600, 0.720	148.600, 0.578	148.600, 0.590	148.600, 0.586	148.600, 0.541	148.600, 0.508	148.600, 0.527	148.600, 0.488	148.600, 0.487	148.600, 0.523
745	148.800, 1.506	148.800, 1.943	148.800, 1.869	148.800, 0.687	148.800, 0.614	148.800, 0.721	148.800, 0.578	148.800, 0.591	148.800, 0.587	148.800, 0.541	148.800, 0.508	148.800, 0.527	148.800, 0.488	148.800, 0.486	148.800, 0.524
746	149.000, 1.507	149.000, 1.944	149.000, 1.870	149.000, 0.687	149.000, 0.614	149.000, 0.721	149.000, 0.578	149.000, 0.591	149.000, 0.587	149.000, 0.542	149.000, 0.508	149.000, 0.527	149.000, 0.488	149.000, 0.486	149.000, 0.524
747	149.200, 1.508	149.200, 1.945	149.200, 1.871	149.200, 0.688	149.200, 0.614	149.200, 0.721	149.200, 0.578	149.200, 0.592	149.200, 0.587	149.200, 0.542	149.200, 0.508	149.200, 0.528	149.200, 0.488	149.200, 0.486	149.200, 0.525
748	149.400, 1.509	149.400, 1.946	149.400, 1.872	149.400, 0.688	149.400, 0.614	149.400, 0.721	149.400, 0.578	149.400, 0.592	149.400, 0.588	149.400, 0.542	149.400, 0.508	149.400, 0.528	149.400, 0.488	149.400, 0.486	149.400, 0.525
749	149.600, 1.509	149.600, 1.947	149.600, 1.873	149.600, 0.688	149.600, 0.613	149.600, 0.722	149.600, 0.578	149.600, 0.592	149.600, 0.588	149.600, 0.542	149.600, 0.508	149.600, 0.528	149.600, 0.488	149.600, 0.486	149.600, 0.526
750	149.800, 1.510	149.800, 1.948	149.800, 1.874	149.800, 0.689	149.800, 0.613	149.800, 0.722	149.800, 0.578	149.800, 0.593	149.800, 0.588	149.800, 0.542	149.800, 0.508	149.800, 0.528	149.800, 0.488	149.800, 0.485	149.800, 0.526
751	150.000, 1.510	150.000, 1.948	150.000, 1.874	150.000, 0.689	150.000, 0.613	150.000, 0.722	150.000, 0.578	150.000, 0.593	150.000, 0.588	150.000, 0.542	150.000, 0.508	150.000, 0.528	150.000, 0.488	150.000, 0.485	150.000, 0.526
752	150.200, 1.511	150.200, 1.949	150.200, 1.874	150.200, 0.689	150.200, 0.615	150.200, 0.722	150.200, 0.581	150.200, 0.596	150.200, 0.591	150.200, 0.545	150.200, 0.511	150.200, 0.531	150.200, 0.490	150.200, 0.488	150.200, 0.530
753	150.400, 1.512	150.400, 1.950	150.400, 1.875	150.400, 0.690	150.400, 0.616	150.400, 0.723	150.400, 0.585	150.400, 0.598	150.400, 0.595	150.400, 0.548	150.400, 0.514	150.400, 0.534	150.400, 0.493	150.400, 0.492	150.400, 0.534
754	150.600, 1.514	150.600, 1.952	150.600, 1.876	150.600, 0.690	150.600, 0.618	150.600, 0.723	150.600, 0.589	150.600, 0.601	150.600, 0.598	150.600, 0.551	150.600, 0.517	150.600, 0.538	150.600, 0.497	150.600, 0.495	150.600, 0.538
755	150.800, 1.515	150.800, 1.953	150.800, 1.877	150.800, 0.691	150.800, 0.619	150.800, 0.723	150.800, 0.593	150.800, 0.604	150.800, 0.602	150.800, 0.555	150.800, 0.521	150.800, 0.542	150.800, 0.500	150.800, 0.499	150.800, 0.543
756	151.000, 1.516	151.000, 1.954	151.000, 1.878	151.000, 0.691	151.000, 0.621	151.000, 0.724	151.000, 0.597	151.000, 0.607	151.000, 0.606	151.000, 0.558	151.000, 0.524	151.000, 0.546	151.000, 0.503	151.000, 0.503	151.000, 0.547
757	151.200, 1.517	151.200, 1.955	151.200, 1.878	151.200, 0.692	151.200, 0.623	151.200, 0.724	151.200, 0.601	151.200, 0.610	151.200, 0.610	151.200, 0.561	151.200, 0.528	151.200, 0.550	151.200, 0.507	151.200, 0.506	151.200, 0.551
758	151.400, 1.517	151.400, 1.956	151.400, 1.878	151.400, 0.692	151.400, 0.624	151.400, 0.724	151.400, 0.604	151.400, 0.613	151.400, 0.613	151.400, 0.564	151.400, 0.531	151.400, 0.553	151.400, 0.510	151.400, 0.510	151.400, 0.555
759	151.600, 1.518	151.600, 1.956	151.600, 1.878	151.600, 0.693	151.600, 0.626	151.600, 0.724	151.600, 0.607	151.600, 0.615	151.600, 0.616	151.600, 0.566	151.600, 0.534	151.600, 0.557	151.600, 0.513	151.600, 0.513	151.600, 0.559
760	151.800, 1.518	151.800, 1.956	151.800, 1.878	151.800, 0.693	151.800, 0.627	151.800, 0.724	151.800, 0.610	151.800, 0.617	151.800, 0.618	151.800, 0.568	151.800, 0.537	151.800, 0.559	151.800, 0.516	151.800, 0.515	151.800, 0.562
761	152.000, 1.518	152.000, 1.956	152.000, 1.878	152.000, 0.693	152.000, 0.628	152.000, 0.724	152.000, 0.612	152.000, 0.618	152.000, 0.620	152.000, 0.569	152.000, 0.539	152.000, 0.562	152.000, 0.518	152.000, 0.518	152.000, 0.565
762	152.200, 1.517	152.200, 1.956	152.200, 1.877	152.200, 0.693	152.200, 0.629	152.200, 0.723	152.200, 0.613	152.200, 0.618	152.200, 0.621	152.200, 0.569	152.200, 0.540	152.200, 0.563	152.200, 0.519	152.200, 0.519	152.200, 0.566
763	152.400, 1.516	152.400, 1.956	152.400, 1.876	152.400, 0.693	152.400, 0.629	152.400, 0.723	152.400, 0.614	152.400, 0.618	152.400, 0.622	152.400, 0.570	152.400, 0.542	152.400, 0.564	152.400, 0.520	152.400, 0.520	152.400, 0.568
764	152.600, 1.515	152.600, 1.955	152.600, 1.876	152.600, 0.693	152.600, 0.629	152.600, 0.722	152.600, 0.615	152.600, 0.619	152.600, 0.622	152.600, 0.570	152.600, 0.543	152.600, 0.565	152.600, 0.521	152.600, 0.521	152.600, 0.569
765	152.800, 1.514	152.800, 1.955	152.800, 1.875	152.800, 0.693	152.800, 0.629	152.800, 0.722	152.800, 0.615	152.800, 0.619	152.800, 0.622	152.800, 0.570	152.800, 0.543	152.800, 0.566	152.800, 0.522	152.800, 0.522	152.800, 0.570
766	153.000, 1.514	153.000, 1.954	153.000, 1.874	153.000, 0.693	153.000, 0.629	153.000, 0.721	153.000, 0.615	153.000, 0.619	153.000, 0.623	153.000, 0.570	153.000, 0.544	153.000, 0.567	153.000, 0.522	153.000, 0.523	153.000, 0.571
767	153.200, 1.513	153.200, 1.954	153.200, 1.873	153.200, 0.693	153.200, 0.629	153.200, 0.720	153.200, 0.615	153.200, 0.619	153.200, 0.623	153.200, 0.570	153.200, 0.544	153.200, 0.567	153.200, 0.522	153.200, 0.523	153.200, 0.571
768	153.400, 1.512	153.400, 1.953	153.400, 1.871	153.400, 0.693	153.400, 0.629	153.400, 0.719	153.400, 0.615	153.400, 0.620	153.400, 0.623	153.400, 0.570	153.400, 0.544	153.400, 0.567	153.400, 0.522	153.400, 0.524	153.400, 0.572
769	153.600, 1.512	153.600, 1.953	153.600, 1.870	153.600, 0.692	153.600, 0.629	153.600, 0.719	153.600, 0.615	153.600, 0.620	153.600, 0.623	153.600, 0.570	153.600, 0.544	153.600, 0.568	153.600, 0.522	153.600, 0.525	153.600, 0.572
770	153.800, 1.511	153.800, 1.952	153.800, 1.869	153.800, 0.692	153.800, 0.629	153.800, 0.718	153.800, 0.616	153.800, 0.620	153.800, 0.623	153.800, 0.570	153.800, 0.544	153.800, 0.568	153.800, 0.523	153.800, 0.525	153.800, 0.572
771	154.000, 1.511	154.000, 1.952	154.000, 1.867	154.000, 0.692	154.000, 0.629	154.000, 0.718	154.000, 0.616	154.000, 0.620	154.000, 0.623	154.000, 0.570	154.000, 0.544	154.000, 0.568	154.000, 0.523	154.000, 0.526	154.000, 0.572
772	154.200, 1.510	154.200, 1.951	154.200, 1.866	154.200, 0.692	154.200, 0.629	154.200, 0.717	154.200, 0.616	154.200, 0.620	154.200, 0.623	154.200, 0.570	154.200, 0.544	154.200, 0.568	154.200, 0.523	154.200, 0.526	154.200, 0.573
773	154.400, 1.510	154.400, 1.950	154.400, 1.865	154.400, 0.691	154.400, 0.629	154.400, 0.716	154.400, 0.616	154.400, 0.620	154.400, 0.623	154.400, 0.570	154.400, 0.545	154.400, 0.569	154.400, 0.523	154.400, 0.526	154.400, 0.573
774	154.600, 1.509	154.600, 1.949	154.600, 1.863	154.600, 0.690	154.600, 0.629	154.600, 0.716	154.600, 0.615	154.600, 0.620	154.600, 0.623	154.600, 0.570	154.600, 0.545	154.600, 0.569	154.600, 0.523	154.600, 0.526	154.600, 0.573
775	154.800, 1.509	154.800, 1.948	154.800, 1.862	154.800, 0.689	154.800, 0.628	154.800, 0.715	154.800, 0.615	154.800, 0.620	154.800, 0.623	154.800, 0.570	154.800, 0.545	154.800, 0.569	154.800, 0.523	154.800, 0.526	154.800, 0.574
776	155.000, 1.508	155.000, 1.947	155.000, 1.860	155.000, 0.689	155.000, 0.628	155.000, 0.714	155.000, 0.615	155.000, 0.619	155.000, 0.623	155.000, 0.570	155.000, 0.545	155.000, 0.569	155.000, 0.523	155.000, 0.526	155.000, 0.574
777	155.200, 1.508	155.200, 1.946	155.200, 1.859	155.200, 0.688	155.200, 0.628	155.200, 0.714	155.200, 0.615	155.200, 0.619	155.200, 0.623	155.200, 0.570	155.200, 0.545	155.200, 0.569	155.200, 0.523	155.200, 0.526	155.200, 0.574
778	155.400, 1.507	155.400, 1.945	155.400, 1.858	155.400, 0.687	155.400, 0.628	155.400, 0.713	155.400, 0.614	155.400, 0.619	155.400, 0.623	155.400, 0.570	155.400, 0.545	155.400, 0.569	155.400, 0.523	155.400, 0.526	155.400, 0.574
779	155.600, 1.506	155.600, 1.944	155.600, 1.856	155.600, 0.686	155.600, 0.628	155.600, 0.712	155.600, 0.614	155.600, 0.618	155.600, 0.623	155.600, 0.570	155.600, 0.545	155.600, 0.569	155.600, 0.523	155.600, 0.526	155.600, 0.574
780	155.800, 1.505	155.800, 1.943	155.800, 1.855	155.800, 0.685	155.800, 0.628	155.800, 0.712	155.800, 0.614	155.800, 0.618	155.800, 0.622	155.800, 0.570	155.800, 0.545	155.800, 0.569	155.800, 0.522	155.800, 0.526	155.800, 0.574
781	156.000, 1.504	156.000, 1.942	156.000, 1.854	156.000, 0.685	156.000, 0.627	156.000, 0.711	156.000, 0.614	156.000, 0.617	156.000, 0.622	156.000, 0.570	156.000, 0.544	156.000, 0.569	156.000, 0.522	156.000, 0.526	156.000, 0.574
782	156.200, 1.503	156.200, 1.940	156.200, 1.853	156.200, 0.684	156.200, 0.627	156.200, 0.711	156.200, 0.614	156.200, 0.617	156.200, 0.621	156.200, 0.570	156.200, 0.544	156.200, 0.569	156.200, 0.522	156.200, 0.526	156.200, 0.575
783	156.400, 1.502	156.400, 1.939	156.400, 1.852	156.400, 0.683	156.400, 0.627	156.400, 0.710	156.400, 0.614	156.400, 0.616	156.400, 0.621	156.400, 0.569	156.400, 0.544	156.400, 0.569	156.400, 0.522	156.400, 0.526	156.400, 0.575
784	156.600, 1.500	156.600, 1.937	156.600, 1.851	156.600, 0.683	156.600, 0.626	156.600, 0.710	156.600, 0.613	156.600, 0.616	156.600, 0.620	156.600, 0.569	156.600, 0.543	156.600, 0.568	156.600, 0.522	156.600, 0.526	156.600, 0.575
785	156.800, 1.499	156.800, 1.936	156.800, 1.850	156.800, 0.682	156.800, 0.626	156.800, 0.709	156.800, 0.613	156.800, 0.615	156.800, 0.619	156.800, 0.568	156.800, 0.543	156.800, 0.568	156.800, 0.521	156.800, 0.527	156.800, 0.574
786	157.000, 1.498	157.000, 1.935	157.000, 1.849	157.000, 0.682	157.000, 0.625	157.000, 0.708	157.000, 0.613	157.000, 0.615	157.000, 0.618	157.000, 0.568	157.000, 0.543	157.000, 0.567	157.000, 0.521	157.000, 0.527	157.000, 0.574
787	157.200, 1.497	157.200, 1.933	157.200, 1.848	157.200, 0.682	157.200, 0.625	157.200, 0.708	157.200, 0.613	157.200, 0.615	157.200, 0.618	157.200, 0.567	157.200, 0.543	157.200, 0.567	157.200, 0.522	157.200, 0.527	157.200, 0.574
788	157.400, 1.495	157.400, 1.932	157.400, 1.846	157.400, 0.682	157.400, 0.624	157.400, 0.707	157.400, 0.613	157.400, 0.615	157.400, 0.617	157.400, 0.567	157.400, 0.543	157.400, 0.567	157.400, 0.522	157.400, 0.527	157.400, 0.574
789	157.600, 1.494	157.600, 1.931	157.600, 1.845	157.600, 0.681	157.600, 0.623	157.600, 0.707	157.600, 0.613	157.600, 0.615	157.600, 0.617	157.600, 0.566	157.600, 0.543	157.600, 0.566	157.600, 0.522	157.600, 0.527	157.600, 0.573
790	157.800, 1.493	157.800, 1.929	157.800, 1.843	157.800, 0.681	157.800, 0.623	157.800, 0.706	157.800, 0.613	157.800, 0.614	157.800, 0.617	157.800, 0.566	157.800, 0.543	157.800, 0.566	157.800, 0.522	157.800, 0.527	157.800, 0.573
791	158.000, 1.492	158.000, 1.928	158.000, 1.841	158.000, 0.680	158.000, 0.622	158.000, 0.705	158.000, 0.613	158.000, 0.614	158.000, 0.617	158.000, 0.566	158.000, 0.543	158.000, 0.566	158.000, 0.522	158.000, 0.526	158.000, 0.572
792	158.200, 1.491	158.200, 1.927	158.200, 1.840	158.200, 0.680	158.200, 0.622	158.200, 0.705	158.200, 0.613	158.200, 0.614	158.200, 0.617	158.200, 0.565	158.200, 0.543	158.200, 0.566	158.200, 0.522	158.200, 0.526	158.200, 0.572
793	158.400, 1.490	158.400, 1.925	158.400, 1.838	158.400, 0.679	158.400, 0.621	158.400, 0.704	158.400, 0.612	158.400, 0.614	158.400, 0.617	158.400, 0.565	158.400, 0.543	158.400, 0.565	158.400, 0.522	158.400, 0.526	158.400, 0.572
794	158.600, 1.489	158.600, 1.924	158.600, 1.836	158.600, 0.678	158.600, 0.621	158.600, 0.704	158.600, 0.612	158.600, 0.613	158.600, 0.617	158.600, 0.565	158.600, 0.543	158.600, 0.565	158.600, 0.521	158.600, 0.525	158.600, 0.571
795	158.800, 1.488	158.800, 1.923	158.800, 1.835	158.800, 0.678	158.800, 0.620	158.800, 0.703	158.800, 0.612	158.800, 0.613	158.800, 0.617	158.800, 0.565	158.800, 0.543	158.800, 0.565	158.800, 0.521	158.800, 0.525	158.800, 0.571
796	159.000, 1.487	159.000, 1.921	159.000, 1.833	159.000, 0.677	159.000, 0.620	159.000, 0.703	159.000, 0.611	159.000, 0.613	159.000, 0.617	159.000, 0.565	159.000, 0.543	159.000, 0.565	159.000, 0.521	159.000, 0.525	159.000, 0.571
797	159.200, 1.487	159.200, 1.920	159.200, 1.832	159.200, 0.677	159.200, 0.620	159.200, 0.702	159.200, 0.611	159.200, 0.613	159.200, 0.617	159.200, 0.564	159.200, 0.543	159.200, 0.565	159.200, 0.521	159.200, 0.524	159.200, 0.571
798	159.400, 1.486	159.400, 1.919	159.400, 1.830	159.400, 0.677	159.400, 0.620	159.400, 0.701	159.400, 0.610	159.400, 0.612	159.400, 0.616	159.400, 0.564	159.400, 0.543	159.400, 0.565	159.400, 0.521	159.400, 0.524	159.400, 0.570
799	159.600, 1.485	159.600, 1.918	159.600, 1.829	159.600, 0.677	159.600, 0.620	159.600, 0.701	159.600, 0.610	159.600, 0.612	159.600, 0.616	159.600, 0.564	159.600, 0.543	159.600, 0.565	159.600, 0.521	159.600, 0.524	159.600, 0.570
800	159.800, 1.484	159.800, 1.917	159.800, 1.828	159.800, 0.676	159.800, 0.619	159.800, 0.700	159.800, 0.609	159.800, 0.611	159.800, 0.615	159.800, 0.563	159.800, 0.542	159.800, 0.565	159.800, 0.521	159.800, 0.524	159.800, 0.570
801	160.000, 1.483	160.000, 1.916	160.000, 1.827	160.000, 0.676	160.000, 0.619	160.000, 0.699	160.000, 0.608	160.000, 0.610	160.000, 0.615	160.000, 0.563	160.000, 0.542	160.000, 0.565	160.000, 0.521	160.000, 0.524	160.000, 0.570
802	160.200, 1.481	160.200, 1.915	160.200, 1.826	160.200, 0.676	160.200, 0.619	160.200, 0.699	160.200, 0.608	160.200, 0.609	160.200, 0.614	160.200, 0.562	160.200, 0.542	160.200, 0.565	160.200, 0.520	160.200, 0.523	160.200, 0.570
803	160.400, 1.480	160.400, 1.914	160.400, 1.825	160.400, 0.675	160.400, 0.618	160.400, 0.698	160.400, 0.607	160.400, 0.609	160.400, 0.614	160.400, 0.562	160.400, 0.541	160.400, 0.565	160.400, 0.520	160.400, 0.523	160.400, 0.570
804	160.600, 1.479	160.600, 1.913	160.600, 1.824	160.600, 0.675	160.600, 0.618	160.600, 0.698	160.600, 0.607	160.600, 0.608	160.600, 0.613	160.600, 0.562	160.600, 0.541	160.600, 0.564	160.600, 0.520	160.600, 0.523	160.600, 0.570
805	160.800, 1.479	160.800, 1.912	160.800, 1.823	160.800, 0.674	160.800, 0.617	160.800, 0.697	160.800, 0.607	160.800, 0.608	160.800, 0.612	160.800, 0.561	160.800, 0.540	160.800, 0.564	160.800, 0.520	160.800, 0.522	160.800, 0.570
806	161.000, 1.478	161.000, 1.911	161.000, 1.823	161.000, 0.674	161.000, 0.617	161.000, 0.697	161.000, 0.606	161.000, 0.607	161.000, 0.612	161.000, 0.561	161.000, 0.540	161.000, 0.563	161.000, 0.520	161.000, 0.522	161.000, 0.570
807	161.200, 1.477	161.200, 1.910	161.200, 1.822	161.200, 0.673	161.200, 0.616	161.200, 0.696	161.200, 0.606	161.200, 0.607	161.200, 0.612	161.200, 0.561	161.200, 0.539	161.200, 0.563	161.200, 0.520	161.200, 0.521	161.200, 0.570
808	161.400, 1.476	161.400, 1.909	161.400, 1.821	161.400, 0.673	161.400, 0.616	161.400, 0.696	161.400, 0.606	161.400, 0.606	161.400, 0.611	161.400, 0.561	161.400, 0.539	161.400, 0.563	161.400, 0.520	161.400, 0.521	161.400, 0.569
809	161.600, 1.475	161.600, 1.908	161.600, 1.820	161.600, 0.672	161.600, 0.615	161.600, 0.696	161.600, 0.606	161.600, 0.606	161.600, 0.611	161.600, 0.561	161.600, 0.539	161.600, 0.562	161.600, 0.519	161.600, 0.521	161.600, 0.569
810	161.800, 1.474	161.800, 1.907	161.800, 1.818	161.800, 0.672	161.800, 0.615	161.800, 0.695	161.800, 0.606	161.800, 0.606	161.800, 0.611	161.800, 0.561	161.800, 0.539	161.800, 0.562	161.800, 0.519	161.800, 0.520	161.800, 0.569
811	162.000, 1.474	162.000, 1.906	162.000, 1.817	162.000, 0.671	162.000, 0.615	162.000, 0.695	162.000, 0.605	162.000, 0.605	162.000, 0.611	162.000, 0.560	162.000, 0.539	162.000, 0.562	162.000, 0.519	162.000, 0.520	162.000, 0.568
812	162.200, 1.474	162.200, 1.905	162.200, 1.816	162.200, 0.671	162.200, 0.614	162.200, 0.695	162.200, 0.605	162.200, 0.605	162.200, 0.611	162.200, 0.560	162.200, 0.539	162.200, 0.562	162.200, 0.518	162.200, 0.520	162.200, 0.567
813	162.400, 1.473	162.400, 1.904	162.400, 1.815	162.400, 0.670	162.400, 0.614	162.400, 0.695	162.400, 0.605	162.400, 0.605	162.400, 0.611	162.400, 0.560	162.400, 0.539	162.400, 0.562	162.400, 0.518	162.400, 0.520	162.400, 0.567
814	162.600, 1.472	162.600, 1.903	162.600, 1.813	162.600, 0.670	162.600, 0.614	162.600, 0.694	162.600, 0.604	162.600, 0.605	162.600, 0.611	162.600, 0.559	162.600, 0.539	162.600, 0.561	162.600, 0.517	162.600, 0.519	162.600, 0.566
815	162.800, 1.471	162.800, 1.901	162.800, 1.811	162.800, 0.670	162.800, 0.614	162.800, 0.694	162.800, 0.604	162.800, 0.605	162.800, 0.611	162.800, 0.559	162.800, 0.539	162.800, 0.561	162.800, 0.517	162.800, 0.519	162.800, 0.566
816	163.000, 1.470	163.000, 1.900	163.000, 1.809	163.000, 0.669	163.000, 0.613	163.000, 0.694	163.000, 0.604	163.000, 0.605	163.000, 0.610	163.000, 0.559	163.000, 0.538	163.000, 0.561	163.000, 0.516	163.000, 0.519	163.000, 0.566
817	163.200, 1.469	163.200, 1.899	163.200, 1.807	163.200, 0.669	163.200, 0.613	163.200, 0.694	163.200, 0.603	163.200, 0.604	163.200, 0.610	163.200, 0.558	163.200, 0.538	163.200, 0.560	163.200, 0.516	163.200, 0.520	163.200, 0.566
818	163.400, 1.468	163.400, 1.898	163.400, 1.805	163.400, 0.669	163.400, 0.613	163.400, 0.693	163.400, 0.603	163.400, 0.604	163.400, 0.610	163.400, 0.557	163.400, 0.538	163.400, 0.560	163.400, 0.516	163.400, 0.520	163.400, 0.565
819	163.600, 1.467	163.600, 1.896	163.600, 1.803	163.600, 0.669	163.600, 0.612	163.600, 0.693	163.600, 0.603	163.600, 0.603	163.600, 0.609	163.600, 0.557	163.600, 0.538	163.600, 0.560	163.600, 0.516	163.600, 0.520	163.600, 0.565
820	163.800, 1.465	163.800, 1.895	163.800, 1.801	163.800, 0.669	163.800, 0.612	163.800, 0.692	163.800, 0.603	163.800, 0.603	163.800, 0.609	163.800, 0.557	163.800, 0.537	163.800, 0.559	163.800, 0.516	163.800, 0.521	163.800, 0.565
821	164.000, 1.464	164.000, 1.894	164.000, 1.800	164.000, 0.668	164.000, 0.611	164.000, 0.691	164.000, 0.602	164.000, 0.602	164.000, 0.609	164.000, 0.556	164.000, 0.537	164.000, 0.559	164.000, 0.516	164.000, 0.521	164.000, 0.564
822	164.200, 1.463	164.200, 1.892	164.200, 1.798	164.200, 0.668	164.200, 0.611	164.200, 0.691	164.200, 0.602	164.200, 0.602	164.200, 0.608	164.200, 0.556	164.200, 0.536	164.200, 0.558	164.200, 0.516	164.200, 0.520	164.200, 0.564
823	164.400, 1.462	164.400, 1.891	164.400, 1.797	164.400, 0.667	164.400, 0.610	164.400, 0.690	164.400, 0.602	164.400, 0.601	164.400, 0.608	164.400, 0.556	164.400, 0.536	164.400, 0.558	164.400, 0.516	164.400, 0.520	164.400, 0.564
824	164.600, 1.461	164.600, 1.890	164.600, 1.796	164.600, 0.667	164.600, 0.610	164.600, 0.690	164.600, 0.601	164.600, 0.601	164.600, 0.607	164.600, 0.556	164.600, 0.535	164.600, 0.557	164.600, 0.515	164.600, 0.519	164.600, 0.563
825	164.800, 1.460	164.800, 1.888	164.800, 1.795	164.800, 0.667	164.800, 0.609	164.800, 0.689	164.800, 0.601	164.800, 0.600	164.800, 0.607	164.800, 0.555	164.800, 0.534	164.800, 0.557	164.800, 0.515	164.800, 0.519	164.800, 0.563
826	165.000, 1.459	165.000, 1.887	165.000, 1.794	165.000, 0.666	165.000, 0.609	165.000, 0.688	165.000, 0.601	165.000, 0.599	165.000, 0.606	165.000, 0.555	165.000, 0.534	165.000, 0.556	165.000, 0.515	165.000, 0.519	165.000, 0.563
827	165.200, 1.458	165.200, 1.886	165.200, 1.793	165.200, 0.666	165.200, 0.608	165.200, 0.688	165.200, 0.601	165.200, 0.599	165.200, 0.606	165.200, 0.555	165.200, 0.534	165.200, 0.556	165.200, 0.515	165.200, 0.518	165.200, 0.563
828	165.400, 1.458	165.400, 1.885	165.400, 1.792	165.400, 0.666	165.400, 0.608	165.400, 0.687	165.400, 0.600	165.400, 0.598	165.400, 0.605	165.400, 0.555	165.400, 0.534	165.400, 0.556	165.400, 0.515	165.400, 0.518	165.400, 0.563
829	165.600, 1.457	165.600, 1.883	165.600, 1.790	165.600, 0.665	165.600, 0.607	165.600, 0.687	165.600, 0.600	165.600, 0.598	165.600, 0.605	165.600, 0.555	165.600, 0.533	165.600, 0.555	165.600, 0.515	165.600, 0.518	165.600, 0.563
830	165.800, 1.457	165.800, 1.882	165.800, 1.789	165.800, 0.665	165.800, 0.607	165.800, 0.687	165.800, 0.600	165.800, 0.598	165.800, 0.605	165.800, 0.554	165.800, 0.533	165.800, 0.555	165.800, 0.514	165.800, 0.518	165.800, 0.563
831	166.000, 1.456	166.000, 1.881	166.000, 1.788	166.000, 0.665	166.000, 0.607	166.000, 0.687	166.000, 0.599	166.000, 0.597	166.000, 0.604	166.000, 0.554	166.000, 0.533	166.000, 0.554	166.000, 0.514	166.000, 0.518	166.000, 0.563
832	166.200, 1.455	166.200, 1.880	166.200, 1.787	166.200, 0.664	166.200, 0.606	166.200, 0.686	166.200, 0.599	166.200, 0.597	166.200, 0.604	166.200, 0.553	166.200, 0.533	166.200, 0.554	166.200, 0.514	166.200, 0.518	166.200, 0.563
833	166.400, 1.454	166.400, 1.879	166.400, 1.785	166.400, 0.664	166.400, 0.606	166.400, 0.686	166.400, 0.599	166.400, 0.597	166.400, 0.603	166.400, 0.553	166.400, 0.533	166.400, 0.553	166.400, 0.513	166.400, 0.518	166.400, 0.563
834	166.600, 1.453	166.600, 1.877	166.600, 1.783	166.600, 0.664	166.600, 0.606	166.600, 0.686	166.600, 0.599	166.600, 0.597	166.600, 0.603	166.600, 0.553	166.600, 0.532	166.600, 0.553	166.600, 0.513	166.600, 0.518	166.600, 0.563
835	166.800, 1.452	166.800, 1.876	166.800, 1.782	166.800, 0.664	166.800, 0.606	166.800, 0.685	166.800, 0.599	166.800, 0.597	166.800, 0.602	166.800, 0.553	166.800, 0.532	166.800, 0.552	166.800, 0.513	166.800, 0.518	166.800, 0.563
836	167.000, 1.451	167.000, 1.875	167.000, 1.780	167.000, 0.663	167.000, 0.605	167.000, 0.685	167.000, 0.599	167.000, 0.597	167.000, 0.602	167.000, 0.552	167.000, 0.532	167.000, 0.552	167.000, 0.513	167.000, 0.518	167.000, 0.563
837	167.200, 1.449	167.200, 1.873	167.200, 1.778	167.200, 0.663	167.200, 0.605	167.200, 0.685	167.200, 0.599	167.200, 0.596	167.200, 0.602	167.200, 0.552	167.200, 0.532	167.200, 0.552	167.200, 0.513	167.200, 0.518	167.200, 0.562
838	167.400, 1.448	167.400, 1.872	167.400, 1.776	167.400, 0.663	167.400, 0.605	167.400, 0.685	167.400, 0.598	167.400, 0.596	167.400, 0.602	167.400, 0.552	167.400, 0.532	167.400, 0.552	167.400, 0.513	167.400, 0.518	167.400, 0.562
839	167.600, 1.447	167.600, 1.871	167.600, 1.774	167.600, 0.662	167.600, 0.605	167.600, 0.684	167.600, 0.598	167.600, 0.596	167.600, 0.601	167.600, 0.552	167.600, 0.532	167.600, 0.551	167.600, 0.513	167.600, 0.518	167.600, 0.561
840	167.800, 1.445	167.800, 1.869	167.800, 1.772	167.800, 0.662	167.800, 0.605	167.800, 0.684	167.800, 0.598	167.800, 0.596	167.800, 0.601	167.800, 0.551	167.800, 0.532	167.800, 0.551	167.800, 0.513	167.800, 0.518	167.800, 0.561
841	168.000, 1.444	168.000, 1.868	168.000, 1.771	168.000, 0.661	168.000, 0.605	168.000, 0.684	168.000, 0.598	168.000, 0.596	168.000, 0.601	168.000, 0.551	168.000, 0.532	168.000, 0.551	168.000, 0.512	168.000, 0.518	168.000, 0.560
842	168.200, 1.443	168.200, 1.866	168.200, 1.769	168.200, 0.661	168.200, 0.605	168.200, 0.683	168.200, 0.597	168.200, 0.596	168.200, 0.601	168.200, 0.550	168.200, 0.531	168.200, 0.550	168.200, 0.512	168.200, 0.517	168.200, 0.559
843	168.400, 1.442	168.400, 1.865	168.400, 1.767	168.400, 0.660	168.400, 0.604	168.400, 0.683	168.400, 0.597	168.400, 0.595	168.400, 0.600	168.400, 0.550	168.400, 0.531	168.400, 0.550	168.400, 0.511	168.400, 0.517	168.400, 0.559
844	168.600, 1.441	168.600, 1.864	168.600, 1.766	168.600, 0.660	168.600, 0.604	168.600, 0.682	168.600, 0.597	168.600, 0.595	168.600, 0.600	168.600, 0.549	168.600, 0.531	168.600, 0.550	168.600, 0.511	168.600, 0.516	168.600, 0.558
845	168.800, 1.441	168.800, 1.863	168.800, 1.765	168.800, 0.660	168.800, 0.604	168.800, 0.682	168.800, 0.596	168.800, 0.595	168.800, 0.600	168.800, 0.549	168.800, 0.531	168.800, 0.550	168.800, 0.510	168.800, 0.516	168.800, 0.558
846	169.000, 1.440	169.000, 1.861	169.000, 1.764	169.000, 0.659	169.000, 0.603	169.000, 0.682	169.000, 0.596	169.000, 0.594	169.000, 0.599	169.000, 0.549	169.000, 0.531	169.000, 0.550	169.000, 0.510	169.000, 0.516	169.000, 0.558
847	169.200, 1.439	169.200, 1.860	169.200, 1.763	169.200, 0.659	169.200, 0.603	169.200, 0.681	169.200, 0.596	169.200, 0.594	169.200, 0.599	169.200, 0.549	169.200, 0.531	169.200, 0.550	169.200, 0.510	169.200, 0.515	169.200, 0.557
848	169.400, 1.438	169.400, 1.859	169.400, 1.762	169.400, 0.658	169.400, 0.603	169.400, 0.681	169.400, 0.595	169.400, 0.593	169.400, 0.598	169.400, 0.548	169.400, 0.530	169.400, 0.550	169.400, 0.510	169.400, 0.515	169.400, 0.557
849	169.600, 1.437	169.600, 1.858	169.600, 1.761	169.600, 0.658	169.600, 0.602	169.600, 0.680	169.600, 0.595	169.600, 0.593	169.600, 0.598	169.600, 0.548	169.600, 0.530	169.600, 0.549	169.600, 0.510	169.600, 0.514	169.600, 0.557
850	169.800, 1.437	169.800, 1.857	169.800, 1.760	169.800, 0.658	169.800, 0.602	169.800, 0.680	169.800, 0.595	169.800, 0.593	169.800, 0.597	169.800, 0.548	169.800, 0.530	169.800, 0.549	169.800, 0.510	169.800, 0.514	169.800, 0.557
851	170.000, 1.436	170.000, 1.856	170.000, 1.759	170.000, 0.657	170.000, 0.602	170.000, 0.679	170.000, 0.594	170.000, 0.592	170.000, 0.597	170.000, 0.548	170.000, 0.530	170.000, 0.549	170.000, 0.510	170.000, 0.513	170.000, 0.556
852	170.200, 1.435	170.200, 1.855	170.200, 1.758	170.200, 0.657	170.200, 0.601	170.200, 0.679	170.200, 0.594	170.200, 0.592	170.200, 0.597	170.200, 0.548	170.200, 0.529	170.200, 0.549	170.200, 0.509	170.200, 0.513	170.200, 0.556
853	170.400, 1.434	170.400, 1.854	170.400, 1.757	170.400, 0.657	170.400, 0.601	170.400, 0.678	170.400, 0.594	170.400, 0.592	170.400, 0.596	170.400, 0.548	170.400, 0.529	170.400, 0.549	170.400, 0.509	170.400, 0.513	170.400, 0.556
854	170.600, 1.433	170.600, 1.852	170.600, 1.756	170.600, 0.657	170.600, 0.601	170.600, 0.678	170.600, 0.594	170.600, 0.591	170.600, 0.596	170.600, 0.548	170.600, 0.529	170.600, 0.549	170.600, 0.509	170.600, 0.513	170.600, 0.556
855	170.800, 1.432	170.800, 1.851	170.800, 1.755	170.800, 0.657	170.800, 0.600	170.800, 0.677	170.800, 0.594	170.800, 0.591	170.800, 0.596	170.800, 0.548	170.800, 0.529	170.800, 0.549	170.800, 0.509	170.800, 0.512	170.800, 0.555
856	171.000, 1.431	171.000, 1.849	171.000, 1.754	171.000, 0.657	171.000, 0.600	171.000, 0.677	171.000, 0.593	171.000, 0.591	171.000, 0.596	171.000, 0.548	171.000, 0.529	171.000, 0.549	171.000, 0.509	171.000, 0.512	171.000, 0.555
857	171.200, 1.430	171.200, 1.848	171.200, 1.752	171.200, 0.657	171.200, 0.599	171.200, 0.677	171.200, 0.593	171.200, 0.591	171.200, 0.595	171.200, 0.548	171.200, 0.528	171.200, 0.548	171.200, 0.509	171.200, 0.512	171.200, 0.555
858	171.400, 1.429	171.400, 1.847	171.400, 1.751	171.400, 0.656	171.400, 0.599	171.400, 0.677	171.400, 0.593	171.400, 0.590	171.400, 0.595	171.400, 0.548	171.400, 0.528	171.400, 0.548	171.400, 0.508	171.400, 0.512	171.400, 0.555
859	171.600, 1.428	171.600, 1.846	171.600, 1.749	171.600, 0.656	171.600, 0.598	171.600, 0.677	171.600, 0.592	171.600, 0.590	171.600, 0.595	171.600, 0.547	171.600, 0.528	171.600, 0.548	171.600, 0.508	171.600, 0.511	171.600, 0.555
860	171.800, 1.427	171.800, 1.845	171.800, 1.747	171.800, 0.655	171.800, 0.598	171.800, 0.676	171.800, 0.592	171.800, 0.590	171.800, 0.595	171.800, 0.547	171.800, 0.527	171.800, 0.547	171.800, 0.508	171.800, 0.511	171.800, 0.554
861	172.000, 1.426	172.000, 1.843	172.000, 1.745	172.000, 0.655	172.000, 0.597	172.000, 0.676	172.000, 0.592	172.000, 0.589	172.000, 0.594	172.000, 0.547	172.000, 0.527	172.000, 0.547	172.000, 0.508	172.000, 0.511	172.000, 0.554
862	172.200, 1.425	172.200, 1.842	172.200, 1.744	172.200, 0.655	172.200, 0.597	172.200, 0.676	172.200, 0.591	172.200, 0.589	172.200, 0.594	172.200, 0.546	172.200, 0.526	172.200, 0.547	172.200, 0.507	172.200, 0.511	172.200, 0.554
863	172.400, 1.423	172.400, 1.841	172.400, 1.742	172.400, 0.654	172.400, 0.596	172.400, 0.675	172.400, 0.591	172.400, 0.589	172.400, 0.594	172.400, 0.546	172.400, 0.526	172.400, 0.546	172.400, 0.507	172.400, 0.511	172.400, 0.553
864	172.600, 1.422	172.600, 1.839	172.600, 1.741	172.600, 0.654	172.600, 0.596	172.600, 0.675	172.600, 0.591	172.600, 0.589	172.600, 0.593	172.600, 0.545	172.600, 0.526	172.600, 0.546	172.600, 0.507	172.600, 0.511	172.600, 0.553
865	172.800, 1.421	172.800, 1.838	172.800, 1.740	172.800, 0.654	172.800, 0.596	172.800, 0.675	172.800, 0.591	172.800, 0.589	172.800, 0.593	172.800, 0.545	172.800, 0.526	172.800, 0.546	172.800, 0.508	172.800, 0.511	172.800, 0.553
866	173.000, 1.420	173.000, 1.837	173.000, 1.738	173.000, 0.654	173.000, 0.596	173.000, 0.674	173.000, 0.591	173.000, 0.589	173.000, 0.593	173.000, 0.544	173.000, 0.525	173.000, 0.545	173.000, 0.508	173.000, 0.511	173.000, 0.553
867	173.200, 1.419	173.200, 1.835	173.200, 1.737	173.200, 0.654	173.200, 0.596	173.200, 0.674	173.200, 0.590	173.200, 0.589	173.200, 0.593	173.200, 0.544	173.200, 0.525	173.200, 0.545	173.200, 0.508	173.200, 0.510	173.200, 0.552
868	173.400, 1.418	173.400, 1.834	173.400, 1.736	173.400, 0.654	173.400, 0.596	173.400, 0.673	173.400, 0.590	173.400, 0.589	173.400, 0.592	173.400, 0.543	173.400, 0.525	173.400, 0.544	173.400, 0.508	173.400, 0.510	173.400, 0.552
869	173.600, 1.417	173.600, 1.833	173.600, 1.734	173.600, 0.654	173.600, 0.595	173.600, 0.673	173.600, 0.590	173.600, 0.589	173.600, 0.592	173.600, 0.543	173.600, 0.525	173.600, 0.544	173.600, 0.508	173.600, 0.510	173.600, 0.552
870	173.800, 1.416	173.800, 1.831	173.800, 1.733	173.800, 0.654	173.800, 0.595	173.800, 0.672	173.800, 0.590	173.800, 0.589	173.800, 0.591	173.800, 0.542	173.800, 0.525	173.800, 0.544	173.800, 0.508	173.800, 0.510	173.800, 0.552
871	174.000, 1.416	174.000, 1.830	174.000, 1.731	174.000, 0.654	174.000, 0.595	174.000, 0.672	174.000, 0.590	174.000, 0.589	174.000, 0.591	174.000, 0.542	174.000, 0.525	174.000, 0.544	174.000, 0.508	174.000, 0.510	174.000, 0.552
872	174.200, 1.415	174.200, 1.828	174.200, 1.730	174.200, 0.654	174.200, 0.595	174.200, 0.672	174.200, 0.590	174.200, 0.589	174.200, 0.590	174.200, 0.541	174.200, 0.525	174.200, 0.544	174.200, 0.508	174.200, 0.510	174.200, 0.551
873	174.400, 1.415	174.400, 1.827	174.400, 1.728	174.400, 0.654	174.400, 0.594	174.400, 0.672	174.400, 0.590	174.400, 0.589	174.400, 0.590	174.400, 0.541	174.400, 0.524	174.400, 0.544	174.400, 0.507	174.400, 0.509	174.400, 0.551
874	174.600, 1.414	174.600, 1.826	174.600, 1.727	174.600, 0.654	174.600, 0.594	174.600, 0.672	174.600, 0.589	174.600, 0.589	174.600, 0.590	174.600, 0.541	174.600, 0.524	174.600, 0.544	174.600, 0.507	174.600, 0.509	174.600, 0.551
875	174.800, 1.413	174.800, 1.824	174.800, 1.726	174.800, 0.653	174.800, 0.593	174.800, 0.671	174.800, 0.589	174.800, 0.589	174.800, 0.590	174.800, 0.541	174.800, 0.524	174.800, 0.543	174.800, 0.506	174.800, 0.509	174.800, 0.551
876	175.000, 1.413	175.000, 1.823	175.000, 1.725	175.000, 0.653	175.000, 0.593	175.000, 0.671	175.000, 0.589	175.000, 0.588	175.000, 0.590	175.000, 0.540	175.000, 0.523	175.000, 0.543	175.000, 0.505	175.000, 0.509	175.000, 0.551
877	175.200, 1.412	175.200, 1.822	175.200, 1.724	175.200, 0.653	175.200, 0.592	175.200, 0.671	175.200, 0.589	175.200, 0.588	175.200, 0.590	175.200, 0.540	175.200, 0.523	175.200, 0.542	175.200, 0.505	175.200, 0.509	175.200, 0.551
878	175.400, 1.412	175.400, 1.821	175.400, 1.722	175.400, 0.652	175.400, 0.592	175.400, 0.671	175.400, 0.588	175.400, 0.588	175.400, 0.590	175.400, 0.540	175.400, 0.523	175.400, 0.542	175.400, 0.504	175.400, 0.509	175.400, 0.551
879	175.600, 1.411	175.600, 1.820	175.600, 1.721	175.600, 0.652	175.600, 0.591	175.600, 0.670	175.600, 0.588	175.600, 0.587	175.600, 0.589	175.600, 0.540	175.600, 0.523	175.600, 0.542	175.600, 0.503	175.600, 0.508	175.600, 0.550
880	175.800, 1.410	175.800, 1.819	175.800, 1.720	175.800, 0.651	175.800, 0.591	175.800, 0.670	175.800, 0.588	175.800, 0.587	175.800, 0.589	175.800, 0.540	175.800, 0.522	175.800, 0.541	175.800, 0.503	175.800, 0.508	175.800, 0.550
881	176.000, 1.409	176.000, 1.818	176.000, 1.719	176.000, 0.651	176.000, 0.591	176.000, 0.670	176.000, 0.587	176.000, 0.586	176.000, 0.589	176.000, 0.540	176.000, 0.522	176.000, 0.541	176.000, 0.502	176.000, 0.508	176.000, 0.549
882	176.200, 1.408	176.200, 1.816	176.200, 1.718	176.200, 0.651	176.200, 0.591	176.200, 0.669	176.200, 0.587	176.200, 0.586	176.200, 0.589	176.200, 0.540	176.200, 0.522	176.200, 0.541	176.200, 0.502	176.200, 0.508	176.200, 0.549
883	176.400, 1.407	176.400, 1.815	176.400, 1.717	176.400, 0.650	176.400, 0.590	176.400, 0.669	176.400, 0.586	176.400, 0.585	176.400, 0.589	176.400, 0.540	176.400, 0.521	176.400, 0.540	176.400, 0.501	176.400, 0.508	176.400, 0.549
884	176.600, 1.406	176.600, 1.814	176.600, 1.716	176.600, 0.650	176.600, 0.590	176.600, 0.668	176.600, 0.586	176.600, 0.585	176.600, 0.589	176.600, 0.540	176.600, 0.521	176.600, 0.540	176.600, 0.501	176.600, 0.508	176.600, 0.548
885	176.800, 1.405	176.800, 1.813	176.800, 1.715	176.800, 0.650	176.800, 0.590	176.800, 0.668	176.800, 0.585	176.800, 0.584	176.800, 0.589	176.800, 0.540	176.800, 0.521	176.800, 0.539	176.800, 0.501	176.800, 0.508	176.800, 0.548
886	177.000, 1.403	177.000, 1.812	177.000, 1.714	177.000, 0.649	177.000, 0.590	177.000, 0.668	177.000, 0.585	177.000, 0.584	177.000, 0.589	177.000, 0.540	177.000, 0.521	177.000, 0.539	177.000, 0.501	177.000, 0.508	177.000, 0.548
887	177.200, 1.402	177.200, 1.810	177.200, 1.712	177.200, 0.649	177.200, 0.590	177.200, 0.668	177.200, 0.584	177.200, 0.583	177.200, 0.588	177.200, 0.540	177.200, 0.521	177.200, 0.539	177.200, 0.501	177.200, 0.508	177.200, 0.548
888	177.400, 1.400	177.400, 1.809	177.400, 1.711	177.400, 0.649	177.400, 0.590	177.400, 0.668	177.400, 0.584	177.400, 0.583	177.400, 0.588	177.400, 0.540	177.400, 0.521	177.400, 0.539	177.400, 0.501	177.400, 0.508	177.400, 0.547
889	177.600, 1.399	177.600, 1.808	177.600, 1.710	177.600, 0.648	177.600, 0.590	177.600, 0.668	177.600, 0.584	177.600, 0.582	177.600, 0.587	177.600, 0.540	177.600, 0.521	177.600, 0.539	177.600, 0.501	177.600, 0.508	177.600, 0.547
890	177.800, 1.398	177.800, 1.807	177.800, 1.708	177.800, 0.648	177.800, 0.590	177.800, 0.667	177.800, 0.584	177.800, 0.582	177.800, 0.587	177.800, 0.540	177.800, 0.520	177.800, 0.539	177.800, 0.501	177.800, 0.508	177.800, 0.546
891	178.000, 1.397	178.000, 1.805	178.000, 1.707	178.000, 0.648	178.000, 0.589	178.000, 0.667	178.000, 0.584	178.000, 0.582	178.000, 0.586	178.000, 0.539	178.000, 0.520	178.000, 0.539	178.000, 0.501	178.000, 0.507	178.000, 0.546
892	178.200, 1.396	178.200, 1.804	178.200, 1.705	178.200, 0.648	178.200, 0.589	178.200, 0.667	178.200, 0.584	178.200, 0.582	178.200, 0.586	178.200, 0.539	178.200, 0.520	178.200, 0.538	178.200, 0.501	178.200, 0.507	178.200, 0.545
893	178.400, 1.395	178.400, 1.803	178.400, 1.704	178.400, 0.648	178.400, 0.589	178.400, 0.667	178.400, 0.584	178.400, 0.582	178.400, 0.586	178.400, 0.539	178.400, 0.519	178.400, 0.538	178.400, 0.501	178.400, 0.506	178.400, 0.545
894	178.600, 1.394	178.600, 1.801	178.600, 1.702	178.600, 0.647	178.600, 0.589	178.600, 0.666	178.600, 0.584	178.600, 0.582	178.600, 0.586	178.600, 0.538	178.600, 0.519	178.600, 0.538	178.600, 0.501	178.600, 0.506	178.600, 0.545
895	178.800, 1.393	178.800, 1.800	178.800, 1.701	178.800, 0.647	178.800, 0.589	178.800, 0.666	178.800, 0.584	178.800, 0.582	178.800, 0.586	178.800, 0.538	178.800, 0.519	178.800, 0.538	178.800, 0.501	178.800, 0.506	178.800, 0.545
896	179.000, 1.392	179.000, 1.799	179.000, 1.700	179.000, 0.647	179.000, 0.588	179.000, 0.666	179.000, 0.584	179.000, 0.581	179.000, 0.585	179.000, 0.537	179.000, 0.518	179.000, 0.537	179.000, 0.501	179.000, 0.505	179.000, 0.544
897	179.200, 1.392	179.200, 1.797	179.200, 1.698	179.200, 0.647	179.200, 0.588	179.200, 0.666	179.200, 0.583	179.200, 0.581	179.200, 0.585	179.200, 0.537	179.200, 0.518	179.200, 0.537	179.200, 0.501	179.200, 0.505	179.200, 0.544
898	179.400, 1.391	179.400, 1.796	179.400, 1.697	179.400, 0.647	179.400, 0.588	179.400, 0.666	179.400, 0.583	179.400, 0.581	179.400, 0.585	179.400, 0.536	179.400, 0.518	179.400, 0.537	179.400, 0.501	179.400, 0.505	179.400, 0.544
899	179.600, 1.390	179.600, 1.795	179.600, 1.695	179.600, 0.647	179.600, 0.588	179.600, 0.665	179.600, 0.583	179.600, 0.581	179.600, 0.585	179.600, 0.536	179.600, 0.518	179.600, 0.537	179.600, 0.501	179.600, 0.505	179.600, 0.544
900	179.800, 1.389	179.800, 1.794	179.800, 1.694	179.800, 0.646	179.800, 0.588	179.800, 0.665	179.800, 0.582	179.800, 0.581	179.800, 0.585	179.800, 0.536	179.800, 0.517	179.800, 0.537	179.800, 0.501	179.800, 0.505	179.800, 0.544
901	180.000, 1.388	180.000, 1.793	180.000, 1.692	180.000, 0.646	180.000, 0.588	180.000, 0.664	180.000, 0.582	180.000, 0.581	180.000, 0.585	180.000, 0.536	180.000, 0.517	180.000, 0.536	180.000, 0.501	180.000, 0.505	180.000, 0.544
902	180.200, 1.387	180.200, 1.792	180.200, 1.690	180.200, 0.646	180.200, 0.587	180.200, 0.664	180.200, 0.581	180.200, 0.580	180.200, 0.585	180.200, 0.536	180.200, 0.517	180.200, 0.536	180.200, 0.500	180.200, 0.505	180.200, 0.544
903	180.400, 1.387	180.400, 1.790	180.400, 1.689	180.400, 0.646	180.400, 0.587	180.400, 0.663	180.400, 0.581	180.400, 0.580	180.400, 0.584	180.400, 0.536	180.400, 0.517	180.400, 0.536	180.400, 0.500	180.400, 0.505	180.400, 0.543
904	180.600, 1.386	180.600, 1.789	180.600, 1.687	180.600, 0.646	180.600, 0.587	180.600, 0.663	180.600, 0.580	180.600, 0.579	180.600, 0.584	180.600, 0.536	180.600, 0.517	180.600, 0.535	180.600, 0.500	180.600, 0.505	180.600, 0.543
905	180.800, 1.385	180.800, 1.788	180.800, 1.686	180.800, 0.646	180.800, 0.586	180.800, 0.663	180.800, 0.580	180.800, 0.579	180.800, 0.584	180.800, 0.536	180.800, 0.517	180.800, 0.535	180.800, 0.500	180.800, 0.505	180.800, 0.543
906	181.000, 1.384	181.000, 1.787	181.000, 1.684	181.000, 0.645	181.000, 0.586	181.000, 0.662	181.000, 0.579	181.000, 0.579	181.000, 0.584	181.000, 0.536	181.000, 0.516	181.000, 0.535	181.000, 0.499	181.000, 0.505	181.000, 0.543
907	181.200, 1.383	181.200, 1.785	181.200, 1.683	181.200, 0.645	181.200, 0.585	181.200, 0.662	181.200, 0.579	181.200, 0.578	181.200, 0.583	181.200, 0.536	181.200, 0.516	181.200, 0.535	181.200, 0.499	181.200, 0.505	181.200, 0.542
908	181.400, 1.382	181.400, 1.784	181.400, 1.682	181.400, 0.645	181.400, 0.585	181.400, 0.662	181.400, 0.579	181.400, 0.578	181.400, 0.583	181.400, 0.536	181.400, 0.516	181.400, 0.534	181.400, 0.498	181.400, 0.505	181.400, 0.542
909	181.600, 1.381	181.600, 1.783	181.600, 1.681	181.600, 0.645	181.600, 0.585	181.600, 0.661	181.600, 0.578	181.600, 0.578	181.600, 0.583	181.600, 0.536	181.600, 0.516	181.600, 0.534	181.600, 0.498	181.600, 0.504	181.600, 0.542
910	181.800, 1.380	181.800, 1.782	181.800, 1.680	181.800, 0.644	181.800, 0.584	181.800, 0.661	181.800, 0.578	181.800, 0.579	181.800, 0.582	181.800, 0.536	181.800, 0.516	181.800, 0.534	181.800, 0.498	181.800, 0.504	181.800, 0.542
911	182.000, 1.379	182.000, 1.781	182.000, 1.680	182.000, 0.644	182.000, 0.584	182.000, 0.660	182.000, 0.578	182.000, 0.579	182.000, 0.582	182.000, 0.536	182.000, 0.515	182.000, 0.533	182.000, 0.497	182.000, 0.503	182.000, 0.542
912	182.200, 1.378	182.200, 1.779	182.200, 1.679	182.200, 0.644	182.200, 0.584	182.200, 0.660	182.200, 0.577	182.200, 0.579	182.200, 0.582	182.200, 0.536	182.200, 0.515	182.200, 0.533	182.200, 0.497	182.200, 0.503	182.200, 0.542
913	182.400, 1.378	182.400, 1.778	182.400, 1.678	182.400, 0.644	182.400, 0.583	182.400, 0.660	182.400, 0.577	182.400, 0.579	182.400, 0.582	182.400, 0.536	182.400, 0.515	182.400, 0.533	182.400, 0.497	182.400, 0.502	182.400, 0.542
914	182.600, 1.377	182.600, 1.777	182.600, 1.677	182.600, 0.643	182.600, 0.583	182.600, 0.660	182.600, 0.577	182.600, 0.578	182.600, 0.581	182.600, 0.535	182.600, 0.515	182.600, 0.533	182.600, 0.497	182.600, 0.502	182.600, 0.542
915	182.800, 1.376	182.800, 1.776	182.800, 1.676	182.800, 0.643	182.800, 0.583	182.800, 0.659	182.800, 0.577	182.800, 0.578	182.800, 0.581	182.800, 0.535	182.800, 0.515	182.800, 0.533	182.800, 0.497	182.800, 0.501	182.800, 0.542
916	183.000, 1.375	183.000, 1.775	183.000, 1.675	183.000, 0.643	183.000, 0.582	183.000, 0.660	183.000, 0.577	183.000, 0.578	183.000, 0.581	183.000, 0.535	183.000, 0.515	183.000, 0.533	183.000, 0.497	183.000, 0.501	183.000, 0.542
917	183.200, 1.374	183.200, 1.774	183.200, 1.674	183.200, 0.642	183.200, 0.582	183.200, 0.660	183.200, 0.577	183.200, 0.578	183.200, 0.581	183.200, 0.534	183.200, 0.515	183.200, 0.533	183.200, 0.497	183.200, 0.501	183.200, 0.541
918	183.400, 1.373	183.400, 1.773	183.400, 1.673	183.400, 0.642	183.400, 0.582	183.400, 0.659	183.400, 0.577	183.400, 0.578	183.400, 0.580	183.400, 0.534	183.400, 0.515	183.400, 0.533	183.400, 0.497	183.400, 0.501	183.400, 0.541
919	183.600, 1.372	183.600, 1.772	183.600, 1.672	183.600, 0.641	183.600, 0.582	183.600, 0.659	183.600, 0.577	183.600, 0.578	183.600, 0.580	183.600, 0.534	183.600, 0.515	183.600, 0.533	183.600, 0.497	183.600, 0.501	183.600, 0.541
920	183.800, 1.371	183.800, 1.771	183.800, 1.670	183.800, 0.641	183.800, 0.582	183.800, 0.659	183.800, 0.577	183.800, 0.578	183.800, 0.580	183.800, 0.533	183.800, 0.515	183.800, 0.532	183.800, 0.497	183.800, 0.501	183.800, 0.540
921	184.000, 1.370	184.000, 1.769	184.000, 1.669	184.000, 0.640	184.000, 0.581	184.000, 0.659	184.000, 0.577	184.000, 0.578	184.000, 0.580	184.000, 0.533	184.000, 0.515	184.000, 0.532	184.000, 0.497	184.000, 0.501	184.000, 0.540
922	184.200, 1.369	184.200, 1.768	184.200, 1.667	184.200, 0.640	184.200, 0.581	184.200, 0.659	184.200, 0.577	184.200, 0.578	184.200, 0.580	184.200, 0.533	184.200, 0.515	184.200, 0.532	184.200, 0.497	184.200, 0.501	184.200, 0.540
923	184.400, 1.368	184.400, 1.766	184.400, 1.665	184.400, 0.640	184.400, 0.581	184.400, 0.659	184.400, 0.577	184.400, 0.577	184.400, 0.579	184.400, 0.533	184.400, 0.515	184.400, 0.531	184.400, 0.497	184.400, 0.500	184.400, 0.539
924	184.600, 1.367	184.600, 1.765	184.600, 1.664	184.600, 0.640	184.600, 0.581	184.600, 0.659	184.600, 0.578	184.600, 0.577	184.600, 0.579	184.600, 0.532	184.600, 0.514	184.600, 0.531	184.600, 0.497	184.600, 0.500	184.600, 0.539
925	184.800, 1.365	184.800, 1.763	184.800, 1.662	184.800, 0.639	184.800, 0.581	184.800, 0.658	184.800, 0.577	184.800, 0.577	184.800, 0.579	184.800, 0.532	184.800, 0.514	184.800, 0.530	184.800, 0.496	184.800, 0.500	184.800, 0.538
926	185.000, 1.364	185.000, 1.762	185.000, 1.660	185.000, 0.639	185.000, 0.581	185.000, 0.658	185.000, 0.577	185.000, 0.576	185.000, 0.578	185.000, 0.531	185.000, 0.514	185.000, 0.530	185.000, 0.496	185.000, 0.500	185.000, 0.538
927	185.200, 1.363	185.200, 1.760	185.200, 1.658	185.200, 0.639	185.200, 0.581	185.200, 0.658	185.200, 0.577	185.200, 0.576	185.200, 0.578	185.200, 0.531	185.200, 0.513	185.200, 0.529	185.200, 0.496	185.200, 0.500	185.200, 0.538
928	185.400, 1.362	185.400, 1.759	185.400, 1.657	185.400, 0.639	185.400, 0.581	185.400, 0.658	185.400, 0.577	185.400, 0.576	185.400, 0.578	185.400, 0.531	185.400, 0.513	185.400, 0.529	185.400, 0.495	185.400, 0.499	185.400, 0.538
929	185.600, 1.361	185.600, 1.758	185.600, 1.655	185.600, 0.639	185.600, 0.582	185.600, 0.658	185.600, 0.576	185.600, 0.576	185.600, 0.578	185.600, 0.531	185.600, 0.513	185.600, 0.529	185.600, 0.495	185.600, 0.499	185.600, 0.538
930	185.800, 1.361	185.800, 1.756	185.800, 1.654	185.800, 0.638	185.800, 0.582	185.800, 0.658	185.800, 0.576	185.800, 0.575	185.800, 0.578	185.800, 0.531	185.800, 0.512	185.800, 0.529	185.800, 0.495	185.800, 0.499	185.800, 0.537
931	186.000, 1.360	186.000, 1.755	186.000, 1.652	186.000, 0.638	186.000, 0.582	186.000, 0.657	186.000, 0.575	186.000, 0.575	186.000, 0.577	186.000, 0.531	186.000, 0.512	186.000, 0.529	186.000, 0.494	186.000, 0.499	186.000, 0.537
932	186.200, 1.359	186.200, 1.754	186.200, 1.651	186.200, 0.638	186.200, 0.582	186.200, 0.657	186.200, 0.574	186.200, 0.575	186.200, 0.577	186.200, 0.531	186.200, 0.512	186.200, 0.528	186.200, 0.494	186.200, 0.499	186.200, 0.537
933	186.400, 1.358	186.400, 1.753	186.400, 1.650	186.400, 0.638	186.400, 0.581	186.400, 0.657	186.400, 0.574	186.400, 0.575	186.400, 0.576	186.400, 0.530	186.400, 0.511	186.400, 0.528	186.400, 0.494	186.400, 0.498	186.400, 0.537
934	186.600, 1.357	186.600, 1.752	186.600, 1.648	186.600, 0.638	186.600, 0.581	186.600, 0.657	186.600, 0.573	186.600, 0.574	186.600, 0.576	186.600, 0.530	186.600, 0.511	186.600, 0.528	186.600, 0.494	186.600, 0.498	186.600, 0.537
935	186.800, 1.356	186.800, 1.751	186.800, 1.647	186.800, 0.637	186.800, 0.581	186.800, 0.656	186.800, 0.573	186.800, 0.574	186.800, 0.576	186.800, 0.530	186.800, 0.511	186.800, 0.528	186.800, 0.494	186.800, 0.498	186.800, 0.536
936	187.000, 1.356	187.000, 1.750	187.000, 1.647	187.000, 0.637	187.000, 0.581	187.000, 0.656	187.000, 0.572	187.000, 0.574	187.000, 0.575	187.000, 0.530	187.000, 0.511	187.000, 0.529	187.000, 0.493	187.000, 0.497	187.000, 0.536
937	187.200, 1.355	187.200, 1.749	187.200, 1.646	187.200, 0.636	187.200, 0.581	187.200, 0.656	187.200, 0.572	187.200, 0.574	187.200, 0.575	187.200, 0.529	187.200, 0.511	187.200, 0.529	187.200, 0.493	187.200, 0.497	187.200, 0.536
938	187.400, 1.354	187.400, 1.748	187.400, 1.645	187.400, 0.636	187.400, 0.580	187.400, 0.656	187.400, 0.572	187.400, 0.574	187.400, 0.575	187.400, 0.529	187.400, 0.511	187.400, 0.529	187.400, 0.493	187.400, 0.497	187.400, 0.536
939	187.600, 1.353	187.600, 1.746	187.600, 1.644	187.600, 0.636	187.600, 0.580	187.600, 0.655	187.600, 0.572	187.600, 0.574	187.600, 0.575	187.600, 0.529	187.600, 0.511	187.600, 0.529	187.600, 0.493	187.600, 0.497	187.600, 0.536
940	187.800, 1.352	187.800, 1.745	187.800, 1.643	187.800, 0.635	187.800, 0.579	187.800, 0.655	187.800, 0.572	187.800, 0.573	187.800, 0.575	187.800, 0.529	187.800, 0.511	187.800, 0.528	187.800, 0.493	187.800, 0.497	187.800, 0.535
941	188.000, 1.351	188.000, 1.744	188.000, 1.641	188.000, 0.635	188.000, 0.579	188.000, 0.655	188.000, 0.572	188.000, 0.573	188.000, 0.574	188.000, 0.529	188.000, 0.511	188.000, 0.528	188.000, 0.494	188.000, 0.497	188.000, 0.535
942	188.200, 1.350	188.200, 1.743	188.200, 1.640	188.200, 0.635	188.200, 0.578	188.200, 0.654	188.200, 0.572	188.200, 0.573	188.200, 0.574	188.200, 0.529	188.200, 0.511	188.200, 0.528	188.200, 0.494	188.200, 0.497	188.200, 0.535
943	188.400, 1.349	188.400, 1.742	188.400, 1.639	188.400, 0.635	188.400, 0.578	188.400, 0.654	188.400, 0.572	188.400, 0.572	188.400, 0.574	188.400, 0.528	188.400, 0.511	188.400, 0.527	188.400, 0.494	188.400, 0.497	188.400, 0.534
944	188.600, 1.348	188.600, 1.741	188.600, 1.637	188.600, 0.636	188.600, 0.578	188.600, 0.654	188.600, 0.572	188.600, 0.572	188.600, 0.574	188.600, 0.528	188.600, 0.511	188.600, 0.527	188.600, 0.493	188.600, 0.497	188.600, 0.534
945	188.800, 1.348	188.800, 1.739	188.800, 1.636	188.800, 0.636	188.800, 0.577	188.800, 0.653	188.800, 0.572	188.800, 0.572	188.800, 0.574	188.800, 0.528	188.800, 0.511	188.800, 0.526	188.800, 0.493	188.800, 0.497	188.800, 0.534
946	189.000, 1.347	189.000, 1.738	189.000, 1.635	189.000, 0.636	189.000, 0.577	189.000, 0.653	189.000, 0.572	189.000, 0.572	189.000, 0.574	189.000, 0.528	189.000, 0.510	189.000, 0.526	189.000, 0.493	189.000, 0.497	189.000, 0.534
947	189.200, 1.346	189.200, 1.737	189.200, 1.633	189.200, 0.636	189.200, 0.577	189.200, 0.653	189.200, 0.572	189.200, 0.571	189.200, 0.574	189.200, 0.528	189.200, 0.510	189.200, 0.526	189.200, 0.492	189.200, 0.497	189.200, 0.534
948	189.400, 1.345	189.400, 1.735	189.400, 1.632	189.400, 0.637	189.400, 0.577	189.400, 0.653	189.400, 0.571	189.400, 0.571	189.400, 0.574	189.400, 0.527	189.400, 0.509	189.400, 0.526	189.400, 0.492	189.400, 0.497	189.400, 0.534
949	189.600, 1.344	189.600, 1.734	189.600, 1.630	189.600, 0.637	189.600, 0.577	189.600, 0.653	189.600, 0.571	189.600, 0.571	189.600, 0.574	189.600, 0.527	189.600, 0.509	189.600, 0.525	189.600, 0.492	189.600, 0.497	189.600, 0.534
950	189.800, 1.343	189.800, 1.733	189.800, 1.629	189.800, 0.637	189.800, 0.576	189.800, 0.653	189.800, 0.571	189.800, 0.571	189.800, 0.573	189.800, 0.528	189.800, 0.509	189.800, 0.525	189.800, 0.492	189.800, 0.497	189.800, 0.534
951	190.000, 1.342	190.000, 1.732	190.000, 1.628	190.000, 0.637	190.000, 0.576	190.000, 0.652	190.000, 0.570	190.000, 0.571	190.000, 0.573	190.000, 0.528	190.000, 0.509	190.000, 0.525	190.000, 0.491	190.000, 0.497	190.000, 0.535
952	190.200, 1.341	190.200, 1.730	190.200, 1.627	190.200, 0.637	190.200, 0.576	190.200, 0.652	190.200, 0.570	190.200, 0.570	190.200, 0.573	190.200, 0.527	190.200, 0.509	190.200, 0.525	190.200, 0.491	190.200, 0.497	190.200, 0.535
953	190.400, 1.340	190.400, 1.729	190.400, 1.625	190.400, 0.637	190.400, 0.575	190.400, 0.652	190.400, 0.569	190.400, 0.570	190.400, 0.573	190.400, 0.527	190.400, 0.509	190.400, 0.525	190.400, 0.491	190.400, 0.496	190.400, 0.535
954	190.600, 1.339	190.600, 1.728	190.600, 1.624	190.600, 0.637	190.600, 0.575	190.600, 0.652	190.600, 0.569	190.600, 0.570	190.600, 0.572	190.600, 0.527	190.600, 0.509	190.600, 0.524	190.600, 0.491	190.600, 0.496	190.600, 0.534
955	190.800, 1.339	190.800, 1.726	190.800, 1.623	190.800, 0.637	190.800, 0.575	190.800, 0.652	190.800, 0.569	190.800, 0.570	190.800, 0.572	190.800, 0.527	190.800, 0.509	190.800, 0.524	190.800, 0.490	190.800, 0.496	190.800, 0.534
956	191.000, 1.338	191.000, 1.725	191.000, 1.621	191.000, 0.637	191.000, 0.575	191.000, 0.652	191.000, 0.569	191.000, 0.569	191.000, 0.572	191.000, 0.527	191.000, 0.509	191.000, 0.525	191.000, 0.490	191.000, 0.495	191.000, 0.534
957	191.200, 1.337	191.200, 1.723	191.200, 1.620	191.200, 0.636	191.200, 0.575	191.200, 0.652	191.200, 0.568	191.200, 0.569	191.200, 0.571	191.200, 0.527	191.200, 0.509	191.200, 0.525	191.200, 0.490	191.200, 0.495	191.200, 0.534
958	191.400, 1.336	191.400, 1.722	191.400, 1.619	191.400, 0.636	191.400, 0.575	191.400, 0.652	191.400, 0.568	191.400, 0.569	191.400, 0.571	191.400, 0.526	191.400, 0.509	191.400, 0.525	191.400, 0.490	191.400, 0.495	191.400, 0.534
959	191.600, 1.336	191.600, 1.720	191.600, 1.618	191.600, 0.635	191.600, 0.575	191.600, 0.651	191.600, 0.568	191.600, 0.569	191.600, 0.571	191.600, 0.526	191.600, 0.509	191.600, 0.525	191.600, 0.490	191.600, 0.494	191.600, 0.533
960	191.800, 1.335	191.800, 1.719	191.800, 1.617	191.800, 0.635	191.800, 0.574	191.800, 0.651	191.800, 0.568	191.800, 0.569	191.800, 0.571	191.800, 0.526	191.800, 0.509	191.800, 0.525	191.800, 0.489	191.800, 0.494	191.800, 0.533
961	192.000, 1.334	192.000, 1.718	192.000, 1.615	192.000, 0.634	192.000, 0.574	192.000, 0.651	192.000, 0.567	192.000, 0.569	192.000, 0.571	192.000, 0.526	192.000, 0.509	192.000, 0.525	192.000, 0.489	192.000, 0.494	192.000, 0.532
962	192.200, 1.334	192.200, 1.716	192.200, 1.614	192.200, 0.634	192.200, 0.574	192.200, 0.650	192.200, 0.567	192.200, 0.569	192.200, 0.571	192.200, 0.526	192.200, 0.509	192.200, 0.525	192.200, 0.489	192.200, 0.494	192.200, 0.531
963	192.400, 1.333	192.400, 1.715	192.400, 1.613	192.400, 0.634	192.400, 0.574	192.400, 0.650	192.400, 0.567	192.400, 0.569	192.400, 0.571	192.400, 0.526	192.400, 0.509	192.400, 0.525	192.400, 0.489	192.400, 0.494	192.400, 0.531
964	192.600, 1.332	192.600, 1.713	192.600, 1.612	192.600, 0.633	192.600, 0.574	192.600, 0.649	192.600, 0.567	192.600, 0.570	192.600, 0.571	192.600, 0.525	192.600, 0.509	192.600, 0.525	192.600, 0.489	192.600, 0.493	192.600, 0.531
965	192.800, 1.331	192.800, 1.712	192.800, 1.611	192.800, 0.633	192.800, 0.574	192.800, 0.649	192.800, 0.567	192.800, 0.570	192.800, 0.571	192.800, 0.525	192.800, 0.509	192.800, 0.525	192.800, 0.489	192.800, 0.493	192.800, 0.530
966	193.000, 1.330	193.000, 1.711	193.000, 1.610	193.000, 0.633	193.000, 0.574	193.000, 0.648	193.000, 0.567	193.000, 0.570	193.000, 0.571	193.000, 0.525	193.000, 0.508	193.000, 0.525	193.000, 0.489	193.000, 0.493	193.000, 0.530
967	193.200, 1.329	193.200, 1.710	193.200, 1.609	193.200, 0.633	193.200, 0.574	193.200, 0.648	193.200, 0.567	193.200, 0.570	193.200, 0.571	193.200, 0.525	193.200, 0.508	193.200, 0.525	193.200, 0.489	193.200, 0.493	193.200, 0.530
968	193.400, 1.328	193.400, 1.709	193.400, 1.608	193.400, 0.633	193.400, 0.573	193.400, 0.648	193.400, 0.567	193.400, 0.570	193.400, 0.572	193.400, 0.524	193.400, 0.507	193.400, 0.525	193.400, 0.489	193.400, 0.493	193.400, 0.530
969	193.600, 1.327	193.600, 1.708	193.600, 1.607	193.600, 0.632	193.600, 0.573	193.600, 0.647	193.600, 0.567	193.600, 0.570	193.600, 0.572	193.600, 0.524	193.600, 0.507	193.600, 0.525	193.600, 0.489	193.600, 0.493	193.600, 0.529
970	193.800, 1.326	193.800, 1.707	193.800, 1.606	193.800, 0.632	193.800, 0.573	193.800, 0.647	193.800, 0.567	193.800, 0.569	193.800, 0.572	193.800, 0.524	193.800, 0.507	193.800, 0.524	193.800, 0.489	193.800, 0.493	193.800, 0.529
971	194.000, 1.325	194.000, 1.707	194.000, 1.605	194.000, 0.632	194.000, 0.572	194.000, 0.647	194.000, 0.566	194.000, 0.569	194.000, 0.572	194.000, 0.524	194.000, 0.507	194.000, 0.524	194.000, 0.489	194.000, 0.493	194.000, 0.529
972	194.200, 1.324	194.200, 1.706	194.200, 1.603	194.200, 0.631	194.200, 0.572	194.200, 0.647	194.200, 0.566	194.200, 0.568	194.200, 0.571	194.200, 0.524	194.200, 0.507	194.200, 0.524	194.200, 0.489	194.200, 0.493	194.200, 0.529
973	194.400, 1.323	194.400, 1.705	194.400, 1.602	194.400, 0.631	194.400, 0.571	194.400, 0.647	194.400, 0.566	194.400, 0.568	194.400, 0.571	194.400, 0.524	194.400, 0.506	194.400, 0.523	194.400, 0.489	194.400, 0.493	194.400, 0.529
974	194.600, 1.322	194.600, 1.704	194.600, 1.600	194.600, 0.631	194.600, 0.571	194.600, 0.647	194.600, 0.566	194.600, 0.567	194.600, 0.570	194.600, 0.523	194.600, 0.506	194.600, 0.523	194.600, 0.489	194.600, 0.494	194.600, 0.529
975	194.800, 1.321	194.800, 1.703	194.800, 1.599	194.800, 0.630	194.800, 0.571	194.800, 0.647	194.800, 0.566	194.800, 0.567	194.800, 0.570	194.800, 0.523	194.800, 0.506	194.800, 0.523	194.800, 0.489	194.800, 0.493	194.800, 0.529
976	195.000, 1.320	195.000, 1.702	195.000, 1.598	195.000, 0.630	195.000, 0.571	195.000, 0.647	195.000, 0.566	195.000, 0.567	195.000, 0.569	195.000, 0.523	195.000, 0.506	195.000, 0.522	195.000, 0.489	195.000, 0.493	195.000, 0.529
977	195.200, 1.320	195.200, 1.701	195.200, 1.597	195.200, 0.630	195.200, 0.570	195.200, 0.647	195.200, 0.566	195.200, 0.567	195.200, 0.569	195.200, 0.523	195.200, 0.506	195.200, 0.522	195.200, 0.488	195.200, 0.493	195.200, 0.529
978	195.400, 1.319	195.400, 1.700	195.400, 1.596	195.400, 0.630	195.400, 0.570	195.400, 0.647	195.400, 0.565	195.400, 0.567	195.400, 0.569	195.400, 0.522	195.400, 0.506	195.400, 0.522	195.400, 0.488	195.400, 0.493	195.400, 0.529
979	195.600, 1.318	195.600, 1.699	195.600, 1.594	195.600, 0.630	195.600, 0.570	195.600, 0.647	195.600, 0.565	195.600, 0.566	195.600, 0.568	195.600, 0.522	195.600, 0.506	195.600, 0.522	195.600, 0.487	195.600, 0.493	195.600, 0.529
980	195.800, 1.317	195.800, 1.697	195.800, 1.593	195.800, 0.630	195.800, 0.569	195.800, 0.647	195.800, 0.565	195.800, 0.566	195.800, 0.568	195.800, 0.522	195.800, 0.505	195.800, 0.522	195.800, 0.487	195.800, 0.493	195.800, 0.529
981	196.000, 1.316	196.000, 1.696	196.000, 1.592	196.000, 0.630	196.000, 0.569	196.000, 0.646	196.000, 0.564	196.000, 0.566	196.000, 0.568	196.000, 0.521	196.000, 0.505	196.000, 0.522	196.000, 0.486	196.000, 0.493	196.000, 0.528
982	196.200, 1.315	196.200, 1.695	196.200, 1.591	196.200, 0.630	196.200, 0.569	196.200, 0.646	196.200, 0.564	196.200, 0.566	196.200, 0.568	196.200, 0.521	196.200, 0.505	196.200, 0.522	196.200, 0.486	196.200, 0.493	196.200, 0.528
983	196.400, 1.314	196.400, 1.693	196.400, 1.589	196.400, 0.630	196.400, 0.569	196.400, 0.646	196.400, 0.564	196.400, 0.566	196.400, 0.568	196.400, 0.521	196.400, 0.505	196.400, 0.521	196.400, 0.486	196.400, 0.493	196.400, 0.528
984	196.600, 1.313	196.600, 1.692	196.600, 1.588	196.600, 0.630	196.600, 0.569	196.600, 0.646	196.600, 0.564	196.600, 0.565	196.600, 0.568	196.600, 0.521	196.600, 0.504	196.600, 0.521	196.600, 0.485	196.600, 0.493	196.600, 0.528
985	196.800, 1.312	196.800, 1.690	196.800, 1.587	196.800, 0.631	196.800, 0.569	196.800, 0.645	196.800, 0.564	196.800, 0.565	196.800, 0.567	196.800, 0.521	196.800, 0.504	196.800, 0.521	196.800, 0.485	196.800, 0.492	196.800, 0.528
986	197.000, 1.311	197.000, 1.689	197.000, 1.585	197.000, 0.631	197.000, 0.569	197.000, 0.645	197.000, 0.564	197.000, 0.565	197.000, 0.567	197.000, 0.520	197.000, 0.504	197.000, 0.520	197.000, 0.485	197.000, 0.492	197.000, 0.528
987	197.200, 1.311	197.200, 1.687	197.200, 1.584	197.200, 0.631	197.200, 0.569	197.200, 0.645	197.200, 0.564	197.200, 0.565	197.200, 0.568	197.200, 0.520	197.200, 0.504	197.200, 0.520	197.200, 0.485	197.200, 0.492	197.200, 0.528
988	197.400, 1.310	197.400, 1.686	197.400, 1.582	197.400, 0.631	197.400, 0.569	197.400, 0.645	197.400, 0.564	197.400, 0.565	197.400, 0.567	197.400, 0.520	197.400, 0.504	197.400, 0.519	197.400, 0.485	197.400, 0.491	197.400, 0.528
989	197.600, 1.309	197.600, 1.684	197.600, 1.581	197.600, 0.631	197.600, 0.569	197.600, 0.644	197.600, 0.564	197.600, 0.565	197.600, 0.567	197.600, 0.520	197.600, 0.503	197.600, 0.519	197.600, 0.485	197.600, 0.491	197.600, 0.528
990	197.800, 1.308	197.800, 1.683	197.800, 1.579	197.800, 0.631	197.800, 0.569	197.800, 0.644	197.800, 0.564	197.800, 0.565	197.800, 0.567	197.800, 0.520	197.800, 0.503	197.800, 0.519	197.800, 0.485	197.800, 0.491	197.800, 0.527
991	198.000, 1.308	198.000, 1.682	198.000, 1.578	198.000, 0.631	198.000, 0.569	198.000, 0.644	198.000, 0.564	198.000, 0.565	198.000, 0.567	198.000, 0.520	198.000, 0.503	198.000, 0.518	198.000, 0.485	198.000, 0.491	198.000, 0.527
992	198.200, 1.307	198.200, 1.681	198.200, 1.577	198.200, 0.630	198.200, 0.569	198.200, 0.644	198.200, 0.564	198.200, 0.564	198.200, 0.566	198.200, 0.520	198.200, 0.502	198.200, 0.518	198.200, 0.486	198.200, 0.491	198.200, 0.527
993	198.400, 1.306	198.400, 1.679	198.400, 1.575	198.400, 0.630	198.400, 0.569	198.400, 0.644	198.400, 0.564	198.400, 0.564	198.400, 0.566	198.400, 0.520	198.400, 0.502	198.400, 0.518	198.400, 0.486	198.400, 0.491	198.400, 0.527
994	198.600, 1.305	198.600, 1.678	198.600, 1.574	198.600, 0.630	198.600, 0.569	198.600, 0.644	198.600, 0.564	198.600, 0.564	198.600, 0.565	198.600, 0.520	198.600, 0.502	198.600, 0.518	198.600, 0.486	198.600, 0.490	198.600, 0.527
995	198.800, 1.304	198.800, 1.677	198.800, 1.573	198.800, 0.629	198.800, 0.568	198.800, 0.644	198.800, 0.564	198.800, 0.564	198.800, 0.565	198.800, 0.520	198.800, 0.502	198.800, 0.518	198.800, 0.486	198.800, 0.490	198.800, 0.526
996	199.000, 1.303	199.000, 1.676	199.000, 1.571	199.000, 0.629	199.000, 0.568	199.000, 0.644	199.000, 0.564	199.000, 0.564	199.000, 0.564	199.000, 0.519	199.000, 0.501	199.000, 0.518	199.000, 0.486	199.000, 0.490	199.000, 0.526
997	199.200, 1.302	199.200, 1.675	199.200, 1.571	199.200, 0.629	199.200, 0.568	199.200, 0.644	199.200, 0.563	199.200, 0.564	199.200, 0.564	199.200, 0.519	199.200, 0.501	199.200, 0.518	199.200, 0.485	199.200, 0.490	199.200, 0.526
998	199.400, 1.301	199.400, 1.674	199.400, 1.569	199.400, 0.628	199.400, 0.567	199.400, 0.644	199.400, 0.563	199.400, 0.564	199.400, 0.564	199.400, 0.519	199.400, 0.501	199.400, 0.518	199.400, 0.485	199.400, 0.490	199.400, 0.526
999	199.600, 1.300	199.600, 1.672	199.600, 1.568	199.600, 0.628	199.600, 0.567	199.600, 0.644	199.600, 0.563	199.600, 0.564	199.600, 0.563	199.600, 0.519	199.600, 0.501	199.600, 0.518	199.600, 0.485	199.600, 0.490	199.600, 0.526
1000	199.800, 1.299	199.800, 1.671	199.800, 1.567	199.800, 0.628	199.800, 0.567	199.800, 0.643	199.800, 0.563	199.800, 0.564	199.800, 0.563	199.800, 0.519	199.800, 0.501	199.800, 0.518	199.800, 0.485	199.800, 0.490	199.800, 0.526
1001	200.000, 1.298	200.000, 1.671	200.000, 1.566	200.000, 0.627	200.000, 0.567	200.000, 0.643	200.000, 0.563	200.000, 0.564	200.000, 0.563	200.000, 0.519	200.000, 0.501	200.000, 0.518	200.000, 0.484	200.000, 0.490	200.000, 0.526
1002	200.200, 1.297	200.200, 1.670	200.200, 1.565	200.200, 0.627	200.200, 0.566	200.200, 0.643	200.200, 0.563	200.200, 0.564	200.200, 0.563	200.200, 0.518	200.200, 0.501	200.200, 0.518	200.200, 0.484	200.200, 0.489	200.200, 0.526
1003	200.400, 1.296	200.400, 1.668	200.400, 1.564	200.400, 0.627	200.400, 0.566	200.400, 0.643	200.400, 0.562	200.400, 0.563	200.400, 0.563	200.400, 0.518	200.400, 0.502	200.400, 0.518	200.400, 0.484	200.400, 0.489	200.400, 0.526
1004	200.600, 1.295	200.600, 1.667	200.600, 1.563	200.600, 0.627	200.600, 0.566	200.600, 0.642	200.600, 0.562	200.600, 0.563	200.600, 0.563	200.600, 0.518	200.600, 0.502	200.600, 0.518	200.600, 0.483	200.600, 0.489	200.600, 0.525
1005	200.800, 1.295	200.800, 1.666	200.800, 1.562	200.800, 0.627	200.800, 0.566	200.800, 0.642	200.800, 0.562	200.800, 0.563	200.800, 0.563	200.800, 0.517	200.800, 0.502	200.800, 0.518	200.800, 0.483	200.800, 0.489	200.800, 0.525
1006	201.000, 1.294	201.000, 1.665	201.000, 1.561	201.000, 0.627	201.000, 0.565	201.000, 0.642	201.000, 0.562	201.000, 0.563	201.000, 0.563	201.000, 0.517	201.000, 0.502	201.000, 0.518	201.000, 0.483	201.000, 0.489	201.000, 0.525
1007	201.200, 1.293	201.200, 1.664	201.200, 1.560	201.200, 0.627	201.200, 0.565	201.200, 0.641	201.200, 0.562	201.200, 0.563	201.200, 0.563	201.200, 0.517	201.200, 0.502	201.200, 0.517	201.200, 0.483	201.200, 0.489	201.200, 0.525
1008	201.400, 1.293	201.400, 1.663	201.400, 1.558	201.400, 0.627	201.400, 0.565	201.400, 0.641	201.400, 0.561	201.400, 0.563	201.400, 0.564	201.400, 0.517	201.400, 0.502	201.400, 0.517	201.400, 0.482	201.400, 0.489	201.400, 0.524
1009	201.600, 1.292	201.600, 1.661	201.600, 1.557	201.600, 0.627	201.600, 0.564	201.600, 0.640	201.600, 0.561	201.600, 0.562	201.600, 0.563	201.600, 0.517	201.600, 0.502	201.600, 0.517	201.600, 0.482	201.600, 0.488	201.600, 0.524
1010	201.800, 1.292	201.800, 1.660	201.800, 1.556	201.800, 0.627	201.800, 0.564	201.800, 0.640	201.800, 0.561	201.800, 0.562	201.800, 0.563	201.800, 0.517	201.800, 0.502	201.800, 0.517	201.800, 0.482	201.800, 0.488	201.800, 0.524
1011	202.000, 1.291	202.000, 1.659	202.000, 1.555	202.000, 0.626	202.000, 0.564	202.000, 0.639	202.000, 0.561	202.000, 0.562	202.000, 0.563	202.000, 0.517	202.000, 0.502	202.000, 0.516	202.000, 0.482	202.000, 0.488	202.000, 0.523
1012	202.200, 1.290	202.200, 1.658	202.200, 1.554	202.200, 0.626	202.200, 0.563	202.200, 0.639	202.200, 0.561	202.200, 0.562	202.200, 0.563	202.200, 0.517	202.200, 0.502	202.200, 0.516	202.200, 0.482	202.200, 0.488	202.200, 0.523
1013	202.400, 1.289	202.400, 1.657	202.400, 1.552	202.400, 0.626	202.400, 0.563	202.400, 0.639	202.400, 0.561	202.400, 0.562	202.400, 0.563	202.400, 0.518	202.400, 0.501	202.400, 0.516	202.400, 0.482	202.400, 0.487	202.400, 0.523
1014	202.600, 1.289	202.600, 1.656	202.600, 1.551	202.600, 0.626	202.600, 0.563	202.600, 0.639	202.600, 0.561	202.600, 0.562	202.600, 0.562	202.600, 0.518	202.600, 0.501	202.600, 0.516	202.600, 0.482	202.600, 0.487	202.600, 0.523
1015	202.800, 1.288	202.800, 1.655	202.800, 1.550	202.800, 0.625	202.800, 0.563	202.800, 0.639	202.800, 0.560	202.800, 0.562	202.800, 0.562	202.800, 0.518	202.800, 0.501	202.800, 0.516	202.800, 0.482	202.800, 0.487	202.800, 0.523
1016	203.000, 1.287	203.000, 1.653	203.000, 1.548	203.000, 0.625	203.000, 0.563	203.000, 0.639	203.000, 0.560	203.000, 0.561	203.000, 0.561	203.000, 0.518	203.000, 0.500	203.000, 0.516	203.000, 0.482	203.000, 0.487	203.000, 0.523
1017	203.200, 1.285	203.200, 1.652	203.200, 1.547	203.200, 0.625	203.200, 0.563	203.200, 0.639	203.200, 0.560	203.200, 0.561	203.200, 0.561	203.200, 0.518	203.200, 0.500	203.200, 0.516	203.200, 0.482	203.200, 0.487	203.200, 0.523
1018	203.400, 1.284	203.400, 1.651	203.400, 1.546	203.400, 0.624	203.400, 0.563	203.400, 0.639	203.400, 0.559	203.400, 0.561	203.400, 0.561	203.400, 0.517	203.400, 0.499	203.400, 0.516	203.400, 0.482	203.400, 0.486	203.400, 0.523
1019	203.600, 1.283	203.600, 1.649	203.600, 1.545	203.600, 0.624	203.600, 0.563	203.600, 0.639	203.600, 0.559	203.600, 0.561	203.600, 0.560	203.600, 0.517	203.600, 0.499	203.600, 0.516	203.600, 0.482	203.600, 0.486	203.600, 0.523
1020	203.800, 1.282	203.800, 1.648	203.800, 1.544	203.800, 0.624	203.800, 0.562	203.800, 0.639	203.800, 0.559	203.800, 0.561	203.800, 0.560	203.800, 0.517	203.800, 0.498	203.800, 0.515	203.800, 0.482	203.800, 0.486	203.800, 0.523
1021	204.000, 1.281	204.000, 1.647	204.000, 1.543	204.000, 0.624	204.000, 0.562	204.000, 0.638	204.000, 0.559	204.000, 0.561	204.000, 0.560	204.000, 0.516	204.000, 0.498	204.000, 0.515	204.000, 0.481	204.000, 0.486	204.000, 0.523
1022	204.200, 1.279	204.200, 1.645	204.200, 1.541	204.200, 0.624	204.200, 0.562	204.200, 0.638	204.200, 0.559	204.200, 0.561	204.200, 0.560	204.200, 0.516	204.200, 0.497	204.200, 0.515	204.200, 0.481	204.200, 0.487	204.200, 0.523
1023	204.400, 1.278	204.400, 1.644	204.400, 1.540	204.400, 0.624	204.400, 0.562	204.400, 0.638	204.400, 0.559	204.400, 0.561	204.400, 0.559	204.400, 0.516	204.400, 0.497	204.400, 0.515	204.400, 0.481	204.400, 0.487	204.400, 0.522
1024	204.600, 1.277	204.600, 1.643	204.600, 1.539	204.600, 0.624	204.600, 0.562	204.600, 0.638	204.600, 0.559	204.600, 0.561	204.600, 0.559	204.600, 0.515	204.600, 0.497	204.600, 0.515	204.600, 0.480	204.600, 0.487	204.600, 0.522
1025	204.800, 1.276	204.800, 1.642	204.800, 1.538	204.800, 0.624	204.800, 0.562	204.800, 0.637	204.800, 0.558	204.800, 0.561	204.800, 0.559	204.800, 0.515	204.800, 0.497	204.800, 0.515	204.800, 0.480	204.800, 0.487	204.800, 0.522
1026	205.000, 1.275	205.000, 1.641	205.000, 1.537	205.000, 0.624	205.000, 0.562	205.000, 0.637	205.000, 0.558	205.000, 0.561	205.000, 0.559	205.000, 0.515	205.000, 0.497	205.000, 0.515	205.000, 0.480	205.000, 0.487	205.000, 0.522
1027	205.200, 1.274	205.200, 1.640	205.200, 1.536	205.200, 0.624	205.200, 0.562	205.200, 0.637	205.200, 0.558	205.200, 0.561	205.200, 0.559	205.200, 0.515	205.200, 0.497	205.200, 0.514	205.200, 0.479	205.200, 0.487	205.200, 0.521
1028	205.400, 1.273	205.400, 1.639	205.400, 1.535	205.400, 0.624	205.400, 0.562	205.400, 0.636	205.400, 0.558	205.400, 0.561	205.400, 0.560	205.400, 0.515	205.400, 0.497	205.400, 0.514	205.400, 0.479	205.400, 0.486	205.400, 0.521
1029	205.600, 1.272	205.600, 1.638	205.600, 1.534	205.600, 0.624	205.600, 0.562	205.600, 0.636	205.600, 0.558	205.600, 0.561	205.600, 0.560	205.600, 0.515	205.600, 0.497	205.600, 0.514	205.600, 0.479	205.600, 0.486	205.600, 0.521
1030	205.800, 1.271	205.800, 1.637	205.800, 1.532	205.800, 0.623	205.800, 0.561	205.800, 0.636	205.800, 0.557	205.800, 0.561	205.800, 0.560	205.800, 0.515	205.800, 0.497	205.800, 0.513	205.800, 0.479	205.800, 0.486	205.800, 0.521
1031	206.000, 1.271	206.000, 1.636	206.000, 1.531	206.000, 0.623	206.000, 0.561	206.000, 0.636	206.000, 0.557	206.000, 0.560	206.000, 0.561	206.000, 0.515	206.000, 0.497	206.000, 0.513	206.000, 0.479	206.000, 0.486	206.000, 0.521
1032	206.200, 1.270	206.200, 1.635	206.200, 1.530	206.200, 0.623	206.200, 0.561	206.200, 0.636	206.200, 0.557	206.200, 0.560	206.200, 0.561	206.200, 0.515	206.200, 0.497	206.200, 0.513	206.200, 0.479	206.200, 0.485	206.200, 0.520
1033	206.400, 1.269	206.400, 1.634	206.400, 1.528	206.400, 0.622	206.400, 0.561	206.400, 0.636	206.400, 0.556	206.400, 0.560	206.400, 0.561	206.400, 0.515	206.400, 0.497	206.400, 0.513	206.400, 0.479	206.400, 0.485	206.400, 0.520
1034	206.600, 1.269	206.600, 1.633	206.600, 1.527	206.600, 0.622	206.600, 0.561	206.600, 0.636	206.600, 0.556	206.600, 0.560	206.600, 0.560	206.600, 0.515	206.600, 0.497	206.600, 0.513	206.600, 0.479	206.600, 0.485	206.600, 0.520
1035	206.800, 1.268	206.800, 1.631	206.800, 1.525	206.800, 0.622	206.800, 0.561	206.800, 0.636	206.800, 0.556	206.800, 0.559	206.800, 0.560	206.800, 0.515	206.800, 0.497	206.800, 0.513	206.800, 0.479	206.800, 0.485	206.800, 0.520
1036	207.000, 1.267	207.000, 1.630	207.000, 1.524	207.000, 0.621	207.000, 0.561	207.000, 0.637	207.000, 0.556	207.000, 0.559	207.000, 0.560	207.000, 0.514	207.000, 0.497	207.000, 0.513	207.000, 0.480	207.000, 0.485	207.000, 0.519
1037	207.200, 1.267	207.200, 1.628	207.200, 1.523	207.200, 0.621	207.200, 0.561	207.200, 0.637	207.200, 0.556	207.200, 0.558	207.200, 0.559	207.200, 0.514	207.200, 0.497	207.200, 0.513	207.200, 0.480	207.200, 0.485	207.200, 0.519
1038	207.400, 1.266	207.400, 1.627	207.400, 1.521	207.400, 0.621	207.400, 0.561	207.400, 0.637	207.400, 0.556	207.400, 0.558	207.400, 0.559	207.400, 0.514	207.400, 0.497	207.400, 0.513	207.400, 0.480	207.400, 0.485	207.400, 0.519
1039	207.600, 1.266	207.600, 1.625	207.600, 1.520	207.600, 0.621	207.600, 0.561	207.600, 0.636	207.600, 0.556	207.600, 0.557	207.600, 0.558	207.600, 0.514	207.600, 0.496	207.600, 0.513	207.600, 0.481	207.600, 0.485	207.600, 0.519
1040	207.800, 1.265	207.800, 1.624	207.800, 1.519	207.800, 0.622	207.800, 0.561	207.800, 0.636	207.800, 0.555	207.800, 0.557	207.800, 0.558	207.800, 0.514	207.800, 0.496	207.800, 0.513	207.800, 0.481	207.800, 0.485	207.800, 0.519
1041	208.000, 1.264	208.000, 1.622	208.000, 1.518	208.000, 0.622	208.000, 0.561	208.000, 0.636	208.000, 0.556	208.000, 0.557	208.000, 0.557	208.000, 0.513	208.000, 0.496	208.000, 0.513	208.000, 0.481	208.000, 0.486	208.000, 0.518
1042	208.200, 1.264	208.200, 1.621	208.200, 1.517	208.200, 0.622	208.200, 0.561	208.200, 0.636	208.200, 0.555	208.200, 0.557	208.200, 0.557	208.200, 0.513	208.200, 0.496	208.200, 0.513	208.200, 0.480	208.200, 0.486	208.200, 0.518
1043	208.400, 1.263	208.400, 1.620	208.400, 1.516	208.400, 0.622	208.400, 0.560	208.400, 0.635	208.400, 0.555	208.400, 0.557	208.400, 0.557	208.400, 0.513	208.400, 0.496	208.400, 0.513	208.400, 0.480	208.400, 0.486	208.400, 0.518
1044	208.600, 1.262	208.600, 1.619	208.600, 1.515	208.600, 0.622	208.600, 0.560	208.600, 0.635	208.600, 0.555	208.600, 0.557	208.600, 0.557	208.600, 0.513	208.600, 0.496	208.600, 0.512	208.600, 0.480	208.600, 0.485	208.600, 0.518
1045	208.800, 1.261	208.800, 1.618	208.800, 1.514	208.800, 0.622	208.800, 0.560	208.800, 0.634	208.800, 0.555	208.800, 0.557	208.800, 0.556	208.800, 0.513	208.800, 0.496	208.800, 0.512	208.800, 0.479	208.800, 0.485	208.800, 0.519
1046	209.000, 1.260	209.000, 1.617	209.000, 1.513	209.000, 0.622	209.000, 0.560	209.000, 0.634	209.000, 0.555	209.000, 0.557	209.000, 0.557	209.000, 0.513	209.000, 0.496	209.000, 0.512	209.000, 0.479	209.000, 0.485	209.000, 0.518
1047	209.200, 1.258	209.200, 1.616	209.200, 1.513	209.200, 0.622	209.200, 0.560	209.200, 0.633	209.200, 0.555	209.200, 0.557	209.200, 0.557	209.200, 0.513	209.200, 0.496	209.200, 0.511	209.200, 0.478	209.200, 0.485	209.200, 0.518
1048	209.400, 1.257	209.400, 1.616	209.400, 1.512	209.400, 0.622	209.400, 0.559	209.400, 0.633	209.400, 0.555	209.400, 0.557	209.400, 0.557	209.400, 0.512	209.400, 0.496	209.400, 0.511	209.400, 0.478	209.400, 0.485	209.400, 0.518
1049	209.600, 1.255	209.600, 1.615	209.600, 1.511	209.600, 0.621	209.600, 0.559	209.600, 0.633	209.600, 0.554	209.600, 0.556	209.600, 0.557	209.600, 0.512	209.600, 0.496	209.600, 0.511	209.600, 0.477	209.600, 0.484	209.600, 0.518
1050	209.800, 1.254	209.800, 1.614	209.800, 1.510	209.800, 0.621	209.800, 0.559	209.800, 0.633	209.800, 0.554	209.800, 0.556	209.800, 0.557	209.800, 0.512	209.800, 0.496	209.800, 0.510	209.800, 0.477	209.800, 0.484	209.800, 0.518
1051	210.000, 1.253	210.000, 1.613	210.000, 1.509	210.000, 0.620	210.000, 0.559	210.000, 0.633	210.000, 0.554	210.000, 0.556	210.000, 0.557	210.000, 0.512	210.000, 0.496	210.000, 0.510	210.000, 0.476	210.000, 0.483	210.000, 0.518
1052	210.200, 1.252	210.200, 1.612	210.200, 1.508	210.200, 0.620	210.200, 0.559	210.200, 0.632	210.200, 0.554	210.200, 0.556	210.200, 0.557	210.200, 0.511	210.200, 0.495	210.200, 0.510	210.200, 0.476	210.200, 0.483	210.200, 0.517
1053	210.400, 1.251	210.400, 1.611	210.400, 1.507	210.400, 0.620	210.400, 0.559	210.400, 0.632	210.400, 0.554	210.400, 0.556	210.400, 0.557	210.400, 0.511	210.400, 0.495	210.400, 0.509	210.400, 0.476	210.400, 0.482	210.400, 0.517
1054	210.600, 1.251	210.600, 1.610	210.600, 1.506	210.600, 0.619	210.600, 0.559	210.600, 0.632	210.600, 0.554	210.600, 0.556	210.600, 0.557	210.600, 0.511	210.600, 0.495	210.600, 0.509	210.600, 0.476	210.600, 0.482	210.600, 0.516
1055	210.800, 1.250	210.800, 1.609	210.800, 1.505	210.800, 0.619	210.800, 0.559	210.800, 0.632	210.800, 0.554	210.800, 0.556	210.800, 0.556	210.800, 0.511	210.800, 0.495	210.800, 0.508	210.800, 0.476	210.800, 0.482	210.800, 0.516
1056	211.000, 1.250	211.000, 1.608	211.000, 1.504	211.000, 0.619	211.000, 0.559	211.000, 0.632	211.000, 0.554	211.000, 0.556	211.000, 0.556	211.000, 0.511	211.000, 0.495	211.000, 0.508	211.000, 0.476	211.000, 0.481	211.000, 0.516
1057	211.200, 1.249	211.200, 1.607	211.200, 1.503	211.200, 0.619	211.200, 0.558	211.200, 0.632	211.200, 0.554	211.200, 0.556	211.200, 0.556	211.200, 0.510	211.200, 0.495	211.200, 0.508	211.200, 0.476	211.200, 0.481	211.200, 0.516
1058	211.400, 1.249	211.400, 1.605	211.400, 1.501	211.400, 0.619	211.400, 0.558	211.400, 0.632	211.400, 0.554	211.400, 0.556	211.400, 0.556	211.400, 0.510	211.400, 0.495	211.400, 0.509	211.400, 0.476	211.400, 0.481	211.400, 0.515
1059	211.600, 1.248	211.600, 1.604	211.600, 1.500	211.600, 0.619	211.600, 0.558	211.600, 0.632	211.600, 0.554	211.600, 0.556	211.600, 0.555	211.600, 0.510	211.600, 0.494	211.600, 0.509	211.600, 0.475	211.600, 0.481	211.600, 0.515
1060	211.800, 1.248	211.800, 1.603	211.800, 1.499	211.800, 0.618	211.800, 0.558	211.800, 0.632	211.800, 0.554	211.800, 0.556	211.800, 0.555	211.800, 0.510	211.800, 0.494	211.800, 0.509	211.800, 0.475	211.800, 0.481	211.800, 0.515
1061	212.000, 1.247	212.000, 1.601	212.000, 1.498	212.000, 0.618	212.000, 0.558	212.000, 0.632	212.000, 0.554	212.000, 0.556	212.000, 0.555	212.000, 0.510	212.000, 0.494	212.000, 0.509	212.000, 0.475	212.000, 0.481	212.000, 0.515
1062	212.200, 1.246	212.200, 1.600	212.200, 1.496	212.200, 0.618	212.200, 0.558	212.200, 0.632	212.200, 0.554	212.200, 0.555	212.200, 0.555	212.200, 0.510	212.200, 0.494	212.200, 0.509	212.200, 0.475	212.200, 0.481	212.200, 0.515
1063	212.400, 1.245	212.400, 1.599	212.400, 1.495	212.400, 0.618	212.400, 0.558	212.400, 0.632	212.400, 0.553	212.400, 0.555	212.400, 0.555	212.400, 0.510	212.400, 0.494	212.400, 0.509	212.400, 0.475	212.400, 0.480	212.400, 0.516
1064	212.600, 1.244	212.600, 1.597	212.600, 1.494	212.600, 0.618	212.600, 0.558	212.600, 0.632	212.600, 0.553	212.600, 0.555	212.600, 0.555	212.600, 0.510	212.600, 0.494	212.600, 0.509	212.600, 0.475	212.600, 0.480	212.600, 0.516
1065	212.800, 1.243	212.800, 1.596	212.800, 1.492	212.800, 0.617	212.800, 0.557	212.800, 0.632	212.800, 0.553	212.800, 0.555	212.800, 0.555	212.800, 0.510	212.800, 0.494	212.800, 0.509	212.800, 0.474	212.800, 0.480	212.800, 0.516
1066	213.000, 1.242	213.000, 1.595	213.000, 1.491	213.000, 0.617	213.000, 0.557	213.000, 0.632	213.000, 0.553	213.000, 0.555	213.000, 0.555	213.000, 0.510	213.000, 0.494	213.000, 0.508	213.000, 0.474	213.000, 0.480	213.000, 0.516
1067	213.200, 1.241	213.200, 1.594	213.200, 1.490	213.200, 0.617	213.200, 0.556	213.200, 0.632	213.200, 0.553	213.200, 0.555	213.200, 0.555	213.200, 0.510	213.200, 0.494	213.200, 0.508	213.200, 0.474	213.200, 0.481	213.200, 0.516
1068	213.400, 1.240	213.400, 1.592	213.400, 1.489	213.400, 0.617	213.400, 0.556	213.400, 0.632	213.400, 0.553	213.400, 0.554	213.400, 0.554	213.400, 0.510	213.400, 0.494	213.400, 0.508	213.400, 0.474	213.400, 0.481	213.400, 0.516
1069	213.600, 1.240	213.600, 1.591	213.600, 1.487	213.600, 0.616	213.600, 0.556	213.600, 0.632	213.600, 0.552	213.600, 0.554	213.600, 0.554	213.600, 0.510	213.600, 0.494	213.600, 0.508	213.600, 0.474	213.600, 0.481	213.600, 0.516
1070	213.800, 1.239	213.800, 1.589	213.800, 1.486	213.800, 0.616	213.800, 0.556	213.800, 0.632	213.800, 0.552	213.800, 0.554	213.800, 0.554	213.800, 0.510	213.800, 0.494	213.800, 0.507	213.800, 0.474	213.800, 0.480	213.800, 0.516
1071	214.000, 1.238	214.000, 1.588	214.000, 1.485	214.000, 0.616	214.000, 0.556	214.000, 0.631	214.000, 0.552	214.000, 0.554	214.000, 0.553	214.000, 0.510	214.000, 0.494	214.000, 0.506	214.000, 0.474	214.000, 0.480	214.000, 0.516
1072	214.200, 1.238	214.200, 1.586	214.200, 1.484	214.200, 0.616	214.200, 0.556	214.200, 0.631	214.200, 0.552	214.200, 0.554	214.200, 0.553	214.200, 0.509	214.200, 0.494	214.200, 0.506	214.200, 0.474	214.200, 0.480	214.200, 0.516
1073	214.400, 1.237	214.400, 1.585	214.400, 1.482	214.400, 0.616	214.400, 0.556	214.400, 0.631	214.400, 0.552	214.400, 0.554	214.400, 0.552	214.400, 0.509	214.400, 0.493	214.400, 0.505	214.400, 0.474	214.400, 0.480	214.400, 0.516
1074	214.600, 1.237	214.600, 1.584	214.600, 1.481	214.600, 0.616	214.600, 0.556	214.600, 0.631	214.600, 0.552	214.600, 0.554	214.600, 0.552	214.600, 0.509	214.600, 0.493	214.600, 0.505	214.600, 0.474	214.600, 0.480	214.600, 0.516
1075	214.800, 1.236	214.800, 1.583	214.800, 1.480	214.800, 0.616	214.800, 0.556	214.800, 0.631	214.800, 0.551	214.800, 0.554	214.800, 0.552	214.800, 0.509	214.800, 0.493	214.800, 0.505	214.800, 0.474	214.800, 0.480	214.800, 0.516
1076	215.000, 1.235	215.000, 1.582	215.000, 1.479	215.000, 0.616	215.000, 0.556	215.000, 0.631	215.000, 0.551	215.000, 0.554	215.000, 0.552	215.000, 0.509	215.000, 0.493	215.000, 0.505	215.000, 0.474	215.000, 0.480	215.000, 0.515
1077	215.200, 1.234	215.200, 1.581	215.200, 1.477	215.200, 0.616	215.200, 0.556	215.200, 0.631	215.200, 0.551	215.200, 0.554	215.200, 0.552	215.200, 0.509	215.200, 0.492	215.200, 0.505	215.200, 0.474	215.200, 0.480	215.200, 0.515
1078	215.400, 1.232	215.400, 1.580	215.400, 1.476	215.400, 0.616	215.400, 0.556	215.400, 0.630	215.400, 0.551	215.400, 0.553	215.400, 0.552	215.400, 0.508	215.400, 0.492	215.400, 0.505	215.400, 0.474	215.400, 0.480	215.400, 0.515
1079	215.600, 1.231	215.600, 1.579	215.600, 1.475	215.600, 0.616	215.600, 0.556	215.600, 0.630	215.600, 0.550	215.600, 0.553	215.600, 0.552	215.600, 0.508	215.600, 0.492	215.600, 0.505	215.600, 0.473	215.600, 0.480	215.600, 0.515
1080	215.800, 1.230	215.800, 1.578	215.800, 1.474	215.800, 0.616	215.800, 0.555	215.800, 0.630	215.800, 0.550	215.800, 0.553	215.800, 0.552	215.800, 0.508	215.800, 0.492	215.800, 0.505	215.800, 0.473	215.800, 0.479	215.800, 0.514
1081	216.000, 1.229	216.000, 1.577	216.000, 1.473	216.000, 0.616	216.000, 0.555	216.000, 0.630	216.000, 0.550	216.000, 0.553	216.000, 0.552	216.000, 0.508	216.000, 0.492	216.000, 0.505	216.000, 0.473	216.000, 0.479	216.000, 0.514
1082	216.200, 1.229	216.200, 1.576	216.200, 1.472	216.200, 0.616	216.200, 0.555	216.200, 0.630	216.200, 0.550	216.200, 0.553	216.200, 0.552	216.200, 0.508	216.200, 0.492	216.200, 0.505	216.200, 0.473	216.200, 0.479	216.200, 0.514
1083	216.400, 1.228	216.400, 1.575	216.400, 1.472	216.400, 0.616	216.400, 0.555	216.400, 0.629	216.400, 0.550	216.400, 0.552	216.400, 0.552	216.400, 0.508	216.400, 0.492	216.400, 0.505	216.400, 0.472	216.400, 0.478	216.400, 0.514
1084	216.600, 1.227	216.600, 1.574	216.600, 1.471	216.600, 0.615	216.600, 0.554	216.600, 0.629	216.600, 0.550	216.600, 0.552	216.600, 0.552	216.600, 0.508	216.600, 0.492	216.600, 0.506	216.600, 0.472	216.600, 0.478	216.600, 0.514
1085	216.800, 1.226	216.800, 1.573	216.800, 1.470	216.800, 0.615	216.800, 0.554	216.800, 0.629	216.800, 0.549	216.800, 0.552	216.800, 0.552	216.800, 0.508	216.800, 0.492	216.800, 0.506	216.800, 0.472	216.800, 0.478	216.800, 0.513
1086	217.000, 1.226	217.000, 1.572	217.000, 1.469	217.000, 0.615	217.000, 0.553	217.000, 0.628	217.000, 0.550	217.000, 0.552	217.000, 0.552	217.000, 0.508	217.000, 0.492	217.000, 0.506	217.000, 0.472	217.000, 0.478	217.000, 0.513
1087	217.200, 1.225	217.200, 1.570	217.200, 1.468	217.200, 0.615	217.200, 0.553	217.200, 0.628	217.200, 0.549	217.200, 0.552	217.200, 0.551	217.200, 0.508	217.200, 0.492	217.200, 0.506	217.200, 0.472	217.200, 0.478	217.200, 0.513
1088	217.400, 1.225	217.400, 1.569	217.400, 1.467	217.400, 0.615	217.400, 0.553	217.400, 0.628	217.400, 0.549	217.400, 0.551	217.400, 0.551	217.400, 0.507	217.400, 0.492	217.400, 0.506	217.400, 0.472	217.400, 0.478	217.400, 0.513
1089	217.600, 1.224	217.600, 1.568	217.600, 1.466	217.600, 0.615	217.600, 0.552	217.600, 0.627	217.600, 0.549	217.600, 0.551	217.600, 0.551	217.600, 0.507	217.600, 0.492	217.600, 0.505	217.600, 0.472	217.600, 0.478	217.600, 0.512
1090	217.800, 1.224	217.800, 1.567	217.800, 1.464	217.800, 0.614	217.800, 0.552	217.800, 0.627	217.800, 0.549	217.800, 0.551	217.800, 0.551	217.800, 0.507	217.800, 0.492	217.800, 0.506	217.800, 0.472	217.800, 0.478	217.800, 0.512
1091	218.000, 1.223	218.000, 1.566	218.000, 1.463	218.000, 0.614	218.000, 0.552	218.000, 0.627	218.000, 0.549	218.000, 0.551	218.000, 0.550	218.000, 0.507	218.000, 0.492	218.000, 0.505	218.000, 0.472	218.000, 0.479	218.000, 0.512
1092	218.200, 1.222	218.200, 1.565	218.200, 1.462	218.200, 0.614	218.200, 0.552	218.200, 0.627	218.200, 0.549	218.200, 0.551	218.200, 0.550	218.200, 0.506	218.200, 0.491	218.200, 0.506	218.200, 0.472	218.200, 0.479	218.200, 0.512
1093	218.400, 1.221	218.400, 1.565	218.400, 1.460	218.400, 0.614	218.400, 0.552	218.400, 0.627	218.400, 0.548	218.400, 0.550	218.400, 0.550	218.400, 0.506	218.400, 0.491	218.400, 0.506	218.400, 0.472	218.400, 0.479	218.400, 0.512
1094	218.600, 1.220	218.600, 1.564	218.600, 1.459	218.600, 0.614	218.600, 0.552	218.600, 0.627	218.600, 0.548	218.600, 0.550	218.600, 0.549	218.600, 0.506	218.600, 0.491	218.600, 0.506	218.600, 0.472	218.600, 0.479	218.600, 0.511
1095	218.800, 1.219	218.800, 1.563	218.800, 1.458	218.800, 0.613	218.800, 0.552	218.800, 0.627	218.800, 0.548	218.800, 0.550	218.800, 0.549	218.800, 0.506	218.800, 0.491	218.800, 0.506	218.800, 0.472	218.800, 0.479	218.800, 0.511
1096	219.000, 1.217	219.000, 1.562	219.000, 1.457	219.000, 0.613	219.000, 0.552	219.000, 0.627	219.000, 0.548	219.000, 0.550	219.000, 0.549	219.000, 0.506	219.000, 0.490	219.000, 0.505	219.000, 0.472	219.000, 0.479	219.000, 0.511
1097	219.200, 1.216	219.200, 1.561	219.200, 1.456	219.200, 0.613	219.200, 0.552	219.200, 0.627	219.200, 0.548	219.200, 0.550	219.200, 0.549	219.200, 0.506	219.200, 0.490	219.200, 0.505	219.200, 0.472	219.200, 0.479	219.200, 0.511
1098	219.400, 1.215	219.400, 1.560	219.400, 1.455	219.400, 0.613	219.400, 0.552	219.400, 0.627	219.400, 0.548	219.400, 0.550	219.400, 0.549	219.400, 0.506	219.400, 0.490	219.400, 0.505	219.400, 0.472	219.400, 0.479	219.400, 0.511
1099	219.600, 1.214	219.600, 1.559	219.600, 1.454	219.600, 0.613	219.600, 0.552	219.600, 0.627	219.600, 0.548	219.600, 0.550	219.600, 0.549	219.600, 0.506	219.600, 0.490	219.600, 0.505	219.600, 0.471	219.600, 0.478	219.600, 0.511
1100	219.800, 1.213	219.800, 1.558	219.800, 1.453	219.800, 0.613	219.800, 0.551	219.800, 0.627	219.800, 0.547	219.800, 0.550	219.800, 0.549	219.800, 0.506	219.800, 0.490	219.800, 0.504	219.800, 0.471	219.800, 0.478	219.800, 0.511
1101	220.000, 1.213	220.000, 1.556	220.000, 1.452	220.000, 0.613	220.000, 0.551	220.000, 0.626	220.000, 0.548	220.000, 0.550	220.000, 0.549	220.000, 0.505	220.000, 0.489	220.000, 0.504	220.000, 0.471	220.000, 0.477	220.000, 0.512
1102	220.200, 1.212	220.200, 1.555	220.200, 1.451	220.200, 0.613	220.200, 0.551	220.200, 0.626	220.200, 0.548	220.200, 0.549	220.200, 0.549	220.200, 0.505	220.200, 0.489	220.200, 0.503	220.200, 0.471	220.200, 0.477	220.200, 0.512
1103	220.400, 1.211	220.400, 1.554	220.400, 1.450	220.400, 0.613	220.400, 0.551	220.400, 0.626	220.400, 0.548	220.400, 0.550	220.400, 0.550	220.400, 0.505	220.400, 0.489	220.400, 0.503	220.400, 0.471	220.400, 0.477	220.400, 0.512
1104	220.600, 1.210	220.600, 1.553	220.600, 1.448	220.600, 0.613	220.600, 0.551	220.600, 0.626	220.600, 0.548	220.600, 0.550	220.600, 0.550	220.600, 0.505	220.600, 0.489	220.600, 0.503	220.600, 0.471	220.600, 0.476	220.600, 0.512
1105	220.800, 1.210	220.800, 1.552	220.800, 1.447	220.800, 0.613	220.800, 0.551	220.800, 0.626	220.800, 0.548	220.800, 0.550	220.800, 0.550	220.800, 0.505	220.800, 0.489	220.800, 0.502	220.800, 0.470	220.800, 0.476	220.800, 0.512
1106	221.000, 1.209	221.000, 1.551	221.000, 1.445	221.000, 0.613	221.000, 0.550	221.000, 0.626	221.000, 0.548	221.000, 0.550	221.000, 0.550	221.000, 0.504	221.000, 0.489	221.000, 0.502	221.000, 0.470	221.000, 0.476	221.000, 0.512
1107	221.200, 1.208	221.200, 1.550	221.200, 1.444	221.200, 0.614	221.200, 0.550	221.200, 0.625	221.200, 0.548	221.200, 0.550	221.200, 0.550	221.200, 0.504	221.200, 0.489	221.200, 0.502	221.200, 0.470	221.200, 0.476	221.200, 0.512
1108	221.400, 1.207	221.400, 1.549	221.400, 1.443	221.400, 0.614	221.400, 0.550	221.400, 0.625	221.400, 0.548	221.400, 0.550	221.400, 0.550	221.400, 0.504	221.400, 0.489	221.400, 0.501	221.400, 0.470	221.400, 0.476	221.400, 0.511
1109	221.600, 1.206	221.600, 1.548	221.600, 1.441	221.600, 0.614	221.600, 0.550	221.600, 0.625	221.600, 0.547	221.600, 0.550	221.600, 0.550	221.600, 0.504	221.600, 0.489	221.600, 0.501	221.600, 0.470	221.600, 0.476	221.600, 0.511
1110	221.800, 1.205	221.800, 1.546	221.800, 1.440	221.800, 0.614	221.800, 0.550	221.800, 0.624	221.800, 0.547	221.800, 0.550	221.800, 0.550	221.800, 0.503	221.800, 0.489	221.800, 0.501	221.800, 0.470	221.800, 0.476	221.800, 0.511
1111	222.000, 1.205	222.000, 1.545	222.000, 1.439	222.000, 0.614	222.000, 0.550	222.000, 0.624	222.000, 0.547	222.000, 0.550	222.000, 0.550	222.000, 0.503	222.000, 0.489	222.000, 0.501	222.000, 0.470	222.000, 0.476	222.000, 0.511
1112	222.200, 1.204	222.200, 1.544	222.200, 1.438	222.200, 0.613	222.200, 0.550	222.200, 0.624	222.200, 0.546	222.200, 0.549	222.200, 0.549	222.200, 0.503	222.200, 0.489	222.200, 0.501	222.200, 0.470	222.200, 0.476	222.200, 0.511
1113	222.400, 1.203	222.400, 1.543	222.400, 1.437	222.400, 0.613	222.400, 0.549	222.400, 0.624	222.400, 0.546	222.400, 0.549	222.400, 0.549	222.400, 0.503	222.400, 0.489	222.400, 0.501	222.400, 0.470	222.400, 0.476	222.400, 0.511
1114	222.600, 1.202	222.600, 1.541	222.600, 1.436	222.600, 0.613	222.600, 0.549	222.600, 0.624	222.600, 0.546	222.600, 0.549	222.600, 0.549	222.600, 0.503	222.600, 0.489	222.600, 0.501	222.600, 0.469	222.600, 0.476	222.600, 0.511
1115	222.800, 1.202	222.800, 1.540	222.800, 1.435	222.800, 0.612	222.800, 0.549	222.800, 0.624	222.800, 0.545	222.800, 0.549	222.800, 0.548	222.800, 0.503	222.800, 0.489	222.800, 0.501	222.800, 0.469	222.800, 0.476	222.800, 0.511
1116	223.000, 1.201	223.000, 1.539	223.000, 1.434	223.000, 0.612	223.000, 0.549	223.000, 0.624	223.000, 0.545	223.000, 0.548	223.000, 0.548	223.000, 0.503	223.000, 0.489	223.000, 0.501	223.000, 0.469	223.000, 0.476	223.000, 0.510
1117	223.200, 1.200	223.200, 1.538	223.200, 1.433	223.200, 0.612	223.200, 0.549	223.200, 0.624	223.200, 0.545	223.200, 0.548	223.200, 0.548	223.200, 0.503	223.200, 0.489	223.200, 0.501	223.200, 0.469	223.200, 0.476	223.200, 0.510
1118	223.400, 1.199	223.400, 1.537	223.400, 1.432	223.400, 0.611	223.400, 0.549	223.400, 0.624	223.400, 0.545	223.400, 0.548	223.400, 0.548	223.400, 0.503	223.400, 0.488	223.400, 0.501	223.400, 0.469	223.400, 0.476	223.400, 0.510
1119	223.600, 1.198	223.600, 1.536	223.600, 1.431	223.600, 0.611	223.600, 0.549	223.600, 0.624	223.600, 0.545	223.600, 0.548	223.600, 0.548	223.600, 0.504	223.600, 0.488	223.600, 0.501	223.600, 0.469	223.600, 0.476	223.600, 0.510
1120	223.800, 1.198	223.800, 1.534	223.800, 1.430	223.800, 0.610	223.800, 0.548	223.800, 0.624	223.800, 0.545	223.800, 0.548	223.800, 0.548	223.800, 0.504	223.800, 0.488	223.800, 0.501	223.800, 0.469	223.800, 0.476	223.800, 0.510
1121	224.000, 1.197	224.000, 1.533	224.000, 1.429	224.000, 0.610	224.000, 0.548	224.000, 0.623	224.000, 0.545	224.000, 0.548	224.000, 0.548	224.000, 0.504	224.000, 0.488	224.000, 0.501	224.000, 0.469	224.000, 0.476	224.000, 0.510
1122	224.200, 1.196	224.200, 1.532	224.200, 1.428	224.200, 0.610	224.200, 0.548	224.200, 0.623	224.200, 0.545	224.200, 0.548	224.200, 0.548	224.200, 0.504	224.200, 0.488	224.200, 0.500	224.200, 0.468	224.200, 0.475	224.200, 0.510
1123	224.400, 1.195	224.400, 1.531	224.400, 1.427	224.400, 0.610	224.400, 0.549	224.400, 0.623	224.400, 0.545	224.400, 0.548	224.400, 0.548	224.400, 0.504	224.400, 0.488	224.400, 0.500	224.400, 0.468	224.400, 0.475	224.400, 0.510
1124	224.600, 1.194	224.600, 1.530	224.600, 1.426	224.600, 0.610	224.600, 0.549	224.600, 0.623	224.600, 0.546	224.600, 0.548	224.600, 0.548	224.600, 0.504	224.600, 0.488	224.600, 0.500	224.600, 0.468	224.600, 0.475	224.600, 0.510
1125	224.800, 1.193	224.800, 1.529	224.800, 1.425	224.800, 0.610	224.800, 0.549	224.800, 0.623	224.800, 0.546	224.800, 0.547	224.800, 0.548	224.800, 0.504	224.800, 0.488	224.800, 0.500	224.800, 0.468	224.800, 0.475	224.800, 0.510
1126	225.000, 1.192	225.000, 1.528	225.000, 1.424	225.000, 0.610	225.000, 0.549	225.000, 0.622	225.000, 0.546	225.000, 0.547	225.000, 0.548	225.000, 0.504	225.000, 0.488	225.000, 0.500	225.000, 0.467	225.000, 0.475	225.000, 0.510
1127	225.200, 1.191	225.200, 1.527	225.200, 1.423	225.200, 0.611	225.200, 0.549	225.200, 0.622	225.200, 0.546	225.200, 0.547	225.200, 0.548	225.200, 0.504	225.200, 0.488	225.200, 0.500	225.200, 0.467	225.200, 0.475	225.200, 0.510
1128	225.400, 1.191	225.400, 1.525	225.400, 1.422	225.400, 0.611	225.400, 0.549	225.400, 0.622	225.400, 0.545	225.400, 0.547	225.400, 0.548	225.400, 0.503	225.400, 0.488	225.400, 0.500	225.400, 0.467	225.400, 0.475	225.400, 0.510
1129	225.600, 1.190	225.600, 1.524	225.600, 1.421	225.600, 0.610	225.600, 0.549	225.600, 0.622	225.600, 0.545	225.600, 0.547	225.600, 0.548	225.600, 0.503	225.600, 0.488	225.600, 0.500	225.600, 0.467	225.600, 0.474	225.600, 0.510
1130	225.800, 1.189	225.800, 1.523	225.800, 1.419	225.800, 0.610	225.800, 0.548	225.800, 0.622	225.800, 0.545	225.800, 0.546	225.800, 0.548	225.800, 0.503	225.800, 0.488	225.800, 0.500	225.800, 0.467	225.800, 0.474	225.800, 0.510
1131	226.000, 1.188	226.000, 1.522	226.000, 1.418	226.000, 0.610	226.000, 0.548	226.000, 0.622	226.000, 0.544	226.000, 0.546	226.000, 0.547	226.000, 0.502	226.000, 0.488	226.000, 0.500	226.000, 0.467	226.000, 0.474	226.000, 0.509
1132	226.200, 1.188	226.200, 1.521	226.200, 1.417	226.200, 0.610	226.200, 0.548	226.200, 0.622	226.200, 0.544	226.200, 0.545	226.200, 0.546	226.200, 0.502	226.200, 0.488	226.200, 0.500	226.200, 0.467	226.200, 0.473	226.200, 0.509
1133	226.400, 1.187	226.400, 1.520	226.400, 1.416	226.400, 0.610	226.400, 0.548	226.400, 0.622	226.400, 0.543	226.400, 0.545	226.400, 0.546	226.400, 0.502	226.400, 0.487	226.400, 0.500	226.400, 0.467	226.400, 0.473	226.400, 0.508
1134	226.600, 1.186	226.600, 1.519	226.600, 1.415	226.600, 0.610	226.600, 0.547	226.600, 0.622	226.600, 0.543	226.600, 0.545	226.600, 0.545	226.600, 0.501	226.600, 0.487	226.600, 0.500	226.600, 0.467	226.600, 0.473	226.600, 0.507
1135	226.800, 1.185	226.800, 1.518	226.800, 1.413	226.800, 0.610	226.800, 0.547	226.800, 0.622	226.800, 0.543	226.800, 0.545	226.800, 0.545	226.800, 0.501	226.800, 0.486	226.800, 0.500	226.800, 0.467	226.800, 0.473	226.800, 0.507
1136	227.000, 1.185	227.000, 1.517	227.000, 1.412	227.000, 0.610	227.000, 0.547	227.000, 0.622	227.000, 0.543	227.000, 0.546	227.000, 0.544	227.000, 0.501	227.000, 0.486	227.000, 0.500	227.000, 0.467	227.000, 0.473	227.000, 0.506
1137	227.200, 1.184	227.200, 1.516	227.200, 1.411	227.200, 0.610	227.200, 0.547	227.200, 0.622	227.200, 0.543	227.200, 0.546	227.200, 0.544	227.200, 0.501	227.200, 0.486	227.200, 0.499	227.200, 0.466	227.200, 0.472	227.200, 0.506
1138	227.400, 1.183	227.400, 1.515	227.400, 1.409	227.400, 0.610	227.400, 0.546	227.400, 0.621	227.400, 0.543	227.400, 0.546	227.400, 0.543	227.400, 0.501	227.400, 0.486	227.400, 0.499	227.400, 0.466	227.400, 0.472	227.400, 0.506
1139	227.600, 1.183	227.600, 1.513	227.600, 1.408	227.600, 0.609	227.600, 0.546	227.600, 0.621	227.600, 0.543	227.600, 0.546	227.600, 0.543	227.600, 0.501	227.600, 0.485	227.600, 0.499	227.600, 0.466	227.600, 0.472	227.600, 0.506
1140	227.800, 1.182	227.800, 1.512	227.800, 1.407	227.800, 0.609	227.800, 0.546	227.800, 0.621	227.800, 0.543	227.800, 0.546	227.800, 0.543	227.800, 0.501	227.800, 0.485	227.800, 0.498	227.800, 0.466	227.800, 0.472	227.800, 0.505
1141	228.000, 1.181	228.000, 1.511	228.000, 1.406	228.000, 0.609	228.000, 0.546	228.000, 0.620	228.000, 0.543	228.000, 0.546	228.000, 0.542	228.000, 0.501	228.000, 0.485	228.000, 0.498	228.000, 0.466	228.000, 0.472	228.000, 0.505
1142	228.200, 1.181	228.200, 1.510	228.200, 1.405	228.200, 0.608	228.200, 0.546	228.200, 0.620	228.200, 0.543	228.200, 0.546	228.200, 0.543	228.200, 0.501	228.200, 0.485	228.200, 0.498	228.200, 0.466	228.200, 0.472	228.200, 0.505
1143	228.400, 1.180	228.400, 1.509	228.400, 1.404	228.400, 0.608	228.400, 0.546	228.400, 0.620	228.400, 0.543	228.400, 0.546	228.400, 0.542	228.400, 0.501	228.400, 0.485	228.400, 0.498	228.400, 0.465	228.400, 0.472	228.400, 0.505
1144	228.600, 1.179	228.600, 1.508	228.600, 1.403	228.600, 0.608	228.600, 0.546	228.600, 0.620	228.600, 0.543	228.600, 0.545	228.600, 0.542	228.600, 0.501	228.600, 0.485	228.600, 0.498	228.600, 0.465	228.600, 0.472	228.600, 0.505
1145	228.800, 1.178	228.800, 1.508	228.800, 1.402	228.800, 0.608	228.800, 0.546	228.800, 0.620	228.800, 0.543	228.800, 0.545	228.800, 0.542	228.800, 0.501	228.800, 0.485	228.800, 0.498	228.800, 0.465	228.800, 0.472	228.800, 0.505
1146	229.000, 1.177	229.000, 1.507	229.000, 1.401	229.000, 0.608	229.000, 0.546	229.000, 0.620	229.000, 0.543	229.000, 0.545	229.000, 0.543	229.000, 0.501	229.000, 0.484	229.000, 0.498	229.000, 0.465	229.000, 0.472	229.000, 0.505
1147	229.200, 1.176	229.200, 1.506	229.200, 1.400	229.200, 0.608	229.200, 0.546	229.200, 0.619	229.200, 0.543	229.200, 0.545	229.200, 0.542	229.200, 0.500	229.200, 0.484	229.200, 0.497	229.200, 0.465	229.200, 0.472	229.200, 0.505
1148	229.400, 1.175	229.400, 1.505	229.400, 1.400	229.400, 0.607	229.400, 0.546	229.400, 0.619	229.400, 0.543	229.400, 0.545	229.400, 0.543	229.400, 0.500	229.400, 0.484	229.400, 0.497	229.400, 0.465	229.400, 0.472	229.400, 0.505
1149	229.600, 1.173	229.600, 1.504	229.600, 1.399	229.600, 0.607	229.600, 0.546	229.600, 0.619	229.600, 0.543	229.600, 0.545	229.600, 0.543	229.600, 0.500	229.600, 0.484	229.600, 0.497	229.600, 0.465	229.600, 0.472	229.600, 0.505
1150	229.800, 1.172	229.800, 1.503	229.800, 1.398	229.800, 0.607	229.800, 0.545	229.800, 0.619	229.800, 0.543	229.800, 0.545	229.800, 0.543	229.800, 0.500	229.800, 0.484	229.800, 0.497	229.800, 0.465	229.800, 0.472	229.800, 0.505
1151	230.000, 1.171	230.000, 1.502	230.000, 1.397	230.000, 0.607	230.000, 0.545	230.000, 0.619	230.000, 0.542	230.000, 0.545	230.000, 0.543	230.000, 0.500	230.000, 0.484	230.000, 0.497	230.000, 0.464	230.000, 0.472	230.000, 0.505
1152	230.200, 1.171	230.200, 1.501	230.200, 1.396	230.200, 0.607	230.200, 0.545	230.200, 0.618	230.200, 0.542	230.200, 0.544	230.200, 0.543	230.200, 0.500	230.200, 0.483	230.200, 0.497	230.200, 0.464	230.200, 0.472	230.200, 0.505
1153	230.400, 1.170	230.400, 1.500	230.400, 1.395	230.400, 0.607	230.400, 0.545	230.400, 0.618	230.400, 0.542	230.400, 0.545	230.400, 0.544	230.400, 0.500	230.400, 0.483	230.400, 0.497	230.400, 0.464	230.400, 0.472	230.400, 0.505
1154	230.600, 1.169	230.600, 1.498	230.600, 1.394	230.600, 0.607	230.600, 0.545	230.600, 0.618	230.600, 0.542	230.600, 0.545	230.600, 0.544	230.600, 0.500	230.600, 0.483	230.600, 0.497	230.600, 0.464	230.600, 0.472	230.600, 0.505
1155	230.800, 1.168	230.800, 1.497	230.800, 1.393	230.800, 0.607	230.800, 0.544	230.800, 0.618	230.800, 0.542	230.800, 0.545	230.800, 0.544	230.800, 0.499	230.800, 0.483	230.800, 0.497	230.800, 0.464	230.800, 0.472	230.800, 0.505
1156	231.000, 1.168	231.000, 1.495	231.000, 1.392	231.000, 0.607	231.000, 0.544	231.000, 0.618	231.000, 0.542	231.000, 0.545	231.000, 0.544	231.000, 0.499	231.000, 0.483	231.000, 0.497	231.000, 0.464	231.000, 0.471	231.000, 0.505
1157	231.200, 1.167	231.200, 1.494	231.200, 1.391	231.200, 0.607	231.200, 0.544	231.200, 0.618	231.200, 0.542	231.200, 0.545	231.200, 0.544	231.200, 0.499	231.200, 0.483	231.200, 0.497	231.200, 0.464	231.200, 0.471	231.200, 0.505
1158	231.400, 1.167	231.400, 1.493	231.400, 1.390	231.400, 0.607	231.400, 0.544	231.400, 0.618	231.400, 0.542	231.400, 0.545	231.400, 0.544	231.400, 0.499	231.400, 0.483	231.400, 0.496	231.400, 0.464	231.400, 0.471	231.400, 0.504
1159	231.600, 1.166	231.600, 1.491	231.600, 1.389	231.600, 0.607	231.600, 0.544	231.600, 0.617	231.600, 0.542	231.600, 0.545	231.600, 0.545	231.600, 0.499	231.600, 0.483	231.600, 0.496	231.600, 0.464	231.600, 0.471	231.600, 0.504
1160	231.800, 1.166	231.800, 1.490	231.800, 1.389	231.800, 0.607	231.800, 0.544	231.800, 0.617	231.800, 0.542	231.800, 0.545	231.800, 0.545	231.800, 0.498	231.800, 0.484	231.800, 0.496	231.800, 0.464	231.800, 0.471	231.800, 0.504
1161	232.000, 1.165	232.000, 1.489	232.000, 1.388	232.000, 0.606	232.000, 0.544	232.000, 0.617	232.000, 0.542	232.000, 0.545	232.000, 0.545	232.000, 0.498	232.000, 0.483	232.000, 0.495	232.000, 0.463	232.000, 0.471	232.000, 0.504
1162	232.200, 1.164	232.200, 1.488	232.200, 1.387	232.200, 0.606	232.200, 0.544	232.200, 0.617	232.200, 0.542	232.200, 0.545	232.200, 0.545	232.200, 0.498	232.200, 0.483	232.200, 0.495	232.200, 0.463	232.200, 0.470	232.200, 0.504
1163	232.400, 1.163	232.400, 1.487	232.400, 1.386	232.400, 0.606	232.400, 0.544	232.400, 0.617	232.400, 0.541	232.400, 0.545	232.400, 0.545	232.400, 0.499	232.400, 0.483	232.400, 0.495	232.400, 0.463	232.400, 0.470	232.400, 0.504
1164	232.600, 1.162	232.600, 1.486	232.600, 1.384	232.600, 0.606	232.600, 0.544	232.600, 0.617	232.600, 0.541	232.600, 0.544	232.600, 0.544	232.600, 0.499	232.600, 0.483	232.600, 0.496	232.600, 0.463	232.600, 0.470	232.600, 0.504
1165	232.800, 1.161	232.800, 1.485	232.800, 1.383	232.800, 0.606	232.800, 0.544	232.800, 0.617	232.800, 0.541	232.800, 0.544	232.800, 0.544	232.800, 0.499	232.800, 0.483	232.800, 0.496	232.800, 0.464	232.800, 0.470	232.800, 0.503
1166	233.000, 1.160	233.000, 1.484	233.000, 1.382	233.000, 0.606	233.000, 0.543	233.000, 0.617	233.000, 0.540	233.000, 0.544	233.000, 0.543	233.000, 0.499	233.000, 0.483	233.000, 0.496	233.000, 0.463	233.000, 0.470	233.000, 0.503
1167	233.200, 1.159	233.200, 1.483	233.200, 1.381	233.200, 0.606	233.200, 0.543	233.200, 0.617	233.200, 0.540	233.200, 0.544	233.200, 0.542	233.200, 0.500	233.200, 0.483	233.200, 0.496	233.200, 0.463	233.200, 0.470	233.200, 0.503
1168	233.400, 1.158	233.400, 1.482	233.400, 1.380	233.400, 0.606	233.400, 0.543	233.400, 0.617	233.400, 0.540	233.400, 0.544	233.400, 0.542	233.400, 0.500	233.400, 0.483	233.400, 0.496	233.400, 0.463	233.400, 0.470	233.400, 0.503
1169	233.600, 1.157	233.600, 1.481	233.600, 1.378	233.600, 0.606	233.600, 0.542	233.600, 0.617	233.600, 0.540	233.600, 0.543	233.600, 0.541	233.600, 0.500	233.600, 0.483	233.600, 0.495	233.600, 0.463	233.600, 0.470	233.600, 0.503
1170	233.800, 1.156	233.800, 1.480	233.800, 1.377	233.800, 0.606	233.800, 0.542	233.800, 0.617	233.800, 0.540	233.800, 0.543	233.800, 0.541	233.800, 0.500	233.800, 0.483	233.800, 0.495	233.800, 0.463	233.800, 0.470	233.800, 0.503
1171	234.000, 1.156	234.000, 1.479	234.000, 1.376	234.000, 0.606	234.000, 0.541	234.000, 0.617	234.000, 0.540	234.000, 0.543	234.000, 0.540	234.000, 0.499	234.000, 0.483	234.000, 0.495	234.000, 0.463	234.000, 0.470	234.000, 0.503
1172	234.200, 1.155	234.200, 1.478	234.200, 1.374	234.200, 0.605	234.200, 0.541	234.200, 0.617	234.200, 0.539	234.200, 0.543	234.200, 0.540	234.200, 0.499	234.200, 0.483	234.200, 0.495	234.200, 0.463	234.200, 0.470	234.200, 0.503
1173	234.400, 1.154	234.400, 1.477	234.400, 1.373	234.400, 0.605	234.400, 0.541	234.400, 0.617	234.400, 0.539	234.400, 0.543	234.400, 0.540	234.400, 0.499	234.400, 0.483	234.400, 0.495	234.400, 0.463	234.400, 0.470	234.400, 0.503
1174	234.600, 1.153	234.600, 1.476	234.600, 1.372	234.600, 0.605	234.600, 0.540	234.600, 0.617	234.600, 0.539	234.600, 0.543	234.600, 0.539	234.600, 0.498	234.600, 0.483	234.600, 0.495	234.600, 0.463	234.600, 0.470	234.600, 0.502
1175	234.800, 1.153	234.800, 1.475	234.800, 1.371	234.800, 0.605	234.800, 0.540	234.800, 0.617	234.800, 0.539	234.800, 0.542	234.800, 0.539	234.800, 0.498	234.800, 0.483	234.800, 0.495	234.800, 0.463	234.800, 0.470	234.800, 0.502
1176	235.000, 1.153	235.000, 1.474	235.000, 1.370	235.000, 0.605	235.000, 0.540	235.000, 0.617	235.000, 0.539	235.000, 0.542	235.000, 0.539	235.000, 0.498	235.000, 0.483	235.000, 0.495	235.000, 0.463	235.000, 0.469	235.000, 0.502
1177	235.200, 1.152	235.200, 1.473	235.200, 1.369	235.200, 0.605	235.200, 0.540	235.200, 0.616	235.200, 0.539	235.200, 0.542	235.200, 0.538	235.200, 0.498	235.200, 0.483	235.200, 0.495	235.200, 0.463	235.200, 0.469	235.200, 0.502
1178	235.400, 1.152	235.400, 1.472	235.400, 1.369	235.400, 0.605	235.400, 0.540	235.400, 0.616	235.400, 0.539	235.400, 0.542	235.400, 0.538	235.400, 0.498	235.400, 0.483	235.400, 0.495	235.400, 0.463	235.400, 0.469	235.400, 0.501
1179	235.600, 1.151	235.600, 1.471	235.600, 1.368	235.600, 0.605	235.600, 0.540	235.600, 0.616	235.600, 0.539	235.600, 0.542	235.600, 0.538	235.600, 0.498	235.600, 0.483	235.600, 0.495	235.600, 0.463	235.600, 0.469	235.600, 0.501
1180	235.800, 1.151	235.800, 1.470	235.800, 1.368	235.800, 0.605	235.800, 0.540	235.800, 0.615	235.800, 0.539	235.800, 0.542	235.800, 0.539	235.800, 0.498	235.800, 0.483	235.800, 0.494	235.800, 0.463	235.800, 0.469	235.800, 0.501
1181	236.000, 1.150	236.000, 1.469	236.000, 1.367	236.000, 0.605	236.000, 0.540	236.000, 0.615	236.000, 0.539	236.000, 0.542	236.000, 0.539	236.000, 0.498	236.000, 0.482	236.000, 0.494	236.000, 0.463	236.000, 0.469	236.000, 0.501
1182	236.200, 1.149	236.200, 1.468	236.200, 1.366	236.200, 0.605	236.200, 0.540	236.200, 0.615	236.200, 0.539	236.200, 0.542	236.200, 0.539	236.200, 0.498	236.200, 0.482	236.200, 0.494	236.200, 0.463	236.200, 0.469	236.200, 0.501
1183	236.400, 1.148	236.400, 1.467	236.400, 1.365	236.400, 0.605	236.400, 0.540	236.400, 0.615	236.400, 0.538	236.400, 0.541	236.400, 0.539	236.400, 0.498	236.400, 0.481	236.400, 0.494	236.400, 0.463	236.400, 0.469	236.400, 0.501
1184	236.600, 1.147	236.600, 1.466	236.600, 1.364	236.600, 0.605	236.600, 0.540	236.600, 0.615	236.600, 0.538	236.600, 0.541	236.600, 0.539	236.600, 0.498	236.600, 0.481	236.600, 0.494	236.600, 0.463	236.600, 0.469	236.600, 0.501
1185	236.800, 1.146	236.800, 1.465	236.800, 1.363	236.800, 0.604	236.800, 0.540	236.800, 0.615	236.800, 0.538	236.800, 0.541	236.800, 0.539	236.800, 0.498	236.800, 0.481	236.800, 0.494	236.800, 0.463	236.800, 0.468	236.800, 0.502
1186	237.000, 1.145	237.000, 1.464	237.000, 1.362	237.000, 0.604	237.000, 0.540	237.000, 0.615	237.000, 0.538	237.000, 0.541	237.000, 0.539	237.000, 0.498	237.000, 0.480	237.000, 0.494	237.000, 0.463	237.000, 0.468	237.000, 0.502
1187	237.200, 1.144	237.200, 1.463	237.200, 1.360	237.200, 0.604	237.200, 0.540	237.200, 0.615	237.200, 0.538	237.200, 0.541	237.200, 0.539	237.200, 0.498	237.200, 0.480	237.200, 0.493	237.200, 0.462	237.200, 0.468	237.200, 0.502
1188	237.400, 1.143	237.400, 1.463	237.400, 1.359	237.400, 0.604	237.400, 0.540	237.400, 0.615	237.400, 0.538	237.400, 0.541	237.400, 0.539	237.400, 0.497	237.400, 0.480	237.400, 0.493	237.400, 0.462	237.400, 0.468	237.400, 0.502
1189	237.600, 1.142	237.600, 1.462	237.600, 1.358	237.600, 0.604	237.600, 0.540	237.600, 0.615	237.600, 0.538	237.600, 0.541	237.600, 0.539	237.600, 0.497	237.600, 0.480	237.600, 0.493	237.600, 0.462	237.600, 0.468	237.600, 0.502
1190	237.800, 1.141	237.800, 1.461	237.800, 1.357	237.800, 0.604	237.800, 0.540	237.800, 0.614	237.800, 0.538	237.800, 0.540	237.800, 0.539	237.800, 0.496	237.800, 0.480	237.800, 0.492	237.800, 0.462	237.800, 0.468	237.800, 0.502
1191	238.000, 1.140	238.000, 1.460	238.000, 1.355	238.000, 0.603	238.000, 0.540	238.000, 0.614	238.000, 0.538	238.000, 0.540	238.000, 0.539	238.000, 0.496	238.000, 0.480	238.000, 0.492	238.000, 0.462	238.000, 0.468	238.000, 0.502
1192	238.200, 1.140	238.200, 1.459	238.200, 1.354	238.200, 0.603	238.200, 0.540	238.200, 0.614	238.200, 0.537	238.200, 0.540	238.200, 0.539	238.200, 0.495	238.200, 0.480	238.200, 0.492	238.200, 0.462	238.200, 0.468	238.200, 0.502
1193	238.400, 1.139	238.400, 1.457	238.400, 1.353	238.400, 0.603	238.400, 0.540	238.400, 0.614	238.400, 0.537	238.400, 0.539	238.400, 0.539	238.400, 0.495	238.400, 0.480	238.400, 0.492	238.400, 0.462	238.400, 0.468	238.400, 0.502
1194	238.600, 1.138	238.600, 1.456	238.600, 1.351	238.600, 0.603	238.600, 0.540	238.600, 0.614	238.600, 0.537	238.600, 0.539	238.600, 0.538	238.600, 0.495	238.600, 0.481	238.600, 0.492	238.600, 0.462	238.600, 0.468	238.600, 0.502
1195	238.800, 1.137	238.800, 1.454	238.800, 1.350	238.800, 0.603	238.800, 0.539	238.800, 0.614	238.800, 0.537	238.800, 0.539	238.800, 0.538	238.800, 0.495	238.800, 0.481	238.800, 0.492	238.800, 0.462	238.800, 0.468	238.800, 0.502
1196	239.000, 1.136	239.000, 1.453	239.000, 1.349	239.000, 0.603	239.000, 0.539	239.000, 0.614	239.000, 0.536	239.000, 0.538	239.000, 0.538	239.000, 0.494	239.000, 0.481	239.000, 0.492	239.000, 0.462	239.000, 0.468	239.000, 0.502
1197	239.200, 1.135	239.200, 1.452	239.200, 1.348	239.200, 0.603	239.200, 0.539	239.200, 0.613	239.200, 0.536	239.200, 0.538	239.200, 0.538	239.200, 0.494	239.200, 0.481	239.200, 0.492	239.200, 0.461	239.200, 0.468	239.200, 0.502
1198	239.400, 1.134	239.400, 1.451	239.400, 1.348	239.400, 0.603	239.400, 0.539	239.400, 0.613	239.400, 0.536	239.400, 0.538	239.400, 0.537	239.400, 0.494	239.400, 0.481	239.400, 0.492	239.400, 0.461	239.400, 0.468	239.400, 0.502
1199	239.600, 1.133	239.600, 1.450	239.600, 1.347	239.600, 0.602	239.600, 0.538	239.600, 0.613	239.600, 0.536	239.600, 0.538	239.600, 0.537	239.600, 0.494	239.600, 0.481	239.600, 0.492	239.600, 0.461	239.600, 0.468	239.600, 0.501
1200	239.800, 1.132	239.800, 1.449	239.800, 1.346	239.800, 0.602	239.800, 0.538	239.800, 0.613	239.800, 0.536	239.800, 0.538	239.800, 0.537	239.800, 0.494	239.800, 0.481	239.800, 0.492	239.800, 0.461	239.800, 0.467	239.800, 0.501
1201	240.000, 1.131	240.000, 1.448	240.000, 1.345	240.000, 0.602	240.000, 0.538	240.000, 0.613	240.000, 0.535	240.000, 0.538	240.000, 0.537	240.000, 0.494	240.000, 0.480	240.000, 0.492	240.000, 0.460	240.000, 0.467	240.000, 0.500
1202	240.200, 1.131	240.200, 1.447	240.200, 1.344	240.200, 0.602	240.200, 0.538	240.200, 0.613	240.200, 0.535	240.200, 0.538	240.200, 0.537	240.200, 0.494	240.200, 0.480	240.200, 0.492	240.200, 0.460	240.200, 0.467	240.200, 0.500
1203	240.400, 1.130	240.400, 1.446	240.400, 1.343	240.400, 0.601	240.400, 0.537	240.400, 0.613	240.400, 0.535	240.400, 0.538	240.400, 0.537	240.400, 0.494	240.400, 0.480	240.400, 0.492	240.400, 0.459	240.400, 0.467	240.400, 0.500
1204	240.600, 1.130	240.600, 1.446	240.600, 1.342	240.600, 0.601	240.600, 0.537	240.600, 0.612	240.600, 0.535	240.600, 0.538	240.600, 0.537	240.600, 0.494	240.600, 0.479	240.600, 0.491	240.600, 0.459	240.600, 0.467	240.600, 0.499
1205	240.800, 1.129	240.800, 1.445	240.800, 1.341	240.800, 0.601	240.800, 0.538	240.800, 0.612	240.800, 0.536	240.800, 0.538	240.800, 0.537	240.800, 0.494	240.800, 0.479	240.800, 0.491	240.800, 0.459	240.800, 0.467	240.800, 0.499
1206	241.000, 1.128	241.000, 1.444	241.000, 1.340	241.000, 0.601	241.000, 0.538	241.000, 0.612	241.000, 0.536	241.000, 0.538	241.000, 0.537	241.000, 0.494	241.000, 0.479	241.000, 0.491	241.000, 0.458	241.000, 0.467	241.000, 0.498
1207	241.200, 1.128	241.200, 1.443	241.200, 1.339	241.200, 0.600	241.200, 0.538	241.200, 0.612	241.200, 0.536	241.200, 0.538	241.200, 0.537	241.200, 0.494	241.200, 0.479	241.200, 0.491	241.200, 0.458	241.200, 0.467	241.200, 0.498
1208	241.400, 1.127	241.400, 1.442	241.400, 1.338	241.400, 0.600	241.400, 0.538	241.400, 0.612	241.400, 0.536	241.400, 0.538	241.400, 0.537	241.400, 0.494	241.400, 0.479	241.400, 0.490	241.400, 0.458	241.400, 0.467	241.400, 0.498
1209	241.600, 1.127	241.600, 1.441	241.600, 1.337	241.600, 0.600	241.600, 0.538	241.600, 0.612	241.600, 0.536	241.600, 0.538	241.600, 0.536	241.600, 0.494	241.600, 0.479	241.600, 0.490	241.600, 0.457	241.600, 0.466	241.600, 0.497
1210	241.800, 1.126	241.800, 1.440	241.800, 1.336	241.800, 0.600	241.800, 0.538	241.800, 0.611	241.800, 0.536	241.800, 0.538	241.800, 0.536	241.800, 0.494	241.800, 0.479	241.800, 0.490	241.800, 0.457	241.800, 0.466	241.800, 0.497
1211	242.000, 1.126	242.000, 1.439	242.000, 1.335	242.000, 0.600	242.000, 0.539	242.000, 0.611	242.000, 0.536	242.000, 0.538	242.000, 0.536	242.000, 0.494	242.000, 0.479	242.000, 0.490	242.000, 0.457	242.000, 0.466	242.000, 0.497
1212	242.200, 1.125	242.200, 1.438	242.200, 1.333	242.200, 0.600	242.200, 0.539	242.200, 0.611	242.200, 0.536	242.200, 0.538	242.200, 0.536	242.200, 0.494	242.200, 0.479	242.200, 0.490	242.200, 0.457	242.200, 0.466	242.200, 0.497
1213	242.400, 1.124	242.400, 1.437	242.400, 1.332	242.400, 0.600	242.400, 0.538	242.400, 0.611	242.400, 0.536	242.400, 0.538	242.400, 0.536	242.400, 0.494	242.400, 0.479	242.400, 0.490	242.400, 0.457	242.400, 0.466	242.400, 0.497
1214	242.600, 1.124	242.600, 1.436	242.600, 1.331	242.600, 0.600	242.600, 0.538	242.600, 0.612	242.600, 0.536	242.600, 0.538	242.600, 0.536	242.600, 0.494	242.600, 0.479	242.600, 0.490	242.600, 0.457	242.600, 0.466	242.600, 0.497
1215	242.800, 1.123	242.800, 1.435	242.800, 1.330	242.800, 0.600	242.800, 0.538	242.800, 0.612	242.800, 0.536	242.800, 0.538	242.800, 0.536	242.800, 0.493	242.800, 0.479	242.800, 0.490	242.800, 0.457	242.800, 0.466	242.800, 0.497
1216	243.000, 1.122	243.000, 1.433	243.000, 1.330	243.000, 0.600	243.000, 0.538	243.000, 0.612	243.000, 0.536	243.000, 0.538	243.000, 0.535	243.000, 0.493	243.000, 0.479	243.000, 0.490	243.000, 0.457	243.000, 0.466	243.000, 0.498
1217	243.200, 1.121	243.200, 1.432	243.200, 1.329	243.200, 0.600	243.200, 0.537	243.200, 0.612	243.200, 0.536	243.200, 0.539	243.200, 0.535	243.200, 0.493	243.200, 0.478	243.200, 0.490	243.200, 0.457	243.200, 0.466	243.200, 0.498
1218	243.400, 1.121	243.400, 1.431	243.400, 1.328	243.400, 0.600	243.400, 0.537	243.400, 0.612	243.400, 0.536	243.400, 0.538	243.400, 0.535	243.400, 0.493	243.400, 0.478	243.400, 0.490	243.400, 0.457	243.400, 0.466	243.400, 0.498
1219	243.600, 1.120	243.600, 1.430	243.600, 1.327	243.600, 0.600	243.600, 0.537	243.600, 0.612	243.600, 0.536	243.600, 0.538	243.600, 0.535	243.600, 0.493	243.600, 0.478	243.600, 0.490	243.600, 0.457	243.600, 0.466	243.600, 0.498
1220	243.800, 1.120	243.800, 1.429	243.800, 1.326	243.800, 0.600	243.800, 0.537	243.800, 0.612	243.800, 0.536	243.800, 0.538	243.800, 0.536	243.800, 0.493	243.800, 0.478	243.800, 0.490	243.800, 0.458	243.800, 0.466	243.800, 0.498
1221	244.000, 1.119	244.000, 1.428	244.000, 1.325	244.000, 0.600	244.000, 0.536	244.000, 0.612	244.000, 0.535	244.000, 0.538	244.000, 0.535	244.000, 0.493	244.000, 0.478	244.000, 0.490	244.000, 0.458	244.000, 0.466	244.000, 0.497
1222	244.200, 1.119	244.200, 1.428	244.200, 1.324	244.200, 0.600	244.200, 0.536	244.200, 0.612	244.200, 0.535	244.200, 0.538	244.200, 0.535	244.200, 0.493	244.200, 0.478	244.200, 0.490	244.200, 0.458	244.200, 0.466	244.200, 0.497
1223	244.400, 1.118	244.400, 1.427	244.400, 1.323	244.400, 0.599	244.400, 0.536	244.400, 0.612	244.400, 0.535	244.400, 0.538	244.400, 0.536	244.400, 0.493	244.400, 0.478	244.400, 0.490	244.400, 0.458	244.400, 0.465	244.400, 0.497
1224	244.600, 1.117	244.600, 1.426	244.600, 1.322	244.600, 0.599	244.600, 0.536	244.600, 0.611	244.600, 0.535	244.600, 0.538	244.600, 0.536	244.600, 0.492	244.600, 0.478	244.600, 0.490	244.600, 0.458	244.600, 0.465	244.600, 0.497
1225	244.800, 1.117	244.800, 1.425	244.800, 1.321	244.800, 0.599	244.800, 0.536	244.800, 0.611	244.800, 0.534	244.800, 0.538	244.800, 0.536	244.800, 0.492	244.800, 0.478	244.800, 0.490	244.800, 0.458	244.800, 0.465	244.800, 0.497
1226	245.000, 1.116	245.000, 1.424	245.000, 1.320	245.000, 0.599	245.000, 0.536	245.000, 0.611	245.000, 0.534	245.000, 0.538	245.000, 0.536	245.000, 0.492	245.000, 0.478	245.000, 0.490	245.000, 0.458	245.000, 0.465	245.000, 0.497
1227	245.200, 1.115	245.200, 1.422	245.200, 1.318	245.200, 0.599	245.200, 0.536	245.200, 0.610	245.200, 0.534	245.200, 0.538	245.200, 0.536	245.200, 0.492	245.200, 0.478	245.200, 0.490	245.200, 0.458	245.200, 0.465	245.200, 0.497
1228	245.400, 1.114	245.400, 1.421	245.400, 1.317	245.400, 0.598	245.400, 0.536	245.400, 0.610	245.400, 0.533	245.400, 0.538	245.400, 0.536	245.400, 0.492	245.400, 0.478	245.400, 0.490	245.400, 0.458	245.400, 0.465	245.400, 0.497
1229	245.600, 1.113	245.600, 1.420	245.600, 1.316	245.600, 0.598	245.600, 0.536	245.600, 0.610	245.600, 0.533	245.600, 0.538	245.600, 0.536	245.600, 0.492	245.600, 0.478	245.600, 0.490	245.600, 0.458	245.600, 0.465	245.600, 0.497
1230	245.800, 1.113	245.800, 1.419	245.800, 1.315	245.800, 0.598	245.800, 0.536	245.800, 0.610	245.800, 0.533	245.800, 0.538	245.800, 0.536	245.800, 0.492	245.800, 0.478	245.800, 0.490	245.800, 0.458	245.800, 0.465	245.800, 0.497
1231	246.000, 1.112	246.000, 1.418	246.000, 1.314	246.000, 0.598	246.000, 0.536	246.000, 0.610	246.000, 0.533	246.000, 0.538	246.000, 0.536	246.000, 0.492	246.000, 0.478	246.000, 0.489	246.000, 0.458	246.000, 0.465	246.000, 0.497
1232	246.200, 1.111	246.200, 1.416	246.200, 1.313	246.200, 0.598	246.200, 0.536	246.200, 0.610	246.200, 0.533	246.200, 0.538	246.200, 0.536	246.200, 0.492	246.200, 0.478	246.200, 0.489	246.200, 0.458	246.200, 0.465	246.200, 0.497
1233	246.400, 1.110	246.400, 1.415	246.400, 1.312	246.400, 0.598	246.400, 0.536	246.400, 0.610	246.400, 0.533	246.400, 0.538	246.400, 0.536	246.400, 0.492	246.400, 0.477	246.400, 0.489	246.400, 0.458	246.400, 0.465	246.400, 0.497
1234	246.600, 1.110	246.600, 1.414	246.600, 1.311	246.600, 0.599	246.600, 0.536	246.600, 0.610	246.600, 0.533	246.600, 0.538	246.600, 0.536	246.600, 0.492	246.600, 0.477	246.600, 0.489	246.600, 0.458	246.600, 0.465	246.600, 0.497
1235	246.800, 1.109	246.800, 1.413	246.800, 1.311	246.800, 0.599	246.800, 0.536	246.800, 0.609	246.800, 0.533	246.800, 0.538	246.800, 0.536	246.800, 0.492	246.800, 0.477	246.800, 0.489	246.800, 0.458	246.800, 0.465	246.800, 0.497
1236	247.000, 1.108	247.000, 1.412	247.000, 1.310	247.000, 0.599	247.000, 0.536	247.000, 0.609	247.000, 0.533	247.000, 0.537	247.000, 0.535	247.000, 0.492	247.000, 0.477	247.000, 0.489	247.000, 0.458	247.000, 0.464	247.000, 0.497
1237	247.200, 1.107	247.200, 1.411	247.200, 1.309	247.200, 0.599	247.200, 0.536	247.200, 0.609	247.200, 0.533	247.200, 0.537	247.200, 0.535	247.200, 0.492	247.200, 0.477	247.200, 0.489	247.200, 0.458	247.200, 0.464	247.200, 0.497
1238	247.400, 1.106	247.400, 1.410	247.400, 1.308	247.400, 0.599	247.400, 0.536	247.400, 0.609	247.400, 0.533	247.400, 0.537	247.400, 0.535	247.400, 0.492	247.400, 0.476	247.400, 0.489	247.400, 0.458	247.400, 0.464	247.400, 0.497
1239	247.600, 1.106	247.600, 1.409	247.600, 1.307	247.600, 0.599	247.600, 0.535	247.600, 0.609	247.600, 0.533	247.600, 0.536	247.600, 0.535	247.600, 0.492	247.600, 0.476	247.600, 0.488	247.600, 0.458	247.600, 0.464	247.600, 0.497
1240	247.800, 1.105	247.800, 1.408	247.800, 1.306	247.800, 0.599	247.800, 0.535	247.800, 0.609	247.800, 0.533	247.800, 0.536	247.800, 0.534	247.800, 0.492	247.800, 0.476	247.800, 0.488	247.800, 0.458	247.800, 0.464	247.800, 0.497
1241	248.000, 1.104	248.000, 1.407	248.000, 1.305	248.000, 0.599	248.000, 0.535	248.000, 0.609	248.000, 0.533	248.000, 0.536	248.000, 0.534	248.000, 0.491	248.000, 0.476	248.000, 0.488	248.000, 0.457	248.000, 0.464	248.000, 0.497
1242	248.200, 1.103	248.200, 1.407	248.200, 1.304	248.200, 0.599	248.200, 0.535	248.200, 0.609	248.200, 0.533	248.200, 0.535	248.200, 0.534	248.200, 0.491	248.200, 0.476	248.200, 0.488	248.200, 0.457	248.200, 0.463	248.200, 0.497
1243	248.400, 1.103	248.400, 1.406	248.400, 1.303	248.400, 0.598	248.400, 0.534	248.400, 0.609	248.400, 0.533	248.400, 0.535	248.400, 0.533	248.400, 0.491	248.400, 0.476	248.400, 0.488	248.400, 0.457	248.400, 0.463	248.400, 0.497
1244	248.600, 1.102	248.600, 1.405	248.600, 1.301	248.600, 0.598	248.600, 0.534	248.600, 0.609	248.600, 0.533	248.600, 0.535	248.600, 0.533	248.600, 0.491	248.600, 0.476	248.600, 0.488	248.600, 0.457	248.600, 0.463	248.600, 0.497
1245	248.800, 1.101	248.800, 1.404	248.800, 1.300	248.800, 0.598	248.800, 0.534	248.800, 0.609	248.800, 0.532	248.800, 0.535	248.800, 0.533	248.800, 0.491	248.800, 0.476	248.800, 0.488	248.800, 0.457	248.800, 0.463	248.800, 0.496
1246	249.000, 1.100	249.000, 1.403	249.000, 1.299	249.000, 0.598	249.000, 0.533	249.000, 0.609	249.000, 0.532	249.000, 0.535	249.000, 0.532	249.000, 0.490	249.000, 0.476	249.000, 0.488	249.000, 0.456	249.000, 0.463	249.000, 0.496
1247	249.200, 1.100	249.200, 1.402	249.200, 1.298	249.200, 0.597	249.200, 0.533	249.200, 0.609	249.200, 0.532	249.200, 0.535	249.200, 0.532	249.200, 0.490	249.200, 0.476	249.200, 0.488	249.200, 0.456	249.200, 0.463	249.200, 0.496
1248	249.400, 1.099	249.400, 1.401	249.400, 1.297	249.400, 0.597	249.400, 0.533	249.400, 0.608	249.400, 0.532	249.400, 0.535	249.400, 0.532	249.400, 0.490	249.400, 0.476	249.400, 0.487	249.400, 0.456	249.400, 0.463	249.400, 0.496
1249	249.600, 1.098	249.600, 1.400	249.600, 1.296	249.600, 0.597	249.600, 0.533	249.600, 0.608	249.600, 0.532	249.600, 0.535	249.600, 0.532	249.600, 0.490	249.600, 0.476	249.600, 0.487	249.600, 0.456	249.600, 0.463	249.600, 0.496
1250	249.800, 1.098	249.800, 1.399	249.800, 1.296	249.800, 0.597	249.800, 0.532	249.800, 0.608	249.800, 0.532	249.800, 0.534	249.800, 0.532	249.800, 0.490	249.800, 0.475	249.800, 0.487	249.800, 0.455	249.800, 0.463	249.800, 0.495
1251	250.000, 1.097	250.000, 1.398	250.000, 1.295	250.000, 0.596	250.000, 0.532	250.000, 0.608	250.000, 0.533	250.000, 0.534	250.000, 0.532	250.000, 0.490	250.000, 0.475	250.000, 0.487	250.000, 0.455	250.000, 0.463	250.000, 0.495
1252	250.200, 1.096	250.200, 1.397	250.200, 1.294	250.200, 0.596	250.200, 0.532	250.200, 0.608	250.200, 0.533	250.200, 0.534	250.200, 0.532	250.200, 0.490	250.200, 0.475	250.200, 0.487	250.200, 0.455	250.200, 0.463	250.200, 0.495
1253	250.400, 1.095	250.400, 1.396	250.400, 1.293	250.400, 0.595	250.400, 0.532	250.400, 0.607	250.400, 0.533	250.400, 0.534	250.400, 0.533	250.400, 0.490	250.400, 0.475	250.400, 0.487	250.400, 0.455	250.400, 0.463	250.400, 0.494
1254	250.600, 1.094	250.600, 1.395	250.600, 1.292	250.600, 0.595	250.600, 0.532	250.600, 0.607	250.600, 0.533	250.600, 0.535	250.600, 0.533	250.600, 0.490	250.600, 0.475	250.600, 0.487	250.600, 0.455	250.600, 0.463	250.600, 0.494
1255	250.800, 1.094	250.800, 1.394	250.800, 1.291	250.800, 0.595	250.800, 0.532	250.800, 0.607	250.800, 0.533	250.800, 0.535	250.800, 0.533	250.800, 0.490	250.800, 0.475	250.800, 0.487	250.800, 0.455	250.800, 0.462	250.800, 0.494
1256	251.000, 1.093	251.000, 1.393	251.000, 1.290	251.000, 0.595	251.000, 0.532	251.000, 0.606	251.000, 0.532	251.000, 0.535	251.000, 0.532	251.000, 0.490	251.000, 0.475	251.000, 0.487	251.000, 0.455	251.000, 0.462	251.000, 0.493
1257	251.200, 1.092	251.200, 1.392	251.200, 1.289	251.200, 0.595	251.200, 0.532	251.200, 0.606	251.200, 0.532	251.200, 0.535	251.200, 0.532	251.200, 0.490	251.200, 0.474	251.200, 0.487	251.200, 0.455	251.200, 0.462	251.200, 0.493
1258	251.400, 1.091	251.400, 1.391	251.400, 1.288	251.400, 0.595	251.400, 0.532	251.400, 0.606	251.400, 0.532	251.400, 0.535	251.400, 0.532	251.400, 0.490	251.400, 0.474	251.400, 0.487	251.400, 0.455	251.400, 0.462	251.400, 0.493
1259	251.600, 1.091	251.600, 1.389	251.600, 1.287	251.600, 0.596	251.600, 0.532	251.600, 0.606	251.600, 0.532	251.600, 0.535	251.600, 0.532	251.600, 0.490	251.600, 0.474	251.600, 0.487	251.600, 0.455	251.600, 0.461	251.600, 0.493
1260	251.800, 1.090	251.800, 1.388	251.800, 1.286	251.800, 0.596	251.800, 0.532	251.800, 0.606	251.800, 0.532	251.800, 0.535	251.800, 0.532	251.800, 0.490	251.800, 0.474	251.800, 0.487	251.800, 0.455	251.800, 0.461	251.800, 0.493
1261	252.000, 1.089	252.000, 1.387	252.000, 1.285	252.000, 0.596	252.000, 0.532	252.000, 0.607	252.000, 0.532	252.000, 0.535	252.000, 0.532	252.000, 0.490	252.000, 0.474	252.000, 0.487	252.000, 0.455	252.000, 0.461	252.000, 0.494
1262	252.200, 1.089	252.200, 1.386	252.200, 1.284	252.200, 0.597	252.200, 0.533	252.200, 0.607	252.200, 0.532	252.200, 0.535	252.200, 0.531	252.200, 0.490	252.200, 0.474	252.200, 0.487	252.200, 0.455	252.200, 0.461	252.200, 0.494
1263	252.400, 1.088	252.400, 1.385	252.400, 1.283	252.400, 0.597	252.400, 0.533	252.400, 0.607	252.400, 0.532	252.400, 0.535	252.400, 0.531	252.400, 0.490	252.400, 0.474	252.400, 0.487	252.400, 0.455	252.400, 0.461	252.400, 0.494
1264	252.600, 1.087	252.600, 1.384	252.600, 1.281	252.600, 0.597	252.600, 0.533	252.600, 0.606	252.600, 0.531	252.600, 0.534	252.600, 0.531	252.600, 0.489	252.600, 0.473	252.600, 0.487	252.600, 0.455	252.600, 0.461	252.600, 0.494
1265	252.800, 1.086	252.800, 1.383	252.800, 1.280	252.800, 0.597	252.800, 0.532	252.800, 0.606	252.800, 0.531	252.800, 0.534	252.800, 0.530	252.800, 0.489	252.800, 0.473	252.800, 0.486	252.800, 0.455	252.800, 0.461	252.800, 0.494
1266	253.000, 1.085	253.000, 1.382	253.000, 1.279	253.000, 0.597	253.000, 0.532	253.000, 0.606	253.000, 0.531	253.000, 0.534	253.000, 0.530	253.000, 0.489	253.000, 0.473	253.000, 0.486	253.000, 0.454	253.000, 0.462	253.000, 0.494
1267	253.200, 1.084	253.200, 1.381	253.200, 1.279	253.200, 0.598	253.200, 0.532	253.200, 0.606	253.200, 0.531	253.200, 0.534	253.200, 0.530	253.200, 0.489	253.200, 0.473	253.200, 0.486	253.200, 0.454	253.200, 0.462	253.200, 0.494
1268	253.400, 1.083	253.400, 1.380	253.400, 1.278	253.400, 0.597	253.400, 0.532	253.400, 0.606	253.400, 0.530	253.400, 0.534	253.400, 0.530	253.400, 0.489	253.400, 0.473	253.400, 0.486	253.400, 0.454	253.400, 0.462	253.400, 0.494
1269	253.600, 1.082	253.600, 1.380	253.600, 1.277	253.600, 0.597	253.600, 0.532	253.600, 0.606	253.600, 0.530	253.600, 0.534	253.600, 0.530	253.600, 0.489	253.600, 0.473	253.600, 0.486	253.600, 0.454	253.600, 0.462	253.600, 0.494
1270	253.800, 1.081	253.800, 1.379	253.800, 1.276	253.800, 0.597	253.800, 0.532	253.800, 0.606	253.800, 0.530	253.800, 0.534	253.800, 0.530	253.800, 0.488	253.800, 0.473	253.800, 0.485	253.800, 0.454	253.800, 0.462	253.800, 0.494
1271	254.000, 1.080	254.000, 1.378	254.000, 1.275	254.000, 0.596	254.000, 0.532	254.000, 0.606	254.000, 0.530	254.000, 0.534	254.000, 0.530	254.000, 0.488	254.000, 0.473	254.000, 0.485	254.000, 0.454	254.000, 0.462	254.000, 0.494
1272	254.200, 1.080	254.200, 1.377	254.200, 1.274	254.200, 0.596	254.200, 0.532	254.200, 0.606	254.200, 0.530	254.200, 0.534	254.200, 0.530	254.200, 0.488	254.200, 0.473	254.200, 0.485	254.200, 0.454	254.200, 0.462	254.200, 0.494
1273	254.400, 1.079	254.400, 1.376	254.400, 1.273	254.400, 0.595	254.400, 0.531	254.400, 0.606	254.400, 0.529	254.400, 0.535	254.400, 0.530	254.400, 0.488	254.400, 0.473	254.400, 0.485	254.400, 0.454	254.400, 0.462	254.400, 0.494
1274	254.600, 1.078	254.600, 1.374	254.600, 1.272	254.600, 0.594	254.600, 0.531	254.600, 0.606	254.600, 0.529	254.600, 0.535	254.600, 0.530	254.600, 0.488	254.600, 0.473	254.600, 0.484	254.600, 0.454	254.600, 0.461	254.600, 0.493
1275	254.800, 1.078	254.800, 1.373	254.800, 1.271	254.800, 0.594	254.800, 0.531	254.800, 0.606	254.800, 0.528	254.800, 0.535	254.800, 0.530	254.800, 0.488	254.800, 0.473	254.800, 0.484	254.800, 0.454	254.800, 0.461	254.800, 0.493
1276	255.000, 1.078	255.000, 1.372	255.000, 1.271	255.000, 0.593	255.000, 0.531	255.000, 0.606	255.000, 0.528	255.000, 0.535	255.000, 0.531	255.000, 0.489	255.000, 0.473	255.000, 0.484	255.000, 0.454	255.000, 0.460	255.000, 0.493
1277	255.200, 1.077	255.200, 1.371	255.200, 1.270	255.200, 0.593	255.200, 0.531	255.200, 0.606	255.200, 0.528	255.200, 0.535	255.200, 0.531	255.200, 0.489	255.200, 0.473	255.200, 0.484	255.200, 0.454	255.200, 0.460	255.200, 0.493
1278	255.400, 1.077	255.400, 1.370	255.400, 1.269	255.400, 0.593	255.400, 0.531	255.400, 0.606	255.400, 0.528	255.400, 0.535	255.400, 0.531	255.400, 0.489	255.400, 0.473	255.400, 0.483	255.400, 0.454	255.400, 0.460	255.400, 0.493
1279	255.600, 1.077	255.600, 1.369	255.600, 1.268	255.600, 0.592	255.600, 0.531	255.600, 0.606	255.600, 0.528	255.600, 0.535	255.600, 0.531	255.600, 0.489	255.600, 0.473	255.600, 0.483	255.600, 0.454	255.600, 0.459	255.600, 0.493
1280	255.800, 1.076	255.800, 1.368	255.800, 1.267	255.800, 0.592	255.800, 0.531	255.800, 0.606	255.800, 0.528	255.800, 0.535	255.800, 0.532	255.800, 0.489	255.800, 0.473	255.800, 0.483	255.800, 0.454	255.800, 0.459	255.800, 0.493
1281	256.000, 1.075	256.000, 1.367	256.000, 1.266	256.000, 0.592	256.000, 0.531	256.000, 0.605	256.000, 0.528	256.000, 0.534	256.000, 0.532	256.000, 0.489	256.000, 0.473	256.000, 0.483	256.000, 0.454	256.000, 0.459	256.000, 0.493
1282	256.200, 1.074	256.200, 1.366	256.200, 1.266	256.200, 0.592	256.200, 0.531	256.200, 0.605	256.200, 0.527	256.200, 0.534	256.200, 0.532	256.200, 0.489	256.200, 0.473	256.200, 0.483	256.200, 0.454	256.200, 0.458	256.200, 0.493
1283	256.400, 1.073	256.400, 1.365	256.400, 1.265	256.400, 0.592	256.400, 0.530	256.400, 0.605	256.400, 0.527	256.400, 0.533	256.400, 0.532	256.400, 0.489	256.400, 0.473	256.400, 0.483	256.400, 0.454	256.400, 0.458	256.400, 0.492
1284	256.600, 1.072	256.600, 1.364	256.600, 1.264	256.600, 0.592	256.600, 0.530	256.600, 0.605	256.600, 0.527	256.600, 0.533	256.600, 0.531	256.600, 0.488	256.600, 0.473	256.600, 0.483	256.600, 0.454	256.600, 0.459	256.600, 0.492
1285	256.800, 1.071	256.800, 1.363	256.800, 1.263	256.800, 0.593	256.800, 0.530	256.800, 0.605	256.800, 0.527	256.800, 0.533	256.800, 0.531	256.800, 0.488	256.800, 0.473	256.800, 0.483	256.800, 0.454	256.800, 0.459	256.800, 0.492
1286	257.000, 1.070	257.000, 1.362	257.000, 1.262	257.000, 0.593	257.000, 0.530	257.000, 0.605	257.000, 0.527	257.000, 0.532	257.000, 0.531	257.000, 0.488	257.000, 0.473	257.000, 0.483	257.000, 0.453	257.000, 0.459	257.000, 0.492
1287	257.200, 1.070	257.200, 1.361	257.200, 1.261	257.200, 0.593	257.200, 0.530	257.200, 0.605	257.200, 0.527	257.200, 0.532	257.200, 0.530	257.200, 0.488	257.200, 0.473	257.200, 0.483	257.200, 0.453	257.200, 0.459	257.200, 0.492
1288	257.400, 1.069	257.400, 1.360	257.400, 1.260	257.400, 0.593	257.400, 0.529	257.400, 0.605	257.400, 0.527	257.400, 0.532	257.400, 0.530	257.400, 0.487	257.400, 0.473	257.400, 0.483	257.400, 0.453	257.400, 0.459	257.400, 0.492
1289	257.600, 1.068	257.600, 1.360	257.600, 1.259	257.600, 0.593	257.600, 0.529	257.600, 0.605	257.600, 0.527	257.600, 0.532	257.600, 0.530	257.600, 0.487	257.600, 0.473	257.600, 0.483	257.600, 0.453	257.600, 0.459	257.600, 0.492
1290	257.800, 1.067	257.800, 1.359	257.800, 1.258	257.800, 0.593	257.800, 0.530	257.800, 0.605	257.800, 0.527	257.800, 0.532	257.800, 0.529	257.800, 0.487	257.800, 0.473	257.800, 0.483	257.800, 0.453	257.800, 0.459	257.800, 0.492
1291	258.000, 1.067	258.000, 1.358	258.000, 1.257	258.000, 0.593	258.000, 0.530	258.000, 0.604	258.000, 0.527	258.000, 0.532	258.000, 0.529	258.000, 0.487	258.000, 0.472	258.000, 0.483	258.000, 0.453	258.000, 0.459	258.000, 0.492
1292	258.200, 1.066	258.200, 1.357	258.200, 1.256	258.200, 0.593	258.200, 0.530	258.200, 0.604	258.200, 0.527	258.200, 0.532	258.200, 0.529	258.200, 0.487	258.200, 0.472	258.200, 0.483	258.200, 0.452	258.200, 0.459	258.200, 0.492
1293	258.400, 1.065	258.400, 1.356	258.400, 1.255	258.400, 0.593	258.400, 0.530	258.400, 0.604	258.400, 0.527	258.400, 0.532	258.400, 0.529	258.400, 0.487	258.400, 0.472	258.400, 0.483	258.400, 0.452	258.400, 0.459	258.400, 0.492
1294	258.600, 1.065	258.600, 1.355	258.600, 1.254	258.600, 0.593	258.600, 0.530	258.600, 0.603	258.600, 0.527	258.600, 0.532	258.600, 0.529	258.600, 0.487	258.600, 0.472	258.600, 0.482	258.600, 0.452	258.600, 0.459	258.600, 0.493
1295	258.800, 1.064	258.800, 1.354	258.800, 1.253	258.800, 0.593	258.800, 0.530	258.800, 0.603	258.800, 0.527	258.800, 0.532	258.800, 0.529	258.800, 0.487	258.800, 0.471	258.800, 0.482	258.800, 0.451	258.800, 0.459	258.800, 0.493
1296	259.000, 1.064	259.000, 1.353	259.000, 1.252	259.000, 0.593	259.000, 0.530	259.000, 0.602	259.000, 0.527	259.000, 0.532	259.000, 0.529	259.000, 0.487	259.000, 0.471	259.000, 0.482	259.000, 0.451	259.000, 0.459	259.000, 0.493
1297	259.200, 1.063	259.200, 1.352	259.200, 1.251	259.200, 0.593	259.200, 0.530	259.200, 0.602	259.200, 0.527	259.200, 0.531	259.200, 0.529	259.200, 0.487	259.200, 0.471	259.200, 0.482	259.200, 0.451	259.200, 0.459	259.200, 0.493
1298	259.400, 1.063	259.400, 1.352	259.400, 1.250	259.400, 0.593	259.400, 0.530	259.400, 0.602	259.400, 0.527	259.400, 0.531	259.400, 0.529	259.400, 0.487	259.400, 0.471	259.400, 0.482	259.400, 0.451	259.400, 0.459	259.400, 0.492
1299	259.600, 1.062	259.600, 1.351	259.600, 1.250	259.600, 0.593	259.600, 0.530	259.600, 0.602	259.600, 0.527	259.600, 0.531	259.600, 0.528	259.600, 0.487	259.600, 0.471	259.600, 0.482	259.600, 0.451	259.600, 0.459	259.600, 0.492
1300	259.800, 1.061	259.800, 1.350	259.800, 1.249	259.800, 0.593	259.800, 0.530	259.800, 0.602	259.800, 0.527	259.800, 0.531	259.800, 0.528	259.800, 0.487	259.800, 0.470	259.800, 0.482	259.800, 0.451	259.800, 0.459	259.800, 0.492
1301	260.000, 1.060	260.000, 1.349	260.000, 1.248	260.000, 0.593	260.000, 0.529	260.000, 0.602	260.000, 0.528	260.000, 0.531	260.000, 0.528	260.000, 0.487	260.000, 0.470	260.000, 0.482	260.000, 0.451	260.000, 0.459	260.000, 0.491
1302	260.200, 1.059	260.200, 1.348	260.200, 1.247	260.200, 0.593	260.200, 0.529	260.200, 0.602	260.200, 0.528	260.200, 0.531	260.200, 0.528	260.200, 0.487	260.200, 0.470	260.200, 0.482	260.200, 0.451	260.200, 0.459	260.200, 0.491
1303	260.400, 1.058	260.400, 1.347	260.400, 1.246	260.400, 0.593	260.400, 0.529	260.400, 0.602	260.400, 0.528	260.400, 0.531	260.400, 0.528	260.400, 0.487	260.400, 0.471	260.400, 0.482	260.400, 0.451	260.400, 0.459	260.400, 0.491
1304	260.600, 1.057	260.600, 1.345	260.600, 1.245	260.600, 0.593	260.600, 0.529	260.600, 0.602	260.600, 0.528	260.600, 0.531	260.600, 0.528	260.600, 0.486	260.600, 0.471	260.600, 0.482	260.600, 0.451	260.600, 0.459	260.600, 0.490
1305	260.800, 1.057	260.800, 1.344	260.800, 1.244	260.800, 0.593	260.800, 0.528	260.800, 0.603	260.800, 0.528	260.800, 0.531	260.800, 0.527	260.800, 0.486	260.800, 0.471	260.800, 0.483	260.800, 0.451	260.800, 0.459	260.800, 0.490
1306	261.000, 1.056	261.000, 1.343	261.000, 1.244	261.000, 0.593	261.000, 0.528	261.000, 0.603	261.000, 0.527	261.000, 0.531	261.000, 0.527	261.000, 0.486	261.000, 0.471	261.000, 0.483	261.000, 0.451	261.000, 0.459	261.000, 0.490
1307	261.200, 1.055	261.200, 1.342	261.200, 1.243	261.200, 0.593	261.200, 0.528	261.200, 0.603	261.200, 0.527	261.200, 0.531	261.200, 0.527	261.200, 0.485	261.200, 0.471	261.200, 0.482	261.200, 0.451	261.200, 0.459	261.200, 0.489
1308	261.400, 1.054	261.400, 1.342	261.400, 1.242	261.400, 0.592	261.400, 0.528	261.400, 0.603	261.400, 0.527	261.400, 0.531	261.400, 0.527	261.400, 0.485	261.400, 0.471	261.400, 0.482	261.400, 0.451	261.400, 0.458	261.400, 0.489
1309	261.600, 1.053	261.600, 1.341	261.600, 1.241	261.600, 0.592	261.600, 0.528	261.600, 0.602	261.600, 0.527	261.600, 0.531	261.600, 0.526	261.600, 0.485	261.600, 0.470	261.600, 0.482	261.600, 0.451	261.600, 0.458	261.600, 0.489
1310	261.800, 1.052	261.800, 1.340	261.800, 1.240	261.800, 0.592	261.800, 0.528	261.800, 0.602	261.800, 0.526	261.800, 0.531	261.800, 0.526	261.800, 0.485	261.800, 0.470	261.800, 0.482	261.800, 0.451	261.800, 0.458	261.800, 0.489
1311	262.000, 1.052	262.000, 1.339	262.000, 1.239	262.000, 0.592	262.000, 0.528	262.000, 0.602	262.000, 0.526	262.000, 0.531	262.000, 0.526	262.000, 0.485	262.000, 0.470	262.000, 0.482	262.000, 0.451	262.000, 0.458	262.000, 0.489
1312	262.200, 1.051	262.200, 1.338	262.200, 1.238	262.200, 0.592	262.200, 0.528	262.200, 0.602	262.200, 0.526	262.200, 0.531	262.200, 0.526	262.200, 0.485	262.200, 0.470	262.200, 0.482	262.200, 0.451	262.200, 0.458	262.200, 0.489
1313	262.400, 1.050	262.400, 1.337	262.400, 1.236	262.400, 0.592	262.400, 0.528	262.400, 0.602	262.400, 0.526	262.400, 0.530	262.400, 0.527	262.400, 0.485	262.400, 0.471	262.400, 0.481	262.400, 0.451	262.400, 0.458	262.400, 0.489
1314	262.600, 1.050	262.600, 1.337	262.600, 1.235	262.600, 0.591	262.600, 0.527	262.600, 0.601	262.600, 0.526	262.600, 0.530	262.600, 0.527	262.600, 0.486	262.600, 0.471	262.600, 0.481	262.600, 0.451	262.600, 0.458	262.600, 0.489
1315	262.800, 1.049	262.800, 1.336	262.800, 1.234	262.800, 0.591	262.800, 0.527	262.800, 0.601	262.800, 0.526	262.800, 0.530	262.800, 0.527	262.800, 0.486	262.800, 0.471	262.800, 0.481	262.800, 0.450	262.800, 0.458	262.800, 0.489
1316	263.000, 1.049	263.000, 1.335	263.000, 1.233	263.000, 0.591	263.000, 0.527	263.000, 0.601	263.000, 0.526	263.000, 0.530	263.000, 0.527	263.000, 0.486	263.000, 0.470	263.000, 0.481	263.000, 0.450	263.000, 0.457	263.000, 0.489
1317	263.200, 1.048	263.200, 1.335	263.200, 1.232	263.200, 0.591	263.200, 0.527	263.200, 0.601	263.200, 0.526	263.200, 0.530	263.200, 0.527	263.200, 0.486	263.200, 0.470	263.200, 0.480	263.200, 0.450	263.200, 0.457	263.200, 0.488
1318	263.400, 1.048	263.400, 1.334	263.400, 1.231	263.400, 0.591	263.400, 0.527	263.400, 0.601	263.400, 0.526	263.400, 0.530	263.400, 0.527	263.400, 0.486	263.400, 0.470	263.400, 0.480	263.400, 0.450	263.400, 0.457	263.400, 0.488
1319	263.600, 1.048	263.600, 1.333	263.600, 1.231	263.600, 0.591	263.600, 0.528	263.600, 0.601	263.600, 0.526	263.600, 0.530	263.600, 0.528	263.600, 0.486	263.600, 0.470	263.600, 0.480	263.600, 0.450	263.600, 0.457	263.600, 0.488
1320	263.800, 1.047	263.800, 1.332	263.800, 1.230	263.800, 0.591	263.800, 0.528	263.800, 0.601	263.800, 0.526	263.800, 0.530	263.800, 0.528	263.800, 0.486	263.800, 0.469	263.800, 0.481	263.800, 0.450	263.800, 0.457	263.800, 0.488
1321	264.000, 1.047	264.000, 1.331	264.000, 1.229	264.000, 0.591	264.000, 0.528	264.000, 0.601	264.000, 0.527	264.000, 0.530	264.000, 0.527	264.000, 0.486	264.000, 0.469	264.000, 0.481	264.000, 0.450	264.000, 0.457	264.000, 0.488
1322	264.200, 1.046	264.200, 1.329	264.200, 1.228	264.200, 0.591	264.200, 0.528	264.200, 0.601	264.200, 0.527	264.200, 0.530	264.200, 0.528	264.200, 0.485	264.200, 0.469	264.200, 0.481	264.200, 0.450	264.200, 0.457	264.200, 0.488
1323	264.400, 1.045	264.400, 1.328	264.400, 1.227	264.400, 0.591	264.400, 0.528	264.400, 0.601	264.400, 0.527	264.400, 0.530	264.400, 0.527	264.400, 0.485	264.400, 0.469	264.400, 0.480	264.400, 0.449	264.400, 0.457	264.400, 0.487
1324	264.600, 1.044	264.600, 1.326	264.600, 1.226	264.600, 0.591	264.600, 0.527	264.600, 0.601	264.600, 0.527	264.600, 0.530	264.600, 0.527	264.600, 0.485	264.600, 0.469	264.600, 0.480	264.600, 0.449	264.600, 0.457	264.600, 0.488
1325	264.800, 1.043	264.800, 1.325	264.800, 1.226	264.800, 0.591	264.800, 0.527	264.800, 0.601	264.800, 0.527	264.800, 0.529	264.800, 0.527	264.800, 0.485	264.800, 0.469	264.800, 0.480	264.800, 0.449	264.800, 0.457	264.800, 0.487
1326	265.000, 1.042	265.000, 1.324	265.000, 1.225	265.000, 0.591	265.000, 0.527	265.000, 0.600	265.000, 0.527	265.000, 0.529	265.000, 0.527	265.000, 0.485	265.000, 0.468	265.000, 0.480	265.000, 0.449	265.000, 0.457	265.000, 0.487
1327	265.200, 1.042	265.200, 1.323	265.200, 1.224	265.200, 0.591	265.200, 0.527	265.200, 0.600	265.200, 0.526	265.200, 0.529	265.200, 0.527	265.200, 0.485	265.200, 0.468	265.200, 0.480	265.200, 0.449	265.200, 0.457	265.200, 0.487
1328	265.400, 1.041	265.400, 1.322	265.400, 1.223	265.400, 0.591	265.400, 0.527	265.400, 0.600	265.400, 0.526	265.400, 0.529	265.400, 0.526	265.400, 0.485	265.400, 0.468	265.400, 0.480	265.400, 0.448	265.400, 0.457	265.400, 0.487
1329	265.600, 1.040	265.600, 1.321	265.600, 1.223	265.600, 0.591	265.600, 0.527	265.600, 0.600	265.600, 0.526	265.600, 0.529	265.600, 0.526	265.600, 0.485	265.600, 0.468	265.600, 0.480	265.600, 0.448	265.600, 0.457	265.600, 0.487
1330	265.800, 1.039	265.800, 1.320	265.800, 1.222	265.800, 0.591	265.800, 0.526	265.800, 0.600	265.800, 0.526	265.800, 0.529	265.800, 0.526	265.800, 0.485	265.800, 0.468	265.800, 0.480	265.800, 0.448	265.800, 0.457	265.800, 0.487
1331	266.000, 1.039	266.000, 1.319	266.000, 1.221	266.000, 0.591	266.000, 0.526	266.000, 0.600	266.000, 0.525	266.000, 0.529	266.000, 0.526	266.000, 0.485	266.000, 0.468	266.000, 0.480	266.000, 0.448	266.000, 0.457	266.000, 0.487
1332	266.200, 1.038	266.200, 1.319	266.200, 1.220	266.200, 0.591	266.200, 0.526	266.200, 0.600	266.200, 0.525	266.200, 0.528	266.200, 0.526	266.200, 0.484	266.200, 0.468	266.200, 0.480	266.200, 0.448	266.200, 0.457	266.200, 0.487
1333	266.400, 1.037	266.400, 1.318	266.400, 1.219	266.400, 0.590	266.400, 0.526	266.400, 0.600	266.400, 0.525	266.400, 0.528	266.400, 0.526	266.400, 0.484	266.400, 0.468	266.400, 0.479	266.400, 0.448	266.400, 0.457	266.400, 0.487
1334	266.600, 1.037	266.600, 1.317	266.600, 1.218	266.600, 0.590	266.600, 0.526	266.600, 0.600	266.600, 0.525	266.600, 0.528	266.600, 0.526	266.600, 0.484	266.600, 0.468	266.600, 0.479	266.600, 0.448	266.600, 0.457	266.600, 0.487
1335	266.800, 1.036	266.800, 1.316	266.800, 1.217	266.800, 0.590	266.800, 0.526	266.800, 0.600	266.800, 0.525	266.800, 0.528	266.800, 0.526	266.800, 0.483	266.800, 0.468	266.800, 0.479	266.800, 0.448	266.800, 0.457	266.800, 0.487
1336	267.000, 1.036	267.000, 1.316	267.000, 1.216	267.000, 0.590	267.000, 0.526	267.000, 0.600	267.000, 0.525	267.000, 0.528	267.000, 0.525	267.000, 0.483	267.000, 0.468	267.000, 0.479	267.000, 0.447	267.000, 0.457	267.000, 0.487
1337	267.200, 1.035	267.200, 1.315	267.200, 1.215	267.200, 0.590	267.200, 0.526	267.200, 0.600	267.200, 0.526	267.200, 0.528	267.200, 0.525	267.200, 0.483	267.200, 0.468	267.200, 0.480	267.200, 0.447	267.200, 0.457	267.200, 0.487
1338	267.400, 1.035	267.400, 1.314	267.400, 1.214	267.400, 0.590	267.400, 0.526	267.400, 0.600	267.400, 0.526	267.400, 0.529	267.400, 0.525	267.400, 0.483	267.400, 0.468	267.400, 0.480	267.400, 0.447	267.400, 0.457	267.400, 0.487
1339	267.600, 1.034	267.600, 1.314	267.600, 1.213	267.600, 0.590	267.600, 0.526	267.600, 0.600	267.600, 0.526	267.600, 0.529	267.600, 0.525	267.600, 0.483	267.600, 0.468	267.600, 0.480	267.600, 0.447	267.600, 0.457	267.600, 0.487
1340	267.800, 1.033	267.800, 1.313	267.800, 1.211	267.800, 0.590	267.800, 0.526	267.800, 0.600	267.800, 0.526	267.800, 0.529	267.800, 0.524	267.800, 0.483	267.800, 0.468	267.800, 0.480	267.800, 0.447	267.800, 0.456	267.800, 0.487
1341	268.000, 1.032	268.000, 1.312	268.000, 1.210	268.000, 0.590	268.000, 0.526	268.000, 0.599	268.000, 0.526	268.000, 0.529	268.000, 0.524	268.000, 0.483	268.000, 0.468	268.000, 0.480	268.000, 0.446	268.000, 0.456	268.000, 0.486
1342	268.200, 1.031	268.200, 1.310	268.200, 1.209	268.200, 0.590	268.200, 0.526	268.200, 0.599	268.200, 0.526	268.200, 0.529	268.200, 0.524	268.200, 0.482	268.200, 0.468	268.200, 0.480	268.200, 0.446	268.200, 0.456	268.200, 0.486
1343	268.400, 1.030	268.400, 1.309	268.400, 1.208	268.400, 0.590	268.400, 0.526	268.400, 0.599	268.400, 0.525	268.400, 0.529	268.400, 0.523	268.400, 0.482	268.400, 0.468	268.400, 0.479	268.400, 0.446	268.400, 0.456	268.400, 0.486
1344	268.600, 1.029	268.600, 1.308	268.600, 1.207	268.600, 0.589	268.600, 0.526	268.600, 0.599	268.600, 0.525	268.600, 0.529	268.600, 0.523	268.600, 0.482	268.600, 0.468	268.600, 0.479	268.600, 0.445	268.600, 0.456	268.600, 0.486
1345	268.800, 1.028	268.800, 1.308	268.800, 1.206	268.800, 0.589	268.800, 0.525	268.800, 0.599	268.800, 0.525	268.800, 0.529	268.800, 0.523	268.800, 0.482	268.800, 0.468	268.800, 0.479	268.800, 0.445	268.800, 0.455	268.800, 0.485
1346	269.000, 1.027	269.000, 1.307	269.000, 1.205	269.000, 0.589	269.000, 0.525	269.000, 0.599	269.000, 0.525	269.000, 0.529	269.000, 0.523	269.000, 0.482	269.000, 0.467	269.000, 0.479	269.000, 0.445	269.000, 0.455	269.000, 0.485
1347	269.200, 1.026	269.200, 1.306	269.200, 1.204	269.200, 0.589	269.200, 0.525	269.200, 0.598	269.200, 0.525	269.200, 0.529	269.200, 0.523	269.200, 0.482	269.200, 0.467	269.200, 0.479	269.200, 0.444	269.200, 0.455	269.200, 0.485
1348	269.400, 1.026	269.400, 1.305	269.400, 1.204	269.400, 0.589	269.400, 0.525	269.400, 0.598	269.400, 0.525	269.400, 0.529	269.400, 0.522	269.400, 0.482	269.400, 0.467	269.400, 0.479	269.400, 0.444	269.400, 0.455	269.400, 0.485
1349	269.600, 1.025	269.600, 1.305	269.600, 1.203	269.600, 0.589	269.600, 0.525	269.600, 0.598	269.600, 0.525	269.600, 0.528	269.600, 0.522	269.600, 0.482	269.600, 0.467	269.600, 0.479	269.600, 0.444	269.600, 0.455	269.600, 0.485
1350	269.800, 1.025	269.800, 1.304	269.800, 1.203	269.800, 0.589	269.800, 0.525	269.800, 0.598	269.800, 0.524	269.800, 0.528	269.800, 0.522	269.800, 0.482	269.800, 0.466	269.800, 0.479	269.800, 0.444	269.800, 0.454	269.800, 0.485
1351	,	,	,	,	,	,	,	,	,	,	,	,	,	,	,
1352	,	,	,	,	,	,	,	,	,	,	,	,	,	,	,
1353	,	,	,	,	,	,	,	,	,	,	,	,	,	,	,
1354	,	,	,	,	,	,	,	,	,	,	,	,	,	,	,
1355	,	,	,	,	,	,	,	,	,	,	,	,	,	,	,
1356	,	,	,	,	,	,	,	,	,	,	,	,	,	,	,
1357	,	,	,	,	,	,	,	,	,	,	,	,	,	,	,
1358	,	,	,	,	,	,	,	,	,	,	,	,	,	,	,
1359	,	,	,	,	,	,	,	,	,	,	,	,	,	,	,
1360	,	,	,	,	,	,	,	,	,	,	,	,	,	,	,
1361	,	,	,	,	,	,	,	,	,	,	,	,	,	,	,
1362	,	,	,	,	,	,	,	,	,	,	,	,	,	,	,
1363	,	,	,	,	,	,	,	,	,	,	,	,	,	,	,
1364	,	,	,	,	,	,	,	,	,	,	,	,	,	,	,
1365	,	,	,	,	,	,	,	,	,	,	,	,	,	,	,
1366	,	,	,	,	,	,	,	,	,	,	,	,	,	,	,
1367	,	,	,	,	,	,	,	,	,	,	,	,	,	,	,
1368	,	,	,	,	,	,	,	,	,	,	,	,	,	,	,
1369	,	,	,	,	,	,	,	,	,	,	,	,	,	,	,
1370	,	,	,	,	,	,	,	,	,	,	,	,	,	,	,
1371	,	,	,	,	,	,	,	,	,	,	,	,	,	,	,
1372	,	,	,	,	,	,	,	,	,	,	,	,	,	,	,
1373	,	,	,	,	,	,	,	,	,	,	,	,	,	,	,
1374	,	,	,	,	,	,	,	,	,	,	,	,	,	,	,
1375	,	,	,	,	,	,	,	,	,	,	,	,	,	,	,
1376	,	,	,	,	,	,	,	,	,	,	,	,	,	,	,
1377	,	,	,	,	,	,	,	,	,	,	,	,	,	,	,
1378	,	,	,	,	,	,	,	,	,	,	,	,	,	,	,
1379	,	,	,	,	,	,	,	,	,	,	,	,	,	,	,
1380	,	,	,	,	,	,	,	,	,	,	,	,	,	,	,
1381	,	,	,	,	,	,	,	,	,	,	,	,	,	,	,
1382	,	,	,	,	,	,	,	,	,	,	,	,	,	,	,
1383	,	,	,	,	,	,	,	,	,	,	,	,	,	,	,
1384	,	,	,	,	,	,	,	,	,	,	,	,	,	,	,
1385	,	,	,	,	,	,	,	,	,	,	,	,	,	,	,
1386	,	,	,	,	,	,	,	,	,	,	,	,	,	,	,
1387	,	,	,	,	,	,	,	,	,	,	,	,	,	,	,
1388	,	,	,	,	,	,	,	,	,	,	,	,	,	,	,
1389	,	,	,	,	,	,	,	,	,	,	,	,	,	,	,
1390	,	,	,	,	,	,	,	,	,	,	,	,	,	,	,
1391	,	,	,	,	,	,	,	,	,	,	,	,	,	,	,
1392	,	,	,	,	,	,	,	,	,	,	,	,	,	,	,
1393	,	,	,	,	,	,	,	,	,	,	,	,	,	,	,
1394	,	,	,	,	,	,	,	,	,	,	,	,	,	,	,
1395	,	,	,	,	,	,	,	,	,	,	,	,	,	,	,
1396	,	,	,	,	,	,	,	,	,	,	,	,	,	,	,
1397	,	,	,	,	,	,	,	,	,	,	,	,	,	,	,
1398	,	,	,	,	,	,	,	,	,	,	,	,	,	,	,
1399	,	,	,	,	,	,	,	,	,	,	,	,	,	,	,
1400	,	,	,	,	,	,	,	,	,	,	,	,	,	,	,
1401	,	,	,	,	,	,	,	,	,	,	,	,	,	,	,
1402	,	,	,	,	,	,	,	,	,	,	,	,	,	,	,
1403	,	,	,	,	,	,	,	,	,	,	,	,	,	,	,
1404	,	,	,	,	,	,	,	,	,	,	,	,	,	,	,
1405	,	,	,	,	,	,	,	,	,	,	,	,	,	,	,
1406	,	,	,	,	,	,	,	,	,	,	,	,	,	,	,
1407	,	,	,	,	,	,	,	,	,	,	,	,	,	,	,
1408	,	,	,	,	,	,	,	,	,	,	,	,	,	,	,
1409	,	,	,	,	,	,	,	,	,	,	,	,	,	,	,
1410	,	,	,	,	,	,	,	,	,	,	,	,	,	,	,
1411	,	,	,	,	,	,	,	,	,	,	,	,	,	,	,
1412	,	,	,	,	,	,	,	,	,	,	,	,	,	,	,
1413	,	,	,	,	,	,	,	,	,	,	,	,	,	,	,
1414	,	,	,	,	,	,	,	,	,	,	,	,	,	,	,
1415	,	,	,	,	,	,	,	,	,	,	,	,	,	,	,
1416	,	,	,	,	,	,	,	,	,	,	,	,	,	,	,
1417	,	,	,	,	,	,	,	,	,	,	,	,	,	,	,
1418	,	,	,	,	,	,	,	,	,	,	,	,	,	,	,
1419	,	,	,	,	,	,	,	,	,	,	,	,	,	,	,
1420	,	,	,	,	,	,	,	,	,	,	,	,	,	,	,
1421	,	,	,	,	,	,	,	,	,	,	,	,	,	,	,
1422	,	,	,	,	,	,	,	,	,	,	,	,	,	,	,
1423	,	,	,	,	,	,	,	,	,	,	,	,	,	,	,
1424	,	,	,	,	,	,	,	,	,	,	,	,	,	,	,
1425	,	,	,	,	,	,	,	,	,	,	,	,	,	,	,
1426	,	,	,	,	,	,	,	,	,	,	,	,	,	,	,
1427	,	,	,	,	,	,	,	,	,	,	,	,	,	,	,
1428	,	,	,	,	,	,	,	,	,	,	,	,	,	,	,
1429	,	,	,	,	,	,	,	,	,	,	,	,	,	,	,
1430	,	,	,	,	,	,	,	,	,	,	,	,	,	,	,
1431	,	,	,	,	,	,	,	,	,	,	,	,	,	,	,
1432	,	,	,	,	,	,	,	,	,	,	,	,	,	,	,
1433	,	,	,	,	,	,	,	,	,	,	,	,	,	,	,
1434	,	,	,	,	,	,	,	,	,	,	,	,	,	,	,
1435	,	,	,	,	,	,	,	,	,	,	,	,	,	,	,
1436	,	,	,	,	,	,	,	,	,	,	,	,	,	,	,
1437	,	,	,	,	,	,	,	,	,	,	,	,	,	,	,
1438	,	,	,	,	,	,	,	,	,	,	,	,	,	,	,
1439	,	,	,	,	,	,	,	,	,	,	,	,	,	,	,
1440	,	,	,	,	,	,	,	,	,	,	,	,	,	,	,
1441	,	,	,	,	,	,	,	,	,	,	,	,	,	,	,
1442	,	,	,	,	,	,	,	,	,	,	,	,	,	,	,
1443	,	,	,	,	,	,	,	,	,	,	,	,	,	,	,
1444	,	,	,	,	,	,	,	,	,	,	,	,	,	,	,
1445	,	,	,	,	,	,	,	,	,	,	,	,	,	,	,
1446	,	,	,	,	,	,	,	,	,	,	,	,	,	,	,
1447	,	,	,	,	,	,	,	,	,	,	,	,	,	,	,
1448	,	,	,	,	,	,	,	,	,	,	,	,	,	,	,
1449	,	,	,	,	,	,	,	,	,	,	,	,	,	,	,
1450	,	,	,	,	,	,	,	,	,	,	,	,	,	,	,
1451	,	,	,	,	,	,	,	,	,	,	,	,	,	,	,
1452	,	,	,	,	,	,	,	,	,	,	,	,	,	,	,
1453	,	,	,	,	,	,	,	,	,	,	,	,	,	,	,
1454	,	,	,	,	,	,	,	,	,	,	,	,	,	,	,
1455	,	,	,	,	,	,	,	,	,	,	,	,	,	,	,
1456	,	,	,	,	,	,	,	,	,	,	,	,	,	,	,
1457	,	,	,	,	,	,	,	,	,	,	,	,	,	,	,
1458	,	,	,	,	,	,	,	,	,	,	,	,	,	,	,
1459	,	,	,	,	,	,	,	,	,	,	,	,	,	,	,
1460	,	,	,	,	,	,	,	,	,	,	,	,	,	,	,
1461	,	,	,	,	,	,	,	,	,	,	,	,	,	,	,
1462	,	,	,	,	,	,	,	,	,	,	,	,	,	,	,
1463	,	,	,	,	,	,	,	,	,	,	,	,	,	,	,
1464	,	,	,	,	,	,	,	,	,	,	,	,	,	,	,
1465	,	,	,	,	,	,	,	,	,	,	,	,	,	,	,
1466	,	,	,	,	,	,	,	,	,	,	,	,	,	,	,
1467	,	,	,	,	,	,	,	,	,	,	,	,	,	,	,
1468	,	,	,	,	,	,	,	,	,	,	,	,	,	,	,
1469	,	,	,	,	,	,	,	,	,	,	,	,	,	,	,
1470	,	,	,	,	,	,	,	,	,	,	,	,	,	,	,
1471	,	,	,	,	,	,	,	,	,	,	,	,	,	,	,
1472	,	,	,	,	,	,	,	,	,	,	,	,	,	,	,
1473	,	,	,	,	,	,	,	,	,	,	,	,	,	,	,
1474	,	,	,	,	,	,	,	,	,	,	,	,	,	,	,
1475	,	,	,	,	,	,	,	,	,	,	,	,	,	,	,
1476	,	,	,	,	,	,	,	,	,	,	,	,	,	,	,
1477	,	,	,	,	,	,	,	,	,	,	,	,	,	,	,
1478	,	,	,	,	,	,	,	,	,	,	,	,	,	,	,
1479	,	,	,	,	,	,	,	,	,	,	,	,	,	,	,
1480	,	,	,	,	,	,	,	,	,	,	,	,	,	,	,
1481	,	,	,	,	,	,	,	,	,	,	,	,	,	,	,
1482	,	,	,	,	,	,	,	,	,	,	,	,	,	,	,
1483	,	,	,	,	,	,	,	,	,	,	,	,	,	,	,
1484	,	,	,	,	,	,	,	,	,	,	,	,	,	,	,
1485	,	,	,	,	,	,	,	,	,	,	,	,	,	,	,
1486	,	,	,	,	,	,	,	,	,	,	,	,	,	,	,
1487	,	,	,	,	,	,	,	,	,	,	,	,	,	,	,
1488	,	,	,	,	,	,	,	,	,	,	,	,	,	,	,
1489	,	,	,	,	,	,	,	,	,	,	,	,	,	,	,
1490	,	,	,	,	,	,	,	,	,	,	,	,	,	,	,
1491	,	,	,	,	,	,	,	,	,	,	,	,	,	,	,
1492	,	,	,	,	,	,	,	,	,	,	,	,	,	,	,
1493	,	,	,	,	,	,	,	,	,	,	,	,	,	,	,
1494	,	,	,	,	,	,	,	,	,	,	,	,	,	,	,
1495	,	,	,	,	,	,	,	,	,	,	,	,	,	,	,
1496	,	,	,	,	,	,	,	,	,	,	,	,	,	,	,
1497	,	,	,	,	,	,	,	,	,	,	,	,	,	,	,
1498	,	,	,	,	,	,	,	,	,	,	,	,	,	,	,
1499	,	,	,	,	,	,	,	,	,	,	,	,	,	,	,
1500	,	,	,	,	,	,	,	,	,	,	,	,	,	,	,
1501	,	,	,	,	,	,	,	,	,	,	,	,	,	,	,
1502	,	,	,	,	,	,	,	,	,	,	,	,	,	,	,
1503	,	,	,	,	,	,	,	,	,	,	,	,	,	,	,
1504	,	,	,	,	,	,	,	,	,	,	,	,	,	,	,
1505	,	,	,	,	,	,	,	,	,	,	,	,	,	,	,
1506	,	,	,	,	,	,	,	,	,	,	,	,	,	,	,
1507	,	,	,	,	,	,	,	,	,	,	,	,	,	,	,
1508	,	,	,	,	,	,	,	,	,	,	,	,	,	,	,
1509	,	,	,	,	,	,	,	,	,	,	,	,	,	,	,
1510	,	,	,	,	,	,	,	,	,	,	,	,	,	,	,
1511	,	,	,	,	,	,	,	,	,	,	,	,	,	,	,
1512	,	,	,	,	,	,	,	,	,	,	,	,	,	,	,
1513	,	,	,	,	,	,	,	,	,	,	,	,	,	,	,
1514	,	,	,	,	,	,	,	,	,	,	,	,	,	,	,
1515	,	,	,	,	,	,	,	,	,	,	,	,	,	,	,
1516	,	,	,	,	,	,	,	,	,	,	,	,	,	,	,
1517	,	,	,	,	,	,	,	,	,	,	,	,	,	,	,
1518	,	,	,	,	,	,	,	,	,	,	,	,	,	,	,
1519	,	,	,	,	,	,	,	,	,	,	,	,	,	,	,
1520	,	,	,	,	,	,	,	,	,	,	,	,	,	,	,
1521	,	,	,	,	,	,	,	,	,	,	,	,	,	,	,
1522	,	,	,	,	,	,	,	,	,	,	,	,	,	,	,
1523	,	,	,	,	,	,	,	,	,	,	,	,	,	,	,
1524	,	,	,	,	,	,	,	,	,	,	,	,	,	,	,
1525	,	,	,	,	,	,	,	,	,	,	,	,	,	,	,
1526	,	,	,	,	,	,	,	,	,	,	,	,	,	,	,
1527	,	,	,	,	,	,	,	,	,	,	,	,	,	,	,
1528	,	,	,	,	,	,	,	,	,	,	,	,	,	,	,
1529	,	,	,	,	,	,	,	,	,	,	,	,	,	,	,
1530	,	,	,	,	,	,	,	,	,	,	,	,	,	,	,
1531	,	,	,	,	,	,	,	,	,	,	,	,	,	,	,
1532	,	,	,	,	,	,	,	,	,	,	,	,	,	,	,
1533	,	,	,	,	,	,	,	,	,	,	,	,	,	,	,
1534	,	,	,	,	,	,	,	,	,	,	,	,	,	,	,
1535	,	,	,	,	,	,	,	,	,	,	,	,	,	,	,
1536	,	,	,	,	,	,	,	,	,	,	,	,	,	,	,
1537	,	,	,	,	,	,	,	,	,	,	,	,	,	,	,
1538	,	,	,	,	,	,	,	,	,	,	,	,	,	,	,
1539	,	,	,	,	,	,	,	,	,	,	,	,	,	,	,
1540	,	,	,	,	,	,	,	,	,	,	,	,	,	,	,
1541	,	,	,	,	,	,	,	,	,	,	,	,	,	,	,
1542	,	,	,	,	,	,	,	,	,	,	,	,	,	,	,
1543	,	,	,	,	,	,	,	,	,	,	,	,	,	,	,
1544	,	,	,	,	,	,	,	,	,	,	,	,	,	,	,
1545	,	,	,	,	,	,	,	,	,	,	,	,	,	,	,
1546	,	,	,	,	,	,	,	,	,	,	,	,	,	,	,
1547	,	,	,	,	,	,	,	,	,	,	,	,	,	,	,
1548	,	,	,	,	,	,	,	,	,	,	,	,	,	,	,
1549	,	,	,	,	,	,	,	,	,	,	,	,	,	,	,
1550	,	,	,	,	,	,	,	,	,	,	,	,	,	,	,
1551	,	,	,	,	,	,	,	,	,	,	,	,	,	,	,
1552	,	,	,	,	,	,	,	,	,	,	,	,	,	,	,
1553	,	,	,	,	,	,	,	,	,	,	,	,	,	,	,
1554	,	,	,	,	,	,	,	,	,	,	,	,	,	,	,
1555	,	,	,	,	,	,	,	,	,	,	,	,	,	,	,
1556	,	,	,	,	,	,	,	,	,	,	,	,	,	,	,
1557	,	,	,	,	,	,	,	,	,	,	,	,	,	,	,
1558	,	,	,	,	,	,	,	,	,	,	,	,	,	,	,
1559	,	,	,	,	,	,	,	,	,	,	,	,	,	,	,
1560	,	,	,	,	,	,	,	,	,	,	,	,	,	,	,
1561	,	,	,	,	,	,	,	,	,	,	,	,	,	,	,
1562	,	,	,	,	,	,	,	,	,	,	,	,	,	,	,
1563	,	,	,	,	,	,	,	,	,	,	,	,	,	,	,
1564	,	,	,	,	,	,	,	,	,	,	,	,	,	,	,
1565	,	,	,	,	,	,	,	,	,	,	,	,	,	,	,
1566	,	,	,	,	,	,	,	,	,	,	,	,	,	,	,
1567	,	,	,	,	,	,	,	,	,	,	,	,	,	,	,
1568	,	,	,	,	,	,	,	,	,	,	,	,	,	,	,
1569	,	,	,	,	,	,	,	,	,	,	,	,	,	,	,
1570	,	,	,	,	,	,	,	,	,	,	,	,	,	,	,
1571	,	,	,	,	,	,	,	,	,	,	,	,	,	,	,
1572	,	,	,	,	,	,	,	,	,	,	,	,	,	,	,
1573	,	,	,	,	,	,	,	,	,	,	,	,	,	,	,
1574	,	,	,	,	,	,	,	,	,	,	,	,	,	,	,
1575	,	,	,	,	,	,	,	,	,	,	,	,	,	,	,
1576	,	,	,	,	,	,	,	,	,	,	,	,	,	,	,
1577	,	,	,	,	,	,	,	,	,	,	,	,	,	,	,
1578	,	,	,	,	,	,	,	,	,	,	,	,	,	,	,
1579	,	,	,	,	,	,	,	,	,	,	,	,	,	,	,
1580	,	,	,	,	,	,	,	,	,	,	,	,	,	,	,
1581	,	,	,	,	,	,	,	,	,	,	,	,	,	,	,
1582	,	,	,	,	,	,	,	,	,	,	,	,	,	,	,
1583	,	,	,	,	,	,	,	,	,	,	,	,	,	,	,
1584	,	,	,	,	,	,	,	,	,	,	,	,	,	,	,
1585	,	,	,	,	,	,	,	,	,	,	,	,	,	,	,
1586	,	,	,	,	,	,	,	,	,	,	,	,	,	,	,
1587	,	,	,	,	,	,	,	,	,	,	,	,	,	,	,
1588	,	,	,	,	,	,	,	,	,	,	,	,	,	,	,
1589	,	,	,	,	,	,	,	,	,	,	,	,	,	,	,
1590	,	,	,	,	,	,	,	,	,	,	,	,	,	,	,
1591	,	,	,	,	,	,	,	,	,	,	,	,	,	,	,
1592	,	,	,	,	,	,	,	,	,	,	,	,	,	,	,
1593	,	,	,	,	,	,	,	,	,	,	,	,	,	,	,
1594	,	,	,	,	,	,	,	,	,	,	,	,	,	,	,
1595	,	,	,	,	,	,	,	,	,	,	,	,	,	,	,
1596	,	,	,	,	,	,	,	,	,	,	,	,	,	,	,
1597	,	,	,	,	,	,	,	,	,	,	,	,	,	,	,
1598	,	,	,	,	,	,	,	,	,	,	,	,	,	,	,
1599	,	,	,	,	,	,	,	,	,	,	,	,	,	,	,
1600	,	,	,	,	,	,	,	,	,	,	,	,	,	,	,
1601	,	,	,	,	,	,	,	,	,	,	,	,	,	,	,
1602	,	,	,	,	,	,	,	,	,	,	,	,	,	,	,
1603	,	,	,	,	,	,	,	,	,	,	,	,	,	,	,
1604	,	,	,	,	,	,	,	,	,	,	,	,	,	,	,
1605	,	,	,	,	,	,	,	,	,	,	,	,	,	,	,
1606	,	,	,	,	,	,	,	,	,	,	,	,	,	,	,
1607	,	,	,	,	,	,	,	,	,	,	,	,	,	,	,
1608	,	,	,	,	,	,	,	,	,	,	,	,	,	,	,
1609	,	,	,	,	,	,	,	,	,	,	,	,	,	,	,
1610	,	,	,	,	,	,	,	,	,	,	,	,	,	,	,
1611	,	,	,	,	,	,	,	,	,	,	,	,	,	,	,
1612	,	,	,	,	,	,	,	,	,	,	,	,	,	,	,
1613	,	,	,	,	,	,	,	,	,	,	,	,	,	,	,
1614	,	,	,	,	,	,	,	,	,	,	,	,	,	,	,
1615	,	,	,	,	,	,	,	,	,	,	,	,	,	,	,
1616	,	,	,	,	,	,	,	,	,	,	,	,	,	,	,
1617	,	,	,	,	,	,	,	,	,	,	,	,	,	,	,
1618	,	,	,	,	,	,	,	,	,	,	,	,	,	,	,
1619	,	,	,	,	,	,	,	,	,	,	,	,	,	,	,
1620	,	,	,	,	,	,	,	,	,	,	,	,	,	,	,
1621	,	,	,	,	,	,	,	,	,	,	,	,	,	,	,
1622	,	,	,	,	,	,	,	,	,	,	,	,	,	,	,
1623	,	,	,	,	,	,	,	,	,	,	,	,	,	,	,
1624	,	,	,	,	,	,	,	,	,	,	,	,	,	,	,
1625	,	,	,	,	,	,	,	,	,	,	,	,	,	,	,
1626	,	,	,	,	,	,	,	,	,	,	,	,	,	,	,
1627	,	,	,	,	,	,	,	,	,	,	,	,	,	,	,
1628	,	,	,	,	,	,	,	,	,	,	,	,	,	,	,
1629	,	,	,	,	,	,	,	,	,	,	,	,	,	,	,
1630	,	,	,	,	,	,	,	,	,	,	,	,	,	,	,
1631	,	,	,	,	,	,	,	,	,	,	,	,	,	,	,
1632	,	,	,	,	,	,	,	,	,	,	,	,	,	,	,
1633	,	,	,	,	,	,	,	,	,	,	,	,	,	,	,
1634	,	,	,	,	,	,	,	,	,	,	,	,	,	,	,
1635	,	,	,	,	,	,	,	,	,	,	,	,	,	,	,
1636	,	,	,	,	,	,	,	,	,	,	,	,	,	,	,
1637	,	,	,	,	,	,	,	,	,	,	,	,	,	,	,
1638	,	,	,	,	,	,	,	,	,	,	,	,	,	,	,
1639	,	,	,	,	,	,	,	,	,	,	,	,	,	,	,
1640	,	,	,	,	,	,	,	,	,	,	,	,	,	,	,
1641	,	,	,	,	,	,	,	,	,	,	,	,	,	,	,
1642	,	,	,	,	,	,	,	,	,	,	,	,	,	,	,
1643	,	,	,	,	,	,	,	,	,	,	,	,	,	,	,
1644	,	,	,	,	,	,	,	,	,	,	,	,	,	,	,
1645	,	,	,	,	,	,	,	,	,	,	,	,	,	,	,
1646	,	,	,	,	,	,	,	,	,	,	,	,	,	,	,
1647	,	,	,	,	,	,	,	,	,	,	,	,	,	,	,
1648	,	,	,	,	,	,	,	,	,	,	,	,	,	,	,
1649	,	,	,	,	,	,	,	,	,	,	,	,	,	,	,
1650	,	,	,	,	,	,	,	,	,	,	,	,	,	,	,
1651	,	,	,	,	,	,	,	,	,	,	,	,	,	,	,
1652	,	,	,	,	,	,	,	,	,	,	,	,	,	,	,
1653	,	,	,	,	,	,	,	,	,	,	,	,	,	,	,
1654	,	,	,	,	,	,	,	,	,	,	,	,	,	,	,
1655	,	,	,	,	,	,	,	,	,	,	,	,	,	,	,
1656	,	,	,	,	,	,	,	,	,	,	,	,	,	,	,
1657	,	,	,	,	,	,	,	,	,	,	,	,	,	,	,
1658	,	,	,	,	,	,	,	,	,	,	,	,	,	,	,
1659	,	,	,	,	,	,	,	,	,	,	,	,	,	,	,
1660	,	,	,	,	,	,	,	,	,	,	,	,	,	,	,
1661	,	,	,	,	,	,	,	,	,	,	,	,	,	,	,
1662	,	,	,	,	,	,	,	,	,	,	,	,	,	,	,
1663	,	,	,	,	,	,	,	,	,	,	,	,	,	,	,
1664	,	,	,	,	,	,	,	,	,	,	,	,	,	,	,
1665	,	,	,	,	,	,	,	,	,	,	,	,	,	,	,
1666	,	,	,	,	,	,	,	,	,	,	,	,	,	,	,
1667	,	,	,	,	,	,	,	,	,	,	,	,	,	,	,
1668	,	,	,	,	,	,	,	,	,	,	,	,	,	,	,
1669	,	,	,	,	,	,	,	,	,	,	,	,	,	,	,
1670	,	,	,	,	,	,	,	,	,	,	,	,	,	,	,
1671	,	,	,	,	,	,	,	,	,	,	,	,	,	,	,
1672	,	,	,	,	,	,	,	,	,	,	,	,	,	,	,
1673	,	,	,	,	,	,	,	,	,	,	,	,	,	,	,
1674	,	,	,	,	,	,	,	,	,	,	,	,	,	,	,
1675	,	,	,	,	,	,	,	,	,	,	,	,	,	,	,
1676	,	,	,	,	,	,	,	,	,	,	,	,	,	,	,
1677	,	,	,	,	,	,	,	,	,	,	,	,	,	,	,
1678	,	,	,	,	,	,	,	,	,	,	,	,	,	,	,
1679	,	,	,	,	,	,	,	,	,	,	,	,	,	,	,
1680	,	,	,	,	,	,	,	,	,	,	,	,	,	,	,
1681	,	,	,	,	,	,	,	,	,	,	,	,	,	,	,
1682	,	,	,	,	,	,	,	,	,	,	,	,	,	,	,
1683	,	,	,	,	,	,	,	,	,	,	,	,	,	,	,
1684	,	,	,	,	,	,	,	,	,	,	,	,	,	,	,
1685	,	,	,	,	,	,	,	,	,	,	,	,	,	,	,
1686	,	,	,	,	,	,	,	,	,	,	,	,	,	,	,
1687	,	,	,	,	,	,	,	,	,	,	,	,	,	,	,
1688	,	,	,	,	,	,	,	,	,	,	,	,	,	,	,
1689	,	,	,	,	,	,	,	,	,	,	,	,	,	,	,
1690	,	,	,	,	,	,	,	,	,	,	,	,	,	,	,
1691	,	,	,	,	,	,	,	,	,	,	,	,	,	,	,
1692	,	,	,	,	,	,	,	,	,	,	,	,	,	,	,
1693	,	,	,	,	,	,	,	,	,	,	,	,	,	,	,
1694	,	,	,	,	,	,	,	,	,	,	,	,	,	,	,
1695	,	,	,	,	,	,	,	,	,	,	,	,	,	,	,
1696	,	,	,	,	,	,	,	,	,	,	,	,	,	,	,
1697	,	,	,	,	,	,	,	,	,	,	,	,	,	,	,
1698	,	,	,	,	,	,	,	,	,	,	,	,	,	,	,
1699	,	,	,	,	,	,	,	,	,	,	,	,	,	,	,
1700	,	,	,	,	,	,	,	,	,	,	,	,	,	,	,
1701	,	,	,	,	,	,	,	,	,	,	,	,	,	,	,
1702	,	,	,	,	,	,	,	,	,	,	,	,	,	,	,
1703	,	,	,	,	,	,	,	,	,	,	,	,	,	,	,
1704	,	,	,	,	,	,	,	,	,	,	,	,	,	,	,
1705	,	,	,	,	,	,	,	,	,	,	,	,	,	,	,
1706	,	,	,	,	,	,	,	,	,	,	,	,	,	,	,
1707	,	,	,	,	,	,	,	,	,	,	,	,	,	,	,
1708	,	,	,	,	,	,	,	,	,	,	,	,	,	,	,
1709	,	,	,	,	,	,	,	,	,	,	,	,	,	,	,
1710	,	,	,	,	,	,	,	,	,	,	,	,	,	,	,
1711	,	,	,	,	,	,	,	,	,	,	,	,	,	,	,
1712	,	,	,	,	,	,	,	,	,	,	,	,	,	,	,
1713	,	,	,	,	,	,	,	,	,	,	,	,	,	,	,
1714	,	,	,	,	,	,	,	,	,	,	,	,	,	,	,
1715	,	,	,	,	,	,	,	,	,	,	,	,	,	,	,
1716	,	,	,	,	,	,	,	,	,	,	,	,	,	,	,
1717	,	,	,	,	,	,	,	,	,	,	,	,	,	,	,
1718	,	,	,	,	,	,	,	,	,	,	,	,	,	,	,
1719	,	,	,	,	,	,	,	,	,	,	,	,	,	,	,
1720	,	,	,	,	,	,	,	,	,	,	,	,	,	,	,
1721	,	,	,	,	,	,	,	,	,	,	,	,	,	,	,
1722	,	,	,	,	,	,	,	,	,	,	,	,	,	,	,
1723	,	,	,	,	,	,	,	,	,	,	,	,	,	,	,
1724	,	,	,	,	,	,	,	,	,	,	,	,	,	,	,
1725	,	,	,	,	,	,	,	,	,	,	,	,	,	,	,
1726	,	,	,	,	,	,	,	,	,	,	,	,	,	,	,
1727	,	,	,	,	,	,	,	,	,	,	,	,	,	,	,
1728	,	,	,	,	,	,	,	,	,	,	,	,	,	,	,
1729	,	,	,	,	,	,	,	,	,	,	,	,	,	,	,
1730	,	,	,	,	,	,	,	,	,	,	,	,	,	,	,
1731	,	,	,	,	,	,	,	,	,	,	,	,	,	,	,
1732	,	,	,	,	,	,	,	,	,	,	,	,	,	,	,
1733	,	,	,	,	,	,	,	,	,	,	,	,	,	,	,
1734	,	,	,	,	,	,	,	,	,	,	,	,	,	,	,
1735	,	,	,	,	,	,	,	,	,	,	,	,	,	,	,
1736	,	,	,	,	,	,	,	,	,	,	,	,	,	,	,
1737	,	,	,	,	,	,	,	,	,	,	,	,	,	,	,
1738	,	,	,	,	,	,	,	,	,	,	,	,	,	,	,
1739	,	,	,	,	,	,	,	,	,	,	,	,	,	,	,
1740	,	,	,	,	,	,	,	,	,	,	,	,	,	,	,
1741	,	,	,	,	,	,	,	,	,	,	,	,	,	,	,
1742	,	,	,	,	,	,	,	,	,	,	,	,	,	,	,
1743	,	,	,	,	,	,	,	,	,	,	,	,	,	,	,
1744	,	,	,	,	,	,	,	,	,	,	,	,	,	,	,
1745	,	,	,	,	,	,	,	,	,	,	,	,	,	,	,
1746	,	,	,	,	,	,	,	,	,	,	,	,	,	,	,
1747	,	,	,	,	,	,	,	,	,	,	,	,	,	,	,
1748	,	,	,	,	,	,	,	,	,	,	,	,	,	,	,
1749	,	,	,	,	,	,	,	,	,	,	,	,	,	,	,
1750	,	,	,	,	,	,	,	,	,	,	,	,	,	,	,
1751	,	,	,	,	,	,	,	,	,	,	,	,	,	,	,
1752	,	,	,	,	,	,	,	,	,	,	,	,	,	,	,
1753	,	,	,	,	,	,	,	,	,	,	,	,	,	,	,
1754	,	,	,	,	,	,	,	,	,	,	,	,	,	,	,
1755	,	,	,	,	,	,	,	,	,	,	,	,	,	,	,
1756	,	,	,	,	,	,	,	,	,	,	,	,	,	,	,
1757	,	,	,	,	,	,	,	,	,	,	,	,	,	,	,
1758	,	,	,	,	,	,	,	,	,	,	,	,	,	,	,
1759	,	,	,	,	,	,	,	,	,	,	,	,	,	,	,
1760	,	,	,	,	,	,	,	,	,	,	,	,	,	,	,
1761	,	,	,	,	,	,	,	,	,	,	,	,	,	,	,
1762	,	,	,	,	,	,	,	,	,	,	,	,	,	,	,
1763	,	,	,	,	,	,	,	,	,	,	,	,	,	,	,
1764	,	,	,	,	,	,	,	,	,	,	,	,	,	,	,
1765	,	,	,	,	,	,	,	,	,	,	,	,	,	,	,
1766	,	,	,	,	,	,	,	,	,	,	,	,	,	,	,
1767	,	,	,	,	,	,	,	,	,	,	,	,	,	,	,
1768	,	,	,	,	,	,	,	,	,	,	,	,	,	,	,
1769	,	,	,	,	,	,	,	,	,	,	,	,	,	,	,
1770	,	,	,	,	,	,	,	,	,	,	,	,	,	,	,
1771	,	,	,	,	,	,	,	,	,	,	,	,	,	,	,
1772	,	,	,	,	,	,	,	,	,	,	,	,	,	,	,
1773	,	,	,	,	,	,	,	,	,	,	,	,	,	,	,
1774	,	,	,	,	,	,	,	,	,	,	,	,	,	,	,
1775	,	,	,	,	,	,	,	,	,	,	,	,	,	,	,
1776	,	,	,	,	,	,	,	,	,	,	,	,	,	,	,
1777	,	,	,	,	,	,	,	,	,	,	,	,	,	,	,
1778	,	,	,	,	,	,	,	,	,	,	,	,	,	,	,
1779	,	,	,	,	,	,	,	,	,	,	,	,	,	,	,
1780	,	,	,	,	,	,	,	,	,	,	,	,	,	,	,
1781	,	,	,	,	,	,	,	,	,	,	,	,	,	,	,
1782	,	,	,	,	,	,	,	,	,	,	,	,	,	,	,
1783	,	,	,	,	,	,	,	,	,	,	,	,	,	,	,
1784	,	,	,	,	,	,	,	,	,	,	,	,	,	,	,
1785	,	,	,	,	,	,	,	,	,	,	,	,	,	,	,
1786	,	,	,	,	,	,	,	,	,	,	,	,	,	,	,
1787	,	,	,	,	,	,	,	,	,	,	,	,	,	,	,
1788	,	,	,	,	,	,	,	,	,	,	,	,	,	,	,
1789	,	,	,	,	,	,	,	,	,	,	,	,	,	,	,
1790	,	,	,	,	,	,	,	,	,	,	,	,	,	,	,
1791	,	,	,	,	,	,	,	,	,	,	,	,	,	,	,
1792	,	,	,	,	,	,	,	,	,	,	,	,	,	,	,
1793	,	,	,	,	,	,	,	,	,	,	,	,	,	,	,
1794	,	,	,	,	,	,	,	,	,	,	,	,	,	,	,
1795	,	,	,	,	,	,	,	,	,	,	,	,	,	,	,
1796	,	,	,	,	,	,	,	,	,	,	,	,	,	,	,
1797	,	,	,	,	,	,	,	,	,	,	,	,	,	,	,
1798	,	,	,	,	,	,	,	,	,	,	,	,	,	,	,
1799	,	,	,	,	,	,	,	,	,	,	,	,	,	,	,
1800	,	,	,	,	,	,	,	,	,	,	,	,	,	,	,
1801	,	,	,	,	,	,	,	,	,	,	,	,	,	,	,
1802	,	,	,	,	,	,	,	,	,	,	,	,	,	,	,
1803	,	,	,	,	,	,	,	,	,	,	,	,	,	,	,
1804	,	,	,	,	,	,	,	,	,	,	,	,	,	,	,
1805	,	,	,	,	,	,	,	,	,	,	,	,	,	,	,
1806	,	,	,	,	,	,	,	,	,	,	,	,	,	,	,
1807	,	,	,	,	,	,	,	,	,	,	,	,	,	,	,
1808	,	,	,	,	,	,	,	,	,	,	,	,	,	,	,
1809	,	,	,	,	,	,	,	,	,	,	,	,	,	,	,
1810	,	,	,	,	,	,	,	,	,	,	,	,	,	,	,
1811	,	,	,	,	,	,	,	,	,	,	,	,	,	,	,
1812	,	,	,	,	,	,	,	,	,	,	,	,	,	,	,
1813	,	,	,	,	,	,	,	,	,	,	,	,	,	,	,
1814	,	,	,	,	,	,	,	,	,	,	,	,	,	,	,
1815	,	,	,	,	,	,	,	,	,	,	,	,	,	,	,
1816	,	,	,	,	,	,	,	,	,	,	,	,	,	,	,
1817	,	,	,	,	,	,	,	,	,	,	,	,	,	,	,
1818	,	,	,	,	,	,	,	,	,	,	,	,	,	,	,
1819	,	,	,	,	,	,	,	,	,	,	,	,	,	,	,
1820	,	,	,	,	,	,	,	,	,	,	,	,	,	,	,
1821	,	,	,	,	,	,	,	,	,	,	,	,	,	,	,
1822	,	,	,	,	,	,	,	,	,	,	,	,	,	,	,
1823	,	,	,	,	,	,	,	,	,	,	,	,	,	,	,
1824	,	,	,	,	,	,	,	,	,	,	,	,	,	,	,
1825	,	,	,	,	,	,	,	,	,	,	,	,	,	,	,
1826	,	,	,	,	,	,	,	,	,	,	,	,	,	,	,
1827	,	,	,	,	,	,	,	,	,	,	,	,	,	,	,
1828	,	,	,	,	,	,	,	,	,	,	,	,	,	,	,
1829	,	,	,	,	,	,	,	,	,	,	,	,	,	,	,
1830	,	,	,	,	,	,	,	,	,	,	,	,	,	,	,
1831	,	,	,	,	,	,	,	,	,	,	,	,	,	,	,
1832	,	,	,	,	,	,	,	,	,	,	,	,	,	,	,
1833	,	,	,	,	,	,	,	,	,	,	,	,	,	,	,
1834	,	,	,	,	,	,	,	,	,	,	,	,	,	,	,
1835	,	,	,	,	,	,	,	,	,	,	,	,	,	,	,
1836	,	,	,	,	,	,	,	,	,	,	,	,	,	,	,
1837	,	,	,	,	,	,	,	,	,	,	,	,	,	,	,
1838	,	,	,	,	,	,	,	,	,	,	,	,	,	,	,
1839	,	,	,	,	,	,	,	,	,	,	,	,	,	,	,
1840	,	,	,	,	,	,	,	,	,	,	,	,	,	,	,
1841	,	,	,	,	,	,	,	,	,	,	,	,	,	,	,
1842	,	,	,	,	,	,	,	,	,	,	,	,	,	,	,
1843	,	,	,	,	,	,	,	,	,	,	,	,	,	,	,
1844	,	,	,	,	,	,	,	,	,	,	,	,	,	,	,
1845	,	,	,	,	,	,	,	,	,	,	,	,	,	,	,
1846	,	,	,	,	,	,	,	,	,	,	,	,	,	,	,
1847	,	,	,	,	,	,	,	,	,	,	,	,	,	,	,
1848	,	,	,	,	,	,	,	,	,	,	,	,	,	,	,
1849	,	,	,	,	,	,	,	,	,	,	,	,	,	,	,
1850	,	,	,	,	,	,	,	,	,	,	,	,	,	,	,
1851	,	,	,	,	,	,	,	,	,	,	,	,	,	,	,
1852	,	,	,	,	,	,	,	,	,	,	,	,	,	,	,
1853	,	,	,	,	,	,	,	,	,	,	,	,	,	,	,
1854	,	,	,	,	,	,	,	,	,	,	,	,	,	,	,
1855	,	,	,	,	,	,	,	,	,	,	,	,	,	,	,
1856	,	,	,	,	,	,	,	,	,	,	,	,	,	,	,
1857	,	,	,	,	,	,	,	,	,	,	,	,	,	,	,
1858	,	,	,	,	,	,	,	,	,	,	,	,	,	,	,
1859	,	,	,	,	,	,	,	,	,	,	,	,	,	,	,
1860	,	,	,	,	,	,	,	,	,	,	,	,	,	,	,
1861	,	,	,	,	,	,	,	,	,	,	,	,	,	,	,
1862	,	,	,	,	,	,	,	,	,	,	,	,	,	,	,
1863	,	,	,	,	,	,	,	,	,	,	,	,	,	,	,
1864	,	,	,	,	,	,	,	,	,	,	,	,	,	,	,
1865	,	,	,	,	,	,	,	,	,	,	,	,	,	,	,
1866	,	,	,	,	,	,	,	,	,	,	,	,	,	,	,
1867	,	,	,	,	,	,	,	,	,	,	,	,	,	,	,
1868	,	,	,	,	,	,	,	,	,	,	,	,	,	,	,
1869	,	,	,	,	,	,	,	,	,	,	,	,	,	,	,
1870	,	,	,	,	,	,	,	,	,	,	,	,	,	,	,
1871	,	,	,	,	,	,	,	,	,	,	,	,	,	,	,
1872	,	,	,	,	,	,	,	,	,	,	,	,	,	,	,
1873	,	,	,	,	,	,	,	,	,	,	,	,	,	,	,
1874	,	,	,	,	,	,	,	,	,	,	,	,	,	,	,
1875	,	,	,	,	,	,	,	,	,	,	,	,	,	,	,
1876	,	,	,	,	,	,	,	,	,	,	,	,	,	,	,
1877	,	,	,	,	,	,	,	,	,	,	,	,	,	,	,
1878	,	,	,	,	,	,	,	,	,	,	,	,	,	,	,
1879	,	,	,	,	,	,	,	,	,	,	,	,	,	,	,
1880	,	,	,	,	,	,	,	,	,	,	,	,	,	,	,
1881	,	,	,	,	,	,	,	,	,	,	,	,	,	,	,
1882	,	,	,	,	,	,	,	,	,	,	,	,	,	,	,
1883	,	,	,	,	,	,	,	,	,	,	,	,	,	,	,
1884	,	,	,	,	,	,	,	,	,	,	,	,	,	,	,
1885	,	,	,	,	,	,	,	,	,	,	,	,	,	,	,
1886	,	,	,	,	,	,	,	,	,	,	,	,	,	,	,
1887	,	,	,	,	,	,	,	,	,	,	,	,	,	,	,
1888	,	,	,	,	,	,	,	,	,	,	,	,	,	,	,
1889	,	,	,	,	,	,	,	,	,	,	,	,	,	,	,
1890	,	,	,	,	,	,	,	,	,	,	,	,	,	,	,
1891	,	,	,	,	,	,	,	,	,	,	,	,	,	,	,
1892	,	,	,	,	,	,	,	,	,	,	,	,	,	,	,
1893	,	,	,	,	,	,	,	,	,	,	,	,	,	,	,
1894	,	,	,	,	,	,	,	,	,	,	,	,	,	,	,
1895	,	,	,	,	,	,	,	,	,	,	,	,	,	,	,
1896	,	,	,	,	,	,	,	,	,	,	,	,	,	,	,
1897	,	,	,	,	,	,	,	,	,	,	,	,	,	,	,
1898	,	,	,	,	,	,	,	,	,	,	,	,	,	,	,
1899	,	,	,	,	,	,	,	,	,	,	,	,	,	,	,
1900	,	,	,	,	,	,	,	,	,	,	,	,	,	,	,
1901	,	,	,	,	,	,	,	,	,	,	,	,	,	,	,
1902	,	,	,	,	,	,	,	,	,	,	,	,	,	,	,
1903	,	,	,	,	,	,	,	,	,	,	,	,	,	,	,
1904	,	,	,	,	,	,	,	,	,	,	,	,	,	,	,
1905	,	,	,	,	,	,	,	,	,	,	,	,	,	,	,
1906	,	,	,	,	,	,	,	,	,	,	,	,	,	,	,
1907	,	,	,	,	,	,	,	,	,	,	,	,	,	,	,
1908	,	,	,	,	,	,	,	,	,	,	,	,	,	,	,
1909	,	,	,	,	,	,	,	,	,	,	,	,	,	,	,
1910	,	,	,	,	,	,	,	,	,	,	,	,	,	,	,
1911	,	,	,	,	,	,	,	,	,	,	,	,	,	,	,
1912	,	,	,	,	,	,	,	,	,	,	,	,	,	,	,
1913	,	,	,	,	,	,	,	,	,	,	,	,	,	,	,
1914	,	,	,	,	,	,	,	,	,	,	,	,	,	,	,
1915	,	,	,	,	,	,	,	,	,	,	,	,	,	,	,
1916	,	,	,	,	,	,	,	,	,	,	,	,	,	,	,
1917	,	,	,	,	,	,	,	,	,	,	,	,	,	,	,
1918	,	,	,	,	,	,	,	,	,	,	,	,	,	,	,
1919	,	,	,	,	,	,	,	,	,	,	,	,	,	,	,
1920	,	,	,	,	,	,	,	,	,	,	,	,	,	,	,
1921	,	,	,	,	,	,	,	,	,	,	,	,	,	,	,
1922	,	,	,	,	,	,	,	,	,	,	,	,	,	,	,
1923	,	,	,	,	,	,	,	,	,	,	,	,	,	,	,
1924	,	,	,	,	,	,	,	,	,	,	,	,	,	,	,
1925	,	,	,	,	,	,	,	,	,	,	,	,	,	,	,
1926	,	,	,	,	,	,	,	,	,	,	,	,	,	,	,
1927	,	,	,	,	,	,	,	,	,	,	,	,	,	,	,
1928	,	,	,	,	,	,	,	,	,	,	,	,	,	,	,
1929	,	,	,	,	,	,	,	,	,	,	,	,	,	,	,
1930	,	,	,	,	,	,	,	,	,	,	,	,	,	,	,
1931	,	,	,	,	,	,	,	,	,	,	,	,	,	,	,
1932	,	,	,	,	,	,	,	,	,	,	,	,	,	,	,
1933	,	,	,	,	,	,	,	,	,	,	,	,	,	,	,
1934	,	,	,	,	,	,	,	,	,	,	,	,	,	,	,
1935	,	,	,	,	,	,	,	,	,	,	,	,	,	,	,
1936	,	,	,	,	,	,	,	,	,	,	,	,	,	,	,
1937	,	,	,	,	,	,	,	,	,	,	,	,	,	,	,
1938	,	,	,	,	,	,	,	,	,	,	,	,	,	,	,
1939	,	,	,	,	,	,	,	,	,	,	,	,	,	,	,
1940	,	,	,	,	,	,	,	,	,	,	,	,	,	,	,
1941	,	,	,	,	,	,	,	,	,	,	,	,	,	,	,
1942	,	,	,	,	,	,	,	,	,	,	,	,	,	,	,
1943	,	,	,	,	,	,	,	,	,	,	,	,	,	,	,
1944	,	,	,	,	,	,	,	,	,	,	,	,	,	,	,
1945	,	,	,	,	,	,	,	,	,	,	,	,	,	,	,
1946	,	,	,	,	,	,	,	,	,	,	,	,	,	,	,
1947	,	,	,	,	,	,	,	,	,	,	,	,	,	,	,
1948	,	,	,	,	,	,	,	,	,	,	,	,	,	,	,
1949	,	,	,	,	,	,	,	,	,	,	,	,	,	,	,
1950	,	,	,	,	,	,	,	,	,	,	,	,	,	,	,
1951	,	,	,	,	,	,	,	,	,	,	,	,	,	,	,
1952	,	,	,	,	,	,	,	,	,	,	,	,	,	,	,
1953	,	,	,	,	,	,	,	,	,	,	,	,	,	,	,
1954	,	,	,	,	,	,	,	,	,	,	,	,	,	,	,
1955	,	,	,	,	,	,	,	,	,	,	,	,	,	,	,
1956	,	,	,	,	,	,	,	,	,	,	,	,	,	,	,
1957	,	,	,	,	,	,	,	,	,	,	,	,	,	,	,
1958	,	,	,	,	,	,	,	,	,	,	,	,	,	,	,
1959	,	,	,	,	,	,	,	,	,	,	,	,	,	,	,
1960	,	,	,	,	,	,	,	,	,	,	,	,	,	,	,
1961	,	,	,	,	,	,	,	,	,	,	,	,	,	,	,
1962	,	,	,	,	,	,	,	,	,	,	,	,	,	,	,
1963	,	,	,	,	,	,	,	,	,	,	,	,	,	,	,
1964	,	,	,	,	,	,	,	,	,	,	,	,	,	,	,
1965	,	,	,	,	,	,	,	,	,	,	,	,	,	,	,
1966	,	,	,	,	,	,	,	,	,	,	,	,	,	,	,
1967	,	,	,	,	,	,	,	,	,	,	,	,	,	,	,
1968	,	,	,	,	,	,	,	,	,	,	,	,	,	,	,
1969	,	,	,	,	,	,	,	,	,	,	,	,	,	,	,
1970	,	,	,	,	,	,	,	,	,	,	,	,	,	,	,
1971	,	,	,	,	,	,	,	,	,	,	,	,	,	,	,
1972	,	,	,	,	,	,	,	,	,	,	,	,	,	,	,
1973	,	,	,	,	,	,	,	,	,	,	,	,	,	,	,
1974	,	,	,	,	,	,	,	,	,	,	,	,	,	,	,
1975	,	,	,	,	,	,	,	,	,	,	,	,	,	,	,
1976	,	,	,	,	,	,	,	,	,	,	,	,	,	,	,
1977	,	,	,	,	,	,	,	,	,	,	,	,	,	,	,
1978	,	,	,	,	,	,	,	,	,	,	,	,	,	,	,
1979	,	,	,	,	,	,	,	,	,	,	,	,	,	,	,
1980	,	,	,	,	,	,	,	,	,	,	,	,	,	,	,
1981	,	,	,	,	,	,	,	,	,	,	,	,	,	,	,
1982	,	,	,	,	,	,	,	,	,	,	,	,	,	,	,
1983	,	,	,	,	,	,	,	,	,	,	,	,	,	,	,
1984	,	,	,	,	,	,	,	,	,	,	,	,	,	,	,
1985	,	,	,	,	,	,	,	,	,	,	,	,	,	,	,
1986	,	,	,	,	,	,	,	,	,	,	,	,	,	,	,
1987	,	,	,	,	,	,	,	,	,	,	,	,	,	,	,
1988	,	,	,	,	,	,	,	,	,	,	,	,	,	,	,
1989	,	,	,	,	,	,	,	,	,	,	,	,	,	,	,
1990	,	,	,	,	,	,	,	,	,	,	,	,	,	,	,
1991	,	,	,	,	,	,	,	,	,	,	,	,	,	,	,
1992	,	,	,	,	,	,	,	,	,	,	,	,	,	,	,
1993	,	,	,	,	,	,	,	,	,	,	,	,	,	,	,
1994	,	,	,	,	,	,	,	,	,	,	,	,	,	,	,
1995	,	,	,	,	,	,	,	,	,	,	,	,	,	,	,
1996	,	,	,	,	,	,	,	,	,	,	,	,	,	,	,
1997	,	,	,	,	,	,	,	,	,	,	,	,	,	,	,
1998	,	,	,	,	,	,	,	,	,	,	,	,	,	,	,
1999	,	,	,	,	,	,	,	,	,	,	,	,	,	,	,
[truncated: 13,001 more rows]
