# Supplementary material for: ParB spreading on DNA requires cytidine triphosphate in vitro
Source: eLife journal article supplement (doi:10.7554/elife.53515), 2020-02-20
Supplement: fig2-figsupp3-data1 [file Fig2_supp3_Staphylococcus_ParB_rep1_2_3.xlsx]

## Sheet: FORMAT
	sample ID #1	sample ID #2	sample ID #3
data point	time point (sec), wavelength shift (nm)	time point (sec), wavelength shift (nm)	time point (sec), wavelength shift (nm)
1
2
3
.
.
.

## Sheet: Fig2_supp3_Staphylococcus_B_123
	169bp closed parS DNA and Staphylococcus ParB	169bp closed parS DNA and Staphylococcus ParB 1mM CTP	169bp closed parS DNA and Staphylococcus ParB 1mM CTP	169bp closed parS DNA and Staphylococcus ParB	169bp closed parS DNA and Staphylococcus ParB 1mM ATP	169bp closed parS DNA and Staphylococcus ParB 1mM GTP	169bp closed parS DNA and Staphylococcus ParB 1mM UTP	169bp closed parS DNA and Staphylococcus ParB	169bp closed parS DNA and Staphylococcus ParB 1mM ATP	169bp closed parS DNA and Staphylococcus ParB 1mM GTP	169bp closed parS DNA and Staphylococcus ParB 1mM UTP	169bp closed parS DNA and Staphylococcus ParB 1mM ATP	169bp closed parS DNA and Staphylococcus ParB 1mM GTP	169bp closed parS DNA and Staphylococcus ParB 1mM UTP	169bp closed parS DNA and Staphylococcus ParB 1mM CTP
1	0.000, -0.009	0.000, -0.012	0.000, -0.026	0.000, -0.022	0.000, -0.014	0.000, -0.010	0.000, -0.012	0.000, -0.010	0.000, -0.012	0.000, -0.009	0.000, -0.018	0.000, -0.009	0.000, -0.029	0.000, -0.017	0.000, -0.035
2	0.200, -0.010	0.200, -0.011	0.200, -0.026	0.200, -0.022	0.200, -0.014	0.200, -0.010	0.200, -0.012	0.200, -0.010	0.200, -0.012	0.200, -0.010	0.200, -0.018	0.200, -0.010	0.200, -0.029	0.200, -0.017	0.200, -0.034
3	0.400, -0.010	0.400, -0.011	0.400, -0.027	0.400, -0.023	0.400, -0.015	0.400, -0.011	0.400, -0.012	0.400, -0.010	0.400, -0.013	0.400, -0.010	0.400, -0.019	0.400, -0.012	0.400, -0.029	0.400, -0.018	0.400, -0.033
4	0.600, -0.010	0.600, -0.011	0.600, -0.027	0.600, -0.023	0.600, -0.016	0.600, -0.011	0.600, -0.012	0.600, -0.010	0.600, -0.013	0.600, -0.011	0.600, -0.019	0.600, -0.013	0.600, -0.028	0.600, -0.018	0.600, -0.032
5	0.800, -0.010	0.800, -0.012	0.800, -0.028	0.800, -0.023	0.800, -0.016	0.800, -0.012	0.800, -0.012	0.800, -0.010	0.800, -0.014	0.800, -0.011	0.800, -0.019	0.800, -0.014	0.800, -0.028	0.800, -0.019	0.800, -0.031
6	1.000, -0.010	1.000, -0.012	1.000, -0.028	1.000, -0.024	1.000, -0.017	1.000, -0.013	1.000, -0.012	1.000, -0.011	1.000, -0.015	1.000, -0.012	1.000, -0.019	1.000, -0.015	1.000, -0.028	1.000, -0.019	1.000, -0.029
7	1.200, -0.009	1.200, -0.012	1.200, -0.028	1.200, -0.024	1.200, -0.017	1.200, -0.013	1.200, -0.012	1.200, -0.011	1.200, -0.015	1.200, -0.012	1.200, -0.019	1.200, -0.015	1.200, -0.028	1.200, -0.019	1.200, -0.028
8	1.400, -0.009	1.400, -0.013	1.400, -0.028	1.400, -0.024	1.400, -0.018	1.400, -0.013	1.400, -0.012	1.400, -0.011	1.400, -0.016	1.400, -0.012	1.400, -0.019	1.400, -0.016	1.400, -0.027	1.400, -0.020	1.400, -0.027
9	1.600, -0.009	1.600, -0.014	1.600, -0.028	1.600, -0.024	1.600, -0.018	1.600, -0.014	1.600, -0.012	1.600, -0.011	1.600, -0.016	1.600, -0.012	1.600, -0.019	1.600, -0.016	1.600, -0.027	1.600, -0.020	1.600, -0.026
10	1.800, -0.008	1.800, -0.014	1.800, -0.028	1.800, -0.024	1.800, -0.018	1.800, -0.014	1.800, -0.011	1.800, -0.011	1.800, -0.017	1.800, -0.013	1.800, -0.019	1.800, -0.016	1.800, -0.026	1.800, -0.020	1.800, -0.025
11	2.000, -0.007	2.000, -0.015	2.000, -0.028	2.000, -0.024	2.000, -0.018	2.000, -0.014	2.000, -0.011	2.000, -0.011	2.000, -0.017	2.000, -0.013	2.000, -0.019	2.000, -0.016	2.000, -0.026	2.000, -0.020	2.000, -0.024
12	2.200, -0.006	2.200, -0.015	2.200, -0.028	2.200, -0.024	2.200, -0.019	2.200, -0.014	2.200, -0.011	2.200, -0.011	2.200, -0.017	2.200, -0.012	2.200, -0.019	2.200, -0.015	2.200, -0.026	2.200, -0.019	2.200, -0.024
13	2.400, -0.006	2.400, -0.016	2.400, -0.028	2.400, -0.024	2.400, -0.018	2.400, -0.014	2.400, -0.011	2.400, -0.011	2.400, -0.016	2.400, -0.013	2.400, -0.018	2.400, -0.015	2.400, -0.025	2.400, -0.019	2.400, -0.023
14	2.600, -0.006	2.600, -0.016	2.600, -0.028	2.600, -0.023	2.600, -0.018	2.600, -0.014	2.600, -0.011	2.600, -0.011	2.600, -0.016	2.600, -0.013	2.600, -0.018	2.600, -0.015	2.600, -0.024	2.600, -0.019	2.600, -0.023
15	2.800, -0.006	2.800, -0.016	2.800, -0.027	2.800, -0.023	2.800, -0.018	2.800, -0.013	2.800, -0.011	2.800, -0.011	2.800, -0.016	2.800, -0.013	2.800, -0.018	2.800, -0.014	2.800, -0.024	2.800, -0.018	2.800, -0.022
16	3.000, -0.006	3.000, -0.015	3.000, -0.027	3.000, -0.022	3.000, -0.018	3.000, -0.013	3.000, -0.011	3.000, -0.011	3.000, -0.016	3.000, -0.013	3.000, -0.018	3.000, -0.015	3.000, -0.023	3.000, -0.018	3.000, -0.022
17	3.200, -0.006	3.200, -0.015	3.200, -0.027	3.200, -0.022	3.200, -0.017	3.200, -0.013	3.200, -0.011	3.200, -0.011	3.200, -0.016	3.200, -0.012	3.200, -0.017	3.200, -0.015	3.200, -0.023	3.200, -0.018	3.200, -0.021
18	3.400, -0.006	3.400, -0.015	3.400, -0.026	3.400, -0.021	3.400, -0.017	3.400, -0.013	3.400, -0.011	3.400, -0.011	3.400, -0.015	3.400, -0.012	3.400, -0.017	3.400, -0.015	3.400, -0.023	3.400, -0.018	3.400, -0.021
19	3.600, -0.006	3.600, -0.014	3.600, -0.026	3.600, -0.020	3.600, -0.017	3.600, -0.014	3.600, -0.011	3.600, -0.011	3.600, -0.015	3.600, -0.012	3.600, -0.017	3.600, -0.015	3.600, -0.022	3.600, -0.018	3.600, -0.021
20	3.800, -0.006	3.800, -0.014	3.800, -0.026	3.800, -0.020	3.800, -0.016	3.800, -0.014	3.800, -0.011	3.800, -0.011	3.800, -0.015	3.800, -0.012	3.800, -0.016	3.800, -0.015	3.800, -0.022	3.800, -0.017	3.800, -0.021
21	4.000, -0.006	4.000, -0.013	4.000, -0.025	4.000, -0.019	4.000, -0.016	4.000, -0.014	4.000, -0.011	4.000, -0.011	4.000, -0.015	4.000, -0.012	4.000, -0.016	4.000, -0.016	4.000, -0.021	4.000, -0.017	4.000, -0.021
22	4.200, -0.006	4.200, -0.013	4.200, -0.025	4.200, -0.018	4.200, -0.016	4.200, -0.014	4.200, -0.011	4.200, -0.011	4.200, -0.014	4.200, -0.012	4.200, -0.016	4.200, -0.016	4.200, -0.021	4.200, -0.017	4.200, -0.021
23	4.400, -0.006	4.400, -0.013	4.400, -0.024	4.400, -0.017	4.400, -0.016	4.400, -0.014	4.400, -0.011	4.400, -0.010	4.400, -0.014	4.400, -0.011	4.400, -0.015	4.400, -0.016	4.400, -0.020	4.400, -0.016	4.400, -0.020
24	4.600, -0.006	4.600, -0.013	4.600, -0.024	4.600, -0.017	4.600, -0.015	4.600, -0.015	4.600, -0.011	4.600, -0.010	4.600, -0.014	4.600, -0.011	4.600, -0.015	4.600, -0.016	4.600, -0.020	4.600, -0.016	4.600, -0.020
25	4.800, -0.005	4.800, -0.013	4.800, -0.023	4.800, -0.016	4.800, -0.015	4.800, -0.015	4.800, -0.011	4.800, -0.010	4.800, -0.014	4.800, -0.011	4.800, -0.015	4.800, -0.016	4.800, -0.019	4.800, -0.016	4.800, -0.020
26	5.000, -0.005	5.000, -0.014	5.000, -0.023	5.000, -0.015	5.000, -0.015	5.000, -0.015	5.000, -0.011	5.000, -0.010	5.000, -0.014	5.000, -0.011	5.000, -0.015	5.000, -0.015	5.000, -0.019	5.000, -0.016	5.000, -0.020
27	5.200, -0.005	5.200, -0.014	5.200, -0.022	5.200, -0.015	5.200, -0.015	5.200, -0.014	5.200, -0.011	5.200, -0.010	5.200, -0.014	5.200, -0.011	5.200, -0.015	5.200, -0.015	5.200, -0.018	5.200, -0.016	5.200, -0.019
28	5.400, -0.004	5.400, -0.014	5.400, -0.022	5.400, -0.015	5.400, -0.015	5.400, -0.014	5.400, -0.011	5.400, -0.009	5.400, -0.014	5.400, -0.011	5.400, -0.015	5.400, -0.015	5.400, -0.018	5.400, -0.016	5.400, -0.019
29	5.600, -0.004	5.600, -0.014	5.600, -0.021	5.600, -0.014	5.600, -0.015	5.600, -0.014	5.600, -0.011	5.600, -0.009	5.600, -0.014	5.600, -0.011	5.600, -0.015	5.600, -0.014	5.600, -0.018	5.600, -0.016	5.600, -0.018
30	5.800, -0.004	5.800, -0.014	5.800, -0.021	5.800, -0.014	5.800, -0.015	5.800, -0.013	5.800, -0.011	5.800, -0.009	5.800, -0.013	5.800, -0.011	5.800, -0.016	5.800, -0.014	5.800, -0.017	5.800, -0.016	5.800, -0.018
31	6.000, -0.004	6.000, -0.014	6.000, -0.021	6.000, -0.014	6.000, -0.015	6.000, -0.013	6.000, -0.011	6.000, -0.009	6.000, -0.013	6.000, -0.011	6.000, -0.016	6.000, -0.013	6.000, -0.017	6.000, -0.016	6.000, -0.018
32	6.200, -0.003	6.200, -0.014	6.200, -0.020	6.200, -0.014	6.200, -0.015	6.200, -0.012	6.200, -0.010	6.200, -0.009	6.200, -0.013	6.200, -0.011	6.200, -0.016	6.200, -0.013	6.200, -0.017	6.200, -0.016	6.200, -0.017
33	6.400, -0.003	6.400, -0.014	6.400, -0.020	6.400, -0.014	6.400, -0.015	6.400, -0.012	6.400, -0.010	6.400, -0.009	6.400, -0.012	6.400, -0.011	6.400, -0.016	6.400, -0.013	6.400, -0.016	6.400, -0.016	6.400, -0.016
34	6.600, -0.004	6.600, -0.013	6.600, -0.020	6.600, -0.014	6.600, -0.015	6.600, -0.012	6.600, -0.010	6.600, -0.009	6.600, -0.012	6.600, -0.011	6.600, -0.016	6.600, -0.012	6.600, -0.016	6.600, -0.016	6.600, -0.016
35	6.800, -0.003	6.800, -0.013	6.800, -0.020	6.800, -0.014	6.800, -0.014	6.800, -0.012	6.800, -0.010	6.800, -0.009	6.800, -0.012	6.800, -0.011	6.800, -0.015	6.800, -0.012	6.800, -0.016	6.800, -0.016	6.800, -0.015
36	7.000, -0.003	7.000, -0.013	7.000, -0.020	7.000, -0.014	7.000, -0.014	7.000, -0.012	7.000, -0.010	7.000, -0.008	7.000, -0.011	7.000, -0.011	7.000, -0.015	7.000, -0.012	7.000, -0.016	7.000, -0.016	7.000, -0.015
37	7.200, -0.003	7.200, -0.012	7.200, -0.020	7.200, -0.013	7.200, -0.014	7.200, -0.012	7.200, -0.010	7.200, -0.008	7.200, -0.011	7.200, -0.011	7.200, -0.014	7.200, -0.012	7.200, -0.016	7.200, -0.015	7.200, -0.014
38	7.400, -0.003	7.400, -0.012	7.400, -0.019	7.400, -0.013	7.400, -0.013	7.400, -0.012	7.400, -0.010	7.400, -0.008	7.400, -0.011	7.400, -0.011	7.400, -0.014	7.400, -0.012	7.400, -0.015	7.400, -0.015	7.400, -0.014
39	7.600, -0.003	7.600, -0.012	7.600, -0.019	7.600, -0.013	7.600, -0.013	7.600, -0.012	7.600, -0.010	7.600, -0.008	7.600, -0.010	7.600, -0.011	7.600, -0.014	7.600, -0.012	7.600, -0.015	7.600, -0.015	7.600, -0.014
40	7.800, -0.003	7.800, -0.012	7.800, -0.019	7.800, -0.012	7.800, -0.013	7.800, -0.012	7.800, -0.010	7.800, -0.008	7.800, -0.010	7.800, -0.010	7.800, -0.013	7.800, -0.012	7.800, -0.014	7.800, -0.014	7.800, -0.014
41	8.000, -0.003	8.000, -0.012	8.000, -0.019	8.000, -0.011	8.000, -0.013	8.000, -0.012	8.000, -0.010	8.000, -0.007	8.000, -0.010	8.000, -0.010	8.000, -0.013	8.000, -0.012	8.000, -0.014	8.000, -0.014	8.000, -0.013
42	8.200, -0.004	8.200, -0.012	8.200, -0.019	8.200, -0.010	8.200, -0.012	8.200, -0.012	8.200, -0.009	8.200, -0.007	8.200, -0.010	8.200, -0.009	8.200, -0.013	8.200, -0.011	8.200, -0.013	8.200, -0.013	8.200, -0.013
43	8.400, -0.003	8.400, -0.012	8.400, -0.018	8.400, -0.010	8.400, -0.012	8.400, -0.012	8.400, -0.009	8.400, -0.007	8.400, -0.010	8.400, -0.009	8.400, -0.012	8.400, -0.011	8.400, -0.013	8.400, -0.013	8.400, -0.013
44	8.600, -0.003	8.600, -0.012	8.600, -0.018	8.600, -0.009	8.600, -0.012	8.600, -0.012	8.600, -0.009	8.600, -0.007	8.600, -0.010	8.600, -0.009	8.600, -0.012	8.600, -0.011	8.600, -0.012	8.600, -0.013	8.600, -0.012
45	8.800, -0.003	8.800, -0.012	8.800, -0.018	8.800, -0.008	8.800, -0.011	8.800, -0.012	8.800, -0.009	8.800, -0.007	8.800, -0.010	8.800, -0.009	8.800, -0.012	8.800, -0.011	8.800, -0.012	8.800, -0.013	8.800, -0.012
46	9.000, -0.003	9.000, -0.012	9.000, -0.018	9.000, -0.008	9.000, -0.011	9.000, -0.012	9.000, -0.009	9.000, -0.006	9.000, -0.010	9.000, -0.009	9.000, -0.012	9.000, -0.011	9.000, -0.011	9.000, -0.012	9.000, -0.012
47	9.200, -0.003	9.200, -0.012	9.200, -0.017	9.200, -0.007	9.200, -0.011	9.200, -0.011	9.200, -0.009	9.200, -0.006	9.200, -0.010	9.200, -0.009	9.200, -0.012	9.200, -0.011	9.200, -0.011	9.200, -0.012	9.200, -0.012
48	9.400, -0.003	9.400, -0.012	9.400, -0.017	9.400, -0.007	9.400, -0.010	9.400, -0.010	9.400, -0.008	9.400, -0.006	9.400, -0.010	9.400, -0.008	9.400, -0.012	9.400, -0.011	9.400, -0.011	9.400, -0.012	9.400, -0.012
49	9.600, -0.003	9.600, -0.012	9.600, -0.017	9.600, -0.007	9.600, -0.010	9.600, -0.010	9.600, -0.008	9.600, -0.006	9.600, -0.010	9.600, -0.008	9.600, -0.011	9.600, -0.010	9.600, -0.010	9.600, -0.012	9.600, -0.012
50	9.800, -0.003	9.800, -0.012	9.800, -0.016	9.800, -0.007	9.800, -0.010	9.800, -0.009	9.800, -0.008	9.800, -0.006	9.800, -0.010	9.800, -0.008	9.800, -0.011	9.800, -0.010	9.800, -0.010	9.800, -0.012	9.800, -0.011
51	10.000, -0.003	10.000, -0.012	10.000, -0.016	10.000, -0.006	10.000, -0.010	10.000, -0.008	10.000, -0.008	10.000, -0.006	10.000, -0.010	10.000, -0.008	10.000, -0.011	10.000, -0.010	10.000, -0.010	10.000, -0.012	10.000, -0.011
52	10.200, -0.003	10.200, -0.012	10.200, -0.016	10.200, -0.006	10.200, -0.010	10.200, -0.008	10.200, -0.008	10.200, -0.006	10.200, -0.010	10.200, -0.008	10.200, -0.011	10.200, -0.010	10.200, -0.010	10.200, -0.011	10.200, -0.011
53	10.400, -0.003	10.400, -0.012	10.400, -0.016	10.400, -0.006	10.400, -0.010	10.400, -0.008	10.400, -0.008	10.400, -0.006	10.400, -0.010	10.400, -0.008	10.400, -0.011	10.400, -0.010	10.400, -0.010	10.400, -0.011	10.400, -0.011
54	10.600, -0.003	10.600, -0.012	10.600, -0.015	10.600, -0.006	10.600, -0.010	10.600, -0.007	10.600, -0.007	10.600, -0.006	10.600, -0.010	10.600, -0.008	10.600, -0.010	10.600, -0.010	10.600, -0.010	10.600, -0.010	10.600, -0.011
55	10.800, -0.002	10.800, -0.012	10.800, -0.015	10.800, -0.006	10.800, -0.010	10.800, -0.007	10.800, -0.007	10.800, -0.006	10.800, -0.010	10.800, -0.008	10.800, -0.010	10.800, -0.009	10.800, -0.010	10.800, -0.010	10.800, -0.011
56	11.000, -0.002	11.000, -0.012	11.000, -0.015	11.000, -0.006	11.000, -0.010	11.000, -0.007	11.000, -0.007	11.000, -0.006	11.000, -0.010	11.000, -0.008	11.000, -0.010	11.000, -0.009	11.000, -0.009	11.000, -0.009	11.000, -0.011
57	11.200, -0.002	11.200, -0.011	11.200, -0.015	11.200, -0.006	11.200, -0.010	11.200, -0.007	11.200, -0.007	11.200, -0.006	11.200, -0.010	11.200, -0.008	11.200, -0.010	11.200, -0.009	11.200, -0.009	11.200, -0.009	11.200, -0.011
58	11.400, -0.002	11.400, -0.011	11.400, -0.015	11.400, -0.005	11.400, -0.010	11.400, -0.007	11.400, -0.007	11.400, -0.005	11.400, -0.010	11.400, -0.008	11.400, -0.009	11.400, -0.009	11.400, -0.009	11.400, -0.008	11.400, -0.010
59	11.600, -0.002	11.600, -0.011	11.600, -0.014	11.600, -0.005	11.600, -0.010	11.600, -0.007	11.600, -0.007	11.600, -0.005	11.600, -0.009	11.600, -0.007	11.600, -0.009	11.600, -0.009	11.600, -0.009	11.600, -0.008	11.600, -0.010
60	11.800, -0.003	11.800, -0.011	11.800, -0.014	11.800, -0.005	11.800, -0.010	11.800, -0.007	11.800, -0.006	11.800, -0.005	11.800, -0.009	11.800, -0.007	11.800, -0.009	11.800, -0.008	11.800, -0.009	11.800, -0.008	11.800, -0.010
61	12.000, -0.003	12.000, -0.010	12.000, -0.014	12.000, -0.005	12.000, -0.010	12.000, -0.007	12.000, -0.006	12.000, -0.005	12.000, -0.009	12.000, -0.007	12.000, -0.009	12.000, -0.008	12.000, -0.009	12.000, -0.007	12.000, -0.010
62	12.200, -0.003	12.200, -0.010	12.200, -0.014	12.200, -0.005	12.200, -0.010	12.200, -0.008	12.200, -0.006	12.200, -0.004	12.200, -0.009	12.200, -0.007	12.200, -0.009	12.200, -0.008	12.200, -0.009	12.200, -0.007	12.200, -0.010
63	12.400, -0.003	12.400, -0.010	12.400, -0.014	12.400, -0.005	12.400, -0.010	12.400, -0.008	12.400, -0.006	12.400, -0.004	12.400, -0.009	12.400, -0.007	12.400, -0.009	12.400, -0.007	12.400, -0.009	12.400, -0.007	12.400, -0.009
64	12.600, -0.003	12.600, -0.010	12.600, -0.014	12.600, -0.005	12.600, -0.010	12.600, -0.008	12.600, -0.006	12.600, -0.004	12.600, -0.009	12.600, -0.006	12.600, -0.009	12.600, -0.007	12.600, -0.009	12.600, -0.008	12.600, -0.009
65	12.800, -0.003	12.800, -0.010	12.800, -0.013	12.800, -0.005	12.800, -0.009	12.800, -0.008	12.800, -0.006	12.800, -0.004	12.800, -0.009	12.800, -0.006	12.800, -0.009	12.800, -0.007	12.800, -0.009	12.800, -0.008	12.800, -0.009
66	13.000, -0.003	13.000, -0.010	13.000, -0.013	13.000, -0.005	13.000, -0.009	13.000, -0.008	13.000, -0.007	13.000, -0.003	13.000, -0.009	13.000, -0.006	13.000, -0.009	13.000, -0.006	13.000, -0.009	13.000, -0.008	13.000, -0.009
67	13.200, -0.003	13.200, -0.009	13.200, -0.012	13.200, -0.005	13.200, -0.008	13.200, -0.008	13.200, -0.007	13.200, -0.003	13.200, -0.009	13.200, -0.006	13.200, -0.008	13.200, -0.006	13.200, -0.009	13.200, -0.008	13.200, -0.009
68	13.400, -0.003	13.400, -0.009	13.400, -0.012	13.400, -0.005	13.400, -0.008	13.400, -0.008	13.400, -0.007	13.400, -0.003	13.400, -0.009	13.400, -0.006	13.400, -0.008	13.400, -0.006	13.400, -0.009	13.400, -0.008	13.400, -0.008
69	13.600, -0.003	13.600, -0.009	13.600, -0.011	13.600, -0.005	13.600, -0.008	13.600, -0.008	13.600, -0.007	13.600, -0.002	13.600, -0.009	13.600, -0.005	13.600, -0.009	13.600, -0.006	13.600, -0.009	13.600, -0.008	13.600, -0.008
70	13.800, -0.003	13.800, -0.009	13.800, -0.011	13.800, -0.005	13.800, -0.008	13.800, -0.008	13.800, -0.006	13.800, -0.002	13.800, -0.009	13.800, -0.005	13.800, -0.009	13.800, -0.006	13.800, -0.009	13.800, -0.008	13.800, -0.008
71	14.000, -0.003	14.000, -0.009	14.000, -0.010	14.000, -0.005	14.000, -0.008	14.000, -0.008	14.000, -0.006	14.000, -0.002	14.000, -0.008	14.000, -0.005	14.000, -0.009	14.000, -0.005	14.000, -0.009	14.000, -0.009	14.000, -0.008
72	14.200, -0.003	14.200, -0.009	14.200, -0.010	14.200, -0.005	14.200, -0.007	14.200, -0.007	14.200, -0.006	14.200, -0.003	14.200, -0.008	14.200, -0.005	14.200, -0.009	14.200, -0.006	14.200, -0.009	14.200, -0.009	14.200, -0.008
73	14.400, -0.002	14.400, -0.009	14.400, -0.010	14.400, -0.005	14.400, -0.007	14.400, -0.007	14.400, -0.006	14.400, -0.003	14.400, -0.008	14.400, -0.005	14.400, -0.009	14.400, -0.006	14.400, -0.009	14.400, -0.009	14.400, -0.008
74	14.600, -0.002	14.600, -0.009	14.600, -0.010	14.600, -0.005	14.600, -0.007	14.600, -0.007	14.600, -0.006	14.600, -0.003	14.600, -0.007	14.600, -0.005	14.600, -0.009	14.600, -0.006	14.600, -0.008	14.600, -0.009	14.600, -0.007
75	14.800, -0.001	14.800, -0.009	14.800, -0.009	14.800, -0.005	14.800, -0.007	14.800, -0.007	14.800, -0.006	14.800, -0.003	14.800, -0.007	14.800, -0.006	14.800, -0.008	14.800, -0.006	14.800, -0.008	14.800, -0.009	14.800, -0.007
76	15.000, -0.001	15.000, -0.009	15.000, -0.009	15.000, -0.005	15.000, -0.007	15.000, -0.007	15.000, -0.005	15.000, -0.003	15.000, -0.007	15.000, -0.006	15.000, -0.008	15.000, -0.006	15.000, -0.008	15.000, -0.009	15.000, -0.007
77	15.200, -0.000	15.200, -0.009	15.200, -0.009	15.200, -0.004	15.200, -0.006	15.200, -0.006	15.200, -0.005	15.200, -0.003	15.200, -0.006	15.200, -0.006	15.200, -0.008	15.200, -0.006	15.200, -0.007	15.200, -0.008	15.200, -0.007
78	15.400, -0.000	15.400, -0.009	15.400, -0.009	15.400, -0.004	15.400, -0.006	15.400, -0.006	15.400, -0.005	15.400, -0.003	15.400, -0.006	15.400, -0.006	15.400, -0.008	15.400, -0.006	15.400, -0.007	15.400, -0.008	15.400, -0.006
79	15.600, 0.000	15.600, -0.008	15.600, -0.009	15.600, -0.004	15.600, -0.006	15.600, -0.006	15.600, -0.005	15.600, -0.003	15.600, -0.006	15.600, -0.007	15.600, -0.007	15.600, -0.006	15.600, -0.007	15.600, -0.007	15.600, -0.006
80	15.800, 0.000	15.800, -0.008	15.800, -0.009	15.800, -0.003	15.800, -0.006	15.800, -0.006	15.800, -0.005	15.800, -0.003	15.800, -0.006	15.800, -0.007	15.800, -0.007	15.800, -0.006	15.800, -0.007	15.800, -0.007	15.800, -0.006
81	16.000, 0.000	16.000, -0.008	16.000, -0.009	16.000, -0.003	16.000, -0.006	16.000, -0.006	16.000, -0.005	16.000, -0.003	16.000, -0.006	16.000, -0.007	16.000, -0.007	16.000, -0.006	16.000, -0.006	16.000, -0.007	16.000, -0.006
82	16.200, 0.000	16.200, -0.008	16.200, -0.009	16.200, -0.003	16.200, -0.005	16.200, -0.006	16.200, -0.005	16.200, -0.004	16.200, -0.006	16.200, -0.007	16.200, -0.006	16.200, -0.006	16.200, -0.006	16.200, -0.006	16.200, -0.005
83	16.400, 0.000	16.400, -0.007	16.400, -0.009	16.400, -0.003	16.400, -0.005	16.400, -0.006	16.400, -0.005	16.400, -0.003	16.400, -0.007	16.400, -0.007	16.400, -0.006	16.400, -0.006	16.400, -0.006	16.400, -0.006	16.400, -0.005
84	16.600, 0.000	16.600, -0.007	16.600, -0.009	16.600, -0.003	16.600, -0.005	16.600, -0.006	16.600, -0.005	16.600, -0.003	16.600, -0.007	16.600, -0.007	16.600, -0.006	16.600, -0.006	16.600, -0.006	16.600, -0.006	16.600, -0.005
85	16.800, -0.000	16.800, -0.007	16.800, -0.009	16.800, -0.003	16.800, -0.005	16.800, -0.006	16.800, -0.005	16.800, -0.003	16.800, -0.007	16.800, -0.007	16.800, -0.006	16.800, -0.005	16.800, -0.005	16.800, -0.006	16.800, -0.005
86	17.000, -0.000	17.000, -0.006	17.000, -0.009	17.000, -0.004	17.000, -0.005	17.000, -0.006	17.000, -0.005	17.000, -0.003	17.000, -0.006	17.000, -0.006	17.000, -0.006	17.000, -0.005	17.000, -0.005	17.000, -0.005	17.000, -0.005
87	17.200, -0.000	17.200, -0.006	17.200, -0.008	17.200, -0.004	17.200, -0.005	17.200, -0.005	17.200, -0.005	17.200, -0.003	17.200, -0.006	17.200, -0.006	17.200, -0.006	17.200, -0.005	17.200, -0.005	17.200, -0.005	17.200, -0.005
88	17.400, -0.001	17.400, -0.006	17.400, -0.008	17.400, -0.004	17.400, -0.005	17.400, -0.005	17.400, -0.005	17.400, -0.003	17.400, -0.006	17.400, -0.005	17.400, -0.005	17.400, -0.005	17.400, -0.004	17.400, -0.005	17.400, -0.005
89	17.600, -0.001	17.600, -0.006	17.600, -0.008	17.600, -0.004	17.600, -0.005	17.600, -0.005	17.600, -0.004	17.600, -0.003	17.600, -0.006	17.600, -0.005	17.600, -0.005	17.600, -0.004	17.600, -0.004	17.600, -0.005	17.600, -0.005
90	17.800, -0.001	17.800, -0.006	17.800, -0.008	17.800, -0.004	17.800, -0.005	17.800, -0.005	17.800, -0.004	17.800, -0.003	17.800, -0.005	17.800, -0.004	17.800, -0.005	17.800, -0.004	17.800, -0.004	17.800, -0.005	17.800, -0.005
91	18.000, -0.001	18.000, -0.006	18.000, -0.008	18.000, -0.004	18.000, -0.005	18.000, -0.004	18.000, -0.004	18.000, -0.003	18.000, -0.005	18.000, -0.004	18.000, -0.005	18.000, -0.004	18.000, -0.004	18.000, -0.005	18.000, -0.005
92	18.200, -0.001	18.200, -0.006	18.200, -0.008	18.200, -0.004	18.200, -0.005	18.200, -0.004	18.200, -0.004	18.200, -0.003	18.200, -0.005	18.200, -0.004	18.200, -0.005	18.200, -0.004	18.200, -0.004	18.200, -0.005	18.200, -0.005
93	18.400, -0.002	18.400, -0.005	18.400, -0.008	18.400, -0.004	18.400, -0.005	18.400, -0.004	18.400, -0.004	18.400, -0.004	18.400, -0.004	18.400, -0.004	18.400, -0.005	18.400, -0.004	18.400, -0.005	18.400, -0.005	18.400, -0.005
94	18.600, -0.001	18.600, -0.005	18.600, -0.008	18.600, -0.004	18.600, -0.005	18.600, -0.003	18.600, -0.004	18.600, -0.003	18.600, -0.004	18.600, -0.003	18.600, -0.005	18.600, -0.004	18.600, -0.005	18.600, -0.005	18.600, -0.005
95	18.800, -0.001	18.800, -0.005	18.800, -0.008	18.800, -0.004	18.800, -0.005	18.800, -0.003	18.800, -0.004	18.800, -0.003	18.800, -0.004	18.800, -0.003	18.800, -0.005	18.800, -0.003	18.800, -0.005	18.800, -0.005	18.800, -0.005
96	19.000, -0.001	19.000, -0.005	19.000, -0.007	19.000, -0.004	19.000, -0.005	19.000, -0.003	19.000, -0.004	19.000, -0.003	19.000, -0.004	19.000, -0.003	19.000, -0.005	19.000, -0.003	19.000, -0.005	19.000, -0.005	19.000, -0.005
97	19.200, -0.001	19.200, -0.005	19.200, -0.007	19.200, -0.004	19.200, -0.005	19.200, -0.003	19.200, -0.004	19.200, -0.003	19.200, -0.004	19.200, -0.003	19.200, -0.005	19.200, -0.003	19.200, -0.005	19.200, -0.004	19.200, -0.004
98	19.400, -0.001	19.400, -0.005	19.400, -0.007	19.400, -0.004	19.400, -0.005	19.400, -0.003	19.400, -0.004	19.400, -0.003	19.400, -0.004	19.400, -0.003	19.400, -0.005	19.400, -0.003	19.400, -0.005	19.400, -0.004	19.400, -0.004
99	19.600, -0.001	19.600, -0.006	19.600, -0.007	19.600, -0.003	19.600, -0.004	19.600, -0.003	19.600, -0.004	19.600, -0.003	19.600, -0.004	19.600, -0.003	19.600, -0.004	19.600, -0.003	19.600, -0.005	19.600, -0.004	19.600, -0.004
100	19.800, -0.000	19.800, -0.006	19.800, -0.007	19.800, -0.003	19.800, -0.004	19.800, -0.003	19.800, -0.003	19.800, -0.003	19.800, -0.004	19.800, -0.003	19.800, -0.004	19.800, -0.003	19.800, -0.005	19.800, -0.004	19.800, -0.004
101	20.000, -0.000	20.000, -0.006	20.000, -0.007	20.000, -0.003	20.000, -0.004	20.000, -0.003	20.000, -0.003	20.000, -0.002	20.000, -0.004	20.000, -0.003	20.000, -0.004	20.000, -0.003	20.000, -0.005	20.000, -0.005	20.000, -0.003
102	20.200, -0.000	20.200, -0.006	20.200, -0.007	20.200, -0.003	20.200, -0.003	20.200, -0.003	20.200, -0.003	20.200, -0.002	20.200, -0.004	20.200, -0.003	20.200, -0.004	20.200, -0.003	20.200, -0.005	20.200, -0.005	20.200, -0.003
103	20.400, 0.000	20.400, -0.005	20.400, -0.006	20.400, -0.003	20.400, -0.003	20.400, -0.003	20.400, -0.003	20.400, -0.002	20.400, -0.004	20.400, -0.003	20.400, -0.004	20.400, -0.003	20.400, -0.004	20.400, -0.005	20.400, -0.003
104	20.600, 0.000	20.600, -0.005	20.600, -0.006	20.600, -0.003	20.600, -0.002	20.600, -0.003	20.600, -0.003	20.600, -0.002	20.600, -0.003	20.600, -0.002	20.600, -0.004	20.600, -0.003	20.600, -0.004	20.600, -0.004	20.600, -0.003
105	20.800, 0.000	20.800, -0.005	20.800, -0.006	20.800, -0.003	20.800, -0.002	20.800, -0.003	20.800, -0.002	20.800, -0.001	20.800, -0.003	20.800, -0.002	20.800, -0.004	20.800, -0.003	20.800, -0.004	20.800, -0.004	20.800, -0.003
106	21.000, 0.000	21.000, -0.005	21.000, -0.006	21.000, -0.003	21.000, -0.002	21.000, -0.003	21.000, -0.002	21.000, -0.001	21.000, -0.003	21.000, -0.002	21.000, -0.004	21.000, -0.003	21.000, -0.004	21.000, -0.004	21.000, -0.003
107	21.200, 0.000	21.200, -0.005	21.200, -0.006	21.200, -0.003	21.200, -0.001	21.200, -0.003	21.200, -0.002	21.200, -0.001	21.200, -0.002	21.200, -0.002	21.200, -0.004	21.200, -0.003	21.200, -0.003	21.200, -0.004	21.200, -0.003
108	21.400, 0.000	21.400, -0.006	21.400, -0.005	21.400, -0.002	21.400, -0.001	21.400, -0.003	21.400, -0.002	21.400, -0.001	21.400, -0.002	21.400, -0.002	21.400, -0.004	21.400, -0.003	21.400, -0.003	21.400, -0.004	21.400, -0.003
109	21.600, 0.000	21.600, -0.006	21.600, -0.005	21.600, -0.002	21.600, -0.001	21.600, -0.003	21.600, -0.003	21.600, -0.001	21.600, -0.001	21.600, -0.002	21.600, -0.004	21.600, -0.003	21.600, -0.003	21.600, -0.003	21.600, -0.003
110	21.800, 0.000	21.800, -0.006	21.800, -0.005	21.800, -0.002	21.800, -0.001	21.800, -0.003	21.800, -0.003	21.800, -0.001	21.800, -0.001	21.800, -0.001	21.800, -0.004	21.800, -0.003	21.800, -0.003	21.800, -0.003	21.800, -0.004
111	22.000, 0.000	22.000, -0.005	22.000, -0.005	22.000, -0.002	22.000, -0.001	22.000, -0.003	22.000, -0.003	22.000, -0.001	22.000, -0.001	22.000, -0.001	22.000, -0.004	22.000, -0.003	22.000, -0.003	22.000, -0.003	22.000, -0.004
112	22.200, 0.000	22.200, -0.005	22.200, -0.004	22.200, -0.002	22.200, -0.001	22.200, -0.003	22.200, -0.003	22.200, -0.001	22.200, -0.001	22.200, -0.001	22.200, -0.004	22.200, -0.002	22.200, -0.003	22.200, -0.003	22.200, -0.004
113	22.400, 0.000	22.400, -0.005	22.400, -0.004	22.400, -0.002	22.400, -0.001	22.400, -0.003	22.400, -0.003	22.400, -0.001	22.400, -0.000	22.400, -0.002	22.400, -0.004	22.400, -0.002	22.400, -0.003	22.400, -0.003	22.400, -0.004
114	22.600, 0.000	22.600, -0.005	22.600, -0.004	22.600, -0.002	22.600, -0.001	22.600, -0.003	22.600, -0.003	22.600, -0.001	22.600, -0.000	22.600, -0.002	22.600, -0.004	22.600, -0.002	22.600, -0.003	22.600, -0.003	22.600, -0.004
115	22.800, 0.000	22.800, -0.005	22.800, -0.003	22.800, -0.002	22.800, -0.001	22.800, -0.003	22.800, -0.003	22.800, -0.001	22.800, -0.001	22.800, -0.002	22.800, -0.003	22.800, -0.002	22.800, -0.003	22.800, -0.003	22.800, -0.004
116	23.000, 0.000	23.000, -0.005	23.000, -0.003	23.000, -0.002	23.000, -0.002	23.000, -0.003	23.000, -0.003	23.000, -0.001	23.000, -0.001	23.000, -0.003	23.000, -0.003	23.000, -0.002	23.000, -0.003	23.000, -0.003	23.000, -0.005
117	23.200, 0.000	23.200, -0.005	23.200, -0.003	23.200, -0.002	23.200, -0.002	23.200, -0.003	23.200, -0.003	23.200, -0.001	23.200, -0.001	23.200, -0.003	23.200, -0.003	23.200, -0.002	23.200, -0.003	23.200, -0.002	23.200, -0.005
118	23.400, 0.001	23.400, -0.004	23.400, -0.003	23.400, -0.001	23.400, -0.002	23.400, -0.003	23.400, -0.003	23.400, -0.001	23.400, -0.001	23.400, -0.003	23.400, -0.003	23.400, -0.002	23.400, -0.003	23.400, -0.002	23.400, -0.004
119	23.600, 0.001	23.600, -0.004	23.600, -0.002	23.600, -0.001	23.600, -0.001	23.600, -0.003	23.600, -0.003	23.600, -0.001	23.600, -0.001	23.600, -0.003	23.600, -0.002	23.600, -0.002	23.600, -0.003	23.600, -0.002	23.600, -0.004
120	23.800, 0.000	23.800, -0.004	23.800, -0.002	23.800, -0.002	23.800, -0.001	23.800, -0.002	23.800, -0.003	23.800, -0.001	23.800, -0.002	23.800, -0.003	23.800, -0.002	23.800, -0.002	23.800, -0.003	23.800, -0.002	23.800, -0.004
121	24.000, 0.000	24.000, -0.003	24.000, -0.002	24.000, -0.002	24.000, -0.001	24.000, -0.002	24.000, -0.003	24.000, -0.000	24.000, -0.002	24.000, -0.003	24.000, -0.002	24.000, -0.002	24.000, -0.002	24.000, -0.002	24.000, -0.003
122	24.200, 0.000	24.200, -0.003	24.200, -0.002	24.200, -0.001	24.200, -0.001	24.200, -0.002	24.200, -0.002	24.200, -0.000	24.200, -0.002	24.200, -0.003	24.200, -0.002	24.200, -0.002	24.200, -0.002	24.200, -0.002	24.200, -0.003
123	24.400, 0.000	24.400, -0.003	24.400, -0.002	24.400, -0.001	24.400, -0.001	24.400, -0.001	24.400, -0.002	24.400, -0.000	24.400, -0.002	24.400, -0.003	24.400, -0.001	24.400, -0.002	24.400, -0.002	24.400, -0.002	24.400, -0.002
124	24.600, 0.000	24.600, -0.003	24.600, -0.002	24.600, -0.001	24.600, -0.000	24.600, -0.001	24.600, -0.002	24.600, -0.000	24.600, -0.002	24.600, -0.002	24.600, -0.001	24.600, -0.002	24.600, -0.001	24.600, -0.002	24.600, -0.001
125	24.800, 0.000	24.800, -0.003	24.800, -0.002	24.800, -0.001	24.800, -0.000	24.800, -0.001	24.800, -0.001	24.800, -0.000	24.800, -0.002	24.800, -0.002	24.800, -0.001	24.800, -0.002	24.800, -0.001	24.800, -0.001	24.800, -0.001
126	25.000, 0.000	25.000, -0.003	25.000, -0.002	25.000, -0.001	25.000, 0.000	25.000, -0.001	25.000, -0.001	25.000, -0.000	25.000, -0.002	25.000, -0.002	25.000, -0.001	25.000, -0.003	25.000, -0.001	25.000, -0.001	25.000, -0.000
127	25.200, 0.000	25.200, -0.003	25.200, -0.002	25.200, -0.000	25.200, 0.000	25.200, -0.001	25.200, -0.000	25.200, -0.000	25.200, -0.002	25.200, -0.001	25.200, -0.000	25.200, -0.003	25.200, -0.001	25.200, -0.001	25.200, -0.000
128	25.400, 0.001	25.400, -0.002	25.400, -0.002	25.400, -0.000	25.400, 0.001	25.400, -0.001	25.400, 0.000	25.400, -0.000	25.400, -0.002	25.400, -0.001	25.400, -0.000	25.400, -0.002	25.400, -0.001	25.400, -0.001	25.400, -0.000
129	25.600, 0.001	25.600, -0.002	25.600, -0.002	25.600, -0.000	25.600, 0.001	25.600, -0.001	25.600, 0.000	25.600, -0.000	25.600, -0.002	25.600, -0.001	25.600, 0.000	25.600, -0.002	25.600, -0.001	25.600, -0.001	25.600, -0.000
130	25.800, 0.001	25.800, -0.002	25.800, -0.002	25.800, -0.000	25.800, 0.001	25.800, -0.000	25.800, 0.000	25.800, 0.000	25.800, -0.001	25.800, -0.000	25.800, 0.000	25.800, -0.002	25.800, -0.001	25.800, -0.001	25.800, -0.000
131	26.000, 0.001	26.000, -0.002	26.000, -0.002	26.000, -0.000	26.000, 0.001	26.000, -0.000	26.000, 0.001	26.000, 0.000	26.000, -0.001	26.000, 0.000	26.000, 0.000	26.000, -0.002	26.000, -0.001	26.000, -0.001	26.000, -0.000
132	26.200, 0.001	26.200, -0.002	26.200, -0.002	26.200, -0.000	26.200, 0.002	26.200, -0.000	26.200, 0.001	26.200, 0.000	26.200, -0.001	26.200, 0.001	26.200, 0.000	26.200, -0.002	26.200, -0.001	26.200, -0.001	26.200, -0.001
133	26.400, 0.001	26.400, -0.002	26.400, -0.001	26.400, -0.000	26.400, 0.002	26.400, 0.000	26.400, 0.001	26.400, -0.000	26.400, -0.001	26.400, 0.001	26.400, -0.000	26.400, -0.001	26.400, -0.001	26.400, -0.001	26.400, -0.001
134	26.600, 0.002	26.600, -0.002	26.600, -0.001	26.600, -0.000	26.600, 0.002	26.600, 0.000	26.600, 0.000	26.600, -0.000	26.600, -0.001	26.600, 0.001	26.600, -0.000	26.600, -0.001	26.600, -0.001	26.600, -0.001	26.600, -0.001
135	26.800, 0.001	26.800, -0.002	26.800, -0.001	26.800, -0.000	26.800, 0.002	26.800, 0.000	26.800, 0.000	26.800, -0.000	26.800, -0.001	26.800, 0.001	26.800, -0.001	26.800, -0.001	26.800, -0.001	26.800, -0.001	26.800, -0.002
136	27.000, 0.001	27.000, -0.002	27.000, -0.001	27.000, -0.000	27.000, 0.001	27.000, 0.000	27.000, -0.000	27.000, -0.000	27.000, -0.001	27.000, 0.001	27.000, -0.001	27.000, -0.001	27.000, -0.000	27.000, -0.000	27.000, -0.002
137	27.200, 0.001	27.200, -0.002	27.200, -0.001	27.200, -0.000	27.200, 0.001	27.200, 0.000	27.200, -0.000	27.200, -0.000	27.200, -0.001	27.200, 0.001	27.200, -0.001	27.200, -0.001	27.200, 0.000	27.200, -0.000	27.200, -0.002
138	27.400, 0.001	27.400, -0.001	27.400, -0.001	27.400, -0.000	27.400, 0.001	27.400, 0.000	27.400, -0.001	27.400, -0.000	27.400, -0.001	27.400, 0.000	27.400, -0.001	27.400, -0.001	27.400, 0.000	27.400, -0.000	27.400, -0.002
139	27.600, 0.000	27.600, -0.001	27.600, -0.000	27.600, -0.000	27.600, 0.001	27.600, 0.000	27.600, -0.001	27.600, -0.000	27.600, -0.000	27.600, 0.000	27.600, -0.001	27.600, -0.001	27.600, 0.000	27.600, -0.000	27.600, -0.001
140	27.800, 0.000	27.800, -0.001	27.800, -0.000	27.800, -0.000	27.800, 0.001	27.800, 0.000	27.800, -0.001	27.800, -0.000	27.800, -0.000	27.800, 0.000	27.800, -0.001	27.800, -0.000	27.800, 0.000	27.800, -0.000	27.800, -0.001
141	28.000, 0.000	28.000, -0.000	28.000, -0.000	28.000, -0.000	28.000, 0.000	28.000, 0.000	28.000, -0.001	28.000, -0.000	28.000, 0.000	28.000, -0.000	28.000, -0.001	28.000, -0.000	28.000, 0.000	28.000, -0.000	28.000, -0.001
142	28.200, 0.000	28.200, -0.000	28.200, -0.000	28.200, -0.000	28.200, -0.000	28.200, 0.000	28.200, -0.001	28.200, 0.000	28.200, 0.000	28.200, -0.000	28.200, -0.001	28.200, 0.000	28.200, 0.000	28.200, -0.000	28.200, -0.000
143	28.400, -0.000	28.400, 0.000	28.400, -0.000	28.400, -0.000	28.400, -0.000	28.400, 0.000	28.400, -0.000	28.400, 0.000	28.400, 0.000	28.400, -0.000	28.400, -0.000	28.400, 0.000	28.400, 0.000	28.400, -0.000	28.400, 0.000
144	28.600, -0.000	28.600, 0.000	28.600, -0.000	28.600, 0.000	28.600, -0.001	28.600, -0.000	28.600, -0.000	28.600, 0.000	28.600, 0.000	28.600, -0.000	28.600, 0.000	28.600, 0.000	28.600, 0.000	28.600, -0.000	28.600, 0.001
145	28.800, -0.000	28.800, 0.000	28.800, 0.000	28.800, 0.000	28.800, -0.001	28.800, -0.000	28.800, 0.000	28.800, 0.000	28.800, 0.000	28.800, -0.000	28.800, 0.000	28.800, 0.000	28.800, 0.000	28.800, 0.000	28.800, 0.001
146	29.000, -0.000	29.000, 0.001	29.000, 0.000	29.000, 0.000	29.000, -0.001	29.000, -0.000	29.000, 0.001	29.000, 0.000	29.000, 0.000	29.000, -0.000	29.000, 0.001	29.000, 0.000	29.000, -0.000	29.000, 0.000	29.000, 0.001
147	29.200, -0.001	29.200, 0.001	29.200, 0.001	29.200, 0.000	29.200, -0.001	29.200, -0.000	29.200, 0.001	29.200, 0.000	29.200, 0.000	29.200, -0.000	29.200, 0.001	29.200, 0.000	29.200, -0.000	29.200, 0.000	29.200, 0.001
148	29.400, -0.001	29.400, 0.001	29.400, 0.001	29.400, 0.000	29.400, -0.001	29.400, -0.000	29.400, 0.001	29.400, 0.000	29.400, 0.000	29.400, -0.000	29.400, 0.001	29.400, 0.000	29.400, -0.000	29.400, 0.000	29.400, 0.001
149	29.600, -0.001	29.600, 0.001	29.600, 0.001	29.600, 0.000	29.600, -0.000	29.600, -0.000	29.600, 0.001	29.600, 0.000	29.600, 0.000	29.600, 0.000	29.600, 0.001	29.600, 0.000	29.600, -0.000	29.600, 0.000	29.600, 0.001
150	29.800, -0.001	29.800, 0.001	29.800, 0.001	29.800, 0.000	29.800, -0.000	29.800, -0.001	29.800, 0.001	29.800, 0.000	29.800, 0.000	29.800, 0.000	29.800, 0.002	29.800, 0.001	29.800, -0.000	29.800, 0.000	29.800, 0.001
151	30.000, 0.000	30.000, 0.000	30.000, 0.000	30.000, 0.000	30.000, 0.000	30.000, 0.000	30.000, 0.000	30.000, 0.000	30.000, 0.000	30.000, 0.000	30.000, 0.000	30.000, 0.000	30.000, 0.000	30.000, 0.000	30.000, 0.000
152	30.200, 0.016	30.200, 0.011	30.200, 0.007	30.200, 0.019	30.200, 0.012	30.200, 0.016	30.200, 0.015	30.200, 0.012	30.200, 0.013	30.200, 0.016	30.200, 0.017	30.200, 0.015	30.200, 0.018	30.200, 0.014	30.200, 0.011
153	30.400, 0.037	30.400, 0.026	30.400, 0.017	30.400, 0.044	30.400, 0.028	30.400, 0.037	30.400, 0.036	30.400, 0.029	30.400, 0.030	30.400, 0.036	30.400, 0.039	30.400, 0.033	30.400, 0.040	30.400, 0.032	30.400, 0.027
154	30.600, 0.064	30.600, 0.045	30.600, 0.029	30.600, 0.074	30.600, 0.048	30.600, 0.063	30.600, 0.060	30.600, 0.050	30.600, 0.052	30.600, 0.062	30.600, 0.066	30.600, 0.057	30.600, 0.068	30.600, 0.055	30.600, 0.049
155	30.800, 0.095	30.800, 0.068	30.800, 0.044	30.800, 0.110	30.800, 0.072	30.800, 0.094	30.800, 0.090	30.800, 0.077	30.800, 0.079	30.800, 0.093	30.800, 0.097	30.800, 0.085	30.800, 0.101	30.800, 0.083	30.800, 0.077
156	31.000, 0.132	31.000, 0.095	31.000, 0.062	31.000, 0.151	31.000, 0.100	31.000, 0.129	31.000, 0.123	31.000, 0.107	31.000, 0.110	31.000, 0.129	31.000, 0.133	31.000, 0.117	31.000, 0.139	31.000, 0.115	31.000, 0.111
157	31.200, 0.172	31.200, 0.126	31.200, 0.082	31.200, 0.197	31.200, 0.133	31.200, 0.168	31.200, 0.161	31.200, 0.142	31.200, 0.145	31.200, 0.169	31.200, 0.173	31.200, 0.153	31.200, 0.180	31.200, 0.151	31.200, 0.151
158	31.400, 0.217	31.400, 0.160	31.400, 0.104	31.400, 0.246	31.400, 0.168	31.400, 0.210	31.400, 0.202	31.400, 0.180	31.400, 0.183	31.400, 0.212	31.400, 0.216	31.400, 0.193	31.400, 0.225	31.400, 0.191	31.400, 0.196
159	31.600, 0.264	31.600, 0.197	31.600, 0.129	31.600, 0.298	31.600, 0.207	31.600, 0.254	31.600, 0.245	31.600, 0.222	31.600, 0.225	31.600, 0.258	31.600, 0.262	31.600, 0.235	31.600, 0.273	31.600, 0.234	31.600, 0.246
160	31.800, 0.313	31.800, 0.236	31.800, 0.156	31.800, 0.352	31.800, 0.247	31.800, 0.300	31.800, 0.289	31.800, 0.266	31.800, 0.268	31.800, 0.305	31.800, 0.308	31.800, 0.278	31.800, 0.321	31.800, 0.278	31.800, 0.299
161	32.000, 0.363	32.000, 0.277	32.000, 0.183	32.000, 0.405	32.000, 0.289	32.000, 0.345	32.000, 0.333	32.000, 0.310	32.000, 0.312	32.000, 0.353	32.000, 0.355	32.000, 0.321	32.000, 0.368	32.000, 0.324	32.000, 0.355
162	32.200, 0.411	32.200, 0.317	32.200, 0.211	32.200, 0.456	32.200, 0.330	32.200, 0.389	32.200, 0.376	32.200, 0.355	32.200, 0.356	32.200, 0.399	32.200, 0.400	32.200, 0.363	32.200, 0.414	32.200, 0.368	32.200, 0.412
163	32.400, 0.458	32.400, 0.357	32.400, 0.240	32.400, 0.505	32.400, 0.370	32.400, 0.432	32.400, 0.418	32.400, 0.397	32.400, 0.398	32.400, 0.443	32.400, 0.443	32.400, 0.404	32.400, 0.457	32.400, 0.411	32.400, 0.467
164	32.600, 0.503	32.600, 0.397	32.600, 0.269	32.600, 0.551	32.600, 0.409	32.600, 0.473	32.600, 0.457	32.600, 0.438	32.600, 0.439	32.600, 0.486	32.600, 0.483	32.600, 0.442	32.600, 0.498	32.600, 0.452	32.600, 0.519
165	32.800, 0.546	32.800, 0.436	32.800, 0.297	32.800, 0.595	32.800, 0.447	32.800, 0.511	32.800, 0.494	32.800, 0.478	32.800, 0.479	32.800, 0.526	32.800, 0.522	32.800, 0.479	32.800, 0.536	32.800, 0.492	32.800, 0.569
166	33.000, 0.587	33.000, 0.474	33.000, 0.326	33.000, 0.637	33.000, 0.483	33.000, 0.548	33.000, 0.530	33.000, 0.515	33.000, 0.516	33.000, 0.564	33.000, 0.559	33.000, 0.513	33.000, 0.572	33.000, 0.529	33.000, 0.617
167	33.200, 0.625	33.200, 0.511	33.200, 0.354	33.200, 0.674	33.200, 0.517	33.200, 0.581	33.200, 0.563	33.200, 0.549	33.200, 0.550	33.200, 0.598	33.200, 0.592	33.200, 0.544	33.200, 0.605	33.200, 0.564	33.200, 0.661
168	33.400, 0.660	33.400, 0.546	33.400, 0.382	33.400, 0.709	33.400, 0.549	33.400, 0.611	33.400, 0.593	33.400, 0.580	33.400, 0.581	33.400, 0.630	33.400, 0.623	33.400, 0.572	33.400, 0.634	33.400, 0.595	33.400, 0.701
169	33.600, 0.692	33.600, 0.580	33.600, 0.409	33.600, 0.740	33.600, 0.578	33.600, 0.639	33.600, 0.621	33.600, 0.609	33.600, 0.610	33.600, 0.658	33.600, 0.651	33.600, 0.597	33.600, 0.660	33.600, 0.624	33.600, 0.739
170	33.800, 0.722	33.800, 0.612	33.800, 0.436	33.800, 0.768	33.800, 0.605	33.800, 0.664	33.800, 0.646	33.800, 0.635	33.800, 0.635	33.800, 0.684	33.800, 0.677	33.800, 0.620	33.800, 0.683	33.800, 0.650	33.800, 0.774
171	34.000, 0.748	34.000, 0.643	34.000, 0.462	34.000, 0.793	34.000, 0.630	34.000, 0.687	34.000, 0.668	34.000, 0.659	34.000, 0.659	34.000, 0.706	34.000, 0.699	34.000, 0.640	34.000, 0.704	34.000, 0.674	34.000, 0.806
172	34.200, 0.772	34.200, 0.672	34.200, 0.487	34.200, 0.815	34.200, 0.652	34.200, 0.707	34.200, 0.689	34.200, 0.680	34.200, 0.680	34.200, 0.727	34.200, 0.720	34.200, 0.658	34.200, 0.722	34.200, 0.695	34.200, 0.836
173	34.400, 0.794	34.400, 0.700	34.400, 0.512	34.400, 0.835	34.400, 0.673	34.400, 0.726	34.400, 0.708	34.400, 0.700	34.400, 0.699	34.400, 0.746	34.400, 0.739	34.400, 0.674	34.400, 0.739	34.400, 0.715	34.400, 0.864
174	34.600, 0.814	34.600, 0.727	34.600, 0.536	34.600, 0.853	34.600, 0.691	34.600, 0.743	34.600, 0.725	34.600, 0.718	34.600, 0.716	34.600, 0.763	34.600, 0.755	34.600, 0.689	34.600, 0.754	34.600, 0.732	34.600, 0.890
175	34.800, 0.832	34.800, 0.753	34.800, 0.560	34.800, 0.869	34.800, 0.708	34.800, 0.758	34.800, 0.741	34.800, 0.734	34.800, 0.732	34.800, 0.778	34.800, 0.770	34.800, 0.703	34.800, 0.768	34.800, 0.748	34.800, 0.913
176	35.000, 0.848	35.000, 0.777	35.000, 0.583	35.000, 0.883	35.000, 0.724	35.000, 0.772	35.000, 0.755	35.000, 0.749	35.000, 0.746	35.000, 0.792	35.000, 0.784	35.000, 0.715	35.000, 0.780	35.000, 0.762	35.000, 0.936
177	35.200, 0.863	35.200, 0.799	35.200, 0.605	35.200, 0.896	35.200, 0.738	35.200, 0.785	35.200, 0.769	35.200, 0.762	35.200, 0.759	35.200, 0.804	35.200, 0.797	35.200, 0.726	35.200, 0.791	35.200, 0.775	35.200, 0.957
178	35.400, 0.877	35.400, 0.821	35.400, 0.626	35.400, 0.908	35.400, 0.751	35.400, 0.797	35.400, 0.781	35.400, 0.775	35.400, 0.771	35.400, 0.815	35.400, 0.808	35.400, 0.736	35.400, 0.802	35.400, 0.787	35.400, 0.976
179	35.600, 0.890	35.600, 0.842	35.600, 0.646	35.600, 0.919	35.600, 0.763	35.600, 0.808	35.600, 0.792	35.600, 0.786	35.600, 0.782	35.600, 0.826	35.600, 0.819	35.600, 0.746	35.600, 0.811	35.600, 0.797	35.600, 0.995
180	35.800, 0.902	35.800, 0.861	35.800, 0.666	35.800, 0.929	35.800, 0.774	35.800, 0.818	35.800, 0.802	35.800, 0.796	35.800, 0.792	35.800, 0.835	35.800, 0.830	35.800, 0.755	35.800, 0.820	35.800, 0.807	35.800, 1.013
181	36.000, 0.913	36.000, 0.880	36.000, 0.685	36.000, 0.938	36.000, 0.784	36.000, 0.828	36.000, 0.811	36.000, 0.806	36.000, 0.801	36.000, 0.843	36.000, 0.839	36.000, 0.763	36.000, 0.828	36.000, 0.816	36.000, 1.030
182	36.200, 0.923	36.200, 0.898	36.200, 0.703	36.200, 0.947	36.200, 0.794	36.200, 0.837	36.200, 0.820	36.200, 0.814	36.200, 0.810	36.200, 0.852	36.200, 0.848	36.200, 0.771	36.200, 0.835	36.200, 0.824	36.200, 1.046
183	36.400, 0.933	36.400, 0.916	36.400, 0.721	36.400, 0.955	36.400, 0.803	36.400, 0.846	36.400, 0.828	36.400, 0.822	36.400, 0.819	36.400, 0.859	36.400, 0.855	36.400, 0.778	36.400, 0.842	36.400, 0.832	36.400, 1.061
184	36.600, 0.942	36.600, 0.932	36.600, 0.738	36.600, 0.963	36.600, 0.812	36.600, 0.854	36.600, 0.836	36.600, 0.829	36.600, 0.827	36.600, 0.867	36.600, 0.863	36.600, 0.785	36.600, 0.849	36.600, 0.839	36.600, 1.076
185	36.800, 0.950	36.800, 0.948	36.800, 0.754	36.800, 0.970	36.800, 0.820	36.800, 0.862	36.800, 0.843	36.800, 0.836	36.800, 0.834	36.800, 0.874	36.800, 0.870	36.800, 0.792	36.800, 0.855	36.800, 0.846	36.800, 1.089
186	37.000, 0.958	37.000, 0.964	37.000, 0.770	37.000, 0.977	37.000, 0.828	37.000, 0.869	37.000, 0.850	37.000, 0.843	37.000, 0.842	37.000, 0.881	37.000, 0.877	37.000, 0.798	37.000, 0.861	37.000, 0.852	37.000, 1.102
187	37.200, 0.965	37.200, 0.978	37.200, 0.785	37.200, 0.984	37.200, 0.836	37.200, 0.876	37.200, 0.857	37.200, 0.849	37.200, 0.848	37.200, 0.887	37.200, 0.883	37.200, 0.803	37.200, 0.866	37.200, 0.858	37.200, 1.114
188	37.400, 0.972	37.400, 0.993	37.400, 0.800	37.400, 0.991	37.400, 0.843	37.400, 0.882	37.400, 0.863	37.400, 0.855	37.400, 0.855	37.400, 0.893	37.400, 0.889	37.400, 0.809	37.400, 0.871	37.400, 0.864	37.400, 1.126
189	37.600, 0.979	37.600, 1.006	37.600, 0.815	37.600, 0.997	37.600, 0.850	37.600, 0.889	37.600, 0.869	37.600, 0.861	37.600, 0.861	37.600, 0.899	37.600, 0.895	37.600, 0.814	37.600, 0.876	37.600, 0.870	37.600, 1.137
190	37.800, 0.985	37.800, 1.019	37.800, 0.829	37.800, 1.002	37.800, 0.857	37.800, 0.895	37.800, 0.875	37.800, 0.866	37.800, 0.867	37.800, 0.904	37.800, 0.901	37.800, 0.819	37.800, 0.881	37.800, 0.875	37.800, 1.148
191	38.000, 0.991	38.000, 1.032	38.000, 0.842	38.000, 1.007	38.000, 0.863	38.000, 0.900	38.000, 0.881	38.000, 0.872	38.000, 0.872	38.000, 0.910	38.000, 0.907	38.000, 0.824	38.000, 0.885	38.000, 0.881	38.000, 1.158
192	38.200, 0.996	38.200, 1.044	38.200, 0.855	38.200, 1.012	38.200, 0.869	38.200, 0.905	38.200, 0.887	38.200, 0.878	38.200, 0.877	38.200, 0.915	38.200, 0.912	38.200, 0.828	38.200, 0.890	38.200, 0.886	38.200, 1.168
193	38.400, 1.002	38.400, 1.055	38.400, 0.867	38.400, 1.017	38.400, 0.875	38.400, 0.911	38.400, 0.892	38.400, 0.883	38.400, 0.882	38.400, 0.921	38.400, 0.917	38.400, 0.833	38.400, 0.894	38.400, 0.891	38.400, 1.178
194	38.600, 1.007	38.600, 1.066	38.600, 0.879	38.600, 1.021	38.600, 0.880	38.600, 0.916	38.600, 0.898	38.600, 0.888	38.600, 0.888	38.600, 0.926	38.600, 0.922	38.600, 0.838	38.600, 0.899	38.600, 0.896	38.600, 1.187
195	38.800, 1.012	38.800, 1.076	38.800, 0.891	38.800, 1.026	38.800, 0.886	38.800, 0.921	38.800, 0.903	38.800, 0.893	38.800, 0.892	38.800, 0.930	38.800, 0.927	38.800, 0.842	38.800, 0.903	38.800, 0.901	38.800, 1.196
196	39.000, 1.017	39.000, 1.086	39.000, 0.902	39.000, 1.030	39.000, 0.891	39.000, 0.926	39.000, 0.908	39.000, 0.898	39.000, 0.897	39.000, 0.935	39.000, 0.932	39.000, 0.845	39.000, 0.908	39.000, 0.906	39.000, 1.205
197	39.200, 1.022	39.200, 1.096	39.200, 0.913	39.200, 1.035	39.200, 0.897	39.200, 0.930	39.200, 0.913	39.200, 0.903	39.200, 0.901	39.200, 0.939	39.200, 0.937	39.200, 0.849	39.200, 0.912	39.200, 0.910	39.200, 1.213
198	39.400, 1.027	39.400, 1.106	39.400, 0.924	39.400, 1.039	39.400, 0.902	39.400, 0.935	39.400, 0.917	39.400, 0.908	39.400, 0.906	39.400, 0.943	39.400, 0.941	39.400, 0.853	39.400, 0.917	39.400, 0.914	39.400, 1.221
199	39.600, 1.032	39.600, 1.115	39.600, 0.934	39.600, 1.044	39.600, 0.907	39.600, 0.940	39.600, 0.922	39.600, 0.912	39.600, 0.910	39.600, 0.948	39.600, 0.946	39.600, 0.856	39.600, 0.921	39.600, 0.918	39.600, 1.228
200	39.800, 1.038	39.800, 1.125	39.800, 0.944	39.800, 1.048	39.800, 0.911	39.800, 0.945	39.800, 0.926	39.800, 0.916	39.800, 0.915	39.800, 0.952	39.800, 0.950	39.800, 0.860	39.800, 0.925	39.800, 0.922	39.800, 1.236
201	40.000, 1.043	40.000, 1.134	40.000, 0.954	40.000, 1.052	40.000, 0.915	40.000, 0.949	40.000, 0.930	40.000, 0.920	40.000, 0.919	40.000, 0.957	40.000, 0.955	40.000, 0.864	40.000, 0.930	40.000, 0.926	40.000, 1.243
202	40.200, 1.048	40.200, 1.143	40.200, 0.963	40.200, 1.056	40.200, 0.920	40.200, 0.954	40.200, 0.934	40.200, 0.924	40.200, 0.923	40.200, 0.961	40.200, 0.959	40.200, 0.868	40.200, 0.934	40.200, 0.930	40.200, 1.250
203	40.400, 1.053	40.400, 1.152	40.400, 0.972	40.400, 1.060	40.400, 0.924	40.400, 0.958	40.400, 0.938	40.400, 0.928	40.400, 0.928	40.400, 0.965	40.400, 0.963	40.400, 0.871	40.400, 0.938	40.400, 0.933	40.400, 1.257
204	40.600, 1.058	40.600, 1.160	40.600, 0.981	40.600, 1.064	40.600, 0.928	40.600, 0.962	40.600, 0.942	40.600, 0.931	40.600, 0.932	40.600, 0.969	40.600, 0.967	40.600, 0.875	40.600, 0.942	40.600, 0.937	40.600, 1.264
205	40.800, 1.062	40.800, 1.169	40.800, 0.990	40.800, 1.068	40.800, 0.933	40.800, 0.966	40.800, 0.946	40.800, 0.935	40.800, 0.936	40.800, 0.973	40.800, 0.970	40.800, 0.878	40.800, 0.945	40.800, 0.940	40.800, 1.270
206	41.000, 1.067	41.000, 1.177	41.000, 0.998	41.000, 1.072	41.000, 0.937	41.000, 0.970	41.000, 0.949	41.000, 0.939	41.000, 0.940	41.000, 0.976	41.000, 0.974	41.000, 0.882	41.000, 0.948	41.000, 0.944	41.000, 1.276
207	41.200, 1.071	41.200, 1.185	41.200, 1.006	41.200, 1.076	41.200, 0.941	41.200, 0.973	41.200, 0.953	41.200, 0.942	41.200, 0.943	41.200, 0.979	41.200, 0.978	41.200, 0.885	41.200, 0.952	41.200, 0.947	41.200, 1.282
208	41.400, 1.075	41.400, 1.193	41.400, 1.014	41.400, 1.079	41.400, 0.945	41.400, 0.977	41.400, 0.956	41.400, 0.946	41.400, 0.947	41.400, 0.982	41.400, 0.982	41.400, 0.889	41.400, 0.954	41.400, 0.950	41.400, 1.288
209	41.600, 1.079	41.600, 1.201	41.600, 1.022	41.600, 1.082	41.600, 0.949	41.600, 0.980	41.600, 0.960	41.600, 0.949	41.600, 0.950	41.600, 0.986	41.600, 0.985	41.600, 0.892	41.600, 0.957	41.600, 0.953	41.600, 1.294
210	41.800, 1.083	41.800, 1.209	41.800, 1.029	41.800, 1.086	41.800, 0.953	41.800, 0.984	41.800, 0.964	41.800, 0.953	41.800, 0.953	41.800, 0.989	41.800, 0.989	41.800, 0.895	41.800, 0.960	41.800, 0.957	41.800, 1.300
211	42.000, 1.087	42.000, 1.216	42.000, 1.036	42.000, 1.089	42.000, 0.956	42.000, 0.987	42.000, 0.967	42.000, 0.956	42.000, 0.957	42.000, 0.992	42.000, 0.992	42.000, 0.898	42.000, 0.963	42.000, 0.960	42.000, 1.306
212	42.200, 1.090	42.200, 1.224	42.200, 1.044	42.200, 1.091	42.200, 0.960	42.200, 0.990	42.200, 0.971	42.200, 0.960	42.200, 0.960	42.200, 0.995	42.200, 0.996	42.200, 0.901	42.200, 0.965	42.200, 0.963	42.200, 1.311
213	42.400, 1.094	42.400, 1.231	42.400, 1.051	42.400, 1.094	42.400, 0.963	42.400, 0.993	42.400, 0.975	42.400, 0.963	42.400, 0.963	42.400, 0.998	42.400, 0.999	42.400, 0.904	42.400, 0.968	42.400, 0.966	42.400, 1.317
214	42.600, 1.097	42.600, 1.238	42.600, 1.058	42.600, 1.097	42.600, 0.967	42.600, 0.996	42.600, 0.978	42.600, 0.967	42.600, 0.966	42.600, 1.001	42.600, 1.002	42.600, 0.907	42.600, 0.971	42.600, 0.970	42.600, 1.322
215	42.800, 1.100	42.800, 1.245	42.800, 1.065	42.800, 1.101	42.800, 0.970	42.800, 0.999	42.800, 0.981	42.800, 0.970	42.800, 0.968	42.800, 1.003	42.800, 1.006	42.800, 0.909	42.800, 0.973	42.800, 0.973	42.800, 1.327
216	43.000, 1.104	43.000, 1.252	43.000, 1.072	43.000, 1.104	43.000, 0.974	43.000, 1.002	43.000, 0.984	43.000, 0.973	43.000, 0.971	43.000, 1.006	43.000, 1.009	43.000, 0.912	43.000, 0.976	43.000, 0.976	43.000, 1.332
217	43.200, 1.107	43.200, 1.258	43.200, 1.078	43.200, 1.107	43.200, 0.977	43.200, 1.005	43.200, 0.988	43.200, 0.976	43.200, 0.974	43.200, 1.009	43.200, 1.012	43.200, 0.914	43.200, 0.978	43.200, 0.978	43.200, 1.337
218	43.400, 1.110	43.400, 1.264	43.400, 1.085	43.400, 1.111	43.400, 0.980	43.400, 1.008	43.400, 0.991	43.400, 0.979	43.400, 0.978	43.400, 1.012	43.400, 1.014	43.400, 0.917	43.400, 0.981	43.400, 0.981	43.400, 1.341
219	43.600, 1.113	43.600, 1.271	43.600, 1.091	43.600, 1.114	43.600, 0.983	43.600, 1.011	43.600, 0.994	43.600, 0.982	43.600, 0.981	43.600, 1.014	43.600, 1.017	43.600, 0.920	43.600, 0.984	43.600, 0.984	43.600, 1.346
220	43.800, 1.116	43.800, 1.276	43.800, 1.097	43.800, 1.117	43.800, 0.986	43.800, 1.014	43.800, 0.996	43.800, 0.985	43.800, 0.984	43.800, 1.017	43.800, 1.019	43.800, 0.922	43.800, 0.986	43.800, 0.986	43.800, 1.350
221	44.000, 1.119	44.000, 1.282	44.000, 1.103	44.000, 1.120	44.000, 0.989	44.000, 1.017	44.000, 0.999	44.000, 0.988	44.000, 0.987	44.000, 1.020	44.000, 1.022	44.000, 0.925	44.000, 0.989	44.000, 0.989	44.000, 1.355
222	44.200, 1.123	44.200, 1.288	44.200, 1.110	44.200, 1.122	44.200, 0.991	44.200, 1.019	44.200, 1.002	44.200, 0.990	44.200, 0.990	44.200, 1.023	44.200, 1.025	44.200, 0.927	44.200, 0.991	44.200, 0.991	44.200, 1.359
223	44.400, 1.126	44.400, 1.294	44.400, 1.116	44.400, 1.125	44.400, 0.994	44.400, 1.022	44.400, 1.005	44.400, 0.992	44.400, 0.993	44.400, 1.025	44.400, 1.027	44.400, 0.930	44.400, 0.994	44.400, 0.994	44.400, 1.363
224	44.600, 1.129	44.600, 1.299	44.600, 1.121	44.600, 1.128	44.600, 0.997	44.600, 1.024	44.600, 1.007	44.600, 0.995	44.600, 0.996	44.600, 1.028	44.600, 1.030	44.600, 0.932	44.600, 0.996	44.600, 0.996	44.600, 1.367
225	44.800, 1.132	44.800, 1.304	44.800, 1.127	44.800, 1.131	44.800, 1.000	44.800, 1.026	44.800, 1.010	44.800, 0.997	44.800, 0.998	44.800, 1.031	44.800, 1.032	44.800, 0.934	44.800, 0.999	44.800, 0.998	44.800, 1.371
226	45.000, 1.135	45.000, 1.309	45.000, 1.133	45.000, 1.134	45.000, 1.003	45.000, 1.029	45.000, 1.012	45.000, 0.999	45.000, 1.001	45.000, 1.033	45.000, 1.035	45.000, 0.937	45.000, 1.001	45.000, 1.001	45.000, 1.376
227	45.200, 1.138	45.200, 1.314	45.200, 1.138	45.200, 1.137	45.200, 1.005	45.200, 1.031	45.200, 1.015	45.200, 1.001	45.200, 1.004	45.200, 1.035	45.200, 1.037	45.200, 0.939	45.200, 1.003	45.200, 1.003	45.200, 1.380
228	45.400, 1.141	45.400, 1.320	45.400, 1.143	45.400, 1.139	45.400, 1.008	45.400, 1.033	45.400, 1.017	45.400, 1.004	45.400, 1.006	45.400, 1.038	45.400, 1.040	45.400, 0.941	45.400, 1.005	45.400, 1.006	45.400, 1.385
229	45.600, 1.144	45.600, 1.325	45.600, 1.149	45.600, 1.142	45.600, 1.010	45.600, 1.036	45.600, 1.019	45.600, 1.006	45.600, 1.008	45.600, 1.040	45.600, 1.042	45.600, 0.943	45.600, 1.007	45.600, 1.008	45.600, 1.389
230	45.800, 1.146	45.800, 1.330	45.800, 1.154	45.800, 1.144	45.800, 1.012	45.800, 1.038	45.800, 1.022	45.800, 1.009	45.800, 1.010	45.800, 1.042	45.800, 1.045	45.800, 0.946	45.800, 1.009	45.800, 1.010	45.800, 1.393
231	46.000, 1.149	46.000, 1.335	46.000, 1.160	46.000, 1.146	46.000, 1.014	46.000, 1.040	46.000, 1.024	46.000, 1.011	46.000, 1.013	46.000, 1.045	46.000, 1.047	46.000, 0.948	46.000, 1.011	46.000, 1.012	46.000, 1.398
232	46.200, 1.151	46.200, 1.340	46.200, 1.165	46.200, 1.148	46.200, 1.016	46.200, 1.042	46.200, 1.027	46.200, 1.013	46.200, 1.015	46.200, 1.047	46.200, 1.050	46.200, 0.950	46.200, 1.013	46.200, 1.014	46.200, 1.402
233	46.400, 1.154	46.400, 1.344	46.400, 1.170	46.400, 1.150	46.400, 1.018	46.400, 1.045	46.400, 1.029	46.400, 1.016	46.400, 1.017	46.400, 1.049	46.400, 1.052	46.400, 0.952	46.400, 1.015	46.400, 1.017	46.400, 1.406
234	46.600, 1.156	46.600, 1.349	46.600, 1.175	46.600, 1.152	46.600, 1.021	46.600, 1.047	46.600, 1.032	46.600, 1.018	46.600, 1.019	46.600, 1.050	46.600, 1.055	46.600, 0.954	46.600, 1.016	46.600, 1.019	46.600, 1.410
235	46.800, 1.159	46.800, 1.353	46.800, 1.180	46.800, 1.154	46.800, 1.023	46.800, 1.050	46.800, 1.034	46.800, 1.020	46.800, 1.021	46.800, 1.052	46.800, 1.057	46.800, 0.956	46.800, 1.018	46.800, 1.021	46.800, 1.414
236	47.000, 1.162	47.000, 1.357	47.000, 1.184	47.000, 1.156	47.000, 1.026	47.000, 1.052	47.000, 1.036	47.000, 1.022	47.000, 1.023	47.000, 1.053	47.000, 1.059	47.000, 0.958	47.000, 1.020	47.000, 1.023	47.000, 1.418
237	47.200, 1.164	47.200, 1.362	47.200, 1.188	47.200, 1.158	47.200, 1.028	47.200, 1.054	47.200, 1.038	47.200, 1.024	47.200, 1.024	47.200, 1.055	47.200, 1.061	47.200, 0.959	47.200, 1.022	47.200, 1.026	47.200, 1.421
238	47.400, 1.167	47.400, 1.366	47.400, 1.192	47.400, 1.160	47.400, 1.031	47.400, 1.056	47.400, 1.041	47.400, 1.026	47.400, 1.026	47.400, 1.057	47.400, 1.063	47.400, 0.961	47.400, 1.024	47.400, 1.028	47.400, 1.425
239	47.600, 1.169	47.600, 1.371	47.600, 1.197	47.600, 1.162	47.600, 1.033	47.600, 1.058	47.600, 1.043	47.600, 1.028	47.600, 1.028	47.600, 1.058	47.600, 1.065	47.600, 0.963	47.600, 1.026	47.600, 1.030	47.600, 1.428
240	47.800, 1.171	47.800, 1.375	47.800, 1.201	47.800, 1.164	47.800, 1.035	47.800, 1.060	47.800, 1.045	47.800, 1.030	47.800, 1.030	47.800, 1.061	47.800, 1.067	47.800, 0.965	47.800, 1.027	47.800, 1.032	47.800, 1.432
241	48.000, 1.174	48.000, 1.379	48.000, 1.205	48.000, 1.166	48.000, 1.038	48.000, 1.062	48.000, 1.047	48.000, 1.032	48.000, 1.032	48.000, 1.063	48.000, 1.069	48.000, 0.967	48.000, 1.029	48.000, 1.034	48.000, 1.435
242	48.200, 1.176	48.200, 1.384	48.200, 1.209	48.200, 1.167	48.200, 1.040	48.200, 1.064	48.200, 1.049	48.200, 1.034	48.200, 1.034	48.200, 1.065	48.200, 1.071	48.200, 0.968	48.200, 1.031	48.200, 1.036	48.200, 1.438
243	48.400, 1.179	48.400, 1.388	48.400, 1.213	48.400, 1.169	48.400, 1.042	48.400, 1.066	48.400, 1.051	48.400, 1.036	48.400, 1.036	48.400, 1.067	48.400, 1.072	48.400, 0.970	48.400, 1.032	48.400, 1.038	48.400, 1.441
244	48.600, 1.181	48.600, 1.393	48.600, 1.217	48.600, 1.171	48.600, 1.044	48.600, 1.067	48.600, 1.053	48.600, 1.038	48.600, 1.038	48.600, 1.069	48.600, 1.074	48.600, 0.971	48.600, 1.034	48.600, 1.039	48.600, 1.445
245	48.800, 1.184	48.800, 1.397	48.800, 1.222	48.800, 1.173	48.800, 1.046	48.800, 1.069	48.800, 1.055	48.800, 1.040	48.800, 1.040	48.800, 1.071	48.800, 1.076	48.800, 0.973	48.800, 1.035	48.800, 1.041	48.800, 1.448
246	49.000, 1.186	49.000, 1.402	49.000, 1.226	49.000, 1.175	49.000, 1.048	49.000, 1.071	49.000, 1.057	49.000, 1.042	49.000, 1.042	49.000, 1.073	49.000, 1.078	49.000, 0.975	49.000, 1.037	49.000, 1.043	49.000, 1.452
247	49.200, 1.188	49.200, 1.406	49.200, 1.230	49.200, 1.177	49.200, 1.050	49.200, 1.073	49.200, 1.059	49.200, 1.044	49.200, 1.044	49.200, 1.075	49.200, 1.079	49.200, 0.976	49.200, 1.038	49.200, 1.044	49.200, 1.455
248	49.400, 1.190	49.400, 1.410	49.400, 1.234	49.400, 1.179	49.400, 1.051	49.400, 1.074	49.400, 1.060	49.400, 1.045	49.400, 1.046	49.400, 1.077	49.400, 1.081	49.400, 0.977	49.400, 1.040	49.400, 1.045	49.400, 1.459
249	49.600, 1.192	49.600, 1.415	49.600, 1.238	49.600, 1.180	49.600, 1.053	49.600, 1.076	49.600, 1.062	49.600, 1.047	49.600, 1.048	49.600, 1.079	49.600, 1.083	49.600, 0.979	49.600, 1.041	49.600, 1.047	49.600, 1.461
250	49.800, 1.194	49.800, 1.418	49.800, 1.242	49.800, 1.182	49.800, 1.054	49.800, 1.078	49.800, 1.064	49.800, 1.049	49.800, 1.050	49.800, 1.081	49.800, 1.084	49.800, 0.980	49.800, 1.043	49.800, 1.048	49.800, 1.464
251	50.000, 1.196	50.000, 1.422	50.000, 1.247	50.000, 1.184	50.000, 1.056	50.000, 1.080	50.000, 1.066	50.000, 1.050	50.000, 1.052	50.000, 1.082	50.000, 1.086	50.000, 0.981	50.000, 1.044	50.000, 1.049	50.000, 1.467
252	50.200, 1.198	50.200, 1.426	50.200, 1.251	50.200, 1.186	50.200, 1.057	50.200, 1.081	50.200, 1.068	50.200, 1.052	50.200, 1.053	50.200, 1.083	50.200, 1.087	50.200, 0.982	50.200, 1.045	50.200, 1.050	50.200, 1.470
253	50.400, 1.200	50.400, 1.429	50.400, 1.255	50.400, 1.188	50.400, 1.059	50.400, 1.083	50.400, 1.070	50.400, 1.054	50.400, 1.055	50.400, 1.084	50.400, 1.088	50.400, 0.984	50.400, 1.047	50.400, 1.052	50.400, 1.473
254	50.600, 1.202	50.600, 1.433	50.600, 1.259	50.600, 1.189	50.600, 1.061	50.600, 1.085	50.600, 1.072	50.600, 1.055	50.600, 1.057	50.600, 1.085	50.600, 1.089	50.600, 0.985	50.600, 1.048	50.600, 1.053	50.600, 1.476
255	50.800, 1.204	50.800, 1.437	50.800, 1.263	50.800, 1.191	50.800, 1.063	50.800, 1.086	50.800, 1.073	50.800, 1.057	50.800, 1.058	50.800, 1.086	50.800, 1.090	50.800, 0.986	50.800, 1.049	50.800, 1.055	50.800, 1.479
256	51.000, 1.205	51.000, 1.441	51.000, 1.267	51.000, 1.192	51.000, 1.064	51.000, 1.088	51.000, 1.075	51.000, 1.058	51.000, 1.060	51.000, 1.087	51.000, 1.091	51.000, 0.988	51.000, 1.050	51.000, 1.056	51.000, 1.482
257	51.200, 1.207	51.200, 1.444	51.200, 1.270	51.200, 1.194	51.200, 1.066	51.200, 1.089	51.200, 1.076	51.200, 1.059	51.200, 1.061	51.200, 1.088	51.200, 1.092	51.200, 0.989	51.200, 1.052	51.200, 1.057	51.200, 1.485
258	51.400, 1.209	51.400, 1.448	51.400, 1.274	51.400, 1.195	51.400, 1.068	51.400, 1.090	51.400, 1.077	51.400, 1.061	51.400, 1.063	51.400, 1.089	51.400, 1.094	51.400, 0.991	51.400, 1.053	51.400, 1.058	51.400, 1.487
259	51.600, 1.210	51.600, 1.451	51.600, 1.277	51.600, 1.196	51.600, 1.069	51.600, 1.091	51.600, 1.079	51.600, 1.062	51.600, 1.064	51.600, 1.090	51.600, 1.096	51.600, 0.992	51.600, 1.054	51.600, 1.059	51.600, 1.490
260	51.800, 1.212	51.800, 1.455	51.800, 1.281	51.800, 1.197	51.800, 1.071	51.800, 1.093	51.800, 1.080	51.800, 1.064	51.800, 1.065	51.800, 1.091	51.800, 1.097	51.800, 0.993	51.800, 1.055	51.800, 1.061	51.800, 1.493
261	52.000, 1.214	52.000, 1.459	52.000, 1.284	52.000, 1.199	52.000, 1.072	52.000, 1.094	52.000, 1.082	52.000, 1.066	52.000, 1.067	52.000, 1.093	52.000, 1.099	52.000, 0.995	52.000, 1.056	52.000, 1.062	52.000, 1.496
262	52.200, 1.215	52.200, 1.462	52.200, 1.288	52.200, 1.200	52.200, 1.074	52.200, 1.096	52.200, 1.083	52.200, 1.068	52.200, 1.068	52.200, 1.093	52.200, 1.100	52.200, 0.996	52.200, 1.057	52.200, 1.063	52.200, 1.499
263	52.400, 1.217	52.400, 1.465	52.400, 1.291	52.400, 1.201	52.400, 1.075	52.400, 1.097	52.400, 1.084	52.400, 1.069	52.400, 1.069	52.400, 1.094	52.400, 1.102	52.400, 0.997	52.400, 1.058	52.400, 1.065	52.400, 1.502
264	52.600, 1.218	52.600, 1.469	52.600, 1.295	52.600, 1.202	52.600, 1.077	52.600, 1.098	52.600, 1.085	52.600, 1.071	52.600, 1.070	52.600, 1.095	52.600, 1.103	52.600, 0.998	52.600, 1.059	52.600, 1.066	52.600, 1.505
265	52.800, 1.219	52.800, 1.472	52.800, 1.298	52.800, 1.204	52.800, 1.078	52.800, 1.099	52.800, 1.087	52.800, 1.073	52.800, 1.071	52.800, 1.097	52.800, 1.104	52.800, 0.999	52.800, 1.060	52.800, 1.068	52.800, 1.507
266	53.000, 1.220	53.000, 1.476	53.000, 1.301	53.000, 1.205	53.000, 1.079	53.000, 1.100	53.000, 1.088	53.000, 1.074	53.000, 1.072	53.000, 1.098	53.000, 1.106	53.000, 1.000	53.000, 1.061	53.000, 1.069	53.000, 1.510
267	53.200, 1.221	53.200, 1.479	53.200, 1.304	53.200, 1.207	53.200, 1.080	53.200, 1.101	53.200, 1.089	53.200, 1.075	53.200, 1.073	53.200, 1.099	53.200, 1.107	53.200, 1.001	53.200, 1.062	53.200, 1.070	53.200, 1.513
268	53.400, 1.222	53.400, 1.482	53.400, 1.307	53.400, 1.208	53.400, 1.082	53.400, 1.102	53.400, 1.090	53.400, 1.077	53.400, 1.074	53.400, 1.101	53.400, 1.108	53.400, 1.002	53.400, 1.063	53.400, 1.072	53.400, 1.515
269	53.600, 1.223	53.600, 1.485	53.600, 1.310	53.600, 1.209	53.600, 1.083	53.600, 1.103	53.600, 1.091	53.600, 1.078	53.600, 1.074	53.600, 1.102	53.600, 1.109	53.600, 1.003	53.600, 1.064	53.600, 1.073	53.600, 1.517
270	53.800, 1.225	53.800, 1.489	53.800, 1.313	53.800, 1.211	53.800, 1.084	53.800, 1.104	53.800, 1.092	53.800, 1.080	53.800, 1.075	53.800, 1.103	53.800, 1.110	53.800, 1.004	53.800, 1.065	53.800, 1.075	53.800, 1.520
271	54.000, 1.226	54.000, 1.492	54.000, 1.316	54.000, 1.212	54.000, 1.085	54.000, 1.105	54.000, 1.093	54.000, 1.081	54.000, 1.076	54.000, 1.105	54.000, 1.111	54.000, 1.005	54.000, 1.066	54.000, 1.076	54.000, 1.522
272	54.200, 1.228	54.200, 1.495	54.200, 1.320	54.200, 1.214	54.200, 1.086	54.200, 1.106	54.200, 1.094	54.200, 1.082	54.200, 1.077	54.200, 1.106	54.200, 1.112	54.200, 1.006	54.200, 1.066	54.200, 1.078	54.200, 1.525
273	54.400, 1.229	54.400, 1.499	54.400, 1.323	54.400, 1.215	54.400, 1.087	54.400, 1.107	54.400, 1.095	54.400, 1.083	54.400, 1.078	54.400, 1.107	54.400, 1.113	54.400, 1.007	54.400, 1.067	54.400, 1.079	54.400, 1.528
274	54.600, 1.231	54.600, 1.502	54.600, 1.326	54.600, 1.216	54.600, 1.088	54.600, 1.109	54.600, 1.096	54.600, 1.084	54.600, 1.079	54.600, 1.108	54.600, 1.114	54.600, 1.008	54.600, 1.067	54.600, 1.081	54.600, 1.531
275	54.800, 1.232	54.800, 1.505	54.800, 1.330	54.800, 1.217	54.800, 1.089	54.800, 1.110	54.800, 1.097	54.800, 1.084	54.800, 1.080	54.800, 1.109	54.800, 1.115	54.800, 1.010	54.800, 1.068	54.800, 1.082	54.800, 1.533
276	55.000, 1.234	55.000, 1.508	55.000, 1.333	55.000, 1.218	55.000, 1.090	55.000, 1.111	55.000, 1.098	55.000, 1.085	55.000, 1.081	55.000, 1.110	55.000, 1.117	55.000, 1.010	55.000, 1.069	55.000, 1.083	55.000, 1.536
277	55.200, 1.235	55.200, 1.511	55.200, 1.336	55.200, 1.219	55.200, 1.091	55.200, 1.112	55.200, 1.100	55.200, 1.086	55.200, 1.082	55.200, 1.111	55.200, 1.118	55.200, 1.011	55.200, 1.069	55.200, 1.083	55.200, 1.539
278	55.400, 1.237	55.400, 1.514	55.400, 1.339	55.400, 1.220	55.400, 1.092	55.400, 1.113	55.400, 1.101	55.400, 1.086	55.400, 1.083	55.400, 1.112	55.400, 1.120	55.400, 1.012	55.400, 1.070	55.400, 1.084	55.400, 1.541
279	55.600, 1.239	55.600, 1.518	55.600, 1.342	55.600, 1.221	55.600, 1.094	55.600, 1.115	55.600, 1.103	55.600, 1.087	55.600, 1.085	55.600, 1.113	55.600, 1.121	55.600, 1.013	55.600, 1.071	55.600, 1.085	55.600, 1.544
280	55.800, 1.240	55.800, 1.521	55.800, 1.345	55.800, 1.222	55.800, 1.095	55.800, 1.116	55.800, 1.105	55.800, 1.088	55.800, 1.086	55.800, 1.114	55.800, 1.122	55.800, 1.014	55.800, 1.072	55.800, 1.085	55.800, 1.546
281	56.000, 1.242	56.000, 1.524	56.000, 1.349	56.000, 1.222	56.000, 1.097	56.000, 1.117	56.000, 1.106	56.000, 1.089	56.000, 1.087	56.000, 1.115	56.000, 1.123	56.000, 1.015	56.000, 1.072	56.000, 1.086	56.000, 1.549
282	56.200, 1.243	56.200, 1.527	56.200, 1.352	56.200, 1.223	56.200, 1.098	56.200, 1.118	56.200, 1.108	56.200, 1.090	56.200, 1.088	56.200, 1.116	56.200, 1.124	56.200, 1.017	56.200, 1.073	56.200, 1.087	56.200, 1.551
283	56.400, 1.244	56.400, 1.530	56.400, 1.355	56.400, 1.224	56.400, 1.100	56.400, 1.119	56.400, 1.110	56.400, 1.091	56.400, 1.089	56.400, 1.116	56.400, 1.125	56.400, 1.018	56.400, 1.074	56.400, 1.087	56.400, 1.553
284	56.600, 1.245	56.600, 1.532	56.600, 1.358	56.600, 1.225	56.600, 1.101	56.600, 1.120	56.600, 1.111	56.600, 1.092	56.600, 1.090	56.600, 1.117	56.600, 1.126	56.600, 1.018	56.600, 1.075	56.600, 1.088	56.600, 1.555
285	56.800, 1.246	56.800, 1.535	56.800, 1.361	56.800, 1.226	56.800, 1.102	56.800, 1.121	56.800, 1.113	56.800, 1.093	56.800, 1.092	56.800, 1.118	56.800, 1.127	56.800, 1.019	56.800, 1.076	56.800, 1.089	56.800, 1.557
286	57.000, 1.246	57.000, 1.538	57.000, 1.363	57.000, 1.227	57.000, 1.103	57.000, 1.122	57.000, 1.114	57.000, 1.094	57.000, 1.093	57.000, 1.119	57.000, 1.128	57.000, 1.020	57.000, 1.077	57.000, 1.090	57.000, 1.559
287	57.200, 1.247	57.200, 1.541	57.200, 1.366	57.200, 1.227	57.200, 1.104	57.200, 1.123	57.200, 1.115	57.200, 1.095	57.200, 1.094	57.200, 1.120	57.200, 1.129	57.200, 1.021	57.200, 1.078	57.200, 1.090	57.200, 1.561
288	57.400, 1.247	57.400, 1.543	57.400, 1.368	57.400, 1.228	57.400, 1.105	57.400, 1.124	57.400, 1.116	57.400, 1.096	57.400, 1.095	57.400, 1.121	57.400, 1.130	57.400, 1.021	57.400, 1.079	57.400, 1.091	57.400, 1.563
289	57.600, 1.248	57.600, 1.546	57.600, 1.371	57.600, 1.229	57.600, 1.105	57.600, 1.124	57.600, 1.117	57.600, 1.097	57.600, 1.096	57.600, 1.122	57.600, 1.130	57.600, 1.022	57.600, 1.080	57.600, 1.092	57.600, 1.566
290	57.800, 1.249	57.800, 1.549	57.800, 1.373	57.800, 1.230	57.800, 1.106	57.800, 1.125	57.800, 1.117	57.800, 1.098	57.800, 1.097	57.800, 1.122	57.800, 1.131	57.800, 1.022	57.800, 1.080	57.800, 1.093	57.800, 1.568
291	58.000, 1.250	58.000, 1.552	58.000, 1.376	58.000, 1.231	58.000, 1.107	58.000, 1.126	58.000, 1.118	58.000, 1.100	58.000, 1.098	58.000, 1.123	58.000, 1.132	58.000, 1.023	58.000, 1.081	58.000, 1.094	58.000, 1.570
292	58.200, 1.251	58.200, 1.555	58.200, 1.379	58.200, 1.232	58.200, 1.107	58.200, 1.127	58.200, 1.118	58.200, 1.101	58.200, 1.098	58.200, 1.124	58.200, 1.133	58.200, 1.024	58.200, 1.082	58.200, 1.095	58.200, 1.573
293	58.400, 1.252	58.400, 1.558	58.400, 1.382	58.400, 1.234	58.400, 1.108	58.400, 1.128	58.400, 1.119	58.400, 1.102	58.400, 1.099	58.400, 1.124	58.400, 1.134	58.400, 1.024	58.400, 1.083	58.400, 1.096	58.400, 1.575
294	58.600, 1.253	58.600, 1.561	58.600, 1.384	58.600, 1.235	58.600, 1.109	58.600, 1.129	58.600, 1.119	58.600, 1.103	58.600, 1.100	58.600, 1.125	58.600, 1.135	58.600, 1.025	58.600, 1.084	58.600, 1.097	58.600, 1.578
295	58.800, 1.255	58.800, 1.563	58.800, 1.386	58.800, 1.236	58.800, 1.110	58.800, 1.130	58.800, 1.120	58.800, 1.104	58.800, 1.100	58.800, 1.126	58.800, 1.136	58.800, 1.026	58.800, 1.085	58.800, 1.097	58.800, 1.580
296	59.000, 1.256	59.000, 1.566	59.000, 1.389	59.000, 1.237	59.000, 1.110	59.000, 1.130	59.000, 1.120	59.000, 1.105	59.000, 1.101	59.000, 1.126	59.000, 1.137	59.000, 1.027	59.000, 1.086	59.000, 1.098	59.000, 1.582
297	59.200, 1.257	59.200, 1.569	59.200, 1.391	59.200, 1.238	59.200, 1.111	59.200, 1.131	59.200, 1.121	59.200, 1.106	59.200, 1.102	59.200, 1.127	59.200, 1.137	59.200, 1.028	59.200, 1.087	59.200, 1.099	59.200, 1.584
298	59.400, 1.259	59.400, 1.572	59.400, 1.393	59.400, 1.239	59.400, 1.112	59.400, 1.131	59.400, 1.122	59.400, 1.107	59.400, 1.102	59.400, 1.127	59.400, 1.138	59.400, 1.029	59.400, 1.087	59.400, 1.100	59.400, 1.586
299	59.600, 1.260	59.600, 1.574	59.600, 1.396	59.600, 1.239	59.600, 1.113	59.600, 1.131	59.600, 1.123	59.600, 1.108	59.600, 1.103	59.600, 1.127	59.600, 1.138	59.600, 1.029	59.600, 1.088	59.600, 1.101	59.600, 1.589
300	59.800, 1.262	59.800, 1.577	59.800, 1.399	59.800, 1.240	59.800, 1.114	59.800, 1.132	59.800, 1.124	59.800, 1.109	59.800, 1.103	59.800, 1.127	59.800, 1.139	59.800, 1.030	59.800, 1.088	59.800, 1.102	59.800, 1.591
301	60.000, 1.263	60.000, 1.580	60.000, 1.401	60.000, 1.241	60.000, 1.115	60.000, 1.132	60.000, 1.124	60.000, 1.110	60.000, 1.104	60.000, 1.128	60.000, 1.140	60.000, 1.031	60.000, 1.089	60.000, 1.103	60.000, 1.593
302	60.200, 1.264	60.200, 1.582	60.200, 1.404	60.200, 1.242	60.200, 1.117	60.200, 1.132	60.200, 1.126	60.200, 1.110	60.200, 1.105	60.200, 1.128	60.200, 1.140	60.200, 1.032	60.200, 1.089	60.200, 1.103	60.200, 1.595
303	60.400, 1.265	60.400, 1.584	60.400, 1.407	60.400, 1.243	60.400, 1.118	60.400, 1.132	60.400, 1.126	60.400, 1.111	60.400, 1.105	60.400, 1.129	60.400, 1.141	60.400, 1.033	60.400, 1.090	60.400, 1.104	60.400, 1.597
304	60.600, 1.266	60.600, 1.586	60.600, 1.410	60.600, 1.243	60.600, 1.119	60.600, 1.133	60.600, 1.128	60.600, 1.111	60.600, 1.106	60.600, 1.130	60.600, 1.142	60.600, 1.033	60.600, 1.090	60.600, 1.105	60.600, 1.599
305	60.800, 1.266	60.800, 1.589	60.800, 1.412	60.800, 1.244	60.800, 1.120	60.800, 1.133	60.800, 1.129	60.800, 1.112	60.800, 1.107	60.800, 1.131	60.800, 1.142	60.800, 1.034	60.800, 1.091	60.800, 1.105	60.800, 1.600
306	61.000, 1.267	61.000, 1.591	61.000, 1.415	61.000, 1.245	61.000, 1.121	61.000, 1.134	61.000, 1.130	61.000, 1.113	61.000, 1.108	61.000, 1.132	61.000, 1.143	61.000, 1.034	61.000, 1.091	61.000, 1.106	61.000, 1.602
307	61.200, 1.267	61.200, 1.593	61.200, 1.418	61.200, 1.245	61.200, 1.121	61.200, 1.134	61.200, 1.131	61.200, 1.113	61.200, 1.109	61.200, 1.133	61.200, 1.143	61.200, 1.034	61.200, 1.092	61.200, 1.107	61.200, 1.604
308	61.400, 1.268	61.400, 1.596	61.400, 1.420	61.400, 1.246	61.400, 1.122	61.400, 1.135	61.400, 1.132	61.400, 1.114	61.400, 1.110	61.400, 1.134	61.400, 1.143	61.400, 1.034	61.400, 1.092	61.400, 1.108	61.400, 1.606
309	61.600, 1.268	61.600, 1.598	61.600, 1.423	61.600, 1.247	61.600, 1.122	61.600, 1.136	61.600, 1.132	61.600, 1.115	61.600, 1.111	61.600, 1.135	61.600, 1.143	61.600, 1.034	61.600, 1.093	61.600, 1.108	61.600, 1.608
310	61.800, 1.269	61.800, 1.600	61.800, 1.426	61.800, 1.248	61.800, 1.123	61.800, 1.137	61.800, 1.133	61.800, 1.115	61.800, 1.112	61.800, 1.136	61.800, 1.144	61.800, 1.034	61.800, 1.093	61.800, 1.108	61.800, 1.610
311	62.000, 1.270	62.000, 1.602	62.000, 1.429	62.000, 1.249	62.000, 1.124	62.000, 1.138	62.000, 1.134	62.000, 1.116	62.000, 1.113	62.000, 1.137	62.000, 1.144	62.000, 1.034	62.000, 1.094	62.000, 1.109	62.000, 1.611
312	62.200, 1.271	62.200, 1.604	62.200, 1.432	62.200, 1.250	62.200, 1.124	62.200, 1.139	62.200, 1.134	62.200, 1.116	62.200, 1.114	62.200, 1.138	62.200, 1.144	62.200, 1.035	62.200, 1.094	62.200, 1.109	62.200, 1.613
313	62.400, 1.272	62.400, 1.607	62.400, 1.434	62.400, 1.251	62.400, 1.125	62.400, 1.140	62.400, 1.135	62.400, 1.117	62.400, 1.115	62.400, 1.139	62.400, 1.145	62.400, 1.036	62.400, 1.095	62.400, 1.110	62.400, 1.615
314	62.600, 1.273	62.600, 1.610	62.600, 1.437	62.600, 1.252	62.600, 1.125	62.600, 1.141	62.600, 1.135	62.600, 1.117	62.600, 1.116	62.600, 1.139	62.600, 1.145	62.600, 1.036	62.600, 1.095	62.600, 1.110	62.600, 1.617
315	62.800, 1.274	62.800, 1.612	62.800, 1.439	62.800, 1.253	62.800, 1.125	62.800, 1.142	62.800, 1.136	62.800, 1.118	62.800, 1.116	62.800, 1.139	62.800, 1.146	62.800, 1.037	62.800, 1.096	62.800, 1.111	62.800, 1.619
316	63.000, 1.275	63.000, 1.615	63.000, 1.442	63.000, 1.253	63.000, 1.126	63.000, 1.142	63.000, 1.137	63.000, 1.118	63.000, 1.117	63.000, 1.139	63.000, 1.147	63.000, 1.037	63.000, 1.096	63.000, 1.112	63.000, 1.621
317	63.200, 1.276	63.200, 1.618	63.200, 1.444	63.200, 1.253	63.200, 1.126	63.200, 1.143	63.200, 1.138	63.200, 1.119	63.200, 1.118	63.200, 1.140	63.200, 1.148	63.200, 1.038	63.200, 1.096	63.200, 1.112	63.200, 1.623
318	63.400, 1.277	63.400, 1.620	63.400, 1.446	63.400, 1.254	63.400, 1.127	63.400, 1.144	63.400, 1.139	63.400, 1.120	63.400, 1.119	63.400, 1.140	63.400, 1.149	63.400, 1.038	63.400, 1.096	63.400, 1.113	63.400, 1.626
319	63.600, 1.278	63.600, 1.623	63.600, 1.448	63.600, 1.254	63.600, 1.128	63.600, 1.144	63.600, 1.140	63.600, 1.120	63.600, 1.119	63.600, 1.141	63.600, 1.149	63.600, 1.039	63.600, 1.097	63.600, 1.113	63.600, 1.628
320	63.800, 1.278	63.800, 1.626	63.800, 1.450	63.800, 1.254	63.800, 1.129	63.800, 1.145	63.800, 1.140	63.800, 1.121	63.800, 1.120	63.800, 1.141	63.800, 1.150	63.800, 1.039	63.800, 1.097	63.800, 1.114	63.800, 1.630
321	64.000, 1.279	64.000, 1.629	64.000, 1.452	64.000, 1.254	64.000, 1.130	64.000, 1.146	64.000, 1.141	64.000, 1.122	64.000, 1.121	64.000, 1.142	64.000, 1.151	64.000, 1.040	64.000, 1.098	64.000, 1.115	64.000, 1.633
322	64.200, 1.281	64.200, 1.631	64.200, 1.454	64.200, 1.255	64.200, 1.131	64.200, 1.146	64.200, 1.141	64.200, 1.123	64.200, 1.121	64.200, 1.143	64.200, 1.152	64.200, 1.041	64.200, 1.098	64.200, 1.115	64.200, 1.635
323	64.400, 1.281	64.400, 1.634	64.400, 1.457	64.400, 1.256	64.400, 1.131	64.400, 1.147	64.400, 1.142	64.400, 1.124	64.400, 1.122	64.400, 1.144	64.400, 1.153	64.400, 1.042	64.400, 1.099	64.400, 1.115	64.400, 1.636
324	64.600, 1.282	64.600, 1.636	64.600, 1.459	64.600, 1.257	64.600, 1.132	64.600, 1.148	64.600, 1.142	64.600, 1.124	64.600, 1.122	64.600, 1.145	64.600, 1.154	64.600, 1.042	64.600, 1.099	64.600, 1.116	64.600, 1.638
325	64.800, 1.283	64.800, 1.638	64.800, 1.460	64.800, 1.257	64.800, 1.133	64.800, 1.149	64.800, 1.143	64.800, 1.125	64.800, 1.122	64.800, 1.145	64.800, 1.154	64.800, 1.043	64.800, 1.099	64.800, 1.116	64.800, 1.640
326	65.000, 1.283	65.000, 1.640	65.000, 1.462	65.000, 1.258	65.000, 1.133	65.000, 1.150	65.000, 1.143	65.000, 1.125	65.000, 1.123	65.000, 1.146	65.000, 1.155	65.000, 1.043	65.000, 1.100	65.000, 1.117	65.000, 1.642
327	65.200, 1.284	65.200, 1.642	65.200, 1.464	65.200, 1.259	65.200, 1.134	65.200, 1.151	65.200, 1.143	65.200, 1.126	65.200, 1.123	65.200, 1.147	65.200, 1.156	65.200, 1.044	65.200, 1.100	65.200, 1.117	65.200, 1.643
328	65.400, 1.284	65.400, 1.643	65.400, 1.466	65.400, 1.260	65.400, 1.134	65.400, 1.151	65.400, 1.143	65.400, 1.126	65.400, 1.123	65.400, 1.148	65.400, 1.156	65.400, 1.044	65.400, 1.101	65.400, 1.117	65.400, 1.645
329	65.600, 1.285	65.600, 1.645	65.600, 1.468	65.600, 1.261	65.600, 1.135	65.600, 1.152	65.600, 1.144	65.600, 1.127	65.600, 1.124	65.600, 1.148	65.600, 1.156	65.600, 1.045	65.600, 1.101	65.600, 1.118	65.600, 1.647
330	65.800, 1.285	65.800, 1.647	65.800, 1.470	65.800, 1.261	65.800, 1.135	65.800, 1.153	65.800, 1.144	65.800, 1.127	65.800, 1.124	65.800, 1.149	65.800, 1.157	65.800, 1.046	65.800, 1.102	65.800, 1.118	65.800, 1.648
331	66.000, 1.286	66.000, 1.648	66.000, 1.472	66.000, 1.262	66.000, 1.135	66.000, 1.153	66.000, 1.145	66.000, 1.127	66.000, 1.124	66.000, 1.149	66.000, 1.157	66.000, 1.047	66.000, 1.102	66.000, 1.119	66.000, 1.650
332	66.200, 1.287	66.200, 1.650	66.200, 1.474	66.200, 1.263	66.200, 1.135	66.200, 1.153	66.200, 1.145	66.200, 1.128	66.200, 1.124	66.200, 1.149	66.200, 1.157	66.200, 1.047	66.200, 1.102	66.200, 1.119	66.200, 1.651
333	66.400, 1.287	66.400, 1.652	66.400, 1.477	66.400, 1.264	66.400, 1.136	66.400, 1.153	66.400, 1.146	66.400, 1.128	66.400, 1.124	66.400, 1.149	66.400, 1.158	66.400, 1.047	66.400, 1.102	66.400, 1.120	66.400, 1.653
334	66.600, 1.288	66.600, 1.654	66.600, 1.479	66.600, 1.264	66.600, 1.136	66.600, 1.153	66.600, 1.147	66.600, 1.128	66.600, 1.124	66.600, 1.149	66.600, 1.159	66.600, 1.048	66.600, 1.102	66.600, 1.121	66.600, 1.655
335	66.800, 1.289	66.800, 1.655	66.800, 1.481	66.800, 1.264	66.800, 1.137	66.800, 1.153	66.800, 1.148	66.800, 1.129	66.800, 1.125	66.800, 1.149	66.800, 1.159	66.800, 1.048	66.800, 1.102	66.800, 1.121	66.800, 1.657
336	67.000, 1.289	67.000, 1.657	67.000, 1.483	67.000, 1.265	67.000, 1.137	67.000, 1.153	67.000, 1.148	67.000, 1.130	67.000, 1.125	67.000, 1.149	67.000, 1.160	67.000, 1.048	67.000, 1.103	67.000, 1.122	67.000, 1.659
337	67.200, 1.290	67.200, 1.659	67.200, 1.486	67.200, 1.265	67.200, 1.138	67.200, 1.153	67.200, 1.149	67.200, 1.130	67.200, 1.125	67.200, 1.150	67.200, 1.160	67.200, 1.048	67.200, 1.103	67.200, 1.122	67.200, 1.661
338	67.400, 1.291	67.400, 1.661	67.400, 1.488	67.400, 1.265	67.400, 1.138	67.400, 1.153	67.400, 1.150	67.400, 1.131	67.400, 1.126	67.400, 1.150	67.400, 1.161	67.400, 1.049	67.400, 1.103	67.400, 1.123	67.400, 1.663
339	67.600, 1.292	67.600, 1.663	67.600, 1.490	67.600, 1.265	67.600, 1.139	67.600, 1.154	67.600, 1.150	67.600, 1.131	67.600, 1.126	67.600, 1.151	67.600, 1.162	67.600, 1.049	67.600, 1.103	67.600, 1.123	67.600, 1.665
340	67.800, 1.293	67.800, 1.665	67.800, 1.493	67.800, 1.266	67.800, 1.140	67.800, 1.154	67.800, 1.151	67.800, 1.132	67.800, 1.127	67.800, 1.151	67.800, 1.162	67.800, 1.049	67.800, 1.103	67.800, 1.124	67.800, 1.667
341	68.000, 1.294	68.000, 1.666	68.000, 1.495	68.000, 1.266	68.000, 1.141	68.000, 1.155	68.000, 1.151	68.000, 1.133	68.000, 1.127	68.000, 1.151	68.000, 1.163	68.000, 1.050	68.000, 1.103	68.000, 1.125	68.000, 1.669
342	68.200, 1.295	68.200, 1.668	68.200, 1.497	68.200, 1.267	68.200, 1.141	68.200, 1.156	68.200, 1.151	68.200, 1.133	68.200, 1.128	68.200, 1.152	68.200, 1.164	68.200, 1.050	68.200, 1.103	68.200, 1.126	68.200, 1.671
343	68.400, 1.296	68.400, 1.670	68.400, 1.500	68.400, 1.267	68.400, 1.142	68.400, 1.156	68.400, 1.152	68.400, 1.134	68.400, 1.128	68.400, 1.152	68.400, 1.164	68.400, 1.050	68.400, 1.104	68.400, 1.126	68.400, 1.673
344	68.600, 1.297	68.600, 1.672	68.600, 1.502	68.600, 1.267	68.600, 1.143	68.600, 1.157	68.600, 1.152	68.600, 1.134	68.600, 1.129	68.600, 1.153	68.600, 1.165	68.600, 1.050	68.600, 1.104	68.600, 1.127	68.600, 1.675
345	68.800, 1.297	68.800, 1.675	68.800, 1.504	68.800, 1.268	68.800, 1.143	68.800, 1.158	68.800, 1.153	68.800, 1.135	68.800, 1.130	68.800, 1.153	68.800, 1.165	68.800, 1.050	68.800, 1.104	68.800, 1.127	68.800, 1.677
346	69.000, 1.298	69.000, 1.677	69.000, 1.506	69.000, 1.268	69.000, 1.144	69.000, 1.158	69.000, 1.153	69.000, 1.135	69.000, 1.130	69.000, 1.154	69.000, 1.166	69.000, 1.050	69.000, 1.105	69.000, 1.127	69.000, 1.678
347	69.200, 1.298	69.200, 1.679	69.200, 1.508	69.200, 1.268	69.200, 1.144	69.200, 1.159	69.200, 1.154	69.200, 1.135	69.200, 1.131	69.200, 1.154	69.200, 1.166	69.200, 1.051	69.200, 1.105	69.200, 1.128	69.200, 1.680
348	69.400, 1.299	69.400, 1.682	69.400, 1.510	69.400, 1.269	69.400, 1.145	69.400, 1.159	69.400, 1.155	69.400, 1.136	69.400, 1.132	69.400, 1.154	69.400, 1.167	69.400, 1.051	69.400, 1.106	69.400, 1.128	69.400, 1.681
349	69.600, 1.300	69.600, 1.684	69.600, 1.512	69.600, 1.269	69.600, 1.145	69.600, 1.160	69.600, 1.156	69.600, 1.136	69.600, 1.132	69.600, 1.154	69.600, 1.167	69.600, 1.052	69.600, 1.106	69.600, 1.128	69.600, 1.682
350	69.800, 1.300	69.800, 1.686	69.800, 1.515	69.800, 1.269	69.800, 1.146	69.800, 1.160	69.800, 1.157	69.800, 1.137	69.800, 1.133	69.800, 1.155	69.800, 1.167	69.800, 1.053	69.800, 1.107	69.800, 1.129	69.800, 1.684
351	70.000, 1.301	70.000, 1.688	70.000, 1.516	70.000, 1.269	70.000, 1.147	70.000, 1.161	70.000, 1.157	70.000, 1.138	70.000, 1.133	70.000, 1.155	70.000, 1.167	70.000, 1.053	70.000, 1.108	70.000, 1.129	70.000, 1.685
352	70.200, 1.301	70.200, 1.690	70.200, 1.518	70.200, 1.270	70.200, 1.147	70.200, 1.161	70.200, 1.158	70.200, 1.138	70.200, 1.134	70.200, 1.155	70.200, 1.166	70.200, 1.054	70.200, 1.108	70.200, 1.129	70.200, 1.686
353	70.400, 1.302	70.400, 1.692	70.400, 1.520	70.400, 1.270	70.400, 1.148	70.400, 1.161	70.400, 1.158	70.400, 1.138	70.400, 1.135	70.400, 1.156	70.400, 1.167	70.400, 1.054	70.400, 1.109	70.400, 1.129	70.400, 1.688
354	70.600, 1.302	70.600, 1.695	70.600, 1.521	70.600, 1.270	70.600, 1.148	70.600, 1.161	70.600, 1.158	70.600, 1.139	70.600, 1.135	70.600, 1.156	70.600, 1.167	70.600, 1.055	70.600, 1.110	70.600, 1.129	70.600, 1.690
355	70.800, 1.302	70.800, 1.697	70.800, 1.522	70.800, 1.271	70.800, 1.149	70.800, 1.161	70.800, 1.158	70.800, 1.139	70.800, 1.136	70.800, 1.157	70.800, 1.167	70.800, 1.055	70.800, 1.111	70.800, 1.129	70.800, 1.691
356	71.000, 1.303	71.000, 1.699	71.000, 1.524	71.000, 1.271	71.000, 1.149	71.000, 1.160	71.000, 1.159	71.000, 1.139	71.000, 1.136	71.000, 1.157	71.000, 1.167	71.000, 1.056	71.000, 1.111	71.000, 1.129	71.000, 1.693
357	71.200, 1.303	71.200, 1.700	71.200, 1.526	71.200, 1.272	71.200, 1.150	71.200, 1.160	71.200, 1.159	71.200, 1.139	71.200, 1.137	71.200, 1.158	71.200, 1.168	71.200, 1.056	71.200, 1.112	71.200, 1.129	71.200, 1.694
358	71.400, 1.304	71.400, 1.702	71.400, 1.528	71.400, 1.272	71.400, 1.150	71.400, 1.161	71.400, 1.159	71.400, 1.140	71.400, 1.137	71.400, 1.158	71.400, 1.168	71.400, 1.057	71.400, 1.112	71.400, 1.129	71.400, 1.696
359	71.600, 1.304	71.600, 1.703	71.600, 1.529	71.600, 1.273	71.600, 1.151	71.600, 1.160	71.600, 1.160	71.600, 1.140	71.600, 1.138	71.600, 1.158	71.600, 1.168	71.600, 1.057	71.600, 1.113	71.600, 1.129	71.600, 1.698
360	71.800, 1.305	71.800, 1.705	71.800, 1.531	71.800, 1.274	71.800, 1.151	71.800, 1.160	71.800, 1.160	71.800, 1.140	71.800, 1.138	71.800, 1.158	71.800, 1.169	71.800, 1.057	71.800, 1.113	71.800, 1.130	71.800, 1.700
361	72.000, 1.306	72.000, 1.707	72.000, 1.533	72.000, 1.274	72.000, 1.152	72.000, 1.160	72.000, 1.160	72.000, 1.141	72.000, 1.139	72.000, 1.158	72.000, 1.169	72.000, 1.058	72.000, 1.113	72.000, 1.130	72.000, 1.701
362	72.200, 1.306	72.200, 1.708	72.200, 1.535	72.200, 1.274	72.200, 1.152	72.200, 1.160	72.200, 1.161	72.200, 1.141	72.200, 1.140	72.200, 1.158	72.200, 1.169	72.200, 1.058	72.200, 1.113	72.200, 1.131	72.200, 1.703
363	72.400, 1.307	72.400, 1.710	72.400, 1.536	72.400, 1.275	72.400, 1.152	72.400, 1.161	72.400, 1.161	72.400, 1.142	72.400, 1.140	72.400, 1.159	72.400, 1.170	72.400, 1.059	72.400, 1.113	72.400, 1.132	72.400, 1.705
364	72.600, 1.307	72.600, 1.712	72.600, 1.538	72.600, 1.275	72.600, 1.152	72.600, 1.161	72.600, 1.161	72.600, 1.142	72.600, 1.141	72.600, 1.159	72.600, 1.170	72.600, 1.059	72.600, 1.113	72.600, 1.132	72.600, 1.707
365	72.800, 1.308	72.800, 1.714	72.800, 1.540	72.800, 1.276	72.800, 1.153	72.800, 1.162	72.800, 1.162	72.800, 1.143	72.800, 1.141	72.800, 1.160	72.800, 1.170	72.800, 1.060	72.800, 1.113	72.800, 1.133	72.800, 1.708
366	73.000, 1.308	73.000, 1.716	73.000, 1.542	73.000, 1.276	73.000, 1.153	73.000, 1.162	73.000, 1.162	73.000, 1.143	73.000, 1.141	73.000, 1.160	73.000, 1.171	73.000, 1.060	73.000, 1.113	73.000, 1.133	73.000, 1.710
367	73.200, 1.309	73.200, 1.717	73.200, 1.544	73.200, 1.276	73.200, 1.153	73.200, 1.163	73.200, 1.163	73.200, 1.144	73.200, 1.142	73.200, 1.160	73.200, 1.171	73.200, 1.060	73.200, 1.113	73.200, 1.133	73.200, 1.711
368	73.400, 1.309	73.400, 1.719	73.400, 1.546	73.400, 1.277	73.400, 1.153	73.400, 1.163	73.400, 1.164	73.400, 1.144	73.400, 1.142	73.400, 1.160	73.400, 1.171	73.400, 1.061	73.400, 1.113	73.400, 1.134	73.400, 1.712
369	73.600, 1.310	73.600, 1.720	73.600, 1.548	73.600, 1.277	73.600, 1.154	73.600, 1.164	73.600, 1.164	73.600, 1.145	73.600, 1.141	73.600, 1.160	73.600, 1.171	73.600, 1.061	73.600, 1.113	73.600, 1.134	73.600, 1.714
370	73.800, 1.311	73.800, 1.721	73.800, 1.550	73.800, 1.277	73.800, 1.154	73.800, 1.165	73.800, 1.164	73.800, 1.145	73.800, 1.141	73.800, 1.160	73.800, 1.171	73.800, 1.061	73.800, 1.113	73.800, 1.135	73.800, 1.715
371	74.000, 1.311	74.000, 1.723	74.000, 1.551	74.000, 1.278	74.000, 1.154	74.000, 1.165	74.000, 1.165	74.000, 1.146	74.000, 1.142	74.000, 1.161	74.000, 1.171	74.000, 1.061	74.000, 1.113	74.000, 1.135	74.000, 1.717
372	74.200, 1.311	74.200, 1.724	74.200, 1.553	74.200, 1.278	74.200, 1.154	74.200, 1.166	74.200, 1.165	74.200, 1.146	74.200, 1.142	74.200, 1.161	74.200, 1.172	74.200, 1.061	74.200, 1.113	74.200, 1.136	74.200, 1.718
373	74.400, 1.312	74.400, 1.726	74.400, 1.555	74.400, 1.279	74.400, 1.155	74.400, 1.166	74.400, 1.165	74.400, 1.147	74.400, 1.142	74.400, 1.161	74.400, 1.172	74.400, 1.061	74.400, 1.113	74.400, 1.136	74.400, 1.720
374	74.600, 1.312	74.600, 1.727	74.600, 1.557	74.600, 1.280	74.600, 1.155	74.600, 1.166	74.600, 1.165	74.600, 1.147	74.600, 1.142	74.600, 1.162	74.600, 1.173	74.600, 1.061	74.600, 1.113	74.600, 1.136	74.600, 1.721
375	74.800, 1.313	74.800, 1.729	74.800, 1.559	74.800, 1.280	74.800, 1.155	74.800, 1.167	74.800, 1.165	74.800, 1.147	74.800, 1.143	74.800, 1.162	74.800, 1.173	74.800, 1.062	74.800, 1.114	74.800, 1.137	74.800, 1.722
376	75.000, 1.313	75.000, 1.730	75.000, 1.562	75.000, 1.281	75.000, 1.156	75.000, 1.167	75.000, 1.166	75.000, 1.148	75.000, 1.143	75.000, 1.162	75.000, 1.174	75.000, 1.061	75.000, 1.114	75.000, 1.137	75.000, 1.724
377	75.200, 1.314	75.200, 1.731	75.200, 1.564	75.200, 1.282	75.200, 1.157	75.200, 1.167	75.200, 1.166	75.200, 1.148	75.200, 1.143	75.200, 1.162	75.200, 1.174	75.200, 1.062	75.200, 1.115	75.200, 1.138	75.200, 1.725
378	75.400, 1.314	75.400, 1.733	75.400, 1.566	75.400, 1.283	75.400, 1.157	75.400, 1.168	75.400, 1.167	75.400, 1.148	75.400, 1.144	75.400, 1.162	75.400, 1.175	75.400, 1.062	75.400, 1.115	75.400, 1.138	75.400, 1.726
379	75.600, 1.314	75.600, 1.734	75.600, 1.569	75.600, 1.283	75.600, 1.158	75.600, 1.168	75.600, 1.167	75.600, 1.148	75.600, 1.145	75.600, 1.162	75.600, 1.175	75.600, 1.062	75.600, 1.116	75.600, 1.138	75.600, 1.728
380	75.800, 1.315	75.800, 1.735	75.800, 1.571	75.800, 1.283	75.800, 1.159	75.800, 1.169	75.800, 1.168	75.800, 1.148	75.800, 1.145	75.800, 1.162	75.800, 1.176	75.800, 1.062	75.800, 1.116	75.800, 1.139	75.800, 1.729
381	76.000, 1.315	76.000, 1.737	76.000, 1.572	76.000, 1.284	76.000, 1.159	76.000, 1.169	76.000, 1.168	76.000, 1.149	76.000, 1.146	76.000, 1.163	76.000, 1.177	76.000, 1.063	76.000, 1.117	76.000, 1.139	76.000, 1.730
382	76.200, 1.316	76.200, 1.738	76.200, 1.574	76.200, 1.284	76.200, 1.160	76.200, 1.170	76.200, 1.169	76.200, 1.149	76.200, 1.146	76.200, 1.163	76.200, 1.177	76.200, 1.063	76.200, 1.117	76.200, 1.139	76.200, 1.731
383	76.400, 1.316	76.400, 1.740	76.400, 1.576	76.400, 1.284	76.400, 1.160	76.400, 1.170	76.400, 1.169	76.400, 1.149	76.400, 1.147	76.400, 1.164	76.400, 1.177	76.400, 1.063	76.400, 1.118	76.400, 1.139	76.400, 1.732
384	76.600, 1.317	76.600, 1.742	76.600, 1.578	76.600, 1.284	76.600, 1.161	76.600, 1.170	76.600, 1.170	76.600, 1.149	76.600, 1.147	76.600, 1.164	76.600, 1.178	76.600, 1.064	76.600, 1.118	76.600, 1.139	76.600, 1.733
385	76.800, 1.317	76.800, 1.743	76.800, 1.579	76.800, 1.284	76.800, 1.161	76.800, 1.171	76.800, 1.170	76.800, 1.150	76.800, 1.147	76.800, 1.165	76.800, 1.178	76.800, 1.064	76.800, 1.118	76.800, 1.139	76.800, 1.734
386	77.000, 1.317	77.000, 1.745	77.000, 1.581	77.000, 1.285	77.000, 1.161	77.000, 1.171	77.000, 1.171	77.000, 1.150	77.000, 1.147	77.000, 1.165	77.000, 1.178	77.000, 1.065	77.000, 1.119	77.000, 1.139	77.000, 1.736
387	77.200, 1.317	77.200, 1.747	77.200, 1.582	77.200, 1.285	77.200, 1.162	77.200, 1.171	77.200, 1.172	77.200, 1.151	77.200, 1.147	77.200, 1.165	77.200, 1.179	77.200, 1.065	77.200, 1.119	77.200, 1.139	77.200, 1.737
388	77.400, 1.317	77.400, 1.749	77.400, 1.583	77.400, 1.285	77.400, 1.162	77.400, 1.171	77.400, 1.172	77.400, 1.151	77.400, 1.147	77.400, 1.166	77.400, 1.179	77.400, 1.065	77.400, 1.119	77.400, 1.139	77.400, 1.739
389	77.600, 1.317	77.600, 1.750	77.600, 1.584	77.600, 1.285	77.600, 1.162	77.600, 1.171	77.600, 1.172	77.600, 1.152	77.600, 1.148	77.600, 1.166	77.600, 1.179	77.600, 1.066	77.600, 1.119	77.600, 1.140	77.600, 1.741
390	77.800, 1.317	77.800, 1.752	77.800, 1.585	77.800, 1.285	77.800, 1.162	77.800, 1.171	77.800, 1.173	77.800, 1.152	77.800, 1.149	77.800, 1.166	77.800, 1.180	77.800, 1.066	77.800, 1.119	77.800, 1.140	77.800, 1.743
391	78.000, 1.318	78.000, 1.754	78.000, 1.587	78.000, 1.285	78.000, 1.163	78.000, 1.171	78.000, 1.173	78.000, 1.153	78.000, 1.149	78.000, 1.167	78.000, 1.180	78.000, 1.066	78.000, 1.119	78.000, 1.141	78.000, 1.744
392	78.200, 1.318	78.200, 1.756	78.200, 1.588	78.200, 1.285	78.200, 1.163	78.200, 1.171	78.200, 1.173	78.200, 1.153	78.200, 1.150	78.200, 1.168	78.200, 1.180	78.200, 1.067	78.200, 1.120	78.200, 1.141	78.200, 1.746
393	78.400, 1.319	78.400, 1.758	78.400, 1.589	78.400, 1.286	78.400, 1.163	78.400, 1.171	78.400, 1.174	78.400, 1.153	78.400, 1.151	78.400, 1.168	78.400, 1.180	78.400, 1.067	78.400, 1.120	78.400, 1.141	78.400, 1.748
394	78.600, 1.319	78.600, 1.759	78.600, 1.591	78.600, 1.286	78.600, 1.163	78.600, 1.172	78.600, 1.174	78.600, 1.154	78.600, 1.151	78.600, 1.169	78.600, 1.180	78.600, 1.067	78.600, 1.121	78.600, 1.142	78.600, 1.749
395	78.800, 1.320	78.800, 1.761	78.800, 1.592	78.800, 1.286	78.800, 1.164	78.800, 1.172	78.800, 1.174	78.800, 1.154	78.800, 1.152	78.800, 1.169	78.800, 1.180	78.800, 1.067	78.800, 1.122	78.800, 1.142	78.800, 1.751
396	79.000, 1.320	79.000, 1.762	79.000, 1.593	79.000, 1.287	79.000, 1.164	79.000, 1.173	79.000, 1.175	79.000, 1.154	79.000, 1.152	79.000, 1.169	79.000, 1.180	79.000, 1.067	79.000, 1.122	79.000, 1.143	79.000, 1.752
397	79.200, 1.321	79.200, 1.764	79.200, 1.594	79.200, 1.287	79.200, 1.164	79.200, 1.173	79.200, 1.175	79.200, 1.154	79.200, 1.153	79.200, 1.169	79.200, 1.180	79.200, 1.067	79.200, 1.123	79.200, 1.143	79.200, 1.754
398	79.400, 1.321	79.400, 1.765	79.400, 1.596	79.400, 1.287	79.400, 1.164	79.400, 1.174	79.400, 1.175	79.400, 1.155	79.400, 1.154	79.400, 1.170	79.400, 1.181	79.400, 1.067	79.400, 1.123	79.400, 1.144	79.400, 1.755
399	79.600, 1.322	79.600, 1.766	79.600, 1.597	79.600, 1.287	79.600, 1.165	79.600, 1.174	79.600, 1.176	79.600, 1.155	79.600, 1.154	79.600, 1.170	79.600, 1.181	79.600, 1.067	79.600, 1.123	79.600, 1.144	79.600, 1.756
400	79.800, 1.322	79.800, 1.767	79.800, 1.598	79.800, 1.288	79.800, 1.165	79.800, 1.174	79.800, 1.176	79.800, 1.155	79.800, 1.154	79.800, 1.170	79.800, 1.181	79.800, 1.067	79.800, 1.123	79.800, 1.144	79.800, 1.758
401	80.000, 1.323	80.000, 1.768	80.000, 1.600	80.000, 1.288	80.000, 1.166	80.000, 1.174	80.000, 1.176	80.000, 1.155	80.000, 1.154	80.000, 1.169	80.000, 1.181	80.000, 1.068	80.000, 1.123	80.000, 1.144	80.000, 1.759
402	80.200, 1.324	80.200, 1.770	80.200, 1.601	80.200, 1.288	80.200, 1.166	80.200, 1.174	80.200, 1.177	80.200, 1.155	80.200, 1.154	80.200, 1.170	80.200, 1.182	80.200, 1.068	80.200, 1.123	80.200, 1.144	80.200, 1.760
403	80.400, 1.324	80.400, 1.771	80.400, 1.602	80.400, 1.289	80.400, 1.166	80.400, 1.174	80.400, 1.177	80.400, 1.155	80.400, 1.154	80.400, 1.170	80.400, 1.182	80.400, 1.068	80.400, 1.123	80.400, 1.144	80.400, 1.762
404	80.600, 1.325	80.600, 1.772	80.600, 1.603	80.600, 1.289	80.600, 1.167	80.600, 1.174	80.600, 1.177	80.600, 1.156	80.600, 1.154	80.600, 1.170	80.600, 1.182	80.600, 1.069	80.600, 1.122	80.600, 1.143	80.600, 1.763
405	80.800, 1.325	80.800, 1.773	80.800, 1.604	80.800, 1.289	80.800, 1.167	80.800, 1.174	80.800, 1.177	80.800, 1.156	80.800, 1.153	80.800, 1.170	80.800, 1.182	80.800, 1.069	80.800, 1.122	80.800, 1.143	80.800, 1.765
406	81.000, 1.326	81.000, 1.775	81.000, 1.606	81.000, 1.290	81.000, 1.167	81.000, 1.175	81.000, 1.178	81.000, 1.157	81.000, 1.153	81.000, 1.170	81.000, 1.183	81.000, 1.069	81.000, 1.122	81.000, 1.143	81.000, 1.766
407	81.200, 1.326	81.200, 1.776	81.200, 1.607	81.200, 1.290	81.200, 1.167	81.200, 1.175	81.200, 1.178	81.200, 1.157	81.200, 1.153	81.200, 1.170	81.200, 1.183	81.200, 1.070	81.200, 1.121	81.200, 1.144	81.200, 1.767
408	81.400, 1.326	81.400, 1.778	81.400, 1.609	81.400, 1.290	81.400, 1.167	81.400, 1.176	81.400, 1.178	81.400, 1.158	81.400, 1.153	81.400, 1.170	81.400, 1.183	81.400, 1.070	81.400, 1.121	81.400, 1.144	81.400, 1.768
409	81.600, 1.327	81.600, 1.779	81.600, 1.611	81.600, 1.291	81.600, 1.167	81.600, 1.176	81.600, 1.178	81.600, 1.159	81.600, 1.154	81.600, 1.170	81.600, 1.183	81.600, 1.071	81.600, 1.121	81.600, 1.144	81.600, 1.770
410	81.800, 1.327	81.800, 1.781	81.800, 1.613	81.800, 1.291	81.800, 1.167	81.800, 1.177	81.800, 1.179	81.800, 1.159	81.800, 1.154	81.800, 1.170	81.800, 1.183	81.800, 1.071	81.800, 1.121	81.800, 1.145	81.800, 1.770
411	82.000, 1.327	82.000, 1.782	82.000, 1.615	82.000, 1.292	82.000, 1.167	82.000, 1.177	82.000, 1.179	82.000, 1.159	82.000, 1.154	82.000, 1.170	82.000, 1.183	82.000, 1.072	82.000, 1.122	82.000, 1.145	82.000, 1.771
412	82.200, 1.328	82.200, 1.784	82.200, 1.617	82.200, 1.292	82.200, 1.167	82.200, 1.178	82.200, 1.179	82.200, 1.160	82.200, 1.154	82.200, 1.171	82.200, 1.183	82.200, 1.072	82.200, 1.122	82.200, 1.145	82.200, 1.772
413	82.400, 1.328	82.400, 1.785	82.400, 1.618	82.400, 1.292	82.400, 1.167	82.400, 1.179	82.400, 1.180	82.400, 1.160	82.400, 1.154	82.400, 1.171	82.400, 1.183	82.400, 1.072	82.400, 1.123	82.400, 1.145	82.400, 1.773
414	82.600, 1.329	82.600, 1.787	82.600, 1.620	82.600, 1.292	82.600, 1.167	82.600, 1.179	82.600, 1.180	82.600, 1.161	82.600, 1.154	82.600, 1.172	82.600, 1.183	82.600, 1.072	82.600, 1.123	82.600, 1.146	82.600, 1.774
415	82.800, 1.329	82.800, 1.789	82.800, 1.622	82.800, 1.292	82.800, 1.168	82.800, 1.180	82.800, 1.180	82.800, 1.161	82.800, 1.154	82.800, 1.172	82.800, 1.184	82.800, 1.072	82.800, 1.124	82.800, 1.146	82.800, 1.774
416	83.000, 1.330	83.000, 1.790	83.000, 1.624	83.000, 1.293	83.000, 1.168	83.000, 1.180	83.000, 1.181	83.000, 1.162	83.000, 1.155	83.000, 1.172	83.000, 1.184	83.000, 1.072	83.000, 1.124	83.000, 1.147	83.000, 1.775
417	83.200, 1.330	83.200, 1.792	83.200, 1.626	83.200, 1.293	83.200, 1.168	83.200, 1.180	83.200, 1.181	83.200, 1.162	83.200, 1.155	83.200, 1.173	83.200, 1.184	83.200, 1.072	83.200, 1.125	83.200, 1.147	83.200, 1.776
418	83.400, 1.330	83.400, 1.794	83.400, 1.628	83.400, 1.293	83.400, 1.169	83.400, 1.179	83.400, 1.182	83.400, 1.162	83.400, 1.156	83.400, 1.173	83.400, 1.184	83.400, 1.071	83.400, 1.126	83.400, 1.148	83.400, 1.777
419	83.600, 1.330	83.600, 1.795	83.600, 1.630	83.600, 1.293	83.600, 1.169	83.600, 1.179	83.600, 1.182	83.600, 1.162	83.600, 1.156	83.600, 1.173	83.600, 1.185	83.600, 1.071	83.600, 1.126	83.600, 1.148	83.600, 1.779
420	83.800, 1.331	83.800, 1.797	83.800, 1.631	83.800, 1.293	83.800, 1.170	83.800, 1.179	83.800, 1.183	83.800, 1.162	83.800, 1.156	83.800, 1.173	83.800, 1.185	83.800, 1.071	83.800, 1.127	83.800, 1.149	83.800, 1.780
421	84.000, 1.331	84.000, 1.798	84.000, 1.633	84.000, 1.293	84.000, 1.171	84.000, 1.178	84.000, 1.183	84.000, 1.161	84.000, 1.156	84.000, 1.173	84.000, 1.185	84.000, 1.071	84.000, 1.128	84.000, 1.149	84.000, 1.782
422	84.200, 1.331	84.200, 1.799	84.200, 1.634	84.200, 1.293	84.200, 1.171	84.200, 1.178	84.200, 1.184	84.200, 1.161	84.200, 1.156	84.200, 1.173	84.200, 1.186	84.200, 1.071	84.200, 1.128	84.200, 1.149	84.200, 1.783
423	84.400, 1.332	84.400, 1.801	84.400, 1.635	84.400, 1.293	84.400, 1.172	84.400, 1.178	84.400, 1.184	84.400, 1.161	84.400, 1.156	84.400, 1.174	84.400, 1.186	84.400, 1.071	84.400, 1.128	84.400, 1.150	84.400, 1.785
424	84.600, 1.332	84.600, 1.802	84.600, 1.636	84.600, 1.293	84.600, 1.172	84.600, 1.178	84.600, 1.184	84.600, 1.162	84.600, 1.156	84.600, 1.174	84.600, 1.187	84.600, 1.071	84.600, 1.128	84.600, 1.150	84.600, 1.786
425	84.800, 1.332	84.800, 1.803	84.800, 1.637	84.800, 1.294	84.800, 1.173	84.800, 1.179	84.800, 1.184	84.800, 1.162	84.800, 1.156	84.800, 1.174	84.800, 1.187	84.800, 1.072	84.800, 1.128	84.800, 1.150	84.800, 1.787
426	85.000, 1.333	85.000, 1.804	85.000, 1.639	85.000, 1.294	85.000, 1.173	85.000, 1.179	85.000, 1.184	85.000, 1.162	85.000, 1.157	85.000, 1.174	85.000, 1.188	85.000, 1.072	85.000, 1.128	85.000, 1.150	85.000, 1.788
427	85.200, 1.333	85.200, 1.805	85.200, 1.640	85.200, 1.294	85.200, 1.172	85.200, 1.180	85.200, 1.184	85.200, 1.163	85.200, 1.157	85.200, 1.174	85.200, 1.188	85.200, 1.073	85.200, 1.128	85.200, 1.150	85.200, 1.789
428	85.400, 1.333	85.400, 1.807	85.400, 1.642	85.400, 1.295	85.400, 1.172	85.400, 1.180	85.400, 1.184	85.400, 1.163	85.400, 1.158	85.400, 1.174	85.400, 1.189	85.400, 1.073	85.400, 1.127	85.400, 1.151	85.400, 1.790
429	85.600, 1.334	85.600, 1.808	85.600, 1.643	85.600, 1.295	85.600, 1.172	85.600, 1.181	85.600, 1.185	85.600, 1.163	85.600, 1.158	85.600, 1.174	85.600, 1.189	85.600, 1.074	85.600, 1.127	85.600, 1.151	85.600, 1.792
430	85.800, 1.334	85.800, 1.809	85.800, 1.644	85.800, 1.295	85.800, 1.172	85.800, 1.181	85.800, 1.185	85.800, 1.164	85.800, 1.158	85.800, 1.174	85.800, 1.189	85.800, 1.075	85.800, 1.127	85.800, 1.151	85.800, 1.793
431	86.000, 1.335	86.000, 1.810	86.000, 1.646	86.000, 1.296	86.000, 1.172	86.000, 1.182	86.000, 1.185	86.000, 1.164	86.000, 1.158	86.000, 1.174	86.000, 1.189	86.000, 1.075	86.000, 1.127	86.000, 1.151	86.000, 1.794
432	86.200, 1.336	86.200, 1.812	86.200, 1.647	86.200, 1.296	86.200, 1.172	86.200, 1.182	86.200, 1.184	86.200, 1.164	86.200, 1.158	86.200, 1.174	86.200, 1.189	86.200, 1.076	86.200, 1.127	86.200, 1.150	86.200, 1.795
433	86.400, 1.336	86.400, 1.813	86.400, 1.649	86.400, 1.297	86.400, 1.172	86.400, 1.182	86.400, 1.184	86.400, 1.165	86.400, 1.158	86.400, 1.175	86.400, 1.189	86.400, 1.077	86.400, 1.127	86.400, 1.150	86.400, 1.796
434	86.600, 1.337	86.600, 1.814	86.600, 1.650	86.600, 1.297	86.600, 1.173	86.600, 1.182	86.600, 1.185	86.600, 1.165	86.600, 1.158	86.600, 1.175	86.600, 1.189	86.600, 1.077	86.600, 1.128	86.600, 1.151	86.600, 1.796
435	86.800, 1.337	86.800, 1.815	86.800, 1.651	86.800, 1.298	86.800, 1.173	86.800, 1.182	86.800, 1.185	86.800, 1.166	86.800, 1.159	86.800, 1.175	86.800, 1.189	86.800, 1.077	86.800, 1.128	86.800, 1.151	86.800, 1.797
436	87.000, 1.338	87.000, 1.817	87.000, 1.652	87.000, 1.298	87.000, 1.173	87.000, 1.182	87.000, 1.185	87.000, 1.166	87.000, 1.159	87.000, 1.175	87.000, 1.189	87.000, 1.077	87.000, 1.128	87.000, 1.151	87.000, 1.798
437	87.200, 1.338	87.200, 1.818	87.200, 1.653	87.200, 1.298	87.200, 1.174	87.200, 1.182	87.200, 1.186	87.200, 1.166	87.200, 1.159	87.200, 1.176	87.200, 1.188	87.200, 1.077	87.200, 1.129	87.200, 1.151	87.200, 1.798
438	87.400, 1.338	87.400, 1.819	87.400, 1.654	87.400, 1.298	87.400, 1.174	87.400, 1.182	87.400, 1.186	87.400, 1.166	87.400, 1.160	87.400, 1.176	87.400, 1.188	87.400, 1.077	87.400, 1.129	87.400, 1.151	87.400, 1.800
439	87.600, 1.338	87.600, 1.820	87.600, 1.655	87.600, 1.298	87.600, 1.175	87.600, 1.182	87.600, 1.187	87.600, 1.167	87.600, 1.160	87.600, 1.176	87.600, 1.188	87.600, 1.077	87.600, 1.129	87.600, 1.151	87.600, 1.801
440	87.800, 1.338	87.800, 1.822	87.800, 1.656	87.800, 1.298	87.800, 1.175	87.800, 1.183	87.800, 1.187	87.800, 1.167	87.800, 1.160	87.800, 1.176	87.800, 1.188	87.800, 1.077	87.800, 1.130	87.800, 1.152	87.800, 1.802
441	88.000, 1.338	88.000, 1.823	88.000, 1.657	88.000, 1.298	88.000, 1.175	88.000, 1.183	88.000, 1.187	88.000, 1.167	88.000, 1.161	88.000, 1.177	88.000, 1.188	88.000, 1.077	88.000, 1.130	88.000, 1.152	88.000, 1.802
442	88.200, 1.338	88.200, 1.824	88.200, 1.659	88.200, 1.298	88.200, 1.176	88.200, 1.183	88.200, 1.187	88.200, 1.167	88.200, 1.161	88.200, 1.177	88.200, 1.188	88.200, 1.077	88.200, 1.130	88.200, 1.152	88.200, 1.803
443	88.400, 1.338	88.400, 1.825	88.400, 1.660	88.400, 1.298	88.400, 1.176	88.400, 1.183	88.400, 1.187	88.400, 1.166	88.400, 1.161	88.400, 1.178	88.400, 1.188	88.400, 1.077	88.400, 1.130	88.400, 1.152	88.400, 1.804
444	88.600, 1.338	88.600, 1.826	88.600, 1.661	88.600, 1.298	88.600, 1.176	88.600, 1.183	88.600, 1.187	88.600, 1.166	88.600, 1.161	88.600, 1.178	88.600, 1.188	88.600, 1.077	88.600, 1.130	88.600, 1.152	88.600, 1.805
445	88.800, 1.337	88.800, 1.826	88.800, 1.662	88.800, 1.298	88.800, 1.176	88.800, 1.183	88.800, 1.187	88.800, 1.166	88.800, 1.161	88.800, 1.178	88.800, 1.188	88.800, 1.077	88.800, 1.130	88.800, 1.152	88.800, 1.806
446	89.000, 1.337	89.000, 1.828	89.000, 1.664	89.000, 1.299	89.000, 1.176	89.000, 1.184	89.000, 1.187	89.000, 1.166	89.000, 1.162	89.000, 1.179	89.000, 1.188	89.000, 1.077	89.000, 1.130	89.000, 1.152	89.000, 1.807
447	89.200, 1.337	89.200, 1.829	89.200, 1.665	89.200, 1.299	89.200, 1.176	89.200, 1.184	89.200, 1.188	89.200, 1.166	89.200, 1.162	89.200, 1.179	89.200, 1.189	89.200, 1.076	89.200, 1.130	89.200, 1.152	89.200, 1.808
448	89.400, 1.337	89.400, 1.830	89.400, 1.666	89.400, 1.300	89.400, 1.176	89.400, 1.184	89.400, 1.188	89.400, 1.166	89.400, 1.163	89.400, 1.179	89.400, 1.189	89.400, 1.076	89.400, 1.130	89.400, 1.152	89.400, 1.810
449	89.600, 1.337	89.600, 1.832	89.600, 1.667	89.600, 1.300	89.600, 1.176	89.600, 1.184	89.600, 1.188	89.600, 1.167	89.600, 1.163	89.600, 1.179	89.600, 1.190	89.600, 1.077	89.600, 1.131	89.600, 1.152	89.600, 1.811
450	89.800, 1.338	89.800, 1.833	89.800, 1.668	89.800, 1.301	89.800, 1.176	89.800, 1.184	89.800, 1.188	89.800, 1.167	89.800, 1.163	89.800, 1.180	89.800, 1.190	89.800, 1.077	89.800, 1.131	89.800, 1.152	89.800, 1.813
451	90.000, 1.338	90.000, 1.834	90.000, 1.669	90.000, 1.301	90.000, 1.177	90.000, 1.185	90.000, 1.188	90.000, 1.167	90.000, 1.163	90.000, 1.180	90.000, 1.191	90.000, 1.077	90.000, 1.131	90.000, 1.152	90.000, 1.814
452	90.200, 1.339	90.200, 1.836	90.200, 1.671	90.200, 1.302	90.200, 1.177	90.200, 1.185	90.200, 1.189	90.200, 1.167	90.200, 1.163	90.200, 1.180	90.200, 1.192	90.200, 1.078	90.200, 1.132	90.200, 1.153	90.200, 1.815
453	90.400, 1.339	90.400, 1.837	90.400, 1.672	90.400, 1.302	90.400, 1.177	90.400, 1.186	90.400, 1.189	90.400, 1.168	90.400, 1.163	90.400, 1.180	90.400, 1.192	90.400, 1.078	90.400, 1.132	90.400, 1.153	90.400, 1.815
454	90.600, 1.340	90.600, 1.838	90.600, 1.673	90.600, 1.302	90.600, 1.178	90.600, 1.186	90.600, 1.189	90.600, 1.168	90.600, 1.164	90.600, 1.180	90.600, 1.193	90.600, 1.079	90.600, 1.132	90.600, 1.154	90.600, 1.816
455	90.800, 1.340	90.800, 1.839	90.800, 1.674	90.800, 1.302	90.800, 1.179	90.800, 1.186	90.800, 1.189	90.800, 1.168	90.800, 1.164	90.800, 1.180	90.800, 1.193	90.800, 1.079	90.800, 1.132	90.800, 1.154	90.800, 1.817
456	91.000, 1.341	91.000, 1.841	91.000, 1.675	91.000, 1.302	91.000, 1.179	91.000, 1.186	91.000, 1.190	91.000, 1.169	91.000, 1.164	91.000, 1.180	91.000, 1.194	91.000, 1.079	91.000, 1.132	91.000, 1.154	91.000, 1.818
457	91.200, 1.341	91.200, 1.842	91.200, 1.676	91.200, 1.302	91.200, 1.180	91.200, 1.187	91.200, 1.190	91.200, 1.169	91.200, 1.165	91.200, 1.180	91.200, 1.194	91.200, 1.080	91.200, 1.132	91.200, 1.155	91.200, 1.819
458	91.400, 1.342	91.400, 1.843	91.400, 1.678	91.400, 1.302	91.400, 1.180	91.400, 1.187	91.400, 1.190	91.400, 1.170	91.400, 1.165	91.400, 1.180	91.400, 1.194	91.400, 1.080	91.400, 1.133	91.400, 1.155	91.400, 1.820
459	91.600, 1.342	91.600, 1.844	91.600, 1.679	91.600, 1.302	91.600, 1.181	91.600, 1.188	91.600, 1.190	91.600, 1.170	91.600, 1.165	91.600, 1.179	91.600, 1.194	91.600, 1.080	91.600, 1.133	91.600, 1.155	91.600, 1.821
460	91.800, 1.343	91.800, 1.845	91.800, 1.680	91.800, 1.302	91.800, 1.181	91.800, 1.188	91.800, 1.190	91.800, 1.170	91.800, 1.165	91.800, 1.179	91.800, 1.194	91.800, 1.080	91.800, 1.133	91.800, 1.155	91.800, 1.821
461	92.000, 1.343	92.000, 1.846	92.000, 1.681	92.000, 1.302	92.000, 1.181	92.000, 1.188	92.000, 1.190	92.000, 1.170	92.000, 1.165	92.000, 1.179	92.000, 1.194	92.000, 1.080	92.000, 1.134	92.000, 1.155	92.000, 1.822
462	92.200, 1.344	92.200, 1.847	92.200, 1.682	92.200, 1.302	92.200, 1.181	92.200, 1.189	92.200, 1.190	92.200, 1.170	92.200, 1.165	92.200, 1.179	92.200, 1.194	92.200, 1.080	92.200, 1.134	92.200, 1.156	92.200, 1.823
463	92.400, 1.344	92.400, 1.848	92.400, 1.683	92.400, 1.302	92.400, 1.182	92.400, 1.189	92.400, 1.191	92.400, 1.170	92.400, 1.164	92.400, 1.179	92.400, 1.194	92.400, 1.080	92.400, 1.134	92.400, 1.155	92.400, 1.824
464	92.600, 1.345	92.600, 1.849	92.600, 1.684	92.600, 1.302	92.600, 1.182	92.600, 1.189	92.600, 1.191	92.600, 1.171	92.600, 1.164	92.600, 1.179	92.600, 1.194	92.600, 1.081	92.600, 1.134	92.600, 1.156	92.600, 1.825
465	92.800, 1.345	92.800, 1.850	92.800, 1.685	92.800, 1.302	92.800, 1.183	92.800, 1.189	92.800, 1.191	92.800, 1.171	92.800, 1.165	92.800, 1.179	92.800, 1.194	92.800, 1.081	92.800, 1.134	92.800, 1.156	92.800, 1.826
466	93.000, 1.346	93.000, 1.851	93.000, 1.686	93.000, 1.303	93.000, 1.183	93.000, 1.189	93.000, 1.192	93.000, 1.171	93.000, 1.165	93.000, 1.180	93.000, 1.194	93.000, 1.081	93.000, 1.134	93.000, 1.156	93.000, 1.827
467	93.200, 1.346	93.200, 1.852	93.200, 1.687	93.200, 1.303	93.200, 1.183	93.200, 1.189	93.200, 1.192	93.200, 1.171	93.200, 1.165	93.200, 1.180	93.200, 1.194	93.200, 1.081	93.200, 1.135	93.200, 1.156	93.200, 1.829
468	93.400, 1.346	93.400, 1.853	93.400, 1.688	93.400, 1.304	93.400, 1.183	93.400, 1.189	93.400, 1.192	93.400, 1.172	93.400, 1.166	93.400, 1.180	93.400, 1.194	93.400, 1.081	93.400, 1.135	93.400, 1.156	93.400, 1.830
469	93.600, 1.347	93.600, 1.855	93.600, 1.689	93.600, 1.304	93.600, 1.183	93.600, 1.189	93.600, 1.193	93.600, 1.172	93.600, 1.166	93.600, 1.181	93.600, 1.195	93.600, 1.082	93.600, 1.135	93.600, 1.156	93.600, 1.832
470	93.800, 1.347	93.800, 1.856	93.800, 1.690	93.800, 1.304	93.800, 1.183	93.800, 1.189	93.800, 1.193	93.800, 1.173	93.800, 1.167	93.800, 1.181	93.800, 1.195	93.800, 1.082	93.800, 1.135	93.800, 1.156	93.800, 1.833
471	94.000, 1.347	94.000, 1.857	94.000, 1.691	94.000, 1.305	94.000, 1.183	94.000, 1.189	94.000, 1.193	94.000, 1.173	94.000, 1.167	94.000, 1.182	94.000, 1.195	94.000, 1.082	94.000, 1.135	94.000, 1.157	94.000, 1.834
472	94.200, 1.347	94.200, 1.858	94.200, 1.693	94.200, 1.305	94.200, 1.183	94.200, 1.189	94.200, 1.194	94.200, 1.173	94.200, 1.168	94.200, 1.182	94.200, 1.196	94.200, 1.083	94.200, 1.135	94.200, 1.157	94.200, 1.835
473	94.400, 1.348	94.400, 1.860	94.400, 1.694	94.400, 1.305	94.400, 1.183	94.400, 1.189	94.400, 1.194	94.400, 1.173	94.400, 1.169	94.400, 1.183	94.400, 1.196	94.400, 1.083	94.400, 1.135	94.400, 1.157	94.400, 1.835
474	94.600, 1.348	94.600, 1.861	94.600, 1.695	94.600, 1.305	94.600, 1.183	94.600, 1.189	94.600, 1.194	94.600, 1.174	94.600, 1.169	94.600, 1.183	94.600, 1.196	94.600, 1.083	94.600, 1.135	94.600, 1.157	94.600, 1.836
475	94.800, 1.348	94.800, 1.862	94.800, 1.697	94.800, 1.305	94.800, 1.183	94.800, 1.190	94.800, 1.194	94.800, 1.174	94.800, 1.170	94.800, 1.183	94.800, 1.196	94.800, 1.083	94.800, 1.135	94.800, 1.158	94.800, 1.837
476	95.000, 1.349	95.000, 1.863	95.000, 1.698	95.000, 1.305	95.000, 1.183	95.000, 1.190	95.000, 1.194	95.000, 1.174	95.000, 1.170	95.000, 1.183	95.000, 1.197	95.000, 1.083	95.000, 1.135	95.000, 1.158	95.000, 1.839
477	95.200, 1.349	95.200, 1.865	95.200, 1.699	95.200, 1.305	95.200, 1.183	95.200, 1.190	95.200, 1.195	95.200, 1.175	95.200, 1.171	95.200, 1.183	95.200, 1.197	95.200, 1.083	95.200, 1.135	95.200, 1.158	95.200, 1.840
478	95.400, 1.349	95.400, 1.866	95.400, 1.700	95.400, 1.305	95.400, 1.183	95.400, 1.191	95.400, 1.195	95.400, 1.175	95.400, 1.171	95.400, 1.183	95.400, 1.197	95.400, 1.083	95.400, 1.136	95.400, 1.158	95.400, 1.841
479	95.600, 1.350	95.600, 1.867	95.600, 1.701	95.600, 1.306	95.600, 1.183	95.600, 1.191	95.600, 1.195	95.600, 1.175	95.600, 1.171	95.600, 1.182	95.600, 1.197	95.600, 1.083	95.600, 1.136	95.600, 1.158	95.600, 1.842
480	95.800, 1.350	95.800, 1.869	95.800, 1.702	95.800, 1.306	95.800, 1.183	95.800, 1.192	95.800, 1.195	95.800, 1.175	95.800, 1.171	95.800, 1.182	95.800, 1.197	95.800, 1.083	95.800, 1.136	95.800, 1.158	95.800, 1.843
481	96.000, 1.350	96.000, 1.870	96.000, 1.703	96.000, 1.306	96.000, 1.183	96.000, 1.193	96.000, 1.195	96.000, 1.175	96.000, 1.171	96.000, 1.182	96.000, 1.197	96.000, 1.083	96.000, 1.136	96.000, 1.158	96.000, 1.844
482	96.200, 1.351	96.200, 1.872	96.200, 1.705	96.200, 1.306	96.200, 1.184	96.200, 1.193	96.200, 1.196	96.200, 1.175	96.200, 1.170	96.200, 1.181	96.200, 1.197	96.200, 1.083	96.200, 1.136	96.200, 1.158	96.200, 1.845
483	96.400, 1.351	96.400, 1.873	96.400, 1.706	96.400, 1.306	96.400, 1.184	96.400, 1.194	96.400, 1.196	96.400, 1.175	96.400, 1.170	96.400, 1.181	96.400, 1.197	96.400, 1.083	96.400, 1.137	96.400, 1.158	96.400, 1.846
484	96.600, 1.352	96.600, 1.874	96.600, 1.707	96.600, 1.306	96.600, 1.184	96.600, 1.194	96.600, 1.196	96.600, 1.175	96.600, 1.170	96.600, 1.181	96.600, 1.197	96.600, 1.083	96.600, 1.137	96.600, 1.158	96.600, 1.846
485	96.800, 1.352	96.800, 1.874	96.800, 1.708	96.800, 1.307	96.800, 1.185	96.800, 1.194	96.800, 1.196	96.800, 1.175	96.800, 1.170	96.800, 1.181	96.800, 1.198	96.800, 1.083	96.800, 1.137	96.800, 1.158	96.800, 1.847
486	97.000, 1.352	97.000, 1.875	97.000, 1.709	97.000, 1.307	97.000, 1.185	97.000, 1.194	97.000, 1.196	97.000, 1.175	97.000, 1.169	97.000, 1.181	97.000, 1.198	97.000, 1.083	97.000, 1.137	97.000, 1.159	97.000, 1.848
487	97.200, 1.352	97.200, 1.875	97.200, 1.711	97.200, 1.307	97.200, 1.185	97.200, 1.194	97.200, 1.196	97.200, 1.176	97.200, 1.169	97.200, 1.182	97.200, 1.198	97.200, 1.083	97.200, 1.137	97.200, 1.159	97.200, 1.849
488	97.400, 1.352	97.400, 1.876	97.400, 1.712	97.400, 1.308	97.400, 1.186	97.400, 1.193	97.400, 1.196	97.400, 1.176	97.400, 1.169	97.400, 1.182	97.400, 1.199	97.400, 1.083	97.400, 1.137	97.400, 1.159	97.400, 1.850
489	97.600, 1.353	97.600, 1.876	97.600, 1.713	97.600, 1.308	97.600, 1.186	97.600, 1.193	97.600, 1.196	97.600, 1.176	97.600, 1.168	97.600, 1.183	97.600, 1.199	97.600, 1.083	97.600, 1.137	97.600, 1.159	97.600, 1.850
490	97.800, 1.353	97.800, 1.876	97.800, 1.714	97.800, 1.308	97.800, 1.187	97.800, 1.193	97.800, 1.197	97.800, 1.176	97.800, 1.168	97.800, 1.183	97.800, 1.200	97.800, 1.084	97.800, 1.137	97.800, 1.159	97.800, 1.851
491	98.000, 1.353	98.000, 1.877	98.000, 1.715	98.000, 1.308	98.000, 1.188	98.000, 1.193	98.000, 1.197	98.000, 1.176	98.000, 1.168	98.000, 1.184	98.000, 1.200	98.000, 1.084	98.000, 1.138	98.000, 1.159	98.000, 1.851
492	98.200, 1.353	98.200, 1.877	98.200, 1.716	98.200, 1.308	98.200, 1.188	98.200, 1.193	98.200, 1.198	98.200, 1.177	98.200, 1.167	98.200, 1.184	98.200, 1.200	98.200, 1.085	98.200, 1.138	98.200, 1.159	98.200, 1.851
493	98.400, 1.354	98.400, 1.878	98.400, 1.717	98.400, 1.308	98.400, 1.189	98.400, 1.193	98.400, 1.198	98.400, 1.177	98.400, 1.167	98.400, 1.185	98.400, 1.200	98.400, 1.085	98.400, 1.138	98.400, 1.159	98.400, 1.851
494	98.600, 1.354	98.600, 1.878	98.600, 1.718	98.600, 1.308	98.600, 1.189	98.600, 1.193	98.600, 1.198	98.600, 1.177	98.600, 1.167	98.600, 1.185	98.600, 1.200	98.600, 1.086	98.600, 1.138	98.600, 1.160	98.600, 1.852
495	98.800, 1.354	98.800, 1.879	98.800, 1.720	98.800, 1.308	98.800, 1.190	98.800, 1.193	98.800, 1.199	98.800, 1.177	98.800, 1.168	98.800, 1.186	98.800, 1.200	98.800, 1.086	98.800, 1.138	98.800, 1.160	98.800, 1.853
496	99.000, 1.354	99.000, 1.880	99.000, 1.721	99.000, 1.308	99.000, 1.190	99.000, 1.193	99.000, 1.199	99.000, 1.177	99.000, 1.168	99.000, 1.186	99.000, 1.200	99.000, 1.086	99.000, 1.138	99.000, 1.160	99.000, 1.854
497	99.200, 1.354	99.200, 1.881	99.200, 1.722	99.200, 1.309	99.200, 1.190	99.200, 1.193	99.200, 1.199	99.200, 1.177	99.200, 1.169	99.200, 1.186	99.200, 1.200	99.200, 1.087	99.200, 1.138	99.200, 1.161	99.200, 1.854
498	99.400, 1.355	99.400, 1.883	99.400, 1.723	99.400, 1.309	99.400, 1.190	99.400, 1.193	99.400, 1.199	99.400, 1.177	99.400, 1.169	99.400, 1.186	99.400, 1.200	99.400, 1.087	99.400, 1.138	99.400, 1.161	99.400, 1.855
499	99.600, 1.355	99.600, 1.884	99.600, 1.724	99.600, 1.310	99.600, 1.190	99.600, 1.193	99.600, 1.199	99.600, 1.177	99.600, 1.170	99.600, 1.186	99.600, 1.200	99.600, 1.087	99.600, 1.138	99.600, 1.161	99.600, 1.856
500	99.800, 1.355	99.800, 1.886	99.800, 1.725	99.800, 1.310	99.800, 1.189	99.800, 1.194	99.800, 1.199	99.800, 1.177	99.800, 1.170	99.800, 1.186	99.800, 1.200	99.800, 1.087	99.800, 1.138	99.800, 1.161	99.800, 1.857
501	100.000, 1.355	100.000, 1.887	100.000, 1.726	100.000, 1.310	100.000, 1.189	100.000, 1.194	100.000, 1.199	100.000, 1.177	100.000, 1.171	100.000, 1.185	100.000, 1.200	100.000, 1.087	100.000, 1.139	100.000, 1.161	100.000, 1.858
502	100.200, 1.356	100.200, 1.888	100.200, 1.727	100.200, 1.310	100.200, 1.189	100.200, 1.194	100.200, 1.199	100.200, 1.177	100.200, 1.172	100.200, 1.185	100.200, 1.200	100.200, 1.086	100.200, 1.139	100.200, 1.161	100.200, 1.859
503	100.400, 1.356	100.400, 1.889	100.400, 1.728	100.400, 1.311	100.400, 1.188	100.400, 1.195	100.400, 1.200	100.400, 1.177	100.400, 1.172	100.400, 1.185	100.400, 1.200	100.400, 1.086	100.400, 1.140	100.400, 1.161	100.400, 1.860
504	100.600, 1.356	100.600, 1.890	100.600, 1.729	100.600, 1.311	100.600, 1.188	100.600, 1.195	100.600, 1.200	100.600, 1.178	100.600, 1.173	100.600, 1.185	100.600, 1.200	100.600, 1.086	100.600, 1.140	100.600, 1.161	100.600, 1.861
505	100.800, 1.356	100.800, 1.891	100.800, 1.730	100.800, 1.311	100.800, 1.188	100.800, 1.195	100.800, 1.200	100.800, 1.178	100.800, 1.173	100.800, 1.185	100.800, 1.200	100.800, 1.086	100.800, 1.140	100.800, 1.161	100.800, 1.862
506	101.000, 1.356	101.000, 1.892	101.000, 1.731	101.000, 1.311	101.000, 1.188	101.000, 1.195	101.000, 1.200	101.000, 1.178	101.000, 1.173	101.000, 1.186	101.000, 1.200	101.000, 1.086	101.000, 1.140	101.000, 1.161	101.000, 1.864
507	101.200, 1.356	101.200, 1.893	101.200, 1.732	101.200, 1.311	101.200, 1.188	101.200, 1.196	101.200, 1.200	101.200, 1.178	101.200, 1.174	101.200, 1.186	101.200, 1.200	101.200, 1.086	101.200, 1.139	101.200, 1.161	101.200, 1.865
508	101.400, 1.357	101.400, 1.894	101.400, 1.733	101.400, 1.311	101.400, 1.188	101.400, 1.196	101.400, 1.200	101.400, 1.179	101.400, 1.174	101.400, 1.187	101.400, 1.200	101.400, 1.087	101.400, 1.139	101.400, 1.162	101.400, 1.866
509	101.600, 1.357	101.600, 1.896	101.600, 1.733	101.600, 1.311	101.600, 1.188	101.600, 1.196	101.600, 1.201	101.600, 1.179	101.600, 1.174	101.600, 1.187	101.600, 1.201	101.600, 1.087	101.600, 1.139	101.600, 1.162	101.600, 1.866
510	101.800, 1.356	101.800, 1.897	101.800, 1.734	101.800, 1.310	101.800, 1.188	101.800, 1.196	101.800, 1.201	101.800, 1.179	101.800, 1.174	101.800, 1.188	101.800, 1.201	101.800, 1.088	101.800, 1.138	101.800, 1.162	101.800, 1.867
511	102.000, 1.357	102.000, 1.898	102.000, 1.735	102.000, 1.310	102.000, 1.188	102.000, 1.196	102.000, 1.201	102.000, 1.180	102.000, 1.174	102.000, 1.188	102.000, 1.202	102.000, 1.088	102.000, 1.138	102.000, 1.162	102.000, 1.868
512	102.200, 1.357	102.200, 1.899	102.200, 1.736	102.200, 1.310	102.200, 1.188	102.200, 1.196	102.200, 1.202	102.200, 1.180	102.200, 1.174	102.200, 1.188	102.200, 1.202	102.200, 1.088	102.200, 1.138	102.200, 1.162	102.200, 1.869
513	102.400, 1.357	102.400, 1.900	102.400, 1.737	102.400, 1.310	102.400, 1.188	102.400, 1.196	102.400, 1.202	102.400, 1.181	102.400, 1.174	102.400, 1.189	102.400, 1.202	102.400, 1.088	102.400, 1.137	102.400, 1.163	102.400, 1.870
514	102.600, 1.357	102.600, 1.900	102.600, 1.738	102.600, 1.310	102.600, 1.189	102.600, 1.196	102.600, 1.203	102.600, 1.181	102.600, 1.174	102.600, 1.189	102.600, 1.202	102.600, 1.088	102.600, 1.137	102.600, 1.163	102.600, 1.871
515	102.800, 1.358	102.800, 1.901	102.800, 1.739	102.800, 1.310	102.800, 1.189	102.800, 1.196	102.800, 1.203	102.800, 1.182	102.800, 1.173	102.800, 1.189	102.800, 1.202	102.800, 1.088	102.800, 1.137	102.800, 1.163	102.800, 1.871
516	103.000, 1.358	103.000, 1.902	103.000, 1.739	103.000, 1.311	103.000, 1.189	103.000, 1.196	103.000, 1.203	103.000, 1.182	103.000, 1.173	103.000, 1.189	103.000, 1.203	103.000, 1.088	103.000, 1.136	103.000, 1.164	103.000, 1.872
517	103.200, 1.358	103.200, 1.902	103.200, 1.740	103.200, 1.311	103.200, 1.190	103.200, 1.196	103.200, 1.203	103.200, 1.182	103.200, 1.174	103.200, 1.189	103.200, 1.203	103.200, 1.088	103.200, 1.136	103.200, 1.164	103.200, 1.872
518	103.400, 1.359	103.400, 1.903	103.400, 1.741	103.400, 1.312	103.400, 1.190	103.400, 1.196	103.400, 1.203	103.400, 1.182	103.400, 1.174	103.400, 1.189	103.400, 1.203	103.400, 1.088	103.400, 1.137	103.400, 1.164	103.400, 1.872
519	103.600, 1.359	103.600, 1.904	103.600, 1.742	103.600, 1.312	103.600, 1.190	103.600, 1.197	103.600, 1.204	103.600, 1.182	103.600, 1.174	103.600, 1.189	103.600, 1.203	103.600, 1.088	103.600, 1.137	103.600, 1.164	103.600, 1.873
520	103.800, 1.359	103.800, 1.904	103.800, 1.743	103.800, 1.313	103.800, 1.190	103.800, 1.197	103.800, 1.204	103.800, 1.182	103.800, 1.174	103.800, 1.189	103.800, 1.203	103.800, 1.088	103.800, 1.138	103.800, 1.164	103.800, 1.873
521	104.000, 1.360	104.000, 1.905	104.000, 1.743	104.000, 1.313	104.000, 1.191	104.000, 1.197	104.000, 1.204	104.000, 1.182	104.000, 1.174	104.000, 1.189	104.000, 1.203	104.000, 1.088	104.000, 1.138	104.000, 1.164	104.000, 1.873
522	104.200, 1.360	104.200, 1.906	104.200, 1.744	104.200, 1.313	104.200, 1.191	104.200, 1.197	104.200, 1.204	104.200, 1.182	104.200, 1.174	104.200, 1.188	104.200, 1.203	104.200, 1.088	104.200, 1.139	104.200, 1.164	104.200, 1.874
523	104.400, 1.360	104.400, 1.907	104.400, 1.745	104.400, 1.314	104.400, 1.191	104.400, 1.197	104.400, 1.204	104.400, 1.182	104.400, 1.174	104.400, 1.188	104.400, 1.203	104.400, 1.088	104.400, 1.140	104.400, 1.164	104.400, 1.875
524	104.600, 1.360	104.600, 1.908	104.600, 1.746	104.600, 1.314	104.600, 1.191	104.600, 1.196	104.600, 1.204	104.600, 1.181	104.600, 1.174	104.600, 1.188	104.600, 1.203	104.600, 1.089	104.600, 1.141	104.600, 1.164	104.600, 1.875
525	104.800, 1.360	104.800, 1.909	104.800, 1.747	104.800, 1.314	104.800, 1.192	104.800, 1.196	104.800, 1.204	104.800, 1.181	104.800, 1.175	104.800, 1.189	104.800, 1.204	104.800, 1.089	104.800, 1.141	104.800, 1.164	104.800, 1.876
526	105.000, 1.360	105.000, 1.910	105.000, 1.748	105.000, 1.314	105.000, 1.192	105.000, 1.196	105.000, 1.203	105.000, 1.181	105.000, 1.175	105.000, 1.189	105.000, 1.204	105.000, 1.090	105.000, 1.142	105.000, 1.164	105.000, 1.877
527	105.200, 1.360	105.200, 1.910	105.200, 1.749	105.200, 1.315	105.200, 1.192	105.200, 1.196	105.200, 1.203	105.200, 1.181	105.200, 1.175	105.200, 1.190	105.200, 1.204	105.200, 1.090	105.200, 1.143	105.200, 1.164	105.200, 1.878
528	105.400, 1.360	105.400, 1.911	105.400, 1.749	105.400, 1.315	105.400, 1.193	105.400, 1.196	105.400, 1.203	105.400, 1.182	105.400, 1.176	105.400, 1.190	105.400, 1.204	105.400, 1.090	105.400, 1.144	105.400, 1.165	105.400, 1.878
529	105.600, 1.360	105.600, 1.913	105.600, 1.750	105.600, 1.315	105.600, 1.193	105.600, 1.196	105.600, 1.203	105.600, 1.182	105.600, 1.176	105.600, 1.190	105.600, 1.204	105.600, 1.090	105.600, 1.144	105.600, 1.165	105.600, 1.879
530	105.800, 1.361	105.800, 1.914	105.800, 1.751	105.800, 1.315	105.800, 1.193	105.800, 1.196	105.800, 1.204	105.800, 1.182	105.800, 1.177	105.800, 1.191	105.800, 1.204	105.800, 1.089	105.800, 1.144	105.800, 1.165	105.800, 1.880
531	106.000, 1.361	106.000, 1.915	106.000, 1.752	106.000, 1.315	106.000, 1.193	106.000, 1.196	106.000, 1.204	106.000, 1.183	106.000, 1.177	106.000, 1.191	106.000, 1.204	106.000, 1.089	106.000, 1.144	106.000, 1.165	106.000, 1.881
532	106.200, 1.361	106.200, 1.916	106.200, 1.753	106.200, 1.315	106.200, 1.194	106.200, 1.196	106.200, 1.204	106.200, 1.183	106.200, 1.177	106.200, 1.191	106.200, 1.204	106.200, 1.089	106.200, 1.144	106.200, 1.166	106.200, 1.882
533	106.400, 1.361	106.400, 1.917	106.400, 1.754	106.400, 1.315	106.400, 1.194	106.400, 1.196	106.400, 1.204	106.400, 1.183	106.400, 1.177	106.400, 1.191	106.400, 1.204	106.400, 1.088	106.400, 1.144	106.400, 1.166	106.400, 1.883
534	106.600, 1.361	106.600, 1.918	106.600, 1.755	106.600, 1.315	106.600, 1.194	106.600, 1.196	106.600, 1.205	106.600, 1.183	106.600, 1.177	106.600, 1.191	106.600, 1.204	106.600, 1.088	106.600, 1.143	106.600, 1.166	106.600, 1.884
535	106.800, 1.361	106.800, 1.919	106.800, 1.756	106.800, 1.315	106.800, 1.194	106.800, 1.196	106.800, 1.205	106.800, 1.183	106.800, 1.177	106.800, 1.191	106.800, 1.204	106.800, 1.088	106.800, 1.143	106.800, 1.166	106.800, 1.884
536	107.000, 1.361	107.000, 1.920	107.000, 1.756	107.000, 1.315	107.000, 1.195	107.000, 1.197	107.000, 1.206	107.000, 1.183	107.000, 1.177	107.000, 1.191	107.000, 1.204	107.000, 1.088	107.000, 1.143	107.000, 1.166	107.000, 1.885
537	107.200, 1.361	107.200, 1.921	107.200, 1.757	107.200, 1.315	107.200, 1.195	107.200, 1.197	107.200, 1.206	107.200, 1.183	107.200, 1.177	107.200, 1.191	107.200, 1.204	107.200, 1.088	107.200, 1.143	107.200, 1.166	107.200, 1.886
538	107.400, 1.361	107.400, 1.922	107.400, 1.758	107.400, 1.314	107.400, 1.195	107.400, 1.198	107.400, 1.206	107.400, 1.183	107.400, 1.177	107.400, 1.191	107.400, 1.204	107.400, 1.088	107.400, 1.142	107.400, 1.166	107.400, 1.887
539	107.600, 1.361	107.600, 1.923	107.600, 1.759	107.600, 1.314	107.600, 1.195	107.600, 1.198	107.600, 1.206	107.600, 1.183	107.600, 1.177	107.600, 1.190	107.600, 1.204	107.600, 1.088	107.600, 1.142	107.600, 1.166	107.600, 1.887
540	107.800, 1.362	107.800, 1.925	107.800, 1.760	107.800, 1.314	107.800, 1.196	107.800, 1.198	107.800, 1.206	107.800, 1.183	107.800, 1.177	107.800, 1.190	107.800, 1.204	107.800, 1.089	107.800, 1.141	107.800, 1.166	107.800, 1.888
541	108.000, 1.362	108.000, 1.926	108.000, 1.760	108.000, 1.314	108.000, 1.196	108.000, 1.199	108.000, 1.206	108.000, 1.184	108.000, 1.177	108.000, 1.190	108.000, 1.204	108.000, 1.089	108.000, 1.141	108.000, 1.165	108.000, 1.889
542	108.200, 1.363	108.200, 1.927	108.200, 1.761	108.200, 1.314	108.200, 1.196	108.200, 1.199	108.200, 1.207	108.200, 1.184	108.200, 1.177	108.200, 1.190	108.200, 1.205	108.200, 1.090	108.200, 1.141	108.200, 1.165	108.200, 1.890
543	108.400, 1.363	108.400, 1.927	108.400, 1.762	108.400, 1.314	108.400, 1.196	108.400, 1.199	108.400, 1.207	108.400, 1.184	108.400, 1.177	108.400, 1.190	108.400, 1.205	108.400, 1.090	108.400, 1.142	108.400, 1.165	108.400, 1.891
544	108.600, 1.364	108.600, 1.928	108.600, 1.763	108.600, 1.315	108.600, 1.196	108.600, 1.199	108.600, 1.207	108.600, 1.184	108.600, 1.177	108.600, 1.190	108.600, 1.206	108.600, 1.091	108.600, 1.142	108.600, 1.165	108.600, 1.892
545	108.800, 1.364	108.800, 1.928	108.800, 1.764	108.800, 1.315	108.800, 1.196	108.800, 1.199	108.800, 1.208	108.800, 1.184	108.800, 1.177	108.800, 1.190	108.800, 1.206	108.800, 1.091	108.800, 1.143	108.800, 1.165	108.800, 1.893
546	109.000, 1.364	109.000, 1.929	109.000, 1.765	109.000, 1.316	109.000, 1.196	109.000, 1.199	109.000, 1.208	109.000, 1.185	109.000, 1.178	109.000, 1.190	109.000, 1.206	109.000, 1.091	109.000, 1.143	109.000, 1.165	109.000, 1.894
547	109.200, 1.365	109.200, 1.929	109.200, 1.766	109.200, 1.317	109.200, 1.196	109.200, 1.200	109.200, 1.208	109.200, 1.185	109.200, 1.178	109.200, 1.190	109.200, 1.207	109.200, 1.091	109.200, 1.144	109.200, 1.166	109.200, 1.895
548	109.400, 1.365	109.400, 1.930	109.400, 1.767	109.400, 1.318	109.400, 1.196	109.400, 1.200	109.400, 1.208	109.400, 1.186	109.400, 1.179	109.400, 1.190	109.400, 1.206	109.400, 1.091	109.400, 1.144	109.400, 1.166	109.400, 1.895
549	109.600, 1.366	109.600, 1.931	109.600, 1.769	109.600, 1.318	109.600, 1.196	109.600, 1.200	109.600, 1.208	109.600, 1.186	109.600, 1.179	109.600, 1.190	109.600, 1.206	109.600, 1.091	109.600, 1.144	109.600, 1.166	109.600, 1.895
550	109.800, 1.366	109.800, 1.931	109.800, 1.770	109.800, 1.319	109.800, 1.196	109.800, 1.201	109.800, 1.208	109.800, 1.186	109.800, 1.179	109.800, 1.190	109.800, 1.206	109.800, 1.091	109.800, 1.144	109.800, 1.167	109.800, 1.895
551	110.000, 1.366	110.000, 1.932	110.000, 1.771	110.000, 1.319	110.000, 1.196	110.000, 1.201	110.000, 1.208	110.000, 1.187	110.000, 1.180	110.000, 1.189	110.000, 1.206	110.000, 1.091	110.000, 1.144	110.000, 1.167	110.000, 1.895
552	110.200, 1.366	110.200, 1.933	110.200, 1.772	110.200, 1.320	110.200, 1.196	110.200, 1.201	110.200, 1.208	110.200, 1.187	110.200, 1.180	110.200, 1.189	110.200, 1.206	110.200, 1.091	110.200, 1.144	110.200, 1.167	110.200, 1.896
553	110.400, 1.366	110.400, 1.934	110.400, 1.773	110.400, 1.320	110.400, 1.195	110.400, 1.202	110.400, 1.209	110.400, 1.186	110.400, 1.180	110.400, 1.189	110.400, 1.206	110.400, 1.092	110.400, 1.144	110.400, 1.168	110.400, 1.896
554	110.600, 1.365	110.600, 1.935	110.600, 1.774	110.600, 1.320	110.600, 1.195	110.600, 1.202	110.600, 1.209	110.600, 1.186	110.600, 1.180	110.600, 1.189	110.600, 1.206	110.600, 1.092	110.600, 1.144	110.600, 1.168	110.600, 1.896
555	110.800, 1.365	110.800, 1.937	110.800, 1.775	110.800, 1.320	110.800, 1.195	110.800, 1.202	110.800, 1.209	110.800, 1.186	110.800, 1.180	110.800, 1.189	110.800, 1.205	110.800, 1.092	110.800, 1.144	110.800, 1.168	110.800, 1.896
556	111.000, 1.365	111.000, 1.938	111.000, 1.776	111.000, 1.320	111.000, 1.195	111.000, 1.203	111.000, 1.209	111.000, 1.186	111.000, 1.180	111.000, 1.190	111.000, 1.205	111.000, 1.093	111.000, 1.144	111.000, 1.168	111.000, 1.896
557	111.200, 1.365	111.200, 1.940	111.200, 1.777	111.200, 1.320	111.200, 1.195	111.200, 1.203	111.200, 1.208	111.200, 1.187	111.200, 1.180	111.200, 1.190	111.200, 1.205	111.200, 1.093	111.200, 1.144	111.200, 1.169	111.200, 1.896
558	111.400, 1.365	111.400, 1.941	111.400, 1.778	111.400, 1.320	111.400, 1.195	111.400, 1.203	111.400, 1.208	111.400, 1.187	111.400, 1.180	111.400, 1.190	111.400, 1.204	111.400, 1.094	111.400, 1.144	111.400, 1.169	111.400, 1.896
559	111.600, 1.365	111.600, 1.942	111.600, 1.780	111.600, 1.320	111.600, 1.195	111.600, 1.203	111.600, 1.208	111.600, 1.187	111.600, 1.180	111.600, 1.190	111.600, 1.204	111.600, 1.094	111.600, 1.144	111.600, 1.169	111.600, 1.897
560	111.800, 1.366	111.800, 1.943	111.800, 1.781	111.800, 1.319	111.800, 1.196	111.800, 1.203	111.800, 1.208	111.800, 1.187	111.800, 1.180	111.800, 1.190	111.800, 1.204	111.800, 1.094	111.800, 1.145	111.800, 1.169	111.800, 1.898
561	112.000, 1.366	112.000, 1.944	112.000, 1.781	112.000, 1.319	112.000, 1.196	112.000, 1.203	112.000, 1.208	112.000, 1.187	112.000, 1.180	112.000, 1.191	112.000, 1.205	112.000, 1.094	112.000, 1.145	112.000, 1.169	112.000, 1.899
562	112.200, 1.367	112.200, 1.945	112.200, 1.782	112.200, 1.319	112.200, 1.196	112.200, 1.203	112.200, 1.208	112.200, 1.187	112.200, 1.181	112.200, 1.191	112.200, 1.205	112.200, 1.094	112.200, 1.145	112.200, 1.169	112.200, 1.900
563	112.400, 1.367	112.400, 1.945	112.400, 1.783	112.400, 1.320	112.400, 1.196	112.400, 1.203	112.400, 1.208	112.400, 1.187	112.400, 1.181	112.400, 1.192	112.400, 1.206	112.400, 1.094	112.400, 1.146	112.400, 1.169	112.400, 1.901
564	112.600, 1.367	112.600, 1.946	112.600, 1.783	112.600, 1.320	112.600, 1.197	112.600, 1.203	112.600, 1.209	112.600, 1.188	112.600, 1.182	112.600, 1.193	112.600, 1.207	112.600, 1.094	112.600, 1.146	112.600, 1.169	112.600, 1.902
565	112.800, 1.367	112.800, 1.947	112.800, 1.784	112.800, 1.320	112.800, 1.197	112.800, 1.203	112.800, 1.209	112.800, 1.188	112.800, 1.182	112.800, 1.193	112.800, 1.207	112.800, 1.094	112.800, 1.147	112.800, 1.169	112.800, 1.902
566	113.000, 1.367	113.000, 1.948	113.000, 1.784	113.000, 1.320	113.000, 1.198	113.000, 1.202	113.000, 1.209	113.000, 1.189	113.000, 1.183	113.000, 1.193	113.000, 1.207	113.000, 1.093	113.000, 1.147	113.000, 1.169	113.000, 1.903
567	113.200, 1.367	113.200, 1.949	113.200, 1.785	113.200, 1.319	113.200, 1.198	113.200, 1.202	113.200, 1.209	113.200, 1.189	113.200, 1.183	113.200, 1.194	113.200, 1.208	113.200, 1.093	113.200, 1.147	113.200, 1.169	113.200, 1.903
568	113.400, 1.367	113.400, 1.949	113.400, 1.786	113.400, 1.319	113.400, 1.198	113.400, 1.202	113.400, 1.209	113.400, 1.190	113.400, 1.183	113.400, 1.194	113.400, 1.208	113.400, 1.093	113.400, 1.147	113.400, 1.168	113.400, 1.904
569	113.600, 1.367	113.600, 1.950	113.600, 1.787	113.600, 1.319	113.600, 1.198	113.600, 1.202	113.600, 1.209	113.600, 1.190	113.600, 1.183	113.600, 1.194	113.600, 1.208	113.600, 1.093	113.600, 1.147	113.600, 1.168	113.600, 1.904
570	113.800, 1.367	113.800, 1.950	113.800, 1.787	113.800, 1.319	113.800, 1.198	113.800, 1.202	113.800, 1.209	113.800, 1.190	113.800, 1.183	113.800, 1.194	113.800, 1.208	113.800, 1.093	113.800, 1.147	113.800, 1.168	113.800, 1.905
571	114.000, 1.368	114.000, 1.951	114.000, 1.788	114.000, 1.318	114.000, 1.199	114.000, 1.202	114.000, 1.210	114.000, 1.191	114.000, 1.183	114.000, 1.195	114.000, 1.208	114.000, 1.093	114.000, 1.146	114.000, 1.168	114.000, 1.905
572	114.200, 1.368	114.200, 1.952	114.200, 1.788	114.200, 1.318	114.200, 1.199	114.200, 1.202	114.200, 1.210	114.200, 1.191	114.200, 1.183	114.200, 1.195	114.200, 1.208	114.200, 1.092	114.200, 1.146	114.200, 1.168	114.200, 1.906
573	114.400, 1.367	114.400, 1.952	114.400, 1.789	114.400, 1.318	114.400, 1.199	114.400, 1.202	114.400, 1.210	114.400, 1.191	114.400, 1.183	114.400, 1.195	114.400, 1.208	114.400, 1.092	114.400, 1.146	114.400, 1.169	114.400, 1.906
574	114.600, 1.367	114.600, 1.954	114.600, 1.790	114.600, 1.318	114.600, 1.198	114.600, 1.202	114.600, 1.210	114.600, 1.191	114.600, 1.183	114.600, 1.195	114.600, 1.208	114.600, 1.092	114.600, 1.145	114.600, 1.169	114.600, 1.907
575	114.800, 1.367	114.800, 1.955	114.800, 1.790	114.800, 1.318	114.800, 1.199	114.800, 1.202	114.800, 1.210	114.800, 1.191	114.800, 1.183	114.800, 1.194	114.800, 1.207	114.800, 1.091	114.800, 1.145	114.800, 1.169	114.800, 1.907
576	115.000, 1.367	115.000, 1.956	115.000, 1.791	115.000, 1.318	115.000, 1.199	115.000, 1.202	115.000, 1.210	115.000, 1.190	115.000, 1.183	115.000, 1.194	115.000, 1.207	115.000, 1.091	115.000, 1.144	115.000, 1.170	115.000, 1.908
577	115.200, 1.367	115.200, 1.957	115.200, 1.792	115.200, 1.317	115.200, 1.199	115.200, 1.203	115.200, 1.210	115.200, 1.190	115.200, 1.183	115.200, 1.194	115.200, 1.207	115.200, 1.091	115.200, 1.144	115.200, 1.170	115.200, 1.909
578	115.400, 1.368	115.400, 1.958	115.400, 1.793	115.400, 1.317	115.400, 1.200	115.400, 1.203	115.400, 1.210	115.400, 1.189	115.400, 1.183	115.400, 1.194	115.400, 1.207	115.400, 1.092	115.400, 1.144	115.400, 1.171	115.400, 1.911
579	115.600, 1.368	115.600, 1.959	115.600, 1.794	115.600, 1.317	115.600, 1.200	115.600, 1.203	115.600, 1.210	115.600, 1.189	115.600, 1.183	115.600, 1.194	115.600, 1.207	115.600, 1.092	115.600, 1.144	115.600, 1.171	115.600, 1.912
580	115.800, 1.369	115.800, 1.960	115.800, 1.795	115.800, 1.316	115.800, 1.200	115.800, 1.204	115.800, 1.211	115.800, 1.188	115.800, 1.182	115.800, 1.194	115.800, 1.207	115.800, 1.092	115.800, 1.144	115.800, 1.172	115.800, 1.913
581	116.000, 1.369	116.000, 1.961	116.000, 1.796	116.000, 1.317	116.000, 1.201	116.000, 1.204	116.000, 1.211	116.000, 1.188	116.000, 1.182	116.000, 1.193	116.000, 1.208	116.000, 1.092	116.000, 1.144	116.000, 1.172	116.000, 1.914
582	116.200, 1.370	116.200, 1.962	116.200, 1.797	116.200, 1.317	116.200, 1.201	116.200, 1.204	116.200, 1.211	116.200, 1.188	116.200, 1.182	116.200, 1.194	116.200, 1.208	116.200, 1.093	116.200, 1.144	116.200, 1.173	116.200, 1.914
583	116.400, 1.370	116.400, 1.962	116.400, 1.798	116.400, 1.317	116.400, 1.202	116.400, 1.204	116.400, 1.212	116.400, 1.188	116.400, 1.183	116.400, 1.194	116.400, 1.208	116.400, 1.093	116.400, 1.145	116.400, 1.173	116.400, 1.914
584	116.600, 1.371	116.600, 1.963	116.600, 1.799	116.600, 1.317	116.600, 1.202	116.600, 1.204	116.600, 1.212	116.600, 1.188	116.600, 1.183	116.600, 1.193	116.600, 1.208	116.600, 1.094	116.600, 1.145	116.600, 1.173	116.600, 1.915
585	116.800, 1.371	116.800, 1.964	116.800, 1.800	116.800, 1.317	116.800, 1.202	116.800, 1.204	116.800, 1.212	116.800, 1.188	116.800, 1.183	116.800, 1.193	116.800, 1.208	116.800, 1.095	116.800, 1.145	116.800, 1.173	116.800, 1.915
586	117.000, 1.371	117.000, 1.964	117.000, 1.800	117.000, 1.317	117.000, 1.202	117.000, 1.204	117.000, 1.213	117.000, 1.188	117.000, 1.184	117.000, 1.194	117.000, 1.207	117.000, 1.095	117.000, 1.145	117.000, 1.173	117.000, 1.915
587	117.200, 1.372	117.200, 1.965	117.200, 1.801	117.200, 1.318	117.200, 1.203	117.200, 1.204	117.200, 1.212	117.200, 1.188	117.200, 1.184	117.200, 1.194	117.200, 1.207	117.200, 1.096	117.200, 1.145	117.200, 1.173	117.200, 1.915
588	117.400, 1.372	117.400, 1.966	117.400, 1.802	117.400, 1.319	117.400, 1.203	117.400, 1.204	117.400, 1.212	117.400, 1.189	117.400, 1.184	117.400, 1.194	117.400, 1.207	117.400, 1.096	117.400, 1.145	117.400, 1.172	117.400, 1.915
589	117.600, 1.373	117.600, 1.966	117.600, 1.803	117.600, 1.319	117.600, 1.203	117.600, 1.204	117.600, 1.212	117.600, 1.189	117.600, 1.184	117.600, 1.194	117.600, 1.208	117.600, 1.096	117.600, 1.145	117.600, 1.171	117.600, 1.915
590	117.800, 1.373	117.800, 1.966	117.800, 1.803	117.800, 1.320	117.800, 1.203	117.800, 1.204	117.800, 1.212	117.800, 1.190	117.800, 1.184	117.800, 1.194	117.800, 1.208	117.800, 1.097	117.800, 1.146	117.800, 1.171	117.800, 1.916
591	118.000, 1.373	118.000, 1.967	118.000, 1.804	118.000, 1.320	118.000, 1.203	118.000, 1.204	118.000, 1.212	118.000, 1.190	118.000, 1.184	118.000, 1.194	118.000, 1.208	118.000, 1.097	118.000, 1.146	118.000, 1.170	118.000, 1.916
592	118.200, 1.373	118.200, 1.968	118.200, 1.804	118.200, 1.321	118.200, 1.203	118.200, 1.204	118.200, 1.212	118.200, 1.191	118.200, 1.184	118.200, 1.194	118.200, 1.209	118.200, 1.097	118.200, 1.146	118.200, 1.170	118.200, 1.916
593	118.400, 1.373	118.400, 1.969	118.400, 1.805	118.400, 1.321	118.400, 1.203	118.400, 1.204	118.400, 1.213	118.400, 1.191	118.400, 1.184	118.400, 1.194	118.400, 1.209	118.400, 1.096	118.400, 1.146	118.400, 1.170	118.400, 1.916
594	118.600, 1.373	118.600, 1.970	118.600, 1.805	118.600, 1.322	118.600, 1.203	118.600, 1.204	118.600, 1.213	118.600, 1.191	118.600, 1.185	118.600, 1.194	118.600, 1.209	118.600, 1.096	118.600, 1.147	118.600, 1.169	118.600, 1.917
595	118.800, 1.373	118.800, 1.971	118.800, 1.806	118.800, 1.322	118.800, 1.203	118.800, 1.204	118.800, 1.213	118.800, 1.192	118.800, 1.185	118.800, 1.194	118.800, 1.209	118.800, 1.096	118.800, 1.147	118.800, 1.169	118.800, 1.917
596	119.000, 1.373	119.000, 1.971	119.000, 1.807	119.000, 1.323	119.000, 1.203	119.000, 1.205	119.000, 1.214	119.000, 1.192	119.000, 1.185	119.000, 1.194	119.000, 1.209	119.000, 1.095	119.000, 1.147	119.000, 1.169	119.000, 1.918
597	119.200, 1.373	119.200, 1.972	119.200, 1.808	119.200, 1.323	119.200, 1.202	119.200, 1.205	119.200, 1.214	119.200, 1.192	119.200, 1.185	119.200, 1.194	119.200, 1.209	119.200, 1.095	119.200, 1.148	119.200, 1.170	119.200, 1.918
598	119.400, 1.373	119.400, 1.972	119.400, 1.809	119.400, 1.323	119.400, 1.202	119.400, 1.205	119.400, 1.215	119.400, 1.192	119.400, 1.185	119.400, 1.194	119.400, 1.209	119.400, 1.095	119.400, 1.148	119.400, 1.170	119.400, 1.919
599	119.600, 1.372	119.600, 1.973	119.600, 1.809	119.600, 1.323	119.600, 1.202	119.600, 1.206	119.600, 1.216	119.600, 1.192	119.600, 1.184	119.600, 1.194	119.600, 1.209	119.600, 1.094	119.600, 1.149	119.600, 1.170	119.600, 1.919
600	119.800, 1.372	119.800, 1.973	119.800, 1.810	119.800, 1.322	119.800, 1.202	119.800, 1.206	119.800, 1.216	119.800, 1.192	119.800, 1.184	119.800, 1.195	119.800, 1.209	119.800, 1.094	119.800, 1.149	119.800, 1.170	119.800, 1.920
601	120.000, 1.372	120.000, 1.973	120.000, 1.811	120.000, 1.322	120.000, 1.201	120.000, 1.207	120.000, 1.217	120.000, 1.192	120.000, 1.184	120.000, 1.195	120.000, 1.209	120.000, 1.093	120.000, 1.148	120.000, 1.171	120.000, 1.920
602	120.200, 1.372	120.200, 1.973	120.200, 1.812	120.200, 1.322	120.200, 1.201	120.200, 1.207	120.200, 1.217	120.200, 1.191	120.200, 1.184	120.200, 1.196	120.200, 1.209	120.200, 1.093	120.200, 1.148	120.200, 1.171	120.200, 1.920
603	120.400, 1.372	120.400, 1.974	120.400, 1.813	120.400, 1.322	120.400, 1.201	120.400, 1.208	120.400, 1.217	120.400, 1.191	120.400, 1.184	120.400, 1.196	120.400, 1.209	120.400, 1.093	120.400, 1.148	120.400, 1.172	120.400, 1.920
604	120.600, 1.372	120.600, 1.974	120.600, 1.813	120.600, 1.322	120.600, 1.201	120.600, 1.208	120.600, 1.217	120.600, 1.191	120.600, 1.184	120.600, 1.196	120.600, 1.209	120.600, 1.093	120.600, 1.148	120.600, 1.172	120.600, 1.920
605	120.800, 1.372	120.800, 1.975	120.800, 1.814	120.800, 1.322	120.800, 1.201	120.800, 1.208	120.800, 1.217	120.800, 1.191	120.800, 1.184	120.800, 1.196	120.800, 1.209	120.800, 1.093	120.800, 1.148	120.800, 1.173	120.800, 1.920
606	121.000, 1.373	121.000, 1.975	121.000, 1.815	121.000, 1.322	121.000, 1.201	121.000, 1.208	121.000, 1.216	121.000, 1.192	121.000, 1.184	121.000, 1.196	121.000, 1.209	121.000, 1.094	121.000, 1.147	121.000, 1.173	121.000, 1.921
607	121.200, 1.373	121.200, 1.976	121.200, 1.815	121.200, 1.323	121.200, 1.201	121.200, 1.208	121.200, 1.216	121.200, 1.192	121.200, 1.184	121.200, 1.197	121.200, 1.209	121.200, 1.094	121.200, 1.147	121.200, 1.173	121.200, 1.921
608	121.400, 1.374	121.400, 1.977	121.400, 1.816	121.400, 1.323	121.400, 1.201	121.400, 1.208	121.400, 1.216	121.400, 1.192	121.400, 1.184	121.400, 1.197	121.400, 1.209	121.400, 1.094	121.400, 1.147	121.400, 1.174	121.400, 1.921
609	121.600, 1.374	121.600, 1.977	121.600, 1.816	121.600, 1.323	121.600, 1.201	121.600, 1.208	121.600, 1.216	121.600, 1.193	121.600, 1.184	121.600, 1.197	121.600, 1.209	121.600, 1.095	121.600, 1.147	121.600, 1.174	121.600, 1.922
610	121.800, 1.375	121.800, 1.978	121.800, 1.817	121.800, 1.323	121.800, 1.202	121.800, 1.207	121.800, 1.215	121.800, 1.193	121.800, 1.184	121.800, 1.197	121.800, 1.209	121.800, 1.095	121.800, 1.147	121.800, 1.174	121.800, 1.922
611	122.000, 1.375	122.000, 1.979	122.000, 1.818	122.000, 1.323	122.000, 1.202	122.000, 1.207	122.000, 1.215	122.000, 1.193	122.000, 1.185	122.000, 1.197	122.000, 1.209	122.000, 1.096	122.000, 1.148	122.000, 1.174	122.000, 1.923
612	122.200, 1.375	122.200, 1.980	122.200, 1.818	122.200, 1.323	122.200, 1.203	122.200, 1.207	122.200, 1.215	122.200, 1.194	122.200, 1.185	122.200, 1.197	122.200, 1.209	122.200, 1.096	122.200, 1.148	122.200, 1.174	122.200, 1.923
613	122.400, 1.376	122.400, 1.981	122.400, 1.819	122.400, 1.323	122.400, 1.203	122.400, 1.208	122.400, 1.216	122.400, 1.194	122.400, 1.185	122.400, 1.197	122.400, 1.209	122.400, 1.097	122.400, 1.149	122.400, 1.174	122.400, 1.924
614	122.600, 1.376	122.600, 1.982	122.600, 1.820	122.600, 1.323	122.600, 1.203	122.600, 1.208	122.600, 1.216	122.600, 1.195	122.600, 1.186	122.600, 1.196	122.600, 1.210	122.600, 1.097	122.600, 1.149	122.600, 1.174	122.600, 1.925
615	122.800, 1.376	122.800, 1.982	122.800, 1.820	122.800, 1.324	122.800, 1.204	122.800, 1.208	122.800, 1.216	122.800, 1.195	122.800, 1.186	122.800, 1.196	122.800, 1.210	122.800, 1.097	122.800, 1.150	122.800, 1.174	122.800, 1.925
616	123.000, 1.376	123.000, 1.983	123.000, 1.821	123.000, 1.324	123.000, 1.204	123.000, 1.208	123.000, 1.217	123.000, 1.196	123.000, 1.186	123.000, 1.197	123.000, 1.210	123.000, 1.097	123.000, 1.150	123.000, 1.174	123.000, 1.926
617	123.200, 1.376	123.200, 1.983	123.200, 1.821	123.200, 1.324	123.200, 1.205	123.200, 1.209	123.200, 1.217	123.200, 1.196	123.200, 1.187	123.200, 1.197	123.200, 1.211	123.200, 1.097	123.200, 1.150	123.200, 1.174	123.200, 1.927
618	123.400, 1.376	123.400, 1.984	123.400, 1.822	123.400, 1.324	123.400, 1.205	123.400, 1.209	123.400, 1.217	123.400, 1.196	123.400, 1.187	123.400, 1.197	123.400, 1.211	123.400, 1.097	123.400, 1.151	123.400, 1.174	123.400, 1.928
619	123.600, 1.375	123.600, 1.984	123.600, 1.822	123.600, 1.325	123.600, 1.206	123.600, 1.209	123.600, 1.218	123.600, 1.196	123.600, 1.187	123.600, 1.197	123.600, 1.211	123.600, 1.096	123.600, 1.151	123.600, 1.174	123.600, 1.928
620	123.800, 1.375	123.800, 1.985	123.800, 1.822	123.800, 1.324	123.800, 1.206	123.800, 1.210	123.800, 1.218	123.800, 1.195	123.800, 1.187	123.800, 1.197	123.800, 1.211	123.800, 1.096	123.800, 1.151	123.800, 1.174	123.800, 1.929
621	124.000, 1.375	124.000, 1.986	124.000, 1.823	124.000, 1.325	124.000, 1.206	124.000, 1.210	124.000, 1.218	124.000, 1.195	124.000, 1.187	124.000, 1.197	124.000, 1.211	124.000, 1.096	124.000, 1.151	124.000, 1.173	124.000, 1.929
622	124.200, 1.375	124.200, 1.986	124.200, 1.824	124.200, 1.325	124.200, 1.207	124.200, 1.210	124.200, 1.217	124.200, 1.194	124.200, 1.187	124.200, 1.198	124.200, 1.212	124.200, 1.097	124.200, 1.150	124.200, 1.173	124.200, 1.929
623	124.400, 1.375	124.400, 1.986	124.400, 1.824	124.400, 1.325	124.400, 1.207	124.400, 1.210	124.400, 1.217	124.400, 1.194	124.400, 1.187	124.400, 1.198	124.400, 1.212	124.400, 1.097	124.400, 1.150	124.400, 1.173	124.400, 1.929
624	124.600, 1.376	124.600, 1.987	124.600, 1.825	124.600, 1.325	124.600, 1.207	124.600, 1.210	124.600, 1.217	124.600, 1.193	124.600, 1.188	124.600, 1.199	124.600, 1.213	124.600, 1.097	124.600, 1.150	124.600, 1.173	124.600, 1.930
625	124.800, 1.376	124.800, 1.987	124.800, 1.826	124.800, 1.325	124.800, 1.207	124.800, 1.210	124.800, 1.217	124.800, 1.193	124.800, 1.188	124.800, 1.199	124.800, 1.213	124.800, 1.097	124.800, 1.150	124.800, 1.173	124.800, 1.930
626	125.000, 1.376	125.000, 1.988	125.000, 1.826	125.000, 1.325	125.000, 1.207	125.000, 1.209	125.000, 1.217	125.000, 1.193	125.000, 1.188	125.000, 1.199	125.000, 1.213	125.000, 1.097	125.000, 1.149	125.000, 1.173	125.000, 1.931
627	125.200, 1.376	125.200, 1.988	125.200, 1.827	125.200, 1.325	125.200, 1.207	125.200, 1.209	125.200, 1.217	125.200, 1.193	125.200, 1.188	125.200, 1.200	125.200, 1.213	125.200, 1.098	125.200, 1.149	125.200, 1.174	125.200, 1.932
628	125.400, 1.376	125.400, 1.989	125.400, 1.828	125.400, 1.325	125.400, 1.207	125.400, 1.209	125.400, 1.218	125.400, 1.193	125.400, 1.188	125.400, 1.200	125.400, 1.213	125.400, 1.098	125.400, 1.149	125.400, 1.174	125.400, 1.932
629	125.600, 1.376	125.600, 1.989	125.600, 1.829	125.600, 1.325	125.600, 1.206	125.600, 1.209	125.600, 1.218	125.600, 1.193	125.600, 1.188	125.600, 1.200	125.600, 1.214	125.600, 1.098	125.600, 1.149	125.600, 1.174	125.600, 1.933
630	125.800, 1.377	125.800, 1.990	125.800, 1.829	125.800, 1.325	125.800, 1.206	125.800, 1.208	125.800, 1.218	125.800, 1.193	125.800, 1.188	125.800, 1.201	125.800, 1.214	125.800, 1.098	125.800, 1.148	125.800, 1.174	125.800, 1.934
631	126.000, 1.377	126.000, 1.990	126.000, 1.830	126.000, 1.325	126.000, 1.206	126.000, 1.208	126.000, 1.219	126.000, 1.193	126.000, 1.189	126.000, 1.201	126.000, 1.214	126.000, 1.098	126.000, 1.148	126.000, 1.174	126.000, 1.934
632	126.200, 1.377	126.200, 1.991	126.200, 1.831	126.200, 1.326	126.200, 1.206	126.200, 1.208	126.200, 1.219	126.200, 1.193	126.200, 1.189	126.200, 1.200	126.200, 1.214	126.200, 1.098	126.200, 1.148	126.200, 1.175	126.200, 1.935
633	126.400, 1.378	126.400, 1.991	126.400, 1.831	126.400, 1.326	126.400, 1.206	126.400, 1.208	126.400, 1.220	126.400, 1.194	126.400, 1.189	126.400, 1.200	126.400, 1.214	126.400, 1.098	126.400, 1.148	126.400, 1.175	126.400, 1.935
634	126.600, 1.378	126.600, 1.992	126.600, 1.832	126.600, 1.326	126.600, 1.206	126.600, 1.208	126.600, 1.220	126.600, 1.194	126.600, 1.189	126.600, 1.200	126.600, 1.214	126.600, 1.097	126.600, 1.149	126.600, 1.175	126.600, 1.936
635	126.800, 1.378	126.800, 1.992	126.800, 1.833	126.800, 1.326	126.800, 1.206	126.800, 1.209	126.800, 1.220	126.800, 1.195	126.800, 1.190	126.800, 1.200	126.800, 1.214	126.800, 1.097	126.800, 1.149	126.800, 1.175	126.800, 1.936
636	127.000, 1.378	127.000, 1.993	127.000, 1.833	127.000, 1.326	127.000, 1.206	127.000, 1.209	127.000, 1.220	127.000, 1.195	127.000, 1.189	127.000, 1.200	127.000, 1.214	127.000, 1.097	127.000, 1.149	127.000, 1.176	127.000, 1.937
637	127.200, 1.379	127.200, 1.994	127.200, 1.834	127.200, 1.326	127.200, 1.206	127.200, 1.209	127.200, 1.220	127.200, 1.196	127.200, 1.189	127.200, 1.200	127.200, 1.214	127.200, 1.097	127.200, 1.149	127.200, 1.176	127.200, 1.937
638	127.400, 1.379	127.400, 1.995	127.400, 1.834	127.400, 1.326	127.400, 1.206	127.400, 1.210	127.400, 1.220	127.400, 1.196	127.400, 1.189	127.400, 1.199	127.400, 1.213	127.400, 1.097	127.400, 1.150	127.400, 1.176	127.400, 1.937
639	127.600, 1.379	127.600, 1.995	127.600, 1.834	127.600, 1.326	127.600, 1.206	127.600, 1.210	127.600, 1.219	127.600, 1.196	127.600, 1.189	127.600, 1.199	127.600, 1.213	127.600, 1.097	127.600, 1.150	127.600, 1.176	127.600, 1.937
640	127.800, 1.379	127.800, 1.996	127.800, 1.835	127.800, 1.326	127.800, 1.206	127.800, 1.210	127.800, 1.218	127.800, 1.196	127.800, 1.189	127.800, 1.199	127.800, 1.213	127.800, 1.098	127.800, 1.150	127.800, 1.176	127.800, 1.937
641	128.000, 1.379	128.000, 1.996	128.000, 1.835	128.000, 1.326	128.000, 1.206	128.000, 1.210	128.000, 1.218	128.000, 1.196	128.000, 1.189	128.000, 1.198	128.000, 1.213	128.000, 1.098	128.000, 1.151	128.000, 1.176	128.000, 1.937
642	128.200, 1.379	128.200, 1.996	128.200, 1.836	128.200, 1.326	128.200, 1.206	128.200, 1.210	128.200, 1.217	128.200, 1.196	128.200, 1.189	128.200, 1.198	128.200, 1.213	128.200, 1.098	128.200, 1.151	128.200, 1.176	128.200, 1.937
643	128.400, 1.379	128.400, 1.997	128.400, 1.837	128.400, 1.326	128.400, 1.206	128.400, 1.210	128.400, 1.217	128.400, 1.196	128.400, 1.189	128.400, 1.198	128.400, 1.213	128.400, 1.099	128.400, 1.151	128.400, 1.176	128.400, 1.937
644	128.600, 1.379	128.600, 1.997	128.600, 1.837	128.600, 1.326	128.600, 1.206	128.600, 1.211	128.600, 1.217	128.600, 1.196	128.600, 1.189	128.600, 1.198	128.600, 1.213	128.600, 1.099	128.600, 1.151	128.600, 1.176	128.600, 1.937
645	128.800, 1.379	128.800, 1.998	128.800, 1.838	128.800, 1.326	128.800, 1.206	128.800, 1.211	128.800, 1.217	128.800, 1.196	128.800, 1.189	128.800, 1.198	128.800, 1.212	128.800, 1.099	128.800, 1.151	128.800, 1.176	128.800, 1.937
646	129.000, 1.379	129.000, 1.998	129.000, 1.839	129.000, 1.327	129.000, 1.205	129.000, 1.211	129.000, 1.218	129.000, 1.196	129.000, 1.189	129.000, 1.198	129.000, 1.212	129.000, 1.100	129.000, 1.151	129.000, 1.176	129.000, 1.938
647	129.200, 1.379	129.200, 1.999	129.200, 1.839	129.200, 1.327	129.200, 1.205	129.200, 1.211	129.200, 1.218	129.200, 1.196	129.200, 1.188	129.200, 1.198	129.200, 1.212	129.200, 1.100	129.200, 1.151	129.200, 1.175	129.200, 1.938
648	129.400, 1.379	129.400, 2.000	129.400, 1.840	129.400, 1.327	129.400, 1.205	129.400, 1.211	129.400, 1.219	129.400, 1.196	129.400, 1.188	129.400, 1.198	129.400, 1.213	129.400, 1.100	129.400, 1.152	129.400, 1.175	129.400, 1.939
649	129.600, 1.379	129.600, 2.001	129.600, 1.840	129.600, 1.327	129.600, 1.205	129.600, 1.211	129.600, 1.219	129.600, 1.196	129.600, 1.188	129.600, 1.198	129.600, 1.213	129.600, 1.100	129.600, 1.152	129.600, 1.175	129.600, 1.939
650	129.800, 1.379	129.800, 2.002	129.800, 1.841	129.800, 1.327	129.800, 1.206	129.800, 1.211	129.800, 1.219	129.800, 1.196	129.800, 1.189	129.800, 1.199	129.800, 1.213	129.800, 1.100	129.800, 1.152	129.800, 1.175	129.800, 1.940
651	130.000, 1.379	130.000, 2.002	130.000, 1.841	130.000, 1.328	130.000, 1.206	130.000, 1.211	130.000, 1.220	130.000, 1.197	130.000, 1.189	130.000, 1.199	130.000, 1.214	130.000, 1.100	130.000, 1.152	130.000, 1.175	130.000, 1.940
652	130.200, 1.379	130.200, 2.003	130.200, 1.842	130.200, 1.328	130.200, 1.207	130.200, 1.210	130.200, 1.220	130.200, 1.197	130.200, 1.189	130.200, 1.199	130.200, 1.214	130.200, 1.100	130.200, 1.152	130.200, 1.175	130.200, 1.941
653	130.400, 1.380	130.400, 2.004	130.400, 1.843	130.400, 1.328	130.400, 1.208	130.400, 1.211	130.400, 1.220	130.400, 1.197	130.400, 1.190	130.400, 1.199	130.400, 1.215	130.400, 1.100	130.400, 1.152	130.400, 1.175	130.400, 1.942
654	130.600, 1.380	130.600, 2.004	130.600, 1.844	130.600, 1.328	130.600, 1.208	130.600, 1.210	130.600, 1.220	130.600, 1.198	130.600, 1.190	130.600, 1.200	130.600, 1.215	130.600, 1.100	130.600, 1.152	130.600, 1.175	130.600, 1.942
655	130.800, 1.380	130.800, 2.005	130.800, 1.844	130.800, 1.328	130.800, 1.209	130.800, 1.211	130.800, 1.220	130.800, 1.198	130.800, 1.190	130.800, 1.200	130.800, 1.215	130.800, 1.100	130.800, 1.152	130.800, 1.175	130.800, 1.944
656	131.000, 1.380	131.000, 2.005	131.000, 1.845	131.000, 1.328	131.000, 1.210	131.000, 1.210	131.000, 1.220	131.000, 1.198	131.000, 1.191	131.000, 1.201	131.000, 1.214	131.000, 1.100	131.000, 1.152	131.000, 1.175	131.000, 1.945
657	131.200, 1.380	131.200, 2.005	131.200, 1.845	131.200, 1.328	131.200, 1.210	131.200, 1.210	131.200, 1.220	131.200, 1.198	131.200, 1.191	131.200, 1.201	131.200, 1.214	131.200, 1.100	131.200, 1.152	131.200, 1.175	131.200, 1.946
658	131.400, 1.380	131.400, 2.006	131.400, 1.845	131.400, 1.329	131.400, 1.210	131.400, 1.210	131.400, 1.219	131.400, 1.198	131.400, 1.191	131.400, 1.201	131.400, 1.214	131.400, 1.099	131.400, 1.152	131.400, 1.175	131.400, 1.947
659	131.600, 1.381	131.600, 2.006	131.600, 1.845	131.600, 1.329	131.600, 1.211	131.600, 1.210	131.600, 1.219	131.600, 1.198	131.600, 1.191	131.600, 1.201	131.600, 1.213	131.600, 1.099	131.600, 1.152	131.600, 1.175	131.600, 1.947
660	131.800, 1.381	131.800, 2.007	131.800, 1.846	131.800, 1.329	131.800, 1.211	131.800, 1.209	131.800, 1.219	131.800, 1.198	131.800, 1.192	131.800, 1.200	131.800, 1.213	131.800, 1.099	131.800, 1.152	131.800, 1.175	131.800, 1.948
661	132.000, 1.381	132.000, 2.007	132.000, 1.846	132.000, 1.329	132.000, 1.211	132.000, 1.209	132.000, 1.219	132.000, 1.198	132.000, 1.192	132.000, 1.200	132.000, 1.213	132.000, 1.099	132.000, 1.152	132.000, 1.175	132.000, 1.948
662	132.200, 1.381	132.200, 2.008	132.200, 1.847	132.200, 1.329	132.200, 1.211	132.200, 1.209	132.200, 1.219	132.200, 1.198	132.200, 1.192	132.200, 1.200	132.200, 1.212	132.200, 1.099	132.200, 1.152	132.200, 1.175	132.200, 1.948
663	132.400, 1.381	132.400, 2.008	132.400, 1.848	132.400, 1.329	132.400, 1.210	132.400, 1.209	132.400, 1.219	132.400, 1.198	132.400, 1.192	132.400, 1.200	132.400, 1.212	132.400, 1.099	132.400, 1.152	132.400, 1.175	132.400, 1.948
664	132.600, 1.381	132.600, 2.009	132.600, 1.849	132.600, 1.329	132.600, 1.210	132.600, 1.209	132.600, 1.220	132.600, 1.198	132.600, 1.193	132.600, 1.199	132.600, 1.212	132.600, 1.099	132.600, 1.152	132.600, 1.175	132.600, 1.948
665	132.800, 1.382	132.800, 2.009	132.800, 1.849	132.800, 1.328	132.800, 1.209	132.800, 1.209	132.800, 1.220	132.800, 1.198	132.800, 1.193	132.800, 1.199	132.800, 1.211	132.800, 1.099	132.800, 1.151	132.800, 1.175	132.800, 1.949
666	133.000, 1.382	133.000, 2.010	133.000, 1.850	133.000, 1.328	133.000, 1.209	133.000, 1.209	133.000, 1.221	133.000, 1.198	133.000, 1.193	133.000, 1.199	133.000, 1.211	133.000, 1.099	133.000, 1.151	133.000, 1.175	133.000, 1.949
667	133.200, 1.382	133.200, 2.010	133.200, 1.850	133.200, 1.328	133.200, 1.208	133.200, 1.210	133.200, 1.221	133.200, 1.198	133.200, 1.193	133.200, 1.199	133.200, 1.212	133.200, 1.099	133.200, 1.152	133.200, 1.176	133.200, 1.949
668	133.400, 1.383	133.400, 2.011	133.400, 1.850	133.400, 1.328	133.400, 1.208	133.400, 1.210	133.400, 1.222	133.400, 1.197	133.400, 1.193	133.400, 1.199	133.400, 1.212	133.400, 1.099	133.400, 1.152	133.400, 1.176	133.400, 1.949
669	133.600, 1.383	133.600, 2.011	133.600, 1.851	133.600, 1.328	133.600, 1.207	133.600, 1.210	133.600, 1.222	133.600, 1.198	133.600, 1.193	133.600, 1.199	133.600, 1.213	133.600, 1.099	133.600, 1.152	133.600, 1.176	133.600, 1.949
670	133.800, 1.383	133.800, 2.011	133.800, 1.852	133.800, 1.328	133.800, 1.207	133.800, 1.210	133.800, 1.222	133.800, 1.198	133.800, 1.193	133.800, 1.199	133.800, 1.213	133.800, 1.099	133.800, 1.153	133.800, 1.176	133.800, 1.949
671	134.000, 1.384	134.000, 2.012	134.000, 1.853	134.000, 1.328	134.000, 1.207	134.000, 1.211	134.000, 1.223	134.000, 1.198	134.000, 1.193	134.000, 1.199	134.000, 1.214	134.000, 1.100	134.000, 1.153	134.000, 1.176	134.000, 1.949
672	134.200, 1.384	134.200, 2.012	134.200, 1.853	134.200, 1.329	134.200, 1.207	134.200, 1.211	134.200, 1.223	134.200, 1.198	134.200, 1.193	134.200, 1.199	134.200, 1.214	134.200, 1.100	134.200, 1.153	134.200, 1.176	134.200, 1.949
673	134.400, 1.384	134.400, 2.012	134.400, 1.854	134.400, 1.329	134.400, 1.208	134.400, 1.212	134.400, 1.223	134.400, 1.199	134.400, 1.193	134.400, 1.199	134.400, 1.215	134.400, 1.100	134.400, 1.153	134.400, 1.176	134.400, 1.949
674	134.600, 1.383	134.600, 2.013	134.600, 1.854	134.600, 1.329	134.600, 1.208	134.600, 1.212	134.600, 1.223	134.600, 1.199	134.600, 1.192	134.600, 1.200	134.600, 1.215	134.600, 1.100	134.600, 1.153	134.600, 1.176	134.600, 1.950
675	134.800, 1.383	134.800, 2.013	134.800, 1.855	134.800, 1.329	134.800, 1.208	134.800, 1.212	134.800, 1.223	134.800, 1.200	134.800, 1.192	134.800, 1.200	134.800, 1.215	134.800, 1.100	134.800, 1.153	134.800, 1.176	134.800, 1.950
676	135.000, 1.383	135.000, 2.014	135.000, 1.855	135.000, 1.330	135.000, 1.208	135.000, 1.213	135.000, 1.224	135.000, 1.200	135.000, 1.192	135.000, 1.200	135.000, 1.216	135.000, 1.101	135.000, 1.153	135.000, 1.176	135.000, 1.950
677	135.200, 1.383	135.200, 2.015	135.200, 1.856	135.200, 1.330	135.200, 1.209	135.200, 1.213	135.200, 1.224	135.200, 1.200	135.200, 1.192	135.200, 1.200	135.200, 1.216	135.200, 1.101	135.200, 1.152	135.200, 1.176	135.200, 1.950
678	135.400, 1.383	135.400, 2.015	135.400, 1.856	135.400, 1.330	135.400, 1.209	135.400, 1.213	135.400, 1.224	135.400, 1.200	135.400, 1.192	135.400, 1.200	135.400, 1.216	135.400, 1.100	135.400, 1.152	135.400, 1.176	135.400, 1.950
679	135.600, 1.383	135.600, 2.016	135.600, 1.857	135.600, 1.330	135.600, 1.209	135.600, 1.213	135.600, 1.224	135.600, 1.200	135.600, 1.192	135.600, 1.200	135.600, 1.216	135.600, 1.100	135.600, 1.152	135.600, 1.176	135.600, 1.950
680	135.800, 1.382	135.800, 2.017	135.800, 1.857	135.800, 1.330	135.800, 1.210	135.800, 1.214	135.800, 1.224	135.800, 1.199	135.800, 1.192	135.800, 1.201	135.800, 1.216	135.800, 1.100	135.800, 1.152	135.800, 1.176	135.800, 1.950
681	136.000, 1.382	136.000, 2.018	136.000, 1.858	136.000, 1.330	136.000, 1.210	136.000, 1.214	136.000, 1.224	136.000, 1.199	136.000, 1.193	136.000, 1.201	136.000, 1.215	136.000, 1.100	136.000, 1.152	136.000, 1.176	136.000, 1.951
682	136.200, 1.383	136.200, 2.019	136.200, 1.858	136.200, 1.330	136.200, 1.210	136.200, 1.215	136.200, 1.224	136.200, 1.199	136.200, 1.193	136.200, 1.201	136.200, 1.215	136.200, 1.100	136.200, 1.151	136.200, 1.176	136.200, 1.951
683	136.400, 1.383	136.400, 2.020	136.400, 1.859	136.400, 1.330	136.400, 1.210	136.400, 1.215	136.400, 1.224	136.400, 1.199	136.400, 1.193	136.400, 1.201	136.400, 1.215	136.400, 1.100	136.400, 1.151	136.400, 1.177	136.400, 1.952
684	136.600, 1.383	136.600, 2.020	136.600, 1.859	136.600, 1.330	136.600, 1.210	136.600, 1.215	136.600, 1.224	136.600, 1.199	136.600, 1.193	136.600, 1.201	136.600, 1.215	136.600, 1.100	136.600, 1.151	136.600, 1.177	136.600, 1.952
685	136.800, 1.383	136.800, 2.021	136.800, 1.859	136.800, 1.330	136.800, 1.211	136.800, 1.215	136.800, 1.224	136.800, 1.198	136.800, 1.193	136.800, 1.201	136.800, 1.215	136.800, 1.101	136.800, 1.151	136.800, 1.177	136.800, 1.953
686	137.000, 1.384	137.000, 2.021	137.000, 1.859	137.000, 1.330	137.000, 1.211	137.000, 1.214	137.000, 1.224	137.000, 1.198	137.000, 1.193	137.000, 1.201	137.000, 1.214	137.000, 1.101	137.000, 1.151	137.000, 1.177	137.000, 1.953
687	137.200, 1.384	137.200, 2.021	137.200, 1.859	137.200, 1.330	137.200, 1.212	137.200, 1.214	137.200, 1.224	137.200, 1.197	137.200, 1.193	137.200, 1.201	137.200, 1.215	137.200, 1.101	137.200, 1.151	137.200, 1.178	137.200, 1.954
688	137.400, 1.384	137.400, 2.022	137.400, 1.860	137.400, 1.330	137.400, 1.212	137.400, 1.214	137.400, 1.224	137.400, 1.196	137.400, 1.193	137.400, 1.201	137.400, 1.215	137.400, 1.101	137.400, 1.151	137.400, 1.178	137.400, 1.954
689	137.600, 1.384	137.600, 2.022	137.600, 1.860	137.600, 1.330	137.600, 1.212	137.600, 1.214	137.600, 1.224	137.600, 1.196	137.600, 1.193	137.600, 1.202	137.600, 1.215	137.600, 1.101	137.600, 1.151	137.600, 1.178	137.600, 1.955
690	137.800, 1.384	137.800, 2.022	137.800, 1.860	137.800, 1.331	137.800, 1.213	137.800, 1.214	137.800, 1.224	137.800, 1.196	137.800, 1.193	137.800, 1.202	137.800, 1.215	137.800, 1.101	137.800, 1.151	137.800, 1.178	137.800, 1.955
691	138.000, 1.385	138.000, 2.022	138.000, 1.860	138.000, 1.331	138.000, 1.213	138.000, 1.213	138.000, 1.224	138.000, 1.197	138.000, 1.193	138.000, 1.202	138.000, 1.215	138.000, 1.101	138.000, 1.151	138.000, 1.178	138.000, 1.956
692	138.200, 1.385	138.200, 2.023	138.200, 1.860	138.200, 1.331	138.200, 1.213	138.200, 1.213	138.200, 1.224	138.200, 1.197	138.200, 1.193	138.200, 1.202	138.200, 1.215	138.200, 1.101	138.200, 1.151	138.200, 1.178	138.200, 1.956
693	138.400, 1.386	138.400, 2.023	138.400, 1.861	138.400, 1.331	138.400, 1.213	138.400, 1.213	138.400, 1.224	138.400, 1.197	138.400, 1.193	138.400, 1.202	138.400, 1.215	138.400, 1.102	138.400, 1.151	138.400, 1.178	138.400, 1.957
694	138.600, 1.386	138.600, 2.023	138.600, 1.861	138.600, 1.331	138.600, 1.213	138.600, 1.213	138.600, 1.225	138.600, 1.198	138.600, 1.194	138.600, 1.202	138.600, 1.216	138.600, 1.102	138.600, 1.151	138.600, 1.178	138.600, 1.957
695	138.800, 1.386	138.800, 2.023	138.800, 1.862	138.800, 1.332	138.800, 1.213	138.800, 1.213	138.800, 1.225	138.800, 1.198	138.800, 1.194	138.800, 1.202	138.800, 1.216	138.800, 1.102	138.800, 1.151	138.800, 1.178	138.800, 1.958
696	139.000, 1.386	139.000, 2.024	139.000, 1.862	139.000, 1.332	139.000, 1.213	139.000, 1.213	139.000, 1.225	139.000, 1.198	139.000, 1.194	139.000, 1.202	139.000, 1.216	139.000, 1.102	139.000, 1.151	139.000, 1.178	139.000, 1.958
697	139.200, 1.385	139.200, 2.024	139.200, 1.863	139.200, 1.332	139.200, 1.213	139.200, 1.213	139.200, 1.226	139.200, 1.199	139.200, 1.194	139.200, 1.202	139.200, 1.216	139.200, 1.102	139.200, 1.151	139.200, 1.177	139.200, 1.959
698	139.400, 1.385	139.400, 2.024	139.400, 1.864	139.400, 1.332	139.400, 1.213	139.400, 1.214	139.400, 1.226	139.400, 1.199	139.400, 1.194	139.400, 1.202	139.400, 1.216	139.400, 1.101	139.400, 1.151	139.400, 1.177	139.400, 1.959
699	139.600, 1.385	139.600, 2.025	139.600, 1.864	139.600, 1.332	139.600, 1.213	139.600, 1.214	139.600, 1.226	139.600, 1.200	139.600, 1.194	139.600, 1.202	139.600, 1.216	139.600, 1.101	139.600, 1.151	139.600, 1.177	139.600, 1.959
700	139.800, 1.385	139.800, 2.025	139.800, 1.865	139.800, 1.332	139.800, 1.213	139.800, 1.215	139.800, 1.225	139.800, 1.200	139.800, 1.194	139.800, 1.203	139.800, 1.216	139.800, 1.101	139.800, 1.151	139.800, 1.177	139.800, 1.959
701	140.000, 1.385	140.000, 2.025	140.000, 1.866	140.000, 1.331	140.000, 1.213	140.000, 1.215	140.000, 1.225	140.000, 1.201	140.000, 1.195	140.000, 1.202	140.000, 1.216	140.000, 1.102	140.000, 1.151	140.000, 1.177	140.000, 1.959
702	140.200, 1.384	140.200, 2.026	140.200, 1.866	140.200, 1.331	140.200, 1.213	140.200, 1.216	140.200, 1.225	140.200, 1.201	140.200, 1.195	140.200, 1.202	140.200, 1.216	140.200, 1.102	140.200, 1.152	140.200, 1.177	140.200, 1.959
703	140.400, 1.384	140.400, 2.026	140.400, 1.867	140.400, 1.331	140.400, 1.213	140.400, 1.216	140.400, 1.225	140.400, 1.201	140.400, 1.195	140.400, 1.202	140.400, 1.216	140.400, 1.102	140.400, 1.152	140.400, 1.177	140.400, 1.960
704	140.600, 1.384	140.600, 2.026	140.600, 1.867	140.600, 1.331	140.600, 1.213	140.600, 1.216	140.600, 1.225	140.600, 1.201	140.600, 1.195	140.600, 1.202	140.600, 1.216	140.600, 1.102	140.600, 1.153	140.600, 1.177	140.600, 1.960
705	140.800, 1.384	140.800, 2.027	140.800, 1.868	140.800, 1.331	140.800, 1.214	140.800, 1.216	140.800, 1.225	140.800, 1.201	140.800, 1.195	140.800, 1.201	140.800, 1.216	140.800, 1.102	140.800, 1.153	140.800, 1.178	140.800, 1.960
706	141.000, 1.384	141.000, 2.027	141.000, 1.868	141.000, 1.331	141.000, 1.214	141.000, 1.217	141.000, 1.225	141.000, 1.201	141.000, 1.194	141.000, 1.202	141.000, 1.216	141.000, 1.103	141.000, 1.154	141.000, 1.178	141.000, 1.960
707	141.200, 1.384	141.200, 2.028	141.200, 1.868	141.200, 1.331	141.200, 1.214	141.200, 1.217	141.200, 1.225	141.200, 1.201	141.200, 1.194	141.200, 1.202	141.200, 1.217	141.200, 1.103	141.200, 1.154	141.200, 1.178	141.200, 1.961
708	141.400, 1.384	141.400, 2.029	141.400, 1.868	141.400, 1.331	141.400, 1.214	141.400, 1.218	141.400, 1.225	141.400, 1.201	141.400, 1.194	141.400, 1.202	141.400, 1.217	141.400, 1.103	141.400, 1.154	141.400, 1.178	141.400, 1.961
709	141.600, 1.384	141.600, 2.029	141.600, 1.869	141.600, 1.331	141.600, 1.214	141.600, 1.218	141.600, 1.225	141.600, 1.201	141.600, 1.194	141.600, 1.202	141.600, 1.217	141.600, 1.103	141.600, 1.154	141.600, 1.178	141.600, 1.961
710	141.800, 1.385	141.800, 2.030	141.800, 1.869	141.800, 1.331	141.800, 1.215	141.800, 1.219	141.800, 1.225	141.800, 1.201	141.800, 1.194	141.800, 1.202	141.800, 1.217	141.800, 1.103	141.800, 1.155	141.800, 1.178	141.800, 1.961
711	142.000, 1.385	142.000, 2.031	142.000, 1.870	142.000, 1.331	142.000, 1.215	142.000, 1.219	142.000, 1.225	142.000, 1.201	142.000, 1.195	142.000, 1.202	142.000, 1.218	142.000, 1.103	142.000, 1.155	142.000, 1.178	142.000, 1.961
712	142.200, 1.386	142.200, 2.032	142.200, 1.871	142.200, 1.331	142.200, 1.215	142.200, 1.219	142.200, 1.225	142.200, 1.201	142.200, 1.195	142.200, 1.202	142.200, 1.218	142.200, 1.102	142.200, 1.155	142.200, 1.178	142.200, 1.962
713	142.400, 1.386	142.400, 2.033	142.400, 1.871	142.400, 1.331	142.400, 1.215	142.400, 1.219	142.400, 1.225	142.400, 1.201	142.400, 1.196	142.400, 1.202	142.400, 1.218	142.400, 1.102	142.400, 1.155	142.400, 1.178	142.400, 1.962
714	142.600, 1.387	142.600, 2.034	142.600, 1.872	142.600, 1.331	142.600, 1.215	142.600, 1.219	142.600, 1.225	142.600, 1.201	142.600, 1.196	142.600, 1.202	142.600, 1.218	142.600, 1.102	142.600, 1.155	142.600, 1.178	142.600, 1.962
715	142.800, 1.387	142.800, 2.034	142.800, 1.872	142.800, 1.331	142.800, 1.216	142.800, 1.219	142.800, 1.224	142.800, 1.200	142.800, 1.197	142.800, 1.202	142.800, 1.218	142.800, 1.102	142.800, 1.155	142.800, 1.178	142.800, 1.963
716	143.000, 1.387	143.000, 2.035	143.000, 1.873	143.000, 1.331	143.000, 1.216	143.000, 1.219	143.000, 1.224	143.000, 1.200	143.000, 1.197	143.000, 1.202	143.000, 1.218	143.000, 1.101	143.000, 1.155	143.000, 1.178	143.000, 1.963
717	143.200, 1.387	143.200, 2.035	143.200, 1.873	143.200, 1.331	143.200, 1.216	143.200, 1.219	143.200, 1.224	143.200, 1.200	143.200, 1.197	143.200, 1.202	143.200, 1.217	143.200, 1.101	143.200, 1.155	143.200, 1.178	143.200, 1.963
718	143.400, 1.387	143.400, 2.035	143.400, 1.874	143.400, 1.331	143.400, 1.216	143.400, 1.219	143.400, 1.224	143.400, 1.200	143.400, 1.198	143.400, 1.202	143.400, 1.217	143.400, 1.101	143.400, 1.154	143.400, 1.178	143.400, 1.963
719	143.600, 1.387	143.600, 2.036	143.600, 1.874	143.600, 1.331	143.600, 1.216	143.600, 1.218	143.600, 1.224	143.600, 1.200	143.600, 1.198	143.600, 1.202	143.600, 1.217	143.600, 1.101	143.600, 1.154	143.600, 1.178	143.600, 1.963
720	143.800, 1.387	143.800, 2.036	143.800, 1.875	143.800, 1.331	143.800, 1.216	143.800, 1.218	143.800, 1.224	143.800, 1.200	143.800, 1.198	143.800, 1.202	143.800, 1.216	143.800, 1.101	143.800, 1.154	143.800, 1.178	143.800, 1.963
721	144.000, 1.388	144.000, 2.036	144.000, 1.875	144.000, 1.332	144.000, 1.216	144.000, 1.218	144.000, 1.223	144.000, 1.200	144.000, 1.198	144.000, 1.202	144.000, 1.216	144.000, 1.101	144.000, 1.154	144.000, 1.178	144.000, 1.963
722	144.200, 1.388	144.200, 2.037	144.200, 1.875	144.200, 1.332	144.200, 1.216	144.200, 1.218	144.200, 1.223	144.200, 1.200	144.200, 1.198	144.200, 1.202	144.200, 1.216	144.200, 1.101	144.200, 1.154	144.200, 1.178	144.200, 1.963
723	144.400, 1.388	144.400, 2.037	144.400, 1.875	144.400, 1.332	144.400, 1.215	144.400, 1.218	144.400, 1.223	144.400, 1.200	144.400, 1.197	144.400, 1.201	144.400, 1.216	144.400, 1.101	144.400, 1.154	144.400, 1.179	144.400, 1.963
724	144.600, 1.388	144.600, 2.037	144.600, 1.876	144.600, 1.332	144.600, 1.215	144.600, 1.218	144.600, 1.223	144.600, 1.200	144.600, 1.197	144.600, 1.201	144.600, 1.216	144.600, 1.101	144.600, 1.154	144.600, 1.179	144.600, 1.964
725	144.800, 1.388	144.800, 2.038	144.800, 1.876	144.800, 1.332	144.800, 1.215	144.800, 1.218	144.800, 1.223	144.800, 1.201	144.800, 1.197	144.800, 1.202	144.800, 1.216	144.800, 1.101	144.800, 1.154	144.800, 1.179	144.800, 1.964
726	145.000, 1.389	145.000, 2.038	145.000, 1.876	145.000, 1.332	145.000, 1.214	145.000, 1.218	145.000, 1.224	145.000, 1.201	145.000, 1.197	145.000, 1.202	145.000, 1.216	145.000, 1.101	145.000, 1.155	145.000, 1.179	145.000, 1.965
727	145.200, 1.389	145.200, 2.038	145.200, 1.877	145.200, 1.332	145.200, 1.214	145.200, 1.218	145.200, 1.224	145.200, 1.201	145.200, 1.197	145.200, 1.202	145.200, 1.216	145.200, 1.101	145.200, 1.155	145.200, 1.179	145.200, 1.965
728	145.400, 1.389	145.400, 2.038	145.400, 1.877	145.400, 1.332	145.400, 1.215	145.400, 1.218	145.400, 1.224	145.400, 1.201	145.400, 1.196	145.400, 1.202	145.400, 1.216	145.400, 1.101	145.400, 1.155	145.400, 1.178	145.400, 1.966
729	145.600, 1.389	145.600, 2.038	145.600, 1.878	145.600, 1.332	145.600, 1.215	145.600, 1.218	145.600, 1.224	145.600, 1.201	145.600, 1.196	145.600, 1.202	145.600, 1.216	145.600, 1.101	145.600, 1.155	145.600, 1.178	145.600, 1.966
730	145.800, 1.389	145.800, 2.038	145.800, 1.878	145.800, 1.332	145.800, 1.215	145.800, 1.218	145.800, 1.225	145.800, 1.201	145.800, 1.197	145.800, 1.202	145.800, 1.216	145.800, 1.101	145.800, 1.155	145.800, 1.179	145.800, 1.966
731	146.000, 1.389	146.000, 2.038	146.000, 1.878	146.000, 1.332	146.000, 1.215	146.000, 1.218	146.000, 1.225	146.000, 1.201	146.000, 1.197	146.000, 1.202	146.000, 1.216	146.000, 1.102	146.000, 1.156	146.000, 1.179	146.000, 1.967
732	146.200, 1.389	146.200, 2.039	146.200, 1.878	146.200, 1.333	146.200, 1.215	146.200, 1.218	146.200, 1.226	146.200, 1.201	146.200, 1.197	146.200, 1.203	146.200, 1.216	146.200, 1.102	146.200, 1.156	146.200, 1.179	146.200, 1.967
733	146.400, 1.389	146.400, 2.039	146.400, 1.878	146.400, 1.333	146.400, 1.215	146.400, 1.218	146.400, 1.226	146.400, 1.201	146.400, 1.198	146.400, 1.203	146.400, 1.216	146.400, 1.103	146.400, 1.156	146.400, 1.179	146.400, 1.966
734	146.600, 1.389	146.600, 2.040	146.600, 1.878	146.600, 1.333	146.600, 1.216	146.600, 1.218	146.600, 1.227	146.600, 1.201	146.600, 1.198	146.600, 1.204	146.600, 1.216	146.600, 1.103	146.600, 1.156	146.600, 1.178	146.600, 1.966
735	146.800, 1.389	146.800, 2.040	146.800, 1.878	146.800, 1.333	146.800, 1.216	146.800, 1.219	146.800, 1.227	146.800, 1.201	146.800, 1.198	146.800, 1.204	146.800, 1.216	146.800, 1.104	146.800, 1.156	146.800, 1.178	146.800, 1.966
736	147.000, 1.389	147.000, 2.040	147.000, 1.878	147.000, 1.333	147.000, 1.216	147.000, 1.219	147.000, 1.227	147.000, 1.201	147.000, 1.198	147.000, 1.204	147.000, 1.217	147.000, 1.105	147.000, 1.156	147.000, 1.178	147.000, 1.966
737	147.200, 1.389	147.200, 2.041	147.200, 1.878	147.200, 1.333	147.200, 1.216	147.200, 1.219	147.200, 1.227	147.200, 1.202	147.200, 1.198	147.200, 1.204	147.200, 1.217	147.200, 1.105	147.200, 1.156	147.200, 1.179	147.200, 1.966
738	147.400, 1.389	147.400, 2.042	147.400, 1.878	147.400, 1.333	147.400, 1.216	147.400, 1.220	147.400, 1.228	147.400, 1.202	147.400, 1.197	147.400, 1.204	147.400, 1.217	147.400, 1.106	147.400, 1.155	147.400, 1.179	147.400, 1.966
739	147.600, 1.390	147.600, 2.042	147.600, 1.879	147.600, 1.333	147.600, 1.216	147.600, 1.220	147.600, 1.228	147.600, 1.202	147.600, 1.197	147.600, 1.205	147.600, 1.217	147.600, 1.106	147.600, 1.155	147.600, 1.179	147.600, 1.965
740	147.800, 1.390	147.800, 2.043	147.800, 1.880	147.800, 1.332	147.800, 1.216	147.800, 1.220	147.800, 1.228	147.800, 1.202	147.800, 1.197	147.800, 1.205	147.800, 1.217	147.800, 1.106	147.800, 1.154	147.800, 1.179	147.800, 1.965
741	148.000, 1.390	148.000, 2.044	148.000, 1.880	148.000, 1.332	148.000, 1.217	148.000, 1.220	148.000, 1.228	148.000, 1.202	148.000, 1.197	148.000, 1.205	148.000, 1.218	148.000, 1.106	148.000, 1.154	148.000, 1.179	148.000, 1.965
742	148.200, 1.391	148.200, 2.044	148.200, 1.881	148.200, 1.332	148.200, 1.217	148.200, 1.220	148.200, 1.228	148.200, 1.202	148.200, 1.197	148.200, 1.205	148.200, 1.218	148.200, 1.106	148.200, 1.153	148.200, 1.179	148.200, 1.966
743	148.400, 1.391	148.400, 2.045	148.400, 1.882	148.400, 1.332	148.400, 1.217	148.400, 1.220	148.400, 1.228	148.400, 1.203	148.400, 1.197	148.400, 1.205	148.400, 1.218	148.400, 1.106	148.400, 1.153	148.400, 1.179	148.400, 1.966
744	148.600, 1.392	148.600, 2.045	148.600, 1.883	148.600, 1.333	148.600, 1.217	148.600, 1.219	148.600, 1.228	148.600, 1.203	148.600, 1.197	148.600, 1.205	148.600, 1.218	148.600, 1.106	148.600, 1.153	148.600, 1.178	148.600, 1.967
745	148.800, 1.392	148.800, 2.045	148.800, 1.884	148.800, 1.333	148.800, 1.217	148.800, 1.219	148.800, 1.228	148.800, 1.203	148.800, 1.197	148.800, 1.206	148.800, 1.218	148.800, 1.106	148.800, 1.152	148.800, 1.178	148.800, 1.967
746	149.000, 1.393	149.000, 2.045	149.000, 1.885	149.000, 1.333	149.000, 1.217	149.000, 1.219	149.000, 1.228	149.000, 1.204	149.000, 1.197	149.000, 1.206	149.000, 1.218	149.000, 1.106	149.000, 1.152	149.000, 1.178	149.000, 1.968
747	149.200, 1.393	149.200, 2.046	149.200, 1.885	149.200, 1.333	149.200, 1.217	149.200, 1.219	149.200, 1.229	149.200, 1.204	149.200, 1.197	149.200, 1.206	149.200, 1.218	149.200, 1.105	149.200, 1.152	149.200, 1.178	149.200, 1.969
748	149.400, 1.394	149.400, 2.045	149.400, 1.886	149.400, 1.333	149.400, 1.217	149.400, 1.218	149.400, 1.229	149.400, 1.204	149.400, 1.198	149.400, 1.206	149.400, 1.218	149.400, 1.105	149.400, 1.152	149.400, 1.177	149.400, 1.969
749	149.600, 1.394	149.600, 2.046	149.600, 1.886	149.600, 1.333	149.600, 1.217	149.600, 1.218	149.600, 1.229	149.600, 1.204	149.600, 1.198	149.600, 1.207	149.600, 1.218	149.600, 1.104	149.600, 1.152	149.600, 1.177	149.600, 1.970
750	149.800, 1.394	149.800, 2.046	149.800, 1.886	149.800, 1.333	149.800, 1.217	149.800, 1.218	149.800, 1.229	149.800, 1.204	149.800, 1.198	149.800, 1.207	149.800, 1.218	149.800, 1.104	149.800, 1.152	149.800, 1.177	149.800, 1.970
751	150.000, 1.394	150.000, 2.046	150.000, 1.886	150.000, 1.333	150.000, 1.217	150.000, 1.218	150.000, 1.229	150.000, 1.204	150.000, 1.198	150.000, 1.207	150.000, 1.218	150.000, 1.104	150.000, 1.152	150.000, 1.177	150.000, 1.970
752	150.200, 1.396	150.200, 2.048	150.200, 1.888	150.200, 1.336	150.200, 1.219	150.200, 1.220	150.200, 1.231	150.200, 1.207	150.200, 1.200	150.200, 1.209	150.200, 1.220	150.200, 1.107	150.200, 1.154	150.200, 1.180	150.200, 1.975
753	150.400, 1.397	150.400, 2.051	150.400, 1.890	150.400, 1.338	150.400, 1.221	150.400, 1.222	150.400, 1.234	150.400, 1.209	150.400, 1.202	150.400, 1.211	150.400, 1.223	150.400, 1.110	150.400, 1.157	150.400, 1.183	150.400, 1.980
754	150.600, 1.399	150.600, 2.053	150.600, 1.892	150.600, 1.341	150.600, 1.224	150.600, 1.224	150.600, 1.236	150.600, 1.212	150.600, 1.204	150.600, 1.213	150.600, 1.225	150.600, 1.113	150.600, 1.161	150.600, 1.186	150.600, 1.985
755	150.800, 1.401	150.800, 2.056	150.800, 1.894	150.800, 1.344	150.800, 1.226	150.800, 1.226	150.800, 1.239	150.800, 1.214	150.800, 1.206	150.800, 1.215	150.800, 1.228	150.800, 1.116	150.800, 1.164	150.800, 1.190	150.800, 1.990
756	151.000, 1.402	151.000, 2.058	151.000, 1.896	151.000, 1.347	151.000, 1.228	151.000, 1.228	151.000, 1.242	151.000, 1.217	151.000, 1.208	151.000, 1.217	151.000, 1.230	151.000, 1.119	151.000, 1.167	151.000, 1.193	151.000, 1.995
757	151.200, 1.404	151.200, 2.060	151.200, 1.898	151.200, 1.349	151.200, 1.230	151.200, 1.230	151.200, 1.245	151.200, 1.219	151.200, 1.210	151.200, 1.218	151.200, 1.233	151.200, 1.122	151.200, 1.171	151.200, 1.195	151.200, 2.000
758	151.400, 1.405	151.400, 2.061	151.400, 1.899	151.400, 1.351	151.400, 1.231	151.400, 1.232	151.400, 1.247	151.400, 1.220	151.400, 1.211	151.400, 1.220	151.400, 1.235	151.400, 1.124	151.400, 1.174	151.400, 1.198	151.400, 2.004
759	151.600, 1.406	151.600, 2.062	151.600, 1.899	151.600, 1.353	151.600, 1.233	151.600, 1.234	151.600, 1.250	151.600, 1.222	151.600, 1.213	151.600, 1.221	151.600, 1.237	151.600, 1.126	151.600, 1.176	151.600, 1.200	151.600, 2.007
760	151.800, 1.407	151.800, 2.063	151.800, 1.899	151.800, 1.355	151.800, 1.234	151.800, 1.235	151.800, 1.251	151.800, 1.223	151.800, 1.214	151.800, 1.223	151.800, 1.239	151.800, 1.128	151.800, 1.178	151.800, 1.201	151.800, 2.010
761	152.000, 1.408	152.000, 2.062	152.000, 1.898	152.000, 1.356	152.000, 1.235	152.000, 1.236	152.000, 1.253	152.000, 1.223	152.000, 1.214	152.000, 1.223	152.000, 1.240	152.000, 1.129	152.000, 1.179	152.000, 1.202	152.000, 2.011
762	152.200, 1.408	152.200, 2.061	152.200, 1.897	152.200, 1.356	152.200, 1.235	152.200, 1.236	152.200, 1.253	152.200, 1.223	152.200, 1.214	152.200, 1.223	152.200, 1.241	152.200, 1.129	152.200, 1.180	152.200, 1.202	152.200, 2.011
763	152.400, 1.408	152.400, 2.059	152.400, 1.896	152.400, 1.356	152.400, 1.235	152.400, 1.236	152.400, 1.254	152.400, 1.223	152.400, 1.215	152.400, 1.223	152.400, 1.242	152.400, 1.129	152.400, 1.180	152.400, 1.202	152.400, 2.011
764	152.600, 1.408	152.600, 2.058	152.600, 1.894	152.600, 1.356	152.600, 1.234	152.600, 1.236	152.600, 1.254	152.600, 1.223	152.600, 1.215	152.600, 1.223	152.600, 1.243	152.600, 1.129	152.600, 1.180	152.600, 1.202	152.600, 2.011
765	152.800, 1.407	152.800, 2.056	152.800, 1.893	152.800, 1.355	152.800, 1.234	152.800, 1.236	152.800, 1.255	152.800, 1.223	152.800, 1.215	152.800, 1.223	152.800, 1.243	152.800, 1.129	152.800, 1.180	152.800, 1.201	152.800, 2.011
766	153.000, 1.407	153.000, 2.054	153.000, 1.891	153.000, 1.355	153.000, 1.233	153.000, 1.236	153.000, 1.255	153.000, 1.222	153.000, 1.215	153.000, 1.223	153.000, 1.242	153.000, 1.129	153.000, 1.180	153.000, 1.201	153.000, 2.011
767	153.200, 1.406	153.200, 2.052	153.200, 1.889	153.200, 1.354	153.200, 1.233	153.200, 1.236	153.200, 1.255	153.200, 1.222	153.200, 1.216	153.200, 1.223	153.200, 1.242	153.200, 1.128	153.200, 1.180	153.200, 1.201	153.200, 2.010
768	153.400, 1.405	153.400, 2.050	153.400, 1.887	153.400, 1.353	153.400, 1.233	153.400, 1.235	153.400, 1.255	153.400, 1.221	153.400, 1.216	153.400, 1.223	153.400, 1.242	153.400, 1.128	153.400, 1.180	153.400, 1.201	153.400, 2.010
769	153.600, 1.405	153.600, 2.049	153.600, 1.885	153.600, 1.353	153.600, 1.232	153.600, 1.235	153.600, 1.254	153.600, 1.221	153.600, 1.216	153.600, 1.222	153.600, 1.241	153.600, 1.128	153.600, 1.180	153.600, 1.201	153.600, 2.009
770	153.800, 1.404	153.800, 2.047	153.800, 1.883	153.800, 1.352	153.800, 1.232	153.800, 1.235	153.800, 1.254	153.800, 1.221	153.800, 1.215	153.800, 1.222	153.800, 1.241	153.800, 1.128	153.800, 1.180	153.800, 1.200	153.800, 2.008
771	154.000, 1.404	154.000, 2.045	154.000, 1.882	154.000, 1.352	154.000, 1.232	154.000, 1.235	154.000, 1.254	154.000, 1.221	154.000, 1.215	154.000, 1.221	154.000, 1.240	154.000, 1.128	154.000, 1.179	154.000, 1.200	154.000, 2.007
772	154.200, 1.403	154.200, 2.043	154.200, 1.880	154.200, 1.351	154.200, 1.232	154.200, 1.234	154.200, 1.254	154.200, 1.221	154.200, 1.215	154.200, 1.221	154.200, 1.240	154.200, 1.128	154.200, 1.179	154.200, 1.200	154.200, 2.007
773	154.400, 1.403	154.400, 2.041	154.400, 1.879	154.400, 1.351	154.400, 1.231	154.400, 1.234	154.400, 1.253	154.400, 1.221	154.400, 1.215	154.400, 1.221	154.400, 1.240	154.400, 1.128	154.400, 1.179	154.400, 1.200	154.400, 2.006
774	154.600, 1.402	154.600, 2.039	154.600, 1.877	154.600, 1.351	154.600, 1.231	154.600, 1.234	154.600, 1.253	154.600, 1.220	154.600, 1.215	154.600, 1.220	154.600, 1.240	154.600, 1.127	154.600, 1.178	154.600, 1.199	154.600, 2.006
775	154.800, 1.402	154.800, 2.037	154.800, 1.876	154.800, 1.351	154.800, 1.231	154.800, 1.233	154.800, 1.253	154.800, 1.220	154.800, 1.215	154.800, 1.220	154.800, 1.240	154.800, 1.127	154.800, 1.178	154.800, 1.199	154.800, 2.005
776	155.000, 1.401	155.000, 2.034	155.000, 1.874	155.000, 1.350	155.000, 1.230	155.000, 1.233	155.000, 1.253	155.000, 1.220	155.000, 1.214	155.000, 1.219	155.000, 1.240	155.000, 1.127	155.000, 1.178	155.000, 1.199	155.000, 2.004
777	155.200, 1.400	155.200, 2.032	155.200, 1.872	155.200, 1.350	155.200, 1.230	155.200, 1.233	155.200, 1.253	155.200, 1.220	155.200, 1.214	155.200, 1.219	155.200, 1.240	155.200, 1.127	155.200, 1.178	155.200, 1.199	155.200, 2.003
778	155.400, 1.400	155.400, 2.030	155.400, 1.870	155.400, 1.350	155.400, 1.229	155.400, 1.233	155.400, 1.253	155.400, 1.220	155.400, 1.213	155.400, 1.219	155.400, 1.240	155.400, 1.127	155.400, 1.178	155.400, 1.198	155.400, 2.002
779	155.600, 1.399	155.600, 2.028	155.600, 1.868	155.600, 1.349	155.600, 1.229	155.600, 1.232	155.600, 1.253	155.600, 1.220	155.600, 1.213	155.600, 1.219	155.600, 1.240	155.600, 1.127	155.600, 1.178	155.600, 1.198	155.600, 2.001
780	155.800, 1.399	155.800, 2.026	155.800, 1.867	155.800, 1.349	155.800, 1.229	155.800, 1.232	155.800, 1.253	155.800, 1.220	155.800, 1.212	155.800, 1.219	155.800, 1.240	155.800, 1.127	155.800, 1.177	155.800, 1.198	155.800, 2.000
781	156.000, 1.398	156.000, 2.024	156.000, 1.865	156.000, 1.349	156.000, 1.229	156.000, 1.231	156.000, 1.253	156.000, 1.220	156.000, 1.212	156.000, 1.219	156.000, 1.241	156.000, 1.127	156.000, 1.177	156.000, 1.198	156.000, 1.999
782	156.200, 1.398	156.200, 2.022	156.200, 1.863	156.200, 1.348	156.200, 1.228	156.200, 1.231	156.200, 1.252	156.200, 1.220	156.200, 1.212	156.200, 1.219	156.200, 1.241	156.200, 1.127	156.200, 1.177	156.200, 1.198	156.200, 1.998
783	156.400, 1.398	156.400, 2.020	156.400, 1.861	156.400, 1.348	156.400, 1.228	156.400, 1.231	156.400, 1.252	156.400, 1.219	156.400, 1.211	156.400, 1.219	156.400, 1.240	156.400, 1.127	156.400, 1.176	156.400, 1.197	156.400, 1.997
784	156.600, 1.398	156.600, 2.018	156.600, 1.859	156.600, 1.348	156.600, 1.228	156.600, 1.230	156.600, 1.251	156.600, 1.219	156.600, 1.211	156.600, 1.218	156.600, 1.240	156.600, 1.127	156.600, 1.176	156.600, 1.197	156.600, 1.996
785	156.800, 1.397	156.800, 2.017	156.800, 1.858	156.800, 1.347	156.800, 1.227	156.800, 1.230	156.800, 1.251	156.800, 1.219	156.800, 1.210	156.800, 1.218	156.800, 1.240	156.800, 1.126	156.800, 1.176	156.800, 1.196	156.800, 1.995
786	157.000, 1.397	157.000, 2.015	157.000, 1.856	157.000, 1.347	157.000, 1.226	157.000, 1.230	157.000, 1.251	157.000, 1.218	157.000, 1.210	157.000, 1.218	157.000, 1.239	157.000, 1.126	157.000, 1.175	157.000, 1.196	157.000, 1.994
787	157.200, 1.396	157.200, 2.014	157.200, 1.854	157.200, 1.346	157.200, 1.226	157.200, 1.230	157.200, 1.251	157.200, 1.218	157.200, 1.209	157.200, 1.218	157.200, 1.239	157.200, 1.126	157.200, 1.175	157.200, 1.196	157.200, 1.993
788	157.400, 1.396	157.400, 2.012	157.400, 1.852	157.400, 1.346	157.400, 1.225	157.400, 1.230	157.400, 1.250	157.400, 1.218	157.400, 1.209	157.400, 1.217	157.400, 1.238	157.400, 1.125	157.400, 1.174	157.400, 1.196	157.400, 1.992
789	157.600, 1.395	157.600, 2.010	157.600, 1.850	157.600, 1.346	157.600, 1.225	157.600, 1.230	157.600, 1.250	157.600, 1.217	157.600, 1.209	157.600, 1.217	157.600, 1.238	157.600, 1.125	157.600, 1.174	157.600, 1.196	157.600, 1.991
790	157.800, 1.395	157.800, 2.008	157.800, 1.849	157.800, 1.345	157.800, 1.224	157.800, 1.230	157.800, 1.250	157.800, 1.217	157.800, 1.208	157.800, 1.217	157.800, 1.237	157.800, 1.125	157.800, 1.174	157.800, 1.196	157.800, 1.990
791	158.000, 1.394	158.000, 2.006	158.000, 1.847	158.000, 1.345	158.000, 1.224	158.000, 1.229	158.000, 1.250	158.000, 1.217	158.000, 1.208	158.000, 1.216	158.000, 1.237	158.000, 1.124	158.000, 1.174	158.000, 1.196	158.000, 1.989
792	158.200, 1.394	158.200, 2.004	158.200, 1.845	158.200, 1.345	158.200, 1.224	158.200, 1.229	158.200, 1.250	158.200, 1.217	158.200, 1.208	158.200, 1.216	158.200, 1.236	158.200, 1.124	158.200, 1.173	158.200, 1.195	158.200, 1.988
793	158.400, 1.394	158.400, 2.002	158.400, 1.844	158.400, 1.345	158.400, 1.223	158.400, 1.229	158.400, 1.249	158.400, 1.216	158.400, 1.208	158.400, 1.216	158.400, 1.236	158.400, 1.124	158.400, 1.173	158.400, 1.195	158.400, 1.988
794	158.600, 1.393	158.600, 2.000	158.600, 1.842	158.600, 1.345	158.600, 1.223	158.600, 1.228	158.600, 1.249	158.600, 1.216	158.600, 1.208	158.600, 1.215	158.600, 1.236	158.600, 1.123	158.600, 1.173	158.600, 1.195	158.600, 1.987
795	158.800, 1.392	158.800, 1.998	158.800, 1.840	158.800, 1.345	158.800, 1.222	158.800, 1.228	158.800, 1.249	158.800, 1.216	158.800, 1.208	158.800, 1.215	158.800, 1.236	158.800, 1.123	158.800, 1.173	158.800, 1.194	158.800, 1.986
796	159.000, 1.392	159.000, 1.996	159.000, 1.839	159.000, 1.345	159.000, 1.222	159.000, 1.228	159.000, 1.249	159.000, 1.215	159.000, 1.208	159.000, 1.215	159.000, 1.235	159.000, 1.123	159.000, 1.173	159.000, 1.194	159.000, 1.985
797	159.200, 1.391	159.200, 1.995	159.200, 1.837	159.200, 1.344	159.200, 1.221	159.200, 1.227	159.200, 1.249	159.200, 1.215	159.200, 1.207	159.200, 1.214	159.200, 1.235	159.200, 1.123	159.200, 1.173	159.200, 1.193	159.200, 1.984
798	159.400, 1.391	159.400, 1.993	159.400, 1.836	159.400, 1.344	159.400, 1.221	159.400, 1.227	159.400, 1.249	159.400, 1.215	159.400, 1.207	159.400, 1.214	159.400, 1.235	159.400, 1.123	159.400, 1.173	159.400, 1.193	159.400, 1.983
799	159.600, 1.390	159.600, 1.991	159.600, 1.834	159.600, 1.343	159.600, 1.220	159.600, 1.227	159.600, 1.249	159.600, 1.214	159.600, 1.207	159.600, 1.214	159.600, 1.235	159.600, 1.123	159.600, 1.173	159.600, 1.193	159.600, 1.982
800	159.800, 1.390	159.800, 1.989	159.800, 1.833	159.800, 1.343	159.800, 1.220	159.800, 1.226	159.800, 1.249	159.800, 1.214	159.800, 1.207	159.800, 1.213	159.800, 1.235	159.800, 1.123	159.800, 1.173	159.800, 1.192	159.800, 1.981
801	160.000, 1.390	160.000, 1.987	160.000, 1.832	160.000, 1.343	160.000, 1.220	160.000, 1.226	160.000, 1.248	160.000, 1.214	160.000, 1.207	160.000, 1.213	160.000, 1.234	160.000, 1.123	160.000, 1.173	160.000, 1.192	160.000, 1.980
802	160.200, 1.389	160.200, 1.985	160.200, 1.830	160.200, 1.342	160.200, 1.219	160.200, 1.225	160.200, 1.248	160.200, 1.213	160.200, 1.207	160.200, 1.212	160.200, 1.234	160.200, 1.123	160.200, 1.172	160.200, 1.191	160.200, 1.979
803	160.400, 1.389	160.400, 1.984	160.400, 1.829	160.400, 1.342	160.400, 1.219	160.400, 1.225	160.400, 1.248	160.400, 1.213	160.400, 1.206	160.400, 1.212	160.400, 1.234	160.400, 1.122	160.400, 1.172	160.400, 1.191	160.400, 1.978
804	160.600, 1.388	160.600, 1.982	160.600, 1.828	160.600, 1.342	160.600, 1.218	160.600, 1.225	160.600, 1.247	160.600, 1.212	160.600, 1.206	160.600, 1.212	160.600, 1.233	160.600, 1.122	160.600, 1.172	160.600, 1.191	160.600, 1.978
805	160.800, 1.388	160.800, 1.981	160.800, 1.826	160.800, 1.341	160.800, 1.218	160.800, 1.225	160.800, 1.247	160.800, 1.212	160.800, 1.205	160.800, 1.211	160.800, 1.233	160.800, 1.122	160.800, 1.172	160.800, 1.191	160.800, 1.977
806	161.000, 1.387	161.000, 1.979	161.000, 1.825	161.000, 1.341	161.000, 1.218	161.000, 1.225	161.000, 1.247	161.000, 1.211	161.000, 1.205	161.000, 1.211	161.000, 1.233	161.000, 1.121	161.000, 1.172	161.000, 1.191	161.000, 1.976
807	161.200, 1.387	161.200, 1.978	161.200, 1.823	161.200, 1.341	161.200, 1.217	161.200, 1.224	161.200, 1.246	161.200, 1.211	161.200, 1.204	161.200, 1.211	161.200, 1.233	161.200, 1.121	161.200, 1.172	161.200, 1.191	161.200, 1.976
808	161.400, 1.386	161.400, 1.976	161.400, 1.822	161.400, 1.340	161.400, 1.217	161.400, 1.224	161.400, 1.246	161.400, 1.211	161.400, 1.204	161.400, 1.210	161.400, 1.233	161.400, 1.120	161.400, 1.172	161.400, 1.191	161.400, 1.975
809	161.600, 1.386	161.600, 1.974	161.600, 1.820	161.600, 1.340	161.600, 1.217	161.600, 1.224	161.600, 1.246	161.600, 1.210	161.600, 1.204	161.600, 1.210	161.600, 1.233	161.600, 1.120	161.600, 1.171	161.600, 1.191	161.600, 1.975
810	161.800, 1.385	161.800, 1.972	161.800, 1.818	161.800, 1.340	161.800, 1.216	161.800, 1.223	161.800, 1.245	161.800, 1.210	161.800, 1.203	161.800, 1.210	161.800, 1.233	161.800, 1.119	161.800, 1.171	161.800, 1.190	161.800, 1.974
811	162.000, 1.385	162.000, 1.970	162.000, 1.817	162.000, 1.339	162.000, 1.216	162.000, 1.223	162.000, 1.245	162.000, 1.210	162.000, 1.203	162.000, 1.210	162.000, 1.233	162.000, 1.119	162.000, 1.171	162.000, 1.190	162.000, 1.974
812	162.200, 1.385	162.200, 1.968	162.200, 1.815	162.200, 1.339	162.200, 1.216	162.200, 1.222	162.200, 1.245	162.200, 1.210	162.200, 1.203	162.200, 1.209	162.200, 1.233	162.200, 1.118	162.200, 1.171	162.200, 1.190	162.200, 1.973
813	162.400, 1.384	162.400, 1.966	162.400, 1.813	162.400, 1.339	162.400, 1.215	162.400, 1.222	162.400, 1.244	162.400, 1.210	162.400, 1.203	162.400, 1.209	162.400, 1.233	162.400, 1.118	162.400, 1.171	162.400, 1.190	162.400, 1.973
814	162.600, 1.384	162.600, 1.964	162.600, 1.812	162.600, 1.338	162.600, 1.215	162.600, 1.221	162.600, 1.244	162.600, 1.210	162.600, 1.203	162.600, 1.209	162.600, 1.233	162.600, 1.118	162.600, 1.171	162.600, 1.189	162.600, 1.972
815	162.800, 1.383	162.800, 1.961	162.800, 1.810	162.800, 1.338	162.800, 1.214	162.800, 1.221	162.800, 1.244	162.800, 1.210	162.800, 1.203	162.800, 1.208	162.800, 1.233	162.800, 1.117	162.800, 1.171	162.800, 1.189	162.800, 1.971
816	163.000, 1.383	163.000, 1.959	163.000, 1.808	163.000, 1.337	163.000, 1.214	163.000, 1.220	163.000, 1.243	163.000, 1.210	163.000, 1.203	163.000, 1.208	163.000, 1.232	163.000, 1.117	163.000, 1.170	163.000, 1.188	163.000, 1.970
817	163.200, 1.383	163.200, 1.957	163.200, 1.807	163.200, 1.337	163.200, 1.213	163.200, 1.220	163.200, 1.243	163.200, 1.210	163.200, 1.202	163.200, 1.207	163.200, 1.232	163.200, 1.117	163.200, 1.170	163.200, 1.188	163.200, 1.969
818	163.400, 1.382	163.400, 1.955	163.400, 1.805	163.400, 1.336	163.400, 1.213	163.400, 1.219	163.400, 1.243	163.400, 1.209	163.400, 1.202	163.400, 1.207	163.400, 1.231	163.400, 1.117	163.400, 1.170	163.400, 1.187	163.400, 1.969
819	163.600, 1.382	163.600, 1.952	163.600, 1.804	163.600, 1.335	163.600, 1.212	163.600, 1.219	163.600, 1.242	163.600, 1.209	163.600, 1.202	163.600, 1.206	163.600, 1.231	163.600, 1.117	163.600, 1.169	163.600, 1.187	163.600, 1.967
820	163.800, 1.382	163.800, 1.950	163.800, 1.803	163.800, 1.335	163.800, 1.212	163.800, 1.219	163.800, 1.242	163.800, 1.209	163.800, 1.202	163.800, 1.206	163.800, 1.230	163.800, 1.117	163.800, 1.168	163.800, 1.186	163.800, 1.966
821	164.000, 1.381	164.000, 1.948	164.000, 1.801	164.000, 1.334	164.000, 1.212	164.000, 1.218	164.000, 1.241	164.000, 1.208	164.000, 1.202	164.000, 1.205	164.000, 1.230	164.000, 1.117	164.000, 1.168	164.000, 1.186	164.000, 1.965
822	164.200, 1.381	164.200, 1.947	164.200, 1.800	164.200, 1.334	164.200, 1.211	164.200, 1.218	164.200, 1.241	164.200, 1.208	164.200, 1.201	164.200, 1.205	164.200, 1.229	164.200, 1.117	164.200, 1.167	164.200, 1.186	164.200, 1.965
823	164.400, 1.381	164.400, 1.945	164.400, 1.798	164.400, 1.334	164.400, 1.211	164.400, 1.218	164.400, 1.240	164.400, 1.207	164.400, 1.200	164.400, 1.204	164.400, 1.229	164.400, 1.116	164.400, 1.167	164.400, 1.186	164.400, 1.964
824	164.600, 1.380	164.600, 1.943	164.600, 1.797	164.600, 1.334	164.600, 1.211	164.600, 1.218	164.600, 1.240	164.600, 1.207	164.600, 1.200	164.600, 1.204	164.600, 1.228	164.600, 1.116	164.600, 1.166	164.600, 1.185	164.600, 1.963
825	164.800, 1.380	164.800, 1.941	164.800, 1.795	164.800, 1.334	164.800, 1.210	164.800, 1.218	164.800, 1.239	164.800, 1.207	164.800, 1.199	164.800, 1.203	164.800, 1.228	164.800, 1.116	164.800, 1.166	164.800, 1.185	164.800, 1.962
826	165.000, 1.380	165.000, 1.939	165.000, 1.793	165.000, 1.333	165.000, 1.210	165.000, 1.218	165.000, 1.239	165.000, 1.207	165.000, 1.198	165.000, 1.203	165.000, 1.228	165.000, 1.116	165.000, 1.165	165.000, 1.185	165.000, 1.962
827	165.200, 1.379	165.200, 1.938	165.200, 1.792	165.200, 1.333	165.200, 1.209	165.200, 1.217	165.200, 1.238	165.200, 1.206	165.200, 1.198	165.200, 1.203	165.200, 1.228	165.200, 1.115	165.200, 1.165	165.200, 1.185	165.200, 1.961
828	165.400, 1.379	165.400, 1.936	165.400, 1.790	165.400, 1.333	165.400, 1.209	165.400, 1.217	165.400, 1.238	165.400, 1.206	165.400, 1.197	165.400, 1.203	165.400, 1.228	165.400, 1.115	165.400, 1.165	165.400, 1.184	165.400, 1.960
829	165.600, 1.379	165.600, 1.934	165.600, 1.789	165.600, 1.333	165.600, 1.208	165.600, 1.216	165.600, 1.238	165.600, 1.205	165.600, 1.197	165.600, 1.203	165.600, 1.228	165.600, 1.114	165.600, 1.164	165.600, 1.184	165.600, 1.959
830	165.800, 1.379	165.800, 1.932	165.800, 1.787	165.800, 1.333	165.800, 1.208	165.800, 1.216	165.800, 1.237	165.800, 1.205	165.800, 1.196	165.800, 1.204	165.800, 1.228	165.800, 1.114	165.800, 1.164	165.800, 1.184	165.800, 1.958
831	166.000, 1.378	166.000, 1.931	166.000, 1.786	166.000, 1.333	166.000, 1.207	166.000, 1.215	166.000, 1.237	166.000, 1.205	166.000, 1.196	166.000, 1.204	166.000, 1.228	166.000, 1.113	166.000, 1.164	166.000, 1.184	166.000, 1.957
832	166.200, 1.378	166.200, 1.929	166.200, 1.785	166.200, 1.333	166.200, 1.207	166.200, 1.215	166.200, 1.237	166.200, 1.205	166.200, 1.196	166.200, 1.204	166.200, 1.228	166.200, 1.113	166.200, 1.163	166.200, 1.183	166.200, 1.956
833	166.400, 1.378	166.400, 1.927	166.400, 1.784	166.400, 1.333	166.400, 1.207	166.400, 1.214	166.400, 1.237	166.400, 1.205	166.400, 1.196	166.400, 1.204	166.400, 1.227	166.400, 1.112	166.400, 1.163	166.400, 1.183	166.400, 1.955
834	166.600, 1.378	166.600, 1.925	166.600, 1.783	166.600, 1.332	166.600, 1.206	166.600, 1.214	166.600, 1.237	166.600, 1.205	166.600, 1.196	166.600, 1.203	166.600, 1.227	166.600, 1.112	166.600, 1.163	166.600, 1.183	166.600, 1.954
835	166.800, 1.377	166.800, 1.924	166.800, 1.781	166.800, 1.332	166.800, 1.206	166.800, 1.214	166.800, 1.237	166.800, 1.204	166.800, 1.196	166.800, 1.203	166.800, 1.227	166.800, 1.112	166.800, 1.163	166.800, 1.182	166.800, 1.953
836	167.000, 1.377	167.000, 1.922	167.000, 1.780	167.000, 1.332	167.000, 1.206	167.000, 1.214	167.000, 1.236	167.000, 1.204	167.000, 1.196	167.000, 1.203	167.000, 1.226	167.000, 1.111	167.000, 1.163	167.000, 1.182	167.000, 1.952
837	167.200, 1.377	167.200, 1.920	167.200, 1.779	167.200, 1.332	167.200, 1.206	167.200, 1.214	167.200, 1.236	167.200, 1.204	167.200, 1.196	167.200, 1.203	167.200, 1.226	167.200, 1.111	167.200, 1.163	167.200, 1.182	167.200, 1.952
838	167.400, 1.377	167.400, 1.918	167.400, 1.778	167.400, 1.332	167.400, 1.206	167.400, 1.213	167.400, 1.236	167.400, 1.203	167.400, 1.196	167.400, 1.203	167.400, 1.226	167.400, 1.111	167.400, 1.162	167.400, 1.182	167.400, 1.951
839	167.600, 1.376	167.600, 1.915	167.600, 1.776	167.600, 1.331	167.600, 1.206	167.600, 1.213	167.600, 1.236	167.600, 1.203	167.600, 1.196	167.600, 1.203	167.600, 1.226	167.600, 1.111	167.600, 1.162	167.600, 1.181	167.600, 1.950
840	167.800, 1.376	167.800, 1.913	167.800, 1.775	167.800, 1.331	167.800, 1.206	167.800, 1.213	167.800, 1.236	167.800, 1.203	167.800, 1.196	167.800, 1.202	167.800, 1.225	167.800, 1.111	167.800, 1.161	167.800, 1.181	167.800, 1.949
841	168.000, 1.376	168.000, 1.911	168.000, 1.774	168.000, 1.330	168.000, 1.206	168.000, 1.213	168.000, 1.236	168.000, 1.203	168.000, 1.196	168.000, 1.202	168.000, 1.225	168.000, 1.111	168.000, 1.161	168.000, 1.181	168.000, 1.948
842	168.200, 1.376	168.200, 1.909	168.200, 1.772	168.200, 1.330	168.200, 1.206	168.200, 1.212	168.200, 1.235	168.200, 1.203	168.200, 1.195	168.200, 1.201	168.200, 1.224	168.200, 1.111	168.200, 1.161	168.200, 1.181	168.200, 1.947
843	168.400, 1.376	168.400, 1.906	168.400, 1.770	168.400, 1.330	168.400, 1.205	168.400, 1.211	168.400, 1.235	168.400, 1.202	168.400, 1.195	168.400, 1.200	168.400, 1.224	168.400, 1.111	168.400, 1.161	168.400, 1.181	168.400, 1.947
844	168.600, 1.376	168.600, 1.904	168.600, 1.768	168.600, 1.329	168.600, 1.205	168.600, 1.211	168.600, 1.234	168.600, 1.202	168.600, 1.194	168.600, 1.199	168.600, 1.224	168.600, 1.111	168.600, 1.161	168.600, 1.181	168.600, 1.946
845	168.800, 1.375	168.800, 1.902	168.800, 1.767	168.800, 1.328	168.800, 1.204	168.800, 1.210	168.800, 1.234	168.800, 1.202	168.800, 1.193	168.800, 1.199	168.800, 1.223	168.800, 1.111	168.800, 1.161	168.800, 1.181	168.800, 1.945
846	169.000, 1.375	169.000, 1.899	169.000, 1.765	169.000, 1.328	169.000, 1.204	169.000, 1.210	169.000, 1.233	169.000, 1.201	169.000, 1.193	169.000, 1.198	169.000, 1.223	169.000, 1.111	169.000, 1.160	169.000, 1.181	169.000, 1.944
847	169.200, 1.374	169.200, 1.897	169.200, 1.763	169.200, 1.327	169.200, 1.203	169.200, 1.209	169.200, 1.233	169.200, 1.201	169.200, 1.192	169.200, 1.198	169.200, 1.223	169.200, 1.111	169.200, 1.160	169.200, 1.181	169.200, 1.943
848	169.400, 1.374	169.400, 1.895	169.400, 1.761	169.400, 1.327	169.400, 1.203	169.400, 1.208	169.400, 1.233	169.400, 1.201	169.400, 1.192	169.400, 1.198	169.400, 1.223	169.400, 1.110	169.400, 1.160	169.400, 1.181	169.400, 1.942
849	169.600, 1.373	169.600, 1.893	169.600, 1.759	169.600, 1.326	169.600, 1.203	169.600, 1.208	169.600, 1.233	169.600, 1.201	169.600, 1.191	169.600, 1.197	169.600, 1.222	169.600, 1.110	169.600, 1.160	169.600, 1.181	169.600, 1.941
850	169.800, 1.372	169.800, 1.891	169.800, 1.757	169.800, 1.326	169.800, 1.202	169.800, 1.208	169.800, 1.232	169.800, 1.200	169.800, 1.191	169.800, 1.197	169.800, 1.222	169.800, 1.110	169.800, 1.160	169.800, 1.181	169.800, 1.940
851	170.000, 1.372	170.000, 1.889	170.000, 1.756	170.000, 1.326	170.000, 1.202	170.000, 1.208	170.000, 1.232	170.000, 1.200	170.000, 1.190	170.000, 1.197	170.000, 1.222	170.000, 1.109	170.000, 1.160	170.000, 1.181	170.000, 1.939
852	170.200, 1.371	170.200, 1.887	170.200, 1.754	170.200, 1.325	170.200, 1.202	170.200, 1.208	170.200, 1.231	170.200, 1.200	170.200, 1.190	170.200, 1.197	170.200, 1.222	170.200, 1.109	170.200, 1.160	170.200, 1.180	170.200, 1.939
853	170.400, 1.371	170.400, 1.885	170.400, 1.752	170.400, 1.325	170.400, 1.201	170.400, 1.208	170.400, 1.231	170.400, 1.199	170.400, 1.190	170.400, 1.196	170.400, 1.222	170.400, 1.108	170.400, 1.159	170.400, 1.180	170.400, 1.938
854	170.600, 1.370	170.600, 1.883	170.600, 1.750	170.600, 1.325	170.600, 1.201	170.600, 1.208	170.600, 1.231	170.600, 1.199	170.600, 1.190	170.600, 1.196	170.600, 1.221	170.600, 1.108	170.600, 1.159	170.600, 1.179	170.600, 1.937
855	170.800, 1.370	170.800, 1.881	170.800, 1.749	170.800, 1.324	170.800, 1.201	170.800, 1.208	170.800, 1.230	170.800, 1.198	170.800, 1.190	170.800, 1.196	170.800, 1.221	170.800, 1.108	170.800, 1.158	170.800, 1.179	170.800, 1.936
856	171.000, 1.369	171.000, 1.879	171.000, 1.747	171.000, 1.324	171.000, 1.201	171.000, 1.208	171.000, 1.230	171.000, 1.198	171.000, 1.190	171.000, 1.196	171.000, 1.221	171.000, 1.107	171.000, 1.158	171.000, 1.178	171.000, 1.935
857	171.200, 1.369	171.200, 1.877	171.200, 1.746	171.200, 1.324	171.200, 1.201	171.200, 1.208	171.200, 1.230	171.200, 1.197	171.200, 1.190	171.200, 1.195	171.200, 1.220	171.200, 1.107	171.200, 1.158	171.200, 1.178	171.200, 1.935
858	171.400, 1.369	171.400, 1.874	171.400, 1.745	171.400, 1.323	171.400, 1.201	171.400, 1.208	171.400, 1.230	171.400, 1.197	171.400, 1.190	171.400, 1.195	171.400, 1.220	171.400, 1.106	171.400, 1.157	171.400, 1.177	171.400, 1.934
859	171.600, 1.368	171.600, 1.872	171.600, 1.744	171.600, 1.323	171.600, 1.201	171.600, 1.207	171.600, 1.230	171.600, 1.197	171.600, 1.189	171.600, 1.195	171.600, 1.219	171.600, 1.106	171.600, 1.157	171.600, 1.177	171.600, 1.933
860	171.800, 1.368	171.800, 1.870	171.800, 1.743	171.800, 1.323	171.800, 1.200	171.800, 1.207	171.800, 1.229	171.800, 1.197	171.800, 1.189	171.800, 1.194	171.800, 1.219	171.800, 1.106	171.800, 1.157	171.800, 1.176	171.800, 1.932
861	172.000, 1.368	172.000, 1.868	172.000, 1.741	172.000, 1.322	172.000, 1.200	172.000, 1.207	172.000, 1.229	172.000, 1.197	172.000, 1.189	172.000, 1.194	172.000, 1.219	172.000, 1.106	172.000, 1.156	172.000, 1.176	172.000, 1.931
862	172.200, 1.368	172.200, 1.866	172.200, 1.740	172.200, 1.322	172.200, 1.199	172.200, 1.206	172.200, 1.229	172.200, 1.197	172.200, 1.189	172.200, 1.194	172.200, 1.219	172.200, 1.106	172.200, 1.156	172.200, 1.175	172.200, 1.930
863	172.400, 1.367	172.400, 1.863	172.400, 1.738	172.400, 1.322	172.400, 1.199	172.400, 1.206	172.400, 1.228	172.400, 1.197	172.400, 1.188	172.400, 1.193	172.400, 1.219	172.400, 1.106	172.400, 1.156	172.400, 1.174	172.400, 1.929
864	172.600, 1.367	172.600, 1.861	172.600, 1.737	172.600, 1.322	172.600, 1.198	172.600, 1.205	172.600, 1.228	172.600, 1.196	172.600, 1.188	172.600, 1.193	172.600, 1.219	172.600, 1.105	172.600, 1.156	172.600, 1.174	172.600, 1.928
865	172.800, 1.367	172.800, 1.859	172.800, 1.735	172.800, 1.321	172.800, 1.198	172.800, 1.205	172.800, 1.228	172.800, 1.196	172.800, 1.187	172.800, 1.193	172.800, 1.219	172.800, 1.105	172.800, 1.155	172.800, 1.174	172.800, 1.927
866	173.000, 1.367	173.000, 1.857	173.000, 1.733	173.000, 1.321	173.000, 1.198	173.000, 1.204	173.000, 1.228	173.000, 1.196	173.000, 1.187	173.000, 1.192	173.000, 1.219	173.000, 1.105	173.000, 1.155	173.000, 1.173	173.000, 1.925
867	173.200, 1.366	173.200, 1.855	173.200, 1.732	173.200, 1.321	173.200, 1.197	173.200, 1.204	173.200, 1.227	173.200, 1.196	173.200, 1.186	173.200, 1.192	173.200, 1.219	173.200, 1.105	173.200, 1.155	173.200, 1.173	173.200, 1.924
868	173.400, 1.366	173.400, 1.852	173.400, 1.730	173.400, 1.321	173.400, 1.197	173.400, 1.204	173.400, 1.227	173.400, 1.196	173.400, 1.186	173.400, 1.192	173.400, 1.219	173.400, 1.105	173.400, 1.155	173.400, 1.173	173.400, 1.923
869	173.600, 1.366	173.600, 1.850	173.600, 1.728	173.600, 1.321	173.600, 1.197	173.600, 1.203	173.600, 1.227	173.600, 1.196	173.600, 1.186	173.600, 1.192	173.600, 1.219	173.600, 1.105	173.600, 1.155	173.600, 1.173	173.600, 1.922
870	173.800, 1.365	173.800, 1.848	173.800, 1.726	173.800, 1.321	173.800, 1.197	173.800, 1.203	173.800, 1.226	173.800, 1.195	173.800, 1.185	173.800, 1.192	173.800, 1.218	173.800, 1.104	173.800, 1.155	173.800, 1.173	173.800, 1.922
871	174.000, 1.365	174.000, 1.846	174.000, 1.724	174.000, 1.321	174.000, 1.196	174.000, 1.202	174.000, 1.226	174.000, 1.195	174.000, 1.185	174.000, 1.192	174.000, 1.218	174.000, 1.104	174.000, 1.154	174.000, 1.173	174.000, 1.921
872	174.200, 1.365	174.200, 1.843	174.200, 1.723	174.200, 1.320	174.200, 1.196	174.200, 1.202	174.200, 1.225	174.200, 1.195	174.200, 1.185	174.200, 1.192	174.200, 1.218	174.200, 1.103	174.200, 1.154	174.200, 1.172	174.200, 1.920
873	174.400, 1.365	174.400, 1.841	174.400, 1.721	174.400, 1.320	174.400, 1.196	174.400, 1.202	174.400, 1.225	174.400, 1.194	174.400, 1.185	174.400, 1.192	174.400, 1.217	174.400, 1.103	174.400, 1.154	174.400, 1.172	174.400, 1.919
874	174.600, 1.365	174.600, 1.838	174.600, 1.719	174.600, 1.319	174.600, 1.195	174.600, 1.201	174.600, 1.225	174.600, 1.194	174.600, 1.185	174.600, 1.192	174.600, 1.216	174.600, 1.103	174.600, 1.153	174.600, 1.172	174.600, 1.918
875	174.800, 1.365	174.800, 1.836	174.800, 1.718	174.800, 1.319	174.800, 1.195	174.800, 1.201	174.800, 1.225	174.800, 1.193	174.800, 1.185	174.800, 1.192	174.800, 1.216	174.800, 1.102	174.800, 1.153	174.800, 1.172	174.800, 1.917
876	175.000, 1.364	175.000, 1.833	175.000, 1.716	175.000, 1.319	175.000, 1.195	175.000, 1.201	175.000, 1.225	175.000, 1.193	175.000, 1.185	175.000, 1.191	175.000, 1.215	175.000, 1.102	175.000, 1.153	175.000, 1.172	175.000, 1.916
877	175.200, 1.364	175.200, 1.831	175.200, 1.715	175.200, 1.319	175.200, 1.195	175.200, 1.201	175.200, 1.224	175.200, 1.192	175.200, 1.185	175.200, 1.191	175.200, 1.214	175.200, 1.102	175.200, 1.152	175.200, 1.172	175.200, 1.916
878	175.400, 1.364	175.400, 1.829	175.400, 1.713	175.400, 1.319	175.400, 1.195	175.400, 1.201	175.400, 1.224	175.400, 1.192	175.400, 1.185	175.400, 1.191	175.400, 1.214	175.400, 1.101	175.400, 1.152	175.400, 1.172	175.400, 1.915
879	175.600, 1.364	175.600, 1.827	175.600, 1.712	175.600, 1.318	175.600, 1.194	175.600, 1.201	175.600, 1.223	175.600, 1.191	175.600, 1.185	175.600, 1.190	175.600, 1.214	175.600, 1.101	175.600, 1.152	175.600, 1.172	175.600, 1.914
880	175.800, 1.364	175.800, 1.824	175.800, 1.711	175.800, 1.318	175.800, 1.194	175.800, 1.201	175.800, 1.223	175.800, 1.191	175.800, 1.184	175.800, 1.190	175.800, 1.213	175.800, 1.101	175.800, 1.152	175.800, 1.172	175.800, 1.913
881	176.000, 1.364	176.000, 1.822	176.000, 1.710	176.000, 1.318	176.000, 1.194	176.000, 1.201	176.000, 1.223	176.000, 1.190	176.000, 1.184	176.000, 1.190	176.000, 1.213	176.000, 1.101	176.000, 1.151	176.000, 1.172	176.000, 1.912
882	176.200, 1.363	176.200, 1.820	176.200, 1.708	176.200, 1.318	176.200, 1.193	176.200, 1.201	176.200, 1.222	176.200, 1.190	176.200, 1.183	176.200, 1.190	176.200, 1.213	176.200, 1.100	176.200, 1.151	176.200, 1.172	176.200, 1.911
883	176.400, 1.363	176.400, 1.818	176.400, 1.707	176.400, 1.318	176.400, 1.193	176.400, 1.201	176.400, 1.222	176.400, 1.189	176.400, 1.183	176.400, 1.189	176.400, 1.213	176.400, 1.100	176.400, 1.151	176.400, 1.172	176.400, 1.910
884	176.600, 1.362	176.600, 1.815	176.600, 1.705	176.600, 1.317	176.600, 1.193	176.600, 1.201	176.600, 1.221	176.600, 1.189	176.600, 1.182	176.600, 1.189	176.600, 1.213	176.600, 1.100	176.600, 1.151	176.600, 1.171	176.600, 1.909
885	176.800, 1.362	176.800, 1.813	176.800, 1.703	176.800, 1.317	176.800, 1.193	176.800, 1.201	176.800, 1.221	176.800, 1.189	176.800, 1.182	176.800, 1.189	176.800, 1.213	176.800, 1.100	176.800, 1.150	176.800, 1.171	176.800, 1.908
886	177.000, 1.361	177.000, 1.811	177.000, 1.702	177.000, 1.317	177.000, 1.192	177.000, 1.201	177.000, 1.220	177.000, 1.189	177.000, 1.181	177.000, 1.188	177.000, 1.212	177.000, 1.100	177.000, 1.150	177.000, 1.171	177.000, 1.907
887	177.200, 1.361	177.200, 1.809	177.200, 1.700	177.200, 1.316	177.200, 1.192	177.200, 1.201	177.200, 1.220	177.200, 1.189	177.200, 1.181	177.200, 1.188	177.200, 1.212	177.200, 1.099	177.200, 1.150	177.200, 1.171	177.200, 1.906
888	177.400, 1.360	177.400, 1.807	177.400, 1.698	177.400, 1.316	177.400, 1.192	177.400, 1.200	177.400, 1.219	177.400, 1.189	177.400, 1.180	177.400, 1.187	177.400, 1.212	177.400, 1.099	177.400, 1.150	177.400, 1.171	177.400, 1.905
889	177.600, 1.359	177.600, 1.805	177.600, 1.697	177.600, 1.316	177.600, 1.192	177.600, 1.199	177.600, 1.219	177.600, 1.189	177.600, 1.180	177.600, 1.187	177.600, 1.211	177.600, 1.099	177.600, 1.150	177.600, 1.170	177.600, 1.904
890	177.800, 1.359	177.800, 1.803	177.800, 1.695	177.800, 1.315	177.800, 1.191	177.800, 1.199	177.800, 1.218	177.800, 1.189	177.800, 1.180	177.800, 1.187	177.800, 1.211	177.800, 1.099	177.800, 1.149	177.800, 1.170	177.800, 1.903
891	178.000, 1.358	178.000, 1.801	178.000, 1.693	178.000, 1.315	178.000, 1.191	178.000, 1.198	178.000, 1.218	178.000, 1.189	178.000, 1.180	178.000, 1.187	178.000, 1.211	178.000, 1.098	178.000, 1.149	178.000, 1.170	178.000, 1.902
892	178.200, 1.358	178.200, 1.798	178.200, 1.691	178.200, 1.314	178.200, 1.191	178.200, 1.198	178.200, 1.218	178.200, 1.189	178.200, 1.180	178.200, 1.187	178.200, 1.210	178.200, 1.099	178.200, 1.149	178.200, 1.169	178.200, 1.901
893	178.400, 1.358	178.400, 1.796	178.400, 1.689	178.400, 1.314	178.400, 1.190	178.400, 1.197	178.400, 1.218	178.400, 1.189	178.400, 1.180	178.400, 1.187	178.400, 1.210	178.400, 1.099	178.400, 1.149	178.400, 1.169	178.400, 1.901
894	178.600, 1.358	178.600, 1.794	178.600, 1.688	178.600, 1.313	178.600, 1.190	178.600, 1.197	178.600, 1.217	178.600, 1.189	178.600, 1.180	178.600, 1.186	178.600, 1.210	178.600, 1.099	178.600, 1.149	178.600, 1.169	178.600, 1.900
895	178.800, 1.358	178.800, 1.792	178.800, 1.686	178.800, 1.313	178.800, 1.190	178.800, 1.196	178.800, 1.217	178.800, 1.189	178.800, 1.180	178.800, 1.186	178.800, 1.210	178.800, 1.099	178.800, 1.148	178.800, 1.168	178.800, 1.899
896	179.000, 1.358	179.000, 1.789	179.000, 1.684	179.000, 1.313	179.000, 1.189	179.000, 1.196	179.000, 1.217	179.000, 1.189	179.000, 1.179	179.000, 1.186	179.000, 1.210	179.000, 1.099	179.000, 1.148	179.000, 1.168	179.000, 1.898
897	179.200, 1.358	179.200, 1.787	179.200, 1.682	179.200, 1.312	179.200, 1.189	179.200, 1.195	179.200, 1.217	179.200, 1.188	179.200, 1.179	179.200, 1.185	179.200, 1.210	179.200, 1.098	179.200, 1.148	179.200, 1.168	179.200, 1.897
898	179.400, 1.357	179.400, 1.785	179.400, 1.681	179.400, 1.312	179.400, 1.188	179.400, 1.195	179.400, 1.217	179.400, 1.188	179.400, 1.179	179.400, 1.185	179.400, 1.210	179.400, 1.098	179.400, 1.148	179.400, 1.168	179.400, 1.896
899	179.600, 1.357	179.600, 1.783	179.600, 1.679	179.600, 1.312	179.600, 1.187	179.600, 1.195	179.600, 1.217	179.600, 1.187	179.600, 1.179	179.600, 1.185	179.600, 1.210	179.600, 1.098	179.600, 1.147	179.600, 1.167	179.600, 1.895
900	179.800, 1.357	179.800, 1.780	179.800, 1.678	179.800, 1.312	179.800, 1.187	179.800, 1.195	179.800, 1.217	179.800, 1.187	179.800, 1.179	179.800, 1.185	179.800, 1.210	179.800, 1.097	179.800, 1.147	179.800, 1.167	179.800, 1.895
901	180.000, 1.357	180.000, 1.778	180.000, 1.676	180.000, 1.312	180.000, 1.187	180.000, 1.195	180.000, 1.217	180.000, 1.187	180.000, 1.178	180.000, 1.184	180.000, 1.211	180.000, 1.097	180.000, 1.146	180.000, 1.167	180.000, 1.894
902	180.200, 1.356	180.200, 1.776	180.200, 1.674	180.200, 1.311	180.200, 1.186	180.200, 1.195	180.200, 1.217	180.200, 1.186	180.200, 1.178	180.200, 1.184	180.200, 1.211	180.200, 1.096	180.200, 1.146	180.200, 1.166	180.200, 1.893
903	180.400, 1.356	180.400, 1.774	180.400, 1.672	180.400, 1.311	180.400, 1.185	180.400, 1.194	180.400, 1.216	180.400, 1.186	180.400, 1.177	180.400, 1.183	180.400, 1.211	180.400, 1.096	180.400, 1.145	180.400, 1.166	180.400, 1.892
904	180.600, 1.356	180.600, 1.772	180.600, 1.671	180.600, 1.311	180.600, 1.185	180.600, 1.194	180.600, 1.216	180.600, 1.185	180.600, 1.177	180.600, 1.183	180.600, 1.210	180.600, 1.095	180.600, 1.145	180.600, 1.165	180.600, 1.891
905	180.800, 1.356	180.800, 1.770	180.800, 1.669	180.800, 1.311	180.800, 1.184	180.800, 1.194	180.800, 1.216	180.800, 1.185	180.800, 1.177	180.800, 1.182	180.800, 1.210	180.800, 1.094	180.800, 1.145	180.800, 1.165	180.800, 1.890
906	181.000, 1.356	181.000, 1.768	181.000, 1.667	181.000, 1.310	181.000, 1.183	181.000, 1.193	181.000, 1.216	181.000, 1.185	181.000, 1.176	181.000, 1.182	181.000, 1.210	181.000, 1.094	181.000, 1.144	181.000, 1.165	181.000, 1.888
907	181.200, 1.355	181.200, 1.766	181.200, 1.666	181.200, 1.310	181.200, 1.183	181.200, 1.193	181.200, 1.215	181.200, 1.185	181.200, 1.176	181.200, 1.182	181.200, 1.209	181.200, 1.094	181.200, 1.144	181.200, 1.164	181.200, 1.887
908	181.400, 1.355	181.400, 1.763	181.400, 1.664	181.400, 1.310	181.400, 1.183	181.400, 1.192	181.400, 1.215	181.400, 1.184	181.400, 1.176	181.400, 1.181	181.400, 1.208	181.400, 1.093	181.400, 1.144	181.400, 1.164	181.400, 1.885
909	181.600, 1.355	181.600, 1.761	181.600, 1.663	181.600, 1.309	181.600, 1.182	181.600, 1.192	181.600, 1.214	181.600, 1.184	181.600, 1.175	181.600, 1.181	181.600, 1.208	181.600, 1.093	181.600, 1.143	181.600, 1.163	181.600, 1.884
910	181.800, 1.355	181.800, 1.759	181.800, 1.661	181.800, 1.309	181.800, 1.182	181.800, 1.191	181.800, 1.214	181.800, 1.184	181.800, 1.175	181.800, 1.181	181.800, 1.207	181.800, 1.093	181.800, 1.143	181.800, 1.163	181.800, 1.883
911	182.000, 1.354	182.000, 1.756	182.000, 1.660	182.000, 1.309	182.000, 1.182	182.000, 1.191	182.000, 1.214	182.000, 1.184	182.000, 1.175	182.000, 1.180	182.000, 1.206	182.000, 1.093	182.000, 1.143	182.000, 1.163	182.000, 1.882
912	182.200, 1.354	182.200, 1.754	182.200, 1.658	182.200, 1.308	182.200, 1.182	182.200, 1.190	182.200, 1.214	182.200, 1.184	182.200, 1.175	182.200, 1.180	182.200, 1.206	182.200, 1.092	182.200, 1.143	182.200, 1.162	182.200, 1.880
913	182.400, 1.354	182.400, 1.752	182.400, 1.656	182.400, 1.308	182.400, 1.182	182.400, 1.190	182.400, 1.213	182.400, 1.184	182.400, 1.175	182.400, 1.180	182.400, 1.205	182.400, 1.092	182.400, 1.143	182.400, 1.162	182.400, 1.879
914	182.600, 1.354	182.600, 1.749	182.600, 1.655	182.600, 1.308	182.600, 1.182	182.600, 1.189	182.600, 1.213	182.600, 1.184	182.600, 1.175	182.600, 1.179	182.600, 1.205	182.600, 1.092	182.600, 1.143	182.600, 1.162	182.600, 1.878
915	182.800, 1.354	182.800, 1.747	182.800, 1.653	182.800, 1.307	182.800, 1.182	182.800, 1.189	182.800, 1.213	182.800, 1.184	182.800, 1.175	182.800, 1.180	182.800, 1.205	182.800, 1.093	182.800, 1.142	182.800, 1.162	182.800, 1.877
916	183.000, 1.353	183.000, 1.745	183.000, 1.652	183.000, 1.307	183.000, 1.181	183.000, 1.188	183.000, 1.213	183.000, 1.184	183.000, 1.175	183.000, 1.180	183.000, 1.204	183.000, 1.092	183.000, 1.142	183.000, 1.162	183.000, 1.875
917	183.200, 1.353	183.200, 1.743	183.200, 1.650	183.200, 1.307	183.200, 1.181	183.200, 1.188	183.200, 1.213	183.200, 1.184	183.200, 1.175	183.200, 1.180	183.200, 1.204	183.200, 1.092	183.200, 1.142	183.200, 1.162	183.200, 1.874
918	183.400, 1.352	183.400, 1.741	183.400, 1.648	183.400, 1.307	183.400, 1.181	183.400, 1.188	183.400, 1.213	183.400, 1.183	183.400, 1.175	183.400, 1.180	183.400, 1.204	183.400, 1.092	183.400, 1.142	183.400, 1.162	183.400, 1.873
919	183.600, 1.352	183.600, 1.739	183.600, 1.647	183.600, 1.307	183.600, 1.181	183.600, 1.188	183.600, 1.214	183.600, 1.183	183.600, 1.174	183.600, 1.180	183.600, 1.204	183.600, 1.092	183.600, 1.142	183.600, 1.162	183.600, 1.872
920	183.800, 1.351	183.800, 1.737	183.800, 1.645	183.800, 1.307	183.800, 1.180	183.800, 1.187	183.800, 1.214	183.800, 1.183	183.800, 1.174	183.800, 1.180	183.800, 1.204	183.800, 1.092	183.800, 1.141	183.800, 1.161	183.800, 1.871
921	184.000, 1.351	184.000, 1.735	184.000, 1.643	184.000, 1.307	184.000, 1.180	184.000, 1.187	184.000, 1.214	184.000, 1.182	184.000, 1.174	184.000, 1.181	184.000, 1.204	184.000, 1.092	184.000, 1.141	184.000, 1.160	184.000, 1.870
922	184.200, 1.351	184.200, 1.733	184.200, 1.642	184.200, 1.307	184.200, 1.180	184.200, 1.187	184.200, 1.213	184.200, 1.182	184.200, 1.173	184.200, 1.181	184.200, 1.204	184.200, 1.092	184.200, 1.141	184.200, 1.160	184.200, 1.869
923	184.400, 1.350	184.400, 1.731	184.400, 1.640	184.400, 1.307	184.400, 1.180	184.400, 1.187	184.400, 1.213	184.400, 1.181	184.400, 1.173	184.400, 1.181	184.400, 1.204	184.400, 1.092	184.400, 1.141	184.400, 1.160	184.400, 1.867
924	184.600, 1.350	184.600, 1.729	184.600, 1.639	184.600, 1.307	184.600, 1.179	184.600, 1.187	184.600, 1.212	184.600, 1.181	184.600, 1.173	184.600, 1.181	184.600, 1.204	184.600, 1.092	184.600, 1.141	184.600, 1.159	184.600, 1.866
925	184.800, 1.350	184.800, 1.727	184.800, 1.637	184.800, 1.306	184.800, 1.179	184.800, 1.187	184.800, 1.212	184.800, 1.180	184.800, 1.172	184.800, 1.181	184.800, 1.203	184.800, 1.092	184.800, 1.140	184.800, 1.159	184.800, 1.865
926	185.000, 1.350	185.000, 1.724	185.000, 1.636	185.000, 1.306	185.000, 1.179	185.000, 1.187	185.000, 1.211	185.000, 1.180	185.000, 1.172	185.000, 1.181	185.000, 1.203	185.000, 1.092	185.000, 1.140	185.000, 1.159	185.000, 1.864
927	185.200, 1.350	185.200, 1.722	185.200, 1.634	185.200, 1.306	185.200, 1.179	185.200, 1.187	185.200, 1.210	185.200, 1.179	185.200, 1.172	185.200, 1.180	185.200, 1.202	185.200, 1.092	185.200, 1.140	185.200, 1.159	185.200, 1.863
928	185.400, 1.349	185.400, 1.720	185.400, 1.633	185.400, 1.305	185.400, 1.179	185.400, 1.187	185.400, 1.210	185.400, 1.179	185.400, 1.172	185.400, 1.180	185.400, 1.202	185.400, 1.092	185.400, 1.140	185.400, 1.159	185.400, 1.862
929	185.600, 1.349	185.600, 1.717	185.600, 1.631	185.600, 1.305	185.600, 1.179	185.600, 1.186	185.600, 1.210	185.600, 1.178	185.600, 1.171	185.600, 1.180	185.600, 1.201	185.600, 1.092	185.600, 1.139	185.600, 1.159	185.600, 1.861
930	185.800, 1.349	185.800, 1.715	185.800, 1.629	185.800, 1.304	185.800, 1.179	185.800, 1.186	185.800, 1.209	185.800, 1.178	185.800, 1.171	185.800, 1.179	185.800, 1.201	185.800, 1.092	185.800, 1.139	185.800, 1.159	185.800, 1.860
931	186.000, 1.349	186.000, 1.712	186.000, 1.628	186.000, 1.304	186.000, 1.179	186.000, 1.186	186.000, 1.209	186.000, 1.178	186.000, 1.171	186.000, 1.178	186.000, 1.201	186.000, 1.091	186.000, 1.139	186.000, 1.159	186.000, 1.859
932	186.200, 1.349	186.200, 1.710	186.200, 1.626	186.200, 1.303	186.200, 1.179	186.200, 1.186	186.200, 1.209	186.200, 1.177	186.200, 1.171	186.200, 1.177	186.200, 1.200	186.200, 1.091	186.200, 1.139	186.200, 1.159	186.200, 1.858
933	186.400, 1.349	186.400, 1.707	186.400, 1.624	186.400, 1.303	186.400, 1.178	186.400, 1.185	186.400, 1.209	186.400, 1.177	186.400, 1.171	186.400, 1.176	186.400, 1.200	186.400, 1.091	186.400, 1.139	186.400, 1.159	186.400, 1.857
934	186.600, 1.349	186.600, 1.705	186.600, 1.622	186.600, 1.302	186.600, 1.178	186.600, 1.185	186.600, 1.209	186.600, 1.177	186.600, 1.171	186.600, 1.176	186.600, 1.200	186.600, 1.091	186.600, 1.138	186.600, 1.159	186.600, 1.856
935	186.800, 1.348	186.800, 1.703	186.800, 1.620	186.800, 1.302	186.800, 1.178	186.800, 1.184	186.800, 1.209	186.800, 1.177	186.800, 1.171	186.800, 1.175	186.800, 1.199	186.800, 1.090	186.800, 1.138	186.800, 1.158	186.800, 1.855
936	187.000, 1.348	187.000, 1.700	187.000, 1.618	187.000, 1.302	187.000, 1.178	187.000, 1.184	187.000, 1.209	187.000, 1.177	187.000, 1.171	187.000, 1.175	187.000, 1.199	187.000, 1.090	187.000, 1.138	187.000, 1.158	187.000, 1.854
937	187.200, 1.347	187.200, 1.698	187.200, 1.616	187.200, 1.302	187.200, 1.178	187.200, 1.183	187.200, 1.209	187.200, 1.176	187.200, 1.171	187.200, 1.175	187.200, 1.199	187.200, 1.090	187.200, 1.137	187.200, 1.157	187.200, 1.852
938	187.400, 1.346	187.400, 1.696	187.400, 1.615	187.400, 1.302	187.400, 1.177	187.400, 1.183	187.400, 1.209	187.400, 1.176	187.400, 1.171	187.400, 1.175	187.400, 1.199	187.400, 1.089	187.400, 1.137	187.400, 1.157	187.400, 1.851
939	187.600, 1.346	187.600, 1.695	187.600, 1.613	187.600, 1.301	187.600, 1.177	187.600, 1.183	187.600, 1.209	187.600, 1.176	187.600, 1.170	187.600, 1.175	187.600, 1.198	187.600, 1.089	187.600, 1.137	187.600, 1.156	187.600, 1.850
940	187.800, 1.345	187.800, 1.693	187.800, 1.612	187.800, 1.301	187.800, 1.177	187.800, 1.183	187.800, 1.208	187.800, 1.176	187.800, 1.170	187.800, 1.175	187.800, 1.198	187.800, 1.089	187.800, 1.137	187.800, 1.156	187.800, 1.849
941	188.000, 1.345	188.000, 1.691	188.000, 1.610	188.000, 1.300	188.000, 1.177	188.000, 1.183	188.000, 1.208	188.000, 1.175	188.000, 1.170	188.000, 1.175	188.000, 1.198	188.000, 1.089	188.000, 1.137	188.000, 1.155	188.000, 1.848
942	188.200, 1.345	188.200, 1.689	188.200, 1.609	188.200, 1.300	188.200, 1.177	188.200, 1.182	188.200, 1.208	188.200, 1.175	188.200, 1.170	188.200, 1.174	188.200, 1.198	188.200, 1.088	188.200, 1.136	188.200, 1.155	188.200, 1.847
943	188.400, 1.344	188.400, 1.688	188.400, 1.608	188.400, 1.300	188.400, 1.177	188.400, 1.182	188.400, 1.207	188.400, 1.175	188.400, 1.170	188.400, 1.174	188.400, 1.198	188.400, 1.088	188.400, 1.136	188.400, 1.155	188.400, 1.846
944	188.600, 1.344	188.600, 1.686	188.600, 1.606	188.600, 1.299	188.600, 1.177	188.600, 1.182	188.600, 1.207	188.600, 1.176	188.600, 1.170	188.600, 1.174	188.600, 1.198	188.600, 1.088	188.600, 1.136	188.600, 1.155	188.600, 1.845
945	188.800, 1.344	188.800, 1.684	188.800, 1.605	188.800, 1.299	188.800, 1.177	188.800, 1.182	188.800, 1.206	188.800, 1.176	188.800, 1.170	188.800, 1.174	188.800, 1.197	188.800, 1.088	188.800, 1.136	188.800, 1.155	188.800, 1.844
946	189.000, 1.344	189.000, 1.682	189.000, 1.603	189.000, 1.299	189.000, 1.177	189.000, 1.182	189.000, 1.206	189.000, 1.176	189.000, 1.169	189.000, 1.174	189.000, 1.197	189.000, 1.087	189.000, 1.136	189.000, 1.155	189.000, 1.843
947	189.200, 1.344	189.200, 1.680	189.200, 1.602	189.200, 1.299	189.200, 1.177	189.200, 1.181	189.200, 1.205	189.200, 1.176	189.200, 1.169	189.200, 1.174	189.200, 1.197	189.200, 1.087	189.200, 1.135	189.200, 1.155	189.200, 1.842
948	189.400, 1.344	189.400, 1.678	189.400, 1.601	189.400, 1.299	189.400, 1.177	189.400, 1.181	189.400, 1.205	189.400, 1.176	189.400, 1.169	189.400, 1.173	189.400, 1.197	189.400, 1.087	189.400, 1.135	189.400, 1.154	189.400, 1.842
949	189.600, 1.344	189.600, 1.676	189.600, 1.599	189.600, 1.299	189.600, 1.176	189.600, 1.181	189.600, 1.205	189.600, 1.176	189.600, 1.169	189.600, 1.173	189.600, 1.197	189.600, 1.087	189.600, 1.135	189.600, 1.154	189.600, 1.841
950	189.800, 1.344	189.800, 1.674	189.800, 1.598	189.800, 1.299	189.800, 1.176	189.800, 1.181	189.800, 1.204	189.800, 1.175	189.800, 1.169	189.800, 1.172	189.800, 1.197	189.800, 1.087	189.800, 1.135	189.800, 1.154	189.800, 1.841
951	190.000, 1.344	190.000, 1.672	190.000, 1.596	190.000, 1.299	190.000, 1.175	190.000, 1.181	190.000, 1.204	190.000, 1.175	190.000, 1.169	190.000, 1.171	190.000, 1.197	190.000, 1.087	190.000, 1.134	190.000, 1.153	190.000, 1.840
952	190.200, 1.344	190.200, 1.670	190.200, 1.595	190.200, 1.299	190.200, 1.175	190.200, 1.180	190.200, 1.204	190.200, 1.175	190.200, 1.169	190.200, 1.171	190.200, 1.197	190.200, 1.087	190.200, 1.134	190.200, 1.153	190.200, 1.840
953	190.400, 1.344	190.400, 1.667	190.400, 1.593	190.400, 1.299	190.400, 1.174	190.400, 1.180	190.400, 1.204	190.400, 1.175	190.400, 1.169	190.400, 1.170	190.400, 1.197	190.400, 1.086	190.400, 1.134	190.400, 1.153	190.400, 1.839
954	190.600, 1.343	190.600, 1.665	190.600, 1.591	190.600, 1.299	190.600, 1.174	190.600, 1.180	190.600, 1.204	190.600, 1.175	190.600, 1.169	190.600, 1.170	190.600, 1.197	190.600, 1.086	190.600, 1.134	190.600, 1.153	190.600, 1.838
955	190.800, 1.343	190.800, 1.663	190.800, 1.590	190.800, 1.299	190.800, 1.174	190.800, 1.179	190.800, 1.204	190.800, 1.174	190.800, 1.168	190.800, 1.170	190.800, 1.198	190.800, 1.086	190.800, 1.134	190.800, 1.153	190.800, 1.836
956	191.000, 1.342	191.000, 1.661	191.000, 1.588	191.000, 1.299	191.000, 1.173	191.000, 1.179	191.000, 1.204	191.000, 1.174	191.000, 1.168	191.000, 1.170	191.000, 1.198	191.000, 1.086	191.000, 1.134	191.000, 1.152	191.000, 1.835
957	191.200, 1.341	191.200, 1.659	191.200, 1.587	191.200, 1.299	191.200, 1.173	191.200, 1.179	191.200, 1.203	191.200, 1.174	191.200, 1.168	191.200, 1.170	191.200, 1.198	191.200, 1.085	191.200, 1.133	191.200, 1.152	191.200, 1.834
958	191.400, 1.341	191.400, 1.658	191.400, 1.586	191.400, 1.298	191.400, 1.173	191.400, 1.179	191.400, 1.203	191.400, 1.173	191.400, 1.167	191.400, 1.170	191.400, 1.197	191.400, 1.085	191.400, 1.133	191.400, 1.152	191.400, 1.833
959	191.600, 1.340	191.600, 1.656	191.600, 1.584	191.600, 1.298	191.600, 1.173	191.600, 1.179	191.600, 1.203	191.600, 1.173	191.600, 1.167	191.600, 1.171	191.600, 1.197	191.600, 1.085	191.600, 1.133	191.600, 1.152	191.600, 1.831
960	191.800, 1.340	191.800, 1.654	191.800, 1.583	191.800, 1.298	191.800, 1.172	191.800, 1.179	191.800, 1.203	191.800, 1.172	191.800, 1.166	191.800, 1.171	191.800, 1.197	191.800, 1.084	191.800, 1.133	191.800, 1.152	191.800, 1.830
961	192.000, 1.339	192.000, 1.653	192.000, 1.581	192.000, 1.297	192.000, 1.172	192.000, 1.179	192.000, 1.202	192.000, 1.172	192.000, 1.165	192.000, 1.171	192.000, 1.197	192.000, 1.084	192.000, 1.133	192.000, 1.152	192.000, 1.829
962	192.200, 1.339	192.200, 1.651	192.200, 1.579	192.200, 1.297	192.200, 1.172	192.200, 1.179	192.200, 1.202	192.200, 1.172	192.200, 1.165	192.200, 1.171	192.200, 1.197	192.200, 1.084	192.200, 1.133	192.200, 1.152	192.200, 1.827
963	192.400, 1.339	192.400, 1.649	192.400, 1.578	192.400, 1.296	192.400, 1.172	192.400, 1.179	192.400, 1.202	192.400, 1.172	192.400, 1.164	192.400, 1.171	192.400, 1.196	192.400, 1.084	192.400, 1.133	192.400, 1.152	192.400, 1.826
964	192.600, 1.339	192.600, 1.648	192.600, 1.576	192.600, 1.296	192.600, 1.172	192.600, 1.179	192.600, 1.201	192.600, 1.172	192.600, 1.164	192.600, 1.171	192.600, 1.196	192.600, 1.084	192.600, 1.133	192.600, 1.152	192.600, 1.825
965	192.800, 1.339	192.800, 1.646	192.800, 1.574	192.800, 1.296	192.800, 1.172	192.800, 1.179	192.800, 1.201	192.800, 1.172	192.800, 1.163	192.800, 1.170	192.800, 1.195	192.800, 1.084	192.800, 1.133	192.800, 1.152	192.800, 1.824
966	193.000, 1.338	193.000, 1.645	193.000, 1.573	193.000, 1.295	193.000, 1.172	193.000, 1.179	193.000, 1.201	193.000, 1.171	193.000, 1.163	193.000, 1.170	193.000, 1.195	193.000, 1.084	193.000, 1.132	193.000, 1.152	193.000, 1.823
967	193.200, 1.338	193.200, 1.643	193.200, 1.571	193.200, 1.295	193.200, 1.172	193.200, 1.179	193.200, 1.200	193.200, 1.171	193.200, 1.163	193.200, 1.169	193.200, 1.194	193.200, 1.083	193.200, 1.132	193.200, 1.151	193.200, 1.822
968	193.400, 1.338	193.400, 1.641	193.400, 1.569	193.400, 1.295	193.400, 1.172	193.400, 1.178	193.400, 1.200	193.400, 1.170	193.400, 1.163	193.400, 1.169	193.400, 1.194	193.400, 1.083	193.400, 1.132	193.400, 1.151	193.400, 1.821
969	193.600, 1.338	193.600, 1.639	193.600, 1.568	193.600, 1.294	193.600, 1.171	193.600, 1.178	193.600, 1.200	193.600, 1.170	193.600, 1.162	193.600, 1.168	193.600, 1.193	193.600, 1.083	193.600, 1.131	193.600, 1.151	193.600, 1.820
970	193.800, 1.338	193.800, 1.637	193.800, 1.566	193.800, 1.294	193.800, 1.171	193.800, 1.177	193.800, 1.200	193.800, 1.170	193.800, 1.162	193.800, 1.168	193.800, 1.193	193.800, 1.083	193.800, 1.131	193.800, 1.151	193.800, 1.819
971	194.000, 1.338	194.000, 1.634	194.000, 1.565	194.000, 1.294	194.000, 1.171	194.000, 1.177	194.000, 1.200	194.000, 1.169	194.000, 1.162	194.000, 1.167	194.000, 1.193	194.000, 1.082	194.000, 1.130	194.000, 1.151	194.000, 1.818
972	194.200, 1.338	194.200, 1.632	194.200, 1.563	194.200, 1.293	194.200, 1.171	194.200, 1.176	194.200, 1.200	194.200, 1.169	194.200, 1.162	194.200, 1.167	194.200, 1.193	194.200, 1.082	194.200, 1.130	194.200, 1.151	194.200, 1.817
973	194.400, 1.337	194.400, 1.630	194.400, 1.562	194.400, 1.293	194.400, 1.171	194.400, 1.176	194.400, 1.199	194.400, 1.169	194.400, 1.162	194.400, 1.167	194.400, 1.193	194.400, 1.082	194.400, 1.129	194.400, 1.150	194.400, 1.816
974	194.600, 1.337	194.600, 1.628	194.600, 1.560	194.600, 1.293	194.600, 1.171	194.600, 1.175	194.600, 1.199	194.600, 1.169	194.600, 1.161	194.600, 1.166	194.600, 1.193	194.600, 1.082	194.600, 1.129	194.600, 1.150	194.600, 1.815
975	194.800, 1.337	194.800, 1.626	194.800, 1.559	194.800, 1.293	194.800, 1.170	194.800, 1.175	194.800, 1.199	194.800, 1.168	194.800, 1.161	194.800, 1.166	194.800, 1.193	194.800, 1.081	194.800, 1.128	194.800, 1.149	194.800, 1.814
976	195.000, 1.336	195.000, 1.624	195.000, 1.557	195.000, 1.293	195.000, 1.170	195.000, 1.174	195.000, 1.199	195.000, 1.168	195.000, 1.161	195.000, 1.166	195.000, 1.192	195.000, 1.081	195.000, 1.128	195.000, 1.149	195.000, 1.812
977	195.200, 1.336	195.200, 1.621	195.200, 1.556	195.200, 1.292	195.200, 1.170	195.200, 1.174	195.200, 1.198	195.200, 1.168	195.200, 1.160	195.200, 1.166	195.200, 1.192	195.200, 1.081	195.200, 1.128	195.200, 1.149	195.200, 1.811
978	195.400, 1.336	195.400, 1.619	195.400, 1.555	195.400, 1.292	195.400, 1.169	195.400, 1.174	195.400, 1.198	195.400, 1.168	195.400, 1.160	195.400, 1.166	195.400, 1.192	195.400, 1.080	195.400, 1.128	195.400, 1.148	195.400, 1.810
979	195.600, 1.335	195.600, 1.617	195.600, 1.554	195.600, 1.292	195.600, 1.169	195.600, 1.173	195.600, 1.198	195.600, 1.168	195.600, 1.160	195.600, 1.166	195.600, 1.191	195.600, 1.080	195.600, 1.128	195.600, 1.148	195.600, 1.809
980	195.800, 1.335	195.800, 1.615	195.800, 1.553	195.800, 1.292	195.800, 1.169	195.800, 1.173	195.800, 1.197	195.800, 1.168	195.800, 1.159	195.800, 1.166	195.800, 1.191	195.800, 1.079	195.800, 1.128	195.800, 1.147	195.800, 1.808
981	196.000, 1.335	196.000, 1.612	196.000, 1.552	196.000, 1.292	196.000, 1.168	196.000, 1.174	196.000, 1.197	196.000, 1.168	196.000, 1.159	196.000, 1.166	196.000, 1.191	196.000, 1.079	196.000, 1.128	196.000, 1.147	196.000, 1.807
982	196.200, 1.335	196.200, 1.610	196.200, 1.550	196.200, 1.292	196.200, 1.168	196.200, 1.174	196.200, 1.197	196.200, 1.168	196.200, 1.159	196.200, 1.166	196.200, 1.190	196.200, 1.078	196.200, 1.128	196.200, 1.147	196.200, 1.806
983	196.400, 1.335	196.400, 1.608	196.400, 1.549	196.400, 1.292	196.400, 1.167	196.400, 1.174	196.400, 1.197	196.400, 1.168	196.400, 1.159	196.400, 1.166	196.400, 1.190	196.400, 1.078	196.400, 1.128	196.400, 1.147	196.400, 1.805
984	196.600, 1.335	196.600, 1.607	196.600, 1.548	196.600, 1.292	196.600, 1.167	196.600, 1.174	196.600, 1.197	196.600, 1.168	196.600, 1.159	196.600, 1.165	196.600, 1.190	196.600, 1.078	196.600, 1.127	196.600, 1.146	196.600, 1.805
985	196.800, 1.335	196.800, 1.605	196.800, 1.547	196.800, 1.292	196.800, 1.167	196.800, 1.174	196.800, 1.197	196.800, 1.168	196.800, 1.159	196.800, 1.165	196.800, 1.189	196.800, 1.078	196.800, 1.127	196.800, 1.146	196.800, 1.804
986	197.000, 1.334	197.000, 1.603	197.000, 1.545	197.000, 1.292	197.000, 1.166	197.000, 1.174	197.000, 1.196	197.000, 1.167	197.000, 1.159	197.000, 1.165	197.000, 1.189	197.000, 1.078	197.000, 1.127	197.000, 1.146	197.000, 1.803
987	197.200, 1.334	197.200, 1.601	197.200, 1.544	197.200, 1.291	197.200, 1.166	197.200, 1.173	197.200, 1.197	197.200, 1.167	197.200, 1.159	197.200, 1.165	197.200, 1.189	197.200, 1.078	197.200, 1.127	197.200, 1.146	197.200, 1.802
988	197.400, 1.334	197.400, 1.600	197.400, 1.543	197.400, 1.291	197.400, 1.166	197.400, 1.173	197.400, 1.197	197.400, 1.167	197.400, 1.159	197.400, 1.164	197.400, 1.189	197.400, 1.078	197.400, 1.127	197.400, 1.146	197.400, 1.801
989	197.600, 1.333	197.600, 1.598	197.600, 1.542	197.600, 1.291	197.600, 1.166	197.600, 1.173	197.600, 1.197	197.600, 1.166	197.600, 1.159	197.600, 1.164	197.600, 1.188	197.600, 1.078	197.600, 1.127	197.600, 1.146	197.600, 1.800
990	197.800, 1.333	197.800, 1.597	197.800, 1.540	197.800, 1.290	197.800, 1.166	197.800, 1.173	197.800, 1.196	197.800, 1.166	197.800, 1.158	197.800, 1.164	197.800, 1.188	197.800, 1.078	197.800, 1.127	197.800, 1.146	197.800, 1.799
991	198.000, 1.333	198.000, 1.595	198.000, 1.539	198.000, 1.290	198.000, 1.166	198.000, 1.173	198.000, 1.196	198.000, 1.165	198.000, 1.158	198.000, 1.164	198.000, 1.188	198.000, 1.078	198.000, 1.126	198.000, 1.145	198.000, 1.798
992	198.200, 1.333	198.200, 1.594	198.200, 1.537	198.200, 1.290	198.200, 1.166	198.200, 1.172	198.200, 1.196	198.200, 1.165	198.200, 1.158	198.200, 1.164	198.200, 1.188	198.200, 1.078	198.200, 1.126	198.200, 1.145	198.200, 1.797
993	198.400, 1.332	198.400, 1.593	198.400, 1.536	198.400, 1.289	198.400, 1.166	198.400, 1.172	198.400, 1.196	198.400, 1.164	198.400, 1.157	198.400, 1.164	198.400, 1.188	198.400, 1.078	198.400, 1.126	198.400, 1.145	198.400, 1.796
994	198.600, 1.332	198.600, 1.592	198.600, 1.534	198.600, 1.289	198.600, 1.166	198.600, 1.172	198.600, 1.195	198.600, 1.164	198.600, 1.157	198.600, 1.164	198.600, 1.188	198.600, 1.078	198.600, 1.126	198.600, 1.145	198.600, 1.795
995	198.800, 1.332	198.800, 1.590	198.800, 1.533	198.800, 1.289	198.800, 1.166	198.800, 1.171	198.800, 1.195	198.800, 1.164	198.800, 1.157	198.800, 1.164	198.800, 1.188	198.800, 1.078	198.800, 1.126	198.800, 1.144	198.800, 1.794
996	199.000, 1.332	199.000, 1.589	199.000, 1.531	199.000, 1.288	199.000, 1.166	199.000, 1.171	199.000, 1.195	199.000, 1.163	199.000, 1.156	199.000, 1.164	199.000, 1.187	199.000, 1.078	199.000, 1.126	199.000, 1.144	199.000, 1.793
997	199.200, 1.332	199.200, 1.587	199.200, 1.530	199.200, 1.288	199.200, 1.166	199.200, 1.171	199.200, 1.195	199.200, 1.163	199.200, 1.156	199.200, 1.164	199.200, 1.187	199.200, 1.078	199.200, 1.126	199.200, 1.144	199.200, 1.792
998	199.400, 1.332	199.400, 1.585	199.400, 1.529	199.400, 1.287	199.400, 1.166	199.400, 1.171	199.400, 1.195	199.400, 1.163	199.400, 1.156	199.400, 1.164	199.400, 1.187	199.400, 1.078	199.400, 1.126	199.400, 1.144	199.400, 1.791
999	199.600, 1.332	199.600, 1.583	199.600, 1.527	199.600, 1.287	199.600, 1.166	199.600, 1.171	199.600, 1.195	199.600, 1.163	199.600, 1.156	199.600, 1.163	199.600, 1.187	199.600, 1.077	199.600, 1.126	199.600, 1.144	199.600, 1.791
1000	199.800, 1.332	199.800, 1.581	199.800, 1.526	199.800, 1.286	199.800, 1.165	199.800, 1.171	199.800, 1.194	199.800, 1.163	199.800, 1.155	199.800, 1.164	199.800, 1.186	199.800, 1.077	199.800, 1.125	199.800, 1.144	199.800, 1.790
1001	200.000, 1.333	200.000, 1.580	200.000, 1.525	200.000, 1.286	200.000, 1.165	200.000, 1.170	200.000, 1.194	200.000, 1.162	200.000, 1.155	200.000, 1.163	200.000, 1.186	200.000, 1.077	200.000, 1.125	200.000, 1.144	200.000, 1.789
1002	200.200, 1.333	200.200, 1.578	200.200, 1.524	200.200, 1.285	200.200, 1.165	200.200, 1.170	200.200, 1.194	200.200, 1.162	200.200, 1.155	200.200, 1.163	200.200, 1.186	200.200, 1.077	200.200, 1.125	200.200, 1.144	200.200, 1.788
1003	200.400, 1.333	200.400, 1.576	200.400, 1.522	200.400, 1.285	200.400, 1.165	200.400, 1.170	200.400, 1.194	200.400, 1.162	200.400, 1.155	200.400, 1.163	200.400, 1.186	200.400, 1.077	200.400, 1.125	200.400, 1.144	200.400, 1.787
1004	200.600, 1.332	200.600, 1.575	200.600, 1.521	200.600, 1.285	200.600, 1.165	200.600, 1.170	200.600, 1.194	200.600, 1.162	200.600, 1.155	200.600, 1.163	200.600, 1.186	200.600, 1.077	200.600, 1.125	200.600, 1.144	200.600, 1.786
1005	200.800, 1.332	200.800, 1.573	200.800, 1.520	200.800, 1.284	200.800, 1.165	200.800, 1.170	200.800, 1.194	200.800, 1.162	200.800, 1.155	200.800, 1.163	200.800, 1.186	200.800, 1.077	200.800, 1.124	200.800, 1.144	200.800, 1.785
1006	201.000, 1.331	201.000, 1.572	201.000, 1.519	201.000, 1.284	201.000, 1.165	201.000, 1.169	201.000, 1.194	201.000, 1.162	201.000, 1.155	201.000, 1.162	201.000, 1.185	201.000, 1.077	201.000, 1.124	201.000, 1.144	201.000, 1.784
1007	201.200, 1.331	201.200, 1.570	201.200, 1.517	201.200, 1.284	201.200, 1.164	201.200, 1.169	201.200, 1.193	201.200, 1.162	201.200, 1.155	201.200, 1.162	201.200, 1.185	201.200, 1.077	201.200, 1.124	201.200, 1.144	201.200, 1.783
1008	201.400, 1.330	201.400, 1.568	201.400, 1.516	201.400, 1.283	201.400, 1.164	201.400, 1.169	201.400, 1.193	201.400, 1.162	201.400, 1.155	201.400, 1.162	201.400, 1.185	201.400, 1.077	201.400, 1.124	201.400, 1.144	201.400, 1.782
1009	201.600, 1.330	201.600, 1.567	201.600, 1.515	201.600, 1.283	201.600, 1.164	201.600, 1.168	201.600, 1.193	201.600, 1.162	201.600, 1.155	201.600, 1.161	201.600, 1.185	201.600, 1.076	201.600, 1.124	201.600, 1.144	201.600, 1.781
1010	201.800, 1.330	201.800, 1.565	201.800, 1.514	201.800, 1.283	201.800, 1.163	201.800, 1.168	201.800, 1.193	201.800, 1.162	201.800, 1.155	201.800, 1.161	201.800, 1.185	201.800, 1.076	201.800, 1.124	201.800, 1.144	201.800, 1.780
1011	202.000, 1.330	202.000, 1.564	202.000, 1.512	202.000, 1.283	202.000, 1.163	202.000, 1.168	202.000, 1.192	202.000, 1.161	202.000, 1.155	202.000, 1.161	202.000, 1.184	202.000, 1.076	202.000, 1.124	202.000, 1.143	202.000, 1.778
1012	202.200, 1.330	202.200, 1.562	202.200, 1.511	202.200, 1.283	202.200, 1.162	202.200, 1.167	202.200, 1.192	202.200, 1.161	202.200, 1.155	202.200, 1.161	202.200, 1.184	202.200, 1.075	202.200, 1.124	202.200, 1.143	202.200, 1.778
1013	202.400, 1.329	202.400, 1.560	202.400, 1.510	202.400, 1.283	202.400, 1.162	202.400, 1.167	202.400, 1.191	202.400, 1.161	202.400, 1.155	202.400, 1.160	202.400, 1.184	202.400, 1.075	202.400, 1.123	202.400, 1.142	202.400, 1.777
1014	202.600, 1.329	202.600, 1.559	202.600, 1.508	202.600, 1.283	202.600, 1.161	202.600, 1.167	202.600, 1.191	202.600, 1.161	202.600, 1.155	202.600, 1.160	202.600, 1.183	202.600, 1.075	202.600, 1.123	202.600, 1.142	202.600, 1.776
1015	202.800, 1.329	202.800, 1.557	202.800, 1.507	202.800, 1.283	202.800, 1.161	202.800, 1.167	202.800, 1.191	202.800, 1.160	202.800, 1.155	202.800, 1.160	202.800, 1.183	202.800, 1.075	202.800, 1.123	202.800, 1.142	202.800, 1.775
1016	203.000, 1.329	203.000, 1.555	203.000, 1.505	203.000, 1.283	203.000, 1.161	203.000, 1.166	203.000, 1.191	203.000, 1.160	203.000, 1.155	203.000, 1.159	203.000, 1.183	203.000, 1.074	203.000, 1.122	203.000, 1.141	203.000, 1.774
1017	203.200, 1.328	203.200, 1.554	203.200, 1.504	203.200, 1.283	203.200, 1.160	203.200, 1.166	203.200, 1.191	203.200, 1.160	203.200, 1.155	203.200, 1.159	203.200, 1.183	203.200, 1.074	203.200, 1.122	203.200, 1.141	203.200, 1.773
1018	203.400, 1.328	203.400, 1.552	203.400, 1.503	203.400, 1.283	203.400, 1.160	203.400, 1.166	203.400, 1.191	203.400, 1.159	203.400, 1.155	203.400, 1.159	203.400, 1.183	203.400, 1.074	203.400, 1.122	203.400, 1.141	203.400, 1.772
1019	203.600, 1.328	203.600, 1.551	203.600, 1.502	203.600, 1.282	203.600, 1.160	203.600, 1.166	203.600, 1.191	203.600, 1.159	203.600, 1.155	203.600, 1.159	203.600, 1.183	203.600, 1.073	203.600, 1.122	203.600, 1.141	203.600, 1.772
1020	203.800, 1.328	203.800, 1.549	203.800, 1.501	203.800, 1.282	203.800, 1.160	203.800, 1.166	203.800, 1.191	203.800, 1.159	203.800, 1.155	203.800, 1.159	203.800, 1.183	203.800, 1.073	203.800, 1.121	203.800, 1.141	203.800, 1.771
1021	204.000, 1.327	204.000, 1.548	204.000, 1.500	204.000, 1.282	204.000, 1.160	204.000, 1.166	204.000, 1.190	204.000, 1.158	204.000, 1.154	204.000, 1.159	204.000, 1.183	204.000, 1.073	204.000, 1.121	204.000, 1.141	204.000, 1.770
1022	204.200, 1.327	204.200, 1.546	204.200, 1.498	204.200, 1.282	204.200, 1.160	204.200, 1.166	204.200, 1.190	204.200, 1.158	204.200, 1.153	204.200, 1.159	204.200, 1.183	204.200, 1.072	204.200, 1.121	204.200, 1.141	204.200, 1.769
1023	204.400, 1.326	204.400, 1.544	204.400, 1.497	204.400, 1.282	204.400, 1.160	204.400, 1.166	204.400, 1.190	204.400, 1.158	204.400, 1.153	204.400, 1.159	204.400, 1.183	204.400, 1.072	204.400, 1.121	204.400, 1.141	204.400, 1.768
1024	204.600, 1.326	204.600, 1.543	204.600, 1.496	204.600, 1.281	204.600, 1.159	204.600, 1.166	204.600, 1.189	204.600, 1.158	204.600, 1.152	204.600, 1.159	204.600, 1.183	204.600, 1.072	204.600, 1.120	204.600, 1.141	204.600, 1.767
1025	204.800, 1.325	204.800, 1.541	204.800, 1.495	204.800, 1.281	204.800, 1.159	204.800, 1.166	204.800, 1.189	204.800, 1.158	204.800, 1.152	204.800, 1.159	204.800, 1.183	204.800, 1.072	204.800, 1.120	204.800, 1.141	204.800, 1.766
1026	205.000, 1.325	205.000, 1.540	205.000, 1.494	205.000, 1.281	205.000, 1.159	205.000, 1.165	205.000, 1.189	205.000, 1.158	205.000, 1.151	205.000, 1.159	205.000, 1.182	205.000, 1.072	205.000, 1.120	205.000, 1.141	205.000, 1.765
1027	205.200, 1.325	205.200, 1.538	205.200, 1.493	205.200, 1.281	205.200, 1.159	205.200, 1.165	205.200, 1.188	205.200, 1.158	205.200, 1.151	205.200, 1.158	205.200, 1.182	205.200, 1.072	205.200, 1.121	205.200, 1.141	205.200, 1.764
1028	205.400, 1.325	205.400, 1.537	205.400, 1.492	205.400, 1.280	205.400, 1.159	205.400, 1.164	205.400, 1.188	205.400, 1.158	205.400, 1.150	205.400, 1.158	205.400, 1.182	205.400, 1.071	205.400, 1.121	205.400, 1.140	205.400, 1.763
1029	205.600, 1.325	205.600, 1.535	205.600, 1.491	205.600, 1.280	205.600, 1.159	205.600, 1.164	205.600, 1.188	205.600, 1.158	205.600, 1.150	205.600, 1.158	205.600, 1.181	205.600, 1.071	205.600, 1.121	205.600, 1.140	205.600, 1.762
1030	205.800, 1.324	205.800, 1.534	205.800, 1.490	205.800, 1.281	205.800, 1.159	205.800, 1.164	205.800, 1.188	205.800, 1.158	205.800, 1.150	205.800, 1.158	205.800, 1.181	205.800, 1.071	205.800, 1.121	205.800, 1.140	205.800, 1.761
1031	206.000, 1.324	206.000, 1.532	206.000, 1.489	206.000, 1.281	206.000, 1.159	206.000, 1.164	206.000, 1.188	206.000, 1.158	206.000, 1.149	206.000, 1.157	206.000, 1.181	206.000, 1.071	206.000, 1.120	206.000, 1.139	206.000, 1.760
1032	206.200, 1.324	206.200, 1.531	206.200, 1.488	206.200, 1.281	206.200, 1.158	206.200, 1.164	206.200, 1.188	206.200, 1.158	206.200, 1.149	206.200, 1.157	206.200, 1.181	206.200, 1.071	206.200, 1.120	206.200, 1.138	206.200, 1.760
1033	206.400, 1.324	206.400, 1.530	206.400, 1.487	206.400, 1.281	206.400, 1.158	206.400, 1.163	206.400, 1.188	206.400, 1.158	206.400, 1.149	206.400, 1.157	206.400, 1.181	206.400, 1.071	206.400, 1.119	206.400, 1.138	206.400, 1.759
1034	206.600, 1.324	206.600, 1.528	206.600, 1.486	206.600, 1.281	206.600, 1.158	206.600, 1.163	206.600, 1.187	206.600, 1.157	206.600, 1.149	206.600, 1.157	206.600, 1.181	206.600, 1.071	206.600, 1.119	206.600, 1.138	206.600, 1.758
1035	206.800, 1.323	206.800, 1.527	206.800, 1.485	206.800, 1.280	206.800, 1.158	206.800, 1.163	206.800, 1.187	206.800, 1.157	206.800, 1.149	206.800, 1.156	206.800, 1.181	206.800, 1.071	206.800, 1.118	206.800, 1.137	206.800, 1.758
1036	207.000, 1.323	207.000, 1.526	207.000, 1.483	207.000, 1.280	207.000, 1.158	207.000, 1.163	207.000, 1.187	207.000, 1.157	207.000, 1.149	207.000, 1.156	207.000, 1.182	207.000, 1.071	207.000, 1.118	207.000, 1.137	207.000, 1.757
1037	207.200, 1.323	207.200, 1.525	207.200, 1.482	207.200, 1.279	207.200, 1.157	207.200, 1.163	207.200, 1.187	207.200, 1.156	207.200, 1.149	207.200, 1.156	207.200, 1.182	207.200, 1.070	207.200, 1.118	207.200, 1.137	207.200, 1.756
1038	207.400, 1.323	207.400, 1.524	207.400, 1.481	207.400, 1.279	207.400, 1.157	207.400, 1.163	207.400, 1.187	207.400, 1.156	207.400, 1.149	207.400, 1.156	207.400, 1.182	207.400, 1.070	207.400, 1.117	207.400, 1.137	207.400, 1.756
1039	207.600, 1.323	207.600, 1.523	207.600, 1.480	207.600, 1.279	207.600, 1.157	207.600, 1.163	207.600, 1.186	207.600, 1.156	207.600, 1.149	207.600, 1.156	207.600, 1.182	207.600, 1.070	207.600, 1.117	207.600, 1.137	207.600, 1.755
1040	207.800, 1.322	207.800, 1.522	207.800, 1.479	207.800, 1.278	207.800, 1.157	207.800, 1.163	207.800, 1.186	207.800, 1.155	207.800, 1.149	207.800, 1.156	207.800, 1.182	207.800, 1.069	207.800, 1.117	207.800, 1.137	207.800, 1.754
1041	208.000, 1.322	208.000, 1.520	208.000, 1.477	208.000, 1.278	208.000, 1.157	208.000, 1.163	208.000, 1.186	208.000, 1.155	208.000, 1.148	208.000, 1.156	208.000, 1.182	208.000, 1.069	208.000, 1.117	208.000, 1.137	208.000, 1.753
1042	208.200, 1.322	208.200, 1.519	208.200, 1.476	208.200, 1.278	208.200, 1.157	208.200, 1.163	208.200, 1.186	208.200, 1.154	208.200, 1.148	208.200, 1.156	208.200, 1.182	208.200, 1.069	208.200, 1.116	208.200, 1.137	208.200, 1.752
1043	208.400, 1.322	208.400, 1.518	208.400, 1.475	208.400, 1.278	208.400, 1.157	208.400, 1.162	208.400, 1.186	208.400, 1.154	208.400, 1.148	208.400, 1.156	208.400, 1.181	208.400, 1.069	208.400, 1.117	208.400, 1.137	208.400, 1.751
1044	208.600, 1.321	208.600, 1.517	208.600, 1.474	208.600, 1.277	208.600, 1.157	208.600, 1.162	208.600, 1.186	208.600, 1.154	208.600, 1.148	208.600, 1.155	208.600, 1.181	208.600, 1.069	208.600, 1.117	208.600, 1.137	208.600, 1.750
1045	208.800, 1.321	208.800, 1.515	208.800, 1.473	208.800, 1.277	208.800, 1.156	208.800, 1.162	208.800, 1.186	208.800, 1.154	208.800, 1.148	208.800, 1.155	208.800, 1.180	208.800, 1.069	208.800, 1.117	208.800, 1.137	208.800, 1.749
1046	209.000, 1.321	209.000, 1.514	209.000, 1.472	209.000, 1.277	209.000, 1.156	209.000, 1.161	209.000, 1.185	209.000, 1.154	209.000, 1.148	209.000, 1.155	209.000, 1.180	209.000, 1.068	209.000, 1.117	209.000, 1.136	209.000, 1.748
1047	209.200, 1.321	209.200, 1.513	209.200, 1.471	209.200, 1.277	209.200, 1.156	209.200, 1.161	209.200, 1.185	209.200, 1.154	209.200, 1.148	209.200, 1.155	209.200, 1.180	209.200, 1.068	209.200, 1.116	209.200, 1.136	209.200, 1.747
1048	209.400, 1.320	209.400, 1.511	209.400, 1.470	209.400, 1.277	209.400, 1.156	209.400, 1.161	209.400, 1.185	209.400, 1.154	209.400, 1.148	209.400, 1.155	209.400, 1.180	209.400, 1.068	209.400, 1.116	209.400, 1.136	209.400, 1.746
1049	209.600, 1.320	209.600, 1.510	209.600, 1.469	209.600, 1.277	209.600, 1.155	209.600, 1.161	209.600, 1.186	209.600, 1.154	209.600, 1.147	209.600, 1.155	209.600, 1.179	209.600, 1.068	209.600, 1.116	209.600, 1.136	209.600, 1.745
1050	209.800, 1.320	209.800, 1.509	209.800, 1.467	209.800, 1.277	209.800, 1.155	209.800, 1.160	209.800, 1.186	209.800, 1.154	209.800, 1.147	209.800, 1.155	209.800, 1.179	209.800, 1.068	209.800, 1.116	209.800, 1.136	209.800, 1.744
1051	210.000, 1.320	210.000, 1.507	210.000, 1.466	210.000, 1.276	210.000, 1.155	210.000, 1.160	210.000, 1.185	210.000, 1.155	210.000, 1.147	210.000, 1.155	210.000, 1.179	210.000, 1.068	210.000, 1.116	210.000, 1.135	210.000, 1.743
1052	210.200, 1.320	210.200, 1.505	210.200, 1.465	210.200, 1.276	210.200, 1.154	210.200, 1.160	210.200, 1.185	210.200, 1.155	210.200, 1.147	210.200, 1.155	210.200, 1.179	210.200, 1.067	210.200, 1.116	210.200, 1.135	210.200, 1.742
1053	210.400, 1.320	210.400, 1.504	210.400, 1.464	210.400, 1.276	210.400, 1.154	210.400, 1.159	210.400, 1.185	210.400, 1.155	210.400, 1.146	210.400, 1.154	210.400, 1.178	210.400, 1.067	210.400, 1.116	210.400, 1.135	210.400, 1.741
1054	210.600, 1.320	210.600, 1.503	210.600, 1.463	210.600, 1.276	210.600, 1.154	210.600, 1.159	210.600, 1.185	210.600, 1.154	210.600, 1.146	210.600, 1.154	210.600, 1.178	210.600, 1.067	210.600, 1.115	210.600, 1.134	210.600, 1.740
1055	210.800, 1.320	210.800, 1.502	210.800, 1.462	210.800, 1.275	210.800, 1.154	210.800, 1.159	210.800, 1.185	210.800, 1.154	210.800, 1.146	210.800, 1.154	210.800, 1.177	210.800, 1.066	210.800, 1.115	210.800, 1.134	210.800, 1.739
1056	211.000, 1.320	211.000, 1.501	211.000, 1.460	211.000, 1.275	211.000, 1.154	211.000, 1.158	211.000, 1.184	211.000, 1.154	211.000, 1.146	211.000, 1.153	211.000, 1.177	211.000, 1.066	211.000, 1.115	211.000, 1.133	211.000, 1.738
1057	211.200, 1.319	211.200, 1.500	211.200, 1.459	211.200, 1.275	211.200, 1.154	211.200, 1.158	211.200, 1.184	211.200, 1.153	211.200, 1.146	211.200, 1.153	211.200, 1.176	211.200, 1.066	211.200, 1.114	211.200, 1.133	211.200, 1.736
1058	211.400, 1.319	211.400, 1.499	211.400, 1.458	211.400, 1.275	211.400, 1.153	211.400, 1.158	211.400, 1.184	211.400, 1.153	211.400, 1.146	211.400, 1.152	211.400, 1.176	211.400, 1.065	211.400, 1.114	211.400, 1.132	211.400, 1.735
1059	211.600, 1.319	211.600, 1.497	211.600, 1.457	211.600, 1.275	211.600, 1.153	211.600, 1.158	211.600, 1.183	211.600, 1.153	211.600, 1.146	211.600, 1.152	211.600, 1.175	211.600, 1.065	211.600, 1.114	211.600, 1.132	211.600, 1.734
1060	211.800, 1.319	211.800, 1.496	211.800, 1.456	211.800, 1.275	211.800, 1.153	211.800, 1.157	211.800, 1.183	211.800, 1.152	211.800, 1.146	211.800, 1.152	211.800, 1.175	211.800, 1.065	211.800, 1.114	211.800, 1.131	211.800, 1.733
1061	212.000, 1.318	212.000, 1.495	212.000, 1.455	212.000, 1.275	212.000, 1.153	212.000, 1.157	212.000, 1.182	212.000, 1.152	212.000, 1.146	212.000, 1.152	212.000, 1.175	212.000, 1.065	212.000, 1.114	212.000, 1.131	212.000, 1.732
1062	212.200, 1.318	212.200, 1.493	212.200, 1.454	212.200, 1.275	212.200, 1.153	212.200, 1.156	212.200, 1.182	212.200, 1.151	212.200, 1.146	212.200, 1.151	212.200, 1.175	212.200, 1.065	212.200, 1.114	212.200, 1.131	212.200, 1.731
1063	212.400, 1.318	212.400, 1.492	212.400, 1.454	212.400, 1.275	212.400, 1.152	212.400, 1.156	212.400, 1.182	212.400, 1.151	212.400, 1.146	212.400, 1.151	212.400, 1.175	212.400, 1.064	212.400, 1.114	212.400, 1.131	212.400, 1.731
1064	212.600, 1.317	212.600, 1.491	212.600, 1.453	212.600, 1.275	212.600, 1.152	212.600, 1.156	212.600, 1.182	212.600, 1.150	212.600, 1.146	212.600, 1.151	212.600, 1.175	212.600, 1.064	212.600, 1.114	212.600, 1.131	212.600, 1.730
1065	212.800, 1.317	212.800, 1.490	212.800, 1.452	212.800, 1.274	212.800, 1.152	212.800, 1.156	212.800, 1.181	212.800, 1.150	212.800, 1.146	212.800, 1.151	212.800, 1.175	212.800, 1.064	212.800, 1.114	212.800, 1.131	212.800, 1.730
1066	213.000, 1.317	213.000, 1.489	213.000, 1.451	213.000, 1.274	213.000, 1.151	213.000, 1.156	213.000, 1.181	213.000, 1.150	213.000, 1.146	213.000, 1.151	213.000, 1.175	213.000, 1.064	213.000, 1.114	213.000, 1.132	213.000, 1.729
1067	213.200, 1.317	213.200, 1.488	213.200, 1.449	213.200, 1.274	213.200, 1.151	213.200, 1.156	213.200, 1.181	213.200, 1.150	213.200, 1.146	213.200, 1.151	213.200, 1.176	213.200, 1.064	213.200, 1.114	213.200, 1.132	213.200, 1.728
1068	213.400, 1.317	213.400, 1.486	213.400, 1.448	213.400, 1.274	213.400, 1.150	213.400, 1.156	213.400, 1.181	213.400, 1.149	213.400, 1.146	213.400, 1.151	213.400, 1.176	213.400, 1.064	213.400, 1.114	213.400, 1.132	213.400, 1.728
1069	213.600, 1.317	213.600, 1.485	213.600, 1.447	213.600, 1.274	213.600, 1.150	213.600, 1.156	213.600, 1.180	213.600, 1.149	213.600, 1.146	213.600, 1.151	213.600, 1.176	213.600, 1.063	213.600, 1.115	213.600, 1.132	213.600, 1.727
1070	213.800, 1.317	213.800, 1.484	213.800, 1.446	213.800, 1.274	213.800, 1.150	213.800, 1.156	213.800, 1.180	213.800, 1.149	213.800, 1.146	213.800, 1.151	213.800, 1.176	213.800, 1.063	213.800, 1.115	213.800, 1.132	213.800, 1.726
1071	214.000, 1.317	214.000, 1.483	214.000, 1.445	214.000, 1.273	214.000, 1.150	214.000, 1.156	214.000, 1.180	214.000, 1.149	214.000, 1.146	214.000, 1.151	214.000, 1.176	214.000, 1.063	214.000, 1.115	214.000, 1.132	214.000, 1.726
1072	214.200, 1.317	214.200, 1.482	214.200, 1.444	214.200, 1.273	214.200, 1.149	214.200, 1.156	214.200, 1.180	214.200, 1.149	214.200, 1.145	214.200, 1.151	214.200, 1.175	214.200, 1.062	214.200, 1.114	214.200, 1.132	214.200, 1.725
1073	214.400, 1.317	214.400, 1.481	214.400, 1.443	214.400, 1.273	214.400, 1.149	214.400, 1.156	214.400, 1.180	214.400, 1.148	214.400, 1.145	214.400, 1.151	214.400, 1.175	214.400, 1.062	214.400, 1.114	214.400, 1.131	214.400, 1.724
1074	214.600, 1.317	214.600, 1.480	214.600, 1.442	214.600, 1.273	214.600, 1.149	214.600, 1.157	214.600, 1.180	214.600, 1.148	214.600, 1.145	214.600, 1.151	214.600, 1.174	214.600, 1.062	214.600, 1.113	214.600, 1.131	214.600, 1.723
1075	214.800, 1.316	214.800, 1.479	214.800, 1.441	214.800, 1.272	214.800, 1.149	214.800, 1.157	214.800, 1.180	214.800, 1.149	214.800, 1.145	214.800, 1.151	214.800, 1.174	214.800, 1.062	214.800, 1.113	214.800, 1.131	214.800, 1.723
1076	215.000, 1.316	215.000, 1.478	215.000, 1.440	215.000, 1.272	215.000, 1.149	215.000, 1.157	215.000, 1.180	215.000, 1.149	215.000, 1.144	215.000, 1.151	215.000, 1.173	215.000, 1.062	215.000, 1.112	215.000, 1.130	215.000, 1.722
1077	215.200, 1.316	215.200, 1.477	215.200, 1.440	215.200, 1.272	215.200, 1.149	215.200, 1.157	215.200, 1.179	215.200, 1.149	215.200, 1.144	215.200, 1.150	215.200, 1.172	215.200, 1.062	215.200, 1.112	215.200, 1.130	215.200, 1.721
1078	215.400, 1.315	215.400, 1.476	215.400, 1.439	215.400, 1.272	215.400, 1.149	215.400, 1.156	215.400, 1.179	215.400, 1.149	215.400, 1.144	215.400, 1.150	215.400, 1.172	215.400, 1.062	215.400, 1.111	215.400, 1.129	215.400, 1.720
1079	215.600, 1.315	215.600, 1.475	215.600, 1.438	215.600, 1.271	215.600, 1.148	215.600, 1.156	215.600, 1.179	215.600, 1.149	215.600, 1.143	215.600, 1.150	215.600, 1.172	215.600, 1.062	215.600, 1.111	215.600, 1.129	215.600, 1.719
1080	215.800, 1.315	215.800, 1.473	215.800, 1.438	215.800, 1.271	215.800, 1.148	215.800, 1.156	215.800, 1.179	215.800, 1.148	215.800, 1.143	215.800, 1.150	215.800, 1.171	215.800, 1.062	215.800, 1.111	215.800, 1.129	215.800, 1.719
1081	216.000, 1.315	216.000, 1.472	216.000, 1.437	216.000, 1.271	216.000, 1.148	216.000, 1.155	216.000, 1.179	216.000, 1.148	216.000, 1.143	216.000, 1.149	216.000, 1.171	216.000, 1.061	216.000, 1.110	216.000, 1.129	216.000, 1.718
1082	216.200, 1.315	216.200, 1.471	216.200, 1.436	216.200, 1.271	216.200, 1.148	216.200, 1.155	216.200, 1.179	216.200, 1.148	216.200, 1.142	216.200, 1.149	216.200, 1.171	216.200, 1.061	216.200, 1.110	216.200, 1.128	216.200, 1.717
1083	216.400, 1.315	216.400, 1.469	216.400, 1.435	216.400, 1.271	216.400, 1.148	216.400, 1.155	216.400, 1.178	216.400, 1.148	216.400, 1.142	216.400, 1.149	216.400, 1.171	216.400, 1.061	216.400, 1.110	216.400, 1.128	216.400, 1.717
1084	216.600, 1.315	216.600, 1.468	216.600, 1.434	216.600, 1.271	216.600, 1.148	216.600, 1.154	216.600, 1.178	216.600, 1.148	216.600, 1.142	216.600, 1.149	216.600, 1.171	216.600, 1.061	216.600, 1.110	216.600, 1.128	216.600, 1.716
1085	216.800, 1.315	216.800, 1.467	216.800, 1.433	216.800, 1.271	216.800, 1.148	216.800, 1.154	216.800, 1.178	216.800, 1.148	216.800, 1.142	216.800, 1.149	216.800, 1.171	216.800, 1.061	216.800, 1.110	216.800, 1.128	216.800, 1.715
1086	217.000, 1.315	217.000, 1.465	217.000, 1.432	217.000, 1.270	217.000, 1.148	217.000, 1.154	217.000, 1.178	217.000, 1.148	217.000, 1.141	217.000, 1.149	217.000, 1.171	217.000, 1.061	217.000, 1.110	217.000, 1.129	217.000, 1.715
1087	217.200, 1.315	217.200, 1.464	217.200, 1.431	217.200, 1.270	217.200, 1.148	217.200, 1.154	217.200, 1.178	217.200, 1.148	217.200, 1.141	217.200, 1.148	217.200, 1.171	217.200, 1.061	217.200, 1.110	217.200, 1.129	217.200, 1.714
1088	217.400, 1.315	217.400, 1.463	217.400, 1.429	217.400, 1.270	217.400, 1.148	217.400, 1.153	217.400, 1.178	217.400, 1.147	217.400, 1.141	217.400, 1.148	217.400, 1.171	217.400, 1.061	217.400, 1.110	217.400, 1.129	217.400, 1.713
1089	217.600, 1.315	217.600, 1.462	217.600, 1.428	217.600, 1.270	217.600, 1.148	217.600, 1.153	217.600, 1.177	217.600, 1.147	217.600, 1.141	217.600, 1.148	217.600, 1.171	217.600, 1.060	217.600, 1.110	217.600, 1.129	217.600, 1.712
1090	217.800, 1.314	217.800, 1.461	217.800, 1.428	217.800, 1.270	217.800, 1.148	217.800, 1.153	217.800, 1.177	217.800, 1.147	217.800, 1.141	217.800, 1.148	217.800, 1.171	217.800, 1.060	217.800, 1.110	217.800, 1.129	217.800, 1.712
1091	218.000, 1.314	218.000, 1.460	218.000, 1.427	218.000, 1.270	218.000, 1.148	218.000, 1.153	218.000, 1.177	218.000, 1.147	218.000, 1.141	218.000, 1.148	218.000, 1.171	218.000, 1.060	218.000, 1.110	218.000, 1.129	218.000, 1.711
1092	218.200, 1.314	218.200, 1.458	218.200, 1.426	218.200, 1.270	218.200, 1.148	218.200, 1.153	218.200, 1.177	218.200, 1.146	218.200, 1.141	218.200, 1.148	218.200, 1.171	218.200, 1.060	218.200, 1.109	218.200, 1.129	218.200, 1.710
1093	218.400, 1.313	218.400, 1.457	218.400, 1.425	218.400, 1.270	218.400, 1.147	218.400, 1.152	218.400, 1.177	218.400, 1.146	218.400, 1.141	218.400, 1.147	218.400, 1.171	218.400, 1.059	218.400, 1.109	218.400, 1.129	218.400, 1.709
1094	218.600, 1.313	218.600, 1.456	218.600, 1.424	218.600, 1.270	218.600, 1.147	218.600, 1.152	218.600, 1.177	218.600, 1.146	218.600, 1.141	218.600, 1.147	218.600, 1.170	218.600, 1.059	218.600, 1.109	218.600, 1.129	218.600, 1.708
1095	218.800, 1.313	218.800, 1.455	218.800, 1.424	218.800, 1.269	218.800, 1.147	218.800, 1.152	218.800, 1.176	218.800, 1.146	218.800, 1.141	218.800, 1.146	218.800, 1.170	218.800, 1.059	218.800, 1.109	218.800, 1.129	218.800, 1.707
1096	219.000, 1.312	219.000, 1.455	219.000, 1.423	219.000, 1.269	219.000, 1.146	219.000, 1.152	219.000, 1.176	219.000, 1.146	219.000, 1.141	219.000, 1.146	219.000, 1.170	219.000, 1.060	219.000, 1.109	219.000, 1.128	219.000, 1.707
1097	219.200, 1.312	219.200, 1.454	219.200, 1.422	219.200, 1.269	219.200, 1.146	219.200, 1.152	219.200, 1.176	219.200, 1.145	219.200, 1.140	219.200, 1.146	219.200, 1.169	219.200, 1.060	219.200, 1.109	219.200, 1.128	219.200, 1.706
1098	219.400, 1.312	219.400, 1.453	219.400, 1.421	219.400, 1.269	219.400, 1.146	219.400, 1.151	219.400, 1.176	219.400, 1.145	219.400, 1.140	219.400, 1.146	219.400, 1.169	219.400, 1.060	219.400, 1.109	219.400, 1.128	219.400, 1.705
1099	219.600, 1.311	219.600, 1.452	219.600, 1.420	219.600, 1.269	219.600, 1.145	219.600, 1.151	219.600, 1.175	219.600, 1.145	219.600, 1.140	219.600, 1.146	219.600, 1.169	219.600, 1.060	219.600, 1.108	219.600, 1.127	219.600, 1.705
1100	219.800, 1.311	219.800, 1.451	219.800, 1.419	219.800, 1.269	219.800, 1.145	219.800, 1.151	219.800, 1.175	219.800, 1.145	219.800, 1.140	219.800, 1.146	219.800, 1.169	219.800, 1.060	219.800, 1.108	219.800, 1.127	219.800, 1.704
1101	220.000, 1.311	220.000, 1.450	220.000, 1.419	220.000, 1.269	220.000, 1.145	220.000, 1.151	220.000, 1.175	220.000, 1.145	220.000, 1.140	220.000, 1.145	220.000, 1.169	220.000, 1.060	220.000, 1.108	220.000, 1.127	220.000, 1.703
1102	220.200, 1.311	220.200, 1.449	220.200, 1.418	220.200, 1.269	220.200, 1.144	220.200, 1.151	220.200, 1.175	220.200, 1.145	220.200, 1.140	220.200, 1.145	220.200, 1.169	220.200, 1.060	220.200, 1.108	220.200, 1.126	220.200, 1.702
1103	220.400, 1.311	220.400, 1.448	220.400, 1.417	220.400, 1.268	220.400, 1.144	220.400, 1.151	220.400, 1.174	220.400, 1.144	220.400, 1.139	220.400, 1.145	220.400, 1.169	220.400, 1.060	220.400, 1.108	220.400, 1.126	220.400, 1.702
1104	220.600, 1.311	220.600, 1.447	220.600, 1.416	220.600, 1.268	220.600, 1.144	220.600, 1.150	220.600, 1.174	220.600, 1.144	220.600, 1.139	220.600, 1.145	220.600, 1.169	220.600, 1.060	220.600, 1.108	220.600, 1.126	220.600, 1.701
1105	220.800, 1.310	220.800, 1.446	220.800, 1.415	220.800, 1.268	220.800, 1.144	220.800, 1.150	220.800, 1.174	220.800, 1.144	220.800, 1.139	220.800, 1.145	220.800, 1.169	220.800, 1.060	220.800, 1.107	220.800, 1.126	220.800, 1.701
1106	221.000, 1.310	221.000, 1.445	221.000, 1.414	221.000, 1.268	221.000, 1.143	221.000, 1.150	221.000, 1.174	221.000, 1.144	221.000, 1.139	221.000, 1.145	221.000, 1.169	221.000, 1.060	221.000, 1.107	221.000, 1.126	221.000, 1.700
1107	221.200, 1.310	221.200, 1.444	221.200, 1.413	221.200, 1.268	221.200, 1.143	221.200, 1.150	221.200, 1.174	221.200, 1.144	221.200, 1.138	221.200, 1.145	221.200, 1.169	221.200, 1.059	221.200, 1.107	221.200, 1.126	221.200, 1.700
1108	221.400, 1.310	221.400, 1.443	221.400, 1.413	221.400, 1.267	221.400, 1.143	221.400, 1.150	221.400, 1.174	221.400, 1.144	221.400, 1.138	221.400, 1.145	221.400, 1.169	221.400, 1.059	221.400, 1.107	221.400, 1.126	221.400, 1.699
1109	221.600, 1.309	221.600, 1.442	221.600, 1.412	221.600, 1.267	221.600, 1.143	221.600, 1.150	221.600, 1.174	221.600, 1.144	221.600, 1.138	221.600, 1.144	221.600, 1.168	221.600, 1.059	221.600, 1.107	221.600, 1.126	221.600, 1.698
1110	221.800, 1.309	221.800, 1.441	221.800, 1.411	221.800, 1.267	221.800, 1.143	221.800, 1.150	221.800, 1.174	221.800, 1.144	221.800, 1.137	221.800, 1.144	221.800, 1.168	221.800, 1.059	221.800, 1.107	221.800, 1.126	221.800, 1.698
1111	222.000, 1.309	222.000, 1.440	222.000, 1.411	222.000, 1.266	222.000, 1.143	222.000, 1.150	222.000, 1.174	222.000, 1.144	222.000, 1.137	222.000, 1.144	222.000, 1.168	222.000, 1.058	222.000, 1.106	222.000, 1.126	222.000, 1.697
1112	222.200, 1.308	222.200, 1.439	222.200, 1.410	222.200, 1.266	222.200, 1.143	222.200, 1.150	222.200, 1.174	222.200, 1.144	222.200, 1.137	222.200, 1.144	222.200, 1.167	222.200, 1.058	222.200, 1.106	222.200, 1.126	222.200, 1.696
1113	222.400, 1.308	222.400, 1.438	222.400, 1.409	222.400, 1.265	222.400, 1.143	222.400, 1.150	222.400, 1.174	222.400, 1.143	222.400, 1.137	222.400, 1.144	222.400, 1.167	222.400, 1.058	222.400, 1.106	222.400, 1.126	222.400, 1.696
1114	222.600, 1.308	222.600, 1.438	222.600, 1.408	222.600, 1.265	222.600, 1.143	222.600, 1.149	222.600, 1.174	222.600, 1.143	222.600, 1.137	222.600, 1.144	222.600, 1.166	222.600, 1.058	222.600, 1.106	222.600, 1.126	222.600, 1.695
1115	222.800, 1.308	222.800, 1.437	222.800, 1.407	222.800, 1.265	222.800, 1.143	222.800, 1.149	222.800, 1.174	222.800, 1.143	222.800, 1.136	222.800, 1.144	222.800, 1.166	222.800, 1.058	222.800, 1.106	222.800, 1.126	222.800, 1.694
1116	223.000, 1.308	223.000, 1.436	223.000, 1.406	223.000, 1.264	223.000, 1.143	223.000, 1.149	223.000, 1.174	223.000, 1.143	223.000, 1.136	223.000, 1.145	223.000, 1.166	223.000, 1.058	223.000, 1.106	223.000, 1.126	223.000, 1.693
1117	223.200, 1.308	223.200, 1.435	223.200, 1.405	223.200, 1.264	223.200, 1.144	223.200, 1.149	223.200, 1.174	223.200, 1.143	223.200, 1.136	223.200, 1.145	223.200, 1.166	223.200, 1.058	223.200, 1.106	223.200, 1.126	223.200, 1.693
1118	223.400, 1.308	223.400, 1.434	223.400, 1.404	223.400, 1.264	223.400, 1.144	223.400, 1.149	223.400, 1.173	223.400, 1.143	223.400, 1.136	223.400, 1.145	223.400, 1.166	223.400, 1.058	223.400, 1.106	223.400, 1.125	223.400, 1.692
1119	223.600, 1.308	223.600, 1.433	223.600, 1.403	223.600, 1.264	223.600, 1.143	223.600, 1.149	223.600, 1.173	223.600, 1.143	223.600, 1.136	223.600, 1.145	223.600, 1.166	223.600, 1.058	223.600, 1.106	223.600, 1.125	223.600, 1.690
1120	223.800, 1.308	223.800, 1.432	223.800, 1.402	223.800, 1.263	223.800, 1.143	223.800, 1.149	223.800, 1.173	223.800, 1.142	223.800, 1.135	223.800, 1.145	223.800, 1.166	223.800, 1.058	223.800, 1.105	223.800, 1.125	223.800, 1.689
1121	224.000, 1.308	224.000, 1.431	224.000, 1.401	224.000, 1.264	224.000, 1.143	224.000, 1.148	224.000, 1.172	224.000, 1.142	224.000, 1.135	224.000, 1.145	224.000, 1.166	224.000, 1.058	224.000, 1.105	224.000, 1.125	224.000, 1.688
1122	224.200, 1.308	224.200, 1.430	224.200, 1.401	224.200, 1.264	224.200, 1.143	224.200, 1.148	224.200, 1.172	224.200, 1.142	224.200, 1.135	224.200, 1.145	224.200, 1.165	224.200, 1.057	224.200, 1.105	224.200, 1.125	224.200, 1.687
1123	224.400, 1.307	224.400, 1.429	224.400, 1.400	224.400, 1.263	224.400, 1.143	224.400, 1.148	224.400, 1.172	224.400, 1.141	224.400, 1.135	224.400, 1.144	224.400, 1.165	224.400, 1.057	224.400, 1.105	224.400, 1.125	224.400, 1.686
1124	224.600, 1.307	224.600, 1.428	224.600, 1.399	224.600, 1.264	224.600, 1.142	224.600, 1.148	224.600, 1.172	224.600, 1.141	224.600, 1.135	224.600, 1.144	224.600, 1.165	224.600, 1.057	224.600, 1.105	224.600, 1.125	224.600, 1.685
1125	224.800, 1.307	224.800, 1.427	224.800, 1.399	224.800, 1.264	224.800, 1.142	224.800, 1.147	224.800, 1.172	224.800, 1.141	224.800, 1.135	224.800, 1.144	224.800, 1.165	224.800, 1.057	224.800, 1.105	224.800, 1.125	224.800, 1.685
1126	225.000, 1.307	225.000, 1.425	225.000, 1.399	225.000, 1.264	225.000, 1.142	225.000, 1.147	225.000, 1.172	225.000, 1.141	225.000, 1.135	225.000, 1.143	225.000, 1.165	225.000, 1.056	225.000, 1.105	225.000, 1.124	225.000, 1.684
1127	225.200, 1.307	225.200, 1.424	225.200, 1.398	225.200, 1.264	225.200, 1.142	225.200, 1.147	225.200, 1.172	225.200, 1.140	225.200, 1.135	225.200, 1.143	225.200, 1.165	225.200, 1.056	225.200, 1.105	225.200, 1.124	225.200, 1.684
1128	225.400, 1.307	225.400, 1.423	225.400, 1.398	225.400, 1.263	225.400, 1.142	225.400, 1.147	225.400, 1.172	225.400, 1.140	225.400, 1.135	225.400, 1.142	225.400, 1.165	225.400, 1.056	225.400, 1.104	225.400, 1.124	225.400, 1.683
1129	225.600, 1.307	225.600, 1.423	225.600, 1.397	225.600, 1.263	225.600, 1.142	225.600, 1.148	225.600, 1.172	225.600, 1.139	225.600, 1.136	225.600, 1.142	225.600, 1.165	225.600, 1.056	225.600, 1.104	225.600, 1.124	225.600, 1.683
1130	225.800, 1.307	225.800, 1.422	225.800, 1.397	225.800, 1.263	225.800, 1.141	225.800, 1.148	225.800, 1.172	225.800, 1.139	225.800, 1.136	225.800, 1.141	225.800, 1.165	225.800, 1.056	225.800, 1.104	225.800, 1.124	225.800, 1.682
1131	226.000, 1.307	226.000, 1.422	226.000, 1.396	226.000, 1.263	226.000, 1.141	226.000, 1.148	226.000, 1.172	226.000, 1.138	226.000, 1.136	226.000, 1.141	226.000, 1.165	226.000, 1.055	226.000, 1.104	226.000, 1.123	226.000, 1.682
1132	226.200, 1.307	226.200, 1.421	226.200, 1.395	226.200, 1.262	226.200, 1.141	226.200, 1.148	226.200, 1.172	226.200, 1.138	226.200, 1.136	226.200, 1.141	226.200, 1.165	226.200, 1.055	226.200, 1.103	226.200, 1.123	226.200, 1.682
1133	226.400, 1.306	226.400, 1.420	226.400, 1.394	226.400, 1.262	226.400, 1.141	226.400, 1.148	226.400, 1.172	226.400, 1.137	226.400, 1.135	226.400, 1.141	226.400, 1.165	226.400, 1.055	226.400, 1.103	226.400, 1.123	226.400, 1.682
1134	226.600, 1.306	226.600, 1.419	226.600, 1.393	226.600, 1.262	226.600, 1.141	226.600, 1.148	226.600, 1.172	226.600, 1.137	226.600, 1.135	226.600, 1.142	226.600, 1.165	226.600, 1.054	226.600, 1.103	226.600, 1.123	226.600, 1.682
1135	226.800, 1.306	226.800, 1.419	226.800, 1.392	226.800, 1.261	226.800, 1.140	226.800, 1.148	226.800, 1.171	226.800, 1.137	226.800, 1.134	226.800, 1.142	226.800, 1.164	226.800, 1.054	226.800, 1.102	226.800, 1.123	226.800, 1.681
1136	227.000, 1.306	227.000, 1.418	227.000, 1.391	227.000, 1.261	227.000, 1.140	227.000, 1.148	227.000, 1.171	227.000, 1.137	227.000, 1.134	227.000, 1.142	227.000, 1.164	227.000, 1.054	227.000, 1.102	227.000, 1.122	227.000, 1.681
1137	227.200, 1.306	227.200, 1.417	227.200, 1.390	227.200, 1.261	227.200, 1.140	227.200, 1.147	227.200, 1.171	227.200, 1.137	227.200, 1.133	227.200, 1.142	227.200, 1.164	227.200, 1.054	227.200, 1.101	227.200, 1.122	227.200, 1.680
1138	227.400, 1.305	227.400, 1.416	227.400, 1.389	227.400, 1.261	227.400, 1.140	227.400, 1.147	227.400, 1.170	227.400, 1.137	227.400, 1.133	227.400, 1.142	227.400, 1.163	227.400, 1.054	227.400, 1.101	227.400, 1.122	227.400, 1.679
1139	227.600, 1.305	227.600, 1.415	227.600, 1.387	227.600, 1.261	227.600, 1.140	227.600, 1.147	227.600, 1.170	227.600, 1.137	227.600, 1.133	227.600, 1.142	227.600, 1.163	227.600, 1.054	227.600, 1.101	227.600, 1.122	227.600, 1.678
1140	227.800, 1.305	227.800, 1.414	227.800, 1.387	227.800, 1.261	227.800, 1.140	227.800, 1.146	227.800, 1.170	227.800, 1.137	227.800, 1.132	227.800, 1.141	227.800, 1.162	227.800, 1.054	227.800, 1.101	227.800, 1.121	227.800, 1.677
1141	228.000, 1.304	228.000, 1.413	228.000, 1.386	228.000, 1.261	228.000, 1.139	228.000, 1.146	228.000, 1.169	228.000, 1.137	228.000, 1.132	228.000, 1.141	228.000, 1.162	228.000, 1.054	228.000, 1.101	228.000, 1.121	228.000, 1.676
1142	228.200, 1.304	228.200, 1.412	228.200, 1.385	228.200, 1.261	228.200, 1.139	228.200, 1.145	228.200, 1.169	228.200, 1.137	228.200, 1.132	228.200, 1.141	228.200, 1.162	228.200, 1.054	228.200, 1.101	228.200, 1.121	228.200, 1.676
1143	228.400, 1.303	228.400, 1.411	228.400, 1.384	228.400, 1.261	228.400, 1.139	228.400, 1.145	228.400, 1.169	228.400, 1.137	228.400, 1.132	228.400, 1.141	228.400, 1.161	228.400, 1.054	228.400, 1.101	228.400, 1.121	228.400, 1.675
1144	228.600, 1.303	228.600, 1.410	228.600, 1.384	228.600, 1.261	228.600, 1.138	228.600, 1.144	228.600, 1.169	228.600, 1.138	228.600, 1.132	228.600, 1.140	228.600, 1.161	228.600, 1.054	228.600, 1.101	228.600, 1.120	228.600, 1.674
1145	228.800, 1.303	228.800, 1.409	228.800, 1.383	228.800, 1.261	228.800, 1.138	228.800, 1.144	228.800, 1.168	228.800, 1.138	228.800, 1.132	228.800, 1.140	228.800, 1.161	228.800, 1.054	228.800, 1.101	228.800, 1.120	228.800, 1.674
1146	229.000, 1.303	229.000, 1.409	229.000, 1.383	229.000, 1.261	229.000, 1.138	229.000, 1.143	229.000, 1.168	229.000, 1.138	229.000, 1.132	229.000, 1.139	229.000, 1.161	229.000, 1.054	229.000, 1.101	229.000, 1.120	229.000, 1.673
1147	229.200, 1.303	229.200, 1.408	229.200, 1.382	229.200, 1.261	229.200, 1.138	229.200, 1.143	229.200, 1.168	229.200, 1.138	229.200, 1.132	229.200, 1.139	229.200, 1.161	229.200, 1.054	229.200, 1.101	229.200, 1.120	229.200, 1.673
1148	229.400, 1.303	229.400, 1.407	229.400, 1.382	229.400, 1.260	229.400, 1.138	229.400, 1.143	229.400, 1.168	229.400, 1.137	229.400, 1.132	229.400, 1.138	229.400, 1.161	229.400, 1.054	229.400, 1.101	229.400, 1.121	229.400, 1.672
1149	229.600, 1.303	229.600, 1.407	229.600, 1.381	229.600, 1.260	229.600, 1.138	229.600, 1.143	229.600, 1.168	229.600, 1.137	229.600, 1.131	229.600, 1.138	229.600, 1.161	229.600, 1.054	229.600, 1.101	229.600, 1.120	229.600, 1.671
1150	229.800, 1.303	229.800, 1.406	229.800, 1.381	229.800, 1.260	229.800, 1.138	229.800, 1.143	229.800, 1.168	229.800, 1.137	229.800, 1.131	229.800, 1.138	229.800, 1.162	229.800, 1.053	229.800, 1.101	229.800, 1.120	229.800, 1.671
1151	230.000, 1.303	230.000, 1.405	230.000, 1.380	230.000, 1.260	230.000, 1.138	230.000, 1.143	230.000, 1.168	230.000, 1.136	230.000, 1.131	230.000, 1.138	230.000, 1.162	230.000, 1.053	230.000, 1.101	230.000, 1.120	230.000, 1.671
1152	230.200, 1.303	230.200, 1.404	230.200, 1.380	230.200, 1.259	230.200, 1.138	230.200, 1.143	230.200, 1.168	230.200, 1.136	230.200, 1.130	230.200, 1.137	230.200, 1.162	230.200, 1.053	230.200, 1.101	230.200, 1.120	230.200, 1.670
1153	230.400, 1.303	230.400, 1.404	230.400, 1.379	230.400, 1.259	230.400, 1.138	230.400, 1.143	230.400, 1.167	230.400, 1.136	230.400, 1.130	230.400, 1.137	230.400, 1.162	230.400, 1.052	230.400, 1.101	230.400, 1.119	230.400, 1.670
1154	230.600, 1.302	230.600, 1.403	230.600, 1.379	230.600, 1.259	230.600, 1.138	230.600, 1.143	230.600, 1.167	230.600, 1.136	230.600, 1.130	230.600, 1.137	230.600, 1.162	230.600, 1.052	230.600, 1.101	230.600, 1.119	230.600, 1.669
1155	230.800, 1.302	230.800, 1.403	230.800, 1.379	230.800, 1.259	230.800, 1.138	230.800, 1.143	230.800, 1.167	230.800, 1.135	230.800, 1.129	230.800, 1.137	230.800, 1.162	230.800, 1.052	230.800, 1.101	230.800, 1.119	230.800, 1.669
1156	231.000, 1.302	231.000, 1.402	231.000, 1.378	231.000, 1.258	231.000, 1.138	231.000, 1.143	231.000, 1.167	231.000, 1.135	231.000, 1.129	231.000, 1.137	231.000, 1.162	231.000, 1.052	231.000, 1.101	231.000, 1.119	231.000, 1.668
1157	231.200, 1.302	231.200, 1.401	231.200, 1.377	231.200, 1.258	231.200, 1.138	231.200, 1.143	231.200, 1.167	231.200, 1.135	231.200, 1.129	231.200, 1.137	231.200, 1.161	231.200, 1.051	231.200, 1.101	231.200, 1.118	231.200, 1.667
1158	231.400, 1.301	231.400, 1.401	231.400, 1.377	231.400, 1.258	231.400, 1.138	231.400, 1.143	231.400, 1.167	231.400, 1.135	231.400, 1.129	231.400, 1.137	231.400, 1.161	231.400, 1.051	231.400, 1.101	231.400, 1.118	231.400, 1.666
1159	231.600, 1.301	231.600, 1.400	231.600, 1.376	231.600, 1.258	231.600, 1.137	231.600, 1.143	231.600, 1.167	231.600, 1.134	231.600, 1.129	231.600, 1.137	231.600, 1.161	231.600, 1.051	231.600, 1.101	231.600, 1.117	231.600, 1.666
1160	231.800, 1.301	231.800, 1.399	231.800, 1.375	231.800, 1.258	231.800, 1.137	231.800, 1.143	231.800, 1.167	231.800, 1.134	231.800, 1.129	231.800, 1.137	231.800, 1.161	231.800, 1.051	231.800, 1.101	231.800, 1.117	231.800, 1.665
1161	232.000, 1.301	232.000, 1.398	232.000, 1.374	232.000, 1.258	232.000, 1.136	232.000, 1.143	232.000, 1.167	232.000, 1.134	232.000, 1.129	232.000, 1.137	232.000, 1.160	232.000, 1.050	232.000, 1.101	232.000, 1.117	232.000, 1.664
1162	232.200, 1.301	232.200, 1.397	232.200, 1.374	232.200, 1.258	232.200, 1.136	232.200, 1.143	232.200, 1.167	232.200, 1.134	232.200, 1.129	232.200, 1.137	232.200, 1.160	232.200, 1.050	232.200, 1.101	232.200, 1.117	232.200, 1.663
1163	232.400, 1.301	232.400, 1.396	232.400, 1.373	232.400, 1.257	232.400, 1.135	232.400, 1.143	232.400, 1.167	232.400, 1.134	232.400, 1.129	232.400, 1.137	232.400, 1.160	232.400, 1.050	232.400, 1.101	232.400, 1.117	232.400, 1.662
1164	232.600, 1.301	232.600, 1.395	232.600, 1.372	232.600, 1.257	232.600, 1.135	232.600, 1.143	232.600, 1.167	232.600, 1.134	232.600, 1.129	232.600, 1.137	232.600, 1.160	232.600, 1.050	232.600, 1.101	232.600, 1.117	232.600, 1.661
1165	232.800, 1.301	232.800, 1.394	232.800, 1.371	232.800, 1.257	232.800, 1.135	232.800, 1.143	232.800, 1.166	232.800, 1.134	232.800, 1.129	232.800, 1.137	232.800, 1.159	232.800, 1.050	232.800, 1.101	232.800, 1.117	232.800, 1.661
1166	233.000, 1.301	233.000, 1.393	233.000, 1.370	233.000, 1.257	233.000, 1.134	233.000, 1.143	233.000, 1.166	233.000, 1.134	233.000, 1.129	233.000, 1.137	233.000, 1.159	233.000, 1.050	233.000, 1.100	233.000, 1.117	233.000, 1.660
1167	233.200, 1.301	233.200, 1.393	233.200, 1.369	233.200, 1.257	233.200, 1.134	233.200, 1.142	233.200, 1.166	233.200, 1.133	233.200, 1.129	233.200, 1.137	233.200, 1.159	233.200, 1.050	233.200, 1.100	233.200, 1.117	233.200, 1.659
1168	233.400, 1.300	233.400, 1.392	233.400, 1.368	233.400, 1.257	233.400, 1.134	233.400, 1.142	233.400, 1.166	233.400, 1.133	233.400, 1.129	233.400, 1.137	233.400, 1.159	233.400, 1.050	233.400, 1.100	233.400, 1.116	233.400, 1.658
1169	233.600, 1.300	233.600, 1.391	233.600, 1.368	233.600, 1.257	233.600, 1.134	233.600, 1.142	233.600, 1.166	233.600, 1.132	233.600, 1.128	233.600, 1.137	233.600, 1.159	233.600, 1.050	233.600, 1.099	233.600, 1.116	233.600, 1.657
1170	233.800, 1.300	233.800, 1.391	233.800, 1.367	233.800, 1.257	233.800, 1.134	233.800, 1.141	233.800, 1.166	233.800, 1.132	233.800, 1.128	233.800, 1.137	233.800, 1.158	233.800, 1.050	233.800, 1.099	233.800, 1.115	233.800, 1.656
1171	234.000, 1.300	234.000, 1.390	234.000, 1.367	234.000, 1.257	234.000, 1.134	234.000, 1.141	234.000, 1.165	234.000, 1.132	234.000, 1.128	234.000, 1.136	234.000, 1.158	234.000, 1.050	234.000, 1.098	234.000, 1.115	234.000, 1.655
1172	234.200, 1.299	234.200, 1.390	234.200, 1.366	234.200, 1.256	234.200, 1.134	234.200, 1.141	234.200, 1.165	234.200, 1.132	234.200, 1.128	234.200, 1.136	234.200, 1.158	234.200, 1.049	234.200, 1.098	234.200, 1.115	234.200, 1.654
1173	234.400, 1.299	234.400, 1.389	234.400, 1.366	234.400, 1.256	234.400, 1.134	234.400, 1.141	234.400, 1.164	234.400, 1.132	234.400, 1.128	234.400, 1.136	234.400, 1.158	234.400, 1.049	234.400, 1.098	234.400, 1.115	234.400, 1.654
1174	234.600, 1.298	234.600, 1.388	234.600, 1.366	234.600, 1.256	234.600, 1.134	234.600, 1.141	234.600, 1.164	234.600, 1.132	234.600, 1.127	234.600, 1.136	234.600, 1.158	234.600, 1.049	234.600, 1.097	234.600, 1.115	234.600, 1.653
1175	234.800, 1.298	234.800, 1.388	234.800, 1.365	234.800, 1.256	234.800, 1.134	234.800, 1.141	234.800, 1.164	234.800, 1.132	234.800, 1.127	234.800, 1.135	234.800, 1.157	234.800, 1.049	234.800, 1.097	234.800, 1.114	234.800, 1.652
1176	235.000, 1.298	235.000, 1.387	235.000, 1.365	235.000, 1.256	235.000, 1.134	235.000, 1.141	235.000, 1.164	235.000, 1.132	235.000, 1.127	235.000, 1.135	235.000, 1.157	235.000, 1.049	235.000, 1.097	235.000, 1.114	235.000, 1.652
1177	235.200, 1.297	235.200, 1.387	235.200, 1.365	235.200, 1.255	235.200, 1.134	235.200, 1.141	235.200, 1.164	235.200, 1.133	235.200, 1.127	235.200, 1.135	235.200, 1.157	235.200, 1.049	235.200, 1.097	235.200, 1.114	235.200, 1.651
1178	235.400, 1.297	235.400, 1.386	235.400, 1.364	235.400, 1.255	235.400, 1.134	235.400, 1.141	235.400, 1.164	235.400, 1.133	235.400, 1.127	235.400, 1.134	235.400, 1.157	235.400, 1.049	235.400, 1.097	235.400, 1.113	235.400, 1.651
1179	235.600, 1.297	235.600, 1.386	235.600, 1.363	235.600, 1.255	235.600, 1.133	235.600, 1.141	235.600, 1.164	235.600, 1.133	235.600, 1.127	235.600, 1.134	235.600, 1.157	235.600, 1.048	235.600, 1.097	235.600, 1.113	235.600, 1.651
1180	235.800, 1.297	235.800, 1.385	235.800, 1.363	235.800, 1.254	235.800, 1.133	235.800, 1.141	235.800, 1.164	235.800, 1.133	235.800, 1.127	235.800, 1.134	235.800, 1.157	235.800, 1.048	235.800, 1.097	235.800, 1.113	235.800, 1.650
1181	236.000, 1.297	236.000, 1.384	236.000, 1.362	236.000, 1.254	236.000, 1.133	236.000, 1.141	236.000, 1.164	236.000, 1.133	236.000, 1.127	236.000, 1.134	236.000, 1.157	236.000, 1.048	236.000, 1.097	236.000, 1.114	236.000, 1.650
1182	236.200, 1.297	236.200, 1.384	236.200, 1.361	236.200, 1.254	236.200, 1.132	236.200, 1.141	236.200, 1.164	236.200, 1.133	236.200, 1.127	236.200, 1.134	236.200, 1.157	236.200, 1.048	236.200, 1.097	236.200, 1.114	236.200, 1.649
1183	236.400, 1.297	236.400, 1.383	236.400, 1.360	236.400, 1.253	236.400, 1.132	236.400, 1.141	236.400, 1.164	236.400, 1.133	236.400, 1.127	236.400, 1.134	236.400, 1.158	236.400, 1.048	236.400, 1.097	236.400, 1.114	236.400, 1.649
1184	236.600, 1.297	236.600, 1.382	236.600, 1.359	236.600, 1.253	236.600, 1.132	236.600, 1.140	236.600, 1.164	236.600, 1.133	236.600, 1.127	236.600, 1.134	236.600, 1.158	236.600, 1.047	236.600, 1.097	236.600, 1.114	236.600, 1.649
1185	236.800, 1.297	236.800, 1.382	236.800, 1.358	236.800, 1.253	236.800, 1.132	236.800, 1.140	236.800, 1.164	236.800, 1.133	236.800, 1.127	236.800, 1.134	236.800, 1.158	236.800, 1.048	236.800, 1.097	236.800, 1.113	236.800, 1.648
1186	237.000, 1.297	237.000, 1.381	237.000, 1.358	237.000, 1.253	237.000, 1.132	237.000, 1.140	237.000, 1.164	237.000, 1.133	237.000, 1.127	237.000, 1.134	237.000, 1.158	237.000, 1.048	237.000, 1.097	237.000, 1.113	237.000, 1.648
1187	237.200, 1.297	237.200, 1.381	237.200, 1.357	237.200, 1.253	237.200, 1.132	237.200, 1.140	237.200, 1.163	237.200, 1.133	237.200, 1.127	237.200, 1.134	237.200, 1.158	237.200, 1.048	237.200, 1.096	237.200, 1.113	237.200, 1.647
1188	237.400, 1.297	237.400, 1.380	237.400, 1.356	237.400, 1.253	237.400, 1.132	237.400, 1.139	237.400, 1.163	237.400, 1.132	237.400, 1.127	237.400, 1.134	237.400, 1.158	237.400, 1.048	237.400, 1.096	237.400, 1.113	237.400, 1.646
1189	237.600, 1.296	237.600, 1.380	237.600, 1.356	237.600, 1.253	237.600, 1.132	237.600, 1.139	237.600, 1.163	237.600, 1.132	237.600, 1.126	237.600, 1.133	237.600, 1.158	237.600, 1.048	237.600, 1.096	237.600, 1.113	237.600, 1.646
1190	237.800, 1.296	237.800, 1.379	237.800, 1.355	237.800, 1.253	237.800, 1.131	237.800, 1.139	237.800, 1.163	237.800, 1.131	237.800, 1.126	237.800, 1.133	237.800, 1.157	237.800, 1.048	237.800, 1.095	237.800, 1.114	237.800, 1.645
1191	238.000, 1.296	238.000, 1.378	238.000, 1.355	238.000, 1.253	238.000, 1.131	238.000, 1.139	238.000, 1.162	238.000, 1.131	238.000, 1.126	238.000, 1.133	238.000, 1.157	238.000, 1.048	238.000, 1.095	238.000, 1.114	238.000, 1.644
1192	238.200, 1.295	238.200, 1.377	238.200, 1.354	238.200, 1.253	238.200, 1.131	238.200, 1.139	238.200, 1.162	238.200, 1.131	238.200, 1.126	238.200, 1.132	238.200, 1.157	238.200, 1.048	238.200, 1.094	238.200, 1.114	238.200, 1.644
1193	238.400, 1.295	238.400, 1.376	238.400, 1.353	238.400, 1.253	238.400, 1.131	238.400, 1.139	238.400, 1.162	238.400, 1.131	238.400, 1.125	238.400, 1.132	238.400, 1.156	238.400, 1.048	238.400, 1.094	238.400, 1.114	238.400, 1.643
1194	238.600, 1.294	238.600, 1.376	238.600, 1.353	238.600, 1.252	238.600, 1.131	238.600, 1.139	238.600, 1.162	238.600, 1.131	238.600, 1.125	238.600, 1.131	238.600, 1.156	238.600, 1.048	238.600, 1.094	238.600, 1.114	238.600, 1.643
1195	238.800, 1.294	238.800, 1.375	238.800, 1.352	238.800, 1.252	238.800, 1.131	238.800, 1.138	238.800, 1.161	238.800, 1.131	238.800, 1.125	238.800, 1.131	238.800, 1.155	238.800, 1.048	238.800, 1.094	238.800, 1.114	238.800, 1.643
1196	239.000, 1.294	239.000, 1.374	239.000, 1.351	239.000, 1.252	239.000, 1.131	239.000, 1.138	239.000, 1.161	239.000, 1.130	239.000, 1.124	239.000, 1.131	239.000, 1.155	239.000, 1.047	239.000, 1.094	239.000, 1.114	239.000, 1.642
1197	239.200, 1.294	239.200, 1.373	239.200, 1.351	239.200, 1.252	239.200, 1.131	239.200, 1.138	239.200, 1.161	239.200, 1.130	239.200, 1.124	239.200, 1.130	239.200, 1.155	239.200, 1.047	239.200, 1.093	239.200, 1.114	239.200, 1.642
1198	239.400, 1.294	239.400, 1.372	239.400, 1.350	239.400, 1.252	239.400, 1.130	239.400, 1.137	239.400, 1.161	239.400, 1.130	239.400, 1.124	239.400, 1.130	239.400, 1.155	239.400, 1.046	239.400, 1.093	239.400, 1.114	239.400, 1.641
1199	239.600, 1.294	239.600, 1.371	239.600, 1.349	239.600, 1.251	239.600, 1.130	239.600, 1.137	239.600, 1.161	239.600, 1.130	239.600, 1.124	239.600, 1.130	239.600, 1.155	239.600, 1.046	239.600, 1.093	239.600, 1.114	239.600, 1.641
1200	239.800, 1.294	239.800, 1.371	239.800, 1.349	239.800, 1.251	239.800, 1.130	239.800, 1.137	239.800, 1.161	239.800, 1.129	239.800, 1.124	239.800, 1.130	239.800, 1.155	239.800, 1.045	239.800, 1.094	239.800, 1.114	239.800, 1.640
1201	240.000, 1.294	240.000, 1.370	240.000, 1.348	240.000, 1.251	240.000, 1.129	240.000, 1.137	240.000, 1.160	240.000, 1.130	240.000, 1.124	240.000, 1.130	240.000, 1.155	240.000, 1.045	240.000, 1.094	240.000, 1.114	240.000, 1.640
1202	240.200, 1.294	240.200, 1.369	240.200, 1.347	240.200, 1.251	240.200, 1.129	240.200, 1.136	240.200, 1.160	240.200, 1.130	240.200, 1.124	240.200, 1.130	240.200, 1.155	240.200, 1.044	240.200, 1.094	240.200, 1.114	240.200, 1.639
1203	240.400, 1.294	240.400, 1.368	240.400, 1.347	240.400, 1.251	240.400, 1.129	240.400, 1.136	240.400, 1.160	240.400, 1.130	240.400, 1.124	240.400, 1.130	240.400, 1.155	240.400, 1.044	240.400, 1.094	240.400, 1.113	240.400, 1.639
1204	240.600, 1.294	240.600, 1.367	240.600, 1.346	240.600, 1.251	240.600, 1.129	240.600, 1.136	240.600, 1.160	240.600, 1.130	240.600, 1.124	240.600, 1.130	240.600, 1.155	240.600, 1.044	240.600, 1.095	240.600, 1.113	240.600, 1.638
1205	240.800, 1.295	240.800, 1.367	240.800, 1.346	240.800, 1.251	240.800, 1.129	240.800, 1.136	240.800, 1.160	240.800, 1.130	240.800, 1.123	240.800, 1.130	240.800, 1.155	240.800, 1.044	240.800, 1.095	240.800, 1.113	240.800, 1.638
1206	241.000, 1.295	241.000, 1.366	241.000, 1.346	241.000, 1.251	241.000, 1.128	241.000, 1.136	241.000, 1.160	241.000, 1.130	241.000, 1.123	241.000, 1.130	241.000, 1.155	241.000, 1.044	241.000, 1.095	241.000, 1.113	241.000, 1.637
1207	241.200, 1.294	241.200, 1.366	241.200, 1.346	241.200, 1.250	241.200, 1.128	241.200, 1.136	241.200, 1.159	241.200, 1.130	241.200, 1.123	241.200, 1.130	241.200, 1.155	241.200, 1.044	241.200, 1.094	241.200, 1.113	241.200, 1.636
1208	241.400, 1.294	241.400, 1.365	241.400, 1.345	241.400, 1.250	241.400, 1.128	241.400, 1.136	241.400, 1.159	241.400, 1.129	241.400, 1.123	241.400, 1.130	241.400, 1.154	241.400, 1.044	241.400, 1.094	241.400, 1.113	241.400, 1.636
1209	241.600, 1.293	241.600, 1.365	241.600, 1.345	241.600, 1.250	241.600, 1.128	241.600, 1.136	241.600, 1.159	241.600, 1.129	241.600, 1.123	241.600, 1.130	241.600, 1.154	241.600, 1.044	241.600, 1.094	241.600, 1.112	241.600, 1.635
1210	241.800, 1.293	241.800, 1.364	241.800, 1.345	241.800, 1.250	241.800, 1.128	241.800, 1.136	241.800, 1.159	241.800, 1.129	241.800, 1.123	241.800, 1.131	241.800, 1.153	241.800, 1.044	241.800, 1.094	241.800, 1.112	241.800, 1.635
1211	242.000, 1.292	242.000, 1.364	242.000, 1.344	242.000, 1.250	242.000, 1.128	242.000, 1.137	242.000, 1.159	242.000, 1.129	242.000, 1.122	242.000, 1.131	242.000, 1.153	242.000, 1.044	242.000, 1.093	242.000, 1.111	242.000, 1.634
1212	242.200, 1.292	242.200, 1.363	242.200, 1.343	242.200, 1.250	242.200, 1.128	242.200, 1.137	242.200, 1.159	242.200, 1.129	242.200, 1.122	242.200, 1.131	242.200, 1.152	242.200, 1.044	242.200, 1.093	242.200, 1.110	242.200, 1.634
1213	242.400, 1.292	242.400, 1.363	242.400, 1.343	242.400, 1.250	242.400, 1.128	242.400, 1.137	242.400, 1.159	242.400, 1.128	242.400, 1.122	242.400, 1.131	242.400, 1.152	242.400, 1.044	242.400, 1.093	242.400, 1.110	242.400, 1.634
1214	242.600, 1.292	242.600, 1.363	242.600, 1.342	242.600, 1.249	242.600, 1.128	242.600, 1.137	242.600, 1.159	242.600, 1.128	242.600, 1.122	242.600, 1.130	242.600, 1.152	242.600, 1.044	242.600, 1.092	242.600, 1.109	242.600, 1.633
1215	242.800, 1.292	242.800, 1.362	242.800, 1.341	242.800, 1.249	242.800, 1.128	242.800, 1.137	242.800, 1.159	242.800, 1.128	242.800, 1.122	242.800, 1.130	242.800, 1.152	242.800, 1.044	242.800, 1.092	242.800, 1.109	242.800, 1.633
1216	243.000, 1.292	243.000, 1.361	243.000, 1.341	243.000, 1.249	243.000, 1.128	243.000, 1.137	243.000, 1.159	243.000, 1.128	243.000, 1.122	243.000, 1.130	243.000, 1.152	243.000, 1.044	243.000, 1.092	243.000, 1.108	243.000, 1.633
1217	243.200, 1.292	243.200, 1.361	243.200, 1.340	243.200, 1.249	243.200, 1.128	243.200, 1.137	243.200, 1.159	243.200, 1.127	243.200, 1.122	243.200, 1.130	243.200, 1.152	243.200, 1.044	243.200, 1.091	243.200, 1.108	243.200, 1.632
1218	243.400, 1.292	243.400, 1.360	243.400, 1.340	243.400, 1.249	243.400, 1.128	243.400, 1.137	243.400, 1.158	243.400, 1.127	243.400, 1.121	243.400, 1.129	243.400, 1.151	243.400, 1.043	243.400, 1.091	243.400, 1.108	243.400, 1.631
1219	243.600, 1.292	243.600, 1.359	243.600, 1.339	243.600, 1.248	243.600, 1.128	243.600, 1.136	243.600, 1.158	243.600, 1.127	243.600, 1.121	243.600, 1.129	243.600, 1.151	243.600, 1.043	243.600, 1.091	243.600, 1.108	243.600, 1.631
1220	243.800, 1.292	243.800, 1.358	243.800, 1.339	243.800, 1.248	243.800, 1.128	243.800, 1.136	243.800, 1.158	243.800, 1.127	243.800, 1.121	243.800, 1.128	243.800, 1.151	243.800, 1.043	243.800, 1.092	243.800, 1.108	243.800, 1.630
1221	244.000, 1.292	244.000, 1.357	244.000, 1.339	244.000, 1.248	244.000, 1.127	244.000, 1.135	244.000, 1.158	244.000, 1.127	244.000, 1.121	244.000, 1.128	244.000, 1.151	244.000, 1.043	244.000, 1.092	244.000, 1.108	244.000, 1.630
1222	244.200, 1.292	244.200, 1.356	244.200, 1.338	244.200, 1.248	244.200, 1.127	244.200, 1.134	244.200, 1.158	244.200, 1.127	244.200, 1.121	244.200, 1.127	244.200, 1.150	244.200, 1.043	244.200, 1.092	244.200, 1.108	244.200, 1.629
1223	244.400, 1.291	244.400, 1.356	244.400, 1.338	244.400, 1.247	244.400, 1.127	244.400, 1.134	244.400, 1.158	244.400, 1.126	244.400, 1.121	244.400, 1.127	244.400, 1.150	244.400, 1.043	244.400, 1.092	244.400, 1.109	244.400, 1.629
1224	244.600, 1.291	244.600, 1.355	244.600, 1.338	244.600, 1.247	244.600, 1.127	244.600, 1.133	244.600, 1.158	244.600, 1.126	244.600, 1.120	244.600, 1.127	244.600, 1.150	244.600, 1.042	244.600, 1.092	244.600, 1.109	244.600, 1.628
1225	244.800, 1.291	244.800, 1.355	244.800, 1.337	244.800, 1.247	244.800, 1.127	244.800, 1.133	244.800, 1.157	244.800, 1.126	244.800, 1.120	244.800, 1.126	244.800, 1.150	244.800, 1.042	244.800, 1.092	244.800, 1.110	244.800, 1.628
1226	245.000, 1.291	245.000, 1.354	245.000, 1.337	245.000, 1.247	245.000, 1.127	245.000, 1.133	245.000, 1.157	245.000, 1.126	245.000, 1.120	245.000, 1.126	245.000, 1.150	245.000, 1.042	245.000, 1.092	245.000, 1.110	245.000, 1.628
1227	245.200, 1.290	245.200, 1.354	245.200, 1.336	245.200, 1.247	245.200, 1.127	245.200, 1.133	245.200, 1.157	245.200, 1.126	245.200, 1.120	245.200, 1.126	245.200, 1.150	245.200, 1.042	245.200, 1.091	245.200, 1.110	245.200, 1.627
1228	245.400, 1.290	245.400, 1.353	245.400, 1.335	245.400, 1.247	245.400, 1.127	245.400, 1.133	245.400, 1.157	245.400, 1.126	245.400, 1.120	245.400, 1.126	245.400, 1.150	245.400, 1.042	245.400, 1.091	245.400, 1.111	245.400, 1.627
1229	245.600, 1.289	245.600, 1.353	245.600, 1.335	245.600, 1.247	245.600, 1.127	245.600, 1.133	245.600, 1.157	245.600, 1.126	245.600, 1.121	245.600, 1.126	245.600, 1.150	245.600, 1.042	245.600, 1.091	245.600, 1.111	245.600, 1.626
1230	245.800, 1.289	245.800, 1.353	245.800, 1.334	245.800, 1.247	245.800, 1.127	245.800, 1.133	245.800, 1.157	245.800, 1.125	245.800, 1.121	245.800, 1.126	245.800, 1.150	245.800, 1.042	245.800, 1.091	245.800, 1.110	245.800, 1.626
1231	246.000, 1.289	246.000, 1.352	246.000, 1.334	246.000, 1.247	246.000, 1.127	246.000, 1.133	246.000, 1.157	246.000, 1.125	246.000, 1.121	246.000, 1.126	246.000, 1.149	246.000, 1.041	246.000, 1.091	246.000, 1.110	246.000, 1.625
1232	246.200, 1.289	246.200, 1.352	246.200, 1.333	246.200, 1.247	246.200, 1.127	246.200, 1.133	246.200, 1.157	246.200, 1.125	246.200, 1.121	246.200, 1.126	246.200, 1.149	246.200, 1.041	246.200, 1.091	246.200, 1.110	246.200, 1.625
1233	246.400, 1.289	246.400, 1.351	246.400, 1.333	246.400, 1.246	246.400, 1.127	246.400, 1.133	246.400, 1.156	246.400, 1.125	246.400, 1.121	246.400, 1.126	246.400, 1.149	246.400, 1.041	246.400, 1.091	246.400, 1.111	246.400, 1.624
1234	246.600, 1.288	246.600, 1.351	246.600, 1.332	246.600, 1.246	246.600, 1.127	246.600, 1.133	246.600, 1.156	246.600, 1.125	246.600, 1.121	246.600, 1.126	246.600, 1.149	246.600, 1.041	246.600, 1.091	246.600, 1.111	246.600, 1.624
1235	246.800, 1.288	246.800, 1.350	246.800, 1.332	246.800, 1.246	246.800, 1.127	246.800, 1.133	246.800, 1.156	246.800, 1.124	246.800, 1.121	246.800, 1.126	246.800, 1.149	246.800, 1.041	246.800, 1.091	246.800, 1.111	246.800, 1.623
1236	247.000, 1.288	247.000, 1.350	247.000, 1.332	247.000, 1.245	247.000, 1.127	247.000, 1.133	247.000, 1.155	247.000, 1.124	247.000, 1.120	247.000, 1.126	247.000, 1.149	247.000, 1.041	247.000, 1.091	247.000, 1.111	247.000, 1.623
1237	247.200, 1.288	247.200, 1.349	247.200, 1.332	247.200, 1.245	247.200, 1.127	247.200, 1.133	247.200, 1.155	247.200, 1.124	247.200, 1.120	247.200, 1.126	247.200, 1.149	247.200, 1.041	247.200, 1.091	247.200, 1.111	247.200, 1.622
1238	247.400, 1.288	247.400, 1.349	247.400, 1.332	247.400, 1.245	247.400, 1.126	247.400, 1.133	247.400, 1.155	247.400, 1.124	247.400, 1.120	247.400, 1.126	247.400, 1.149	247.400, 1.040	247.400, 1.091	247.400, 1.110	247.400, 1.622
1239	247.600, 1.288	247.600, 1.348	247.600, 1.331	247.600, 1.244	247.600, 1.126	247.600, 1.132	247.600, 1.155	247.600, 1.124	247.600, 1.119	247.600, 1.126	247.600, 1.149	247.600, 1.040	247.600, 1.091	247.600, 1.110	247.600, 1.621
1240	247.800, 1.287	247.800, 1.348	247.800, 1.331	247.800, 1.244	247.800, 1.126	247.800, 1.132	247.800, 1.155	247.800, 1.124	247.800, 1.119	247.800, 1.126	247.800, 1.149	247.800, 1.040	247.800, 1.091	247.800, 1.110	247.800, 1.621
1241	248.000, 1.287	248.000, 1.347	248.000, 1.331	248.000, 1.244	248.000, 1.126	248.000, 1.132	248.000, 1.155	248.000, 1.124	248.000, 1.119	248.000, 1.126	248.000, 1.149	248.000, 1.040	248.000, 1.091	248.000, 1.109	248.000, 1.620
1242	248.200, 1.287	248.200, 1.347	248.200, 1.330	248.200, 1.244	248.200, 1.125	248.200, 1.131	248.200, 1.155	248.200, 1.124	248.200, 1.119	248.200, 1.126	248.200, 1.149	248.200, 1.040	248.200, 1.091	248.200, 1.109	248.200, 1.620
1243	248.400, 1.287	248.400, 1.346	248.400, 1.330	248.400, 1.244	248.400, 1.125	248.400, 1.131	248.400, 1.155	248.400, 1.124	248.400, 1.119	248.400, 1.125	248.400, 1.149	248.400, 1.040	248.400, 1.090	248.400, 1.109	248.400, 1.619
1244	248.600, 1.287	248.600, 1.346	248.600, 1.329	248.600, 1.244	248.600, 1.125	248.600, 1.131	248.600, 1.155	248.600, 1.124	248.600, 1.119	248.600, 1.125	248.600, 1.148	248.600, 1.040	248.600, 1.090	248.600, 1.108	248.600, 1.619
1245	248.800, 1.287	248.800, 1.346	248.800, 1.328	248.800, 1.244	248.800, 1.125	248.800, 1.131	248.800, 1.155	248.800, 1.124	248.800, 1.119	248.800, 1.124	248.800, 1.149	248.800, 1.040	248.800, 1.089	248.800, 1.108	248.800, 1.619
1246	249.000, 1.287	249.000, 1.345	249.000, 1.327	249.000, 1.244	249.000, 1.124	249.000, 1.131	249.000, 1.155	249.000, 1.124	249.000, 1.119	249.000, 1.124	249.000, 1.148	249.000, 1.040	249.000, 1.089	249.000, 1.107	249.000, 1.618
1247	249.200, 1.287	249.200, 1.345	249.200, 1.327	249.200, 1.244	249.200, 1.124	249.200, 1.131	249.200, 1.155	249.200, 1.124	249.200, 1.119	249.200, 1.124	249.200, 1.148	249.200, 1.040	249.200, 1.088	249.200, 1.107	249.200, 1.618
1248	249.400, 1.288	249.400, 1.344	249.400, 1.326	249.400, 1.245	249.400, 1.124	249.400, 1.131	249.400, 1.155	249.400, 1.124	249.400, 1.118	249.400, 1.124	249.400, 1.148	249.400, 1.040	249.400, 1.088	249.400, 1.107	249.400, 1.617
1249	249.600, 1.288	249.600, 1.344	249.600, 1.326	249.600, 1.245	249.600, 1.124	249.600, 1.131	249.600, 1.155	249.600, 1.123	249.600, 1.118	249.600, 1.124	249.600, 1.148	249.600, 1.039	249.600, 1.087	249.600, 1.107	249.600, 1.617
1250	249.800, 1.288	249.800, 1.343	249.800, 1.325	249.800, 1.245	249.800, 1.124	249.800, 1.131	249.800, 1.154	249.800, 1.123	249.800, 1.117	249.800, 1.124	249.800, 1.148	249.800, 1.039	249.800, 1.087	249.800, 1.107	249.800, 1.616
1251	250.000, 1.288	250.000, 1.343	250.000, 1.325	250.000, 1.245	250.000, 1.124	250.000, 1.131	250.000, 1.154	250.000, 1.123	250.000, 1.117	250.000, 1.124	250.000, 1.147	250.000, 1.039	250.000, 1.087	250.000, 1.107	250.000, 1.616
1252	250.200, 1.288	250.200, 1.343	250.200, 1.324	250.200, 1.245	250.200, 1.124	250.200, 1.131	250.200, 1.154	250.200, 1.122	250.200, 1.117	250.200, 1.124	250.200, 1.147	250.200, 1.039	250.200, 1.088	250.200, 1.107	250.200, 1.615
1253	250.400, 1.288	250.400, 1.343	250.400, 1.324	250.400, 1.244	250.400, 1.124	250.400, 1.131	250.400, 1.154	250.400, 1.122	250.400, 1.116	250.400, 1.124	250.400, 1.147	250.400, 1.039	250.400, 1.088	250.400, 1.107	250.400, 1.615
1254	250.600, 1.287	250.600, 1.342	250.600, 1.324	250.600, 1.244	250.600, 1.124	250.600, 1.131	250.600, 1.154	250.600, 1.121	250.600, 1.116	250.600, 1.124	250.600, 1.147	250.600, 1.039	250.600, 1.088	250.600, 1.107	250.600, 1.614
1255	250.800, 1.287	250.800, 1.341	250.800, 1.323	250.800, 1.244	250.800, 1.124	250.800, 1.131	250.800, 1.154	250.800, 1.121	250.800, 1.116	250.800, 1.124	250.800, 1.147	250.800, 1.039	250.800, 1.088	250.800, 1.107	250.800, 1.614
1256	251.000, 1.286	251.000, 1.341	251.000, 1.323	251.000, 1.244	251.000, 1.124	251.000, 1.131	251.000, 1.154	251.000, 1.121	251.000, 1.116	251.000, 1.124	251.000, 1.147	251.000, 1.039	251.000, 1.088	251.000, 1.107	251.000, 1.613
1257	251.200, 1.286	251.200, 1.340	251.200, 1.322	251.200, 1.243	251.200, 1.124	251.200, 1.130	251.200, 1.153	251.200, 1.121	251.200, 1.115	251.200, 1.124	251.200, 1.146	251.200, 1.039	251.200, 1.088	251.200, 1.107	251.200, 1.613
1258	251.400, 1.286	251.400, 1.339	251.400, 1.322	251.400, 1.243	251.400, 1.124	251.400, 1.130	251.400, 1.153	251.400, 1.120	251.400, 1.115	251.400, 1.124	251.400, 1.146	251.400, 1.039	251.400, 1.088	251.400, 1.107	251.400, 1.612
1259	251.600, 1.285	251.600, 1.338	251.600, 1.322	251.600, 1.243	251.600, 1.124	251.600, 1.130	251.600, 1.153	251.600, 1.120	251.600, 1.115	251.600, 1.124	251.600, 1.146	251.600, 1.039	251.600, 1.089	251.600, 1.107	251.600, 1.612
1260	251.800, 1.285	251.800, 1.338	251.800, 1.321	251.800, 1.243	251.800, 1.123	251.800, 1.130	251.800, 1.153	251.800, 1.120	251.800, 1.115	251.800, 1.124	251.800, 1.145	251.800, 1.039	251.800, 1.089	251.800, 1.107	251.800, 1.611
1261	252.000, 1.285	252.000, 1.337	252.000, 1.321	252.000, 1.243	252.000, 1.123	252.000, 1.129	252.000, 1.152	252.000, 1.120	252.000, 1.116	252.000, 1.124	252.000, 1.145	252.000, 1.039	252.000, 1.089	252.000, 1.106	252.000, 1.611
1262	252.200, 1.284	252.200, 1.337	252.200, 1.320	252.200, 1.243	252.200, 1.123	252.200, 1.129	252.200, 1.152	252.200, 1.120	252.200, 1.116	252.200, 1.123	252.200, 1.145	252.200, 1.038	252.200, 1.089	252.200, 1.106	252.200, 1.610
1263	252.400, 1.284	252.400, 1.336	252.400, 1.320	252.400, 1.242	252.400, 1.123	252.400, 1.129	252.400, 1.152	252.400, 1.120	252.400, 1.116	252.400, 1.123	252.400, 1.145	252.400, 1.038	252.400, 1.089	252.400, 1.106	252.400, 1.610
1264	252.600, 1.284	252.600, 1.336	252.600, 1.319	252.600, 1.242	252.600, 1.123	252.600, 1.129	252.600, 1.152	252.600, 1.120	252.600, 1.116	252.600, 1.123	252.600, 1.145	252.600, 1.038	252.600, 1.088	252.600, 1.106	252.600, 1.609
1265	252.800, 1.284	252.800, 1.335	252.800, 1.319	252.800, 1.242	252.800, 1.123	252.800, 1.129	252.800, 1.151	252.800, 1.120	252.800, 1.116	252.800, 1.123	252.800, 1.145	252.800, 1.037	252.800, 1.088	252.800, 1.106	252.800, 1.609
1266	253.000, 1.284	253.000, 1.335	253.000, 1.319	253.000, 1.242	253.000, 1.123	253.000, 1.129	253.000, 1.151	253.000, 1.120	253.000, 1.116	253.000, 1.123	253.000, 1.146	253.000, 1.037	253.000, 1.088	253.000, 1.106	253.000, 1.608
1267	253.200, 1.285	253.200, 1.334	253.200, 1.318	253.200, 1.242	253.200, 1.123	253.200, 1.129	253.200, 1.151	253.200, 1.120	253.200, 1.116	253.200, 1.124	253.200, 1.146	253.200, 1.037	253.200, 1.087	253.200, 1.105	253.200, 1.608
1268	253.400, 1.285	253.400, 1.334	253.400, 1.318	253.400, 1.242	253.400, 1.123	253.400, 1.129	253.400, 1.150	253.400, 1.121	253.400, 1.115	253.400, 1.124	253.400, 1.146	253.400, 1.036	253.400, 1.087	253.400, 1.105	253.400, 1.607
1269	253.600, 1.285	253.600, 1.333	253.600, 1.318	253.600, 1.241	253.600, 1.123	253.600, 1.129	253.600, 1.150	253.600, 1.121	253.600, 1.115	253.600, 1.124	253.600, 1.146	253.600, 1.036	253.600, 1.087	253.600, 1.105	253.600, 1.606
1270	253.800, 1.285	253.800, 1.333	253.800, 1.317	253.800, 1.241	253.800, 1.122	253.800, 1.128	253.800, 1.150	253.800, 1.121	253.800, 1.115	253.800, 1.124	253.800, 1.146	253.800, 1.036	253.800, 1.086	253.800, 1.104	253.800, 1.606
1271	254.000, 1.285	254.000, 1.333	254.000, 1.317	254.000, 1.241	254.000, 1.122	254.000, 1.128	254.000, 1.150	254.000, 1.121	254.000, 1.115	254.000, 1.123	254.000, 1.146	254.000, 1.036	254.000, 1.086	254.000, 1.104	254.000, 1.605
1272	254.200, 1.285	254.200, 1.332	254.200, 1.316	254.200, 1.241	254.200, 1.122	254.200, 1.128	254.200, 1.149	254.200, 1.121	254.200, 1.114	254.200, 1.123	254.200, 1.146	254.200, 1.036	254.200, 1.085	254.200, 1.104	254.200, 1.605
1273	254.400, 1.285	254.400, 1.332	254.400, 1.316	254.400, 1.241	254.400, 1.122	254.400, 1.128	254.400, 1.149	254.400, 1.121	254.400, 1.114	254.400, 1.123	254.400, 1.146	254.400, 1.036	254.400, 1.085	254.400, 1.104	254.400, 1.605
1274	254.600, 1.284	254.600, 1.331	254.600, 1.315	254.600, 1.241	254.600, 1.122	254.600, 1.127	254.600, 1.149	254.600, 1.121	254.600, 1.114	254.600, 1.123	254.600, 1.146	254.600, 1.037	254.600, 1.085	254.600, 1.103	254.600, 1.605
1275	254.800, 1.284	254.800, 1.330	254.800, 1.314	254.800, 1.241	254.800, 1.122	254.800, 1.127	254.800, 1.150	254.800, 1.121	254.800, 1.114	254.800, 1.122	254.800, 1.146	254.800, 1.037	254.800, 1.085	254.800, 1.103	254.800, 1.604
1276	255.000, 1.284	255.000, 1.329	255.000, 1.314	255.000, 1.241	255.000, 1.122	255.000, 1.127	255.000, 1.149	255.000, 1.121	255.000, 1.114	255.000, 1.122	255.000, 1.145	255.000, 1.037	255.000, 1.085	255.000, 1.103	255.000, 1.604
1277	255.200, 1.283	255.200, 1.329	255.200, 1.313	255.200, 1.241	255.200, 1.121	255.200, 1.126	255.200, 1.149	255.200, 1.121	255.200, 1.114	255.200, 1.122	255.200, 1.145	255.200, 1.037	255.200, 1.085	255.200, 1.103	255.200, 1.604
1278	255.400, 1.283	255.400, 1.328	255.400, 1.312	255.400, 1.241	255.400, 1.121	255.400, 1.126	255.400, 1.149	255.400, 1.121	255.400, 1.114	255.400, 1.121	255.400, 1.145	255.400, 1.037	255.400, 1.085	255.400, 1.103	255.400, 1.604
1279	255.600, 1.283	255.600, 1.327	255.600, 1.312	255.600, 1.241	255.600, 1.120	255.600, 1.126	255.600, 1.149	255.600, 1.120	255.600, 1.114	255.600, 1.121	255.600, 1.144	255.600, 1.037	255.600, 1.084	255.600, 1.103	255.600, 1.604
1280	255.800, 1.283	255.800, 1.327	255.800, 1.311	255.800, 1.241	255.800, 1.120	255.800, 1.126	255.800, 1.149	255.800, 1.120	255.800, 1.114	255.800, 1.121	255.800, 1.144	255.800, 1.037	255.800, 1.084	255.800, 1.103	255.800, 1.603
1281	256.000, 1.283	256.000, 1.326	256.000, 1.311	256.000, 1.241	256.000, 1.120	256.000, 1.126	256.000, 1.149	256.000, 1.120	256.000, 1.114	256.000, 1.120	256.000, 1.144	256.000, 1.037	256.000, 1.084	256.000, 1.103	256.000, 1.603
1282	256.200, 1.283	256.200, 1.326	256.200, 1.310	256.200, 1.241	256.200, 1.119	256.200, 1.126	256.200, 1.149	256.200, 1.120	256.200, 1.114	256.200, 1.120	256.200, 1.144	256.200, 1.037	256.200, 1.084	256.200, 1.103	256.200, 1.602
1283	256.400, 1.282	256.400, 1.326	256.400, 1.310	256.400, 1.240	256.400, 1.119	256.400, 1.126	256.400, 1.149	256.400, 1.119	256.400, 1.114	256.400, 1.120	256.400, 1.144	256.400, 1.037	256.400, 1.084	256.400, 1.103	256.400, 1.602
1284	256.600, 1.282	256.600, 1.325	256.600, 1.309	256.600, 1.240	256.600, 1.119	256.600, 1.126	256.600, 1.149	256.600, 1.119	256.600, 1.114	256.600, 1.120	256.600, 1.144	256.600, 1.036	256.600, 1.084	256.600, 1.103	256.600, 1.601
1285	256.800, 1.282	256.800, 1.325	256.800, 1.309	256.800, 1.240	256.800, 1.119	256.800, 1.126	256.800, 1.149	256.800, 1.119	256.800, 1.114	256.800, 1.120	256.800, 1.144	256.800, 1.036	256.800, 1.084	256.800, 1.103	256.800, 1.601
1286	257.000, 1.281	257.000, 1.324	257.000, 1.309	257.000, 1.239	257.000, 1.119	257.000, 1.126	257.000, 1.149	257.000, 1.119	257.000, 1.114	257.000, 1.120	257.000, 1.144	257.000, 1.036	257.000, 1.084	257.000, 1.103	257.000, 1.600
1287	257.200, 1.281	257.200, 1.324	257.200, 1.308	257.200, 1.239	257.200, 1.119	257.200, 1.126	257.200, 1.149	257.200, 1.119	257.200, 1.113	257.200, 1.120	257.200, 1.144	257.200, 1.036	257.200, 1.083	257.200, 1.103	257.200, 1.600
1288	257.400, 1.281	257.400, 1.324	257.400, 1.308	257.400, 1.239	257.400, 1.118	257.400, 1.126	257.400, 1.149	257.400, 1.119	257.400, 1.113	257.400, 1.121	257.400, 1.144	257.400, 1.036	257.400, 1.083	257.400, 1.103	257.400, 1.599
1289	257.600, 1.281	257.600, 1.323	257.600, 1.307	257.600, 1.238	257.600, 1.118	257.600, 1.126	257.600, 1.149	257.600, 1.118	257.600, 1.113	257.600, 1.121	257.600, 1.144	257.600, 1.035	257.600, 1.083	257.600, 1.103	257.600, 1.599
1290	257.800, 1.281	257.800, 1.323	257.800, 1.307	257.800, 1.238	257.800, 1.118	257.800, 1.126	257.800, 1.149	257.800, 1.118	257.800, 1.112	257.800, 1.121	257.800, 1.144	257.800, 1.035	257.800, 1.083	257.800, 1.102	257.800, 1.598
1291	258.000, 1.281	258.000, 1.323	258.000, 1.307	258.000, 1.238	258.000, 1.118	258.000, 1.126	258.000, 1.148	258.000, 1.118	258.000, 1.112	258.000, 1.121	258.000, 1.144	258.000, 1.035	258.000, 1.083	258.000, 1.102	258.000, 1.598
1292	258.200, 1.280	258.200, 1.322	258.200, 1.306	258.200, 1.238	258.200, 1.119	258.200, 1.126	258.200, 1.148	258.200, 1.117	258.200, 1.112	258.200, 1.120	258.200, 1.144	258.200, 1.035	258.200, 1.083	258.200, 1.102	258.200, 1.598
1293	258.400, 1.280	258.400, 1.322	258.400, 1.306	258.400, 1.238	258.400, 1.119	258.400, 1.126	258.400, 1.148	258.400, 1.117	258.400, 1.112	258.400, 1.120	258.400, 1.145	258.400, 1.035	258.400, 1.083	258.400, 1.101	258.400, 1.597
1294	258.600, 1.280	258.600, 1.321	258.600, 1.305	258.600, 1.237	258.600, 1.119	258.600, 1.126	258.600, 1.148	258.600, 1.116	258.600, 1.112	258.600, 1.120	258.600, 1.145	258.600, 1.035	258.600, 1.083	258.600, 1.101	258.600, 1.597
1295	258.800, 1.280	258.800, 1.320	258.800, 1.305	258.800, 1.237	258.800, 1.119	258.800, 1.126	258.800, 1.148	258.800, 1.116	258.800, 1.112	258.800, 1.120	258.800, 1.145	258.800, 1.035	258.800, 1.083	258.800, 1.101	258.800, 1.597
1296	259.000, 1.279	259.000, 1.320	259.000, 1.305	259.000, 1.237	259.000, 1.118	259.000, 1.126	259.000, 1.148	259.000, 1.116	259.000, 1.112	259.000, 1.119	259.000, 1.145	259.000, 1.034	259.000, 1.083	259.000, 1.101	259.000, 1.596
1297	259.200, 1.279	259.200, 1.320	259.200, 1.305	259.200, 1.237	259.200, 1.118	259.200, 1.126	259.200, 1.147	259.200, 1.116	259.200, 1.112	259.200, 1.119	259.200, 1.145	259.200, 1.034	259.200, 1.083	259.200, 1.101	259.200, 1.596
1298	259.400, 1.280	259.400, 1.319	259.400, 1.305	259.400, 1.237	259.400, 1.118	259.400, 1.126	259.400, 1.147	259.400, 1.116	259.400, 1.112	259.400, 1.119	259.400, 1.144	259.400, 1.034	259.400, 1.083	259.400, 1.101	259.400, 1.595
1299	259.600, 1.280	259.600, 1.319	259.600, 1.305	259.600, 1.237	259.600, 1.117	259.600, 1.126	259.600, 1.147	259.600, 1.116	259.600, 1.112	259.600, 1.119	259.600, 1.144	259.600, 1.034	259.600, 1.083	259.600, 1.102	259.600, 1.595
1300	259.800, 1.280	259.800, 1.319	259.800, 1.305	259.800, 1.237	259.800, 1.117	259.800, 1.125	259.800, 1.147	259.800, 1.115	259.800, 1.112	259.800, 1.118	259.800, 1.144	259.800, 1.034	259.800, 1.083	259.800, 1.102	259.800, 1.595
1301	260.000, 1.280	260.000, 1.319	260.000, 1.304	260.000, 1.236	260.000, 1.116	260.000, 1.125	260.000, 1.147	260.000, 1.115	260.000, 1.112	260.000, 1.118	260.000, 1.144	260.000, 1.034	260.000, 1.083	260.000, 1.101	260.000, 1.594
1302	260.200, 1.280	260.200, 1.319	260.200, 1.304	260.200, 1.236	260.200, 1.116	260.200, 1.124	260.200, 1.146	260.200, 1.115	260.200, 1.112	260.200, 1.118	260.200, 1.143	260.200, 1.033	260.200, 1.083	260.200, 1.101	260.200, 1.594
1303	260.400, 1.280	260.400, 1.318	260.400, 1.304	260.400, 1.236	260.400, 1.116	260.400, 1.124	260.400, 1.146	260.400, 1.115	260.400, 1.111	260.400, 1.118	260.400, 1.143	260.400, 1.033	260.400, 1.083	260.400, 1.101	260.400, 1.594
1304	260.600, 1.280	260.600, 1.318	260.600, 1.304	260.600, 1.236	260.600, 1.117	260.600, 1.123	260.600, 1.146	260.600, 1.116	260.600, 1.111	260.600, 1.118	260.600, 1.143	260.600, 1.033	260.600, 1.082	260.600, 1.101	260.600, 1.593
1305	260.800, 1.280	260.800, 1.318	260.800, 1.303	260.800, 1.236	260.800, 1.117	260.800, 1.123	260.800, 1.146	260.800, 1.116	260.800, 1.111	260.800, 1.118	260.800, 1.142	260.800, 1.033	260.800, 1.082	260.800, 1.101	260.800, 1.593
1306	261.000, 1.280	261.000, 1.317	261.000, 1.303	261.000, 1.236	261.000, 1.117	261.000, 1.123	261.000, 1.146	261.000, 1.116	261.000, 1.111	261.000, 1.118	261.000, 1.142	261.000, 1.033	261.000, 1.082	261.000, 1.101	261.000, 1.593
1307	261.200, 1.280	261.200, 1.317	261.200, 1.302	261.200, 1.236	261.200, 1.117	261.200, 1.123	261.200, 1.146	261.200, 1.116	261.200, 1.111	261.200, 1.118	261.200, 1.141	261.200, 1.033	261.200, 1.081	261.200, 1.100	261.200, 1.592
1308	261.400, 1.280	261.400, 1.316	261.400, 1.302	261.400, 1.236	261.400, 1.117	261.400, 1.123	261.400, 1.146	261.400, 1.116	261.400, 1.110	261.400, 1.118	261.400, 1.141	261.400, 1.033	261.400, 1.080	261.400, 1.100	261.400, 1.592
1309	261.600, 1.280	261.600, 1.316	261.600, 1.301	261.600, 1.236	261.600, 1.117	261.600, 1.122	261.600, 1.146	261.600, 1.116	261.600, 1.110	261.600, 1.118	261.600, 1.141	261.600, 1.032	261.600, 1.080	261.600, 1.100	261.600, 1.591
1310	261.800, 1.279	261.800, 1.315	261.800, 1.301	261.800, 1.236	261.800, 1.117	261.800, 1.122	261.800, 1.146	261.800, 1.116	261.800, 1.110	261.800, 1.118	261.800, 1.141	261.800, 1.033	261.800, 1.080	261.800, 1.100	261.800, 1.591
1311	262.000, 1.279	262.000, 1.315	262.000, 1.300	262.000, 1.236	262.000, 1.117	262.000, 1.122	262.000, 1.146	262.000, 1.116	262.000, 1.110	262.000, 1.118	262.000, 1.141	262.000, 1.033	262.000, 1.079	262.000, 1.099	262.000, 1.590
1312	262.200, 1.279	262.200, 1.314	262.200, 1.300	262.200, 1.235	262.200, 1.117	262.200, 1.122	262.200, 1.146	262.200, 1.115	262.200, 1.110	262.200, 1.118	262.200, 1.141	262.200, 1.033	262.200, 1.079	262.200, 1.099	262.200, 1.590
1313	262.400, 1.278	262.400, 1.313	262.400, 1.299	262.400, 1.235	262.400, 1.117	262.400, 1.122	262.400, 1.146	262.400, 1.116	262.400, 1.110	262.400, 1.117	262.400, 1.141	262.400, 1.033	262.400, 1.079	262.400, 1.098	262.400, 1.589
1314	262.600, 1.277	262.600, 1.313	262.600, 1.299	262.600, 1.235	262.600, 1.117	262.600, 1.122	262.600, 1.146	262.600, 1.116	262.600, 1.110	262.600, 1.117	262.600, 1.141	262.600, 1.033	262.600, 1.079	262.600, 1.098	262.600, 1.589
1315	262.800, 1.277	262.800, 1.312	262.800, 1.299	262.800, 1.235	262.800, 1.117	262.800, 1.122	262.800, 1.146	262.800, 1.116	262.800, 1.110	262.800, 1.117	262.800, 1.141	262.800, 1.033	262.800, 1.079	262.800, 1.098	262.800, 1.588
1316	263.000, 1.277	263.000, 1.312	263.000, 1.298	263.000, 1.234	263.000, 1.117	263.000, 1.122	263.000, 1.146	263.000, 1.115	263.000, 1.110	263.000, 1.116	263.000, 1.141	263.000, 1.033	263.000, 1.080	263.000, 1.098	263.000, 1.588
1317	263.200, 1.277	263.200, 1.312	263.200, 1.298	263.200, 1.234	263.200, 1.117	263.200, 1.123	263.200, 1.146	263.200, 1.115	263.200, 1.110	263.200, 1.116	263.200, 1.141	263.200, 1.033	263.200, 1.080	263.200, 1.098	263.200, 1.587
1318	263.400, 1.277	263.400, 1.311	263.400, 1.298	263.400, 1.234	263.400, 1.116	263.400, 1.123	263.400, 1.146	263.400, 1.115	263.400, 1.111	263.400, 1.116	263.400, 1.141	263.400, 1.033	263.400, 1.080	263.400, 1.098	263.400, 1.587
1319	263.600, 1.277	263.600, 1.311	263.600, 1.297	263.600, 1.234	263.600, 1.116	263.600, 1.123	263.600, 1.146	263.600, 1.114	263.600, 1.111	263.600, 1.116	263.600, 1.140	263.600, 1.033	263.600, 1.081	263.600, 1.098	263.600, 1.586
1320	263.800, 1.277	263.800, 1.311	263.800, 1.297	263.800, 1.234	263.800, 1.116	263.800, 1.122	263.800, 1.146	263.800, 1.114	263.800, 1.110	263.800, 1.116	263.800, 1.140	263.800, 1.033	263.800, 1.081	263.800, 1.098	263.800, 1.586
1321	264.000, 1.277	264.000, 1.311	264.000, 1.297	264.000, 1.234	264.000, 1.115	264.000, 1.122	264.000, 1.146	264.000, 1.114	264.000, 1.110	264.000, 1.116	264.000, 1.140	264.000, 1.032	264.000, 1.081	264.000, 1.098	264.000, 1.586
1322	264.200, 1.276	264.200, 1.310	264.200, 1.296	264.200, 1.234	264.200, 1.115	264.200, 1.121	264.200, 1.146	264.200, 1.114	264.200, 1.110	264.200, 1.116	264.200, 1.139	264.200, 1.032	264.200, 1.081	264.200, 1.098	264.200, 1.585
1323	264.400, 1.276	264.400, 1.310	264.400, 1.296	264.400, 1.234	264.400, 1.115	264.400, 1.121	264.400, 1.146	264.400, 1.114	264.400, 1.110	264.400, 1.116	264.400, 1.139	264.400, 1.032	264.400, 1.080	264.400, 1.098	264.400, 1.585
1324	264.600, 1.276	264.600, 1.310	264.600, 1.296	264.600, 1.234	264.600, 1.115	264.600, 1.121	264.600, 1.146	264.600, 1.114	264.600, 1.110	264.600, 1.116	264.600, 1.139	264.600, 1.032	264.600, 1.080	264.600, 1.098	264.600, 1.585
1325	264.800, 1.276	264.800, 1.310	264.800, 1.295	264.800, 1.234	264.800, 1.114	264.800, 1.121	264.800, 1.146	264.800, 1.113	264.800, 1.109	264.800, 1.116	264.800, 1.139	264.800, 1.031	264.800, 1.080	264.800, 1.098	264.800, 1.585
1326	265.000, 1.276	265.000, 1.309	265.000, 1.295	265.000, 1.234	265.000, 1.114	265.000, 1.121	265.000, 1.146	265.000, 1.113	265.000, 1.109	265.000, 1.117	265.000, 1.138	265.000, 1.031	265.000, 1.080	265.000, 1.098	265.000, 1.585
1327	265.200, 1.276	265.200, 1.309	265.200, 1.294	265.200, 1.234	265.200, 1.114	265.200, 1.121	265.200, 1.146	265.200, 1.113	265.200, 1.109	265.200, 1.117	265.200, 1.138	265.200, 1.031	265.200, 1.080	265.200, 1.098	265.200, 1.584
1328	265.400, 1.276	265.400, 1.308	265.400, 1.294	265.400, 1.234	265.400, 1.114	265.400, 1.120	265.400, 1.146	265.400, 1.112	265.400, 1.109	265.400, 1.117	265.400, 1.138	265.400, 1.030	265.400, 1.080	265.400, 1.098	265.400, 1.584
1329	265.600, 1.276	265.600, 1.308	265.600, 1.293	265.600, 1.233	265.600, 1.114	265.600, 1.120	265.600, 1.145	265.600, 1.112	265.600, 1.109	265.600, 1.118	265.600, 1.138	265.600, 1.030	265.600, 1.080	265.600, 1.098	265.600, 1.584
1330	265.800, 1.276	265.800, 1.307	265.800, 1.293	265.800, 1.233	265.800, 1.114	265.800, 1.120	265.800, 1.145	265.800, 1.112	265.800, 1.109	265.800, 1.118	265.800, 1.138	265.800, 1.030	265.800, 1.080	265.800, 1.097	265.800, 1.584
1331	266.000, 1.275	266.000, 1.307	266.000, 1.293	266.000, 1.233	266.000, 1.114	266.000, 1.120	266.000, 1.145	266.000, 1.112	266.000, 1.109	266.000, 1.118	266.000, 1.138	266.000, 1.029	266.000, 1.080	266.000, 1.097	266.000, 1.584
1332	266.200, 1.275	266.200, 1.306	266.200, 1.292	266.200, 1.233	266.200, 1.114	266.200, 1.120	266.200, 1.144	266.200, 1.112	266.200, 1.109	266.200, 1.117	266.200, 1.138	266.200, 1.029	266.200, 1.080	266.200, 1.097	266.200, 1.584
1333	266.400, 1.275	266.400, 1.306	266.400, 1.292	266.400, 1.232	266.400, 1.115	266.400, 1.121	266.400, 1.144	266.400, 1.112	266.400, 1.109	266.400, 1.117	266.400, 1.138	266.400, 1.029	266.400, 1.080	266.400, 1.097	266.400, 1.583
1334	266.600, 1.275	266.600, 1.305	266.600, 1.292	266.600, 1.232	266.600, 1.115	266.600, 1.121	266.600, 1.144	266.600, 1.112	266.600, 1.109	266.600, 1.117	266.600, 1.138	266.600, 1.029	266.600, 1.079	266.600, 1.097	266.600, 1.583
1335	266.800, 1.275	266.800, 1.305	266.800, 1.292	266.800, 1.232	266.800, 1.115	266.800, 1.121	266.800, 1.144	266.800, 1.112	266.800, 1.109	266.800, 1.116	266.800, 1.138	266.800, 1.028	266.800, 1.079	266.800, 1.096	266.800, 1.582
1336	267.000, 1.275	267.000, 1.304	267.000, 1.292	267.000, 1.232	267.000, 1.114	267.000, 1.121	267.000, 1.143	267.000, 1.112	267.000, 1.109	267.000, 1.116	267.000, 1.138	267.000, 1.028	267.000, 1.079	267.000, 1.096	267.000, 1.581
1337	267.200, 1.276	267.200, 1.304	267.200, 1.292	267.200, 1.231	267.200, 1.114	267.200, 1.121	267.200, 1.143	267.200, 1.112	267.200, 1.109	267.200, 1.116	267.200, 1.137	267.200, 1.028	267.200, 1.079	267.200, 1.096	267.200, 1.581
1338	267.400, 1.275	267.400, 1.303	267.400, 1.291	267.400, 1.231	267.400, 1.114	267.400, 1.121	267.400, 1.143	267.400, 1.112	267.400, 1.109	267.400, 1.116	267.400, 1.137	267.400, 1.028	267.400, 1.079	267.400, 1.096	267.400, 1.580
1339	267.600, 1.275	267.600, 1.303	267.600, 1.291	267.600, 1.231	267.600, 1.114	267.600, 1.120	267.600, 1.143	267.600, 1.112	267.600, 1.109	267.600, 1.115	267.600, 1.137	267.600, 1.028	267.600, 1.078	267.600, 1.096	267.600, 1.579
1340	267.800, 1.275	267.800, 1.303	267.800, 1.291	267.800, 1.231	267.800, 1.114	267.800, 1.120	267.800, 1.143	267.800, 1.112	267.800, 1.109	267.800, 1.115	267.800, 1.137	267.800, 1.028	267.800, 1.078	267.800, 1.096	267.800, 1.579
1341	268.000, 1.275	268.000, 1.303	268.000, 1.290	268.000, 1.231	268.000, 1.114	268.000, 1.119	268.000, 1.142	268.000, 1.112	268.000, 1.108	268.000, 1.114	268.000, 1.136	268.000, 1.028	268.000, 1.078	268.000, 1.096	268.000, 1.578
1342	268.200, 1.275	268.200, 1.302	268.200, 1.290	268.200, 1.231	268.200, 1.113	268.200, 1.119	268.200, 1.142	268.200, 1.112	268.200, 1.108	268.200, 1.114	268.200, 1.136	268.200, 1.028	268.200, 1.078	268.200, 1.097	268.200, 1.577
1343	268.400, 1.275	268.400, 1.302	268.400, 1.289	268.400, 1.231	268.400, 1.113	268.400, 1.119	268.400, 1.143	268.400, 1.112	268.400, 1.108	268.400, 1.114	268.400, 1.136	268.400, 1.028	268.400, 1.077	268.400, 1.097	268.400, 1.577
1344	268.600, 1.275	268.600, 1.302	268.600, 1.289	268.600, 1.231	268.600, 1.113	268.600, 1.119	268.600, 1.143	268.600, 1.112	268.600, 1.108	268.600, 1.113	268.600, 1.136	268.600, 1.028	268.600, 1.077	268.600, 1.097	268.600, 1.577
1345	268.800, 1.275	268.800, 1.302	268.800, 1.288	268.800, 1.231	268.800, 1.113	268.800, 1.119	268.800, 1.143	268.800, 1.111	268.800, 1.107	268.800, 1.113	268.800, 1.137	268.800, 1.028	268.800, 1.077	268.800, 1.097	268.800, 1.576
1346	269.000, 1.275	269.000, 1.301	269.000, 1.288	269.000, 1.231	269.000, 1.112	269.000, 1.120	269.000, 1.143	269.000, 1.111	269.000, 1.107	269.000, 1.113	269.000, 1.137	269.000, 1.027	269.000, 1.077	269.000, 1.097	269.000, 1.576
1347	269.200, 1.274	269.200, 1.301	269.200, 1.287	269.200, 1.231	269.200, 1.112	269.200, 1.120	269.200, 1.142	269.200, 1.111	269.200, 1.107	269.200, 1.114	269.200, 1.137	269.200, 1.027	269.200, 1.077	269.200, 1.097	269.200, 1.576
1348	269.400, 1.274	269.400, 1.301	269.400, 1.287	269.400, 1.231	269.400, 1.112	269.400, 1.120	269.400, 1.142	269.400, 1.110	269.400, 1.106	269.400, 1.114	269.400, 1.137	269.400, 1.027	269.400, 1.077	269.400, 1.097	269.400, 1.576
1349	269.600, 1.274	269.600, 1.301	269.600, 1.286	269.600, 1.231	269.600, 1.112	269.600, 1.120	269.600, 1.142	269.600, 1.110	269.600, 1.106	269.600, 1.114	269.600, 1.138	269.600, 1.027	269.600, 1.077	269.600, 1.097	269.600, 1.576
1350	269.800, 1.273	269.800, 1.301	269.800, 1.286	269.800, 1.231	269.800, 1.111	269.800, 1.120	269.800, 1.142	269.800, 1.110	269.800, 1.106	269.800, 1.114	269.800, 1.138	269.800, 1.027	269.800, 1.077	269.800, 1.097	269.800, 1.576
1351	,	,	,	,	,	,	,	,	,	,	,	,	,	,	,
1352	,	,	,	,	,	,	,	,	,	,	,	,	,	,	,
1353	,	,	,	,	,	,	,	,	,	,	,	,	,	,	,
1354	,	,	,	,	,	,	,	,	,	,	,	,	,	,	,
1355	,	,	,	,	,	,	,	,	,	,	,	,	,	,	,
1356	,	,	,	,	,	,	,	,	,	,	,	,	,	,	,
1357	,	,	,	,	,	,	,	,	,	,	,	,	,	,	,
1358	,	,	,	,	,	,	,	,	,	,	,	,	,	,	,
1359	,	,	,	,	,	,	,	,	,	,	,	,	,	,	,
1360	,	,	,	,	,	,	,	,	,	,	,	,	,	,	,
1361	,	,	,	,	,	,	,	,	,	,	,	,	,	,	,
1362	,	,	,	,	,	,	,	,	,	,	,	,	,	,	,
1363	,	,	,	,	,	,	,	,	,	,	,	,	,	,	,
1364	,	,	,	,	,	,	,	,	,	,	,	,	,	,	,
1365	,	,	,	,	,	,	,	,	,	,	,	,	,	,	,
1366	,	,	,	,	,	,	,	,	,	,	,	,	,	,	,
1367	,	,	,	,	,	,	,	,	,	,	,	,	,	,	,
1368	,	,	,	,	,	,	,	,	,	,	,	,	,	,	,
1369	,	,	,	,	,	,	,	,	,	,	,	,	,	,	,
1370	,	,	,	,	,	,	,	,	,	,	,	,	,	,	,
1371	,	,	,	,	,	,	,	,	,	,	,	,	,	,	,
1372	,	,	,	,	,	,	,	,	,	,	,	,	,	,	,
1373	,	,	,	,	,	,	,	,	,	,	,	,	,	,	,
1374	,	,	,	,	,	,	,	,	,	,	,	,	,	,	,
1375	,	,	,	,	,	,	,	,	,	,	,	,	,	,	,
1376	,	,	,	,	,	,	,	,	,	,	,	,	,	,	,
1377	,	,	,	,	,	,	,	,	,	,	,	,	,	,	,
1378	,	,	,	,	,	,	,	,	,	,	,	,	,	,	,
1379	,	,	,	,	,	,	,	,	,	,	,	,	,	,	,
1380	,	,	,	,	,	,	,	,	,	,	,	,	,	,	,
1381	,	,	,	,	,	,	,	,	,	,	,	,	,	,	,
1382	,	,	,	,	,	,	,	,	,	,	,	,	,	,	,
1383	,	,	,	,	,	,	,	,	,	,	,	,	,	,	,
1384	,	,	,	,	,	,	,	,	,	,	,	,	,	,	,
1385	,	,	,	,	,	,	,	,	,	,	,	,	,	,	,
1386	,	,	,	,	,	,	,	,	,	,	,	,	,	,	,
1387	,	,	,	,	,	,	,	,	,	,	,	,	,	,	,
1388	,	,	,	,	,	,	,	,	,	,	,	,	,	,	,
1389	,	,	,	,	,	,	,	,	,	,	,	,	,	,	,
1390	,	,	,	,	,	,	,	,	,	,	,	,	,	,	,
1391	,	,	,	,	,	,	,	,	,	,	,	,	,	,	,
1392	,	,	,	,	,	,	,	,	,	,	,	,	,	,	,
1393	,	,	,	,	,	,	,	,	,	,	,	,	,	,	,
1394	,	,	,	,	,	,	,	,	,	,	,	,	,	,	,
1395	,	,	,	,	,	,	,	,	,	,	,	,	,	,	,
1396	,	,	,	,	,	,	,	,	,	,	,	,	,	,	,
1397	,	,	,	,	,	,	,	,	,	,	,	,	,	,	,
1398	,	,	,	,	,	,	,	,	,	,	,	,	,	,	,
1399	,	,	,	,	,	,	,	,	,	,	,	,	,	,	,
1400	,	,	,	,	,	,	,	,	,	,	,	,	,	,	,
1401	,	,	,	,	,	,	,	,	,	,	,	,	,	,	,
1402	,	,	,	,	,	,	,	,	,	,	,	,	,	,	,
1403	,	,	,	,	,	,	,	,	,	,	,	,	,	,	,
1404	,	,	,	,	,	,	,	,	,	,	,	,	,	,	,
1405	,	,	,	,	,	,	,	,	,	,	,	,	,	,	,
1406	,	,	,	,	,	,	,	,	,	,	,	,	,	,	,
1407	,	,	,	,	,	,	,	,	,	,	,	,	,	,	,
1408	,	,	,	,	,	,	,	,	,	,	,	,	,	,	,
1409	,	,	,	,	,	,	,	,	,	,	,	,	,	,	,
1410	,	,	,	,	,	,	,	,	,	,	,	,	,	,	,
1411	,	,	,	,	,	,	,	,	,	,	,	,	,	,	,
1412	,	,	,	,	,	,	,	,	,	,	,	,	,	,	,
1413	,	,	,	,	,	,	,	,	,	,	,	,	,	,	,
1414	,	,	,	,	,	,	,	,	,	,	,	,	,	,	,
1415	,	,	,	,	,	,	,	,	,	,	,	,	,	,	,
1416	,	,	,	,	,	,	,	,	,	,	,	,	,	,	,
1417	,	,	,	,	,	,	,	,	,	,	,	,	,	,	,
1418	,	,	,	,	,	,	,	,	,	,	,	,	,	,	,
1419	,	,	,	,	,	,	,	,	,	,	,	,	,	,	,
1420	,	,	,	,	,	,	,	,	,	,	,	,	,	,	,
1421	,	,	,	,	,	,	,	,	,	,	,	,	,	,	,
1422	,	,	,	,	,	,	,	,	,	,	,	,	,	,	,
1423	,	,	,	,	,	,	,	,	,	,	,	,	,	,	,
1424	,	,	,	,	,	,	,	,	,	,	,	,	,	,	,
1425	,	,	,	,	,	,	,	,	,	,	,	,	,	,	,
1426	,	,	,	,	,	,	,	,	,	,	,	,	,	,	,
1427	,	,	,	,	,	,	,	,	,	,	,	,	,	,	,
1428	,	,	,	,	,	,	,	,	,	,	,	,	,	,	,
1429	,	,	,	,	,	,	,	,	,	,	,	,	,	,	,
1430	,	,	,	,	,	,	,	,	,	,	,	,	,	,	,
1431	,	,	,	,	,	,	,	,	,	,	,	,	,	,	,
1432	,	,	,	,	,	,	,	,	,	,	,	,	,	,	,
1433	,	,	,	,	,	,	,	,	,	,	,	,	,	,	,
1434	,	,	,	,	,	,	,	,	,	,	,	,	,	,	,
1435	,	,	,	,	,	,	,	,	,	,	,	,	,	,	,
1436	,	,	,	,	,	,	,	,	,	,	,	,	,	,	,
1437	,	,	,	,	,	,	,	,	,	,	,	,	,	,	,
1438	,	,	,	,	,	,	,	,	,	,	,	,	,	,	,
1439	,	,	,	,	,	,	,	,	,	,	,	,	,	,	,
1440	,	,	,	,	,	,	,	,	,	,	,	,	,	,	,
1441	,	,	,	,	,	,	,	,	,	,	,	,	,	,	,
1442	,	,	,	,	,	,	,	,	,	,	,	,	,	,	,
1443	,	,	,	,	,	,	,	,	,	,	,	,	,	,	,
1444	,	,	,	,	,	,	,	,	,	,	,	,	,	,	,
1445	,	,	,	,	,	,	,	,	,	,	,	,	,	,	,
1446	,	,	,	,	,	,	,	,	,	,	,	,	,	,	,
1447	,	,	,	,	,	,	,	,	,	,	,	,	,	,	,
1448	,	,	,	,	,	,	,	,	,	,	,	,	,	,	,
1449	,	,	,	,	,	,	,	,	,	,	,	,	,	,	,
1450	,	,	,	,	,	,	,	,	,	,	,	,	,	,	,
1451	,	,	,	,	,	,	,	,	,	,	,	,	,	,	,
1452	,	,	,	,	,	,	,	,	,	,	,	,	,	,	,
1453	,	,	,	,	,	,	,	,	,	,	,	,	,	,	,
1454	,	,	,	,	,	,	,	,	,	,	,	,	,	,	,
1455	,	,	,	,	,	,	,	,	,	,	,	,	,	,	,
1456	,	,	,	,	,	,	,	,	,	,	,	,	,	,	,
1457	,	,	,	,	,	,	,	,	,	,	,	,	,	,	,
1458	,	,	,	,	,	,	,	,	,	,	,	,	,	,	,
1459	,	,	,	,	,	,	,	,	,	,	,	,	,	,	,
1460	,	,	,	,	,	,	,	,	,	,	,	,	,	,	,
1461	,	,	,	,	,	,	,	,	,	,	,	,	,	,	,
1462	,	,	,	,	,	,	,	,	,	,	,	,	,	,	,
1463	,	,	,	,	,	,	,	,	,	,	,	,	,	,	,
1464	,	,	,	,	,	,	,	,	,	,	,	,	,	,	,
1465	,	,	,	,	,	,	,	,	,	,	,	,	,	,	,
1466	,	,	,	,	,	,	,	,	,	,	,	,	,	,	,
1467	,	,	,	,	,	,	,	,	,	,	,	,	,	,	,
1468	,	,	,	,	,	,	,	,	,	,	,	,	,	,	,
1469	,	,	,	,	,	,	,	,	,	,	,	,	,	,	,
1470	,	,	,	,	,	,	,	,	,	,	,	,	,	,	,
1471	,	,	,	,	,	,	,	,	,	,	,	,	,	,	,
1472	,	,	,	,	,	,	,	,	,	,	,	,	,	,	,
1473	,	,	,	,	,	,	,	,	,	,	,	,	,	,	,
1474	,	,	,	,	,	,	,	,	,	,	,	,	,	,	,
1475	,	,	,	,	,	,	,	,	,	,	,	,	,	,	,
1476	,	,	,	,	,	,	,	,	,	,	,	,	,	,	,
1477	,	,	,	,	,	,	,	,	,	,	,	,	,	,	,
1478	,	,	,	,	,	,	,	,	,	,	,	,	,	,	,
1479	,	,	,	,	,	,	,	,	,	,	,	,	,	,	,
1480	,	,	,	,	,	,	,	,	,	,	,	,	,	,	,
1481	,	,	,	,	,	,	,	,	,	,	,	,	,	,	,
1482	,	,	,	,	,	,	,	,	,	,	,	,	,	,	,
1483	,	,	,	,	,	,	,	,	,	,	,	,	,	,	,
1484	,	,	,	,	,	,	,	,	,	,	,	,	,	,	,
1485	,	,	,	,	,	,	,	,	,	,	,	,	,	,	,
1486	,	,	,	,	,	,	,	,	,	,	,	,	,	,	,
1487	,	,	,	,	,	,	,	,	,	,	,	,	,	,	,
1488	,	,	,	,	,	,	,	,	,	,	,	,	,	,	,
1489	,	,	,	,	,	,	,	,	,	,	,	,	,	,	,
1490	,	,	,	,	,	,	,	,	,	,	,	,	,	,	,
1491	,	,	,	,	,	,	,	,	,	,	,	,	,	,	,
1492	,	,	,	,	,	,	,	,	,	,	,	,	,	,	,
1493	,	,	,	,	,	,	,	,	,	,	,	,	,	,	,
1494	,	,	,	,	,	,	,	,	,	,	,	,	,	,	,
1495	,	,	,	,	,	,	,	,	,	,	,	,	,	,	,
1496	,	,	,	,	,	,	,	,	,	,	,	,	,	,	,
1497	,	,	,	,	,	,	,	,	,	,	,	,	,	,	,
1498	,	,	,	,	,	,	,	,	,	,	,	,	,	,	,
1499	,	,	,	,	,	,	,	,	,	,	,	,	,	,	,
1500	,	,	,	,	,	,	,	,	,	,	,	,	,	,	,
1501	,	,	,	,	,	,	,	,	,	,	,	,	,	,	,
1502	,	,	,	,	,	,	,	,	,	,	,	,	,	,	,
1503	,	,	,	,	,	,	,	,	,	,	,	,	,	,	,
1504	,	,	,	,	,	,	,	,	,	,	,	,	,	,	,
1505	,	,	,	,	,	,	,	,	,	,	,	,	,	,	,
1506	,	,	,	,	,	,	,	,	,	,	,	,	,	,	,
1507	,	,	,	,	,	,	,	,	,	,	,	,	,	,	,
1508	,	,	,	,	,	,	,	,	,	,	,	,	,	,	,
1509	,	,	,	,	,	,	,	,	,	,	,	,	,	,	,
1510	,	,	,	,	,	,	,	,	,	,	,	,	,	,	,
1511	,	,	,	,	,	,	,	,	,	,	,	,	,	,	,
1512	,	,	,	,	,	,	,	,	,	,	,	,	,	,	,
1513	,	,	,	,	,	,	,	,	,	,	,	,	,	,	,
1514	,	,	,	,	,	,	,	,	,	,	,	,	,	,	,
1515	,	,	,	,	,	,	,	,	,	,	,	,	,	,	,
1516	,	,	,	,	,	,	,	,	,	,	,	,	,	,	,
1517	,	,	,	,	,	,	,	,	,	,	,	,	,	,	,
1518	,	,	,	,	,	,	,	,	,	,	,	,	,	,	,
1519	,	,	,	,	,	,	,	,	,	,	,	,	,	,	,
1520	,	,	,	,	,	,	,	,	,	,	,	,	,	,	,
1521	,	,	,	,	,	,	,	,	,	,	,	,	,	,	,
1522	,	,	,	,	,	,	,	,	,	,	,	,	,	,	,
1523	,	,	,	,	,	,	,	,	,	,	,	,	,	,	,
1524	,	,	,	,	,	,	,	,	,	,	,	,	,	,	,
1525	,	,	,	,	,	,	,	,	,	,	,	,	,	,	,
1526	,	,	,	,	,	,	,	,	,	,	,	,	,	,	,
1527	,	,	,	,	,	,	,	,	,	,	,	,	,	,	,
1528	,	,	,	,	,	,	,	,	,	,	,	,	,	,	,
1529	,	,	,	,	,	,	,	,	,	,	,	,	,	,	,
1530	,	,	,	,	,	,	,	,	,	,	,	,	,	,	,
1531	,	,	,	,	,	,	,	,	,	,	,	,	,	,	,
1532	,	,	,	,	,	,	,	,	,	,	,	,	,	,	,
1533	,	,	,	,	,	,	,	,	,	,	,	,	,	,	,
1534	,	,	,	,	,	,	,	,	,	,	,	,	,	,	,
1535	,	,	,	,	,	,	,	,	,	,	,	,	,	,	,
1536	,	,	,	,	,	,	,	,	,	,	,	,	,	,	,
1537	,	,	,	,	,	,	,	,	,	,	,	,	,	,	,
1538	,	,	,	,	,	,	,	,	,	,	,	,	,	,	,
1539	,	,	,	,	,	,	,	,	,	,	,	,	,	,	,
1540	,	,	,	,	,	,	,	,	,	,	,	,	,	,	,
1541	,	,	,	,	,	,	,	,	,	,	,	,	,	,	,
1542	,	,	,	,	,	,	,	,	,	,	,	,	,	,	,
1543	,	,	,	,	,	,	,	,	,	,	,	,	,	,	,
1544	,	,	,	,	,	,	,	,	,	,	,	,	,	,	,
1545	,	,	,	,	,	,	,	,	,	,	,	,	,	,	,
1546	,	,	,	,	,	,	,	,	,	,	,	,	,	,	,
1547	,	,	,	,	,	,	,	,	,	,	,	,	,	,	,
1548	,	,	,	,	,	,	,	,	,	,	,	,	,	,	,
1549	,	,	,	,	,	,	,	,	,	,	,	,	,	,	,
1550	,	,	,	,	,	,	,	,	,	,	,	,	,	,	,
1551	,	,	,	,	,	,	,	,	,	,	,	,	,	,	,
1552	,	,	,	,	,	,	,	,	,	,	,	,	,	,	,
1553	,	,	,	,	,	,	,	,	,	,	,	,	,	,	,
1554	,	,	,	,	,	,	,	,	,	,	,	,	,	,	,
1555	,	,	,	,	,	,	,	,	,	,	,	,	,	,	,
1556	,	,	,	,	,	,	,	,	,	,	,	,	,	,	,
1557	,	,	,	,	,	,	,	,	,	,	,	,	,	,	,
1558	,	,	,	,	,	,	,	,	,	,	,	,	,	,	,
1559	,	,	,	,	,	,	,	,	,	,	,	,	,	,	,
1560	,	,	,	,	,	,	,	,	,	,	,	,	,	,	,
1561	,	,	,	,	,	,	,	,	,	,	,	,	,	,	,
1562	,	,	,	,	,	,	,	,	,	,	,	,	,	,	,
1563	,	,	,	,	,	,	,	,	,	,	,	,	,	,	,
1564	,	,	,	,	,	,	,	,	,	,	,	,	,	,	,
1565	,	,	,	,	,	,	,	,	,	,	,	,	,	,	,
1566	,	,	,	,	,	,	,	,	,	,	,	,	,	,	,
1567	,	,	,	,	,	,	,	,	,	,	,	,	,	,	,
1568	,	,	,	,	,	,	,	,	,	,	,	,	,	,	,
1569	,	,	,	,	,	,	,	,	,	,	,	,	,	,	,
1570	,	,	,	,	,	,	,	,	,	,	,	,	,	,	,
1571	,	,	,	,	,	,	,	,	,	,	,	,	,	,	,
1572	,	,	,	,	,	,	,	,	,	,	,	,	,	,	,
1573	,	,	,	,	,	,	,	,	,	,	,	,	,	,	,
1574	,	,	,	,	,	,	,	,	,	,	,	,	,	,	,
1575	,	,	,	,	,	,	,	,	,	,	,	,	,	,	,
1576	,	,	,	,	,	,	,	,	,	,	,	,	,	,	,
1577	,	,	,	,	,	,	,	,	,	,	,	,	,	,	,
1578	,	,	,	,	,	,	,	,	,	,	,	,	,	,	,
1579	,	,	,	,	,	,	,	,	,	,	,	,	,	,	,
1580	,	,	,	,	,	,	,	,	,	,	,	,	,	,	,
1581	,	,	,	,	,	,	,	,	,	,	,	,	,	,	,
1582	,	,	,	,	,	,	,	,	,	,	,	,	,	,	,
1583	,	,	,	,	,	,	,	,	,	,	,	,	,	,	,
1584	,	,	,	,	,	,	,	,	,	,	,	,	,	,	,
1585	,	,	,	,	,	,	,	,	,	,	,	,	,	,	,
1586	,	,	,	,	,	,	,	,	,	,	,	,	,	,	,
1587	,	,	,	,	,	,	,	,	,	,	,	,	,	,	,
1588	,	,	,	,	,	,	,	,	,	,	,	,	,	,	,
1589	,	,	,	,	,	,	,	,	,	,	,	,	,	,	,
1590	,	,	,	,	,	,	,	,	,	,	,	,	,	,	,
1591	,	,	,	,	,	,	,	,	,	,	,	,	,	,	,
1592	,	,	,	,	,	,	,	,	,	,	,	,	,	,	,
1593	,	,	,	,	,	,	,	,	,	,	,	,	,	,	,
1594	,	,	,	,	,	,	,	,	,	,	,	,	,	,	,
1595	,	,	,	,	,	,	,	,	,	,	,	,	,	,	,
1596	,	,	,	,	,	,	,	,	,	,	,	,	,	,	,
1597	,	,	,	,	,	,	,	,	,	,	,	,	,	,	,
1598	,	,	,	,	,	,	,	,	,	,	,	,	,	,	,
1599	,	,	,	,	,	,	,	,	,	,	,	,	,	,	,
1600	,	,	,	,	,	,	,	,	,	,	,	,	,	,	,
1601	,	,	,	,	,	,	,	,	,	,	,	,	,	,	,
1602	,	,	,	,	,	,	,	,	,	,	,	,	,	,	,
1603	,	,	,	,	,	,	,	,	,	,	,	,	,	,	,
1604	,	,	,	,	,	,	,	,	,	,	,	,	,	,	,
1605	,	,	,	,	,	,	,	,	,	,	,	,	,	,	,
1606	,	,	,	,	,	,	,	,	,	,	,	,	,	,	,
1607	,	,	,	,	,	,	,	,	,	,	,	,	,	,	,
1608	,	,	,	,	,	,	,	,	,	,	,	,	,	,	,
1609	,	,	,	,	,	,	,	,	,	,	,	,	,	,	,
1610	,	,	,	,	,	,	,	,	,	,	,	,	,	,	,
1611	,	,	,	,	,	,	,	,	,	,	,	,	,	,	,
1612	,	,	,	,	,	,	,	,	,	,	,	,	,	,	,
1613	,	,	,	,	,	,	,	,	,	,	,	,	,	,	,
1614	,	,	,	,	,	,	,	,	,	,	,	,	,	,	,
1615	,	,	,	,	,	,	,	,	,	,	,	,	,	,	,
1616	,	,	,	,	,	,	,	,	,	,	,	,	,	,	,
1617	,	,	,	,	,	,	,	,	,	,	,	,	,	,	,
1618	,	,	,	,	,	,	,	,	,	,	,	,	,	,	,
1619	,	,	,	,	,	,	,	,	,	,	,	,	,	,	,
1620	,	,	,	,	,	,	,	,	,	,	,	,	,	,	,
1621	,	,	,	,	,	,	,	,	,	,	,	,	,	,	,
1622	,	,	,	,	,	,	,	,	,	,	,	,	,	,	,
1623	,	,	,	,	,	,	,	,	,	,	,	,	,	,	,
1624	,	,	,	,	,	,	,	,	,	,	,	,	,	,	,
1625	,	,	,	,	,	,	,	,	,	,	,	,	,	,	,
1626	,	,	,	,	,	,	,	,	,	,	,	,	,	,	,
1627	,	,	,	,	,	,	,	,	,	,	,	,	,	,	,
1628	,	,	,	,	,	,	,	,	,	,	,	,	,	,	,
1629	,	,	,	,	,	,	,	,	,	,	,	,	,	,	,
1630	,	,	,	,	,	,	,	,	,	,	,	,	,	,	,
1631	,	,	,	,	,	,	,	,	,	,	,	,	,	,	,
1632	,	,	,	,	,	,	,	,	,	,	,	,	,	,	,
1633	,	,	,	,	,	,	,	,	,	,	,	,	,	,	,
1634	,	,	,	,	,	,	,	,	,	,	,	,	,	,	,
1635	,	,	,	,	,	,	,	,	,	,	,	,	,	,	,
1636	,	,	,	,	,	,	,	,	,	,	,	,	,	,	,
1637	,	,	,	,	,	,	,	,	,	,	,	,	,	,	,
1638	,	,	,	,	,	,	,	,	,	,	,	,	,	,	,
1639	,	,	,	,	,	,	,	,	,	,	,	,	,	,	,
1640	,	,	,	,	,	,	,	,	,	,	,	,	,	,	,
1641	,	,	,	,	,	,	,	,	,	,	,	,	,	,	,
1642	,	,	,	,	,	,	,	,	,	,	,	,	,	,	,
1643	,	,	,	,	,	,	,	,	,	,	,	,	,	,	,
1644	,	,	,	,	,	,	,	,	,	,	,	,	,	,	,
1645	,	,	,	,	,	,	,	,	,	,	,	,	,	,	,
1646	,	,	,	,	,	,	,	,	,	,	,	,	,	,	,
1647	,	,	,	,	,	,	,	,	,	,	,	,	,	,	,
1648	,	,	,	,	,	,	,	,	,	,	,	,	,	,	,
1649	,	,	,	,	,	,	,	,	,	,	,	,	,	,	,
1650	,	,	,	,	,	,	,	,	,	,	,	,	,	,	,
1651	,	,	,	,	,	,	,	,	,	,	,	,	,	,	,
1652	,	,	,	,	,	,	,	,	,	,	,	,	,	,	,
1653	,	,	,	,	,	,	,	,	,	,	,	,	,	,	,
1654	,	,	,	,	,	,	,	,	,	,	,	,	,	,	,
1655	,	,	,	,	,	,	,	,	,	,	,	,	,	,	,
1656	,	,	,	,	,	,	,	,	,	,	,	,	,	,	,
1657	,	,	,	,	,	,	,	,	,	,	,	,	,	,	,
1658	,	,	,	,	,	,	,	,	,	,	,	,	,	,	,
1659	,	,	,	,	,	,	,	,	,	,	,	,	,	,	,
1660	,	,	,	,	,	,	,	,	,	,	,	,	,	,	,
1661	,	,	,	,	,	,	,	,	,	,	,	,	,	,	,
1662	,	,	,	,	,	,	,	,	,	,	,	,	,	,	,
1663	,	,	,	,	,	,	,	,	,	,	,	,	,	,	,
1664	,	,	,	,	,	,	,	,	,	,	,	,	,	,	,
1665	,	,	,	,	,	,	,	,	,	,	,	,	,	,	,
1666	,	,	,	,	,	,	,	,	,	,	,	,	,	,	,
1667	,	,	,	,	,	,	,	,	,	,	,	,	,	,	,
1668	,	,	,	,	,	,	,	,	,	,	,	,	,	,	,
1669	,	,	,	,	,	,	,	,	,	,	,	,	,	,	,
1670	,	,	,	,	,	,	,	,	,	,	,	,	,	,	,
1671	,	,	,	,	,	,	,	,	,	,	,	,	,	,	,
1672	,	,	,	,	,	,	,	,	,	,	,	,	,	,	,
1673	,	,	,	,	,	,	,	,	,	,	,	,	,	,	,
1674	,	,	,	,	,	,	,	,	,	,	,	,	,	,	,
1675	,	,	,	,	,	,	,	,	,	,	,	,	,	,	,
1676	,	,	,	,	,	,	,	,	,	,	,	,	,	,	,
1677	,	,	,	,	,	,	,	,	,	,	,	,	,	,	,
1678	,	,	,	,	,	,	,	,	,	,	,	,	,	,	,
1679	,	,	,	,	,	,	,	,	,	,	,	,	,	,	,
1680	,	,	,	,	,	,	,	,	,	,	,	,	,	,	,
1681	,	,	,	,	,	,	,	,	,	,	,	,	,	,	,
1682	,	,	,	,	,	,	,	,	,	,	,	,	,	,	,
1683	,	,	,	,	,	,	,	,	,	,	,	,	,	,	,
1684	,	,	,	,	,	,	,	,	,	,	,	,	,	,	,
1685	,	,	,	,	,	,	,	,	,	,	,	,	,	,	,
1686	,	,	,	,	,	,	,	,	,	,	,	,	,	,	,
1687	,	,	,	,	,	,	,	,	,	,	,	,	,	,	,
1688	,	,	,	,	,	,	,	,	,	,	,	,	,	,	,
1689	,	,	,	,	,	,	,	,	,	,	,	,	,	,	,
1690	,	,	,	,	,	,	,	,	,	,	,	,	,	,	,
1691	,	,	,	,	,	,	,	,	,	,	,	,	,	,	,
1692	,	,	,	,	,	,	,	,	,	,	,	,	,	,	,
1693	,	,	,	,	,	,	,	,	,	,	,	,	,	,	,
1694	,	,	,	,	,	,	,	,	,	,	,	,	,	,	,
1695	,	,	,	,	,	,	,	,	,	,	,	,	,	,	,
1696	,	,	,	,	,	,	,	,	,	,	,	,	,	,	,
1697	,	,	,	,	,	,	,	,	,	,	,	,	,	,	,
1698	,	,	,	,	,	,	,	,	,	,	,	,	,	,	,
1699	,	,	,	,	,	,	,	,	,	,	,	,	,	,	,
1700	,	,	,	,	,	,	,	,	,	,	,	,	,	,	,
1701	,	,	,	,	,	,	,	,	,	,	,	,	,	,	,
1702	,	,	,	,	,	,	,	,	,	,	,	,	,	,	,
1703	,	,	,	,	,	,	,	,	,	,	,	,	,	,	,
1704	,	,	,	,	,	,	,	,	,	,	,	,	,	,	,
1705	,	,	,	,	,	,	,	,	,	,	,	,	,	,	,
1706	,	,	,	,	,	,	,	,	,	,	,	,	,	,	,
1707	,	,	,	,	,	,	,	,	,	,	,	,	,	,	,
1708	,	,	,	,	,	,	,	,	,	,	,	,	,	,	,
1709	,	,	,	,	,	,	,	,	,	,	,	,	,	,	,
1710	,	,	,	,	,	,	,	,	,	,	,	,	,	,	,
1711	,	,	,	,	,	,	,	,	,	,	,	,	,	,	,
1712	,	,	,	,	,	,	,	,	,	,	,	,	,	,	,
1713	,	,	,	,	,	,	,	,	,	,	,	,	,	,	,
1714	,	,	,	,	,	,	,	,	,	,	,	,	,	,	,
1715	,	,	,	,	,	,	,	,	,	,	,	,	,	,	,
1716	,	,	,	,	,	,	,	,	,	,	,	,	,	,	,
1717	,	,	,	,	,	,	,	,	,	,	,	,	,	,	,
1718	,	,	,	,	,	,	,	,	,	,	,	,	,	,	,
1719	,	,	,	,	,	,	,	,	,	,	,	,	,	,	,
1720	,	,	,	,	,	,	,	,	,	,	,	,	,	,	,
1721	,	,	,	,	,	,	,	,	,	,	,	,	,	,	,
1722	,	,	,	,	,	,	,	,	,	,	,	,	,	,	,
1723	,	,	,	,	,	,	,	,	,	,	,	,	,	,	,
1724	,	,	,	,	,	,	,	,	,	,	,	,	,	,	,
1725	,	,	,	,	,	,	,	,	,	,	,	,	,	,	,
1726	,	,	,	,	,	,	,	,	,	,	,	,	,	,	,
1727	,	,	,	,	,	,	,	,	,	,	,	,	,	,	,
1728	,	,	,	,	,	,	,	,	,	,	,	,	,	,	,
1729	,	,	,	,	,	,	,	,	,	,	,	,	,	,	,
1730	,	,	,	,	,	,	,	,	,	,	,	,	,	,	,
1731	,	,	,	,	,	,	,	,	,	,	,	,	,	,	,
1732	,	,	,	,	,	,	,	,	,	,	,	,	,	,	,
1733	,	,	,	,	,	,	,	,	,	,	,	,	,	,	,
1734	,	,	,	,	,	,	,	,	,	,	,	,	,	,	,
1735	,	,	,	,	,	,	,	,	,	,	,	,	,	,	,
1736	,	,	,	,	,	,	,	,	,	,	,	,	,	,	,
1737	,	,	,	,	,	,	,	,	,	,	,	,	,	,	,
1738	,	,	,	,	,	,	,	,	,	,	,	,	,	,	,
1739	,	,	,	,	,	,	,	,	,	,	,	,	,	,	,
1740	,	,	,	,	,	,	,	,	,	,	,	,	,	,	,
1741	,	,	,	,	,	,	,	,	,	,	,	,	,	,	,
1742	,	,	,	,	,	,	,	,	,	,	,	,	,	,	,
1743	,	,	,	,	,	,	,	,	,	,	,	,	,	,	,
1744	,	,	,	,	,	,	,	,	,	,	,	,	,	,	,
1745	,	,	,	,	,	,	,	,	,	,	,	,	,	,	,
1746	,	,	,	,	,	,	,	,	,	,	,	,	,	,	,
1747	,	,	,	,	,	,	,	,	,	,	,	,	,	,	,
1748	,	,	,	,	,	,	,	,	,	,	,	,	,	,	,
1749	,	,	,	,	,	,	,	,	,	,	,	,	,	,	,
1750	,	,	,	,	,	,	,	,	,	,	,	,	,	,	,
1751	,	,	,	,	,	,	,	,	,	,	,	,	,	,	,
1752	,	,	,	,	,	,	,	,	,	,	,	,	,	,	,
1753	,	,	,	,	,	,	,	,	,	,	,	,	,	,	,
1754	,	,	,	,	,	,	,	,	,	,	,	,	,	,	,
1755	,	,	,	,	,	,	,	,	,	,	,	,	,	,	,
1756	,	,	,	,	,	,	,	,	,	,	,	,	,	,	,
1757	,	,	,	,	,	,	,	,	,	,	,	,	,	,	,
1758	,	,	,	,	,	,	,	,	,	,	,	,	,	,	,
1759	,	,	,	,	,	,	,	,	,	,	,	,	,	,	,
1760	,	,	,	,	,	,	,	,	,	,	,	,	,	,	,
1761	,	,	,	,	,	,	,	,	,	,	,	,	,	,	,
1762	,	,	,	,	,	,	,	,	,	,	,	,	,	,	,
1763	,	,	,	,	,	,	,	,	,	,	,	,	,	,	,
1764	,	,	,	,	,	,	,	,	,	,	,	,	,	,	,
1765	,	,	,	,	,	,	,	,	,	,	,	,	,	,	,
1766	,	,	,	,	,	,	,	,	,	,	,	,	,	,	,
1767	,	,	,	,	,	,	,	,	,	,	,	,	,	,	,
1768	,	,	,	,	,	,	,	,	,	,	,	,	,	,	,
1769	,	,	,	,	,	,	,	,	,	,	,	,	,	,	,
1770	,	,	,	,	,	,	,	,	,	,	,	,	,	,	,
1771	,	,	,	,	,	,	,	,	,	,	,	,	,	,	,
1772	,	,	,	,	,	,	,	,	,	,	,	,	,	,	,
1773	,	,	,	,	,	,	,	,	,	,	,	,	,	,	,
1774	,	,	,	,	,	,	,	,	,	,	,	,	,	,	,
1775	,	,	,	,	,	,	,	,	,	,	,	,	,	,	,
1776	,	,	,	,	,	,	,	,	,	,	,	,	,	,	,
1777	,	,	,	,	,	,	,	,	,	,	,	,	,	,	,
1778	,	,	,	,	,	,	,	,	,	,	,	,	,	,	,
1779	,	,	,	,	,	,	,	,	,	,	,	,	,	,	,
1780	,	,	,	,	,	,	,	,	,	,	,	,	,	,	,
1781	,	,	,	,	,	,	,	,	,	,	,	,	,	,	,
1782	,	,	,	,	,	,	,	,	,	,	,	,	,	,	,
1783	,	,	,	,	,	,	,	,	,	,	,	,	,	,	,
1784	,	,	,	,	,	,	,	,	,	,	,	,	,	,	,
1785	,	,	,	,	,	,	,	,	,	,	,	,	,	,	,
1786	,	,	,	,	,	,	,	,	,	,	,	,	,	,	,
1787	,	,	,	,	,	,	,	,	,	,	,	,	,	,	,
1788	,	,	,	,	,	,	,	,	,	,	,	,	,	,	,
1789	,	,	,	,	,	,	,	,	,	,	,	,	,	,	,
1790	,	,	,	,	,	,	,	,	,	,	,	,	,	,	,
1791	,	,	,	,	,	,	,	,	,	,	,	,	,	,	,
1792	,	,	,	,	,	,	,	,	,	,	,	,	,	,	,
1793	,	,	,	,	,	,	,	,	,	,	,	,	,	,	,
1794	,	,	,	,	,	,	,	,	,	,	,	,	,	,	,
1795	,	,	,	,	,	,	,	,	,	,	,	,	,	,	,
1796	,	,	,	,	,	,	,	,	,	,	,	,	,	,	,
1797	,	,	,	,	,	,	,	,	,	,	,	,	,	,	,
1798	,	,	,	,	,	,	,	,	,	,	,	,	,	,	,
1799	,	,	,	,	,	,	,	,	,	,	,	,	,	,	,
1800	,	,	,	,	,	,	,	,	,	,	,	,	,	,	,
1801	,	,	,	,	,	,	,	,	,	,	,	,	,	,	,
1802	,	,	,	,	,	,	,	,	,	,	,	,	,	,	,
1803	,	,	,	,	,	,	,	,	,	,	,	,	,	,	,
1804	,	,	,	,	,	,	,	,	,	,	,	,	,	,	,
1805	,	,	,	,	,	,	,	,	,	,	,	,	,	,	,
1806	,	,	,	,	,	,	,	,	,	,	,	,	,	,	,
1807	,	,	,	,	,	,	,	,	,	,	,	,	,	,	,
1808	,	,	,	,	,	,	,	,	,	,	,	,	,	,	,
1809	,	,	,	,	,	,	,	,	,	,	,	,	,	,	,
1810	,	,	,	,	,	,	,	,	,	,	,	,	,	,	,
1811	,	,	,	,	,	,	,	,	,	,	,	,	,	,	,
1812	,	,	,	,	,	,	,	,	,	,	,	,	,	,	,
1813	,	,	,	,	,	,	,	,	,	,	,	,	,	,	,
1814	,	,	,	,	,	,	,	,	,	,	,	,	,	,	,
1815	,	,	,	,	,	,	,	,	,	,	,	,	,	,	,
1816	,	,	,	,	,	,	,	,	,	,	,	,	,	,	,
1817	,	,	,	,	,	,	,	,	,	,	,	,	,	,	,
1818	,	,	,	,	,	,	,	,	,	,	,	,	,	,	,
1819	,	,	,	,	,	,	,	,	,	,	,	,	,	,	,
1820	,	,	,	,	,	,	,	,	,	,	,	,	,	,	,
1821	,	,	,	,	,	,	,	,	,	,	,	,	,	,	,
1822	,	,	,	,	,	,	,	,	,	,	,	,	,	,	,
1823	,	,	,	,	,	,	,	,	,	,	,	,	,	,	,
1824	,	,	,	,	,	,	,	,	,	,	,	,	,	,	,
1825	,	,	,	,	,	,	,	,	,	,	,	,	,	,	,
1826	,	,	,	,	,	,	,	,	,	,	,	,	,	,	,
1827	,	,	,	,	,	,	,	,	,	,	,	,	,	,	,
1828	,	,	,	,	,	,	,	,	,	,	,	,	,	,	,
1829	,	,	,	,	,	,	,	,	,	,	,	,	,	,	,
1830	,	,	,	,	,	,	,	,	,	,	,	,	,	,	,
1831	,	,	,	,	,	,	,	,	,	,	,	,	,	,	,
1832	,	,	,	,	,	,	,	,	,	,	,	,	,	,	,
1833	,	,	,	,	,	,	,	,	,	,	,	,	,	,	,
1834	,	,	,	,	,	,	,	,	,	,	,	,	,	,	,
1835	,	,	,	,	,	,	,	,	,	,	,	,	,	,	,
1836	,	,	,	,	,	,	,	,	,	,	,	,	,	,	,
1837	,	,	,	,	,	,	,	,	,	,	,	,	,	,	,
1838	,	,	,	,	,	,	,	,	,	,	,	,	,	,	,
1839	,	,	,	,	,	,	,	,	,	,	,	,	,	,	,
1840	,	,	,	,	,	,	,	,	,	,	,	,	,	,	,
1841	,	,	,	,	,	,	,	,	,	,	,	,	,	,	,
1842	,	,	,	,	,	,	,	,	,	,	,	,	,	,	,
1843	,	,	,	,	,	,	,	,	,	,	,	,	,	,	,
1844	,	,	,	,	,	,	,	,	,	,	,	,	,	,	,
1845	,	,	,	,	,	,	,	,	,	,	,	,	,	,	,
1846	,	,	,	,	,	,	,	,	,	,	,	,	,	,	,
1847	,	,	,	,	,	,	,	,	,	,	,	,	,	,	,
1848	,	,	,	,	,	,	,	,	,	,	,	,	,	,	,
1849	,	,	,	,	,	,	,	,	,	,	,	,	,	,	,
1850	,	,	,	,	,	,	,	,	,	,	,	,	,	,	,
1851	,	,	,	,	,	,	,	,	,	,	,	,	,	,	,
1852	,	,	,	,	,	,	,	,	,	,	,	,	,	,	,
1853	,	,	,	,	,	,	,	,	,	,	,	,	,	,	,
1854	,	,	,	,	,	,	,	,	,	,	,	,	,	,	,
1855	,	,	,	,	,	,	,	,	,	,	,	,	,	,	,
1856	,	,	,	,	,	,	,	,	,	,	,	,	,	,	,
1857	,	,	,	,	,	,	,	,	,	,	,	,	,	,	,
1858	,	,	,	,	,	,	,	,	,	,	,	,	,	,	,
1859	,	,	,	,	,	,	,	,	,	,	,	,	,	,	,
1860	,	,	,	,	,	,	,	,	,	,	,	,	,	,	,
1861	,	,	,	,	,	,	,	,	,	,	,	,	,	,	,
1862	,	,	,	,	,	,	,	,	,	,	,	,	,	,	,
1863	,	,	,	,	,	,	,	,	,	,	,	,	,	,	,
1864	,	,	,	,	,	,	,	,	,	,	,	,	,	,	,
1865	,	,	,	,	,	,	,	,	,	,	,	,	,	,	,
1866	,	,	,	,	,	,	,	,	,	,	,	,	,	,	,
1867	,	,	,	,	,	,	,	,	,	,	,	,	,	,	,
1868	,	,	,	,	,	,	,	,	,	,	,	,	,	,	,
1869	,	,	,	,	,	,	,	,	,	,	,	,	,	,	,
1870	,	,	,	,	,	,	,	,	,	,	,	,	,	,	,
1871	,	,	,	,	,	,	,	,	,	,	,	,	,	,	,
1872	,	,	,	,	,	,	,	,	,	,	,	,	,	,	,
1873	,	,	,	,	,	,	,	,	,	,	,	,	,	,	,
1874	,	,	,	,	,	,	,	,	,	,	,	,	,	,	,
1875	,	,	,	,	,	,	,	,	,	,	,	,	,	,	,
1876	,	,	,	,	,	,	,	,	,	,	,	,	,	,	,
1877	,	,	,	,	,	,	,	,	,	,	,	,	,	,	,
1878	,	,	,	,	,	,	,	,	,	,	,	,	,	,	,
1879	,	,	,	,	,	,	,	,	,	,	,	,	,	,	,
1880	,	,	,	,	,	,	,	,	,	,	,	,	,	,	,
1881	,	,	,	,	,	,	,	,	,	,	,	,	,	,	,
1882	,	,	,	,	,	,	,	,	,	,	,	,	,	,	,
1883	,	,	,	,	,	,	,	,	,	,	,	,	,	,	,
1884	,	,	,	,	,	,	,	,	,	,	,	,	,	,	,
1885	,	,	,	,	,	,	,	,	,	,	,	,	,	,	,
1886	,	,	,	,	,	,	,	,	,	,	,	,	,	,	,
1887	,	,	,	,	,	,	,	,	,	,	,	,	,	,	,
1888	,	,	,	,	,	,	,	,	,	,	,	,	,	,	,
1889	,	,	,	,	,	,	,	,	,	,	,	,	,	,	,
1890	,	,	,	,	,	,	,	,	,	,	,	,	,	,	,
1891	,	,	,	,	,	,	,	,	,	,	,	,	,	,	,
1892	,	,	,	,	,	,	,	,	,	,	,	,	,	,	,
1893	,	,	,	,	,	,	,	,	,	,	,	,	,	,	,
1894	,	,	,	,	,	,	,	,	,	,	,	,	,	,	,
1895	,	,	,	,	,	,	,	,	,	,	,	,	,	,	,
1896	,	,	,	,	,	,	,	,	,	,	,	,	,	,	,
1897	,	,	,	,	,	,	,	,	,	,	,	,	,	,	,
1898	,	,	,	,	,	,	,	,	,	,	,	,	,	,	,
1899	,	,	,	,	,	,	,	,	,	,	,	,	,	,	,
1900	,	,	,	,	,	,	,	,	,	,	,	,	,	,	,
1901	,	,	,	,	,	,	,	,	,	,	,	,	,	,	,
1902	,	,	,	,	,	,	,	,	,	,	,	,	,	,	,
1903	,	,	,	,	,	,	,	,	,	,	,	,	,	,	,
1904	,	,	,	,	,	,	,	,	,	,	,	,	,	,	,
1905	,	,	,	,	,	,	,	,	,	,	,	,	,	,	,
1906	,	,	,	,	,	,	,	,	,	,	,	,	,	,	,
1907	,	,	,	,	,	,	,	,	,	,	,	,	,	,	,
1908	,	,	,	,	,	,	,	,	,	,	,	,	,	,	,
1909	,	,	,	,	,	,	,	,	,	,	,	,	,	,	,
1910	,	,	,	,	,	,	,	,	,	,	,	,	,	,	,
1911	,	,	,	,	,	,	,	,	,	,	,	,	,	,	,
1912	,	,	,	,	,	,	,	,	,	,	,	,	,	,	,
1913	,	,	,	,	,	,	,	,	,	,	,	,	,	,	,
1914	,	,	,	,	,	,	,	,	,	,	,	,	,	,	,
1915	,	,	,	,	,	,	,	,	,	,	,	,	,	,	,
1916	,	,	,	,	,	,	,	,	,	,	,	,	,	,	,
1917	,	,	,	,	,	,	,	,	,	,	,	,	,	,	,
1918	,	,	,	,	,	,	,	,	,	,	,	,	,	,	,
1919	,	,	,	,	,	,	,	,	,	,	,	,	,	,	,
1920	,	,	,	,	,	,	,	,	,	,	,	,	,	,	,
1921	,	,	,	,	,	,	,	,	,	,	,	,	,	,	,
1922	,	,	,	,	,	,	,	,	,	,	,	,	,	,	,
1923	,	,	,	,	,	,	,	,	,	,	,	,	,	,	,
1924	,	,	,	,	,	,	,	,	,	,	,	,	,	,	,
1925	,	,	,	,	,	,	,	,	,	,	,	,	,	,	,
1926	,	,	,	,	,	,	,	,	,	,	,	,	,	,	,
1927	,	,	,	,	,	,	,	,	,	,	,	,	,	,	,
1928	,	,	,	,	,	,	,	,	,	,	,	,	,	,	,
1929	,	,	,	,	,	,	,	,	,	,	,	,	,	,	,
1930	,	,	,	,	,	,	,	,	,	,	,	,	,	,	,
1931	,	,	,	,	,	,	,	,	,	,	,	,	,	,	,
1932	,	,	,	,	,	,	,	,	,	,	,	,	,	,	,
1933	,	,	,	,	,	,	,	,	,	,	,	,	,	,	,
1934	,	,	,	,	,	,	,	,	,	,	,	,	,	,	,
1935	,	,	,	,	,	,	,	,	,	,	,	,	,	,	,
1936	,	,	,	,	,	,	,	,	,	,	,	,	,	,	,
1937	,	,	,	,	,	,	,	,	,	,	,	,	,	,	,
1938	,	,	,	,	,	,	,	,	,	,	,	,	,	,	,
1939	,	,	,	,	,	,	,	,	,	,	,	,	,	,	,
1940	,	,	,	,	,	,	,	,	,	,	,	,	,	,	,
1941	,	,	,	,	,	,	,	,	,	,	,	,	,	,	,
1942	,	,	,	,	,	,	,	,	,	,	,	,	,	,	,
1943	,	,	,	,	,	,	,	,	,	,	,	,	,	,	,
1944	,	,	,	,	,	,	,	,	,	,	,	,	,	,	,
1945	,	,	,	,	,	,	,	,	,	,	,	,	,	,	,
1946	,	,	,	,	,	,	,	,	,	,	,	,	,	,	,
1947	,	,	,	,	,	,	,	,	,	,	,	,	,	,	,
1948	,	,	,	,	,	,	,	,	,	,	,	,	,	,	,
1949	,	,	,	,	,	,	,	,	,	,	,	,	,	,	,
1950	,	,	,	,	,	,	,	,	,	,	,	,	,	,	,
1951	,	,	,	,	,	,	,	,	,	,	,	,	,	,	,
1952	,	,	,	,	,	,	,	,	,	,	,	,	,	,	,
1953	,	,	,	,	,	,	,	,	,	,	,	,	,	,	,
1954	,	,	,	,	,	,	,	,	,	,	,	,	,	,	,
1955	,	,	,	,	,	,	,	,	,	,	,	,	,	,	,
1956	,	,	,	,	,	,	,	,	,	,	,	,	,	,	,
1957	,	,	,	,	,	,	,	,	,	,	,	,	,	,	,
1958	,	,	,	,	,	,	,	,	,	,	,	,	,	,	,
1959	,	,	,	,	,	,	,	,	,	,	,	,	,	,	,
1960	,	,	,	,	,	,	,	,	,	,	,	,	,	,	,
1961	,	,	,	,	,	,	,	,	,	,	,	,	,	,	,
1962	,	,	,	,	,	,	,	,	,	,	,	,	,	,	,
1963	,	,	,	,	,	,	,	,	,	,	,	,	,	,	,
1964	,	,	,	,	,	,	,	,	,	,	,	,	,	,	,
1965	,	,	,	,	,	,	,	,	,	,	,	,	,	,	,
1966	,	,	,	,	,	,	,	,	,	,	,	,	,	,	,
1967	,	,	,	,	,	,	,	,	,	,	,	,	,	,	,
1968	,	,	,	,	,	,	,	,	,	,	,	,	,	,	,
1969	,	,	,	,	,	,	,	,	,	,	,	,	,	,	,
1970	,	,	,	,	,	,	,	,	,	,	,	,	,	,	,
1971	,	,	,	,	,	,	,	,	,	,	,	,	,	,	,
1972	,	,	,	,	,	,	,	,	,	,	,	,	,	,	,
1973	,	,	,	,	,	,	,	,	,	,	,	,	,	,	,
1974	,	,	,	,	,	,	,	,	,	,	,	,	,	,	,
1975	,	,	,	,	,	,	,	,	,	,	,	,	,	,	,
1976	,	,	,	,	,	,	,	,	,	,	,	,	,	,	,
1977	,	,	,	,	,	,	,	,	,	,	,	,	,	,	,
1978	,	,	,	,	,	,	,	,	,	,	,	,	,	,	,
1979	,	,	,	,	,	,	,	,	,	,	,	,	,	,	,
1980	,	,	,	,	,	,	,	,	,	,	,	,	,	,	,
1981	,	,	,	,	,	,	,	,	,	,	,	,	,	,	,
1982	,	,	,	,	,	,	,	,	,	,	,	,	,	,	,
1983	,	,	,	,	,	,	,	,	,	,	,	,	,	,	,
1984	,	,	,	,	,	,	,	,	,	,	,	,	,	,	,
1985	,	,	,	,	,	,	,	,	,	,	,	,	,	,	,
1986	,	,	,	,	,	,	,	,	,	,	,	,	,	,	,
1987	,	,	,	,	,	,	,	,	,	,	,	,	,	,	,
1988	,	,	,	,	,	,	,	,	,	,	,	,	,	,	,
1989	,	,	,	,	,	,	,	,	,	,	,	,	,	,	,
1990	,	,	,	,	,	,	,	,	,	,	,	,	,	,	,
1991	,	,	,	,	,	,	,	,	,	,	,	,	,	,	,
1992	,	,	,	,	,	,	,	,	,	,	,	,	,	,	,
1993	,	,	,	,	,	,	,	,	,	,	,	,	,	,	,
1994	,	,	,	,	,	,	,	,	,	,	,	,	,	,	,
1995	,	,	,	,	,	,	,	,	,	,	,	,	,	,	,
1996	,	,	,	,	,	,	,	,	,	,	,	,	,	,	,
1997	,	,	,	,	,	,	,	,	,	,	,	,	,	,	,
1998	,	,	,	,	,	,	,	,	,	,	,	,	,	,	,
1999	,	,	,	,	,	,	,	,	,	,	,	,	,	,	,
[truncated: 13,001 more rows]
