# Supplementary material for: ParB spreading on DNA requires cytidine triphosphate in vitro
Source: eLife journal article supplement (doi:10.7554/elife.53515), 2020-02-20
Supplement: fig2-figsupp3-data1 [file Fig2_supp3_Thermus_ParB_rep1_2_3.xlsx]

## Sheet: FORMAT
	sample ID #1	sample ID #2	sample ID #3
data point	time point (sec), wavelength shift (nm)	time point (sec), wavelength shift (nm)	time point (sec), wavelength shift (nm)
1
2
3
.
.
.

## Sheet: Fig2_supp3_Thermus_ParB_123
	169bp closed parS DNA and Thermus ParB	169bp closed parS DNA and Thermus ParB	169bp closed parS DNA and Thermus ParB	169bp closed parS DNA and Thermus ParB 1mM CTP	169bp closed parS DNA and Thermus ParB 1mM CTP	169bp closed parS DNA and Thermus ParB 1mM CTP	169bp closed parS DNA and Thermus ParB 1mM ATP	169bp closed parS DNA and Thermus ParB 1mM ATP	169bp closed parS DNA and Thermus ParB 1mM ATP	169bp closed parS DNA and Thermus ParB 1mM GTP	169bp closed parS DNA and Thermus ParB 1mM GTP	169bp closed parS DNA and Thermus ParB 1mM GTP	169bp closed parS DNA and Thermus ParB 1mM UTP	169bp closed parS DNA and Thermus ParB 1mM UTP	169bp closed parS DNA and Thermus ParB 1mM UTP
1	0.000, 0.021	0.000, 0.014	0.000, 0.006	0.000, 0.005	0.000, 0.005	0.000, 0.020	0.000, -0.002	0.000, -0.015	0.000, -0.005	0.000, -0.003	0.000, 0.004	0.000, 0.001	0.000, -0.004	0.000, 0.038	0.000, -0.012
2	0.200, 0.020	0.200, 0.014	0.200, 0.005	0.200, 0.006	0.200, 0.005	0.200, 0.020	0.200, -0.002	0.200, -0.013	0.200, -0.005	0.200, -0.002	0.200, 0.004	0.200, 0.001	0.200, -0.005	0.200, 0.036	0.200, -0.012
3	0.400, 0.020	0.400, 0.014	0.400, 0.006	0.400, 0.006	0.400, 0.005	0.400, 0.019	0.400, -0.002	0.400, -0.012	0.400, -0.005	0.400, -0.002	0.400, 0.004	0.400, 0.001	0.400, -0.005	0.400, 0.033	0.400, -0.011
4	0.600, 0.020	0.600, 0.013	0.600, 0.006	0.600, 0.007	0.600, 0.005	0.600, 0.019	0.600, -0.002	0.600, -0.011	0.600, -0.005	0.600, -0.001	0.600, 0.003	0.600, 0.001	0.600, -0.005	0.600, 0.031	0.600, -0.010
5	0.800, 0.019	0.800, 0.013	0.800, 0.006	0.800, 0.007	0.800, 0.004	0.800, 0.018	0.800, -0.002	0.800, -0.009	0.800, -0.005	0.800, -0.001	0.800, 0.003	0.800, 0.001	0.800, -0.006	0.800, 0.028	0.800, -0.009
6	1.000, 0.018	1.000, 0.012	1.000, 0.006	1.000, 0.007	1.000, 0.004	1.000, 0.017	1.000, -0.002	1.000, -0.008	1.000, -0.005	1.000, -0.000	1.000, 0.002	1.000, 0.001	1.000, -0.006	1.000, 0.026	1.000, -0.008
7	1.200, 0.018	1.200, 0.012	1.200, 0.006	1.200, 0.007	1.200, 0.004	1.200, 0.017	1.200, -0.002	1.200, -0.007	1.200, -0.005	1.200, -0.000	1.200, 0.002	1.200, 0.001	1.200, -0.006	1.200, 0.023	1.200, -0.008
8	1.400, 0.017	1.400, 0.011	1.400, 0.006	1.400, 0.008	1.400, 0.004	1.400, 0.016	1.400, -0.002	1.400, -0.006	1.400, -0.005	1.400, 0.000	1.400, 0.001	1.400, 0.001	1.400, -0.006	1.400, 0.021	1.400, -0.007
9	1.600, 0.016	1.600, 0.011	1.600, 0.005	1.600, 0.008	1.600, 0.004	1.600, 0.016	1.600, -0.002	1.600, -0.005	1.600, -0.005	1.600, 0.001	1.600, 0.001	1.600, 0.001	1.600, -0.006	1.600, 0.020	1.600, -0.006
10	1.800, 0.016	1.800, 0.010	1.800, 0.005	1.800, 0.008	1.800, 0.004	1.800, 0.015	1.800, -0.002	1.800, -0.004	1.800, -0.005	1.800, 0.001	1.800, 0.000	1.800, 0.002	1.800, -0.006	1.800, 0.018	1.800, -0.006
11	2.000, 0.015	2.000, 0.010	2.000, 0.005	2.000, 0.008	2.000, 0.004	2.000, 0.015	2.000, -0.002	2.000, -0.004	2.000, -0.005	2.000, 0.001	2.000, -0.000	2.000, 0.002	2.000, -0.006	2.000, 0.017	2.000, -0.005
12	2.200, 0.015	2.200, 0.010	2.200, 0.005	2.200, 0.009	2.200, 0.004	2.200, 0.015	2.200, -0.002	2.200, -0.004	2.200, -0.005	2.200, 0.002	2.200, -0.001	2.200, 0.002	2.200, -0.006	2.200, 0.017	2.200, -0.005
13	2.400, 0.015	2.400, 0.009	2.400, 0.005	2.400, 0.009	2.400, 0.004	2.400, 0.015	2.400, -0.001	2.400, -0.003	2.400, -0.004	2.400, 0.002	2.400, -0.001	2.400, 0.002	2.400, -0.006	2.400, 0.017	2.400, -0.005
14	2.600, 0.014	2.600, 0.009	2.600, 0.005	2.600, 0.008	2.600, 0.004	2.600, 0.014	2.600, -0.001	2.600, -0.003	2.600, -0.004	2.600, 0.002	2.600, -0.001	2.600, 0.002	2.600, -0.005	2.600, 0.016	2.600, -0.005
15	2.800, 0.014	2.800, 0.008	2.800, 0.004	2.800, 0.008	2.800, 0.004	2.800, 0.014	2.800, -0.001	2.800, -0.003	2.800, -0.004	2.800, 0.002	2.800, -0.001	2.800, 0.002	2.800, -0.005	2.800, 0.016	2.800, -0.005
16	3.000, 0.013	3.000, 0.008	3.000, 0.004	3.000, 0.008	3.000, 0.004	3.000, 0.013	3.000, -0.001	3.000, -0.003	3.000, -0.004	3.000, 0.002	3.000, -0.001	3.000, 0.002	3.000, -0.005	3.000, 0.015	3.000, -0.005
17	3.200, 0.013	3.200, 0.008	3.200, 0.004	3.200, 0.008	3.200, 0.005	3.200, 0.013	3.200, -0.001	3.200, -0.003	3.200, -0.003	3.200, 0.002	3.200, -0.001	3.200, 0.002	3.200, -0.005	3.200, 0.015	3.200, -0.005
18	3.400, 0.013	3.400, 0.008	3.400, 0.003	3.400, 0.008	3.400, 0.005	3.400, 0.013	3.400, -0.001	3.400, -0.003	3.400, -0.003	3.400, 0.002	3.400, -0.001	3.400, 0.002	3.400, -0.005	3.400, 0.014	3.400, -0.004
19	3.600, 0.012	3.600, 0.008	3.600, 0.003	3.600, 0.008	3.600, 0.005	3.600, 0.012	3.600, -0.001	3.600, -0.003	3.600, -0.003	3.600, 0.002	3.600, -0.001	3.600, 0.002	3.600, -0.005	3.600, 0.014	3.600, -0.004
20	3.800, 0.012	3.800, 0.008	3.800, 0.003	3.800, 0.008	3.800, 0.005	3.800, 0.012	3.800, -0.001	3.800, -0.003	3.800, -0.003	3.800, 0.002	3.800, -0.000	3.800, 0.002	3.800, -0.005	3.800, 0.013	3.800, -0.004
21	4.000, 0.012	4.000, 0.008	4.000, 0.002	4.000, 0.008	4.000, 0.005	4.000, 0.011	4.000, -0.000	4.000, -0.003	4.000, -0.002	4.000, 0.003	4.000, -0.000	4.000, 0.002	4.000, -0.005	4.000, 0.012	4.000, -0.003
22	4.200, 0.012	4.200, 0.008	4.200, 0.002	4.200, 0.008	4.200, 0.005	4.200, 0.011	4.200, -0.000	4.200, -0.002	4.200, -0.002	4.200, 0.003	4.200, -0.000	4.200, 0.002	4.200, -0.005	4.200, 0.012	4.200, -0.003
23	4.400, 0.012	4.400, 0.008	4.400, 0.002	4.400, 0.008	4.400, 0.005	4.400, 0.010	4.400, 0.000	4.400, -0.002	4.400, -0.001	4.400, 0.003	4.400, -0.000	4.400, 0.002	4.400, -0.005	4.400, 0.011	4.400, -0.002
24	4.600, 0.012	4.600, 0.008	4.600, 0.002	4.600, 0.008	4.600, 0.005	4.600, 0.010	4.600, 0.001	4.600, -0.002	4.600, -0.001	4.600, 0.002	4.600, -0.000	4.600, 0.001	4.600, -0.005	4.600, 0.011	4.600, -0.002
25	4.800, 0.012	4.800, 0.008	4.800, 0.002	4.800, 0.009	4.800, 0.005	4.800, 0.009	4.800, 0.001	4.800, -0.001	4.800, -0.000	4.800, 0.002	4.800, -0.000	4.800, 0.001	4.800, -0.005	4.800, 0.010	4.800, -0.002
26	5.000, 0.011	5.000, 0.007	5.000, 0.002	5.000, 0.009	5.000, 0.005	5.000, 0.009	5.000, 0.001	5.000, -0.001	5.000, -0.000	5.000, 0.002	5.000, 0.000	5.000, 0.001	5.000, -0.005	5.000, 0.009	5.000, -0.001
27	5.200, 0.011	5.200, 0.007	5.200, 0.002	5.200, 0.009	5.200, 0.005	5.200, 0.008	5.200, 0.001	5.200, -0.001	5.200, 0.000	5.200, 0.001	5.200, 0.000	5.200, 0.001	5.200, -0.005	5.200, 0.009	5.200, -0.001
28	5.400, 0.011	5.400, 0.007	5.400, 0.002	5.400, 0.009	5.400, 0.005	5.400, 0.008	5.400, 0.001	5.400, -0.001	5.400, 0.000	5.400, 0.001	5.400, 0.001	5.400, 0.002	5.400, -0.004	5.400, 0.009	5.400, -0.001
29	5.600, 0.011	5.600, 0.007	5.600, 0.002	5.600, 0.009	5.600, 0.005	5.600, 0.007	5.600, 0.001	5.600, -0.001	5.600, 0.000	5.600, 0.001	5.600, 0.001	5.600, 0.002	5.600, -0.004	5.600, 0.008	5.600, -0.001
30	5.800, 0.010	5.800, 0.007	5.800, 0.002	5.800, 0.009	5.800, 0.004	5.800, 0.007	5.800, 0.000	5.800, -0.001	5.800, -0.000	5.800, 0.000	5.800, 0.001	5.800, 0.002	5.800, -0.004	5.800, 0.008	5.800, -0.001
31	6.000, 0.010	6.000, 0.006	6.000, 0.003	6.000, 0.009	6.000, 0.004	6.000, 0.007	6.000, -0.000	6.000, -0.001	6.000, -0.000	6.000, 0.000	6.000, 0.001	6.000, 0.002	6.000, -0.004	6.000, 0.008	6.000, -0.001
32	6.200, 0.010	6.200, 0.006	6.200, 0.003	6.200, 0.009	6.200, 0.004	6.200, 0.006	6.200, -0.001	6.200, -0.001	6.200, -0.000	6.200, -0.000	6.200, 0.001	6.200, 0.002	6.200, -0.004	6.200, 0.008	6.200, -0.001
33	6.400, 0.010	6.400, 0.006	6.400, 0.003	6.400, 0.008	6.400, 0.004	6.400, 0.006	6.400, -0.001	6.400, -0.001	6.400, -0.001	6.400, -0.000	6.400, 0.001	6.400, 0.002	6.400, -0.004	6.400, 0.007	6.400, -0.001
34	6.600, 0.009	6.600, 0.005	6.600, 0.003	6.600, 0.008	6.600, 0.004	6.600, 0.006	6.600, -0.001	6.600, -0.001	6.600, -0.001	6.600, -0.001	6.600, 0.001	6.600, 0.002	6.600, -0.004	6.600, 0.007	6.600, -0.001
35	6.800, 0.009	6.800, 0.005	6.800, 0.003	6.800, 0.008	6.800, 0.003	6.800, 0.006	6.800, -0.001	6.800, -0.002	6.800, -0.001	6.800, -0.001	6.800, 0.000	6.800, 0.002	6.800, -0.004	6.800, 0.007	6.800, -0.001
36	7.000, 0.009	7.000, 0.005	7.000, 0.003	7.000, 0.008	7.000, 0.003	7.000, 0.006	7.000, -0.002	7.000, -0.002	7.000, -0.001	7.000, -0.001	7.000, -0.000	7.000, 0.002	7.000, -0.004	7.000, 0.007	7.000, -0.001
37	7.200, 0.009	7.200, 0.005	7.200, 0.003	7.200, 0.007	7.200, 0.003	7.200, 0.006	7.200, -0.001	7.200, -0.002	7.200, -0.001	7.200, -0.001	7.200, -0.000	7.200, 0.002	7.200, -0.004	7.200, 0.007	7.200, -0.001
38	7.400, 0.009	7.400, 0.005	7.400, 0.002	7.400, 0.007	7.400, 0.003	7.400, 0.006	7.400, -0.001	7.400, -0.002	7.400, -0.002	7.400, -0.001	7.400, -0.001	7.400, 0.002	7.400, -0.005	7.400, 0.007	7.400, -0.001
39	7.600, 0.009	7.600, 0.005	7.600, 0.002	7.600, 0.007	7.600, 0.003	7.600, 0.006	7.600, -0.001	7.600, -0.002	7.600, -0.002	7.600, -0.001	7.600, -0.001	7.600, 0.002	7.600, -0.004	7.600, 0.006	7.600, -0.001
40	7.800, 0.009	7.800, 0.005	7.800, 0.002	7.800, 0.007	7.800, 0.003	7.800, 0.006	7.800, -0.001	7.800, -0.002	7.800, -0.001	7.800, -0.001	7.800, -0.001	7.800, 0.002	7.800, -0.004	7.800, 0.006	7.800, -0.001
41	8.000, 0.009	8.000, 0.005	8.000, 0.002	8.000, 0.007	8.000, 0.003	8.000, 0.006	8.000, -0.001	8.000, -0.002	8.000, -0.001	8.000, -0.001	8.000, -0.002	8.000, 0.002	8.000, -0.004	8.000, 0.006	8.000, -0.001
42	8.200, 0.010	8.200, 0.005	8.200, 0.002	8.200, 0.007	8.200, 0.003	8.200, 0.006	8.200, -0.000	8.200, -0.002	8.200, -0.001	8.200, -0.001	8.200, -0.002	8.200, 0.002	8.200, -0.004	8.200, 0.006	8.200, -0.001
43	8.400, 0.010	8.400, 0.005	8.400, 0.002	8.400, 0.007	8.400, 0.003	8.400, 0.006	8.400, 0.000	8.400, -0.002	8.400, -0.001	8.400, -0.000	8.400, -0.002	8.400, 0.002	8.400, -0.004	8.400, 0.006	8.400, -0.000
44	8.600, 0.010	8.600, 0.005	8.600, 0.002	8.600, 0.007	8.600, 0.003	8.600, 0.006	8.600, 0.001	8.600, -0.002	8.600, -0.001	8.600, -0.000	8.600, -0.002	8.600, 0.002	8.600, -0.004	8.600, 0.005	8.600, -0.000
45	8.800, 0.010	8.800, 0.005	8.800, 0.002	8.800, 0.006	8.800, 0.002	8.800, 0.006	8.800, 0.001	8.800, -0.001	8.800, -0.001	8.800, -0.000	8.800, -0.001	8.800, 0.002	8.800, -0.004	8.800, 0.005	8.800, 0.000
46	9.000, 0.010	9.000, 0.005	9.000, 0.002	9.000, 0.006	9.000, 0.002	9.000, 0.005	9.000, 0.002	9.000, -0.001	9.000, -0.001	9.000, 0.000	9.000, -0.001	9.000, 0.002	9.000, -0.004	9.000, 0.005	9.000, 0.000
47	9.200, 0.010	9.200, 0.004	9.200, 0.002	9.200, 0.006	9.200, 0.002	9.200, 0.005	9.200, 0.002	9.200, -0.001	9.200, -0.001	9.200, 0.000	9.200, -0.000	9.200, 0.002	9.200, -0.003	9.200, 0.005	9.200, 0.000
48	9.400, 0.010	9.400, 0.004	9.400, 0.002	9.400, 0.006	9.400, 0.002	9.400, 0.005	9.400, 0.002	9.400, -0.001	9.400, -0.001	9.400, 0.001	9.400, -0.000	9.400, 0.002	9.400, -0.003	9.400, 0.005	9.400, 0.000
49	9.600, 0.010	9.600, 0.004	9.600, 0.002	9.600, 0.005	9.600, 0.002	9.600, 0.005	9.600, 0.002	9.600, -0.001	9.600, -0.002	9.600, 0.001	9.600, -0.000	9.600, 0.002	9.600, -0.003	9.600, 0.004	9.600, 0.000
50	9.800, 0.009	9.800, 0.004	9.800, 0.002	9.800, 0.005	9.800, 0.002	9.800, 0.005	9.800, 0.002	9.800, -0.001	9.800, -0.002	9.800, 0.001	9.800, -0.000	9.800, 0.002	9.800, -0.003	9.800, 0.004	9.800, -0.000
51	10.000, 0.009	10.000, 0.004	10.000, 0.002	10.000, 0.005	10.000, 0.002	10.000, 0.004	10.000, 0.002	10.000, -0.001	10.000, -0.002	10.000, 0.001	10.000, -0.000	10.000, 0.002	10.000, -0.003	10.000, 0.004	10.000, -0.000
52	10.200, 0.009	10.200, 0.003	10.200, 0.002	10.200, 0.005	10.200, 0.002	10.200, 0.004	10.200, 0.001	10.200, -0.001	10.200, -0.002	10.200, 0.001	10.200, -0.001	10.200, 0.002	10.200, -0.003	10.200, 0.003	10.200, -0.001
53	10.400, 0.009	10.400, 0.003	10.400, 0.002	10.400, 0.005	10.400, 0.002	10.400, 0.004	10.400, 0.001	10.400, -0.001	10.400, -0.002	10.400, 0.001	10.400, -0.001	10.400, 0.002	10.400, -0.003	10.400, 0.003	10.400, -0.001
54	10.600, 0.008	10.600, 0.003	10.600, 0.002	10.600, 0.005	10.600, 0.002	10.600, 0.004	10.600, 0.001	10.600, -0.001	10.600, -0.002	10.600, 0.000	10.600, -0.001	10.600, 0.002	10.600, -0.003	10.600, 0.003	10.600, -0.001
55	10.800, 0.008	10.800, 0.003	10.800, 0.002	10.800, 0.005	10.800, 0.003	10.800, 0.003	10.800, 0.001	10.800, -0.001	10.800, -0.002	10.800, -0.000	10.800, -0.001	10.800, 0.002	10.800, -0.003	10.800, 0.003	10.800, -0.001
56	11.000, 0.008	11.000, 0.002	11.000, 0.001	11.000, 0.005	11.000, 0.003	11.000, 0.003	11.000, 0.001	11.000, -0.001	11.000, -0.002	11.000, -0.001	11.000, -0.001	11.000, 0.002	11.000, -0.002	11.000, 0.003	11.000, -0.001
57	11.200, 0.007	11.200, 0.002	11.200, 0.001	11.200, 0.005	11.200, 0.003	11.200, 0.003	11.200, 0.001	11.200, -0.001	11.200, -0.002	11.200, -0.001	11.200, -0.001	11.200, 0.002	11.200, -0.002	11.200, 0.003	11.200, -0.001
58	11.400, 0.007	11.400, 0.002	11.400, 0.001	11.400, 0.006	11.400, 0.003	11.400, 0.003	11.400, 0.001	11.400, -0.000	11.400, -0.002	11.400, -0.001	11.400, -0.001	11.400, 0.001	11.400, -0.002	11.400, 0.003	11.400, -0.001
59	11.600, 0.007	11.600, 0.002	11.600, 0.001	11.600, 0.006	11.600, 0.003	11.600, 0.003	11.600, 0.001	11.600, -0.000	11.600, -0.002	11.600, -0.001	11.600, -0.001	11.600, 0.001	11.600, -0.001	11.600, 0.003	11.600, -0.001
60	11.800, 0.007	11.800, 0.002	11.800, 0.001	11.800, 0.006	11.800, 0.003	11.800, 0.003	11.800, 0.001	11.800, 0.000	11.800, -0.002	11.800, -0.001	11.800, -0.001	11.800, 0.001	11.800, -0.001	11.800, 0.002	11.800, -0.001
61	12.000, 0.007	12.000, 0.002	12.000, 0.000	12.000, 0.006	12.000, 0.003	12.000, 0.002	12.000, 0.000	12.000, 0.000	12.000, -0.002	12.000, -0.001	12.000, -0.001	12.000, 0.001	12.000, -0.001	12.000, 0.002	12.000, -0.000
62	12.200, 0.007	12.200, 0.002	12.200, 0.000	12.200, 0.006	12.200, 0.003	12.200, 0.002	12.200, 0.001	12.200, 0.000	12.200, -0.002	12.200, -0.001	12.200, -0.001	12.200, 0.001	12.200, -0.001	12.200, 0.002	12.200, -0.000
63	12.400, 0.007	12.400, 0.002	12.400, 0.000	12.400, 0.005	12.400, 0.003	12.400, 0.002	12.400, 0.000	12.400, 0.001	12.400, -0.001	12.400, -0.001	12.400, -0.001	12.400, 0.001	12.400, -0.001	12.400, 0.002	12.400, 0.000
64	12.600, 0.007	12.600, 0.002	12.600, 0.000	12.600, 0.005	12.600, 0.002	12.600, 0.001	12.600, 0.000	12.600, 0.001	12.600, -0.001	12.600, -0.001	12.600, -0.001	12.600, 0.001	12.600, -0.001	12.600, 0.002	12.600, 0.000
65	12.800, 0.006	12.800, 0.002	12.800, -0.000	12.800, 0.005	12.800, 0.002	12.800, 0.001	12.800, 0.001	12.800, 0.001	12.800, -0.001	12.800, -0.001	12.800, -0.000	12.800, 0.000	12.800, -0.001	12.800, 0.003	12.800, 0.000
66	13.000, 0.006	13.000, 0.002	13.000, -0.000	13.000, 0.005	13.000, 0.002	13.000, 0.001	13.000, 0.001	13.000, 0.001	13.000, -0.001	13.000, -0.001	13.000, -0.000	13.000, 0.000	13.000, -0.001	13.000, 0.003	13.000, 0.000
67	13.200, 0.006	13.200, 0.002	13.200, -0.000	13.200, 0.004	13.200, 0.001	13.200, 0.001	13.200, 0.001	13.200, 0.001	13.200, -0.000	13.200, -0.001	13.200, -0.001	13.200, 0.001	13.200, -0.001	13.200, 0.003	13.200, 0.000
68	13.400, 0.006	13.400, 0.002	13.400, -0.000	13.400, 0.004	13.400, 0.001	13.400, 0.001	13.400, 0.001	13.400, 0.001	13.400, -0.000	13.400, -0.001	13.400, -0.001	13.400, 0.001	13.400, -0.001	13.400, 0.003	13.400, 0.000
69	13.600, 0.006	13.600, 0.003	13.600, -0.000	13.600, 0.004	13.600, 0.001	13.600, 0.001	13.600, 0.001	13.600, 0.001	13.600, -0.000	13.600, -0.001	13.600, -0.001	13.600, 0.001	13.600, -0.002	13.600, 0.003	13.600, 0.000
70	13.800, 0.006	13.800, 0.003	13.800, -0.001	13.800, 0.004	13.800, 0.001	13.800, 0.001	13.800, 0.001	13.800, 0.001	13.800, -0.000	13.800, -0.000	13.800, -0.001	13.800, 0.001	13.800, -0.002	13.800, 0.003	13.800, -0.000
71	14.000, 0.006	14.000, 0.003	14.000, -0.001	14.000, 0.005	14.000, 0.001	14.000, 0.001	14.000, 0.001	14.000, 0.001	14.000, -0.000	14.000, -0.000	14.000, -0.001	14.000, 0.002	14.000, -0.002	14.000, 0.003	14.000, -0.001
72	14.200, 0.006	14.200, 0.003	14.200, -0.000	14.200, 0.005	14.200, 0.001	14.200, 0.002	14.200, 0.000	14.200, 0.001	14.200, -0.000	14.200, -0.000	14.200, -0.001	14.200, 0.002	14.200, -0.002	14.200, 0.003	14.200, -0.001
73	14.400, 0.006	14.400, 0.002	14.400, -0.000	14.400, 0.005	14.400, 0.001	14.400, 0.002	14.400, 0.000	14.400, 0.000	14.400, -0.000	14.400, -0.000	14.400, -0.001	14.400, 0.002	14.400, -0.002	14.400, 0.003	14.400, -0.001
74	14.600, 0.005	14.600, 0.002	14.600, -0.000	14.600, 0.005	14.600, 0.001	14.600, 0.002	14.600, 0.000	14.600, 0.000	14.600, -0.000	14.600, -0.000	14.600, -0.001	14.600, 0.002	14.600, -0.002	14.600, 0.003	14.600, -0.002
75	14.800, 0.005	14.800, 0.002	14.800, 0.000	14.800, 0.005	14.800, 0.001	14.800, 0.002	14.800, 0.000	14.800, -0.000	14.800, -0.001	14.800, -0.000	14.800, -0.001	14.800, 0.003	14.800, -0.002	14.800, 0.003	14.800, -0.002
76	15.000, 0.005	15.000, 0.002	15.000, 0.000	15.000, 0.005	15.000, 0.001	15.000, 0.002	15.000, 0.000	15.000, -0.000	15.000, -0.001	15.000, -0.000	15.000, -0.001	15.000, 0.003	15.000, -0.002	15.000, 0.003	15.000, -0.002
77	15.200, 0.004	15.200, 0.002	15.200, 0.000	15.200, 0.005	15.200, 0.001	15.200, 0.002	15.200, 0.000	15.200, -0.000	15.200, -0.001	15.200, 0.000	15.200, -0.000	15.200, 0.003	15.200, -0.002	15.200, 0.003	15.200, -0.002
78	15.400, 0.004	15.400, 0.002	15.400, 0.000	15.400, 0.005	15.400, 0.001	15.400, 0.002	15.400, 0.000	15.400, -0.000	15.400, -0.001	15.400, 0.000	15.400, -0.000	15.400, 0.003	15.400, -0.002	15.400, 0.003	15.400, -0.002
79	15.600, 0.004	15.600, 0.002	15.600, 0.001	15.600, 0.005	15.600, 0.001	15.600, 0.002	15.600, 0.000	15.600, -0.000	15.600, -0.001	15.600, 0.001	15.600, -0.000	15.600, 0.003	15.600, -0.002	15.600, 0.003	15.600, -0.002
80	15.800, 0.004	15.800, 0.002	15.800, 0.000	15.800, 0.005	15.800, 0.001	15.800, 0.001	15.800, 0.000	15.800, -0.000	15.800, -0.001	15.800, 0.001	15.800, 0.000	15.800, 0.003	15.800, -0.001	15.800, 0.003	15.800, -0.003
81	16.000, 0.004	16.000, 0.002	16.000, 0.000	16.000, 0.005	16.000, 0.001	16.000, 0.001	16.000, 0.000	16.000, -0.000	16.000, -0.001	16.000, 0.001	16.000, 0.000	16.000, 0.002	16.000, -0.001	16.000, 0.003	16.000, -0.002
82	16.200, 0.003	16.200, 0.001	16.200, 0.000	16.200, 0.005	16.200, 0.001	16.200, 0.001	16.200, 0.000	16.200, 0.000	16.200, -0.001	16.200, 0.001	16.200, 0.000	16.200, 0.002	16.200, -0.001	16.200, 0.003	16.200, -0.002
83	16.400, 0.003	16.400, 0.001	16.400, 0.000	16.400, 0.005	16.400, 0.001	16.400, 0.000	16.400, 0.000	16.400, 0.000	16.400, -0.001	16.400, 0.001	16.400, 0.000	16.400, 0.001	16.400, -0.001	16.400, 0.003	16.400, -0.002
84	16.600, 0.003	16.600, 0.001	16.600, 0.000	16.600, 0.004	16.600, 0.002	16.600, 0.000	16.600, 0.000	16.600, 0.000	16.600, -0.000	16.600, 0.001	16.600, -0.000	16.600, 0.001	16.600, -0.001	16.600, 0.003	16.600, -0.002
85	16.800, 0.003	16.800, 0.001	16.800, 0.000	16.800, 0.004	16.800, 0.002	16.800, -0.000	16.800, 0.001	16.800, 0.000	16.800, -0.000	16.800, 0.001	16.800, -0.000	16.800, 0.001	16.800, -0.001	16.800, 0.002	16.800, -0.001
86	17.000, 0.004	17.000, 0.001	17.000, 0.000	17.000, 0.004	17.000, 0.002	17.000, -0.001	17.000, 0.001	17.000, 0.000	17.000, -0.001	17.000, 0.001	17.000, -0.001	17.000, 0.001	17.000, -0.001	17.000, 0.002	17.000, -0.001
87	17.200, 0.004	17.200, 0.001	17.200, 0.000	17.200, 0.004	17.200, 0.002	17.200, -0.001	17.200, 0.001	17.200, 0.000	17.200, -0.001	17.200, 0.001	17.200, -0.001	17.200, 0.001	17.200, -0.001	17.200, 0.002	17.200, -0.001
88	17.400, 0.004	17.400, 0.001	17.400, 0.000	17.400, 0.004	17.400, 0.002	17.400, -0.001	17.400, 0.001	17.400, -0.000	17.400, -0.001	17.400, 0.001	17.400, -0.001	17.400, 0.001	17.400, -0.001	17.400, 0.002	17.400, -0.001
89	17.600, 0.004	17.600, 0.001	17.600, 0.000	17.600, 0.004	17.600, 0.002	17.600, -0.001	17.600, 0.001	17.600, -0.000	17.600, -0.001	17.600, 0.000	17.600, -0.001	17.600, 0.001	17.600, -0.001	17.600, 0.002	17.600, -0.001
90	17.800, 0.004	17.800, 0.001	17.800, -0.000	17.800, 0.004	17.800, 0.002	17.800, -0.001	17.800, 0.001	17.800, -0.001	17.800, -0.001	17.800, 0.000	17.800, -0.001	17.800, 0.001	17.800, -0.000	17.800, 0.002	17.800, -0.001
91	18.000, 0.004	18.000, 0.001	18.000, -0.000	18.000, 0.004	18.000, 0.002	18.000, -0.001	18.000, 0.001	18.000, -0.001	18.000, -0.001	18.000, -0.000	18.000, -0.001	18.000, 0.002	18.000, -0.000	18.000, 0.001	18.000, -0.001
92	18.200, 0.004	18.200, 0.001	18.200, -0.000	18.200, 0.004	18.200, 0.001	18.200, -0.000	18.200, 0.001	18.200, -0.001	18.200, -0.001	18.200, -0.000	18.200, -0.001	18.200, 0.002	18.200, -0.000	18.200, 0.002	18.200, -0.001
93	18.400, 0.003	18.400, 0.001	18.400, -0.000	18.400, 0.004	18.400, 0.001	18.400, -0.000	18.400, 0.001	18.400, -0.001	18.400, -0.001	18.400, -0.000	18.400, -0.001	18.400, 0.002	18.400, -0.000	18.400, 0.002	18.400, -0.001
94	18.600, 0.003	18.600, 0.001	18.600, -0.000	18.600, 0.004	18.600, 0.001	18.600, 0.000	18.600, 0.001	18.600, -0.001	18.600, -0.001	18.600, -0.001	18.600, -0.001	18.600, 0.002	18.600, -0.000	18.600, 0.002	18.600, -0.001
95	18.800, 0.002	18.800, 0.001	18.800, -0.000	18.800, 0.004	18.800, 0.001	18.800, 0.000	18.800, 0.000	18.800, -0.001	18.800, -0.001	18.800, -0.000	18.800, -0.001	18.800, 0.002	18.800, -0.000	18.800, 0.002	18.800, -0.001
96	19.000, 0.002	19.000, 0.001	19.000, -0.000	19.000, 0.004	19.000, 0.001	19.000, 0.000	19.000, 0.000	19.000, -0.001	19.000, -0.000	19.000, -0.000	19.000, -0.001	19.000, 0.002	19.000, 0.000	19.000, 0.002	19.000, -0.001
97	19.200, 0.002	19.200, 0.001	19.200, -0.001	19.200, 0.004	19.200, 0.001	19.200, 0.000	19.200, 0.000	19.200, -0.001	19.200, -0.000	19.200, -0.000	19.200, -0.000	19.200, 0.002	19.200, 0.000	19.200, 0.002	19.200, -0.001
98	19.400, 0.002	19.400, 0.001	19.400, -0.001	19.400, 0.004	19.400, 0.001	19.400, 0.000	19.400, -0.000	19.400, -0.001	19.400, -0.000	19.400, 0.000	19.400, -0.000	19.400, 0.002	19.400, 0.001	19.400, 0.001	19.400, -0.001
99	19.600, 0.001	19.600, 0.001	19.600, -0.001	19.600, 0.004	19.600, 0.001	19.600, 0.001	19.600, -0.000	19.600, -0.001	19.600, -0.000	19.600, 0.000	19.600, -0.000	19.600, 0.002	19.600, 0.001	19.600, 0.001	19.600, -0.001
100	19.800, 0.001	19.800, 0.001	19.800, -0.001	19.800, 0.004	19.800, 0.001	19.800, 0.001	19.800, -0.001	19.800, -0.000	19.800, -0.000	19.800, 0.001	19.800, -0.000	19.800, 0.002	19.800, 0.001	19.800, 0.001	19.800, -0.001
101	20.000, 0.001	20.000, 0.001	20.000, -0.001	20.000, 0.004	20.000, 0.001	20.000, 0.001	20.000, -0.001	20.000, -0.000	20.000, 0.000	20.000, 0.001	20.000, -0.000	20.000, 0.002	20.000, 0.001	20.000, 0.001	20.000, -0.001
102	20.200, 0.002	20.200, 0.000	20.200, -0.001	20.200, 0.004	20.200, 0.001	20.200, 0.001	20.200, -0.001	20.200, -0.000	20.200, 0.000	20.200, 0.001	20.200, -0.000	20.200, 0.002	20.200, 0.001	20.200, 0.001	20.200, -0.001
103	20.400, 0.002	20.400, 0.000	20.400, -0.001	20.400, 0.004	20.400, 0.001	20.400, 0.001	20.400, -0.001	20.400, 0.000	20.400, 0.000	20.400, 0.001	20.400, -0.000	20.400, 0.002	20.400, 0.000	20.400, 0.001	20.400, -0.001
104	20.600, 0.002	20.600, 0.000	20.600, -0.001	20.600, 0.003	20.600, 0.001	20.600, 0.001	20.600, -0.002	20.600, 0.000	20.600, 0.000	20.600, 0.001	20.600, -0.000	20.600, 0.002	20.600, 0.000	20.600, 0.001	20.600, -0.001
105	20.800, 0.002	20.800, 0.001	20.800, -0.001	20.800, 0.003	20.800, 0.001	20.800, 0.001	20.800, -0.002	20.800, -0.000	20.800, -0.000	20.800, 0.001	20.800, -0.000	20.800, 0.001	20.800, -0.000	20.800, 0.000	20.800, -0.000
106	21.000, 0.002	21.000, 0.001	21.000, -0.001	21.000, 0.002	21.000, 0.000	21.000, 0.001	21.000, -0.002	21.000, -0.000	21.000, -0.000	21.000, 0.000	21.000, -0.000	21.000, 0.001	21.000, -0.001	21.000, 0.000	21.000, -0.000
107	21.200, 0.002	21.200, 0.001	21.200, -0.001	21.200, 0.002	21.200, 0.000	21.200, 0.000	21.200, -0.002	21.200, -0.000	21.200, -0.000	21.200, -0.000	21.200, -0.000	21.200, 0.001	21.200, -0.001	21.200, 0.000	21.200, 0.000
108	21.400, 0.002	21.400, 0.002	21.400, -0.001	21.400, 0.001	21.400, 0.000	21.400, 0.000	21.400, -0.002	21.400, -0.000	21.400, -0.000	21.400, -0.001	21.400, -0.000	21.400, 0.001	21.400, -0.001	21.400, 0.000	21.400, 0.000
109	21.600, 0.002	21.600, 0.002	21.600, -0.001	21.600, 0.001	21.600, -0.000	21.600, 0.000	21.600, -0.002	21.600, -0.000	21.600, -0.000	21.600, -0.001	21.600, 0.000	21.600, 0.001	21.600, -0.001	21.600, 0.000	21.600, 0.000
110	21.800, 0.002	21.800, 0.002	21.800, -0.002	21.800, 0.001	21.800, -0.000	21.800, -0.000	21.800, -0.002	21.800, -0.001	21.800, -0.000	21.800, -0.001	21.800, 0.000	21.800, 0.001	21.800, -0.001	21.800, 0.000	21.800, 0.000
111	22.000, 0.002	22.000, 0.002	22.000, -0.001	22.000, 0.000	22.000, -0.000	22.000, -0.000	22.000, -0.002	22.000, -0.001	22.000, -0.000	22.000, -0.001	22.000, 0.000	22.000, 0.001	22.000, -0.001	22.000, 0.001	22.000, 0.000
112	22.200, 0.002	22.200, 0.002	22.200, -0.001	22.200, 0.000	22.200, -0.000	22.200, -0.000	22.200, -0.002	22.200, -0.001	22.200, -0.000	22.200, -0.002	22.200, 0.001	22.200, 0.001	22.200, -0.000	22.200, 0.001	22.200, 0.000
113	22.400, 0.001	22.400, 0.002	22.400, -0.001	22.400, 0.000	22.400, -0.000	22.400, 0.000	22.400, -0.001	22.400, -0.002	22.400, -0.000	22.400, -0.002	22.400, 0.001	22.400, 0.001	22.400, -0.000	22.400, 0.001	22.400, 0.000
114	22.600, 0.001	22.600, 0.002	22.600, -0.001	22.600, 0.000	22.600, 0.000	22.600, 0.000	22.600, -0.001	22.600, -0.002	22.600, -0.000	22.600, -0.002	22.600, 0.001	22.600, 0.001	22.600, -0.000	22.600, 0.001	22.600, 0.000
115	22.800, 0.001	22.800, 0.002	22.800, -0.001	22.800, 0.001	22.800, 0.000	22.800, 0.000	22.800, -0.001	22.800, -0.002	22.800, -0.000	22.800, -0.002	22.800, 0.001	22.800, 0.002	22.800, 0.000	22.800, 0.001	22.800, 0.000
116	23.000, 0.001	23.000, 0.001	23.000, -0.001	23.000, 0.001	23.000, 0.000	23.000, 0.000	23.000, -0.001	23.000, -0.002	23.000, -0.000	23.000, -0.002	23.000, 0.001	23.000, 0.002	23.000, 0.000	23.000, 0.001	23.000, 0.000
117	23.200, 0.001	23.200, 0.001	23.200, -0.001	23.200, 0.001	23.200, 0.000	23.200, 0.000	23.200, -0.000	23.200, -0.002	23.200, -0.000	23.200, -0.002	23.200, 0.001	23.200, 0.002	23.200, 0.000	23.200, 0.001	23.200, 0.001
118	23.400, 0.001	23.400, 0.001	23.400, -0.001	23.400, 0.001	23.400, 0.000	23.400, 0.000	23.400, -0.000	23.400, -0.002	23.400, 0.000	23.400, -0.002	23.400, 0.001	23.400, 0.002	23.400, 0.000	23.400, 0.001	23.400, 0.001
119	23.600, 0.002	23.600, 0.001	23.600, -0.001	23.600, 0.002	23.600, 0.000	23.600, 0.000	23.600, -0.000	23.600, -0.002	23.600, 0.000	23.600, -0.001	23.600, 0.001	23.600, 0.002	23.600, 0.000	23.600, 0.000	23.600, 0.001
120	23.800, 0.002	23.800, 0.001	23.800, -0.001	23.800, 0.002	23.800, 0.000	23.800, 0.000	23.800, -0.000	23.800, -0.002	23.800, 0.000	23.800, -0.001	23.800, 0.001	23.800, 0.002	23.800, 0.000	23.800, 0.000	23.800, 0.001
121	24.000, 0.002	24.000, 0.001	24.000, -0.001	24.000, 0.002	24.000, -0.000	24.000, 0.000	24.000, -0.000	24.000, -0.001	24.000, 0.000	24.000, -0.001	24.000, 0.001	24.000, 0.002	24.000, 0.000	24.000, 0.000	24.000, 0.001
122	24.200, 0.002	24.200, 0.001	24.200, -0.001	24.200, 0.002	24.200, -0.000	24.200, -0.000	24.200, -0.000	24.200, -0.001	24.200, 0.000	24.200, -0.001	24.200, 0.001	24.200, 0.002	24.200, -0.000	24.200, 0.000	24.200, 0.001
123	24.400, 0.002	24.400, 0.001	24.400, -0.001	24.400, 0.002	24.400, -0.000	24.400, -0.000	24.400, -0.000	24.400, -0.001	24.400, 0.000	24.400, -0.001	24.400, 0.001	24.400, 0.002	24.400, -0.000	24.400, 0.000	24.400, 0.000
124	24.600, 0.002	24.600, 0.001	24.600, -0.001	24.600, 0.002	24.600, -0.001	24.600, -0.000	24.600, -0.000	24.600, -0.001	24.600, 0.000	24.600, -0.001	24.600, 0.001	24.600, 0.001	24.600, -0.000	24.600, 0.000	24.600, 0.000
125	24.800, 0.002	24.800, 0.001	24.800, -0.001	24.800, 0.002	24.800, -0.001	24.800, -0.001	24.800, -0.000	24.800, -0.001	24.800, 0.000	24.800, -0.000	24.800, 0.000	24.800, 0.001	24.800, -0.001	24.800, 0.000	24.800, -0.000
126	25.000, 0.001	25.000, 0.001	25.000, -0.001	25.000, 0.002	25.000, -0.001	25.000, -0.001	25.000, -0.000	25.000, -0.000	25.000, 0.000	25.000, -0.000	25.000, 0.000	25.000, 0.001	25.000, -0.001	25.000, 0.000	25.000, -0.000
127	25.200, 0.001	25.200, 0.001	25.200, -0.001	25.200, 0.002	25.200, -0.001	25.200, -0.001	25.200, -0.001	25.200, 0.000	25.200, 0.000	25.200, 0.000	25.200, -0.000	25.200, 0.001	25.200, -0.001	25.200, 0.000	25.200, -0.000
128	25.400, 0.001	25.400, 0.001	25.400, -0.001	25.400, 0.002	25.400, -0.001	25.400, -0.001	25.400, -0.000	25.400, 0.000	25.400, 0.001	25.400, 0.000	25.400, -0.000	25.400, 0.001	25.400, -0.000	25.400, 0.001	25.400, -0.000
129	25.600, 0.001	25.600, 0.001	25.600, -0.001	25.600, 0.002	25.600, -0.001	25.600, -0.001	25.600, -0.000	25.600, 0.000	25.600, 0.001	25.600, 0.001	25.600, -0.000	25.600, 0.001	25.600, -0.000	25.600, 0.001	25.600, -0.000
130	25.800, 0.001	25.800, 0.001	25.800, -0.001	25.800, 0.002	25.800, -0.001	25.800, -0.001	25.800, -0.000	25.800, 0.000	25.800, 0.001	25.800, 0.001	25.800, -0.000	25.800, 0.001	25.800, -0.000	25.800, 0.001	25.800, -0.000
131	26.000, 0.000	26.000, 0.001	26.000, -0.001	26.000, 0.002	26.000, -0.001	26.000, -0.001	26.000, -0.000	26.000, -0.000	26.000, 0.001	26.000, 0.001	26.000, 0.000	26.000, 0.001	26.000, 0.000	26.000, 0.001	26.000, -0.000
132	26.200, 0.000	26.200, 0.001	26.200, -0.001	26.200, 0.002	26.200, -0.000	26.200, -0.001	26.200, 0.000	26.200, -0.000	26.200, 0.001	26.200, 0.001	26.200, 0.000	26.200, 0.001	26.200, 0.000	26.200, 0.001	26.200, -0.000
133	26.400, 0.000	26.400, 0.001	26.400, -0.001	26.400, 0.002	26.400, -0.000	26.400, -0.001	26.400, 0.000	26.400, -0.000	26.400, 0.001	26.400, 0.000	26.400, -0.000	26.400, 0.001	26.400, 0.001	26.400, 0.001	26.400, -0.000
134	26.600, -0.000	26.600, 0.000	26.600, -0.001	26.600, 0.002	26.600, -0.000	26.600, -0.001	26.600, 0.000	26.600, -0.000	26.600, 0.001	26.600, 0.000	26.600, -0.000	26.600, 0.001	26.600, 0.001	26.600, 0.001	26.600, 0.000
135	26.800, -0.000	26.800, 0.000	26.800, -0.001	26.800, 0.002	26.800, -0.000	26.800, -0.001	26.800, 0.001	26.800, 0.000	26.800, 0.001	26.800, 0.000	26.800, -0.000	26.800, 0.000	26.800, 0.001	26.800, 0.001	26.800, 0.000
136	27.000, 0.000	27.000, 0.000	27.000, -0.001	27.000, 0.002	27.000, -0.000	27.000, -0.001	27.000, 0.001	27.000, 0.000	27.000, 0.000	27.000, 0.000	27.000, -0.000	27.000, 0.000	27.000, 0.001	27.000, 0.001	27.000, 0.001
137	27.200, 0.000	27.200, 0.000	27.200, -0.001	27.200, 0.002	27.200, -0.000	27.200, -0.001	27.200, 0.000	27.200, 0.000	27.200, 0.000	27.200, -0.000	27.200, -0.000	27.200, 0.000	27.200, 0.001	27.200, 0.001	27.200, 0.001
138	27.400, 0.000	27.400, 0.001	27.400, -0.001	27.400, 0.001	27.400, -0.000	27.400, -0.001	27.400, 0.000	27.400, 0.000	27.400, 0.000	27.400, 0.000	27.400, -0.000	27.400, 0.000	27.400, 0.001	27.400, 0.001	27.400, 0.001
139	27.600, 0.000	27.600, 0.001	27.600, -0.000	27.600, 0.001	27.600, -0.000	27.600, -0.001	27.600, 0.000	27.600, 0.000	27.600, 0.000	27.600, 0.000	27.600, -0.000	27.600, 0.000	27.600, 0.001	27.600, 0.001	27.600, 0.001
140	27.800, 0.000	27.800, 0.000	27.800, -0.000	27.800, 0.000	27.800, -0.000	27.800, -0.001	27.800, 0.000	27.800, 0.000	27.800, 0.000	27.800, -0.000	27.800, -0.000	27.800, -0.000	27.800, 0.001	27.800, 0.001	27.800, 0.001
141	28.000, 0.000	28.000, 0.000	28.000, -0.000	28.000, 0.000	28.000, -0.000	28.000, -0.001	28.000, 0.000	28.000, 0.000	28.000, -0.000	28.000, -0.000	28.000, -0.000	28.000, -0.000	28.000, 0.000	28.000, 0.001	28.000, 0.001
142	28.200, 0.000	28.200, 0.000	28.200, 0.000	28.200, -0.000	28.200, -0.000	28.200, -0.000	28.200, -0.000	28.200, 0.000	28.200, -0.000	28.200, -0.000	28.200, -0.000	28.200, -0.000	28.200, 0.000	28.200, 0.000	28.200, 0.000
143	28.400, 0.000	28.400, 0.000	28.400, 0.000	28.400, -0.001	28.400, -0.000	28.400, -0.000	28.400, -0.000	28.400, 0.000	28.400, -0.000	28.400, -0.000	28.400, -0.000	28.400, -0.000	28.400, 0.000	28.400, 0.000	28.400, 0.000
144	28.600, 0.000	28.600, 0.000	28.600, 0.000	28.600, -0.001	28.600, -0.000	28.600, 0.000	28.600, -0.000	28.600, 0.000	28.600, -0.000	28.600, -0.000	28.600, -0.000	28.600, -0.000	28.600, -0.000	28.600, -0.000	28.600, -0.000
145	28.800, -0.000	28.800, -0.000	28.800, 0.000	28.800, -0.001	28.800, -0.000	28.800, 0.000	28.800, -0.000	28.800, 0.000	28.800, -0.000	28.800, -0.000	28.800, -0.000	28.800, -0.000	28.800, -0.000	28.800, -0.001	28.800, -0.001
146	29.000, -0.000	29.000, -0.000	29.000, 0.000	29.000, -0.001	29.000, 0.000	29.000, 0.001	29.000, -0.000	29.000, -0.000	29.000, -0.000	29.000, 0.000	29.000, -0.000	29.000, 0.000	29.000, -0.001	29.000, -0.001	29.000, -0.001
147	29.200, -0.000	29.200, -0.000	29.200, 0.000	29.200, -0.001	29.200, 0.000	29.200, 0.001	29.200, -0.000	29.200, -0.000	29.200, -0.000	29.200, 0.000	29.200, 0.000	29.200, 0.000	29.200, -0.001	29.200, -0.001	29.200, -0.001
148	29.400, -0.000	29.400, -0.001	29.400, 0.000	29.400, -0.001	29.400, 0.001	29.400, 0.001	29.400, -0.000	29.400, -0.000	29.400, -0.000	29.400, 0.000	29.400, 0.000	29.400, -0.000	29.400, -0.001	29.400, -0.001	29.400, -0.001
149	29.600, -0.001	29.600, -0.001	29.600, 0.000	29.600, -0.001	29.600, 0.001	29.600, 0.001	29.600, -0.000	29.600, -0.001	29.600, -0.000	29.600, 0.000	29.600, 0.001	29.600, -0.000	29.600, -0.001	29.600, -0.001	29.600, -0.001
150	29.800, -0.001	29.800, -0.001	29.800, 0.001	29.800, -0.001	29.800, 0.001	29.800, 0.001	29.800, 0.000	29.800, -0.001	29.800, 0.000	29.800, -0.000	29.800, 0.001	29.800, -0.000	29.800, -0.001	29.800, -0.002	29.800, -0.001
151	30.000, 0.000	30.000, 0.000	30.000, 0.000	30.000, 0.000	30.000, 0.000	30.000, 0.000	30.000, 0.000	30.000, 0.000	30.000, 0.000	30.000, 0.000	30.000, 0.000	30.000, 0.000	30.000, 0.000	30.000, 0.000	30.000, 0.000
152	30.200, 0.044	30.200, 0.032	30.200, 0.028	30.200, 0.033	30.200, 0.025	30.200, 0.019	30.200, 0.027	30.200, 0.033	30.200, 0.025	30.200, 0.020	30.200, 0.015	30.200, 0.019	30.200, 0.017	30.200, 0.020	30.200, 0.016
153	30.400, 0.101	30.400, 0.077	30.400, 0.067	30.400, 0.077	30.400, 0.061	30.400, 0.049	30.400, 0.066	30.400, 0.079	30.400, 0.063	30.400, 0.051	30.400, 0.041	30.400, 0.050	30.400, 0.045	30.400, 0.052	30.400, 0.043
154	30.600, 0.168	30.600, 0.133	30.600, 0.118	30.600, 0.131	30.600, 0.107	30.600, 0.088	30.600, 0.117	30.600, 0.137	30.600, 0.112	30.600, 0.095	30.600, 0.078	30.600, 0.094	30.600, 0.087	30.600, 0.096	30.600, 0.081
155	30.800, 0.244	30.800, 0.199	30.800, 0.179	30.800, 0.194	30.800, 0.162	30.800, 0.137	30.800, 0.180	30.800, 0.206	30.800, 0.171	30.800, 0.149	30.800, 0.128	30.800, 0.149	30.800, 0.141	30.800, 0.153	30.800, 0.131
156	31.000, 0.327	31.000, 0.273	31.000, 0.249	31.000, 0.265	31.000, 0.225	31.000, 0.194	31.000, 0.251	31.000, 0.283	31.000, 0.240	31.000, 0.212	31.000, 0.190	31.000, 0.215	31.000, 0.207	31.000, 0.220	31.000, 0.193
157	31.200, 0.414	31.200, 0.353	31.200, 0.324	31.200, 0.341	31.200, 0.295	31.200, 0.258	31.200, 0.330	31.200, 0.366	31.200, 0.315	31.200, 0.282	31.200, 0.261	31.200, 0.290	31.200, 0.284	31.200, 0.298	31.200, 0.265
158	31.400, 0.503	31.400, 0.437	31.400, 0.404	31.400, 0.421	31.400, 0.370	31.400, 0.328	31.400, 0.413	31.400, 0.453	31.400, 0.394	31.400, 0.358	31.400, 0.339	31.400, 0.371	31.400, 0.369	31.400, 0.383	31.400, 0.345
159	31.600, 0.591	31.600, 0.522	31.600, 0.486	31.600, 0.502	31.600, 0.448	31.600, 0.401	31.600, 0.498	31.600, 0.541	31.600, 0.475	31.600, 0.437	31.600, 0.423	31.600, 0.456	31.600, 0.460	31.600, 0.474	31.600, 0.431
160	31.800, 0.676	31.800, 0.605	31.800, 0.567	31.800, 0.583	31.800, 0.527	31.800, 0.476	31.800, 0.584	31.800, 0.627	31.800, 0.556	31.800, 0.517	31.800, 0.509	31.800, 0.542	31.800, 0.554	31.800, 0.566	31.800, 0.521
161	32.000, 0.755	32.000, 0.685	32.000, 0.644	32.000, 0.660	32.000, 0.603	32.000, 0.551	32.000, 0.666	32.000, 0.709	32.000, 0.634	32.000, 0.595	32.000, 0.595	32.000, 0.626	32.000, 0.649	32.000, 0.658	32.000, 0.611
162	32.200, 0.825	32.200, 0.757	32.200, 0.716	32.200, 0.732	32.200, 0.676	32.200, 0.622	32.200, 0.743	32.200, 0.784	32.200, 0.707	32.200, 0.668	32.200, 0.679	32.200, 0.707	32.200, 0.740	32.200, 0.746	32.200, 0.698
163	32.400, 0.884	32.400, 0.820	32.400, 0.779	32.400, 0.795	32.400, 0.741	32.400, 0.687	32.400, 0.810	32.400, 0.849	32.400, 0.770	32.400, 0.733	32.400, 0.755	32.400, 0.779	32.400, 0.825	32.400, 0.825	32.400, 0.778
164	32.600, 0.931	32.600, 0.872	32.600, 0.832	32.600, 0.850	32.600, 0.798	32.600, 0.744	32.600, 0.867	32.600, 0.901	32.600, 0.823	32.600, 0.786	32.600, 0.822	32.600, 0.840	32.600, 0.900	32.600, 0.894	32.600, 0.850
165	32.800, 0.970	32.800, 0.915	32.800, 0.875	32.800, 0.897	32.800, 0.849	32.800, 0.794	32.800, 0.914	32.800, 0.944	32.800, 0.866	32.800, 0.830	32.800, 0.879	32.800, 0.891	32.800, 0.965	32.800, 0.954	32.800, 0.913
166	33.000, 1.003	33.000, 0.950	33.000, 0.910	33.000, 0.940	33.000, 0.893	33.000, 0.839	33.000, 0.953	33.000, 0.979	33.000, 0.902	33.000, 0.866	33.000, 0.927	33.000, 0.934	33.000, 1.021	33.000, 1.004	33.000, 0.967
167	33.200, 1.028	33.200, 0.976	33.200, 0.936	33.200, 0.975	33.200, 0.931	33.200, 0.875	33.200, 0.981	33.200, 1.004	33.200, 0.928	33.200, 0.893	33.200, 0.964	33.200, 0.965	33.200, 1.065	33.200, 1.043	33.200, 1.010
168	33.400, 1.050	33.400, 0.997	33.400, 0.955	33.400, 1.006	33.400, 0.962	33.400, 0.906	33.400, 1.003	33.400, 1.023	33.400, 0.947	33.400, 0.911	33.400, 0.991	33.400, 0.988	33.400, 1.100	33.400, 1.073	33.400, 1.043
169	33.600, 1.070	33.600, 1.014	33.600, 0.971	33.600, 1.035	33.600, 0.990	33.600, 0.933	33.600, 1.021	33.600, 1.039	33.600, 0.962	33.600, 0.926	33.600, 1.012	33.600, 1.005	33.600, 1.127	33.600, 1.096	33.600, 1.068
170	33.800, 1.090	33.800, 1.031	33.800, 0.985	33.800, 1.062	33.800, 1.016	33.800, 0.957	33.800, 1.036	33.800, 1.054	33.800, 0.975	33.800, 0.938	33.800, 1.028	33.800, 1.018	33.800, 1.148	33.800, 1.113	33.800, 1.087
171	34.000, 1.110	34.000, 1.046	34.000, 0.999	34.000, 1.090	34.000, 1.041	34.000, 0.980	34.000, 1.051	34.000, 1.069	34.000, 0.988	34.000, 0.950	34.000, 1.041	34.000, 1.029	34.000, 1.166	34.000, 1.127	34.000, 1.102
172	34.200, 1.132	34.200, 1.063	34.200, 1.014	34.200, 1.118	34.200, 1.066	34.200, 1.003	34.200, 1.066	34.200, 1.085	34.200, 1.000	34.200, 0.962	34.200, 1.053	34.200, 1.039	34.200, 1.181	34.200, 1.140	34.200, 1.113
173	34.400, 1.152	34.400, 1.079	34.400, 1.030	34.400, 1.145	34.400, 1.091	34.400, 1.026	34.400, 1.083	34.400, 1.101	34.400, 1.014	34.400, 0.975	34.400, 1.065	34.400, 1.050	34.400, 1.196	34.400, 1.152	34.400, 1.124
174	34.600, 1.173	34.600, 1.097	34.600, 1.045	34.600, 1.172	34.600, 1.116	34.600, 1.048	34.600, 1.099	34.600, 1.117	34.600, 1.028	34.600, 0.988	34.600, 1.077	34.600, 1.062	34.600, 1.211	34.600, 1.165	34.600, 1.135
175	34.800, 1.192	34.800, 1.114	34.800, 1.061	34.800, 1.199	34.800, 1.140	34.800, 1.071	34.800, 1.115	34.800, 1.133	34.800, 1.043	34.800, 1.002	34.800, 1.091	34.800, 1.075	34.800, 1.227	34.800, 1.178	34.800, 1.146
176	35.000, 1.211	35.000, 1.131	35.000, 1.076	35.000, 1.225	35.000, 1.164	35.000, 1.093	35.000, 1.132	35.000, 1.149	35.000, 1.056	35.000, 1.015	35.000, 1.104	35.000, 1.087	35.000, 1.243	35.000, 1.191	35.000, 1.157
177	35.200, 1.230	35.200, 1.147	35.200, 1.091	35.200, 1.250	35.200, 1.188	35.200, 1.116	35.200, 1.147	35.200, 1.164	35.200, 1.070	35.200, 1.028	35.200, 1.118	35.200, 1.100	35.200, 1.259	35.200, 1.204	35.200, 1.169
178	35.400, 1.248	35.400, 1.163	35.400, 1.105	35.400, 1.275	35.400, 1.211	35.400, 1.137	35.400, 1.162	35.400, 1.179	35.400, 1.083	35.400, 1.040	35.400, 1.131	35.400, 1.112	35.400, 1.275	35.400, 1.218	35.400, 1.181
179	35.600, 1.266	35.600, 1.179	35.600, 1.119	35.600, 1.299	35.600, 1.234	35.600, 1.159	35.600, 1.177	35.600, 1.194	35.600, 1.096	35.600, 1.053	35.600, 1.145	35.600, 1.124	35.600, 1.290	35.600, 1.231	35.600, 1.193
180	35.800, 1.283	35.800, 1.194	35.800, 1.133	35.800, 1.322	35.800, 1.257	35.800, 1.180	35.800, 1.192	35.800, 1.208	35.800, 1.109	35.800, 1.065	35.800, 1.158	35.800, 1.136	35.800, 1.306	35.800, 1.244	35.800, 1.204
181	36.000, 1.300	36.000, 1.210	36.000, 1.147	36.000, 1.345	36.000, 1.278	36.000, 1.201	36.000, 1.206	36.000, 1.222	36.000, 1.121	36.000, 1.076	36.000, 1.170	36.000, 1.148	36.000, 1.320	36.000, 1.257	36.000, 1.216
182	36.200, 1.317	36.200, 1.224	36.200, 1.160	36.200, 1.368	36.200, 1.300	36.200, 1.221	36.200, 1.220	36.200, 1.236	36.200, 1.134	36.200, 1.088	36.200, 1.183	36.200, 1.160	36.200, 1.335	36.200, 1.270	36.200, 1.228
183	36.400, 1.333	36.400, 1.238	36.400, 1.173	36.400, 1.390	36.400, 1.321	36.400, 1.240	36.400, 1.233	36.400, 1.249	36.400, 1.146	36.400, 1.099	36.400, 1.195	36.400, 1.171	36.400, 1.349	36.400, 1.282	36.400, 1.240
184	36.600, 1.349	36.600, 1.253	36.600, 1.186	36.600, 1.412	36.600, 1.342	36.600, 1.260	36.600, 1.246	36.600, 1.262	36.600, 1.158	36.600, 1.110	36.600, 1.207	36.600, 1.182	36.600, 1.363	36.600, 1.295	36.600, 1.251
185	36.800, 1.365	36.800, 1.266	36.800, 1.198	36.800, 1.433	36.800, 1.362	36.800, 1.278	36.800, 1.259	36.800, 1.274	36.800, 1.170	36.800, 1.120	36.800, 1.219	36.800, 1.193	36.800, 1.376	36.800, 1.307	36.800, 1.262
186	37.000, 1.380	37.000, 1.280	37.000, 1.210	37.000, 1.454	37.000, 1.382	37.000, 1.297	37.000, 1.272	37.000, 1.287	37.000, 1.181	37.000, 1.131	37.000, 1.231	37.000, 1.204	37.000, 1.390	37.000, 1.319	37.000, 1.273
187	37.200, 1.395	37.200, 1.293	37.200, 1.222	37.200, 1.475	37.200, 1.402	37.200, 1.315	37.200, 1.284	37.200, 1.299	37.200, 1.192	37.200, 1.141	37.200, 1.242	37.200, 1.214	37.200, 1.403	37.200, 1.331	37.200, 1.284
188	37.400, 1.409	37.400, 1.306	37.400, 1.234	37.400, 1.495	37.400, 1.421	37.400, 1.333	37.400, 1.297	37.400, 1.311	37.400, 1.203	37.400, 1.150	37.400, 1.253	37.400, 1.225	37.400, 1.416	37.400, 1.343	37.400, 1.295
189	37.600, 1.423	37.600, 1.319	37.600, 1.245	37.600, 1.515	37.600, 1.440	37.600, 1.350	37.600, 1.309	37.600, 1.323	37.600, 1.214	37.600, 1.160	37.600, 1.264	37.600, 1.235	37.600, 1.429	37.600, 1.354	37.600, 1.305
190	37.800, 1.437	37.800, 1.331	37.800, 1.256	37.800, 1.535	37.800, 1.458	37.800, 1.368	37.800, 1.320	37.800, 1.335	37.800, 1.225	37.800, 1.170	37.800, 1.275	37.800, 1.245	37.800, 1.441	37.800, 1.365	37.800, 1.315
191	38.000, 1.450	38.000, 1.343	38.000, 1.267	38.000, 1.555	38.000, 1.477	38.000, 1.385	38.000, 1.332	38.000, 1.347	38.000, 1.235	38.000, 1.179	38.000, 1.285	38.000, 1.255	38.000, 1.454	38.000, 1.376	38.000, 1.324
192	38.200, 1.463	38.200, 1.355	38.200, 1.278	38.200, 1.574	38.200, 1.494	38.200, 1.401	38.200, 1.344	38.200, 1.358	38.200, 1.245	38.200, 1.188	38.200, 1.295	38.200, 1.265	38.200, 1.466	38.200, 1.387	38.200, 1.334
193	38.400, 1.476	38.400, 1.366	38.400, 1.288	38.400, 1.593	38.400, 1.511	38.400, 1.418	38.400, 1.355	38.400, 1.369	38.400, 1.255	38.400, 1.197	38.400, 1.305	38.400, 1.274	38.400, 1.478	38.400, 1.397	38.400, 1.343
194	38.600, 1.488	38.600, 1.378	38.600, 1.299	38.600, 1.612	38.600, 1.528	38.600, 1.434	38.600, 1.366	38.600, 1.380	38.600, 1.265	38.600, 1.206	38.600, 1.315	38.600, 1.284	38.600, 1.490	38.600, 1.408	38.600, 1.352
195	38.800, 1.500	38.800, 1.389	38.800, 1.309	38.800, 1.630	38.800, 1.545	38.800, 1.450	38.800, 1.377	38.800, 1.390	38.800, 1.274	38.800, 1.214	38.800, 1.324	38.800, 1.293	38.800, 1.502	38.800, 1.418	38.800, 1.361
196	39.000, 1.512	39.000, 1.399	39.000, 1.319	39.000, 1.647	39.000, 1.562	39.000, 1.466	39.000, 1.388	39.000, 1.400	39.000, 1.283	39.000, 1.223	39.000, 1.334	39.000, 1.302	39.000, 1.514	39.000, 1.427	39.000, 1.370
197	39.200, 1.523	39.200, 1.410	39.200, 1.328	39.200, 1.664	39.200, 1.578	39.200, 1.481	39.200, 1.399	39.200, 1.410	39.200, 1.292	39.200, 1.231	39.200, 1.343	39.200, 1.311	39.200, 1.525	39.200, 1.437	39.200, 1.378
198	39.400, 1.534	39.400, 1.420	39.400, 1.338	39.400, 1.681	39.400, 1.594	39.400, 1.496	39.400, 1.409	39.400, 1.420	39.400, 1.301	39.400, 1.239	39.400, 1.353	39.400, 1.320	39.400, 1.537	39.400, 1.447	39.400, 1.387
199	39.600, 1.545	39.600, 1.430	39.600, 1.347	39.600, 1.698	39.600, 1.610	39.600, 1.511	39.600, 1.419	39.600, 1.429	39.600, 1.310	39.600, 1.247	39.600, 1.362	39.600, 1.328	39.600, 1.548	39.600, 1.456	39.600, 1.396
200	39.800, 1.556	39.800, 1.440	39.800, 1.356	39.800, 1.715	39.800, 1.625	39.800, 1.525	39.800, 1.428	39.800, 1.438	39.800, 1.319	39.800, 1.254	39.800, 1.371	39.800, 1.337	39.800, 1.559	39.800, 1.465	39.800, 1.404
201	40.000, 1.567	40.000, 1.450	40.000, 1.364	40.000, 1.731	40.000, 1.641	40.000, 1.540	40.000, 1.438	40.000, 1.447	40.000, 1.327	40.000, 1.261	40.000, 1.380	40.000, 1.345	40.000, 1.569	40.000, 1.475	40.000, 1.413
202	40.200, 1.577	40.200, 1.460	40.200, 1.373	40.200, 1.747	40.200, 1.656	40.200, 1.553	40.200, 1.447	40.200, 1.456	40.200, 1.335	40.200, 1.268	40.200, 1.389	40.200, 1.353	40.200, 1.580	40.200, 1.484	40.200, 1.421
203	40.400, 1.587	40.400, 1.469	40.400, 1.381	40.400, 1.762	40.400, 1.671	40.400, 1.567	40.400, 1.456	40.400, 1.465	40.400, 1.344	40.400, 1.275	40.400, 1.397	40.400, 1.361	40.400, 1.590	40.400, 1.493	40.400, 1.429
204	40.600, 1.597	40.600, 1.479	40.600, 1.390	40.600, 1.778	40.600, 1.685	40.600, 1.581	40.600, 1.465	40.600, 1.473	40.600, 1.352	40.600, 1.282	40.600, 1.406	40.600, 1.368	40.600, 1.600	40.600, 1.501	40.600, 1.437
205	40.800, 1.607	40.800, 1.488	40.800, 1.398	40.800, 1.792	40.800, 1.700	40.800, 1.594	40.800, 1.474	40.800, 1.482	40.800, 1.360	40.800, 1.288	40.800, 1.414	40.800, 1.376	40.800, 1.609	40.800, 1.510	40.800, 1.445
206	41.000, 1.616	41.000, 1.496	41.000, 1.406	41.000, 1.807	41.000, 1.714	41.000, 1.607	41.000, 1.482	41.000, 1.490	41.000, 1.367	41.000, 1.294	41.000, 1.422	41.000, 1.383	41.000, 1.619	41.000, 1.518	41.000, 1.453
207	41.200, 1.626	41.200, 1.504	41.200, 1.414	41.200, 1.822	41.200, 1.728	41.200, 1.620	41.200, 1.490	41.200, 1.498	41.200, 1.375	41.200, 1.300	41.200, 1.430	41.200, 1.390	41.200, 1.628	41.200, 1.527	41.200, 1.461
208	41.400, 1.635	41.400, 1.512	41.400, 1.421	41.400, 1.836	41.400, 1.741	41.400, 1.633	41.400, 1.499	41.400, 1.506	41.400, 1.382	41.400, 1.306	41.400, 1.437	41.400, 1.397	41.400, 1.637	41.400, 1.535	41.400, 1.468
209	41.600, 1.644	41.600, 1.520	41.600, 1.429	41.600, 1.850	41.600, 1.755	41.600, 1.646	41.600, 1.507	41.600, 1.514	41.600, 1.389	41.600, 1.312	41.600, 1.445	41.600, 1.404	41.600, 1.646	41.600, 1.543	41.600, 1.476
210	41.800, 1.652	41.800, 1.528	41.800, 1.436	41.800, 1.864	41.800, 1.769	41.800, 1.659	41.800, 1.515	41.800, 1.522	41.800, 1.396	41.800, 1.318	41.800, 1.452	41.800, 1.411	41.800, 1.654	41.800, 1.551	41.800, 1.483
211	42.000, 1.661	42.000, 1.536	42.000, 1.443	42.000, 1.878	42.000, 1.782	42.000, 1.671	42.000, 1.523	42.000, 1.530	42.000, 1.403	42.000, 1.323	42.000, 1.459	42.000, 1.417	42.000, 1.662	42.000, 1.559	42.000, 1.490
212	42.200, 1.669	42.200, 1.544	42.200, 1.450	42.200, 1.891	42.200, 1.795	42.200, 1.683	42.200, 1.531	42.200, 1.537	42.200, 1.410	42.200, 1.328	42.200, 1.467	42.200, 1.424	42.200, 1.670	42.200, 1.566	42.200, 1.497
213	42.400, 1.677	42.400, 1.551	42.400, 1.456	42.400, 1.905	42.400, 1.808	42.400, 1.696	42.400, 1.538	42.400, 1.544	42.400, 1.417	42.400, 1.334	42.400, 1.474	42.400, 1.430	42.400, 1.678	42.400, 1.574	42.400, 1.505
214	42.600, 1.685	42.600, 1.558	42.600, 1.463	42.600, 1.918	42.600, 1.821	42.600, 1.708	42.600, 1.545	42.600, 1.551	42.600, 1.424	42.600, 1.339	42.600, 1.481	42.600, 1.437	42.600, 1.687	42.600, 1.581	42.600, 1.512
215	42.800, 1.693	42.800, 1.565	42.800, 1.469	42.800, 1.930	42.800, 1.834	42.800, 1.720	42.800, 1.552	42.800, 1.557	42.800, 1.430	42.800, 1.344	42.800, 1.488	42.800, 1.443	42.800, 1.695	42.800, 1.589	42.800, 1.518
216	43.000, 1.700	43.000, 1.572	43.000, 1.475	43.000, 1.943	43.000, 1.847	43.000, 1.732	43.000, 1.559	43.000, 1.564	43.000, 1.436	43.000, 1.349	43.000, 1.494	43.000, 1.449	43.000, 1.703	43.000, 1.596	43.000, 1.525
217	43.200, 1.708	43.200, 1.579	43.200, 1.480	43.200, 1.956	43.200, 1.859	43.200, 1.743	43.200, 1.565	43.200, 1.570	43.200, 1.443	43.200, 1.354	43.200, 1.501	43.200, 1.455	43.200, 1.711	43.200, 1.603	43.200, 1.532
218	43.400, 1.715	43.400, 1.586	43.400, 1.486	43.400, 1.968	43.400, 1.871	43.400, 1.755	43.400, 1.572	43.400, 1.576	43.400, 1.449	43.400, 1.358	43.400, 1.507	43.400, 1.460	43.400, 1.719	43.400, 1.609	43.400, 1.538
219	43.600, 1.722	43.600, 1.592	43.600, 1.491	43.600, 1.981	43.600, 1.883	43.600, 1.766	43.600, 1.578	43.600, 1.582	43.600, 1.455	43.600, 1.363	43.600, 1.514	43.600, 1.466	43.600, 1.726	43.600, 1.616	43.600, 1.544
220	43.800, 1.729	43.800, 1.599	43.800, 1.497	43.800, 1.993	43.800, 1.895	43.800, 1.778	43.800, 1.584	43.800, 1.588	43.800, 1.461	43.800, 1.367	43.800, 1.520	43.800, 1.472	43.800, 1.734	43.800, 1.623	43.800, 1.550
221	44.000, 1.736	44.000, 1.605	44.000, 1.502	44.000, 2.006	44.000, 1.907	44.000, 1.789	44.000, 1.590	44.000, 1.594	44.000, 1.467	44.000, 1.371	44.000, 1.526	44.000, 1.477	44.000, 1.741	44.000, 1.629	44.000, 1.556
222	44.200, 1.743	44.200, 1.612	44.200, 1.507	44.200, 2.018	44.200, 1.919	44.200, 1.800	44.200, 1.595	44.200, 1.599	44.200, 1.472	44.200, 1.375	44.200, 1.532	44.200, 1.482	44.200, 1.749	44.200, 1.636	44.200, 1.562
223	44.400, 1.749	44.400, 1.618	44.400, 1.512	44.400, 2.030	44.400, 1.931	44.400, 1.811	44.400, 1.601	44.400, 1.605	44.400, 1.477	44.400, 1.380	44.400, 1.537	44.400, 1.487	44.400, 1.756	44.400, 1.642	44.400, 1.568
224	44.600, 1.756	44.600, 1.624	44.600, 1.518	44.600, 2.041	44.600, 1.942	44.600, 1.822	44.600, 1.607	44.600, 1.611	44.600, 1.483	44.600, 1.383	44.600, 1.542	44.600, 1.492	44.600, 1.763	44.600, 1.648	44.600, 1.574
225	44.800, 1.762	44.800, 1.630	44.800, 1.523	44.800, 2.053	44.800, 1.953	44.800, 1.833	44.800, 1.613	44.800, 1.616	44.800, 1.488	44.800, 1.387	44.800, 1.548	44.800, 1.496	44.800, 1.770	44.800, 1.654	44.800, 1.579
226	45.000, 1.768	45.000, 1.635	45.000, 1.528	45.000, 2.064	45.000, 1.964	45.000, 1.843	45.000, 1.619	45.000, 1.622	45.000, 1.493	45.000, 1.391	45.000, 1.553	45.000, 1.501	45.000, 1.776	45.000, 1.660	45.000, 1.585
227	45.200, 1.774	45.200, 1.641	45.200, 1.533	45.200, 2.075	45.200, 1.975	45.200, 1.853	45.200, 1.625	45.200, 1.627	45.200, 1.497	45.200, 1.395	45.200, 1.558	45.200, 1.506	45.200, 1.783	45.200, 1.666	45.200, 1.590
228	45.400, 1.780	45.400, 1.646	45.400, 1.538	45.400, 2.086	45.400, 1.986	45.400, 1.863	45.400, 1.631	45.400, 1.632	45.400, 1.502	45.400, 1.399	45.400, 1.563	45.400, 1.511	45.400, 1.788	45.400, 1.672	45.400, 1.596
229	45.600, 1.786	45.600, 1.652	45.600, 1.543	45.600, 2.097	45.600, 1.997	45.600, 1.873	45.600, 1.636	45.600, 1.637	45.600, 1.507	45.600, 1.402	45.600, 1.567	45.600, 1.515	45.600, 1.794	45.600, 1.677	45.600, 1.601
230	45.800, 1.791	45.800, 1.657	45.800, 1.548	45.800, 2.108	45.800, 2.008	45.800, 1.883	45.800, 1.642	45.800, 1.642	45.800, 1.512	45.800, 1.406	45.800, 1.572	45.800, 1.520	45.800, 1.800	45.800, 1.683	45.800, 1.607
231	46.000, 1.797	46.000, 1.663	46.000, 1.552	46.000, 2.119	46.000, 2.019	46.000, 1.893	46.000, 1.647	46.000, 1.647	46.000, 1.516	46.000, 1.409	46.000, 1.576	46.000, 1.525	46.000, 1.805	46.000, 1.689	46.000, 1.612
232	46.200, 1.802	46.200, 1.668	46.200, 1.557	46.200, 2.130	46.200, 2.029	46.200, 1.902	46.200, 1.653	46.200, 1.652	46.200, 1.521	46.200, 1.412	46.200, 1.581	46.200, 1.529	46.200, 1.811	46.200, 1.694	46.200, 1.617
233	46.400, 1.808	46.400, 1.673	46.400, 1.561	46.400, 2.140	46.400, 2.040	46.400, 1.912	46.400, 1.658	46.400, 1.657	46.400, 1.525	46.400, 1.415	46.400, 1.585	46.400, 1.534	46.400, 1.816	46.400, 1.700	46.400, 1.622
234	46.600, 1.813	46.600, 1.678	46.600, 1.566	46.600, 2.151	46.600, 2.050	46.600, 1.922	46.600, 1.663	46.600, 1.662	46.600, 1.529	46.600, 1.419	46.600, 1.589	46.600, 1.538	46.600, 1.821	46.600, 1.705	46.600, 1.627
235	46.800, 1.818	46.800, 1.682	46.800, 1.570	46.800, 2.161	46.800, 2.059	46.800, 1.931	46.800, 1.668	46.800, 1.667	46.800, 1.534	46.800, 1.422	46.800, 1.594	46.800, 1.543	46.800, 1.826	46.800, 1.710	46.800, 1.632
236	47.000, 1.823	47.000, 1.686	47.000, 1.574	47.000, 2.172	47.000, 2.069	47.000, 1.941	47.000, 1.673	47.000, 1.671	47.000, 1.538	47.000, 1.425	47.000, 1.598	47.000, 1.547	47.000, 1.831	47.000, 1.715	47.000, 1.636
237	47.200, 1.827	47.200, 1.691	47.200, 1.578	47.200, 2.182	47.200, 2.079	47.200, 1.950	47.200, 1.678	47.200, 1.676	47.200, 1.542	47.200, 1.428	47.200, 1.602	47.200, 1.551	47.200, 1.837	47.200, 1.720	47.200, 1.640
238	47.400, 1.832	47.400, 1.695	47.400, 1.582	47.400, 2.192	47.400, 2.088	47.400, 1.960	47.400, 1.683	47.400, 1.680	47.400, 1.546	47.400, 1.431	47.400, 1.606	47.400, 1.555	47.400, 1.842	47.400, 1.724	47.400, 1.645
239	47.600, 1.836	47.600, 1.699	47.600, 1.586	47.600, 2.203	47.600, 2.097	47.600, 1.969	47.600, 1.687	47.600, 1.684	47.600, 1.550	47.600, 1.434	47.600, 1.610	47.600, 1.559	47.600, 1.847	47.600, 1.729	47.600, 1.649
240	47.800, 1.841	47.800, 1.703	47.800, 1.590	47.800, 2.213	47.800, 2.106	47.800, 1.979	47.800, 1.691	47.800, 1.688	47.800, 1.554	47.800, 1.436	47.800, 1.614	47.800, 1.563	47.800, 1.852	47.800, 1.733	47.800, 1.653
241	48.000, 1.845	48.000, 1.708	48.000, 1.593	48.000, 2.222	48.000, 2.115	48.000, 1.988	48.000, 1.696	48.000, 1.692	48.000, 1.558	48.000, 1.439	48.000, 1.618	48.000, 1.566	48.000, 1.857	48.000, 1.737	48.000, 1.657
242	48.200, 1.850	48.200, 1.712	48.200, 1.597	48.200, 2.232	48.200, 2.125	48.200, 1.997	48.200, 1.700	48.200, 1.695	48.200, 1.562	48.200, 1.441	48.200, 1.622	48.200, 1.570	48.200, 1.862	48.200, 1.742	48.200, 1.661
243	48.400, 1.854	48.400, 1.716	48.400, 1.601	48.400, 2.242	48.400, 2.134	48.400, 2.006	48.400, 1.704	48.400, 1.699	48.400, 1.566	48.400, 1.443	48.400, 1.626	48.400, 1.573	48.400, 1.867	48.400, 1.746	48.400, 1.665
244	48.600, 1.859	48.600, 1.720	48.600, 1.604	48.600, 2.251	48.600, 2.143	48.600, 2.015	48.600, 1.709	48.600, 1.702	48.600, 1.569	48.600, 1.446	48.600, 1.630	48.600, 1.576	48.600, 1.872	48.600, 1.750	48.600, 1.668
245	48.800, 1.863	48.800, 1.725	48.800, 1.607	48.800, 2.261	48.800, 2.152	48.800, 2.023	48.800, 1.713	48.800, 1.705	48.800, 1.572	48.800, 1.448	48.800, 1.634	48.800, 1.580	48.800, 1.877	48.800, 1.754	48.800, 1.672
246	49.000, 1.867	49.000, 1.729	49.000, 1.611	49.000, 2.270	49.000, 2.161	49.000, 2.032	49.000, 1.717	49.000, 1.708	49.000, 1.575	49.000, 1.450	49.000, 1.638	49.000, 1.583	49.000, 1.881	49.000, 1.758	49.000, 1.676
247	49.200, 1.872	49.200, 1.732	49.200, 1.614	49.200, 2.280	49.200, 2.170	49.200, 2.041	49.200, 1.721	49.200, 1.711	49.200, 1.578	49.200, 1.452	49.200, 1.642	49.200, 1.586	49.200, 1.886	49.200, 1.763	49.200, 1.679
248	49.400, 1.876	49.400, 1.736	49.400, 1.618	49.400, 2.289	49.400, 2.179	49.400, 2.049	49.400, 1.725	49.400, 1.714	49.400, 1.582	49.400, 1.455	49.400, 1.645	49.400, 1.590	49.400, 1.890	49.400, 1.767	49.400, 1.683
249	49.600, 1.880	49.600, 1.740	49.600, 1.621	49.600, 2.299	49.600, 2.189	49.600, 2.057	49.600, 1.729	49.600, 1.717	49.600, 1.585	49.600, 1.457	49.600, 1.649	49.600, 1.593	49.600, 1.894	49.600, 1.771	49.600, 1.686
250	49.800, 1.884	49.800, 1.743	49.800, 1.625	49.800, 2.308	49.800, 2.198	49.800, 2.066	49.800, 1.732	49.800, 1.720	49.800, 1.588	49.800, 1.459	49.800, 1.652	49.800, 1.596	49.800, 1.898	49.800, 1.775	49.800, 1.690
251	50.000, 1.888	50.000, 1.747	50.000, 1.628	50.000, 2.318	50.000, 2.207	50.000, 2.074	50.000, 1.736	50.000, 1.724	50.000, 1.591	50.000, 1.462	50.000, 1.656	50.000, 1.599	50.000, 1.902	50.000, 1.779	50.000, 1.693
252	50.200, 1.892	50.200, 1.750	50.200, 1.631	50.200, 2.327	50.200, 2.216	50.200, 2.082	50.200, 1.740	50.200, 1.727	50.200, 1.594	50.200, 1.464	50.200, 1.659	50.200, 1.602	50.200, 1.906	50.200, 1.783	50.200, 1.697
253	50.400, 1.896	50.400, 1.754	50.400, 1.634	50.400, 2.337	50.400, 2.225	50.400, 2.090	50.400, 1.743	50.400, 1.730	50.400, 1.597	50.400, 1.466	50.400, 1.662	50.400, 1.605	50.400, 1.910	50.400, 1.786	50.400, 1.700
254	50.600, 1.900	50.600, 1.757	50.600, 1.637	50.600, 2.346	50.600, 2.234	50.600, 2.098	50.600, 1.747	50.600, 1.733	50.600, 1.600	50.600, 1.468	50.600, 1.666	50.600, 1.608	50.600, 1.914	50.600, 1.790	50.600, 1.703
255	50.800, 1.903	50.800, 1.760	50.800, 1.640	50.800, 2.355	50.800, 2.243	50.800, 2.106	50.800, 1.750	50.800, 1.736	50.800, 1.603	50.800, 1.471	50.800, 1.668	50.800, 1.610	50.800, 1.918	50.800, 1.793	50.800, 1.707
256	51.000, 1.907	51.000, 1.764	51.000, 1.643	51.000, 2.364	51.000, 2.252	51.000, 2.114	51.000, 1.753	51.000, 1.739	51.000, 1.605	51.000, 1.472	51.000, 1.671	51.000, 1.613	51.000, 1.922	51.000, 1.797	51.000, 1.710
257	51.200, 1.911	51.200, 1.767	51.200, 1.647	51.200, 2.372	51.200, 2.260	51.200, 2.122	51.200, 1.756	51.200, 1.743	51.200, 1.608	51.200, 1.474	51.200, 1.674	51.200, 1.616	51.200, 1.926	51.200, 1.800	51.200, 1.713
258	51.400, 1.914	51.400, 1.770	51.400, 1.650	51.400, 2.381	51.400, 2.269	51.400, 2.130	51.400, 1.760	51.400, 1.746	51.400, 1.611	51.400, 1.476	51.400, 1.676	51.400, 1.619	51.400, 1.929	51.400, 1.803	51.400, 1.716
259	51.600, 1.918	51.600, 1.773	51.600, 1.653	51.600, 2.390	51.600, 2.278	51.600, 2.138	51.600, 1.763	51.600, 1.749	51.600, 1.614	51.600, 1.477	51.600, 1.679	51.600, 1.622	51.600, 1.933	51.600, 1.806	51.600, 1.720
260	51.800, 1.921	51.800, 1.776	51.800, 1.656	51.800, 2.398	51.800, 2.286	51.800, 2.146	51.800, 1.766	51.800, 1.752	51.800, 1.617	51.800, 1.478	51.800, 1.682	51.800, 1.625	51.800, 1.936	51.800, 1.809	51.800, 1.723
261	52.000, 1.924	52.000, 1.779	52.000, 1.659	52.000, 2.406	52.000, 2.294	52.000, 2.154	52.000, 1.768	52.000, 1.755	52.000, 1.620	52.000, 1.480	52.000, 1.684	52.000, 1.628	52.000, 1.939	52.000, 1.812	52.000, 1.726
262	52.200, 1.927	52.200, 1.782	52.200, 1.661	52.200, 2.414	52.200, 2.302	52.200, 2.162	52.200, 1.771	52.200, 1.758	52.200, 1.623	52.200, 1.481	52.200, 1.687	52.200, 1.631	52.200, 1.942	52.200, 1.815	52.200, 1.729
263	52.400, 1.931	52.400, 1.785	52.400, 1.664	52.400, 2.423	52.400, 2.310	52.400, 2.170	52.400, 1.774	52.400, 1.760	52.400, 1.625	52.400, 1.482	52.400, 1.690	52.400, 1.634	52.400, 1.945	52.400, 1.818	52.400, 1.732
264	52.600, 1.934	52.600, 1.788	52.600, 1.667	52.600, 2.431	52.600, 2.318	52.600, 2.177	52.600, 1.777	52.600, 1.763	52.600, 1.628	52.600, 1.484	52.600, 1.693	52.600, 1.637	52.600, 1.948	52.600, 1.821	52.600, 1.735
265	52.800, 1.937	52.800, 1.791	52.800, 1.670	52.800, 2.439	52.800, 2.326	52.800, 2.185	52.800, 1.780	52.800, 1.766	52.800, 1.630	52.800, 1.485	52.800, 1.696	52.800, 1.640	52.800, 1.951	52.800, 1.824	52.800, 1.738
266	53.000, 1.940	53.000, 1.794	53.000, 1.672	53.000, 2.447	53.000, 2.334	53.000, 2.192	53.000, 1.783	53.000, 1.769	53.000, 1.633	53.000, 1.486	53.000, 1.699	53.000, 1.643	53.000, 1.954	53.000, 1.828	53.000, 1.741
267	53.200, 1.944	53.200, 1.796	53.200, 1.675	53.200, 2.456	53.200, 2.342	53.200, 2.200	53.200, 1.786	53.200, 1.771	53.200, 1.635	53.200, 1.487	53.200, 1.702	53.200, 1.645	53.200, 1.957	53.200, 1.831	53.200, 1.744
268	53.400, 1.947	53.400, 1.798	53.400, 1.678	53.400, 2.464	53.400, 2.349	53.400, 2.207	53.400, 1.789	53.400, 1.774	53.400, 1.638	53.400, 1.489	53.400, 1.705	53.400, 1.648	53.400, 1.960	53.400, 1.834	53.400, 1.747
269	53.600, 1.950	53.600, 1.801	53.600, 1.680	53.600, 2.472	53.600, 2.357	53.600, 2.214	53.600, 1.791	53.600, 1.777	53.600, 1.640	53.600, 1.491	53.600, 1.708	53.600, 1.650	53.600, 1.963	53.600, 1.837	53.600, 1.750
270	53.800, 1.953	53.800, 1.803	53.800, 1.682	53.800, 2.480	53.800, 2.364	53.800, 2.222	53.800, 1.794	53.800, 1.779	53.800, 1.643	53.800, 1.493	53.800, 1.711	53.800, 1.652	53.800, 1.966	53.800, 1.840	53.800, 1.753
271	54.000, 1.955	54.000, 1.806	54.000, 1.685	54.000, 2.488	54.000, 2.372	54.000, 2.229	54.000, 1.796	54.000, 1.782	54.000, 1.645	54.000, 1.494	54.000, 1.714	54.000, 1.654	54.000, 1.968	54.000, 1.842	54.000, 1.756
272	54.200, 1.958	54.200, 1.809	54.200, 1.687	54.200, 2.496	54.200, 2.380	54.200, 2.236	54.200, 1.799	54.200, 1.784	54.200, 1.647	54.200, 1.496	54.200, 1.717	54.200, 1.656	54.200, 1.971	54.200, 1.845	54.200, 1.758
273	54.400, 1.961	54.400, 1.811	54.400, 1.690	54.400, 2.504	54.400, 2.387	54.400, 2.242	54.400, 1.802	54.400, 1.786	54.400, 1.650	54.400, 1.498	54.400, 1.720	54.400, 1.658	54.400, 1.974	54.400, 1.848	54.400, 1.761
274	54.600, 1.963	54.600, 1.814	54.600, 1.692	54.600, 2.512	54.600, 2.395	54.600, 2.249	54.600, 1.804	54.600, 1.788	54.600, 1.652	54.600, 1.499	54.600, 1.723	54.600, 1.660	54.600, 1.977	54.600, 1.851	54.600, 1.763
275	54.800, 1.966	54.800, 1.816	54.800, 1.695	54.800, 2.519	54.800, 2.402	54.800, 2.256	54.800, 1.807	54.800, 1.790	54.800, 1.654	54.800, 1.501	54.800, 1.725	54.800, 1.662	54.800, 1.981	54.800, 1.854	54.800, 1.766
276	55.000, 1.969	55.000, 1.819	55.000, 1.698	55.000, 2.527	55.000, 2.410	55.000, 2.263	55.000, 1.810	55.000, 1.792	55.000, 1.656	55.000, 1.502	55.000, 1.728	55.000, 1.664	55.000, 1.984	55.000, 1.857	55.000, 1.768
277	55.200, 1.972	55.200, 1.821	55.200, 1.700	55.200, 2.535	55.200, 2.417	55.200, 2.270	55.200, 1.812	55.200, 1.794	55.200, 1.658	55.200, 1.504	55.200, 1.731	55.200, 1.666	55.200, 1.987	55.200, 1.859	55.200, 1.771
278	55.400, 1.974	55.400, 1.824	55.400, 1.703	55.400, 2.543	55.400, 2.425	55.400, 2.277	55.400, 1.815	55.400, 1.796	55.400, 1.661	55.400, 1.505	55.400, 1.734	55.400, 1.668	55.400, 1.990	55.400, 1.862	55.400, 1.773
279	55.600, 1.977	55.600, 1.826	55.600, 1.705	55.600, 2.551	55.600, 2.433	55.600, 2.284	55.600, 1.817	55.600, 1.798	55.600, 1.663	55.600, 1.507	55.600, 1.736	55.600, 1.670	55.600, 1.993	55.600, 1.865	55.600, 1.776
280	55.800, 1.979	55.800, 1.829	55.800, 1.707	55.800, 2.559	55.800, 2.440	55.800, 2.291	55.800, 1.820	55.800, 1.800	55.800, 1.665	55.800, 1.508	55.800, 1.739	55.800, 1.673	55.800, 1.996	55.800, 1.867	55.800, 1.778
281	56.000, 1.982	56.000, 1.831	56.000, 1.709	56.000, 2.566	56.000, 2.447	56.000, 2.298	56.000, 1.822	56.000, 1.802	56.000, 1.668	56.000, 1.510	56.000, 1.741	56.000, 1.675	56.000, 1.999	56.000, 1.870	56.000, 1.781
282	56.200, 1.985	56.200, 1.833	56.200, 1.712	56.200, 2.574	56.200, 2.455	56.200, 2.305	56.200, 1.825	56.200, 1.804	56.200, 1.670	56.200, 1.511	56.200, 1.743	56.200, 1.677	56.200, 2.002	56.200, 1.873	56.200, 1.783
283	56.400, 1.987	56.400, 1.836	56.400, 1.714	56.400, 2.582	56.400, 2.462	56.400, 2.312	56.400, 1.827	56.400, 1.806	56.400, 1.672	56.400, 1.512	56.400, 1.746	56.400, 1.679	56.400, 2.004	56.400, 1.875	56.400, 1.785
284	56.600, 1.990	56.600, 1.838	56.600, 1.716	56.600, 2.589	56.600, 2.469	56.600, 2.318	56.600, 1.830	56.600, 1.808	56.600, 1.674	56.600, 1.513	56.600, 1.748	56.600, 1.681	56.600, 2.006	56.600, 1.878	56.600, 1.787
285	56.800, 1.993	56.800, 1.840	56.800, 1.718	56.800, 2.597	56.800, 2.476	56.800, 2.325	56.800, 1.832	56.800, 1.810	56.800, 1.676	56.800, 1.514	56.800, 1.749	56.800, 1.683	56.800, 2.008	56.800, 1.880	56.800, 1.789
286	57.000, 1.996	57.000, 1.843	57.000, 1.720	57.000, 2.605	57.000, 2.483	57.000, 2.332	57.000, 1.835	57.000, 1.812	57.000, 1.678	57.000, 1.515	57.000, 1.751	57.000, 1.685	57.000, 2.010	57.000, 1.883	57.000, 1.791
287	57.200, 1.998	57.200, 1.845	57.200, 1.722	57.200, 2.612	57.200, 2.490	57.200, 2.339	57.200, 1.837	57.200, 1.815	57.200, 1.680	57.200, 1.516	57.200, 1.754	57.200, 1.687	57.200, 2.012	57.200, 1.885	57.200, 1.794
288	57.400, 2.001	57.400, 1.847	57.400, 1.723	57.400, 2.619	57.400, 2.497	57.400, 2.345	57.400, 1.839	57.400, 1.816	57.400, 1.682	57.400, 1.517	57.400, 1.756	57.400, 1.689	57.400, 2.014	57.400, 1.887	57.400, 1.796
289	57.600, 2.004	57.600, 1.850	57.600, 1.725	57.600, 2.626	57.600, 2.503	57.600, 2.352	57.600, 1.841	57.600, 1.818	57.600, 1.684	57.600, 1.518	57.600, 1.758	57.600, 1.690	57.600, 2.016	57.600, 1.889	57.600, 1.798
290	57.800, 2.006	57.800, 1.852	57.800, 1.727	57.800, 2.633	57.800, 2.510	57.800, 2.359	57.800, 1.843	57.800, 1.820	57.800, 1.686	57.800, 1.519	57.800, 1.760	57.800, 1.692	57.800, 2.018	57.800, 1.891	57.800, 1.800
291	58.000, 2.009	58.000, 1.854	58.000, 1.729	58.000, 2.640	58.000, 2.517	58.000, 2.366	58.000, 1.845	58.000, 1.822	58.000, 1.687	58.000, 1.520	58.000, 1.762	58.000, 1.694	58.000, 2.020	58.000, 1.893	58.000, 1.802
292	58.200, 2.011	58.200, 1.856	58.200, 1.731	58.200, 2.646	58.200, 2.524	58.200, 2.372	58.200, 1.847	58.200, 1.823	58.200, 1.689	58.200, 1.521	58.200, 1.764	58.200, 1.696	58.200, 2.023	58.200, 1.896	58.200, 1.804
293	58.400, 2.013	58.400, 1.858	58.400, 1.733	58.400, 2.653	58.400, 2.530	58.400, 2.379	58.400, 1.849	58.400, 1.825	58.400, 1.690	58.400, 1.522	58.400, 1.766	58.400, 1.698	58.400, 2.025	58.400, 1.898	58.400, 1.806
294	58.600, 2.016	58.600, 1.860	58.600, 1.736	58.600, 2.660	58.600, 2.537	58.600, 2.385	58.600, 1.851	58.600, 1.827	58.600, 1.692	58.600, 1.523	58.600, 1.769	58.600, 1.700	58.600, 2.027	58.600, 1.900	58.600, 1.808
295	58.800, 2.018	58.800, 1.862	58.800, 1.738	58.800, 2.667	58.800, 2.544	58.800, 2.391	58.800, 1.854	58.800, 1.829	58.800, 1.693	58.800, 1.524	58.800, 1.771	58.800, 1.701	58.800, 2.030	58.800, 1.902	58.800, 1.811
296	59.000, 2.020	59.000, 1.864	59.000, 1.740	59.000, 2.674	59.000, 2.551	59.000, 2.397	59.000, 1.856	59.000, 1.831	59.000, 1.694	59.000, 1.526	59.000, 1.773	59.000, 1.703	59.000, 2.032	59.000, 1.904	59.000, 1.813
297	59.200, 2.023	59.200, 1.866	59.200, 1.742	59.200, 2.681	59.200, 2.558	59.200, 2.403	59.200, 1.858	59.200, 1.833	59.200, 1.696	59.200, 1.527	59.200, 1.776	59.200, 1.705	59.200, 2.035	59.200, 1.906	59.200, 1.815
298	59.400, 2.025	59.400, 1.868	59.400, 1.743	59.400, 2.688	59.400, 2.565	59.400, 2.409	59.400, 1.860	59.400, 1.835	59.400, 1.697	59.400, 1.528	59.400, 1.778	59.400, 1.707	59.400, 2.037	59.400, 1.908	59.400, 1.817
299	59.600, 2.027	59.600, 1.870	59.600, 1.745	59.600, 2.695	59.600, 2.572	59.600, 2.415	59.600, 1.862	59.600, 1.836	59.600, 1.699	59.600, 1.530	59.600, 1.780	59.600, 1.708	59.600, 2.040	59.600, 1.910	59.600, 1.819
300	59.800, 2.029	59.800, 1.872	59.800, 1.747	59.800, 2.702	59.800, 2.579	59.800, 2.421	59.800, 1.864	59.800, 1.838	59.800, 1.701	59.800, 1.531	59.800, 1.782	59.800, 1.710	59.800, 2.042	59.800, 1.912	59.800, 1.822
301	60.000, 2.031	60.000, 1.874	60.000, 1.749	60.000, 2.709	60.000, 2.586	60.000, 2.427	60.000, 1.867	60.000, 1.839	60.000, 1.702	60.000, 1.532	60.000, 1.784	60.000, 1.711	60.000, 2.044	60.000, 1.915	60.000, 1.824
302	60.200, 2.032	60.200, 1.876	60.200, 1.750	60.200, 2.716	60.200, 2.592	60.200, 2.433	60.200, 1.869	60.200, 1.841	60.200, 1.704	60.200, 1.534	60.200, 1.786	60.200, 1.713	60.200, 2.047	60.200, 1.917	60.200, 1.826
303	60.400, 2.034	60.400, 1.878	60.400, 1.752	60.400, 2.722	60.400, 2.599	60.400, 2.440	60.400, 1.871	60.400, 1.843	60.400, 1.706	60.400, 1.535	60.400, 1.787	60.400, 1.714	60.400, 2.048	60.400, 1.919	60.400, 1.828
304	60.600, 2.036	60.600, 1.880	60.600, 1.754	60.600, 2.729	60.600, 2.605	60.600, 2.446	60.600, 1.873	60.600, 1.844	60.600, 1.707	60.600, 1.536	60.600, 1.789	60.600, 1.716	60.600, 2.050	60.600, 1.921	60.600, 1.830
305	60.800, 2.038	60.800, 1.882	60.800, 1.756	60.800, 2.736	60.800, 2.611	60.800, 2.452	60.800, 1.875	60.800, 1.846	60.800, 1.709	60.800, 1.538	60.800, 1.791	60.800, 1.718	60.800, 2.052	60.800, 1.922	60.800, 1.832
306	61.000, 2.041	61.000, 1.884	61.000, 1.758	61.000, 2.742	61.000, 2.618	61.000, 2.458	61.000, 1.877	61.000, 1.848	61.000, 1.710	61.000, 1.539	61.000, 1.793	61.000, 1.719	61.000, 2.054	61.000, 1.924	61.000, 1.834
307	61.200, 2.043	61.200, 1.886	61.200, 1.760	61.200, 2.749	61.200, 2.624	61.200, 2.464	61.200, 1.878	61.200, 1.849	61.200, 1.712	61.200, 1.540	61.200, 1.795	61.200, 1.721	61.200, 2.056	61.200, 1.926	61.200, 1.836
308	61.400, 2.045	61.400, 1.888	61.400, 1.762	61.400, 2.755	61.400, 2.630	61.400, 2.470	61.400, 1.880	61.400, 1.851	61.400, 1.713	61.400, 1.542	61.400, 1.797	61.400, 1.723	61.400, 2.058	61.400, 1.928	61.400, 1.838
309	61.600, 2.047	61.600, 1.889	61.600, 1.764	61.600, 2.761	61.600, 2.636	61.600, 2.476	61.600, 1.881	61.600, 1.852	61.600, 1.715	61.600, 1.543	61.600, 1.799	61.600, 1.725	61.600, 2.060	61.600, 1.929	61.600, 1.840
310	61.800, 2.048	61.800, 1.891	61.800, 1.766	61.800, 2.768	61.800, 2.642	61.800, 2.482	61.800, 1.883	61.800, 1.854	61.800, 1.717	61.800, 1.544	61.800, 1.801	61.800, 1.727	61.800, 2.061	61.800, 1.931	61.800, 1.841
311	62.000, 2.050	62.000, 1.892	62.000, 1.768	62.000, 2.774	62.000, 2.649	62.000, 2.489	62.000, 1.885	62.000, 1.856	62.000, 1.718	62.000, 1.545	62.000, 1.803	62.000, 1.728	62.000, 2.063	62.000, 1.933	62.000, 1.843
312	62.200, 2.052	62.200, 1.894	62.200, 1.770	62.200, 2.781	62.200, 2.655	62.200, 2.494	62.200, 1.887	62.200, 1.857	62.200, 1.720	62.200, 1.546	62.200, 1.804	62.200, 1.730	62.200, 2.065	62.200, 1.934	62.200, 1.844
313	62.400, 2.054	62.400, 1.895	62.400, 1.772	62.400, 2.787	62.400, 2.661	62.400, 2.500	62.400, 1.889	62.400, 1.859	62.400, 1.721	62.400, 1.548	62.400, 1.806	62.400, 1.732	62.400, 2.067	62.400, 1.936	62.400, 1.846
314	62.600, 2.056	62.600, 1.897	62.600, 1.774	62.600, 2.794	62.600, 2.668	62.600, 2.506	62.600, 1.890	62.600, 1.860	62.600, 1.723	62.600, 1.549	62.600, 1.809	62.600, 1.734	62.600, 2.069	62.600, 1.938	62.600, 1.847
315	62.800, 2.058	62.800, 1.898	62.800, 1.775	62.800, 2.801	62.800, 2.674	62.800, 2.512	62.800, 1.892	62.800, 1.862	62.800, 1.724	62.800, 1.550	62.800, 1.810	62.800, 1.735	62.800, 2.071	62.800, 1.939	62.800, 1.849
316	63.000, 2.060	63.000, 1.900	63.000, 1.777	63.000, 2.807	63.000, 2.680	63.000, 2.517	63.000, 1.894	63.000, 1.863	63.000, 1.726	63.000, 1.551	63.000, 1.812	63.000, 1.737	63.000, 2.072	63.000, 1.941	63.000, 1.851
317	63.200, 2.062	63.200, 1.901	63.200, 1.779	63.200, 2.814	63.200, 2.686	63.200, 2.523	63.200, 1.896	63.200, 1.865	63.200, 1.727	63.200, 1.553	63.200, 1.814	63.200, 1.738	63.200, 2.074	63.200, 1.943	63.200, 1.852
318	63.400, 2.063	63.400, 1.903	63.400, 1.780	63.400, 2.821	63.400, 2.692	63.400, 2.529	63.400, 1.898	63.400, 1.866	63.400, 1.729	63.400, 1.554	63.400, 1.817	63.400, 1.739	63.400, 2.076	63.400, 1.944	63.400, 1.854
319	63.600, 2.065	63.600, 1.905	63.600, 1.782	63.600, 2.827	63.600, 2.698	63.600, 2.535	63.600, 1.900	63.600, 1.868	63.600, 1.730	63.600, 1.555	63.600, 1.819	63.600, 1.741	63.600, 2.078	63.600, 1.946	63.600, 1.856
320	63.800, 2.066	63.800, 1.906	63.800, 1.783	63.800, 2.834	63.800, 2.704	63.800, 2.540	63.800, 1.902	63.800, 1.869	63.800, 1.732	63.800, 1.556	63.800, 1.821	63.800, 1.742	63.800, 2.080	63.800, 1.948	63.800, 1.858
321	64.000, 2.068	64.000, 1.908	64.000, 1.784	64.000, 2.840	64.000, 2.710	64.000, 2.546	64.000, 1.905	64.000, 1.871	64.000, 1.733	64.000, 1.557	64.000, 1.823	64.000, 1.743	64.000, 2.081	64.000, 1.950	64.000, 1.860
322	64.200, 2.070	64.200, 1.910	64.200, 1.786	64.200, 2.847	64.200, 2.716	64.200, 2.552	64.200, 1.907	64.200, 1.873	64.200, 1.735	64.200, 1.558	64.200, 1.825	64.200, 1.744	64.200, 2.083	64.200, 1.951	64.200, 1.862
323	64.400, 2.072	64.400, 1.911	64.400, 1.787	64.400, 2.853	64.400, 2.722	64.400, 2.558	64.400, 1.909	64.400, 1.874	64.400, 1.736	64.400, 1.558	64.400, 1.826	64.400, 1.746	64.400, 2.084	64.400, 1.953	64.400, 1.864
324	64.600, 2.075	64.600, 1.913	64.600, 1.789	64.600, 2.860	64.600, 2.727	64.600, 2.564	64.600, 1.911	64.600, 1.876	64.600, 1.737	64.600, 1.559	64.600, 1.828	64.600, 1.747	64.600, 2.086	64.600, 1.955	64.600, 1.865
325	64.800, 2.077	64.800, 1.915	64.800, 1.790	64.800, 2.866	64.800, 2.733	64.800, 2.570	64.800, 1.912	64.800, 1.878	64.800, 1.739	64.800, 1.560	64.800, 1.830	64.800, 1.748	64.800, 2.087	64.800, 1.957	64.800, 1.867
326	65.000, 2.079	65.000, 1.916	65.000, 1.792	65.000, 2.872	65.000, 2.739	65.000, 2.575	65.000, 1.914	65.000, 1.879	65.000, 1.740	65.000, 1.561	65.000, 1.831	65.000, 1.750	65.000, 2.089	65.000, 1.958	65.000, 1.869
327	65.200, 2.081	65.200, 1.918	65.200, 1.793	65.200, 2.878	65.200, 2.745	65.200, 2.581	65.200, 1.916	65.200, 1.881	65.200, 1.741	65.200, 1.562	65.200, 1.833	65.200, 1.751	65.200, 2.091	65.200, 1.960	65.200, 1.870
328	65.400, 2.083	65.400, 1.919	65.400, 1.795	65.400, 2.884	65.400, 2.750	65.400, 2.587	65.400, 1.917	65.400, 1.883	65.400, 1.742	65.400, 1.563	65.400, 1.835	65.400, 1.753	65.400, 2.093	65.400, 1.961	65.400, 1.872
329	65.600, 2.085	65.600, 1.920	65.600, 1.796	65.600, 2.889	65.600, 2.756	65.600, 2.592	65.600, 1.919	65.600, 1.884	65.600, 1.743	65.600, 1.563	65.600, 1.836	65.600, 1.754	65.600, 2.095	65.600, 1.963	65.600, 1.874
330	65.800, 2.087	65.800, 1.922	65.800, 1.798	65.800, 2.895	65.800, 2.762	65.800, 2.597	65.800, 1.921	65.800, 1.885	65.800, 1.744	65.800, 1.564	65.800, 1.838	65.800, 1.756	65.800, 2.096	65.800, 1.965	65.800, 1.876
331	66.000, 2.089	66.000, 1.923	66.000, 1.799	66.000, 2.901	66.000, 2.768	66.000, 2.602	66.000, 1.923	66.000, 1.886	66.000, 1.746	66.000, 1.565	66.000, 1.839	66.000, 1.757	66.000, 2.098	66.000, 1.966	66.000, 1.878
332	66.200, 2.091	66.200, 1.924	66.200, 1.801	66.200, 2.907	66.200, 2.773	66.200, 2.607	66.200, 1.924	66.200, 1.887	66.200, 1.747	66.200, 1.566	66.200, 1.840	66.200, 1.759	66.200, 2.100	66.200, 1.968	66.200, 1.880
333	66.400, 2.093	66.400, 1.926	66.400, 1.802	66.400, 2.913	66.400, 2.779	66.400, 2.612	66.400, 1.926	66.400, 1.887	66.400, 1.748	66.400, 1.567	66.400, 1.842	66.400, 1.760	66.400, 2.102	66.400, 1.969	66.400, 1.881
334	66.600, 2.095	66.600, 1.927	66.600, 1.804	66.600, 2.919	66.600, 2.785	66.600, 2.617	66.600, 1.927	66.600, 1.888	66.600, 1.749	66.600, 1.568	66.600, 1.843	66.600, 1.761	66.600, 2.103	66.600, 1.971	66.600, 1.883
335	66.800, 2.097	66.800, 1.928	66.800, 1.806	66.800, 2.924	66.800, 2.792	66.800, 2.622	66.800, 1.928	66.800, 1.889	66.800, 1.750	66.800, 1.569	66.800, 1.844	66.800, 1.762	66.800, 2.105	66.800, 1.972	66.800, 1.885
336	67.000, 2.098	67.000, 1.930	67.000, 1.807	67.000, 2.930	67.000, 2.798	67.000, 2.627	67.000, 1.929	67.000, 1.890	67.000, 1.751	67.000, 1.570	67.000, 1.846	67.000, 1.763	67.000, 2.107	67.000, 1.974	67.000, 1.887
337	67.200, 2.099	67.200, 1.931	67.200, 1.809	67.200, 2.936	67.200, 2.804	67.200, 2.632	67.200, 1.931	67.200, 1.891	67.200, 1.752	67.200, 1.572	67.200, 1.848	67.200, 1.764	67.200, 2.108	67.200, 1.975	67.200, 1.888
338	67.400, 2.101	67.400, 1.933	67.400, 1.811	67.400, 2.942	67.400, 2.810	67.400, 2.638	67.400, 1.932	67.400, 1.892	67.400, 1.753	67.400, 1.573	67.400, 1.850	67.400, 1.765	67.400, 2.109	67.400, 1.977	67.400, 1.890
339	67.600, 2.102	67.600, 1.935	67.600, 1.813	67.600, 2.948	67.600, 2.817	67.600, 2.643	67.600, 1.933	67.600, 1.893	67.600, 1.755	67.600, 1.574	67.600, 1.852	67.600, 1.766	67.600, 2.111	67.600, 1.979	67.600, 1.891
340	67.800, 2.104	67.800, 1.936	67.800, 1.814	67.800, 2.954	67.800, 2.822	67.800, 2.648	67.800, 1.935	67.800, 1.895	67.800, 1.756	67.800, 1.575	67.800, 1.854	67.800, 1.767	67.800, 2.112	67.800, 1.981	67.800, 1.893
341	68.000, 2.106	68.000, 1.938	68.000, 1.816	68.000, 2.960	68.000, 2.828	68.000, 2.653	68.000, 1.936	68.000, 1.896	68.000, 1.757	68.000, 1.576	68.000, 1.855	68.000, 1.768	68.000, 2.114	68.000, 1.983	68.000, 1.894
342	68.200, 2.107	68.200, 1.940	68.200, 1.817	68.200, 2.966	68.200, 2.834	68.200, 2.658	68.200, 1.937	68.200, 1.897	68.200, 1.758	68.200, 1.578	68.200, 1.857	68.200, 1.770	68.200, 2.115	68.200, 1.984	68.200, 1.895
343	68.400, 2.109	68.400, 1.942	68.400, 1.818	68.400, 2.971	68.400, 2.840	68.400, 2.663	68.400, 1.939	68.400, 1.898	68.400, 1.759	68.400, 1.579	68.400, 1.859	68.400, 1.771	68.400, 2.116	68.400, 1.985	68.400, 1.897
344	68.600, 2.110	68.600, 1.943	68.600, 1.820	68.600, 2.977	68.600, 2.846	68.600, 2.668	68.600, 1.940	68.600, 1.900	68.600, 1.760	68.600, 1.580	68.600, 1.860	68.600, 1.772	68.600, 2.117	68.600, 1.987	68.600, 1.898
345	68.800, 2.112	68.800, 1.945	68.800, 1.821	68.800, 2.982	68.800, 2.851	68.800, 2.673	68.800, 1.941	68.800, 1.901	68.800, 1.761	68.800, 1.581	68.800, 1.862	68.800, 1.773	68.800, 2.119	68.800, 1.988	68.800, 1.899
346	69.000, 2.113	69.000, 1.946	69.000, 1.822	69.000, 2.988	69.000, 2.856	69.000, 2.679	69.000, 1.942	69.000, 1.903	69.000, 1.762	69.000, 1.582	69.000, 1.864	69.000, 1.774	69.000, 2.120	69.000, 1.990	69.000, 1.900
347	69.200, 2.114	69.200, 1.947	69.200, 1.823	69.200, 2.993	69.200, 2.862	69.200, 2.684	69.200, 1.943	69.200, 1.905	69.200, 1.763	69.200, 1.583	69.200, 1.866	69.200, 1.775	69.200, 2.122	69.200, 1.991	69.200, 1.902
348	69.400, 2.116	69.400, 1.948	69.400, 1.824	69.400, 2.999	69.400, 2.867	69.400, 2.689	69.400, 1.945	69.400, 1.906	69.400, 1.764	69.400, 1.584	69.400, 1.868	69.400, 1.777	69.400, 2.123	69.400, 1.992	69.400, 1.903
349	69.600, 2.117	69.600, 1.950	69.600, 1.825	69.600, 3.004	69.600, 2.872	69.600, 2.694	69.600, 1.947	69.600, 1.908	69.600, 1.765	69.600, 1.585	69.600, 1.870	69.600, 1.778	69.600, 2.125	69.600, 1.994	69.600, 1.904
350	69.800, 2.118	69.800, 1.951	69.800, 1.826	69.800, 3.010	69.800, 2.877	69.800, 2.700	69.800, 1.948	69.800, 1.910	69.800, 1.765	69.800, 1.586	69.800, 1.871	69.800, 1.779	69.800, 2.126	69.800, 1.995	69.800, 1.905
351	70.000, 2.120	70.000, 1.952	70.000, 1.827	70.000, 3.015	70.000, 2.882	70.000, 2.705	70.000, 1.950	70.000, 1.911	70.000, 1.766	70.000, 1.586	70.000, 1.873	70.000, 1.780	70.000, 2.128	70.000, 1.996	70.000, 1.907
352	70.200, 2.121	70.200, 1.953	70.200, 1.828	70.200, 3.021	70.200, 2.887	70.200, 2.710	70.200, 1.951	70.200, 1.912	70.200, 1.767	70.200, 1.587	70.200, 1.874	70.200, 1.782	70.200, 2.130	70.200, 1.997	70.200, 1.908
353	70.400, 2.122	70.400, 1.955	70.400, 1.829	70.400, 3.027	70.400, 2.893	70.400, 2.715	70.400, 1.952	70.400, 1.914	70.400, 1.768	70.400, 1.588	70.400, 1.875	70.400, 1.783	70.400, 2.131	70.400, 1.998	70.400, 1.909
354	70.600, 2.123	70.600, 1.956	70.600, 1.831	70.600, 3.032	70.600, 2.898	70.600, 2.721	70.600, 1.953	70.600, 1.915	70.600, 1.769	70.600, 1.589	70.600, 1.876	70.600, 1.784	70.600, 2.133	70.600, 2.000	70.600, 1.910
355	70.800, 2.125	70.800, 1.957	70.800, 1.832	70.800, 3.038	70.800, 2.903	70.800, 2.726	70.800, 1.955	70.800, 1.916	70.800, 1.770	70.800, 1.590	70.800, 1.877	70.800, 1.785	70.800, 2.134	70.800, 2.001	70.800, 1.912
356	71.000, 2.126	71.000, 1.958	71.000, 1.833	71.000, 3.044	71.000, 2.908	71.000, 2.731	71.000, 1.956	71.000, 1.917	71.000, 1.771	71.000, 1.590	71.000, 1.879	71.000, 1.786	71.000, 2.136	71.000, 2.003	71.000, 1.913
357	71.200, 2.127	71.200, 1.959	71.200, 1.835	71.200, 3.049	71.200, 2.913	71.200, 2.736	71.200, 1.957	71.200, 1.919	71.200, 1.772	71.200, 1.591	71.200, 1.880	71.200, 1.788	71.200, 2.137	71.200, 2.004	71.200, 1.915
358	71.400, 2.129	71.400, 1.961	71.400, 1.836	71.400, 3.055	71.400, 2.918	71.400, 2.741	71.400, 1.958	71.400, 1.920	71.400, 1.774	71.400, 1.593	71.400, 1.881	71.400, 1.789	71.400, 2.138	71.400, 2.006	71.400, 1.916
359	71.600, 2.130	71.600, 1.962	71.600, 1.838	71.600, 3.060	71.600, 2.923	71.600, 2.746	71.600, 1.959	71.600, 1.921	71.600, 1.775	71.600, 1.594	71.600, 1.882	71.600, 1.790	71.600, 2.140	71.600, 2.007	71.600, 1.918
360	71.800, 2.132	71.800, 1.964	71.800, 1.839	71.800, 3.066	71.800, 2.928	71.800, 2.750	71.800, 1.960	71.800, 1.922	71.800, 1.775	71.800, 1.595	71.800, 1.883	71.800, 1.791	71.800, 2.141	71.800, 2.008	71.800, 1.920
361	72.000, 2.133	72.000, 1.966	72.000, 1.841	72.000, 3.071	72.000, 2.933	72.000, 2.755	72.000, 1.961	72.000, 1.922	72.000, 1.776	72.000, 1.596	72.000, 1.884	72.000, 1.792	72.000, 2.142	72.000, 2.010	72.000, 1.922
362	72.200, 2.134	72.200, 1.967	72.200, 1.842	72.200, 3.077	72.200, 2.938	72.200, 2.759	72.200, 1.962	72.200, 1.923	72.200, 1.777	72.200, 1.597	72.200, 1.886	72.200, 1.793	72.200, 2.142	72.200, 2.011	72.200, 1.923
363	72.400, 2.136	72.400, 1.968	72.400, 1.844	72.400, 3.083	72.400, 2.943	72.400, 2.764	72.400, 1.963	72.400, 1.924	72.400, 1.778	72.400, 1.599	72.400, 1.887	72.400, 1.794	72.400, 2.143	72.400, 2.012	72.400, 1.925
364	72.600, 2.137	72.600, 1.969	72.600, 1.845	72.600, 3.089	72.600, 2.948	72.600, 2.768	72.600, 1.964	72.600, 1.926	72.600, 1.779	72.600, 1.600	72.600, 1.889	72.600, 1.795	72.600, 2.144	72.600, 2.013	72.600, 1.926
365	72.800, 2.138	72.800, 1.971	72.800, 1.847	72.800, 3.095	72.800, 2.953	72.800, 2.773	72.800, 1.965	72.800, 1.927	72.800, 1.780	72.800, 1.601	72.800, 1.891	72.800, 1.797	72.800, 2.145	72.800, 2.014	72.800, 1.927
366	73.000, 2.139	73.000, 1.972	73.000, 1.848	73.000, 3.100	73.000, 2.958	73.000, 2.778	73.000, 1.967	73.000, 1.928	73.000, 1.781	73.000, 1.603	73.000, 1.892	73.000, 1.798	73.000, 2.146	73.000, 2.015	73.000, 1.929
367	73.200, 2.140	73.200, 1.973	73.200, 1.849	73.200, 3.106	73.200, 2.963	73.200, 2.783	73.200, 1.968	73.200, 1.929	73.200, 1.782	73.200, 1.604	73.200, 1.894	73.200, 1.799	73.200, 2.148	73.200, 2.016	73.200, 1.930
368	73.400, 2.142	73.400, 1.974	73.400, 1.850	73.400, 3.111	73.400, 2.968	73.400, 2.788	73.400, 1.969	73.400, 1.930	73.400, 1.783	73.400, 1.605	73.400, 1.896	73.400, 1.800	73.400, 2.149	73.400, 2.017	73.400, 1.931
369	73.600, 2.143	73.600, 1.974	73.600, 1.851	73.600, 3.116	73.600, 2.973	73.600, 2.793	73.600, 1.971	73.600, 1.931	73.600, 1.784	73.600, 1.606	73.600, 1.898	73.600, 1.801	73.600, 2.150	73.600, 2.018	73.600, 1.933
370	73.800, 2.144	73.800, 1.975	73.800, 1.852	73.800, 3.122	73.800, 2.978	73.800, 2.798	73.800, 1.972	73.800, 1.932	73.800, 1.785	73.800, 1.607	73.800, 1.899	73.800, 1.802	73.800, 2.152	73.800, 2.019	73.800, 1.934
371	74.000, 2.145	74.000, 1.976	74.000, 1.854	74.000, 3.127	74.000, 2.984	74.000, 2.802	74.000, 1.973	74.000, 1.933	74.000, 1.786	74.000, 1.608	74.000, 1.901	74.000, 1.803	74.000, 2.153	74.000, 2.021	74.000, 1.935
372	74.200, 2.146	74.200, 1.977	74.200, 1.855	74.200, 3.132	74.200, 2.989	74.200, 2.807	74.200, 1.975	74.200, 1.934	74.200, 1.787	74.200, 1.609	74.200, 1.902	74.200, 1.804	74.200, 2.155	74.200, 2.022	74.200, 1.936
373	74.400, 2.147	74.400, 1.978	74.400, 1.857	74.400, 3.137	74.400, 2.995	74.400, 2.812	74.400, 1.976	74.400, 1.934	74.400, 1.788	74.400, 1.610	74.400, 1.904	74.400, 1.805	74.400, 2.157	74.400, 2.024	74.400, 1.937
374	74.600, 2.148	74.600, 1.979	74.600, 1.858	74.600, 3.143	74.600, 3.000	74.600, 2.816	74.600, 1.977	74.600, 1.935	74.600, 1.789	74.600, 1.611	74.600, 1.905	74.600, 1.806	74.600, 2.158	74.600, 2.025	74.600, 1.938
375	74.800, 2.149	74.800, 1.980	74.800, 1.860	74.800, 3.147	74.800, 3.005	74.800, 2.821	74.800, 1.978	74.800, 1.935	74.800, 1.789	74.800, 1.612	74.800, 1.907	74.800, 1.807	74.800, 2.160	74.800, 2.026	74.800, 1.940
376	75.000, 2.151	75.000, 1.981	75.000, 1.861	75.000, 3.152	75.000, 3.010	75.000, 2.825	75.000, 1.979	75.000, 1.936	75.000, 1.790	75.000, 1.613	75.000, 1.908	75.000, 1.808	75.000, 2.161	75.000, 2.028	75.000, 1.941
377	75.200, 2.152	75.200, 1.982	75.200, 1.862	75.200, 3.157	75.200, 3.014	75.200, 2.830	75.200, 1.980	75.200, 1.937	75.200, 1.791	75.200, 1.614	75.200, 1.910	75.200, 1.808	75.200, 2.162	75.200, 2.029	75.200, 1.942
378	75.400, 2.153	75.400, 1.984	75.400, 1.862	75.400, 3.162	75.400, 3.019	75.400, 2.834	75.400, 1.981	75.400, 1.937	75.400, 1.791	75.400, 1.615	75.400, 1.911	75.400, 1.809	75.400, 2.163	75.400, 2.031	75.400, 1.943
379	75.600, 2.155	75.600, 1.985	75.600, 1.863	75.600, 3.166	75.600, 3.024	75.600, 2.838	75.600, 1.982	75.600, 1.938	75.600, 1.792	75.600, 1.617	75.600, 1.913	75.600, 1.810	75.600, 2.164	75.600, 2.032	75.600, 1.944
380	75.800, 2.156	75.800, 1.987	75.800, 1.864	75.800, 3.171	75.800, 3.029	75.800, 2.843	75.800, 1.983	75.800, 1.939	75.800, 1.792	75.800, 1.618	75.800, 1.914	75.800, 1.811	75.800, 2.165	75.800, 2.032	75.800, 1.945
381	76.000, 2.157	76.000, 1.988	76.000, 1.865	76.000, 3.176	76.000, 3.034	76.000, 2.847	76.000, 1.985	76.000, 1.940	76.000, 1.793	76.000, 1.619	76.000, 1.915	76.000, 1.812	76.000, 2.167	76.000, 2.033	76.000, 1.946
382	76.200, 2.159	76.200, 1.990	76.200, 1.866	76.200, 3.181	76.200, 3.039	76.200, 2.851	76.200, 1.986	76.200, 1.941	76.200, 1.794	76.200, 1.620	76.200, 1.917	76.200, 1.813	76.200, 2.168	76.200, 2.034	76.200, 1.947
383	76.400, 2.160	76.400, 1.991	76.400, 1.867	76.400, 3.186	76.400, 3.043	76.400, 2.856	76.400, 1.987	76.400, 1.942	76.400, 1.795	76.400, 1.621	76.400, 1.918	76.400, 1.814	76.400, 2.169	76.400, 2.035	76.400, 1.949
384	76.600, 2.161	76.600, 1.993	76.600, 1.867	76.600, 3.192	76.600, 3.048	76.600, 2.860	76.600, 1.988	76.600, 1.943	76.600, 1.796	76.600, 1.622	76.600, 1.919	76.600, 1.815	76.600, 2.171	76.600, 2.036	76.600, 1.950
385	76.800, 2.162	76.800, 1.994	76.800, 1.868	76.800, 3.197	76.800, 3.053	76.800, 2.865	76.800, 1.989	76.800, 1.944	76.800, 1.797	76.800, 1.623	76.800, 1.920	76.800, 1.816	76.800, 2.172	76.800, 2.037	76.800, 1.951
386	77.000, 2.163	77.000, 1.996	77.000, 1.869	77.000, 3.202	77.000, 3.057	77.000, 2.869	77.000, 1.990	77.000, 1.945	77.000, 1.798	77.000, 1.624	77.000, 1.921	77.000, 1.818	77.000, 2.173	77.000, 2.038	77.000, 1.953
387	77.200, 2.164	77.200, 1.997	77.200, 1.870	77.200, 3.206	77.200, 3.062	77.200, 2.873	77.200, 1.991	77.200, 1.946	77.200, 1.799	77.200, 1.625	77.200, 1.922	77.200, 1.818	77.200, 2.174	77.200, 2.038	77.200, 1.954
388	77.400, 2.165	77.400, 1.998	77.400, 1.871	77.400, 3.211	77.400, 3.067	77.400, 2.878	77.400, 1.992	77.400, 1.948	77.400, 1.801	77.400, 1.625	77.400, 1.922	77.400, 1.819	77.400, 2.174	77.400, 2.039	77.400, 1.955
389	77.600, 2.166	77.600, 1.999	77.600, 1.872	77.600, 3.216	77.600, 3.072	77.600, 2.882	77.600, 1.993	77.600, 1.949	77.600, 1.802	77.600, 1.626	77.600, 1.923	77.600, 1.820	77.600, 2.175	77.600, 2.041	77.600, 1.956
390	77.800, 2.167	77.800, 2.000	77.800, 1.873	77.800, 3.222	77.800, 3.076	77.800, 2.886	77.800, 1.994	77.800, 1.950	77.800, 1.803	77.800, 1.627	77.800, 1.924	77.800, 1.821	77.800, 2.176	77.800, 2.042	77.800, 1.957
391	78.000, 2.168	78.000, 2.002	78.000, 1.875	78.000, 3.227	78.000, 3.081	78.000, 2.891	78.000, 1.995	78.000, 1.950	78.000, 1.804	78.000, 1.628	78.000, 1.925	78.000, 1.822	78.000, 2.177	78.000, 2.043	78.000, 1.958
392	78.200, 2.169	78.200, 2.003	78.200, 1.876	78.200, 3.232	78.200, 3.086	78.200, 2.895	78.200, 1.996	78.200, 1.951	78.200, 1.805	78.200, 1.629	78.200, 1.926	78.200, 1.823	78.200, 2.178	78.200, 2.044	78.200, 1.959
393	78.400, 2.170	78.400, 2.004	78.400, 1.877	78.400, 3.238	78.400, 3.091	78.400, 2.899	78.400, 1.998	78.400, 1.952	78.400, 1.805	78.400, 1.630	78.400, 1.927	78.400, 1.824	78.400, 2.179	78.400, 2.045	78.400, 1.961
394	78.600, 2.171	78.600, 2.005	78.600, 1.878	78.600, 3.243	78.600, 3.096	78.600, 2.904	78.600, 1.999	78.600, 1.953	78.600, 1.806	78.600, 1.630	78.600, 1.929	78.600, 1.825	78.600, 2.179	78.600, 2.046	78.600, 1.962
395	78.800, 2.172	78.800, 2.006	78.800, 1.879	78.800, 3.248	78.800, 3.100	78.800, 2.908	78.800, 2.000	78.800, 1.953	78.800, 1.807	78.800, 1.631	78.800, 1.930	78.800, 1.826	78.800, 2.180	78.800, 2.047	78.800, 1.963
396	79.000, 2.172	79.000, 2.007	79.000, 1.880	79.000, 3.253	79.000, 3.105	79.000, 2.913	79.000, 2.001	79.000, 1.954	79.000, 1.807	79.000, 1.632	79.000, 1.932	79.000, 1.827	79.000, 2.181	79.000, 2.049	79.000, 1.964
397	79.200, 2.173	79.200, 2.008	79.200, 1.881	79.200, 3.257	79.200, 3.110	79.200, 2.917	79.200, 2.003	79.200, 1.955	79.200, 1.808	79.200, 1.633	79.200, 1.933	79.200, 1.828	79.200, 2.182	79.200, 2.050	79.200, 1.964
398	79.400, 2.174	79.400, 2.009	79.400, 1.882	79.400, 3.262	79.400, 3.114	79.400, 2.921	79.400, 2.004	79.400, 1.956	79.400, 1.809	79.400, 1.634	79.400, 1.934	79.400, 1.829	79.400, 2.183	79.400, 2.051	79.400, 1.965
399	79.600, 2.175	79.600, 2.010	79.600, 1.883	79.600, 3.266	79.600, 3.119	79.600, 2.926	79.600, 2.005	79.600, 1.956	79.600, 1.809	79.600, 1.635	79.600, 1.936	79.600, 1.830	79.600, 2.184	79.600, 2.052	79.600, 1.966
400	79.800, 2.176	79.800, 2.011	79.800, 1.884	79.800, 3.270	79.800, 3.123	79.800, 2.930	79.800, 2.006	79.800, 1.957	79.800, 1.810	79.800, 1.636	79.800, 1.937	79.800, 1.831	79.800, 2.186	79.800, 2.053	79.800, 1.967
401	80.000, 2.177	80.000, 2.012	80.000, 1.885	80.000, 3.275	80.000, 3.128	80.000, 2.934	80.000, 2.008	80.000, 1.958	80.000, 1.811	80.000, 1.637	80.000, 1.939	80.000, 1.831	80.000, 2.187	80.000, 2.054	80.000, 1.968
402	80.200, 2.178	80.200, 2.013	80.200, 1.886	80.200, 3.279	80.200, 3.132	80.200, 2.937	80.200, 2.008	80.200, 1.959	80.200, 1.811	80.200, 1.638	80.200, 1.940	80.200, 1.832	80.200, 2.188	80.200, 2.055	80.200, 1.969
403	80.400, 2.179	80.400, 2.014	80.400, 1.887	80.400, 3.284	80.400, 3.137	80.400, 2.941	80.400, 2.009	80.400, 1.960	80.400, 1.812	80.400, 1.639	80.400, 1.942	80.400, 1.833	80.400, 2.190	80.400, 2.056	80.400, 1.970
404	80.600, 2.180	80.600, 2.015	80.600, 1.888	80.600, 3.288	80.600, 3.141	80.600, 2.945	80.600, 2.010	80.600, 1.960	80.600, 1.813	80.600, 1.640	80.600, 1.943	80.600, 1.834	80.600, 2.191	80.600, 2.056	80.600, 1.971
405	80.800, 2.181	80.800, 2.017	80.800, 1.889	80.800, 3.292	80.800, 3.145	80.800, 2.948	80.800, 2.011	80.800, 1.961	80.800, 1.813	80.800, 1.641	80.800, 1.944	80.800, 1.835	80.800, 2.192	80.800, 2.057	80.800, 1.972
406	81.000, 2.182	81.000, 2.018	81.000, 1.891	81.000, 3.297	81.000, 3.150	81.000, 2.952	81.000, 2.011	81.000, 1.962	81.000, 1.814	81.000, 1.642	81.000, 1.946	81.000, 1.835	81.000, 2.193	81.000, 2.058	81.000, 1.973
407	81.200, 2.183	81.200, 2.019	81.200, 1.892	81.200, 3.302	81.200, 3.154	81.200, 2.956	81.200, 2.012	81.200, 1.963	81.200, 1.815	81.200, 1.642	81.200, 1.947	81.200, 1.836	81.200, 2.194	81.200, 2.059	81.200, 1.974
408	81.400, 2.184	81.400, 2.020	81.400, 1.893	81.400, 3.306	81.400, 3.158	81.400, 2.960	81.400, 2.013	81.400, 1.963	81.400, 1.815	81.400, 1.643	81.400, 1.948	81.400, 1.837	81.400, 2.194	81.400, 2.060	81.400, 1.975
409	81.600, 2.185	81.600, 2.021	81.600, 1.894	81.600, 3.311	81.600, 3.162	81.600, 2.964	81.600, 2.014	81.600, 1.964	81.600, 1.816	81.600, 1.644	81.600, 1.949	81.600, 1.838	81.600, 2.195	81.600, 2.061	81.600, 1.976
410	81.800, 2.186	81.800, 2.022	81.800, 1.895	81.800, 3.316	81.800, 3.167	81.800, 2.968	81.800, 2.015	81.800, 1.964	81.800, 1.816	81.800, 1.644	81.800, 1.950	81.800, 1.839	81.800, 2.195	81.800, 2.062	81.800, 1.977
411	82.000, 2.187	82.000, 2.023	82.000, 1.896	82.000, 3.321	82.000, 3.171	82.000, 2.972	82.000, 2.016	82.000, 1.965	82.000, 1.817	82.000, 1.645	82.000, 1.951	82.000, 1.840	82.000, 2.196	82.000, 2.063	82.000, 1.978
412	82.200, 2.188	82.200, 2.024	82.200, 1.897	82.200, 3.326	82.200, 3.176	82.200, 2.976	82.200, 2.017	82.200, 1.966	82.200, 1.817	82.200, 1.646	82.200, 1.952	82.200, 1.840	82.200, 2.196	82.200, 2.063	82.200, 1.978
413	82.400, 2.189	82.400, 2.025	82.400, 1.898	82.400, 3.331	82.400, 3.180	82.400, 2.980	82.400, 2.018	82.400, 1.967	82.400, 1.818	82.400, 1.646	82.400, 1.953	82.400, 1.841	82.400, 2.197	82.400, 2.064	82.400, 1.979
414	82.600, 2.190	82.600, 2.026	82.600, 1.899	82.600, 3.336	82.600, 3.185	82.600, 2.985	82.600, 2.020	82.600, 1.967	82.600, 1.819	82.600, 1.647	82.600, 1.953	82.600, 1.842	82.600, 2.198	82.600, 2.065	82.600, 1.981
415	82.800, 2.191	82.800, 2.027	82.800, 1.900	82.800, 3.341	82.800, 3.189	82.800, 2.989	82.800, 2.021	82.800, 1.968	82.800, 1.819	82.800, 1.648	82.800, 1.954	82.800, 1.843	82.800, 2.199	82.800, 2.066	82.800, 1.981
416	83.000, 2.192	83.000, 2.028	83.000, 1.901	83.000, 3.346	83.000, 3.193	83.000, 2.993	83.000, 2.022	83.000, 1.969	83.000, 1.820	83.000, 1.650	83.000, 1.955	83.000, 1.843	83.000, 2.200	83.000, 2.067	83.000, 1.982
417	83.200, 2.193	83.200, 2.029	83.200, 1.902	83.200, 3.350	83.200, 3.197	83.200, 2.998	83.200, 2.024	83.200, 1.970	83.200, 1.821	83.200, 1.651	83.200, 1.956	83.200, 1.844	83.200, 2.201	83.200, 2.067	83.200, 1.983
418	83.400, 2.193	83.400, 2.030	83.400, 1.902	83.400, 3.355	83.400, 3.201	83.400, 3.002	83.400, 2.025	83.400, 1.971	83.400, 1.821	83.400, 1.653	83.400, 1.957	83.400, 1.845	83.400, 2.202	83.400, 2.068	83.400, 1.984
419	83.600, 2.194	83.600, 2.030	83.600, 1.903	83.600, 3.359	83.600, 3.205	83.600, 3.006	83.600, 2.026	83.600, 1.972	83.600, 1.821	83.600, 1.654	83.600, 1.957	83.600, 1.846	83.600, 2.203	83.600, 2.069	83.600, 1.984
420	83.800, 2.195	83.800, 2.031	83.800, 1.904	83.800, 3.363	83.800, 3.209	83.800, 3.010	83.800, 2.027	83.800, 1.973	83.800, 1.822	83.800, 1.656	83.800, 1.958	83.800, 1.846	83.800, 2.204	83.800, 2.070	83.800, 1.985
421	84.000, 2.195	84.000, 2.032	84.000, 1.905	84.000, 3.367	84.000, 3.214	84.000, 3.014	84.000, 2.028	84.000, 1.974	84.000, 1.823	84.000, 1.657	84.000, 1.959	84.000, 1.847	84.000, 2.205	84.000, 2.070	84.000, 1.986
422	84.200, 2.196	84.200, 2.032	84.200, 1.905	84.200, 3.372	84.200, 3.218	84.200, 3.017	84.200, 2.029	84.200, 1.974	84.200, 1.823	84.200, 1.658	84.200, 1.960	84.200, 1.847	84.200, 2.206	84.200, 2.071	84.200, 1.987
423	84.400, 2.196	84.400, 2.033	84.400, 1.906	84.400, 3.376	84.400, 3.222	84.400, 3.021	84.400, 2.030	84.400, 1.975	84.400, 1.824	84.400, 1.659	84.400, 1.961	84.400, 1.848	84.400, 2.208	84.400, 2.072	84.400, 1.988
424	84.600, 2.196	84.600, 2.034	84.600, 1.907	84.600, 3.380	84.600, 3.226	84.600, 3.025	84.600, 2.031	84.600, 1.975	84.600, 1.824	84.600, 1.660	84.600, 1.962	84.600, 1.848	84.600, 2.209	84.600, 2.072	84.600, 1.990
425	84.800, 2.197	84.800, 2.034	84.800, 1.908	84.800, 3.384	84.800, 3.230	84.800, 3.029	84.800, 2.032	84.800, 1.975	84.800, 1.825	84.800, 1.661	84.800, 1.963	84.800, 1.849	84.800, 2.210	84.800, 2.073	84.800, 1.991
426	85.000, 2.198	85.000, 2.035	85.000, 1.909	85.000, 3.389	85.000, 3.234	85.000, 3.032	85.000, 2.033	85.000, 1.976	85.000, 1.826	85.000, 1.661	85.000, 1.963	85.000, 1.849	85.000, 2.211	85.000, 2.073	85.000, 1.992
427	85.200, 2.198	85.200, 2.036	85.200, 1.910	85.200, 3.393	85.200, 3.238	85.200, 3.036	85.200, 2.034	85.200, 1.976	85.200, 1.826	85.200, 1.662	85.200, 1.964	85.200, 1.850	85.200, 2.212	85.200, 2.074	85.200, 1.993
428	85.400, 2.199	85.400, 2.037	85.400, 1.911	85.400, 3.398	85.400, 3.242	85.400, 3.039	85.400, 2.034	85.400, 1.976	85.400, 1.827	85.400, 1.662	85.400, 1.965	85.400, 1.850	85.400, 2.213	85.400, 2.075	85.400, 1.994
429	85.600, 2.200	85.600, 2.038	85.600, 1.912	85.600, 3.402	85.600, 3.246	85.600, 3.043	85.600, 2.035	85.600, 1.977	85.600, 1.828	85.600, 1.663	85.600, 1.965	85.600, 1.851	85.600, 2.213	85.600, 2.076	85.600, 1.995
430	85.800, 2.201	85.800, 2.040	85.800, 1.912	85.800, 3.407	85.800, 3.250	85.800, 3.046	85.800, 2.036	85.800, 1.977	85.800, 1.829	85.800, 1.663	85.800, 1.966	85.800, 1.852	85.800, 2.214	85.800, 2.077	85.800, 1.996
431	86.000, 2.202	86.000, 2.041	86.000, 1.913	86.000, 3.412	86.000, 3.254	86.000, 3.050	86.000, 2.037	86.000, 1.978	86.000, 1.831	86.000, 1.664	86.000, 1.967	86.000, 1.852	86.000, 2.215	86.000, 2.078	86.000, 1.997
432	86.200, 2.202	86.200, 2.042	86.200, 1.914	86.200, 3.416	86.200, 3.259	86.200, 3.053	86.200, 2.038	86.200, 1.978	86.200, 1.832	86.200, 1.664	86.200, 1.968	86.200, 1.853	86.200, 2.216	86.200, 2.079	86.200, 1.998
433	86.400, 2.203	86.400, 2.044	86.400, 1.915	86.400, 3.421	86.400, 3.263	86.400, 3.057	86.400, 2.039	86.400, 1.979	86.400, 1.833	86.400, 1.665	86.400, 1.969	86.400, 1.854	86.400, 2.217	86.400, 2.080	86.400, 1.999
434	86.600, 2.204	86.600, 2.045	86.600, 1.915	86.600, 3.425	86.600, 3.267	86.600, 3.061	86.600, 2.039	86.600, 1.980	86.600, 1.834	86.600, 1.666	86.600, 1.970	86.600, 1.855	86.600, 2.218	86.600, 2.081	86.600, 2.000
435	86.800, 2.205	86.800, 2.046	86.800, 1.916	86.800, 3.430	86.800, 3.271	86.800, 3.065	86.800, 2.041	86.800, 1.981	86.800, 1.835	86.800, 1.667	86.800, 1.971	86.800, 1.856	86.800, 2.219	86.800, 2.082	86.800, 2.001
436	87.000, 2.205	87.000, 2.047	87.000, 1.916	87.000, 3.434	87.000, 3.275	87.000, 3.068	87.000, 2.042	87.000, 1.982	87.000, 1.835	87.000, 1.668	87.000, 1.972	87.000, 1.856	87.000, 2.220	87.000, 2.083	87.000, 2.002
437	87.200, 2.206	87.200, 2.048	87.200, 1.917	87.200, 3.438	87.200, 3.279	87.200, 3.072	87.200, 2.043	87.200, 1.984	87.200, 1.836	87.200, 1.669	87.200, 1.974	87.200, 1.857	87.200, 2.221	87.200, 2.084	87.200, 2.003
438	87.400, 2.207	87.400, 2.049	87.400, 1.917	87.400, 3.442	87.400, 3.283	87.400, 3.076	87.400, 2.044	87.400, 1.985	87.400, 1.837	87.400, 1.669	87.400, 1.975	87.400, 1.858	87.400, 2.222	87.400, 2.085	87.400, 2.004
439	87.600, 2.208	87.600, 2.050	87.600, 1.918	87.600, 3.446	87.600, 3.287	87.600, 3.080	87.600, 2.045	87.600, 1.986	87.600, 1.837	87.600, 1.670	87.600, 1.977	87.600, 1.858	87.600, 2.223	87.600, 2.086	87.600, 2.004
440	87.800, 2.208	87.800, 2.051	87.800, 1.919	87.800, 3.450	87.800, 3.291	87.800, 3.084	87.800, 2.047	87.800, 1.987	87.800, 1.837	87.800, 1.671	87.800, 1.978	87.800, 1.859	87.800, 2.223	87.800, 2.086	87.800, 2.005
441	88.000, 2.209	88.000, 2.052	88.000, 1.919	88.000, 3.454	88.000, 3.296	88.000, 3.089	88.000, 2.048	88.000, 1.988	88.000, 1.838	88.000, 1.672	88.000, 1.979	88.000, 1.860	88.000, 2.224	88.000, 2.087	88.000, 2.006
442	88.200, 2.210	88.200, 2.053	88.200, 1.920	88.200, 3.458	88.200, 3.300	88.200, 3.093	88.200, 2.049	88.200, 1.989	88.200, 1.838	88.200, 1.672	88.200, 1.980	88.200, 1.860	88.200, 2.225	88.200, 2.088	88.200, 2.006
443	88.400, 2.211	88.400, 2.054	88.400, 1.921	88.400, 3.462	88.400, 3.304	88.400, 3.097	88.400, 2.050	88.400, 1.989	88.400, 1.838	88.400, 1.673	88.400, 1.981	88.400, 1.861	88.400, 2.225	88.400, 2.088	88.400, 2.007
444	88.600, 2.212	88.600, 2.055	88.600, 1.921	88.600, 3.466	88.600, 3.308	88.600, 3.101	88.600, 2.050	88.600, 1.990	88.600, 1.839	88.600, 1.673	88.600, 1.982	88.600, 1.861	88.600, 2.226	88.600, 2.089	88.600, 2.008
445	88.800, 2.213	88.800, 2.055	88.800, 1.922	88.800, 3.470	88.800, 3.312	88.800, 3.104	88.800, 2.051	88.800, 1.990	88.800, 1.839	88.800, 1.674	88.800, 1.983	88.800, 1.861	88.800, 2.227	88.800, 2.090	88.800, 2.008
446	89.000, 2.214	89.000, 2.056	89.000, 1.923	89.000, 3.474	89.000, 3.316	89.000, 3.108	89.000, 2.052	89.000, 1.991	89.000, 1.840	89.000, 1.674	89.000, 1.984	89.000, 1.862	89.000, 2.228	89.000, 2.091	89.000, 2.009
447	89.200, 2.214	89.200, 2.057	89.200, 1.924	89.200, 3.479	89.200, 3.320	89.200, 3.111	89.200, 2.053	89.200, 1.991	89.200, 1.840	89.200, 1.675	89.200, 1.984	89.200, 1.863	89.200, 2.228	89.200, 2.092	89.200, 2.009
448	89.400, 2.215	89.400, 2.058	89.400, 1.925	89.400, 3.483	89.400, 3.324	89.400, 3.115	89.400, 2.053	89.400, 1.992	89.400, 1.841	89.400, 1.676	89.400, 1.985	89.400, 1.863	89.400, 2.229	89.400, 2.093	89.400, 2.010
449	89.600, 2.216	89.600, 2.058	89.600, 1.926	89.600, 3.487	89.600, 3.327	89.600, 3.118	89.600, 2.054	89.600, 1.992	89.600, 1.841	89.600, 1.676	89.600, 1.986	89.600, 1.864	89.600, 2.230	89.600, 2.094	89.600, 2.011
450	89.800, 2.217	89.800, 2.059	89.800, 1.927	89.800, 3.492	89.800, 3.331	89.800, 3.122	89.800, 2.055	89.800, 1.993	89.800, 1.842	89.800, 1.677	89.800, 1.987	89.800, 1.865	89.800, 2.230	89.800, 2.095	89.800, 2.012
451	90.000, 2.217	90.000, 2.059	90.000, 1.928	90.000, 3.496	90.000, 3.336	90.000, 3.125	90.000, 2.056	90.000, 1.993	90.000, 1.843	90.000, 1.677	90.000, 1.988	90.000, 1.866	90.000, 2.231	90.000, 2.096	90.000, 2.013
452	90.200, 2.218	90.200, 2.060	90.200, 1.929	90.200, 3.500	90.200, 3.340	90.200, 3.129	90.200, 2.057	90.200, 1.994	90.200, 1.843	90.200, 1.677	90.200, 1.988	90.200, 1.867	90.200, 2.232	90.200, 2.096	90.200, 2.014
453	90.400, 2.219	90.400, 2.061	90.400, 1.930	90.400, 3.505	90.400, 3.344	90.400, 3.132	90.400, 2.058	90.400, 1.995	90.400, 1.844	90.400, 1.678	90.400, 1.989	90.400, 1.867	90.400, 2.233	90.400, 2.097	90.400, 2.014
454	90.600, 2.219	90.600, 2.061	90.600, 1.931	90.600, 3.509	90.600, 3.348	90.600, 3.135	90.600, 2.059	90.600, 1.996	90.600, 1.845	90.600, 1.678	90.600, 1.989	90.600, 1.868	90.600, 2.233	90.600, 2.098	90.600, 2.015
455	90.800, 2.220	90.800, 2.062	90.800, 1.932	90.800, 3.513	90.800, 3.352	90.800, 3.139	90.800, 2.060	90.800, 1.997	90.800, 1.846	90.800, 1.679	90.800, 1.990	90.800, 1.869	90.800, 2.234	90.800, 2.099	90.800, 2.016
456	91.000, 2.221	91.000, 2.063	91.000, 1.932	91.000, 3.517	91.000, 3.355	91.000, 3.142	91.000, 2.061	91.000, 1.997	91.000, 1.847	91.000, 1.680	91.000, 1.990	91.000, 1.870	91.000, 2.235	91.000, 2.100	91.000, 2.017
457	91.200, 2.222	91.200, 2.064	91.200, 1.933	91.200, 3.521	91.200, 3.359	91.200, 3.145	91.200, 2.062	91.200, 1.998	91.200, 1.847	91.200, 1.681	91.200, 1.991	91.200, 1.871	91.200, 2.236	91.200, 2.100	91.200, 2.019
458	91.400, 2.223	91.400, 2.065	91.400, 1.934	91.400, 3.525	91.400, 3.363	91.400, 3.148	91.400, 2.063	91.400, 1.999	91.400, 1.848	91.400, 1.682	91.400, 1.992	91.400, 1.871	91.400, 2.236	91.400, 2.101	91.400, 2.020
459	91.600, 2.224	91.600, 2.066	91.600, 1.934	91.600, 3.529	91.600, 3.366	91.600, 3.152	91.600, 2.064	91.600, 1.999	91.600, 1.848	91.600, 1.683	91.600, 1.993	91.600, 1.872	91.600, 2.237	91.600, 2.101	91.600, 2.021
460	91.800, 2.225	91.800, 2.067	91.800, 1.935	91.800, 3.533	91.800, 3.369	91.800, 3.155	91.800, 2.065	91.800, 2.000	91.800, 1.849	91.800, 1.683	91.800, 1.994	91.800, 1.873	91.800, 2.238	91.800, 2.101	91.800, 2.021
461	92.000, 2.225	92.000, 2.068	92.000, 1.936	92.000, 3.537	92.000, 3.373	92.000, 3.159	92.000, 2.067	92.000, 2.000	92.000, 1.849	92.000, 1.684	92.000, 1.995	92.000, 1.874	92.000, 2.238	92.000, 2.102	92.000, 2.022
462	92.200, 2.226	92.200, 2.069	92.200, 1.936	92.200, 3.541	92.200, 3.376	92.200, 3.162	92.200, 2.068	92.200, 2.000	92.200, 1.850	92.200, 1.684	92.200, 1.996	92.200, 1.874	92.200, 2.239	92.200, 2.102	92.200, 2.023
463	92.400, 2.227	92.400, 2.070	92.400, 1.937	92.400, 3.545	92.400, 3.380	92.400, 3.165	92.400, 2.069	92.400, 2.001	92.400, 1.850	92.400, 1.685	92.400, 1.997	92.400, 1.875	92.400, 2.240	92.400, 2.102	92.400, 2.023
464	92.600, 2.228	92.600, 2.071	92.600, 1.937	92.600, 3.549	92.600, 3.383	92.600, 3.169	92.600, 2.069	92.600, 2.001	92.600, 1.851	92.600, 1.686	92.600, 1.998	92.600, 1.875	92.600, 2.241	92.600, 2.103	92.600, 2.024
465	92.800, 2.229	92.800, 2.071	92.800, 1.938	92.800, 3.553	92.800, 3.387	92.800, 3.172	92.800, 2.070	92.800, 2.002	92.800, 1.851	92.800, 1.686	92.800, 1.999	92.800, 1.876	92.800, 2.242	92.800, 2.104	92.800, 2.024
466	93.000, 2.230	93.000, 2.072	93.000, 1.938	93.000, 3.557	93.000, 3.390	93.000, 3.175	93.000, 2.071	93.000, 2.003	93.000, 1.852	93.000, 1.687	93.000, 2.000	93.000, 1.877	93.000, 2.243	93.000, 2.104	93.000, 2.025
467	93.200, 2.231	93.200, 2.072	93.200, 1.939	93.200, 3.561	93.200, 3.394	93.200, 3.178	93.200, 2.072	93.200, 2.003	93.200, 1.853	93.200, 1.688	93.200, 2.001	93.200, 1.877	93.200, 2.244	93.200, 2.105	93.200, 2.025
468	93.400, 2.231	93.400, 2.073	93.400, 1.940	93.400, 3.564	93.400, 3.397	93.400, 3.182	93.400, 2.072	93.400, 2.004	93.400, 1.853	93.400, 1.689	93.400, 2.002	93.400, 1.878	93.400, 2.245	93.400, 2.106	93.400, 2.026
469	93.600, 2.232	93.600, 2.073	93.600, 1.941	93.600, 3.568	93.600, 3.401	93.600, 3.185	93.600, 2.073	93.600, 2.005	93.600, 1.854	93.600, 1.689	93.600, 2.003	93.600, 1.879	93.600, 2.246	93.600, 2.106	93.600, 2.027
470	93.800, 2.233	93.800, 2.074	93.800, 1.941	93.800, 3.572	93.800, 3.405	93.800, 3.189	93.800, 2.074	93.800, 2.006	93.800, 1.854	93.800, 1.689	93.800, 2.003	93.800, 1.879	93.800, 2.246	93.800, 2.107	93.800, 2.027
471	94.000, 2.233	94.000, 2.074	94.000, 1.942	94.000, 3.576	94.000, 3.408	94.000, 3.192	94.000, 2.074	94.000, 2.007	94.000, 1.855	94.000, 1.690	94.000, 2.004	94.000, 1.879	94.000, 2.247	94.000, 2.107	94.000, 2.028
472	94.200, 2.234	94.200, 2.075	94.200, 1.943	94.200, 3.579	94.200, 3.412	94.200, 3.196	94.200, 2.075	94.200, 2.008	94.200, 1.856	94.200, 1.690	94.200, 2.005	94.200, 1.880	94.200, 2.247	94.200, 2.108	94.200, 2.028
473	94.400, 2.235	94.400, 2.076	94.400, 1.944	94.400, 3.583	94.400, 3.416	94.400, 3.199	94.400, 2.076	94.400, 2.008	94.400, 1.856	94.400, 1.691	94.400, 2.005	94.400, 1.881	94.400, 2.247	94.400, 2.108	94.400, 2.029
474	94.600, 2.236	94.600, 2.076	94.600, 1.944	94.600, 3.588	94.600, 3.419	94.600, 3.202	94.600, 2.076	94.600, 2.009	94.600, 1.857	94.600, 1.691	94.600, 2.006	94.600, 1.881	94.600, 2.248	94.600, 2.109	94.600, 2.030
475	94.800, 2.236	94.800, 2.077	94.800, 1.945	94.800, 3.592	94.800, 3.423	94.800, 3.206	94.800, 2.077	94.800, 2.010	94.800, 1.858	94.800, 1.692	94.800, 2.006	94.800, 1.882	94.800, 2.248	94.800, 2.110	94.800, 2.030
476	95.000, 2.237	95.000, 2.078	95.000, 1.946	95.000, 3.595	95.000, 3.427	95.000, 3.209	95.000, 2.077	95.000, 2.010	95.000, 1.858	95.000, 1.693	95.000, 2.007	95.000, 1.882	95.000, 2.249	95.000, 2.110	95.000, 2.031
477	95.200, 2.238	95.200, 2.079	95.200, 1.947	95.200, 3.599	95.200, 3.431	95.200, 3.212	95.200, 2.078	95.200, 2.010	95.200, 1.859	95.200, 1.694	95.200, 2.007	95.200, 1.883	95.200, 2.249	95.200, 2.111	95.200, 2.032
478	95.400, 2.238	95.400, 2.080	95.400, 1.947	95.400, 3.603	95.400, 3.434	95.400, 3.215	95.400, 2.079	95.400, 2.011	95.400, 1.859	95.400, 1.694	95.400, 2.008	95.400, 1.884	95.400, 2.250	95.400, 2.111	95.400, 2.033
479	95.600, 2.239	95.600, 2.081	95.600, 1.947	95.600, 3.607	95.600, 3.438	95.600, 3.218	95.600, 2.080	95.600, 2.011	95.600, 1.860	95.600, 1.695	95.600, 2.008	95.600, 1.884	95.600, 2.250	95.600, 2.111	95.600, 2.034
480	95.800, 2.239	95.800, 2.082	95.800, 1.948	95.800, 3.611	95.800, 3.441	95.800, 3.221	95.800, 2.081	95.800, 2.011	95.800, 1.861	95.800, 1.695	95.800, 2.009	95.800, 1.885	95.800, 2.251	95.800, 2.112	95.800, 2.034
481	96.000, 2.240	96.000, 2.082	96.000, 1.949	96.000, 3.615	96.000, 3.445	96.000, 3.224	96.000, 2.082	96.000, 2.011	96.000, 1.861	96.000, 1.695	96.000, 2.009	96.000, 1.885	96.000, 2.252	96.000, 2.113	96.000, 2.035
482	96.200, 2.241	96.200, 2.083	96.200, 1.949	96.200, 3.619	96.200, 3.449	96.200, 3.227	96.200, 2.083	96.200, 2.012	96.200, 1.862	96.200, 1.695	96.200, 2.010	96.200, 1.886	96.200, 2.253	96.200, 2.114	96.200, 2.035
483	96.400, 2.242	96.400, 2.084	96.400, 1.949	96.400, 3.623	96.400, 3.452	96.400, 3.231	96.400, 2.083	96.400, 2.012	96.400, 1.863	96.400, 1.696	96.400, 2.011	96.400, 1.886	96.400, 2.254	96.400, 2.115	96.400, 2.036
484	96.600, 2.243	96.600, 2.085	96.600, 1.950	96.600, 3.626	96.600, 3.456	96.600, 3.234	96.600, 2.084	96.600, 2.012	96.600, 1.864	96.600, 1.697	96.600, 2.012	96.600, 1.887	96.600, 2.255	96.600, 2.116	96.600, 2.036
485	96.800, 2.244	96.800, 2.085	96.800, 1.950	96.800, 3.630	96.800, 3.459	96.800, 3.237	96.800, 2.085	96.800, 2.013	96.800, 1.864	96.800, 1.698	96.800, 2.013	96.800, 1.887	96.800, 2.255	96.800, 2.117	96.800, 2.037
486	97.000, 2.245	97.000, 2.086	97.000, 1.951	97.000, 3.634	97.000, 3.462	97.000, 3.240	97.000, 2.085	97.000, 2.013	97.000, 1.865	97.000, 1.698	97.000, 2.014	97.000, 1.888	97.000, 2.256	97.000, 2.118	97.000, 2.037
487	97.200, 2.246	97.200, 2.087	97.200, 1.951	97.200, 3.638	97.200, 3.465	97.200, 3.243	97.200, 2.086	97.200, 2.014	97.200, 1.866	97.200, 1.699	97.200, 2.014	97.200, 1.888	97.200, 2.257	97.200, 2.119	97.200, 2.038
488	97.400, 2.247	97.400, 2.087	97.400, 1.951	97.400, 3.641	97.400, 3.468	97.400, 3.246	97.400, 2.086	97.400, 2.014	97.400, 1.866	97.400, 1.700	97.400, 2.015	97.400, 1.889	97.400, 2.257	97.400, 2.120	97.400, 2.038
489	97.600, 2.247	97.600, 2.088	97.600, 1.952	97.600, 3.645	97.600, 3.471	97.600, 3.250	97.600, 2.087	97.600, 2.015	97.600, 1.867	97.600, 1.700	97.600, 2.016	97.600, 1.889	97.600, 2.257	97.600, 2.120	97.600, 2.039
490	97.800, 2.248	97.800, 2.088	97.800, 1.952	97.800, 3.649	97.800, 3.474	97.800, 3.253	97.800, 2.088	97.800, 2.015	97.800, 1.867	97.800, 1.701	97.800, 2.017	97.800, 1.890	97.800, 2.258	97.800, 2.121	97.800, 2.040
491	98.000, 2.248	98.000, 2.089	98.000, 1.953	98.000, 3.653	98.000, 3.477	98.000, 3.256	98.000, 2.088	98.000, 2.015	98.000, 1.868	98.000, 1.701	98.000, 2.018	98.000, 1.891	98.000, 2.258	98.000, 2.121	98.000, 2.040
492	98.200, 2.249	98.200, 2.090	98.200, 1.954	98.200, 3.656	98.200, 3.480	98.200, 3.260	98.200, 2.089	98.200, 2.016	98.200, 1.868	98.200, 1.701	98.200, 2.019	98.200, 1.892	98.200, 2.259	98.200, 2.122	98.200, 2.041
493	98.400, 2.249	98.400, 2.090	98.400, 1.955	98.400, 3.660	98.400, 3.484	98.400, 3.263	98.400, 2.090	98.400, 2.016	98.400, 1.869	98.400, 1.702	98.400, 2.019	98.400, 1.892	98.400, 2.259	98.400, 2.122	98.400, 2.041
494	98.600, 2.250	98.600, 2.091	98.600, 1.956	98.600, 3.664	98.600, 3.487	98.600, 3.266	98.600, 2.091	98.600, 2.016	98.600, 1.869	98.600, 1.702	98.600, 2.020	98.600, 1.893	98.600, 2.260	98.600, 2.123	98.600, 2.042
495	98.800, 2.250	98.800, 2.091	98.800, 1.957	98.800, 3.668	98.800, 3.491	98.800, 3.268	98.800, 2.092	98.800, 2.017	98.800, 1.870	98.800, 1.703	98.800, 2.021	98.800, 1.893	98.800, 2.261	98.800, 2.123	98.800, 2.042
496	99.000, 2.251	99.000, 2.092	99.000, 1.957	99.000, 3.672	99.000, 3.495	99.000, 3.271	99.000, 2.092	99.000, 2.017	99.000, 1.870	99.000, 1.703	99.000, 2.022	99.000, 1.894	99.000, 2.262	99.000, 2.124	99.000, 2.043
497	99.200, 2.251	99.200, 2.093	99.200, 1.958	99.200, 3.675	99.200, 3.498	99.200, 3.274	99.200, 2.093	99.200, 2.017	99.200, 1.871	99.200, 1.704	99.200, 2.023	99.200, 1.894	99.200, 2.263	99.200, 2.124	99.200, 2.043
498	99.400, 2.252	99.400, 2.093	99.400, 1.958	99.400, 3.679	99.400, 3.502	99.400, 3.277	99.400, 2.093	99.400, 2.018	99.400, 1.871	99.400, 1.704	99.400, 2.024	99.400, 1.895	99.400, 2.263	99.400, 2.125	99.400, 2.043
499	99.600, 2.253	99.600, 2.094	99.600, 1.958	99.600, 3.682	99.600, 3.506	99.600, 3.280	99.600, 2.094	99.600, 2.018	99.600, 1.872	99.600, 1.704	99.600, 2.025	99.600, 1.895	99.600, 2.264	99.600, 2.125	99.600, 2.044
500	99.800, 2.254	99.800, 2.094	99.800, 1.959	99.800, 3.686	99.800, 3.509	99.800, 3.283	99.800, 2.094	99.800, 2.019	99.800, 1.872	99.800, 1.704	99.800, 2.025	99.800, 1.896	99.800, 2.265	99.800, 2.125	99.800, 2.044
501	100.000, 2.255	100.000, 2.095	100.000, 1.959	100.000, 3.689	100.000, 3.513	100.000, 3.287	100.000, 2.095	100.000, 2.019	100.000, 1.873	100.000, 1.705	100.000, 2.026	100.000, 1.896	100.000, 2.266	100.000, 2.126	100.000, 2.045
502	100.200, 2.255	100.200, 2.095	100.200, 1.960	100.200, 3.693	100.200, 3.516	100.200, 3.290	100.200, 2.096	100.200, 2.020	100.200, 1.873	100.200, 1.705	100.200, 2.027	100.200, 1.896	100.200, 2.266	100.200, 2.127	100.200, 2.046
503	100.400, 2.256	100.400, 2.096	100.400, 1.960	100.400, 3.696	100.400, 3.520	100.400, 3.293	100.400, 2.096	100.400, 2.020	100.400, 1.873	100.400, 1.706	100.400, 2.028	100.400, 1.896	100.400, 2.267	100.400, 2.127	100.400, 2.046
504	100.600, 2.257	100.600, 2.096	100.600, 1.960	100.600, 3.700	100.600, 3.523	100.600, 3.296	100.600, 2.097	100.600, 2.021	100.600, 1.874	100.600, 1.707	100.600, 2.029	100.600, 1.896	100.600, 2.267	100.600, 2.128	100.600, 2.047
505	100.800, 2.258	100.800, 2.097	100.800, 1.961	100.800, 3.703	100.800, 3.527	100.800, 3.299	100.800, 2.097	100.800, 2.022	100.800, 1.874	100.800, 1.708	100.800, 2.029	100.800, 1.896	100.800, 2.267	100.800, 2.129	100.800, 2.048
506	101.000, 2.258	101.000, 2.097	101.000, 1.961	101.000, 3.707	101.000, 3.530	101.000, 3.302	101.000, 2.098	101.000, 2.022	101.000, 1.874	101.000, 1.709	101.000, 2.030	101.000, 1.897	101.000, 2.268	101.000, 2.129	101.000, 2.049
507	101.200, 2.259	101.200, 2.098	101.200, 1.961	101.200, 3.710	101.200, 3.533	101.200, 3.305	101.200, 2.098	101.200, 2.022	101.200, 1.875	101.200, 1.710	101.200, 2.031	101.200, 1.897	101.200, 2.268	101.200, 2.130	101.200, 2.050
508	101.400, 2.260	101.400, 2.098	101.400, 1.961	101.400, 3.713	101.400, 3.537	101.400, 3.308	101.400, 2.099	101.400, 2.023	101.400, 1.875	101.400, 1.711	101.400, 2.032	101.400, 1.898	101.400, 2.269	101.400, 2.130	101.400, 2.051
509	101.600, 2.260	101.600, 2.099	101.600, 1.961	101.600, 3.717	101.600, 3.540	101.600, 3.311	101.600, 2.100	101.600, 2.023	101.600, 1.875	101.600, 1.711	101.600, 2.032	101.600, 1.898	101.600, 2.269	101.600, 2.131	101.600, 2.052
510	101.800, 2.261	101.800, 2.099	101.800, 1.962	101.800, 3.720	101.800, 3.543	101.800, 3.314	101.800, 2.100	101.800, 2.023	101.800, 1.876	101.800, 1.712	101.800, 2.033	101.800, 1.898	101.800, 2.270	101.800, 2.131	101.800, 2.053
511	102.000, 2.262	102.000, 2.100	102.000, 1.962	102.000, 3.723	102.000, 3.546	102.000, 3.316	102.000, 2.101	102.000, 2.023	102.000, 1.876	102.000, 1.713	102.000, 2.034	102.000, 1.899	102.000, 2.270	102.000, 2.132	102.000, 2.054
512	102.200, 2.262	102.200, 2.100	102.200, 1.962	102.200, 3.727	102.200, 3.550	102.200, 3.319	102.200, 2.102	102.200, 2.024	102.200, 1.877	102.200, 1.713	102.200, 2.034	102.200, 1.899	102.200, 2.271	102.200, 2.132	102.200, 2.054
513	102.400, 2.263	102.400, 2.101	102.400, 1.963	102.400, 3.731	102.400, 3.553	102.400, 3.322	102.400, 2.102	102.400, 2.024	102.400, 1.877	102.400, 1.714	102.400, 2.035	102.400, 1.900	102.400, 2.272	102.400, 2.132	102.400, 2.055
514	102.600, 2.264	102.600, 2.101	102.600, 1.963	102.600, 3.734	102.600, 3.556	102.600, 3.324	102.600, 2.103	102.600, 2.024	102.600, 1.877	102.600, 1.714	102.600, 2.036	102.600, 1.900	102.600, 2.272	102.600, 2.132	102.600, 2.055
515	102.800, 2.264	102.800, 2.101	102.800, 1.964	102.800, 3.738	102.800, 3.560	102.800, 3.327	102.800, 2.104	102.800, 2.025	102.800, 1.878	102.800, 1.714	102.800, 2.036	102.800, 1.900	102.800, 2.273	102.800, 2.133	102.800, 2.055
516	103.000, 2.265	103.000, 2.102	103.000, 1.964	103.000, 3.741	103.000, 3.562	103.000, 3.330	103.000, 2.104	103.000, 2.025	103.000, 1.878	103.000, 1.714	103.000, 2.036	103.000, 1.901	103.000, 2.273	103.000, 2.133	103.000, 2.055
517	103.200, 2.265	103.200, 2.102	103.200, 1.964	103.200, 3.745	103.200, 3.566	103.200, 3.334	103.200, 2.105	103.200, 2.025	103.200, 1.879	103.200, 1.714	103.200, 2.037	103.200, 1.901	103.200, 2.273	103.200, 2.133	103.200, 2.056
518	103.400, 2.266	103.400, 2.102	103.400, 1.964	103.400, 3.748	103.400, 3.568	103.400, 3.337	103.400, 2.106	103.400, 2.026	103.400, 1.879	103.400, 1.714	103.400, 2.037	103.400, 1.902	103.400, 2.273	103.400, 2.133	103.400, 2.056
519	103.600, 2.266	103.600, 2.102	103.600, 1.965	103.600, 3.752	103.600, 3.571	103.600, 3.340	103.600, 2.106	103.600, 2.026	103.600, 1.880	103.600, 1.714	103.600, 2.036	103.600, 1.902	103.600, 2.274	103.600, 2.134	103.600, 2.056
520	103.800, 2.267	103.800, 2.103	103.800, 1.966	103.800, 3.756	103.800, 3.575	103.800, 3.344	103.800, 2.107	103.800, 2.027	103.800, 1.881	103.800, 1.714	103.800, 2.036	103.800, 1.903	103.800, 2.274	103.800, 2.134	103.800, 2.057
521	104.000, 2.267	104.000, 2.103	104.000, 1.966	104.000, 3.759	104.000, 3.578	104.000, 3.348	104.000, 2.108	104.000, 2.027	104.000, 1.881	104.000, 1.714	104.000, 2.036	104.000, 1.903	104.000, 2.274	104.000, 2.135	104.000, 2.057
522	104.200, 2.267	104.200, 2.104	104.200, 1.967	104.200, 3.762	104.200, 3.581	104.200, 3.351	104.200, 2.108	104.200, 2.028	104.200, 1.882	104.200, 1.714	104.200, 2.037	104.200, 1.904	104.200, 2.274	104.200, 2.135	104.200, 2.058
523	104.400, 2.267	104.400, 2.105	104.400, 1.968	104.400, 3.766	104.400, 3.584	104.400, 3.354	104.400, 2.109	104.400, 2.028	104.400, 1.882	104.400, 1.714	104.400, 2.037	104.400, 1.904	104.400, 2.274	104.400, 2.136	104.400, 2.059
524	104.600, 2.268	104.600, 2.105	104.600, 1.968	104.600, 3.769	104.600, 3.587	104.600, 3.358	104.600, 2.110	104.600, 2.028	104.600, 1.883	104.600, 1.715	104.600, 2.038	104.600, 1.904	104.600, 2.275	104.600, 2.136	104.600, 2.060
525	104.800, 2.268	104.800, 2.106	104.800, 1.969	104.800, 3.773	104.800, 3.590	104.800, 3.361	104.800, 2.110	104.800, 2.029	104.800, 1.883	104.800, 1.716	104.800, 2.038	104.800, 1.904	104.800, 2.275	104.800, 2.137	104.800, 2.060
526	105.000, 2.269	105.000, 2.106	105.000, 1.970	105.000, 3.776	105.000, 3.594	105.000, 3.364	105.000, 2.111	105.000, 2.029	105.000, 1.884	105.000, 1.716	105.000, 2.039	105.000, 1.904	105.000, 2.276	105.000, 2.137	105.000, 2.061
527	105.200, 2.269	105.200, 2.107	105.200, 1.970	105.200, 3.779	105.200, 3.597	105.200, 3.366	105.200, 2.112	105.200, 2.029	105.200, 1.884	105.200, 1.717	105.200, 2.040	105.200, 1.905	105.200, 2.276	105.200, 2.138	105.200, 2.062
528	105.400, 2.270	105.400, 2.107	105.400, 1.970	105.400, 3.783	105.400, 3.600	105.400, 3.369	105.400, 2.112	105.400, 2.029	105.400, 1.885	105.400, 1.717	105.400, 2.041	105.400, 1.905	105.400, 2.277	105.400, 2.138	105.400, 2.062
529	105.600, 2.271	105.600, 2.108	105.600, 1.971	105.600, 3.787	105.600, 3.603	105.600, 3.371	105.600, 2.113	105.600, 2.029	105.600, 1.885	105.600, 1.718	105.600, 2.042	105.600, 1.905	105.600, 2.278	105.600, 2.138	105.600, 2.062
530	105.800, 2.272	105.800, 2.109	105.800, 1.971	105.800, 3.791	105.800, 3.606	105.800, 3.374	105.800, 2.113	105.800, 2.029	105.800, 1.886	105.800, 1.718	105.800, 2.042	105.800, 1.906	105.800, 2.278	105.800, 2.138	105.800, 2.063
531	106.000, 2.273	106.000, 2.109	106.000, 1.971	106.000, 3.794	106.000, 3.610	106.000, 3.376	106.000, 2.114	106.000, 2.030	106.000, 1.886	106.000, 1.718	106.000, 2.043	106.000, 1.906	106.000, 2.279	106.000, 2.138	106.000, 2.063
532	106.200, 2.274	106.200, 2.110	106.200, 1.971	106.200, 3.798	106.200, 3.613	106.200, 3.379	106.200, 2.114	106.200, 2.030	106.200, 1.886	106.200, 1.719	106.200, 2.044	106.200, 1.907	106.200, 2.280	106.200, 2.138	106.200, 2.063
533	106.400, 2.275	106.400, 2.110	106.400, 1.971	106.400, 3.802	106.400, 3.616	106.400, 3.381	106.400, 2.115	106.400, 2.031	106.400, 1.886	106.400, 1.719	106.400, 2.045	106.400, 1.907	106.400, 2.280	106.400, 2.139	106.400, 2.064
534	106.600, 2.275	106.600, 2.110	106.600, 1.972	106.600, 3.805	106.600, 3.619	106.600, 3.383	106.600, 2.115	106.600, 2.031	106.600, 1.887	106.600, 1.719	106.600, 2.045	106.600, 1.907	106.600, 2.281	106.600, 2.140	106.600, 2.064
535	106.800, 2.276	106.800, 2.111	106.800, 1.972	106.800, 3.808	106.800, 3.622	106.800, 3.386	106.800, 2.116	106.800, 2.031	106.800, 1.887	106.800, 1.719	106.800, 2.046	106.800, 1.908	106.800, 2.282	106.800, 2.140	106.800, 2.064
536	107.000, 2.276	107.000, 2.111	107.000, 1.972	107.000, 3.812	107.000, 3.625	107.000, 3.388	107.000, 2.116	107.000, 2.032	107.000, 1.888	107.000, 1.719	107.000, 2.046	107.000, 1.908	107.000, 2.282	107.000, 2.141	107.000, 2.065
537	107.200, 2.276	107.200, 2.112	107.200, 1.973	107.200, 3.815	107.200, 3.628	107.200, 3.391	107.200, 2.117	107.200, 2.032	107.200, 1.888	107.200, 1.719	107.200, 2.047	107.200, 1.908	107.200, 2.282	107.200, 2.142	107.200, 2.065
538	107.400, 2.276	107.400, 2.112	107.400, 1.973	107.400, 3.818	107.400, 3.632	107.400, 3.393	107.400, 2.117	107.400, 2.032	107.400, 1.888	107.400, 1.719	107.400, 2.047	107.400, 1.908	107.400, 2.283	107.400, 2.142	107.400, 2.065
539	107.600, 2.276	107.600, 2.113	107.600, 1.973	107.600, 3.822	107.600, 3.635	107.600, 3.396	107.600, 2.118	107.600, 2.033	107.600, 1.888	107.600, 1.720	107.600, 2.047	107.600, 1.909	107.600, 2.283	107.600, 2.142	107.600, 2.065
540	107.800, 2.276	107.800, 2.113	107.800, 1.974	107.800, 3.825	107.800, 3.638	107.800, 3.398	107.800, 2.118	107.800, 2.033	107.800, 1.888	107.800, 1.720	107.800, 2.048	107.800, 1.909	107.800, 2.284	107.800, 2.143	107.800, 2.066
541	108.000, 2.276	108.000, 2.113	108.000, 1.974	108.000, 3.828	108.000, 3.641	108.000, 3.401	108.000, 2.118	108.000, 2.034	108.000, 1.889	108.000, 1.721	108.000, 2.048	108.000, 1.910	108.000, 2.284	108.000, 2.143	108.000, 2.066
542	108.200, 2.276	108.200, 2.113	108.200, 1.975	108.200, 3.830	108.200, 3.645	108.200, 3.403	108.200, 2.119	108.200, 2.034	108.200, 1.889	108.200, 1.721	108.200, 2.049	108.200, 1.910	108.200, 2.284	108.200, 2.143	108.200, 2.067
543	108.400, 2.277	108.400, 2.114	108.400, 1.975	108.400, 3.833	108.400, 3.648	108.400, 3.406	108.400, 2.119	108.400, 2.034	108.400, 1.890	108.400, 1.722	108.400, 2.049	108.400, 1.910	108.400, 2.284	108.400, 2.143	108.400, 2.067
544	108.600, 2.277	108.600, 2.114	108.600, 1.976	108.600, 3.836	108.600, 3.650	108.600, 3.408	108.600, 2.119	108.600, 2.035	108.600, 1.890	108.600, 1.722	108.600, 2.050	108.600, 1.911	108.600, 2.283	108.600, 2.144	108.600, 2.067
545	108.800, 2.278	108.800, 2.114	108.800, 1.976	108.800, 3.839	108.800, 3.653	108.800, 3.411	108.800, 2.120	108.800, 2.035	108.800, 1.891	108.800, 1.723	108.800, 2.051	108.800, 1.911	108.800, 2.283	108.800, 2.144	108.800, 2.068
546	109.000, 2.278	109.000, 2.114	109.000, 1.977	109.000, 3.842	109.000, 3.656	109.000, 3.414	109.000, 2.120	109.000, 2.035	109.000, 1.891	109.000, 1.723	109.000, 2.051	109.000, 1.912	109.000, 2.283	109.000, 2.144	109.000, 2.068
547	109.200, 2.279	109.200, 2.114	109.200, 1.977	109.200, 3.845	109.200, 3.658	109.200, 3.417	109.200, 2.120	109.200, 2.036	109.200, 1.892	109.200, 1.724	109.200, 2.052	109.200, 1.912	109.200, 2.283	109.200, 2.143	109.200, 2.068
548	109.400, 2.280	109.400, 2.114	109.400, 1.978	109.400, 3.848	109.400, 3.661	109.400, 3.419	109.400, 2.121	109.400, 2.036	109.400, 1.892	109.400, 1.724	109.400, 2.053	109.400, 1.913	109.400, 2.284	109.400, 2.143	109.400, 2.069
549	109.600, 2.281	109.600, 2.114	109.600, 1.978	109.600, 3.851	109.600, 3.664	109.600, 3.422	109.600, 2.121	109.600, 2.036	109.600, 1.893	109.600, 1.724	109.600, 2.053	109.600, 1.914	109.600, 2.284	109.600, 2.144	109.600, 2.069
550	109.800, 2.282	109.800, 2.114	109.800, 1.979	109.800, 3.854	109.800, 3.667	109.800, 3.425	109.800, 2.121	109.800, 2.036	109.800, 1.893	109.800, 1.725	109.800, 2.053	109.800, 1.914	109.800, 2.285	109.800, 2.144	109.800, 2.070
551	110.000, 2.283	110.000, 2.114	110.000, 1.979	110.000, 3.857	110.000, 3.669	110.000, 3.427	110.000, 2.122	110.000, 2.036	110.000, 1.893	110.000, 1.725	110.000, 2.054	110.000, 1.915	110.000, 2.285	110.000, 2.145	110.000, 2.070
552	110.200, 2.283	110.200, 2.115	110.200, 1.979	110.200, 3.860	110.200, 3.672	110.200, 3.430	110.200, 2.122	110.200, 2.036	110.200, 1.894	110.200, 1.726	110.200, 2.054	110.200, 1.915	110.200, 2.286	110.200, 2.145	110.200, 2.071
553	110.400, 2.284	110.400, 2.115	110.400, 1.980	110.400, 3.863	110.400, 3.674	110.400, 3.433	110.400, 2.123	110.400, 2.037	110.400, 1.894	110.400, 1.726	110.400, 2.054	110.400, 1.915	110.400, 2.287	110.400, 2.146	110.400, 2.072
554	110.600, 2.284	110.600, 2.115	110.600, 1.980	110.600, 3.867	110.600, 3.677	110.600, 3.436	110.600, 2.124	110.600, 2.037	110.600, 1.894	110.600, 1.726	110.600, 2.055	110.600, 1.915	110.600, 2.287	110.600, 2.147	110.600, 2.072
555	110.800, 2.284	110.800, 2.116	110.800, 1.981	110.800, 3.871	110.800, 3.680	110.800, 3.439	110.800, 2.124	110.800, 2.037	110.800, 1.895	110.800, 1.727	110.800, 2.055	110.800, 1.915	110.800, 2.288	110.800, 2.148	110.800, 2.073
556	111.000, 2.284	111.000, 2.117	111.000, 1.981	111.000, 3.874	111.000, 3.683	111.000, 3.442	111.000, 2.125	111.000, 2.037	111.000, 1.895	111.000, 1.727	111.000, 2.055	111.000, 1.915	111.000, 2.288	111.000, 2.149	111.000, 2.073
557	111.200, 2.284	111.200, 2.117	111.200, 1.981	111.200, 3.878	111.200, 3.686	111.200, 3.445	111.200, 2.125	111.200, 2.037	111.200, 1.895	111.200, 1.728	111.200, 2.055	111.200, 1.915	111.200, 2.289	111.200, 2.149	111.200, 2.074
558	111.400, 2.284	111.400, 2.118	111.400, 1.981	111.400, 3.882	111.400, 3.689	111.400, 3.448	111.400, 2.126	111.400, 2.038	111.400, 1.896	111.400, 1.728	111.400, 2.056	111.400, 1.915	111.400, 2.290	111.400, 2.150	111.400, 2.074
559	111.600, 2.284	111.600, 2.118	111.600, 1.982	111.600, 3.886	111.600, 3.692	111.600, 3.450	111.600, 2.127	111.600, 2.038	111.600, 1.896	111.600, 1.729	111.600, 2.056	111.600, 1.915	111.600, 2.290	111.600, 2.150	111.600, 2.074
560	111.800, 2.285	111.800, 2.119	111.800, 1.982	111.800, 3.889	111.800, 3.695	111.800, 3.453	111.800, 2.127	111.800, 2.038	111.800, 1.896	111.800, 1.729	111.800, 2.056	111.800, 1.916	111.800, 2.291	111.800, 2.150	111.800, 2.075
561	112.000, 2.285	112.000, 2.119	112.000, 1.982	112.000, 3.893	112.000, 3.698	112.000, 3.456	112.000, 2.128	112.000, 2.039	112.000, 1.897	112.000, 1.730	112.000, 2.057	112.000, 1.916	112.000, 2.291	112.000, 2.151	112.000, 2.075
562	112.200, 2.285	112.200, 2.119	112.200, 1.983	112.200, 3.897	112.200, 3.702	112.200, 3.458	112.200, 2.128	112.200, 2.039	112.200, 1.898	112.200, 1.730	112.200, 2.057	112.200, 1.916	112.200, 2.291	112.200, 2.151	112.200, 2.075
563	112.400, 2.285	112.400, 2.120	112.400, 1.983	112.400, 3.900	112.400, 3.705	112.400, 3.461	112.400, 2.128	112.400, 2.040	112.400, 1.898	112.400, 1.730	112.400, 2.058	112.400, 1.917	112.400, 2.292	112.400, 2.152	112.400, 2.075
564	112.600, 2.286	112.600, 2.120	112.600, 1.983	112.600, 3.903	112.600, 3.708	112.600, 3.464	112.600, 2.129	112.600, 2.040	112.600, 1.899	112.600, 1.731	112.600, 2.059	112.600, 1.917	112.600, 2.292	112.600, 2.152	112.600, 2.075
565	112.800, 2.286	112.800, 2.121	112.800, 1.983	112.800, 3.907	112.800, 3.711	112.800, 3.466	112.800, 2.129	112.800, 2.040	112.800, 1.899	112.800, 1.731	112.800, 2.059	112.800, 1.918	112.800, 2.293	112.800, 2.152	112.800, 2.076
566	113.000, 2.287	113.000, 2.121	113.000, 1.984	113.000, 3.909	113.000, 3.714	113.000, 3.468	113.000, 2.129	113.000, 2.041	113.000, 1.899	113.000, 1.731	113.000, 2.060	113.000, 1.918	113.000, 2.293	113.000, 2.152	113.000, 2.076
567	113.200, 2.287	113.200, 2.122	113.200, 1.984	113.200, 3.912	113.200, 3.717	113.200, 3.470	113.200, 2.130	113.200, 2.041	113.200, 1.899	113.200, 1.732	113.200, 2.061	113.200, 1.918	113.200, 2.294	113.200, 2.152	113.200, 2.076
568	113.400, 2.287	113.400, 2.122	113.400, 1.984	113.400, 3.915	113.400, 3.720	113.400, 3.472	113.400, 2.130	113.400, 2.041	113.400, 1.899	113.400, 1.732	113.400, 2.061	113.400, 1.919	113.400, 2.294	113.400, 2.152	113.400, 2.076
569	113.600, 2.288	113.600, 2.123	113.600, 1.984	113.600, 3.918	113.600, 3.723	113.600, 3.475	113.600, 2.130	113.600, 2.042	113.600, 1.899	113.600, 1.732	113.600, 2.062	113.600, 1.919	113.600, 2.295	113.600, 2.152	113.600, 2.077
570	113.800, 2.288	113.800, 2.123	113.800, 1.984	113.800, 3.920	113.800, 3.726	113.800, 3.477	113.800, 2.130	113.800, 2.042	113.800, 1.899	113.800, 1.732	113.800, 2.062	113.800, 1.919	113.800, 2.295	113.800, 2.153	113.800, 2.077
571	114.000, 2.288	114.000, 2.123	114.000, 1.984	114.000, 3.923	114.000, 3.728	114.000, 3.480	114.000, 2.131	114.000, 2.042	114.000, 1.899	114.000, 1.733	114.000, 2.063	114.000, 1.919	114.000, 2.294	114.000, 2.153	114.000, 2.078
572	114.200, 2.288	114.200, 2.124	114.200, 1.984	114.200, 3.926	114.200, 3.731	114.200, 3.482	114.200, 2.131	114.200, 2.043	114.200, 1.899	114.200, 1.733	114.200, 2.063	114.200, 1.920	114.200, 2.294	114.200, 2.153	114.200, 2.078
573	114.400, 2.288	114.400, 2.124	114.400, 1.984	114.400, 3.928	114.400, 3.733	114.400, 3.485	114.400, 2.132	114.400, 2.043	114.400, 1.899	114.400, 1.733	114.400, 2.064	114.400, 1.920	114.400, 2.294	114.400, 2.154	114.400, 2.079
574	114.600, 2.288	114.600, 2.124	114.600, 1.984	114.600, 3.931	114.600, 3.736	114.600, 3.488	114.600, 2.132	114.600, 2.043	114.600, 1.899	114.600, 1.733	114.600, 2.064	114.600, 1.920	114.600, 2.293	114.600, 2.154	114.600, 2.080
575	114.800, 2.289	114.800, 2.125	114.800, 1.985	114.800, 3.934	114.800, 3.738	114.800, 3.490	114.800, 2.133	114.800, 2.043	114.800, 1.899	114.800, 1.733	114.800, 2.065	114.800, 1.920	114.800, 2.293	114.800, 2.154	114.800, 2.080
576	115.000, 2.289	115.000, 2.125	115.000, 1.985	115.000, 3.936	115.000, 3.741	115.000, 3.492	115.000, 2.133	115.000, 2.043	115.000, 1.900	115.000, 1.734	115.000, 2.065	115.000, 1.920	115.000, 2.293	115.000, 2.155	115.000, 2.081
577	115.200, 2.289	115.200, 2.126	115.200, 1.985	115.200, 3.939	115.200, 3.744	115.200, 3.495	115.200, 2.133	115.200, 2.043	115.200, 1.900	115.200, 1.734	115.200, 2.066	115.200, 1.921	115.200, 2.293	115.200, 2.155	115.200, 2.081
578	115.400, 2.290	115.400, 2.126	115.400, 1.986	115.400, 3.942	115.400, 3.746	115.400, 3.497	115.400, 2.134	115.400, 2.043	115.400, 1.900	115.400, 1.735	115.400, 2.066	115.400, 1.921	115.400, 2.293	115.400, 2.155	115.400, 2.082
579	115.600, 2.290	115.600, 2.126	115.600, 1.986	115.600, 3.945	115.600, 3.749	115.600, 3.499	115.600, 2.134	115.600, 2.044	115.600, 1.901	115.600, 1.735	115.600, 2.067	115.600, 1.921	115.600, 2.293	115.600, 2.155	115.600, 2.083
580	115.800, 2.290	115.800, 2.127	115.800, 1.987	115.800, 3.948	115.800, 3.752	115.800, 3.502	115.800, 2.135	115.800, 2.044	115.800, 1.901	115.800, 1.736	115.800, 2.068	115.800, 1.921	115.800, 2.294	115.800, 2.155	115.800, 2.083
581	116.000, 2.290	116.000, 2.127	116.000, 1.987	116.000, 3.951	116.000, 3.755	116.000, 3.505	116.000, 2.136	116.000, 2.044	116.000, 1.902	116.000, 1.736	116.000, 2.069	116.000, 1.922	116.000, 2.294	116.000, 2.155	116.000, 2.084
582	116.200, 2.290	116.200, 2.127	116.200, 1.988	116.200, 3.954	116.200, 3.757	116.200, 3.507	116.200, 2.136	116.200, 2.044	116.200, 1.902	116.200, 1.736	116.200, 2.069	116.200, 1.922	116.200, 2.295	116.200, 2.155	116.200, 2.084
583	116.400, 2.291	116.400, 2.128	116.400, 1.988	116.400, 3.957	116.400, 3.760	116.400, 3.510	116.400, 2.137	116.400, 2.045	116.400, 1.903	116.400, 1.737	116.400, 2.069	116.400, 1.922	116.400, 2.296	116.400, 2.155	116.400, 2.084
584	116.600, 2.291	116.600, 2.128	116.600, 1.988	116.600, 3.960	116.600, 3.763	116.600, 3.513	116.600, 2.137	116.600, 2.045	116.600, 1.903	116.600, 1.737	116.600, 2.070	116.600, 1.922	116.600, 2.296	116.600, 2.155	116.600, 2.084
585	116.800, 2.291	116.800, 2.129	116.800, 1.989	116.800, 3.963	116.800, 3.765	116.800, 3.515	116.800, 2.137	116.800, 2.045	116.800, 1.903	116.800, 1.737	116.800, 2.070	116.800, 1.922	116.800, 2.297	116.800, 2.155	116.800, 2.084
586	117.000, 2.292	117.000, 2.129	117.000, 1.989	117.000, 3.966	117.000, 3.768	117.000, 3.517	117.000, 2.138	117.000, 2.045	117.000, 1.904	117.000, 1.737	117.000, 2.070	117.000, 1.923	117.000, 2.298	117.000, 2.156	117.000, 2.084
587	117.200, 2.292	117.200, 2.129	117.200, 1.989	117.200, 3.969	117.200, 3.771	117.200, 3.520	117.200, 2.138	117.200, 2.045	117.200, 1.904	117.200, 1.737	117.200, 2.071	117.200, 1.923	117.200, 2.298	117.200, 2.156	117.200, 2.084
588	117.400, 2.292	117.400, 2.129	117.400, 1.989	117.400, 3.972	117.400, 3.774	117.400, 3.522	117.400, 2.138	117.400, 2.045	117.400, 1.904	117.400, 1.738	117.400, 2.071	117.400, 1.923	117.400, 2.299	117.400, 2.156	117.400, 2.085
589	117.600, 2.293	117.600, 2.129	117.600, 1.990	117.600, 3.975	117.600, 3.776	117.600, 3.525	117.600, 2.138	117.600, 2.045	117.600, 1.904	117.600, 1.738	117.600, 2.071	117.600, 1.924	117.600, 2.299	117.600, 2.156	117.600, 2.085
590	117.800, 2.293	117.800, 2.129	117.800, 1.990	117.800, 3.978	117.800, 3.779	117.800, 3.527	117.800, 2.138	117.800, 2.045	117.800, 1.904	117.800, 1.738	117.800, 2.071	117.800, 1.924	117.800, 2.299	117.800, 2.157	117.800, 2.085
591	118.000, 2.294	118.000, 2.129	118.000, 1.990	118.000, 3.981	118.000, 3.781	118.000, 3.530	118.000, 2.139	118.000, 2.046	118.000, 1.904	118.000, 1.738	118.000, 2.070	118.000, 1.924	118.000, 2.299	118.000, 2.157	118.000, 2.085
592	118.200, 2.294	118.200, 2.129	118.200, 1.990	118.200, 3.984	118.200, 3.784	118.200, 3.532	118.200, 2.139	118.200, 2.046	118.200, 1.904	118.200, 1.738	118.200, 2.070	118.200, 1.925	118.200, 2.299	118.200, 2.158	118.200, 2.085
593	118.400, 2.295	118.400, 2.129	118.400, 1.991	118.400, 3.986	118.400, 3.786	118.400, 3.534	118.400, 2.139	118.400, 2.046	118.400, 1.904	118.400, 1.738	118.400, 2.070	118.400, 1.925	118.400, 2.299	118.400, 2.158	118.400, 2.086
594	118.600, 2.295	118.600, 2.130	118.600, 1.991	118.600, 3.989	118.600, 3.789	118.600, 3.537	118.600, 2.139	118.600, 2.046	118.600, 1.904	118.600, 1.738	118.600, 2.070	118.600, 1.926	118.600, 2.299	118.600, 2.158	118.600, 2.086
595	118.800, 2.296	118.800, 2.130	118.800, 1.991	118.800, 3.992	118.800, 3.791	118.800, 3.539	118.800, 2.140	118.800, 2.046	118.800, 1.904	118.800, 1.739	118.800, 2.071	118.800, 1.926	118.800, 2.299	118.800, 2.159	118.800, 2.086
596	119.000, 2.296	119.000, 2.130	119.000, 1.991	119.000, 3.995	119.000, 3.794	119.000, 3.542	119.000, 2.140	119.000, 2.047	119.000, 1.904	119.000, 1.739	119.000, 2.071	119.000, 1.927	119.000, 2.300	119.000, 2.159	119.000, 2.086
597	119.200, 2.296	119.200, 2.131	119.200, 1.991	119.200, 3.998	119.200, 3.796	119.200, 3.544	119.200, 2.140	119.200, 2.047	119.200, 1.904	119.200, 1.739	119.200, 2.072	119.200, 1.927	119.200, 2.300	119.200, 2.159	119.200, 2.087
598	119.400, 2.296	119.400, 2.131	119.400, 1.991	119.400, 4.001	119.400, 3.799	119.400, 3.547	119.400, 2.140	119.400, 2.048	119.400, 1.904	119.400, 1.739	119.400, 2.072	119.400, 1.927	119.400, 2.301	119.400, 2.159	119.400, 2.087
599	119.600, 2.296	119.600, 2.131	119.600, 1.992	119.600, 4.004	119.600, 3.801	119.600, 3.549	119.600, 2.141	119.600, 2.048	119.600, 1.905	119.600, 1.739	119.600, 2.073	119.600, 1.928	119.600, 2.301	119.600, 2.158	119.600, 2.087
600	119.800, 2.296	119.800, 2.132	119.800, 1.992	119.800, 4.007	119.800, 3.804	119.800, 3.551	119.800, 2.141	119.800, 2.048	119.800, 1.905	119.800, 1.739	119.800, 2.074	119.800, 1.928	119.800, 2.302	119.800, 2.158	119.800, 2.088
601	120.000, 2.296	120.000, 2.132	120.000, 1.992	120.000, 4.010	120.000, 3.806	120.000, 3.553	120.000, 2.142	120.000, 2.049	120.000, 1.905	120.000, 1.739	120.000, 2.074	120.000, 1.928	120.000, 2.302	120.000, 2.158	120.000, 2.089
602	120.200, 2.296	120.200, 2.132	120.200, 1.993	120.200, 4.013	120.200, 3.809	120.200, 3.555	120.200, 2.142	120.200, 2.049	120.200, 1.906	120.200, 1.739	120.200, 2.074	120.200, 1.928	120.200, 2.303	120.200, 2.159	120.200, 2.089
603	120.400, 2.296	120.400, 2.133	120.400, 1.993	120.400, 4.016	120.400, 3.812	120.400, 3.558	120.400, 2.142	120.400, 2.048	120.400, 1.906	120.400, 1.739	120.400, 2.075	120.400, 1.929	120.400, 2.303	120.400, 2.159	120.400, 2.090
604	120.600, 2.296	120.600, 2.133	120.600, 1.993	120.600, 4.018	120.600, 3.815	120.600, 3.560	120.600, 2.143	120.600, 2.048	120.600, 1.907	120.600, 1.739	120.600, 2.075	120.600, 1.929	120.600, 2.303	120.600, 2.159	120.600, 2.091
605	120.800, 2.296	120.800, 2.133	120.800, 1.993	120.800, 4.021	120.800, 3.818	120.800, 3.563	120.800, 2.143	120.800, 2.048	120.800, 1.907	120.800, 1.739	120.800, 2.076	120.800, 1.929	120.800, 2.303	120.800, 2.160	120.800, 2.092
606	121.000, 2.297	121.000, 2.134	121.000, 1.993	121.000, 4.024	121.000, 3.820	121.000, 3.565	121.000, 2.144	121.000, 2.048	121.000, 1.908	121.000, 1.740	121.000, 2.076	121.000, 1.930	121.000, 2.304	121.000, 2.160	121.000, 2.092
607	121.200, 2.297	121.200, 2.134	121.200, 1.993	121.200, 4.027	121.200, 3.823	121.200, 3.567	121.200, 2.144	121.200, 2.048	121.200, 1.908	121.200, 1.740	121.200, 2.076	121.200, 1.930	121.200, 2.304	121.200, 2.160	121.200, 2.093
608	121.400, 2.297	121.400, 2.134	121.400, 1.993	121.400, 4.030	121.400, 3.826	121.400, 3.570	121.400, 2.144	121.400, 2.047	121.400, 1.908	121.400, 1.741	121.400, 2.076	121.400, 1.930	121.400, 2.304	121.400, 2.161	121.400, 2.093
609	121.600, 2.298	121.600, 2.134	121.600, 1.993	121.600, 4.033	121.600, 3.828	121.600, 3.572	121.600, 2.145	121.600, 2.047	121.600, 1.909	121.600, 1.741	121.600, 2.076	121.600, 1.931	121.600, 2.304	121.600, 2.161	121.600, 2.094
610	121.800, 2.299	121.800, 2.134	121.800, 1.993	121.800, 4.036	121.800, 3.831	121.800, 3.574	121.800, 2.145	121.800, 2.047	121.800, 1.909	121.800, 1.741	121.800, 2.077	121.800, 1.931	121.800, 2.304	121.800, 2.161	121.800, 2.094
611	122.000, 2.299	122.000, 2.134	122.000, 1.994	122.000, 4.039	122.000, 3.834	122.000, 3.577	122.000, 2.145	122.000, 2.047	122.000, 1.909	122.000, 1.741	122.000, 2.077	122.000, 1.931	122.000, 2.304	122.000, 2.161	122.000, 2.094
612	122.200, 2.300	122.200, 2.134	122.200, 1.994	122.200, 4.042	122.200, 3.836	122.200, 3.579	122.200, 2.145	122.200, 2.048	122.200, 1.909	122.200, 1.742	122.200, 2.077	122.200, 1.932	122.200, 2.305	122.200, 2.162	122.200, 2.094
613	122.400, 2.300	122.400, 2.134	122.400, 1.995	122.400, 4.045	122.400, 3.839	122.400, 3.581	122.400, 2.145	122.400, 2.048	122.400, 1.909	122.400, 1.742	122.400, 2.077	122.400, 1.932	122.400, 2.305	122.400, 2.162	122.400, 2.095
614	122.600, 2.301	122.600, 2.134	122.600, 1.995	122.600, 4.048	122.600, 3.841	122.600, 3.584	122.600, 2.146	122.600, 2.049	122.600, 1.909	122.600, 1.742	122.600, 2.077	122.600, 1.932	122.600, 2.305	122.600, 2.162	122.600, 2.095
615	122.800, 2.301	122.800, 2.134	122.800, 1.995	122.800, 4.051	122.800, 3.843	122.800, 3.586	122.800, 2.146	122.800, 2.050	122.800, 1.909	122.800, 1.742	122.800, 2.077	122.800, 1.932	122.800, 2.306	122.800, 2.162	122.800, 2.095
616	123.000, 2.301	123.000, 2.134	123.000, 1.995	123.000, 4.054	123.000, 3.846	123.000, 3.589	123.000, 2.146	123.000, 2.050	123.000, 1.909	123.000, 1.742	123.000, 2.078	123.000, 1.932	123.000, 2.306	123.000, 2.162	123.000, 2.095
617	123.200, 2.302	123.200, 2.134	123.200, 1.995	123.200, 4.057	123.200, 3.848	123.200, 3.591	123.200, 2.147	123.200, 2.051	123.200, 1.910	123.200, 1.742	123.200, 2.078	123.200, 1.932	123.200, 2.306	123.200, 2.162	123.200, 2.095
618	123.400, 2.302	123.400, 2.135	123.400, 1.995	123.400, 4.059	123.400, 3.851	123.400, 3.593	123.400, 2.147	123.400, 2.051	123.400, 1.909	123.400, 1.742	123.400, 2.079	123.400, 1.932	123.400, 2.307	123.400, 2.163	123.400, 2.095
619	123.600, 2.302	123.600, 2.135	123.600, 1.996	123.600, 4.062	123.600, 3.853	123.600, 3.595	123.600, 2.147	123.600, 2.051	123.600, 1.910	123.600, 1.742	123.600, 2.079	123.600, 1.932	123.600, 2.307	123.600, 2.163	123.600, 2.095
620	123.800, 2.302	123.800, 2.135	123.800, 1.996	123.800, 4.064	123.800, 3.855	123.800, 3.597	123.800, 2.147	123.800, 2.051	123.800, 1.910	123.800, 1.742	123.800, 2.079	123.800, 1.932	123.800, 2.307	123.800, 2.163	123.800, 2.095
621	124.000, 2.302	124.000, 2.135	124.000, 1.996	124.000, 4.067	124.000, 3.858	124.000, 3.599	124.000, 2.148	124.000, 2.051	124.000, 1.910	124.000, 1.742	124.000, 2.080	124.000, 1.931	124.000, 2.307	124.000, 2.163	124.000, 2.096
622	124.200, 2.303	124.200, 2.135	124.200, 1.996	124.200, 4.069	124.200, 3.860	124.200, 3.601	124.200, 2.148	124.200, 2.051	124.200, 1.910	124.200, 1.742	124.200, 2.080	124.200, 1.931	124.200, 2.307	124.200, 2.164	124.200, 2.096
623	124.400, 2.303	124.400, 2.135	124.400, 1.996	124.400, 4.072	124.400, 3.863	124.400, 3.603	124.400, 2.149	124.400, 2.050	124.400, 1.910	124.400, 1.742	124.400, 2.081	124.400, 1.931	124.400, 2.307	124.400, 2.164	124.400, 2.096
624	124.600, 2.303	124.600, 2.136	124.600, 1.996	124.600, 4.075	124.600, 3.866	124.600, 3.605	124.600, 2.149	124.600, 2.050	124.600, 1.910	124.600, 1.742	124.600, 2.081	124.600, 1.931	124.600, 2.307	124.600, 2.164	124.600, 2.097
625	124.800, 2.303	124.800, 2.136	124.800, 1.997	124.800, 4.077	124.800, 3.868	124.800, 3.607	124.800, 2.150	124.800, 2.050	124.800, 1.910	124.800, 1.743	124.800, 2.082	124.800, 1.932	124.800, 2.307	124.800, 2.164	124.800, 2.097
626	125.000, 2.304	125.000, 2.137	125.000, 1.997	125.000, 4.080	125.000, 3.871	125.000, 3.609	125.000, 2.150	125.000, 2.050	125.000, 1.910	125.000, 1.743	125.000, 2.082	125.000, 1.932	125.000, 2.308	125.000, 2.165	125.000, 2.097
627	125.200, 2.304	125.200, 2.137	125.200, 1.997	125.200, 4.083	125.200, 3.873	125.200, 3.611	125.200, 2.151	125.200, 2.050	125.200, 1.910	125.200, 1.743	125.200, 2.083	125.200, 1.932	125.200, 2.308	125.200, 2.164	125.200, 2.097
628	125.400, 2.305	125.400, 2.138	125.400, 1.997	125.400, 4.086	125.400, 3.875	125.400, 3.614	125.400, 2.151	125.400, 2.050	125.400, 1.910	125.400, 1.744	125.400, 2.083	125.400, 1.932	125.400, 2.308	125.400, 2.164	125.400, 2.097
629	125.600, 2.305	125.600, 2.138	125.600, 1.998	125.600, 4.089	125.600, 3.878	125.600, 3.616	125.600, 2.152	125.600, 2.050	125.600, 1.911	125.600, 1.744	125.600, 2.084	125.600, 1.933	125.600, 2.308	125.600, 2.164	125.600, 2.097
630	125.800, 2.305	125.800, 2.139	125.800, 1.998	125.800, 4.092	125.800, 3.880	125.800, 3.618	125.800, 2.152	125.800, 2.050	125.800, 1.911	125.800, 1.744	125.800, 2.084	125.800, 1.933	125.800, 2.308	125.800, 2.164	125.800, 2.097
631	126.000, 2.306	126.000, 2.139	126.000, 1.999	126.000, 4.095	126.000, 3.882	126.000, 3.620	126.000, 2.152	126.000, 2.050	126.000, 1.911	126.000, 1.744	126.000, 2.084	126.000, 1.934	126.000, 2.308	126.000, 2.164	126.000, 2.098
632	126.200, 2.306	126.200, 2.139	126.200, 1.999	126.200, 4.098	126.200, 3.885	126.200, 3.622	126.200, 2.153	126.200, 2.051	126.200, 1.911	126.200, 1.745	126.200, 2.084	126.200, 1.934	126.200, 2.308	126.200, 2.164	126.200, 2.098
633	126.400, 2.306	126.400, 2.139	126.400, 1.999	126.400, 4.101	126.400, 3.887	126.400, 3.625	126.400, 2.153	126.400, 2.051	126.400, 1.912	126.400, 1.745	126.400, 2.084	126.400, 1.935	126.400, 2.308	126.400, 2.164	126.400, 2.099
634	126.600, 2.307	126.600, 2.140	126.600, 1.999	126.600, 4.103	126.600, 3.889	126.600, 3.627	126.600, 2.154	126.600, 2.051	126.600, 1.912	126.600, 1.745	126.600, 2.084	126.600, 1.935	126.600, 2.307	126.600, 2.164	126.600, 2.099
635	126.800, 2.307	126.800, 2.140	126.800, 1.999	126.800, 4.106	126.800, 3.891	126.800, 3.629	126.800, 2.154	126.800, 2.051	126.800, 1.912	126.800, 1.745	126.800, 2.084	126.800, 1.936	126.800, 2.307	126.800, 2.164	126.800, 2.100
636	127.000, 2.307	127.000, 2.140	127.000, 1.999	127.000, 4.109	127.000, 3.894	127.000, 3.631	127.000, 2.154	127.000, 2.052	127.000, 1.913	127.000, 1.745	127.000, 2.085	127.000, 1.936	127.000, 2.307	127.000, 2.164	127.000, 2.100
637	127.200, 2.307	127.200, 2.141	127.200, 1.999	127.200, 4.111	127.200, 3.896	127.200, 3.633	127.200, 2.154	127.200, 2.052	127.200, 1.913	127.200, 1.746	127.200, 2.085	127.200, 1.936	127.200, 2.306	127.200, 2.165	127.200, 2.100
638	127.400, 2.307	127.400, 2.141	127.400, 1.999	127.400, 4.113	127.400, 3.899	127.400, 3.635	127.400, 2.155	127.400, 2.052	127.400, 1.913	127.400, 1.746	127.400, 2.085	127.400, 1.936	127.400, 2.306	127.400, 2.165	127.400, 2.100
639	127.600, 2.306	127.600, 2.141	127.600, 1.999	127.600, 4.115	127.600, 3.901	127.600, 3.637	127.600, 2.155	127.600, 2.052	127.600, 1.913	127.600, 1.746	127.600, 2.085	127.600, 1.937	127.600, 2.306	127.600, 2.166	127.600, 2.101
640	127.800, 2.306	127.800, 2.140	127.800, 1.999	127.800, 4.118	127.800, 3.903	127.800, 3.638	127.800, 2.155	127.800, 2.052	127.800, 1.913	127.800, 1.746	127.800, 2.085	127.800, 1.937	127.800, 2.307	127.800, 2.166	127.800, 2.101
641	128.000, 2.305	128.000, 2.140	128.000, 1.999	128.000, 4.120	128.000, 3.905	128.000, 3.640	128.000, 2.155	128.000, 2.052	128.000, 1.914	128.000, 1.746	128.000, 2.085	128.000, 1.937	128.000, 2.307	128.000, 2.167	128.000, 2.101
642	128.200, 2.305	128.200, 2.140	128.200, 1.999	128.200, 4.123	128.200, 3.908	128.200, 3.642	128.200, 2.155	128.200, 2.052	128.200, 1.913	128.200, 1.746	128.200, 2.086	128.200, 1.937	128.200, 2.307	128.200, 2.167	128.200, 2.101
643	128.400, 2.305	128.400, 2.140	128.400, 1.999	128.400, 4.125	128.400, 3.910	128.400, 3.644	128.400, 2.156	128.400, 2.053	128.400, 1.914	128.400, 1.746	128.400, 2.086	128.400, 1.937	128.400, 2.308	128.400, 2.168	128.400, 2.101
644	128.600, 2.305	128.600, 2.140	128.600, 2.000	128.600, 4.128	128.600, 3.913	128.600, 3.646	128.600, 2.156	128.600, 2.053	128.600, 1.914	128.600, 1.746	128.600, 2.086	128.600, 1.937	128.600, 2.308	128.600, 2.168	128.600, 2.101
645	128.800, 2.305	128.800, 2.141	128.800, 2.000	128.800, 4.131	128.800, 3.915	128.800, 3.649	128.800, 2.156	128.800, 2.053	128.800, 1.914	128.800, 1.746	128.800, 2.087	128.800, 1.937	128.800, 2.309	128.800, 2.168	128.800, 2.101
646	129.000, 2.306	129.000, 2.141	129.000, 2.000	129.000, 4.133	129.000, 3.918	129.000, 3.651	129.000, 2.156	129.000, 2.054	129.000, 1.914	129.000, 1.746	129.000, 2.087	129.000, 1.937	129.000, 2.309	129.000, 2.168	129.000, 2.101
647	129.200, 2.306	129.200, 2.141	129.200, 2.000	129.200, 4.136	129.200, 3.920	129.200, 3.653	129.200, 2.156	129.200, 2.054	129.200, 1.914	129.200, 1.746	129.200, 2.087	129.200, 1.937	129.200, 2.310	129.200, 2.168	129.200, 2.101
648	129.400, 2.306	129.400, 2.142	129.400, 2.000	129.400, 4.138	129.400, 3.922	129.400, 3.656	129.400, 2.156	129.400, 2.054	129.400, 1.914	129.400, 1.746	129.400, 2.087	129.400, 1.937	129.400, 2.310	129.400, 2.168	129.400, 2.100
649	129.600, 2.307	129.600, 2.142	129.600, 2.001	129.600, 4.141	129.600, 3.925	129.600, 3.658	129.600, 2.156	129.600, 2.054	129.600, 1.914	129.600, 1.746	129.600, 2.088	129.600, 1.938	129.600, 2.310	129.600, 2.168	129.600, 2.100
650	129.800, 2.307	129.800, 2.142	129.800, 2.001	129.800, 4.143	129.800, 3.927	129.800, 3.661	129.800, 2.156	129.800, 2.054	129.800, 1.914	129.800, 1.746	129.800, 2.088	129.800, 1.938	129.800, 2.310	129.800, 2.168	129.800, 2.101
651	130.000, 2.308	130.000, 2.142	130.000, 2.001	130.000, 4.146	130.000, 3.930	130.000, 3.663	130.000, 2.157	130.000, 2.053	130.000, 1.914	130.000, 1.747	130.000, 2.088	130.000, 1.938	130.000, 2.310	130.000, 2.168	130.000, 2.101
652	130.200, 2.309	130.200, 2.143	130.200, 2.001	130.200, 4.148	130.200, 3.932	130.200, 3.665	130.200, 2.157	130.200, 2.053	130.200, 1.914	130.200, 1.747	130.200, 2.088	130.200, 1.938	130.200, 2.310	130.200, 2.168	130.200, 2.101
653	130.400, 2.309	130.400, 2.143	130.400, 2.000	130.400, 4.151	130.400, 3.935	130.400, 3.667	130.400, 2.157	130.400, 2.053	130.400, 1.914	130.400, 1.747	130.400, 2.088	130.400, 1.939	130.400, 2.310	130.400, 2.168	130.400, 2.102
654	130.600, 2.310	130.600, 2.144	130.600, 2.000	130.600, 4.154	130.600, 3.937	130.600, 3.669	130.600, 2.158	130.600, 2.053	130.600, 1.914	130.600, 1.747	130.600, 2.089	130.600, 1.939	130.600, 2.310	130.600, 2.168	130.600, 2.102
655	130.800, 2.310	130.800, 2.144	130.800, 2.000	130.800, 4.156	130.800, 3.939	130.800, 3.671	130.800, 2.158	130.800, 2.054	130.800, 1.914	130.800, 1.747	130.800, 2.089	130.800, 1.939	130.800, 2.310	130.800, 2.168	130.800, 2.103
656	131.000, 2.311	131.000, 2.144	131.000, 2.000	131.000, 4.159	131.000, 3.942	131.000, 3.673	131.000, 2.159	131.000, 2.054	131.000, 1.915	131.000, 1.747	131.000, 2.089	131.000, 1.939	131.000, 2.310	131.000, 2.169	131.000, 2.103
657	131.200, 2.311	131.200, 2.144	131.200, 2.000	131.200, 4.161	131.200, 3.944	131.200, 3.674	131.200, 2.159	131.200, 2.054	131.200, 1.915	131.200, 1.747	131.200, 2.088	131.200, 1.938	131.200, 2.310	131.200, 2.169	131.200, 2.103
658	131.400, 2.311	131.400, 2.143	131.400, 2.001	131.400, 4.164	131.400, 3.946	131.400, 3.676	131.400, 2.159	131.400, 2.054	131.400, 1.915	131.400, 1.747	131.400, 2.088	131.400, 1.938	131.400, 2.309	131.400, 2.169	131.400, 2.103
659	131.600, 2.312	131.600, 2.143	131.600, 2.001	131.600, 4.166	131.600, 3.948	131.600, 3.678	131.600, 2.159	131.600, 2.054	131.600, 1.915	131.600, 1.747	131.600, 2.088	131.600, 1.938	131.600, 2.309	131.600, 2.169	131.600, 2.104
660	131.800, 2.312	131.800, 2.143	131.800, 2.001	131.800, 4.168	131.800, 3.950	131.800, 3.680	131.800, 2.160	131.800, 2.054	131.800, 1.916	131.800, 1.747	131.800, 2.088	131.800, 1.938	131.800, 2.309	131.800, 2.170	131.800, 2.104
661	132.000, 2.312	132.000, 2.143	132.000, 2.001	132.000, 4.171	132.000, 3.952	132.000, 3.682	132.000, 2.160	132.000, 2.055	132.000, 1.916	132.000, 1.747	132.000, 2.088	132.000, 1.937	132.000, 2.309	132.000, 2.170	132.000, 2.104
662	132.200, 2.313	132.200, 2.142	132.200, 2.002	132.200, 4.173	132.200, 3.954	132.200, 3.684	132.200, 2.160	132.200, 2.055	132.200, 1.916	132.200, 1.747	132.200, 2.088	132.200, 1.937	132.200, 2.310	132.200, 2.170	132.200, 2.104
663	132.400, 2.313	132.400, 2.142	132.400, 2.002	132.400, 4.175	132.400, 3.956	132.400, 3.686	132.400, 2.160	132.400, 2.055	132.400, 1.916	132.400, 1.747	132.400, 2.089	132.400, 1.937	132.400, 2.310	132.400, 2.171	132.400, 2.104
664	132.600, 2.313	132.600, 2.142	132.600, 2.002	132.600, 4.178	132.600, 3.958	132.600, 3.688	132.600, 2.160	132.600, 2.055	132.600, 1.916	132.600, 1.747	132.600, 2.089	132.600, 1.937	132.600, 2.310	132.600, 2.170	132.600, 2.104
665	132.800, 2.313	132.800, 2.143	132.800, 2.002	132.800, 4.180	132.800, 3.960	132.800, 3.691	132.800, 2.160	132.800, 2.055	132.800, 1.916	132.800, 1.747	132.800, 2.090	132.800, 1.938	132.800, 2.310	132.800, 2.170	132.800, 2.104
666	133.000, 2.313	133.000, 2.143	133.000, 2.003	133.000, 4.182	133.000, 3.961	133.000, 3.693	133.000, 2.160	133.000, 2.055	133.000, 1.916	133.000, 1.747	133.000, 2.090	133.000, 1.938	133.000, 2.311	133.000, 2.170	133.000, 2.104
667	133.200, 2.313	133.200, 2.144	133.200, 2.003	133.200, 4.185	133.200, 3.963	133.200, 3.695	133.200, 2.160	133.200, 2.055	133.200, 1.916	133.200, 1.747	133.200, 2.091	133.200, 1.938	133.200, 2.311	133.200, 2.170	133.200, 2.105
668	133.400, 2.313	133.400, 2.144	133.400, 2.003	133.400, 4.187	133.400, 3.965	133.400, 3.697	133.400, 2.161	133.400, 2.055	133.400, 1.916	133.400, 1.747	133.400, 2.091	133.400, 1.938	133.400, 2.312	133.400, 2.170	133.400, 2.105
669	133.600, 2.313	133.600, 2.145	133.600, 2.003	133.600, 4.190	133.600, 3.967	133.600, 3.698	133.600, 2.161	133.600, 2.055	133.600, 1.916	133.600, 1.747	133.600, 2.092	133.600, 1.939	133.600, 2.312	133.600, 2.170	133.600, 2.106
670	133.800, 2.313	133.800, 2.145	133.800, 2.003	133.800, 4.193	133.800, 3.969	133.800, 3.700	133.800, 2.161	133.800, 2.055	133.800, 1.916	133.800, 1.747	133.800, 2.093	133.800, 1.939	133.800, 2.313	133.800, 2.170	133.800, 2.106
671	134.000, 2.313	134.000, 2.146	134.000, 2.003	134.000, 4.196	134.000, 3.971	134.000, 3.702	134.000, 2.162	134.000, 2.054	134.000, 1.916	134.000, 1.747	134.000, 2.093	134.000, 1.939	134.000, 2.314	134.000, 2.170	134.000, 2.106
672	134.200, 2.313	134.200, 2.146	134.200, 2.003	134.200, 4.199	134.200, 3.973	134.200, 3.704	134.200, 2.162	134.200, 2.054	134.200, 1.916	134.200, 1.747	134.200, 2.093	134.200, 1.939	134.200, 2.314	134.200, 2.170	134.200, 2.107
673	134.400, 2.313	134.400, 2.147	134.400, 2.002	134.400, 4.202	134.400, 3.976	134.400, 3.706	134.400, 2.162	134.400, 2.054	134.400, 1.915	134.400, 1.747	134.400, 2.094	134.400, 1.939	134.400, 2.314	134.400, 2.170	134.400, 2.107
674	134.600, 2.313	134.600, 2.147	134.600, 2.002	134.600, 4.205	134.600, 3.978	134.600, 3.708	134.600, 2.163	134.600, 2.054	134.600, 1.915	134.600, 1.747	134.600, 2.094	134.600, 1.939	134.600, 2.315	134.600, 2.170	134.600, 2.106
675	134.800, 2.314	134.800, 2.147	134.800, 2.002	134.800, 4.208	134.800, 3.981	134.800, 3.710	134.800, 2.163	134.800, 2.054	134.800, 1.915	134.800, 1.747	134.800, 2.094	134.800, 1.939	134.800, 2.315	134.800, 2.170	134.800, 2.106
676	135.000, 2.314	135.000, 2.147	135.000, 2.002	135.000, 4.210	135.000, 3.983	135.000, 3.712	135.000, 2.163	135.000, 2.054	135.000, 1.916	135.000, 1.747	135.000, 2.094	135.000, 1.939	135.000, 2.315	135.000, 2.170	135.000, 2.106
677	135.200, 2.313	135.200, 2.147	135.200, 2.002	135.200, 4.213	135.200, 3.986	135.200, 3.714	135.200, 2.164	135.200, 2.053	135.200, 1.916	135.200, 1.747	135.200, 2.094	135.200, 1.940	135.200, 2.314	135.200, 2.170	135.200, 2.106
678	135.400, 2.313	135.400, 2.147	135.400, 2.002	135.400, 4.215	135.400, 3.988	135.400, 3.716	135.400, 2.164	135.400, 2.054	135.400, 1.916	135.400, 1.748	135.400, 2.094	135.400, 1.940	135.400, 2.314	135.400, 2.170	135.400, 2.106
679	135.600, 2.313	135.600, 2.147	135.600, 2.002	135.600, 4.218	135.600, 3.991	135.600, 3.718	135.600, 2.165	135.600, 2.054	135.600, 1.917	135.600, 1.748	135.600, 2.094	135.600, 1.940	135.600, 2.314	135.600, 2.170	135.600, 2.107
680	135.800, 2.313	135.800, 2.147	135.800, 2.002	135.800, 4.220	135.800, 3.993	135.800, 3.720	135.800, 2.165	135.800, 2.054	135.800, 1.917	135.800, 1.748	135.800, 2.094	135.800, 1.940	135.800, 2.314	135.800, 2.170	135.800, 2.107
681	136.000, 2.313	136.000, 2.147	136.000, 2.002	136.000, 4.222	136.000, 3.996	136.000, 3.722	136.000, 2.165	136.000, 2.054	136.000, 1.917	136.000, 1.748	136.000, 2.095	136.000, 1.940	136.000, 2.314	136.000, 2.170	136.000, 2.107
682	136.200, 2.313	136.200, 2.147	136.200, 2.002	136.200, 4.224	136.200, 3.998	136.200, 3.724	136.200, 2.165	136.200, 2.055	136.200, 1.918	136.200, 1.749	136.200, 2.095	136.200, 1.940	136.200, 2.314	136.200, 2.170	136.200, 2.107
683	136.400, 2.313	136.400, 2.147	136.400, 2.002	136.400, 4.227	136.400, 4.000	136.400, 3.726	136.400, 2.166	136.400, 2.055	136.400, 1.918	136.400, 1.749	136.400, 2.095	136.400, 1.940	136.400, 2.314	136.400, 2.169	136.400, 2.107
684	136.600, 2.313	136.600, 2.147	136.600, 2.002	136.600, 4.229	136.600, 4.002	136.600, 3.728	136.600, 2.166	136.600, 2.055	136.600, 1.918	136.600, 1.749	136.600, 2.096	136.600, 1.940	136.600, 2.313	136.600, 2.169	136.600, 2.108
685	136.800, 2.313	136.800, 2.147	136.800, 2.002	136.800, 4.231	136.800, 4.003	136.800, 3.730	136.800, 2.167	136.800, 2.055	136.800, 1.918	136.800, 1.749	136.800, 2.096	136.800, 1.940	136.800, 2.313	136.800, 2.169	136.800, 2.108
686	137.000, 2.313	137.000, 2.147	137.000, 2.003	137.000, 4.234	137.000, 4.005	137.000, 3.732	137.000, 2.167	137.000, 2.055	137.000, 1.919	137.000, 1.749	137.000, 2.097	137.000, 1.940	137.000, 2.313	137.000, 2.170	137.000, 2.108
687	137.200, 2.313	137.200, 2.147	137.200, 2.003	137.200, 4.236	137.200, 4.007	137.200, 3.733	137.200, 2.167	137.200, 2.055	137.200, 1.919	137.200, 1.749	137.200, 2.097	137.200, 1.940	137.200, 2.313	137.200, 2.170	137.200, 2.109
688	137.400, 2.313	137.400, 2.147	137.400, 2.003	137.400, 4.238	137.400, 4.009	137.400, 3.735	137.400, 2.168	137.400, 2.056	137.400, 1.919	137.400, 1.749	137.400, 2.097	137.400, 1.940	137.400, 2.313	137.400, 2.171	137.400, 2.109
689	137.600, 2.313	137.600, 2.147	137.600, 2.004	137.600, 4.241	137.600, 4.011	137.600, 3.737	137.600, 2.168	137.600, 2.056	137.600, 1.918	137.600, 1.749	137.600, 2.098	137.600, 1.940	137.600, 2.313	137.600, 2.171	137.600, 2.109
690	137.800, 2.314	137.800, 2.147	137.800, 2.004	137.800, 4.244	137.800, 4.013	137.800, 3.738	137.800, 2.168	137.800, 2.056	137.800, 1.918	137.800, 1.748	137.800, 2.098	137.800, 1.940	137.800, 2.313	137.800, 2.172	137.800, 2.109
691	138.000, 2.314	138.000, 2.147	138.000, 2.004	138.000, 4.246	138.000, 4.015	138.000, 3.740	138.000, 2.168	138.000, 2.056	138.000, 1.918	138.000, 1.748	138.000, 2.098	138.000, 1.940	138.000, 2.313	138.000, 2.173	138.000, 2.109
692	138.200, 2.315	138.200, 2.147	138.200, 2.004	138.200, 4.248	138.200, 4.017	138.200, 3.742	138.200, 2.168	138.200, 2.057	138.200, 1.918	138.200, 1.748	138.200, 2.098	138.200, 1.940	138.200, 2.313	138.200, 2.173	138.200, 2.109
693	138.400, 2.315	138.400, 2.147	138.400, 2.004	138.400, 4.251	138.400, 4.020	138.400, 3.743	138.400, 2.168	138.400, 2.057	138.400, 1.918	138.400, 1.748	138.400, 2.098	138.400, 1.940	138.400, 2.313	138.400, 2.174	138.400, 2.109
694	138.600, 2.315	138.600, 2.147	138.600, 2.004	138.600, 4.253	138.600, 4.022	138.600, 3.745	138.600, 2.168	138.600, 2.057	138.600, 1.918	138.600, 1.748	138.600, 2.098	138.600, 1.940	138.600, 2.313	138.600, 2.174	138.600, 2.109
695	138.800, 2.315	138.800, 2.146	138.800, 2.004	138.800, 4.255	138.800, 4.024	138.800, 3.747	138.800, 2.169	138.800, 2.057	138.800, 1.918	138.800, 1.748	138.800, 2.098	138.800, 1.940	138.800, 2.313	138.800, 2.174	138.800, 2.109
696	139.000, 2.316	139.000, 2.146	139.000, 2.004	139.000, 4.257	139.000, 4.027	139.000, 3.749	139.000, 2.169	139.000, 2.057	139.000, 1.918	139.000, 1.748	139.000, 2.097	139.000, 1.940	139.000, 2.313	139.000, 2.174	139.000, 2.109
697	139.200, 2.316	139.200, 2.146	139.200, 2.003	139.200, 4.259	139.200, 4.029	139.200, 3.751	139.200, 2.169	139.200, 2.057	139.200, 1.919	139.200, 1.748	139.200, 2.097	139.200, 1.940	139.200, 2.313	139.200, 2.174	139.200, 2.109
698	139.400, 2.316	139.400, 2.146	139.400, 2.003	139.400, 4.261	139.400, 4.031	139.400, 3.753	139.400, 2.169	139.400, 2.057	139.400, 1.919	139.400, 1.748	139.400, 2.097	139.400, 1.940	139.400, 2.313	139.400, 2.174	139.400, 2.110
699	139.600, 2.316	139.600, 2.146	139.600, 2.002	139.600, 4.263	139.600, 4.033	139.600, 3.755	139.600, 2.170	139.600, 2.056	139.600, 1.919	139.600, 1.748	139.600, 2.097	139.600, 1.940	139.600, 2.313	139.600, 2.174	139.600, 2.110
700	139.800, 2.316	139.800, 2.146	139.800, 2.002	139.800, 4.265	139.800, 4.035	139.800, 3.757	139.800, 2.170	139.800, 2.056	139.800, 1.919	139.800, 1.748	139.800, 2.097	139.800, 1.940	139.800, 2.313	139.800, 2.173	139.800, 2.110
701	140.000, 2.316	140.000, 2.146	140.000, 2.002	140.000, 4.267	140.000, 4.037	140.000, 3.759	140.000, 2.170	140.000, 2.056	140.000, 1.919	140.000, 1.748	140.000, 2.097	140.000, 1.940	140.000, 2.313	140.000, 2.173	140.000, 2.109
702	140.200, 2.316	140.200, 2.146	140.200, 2.002	140.200, 4.269	140.200, 4.040	140.200, 3.761	140.200, 2.170	140.200, 2.055	140.200, 1.919	140.200, 1.748	140.200, 2.098	140.200, 1.940	140.200, 2.313	140.200, 2.172	140.200, 2.109
703	140.400, 2.315	140.400, 2.147	140.400, 2.002	140.400, 4.271	140.400, 4.042	140.400, 3.763	140.400, 2.170	140.400, 2.055	140.400, 1.919	140.400, 1.749	140.400, 2.098	140.400, 1.940	140.400, 2.313	140.400, 2.171	140.400, 2.109
704	140.600, 2.315	140.600, 2.147	140.600, 2.002	140.600, 4.273	140.600, 4.044	140.600, 3.765	140.600, 2.170	140.600, 2.055	140.600, 1.919	140.600, 1.749	140.600, 2.098	140.600, 1.940	140.600, 2.313	140.600, 2.171	140.600, 2.109
705	140.800, 2.315	140.800, 2.147	140.800, 2.002	140.800, 4.275	140.800, 4.046	140.800, 3.767	140.800, 2.170	140.800, 2.055	140.800, 1.919	140.800, 1.749	140.800, 2.098	140.800, 1.940	140.800, 2.313	140.800, 2.171	140.800, 2.109
706	141.000, 2.315	141.000, 2.147	141.000, 2.002	141.000, 4.277	141.000, 4.048	141.000, 3.769	141.000, 2.170	141.000, 2.054	141.000, 1.919	141.000, 1.749	141.000, 2.099	141.000, 1.940	141.000, 2.313	141.000, 2.170	141.000, 2.109
707	141.200, 2.315	141.200, 2.147	141.200, 2.003	141.200, 4.279	141.200, 4.050	141.200, 3.770	141.200, 2.170	141.200, 2.054	141.200, 1.919	141.200, 1.749	141.200, 2.099	141.200, 1.940	141.200, 2.313	141.200, 2.171	141.200, 2.109
708	141.400, 2.315	141.400, 2.147	141.400, 2.003	141.400, 4.281	141.400, 4.052	141.400, 3.772	141.400, 2.170	141.400, 2.054	141.400, 1.919	141.400, 1.750	141.400, 2.099	141.400, 1.940	141.400, 2.313	141.400, 2.171	141.400, 2.109
709	141.600, 2.315	141.600, 2.148	141.600, 2.003	141.600, 4.283	141.600, 4.053	141.600, 3.773	141.600, 2.170	141.600, 2.054	141.600, 1.919	141.600, 1.750	141.600, 2.100	141.600, 1.940	141.600, 2.313	141.600, 2.171	141.600, 2.109
710	141.800, 2.315	141.800, 2.147	141.800, 2.004	141.800, 4.286	141.800, 4.055	141.800, 3.775	141.800, 2.169	141.800, 2.054	141.800, 1.920	141.800, 1.750	141.800, 2.100	141.800, 1.941	141.800, 2.313	141.800, 2.172	141.800, 2.110
711	142.000, 2.316	142.000, 2.147	142.000, 2.004	142.000, 4.288	142.000, 4.057	142.000, 3.776	142.000, 2.169	142.000, 2.054	142.000, 1.920	142.000, 1.749	142.000, 2.101	142.000, 1.941	142.000, 2.312	142.000, 2.172	142.000, 2.110
712	142.200, 2.316	142.200, 2.147	142.200, 2.004	142.200, 4.290	142.200, 4.058	142.200, 3.778	142.200, 2.169	142.200, 2.054	142.200, 1.920	142.200, 1.749	142.200, 2.101	142.200, 1.941	142.200, 2.312	142.200, 2.173	142.200, 2.110
713	142.400, 2.316	142.400, 2.147	142.400, 2.004	142.400, 4.292	142.400, 4.060	142.400, 3.780	142.400, 2.169	142.400, 2.054	142.400, 1.920	142.400, 1.749	142.400, 2.101	142.400, 1.941	142.400, 2.312	142.400, 2.173	142.400, 2.111
714	142.600, 2.316	142.600, 2.146	142.600, 2.003	142.600, 4.294	142.600, 4.062	142.600, 3.782	142.600, 2.170	142.600, 2.054	142.600, 1.920	142.600, 1.749	142.600, 2.101	142.600, 1.941	142.600, 2.311	142.600, 2.173	142.600, 2.111
715	142.800, 2.316	142.800, 2.146	142.800, 2.003	142.800, 4.297	142.800, 4.064	142.800, 3.784	142.800, 2.170	142.800, 2.055	142.800, 1.920	142.800, 1.749	142.800, 2.102	142.800, 1.941	142.800, 2.311	142.800, 2.173	142.800, 2.112
716	143.000, 2.316	143.000, 2.146	143.000, 2.003	143.000, 4.299	143.000, 4.065	143.000, 3.785	143.000, 2.171	143.000, 2.055	143.000, 1.920	143.000, 1.748	143.000, 2.102	143.000, 1.941	143.000, 2.311	143.000, 2.174	143.000, 2.112
717	143.200, 2.316	143.200, 2.145	143.200, 2.003	143.200, 4.302	143.200, 4.067	143.200, 3.787	143.200, 2.171	143.200, 2.055	143.200, 1.919	143.200, 1.748	143.200, 2.102	143.200, 1.941	143.200, 2.311	143.200, 2.174	143.200, 2.113
718	143.400, 2.316	143.400, 2.145	143.400, 2.002	143.400, 4.304	143.400, 4.068	143.400, 3.789	143.400, 2.171	143.400, 2.055	143.400, 1.919	143.400, 1.748	143.400, 2.102	143.400, 1.941	143.400, 2.311	143.400, 2.174	143.400, 2.113
719	143.600, 2.317	143.600, 2.145	143.600, 2.002	143.600, 4.306	143.600, 4.070	143.600, 3.790	143.600, 2.171	143.600, 2.055	143.600, 1.919	143.600, 1.748	143.600, 2.102	143.600, 1.941	143.600, 2.311	143.600, 2.174	143.600, 2.113
720	143.800, 2.317	143.800, 2.144	143.800, 2.002	143.800, 4.309	143.800, 4.071	143.800, 3.792	143.800, 2.172	143.800, 2.055	143.800, 1.919	143.800, 1.748	143.800, 2.102	143.800, 1.941	143.800, 2.312	143.800, 2.174	143.800, 2.113
721	144.000, 2.317	144.000, 2.144	144.000, 2.002	144.000, 4.311	144.000, 4.073	144.000, 3.794	144.000, 2.172	144.000, 2.055	144.000, 1.919	144.000, 1.748	144.000, 2.102	144.000, 1.941	144.000, 2.312	144.000, 2.173	144.000, 2.112
722	144.200, 2.317	144.200, 2.144	144.200, 2.002	144.200, 4.313	144.200, 4.075	144.200, 3.796	144.200, 2.172	144.200, 2.055	144.200, 1.920	144.200, 1.749	144.200, 2.102	144.200, 1.941	144.200, 2.313	144.200, 2.173	144.200, 2.112
723	144.400, 2.317	144.400, 2.144	144.400, 2.002	144.400, 4.316	144.400, 4.077	144.400, 3.798	144.400, 2.172	144.400, 2.055	144.400, 1.920	144.400, 1.749	144.400, 2.102	144.400, 1.941	144.400, 2.313	144.400, 2.173	144.400, 2.112
724	144.600, 2.317	144.600, 2.145	144.600, 2.002	144.600, 4.318	144.600, 4.079	144.600, 3.799	144.600, 2.173	144.600, 2.055	144.600, 1.920	144.600, 1.749	144.600, 2.101	144.600, 1.941	144.600, 2.313	144.600, 2.173	144.600, 2.112
725	144.800, 2.317	144.800, 2.145	144.800, 2.002	144.800, 4.320	144.800, 4.081	144.800, 3.800	144.800, 2.173	144.800, 2.055	144.800, 1.920	144.800, 1.749	144.800, 2.101	144.800, 1.941	144.800, 2.313	144.800, 2.173	144.800, 2.111
726	145.000, 2.317	145.000, 2.145	145.000, 2.003	145.000, 4.323	145.000, 4.082	145.000, 3.801	145.000, 2.173	145.000, 2.055	145.000, 1.920	145.000, 1.749	145.000, 2.101	145.000, 1.942	145.000, 2.313	145.000, 2.173	145.000, 2.111
727	145.200, 2.318	145.200, 2.146	145.200, 2.003	145.200, 4.325	145.200, 4.084	145.200, 3.803	145.200, 2.174	145.200, 2.055	145.200, 1.920	145.200, 1.750	145.200, 2.101	145.200, 1.942	145.200, 2.313	145.200, 2.173	145.200, 2.111
728	145.400, 2.319	145.400, 2.146	145.400, 2.003	145.400, 4.327	145.400, 4.086	145.400, 3.804	145.400, 2.174	145.400, 2.055	145.400, 1.920	145.400, 1.750	145.400, 2.101	145.400, 1.942	145.400, 2.313	145.400, 2.173	145.400, 2.111
729	145.600, 2.319	145.600, 2.147	145.600, 2.003	145.600, 4.329	145.600, 4.089	145.600, 3.806	145.600, 2.174	145.600, 2.055	145.600, 1.920	145.600, 1.750	145.600, 2.101	145.600, 1.943	145.600, 2.313	145.600, 2.173	145.600, 2.111
730	145.800, 2.320	145.800, 2.147	145.800, 2.003	145.800, 4.331	145.800, 4.091	145.800, 3.808	145.800, 2.174	145.800, 2.055	145.800, 1.920	145.800, 1.750	145.800, 2.101	145.800, 1.943	145.800, 2.312	145.800, 2.173	145.800, 2.111
731	146.000, 2.320	146.000, 2.147	146.000, 2.004	146.000, 4.333	146.000, 4.093	146.000, 3.810	146.000, 2.174	146.000, 2.055	146.000, 1.920	146.000, 1.749	146.000, 2.102	146.000, 1.943	146.000, 2.312	146.000, 2.173	146.000, 2.111
732	146.200, 2.320	146.200, 2.147	146.200, 2.004	146.200, 4.334	146.200, 4.096	146.200, 3.812	146.200, 2.174	146.200, 2.055	146.200, 1.920	146.200, 1.749	146.200, 2.102	146.200, 1.943	146.200, 2.312	146.200, 2.173	146.200, 2.111
733	146.400, 2.321	146.400, 2.147	146.400, 2.004	146.400, 4.336	146.400, 4.098	146.400, 3.814	146.400, 2.174	146.400, 2.054	146.400, 1.920	146.400, 1.749	146.400, 2.102	146.400, 1.942	146.400, 2.312	146.400, 2.173	146.400, 2.111
734	146.600, 2.321	146.600, 2.147	146.600, 2.004	146.600, 4.339	146.600, 4.100	146.600, 3.816	146.600, 2.174	146.600, 2.054	146.600, 1.919	146.600, 1.749	146.600, 2.103	146.600, 1.942	146.600, 2.312	146.600, 2.174	146.600, 2.111
735	146.800, 2.321	146.800, 2.146	146.800, 2.004	146.800, 4.341	146.800, 4.102	146.800, 3.818	146.800, 2.174	146.800, 2.054	146.800, 1.919	146.800, 1.749	146.800, 2.103	146.800, 1.941	146.800, 2.312	146.800, 2.174	146.800, 2.111
736	147.000, 2.321	147.000, 2.146	147.000, 2.004	147.000, 4.342	147.000, 4.104	147.000, 3.819	147.000, 2.174	147.000, 2.054	147.000, 1.919	147.000, 1.748	147.000, 2.103	147.000, 1.941	147.000, 2.311	147.000, 2.174	147.000, 2.112
737	147.200, 2.321	147.200, 2.145	147.200, 2.004	147.200, 4.344	147.200, 4.106	147.200, 3.821	147.200, 2.174	147.200, 2.054	147.200, 1.918	147.200, 1.748	147.200, 2.103	147.200, 1.941	147.200, 2.311	147.200, 2.174	147.200, 2.112
738	147.400, 2.321	147.400, 2.145	147.400, 2.004	147.400, 4.346	147.400, 4.108	147.400, 3.823	147.400, 2.174	147.400, 2.054	147.400, 1.918	147.400, 1.748	147.400, 2.103	147.400, 1.940	147.400, 2.312	147.400, 2.174	147.400, 2.112
739	147.600, 2.321	147.600, 2.145	147.600, 2.004	147.600, 4.348	147.600, 4.110	147.600, 3.825	147.600, 2.174	147.600, 2.053	147.600, 1.918	147.600, 1.748	147.600, 2.103	147.600, 1.940	147.600, 2.312	147.600, 2.175	147.600, 2.112
740	147.800, 2.320	147.800, 2.144	147.800, 2.004	147.800, 4.350	147.800, 4.112	147.800, 3.826	147.800, 2.174	147.800, 2.053	147.800, 1.918	147.800, 1.748	147.800, 2.103	147.800, 1.940	147.800, 2.312	147.800, 2.175	147.800, 2.112
741	148.000, 2.320	148.000, 2.144	148.000, 2.004	148.000, 4.352	148.000, 4.114	148.000, 3.828	148.000, 2.174	148.000, 2.053	148.000, 1.918	148.000, 1.749	148.000, 2.103	148.000, 1.940	148.000, 2.312	148.000, 2.175	148.000, 2.112
742	148.200, 2.320	148.200, 2.144	148.200, 2.004	148.200, 4.354	148.200, 4.115	148.200, 3.830	148.200, 2.174	148.200, 2.053	148.200, 1.918	148.200, 1.749	148.200, 2.104	148.200, 1.940	148.200, 2.312	148.200, 2.175	148.200, 2.113
743	148.400, 2.320	148.400, 2.143	148.400, 2.004	148.400, 4.356	148.400, 4.117	148.400, 3.831	148.400, 2.174	148.400, 2.053	148.400, 1.918	148.400, 1.749	148.400, 2.103	148.400, 1.939	148.400, 2.312	148.400, 2.175	148.400, 2.113
744	148.600, 2.320	148.600, 2.143	148.600, 2.004	148.600, 4.358	148.600, 4.119	148.600, 3.833	148.600, 2.174	148.600, 2.053	148.600, 1.918	148.600, 1.750	148.600, 2.103	148.600, 1.939	148.600, 2.312	148.600, 2.175	148.600, 2.113
745	148.800, 2.320	148.800, 2.143	148.800, 2.003	148.800, 4.360	148.800, 4.121	148.800, 3.835	148.800, 2.175	148.800, 2.053	148.800, 1.918	148.800, 1.750	148.800, 2.103	148.800, 1.939	148.800, 2.312	148.800, 2.175	148.800, 2.113
746	149.000, 2.320	149.000, 2.143	149.000, 2.003	149.000, 4.362	149.000, 4.122	149.000, 3.836	149.000, 2.175	149.000, 2.053	149.000, 1.917	149.000, 1.750	149.000, 2.103	149.000, 1.940	149.000, 2.311	149.000, 2.175	149.000, 2.113
747	149.200, 2.320	149.200, 2.143	149.200, 2.003	149.200, 4.364	149.200, 4.124	149.200, 3.837	149.200, 2.175	149.200, 2.054	149.200, 1.917	149.200, 1.751	149.200, 2.103	149.200, 1.940	149.200, 2.311	149.200, 2.175	149.200, 2.113
748	149.400, 2.321	149.400, 2.144	149.400, 2.003	149.400, 4.365	149.400, 4.125	149.400, 3.839	149.400, 2.175	149.400, 2.054	149.400, 1.917	149.400, 1.751	149.400, 2.104	149.400, 1.940	149.400, 2.311	149.400, 2.175	149.400, 2.113
749	149.600, 2.321	149.600, 2.144	149.600, 2.003	149.600, 4.367	149.600, 4.127	149.600, 3.840	149.600, 2.175	149.600, 2.054	149.600, 1.917	149.600, 1.751	149.600, 2.103	149.600, 1.940	149.600, 2.311	149.600, 2.175	149.600, 2.112
750	149.800, 2.321	149.800, 2.144	149.800, 2.003	149.800, 4.368	149.800, 4.128	149.800, 3.840	149.800, 2.175	149.800, 2.054	149.800, 1.917	149.800, 1.751	149.800, 2.104	149.800, 1.940	149.800, 2.311	149.800, 2.175	149.800, 2.112
751	150.000, 2.321	150.000, 2.144	150.000, 2.003	150.000, 4.368	150.000, 4.128	150.000, 3.840	150.000, 2.175	150.000, 2.054	150.000, 1.917	150.000, 1.751	150.000, 2.104	150.000, 1.940	150.000, 2.311	150.000, 2.175	150.000, 2.112
752	150.200, 2.324	150.200, 2.147	150.200, 2.006	150.200, 4.372	150.200, 4.133	150.200, 3.846	150.200, 2.179	150.200, 2.057	150.200, 1.922	150.200, 1.758	150.200, 2.112	150.200, 1.947	150.200, 2.318	150.200, 2.180	150.200, 2.118
753	150.400, 2.328	150.400, 2.151	150.400, 2.010	150.400, 4.377	150.400, 4.139	150.400, 3.851	150.400, 2.184	150.400, 2.061	150.400, 1.926	150.400, 1.766	150.400, 2.120	150.400, 1.953	150.400, 2.326	150.400, 2.186	150.400, 2.123
754	150.600, 2.331	150.600, 2.154	150.600, 2.014	150.600, 4.381	150.600, 4.146	150.600, 3.856	150.600, 2.189	150.600, 2.064	150.600, 1.931	150.600, 1.774	150.600, 2.128	150.600, 1.960	150.600, 2.334	150.600, 2.192	150.600, 2.129
755	150.800, 2.334	150.800, 2.157	150.800, 2.018	150.800, 4.386	150.800, 4.153	150.800, 3.862	150.800, 2.193	150.800, 2.067	150.800, 1.935	150.800, 1.782	150.800, 2.136	150.800, 1.966	150.800, 2.342	150.800, 2.198	150.800, 2.135
756	151.000, 2.337	151.000, 2.160	151.000, 2.021	151.000, 4.391	151.000, 4.159	151.000, 3.868	151.000, 2.197	151.000, 2.070	151.000, 1.939	151.000, 1.789	151.000, 2.144	151.000, 1.973	151.000, 2.349	151.000, 2.203	151.000, 2.140
757	151.200, 2.339	151.200, 2.162	151.200, 2.024	151.200, 4.396	151.200, 4.166	151.200, 3.873	151.200, 2.201	151.200, 2.073	151.200, 1.942	151.200, 1.796	151.200, 2.152	151.200, 1.978	151.200, 2.355	151.200, 2.208	151.200, 2.145
758	151.400, 2.340	151.400, 2.164	151.400, 2.026	151.400, 4.400	151.400, 4.172	151.400, 3.878	151.400, 2.203	151.400, 2.076	151.400, 1.945	151.400, 1.803	151.400, 2.158	151.400, 1.983	151.400, 2.361	151.400, 2.212	151.400, 2.150
759	151.600, 2.341	151.600, 2.164	151.600, 2.028	151.600, 4.404	151.600, 4.177	151.600, 3.882	151.600, 2.205	151.600, 2.078	151.600, 1.947	151.600, 1.808	151.600, 2.163	151.600, 1.987	151.600, 2.366	151.600, 2.215	151.600, 2.153
760	151.800, 2.340	151.800, 2.164	151.800, 2.029	151.800, 4.407	151.800, 4.181	151.800, 3.886	151.800, 2.206	151.800, 2.079	151.800, 1.948	151.800, 1.812	151.800, 2.167	151.800, 1.990	151.800, 2.369	151.800, 2.216	151.800, 2.155
761	152.000, 2.339	152.000, 2.163	152.000, 2.029	152.000, 4.410	152.000, 4.185	152.000, 3.888	152.000, 2.206	152.000, 2.079	152.000, 1.948	152.000, 1.814	152.000, 2.169	152.000, 1.992	152.000, 2.370	152.000, 2.216	152.000, 2.156
762	152.200, 2.336	152.200, 2.160	152.200, 2.027	152.200, 4.411	152.200, 4.187	152.200, 3.889	152.200, 2.204	152.200, 2.079	152.200, 1.946	152.200, 1.815	152.200, 2.169	152.200, 1.991	152.200, 2.369	152.200, 2.215	152.200, 2.156
763	152.400, 2.334	152.400, 2.159	152.400, 2.026	152.400, 4.413	152.400, 4.188	152.400, 3.891	152.400, 2.203	152.400, 2.079	152.400, 1.946	152.400, 1.816	152.400, 2.169	152.400, 1.991	152.400, 2.369	152.400, 2.214	152.400, 2.155
764	152.600, 2.332	152.600, 2.157	152.600, 2.026	152.600, 4.414	152.600, 4.190	152.600, 3.892	152.600, 2.202	152.600, 2.079	152.600, 1.945	152.600, 1.817	152.600, 2.170	152.600, 1.991	152.600, 2.369	152.600, 2.213	152.600, 2.155
765	152.800, 2.330	152.800, 2.156	152.800, 2.025	152.800, 4.415	152.800, 4.191	152.800, 3.893	152.800, 2.202	152.800, 2.078	152.800, 1.944	152.800, 1.818	152.800, 2.170	152.800, 1.991	152.800, 2.369	152.800, 2.212	152.800, 2.154
766	153.000, 2.328	153.000, 2.155	153.000, 2.024	153.000, 4.415	153.000, 4.192	153.000, 3.894	153.000, 2.201	153.000, 2.078	153.000, 1.943	153.000, 1.819	153.000, 2.170	153.000, 1.991	153.000, 2.368	153.000, 2.210	153.000, 2.153
767	153.200, 2.327	153.200, 2.153	153.200, 2.023	153.200, 4.416	153.200, 4.193	153.200, 3.896	153.200, 2.200	153.200, 2.078	153.200, 1.942	153.200, 1.819	153.200, 2.171	153.200, 1.991	153.200, 2.368	153.200, 2.209	153.200, 2.152
768	153.400, 2.325	153.400, 2.152	153.400, 2.022	153.400, 4.416	153.400, 4.194	153.400, 3.897	153.400, 2.199	153.400, 2.077	153.400, 1.942	153.400, 1.820	153.400, 2.171	153.400, 1.991	153.400, 2.368	153.400, 2.208	153.400, 2.151
769	153.600, 2.324	153.600, 2.151	153.600, 2.022	153.600, 4.417	153.600, 4.195	153.600, 3.898	153.600, 2.199	153.600, 2.077	153.600, 1.941	153.600, 1.821	153.600, 2.171	153.600, 1.991	153.600, 2.368	153.600, 2.206	153.600, 2.150
770	153.800, 2.323	153.800, 2.150	153.800, 2.021	153.800, 4.418	153.800, 4.196	153.800, 3.899	153.800, 2.198	153.800, 2.077	153.800, 1.940	153.800, 1.821	153.800, 2.171	153.800, 1.991	153.800, 2.368	153.800, 2.205	153.800, 2.149
771	154.000, 2.321	154.000, 2.149	154.000, 2.020	154.000, 4.418	154.000, 4.196	154.000, 3.900	154.000, 2.196	154.000, 2.076	154.000, 1.939	154.000, 1.822	154.000, 2.171	154.000, 1.990	154.000, 2.367	154.000, 2.203	154.000, 2.148
772	154.200, 2.320	154.200, 2.148	154.200, 2.020	154.200, 4.419	154.200, 4.197	154.200, 3.901	154.200, 2.195	154.200, 2.076	154.200, 1.939	154.200, 1.822	154.200, 2.172	154.200, 1.990	154.200, 2.367	154.200, 2.202	154.200, 2.147
773	154.400, 2.319	154.400, 2.147	154.400, 2.019	154.400, 4.420	154.400, 4.198	154.400, 3.901	154.400, 2.194	154.400, 2.075	154.400, 1.938	154.400, 1.822	154.400, 2.171	154.400, 1.990	154.400, 2.366	154.400, 2.200	154.400, 2.146
774	154.600, 2.317	154.600, 2.146	154.600, 2.019	154.600, 4.421	154.600, 4.199	154.600, 3.902	154.600, 2.193	154.600, 2.074	154.600, 1.937	154.600, 1.823	154.600, 2.171	154.600, 1.989	154.600, 2.366	154.600, 2.198	154.600, 2.145
775	154.800, 2.316	154.800, 2.145	154.800, 2.018	154.800, 4.421	154.800, 4.200	154.800, 3.903	154.800, 2.192	154.800, 2.074	154.800, 1.936	154.800, 1.823	154.800, 2.171	154.800, 1.989	154.800, 2.365	154.800, 2.197	154.800, 2.144
776	155.000, 2.315	155.000, 2.144	155.000, 2.018	155.000, 4.422	155.000, 4.201	155.000, 3.904	155.000, 2.191	155.000, 2.073	155.000, 1.935	155.000, 1.822	155.000, 2.171	155.000, 1.988	155.000, 2.365	155.000, 2.196	155.000, 2.143
777	155.200, 2.314	155.200, 2.143	155.200, 2.017	155.200, 4.423	155.200, 4.201	155.200, 3.905	155.200, 2.189	155.200, 2.072	155.200, 1.934	155.200, 1.822	155.200, 2.171	155.200, 1.988	155.200, 2.364	155.200, 2.195	155.200, 2.143
778	155.400, 2.313	155.400, 2.142	155.400, 2.016	155.400, 4.423	155.400, 4.202	155.400, 3.905	155.400, 2.188	155.400, 2.071	155.400, 1.933	155.400, 1.822	155.400, 2.170	155.400, 1.987	155.400, 2.364	155.400, 2.193	155.400, 2.142
779	155.600, 2.312	155.600, 2.142	155.600, 2.016	155.600, 4.424	155.600, 4.203	155.600, 3.906	155.600, 2.187	155.600, 2.071	155.600, 1.932	155.600, 1.822	155.600, 2.170	155.600, 1.987	155.600, 2.364	155.600, 2.192	155.600, 2.141
780	155.800, 2.311	155.800, 2.141	155.800, 2.015	155.800, 4.424	155.800, 4.203	155.800, 3.906	155.800, 2.186	155.800, 2.070	155.800, 1.931	155.800, 1.822	155.800, 2.170	155.800, 1.986	155.800, 2.363	155.800, 2.192	155.800, 2.140
781	156.000, 2.309	156.000, 2.140	156.000, 2.014	156.000, 4.425	156.000, 4.203	156.000, 3.906	156.000, 2.185	156.000, 2.069	156.000, 1.931	156.000, 1.822	156.000, 2.170	156.000, 1.986	156.000, 2.363	156.000, 2.191	156.000, 2.139
782	156.200, 2.308	156.200, 2.139	156.200, 2.013	156.200, 4.425	156.200, 4.204	156.200, 3.907	156.200, 2.184	156.200, 2.068	156.200, 1.930	156.200, 1.823	156.200, 2.170	156.200, 1.985	156.200, 2.363	156.200, 2.190	156.200, 2.138
783	156.400, 2.307	156.400, 2.138	156.400, 2.012	156.400, 4.425	156.400, 4.204	156.400, 3.907	156.400, 2.183	156.400, 2.067	156.400, 1.929	156.400, 1.823	156.400, 2.170	156.400, 1.984	156.400, 2.362	156.400, 2.190	156.400, 2.137
784	156.600, 2.306	156.600, 2.138	156.600, 2.012	156.600, 4.426	156.600, 4.205	156.600, 3.907	156.600, 2.182	156.600, 2.066	156.600, 1.928	156.600, 1.823	156.600, 2.170	156.600, 1.984	156.600, 2.362	156.600, 2.189	156.600, 2.137
785	156.800, 2.305	156.800, 2.137	156.800, 2.011	156.800, 4.426	156.800, 4.205	156.800, 3.907	156.800, 2.181	156.800, 2.065	156.800, 1.928	156.800, 1.823	156.800, 2.169	156.800, 1.983	156.800, 2.361	156.800, 2.189	156.800, 2.136
786	157.000, 2.304	157.000, 2.136	157.000, 2.010	157.000, 4.426	157.000, 4.206	157.000, 3.907	157.000, 2.181	157.000, 2.064	157.000, 1.927	157.000, 1.823	157.000, 2.169	157.000, 1.983	157.000, 2.361	157.000, 2.188	157.000, 2.134
787	157.200, 2.303	157.200, 2.135	157.200, 2.009	157.200, 4.426	157.200, 4.206	157.200, 3.907	157.200, 2.180	157.200, 2.064	157.200, 1.926	157.200, 1.823	157.200, 2.169	157.200, 1.982	157.200, 2.360	157.200, 2.187	157.200, 2.133
788	157.400, 2.302	157.400, 2.134	157.400, 2.008	157.400, 4.426	157.400, 4.207	157.400, 3.907	157.400, 2.179	157.400, 2.063	157.400, 1.926	157.400, 1.823	157.400, 2.168	157.400, 1.982	157.400, 2.360	157.400, 2.186	157.400, 2.132
789	157.600, 2.300	157.600, 2.133	157.600, 2.007	157.600, 4.426	157.600, 4.207	157.600, 3.907	157.600, 2.178	157.600, 2.063	157.600, 1.925	157.600, 1.823	157.600, 2.168	157.600, 1.982	157.600, 2.359	157.600, 2.185	157.600, 2.131
790	157.800, 2.299	157.800, 2.132	157.800, 2.006	157.800, 4.426	157.800, 4.208	157.800, 3.907	157.800, 2.178	157.800, 2.062	157.800, 1.924	157.800, 1.823	157.800, 2.167	157.800, 1.982	157.800, 2.358	157.800, 2.183	157.800, 2.130
791	158.000, 2.298	158.000, 2.131	158.000, 2.006	158.000, 4.426	158.000, 4.209	158.000, 3.907	158.000, 2.177	158.000, 2.061	158.000, 1.923	158.000, 1.823	158.000, 2.167	158.000, 1.981	158.000, 2.358	158.000, 2.182	158.000, 2.129
792	158.200, 2.297	158.200, 2.130	158.200, 2.006	158.200, 4.427	158.200, 4.209	158.200, 3.908	158.200, 2.176	158.200, 2.061	158.200, 1.922	158.200, 1.824	158.200, 2.166	158.200, 1.981	158.200, 2.357	158.200, 2.181	158.200, 2.128
793	158.400, 2.295	158.400, 2.129	158.400, 2.005	158.400, 4.427	158.400, 4.210	158.400, 3.908	158.400, 2.176	158.400, 2.060	158.400, 1.921	158.400, 1.824	158.400, 2.165	158.400, 1.981	158.400, 2.356	158.400, 2.180	158.400, 2.127
794	158.600, 2.294	158.600, 2.128	158.600, 2.005	158.600, 4.428	158.600, 4.210	158.600, 3.908	158.600, 2.175	158.600, 2.059	158.600, 1.921	158.600, 1.824	158.600, 2.165	158.600, 1.980	158.600, 2.356	158.600, 2.179	158.600, 2.126
795	158.800, 2.292	158.800, 2.127	158.800, 2.004	158.800, 4.428	158.800, 4.211	158.800, 3.909	158.800, 2.174	158.800, 2.058	158.800, 1.920	158.800, 1.824	158.800, 2.164	158.800, 1.980	158.800, 2.355	158.800, 2.177	158.800, 2.125
796	159.000, 2.291	159.000, 2.126	159.000, 2.004	159.000, 4.429	159.000, 4.211	159.000, 3.909	159.000, 2.173	159.000, 2.057	159.000, 1.919	159.000, 1.823	159.000, 2.163	159.000, 1.980	159.000, 2.354	159.000, 2.176	159.000, 2.125
797	159.200, 2.289	159.200, 2.125	159.200, 2.003	159.200, 4.429	159.200, 4.211	159.200, 3.909	159.200, 2.172	159.200, 2.057	159.200, 1.918	159.200, 1.823	159.200, 2.163	159.200, 1.979	159.200, 2.354	159.200, 2.175	159.200, 2.124
798	159.400, 2.288	159.400, 2.124	159.400, 2.002	159.400, 4.430	159.400, 4.212	159.400, 3.910	159.400, 2.171	159.400, 2.056	159.400, 1.918	159.400, 1.823	159.400, 2.162	159.400, 1.979	159.400, 2.353	159.400, 2.175	159.400, 2.124
799	159.600, 2.287	159.600, 2.123	159.600, 2.002	159.600, 4.430	159.600, 4.212	159.600, 3.910	159.600, 2.170	159.600, 2.055	159.600, 1.917	159.600, 1.823	159.600, 2.162	159.600, 1.978	159.600, 2.352	159.600, 2.174	159.600, 2.123
800	159.800, 2.286	159.800, 2.122	159.800, 2.001	159.800, 4.430	159.800, 4.213	159.800, 3.911	159.800, 2.169	159.800, 2.054	159.800, 1.916	159.800, 1.823	159.800, 2.162	159.800, 1.977	159.800, 2.351	159.800, 2.173	159.800, 2.123
801	160.000, 2.285	160.000, 2.121	160.000, 2.000	160.000, 4.431	160.000, 4.213	160.000, 3.911	160.000, 2.168	160.000, 2.053	160.000, 1.915	160.000, 1.823	160.000, 2.161	160.000, 1.977	160.000, 2.350	160.000, 2.172	160.000, 2.122
802	160.200, 2.284	160.200, 2.121	160.200, 1.999	160.200, 4.431	160.200, 4.214	160.200, 3.911	160.200, 2.167	160.200, 2.052	160.200, 1.914	160.200, 1.823	160.200, 2.161	160.200, 1.976	160.200, 2.349	160.200, 2.172	160.200, 2.121
803	160.400, 2.284	160.400, 2.120	160.400, 1.998	160.400, 4.431	160.400, 4.214	160.400, 3.911	160.400, 2.166	160.400, 2.051	160.400, 1.914	160.400, 1.823	160.400, 2.161	160.400, 1.975	160.400, 2.348	160.400, 2.171	160.400, 2.120
804	160.600, 2.283	160.600, 2.120	160.600, 1.997	160.600, 4.432	160.600, 4.215	160.600, 3.911	160.600, 2.166	160.600, 2.050	160.600, 1.913	160.600, 1.822	160.600, 2.160	160.600, 1.975	160.600, 2.347	160.600, 2.170	160.600, 2.119
805	160.800, 2.282	160.800, 2.119	160.800, 1.996	160.800, 4.432	160.800, 4.215	160.800, 3.911	160.800, 2.165	160.800, 2.050	160.800, 1.912	160.800, 1.822	160.800, 2.160	160.800, 1.975	160.800, 2.347	160.800, 2.170	160.800, 2.118
806	161.000, 2.281	161.000, 2.119	161.000, 1.995	161.000, 4.431	161.000, 4.215	161.000, 3.911	161.000, 2.164	161.000, 2.049	161.000, 1.911	161.000, 1.822	161.000, 2.160	161.000, 1.974	161.000, 2.346	161.000, 2.169	161.000, 2.117
807	161.200, 2.280	161.200, 2.118	161.200, 1.994	161.200, 4.431	161.200, 4.216	161.200, 3.912	161.200, 2.163	161.200, 2.048	161.200, 1.910	161.200, 1.822	161.200, 2.159	161.200, 1.974	161.200, 2.345	161.200, 2.168	161.200, 2.116
808	161.400, 2.279	161.400, 2.117	161.400, 1.993	161.400, 4.431	161.400, 4.216	161.400, 3.912	161.400, 2.162	161.400, 2.048	161.400, 1.910	161.400, 1.821	161.400, 2.159	161.400, 1.973	161.400, 2.345	161.400, 2.167	161.400, 2.115
809	161.600, 2.279	161.600, 2.117	161.600, 1.993	161.600, 4.430	161.600, 4.216	161.600, 3.912	161.600, 2.161	161.600, 2.047	161.600, 1.909	161.600, 1.821	161.600, 2.159	161.600, 1.973	161.600, 2.344	161.600, 2.166	161.600, 2.114
810	161.800, 2.278	161.800, 2.116	161.800, 1.992	161.800, 4.430	161.800, 4.217	161.800, 3.912	161.800, 2.160	161.800, 2.046	161.800, 1.908	161.800, 1.821	161.800, 2.159	161.800, 1.973	161.800, 2.344	161.800, 2.165	161.800, 2.113
811	162.000, 2.277	162.000, 2.115	162.000, 1.992	162.000, 4.429	162.000, 4.217	162.000, 3.912	162.000, 2.160	162.000, 2.046	162.000, 1.907	162.000, 1.820	162.000, 2.158	162.000, 1.972	162.000, 2.343	162.000, 2.164	162.000, 2.112
812	162.200, 2.276	162.200, 2.114	162.200, 1.991	162.200, 4.429	162.200, 4.217	162.200, 3.913	162.200, 2.159	162.200, 2.045	162.200, 1.907	162.200, 1.820	162.200, 2.157	162.200, 1.972	162.200, 2.343	162.200, 2.163	162.200, 2.112
813	162.400, 2.275	162.400, 2.114	162.400, 1.991	162.400, 4.429	162.400, 4.218	162.400, 3.913	162.400, 2.158	162.400, 2.045	162.400, 1.906	162.400, 1.820	162.400, 2.156	162.400, 1.972	162.400, 2.342	162.400, 2.163	162.400, 2.111
814	162.600, 2.274	162.600, 2.113	162.600, 1.990	162.600, 4.429	162.600, 4.218	162.600, 3.913	162.600, 2.157	162.600, 2.044	162.600, 1.905	162.600, 1.819	162.600, 2.155	162.600, 1.971	162.600, 2.342	162.600, 2.162	162.600, 2.111
815	162.800, 2.273	162.800, 2.112	162.800, 1.990	162.800, 4.429	162.800, 4.218	162.800, 3.914	162.800, 2.156	162.800, 2.043	162.800, 1.904	162.800, 1.819	162.800, 2.155	162.800, 1.971	162.800, 2.342	162.800, 2.161	162.800, 2.110
816	163.000, 2.272	163.000, 2.111	163.000, 1.989	163.000, 4.429	163.000, 4.218	163.000, 3.914	163.000, 2.155	163.000, 2.042	163.000, 1.903	163.000, 1.819	163.000, 2.154	163.000, 1.970	163.000, 2.341	163.000, 2.160	163.000, 2.110
817	163.200, 2.271	163.200, 2.111	163.200, 1.989	163.200, 4.430	163.200, 4.218	163.200, 3.914	163.200, 2.154	163.200, 2.042	163.200, 1.903	163.200, 1.819	163.200, 2.154	163.200, 1.969	163.200, 2.341	163.200, 2.159	163.200, 2.109
818	163.400, 2.270	163.400, 2.110	163.400, 1.989	163.400, 4.430	163.400, 4.218	163.400, 3.914	163.400, 2.154	163.400, 2.041	163.400, 1.902	163.400, 1.818	163.400, 2.153	163.400, 1.969	163.400, 2.340	163.400, 2.159	163.400, 2.109
819	163.600, 2.269	163.600, 2.109	163.600, 1.988	163.600, 4.430	163.600, 4.219	163.600, 3.915	163.600, 2.153	163.600, 2.041	163.600, 1.901	163.600, 1.818	163.600, 2.153	163.600, 1.968	163.600, 2.340	163.600, 2.158	163.600, 2.108
820	163.800, 2.268	163.800, 2.108	163.800, 1.987	163.800, 4.431	163.800, 4.219	163.800, 3.915	163.800, 2.152	163.800, 2.040	163.800, 1.900	163.800, 1.818	163.800, 2.152	163.800, 1.967	163.800, 2.339	163.800, 2.157	163.800, 2.107
821	164.000, 2.267	164.000, 2.107	164.000, 1.987	164.000, 4.432	164.000, 4.219	164.000, 3.915	164.000, 2.151	164.000, 2.040	164.000, 1.899	164.000, 1.817	164.000, 2.152	164.000, 1.966	164.000, 2.339	164.000, 2.156	164.000, 2.106
822	164.200, 2.266	164.200, 2.107	164.200, 1.986	164.200, 4.432	164.200, 4.219	164.200, 3.915	164.200, 2.150	164.200, 2.039	164.200, 1.899	164.200, 1.817	164.200, 2.152	164.200, 1.966	164.200, 2.338	164.200, 2.155	164.200, 2.105
823	164.400, 2.265	164.400, 2.106	164.400, 1.985	164.400, 4.432	164.400, 4.219	164.400, 3.915	164.400, 2.150	164.400, 2.038	164.400, 1.898	164.400, 1.817	164.400, 2.152	164.400, 1.965	164.400, 2.338	164.400, 2.154	164.400, 2.104
824	164.600, 2.264	164.600, 2.105	164.600, 1.985	164.600, 4.432	164.600, 4.219	164.600, 3.916	164.600, 2.149	164.600, 2.038	164.600, 1.897	164.600, 1.817	164.600, 2.151	164.600, 1.965	164.600, 2.338	164.600, 2.153	164.600, 2.103
825	164.800, 2.263	164.800, 2.105	164.800, 1.984	164.800, 4.432	164.800, 4.219	164.800, 3.916	164.800, 2.148	164.800, 2.037	164.800, 1.897	164.800, 1.817	164.800, 2.151	164.800, 1.964	164.800, 2.337	164.800, 2.152	164.800, 2.102
826	165.000, 2.262	165.000, 2.105	165.000, 1.984	165.000, 4.432	165.000, 4.219	165.000, 3.917	165.000, 2.147	165.000, 2.037	165.000, 1.896	165.000, 1.817	165.000, 2.151	165.000, 1.963	165.000, 2.337	165.000, 2.151	165.000, 2.102
827	165.200, 2.261	165.200, 2.104	165.200, 1.983	165.200, 4.432	165.200, 4.219	165.200, 3.917	165.200, 2.147	165.200, 2.036	165.200, 1.895	165.200, 1.817	165.200, 2.151	165.200, 1.963	165.200, 2.337	165.200, 2.150	165.200, 2.101
828	165.400, 2.261	165.400, 2.103	165.400, 1.982	165.400, 4.432	165.400, 4.219	165.400, 3.918	165.400, 2.146	165.400, 2.035	165.400, 1.894	165.400, 1.817	165.400, 2.150	165.400, 1.962	165.400, 2.336	165.400, 2.150	165.400, 2.100
829	165.600, 2.260	165.600, 2.103	165.600, 1.981	165.600, 4.431	165.600, 4.219	165.600, 3.918	165.600, 2.146	165.600, 2.034	165.600, 1.894	165.600, 1.817	165.600, 2.150	165.600, 1.961	165.600, 2.336	165.600, 2.149	165.600, 2.100
830	165.800, 2.260	165.800, 2.102	165.800, 1.981	165.800, 4.431	165.800, 4.219	165.800, 3.918	165.800, 2.145	165.800, 2.034	165.800, 1.892	165.800, 1.816	165.800, 2.149	165.800, 1.961	165.800, 2.335	165.800, 2.148	165.800, 2.100
831	166.000, 2.259	166.000, 2.102	166.000, 1.980	166.000, 4.431	166.000, 4.219	166.000, 3.919	166.000, 2.145	166.000, 2.033	166.000, 1.891	166.000, 1.816	166.000, 2.148	166.000, 1.960	166.000, 2.334	166.000, 2.148	166.000, 2.099
832	166.200, 2.259	166.200, 2.102	166.200, 1.980	166.200, 4.431	166.200, 4.219	166.200, 3.919	166.200, 2.144	166.200, 2.032	166.200, 1.890	166.200, 1.816	166.200, 2.147	166.200, 1.960	166.200, 2.334	166.200, 2.147	166.200, 2.099
833	166.400, 2.258	166.400, 2.101	166.400, 1.979	166.400, 4.431	166.400, 4.219	166.400, 3.919	166.400, 2.144	166.400, 2.031	166.400, 1.889	166.400, 1.816	166.400, 2.146	166.400, 1.959	166.400, 2.333	166.400, 2.147	166.400, 2.099
834	166.600, 2.258	166.600, 2.100	166.600, 1.979	166.600, 4.431	166.600, 4.219	166.600, 3.919	166.600, 2.143	166.600, 2.030	166.600, 1.889	166.600, 1.815	166.600, 2.146	166.600, 1.959	166.600, 2.332	166.600, 2.146	166.600, 2.098
835	166.800, 2.257	166.800, 2.100	166.800, 1.979	166.800, 4.431	166.800, 4.219	166.800, 3.919	166.800, 2.142	166.800, 2.029	166.800, 1.888	166.800, 1.815	166.800, 2.145	166.800, 1.958	166.800, 2.332	166.800, 2.146	166.800, 2.098
836	167.000, 2.256	167.000, 2.099	167.000, 1.978	167.000, 4.431	167.000, 4.219	167.000, 3.919	167.000, 2.142	167.000, 2.028	167.000, 1.887	167.000, 1.815	167.000, 2.144	167.000, 1.958	167.000, 2.331	167.000, 2.145	167.000, 2.097
837	167.200, 2.255	167.200, 2.098	167.200, 1.978	167.200, 4.431	167.200, 4.219	167.200, 3.919	167.200, 2.141	167.200, 2.027	167.200, 1.887	167.200, 1.814	167.200, 2.144	167.200, 1.957	167.200, 2.331	167.200, 2.145	167.200, 2.097
838	167.400, 2.255	167.400, 2.097	167.400, 1.978	167.400, 4.432	167.400, 4.220	167.400, 3.919	167.400, 2.140	167.400, 2.027	167.400, 1.886	167.400, 1.814	167.400, 2.143	167.400, 1.957	167.400, 2.330	167.400, 2.144	167.400, 2.097
839	167.600, 2.254	167.600, 2.096	167.600, 1.977	167.600, 4.432	167.600, 4.220	167.600, 3.918	167.600, 2.139	167.600, 2.026	167.600, 1.886	167.600, 1.813	167.600, 2.143	167.600, 1.957	167.600, 2.330	167.600, 2.143	167.600, 2.096
840	167.800, 2.253	167.800, 2.096	167.800, 1.977	167.800, 4.432	167.800, 4.221	167.800, 3.918	167.800, 2.138	167.800, 2.026	167.800, 1.886	167.800, 1.812	167.800, 2.143	167.800, 1.956	167.800, 2.329	167.800, 2.142	167.800, 2.095
841	168.000, 2.252	168.000, 2.095	168.000, 1.976	168.000, 4.432	168.000, 4.221	168.000, 3.918	168.000, 2.138	168.000, 2.025	168.000, 1.886	168.000, 1.812	168.000, 2.142	168.000, 1.956	168.000, 2.328	168.000, 2.141	168.000, 2.095
842	168.200, 2.251	168.200, 2.094	168.200, 1.976	168.200, 4.432	168.200, 4.221	168.200, 3.918	168.200, 2.137	168.200, 2.025	168.200, 1.885	168.200, 1.812	168.200, 2.142	168.200, 1.956	168.200, 2.327	168.200, 2.140	168.200, 2.094
843	168.400, 2.250	168.400, 2.093	168.400, 1.975	168.400, 4.431	168.400, 4.222	168.400, 3.918	168.400, 2.136	168.400, 2.024	168.400, 1.885	168.400, 1.811	168.400, 2.142	168.400, 1.956	168.400, 2.326	168.400, 2.139	168.400, 2.093
844	168.600, 2.249	168.600, 2.092	168.600, 1.975	168.600, 4.431	168.600, 4.222	168.600, 3.918	168.600, 2.135	168.600, 2.024	168.600, 1.885	168.600, 1.811	168.600, 2.141	168.600, 1.955	168.600, 2.326	168.600, 2.139	168.600, 2.092
845	168.800, 2.249	168.800, 2.091	168.800, 1.974	168.800, 4.430	168.800, 4.222	168.800, 3.919	168.800, 2.134	168.800, 2.023	168.800, 1.885	168.800, 1.811	168.800, 2.141	168.800, 1.955	168.800, 2.325	168.800, 2.138	168.800, 2.091
846	169.000, 2.248	169.000, 2.090	169.000, 1.973	169.000, 4.430	169.000, 4.223	169.000, 3.919	169.000, 2.134	169.000, 2.023	169.000, 1.885	169.000, 1.812	169.000, 2.140	169.000, 1.955	169.000, 2.325	169.000, 2.137	169.000, 2.090
847	169.200, 2.247	169.200, 2.089	169.200, 1.973	169.200, 4.430	169.200, 4.223	169.200, 3.919	169.200, 2.133	169.200, 2.022	169.200, 1.884	169.200, 1.812	169.200, 2.140	169.200, 1.954	169.200, 2.325	169.200, 2.136	169.200, 2.090
848	169.400, 2.247	169.400, 2.088	169.400, 1.972	169.400, 4.430	169.400, 4.224	169.400, 3.919	169.400, 2.133	169.400, 2.022	169.400, 1.884	169.400, 1.812	169.400, 2.140	169.400, 1.954	169.400, 2.325	169.400, 2.135	169.400, 2.089
849	169.600, 2.246	169.600, 2.088	169.600, 1.971	169.600, 4.430	169.600, 4.224	169.600, 3.919	169.600, 2.132	169.600, 2.021	169.600, 1.883	169.600, 1.812	169.600, 2.140	169.600, 1.953	169.600, 2.324	169.600, 2.134	169.600, 2.088
850	169.800, 2.246	169.800, 2.087	169.800, 1.970	169.800, 4.429	169.800, 4.224	169.800, 3.919	169.800, 2.132	169.800, 2.021	169.800, 1.883	169.800, 1.812	169.800, 2.140	169.800, 1.953	169.800, 2.324	169.800, 2.134	169.800, 2.088
851	170.000, 2.245	170.000, 2.087	170.000, 1.970	170.000, 4.429	170.000, 4.224	170.000, 3.919	170.000, 2.131	170.000, 2.020	170.000, 1.882	170.000, 1.812	170.000, 2.139	170.000, 1.952	170.000, 2.323	170.000, 2.133	170.000, 2.087
852	170.200, 2.244	170.200, 2.086	170.200, 1.969	170.200, 4.429	170.200, 4.224	170.200, 3.919	170.200, 2.130	170.200, 2.019	170.200, 1.881	170.200, 1.812	170.200, 2.139	170.200, 1.952	170.200, 2.323	170.200, 2.132	170.200, 2.086
853	170.400, 2.244	170.400, 2.086	170.400, 1.969	170.400, 4.429	170.400, 4.223	170.400, 3.919	170.400, 2.129	170.400, 2.019	170.400, 1.881	170.400, 1.812	170.400, 2.139	170.400, 1.951	170.400, 2.323	170.400, 2.131	170.400, 2.086
854	170.600, 2.243	170.600, 2.085	170.600, 1.968	170.600, 4.429	170.600, 4.223	170.600, 3.919	170.600, 2.128	170.600, 2.018	170.600, 1.880	170.600, 1.812	170.600, 2.138	170.600, 1.951	170.600, 2.323	170.600, 2.131	170.600, 2.085
855	170.800, 2.243	170.800, 2.085	170.800, 1.968	170.800, 4.430	170.800, 4.223	170.800, 3.919	170.800, 2.127	170.800, 2.017	170.800, 1.879	170.800, 1.811	170.800, 2.138	170.800, 1.950	170.800, 2.322	170.800, 2.130	170.800, 2.085
856	171.000, 2.242	171.000, 2.085	171.000, 1.968	171.000, 4.430	171.000, 4.223	171.000, 3.920	171.000, 2.126	171.000, 2.017	171.000, 1.878	171.000, 1.811	171.000, 2.138	171.000, 1.949	171.000, 2.322	171.000, 2.129	171.000, 2.085
857	171.200, 2.241	171.200, 2.085	171.200, 1.967	171.200, 4.430	171.200, 4.223	171.200, 3.920	171.200, 2.125	171.200, 2.016	171.200, 1.877	171.200, 1.810	171.200, 2.137	171.200, 1.949	171.200, 2.322	171.200, 2.129	171.200, 2.084
858	171.400, 2.241	171.400, 2.085	171.400, 1.967	171.400, 4.430	171.400, 4.223	171.400, 3.920	171.400, 2.125	171.400, 2.016	171.400, 1.877	171.400, 1.809	171.400, 2.136	171.400, 1.948	171.400, 2.321	171.400, 2.129	171.400, 2.084
859	171.600, 2.240	171.600, 2.085	171.600, 1.967	171.600, 4.430	171.600, 4.223	171.600, 3.920	171.600, 2.124	171.600, 2.015	171.600, 1.876	171.600, 1.808	171.600, 2.136	171.600, 1.948	171.600, 2.321	171.600, 2.128	171.600, 2.083
860	171.800, 2.239	171.800, 2.084	171.800, 1.966	171.800, 4.431	171.800, 4.223	171.800, 3.920	171.800, 2.123	171.800, 2.014	171.800, 1.875	171.800, 1.808	171.800, 2.135	171.800, 1.948	171.800, 2.320	171.800, 2.128	171.800, 2.083
861	172.000, 2.238	172.000, 2.084	172.000, 1.965	172.000, 4.431	172.000, 4.223	172.000, 3.920	172.000, 2.123	172.000, 2.014	172.000, 1.874	172.000, 1.807	172.000, 2.134	172.000, 1.947	172.000, 2.319	172.000, 2.128	172.000, 2.082
862	172.200, 2.237	172.200, 2.084	172.200, 1.965	172.200, 4.431	172.200, 4.223	172.200, 3.920	172.200, 2.122	172.200, 2.013	172.200, 1.873	172.200, 1.807	172.200, 2.134	172.200, 1.947	172.200, 2.318	172.200, 2.128	172.200, 2.081
863	172.400, 2.237	172.400, 2.083	172.400, 1.964	172.400, 4.432	172.400, 4.223	172.400, 3.921	172.400, 2.121	172.400, 2.012	172.400, 1.873	172.400, 1.806	172.400, 2.133	172.400, 1.947	172.400, 2.318	172.400, 2.128	172.400, 2.081
864	172.600, 2.236	172.600, 2.082	172.600, 1.963	172.600, 4.432	172.600, 4.223	172.600, 3.921	172.600, 2.121	172.600, 2.012	172.600, 1.872	172.600, 1.806	172.600, 2.132	172.600, 1.946	172.600, 2.317	172.600, 2.127	172.600, 2.080
865	172.800, 2.235	172.800, 2.082	172.800, 1.963	172.800, 4.432	172.800, 4.223	172.800, 3.920	172.800, 2.120	172.800, 2.011	172.800, 1.872	172.800, 1.806	172.800, 2.132	172.800, 1.946	172.800, 2.317	172.800, 2.127	172.800, 2.080
866	173.000, 2.234	173.000, 2.081	173.000, 1.963	173.000, 4.432	173.000, 4.223	173.000, 3.920	173.000, 2.120	173.000, 2.010	173.000, 1.871	173.000, 1.806	173.000, 2.132	173.000, 1.945	173.000, 2.317	173.000, 2.127	173.000, 2.079
867	173.200, 2.233	173.200, 2.081	173.200, 1.962	173.200, 4.432	173.200, 4.223	173.200, 3.920	173.200, 2.120	173.200, 2.010	173.200, 1.871	173.200, 1.806	173.200, 2.132	173.200, 1.945	173.200, 2.316	173.200, 2.126	173.200, 2.079
868	173.400, 2.232	173.400, 2.080	173.400, 1.961	173.400, 4.432	173.400, 4.223	173.400, 3.920	173.400, 2.119	173.400, 2.009	173.400, 1.870	173.400, 1.806	173.400, 2.132	173.400, 1.945	173.400, 2.316	173.400, 2.126	173.400, 2.079
869	173.600, 2.231	173.600, 2.080	173.600, 1.961	173.600, 4.432	173.600, 4.223	173.600, 3.920	173.600, 2.119	173.600, 2.009	173.600, 1.870	173.600, 1.806	173.600, 2.131	173.600, 1.944	173.600, 2.316	173.600, 2.125	173.600, 2.078
870	173.800, 2.230	173.800, 2.079	173.800, 1.960	173.800, 4.432	173.800, 4.223	173.800, 3.919	173.800, 2.118	173.800, 2.008	173.800, 1.869	173.800, 1.806	173.800, 2.131	173.800, 1.944	173.800, 2.315	173.800, 2.124	173.800, 2.078
871	174.000, 2.229	174.000, 2.078	174.000, 1.960	174.000, 4.432	174.000, 4.223	174.000, 3.919	174.000, 2.117	174.000, 2.008	174.000, 1.869	174.000, 1.806	174.000, 2.130	174.000, 1.944	174.000, 2.315	174.000, 2.124	174.000, 2.078
872	174.200, 2.228	174.200, 2.077	174.200, 1.960	174.200, 4.432	174.200, 4.223	174.200, 3.919	174.200, 2.116	174.200, 2.008	174.200, 1.868	174.200, 1.806	174.200, 2.130	174.200, 1.944	174.200, 2.315	174.200, 2.123	174.200, 2.078
873	174.400, 2.228	174.400, 2.076	174.400, 1.959	174.400, 4.431	174.400, 4.223	174.400, 3.919	174.400, 2.116	174.400, 2.007	174.400, 1.867	174.400, 1.805	174.400, 2.130	174.400, 1.943	174.400, 2.315	174.400, 2.122	174.400, 2.077
874	174.600, 2.227	174.600, 2.075	174.600, 1.959	174.600, 4.431	174.600, 4.223	174.600, 3.919	174.600, 2.115	174.600, 2.007	174.600, 1.867	174.600, 1.805	174.600, 2.129	174.600, 1.943	174.600, 2.314	174.600, 2.121	174.600, 2.077
875	174.800, 2.227	174.800, 2.074	174.800, 1.958	174.800, 4.431	174.800, 4.223	174.800, 3.919	174.800, 2.115	174.800, 2.006	174.800, 1.866	174.800, 1.804	174.800, 2.129	174.800, 1.942	174.800, 2.314	174.800, 2.121	174.800, 2.076
876	175.000, 2.227	175.000, 2.074	175.000, 1.958	175.000, 4.430	175.000, 4.223	175.000, 3.919	175.000, 2.114	175.000, 2.006	175.000, 1.866	175.000, 1.804	175.000, 2.129	175.000, 1.942	175.000, 2.313	175.000, 2.120	175.000, 2.076
877	175.200, 2.227	175.200, 2.073	175.200, 1.957	175.200, 4.430	175.200, 4.223	175.200, 3.919	175.200, 2.113	175.200, 2.005	175.200, 1.865	175.200, 1.804	175.200, 2.128	175.200, 1.942	175.200, 2.312	175.200, 2.119	175.200, 2.075
878	175.400, 2.226	175.400, 2.073	175.400, 1.957	175.400, 4.429	175.400, 4.223	175.400, 3.920	175.400, 2.112	175.400, 2.004	175.400, 1.865	175.400, 1.803	175.400, 2.127	175.400, 1.942	175.400, 2.312	175.400, 2.119	175.400, 2.075
879	175.600, 2.226	175.600, 2.072	175.600, 1.956	175.600, 4.429	175.600, 4.224	175.600, 3.920	175.600, 2.112	175.600, 2.003	175.600, 1.864	175.600, 1.803	175.600, 2.127	175.600, 1.941	175.600, 2.311	175.600, 2.118	175.600, 2.074
880	175.800, 2.226	175.800, 2.072	175.800, 1.955	175.800, 4.429	175.800, 4.224	175.800, 3.920	175.800, 2.111	175.800, 2.002	175.800, 1.864	175.800, 1.803	175.800, 2.127	175.800, 1.941	175.800, 2.311	175.800, 2.117	175.800, 2.073
881	176.000, 2.226	176.000, 2.072	176.000, 1.955	176.000, 4.429	176.000, 4.224	176.000, 3.920	176.000, 2.110	176.000, 2.002	176.000, 1.863	176.000, 1.803	176.000, 2.126	176.000, 1.941	176.000, 2.310	176.000, 2.117	176.000, 2.073
882	176.200, 2.225	176.200, 2.071	176.200, 1.954	176.200, 4.429	176.200, 4.224	176.200, 3.920	176.200, 2.109	176.200, 2.001	176.200, 1.863	176.200, 1.802	176.200, 2.127	176.200, 1.940	176.200, 2.309	176.200, 2.117	176.200, 2.072
883	176.400, 2.224	176.400, 2.071	176.400, 1.954	176.400, 4.430	176.400, 4.224	176.400, 3.920	176.400, 2.109	176.400, 2.001	176.400, 1.862	176.400, 1.802	176.400, 2.126	176.400, 1.940	176.400, 2.309	176.400, 2.116	176.400, 2.072
884	176.600, 2.224	176.600, 2.071	176.600, 1.954	176.600, 4.430	176.600, 4.223	176.600, 3.921	176.600, 2.108	176.600, 2.000	176.600, 1.862	176.600, 1.802	176.600, 2.126	176.600, 1.940	176.600, 2.309	176.600, 2.116	176.600, 2.071
885	176.800, 2.223	176.800, 2.071	176.800, 1.953	176.800, 4.430	176.800, 4.223	176.800, 3.921	176.800, 2.108	176.800, 1.999	176.800, 1.861	176.800, 1.802	176.800, 2.126	176.800, 1.940	176.800, 2.308	176.800, 2.116	176.800, 2.071
886	177.000, 2.223	177.000, 2.071	177.000, 1.953	177.000, 4.430	177.000, 4.223	177.000, 3.921	177.000, 2.107	177.000, 1.999	177.000, 1.860	177.000, 1.802	177.000, 2.126	177.000, 1.939	177.000, 2.308	177.000, 2.115	177.000, 2.070
887	177.200, 2.222	177.200, 2.071	177.200, 1.953	177.200, 4.431	177.200, 4.224	177.200, 3.921	177.200, 2.107	177.200, 1.998	177.200, 1.860	177.200, 1.802	177.200, 2.126	177.200, 1.939	177.200, 2.307	177.200, 2.115	177.200, 2.070
888	177.400, 2.221	177.400, 2.070	177.400, 1.952	177.400, 4.431	177.400, 4.224	177.400, 3.921	177.400, 2.107	177.400, 1.998	177.400, 1.859	177.400, 1.802	177.400, 2.125	177.400, 1.939	177.400, 2.307	177.400, 2.114	177.400, 2.069
889	177.600, 2.221	177.600, 2.070	177.600, 1.952	177.600, 4.431	177.600, 4.224	177.600, 3.921	177.600, 2.106	177.600, 1.997	177.600, 1.859	177.600, 1.802	177.600, 2.125	177.600, 1.939	177.600, 2.307	177.600, 2.114	177.600, 2.069
890	177.800, 2.220	177.800, 2.069	177.800, 1.952	177.800, 4.432	177.800, 4.224	177.800, 3.921	177.800, 2.106	177.800, 1.997	177.800, 1.858	177.800, 1.801	177.800, 2.124	177.800, 1.939	177.800, 2.307	177.800, 2.113	177.800, 2.068
891	178.000, 2.219	178.000, 2.068	178.000, 1.951	178.000, 4.432	178.000, 4.224	178.000, 3.921	178.000, 2.105	178.000, 1.997	178.000, 1.857	178.000, 1.801	178.000, 2.124	178.000, 1.939	178.000, 2.307	178.000, 2.113	178.000, 2.068
892	178.200, 2.219	178.200, 2.067	178.200, 1.951	178.200, 4.432	178.200, 4.223	178.200, 3.921	178.200, 2.105	178.200, 1.996	178.200, 1.857	178.200, 1.801	178.200, 2.124	178.200, 1.938	178.200, 2.307	178.200, 2.112	178.200, 2.068
893	178.400, 2.218	178.400, 2.066	178.400, 1.951	178.400, 4.432	178.400, 4.223	178.400, 3.922	178.400, 2.105	178.400, 1.996	178.400, 1.856	178.400, 1.801	178.400, 2.123	178.400, 1.938	178.400, 2.306	178.400, 2.112	178.400, 2.068
894	178.600, 2.218	178.600, 2.066	178.600, 1.950	178.600, 4.432	178.600, 4.223	178.600, 3.922	178.600, 2.104	178.600, 1.996	178.600, 1.855	178.600, 1.801	178.600, 2.123	178.600, 1.938	178.600, 2.306	178.600, 2.112	178.600, 2.067
895	178.800, 2.218	178.800, 2.065	178.800, 1.950	178.800, 4.432	178.800, 4.223	178.800, 3.922	178.800, 2.103	178.800, 1.995	178.800, 1.855	178.800, 1.801	178.800, 2.123	178.800, 1.937	178.800, 2.306	178.800, 2.111	178.800, 2.067
896	179.000, 2.217	179.000, 2.065	179.000, 1.949	179.000, 4.431	179.000, 4.223	179.000, 3.922	179.000, 2.102	179.000, 1.994	179.000, 1.854	179.000, 1.801	179.000, 2.123	179.000, 1.937	179.000, 2.306	179.000, 2.111	179.000, 2.067
897	179.200, 2.217	179.200, 2.064	179.200, 1.949	179.200, 4.431	179.200, 4.224	179.200, 3.922	179.200, 2.102	179.200, 1.994	179.200, 1.854	179.200, 1.800	179.200, 2.123	179.200, 1.936	179.200, 2.306	179.200, 2.111	179.200, 2.067
898	179.400, 2.216	179.400, 2.064	179.400, 1.949	179.400, 4.431	179.400, 4.224	179.400, 3.922	179.400, 2.101	179.400, 1.993	179.400, 1.853	179.400, 1.800	179.400, 2.122	179.400, 1.936	179.400, 2.305	179.400, 2.110	179.400, 2.067
899	179.600, 2.216	179.600, 2.063	179.600, 1.948	179.600, 4.431	179.600, 4.224	179.600, 3.922	179.600, 2.100	179.600, 1.993	179.600, 1.853	179.600, 1.800	179.600, 2.122	179.600, 1.935	179.600, 2.305	179.600, 2.110	179.600, 2.066
900	179.800, 2.215	179.800, 2.063	179.800, 1.948	179.800, 4.431	179.800, 4.224	179.800, 3.922	179.800, 2.100	179.800, 1.993	179.800, 1.853	179.800, 1.800	179.800, 2.122	179.800, 1.934	179.800, 2.304	179.800, 2.109	179.800, 2.066
901	180.000, 2.214	180.000, 2.062	180.000, 1.948	180.000, 4.431	180.000, 4.224	180.000, 3.922	180.000, 2.100	180.000, 1.993	180.000, 1.853	180.000, 1.799	180.000, 2.122	180.000, 1.934	180.000, 2.303	180.000, 2.109	180.000, 2.066
902	180.200, 2.214	180.200, 2.062	180.200, 1.947	180.200, 4.431	180.200, 4.224	180.200, 3.922	180.200, 2.099	180.200, 1.993	180.200, 1.853	180.200, 1.798	180.200, 2.122	180.200, 1.933	180.200, 2.303	180.200, 2.108	180.200, 2.066
903	180.400, 2.213	180.400, 2.061	180.400, 1.947	180.400, 4.431	180.400, 4.224	180.400, 3.921	180.400, 2.099	180.400, 1.993	180.400, 1.853	180.400, 1.798	180.400, 2.122	180.400, 1.933	180.400, 2.302	180.400, 2.108	180.400, 2.066
904	180.600, 2.213	180.600, 2.061	180.600, 1.947	180.600, 4.430	180.600, 4.224	180.600, 3.921	180.600, 2.098	180.600, 1.993	180.600, 1.852	180.600, 1.797	180.600, 2.121	180.600, 1.932	180.600, 2.302	180.600, 2.107	180.600, 2.065
905	180.800, 2.212	180.800, 2.060	180.800, 1.947	180.800, 4.430	180.800, 4.224	180.800, 3.920	180.800, 2.098	180.800, 1.992	180.800, 1.852	180.800, 1.797	180.800, 2.120	180.800, 1.932	180.800, 2.301	180.800, 2.106	180.800, 2.065
906	181.000, 2.212	181.000, 2.060	181.000, 1.946	181.000, 4.430	181.000, 4.224	181.000, 3.920	181.000, 2.098	181.000, 1.991	181.000, 1.851	181.000, 1.796	181.000, 2.119	181.000, 1.932	181.000, 2.301	181.000, 2.105	181.000, 2.064
907	181.200, 2.212	181.200, 2.059	181.200, 1.946	181.200, 4.430	181.200, 4.224	181.200, 3.919	181.200, 2.097	181.200, 1.991	181.200, 1.851	181.200, 1.796	181.200, 2.118	181.200, 1.931	181.200, 2.300	181.200, 2.105	181.200, 2.064
908	181.400, 2.211	181.400, 2.059	181.400, 1.945	181.400, 4.430	181.400, 4.225	181.400, 3.919	181.400, 2.097	181.400, 1.990	181.400, 1.851	181.400, 1.796	181.400, 2.117	181.400, 1.931	181.400, 2.299	181.400, 2.104	181.400, 2.063
909	181.600, 2.210	181.600, 2.058	181.600, 1.945	181.600, 4.430	181.600, 4.225	181.600, 3.919	181.600, 2.096	181.600, 1.989	181.600, 1.850	181.600, 1.796	181.600, 2.117	181.600, 1.930	181.600, 2.299	181.600, 2.104	181.600, 2.063
910	181.800, 2.210	181.800, 2.058	181.800, 1.944	181.800, 4.430	181.800, 4.225	181.800, 3.918	181.800, 2.096	181.800, 1.989	181.800, 1.849	181.800, 1.795	181.800, 2.116	181.800, 1.930	181.800, 2.299	181.800, 2.104	181.800, 2.063
911	182.000, 2.209	182.000, 2.057	182.000, 1.943	182.000, 4.430	182.000, 4.224	182.000, 3.918	182.000, 2.096	182.000, 1.988	182.000, 1.849	182.000, 1.795	182.000, 2.115	182.000, 1.930	182.000, 2.298	182.000, 2.103	182.000, 2.062
912	182.200, 2.209	182.200, 2.057	182.200, 1.943	182.200, 4.429	182.200, 4.224	182.200, 3.918	182.200, 2.095	182.200, 1.987	182.200, 1.848	182.200, 1.795	182.200, 2.115	182.200, 1.929	182.200, 2.298	182.200, 2.103	182.200, 2.062
913	182.400, 2.208	182.400, 2.056	182.400, 1.942	182.400, 4.429	182.400, 4.224	182.400, 3.918	182.400, 2.095	182.400, 1.986	182.400, 1.847	182.400, 1.795	182.400, 2.115	182.400, 1.929	182.400, 2.298	182.400, 2.103	182.400, 2.061
914	182.600, 2.208	182.600, 2.056	182.600, 1.941	182.600, 4.429	182.600, 4.224	182.600, 3.918	182.600, 2.094	182.600, 1.986	182.600, 1.846	182.600, 1.795	182.600, 2.115	182.600, 1.929	182.600, 2.297	182.600, 2.102	182.600, 2.061
915	182.800, 2.208	182.800, 2.056	182.800, 1.941	182.800, 4.429	182.800, 4.224	182.800, 3.919	182.800, 2.093	182.800, 1.985	182.800, 1.846	182.800, 1.795	182.800, 2.114	182.800, 1.928	182.800, 2.297	182.800, 2.102	182.800, 2.061
916	183.000, 2.207	183.000, 2.056	183.000, 1.940	183.000, 4.429	183.000, 4.224	183.000, 3.919	183.000, 2.093	183.000, 1.985	183.000, 1.845	183.000, 1.795	183.000, 2.114	183.000, 1.928	183.000, 2.297	183.000, 2.102	183.000, 2.060
917	183.200, 2.207	183.200, 2.056	183.200, 1.940	183.200, 4.429	183.200, 4.224	183.200, 3.919	183.200, 2.093	183.200, 1.984	183.200, 1.844	183.200, 1.795	183.200, 2.114	183.200, 1.927	183.200, 2.296	183.200, 2.101	183.200, 2.059
918	183.400, 2.206	183.400, 2.056	183.400, 1.939	183.400, 4.429	183.400, 4.224	183.400, 3.919	183.400, 2.092	183.400, 1.984	183.400, 1.844	183.400, 1.795	183.400, 2.113	183.400, 1.927	183.400, 2.296	183.400, 2.101	183.400, 2.059
919	183.600, 2.206	183.600, 2.055	183.600, 1.939	183.600, 4.430	183.600, 4.225	183.600, 3.919	183.600, 2.092	183.600, 1.984	183.600, 1.843	183.600, 1.795	183.600, 2.113	183.600, 1.927	183.600, 2.295	183.600, 2.101	183.600, 2.059
920	183.800, 2.205	183.800, 2.055	183.800, 1.939	183.800, 4.430	183.800, 4.225	183.800, 3.920	183.800, 2.091	183.800, 1.984	183.800, 1.843	183.800, 1.794	183.800, 2.113	183.800, 1.926	183.800, 2.295	183.800, 2.101	183.800, 2.058
921	184.000, 2.205	184.000, 2.054	184.000, 1.938	184.000, 4.430	184.000, 4.225	184.000, 3.920	184.000, 2.091	184.000, 1.984	184.000, 1.843	184.000, 1.794	184.000, 2.112	184.000, 1.927	184.000, 2.295	184.000, 2.100	184.000, 2.058
922	184.200, 2.204	184.200, 2.054	184.200, 1.938	184.200, 4.430	184.200, 4.224	184.200, 3.920	184.200, 2.091	184.200, 1.984	184.200, 1.843	184.200, 1.794	184.200, 2.112	184.200, 1.927	184.200, 2.294	184.200, 2.100	184.200, 2.057
923	184.400, 2.204	184.400, 2.053	184.400, 1.938	184.400, 4.430	184.400, 4.225	184.400, 3.920	184.400, 2.090	184.400, 1.984	184.400, 1.843	184.400, 1.794	184.400, 2.112	184.400, 1.927	184.400, 2.294	184.400, 2.100	184.400, 2.057
924	184.600, 2.203	184.600, 2.053	184.600, 1.938	184.600, 4.430	184.600, 4.225	184.600, 3.920	184.600, 2.090	184.600, 1.984	184.600, 1.843	184.600, 1.793	184.600, 2.111	184.600, 1.926	184.600, 2.293	184.600, 2.099	184.600, 2.056
925	184.800, 2.202	184.800, 2.053	184.800, 1.938	184.800, 4.429	184.800, 4.225	184.800, 3.920	184.800, 2.089	184.800, 1.983	184.800, 1.843	184.800, 1.793	184.800, 2.111	184.800, 1.926	184.800, 2.293	184.800, 2.099	184.800, 2.055
926	185.000, 2.202	185.000, 2.052	185.000, 1.938	185.000, 4.429	185.000, 4.225	185.000, 3.920	185.000, 2.089	185.000, 1.983	185.000, 1.843	185.000, 1.793	185.000, 2.110	185.000, 1.926	185.000, 2.292	185.000, 2.099	185.000, 2.055
927	185.200, 2.201	185.200, 2.052	185.200, 1.938	185.200, 4.429	185.200, 4.225	185.200, 3.919	185.200, 2.088	185.200, 1.982	185.200, 1.843	185.200, 1.793	185.200, 2.110	185.200, 1.926	185.200, 2.292	185.200, 2.098	185.200, 2.054
928	185.400, 2.201	185.400, 2.051	185.400, 1.937	185.400, 4.429	185.400, 4.225	185.400, 3.919	185.400, 2.088	185.400, 1.982	185.400, 1.843	185.400, 1.793	185.400, 2.110	185.400, 1.925	185.400, 2.291	185.400, 2.098	185.400, 2.054
929	185.600, 2.200	185.600, 2.051	185.600, 1.937	185.600, 4.429	185.600, 4.225	185.600, 3.919	185.600, 2.088	185.600, 1.981	185.600, 1.843	185.600, 1.793	185.600, 2.110	185.600, 1.925	185.600, 2.291	185.600, 2.097	185.600, 2.053
930	185.800, 2.200	185.800, 2.050	185.800, 1.936	185.800, 4.429	185.800, 4.224	185.800, 3.919	185.800, 2.088	185.800, 1.980	185.800, 1.843	185.800, 1.792	185.800, 2.109	185.800, 1.925	185.800, 2.290	185.800, 2.097	185.800, 2.053
931	186.000, 2.200	186.000, 2.050	186.000, 1.936	186.000, 4.428	186.000, 4.224	186.000, 3.919	186.000, 2.087	186.000, 1.979	186.000, 1.842	186.000, 1.792	186.000, 2.109	186.000, 1.924	186.000, 2.290	186.000, 2.096	186.000, 2.052
932	186.200, 2.199	186.200, 2.049	186.200, 1.935	186.200, 4.428	186.200, 4.224	186.200, 3.919	186.200, 2.087	186.200, 1.979	186.200, 1.842	186.200, 1.792	186.200, 2.109	186.200, 1.924	186.200, 2.290	186.200, 2.096	186.200, 2.052
933	186.400, 2.199	186.400, 2.049	186.400, 1.934	186.400, 4.427	186.400, 4.223	186.400, 3.919	186.400, 2.086	186.400, 1.978	186.400, 1.841	186.400, 1.792	186.400, 2.109	186.400, 1.923	186.400, 2.289	186.400, 2.095	186.400, 2.052
934	186.600, 2.198	186.600, 2.048	186.600, 1.934	186.600, 4.427	186.600, 4.223	186.600, 3.919	186.600, 2.085	186.600, 1.978	186.600, 1.840	186.600, 1.792	186.600, 2.108	186.600, 1.923	186.600, 2.289	186.600, 2.095	186.600, 2.052
935	186.800, 2.198	186.800, 2.048	186.800, 1.934	186.800, 4.427	186.800, 4.223	186.800, 3.919	186.800, 2.085	186.800, 1.978	186.800, 1.839	186.800, 1.792	186.800, 2.108	186.800, 1.923	186.800, 2.288	186.800, 2.094	186.800, 2.052
936	187.000, 2.197	187.000, 2.047	187.000, 1.933	187.000, 4.426	187.000, 4.222	187.000, 3.920	187.000, 2.084	187.000, 1.977	187.000, 1.839	187.000, 1.792	187.000, 2.108	187.000, 1.922	187.000, 2.288	187.000, 2.094	187.000, 2.051
937	187.200, 2.197	187.200, 2.047	187.200, 1.933	187.200, 4.426	187.200, 4.222	187.200, 3.920	187.200, 2.083	187.200, 1.976	187.200, 1.838	187.200, 1.791	187.200, 2.107	187.200, 1.922	187.200, 2.288	187.200, 2.093	187.200, 2.051
938	187.400, 2.196	187.400, 2.047	187.400, 1.932	187.400, 4.426	187.400, 4.223	187.400, 3.919	187.400, 2.083	187.400, 1.976	187.400, 1.837	187.400, 1.791	187.400, 2.107	187.400, 1.922	187.400, 2.287	187.400, 2.093	187.400, 2.051
939	187.600, 2.195	187.600, 2.046	187.600, 1.932	187.600, 4.426	187.600, 4.223	187.600, 3.919	187.600, 2.082	187.600, 1.975	187.600, 1.836	187.600, 1.791	187.600, 2.106	187.600, 1.922	187.600, 2.287	187.600, 2.093	187.600, 2.050
940	187.800, 2.195	187.800, 2.046	187.800, 1.932	187.800, 4.426	187.800, 4.223	187.800, 3.919	187.800, 2.082	187.800, 1.975	187.800, 1.836	187.800, 1.790	187.800, 2.106	187.800, 1.922	187.800, 2.287	187.800, 2.093	187.800, 2.050
941	188.000, 2.194	188.000, 2.045	188.000, 1.932	188.000, 4.427	188.000, 4.223	188.000, 3.919	188.000, 2.082	188.000, 1.974	188.000, 1.835	188.000, 1.790	188.000, 2.106	188.000, 1.922	188.000, 2.286	188.000, 2.093	188.000, 2.049
942	188.200, 2.194	188.200, 2.045	188.200, 1.932	188.200, 4.427	188.200, 4.223	188.200, 3.919	188.200, 2.081	188.200, 1.974	188.200, 1.835	188.200, 1.790	188.200, 2.105	188.200, 1.922	188.200, 2.286	188.200, 2.092	188.200, 2.049
943	188.400, 2.194	188.400, 2.044	188.400, 1.931	188.400, 4.427	188.400, 4.224	188.400, 3.920	188.400, 2.081	188.400, 1.973	188.400, 1.835	188.400, 1.790	188.400, 2.105	188.400, 1.922	188.400, 2.286	188.400, 2.092	188.400, 2.048
944	188.600, 2.194	188.600, 2.044	188.600, 1.931	188.600, 4.427	188.600, 4.224	188.600, 3.920	188.600, 2.080	188.600, 1.973	188.600, 1.834	188.600, 1.790	188.600, 2.105	188.600, 1.922	188.600, 2.286	188.600, 2.092	188.600, 2.048
945	188.800, 2.194	188.800, 2.043	188.800, 1.931	188.800, 4.427	188.800, 4.224	188.800, 3.920	188.800, 2.080	188.800, 1.972	188.800, 1.834	188.800, 1.790	188.800, 2.105	188.800, 1.921	188.800, 2.286	188.800, 2.091	188.800, 2.047
946	189.000, 2.194	189.000, 2.043	189.000, 1.930	189.000, 4.427	189.000, 4.225	189.000, 3.919	189.000, 2.079	189.000, 1.972	189.000, 1.834	189.000, 1.790	189.000, 2.105	189.000, 1.921	189.000, 2.285	189.000, 2.091	189.000, 2.047
947	189.200, 2.193	189.200, 2.043	189.200, 1.930	189.200, 4.427	189.200, 4.224	189.200, 3.919	189.200, 2.079	189.200, 1.971	189.200, 1.833	189.200, 1.790	189.200, 2.105	189.200, 1.921	189.200, 2.285	189.200, 2.091	189.200, 2.047
948	189.400, 2.193	189.400, 2.042	189.400, 1.930	189.400, 4.428	189.400, 4.224	189.400, 3.919	189.400, 2.078	189.400, 1.971	189.400, 1.832	189.400, 1.789	189.400, 2.105	189.400, 1.920	189.400, 2.284	189.400, 2.090	189.400, 2.046
949	189.600, 2.193	189.600, 2.042	189.600, 1.929	189.600, 4.428	189.600, 4.224	189.600, 3.919	189.600, 2.077	189.600, 1.970	189.600, 1.832	189.600, 1.789	189.600, 2.105	189.600, 1.920	189.600, 2.284	189.600, 2.090	189.600, 2.046
950	189.800, 2.192	189.800, 2.041	189.800, 1.928	189.800, 4.427	189.800, 4.224	189.800, 3.919	189.800, 2.077	189.800, 1.969	189.800, 1.831	189.800, 1.789	189.800, 2.104	189.800, 1.919	189.800, 2.284	189.800, 2.090	189.800, 2.045
951	190.000, 2.192	190.000, 2.041	190.000, 1.928	190.000, 4.427	190.000, 4.223	190.000, 3.919	190.000, 2.076	190.000, 1.969	190.000, 1.831	190.000, 1.789	190.000, 2.104	190.000, 1.919	190.000, 2.284	190.000, 2.090	190.000, 2.045
952	190.200, 2.191	190.200, 2.040	190.200, 1.927	190.200, 4.427	190.200, 4.223	190.200, 3.919	190.200, 2.075	190.200, 1.968	190.200, 1.830	190.200, 1.789	190.200, 2.104	190.200, 1.918	190.200, 2.284	190.200, 2.089	190.200, 2.045
953	190.400, 2.191	190.400, 2.040	190.400, 1.926	190.400, 4.427	190.400, 4.223	190.400, 3.919	190.400, 2.075	190.400, 1.968	190.400, 1.830	190.400, 1.789	190.400, 2.103	190.400, 1.918	190.400, 2.284	190.400, 2.089	190.400, 2.045
954	190.600, 2.190	190.600, 2.040	190.600, 1.926	190.600, 4.426	190.600, 4.223	190.600, 3.919	190.600, 2.075	190.600, 1.967	190.600, 1.829	190.600, 1.790	190.600, 2.103	190.600, 1.917	190.600, 2.284	190.600, 2.089	190.600, 2.045
955	190.800, 2.189	190.800, 2.040	190.800, 1.925	190.800, 4.426	190.800, 4.223	190.800, 3.919	190.800, 2.074	190.800, 1.967	190.800, 1.829	190.800, 1.790	190.800, 2.102	190.800, 1.917	190.800, 2.283	190.800, 2.088	190.800, 2.044
956	191.000, 2.189	191.000, 2.040	191.000, 1.925	191.000, 4.425	191.000, 4.223	191.000, 3.919	191.000, 2.074	191.000, 1.966	191.000, 1.828	191.000, 1.789	191.000, 2.102	191.000, 1.917	191.000, 2.283	191.000, 2.088	191.000, 2.044
957	191.200, 2.188	191.200, 2.039	191.200, 1.925	191.200, 4.425	191.200, 4.223	191.200, 3.919	191.200, 2.074	191.200, 1.966	191.200, 1.828	191.200, 1.789	191.200, 2.101	191.200, 1.916	191.200, 2.282	191.200, 2.087	191.200, 2.044
958	191.400, 2.188	191.400, 2.039	191.400, 1.924	191.400, 4.425	191.400, 4.223	191.400, 3.919	191.400, 2.073	191.400, 1.965	191.400, 1.827	191.400, 1.789	191.400, 2.101	191.400, 1.916	191.400, 2.282	191.400, 2.087	191.400, 2.044
959	191.600, 2.187	191.600, 2.039	191.600, 1.924	191.600, 4.425	191.600, 4.223	191.600, 3.919	191.600, 2.073	191.600, 1.965	191.600, 1.827	191.600, 1.789	191.600, 2.100	191.600, 1.915	191.600, 2.282	191.600, 2.086	191.600, 2.044
960	191.800, 2.187	191.800, 2.038	191.800, 1.924	191.800, 4.425	191.800, 4.223	191.800, 3.918	191.800, 2.073	191.800, 1.964	191.800, 1.827	191.800, 1.789	191.800, 2.100	191.800, 1.915	191.800, 2.281	191.800, 2.086	191.800, 2.044
961	192.000, 2.186	192.000, 2.038	192.000, 1.924	192.000, 4.425	192.000, 4.223	192.000, 3.918	192.000, 2.073	192.000, 1.964	192.000, 1.827	192.000, 1.789	192.000, 2.099	192.000, 1.915	192.000, 2.280	192.000, 2.085	192.000, 2.044
962	192.200, 2.186	192.200, 2.038	192.200, 1.924	192.200, 4.425	192.200, 4.222	192.200, 3.918	192.200, 2.072	192.200, 1.964	192.200, 1.827	192.200, 1.789	192.200, 2.099	192.200, 1.915	192.200, 2.280	192.200, 2.085	192.200, 2.043
963	192.400, 2.186	192.400, 2.038	192.400, 1.924	192.400, 4.425	192.400, 4.222	192.400, 3.918	192.400, 2.072	192.400, 1.964	192.400, 1.827	192.400, 1.788	192.400, 2.098	192.400, 1.915	192.400, 2.279	192.400, 2.084	192.400, 2.043
964	192.600, 2.185	192.600, 2.038	192.600, 1.924	192.600, 4.424	192.600, 4.221	192.600, 3.918	192.600, 2.072	192.600, 1.964	192.600, 1.827	192.600, 1.788	192.600, 2.098	192.600, 1.915	192.600, 2.279	192.600, 2.084	192.600, 2.043
965	192.800, 2.185	192.800, 2.037	192.800, 1.924	192.800, 4.424	192.800, 4.221	192.800, 3.918	192.800, 2.071	192.800, 1.963	192.800, 1.827	192.800, 1.787	192.800, 2.098	192.800, 1.914	192.800, 2.278	192.800, 2.083	192.800, 2.043
966	193.000, 2.184	193.000, 2.037	193.000, 1.924	193.000, 4.424	193.000, 4.220	193.000, 3.918	193.000, 2.071	193.000, 1.963	193.000, 1.827	193.000, 1.786	193.000, 2.097	193.000, 1.914	193.000, 2.278	193.000, 2.083	193.000, 2.042
967	193.200, 2.183	193.200, 2.037	193.200, 1.923	193.200, 4.424	193.200, 4.220	193.200, 3.918	193.200, 2.071	193.200, 1.963	193.200, 1.826	193.200, 1.786	193.200, 2.097	193.200, 1.914	193.200, 2.277	193.200, 2.083	193.200, 2.042
968	193.400, 2.183	193.400, 2.037	193.400, 1.923	193.400, 4.424	193.400, 4.219	193.400, 3.918	193.400, 2.071	193.400, 1.962	193.400, 1.826	193.400, 1.785	193.400, 2.096	193.400, 1.914	193.400, 2.276	193.400, 2.083	193.400, 2.041
969	193.600, 2.182	193.600, 2.037	193.600, 1.923	193.600, 4.424	193.600, 4.219	193.600, 3.918	193.600, 2.071	193.600, 1.962	193.600, 1.826	193.600, 1.784	193.600, 2.096	193.600, 1.913	193.600, 2.276	193.600, 2.082	193.600, 2.041
970	193.800, 2.182	193.800, 2.037	193.800, 1.922	193.800, 4.424	193.800, 4.219	193.800, 3.917	193.800, 2.070	193.800, 1.961	193.800, 1.825	193.800, 1.784	193.800, 2.095	193.800, 1.913	193.800, 2.276	193.800, 2.082	193.800, 2.041
971	194.000, 2.181	194.000, 2.036	194.000, 1.922	194.000, 4.425	194.000, 4.219	194.000, 3.917	194.000, 2.070	194.000, 1.961	194.000, 1.825	194.000, 1.784	194.000, 2.095	194.000, 1.913	194.000, 2.276	194.000, 2.081	194.000, 2.040
972	194.200, 2.181	194.200, 2.036	194.200, 1.922	194.200, 4.425	194.200, 4.219	194.200, 3.917	194.200, 2.070	194.200, 1.961	194.200, 1.824	194.200, 1.784	194.200, 2.095	194.200, 1.913	194.200, 2.275	194.200, 2.081	194.200, 2.040
973	194.400, 2.181	194.400, 2.036	194.400, 1.921	194.400, 4.425	194.400, 4.220	194.400, 3.917	194.400, 2.069	194.400, 1.961	194.400, 1.824	194.400, 1.784	194.400, 2.095	194.400, 1.913	194.400, 2.275	194.400, 2.080	194.400, 2.039
974	194.600, 2.181	194.600, 2.035	194.600, 1.921	194.600, 4.425	194.600, 4.220	194.600, 3.918	194.600, 2.069	194.600, 1.960	194.600, 1.823	194.600, 1.784	194.600, 2.095	194.600, 1.912	194.600, 2.274	194.600, 2.080	194.600, 2.039
975	194.800, 2.180	194.800, 2.035	194.800, 1.921	194.800, 4.425	194.800, 4.220	194.800, 3.918	194.800, 2.068	194.800, 1.960	194.800, 1.822	194.800, 1.784	194.800, 2.095	194.800, 1.912	194.800, 2.274	194.800, 2.079	194.800, 2.038
976	195.000, 2.180	195.000, 2.034	195.000, 1.920	195.000, 4.425	195.000, 4.221	195.000, 3.918	195.000, 2.067	195.000, 1.960	195.000, 1.822	195.000, 1.784	195.000, 2.095	195.000, 1.911	195.000, 2.273	195.000, 2.079	195.000, 2.038
977	195.200, 2.180	195.200, 2.034	195.200, 1.920	195.200, 4.425	195.200, 4.221	195.200, 3.918	195.200, 2.066	195.200, 1.959	195.200, 1.821	195.200, 1.784	195.200, 2.095	195.200, 1.911	195.200, 2.273	195.200, 2.078	195.200, 2.038
978	195.400, 2.180	195.400, 2.033	195.400, 1.920	195.400, 4.424	195.400, 4.221	195.400, 3.918	195.400, 2.066	195.400, 1.959	195.400, 1.821	195.400, 1.784	195.400, 2.095	195.400, 1.910	195.400, 2.272	195.400, 2.078	195.400, 2.038
979	195.600, 2.180	195.600, 2.033	195.600, 1.919	195.600, 4.424	195.600, 4.221	195.600, 3.919	195.600, 2.065	195.600, 1.958	195.600, 1.821	195.600, 1.783	195.600, 2.095	195.600, 1.910	195.600, 2.272	195.600, 2.078	195.600, 2.037
980	195.800, 2.180	195.800, 2.032	195.800, 1.919	195.800, 4.424	195.800, 4.222	195.800, 3.919	195.800, 2.064	195.800, 1.958	195.800, 1.820	195.800, 1.783	195.800, 2.095	195.800, 1.910	195.800, 2.271	195.800, 2.077	195.800, 2.037
981	196.000, 2.179	196.000, 2.032	196.000, 1.919	196.000, 4.424	196.000, 4.222	196.000, 3.919	196.000, 2.063	196.000, 1.958	196.000, 1.820	196.000, 1.783	196.000, 2.094	196.000, 1.910	196.000, 2.271	196.000, 2.077	196.000, 2.037
982	196.200, 2.179	196.200, 2.031	196.200, 1.918	196.200, 4.424	196.200, 4.222	196.200, 3.919	196.200, 2.063	196.200, 1.957	196.200, 1.819	196.200, 1.783	196.200, 2.094	196.200, 1.910	196.200, 2.271	196.200, 2.077	196.200, 2.037
983	196.400, 2.178	196.400, 2.031	196.400, 1.918	196.400, 4.424	196.400, 4.222	196.400, 3.918	196.400, 2.062	196.400, 1.957	196.400, 1.819	196.400, 1.783	196.400, 2.094	196.400, 1.910	196.400, 2.271	196.400, 2.077	196.400, 2.037
984	196.600, 2.178	196.600, 2.030	196.600, 1.918	196.600, 4.424	196.600, 4.222	196.600, 3.918	196.600, 2.062	196.600, 1.957	196.600, 1.818	196.600, 1.782	196.600, 2.094	196.600, 1.909	196.600, 2.271	196.600, 2.076	196.600, 2.036
985	196.800, 2.177	196.800, 2.030	196.800, 1.918	196.800, 4.424	196.800, 4.222	196.800, 3.918	196.800, 2.062	196.800, 1.957	196.800, 1.818	196.800, 1.782	196.800, 2.094	196.800, 1.909	196.800, 2.271	196.800, 2.076	196.800, 2.036
986	197.000, 2.177	197.000, 2.029	197.000, 1.917	197.000, 4.424	197.000, 4.221	197.000, 3.918	197.000, 2.062	197.000, 1.956	197.000, 1.818	197.000, 1.781	197.000, 2.094	197.000, 1.909	197.000, 2.272	197.000, 2.076	197.000, 2.036
987	197.200, 2.176	197.200, 2.029	197.200, 1.917	197.200, 4.424	197.200, 4.221	197.200, 3.917	197.200, 2.062	197.200, 1.956	197.200, 1.818	197.200, 1.781	197.200, 2.093	197.200, 1.909	197.200, 2.272	197.200, 2.075	197.200, 2.036
988	197.400, 2.176	197.400, 2.029	197.400, 1.917	197.400, 4.424	197.400, 4.221	197.400, 3.917	197.400, 2.063	197.400, 1.955	197.400, 1.817	197.400, 1.781	197.400, 2.093	197.400, 1.909	197.400, 2.272	197.400, 2.075	197.400, 2.035
989	197.600, 2.175	197.600, 2.029	197.600, 1.917	197.600, 4.424	197.600, 4.221	197.600, 3.916	197.600, 2.062	197.600, 1.955	197.600, 1.817	197.600, 1.781	197.600, 2.093	197.600, 1.908	197.600, 2.272	197.600, 2.074	197.600, 2.035
990	197.800, 2.175	197.800, 2.029	197.800, 1.916	197.800, 4.424	197.800, 4.221	197.800, 3.915	197.800, 2.062	197.800, 1.955	197.800, 1.817	197.800, 1.781	197.800, 2.093	197.800, 1.908	197.800, 2.272	197.800, 2.074	197.800, 2.035
991	198.000, 2.175	198.000, 2.029	198.000, 1.916	198.000, 4.424	198.000, 4.221	198.000, 3.915	198.000, 2.062	198.000, 1.954	198.000, 1.817	198.000, 1.781	198.000, 2.093	198.000, 1.908	198.000, 2.272	198.000, 2.073	198.000, 2.034
992	198.200, 2.174	198.200, 2.029	198.200, 1.916	198.200, 4.424	198.200, 4.221	198.200, 3.915	198.200, 2.061	198.200, 1.954	198.200, 1.816	198.200, 1.780	198.200, 2.093	198.200, 1.907	198.200, 2.272	198.200, 2.073	198.200, 2.034
993	198.400, 2.174	198.400, 2.028	198.400, 1.915	198.400, 4.425	198.400, 4.221	198.400, 3.915	198.400, 2.061	198.400, 1.953	198.400, 1.816	198.400, 1.780	198.400, 2.092	198.400, 1.907	198.400, 2.272	198.400, 2.073	198.400, 2.033
994	198.600, 2.174	198.600, 2.028	198.600, 1.915	198.600, 4.425	198.600, 4.221	198.600, 3.914	198.600, 2.060	198.600, 1.953	198.600, 1.816	198.600, 1.780	198.600, 2.092	198.600, 1.907	198.600, 2.272	198.600, 2.072	198.600, 2.033
995	198.800, 2.174	198.800, 2.028	198.800, 1.914	198.800, 4.425	198.800, 4.221	198.800, 3.915	198.800, 2.060	198.800, 1.952	198.800, 1.815	198.800, 1.780	198.800, 2.092	198.800, 1.907	198.800, 2.271	198.800, 2.072	198.800, 2.032
996	199.000, 2.173	199.000, 2.028	199.000, 1.913	199.000, 4.425	199.000, 4.221	199.000, 3.915	199.000, 2.059	199.000, 1.952	199.000, 1.815	199.000, 1.779	199.000, 2.091	199.000, 1.906	199.000, 2.271	199.000, 2.071	199.000, 2.032
997	199.200, 2.173	199.200, 2.028	199.200, 1.913	199.200, 4.425	199.200, 4.220	199.200, 3.915	199.200, 2.058	199.200, 1.951	199.200, 1.815	199.200, 1.779	199.200, 2.091	199.200, 1.906	199.200, 2.270	199.200, 2.071	199.200, 2.032
998	199.400, 2.173	199.400, 2.027	199.400, 1.913	199.400, 4.424	199.400, 4.220	199.400, 3.915	199.400, 2.058	199.400, 1.951	199.400, 1.815	199.400, 1.779	199.400, 2.090	199.400, 1.906	199.400, 2.270	199.400, 2.071	199.400, 2.031
999	199.600, 2.173	199.600, 2.027	199.600, 1.912	199.600, 4.424	199.600, 4.220	199.600, 3.915	199.600, 2.057	199.600, 1.950	199.600, 1.814	199.600, 1.779	199.600, 2.090	199.600, 1.905	199.600, 2.269	199.600, 2.071	199.600, 2.031
1000	199.800, 2.172	199.800, 2.027	199.800, 1.912	199.800, 4.423	199.800, 4.220	199.800, 3.916	199.800, 2.056	199.800, 1.950	199.800, 1.814	199.800, 1.778	199.800, 2.089	199.800, 1.905	199.800, 2.269	199.800, 2.071	199.800, 2.031
1001	200.000, 2.172	200.000, 2.027	200.000, 1.912	200.000, 4.422	200.000, 4.219	200.000, 3.916	200.000, 2.056	200.000, 1.949	200.000, 1.813	200.000, 1.778	200.000, 2.089	200.000, 1.905	200.000, 2.268	200.000, 2.071	200.000, 2.030
1002	200.200, 2.171	200.200, 2.026	200.200, 1.911	200.200, 4.422	200.200, 4.219	200.200, 3.916	200.200, 2.056	200.200, 1.949	200.200, 1.813	200.200, 1.778	200.200, 2.089	200.200, 1.905	200.200, 2.268	200.200, 2.071	200.200, 2.030
1003	200.400, 2.171	200.400, 2.026	200.400, 1.911	200.400, 4.422	200.400, 4.219	200.400, 3.916	200.400, 2.055	200.400, 1.949	200.400, 1.813	200.400, 1.778	200.400, 2.089	200.400, 1.905	200.400, 2.268	200.400, 2.071	200.400, 2.029
1004	200.600, 2.171	200.600, 2.026	200.600, 1.911	200.600, 4.421	200.600, 4.219	200.600, 3.916	200.600, 2.055	200.600, 1.949	200.600, 1.812	200.600, 1.777	200.600, 2.088	200.600, 1.905	200.600, 2.268	200.600, 2.071	200.600, 2.029
1005	200.800, 2.170	200.800, 2.025	200.800, 1.911	200.800, 4.421	200.800, 4.219	200.800, 3.916	200.800, 2.054	200.800, 1.948	200.800, 1.812	200.800, 1.777	200.800, 2.088	200.800, 1.904	200.800, 2.268	200.800, 2.070	200.800, 2.028
1006	201.000, 2.170	201.000, 2.025	201.000, 1.911	201.000, 4.421	201.000, 4.218	201.000, 3.916	201.000, 2.054	201.000, 1.948	201.000, 1.812	201.000, 1.777	201.000, 2.088	201.000, 1.904	201.000, 2.268	201.000, 2.070	201.000, 2.028
1007	201.200, 2.169	201.200, 2.024	201.200, 1.911	201.200, 4.421	201.200, 4.218	201.200, 3.916	201.200, 2.054	201.200, 1.948	201.200, 1.811	201.200, 1.777	201.200, 2.087	201.200, 1.904	201.200, 2.267	201.200, 2.070	201.200, 2.028
1008	201.400, 2.169	201.400, 2.024	201.400, 1.911	201.400, 4.420	201.400, 4.218	201.400, 3.916	201.400, 2.053	201.400, 1.947	201.400, 1.811	201.400, 1.777	201.400, 2.087	201.400, 1.904	201.400, 2.267	201.400, 2.069	201.400, 2.028
1009	201.600, 2.168	201.600, 2.024	201.600, 1.910	201.600, 4.420	201.600, 4.218	201.600, 3.916	201.600, 2.053	201.600, 1.947	201.600, 1.811	201.600, 1.777	201.600, 2.087	201.600, 1.904	201.600, 2.267	201.600, 2.069	201.600, 2.027
1010	201.800, 2.168	201.800, 2.024	201.800, 1.910	201.800, 4.420	201.800, 4.217	201.800, 3.916	201.800, 2.052	201.800, 1.947	201.800, 1.810	201.800, 1.777	201.800, 2.087	201.800, 1.903	201.800, 2.266	201.800, 2.069	201.800, 2.027
1011	202.000, 2.167	202.000, 2.023	202.000, 1.910	202.000, 4.420	202.000, 4.217	202.000, 3.916	202.000, 2.052	202.000, 1.947	202.000, 1.810	202.000, 1.778	202.000, 2.086	202.000, 1.903	202.000, 2.266	202.000, 2.068	202.000, 2.027
1012	202.200, 2.167	202.200, 2.023	202.200, 1.909	202.200, 4.420	202.200, 4.217	202.200, 3.916	202.200, 2.052	202.200, 1.947	202.200, 1.809	202.200, 1.778	202.200, 2.086	202.200, 1.903	202.200, 2.265	202.200, 2.068	202.200, 2.027
1013	202.400, 2.167	202.400, 2.023	202.400, 1.909	202.400, 4.421	202.400, 4.217	202.400, 3.916	202.400, 2.051	202.400, 1.947	202.400, 1.809	202.400, 1.777	202.400, 2.086	202.400, 1.903	202.400, 2.265	202.400, 2.068	202.400, 2.027
1014	202.600, 2.167	202.600, 2.022	202.600, 1.908	202.600, 4.421	202.600, 4.217	202.600, 3.916	202.600, 2.051	202.600, 1.946	202.600, 1.809	202.600, 1.777	202.600, 2.086	202.600, 1.903	202.600, 2.265	202.600, 2.067	202.600, 2.026
1015	202.800, 2.167	202.800, 2.022	202.800, 1.908	202.800, 4.421	202.800, 4.217	202.800, 3.916	202.800, 2.051	202.800, 1.945	202.800, 1.809	202.800, 1.777	202.800, 2.085	202.800, 1.902	202.800, 2.264	202.800, 2.067	202.800, 2.026
1016	203.000, 2.166	203.000, 2.022	203.000, 1.907	203.000, 4.422	203.000, 4.217	203.000, 3.917	203.000, 2.051	203.000, 1.945	203.000, 1.809	203.000, 1.777	203.000, 2.085	203.000, 1.902	203.000, 2.264	203.000, 2.067	203.000, 2.026
1017	203.200, 2.166	203.200, 2.021	203.200, 1.907	203.200, 4.422	203.200, 4.218	203.200, 3.917	203.200, 2.051	203.200, 1.944	203.200, 1.809	203.200, 1.777	203.200, 2.085	203.200, 1.902	203.200, 2.264	203.200, 2.067	203.200, 2.026
1018	203.400, 2.166	203.400, 2.021	203.400, 1.907	203.400, 4.421	203.400, 4.218	203.400, 3.916	203.400, 2.050	203.400, 1.944	203.400, 1.809	203.400, 1.777	203.400, 2.084	203.400, 1.902	203.400, 2.263	203.400, 2.066	203.400, 2.026
1019	203.600, 2.166	203.600, 2.021	203.600, 1.906	203.600, 4.421	203.600, 4.218	203.600, 3.916	203.600, 2.050	203.600, 1.943	203.600, 1.808	203.600, 1.776	203.600, 2.084	203.600, 1.902	203.600, 2.263	203.600, 2.066	203.600, 2.025
1020	203.800, 2.165	203.800, 2.020	203.800, 1.906	203.800, 4.421	203.800, 4.218	203.800, 3.916	203.800, 2.050	203.800, 1.943	203.800, 1.808	203.800, 1.776	203.800, 2.084	203.800, 1.902	203.800, 2.263	203.800, 2.065	203.800, 2.025
1021	204.000, 2.165	204.000, 2.020	204.000, 1.906	204.000, 4.421	204.000, 4.219	204.000, 3.916	204.000, 2.050	204.000, 1.943	204.000, 1.808	204.000, 1.776	204.000, 2.084	204.000, 1.902	204.000, 2.262	204.000, 2.065	204.000, 2.025
1022	204.200, 2.165	204.200, 2.020	204.200, 1.906	204.200, 4.420	204.200, 4.219	204.200, 3.915	204.200, 2.050	204.200, 1.942	204.200, 1.807	204.200, 1.776	204.200, 2.084	204.200, 1.901	204.200, 2.262	204.200, 2.065	204.200, 2.024
1023	204.400, 2.164	204.400, 2.019	204.400, 1.905	204.400, 4.420	204.400, 4.219	204.400, 3.915	204.400, 2.049	204.400, 1.942	204.400, 1.807	204.400, 1.775	204.400, 2.084	204.400, 1.901	204.400, 2.262	204.400, 2.065	204.400, 2.024
1024	204.600, 2.164	204.600, 2.019	204.600, 1.905	204.600, 4.420	204.600, 4.219	204.600, 3.915	204.600, 2.049	204.600, 1.942	204.600, 1.807	204.600, 1.775	204.600, 2.083	204.600, 1.900	204.600, 2.261	204.600, 2.065	204.600, 2.024
1025	204.800, 2.164	204.800, 2.019	204.800, 1.905	204.800, 4.420	204.800, 4.219	204.800, 3.915	204.800, 2.049	204.800, 1.942	204.800, 1.806	204.800, 1.775	204.800, 2.083	204.800, 1.900	204.800, 2.261	204.800, 2.065	204.800, 2.024
1026	205.000, 2.163	205.000, 2.018	205.000, 1.905	205.000, 4.419	205.000, 4.219	205.000, 3.915	205.000, 2.048	205.000, 1.942	205.000, 1.806	205.000, 1.775	205.000, 2.083	205.000, 1.900	205.000, 2.260	205.000, 2.065	205.000, 2.023
1027	205.200, 2.163	205.200, 2.018	205.200, 1.905	205.200, 4.419	205.200, 4.218	205.200, 3.914	205.200, 2.048	205.200, 1.942	205.200, 1.805	205.200, 1.775	205.200, 2.083	205.200, 1.899	205.200, 2.260	205.200, 2.065	205.200, 2.023
1028	205.400, 2.162	205.400, 2.018	205.400, 1.905	205.400, 4.419	205.400, 4.218	205.400, 3.914	205.400, 2.047	205.400, 1.942	205.400, 1.805	205.400, 1.775	205.400, 2.082	205.400, 1.899	205.400, 2.259	205.400, 2.064	205.400, 2.023
1029	205.600, 2.162	205.600, 2.017	205.600, 1.905	205.600, 4.419	205.600, 4.217	205.600, 3.914	205.600, 2.047	205.600, 1.942	205.600, 1.805	205.600, 1.774	205.600, 2.082	205.600, 1.899	205.600, 2.259	205.600, 2.064	205.600, 2.023
1030	205.800, 2.161	205.800, 2.017	205.800, 1.905	205.800, 4.419	205.800, 4.217	205.800, 3.914	205.800, 2.047	205.800, 1.942	205.800, 1.804	205.800, 1.774	205.800, 2.082	205.800, 1.898	205.800, 2.258	205.800, 2.064	205.800, 2.023
1031	206.000, 2.161	206.000, 2.017	206.000, 1.904	206.000, 4.419	206.000, 4.217	206.000, 3.914	206.000, 2.046	206.000, 1.942	206.000, 1.804	206.000, 1.774	206.000, 2.081	206.000, 1.898	206.000, 2.258	206.000, 2.064	206.000, 2.023
1032	206.200, 2.160	206.200, 2.017	206.200, 1.904	206.200, 4.419	206.200, 4.216	206.200, 3.914	206.200, 2.046	206.200, 1.942	206.200, 1.803	206.200, 1.774	206.200, 2.081	206.200, 1.897	206.200, 2.258	206.200, 2.063	206.200, 2.023
1033	206.400, 2.160	206.400, 2.017	206.400, 1.904	206.400, 4.419	206.400, 4.216	206.400, 3.914	206.400, 2.045	206.400, 1.941	206.400, 1.803	206.400, 1.774	206.400, 2.081	206.400, 1.897	206.400, 2.258	206.400, 2.063	206.400, 2.022
1034	206.600, 2.160	206.600, 2.016	206.600, 1.904	206.600, 4.419	206.600, 4.216	206.600, 3.914	206.600, 2.045	206.600, 1.941	206.600, 1.803	206.600, 1.774	206.600, 2.080	206.600, 1.897	206.600, 2.258	206.600, 2.063	206.600, 2.022
1035	206.800, 2.159	206.800, 2.016	206.800, 1.904	206.800, 4.419	206.800, 4.216	206.800, 3.914	206.800, 2.045	206.800, 1.940	206.800, 1.802	206.800, 1.773	206.800, 2.080	206.800, 1.897	206.800, 2.258	206.800, 2.062	206.800, 2.022
1036	207.000, 2.159	207.000, 2.016	207.000, 1.904	207.000, 4.419	207.000, 4.216	207.000, 3.914	207.000, 2.044	207.000, 1.940	207.000, 1.802	207.000, 1.773	207.000, 2.080	207.000, 1.897	207.000, 2.258	207.000, 2.062	207.000, 2.022
1037	207.200, 2.158	207.200, 2.016	207.200, 1.904	207.200, 4.419	207.200, 4.216	207.200, 3.914	207.200, 2.044	207.200, 1.939	207.200, 1.802	207.200, 1.773	207.200, 2.079	207.200, 1.897	207.200, 2.258	207.200, 2.061	207.200, 2.022
1038	207.400, 2.158	207.400, 2.016	207.400, 1.904	207.400, 4.419	207.400, 4.216	207.400, 3.914	207.400, 2.044	207.400, 1.938	207.400, 1.802	207.400, 1.773	207.400, 2.079	207.400, 1.896	207.400, 2.258	207.400, 2.061	207.400, 2.022
1039	207.600, 2.158	207.600, 2.015	207.600, 1.904	207.600, 4.418	207.600, 4.216	207.600, 3.914	207.600, 2.043	207.600, 1.938	207.600, 1.801	207.600, 1.773	207.600, 2.078	207.600, 1.896	207.600, 2.258	207.600, 2.061	207.600, 2.022
1040	207.800, 2.157	207.800, 2.015	207.800, 1.904	207.800, 4.418	207.800, 4.216	207.800, 3.914	207.800, 2.043	207.800, 1.937	207.800, 1.801	207.800, 1.772	207.800, 2.078	207.800, 1.896	207.800, 2.258	207.800, 2.061	207.800, 2.022
1041	208.000, 2.157	208.000, 2.014	208.000, 1.904	208.000, 4.417	208.000, 4.216	208.000, 3.914	208.000, 2.043	208.000, 1.937	208.000, 1.801	208.000, 1.772	208.000, 2.078	208.000, 1.896	208.000, 2.258	208.000, 2.060	208.000, 2.021
1042	208.200, 2.157	208.200, 2.014	208.200, 1.903	208.200, 4.417	208.200, 4.216	208.200, 3.913	208.200, 2.042	208.200, 1.936	208.200, 1.801	208.200, 1.772	208.200, 2.078	208.200, 1.896	208.200, 2.258	208.200, 2.060	208.200, 2.021
1043	208.400, 2.157	208.400, 2.013	208.400, 1.903	208.400, 4.417	208.400, 4.216	208.400, 3.913	208.400, 2.042	208.400, 1.936	208.400, 1.800	208.400, 1.771	208.400, 2.078	208.400, 1.895	208.400, 2.257	208.400, 2.060	208.400, 2.021
1044	208.600, 2.157	208.600, 2.013	208.600, 1.903	208.600, 4.416	208.600, 4.216	208.600, 3.913	208.600, 2.041	208.600, 1.936	208.600, 1.800	208.600, 1.771	208.600, 2.078	208.600, 1.895	208.600, 2.257	208.600, 2.060	208.600, 2.021
1045	208.800, 2.157	208.800, 2.013	208.800, 1.902	208.800, 4.416	208.800, 4.216	208.800, 3.913	208.800, 2.041	208.800, 1.935	208.800, 1.800	208.800, 1.771	208.800, 2.078	208.800, 1.895	208.800, 2.256	208.800, 2.060	208.800, 2.021
1046	209.000, 2.156	209.000, 2.013	209.000, 1.902	209.000, 4.416	209.000, 4.216	209.000, 3.912	209.000, 2.040	209.000, 1.935	209.000, 1.800	209.000, 1.770	209.000, 2.078	209.000, 1.895	209.000, 2.256	209.000, 2.060	209.000, 2.020
1047	209.200, 2.156	209.200, 2.013	209.200, 1.901	209.200, 4.416	209.200, 4.216	209.200, 3.912	209.200, 2.040	209.200, 1.934	209.200, 1.800	209.200, 1.770	209.200, 2.078	209.200, 1.894	209.200, 2.255	209.200, 2.059	209.200, 2.020
1048	209.400, 2.155	209.400, 2.012	209.400, 1.901	209.400, 4.415	209.400, 4.216	209.400, 3.912	209.400, 2.039	209.400, 1.934	209.400, 1.800	209.400, 1.769	209.400, 2.077	209.400, 1.894	209.400, 2.255	209.400, 2.059	209.400, 2.020
1049	209.600, 2.155	209.600, 2.012	209.600, 1.901	209.600, 4.416	209.600, 4.216	209.600, 3.912	209.600, 2.039	209.600, 1.934	209.600, 1.800	209.600, 1.769	209.600, 2.077	209.600, 1.894	209.600, 2.254	209.600, 2.059	209.600, 2.020
1050	209.800, 2.155	209.800, 2.012	209.800, 1.900	209.800, 4.416	209.800, 4.216	209.800, 3.912	209.800, 2.038	209.800, 1.933	209.800, 1.799	209.800, 1.769	209.800, 2.077	209.800, 1.894	209.800, 2.254	209.800, 2.058	209.800, 2.019
1051	210.000, 2.154	210.000, 2.012	210.000, 1.900	210.000, 4.416	210.000, 4.216	210.000, 3.912	210.000, 2.038	210.000, 1.933	210.000, 1.799	210.000, 1.769	210.000, 2.077	210.000, 1.894	210.000, 2.253	210.000, 2.058	210.000, 2.019
1052	210.200, 2.154	210.200, 2.011	210.200, 1.899	210.200, 4.416	210.200, 4.216	210.200, 3.912	210.200, 2.037	210.200, 1.933	210.200, 1.798	210.200, 1.769	210.200, 2.077	210.200, 1.893	210.200, 2.253	210.200, 2.058	210.200, 2.019
1053	210.400, 2.153	210.400, 2.011	210.400, 1.899	210.400, 4.416	210.400, 4.216	210.400, 3.912	210.400, 2.037	210.400, 1.933	210.400, 1.798	210.400, 1.768	210.400, 2.077	210.400, 1.893	210.400, 2.252	210.400, 2.058	210.400, 2.019
1054	210.600, 2.153	210.600, 2.011	210.600, 1.898	210.600, 4.416	210.600, 4.216	210.600, 3.912	210.600, 2.037	210.600, 1.932	210.600, 1.797	210.600, 1.768	210.600, 2.076	210.600, 1.893	210.600, 2.252	210.600, 2.057	210.600, 2.019
1055	210.800, 2.152	210.800, 2.010	210.800, 1.898	210.800, 4.417	210.800, 4.215	210.800, 3.912	210.800, 2.037	210.800, 1.932	210.800, 1.796	210.800, 1.768	210.800, 2.076	210.800, 1.892	210.800, 2.252	210.800, 2.057	210.800, 2.018
1056	211.000, 2.152	211.000, 2.010	211.000, 1.898	211.000, 4.417	211.000, 4.215	211.000, 3.912	211.000, 2.037	211.000, 1.932	211.000, 1.796	211.000, 1.768	211.000, 2.076	211.000, 1.892	211.000, 2.252	211.000, 2.057	211.000, 2.018
1057	211.200, 2.152	211.200, 2.009	211.200, 1.897	211.200, 4.417	211.200, 4.215	211.200, 3.912	211.200, 2.037	211.200, 1.931	211.200, 1.795	211.200, 1.768	211.200, 2.075	211.200, 1.892	211.200, 2.252	211.200, 2.056	211.200, 2.018
1058	211.400, 2.151	211.400, 2.009	211.400, 1.897	211.400, 4.417	211.400, 4.214	211.400, 3.912	211.400, 2.038	211.400, 1.931	211.400, 1.795	211.400, 1.768	211.400, 2.075	211.400, 1.892	211.400, 2.253	211.400, 2.056	211.400, 2.017
1059	211.600, 2.151	211.600, 2.008	211.600, 1.897	211.600, 4.417	211.600, 4.213	211.600, 3.912	211.600, 2.038	211.600, 1.931	211.600, 1.795	211.600, 1.768	211.600, 2.075	211.600, 1.891	211.600, 2.253	211.600, 2.055	211.600, 2.017
1060	211.800, 2.151	211.800, 2.008	211.800, 1.897	211.800, 4.417	211.800, 4.213	211.800, 3.912	211.800, 2.038	211.800, 1.931	211.800, 1.794	211.800, 1.769	211.800, 2.074	211.800, 1.891	211.800, 2.253	211.800, 2.055	211.800, 2.016
1061	212.000, 2.151	212.000, 2.007	212.000, 1.896	212.000, 4.416	212.000, 4.212	212.000, 3.912	212.000, 2.037	212.000, 1.931	212.000, 1.794	212.000, 1.768	212.000, 2.074	212.000, 1.891	212.000, 2.254	212.000, 2.054	212.000, 2.016
1062	212.200, 2.151	212.200, 2.007	212.200, 1.896	212.200, 4.416	212.200, 4.212	212.200, 3.912	212.200, 2.037	212.200, 1.930	212.200, 1.794	212.200, 1.768	212.200, 2.074	212.200, 1.891	212.200, 2.254	212.200, 2.054	212.200, 2.016
1063	212.400, 2.151	212.400, 2.007	212.400, 1.896	212.400, 4.416	212.400, 4.212	212.400, 3.912	212.400, 2.037	212.400, 1.930	212.400, 1.793	212.400, 1.768	212.400, 2.073	212.400, 1.891	212.400, 2.253	212.400, 2.053	212.400, 2.016
1064	212.600, 2.151	212.600, 2.007	212.600, 1.895	212.600, 4.416	212.600, 4.212	212.600, 3.911	212.600, 2.037	212.600, 1.930	212.600, 1.793	212.600, 1.768	212.600, 2.073	212.600, 1.891	212.600, 2.253	212.600, 2.053	212.600, 2.015
1065	212.800, 2.150	212.800, 2.007	212.800, 1.895	212.800, 4.416	212.800, 4.212	212.800, 3.911	212.800, 2.037	212.800, 1.930	212.800, 1.793	212.800, 1.768	212.800, 2.073	212.800, 1.890	212.800, 2.253	212.800, 2.053	212.800, 2.015
1066	213.000, 2.150	213.000, 2.006	213.000, 1.895	213.000, 4.416	213.000, 4.212	213.000, 3.911	213.000, 2.037	213.000, 1.930	213.000, 1.793	213.000, 1.768	213.000, 2.072	213.000, 1.890	213.000, 2.252	213.000, 2.053	213.000, 2.015
1067	213.200, 2.150	213.200, 2.006	213.200, 1.894	213.200, 4.416	213.200, 4.212	213.200, 3.910	213.200, 2.036	213.200, 1.930	213.200, 1.793	213.200, 1.768	213.200, 2.072	213.200, 1.890	213.200, 2.251	213.200, 2.053	213.200, 2.015
1068	213.400, 2.150	213.400, 2.006	213.400, 1.894	213.400, 4.416	213.400, 4.212	213.400, 3.910	213.400, 2.036	213.400, 1.929	213.400, 1.793	213.400, 1.767	213.400, 2.071	213.400, 1.890	213.400, 2.251	213.400, 2.053	213.400, 2.015
1069	213.600, 2.150	213.600, 2.006	213.600, 1.894	213.600, 4.416	213.600, 4.212	213.600, 3.910	213.600, 2.035	213.600, 1.929	213.600, 1.793	213.600, 1.767	213.600, 2.071	213.600, 1.890	213.600, 2.250	213.600, 2.053	213.600, 2.015
1070	213.800, 2.150	213.800, 2.006	213.800, 1.894	213.800, 4.416	213.800, 4.213	213.800, 3.910	213.800, 2.034	213.800, 1.929	213.800, 1.792	213.800, 1.767	213.800, 2.071	213.800, 1.890	213.800, 2.249	213.800, 2.053	213.800, 2.015
1071	214.000, 2.149	214.000, 2.005	214.000, 1.894	214.000, 4.416	214.000, 4.213	214.000, 3.910	214.000, 2.033	214.000, 1.928	214.000, 1.792	214.000, 1.767	214.000, 2.070	214.000, 1.890	214.000, 2.249	214.000, 2.052	214.000, 2.015
1072	214.200, 2.149	214.200, 2.005	214.200, 1.893	214.200, 4.416	214.200, 4.213	214.200, 3.910	214.200, 2.033	214.200, 1.928	214.200, 1.792	214.200, 1.766	214.200, 2.070	214.200, 1.889	214.200, 2.248	214.200, 2.052	214.200, 2.015
1073	214.400, 2.148	214.400, 2.005	214.400, 1.893	214.400, 4.416	214.400, 4.214	214.400, 3.911	214.400, 2.032	214.400, 1.927	214.400, 1.791	214.400, 1.766	214.400, 2.070	214.400, 1.889	214.400, 2.248	214.400, 2.052	214.400, 2.015
1074	214.600, 2.148	214.600, 2.005	214.600, 1.893	214.600, 4.416	214.600, 4.214	214.600, 3.911	214.600, 2.032	214.600, 1.927	214.600, 1.791	214.600, 1.766	214.600, 2.070	214.600, 1.889	214.600, 2.247	214.600, 2.051	214.600, 2.015
1075	214.800, 2.147	214.800, 2.005	214.800, 1.893	214.800, 4.416	214.800, 4.213	214.800, 3.911	214.800, 2.031	214.800, 1.926	214.800, 1.791	214.800, 1.766	214.800, 2.070	214.800, 1.889	214.800, 2.247	214.800, 2.051	214.800, 2.014
1076	215.000, 2.147	215.000, 2.005	215.000, 1.892	215.000, 4.415	215.000, 4.213	215.000, 3.911	215.000, 2.031	215.000, 1.926	215.000, 1.790	215.000, 1.766	215.000, 2.070	215.000, 1.889	215.000, 2.247	215.000, 2.050	215.000, 2.014
1077	215.200, 2.146	215.200, 2.004	215.200, 1.892	215.200, 4.415	215.200, 4.213	215.200, 3.911	215.200, 2.030	215.200, 1.926	215.200, 1.790	215.200, 1.766	215.200, 2.070	215.200, 1.889	215.200, 2.246	215.200, 2.050	215.200, 2.014
1078	215.400, 2.146	215.400, 2.004	215.400, 1.892	215.400, 4.415	215.400, 4.213	215.400, 3.911	215.400, 2.030	215.400, 1.925	215.400, 1.790	215.400, 1.766	215.400, 2.070	215.400, 1.889	215.400, 2.246	215.400, 2.049	215.400, 2.013
1079	215.600, 2.145	215.600, 2.004	215.600, 1.892	215.600, 4.415	215.600, 4.213	215.600, 3.911	215.600, 2.030	215.600, 1.925	215.600, 1.790	215.600, 1.766	215.600, 2.070	215.600, 1.889	215.600, 2.246	215.600, 2.049	215.600, 2.013
1080	215.800, 2.145	215.800, 2.004	215.800, 1.892	215.800, 4.414	215.800, 4.212	215.800, 3.911	215.800, 2.030	215.800, 1.924	215.800, 1.790	215.800, 1.765	215.800, 2.070	215.800, 1.889	215.800, 2.246	215.800, 2.048	215.800, 2.012
1081	216.000, 2.145	216.000, 2.003	216.000, 1.892	216.000, 4.414	216.000, 4.212	216.000, 3.911	216.000, 2.029	216.000, 1.923	216.000, 1.790	216.000, 1.765	216.000, 2.070	216.000, 1.889	216.000, 2.246	216.000, 2.048	216.000, 2.012
1082	216.200, 2.145	216.200, 2.003	216.200, 1.892	216.200, 4.414	216.200, 4.212	216.200, 3.911	216.200, 2.029	216.200, 1.923	216.200, 1.789	216.200, 1.765	216.200, 2.069	216.200, 1.889	216.200, 2.246	216.200, 2.048	216.200, 2.011
1083	216.400, 2.145	216.400, 2.003	216.400, 1.892	216.400, 4.413	216.400, 4.212	216.400, 3.911	216.400, 2.029	216.400, 1.922	216.400, 1.789	216.400, 1.764	216.400, 2.069	216.400, 1.888	216.400, 2.246	216.400, 2.048	216.400, 2.011
1084	216.600, 2.145	216.600, 2.002	216.600, 1.891	216.600, 4.413	216.600, 4.213	216.600, 3.911	216.600, 2.029	216.600, 1.922	216.600, 1.789	216.600, 1.764	216.600, 2.068	216.600, 1.888	216.600, 2.245	216.600, 2.048	216.600, 2.010
1085	216.800, 2.145	216.800, 2.002	216.800, 1.891	216.800, 4.413	216.800, 4.213	216.800, 3.911	216.800, 2.029	216.800, 1.922	216.800, 1.788	216.800, 1.764	216.800, 2.068	216.800, 1.887	216.800, 2.245	216.800, 2.048	216.800, 2.010
1086	217.000, 2.145	217.000, 2.002	217.000, 1.891	217.000, 4.413	217.000, 4.213	217.000, 3.911	217.000, 2.028	217.000, 1.922	217.000, 1.788	217.000, 1.764	217.000, 2.068	217.000, 1.887	217.000, 2.245	217.000, 2.047	217.000, 2.009
1087	217.200, 2.145	217.200, 2.001	217.200, 1.891	217.200, 4.413	217.200, 4.213	217.200, 3.910	217.200, 2.028	217.200, 1.922	217.200, 1.788	217.200, 1.764	217.200, 2.067	217.200, 1.886	217.200, 2.244	217.200, 2.047	217.200, 2.009
1088	217.400, 2.144	217.400, 2.001	217.400, 1.891	217.400, 4.412	217.400, 4.213	217.400, 3.910	217.400, 2.028	217.400, 1.922	217.400, 1.787	217.400, 1.764	217.400, 2.067	217.400, 1.886	217.400, 2.244	217.400, 2.047	217.400, 2.009
1089	217.600, 2.144	217.600, 2.001	217.600, 1.891	217.600, 4.412	217.600, 4.213	217.600, 3.910	217.600, 2.027	217.600, 1.922	217.600, 1.787	217.600, 1.764	217.600, 2.066	217.600, 1.886	217.600, 2.244	217.600, 2.047	217.600, 2.009
1090	217.800, 2.144	217.800, 2.001	217.800, 1.891	217.800, 4.412	217.800, 4.213	217.800, 3.910	217.800, 2.027	217.800, 1.922	217.800, 1.786	217.800, 1.764	217.800, 2.066	217.800, 1.886	217.800, 2.244	217.800, 2.046	217.800, 2.009
1091	218.000, 2.144	218.000, 2.001	218.000, 1.890	218.000, 4.412	218.000, 4.213	218.000, 3.910	218.000, 2.027	218.000, 1.922	218.000, 1.786	218.000, 1.764	218.000, 2.066	218.000, 1.885	218.000, 2.243	218.000, 2.046	218.000, 2.009
1092	218.200, 2.143	218.200, 2.001	218.200, 1.890	218.200, 4.412	218.200, 4.213	218.200, 3.910	218.200, 2.027	218.200, 1.922	218.200, 1.785	218.200, 1.764	218.200, 2.065	218.200, 1.885	218.200, 2.243	218.200, 2.046	218.200, 2.009
1093	218.400, 2.143	218.400, 2.001	218.400, 1.890	218.400, 4.412	218.400, 4.213	218.400, 3.910	218.400, 2.027	218.400, 1.922	218.400, 1.785	218.400, 1.764	218.400, 2.065	218.400, 1.885	218.400, 2.243	218.400, 2.045	218.400, 2.009
1094	218.600, 2.142	218.600, 2.001	218.600, 1.890	218.600, 4.412	218.600, 4.212	218.600, 3.910	218.600, 2.026	218.600, 1.922	218.600, 1.785	218.600, 1.764	218.600, 2.065	218.600, 1.885	218.600, 2.243	218.600, 2.045	218.600, 2.008
1095	218.800, 2.142	218.800, 2.000	218.800, 1.890	218.800, 4.412	218.800, 4.212	218.800, 3.910	218.800, 2.026	218.800, 1.922	218.800, 1.784	218.800, 1.764	218.800, 2.065	218.800, 1.884	218.800, 2.243	218.800, 2.045	218.800, 2.008
1096	219.000, 2.141	219.000, 2.000	219.000, 1.889	219.000, 4.413	219.000, 4.211	219.000, 3.910	219.000, 2.026	219.000, 1.922	219.000, 1.784	219.000, 1.764	219.000, 2.065	219.000, 1.884	219.000, 2.243	219.000, 2.045	219.000, 2.008
1097	219.200, 2.141	219.200, 2.000	219.200, 1.889	219.200, 4.413	219.200, 4.210	219.200, 3.910	219.200, 2.026	219.200, 1.922	219.200, 1.784	219.200, 1.763	219.200, 2.065	219.200, 1.884	219.200, 2.242	219.200, 2.045	219.200, 2.007
1098	219.400, 2.140	219.400, 1.999	219.400, 1.889	219.400, 4.413	219.400, 4.210	219.400, 3.910	219.400, 2.025	219.400, 1.922	219.400, 1.784	219.400, 1.763	219.400, 2.065	219.400, 1.884	219.400, 2.242	219.400, 2.045	219.400, 2.007
1099	219.600, 2.140	219.600, 1.999	219.600, 1.888	219.600, 4.413	219.600, 4.209	219.600, 3.910	219.600, 2.025	219.600, 1.921	219.600, 1.784	219.600, 1.762	219.600, 2.065	219.600, 1.884	219.600, 2.242	219.600, 2.045	219.600, 2.007
1100	219.800, 2.140	219.800, 1.999	219.800, 1.888	219.800, 4.413	219.800, 4.208	219.800, 3.909	219.800, 2.025	219.800, 1.921	219.800, 1.784	219.800, 1.762	219.800, 2.065	219.800, 1.884	219.800, 2.242	219.800, 2.045	219.800, 2.006
1101	220.000, 2.140	220.000, 1.998	220.000, 1.887	220.000, 4.413	220.000, 4.208	220.000, 3.909	220.000, 2.025	220.000, 1.921	220.000, 1.784	220.000, 1.761	220.000, 2.065	220.000, 1.883	220.000, 2.242	220.000, 2.045	220.000, 2.006
1102	220.200, 2.139	220.200, 1.998	220.200, 1.887	220.200, 4.413	220.200, 4.208	220.200, 3.909	220.200, 2.025	220.200, 1.920	220.200, 1.784	220.200, 1.761	220.200, 2.065	220.200, 1.883	220.200, 2.242	220.200, 2.045	220.200, 2.006
1103	220.400, 2.139	220.400, 1.997	220.400, 1.887	220.400, 4.413	220.400, 4.208	220.400, 3.909	220.400, 2.024	220.400, 1.919	220.400, 1.784	220.400, 1.760	220.400, 2.065	220.400, 1.882	220.400, 2.242	220.400, 2.045	220.400, 2.005
1104	220.600, 2.139	220.600, 1.997	220.600, 1.886	220.600, 4.413	220.600, 4.208	220.600, 3.909	220.600, 2.024	220.600, 1.918	220.600, 1.783	220.600, 1.760	220.600, 2.065	220.600, 1.882	220.600, 2.241	220.600, 2.044	220.600, 2.005
1105	220.800, 2.138	220.800, 1.996	220.800, 1.886	220.800, 4.413	220.800, 4.208	220.800, 3.909	220.800, 2.023	220.800, 1.918	220.800, 1.783	220.800, 1.760	220.800, 2.065	220.800, 1.881	220.800, 2.241	220.800, 2.044	220.800, 2.005
1106	221.000, 2.138	221.000, 1.996	221.000, 1.886	221.000, 4.412	221.000, 4.208	221.000, 3.909	221.000, 2.023	221.000, 1.917	221.000, 1.783	221.000, 1.760	221.000, 2.065	221.000, 1.881	221.000, 2.241	221.000, 2.044	221.000, 2.005
1107	221.200, 2.137	221.200, 1.996	221.200, 1.886	221.200, 4.412	221.200, 4.208	221.200, 3.909	221.200, 2.022	221.200, 1.917	221.200, 1.783	221.200, 1.760	221.200, 2.065	221.200, 1.881	221.200, 2.240	221.200, 2.044	221.200, 2.005
1108	221.400, 2.137	221.400, 1.996	221.400, 1.885	221.400, 4.412	221.400, 4.208	221.400, 3.908	221.400, 2.022	221.400, 1.916	221.400, 1.783	221.400, 1.760	221.400, 2.065	221.400, 1.881	221.400, 2.240	221.400, 2.044	221.400, 2.005
1109	221.600, 2.137	221.600, 1.995	221.600, 1.885	221.600, 4.411	221.600, 4.208	221.600, 3.908	221.600, 2.021	221.600, 1.916	221.600, 1.782	221.600, 1.760	221.600, 2.065	221.600, 1.881	221.600, 2.240	221.600, 2.043	221.600, 2.005
1110	221.800, 2.137	221.800, 1.995	221.800, 1.885	221.800, 4.411	221.800, 4.208	221.800, 3.908	221.800, 2.021	221.800, 1.915	221.800, 1.782	221.800, 1.760	221.800, 2.065	221.800, 1.881	221.800, 2.240	221.800, 2.043	221.800, 2.005
1111	222.000, 2.137	222.000, 1.995	222.000, 1.885	222.000, 4.411	222.000, 4.208	222.000, 3.908	222.000, 2.021	222.000, 1.915	222.000, 1.781	222.000, 1.760	222.000, 2.065	222.000, 1.881	222.000, 2.240	222.000, 2.043	222.000, 2.004
1112	222.200, 2.137	222.200, 1.995	222.200, 1.885	222.200, 4.411	222.200, 4.207	222.200, 3.908	222.200, 2.020	222.200, 1.915	222.200, 1.781	222.200, 1.760	222.200, 2.064	222.200, 1.881	222.200, 2.239	222.200, 2.043	222.200, 2.004
1113	222.400, 2.137	222.400, 1.995	222.400, 1.884	222.400, 4.411	222.400, 4.207	222.400, 3.908	222.400, 2.020	222.400, 1.915	222.400, 1.780	222.400, 1.759	222.400, 2.064	222.400, 1.881	222.400, 2.239	222.400, 2.042	222.400, 2.004
1114	222.600, 2.137	222.600, 1.994	222.600, 1.884	222.600, 4.410	222.600, 4.207	222.600, 3.908	222.600, 2.019	222.600, 1.914	222.600, 1.780	222.600, 1.759	222.600, 2.064	222.600, 1.881	222.600, 2.238	222.600, 2.042	222.600, 2.004
1115	222.800, 2.136	222.800, 1.994	222.800, 1.884	222.800, 4.410	222.800, 4.207	222.800, 3.908	222.800, 2.019	222.800, 1.915	222.800, 1.780	222.800, 1.759	222.800, 2.063	222.800, 1.881	222.800, 2.238	222.800, 2.042	222.800, 2.003
1116	223.000, 2.136	223.000, 1.994	223.000, 1.884	223.000, 4.410	223.000, 4.206	223.000, 3.908	223.000, 2.019	223.000, 1.915	223.000, 1.779	223.000, 1.759	223.000, 2.063	223.000, 1.881	223.000, 2.238	223.000, 2.041	223.000, 2.003
1117	223.200, 2.136	223.200, 1.994	223.200, 1.884	223.200, 4.410	223.200, 4.206	223.200, 3.907	223.200, 2.019	223.200, 1.915	223.200, 1.779	223.200, 1.758	223.200, 2.063	223.200, 1.881	223.200, 2.237	223.200, 2.041	223.200, 2.003
1118	223.400, 2.136	223.400, 1.993	223.400, 1.883	223.400, 4.410	223.400, 4.206	223.400, 3.907	223.400, 2.019	223.400, 1.915	223.400, 1.779	223.400, 1.758	223.400, 2.063	223.400, 1.881	223.400, 2.237	223.400, 2.041	223.400, 2.002
1119	223.600, 2.135	223.600, 1.993	223.600, 1.883	223.600, 4.410	223.600, 4.206	223.600, 3.907	223.600, 2.019	223.600, 1.915	223.600, 1.779	223.600, 1.758	223.600, 2.062	223.600, 1.881	223.600, 2.237	223.600, 2.040	223.600, 2.002
1120	223.800, 2.135	223.800, 1.993	223.800, 1.883	223.800, 4.410	223.800, 4.206	223.800, 3.906	223.800, 2.018	223.800, 1.915	223.800, 1.779	223.800, 1.758	223.800, 2.062	223.800, 1.881	223.800, 2.237	223.800, 2.040	223.800, 2.002
1121	224.000, 2.134	224.000, 1.993	224.000, 1.883	224.000, 4.410	224.000, 4.206	224.000, 3.906	224.000, 2.018	224.000, 1.915	224.000, 1.778	224.000, 1.757	224.000, 2.062	224.000, 1.881	224.000, 2.237	224.000, 2.040	224.000, 2.003
1122	224.200, 2.134	224.200, 1.992	224.200, 1.883	224.200, 4.410	224.200, 4.207	224.200, 3.905	224.200, 2.018	224.200, 1.915	224.200, 1.778	224.200, 1.757	224.200, 2.062	224.200, 1.881	224.200, 2.236	224.200, 2.040	224.200, 2.002
1123	224.400, 2.134	224.400, 1.992	224.400, 1.882	224.400, 4.410	224.400, 4.207	224.400, 3.905	224.400, 2.018	224.400, 1.915	224.400, 1.778	224.400, 1.757	224.400, 2.061	224.400, 1.881	224.400, 2.236	224.400, 2.040	224.400, 2.002
1124	224.600, 2.133	224.600, 1.992	224.600, 1.882	224.600, 4.410	224.600, 4.207	224.600, 3.905	224.600, 2.018	224.600, 1.914	224.600, 1.778	224.600, 1.757	224.600, 2.061	224.600, 1.881	224.600, 2.236	224.600, 2.039	224.600, 2.002
1125	224.800, 2.133	224.800, 1.992	224.800, 1.882	224.800, 4.410	224.800, 4.207	224.800, 3.905	224.800, 2.018	224.800, 1.914	224.800, 1.778	224.800, 1.757	224.800, 2.060	224.800, 1.881	224.800, 2.236	224.800, 2.039	224.800, 2.002
1126	225.000, 2.132	225.000, 1.991	225.000, 1.882	225.000, 4.410	225.000, 4.207	225.000, 3.905	225.000, 2.018	225.000, 1.914	225.000, 1.778	225.000, 1.757	225.000, 2.060	225.000, 1.881	225.000, 2.236	225.000, 2.039	225.000, 2.002
1127	225.200, 2.132	225.200, 1.991	225.200, 1.882	225.200, 4.409	225.200, 4.207	225.200, 3.905	225.200, 2.018	225.200, 1.913	225.200, 1.778	225.200, 1.757	225.200, 2.060	225.200, 1.881	225.200, 2.236	225.200, 2.039	225.200, 2.001
1128	225.400, 2.132	225.400, 1.991	225.400, 1.881	225.400, 4.409	225.400, 4.207	225.400, 3.905	225.400, 2.017	225.400, 1.913	225.400, 1.778	225.400, 1.757	225.400, 2.060	225.400, 1.880	225.400, 2.235	225.400, 2.039	225.400, 2.001
1129	225.600, 2.131	225.600, 1.990	225.600, 1.881	225.600, 4.409	225.600, 4.207	225.600, 3.905	225.600, 2.017	225.600, 1.912	225.600, 1.777	225.600, 1.757	225.600, 2.059	225.600, 1.880	225.600, 2.235	225.600, 2.039	225.600, 2.001
1130	225.800, 2.131	225.800, 1.990	225.800, 1.881	225.800, 4.408	225.800, 4.206	225.800, 3.906	225.800, 2.017	225.800, 1.911	225.800, 1.777	225.800, 1.757	225.800, 2.059	225.800, 1.880	225.800, 2.235	225.800, 2.039	225.800, 2.001
1131	226.000, 2.131	226.000, 1.990	226.000, 1.880	226.000, 4.408	226.000, 4.206	226.000, 3.906	226.000, 2.017	226.000, 1.911	226.000, 1.777	226.000, 1.756	226.000, 2.059	226.000, 1.879	226.000, 2.234	226.000, 2.038	226.000, 2.001
1132	226.200, 2.131	226.200, 1.990	226.200, 1.880	226.200, 4.408	226.200, 4.206	226.200, 3.906	226.200, 2.016	226.200, 1.910	226.200, 1.776	226.200, 1.756	226.200, 2.058	226.200, 1.879	226.200, 2.234	226.200, 2.038	226.200, 2.001
1133	226.400, 2.131	226.400, 1.990	226.400, 1.880	226.400, 4.407	226.400, 4.206	226.400, 3.906	226.400, 2.016	226.400, 1.910	226.400, 1.776	226.400, 1.756	226.400, 2.058	226.400, 1.879	226.400, 2.233	226.400, 2.038	226.400, 2.001
1134	226.600, 2.131	226.600, 1.989	226.600, 1.879	226.600, 4.407	226.600, 4.206	226.600, 3.906	226.600, 2.015	226.600, 1.909	226.600, 1.775	226.600, 1.756	226.600, 2.058	226.600, 1.878	226.600, 2.233	226.600, 2.038	226.600, 2.001
1135	226.800, 2.130	226.800, 1.989	226.800, 1.879	226.800, 4.407	226.800, 4.206	226.800, 3.906	226.800, 2.015	226.800, 1.909	226.800, 1.775	226.800, 1.756	226.800, 2.058	226.800, 1.878	226.800, 2.233	226.800, 2.037	226.800, 2.000
1136	227.000, 2.130	227.000, 1.989	227.000, 1.879	227.000, 4.407	227.000, 4.206	227.000, 3.906	227.000, 2.014	227.000, 1.909	227.000, 1.774	227.000, 1.756	227.000, 2.058	227.000, 1.877	227.000, 2.233	227.000, 2.037	227.000, 2.000
1137	227.200, 2.130	227.200, 1.988	227.200, 1.879	227.200, 4.407	227.200, 4.206	227.200, 3.906	227.200, 2.014	227.200, 1.909	227.200, 1.774	227.200, 1.756	227.200, 2.058	227.200, 1.877	227.200, 2.233	227.200, 2.036	227.200, 2.000
1138	227.400, 2.130	227.400, 1.988	227.400, 1.879	227.400, 4.407	227.400, 4.206	227.400, 3.906	227.400, 2.014	227.400, 1.908	227.400, 1.774	227.400, 1.756	227.400, 2.057	227.400, 1.877	227.400, 2.233	227.400, 2.036	227.400, 2.000
1139	227.600, 2.130	227.600, 1.988	227.600, 1.879	227.600, 4.407	227.600, 4.207	227.600, 3.906	227.600, 2.013	227.600, 1.908	227.600, 1.774	227.600, 1.756	227.600, 2.057	227.600, 1.876	227.600, 2.233	227.600, 2.035	227.600, 1.999
1140	227.800, 2.130	227.800, 1.988	227.800, 1.879	227.800, 4.407	227.800, 4.207	227.800, 3.905	227.800, 2.013	227.800, 1.908	227.800, 1.774	227.800, 1.755	227.800, 2.057	227.800, 1.876	227.800, 2.233	227.800, 2.035	227.800, 1.999
1141	228.000, 2.129	228.000, 1.988	228.000, 1.879	228.000, 4.407	228.000, 4.206	228.000, 3.905	228.000, 2.013	228.000, 1.908	228.000, 1.774	228.000, 1.756	228.000, 2.057	228.000, 1.876	228.000, 2.233	228.000, 2.035	228.000, 1.998
1142	228.200, 2.129	228.200, 1.988	228.200, 1.879	228.200, 4.407	228.200, 4.206	228.200, 3.905	228.200, 2.013	228.200, 1.908	228.200, 1.773	228.200, 1.756	228.200, 2.057	228.200, 1.876	228.200, 2.233	228.200, 2.034	228.200, 1.997
1143	228.400, 2.129	228.400, 1.987	228.400, 1.879	228.400, 4.408	228.400, 4.206	228.400, 3.905	228.400, 2.013	228.400, 1.907	228.400, 1.773	228.400, 1.756	228.400, 2.056	228.400, 1.875	228.400, 2.233	228.400, 2.034	228.400, 1.997
1144	228.600, 2.129	228.600, 1.987	228.600, 1.879	228.600, 4.408	228.600, 4.206	228.600, 3.905	228.600, 2.012	228.600, 1.907	228.600, 1.773	228.600, 1.756	228.600, 2.056	228.600, 1.875	228.600, 2.233	228.600, 2.034	228.600, 1.997
1145	228.800, 2.129	228.800, 1.987	228.800, 1.879	228.800, 4.408	228.800, 4.206	228.800, 3.905	228.800, 2.012	228.800, 1.907	228.800, 1.773	228.800, 1.756	228.800, 2.056	228.800, 1.875	228.800, 2.233	228.800, 2.034	228.800, 1.996
1146	229.000, 2.129	229.000, 1.987	229.000, 1.879	229.000, 4.409	229.000, 4.206	229.000, 3.905	229.000, 2.012	229.000, 1.906	229.000, 1.773	229.000, 1.756	229.000, 2.056	229.000, 1.875	229.000, 2.232	229.000, 2.033	229.000, 1.996
1147	229.200, 2.128	229.200, 1.987	229.200, 1.878	229.200, 4.409	229.200, 4.206	229.200, 3.904	229.200, 2.012	229.200, 1.906	229.200, 1.772	229.200, 1.755	229.200, 2.055	229.200, 1.875	229.200, 2.232	229.200, 2.033	229.200, 1.996
1148	229.400, 2.128	229.400, 1.987	229.400, 1.878	229.400, 4.408	229.400, 4.206	229.400, 3.904	229.400, 2.012	229.400, 1.906	229.400, 1.772	229.400, 1.755	229.400, 2.055	229.400, 1.874	229.400, 2.231	229.400, 2.033	229.400, 1.996
1149	229.600, 2.128	229.600, 1.987	229.600, 1.878	229.600, 4.408	229.600, 4.207	229.600, 3.903	229.600, 2.012	229.600, 1.906	229.600, 1.772	229.600, 1.755	229.600, 2.055	229.600, 1.874	229.600, 2.231	229.600, 2.033	229.600, 1.996
1150	229.800, 2.128	229.800, 1.987	229.800, 1.878	229.800, 4.408	229.800, 4.206	229.800, 3.903	229.800, 2.011	229.800, 1.906	229.800, 1.771	229.800, 1.755	229.800, 2.054	229.800, 1.874	229.800, 2.230	229.800, 2.033	229.800, 1.996
1151	230.000, 2.127	230.000, 1.988	230.000, 1.877	230.000, 4.408	230.000, 4.206	230.000, 3.903	230.000, 2.011	230.000, 1.906	230.000, 1.771	230.000, 1.755	230.000, 2.054	230.000, 1.874	230.000, 2.230	230.000, 2.033	230.000, 1.996
1152	230.200, 2.127	230.200, 1.987	230.200, 1.877	230.200, 4.408	230.200, 4.206	230.200, 3.902	230.200, 2.011	230.200, 1.906	230.200, 1.770	230.200, 1.754	230.200, 2.054	230.200, 1.874	230.200, 2.229	230.200, 2.033	230.200, 1.996
1153	230.400, 2.126	230.400, 1.987	230.400, 1.877	230.400, 4.408	230.400, 4.206	230.400, 3.902	230.400, 2.010	230.400, 1.905	230.400, 1.770	230.400, 1.754	230.400, 2.054	230.400, 1.873	230.400, 2.229	230.400, 2.033	230.400, 1.995
1154	230.600, 2.126	230.600, 1.987	230.600, 1.877	230.600, 4.408	230.600, 4.206	230.600, 3.902	230.600, 2.010	230.600, 1.905	230.600, 1.770	230.600, 1.754	230.600, 2.053	230.600, 1.873	230.600, 2.228	230.600, 2.033	230.600, 1.995
1155	230.800, 2.126	230.800, 1.987	230.800, 1.876	230.800, 4.407	230.800, 4.206	230.800, 3.902	230.800, 2.010	230.800, 1.905	230.800, 1.769	230.800, 1.753	230.800, 2.053	230.800, 1.873	230.800, 2.228	230.800, 2.032	230.800, 1.995
1156	231.000, 2.126	231.000, 1.987	231.000, 1.876	231.000, 4.407	231.000, 4.206	231.000, 3.901	231.000, 2.010	231.000, 1.905	231.000, 1.769	231.000, 1.753	231.000, 2.053	231.000, 1.873	231.000, 2.228	231.000, 2.032	231.000, 1.995
1157	231.200, 2.126	231.200, 1.986	231.200, 1.876	231.200, 4.406	231.200, 4.206	231.200, 3.901	231.200, 2.010	231.200, 1.905	231.200, 1.769	231.200, 1.753	231.200, 2.054	231.200, 1.873	231.200, 2.227	231.200, 2.032	231.200, 1.994
1158	231.400, 2.125	231.400, 1.986	231.400, 1.876	231.400, 4.405	231.400, 4.206	231.400, 3.901	231.400, 2.010	231.400, 1.904	231.400, 1.769	231.400, 1.752	231.400, 2.054	231.400, 1.873	231.400, 2.227	231.400, 2.032	231.400, 1.994
1159	231.600, 2.125	231.600, 1.986	231.600, 1.876	231.600, 4.405	231.600, 4.206	231.600, 3.901	231.600, 2.010	231.600, 1.904	231.600, 1.768	231.600, 1.752	231.600, 2.054	231.600, 1.873	231.600, 2.227	231.600, 2.032	231.600, 1.993
1160	231.800, 2.124	231.800, 1.986	231.800, 1.875	231.800, 4.405	231.800, 4.205	231.800, 3.901	231.800, 2.010	231.800, 1.904	231.800, 1.768	231.800, 1.752	231.800, 2.054	231.800, 1.873	231.800, 2.227	231.800, 2.032	231.800, 1.993
1161	232.000, 2.124	232.000, 1.985	232.000, 1.875	232.000, 4.404	232.000, 4.205	232.000, 3.901	232.000, 2.009	232.000, 1.904	232.000, 1.768	232.000, 1.752	232.000, 2.054	232.000, 1.874	232.000, 2.227	232.000, 2.032	232.000, 1.992
1162	232.200, 2.124	232.200, 1.985	232.200, 1.875	232.200, 4.404	232.200, 4.204	232.200, 3.901	232.200, 2.009	232.200, 1.904	232.200, 1.768	232.200, 1.752	232.200, 2.054	232.200, 1.874	232.200, 2.227	232.200, 2.032	232.200, 1.992
1163	232.400, 2.124	232.400, 1.984	232.400, 1.874	232.400, 4.404	232.400, 4.204	232.400, 3.901	232.400, 2.009	232.400, 1.903	232.400, 1.768	232.400, 1.752	232.400, 2.054	232.400, 1.874	232.400, 2.227	232.400, 2.032	232.400, 1.992
1164	232.600, 2.124	232.600, 1.984	232.600, 1.874	232.600, 4.404	232.600, 4.204	232.600, 3.901	232.600, 2.008	232.600, 1.903	232.600, 1.768	232.600, 1.752	232.600, 2.054	232.600, 1.873	232.600, 2.227	232.600, 2.031	232.600, 1.992
1165	232.800, 2.124	232.800, 1.983	232.800, 1.874	232.800, 4.404	232.800, 4.204	232.800, 3.901	232.800, 2.008	232.800, 1.902	232.800, 1.768	232.800, 1.752	232.800, 2.054	232.800, 1.873	232.800, 2.227	232.800, 2.031	232.800, 1.992
1166	233.000, 2.124	233.000, 1.983	233.000, 1.873	233.000, 4.404	233.000, 4.204	233.000, 3.901	233.000, 2.008	233.000, 1.902	233.000, 1.768	233.000, 1.751	233.000, 2.053	233.000, 1.873	233.000, 2.227	233.000, 2.031	233.000, 1.992
1167	233.200, 2.124	233.200, 1.983	233.200, 1.873	233.200, 4.404	233.200, 4.204	233.200, 3.901	233.200, 2.007	233.200, 1.902	233.200, 1.768	233.200, 1.751	233.200, 2.053	233.200, 1.873	233.200, 2.227	233.200, 2.031	233.200, 1.992
1168	233.400, 2.123	233.400, 1.982	233.400, 1.873	233.400, 4.404	233.400, 4.203	233.400, 3.901	233.400, 2.006	233.400, 1.901	233.400, 1.767	233.400, 1.751	233.400, 2.053	233.400, 1.872	233.400, 2.227	233.400, 2.030	233.400, 1.991
1169	233.600, 2.123	233.600, 1.982	233.600, 1.873	233.600, 4.404	233.600, 4.203	233.600, 3.901	233.600, 2.006	233.600, 1.901	233.600, 1.767	233.600, 1.751	233.600, 2.053	233.600, 1.872	233.600, 2.227	233.600, 2.030	233.600, 1.991
1170	233.800, 2.123	233.800, 1.982	233.800, 1.872	233.800, 4.405	233.800, 4.203	233.800, 3.901	233.800, 2.006	233.800, 1.901	233.800, 1.767	233.800, 1.751	233.800, 2.053	233.800, 1.871	233.800, 2.227	233.800, 2.029	233.800, 1.991
1171	234.000, 2.122	234.000, 1.982	234.000, 1.872	234.000, 4.405	234.000, 4.203	234.000, 3.901	234.000, 2.005	234.000, 1.901	234.000, 1.767	234.000, 1.751	234.000, 2.052	234.000, 1.871	234.000, 2.226	234.000, 2.029	234.000, 1.992
1172	234.200, 2.122	234.200, 1.982	234.200, 1.872	234.200, 4.405	234.200, 4.203	234.200, 3.901	234.200, 2.005	234.200, 1.901	234.200, 1.767	234.200, 1.751	234.200, 2.052	234.200, 1.870	234.200, 2.226	234.200, 2.029	234.200, 1.992
1173	234.400, 2.122	234.400, 1.981	234.400, 1.872	234.400, 4.405	234.400, 4.203	234.400, 3.901	234.400, 2.005	234.400, 1.900	234.400, 1.767	234.400, 1.750	234.400, 2.052	234.400, 1.870	234.400, 2.226	234.400, 2.029	234.400, 1.992
1174	234.600, 2.121	234.600, 1.981	234.600, 1.872	234.600, 4.404	234.600, 4.203	234.600, 3.901	234.600, 2.005	234.600, 1.900	234.600, 1.766	234.600, 1.750	234.600, 2.051	234.600, 1.869	234.600, 2.225	234.600, 2.029	234.600, 1.992
1175	234.800, 2.121	234.800, 1.981	234.800, 1.872	234.800, 4.404	234.800, 4.203	234.800, 3.901	234.800, 2.005	234.800, 1.900	234.800, 1.766	234.800, 1.750	234.800, 2.051	234.800, 1.869	234.800, 2.225	234.800, 2.029	234.800, 1.992
1176	235.000, 2.120	235.000, 1.981	235.000, 1.872	235.000, 4.403	235.000, 4.204	235.000, 3.901	235.000, 2.005	235.000, 1.900	235.000, 1.766	235.000, 1.750	235.000, 2.051	235.000, 1.869	235.000, 2.225	235.000, 2.029	235.000, 1.992
1177	235.200, 2.120	235.200, 1.981	235.200, 1.872	235.200, 4.403	235.200, 4.204	235.200, 3.901	235.200, 2.005	235.200, 1.900	235.200, 1.766	235.200, 1.750	235.200, 2.050	235.200, 1.869	235.200, 2.225	235.200, 2.029	235.200, 1.991
1178	235.400, 2.120	235.400, 1.981	235.400, 1.872	235.400, 4.403	235.400, 4.204	235.400, 3.901	235.400, 2.005	235.400, 1.900	235.400, 1.765	235.400, 1.749	235.400, 2.050	235.400, 1.869	235.400, 2.225	235.400, 2.028	235.400, 1.991
1179	235.600, 2.120	235.600, 1.981	235.600, 1.872	235.600, 4.403	235.600, 4.204	235.600, 3.901	235.600, 2.004	235.600, 1.899	235.600, 1.765	235.600, 1.749	235.600, 2.050	235.600, 1.869	235.600, 2.225	235.600, 2.028	235.600, 1.991
1180	235.800, 2.119	235.800, 1.981	235.800, 1.871	235.800, 4.403	235.800, 4.204	235.800, 3.901	235.800, 2.004	235.800, 1.899	235.800, 1.765	235.800, 1.749	235.800, 2.049	235.800, 1.869	235.800, 2.224	235.800, 2.028	235.800, 1.991
1181	236.000, 2.119	236.000, 1.980	236.000, 1.871	236.000, 4.403	236.000, 4.203	236.000, 3.901	236.000, 2.004	236.000, 1.899	236.000, 1.765	236.000, 1.749	236.000, 2.049	236.000, 1.869	236.000, 2.224	236.000, 2.028	236.000, 1.990
1182	236.200, 2.119	236.200, 1.980	236.200, 1.871	236.200, 4.404	236.200, 4.203	236.200, 3.901	236.200, 2.003	236.200, 1.898	236.200, 1.765	236.200, 1.749	236.200, 2.049	236.200, 1.869	236.200, 2.224	236.200, 2.027	236.200, 1.990
1183	236.400, 2.119	236.400, 1.980	236.400, 1.871	236.400, 4.404	236.400, 4.203	236.400, 3.901	236.400, 2.003	236.400, 1.898	236.400, 1.765	236.400, 1.749	236.400, 2.049	236.400, 1.869	236.400, 2.223	236.400, 2.027	236.400, 1.990
1184	236.600, 2.119	236.600, 1.980	236.600, 1.871	236.600, 4.404	236.600, 4.202	236.600, 3.901	236.600, 2.003	236.600, 1.898	236.600, 1.764	236.600, 1.749	236.600, 2.048	236.600, 1.868	236.600, 2.223	236.600, 2.026	236.600, 1.989
1185	236.800, 2.119	236.800, 1.979	236.800, 1.871	236.800, 4.404	236.800, 4.202	236.800, 3.901	236.800, 2.002	236.800, 1.897	236.800, 1.764	236.800, 1.749	236.800, 2.048	236.800, 1.868	236.800, 2.223	236.800, 2.026	236.800, 1.989
1186	237.000, 2.119	237.000, 1.979	237.000, 1.871	237.000, 4.404	237.000, 4.202	237.000, 3.900	237.000, 2.002	237.000, 1.897	237.000, 1.763	237.000, 1.749	237.000, 2.048	237.000, 1.868	237.000, 2.222	237.000, 2.025	237.000, 1.989
1187	237.200, 2.119	237.200, 1.979	237.200, 1.871	237.200, 4.405	237.200, 4.202	237.200, 3.900	237.200, 2.002	237.200, 1.896	237.200, 1.763	237.200, 1.749	237.200, 2.047	237.200, 1.868	237.200, 2.222	237.200, 2.025	237.200, 1.988
1188	237.400, 2.119	237.400, 1.979	237.400, 1.871	237.400, 4.405	237.400, 4.202	237.400, 3.900	237.400, 2.002	237.400, 1.896	237.400, 1.762	237.400, 1.749	237.400, 2.047	237.400, 1.868	237.400, 2.222	237.400, 2.024	237.400, 1.988
1189	237.600, 2.118	237.600, 1.979	237.600, 1.870	237.600, 4.405	237.600, 4.202	237.600, 3.899	237.600, 2.002	237.600, 1.896	237.600, 1.762	237.600, 1.748	237.600, 2.046	237.600, 1.868	237.600, 2.221	237.600, 2.024	237.600, 1.988
1190	237.800, 2.118	237.800, 1.979	237.800, 1.870	237.800, 4.405	237.800, 4.202	237.800, 3.899	237.800, 2.002	237.800, 1.896	237.800, 1.761	237.800, 1.748	237.800, 2.046	237.800, 1.868	237.800, 2.221	237.800, 2.023	237.800, 1.987
1191	238.000, 2.117	238.000, 1.979	238.000, 1.870	238.000, 4.405	238.000, 4.202	238.000, 3.898	238.000, 2.002	238.000, 1.895	238.000, 1.761	238.000, 1.748	238.000, 2.046	238.000, 1.867	238.000, 2.221	238.000, 2.023	238.000, 1.987
1192	238.200, 2.117	238.200, 1.978	238.200, 1.869	238.200, 4.404	238.200, 4.202	238.200, 3.898	238.200, 2.002	238.200, 1.895	238.200, 1.761	238.200, 1.747	238.200, 2.046	238.200, 1.867	238.200, 2.220	238.200, 2.023	238.200, 1.987
1193	238.400, 2.116	238.400, 1.978	238.400, 1.869	238.400, 4.404	238.400, 4.202	238.400, 3.898	238.400, 2.002	238.400, 1.895	238.400, 1.760	238.400, 1.748	238.400, 2.046	238.400, 1.867	238.400, 2.220	238.400, 2.023	238.400, 1.987
1194	238.600, 2.116	238.600, 1.978	238.600, 1.869	238.600, 4.403	238.600, 4.201	238.600, 3.898	238.600, 2.001	238.600, 1.895	238.600, 1.760	238.600, 1.747	238.600, 2.046	238.600, 1.867	238.600, 2.220	238.600, 2.023	238.600, 1.987
1195	238.800, 2.116	238.800, 1.978	238.800, 1.869	238.800, 4.402	238.800, 4.201	238.800, 3.898	238.800, 2.001	238.800, 1.895	238.800, 1.760	238.800, 1.747	238.800, 2.046	238.800, 1.867	238.800, 2.221	238.800, 2.023	238.800, 1.987
1196	239.000, 2.115	239.000, 1.977	239.000, 1.869	239.000, 4.402	239.000, 4.201	239.000, 3.898	239.000, 2.000	239.000, 1.895	239.000, 1.760	239.000, 1.747	239.000, 2.046	239.000, 1.866	239.000, 2.221	239.000, 2.023	239.000, 1.987
1197	239.200, 2.115	239.200, 1.977	239.200, 1.868	239.200, 4.401	239.200, 4.201	239.200, 3.897	239.200, 2.000	239.200, 1.895	239.200, 1.760	239.200, 1.747	239.200, 2.046	239.200, 1.866	239.200, 2.221	239.200, 2.023	239.200, 1.987
1198	239.400, 2.114	239.400, 1.977	239.400, 1.868	239.400, 4.401	239.400, 4.200	239.400, 3.897	239.400, 1.999	239.400, 1.895	239.400, 1.760	239.400, 1.747	239.400, 2.046	239.400, 1.866	239.400, 2.221	239.400, 2.023	239.400, 1.987
1199	239.600, 2.114	239.600, 1.976	239.600, 1.868	239.600, 4.401	239.600, 4.200	239.600, 3.897	239.600, 1.999	239.600, 1.895	239.600, 1.760	239.600, 1.747	239.600, 2.045	239.600, 1.866	239.600, 2.221	239.600, 2.024	239.600, 1.987
1200	239.800, 2.114	239.800, 1.976	239.800, 1.867	239.800, 4.401	239.800, 4.199	239.800, 3.897	239.800, 1.999	239.800, 1.895	239.800, 1.760	239.800, 1.747	239.800, 2.045	239.800, 1.866	239.800, 2.220	239.800, 2.024	239.800, 1.987
1201	240.000, 2.113	240.000, 1.976	240.000, 1.867	240.000, 4.400	240.000, 4.199	240.000, 3.897	240.000, 1.998	240.000, 1.895	240.000, 1.760	240.000, 1.747	240.000, 2.045	240.000, 1.866	240.000, 2.220	240.000, 2.024	240.000, 1.987
1202	240.200, 2.113	240.200, 1.976	240.200, 1.867	240.200, 4.400	240.200, 4.199	240.200, 3.897	240.200, 1.998	240.200, 1.895	240.200, 1.760	240.200, 1.747	240.200, 2.044	240.200, 1.866	240.200, 2.220	240.200, 2.024	240.200, 1.987
1203	240.400, 2.113	240.400, 1.976	240.400, 1.867	240.400, 4.400	240.400, 4.199	240.400, 3.898	240.400, 1.998	240.400, 1.894	240.400, 1.760	240.400, 1.747	240.400, 2.044	240.400, 1.866	240.400, 2.220	240.400, 2.024	240.400, 1.987
1204	240.600, 2.113	240.600, 1.976	240.600, 1.867	240.600, 4.400	240.600, 4.198	240.600, 3.898	240.600, 1.998	240.600, 1.894	240.600, 1.759	240.600, 1.747	240.600, 2.043	240.600, 1.866	240.600, 2.220	240.600, 2.024	240.600, 1.987
1205	240.800, 2.113	240.800, 1.976	240.800, 1.867	240.800, 4.400	240.800, 4.198	240.800, 3.898	240.800, 1.998	240.800, 1.893	240.800, 1.759	240.800, 1.747	240.800, 2.043	240.800, 1.866	240.800, 2.220	240.800, 2.024	240.800, 1.987
1206	241.000, 2.113	241.000, 1.976	241.000, 1.867	241.000, 4.400	241.000, 4.198	241.000, 3.898	241.000, 1.997	241.000, 1.893	241.000, 1.759	241.000, 1.747	241.000, 2.042	241.000, 1.866	241.000, 2.220	241.000, 2.024	241.000, 1.987
1207	241.200, 2.113	241.200, 1.976	241.200, 1.867	241.200, 4.401	241.200, 4.198	241.200, 3.897	241.200, 1.997	241.200, 1.893	241.200, 1.759	241.200, 1.746	241.200, 2.042	241.200, 1.866	241.200, 2.220	241.200, 2.024	241.200, 1.986
1208	241.400, 2.113	241.400, 1.976	241.400, 1.867	241.400, 4.401	241.400, 4.198	241.400, 3.897	241.400, 1.997	241.400, 1.893	241.400, 1.759	241.400, 1.746	241.400, 2.042	241.400, 1.866	241.400, 2.219	241.400, 2.023	241.400, 1.986
1209	241.600, 2.112	241.600, 1.975	241.600, 1.867	241.600, 4.401	241.600, 4.198	241.600, 3.896	241.600, 1.997	241.600, 1.893	241.600, 1.759	241.600, 1.746	241.600, 2.042	241.600, 1.866	241.600, 2.219	241.600, 2.023	241.600, 1.986
1210	241.800, 2.112	241.800, 1.975	241.800, 1.866	241.800, 4.400	241.800, 4.198	241.800, 3.896	241.800, 1.997	241.800, 1.892	241.800, 1.758	241.800, 1.746	241.800, 2.042	241.800, 1.866	241.800, 2.219	241.800, 2.023	241.800, 1.985
1211	242.000, 2.112	242.000, 1.975	242.000, 1.866	242.000, 4.400	242.000, 4.198	242.000, 3.896	242.000, 1.997	242.000, 1.892	242.000, 1.758	242.000, 1.746	242.000, 2.042	242.000, 1.866	242.000, 2.219	242.000, 2.022	242.000, 1.985
1212	242.200, 2.111	242.200, 1.975	242.200, 1.866	242.200, 4.400	242.200, 4.198	242.200, 3.896	242.200, 1.997	242.200, 1.892	242.200, 1.758	242.200, 1.746	242.200, 2.042	242.200, 1.866	242.200, 2.218	242.200, 2.022	242.200, 1.985
1213	242.400, 2.111	242.400, 1.974	242.400, 1.866	242.400, 4.399	242.400, 4.198	242.400, 3.897	242.400, 1.996	242.400, 1.891	242.400, 1.758	242.400, 1.746	242.400, 2.042	242.400, 1.866	242.400, 2.218	242.400, 2.022	242.400, 1.985
1214	242.600, 2.111	242.600, 1.974	242.600, 1.865	242.600, 4.399	242.600, 4.198	242.600, 3.897	242.600, 1.995	242.600, 1.891	242.600, 1.758	242.600, 1.745	242.600, 2.042	242.600, 1.866	242.600, 2.218	242.600, 2.022	242.600, 1.985
1215	242.800, 2.111	242.800, 1.974	242.800, 1.865	242.800, 4.399	242.800, 4.198	242.800, 3.897	242.800, 1.995	242.800, 1.891	242.800, 1.758	242.800, 1.745	242.800, 2.042	242.800, 1.866	242.800, 2.218	242.800, 2.021	242.800, 1.985
1216	243.000, 2.111	243.000, 1.974	243.000, 1.865	243.000, 4.398	243.000, 4.198	243.000, 3.897	243.000, 1.994	243.000, 1.891	243.000, 1.758	243.000, 1.745	243.000, 2.042	243.000, 1.865	243.000, 2.217	243.000, 2.021	243.000, 1.984
1217	243.200, 2.111	243.200, 1.973	243.200, 1.865	243.200, 4.398	243.200, 4.198	243.200, 3.897	243.200, 1.993	243.200, 1.891	243.200, 1.758	243.200, 1.745	243.200, 2.042	243.200, 1.865	243.200, 2.217	243.200, 2.021	243.200, 1.984
1218	243.400, 2.111	243.400, 1.973	243.400, 1.864	243.400, 4.398	243.400, 4.198	243.400, 3.896	243.400, 1.993	243.400, 1.890	243.400, 1.758	243.400, 1.744	243.400, 2.043	243.400, 1.865	243.400, 2.217	243.400, 2.021	243.400, 1.984
1219	243.600, 2.111	243.600, 1.973	243.600, 1.864	243.600, 4.397	243.600, 4.198	243.600, 3.896	243.600, 1.992	243.600, 1.890	243.600, 1.757	243.600, 1.744	243.600, 2.043	243.600, 1.864	243.600, 2.216	243.600, 2.021	243.600, 1.984
1220	243.800, 2.111	243.800, 1.973	243.800, 1.864	243.800, 4.397	243.800, 4.198	243.800, 3.896	243.800, 1.992	243.800, 1.890	243.800, 1.757	243.800, 1.744	243.800, 2.042	243.800, 1.864	243.800, 2.216	243.800, 2.020	243.800, 1.983
1221	244.000, 2.112	244.000, 1.973	244.000, 1.864	244.000, 4.396	244.000, 4.198	244.000, 3.896	244.000, 1.992	244.000, 1.889	244.000, 1.757	244.000, 1.744	244.000, 2.042	244.000, 1.864	244.000, 2.216	244.000, 2.020	244.000, 1.982
1222	244.200, 2.112	244.200, 1.972	244.200, 1.863	244.200, 4.396	244.200, 4.197	244.200, 3.896	244.200, 1.992	244.200, 1.889	244.200, 1.756	244.200, 1.744	244.200, 2.042	244.200, 1.863	244.200, 2.216	244.200, 2.020	244.200, 1.982
1223	244.400, 2.112	244.400, 1.972	244.400, 1.863	244.400, 4.396	244.400, 4.197	244.400, 3.896	244.400, 1.991	244.400, 1.888	244.400, 1.756	244.400, 1.744	244.400, 2.041	244.400, 1.863	244.400, 2.216	244.400, 2.020	244.400, 1.981
1224	244.600, 2.112	244.600, 1.972	244.600, 1.863	244.600, 4.395	244.600, 4.197	244.600, 3.895	244.600, 1.991	244.600, 1.888	244.600, 1.755	244.600, 1.743	244.600, 2.041	244.600, 1.862	244.600, 2.216	244.600, 2.020	244.600, 1.981
1225	244.800, 2.112	244.800, 1.972	244.800, 1.863	244.800, 4.395	244.800, 4.197	244.800, 3.895	244.800, 1.991	244.800, 1.887	244.800, 1.755	244.800, 1.743	244.800, 2.041	244.800, 1.862	244.800, 2.216	244.800, 2.020	244.800, 1.981
1226	245.000, 2.112	245.000, 1.972	245.000, 1.863	245.000, 4.395	245.000, 4.197	245.000, 3.895	245.000, 1.991	245.000, 1.887	245.000, 1.754	245.000, 1.743	245.000, 2.040	245.000, 1.862	245.000, 2.216	245.000, 2.020	245.000, 1.980
1227	245.200, 2.112	245.200, 1.972	245.200, 1.863	245.200, 4.395	245.200, 4.197	245.200, 3.894	245.200, 1.992	245.200, 1.887	245.200, 1.754	245.200, 1.743	245.200, 2.040	245.200, 1.861	245.200, 2.216	245.200, 2.020	245.200, 1.980
1228	245.400, 2.111	245.400, 1.971	245.400, 1.863	245.400, 4.395	245.400, 4.196	245.400, 3.894	245.400, 1.992	245.400, 1.887	245.400, 1.753	245.400, 1.743	245.400, 2.040	245.400, 1.861	245.400, 2.216	245.400, 2.020	245.400, 1.980
1229	245.600, 2.111	245.600, 1.971	245.600, 1.863	245.600, 4.395	245.600, 4.196	245.600, 3.893	245.600, 1.992	245.600, 1.887	245.600, 1.753	245.600, 1.744	245.600, 2.040	245.600, 1.861	245.600, 2.215	245.600, 2.020	245.600, 1.980
1230	245.800, 2.110	245.800, 1.971	245.800, 1.863	245.800, 4.395	245.800, 4.196	245.800, 3.893	245.800, 1.993	245.800, 1.887	245.800, 1.752	245.800, 1.744	245.800, 2.039	245.800, 1.861	245.800, 2.215	245.800, 2.019	245.800, 1.980
1231	246.000, 2.110	246.000, 1.971	246.000, 1.863	246.000, 4.396	246.000, 4.196	246.000, 3.894	246.000, 1.993	246.000, 1.887	246.000, 1.752	246.000, 1.744	246.000, 2.039	246.000, 1.861	246.000, 2.215	246.000, 2.019	246.000, 1.980
1232	246.200, 2.109	246.200, 1.971	246.200, 1.863	246.200, 4.395	246.200, 4.196	246.200, 3.893	246.200, 1.993	246.200, 1.887	246.200, 1.752	246.200, 1.743	246.200, 2.039	246.200, 1.861	246.200, 2.215	246.200, 2.019	246.200, 1.980
1233	246.400, 2.108	246.400, 1.971	246.400, 1.862	246.400, 4.395	246.400, 4.195	246.400, 3.894	246.400, 1.993	246.400, 1.887	246.400, 1.752	246.400, 1.743	246.400, 2.039	246.400, 1.861	246.400, 2.215	246.400, 2.018	246.400, 1.980
1234	246.600, 2.108	246.600, 1.971	246.600, 1.862	246.600, 4.395	246.600, 4.195	246.600, 3.894	246.600, 1.993	246.600, 1.887	246.600, 1.753	246.600, 1.743	246.600, 2.038	246.600, 1.861	246.600, 2.214	246.600, 2.018	246.600, 1.980
1235	246.800, 2.108	246.800, 1.971	246.800, 1.862	246.800, 4.395	246.800, 4.195	246.800, 3.894	246.800, 1.992	246.800, 1.887	246.800, 1.753	246.800, 1.743	246.800, 2.038	246.800, 1.861	246.800, 2.214	246.800, 2.018	246.800, 1.980
1236	247.000, 2.107	247.000, 1.971	247.000, 1.861	247.000, 4.395	247.000, 4.194	247.000, 3.894	247.000, 1.992	247.000, 1.887	247.000, 1.753	247.000, 1.743	247.000, 2.038	247.000, 1.861	247.000, 2.214	247.000, 2.018	247.000, 1.980
1237	247.200, 2.107	247.200, 1.971	247.200, 1.861	247.200, 4.395	247.200, 4.194	247.200, 3.894	247.200, 1.991	247.200, 1.886	247.200, 1.753	247.200, 1.742	247.200, 2.038	247.200, 1.861	247.200, 2.214	247.200, 2.017	247.200, 1.980
1238	247.400, 2.107	247.400, 1.971	247.400, 1.861	247.400, 4.394	247.400, 4.194	247.400, 3.894	247.400, 1.991	247.400, 1.886	247.400, 1.754	247.400, 1.742	247.400, 2.038	247.400, 1.861	247.400, 2.213	247.400, 2.017	247.400, 1.980
1239	247.600, 2.107	247.600, 1.971	247.600, 1.861	247.600, 4.394	247.600, 4.194	247.600, 3.893	247.600, 1.991	247.600, 1.886	247.600, 1.754	247.600, 1.742	247.600, 2.037	247.600, 1.861	247.600, 2.213	247.600, 2.017	247.600, 1.980
1240	247.800, 2.107	247.800, 1.971	247.800, 1.860	247.800, 4.394	247.800, 4.194	247.800, 3.893	247.800, 1.990	247.800, 1.885	247.800, 1.754	247.800, 1.741	247.800, 2.037	247.800, 1.861	247.800, 2.213	247.800, 2.017	247.800, 1.979
1241	248.000, 2.107	248.000, 1.970	248.000, 1.860	248.000, 4.393	248.000, 4.194	248.000, 3.893	248.000, 1.990	248.000, 1.885	248.000, 1.754	248.000, 1.741	248.000, 2.037	248.000, 1.861	248.000, 2.213	248.000, 2.016	248.000, 1.979
1242	248.200, 2.107	248.200, 1.970	248.200, 1.860	248.200, 4.393	248.200, 4.194	248.200, 3.893	248.200, 1.989	248.200, 1.885	248.200, 1.754	248.200, 1.741	248.200, 2.037	248.200, 1.861	248.200, 2.213	248.200, 2.016	248.200, 1.979
1243	248.400, 2.107	248.400, 1.970	248.400, 1.860	248.400, 4.392	248.400, 4.195	248.400, 3.893	248.400, 1.989	248.400, 1.885	248.400, 1.754	248.400, 1.741	248.400, 2.037	248.400, 1.861	248.400, 2.213	248.400, 2.016	248.400, 1.979
1244	248.600, 2.107	248.600, 1.970	248.600, 1.860	248.600, 4.392	248.600, 4.195	248.600, 3.892	248.600, 1.989	248.600, 1.885	248.600, 1.754	248.600, 1.741	248.600, 2.037	248.600, 1.861	248.600, 2.213	248.600, 2.016	248.600, 1.978
1245	248.800, 2.106	248.800, 1.969	248.800, 1.860	248.800, 4.392	248.800, 4.195	248.800, 3.892	248.800, 1.988	248.800, 1.885	248.800, 1.753	248.800, 1.741	248.800, 2.037	248.800, 1.861	248.800, 2.213	248.800, 2.016	248.800, 1.978
1246	249.000, 2.106	249.000, 1.969	249.000, 1.860	249.000, 4.392	249.000, 4.196	249.000, 3.892	249.000, 1.988	249.000, 1.885	249.000, 1.753	249.000, 1.741	249.000, 2.037	249.000, 1.861	249.000, 2.213	249.000, 2.016	249.000, 1.977
1247	249.200, 2.106	249.200, 1.969	249.200, 1.860	249.200, 4.392	249.200, 4.196	249.200, 3.892	249.200, 1.988	249.200, 1.885	249.200, 1.752	249.200, 1.741	249.200, 2.037	249.200, 1.861	249.200, 2.212	249.200, 2.016	249.200, 1.977
1248	249.400, 2.106	249.400, 1.969	249.400, 1.860	249.400, 4.392	249.400, 4.196	249.400, 3.892	249.400, 1.987	249.400, 1.885	249.400, 1.752	249.400, 1.741	249.400, 2.037	249.400, 1.861	249.400, 2.212	249.400, 2.015	249.400, 1.977
1249	249.600, 2.106	249.600, 1.968	249.600, 1.860	249.600, 4.392	249.600, 4.196	249.600, 3.892	249.600, 1.987	249.600, 1.885	249.600, 1.751	249.600, 1.741	249.600, 2.037	249.600, 1.861	249.600, 2.212	249.600, 2.015	249.600, 1.977
1250	249.800, 2.106	249.800, 1.968	249.800, 1.860	249.800, 4.393	249.800, 4.195	249.800, 3.892	249.800, 1.987	249.800, 1.885	249.800, 1.750	249.800, 1.741	249.800, 2.037	249.800, 1.861	249.800, 2.212	249.800, 2.015	249.800, 1.977
1251	250.000, 2.106	250.000, 1.967	250.000, 1.860	250.000, 4.393	250.000, 4.195	250.000, 3.892	250.000, 1.987	250.000, 1.884	250.000, 1.750	250.000, 1.741	250.000, 2.037	250.000, 1.860	250.000, 2.212	250.000, 2.015	250.000, 1.977
1252	250.200, 2.106	250.200, 1.967	250.200, 1.860	250.200, 4.393	250.200, 4.194	250.200, 3.892	250.200, 1.986	250.200, 1.884	250.200, 1.749	250.200, 1.741	250.200, 2.037	250.200, 1.860	250.200, 2.211	250.200, 2.014	250.200, 1.977
1253	250.400, 2.105	250.400, 1.967	250.400, 1.860	250.400, 4.393	250.400, 4.194	250.400, 3.892	250.400, 1.986	250.400, 1.884	250.400, 1.748	250.400, 1.740	250.400, 2.037	250.400, 1.860	250.400, 2.211	250.400, 2.014	250.400, 1.977
1254	250.600, 2.105	250.600, 1.967	250.600, 1.859	250.600, 4.393	250.600, 4.193	250.600, 3.891	250.600, 1.986	250.600, 1.883	250.600, 1.748	250.600, 1.740	250.600, 2.037	250.600, 1.860	250.600, 2.211	250.600, 2.014	250.600, 1.977
1255	250.800, 2.105	250.800, 1.966	250.800, 1.859	250.800, 4.393	250.800, 4.193	250.800, 3.891	250.800, 1.985	250.800, 1.883	250.800, 1.748	250.800, 1.740	250.800, 2.037	250.800, 1.859	250.800, 2.210	250.800, 2.014	250.800, 1.977
1256	251.000, 2.105	251.000, 1.966	251.000, 1.858	251.000, 4.394	251.000, 4.193	251.000, 3.890	251.000, 1.985	251.000, 1.883	251.000, 1.747	251.000, 1.739	251.000, 2.036	251.000, 1.859	251.000, 2.210	251.000, 2.014	251.000, 1.977
1257	251.200, 2.105	251.200, 1.966	251.200, 1.858	251.200, 4.394	251.200, 4.192	251.200, 3.890	251.200, 1.985	251.200, 1.882	251.200, 1.747	251.200, 1.739	251.200, 2.036	251.200, 1.859	251.200, 2.210	251.200, 2.014	251.200, 1.977
1258	251.400, 2.105	251.400, 1.966	251.400, 1.858	251.400, 4.394	251.400, 4.192	251.400, 3.890	251.400, 1.985	251.400, 1.882	251.400, 1.747	251.400, 1.739	251.400, 2.036	251.400, 1.858	251.400, 2.209	251.400, 2.014	251.400, 1.977
1259	251.600, 2.105	251.600, 1.966	251.600, 1.858	251.600, 4.394	251.600, 4.192	251.600, 3.890	251.600, 1.985	251.600, 1.881	251.600, 1.747	251.600, 1.738	251.600, 2.036	251.600, 1.858	251.600, 2.209	251.600, 2.014	251.600, 1.977
1260	251.800, 2.105	251.800, 1.966	251.800, 1.857	251.800, 4.394	251.800, 4.192	251.800, 3.889	251.800, 1.985	251.800, 1.881	251.800, 1.747	251.800, 1.738	251.800, 2.036	251.800, 1.858	251.800, 2.209	251.800, 2.014	251.800, 1.977
1261	252.000, 2.104	252.000, 1.966	252.000, 1.857	252.000, 4.394	252.000, 4.192	252.000, 3.889	252.000, 1.985	252.000, 1.881	252.000, 1.747	252.000, 1.738	252.000, 2.035	252.000, 1.857	252.000, 2.208	252.000, 2.014	252.000, 1.977
1262	252.200, 2.104	252.200, 1.966	252.200, 1.857	252.200, 4.394	252.200, 4.192	252.200, 3.889	252.200, 1.985	252.200, 1.880	252.200, 1.748	252.200, 1.738	252.200, 2.035	252.200, 1.857	252.200, 2.208	252.200, 2.014	252.200, 1.976
1263	252.400, 2.104	252.400, 1.966	252.400, 1.857	252.400, 4.394	252.400, 4.192	252.400, 3.889	252.400, 1.985	252.400, 1.880	252.400, 1.748	252.400, 1.738	252.400, 2.035	252.400, 1.856	252.400, 2.208	252.400, 2.014	252.400, 1.976
1264	252.600, 2.103	252.600, 1.966	252.600, 1.857	252.600, 4.393	252.600, 4.192	252.600, 3.888	252.600, 1.985	252.600, 1.880	252.600, 1.748	252.600, 1.738	252.600, 2.034	252.600, 1.856	252.600, 2.208	252.600, 2.013	252.600, 1.976
1265	252.800, 2.103	252.800, 1.966	252.800, 1.857	252.800, 4.393	252.800, 4.192	252.800, 3.888	252.800, 1.985	252.800, 1.879	252.800, 1.748	252.800, 1.738	252.800, 2.034	252.800, 1.856	252.800, 2.208	252.800, 2.013	252.800, 1.976
1266	253.000, 2.103	253.000, 1.965	253.000, 1.857	253.000, 4.393	253.000, 4.191	253.000, 3.888	253.000, 1.985	253.000, 1.879	253.000, 1.748	253.000, 1.738	253.000, 2.033	253.000, 1.856	253.000, 2.208	253.000, 2.013	253.000, 1.976
1267	253.200, 2.102	253.200, 1.965	253.200, 1.856	253.200, 4.393	253.200, 4.191	253.200, 3.889	253.200, 1.985	253.200, 1.879	253.200, 1.748	253.200, 1.738	253.200, 2.033	253.200, 1.856	253.200, 2.208	253.200, 2.013	253.200, 1.976
1268	253.400, 2.102	253.400, 1.965	253.400, 1.856	253.400, 4.392	253.400, 4.191	253.400, 3.889	253.400, 1.985	253.400, 1.879	253.400, 1.748	253.400, 1.738	253.400, 2.033	253.400, 1.856	253.400, 2.208	253.400, 2.012	253.400, 1.976
1269	253.600, 2.102	253.600, 1.965	253.600, 1.856	253.600, 4.392	253.600, 4.191	253.600, 3.889	253.600, 1.985	253.600, 1.879	253.600, 1.747	253.600, 1.738	253.600, 2.033	253.600, 1.856	253.600, 2.208	253.600, 2.012	253.600, 1.976
1270	253.800, 2.102	253.800, 1.964	253.800, 1.856	253.800, 4.392	253.800, 4.190	253.800, 3.889	253.800, 1.985	253.800, 1.879	253.800, 1.747	253.800, 1.739	253.800, 2.032	253.800, 1.856	253.800, 2.208	253.800, 2.012	253.800, 1.976
1271	254.000, 2.101	254.000, 1.964	254.000, 1.856	254.000, 4.391	254.000, 4.190	254.000, 3.889	254.000, 1.984	254.000, 1.878	254.000, 1.746	254.000, 1.739	254.000, 2.032	254.000, 1.856	254.000, 2.207	254.000, 2.012	254.000, 1.976
1272	254.200, 2.101	254.200, 1.964	254.200, 1.855	254.200, 4.391	254.200, 4.190	254.200, 3.889	254.200, 1.984	254.200, 1.878	254.200, 1.746	254.200, 1.739	254.200, 2.032	254.200, 1.856	254.200, 2.207	254.200, 2.011	254.200, 1.976
1273	254.400, 2.100	254.400, 1.963	254.400, 1.855	254.400, 4.391	254.400, 4.190	254.400, 3.889	254.400, 1.984	254.400, 1.878	254.400, 1.746	254.400, 1.738	254.400, 2.032	254.400, 1.855	254.400, 2.207	254.400, 2.011	254.400, 1.976
1274	254.600, 2.100	254.600, 1.963	254.600, 1.855	254.600, 4.390	254.600, 4.191	254.600, 3.888	254.600, 1.983	254.600, 1.878	254.600, 1.745	254.600, 1.738	254.600, 2.032	254.600, 1.855	254.600, 2.207	254.600, 2.011	254.600, 1.976
1275	254.800, 2.100	254.800, 1.963	254.800, 1.855	254.800, 4.390	254.800, 4.191	254.800, 3.888	254.800, 1.983	254.800, 1.878	254.800, 1.745	254.800, 1.738	254.800, 2.032	254.800, 1.855	254.800, 2.207	254.800, 2.011	254.800, 1.976
1276	255.000, 2.100	255.000, 1.963	255.000, 1.854	255.000, 4.390	255.000, 4.191	255.000, 3.888	255.000, 1.982	255.000, 1.878	255.000, 1.745	255.000, 1.737	255.000, 2.032	255.000, 1.855	255.000, 2.207	255.000, 2.011	255.000, 1.976
1277	255.200, 2.100	255.200, 1.962	255.200, 1.854	255.200, 4.390	255.200, 4.192	255.200, 3.888	255.200, 1.982	255.200, 1.877	255.200, 1.744	255.200, 1.737	255.200, 2.032	255.200, 1.854	255.200, 2.206	255.200, 2.011	255.200, 1.976
1278	255.400, 2.100	255.400, 1.962	255.400, 1.854	255.400, 4.390	255.400, 4.192	255.400, 3.888	255.400, 1.981	255.400, 1.877	255.400, 1.744	255.400, 1.736	255.400, 2.032	255.400, 1.854	255.400, 2.206	255.400, 2.010	255.400, 1.976
1279	255.600, 2.100	255.600, 1.962	255.600, 1.854	255.600, 4.389	255.600, 4.192	255.600, 3.889	255.600, 1.981	255.600, 1.877	255.600, 1.744	255.600, 1.736	255.600, 2.032	255.600, 1.854	255.600, 2.206	255.600, 2.010	255.600, 1.976
1280	255.800, 2.100	255.800, 1.962	255.800, 1.853	255.800, 4.389	255.800, 4.192	255.800, 3.889	255.800, 1.980	255.800, 1.877	255.800, 1.744	255.800, 1.736	255.800, 2.032	255.800, 1.854	255.800, 2.206	255.800, 2.010	255.800, 1.976
1281	256.000, 2.099	256.000, 1.962	256.000, 1.853	256.000, 4.389	256.000, 4.192	256.000, 3.889	256.000, 1.980	256.000, 1.877	256.000, 1.744	256.000, 1.735	256.000, 2.032	256.000, 1.854	256.000, 2.206	256.000, 2.010	256.000, 1.975
1282	256.200, 2.099	256.200, 1.962	256.200, 1.853	256.200, 4.389	256.200, 4.192	256.200, 3.889	256.200, 1.979	256.200, 1.877	256.200, 1.744	256.200, 1.735	256.200, 2.032	256.200, 1.854	256.200, 2.206	256.200, 2.009	256.200, 1.975
1283	256.400, 2.099	256.400, 1.962	256.400, 1.853	256.400, 4.390	256.400, 4.191	256.400, 3.889	256.400, 1.979	256.400, 1.877	256.400, 1.744	256.400, 1.735	256.400, 2.032	256.400, 1.854	256.400, 2.206	256.400, 2.009	256.400, 1.974
1284	256.600, 2.098	256.600, 1.962	256.600, 1.853	256.600, 4.390	256.600, 4.191	256.600, 3.889	256.600, 1.978	256.600, 1.877	256.600, 1.744	256.600, 1.735	256.600, 2.032	256.600, 1.854	256.600, 2.205	256.600, 2.009	256.600, 1.974
1285	256.800, 2.098	256.800, 1.962	256.800, 1.853	256.800, 4.390	256.800, 4.190	256.800, 3.889	256.800, 1.978	256.800, 1.876	256.800, 1.744	256.800, 1.735	256.800, 2.031	256.800, 1.854	256.800, 2.205	256.800, 2.009	256.800, 1.973
1286	257.000, 2.097	257.000, 1.962	257.000, 1.852	257.000, 4.390	257.000, 4.190	257.000, 3.889	257.000, 1.978	257.000, 1.876	257.000, 1.744	257.000, 1.735	257.000, 2.031	257.000, 1.854	257.000, 2.205	257.000, 2.009	257.000, 1.973
1287	257.200, 2.097	257.200, 1.962	257.200, 1.852	257.200, 4.390	257.200, 4.190	257.200, 3.889	257.200, 1.978	257.200, 1.876	257.200, 1.743	257.200, 1.735	257.200, 2.031	257.200, 1.854	257.200, 2.205	257.200, 2.009	257.200, 1.973
1288	257.400, 2.097	257.400, 1.961	257.400, 1.853	257.400, 4.390	257.400, 4.189	257.400, 3.889	257.400, 1.978	257.400, 1.876	257.400, 1.743	257.400, 1.735	257.400, 2.031	257.400, 1.854	257.400, 2.205	257.400, 2.008	257.400, 1.972
1289	257.600, 2.096	257.600, 1.961	257.600, 1.853	257.600, 4.390	257.600, 4.188	257.600, 3.889	257.600, 1.978	257.600, 1.876	257.600, 1.743	257.600, 1.736	257.600, 2.030	257.600, 1.853	257.600, 2.205	257.600, 2.008	257.600, 1.972
1290	257.800, 2.096	257.800, 1.960	257.800, 1.853	257.800, 4.390	257.800, 4.188	257.800, 3.888	257.800, 1.978	257.800, 1.876	257.800, 1.743	257.800, 1.736	257.800, 2.030	257.800, 1.853	257.800, 2.205	257.800, 2.008	257.800, 1.972
1291	258.000, 2.095	258.000, 1.960	258.000, 1.853	258.000, 4.390	258.000, 4.188	258.000, 3.888	258.000, 1.978	258.000, 1.875	258.000, 1.743	258.000, 1.736	258.000, 2.030	258.000, 1.853	258.000, 2.204	258.000, 2.008	258.000, 1.972
1292	258.200, 2.095	258.200, 1.960	258.200, 1.854	258.200, 4.389	258.200, 4.188	258.200, 3.888	258.200, 1.978	258.200, 1.875	258.200, 1.743	258.200, 1.736	258.200, 2.029	258.200, 1.852	258.200, 2.204	258.200, 2.008	258.200, 1.972
1293	258.400, 2.095	258.400, 1.959	258.400, 1.854	258.400, 4.389	258.400, 4.188	258.400, 3.888	258.400, 1.978	258.400, 1.874	258.400, 1.742	258.400, 1.736	258.400, 2.029	258.400, 1.852	258.400, 2.204	258.400, 2.008	258.400, 1.972
1294	258.600, 2.095	258.600, 1.959	258.600, 1.854	258.600, 4.388	258.600, 4.188	258.600, 3.887	258.600, 1.977	258.600, 1.874	258.600, 1.742	258.600, 1.735	258.600, 2.029	258.600, 1.852	258.600, 2.204	258.600, 2.008	258.600, 1.972
1295	258.800, 2.095	258.800, 1.959	258.800, 1.854	258.800, 4.388	258.800, 4.188	258.800, 3.887	258.800, 1.977	258.800, 1.873	258.800, 1.742	258.800, 1.735	258.800, 2.029	258.800, 1.852	258.800, 2.204	258.800, 2.008	258.800, 1.972
1296	259.000, 2.095	259.000, 1.958	259.000, 1.853	259.000, 4.387	259.000, 4.188	259.000, 3.887	259.000, 1.977	259.000, 1.873	259.000, 1.742	259.000, 1.735	259.000, 2.029	259.000, 1.852	259.000, 2.203	259.000, 2.008	259.000, 1.972
1297	259.200, 2.096	259.200, 1.958	259.200, 1.853	259.200, 4.387	259.200, 4.188	259.200, 3.887	259.200, 1.977	259.200, 1.872	259.200, 1.741	259.200, 1.735	259.200, 2.029	259.200, 1.852	259.200, 2.203	259.200, 2.008	259.200, 1.972
1298	259.400, 2.096	259.400, 1.958	259.400, 1.853	259.400, 4.387	259.400, 4.188	259.400, 3.887	259.400, 1.977	259.400, 1.872	259.400, 1.741	259.400, 1.735	259.400, 2.029	259.400, 1.852	259.400, 2.203	259.400, 2.008	259.400, 1.972
1299	259.600, 2.096	259.600, 1.958	259.600, 1.853	259.600, 4.386	259.600, 4.188	259.600, 3.887	259.600, 1.977	259.600, 1.872	259.600, 1.741	259.600, 1.735	259.600, 2.029	259.600, 1.852	259.600, 2.202	259.600, 2.007	259.600, 1.972
1300	259.800, 2.096	259.800, 1.958	259.800, 1.852	259.800, 4.386	259.800, 4.188	259.800, 3.887	259.800, 1.977	259.800, 1.872	259.800, 1.741	259.800, 1.734	259.800, 2.029	259.800, 1.852	259.800, 2.202	259.800, 2.007	259.800, 1.972
1301	260.000, 2.096	260.000, 1.958	260.000, 1.852	260.000, 4.386	260.000, 4.188	260.000, 3.886	260.000, 1.977	260.000, 1.872	260.000, 1.741	260.000, 1.734	260.000, 2.029	260.000, 1.852	260.000, 2.202	260.000, 2.007	260.000, 1.971
1302	260.200, 2.096	260.200, 1.957	260.200, 1.852	260.200, 4.386	260.200, 4.188	260.200, 3.886	260.200, 1.977	260.200, 1.872	260.200, 1.741	260.200, 1.734	260.200, 2.029	260.200, 1.852	260.200, 2.201	260.200, 2.007	260.200, 1.971
1303	260.400, 2.095	260.400, 1.957	260.400, 1.851	260.400, 4.385	260.400, 4.188	260.400, 3.886	260.400, 1.977	260.400, 1.872	260.400, 1.741	260.400, 1.733	260.400, 2.029	260.400, 1.852	260.400, 2.201	260.400, 2.007	260.400, 1.970
1304	260.600, 2.095	260.600, 1.957	260.600, 1.851	260.600, 4.385	260.600, 4.188	260.600, 3.885	260.600, 1.976	260.600, 1.872	260.600, 1.741	260.600, 1.733	260.600, 2.029	260.600, 1.852	260.600, 2.200	260.600, 2.007	260.600, 1.970
1305	260.800, 2.094	260.800, 1.957	260.800, 1.850	260.800, 4.386	260.800, 4.188	260.800, 3.885	260.800, 1.976	260.800, 1.872	260.800, 1.741	260.800, 1.733	260.800, 2.029	260.800, 1.852	260.800, 2.200	260.800, 2.007	260.800, 1.969
1306	261.000, 2.094	261.000, 1.956	261.000, 1.850	261.000, 4.386	261.000, 4.188	261.000, 3.885	261.000, 1.976	261.000, 1.872	261.000, 1.741	261.000, 1.732	261.000, 2.029	261.000, 1.852	261.000, 2.200	261.000, 2.007	261.000, 1.969
1307	261.200, 2.093	261.200, 1.956	261.200, 1.850	261.200, 4.386	261.200, 4.188	261.200, 3.885	261.200, 1.976	261.200, 1.872	261.200, 1.741	261.200, 1.732	261.200, 2.029	261.200, 1.852	261.200, 2.200	261.200, 2.007	261.200, 1.969
1308	261.400, 2.093	261.400, 1.956	261.400, 1.850	261.400, 4.386	261.400, 4.188	261.400, 3.885	261.400, 1.976	261.400, 1.872	261.400, 1.741	261.400, 1.732	261.400, 2.029	261.400, 1.852	261.400, 2.200	261.400, 2.006	261.400, 1.969
1309	261.600, 2.093	261.600, 1.956	261.600, 1.850	261.600, 4.386	261.600, 4.188	261.600, 3.885	261.600, 1.975	261.600, 1.872	261.600, 1.741	261.600, 1.732	261.600, 2.029	261.600, 1.852	261.600, 2.200	261.600, 2.006	261.600, 1.969
1310	261.800, 2.092	261.800, 1.956	261.800, 1.850	261.800, 4.386	261.800, 4.188	261.800, 3.885	261.800, 1.975	261.800, 1.872	261.800, 1.741	261.800, 1.732	261.800, 2.028	261.800, 1.852	261.800, 2.200	261.800, 2.006	261.800, 1.969
1311	262.000, 2.092	262.000, 1.956	262.000, 1.849	262.000, 4.387	262.000, 4.188	262.000, 3.885	262.000, 1.975	262.000, 1.872	262.000, 1.741	262.000, 1.732	262.000, 2.028	262.000, 1.852	262.000, 2.200	262.000, 2.006	262.000, 1.969
1312	262.200, 2.092	262.200, 1.957	262.200, 1.849	262.200, 4.387	262.200, 4.188	262.200, 3.885	262.200, 1.975	262.200, 1.871	262.200, 1.740	262.200, 1.732	262.200, 2.028	262.200, 1.852	262.200, 2.200	262.200, 2.006	262.200, 1.969
1313	262.400, 2.092	262.400, 1.957	262.400, 1.849	262.400, 4.387	262.400, 4.188	262.400, 3.885	262.400, 1.974	262.400, 1.871	262.400, 1.740	262.400, 1.732	262.400, 2.028	262.400, 1.852	262.400, 2.200	262.400, 2.006	262.400, 1.969
1314	262.600, 2.092	262.600, 1.957	262.600, 1.849	262.600, 4.387	262.600, 4.188	262.600, 3.885	262.600, 1.974	262.600, 1.870	262.600, 1.739	262.600, 1.732	262.600, 2.028	262.600, 1.851	262.600, 2.199	262.600, 2.005	262.600, 1.969
1315	262.800, 2.092	262.800, 1.957	262.800, 1.849	262.800, 4.387	262.800, 4.187	262.800, 3.885	262.800, 1.974	262.800, 1.870	262.800, 1.739	262.800, 1.732	262.800, 2.028	262.800, 1.851	262.800, 2.199	262.800, 2.005	262.800, 1.969
1316	263.000, 2.092	263.000, 1.957	263.000, 1.849	263.000, 4.386	263.000, 4.187	263.000, 3.885	263.000, 1.973	263.000, 1.869	263.000, 1.738	263.000, 1.731	263.000, 2.027	263.000, 1.851	263.000, 2.199	263.000, 2.005	263.000, 1.968
1317	263.200, 2.092	263.200, 1.957	263.200, 1.849	263.200, 4.386	263.200, 4.187	263.200, 3.885	263.200, 1.973	263.200, 1.869	263.200, 1.737	263.200, 1.731	263.200, 2.027	263.200, 1.850	263.200, 2.199	263.200, 2.005	263.200, 1.968
1318	263.400, 2.091	263.400, 1.956	263.400, 1.849	263.400, 4.386	263.400, 4.186	263.400, 3.885	263.400, 1.973	263.400, 1.869	263.400, 1.737	263.400, 1.731	263.400, 2.027	263.400, 1.850	263.400, 2.199	263.400, 2.005	263.400, 1.968
1319	263.600, 2.091	263.600, 1.956	263.600, 1.848	263.600, 4.385	263.600, 4.186	263.600, 3.885	263.600, 1.972	263.600, 1.869	263.600, 1.737	263.600, 1.731	263.600, 2.026	263.600, 1.850	263.600, 2.199	263.600, 2.005	263.600, 1.967
1320	263.800, 2.091	263.800, 1.956	263.800, 1.848	263.800, 4.385	263.800, 4.185	263.800, 3.884	263.800, 1.972	263.800, 1.869	263.800, 1.736	263.800, 1.731	263.800, 2.026	263.800, 1.849	263.800, 2.199	263.800, 2.004	263.800, 1.967
1321	264.000, 2.091	264.000, 1.956	264.000, 1.847	264.000, 4.384	264.000, 4.185	264.000, 3.884	264.000, 1.972	264.000, 1.869	264.000, 1.736	264.000, 1.731	264.000, 2.026	264.000, 1.849	264.000, 2.199	264.000, 2.004	264.000, 1.967
1322	264.200, 2.090	264.200, 1.956	264.200, 1.847	264.200, 4.384	264.200, 4.184	264.200, 3.884	264.200, 1.972	264.200, 1.868	264.200, 1.736	264.200, 1.731	264.200, 2.026	264.200, 1.849	264.200, 2.199	264.200, 2.004	264.200, 1.966
1323	264.400, 2.090	264.400, 1.956	264.400, 1.847	264.400, 4.384	264.400, 4.183	264.400, 3.883	264.400, 1.971	264.400, 1.868	264.400, 1.736	264.400, 1.731	264.400, 2.025	264.400, 1.849	264.400, 2.199	264.400, 2.004	264.400, 1.966
1324	264.600, 2.090	264.600, 1.956	264.600, 1.846	264.600, 4.384	264.600, 4.183	264.600, 3.883	264.600, 1.971	264.600, 1.867	264.600, 1.736	264.600, 1.731	264.600, 2.025	264.600, 1.849	264.600, 2.199	264.600, 2.003	264.600, 1.966
1325	264.800, 2.089	264.800, 1.956	264.800, 1.846	264.800, 4.384	264.800, 4.183	264.800, 3.883	264.800, 1.971	264.800, 1.867	264.800, 1.736	264.800, 1.731	264.800, 2.025	264.800, 1.849	264.800, 2.198	264.800, 2.003	264.800, 1.966
1326	265.000, 2.089	265.000, 1.955	265.000, 1.846	265.000, 4.384	265.000, 4.183	265.000, 3.882	265.000, 1.971	265.000, 1.867	265.000, 1.736	265.000, 1.731	265.000, 2.025	265.000, 1.849	265.000, 2.198	265.000, 2.003	265.000, 1.966
1327	265.200, 2.089	265.200, 1.955	265.200, 1.846	265.200, 4.384	265.200, 4.183	265.200, 3.882	265.200, 1.971	265.200, 1.866	265.200, 1.736	265.200, 1.731	265.200, 2.025	265.200, 1.849	265.200, 2.198	265.200, 2.002	265.200, 1.966
1328	265.400, 2.089	265.400, 1.955	265.400, 1.846	265.400, 4.384	265.400, 4.182	265.400, 3.882	265.400, 1.971	265.400, 1.866	265.400, 1.736	265.400, 1.731	265.400, 2.025	265.400, 1.849	265.400, 2.198	265.400, 2.002	265.400, 1.966
1329	265.600, 2.089	265.600, 1.955	265.600, 1.846	265.600, 4.384	265.600, 4.183	265.600, 3.882	265.600, 1.971	265.600, 1.866	265.600, 1.736	265.600, 1.731	265.600, 2.025	265.600, 1.849	265.600, 2.197	265.600, 2.002	265.600, 1.966
1330	265.800, 2.088	265.800, 1.955	265.800, 1.846	265.800, 4.384	265.800, 4.183	265.800, 3.881	265.800, 1.971	265.800, 1.866	265.800, 1.736	265.800, 1.731	265.800, 2.025	265.800, 1.849	265.800, 2.197	265.800, 2.002	265.800, 1.966
1331	266.000, 2.088	266.000, 1.954	266.000, 1.846	266.000, 4.384	266.000, 4.183	266.000, 3.881	266.000, 1.971	266.000, 1.866	266.000, 1.736	266.000, 1.731	266.000, 2.025	266.000, 1.848	266.000, 2.197	266.000, 2.002	266.000, 1.966
1332	266.200, 2.088	266.200, 1.954	266.200, 1.846	266.200, 4.384	266.200, 4.183	266.200, 3.881	266.200, 1.971	266.200, 1.866	266.200, 1.736	266.200, 1.731	266.200, 2.025	266.200, 1.848	266.200, 2.196	266.200, 2.002	266.200, 1.966
1333	266.400, 2.088	266.400, 1.954	266.400, 1.846	266.400, 4.383	266.400, 4.183	266.400, 3.881	266.400, 1.971	266.400, 1.867	266.400, 1.735	266.400, 1.730	266.400, 2.025	266.400, 1.848	266.400, 2.196	266.400, 2.003	266.400, 1.966
1334	266.600, 2.088	266.600, 1.953	266.600, 1.847	266.600, 4.383	266.600, 4.183	266.600, 3.881	266.600, 1.972	266.600, 1.867	266.600, 1.735	266.600, 1.730	266.600, 2.025	266.600, 1.848	266.600, 2.196	266.600, 2.003	266.600, 1.965
1335	266.800, 2.088	266.800, 1.953	266.800, 1.847	266.800, 4.383	266.800, 4.183	266.800, 3.881	266.800, 1.972	266.800, 1.867	266.800, 1.735	266.800, 1.730	266.800, 2.025	266.800, 1.848	266.800, 2.196	266.800, 2.003	266.800, 1.965
1336	,	,	,	,	,	,	,	,	,	,	,	,	,	,	,
1337	,	,	,	,	,	,	,	,	,	,	,	,	,	,	,
1338	,	,	,	,	,	,	,	,	,	,	,	,	,	,	,
1339	,	,	,	,	,	,	,	,	,	,	,	,	,	,	,
1340	,	,	,	,	,	,	,	,	,	,	,	,	,	,	,
1341	,	,	,	,	,	,	,	,	,	,	,	,	,	,	,
1342	,	,	,	,	,	,	,	,	,	,	,	,	,	,	,
1343	,	,	,	,	,	,	,	,	,	,	,	,	,	,	,
1344	,	,	,	,	,	,	,	,	,	,	,	,	,	,	,
1345	,	,	,	,	,	,	,	,	,	,	,	,	,	,	,
1346	,	,	,	,	,	,	,	,	,	,	,	,	,	,	,
1347	,	,	,	,	,	,	,	,	,	,	,	,	,	,	,
1348	,	,	,	,	,	,	,	,	,	,	,	,	,	,	,
1349	,	,	,	,	,	,	,	,	,	,	,	,	,	,	,
1350	,	,	,	,	,	,	,	,	,	,	,	,	,	,	,
1351	,	,	,	,	,	,	,	,	,	,	,	,	,	,	,
1352	,	,	,	,	,	,	,	,	,	,	,	,	,	,	,
1353	,	,	,	,	,	,	,	,	,	,	,	,	,	,	,
1354	,	,	,	,	,	,	,	,	,	,	,	,	,	,	,
1355	,	,	,	,	,	,	,	,	,	,	,	,	,	,	,
1356	,	,	,	,	,	,	,	,	,	,	,	,	,	,	,
1357	,	,	,	,	,	,	,	,	,	,	,	,	,	,	,
1358	,	,	,	,	,	,	,	,	,	,	,	,	,	,	,
1359	,	,	,	,	,	,	,	,	,	,	,	,	,	,	,
1360	,	,	,	,	,	,	,	,	,	,	,	,	,	,	,
1361	,	,	,	,	,	,	,	,	,	,	,	,	,	,	,
1362	,	,	,	,	,	,	,	,	,	,	,	,	,	,	,
1363	,	,	,	,	,	,	,	,	,	,	,	,	,	,	,
1364	,	,	,	,	,	,	,	,	,	,	,	,	,	,	,
1365	,	,	,	,	,	,	,	,	,	,	,	,	,	,	,
1366	,	,	,	,	,	,	,	,	,	,	,	,	,	,	,
1367	,	,	,	,	,	,	,	,	,	,	,	,	,	,	,
1368	,	,	,	,	,	,	,	,	,	,	,	,	,	,	,
1369	,	,	,	,	,	,	,	,	,	,	,	,	,	,	,
1370	,	,	,	,	,	,	,	,	,	,	,	,	,	,	,
1371	,	,	,	,	,	,	,	,	,	,	,	,	,	,	,
1372	,	,	,	,	,	,	,	,	,	,	,	,	,	,	,
1373	,	,	,	,	,	,	,	,	,	,	,	,	,	,	,
1374	,	,	,	,	,	,	,	,	,	,	,	,	,	,	,
1375	,	,	,	,	,	,	,	,	,	,	,	,	,	,	,
1376	,	,	,	,	,	,	,	,	,	,	,	,	,	,	,
1377	,	,	,	,	,	,	,	,	,	,	,	,	,	,	,
1378	,	,	,	,	,	,	,	,	,	,	,	,	,	,	,
1379	,	,	,	,	,	,	,	,	,	,	,	,	,	,	,
1380	,	,	,	,	,	,	,	,	,	,	,	,	,	,	,
1381	,	,	,	,	,	,	,	,	,	,	,	,	,	,	,
1382	,	,	,	,	,	,	,	,	,	,	,	,	,	,	,
1383	,	,	,	,	,	,	,	,	,	,	,	,	,	,	,
1384	,	,	,	,	,	,	,	,	,	,	,	,	,	,	,
1385	,	,	,	,	,	,	,	,	,	,	,	,	,	,	,
1386	,	,	,	,	,	,	,	,	,	,	,	,	,	,	,
1387	,	,	,	,	,	,	,	,	,	,	,	,	,	,	,
1388	,	,	,	,	,	,	,	,	,	,	,	,	,	,	,
1389	,	,	,	,	,	,	,	,	,	,	,	,	,	,	,
1390	,	,	,	,	,	,	,	,	,	,	,	,	,	,	,
1391	,	,	,	,	,	,	,	,	,	,	,	,	,	,	,
1392	,	,	,	,	,	,	,	,	,	,	,	,	,	,	,
1393	,	,	,	,	,	,	,	,	,	,	,	,	,	,	,
1394	,	,	,	,	,	,	,	,	,	,	,	,	,	,	,
1395	,	,	,	,	,	,	,	,	,	,	,	,	,	,	,
1396	,	,	,	,	,	,	,	,	,	,	,	,	,	,	,
1397	,	,	,	,	,	,	,	,	,	,	,	,	,	,	,
1398	,	,	,	,	,	,	,	,	,	,	,	,	,	,	,
1399	,	,	,	,	,	,	,	,	,	,	,	,	,	,	,
1400	,	,	,	,	,	,	,	,	,	,	,	,	,	,	,
1401	,	,	,	,	,	,	,	,	,	,	,	,	,	,	,
1402	,	,	,	,	,	,	,	,	,	,	,	,	,	,	,
1403	,	,	,	,	,	,	,	,	,	,	,	,	,	,	,
1404	,	,	,	,	,	,	,	,	,	,	,	,	,	,	,
1405	,	,	,	,	,	,	,	,	,	,	,	,	,	,	,
1406	,	,	,	,	,	,	,	,	,	,	,	,	,	,	,
1407	,	,	,	,	,	,	,	,	,	,	,	,	,	,	,
1408	,	,	,	,	,	,	,	,	,	,	,	,	,	,	,
1409	,	,	,	,	,	,	,	,	,	,	,	,	,	,	,
1410	,	,	,	,	,	,	,	,	,	,	,	,	,	,	,
1411	,	,	,	,	,	,	,	,	,	,	,	,	,	,	,
1412	,	,	,	,	,	,	,	,	,	,	,	,	,	,	,
1413	,	,	,	,	,	,	,	,	,	,	,	,	,	,	,
1414	,	,	,	,	,	,	,	,	,	,	,	,	,	,	,
1415	,	,	,	,	,	,	,	,	,	,	,	,	,	,	,
1416	,	,	,	,	,	,	,	,	,	,	,	,	,	,	,
1417	,	,	,	,	,	,	,	,	,	,	,	,	,	,	,
1418	,	,	,	,	,	,	,	,	,	,	,	,	,	,	,
1419	,	,	,	,	,	,	,	,	,	,	,	,	,	,	,
1420	,	,	,	,	,	,	,	,	,	,	,	,	,	,	,
1421	,	,	,	,	,	,	,	,	,	,	,	,	,	,	,
1422	,	,	,	,	,	,	,	,	,	,	,	,	,	,	,
1423	,	,	,	,	,	,	,	,	,	,	,	,	,	,	,
1424	,	,	,	,	,	,	,	,	,	,	,	,	,	,	,
1425	,	,	,	,	,	,	,	,	,	,	,	,	,	,	,
1426	,	,	,	,	,	,	,	,	,	,	,	,	,	,	,
1427	,	,	,	,	,	,	,	,	,	,	,	,	,	,	,
1428	,	,	,	,	,	,	,	,	,	,	,	,	,	,	,
1429	,	,	,	,	,	,	,	,	,	,	,	,	,	,	,
1430	,	,	,	,	,	,	,	,	,	,	,	,	,	,	,
1431	,	,	,	,	,	,	,	,	,	,	,	,	,	,	,
1432	,	,	,	,	,	,	,	,	,	,	,	,	,	,	,
1433	,	,	,	,	,	,	,	,	,	,	,	,	,	,	,
1434	,	,	,	,	,	,	,	,	,	,	,	,	,	,	,
1435	,	,	,	,	,	,	,	,	,	,	,	,	,	,	,
1436	,	,	,	,	,	,	,	,	,	,	,	,	,	,	,
1437	,	,	,	,	,	,	,	,	,	,	,	,	,	,	,
1438	,	,	,	,	,	,	,	,	,	,	,	,	,	,	,
1439	,	,	,	,	,	,	,	,	,	,	,	,	,	,	,
1440	,	,	,	,	,	,	,	,	,	,	,	,	,	,	,
1441	,	,	,	,	,	,	,	,	,	,	,	,	,	,	,
1442	,	,	,	,	,	,	,	,	,	,	,	,	,	,	,
1443	,	,	,	,	,	,	,	,	,	,	,	,	,	,	,
1444	,	,	,	,	,	,	,	,	,	,	,	,	,	,	,
1445	,	,	,	,	,	,	,	,	,	,	,	,	,	,	,
1446	,	,	,	,	,	,	,	,	,	,	,	,	,	,	,
1447	,	,	,	,	,	,	,	,	,	,	,	,	,	,	,
1448	,	,	,	,	,	,	,	,	,	,	,	,	,	,	,
1449	,	,	,	,	,	,	,	,	,	,	,	,	,	,	,
1450	,	,	,	,	,	,	,	,	,	,	,	,	,	,	,
1451	,	,	,	,	,	,	,	,	,	,	,	,	,	,	,
1452	,	,	,	,	,	,	,	,	,	,	,	,	,	,	,
1453	,	,	,	,	,	,	,	,	,	,	,	,	,	,	,
1454	,	,	,	,	,	,	,	,	,	,	,	,	,	,	,
1455	,	,	,	,	,	,	,	,	,	,	,	,	,	,	,
1456	,	,	,	,	,	,	,	,	,	,	,	,	,	,	,
1457	,	,	,	,	,	,	,	,	,	,	,	,	,	,	,
1458	,	,	,	,	,	,	,	,	,	,	,	,	,	,	,
1459	,	,	,	,	,	,	,	,	,	,	,	,	,	,	,
1460	,	,	,	,	,	,	,	,	,	,	,	,	,	,	,
1461	,	,	,	,	,	,	,	,	,	,	,	,	,	,	,
1462	,	,	,	,	,	,	,	,	,	,	,	,	,	,	,
1463	,	,	,	,	,	,	,	,	,	,	,	,	,	,	,
1464	,	,	,	,	,	,	,	,	,	,	,	,	,	,	,
1465	,	,	,	,	,	,	,	,	,	,	,	,	,	,	,
1466	,	,	,	,	,	,	,	,	,	,	,	,	,	,	,
1467	,	,	,	,	,	,	,	,	,	,	,	,	,	,	,
1468	,	,	,	,	,	,	,	,	,	,	,	,	,	,	,
1469	,	,	,	,	,	,	,	,	,	,	,	,	,	,	,
1470	,	,	,	,	,	,	,	,	,	,	,	,	,	,	,
1471	,	,	,	,	,	,	,	,	,	,	,	,	,	,	,
1472	,	,	,	,	,	,	,	,	,	,	,	,	,	,	,
1473	,	,	,	,	,	,	,	,	,	,	,	,	,	,	,
1474	,	,	,	,	,	,	,	,	,	,	,	,	,	,	,
1475	,	,	,	,	,	,	,	,	,	,	,	,	,	,	,
1476	,	,	,	,	,	,	,	,	,	,	,	,	,	,	,
1477	,	,	,	,	,	,	,	,	,	,	,	,	,	,	,
1478	,	,	,	,	,	,	,	,	,	,	,	,	,	,	,
1479	,	,	,	,	,	,	,	,	,	,	,	,	,	,	,
1480	,	,	,	,	,	,	,	,	,	,	,	,	,	,	,
1481	,	,	,	,	,	,	,	,	,	,	,	,	,	,	,
1482	,	,	,	,	,	,	,	,	,	,	,	,	,	,	,
1483	,	,	,	,	,	,	,	,	,	,	,	,	,	,	,
1484	,	,	,	,	,	,	,	,	,	,	,	,	,	,	,
1485	,	,	,	,	,	,	,	,	,	,	,	,	,	,	,
1486	,	,	,	,	,	,	,	,	,	,	,	,	,	,	,
1487	,	,	,	,	,	,	,	,	,	,	,	,	,	,	,
1488	,	,	,	,	,	,	,	,	,	,	,	,	,	,	,
1489	,	,	,	,	,	,	,	,	,	,	,	,	,	,	,
1490	,	,	,	,	,	,	,	,	,	,	,	,	,	,	,
1491	,	,	,	,	,	,	,	,	,	,	,	,	,	,	,
1492	,	,	,	,	,	,	,	,	,	,	,	,	,	,	,
1493	,	,	,	,	,	,	,	,	,	,	,	,	,	,	,
1494	,	,	,	,	,	,	,	,	,	,	,	,	,	,	,
1495	,	,	,	,	,	,	,	,	,	,	,	,	,	,	,
1496	,	,	,	,	,	,	,	,	,	,	,	,	,	,	,
1497	,	,	,	,	,	,	,	,	,	,	,	,	,	,	,
1498	,	,	,	,	,	,	,	,	,	,	,	,	,	,	,
1499	,	,	,	,	,	,	,	,	,	,	,	,	,	,	,
1500	,	,	,	,	,	,	,	,	,	,	,	,	,	,	,
1501	,	,	,	,	,	,	,	,	,	,	,	,	,	,	,
1502	,	,	,	,	,	,	,	,	,	,	,	,	,	,	,
1503	,	,	,	,	,	,	,	,	,	,	,	,	,	,	,
1504	,	,	,	,	,	,	,	,	,	,	,	,	,	,	,
1505	,	,	,	,	,	,	,	,	,	,	,	,	,	,	,
1506	,	,	,	,	,	,	,	,	,	,	,	,	,	,	,
1507	,	,	,	,	,	,	,	,	,	,	,	,	,	,	,
1508	,	,	,	,	,	,	,	,	,	,	,	,	,	,	,
1509	,	,	,	,	,	,	,	,	,	,	,	,	,	,	,
1510	,	,	,	,	,	,	,	,	,	,	,	,	,	,	,
1511	,	,	,	,	,	,	,	,	,	,	,	,	,	,	,
1512	,	,	,	,	,	,	,	,	,	,	,	,	,	,	,
1513	,	,	,	,	,	,	,	,	,	,	,	,	,	,	,
1514	,	,	,	,	,	,	,	,	,	,	,	,	,	,	,
1515	,	,	,	,	,	,	,	,	,	,	,	,	,	,	,
1516	,	,	,	,	,	,	,	,	,	,	,	,	,	,	,
1517	,	,	,	,	,	,	,	,	,	,	,	,	,	,	,
1518	,	,	,	,	,	,	,	,	,	,	,	,	,	,	,
1519	,	,	,	,	,	,	,	,	,	,	,	,	,	,	,
1520	,	,	,	,	,	,	,	,	,	,	,	,	,	,	,
1521	,	,	,	,	,	,	,	,	,	,	,	,	,	,	,
1522	,	,	,	,	,	,	,	,	,	,	,	,	,	,	,
1523	,	,	,	,	,	,	,	,	,	,	,	,	,	,	,
1524	,	,	,	,	,	,	,	,	,	,	,	,	,	,	,
1525	,	,	,	,	,	,	,	,	,	,	,	,	,	,	,
1526	,	,	,	,	,	,	,	,	,	,	,	,	,	,	,
1527	,	,	,	,	,	,	,	,	,	,	,	,	,	,	,
1528	,	,	,	,	,	,	,	,	,	,	,	,	,	,	,
1529	,	,	,	,	,	,	,	,	,	,	,	,	,	,	,
1530	,	,	,	,	,	,	,	,	,	,	,	,	,	,	,
1531	,	,	,	,	,	,	,	,	,	,	,	,	,	,	,
1532	,	,	,	,	,	,	,	,	,	,	,	,	,	,	,
1533	,	,	,	,	,	,	,	,	,	,	,	,	,	,	,
1534	,	,	,	,	,	,	,	,	,	,	,	,	,	,	,
1535	,	,	,	,	,	,	,	,	,	,	,	,	,	,	,
1536	,	,	,	,	,	,	,	,	,	,	,	,	,	,	,
1537	,	,	,	,	,	,	,	,	,	,	,	,	,	,	,
1538	,	,	,	,	,	,	,	,	,	,	,	,	,	,	,
1539	,	,	,	,	,	,	,	,	,	,	,	,	,	,	,
1540	,	,	,	,	,	,	,	,	,	,	,	,	,	,	,
1541	,	,	,	,	,	,	,	,	,	,	,	,	,	,	,
1542	,	,	,	,	,	,	,	,	,	,	,	,	,	,	,
1543	,	,	,	,	,	,	,	,	,	,	,	,	,	,	,
1544	,	,	,	,	,	,	,	,	,	,	,	,	,	,	,
1545	,	,	,	,	,	,	,	,	,	,	,	,	,	,	,
1546	,	,	,	,	,	,	,	,	,	,	,	,	,	,	,
1547	,	,	,	,	,	,	,	,	,	,	,	,	,	,	,
1548	,	,	,	,	,	,	,	,	,	,	,	,	,	,	,
1549	,	,	,	,	,	,	,	,	,	,	,	,	,	,	,
1550	,	,	,	,	,	,	,	,	,	,	,	,	,	,	,
1551	,	,	,	,	,	,	,	,	,	,	,	,	,	,	,
1552	,	,	,	,	,	,	,	,	,	,	,	,	,	,	,
1553	,	,	,	,	,	,	,	,	,	,	,	,	,	,	,
1554	,	,	,	,	,	,	,	,	,	,	,	,	,	,	,
1555	,	,	,	,	,	,	,	,	,	,	,	,	,	,	,
1556	,	,	,	,	,	,	,	,	,	,	,	,	,	,	,
1557	,	,	,	,	,	,	,	,	,	,	,	,	,	,	,
1558	,	,	,	,	,	,	,	,	,	,	,	,	,	,	,
1559	,	,	,	,	,	,	,	,	,	,	,	,	,	,	,
1560	,	,	,	,	,	,	,	,	,	,	,	,	,	,	,
1561	,	,	,	,	,	,	,	,	,	,	,	,	,	,	,
1562	,	,	,	,	,	,	,	,	,	,	,	,	,	,	,
1563	,	,	,	,	,	,	,	,	,	,	,	,	,	,	,
1564	,	,	,	,	,	,	,	,	,	,	,	,	,	,	,
1565	,	,	,	,	,	,	,	,	,	,	,	,	,	,	,
1566	,	,	,	,	,	,	,	,	,	,	,	,	,	,	,
1567	,	,	,	,	,	,	,	,	,	,	,	,	,	,	,
1568	,	,	,	,	,	,	,	,	,	,	,	,	,	,	,
1569	,	,	,	,	,	,	,	,	,	,	,	,	,	,	,
1570	,	,	,	,	,	,	,	,	,	,	,	,	,	,	,
1571	,	,	,	,	,	,	,	,	,	,	,	,	,	,	,
1572	,	,	,	,	,	,	,	,	,	,	,	,	,	,	,
1573	,	,	,	,	,	,	,	,	,	,	,	,	,	,	,
1574	,	,	,	,	,	,	,	,	,	,	,	,	,	,	,
1575	,	,	,	,	,	,	,	,	,	,	,	,	,	,	,
1576	,	,	,	,	,	,	,	,	,	,	,	,	,	,	,
1577	,	,	,	,	,	,	,	,	,	,	,	,	,	,	,
1578	,	,	,	,	,	,	,	,	,	,	,	,	,	,	,
1579	,	,	,	,	,	,	,	,	,	,	,	,	,	,	,
1580	,	,	,	,	,	,	,	,	,	,	,	,	,	,	,
1581	,	,	,	,	,	,	,	,	,	,	,	,	,	,	,
1582	,	,	,	,	,	,	,	,	,	,	,	,	,	,	,
1583	,	,	,	,	,	,	,	,	,	,	,	,	,	,	,
1584	,	,	,	,	,	,	,	,	,	,	,	,	,	,	,
1585	,	,	,	,	,	,	,	,	,	,	,	,	,	,	,
1586	,	,	,	,	,	,	,	,	,	,	,	,	,	,	,
1587	,	,	,	,	,	,	,	,	,	,	,	,	,	,	,
1588	,	,	,	,	,	,	,	,	,	,	,	,	,	,	,
1589	,	,	,	,	,	,	,	,	,	,	,	,	,	,	,
1590	,	,	,	,	,	,	,	,	,	,	,	,	,	,	,
1591	,	,	,	,	,	,	,	,	,	,	,	,	,	,	,
1592	,	,	,	,	,	,	,	,	,	,	,	,	,	,	,
1593	,	,	,	,	,	,	,	,	,	,	,	,	,	,	,
1594	,	,	,	,	,	,	,	,	,	,	,	,	,	,	,
1595	,	,	,	,	,	,	,	,	,	,	,	,	,	,	,
1596	,	,	,	,	,	,	,	,	,	,	,	,	,	,	,
1597	,	,	,	,	,	,	,	,	,	,	,	,	,	,	,
1598	,	,	,	,	,	,	,	,	,	,	,	,	,	,	,
1599	,	,	,	,	,	,	,	,	,	,	,	,	,	,	,
1600	,	,	,	,	,	,	,	,	,	,	,	,	,	,	,
1601	,	,	,	,	,	,	,	,	,	,	,	,	,	,	,
1602	,	,	,	,	,	,	,	,	,	,	,	,	,	,	,
1603	,	,	,	,	,	,	,	,	,	,	,	,	,	,	,
1604	,	,	,	,	,	,	,	,	,	,	,	,	,	,	,
1605	,	,	,	,	,	,	,	,	,	,	,	,	,	,	,
1606	,	,	,	,	,	,	,	,	,	,	,	,	,	,	,
1607	,	,	,	,	,	,	,	,	,	,	,	,	,	,	,
1608	,	,	,	,	,	,	,	,	,	,	,	,	,	,	,
1609	,	,	,	,	,	,	,	,	,	,	,	,	,	,	,
1610	,	,	,	,	,	,	,	,	,	,	,	,	,	,	,
1611	,	,	,	,	,	,	,	,	,	,	,	,	,	,	,
1612	,	,	,	,	,	,	,	,	,	,	,	,	,	,	,
1613	,	,	,	,	,	,	,	,	,	,	,	,	,	,	,
1614	,	,	,	,	,	,	,	,	,	,	,	,	,	,	,
1615	,	,	,	,	,	,	,	,	,	,	,	,	,	,	,
1616	,	,	,	,	,	,	,	,	,	,	,	,	,	,	,
1617	,	,	,	,	,	,	,	,	,	,	,	,	,	,	,
1618	,	,	,	,	,	,	,	,	,	,	,	,	,	,	,
1619	,	,	,	,	,	,	,	,	,	,	,	,	,	,	,
1620	,	,	,	,	,	,	,	,	,	,	,	,	,	,	,
1621	,	,	,	,	,	,	,	,	,	,	,	,	,	,	,
1622	,	,	,	,	,	,	,	,	,	,	,	,	,	,	,
1623	,	,	,	,	,	,	,	,	,	,	,	,	,	,	,
1624	,	,	,	,	,	,	,	,	,	,	,	,	,	,	,
1625	,	,	,	,	,	,	,	,	,	,	,	,	,	,	,
1626	,	,	,	,	,	,	,	,	,	,	,	,	,	,	,
1627	,	,	,	,	,	,	,	,	,	,	,	,	,	,	,
1628	,	,	,	,	,	,	,	,	,	,	,	,	,	,	,
1629	,	,	,	,	,	,	,	,	,	,	,	,	,	,	,
1630	,	,	,	,	,	,	,	,	,	,	,	,	,	,	,
1631	,	,	,	,	,	,	,	,	,	,	,	,	,	,	,
1632	,	,	,	,	,	,	,	,	,	,	,	,	,	,	,
1633	,	,	,	,	,	,	,	,	,	,	,	,	,	,	,
1634	,	,	,	,	,	,	,	,	,	,	,	,	,	,	,
1635	,	,	,	,	,	,	,	,	,	,	,	,	,	,	,
1636	,	,	,	,	,	,	,	,	,	,	,	,	,	,	,
1637	,	,	,	,	,	,	,	,	,	,	,	,	,	,	,
1638	,	,	,	,	,	,	,	,	,	,	,	,	,	,	,
1639	,	,	,	,	,	,	,	,	,	,	,	,	,	,	,
1640	,	,	,	,	,	,	,	,	,	,	,	,	,	,	,
1641	,	,	,	,	,	,	,	,	,	,	,	,	,	,	,
1642	,	,	,	,	,	,	,	,	,	,	,	,	,	,	,
1643	,	,	,	,	,	,	,	,	,	,	,	,	,	,	,
1644	,	,	,	,	,	,	,	,	,	,	,	,	,	,	,
1645	,	,	,	,	,	,	,	,	,	,	,	,	,	,	,
1646	,	,	,	,	,	,	,	,	,	,	,	,	,	,	,
1647	,	,	,	,	,	,	,	,	,	,	,	,	,	,	,
1648	,	,	,	,	,	,	,	,	,	,	,	,	,	,	,
1649	,	,	,	,	,	,	,	,	,	,	,	,	,	,	,
1650	,	,	,	,	,	,	,	,	,	,	,	,	,	,	,
1651	,	,	,	,	,	,	,	,	,	,	,	,	,	,	,
1652	,	,	,	,	,	,	,	,	,	,	,	,	,	,	,
1653	,	,	,	,	,	,	,	,	,	,	,	,	,	,	,
1654	,	,	,	,	,	,	,	,	,	,	,	,	,	,	,
1655	,	,	,	,	,	,	,	,	,	,	,	,	,	,	,
1656	,	,	,	,	,	,	,	,	,	,	,	,	,	,	,
1657	,	,	,	,	,	,	,	,	,	,	,	,	,	,	,
1658	,	,	,	,	,	,	,	,	,	,	,	,	,	,	,
1659	,	,	,	,	,	,	,	,	,	,	,	,	,	,	,
1660	,	,	,	,	,	,	,	,	,	,	,	,	,	,	,
1661	,	,	,	,	,	,	,	,	,	,	,	,	,	,	,
1662	,	,	,	,	,	,	,	,	,	,	,	,	,	,	,
1663	,	,	,	,	,	,	,	,	,	,	,	,	,	,	,
1664	,	,	,	,	,	,	,	,	,	,	,	,	,	,	,
1665	,	,	,	,	,	,	,	,	,	,	,	,	,	,	,
1666	,	,	,	,	,	,	,	,	,	,	,	,	,	,	,
1667	,	,	,	,	,	,	,	,	,	,	,	,	,	,	,
1668	,	,	,	,	,	,	,	,	,	,	,	,	,	,	,
1669	,	,	,	,	,	,	,	,	,	,	,	,	,	,	,
1670	,	,	,	,	,	,	,	,	,	,	,	,	,	,	,
1671	,	,	,	,	,	,	,	,	,	,	,	,	,	,	,
1672	,	,	,	,	,	,	,	,	,	,	,	,	,	,	,
1673	,	,	,	,	,	,	,	,	,	,	,	,	,	,	,
1674	,	,	,	,	,	,	,	,	,	,	,	,	,	,	,
1675	,	,	,	,	,	,	,	,	,	,	,	,	,	,	,
1676	,	,	,	,	,	,	,	,	,	,	,	,	,	,	,
1677	,	,	,	,	,	,	,	,	,	,	,	,	,	,	,
1678	,	,	,	,	,	,	,	,	,	,	,	,	,	,	,
1679	,	,	,	,	,	,	,	,	,	,	,	,	,	,	,
1680	,	,	,	,	,	,	,	,	,	,	,	,	,	,	,
1681	,	,	,	,	,	,	,	,	,	,	,	,	,	,	,
1682	,	,	,	,	,	,	,	,	,	,	,	,	,	,	,
1683	,	,	,	,	,	,	,	,	,	,	,	,	,	,	,
1684	,	,	,	,	,	,	,	,	,	,	,	,	,	,	,
1685	,	,	,	,	,	,	,	,	,	,	,	,	,	,	,
1686	,	,	,	,	,	,	,	,	,	,	,	,	,	,	,
1687	,	,	,	,	,	,	,	,	,	,	,	,	,	,	,
1688	,	,	,	,	,	,	,	,	,	,	,	,	,	,	,
1689	,	,	,	,	,	,	,	,	,	,	,	,	,	,	,
1690	,	,	,	,	,	,	,	,	,	,	,	,	,	,	,
1691	,	,	,	,	,	,	,	,	,	,	,	,	,	,	,
1692	,	,	,	,	,	,	,	,	,	,	,	,	,	,	,
1693	,	,	,	,	,	,	,	,	,	,	,	,	,	,	,
1694	,	,	,	,	,	,	,	,	,	,	,	,	,	,	,
1695	,	,	,	,	,	,	,	,	,	,	,	,	,	,	,
1696	,	,	,	,	,	,	,	,	,	,	,	,	,	,	,
1697	,	,	,	,	,	,	,	,	,	,	,	,	,	,	,
1698	,	,	,	,	,	,	,	,	,	,	,	,	,	,	,
1699	,	,	,	,	,	,	,	,	,	,	,	,	,	,	,
1700	,	,	,	,	,	,	,	,	,	,	,	,	,	,	,
1701	,	,	,	,	,	,	,	,	,	,	,	,	,	,	,
1702	,	,	,	,	,	,	,	,	,	,	,	,	,	,	,
1703	,	,	,	,	,	,	,	,	,	,	,	,	,	,	,
1704	,	,	,	,	,	,	,	,	,	,	,	,	,	,	,
1705	,	,	,	,	,	,	,	,	,	,	,	,	,	,	,
1706	,	,	,	,	,	,	,	,	,	,	,	,	,	,	,
1707	,	,	,	,	,	,	,	,	,	,	,	,	,	,	,
1708	,	,	,	,	,	,	,	,	,	,	,	,	,	,	,
1709	,	,	,	,	,	,	,	,	,	,	,	,	,	,	,
1710	,	,	,	,	,	,	,	,	,	,	,	,	,	,	,
1711	,	,	,	,	,	,	,	,	,	,	,	,	,	,	,
1712	,	,	,	,	,	,	,	,	,	,	,	,	,	,	,
1713	,	,	,	,	,	,	,	,	,	,	,	,	,	,	,
1714	,	,	,	,	,	,	,	,	,	,	,	,	,	,	,
1715	,	,	,	,	,	,	,	,	,	,	,	,	,	,	,
1716	,	,	,	,	,	,	,	,	,	,	,	,	,	,	,
1717	,	,	,	,	,	,	,	,	,	,	,	,	,	,	,
1718	,	,	,	,	,	,	,	,	,	,	,	,	,	,	,
1719	,	,	,	,	,	,	,	,	,	,	,	,	,	,	,
1720	,	,	,	,	,	,	,	,	,	,	,	,	,	,	,
1721	,	,	,	,	,	,	,	,	,	,	,	,	,	,	,
1722	,	,	,	,	,	,	,	,	,	,	,	,	,	,	,
1723	,	,	,	,	,	,	,	,	,	,	,	,	,	,	,
1724	,	,	,	,	,	,	,	,	,	,	,	,	,	,	,
1725	,	,	,	,	,	,	,	,	,	,	,	,	,	,	,
1726	,	,	,	,	,	,	,	,	,	,	,	,	,	,	,
1727	,	,	,	,	,	,	,	,	,	,	,	,	,	,	,
1728	,	,	,	,	,	,	,	,	,	,	,	,	,	,	,
1729	,	,	,	,	,	,	,	,	,	,	,	,	,	,	,
1730	,	,	,	,	,	,	,	,	,	,	,	,	,	,	,
1731	,	,	,	,	,	,	,	,	,	,	,	,	,	,	,
1732	,	,	,	,	,	,	,	,	,	,	,	,	,	,	,
1733	,	,	,	,	,	,	,	,	,	,	,	,	,	,	,
1734	,	,	,	,	,	,	,	,	,	,	,	,	,	,	,
1735	,	,	,	,	,	,	,	,	,	,	,	,	,	,	,
1736	,	,	,	,	,	,	,	,	,	,	,	,	,	,	,
1737	,	,	,	,	,	,	,	,	,	,	,	,	,	,	,
1738	,	,	,	,	,	,	,	,	,	,	,	,	,	,	,
1739	,	,	,	,	,	,	,	,	,	,	,	,	,	,	,
1740	,	,	,	,	,	,	,	,	,	,	,	,	,	,	,
1741	,	,	,	,	,	,	,	,	,	,	,	,	,	,	,
1742	,	,	,	,	,	,	,	,	,	,	,	,	,	,	,
1743	,	,	,	,	,	,	,	,	,	,	,	,	,	,	,
1744	,	,	,	,	,	,	,	,	,	,	,	,	,	,	,
1745	,	,	,	,	,	,	,	,	,	,	,	,	,	,	,
1746	,	,	,	,	,	,	,	,	,	,	,	,	,	,	,
1747	,	,	,	,	,	,	,	,	,	,	,	,	,	,	,
1748	,	,	,	,	,	,	,	,	,	,	,	,	,	,	,
1749	,	,	,	,	,	,	,	,	,	,	,	,	,	,	,
1750	,	,	,	,	,	,	,	,	,	,	,	,	,	,	,
1751	,	,	,	,	,	,	,	,	,	,	,	,	,	,	,
1752	,	,	,	,	,	,	,	,	,	,	,	,	,	,	,
1753	,	,	,	,	,	,	,	,	,	,	,	,	,	,	,
1754	,	,	,	,	,	,	,	,	,	,	,	,	,	,	,
1755	,	,	,	,	,	,	,	,	,	,	,	,	,	,	,
1756	,	,	,	,	,	,	,	,	,	,	,	,	,	,	,
1757	,	,	,	,	,	,	,	,	,	,	,	,	,	,	,
1758	,	,	,	,	,	,	,	,	,	,	,	,	,	,	,
1759	,	,	,	,	,	,	,	,	,	,	,	,	,	,	,
1760	,	,	,	,	,	,	,	,	,	,	,	,	,	,	,
1761	,	,	,	,	,	,	,	,	,	,	,	,	,	,	,
1762	,	,	,	,	,	,	,	,	,	,	,	,	,	,	,
1763	,	,	,	,	,	,	,	,	,	,	,	,	,	,	,
1764	,	,	,	,	,	,	,	,	,	,	,	,	,	,	,
1765	,	,	,	,	,	,	,	,	,	,	,	,	,	,	,
1766	,	,	,	,	,	,	,	,	,	,	,	,	,	,	,
1767	,	,	,	,	,	,	,	,	,	,	,	,	,	,	,
1768	,	,	,	,	,	,	,	,	,	,	,	,	,	,	,
1769	,	,	,	,	,	,	,	,	,	,	,	,	,	,	,
1770	,	,	,	,	,	,	,	,	,	,	,	,	,	,	,
1771	,	,	,	,	,	,	,	,	,	,	,	,	,	,	,
1772	,	,	,	,	,	,	,	,	,	,	,	,	,	,	,
1773	,	,	,	,	,	,	,	,	,	,	,	,	,	,	,
1774	,	,	,	,	,	,	,	,	,	,	,	,	,	,	,
1775	,	,	,	,	,	,	,	,	,	,	,	,	,	,	,
1776	,	,	,	,	,	,	,	,	,	,	,	,	,	,	,
1777	,	,	,	,	,	,	,	,	,	,	,	,	,	,	,
1778	,	,	,	,	,	,	,	,	,	,	,	,	,	,	,
1779	,	,	,	,	,	,	,	,	,	,	,	,	,	,	,
1780	,	,	,	,	,	,	,	,	,	,	,	,	,	,	,
1781	,	,	,	,	,	,	,	,	,	,	,	,	,	,	,
1782	,	,	,	,	,	,	,	,	,	,	,	,	,	,	,
1783	,	,	,	,	,	,	,	,	,	,	,	,	,	,	,
1784	,	,	,	,	,	,	,	,	,	,	,	,	,	,	,
1785	,	,	,	,	,	,	,	,	,	,	,	,	,	,	,
1786	,	,	,	,	,	,	,	,	,	,	,	,	,	,	,
1787	,	,	,	,	,	,	,	,	,	,	,	,	,	,	,
1788	,	,	,	,	,	,	,	,	,	,	,	,	,	,	,
1789	,	,	,	,	,	,	,	,	,	,	,	,	,	,	,
1790	,	,	,	,	,	,	,	,	,	,	,	,	,	,	,
1791	,	,	,	,	,	,	,	,	,	,	,	,	,	,	,
1792	,	,	,	,	,	,	,	,	,	,	,	,	,	,	,
1793	,	,	,	,	,	,	,	,	,	,	,	,	,	,	,
1794	,	,	,	,	,	,	,	,	,	,	,	,	,	,	,
1795	,	,	,	,	,	,	,	,	,	,	,	,	,	,	,
1796	,	,	,	,	,	,	,	,	,	,	,	,	,	,	,
1797	,	,	,	,	,	,	,	,	,	,	,	,	,	,	,
1798	,	,	,	,	,	,	,	,	,	,	,	,	,	,	,
1799	,	,	,	,	,	,	,	,	,	,	,	,	,	,	,
1800	,	,	,	,	,	,	,	,	,	,	,	,	,	,	,
1801	,	,	,	,	,	,	,	,	,	,	,	,	,	,	,
1802	,	,	,	,	,	,	,	,	,	,	,	,	,	,	,
1803	,	,	,	,	,	,	,	,	,	,	,	,	,	,	,
1804	,	,	,	,	,	,	,	,	,	,	,	,	,	,	,
1805	,	,	,	,	,	,	,	,	,	,	,	,	,	,	,
1806	,	,	,	,	,	,	,	,	,	,	,	,	,	,	,
1807	,	,	,	,	,	,	,	,	,	,	,	,	,	,	,
1808	,	,	,	,	,	,	,	,	,	,	,	,	,	,	,
1809	,	,	,	,	,	,	,	,	,	,	,	,	,	,	,
1810	,	,	,	,	,	,	,	,	,	,	,	,	,	,	,
1811	,	,	,	,	,	,	,	,	,	,	,	,	,	,	,
1812	,	,	,	,	,	,	,	,	,	,	,	,	,	,	,
1813	,	,	,	,	,	,	,	,	,	,	,	,	,	,	,
1814	,	,	,	,	,	,	,	,	,	,	,	,	,	,	,
1815	,	,	,	,	,	,	,	,	,	,	,	,	,	,	,
1816	,	,	,	,	,	,	,	,	,	,	,	,	,	,	,
1817	,	,	,	,	,	,	,	,	,	,	,	,	,	,	,
1818	,	,	,	,	,	,	,	,	,	,	,	,	,	,	,
1819	,	,	,	,	,	,	,	,	,	,	,	,	,	,	,
1820	,	,	,	,	,	,	,	,	,	,	,	,	,	,	,
1821	,	,	,	,	,	,	,	,	,	,	,	,	,	,	,
1822	,	,	,	,	,	,	,	,	,	,	,	,	,	,	,
1823	,	,	,	,	,	,	,	,	,	,	,	,	,	,	,
1824	,	,	,	,	,	,	,	,	,	,	,	,	,	,	,
1825	,	,	,	,	,	,	,	,	,	,	,	,	,	,	,
1826	,	,	,	,	,	,	,	,	,	,	,	,	,	,	,
1827	,	,	,	,	,	,	,	,	,	,	,	,	,	,	,
1828	,	,	,	,	,	,	,	,	,	,	,	,	,	,	,
1829	,	,	,	,	,	,	,	,	,	,	,	,	,	,	,
1830	,	,	,	,	,	,	,	,	,	,	,	,	,	,	,
1831	,	,	,	,	,	,	,	,	,	,	,	,	,	,	,
1832	,	,	,	,	,	,	,	,	,	,	,	,	,	,	,
1833	,	,	,	,	,	,	,	,	,	,	,	,	,	,	,
1834	,	,	,	,	,	,	,	,	,	,	,	,	,	,	,
1835	,	,	,	,	,	,	,	,	,	,	,	,	,	,	,
1836	,	,	,	,	,	,	,	,	,	,	,	,	,	,	,
1837	,	,	,	,	,	,	,	,	,	,	,	,	,	,	,
1838	,	,	,	,	,	,	,	,	,	,	,	,	,	,	,
1839	,	,	,	,	,	,	,	,	,	,	,	,	,	,	,
1840	,	,	,	,	,	,	,	,	,	,	,	,	,	,	,
1841	,	,	,	,	,	,	,	,	,	,	,	,	,	,	,
1842	,	,	,	,	,	,	,	,	,	,	,	,	,	,	,
1843	,	,	,	,	,	,	,	,	,	,	,	,	,	,	,
1844	,	,	,	,	,	,	,	,	,	,	,	,	,	,	,
1845	,	,	,	,	,	,	,	,	,	,	,	,	,	,	,
1846	,	,	,	,	,	,	,	,	,	,	,	,	,	,	,
1847	,	,	,	,	,	,	,	,	,	,	,	,	,	,	,
1848	,	,	,	,	,	,	,	,	,	,	,	,	,	,	,
1849	,	,	,	,	,	,	,	,	,	,	,	,	,	,	,
1850	,	,	,	,	,	,	,	,	,	,	,	,	,	,	,
1851	,	,	,	,	,	,	,	,	,	,	,	,	,	,	,
1852	,	,	,	,	,	,	,	,	,	,	,	,	,	,	,
1853	,	,	,	,	,	,	,	,	,	,	,	,	,	,	,
1854	,	,	,	,	,	,	,	,	,	,	,	,	,	,	,
1855	,	,	,	,	,	,	,	,	,	,	,	,	,	,	,
1856	,	,	,	,	,	,	,	,	,	,	,	,	,	,	,
1857	,	,	,	,	,	,	,	,	,	,	,	,	,	,	,
1858	,	,	,	,	,	,	,	,	,	,	,	,	,	,	,
1859	,	,	,	,	,	,	,	,	,	,	,	,	,	,	,
1860	,	,	,	,	,	,	,	,	,	,	,	,	,	,	,
1861	,	,	,	,	,	,	,	,	,	,	,	,	,	,	,
1862	,	,	,	,	,	,	,	,	,	,	,	,	,	,	,
1863	,	,	,	,	,	,	,	,	,	,	,	,	,	,	,
1864	,	,	,	,	,	,	,	,	,	,	,	,	,	,	,
1865	,	,	,	,	,	,	,	,	,	,	,	,	,	,	,
1866	,	,	,	,	,	,	,	,	,	,	,	,	,	,	,
1867	,	,	,	,	,	,	,	,	,	,	,	,	,	,	,
1868	,	,	,	,	,	,	,	,	,	,	,	,	,	,	,
1869	,	,	,	,	,	,	,	,	,	,	,	,	,	,	,
1870	,	,	,	,	,	,	,	,	,	,	,	,	,	,	,
1871	,	,	,	,	,	,	,	,	,	,	,	,	,	,	,
1872	,	,	,	,	,	,	,	,	,	,	,	,	,	,	,
1873	,	,	,	,	,	,	,	,	,	,	,	,	,	,	,
1874	,	,	,	,	,	,	,	,	,	,	,	,	,	,	,
1875	,	,	,	,	,	,	,	,	,	,	,	,	,	,	,
1876	,	,	,	,	,	,	,	,	,	,	,	,	,	,	,
1877	,	,	,	,	,	,	,	,	,	,	,	,	,	,	,
1878	,	,	,	,	,	,	,	,	,	,	,	,	,	,	,
1879	,	,	,	,	,	,	,	,	,	,	,	,	,	,	,
1880	,	,	,	,	,	,	,	,	,	,	,	,	,	,	,
1881	,	,	,	,	,	,	,	,	,	,	,	,	,	,	,
1882	,	,	,	,	,	,	,	,	,	,	,	,	,	,	,
1883	,	,	,	,	,	,	,	,	,	,	,	,	,	,	,
1884	,	,	,	,	,	,	,	,	,	,	,	,	,	,	,
1885	,	,	,	,	,	,	,	,	,	,	,	,	,	,	,
1886	,	,	,	,	,	,	,	,	,	,	,	,	,	,	,
1887	,	,	,	,	,	,	,	,	,	,	,	,	,	,	,
1888	,	,	,	,	,	,	,	,	,	,	,	,	,	,	,
1889	,	,	,	,	,	,	,	,	,	,	,	,	,	,	,
1890	,	,	,	,	,	,	,	,	,	,	,	,	,	,	,
1891	,	,	,	,	,	,	,	,	,	,	,	,	,	,	,
1892	,	,	,	,	,	,	,	,	,	,	,	,	,	,	,
1893	,	,	,	,	,	,	,	,	,	,	,	,	,	,	,
1894	,	,	,	,	,	,	,	,	,	,	,	,	,	,	,
1895	,	,	,	,	,	,	,	,	,	,	,	,	,	,	,
1896	,	,	,	,	,	,	,	,	,	,	,	,	,	,	,
1897	,	,	,	,	,	,	,	,	,	,	,	,	,	,	,
1898	,	,	,	,	,	,	,	,	,	,	,	,	,	,	,
1899	,	,	,	,	,	,	,	,	,	,	,	,	,	,	,
1900	,	,	,	,	,	,	,	,	,	,	,	,	,	,	,
1901	,	,	,	,	,	,	,	,	,	,	,	,	,	,	,
1902	,	,	,	,	,	,	,	,	,	,	,	,	,	,	,
1903	,	,	,	,	,	,	,	,	,	,	,	,	,	,	,
1904	,	,	,	,	,	,	,	,	,	,	,	,	,	,	,
1905	,	,	,	,	,	,	,	,	,	,	,	,	,	,	,
1906	,	,	,	,	,	,	,	,	,	,	,	,	,	,	,
1907	,	,	,	,	,	,	,	,	,	,	,	,	,	,	,
1908	,	,	,	,	,	,	,	,	,	,	,	,	,	,	,
1909	,	,	,	,	,	,	,	,	,	,	,	,	,	,	,
1910	,	,	,	,	,	,	,	,	,	,	,	,	,	,	,
1911	,	,	,	,	,	,	,	,	,	,	,	,	,	,	,
1912	,	,	,	,	,	,	,	,	,	,	,	,	,	,	,
1913	,	,	,	,	,	,	,	,	,	,	,	,	,	,	,
1914	,	,	,	,	,	,	,	,	,	,	,	,	,	,	,
1915	,	,	,	,	,	,	,	,	,	,	,	,	,	,	,
1916	,	,	,	,	,	,	,	,	,	,	,	,	,	,	,
1917	,	,	,	,	,	,	,	,	,	,	,	,	,	,	,
1918	,	,	,	,	,	,	,	,	,	,	,	,	,	,	,
1919	,	,	,	,	,	,	,	,	,	,	,	,	,	,	,
1920	,	,	,	,	,	,	,	,	,	,	,	,	,	,	,
1921	,	,	,	,	,	,	,	,	,	,	,	,	,	,	,
1922	,	,	,	,	,	,	,	,	,	,	,	,	,	,	,
1923	,	,	,	,	,	,	,	,	,	,	,	,	,	,	,
1924	,	,	,	,	,	,	,	,	,	,	,	,	,	,	,
1925	,	,	,	,	,	,	,	,	,	,	,	,	,	,	,
1926	,	,	,	,	,	,	,	,	,	,	,	,	,	,	,
1927	,	,	,	,	,	,	,	,	,	,	,	,	,	,	,
1928	,	,	,	,	,	,	,	,	,	,	,	,	,	,	,
1929	,	,	,	,	,	,	,	,	,	,	,	,	,	,	,
1930	,	,	,	,	,	,	,	,	,	,	,	,	,	,	,
1931	,	,	,	,	,	,	,	,	,	,	,	,	,	,	,
1932	,	,	,	,	,	,	,	,	,	,	,	,	,	,	,
1933	,	,	,	,	,	,	,	,	,	,	,	,	,	,	,
1934	,	,	,	,	,	,	,	,	,	,	,	,	,	,	,
1935	,	,	,	,	,	,	,	,	,	,	,	,	,	,	,
1936	,	,	,	,	,	,	,	,	,	,	,	,	,	,	,
1937	,	,	,	,	,	,	,	,	,	,	,	,	,	,	,
1938	,	,	,	,	,	,	,	,	,	,	,	,	,	,	,
1939	,	,	,	,	,	,	,	,	,	,	,	,	,	,	,
1940	,	,	,	,	,	,	,	,	,	,	,	,	,	,	,
1941	,	,	,	,	,	,	,	,	,	,	,	,	,	,	,
1942	,	,	,	,	,	,	,	,	,	,	,	,	,	,	,
1943	,	,	,	,	,	,	,	,	,	,	,	,	,	,	,
1944	,	,	,	,	,	,	,	,	,	,	,	,	,	,	,
1945	,	,	,	,	,	,	,	,	,	,	,	,	,	,	,
1946	,	,	,	,	,	,	,	,	,	,	,	,	,	,	,
1947	,	,	,	,	,	,	,	,	,	,	,	,	,	,	,
1948	,	,	,	,	,	,	,	,	,	,	,	,	,	,	,
1949	,	,	,	,	,	,	,	,	,	,	,	,	,	,	,
1950	,	,	,	,	,	,	,	,	,	,	,	,	,	,	,
1951	,	,	,	,	,	,	,	,	,	,	,	,	,	,	,
1952	,	,	,	,	,	,	,	,	,	,	,	,	,	,	,
1953	,	,	,	,	,	,	,	,	,	,	,	,	,	,	,
1954	,	,	,	,	,	,	,	,	,	,	,	,	,	,	,
1955	,	,	,	,	,	,	,	,	,	,	,	,	,	,	,
1956	,	,	,	,	,	,	,	,	,	,	,	,	,	,	,
1957	,	,	,	,	,	,	,	,	,	,	,	,	,	,	,
1958	,	,	,	,	,	,	,	,	,	,	,	,	,	,	,
1959	,	,	,	,	,	,	,	,	,	,	,	,	,	,	,
1960	,	,	,	,	,	,	,	,	,	,	,	,	,	,	,
1961	,	,	,	,	,	,	,	,	,	,	,	,	,	,	,
1962	,	,	,	,	,	,	,	,	,	,	,	,	,	,	,
1963	,	,	,	,	,	,	,	,	,	,	,	,	,	,	,
1964	,	,	,	,	,	,	,	,	,	,	,	,	,	,	,
1965	,	,	,	,	,	,	,	,	,	,	,	,	,	,	,
1966	,	,	,	,	,	,	,	,	,	,	,	,	,	,	,
1967	,	,	,	,	,	,	,	,	,	,	,	,	,	,	,
1968	,	,	,	,	,	,	,	,	,	,	,	,	,	,	,
1969	,	,	,	,	,	,	,	,	,	,	,	,	,	,	,
1970	,	,	,	,	,	,	,	,	,	,	,	,	,	,	,
1971	,	,	,	,	,	,	,	,	,	,	,	,	,	,	,
1972	,	,	,	,	,	,	,	,	,	,	,	,	,	,	,
1973	,	,	,	,	,	,	,	,	,	,	,	,	,	,	,
1974	,	,	,	,	,	,	,	,	,	,	,	,	,	,	,
1975	,	,	,	,	,	,	,	,	,	,	,	,	,	,	,
1976	,	,	,	,	,	,	,	,	,	,	,	,	,	,	,
1977	,	,	,	,	,	,	,	,	,	,	,	,	,	,	,
1978	,	,	,	,	,	,	,	,	,	,	,	,	,	,	,
1979	,	,	,	,	,	,	,	,	,	,	,	,	,	,	,
1980	,	,	,	,	,	,	,	,	,	,	,	,	,	,	,
1981	,	,	,	,	,	,	,	,	,	,	,	,	,	,	,
1982	,	,	,	,	,	,	,	,	,	,	,	,	,	,	,
1983	,	,	,	,	,	,	,	,	,	,	,	,	,	,	,
1984	,	,	,	,	,	,	,	,	,	,	,	,	,	,	,
1985	,	,	,	,	,	,	,	,	,	,	,	,	,	,	,
1986	,	,	,	,	,	,	,	,	,	,	,	,	,	,	,
1987	,	,	,	,	,	,	,	,	,	,	,	,	,	,	,
1988	,	,	,	,	,	,	,	,	,	,	,	,	,	,	,
1989	,	,	,	,	,	,	,	,	,	,	,	,	,	,	,
1990	,	,	,	,	,	,	,	,	,	,	,	,	,	,	,
1991	,	,	,	,	,	,	,	,	,	,	,	,	,	,	,
1992	,	,	,	,	,	,	,	,	,	,	,	,	,	,	,
1993	,	,	,	,	,	,	,	,	,	,	,	,	,	,	,
1994	,	,	,	,	,	,	,	,	,	,	,	,	,	,	,
1995	,	,	,	,	,	,	,	,	,	,	,	,	,	,	,
1996	,	,	,	,	,	,	,	,	,	,	,	,	,	,	,
1997	,	,	,	,	,	,	,	,	,	,	,	,	,	,	,
1998	,	,	,	,	,	,	,	,	,	,	,	,	,	,	,
1999	,	,	,	,	,	,	,	,	,	,	,	,	,	,	,
[truncated: 13,001 more rows]
