# Supplementary material for: ParB spreading on DNA requires cytidine triphosphate in vitro
Source: eLife journal article supplement (doi:10.7554/elife.53515), 2020-02-20
Supplement: fig2-figsupp3-data1 [file Fig2_supp3_Xanthomonas_ParB_rep1_2_3.xlsx]

## Sheet: FORMAT
	sample ID #1	sample ID #2	sample ID #3
data point	time point (sec), wavelength shift (nm)	time point (sec), wavelength shift (nm)	time point (sec), wavelength shift (nm)
1
2
3
.
.
.

## Sheet: Fig2_supp3_Xanthomonas_B_123
	169bp closed parS DNA and Xanthomonas ParB	169bp closed parS DNA and Xanthomonas ParB 1mM ATP	169bp closed parS DNA and Xanthomonas ParB 1mM GTP	169bp closed parS DNA and Xanthomonas ParB 1mM UTP	169bp closed parS DNA and Xanthomonas ParB	169bp closed parS DNA and Xanthomonas ParB 1mM ATP	169bp closed parS DNA and Xanthomonas ParB 1mM GTP	169bp closed parS DNA and Xanthomonas ParB 1mM UTP	169bp closed parS DNA and Xanthomonas ParB	169bp closed parS DNA and Xanthomonas ParB 1mM ATP	169bp closed parS DNA and Xanthomonas ParB 1mM GTP	169bp closed parS DNA and Xanthomonas ParB 1mM UTP	169bp closed parS DNA and Xanthomonas ParB 0.01mM CTP	169bp closed parS DNA and Xanthomonas ParB 0.01mM CTP	169bp closed parS DNA and Xanthomonas ParB 0.01mM CTP
1	0.000, -0.012	0.000, -0.001	0.000, -0.003	0.000, -0.005	0.000, -0.016	0.000, -0.030	0.000, -0.030	0.000, -0.020	0.000, -0.027	0.000, -0.023	0.000, -0.026	0.000, -0.022	0.000, -0.028	0.000, -0.036	0.000, -0.029
2	0.200, -0.012	0.200, -0.002	0.200, -0.003	0.200, -0.005	0.200, -0.018	0.200, -0.030	0.200, -0.030	0.200, -0.021	0.200, -0.027	0.200, -0.024	0.200, -0.027	0.200, -0.023	0.200, -0.028	0.200, -0.035	0.200, -0.030
3	0.400, -0.012	0.400, -0.002	0.400, -0.003	0.400, -0.005	0.400, -0.019	0.400, -0.029	0.400, -0.030	0.400, -0.022	0.400, -0.027	0.400, -0.025	0.400, -0.028	0.400, -0.023	0.400, -0.029	0.400, -0.034	0.400, -0.030
4	0.600, -0.012	0.600, -0.003	0.600, -0.002	0.600, -0.005	0.600, -0.021	0.600, -0.029	0.600, -0.031	0.600, -0.022	0.600, -0.026	0.600, -0.025	0.600, -0.028	0.600, -0.023	0.600, -0.029	0.600, -0.034	0.600, -0.030
5	0.800, -0.012	0.800, -0.004	0.800, -0.002	0.800, -0.005	0.800, -0.022	0.800, -0.028	0.800, -0.031	0.800, -0.022	0.800, -0.026	0.800, -0.026	0.800, -0.029	0.800, -0.024	0.800, -0.029	0.800, -0.033	0.800, -0.030
6	1.000, -0.012	1.000, -0.004	1.000, -0.002	1.000, -0.004	1.000, -0.024	1.000, -0.028	1.000, -0.032	1.000, -0.023	1.000, -0.025	1.000, -0.026	1.000, -0.029	1.000, -0.024	1.000, -0.030	1.000, -0.032	1.000, -0.030
7	1.200, -0.011	1.200, -0.005	1.200, -0.002	1.200, -0.004	1.200, -0.025	1.200, -0.027	1.200, -0.032	1.200, -0.023	1.200, -0.024	1.200, -0.027	1.200, -0.029	1.200, -0.024	1.200, -0.030	1.200, -0.031	1.200, -0.030
8	1.400, -0.011	1.400, -0.005	1.400, -0.002	1.400, -0.004	1.400, -0.027	1.400, -0.026	1.400, -0.032	1.400, -0.023	1.400, -0.023	1.400, -0.027	1.400, -0.029	1.400, -0.024	1.400, -0.030	1.400, -0.030	1.400, -0.029
9	1.600, -0.011	1.600, -0.006	1.600, -0.002	1.600, -0.004	1.600, -0.028	1.600, -0.026	1.600, -0.032	1.600, -0.023	1.600, -0.022	1.600, -0.027	1.600, -0.029	1.600, -0.024	1.600, -0.029	1.600, -0.029	1.600, -0.029
10	1.800, -0.010	1.800, -0.006	1.800, -0.002	1.800, -0.004	1.800, -0.028	1.800, -0.026	1.800, -0.032	1.800, -0.023	1.800, -0.021	1.800, -0.027	1.800, -0.029	1.800, -0.024	1.800, -0.029	1.800, -0.028	1.800, -0.028
11	2.000, -0.010	2.000, -0.006	2.000, -0.003	2.000, -0.004	2.000, -0.029	2.000, -0.025	2.000, -0.032	2.000, -0.022	2.000, -0.021	2.000, -0.027	2.000, -0.028	2.000, -0.024	2.000, -0.028	2.000, -0.027	2.000, -0.028
12	2.200, -0.010	2.200, -0.006	2.200, -0.003	2.200, -0.004	2.200, -0.029	2.200, -0.025	2.200, -0.031	2.200, -0.021	2.200, -0.020	2.200, -0.026	2.200, -0.028	2.200, -0.023	2.200, -0.028	2.200, -0.027	2.200, -0.027
13	2.400, -0.009	2.400, -0.006	2.400, -0.003	2.400, -0.004	2.400, -0.029	2.400, -0.025	2.400, -0.031	2.400, -0.021	2.400, -0.020	2.400, -0.026	2.400, -0.027	2.400, -0.023	2.400, -0.027	2.400, -0.026	2.400, -0.027
14	2.600, -0.009	2.600, -0.006	2.600, -0.003	2.600, -0.004	2.600, -0.029	2.600, -0.024	2.600, -0.030	2.600, -0.020	2.600, -0.020	2.600, -0.025	2.600, -0.027	2.600, -0.023	2.600, -0.027	2.600, -0.025	2.600, -0.026
15	2.800, -0.008	2.800, -0.006	2.800, -0.003	2.800, -0.004	2.800, -0.029	2.800, -0.023	2.800, -0.030	2.800, -0.020	2.800, -0.019	2.800, -0.025	2.800, -0.026	2.800, -0.023	2.800, -0.026	2.800, -0.025	2.800, -0.026
16	3.000, -0.008	3.000, -0.006	3.000, -0.003	3.000, -0.004	3.000, -0.029	3.000, -0.023	3.000, -0.029	3.000, -0.020	3.000, -0.019	3.000, -0.024	3.000, -0.026	3.000, -0.023	3.000, -0.026	3.000, -0.024	3.000, -0.025
17	3.200, -0.008	3.200, -0.006	3.200, -0.003	3.200, -0.004	3.200, -0.029	3.200, -0.022	3.200, -0.029	3.200, -0.020	3.200, -0.019	3.200, -0.024	3.200, -0.025	3.200, -0.022	3.200, -0.025	3.200, -0.023	3.200, -0.025
18	3.400, -0.008	3.400, -0.006	3.400, -0.002	3.400, -0.004	3.400, -0.029	3.400, -0.022	3.400, -0.028	3.400, -0.019	3.400, -0.018	3.400, -0.023	3.400, -0.025	3.400, -0.022	3.400, -0.025	3.400, -0.023	3.400, -0.025
19	3.600, -0.008	3.600, -0.006	3.600, -0.002	3.600, -0.004	3.600, -0.029	3.600, -0.022	3.600, -0.027	3.600, -0.019	3.600, -0.018	3.600, -0.023	3.600, -0.025	3.600, -0.022	3.600, -0.024	3.600, -0.022	3.600, -0.025
20	3.800, -0.008	3.800, -0.005	3.800, -0.002	3.800, -0.004	3.800, -0.029	3.800, -0.021	3.800, -0.027	3.800, -0.019	3.800, -0.018	3.800, -0.022	3.800, -0.024	3.800, -0.022	3.800, -0.023	3.800, -0.022	3.800, -0.024
21	4.000, -0.008	4.000, -0.005	4.000, -0.002	4.000, -0.005	4.000, -0.029	4.000, -0.021	4.000, -0.026	4.000, -0.019	4.000, -0.018	4.000, -0.022	4.000, -0.024	4.000, -0.021	4.000, -0.023	4.000, -0.021	4.000, -0.024
22	4.200, -0.008	4.200, -0.005	4.200, -0.001	4.200, -0.005	4.200, -0.029	4.200, -0.021	4.200, -0.026	4.200, -0.019	4.200, -0.018	4.200, -0.021	4.200, -0.023	4.200, -0.021	4.200, -0.022	4.200, -0.021	4.200, -0.024
23	4.400, -0.008	4.400, -0.005	4.400, -0.001	4.400, -0.005	4.400, -0.029	4.400, -0.020	4.400, -0.025	4.400, -0.019	4.400, -0.017	4.400, -0.021	4.400, -0.022	4.400, -0.021	4.400, -0.022	4.400, -0.021	4.400, -0.024
24	4.600, -0.008	4.600, -0.004	4.600, -0.001	4.600, -0.005	4.600, -0.029	4.600, -0.020	4.600, -0.024	4.600, -0.019	4.600, -0.017	4.600, -0.020	4.600, -0.022	4.600, -0.020	4.600, -0.021	4.600, -0.020	4.600, -0.023
25	4.800, -0.008	4.800, -0.004	4.800, -0.001	4.800, -0.005	4.800, -0.029	4.800, -0.019	4.800, -0.024	4.800, -0.019	4.800, -0.017	4.800, -0.020	4.800, -0.021	4.800, -0.020	4.800, -0.021	4.800, -0.020	4.800, -0.023
26	5.000, -0.008	5.000, -0.004	5.000, -0.001	5.000, -0.004	5.000, -0.029	5.000, -0.019	5.000, -0.023	5.000, -0.019	5.000, -0.017	5.000, -0.019	5.000, -0.020	5.000, -0.020	5.000, -0.020	5.000, -0.020	5.000, -0.022
27	5.200, -0.008	5.200, -0.004	5.200, -0.001	5.200, -0.004	5.200, -0.028	5.200, -0.019	5.200, -0.023	5.200, -0.019	5.200, -0.016	5.200, -0.019	5.200, -0.020	5.200, -0.020	5.200, -0.020	5.200, -0.020	5.200, -0.022
28	5.400, -0.008	5.400, -0.004	5.400, -0.002	5.400, -0.004	5.400, -0.028	5.400, -0.019	5.400, -0.022	5.400, -0.019	5.400, -0.016	5.400, -0.018	5.400, -0.020	5.400, -0.020	5.400, -0.019	5.400, -0.019	5.400, -0.021
29	5.600, -0.008	5.600, -0.004	5.600, -0.002	5.600, -0.004	5.600, -0.028	5.600, -0.018	5.600, -0.022	5.600, -0.018	5.600, -0.016	5.600, -0.017	5.600, -0.019	5.600, -0.019	5.600, -0.018	5.600, -0.019	5.600, -0.021
30	5.800, -0.007	5.800, -0.004	5.800, -0.002	5.800, -0.004	5.800, -0.028	5.800, -0.018	5.800, -0.021	5.800, -0.018	5.800, -0.016	5.800, -0.016	5.800, -0.019	5.800, -0.019	5.800, -0.018	5.800, -0.019	5.800, -0.021
31	6.000, -0.007	6.000, -0.004	6.000, -0.002	6.000, -0.004	6.000, -0.028	6.000, -0.018	6.000, -0.021	6.000, -0.018	6.000, -0.015	6.000, -0.016	6.000, -0.019	6.000, -0.019	6.000, -0.018	6.000, -0.019	6.000, -0.021
32	6.200, -0.007	6.200, -0.005	6.200, -0.002	6.200, -0.003	6.200, -0.027	6.200, -0.017	6.200, -0.020	6.200, -0.017	6.200, -0.015	6.200, -0.015	6.200, -0.019	6.200, -0.018	6.200, -0.017	6.200, -0.019	6.200, -0.021
33	6.400, -0.006	6.400, -0.005	6.400, -0.002	6.400, -0.003	6.400, -0.027	6.400, -0.016	6.400, -0.020	6.400, -0.016	6.400, -0.014	6.400, -0.015	6.400, -0.018	6.400, -0.018	6.400, -0.017	6.400, -0.018	6.400, -0.021
34	6.600, -0.006	6.600, -0.005	6.600, -0.002	6.600, -0.003	6.600, -0.027	6.600, -0.016	6.600, -0.019	6.600, -0.016	6.600, -0.014	6.600, -0.014	6.600, -0.018	6.600, -0.017	6.600, -0.016	6.600, -0.018	6.600, -0.021
35	6.800, -0.006	6.800, -0.005	6.800, -0.003	6.800, -0.003	6.800, -0.027	6.800, -0.015	6.800, -0.019	6.800, -0.015	6.800, -0.013	6.800, -0.014	6.800, -0.018	6.800, -0.017	6.800, -0.016	6.800, -0.018	6.800, -0.021
36	7.000, -0.005	7.000, -0.004	7.000, -0.003	7.000, -0.003	7.000, -0.027	7.000, -0.014	7.000, -0.018	7.000, -0.015	7.000, -0.013	7.000, -0.014	7.000, -0.018	7.000, -0.016	7.000, -0.016	7.000, -0.018	7.000, -0.021
37	7.200, -0.005	7.200, -0.004	7.200, -0.003	7.200, -0.003	7.200, -0.027	7.200, -0.014	7.200, -0.018	7.200, -0.014	7.200, -0.012	7.200, -0.013	7.200, -0.018	7.200, -0.016	7.200, -0.016	7.200, -0.017	7.200, -0.021
38	7.400, -0.005	7.400, -0.004	7.400, -0.003	7.400, -0.003	7.400, -0.028	7.400, -0.013	7.400, -0.018	7.400, -0.014	7.400, -0.012	7.400, -0.013	7.400, -0.018	7.400, -0.016	7.400, -0.015	7.400, -0.017	7.400, -0.021
39	7.600, -0.005	7.600, -0.004	7.600, -0.003	7.600, -0.003	7.600, -0.028	7.600, -0.013	7.600, -0.018	7.600, -0.014	7.600, -0.012	7.600, -0.013	7.600, -0.017	7.600, -0.015	7.600, -0.015	7.600, -0.017	7.600, -0.021
40	7.800, -0.005	7.800, -0.004	7.800, -0.003	7.800, -0.002	7.800, -0.027	7.800, -0.013	7.800, -0.018	7.800, -0.014	7.800, -0.012	7.800, -0.013	7.800, -0.017	7.800, -0.015	7.800, -0.015	7.800, -0.017	7.800, -0.020
41	8.000, -0.005	8.000, -0.005	8.000, -0.003	8.000, -0.002	8.000, -0.027	8.000, -0.012	8.000, -0.018	8.000, -0.014	8.000, -0.011	8.000, -0.013	8.000, -0.017	8.000, -0.015	8.000, -0.015	8.000, -0.017	8.000, -0.020
42	8.200, -0.005	8.200, -0.004	8.200, -0.003	8.200, -0.002	8.200, -0.027	8.200, -0.012	8.200, -0.018	8.200, -0.014	8.200, -0.011	8.200, -0.014	8.200, -0.016	8.200, -0.015	8.200, -0.015	8.200, -0.017	8.200, -0.019
43	8.400, -0.005	8.400, -0.004	8.400, -0.003	8.400, -0.003	8.400, -0.026	8.400, -0.012	8.400, -0.018	8.400, -0.014	8.400, -0.011	8.400, -0.014	8.400, -0.016	8.400, -0.015	8.400, -0.014	8.400, -0.016	8.400, -0.019
44	8.600, -0.005	8.600, -0.004	8.600, -0.003	8.600, -0.003	8.600, -0.026	8.600, -0.012	8.600, -0.018	8.600, -0.014	8.600, -0.011	8.600, -0.014	8.600, -0.016	8.600, -0.015	8.600, -0.014	8.600, -0.016	8.600, -0.018
45	8.800, -0.005	8.800, -0.004	8.800, -0.003	8.800, -0.003	8.800, -0.025	8.800, -0.012	8.800, -0.018	8.800, -0.014	8.800, -0.011	8.800, -0.014	8.800, -0.015	8.800, -0.015	8.800, -0.014	8.800, -0.016	8.800, -0.018
46	9.000, -0.005	9.000, -0.004	9.000, -0.003	9.000, -0.003	9.000, -0.025	9.000, -0.012	9.000, -0.017	9.000, -0.014	9.000, -0.011	9.000, -0.014	9.000, -0.015	9.000, -0.015	9.000, -0.013	9.000, -0.015	9.000, -0.018
47	9.200, -0.005	9.200, -0.004	9.200, -0.002	9.200, -0.003	9.200, -0.024	9.200, -0.012	9.200, -0.017	9.200, -0.014	9.200, -0.010	9.200, -0.013	9.200, -0.015	9.200, -0.015	9.200, -0.013	9.200, -0.015	9.200, -0.017
48	9.400, -0.005	9.400, -0.004	9.400, -0.002	9.400, -0.003	9.400, -0.024	9.400, -0.012	9.400, -0.017	9.400, -0.013	9.400, -0.010	9.400, -0.013	9.400, -0.014	9.400, -0.015	9.400, -0.013	9.400, -0.014	9.400, -0.017
49	9.600, -0.005	9.600, -0.004	9.600, -0.002	9.600, -0.003	9.600, -0.023	9.600, -0.012	9.600, -0.016	9.600, -0.013	9.600, -0.010	9.600, -0.013	9.600, -0.014	9.600, -0.014	9.600, -0.012	9.600, -0.014	9.600, -0.017
50	9.800, -0.005	9.800, -0.004	9.800, -0.002	9.800, -0.003	9.800, -0.023	9.800, -0.012	9.800, -0.016	9.800, -0.013	9.800, -0.010	9.800, -0.013	9.800, -0.014	9.800, -0.014	9.800, -0.012	9.800, -0.013	9.800, -0.017
51	10.000, -0.004	10.000, -0.004	10.000, -0.002	10.000, -0.003	10.000, -0.022	10.000, -0.012	10.000, -0.015	10.000, -0.013	10.000, -0.009	10.000, -0.013	10.000, -0.013	10.000, -0.014	10.000, -0.011	10.000, -0.013	10.000, -0.016
52	10.200, -0.004	10.200, -0.004	10.200, -0.002	10.200, -0.003	10.200, -0.022	10.200, -0.011	10.200, -0.015	10.200, -0.012	10.200, -0.009	10.200, -0.012	10.200, -0.013	10.200, -0.014	10.200, -0.011	10.200, -0.013	10.200, -0.016
53	10.400, -0.004	10.400, -0.003	10.400, -0.002	10.400, -0.003	10.400, -0.022	10.400, -0.011	10.400, -0.014	10.400, -0.012	10.400, -0.009	10.400, -0.012	10.400, -0.013	10.400, -0.014	10.400, -0.011	10.400, -0.012	10.400, -0.015
54	10.600, -0.004	10.600, -0.003	10.600, -0.002	10.600, -0.003	10.600, -0.021	10.600, -0.010	10.600, -0.014	10.600, -0.011	10.600, -0.009	10.600, -0.012	10.600, -0.012	10.600, -0.013	10.600, -0.010	10.600, -0.012	10.600, -0.015
55	10.800, -0.004	10.800, -0.003	10.800, -0.002	10.800, -0.003	10.800, -0.021	10.800, -0.010	10.800, -0.013	10.800, -0.011	10.800, -0.009	10.800, -0.012	10.800, -0.012	10.800, -0.013	10.800, -0.010	10.800, -0.012	10.800, -0.015
56	11.000, -0.004	11.000, -0.003	11.000, -0.002	11.000, -0.003	11.000, -0.021	11.000, -0.009	11.000, -0.013	11.000, -0.010	11.000, -0.008	11.000, -0.011	11.000, -0.012	11.000, -0.012	11.000, -0.010	11.000, -0.011	11.000, -0.014
57	11.200, -0.004	11.200, -0.002	11.200, -0.002	11.200, -0.003	11.200, -0.020	11.200, -0.008	11.200, -0.013	11.200, -0.010	11.200, -0.008	11.200, -0.011	11.200, -0.012	11.200, -0.012	11.200, -0.010	11.200, -0.011	11.200, -0.014
58	11.400, -0.004	11.400, -0.002	11.400, -0.002	11.400, -0.003	11.400, -0.020	11.400, -0.008	11.400, -0.013	11.400, -0.009	11.400, -0.008	11.400, -0.011	11.400, -0.011	11.400, -0.012	11.400, -0.010	11.400, -0.011	11.400, -0.013
59	11.600, -0.004	11.600, -0.002	11.600, -0.002	11.600, -0.003	11.600, -0.019	11.600, -0.007	11.600, -0.013	11.600, -0.009	11.600, -0.008	11.600, -0.010	11.600, -0.011	11.600, -0.011	11.600, -0.010	11.600, -0.011	11.600, -0.013
60	11.800, -0.003	11.800, -0.002	11.800, -0.002	11.800, -0.003	11.800, -0.019	11.800, -0.007	11.800, -0.013	11.800, -0.009	11.800, -0.008	11.800, -0.010	11.800, -0.011	11.800, -0.011	11.800, -0.009	11.800, -0.011	11.800, -0.012
61	12.000, -0.003	12.000, -0.002	12.000, -0.002	12.000, -0.003	12.000, -0.018	12.000, -0.007	12.000, -0.013	12.000, -0.009	12.000, -0.008	12.000, -0.009	12.000, -0.010	12.000, -0.011	12.000, -0.009	12.000, -0.010	12.000, -0.012
62	12.200, -0.003	12.200, -0.001	12.200, -0.001	12.200, -0.003	12.200, -0.018	12.200, -0.007	12.200, -0.013	12.200, -0.008	12.200, -0.008	12.200, -0.009	12.200, -0.010	12.200, -0.011	12.200, -0.009	12.200, -0.010	12.200, -0.012
63	12.400, -0.003	12.400, -0.001	12.400, -0.001	12.400, -0.003	12.400, -0.018	12.400, -0.007	12.400, -0.013	12.400, -0.008	12.400, -0.007	12.400, -0.009	12.400, -0.010	12.400, -0.010	12.400, -0.009	12.400, -0.011	12.400, -0.012
64	12.600, -0.003	12.600, -0.001	12.600, -0.001	12.600, -0.003	12.600, -0.018	12.600, -0.007	12.600, -0.012	12.600, -0.008	12.600, -0.007	12.600, -0.009	12.600, -0.010	12.600, -0.010	12.600, -0.009	12.600, -0.011	12.600, -0.012
65	12.800, -0.002	12.800, -0.001	12.800, -0.001	12.800, -0.002	12.800, -0.017	12.800, -0.006	12.800, -0.012	12.800, -0.008	12.800, -0.007	12.800, -0.008	12.800, -0.010	12.800, -0.010	12.800, -0.009	12.800, -0.011	12.800, -0.012
66	13.000, -0.002	13.000, -0.001	13.000, -0.001	13.000, -0.002	13.000, -0.017	13.000, -0.006	13.000, -0.012	13.000, -0.008	13.000, -0.007	13.000, -0.008	13.000, -0.010	13.000, -0.010	13.000, -0.009	13.000, -0.011	13.000, -0.012
67	13.200, -0.002	13.200, -0.001	13.200, -0.001	13.200, -0.002	13.200, -0.017	13.200, -0.006	13.200, -0.012	13.200, -0.008	13.200, -0.007	13.200, -0.008	13.200, -0.010	13.200, -0.009	13.200, -0.008	13.200, -0.011	13.200, -0.012
68	13.400, -0.002	13.400, -0.001	13.400, -0.001	13.400, -0.002	13.400, -0.017	13.400, -0.006	13.400, -0.011	13.400, -0.008	13.400, -0.006	13.400, -0.007	13.400, -0.009	13.400, -0.009	13.400, -0.008	13.400, -0.011	13.400, -0.012
69	13.600, -0.001	13.600, -0.001	13.600, -0.001	13.600, -0.002	13.600, -0.017	13.600, -0.006	13.600, -0.011	13.600, -0.008	13.600, -0.006	13.600, -0.007	13.600, -0.009	13.600, -0.009	13.600, -0.008	13.600, -0.011	13.600, -0.012
70	13.800, -0.001	13.800, -0.001	13.800, -0.002	13.800, -0.002	13.800, -0.017	13.800, -0.006	13.800, -0.011	13.800, -0.008	13.800, -0.006	13.800, -0.007	13.800, -0.009	13.800, -0.009	13.800, -0.008	13.800, -0.010	13.800, -0.011
71	14.000, -0.001	14.000, -0.001	14.000, -0.002	14.000, -0.001	14.000, -0.017	14.000, -0.006	14.000, -0.011	14.000, -0.008	14.000, -0.006	14.000, -0.007	14.000, -0.009	14.000, -0.008	14.000, -0.007	14.000, -0.010	14.000, -0.011
72	14.200, -0.001	14.200, -0.002	14.200, -0.002	14.200, -0.001	14.200, -0.017	14.200, -0.006	14.200, -0.010	14.200, -0.007	14.200, -0.007	14.200, -0.007	14.200, -0.009	14.200, -0.008	14.200, -0.007	14.200, -0.010	14.200, -0.011
73	14.400, -0.001	14.400, -0.002	14.400, -0.002	14.400, -0.001	14.400, -0.017	14.400, -0.005	14.400, -0.010	14.400, -0.007	14.400, -0.007	14.400, -0.007	14.400, -0.009	14.400, -0.008	14.400, -0.007	14.400, -0.010	14.400, -0.010
74	14.600, -0.001	14.600, -0.002	14.600, -0.002	14.600, -0.001	14.600, -0.017	14.600, -0.005	14.600, -0.010	14.600, -0.007	14.600, -0.007	14.600, -0.007	14.600, -0.009	14.600, -0.008	14.600, -0.006	14.600, -0.009	14.600, -0.010
75	14.800, -0.001	14.800, -0.002	14.800, -0.002	14.800, -0.001	14.800, -0.017	14.800, -0.005	14.800, -0.010	14.800, -0.006	14.800, -0.007	14.800, -0.007	14.800, -0.009	14.800, -0.007	14.800, -0.006	14.800, -0.009	14.800, -0.010
76	15.000, -0.001	15.000, -0.002	15.000, -0.002	15.000, -0.001	15.000, -0.016	15.000, -0.005	15.000, -0.010	15.000, -0.006	15.000, -0.007	15.000, -0.007	15.000, -0.008	15.000, -0.008	15.000, -0.006	15.000, -0.008	15.000, -0.009
77	15.200, -0.002	15.200, -0.002	15.200, -0.002	15.200, -0.001	15.200, -0.016	15.200, -0.004	15.200, -0.009	15.200, -0.006	15.200, -0.007	15.200, -0.007	15.200, -0.008	15.200, -0.008	15.200, -0.006	15.200, -0.008	15.200, -0.009
78	15.400, -0.002	15.400, -0.002	15.400, -0.002	15.400, -0.001	15.400, -0.015	15.400, -0.004	15.400, -0.009	15.400, -0.005	15.400, -0.007	15.400, -0.007	15.400, -0.008	15.400, -0.008	15.400, -0.006	15.400, -0.008	15.400, -0.009
79	15.600, -0.002	15.600, -0.002	15.600, -0.002	15.600, -0.001	15.600, -0.015	15.600, -0.004	15.600, -0.009	15.600, -0.005	15.600, -0.006	15.600, -0.007	15.600, -0.007	15.600, -0.008	15.600, -0.006	15.600, -0.007	15.600, -0.009
80	15.800, -0.002	15.800, -0.002	15.800, -0.002	15.800, -0.001	15.800, -0.015	15.800, -0.004	15.800, -0.008	15.800, -0.005	15.800, -0.006	15.800, -0.007	15.800, -0.007	15.800, -0.008	15.800, -0.006	15.800, -0.007	15.800, -0.008
81	16.000, -0.003	16.000, -0.002	16.000, -0.001	16.000, -0.001	16.000, -0.014	16.000, -0.004	16.000, -0.008	16.000, -0.005	16.000, -0.006	16.000, -0.007	16.000, -0.007	16.000, -0.008	16.000, -0.006	16.000, -0.007	16.000, -0.008
82	16.200, -0.003	16.200, -0.002	16.200, -0.001	16.200, -0.001	16.200, -0.014	16.200, -0.005	16.200, -0.007	16.200, -0.005	16.200, -0.005	16.200, -0.007	16.200, -0.007	16.200, -0.009	16.200, -0.006	16.200, -0.007	16.200, -0.008
83	16.400, -0.003	16.400, -0.001	16.400, -0.001	16.400, -0.001	16.400, -0.013	16.400, -0.005	16.400, -0.007	16.400, -0.005	16.400, -0.005	16.400, -0.007	16.400, -0.007	16.400, -0.009	16.400, -0.006	16.400, -0.007	16.400, -0.008
84	16.600, -0.003	16.600, -0.001	16.600, -0.001	16.600, -0.001	16.600, -0.012	16.600, -0.005	16.600, -0.007	16.600, -0.005	16.600, -0.004	16.600, -0.007	16.600, -0.007	16.600, -0.009	16.600, -0.006	16.600, -0.007	16.600, -0.008
85	16.800, -0.003	16.800, -0.001	16.800, -0.001	16.800, -0.001	16.800, -0.012	16.800, -0.005	16.800, -0.007	16.800, -0.005	16.800, -0.004	16.800, -0.007	16.800, -0.007	16.800, -0.008	16.800, -0.006	16.800, -0.007	16.800, -0.008
86	17.000, -0.003	17.000, -0.002	17.000, -0.001	17.000, -0.001	17.000, -0.012	17.000, -0.005	17.000, -0.006	17.000, -0.005	17.000, -0.004	17.000, -0.007	17.000, -0.007	17.000, -0.008	17.000, -0.006	17.000, -0.007	17.000, -0.008
87	17.200, -0.003	17.200, -0.002	17.200, -0.001	17.200, -0.000	17.200, -0.011	17.200, -0.005	17.200, -0.006	17.200, -0.005	17.200, -0.004	17.200, -0.007	17.200, -0.007	17.200, -0.008	17.200, -0.006	17.200, -0.007	17.200, -0.008
88	17.400, -0.003	17.400, -0.002	17.400, -0.001	17.400, -0.000	17.400, -0.011	17.400, -0.005	17.400, -0.006	17.400, -0.005	17.400, -0.004	17.400, -0.007	17.400, -0.007	17.400, -0.007	17.400, -0.006	17.400, -0.006	17.400, -0.008
89	17.600, -0.002	17.600, -0.002	17.600, -0.001	17.600, -0.000	17.600, -0.011	17.600, -0.005	17.600, -0.006	17.600, -0.004	17.600, -0.004	17.600, -0.006	17.600, -0.007	17.600, -0.007	17.600, -0.006	17.600, -0.006	17.600, -0.008
90	17.800, -0.002	17.800, -0.002	17.800, -0.001	17.800, -0.000	17.800, -0.010	17.800, -0.005	17.800, -0.006	17.800, -0.004	17.800, -0.005	17.800, -0.006	17.800, -0.007	17.800, -0.006	17.800, -0.006	17.800, -0.006	17.800, -0.008
91	18.000, -0.002	18.000, -0.002	18.000, -0.001	18.000, -0.000	18.000, -0.010	18.000, -0.004	18.000, -0.006	18.000, -0.004	18.000, -0.005	18.000, -0.006	18.000, -0.007	18.000, -0.006	18.000, -0.006	18.000, -0.006	18.000, -0.008
92	18.200, -0.002	18.200, -0.002	18.200, -0.001	18.200, -0.001	18.200, -0.010	18.200, -0.004	18.200, -0.006	18.200, -0.004	18.200, -0.006	18.200, -0.006	18.200, -0.007	18.200, -0.006	18.200, -0.006	18.200, -0.006	18.200, -0.008
93	18.400, -0.002	18.400, -0.002	18.400, -0.001	18.400, -0.001	18.400, -0.010	18.400, -0.003	18.400, -0.006	18.400, -0.003	18.400, -0.006	18.400, -0.005	18.400, -0.006	18.400, -0.006	18.400, -0.006	18.400, -0.006	18.400, -0.008
94	18.600, -0.001	18.600, -0.002	18.600, -0.001	18.600, -0.001	18.600, -0.009	18.600, -0.003	18.600, -0.006	18.600, -0.003	18.600, -0.006	18.600, -0.005	18.600, -0.006	18.600, -0.006	18.600, -0.006	18.600, -0.006	18.600, -0.007
95	18.800, -0.001	18.800, -0.002	18.800, -0.001	18.800, -0.001	18.800, -0.009	18.800, -0.002	18.800, -0.006	18.800, -0.003	18.800, -0.006	18.800, -0.005	18.800, -0.006	18.800, -0.006	18.800, -0.005	18.800, -0.006	18.800, -0.007
96	19.000, -0.001	19.000, -0.002	19.000, -0.001	19.000, -0.001	19.000, -0.009	19.000, -0.002	19.000, -0.006	19.000, -0.003	19.000, -0.006	19.000, -0.005	19.000, -0.005	19.000, -0.006	19.000, -0.005	19.000, -0.006	19.000, -0.007
97	19.200, -0.001	19.200, -0.002	19.200, -0.001	19.200, -0.001	19.200, -0.009	19.200, -0.002	19.200, -0.006	19.200, -0.003	19.200, -0.006	19.200, -0.005	19.200, -0.005	19.200, -0.006	19.200, -0.005	19.200, -0.005	19.200, -0.007
98	19.400, -0.000	19.400, -0.002	19.400, -0.001	19.400, -0.001	19.400, -0.009	19.400, -0.002	19.400, -0.006	19.400, -0.003	19.400, -0.006	19.400, -0.005	19.400, -0.005	19.400, -0.006	19.400, -0.004	19.400, -0.005	19.400, -0.007
99	19.600, -0.000	19.600, -0.002	19.600, -0.001	19.600, -0.002	19.600, -0.009	19.600, -0.002	19.600, -0.006	19.600, -0.003	19.600, -0.006	19.600, -0.005	19.600, -0.005	19.600, -0.005	19.600, -0.004	19.600, -0.005	19.600, -0.007
100	19.800, -0.000	19.800, -0.002	19.800, -0.002	19.800, -0.002	19.800, -0.009	19.800, -0.001	19.800, -0.006	19.800, -0.003	19.800, -0.005	19.800, -0.005	19.800, -0.004	19.800, -0.005	19.800, -0.004	19.800, -0.005	19.800, -0.007
101	20.000, -0.000	20.000, -0.002	20.000, -0.002	20.000, -0.001	20.000, -0.009	20.000, -0.001	20.000, -0.006	20.000, -0.003	20.000, -0.005	20.000, -0.005	20.000, -0.004	20.000, -0.005	20.000, -0.003	20.000, -0.004	20.000, -0.006
102	20.200, -0.000	20.200, -0.002	20.200, -0.002	20.200, -0.001	20.200, -0.008	20.200, -0.001	20.200, -0.005	20.200, -0.002	20.200, -0.005	20.200, -0.005	20.200, -0.004	20.200, -0.005	20.200, -0.003	20.200, -0.004	20.200, -0.006
103	20.400, -0.000	20.400, -0.002	20.400, -0.002	20.400, -0.001	20.400, -0.008	20.400, -0.001	20.400, -0.005	20.400, -0.002	20.400, -0.004	20.400, -0.004	20.400, -0.004	20.400, -0.005	20.400, -0.003	20.400, -0.003	20.400, -0.006
104	20.600, -0.000	20.600, -0.002	20.600, -0.002	20.600, -0.001	20.600, -0.008	20.600, -0.002	20.600, -0.005	20.600, -0.002	20.600, -0.004	20.600, -0.004	20.600, -0.004	20.600, -0.005	20.600, -0.003	20.600, -0.003	20.600, -0.006
105	20.800, -0.000	20.800, -0.002	20.800, -0.002	20.800, -0.001	20.800, -0.008	20.800, -0.002	20.800, -0.005	20.800, -0.002	20.800, -0.004	20.800, -0.004	20.800, -0.003	20.800, -0.005	20.800, -0.002	20.800, -0.003	20.800, -0.006
106	21.000, -0.000	21.000, -0.002	21.000, -0.002	21.000, -0.001	21.000, -0.007	21.000, -0.002	21.000, -0.005	21.000, -0.001	21.000, -0.004	21.000, -0.004	21.000, -0.003	21.000, -0.005	21.000, -0.002	21.000, -0.003	21.000, -0.006
107	21.200, -0.000	21.200, -0.003	21.200, -0.002	21.200, -0.001	21.200, -0.007	21.200, -0.002	21.200, -0.005	21.200, -0.001	21.200, -0.003	21.200, -0.004	21.200, -0.003	21.200, -0.005	21.200, -0.002	21.200, -0.003	21.200, -0.005
108	21.400, -0.000	21.400, -0.003	21.400, -0.002	21.400, -0.001	21.400, -0.007	21.400, -0.003	21.400, -0.005	21.400, -0.001	21.400, -0.003	21.400, -0.004	21.400, -0.004	21.400, -0.005	21.400, -0.002	21.400, -0.003	21.400, -0.005
109	21.600, -0.000	21.600, -0.003	21.600, -0.002	21.600, -0.001	21.600, -0.006	21.600, -0.002	21.600, -0.005	21.600, -0.001	21.600, -0.003	21.600, -0.004	21.600, -0.004	21.600, -0.004	21.600, -0.002	21.600, -0.003	21.600, -0.004
110	21.800, -0.000	21.800, -0.003	21.800, -0.002	21.800, -0.001	21.800, -0.006	21.800, -0.002	21.800, -0.005	21.800, -0.001	21.800, -0.003	21.800, -0.004	21.800, -0.003	21.800, -0.004	21.800, -0.002	21.800, -0.003	21.800, -0.004
111	22.000, -0.001	22.000, -0.003	22.000, -0.002	22.000, -0.001	22.000, -0.006	22.000, -0.002	22.000, -0.005	22.000, -0.001	22.000, -0.003	22.000, -0.004	22.000, -0.003	22.000, -0.004	22.000, -0.002	22.000, -0.003	22.000, -0.003
112	22.200, -0.000	22.200, -0.003	22.200, -0.001	22.200, -0.001	22.200, -0.005	22.200, -0.002	22.200, -0.005	22.200, -0.001	22.200, -0.003	22.200, -0.004	22.200, -0.003	22.200, -0.004	22.200, -0.002	22.200, -0.003	22.200, -0.003
113	22.400, -0.000	22.400, -0.003	22.400, -0.001	22.400, -0.001	22.400, -0.005	22.400, -0.002	22.400, -0.005	22.400, -0.001	22.400, -0.003	22.400, -0.003	22.400, -0.003	22.400, -0.004	22.400, -0.002	22.400, -0.003	22.400, -0.003
114	22.600, -0.000	22.600, -0.003	22.600, -0.001	22.600, -0.002	22.600, -0.005	22.600, -0.001	22.600, -0.005	22.600, -0.002	22.600, -0.003	22.600, -0.003	22.600, -0.002	22.600, -0.003	22.600, -0.002	22.600, -0.003	22.600, -0.003
115	22.800, -0.000	22.800, -0.003	22.800, -0.001	22.800, -0.002	22.800, -0.004	22.800, -0.001	22.800, -0.005	22.800, -0.002	22.800, -0.002	22.800, -0.003	22.800, -0.002	22.800, -0.003	22.800, -0.002	22.800, -0.003	22.800, -0.003
116	23.000, -0.000	23.000, -0.003	23.000, -0.001	23.000, -0.002	23.000, -0.004	23.000, -0.001	23.000, -0.005	23.000, -0.002	23.000, -0.002	23.000, -0.003	23.000, -0.002	23.000, -0.003	23.000, -0.002	23.000, -0.003	23.000, -0.003
117	23.200, -0.000	23.200, -0.002	23.200, -0.001	23.200, -0.002	23.200, -0.004	23.200, -0.001	23.200, -0.005	23.200, -0.002	23.200, -0.002	23.200, -0.003	23.200, -0.002	23.200, -0.003	23.200, -0.002	23.200, -0.003	23.200, -0.003
118	23.400, 0.000	23.400, -0.002	23.400, -0.001	23.400, -0.001	23.400, -0.004	23.400, -0.001	23.400, -0.005	23.400, -0.002	23.400, -0.002	23.400, -0.003	23.400, -0.002	23.400, -0.002	23.400, -0.002	23.400, -0.003	23.400, -0.003
119	23.600, -0.000	23.600, -0.002	23.600, -0.001	23.600, -0.001	23.600, -0.005	23.600, -0.001	23.600, -0.004	23.600, -0.002	23.600, -0.002	23.600, -0.003	23.600, -0.001	23.600, -0.002	23.600, -0.002	23.600, -0.003	23.600, -0.003
120	23.800, -0.000	23.800, -0.002	23.800, -0.001	23.800, -0.001	23.800, -0.005	23.800, -0.001	23.800, -0.004	23.800, -0.002	23.800, -0.002	23.800, -0.002	23.800, -0.001	23.800, -0.002	23.800, -0.002	23.800, -0.002	23.800, -0.003
121	24.000, -0.000	24.000, -0.002	24.000, -0.001	24.000, -0.001	24.000, -0.005	24.000, -0.000	24.000, -0.004	24.000, -0.002	24.000, -0.002	24.000, -0.002	24.000, -0.001	24.000, -0.002	24.000, -0.002	24.000, -0.002	24.000, -0.003
122	24.200, -0.000	24.200, -0.002	24.200, -0.001	24.200, -0.000	24.200, -0.004	24.200, -0.000	24.200, -0.004	24.200, -0.001	24.200, -0.002	24.200, -0.002	24.200, -0.000	24.200, -0.002	24.200, -0.002	24.200, -0.002	24.200, -0.003
123	24.400, -0.001	24.400, -0.001	24.400, -0.001	24.400, -0.000	24.400, -0.004	24.400, -0.000	24.400, -0.004	24.400, -0.001	24.400, -0.002	24.400, -0.002	24.400, -0.000	24.400, -0.002	24.400, -0.002	24.400, -0.002	24.400, -0.003
124	24.600, -0.001	24.600, -0.001	24.600, -0.001	24.600, 0.000	24.600, -0.004	24.600, -0.000	24.600, -0.004	24.600, -0.001	24.600, -0.002	24.600, -0.002	24.600, -0.000	24.600, -0.002	24.600, -0.002	24.600, -0.002	24.600, -0.003
125	24.800, -0.001	24.800, -0.001	24.800, -0.001	24.800, 0.000	24.800, -0.004	24.800, -0.000	24.800, -0.004	24.800, -0.000	24.800, -0.002	24.800, -0.002	24.800, -0.001	24.800, -0.002	24.800, -0.002	24.800, -0.002	24.800, -0.002
126	25.000, -0.001	25.000, -0.001	25.000, -0.001	25.000, 0.000	25.000, -0.004	25.000, -0.000	25.000, -0.004	25.000, -0.000	25.000, -0.002	25.000, -0.002	25.000, -0.001	25.000, -0.002	25.000, -0.002	25.000, -0.002	25.000, -0.002
127	25.200, -0.001	25.200, -0.001	25.200, -0.001	25.200, 0.000	25.200, -0.003	25.200, -0.000	25.200, -0.003	25.200, -0.000	25.200, -0.002	25.200, -0.002	25.200, -0.001	25.200, -0.002	25.200, -0.001	25.200, -0.001	25.200, -0.001
128	25.400, -0.001	25.400, -0.001	25.400, -0.001	25.400, -0.000	25.400, -0.003	25.400, -0.000	25.400, -0.003	25.400, 0.000	25.400, -0.001	25.400, -0.001	25.400, -0.001	25.400, -0.002	25.400, -0.001	25.400, -0.001	25.400, -0.001
129	25.600, -0.001	25.600, -0.001	25.600, -0.001	25.600, -0.001	25.600, -0.003	25.600, -0.000	25.600, -0.003	25.600, 0.000	25.600, -0.001	25.600, -0.001	25.600, -0.001	25.600, -0.002	25.600, -0.001	25.600, -0.001	25.600, -0.001
130	25.800, -0.000	25.800, -0.001	25.800, -0.001	25.800, -0.001	25.800, -0.002	25.800, -0.000	25.800, -0.003	25.800, 0.001	25.800, -0.001	25.800, -0.001	25.800, -0.001	25.800, -0.002	25.800, -0.001	25.800, -0.001	25.800, -0.001
131	26.000, -0.000	26.000, -0.000	26.000, -0.001	26.000, -0.001	26.000, -0.002	26.000, -0.000	26.000, -0.003	26.000, 0.001	26.000, -0.001	26.000, -0.001	26.000, -0.001	26.000, -0.002	26.000, -0.001	26.000, -0.001	26.000, -0.001
132	26.200, 0.000	26.200, -0.000	26.200, -0.001	26.200, -0.001	26.200, -0.002	26.200, -0.000	26.200, -0.003	26.200, 0.001	26.200, -0.000	26.200, -0.001	26.200, -0.001	26.200, -0.001	26.200, -0.000	26.200, -0.001	26.200, -0.001
133	26.400, 0.000	26.400, -0.000	26.400, -0.001	26.400, -0.001	26.400, -0.001	26.400, -0.000	26.400, -0.003	26.400, 0.001	26.400, -0.000	26.400, -0.001	26.400, -0.001	26.400, -0.001	26.400, -0.000	26.400, -0.000	26.400, -0.001
134	26.600, 0.000	26.600, -0.000	26.600, -0.001	26.600, -0.001	26.600, -0.001	26.600, -0.000	26.600, -0.003	26.600, 0.001	26.600, -0.000	26.600, -0.001	26.600, -0.001	26.600, -0.001	26.600, -0.000	26.600, -0.000	26.600, -0.001
135	26.800, 0.001	26.800, -0.000	26.800, -0.001	26.800, -0.001	26.800, -0.001	26.800, -0.000	26.800, -0.002	26.800, 0.001	26.800, 0.000	26.800, -0.000	26.800, -0.001	26.800, -0.001	26.800, -0.000	26.800, -0.000	26.800, -0.001
136	27.000, 0.001	27.000, -0.000	27.000, -0.000	27.000, -0.001	27.000, -0.001	27.000, -0.000	27.000, -0.002	27.000, 0.001	27.000, 0.000	27.000, -0.000	27.000, -0.001	27.000, -0.001	27.000, -0.000	27.000, 0.000	27.000, -0.001
137	27.200, 0.001	27.200, -0.000	27.200, -0.000	27.200, -0.001	27.200, -0.001	27.200, -0.000	27.200, -0.002	27.200, 0.000	27.200, -0.000	27.200, 0.000	27.200, -0.001	27.200, -0.001	27.200, -0.001	27.200, 0.000	27.200, -0.001
138	27.400, 0.001	27.400, -0.000	27.400, -0.000	27.400, -0.001	27.400, -0.001	27.400, -0.000	27.400, -0.001	27.400, 0.000	27.400, -0.000	27.400, 0.000	27.400, -0.001	27.400, -0.000	27.400, -0.001	27.400, 0.000	27.400, -0.001
139	27.600, 0.001	27.600, -0.000	27.600, -0.000	27.600, -0.000	27.600, -0.001	27.600, -0.000	27.600, -0.001	27.600, 0.000	27.600, 0.000	27.600, 0.000	27.600, -0.001	27.600, -0.000	27.600, -0.001	27.600, 0.000	27.600, -0.001
140	27.800, 0.001	27.800, -0.001	27.800, 0.000	27.800, -0.000	27.800, -0.001	27.800, -0.000	27.800, -0.001	27.800, -0.000	27.800, -0.000	27.800, 0.000	27.800, -0.000	27.800, -0.000	27.800, -0.001	27.800, 0.000	27.800, -0.001
141	28.000, 0.000	28.000, -0.001	28.000, 0.000	28.000, -0.000	28.000, -0.001	28.000, 0.000	28.000, -0.000	28.000, -0.000	28.000, -0.000	28.000, 0.000	28.000, -0.000	28.000, 0.000	28.000, -0.001	28.000, -0.000	28.000, -0.001
142	28.200, 0.000	28.200, -0.000	28.200, 0.000	28.200, 0.000	28.200, -0.001	28.200, 0.000	28.200, -0.000	28.200, -0.000	28.200, 0.000	28.200, 0.000	28.200, -0.000	28.200, 0.000	28.200, -0.000	28.200, -0.000	28.200, -0.000
143	28.400, -0.000	28.400, -0.000	28.400, 0.000	28.400, 0.000	28.400, -0.000	28.400, 0.000	28.400, 0.000	28.400, -0.000	28.400, 0.000	28.400, 0.000	28.400, -0.000	28.400, 0.000	28.400, -0.000	28.400, -0.000	28.400, 0.000
144	28.600, -0.000	28.600, 0.000	28.600, 0.000	28.600, 0.000	28.600, 0.000	28.600, 0.000	28.600, 0.000	28.600, -0.000	28.600, 0.000	28.600, 0.000	28.600, 0.000	28.600, 0.000	28.600, -0.000	28.600, -0.000	28.600, 0.000
145	28.800, -0.000	28.800, 0.000	28.800, 0.000	28.800, 0.000	28.800, 0.000	28.800, 0.000	28.800, 0.001	28.800, -0.000	28.800, -0.000	28.800, 0.000	28.800, 0.000	28.800, 0.000	28.800, 0.000	28.800, -0.000	28.800, 0.001
146	29.000, -0.001	29.000, 0.000	29.000, 0.000	29.000, 0.000	29.000, 0.001	29.000, 0.000	29.000, 0.001	29.000, -0.000	29.000, 0.000	29.000, -0.000	29.000, 0.000	29.000, 0.000	29.000, 0.000	29.000, -0.000	29.000, 0.001
147	29.200, -0.001	29.200, 0.000	29.200, 0.000	29.200, 0.000	29.200, 0.001	29.200, 0.000	29.200, 0.001	29.200, -0.000	29.200, -0.000	29.200, -0.000	29.200, 0.001	29.200, 0.000	29.200, 0.001	29.200, 0.000	29.200, 0.001
148	29.400, -0.001	29.400, 0.000	29.400, 0.000	29.400, 0.000	29.400, 0.002	29.400, -0.000	29.400, 0.001	29.400, -0.000	29.400, 0.000	29.400, -0.000	29.400, 0.001	29.400, 0.000	29.400, 0.001	29.400, 0.000	29.400, 0.001
149	29.600, -0.001	29.600, 0.001	29.600, -0.000	29.600, 0.000	29.600, 0.002	29.600, -0.000	29.600, 0.001	29.600, 0.000	29.600, 0.000	29.600, -0.000	29.600, 0.001	29.600, 0.000	29.600, 0.001	29.600, 0.000	29.600, 0.001
150	29.800, -0.001	29.800, 0.001	29.800, -0.000	29.800, 0.000	29.800, 0.002	29.800, -0.000	29.800, 0.001	29.800, 0.000	29.800, 0.000	29.800, -0.000	29.800, 0.001	29.800, -0.000	29.800, 0.001	29.800, 0.000	29.800, 0.001
151	30.000, 0.000	30.000, 0.000	30.000, 0.000	30.000, 0.000	30.000, 0.000	30.000, 0.000	30.000, 0.000	30.000, 0.000	30.000, 0.000	30.000, 0.000	30.000, 0.000	30.000, 0.000	30.000, 0.000	30.000, 0.000	30.000, 0.000
152	30.200, -0.001	30.200, -0.002	30.200, -0.001	30.200, -0.004	30.200, 0.006	30.200, -0.002	30.200, 0.001	30.200, 0.004	30.200, -0.000	30.200, 0.001	30.200, 0.002	30.200, 0.007	30.200, 0.006	30.200, 0.008	30.200, 0.008
153	30.400, 0.002	30.400, -0.001	30.400, 0.001	30.400, -0.004	30.400, 0.018	30.400, 0.000	30.400, 0.006	30.400, 0.013	30.400, 0.004	30.400, 0.007	30.400, 0.010	30.400, 0.019	30.400, 0.017	30.400, 0.022	30.400, 0.022
154	30.600, 0.010	30.600, 0.006	30.600, 0.008	30.600, -0.001	30.600, 0.036	30.600, 0.008	30.600, 0.016	30.600, 0.028	30.600, 0.013	30.600, 0.018	30.600, 0.023	30.600, 0.039	30.600, 0.035	30.600, 0.042	30.600, 0.043
155	30.800, 0.025	30.800, 0.019	30.800, 0.021	30.800, 0.008	30.800, 0.061	30.800, 0.021	30.800, 0.033	30.800, 0.051	30.800, 0.029	30.800, 0.035	30.800, 0.043	30.800, 0.067	30.800, 0.060	30.800, 0.070	30.800, 0.072
156	31.000, 0.046	31.000, 0.038	31.000, 0.040	31.000, 0.022	31.000, 0.093	31.000, 0.041	31.000, 0.056	31.000, 0.081	31.000, 0.052	31.000, 0.059	31.000, 0.069	31.000, 0.101	31.000, 0.092	31.000, 0.104	31.000, 0.107
157	31.200, 0.075	31.200, 0.065	31.200, 0.066	31.200, 0.043	31.200, 0.133	31.200, 0.068	31.200, 0.085	31.200, 0.118	31.200, 0.081	31.200, 0.090	31.200, 0.102	31.200, 0.143	31.200, 0.132	31.200, 0.144	31.200, 0.151
158	31.400, 0.111	31.400, 0.099	31.400, 0.098	31.400, 0.070	31.400, 0.180	31.400, 0.102	31.400, 0.121	31.400, 0.162	31.400, 0.118	31.400, 0.127	31.400, 0.141	31.400, 0.191	31.400, 0.177	31.400, 0.190	31.400, 0.200
159	31.600, 0.154	31.600, 0.139	31.600, 0.138	31.600, 0.104	31.600, 0.233	31.600, 0.144	31.600, 0.163	31.600, 0.212	31.600, 0.161	31.600, 0.170	31.600, 0.186	31.600, 0.245	31.600, 0.229	31.600, 0.242	31.600, 0.256
160	31.800, 0.204	31.800, 0.187	31.800, 0.183	31.800, 0.146	31.800, 0.291	31.800, 0.191	31.800, 0.210	31.800, 0.269	31.800, 0.211	31.800, 0.218	31.800, 0.236	31.800, 0.303	31.800, 0.286	31.800, 0.297	31.800, 0.316
161	32.000, 0.260	32.000, 0.241	32.000, 0.234	32.000, 0.194	32.000, 0.354	32.000, 0.245	32.000, 0.262	32.000, 0.329	32.000, 0.266	32.000, 0.271	32.000, 0.290	32.000, 0.364	32.000, 0.347	32.000, 0.355	32.000, 0.380
162	32.200, 0.320	32.200, 0.299	32.200, 0.290	32.200, 0.247	32.200, 0.419	32.200, 0.303	32.200, 0.318	32.200, 0.392	32.200, 0.324	32.200, 0.327	32.200, 0.346	32.200, 0.426	32.200, 0.409	32.200, 0.414	32.200, 0.446
163	32.400, 0.382	32.400, 0.358	32.400, 0.347	32.400, 0.303	32.400, 0.484	32.400, 0.363	32.400, 0.372	32.400, 0.454	32.400, 0.383	32.400, 0.381	32.400, 0.400	32.400, 0.485	32.400, 0.470	32.400, 0.470	32.400, 0.508
164	32.600, 0.443	32.600, 0.416	32.600, 0.402	32.600, 0.359	32.600, 0.546	32.600, 0.421	32.600, 0.425	32.600, 0.512	32.600, 0.440	32.600, 0.433	32.600, 0.452	32.600, 0.539	32.600, 0.527	32.600, 0.523	32.600, 0.568
165	32.800, 0.502	32.800, 0.472	32.800, 0.456	32.800, 0.415	32.800, 0.606	32.800, 0.478	32.800, 0.476	32.800, 0.567	32.800, 0.495	32.800, 0.481	32.800, 0.501	32.800, 0.589	32.800, 0.581	32.800, 0.572	32.800, 0.624
166	33.000, 0.560	33.000, 0.526	33.000, 0.507	33.000, 0.471	33.000, 0.663	33.000, 0.532	33.000, 0.524	33.000, 0.619	33.000, 0.547	33.000, 0.526	33.000, 0.546	33.000, 0.634	33.000, 0.632	33.000, 0.618	33.000, 0.677
167	33.200, 0.612	33.200, 0.576	33.200, 0.555	33.200, 0.523	33.200, 0.713	33.200, 0.582	33.200, 0.567	33.200, 0.665	33.200, 0.594	33.200, 0.566	33.200, 0.585	33.200, 0.673	33.200, 0.676	33.200, 0.657	33.200, 0.724
168	33.400, 0.660	33.400, 0.620	33.400, 0.598	33.400, 0.572	33.400, 0.757	33.400, 0.626	33.400, 0.606	33.400, 0.705	33.400, 0.635	33.400, 0.600	33.400, 0.620	33.400, 0.705	33.400, 0.716	33.400, 0.691	33.400, 0.766
169	33.600, 0.704	33.600, 0.660	33.600, 0.636	33.600, 0.617	33.600, 0.796	33.600, 0.667	33.600, 0.639	33.600, 0.740	33.600, 0.671	33.600, 0.630	33.600, 0.649	33.600, 0.732	33.600, 0.750	33.600, 0.721	33.600, 0.802
170	33.800, 0.741	33.800, 0.694	33.800, 0.669	33.800, 0.658	33.800, 0.829	33.800, 0.702	33.800, 0.669	33.800, 0.770	33.800, 0.702	33.800, 0.655	33.800, 0.675	33.800, 0.754	33.800, 0.780	33.800, 0.747	33.800, 0.834
171	34.000, 0.774	34.000, 0.723	34.000, 0.698	34.000, 0.695	34.000, 0.857	34.000, 0.732	34.000, 0.693	34.000, 0.795	34.000, 0.727	34.000, 0.676	34.000, 0.696	34.000, 0.772	34.000, 0.805	34.000, 0.769	34.000, 0.862
172	34.200, 0.802	34.200, 0.748	34.200, 0.723	34.200, 0.726	34.200, 0.880	34.200, 0.758	34.200, 0.714	34.200, 0.816	34.200, 0.749	34.200, 0.692	34.200, 0.713	34.200, 0.786	34.200, 0.828	34.200, 0.788	34.200, 0.886
173	34.400, 0.826	34.400, 0.769	34.400, 0.743	34.400, 0.754	34.400, 0.899	34.400, 0.780	34.400, 0.732	34.400, 0.834	34.400, 0.766	34.400, 0.706	34.400, 0.727	34.400, 0.798	34.400, 0.847	34.400, 0.805	34.400, 0.907
174	34.600, 0.846	34.600, 0.786	34.600, 0.760	34.600, 0.778	34.600, 0.914	34.600, 0.798	34.600, 0.746	34.600, 0.848	34.600, 0.781	34.600, 0.717	34.600, 0.739	34.600, 0.808	34.600, 0.864	34.600, 0.820	34.600, 0.925
175	34.800, 0.863	34.800, 0.799	34.800, 0.775	34.800, 0.798	34.800, 0.927	34.800, 0.813	34.800, 0.758	34.800, 0.861	34.800, 0.793	34.800, 0.725	34.800, 0.749	34.800, 0.816	34.800, 0.879	34.800, 0.833	34.800, 0.942
176	35.000, 0.877	35.000, 0.811	35.000, 0.786	35.000, 0.814	35.000, 0.937	35.000, 0.825	35.000, 0.768	35.000, 0.871	35.000, 0.802	35.000, 0.731	35.000, 0.757	35.000, 0.823	35.000, 0.893	35.000, 0.844	35.000, 0.956
177	35.200, 0.888	35.200, 0.820	35.200, 0.796	35.200, 0.828	35.200, 0.945	35.200, 0.834	35.200, 0.776	35.200, 0.879	35.200, 0.809	35.200, 0.737	35.200, 0.764	35.200, 0.829	35.200, 0.905	35.200, 0.855	35.200, 0.969
178	35.400, 0.897	35.400, 0.827	35.400, 0.804	35.400, 0.840	35.400, 0.952	35.400, 0.843	35.400, 0.783	35.400, 0.887	35.400, 0.816	35.400, 0.741	35.400, 0.770	35.400, 0.835	35.400, 0.917	35.400, 0.865	35.400, 0.981
179	35.600, 0.905	35.600, 0.834	35.600, 0.811	35.600, 0.850	35.600, 0.958	35.600, 0.850	35.600, 0.790	35.600, 0.894	35.600, 0.821	35.600, 0.745	35.600, 0.775	35.600, 0.840	35.600, 0.928	35.600, 0.874	35.600, 0.992
180	35.800, 0.911	35.800, 0.840	35.800, 0.817	35.800, 0.858	35.800, 0.963	35.800, 0.856	35.800, 0.795	35.800, 0.900	35.800, 0.826	35.800, 0.749	35.800, 0.779	35.800, 0.845	35.800, 0.939	35.800, 0.883	35.800, 1.003
181	36.000, 0.917	36.000, 0.845	36.000, 0.822	36.000, 0.865	36.000, 0.968	36.000, 0.862	36.000, 0.800	36.000, 0.906	36.000, 0.831	36.000, 0.753	36.000, 0.784	36.000, 0.849	36.000, 0.949	36.000, 0.892	36.000, 1.013
182	36.200, 0.922	36.200, 0.850	36.200, 0.827	36.200, 0.872	36.200, 0.973	36.200, 0.867	36.200, 0.804	36.200, 0.911	36.200, 0.835	36.200, 0.757	36.200, 0.788	36.200, 0.854	36.200, 0.959	36.200, 0.901	36.200, 1.022
183	36.400, 0.927	36.400, 0.855	36.400, 0.831	36.400, 0.878	36.400, 0.978	36.400, 0.872	36.400, 0.809	36.400, 0.916	36.400, 0.840	36.400, 0.761	36.400, 0.791	36.400, 0.858	36.400, 0.968	36.400, 0.909	36.400, 1.032
184	36.600, 0.931	36.600, 0.859	36.600, 0.835	36.600, 0.883	36.600, 0.982	36.600, 0.876	36.600, 0.813	36.600, 0.921	36.600, 0.844	36.600, 0.764	36.600, 0.795	36.600, 0.862	36.600, 0.978	36.600, 0.917	36.600, 1.041
185	36.800, 0.936	36.800, 0.864	36.800, 0.838	36.800, 0.888	36.800, 0.987	36.800, 0.880	36.800, 0.817	36.800, 0.925	36.800, 0.848	36.800, 0.767	36.800, 0.799	36.800, 0.866	36.800, 0.987	36.800, 0.925	36.800, 1.050
186	37.000, 0.940	37.000, 0.868	37.000, 0.841	37.000, 0.892	37.000, 0.991	37.000, 0.885	37.000, 0.821	37.000, 0.930	37.000, 0.852	37.000, 0.771	37.000, 0.802	37.000, 0.870	37.000, 0.996	37.000, 0.933	37.000, 1.059
187	37.200, 0.944	37.200, 0.871	37.200, 0.844	37.200, 0.896	37.200, 0.995	37.200, 0.889	37.200, 0.825	37.200, 0.934	37.200, 0.855	37.200, 0.774	37.200, 0.805	37.200, 0.874	37.200, 1.004	37.200, 0.940	37.200, 1.069
188	37.400, 0.947	37.400, 0.875	37.400, 0.847	37.400, 0.900	37.400, 0.999	37.400, 0.893	37.400, 0.828	37.400, 0.938	37.400, 0.859	37.400, 0.777	37.400, 0.808	37.400, 0.878	37.400, 1.013	37.400, 0.947	37.400, 1.077
189	37.600, 0.951	37.600, 0.879	37.600, 0.850	37.600, 0.904	37.600, 1.003	37.600, 0.896	37.600, 0.831	37.600, 0.942	37.600, 0.862	37.600, 0.780	37.600, 0.811	37.600, 0.881	37.600, 1.021	37.600, 0.955	37.600, 1.086
190	37.800, 0.955	37.800, 0.882	37.800, 0.853	37.800, 0.908	37.800, 1.006	37.800, 0.900	37.800, 0.834	37.800, 0.946	37.800, 0.865	37.800, 0.783	37.800, 0.814	37.800, 0.885	37.800, 1.029	37.800, 0.962	37.800, 1.095
191	38.000, 0.958	38.000, 0.886	38.000, 0.856	38.000, 0.912	38.000, 1.010	38.000, 0.904	38.000, 0.838	38.000, 0.949	38.000, 0.868	38.000, 0.786	38.000, 0.818	38.000, 0.889	38.000, 1.037	38.000, 0.969	38.000, 1.103
192	38.200, 0.962	38.200, 0.889	38.200, 0.860	38.200, 0.915	38.200, 1.014	38.200, 0.907	38.200, 0.841	38.200, 0.953	38.200, 0.871	38.200, 0.789	38.200, 0.821	38.200, 0.892	38.200, 1.045	38.200, 0.976	38.200, 1.112
193	38.400, 0.966	38.400, 0.892	38.400, 0.863	38.400, 0.919	38.400, 1.017	38.400, 0.911	38.400, 0.844	38.400, 0.956	38.400, 0.875	38.400, 0.791	38.400, 0.824	38.400, 0.896	38.400, 1.053	38.400, 0.983	38.400, 1.120
194	38.600, 0.969	38.600, 0.895	38.600, 0.866	38.600, 0.922	38.600, 1.021	38.600, 0.914	38.600, 0.847	38.600, 0.960	38.600, 0.878	38.600, 0.794	38.600, 0.826	38.600, 0.899	38.600, 1.061	38.600, 0.990	38.600, 1.127
195	38.800, 0.973	38.800, 0.898	38.800, 0.869	38.800, 0.925	38.800, 1.024	38.800, 0.918	38.800, 0.849	38.800, 0.963	38.800, 0.881	38.800, 0.796	38.800, 0.829	38.800, 0.903	38.800, 1.069	38.800, 0.997	38.800, 1.135
196	39.000, 0.977	39.000, 0.901	39.000, 0.872	39.000, 0.929	39.000, 1.027	39.000, 0.921	39.000, 0.852	39.000, 0.967	39.000, 0.884	39.000, 0.798	39.000, 0.832	39.000, 0.906	39.000, 1.076	39.000, 1.004	39.000, 1.143
197	39.200, 0.980	39.200, 0.904	39.200, 0.875	39.200, 0.932	39.200, 1.031	39.200, 0.924	39.200, 0.854	39.200, 0.970	39.200, 0.887	39.200, 0.800	39.200, 0.835	39.200, 0.909	39.200, 1.084	39.200, 1.011	39.200, 1.151
198	39.400, 0.983	39.400, 0.907	39.400, 0.877	39.400, 0.935	39.400, 1.034	39.400, 0.928	39.400, 0.857	39.400, 0.974	39.400, 0.890	39.400, 0.803	39.400, 0.838	39.400, 0.912	39.400, 1.092	39.400, 1.018	39.400, 1.158
199	39.600, 0.987	39.600, 0.911	39.600, 0.880	39.600, 0.938	39.600, 1.037	39.600, 0.931	39.600, 0.860	39.600, 0.978	39.600, 0.893	39.600, 0.805	39.600, 0.840	39.600, 0.915	39.600, 1.100	39.600, 1.024	39.600, 1.165
200	39.800, 0.990	39.800, 0.914	39.800, 0.883	39.800, 0.941	39.800, 1.040	39.800, 0.934	39.800, 0.862	39.800, 0.981	39.800, 0.896	39.800, 0.808	39.800, 0.843	39.800, 0.918	39.800, 1.108	39.800, 1.031	39.800, 1.173
201	40.000, 0.994	40.000, 0.917	40.000, 0.885	40.000, 0.944	40.000, 1.044	40.000, 0.938	40.000, 0.865	40.000, 0.985	40.000, 0.899	40.000, 0.810	40.000, 0.846	40.000, 0.921	40.000, 1.116	40.000, 1.037	40.000, 1.180
202	40.200, 0.997	40.200, 0.921	40.200, 0.887	40.200, 0.948	40.200, 1.047	40.200, 0.941	40.200, 0.867	40.200, 0.989	40.200, 0.902	40.200, 0.812	40.200, 0.848	40.200, 0.924	40.200, 1.124	40.200, 1.044	40.200, 1.187
203	40.400, 1.001	40.400, 0.924	40.400, 0.890	40.400, 0.951	40.400, 1.050	40.400, 0.944	40.400, 0.870	40.400, 0.993	40.400, 0.905	40.400, 0.815	40.400, 0.851	40.400, 0.927	40.400, 1.131	40.400, 1.050	40.400, 1.194
204	40.600, 1.004	40.600, 0.928	40.600, 0.891	40.600, 0.953	40.600, 1.053	40.600, 0.947	40.600, 0.873	40.600, 0.997	40.600, 0.908	40.600, 0.817	40.600, 0.853	40.600, 0.930	40.600, 1.139	40.600, 1.056	40.600, 1.202
205	40.800, 1.007	40.800, 0.931	40.800, 0.893	40.800, 0.956	40.800, 1.057	40.800, 0.950	40.800, 0.876	40.800, 1.001	40.800, 0.911	40.800, 0.820	40.800, 0.855	40.800, 0.933	40.800, 1.146	40.800, 1.063	40.800, 1.209
206	41.000, 1.010	41.000, 0.934	41.000, 0.895	41.000, 0.959	41.000, 1.060	41.000, 0.954	41.000, 0.878	41.000, 1.005	41.000, 0.913	41.000, 0.822	41.000, 0.858	41.000, 0.936	41.000, 1.154	41.000, 1.069	41.000, 1.217
207	41.200, 1.014	41.200, 0.937	41.200, 0.898	41.200, 0.961	41.200, 1.064	41.200, 0.957	41.200, 0.881	41.200, 1.009	41.200, 0.916	41.200, 0.825	41.200, 0.860	41.200, 0.939	41.200, 1.161	41.200, 1.075	41.200, 1.225
208	41.400, 1.017	41.400, 0.940	41.400, 0.900	41.400, 0.964	41.400, 1.068	41.400, 0.960	41.400, 0.884	41.400, 1.013	41.400, 0.919	41.400, 0.827	41.400, 0.863	41.400, 0.942	41.400, 1.168	41.400, 1.082	41.400, 1.232
209	41.600, 1.021	41.600, 0.943	41.600, 0.902	41.600, 0.967	41.600, 1.071	41.600, 0.964	41.600, 0.887	41.600, 1.016	41.600, 0.921	41.600, 0.830	41.600, 0.865	41.600, 0.945	41.600, 1.175	41.600, 1.088	41.600, 1.240
210	41.800, 1.024	41.800, 0.945	41.800, 0.905	41.800, 0.970	41.800, 1.075	41.800, 0.967	41.800, 0.890	41.800, 1.020	41.800, 0.924	41.800, 0.832	41.800, 0.868	41.800, 0.948	41.800, 1.182	41.800, 1.095	41.800, 1.248
211	42.000, 1.028	42.000, 0.948	42.000, 0.908	42.000, 0.973	42.000, 1.079	42.000, 0.971	42.000, 0.893	42.000, 1.023	42.000, 0.927	42.000, 0.835	42.000, 0.871	42.000, 0.951	42.000, 1.189	42.000, 1.101	42.000, 1.256
212	42.200, 1.032	42.200, 0.951	42.200, 0.910	42.200, 0.975	42.200, 1.083	42.200, 0.974	42.200, 0.896	42.200, 1.026	42.200, 0.929	42.200, 0.838	42.200, 0.874	42.200, 0.955	42.200, 1.195	42.200, 1.107	42.200, 1.264
213	42.400, 1.035	42.400, 0.953	42.400, 0.913	42.400, 0.978	42.400, 1.086	42.400, 0.977	42.400, 0.898	42.400, 1.029	42.400, 0.932	42.400, 0.840	42.400, 0.877	42.400, 0.958	42.400, 1.202	42.400, 1.113	42.400, 1.271
214	42.600, 1.039	42.600, 0.956	42.600, 0.916	42.600, 0.981	42.600, 1.090	42.600, 0.981	42.600, 0.900	42.600, 1.032	42.600, 0.935	42.600, 0.842	42.600, 0.880	42.600, 0.961	42.600, 1.209	42.600, 1.119	42.600, 1.279
215	42.800, 1.042	42.800, 0.959	42.800, 0.918	42.800, 0.984	42.800, 1.093	42.800, 0.984	42.800, 0.903	42.800, 1.036	42.800, 0.938	42.800, 0.845	42.800, 0.882	42.800, 0.964	42.800, 1.216	42.800, 1.125	42.800, 1.286
216	43.000, 1.045	43.000, 0.961	43.000, 0.921	43.000, 0.987	43.000, 1.097	43.000, 0.987	43.000, 0.905	43.000, 1.039	43.000, 0.941	43.000, 0.847	43.000, 0.885	43.000, 0.968	43.000, 1.223	43.000, 1.131	43.000, 1.293
217	43.200, 1.048	43.200, 0.964	43.200, 0.924	43.200, 0.991	43.200, 1.100	43.200, 0.990	43.200, 0.907	43.200, 1.042	43.200, 0.944	43.200, 0.849	43.200, 0.888	43.200, 0.971	43.200, 1.230	43.200, 1.136	43.200, 1.300
218	43.400, 1.052	43.400, 0.967	43.400, 0.926	43.400, 0.994	43.400, 1.103	43.400, 0.993	43.400, 0.909	43.400, 1.045	43.400, 0.947	43.400, 0.852	43.400, 0.890	43.400, 0.974	43.400, 1.237	43.400, 1.142	43.400, 1.307
219	43.600, 1.055	43.600, 0.970	43.600, 0.929	43.600, 0.998	43.600, 1.107	43.600, 0.996	43.600, 0.912	43.600, 1.049	43.600, 0.951	43.600, 0.854	43.600, 0.893	43.600, 0.978	43.600, 1.244	43.600, 1.147	43.600, 1.314
220	43.800, 1.058	43.800, 0.972	43.800, 0.932	43.800, 1.002	43.800, 1.110	43.800, 0.998	43.800, 0.914	43.800, 1.052	43.800, 0.954	43.800, 0.857	43.800, 0.895	43.800, 0.981	43.800, 1.250	43.800, 1.153	43.800, 1.321
221	44.000, 1.061	44.000, 0.975	44.000, 0.934	44.000, 1.006	44.000, 1.113	44.000, 1.001	44.000, 0.916	44.000, 1.056	44.000, 0.957	44.000, 0.859	44.000, 0.898	44.000, 0.985	44.000, 1.257	44.000, 1.159	44.000, 1.328
222	44.200, 1.064	44.200, 0.978	44.200, 0.937	44.200, 1.009	44.200, 1.116	44.200, 1.003	44.200, 0.919	44.200, 1.059	44.200, 0.959	44.200, 0.861	44.200, 0.900	44.200, 0.988	44.200, 1.264	44.200, 1.164	44.200, 1.335
223	44.400, 1.067	44.400, 0.981	44.400, 0.939	44.400, 1.012	44.400, 1.120	44.400, 1.006	44.400, 0.921	44.400, 1.063	44.400, 0.962	44.400, 0.864	44.400, 0.903	44.400, 0.992	44.400, 1.271	44.400, 1.170	44.400, 1.342
224	44.600, 1.070	44.600, 0.984	44.600, 0.941	44.600, 1.015	44.600, 1.124	44.600, 1.009	44.600, 0.924	44.600, 1.067	44.600, 0.965	44.600, 0.866	44.600, 0.906	44.600, 0.996	44.600, 1.278	44.600, 1.176	44.600, 1.348
225	44.800, 1.073	44.800, 0.987	44.800, 0.944	44.800, 1.018	44.800, 1.127	44.800, 1.012	44.800, 0.926	44.800, 1.070	44.800, 0.968	44.800, 0.869	44.800, 0.909	44.800, 0.999	44.800, 1.285	44.800, 1.182	44.800, 1.355
226	45.000, 1.075	45.000, 0.990	45.000, 0.946	45.000, 1.021	45.000, 1.131	45.000, 1.015	45.000, 0.929	45.000, 1.074	45.000, 0.971	45.000, 0.871	45.000, 0.911	45.000, 1.003	45.000, 1.291	45.000, 1.188	45.000, 1.362
227	45.200, 1.078	45.200, 0.992	45.200, 0.949	45.200, 1.024	45.200, 1.134	45.200, 1.018	45.200, 0.932	45.200, 1.077	45.200, 0.973	45.200, 0.874	45.200, 0.914	45.200, 1.006	45.200, 1.298	45.200, 1.194	45.200, 1.369
228	45.400, 1.081	45.400, 0.995	45.400, 0.951	45.400, 1.026	45.400, 1.138	45.400, 1.022	45.400, 0.934	45.400, 1.081	45.400, 0.976	45.400, 0.877	45.400, 0.916	45.400, 1.009	45.400, 1.305	45.400, 1.201	45.400, 1.376
229	45.600, 1.084	45.600, 0.997	45.600, 0.953	45.600, 1.029	45.600, 1.141	45.600, 1.025	45.600, 0.937	45.600, 1.084	45.600, 0.979	45.600, 0.880	45.600, 0.919	45.600, 1.012	45.600, 1.311	45.600, 1.207	45.600, 1.383
230	45.800, 1.087	45.800, 1.000	45.800, 0.956	45.800, 1.032	45.800, 1.144	45.800, 1.028	45.800, 0.939	45.800, 1.087	45.800, 0.981	45.800, 0.882	45.800, 0.921	45.800, 1.015	45.800, 1.318	45.800, 1.213	45.800, 1.389
231	46.000, 1.090	46.000, 1.003	46.000, 0.958	46.000, 1.034	46.000, 1.147	46.000, 1.031	46.000, 0.941	46.000, 1.091	46.000, 0.984	46.000, 0.885	46.000, 0.924	46.000, 1.018	46.000, 1.324	46.000, 1.219	46.000, 1.396
232	46.200, 1.093	46.200, 1.005	46.200, 0.960	46.200, 1.037	46.200, 1.150	46.200, 1.034	46.200, 0.943	46.200, 1.094	46.200, 0.987	46.200, 0.887	46.200, 0.926	46.200, 1.021	46.200, 1.330	46.200, 1.224	46.200, 1.403
233	46.400, 1.097	46.400, 1.008	46.400, 0.962	46.400, 1.039	46.400, 1.153	46.400, 1.037	46.400, 0.945	46.400, 1.097	46.400, 0.990	46.400, 0.889	46.400, 0.929	46.400, 1.024	46.400, 1.336	46.400, 1.230	46.400, 1.409
234	46.600, 1.100	46.600, 1.011	46.600, 0.965	46.600, 1.042	46.600, 1.156	46.600, 1.039	46.600, 0.947	46.600, 1.101	46.600, 0.993	46.600, 0.891	46.600, 0.931	46.600, 1.027	46.600, 1.342	46.600, 1.235	46.600, 1.415
235	46.800, 1.103	46.800, 1.014	46.800, 0.967	46.800, 1.044	46.800, 1.159	46.800, 1.042	46.800, 0.949	46.800, 1.104	46.800, 0.996	46.800, 0.893	46.800, 0.934	46.800, 1.029	46.800, 1.348	46.800, 1.240	46.800, 1.421
236	47.000, 1.107	47.000, 1.016	47.000, 0.970	47.000, 1.047	47.000, 1.162	47.000, 1.045	47.000, 0.951	47.000, 1.107	47.000, 0.999	47.000, 0.895	47.000, 0.936	47.000, 1.032	47.000, 1.354	47.000, 1.245	47.000, 1.428
237	47.200, 1.110	47.200, 1.019	47.200, 0.972	47.200, 1.051	47.200, 1.165	47.200, 1.047	47.200, 0.953	47.200, 1.111	47.200, 1.002	47.200, 0.897	47.200, 0.939	47.200, 1.034	47.200, 1.360	47.200, 1.251	47.200, 1.434
238	47.400, 1.113	47.400, 1.021	47.400, 0.975	47.400, 1.054	47.400, 1.167	47.400, 1.050	47.400, 0.956	47.400, 1.114	47.400, 1.005	47.400, 0.900	47.400, 0.941	47.400, 1.037	47.400, 1.365	47.400, 1.256	47.400, 1.440
239	47.600, 1.116	47.600, 1.024	47.600, 0.977	47.600, 1.057	47.600, 1.170	47.600, 1.052	47.600, 0.958	47.600, 1.118	47.600, 1.008	47.600, 0.902	47.600, 0.944	47.600, 1.039	47.600, 1.371	47.600, 1.261	47.600, 1.447
240	47.800, 1.119	47.800, 1.026	47.800, 0.979	47.800, 1.060	47.800, 1.173	47.800, 1.055	47.800, 0.961	47.800, 1.121	47.800, 1.011	47.800, 0.904	47.800, 0.946	47.800, 1.042	47.800, 1.376	47.800, 1.266	47.800, 1.453
241	48.000, 1.122	48.000, 1.029	48.000, 0.981	48.000, 1.062	48.000, 1.176	48.000, 1.058	48.000, 0.963	48.000, 1.124	48.000, 1.013	48.000, 0.906	48.000, 0.949	48.000, 1.045	48.000, 1.382	48.000, 1.271	48.000, 1.458
242	48.200, 1.125	48.200, 1.031	48.200, 0.983	48.200, 1.065	48.200, 1.179	48.200, 1.061	48.200, 0.966	48.200, 1.128	48.200, 1.016	48.200, 0.907	48.200, 0.951	48.200, 1.048	48.200, 1.388	48.200, 1.276	48.200, 1.464
243	48.400, 1.128	48.400, 1.034	48.400, 0.985	48.400, 1.068	48.400, 1.182	48.400, 1.064	48.400, 0.968	48.400, 1.131	48.400, 1.018	48.400, 0.909	48.400, 0.953	48.400, 1.051	48.400, 1.394	48.400, 1.281	48.400, 1.470
244	48.600, 1.130	48.600, 1.036	48.600, 0.987	48.600, 1.070	48.600, 1.184	48.600, 1.066	48.600, 0.971	48.600, 1.134	48.600, 1.020	48.600, 0.911	48.600, 0.955	48.600, 1.053	48.600, 1.400	48.600, 1.286	48.600, 1.475
245	48.800, 1.133	48.800, 1.039	48.800, 0.989	48.800, 1.073	48.800, 1.188	48.800, 1.070	48.800, 0.973	48.800, 1.137	48.800, 1.022	48.800, 0.913	48.800, 0.957	48.800, 1.056	48.800, 1.406	48.800, 1.292	48.800, 1.481
246	49.000, 1.135	49.000, 1.041	49.000, 0.991	49.000, 1.076	49.000, 1.190	49.000, 1.072	49.000, 0.975	49.000, 1.141	49.000, 1.025	49.000, 0.915	49.000, 0.959	49.000, 1.059	49.000, 1.412	49.000, 1.297	49.000, 1.487
247	49.200, 1.137	49.200, 1.043	49.200, 0.992	49.200, 1.078	49.200, 1.193	49.200, 1.075	49.200, 0.978	49.200, 1.143	49.200, 1.027	49.200, 0.917	49.200, 0.961	49.200, 1.062	49.200, 1.418	49.200, 1.302	49.200, 1.493
248	49.400, 1.140	49.400, 1.045	49.400, 0.994	49.400, 1.080	49.400, 1.196	49.400, 1.078	49.400, 0.980	49.400, 1.146	49.400, 1.029	49.400, 0.919	49.400, 0.963	49.400, 1.065	49.400, 1.423	49.400, 1.306	49.400, 1.499
249	49.600, 1.142	49.600, 1.047	49.600, 0.995	49.600, 1.083	49.600, 1.199	49.600, 1.081	49.600, 0.982	49.600, 1.149	49.600, 1.031	49.600, 0.921	49.600, 0.966	49.600, 1.068	49.600, 1.429	49.600, 1.311	49.600, 1.505
250	49.800, 1.145	49.800, 1.049	49.800, 0.997	49.800, 1.085	49.800, 1.202	49.800, 1.083	49.800, 0.983	49.800, 1.152	49.800, 1.033	49.800, 0.923	49.800, 0.968	49.800, 1.071	49.800, 1.435	49.800, 1.316	49.800, 1.511
251	50.000, 1.147	50.000, 1.052	50.000, 0.999	50.000, 1.088	50.000, 1.205	50.000, 1.086	50.000, 0.985	50.000, 1.154	50.000, 1.036	50.000, 0.924	50.000, 0.970	50.000, 1.074	50.000, 1.441	50.000, 1.320	50.000, 1.516
252	50.200, 1.150	50.200, 1.054	50.200, 1.000	50.200, 1.091	50.200, 1.208	50.200, 1.089	50.200, 0.987	50.200, 1.157	50.200, 1.038	50.200, 0.926	50.200, 0.973	50.200, 1.076	50.200, 1.447	50.200, 1.325	50.200, 1.522
253	50.400, 1.153	50.400, 1.056	50.400, 1.002	50.400, 1.094	50.400, 1.211	50.400, 1.091	50.400, 0.989	50.400, 1.160	50.400, 1.040	50.400, 0.928	50.400, 0.975	50.400, 1.079	50.400, 1.452	50.400, 1.330	50.400, 1.528
254	50.600, 1.156	50.600, 1.058	50.600, 1.004	50.600, 1.097	50.600, 1.213	50.600, 1.094	50.600, 0.991	50.600, 1.163	50.600, 1.042	50.600, 0.930	50.600, 0.977	50.600, 1.081	50.600, 1.457	50.600, 1.334	50.600, 1.533
255	50.800, 1.158	50.800, 1.060	50.800, 1.006	50.800, 1.099	50.800, 1.216	50.800, 1.097	50.800, 0.993	50.800, 1.166	50.800, 1.045	50.800, 0.932	50.800, 0.980	50.800, 1.084	50.800, 1.463	50.800, 1.339	50.800, 1.539
256	51.000, 1.161	51.000, 1.062	51.000, 1.008	51.000, 1.102	51.000, 1.218	51.000, 1.099	51.000, 0.994	51.000, 1.169	51.000, 1.047	51.000, 0.933	51.000, 0.982	51.000, 1.086	51.000, 1.467	51.000, 1.344	51.000, 1.545
257	51.200, 1.164	51.200, 1.064	51.200, 1.010	51.200, 1.105	51.200, 1.220	51.200, 1.102	51.200, 0.996	51.200, 1.172	51.200, 1.050	51.200, 0.935	51.200, 0.984	51.200, 1.088	51.200, 1.472	51.200, 1.348	51.200, 1.550
258	51.400, 1.166	51.400, 1.067	51.400, 1.012	51.400, 1.107	51.400, 1.222	51.400, 1.104	51.400, 0.998	51.400, 1.175	51.400, 1.052	51.400, 0.936	51.400, 0.986	51.400, 1.091	51.400, 1.477	51.400, 1.353	51.400, 1.556
259	51.600, 1.169	51.600, 1.069	51.600, 1.014	51.600, 1.110	51.600, 1.224	51.600, 1.107	51.600, 1.000	51.600, 1.178	51.600, 1.055	51.600, 0.938	51.600, 0.988	51.600, 1.093	51.600, 1.482	51.600, 1.357	51.600, 1.561
260	51.800, 1.171	51.800, 1.071	51.800, 1.016	51.800, 1.113	51.800, 1.226	51.800, 1.109	51.800, 1.001	51.800, 1.181	51.800, 1.057	51.800, 0.940	51.800, 0.990	51.800, 1.096	51.800, 1.487	51.800, 1.362	51.800, 1.566
261	52.000, 1.173	52.000, 1.073	52.000, 1.018	52.000, 1.115	52.000, 1.228	52.000, 1.112	52.000, 1.003	52.000, 1.183	52.000, 1.058	52.000, 0.942	52.000, 0.992	52.000, 1.098	52.000, 1.492	52.000, 1.366	52.000, 1.571
262	52.200, 1.176	52.200, 1.075	52.200, 1.020	52.200, 1.118	52.200, 1.230	52.200, 1.114	52.200, 1.005	52.200, 1.186	52.200, 1.060	52.200, 0.944	52.200, 0.993	52.200, 1.101	52.200, 1.497	52.200, 1.370	52.200, 1.576
263	52.400, 1.177	52.400, 1.077	52.400, 1.023	52.400, 1.120	52.400, 1.232	52.400, 1.116	52.400, 1.007	52.400, 1.189	52.400, 1.062	52.400, 0.946	52.400, 0.995	52.400, 1.103	52.400, 1.502	52.400, 1.375	52.400, 1.582
264	52.600, 1.179	52.600, 1.078	52.600, 1.025	52.600, 1.123	52.600, 1.234	52.600, 1.118	52.600, 1.009	52.600, 1.191	52.600, 1.064	52.600, 0.949	52.600, 0.996	52.600, 1.105	52.600, 1.507	52.600, 1.379	52.600, 1.587
265	52.800, 1.181	52.800, 1.080	52.800, 1.026	52.800, 1.125	52.800, 1.236	52.800, 1.120	52.800, 1.011	52.800, 1.194	52.800, 1.067	52.800, 0.951	52.800, 0.998	52.800, 1.108	52.800, 1.512	52.800, 1.384	52.800, 1.592
266	53.000, 1.183	53.000, 1.081	53.000, 1.028	53.000, 1.127	53.000, 1.239	53.000, 1.123	53.000, 1.013	53.000, 1.197	53.000, 1.069	53.000, 0.953	53.000, 0.999	53.000, 1.110	53.000, 1.517	53.000, 1.389	53.000, 1.597
267	53.200, 1.185	53.200, 1.083	53.200, 1.030	53.200, 1.129	53.200, 1.241	53.200, 1.125	53.200, 1.015	53.200, 1.199	53.200, 1.071	53.200, 0.955	53.200, 1.001	53.200, 1.113	53.200, 1.522	53.200, 1.393	53.200, 1.602
268	53.400, 1.187	53.400, 1.084	53.400, 1.031	53.400, 1.131	53.400, 1.244	53.400, 1.127	53.400, 1.017	53.400, 1.201	53.400, 1.073	53.400, 0.957	53.400, 1.003	53.400, 1.115	53.400, 1.527	53.400, 1.398	53.400, 1.607
269	53.600, 1.189	53.600, 1.086	53.600, 1.033	53.600, 1.133	53.600, 1.246	53.600, 1.129	53.600, 1.019	53.600, 1.203	53.600, 1.075	53.600, 0.959	53.600, 1.004	53.600, 1.117	53.600, 1.532	53.600, 1.403	53.600, 1.612
270	53.800, 1.191	53.800, 1.088	53.800, 1.034	53.800, 1.136	53.800, 1.249	53.800, 1.131	53.800, 1.020	53.800, 1.205	53.800, 1.076	53.800, 0.961	53.800, 1.006	53.800, 1.120	53.800, 1.537	53.800, 1.408	53.800, 1.616
271	54.000, 1.193	54.000, 1.089	54.000, 1.036	54.000, 1.138	54.000, 1.251	54.000, 1.132	54.000, 1.022	54.000, 1.207	54.000, 1.078	54.000, 0.963	54.000, 1.008	54.000, 1.122	54.000, 1.542	54.000, 1.412	54.000, 1.621
272	54.200, 1.195	54.200, 1.091	54.200, 1.037	54.200, 1.141	54.200, 1.254	54.200, 1.135	54.200, 1.024	54.200, 1.209	54.200, 1.079	54.200, 0.965	54.200, 1.010	54.200, 1.124	54.200, 1.548	54.200, 1.417	54.200, 1.626
273	54.400, 1.197	54.400, 1.093	54.400, 1.038	54.400, 1.143	54.400, 1.256	54.400, 1.136	54.400, 1.026	54.400, 1.211	54.400, 1.081	54.400, 0.966	54.400, 1.011	54.400, 1.126	54.400, 1.552	54.400, 1.422	54.400, 1.631
274	54.600, 1.199	54.600, 1.095	54.600, 1.039	54.600, 1.145	54.600, 1.258	54.600, 1.138	54.600, 1.027	54.600, 1.214	54.600, 1.082	54.600, 0.967	54.600, 1.013	54.600, 1.128	54.600, 1.557	54.600, 1.426	54.600, 1.636
275	54.800, 1.201	54.800, 1.097	54.800, 1.041	54.800, 1.147	54.800, 1.260	54.800, 1.140	54.800, 1.028	54.800, 1.216	54.800, 1.084	54.800, 0.969	54.800, 1.015	54.800, 1.130	54.800, 1.562	54.800, 1.430	54.800, 1.641
276	55.000, 1.203	55.000, 1.099	55.000, 1.042	55.000, 1.149	55.000, 1.262	55.000, 1.142	55.000, 1.030	55.000, 1.218	55.000, 1.086	55.000, 0.970	55.000, 1.017	55.000, 1.132	55.000, 1.566	55.000, 1.434	55.000, 1.646
277	55.200, 1.205	55.200, 1.101	55.200, 1.044	55.200, 1.151	55.200, 1.264	55.200, 1.144	55.200, 1.031	55.200, 1.220	55.200, 1.088	55.200, 0.971	55.200, 1.018	55.200, 1.134	55.200, 1.571	55.200, 1.438	55.200, 1.651
278	55.400, 1.207	55.400, 1.103	55.400, 1.045	55.400, 1.153	55.400, 1.266	55.400, 1.146	55.400, 1.032	55.400, 1.222	55.400, 1.090	55.400, 0.972	55.400, 1.020	55.400, 1.136	55.400, 1.575	55.400, 1.442	55.400, 1.656
279	55.600, 1.209	55.600, 1.105	55.600, 1.047	55.600, 1.156	55.600, 1.269	55.600, 1.147	55.600, 1.034	55.600, 1.225	55.600, 1.091	55.600, 0.973	55.600, 1.022	55.600, 1.137	55.600, 1.580	55.600, 1.446	55.600, 1.662
280	55.800, 1.211	55.800, 1.107	55.800, 1.049	55.800, 1.158	55.800, 1.270	55.800, 1.149	55.800, 1.035	55.800, 1.227	55.800, 1.093	55.800, 0.975	55.800, 1.024	55.800, 1.139	55.800, 1.584	55.800, 1.450	55.800, 1.667
281	56.000, 1.212	56.000, 1.108	56.000, 1.051	56.000, 1.160	56.000, 1.272	56.000, 1.150	56.000, 1.036	56.000, 1.230	56.000, 1.095	56.000, 0.976	56.000, 1.025	56.000, 1.141	56.000, 1.589	56.000, 1.454	56.000, 1.672
282	56.200, 1.214	56.200, 1.109	56.200, 1.053	56.200, 1.162	56.200, 1.274	56.200, 1.152	56.200, 1.037	56.200, 1.232	56.200, 1.097	56.200, 0.978	56.200, 1.027	56.200, 1.143	56.200, 1.593	56.200, 1.458	56.200, 1.677
283	56.400, 1.216	56.400, 1.110	56.400, 1.054	56.400, 1.163	56.400, 1.275	56.400, 1.154	56.400, 1.039	56.400, 1.234	56.400, 1.099	56.400, 0.980	56.400, 1.028	56.400, 1.145	56.400, 1.598	56.400, 1.461	56.400, 1.683
284	56.600, 1.217	56.600, 1.111	56.600, 1.055	56.600, 1.165	56.600, 1.277	56.600, 1.155	56.600, 1.040	56.600, 1.237	56.600, 1.101	56.600, 0.981	56.600, 1.030	56.600, 1.147	56.600, 1.602	56.600, 1.465	56.600, 1.688
285	56.800, 1.219	56.800, 1.113	56.800, 1.056	56.800, 1.167	56.800, 1.278	56.800, 1.157	56.800, 1.041	56.800, 1.239	56.800, 1.103	56.800, 0.983	56.800, 1.031	56.800, 1.148	56.800, 1.607	56.800, 1.469	56.800, 1.693
286	57.000, 1.221	57.000, 1.114	57.000, 1.057	57.000, 1.169	57.000, 1.279	57.000, 1.159	57.000, 1.043	57.000, 1.241	57.000, 1.105	57.000, 0.984	57.000, 1.033	57.000, 1.150	57.000, 1.611	57.000, 1.473	57.000, 1.698
287	57.200, 1.223	57.200, 1.115	57.200, 1.058	57.200, 1.170	57.200, 1.280	57.200, 1.160	57.200, 1.044	57.200, 1.243	57.200, 1.107	57.200, 0.986	57.200, 1.035	57.200, 1.152	57.200, 1.616	57.200, 1.477	57.200, 1.703
288	57.400, 1.224	57.400, 1.117	57.400, 1.059	57.400, 1.172	57.400, 1.282	57.400, 1.162	57.400, 1.045	57.400, 1.244	57.400, 1.108	57.400, 0.987	57.400, 1.036	57.400, 1.154	57.400, 1.620	57.400, 1.480	57.400, 1.707
289	57.600, 1.226	57.600, 1.118	57.600, 1.060	57.600, 1.174	57.600, 1.283	57.600, 1.164	57.600, 1.046	57.600, 1.246	57.600, 1.110	57.600, 0.988	57.600, 1.038	57.600, 1.156	57.600, 1.625	57.600, 1.484	57.600, 1.712
290	57.800, 1.227	57.800, 1.119	57.800, 1.061	57.800, 1.176	57.800, 1.284	57.800, 1.165	57.800, 1.048	57.800, 1.248	57.800, 1.112	57.800, 0.989	57.800, 1.039	57.800, 1.157	57.800, 1.629	57.800, 1.488	57.800, 1.717
291	58.000, 1.229	58.000, 1.120	58.000, 1.062	58.000, 1.178	58.000, 1.285	58.000, 1.167	58.000, 1.049	58.000, 1.250	58.000, 1.113	58.000, 0.990	58.000, 1.040	58.000, 1.159	58.000, 1.633	58.000, 1.492	58.000, 1.721
292	58.200, 1.230	58.200, 1.121	58.200, 1.063	58.200, 1.180	58.200, 1.287	58.200, 1.169	58.200, 1.050	58.200, 1.251	58.200, 1.114	58.200, 0.991	58.200, 1.042	58.200, 1.160	58.200, 1.637	58.200, 1.496	58.200, 1.726
293	58.400, 1.231	58.400, 1.122	58.400, 1.063	58.400, 1.182	58.400, 1.288	58.400, 1.170	58.400, 1.052	58.400, 1.253	58.400, 1.116	58.400, 0.992	58.400, 1.043	58.400, 1.162	58.400, 1.642	58.400, 1.500	58.400, 1.730
294	58.600, 1.232	58.600, 1.123	58.600, 1.064	58.600, 1.184	58.600, 1.290	58.600, 1.172	58.600, 1.053	58.600, 1.254	58.600, 1.117	58.600, 0.992	58.600, 1.045	58.600, 1.163	58.600, 1.646	58.600, 1.504	58.600, 1.734
295	58.800, 1.234	58.800, 1.125	58.800, 1.065	58.800, 1.186	58.800, 1.291	58.800, 1.173	58.800, 1.054	58.800, 1.256	58.800, 1.118	58.800, 0.993	58.800, 1.046	58.800, 1.164	58.800, 1.649	58.800, 1.507	58.800, 1.738
296	59.000, 1.235	59.000, 1.126	59.000, 1.066	59.000, 1.188	59.000, 1.293	59.000, 1.174	59.000, 1.055	59.000, 1.257	59.000, 1.119	59.000, 0.994	59.000, 1.047	59.000, 1.165	59.000, 1.653	59.000, 1.511	59.000, 1.743
297	59.200, 1.236	59.200, 1.127	59.200, 1.067	59.200, 1.189	59.200, 1.294	59.200, 1.176	59.200, 1.056	59.200, 1.259	59.200, 1.120	59.200, 0.995	59.200, 1.048	59.200, 1.166	59.200, 1.657	59.200, 1.514	59.200, 1.747
298	59.400, 1.238	59.400, 1.128	59.400, 1.068	59.400, 1.191	59.400, 1.296	59.400, 1.177	59.400, 1.057	59.400, 1.260	59.400, 1.121	59.400, 0.996	59.400, 1.050	59.400, 1.168	59.400, 1.661	59.400, 1.517	59.400, 1.751
299	59.600, 1.239	59.600, 1.129	59.600, 1.069	59.600, 1.192	59.600, 1.297	59.600, 1.178	59.600, 1.058	59.600, 1.262	59.600, 1.122	59.600, 0.997	59.600, 1.051	59.600, 1.169	59.600, 1.665	59.600, 1.521	59.600, 1.755
300	59.800, 1.240	59.800, 1.130	59.800, 1.070	59.800, 1.193	59.800, 1.299	59.800, 1.179	59.800, 1.059	59.800, 1.263	59.800, 1.123	59.800, 0.999	59.800, 1.052	59.800, 1.171	59.800, 1.669	59.800, 1.524	59.800, 1.759
301	60.000, 1.242	60.000, 1.131	60.000, 1.071	60.000, 1.195	60.000, 1.300	60.000, 1.180	60.000, 1.060	60.000, 1.265	60.000, 1.124	60.000, 1.000	60.000, 1.053	60.000, 1.173	60.000, 1.673	60.000, 1.528	60.000, 1.763
302	60.200, 1.243	60.200, 1.131	60.200, 1.072	60.200, 1.196	60.200, 1.302	60.200, 1.182	60.200, 1.061	60.200, 1.266	60.200, 1.125	60.200, 1.001	60.200, 1.054	60.200, 1.174	60.200, 1.677	60.200, 1.531	60.200, 1.767
303	60.400, 1.244	60.400, 1.132	60.400, 1.073	60.400, 1.198	60.400, 1.303	60.400, 1.183	60.400, 1.063	60.400, 1.267	60.400, 1.126	60.400, 1.002	60.400, 1.055	60.400, 1.176	60.400, 1.681	60.400, 1.535	60.400, 1.771
304	60.600, 1.246	60.600, 1.133	60.600, 1.075	60.600, 1.199	60.600, 1.305	60.600, 1.184	60.600, 1.064	60.600, 1.269	60.600, 1.128	60.600, 1.003	60.600, 1.057	60.600, 1.178	60.600, 1.686	60.600, 1.538	60.600, 1.776
305	60.800, 1.247	60.800, 1.134	60.800, 1.076	60.800, 1.201	60.800, 1.306	60.800, 1.186	60.800, 1.065	60.800, 1.270	60.800, 1.129	60.800, 1.005	60.800, 1.058	60.800, 1.179	60.800, 1.690	60.800, 1.542	60.800, 1.781
306	61.000, 1.248	61.000, 1.135	61.000, 1.078	61.000, 1.202	61.000, 1.307	61.000, 1.187	61.000, 1.066	61.000, 1.272	61.000, 1.130	61.000, 1.006	61.000, 1.059	61.000, 1.181	61.000, 1.694	61.000, 1.545	61.000, 1.785
307	61.200, 1.250	61.200, 1.136	61.200, 1.079	61.200, 1.204	61.200, 1.309	61.200, 1.188	61.200, 1.067	61.200, 1.274	61.200, 1.132	61.200, 1.007	61.200, 1.060	61.200, 1.183	61.200, 1.698	61.200, 1.549	61.200, 1.790
308	61.400, 1.251	61.400, 1.137	61.400, 1.080	61.400, 1.205	61.400, 1.310	61.400, 1.189	61.400, 1.069	61.400, 1.276	61.400, 1.133	61.400, 1.008	61.400, 1.061	61.400, 1.184	61.400, 1.702	61.400, 1.552	61.400, 1.794
309	61.600, 1.252	61.600, 1.138	61.600, 1.081	61.600, 1.207	61.600, 1.311	61.600, 1.190	61.600, 1.070	61.600, 1.278	61.600, 1.134	61.600, 1.009	61.600, 1.062	61.600, 1.186	61.600, 1.706	61.600, 1.555	61.600, 1.798
310	61.800, 1.253	61.800, 1.139	61.800, 1.082	61.800, 1.208	61.800, 1.312	61.800, 1.191	61.800, 1.071	61.800, 1.280	61.800, 1.136	61.800, 1.010	61.800, 1.062	61.800, 1.187	61.800, 1.710	61.800, 1.559	61.800, 1.802
311	62.000, 1.255	62.000, 1.140	62.000, 1.083	62.000, 1.209	62.000, 1.314	62.000, 1.192	62.000, 1.072	62.000, 1.281	62.000, 1.137	62.000, 1.011	62.000, 1.063	62.000, 1.188	62.000, 1.714	62.000, 1.562	62.000, 1.806
312	62.200, 1.256	62.200, 1.141	62.200, 1.084	62.200, 1.211	62.200, 1.315	62.200, 1.193	62.200, 1.074	62.200, 1.283	62.200, 1.138	62.200, 1.012	62.200, 1.064	62.200, 1.189	62.200, 1.718	62.200, 1.565	62.200, 1.810
313	62.400, 1.257	62.400, 1.142	62.400, 1.084	62.400, 1.212	62.400, 1.316	62.400, 1.195	62.400, 1.075	62.400, 1.284	62.400, 1.139	62.400, 1.013	62.400, 1.064	62.400, 1.191	62.400, 1.722	62.400, 1.569	62.400, 1.814
314	62.600, 1.259	62.600, 1.143	62.600, 1.085	62.600, 1.213	62.600, 1.317	62.600, 1.196	62.600, 1.076	62.600, 1.285	62.600, 1.141	62.600, 1.013	62.600, 1.065	62.600, 1.192	62.600, 1.725	62.600, 1.572	62.600, 1.818
315	62.800, 1.260	62.800, 1.144	62.800, 1.086	62.800, 1.213	62.800, 1.319	62.800, 1.197	62.800, 1.077	62.800, 1.286	62.800, 1.142	62.800, 1.014	62.800, 1.067	62.800, 1.192	62.800, 1.729	62.800, 1.575	62.800, 1.822
316	63.000, 1.261	63.000, 1.144	63.000, 1.086	63.000, 1.214	63.000, 1.320	63.000, 1.198	63.000, 1.077	63.000, 1.288	63.000, 1.143	63.000, 1.015	63.000, 1.068	63.000, 1.193	63.000, 1.733	63.000, 1.578	63.000, 1.826
317	63.200, 1.262	63.200, 1.145	63.200, 1.087	63.200, 1.215	63.200, 1.322	63.200, 1.199	63.200, 1.078	63.200, 1.289	63.200, 1.145	63.200, 1.016	63.200, 1.069	63.200, 1.194	63.200, 1.736	63.200, 1.581	63.200, 1.829
318	63.400, 1.263	63.400, 1.145	63.400, 1.088	63.400, 1.216	63.400, 1.323	63.400, 1.200	63.400, 1.079	63.400, 1.290	63.400, 1.146	63.400, 1.017	63.400, 1.070	63.400, 1.195	63.400, 1.740	63.400, 1.585	63.400, 1.833
319	63.600, 1.264	63.600, 1.146	63.600, 1.089	63.600, 1.217	63.600, 1.325	63.600, 1.201	63.600, 1.080	63.600, 1.291	63.600, 1.147	63.600, 1.018	63.600, 1.071	63.600, 1.196	63.600, 1.743	63.600, 1.589	63.600, 1.836
320	63.800, 1.265	63.800, 1.146	63.800, 1.089	63.800, 1.219	63.800, 1.326	63.800, 1.203	63.800, 1.080	63.800, 1.292	63.800, 1.149	63.800, 1.019	63.800, 1.072	63.800, 1.198	63.800, 1.747	63.800, 1.592	63.800, 1.840
321	64.000, 1.266	64.000, 1.147	64.000, 1.090	64.000, 1.220	64.000, 1.327	64.000, 1.204	64.000, 1.081	64.000, 1.293	64.000, 1.150	64.000, 1.020	64.000, 1.074	64.000, 1.199	64.000, 1.750	64.000, 1.596	64.000, 1.844
322	64.200, 1.267	64.200, 1.147	64.200, 1.090	64.200, 1.221	64.200, 1.328	64.200, 1.206	64.200, 1.082	64.200, 1.295	64.200, 1.151	64.200, 1.021	64.200, 1.075	64.200, 1.200	64.200, 1.753	64.200, 1.600	64.200, 1.848
323	64.400, 1.268	64.400, 1.148	64.400, 1.091	64.400, 1.222	64.400, 1.329	64.400, 1.207	64.400, 1.083	64.400, 1.296	64.400, 1.152	64.400, 1.022	64.400, 1.076	64.400, 1.202	64.400, 1.757	64.400, 1.603	64.400, 1.852
324	64.600, 1.269	64.600, 1.148	64.600, 1.091	64.600, 1.224	64.600, 1.330	64.600, 1.208	64.600, 1.084	64.600, 1.297	64.600, 1.153	64.600, 1.024	64.600, 1.077	64.600, 1.203	64.600, 1.760	64.600, 1.606	64.600, 1.856
325	64.800, 1.270	64.800, 1.149	64.800, 1.091	64.800, 1.225	64.800, 1.331	64.800, 1.210	64.800, 1.085	64.800, 1.299	64.800, 1.154	64.800, 1.025	64.800, 1.078	64.800, 1.205	64.800, 1.763	64.800, 1.609	64.800, 1.860
326	65.000, 1.271	65.000, 1.149	65.000, 1.092	65.000, 1.226	65.000, 1.332	65.000, 1.211	65.000, 1.086	65.000, 1.300	65.000, 1.155	65.000, 1.026	65.000, 1.078	65.000, 1.206	65.000, 1.767	65.000, 1.612	65.000, 1.864
327	65.200, 1.272	65.200, 1.150	65.200, 1.092	65.200, 1.227	65.200, 1.332	65.200, 1.212	65.200, 1.086	65.200, 1.302	65.200, 1.156	65.200, 1.027	65.200, 1.079	65.200, 1.208	65.200, 1.770	65.200, 1.615	65.200, 1.867
328	65.400, 1.273	65.400, 1.151	65.400, 1.092	65.400, 1.228	65.400, 1.333	65.400, 1.213	65.400, 1.087	65.400, 1.303	65.400, 1.157	65.400, 1.027	65.400, 1.079	65.400, 1.209	65.400, 1.773	65.400, 1.618	65.400, 1.871
329	65.600, 1.274	65.600, 1.151	65.600, 1.093	65.600, 1.230	65.600, 1.333	65.600, 1.214	65.600, 1.087	65.600, 1.304	65.600, 1.157	65.600, 1.028	65.600, 1.080	65.600, 1.210	65.600, 1.776	65.600, 1.621	65.600, 1.875
330	65.800, 1.275	65.800, 1.152	65.800, 1.093	65.800, 1.231	65.800, 1.334	65.800, 1.215	65.800, 1.088	65.800, 1.305	65.800, 1.158	65.800, 1.028	65.800, 1.080	65.800, 1.212	65.800, 1.779	65.800, 1.624	65.800, 1.878
331	66.000, 1.276	66.000, 1.153	66.000, 1.094	66.000, 1.232	66.000, 1.334	66.000, 1.216	66.000, 1.089	66.000, 1.306	66.000, 1.158	66.000, 1.029	66.000, 1.081	66.000, 1.213	66.000, 1.782	66.000, 1.627	66.000, 1.882
332	66.200, 1.277	66.200, 1.154	66.200, 1.094	66.200, 1.233	66.200, 1.335	66.200, 1.217	66.200, 1.089	66.200, 1.306	66.200, 1.159	66.200, 1.029	66.200, 1.081	66.200, 1.214	66.200, 1.786	66.200, 1.630	66.200, 1.886
333	66.400, 1.277	66.400, 1.156	66.400, 1.095	66.400, 1.235	66.400, 1.335	66.400, 1.218	66.400, 1.090	66.400, 1.308	66.400, 1.160	66.400, 1.030	66.400, 1.082	66.400, 1.215	66.400, 1.789	66.400, 1.633	66.400, 1.890
334	66.600, 1.278	66.600, 1.157	66.600, 1.096	66.600, 1.236	66.600, 1.336	66.600, 1.218	66.600, 1.091	66.600, 1.309	66.600, 1.160	66.600, 1.030	66.600, 1.083	66.600, 1.216	66.600, 1.793	66.600, 1.637	66.600, 1.893
335	66.800, 1.279	66.800, 1.158	66.800, 1.097	66.800, 1.237	66.800, 1.337	66.800, 1.219	66.800, 1.092	66.800, 1.309	66.800, 1.162	66.800, 1.031	66.800, 1.084	66.800, 1.217	66.800, 1.796	66.800, 1.640	66.800, 1.897
336	67.000, 1.280	67.000, 1.159	67.000, 1.098	67.000, 1.238	67.000, 1.338	67.000, 1.220	67.000, 1.093	67.000, 1.310	67.000, 1.163	67.000, 1.031	67.000, 1.084	67.000, 1.218	67.000, 1.800	67.000, 1.643	67.000, 1.900
337	67.200, 1.280	67.200, 1.160	67.200, 1.099	67.200, 1.239	67.200, 1.339	67.200, 1.220	67.200, 1.094	67.200, 1.312	67.200, 1.164	67.200, 1.031	67.200, 1.085	67.200, 1.218	67.200, 1.803	67.200, 1.647	67.200, 1.903
338	67.400, 1.281	67.400, 1.161	67.400, 1.100	67.400, 1.240	67.400, 1.340	67.400, 1.221	67.400, 1.094	67.400, 1.313	67.400, 1.165	67.400, 1.032	67.400, 1.086	67.400, 1.219	67.400, 1.806	67.400, 1.650	67.400, 1.907
339	67.600, 1.282	67.600, 1.162	67.600, 1.100	67.600, 1.241	67.600, 1.340	67.600, 1.222	67.600, 1.095	67.600, 1.314	67.600, 1.166	67.600, 1.032	67.600, 1.086	67.600, 1.220	67.600, 1.810	67.600, 1.653	67.600, 1.911
340	67.800, 1.283	67.800, 1.163	67.800, 1.101	67.800, 1.242	67.800, 1.341	67.800, 1.223	67.800, 1.096	67.800, 1.315	67.800, 1.167	67.800, 1.033	67.800, 1.087	67.800, 1.221	67.800, 1.813	67.800, 1.656	67.800, 1.915
341	68.000, 1.283	68.000, 1.164	68.000, 1.101	68.000, 1.243	68.000, 1.342	68.000, 1.224	68.000, 1.097	68.000, 1.316	68.000, 1.168	68.000, 1.034	68.000, 1.088	68.000, 1.222	68.000, 1.816	68.000, 1.659	68.000, 1.918
342	68.200, 1.284	68.200, 1.164	68.200, 1.102	68.200, 1.244	68.200, 1.343	68.200, 1.224	68.200, 1.098	68.200, 1.317	68.200, 1.168	68.200, 1.035	68.200, 1.089	68.200, 1.223	68.200, 1.820	68.200, 1.662	68.200, 1.922
343	68.400, 1.285	68.400, 1.164	68.400, 1.103	68.400, 1.245	68.400, 1.344	68.400, 1.225	68.400, 1.099	68.400, 1.318	68.400, 1.169	68.400, 1.036	68.400, 1.089	68.400, 1.224	68.400, 1.823	68.400, 1.664	68.400, 1.925
344	68.600, 1.286	68.600, 1.164	68.600, 1.103	68.600, 1.245	68.600, 1.345	68.600, 1.226	68.600, 1.100	68.600, 1.319	68.600, 1.170	68.600, 1.037	68.600, 1.090	68.600, 1.225	68.600, 1.826	68.600, 1.667	68.600, 1.929
345	68.800, 1.287	68.800, 1.164	68.800, 1.104	68.800, 1.246	68.800, 1.346	68.800, 1.227	68.800, 1.101	68.800, 1.320	68.800, 1.171	68.800, 1.038	68.800, 1.091	68.800, 1.226	68.800, 1.830	68.800, 1.669	68.800, 1.932
346	69.000, 1.288	69.000, 1.164	69.000, 1.105	69.000, 1.247	69.000, 1.347	69.000, 1.228	69.000, 1.102	69.000, 1.321	69.000, 1.172	69.000, 1.038	69.000, 1.091	69.000, 1.226	69.000, 1.833	69.000, 1.671	69.000, 1.935
347	69.200, 1.289	69.200, 1.164	69.200, 1.106	69.200, 1.248	69.200, 1.348	69.200, 1.229	69.200, 1.102	69.200, 1.322	69.200, 1.173	69.200, 1.039	69.200, 1.092	69.200, 1.227	69.200, 1.836	69.200, 1.673	69.200, 1.938
348	69.400, 1.290	69.400, 1.164	69.400, 1.106	69.400, 1.248	69.400, 1.350	69.400, 1.229	69.400, 1.103	69.400, 1.323	69.400, 1.174	69.400, 1.040	69.400, 1.092	69.400, 1.228	69.400, 1.839	69.400, 1.676	69.400, 1.942
349	69.600, 1.291	69.600, 1.164	69.600, 1.107	69.600, 1.249	69.600, 1.350	69.600, 1.231	69.600, 1.104	69.600, 1.325	69.600, 1.174	69.600, 1.041	69.600, 1.093	69.600, 1.228	69.600, 1.842	69.600, 1.678	69.600, 1.945
350	69.800, 1.291	69.800, 1.164	69.800, 1.107	69.800, 1.250	69.800, 1.351	69.800, 1.232	69.800, 1.105	69.800, 1.326	69.800, 1.175	69.800, 1.042	69.800, 1.094	69.800, 1.229	69.800, 1.845	69.800, 1.681	69.800, 1.948
351	70.000, 1.292	70.000, 1.165	70.000, 1.108	70.000, 1.251	70.000, 1.352	70.000, 1.233	70.000, 1.106	70.000, 1.327	70.000, 1.176	70.000, 1.042	70.000, 1.094	70.000, 1.230	70.000, 1.848	70.000, 1.683	70.000, 1.951
352	70.200, 1.292	70.200, 1.165	70.200, 1.108	70.200, 1.252	70.200, 1.353	70.200, 1.234	70.200, 1.107	70.200, 1.329	70.200, 1.177	70.200, 1.042	70.200, 1.095	70.200, 1.231	70.200, 1.851	70.200, 1.685	70.200, 1.954
353	70.400, 1.293	70.400, 1.166	70.400, 1.108	70.400, 1.252	70.400, 1.353	70.400, 1.235	70.400, 1.107	70.400, 1.330	70.400, 1.178	70.400, 1.043	70.400, 1.096	70.400, 1.232	70.400, 1.854	70.400, 1.688	70.400, 1.958
354	70.600, 1.293	70.600, 1.166	70.600, 1.109	70.600, 1.253	70.600, 1.354	70.600, 1.236	70.600, 1.108	70.600, 1.331	70.600, 1.180	70.600, 1.043	70.600, 1.097	70.600, 1.233	70.600, 1.857	70.600, 1.690	70.600, 1.961
355	70.800, 1.294	70.800, 1.167	70.800, 1.109	70.800, 1.254	70.800, 1.355	70.800, 1.237	70.800, 1.109	70.800, 1.332	70.800, 1.180	70.800, 1.043	70.800, 1.098	70.800, 1.234	70.800, 1.860	70.800, 1.693	70.800, 1.964
356	71.000, 1.294	71.000, 1.167	71.000, 1.109	71.000, 1.255	71.000, 1.355	71.000, 1.238	71.000, 1.110	71.000, 1.333	71.000, 1.181	71.000, 1.043	71.000, 1.099	71.000, 1.235	71.000, 1.863	71.000, 1.696	71.000, 1.967
357	71.200, 1.295	71.200, 1.168	71.200, 1.109	71.200, 1.256	71.200, 1.356	71.200, 1.239	71.200, 1.110	71.200, 1.334	71.200, 1.182	71.200, 1.043	71.200, 1.100	71.200, 1.236	71.200, 1.865	71.200, 1.699	71.200, 1.970
358	71.400, 1.296	71.400, 1.168	71.400, 1.110	71.400, 1.257	71.400, 1.356	71.400, 1.239	71.400, 1.111	71.400, 1.335	71.400, 1.183	71.400, 1.044	71.400, 1.101	71.400, 1.237	71.400, 1.868	71.400, 1.702	71.400, 1.974
359	71.600, 1.297	71.600, 1.169	71.600, 1.110	71.600, 1.258	71.600, 1.357	71.600, 1.239	71.600, 1.111	71.600, 1.336	71.600, 1.183	71.600, 1.044	71.600, 1.101	71.600, 1.238	71.600, 1.871	71.600, 1.705	71.600, 1.977
360	71.800, 1.298	71.800, 1.169	71.800, 1.110	71.800, 1.259	71.800, 1.358	71.800, 1.239	71.800, 1.111	71.800, 1.336	71.800, 1.184	71.800, 1.045	71.800, 1.102	71.800, 1.239	71.800, 1.874	71.800, 1.707	71.800, 1.980
361	72.000, 1.298	72.000, 1.170	72.000, 1.111	72.000, 1.260	72.000, 1.358	72.000, 1.239	72.000, 1.111	72.000, 1.337	72.000, 1.184	72.000, 1.045	72.000, 1.102	72.000, 1.240	72.000, 1.877	72.000, 1.710	72.000, 1.982
362	72.200, 1.299	72.200, 1.170	72.200, 1.112	72.200, 1.261	72.200, 1.359	72.200, 1.239	72.200, 1.111	72.200, 1.337	72.200, 1.185	72.200, 1.046	72.200, 1.102	72.200, 1.241	72.200, 1.880	72.200, 1.712	72.200, 1.985
363	72.400, 1.300	72.400, 1.171	72.400, 1.112	72.400, 1.262	72.400, 1.359	72.400, 1.240	72.400, 1.111	72.400, 1.338	72.400, 1.185	72.400, 1.047	72.400, 1.102	72.400, 1.241	72.400, 1.883	72.400, 1.715	72.400, 1.987
364	72.600, 1.300	72.600, 1.171	72.600, 1.113	72.600, 1.263	72.600, 1.360	72.600, 1.240	72.600, 1.112	72.600, 1.338	72.600, 1.186	72.600, 1.048	72.600, 1.102	72.600, 1.242	72.600, 1.886	72.600, 1.717	72.600, 1.990
365	72.800, 1.301	72.800, 1.171	72.800, 1.114	72.800, 1.264	72.800, 1.361	72.800, 1.240	72.800, 1.112	72.800, 1.339	72.800, 1.187	72.800, 1.049	72.800, 1.103	72.800, 1.243	72.800, 1.888	72.800, 1.720	72.800, 1.993
366	73.000, 1.301	73.000, 1.171	73.000, 1.115	73.000, 1.265	73.000, 1.361	73.000, 1.241	73.000, 1.113	73.000, 1.340	73.000, 1.188	73.000, 1.050	73.000, 1.103	73.000, 1.243	73.000, 1.892	73.000, 1.722	73.000, 1.997
367	73.200, 1.302	73.200, 1.171	73.200, 1.116	73.200, 1.265	73.200, 1.362	73.200, 1.242	73.200, 1.113	73.200, 1.340	73.200, 1.189	73.200, 1.051	73.200, 1.103	73.200, 1.244	73.200, 1.895	73.200, 1.724	73.200, 2.000
368	73.400, 1.302	73.400, 1.172	73.400, 1.116	73.400, 1.266	73.400, 1.362	73.400, 1.243	73.400, 1.114	73.400, 1.341	73.400, 1.189	73.400, 1.052	73.400, 1.103	73.400, 1.245	73.400, 1.898	73.400, 1.726	73.400, 2.003
369	73.600, 1.302	73.600, 1.172	73.600, 1.117	73.600, 1.267	73.600, 1.363	73.600, 1.244	73.600, 1.114	73.600, 1.341	73.600, 1.190	73.600, 1.052	73.600, 1.103	73.600, 1.246	73.600, 1.901	73.600, 1.728	73.600, 2.006
370	73.800, 1.302	73.800, 1.173	73.800, 1.117	73.800, 1.267	73.800, 1.363	73.800, 1.245	73.800, 1.114	73.800, 1.341	73.800, 1.191	73.800, 1.053	73.800, 1.104	73.800, 1.246	73.800, 1.904	73.800, 1.730	73.800, 2.009
371	74.000, 1.303	74.000, 1.173	74.000, 1.118	74.000, 1.268	74.000, 1.363	74.000, 1.246	74.000, 1.115	74.000, 1.342	74.000, 1.192	74.000, 1.053	74.000, 1.104	74.000, 1.247	74.000, 1.907	74.000, 1.732	74.000, 2.012
372	74.200, 1.303	74.200, 1.174	74.200, 1.118	74.200, 1.268	74.200, 1.364	74.200, 1.247	74.200, 1.116	74.200, 1.342	74.200, 1.193	74.200, 1.053	74.200, 1.105	74.200, 1.248	74.200, 1.910	74.200, 1.734	74.200, 2.015
373	74.400, 1.304	74.400, 1.175	74.400, 1.119	74.400, 1.268	74.400, 1.365	74.400, 1.248	74.400, 1.116	74.400, 1.343	74.400, 1.194	74.400, 1.053	74.400, 1.106	74.400, 1.249	74.400, 1.912	74.400, 1.737	74.400, 2.018
374	74.600, 1.305	74.600, 1.176	74.600, 1.119	74.600, 1.268	74.600, 1.366	74.600, 1.249	74.600, 1.117	74.600, 1.344	74.600, 1.195	74.600, 1.053	74.600, 1.107	74.600, 1.250	74.600, 1.915	74.600, 1.739	74.600, 2.021
375	74.800, 1.306	74.800, 1.177	74.800, 1.119	74.800, 1.268	74.800, 1.366	74.800, 1.249	74.800, 1.118	74.800, 1.345	74.800, 1.195	74.800, 1.054	74.800, 1.108	74.800, 1.250	74.800, 1.918	74.800, 1.742	74.800, 2.024
376	75.000, 1.307	75.000, 1.178	75.000, 1.119	75.000, 1.268	75.000, 1.367	75.000, 1.249	75.000, 1.119	75.000, 1.346	75.000, 1.195	75.000, 1.054	75.000, 1.109	75.000, 1.251	75.000, 1.920	75.000, 1.744	75.000, 2.027
377	75.200, 1.307	75.200, 1.179	75.200, 1.119	75.200, 1.269	75.200, 1.368	75.200, 1.250	75.200, 1.119	75.200, 1.347	75.200, 1.196	75.200, 1.054	75.200, 1.110	75.200, 1.252	75.200, 1.922	75.200, 1.747	75.200, 2.030
378	75.400, 1.308	75.400, 1.179	75.400, 1.119	75.400, 1.269	75.400, 1.368	75.400, 1.249	75.400, 1.120	75.400, 1.348	75.400, 1.196	75.400, 1.054	75.400, 1.111	75.400, 1.253	75.400, 1.924	75.400, 1.749	75.400, 2.033
379	75.600, 1.309	75.600, 1.180	75.600, 1.119	75.600, 1.270	75.600, 1.369	75.600, 1.250	75.600, 1.120	75.600, 1.349	75.600, 1.196	75.600, 1.055	75.600, 1.111	75.600, 1.253	75.600, 1.926	75.600, 1.752	75.600, 2.036
380	75.800, 1.310	75.800, 1.181	75.800, 1.120	75.800, 1.270	75.800, 1.370	75.800, 1.250	75.800, 1.121	75.800, 1.350	75.800, 1.196	75.800, 1.055	75.800, 1.112	75.800, 1.254	75.800, 1.928	75.800, 1.754	75.800, 2.038
381	76.000, 1.310	76.000, 1.181	76.000, 1.120	76.000, 1.271	76.000, 1.371	76.000, 1.251	76.000, 1.121	76.000, 1.351	76.000, 1.197	76.000, 1.055	76.000, 1.113	76.000, 1.255	76.000, 1.930	76.000, 1.756	76.000, 2.041
382	76.200, 1.311	76.200, 1.182	76.200, 1.120	76.200, 1.272	76.200, 1.371	76.200, 1.251	76.200, 1.121	76.200, 1.352	76.200, 1.197	76.200, 1.056	76.200, 1.114	76.200, 1.256	76.200, 1.932	76.200, 1.758	76.200, 2.044
383	76.400, 1.311	76.400, 1.182	76.400, 1.121	76.400, 1.273	76.400, 1.372	76.400, 1.251	76.400, 1.122	76.400, 1.353	76.400, 1.198	76.400, 1.056	76.400, 1.114	76.400, 1.257	76.400, 1.935	76.400, 1.760	76.400, 2.046
384	76.600, 1.312	76.600, 1.182	76.600, 1.121	76.600, 1.274	76.600, 1.372	76.600, 1.251	76.600, 1.122	76.600, 1.353	76.600, 1.198	76.600, 1.057	76.600, 1.115	76.600, 1.258	76.600, 1.937	76.600, 1.762	76.600, 2.049
385	76.800, 1.312	76.800, 1.182	76.800, 1.121	76.800, 1.275	76.800, 1.372	76.800, 1.252	76.800, 1.123	76.800, 1.354	76.800, 1.199	76.800, 1.057	76.800, 1.115	76.800, 1.258	76.800, 1.940	76.800, 1.764	76.800, 2.052
386	77.000, 1.312	77.000, 1.183	77.000, 1.121	77.000, 1.275	77.000, 1.372	77.000, 1.252	77.000, 1.123	77.000, 1.355	77.000, 1.200	77.000, 1.057	77.000, 1.115	77.000, 1.259	77.000, 1.942	77.000, 1.766	77.000, 2.055
387	77.200, 1.312	77.200, 1.183	77.200, 1.122	77.200, 1.276	77.200, 1.373	77.200, 1.252	77.200, 1.124	77.200, 1.355	77.200, 1.201	77.200, 1.058	77.200, 1.116	77.200, 1.259	77.200, 1.945	77.200, 1.768	77.200, 2.058
388	77.400, 1.313	77.400, 1.183	77.400, 1.122	77.400, 1.277	77.400, 1.373	77.400, 1.253	77.400, 1.124	77.400, 1.355	77.400, 1.202	77.400, 1.058	77.400, 1.115	77.400, 1.260	77.400, 1.948	77.400, 1.770	77.400, 2.061
389	77.600, 1.313	77.600, 1.184	77.600, 1.123	77.600, 1.277	77.600, 1.374	77.600, 1.253	77.600, 1.125	77.600, 1.356	77.600, 1.203	77.600, 1.058	77.600, 1.116	77.600, 1.260	77.600, 1.950	77.600, 1.772	77.600, 2.063
390	77.800, 1.313	77.800, 1.184	77.800, 1.123	77.800, 1.278	77.800, 1.374	77.800, 1.254	77.800, 1.126	77.800, 1.356	77.800, 1.204	77.800, 1.058	77.800, 1.116	77.800, 1.261	77.800, 1.952	77.800, 1.775	77.800, 2.065
391	78.000, 1.313	78.000, 1.184	78.000, 1.124	78.000, 1.279	78.000, 1.375	78.000, 1.254	78.000, 1.126	78.000, 1.357	78.000, 1.205	78.000, 1.059	78.000, 1.116	78.000, 1.261	78.000, 1.954	78.000, 1.777	78.000, 2.067
392	78.200, 1.314	78.200, 1.185	78.200, 1.125	78.200, 1.279	78.200, 1.376	78.200, 1.255	78.200, 1.126	78.200, 1.358	78.200, 1.206	78.200, 1.059	78.200, 1.116	78.200, 1.262	78.200, 1.957	78.200, 1.780	78.200, 2.070
393	78.400, 1.314	78.400, 1.185	78.400, 1.125	78.400, 1.280	78.400, 1.377	78.400, 1.256	78.400, 1.127	78.400, 1.358	78.400, 1.207	78.400, 1.059	78.400, 1.116	78.400, 1.263	78.400, 1.959	78.400, 1.783	78.400, 2.072
394	78.600, 1.315	78.600, 1.186	78.600, 1.126	78.600, 1.280	78.600, 1.377	78.600, 1.256	78.600, 1.127	78.600, 1.359	78.600, 1.208	78.600, 1.060	78.600, 1.117	78.600, 1.263	78.600, 1.962	78.600, 1.785	78.600, 2.075
395	78.800, 1.316	78.800, 1.186	78.800, 1.126	78.800, 1.281	78.800, 1.378	78.800, 1.257	78.800, 1.127	78.800, 1.360	78.800, 1.208	78.800, 1.060	78.800, 1.118	78.800, 1.264	78.800, 1.965	78.800, 1.788	78.800, 2.078
396	79.000, 1.316	79.000, 1.187	79.000, 1.127	79.000, 1.282	79.000, 1.379	79.000, 1.257	79.000, 1.128	79.000, 1.361	79.000, 1.209	79.000, 1.061	79.000, 1.118	79.000, 1.264	79.000, 1.967	79.000, 1.790	79.000, 2.081
397	79.200, 1.317	79.200, 1.187	79.200, 1.127	79.200, 1.283	79.200, 1.379	79.200, 1.257	79.200, 1.128	79.200, 1.362	79.200, 1.210	79.200, 1.062	79.200, 1.119	79.200, 1.265	79.200, 1.969	79.200, 1.792	79.200, 2.084
398	79.400, 1.317	79.400, 1.187	79.400, 1.127	79.400, 1.284	79.400, 1.380	79.400, 1.258	79.400, 1.128	79.400, 1.362	79.400, 1.210	79.400, 1.063	79.400, 1.120	79.400, 1.266	79.400, 1.972	79.400, 1.794	79.400, 2.086
399	79.600, 1.318	79.600, 1.187	79.600, 1.128	79.600, 1.285	79.600, 1.381	79.600, 1.259	79.600, 1.129	79.600, 1.363	79.600, 1.211	79.600, 1.064	79.600, 1.121	79.600, 1.266	79.600, 1.974	79.600, 1.796	79.600, 2.089
400	79.800, 1.319	79.800, 1.187	79.800, 1.128	79.800, 1.285	79.800, 1.382	79.800, 1.260	79.800, 1.129	79.800, 1.364	79.800, 1.211	79.800, 1.065	79.800, 1.122	79.800, 1.267	79.800, 1.976	79.800, 1.798	79.800, 2.091
401	80.000, 1.320	80.000, 1.187	80.000, 1.129	80.000, 1.286	80.000, 1.382	80.000, 1.261	80.000, 1.130	80.000, 1.364	80.000, 1.211	80.000, 1.066	80.000, 1.123	80.000, 1.268	80.000, 1.978	80.000, 1.800	80.000, 2.094
402	80.200, 1.320	80.200, 1.187	80.200, 1.129	80.200, 1.287	80.200, 1.382	80.200, 1.262	80.200, 1.130	80.200, 1.365	80.200, 1.211	80.200, 1.066	80.200, 1.124	80.200, 1.269	80.200, 1.981	80.200, 1.801	80.200, 2.096
403	80.400, 1.321	80.400, 1.187	80.400, 1.130	80.400, 1.288	80.400, 1.383	80.400, 1.262	80.400, 1.131	80.400, 1.365	80.400, 1.211	80.400, 1.067	80.400, 1.124	80.400, 1.270	80.400, 1.983	80.400, 1.803	80.400, 2.099
404	80.600, 1.321	80.600, 1.188	80.600, 1.130	80.600, 1.289	80.600, 1.383	80.600, 1.263	80.600, 1.132	80.600, 1.366	80.600, 1.211	80.600, 1.068	80.600, 1.125	80.600, 1.271	80.600, 1.985	80.600, 1.805	80.600, 2.101
405	80.800, 1.322	80.800, 1.188	80.800, 1.130	80.800, 1.289	80.800, 1.383	80.800, 1.263	80.800, 1.133	80.800, 1.366	80.800, 1.212	80.800, 1.069	80.800, 1.125	80.800, 1.272	80.800, 1.987	80.800, 1.806	80.800, 2.104
406	81.000, 1.322	81.000, 1.188	81.000, 1.131	81.000, 1.290	81.000, 1.384	81.000, 1.263	81.000, 1.133	81.000, 1.366	81.000, 1.212	81.000, 1.069	81.000, 1.126	81.000, 1.272	81.000, 1.990	81.000, 1.808	81.000, 2.106
407	81.200, 1.323	81.200, 1.188	81.200, 1.131	81.200, 1.290	81.200, 1.385	81.200, 1.264	81.200, 1.134	81.200, 1.366	81.200, 1.213	81.200, 1.070	81.200, 1.126	81.200, 1.273	81.200, 1.992	81.200, 1.811	81.200, 2.108
408	81.400, 1.323	81.400, 1.189	81.400, 1.132	81.400, 1.291	81.400, 1.385	81.400, 1.264	81.400, 1.135	81.400, 1.367	81.400, 1.213	81.400, 1.070	81.400, 1.126	81.400, 1.274	81.400, 1.994	81.400, 1.813	81.400, 2.111
409	81.600, 1.323	81.600, 1.189	81.600, 1.132	81.600, 1.291	81.600, 1.386	81.600, 1.264	81.600, 1.135	81.600, 1.367	81.600, 1.214	81.600, 1.070	81.600, 1.127	81.600, 1.275	81.600, 1.996	81.600, 1.815	81.600, 2.113
410	81.800, 1.323	81.800, 1.189	81.800, 1.133	81.800, 1.292	81.800, 1.386	81.800, 1.265	81.800, 1.136	81.800, 1.367	81.800, 1.214	81.800, 1.070	81.800, 1.127	81.800, 1.275	81.800, 1.998	81.800, 1.816	81.800, 2.115
411	82.000, 1.323	82.000, 1.190	82.000, 1.133	82.000, 1.292	82.000, 1.386	82.000, 1.265	82.000, 1.136	82.000, 1.368	82.000, 1.215	82.000, 1.070	82.000, 1.127	82.000, 1.276	82.000, 2.000	82.000, 1.818	82.000, 2.117
412	82.200, 1.323	82.200, 1.190	82.200, 1.134	82.200, 1.293	82.200, 1.387	82.200, 1.266	82.200, 1.136	82.200, 1.368	82.200, 1.216	82.200, 1.070	82.200, 1.127	82.200, 1.277	82.200, 2.002	82.200, 1.820	82.200, 2.120
413	82.400, 1.323	82.400, 1.191	82.400, 1.134	82.400, 1.293	82.400, 1.387	82.400, 1.267	82.400, 1.136	82.400, 1.369	82.400, 1.216	82.400, 1.070	82.400, 1.127	82.400, 1.277	82.400, 2.004	82.400, 1.822	82.400, 2.122
414	82.600, 1.324	82.600, 1.191	82.600, 1.134	82.600, 1.293	82.600, 1.388	82.600, 1.267	82.600, 1.137	82.600, 1.370	82.600, 1.217	82.600, 1.070	82.600, 1.128	82.600, 1.278	82.600, 2.006	82.600, 1.824	82.600, 2.125
415	82.800, 1.324	82.800, 1.191	82.800, 1.134	82.800, 1.293	82.800, 1.388	82.800, 1.267	82.800, 1.137	82.800, 1.371	82.800, 1.218	82.800, 1.070	82.800, 1.128	82.800, 1.278	82.800, 2.008	82.800, 1.826	82.800, 2.128
416	83.000, 1.325	83.000, 1.192	83.000, 1.134	83.000, 1.293	83.000, 1.389	83.000, 1.268	83.000, 1.138	83.000, 1.372	83.000, 1.220	83.000, 1.070	83.000, 1.128	83.000, 1.278	83.000, 2.010	83.000, 1.828	83.000, 2.130
417	83.200, 1.326	83.200, 1.192	83.200, 1.134	83.200, 1.293	83.200, 1.389	83.200, 1.268	83.200, 1.138	83.200, 1.373	83.200, 1.220	83.200, 1.070	83.200, 1.128	83.200, 1.279	83.200, 2.012	83.200, 1.831	83.200, 2.132
418	83.400, 1.326	83.400, 1.192	83.400, 1.134	83.400, 1.294	83.400, 1.389	83.400, 1.269	83.400, 1.139	83.400, 1.374	83.400, 1.221	83.400, 1.070	83.400, 1.129	83.400, 1.279	83.400, 2.014	83.400, 1.833	83.400, 2.134
419	83.600, 1.327	83.600, 1.192	83.600, 1.134	83.600, 1.294	83.600, 1.390	83.600, 1.269	83.600, 1.139	83.600, 1.375	83.600, 1.222	83.600, 1.070	83.600, 1.129	83.600, 1.279	83.600, 2.016	83.600, 1.835	83.600, 2.136
420	83.800, 1.327	83.800, 1.192	83.800, 1.135	83.800, 1.294	83.800, 1.390	83.800, 1.270	83.800, 1.140	83.800, 1.376	83.800, 1.223	83.800, 1.070	83.800, 1.129	83.800, 1.279	83.800, 2.018	83.800, 1.837	83.800, 2.138
421	84.000, 1.328	84.000, 1.192	84.000, 1.135	84.000, 1.294	84.000, 1.391	84.000, 1.271	84.000, 1.140	84.000, 1.376	84.000, 1.223	84.000, 1.070	84.000, 1.129	84.000, 1.279	84.000, 2.020	84.000, 1.839	84.000, 2.140
422	84.200, 1.328	84.200, 1.193	84.200, 1.135	84.200, 1.294	84.200, 1.392	84.200, 1.271	84.200, 1.141	84.200, 1.377	84.200, 1.223	84.200, 1.070	84.200, 1.129	84.200, 1.280	84.200, 2.022	84.200, 1.841	84.200, 2.143
423	84.400, 1.329	84.400, 1.193	84.400, 1.136	84.400, 1.295	84.400, 1.392	84.400, 1.271	84.400, 1.141	84.400, 1.377	84.400, 1.224	84.400, 1.071	84.400, 1.130	84.400, 1.280	84.400, 2.024	84.400, 1.842	84.400, 2.145
424	84.600, 1.329	84.600, 1.194	84.600, 1.137	84.600, 1.295	84.600, 1.393	84.600, 1.272	84.600, 1.141	84.600, 1.378	84.600, 1.224	84.600, 1.071	84.600, 1.131	84.600, 1.281	84.600, 2.026	84.600, 1.844	84.600, 2.147
425	84.800, 1.330	84.800, 1.194	84.800, 1.137	84.800, 1.296	84.800, 1.393	84.800, 1.272	84.800, 1.142	84.800, 1.378	84.800, 1.224	84.800, 1.072	84.800, 1.131	84.800, 1.281	84.800, 2.028	84.800, 1.846	84.800, 2.149
426	85.000, 1.331	85.000, 1.194	85.000, 1.138	85.000, 1.297	85.000, 1.394	85.000, 1.272	85.000, 1.142	85.000, 1.379	85.000, 1.224	85.000, 1.072	85.000, 1.132	85.000, 1.282	85.000, 2.030	85.000, 1.847	85.000, 2.151
427	85.200, 1.332	85.200, 1.195	85.200, 1.139	85.200, 1.297	85.200, 1.394	85.200, 1.272	85.200, 1.142	85.200, 1.379	85.200, 1.224	85.200, 1.073	85.200, 1.133	85.200, 1.282	85.200, 2.032	85.200, 1.848	85.200, 2.153
428	85.400, 1.332	85.400, 1.195	85.400, 1.139	85.400, 1.298	85.400, 1.395	85.400, 1.273	85.400, 1.142	85.400, 1.380	85.400, 1.224	85.400, 1.073	85.400, 1.134	85.400, 1.283	85.400, 2.034	85.400, 1.849	85.400, 2.155
429	85.600, 1.333	85.600, 1.196	85.600, 1.140	85.600, 1.299	85.600, 1.395	85.600, 1.273	85.600, 1.142	85.600, 1.381	85.600, 1.224	85.600, 1.074	85.600, 1.134	85.600, 1.283	85.600, 2.036	85.600, 1.850	85.600, 2.157
430	85.800, 1.333	85.800, 1.196	85.800, 1.140	85.800, 1.299	85.800, 1.396	85.800, 1.273	85.800, 1.143	85.800, 1.382	85.800, 1.224	85.800, 1.074	85.800, 1.135	85.800, 1.284	85.800, 2.038	85.800, 1.851	85.800, 2.159
431	86.000, 1.334	86.000, 1.197	86.000, 1.140	86.000, 1.300	86.000, 1.397	86.000, 1.274	86.000, 1.143	86.000, 1.383	86.000, 1.225	86.000, 1.075	86.000, 1.136	86.000, 1.284	86.000, 2.040	86.000, 1.853	86.000, 2.161
432	86.200, 1.334	86.200, 1.197	86.200, 1.140	86.200, 1.300	86.200, 1.398	86.200, 1.274	86.200, 1.143	86.200, 1.384	86.200, 1.225	86.200, 1.075	86.200, 1.137	86.200, 1.285	86.200, 2.042	86.200, 1.854	86.200, 2.163
433	86.400, 1.335	86.400, 1.198	86.400, 1.140	86.400, 1.301	86.400, 1.398	86.400, 1.275	86.400, 1.144	86.400, 1.385	86.400, 1.226	86.400, 1.076	86.400, 1.137	86.400, 1.286	86.400, 2.044	86.400, 1.856	86.400, 2.165
434	86.600, 1.335	86.600, 1.198	86.600, 1.140	86.600, 1.302	86.600, 1.399	86.600, 1.275	86.600, 1.144	86.600, 1.386	86.600, 1.227	86.600, 1.077	86.600, 1.138	86.600, 1.286	86.600, 2.046	86.600, 1.858	86.600, 2.166
435	86.800, 1.336	86.800, 1.198	86.800, 1.140	86.800, 1.302	86.800, 1.399	86.800, 1.276	86.800, 1.145	86.800, 1.386	86.800, 1.228	86.800, 1.078	86.800, 1.138	86.800, 1.287	86.800, 2.048	86.800, 1.860	86.800, 2.168
436	87.000, 1.336	87.000, 1.198	87.000, 1.140	87.000, 1.303	87.000, 1.400	87.000, 1.277	87.000, 1.146	87.000, 1.387	87.000, 1.229	87.000, 1.078	87.000, 1.138	87.000, 1.288	87.000, 2.050	87.000, 1.862	87.000, 2.169
437	87.200, 1.337	87.200, 1.198	87.200, 1.141	87.200, 1.304	87.200, 1.400	87.200, 1.278	87.200, 1.146	87.200, 1.387	87.200, 1.230	87.200, 1.079	87.200, 1.139	87.200, 1.288	87.200, 2.052	87.200, 1.864	87.200, 2.171
438	87.400, 1.337	87.400, 1.198	87.400, 1.141	87.400, 1.304	87.400, 1.400	87.400, 1.279	87.400, 1.147	87.400, 1.388	87.400, 1.231	87.400, 1.079	87.400, 1.139	87.400, 1.289	87.400, 2.054	87.400, 1.866	87.400, 2.173
439	87.600, 1.337	87.600, 1.199	87.600, 1.141	87.600, 1.305	87.600, 1.401	87.600, 1.279	87.600, 1.147	87.600, 1.388	87.600, 1.231	87.600, 1.079	87.600, 1.139	87.600, 1.289	87.600, 2.056	87.600, 1.868	87.600, 2.174
440	87.800, 1.337	87.800, 1.199	87.800, 1.141	87.800, 1.305	87.800, 1.401	87.800, 1.280	87.800, 1.148	87.800, 1.388	87.800, 1.232	87.800, 1.079	87.800, 1.139	87.800, 1.290	87.800, 2.058	87.800, 1.869	87.800, 2.176
441	88.000, 1.338	88.000, 1.199	88.000, 1.141	88.000, 1.305	88.000, 1.401	88.000, 1.281	88.000, 1.148	88.000, 1.388	88.000, 1.232	88.000, 1.079	88.000, 1.139	88.000, 1.290	88.000, 2.060	88.000, 1.871	88.000, 2.178
442	88.200, 1.338	88.200, 1.199	88.200, 1.141	88.200, 1.305	88.200, 1.401	88.200, 1.282	88.200, 1.148	88.200, 1.388	88.200, 1.233	88.200, 1.079	88.200, 1.139	88.200, 1.291	88.200, 2.061	88.200, 1.872	88.200, 2.180
443	88.400, 1.338	88.400, 1.200	88.400, 1.141	88.400, 1.305	88.400, 1.401	88.400, 1.282	88.400, 1.148	88.400, 1.388	88.400, 1.233	88.400, 1.080	88.400, 1.138	88.400, 1.291	88.400, 2.063	88.400, 1.874	88.400, 2.182
444	88.600, 1.338	88.600, 1.201	88.600, 1.141	88.600, 1.306	88.600, 1.402	88.600, 1.283	88.600, 1.149	88.600, 1.388	88.600, 1.234	88.600, 1.080	88.600, 1.138	88.600, 1.292	88.600, 2.064	88.600, 1.875	88.600, 2.184
445	88.800, 1.339	88.800, 1.201	88.800, 1.142	88.800, 1.306	88.800, 1.402	88.800, 1.283	88.800, 1.149	88.800, 1.388	88.800, 1.234	88.800, 1.080	88.800, 1.138	88.800, 1.292	88.800, 2.065	88.800, 1.877	88.800, 2.186
446	89.000, 1.339	89.000, 1.202	89.000, 1.142	89.000, 1.307	89.000, 1.403	89.000, 1.283	89.000, 1.150	89.000, 1.388	89.000, 1.234	89.000, 1.080	89.000, 1.138	89.000, 1.293	89.000, 2.067	89.000, 1.878	89.000, 2.188
447	89.200, 1.340	89.200, 1.203	89.200, 1.143	89.200, 1.307	89.200, 1.404	89.200, 1.283	89.200, 1.150	89.200, 1.389	89.200, 1.234	89.200, 1.080	89.200, 1.139	89.200, 1.293	89.200, 2.068	89.200, 1.880	89.200, 2.190
448	89.400, 1.340	89.400, 1.204	89.400, 1.143	89.400, 1.308	89.400, 1.405	89.400, 1.283	89.400, 1.151	89.400, 1.389	89.400, 1.235	89.400, 1.080	89.400, 1.139	89.400, 1.294	89.400, 2.070	89.400, 1.882	89.400, 2.193
449	89.600, 1.340	89.600, 1.205	89.600, 1.143	89.600, 1.308	89.600, 1.405	89.600, 1.283	89.600, 1.152	89.600, 1.390	89.600, 1.235	89.600, 1.080	89.600, 1.140	89.600, 1.294	89.600, 2.071	89.600, 1.883	89.600, 2.195
450	89.800, 1.341	89.800, 1.205	89.800, 1.143	89.800, 1.308	89.800, 1.406	89.800, 1.283	89.800, 1.152	89.800, 1.391	89.800, 1.235	89.800, 1.081	89.800, 1.141	89.800, 1.295	89.800, 2.073	89.800, 1.885	89.800, 2.198
451	90.000, 1.341	90.000, 1.206	90.000, 1.143	90.000, 1.309	90.000, 1.407	90.000, 1.283	90.000, 1.153	90.000, 1.391	90.000, 1.236	90.000, 1.082	90.000, 1.141	90.000, 1.295	90.000, 2.074	90.000, 1.887	90.000, 2.200
452	90.200, 1.341	90.200, 1.206	90.200, 1.143	90.200, 1.309	90.200, 1.407	90.200, 1.283	90.200, 1.153	90.200, 1.392	90.200, 1.237	90.200, 1.082	90.200, 1.142	90.200, 1.296	90.200, 2.076	90.200, 1.889	90.200, 2.202
453	90.400, 1.342	90.400, 1.207	90.400, 1.144	90.400, 1.310	90.400, 1.408	90.400, 1.283	90.400, 1.153	90.400, 1.393	90.400, 1.238	90.400, 1.083	90.400, 1.142	90.400, 1.296	90.400, 2.078	90.400, 1.891	90.400, 2.204
454	90.600, 1.343	90.600, 1.207	90.600, 1.144	90.600, 1.311	90.600, 1.408	90.600, 1.283	90.600, 1.153	90.600, 1.394	90.600, 1.238	90.600, 1.083	90.600, 1.143	90.600, 1.297	90.600, 2.079	90.600, 1.893	90.600, 2.206
455	90.800, 1.343	90.800, 1.207	90.800, 1.145	90.800, 1.312	90.800, 1.409	90.800, 1.284	90.800, 1.153	90.800, 1.394	90.800, 1.239	90.800, 1.084	90.800, 1.143	90.800, 1.298	90.800, 2.080	90.800, 1.894	90.800, 2.207
456	91.000, 1.344	91.000, 1.207	91.000, 1.146	91.000, 1.312	91.000, 1.409	91.000, 1.285	91.000, 1.154	91.000, 1.395	91.000, 1.239	91.000, 1.085	91.000, 1.143	91.000, 1.298	91.000, 2.082	91.000, 1.895	91.000, 2.209
457	91.200, 1.344	91.200, 1.206	91.200, 1.147	91.200, 1.313	91.200, 1.409	91.200, 1.286	91.200, 1.154	91.200, 1.396	91.200, 1.240	91.200, 1.085	91.200, 1.143	91.200, 1.299	91.200, 2.083	91.200, 1.896	91.200, 2.211
458	91.400, 1.345	91.400, 1.206	91.400, 1.147	91.400, 1.313	91.400, 1.409	91.400, 1.287	91.400, 1.154	91.400, 1.397	91.400, 1.240	91.400, 1.085	91.400, 1.144	91.400, 1.299	91.400, 2.085	91.400, 1.897	91.400, 2.212
459	91.600, 1.346	91.600, 1.205	91.600, 1.148	91.600, 1.313	91.600, 1.409	91.600, 1.288	91.600, 1.154	91.600, 1.397	91.600, 1.241	91.600, 1.086	91.600, 1.144	91.600, 1.300	91.600, 2.087	91.600, 1.898	91.600, 2.214
460	91.800, 1.346	91.800, 1.205	91.800, 1.149	91.800, 1.313	91.800, 1.409	91.800, 1.288	91.800, 1.155	91.800, 1.398	91.800, 1.241	91.800, 1.086	91.800, 1.144	91.800, 1.300	91.800, 2.088	91.800, 1.899	91.800, 2.216
461	92.000, 1.347	92.000, 1.205	92.000, 1.149	92.000, 1.313	92.000, 1.410	92.000, 1.289	92.000, 1.155	92.000, 1.399	92.000, 1.242	92.000, 1.086	92.000, 1.144	92.000, 1.300	92.000, 2.090	92.000, 1.900	92.000, 2.218
462	92.200, 1.348	92.200, 1.205	92.200, 1.150	92.200, 1.313	92.200, 1.410	92.200, 1.290	92.200, 1.155	92.200, 1.399	92.200, 1.242	92.200, 1.086	92.200, 1.144	92.200, 1.301	92.200, 2.092	92.200, 1.901	92.200, 2.219
463	92.400, 1.348	92.400, 1.205	92.400, 1.150	92.400, 1.314	92.400, 1.410	92.400, 1.291	92.400, 1.156	92.400, 1.400	92.400, 1.242	92.400, 1.087	92.400, 1.145	92.400, 1.301	92.400, 2.093	92.400, 1.902	92.400, 2.221
464	92.600, 1.348	92.600, 1.206	92.600, 1.151	92.600, 1.314	92.600, 1.411	92.600, 1.291	92.600, 1.156	92.600, 1.400	92.600, 1.243	92.600, 1.087	92.600, 1.145	92.600, 1.301	92.600, 2.095	92.600, 1.903	92.600, 2.222
465	92.800, 1.349	92.800, 1.206	92.800, 1.151	92.800, 1.315	92.800, 1.411	92.800, 1.291	92.800, 1.157	92.800, 1.401	92.800, 1.243	92.800, 1.087	92.800, 1.145	92.800, 1.302	92.800, 2.096	92.800, 1.904	92.800, 2.224
466	93.000, 1.349	93.000, 1.206	93.000, 1.151	93.000, 1.315	93.000, 1.412	93.000, 1.291	93.000, 1.157	93.000, 1.401	93.000, 1.243	93.000, 1.088	93.000, 1.145	93.000, 1.302	93.000, 2.098	93.000, 1.905	93.000, 2.226
467	93.200, 1.349	93.200, 1.207	93.200, 1.151	93.200, 1.315	93.200, 1.412	93.200, 1.291	93.200, 1.158	93.200, 1.402	93.200, 1.243	93.200, 1.088	93.200, 1.146	93.200, 1.302	93.200, 2.099	93.200, 1.907	93.200, 2.228
468	93.400, 1.350	93.400, 1.208	93.400, 1.151	93.400, 1.316	93.400, 1.413	93.400, 1.291	93.400, 1.159	93.400, 1.402	93.400, 1.243	93.400, 1.088	93.400, 1.146	93.400, 1.302	93.400, 2.101	93.400, 1.908	93.400, 2.230
469	93.600, 1.350	93.600, 1.208	93.600, 1.150	93.600, 1.317	93.600, 1.413	93.600, 1.291	93.600, 1.160	93.600, 1.403	93.600, 1.244	93.600, 1.089	93.600, 1.147	93.600, 1.303	93.600, 2.102	93.600, 1.910	93.600, 2.232
470	93.800, 1.350	93.800, 1.209	93.800, 1.149	93.800, 1.317	93.800, 1.414	93.800, 1.291	93.800, 1.160	93.800, 1.403	93.800, 1.245	93.800, 1.089	93.800, 1.147	93.800, 1.303	93.800, 2.103	93.800, 1.911	93.800, 2.233
471	94.000, 1.350	94.000, 1.209	94.000, 1.149	94.000, 1.318	94.000, 1.414	94.000, 1.292	94.000, 1.161	94.000, 1.403	94.000, 1.245	94.000, 1.090	94.000, 1.148	94.000, 1.304	94.000, 2.105	94.000, 1.913	94.000, 2.235
472	94.200, 1.351	94.200, 1.210	94.200, 1.148	94.200, 1.319	94.200, 1.415	94.200, 1.292	94.200, 1.161	94.200, 1.404	94.200, 1.246	94.200, 1.091	94.200, 1.149	94.200, 1.304	94.200, 2.106	94.200, 1.915	94.200, 2.237
473	94.400, 1.351	94.400, 1.210	94.400, 1.148	94.400, 1.320	94.400, 1.416	94.400, 1.292	94.400, 1.161	94.400, 1.404	94.400, 1.247	94.400, 1.092	94.400, 1.149	94.400, 1.305	94.400, 2.108	94.400, 1.916	94.400, 2.239
474	94.600, 1.352	94.600, 1.210	94.600, 1.148	94.600, 1.321	94.600, 1.416	94.600, 1.293	94.600, 1.162	94.600, 1.404	94.600, 1.247	94.600, 1.093	94.600, 1.150	94.600, 1.306	94.600, 2.109	94.600, 1.918	94.600, 2.240
475	94.800, 1.352	94.800, 1.211	94.800, 1.149	94.800, 1.321	94.800, 1.417	94.800, 1.293	94.800, 1.162	94.800, 1.405	94.800, 1.248	94.800, 1.093	94.800, 1.150	94.800, 1.307	94.800, 2.111	94.800, 1.920	94.800, 2.241
476	95.000, 1.353	95.000, 1.211	95.000, 1.149	95.000, 1.322	95.000, 1.417	95.000, 1.293	95.000, 1.162	95.000, 1.405	95.000, 1.248	95.000, 1.094	95.000, 1.151	95.000, 1.308	95.000, 2.112	95.000, 1.921	95.000, 2.243
477	95.200, 1.353	95.200, 1.211	95.200, 1.150	95.200, 1.322	95.200, 1.417	95.200, 1.294	95.200, 1.162	95.200, 1.406	95.200, 1.248	95.200, 1.095	95.200, 1.151	95.200, 1.308	95.200, 2.114	95.200, 1.923	95.200, 2.244
478	95.400, 1.354	95.400, 1.211	95.400, 1.151	95.400, 1.322	95.400, 1.417	95.400, 1.294	95.400, 1.163	95.400, 1.406	95.400, 1.248	95.400, 1.095	95.400, 1.152	95.400, 1.308	95.400, 2.116	95.400, 1.925	95.400, 2.246
479	95.600, 1.355	95.600, 1.211	95.600, 1.151	95.600, 1.322	95.600, 1.418	95.600, 1.295	95.600, 1.163	95.600, 1.407	95.600, 1.248	95.600, 1.095	95.600, 1.152	95.600, 1.309	95.600, 2.118	95.600, 1.927	95.600, 2.247
480	95.800, 1.355	95.800, 1.210	95.800, 1.152	95.800, 1.322	95.800, 1.418	95.800, 1.295	95.800, 1.163	95.800, 1.407	95.800, 1.248	95.800, 1.096	95.800, 1.152	95.800, 1.309	95.800, 2.119	95.800, 1.928	95.800, 2.249
481	96.000, 1.356	96.000, 1.210	96.000, 1.153	96.000, 1.323	96.000, 1.419	96.000, 1.296	96.000, 1.163	96.000, 1.407	96.000, 1.248	96.000, 1.096	96.000, 1.153	96.000, 1.309	96.000, 2.121	96.000, 1.929	96.000, 2.251
482	96.200, 1.356	96.200, 1.210	96.200, 1.154	96.200, 1.323	96.200, 1.419	96.200, 1.296	96.200, 1.163	96.200, 1.408	96.200, 1.248	96.200, 1.096	96.200, 1.153	96.200, 1.309	96.200, 2.122	96.200, 1.931	96.200, 2.252
483	96.400, 1.356	96.400, 1.210	96.400, 1.155	96.400, 1.323	96.400, 1.420	96.400, 1.296	96.400, 1.163	96.400, 1.408	96.400, 1.248	96.400, 1.096	96.400, 1.153	96.400, 1.309	96.400, 2.123	96.400, 1.932	96.400, 2.254
484	96.600, 1.356	96.600, 1.210	96.600, 1.156	96.600, 1.323	96.600, 1.420	96.600, 1.295	96.600, 1.163	96.600, 1.408	96.600, 1.249	96.600, 1.096	96.600, 1.153	96.600, 1.309	96.600, 2.125	96.600, 1.934	96.600, 2.256
485	96.800, 1.357	96.800, 1.210	96.800, 1.157	96.800, 1.323	96.800, 1.420	96.800, 1.295	96.800, 1.163	96.800, 1.409	96.800, 1.249	96.800, 1.096	96.800, 1.153	96.800, 1.309	96.800, 2.126	96.800, 1.935	96.800, 2.258
486	97.000, 1.357	97.000, 1.211	97.000, 1.157	97.000, 1.323	97.000, 1.421	97.000, 1.295	97.000, 1.164	97.000, 1.409	97.000, 1.250	97.000, 1.096	97.000, 1.153	97.000, 1.309	97.000, 2.127	97.000, 1.936	97.000, 2.259
487	97.200, 1.357	97.200, 1.211	97.200, 1.157	97.200, 1.323	97.200, 1.421	97.200, 1.295	97.200, 1.165	97.200, 1.410	97.200, 1.251	97.200, 1.096	97.200, 1.154	97.200, 1.309	97.200, 2.128	97.200, 1.938	97.200, 2.261
488	97.400, 1.357	97.400, 1.212	97.400, 1.158	97.400, 1.324	97.400, 1.422	97.400, 1.295	97.400, 1.165	97.400, 1.410	97.400, 1.252	97.400, 1.096	97.400, 1.154	97.400, 1.309	97.400, 2.129	97.400, 1.939	97.400, 2.263
489	97.600, 1.357	97.600, 1.212	97.600, 1.157	97.600, 1.325	97.600, 1.422	97.600, 1.295	97.600, 1.166	97.600, 1.411	97.600, 1.253	97.600, 1.096	97.600, 1.155	97.600, 1.310	97.600, 2.130	97.600, 1.940	97.600, 2.264
490	97.800, 1.357	97.800, 1.213	97.800, 1.157	97.800, 1.325	97.800, 1.422	97.800, 1.296	97.800, 1.167	97.800, 1.411	97.800, 1.254	97.800, 1.096	97.800, 1.155	97.800, 1.310	97.800, 2.131	97.800, 1.940	97.800, 2.266
491	98.000, 1.357	98.000, 1.214	98.000, 1.157	98.000, 1.326	98.000, 1.423	98.000, 1.297	98.000, 1.167	98.000, 1.412	98.000, 1.255	98.000, 1.096	98.000, 1.156	98.000, 1.311	98.000, 2.132	98.000, 1.942	98.000, 2.268
492	98.200, 1.357	98.200, 1.214	98.200, 1.157	98.200, 1.327	98.200, 1.423	98.200, 1.297	98.200, 1.167	98.200, 1.413	98.200, 1.256	98.200, 1.096	98.200, 1.156	98.200, 1.312	98.200, 2.133	98.200, 1.943	98.200, 2.270
493	98.400, 1.357	98.400, 1.215	98.400, 1.157	98.400, 1.327	98.400, 1.424	98.400, 1.298	98.400, 1.167	98.400, 1.414	98.400, 1.256	98.400, 1.096	98.400, 1.157	98.400, 1.312	98.400, 2.135	98.400, 1.944	98.400, 2.271
494	98.600, 1.357	98.600, 1.215	98.600, 1.157	98.600, 1.328	98.600, 1.424	98.600, 1.299	98.600, 1.168	98.600, 1.414	98.600, 1.257	98.600, 1.096	98.600, 1.157	98.600, 1.313	98.600, 2.136	98.600, 1.944	98.600, 2.272
495	98.800, 1.358	98.800, 1.216	98.800, 1.157	98.800, 1.328	98.800, 1.425	98.800, 1.299	98.800, 1.168	98.800, 1.415	98.800, 1.258	98.800, 1.097	98.800, 1.157	98.800, 1.313	98.800, 2.137	98.800, 1.945	98.800, 2.274
496	99.000, 1.358	99.000, 1.217	99.000, 1.157	99.000, 1.328	99.000, 1.425	99.000, 1.300	99.000, 1.168	99.000, 1.415	99.000, 1.258	99.000, 1.097	99.000, 1.157	99.000, 1.314	99.000, 2.139	99.000, 1.946	99.000, 2.275
497	99.200, 1.359	99.200, 1.217	99.200, 1.157	99.200, 1.328	99.200, 1.426	99.200, 1.300	99.200, 1.169	99.200, 1.416	99.200, 1.258	99.200, 1.097	99.200, 1.157	99.200, 1.314	99.200, 2.140	99.200, 1.947	99.200, 2.276
498	99.400, 1.360	99.400, 1.218	99.400, 1.157	99.400, 1.328	99.400, 1.427	99.400, 1.301	99.400, 1.169	99.400, 1.417	99.400, 1.259	99.400, 1.097	99.400, 1.157	99.400, 1.315	99.400, 2.142	99.400, 1.948	99.400, 2.277
499	99.600, 1.360	99.600, 1.218	99.600, 1.157	99.600, 1.328	99.600, 1.427	99.600, 1.302	99.600, 1.169	99.600, 1.417	99.600, 1.259	99.600, 1.097	99.600, 1.158	99.600, 1.315	99.600, 2.143	99.600, 1.949	99.600, 2.279
500	99.800, 1.361	99.800, 1.218	99.800, 1.157	99.800, 1.329	99.800, 1.428	99.800, 1.302	99.800, 1.169	99.800, 1.417	99.800, 1.259	99.800, 1.098	99.800, 1.158	99.800, 1.316	99.800, 2.144	99.800, 1.949	99.800, 2.280
501	100.000, 1.362	100.000, 1.218	100.000, 1.158	100.000, 1.329	100.000, 1.428	100.000, 1.302	100.000, 1.169	100.000, 1.418	100.000, 1.259	100.000, 1.098	100.000, 1.158	100.000, 1.316	100.000, 2.145	100.000, 1.950	100.000, 2.281
502	100.200, 1.362	100.200, 1.219	100.200, 1.158	100.200, 1.329	100.200, 1.428	100.200, 1.302	100.200, 1.169	100.200, 1.418	100.200, 1.260	100.200, 1.099	100.200, 1.158	100.200, 1.317	100.200, 2.147	100.200, 1.952	100.200, 2.282
503	100.400, 1.363	100.400, 1.219	100.400, 1.159	100.400, 1.330	100.400, 1.429	100.400, 1.302	100.400, 1.169	100.400, 1.418	100.400, 1.260	100.400, 1.099	100.400, 1.158	100.400, 1.317	100.400, 2.148	100.400, 1.953	100.400, 2.283
504	100.600, 1.363	100.600, 1.218	100.600, 1.160	100.600, 1.330	100.600, 1.429	100.600, 1.302	100.600, 1.169	100.600, 1.418	100.600, 1.261	100.600, 1.099	100.600, 1.158	100.600, 1.317	100.600, 2.149	100.600, 1.954	100.600, 2.285
505	100.800, 1.364	100.800, 1.218	100.800, 1.161	100.800, 1.331	100.800, 1.430	100.800, 1.302	100.800, 1.169	100.800, 1.419	100.800, 1.261	100.800, 1.100	100.800, 1.159	100.800, 1.318	100.800, 2.151	100.800, 1.956	100.800, 2.286
506	101.000, 1.364	101.000, 1.218	101.000, 1.161	101.000, 1.331	101.000, 1.430	101.000, 1.303	101.000, 1.170	101.000, 1.419	101.000, 1.261	101.000, 1.101	101.000, 1.160	101.000, 1.318	101.000, 2.153	101.000, 1.957	101.000, 2.288
507	101.200, 1.364	101.200, 1.218	101.200, 1.162	101.200, 1.331	101.200, 1.430	101.200, 1.303	101.200, 1.170	101.200, 1.419	101.200, 1.262	101.200, 1.101	101.200, 1.160	101.200, 1.319	101.200, 2.154	101.200, 1.959	101.200, 2.289
508	101.400, 1.364	101.400, 1.217	101.400, 1.162	101.400, 1.332	101.400, 1.430	101.400, 1.304	101.400, 1.171	101.400, 1.420	101.400, 1.262	101.400, 1.102	101.400, 1.161	101.400, 1.320	101.400, 2.155	101.400, 1.960	101.400, 2.290
509	101.600, 1.364	101.600, 1.217	101.600, 1.162	101.600, 1.332	101.600, 1.430	101.600, 1.304	101.600, 1.171	101.600, 1.420	101.600, 1.262	101.600, 1.102	101.600, 1.162	101.600, 1.320	101.600, 2.156	101.600, 1.962	101.600, 2.292
510	101.800, 1.364	101.800, 1.217	101.800, 1.163	101.800, 1.333	101.800, 1.430	101.800, 1.305	101.800, 1.172	101.800, 1.420	101.800, 1.262	101.800, 1.102	101.800, 1.162	101.800, 1.321	101.800, 2.157	101.800, 1.963	101.800, 2.293
511	102.000, 1.365	102.000, 1.216	102.000, 1.163	102.000, 1.333	102.000, 1.430	102.000, 1.305	102.000, 1.172	102.000, 1.421	102.000, 1.263	102.000, 1.103	102.000, 1.163	102.000, 1.322	102.000, 2.158	102.000, 1.964	102.000, 2.295
512	102.200, 1.365	102.200, 1.216	102.200, 1.163	102.200, 1.333	102.200, 1.431	102.200, 1.306	102.200, 1.172	102.200, 1.421	102.200, 1.263	102.200, 1.103	102.200, 1.163	102.200, 1.322	102.200, 2.159	102.200, 1.966	102.200, 2.296
513	102.400, 1.365	102.400, 1.216	102.400, 1.163	102.400, 1.333	102.400, 1.431	102.400, 1.306	102.400, 1.173	102.400, 1.421	102.400, 1.264	102.400, 1.103	102.400, 1.164	102.400, 1.323	102.400, 2.160	102.400, 1.967	102.400, 2.298
514	102.600, 1.365	102.600, 1.217	102.600, 1.164	102.600, 1.333	102.600, 1.431	102.600, 1.307	102.600, 1.173	102.600, 1.421	102.600, 1.265	102.600, 1.104	102.600, 1.164	102.600, 1.323	102.600, 2.161	102.600, 1.968	102.600, 2.299
515	102.800, 1.365	102.800, 1.217	102.800, 1.164	102.800, 1.333	102.800, 1.432	102.800, 1.307	102.800, 1.174	102.800, 1.422	102.800, 1.265	102.800, 1.104	102.800, 1.165	102.800, 1.324	102.800, 2.162	102.800, 1.969	102.800, 2.301
516	103.000, 1.365	103.000, 1.217	103.000, 1.163	103.000, 1.333	103.000, 1.432	103.000, 1.308	103.000, 1.174	103.000, 1.422	103.000, 1.266	103.000, 1.104	103.000, 1.166	103.000, 1.324	103.000, 2.163	103.000, 1.970	103.000, 2.302
517	103.200, 1.366	103.200, 1.218	103.200, 1.163	103.200, 1.333	103.200, 1.433	103.200, 1.308	103.200, 1.175	103.200, 1.423	103.200, 1.266	103.200, 1.105	103.200, 1.166	103.200, 1.325	103.200, 2.164	103.200, 1.971	103.200, 2.304
518	103.400, 1.366	103.400, 1.218	103.400, 1.163	103.400, 1.334	103.400, 1.433	103.400, 1.308	103.400, 1.175	103.400, 1.423	103.400, 1.267	103.400, 1.105	103.400, 1.167	103.400, 1.325	103.400, 2.165	103.400, 1.972	103.400, 2.305
519	103.600, 1.366	103.600, 1.219	103.600, 1.162	103.600, 1.334	103.600, 1.434	103.600, 1.308	103.600, 1.175	103.600, 1.424	103.600, 1.268	103.600, 1.105	103.600, 1.168	103.600, 1.325	103.600, 2.166	103.600, 1.973	103.600, 2.306
520	103.800, 1.367	103.800, 1.220	103.800, 1.162	103.800, 1.335	103.800, 1.434	103.800, 1.308	103.800, 1.176	103.800, 1.425	103.800, 1.268	103.800, 1.105	103.800, 1.168	103.800, 1.325	103.800, 2.166	103.800, 1.973	103.800, 2.307
521	104.000, 1.368	104.000, 1.220	104.000, 1.163	104.000, 1.335	104.000, 1.435	104.000, 1.308	104.000, 1.176	104.000, 1.426	104.000, 1.269	104.000, 1.105	104.000, 1.168	104.000, 1.326	104.000, 2.167	104.000, 1.974	104.000, 2.309
522	104.200, 1.368	104.200, 1.221	104.200, 1.163	104.200, 1.336	104.200, 1.436	104.200, 1.309	104.200, 1.177	104.200, 1.427	104.200, 1.269	104.200, 1.106	104.200, 1.168	104.200, 1.326	104.200, 2.168	104.200, 1.975	104.200, 2.310
523	104.400, 1.369	104.400, 1.222	104.400, 1.163	104.400, 1.336	104.400, 1.437	104.400, 1.309	104.400, 1.177	104.400, 1.427	104.400, 1.270	104.400, 1.106	104.400, 1.168	104.400, 1.326	104.400, 2.169	104.400, 1.976	104.400, 2.311
524	104.600, 1.370	104.600, 1.222	104.600, 1.164	104.600, 1.336	104.600, 1.438	104.600, 1.309	104.600, 1.178	104.600, 1.428	104.600, 1.270	104.600, 1.106	104.600, 1.168	104.600, 1.326	104.600, 2.170	104.600, 1.976	104.600, 2.313
525	104.800, 1.370	104.800, 1.223	104.800, 1.165	104.800, 1.337	104.800, 1.438	104.800, 1.309	104.800, 1.179	104.800, 1.428	104.800, 1.271	104.800, 1.107	104.800, 1.168	104.800, 1.327	104.800, 2.171	104.800, 1.977	104.800, 2.314
526	105.000, 1.371	105.000, 1.223	105.000, 1.165	105.000, 1.337	105.000, 1.439	105.000, 1.309	105.000, 1.179	105.000, 1.428	105.000, 1.271	105.000, 1.107	105.000, 1.168	105.000, 1.327	105.000, 2.172	105.000, 1.977	105.000, 2.315
527	105.200, 1.371	105.200, 1.223	105.200, 1.166	105.200, 1.338	105.200, 1.440	105.200, 1.309	105.200, 1.180	105.200, 1.429	105.200, 1.271	105.200, 1.108	105.200, 1.168	105.200, 1.328	105.200, 2.173	105.200, 1.978	105.200, 2.316
528	105.400, 1.372	105.400, 1.223	105.400, 1.166	105.400, 1.338	105.400, 1.440	105.400, 1.309	105.400, 1.181	105.400, 1.429	105.400, 1.271	105.400, 1.108	105.400, 1.168	105.400, 1.328	105.400, 2.174	105.400, 1.979	105.400, 2.317
529	105.600, 1.372	105.600, 1.223	105.600, 1.166	105.600, 1.339	105.600, 1.441	105.600, 1.310	105.600, 1.181	105.600, 1.429	105.600, 1.271	105.600, 1.108	105.600, 1.168	105.600, 1.328	105.600, 2.175	105.600, 1.980	105.600, 2.318
530	105.800, 1.373	105.800, 1.224	105.800, 1.167	105.800, 1.339	105.800, 1.441	105.800, 1.310	105.800, 1.181	105.800, 1.429	105.800, 1.272	105.800, 1.109	105.800, 1.167	105.800, 1.329	105.800, 2.176	105.800, 1.980	105.800, 2.319
531	106.000, 1.373	106.000, 1.224	106.000, 1.167	106.000, 1.340	106.000, 1.442	106.000, 1.310	106.000, 1.182	106.000, 1.429	106.000, 1.273	106.000, 1.109	106.000, 1.167	106.000, 1.329	106.000, 2.178	106.000, 1.981	106.000, 2.321
532	106.200, 1.373	106.200, 1.224	106.200, 1.167	106.200, 1.340	106.200, 1.442	106.200, 1.310	106.200, 1.182	106.200, 1.430	106.200, 1.273	106.200, 1.109	106.200, 1.168	106.200, 1.329	106.200, 2.179	106.200, 1.982	106.200, 2.322
533	106.400, 1.373	106.400, 1.224	106.400, 1.167	106.400, 1.341	106.400, 1.443	106.400, 1.311	106.400, 1.182	106.400, 1.430	106.400, 1.274	106.400, 1.110	106.400, 1.168	106.400, 1.330	106.400, 2.180	106.400, 1.984	106.400, 2.323
534	106.600, 1.373	106.600, 1.224	106.600, 1.167	106.600, 1.341	106.600, 1.443	106.600, 1.311	106.600, 1.183	106.600, 1.430	106.600, 1.274	106.600, 1.110	106.600, 1.168	106.600, 1.330	106.600, 2.181	106.600, 1.984	106.600, 2.324
535	106.800, 1.373	106.800, 1.225	106.800, 1.167	106.800, 1.341	106.800, 1.443	106.800, 1.311	106.800, 1.183	106.800, 1.430	106.800, 1.274	106.800, 1.110	106.800, 1.169	106.800, 1.330	106.800, 2.182	106.800, 1.986	106.800, 2.325
536	107.000, 1.372	107.000, 1.225	107.000, 1.167	107.000, 1.342	107.000, 1.444	107.000, 1.312	107.000, 1.183	107.000, 1.430	107.000, 1.275	107.000, 1.111	107.000, 1.169	107.000, 1.331	107.000, 2.184	107.000, 1.987	107.000, 2.326
537	107.200, 1.372	107.200, 1.225	107.200, 1.166	107.200, 1.342	107.200, 1.444	107.200, 1.312	107.200, 1.183	107.200, 1.430	107.200, 1.275	107.200, 1.111	107.200, 1.170	107.200, 1.331	107.200, 2.185	107.200, 1.988	107.200, 2.328
538	107.400, 1.373	107.400, 1.225	107.400, 1.166	107.400, 1.342	107.400, 1.444	107.400, 1.312	107.400, 1.183	107.400, 1.431	107.400, 1.275	107.400, 1.111	107.400, 1.171	107.400, 1.331	107.400, 2.186	107.400, 1.989	107.400, 2.329
539	107.600, 1.373	107.600, 1.226	107.600, 1.166	107.600, 1.343	107.600, 1.444	107.600, 1.313	107.600, 1.183	107.600, 1.431	107.600, 1.275	107.600, 1.111	107.600, 1.171	107.600, 1.331	107.600, 2.188	107.600, 1.990	107.600, 2.330
540	107.800, 1.373	107.800, 1.226	107.800, 1.166	107.800, 1.343	107.800, 1.444	107.800, 1.313	107.800, 1.184	107.800, 1.431	107.800, 1.276	107.800, 1.111	107.800, 1.172	107.800, 1.331	107.800, 2.189	107.800, 1.991	107.800, 2.332
541	108.000, 1.374	108.000, 1.227	108.000, 1.166	108.000, 1.344	108.000, 1.444	108.000, 1.313	108.000, 1.184	108.000, 1.432	108.000, 1.276	108.000, 1.111	108.000, 1.172	108.000, 1.332	108.000, 2.190	108.000, 1.992	108.000, 2.333
542	108.200, 1.374	108.200, 1.227	108.200, 1.166	108.200, 1.344	108.200, 1.445	108.200, 1.313	108.200, 1.184	108.200, 1.432	108.200, 1.276	108.200, 1.111	108.200, 1.173	108.200, 1.332	108.200, 2.191	108.200, 1.993	108.200, 2.334
543	108.400, 1.374	108.400, 1.227	108.400, 1.167	108.400, 1.344	108.400, 1.445	108.400, 1.313	108.400, 1.185	108.400, 1.432	108.400, 1.277	108.400, 1.111	108.400, 1.173	108.400, 1.333	108.400, 2.192	108.400, 1.994	108.400, 2.336
544	108.600, 1.375	108.600, 1.227	108.600, 1.167	108.600, 1.344	108.600, 1.445	108.600, 1.313	108.600, 1.185	108.600, 1.433	108.600, 1.277	108.600, 1.111	108.600, 1.173	108.600, 1.333	108.600, 2.193	108.600, 1.996	108.600, 2.337
545	108.800, 1.375	108.800, 1.228	108.800, 1.167	108.800, 1.344	108.800, 1.445	108.800, 1.313	108.800, 1.185	108.800, 1.433	108.800, 1.277	108.800, 1.111	108.800, 1.173	108.800, 1.334	108.800, 2.194	108.800, 1.997	108.800, 2.339
546	109.000, 1.376	109.000, 1.228	109.000, 1.168	109.000, 1.344	109.000, 1.445	109.000, 1.313	109.000, 1.185	109.000, 1.434	109.000, 1.278	109.000, 1.111	109.000, 1.173	109.000, 1.334	109.000, 2.195	109.000, 1.998	109.000, 2.340
547	109.200, 1.377	109.200, 1.228	109.200, 1.169	109.200, 1.344	109.200, 1.445	109.200, 1.313	109.200, 1.186	109.200, 1.435	109.200, 1.278	109.200, 1.112	109.200, 1.173	109.200, 1.335	109.200, 2.195	109.200, 2.000	109.200, 2.341
548	109.400, 1.378	109.400, 1.228	109.400, 1.169	109.400, 1.345	109.400, 1.445	109.400, 1.313	109.400, 1.186	109.400, 1.436	109.400, 1.279	109.400, 1.112	109.400, 1.172	109.400, 1.335	109.400, 2.196	109.400, 2.001	109.400, 2.343
549	109.600, 1.378	109.600, 1.229	109.600, 1.169	109.600, 1.345	109.600, 1.446	109.600, 1.313	109.600, 1.186	109.600, 1.436	109.600, 1.279	109.600, 1.112	109.600, 1.172	109.600, 1.336	109.600, 2.197	109.600, 2.003	109.600, 2.344
550	109.800, 1.379	109.800, 1.229	109.800, 1.169	109.800, 1.345	109.800, 1.447	109.800, 1.314	109.800, 1.186	109.800, 1.437	109.800, 1.280	109.800, 1.112	109.800, 1.172	109.800, 1.336	109.800, 2.197	109.800, 2.004	109.800, 2.345
551	110.000, 1.380	110.000, 1.229	110.000, 1.170	110.000, 1.346	110.000, 1.447	110.000, 1.314	110.000, 1.186	110.000, 1.438	110.000, 1.280	110.000, 1.113	110.000, 1.172	110.000, 1.337	110.000, 2.198	110.000, 2.005	110.000, 2.346
552	110.200, 1.380	110.200, 1.230	110.200, 1.170	110.200, 1.346	110.200, 1.447	110.200, 1.314	110.200, 1.186	110.200, 1.438	110.200, 1.281	110.200, 1.113	110.200, 1.172	110.200, 1.337	110.200, 2.199	110.200, 2.006	110.200, 2.347
553	110.400, 1.380	110.400, 1.230	110.400, 1.170	110.400, 1.346	110.400, 1.448	110.400, 1.315	110.400, 1.186	110.400, 1.439	110.400, 1.281	110.400, 1.114	110.400, 1.172	110.400, 1.337	110.400, 2.200	110.400, 2.007	110.400, 2.348
554	110.600, 1.381	110.600, 1.230	110.600, 1.170	110.600, 1.347	110.600, 1.449	110.600, 1.316	110.600, 1.186	110.600, 1.439	110.600, 1.281	110.600, 1.114	110.600, 1.172	110.600, 1.338	110.600, 2.200	110.600, 2.007	110.600, 2.348
555	110.800, 1.381	110.800, 1.231	110.800, 1.170	110.800, 1.347	110.800, 1.449	110.800, 1.317	110.800, 1.187	110.800, 1.440	110.800, 1.281	110.800, 1.115	110.800, 1.172	110.800, 1.338	110.800, 2.201	110.800, 2.007	110.800, 2.349
556	111.000, 1.381	111.000, 1.231	111.000, 1.170	111.000, 1.347	111.000, 1.449	111.000, 1.318	111.000, 1.187	111.000, 1.441	111.000, 1.281	111.000, 1.115	111.000, 1.173	111.000, 1.338	111.000, 2.202	111.000, 2.008	111.000, 2.350
557	111.200, 1.381	111.200, 1.231	111.200, 1.170	111.200, 1.348	111.200, 1.450	111.200, 1.319	111.200, 1.187	111.200, 1.441	111.200, 1.281	111.200, 1.115	111.200, 1.174	111.200, 1.339	111.200, 2.203	111.200, 2.008	111.200, 2.351
558	111.400, 1.381	111.400, 1.231	111.400, 1.170	111.400, 1.348	111.400, 1.450	111.400, 1.320	111.400, 1.188	111.400, 1.442	111.400, 1.282	111.400, 1.116	111.400, 1.175	111.400, 1.339	111.400, 2.204	111.400, 2.008	111.400, 2.352
559	111.600, 1.381	111.600, 1.231	111.600, 1.170	111.600, 1.349	111.600, 1.450	111.600, 1.321	111.600, 1.188	111.600, 1.442	111.600, 1.282	111.600, 1.116	111.600, 1.176	111.600, 1.340	111.600, 2.205	111.600, 2.008	111.600, 2.353
560	111.800, 1.381	111.800, 1.230	111.800, 1.170	111.800, 1.349	111.800, 1.449	111.800, 1.321	111.800, 1.189	111.800, 1.443	111.800, 1.282	111.800, 1.117	111.800, 1.177	111.800, 1.340	111.800, 2.206	111.800, 2.008	111.800, 2.354
561	112.000, 1.381	112.000, 1.230	112.000, 1.171	112.000, 1.350	112.000, 1.449	112.000, 1.322	112.000, 1.189	112.000, 1.443	112.000, 1.282	112.000, 1.117	112.000, 1.177	112.000, 1.340	112.000, 2.207	112.000, 2.008	112.000, 2.355
562	112.200, 1.381	112.200, 1.230	112.200, 1.171	112.200, 1.351	112.200, 1.449	112.200, 1.323	112.200, 1.190	112.200, 1.444	112.200, 1.283	112.200, 1.117	112.200, 1.178	112.200, 1.341	112.200, 2.208	112.200, 2.008	112.200, 2.356
563	112.400, 1.382	112.400, 1.230	112.400, 1.172	112.400, 1.351	112.400, 1.449	112.400, 1.323	112.400, 1.190	112.400, 1.444	112.400, 1.283	112.400, 1.118	112.400, 1.178	112.400, 1.341	112.400, 2.209	112.400, 2.009	112.400, 2.358
564	112.600, 1.382	112.600, 1.230	112.600, 1.172	112.600, 1.351	112.600, 1.449	112.600, 1.323	112.600, 1.190	112.600, 1.445	112.600, 1.284	112.600, 1.118	112.600, 1.178	112.600, 1.342	112.600, 2.210	112.600, 2.009	112.600, 2.359
565	112.800, 1.383	112.800, 1.230	112.800, 1.173	112.800, 1.352	112.800, 1.449	112.800, 1.323	112.800, 1.191	112.800, 1.445	112.800, 1.284	112.800, 1.118	112.800, 1.179	112.800, 1.343	112.800, 2.210	112.800, 2.010	112.800, 2.360
566	113.000, 1.383	113.000, 1.230	113.000, 1.174	113.000, 1.352	113.000, 1.449	113.000, 1.323	113.000, 1.191	113.000, 1.445	113.000, 1.285	113.000, 1.118	113.000, 1.179	113.000, 1.343	113.000, 2.211	113.000, 2.011	113.000, 2.361
567	113.200, 1.383	113.200, 1.231	113.200, 1.174	113.200, 1.352	113.200, 1.449	113.200, 1.323	113.200, 1.191	113.200, 1.446	113.200, 1.285	113.200, 1.118	113.200, 1.179	113.200, 1.344	113.200, 2.211	113.200, 2.012	113.200, 2.362
568	113.400, 1.383	113.400, 1.231	113.400, 1.175	113.400, 1.352	113.400, 1.450	113.400, 1.323	113.400, 1.191	113.400, 1.446	113.400, 1.286	113.400, 1.118	113.400, 1.179	113.400, 1.344	113.400, 2.212	113.400, 2.013	113.400, 2.362
569	113.600, 1.383	113.600, 1.231	113.600, 1.175	113.600, 1.352	113.600, 1.450	113.600, 1.323	113.600, 1.191	113.600, 1.445	113.600, 1.286	113.600, 1.118	113.600, 1.179	113.600, 1.344	113.600, 2.212	113.600, 2.014	113.600, 2.363
570	113.800, 1.384	113.800, 1.231	113.800, 1.176	113.800, 1.353	113.800, 1.451	113.800, 1.323	113.800, 1.191	113.800, 1.445	113.800, 1.287	113.800, 1.118	113.800, 1.179	113.800, 1.345	113.800, 2.213	113.800, 2.016	113.800, 2.364
571	114.000, 1.384	114.000, 1.232	114.000, 1.176	114.000, 1.353	114.000, 1.451	114.000, 1.323	114.000, 1.191	114.000, 1.445	114.000, 1.287	114.000, 1.118	114.000, 1.179	114.000, 1.345	114.000, 2.213	114.000, 2.017	114.000, 2.364
572	114.200, 1.384	114.200, 1.232	114.200, 1.176	114.200, 1.354	114.200, 1.452	114.200, 1.323	114.200, 1.191	114.200, 1.445	114.200, 1.288	114.200, 1.118	114.200, 1.180	114.200, 1.345	114.200, 2.214	114.200, 2.018	114.200, 2.365
573	114.400, 1.384	114.400, 1.232	114.400, 1.176	114.400, 1.354	114.400, 1.452	114.400, 1.323	114.400, 1.191	114.400, 1.445	114.400, 1.289	114.400, 1.118	114.400, 1.180	114.400, 1.345	114.400, 2.215	114.400, 2.019	114.400, 2.366
574	114.600, 1.384	114.600, 1.233	114.600, 1.176	114.600, 1.355	114.600, 1.452	114.600, 1.323	114.600, 1.192	114.600, 1.446	114.600, 1.290	114.600, 1.119	114.600, 1.180	114.600, 1.345	114.600, 2.216	114.600, 2.020	114.600, 2.367
575	114.800, 1.384	114.800, 1.233	114.800, 1.176	114.800, 1.355	114.800, 1.453	114.800, 1.324	114.800, 1.192	114.800, 1.446	114.800, 1.290	114.800, 1.119	114.800, 1.180	114.800, 1.345	114.800, 2.217	114.800, 2.021	114.800, 2.369
576	115.000, 1.385	115.000, 1.233	115.000, 1.176	115.000, 1.355	115.000, 1.453	115.000, 1.324	115.000, 1.192	115.000, 1.446	115.000, 1.291	115.000, 1.119	115.000, 1.181	115.000, 1.346	115.000, 2.218	115.000, 2.022	115.000, 2.370
577	115.200, 1.385	115.200, 1.234	115.200, 1.176	115.200, 1.355	115.200, 1.453	115.200, 1.324	115.200, 1.193	115.200, 1.446	115.200, 1.291	115.200, 1.119	115.200, 1.181	115.200, 1.346	115.200, 2.219	115.200, 2.023	115.200, 2.372
578	115.400, 1.385	115.400, 1.234	115.400, 1.176	115.400, 1.355	115.400, 1.453	115.400, 1.324	115.400, 1.193	115.400, 1.447	115.400, 1.292	115.400, 1.119	115.400, 1.181	115.400, 1.346	115.400, 2.219	115.400, 2.023	115.400, 2.373
579	115.600, 1.385	115.600, 1.235	115.600, 1.177	115.600, 1.356	115.600, 1.453	115.600, 1.325	115.600, 1.193	115.600, 1.447	115.600, 1.292	115.600, 1.119	115.600, 1.182	115.600, 1.346	115.600, 2.220	115.600, 2.024	115.600, 2.374
580	115.800, 1.386	115.800, 1.235	115.800, 1.177	115.800, 1.356	115.800, 1.453	115.800, 1.325	115.800, 1.194	115.800, 1.448	115.800, 1.292	115.800, 1.119	115.800, 1.182	115.800, 1.346	115.800, 2.220	115.800, 2.024	115.800, 2.375
581	116.000, 1.386	116.000, 1.236	116.000, 1.177	116.000, 1.357	116.000, 1.454	116.000, 1.325	116.000, 1.194	116.000, 1.448	116.000, 1.292	116.000, 1.120	116.000, 1.182	116.000, 1.346	116.000, 2.221	116.000, 2.025	116.000, 2.376
582	116.200, 1.387	116.200, 1.236	116.200, 1.177	116.200, 1.357	116.200, 1.454	116.200, 1.325	116.200, 1.194	116.200, 1.449	116.200, 1.292	116.200, 1.120	116.200, 1.182	116.200, 1.346	116.200, 2.222	116.200, 2.025	116.200, 2.377
583	116.400, 1.387	116.400, 1.237	116.400, 1.177	116.400, 1.358	116.400, 1.454	116.400, 1.326	116.400, 1.195	116.400, 1.450	116.400, 1.292	116.400, 1.120	116.400, 1.182	116.400, 1.346	116.400, 2.222	116.400, 2.026	116.400, 2.378
584	116.600, 1.388	116.600, 1.238	116.600, 1.177	116.600, 1.358	116.600, 1.454	116.600, 1.326	116.600, 1.195	116.600, 1.451	116.600, 1.292	116.600, 1.121	116.600, 1.182	116.600, 1.346	116.600, 2.223	116.600, 2.026	116.600, 2.378
585	116.800, 1.388	116.800, 1.238	116.800, 1.177	116.800, 1.358	116.800, 1.455	116.800, 1.326	116.800, 1.195	116.800, 1.451	116.800, 1.292	116.800, 1.121	116.800, 1.183	116.800, 1.346	116.800, 2.224	116.800, 2.027	116.800, 2.379
586	117.000, 1.389	117.000, 1.238	117.000, 1.178	117.000, 1.359	117.000, 1.455	117.000, 1.326	117.000, 1.195	117.000, 1.452	117.000, 1.292	117.000, 1.121	117.000, 1.183	117.000, 1.346	117.000, 2.225	117.000, 2.028	117.000, 2.379
587	117.200, 1.389	117.200, 1.238	117.200, 1.178	117.200, 1.359	117.200, 1.455	117.200, 1.326	117.200, 1.196	117.200, 1.453	117.200, 1.293	117.200, 1.121	117.200, 1.183	117.200, 1.346	117.200, 2.225	117.200, 2.029	117.200, 2.380
588	117.400, 1.390	117.400, 1.238	117.400, 1.179	117.400, 1.359	117.400, 1.456	117.400, 1.326	117.400, 1.196	117.400, 1.454	117.400, 1.293	117.400, 1.121	117.400, 1.183	117.400, 1.346	117.400, 2.226	117.400, 2.029	117.400, 2.380
589	117.600, 1.390	117.600, 1.238	117.600, 1.179	117.600, 1.359	117.600, 1.457	117.600, 1.326	117.600, 1.197	117.600, 1.455	117.600, 1.293	117.600, 1.121	117.600, 1.183	117.600, 1.346	117.600, 2.227	117.600, 2.030	117.600, 2.381
590	117.800, 1.391	117.800, 1.238	117.800, 1.180	117.800, 1.359	117.800, 1.457	117.800, 1.327	117.800, 1.198	117.800, 1.455	117.800, 1.294	117.800, 1.122	117.800, 1.184	117.800, 1.346	117.800, 2.227	117.800, 2.031	117.800, 2.381
591	118.000, 1.391	118.000, 1.238	118.000, 1.180	118.000, 1.360	118.000, 1.458	118.000, 1.327	118.000, 1.199	118.000, 1.456	118.000, 1.294	118.000, 1.122	118.000, 1.184	118.000, 1.347	118.000, 2.228	118.000, 2.031	118.000, 2.382
592	118.200, 1.392	118.200, 1.238	118.200, 1.181	118.200, 1.360	118.200, 1.458	118.200, 1.328	118.200, 1.200	118.200, 1.457	118.200, 1.295	118.200, 1.122	118.200, 1.185	118.200, 1.347	118.200, 2.229	118.200, 2.032	118.200, 2.383
593	118.400, 1.392	118.400, 1.238	118.400, 1.181	118.400, 1.360	118.400, 1.458	118.400, 1.328	118.400, 1.201	118.400, 1.457	118.400, 1.295	118.400, 1.123	118.400, 1.185	118.400, 1.348	118.400, 2.230	118.400, 2.033	118.400, 2.384
594	118.600, 1.393	118.600, 1.238	118.600, 1.181	118.600, 1.360	118.600, 1.459	118.600, 1.329	118.600, 1.201	118.600, 1.458	118.600, 1.296	118.600, 1.123	118.600, 1.186	118.600, 1.349	118.600, 2.231	118.600, 2.034	118.600, 2.385
595	118.800, 1.393	118.800, 1.239	118.800, 1.181	118.800, 1.360	118.800, 1.459	118.800, 1.329	118.800, 1.201	118.800, 1.458	118.800, 1.296	118.800, 1.123	118.800, 1.187	118.800, 1.349	118.800, 2.232	118.800, 2.034	118.800, 2.387
596	119.000, 1.393	119.000, 1.239	119.000, 1.181	119.000, 1.361	119.000, 1.460	119.000, 1.330	119.000, 1.201	119.000, 1.458	119.000, 1.296	119.000, 1.123	119.000, 1.187	119.000, 1.350	119.000, 2.232	119.000, 2.035	119.000, 2.387
597	119.200, 1.394	119.200, 1.239	119.200, 1.181	119.200, 1.361	119.200, 1.460	119.200, 1.330	119.200, 1.201	119.200, 1.458	119.200, 1.297	119.200, 1.124	119.200, 1.187	119.200, 1.351	119.200, 2.233	119.200, 2.035	119.200, 2.388
598	119.400, 1.394	119.400, 1.240	119.400, 1.181	119.400, 1.362	119.400, 1.461	119.400, 1.330	119.400, 1.201	119.400, 1.458	119.400, 1.297	119.400, 1.124	119.400, 1.188	119.400, 1.352	119.400, 2.234	119.400, 2.036	119.400, 2.389
599	119.600, 1.394	119.600, 1.240	119.600, 1.181	119.600, 1.362	119.600, 1.462	119.600, 1.330	119.600, 1.200	119.600, 1.458	119.600, 1.297	119.600, 1.124	119.600, 1.188	119.600, 1.353	119.600, 2.234	119.600, 2.036	119.600, 2.389
600	119.800, 1.394	119.800, 1.241	119.800, 1.180	119.800, 1.363	119.800, 1.462	119.800, 1.330	119.800, 1.200	119.800, 1.459	119.800, 1.298	119.800, 1.125	119.800, 1.188	119.800, 1.353	119.800, 2.235	119.800, 2.037	119.800, 2.389
601	120.000, 1.394	120.000, 1.241	120.000, 1.180	120.000, 1.363	120.000, 1.462	120.000, 1.331	120.000, 1.200	120.000, 1.459	120.000, 1.298	120.000, 1.125	120.000, 1.189	120.000, 1.354	120.000, 2.235	120.000, 2.037	120.000, 2.389
602	120.200, 1.395	120.200, 1.241	120.200, 1.180	120.200, 1.364	120.200, 1.463	120.200, 1.331	120.200, 1.199	120.200, 1.459	120.200, 1.299	120.200, 1.126	120.200, 1.189	120.200, 1.355	120.200, 2.236	120.200, 2.038	120.200, 2.390
603	120.400, 1.395	120.400, 1.241	120.400, 1.180	120.400, 1.364	120.400, 1.463	120.400, 1.331	120.400, 1.199	120.400, 1.459	120.400, 1.299	120.400, 1.126	120.400, 1.189	120.400, 1.355	120.400, 2.237	120.400, 2.039	120.400, 2.390
604	120.600, 1.395	120.600, 1.241	120.600, 1.180	120.600, 1.365	120.600, 1.463	120.600, 1.331	120.600, 1.199	120.600, 1.460	120.600, 1.299	120.600, 1.127	120.600, 1.189	120.600, 1.356	120.600, 2.237	120.600, 2.040	120.600, 2.391
605	120.800, 1.396	120.800, 1.241	120.800, 1.180	120.800, 1.365	120.800, 1.464	120.800, 1.331	120.800, 1.199	120.800, 1.460	120.800, 1.299	120.800, 1.127	120.800, 1.189	120.800, 1.356	120.800, 2.238	120.800, 2.041	120.800, 2.392
606	121.000, 1.396	121.000, 1.240	121.000, 1.181	121.000, 1.365	121.000, 1.464	121.000, 1.331	121.000, 1.199	121.000, 1.460	121.000, 1.299	121.000, 1.128	121.000, 1.189	121.000, 1.357	121.000, 2.239	121.000, 2.042	121.000, 2.393
607	121.200, 1.396	121.200, 1.240	121.200, 1.181	121.200, 1.365	121.200, 1.465	121.200, 1.331	121.200, 1.200	121.200, 1.461	121.200, 1.299	121.200, 1.128	121.200, 1.188	121.200, 1.357	121.200, 2.240	121.200, 2.042	121.200, 2.395
608	121.400, 1.396	121.400, 1.240	121.400, 1.181	121.400, 1.365	121.400, 1.465	121.400, 1.331	121.400, 1.200	121.400, 1.461	121.400, 1.299	121.400, 1.129	121.400, 1.188	121.400, 1.357	121.400, 2.241	121.400, 2.044	121.400, 2.396
609	121.600, 1.396	121.600, 1.240	121.600, 1.181	121.600, 1.365	121.600, 1.465	121.600, 1.332	121.600, 1.201	121.600, 1.461	121.600, 1.300	121.600, 1.130	121.600, 1.189	121.600, 1.357	121.600, 2.242	121.600, 2.045	121.600, 2.397
610	121.800, 1.396	121.800, 1.240	121.800, 1.182	121.800, 1.364	121.800, 1.465	121.800, 1.332	121.800, 1.201	121.800, 1.462	121.800, 1.300	121.800, 1.130	121.800, 1.189	121.800, 1.358	121.800, 2.242	121.800, 2.046	121.800, 2.398
611	122.000, 1.396	122.000, 1.240	122.000, 1.182	122.000, 1.364	122.000, 1.465	122.000, 1.332	122.000, 1.201	122.000, 1.462	122.000, 1.300	122.000, 1.130	122.000, 1.189	122.000, 1.358	122.000, 2.243	122.000, 2.047	122.000, 2.399
612	122.200, 1.396	122.200, 1.240	122.200, 1.183	122.200, 1.364	122.200, 1.465	122.200, 1.333	122.200, 1.201	122.200, 1.463	122.200, 1.301	122.200, 1.131	122.200, 1.189	122.200, 1.358	122.200, 2.243	122.200, 2.048	122.200, 2.400
613	122.400, 1.396	122.400, 1.240	122.400, 1.183	122.400, 1.364	122.400, 1.465	122.400, 1.333	122.400, 1.202	122.400, 1.463	122.400, 1.301	122.400, 1.131	122.400, 1.190	122.400, 1.358	122.400, 2.243	122.400, 2.048	122.400, 2.401
614	122.600, 1.396	122.600, 1.241	122.600, 1.184	122.600, 1.364	122.600, 1.465	122.600, 1.334	122.600, 1.202	122.600, 1.464	122.600, 1.301	122.600, 1.131	122.600, 1.190	122.600, 1.358	122.600, 2.244	122.600, 2.048	122.600, 2.402
615	122.800, 1.397	122.800, 1.242	122.800, 1.184	122.800, 1.365	122.800, 1.465	122.800, 1.334	122.800, 1.202	122.800, 1.465	122.800, 1.302	122.800, 1.131	122.800, 1.190	122.800, 1.359	122.800, 2.244	122.800, 2.048	122.800, 2.403
616	123.000, 1.397	123.000, 1.242	123.000, 1.184	123.000, 1.365	123.000, 1.465	123.000, 1.334	123.000, 1.202	123.000, 1.465	123.000, 1.302	123.000, 1.131	123.000, 1.191	123.000, 1.358	123.000, 2.245	123.000, 2.048	123.000, 2.404
617	123.200, 1.397	123.200, 1.243	123.200, 1.185	123.200, 1.365	123.200, 1.465	123.200, 1.334	123.200, 1.203	123.200, 1.466	123.200, 1.303	123.200, 1.131	123.200, 1.192	123.200, 1.358	123.200, 2.245	123.200, 2.048	123.200, 2.405
618	123.400, 1.397	123.400, 1.243	123.400, 1.185	123.400, 1.366	123.400, 1.465	123.400, 1.334	123.400, 1.203	123.400, 1.466	123.400, 1.304	123.400, 1.131	123.400, 1.192	123.400, 1.358	123.400, 2.245	123.400, 2.048	123.400, 2.406
619	123.600, 1.398	123.600, 1.244	123.600, 1.185	123.600, 1.366	123.600, 1.465	123.600, 1.334	123.600, 1.204	123.600, 1.466	123.600, 1.304	123.600, 1.131	123.600, 1.192	123.600, 1.358	123.600, 2.246	123.600, 2.048	123.600, 2.406
620	123.800, 1.398	123.800, 1.244	123.800, 1.186	123.800, 1.366	123.800, 1.465	123.800, 1.334	123.800, 1.205	123.800, 1.466	123.800, 1.305	123.800, 1.132	123.800, 1.192	123.800, 1.358	123.800, 2.246	123.800, 2.048	123.800, 2.407
621	124.000, 1.399	124.000, 1.244	124.000, 1.186	124.000, 1.367	124.000, 1.465	124.000, 1.335	124.000, 1.205	124.000, 1.466	124.000, 1.305	124.000, 1.132	124.000, 1.192	124.000, 1.359	124.000, 2.246	124.000, 2.048	124.000, 2.408
622	124.200, 1.399	124.200, 1.244	124.200, 1.186	124.200, 1.368	124.200, 1.465	124.200, 1.335	124.200, 1.206	124.200, 1.466	124.200, 1.306	124.200, 1.132	124.200, 1.193	124.200, 1.359	124.200, 2.247	124.200, 2.049	124.200, 2.409
623	124.400, 1.400	124.400, 1.244	124.400, 1.186	124.400, 1.369	124.400, 1.466	124.400, 1.336	124.400, 1.206	124.400, 1.467	124.400, 1.306	124.400, 1.133	124.400, 1.192	124.400, 1.360	124.400, 2.248	124.400, 2.049	124.400, 2.410
624	124.600, 1.400	124.600, 1.244	124.600, 1.187	124.600, 1.369	124.600, 1.467	124.600, 1.336	124.600, 1.207	124.600, 1.467	124.600, 1.306	124.600, 1.133	124.600, 1.193	124.600, 1.360	124.600, 2.249	124.600, 2.050	124.600, 2.411
625	124.800, 1.401	124.800, 1.245	124.800, 1.186	124.800, 1.370	124.800, 1.467	124.800, 1.337	124.800, 1.207	124.800, 1.467	124.800, 1.305	124.800, 1.133	124.800, 1.193	124.800, 1.361	124.800, 2.250	124.800, 2.051	124.800, 2.412
626	125.000, 1.401	125.000, 1.245	125.000, 1.186	125.000, 1.370	125.000, 1.468	125.000, 1.337	125.000, 1.207	125.000, 1.467	125.000, 1.305	125.000, 1.133	125.000, 1.193	125.000, 1.361	125.000, 2.251	125.000, 2.052	125.000, 2.412
627	125.200, 1.401	125.200, 1.245	125.200, 1.186	125.200, 1.370	125.200, 1.469	125.200, 1.338	125.200, 1.208	125.200, 1.467	125.200, 1.305	125.200, 1.134	125.200, 1.194	125.200, 1.362	125.200, 2.252	125.200, 2.053	125.200, 2.413
628	125.400, 1.401	125.400, 1.245	125.400, 1.185	125.400, 1.370	125.400, 1.469	125.400, 1.338	125.400, 1.208	125.400, 1.467	125.400, 1.305	125.400, 1.134	125.400, 1.194	125.400, 1.362	125.400, 2.252	125.400, 2.054	125.400, 2.414
629	125.600, 1.401	125.600, 1.245	125.600, 1.185	125.600, 1.370	125.600, 1.470	125.600, 1.338	125.600, 1.208	125.600, 1.467	125.600, 1.305	125.600, 1.134	125.600, 1.194	125.600, 1.362	125.600, 2.253	125.600, 2.055	125.600, 2.414
630	125.800, 1.401	125.800, 1.245	125.800, 1.185	125.800, 1.371	125.800, 1.470	125.800, 1.339	125.800, 1.208	125.800, 1.467	125.800, 1.305	125.800, 1.134	125.800, 1.195	125.800, 1.363	125.800, 2.254	125.800, 2.056	125.800, 2.415
631	126.000, 1.401	126.000, 1.246	126.000, 1.185	126.000, 1.371	126.000, 1.470	126.000, 1.339	126.000, 1.208	126.000, 1.467	126.000, 1.305	126.000, 1.134	126.000, 1.195	126.000, 1.363	126.000, 2.254	126.000, 2.057	126.000, 2.415
632	126.200, 1.401	126.200, 1.246	126.200, 1.185	126.200, 1.371	126.200, 1.470	126.200, 1.340	126.200, 1.208	126.200, 1.467	126.200, 1.305	126.200, 1.134	126.200, 1.195	126.200, 1.363	126.200, 2.255	126.200, 2.058	126.200, 2.415
633	126.400, 1.401	126.400, 1.247	126.400, 1.185	126.400, 1.372	126.400, 1.470	126.400, 1.340	126.400, 1.208	126.400, 1.467	126.400, 1.306	126.400, 1.134	126.400, 1.196	126.400, 1.364	126.400, 2.256	126.400, 2.059	126.400, 2.416
634	126.600, 1.400	126.600, 1.247	126.600, 1.185	126.600, 1.372	126.600, 1.470	126.600, 1.340	126.600, 1.208	126.600, 1.468	126.600, 1.306	126.600, 1.134	126.600, 1.196	126.600, 1.364	126.600, 2.256	126.600, 2.059	126.600, 2.416
635	126.800, 1.400	126.800, 1.247	126.800, 1.186	126.800, 1.373	126.800, 1.470	126.800, 1.340	126.800, 1.208	126.800, 1.468	126.800, 1.306	126.800, 1.134	126.800, 1.197	126.800, 1.365	126.800, 2.257	126.800, 2.059	126.800, 2.417
636	127.000, 1.401	127.000, 1.248	127.000, 1.186	127.000, 1.373	127.000, 1.469	127.000, 1.340	127.000, 1.208	127.000, 1.468	127.000, 1.307	127.000, 1.133	127.000, 1.197	127.000, 1.365	127.000, 2.258	127.000, 2.059	127.000, 2.417
637	127.200, 1.401	127.200, 1.248	127.200, 1.187	127.200, 1.373	127.200, 1.469	127.200, 1.340	127.200, 1.208	127.200, 1.468	127.200, 1.307	127.200, 1.133	127.200, 1.198	127.200, 1.365	127.200, 2.258	127.200, 2.059	127.200, 2.418
638	127.400, 1.401	127.400, 1.248	127.400, 1.188	127.400, 1.373	127.400, 1.469	127.400, 1.340	127.400, 1.209	127.400, 1.468	127.400, 1.308	127.400, 1.133	127.400, 1.198	127.400, 1.366	127.400, 2.258	127.400, 2.059	127.400, 2.418
639	127.600, 1.402	127.600, 1.248	127.600, 1.189	127.600, 1.373	127.600, 1.470	127.600, 1.340	127.600, 1.209	127.600, 1.469	127.600, 1.309	127.600, 1.134	127.600, 1.198	127.600, 1.366	127.600, 2.259	127.600, 2.059	127.600, 2.419
640	127.800, 1.402	127.800, 1.247	127.800, 1.189	127.800, 1.373	127.800, 1.470	127.800, 1.340	127.800, 1.209	127.800, 1.469	127.800, 1.309	127.800, 1.134	127.800, 1.198	127.800, 1.366	127.800, 2.259	127.800, 2.059	127.800, 2.420
641	128.000, 1.403	128.000, 1.247	128.000, 1.190	128.000, 1.374	128.000, 1.471	128.000, 1.340	128.000, 1.210	128.000, 1.469	128.000, 1.310	128.000, 1.134	128.000, 1.198	128.000, 1.367	128.000, 2.259	128.000, 2.060	128.000, 2.421
642	128.200, 1.403	128.200, 1.247	128.200, 1.191	128.200, 1.374	128.200, 1.471	128.200, 1.340	128.200, 1.210	128.200, 1.470	128.200, 1.310	128.200, 1.134	128.200, 1.199	128.200, 1.367	128.200, 2.259	128.200, 2.060	128.200, 2.421
643	128.400, 1.404	128.400, 1.247	128.400, 1.191	128.400, 1.374	128.400, 1.472	128.400, 1.341	128.400, 1.211	128.400, 1.470	128.400, 1.311	128.400, 1.134	128.400, 1.199	128.400, 1.367	128.400, 2.260	128.400, 2.061	128.400, 2.422
644	128.600, 1.405	128.600, 1.246	128.600, 1.191	128.600, 1.375	128.600, 1.472	128.600, 1.341	128.600, 1.211	128.600, 1.471	128.600, 1.311	128.600, 1.134	128.600, 1.199	128.600, 1.367	128.600, 2.260	128.600, 2.062	128.600, 2.423
645	128.800, 1.405	128.800, 1.246	128.800, 1.191	128.800, 1.375	128.800, 1.472	128.800, 1.342	128.800, 1.212	128.800, 1.472	128.800, 1.311	128.800, 1.134	128.800, 1.199	128.800, 1.366	128.800, 2.261	128.800, 2.062	128.800, 2.424
646	129.000, 1.405	129.000, 1.246	129.000, 1.191	129.000, 1.375	129.000, 1.472	129.000, 1.342	129.000, 1.212	129.000, 1.472	129.000, 1.312	129.000, 1.135	129.000, 1.199	129.000, 1.366	129.000, 2.261	129.000, 2.063	129.000, 2.425
647	129.200, 1.406	129.200, 1.246	129.200, 1.191	129.200, 1.375	129.200, 1.473	129.200, 1.342	129.200, 1.212	129.200, 1.473	129.200, 1.312	129.200, 1.135	129.200, 1.199	129.200, 1.366	129.200, 2.262	129.200, 2.063	129.200, 2.427
648	129.400, 1.406	129.400, 1.246	129.400, 1.191	129.400, 1.375	129.400, 1.473	129.400, 1.343	129.400, 1.213	129.400, 1.473	129.400, 1.312	129.400, 1.135	129.400, 1.199	129.400, 1.365	129.400, 2.262	129.400, 2.063	129.400, 2.428
649	129.600, 1.406	129.600, 1.246	129.600, 1.191	129.600, 1.375	129.600, 1.473	129.600, 1.343	129.600, 1.213	129.600, 1.474	129.600, 1.312	129.600, 1.136	129.600, 1.199	129.600, 1.365	129.600, 2.263	129.600, 2.064	129.600, 2.429
650	129.800, 1.407	129.800, 1.247	129.800, 1.191	129.800, 1.375	129.800, 1.474	129.800, 1.343	129.800, 1.213	129.800, 1.474	129.800, 1.312	129.800, 1.136	129.800, 1.199	129.800, 1.365	129.800, 2.264	129.800, 2.064	129.800, 2.430
651	130.000, 1.406	130.000, 1.247	130.000, 1.191	130.000, 1.376	130.000, 1.474	130.000, 1.343	130.000, 1.214	130.000, 1.474	130.000, 1.312	130.000, 1.136	130.000, 1.199	130.000, 1.366	130.000, 2.264	130.000, 2.065	130.000, 2.431
652	130.200, 1.406	130.200, 1.247	130.200, 1.191	130.200, 1.376	130.200, 1.474	130.200, 1.343	130.200, 1.214	130.200, 1.474	130.200, 1.313	130.200, 1.137	130.200, 1.199	130.200, 1.366	130.200, 2.265	130.200, 2.065	130.200, 2.432
653	130.400, 1.406	130.400, 1.248	130.400, 1.191	130.400, 1.377	130.400, 1.474	130.400, 1.344	130.400, 1.214	130.400, 1.475	130.400, 1.313	130.400, 1.137	130.400, 1.199	130.400, 1.366	130.400, 2.266	130.400, 2.065	130.400, 2.432
654	130.600, 1.406	130.600, 1.248	130.600, 1.191	130.600, 1.377	130.600, 1.474	130.600, 1.344	130.600, 1.215	130.600, 1.475	130.600, 1.313	130.600, 1.137	130.600, 1.199	130.600, 1.367	130.600, 2.266	130.600, 2.065	130.600, 2.432
655	130.800, 1.405	130.800, 1.249	130.800, 1.191	130.800, 1.377	130.800, 1.474	130.800, 1.344	130.800, 1.215	130.800, 1.475	130.800, 1.314	130.800, 1.137	130.800, 1.199	130.800, 1.368	130.800, 2.267	130.800, 2.065	130.800, 2.433
656	131.000, 1.405	131.000, 1.249	131.000, 1.191	131.000, 1.378	131.000, 1.475	131.000, 1.344	131.000, 1.215	131.000, 1.475	131.000, 1.314	131.000, 1.137	131.000, 1.200	131.000, 1.368	131.000, 2.267	131.000, 2.065	131.000, 2.433
657	131.200, 1.405	131.200, 1.250	131.200, 1.191	131.200, 1.378	131.200, 1.475	131.200, 1.344	131.200, 1.215	131.200, 1.475	131.200, 1.314	131.200, 1.138	131.200, 1.200	131.200, 1.369	131.200, 2.268	131.200, 2.065	131.200, 2.433
658	131.400, 1.405	131.400, 1.250	131.400, 1.191	131.400, 1.378	131.400, 1.475	131.400, 1.344	131.400, 1.215	131.400, 1.474	131.400, 1.314	131.400, 1.138	131.400, 1.200	131.400, 1.370	131.400, 2.268	131.400, 2.064	131.400, 2.434
659	131.600, 1.405	131.600, 1.251	131.600, 1.191	131.600, 1.378	131.600, 1.476	131.600, 1.344	131.600, 1.215	131.600, 1.474	131.600, 1.314	131.600, 1.138	131.600, 1.201	131.600, 1.371	131.600, 2.269	131.600, 2.065	131.600, 2.434
660	131.800, 1.405	131.800, 1.251	131.800, 1.191	131.800, 1.378	131.800, 1.476	131.800, 1.344	131.800, 1.215	131.800, 1.475	131.800, 1.314	131.800, 1.138	131.800, 1.201	131.800, 1.371	131.800, 2.270	131.800, 2.065	131.800, 2.435
661	132.000, 1.406	132.000, 1.251	132.000, 1.191	132.000, 1.379	132.000, 1.476	132.000, 1.344	132.000, 1.215	132.000, 1.475	132.000, 1.315	132.000, 1.138	132.000, 1.201	132.000, 1.372	132.000, 2.270	132.000, 2.065	132.000, 2.435
662	132.200, 1.406	132.200, 1.251	132.200, 1.191	132.200, 1.379	132.200, 1.476	132.200, 1.344	132.200, 1.215	132.200, 1.475	132.200, 1.315	132.200, 1.138	132.200, 1.202	132.200, 1.372	132.200, 2.271	132.200, 2.066	132.200, 2.436
663	132.400, 1.407	132.400, 1.252	132.400, 1.191	132.400, 1.379	132.400, 1.476	132.400, 1.344	132.400, 1.215	132.400, 1.476	132.400, 1.315	132.400, 1.139	132.400, 1.202	132.400, 1.373	132.400, 2.271	132.400, 2.067	132.400, 2.436
664	132.600, 1.407	132.600, 1.252	132.600, 1.191	132.600, 1.380	132.600, 1.476	132.600, 1.344	132.600, 1.215	132.600, 1.476	132.600, 1.316	132.600, 1.139	132.600, 1.202	132.600, 1.373	132.600, 2.271	132.600, 2.067	132.600, 2.436
665	132.800, 1.407	132.800, 1.252	132.800, 1.191	132.800, 1.380	132.800, 1.477	132.800, 1.345	132.800, 1.215	132.800, 1.477	132.800, 1.316	132.800, 1.139	132.800, 1.203	132.800, 1.373	132.800, 2.272	132.800, 2.068	132.800, 2.437
666	133.000, 1.407	133.000, 1.252	133.000, 1.192	133.000, 1.380	133.000, 1.477	133.000, 1.345	133.000, 1.216	133.000, 1.477	133.000, 1.316	133.000, 1.139	133.000, 1.203	133.000, 1.373	133.000, 2.272	133.000, 2.068	133.000, 2.437
667	133.200, 1.408	133.200, 1.252	133.200, 1.192	133.200, 1.381	133.200, 1.477	133.200, 1.345	133.200, 1.216	133.200, 1.477	133.200, 1.317	133.200, 1.140	133.200, 1.203	133.200, 1.373	133.200, 2.273	133.200, 2.069	133.200, 2.438
668	133.400, 1.408	133.400, 1.252	133.400, 1.192	133.400, 1.381	133.400, 1.477	133.400, 1.345	133.400, 1.216	133.400, 1.477	133.400, 1.317	133.400, 1.140	133.400, 1.204	133.400, 1.373	133.400, 2.274	133.400, 2.070	133.400, 2.439
669	133.600, 1.409	133.600, 1.252	133.600, 1.192	133.600, 1.381	133.600, 1.478	133.600, 1.345	133.600, 1.216	133.600, 1.478	133.600, 1.317	133.600, 1.140	133.600, 1.204	133.600, 1.373	133.600, 2.274	133.600, 2.071	133.600, 2.439
670	133.800, 1.409	133.800, 1.251	133.800, 1.192	133.800, 1.381	133.800, 1.478	133.800, 1.345	133.800, 1.216	133.800, 1.478	133.800, 1.318	133.800, 1.140	133.800, 1.204	133.800, 1.372	133.800, 2.275	133.800, 2.072	133.800, 2.440
671	134.000, 1.410	134.000, 1.251	134.000, 1.192	134.000, 1.382	134.000, 1.479	134.000, 1.346	134.000, 1.217	134.000, 1.478	134.000, 1.319	134.000, 1.140	134.000, 1.204	134.000, 1.372	134.000, 2.275	134.000, 2.073	134.000, 2.441
672	134.200, 1.410	134.200, 1.251	134.200, 1.193	134.200, 1.382	134.200, 1.479	134.200, 1.346	134.200, 1.217	134.200, 1.478	134.200, 1.319	134.200, 1.140	134.200, 1.204	134.200, 1.372	134.200, 2.275	134.200, 2.073	134.200, 2.441
673	134.400, 1.410	134.400, 1.250	134.400, 1.193	134.400, 1.382	134.400, 1.480	134.400, 1.347	134.400, 1.217	134.400, 1.478	134.400, 1.320	134.400, 1.140	134.400, 1.204	134.400, 1.372	134.400, 2.276	134.400, 2.074	134.400, 2.442
674	134.600, 1.410	134.600, 1.250	134.600, 1.193	134.600, 1.382	134.600, 1.480	134.600, 1.347	134.600, 1.217	134.600, 1.478	134.600, 1.320	134.600, 1.140	134.600, 1.204	134.600, 1.372	134.600, 2.276	134.600, 2.074	134.600, 2.442
675	134.800, 1.410	134.800, 1.250	134.800, 1.193	134.800, 1.383	134.800, 1.481	134.800, 1.347	134.800, 1.217	134.800, 1.479	134.800, 1.320	134.800, 1.140	134.800, 1.204	134.800, 1.373	134.800, 2.277	134.800, 2.075	134.800, 2.443
676	135.000, 1.410	135.000, 1.250	135.000, 1.193	135.000, 1.383	135.000, 1.481	135.000, 1.348	135.000, 1.218	135.000, 1.479	135.000, 1.320	135.000, 1.140	135.000, 1.204	135.000, 1.373	135.000, 2.278	135.000, 2.076	135.000, 2.444
677	135.200, 1.410	135.200, 1.250	135.200, 1.193	135.200, 1.383	135.200, 1.482	135.200, 1.348	135.200, 1.218	135.200, 1.479	135.200, 1.320	135.200, 1.140	135.200, 1.204	135.200, 1.374	135.200, 2.278	135.200, 2.076	135.200, 2.445
678	135.400, 1.410	135.400, 1.251	135.400, 1.193	135.400, 1.383	135.400, 1.482	135.400, 1.348	135.400, 1.218	135.400, 1.480	135.400, 1.320	135.400, 1.140	135.400, 1.204	135.400, 1.375	135.400, 2.279	135.400, 2.077	135.400, 2.446
679	135.600, 1.411	135.600, 1.251	135.600, 1.193	135.600, 1.384	135.600, 1.483	135.600, 1.348	135.600, 1.218	135.600, 1.481	135.600, 1.320	135.600, 1.140	135.600, 1.204	135.600, 1.376	135.600, 2.280	135.600, 2.078	135.600, 2.446
680	135.800, 1.411	135.800, 1.251	135.800, 1.194	135.800, 1.384	135.800, 1.484	135.800, 1.348	135.800, 1.218	135.800, 1.481	135.800, 1.320	135.800, 1.141	135.800, 1.204	135.800, 1.377	135.800, 2.280	135.800, 2.079	135.800, 2.447
681	136.000, 1.411	136.000, 1.251	136.000, 1.194	136.000, 1.385	136.000, 1.484	136.000, 1.349	136.000, 1.218	136.000, 1.482	136.000, 1.321	136.000, 1.141	136.000, 1.204	136.000, 1.377	136.000, 2.281	136.000, 2.079	136.000, 2.447
682	136.200, 1.411	136.200, 1.252	136.200, 1.195	136.200, 1.385	136.200, 1.484	136.200, 1.349	136.200, 1.219	136.200, 1.483	136.200, 1.321	136.200, 1.142	136.200, 1.204	136.200, 1.378	136.200, 2.281	136.200, 2.079	136.200, 2.447
683	136.400, 1.411	136.400, 1.253	136.400, 1.195	136.400, 1.385	136.400, 1.485	136.400, 1.349	136.400, 1.219	136.400, 1.484	136.400, 1.321	136.400, 1.142	136.400, 1.204	136.400, 1.379	136.400, 2.281	136.400, 2.079	136.400, 2.448
684	136.600, 1.411	136.600, 1.253	136.600, 1.196	136.600, 1.385	136.600, 1.485	136.600, 1.350	136.600, 1.219	136.600, 1.485	136.600, 1.322	136.600, 1.143	136.600, 1.205	136.600, 1.379	136.600, 2.281	136.600, 2.079	136.600, 2.449
685	136.800, 1.411	136.800, 1.254	136.800, 1.196	136.800, 1.385	136.800, 1.485	136.800, 1.350	136.800, 1.219	136.800, 1.485	136.800, 1.322	136.800, 1.144	136.800, 1.205	136.800, 1.379	136.800, 2.282	136.800, 2.078	136.800, 2.449
686	137.000, 1.412	137.000, 1.255	137.000, 1.196	137.000, 1.385	137.000, 1.485	137.000, 1.351	137.000, 1.220	137.000, 1.486	137.000, 1.323	137.000, 1.144	137.000, 1.206	137.000, 1.379	137.000, 2.282	137.000, 2.079	137.000, 2.450
687	137.200, 1.412	137.200, 1.255	137.200, 1.196	137.200, 1.385	137.200, 1.485	137.200, 1.351	137.200, 1.220	137.200, 1.486	137.200, 1.323	137.200, 1.145	137.200, 1.207	137.200, 1.380	137.200, 2.282	137.200, 2.079	137.200, 2.451
688	137.400, 1.412	137.400, 1.255	137.400, 1.196	137.400, 1.385	137.400, 1.485	137.400, 1.351	137.400, 1.220	137.400, 1.486	137.400, 1.323	137.400, 1.145	137.400, 1.207	137.400, 1.380	137.400, 2.282	137.400, 2.079	137.400, 2.451
689	137.600, 1.412	137.600, 1.255	137.600, 1.196	137.600, 1.385	137.600, 1.485	137.600, 1.351	137.600, 1.220	137.600, 1.486	137.600, 1.323	137.600, 1.145	137.600, 1.208	137.600, 1.379	137.600, 2.282	137.600, 2.078	137.600, 2.451
690	137.800, 1.412	137.800, 1.255	137.800, 1.197	137.800, 1.385	137.800, 1.486	137.800, 1.351	137.800, 1.221	137.800, 1.486	137.800, 1.324	137.800, 1.145	137.800, 1.209	137.800, 1.379	137.800, 2.282	137.800, 2.078	137.800, 2.452
691	138.000, 1.412	138.000, 1.255	138.000, 1.197	138.000, 1.385	138.000, 1.485	138.000, 1.351	138.000, 1.221	138.000, 1.486	138.000, 1.324	138.000, 1.145	138.000, 1.209	138.000, 1.379	138.000, 2.282	138.000, 2.078	138.000, 2.452
692	138.200, 1.413	138.200, 1.256	138.200, 1.198	138.200, 1.386	138.200, 1.485	138.200, 1.351	138.200, 1.221	138.200, 1.486	138.200, 1.324	138.200, 1.145	138.200, 1.209	138.200, 1.379	138.200, 2.282	138.200, 2.078	138.200, 2.453
693	138.400, 1.413	138.400, 1.256	138.400, 1.198	138.400, 1.386	138.400, 1.485	138.400, 1.350	138.400, 1.222	138.400, 1.486	138.400, 1.325	138.400, 1.145	138.400, 1.210	138.400, 1.379	138.400, 2.282	138.400, 2.078	138.400, 2.453
694	138.600, 1.412	138.600, 1.257	138.600, 1.198	138.600, 1.387	138.600, 1.485	138.600, 1.350	138.600, 1.222	138.600, 1.486	138.600, 1.325	138.600, 1.145	138.600, 1.210	138.600, 1.379	138.600, 2.282	138.600, 2.078	138.600, 2.454
695	138.800, 1.412	138.800, 1.257	138.800, 1.198	138.800, 1.387	138.800, 1.485	138.800, 1.350	138.800, 1.222	138.800, 1.486	138.800, 1.325	138.800, 1.145	138.800, 1.210	138.800, 1.379	138.800, 2.282	138.800, 2.079	138.800, 2.454
696	139.000, 1.412	139.000, 1.257	139.000, 1.199	139.000, 1.387	139.000, 1.485	139.000, 1.351	139.000, 1.222	139.000, 1.486	139.000, 1.326	139.000, 1.145	139.000, 1.210	139.000, 1.379	139.000, 2.282	139.000, 2.079	139.000, 2.455
697	139.200, 1.413	139.200, 1.257	139.200, 1.198	139.200, 1.388	139.200, 1.485	139.200, 1.351	139.200, 1.223	139.200, 1.485	139.200, 1.326	139.200, 1.146	139.200, 1.210	139.200, 1.380	139.200, 2.283	139.200, 2.080	139.200, 2.455
698	139.400, 1.413	139.400, 1.257	139.400, 1.198	139.400, 1.388	139.400, 1.485	139.400, 1.351	139.400, 1.223	139.400, 1.485	139.400, 1.326	139.400, 1.146	139.400, 1.210	139.400, 1.380	139.400, 2.283	139.400, 2.080	139.400, 2.455
699	139.600, 1.414	139.600, 1.258	139.600, 1.198	139.600, 1.389	139.600, 1.486	139.600, 1.351	139.600, 1.223	139.600, 1.485	139.600, 1.327	139.600, 1.146	139.600, 1.210	139.600, 1.380	139.600, 2.283	139.600, 2.080	139.600, 2.456
700	139.800, 1.414	139.800, 1.258	139.800, 1.198	139.800, 1.389	139.800, 1.486	139.800, 1.352	139.800, 1.223	139.800, 1.485	139.800, 1.327	139.800, 1.147	139.800, 1.210	139.800, 1.380	139.800, 2.284	139.800, 2.081	139.800, 2.456
701	140.000, 1.415	140.000, 1.258	140.000, 1.198	140.000, 1.389	140.000, 1.486	140.000, 1.352	140.000, 1.223	140.000, 1.485	140.000, 1.327	140.000, 1.148	140.000, 1.210	140.000, 1.380	140.000, 2.284	140.000, 2.081	140.000, 2.457
702	140.200, 1.415	140.200, 1.259	140.200, 1.198	140.200, 1.389	140.200, 1.486	140.200, 1.353	140.200, 1.223	140.200, 1.485	140.200, 1.328	140.200, 1.148	140.200, 1.211	140.200, 1.381	140.200, 2.284	140.200, 2.082	140.200, 2.457
703	140.400, 1.416	140.400, 1.258	140.400, 1.199	140.400, 1.389	140.400, 1.487	140.400, 1.353	140.400, 1.223	140.400, 1.486	140.400, 1.328	140.400, 1.149	140.400, 1.211	140.400, 1.381	140.400, 2.285	140.400, 2.082	140.400, 2.458
704	140.600, 1.416	140.600, 1.258	140.600, 1.198	140.600, 1.389	140.600, 1.487	140.600, 1.354	140.600, 1.224	140.600, 1.486	140.600, 1.328	140.600, 1.150	140.600, 1.211	140.600, 1.381	140.600, 2.286	140.600, 2.083	140.600, 2.459
705	140.800, 1.416	140.800, 1.258	140.800, 1.198	140.800, 1.389	140.800, 1.488	140.800, 1.354	140.800, 1.224	140.800, 1.486	140.800, 1.328	140.800, 1.150	140.800, 1.211	140.800, 1.381	140.800, 2.286	140.800, 2.084	140.800, 2.460
706	141.000, 1.416	141.000, 1.258	141.000, 1.198	141.000, 1.389	141.000, 1.488	141.000, 1.354	141.000, 1.224	141.000, 1.487	141.000, 1.328	141.000, 1.151	141.000, 1.212	141.000, 1.381	141.000, 2.287	141.000, 2.085	141.000, 2.460
707	141.200, 1.416	141.200, 1.258	141.200, 1.198	141.200, 1.389	141.200, 1.488	141.200, 1.354	141.200, 1.224	141.200, 1.487	141.200, 1.328	141.200, 1.151	141.200, 1.212	141.200, 1.382	141.200, 2.287	141.200, 2.085	141.200, 2.461
708	141.400, 1.416	141.400, 1.257	141.400, 1.198	141.400, 1.389	141.400, 1.488	141.400, 1.354	141.400, 1.224	141.400, 1.487	141.400, 1.328	141.400, 1.151	141.400, 1.213	141.400, 1.382	141.400, 2.288	141.400, 2.086	141.400, 2.461
709	141.600, 1.416	141.600, 1.257	141.600, 1.198	141.600, 1.389	141.600, 1.488	141.600, 1.354	141.600, 1.224	141.600, 1.488	141.600, 1.328	141.600, 1.150	141.600, 1.213	141.600, 1.383	141.600, 2.288	141.600, 2.086	141.600, 2.462
710	141.800, 1.417	141.800, 1.257	141.800, 1.198	141.800, 1.390	141.800, 1.488	141.800, 1.354	141.800, 1.224	141.800, 1.489	141.800, 1.328	141.800, 1.150	141.800, 1.213	141.800, 1.383	141.800, 2.289	141.800, 2.087	141.800, 2.462
711	142.000, 1.417	142.000, 1.257	142.000, 1.198	142.000, 1.391	142.000, 1.488	142.000, 1.353	142.000, 1.224	142.000, 1.490	142.000, 1.329	142.000, 1.149	142.000, 1.213	142.000, 1.384	142.000, 2.289	142.000, 2.088	142.000, 2.463
712	142.200, 1.417	142.200, 1.257	142.200, 1.199	142.200, 1.391	142.200, 1.488	142.200, 1.353	142.200, 1.224	142.200, 1.490	142.200, 1.329	142.200, 1.149	142.200, 1.213	142.200, 1.385	142.200, 2.290	142.200, 2.088	142.200, 2.464
713	142.400, 1.417	142.400, 1.257	142.400, 1.199	142.400, 1.392	142.400, 1.488	142.400, 1.354	142.400, 1.224	142.400, 1.491	142.400, 1.329	142.400, 1.148	142.400, 1.213	142.400, 1.385	142.400, 2.290	142.400, 2.089	142.400, 2.464
714	142.600, 1.417	142.600, 1.257	142.600, 1.199	142.600, 1.393	142.600, 1.487	142.600, 1.354	142.600, 1.224	142.600, 1.491	142.600, 1.329	142.600, 1.148	142.600, 1.213	142.600, 1.386	142.600, 2.290	142.600, 2.089	142.600, 2.465
715	142.800, 1.418	142.800, 1.257	142.800, 1.199	142.800, 1.394	142.800, 1.487	142.800, 1.354	142.800, 1.224	142.800, 1.492	142.800, 1.330	142.800, 1.148	142.800, 1.213	142.800, 1.386	142.800, 2.291	142.800, 2.089	142.800, 2.465
716	143.000, 1.418	143.000, 1.257	143.000, 1.199	143.000, 1.394	143.000, 1.488	143.000, 1.355	143.000, 1.224	143.000, 1.492	143.000, 1.330	143.000, 1.148	143.000, 1.213	143.000, 1.386	143.000, 2.291	143.000, 2.089	143.000, 2.466
717	143.200, 1.419	143.200, 1.257	143.200, 1.199	143.200, 1.395	143.200, 1.488	143.200, 1.355	143.200, 1.225	143.200, 1.492	143.200, 1.330	143.200, 1.148	143.200, 1.213	143.200, 1.386	143.200, 2.291	143.200, 2.089	143.200, 2.466
718	143.400, 1.419	143.400, 1.257	143.400, 1.200	143.400, 1.395	143.400, 1.488	143.400, 1.356	143.400, 1.225	143.400, 1.492	143.400, 1.330	143.400, 1.148	143.400, 1.213	143.400, 1.386	143.400, 2.291	143.400, 2.089	143.400, 2.467
719	143.600, 1.420	143.600, 1.257	143.600, 1.200	143.600, 1.395	143.600, 1.488	143.600, 1.357	143.600, 1.225	143.600, 1.492	143.600, 1.330	143.600, 1.149	143.600, 1.213	143.600, 1.385	143.600, 2.292	143.600, 2.089	143.600, 2.467
720	143.800, 1.420	143.800, 1.257	143.800, 1.201	143.800, 1.396	143.800, 1.488	143.800, 1.357	143.800, 1.225	143.800, 1.492	143.800, 1.330	143.800, 1.149	143.800, 1.213	143.800, 1.385	143.800, 2.292	143.800, 2.090	143.800, 2.468
721	144.000, 1.421	144.000, 1.258	144.000, 1.201	144.000, 1.396	144.000, 1.488	144.000, 1.357	144.000, 1.225	144.000, 1.492	144.000, 1.330	144.000, 1.149	144.000, 1.213	144.000, 1.385	144.000, 2.292	144.000, 2.091	144.000, 2.468
722	144.200, 1.421	144.200, 1.258	144.200, 1.202	144.200, 1.396	144.200, 1.488	144.200, 1.357	144.200, 1.225	144.200, 1.492	144.200, 1.330	144.200, 1.149	144.200, 1.214	144.200, 1.385	144.200, 2.292	144.200, 2.091	144.200, 2.469
723	144.400, 1.421	144.400, 1.257	144.400, 1.202	144.400, 1.396	144.400, 1.488	144.400, 1.357	144.400, 1.226	144.400, 1.491	144.400, 1.330	144.400, 1.149	144.400, 1.214	144.400, 1.384	144.400, 2.292	144.400, 2.091	144.400, 2.469
724	144.600, 1.421	144.600, 1.257	144.600, 1.202	144.600, 1.396	144.600, 1.488	144.600, 1.357	144.600, 1.226	144.600, 1.491	144.600, 1.330	144.600, 1.149	144.600, 1.214	144.600, 1.384	144.600, 2.292	144.600, 2.092	144.600, 2.469
725	144.800, 1.421	144.800, 1.257	144.800, 1.202	144.800, 1.397	144.800, 1.489	144.800, 1.357	144.800, 1.226	144.800, 1.491	144.800, 1.330	144.800, 1.149	144.800, 1.215	144.800, 1.384	144.800, 2.292	144.800, 2.092	144.800, 2.469
726	145.000, 1.421	145.000, 1.258	145.000, 1.202	145.000, 1.397	145.000, 1.489	145.000, 1.356	145.000, 1.226	145.000, 1.491	145.000, 1.330	145.000, 1.149	145.000, 1.215	145.000, 1.384	145.000, 2.292	145.000, 2.092	145.000, 2.469
727	145.200, 1.421	145.200, 1.258	145.200, 1.202	145.200, 1.397	145.200, 1.489	145.200, 1.356	145.200, 1.226	145.200, 1.491	145.200, 1.330	145.200, 1.149	145.200, 1.216	145.200, 1.385	145.200, 2.293	145.200, 2.093	145.200, 2.470
728	145.400, 1.421	145.400, 1.258	145.400, 1.202	145.400, 1.397	145.400, 1.489	145.400, 1.356	145.400, 1.226	145.400, 1.491	145.400, 1.330	145.400, 1.148	145.400, 1.216	145.400, 1.385	145.400, 2.294	145.400, 2.093	145.400, 2.470
729	145.600, 1.421	145.600, 1.258	145.600, 1.202	145.600, 1.397	145.600, 1.490	145.600, 1.355	145.600, 1.226	145.600, 1.492	145.600, 1.330	145.600, 1.148	145.600, 1.216	145.600, 1.386	145.600, 2.294	145.600, 2.093	145.600, 2.471
730	145.800, 1.421	145.800, 1.258	145.800, 1.202	145.800, 1.397	145.800, 1.490	145.800, 1.355	145.800, 1.227	145.800, 1.492	145.800, 1.331	145.800, 1.148	145.800, 1.217	145.800, 1.386	145.800, 2.295	145.800, 2.093	145.800, 2.471
731	146.000, 1.421	146.000, 1.259	146.000, 1.202	146.000, 1.397	146.000, 1.491	146.000, 1.354	146.000, 1.227	146.000, 1.493	146.000, 1.331	146.000, 1.148	146.000, 1.217	146.000, 1.387	146.000, 2.295	146.000, 2.093	146.000, 2.472
732	146.200, 1.421	146.200, 1.259	146.200, 1.202	146.200, 1.397	146.200, 1.491	146.200, 1.354	146.200, 1.227	146.200, 1.493	146.200, 1.331	146.200, 1.148	146.200, 1.217	146.200, 1.388	146.200, 2.296	146.200, 2.093	146.200, 2.472
733	146.400, 1.421	146.400, 1.260	146.400, 1.202	146.400, 1.398	146.400, 1.492	146.400, 1.354	146.400, 1.228	146.400, 1.494	146.400, 1.332	146.400, 1.149	146.400, 1.218	146.400, 1.388	146.400, 2.297	146.400, 2.093	146.400, 2.473
734	146.600, 1.421	146.600, 1.260	146.600, 1.203	146.600, 1.398	146.600, 1.492	146.600, 1.354	146.600, 1.228	146.600, 1.494	146.600, 1.332	146.600, 1.149	146.600, 1.218	146.600, 1.389	146.600, 2.297	146.600, 2.093	146.600, 2.473
735	146.800, 1.421	146.800, 1.260	146.800, 1.203	146.800, 1.398	146.800, 1.493	146.800, 1.355	146.800, 1.229	146.800, 1.494	146.800, 1.332	146.800, 1.150	146.800, 1.218	146.800, 1.389	146.800, 2.298	146.800, 2.093	146.800, 2.473
736	147.000, 1.422	147.000, 1.260	147.000, 1.203	147.000, 1.398	147.000, 1.493	147.000, 1.355	147.000, 1.229	147.000, 1.495	147.000, 1.333	147.000, 1.151	147.000, 1.218	147.000, 1.389	147.000, 2.299	147.000, 2.094	147.000, 2.474
737	147.200, 1.422	147.200, 1.261	147.200, 1.204	147.200, 1.399	147.200, 1.493	147.200, 1.356	147.200, 1.229	147.200, 1.495	147.200, 1.333	147.200, 1.151	147.200, 1.218	147.200, 1.389	147.200, 2.299	147.200, 2.094	147.200, 2.474
738	147.400, 1.422	147.400, 1.261	147.400, 1.204	147.400, 1.399	147.400, 1.493	147.400, 1.356	147.400, 1.230	147.400, 1.495	147.400, 1.333	147.400, 1.152	147.400, 1.218	147.400, 1.389	147.400, 2.299	147.400, 2.094	147.400, 2.475
739	147.600, 1.423	147.600, 1.261	147.600, 1.205	147.600, 1.399	147.600, 1.493	147.600, 1.357	147.600, 1.230	147.600, 1.496	147.600, 1.333	147.600, 1.152	147.600, 1.219	147.600, 1.389	147.600, 2.300	147.600, 2.095	147.600, 2.475
740	147.800, 1.423	147.800, 1.261	147.800, 1.205	147.800, 1.399	147.800, 1.492	147.800, 1.357	147.800, 1.230	147.800, 1.496	147.800, 1.333	147.800, 1.153	147.800, 1.219	147.800, 1.390	147.800, 2.300	147.800, 2.095	147.800, 2.476
741	148.000, 1.423	148.000, 1.261	148.000, 1.206	148.000, 1.399	148.000, 1.492	148.000, 1.358	148.000, 1.230	148.000, 1.497	148.000, 1.333	148.000, 1.153	148.000, 1.219	148.000, 1.390	148.000, 2.301	148.000, 2.096	148.000, 2.476
742	148.200, 1.423	148.200, 1.261	148.200, 1.206	148.200, 1.399	148.200, 1.492	148.200, 1.358	148.200, 1.230	148.200, 1.497	148.200, 1.333	148.200, 1.154	148.200, 1.220	148.200, 1.390	148.200, 2.301	148.200, 2.096	148.200, 2.477
743	148.400, 1.423	148.400, 1.261	148.400, 1.206	148.400, 1.400	148.400, 1.492	148.400, 1.359	148.400, 1.230	148.400, 1.498	148.400, 1.333	148.400, 1.154	148.400, 1.220	148.400, 1.390	148.400, 2.301	148.400, 2.097	148.400, 2.477
744	148.600, 1.424	148.600, 1.261	148.600, 1.206	148.600, 1.400	148.600, 1.491	148.600, 1.359	148.600, 1.230	148.600, 1.498	148.600, 1.333	148.600, 1.154	148.600, 1.220	148.600, 1.390	148.600, 2.301	148.600, 2.097	148.600, 2.478
745	148.800, 1.424	148.800, 1.260	148.800, 1.206	148.800, 1.400	148.800, 1.491	148.800, 1.360	148.800, 1.230	148.800, 1.498	148.800, 1.333	148.800, 1.154	148.800, 1.220	148.800, 1.390	148.800, 2.301	148.800, 2.098	148.800, 2.478
746	149.000, 1.424	149.000, 1.260	149.000, 1.206	149.000, 1.400	149.000, 1.491	149.000, 1.361	149.000, 1.231	149.000, 1.499	149.000, 1.333	149.000, 1.154	149.000, 1.220	149.000, 1.390	149.000, 2.302	149.000, 2.099	149.000, 2.479
747	149.200, 1.424	149.200, 1.260	149.200, 1.206	149.200, 1.400	149.200, 1.491	149.200, 1.361	149.200, 1.231	149.200, 1.499	149.200, 1.334	149.200, 1.154	149.200, 1.220	149.200, 1.390	149.200, 2.302	149.200, 2.099	149.200, 2.479
748	149.400, 1.424	149.400, 1.260	149.400, 1.206	149.400, 1.400	149.400, 1.491	149.400, 1.361	149.400, 1.231	149.400, 1.499	149.400, 1.334	149.400, 1.154	149.400, 1.220	149.400, 1.391	149.400, 2.302	149.400, 2.099	149.400, 2.480
749	149.600, 1.424	149.600, 1.260	149.600, 1.206	149.600, 1.400	149.600, 1.491	149.600, 1.362	149.600, 1.231	149.600, 1.499	149.600, 1.334	149.600, 1.154	149.600, 1.219	149.600, 1.391	149.600, 2.302	149.600, 2.100	149.600, 2.480
750	149.800, 1.424	149.800, 1.260	149.800, 1.206	149.800, 1.399	149.800, 1.492	149.800, 1.362	149.800, 1.231	149.800, 1.499	149.800, 1.335	149.800, 1.154	149.800, 1.219	149.800, 1.391	149.800, 2.302	149.800, 2.100	149.800, 2.481
751	150.000, 1.424	150.000, 1.260	150.000, 1.206	150.000, 1.399	150.000, 1.492	150.000, 1.362	150.000, 1.231	150.000, 1.499	150.000, 1.335	150.000, 1.154	150.000, 1.219	150.000, 1.391	150.000, 2.302	150.000, 2.100	150.000, 2.481
752	150.200, 1.429	150.200, 1.267	150.200, 1.214	150.200, 1.407	150.200, 1.496	150.200, 1.368	150.200, 1.239	150.200, 1.505	150.200, 1.340	150.200, 1.160	150.200, 1.225	150.200, 1.396	150.200, 2.306	150.200, 2.105	150.200, 2.485
753	150.400, 1.436	150.400, 1.275	150.400, 1.224	150.400, 1.416	150.400, 1.501	150.400, 1.375	150.400, 1.248	150.400, 1.511	150.400, 1.346	150.400, 1.166	150.400, 1.230	150.400, 1.401	150.400, 2.310	150.400, 2.111	150.400, 2.490
754	150.600, 1.443	150.600, 1.283	150.600, 1.233	150.600, 1.425	150.600, 1.506	150.600, 1.383	150.600, 1.257	150.600, 1.518	150.600, 1.353	150.600, 1.173	150.600, 1.236	150.600, 1.406	150.600, 2.315	150.600, 2.117	150.600, 2.494
755	150.800, 1.450	150.800, 1.292	150.800, 1.243	150.800, 1.434	150.800, 1.511	150.800, 1.390	150.800, 1.266	150.800, 1.525	150.800, 1.360	150.800, 1.180	150.800, 1.243	150.800, 1.412	150.800, 2.320	150.800, 2.123	150.800, 2.499
756	151.000, 1.457	151.000, 1.301	151.000, 1.253	151.000, 1.443	151.000, 1.516	151.000, 1.398	151.000, 1.275	151.000, 1.531	151.000, 1.367	151.000, 1.187	151.000, 1.249	151.000, 1.417	151.000, 2.324	151.000, 2.128	151.000, 2.503
757	151.200, 1.464	151.200, 1.309	151.200, 1.263	151.200, 1.451	151.200, 1.521	151.200, 1.405	151.200, 1.284	151.200, 1.538	151.200, 1.373	151.200, 1.193	151.200, 1.255	151.200, 1.423	151.200, 2.329	151.200, 2.133	151.200, 2.506
758	151.400, 1.470	151.400, 1.317	151.400, 1.272	151.400, 1.459	151.400, 1.525	151.400, 1.412	151.400, 1.293	151.400, 1.544	151.400, 1.380	151.400, 1.200	151.400, 1.261	151.400, 1.428	151.400, 2.332	151.400, 2.137	151.400, 2.508
759	151.600, 1.476	151.600, 1.324	151.600, 1.280	151.600, 1.466	151.600, 1.529	151.600, 1.417	151.600, 1.300	151.600, 1.549	151.600, 1.385	151.600, 1.205	151.600, 1.266	151.600, 1.432	151.600, 2.335	151.600, 2.140	151.600, 2.510
760	151.800, 1.481	151.800, 1.330	151.800, 1.287	151.800, 1.472	151.800, 1.532	151.800, 1.422	151.800, 1.306	151.800, 1.553	151.800, 1.391	151.800, 1.210	151.800, 1.271	151.800, 1.436	151.800, 2.337	151.800, 2.141	151.800, 2.511
761	152.000, 1.485	152.000, 1.335	152.000, 1.292	152.000, 1.476	152.000, 1.534	152.000, 1.426	152.000, 1.311	152.000, 1.557	152.000, 1.395	152.000, 1.213	152.000, 1.274	152.000, 1.438	152.000, 2.338	152.000, 2.142	152.000, 2.510
762	152.200, 1.488	152.200, 1.338	152.200, 1.296	152.200, 1.478	152.200, 1.535	152.200, 1.428	152.200, 1.314	152.200, 1.558	152.200, 1.397	152.200, 1.215	152.200, 1.276	152.200, 1.440	152.200, 2.337	152.200, 2.140	152.200, 2.508
763	152.400, 1.491	152.400, 1.341	152.400, 1.300	152.400, 1.480	152.400, 1.537	152.400, 1.431	152.400, 1.317	152.400, 1.560	152.400, 1.399	152.400, 1.217	152.400, 1.277	152.400, 1.442	152.400, 2.336	152.400, 2.139	152.400, 2.507
764	152.600, 1.493	152.600, 1.344	152.600, 1.304	152.600, 1.483	152.600, 1.538	152.600, 1.433	152.600, 1.319	152.600, 1.561	152.600, 1.402	152.600, 1.219	152.600, 1.279	152.600, 1.443	152.600, 2.334	152.600, 2.139	152.600, 2.505
765	152.800, 1.495	152.800, 1.347	152.800, 1.307	152.800, 1.485	152.800, 1.538	152.800, 1.435	152.800, 1.322	152.800, 1.562	152.800, 1.404	152.800, 1.221	152.800, 1.281	152.800, 1.443	152.800, 2.333	152.800, 2.137	152.800, 2.504
766	153.000, 1.497	153.000, 1.349	153.000, 1.310	153.000, 1.487	153.000, 1.539	153.000, 1.437	153.000, 1.324	153.000, 1.563	153.000, 1.405	153.000, 1.222	153.000, 1.282	153.000, 1.444	153.000, 2.330	153.000, 2.136	153.000, 2.502
767	153.200, 1.499	153.200, 1.351	153.200, 1.313	153.200, 1.489	153.200, 1.540	153.200, 1.439	153.200, 1.327	153.200, 1.564	153.200, 1.407	153.200, 1.224	153.200, 1.284	153.200, 1.444	153.200, 2.328	153.200, 2.134	153.200, 2.501
768	153.400, 1.501	153.400, 1.353	153.400, 1.316	153.400, 1.491	153.400, 1.541	153.400, 1.440	153.400, 1.329	153.400, 1.565	153.400, 1.408	153.400, 1.225	153.400, 1.285	153.400, 1.445	153.400, 2.326	153.400, 2.133	153.400, 2.499
769	153.600, 1.502	153.600, 1.356	153.600, 1.319	153.600, 1.493	153.600, 1.543	153.600, 1.442	153.600, 1.331	153.600, 1.566	153.600, 1.409	153.600, 1.226	153.600, 1.286	153.600, 1.445	153.600, 2.324	153.600, 2.132	153.600, 2.497
770	153.800, 1.504	153.800, 1.358	153.800, 1.322	153.800, 1.495	153.800, 1.543	153.800, 1.443	153.800, 1.333	153.800, 1.567	153.800, 1.410	153.800, 1.227	153.800, 1.287	153.800, 1.446	153.800, 2.321	153.800, 2.130	153.800, 2.495
771	154.000, 1.506	154.000, 1.359	154.000, 1.324	154.000, 1.496	154.000, 1.545	154.000, 1.444	154.000, 1.335	154.000, 1.567	154.000, 1.411	154.000, 1.228	154.000, 1.289	154.000, 1.446	154.000, 2.319	154.000, 2.129	154.000, 2.494
772	154.200, 1.508	154.200, 1.361	154.200, 1.327	154.200, 1.498	154.200, 1.545	154.200, 1.445	154.200, 1.337	154.200, 1.568	154.200, 1.412	154.200, 1.229	154.200, 1.290	154.200, 1.447	154.200, 2.317	154.200, 2.127	154.200, 2.491
773	154.400, 1.510	154.400, 1.363	154.400, 1.330	154.400, 1.500	154.400, 1.547	154.400, 1.446	154.400, 1.339	154.400, 1.569	154.400, 1.412	154.400, 1.230	154.400, 1.291	154.400, 1.447	154.400, 2.314	154.400, 2.126	154.400, 2.490
774	154.600, 1.512	154.600, 1.365	154.600, 1.332	154.600, 1.501	154.600, 1.548	154.600, 1.447	154.600, 1.340	154.600, 1.570	154.600, 1.413	154.600, 1.231	154.600, 1.292	154.600, 1.448	154.600, 2.312	154.600, 2.125	154.600, 2.487
775	154.800, 1.513	154.800, 1.366	154.800, 1.334	154.800, 1.503	154.800, 1.549	154.800, 1.448	154.800, 1.342	154.800, 1.570	154.800, 1.413	154.800, 1.232	154.800, 1.293	154.800, 1.449	154.800, 2.310	154.800, 2.123	154.800, 2.485
776	155.000, 1.515	155.000, 1.368	155.000, 1.337	155.000, 1.504	155.000, 1.549	155.000, 1.449	155.000, 1.344	155.000, 1.571	155.000, 1.414	155.000, 1.233	155.000, 1.294	155.000, 1.449	155.000, 2.308	155.000, 2.122	155.000, 2.483
777	155.200, 1.516	155.200, 1.369	155.200, 1.339	155.200, 1.505	155.200, 1.550	155.200, 1.451	155.200, 1.345	155.200, 1.572	155.200, 1.414	155.200, 1.234	155.200, 1.295	155.200, 1.450	155.200, 2.306	155.200, 2.120	155.200, 2.481
778	155.400, 1.517	155.400, 1.371	155.400, 1.341	155.400, 1.507	155.400, 1.551	155.400, 1.451	155.400, 1.346	155.400, 1.572	155.400, 1.415	155.400, 1.234	155.400, 1.296	155.400, 1.450	155.400, 2.304	155.400, 2.118	155.400, 2.478
779	155.600, 1.518	155.600, 1.372	155.600, 1.342	155.600, 1.508	155.600, 1.552	155.600, 1.452	155.600, 1.348	155.600, 1.573	155.600, 1.415	155.600, 1.235	155.600, 1.297	155.600, 1.451	155.600, 2.302	155.600, 2.116	155.600, 2.476
780	155.800, 1.519	155.800, 1.374	155.800, 1.344	155.800, 1.509	155.800, 1.552	155.800, 1.453	155.800, 1.349	155.800, 1.573	155.800, 1.416	155.800, 1.236	155.800, 1.298	155.800, 1.451	155.800, 2.300	155.800, 2.114	155.800, 2.473
781	156.000, 1.520	156.000, 1.375	156.000, 1.346	156.000, 1.510	156.000, 1.553	156.000, 1.454	156.000, 1.350	156.000, 1.574	156.000, 1.416	156.000, 1.237	156.000, 1.299	156.000, 1.452	156.000, 2.298	156.000, 2.112	156.000, 2.471
782	156.200, 1.521	156.200, 1.376	156.200, 1.347	156.200, 1.511	156.200, 1.554	156.200, 1.455	156.200, 1.351	156.200, 1.574	156.200, 1.417	156.200, 1.237	156.200, 1.299	156.200, 1.452	156.200, 2.296	156.200, 2.110	156.200, 2.468
783	156.400, 1.522	156.400, 1.377	156.400, 1.349	156.400, 1.513	156.400, 1.554	156.400, 1.456	156.400, 1.352	156.400, 1.575	156.400, 1.417	156.400, 1.238	156.400, 1.300	156.400, 1.453	156.400, 2.294	156.400, 2.108	156.400, 2.466
784	156.600, 1.523	156.600, 1.378	156.600, 1.350	156.600, 1.514	156.600, 1.555	156.600, 1.457	156.600, 1.354	156.600, 1.575	156.600, 1.418	156.600, 1.239	156.600, 1.301	156.600, 1.453	156.600, 2.292	156.600, 2.106	156.600, 2.464
785	156.800, 1.523	156.800, 1.379	156.800, 1.352	156.800, 1.515	156.800, 1.556	156.800, 1.457	156.800, 1.355	156.800, 1.576	156.800, 1.418	156.800, 1.240	156.800, 1.301	156.800, 1.453	156.800, 2.290	156.800, 2.104	156.800, 2.461
786	157.000, 1.524	157.000, 1.381	157.000, 1.353	157.000, 1.516	157.000, 1.556	157.000, 1.458	157.000, 1.355	157.000, 1.576	157.000, 1.419	157.000, 1.241	157.000, 1.302	157.000, 1.453	157.000, 2.288	157.000, 2.102	157.000, 2.459
787	157.200, 1.524	157.200, 1.382	157.200, 1.355	157.200, 1.516	157.200, 1.556	157.200, 1.459	157.200, 1.356	157.200, 1.577	157.200, 1.420	157.200, 1.241	157.200, 1.302	157.200, 1.454	157.200, 2.286	157.200, 2.101	157.200, 2.456
788	157.400, 1.525	157.400, 1.383	157.400, 1.356	157.400, 1.517	157.400, 1.557	157.400, 1.460	157.400, 1.357	157.400, 1.577	157.400, 1.420	157.400, 1.241	157.400, 1.303	157.400, 1.454	157.400, 2.284	157.400, 2.099	157.400, 2.454
789	157.600, 1.526	157.600, 1.384	157.600, 1.357	157.600, 1.518	157.600, 1.557	157.600, 1.460	157.600, 1.358	157.600, 1.578	157.600, 1.421	157.600, 1.242	157.600, 1.303	157.600, 1.454	157.600, 2.281	157.600, 2.097	157.600, 2.451
790	157.800, 1.527	157.800, 1.385	157.800, 1.359	157.800, 1.519	157.800, 1.557	157.800, 1.461	157.800, 1.359	157.800, 1.578	157.800, 1.421	157.800, 1.242	157.800, 1.304	157.800, 1.455	157.800, 2.279	157.800, 2.095	157.800, 2.448
791	158.000, 1.528	158.000, 1.386	158.000, 1.360	158.000, 1.519	158.000, 1.557	158.000, 1.462	158.000, 1.360	158.000, 1.579	158.000, 1.422	158.000, 1.242	158.000, 1.305	158.000, 1.455	158.000, 2.277	158.000, 2.094	158.000, 2.445
792	158.200, 1.528	158.200, 1.386	158.200, 1.361	158.200, 1.520	158.200, 1.557	158.200, 1.462	158.200, 1.361	158.200, 1.579	158.200, 1.422	158.200, 1.242	158.200, 1.305	158.200, 1.455	158.200, 2.274	158.200, 2.092	158.200, 2.442
793	158.400, 1.529	158.400, 1.387	158.400, 1.362	158.400, 1.521	158.400, 1.558	158.400, 1.463	158.400, 1.362	158.400, 1.579	158.400, 1.423	158.400, 1.242	158.400, 1.306	158.400, 1.455	158.400, 2.272	158.400, 2.090	158.400, 2.440
794	158.600, 1.530	158.600, 1.388	158.600, 1.363	158.600, 1.521	158.600, 1.558	158.600, 1.463	158.600, 1.363	158.600, 1.579	158.600, 1.423	158.600, 1.242	158.600, 1.306	158.600, 1.455	158.600, 2.269	158.600, 2.088	158.600, 2.437
795	158.800, 1.530	158.800, 1.388	158.800, 1.364	158.800, 1.522	158.800, 1.558	158.800, 1.463	158.800, 1.364	158.800, 1.579	158.800, 1.423	158.800, 1.243	158.800, 1.307	158.800, 1.455	158.800, 2.267	158.800, 2.086	158.800, 2.435
796	159.000, 1.531	159.000, 1.389	159.000, 1.366	159.000, 1.522	159.000, 1.558	159.000, 1.464	159.000, 1.365	159.000, 1.579	159.000, 1.423	159.000, 1.243	159.000, 1.308	159.000, 1.455	159.000, 2.264	159.000, 2.084	159.000, 2.432
797	159.200, 1.531	159.200, 1.389	159.200, 1.367	159.200, 1.523	159.200, 1.558	159.200, 1.464	159.200, 1.365	159.200, 1.579	159.200, 1.424	159.200, 1.243	159.200, 1.309	159.200, 1.455	159.200, 2.261	159.200, 2.082	159.200, 2.429
798	159.400, 1.532	159.400, 1.390	159.400, 1.368	159.400, 1.523	159.400, 1.558	159.400, 1.465	159.400, 1.366	159.400, 1.579	159.400, 1.424	159.400, 1.244	159.400, 1.309	159.400, 1.454	159.400, 2.259	159.400, 2.079	159.400, 2.427
799	159.600, 1.532	159.600, 1.390	159.600, 1.368	159.600, 1.524	159.600, 1.559	159.600, 1.465	159.600, 1.367	159.600, 1.579	159.600, 1.424	159.600, 1.244	159.600, 1.310	159.600, 1.454	159.600, 2.256	159.600, 2.077	159.600, 2.424
800	159.800, 1.533	159.800, 1.391	159.800, 1.369	159.800, 1.524	159.800, 1.559	159.800, 1.465	159.800, 1.368	159.800, 1.579	159.800, 1.424	159.800, 1.245	159.800, 1.310	159.800, 1.454	159.800, 2.254	159.800, 2.074	159.800, 2.422
801	160.000, 1.533	160.000, 1.391	160.000, 1.370	160.000, 1.524	160.000, 1.559	160.000, 1.465	160.000, 1.369	160.000, 1.579	160.000, 1.424	160.000, 1.245	160.000, 1.310	160.000, 1.454	160.000, 2.251	160.000, 2.072	160.000, 2.419
802	160.200, 1.533	160.200, 1.392	160.200, 1.371	160.200, 1.525	160.200, 1.560	160.200, 1.465	160.200, 1.370	160.200, 1.579	160.200, 1.425	160.200, 1.245	160.200, 1.310	160.200, 1.454	160.200, 2.248	160.200, 2.069	160.200, 2.417
803	160.400, 1.534	160.400, 1.392	160.400, 1.372	160.400, 1.525	160.400, 1.560	160.400, 1.466	160.400, 1.370	160.400, 1.579	160.400, 1.425	160.400, 1.246	160.400, 1.311	160.400, 1.454	160.400, 2.246	160.400, 2.067	160.400, 2.415
804	160.600, 1.534	160.600, 1.393	160.600, 1.373	160.600, 1.526	160.600, 1.560	160.600, 1.466	160.600, 1.371	160.600, 1.579	160.600, 1.425	160.600, 1.246	160.600, 1.311	160.600, 1.454	160.600, 2.243	160.600, 2.065	160.600, 2.412
805	160.800, 1.534	160.800, 1.394	160.800, 1.374	160.800, 1.526	160.800, 1.560	160.800, 1.466	160.800, 1.372	160.800, 1.579	160.800, 1.425	160.800, 1.246	160.800, 1.311	160.800, 1.454	160.800, 2.241	160.800, 2.062	160.800, 2.410
806	161.000, 1.535	161.000, 1.394	161.000, 1.374	161.000, 1.527	161.000, 1.561	161.000, 1.467	161.000, 1.372	161.000, 1.580	161.000, 1.425	161.000, 1.247	161.000, 1.311	161.000, 1.453	161.000, 2.239	161.000, 2.060	161.000, 2.407
807	161.200, 1.535	161.200, 1.395	161.200, 1.375	161.200, 1.527	161.200, 1.561	161.200, 1.467	161.200, 1.373	161.200, 1.580	161.200, 1.425	161.200, 1.247	161.200, 1.312	161.200, 1.454	161.200, 2.237	161.200, 2.058	161.200, 2.404
808	161.400, 1.536	161.400, 1.395	161.400, 1.376	161.400, 1.527	161.400, 1.561	161.400, 1.468	161.400, 1.373	161.400, 1.581	161.400, 1.426	161.400, 1.247	161.400, 1.312	161.400, 1.454	161.400, 2.234	161.400, 2.056	161.400, 2.402
809	161.600, 1.536	161.600, 1.395	161.600, 1.377	161.600, 1.528	161.600, 1.562	161.600, 1.468	161.600, 1.374	161.600, 1.581	161.600, 1.426	161.600, 1.247	161.600, 1.312	161.600, 1.454	161.600, 2.232	161.600, 2.053	161.600, 2.399
810	161.800, 1.537	161.800, 1.396	161.800, 1.377	161.800, 1.528	161.800, 1.562	161.800, 1.469	161.800, 1.374	161.800, 1.581	161.800, 1.426	161.800, 1.248	161.800, 1.312	161.800, 1.454	161.800, 2.230	161.800, 2.051	161.800, 2.396
811	162.000, 1.537	162.000, 1.396	162.000, 1.378	162.000, 1.528	162.000, 1.562	162.000, 1.469	162.000, 1.374	162.000, 1.581	162.000, 1.426	162.000, 1.248	162.000, 1.312	162.000, 1.454	162.000, 2.228	162.000, 2.049	162.000, 2.393
812	162.200, 1.538	162.200, 1.397	162.200, 1.379	162.200, 1.528	162.200, 1.563	162.200, 1.469	162.200, 1.374	162.200, 1.581	162.200, 1.427	162.200, 1.248	162.200, 1.312	162.200, 1.454	162.200, 2.225	162.200, 2.047	162.200, 2.390
813	162.400, 1.538	162.400, 1.397	162.400, 1.379	162.400, 1.529	162.400, 1.563	162.400, 1.469	162.400, 1.375	162.400, 1.581	162.400, 1.427	162.400, 1.248	162.400, 1.312	162.400, 1.454	162.400, 2.223	162.400, 2.045	162.400, 2.388
814	162.600, 1.539	162.600, 1.398	162.600, 1.380	162.600, 1.529	162.600, 1.564	162.600, 1.469	162.600, 1.375	162.600, 1.580	162.600, 1.427	162.600, 1.249	162.600, 1.312	162.600, 1.454	162.600, 2.221	162.600, 2.043	162.600, 2.385
815	162.800, 1.539	162.800, 1.399	162.800, 1.381	162.800, 1.529	162.800, 1.564	162.800, 1.469	162.800, 1.375	162.800, 1.580	162.800, 1.428	162.800, 1.249	162.800, 1.312	162.800, 1.454	162.800, 2.219	162.800, 2.040	162.800, 2.383
816	163.000, 1.539	163.000, 1.399	163.000, 1.382	163.000, 1.529	163.000, 1.564	163.000, 1.468	163.000, 1.376	163.000, 1.580	163.000, 1.428	163.000, 1.249	163.000, 1.312	163.000, 1.454	163.000, 2.216	163.000, 2.038	163.000, 2.380
817	163.200, 1.539	163.200, 1.400	163.200, 1.383	163.200, 1.528	163.200, 1.564	163.200, 1.468	163.200, 1.376	163.200, 1.580	163.200, 1.429	163.200, 1.249	163.200, 1.313	163.200, 1.454	163.200, 2.214	163.200, 2.035	163.200, 2.378
818	163.400, 1.539	163.400, 1.400	163.400, 1.383	163.400, 1.528	163.400, 1.564	163.400, 1.468	163.400, 1.377	163.400, 1.580	163.400, 1.429	163.400, 1.249	163.400, 1.313	163.400, 1.454	163.400, 2.211	163.400, 2.033	163.400, 2.375
819	163.600, 1.539	163.600, 1.401	163.600, 1.384	163.600, 1.529	163.600, 1.564	163.600, 1.467	163.600, 1.378	163.600, 1.580	163.600, 1.429	163.600, 1.249	163.600, 1.313	163.600, 1.454	163.600, 2.209	163.600, 2.031	163.600, 2.372
820	163.800, 1.539	163.800, 1.401	163.800, 1.385	163.800, 1.529	163.800, 1.563	163.800, 1.467	163.800, 1.379	163.800, 1.580	163.800, 1.429	163.800, 1.250	163.800, 1.313	163.800, 1.454	163.800, 2.206	163.800, 2.028	163.800, 2.369
821	164.000, 1.539	164.000, 1.401	164.000, 1.385	164.000, 1.529	164.000, 1.563	164.000, 1.467	164.000, 1.380	164.000, 1.580	164.000, 1.429	164.000, 1.250	164.000, 1.313	164.000, 1.454	164.000, 2.203	164.000, 2.026	164.000, 2.366
822	164.200, 1.539	164.200, 1.402	164.200, 1.386	164.200, 1.529	164.200, 1.563	164.200, 1.467	164.200, 1.380	164.200, 1.580	164.200, 1.429	164.200, 1.250	164.200, 1.314	164.200, 1.453	164.200, 2.200	164.200, 2.024	164.200, 2.364
823	164.400, 1.539	164.400, 1.402	164.400, 1.386	164.400, 1.530	164.400, 1.563	164.400, 1.467	164.400, 1.381	164.400, 1.581	164.400, 1.429	164.400, 1.250	164.400, 1.314	164.400, 1.453	164.400, 2.197	164.400, 2.022	164.400, 2.361
824	164.600, 1.540	164.600, 1.402	164.600, 1.386	164.600, 1.530	164.600, 1.563	164.600, 1.468	164.600, 1.381	164.600, 1.581	164.600, 1.428	164.600, 1.250	164.600, 1.315	164.600, 1.453	164.600, 2.194	164.600, 2.020	164.600, 2.358
825	164.800, 1.540	164.800, 1.402	164.800, 1.387	164.800, 1.531	164.800, 1.563	164.800, 1.468	164.800, 1.382	164.800, 1.581	164.800, 1.428	164.800, 1.250	164.800, 1.315	164.800, 1.453	164.800, 2.192	164.800, 2.018	164.800, 2.355
826	165.000, 1.540	165.000, 1.402	165.000, 1.387	165.000, 1.531	165.000, 1.563	165.000, 1.468	165.000, 1.382	165.000, 1.581	165.000, 1.428	165.000, 1.250	165.000, 1.315	165.000, 1.453	165.000, 2.189	165.000, 2.016	165.000, 2.353
827	165.200, 1.540	165.200, 1.402	165.200, 1.387	165.200, 1.531	165.200, 1.563	165.200, 1.469	165.200, 1.382	165.200, 1.582	165.200, 1.427	165.200, 1.251	165.200, 1.316	165.200, 1.453	165.200, 2.186	165.200, 2.013	165.200, 2.350
828	165.400, 1.540	165.400, 1.402	165.400, 1.387	165.400, 1.532	165.400, 1.563	165.400, 1.469	165.400, 1.383	165.400, 1.582	165.400, 1.427	165.400, 1.251	165.400, 1.316	165.400, 1.454	165.400, 2.183	165.400, 2.011	165.400, 2.347
829	165.600, 1.541	165.600, 1.402	165.600, 1.387	165.600, 1.532	165.600, 1.563	165.600, 1.469	165.600, 1.383	165.600, 1.582	165.600, 1.427	165.600, 1.251	165.600, 1.316	165.600, 1.454	165.600, 2.180	165.600, 2.009	165.600, 2.344
830	165.800, 1.541	165.800, 1.402	165.800, 1.388	165.800, 1.532	165.800, 1.563	165.800, 1.470	165.800, 1.383	165.800, 1.582	165.800, 1.427	165.800, 1.252	165.800, 1.317	165.800, 1.454	165.800, 2.177	165.800, 2.006	165.800, 2.341
831	166.000, 1.542	166.000, 1.402	166.000, 1.388	166.000, 1.532	166.000, 1.564	166.000, 1.470	166.000, 1.383	166.000, 1.582	166.000, 1.427	166.000, 1.252	166.000, 1.317	166.000, 1.455	166.000, 2.174	166.000, 2.004	166.000, 2.338
832	166.200, 1.542	166.200, 1.402	166.200, 1.388	166.200, 1.532	166.200, 1.564	166.200, 1.471	166.200, 1.383	166.200, 1.582	166.200, 1.428	166.200, 1.252	166.200, 1.317	166.200, 1.455	166.200, 2.172	166.200, 2.001	166.200, 2.335
833	166.400, 1.542	166.400, 1.402	166.400, 1.388	166.400, 1.532	166.400, 1.564	166.400, 1.471	166.400, 1.384	166.400, 1.582	166.400, 1.428	166.400, 1.252	166.400, 1.318	166.400, 1.455	166.400, 2.170	166.400, 1.999	166.400, 2.333
834	166.600, 1.542	166.600, 1.402	166.600, 1.388	166.600, 1.533	166.600, 1.565	166.600, 1.471	166.600, 1.384	166.600, 1.582	166.600, 1.428	166.600, 1.252	166.600, 1.318	166.600, 1.455	166.600, 2.168	166.600, 1.996	166.600, 2.331
835	166.800, 1.542	166.800, 1.403	166.800, 1.389	166.800, 1.533	166.800, 1.565	166.800, 1.471	166.800, 1.385	166.800, 1.581	166.800, 1.429	166.800, 1.253	166.800, 1.318	166.800, 1.455	166.800, 2.166	166.800, 1.994	166.800, 2.328
836	167.000, 1.542	167.000, 1.402	167.000, 1.390	167.000, 1.533	167.000, 1.564	167.000, 1.471	167.000, 1.386	167.000, 1.581	167.000, 1.429	167.000, 1.253	167.000, 1.319	167.000, 1.455	167.000, 2.163	167.000, 1.991	167.000, 2.326
837	167.200, 1.542	167.200, 1.402	167.200, 1.390	167.200, 1.533	167.200, 1.564	167.200, 1.471	167.200, 1.386	167.200, 1.581	167.200, 1.429	167.200, 1.253	167.200, 1.319	167.200, 1.455	167.200, 2.161	167.200, 1.988	167.200, 2.323
838	167.400, 1.542	167.400, 1.402	167.400, 1.391	167.400, 1.533	167.400, 1.564	167.400, 1.471	167.400, 1.387	167.400, 1.581	167.400, 1.429	167.400, 1.254	167.400, 1.319	167.400, 1.455	167.400, 2.159	167.400, 1.986	167.400, 2.321
839	167.600, 1.542	167.600, 1.402	167.600, 1.391	167.600, 1.532	167.600, 1.565	167.600, 1.471	167.600, 1.388	167.600, 1.581	167.600, 1.429	167.600, 1.254	167.600, 1.319	167.600, 1.454	167.600, 2.156	167.600, 1.983	167.600, 2.318
840	167.800, 1.541	167.800, 1.402	167.800, 1.392	167.800, 1.532	167.800, 1.565	167.800, 1.471	167.800, 1.388	167.800, 1.581	167.800, 1.429	167.800, 1.255	167.800, 1.319	167.800, 1.454	167.800, 2.154	167.800, 1.981	167.800, 2.315
841	168.000, 1.541	168.000, 1.402	168.000, 1.392	168.000, 1.532	168.000, 1.565	168.000, 1.471	168.000, 1.389	168.000, 1.581	168.000, 1.429	168.000, 1.255	168.000, 1.319	168.000, 1.453	168.000, 2.152	168.000, 1.979	168.000, 2.313
842	168.200, 1.541	168.200, 1.402	168.200, 1.393	168.200, 1.532	168.200, 1.566	168.200, 1.470	168.200, 1.389	168.200, 1.581	168.200, 1.429	168.200, 1.256	168.200, 1.319	168.200, 1.453	168.200, 2.150	168.200, 1.977	168.200, 2.310
843	168.400, 1.540	168.400, 1.403	168.400, 1.393	168.400, 1.532	168.400, 1.566	168.400, 1.470	168.400, 1.389	168.400, 1.581	168.400, 1.429	168.400, 1.256	168.400, 1.320	168.400, 1.453	168.400, 2.147	168.400, 1.975	168.400, 2.307
844	168.600, 1.540	168.600, 1.403	168.600, 1.394	168.600, 1.533	168.600, 1.566	168.600, 1.470	168.600, 1.389	168.600, 1.581	168.600, 1.429	168.600, 1.256	168.600, 1.320	168.600, 1.453	168.600, 2.145	168.600, 1.973	168.600, 2.305
845	168.800, 1.540	168.800, 1.403	168.800, 1.394	168.800, 1.533	168.800, 1.566	168.800, 1.470	168.800, 1.390	168.800, 1.581	168.800, 1.429	168.800, 1.256	168.800, 1.320	168.800, 1.452	168.800, 2.142	168.800, 1.971	168.800, 2.302
846	169.000, 1.540	169.000, 1.403	169.000, 1.394	169.000, 1.533	169.000, 1.566	169.000, 1.469	169.000, 1.390	169.000, 1.581	169.000, 1.429	169.000, 1.256	169.000, 1.320	169.000, 1.452	169.000, 2.139	169.000, 1.969	169.000, 2.299
847	169.200, 1.540	169.200, 1.403	169.200, 1.395	169.200, 1.533	169.200, 1.566	169.200, 1.469	169.200, 1.390	169.200, 1.581	169.200, 1.429	169.200, 1.256	169.200, 1.320	169.200, 1.452	169.200, 2.137	169.200, 1.966	169.200, 2.297
848	169.400, 1.541	169.400, 1.403	169.400, 1.395	169.400, 1.533	169.400, 1.566	169.400, 1.469	169.400, 1.390	169.400, 1.581	169.400, 1.429	169.400, 1.255	169.400, 1.320	169.400, 1.452	169.400, 2.134	169.400, 1.964	169.400, 2.294
849	169.600, 1.541	169.600, 1.403	169.600, 1.395	169.600, 1.533	169.600, 1.566	169.600, 1.470	169.600, 1.390	169.600, 1.581	169.600, 1.429	169.600, 1.255	169.600, 1.320	169.600, 1.452	169.600, 2.132	169.600, 1.962	169.600, 2.291
850	169.800, 1.542	169.800, 1.403	169.800, 1.395	169.800, 1.533	169.800, 1.566	169.800, 1.470	169.800, 1.390	169.800, 1.581	169.800, 1.429	169.800, 1.255	169.800, 1.320	169.800, 1.452	169.800, 2.129	169.800, 1.959	169.800, 2.288
851	170.000, 1.542	170.000, 1.404	170.000, 1.396	170.000, 1.533	170.000, 1.566	170.000, 1.470	170.000, 1.390	170.000, 1.581	170.000, 1.429	170.000, 1.254	170.000, 1.320	170.000, 1.452	170.000, 2.127	170.000, 1.957	170.000, 2.286
852	170.200, 1.542	170.200, 1.404	170.200, 1.396	170.200, 1.533	170.200, 1.566	170.200, 1.471	170.200, 1.390	170.200, 1.582	170.200, 1.429	170.200, 1.254	170.200, 1.321	170.200, 1.452	170.200, 2.125	170.200, 1.955	170.200, 2.283
853	170.400, 1.542	170.400, 1.404	170.400, 1.397	170.400, 1.533	170.400, 1.566	170.400, 1.471	170.400, 1.391	170.400, 1.582	170.400, 1.429	170.400, 1.254	170.400, 1.321	170.400, 1.452	170.400, 2.122	170.400, 1.953	170.400, 2.281
854	170.600, 1.543	170.600, 1.404	170.600, 1.397	170.600, 1.534	170.600, 1.566	170.600, 1.471	170.600, 1.391	170.600, 1.582	170.600, 1.429	170.600, 1.253	170.600, 1.321	170.600, 1.452	170.600, 2.119	170.600, 1.950	170.600, 2.278
855	170.800, 1.543	170.800, 1.405	170.800, 1.398	170.800, 1.534	170.800, 1.566	170.800, 1.472	170.800, 1.392	170.800, 1.582	170.800, 1.429	170.800, 1.253	170.800, 1.321	170.800, 1.452	170.800, 2.117	170.800, 1.948	170.800, 2.276
856	171.000, 1.544	171.000, 1.405	171.000, 1.399	171.000, 1.534	171.000, 1.566	171.000, 1.472	171.000, 1.392	171.000, 1.582	171.000, 1.429	171.000, 1.253	171.000, 1.321	171.000, 1.452	171.000, 2.114	171.000, 1.946	171.000, 2.273
857	171.200, 1.544	171.200, 1.405	171.200, 1.399	171.200, 1.534	171.200, 1.566	171.200, 1.472	171.200, 1.393	171.200, 1.582	171.200, 1.429	171.200, 1.254	171.200, 1.321	171.200, 1.451	171.200, 2.112	171.200, 1.944	171.200, 2.271
858	171.400, 1.544	171.400, 1.406	171.400, 1.400	171.400, 1.534	171.400, 1.566	171.400, 1.472	171.400, 1.393	171.400, 1.582	171.400, 1.429	171.400, 1.254	171.400, 1.321	171.400, 1.451	171.400, 2.109	171.400, 1.942	171.400, 2.268
859	171.600, 1.544	171.600, 1.406	171.600, 1.400	171.600, 1.534	171.600, 1.566	171.600, 1.472	171.600, 1.393	171.600, 1.582	171.600, 1.429	171.600, 1.255	171.600, 1.321	171.600, 1.450	171.600, 2.107	171.600, 1.940	171.600, 2.265
860	171.800, 1.544	171.800, 1.407	171.800, 1.400	171.800, 1.534	171.800, 1.566	171.800, 1.471	171.800, 1.393	171.800, 1.582	171.800, 1.429	171.800, 1.255	171.800, 1.321	171.800, 1.450	171.800, 2.104	171.800, 1.938	171.800, 2.263
861	172.000, 1.544	172.000, 1.407	172.000, 1.400	172.000, 1.535	172.000, 1.566	172.000, 1.471	172.000, 1.394	172.000, 1.582	172.000, 1.429	172.000, 1.255	172.000, 1.321	172.000, 1.450	172.000, 2.102	172.000, 1.937	172.000, 2.260
862	172.200, 1.544	172.200, 1.407	172.200, 1.401	172.200, 1.535	172.200, 1.567	172.200, 1.471	172.200, 1.394	172.200, 1.581	172.200, 1.429	172.200, 1.255	172.200, 1.321	172.200, 1.450	172.200, 2.100	172.200, 1.935	172.200, 2.258
863	172.400, 1.544	172.400, 1.408	172.400, 1.401	172.400, 1.535	172.400, 1.567	172.400, 1.470	172.400, 1.394	172.400, 1.581	172.400, 1.429	172.400, 1.255	172.400, 1.321	172.400, 1.450	172.400, 2.098	172.400, 1.933	172.400, 2.255
864	172.600, 1.545	172.600, 1.408	172.600, 1.401	172.600, 1.534	172.600, 1.567	172.600, 1.470	172.600, 1.394	172.600, 1.581	172.600, 1.429	172.600, 1.255	172.600, 1.321	172.600, 1.451	172.600, 2.095	172.600, 1.931	172.600, 2.253
865	172.800, 1.545	172.800, 1.408	172.800, 1.401	172.800, 1.534	172.800, 1.567	172.800, 1.470	172.800, 1.394	172.800, 1.581	172.800, 1.429	172.800, 1.255	172.800, 1.321	172.800, 1.451	172.800, 2.093	172.800, 1.929	172.800, 2.250
866	173.000, 1.545	173.000, 1.408	173.000, 1.402	173.000, 1.534	173.000, 1.567	173.000, 1.470	173.000, 1.394	173.000, 1.580	173.000, 1.429	173.000, 1.255	173.000, 1.321	173.000, 1.451	173.000, 2.092	173.000, 1.927	173.000, 2.248
867	173.200, 1.545	173.200, 1.408	173.200, 1.402	173.200, 1.534	173.200, 1.567	173.200, 1.470	173.200, 1.395	173.200, 1.580	173.200, 1.429	173.200, 1.255	173.200, 1.321	173.200, 1.451	173.200, 2.090	173.200, 1.925	173.200, 2.245
868	173.400, 1.544	173.400, 1.408	173.400, 1.402	173.400, 1.533	173.400, 1.567	173.400, 1.470	173.400, 1.395	173.400, 1.580	173.400, 1.429	173.400, 1.255	173.400, 1.321	173.400, 1.451	173.400, 2.088	173.400, 1.922	173.400, 2.243
869	173.600, 1.544	173.600, 1.408	173.600, 1.402	173.600, 1.533	173.600, 1.566	173.600, 1.470	173.600, 1.395	173.600, 1.579	173.600, 1.429	173.600, 1.255	173.600, 1.322	173.600, 1.451	173.600, 2.086	173.600, 1.920	173.600, 2.240
870	173.800, 1.544	173.800, 1.408	173.800, 1.402	173.800, 1.533	173.800, 1.566	173.800, 1.470	173.800, 1.395	173.800, 1.579	173.800, 1.429	173.800, 1.255	173.800, 1.321	173.800, 1.451	173.800, 2.084	173.800, 1.918	173.800, 2.238
871	174.000, 1.544	174.000, 1.408	174.000, 1.402	174.000, 1.533	174.000, 1.566	174.000, 1.470	174.000, 1.396	174.000, 1.579	174.000, 1.429	174.000, 1.255	174.000, 1.321	174.000, 1.451	174.000, 2.082	174.000, 1.915	174.000, 2.236
872	174.200, 1.544	174.200, 1.408	174.200, 1.402	174.200, 1.533	174.200, 1.566	174.200, 1.470	174.200, 1.396	174.200, 1.578	174.200, 1.429	174.200, 1.255	174.200, 1.321	174.200, 1.450	174.200, 2.080	174.200, 1.913	174.200, 2.234
873	174.400, 1.543	174.400, 1.408	174.400, 1.402	174.400, 1.533	174.400, 1.565	174.400, 1.470	174.400, 1.396	174.400, 1.578	174.400, 1.429	174.400, 1.255	174.400, 1.321	174.400, 1.450	174.400, 2.077	174.400, 1.911	174.400, 2.232
874	174.600, 1.543	174.600, 1.408	174.600, 1.402	174.600, 1.533	174.600, 1.565	174.600, 1.470	174.600, 1.396	174.600, 1.578	174.600, 1.429	174.600, 1.255	174.600, 1.321	174.600, 1.450	174.600, 2.075	174.600, 1.909	174.600, 2.229
875	174.800, 1.543	174.800, 1.408	174.800, 1.403	174.800, 1.533	174.800, 1.565	174.800, 1.470	174.800, 1.397	174.800, 1.578	174.800, 1.429	174.800, 1.255	174.800, 1.321	174.800, 1.449	174.800, 2.073	174.800, 1.907	174.800, 2.227
876	175.000, 1.543	175.000, 1.408	175.000, 1.403	175.000, 1.533	175.000, 1.565	175.000, 1.470	175.000, 1.397	175.000, 1.578	175.000, 1.429	175.000, 1.255	175.000, 1.321	175.000, 1.449	175.000, 2.070	175.000, 1.904	175.000, 2.224
877	175.200, 1.543	175.200, 1.408	175.200, 1.403	175.200, 1.533	175.200, 1.565	175.200, 1.470	175.200, 1.397	175.200, 1.578	175.200, 1.428	175.200, 1.255	175.200, 1.321	175.200, 1.449	175.200, 2.068	175.200, 1.902	175.200, 2.222
878	175.400, 1.543	175.400, 1.408	175.400, 1.404	175.400, 1.534	175.400, 1.565	175.400, 1.470	175.400, 1.397	175.400, 1.578	175.400, 1.428	175.400, 1.255	175.400, 1.322	175.400, 1.448	175.400, 2.065	175.400, 1.900	175.400, 2.219
879	175.600, 1.543	175.600, 1.408	175.600, 1.404	175.600, 1.534	175.600, 1.565	175.600, 1.470	175.600, 1.398	175.600, 1.578	175.600, 1.428	175.600, 1.255	175.600, 1.322	175.600, 1.448	175.600, 2.063	175.600, 1.898	175.600, 2.216
880	175.800, 1.544	175.800, 1.408	175.800, 1.405	175.800, 1.534	175.800, 1.565	175.800, 1.470	175.800, 1.398	175.800, 1.578	175.800, 1.428	175.800, 1.255	175.800, 1.322	175.800, 1.448	175.800, 2.060	175.800, 1.895	175.800, 2.213
881	176.000, 1.544	176.000, 1.408	176.000, 1.405	176.000, 1.534	176.000, 1.565	176.000, 1.469	176.000, 1.398	176.000, 1.579	176.000, 1.428	176.000, 1.255	176.000, 1.322	176.000, 1.448	176.000, 2.058	176.000, 1.893	176.000, 2.211
882	176.200, 1.544	176.200, 1.408	176.200, 1.406	176.200, 1.534	176.200, 1.566	176.200, 1.469	176.200, 1.398	176.200, 1.579	176.200, 1.428	176.200, 1.255	176.200, 1.322	176.200, 1.448	176.200, 2.055	176.200, 1.892	176.200, 2.208
883	176.400, 1.544	176.400, 1.408	176.400, 1.406	176.400, 1.534	176.400, 1.566	176.400, 1.469	176.400, 1.398	176.400, 1.579	176.400, 1.427	176.400, 1.255	176.400, 1.322	176.400, 1.449	176.400, 2.053	176.400, 1.890	176.400, 2.205
884	176.600, 1.545	176.600, 1.408	176.600, 1.407	176.600, 1.534	176.600, 1.566	176.600, 1.469	176.600, 1.398	176.600, 1.579	176.600, 1.427	176.600, 1.255	176.600, 1.322	176.600, 1.449	176.600, 2.051	176.600, 1.888	176.600, 2.202
885	176.800, 1.545	176.800, 1.408	176.800, 1.407	176.800, 1.534	176.800, 1.566	176.800, 1.469	176.800, 1.398	176.800, 1.579	176.800, 1.427	176.800, 1.255	176.800, 1.322	176.800, 1.449	176.800, 2.049	176.800, 1.886	176.800, 2.200
886	177.000, 1.545	177.000, 1.409	177.000, 1.407	177.000, 1.533	177.000, 1.567	177.000, 1.469	177.000, 1.398	177.000, 1.579	177.000, 1.426	177.000, 1.255	177.000, 1.322	177.000, 1.449	177.000, 2.047	177.000, 1.884	177.000, 2.197
887	177.200, 1.545	177.200, 1.409	177.200, 1.408	177.200, 1.533	177.200, 1.567	177.200, 1.470	177.200, 1.399	177.200, 1.578	177.200, 1.426	177.200, 1.256	177.200, 1.322	177.200, 1.449	177.200, 2.045	177.200, 1.882	177.200, 2.194
888	177.400, 1.544	177.400, 1.408	177.400, 1.408	177.400, 1.533	177.400, 1.567	177.400, 1.470	177.400, 1.398	177.400, 1.578	177.400, 1.426	177.400, 1.256	177.400, 1.323	177.400, 1.449	177.400, 2.042	177.400, 1.880	177.400, 2.192
889	177.600, 1.544	177.600, 1.408	177.600, 1.408	177.600, 1.533	177.600, 1.566	177.600, 1.469	177.600, 1.399	177.600, 1.578	177.600, 1.426	177.600, 1.256	177.600, 1.323	177.600, 1.449	177.600, 2.040	177.600, 1.879	177.600, 2.190
890	177.800, 1.544	177.800, 1.408	177.800, 1.407	177.800, 1.533	177.800, 1.566	177.800, 1.469	177.800, 1.399	177.800, 1.577	177.800, 1.426	177.800, 1.256	177.800, 1.323	177.800, 1.449	177.800, 2.037	177.800, 1.877	177.800, 2.187
891	178.000, 1.544	178.000, 1.407	178.000, 1.407	178.000, 1.533	178.000, 1.566	178.000, 1.469	178.000, 1.399	178.000, 1.577	178.000, 1.426	178.000, 1.256	178.000, 1.323	178.000, 1.448	178.000, 2.035	178.000, 1.876	178.000, 2.185
892	178.200, 1.543	178.200, 1.407	178.200, 1.407	178.200, 1.533	178.200, 1.566	178.200, 1.469	178.200, 1.399	178.200, 1.576	178.200, 1.426	178.200, 1.256	178.200, 1.323	178.200, 1.448	178.200, 2.032	178.200, 1.874	178.200, 2.183
893	178.400, 1.543	178.400, 1.408	178.400, 1.408	178.400, 1.533	178.400, 1.566	178.400, 1.469	178.400, 1.399	178.400, 1.576	178.400, 1.426	178.400, 1.255	178.400, 1.323	178.400, 1.448	178.400, 2.030	178.400, 1.872	178.400, 2.181
894	178.600, 1.543	178.600, 1.408	178.600, 1.408	178.600, 1.533	178.600, 1.566	178.600, 1.468	178.600, 1.399	178.600, 1.576	178.600, 1.427	178.600, 1.255	178.600, 1.323	178.600, 1.447	178.600, 2.028	178.600, 1.870	178.600, 2.179
895	178.800, 1.543	178.800, 1.408	178.800, 1.408	178.800, 1.533	178.800, 1.566	178.800, 1.468	178.800, 1.399	178.800, 1.576	178.800, 1.427	178.800, 1.255	178.800, 1.323	178.800, 1.447	178.800, 2.026	178.800, 1.867	178.800, 2.176
896	179.000, 1.543	179.000, 1.408	179.000, 1.408	179.000, 1.533	179.000, 1.566	179.000, 1.468	179.000, 1.400	179.000, 1.576	179.000, 1.427	179.000, 1.255	179.000, 1.323	179.000, 1.447	179.000, 2.024	179.000, 1.865	179.000, 2.174
897	179.200, 1.543	179.200, 1.409	179.200, 1.409	179.200, 1.533	179.200, 1.566	179.200, 1.468	179.200, 1.400	179.200, 1.577	179.200, 1.428	179.200, 1.254	179.200, 1.323	179.200, 1.447	179.200, 2.022	179.200, 1.863	179.200, 2.172
898	179.400, 1.543	179.400, 1.409	179.400, 1.409	179.400, 1.533	179.400, 1.565	179.400, 1.468	179.400, 1.400	179.400, 1.577	179.400, 1.428	179.400, 1.254	179.400, 1.323	179.400, 1.446	179.400, 2.019	179.400, 1.860	179.400, 2.170
899	179.600, 1.544	179.600, 1.409	179.600, 1.409	179.600, 1.533	179.600, 1.565	179.600, 1.468	179.600, 1.401	179.600, 1.577	179.600, 1.428	179.600, 1.254	179.600, 1.323	179.600, 1.446	179.600, 2.017	179.600, 1.858	179.600, 2.167
900	179.800, 1.544	179.800, 1.409	179.800, 1.409	179.800, 1.533	179.800, 1.565	179.800, 1.469	179.800, 1.401	179.800, 1.578	179.800, 1.429	179.800, 1.254	179.800, 1.323	179.800, 1.447	179.800, 2.015	179.800, 1.856	179.800, 2.165
901	180.000, 1.544	180.000, 1.409	180.000, 1.408	180.000, 1.533	180.000, 1.565	180.000, 1.469	180.000, 1.402	180.000, 1.578	180.000, 1.429	180.000, 1.255	180.000, 1.323	180.000, 1.447	180.000, 2.013	180.000, 1.854	180.000, 2.163
902	180.200, 1.544	180.200, 1.410	180.200, 1.408	180.200, 1.532	180.200, 1.565	180.200, 1.469	180.200, 1.402	180.200, 1.579	180.200, 1.429	180.200, 1.255	180.200, 1.323	180.200, 1.447	180.200, 2.011	180.200, 1.852	180.200, 2.160
903	180.400, 1.544	180.400, 1.410	180.400, 1.408	180.400, 1.532	180.400, 1.564	180.400, 1.469	180.400, 1.403	180.400, 1.579	180.400, 1.428	180.400, 1.255	180.400, 1.323	180.400, 1.447	180.400, 2.009	180.400, 1.849	180.400, 2.158
904	180.600, 1.545	180.600, 1.410	180.600, 1.408	180.600, 1.532	180.600, 1.564	180.600, 1.469	180.600, 1.403	180.600, 1.579	180.600, 1.428	180.600, 1.255	180.600, 1.323	180.600, 1.447	180.600, 2.007	180.600, 1.847	180.600, 2.156
905	180.800, 1.545	180.800, 1.410	180.800, 1.408	180.800, 1.532	180.800, 1.564	180.800, 1.470	180.800, 1.403	180.800, 1.579	180.800, 1.428	180.800, 1.255	180.800, 1.323	180.800, 1.447	180.800, 2.005	180.800, 1.845	180.800, 2.154
906	181.000, 1.545	181.000, 1.410	181.000, 1.408	181.000, 1.531	181.000, 1.563	181.000, 1.470	181.000, 1.403	181.000, 1.579	181.000, 1.427	181.000, 1.255	181.000, 1.324	181.000, 1.447	181.000, 2.003	181.000, 1.843	181.000, 2.152
907	181.200, 1.545	181.200, 1.410	181.200, 1.408	181.200, 1.531	181.200, 1.563	181.200, 1.470	181.200, 1.404	181.200, 1.580	181.200, 1.427	181.200, 1.255	181.200, 1.324	181.200, 1.447	181.200, 2.001	181.200, 1.842	181.200, 2.150
908	181.400, 1.545	181.400, 1.409	181.400, 1.408	181.400, 1.531	181.400, 1.562	181.400, 1.470	181.400, 1.404	181.400, 1.579	181.400, 1.427	181.400, 1.255	181.400, 1.324	181.400, 1.446	181.400, 1.999	181.400, 1.840	181.400, 2.148
909	181.600, 1.545	181.600, 1.409	181.600, 1.408	181.600, 1.531	181.600, 1.562	181.600, 1.470	181.600, 1.404	181.600, 1.579	181.600, 1.427	181.600, 1.255	181.600, 1.324	181.600, 1.446	181.600, 1.997	181.600, 1.839	181.600, 2.145
910	181.800, 1.545	181.800, 1.409	181.800, 1.408	181.800, 1.531	181.800, 1.562	181.800, 1.470	181.800, 1.403	181.800, 1.579	181.800, 1.427	181.800, 1.256	181.800, 1.324	181.800, 1.445	181.800, 1.995	181.800, 1.837	181.800, 2.143
911	182.000, 1.545	182.000, 1.409	182.000, 1.409	182.000, 1.531	182.000, 1.563	182.000, 1.470	182.000, 1.403	182.000, 1.579	182.000, 1.427	182.000, 1.256	182.000, 1.324	182.000, 1.445	182.000, 1.993	182.000, 1.835	182.000, 2.141
912	182.200, 1.545	182.200, 1.409	182.200, 1.409	182.200, 1.530	182.200, 1.563	182.200, 1.470	182.200, 1.403	182.200, 1.578	182.200, 1.427	182.200, 1.255	182.200, 1.324	182.200, 1.445	182.200, 1.991	182.200, 1.833	182.200, 2.140
913	182.400, 1.544	182.400, 1.409	182.400, 1.409	182.400, 1.530	182.400, 1.563	182.400, 1.470	182.400, 1.402	182.400, 1.578	182.400, 1.427	182.400, 1.255	182.400, 1.323	182.400, 1.445	182.400, 1.989	182.400, 1.832	182.400, 2.138
914	182.600, 1.544	182.600, 1.409	182.600, 1.410	182.600, 1.530	182.600, 1.564	182.600, 1.469	182.600, 1.402	182.600, 1.578	182.600, 1.426	182.600, 1.255	182.600, 1.323	182.600, 1.445	182.600, 1.987	182.600, 1.830	182.600, 2.135
915	182.800, 1.543	182.800, 1.409	182.800, 1.410	182.800, 1.530	182.800, 1.564	182.800, 1.469	182.800, 1.402	182.800, 1.578	182.800, 1.426	182.800, 1.256	182.800, 1.322	182.800, 1.445	182.800, 1.985	182.800, 1.828	182.800, 2.133
916	183.000, 1.542	183.000, 1.409	183.000, 1.410	183.000, 1.530	183.000, 1.564	183.000, 1.469	183.000, 1.402	183.000, 1.578	183.000, 1.427	183.000, 1.256	183.000, 1.322	183.000, 1.445	183.000, 1.983	183.000, 1.827	183.000, 2.131
917	183.200, 1.542	183.200, 1.409	183.200, 1.411	183.200, 1.530	183.200, 1.565	183.200, 1.469	183.200, 1.402	183.200, 1.578	183.200, 1.427	183.200, 1.256	183.200, 1.322	183.200, 1.445	183.200, 1.981	183.200, 1.825	183.200, 2.129
918	183.400, 1.541	183.400, 1.409	183.400, 1.411	183.400, 1.530	183.400, 1.565	183.400, 1.468	183.400, 1.402	183.400, 1.577	183.400, 1.427	183.400, 1.257	183.400, 1.322	183.400, 1.445	183.400, 1.979	183.400, 1.823	183.400, 2.126
919	183.600, 1.541	183.600, 1.409	183.600, 1.411	183.600, 1.530	183.600, 1.565	183.600, 1.468	183.600, 1.402	183.600, 1.577	183.600, 1.427	183.600, 1.257	183.600, 1.322	183.600, 1.444	183.600, 1.977	183.600, 1.822	183.600, 2.124
920	183.800, 1.541	183.800, 1.409	183.800, 1.411	183.800, 1.530	183.800, 1.565	183.800, 1.468	183.800, 1.402	183.800, 1.577	183.800, 1.427	183.800, 1.257	183.800, 1.322	183.800, 1.444	183.800, 1.975	183.800, 1.820	183.800, 2.122
921	184.000, 1.541	184.000, 1.409	184.000, 1.411	184.000, 1.531	184.000, 1.565	184.000, 1.468	184.000, 1.402	184.000, 1.576	184.000, 1.427	184.000, 1.257	184.000, 1.322	184.000, 1.444	184.000, 1.973	184.000, 1.817	184.000, 2.120
922	184.200, 1.541	184.200, 1.409	184.200, 1.412	184.200, 1.531	184.200, 1.565	184.200, 1.468	184.200, 1.402	184.200, 1.576	184.200, 1.427	184.200, 1.257	184.200, 1.322	184.200, 1.444	184.200, 1.971	184.200, 1.815	184.200, 2.118
923	184.400, 1.541	184.400, 1.409	184.400, 1.412	184.400, 1.531	184.400, 1.565	184.400, 1.467	184.400, 1.403	184.400, 1.576	184.400, 1.427	184.400, 1.257	184.400, 1.322	184.400, 1.443	184.400, 1.969	184.400, 1.813	184.400, 2.116
924	184.600, 1.541	184.600, 1.410	184.600, 1.412	184.600, 1.531	184.600, 1.564	184.600, 1.467	184.600, 1.403	184.600, 1.576	184.600, 1.427	184.600, 1.257	184.600, 1.322	184.600, 1.443	184.600, 1.967	184.600, 1.811	184.600, 2.114
925	184.800, 1.541	184.800, 1.410	184.800, 1.412	184.800, 1.531	184.800, 1.564	184.800, 1.467	184.800, 1.403	184.800, 1.576	184.800, 1.427	184.800, 1.257	184.800, 1.323	184.800, 1.443	184.800, 1.965	184.800, 1.809	184.800, 2.112
926	185.000, 1.541	185.000, 1.410	185.000, 1.412	185.000, 1.531	185.000, 1.563	185.000, 1.468	185.000, 1.403	185.000, 1.576	185.000, 1.426	185.000, 1.257	185.000, 1.323	185.000, 1.442	185.000, 1.963	185.000, 1.808	185.000, 2.110
927	185.200, 1.541	185.200, 1.410	185.200, 1.412	185.200, 1.531	185.200, 1.563	185.200, 1.468	185.200, 1.403	185.200, 1.575	185.200, 1.426	185.200, 1.257	185.200, 1.323	185.200, 1.442	185.200, 1.962	185.200, 1.806	185.200, 2.108
928	185.400, 1.541	185.400, 1.410	185.400, 1.412	185.400, 1.531	185.400, 1.563	185.400, 1.468	185.400, 1.403	185.400, 1.575	185.400, 1.426	185.400, 1.257	185.400, 1.324	185.400, 1.442	185.400, 1.960	185.400, 1.804	185.400, 2.106
929	185.600, 1.542	185.600, 1.410	185.600, 1.411	185.600, 1.531	185.600, 1.562	185.600, 1.468	185.600, 1.403	185.600, 1.575	185.600, 1.426	185.600, 1.257	185.600, 1.324	185.600, 1.442	185.600, 1.958	185.600, 1.802	185.600, 2.104
930	185.800, 1.542	185.800, 1.410	185.800, 1.411	185.800, 1.530	185.800, 1.562	185.800, 1.469	185.800, 1.403	185.800, 1.574	185.800, 1.426	185.800, 1.256	185.800, 1.324	185.800, 1.441	185.800, 1.955	185.800, 1.800	185.800, 2.102
931	186.000, 1.542	186.000, 1.410	186.000, 1.411	186.000, 1.530	186.000, 1.562	186.000, 1.469	186.000, 1.404	186.000, 1.574	186.000, 1.426	186.000, 1.256	186.000, 1.325	186.000, 1.442	186.000, 1.953	186.000, 1.798	186.000, 2.100
932	186.200, 1.543	186.200, 1.410	186.200, 1.411	186.200, 1.529	186.200, 1.562	186.200, 1.469	186.200, 1.404	186.200, 1.574	186.200, 1.425	186.200, 1.256	186.200, 1.325	186.200, 1.442	186.200, 1.951	186.200, 1.797	186.200, 2.098
933	186.400, 1.543	186.400, 1.410	186.400, 1.411	186.400, 1.529	186.400, 1.561	186.400, 1.469	186.400, 1.404	186.400, 1.574	186.400, 1.425	186.400, 1.256	186.400, 1.324	186.400, 1.442	186.400, 1.949	186.400, 1.795	186.400, 2.096
934	186.600, 1.543	186.600, 1.410	186.600, 1.411	186.600, 1.528	186.600, 1.561	186.600, 1.469	186.600, 1.405	186.600, 1.574	186.600, 1.425	186.600, 1.256	186.600, 1.324	186.600, 1.442	186.600, 1.947	186.600, 1.794	186.600, 2.093
935	186.800, 1.542	186.800, 1.411	186.800, 1.412	186.800, 1.528	186.800, 1.561	186.800, 1.469	186.800, 1.405	186.800, 1.574	186.800, 1.425	186.800, 1.256	186.800, 1.324	186.800, 1.443	186.800, 1.945	186.800, 1.793	186.800, 2.091
936	187.000, 1.542	187.000, 1.411	187.000, 1.412	187.000, 1.528	187.000, 1.561	187.000, 1.469	187.000, 1.405	187.000, 1.574	187.000, 1.425	187.000, 1.256	187.000, 1.324	187.000, 1.443	187.000, 1.943	187.000, 1.791	187.000, 2.089
937	187.200, 1.542	187.200, 1.411	187.200, 1.412	187.200, 1.528	187.200, 1.561	187.200, 1.469	187.200, 1.405	187.200, 1.574	187.200, 1.425	187.200, 1.256	187.200, 1.324	187.200, 1.442	187.200, 1.941	187.200, 1.789	187.200, 2.087
938	187.400, 1.542	187.400, 1.411	187.400, 1.412	187.400, 1.528	187.400, 1.561	187.400, 1.469	187.400, 1.406	187.400, 1.573	187.400, 1.425	187.400, 1.256	187.400, 1.324	187.400, 1.442	187.400, 1.939	187.400, 1.788	187.400, 2.085
939	187.600, 1.542	187.600, 1.411	187.600, 1.412	187.600, 1.528	187.600, 1.561	187.600, 1.469	187.600, 1.406	187.600, 1.573	187.600, 1.425	187.600, 1.256	187.600, 1.324	187.600, 1.442	187.600, 1.938	187.600, 1.786	187.600, 2.083
940	187.800, 1.543	187.800, 1.411	187.800, 1.412	187.800, 1.528	187.800, 1.561	187.800, 1.469	187.800, 1.406	187.800, 1.573	187.800, 1.425	187.800, 1.256	187.800, 1.323	187.800, 1.442	187.800, 1.936	187.800, 1.784	187.800, 2.080
941	188.000, 1.543	188.000, 1.411	188.000, 1.412	188.000, 1.527	188.000, 1.561	188.000, 1.469	188.000, 1.406	188.000, 1.573	188.000, 1.425	188.000, 1.256	188.000, 1.323	188.000, 1.442	188.000, 1.934	188.000, 1.782	188.000, 2.078
942	188.200, 1.543	188.200, 1.411	188.200, 1.412	188.200, 1.527	188.200, 1.561	188.200, 1.468	188.200, 1.406	188.200, 1.573	188.200, 1.425	188.200, 1.255	188.200, 1.323	188.200, 1.442	188.200, 1.933	188.200, 1.781	188.200, 2.076
943	188.400, 1.543	188.400, 1.411	188.400, 1.412	188.400, 1.527	188.400, 1.561	188.400, 1.468	188.400, 1.407	188.400, 1.573	188.400, 1.425	188.400, 1.255	188.400, 1.323	188.400, 1.442	188.400, 1.931	188.400, 1.779	188.400, 2.073
944	188.600, 1.543	188.600, 1.411	188.600, 1.412	188.600, 1.528	188.600, 1.561	188.600, 1.468	188.600, 1.407	188.600, 1.573	188.600, 1.425	188.600, 1.255	188.600, 1.323	188.600, 1.442	188.600, 1.929	188.600, 1.777	188.600, 2.071
945	188.800, 1.543	188.800, 1.411	188.800, 1.412	188.800, 1.528	188.800, 1.561	188.800, 1.468	188.800, 1.407	188.800, 1.573	188.800, 1.425	188.800, 1.255	188.800, 1.323	188.800, 1.442	188.800, 1.928	188.800, 1.776	188.800, 2.069
946	189.000, 1.543	189.000, 1.410	189.000, 1.412	189.000, 1.528	189.000, 1.561	189.000, 1.467	189.000, 1.407	189.000, 1.573	189.000, 1.425	189.000, 1.255	189.000, 1.324	189.000, 1.442	189.000, 1.926	189.000, 1.774	189.000, 2.067
947	189.200, 1.543	189.200, 1.410	189.200, 1.413	189.200, 1.528	189.200, 1.561	189.200, 1.467	189.200, 1.407	189.200, 1.573	189.200, 1.425	189.200, 1.254	189.200, 1.324	189.200, 1.442	189.200, 1.925	189.200, 1.772	189.200, 2.065
948	189.400, 1.543	189.400, 1.410	189.400, 1.413	189.400, 1.529	189.400, 1.561	189.400, 1.468	189.400, 1.407	189.400, 1.572	189.400, 1.425	189.400, 1.255	189.400, 1.324	189.400, 1.441	189.400, 1.923	189.400, 1.770	189.400, 2.063
949	189.600, 1.543	189.600, 1.410	189.600, 1.413	189.600, 1.529	189.600, 1.561	189.600, 1.468	189.600, 1.407	189.600, 1.572	189.600, 1.424	189.600, 1.255	189.600, 1.324	189.600, 1.441	189.600, 1.920	189.600, 1.768	189.600, 2.061
950	189.800, 1.542	189.800, 1.410	189.800, 1.413	189.800, 1.529	189.800, 1.561	189.800, 1.468	189.800, 1.407	189.800, 1.572	189.800, 1.424	189.800, 1.255	189.800, 1.324	189.800, 1.441	189.800, 1.918	189.800, 1.767	189.800, 2.059
951	190.000, 1.542	190.000, 1.409	190.000, 1.413	190.000, 1.529	190.000, 1.560	190.000, 1.468	190.000, 1.407	190.000, 1.572	190.000, 1.424	190.000, 1.255	190.000, 1.324	190.000, 1.441	190.000, 1.916	190.000, 1.766	190.000, 2.057
952	190.200, 1.542	190.200, 1.409	190.200, 1.414	190.200, 1.529	190.200, 1.560	190.200, 1.468	190.200, 1.407	190.200, 1.572	190.200, 1.424	190.200, 1.255	190.200, 1.324	190.200, 1.440	190.200, 1.914	190.200, 1.764	190.200, 2.055
953	190.400, 1.542	190.400, 1.409	190.400, 1.414	190.400, 1.529	190.400, 1.560	190.400, 1.468	190.400, 1.407	190.400, 1.572	190.400, 1.424	190.400, 1.255	190.400, 1.324	190.400, 1.440	190.400, 1.912	190.400, 1.763	190.400, 2.054
954	190.600, 1.542	190.600, 1.409	190.600, 1.414	190.600, 1.529	190.600, 1.560	190.600, 1.468	190.600, 1.407	190.600, 1.572	190.600, 1.424	190.600, 1.255	190.600, 1.324	190.600, 1.439	190.600, 1.910	190.600, 1.762	190.600, 2.052
955	190.800, 1.542	190.800, 1.409	190.800, 1.415	190.800, 1.529	190.800, 1.560	190.800, 1.469	190.800, 1.407	190.800, 1.572	190.800, 1.424	190.800, 1.255	190.800, 1.324	190.800, 1.439	190.800, 1.909	190.800, 1.760	190.800, 2.050
956	191.000, 1.542	191.000, 1.409	191.000, 1.415	191.000, 1.529	191.000, 1.560	191.000, 1.469	191.000, 1.407	191.000, 1.572	191.000, 1.424	191.000, 1.255	191.000, 1.324	191.000, 1.439	191.000, 1.907	191.000, 1.759	191.000, 2.049
957	191.200, 1.542	191.200, 1.409	191.200, 1.415	191.200, 1.529	191.200, 1.560	191.200, 1.468	191.200, 1.406	191.200, 1.572	191.200, 1.424	191.200, 1.255	191.200, 1.324	191.200, 1.439	191.200, 1.906	191.200, 1.757	191.200, 2.047
958	191.400, 1.542	191.400, 1.410	191.400, 1.415	191.400, 1.529	191.400, 1.559	191.400, 1.468	191.400, 1.406	191.400, 1.572	191.400, 1.424	191.400, 1.255	191.400, 1.324	191.400, 1.439	191.400, 1.904	191.400, 1.755	191.400, 2.045
959	191.600, 1.542	191.600, 1.410	191.600, 1.415	191.600, 1.528	191.600, 1.559	191.600, 1.468	191.600, 1.406	191.600, 1.572	191.600, 1.424	191.600, 1.255	191.600, 1.324	191.600, 1.439	191.600, 1.903	191.600, 1.753	191.600, 2.043
960	191.800, 1.542	191.800, 1.410	191.800, 1.416	191.800, 1.528	191.800, 1.559	191.800, 1.468	191.800, 1.406	191.800, 1.572	191.800, 1.424	191.800, 1.256	191.800, 1.323	191.800, 1.439	191.800, 1.901	191.800, 1.751	191.800, 2.041
961	192.000, 1.542	192.000, 1.411	192.000, 1.416	192.000, 1.527	192.000, 1.559	192.000, 1.468	192.000, 1.406	192.000, 1.572	192.000, 1.424	192.000, 1.255	192.000, 1.323	192.000, 1.439	192.000, 1.900	192.000, 1.749	192.000, 2.039
962	192.200, 1.542	192.200, 1.411	192.200, 1.416	192.200, 1.527	192.200, 1.559	192.200, 1.468	192.200, 1.407	192.200, 1.573	192.200, 1.424	192.200, 1.256	192.200, 1.323	192.200, 1.439	192.200, 1.898	192.200, 1.748	192.200, 2.037
963	192.400, 1.542	192.400, 1.411	192.400, 1.416	192.400, 1.527	192.400, 1.559	192.400, 1.468	192.400, 1.407	192.400, 1.573	192.400, 1.424	192.400, 1.256	192.400, 1.323	192.400, 1.440	192.400, 1.897	192.400, 1.746	192.400, 2.035
964	192.600, 1.542	192.600, 1.411	192.600, 1.416	192.600, 1.527	192.600, 1.559	192.600, 1.469	192.600, 1.407	192.600, 1.573	192.600, 1.424	192.600, 1.256	192.600, 1.323	192.600, 1.440	192.600, 1.895	192.600, 1.744	192.600, 2.034
965	192.800, 1.542	192.800, 1.411	192.800, 1.416	192.800, 1.526	192.800, 1.559	192.800, 1.469	192.800, 1.407	192.800, 1.573	192.800, 1.424	192.800, 1.256	192.800, 1.322	192.800, 1.440	192.800, 1.894	192.800, 1.743	192.800, 2.032
966	193.000, 1.543	193.000, 1.411	193.000, 1.416	193.000, 1.526	193.000, 1.559	193.000, 1.469	193.000, 1.407	193.000, 1.573	193.000, 1.424	193.000, 1.256	193.000, 1.322	193.000, 1.440	193.000, 1.892	193.000, 1.741	193.000, 2.030
967	193.200, 1.543	193.200, 1.411	193.200, 1.416	193.200, 1.526	193.200, 1.559	193.200, 1.469	193.200, 1.407	193.200, 1.573	193.200, 1.424	193.200, 1.256	193.200, 1.322	193.200, 1.440	193.200, 1.890	193.200, 1.739	193.200, 2.029
968	193.400, 1.543	193.400, 1.411	193.400, 1.416	193.400, 1.527	193.400, 1.559	193.400, 1.469	193.400, 1.407	193.400, 1.572	193.400, 1.424	193.400, 1.256	193.400, 1.322	193.400, 1.441	193.400, 1.888	193.400, 1.738	193.400, 2.027
969	193.600, 1.543	193.600, 1.411	193.600, 1.415	193.600, 1.527	193.600, 1.559	193.600, 1.468	193.600, 1.408	193.600, 1.572	193.600, 1.424	193.600, 1.256	193.600, 1.322	193.600, 1.440	193.600, 1.886	193.600, 1.736	193.600, 2.025
970	193.800, 1.543	193.800, 1.411	193.800, 1.415	193.800, 1.527	193.800, 1.559	193.800, 1.469	193.800, 1.408	193.800, 1.572	193.800, 1.424	193.800, 1.256	193.800, 1.322	193.800, 1.440	193.800, 1.884	193.800, 1.735	193.800, 2.023
971	194.000, 1.543	194.000, 1.411	194.000, 1.415	194.000, 1.528	194.000, 1.559	194.000, 1.469	194.000, 1.408	194.000, 1.572	194.000, 1.423	194.000, 1.256	194.000, 1.323	194.000, 1.440	194.000, 1.882	194.000, 1.734	194.000, 2.022
972	194.200, 1.542	194.200, 1.410	194.200, 1.415	194.200, 1.528	194.200, 1.559	194.200, 1.468	194.200, 1.408	194.200, 1.572	194.200, 1.424	194.200, 1.256	194.200, 1.323	194.200, 1.440	194.200, 1.880	194.200, 1.732	194.200, 2.020
973	194.400, 1.542	194.400, 1.410	194.400, 1.415	194.400, 1.529	194.400, 1.559	194.400, 1.468	194.400, 1.408	194.400, 1.572	194.400, 1.424	194.400, 1.255	194.400, 1.323	194.400, 1.440	194.400, 1.878	194.400, 1.731	194.400, 2.019
974	194.600, 1.542	194.600, 1.410	194.600, 1.415	194.600, 1.529	194.600, 1.559	194.600, 1.468	194.600, 1.408	194.600, 1.572	194.600, 1.424	194.600, 1.255	194.600, 1.323	194.600, 1.440	194.600, 1.876	194.600, 1.730	194.600, 2.017
975	194.800, 1.542	194.800, 1.409	194.800, 1.415	194.800, 1.529	194.800, 1.558	194.800, 1.468	194.800, 1.408	194.800, 1.572	194.800, 1.424	194.800, 1.255	194.800, 1.323	194.800, 1.439	194.800, 1.875	194.800, 1.729	194.800, 2.016
976	195.000, 1.541	195.000, 1.409	195.000, 1.415	195.000, 1.529	195.000, 1.558	195.000, 1.467	195.000, 1.408	195.000, 1.572	195.000, 1.424	195.000, 1.255	195.000, 1.323	195.000, 1.439	195.000, 1.873	195.000, 1.727	195.000, 2.014
977	195.200, 1.541	195.200, 1.409	195.200, 1.415	195.200, 1.529	195.200, 1.558	195.200, 1.467	195.200, 1.408	195.200, 1.572	195.200, 1.424	195.200, 1.255	195.200, 1.323	195.200, 1.439	195.200, 1.872	195.200, 1.726	195.200, 2.012
978	195.400, 1.541	195.400, 1.409	195.400, 1.415	195.400, 1.528	195.400, 1.557	195.400, 1.467	195.400, 1.408	195.400, 1.572	195.400, 1.424	195.400, 1.256	195.400, 1.323	195.400, 1.439	195.400, 1.870	195.400, 1.724	195.400, 2.010
979	195.600, 1.541	195.600, 1.409	195.600, 1.415	195.600, 1.528	195.600, 1.557	195.600, 1.467	195.600, 1.409	195.600, 1.572	195.600, 1.424	195.600, 1.256	195.600, 1.323	195.600, 1.439	195.600, 1.869	195.600, 1.723	195.600, 2.008
980	195.800, 1.541	195.800, 1.409	195.800, 1.415	195.800, 1.528	195.800, 1.557	195.800, 1.467	195.800, 1.409	195.800, 1.571	195.800, 1.424	195.800, 1.256	195.800, 1.323	195.800, 1.438	195.800, 1.867	195.800, 1.721	195.800, 2.007
981	196.000, 1.541	196.000, 1.409	196.000, 1.415	196.000, 1.528	196.000, 1.557	196.000, 1.467	196.000, 1.409	196.000, 1.571	196.000, 1.424	196.000, 1.256	196.000, 1.323	196.000, 1.438	196.000, 1.866	196.000, 1.719	196.000, 2.005
982	196.200, 1.541	196.200, 1.409	196.200, 1.416	196.200, 1.528	196.200, 1.558	196.200, 1.467	196.200, 1.409	196.200, 1.571	196.200, 1.424	196.200, 1.257	196.200, 1.323	196.200, 1.438	196.200, 1.864	196.200, 1.718	196.200, 2.004
983	196.400, 1.541	196.400, 1.409	196.400, 1.415	196.400, 1.527	196.400, 1.558	196.400, 1.467	196.400, 1.409	196.400, 1.571	196.400, 1.424	196.400, 1.257	196.400, 1.323	196.400, 1.438	196.400, 1.862	196.400, 1.716	196.400, 2.002
984	196.600, 1.542	196.600, 1.410	196.600, 1.415	196.600, 1.527	196.600, 1.558	196.600, 1.466	196.600, 1.409	196.600, 1.571	196.600, 1.424	196.600, 1.257	196.600, 1.323	196.600, 1.438	196.600, 1.860	196.600, 1.714	196.600, 2.000
985	196.800, 1.542	196.800, 1.410	196.800, 1.415	196.800, 1.527	196.800, 1.558	196.800, 1.466	196.800, 1.409	196.800, 1.571	196.800, 1.424	196.800, 1.258	196.800, 1.323	196.800, 1.438	196.800, 1.858	196.800, 1.713	196.800, 1.999
986	197.000, 1.542	197.000, 1.410	197.000, 1.415	197.000, 1.526	197.000, 1.557	197.000, 1.466	197.000, 1.409	197.000, 1.571	197.000, 1.424	197.000, 1.258	197.000, 1.323	197.000, 1.437	197.000, 1.856	197.000, 1.711	197.000, 1.997
987	197.200, 1.542	197.200, 1.410	197.200, 1.415	197.200, 1.526	197.200, 1.557	197.200, 1.466	197.200, 1.409	197.200, 1.571	197.200, 1.423	197.200, 1.258	197.200, 1.323	197.200, 1.437	197.200, 1.855	197.200, 1.710	197.200, 1.995
988	197.400, 1.543	197.400, 1.411	197.400, 1.415	197.400, 1.526	197.400, 1.557	197.400, 1.466	197.400, 1.409	197.400, 1.571	197.400, 1.423	197.400, 1.258	197.400, 1.323	197.400, 1.437	197.400, 1.853	197.400, 1.708	197.400, 1.994
989	197.600, 1.543	197.600, 1.411	197.600, 1.414	197.600, 1.527	197.600, 1.557	197.600, 1.466	197.600, 1.409	197.600, 1.571	197.600, 1.423	197.600, 1.257	197.600, 1.323	197.600, 1.436	197.600, 1.852	197.600, 1.707	197.600, 1.992
990	197.800, 1.543	197.800, 1.411	197.800, 1.414	197.800, 1.527	197.800, 1.557	197.800, 1.466	197.800, 1.409	197.800, 1.572	197.800, 1.422	197.800, 1.257	197.800, 1.323	197.800, 1.436	197.800, 1.850	197.800, 1.706	197.800, 1.990
991	198.000, 1.543	198.000, 1.411	198.000, 1.414	198.000, 1.527	198.000, 1.557	198.000, 1.466	198.000, 1.409	198.000, 1.572	198.000, 1.422	198.000, 1.257	198.000, 1.323	198.000, 1.436	198.000, 1.849	198.000, 1.705	198.000, 1.989
992	198.200, 1.543	198.200, 1.411	198.200, 1.414	198.200, 1.527	198.200, 1.557	198.200, 1.466	198.200, 1.408	198.200, 1.571	198.200, 1.422	198.200, 1.257	198.200, 1.323	198.200, 1.435	198.200, 1.848	198.200, 1.704	198.200, 1.987
993	198.400, 1.543	198.400, 1.411	198.400, 1.414	198.400, 1.527	198.400, 1.557	198.400, 1.466	198.400, 1.408	198.400, 1.571	198.400, 1.421	198.400, 1.256	198.400, 1.323	198.400, 1.435	198.400, 1.847	198.400, 1.703	198.400, 1.985
994	198.600, 1.543	198.600, 1.411	198.600, 1.415	198.600, 1.527	198.600, 1.557	198.600, 1.466	198.600, 1.408	198.600, 1.571	198.600, 1.421	198.600, 1.255	198.600, 1.323	198.600, 1.435	198.600, 1.845	198.600, 1.702	198.600, 1.983
995	198.800, 1.542	198.800, 1.411	198.800, 1.415	198.800, 1.527	198.800, 1.557	198.800, 1.466	198.800, 1.408	198.800, 1.571	198.800, 1.420	198.800, 1.255	198.800, 1.322	198.800, 1.435	198.800, 1.844	198.800, 1.701	198.800, 1.981
996	199.000, 1.542	199.000, 1.411	199.000, 1.416	199.000, 1.527	199.000, 1.557	199.000, 1.466	199.000, 1.408	199.000, 1.570	199.000, 1.420	199.000, 1.254	199.000, 1.322	199.000, 1.435	199.000, 1.843	199.000, 1.699	199.000, 1.979
997	199.200, 1.542	199.200, 1.411	199.200, 1.416	199.200, 1.527	199.200, 1.557	199.200, 1.466	199.200, 1.408	199.200, 1.570	199.200, 1.419	199.200, 1.254	199.200, 1.322	199.200, 1.435	199.200, 1.842	199.200, 1.698	199.200, 1.977
998	199.400, 1.542	199.400, 1.411	199.400, 1.417	199.400, 1.527	199.400, 1.557	199.400, 1.466	199.400, 1.408	199.400, 1.570	199.400, 1.419	199.400, 1.253	199.400, 1.322	199.400, 1.435	199.400, 1.841	199.400, 1.697	199.400, 1.975
999	199.600, 1.542	199.600, 1.411	199.600, 1.417	199.600, 1.527	199.600, 1.557	199.600, 1.466	199.600, 1.408	199.600, 1.569	199.600, 1.419	199.600, 1.253	199.600, 1.322	199.600, 1.435	199.600, 1.840	199.600, 1.695	199.600, 1.973
1000	199.800, 1.542	199.800, 1.410	199.800, 1.417	199.800, 1.527	199.800, 1.557	199.800, 1.466	199.800, 1.408	199.800, 1.569	199.800, 1.419	199.800, 1.253	199.800, 1.322	199.800, 1.435	199.800, 1.838	199.800, 1.694	199.800, 1.972
1001	200.000, 1.542	200.000, 1.410	200.000, 1.417	200.000, 1.527	200.000, 1.557	200.000, 1.466	200.000, 1.408	200.000, 1.569	200.000, 1.419	200.000, 1.253	200.000, 1.322	200.000, 1.435	200.000, 1.837	200.000, 1.693	200.000, 1.970
1002	200.200, 1.542	200.200, 1.410	200.200, 1.418	200.200, 1.527	200.200, 1.557	200.200, 1.466	200.200, 1.408	200.200, 1.569	200.200, 1.420	200.200, 1.253	200.200, 1.322	200.200, 1.435	200.200, 1.835	200.200, 1.691	200.200, 1.969
1003	200.400, 1.542	200.400, 1.410	200.400, 1.417	200.400, 1.527	200.400, 1.556	200.400, 1.466	200.400, 1.408	200.400, 1.569	200.400, 1.420	200.400, 1.253	200.400, 1.322	200.400, 1.435	200.400, 1.833	200.400, 1.689	200.400, 1.967
1004	200.600, 1.541	200.600, 1.410	200.600, 1.417	200.600, 1.527	200.600, 1.556	200.600, 1.466	200.600, 1.409	200.600, 1.569	200.600, 1.420	200.600, 1.254	200.600, 1.322	200.600, 1.435	200.600, 1.832	200.600, 1.688	200.600, 1.966
1005	200.800, 1.541	200.800, 1.410	200.800, 1.417	200.800, 1.527	200.800, 1.556	200.800, 1.466	200.800, 1.409	200.800, 1.569	200.800, 1.420	200.800, 1.254	200.800, 1.322	200.800, 1.435	200.800, 1.830	200.800, 1.686	200.800, 1.965
1006	201.000, 1.541	201.000, 1.410	201.000, 1.417	201.000, 1.527	201.000, 1.555	201.000, 1.466	201.000, 1.409	201.000, 1.569	201.000, 1.420	201.000, 1.254	201.000, 1.322	201.000, 1.434	201.000, 1.829	201.000, 1.685	201.000, 1.964
1007	201.200, 1.541	201.200, 1.410	201.200, 1.417	201.200, 1.527	201.200, 1.555	201.200, 1.465	201.200, 1.410	201.200, 1.569	201.200, 1.420	201.200, 1.255	201.200, 1.322	201.200, 1.434	201.200, 1.827	201.200, 1.684	201.200, 1.963
1008	201.400, 1.541	201.400, 1.410	201.400, 1.417	201.400, 1.527	201.400, 1.554	201.400, 1.465	201.400, 1.410	201.400, 1.569	201.400, 1.420	201.400, 1.255	201.400, 1.322	201.400, 1.434	201.400, 1.825	201.400, 1.683	201.400, 1.962
1009	201.600, 1.541	201.600, 1.410	201.600, 1.417	201.600, 1.527	201.600, 1.554	201.600, 1.465	201.600, 1.410	201.600, 1.569	201.600, 1.420	201.600, 1.255	201.600, 1.322	201.600, 1.434	201.600, 1.823	201.600, 1.681	201.600, 1.961
1010	201.800, 1.541	201.800, 1.410	201.800, 1.417	201.800, 1.527	201.800, 1.554	201.800, 1.465	201.800, 1.410	201.800, 1.569	201.800, 1.420	201.800, 1.255	201.800, 1.322	201.800, 1.434	201.800, 1.822	201.800, 1.680	201.800, 1.959
1011	202.000, 1.541	202.000, 1.410	202.000, 1.417	202.000, 1.526	202.000, 1.554	202.000, 1.464	202.000, 1.410	202.000, 1.569	202.000, 1.421	202.000, 1.255	202.000, 1.322	202.000, 1.434	202.000, 1.820	202.000, 1.679	202.000, 1.958
1012	202.200, 1.541	202.200, 1.410	202.200, 1.417	202.200, 1.526	202.200, 1.553	202.200, 1.464	202.200, 1.410	202.200, 1.569	202.200, 1.421	202.200, 1.255	202.200, 1.322	202.200, 1.433	202.200, 1.819	202.200, 1.678	202.200, 1.956
1013	202.400, 1.540	202.400, 1.410	202.400, 1.417	202.400, 1.526	202.400, 1.553	202.400, 1.464	202.400, 1.410	202.400, 1.569	202.400, 1.421	202.400, 1.255	202.400, 1.322	202.400, 1.433	202.400, 1.817	202.400, 1.677	202.400, 1.954
1014	202.600, 1.540	202.600, 1.410	202.600, 1.418	202.600, 1.526	202.600, 1.554	202.600, 1.464	202.600, 1.411	202.600, 1.569	202.600, 1.421	202.600, 1.255	202.600, 1.322	202.600, 1.433	202.600, 1.816	202.600, 1.676	202.600, 1.953
1015	202.800, 1.540	202.800, 1.410	202.800, 1.418	202.800, 1.526	202.800, 1.554	202.800, 1.464	202.800, 1.411	202.800, 1.569	202.800, 1.420	202.800, 1.254	202.800, 1.322	202.800, 1.433	202.800, 1.815	202.800, 1.674	202.800, 1.951
1016	203.000, 1.540	203.000, 1.410	203.000, 1.418	203.000, 1.526	203.000, 1.554	203.000, 1.464	203.000, 1.411	203.000, 1.569	203.000, 1.420	203.000, 1.254	203.000, 1.322	203.000, 1.433	203.000, 1.814	203.000, 1.673	203.000, 1.949
1017	203.200, 1.541	203.200, 1.409	203.200, 1.418	203.200, 1.525	203.200, 1.554	203.200, 1.464	203.200, 1.411	203.200, 1.569	203.200, 1.420	203.200, 1.254	203.200, 1.321	203.200, 1.433	203.200, 1.812	203.200, 1.672	203.200, 1.948
1018	203.400, 1.541	203.400, 1.409	203.400, 1.419	203.400, 1.525	203.400, 1.554	203.400, 1.465	203.400, 1.411	203.400, 1.569	203.400, 1.420	203.400, 1.254	203.400, 1.321	203.400, 1.433	203.400, 1.811	203.400, 1.670	203.400, 1.946
1019	203.600, 1.541	203.600, 1.409	203.600, 1.419	203.600, 1.525	203.600, 1.554	203.600, 1.465	203.600, 1.411	203.600, 1.569	203.600, 1.420	203.600, 1.254	203.600, 1.321	203.600, 1.433	203.600, 1.810	203.600, 1.669	203.600, 1.945
1020	203.800, 1.541	203.800, 1.409	203.800, 1.419	203.800, 1.525	203.800, 1.554	203.800, 1.465	203.800, 1.411	203.800, 1.569	203.800, 1.419	203.800, 1.254	203.800, 1.321	203.800, 1.433	203.800, 1.808	203.800, 1.667	203.800, 1.943
1021	204.000, 1.541	204.000, 1.409	204.000, 1.419	204.000, 1.525	204.000, 1.554	204.000, 1.465	204.000, 1.411	204.000, 1.569	204.000, 1.419	204.000, 1.255	204.000, 1.321	204.000, 1.433	204.000, 1.807	204.000, 1.666	204.000, 1.941
1022	204.200, 1.541	204.200, 1.409	204.200, 1.419	204.200, 1.524	204.200, 1.554	204.200, 1.465	204.200, 1.411	204.200, 1.569	204.200, 1.419	204.200, 1.255	204.200, 1.321	204.200, 1.433	204.200, 1.806	204.200, 1.664	204.200, 1.940
1023	204.400, 1.541	204.400, 1.409	204.400, 1.419	204.400, 1.524	204.400, 1.554	204.400, 1.466	204.400, 1.410	204.400, 1.568	204.400, 1.419	204.400, 1.255	204.400, 1.321	204.400, 1.433	204.400, 1.805	204.400, 1.663	204.400, 1.938
1024	204.600, 1.541	204.600, 1.409	204.600, 1.418	204.600, 1.523	204.600, 1.554	204.600, 1.465	204.600, 1.410	204.600, 1.568	204.600, 1.419	204.600, 1.256	204.600, 1.321	204.600, 1.432	204.600, 1.804	204.600, 1.662	204.600, 1.937
1025	204.800, 1.540	204.800, 1.409	204.800, 1.418	204.800, 1.523	204.800, 1.553	204.800, 1.465	204.800, 1.411	204.800, 1.568	204.800, 1.419	204.800, 1.256	204.800, 1.321	204.800, 1.432	204.800, 1.802	204.800, 1.661	204.800, 1.935
1026	205.000, 1.540	205.000, 1.410	205.000, 1.418	205.000, 1.523	205.000, 1.553	205.000, 1.465	205.000, 1.411	205.000, 1.568	205.000, 1.419	205.000, 1.256	205.000, 1.320	205.000, 1.432	205.000, 1.801	205.000, 1.659	205.000, 1.934
1027	205.200, 1.540	205.200, 1.410	205.200, 1.418	205.200, 1.523	205.200, 1.553	205.200, 1.465	205.200, 1.411	205.200, 1.568	205.200, 1.420	205.200, 1.256	205.200, 1.320	205.200, 1.431	205.200, 1.800	205.200, 1.658	205.200, 1.933
1028	205.400, 1.540	205.400, 1.410	205.400, 1.418	205.400, 1.522	205.400, 1.553	205.400, 1.464	205.400, 1.411	205.400, 1.568	205.400, 1.420	205.400, 1.256	205.400, 1.320	205.400, 1.431	205.400, 1.799	205.400, 1.658	205.400, 1.932
1029	205.600, 1.540	205.600, 1.410	205.600, 1.418	205.600, 1.522	205.600, 1.553	205.600, 1.464	205.600, 1.411	205.600, 1.569	205.600, 1.420	205.600, 1.256	205.600, 1.320	205.600, 1.431	205.600, 1.798	205.600, 1.657	205.600, 1.931
1030	205.800, 1.540	205.800, 1.410	205.800, 1.418	205.800, 1.522	205.800, 1.553	205.800, 1.464	205.800, 1.411	205.800, 1.568	205.800, 1.420	205.800, 1.256	205.800, 1.320	205.800, 1.431	205.800, 1.796	205.800, 1.656	205.800, 1.930
1031	206.000, 1.539	206.000, 1.411	206.000, 1.418	206.000, 1.522	206.000, 1.553	206.000, 1.463	206.000, 1.411	206.000, 1.568	206.000, 1.420	206.000, 1.256	206.000, 1.321	206.000, 1.431	206.000, 1.795	206.000, 1.655	206.000, 1.929
1032	206.200, 1.539	206.200, 1.411	206.200, 1.418	206.200, 1.522	206.200, 1.553	206.200, 1.463	206.200, 1.411	206.200, 1.568	206.200, 1.420	206.200, 1.256	206.200, 1.321	206.200, 1.431	206.200, 1.794	206.200, 1.654	206.200, 1.928
1033	206.400, 1.539	206.400, 1.411	206.400, 1.418	206.400, 1.522	206.400, 1.553	206.400, 1.463	206.400, 1.411	206.400, 1.568	206.400, 1.420	206.400, 1.255	206.400, 1.321	206.400, 1.430	206.400, 1.792	206.400, 1.653	206.400, 1.927
1034	206.600, 1.539	206.600, 1.411	206.600, 1.418	206.600, 1.522	206.600, 1.553	206.600, 1.463	206.600, 1.410	206.600, 1.568	206.600, 1.420	206.600, 1.255	206.600, 1.322	206.600, 1.430	206.600, 1.791	206.600, 1.652	206.600, 1.925
1035	206.800, 1.540	206.800, 1.411	206.800, 1.418	206.800, 1.523	206.800, 1.553	206.800, 1.463	206.800, 1.410	206.800, 1.568	206.800, 1.420	206.800, 1.255	206.800, 1.322	206.800, 1.430	206.800, 1.789	206.800, 1.650	206.800, 1.924
1036	207.000, 1.540	207.000, 1.411	207.000, 1.418	207.000, 1.523	207.000, 1.554	207.000, 1.463	207.000, 1.410	207.000, 1.568	207.000, 1.420	207.000, 1.255	207.000, 1.322	207.000, 1.430	207.000, 1.788	207.000, 1.649	207.000, 1.923
1037	207.200, 1.540	207.200, 1.411	207.200, 1.418	207.200, 1.523	207.200, 1.554	207.200, 1.463	207.200, 1.410	207.200, 1.568	207.200, 1.420	207.200, 1.254	207.200, 1.322	207.200, 1.430	207.200, 1.786	207.200, 1.648	207.200, 1.922
1038	207.400, 1.540	207.400, 1.411	207.400, 1.418	207.400, 1.523	207.400, 1.554	207.400, 1.463	207.400, 1.409	207.400, 1.568	207.400, 1.420	207.400, 1.254	207.400, 1.322	207.400, 1.430	207.400, 1.785	207.400, 1.646	207.400, 1.920
1039	207.600, 1.540	207.600, 1.411	207.600, 1.418	207.600, 1.523	207.600, 1.554	207.600, 1.463	207.600, 1.409	207.600, 1.568	207.600, 1.420	207.600, 1.254	207.600, 1.322	207.600, 1.430	207.600, 1.783	207.600, 1.645	207.600, 1.919
1040	207.800, 1.540	207.800, 1.411	207.800, 1.418	207.800, 1.523	207.800, 1.553	207.800, 1.463	207.800, 1.409	207.800, 1.567	207.800, 1.419	207.800, 1.254	207.800, 1.322	207.800, 1.430	207.800, 1.782	207.800, 1.644	207.800, 1.917
1041	208.000, 1.541	208.000, 1.411	208.000, 1.418	208.000, 1.523	208.000, 1.553	208.000, 1.463	208.000, 1.409	208.000, 1.567	208.000, 1.419	208.000, 1.253	208.000, 1.322	208.000, 1.430	208.000, 1.781	208.000, 1.642	208.000, 1.915
1042	208.200, 1.541	208.200, 1.411	208.200, 1.418	208.200, 1.523	208.200, 1.553	208.200, 1.463	208.200, 1.409	208.200, 1.567	208.200, 1.419	208.200, 1.253	208.200, 1.322	208.200, 1.430	208.200, 1.779	208.200, 1.641	208.200, 1.913
1043	208.400, 1.541	208.400, 1.411	208.400, 1.418	208.400, 1.523	208.400, 1.552	208.400, 1.463	208.400, 1.410	208.400, 1.567	208.400, 1.419	208.400, 1.253	208.400, 1.322	208.400, 1.430	208.400, 1.778	208.400, 1.640	208.400, 1.911
1044	208.600, 1.541	208.600, 1.410	208.600, 1.418	208.600, 1.523	208.600, 1.552	208.600, 1.463	208.600, 1.410	208.600, 1.567	208.600, 1.419	208.600, 1.253	208.600, 1.321	208.600, 1.430	208.600, 1.777	208.600, 1.639	208.600, 1.910
1045	208.800, 1.541	208.800, 1.410	208.800, 1.418	208.800, 1.523	208.800, 1.551	208.800, 1.463	208.800, 1.410	208.800, 1.567	208.800, 1.419	208.800, 1.253	208.800, 1.321	208.800, 1.430	208.800, 1.776	208.800, 1.638	208.800, 1.908
1046	209.000, 1.541	209.000, 1.410	209.000, 1.418	209.000, 1.523	209.000, 1.551	209.000, 1.463	209.000, 1.411	209.000, 1.566	209.000, 1.419	209.000, 1.253	209.000, 1.321	209.000, 1.430	209.000, 1.775	209.000, 1.637	209.000, 1.906
1047	209.200, 1.541	209.200, 1.410	209.200, 1.418	209.200, 1.523	209.200, 1.551	209.200, 1.463	209.200, 1.411	209.200, 1.566	209.200, 1.419	209.200, 1.253	209.200, 1.320	209.200, 1.430	209.200, 1.774	209.200, 1.636	209.200, 1.905
1048	209.400, 1.541	209.400, 1.409	209.400, 1.419	209.400, 1.523	209.400, 1.551	209.400, 1.463	209.400, 1.411	209.400, 1.566	209.400, 1.419	209.400, 1.253	209.400, 1.320	209.400, 1.430	209.400, 1.772	209.400, 1.634	209.400, 1.904
1049	209.600, 1.540	209.600, 1.409	209.600, 1.419	209.600, 1.523	209.600, 1.551	209.600, 1.463	209.600, 1.411	209.600, 1.566	209.600, 1.418	209.600, 1.254	209.600, 1.320	209.600, 1.430	209.600, 1.771	209.600, 1.633	209.600, 1.902
1050	209.800, 1.540	209.800, 1.409	209.800, 1.419	209.800, 1.523	209.800, 1.551	209.800, 1.463	209.800, 1.411	209.800, 1.565	209.800, 1.418	209.800, 1.254	209.800, 1.320	209.800, 1.430	209.800, 1.770	209.800, 1.632	209.800, 1.901
1051	210.000, 1.540	210.000, 1.409	210.000, 1.419	210.000, 1.523	210.000, 1.550	210.000, 1.463	210.000, 1.412	210.000, 1.565	210.000, 1.418	210.000, 1.254	210.000, 1.320	210.000, 1.431	210.000, 1.769	210.000, 1.631	210.000, 1.900
1052	210.200, 1.540	210.200, 1.409	210.200, 1.419	210.200, 1.523	210.200, 1.550	210.200, 1.463	210.200, 1.412	210.200, 1.565	210.200, 1.418	210.200, 1.254	210.200, 1.321	210.200, 1.431	210.200, 1.768	210.200, 1.630	210.200, 1.899
1053	210.400, 1.539	210.400, 1.409	210.400, 1.419	210.400, 1.523	210.400, 1.550	210.400, 1.463	210.400, 1.412	210.400, 1.565	210.400, 1.417	210.400, 1.254	210.400, 1.321	210.400, 1.431	210.400, 1.767	210.400, 1.628	210.400, 1.898
1054	210.600, 1.539	210.600, 1.409	210.600, 1.419	210.600, 1.523	210.600, 1.550	210.600, 1.463	210.600, 1.412	210.600, 1.565	210.600, 1.417	210.600, 1.253	210.600, 1.321	210.600, 1.430	210.600, 1.765	210.600, 1.627	210.600, 1.896
1055	210.800, 1.539	210.800, 1.409	210.800, 1.419	210.800, 1.523	210.800, 1.550	210.800, 1.463	210.800, 1.413	210.800, 1.565	210.800, 1.417	210.800, 1.253	210.800, 1.321	210.800, 1.430	210.800, 1.765	210.800, 1.626	210.800, 1.895
1056	211.000, 1.539	211.000, 1.409	211.000, 1.419	211.000, 1.523	211.000, 1.550	211.000, 1.463	211.000, 1.413	211.000, 1.565	211.000, 1.417	211.000, 1.253	211.000, 1.321	211.000, 1.430	211.000, 1.763	211.000, 1.624	211.000, 1.894
1057	211.200, 1.538	211.200, 1.409	211.200, 1.419	211.200, 1.523	211.200, 1.550	211.200, 1.463	211.200, 1.413	211.200, 1.565	211.200, 1.418	211.200, 1.253	211.200, 1.321	211.200, 1.430	211.200, 1.762	211.200, 1.623	211.200, 1.893
1058	211.400, 1.538	211.400, 1.409	211.400, 1.419	211.400, 1.523	211.400, 1.550	211.400, 1.462	211.400, 1.413	211.400, 1.565	211.400, 1.418	211.400, 1.253	211.400, 1.321	211.400, 1.429	211.400, 1.761	211.400, 1.622	211.400, 1.892
1059	211.600, 1.538	211.600, 1.409	211.600, 1.419	211.600, 1.522	211.600, 1.550	211.600, 1.462	211.600, 1.413	211.600, 1.565	211.600, 1.418	211.600, 1.253	211.600, 1.321	211.600, 1.429	211.600, 1.760	211.600, 1.621	211.600, 1.891
1060	211.800, 1.537	211.800, 1.409	211.800, 1.419	211.800, 1.522	211.800, 1.550	211.800, 1.462	211.800, 1.413	211.800, 1.565	211.800, 1.418	211.800, 1.253	211.800, 1.321	211.800, 1.429	211.800, 1.759	211.800, 1.620	211.800, 1.890
1061	212.000, 1.537	212.000, 1.409	212.000, 1.419	212.000, 1.522	212.000, 1.549	212.000, 1.462	212.000, 1.413	212.000, 1.565	212.000, 1.418	212.000, 1.253	212.000, 1.320	212.000, 1.429	212.000, 1.758	212.000, 1.619	212.000, 1.889
1062	212.200, 1.537	212.200, 1.409	212.200, 1.419	212.200, 1.522	212.200, 1.549	212.200, 1.461	212.200, 1.413	212.200, 1.565	212.200, 1.418	212.200, 1.254	212.200, 1.320	212.200, 1.429	212.200, 1.757	212.200, 1.618	212.200, 1.888
1063	212.400, 1.538	212.400, 1.409	212.400, 1.419	212.400, 1.521	212.400, 1.549	212.400, 1.461	212.400, 1.413	212.400, 1.565	212.400, 1.418	212.400, 1.254	212.400, 1.320	212.400, 1.428	212.400, 1.755	212.400, 1.617	212.400, 1.887
1064	212.600, 1.538	212.600, 1.409	212.600, 1.419	212.600, 1.521	212.600, 1.549	212.600, 1.461	212.600, 1.413	212.600, 1.565	212.600, 1.418	212.600, 1.254	212.600, 1.320	212.600, 1.428	212.600, 1.754	212.600, 1.617	212.600, 1.886
1065	212.800, 1.538	212.800, 1.410	212.800, 1.420	212.800, 1.521	212.800, 1.549	212.800, 1.461	212.800, 1.413	212.800, 1.564	212.800, 1.418	212.800, 1.254	212.800, 1.320	212.800, 1.428	212.800, 1.753	212.800, 1.616	212.800, 1.884
1066	213.000, 1.538	213.000, 1.410	213.000, 1.420	213.000, 1.521	213.000, 1.549	213.000, 1.462	213.000, 1.412	213.000, 1.564	213.000, 1.418	213.000, 1.254	213.000, 1.320	213.000, 1.428	213.000, 1.752	213.000, 1.615	213.000, 1.883
1067	213.200, 1.538	213.200, 1.410	213.200, 1.420	213.200, 1.521	213.200, 1.548	213.200, 1.462	213.200, 1.412	213.200, 1.564	213.200, 1.417	213.200, 1.254	213.200, 1.320	213.200, 1.428	213.200, 1.750	213.200, 1.614	213.200, 1.882
1068	213.400, 1.538	213.400, 1.410	213.400, 1.420	213.400, 1.521	213.400, 1.548	213.400, 1.462	213.400, 1.411	213.400, 1.564	213.400, 1.417	213.400, 1.254	213.400, 1.320	213.400, 1.428	213.400, 1.749	213.400, 1.614	213.400, 1.880
1069	213.600, 1.538	213.600, 1.410	213.600, 1.420	213.600, 1.521	213.600, 1.548	213.600, 1.462	213.600, 1.411	213.600, 1.564	213.600, 1.417	213.600, 1.254	213.600, 1.320	213.600, 1.428	213.600, 1.748	213.600, 1.613	213.600, 1.879
1070	213.800, 1.538	213.800, 1.411	213.800, 1.420	213.800, 1.521	213.800, 1.548	213.800, 1.462	213.800, 1.411	213.800, 1.564	213.800, 1.417	213.800, 1.254	213.800, 1.320	213.800, 1.428	213.800, 1.747	213.800, 1.612	213.800, 1.877
1071	214.000, 1.539	214.000, 1.411	214.000, 1.420	214.000, 1.521	214.000, 1.548	214.000, 1.462	214.000, 1.411	214.000, 1.564	214.000, 1.417	214.000, 1.254	214.000, 1.320	214.000, 1.428	214.000, 1.746	214.000, 1.611	214.000, 1.876
1072	214.200, 1.539	214.200, 1.411	214.200, 1.420	214.200, 1.520	214.200, 1.548	214.200, 1.462	214.200, 1.411	214.200, 1.563	214.200, 1.417	214.200, 1.254	214.200, 1.319	214.200, 1.428	214.200, 1.745	214.200, 1.610	214.200, 1.875
1073	214.400, 1.539	214.400, 1.411	214.400, 1.420	214.400, 1.520	214.400, 1.548	214.400, 1.462	214.400, 1.411	214.400, 1.563	214.400, 1.417	214.400, 1.253	214.400, 1.319	214.400, 1.428	214.400, 1.744	214.400, 1.609	214.400, 1.874
1074	214.600, 1.540	214.600, 1.411	214.600, 1.420	214.600, 1.520	214.600, 1.548	214.600, 1.463	214.600, 1.411	214.600, 1.563	214.600, 1.417	214.600, 1.253	214.600, 1.319	214.600, 1.428	214.600, 1.743	214.600, 1.608	214.600, 1.873
1075	214.800, 1.540	214.800, 1.411	214.800, 1.420	214.800, 1.520	214.800, 1.548	214.800, 1.463	214.800, 1.411	214.800, 1.562	214.800, 1.417	214.800, 1.253	214.800, 1.319	214.800, 1.428	214.800, 1.742	214.800, 1.606	214.800, 1.871
1076	215.000, 1.540	215.000, 1.410	215.000, 1.419	215.000, 1.520	215.000, 1.548	215.000, 1.463	215.000, 1.411	215.000, 1.562	215.000, 1.417	215.000, 1.253	215.000, 1.319	215.000, 1.427	215.000, 1.741	215.000, 1.605	215.000, 1.870
1077	215.200, 1.540	215.200, 1.410	215.200, 1.419	215.200, 1.520	215.200, 1.548	215.200, 1.463	215.200, 1.411	215.200, 1.562	215.200, 1.417	215.200, 1.252	215.200, 1.319	215.200, 1.427	215.200, 1.739	215.200, 1.605	215.200, 1.870
1078	215.400, 1.540	215.400, 1.410	215.400, 1.419	215.400, 1.520	215.400, 1.549	215.400, 1.462	215.400, 1.411	215.400, 1.562	215.400, 1.418	215.400, 1.252	215.400, 1.319	215.400, 1.427	215.400, 1.738	215.400, 1.604	215.400, 1.869
1079	215.600, 1.540	215.600, 1.410	215.600, 1.419	215.600, 1.520	215.600, 1.549	215.600, 1.462	215.600, 1.411	215.600, 1.562	215.600, 1.418	215.600, 1.252	215.600, 1.320	215.600, 1.427	215.600, 1.737	215.600, 1.602	215.600, 1.868
1080	215.800, 1.540	215.800, 1.409	215.800, 1.419	215.800, 1.520	215.800, 1.549	215.800, 1.461	215.800, 1.411	215.800, 1.562	215.800, 1.417	215.800, 1.252	215.800, 1.320	215.800, 1.426	215.800, 1.735	215.800, 1.601	215.800, 1.867
1081	216.000, 1.540	216.000, 1.409	216.000, 1.419	216.000, 1.520	216.000, 1.549	216.000, 1.461	216.000, 1.411	216.000, 1.561	216.000, 1.417	216.000, 1.252	216.000, 1.320	216.000, 1.426	216.000, 1.734	216.000, 1.600	216.000, 1.866
1082	216.200, 1.540	216.200, 1.409	216.200, 1.420	216.200, 1.520	216.200, 1.549	216.200, 1.460	216.200, 1.411	216.200, 1.561	216.200, 1.417	216.200, 1.253	216.200, 1.320	216.200, 1.426	216.200, 1.732	216.200, 1.599	216.200, 1.865
1083	216.400, 1.540	216.400, 1.408	216.400, 1.420	216.400, 1.520	216.400, 1.549	216.400, 1.460	216.400, 1.411	216.400, 1.561	216.400, 1.417	216.400, 1.253	216.400, 1.320	216.400, 1.426	216.400, 1.731	216.400, 1.598	216.400, 1.863
1084	216.600, 1.539	216.600, 1.408	216.600, 1.420	216.600, 1.521	216.600, 1.548	216.600, 1.460	216.600, 1.411	216.600, 1.562	216.600, 1.417	216.600, 1.253	216.600, 1.320	216.600, 1.426	216.600, 1.730	216.600, 1.598	216.600, 1.862
1085	216.800, 1.539	216.800, 1.408	216.800, 1.421	216.800, 1.521	216.800, 1.548	216.800, 1.460	216.800, 1.411	216.800, 1.562	216.800, 1.417	216.800, 1.253	216.800, 1.320	216.800, 1.426	216.800, 1.729	216.800, 1.597	216.800, 1.861
1086	217.000, 1.539	217.000, 1.408	217.000, 1.421	217.000, 1.521	217.000, 1.548	217.000, 1.460	217.000, 1.411	217.000, 1.562	217.000, 1.417	217.000, 1.253	217.000, 1.320	217.000, 1.426	217.000, 1.728	217.000, 1.596	217.000, 1.859
1087	217.200, 1.538	217.200, 1.408	217.200, 1.421	217.200, 1.521	217.200, 1.547	217.200, 1.460	217.200, 1.412	217.200, 1.562	217.200, 1.417	217.200, 1.253	217.200, 1.320	217.200, 1.426	217.200, 1.727	217.200, 1.595	217.200, 1.858
1088	217.400, 1.538	217.400, 1.408	217.400, 1.421	217.400, 1.521	217.400, 1.547	217.400, 1.460	217.400, 1.412	217.400, 1.562	217.400, 1.416	217.400, 1.253	217.400, 1.319	217.400, 1.425	217.400, 1.726	217.400, 1.594	217.400, 1.856
1089	217.600, 1.538	217.600, 1.408	217.600, 1.421	217.600, 1.521	217.600, 1.547	217.600, 1.460	217.600, 1.412	217.600, 1.562	217.600, 1.416	217.600, 1.253	217.600, 1.319	217.600, 1.425	217.600, 1.726	217.600, 1.593	217.600, 1.855
1090	217.800, 1.538	217.800, 1.408	217.800, 1.421	217.800, 1.520	217.800, 1.546	217.800, 1.460	217.800, 1.413	217.800, 1.562	217.800, 1.416	217.800, 1.253	217.800, 1.318	217.800, 1.425	217.800, 1.725	217.800, 1.592	217.800, 1.854
1091	218.000, 1.537	218.000, 1.408	218.000, 1.420	218.000, 1.520	218.000, 1.546	218.000, 1.460	218.000, 1.413	218.000, 1.562	218.000, 1.416	218.000, 1.253	218.000, 1.318	218.000, 1.425	218.000, 1.725	218.000, 1.591	218.000, 1.853
1092	218.200, 1.537	218.200, 1.409	218.200, 1.420	218.200, 1.520	218.200, 1.546	218.200, 1.461	218.200, 1.413	218.200, 1.562	218.200, 1.416	218.200, 1.252	218.200, 1.317	218.200, 1.424	218.200, 1.724	218.200, 1.590	218.200, 1.851
1093	218.400, 1.537	218.400, 1.409	218.400, 1.420	218.400, 1.519	218.400, 1.546	218.400, 1.461	218.400, 1.413	218.400, 1.562	218.400, 1.416	218.400, 1.252	218.400, 1.317	218.400, 1.424	218.400, 1.723	218.400, 1.589	218.400, 1.850
1094	218.600, 1.537	218.600, 1.409	218.600, 1.421	218.600, 1.519	218.600, 1.546	218.600, 1.461	218.600, 1.413	218.600, 1.562	218.600, 1.416	218.600, 1.252	218.600, 1.317	218.600, 1.424	218.600, 1.722	218.600, 1.588	218.600, 1.849
1095	218.800, 1.537	218.800, 1.409	218.800, 1.421	218.800, 1.519	218.800, 1.546	218.800, 1.462	218.800, 1.413	218.800, 1.562	218.800, 1.416	218.800, 1.252	218.800, 1.317	218.800, 1.423	218.800, 1.721	218.800, 1.587	218.800, 1.848
1096	219.000, 1.537	219.000, 1.409	219.000, 1.421	219.000, 1.519	219.000, 1.546	219.000, 1.462	219.000, 1.413	219.000, 1.561	219.000, 1.416	219.000, 1.252	219.000, 1.318	219.000, 1.423	219.000, 1.720	219.000, 1.586	219.000, 1.846
1097	219.200, 1.537	219.200, 1.409	219.200, 1.421	219.200, 1.519	219.200, 1.546	219.200, 1.462	219.200, 1.413	219.200, 1.561	219.200, 1.415	219.200, 1.252	219.200, 1.318	219.200, 1.423	219.200, 1.719	219.200, 1.585	219.200, 1.846
1098	219.400, 1.537	219.400, 1.409	219.400, 1.421	219.400, 1.519	219.400, 1.546	219.400, 1.461	219.400, 1.413	219.400, 1.561	219.400, 1.415	219.400, 1.252	219.400, 1.318	219.400, 1.423	219.400, 1.718	219.400, 1.584	219.400, 1.845
1099	219.600, 1.537	219.600, 1.409	219.600, 1.421	219.600, 1.519	219.600, 1.545	219.600, 1.461	219.600, 1.413	219.600, 1.561	219.600, 1.415	219.600, 1.252	219.600, 1.319	219.600, 1.424	219.600, 1.717	219.600, 1.583	219.600, 1.844
1100	219.800, 1.537	219.800, 1.409	219.800, 1.421	219.800, 1.520	219.800, 1.545	219.800, 1.461	219.800, 1.413	219.800, 1.561	219.800, 1.414	219.800, 1.252	219.800, 1.319	219.800, 1.424	219.800, 1.716	219.800, 1.582	219.800, 1.843
1101	220.000, 1.537	220.000, 1.409	220.000, 1.421	220.000, 1.520	220.000, 1.545	220.000, 1.461	220.000, 1.414	220.000, 1.561	220.000, 1.414	220.000, 1.252	220.000, 1.319	220.000, 1.424	220.000, 1.714	220.000, 1.581	220.000, 1.842
1102	220.200, 1.537	220.200, 1.409	220.200, 1.421	220.200, 1.520	220.200, 1.544	220.200, 1.460	220.200, 1.414	220.200, 1.561	220.200, 1.414	220.200, 1.252	220.200, 1.319	220.200, 1.425	220.200, 1.713	220.200, 1.580	220.200, 1.841
1103	220.400, 1.537	220.400, 1.409	220.400, 1.421	220.400, 1.520	220.400, 1.544	220.400, 1.460	220.400, 1.414	220.400, 1.562	220.400, 1.414	220.400, 1.252	220.400, 1.319	220.400, 1.425	220.400, 1.712	220.400, 1.579	220.400, 1.840
1104	220.600, 1.537	220.600, 1.409	220.600, 1.421	220.600, 1.520	220.600, 1.544	220.600, 1.460	220.600, 1.414	220.600, 1.562	220.600, 1.414	220.600, 1.252	220.600, 1.319	220.600, 1.426	220.600, 1.711	220.600, 1.577	220.600, 1.839
1105	220.800, 1.538	220.800, 1.409	220.800, 1.421	220.800, 1.520	220.800, 1.544	220.800, 1.460	220.800, 1.414	220.800, 1.562	220.800, 1.414	220.800, 1.252	220.800, 1.319	220.800, 1.426	220.800, 1.710	220.800, 1.576	220.800, 1.839
1106	221.000, 1.538	221.000, 1.409	221.000, 1.421	221.000, 1.520	221.000, 1.544	221.000, 1.460	221.000, 1.414	221.000, 1.562	221.000, 1.414	221.000, 1.252	221.000, 1.319	221.000, 1.426	221.000, 1.709	221.000, 1.575	221.000, 1.838
1107	221.200, 1.538	221.200, 1.409	221.200, 1.420	221.200, 1.520	221.200, 1.544	221.200, 1.460	221.200, 1.414	221.200, 1.561	221.200, 1.414	221.200, 1.252	221.200, 1.318	221.200, 1.426	221.200, 1.708	221.200, 1.573	221.200, 1.836
1108	221.400, 1.538	221.400, 1.409	221.400, 1.420	221.400, 1.520	221.400, 1.544	221.400, 1.459	221.400, 1.413	221.400, 1.561	221.400, 1.414	221.400, 1.251	221.400, 1.318	221.400, 1.426	221.400, 1.707	221.400, 1.572	221.400, 1.835
1109	221.600, 1.538	221.600, 1.409	221.600, 1.420	221.600, 1.519	221.600, 1.544	221.600, 1.459	221.600, 1.413	221.600, 1.561	221.600, 1.413	221.600, 1.251	221.600, 1.318	221.600, 1.426	221.600, 1.706	221.600, 1.571	221.600, 1.834
1110	221.800, 1.538	221.800, 1.409	221.800, 1.420	221.800, 1.519	221.800, 1.544	221.800, 1.459	221.800, 1.413	221.800, 1.561	221.800, 1.413	221.800, 1.251	221.800, 1.318	221.800, 1.425	221.800, 1.705	221.800, 1.570	221.800, 1.832
1111	222.000, 1.538	222.000, 1.409	222.000, 1.420	222.000, 1.519	222.000, 1.545	222.000, 1.459	222.000, 1.413	222.000, 1.561	222.000, 1.413	222.000, 1.251	222.000, 1.318	222.000, 1.425	222.000, 1.703	222.000, 1.570	222.000, 1.831
1112	222.200, 1.538	222.200, 1.409	222.200, 1.420	222.200, 1.518	222.200, 1.545	222.200, 1.459	222.200, 1.413	222.200, 1.561	222.200, 1.413	222.200, 1.251	222.200, 1.318	222.200, 1.425	222.200, 1.702	222.200, 1.569	222.200, 1.829
1113	222.400, 1.538	222.400, 1.409	222.400, 1.420	222.400, 1.518	222.400, 1.545	222.400, 1.458	222.400, 1.413	222.400, 1.561	222.400, 1.413	222.400, 1.251	222.400, 1.318	222.400, 1.424	222.400, 1.701	222.400, 1.568	222.400, 1.828
1114	222.600, 1.538	222.600, 1.409	222.600, 1.421	222.600, 1.518	222.600, 1.546	222.600, 1.458	222.600, 1.413	222.600, 1.561	222.600, 1.413	222.600, 1.251	222.600, 1.318	222.600, 1.424	222.600, 1.700	222.600, 1.568	222.600, 1.827
1115	222.800, 1.538	222.800, 1.409	222.800, 1.421	222.800, 1.518	222.800, 1.546	222.800, 1.459	222.800, 1.413	222.800, 1.560	222.800, 1.413	222.800, 1.251	222.800, 1.318	222.800, 1.424	222.800, 1.699	222.800, 1.567	222.800, 1.826
1116	223.000, 1.537	223.000, 1.409	223.000, 1.421	223.000, 1.518	223.000, 1.546	223.000, 1.459	223.000, 1.412	223.000, 1.560	223.000, 1.413	223.000, 1.252	223.000, 1.318	223.000, 1.424	223.000, 1.698	223.000, 1.566	223.000, 1.824
1117	223.200, 1.537	223.200, 1.409	223.200, 1.421	223.200, 1.518	223.200, 1.546	223.200, 1.459	223.200, 1.412	223.200, 1.560	223.200, 1.413	223.200, 1.252	223.200, 1.318	223.200, 1.424	223.200, 1.697	223.200, 1.565	223.200, 1.823
1118	223.400, 1.537	223.400, 1.408	223.400, 1.421	223.400, 1.518	223.400, 1.546	223.400, 1.459	223.400, 1.413	223.400, 1.559	223.400, 1.413	223.400, 1.252	223.400, 1.318	223.400, 1.424	223.400, 1.696	223.400, 1.565	223.400, 1.822
1119	223.600, 1.536	223.600, 1.408	223.600, 1.421	223.600, 1.518	223.600, 1.545	223.600, 1.459	223.600, 1.413	223.600, 1.559	223.600, 1.413	223.600, 1.252	223.600, 1.318	223.600, 1.424	223.600, 1.695	223.600, 1.564	223.600, 1.821
1120	223.800, 1.536	223.800, 1.408	223.800, 1.421	223.800, 1.518	223.800, 1.545	223.800, 1.459	223.800, 1.413	223.800, 1.559	223.800, 1.414	223.800, 1.253	223.800, 1.318	223.800, 1.424	223.800, 1.693	223.800, 1.563	223.800, 1.820
1121	224.000, 1.536	224.000, 1.407	224.000, 1.421	224.000, 1.518	224.000, 1.545	224.000, 1.459	224.000, 1.414	224.000, 1.559	224.000, 1.414	224.000, 1.253	224.000, 1.318	224.000, 1.424	224.000, 1.692	224.000, 1.562	224.000, 1.820
1122	224.200, 1.536	224.200, 1.408	224.200, 1.421	224.200, 1.518	224.200, 1.545	224.200, 1.459	224.200, 1.414	224.200, 1.559	224.200, 1.414	224.200, 1.254	224.200, 1.318	224.200, 1.424	224.200, 1.692	224.200, 1.562	224.200, 1.819
1123	224.400, 1.536	224.400, 1.408	224.400, 1.421	224.400, 1.517	224.400, 1.544	224.400, 1.459	224.400, 1.414	224.400, 1.559	224.400, 1.414	224.400, 1.254	224.400, 1.318	224.400, 1.424	224.400, 1.691	224.400, 1.561	224.400, 1.819
1124	224.600, 1.536	224.600, 1.408	224.600, 1.421	224.600, 1.517	224.600, 1.544	224.600, 1.459	224.600, 1.414	224.600, 1.560	224.600, 1.414	224.600, 1.254	224.600, 1.317	224.600, 1.424	224.600, 1.690	224.600, 1.560	224.600, 1.818
1125	224.800, 1.536	224.800, 1.408	224.800, 1.420	224.800, 1.517	224.800, 1.544	224.800, 1.459	224.800, 1.414	224.800, 1.560	224.800, 1.414	224.800, 1.254	224.800, 1.317	224.800, 1.424	224.800, 1.690	224.800, 1.559	224.800, 1.817
1126	225.000, 1.536	225.000, 1.408	225.000, 1.420	225.000, 1.517	225.000, 1.544	225.000, 1.459	225.000, 1.414	225.000, 1.560	225.000, 1.414	225.000, 1.254	225.000, 1.317	225.000, 1.423	225.000, 1.690	225.000, 1.559	225.000, 1.817
1127	225.200, 1.536	225.200, 1.408	225.200, 1.420	225.200, 1.517	225.200, 1.544	225.200, 1.459	225.200, 1.414	225.200, 1.559	225.200, 1.414	225.200, 1.254	225.200, 1.317	225.200, 1.423	225.200, 1.689	225.200, 1.558	225.200, 1.816
1128	225.400, 1.536	225.400, 1.408	225.400, 1.420	225.400, 1.517	225.400, 1.544	225.400, 1.459	225.400, 1.414	225.400, 1.559	225.400, 1.414	225.400, 1.254	225.400, 1.317	225.400, 1.423	225.400, 1.688	225.400, 1.557	225.400, 1.815
1129	225.600, 1.537	225.600, 1.408	225.600, 1.420	225.600, 1.517	225.600, 1.544	225.600, 1.459	225.600, 1.413	225.600, 1.559	225.600, 1.414	225.600, 1.253	225.600, 1.318	225.600, 1.422	225.600, 1.688	225.600, 1.556	225.600, 1.814
1130	225.800, 1.537	225.800, 1.408	225.800, 1.420	225.800, 1.517	225.800, 1.544	225.800, 1.459	225.800, 1.413	225.800, 1.559	225.800, 1.414	225.800, 1.253	225.800, 1.318	225.800, 1.422	225.800, 1.687	225.800, 1.556	225.800, 1.813
1131	226.000, 1.537	226.000, 1.408	226.000, 1.420	226.000, 1.517	226.000, 1.544	226.000, 1.459	226.000, 1.413	226.000, 1.559	226.000, 1.414	226.000, 1.253	226.000, 1.318	226.000, 1.421	226.000, 1.686	226.000, 1.555	226.000, 1.812
1132	226.200, 1.537	226.200, 1.408	226.200, 1.420	226.200, 1.517	226.200, 1.544	226.200, 1.458	226.200, 1.413	226.200, 1.559	226.200, 1.414	226.200, 1.253	226.200, 1.319	226.200, 1.421	226.200, 1.685	226.200, 1.554	226.200, 1.812
1133	226.400, 1.537	226.400, 1.407	226.400, 1.420	226.400, 1.517	226.400, 1.544	226.400, 1.459	226.400, 1.413	226.400, 1.559	226.400, 1.413	226.400, 1.252	226.400, 1.319	226.400, 1.421	226.400, 1.684	226.400, 1.553	226.400, 1.811
1134	226.600, 1.537	226.600, 1.407	226.600, 1.420	226.600, 1.517	226.600, 1.544	226.600, 1.459	226.600, 1.413	226.600, 1.559	226.600, 1.413	226.600, 1.252	226.600, 1.319	226.600, 1.420	226.600, 1.683	226.600, 1.553	226.600, 1.809
1135	226.800, 1.537	226.800, 1.407	226.800, 1.420	226.800, 1.517	226.800, 1.544	226.800, 1.459	226.800, 1.413	226.800, 1.558	226.800, 1.412	226.800, 1.252	226.800, 1.319	226.800, 1.421	226.800, 1.682	226.800, 1.552	226.800, 1.808
1136	227.000, 1.537	227.000, 1.407	227.000, 1.420	227.000, 1.517	227.000, 1.544	227.000, 1.459	227.000, 1.413	227.000, 1.558	227.000, 1.412	227.000, 1.252	227.000, 1.320	227.000, 1.421	227.000, 1.681	227.000, 1.550	227.000, 1.807
1137	227.200, 1.536	227.200, 1.407	227.200, 1.420	227.200, 1.517	227.200, 1.544	227.200, 1.459	227.200, 1.413	227.200, 1.558	227.200, 1.412	227.200, 1.252	227.200, 1.320	227.200, 1.421	227.200, 1.680	227.200, 1.549	227.200, 1.805
1138	227.400, 1.536	227.400, 1.407	227.400, 1.420	227.400, 1.517	227.400, 1.543	227.400, 1.459	227.400, 1.413	227.400, 1.558	227.400, 1.411	227.400, 1.252	227.400, 1.320	227.400, 1.421	227.400, 1.679	227.400, 1.548	227.400, 1.804
1139	227.600, 1.536	227.600, 1.407	227.600, 1.420	227.600, 1.517	227.600, 1.543	227.600, 1.459	227.600, 1.414	227.600, 1.558	227.600, 1.411	227.600, 1.252	227.600, 1.320	227.600, 1.422	227.600, 1.678	227.600, 1.548	227.600, 1.803
1140	227.800, 1.536	227.800, 1.407	227.800, 1.420	227.800, 1.516	227.800, 1.543	227.800, 1.459	227.800, 1.414	227.800, 1.558	227.800, 1.411	227.800, 1.252	227.800, 1.320	227.800, 1.422	227.800, 1.677	227.800, 1.547	227.800, 1.802
1141	228.000, 1.536	228.000, 1.407	228.000, 1.420	228.000, 1.516	228.000, 1.543	228.000, 1.459	228.000, 1.414	228.000, 1.558	228.000, 1.411	228.000, 1.252	228.000, 1.320	228.000, 1.422	228.000, 1.676	228.000, 1.546	228.000, 1.801
1142	228.200, 1.536	228.200, 1.408	228.200, 1.420	228.200, 1.516	228.200, 1.542	228.200, 1.459	228.200, 1.414	228.200, 1.558	228.200, 1.411	228.200, 1.252	228.200, 1.320	228.200, 1.422	228.200, 1.675	228.200, 1.546	228.200, 1.800
1143	228.400, 1.536	228.400, 1.408	228.400, 1.420	228.400, 1.515	228.400, 1.542	228.400, 1.460	228.400, 1.414	228.400, 1.558	228.400, 1.411	228.400, 1.252	228.400, 1.320	228.400, 1.422	228.400, 1.674	228.400, 1.545	228.400, 1.799
1144	228.600, 1.536	228.600, 1.408	228.600, 1.420	228.600, 1.515	228.600, 1.542	228.600, 1.460	228.600, 1.414	228.600, 1.558	228.600, 1.411	228.600, 1.252	228.600, 1.319	228.600, 1.422	228.600, 1.674	228.600, 1.544	228.600, 1.798
1145	228.800, 1.535	228.800, 1.408	228.800, 1.420	228.800, 1.515	228.800, 1.542	228.800, 1.460	228.800, 1.414	228.800, 1.558	228.800, 1.411	228.800, 1.252	228.800, 1.319	228.800, 1.422	228.800, 1.673	228.800, 1.543	228.800, 1.797
1146	229.000, 1.535	229.000, 1.408	229.000, 1.420	229.000, 1.515	229.000, 1.542	229.000, 1.460	229.000, 1.414	229.000, 1.558	229.000, 1.411	229.000, 1.252	229.000, 1.319	229.000, 1.422	229.000, 1.672	229.000, 1.543	229.000, 1.797
1147	229.200, 1.535	229.200, 1.407	229.200, 1.420	229.200, 1.516	229.200, 1.541	229.200, 1.460	229.200, 1.414	229.200, 1.558	229.200, 1.412	229.200, 1.252	229.200, 1.318	229.200, 1.422	229.200, 1.671	229.200, 1.542	229.200, 1.796
1148	229.400, 1.535	229.400, 1.407	229.400, 1.419	229.400, 1.516	229.400, 1.541	229.400, 1.460	229.400, 1.414	229.400, 1.558	229.400, 1.412	229.400, 1.252	229.400, 1.318	229.400, 1.421	229.400, 1.670	229.400, 1.542	229.400, 1.795
1149	229.600, 1.536	229.600, 1.407	229.600, 1.419	229.600, 1.516	229.600, 1.541	229.600, 1.460	229.600, 1.414	229.600, 1.558	229.600, 1.413	229.600, 1.252	229.600, 1.317	229.600, 1.421	229.600, 1.669	229.600, 1.541	229.600, 1.795
1150	229.800, 1.536	229.800, 1.406	229.800, 1.419	229.800, 1.516	229.800, 1.541	229.800, 1.459	229.800, 1.414	229.800, 1.558	229.800, 1.413	229.800, 1.253	229.800, 1.317	229.800, 1.421	229.800, 1.668	229.800, 1.540	229.800, 1.794
1151	230.000, 1.536	230.000, 1.406	230.000, 1.420	230.000, 1.517	230.000, 1.541	230.000, 1.459	230.000, 1.414	230.000, 1.558	230.000, 1.413	230.000, 1.252	230.000, 1.316	230.000, 1.420	230.000, 1.667	230.000, 1.539	230.000, 1.793
1152	230.200, 1.536	230.200, 1.406	230.200, 1.420	230.200, 1.517	230.200, 1.540	230.200, 1.459	230.200, 1.414	230.200, 1.558	230.200, 1.413	230.200, 1.252	230.200, 1.316	230.200, 1.420	230.200, 1.666	230.200, 1.539	230.200, 1.793
1153	230.400, 1.536	230.400, 1.405	230.400, 1.420	230.400, 1.517	230.400, 1.540	230.400, 1.458	230.400, 1.414	230.400, 1.558	230.400, 1.413	230.400, 1.252	230.400, 1.316	230.400, 1.420	230.400, 1.665	230.400, 1.538	230.400, 1.792
1154	230.600, 1.536	230.600, 1.405	230.600, 1.420	230.600, 1.517	230.600, 1.541	230.600, 1.458	230.600, 1.414	230.600, 1.558	230.600, 1.413	230.600, 1.252	230.600, 1.315	230.600, 1.420	230.600, 1.664	230.600, 1.537	230.600, 1.791
1155	230.800, 1.536	230.800, 1.405	230.800, 1.421	230.800, 1.516	230.800, 1.541	230.800, 1.458	230.800, 1.415	230.800, 1.557	230.800, 1.413	230.800, 1.252	230.800, 1.315	230.800, 1.420	230.800, 1.663	230.800, 1.536	230.800, 1.790
1156	231.000, 1.536	231.000, 1.405	231.000, 1.421	231.000, 1.516	231.000, 1.541	231.000, 1.458	231.000, 1.415	231.000, 1.557	231.000, 1.413	231.000, 1.252	231.000, 1.315	231.000, 1.420	231.000, 1.662	231.000, 1.535	231.000, 1.789
1157	231.200, 1.536	231.200, 1.405	231.200, 1.421	231.200, 1.516	231.200, 1.541	231.200, 1.458	231.200, 1.415	231.200, 1.557	231.200, 1.413	231.200, 1.252	231.200, 1.315	231.200, 1.420	231.200, 1.662	231.200, 1.534	231.200, 1.788
1158	231.400, 1.536	231.400, 1.406	231.400, 1.422	231.400, 1.516	231.400, 1.541	231.400, 1.458	231.400, 1.415	231.400, 1.557	231.400, 1.412	231.400, 1.252	231.400, 1.315	231.400, 1.420	231.400, 1.661	231.400, 1.533	231.400, 1.787
1159	231.600, 1.537	231.600, 1.406	231.600, 1.422	231.600, 1.516	231.600, 1.541	231.600, 1.457	231.600, 1.415	231.600, 1.557	231.600, 1.412	231.600, 1.252	231.600, 1.315	231.600, 1.420	231.600, 1.660	231.600, 1.533	231.600, 1.786
1160	231.800, 1.537	231.800, 1.406	231.800, 1.422	231.800, 1.516	231.800, 1.541	231.800, 1.457	231.800, 1.415	231.800, 1.557	231.800, 1.412	231.800, 1.252	231.800, 1.316	231.800, 1.420	231.800, 1.660	231.800, 1.532	231.800, 1.785
1161	232.000, 1.537	232.000, 1.406	232.000, 1.421	232.000, 1.516	232.000, 1.541	232.000, 1.457	232.000, 1.415	232.000, 1.557	232.000, 1.412	232.000, 1.252	232.000, 1.316	232.000, 1.420	232.000, 1.659	232.000, 1.531	232.000, 1.784
1162	232.200, 1.537	232.200, 1.406	232.200, 1.421	232.200, 1.516	232.200, 1.541	232.200, 1.457	232.200, 1.415	232.200, 1.557	232.200, 1.412	232.200, 1.252	232.200, 1.316	232.200, 1.419	232.200, 1.659	232.200, 1.530	232.200, 1.783
1163	232.400, 1.536	232.400, 1.406	232.400, 1.421	232.400, 1.516	232.400, 1.541	232.400, 1.456	232.400, 1.415	232.400, 1.556	232.400, 1.412	232.400, 1.251	232.400, 1.316	232.400, 1.419	232.400, 1.658	232.400, 1.529	232.400, 1.782
1164	232.600, 1.536	232.600, 1.406	232.600, 1.421	232.600, 1.516	232.600, 1.541	232.600, 1.456	232.600, 1.415	232.600, 1.556	232.600, 1.412	232.600, 1.251	232.600, 1.316	232.600, 1.418	232.600, 1.658	232.600, 1.528	232.600, 1.781
1165	232.800, 1.536	232.800, 1.406	232.800, 1.421	232.800, 1.516	232.800, 1.541	232.800, 1.456	232.800, 1.414	232.800, 1.556	232.800, 1.412	232.800, 1.251	232.800, 1.316	232.800, 1.418	232.800, 1.657	232.800, 1.527	232.800, 1.781
1166	233.000, 1.535	233.000, 1.406	233.000, 1.421	233.000, 1.516	233.000, 1.541	233.000, 1.456	233.000, 1.414	233.000, 1.556	233.000, 1.412	233.000, 1.251	233.000, 1.316	233.000, 1.417	233.000, 1.656	233.000, 1.527	233.000, 1.780
1167	233.200, 1.535	233.200, 1.406	233.200, 1.420	233.200, 1.516	233.200, 1.541	233.200, 1.456	233.200, 1.414	233.200, 1.556	233.200, 1.413	233.200, 1.251	233.200, 1.316	233.200, 1.417	233.200, 1.655	233.200, 1.526	233.200, 1.779
1168	233.400, 1.535	233.400, 1.407	233.400, 1.420	233.400, 1.516	233.400, 1.540	233.400, 1.456	233.400, 1.413	233.400, 1.556	233.400, 1.413	233.400, 1.251	233.400, 1.317	233.400, 1.418	233.400, 1.654	233.400, 1.526	233.400, 1.778
1169	233.600, 1.534	233.600, 1.407	233.600, 1.420	233.600, 1.516	233.600, 1.540	233.600, 1.456	233.600, 1.413	233.600, 1.556	233.600, 1.413	233.600, 1.251	233.600, 1.317	233.600, 1.418	233.600, 1.653	233.600, 1.526	233.600, 1.777
1170	233.800, 1.534	233.800, 1.407	233.800, 1.420	233.800, 1.516	233.800, 1.540	233.800, 1.456	233.800, 1.412	233.800, 1.556	233.800, 1.412	233.800, 1.251	233.800, 1.317	233.800, 1.418	233.800, 1.652	233.800, 1.525	233.800, 1.776
1171	234.000, 1.534	234.000, 1.407	234.000, 1.420	234.000, 1.516	234.000, 1.540	234.000, 1.456	234.000, 1.412	234.000, 1.556	234.000, 1.412	234.000, 1.251	234.000, 1.317	234.000, 1.418	234.000, 1.652	234.000, 1.525	234.000, 1.776
1172	234.200, 1.534	234.200, 1.407	234.200, 1.420	234.200, 1.516	234.200, 1.540	234.200, 1.457	234.200, 1.412	234.200, 1.555	234.200, 1.412	234.200, 1.251	234.200, 1.317	234.200, 1.418	234.200, 1.651	234.200, 1.525	234.200, 1.774
1173	234.400, 1.534	234.400, 1.407	234.400, 1.420	234.400, 1.516	234.400, 1.541	234.400, 1.457	234.400, 1.412	234.400, 1.555	234.400, 1.412	234.400, 1.251	234.400, 1.317	234.400, 1.418	234.400, 1.650	234.400, 1.524	234.400, 1.773
1174	234.600, 1.534	234.600, 1.408	234.600, 1.420	234.600, 1.516	234.600, 1.541	234.600, 1.457	234.600, 1.412	234.600, 1.555	234.600, 1.411	234.600, 1.252	234.600, 1.316	234.600, 1.418	234.600, 1.649	234.600, 1.524	234.600, 1.773
1175	234.800, 1.533	234.800, 1.408	234.800, 1.420	234.800, 1.516	234.800, 1.541	234.800, 1.457	234.800, 1.412	234.800, 1.555	234.800, 1.411	234.800, 1.252	234.800, 1.316	234.800, 1.419	234.800, 1.649	234.800, 1.523	234.800, 1.772
1176	235.000, 1.533	235.000, 1.408	235.000, 1.420	235.000, 1.515	235.000, 1.541	235.000, 1.458	235.000, 1.412	235.000, 1.556	235.000, 1.411	235.000, 1.252	235.000, 1.316	235.000, 1.419	235.000, 1.648	235.000, 1.523	235.000, 1.771
1177	235.200, 1.533	235.200, 1.408	235.200, 1.420	235.200, 1.515	235.200, 1.540	235.200, 1.458	235.200, 1.412	235.200, 1.556	235.200, 1.410	235.200, 1.252	235.200, 1.316	235.200, 1.418	235.200, 1.647	235.200, 1.522	235.200, 1.770
1178	235.400, 1.533	235.400, 1.408	235.400, 1.420	235.400, 1.515	235.400, 1.540	235.400, 1.458	235.400, 1.413	235.400, 1.556	235.400, 1.410	235.400, 1.253	235.400, 1.316	235.400, 1.418	235.400, 1.646	235.400, 1.521	235.400, 1.769
1179	235.600, 1.533	235.600, 1.408	235.600, 1.420	235.600, 1.515	235.600, 1.540	235.600, 1.458	235.600, 1.414	235.600, 1.556	235.600, 1.410	235.600, 1.253	235.600, 1.316	235.600, 1.418	235.600, 1.645	235.600, 1.520	235.600, 1.768
1180	235.800, 1.533	235.800, 1.408	235.800, 1.420	235.800, 1.515	235.800, 1.540	235.800, 1.457	235.800, 1.414	235.800, 1.556	235.800, 1.410	235.800, 1.253	235.800, 1.317	235.800, 1.418	235.800, 1.644	235.800, 1.520	235.800, 1.767
1181	236.000, 1.533	236.000, 1.408	236.000, 1.420	236.000, 1.514	236.000, 1.540	236.000, 1.457	236.000, 1.415	236.000, 1.556	236.000, 1.410	236.000, 1.253	236.000, 1.317	236.000, 1.417	236.000, 1.644	236.000, 1.519	236.000, 1.766
1182	236.200, 1.533	236.200, 1.407	236.200, 1.420	236.200, 1.514	236.200, 1.540	236.200, 1.457	236.200, 1.415	236.200, 1.556	236.200, 1.410	236.200, 1.253	236.200, 1.317	236.200, 1.417	236.200, 1.643	236.200, 1.518	236.200, 1.766
1183	236.400, 1.533	236.400, 1.407	236.400, 1.420	236.400, 1.514	236.400, 1.540	236.400, 1.457	236.400, 1.416	236.400, 1.555	236.400, 1.411	236.400, 1.253	236.400, 1.317	236.400, 1.416	236.400, 1.642	236.400, 1.517	236.400, 1.765
1184	236.600, 1.533	236.600, 1.407	236.600, 1.420	236.600, 1.513	236.600, 1.540	236.600, 1.457	236.600, 1.416	236.600, 1.556	236.600, 1.411	236.600, 1.253	236.600, 1.317	236.600, 1.416	236.600, 1.641	236.600, 1.516	236.600, 1.764
1185	236.800, 1.533	236.800, 1.407	236.800, 1.420	236.800, 1.513	236.800, 1.539	236.800, 1.457	236.800, 1.416	236.800, 1.556	236.800, 1.411	236.800, 1.253	236.800, 1.317	236.800, 1.415	236.800, 1.640	236.800, 1.515	236.800, 1.764
1186	237.000, 1.533	237.000, 1.407	237.000, 1.420	237.000, 1.513	237.000, 1.539	237.000, 1.458	237.000, 1.416	237.000, 1.556	237.000, 1.411	237.000, 1.253	237.000, 1.317	237.000, 1.416	237.000, 1.639	237.000, 1.514	237.000, 1.763
1187	237.200, 1.533	237.200, 1.406	237.200, 1.420	237.200, 1.513	237.200, 1.539	237.200, 1.458	237.200, 1.416	237.200, 1.556	237.200, 1.411	237.200, 1.252	237.200, 1.317	237.200, 1.416	237.200, 1.639	237.200, 1.514	237.200, 1.763
1188	237.400, 1.533	237.400, 1.406	237.400, 1.420	237.400, 1.513	237.400, 1.539	237.400, 1.458	237.400, 1.415	237.400, 1.556	237.400, 1.410	237.400, 1.252	237.400, 1.317	237.400, 1.416	237.400, 1.638	237.400, 1.513	237.400, 1.762
1189	237.600, 1.533	237.600, 1.406	237.600, 1.420	237.600, 1.513	237.600, 1.538	237.600, 1.458	237.600, 1.415	237.600, 1.556	237.600, 1.410	237.600, 1.252	237.600, 1.317	237.600, 1.416	237.600, 1.637	237.600, 1.512	237.600, 1.761
1190	237.800, 1.533	237.800, 1.406	237.800, 1.421	237.800, 1.514	237.800, 1.539	237.800, 1.457	237.800, 1.415	237.800, 1.556	237.800, 1.410	237.800, 1.252	237.800, 1.317	237.800, 1.416	237.800, 1.636	237.800, 1.512	237.800, 1.760
1191	238.000, 1.534	238.000, 1.405	238.000, 1.421	238.000, 1.514	238.000, 1.539	238.000, 1.457	238.000, 1.414	238.000, 1.556	238.000, 1.410	238.000, 1.252	238.000, 1.317	238.000, 1.417	238.000, 1.635	238.000, 1.511	238.000, 1.759
1192	238.200, 1.534	238.200, 1.405	238.200, 1.420	238.200, 1.514	238.200, 1.539	238.200, 1.457	238.200, 1.414	238.200, 1.556	238.200, 1.410	238.200, 1.252	238.200, 1.317	238.200, 1.417	238.200, 1.635	238.200, 1.510	238.200, 1.759
1193	238.400, 1.534	238.400, 1.405	238.400, 1.420	238.400, 1.515	238.400, 1.539	238.400, 1.456	238.400, 1.414	238.400, 1.556	238.400, 1.409	238.400, 1.252	238.400, 1.316	238.400, 1.417	238.400, 1.634	238.400, 1.510	238.400, 1.758
1194	238.600, 1.534	238.600, 1.405	238.600, 1.420	238.600, 1.515	238.600, 1.539	238.600, 1.456	238.600, 1.413	238.600, 1.556	238.600, 1.409	238.600, 1.252	238.600, 1.316	238.600, 1.417	238.600, 1.634	238.600, 1.509	238.600, 1.757
1195	238.800, 1.534	238.800, 1.405	238.800, 1.420	238.800, 1.515	238.800, 1.539	238.800, 1.456	238.800, 1.413	238.800, 1.556	238.800, 1.409	238.800, 1.252	238.800, 1.316	238.800, 1.417	238.800, 1.633	238.800, 1.508	238.800, 1.756
1196	239.000, 1.534	239.000, 1.405	239.000, 1.419	239.000, 1.515	239.000, 1.539	239.000, 1.455	239.000, 1.413	239.000, 1.556	239.000, 1.409	239.000, 1.252	239.000, 1.317	239.000, 1.417	239.000, 1.632	239.000, 1.508	239.000, 1.755
1197	239.200, 1.534	239.200, 1.405	239.200, 1.419	239.200, 1.515	239.200, 1.539	239.200, 1.455	239.200, 1.414	239.200, 1.556	239.200, 1.409	239.200, 1.251	239.200, 1.317	239.200, 1.417	239.200, 1.632	239.200, 1.507	239.200, 1.754
1198	239.400, 1.534	239.400, 1.405	239.400, 1.419	239.400, 1.515	239.400, 1.540	239.400, 1.455	239.400, 1.414	239.400, 1.556	239.400, 1.409	239.400, 1.251	239.400, 1.317	239.400, 1.418	239.400, 1.631	239.400, 1.507	239.400, 1.754
1199	239.600, 1.534	239.600, 1.405	239.600, 1.419	239.600, 1.515	239.600, 1.540	239.600, 1.455	239.600, 1.415	239.600, 1.556	239.600, 1.409	239.600, 1.251	239.600, 1.316	239.600, 1.418	239.600, 1.630	239.600, 1.506	239.600, 1.753
1200	239.800, 1.535	239.800, 1.405	239.800, 1.419	239.800, 1.515	239.800, 1.540	239.800, 1.455	239.800, 1.415	239.800, 1.556	239.800, 1.409	239.800, 1.251	239.800, 1.316	239.800, 1.418	239.800, 1.629	239.800, 1.505	239.800, 1.753
1201	240.000, 1.535	240.000, 1.406	240.000, 1.419	240.000, 1.515	240.000, 1.539	240.000, 1.455	240.000, 1.415	240.000, 1.556	240.000, 1.409	240.000, 1.251	240.000, 1.316	240.000, 1.418	240.000, 1.629	240.000, 1.504	240.000, 1.752
1202	240.200, 1.534	240.200, 1.406	240.200, 1.419	240.200, 1.514	240.200, 1.539	240.200, 1.455	240.200, 1.415	240.200, 1.556	240.200, 1.409	240.200, 1.251	240.200, 1.316	240.200, 1.417	240.200, 1.628	240.200, 1.503	240.200, 1.752
1203	240.400, 1.534	240.400, 1.406	240.400, 1.419	240.400, 1.514	240.400, 1.539	240.400, 1.455	240.400, 1.415	240.400, 1.556	240.400, 1.409	240.400, 1.251	240.400, 1.316	240.400, 1.417	240.400, 1.627	240.400, 1.502	240.400, 1.752
1204	240.600, 1.534	240.600, 1.406	240.600, 1.419	240.600, 1.513	240.600, 1.538	240.600, 1.455	240.600, 1.415	240.600, 1.556	240.600, 1.409	240.600, 1.250	240.600, 1.316	240.600, 1.417	240.600, 1.626	240.600, 1.502	240.600, 1.751
1205	240.800, 1.534	240.800, 1.406	240.800, 1.420	240.800, 1.513	240.800, 1.538	240.800, 1.455	240.800, 1.415	240.800, 1.556	240.800, 1.409	240.800, 1.250	240.800, 1.316	240.800, 1.418	240.800, 1.625	240.800, 1.501	240.800, 1.750
1206	241.000, 1.534	241.000, 1.406	241.000, 1.420	241.000, 1.513	241.000, 1.538	241.000, 1.455	241.000, 1.415	241.000, 1.555	241.000, 1.409	241.000, 1.250	241.000, 1.316	241.000, 1.418	241.000, 1.624	241.000, 1.500	241.000, 1.749
1207	241.200, 1.534	241.200, 1.406	241.200, 1.420	241.200, 1.512	241.200, 1.537	241.200, 1.455	241.200, 1.415	241.200, 1.555	241.200, 1.409	241.200, 1.250	241.200, 1.316	241.200, 1.418	241.200, 1.623	241.200, 1.499	241.200, 1.748
1208	241.400, 1.534	241.400, 1.406	241.400, 1.421	241.400, 1.512	241.400, 1.537	241.400, 1.455	241.400, 1.415	241.400, 1.554	241.400, 1.409	241.400, 1.250	241.400, 1.316	241.400, 1.418	241.400, 1.623	241.400, 1.499	241.400, 1.747
1209	241.600, 1.534	241.600, 1.406	241.600, 1.421	241.600, 1.512	241.600, 1.537	241.600, 1.454	241.600, 1.414	241.600, 1.554	241.600, 1.409	241.600, 1.250	241.600, 1.315	241.600, 1.417	241.600, 1.622	241.600, 1.498	241.600, 1.746
1210	241.800, 1.533	241.800, 1.406	241.800, 1.421	241.800, 1.512	241.800, 1.537	241.800, 1.454	241.800, 1.414	241.800, 1.553	241.800, 1.409	241.800, 1.250	241.800, 1.315	241.800, 1.417	241.800, 1.621	241.800, 1.497	241.800, 1.745
1211	242.000, 1.533	242.000, 1.406	242.000, 1.421	242.000, 1.513	242.000, 1.536	242.000, 1.454	242.000, 1.414	242.000, 1.553	242.000, 1.409	242.000, 1.250	242.000, 1.315	242.000, 1.417	242.000, 1.621	242.000, 1.497	242.000, 1.744
1212	242.200, 1.533	242.200, 1.406	242.200, 1.421	242.200, 1.513	242.200, 1.537	242.200, 1.454	242.200, 1.413	242.200, 1.552	242.200, 1.409	242.200, 1.251	242.200, 1.315	242.200, 1.417	242.200, 1.621	242.200, 1.496	242.200, 1.743
1213	242.400, 1.533	242.400, 1.406	242.400, 1.421	242.400, 1.513	242.400, 1.537	242.400, 1.454	242.400, 1.413	242.400, 1.552	242.400, 1.409	242.400, 1.251	242.400, 1.314	242.400, 1.417	242.400, 1.620	242.400, 1.496	242.400, 1.742
1214	242.600, 1.533	242.600, 1.406	242.600, 1.421	242.600, 1.513	242.600, 1.537	242.600, 1.454	242.600, 1.413	242.600, 1.552	242.600, 1.409	242.600, 1.251	242.600, 1.314	242.600, 1.416	242.600, 1.620	242.600, 1.496	242.600, 1.741
1215	242.800, 1.533	242.800, 1.406	242.800, 1.421	242.800, 1.513	242.800, 1.537	242.800, 1.454	242.800, 1.413	242.800, 1.551	242.800, 1.409	242.800, 1.251	242.800, 1.314	242.800, 1.416	242.800, 1.620	242.800, 1.495	242.800, 1.740
1216	243.000, 1.533	243.000, 1.406	243.000, 1.420	243.000, 1.513	243.000, 1.538	243.000, 1.454	243.000, 1.413	243.000, 1.551	243.000, 1.409	243.000, 1.252	243.000, 1.314	243.000, 1.416	243.000, 1.619	243.000, 1.495	243.000, 1.739
1217	243.200, 1.533	243.200, 1.406	243.200, 1.420	243.200, 1.513	243.200, 1.538	243.200, 1.455	243.200, 1.413	243.200, 1.551	243.200, 1.409	243.200, 1.252	243.200, 1.314	243.200, 1.415	243.200, 1.619	243.200, 1.494	243.200, 1.739
1218	243.400, 1.533	243.400, 1.406	243.400, 1.420	243.400, 1.513	243.400, 1.538	243.400, 1.455	243.400, 1.413	243.400, 1.551	243.400, 1.409	243.400, 1.252	243.400, 1.313	243.400, 1.415	243.400, 1.618	243.400, 1.494	243.400, 1.738
1219	243.600, 1.533	243.600, 1.407	243.600, 1.420	243.600, 1.513	243.600, 1.538	243.600, 1.455	243.600, 1.413	243.600, 1.552	243.600, 1.409	243.600, 1.252	243.600, 1.313	243.600, 1.415	243.600, 1.617	243.600, 1.493	243.600, 1.738
1220	243.800, 1.533	243.800, 1.407	243.800, 1.420	243.800, 1.513	243.800, 1.537	243.800, 1.456	243.800, 1.413	243.800, 1.552	243.800, 1.409	243.800, 1.252	243.800, 1.314	243.800, 1.415	243.800, 1.617	243.800, 1.493	243.800, 1.737
1221	244.000, 1.533	244.000, 1.407	244.000, 1.420	244.000, 1.513	244.000, 1.537	244.000, 1.456	244.000, 1.413	244.000, 1.553	244.000, 1.409	244.000, 1.252	244.000, 1.314	244.000, 1.415	244.000, 1.616	244.000, 1.492	244.000, 1.737
1222	244.200, 1.533	244.200, 1.407	244.200, 1.420	244.200, 1.513	244.200, 1.537	244.200, 1.456	244.200, 1.413	244.200, 1.553	244.200, 1.409	244.200, 1.252	244.200, 1.314	244.200, 1.414	244.200, 1.616	244.200, 1.491	244.200, 1.737
1223	244.400, 1.533	244.400, 1.407	244.400, 1.420	244.400, 1.513	244.400, 1.536	244.400, 1.457	244.400, 1.413	244.400, 1.554	244.400, 1.409	244.400, 1.252	244.400, 1.314	244.400, 1.414	244.400, 1.615	244.400, 1.490	244.400, 1.736
1224	244.600, 1.533	244.600, 1.407	244.600, 1.420	244.600, 1.514	244.600, 1.536	244.600, 1.457	244.600, 1.414	244.600, 1.554	244.600, 1.408	244.600, 1.251	244.600, 1.314	244.600, 1.414	244.600, 1.614	244.600, 1.490	244.600, 1.736
1225	244.800, 1.533	244.800, 1.407	244.800, 1.420	244.800, 1.514	244.800, 1.535	244.800, 1.457	244.800, 1.414	244.800, 1.554	244.800, 1.408	244.800, 1.251	244.800, 1.314	244.800, 1.414	244.800, 1.613	244.800, 1.489	244.800, 1.735
1226	245.000, 1.533	245.000, 1.406	245.000, 1.420	245.000, 1.514	245.000, 1.535	245.000, 1.457	245.000, 1.414	245.000, 1.554	245.000, 1.408	245.000, 1.251	245.000, 1.315	245.000, 1.414	245.000, 1.613	245.000, 1.489	245.000, 1.734
1227	245.200, 1.533	245.200, 1.406	245.200, 1.420	245.200, 1.514	245.200, 1.535	245.200, 1.457	245.200, 1.415	245.200, 1.554	245.200, 1.407	245.200, 1.251	245.200, 1.315	245.200, 1.414	245.200, 1.612	245.200, 1.488	245.200, 1.734
1228	245.400, 1.533	245.400, 1.406	245.400, 1.420	245.400, 1.514	245.400, 1.534	245.400, 1.457	245.400, 1.415	245.400, 1.554	245.400, 1.407	245.400, 1.252	245.400, 1.315	245.400, 1.414	245.400, 1.611	245.400, 1.487	245.400, 1.733
1229	245.600, 1.533	245.600, 1.406	245.600, 1.420	245.600, 1.514	245.600, 1.534	245.600, 1.457	245.600, 1.415	245.600, 1.554	245.600, 1.407	245.600, 1.252	245.600, 1.315	245.600, 1.414	245.600, 1.611	245.600, 1.487	245.600, 1.732
1230	245.800, 1.533	245.800, 1.406	245.800, 1.421	245.800, 1.515	245.800, 1.535	245.800, 1.457	245.800, 1.415	245.800, 1.553	245.800, 1.407	245.800, 1.252	245.800, 1.315	245.800, 1.414	245.800, 1.610	245.800, 1.486	245.800, 1.731
1231	246.000, 1.533	246.000, 1.406	246.000, 1.421	246.000, 1.515	246.000, 1.535	246.000, 1.457	246.000, 1.414	246.000, 1.553	246.000, 1.407	246.000, 1.252	246.000, 1.314	246.000, 1.414	246.000, 1.610	246.000, 1.485	246.000, 1.730
1232	246.200, 1.533	246.200, 1.406	246.200, 1.421	246.200, 1.515	246.200, 1.535	246.200, 1.457	246.200, 1.414	246.200, 1.553	246.200, 1.407	246.200, 1.252	246.200, 1.314	246.200, 1.414	246.200, 1.609	246.200, 1.485	246.200, 1.729
1233	246.400, 1.533	246.400, 1.405	246.400, 1.421	246.400, 1.515	246.400, 1.535	246.400, 1.457	246.400, 1.414	246.400, 1.552	246.400, 1.407	246.400, 1.252	246.400, 1.314	246.400, 1.413	246.400, 1.609	246.400, 1.484	246.400, 1.729
1234	246.600, 1.533	246.600, 1.405	246.600, 1.421	246.600, 1.515	246.600, 1.536	246.600, 1.457	246.600, 1.414	246.600, 1.552	246.600, 1.407	246.600, 1.253	246.600, 1.313	246.600, 1.413	246.600, 1.608	246.600, 1.484	246.600, 1.728
1235	246.800, 1.533	246.800, 1.405	246.800, 1.421	246.800, 1.515	246.800, 1.536	246.800, 1.456	246.800, 1.414	246.800, 1.552	246.800, 1.407	246.800, 1.253	246.800, 1.313	246.800, 1.413	246.800, 1.608	246.800, 1.483	246.800, 1.727
1236	247.000, 1.533	247.000, 1.405	247.000, 1.421	247.000, 1.514	247.000, 1.536	247.000, 1.456	247.000, 1.413	247.000, 1.551	247.000, 1.407	247.000, 1.253	247.000, 1.313	247.000, 1.413	247.000, 1.607	247.000, 1.483	247.000, 1.726
1237	247.200, 1.532	247.200, 1.405	247.200, 1.421	247.200, 1.514	247.200, 1.536	247.200, 1.456	247.200, 1.413	247.200, 1.551	247.200, 1.408	247.200, 1.253	247.200, 1.313	247.200, 1.413	247.200, 1.606	247.200, 1.482	247.200, 1.725
1238	247.400, 1.532	247.400, 1.405	247.400, 1.421	247.400, 1.514	247.400, 1.536	247.400, 1.456	247.400, 1.413	247.400, 1.551	247.400, 1.408	247.400, 1.252	247.400, 1.313	247.400, 1.412	247.400, 1.606	247.400, 1.482	247.400, 1.724
1239	247.600, 1.532	247.600, 1.405	247.600, 1.421	247.600, 1.514	247.600, 1.536	247.600, 1.455	247.600, 1.413	247.600, 1.551	247.600, 1.408	247.600, 1.252	247.600, 1.313	247.600, 1.412	247.600, 1.605	247.600, 1.481	247.600, 1.724
1240	247.800, 1.531	247.800, 1.405	247.800, 1.421	247.800, 1.513	247.800, 1.536	247.800, 1.455	247.800, 1.413	247.800, 1.551	247.800, 1.408	247.800, 1.252	247.800, 1.313	247.800, 1.412	247.800, 1.605	247.800, 1.481	247.800, 1.723
1241	248.000, 1.531	248.000, 1.406	248.000, 1.421	248.000, 1.513	248.000, 1.536	248.000, 1.455	248.000, 1.413	248.000, 1.552	248.000, 1.408	248.000, 1.252	248.000, 1.313	248.000, 1.412	248.000, 1.604	248.000, 1.480	248.000, 1.722
1242	248.200, 1.531	248.200, 1.406	248.200, 1.421	248.200, 1.513	248.200, 1.535	248.200, 1.454	248.200, 1.413	248.200, 1.552	248.200, 1.407	248.200, 1.251	248.200, 1.313	248.200, 1.411	248.200, 1.604	248.200, 1.480	248.200, 1.722
1243	248.400, 1.531	248.400, 1.407	248.400, 1.420	248.400, 1.513	248.400, 1.535	248.400, 1.454	248.400, 1.413	248.400, 1.552	248.400, 1.407	248.400, 1.251	248.400, 1.313	248.400, 1.411	248.400, 1.603	248.400, 1.479	248.400, 1.721
1244	248.600, 1.531	248.600, 1.407	248.600, 1.420	248.600, 1.512	248.600, 1.535	248.600, 1.454	248.600, 1.413	248.600, 1.552	248.600, 1.407	248.600, 1.251	248.600, 1.313	248.600, 1.411	248.600, 1.602	248.600, 1.479	248.600, 1.721
1245	248.800, 1.531	248.800, 1.407	248.800, 1.420	248.800, 1.512	248.800, 1.535	248.800, 1.453	248.800, 1.413	248.800, 1.552	248.800, 1.407	248.800, 1.251	248.800, 1.313	248.800, 1.411	248.800, 1.602	248.800, 1.479	248.800, 1.720
1246	249.000, 1.530	249.000, 1.407	249.000, 1.420	249.000, 1.512	249.000, 1.535	249.000, 1.453	249.000, 1.413	249.000, 1.552	249.000, 1.407	249.000, 1.251	249.000, 1.313	249.000, 1.411	249.000, 1.601	249.000, 1.478	249.000, 1.720
1247	249.200, 1.530	249.200, 1.407	249.200, 1.420	249.200, 1.512	249.200, 1.535	249.200, 1.453	249.200, 1.413	249.200, 1.552	249.200, 1.407	249.200, 1.251	249.200, 1.313	249.200, 1.411	249.200, 1.600	249.200, 1.478	249.200, 1.720
1248	249.400, 1.531	249.400, 1.407	249.400, 1.420	249.400, 1.511	249.400, 1.534	249.400, 1.453	249.400, 1.413	249.400, 1.552	249.400, 1.407	249.400, 1.251	249.400, 1.313	249.400, 1.412	249.400, 1.599	249.400, 1.477	249.400, 1.719
1249	249.600, 1.531	249.600, 1.407	249.600, 1.420	249.600, 1.511	249.600, 1.534	249.600, 1.453	249.600, 1.413	249.600, 1.552	249.600, 1.407	249.600, 1.251	249.600, 1.313	249.600, 1.412	249.600, 1.599	249.600, 1.477	249.600, 1.718
1250	249.800, 1.531	249.800, 1.406	249.800, 1.420	249.800, 1.511	249.800, 1.534	249.800, 1.453	249.800, 1.413	249.800, 1.551	249.800, 1.407	249.800, 1.251	249.800, 1.313	249.800, 1.412	249.800, 1.598	249.800, 1.476	249.800, 1.718
1251	250.000, 1.531	250.000, 1.406	250.000, 1.420	250.000, 1.511	250.000, 1.534	250.000, 1.453	250.000, 1.413	250.000, 1.551	250.000, 1.407	250.000, 1.251	250.000, 1.313	250.000, 1.412	250.000, 1.597	250.000, 1.476	250.000, 1.717
1252	250.200, 1.531	250.200, 1.405	250.200, 1.420	250.200, 1.511	250.200, 1.534	250.200, 1.453	250.200, 1.412	250.200, 1.551	250.200, 1.407	250.200, 1.251	250.200, 1.312	250.200, 1.413	250.200, 1.596	250.200, 1.475	250.200, 1.716
1253	250.400, 1.531	250.400, 1.405	250.400, 1.420	250.400, 1.510	250.400, 1.534	250.400, 1.452	250.400, 1.412	250.400, 1.551	250.400, 1.407	250.400, 1.251	250.400, 1.312	250.400, 1.413	250.400, 1.595	250.400, 1.475	250.400, 1.716
1254	250.600, 1.531	250.600, 1.404	250.600, 1.420	250.600, 1.510	250.600, 1.534	250.600, 1.452	250.600, 1.412	250.600, 1.551	250.600, 1.406	250.600, 1.251	250.600, 1.312	250.600, 1.413	250.600, 1.594	250.600, 1.474	250.600, 1.715
1255	250.800, 1.530	250.800, 1.404	250.800, 1.420	250.800, 1.510	250.800, 1.534	250.800, 1.452	250.800, 1.413	250.800, 1.551	250.800, 1.407	250.800, 1.252	250.800, 1.312	250.800, 1.412	250.800, 1.593	250.800, 1.473	250.800, 1.714
1256	251.000, 1.530	251.000, 1.404	251.000, 1.420	251.000, 1.510	251.000, 1.534	251.000, 1.452	251.000, 1.413	251.000, 1.551	251.000, 1.407	251.000, 1.252	251.000, 1.312	251.000, 1.412	251.000, 1.592	251.000, 1.473	251.000, 1.714
1257	251.200, 1.530	251.200, 1.404	251.200, 1.421	251.200, 1.510	251.200, 1.534	251.200, 1.452	251.200, 1.413	251.200, 1.551	251.200, 1.407	251.200, 1.252	251.200, 1.312	251.200, 1.412	251.200, 1.591	251.200, 1.472	251.200, 1.713
1258	251.400, 1.530	251.400, 1.403	251.400, 1.421	251.400, 1.510	251.400, 1.534	251.400, 1.452	251.400, 1.413	251.400, 1.551	251.400, 1.406	251.400, 1.251	251.400, 1.312	251.400, 1.412	251.400, 1.591	251.400, 1.471	251.400, 1.713
1259	251.600, 1.530	251.600, 1.403	251.600, 1.421	251.600, 1.510	251.600, 1.534	251.600, 1.452	251.600, 1.413	251.600, 1.552	251.600, 1.407	251.600, 1.251	251.600, 1.312	251.600, 1.412	251.600, 1.591	251.600, 1.470	251.600, 1.712
1260	251.800, 1.531	251.800, 1.404	251.800, 1.421	251.800, 1.510	251.800, 1.534	251.800, 1.452	251.800, 1.413	251.800, 1.552	251.800, 1.406	251.800, 1.251	251.800, 1.311	251.800, 1.411	251.800, 1.590	251.800, 1.470	251.800, 1.712
1261	252.000, 1.531	252.000, 1.404	252.000, 1.421	252.000, 1.510	252.000, 1.534	252.000, 1.452	252.000, 1.412	252.000, 1.552	252.000, 1.406	252.000, 1.250	252.000, 1.311	252.000, 1.411	252.000, 1.590	252.000, 1.469	252.000, 1.712
1262	252.200, 1.531	252.200, 1.404	252.200, 1.421	252.200, 1.510	252.200, 1.534	252.200, 1.452	252.200, 1.412	252.200, 1.552	252.200, 1.406	252.200, 1.250	252.200, 1.311	252.200, 1.410	252.200, 1.590	252.200, 1.469	252.200, 1.711
1263	252.400, 1.531	252.400, 1.405	252.400, 1.421	252.400, 1.510	252.400, 1.534	252.400, 1.453	252.400, 1.412	252.400, 1.552	252.400, 1.406	252.400, 1.250	252.400, 1.311	252.400, 1.410	252.400, 1.589	252.400, 1.469	252.400, 1.711
1264	252.600, 1.531	252.600, 1.405	252.600, 1.421	252.600, 1.511	252.600, 1.534	252.600, 1.453	252.600, 1.413	252.600, 1.552	252.600, 1.407	252.600, 1.250	252.600, 1.311	252.600, 1.410	252.600, 1.589	252.600, 1.468	252.600, 1.711
1265	252.800, 1.531	252.800, 1.406	252.800, 1.421	252.800, 1.511	252.800, 1.534	252.800, 1.453	252.800, 1.413	252.800, 1.551	252.800, 1.407	252.800, 1.250	252.800, 1.311	252.800, 1.410	252.800, 1.589	252.800, 1.468	252.800, 1.710
1266	253.000, 1.532	253.000, 1.406	253.000, 1.421	253.000, 1.511	253.000, 1.534	253.000, 1.453	253.000, 1.413	253.000, 1.551	253.000, 1.406	253.000, 1.250	253.000, 1.311	253.000, 1.410	253.000, 1.588	253.000, 1.467	253.000, 1.709
1267	253.200, 1.532	253.200, 1.406	253.200, 1.421	253.200, 1.510	253.200, 1.533	253.200, 1.453	253.200, 1.413	253.200, 1.551	253.200, 1.406	253.200, 1.250	253.200, 1.312	253.200, 1.410	253.200, 1.587	253.200, 1.467	253.200, 1.708
1268	253.400, 1.532	253.400, 1.406	253.400, 1.421	253.400, 1.510	253.400, 1.533	253.400, 1.454	253.400, 1.413	253.400, 1.551	253.400, 1.406	253.400, 1.250	253.400, 1.312	253.400, 1.410	253.400, 1.587	253.400, 1.467	253.400, 1.708
1269	253.600, 1.532	253.600, 1.406	253.600, 1.421	253.600, 1.510	253.600, 1.533	253.600, 1.454	253.600, 1.413	253.600, 1.550	253.600, 1.406	253.600, 1.249	253.600, 1.312	253.600, 1.410	253.600, 1.586	253.600, 1.466	253.600, 1.707
1270	253.800, 1.532	253.800, 1.406	253.800, 1.421	253.800, 1.511	253.800, 1.533	253.800, 1.454	253.800, 1.413	253.800, 1.550	253.800, 1.405	253.800, 1.249	253.800, 1.312	253.800, 1.410	253.800, 1.585	253.800, 1.466	253.800, 1.705
1271	254.000, 1.532	254.000, 1.405	254.000, 1.421	254.000, 1.511	254.000, 1.533	254.000, 1.454	254.000, 1.413	254.000, 1.550	254.000, 1.405	254.000, 1.249	254.000, 1.312	254.000, 1.410	254.000, 1.585	254.000, 1.465	254.000, 1.704
1272	254.200, 1.531	254.200, 1.405	254.200, 1.421	254.200, 1.511	254.200, 1.533	254.200, 1.454	254.200, 1.413	254.200, 1.550	254.200, 1.405	254.200, 1.250	254.200, 1.311	254.200, 1.410	254.200, 1.584	254.200, 1.465	254.200, 1.704
1273	254.400, 1.531	254.400, 1.405	254.400, 1.421	254.400, 1.510	254.400, 1.533	254.400, 1.454	254.400, 1.413	254.400, 1.550	254.400, 1.404	254.400, 1.250	254.400, 1.311	254.400, 1.410	254.400, 1.583	254.400, 1.464	254.400, 1.703
1274	254.600, 1.530	254.600, 1.405	254.600, 1.420	254.600, 1.510	254.600, 1.533	254.600, 1.455	254.600, 1.413	254.600, 1.550	254.600, 1.404	254.600, 1.250	254.600, 1.311	254.600, 1.410	254.600, 1.582	254.600, 1.464	254.600, 1.702
1275	254.800, 1.530	254.800, 1.405	254.800, 1.420	254.800, 1.510	254.800, 1.533	254.800, 1.455	254.800, 1.413	254.800, 1.550	254.800, 1.404	254.800, 1.251	254.800, 1.311	254.800, 1.410	254.800, 1.581	254.800, 1.463	254.800, 1.701
1276	255.000, 1.530	255.000, 1.405	255.000, 1.420	255.000, 1.510	255.000, 1.533	255.000, 1.454	255.000, 1.413	255.000, 1.551	255.000, 1.404	255.000, 1.251	255.000, 1.311	255.000, 1.410	255.000, 1.581	255.000, 1.463	255.000, 1.701
1277	255.200, 1.530	255.200, 1.405	255.200, 1.420	255.200, 1.510	255.200, 1.532	255.200, 1.454	255.200, 1.413	255.200, 1.551	255.200, 1.404	255.200, 1.251	255.200, 1.312	255.200, 1.410	255.200, 1.580	255.200, 1.462	255.200, 1.700
1278	255.400, 1.530	255.400, 1.405	255.400, 1.420	255.400, 1.509	255.400, 1.532	255.400, 1.454	255.400, 1.413	255.400, 1.551	255.400, 1.404	255.400, 1.251	255.400, 1.312	255.400, 1.410	255.400, 1.580	255.400, 1.462	255.400, 1.700
1279	255.600, 1.530	255.600, 1.405	255.600, 1.420	255.600, 1.509	255.600, 1.532	255.600, 1.454	255.600, 1.412	255.600, 1.551	255.600, 1.404	255.600, 1.251	255.600, 1.312	255.600, 1.410	255.600, 1.579	255.600, 1.461	255.600, 1.699
1280	255.800, 1.530	255.800, 1.405	255.800, 1.420	255.800, 1.509	255.800, 1.531	255.800, 1.454	255.800, 1.412	255.800, 1.551	255.800, 1.405	255.800, 1.251	255.800, 1.312	255.800, 1.410	255.800, 1.579	255.800, 1.461	255.800, 1.699
1281	256.000, 1.530	256.000, 1.405	256.000, 1.419	256.000, 1.509	256.000, 1.531	256.000, 1.453	256.000, 1.412	256.000, 1.551	256.000, 1.405	256.000, 1.250	256.000, 1.312	256.000, 1.410	256.000, 1.579	256.000, 1.460	256.000, 1.699
1282	256.200, 1.529	256.200, 1.405	256.200, 1.420	256.200, 1.509	256.200, 1.531	256.200, 1.453	256.200, 1.412	256.200, 1.551	256.200, 1.405	256.200, 1.250	256.200, 1.312	256.200, 1.410	256.200, 1.578	256.200, 1.460	256.200, 1.699
1283	256.400, 1.529	256.400, 1.405	256.400, 1.420	256.400, 1.509	256.400, 1.530	256.400, 1.453	256.400, 1.413	256.400, 1.551	256.400, 1.406	256.400, 1.250	256.400, 1.312	256.400, 1.410	256.400, 1.578	256.400, 1.459	256.400, 1.698
1284	256.600, 1.529	256.600, 1.405	256.600, 1.420	256.600, 1.509	256.600, 1.529	256.600, 1.453	256.600, 1.413	256.600, 1.550	256.600, 1.406	256.600, 1.250	256.600, 1.312	256.600, 1.410	256.600, 1.578	256.600, 1.458	256.600, 1.698
1285	256.800, 1.529	256.800, 1.405	256.800, 1.420	256.800, 1.510	256.800, 1.529	256.800, 1.453	256.800, 1.412	256.800, 1.550	256.800, 1.406	256.800, 1.250	256.800, 1.312	256.800, 1.410	256.800, 1.577	256.800, 1.458	256.800, 1.697
1286	257.000, 1.529	257.000, 1.405	257.000, 1.420	257.000, 1.510	257.000, 1.528	257.000, 1.452	257.000, 1.412	257.000, 1.550	257.000, 1.406	257.000, 1.250	257.000, 1.312	257.000, 1.410	257.000, 1.577	257.000, 1.457	257.000, 1.697
1287	257.200, 1.529	257.200, 1.405	257.200, 1.420	257.200, 1.510	257.200, 1.528	257.200, 1.452	257.200, 1.412	257.200, 1.550	257.200, 1.405	257.200, 1.250	257.200, 1.312	257.200, 1.410	257.200, 1.576	257.200, 1.456	257.200, 1.696
1288	257.400, 1.529	257.400, 1.405	257.400, 1.420	257.400, 1.511	257.400, 1.528	257.400, 1.452	257.400, 1.412	257.400, 1.550	257.400, 1.405	257.400, 1.250	257.400, 1.312	257.400, 1.410	257.400, 1.575	257.400, 1.456	257.400, 1.696
1289	257.600, 1.529	257.600, 1.405	257.600, 1.420	257.600, 1.511	257.600, 1.528	257.600, 1.452	257.600, 1.412	257.600, 1.549	257.600, 1.405	257.600, 1.250	257.600, 1.312	257.600, 1.409	257.600, 1.575	257.600, 1.455	257.600, 1.696
1290	257.800, 1.529	257.800, 1.405	257.800, 1.420	257.800, 1.511	257.800, 1.528	257.800, 1.452	257.800, 1.412	257.800, 1.549	257.800, 1.405	257.800, 1.250	257.800, 1.312	257.800, 1.408	257.800, 1.574	257.800, 1.455	257.800, 1.695
1291	258.000, 1.529	258.000, 1.404	258.000, 1.420	258.000, 1.511	258.000, 1.529	258.000, 1.452	258.000, 1.412	258.000, 1.549	258.000, 1.404	258.000, 1.251	258.000, 1.312	258.000, 1.408	258.000, 1.574	258.000, 1.454	258.000, 1.694
1292	258.200, 1.529	258.200, 1.404	258.200, 1.420	258.200, 1.511	258.200, 1.529	258.200, 1.452	258.200, 1.412	258.200, 1.549	258.200, 1.404	258.200, 1.251	258.200, 1.312	258.200, 1.407	258.200, 1.573	258.200, 1.454	258.200, 1.694
1293	258.400, 1.528	258.400, 1.404	258.400, 1.420	258.400, 1.510	258.400, 1.529	258.400, 1.451	258.400, 1.412	258.400, 1.549	258.400, 1.404	258.400, 1.251	258.400, 1.312	258.400, 1.407	258.400, 1.572	258.400, 1.453	258.400, 1.694
1294	258.600, 1.529	258.600, 1.403	258.600, 1.420	258.600, 1.510	258.600, 1.529	258.600, 1.451	258.600, 1.412	258.600, 1.549	258.600, 1.404	258.600, 1.251	258.600, 1.311	258.600, 1.406	258.600, 1.572	258.600, 1.453	258.600, 1.693
1295	258.800, 1.529	258.800, 1.403	258.800, 1.420	258.800, 1.510	258.800, 1.529	258.800, 1.451	258.800, 1.412	258.800, 1.549	258.800, 1.404	258.800, 1.251	258.800, 1.311	258.800, 1.406	258.800, 1.571	258.800, 1.453	258.800, 1.692
1296	259.000, 1.529	259.000, 1.403	259.000, 1.420	259.000, 1.510	259.000, 1.529	259.000, 1.451	259.000, 1.412	259.000, 1.549	259.000, 1.404	259.000, 1.251	259.000, 1.311	259.000, 1.406	259.000, 1.570	259.000, 1.452	259.000, 1.692
1297	259.200, 1.529	259.200, 1.403	259.200, 1.420	259.200, 1.510	259.200, 1.530	259.200, 1.451	259.200, 1.413	259.200, 1.549	259.200, 1.404	259.200, 1.251	259.200, 1.311	259.200, 1.406	259.200, 1.570	259.200, 1.452	259.200, 1.691
1298	259.400, 1.530	259.400, 1.404	259.400, 1.420	259.400, 1.510	259.400, 1.530	259.400, 1.451	259.400, 1.413	259.400, 1.549	259.400, 1.404	259.400, 1.251	259.400, 1.311	259.400, 1.405	259.400, 1.569	259.400, 1.452	259.400, 1.690
1299	259.600, 1.530	259.600, 1.404	259.600, 1.420	259.600, 1.510	259.600, 1.530	259.600, 1.451	259.600, 1.413	259.600, 1.549	259.600, 1.404	259.600, 1.251	259.600, 1.311	259.600, 1.405	259.600, 1.569	259.600, 1.451	259.600, 1.689
1300	259.800, 1.530	259.800, 1.404	259.800, 1.419	259.800, 1.510	259.800, 1.530	259.800, 1.451	259.800, 1.413	259.800, 1.549	259.800, 1.404	259.800, 1.251	259.800, 1.311	259.800, 1.405	259.800, 1.569	259.800, 1.451	259.800, 1.689
1301	260.000, 1.530	260.000, 1.405	260.000, 1.419	260.000, 1.510	260.000, 1.529	260.000, 1.452	260.000, 1.414	260.000, 1.549	260.000, 1.404	260.000, 1.250	260.000, 1.310	260.000, 1.405	260.000, 1.569	260.000, 1.450	260.000, 1.688
1302	260.200, 1.530	260.200, 1.405	260.200, 1.419	260.200, 1.510	260.200, 1.529	260.200, 1.452	260.200, 1.413	260.200, 1.548	260.200, 1.405	260.200, 1.250	260.200, 1.310	260.200, 1.405	260.200, 1.569	260.200, 1.450	260.200, 1.687
1303	260.400, 1.530	260.400, 1.405	260.400, 1.419	260.400, 1.510	260.400, 1.529	260.400, 1.452	260.400, 1.413	260.400, 1.548	260.400, 1.405	260.400, 1.250	260.400, 1.310	260.400, 1.405	260.400, 1.569	260.400, 1.449	260.400, 1.686
1304	260.600, 1.530	260.600, 1.406	260.600, 1.419	260.600, 1.510	260.600, 1.528	260.600, 1.453	260.600, 1.413	260.600, 1.548	260.600, 1.405	260.600, 1.250	260.600, 1.309	260.600, 1.406	260.600, 1.569	260.600, 1.449	260.600, 1.686
1305	260.800, 1.530	260.800, 1.406	260.800, 1.419	260.800, 1.510	260.800, 1.528	260.800, 1.453	260.800, 1.413	260.800, 1.548	260.800, 1.404	260.800, 1.250	260.800, 1.309	260.800, 1.406	260.800, 1.568	260.800, 1.448	260.800, 1.685
1306	261.000, 1.530	261.000, 1.406	261.000, 1.419	261.000, 1.509	261.000, 1.528	261.000, 1.453	261.000, 1.412	261.000, 1.548	261.000, 1.404	261.000, 1.250	261.000, 1.309	261.000, 1.406	261.000, 1.568	261.000, 1.447	261.000, 1.685
1307	261.200, 1.530	261.200, 1.406	261.200, 1.419	261.200, 1.509	261.200, 1.528	261.200, 1.453	261.200, 1.412	261.200, 1.548	261.200, 1.404	261.200, 1.250	261.200, 1.309	261.200, 1.406	261.200, 1.567	261.200, 1.447	261.200, 1.684
1308	261.400, 1.530	261.400, 1.405	261.400, 1.419	261.400, 1.509	261.400, 1.528	261.400, 1.452	261.400, 1.412	261.400, 1.548	261.400, 1.404	261.400, 1.250	261.400, 1.309	261.400, 1.407	261.400, 1.567	261.400, 1.446	261.400, 1.684
1309	261.600, 1.529	261.600, 1.405	261.600, 1.419	261.600, 1.509	261.600, 1.528	261.600, 1.452	261.600, 1.412	261.600, 1.548	261.600, 1.404	261.600, 1.250	261.600, 1.310	261.600, 1.407	261.600, 1.566	261.600, 1.446	261.600, 1.684
1310	261.800, 1.529	261.800, 1.405	261.800, 1.419	261.800, 1.508	261.800, 1.529	261.800, 1.452	261.800, 1.412	261.800, 1.548	261.800, 1.404	261.800, 1.250	261.800, 1.310	261.800, 1.407	261.800, 1.566	261.800, 1.446	261.800, 1.683
1311	262.000, 1.529	262.000, 1.404	262.000, 1.419	262.000, 1.508	262.000, 1.529	262.000, 1.452	262.000, 1.412	262.000, 1.548	262.000, 1.404	262.000, 1.250	262.000, 1.310	262.000, 1.407	262.000, 1.565	262.000, 1.445	262.000, 1.683
1312	262.200, 1.529	262.200, 1.404	262.200, 1.419	262.200, 1.508	262.200, 1.529	262.200, 1.452	262.200, 1.412	262.200, 1.548	262.200, 1.403	262.200, 1.250	262.200, 1.310	262.200, 1.407	262.200, 1.565	262.200, 1.445	262.200, 1.683
1313	262.400, 1.529	262.400, 1.403	262.400, 1.419	262.400, 1.508	262.400, 1.530	262.400, 1.451	262.400, 1.412	262.400, 1.548	262.400, 1.403	262.400, 1.250	262.400, 1.310	262.400, 1.407	262.400, 1.564	262.400, 1.444	262.400, 1.683
1314	262.600, 1.529	262.600, 1.403	262.600, 1.420	262.600, 1.508	262.600, 1.530	262.600, 1.451	262.600, 1.412	262.600, 1.548	262.600, 1.403	262.600, 1.250	262.600, 1.310	262.600, 1.408	262.600, 1.563	262.600, 1.444	262.600, 1.682
1315	262.800, 1.529	262.800, 1.403	262.800, 1.420	262.800, 1.508	262.800, 1.531	262.800, 1.450	262.800, 1.412	262.800, 1.548	262.800, 1.403	262.800, 1.250	262.800, 1.310	262.800, 1.408	262.800, 1.563	262.800, 1.444	262.800, 1.682
1316	263.000, 1.529	263.000, 1.403	263.000, 1.420	263.000, 1.509	263.000, 1.531	263.000, 1.450	263.000, 1.412	263.000, 1.548	263.000, 1.403	263.000, 1.250	263.000, 1.309	263.000, 1.407	263.000, 1.562	263.000, 1.443	263.000, 1.681
1317	263.200, 1.529	263.200, 1.403	263.200, 1.420	263.200, 1.509	263.200, 1.531	263.200, 1.450	263.200, 1.413	263.200, 1.548	263.200, 1.403	263.200, 1.250	263.200, 1.309	263.200, 1.407	263.200, 1.562	263.200, 1.443	263.200, 1.681
1318	263.400, 1.529	263.400, 1.403	263.400, 1.420	263.400, 1.509	263.400, 1.531	263.400, 1.450	263.400, 1.413	263.400, 1.547	263.400, 1.403	263.400, 1.250	263.400, 1.309	263.400, 1.407	263.400, 1.561	263.400, 1.442	263.400, 1.680
1319	263.600, 1.529	263.600, 1.403	263.600, 1.420	263.600, 1.509	263.600, 1.531	263.600, 1.450	263.600, 1.413	263.600, 1.547	263.600, 1.403	263.600, 1.250	263.600, 1.309	263.600, 1.407	263.600, 1.561	263.600, 1.441	263.600, 1.680
1320	263.800, 1.529	263.800, 1.403	263.800, 1.420	263.800, 1.509	263.800, 1.530	263.800, 1.450	263.800, 1.413	263.800, 1.547	263.800, 1.403	263.800, 1.250	263.800, 1.309	263.800, 1.407	263.800, 1.560	263.800, 1.440	263.800, 1.679
1321	264.000, 1.529	264.000, 1.403	264.000, 1.420	264.000, 1.509	264.000, 1.530	264.000, 1.451	264.000, 1.413	264.000, 1.547	264.000, 1.403	264.000, 1.250	264.000, 1.309	264.000, 1.406	264.000, 1.560	264.000, 1.440	264.000, 1.678
1322	264.200, 1.529	264.200, 1.403	264.200, 1.420	264.200, 1.508	264.200, 1.530	264.200, 1.451	264.200, 1.413	264.200, 1.547	264.200, 1.403	264.200, 1.250	264.200, 1.309	264.200, 1.406	264.200, 1.560	264.200, 1.439	264.200, 1.678
1323	264.400, 1.529	264.400, 1.403	264.400, 1.420	264.400, 1.508	264.400, 1.530	264.400, 1.451	264.400, 1.413	264.400, 1.547	264.400, 1.403	264.400, 1.250	264.400, 1.309	264.400, 1.406	264.400, 1.560	264.400, 1.438	264.400, 1.677
1324	264.600, 1.529	264.600, 1.403	264.600, 1.420	264.600, 1.508	264.600, 1.530	264.600, 1.452	264.600, 1.413	264.600, 1.546	264.600, 1.403	264.600, 1.250	264.600, 1.309	264.600, 1.405	264.600, 1.559	264.600, 1.438	264.600, 1.677
1325	264.800, 1.529	264.800, 1.402	264.800, 1.420	264.800, 1.507	264.800, 1.530	264.800, 1.452	264.800, 1.413	264.800, 1.546	264.800, 1.403	264.800, 1.250	264.800, 1.309	264.800, 1.405	264.800, 1.559	264.800, 1.437	264.800, 1.676
1326	265.000, 1.529	265.000, 1.402	265.000, 1.420	265.000, 1.507	265.000, 1.529	265.000, 1.452	265.000, 1.413	265.000, 1.546	265.000, 1.403	265.000, 1.250	265.000, 1.309	265.000, 1.405	265.000, 1.558	265.000, 1.437	265.000, 1.676
1327	265.200, 1.529	265.200, 1.402	265.200, 1.420	265.200, 1.507	265.200, 1.529	265.200, 1.452	265.200, 1.413	265.200, 1.546	265.200, 1.403	265.200, 1.250	265.200, 1.310	265.200, 1.405	265.200, 1.557	265.200, 1.437	265.200, 1.675
1328	265.400, 1.529	265.400, 1.401	265.400, 1.419	265.400, 1.507	265.400, 1.529	265.400, 1.452	265.400, 1.412	265.400, 1.546	265.400, 1.403	265.400, 1.249	265.400, 1.310	265.400, 1.406	265.400, 1.556	265.400, 1.437	265.400, 1.675
1329	265.600, 1.529	265.600, 1.401	265.600, 1.419	265.600, 1.507	265.600, 1.529	265.600, 1.452	265.600, 1.412	265.600, 1.547	265.600, 1.403	265.600, 1.249	265.600, 1.310	265.600, 1.406	265.600, 1.556	265.600, 1.437	265.600, 1.674
1330	265.800, 1.529	265.800, 1.401	265.800, 1.419	265.800, 1.507	265.800, 1.529	265.800, 1.452	265.800, 1.412	265.800, 1.547	265.800, 1.402	265.800, 1.249	265.800, 1.311	265.800, 1.406	265.800, 1.555	265.800, 1.437	265.800, 1.674
1331	266.000, 1.529	266.000, 1.402	266.000, 1.419	266.000, 1.507	266.000, 1.528	266.000, 1.452	266.000, 1.412	266.000, 1.547	266.000, 1.402	266.000, 1.249	266.000, 1.311	266.000, 1.406	266.000, 1.555	266.000, 1.437	266.000, 1.673
1332	266.200, 1.530	266.200, 1.402	266.200, 1.419	266.200, 1.507	266.200, 1.528	266.200, 1.451	266.200, 1.412	266.200, 1.547	266.200, 1.402	266.200, 1.249	266.200, 1.311	266.200, 1.406	266.200, 1.554	266.200, 1.437	266.200, 1.673
1333	266.400, 1.530	266.400, 1.402	266.400, 1.419	266.400, 1.507	266.400, 1.528	266.400, 1.451	266.400, 1.411	266.400, 1.547	266.400, 1.402	266.400, 1.249	266.400, 1.311	266.400, 1.406	266.400, 1.554	266.400, 1.437	266.400, 1.672
1334	266.600, 1.530	266.600, 1.403	266.600, 1.419	266.600, 1.507	266.600, 1.527	266.600, 1.451	266.600, 1.411	266.600, 1.547	266.600, 1.402	266.600, 1.249	266.600, 1.311	266.600, 1.406	266.600, 1.553	266.600, 1.437	266.600, 1.672
1335	266.800, 1.530	266.800, 1.403	266.800, 1.419	266.800, 1.507	266.800, 1.527	266.800, 1.450	266.800, 1.411	266.800, 1.547	266.800, 1.401	266.800, 1.249	266.800, 1.311	266.800, 1.406	266.800, 1.553	266.800, 1.437	266.800, 1.672
1336	267.000, 1.530	267.000, 1.403	267.000, 1.420	267.000, 1.507	267.000, 1.526	267.000, 1.450	267.000, 1.411	267.000, 1.547	267.000, 1.402	267.000, 1.248	267.000, 1.311	267.000, 1.406	267.000, 1.552	267.000, 1.437	267.000, 1.671
1337	267.200, 1.530	267.200, 1.402	267.200, 1.420	267.200, 1.507	267.200, 1.526	267.200, 1.450	267.200, 1.412	267.200, 1.546	267.200, 1.402	267.200, 1.248	267.200, 1.311	267.200, 1.406	267.200, 1.552	267.200, 1.436	267.200, 1.671
1338	267.400, 1.531	267.400, 1.402	267.400, 1.420	267.400, 1.507	267.400, 1.526	267.400, 1.450	267.400, 1.411	267.400, 1.546	267.400, 1.402	267.400, 1.248	267.400, 1.311	267.400, 1.406	267.400, 1.552	267.400, 1.435	267.400, 1.670
1339	267.600, 1.531	267.600, 1.402	267.600, 1.420	267.600, 1.507	267.600, 1.526	267.600, 1.449	267.600, 1.411	267.600, 1.546	267.600, 1.402	267.600, 1.248	267.600, 1.311	267.600, 1.406	267.600, 1.551	267.600, 1.435	267.600, 1.669
1340	267.800, 1.531	267.800, 1.402	267.800, 1.420	267.800, 1.507	267.800, 1.526	267.800, 1.449	267.800, 1.411	267.800, 1.546	267.800, 1.402	267.800, 1.248	267.800, 1.311	267.800, 1.406	267.800, 1.551	267.800, 1.434	267.800, 1.668
1341	268.000, 1.530	268.000, 1.402	268.000, 1.419	268.000, 1.508	268.000, 1.526	268.000, 1.449	268.000, 1.412	268.000, 1.546	268.000, 1.402	268.000, 1.248	268.000, 1.311	268.000, 1.406	268.000, 1.551	268.000, 1.434	268.000, 1.668
1342	268.200, 1.530	268.200, 1.402	268.200, 1.419	268.200, 1.508	268.200, 1.526	268.200, 1.449	268.200, 1.412	268.200, 1.546	268.200, 1.402	268.200, 1.248	268.200, 1.310	268.200, 1.406	268.200, 1.550	268.200, 1.433	268.200, 1.667
1343	268.400, 1.530	268.400, 1.402	268.400, 1.419	268.400, 1.508	268.400, 1.526	268.400, 1.449	268.400, 1.412	268.400, 1.546	268.400, 1.402	268.400, 1.248	268.400, 1.310	268.400, 1.406	268.400, 1.550	268.400, 1.433	268.400, 1.667
1344	268.600, 1.529	268.600, 1.402	268.600, 1.419	268.600, 1.508	268.600, 1.526	268.600, 1.449	268.600, 1.412	268.600, 1.546	268.600, 1.402	268.600, 1.248	268.600, 1.310	268.600, 1.406	268.600, 1.549	268.600, 1.432	268.600, 1.666
1345	268.800, 1.529	268.800, 1.402	268.800, 1.419	268.800, 1.508	268.800, 1.527	268.800, 1.449	268.800, 1.413	268.800, 1.546	268.800, 1.402	268.800, 1.248	268.800, 1.310	268.800, 1.406	268.800, 1.549	268.800, 1.432	268.800, 1.665
1346	269.000, 1.529	269.000, 1.402	269.000, 1.418	269.000, 1.508	269.000, 1.527	269.000, 1.449	269.000, 1.413	269.000, 1.546	269.000, 1.402	269.000, 1.248	269.000, 1.310	269.000, 1.406	269.000, 1.548	269.000, 1.432	269.000, 1.665
1347	269.200, 1.529	269.200, 1.402	269.200, 1.418	269.200, 1.508	269.200, 1.528	269.200, 1.450	269.200, 1.413	269.200, 1.546	269.200, 1.402	269.200, 1.248	269.200, 1.310	269.200, 1.406	269.200, 1.548	269.200, 1.431	269.200, 1.664
1348	269.400, 1.529	269.400, 1.402	269.400, 1.417	269.400, 1.508	269.400, 1.528	269.400, 1.450	269.400, 1.413	269.400, 1.546	269.400, 1.402	269.400, 1.249	269.400, 1.310	269.400, 1.406	269.400, 1.547	269.400, 1.431	269.400, 1.664
1349	269.600, 1.529	269.600, 1.402	269.600, 1.417	269.600, 1.508	269.600, 1.529	269.600, 1.450	269.600, 1.413	269.600, 1.547	269.600, 1.402	269.600, 1.249	269.600, 1.309	269.600, 1.406	269.600, 1.547	269.600, 1.431	269.600, 1.664
1350	269.800, 1.529	269.800, 1.403	269.800, 1.417	269.800, 1.508	269.800, 1.529	269.800, 1.450	269.800, 1.413	269.800, 1.547	269.800, 1.402	269.800, 1.249	269.800, 1.309	269.800, 1.406	269.800, 1.547	269.800, 1.431	269.800, 1.663
1351	,	,	,	,	,	,	,	,	,	,	,	,	,	,	,
1352	,	,	,	,	,	,	,	,	,	,	,	,	,	,	,
1353	,	,	,	,	,	,	,	,	,	,	,	,	,	,	,
1354	,	,	,	,	,	,	,	,	,	,	,	,	,	,	,
1355	,	,	,	,	,	,	,	,	,	,	,	,	,	,	,
1356	,	,	,	,	,	,	,	,	,	,	,	,	,	,	,
1357	,	,	,	,	,	,	,	,	,	,	,	,	,	,	,
1358	,	,	,	,	,	,	,	,	,	,	,	,	,	,	,
1359	,	,	,	,	,	,	,	,	,	,	,	,	,	,	,
1360	,	,	,	,	,	,	,	,	,	,	,	,	,	,	,
1361	,	,	,	,	,	,	,	,	,	,	,	,	,	,	,
1362	,	,	,	,	,	,	,	,	,	,	,	,	,	,	,
1363	,	,	,	,	,	,	,	,	,	,	,	,	,	,	,
1364	,	,	,	,	,	,	,	,	,	,	,	,	,	,	,
1365	,	,	,	,	,	,	,	,	,	,	,	,	,	,	,
1366	,	,	,	,	,	,	,	,	,	,	,	,	,	,	,
1367	,	,	,	,	,	,	,	,	,	,	,	,	,	,	,
1368	,	,	,	,	,	,	,	,	,	,	,	,	,	,	,
1369	,	,	,	,	,	,	,	,	,	,	,	,	,	,	,
1370	,	,	,	,	,	,	,	,	,	,	,	,	,	,	,
1371	,	,	,	,	,	,	,	,	,	,	,	,	,	,	,
1372	,	,	,	,	,	,	,	,	,	,	,	,	,	,	,
1373	,	,	,	,	,	,	,	,	,	,	,	,	,	,	,
1374	,	,	,	,	,	,	,	,	,	,	,	,	,	,	,
1375	,	,	,	,	,	,	,	,	,	,	,	,	,	,	,
1376	,	,	,	,	,	,	,	,	,	,	,	,	,	,	,
1377	,	,	,	,	,	,	,	,	,	,	,	,	,	,	,
1378	,	,	,	,	,	,	,	,	,	,	,	,	,	,	,
1379	,	,	,	,	,	,	,	,	,	,	,	,	,	,	,
1380	,	,	,	,	,	,	,	,	,	,	,	,	,	,	,
1381	,	,	,	,	,	,	,	,	,	,	,	,	,	,	,
1382	,	,	,	,	,	,	,	,	,	,	,	,	,	,	,
1383	,	,	,	,	,	,	,	,	,	,	,	,	,	,	,
1384	,	,	,	,	,	,	,	,	,	,	,	,	,	,	,
1385	,	,	,	,	,	,	,	,	,	,	,	,	,	,	,
1386	,	,	,	,	,	,	,	,	,	,	,	,	,	,	,
1387	,	,	,	,	,	,	,	,	,	,	,	,	,	,	,
1388	,	,	,	,	,	,	,	,	,	,	,	,	,	,	,
1389	,	,	,	,	,	,	,	,	,	,	,	,	,	,	,
1390	,	,	,	,	,	,	,	,	,	,	,	,	,	,	,
1391	,	,	,	,	,	,	,	,	,	,	,	,	,	,	,
1392	,	,	,	,	,	,	,	,	,	,	,	,	,	,	,
1393	,	,	,	,	,	,	,	,	,	,	,	,	,	,	,
1394	,	,	,	,	,	,	,	,	,	,	,	,	,	,	,
1395	,	,	,	,	,	,	,	,	,	,	,	,	,	,	,
1396	,	,	,	,	,	,	,	,	,	,	,	,	,	,	,
1397	,	,	,	,	,	,	,	,	,	,	,	,	,	,	,
1398	,	,	,	,	,	,	,	,	,	,	,	,	,	,	,
1399	,	,	,	,	,	,	,	,	,	,	,	,	,	,	,
1400	,	,	,	,	,	,	,	,	,	,	,	,	,	,	,
1401	,	,	,	,	,	,	,	,	,	,	,	,	,	,	,
1402	,	,	,	,	,	,	,	,	,	,	,	,	,	,	,
1403	,	,	,	,	,	,	,	,	,	,	,	,	,	,	,
1404	,	,	,	,	,	,	,	,	,	,	,	,	,	,	,
1405	,	,	,	,	,	,	,	,	,	,	,	,	,	,	,
1406	,	,	,	,	,	,	,	,	,	,	,	,	,	,	,
1407	,	,	,	,	,	,	,	,	,	,	,	,	,	,	,
1408	,	,	,	,	,	,	,	,	,	,	,	,	,	,	,
1409	,	,	,	,	,	,	,	,	,	,	,	,	,	,	,
1410	,	,	,	,	,	,	,	,	,	,	,	,	,	,	,
1411	,	,	,	,	,	,	,	,	,	,	,	,	,	,	,
1412	,	,	,	,	,	,	,	,	,	,	,	,	,	,	,
1413	,	,	,	,	,	,	,	,	,	,	,	,	,	,	,
1414	,	,	,	,	,	,	,	,	,	,	,	,	,	,	,
1415	,	,	,	,	,	,	,	,	,	,	,	,	,	,	,
1416	,	,	,	,	,	,	,	,	,	,	,	,	,	,	,
1417	,	,	,	,	,	,	,	,	,	,	,	,	,	,	,
1418	,	,	,	,	,	,	,	,	,	,	,	,	,	,	,
1419	,	,	,	,	,	,	,	,	,	,	,	,	,	,	,
1420	,	,	,	,	,	,	,	,	,	,	,	,	,	,	,
1421	,	,	,	,	,	,	,	,	,	,	,	,	,	,	,
1422	,	,	,	,	,	,	,	,	,	,	,	,	,	,	,
1423	,	,	,	,	,	,	,	,	,	,	,	,	,	,	,
1424	,	,	,	,	,	,	,	,	,	,	,	,	,	,	,
1425	,	,	,	,	,	,	,	,	,	,	,	,	,	,	,
1426	,	,	,	,	,	,	,	,	,	,	,	,	,	,	,
1427	,	,	,	,	,	,	,	,	,	,	,	,	,	,	,
1428	,	,	,	,	,	,	,	,	,	,	,	,	,	,	,
1429	,	,	,	,	,	,	,	,	,	,	,	,	,	,	,
1430	,	,	,	,	,	,	,	,	,	,	,	,	,	,	,
1431	,	,	,	,	,	,	,	,	,	,	,	,	,	,	,
1432	,	,	,	,	,	,	,	,	,	,	,	,	,	,	,
1433	,	,	,	,	,	,	,	,	,	,	,	,	,	,	,
1434	,	,	,	,	,	,	,	,	,	,	,	,	,	,	,
1435	,	,	,	,	,	,	,	,	,	,	,	,	,	,	,
1436	,	,	,	,	,	,	,	,	,	,	,	,	,	,	,
1437	,	,	,	,	,	,	,	,	,	,	,	,	,	,	,
1438	,	,	,	,	,	,	,	,	,	,	,	,	,	,	,
1439	,	,	,	,	,	,	,	,	,	,	,	,	,	,	,
1440	,	,	,	,	,	,	,	,	,	,	,	,	,	,	,
1441	,	,	,	,	,	,	,	,	,	,	,	,	,	,	,
1442	,	,	,	,	,	,	,	,	,	,	,	,	,	,	,
1443	,	,	,	,	,	,	,	,	,	,	,	,	,	,	,
1444	,	,	,	,	,	,	,	,	,	,	,	,	,	,	,
1445	,	,	,	,	,	,	,	,	,	,	,	,	,	,	,
1446	,	,	,	,	,	,	,	,	,	,	,	,	,	,	,
1447	,	,	,	,	,	,	,	,	,	,	,	,	,	,	,
1448	,	,	,	,	,	,	,	,	,	,	,	,	,	,	,
1449	,	,	,	,	,	,	,	,	,	,	,	,	,	,	,
1450	,	,	,	,	,	,	,	,	,	,	,	,	,	,	,
1451	,	,	,	,	,	,	,	,	,	,	,	,	,	,	,
1452	,	,	,	,	,	,	,	,	,	,	,	,	,	,	,
1453	,	,	,	,	,	,	,	,	,	,	,	,	,	,	,
1454	,	,	,	,	,	,	,	,	,	,	,	,	,	,	,
1455	,	,	,	,	,	,	,	,	,	,	,	,	,	,	,
1456	,	,	,	,	,	,	,	,	,	,	,	,	,	,	,
1457	,	,	,	,	,	,	,	,	,	,	,	,	,	,	,
1458	,	,	,	,	,	,	,	,	,	,	,	,	,	,	,
1459	,	,	,	,	,	,	,	,	,	,	,	,	,	,	,
1460	,	,	,	,	,	,	,	,	,	,	,	,	,	,	,
1461	,	,	,	,	,	,	,	,	,	,	,	,	,	,	,
1462	,	,	,	,	,	,	,	,	,	,	,	,	,	,	,
1463	,	,	,	,	,	,	,	,	,	,	,	,	,	,	,
1464	,	,	,	,	,	,	,	,	,	,	,	,	,	,	,
1465	,	,	,	,	,	,	,	,	,	,	,	,	,	,	,
1466	,	,	,	,	,	,	,	,	,	,	,	,	,	,	,
1467	,	,	,	,	,	,	,	,	,	,	,	,	,	,	,
1468	,	,	,	,	,	,	,	,	,	,	,	,	,	,	,
1469	,	,	,	,	,	,	,	,	,	,	,	,	,	,	,
1470	,	,	,	,	,	,	,	,	,	,	,	,	,	,	,
1471	,	,	,	,	,	,	,	,	,	,	,	,	,	,	,
1472	,	,	,	,	,	,	,	,	,	,	,	,	,	,	,
1473	,	,	,	,	,	,	,	,	,	,	,	,	,	,	,
1474	,	,	,	,	,	,	,	,	,	,	,	,	,	,	,
1475	,	,	,	,	,	,	,	,	,	,	,	,	,	,	,
1476	,	,	,	,	,	,	,	,	,	,	,	,	,	,	,
1477	,	,	,	,	,	,	,	,	,	,	,	,	,	,	,
1478	,	,	,	,	,	,	,	,	,	,	,	,	,	,	,
1479	,	,	,	,	,	,	,	,	,	,	,	,	,	,	,
1480	,	,	,	,	,	,	,	,	,	,	,	,	,	,	,
1481	,	,	,	,	,	,	,	,	,	,	,	,	,	,	,
1482	,	,	,	,	,	,	,	,	,	,	,	,	,	,	,
1483	,	,	,	,	,	,	,	,	,	,	,	,	,	,	,
1484	,	,	,	,	,	,	,	,	,	,	,	,	,	,	,
1485	,	,	,	,	,	,	,	,	,	,	,	,	,	,	,
1486	,	,	,	,	,	,	,	,	,	,	,	,	,	,	,
1487	,	,	,	,	,	,	,	,	,	,	,	,	,	,	,
1488	,	,	,	,	,	,	,	,	,	,	,	,	,	,	,
1489	,	,	,	,	,	,	,	,	,	,	,	,	,	,	,
1490	,	,	,	,	,	,	,	,	,	,	,	,	,	,	,
1491	,	,	,	,	,	,	,	,	,	,	,	,	,	,	,
1492	,	,	,	,	,	,	,	,	,	,	,	,	,	,	,
1493	,	,	,	,	,	,	,	,	,	,	,	,	,	,	,
1494	,	,	,	,	,	,	,	,	,	,	,	,	,	,	,
1495	,	,	,	,	,	,	,	,	,	,	,	,	,	,	,
1496	,	,	,	,	,	,	,	,	,	,	,	,	,	,	,
1497	,	,	,	,	,	,	,	,	,	,	,	,	,	,	,
1498	,	,	,	,	,	,	,	,	,	,	,	,	,	,	,
1499	,	,	,	,	,	,	,	,	,	,	,	,	,	,	,
1500	,	,	,	,	,	,	,	,	,	,	,	,	,	,	,
1501	,	,	,	,	,	,	,	,	,	,	,	,	,	,	,
1502	,	,	,	,	,	,	,	,	,	,	,	,	,	,	,
1503	,	,	,	,	,	,	,	,	,	,	,	,	,	,	,
1504	,	,	,	,	,	,	,	,	,	,	,	,	,	,	,
1505	,	,	,	,	,	,	,	,	,	,	,	,	,	,	,
1506	,	,	,	,	,	,	,	,	,	,	,	,	,	,	,
1507	,	,	,	,	,	,	,	,	,	,	,	,	,	,	,
1508	,	,	,	,	,	,	,	,	,	,	,	,	,	,	,
1509	,	,	,	,	,	,	,	,	,	,	,	,	,	,	,
1510	,	,	,	,	,	,	,	,	,	,	,	,	,	,	,
1511	,	,	,	,	,	,	,	,	,	,	,	,	,	,	,
1512	,	,	,	,	,	,	,	,	,	,	,	,	,	,	,
1513	,	,	,	,	,	,	,	,	,	,	,	,	,	,	,
1514	,	,	,	,	,	,	,	,	,	,	,	,	,	,	,
1515	,	,	,	,	,	,	,	,	,	,	,	,	,	,	,
1516	,	,	,	,	,	,	,	,	,	,	,	,	,	,	,
1517	,	,	,	,	,	,	,	,	,	,	,	,	,	,	,
1518	,	,	,	,	,	,	,	,	,	,	,	,	,	,	,
1519	,	,	,	,	,	,	,	,	,	,	,	,	,	,	,
1520	,	,	,	,	,	,	,	,	,	,	,	,	,	,	,
1521	,	,	,	,	,	,	,	,	,	,	,	,	,	,	,
1522	,	,	,	,	,	,	,	,	,	,	,	,	,	,	,
1523	,	,	,	,	,	,	,	,	,	,	,	,	,	,	,
1524	,	,	,	,	,	,	,	,	,	,	,	,	,	,	,
1525	,	,	,	,	,	,	,	,	,	,	,	,	,	,	,
1526	,	,	,	,	,	,	,	,	,	,	,	,	,	,	,
1527	,	,	,	,	,	,	,	,	,	,	,	,	,	,	,
1528	,	,	,	,	,	,	,	,	,	,	,	,	,	,	,
1529	,	,	,	,	,	,	,	,	,	,	,	,	,	,	,
1530	,	,	,	,	,	,	,	,	,	,	,	,	,	,	,
1531	,	,	,	,	,	,	,	,	,	,	,	,	,	,	,
1532	,	,	,	,	,	,	,	,	,	,	,	,	,	,	,
1533	,	,	,	,	,	,	,	,	,	,	,	,	,	,	,
1534	,	,	,	,	,	,	,	,	,	,	,	,	,	,	,
1535	,	,	,	,	,	,	,	,	,	,	,	,	,	,	,
1536	,	,	,	,	,	,	,	,	,	,	,	,	,	,	,
1537	,	,	,	,	,	,	,	,	,	,	,	,	,	,	,
1538	,	,	,	,	,	,	,	,	,	,	,	,	,	,	,
1539	,	,	,	,	,	,	,	,	,	,	,	,	,	,	,
1540	,	,	,	,	,	,	,	,	,	,	,	,	,	,	,
1541	,	,	,	,	,	,	,	,	,	,	,	,	,	,	,
1542	,	,	,	,	,	,	,	,	,	,	,	,	,	,	,
1543	,	,	,	,	,	,	,	,	,	,	,	,	,	,	,
1544	,	,	,	,	,	,	,	,	,	,	,	,	,	,	,
1545	,	,	,	,	,	,	,	,	,	,	,	,	,	,	,
1546	,	,	,	,	,	,	,	,	,	,	,	,	,	,	,
1547	,	,	,	,	,	,	,	,	,	,	,	,	,	,	,
1548	,	,	,	,	,	,	,	,	,	,	,	,	,	,	,
1549	,	,	,	,	,	,	,	,	,	,	,	,	,	,	,
1550	,	,	,	,	,	,	,	,	,	,	,	,	,	,	,
1551	,	,	,	,	,	,	,	,	,	,	,	,	,	,	,
1552	,	,	,	,	,	,	,	,	,	,	,	,	,	,	,
1553	,	,	,	,	,	,	,	,	,	,	,	,	,	,	,
1554	,	,	,	,	,	,	,	,	,	,	,	,	,	,	,
1555	,	,	,	,	,	,	,	,	,	,	,	,	,	,	,
1556	,	,	,	,	,	,	,	,	,	,	,	,	,	,	,
1557	,	,	,	,	,	,	,	,	,	,	,	,	,	,	,
1558	,	,	,	,	,	,	,	,	,	,	,	,	,	,	,
1559	,	,	,	,	,	,	,	,	,	,	,	,	,	,	,
1560	,	,	,	,	,	,	,	,	,	,	,	,	,	,	,
1561	,	,	,	,	,	,	,	,	,	,	,	,	,	,	,
1562	,	,	,	,	,	,	,	,	,	,	,	,	,	,	,
1563	,	,	,	,	,	,	,	,	,	,	,	,	,	,	,
1564	,	,	,	,	,	,	,	,	,	,	,	,	,	,	,
1565	,	,	,	,	,	,	,	,	,	,	,	,	,	,	,
1566	,	,	,	,	,	,	,	,	,	,	,	,	,	,	,
1567	,	,	,	,	,	,	,	,	,	,	,	,	,	,	,
1568	,	,	,	,	,	,	,	,	,	,	,	,	,	,	,
1569	,	,	,	,	,	,	,	,	,	,	,	,	,	,	,
1570	,	,	,	,	,	,	,	,	,	,	,	,	,	,	,
1571	,	,	,	,	,	,	,	,	,	,	,	,	,	,	,
1572	,	,	,	,	,	,	,	,	,	,	,	,	,	,	,
1573	,	,	,	,	,	,	,	,	,	,	,	,	,	,	,
1574	,	,	,	,	,	,	,	,	,	,	,	,	,	,	,
1575	,	,	,	,	,	,	,	,	,	,	,	,	,	,	,
1576	,	,	,	,	,	,	,	,	,	,	,	,	,	,	,
1577	,	,	,	,	,	,	,	,	,	,	,	,	,	,	,
1578	,	,	,	,	,	,	,	,	,	,	,	,	,	,	,
1579	,	,	,	,	,	,	,	,	,	,	,	,	,	,	,
1580	,	,	,	,	,	,	,	,	,	,	,	,	,	,	,
1581	,	,	,	,	,	,	,	,	,	,	,	,	,	,	,
1582	,	,	,	,	,	,	,	,	,	,	,	,	,	,	,
1583	,	,	,	,	,	,	,	,	,	,	,	,	,	,	,
1584	,	,	,	,	,	,	,	,	,	,	,	,	,	,	,
1585	,	,	,	,	,	,	,	,	,	,	,	,	,	,	,
1586	,	,	,	,	,	,	,	,	,	,	,	,	,	,	,
1587	,	,	,	,	,	,	,	,	,	,	,	,	,	,	,
1588	,	,	,	,	,	,	,	,	,	,	,	,	,	,	,
1589	,	,	,	,	,	,	,	,	,	,	,	,	,	,	,
1590	,	,	,	,	,	,	,	,	,	,	,	,	,	,	,
1591	,	,	,	,	,	,	,	,	,	,	,	,	,	,	,
1592	,	,	,	,	,	,	,	,	,	,	,	,	,	,	,
1593	,	,	,	,	,	,	,	,	,	,	,	,	,	,	,
1594	,	,	,	,	,	,	,	,	,	,	,	,	,	,	,
1595	,	,	,	,	,	,	,	,	,	,	,	,	,	,	,
1596	,	,	,	,	,	,	,	,	,	,	,	,	,	,	,
1597	,	,	,	,	,	,	,	,	,	,	,	,	,	,	,
1598	,	,	,	,	,	,	,	,	,	,	,	,	,	,	,
1599	,	,	,	,	,	,	,	,	,	,	,	,	,	,	,
1600	,	,	,	,	,	,	,	,	,	,	,	,	,	,	,
1601	,	,	,	,	,	,	,	,	,	,	,	,	,	,	,
1602	,	,	,	,	,	,	,	,	,	,	,	,	,	,	,
1603	,	,	,	,	,	,	,	,	,	,	,	,	,	,	,
1604	,	,	,	,	,	,	,	,	,	,	,	,	,	,	,
1605	,	,	,	,	,	,	,	,	,	,	,	,	,	,	,
1606	,	,	,	,	,	,	,	,	,	,	,	,	,	,	,
1607	,	,	,	,	,	,	,	,	,	,	,	,	,	,	,
1608	,	,	,	,	,	,	,	,	,	,	,	,	,	,	,
1609	,	,	,	,	,	,	,	,	,	,	,	,	,	,	,
1610	,	,	,	,	,	,	,	,	,	,	,	,	,	,	,
1611	,	,	,	,	,	,	,	,	,	,	,	,	,	,	,
1612	,	,	,	,	,	,	,	,	,	,	,	,	,	,	,
1613	,	,	,	,	,	,	,	,	,	,	,	,	,	,	,
1614	,	,	,	,	,	,	,	,	,	,	,	,	,	,	,
1615	,	,	,	,	,	,	,	,	,	,	,	,	,	,	,
1616	,	,	,	,	,	,	,	,	,	,	,	,	,	,	,
1617	,	,	,	,	,	,	,	,	,	,	,	,	,	,	,
1618	,	,	,	,	,	,	,	,	,	,	,	,	,	,	,
1619	,	,	,	,	,	,	,	,	,	,	,	,	,	,	,
1620	,	,	,	,	,	,	,	,	,	,	,	,	,	,	,
1621	,	,	,	,	,	,	,	,	,	,	,	,	,	,	,
1622	,	,	,	,	,	,	,	,	,	,	,	,	,	,	,
1623	,	,	,	,	,	,	,	,	,	,	,	,	,	,	,
1624	,	,	,	,	,	,	,	,	,	,	,	,	,	,	,
1625	,	,	,	,	,	,	,	,	,	,	,	,	,	,	,
1626	,	,	,	,	,	,	,	,	,	,	,	,	,	,	,
1627	,	,	,	,	,	,	,	,	,	,	,	,	,	,	,
1628	,	,	,	,	,	,	,	,	,	,	,	,	,	,	,
1629	,	,	,	,	,	,	,	,	,	,	,	,	,	,	,
1630	,	,	,	,	,	,	,	,	,	,	,	,	,	,	,
1631	,	,	,	,	,	,	,	,	,	,	,	,	,	,	,
1632	,	,	,	,	,	,	,	,	,	,	,	,	,	,	,
1633	,	,	,	,	,	,	,	,	,	,	,	,	,	,	,
1634	,	,	,	,	,	,	,	,	,	,	,	,	,	,	,
1635	,	,	,	,	,	,	,	,	,	,	,	,	,	,	,
1636	,	,	,	,	,	,	,	,	,	,	,	,	,	,	,
1637	,	,	,	,	,	,	,	,	,	,	,	,	,	,	,
1638	,	,	,	,	,	,	,	,	,	,	,	,	,	,	,
1639	,	,	,	,	,	,	,	,	,	,	,	,	,	,	,
1640	,	,	,	,	,	,	,	,	,	,	,	,	,	,	,
1641	,	,	,	,	,	,	,	,	,	,	,	,	,	,	,
1642	,	,	,	,	,	,	,	,	,	,	,	,	,	,	,
1643	,	,	,	,	,	,	,	,	,	,	,	,	,	,	,
1644	,	,	,	,	,	,	,	,	,	,	,	,	,	,	,
1645	,	,	,	,	,	,	,	,	,	,	,	,	,	,	,
1646	,	,	,	,	,	,	,	,	,	,	,	,	,	,	,
1647	,	,	,	,	,	,	,	,	,	,	,	,	,	,	,
1648	,	,	,	,	,	,	,	,	,	,	,	,	,	,	,
1649	,	,	,	,	,	,	,	,	,	,	,	,	,	,	,
1650	,	,	,	,	,	,	,	,	,	,	,	,	,	,	,
1651	,	,	,	,	,	,	,	,	,	,	,	,	,	,	,
1652	,	,	,	,	,	,	,	,	,	,	,	,	,	,	,
1653	,	,	,	,	,	,	,	,	,	,	,	,	,	,	,
1654	,	,	,	,	,	,	,	,	,	,	,	,	,	,	,
1655	,	,	,	,	,	,	,	,	,	,	,	,	,	,	,
1656	,	,	,	,	,	,	,	,	,	,	,	,	,	,	,
1657	,	,	,	,	,	,	,	,	,	,	,	,	,	,	,
1658	,	,	,	,	,	,	,	,	,	,	,	,	,	,	,
1659	,	,	,	,	,	,	,	,	,	,	,	,	,	,	,
1660	,	,	,	,	,	,	,	,	,	,	,	,	,	,	,
1661	,	,	,	,	,	,	,	,	,	,	,	,	,	,	,
1662	,	,	,	,	,	,	,	,	,	,	,	,	,	,	,
1663	,	,	,	,	,	,	,	,	,	,	,	,	,	,	,
1664	,	,	,	,	,	,	,	,	,	,	,	,	,	,	,
1665	,	,	,	,	,	,	,	,	,	,	,	,	,	,	,
1666	,	,	,	,	,	,	,	,	,	,	,	,	,	,	,
1667	,	,	,	,	,	,	,	,	,	,	,	,	,	,	,
1668	,	,	,	,	,	,	,	,	,	,	,	,	,	,	,
1669	,	,	,	,	,	,	,	,	,	,	,	,	,	,	,
1670	,	,	,	,	,	,	,	,	,	,	,	,	,	,	,
1671	,	,	,	,	,	,	,	,	,	,	,	,	,	,	,
1672	,	,	,	,	,	,	,	,	,	,	,	,	,	,	,
1673	,	,	,	,	,	,	,	,	,	,	,	,	,	,	,
1674	,	,	,	,	,	,	,	,	,	,	,	,	,	,	,
1675	,	,	,	,	,	,	,	,	,	,	,	,	,	,	,
1676	,	,	,	,	,	,	,	,	,	,	,	,	,	,	,
1677	,	,	,	,	,	,	,	,	,	,	,	,	,	,	,
1678	,	,	,	,	,	,	,	,	,	,	,	,	,	,	,
1679	,	,	,	,	,	,	,	,	,	,	,	,	,	,	,
1680	,	,	,	,	,	,	,	,	,	,	,	,	,	,	,
1681	,	,	,	,	,	,	,	,	,	,	,	,	,	,	,
1682	,	,	,	,	,	,	,	,	,	,	,	,	,	,	,
1683	,	,	,	,	,	,	,	,	,	,	,	,	,	,	,
1684	,	,	,	,	,	,	,	,	,	,	,	,	,	,	,
1685	,	,	,	,	,	,	,	,	,	,	,	,	,	,	,
1686	,	,	,	,	,	,	,	,	,	,	,	,	,	,	,
1687	,	,	,	,	,	,	,	,	,	,	,	,	,	,	,
1688	,	,	,	,	,	,	,	,	,	,	,	,	,	,	,
1689	,	,	,	,	,	,	,	,	,	,	,	,	,	,	,
1690	,	,	,	,	,	,	,	,	,	,	,	,	,	,	,
1691	,	,	,	,	,	,	,	,	,	,	,	,	,	,	,
1692	,	,	,	,	,	,	,	,	,	,	,	,	,	,	,
1693	,	,	,	,	,	,	,	,	,	,	,	,	,	,	,
1694	,	,	,	,	,	,	,	,	,	,	,	,	,	,	,
1695	,	,	,	,	,	,	,	,	,	,	,	,	,	,	,
1696	,	,	,	,	,	,	,	,	,	,	,	,	,	,	,
1697	,	,	,	,	,	,	,	,	,	,	,	,	,	,	,
1698	,	,	,	,	,	,	,	,	,	,	,	,	,	,	,
1699	,	,	,	,	,	,	,	,	,	,	,	,	,	,	,
1700	,	,	,	,	,	,	,	,	,	,	,	,	,	,	,
1701	,	,	,	,	,	,	,	,	,	,	,	,	,	,	,
1702	,	,	,	,	,	,	,	,	,	,	,	,	,	,	,
1703	,	,	,	,	,	,	,	,	,	,	,	,	,	,	,
1704	,	,	,	,	,	,	,	,	,	,	,	,	,	,	,
1705	,	,	,	,	,	,	,	,	,	,	,	,	,	,	,
1706	,	,	,	,	,	,	,	,	,	,	,	,	,	,	,
1707	,	,	,	,	,	,	,	,	,	,	,	,	,	,	,
1708	,	,	,	,	,	,	,	,	,	,	,	,	,	,	,
1709	,	,	,	,	,	,	,	,	,	,	,	,	,	,	,
1710	,	,	,	,	,	,	,	,	,	,	,	,	,	,	,
1711	,	,	,	,	,	,	,	,	,	,	,	,	,	,	,
1712	,	,	,	,	,	,	,	,	,	,	,	,	,	,	,
1713	,	,	,	,	,	,	,	,	,	,	,	,	,	,	,
1714	,	,	,	,	,	,	,	,	,	,	,	,	,	,	,
1715	,	,	,	,	,	,	,	,	,	,	,	,	,	,	,
1716	,	,	,	,	,	,	,	,	,	,	,	,	,	,	,
1717	,	,	,	,	,	,	,	,	,	,	,	,	,	,	,
1718	,	,	,	,	,	,	,	,	,	,	,	,	,	,	,
1719	,	,	,	,	,	,	,	,	,	,	,	,	,	,	,
1720	,	,	,	,	,	,	,	,	,	,	,	,	,	,	,
1721	,	,	,	,	,	,	,	,	,	,	,	,	,	,	,
1722	,	,	,	,	,	,	,	,	,	,	,	,	,	,	,
1723	,	,	,	,	,	,	,	,	,	,	,	,	,	,	,
1724	,	,	,	,	,	,	,	,	,	,	,	,	,	,	,
1725	,	,	,	,	,	,	,	,	,	,	,	,	,	,	,
1726	,	,	,	,	,	,	,	,	,	,	,	,	,	,	,
1727	,	,	,	,	,	,	,	,	,	,	,	,	,	,	,
1728	,	,	,	,	,	,	,	,	,	,	,	,	,	,	,
1729	,	,	,	,	,	,	,	,	,	,	,	,	,	,	,
1730	,	,	,	,	,	,	,	,	,	,	,	,	,	,	,
1731	,	,	,	,	,	,	,	,	,	,	,	,	,	,	,
1732	,	,	,	,	,	,	,	,	,	,	,	,	,	,	,
1733	,	,	,	,	,	,	,	,	,	,	,	,	,	,	,
1734	,	,	,	,	,	,	,	,	,	,	,	,	,	,	,
1735	,	,	,	,	,	,	,	,	,	,	,	,	,	,	,
1736	,	,	,	,	,	,	,	,	,	,	,	,	,	,	,
1737	,	,	,	,	,	,	,	,	,	,	,	,	,	,	,
1738	,	,	,	,	,	,	,	,	,	,	,	,	,	,	,
1739	,	,	,	,	,	,	,	,	,	,	,	,	,	,	,
1740	,	,	,	,	,	,	,	,	,	,	,	,	,	,	,
1741	,	,	,	,	,	,	,	,	,	,	,	,	,	,	,
1742	,	,	,	,	,	,	,	,	,	,	,	,	,	,	,
1743	,	,	,	,	,	,	,	,	,	,	,	,	,	,	,
1744	,	,	,	,	,	,	,	,	,	,	,	,	,	,	,
1745	,	,	,	,	,	,	,	,	,	,	,	,	,	,	,
1746	,	,	,	,	,	,	,	,	,	,	,	,	,	,	,
1747	,	,	,	,	,	,	,	,	,	,	,	,	,	,	,
1748	,	,	,	,	,	,	,	,	,	,	,	,	,	,	,
1749	,	,	,	,	,	,	,	,	,	,	,	,	,	,	,
1750	,	,	,	,	,	,	,	,	,	,	,	,	,	,	,
1751	,	,	,	,	,	,	,	,	,	,	,	,	,	,	,
1752	,	,	,	,	,	,	,	,	,	,	,	,	,	,	,
1753	,	,	,	,	,	,	,	,	,	,	,	,	,	,	,
1754	,	,	,	,	,	,	,	,	,	,	,	,	,	,	,
1755	,	,	,	,	,	,	,	,	,	,	,	,	,	,	,
1756	,	,	,	,	,	,	,	,	,	,	,	,	,	,	,
1757	,	,	,	,	,	,	,	,	,	,	,	,	,	,	,
1758	,	,	,	,	,	,	,	,	,	,	,	,	,	,	,
1759	,	,	,	,	,	,	,	,	,	,	,	,	,	,	,
1760	,	,	,	,	,	,	,	,	,	,	,	,	,	,	,
1761	,	,	,	,	,	,	,	,	,	,	,	,	,	,	,
1762	,	,	,	,	,	,	,	,	,	,	,	,	,	,	,
1763	,	,	,	,	,	,	,	,	,	,	,	,	,	,	,
1764	,	,	,	,	,	,	,	,	,	,	,	,	,	,	,
1765	,	,	,	,	,	,	,	,	,	,	,	,	,	,	,
1766	,	,	,	,	,	,	,	,	,	,	,	,	,	,	,
1767	,	,	,	,	,	,	,	,	,	,	,	,	,	,	,
1768	,	,	,	,	,	,	,	,	,	,	,	,	,	,	,
1769	,	,	,	,	,	,	,	,	,	,	,	,	,	,	,
1770	,	,	,	,	,	,	,	,	,	,	,	,	,	,	,
1771	,	,	,	,	,	,	,	,	,	,	,	,	,	,	,
1772	,	,	,	,	,	,	,	,	,	,	,	,	,	,	,
1773	,	,	,	,	,	,	,	,	,	,	,	,	,	,	,
1774	,	,	,	,	,	,	,	,	,	,	,	,	,	,	,
1775	,	,	,	,	,	,	,	,	,	,	,	,	,	,	,
1776	,	,	,	,	,	,	,	,	,	,	,	,	,	,	,
1777	,	,	,	,	,	,	,	,	,	,	,	,	,	,	,
1778	,	,	,	,	,	,	,	,	,	,	,	,	,	,	,
1779	,	,	,	,	,	,	,	,	,	,	,	,	,	,	,
1780	,	,	,	,	,	,	,	,	,	,	,	,	,	,	,
1781	,	,	,	,	,	,	,	,	,	,	,	,	,	,	,
1782	,	,	,	,	,	,	,	,	,	,	,	,	,	,	,
1783	,	,	,	,	,	,	,	,	,	,	,	,	,	,	,
1784	,	,	,	,	,	,	,	,	,	,	,	,	,	,	,
1785	,	,	,	,	,	,	,	,	,	,	,	,	,	,	,
1786	,	,	,	,	,	,	,	,	,	,	,	,	,	,	,
1787	,	,	,	,	,	,	,	,	,	,	,	,	,	,	,
1788	,	,	,	,	,	,	,	,	,	,	,	,	,	,	,
1789	,	,	,	,	,	,	,	,	,	,	,	,	,	,	,
1790	,	,	,	,	,	,	,	,	,	,	,	,	,	,	,
1791	,	,	,	,	,	,	,	,	,	,	,	,	,	,	,
1792	,	,	,	,	,	,	,	,	,	,	,	,	,	,	,
1793	,	,	,	,	,	,	,	,	,	,	,	,	,	,	,
1794	,	,	,	,	,	,	,	,	,	,	,	,	,	,	,
1795	,	,	,	,	,	,	,	,	,	,	,	,	,	,	,
1796	,	,	,	,	,	,	,	,	,	,	,	,	,	,	,
1797	,	,	,	,	,	,	,	,	,	,	,	,	,	,	,
1798	,	,	,	,	,	,	,	,	,	,	,	,	,	,	,
1799	,	,	,	,	,	,	,	,	,	,	,	,	,	,	,
1800	,	,	,	,	,	,	,	,	,	,	,	,	,	,	,
1801	,	,	,	,	,	,	,	,	,	,	,	,	,	,	,
1802	,	,	,	,	,	,	,	,	,	,	,	,	,	,	,
1803	,	,	,	,	,	,	,	,	,	,	,	,	,	,	,
1804	,	,	,	,	,	,	,	,	,	,	,	,	,	,	,
1805	,	,	,	,	,	,	,	,	,	,	,	,	,	,	,
1806	,	,	,	,	,	,	,	,	,	,	,	,	,	,	,
1807	,	,	,	,	,	,	,	,	,	,	,	,	,	,	,
1808	,	,	,	,	,	,	,	,	,	,	,	,	,	,	,
1809	,	,	,	,	,	,	,	,	,	,	,	,	,	,	,
1810	,	,	,	,	,	,	,	,	,	,	,	,	,	,	,
1811	,	,	,	,	,	,	,	,	,	,	,	,	,	,	,
1812	,	,	,	,	,	,	,	,	,	,	,	,	,	,	,
1813	,	,	,	,	,	,	,	,	,	,	,	,	,	,	,
1814	,	,	,	,	,	,	,	,	,	,	,	,	,	,	,
1815	,	,	,	,	,	,	,	,	,	,	,	,	,	,	,
1816	,	,	,	,	,	,	,	,	,	,	,	,	,	,	,
1817	,	,	,	,	,	,	,	,	,	,	,	,	,	,	,
1818	,	,	,	,	,	,	,	,	,	,	,	,	,	,	,
1819	,	,	,	,	,	,	,	,	,	,	,	,	,	,	,
1820	,	,	,	,	,	,	,	,	,	,	,	,	,	,	,
1821	,	,	,	,	,	,	,	,	,	,	,	,	,	,	,
1822	,	,	,	,	,	,	,	,	,	,	,	,	,	,	,
1823	,	,	,	,	,	,	,	,	,	,	,	,	,	,	,
1824	,	,	,	,	,	,	,	,	,	,	,	,	,	,	,
1825	,	,	,	,	,	,	,	,	,	,	,	,	,	,	,
1826	,	,	,	,	,	,	,	,	,	,	,	,	,	,	,
1827	,	,	,	,	,	,	,	,	,	,	,	,	,	,	,
1828	,	,	,	,	,	,	,	,	,	,	,	,	,	,	,
1829	,	,	,	,	,	,	,	,	,	,	,	,	,	,	,
1830	,	,	,	,	,	,	,	,	,	,	,	,	,	,	,
1831	,	,	,	,	,	,	,	,	,	,	,	,	,	,	,
1832	,	,	,	,	,	,	,	,	,	,	,	,	,	,	,
1833	,	,	,	,	,	,	,	,	,	,	,	,	,	,	,
1834	,	,	,	,	,	,	,	,	,	,	,	,	,	,	,
1835	,	,	,	,	,	,	,	,	,	,	,	,	,	,	,
1836	,	,	,	,	,	,	,	,	,	,	,	,	,	,	,
1837	,	,	,	,	,	,	,	,	,	,	,	,	,	,	,
1838	,	,	,	,	,	,	,	,	,	,	,	,	,	,	,
1839	,	,	,	,	,	,	,	,	,	,	,	,	,	,	,
1840	,	,	,	,	,	,	,	,	,	,	,	,	,	,	,
1841	,	,	,	,	,	,	,	,	,	,	,	,	,	,	,
1842	,	,	,	,	,	,	,	,	,	,	,	,	,	,	,
1843	,	,	,	,	,	,	,	,	,	,	,	,	,	,	,
1844	,	,	,	,	,	,	,	,	,	,	,	,	,	,	,
1845	,	,	,	,	,	,	,	,	,	,	,	,	,	,	,
1846	,	,	,	,	,	,	,	,	,	,	,	,	,	,	,
1847	,	,	,	,	,	,	,	,	,	,	,	,	,	,	,
1848	,	,	,	,	,	,	,	,	,	,	,	,	,	,	,
1849	,	,	,	,	,	,	,	,	,	,	,	,	,	,	,
1850	,	,	,	,	,	,	,	,	,	,	,	,	,	,	,
1851	,	,	,	,	,	,	,	,	,	,	,	,	,	,	,
1852	,	,	,	,	,	,	,	,	,	,	,	,	,	,	,
1853	,	,	,	,	,	,	,	,	,	,	,	,	,	,	,
1854	,	,	,	,	,	,	,	,	,	,	,	,	,	,	,
1855	,	,	,	,	,	,	,	,	,	,	,	,	,	,	,
1856	,	,	,	,	,	,	,	,	,	,	,	,	,	,	,
1857	,	,	,	,	,	,	,	,	,	,	,	,	,	,	,
1858	,	,	,	,	,	,	,	,	,	,	,	,	,	,	,
1859	,	,	,	,	,	,	,	,	,	,	,	,	,	,	,
1860	,	,	,	,	,	,	,	,	,	,	,	,	,	,	,
1861	,	,	,	,	,	,	,	,	,	,	,	,	,	,	,
1862	,	,	,	,	,	,	,	,	,	,	,	,	,	,	,
1863	,	,	,	,	,	,	,	,	,	,	,	,	,	,	,
1864	,	,	,	,	,	,	,	,	,	,	,	,	,	,	,
1865	,	,	,	,	,	,	,	,	,	,	,	,	,	,	,
1866	,	,	,	,	,	,	,	,	,	,	,	,	,	,	,
1867	,	,	,	,	,	,	,	,	,	,	,	,	,	,	,
1868	,	,	,	,	,	,	,	,	,	,	,	,	,	,	,
1869	,	,	,	,	,	,	,	,	,	,	,	,	,	,	,
1870	,	,	,	,	,	,	,	,	,	,	,	,	,	,	,
1871	,	,	,	,	,	,	,	,	,	,	,	,	,	,	,
1872	,	,	,	,	,	,	,	,	,	,	,	,	,	,	,
1873	,	,	,	,	,	,	,	,	,	,	,	,	,	,	,
1874	,	,	,	,	,	,	,	,	,	,	,	,	,	,	,
1875	,	,	,	,	,	,	,	,	,	,	,	,	,	,	,
1876	,	,	,	,	,	,	,	,	,	,	,	,	,	,	,
1877	,	,	,	,	,	,	,	,	,	,	,	,	,	,	,
1878	,	,	,	,	,	,	,	,	,	,	,	,	,	,	,
1879	,	,	,	,	,	,	,	,	,	,	,	,	,	,	,
1880	,	,	,	,	,	,	,	,	,	,	,	,	,	,	,
1881	,	,	,	,	,	,	,	,	,	,	,	,	,	,	,
1882	,	,	,	,	,	,	,	,	,	,	,	,	,	,	,
1883	,	,	,	,	,	,	,	,	,	,	,	,	,	,	,
1884	,	,	,	,	,	,	,	,	,	,	,	,	,	,	,
1885	,	,	,	,	,	,	,	,	,	,	,	,	,	,	,
1886	,	,	,	,	,	,	,	,	,	,	,	,	,	,	,
1887	,	,	,	,	,	,	,	,	,	,	,	,	,	,	,
1888	,	,	,	,	,	,	,	,	,	,	,	,	,	,	,
1889	,	,	,	,	,	,	,	,	,	,	,	,	,	,	,
1890	,	,	,	,	,	,	,	,	,	,	,	,	,	,	,
1891	,	,	,	,	,	,	,	,	,	,	,	,	,	,	,
1892	,	,	,	,	,	,	,	,	,	,	,	,	,	,	,
1893	,	,	,	,	,	,	,	,	,	,	,	,	,	,	,
1894	,	,	,	,	,	,	,	,	,	,	,	,	,	,	,
1895	,	,	,	,	,	,	,	,	,	,	,	,	,	,	,
1896	,	,	,	,	,	,	,	,	,	,	,	,	,	,	,
1897	,	,	,	,	,	,	,	,	,	,	,	,	,	,	,
1898	,	,	,	,	,	,	,	,	,	,	,	,	,	,	,
1899	,	,	,	,	,	,	,	,	,	,	,	,	,	,	,
1900	,	,	,	,	,	,	,	,	,	,	,	,	,	,	,
1901	,	,	,	,	,	,	,	,	,	,	,	,	,	,	,
1902	,	,	,	,	,	,	,	,	,	,	,	,	,	,	,
1903	,	,	,	,	,	,	,	,	,	,	,	,	,	,	,
1904	,	,	,	,	,	,	,	,	,	,	,	,	,	,	,
1905	,	,	,	,	,	,	,	,	,	,	,	,	,	,	,
1906	,	,	,	,	,	,	,	,	,	,	,	,	,	,	,
1907	,	,	,	,	,	,	,	,	,	,	,	,	,	,	,
1908	,	,	,	,	,	,	,	,	,	,	,	,	,	,	,
1909	,	,	,	,	,	,	,	,	,	,	,	,	,	,	,
1910	,	,	,	,	,	,	,	,	,	,	,	,	,	,	,
1911	,	,	,	,	,	,	,	,	,	,	,	,	,	,	,
1912	,	,	,	,	,	,	,	,	,	,	,	,	,	,	,
1913	,	,	,	,	,	,	,	,	,	,	,	,	,	,	,
1914	,	,	,	,	,	,	,	,	,	,	,	,	,	,	,
1915	,	,	,	,	,	,	,	,	,	,	,	,	,	,	,
1916	,	,	,	,	,	,	,	,	,	,	,	,	,	,	,
1917	,	,	,	,	,	,	,	,	,	,	,	,	,	,	,
1918	,	,	,	,	,	,	,	,	,	,	,	,	,	,	,
1919	,	,	,	,	,	,	,	,	,	,	,	,	,	,	,
1920	,	,	,	,	,	,	,	,	,	,	,	,	,	,	,
1921	,	,	,	,	,	,	,	,	,	,	,	,	,	,	,
1922	,	,	,	,	,	,	,	,	,	,	,	,	,	,	,
1923	,	,	,	,	,	,	,	,	,	,	,	,	,	,	,
1924	,	,	,	,	,	,	,	,	,	,	,	,	,	,	,
1925	,	,	,	,	,	,	,	,	,	,	,	,	,	,	,
1926	,	,	,	,	,	,	,	,	,	,	,	,	,	,	,
1927	,	,	,	,	,	,	,	,	,	,	,	,	,	,	,
1928	,	,	,	,	,	,	,	,	,	,	,	,	,	,	,
1929	,	,	,	,	,	,	,	,	,	,	,	,	,	,	,
1930	,	,	,	,	,	,	,	,	,	,	,	,	,	,	,
1931	,	,	,	,	,	,	,	,	,	,	,	,	,	,	,
1932	,	,	,	,	,	,	,	,	,	,	,	,	,	,	,
1933	,	,	,	,	,	,	,	,	,	,	,	,	,	,	,
1934	,	,	,	,	,	,	,	,	,	,	,	,	,	,	,
1935	,	,	,	,	,	,	,	,	,	,	,	,	,	,	,
1936	,	,	,	,	,	,	,	,	,	,	,	,	,	,	,
1937	,	,	,	,	,	,	,	,	,	,	,	,	,	,	,
1938	,	,	,	,	,	,	,	,	,	,	,	,	,	,	,
1939	,	,	,	,	,	,	,	,	,	,	,	,	,	,	,
1940	,	,	,	,	,	,	,	,	,	,	,	,	,	,	,
1941	,	,	,	,	,	,	,	,	,	,	,	,	,	,	,
1942	,	,	,	,	,	,	,	,	,	,	,	,	,	,	,
1943	,	,	,	,	,	,	,	,	,	,	,	,	,	,	,
1944	,	,	,	,	,	,	,	,	,	,	,	,	,	,	,
1945	,	,	,	,	,	,	,	,	,	,	,	,	,	,	,
1946	,	,	,	,	,	,	,	,	,	,	,	,	,	,	,
1947	,	,	,	,	,	,	,	,	,	,	,	,	,	,	,
1948	,	,	,	,	,	,	,	,	,	,	,	,	,	,	,
1949	,	,	,	,	,	,	,	,	,	,	,	,	,	,	,
1950	,	,	,	,	,	,	,	,	,	,	,	,	,	,	,
1951	,	,	,	,	,	,	,	,	,	,	,	,	,	,	,
1952	,	,	,	,	,	,	,	,	,	,	,	,	,	,	,
1953	,	,	,	,	,	,	,	,	,	,	,	,	,	,	,
1954	,	,	,	,	,	,	,	,	,	,	,	,	,	,	,
1955	,	,	,	,	,	,	,	,	,	,	,	,	,	,	,
1956	,	,	,	,	,	,	,	,	,	,	,	,	,	,	,
1957	,	,	,	,	,	,	,	,	,	,	,	,	,	,	,
1958	,	,	,	,	,	,	,	,	,	,	,	,	,	,	,
1959	,	,	,	,	,	,	,	,	,	,	,	,	,	,	,
1960	,	,	,	,	,	,	,	,	,	,	,	,	,	,	,
1961	,	,	,	,	,	,	,	,	,	,	,	,	,	,	,
1962	,	,	,	,	,	,	,	,	,	,	,	,	,	,	,
1963	,	,	,	,	,	,	,	,	,	,	,	,	,	,	,
1964	,	,	,	,	,	,	,	,	,	,	,	,	,	,	,
1965	,	,	,	,	,	,	,	,	,	,	,	,	,	,	,
1966	,	,	,	,	,	,	,	,	,	,	,	,	,	,	,
1967	,	,	,	,	,	,	,	,	,	,	,	,	,	,	,
1968	,	,	,	,	,	,	,	,	,	,	,	,	,	,	,
1969	,	,	,	,	,	,	,	,	,	,	,	,	,	,	,
1970	,	,	,	,	,	,	,	,	,	,	,	,	,	,	,
1971	,	,	,	,	,	,	,	,	,	,	,	,	,	,	,
1972	,	,	,	,	,	,	,	,	,	,	,	,	,	,	,
1973	,	,	,	,	,	,	,	,	,	,	,	,	,	,	,
1974	,	,	,	,	,	,	,	,	,	,	,	,	,	,	,
1975	,	,	,	,	,	,	,	,	,	,	,	,	,	,	,
1976	,	,	,	,	,	,	,	,	,	,	,	,	,	,	,
1977	,	,	,	,	,	,	,	,	,	,	,	,	,	,	,
1978	,	,	,	,	,	,	,	,	,	,	,	,	,	,	,
1979	,	,	,	,	,	,	,	,	,	,	,	,	,	,	,
1980	,	,	,	,	,	,	,	,	,	,	,	,	,	,	,
1981	,	,	,	,	,	,	,	,	,	,	,	,	,	,	,
1982	,	,	,	,	,	,	,	,	,	,	,	,	,	,	,
1983	,	,	,	,	,	,	,	,	,	,	,	,	,	,	,
1984	,	,	,	,	,	,	,	,	,	,	,	,	,	,	,
1985	,	,	,	,	,	,	,	,	,	,	,	,	,	,	,
1986	,	,	,	,	,	,	,	,	,	,	,	,	,	,	,
1987	,	,	,	,	,	,	,	,	,	,	,	,	,	,	,
1988	,	,	,	,	,	,	,	,	,	,	,	,	,	,	,
1989	,	,	,	,	,	,	,	,	,	,	,	,	,	,	,
1990	,	,	,	,	,	,	,	,	,	,	,	,	,	,	,
1991	,	,	,	,	,	,	,	,	,	,	,	,	,	,	,
1992	,	,	,	,	,	,	,	,	,	,	,	,	,	,	,
1993	,	,	,	,	,	,	,	,	,	,	,	,	,	,	,
1994	,	,	,	,	,	,	,	,	,	,	,	,	,	,	,
1995	,	,	,	,	,	,	,	,	,	,	,	,	,	,	,
1996	,	,	,	,	,	,	,	,	,	,	,	,	,	,	,
1997	,	,	,	,	,	,	,	,	,	,	,	,	,	,	,
1998	,	,	,	,	,	,	,	,	,	,	,	,	,	,	,
1999	,	,	,	,	,	,	,	,	,	,	,	,	,	,	,
[truncated: 13,001 more rows]
