# Supplementary material for: ParB spreading on DNA requires cytidine triphosphate in vitro
Source: eLife journal article supplement (doi:10.7554/elife.53515), 2020-02-20
Supplement: fig2-figsupp3-data1 [file Fig2_supp3_Zymomonas_ParB_rep1_2_3.xlsx]

## Sheet: FORMAT
	sample ID #1	sample ID #2	sample ID #3
data point	time point (sec), wavelength shift (nm)	time point (sec), wavelength shift (nm)	time point (sec), wavelength shift (nm)
1
2
3
.
.
.

## Sheet: Fig2_supp3_Zymomonas_B_rep1_2_3
	169bp closed parS DNA and Zymomonas ParB	169bp closed parS DNA and Zymomonas ParB 1mM ATP	169bp closed parS DNA and Zymomonas ParB 1mM GTP	169bp closed parS DNA and Zymomonas ParB 1mM UTP	169bp closed parS DNA and Zymomonas ParB	169bp closed parS DNA and Zymomonas ParB 1mM ATP	169bp closed parS DNA and Zymomonas ParB 1mM GTP	169bp closed parS DNA and Zymomonas ParB 1mM UTP	169bp closed parS DNA and Zymomonas ParB	169bp closed parS DNA and Zymomonas ParB 1mM ATP	169bp closed parS DNA and Zymomonas ParB 1mM GTP	169bp closed parS DNA and Zymomonas ParB 1mM UTP	169bp closed parS DNA and Zymomonas ParB 0.01mM CTP	169bp closed parS DNA and Zymomonas ParB 0.01mM CTP	169bp closed parS DNA and Zymomonas ParB 0.01mM CTP
1	0.000, -0.017	0.000, -0.008	0.000, -0.004	0.000, -0.009	0.000, -0.023	0.000, -0.025	0.000, -0.029	0.000, -0.027	0.000, -0.008	0.000, -0.022	0.000, -0.027	0.000, -0.019	0.000, -0.023	0.000, -0.020	0.000, -0.024
2	0.200, -0.016	0.200, -0.008	0.200, -0.004	0.200, -0.009	0.200, -0.023	0.200, -0.025	0.200, -0.028	0.200, -0.026	0.200, -0.007	0.200, -0.023	0.200, -0.026	0.200, -0.020	0.200, -0.024	0.200, -0.020	0.200, -0.025
3	0.400, -0.016	0.400, -0.009	0.400, -0.004	0.400, -0.009	0.400, -0.024	0.400, -0.026	0.400, -0.028	0.400, -0.025	0.400, -0.007	0.400, -0.023	0.400, -0.026	0.400, -0.021	0.400, -0.024	0.400, -0.020	0.400, -0.026
4	0.600, -0.015	0.600, -0.009	0.600, -0.004	0.600, -0.009	0.600, -0.024	0.600, -0.026	0.600, -0.029	0.600, -0.025	0.600, -0.007	0.600, -0.024	0.600, -0.025	0.600, -0.022	0.600, -0.024	0.600, -0.020	0.600, -0.027
5	0.800, -0.014	0.800, -0.009	0.800, -0.004	0.800, -0.010	0.800, -0.024	0.800, -0.027	0.800, -0.029	0.800, -0.024	0.800, -0.007	0.800, -0.024	0.800, -0.024	0.800, -0.023	0.800, -0.024	0.800, -0.020	0.800, -0.028
6	1.000, -0.013	1.000, -0.009	1.000, -0.004	1.000, -0.010	1.000, -0.024	1.000, -0.027	1.000, -0.029	1.000, -0.023	1.000, -0.008	1.000, -0.024	1.000, -0.024	1.000, -0.024	1.000, -0.024	1.000, -0.020	1.000, -0.028
7	1.200, -0.012	1.200, -0.009	1.200, -0.004	1.200, -0.010	1.200, -0.024	1.200, -0.027	1.200, -0.029	1.200, -0.023	1.200, -0.008	1.200, -0.025	1.200, -0.023	1.200, -0.025	1.200, -0.024	1.200, -0.020	1.200, -0.029
8	1.400, -0.011	1.400, -0.009	1.400, -0.004	1.400, -0.010	1.400, -0.024	1.400, -0.028	1.400, -0.029	1.400, -0.022	1.400, -0.008	1.400, -0.025	1.400, -0.023	1.400, -0.026	1.400, -0.024	1.400, -0.020	1.400, -0.029
9	1.600, -0.011	1.600, -0.009	1.600, -0.004	1.600, -0.010	1.600, -0.024	1.600, -0.028	1.600, -0.029	1.600, -0.022	1.600, -0.009	1.600, -0.025	1.600, -0.023	1.600, -0.026	1.600, -0.024	1.600, -0.020	1.600, -0.030
10	1.800, -0.010	1.800, -0.009	1.800, -0.004	1.800, -0.010	1.800, -0.023	1.800, -0.028	1.800, -0.029	1.800, -0.022	1.800, -0.009	1.800, -0.025	1.800, -0.023	1.800, -0.027	1.800, -0.024	1.800, -0.020	1.800, -0.030
11	2.000, -0.010	2.000, -0.008	2.000, -0.004	2.000, -0.009	2.000, -0.023	2.000, -0.028	2.000, -0.028	2.000, -0.022	2.000, -0.010	2.000, -0.025	2.000, -0.023	2.000, -0.027	2.000, -0.024	2.000, -0.020	2.000, -0.029
12	2.200, -0.010	2.200, -0.008	2.200, -0.004	2.200, -0.009	2.200, -0.022	2.200, -0.027	2.200, -0.028	2.200, -0.022	2.200, -0.011	2.200, -0.025	2.200, -0.023	2.200, -0.026	2.200, -0.024	2.200, -0.020	2.200, -0.029
13	2.400, -0.010	2.400, -0.007	2.400, -0.004	2.400, -0.009	2.400, -0.022	2.400, -0.027	2.400, -0.027	2.400, -0.022	2.400, -0.011	2.400, -0.025	2.400, -0.023	2.400, -0.026	2.400, -0.023	2.400, -0.020	2.400, -0.028
14	2.600, -0.011	2.600, -0.007	2.600, -0.004	2.600, -0.009	2.600, -0.021	2.600, -0.026	2.600, -0.027	2.600, -0.022	2.600, -0.011	2.600, -0.025	2.600, -0.023	2.600, -0.026	2.600, -0.023	2.600, -0.019	2.600, -0.028
15	2.800, -0.011	2.800, -0.007	2.800, -0.004	2.800, -0.009	2.800, -0.021	2.800, -0.026	2.800, -0.026	2.800, -0.023	2.800, -0.012	2.800, -0.025	2.800, -0.023	2.800, -0.026	2.800, -0.023	2.800, -0.019	2.800, -0.027
16	3.000, -0.011	3.000, -0.006	3.000, -0.004	3.000, -0.008	3.000, -0.021	3.000, -0.025	3.000, -0.026	3.000, -0.023	3.000, -0.012	3.000, -0.024	3.000, -0.023	3.000, -0.026	3.000, -0.023	3.000, -0.019	3.000, -0.027
17	3.200, -0.011	3.200, -0.006	3.200, -0.003	3.200, -0.008	3.200, -0.020	3.200, -0.025	3.200, -0.025	3.200, -0.023	3.200, -0.012	3.200, -0.024	3.200, -0.023	3.200, -0.025	3.200, -0.023	3.200, -0.019	3.200, -0.027
18	3.400, -0.010	3.400, -0.006	3.400, -0.003	3.400, -0.008	3.400, -0.020	3.400, -0.024	3.400, -0.025	3.400, -0.023	3.400, -0.012	3.400, -0.024	3.400, -0.023	3.400, -0.025	3.400, -0.022	3.400, -0.019	3.400, -0.026
19	3.600, -0.010	3.600, -0.006	3.600, -0.003	3.600, -0.008	3.600, -0.020	3.600, -0.024	3.600, -0.024	3.600, -0.022	3.600, -0.012	3.600, -0.024	3.600, -0.023	3.600, -0.025	3.600, -0.022	3.600, -0.019	3.600, -0.026
20	3.800, -0.010	3.800, -0.005	3.800, -0.003	3.800, -0.008	3.800, -0.020	3.800, -0.024	3.800, -0.024	3.800, -0.022	3.800, -0.012	3.800, -0.023	3.800, -0.022	3.800, -0.024	3.800, -0.021	3.800, -0.019	3.800, -0.026
21	4.000, -0.009	4.000, -0.005	4.000, -0.003	4.000, -0.007	4.000, -0.019	4.000, -0.024	4.000, -0.023	4.000, -0.022	4.000, -0.011	4.000, -0.023	4.000, -0.022	4.000, -0.024	4.000, -0.021	4.000, -0.018	4.000, -0.025
22	4.200, -0.009	4.200, -0.005	4.200, -0.003	4.200, -0.007	4.200, -0.019	4.200, -0.024	4.200, -0.023	4.200, -0.022	4.200, -0.011	4.200, -0.023	4.200, -0.022	4.200, -0.024	4.200, -0.021	4.200, -0.018	4.200, -0.025
23	4.400, -0.009	4.400, -0.005	4.400, -0.003	4.400, -0.007	4.400, -0.019	4.400, -0.024	4.400, -0.023	4.400, -0.021	4.400, -0.011	4.400, -0.022	4.400, -0.022	4.400, -0.023	4.400, -0.021	4.400, -0.018	4.400, -0.024
24	4.600, -0.008	4.600, -0.005	4.600, -0.003	4.600, -0.007	4.600, -0.019	4.600, -0.024	4.600, -0.023	4.600, -0.021	4.600, -0.011	4.600, -0.022	4.600, -0.022	4.600, -0.023	4.600, -0.020	4.600, -0.018	4.600, -0.024
25	4.800, -0.008	4.800, -0.005	4.800, -0.003	4.800, -0.007	4.800, -0.018	4.800, -0.024	4.800, -0.022	4.800, -0.021	4.800, -0.011	4.800, -0.022	4.800, -0.021	4.800, -0.023	4.800, -0.020	4.800, -0.017	4.800, -0.024
26	5.000, -0.008	5.000, -0.005	5.000, -0.003	5.000, -0.007	5.000, -0.018	5.000, -0.024	5.000, -0.022	5.000, -0.020	5.000, -0.011	5.000, -0.022	5.000, -0.021	5.000, -0.023	5.000, -0.020	5.000, -0.017	5.000, -0.023
27	5.200, -0.007	5.200, -0.005	5.200, -0.003	5.200, -0.007	5.200, -0.017	5.200, -0.024	5.200, -0.022	5.200, -0.020	5.200, -0.011	5.200, -0.022	5.200, -0.020	5.200, -0.023	5.200, -0.020	5.200, -0.016	5.200, -0.023
28	5.400, -0.007	5.400, -0.005	5.400, -0.003	5.400, -0.007	5.400, -0.017	5.400, -0.024	5.400, -0.022	5.400, -0.019	5.400, -0.011	5.400, -0.021	5.400, -0.020	5.400, -0.022	5.400, -0.019	5.400, -0.016	5.400, -0.022
29	5.600, -0.007	5.600, -0.006	5.600, -0.003	5.600, -0.007	5.600, -0.016	5.600, -0.024	5.600, -0.022	5.600, -0.019	5.600, -0.011	5.600, -0.021	5.600, -0.020	5.600, -0.022	5.600, -0.019	5.600, -0.016	5.600, -0.022
30	5.800, -0.007	5.800, -0.006	5.800, -0.003	5.800, -0.006	5.800, -0.016	5.800, -0.023	5.800, -0.021	5.800, -0.018	5.800, -0.011	5.800, -0.020	5.800, -0.019	5.800, -0.022	5.800, -0.019	5.800, -0.016	5.800, -0.022
31	6.000, -0.007	6.000, -0.006	6.000, -0.003	6.000, -0.007	6.000, -0.015	6.000, -0.023	6.000, -0.021	6.000, -0.018	6.000, -0.011	6.000, -0.020	6.000, -0.019	6.000, -0.022	6.000, -0.019	6.000, -0.015	6.000, -0.021
32	6.200, -0.007	6.200, -0.006	6.200, -0.003	6.200, -0.007	6.200, -0.015	6.200, -0.023	6.200, -0.021	6.200, -0.017	6.200, -0.011	6.200, -0.020	6.200, -0.018	6.200, -0.021	6.200, -0.018	6.200, -0.015	6.200, -0.021
33	6.400, -0.007	6.400, -0.006	6.400, -0.003	6.400, -0.007	6.400, -0.015	6.400, -0.023	6.400, -0.020	6.400, -0.017	6.400, -0.010	6.400, -0.019	6.400, -0.018	6.400, -0.021	6.400, -0.018	6.400, -0.015	6.400, -0.021
34	6.600, -0.006	6.600, -0.006	6.600, -0.004	6.600, -0.007	6.600, -0.015	6.600, -0.022	6.600, -0.020	6.600, -0.017	6.600, -0.010	6.600, -0.019	6.600, -0.018	6.600, -0.021	6.600, -0.018	6.600, -0.014	6.600, -0.021
35	6.800, -0.006	6.800, -0.006	6.800, -0.004	6.800, -0.007	6.800, -0.014	6.800, -0.022	6.800, -0.020	6.800, -0.017	6.800, -0.010	6.800, -0.018	6.800, -0.017	6.800, -0.021	6.800, -0.017	6.800, -0.014	6.800, -0.021
36	7.000, -0.006	7.000, -0.005	7.000, -0.004	7.000, -0.007	7.000, -0.014	7.000, -0.021	7.000, -0.019	7.000, -0.017	7.000, -0.010	7.000, -0.018	7.000, -0.017	7.000, -0.020	7.000, -0.017	7.000, -0.013	7.000, -0.020
37	7.200, -0.006	7.200, -0.005	7.200, -0.004	7.200, -0.008	7.200, -0.014	7.200, -0.021	7.200, -0.019	7.200, -0.017	7.200, -0.009	7.200, -0.018	7.200, -0.017	7.200, -0.020	7.200, -0.017	7.200, -0.013	7.200, -0.020
38	7.400, -0.006	7.400, -0.005	7.400, -0.004	7.400, -0.008	7.400, -0.014	7.400, -0.021	7.400, -0.019	7.400, -0.017	7.400, -0.009	7.400, -0.018	7.400, -0.017	7.400, -0.020	7.400, -0.016	7.400, -0.013	7.400, -0.020
39	7.600, -0.005	7.600, -0.005	7.600, -0.005	7.600, -0.008	7.600, -0.014	7.600, -0.020	7.600, -0.019	7.600, -0.017	7.600, -0.009	7.600, -0.017	7.600, -0.017	7.600, -0.019	7.600, -0.016	7.600, -0.012	7.600, -0.020
40	7.800, -0.005	7.800, -0.005	7.800, -0.005	7.800, -0.008	7.800, -0.013	7.800, -0.020	7.800, -0.018	7.800, -0.017	7.800, -0.008	7.800, -0.017	7.800, -0.016	7.800, -0.019	7.800, -0.015	7.800, -0.012	7.800, -0.020
41	8.000, -0.005	8.000, -0.005	8.000, -0.005	8.000, -0.008	8.000, -0.013	8.000, -0.020	8.000, -0.018	8.000, -0.017	8.000, -0.008	8.000, -0.017	8.000, -0.016	8.000, -0.019	8.000, -0.015	8.000, -0.012	8.000, -0.020
42	8.200, -0.005	8.200, -0.006	8.200, -0.005	8.200, -0.008	8.200, -0.013	8.200, -0.020	8.200, -0.018	8.200, -0.016	8.200, -0.008	8.200, -0.016	8.200, -0.015	8.200, -0.019	8.200, -0.014	8.200, -0.011	8.200, -0.019
43	8.400, -0.005	8.400, -0.006	8.400, -0.005	8.400, -0.007	8.400, -0.013	8.400, -0.019	8.400, -0.018	8.400, -0.016	8.400, -0.008	8.400, -0.016	8.400, -0.015	8.400, -0.018	8.400, -0.014	8.400, -0.011	8.400, -0.019
44	8.600, -0.005	8.600, -0.006	8.600, -0.004	8.600, -0.007	8.600, -0.012	8.600, -0.019	8.600, -0.017	8.600, -0.016	8.600, -0.008	8.600, -0.016	8.600, -0.015	8.600, -0.018	8.600, -0.014	8.600, -0.011	8.600, -0.019
45	8.800, -0.005	8.800, -0.006	8.800, -0.004	8.800, -0.007	8.800, -0.012	8.800, -0.019	8.800, -0.017	8.800, -0.015	8.800, -0.008	8.800, -0.016	8.800, -0.014	8.800, -0.018	8.800, -0.014	8.800, -0.011	8.800, -0.019
46	9.000, -0.005	9.000, -0.006	9.000, -0.004	9.000, -0.007	9.000, -0.011	9.000, -0.018	9.000, -0.017	9.000, -0.015	9.000, -0.008	9.000, -0.016	9.000, -0.014	9.000, -0.017	9.000, -0.014	9.000, -0.011	9.000, -0.019
47	9.200, -0.005	9.200, -0.006	9.200, -0.004	9.200, -0.007	9.200, -0.011	9.200, -0.018	9.200, -0.017	9.200, -0.014	9.200, -0.008	9.200, -0.016	9.200, -0.014	9.200, -0.017	9.200, -0.013	9.200, -0.011	9.200, -0.018
48	9.400, -0.004	9.400, -0.006	9.400, -0.004	9.400, -0.006	9.400, -0.011	9.400, -0.018	9.400, -0.017	9.400, -0.013	9.400, -0.007	9.400, -0.016	9.400, -0.014	9.400, -0.017	9.400, -0.013	9.400, -0.010	9.400, -0.018
49	9.600, -0.004	9.600, -0.006	9.600, -0.004	9.600, -0.006	9.600, -0.011	9.600, -0.017	9.600, -0.017	9.600, -0.013	9.600, -0.007	9.600, -0.015	9.600, -0.014	9.600, -0.016	9.600, -0.013	9.600, -0.010	9.600, -0.018
50	9.800, -0.004	9.800, -0.005	9.800, -0.004	9.800, -0.006	9.800, -0.010	9.800, -0.017	9.800, -0.017	9.800, -0.013	9.800, -0.007	9.800, -0.015	9.800, -0.014	9.800, -0.016	9.800, -0.013	9.800, -0.010	9.800, -0.018
51	10.000, -0.004	10.000, -0.005	10.000, -0.004	10.000, -0.006	10.000, -0.010	10.000, -0.017	10.000, -0.017	10.000, -0.013	10.000, -0.007	10.000, -0.015	10.000, -0.014	10.000, -0.015	10.000, -0.013	10.000, -0.010	10.000, -0.017
52	10.200, -0.004	10.200, -0.005	10.200, -0.004	10.200, -0.006	10.200, -0.010	10.200, -0.017	10.200, -0.016	10.200, -0.013	10.200, -0.006	10.200, -0.015	10.200, -0.014	10.200, -0.015	10.200, -0.013	10.200, -0.010	10.200, -0.017
53	10.400, -0.004	10.400, -0.005	10.400, -0.004	10.400, -0.006	10.400, -0.010	10.400, -0.017	10.400, -0.016	10.400, -0.013	10.400, -0.006	10.400, -0.015	10.400, -0.014	10.400, -0.015	10.400, -0.013	10.400, -0.009	10.400, -0.016
54	10.600, -0.003	10.600, -0.004	10.600, -0.004	10.600, -0.006	10.600, -0.010	10.600, -0.016	10.600, -0.016	10.600, -0.012	10.600, -0.006	10.600, -0.015	10.600, -0.014	10.600, -0.015	10.600, -0.013	10.600, -0.009	10.600, -0.016
55	10.800, -0.003	10.800, -0.004	10.800, -0.004	10.800, -0.005	10.800, -0.010	10.800, -0.016	10.800, -0.015	10.800, -0.012	10.800, -0.006	10.800, -0.014	10.800, -0.014	10.800, -0.015	10.800, -0.012	10.800, -0.009	10.800, -0.016
56	11.000, -0.003	11.000, -0.004	11.000, -0.004	11.000, -0.005	11.000, -0.010	11.000, -0.016	11.000, -0.015	11.000, -0.012	11.000, -0.006	11.000, -0.014	11.000, -0.013	11.000, -0.015	11.000, -0.012	11.000, -0.009	11.000, -0.015
57	11.200, -0.003	11.200, -0.004	11.200, -0.005	11.200, -0.005	11.200, -0.010	11.200, -0.016	11.200, -0.015	11.200, -0.012	11.200, -0.006	11.200, -0.014	11.200, -0.013	11.200, -0.015	11.200, -0.012	11.200, -0.009	11.200, -0.015
58	11.400, -0.003	11.400, -0.004	11.400, -0.004	11.400, -0.005	11.400, -0.010	11.400, -0.016	11.400, -0.014	11.400, -0.012	11.400, -0.006	11.400, -0.014	11.400, -0.013	11.400, -0.015	11.400, -0.011	11.400, -0.008	11.400, -0.015
59	11.600, -0.003	11.600, -0.004	11.600, -0.004	11.600, -0.005	11.600, -0.010	11.600, -0.015	11.600, -0.014	11.600, -0.012	11.600, -0.006	11.600, -0.014	11.600, -0.012	11.600, -0.015	11.600, -0.011	11.600, -0.008	11.600, -0.015
60	11.800, -0.003	11.800, -0.004	11.800, -0.004	11.800, -0.005	11.800, -0.010	11.800, -0.015	11.800, -0.014	11.800, -0.012	11.800, -0.006	11.800, -0.013	11.800, -0.012	11.800, -0.015	11.800, -0.011	11.800, -0.008	11.800, -0.014
61	12.000, -0.003	12.000, -0.005	12.000, -0.004	12.000, -0.005	12.000, -0.010	12.000, -0.015	12.000, -0.014	12.000, -0.012	12.000, -0.006	12.000, -0.013	12.000, -0.012	12.000, -0.015	12.000, -0.011	12.000, -0.008	12.000, -0.014
62	12.200, -0.004	12.200, -0.005	12.200, -0.004	12.200, -0.005	12.200, -0.009	12.200, -0.014	12.200, -0.013	12.200, -0.012	12.200, -0.006	12.200, -0.013	12.200, -0.011	12.200, -0.015	12.200, -0.010	12.200, -0.008	12.200, -0.014
63	12.400, -0.004	12.400, -0.005	12.400, -0.004	12.400, -0.005	12.400, -0.009	12.400, -0.014	12.400, -0.013	12.400, -0.011	12.400, -0.006	12.400, -0.013	12.400, -0.011	12.400, -0.014	12.400, -0.010	12.400, -0.008	12.400, -0.014
64	12.600, -0.004	12.600, -0.005	12.600, -0.003	12.600, -0.005	12.600, -0.009	12.600, -0.013	12.600, -0.013	12.600, -0.011	12.600, -0.005	12.600, -0.013	12.600, -0.011	12.600, -0.014	12.600, -0.010	12.600, -0.008	12.600, -0.014
65	12.800, -0.004	12.800, -0.005	12.800, -0.003	12.800, -0.005	12.800, -0.008	12.800, -0.012	12.800, -0.012	12.800, -0.011	12.800, -0.005	12.800, -0.012	12.800, -0.011	12.800, -0.013	12.800, -0.010	12.800, -0.008	12.800, -0.014
66	13.000, -0.004	13.000, -0.005	13.000, -0.003	13.000, -0.005	13.000, -0.008	13.000, -0.012	13.000, -0.012	13.000, -0.011	13.000, -0.004	13.000, -0.012	13.000, -0.011	13.000, -0.013	13.000, -0.010	13.000, -0.008	13.000, -0.014
67	13.200, -0.004	13.200, -0.005	13.200, -0.003	13.200, -0.005	13.200, -0.007	13.200, -0.011	13.200, -0.012	13.200, -0.010	13.200, -0.004	13.200, -0.012	13.200, -0.011	13.200, -0.013	13.200, -0.010	13.200, -0.008	13.200, -0.014
68	13.400, -0.003	13.400, -0.005	13.400, -0.003	13.400, -0.005	13.400, -0.007	13.400, -0.011	13.400, -0.012	13.400, -0.010	13.400, -0.003	13.400, -0.012	13.400, -0.011	13.400, -0.012	13.400, -0.010	13.400, -0.008	13.400, -0.013
69	13.600, -0.003	13.600, -0.004	13.600, -0.003	13.600, -0.004	13.600, -0.007	13.600, -0.011	13.600, -0.012	13.600, -0.010	13.600, -0.003	13.600, -0.012	13.600, -0.011	13.600, -0.012	13.600, -0.010	13.600, -0.008	13.600, -0.013
70	13.800, -0.003	13.800, -0.004	13.800, -0.003	13.800, -0.004	13.800, -0.006	13.800, -0.011	13.800, -0.011	13.800, -0.010	13.800, -0.003	13.800, -0.012	13.800, -0.011	13.800, -0.012	13.800, -0.010	13.800, -0.008	13.800, -0.012
71	14.000, -0.003	14.000, -0.003	14.000, -0.003	14.000, -0.003	14.000, -0.006	14.000, -0.011	14.000, -0.011	14.000, -0.010	14.000, -0.003	14.000, -0.011	14.000, -0.011	14.000, -0.011	14.000, -0.010	14.000, -0.008	14.000, -0.012
72	14.200, -0.003	14.200, -0.003	14.200, -0.003	14.200, -0.003	14.200, -0.006	14.200, -0.011	14.200, -0.011	14.200, -0.010	14.200, -0.003	14.200, -0.011	14.200, -0.011	14.200, -0.011	14.200, -0.009	14.200, -0.008	14.200, -0.011
73	14.400, -0.003	14.400, -0.002	14.400, -0.003	14.400, -0.003	14.400, -0.006	14.400, -0.011	14.400, -0.011	14.400, -0.010	14.400, -0.003	14.400, -0.011	14.400, -0.010	14.400, -0.011	14.400, -0.009	14.400, -0.008	14.400, -0.011
74	14.600, -0.003	14.600, -0.002	14.600, -0.003	14.600, -0.003	14.600, -0.007	14.600, -0.011	14.600, -0.010	14.600, -0.010	14.600, -0.003	14.600, -0.010	14.600, -0.010	14.600, -0.010	14.600, -0.009	14.600, -0.009	14.600, -0.011
75	14.800, -0.003	14.800, -0.002	14.800, -0.003	14.800, -0.003	14.800, -0.007	14.800, -0.011	14.800, -0.010	14.800, -0.010	14.800, -0.003	14.800, -0.010	14.800, -0.009	14.800, -0.010	14.800, -0.009	14.800, -0.009	14.800, -0.010
76	15.000, -0.003	15.000, -0.002	15.000, -0.003	15.000, -0.003	15.000, -0.007	15.000, -0.011	15.000, -0.010	15.000, -0.010	15.000, -0.003	15.000, -0.010	15.000, -0.009	15.000, -0.009	15.000, -0.008	15.000, -0.009	15.000, -0.010
77	15.200, -0.003	15.200, -0.002	15.200, -0.003	15.200, -0.003	15.200, -0.007	15.200, -0.011	15.200, -0.010	15.200, -0.010	15.200, -0.003	15.200, -0.010	15.200, -0.008	15.200, -0.009	15.200, -0.008	15.200, -0.008	15.200, -0.010
78	15.400, -0.003	15.400, -0.002	15.400, -0.003	15.400, -0.003	15.400, -0.007	15.400, -0.011	15.400, -0.010	15.400, -0.009	15.400, -0.003	15.400, -0.009	15.400, -0.008	15.400, -0.009	15.400, -0.007	15.400, -0.008	15.400, -0.009
79	15.600, -0.003	15.600, -0.003	15.600, -0.003	15.600, -0.003	15.600, -0.007	15.600, -0.011	15.600, -0.009	15.600, -0.009	15.600, -0.003	15.600, -0.009	15.600, -0.008	15.600, -0.009	15.600, -0.007	15.600, -0.008	15.600, -0.009
80	15.800, -0.003	15.800, -0.003	15.800, -0.003	15.800, -0.003	15.800, -0.006	15.800, -0.011	15.800, -0.009	15.800, -0.009	15.800, -0.003	15.800, -0.009	15.800, -0.008	15.800, -0.008	15.800, -0.007	15.800, -0.008	15.800, -0.009
81	16.000, -0.003	16.000, -0.003	16.000, -0.003	16.000, -0.003	16.000, -0.006	16.000, -0.011	16.000, -0.009	16.000, -0.008	16.000, -0.003	16.000, -0.009	16.000, -0.008	16.000, -0.008	16.000, -0.006	16.000, -0.007	16.000, -0.009
82	16.200, -0.003	16.200, -0.003	16.200, -0.003	16.200, -0.004	16.200, -0.005	16.200, -0.011	16.200, -0.008	16.200, -0.008	16.200, -0.003	16.200, -0.009	16.200, -0.008	16.200, -0.008	16.200, -0.006	16.200, -0.007	16.200, -0.008
83	16.400, -0.003	16.400, -0.003	16.400, -0.003	16.400, -0.004	16.400, -0.005	16.400, -0.010	16.400, -0.008	16.400, -0.008	16.400, -0.003	16.400, -0.009	16.400, -0.008	16.400, -0.008	16.400, -0.006	16.400, -0.007	16.400, -0.008
84	16.600, -0.003	16.600, -0.003	16.600, -0.002	16.600, -0.004	16.600, -0.005	16.600, -0.010	16.600, -0.007	16.600, -0.007	16.600, -0.003	16.600, -0.009	16.600, -0.008	16.600, -0.008	16.600, -0.006	16.600, -0.006	16.600, -0.008
85	16.800, -0.002	16.800, -0.003	16.800, -0.002	16.800, -0.004	16.800, -0.004	16.800, -0.010	16.800, -0.007	16.800, -0.007	16.800, -0.003	16.800, -0.009	16.800, -0.008	16.800, -0.008	16.800, -0.006	16.800, -0.006	16.800, -0.009
86	17.000, -0.002	17.000, -0.003	17.000, -0.002	17.000, -0.004	17.000, -0.004	17.000, -0.010	17.000, -0.007	17.000, -0.007	17.000, -0.003	17.000, -0.009	17.000, -0.008	17.000, -0.009	17.000, -0.006	17.000, -0.006	17.000, -0.008
87	17.200, -0.002	17.200, -0.003	17.200, -0.002	17.200, -0.004	17.200, -0.004	17.200, -0.010	17.200, -0.007	17.200, -0.006	17.200, -0.003	17.200, -0.009	17.200, -0.008	17.200, -0.008	17.200, -0.006	17.200, -0.006	17.200, -0.008
88	17.400, -0.002	17.400, -0.002	17.400, -0.002	17.400, -0.003	17.400, -0.003	17.400, -0.010	17.400, -0.007	17.400, -0.006	17.400, -0.003	17.400, -0.009	17.400, -0.008	17.400, -0.008	17.400, -0.006	17.400, -0.006	17.400, -0.008
89	17.600, -0.002	17.600, -0.002	17.600, -0.002	17.600, -0.003	17.600, -0.003	17.600, -0.010	17.600, -0.007	17.600, -0.006	17.600, -0.003	17.600, -0.009	17.600, -0.008	17.600, -0.008	17.600, -0.006	17.600, -0.006	17.600, -0.008
90	17.800, -0.002	17.800, -0.002	17.800, -0.002	17.800, -0.003	17.800, -0.003	17.800, -0.010	17.800, -0.007	17.800, -0.007	17.800, -0.003	17.800, -0.009	17.800, -0.008	17.800, -0.008	17.800, -0.006	17.800, -0.005	17.800, -0.008
91	18.000, -0.002	18.000, -0.002	18.000, -0.002	18.000, -0.003	18.000, -0.003	18.000, -0.010	18.000, -0.007	18.000, -0.007	18.000, -0.003	18.000, -0.008	18.000, -0.008	18.000, -0.008	18.000, -0.005	18.000, -0.005	18.000, -0.008
92	18.200, -0.003	18.200, -0.002	18.200, -0.002	18.200, -0.003	18.200, -0.003	18.200, -0.010	18.200, -0.007	18.200, -0.007	18.200, -0.003	18.200, -0.008	18.200, -0.007	18.200, -0.008	18.200, -0.005	18.200, -0.005	18.200, -0.008
93	18.400, -0.003	18.400, -0.002	18.400, -0.002	18.400, -0.003	18.400, -0.003	18.400, -0.009	18.400, -0.007	18.400, -0.007	18.400, -0.003	18.400, -0.008	18.400, -0.007	18.400, -0.007	18.400, -0.005	18.400, -0.005	18.400, -0.008
94	18.600, -0.003	18.600, -0.002	18.600, -0.003	18.600, -0.003	18.600, -0.003	18.600, -0.009	18.600, -0.007	18.600, -0.007	18.600, -0.003	18.600, -0.008	18.600, -0.007	18.600, -0.007	18.600, -0.005	18.600, -0.005	18.600, -0.007
95	18.800, -0.003	18.800, -0.002	18.800, -0.003	18.800, -0.003	18.800, -0.003	18.800, -0.009	18.800, -0.007	18.800, -0.007	18.800, -0.003	18.800, -0.008	18.800, -0.006	18.800, -0.007	18.800, -0.005	18.800, -0.005	18.800, -0.007
96	19.000, -0.002	19.000, -0.002	19.000, -0.003	19.000, -0.003	19.000, -0.003	19.000, -0.009	19.000, -0.007	19.000, -0.007	19.000, -0.003	19.000, -0.007	19.000, -0.006	19.000, -0.006	19.000, -0.005	19.000, -0.005	19.000, -0.007
97	19.200, -0.002	19.200, -0.003	19.200, -0.003	19.200, -0.003	19.200, -0.004	19.200, -0.009	19.200, -0.007	19.200, -0.007	19.200, -0.003	19.200, -0.007	19.200, -0.006	19.200, -0.006	19.200, -0.005	19.200, -0.005	19.200, -0.007
98	19.400, -0.002	19.400, -0.003	19.400, -0.003	19.400, -0.003	19.400, -0.004	19.400, -0.008	19.400, -0.007	19.400, -0.007	19.400, -0.003	19.400, -0.007	19.400, -0.006	19.400, -0.006	19.400, -0.005	19.400, -0.005	19.400, -0.007
99	19.600, -0.002	19.600, -0.003	19.600, -0.004	19.600, -0.002	19.600, -0.004	19.600, -0.008	19.600, -0.007	19.600, -0.007	19.600, -0.003	19.600, -0.007	19.600, -0.006	19.600, -0.006	19.600, -0.005	19.600, -0.005	19.600, -0.006
100	19.800, -0.001	19.800, -0.002	19.800, -0.004	19.800, -0.002	19.800, -0.004	19.800, -0.007	19.800, -0.007	19.800, -0.007	19.800, -0.002	19.800, -0.007	19.800, -0.006	19.800, -0.006	19.800, -0.005	19.800, -0.005	19.800, -0.006
101	20.000, -0.001	20.000, -0.002	20.000, -0.004	20.000, -0.002	20.000, -0.004	20.000, -0.007	20.000, -0.007	20.000, -0.007	20.000, -0.002	20.000, -0.006	20.000, -0.005	20.000, -0.006	20.000, -0.005	20.000, -0.005	20.000, -0.006
102	20.200, -0.001	20.200, -0.002	20.200, -0.003	20.200, -0.002	20.200, -0.005	20.200, -0.006	20.200, -0.007	20.200, -0.007	20.200, -0.002	20.200, -0.006	20.200, -0.005	20.200, -0.006	20.200, -0.004	20.200, -0.005	20.200, -0.006
103	20.400, -0.001	20.400, -0.002	20.400, -0.003	20.400, -0.002	20.400, -0.005	20.400, -0.006	20.400, -0.007	20.400, -0.007	20.400, -0.002	20.400, -0.006	20.400, -0.005	20.400, -0.006	20.400, -0.004	20.400, -0.005	20.400, -0.006
104	20.600, -0.001	20.600, -0.002	20.600, -0.003	20.600, -0.002	20.600, -0.005	20.600, -0.005	20.600, -0.006	20.600, -0.006	20.600, -0.002	20.600, -0.005	20.600, -0.005	20.600, -0.006	20.600, -0.004	20.600, -0.005	20.600, -0.006
105	20.800, -0.000	20.800, -0.002	20.800, -0.002	20.800, -0.002	20.800, -0.005	20.800, -0.005	20.800, -0.006	20.800, -0.006	20.800, -0.002	20.800, -0.005	20.800, -0.004	20.800, -0.006	20.800, -0.003	20.800, -0.005	20.800, -0.005
106	21.000, -0.000	21.000, -0.002	21.000, -0.002	21.000, -0.003	21.000, -0.004	21.000, -0.005	21.000, -0.006	21.000, -0.005	21.000, -0.002	21.000, -0.005	21.000, -0.004	21.000, -0.005	21.000, -0.003	21.000, -0.004	21.000, -0.005
107	21.200, -0.000	21.200, -0.002	21.200, -0.002	21.200, -0.003	21.200, -0.004	21.200, -0.005	21.200, -0.006	21.200, -0.005	21.200, -0.002	21.200, -0.005	21.200, -0.004	21.200, -0.005	21.200, -0.003	21.200, -0.004	21.200, -0.005
108	21.400, -0.000	21.400, -0.002	21.400, -0.001	21.400, -0.003	21.400, -0.004	21.400, -0.005	21.400, -0.005	21.400, -0.004	21.400, -0.002	21.400, -0.005	21.400, -0.004	21.400, -0.005	21.400, -0.003	21.400, -0.004	21.400, -0.005
109	21.600, -0.000	21.600, -0.002	21.600, -0.001	21.600, -0.003	21.600, -0.003	21.600, -0.005	21.600, -0.005	21.600, -0.004	21.600, -0.002	21.600, -0.005	21.600, -0.004	21.600, -0.005	21.600, -0.003	21.600, -0.004	21.600, -0.005
110	21.800, -0.001	21.800, -0.002	21.800, -0.001	21.800, -0.003	21.800, -0.003	21.800, -0.005	21.800, -0.005	21.800, -0.003	21.800, -0.001	21.800, -0.005	21.800, -0.004	21.800, -0.005	21.800, -0.002	21.800, -0.004	21.800, -0.006
111	22.000, -0.001	22.000, -0.002	22.000, -0.001	22.000, -0.003	22.000, -0.003	22.000, -0.004	22.000, -0.004	22.000, -0.003	22.000, -0.001	22.000, -0.005	22.000, -0.004	22.000, -0.005	22.000, -0.002	22.000, -0.004	22.000, -0.006
112	22.200, -0.001	22.200, -0.001	22.200, -0.001	22.200, -0.003	22.200, -0.002	22.200, -0.005	22.200, -0.004	22.200, -0.003	22.200, -0.001	22.200, -0.005	22.200, -0.003	22.200, -0.004	22.200, -0.002	22.200, -0.003	22.200, -0.006
113	22.400, -0.001	22.400, -0.001	22.400, -0.001	22.400, -0.003	22.400, -0.002	22.400, -0.005	22.400, -0.004	22.400, -0.003	22.400, -0.001	22.400, -0.005	22.400, -0.004	22.400, -0.004	22.400, -0.002	22.400, -0.003	22.400, -0.006
114	22.600, -0.001	22.600, -0.001	22.600, -0.001	22.600, -0.003	22.600, -0.002	22.600, -0.005	22.600, -0.003	22.600, -0.003	22.600, -0.001	22.600, -0.005	22.600, -0.004	22.600, -0.004	22.600, -0.002	22.600, -0.003	22.600, -0.006
115	22.800, -0.001	22.800, -0.001	22.800, -0.001	22.800, -0.003	22.800, -0.002	22.800, -0.005	22.800, -0.003	22.800, -0.003	22.800, -0.001	22.800, -0.005	22.800, -0.004	22.800, -0.004	22.800, -0.002	22.800, -0.003	22.800, -0.006
116	23.000, -0.001	23.000, -0.001	23.000, -0.001	23.000, -0.003	23.000, -0.002	23.000, -0.005	23.000, -0.003	23.000, -0.003	23.000, -0.000	23.000, -0.005	23.000, -0.004	23.000, -0.003	23.000, -0.002	23.000, -0.003	23.000, -0.005
117	23.200, -0.001	23.200, -0.001	23.200, -0.002	23.200, -0.003	23.200, -0.002	23.200, -0.005	23.200, -0.003	23.200, -0.003	23.200, -0.000	23.200, -0.005	23.200, -0.004	23.200, -0.003	23.200, -0.002	23.200, -0.003	23.200, -0.005
118	23.400, -0.001	23.400, -0.000	23.400, -0.002	23.400, -0.002	23.400, -0.002	23.400, -0.005	23.400, -0.003	23.400, -0.003	23.400, 0.000	23.400, -0.005	23.400, -0.004	23.400, -0.002	23.400, -0.002	23.400, -0.003	23.400, -0.005
119	23.600, -0.001	23.600, -0.000	23.600, -0.002	23.600, -0.002	23.600, -0.002	23.600, -0.004	23.600, -0.003	23.600, -0.003	23.600, 0.000	23.600, -0.005	23.600, -0.003	23.600, -0.002	23.600, -0.002	23.600, -0.003	23.600, -0.004
120	23.800, -0.000	23.800, -0.000	23.800, -0.002	23.800, -0.002	23.800, -0.002	23.800, -0.004	23.800, -0.003	23.800, -0.003	23.800, 0.000	23.800, -0.004	23.800, -0.003	23.800, -0.002	23.800, -0.002	23.800, -0.003	23.800, -0.004
121	24.000, -0.000	24.000, 0.000	24.000, -0.002	24.000, -0.002	24.000, -0.002	24.000, -0.004	24.000, -0.003	24.000, -0.003	24.000, 0.000	24.000, -0.004	24.000, -0.003	24.000, -0.002	24.000, -0.002	24.000, -0.003	24.000, -0.004
122	24.200, 0.000	24.200, 0.000	24.200, -0.002	24.200, -0.002	24.200, -0.002	24.200, -0.003	24.200, -0.002	24.200, -0.003	24.200, 0.000	24.200, -0.004	24.200, -0.002	24.200, -0.001	24.200, -0.002	24.200, -0.003	24.200, -0.004
123	24.400, 0.000	24.400, -0.000	24.400, -0.001	24.400, -0.001	24.400, -0.002	24.400, -0.003	24.400, -0.002	24.400, -0.003	24.400, -0.000	24.400, -0.004	24.400, -0.002	24.400, -0.001	24.400, -0.002	24.400, -0.003	24.400, -0.003
124	24.600, 0.000	24.600, -0.000	24.600, -0.001	24.600, -0.001	24.600, -0.001	24.600, -0.002	24.600, -0.002	24.600, -0.002	24.600, -0.000	24.600, -0.004	24.600, -0.002	24.600, -0.001	24.600, -0.002	24.600, -0.003	24.600, -0.003
125	24.800, 0.000	24.800, -0.000	24.800, -0.001	24.800, -0.001	24.800, -0.001	24.800, -0.002	24.800, -0.002	24.800, -0.002	24.800, -0.000	24.800, -0.004	24.800, -0.002	24.800, -0.001	24.800, -0.002	24.800, -0.003	24.800, -0.003
126	25.000, 0.000	25.000, -0.000	25.000, -0.001	25.000, -0.001	25.000, -0.001	25.000, -0.002	25.000, -0.002	25.000, -0.002	25.000, -0.001	25.000, -0.003	25.000, -0.002	25.000, -0.001	25.000, -0.002	25.000, -0.003	25.000, -0.003
127	25.200, 0.000	25.200, -0.000	25.200, -0.001	25.200, -0.001	25.200, -0.000	25.200, -0.001	25.200, -0.001	25.200, -0.002	25.200, -0.001	25.200, -0.003	25.200, -0.002	25.200, -0.001	25.200, -0.002	25.200, -0.002	25.200, -0.003
128	25.400, 0.000	25.400, -0.000	25.400, -0.001	25.400, -0.001	25.400, 0.000	25.400, -0.001	25.400, -0.001	25.400, -0.001	25.400, -0.001	25.400, -0.003	25.400, -0.002	25.400, -0.001	25.400, -0.002	25.400, -0.002	25.400, -0.002
129	25.600, 0.000	25.600, -0.000	25.600, -0.001	25.600, -0.001	25.600, 0.001	25.600, -0.001	25.600, -0.001	25.600, -0.001	25.600, -0.001	25.600, -0.003	25.600, -0.002	25.600, -0.001	25.600, -0.002	25.600, -0.002	25.600, -0.002
130	25.800, 0.000	25.800, -0.000	25.800, -0.000	25.800, -0.001	25.800, 0.001	25.800, -0.000	25.800, -0.001	25.800, -0.001	25.800, -0.001	25.800, -0.002	25.800, -0.002	25.800, -0.001	25.800, -0.002	25.800, -0.002	25.800, -0.002
131	26.000, -0.000	26.000, -0.000	26.000, -0.001	26.000, -0.001	26.000, 0.001	26.000, -0.000	26.000, -0.001	26.000, -0.001	26.000, -0.001	26.000, -0.002	26.000, -0.002	26.000, -0.001	26.000, -0.002	26.000, -0.002	26.000, -0.002
132	26.200, -0.000	26.200, -0.000	26.200, -0.000	26.200, -0.001	26.200, 0.001	26.200, -0.000	26.200, -0.001	26.200, -0.001	26.200, -0.001	26.200, -0.002	26.200, -0.002	26.200, -0.001	26.200, -0.001	26.200, -0.001	26.200, -0.001
133	26.400, -0.000	26.400, -0.000	26.400, -0.001	26.400, -0.001	26.400, 0.001	26.400, -0.000	26.400, -0.001	26.400, -0.001	26.400, -0.002	26.400, -0.002	26.400, -0.002	26.400, -0.000	26.400, -0.001	26.400, -0.001	26.400, -0.001
134	26.600, -0.000	26.600, -0.001	26.600, -0.001	26.600, -0.001	26.600, 0.001	26.600, -0.000	26.600, -0.001	26.600, -0.001	26.600, -0.002	26.600, -0.001	26.600, -0.002	26.600, -0.000	26.600, -0.001	26.600, -0.001	26.600, -0.001
135	26.800, 0.000	26.800, -0.001	26.800, -0.001	26.800, -0.001	26.800, 0.001	26.800, 0.000	26.800, -0.001	26.800, -0.001	26.800, -0.002	26.800, -0.001	26.800, -0.001	26.800, -0.000	26.800, -0.001	26.800, -0.001	26.800, -0.001
136	27.000, 0.000	27.000, -0.001	27.000, -0.001	27.000, -0.001	27.000, 0.001	27.000, 0.000	27.000, -0.001	27.000, -0.001	27.000, -0.002	27.000, -0.001	27.000, -0.001	27.000, -0.000	27.000, -0.001	27.000, -0.000	27.000, -0.000
137	27.200, 0.001	27.200, -0.001	27.200, -0.000	27.200, -0.001	27.200, 0.000	27.200, 0.000	27.200, -0.001	27.200, -0.001	27.200, -0.002	27.200, -0.000	27.200, -0.001	27.200, -0.000	27.200, -0.001	27.200, -0.000	27.200, 0.000
138	27.400, 0.001	27.400, -0.001	27.400, -0.000	27.400, -0.001	27.400, 0.000	27.400, 0.000	27.400, -0.001	27.400, -0.000	27.400, -0.002	27.400, -0.000	27.400, -0.001	27.400, -0.000	27.400, -0.001	27.400, -0.000	27.400, 0.000
139	27.600, 0.001	27.600, -0.001	27.600, -0.000	27.600, -0.000	27.600, -0.000	27.600, 0.000	27.600, -0.001	27.600, 0.000	27.600, -0.002	27.600, -0.000	27.600, -0.001	27.600, -0.000	27.600, -0.001	27.600, -0.000	27.600, 0.001
140	27.800, 0.001	27.800, -0.000	27.800, -0.000	27.800, -0.000	27.800, -0.000	27.800, 0.000	27.800, -0.000	27.800, 0.000	27.800, -0.002	27.800, -0.000	27.800, -0.001	27.800, -0.000	27.800, -0.000	27.800, -0.000	27.800, 0.001
141	28.000, 0.001	28.000, -0.000	28.000, -0.000	28.000, -0.000	28.000, -0.000	28.000, 0.000	28.000, -0.000	28.000, 0.000	28.000, -0.001	28.000, 0.000	28.000, -0.000	28.000, -0.000	28.000, -0.000	28.000, -0.000	28.000, 0.001
142	28.200, 0.000	28.200, -0.000	28.200, -0.000	28.200, 0.000	28.200, -0.001	28.200, 0.000	28.200, -0.000	28.200, 0.000	28.200, -0.001	28.200, 0.000	28.200, -0.000	28.200, -0.000	28.200, 0.000	28.200, -0.000	28.200, 0.000
143	28.400, 0.000	28.400, 0.000	28.400, -0.000	28.400, 0.000	28.400, -0.001	28.400, 0.000	28.400, -0.000	28.400, 0.000	28.400, -0.000	28.400, 0.000	28.400, 0.000	28.400, -0.000	28.400, 0.001	28.400, -0.000	28.400, 0.000
144	28.600, 0.000	28.600, 0.000	28.600, -0.000	28.600, 0.000	28.600, -0.000	28.600, -0.000	28.600, 0.000	28.600, 0.000	28.600, 0.000	28.600, 0.000	28.600, 0.000	28.600, -0.000	28.600, 0.001	28.600, -0.000	28.600, 0.000
145	28.800, -0.000	28.800, 0.001	28.800, 0.000	28.800, 0.000	28.800, -0.000	28.800, -0.000	28.800, 0.000	28.800, 0.000	28.800, 0.001	28.800, 0.000	28.800, 0.000	28.800, -0.000	28.800, 0.001	28.800, -0.000	28.800, -0.000
146	29.000, -0.000	29.000, 0.001	29.000, 0.000	29.000, 0.000	29.000, -0.000	29.000, -0.000	29.000, 0.001	29.000, 0.000	29.000, 0.001	29.000, 0.000	29.000, 0.001	29.000, -0.000	29.000, 0.001	29.000, 0.000	29.000, -0.000
147	29.200, -0.001	29.200, 0.001	29.200, 0.000	29.200, 0.000	29.200, 0.000	29.200, -0.000	29.200, 0.001	29.200, 0.000	29.200, 0.002	29.200, 0.000	29.200, 0.001	29.200, 0.000	29.200, 0.000	29.200, 0.000	29.200, -0.000
148	29.400, -0.001	29.400, 0.000	29.400, 0.000	29.400, 0.000	29.400, 0.000	29.400, -0.000	29.400, 0.001	29.400, 0.000	29.400, 0.002	29.400, 0.000	29.400, 0.001	29.400, 0.000	29.400, 0.000	29.400, 0.000	29.400, -0.000
149	29.600, -0.001	29.600, 0.001	29.600, 0.001	29.600, 0.000	29.600, 0.001	29.600, -0.000	29.600, 0.001	29.600, -0.000	29.600, 0.002	29.600, 0.000	29.600, 0.001	29.600, 0.000	29.600, 0.000	29.600, 0.000	29.600, -0.001
150	29.800, -0.001	29.800, 0.001	29.800, 0.001	29.800, 0.000	29.800, 0.001	29.800, -0.000	29.800, 0.001	29.800, -0.000	29.800, 0.003	29.800, -0.000	29.800, 0.001	29.800, 0.001	29.800, 0.000	29.800, 0.000	29.800, -0.001
151	30.000, 0.000	30.000, 0.000	30.000, 0.000	30.000, 0.000	30.000, 0.000	30.000, 0.000	30.000, 0.000	30.000, 0.000	30.000, 0.000	30.000, 0.000	30.000, 0.000	30.000, 0.000	30.000, 0.000	30.000, 0.000	30.000, 0.000
152	30.200, -0.004	30.200, -0.006	30.200, -0.007	30.200, -0.007	30.200, -0.005	30.200, -0.007	30.200, -0.007	30.200, -0.007	30.200, -0.004	30.200, -0.007	30.200, -0.008	30.200, -0.008	30.200, -0.005	30.200, -0.006	30.200, -0.006
153	30.400, -0.008	30.400, -0.011	30.400, -0.014	30.400, -0.014	30.400, -0.008	30.400, -0.014	30.400, -0.013	30.400, -0.014	30.400, -0.007	30.400, -0.013	30.400, -0.016	30.400, -0.016	30.400, -0.008	30.400, -0.012	30.400, -0.013
154	30.600, -0.010	30.600, -0.014	30.600, -0.020	30.600, -0.019	30.600, -0.011	30.600, -0.020	30.600, -0.019	30.600, -0.020	30.600, -0.009	30.600, -0.018	30.600, -0.022	30.600, -0.022	30.600, -0.010	30.600, -0.018	30.600, -0.018
155	30.800, -0.011	30.800, -0.015	30.800, -0.024	30.800, -0.023	30.800, -0.011	30.800, -0.023	30.800, -0.022	30.800, -0.023	30.800, -0.009	30.800, -0.021	30.800, -0.026	30.800, -0.026	30.800, -0.009	30.800, -0.022	30.800, -0.022
156	31.000, -0.009	31.000, -0.014	31.000, -0.025	31.000, -0.024	31.000, -0.009	31.000, -0.023	31.000, -0.022	31.000, -0.024	31.000, -0.007	31.000, -0.021	31.000, -0.028	31.000, -0.027	31.000, -0.006	31.000, -0.025	31.000, -0.024
157	31.200, -0.004	31.200, -0.008	31.200, -0.022	31.200, -0.021	31.200, -0.004	31.200, -0.020	31.200, -0.019	31.200, -0.021	31.200, -0.002	31.200, -0.017	31.200, -0.026	31.200, -0.026	31.200, 0.001	31.200, -0.026	31.200, -0.024
158	31.400, 0.004	31.400, 0.001	31.400, -0.016	31.400, -0.015	31.400, 0.006	31.400, -0.013	31.400, -0.011	31.400, -0.014	31.400, 0.007	31.400, -0.010	31.400, -0.020	31.400, -0.019	31.400, 0.012	31.400, -0.023	31.400, -0.020
159	31.600, 0.017	31.600, 0.015	31.600, -0.005	31.600, -0.003	31.600, 0.020	31.600, -0.001	31.600, 0.001	31.600, -0.003	31.600, 0.021	31.600, 0.003	31.600, -0.010	31.600, -0.009	31.600, 0.027	31.600, -0.017	31.600, -0.014
160	31.800, 0.034	31.800, 0.034	31.800, 0.011	31.800, 0.013	31.800, 0.038	31.800, 0.017	31.800, 0.018	31.800, 0.014	31.800, 0.038	31.800, 0.020	31.800, 0.006	31.800, 0.007	31.800, 0.046	31.800, -0.008	31.800, -0.003
161	32.000, 0.056	32.000, 0.059	32.000, 0.033	32.000, 0.035	32.000, 0.062	32.000, 0.040	32.000, 0.041	32.000, 0.037	32.000, 0.061	32.000, 0.043	32.000, 0.027	32.000, 0.029	32.000, 0.069	32.000, 0.006	32.000, 0.012
162	32.200, 0.083	32.200, 0.089	32.200, 0.060	32.200, 0.063	32.200, 0.090	32.200, 0.069	32.200, 0.069	32.200, 0.066	32.200, 0.088	32.200, 0.072	32.200, 0.054	32.200, 0.056	32.200, 0.097	32.200, 0.024	32.200, 0.031
163	32.400, 0.115	32.400, 0.123	32.400, 0.092	32.400, 0.095	32.400, 0.123	32.400, 0.102	32.400, 0.102	32.400, 0.099	32.400, 0.120	32.400, 0.104	32.400, 0.085	32.400, 0.088	32.400, 0.127	32.400, 0.045	32.400, 0.053
164	32.600, 0.150	32.600, 0.160	32.600, 0.127	32.600, 0.130	32.600, 0.160	32.600, 0.139	32.600, 0.139	32.600, 0.135	32.600, 0.154	32.600, 0.140	32.600, 0.120	32.600, 0.123	32.600, 0.160	32.600, 0.070	32.600, 0.078
165	32.800, 0.189	32.800, 0.200	32.800, 0.166	32.800, 0.169	32.800, 0.199	32.800, 0.180	32.800, 0.178	32.800, 0.175	32.800, 0.192	32.800, 0.179	32.800, 0.157	32.800, 0.161	32.800, 0.195	32.800, 0.096	32.800, 0.105
166	33.000, 0.231	33.000, 0.243	33.000, 0.207	33.000, 0.211	33.000, 0.242	33.000, 0.223	33.000, 0.220	33.000, 0.218	33.000, 0.233	33.000, 0.221	33.000, 0.198	33.000, 0.202	33.000, 0.232	33.000, 0.125	33.000, 0.134
167	33.200, 0.274	33.200, 0.288	33.200, 0.249	33.200, 0.255	33.200, 0.286	33.200, 0.268	33.200, 0.264	33.200, 0.263	33.200, 0.276	33.200, 0.264	33.200, 0.240	33.200, 0.245	33.200, 0.269	33.200, 0.155	33.200, 0.165
168	33.400, 0.319	33.400, 0.334	33.400, 0.293	33.400, 0.300	33.400, 0.331	33.400, 0.314	33.400, 0.309	33.400, 0.308	33.400, 0.319	33.400, 0.309	33.400, 0.282	33.400, 0.288	33.400, 0.308	33.400, 0.187	33.400, 0.196
169	33.600, 0.364	33.600, 0.380	33.600, 0.337	33.600, 0.347	33.600, 0.378	33.600, 0.361	33.600, 0.354	33.600, 0.355	33.600, 0.364	33.600, 0.354	33.600, 0.325	33.600, 0.332	33.600, 0.346	33.600, 0.220	33.600, 0.228
170	33.800, 0.410	33.800, 0.427	33.800, 0.381	33.800, 0.393	33.800, 0.424	33.800, 0.408	33.800, 0.399	33.800, 0.402	33.800, 0.409	33.800, 0.399	33.800, 0.369	33.800, 0.376	33.800, 0.385	33.800, 0.254	33.800, 0.261
171	34.000, 0.457	34.000, 0.473	34.000, 0.425	34.000, 0.440	34.000, 0.470	34.000, 0.454	34.000, 0.443	34.000, 0.449	34.000, 0.454	34.000, 0.443	34.000, 0.412	34.000, 0.420	34.000, 0.423	34.000, 0.289	34.000, 0.295
172	34.200, 0.502	34.200, 0.519	34.200, 0.467	34.200, 0.485	34.200, 0.516	34.200, 0.499	34.200, 0.487	34.200, 0.495	34.200, 0.498	34.200, 0.487	34.200, 0.454	34.200, 0.463	34.200, 0.461	34.200, 0.323	34.200, 0.328
173	34.400, 0.547	34.400, 0.563	34.400, 0.509	34.400, 0.530	34.400, 0.561	34.400, 0.542	34.400, 0.529	34.400, 0.540	34.400, 0.541	34.400, 0.530	34.400, 0.495	34.400, 0.505	34.400, 0.498	34.400, 0.358	34.400, 0.361
174	34.600, 0.590	34.600, 0.605	34.600, 0.549	34.600, 0.573	34.600, 0.605	34.600, 0.584	34.600, 0.570	34.600, 0.584	34.600, 0.583	34.600, 0.571	34.600, 0.535	34.600, 0.545	34.600, 0.535	34.600, 0.392	34.600, 0.395
175	34.800, 0.632	34.800, 0.646	34.800, 0.587	34.800, 0.615	34.800, 0.646	34.800, 0.624	34.800, 0.608	34.800, 0.625	34.800, 0.623	34.800, 0.610	34.800, 0.572	34.800, 0.584	34.800, 0.570	34.800, 0.426	34.800, 0.428
176	35.000, 0.671	35.000, 0.684	35.000, 0.624	35.000, 0.655	35.000, 0.686	35.000, 0.661	35.000, 0.644	35.000, 0.665	35.000, 0.661	35.000, 0.647	35.000, 0.607	35.000, 0.620	35.000, 0.604	35.000, 0.459	35.000, 0.461
177	35.200, 0.709	35.200, 0.720	35.200, 0.658	35.200, 0.692	35.200, 0.723	35.200, 0.696	35.200, 0.678	35.200, 0.702	35.200, 0.697	35.200, 0.682	35.200, 0.639	35.200, 0.654	35.200, 0.637	35.200, 0.491	35.200, 0.493
178	35.400, 0.744	35.400, 0.752	35.400, 0.690	35.400, 0.727	35.400, 0.758	35.400, 0.728	35.400, 0.709	35.400, 0.737	35.400, 0.730	35.400, 0.714	35.400, 0.670	35.400, 0.686	35.400, 0.668	35.400, 0.522	35.400, 0.524
179	35.600, 0.777	35.600, 0.782	35.600, 0.720	35.600, 0.759	35.600, 0.790	35.600, 0.757	35.600, 0.738	35.600, 0.769	35.600, 0.761	35.600, 0.743	35.600, 0.697	35.600, 0.715	35.600, 0.698	35.600, 0.553	35.600, 0.555
180	35.800, 0.807	35.800, 0.809	35.800, 0.747	35.800, 0.788	35.800, 0.819	35.800, 0.783	35.800, 0.763	35.800, 0.799	35.800, 0.789	35.800, 0.770	35.800, 0.721	35.800, 0.741	35.800, 0.726	35.800, 0.582	35.800, 0.585
181	36.000, 0.835	36.000, 0.833	36.000, 0.772	36.000, 0.815	36.000, 0.845	36.000, 0.807	36.000, 0.786	36.000, 0.826	36.000, 0.814	36.000, 0.794	36.000, 0.743	36.000, 0.765	36.000, 0.753	36.000, 0.610	36.000, 0.615
182	36.200, 0.859	36.200, 0.854	36.200, 0.794	36.200, 0.838	36.200, 0.869	36.200, 0.828	36.200, 0.807	36.200, 0.850	36.200, 0.837	36.200, 0.815	36.200, 0.763	36.200, 0.786	36.200, 0.778	36.200, 0.637	36.200, 0.644
183	36.400, 0.882	36.400, 0.873	36.400, 0.813	36.400, 0.859	36.400, 0.891	36.400, 0.846	36.400, 0.825	36.400, 0.871	36.400, 0.857	36.400, 0.833	36.400, 0.780	36.400, 0.804	36.400, 0.802	36.400, 0.663	36.400, 0.672
184	36.600, 0.901	36.600, 0.889	36.600, 0.831	36.600, 0.877	36.600, 0.909	36.600, 0.862	36.600, 0.841	36.600, 0.890	36.600, 0.875	36.600, 0.850	36.600, 0.796	36.600, 0.820	36.600, 0.825	36.600, 0.687	36.600, 0.698
185	36.800, 0.919	36.800, 0.903	36.800, 0.845	36.800, 0.893	36.800, 0.926	36.800, 0.876	36.800, 0.855	36.800, 0.906	36.800, 0.890	36.800, 0.864	36.800, 0.809	36.800, 0.834	36.800, 0.847	36.800, 0.710	36.800, 0.724
186	37.000, 0.933	37.000, 0.914	37.000, 0.858	37.000, 0.907	37.000, 0.940	37.000, 0.888	37.000, 0.866	37.000, 0.920	37.000, 0.903	37.000, 0.876	37.000, 0.821	37.000, 0.846	37.000, 0.867	37.000, 0.732	37.000, 0.748
187	37.200, 0.945	37.200, 0.924	37.200, 0.869	37.200, 0.919	37.200, 0.952	37.200, 0.898	37.200, 0.876	37.200, 0.932	37.200, 0.915	37.200, 0.886	37.200, 0.831	37.200, 0.856	37.200, 0.886	37.200, 0.753	37.200, 0.771
188	37.400, 0.956	37.400, 0.933	37.400, 0.879	37.400, 0.929	37.400, 0.962	37.400, 0.907	37.400, 0.885	37.400, 0.942	37.400, 0.925	37.400, 0.895	37.400, 0.839	37.400, 0.865	37.400, 0.905	37.400, 0.773	37.400, 0.793
189	37.600, 0.965	37.600, 0.941	37.600, 0.886	37.600, 0.938	37.600, 0.970	37.600, 0.914	37.600, 0.892	37.600, 0.950	37.600, 0.934	37.600, 0.902	37.600, 0.846	37.600, 0.872	37.600, 0.922	37.600, 0.792	37.600, 0.813
190	37.800, 0.973	37.800, 0.948	37.800, 0.893	37.800, 0.945	37.800, 0.978	37.800, 0.920	37.800, 0.899	37.800, 0.956	37.800, 0.941	37.800, 0.908	37.800, 0.852	37.800, 0.878	37.800, 0.939	37.800, 0.809	37.800, 0.832
191	38.000, 0.980	38.000, 0.954	38.000, 0.898	38.000, 0.951	38.000, 0.984	38.000, 0.925	38.000, 0.904	38.000, 0.962	38.000, 0.947	38.000, 0.913	38.000, 0.857	38.000, 0.883	38.000, 0.954	38.000, 0.826	38.000, 0.850
192	38.200, 0.986	38.200, 0.959	38.200, 0.902	38.200, 0.956	38.200, 0.989	38.200, 0.929	38.200, 0.908	38.200, 0.966	38.200, 0.952	38.200, 0.918	38.200, 0.862	38.200, 0.887	38.200, 0.969	38.200, 0.842	38.200, 0.868
193	38.400, 0.990	38.400, 0.963	38.400, 0.906	38.400, 0.961	38.400, 0.993	38.400, 0.933	38.400, 0.912	38.400, 0.970	38.400, 0.957	38.400, 0.922	38.400, 0.865	38.400, 0.891	38.400, 0.983	38.400, 0.856	38.400, 0.884
194	38.600, 0.994	38.600, 0.967	38.600, 0.909	38.600, 0.964	38.600, 0.997	38.600, 0.936	38.600, 0.916	38.600, 0.973	38.600, 0.960	38.600, 0.925	38.600, 0.868	38.600, 0.894	38.600, 0.996	38.600, 0.870	38.600, 0.900
195	38.800, 0.998	38.800, 0.970	38.800, 0.911	38.800, 0.968	38.800, 1.001	38.800, 0.939	38.800, 0.919	38.800, 0.976	38.800, 0.964	38.800, 0.928	38.800, 0.871	38.800, 0.897	38.800, 1.008	38.800, 0.884	38.800, 0.914
196	39.000, 1.000	39.000, 0.973	39.000, 0.914	39.000, 0.970	39.000, 1.004	39.000, 0.941	39.000, 0.921	39.000, 0.978	39.000, 0.967	39.000, 0.931	39.000, 0.874	39.000, 0.900	39.000, 1.020	39.000, 0.896	39.000, 0.928
197	39.200, 1.003	39.200, 0.975	39.200, 0.916	39.200, 0.973	39.200, 1.006	39.200, 0.943	39.200, 0.924	39.200, 0.981	39.200, 0.969	39.200, 0.933	39.200, 0.876	39.200, 0.903	39.200, 1.031	39.200, 0.908	39.200, 0.941
198	39.400, 1.006	39.400, 0.978	39.400, 0.918	39.400, 0.975	39.400, 1.009	39.400, 0.945	39.400, 0.926	39.400, 0.983	39.400, 0.971	39.400, 0.935	39.400, 0.878	39.400, 0.905	39.400, 1.041	39.400, 0.919	39.400, 0.954
199	39.600, 1.008	39.600, 0.980	39.600, 0.920	39.600, 0.977	39.600, 1.011	39.600, 0.947	39.600, 0.928	39.600, 0.985	39.600, 0.973	39.600, 0.937	39.600, 0.880	39.600, 0.908	39.600, 1.051	39.600, 0.929	39.600, 0.966
200	39.800, 1.010	39.800, 0.981	39.800, 0.922	39.800, 0.978	39.800, 1.013	39.800, 0.949	39.800, 0.930	39.800, 0.987	39.800, 0.975	39.800, 0.938	39.800, 0.882	39.800, 0.910	39.800, 1.060	39.800, 0.939	39.800, 0.978
201	40.000, 1.012	40.000, 0.983	40.000, 0.923	40.000, 0.980	40.000, 1.015	40.000, 0.951	40.000, 0.931	40.000, 0.989	40.000, 0.976	40.000, 0.940	40.000, 0.884	40.000, 0.912	40.000, 1.069	40.000, 0.949	40.000, 0.990
202	40.200, 1.014	40.200, 0.984	40.200, 0.925	40.200, 0.981	40.200, 1.017	40.200, 0.952	40.200, 0.933	40.200, 0.991	40.200, 0.977	40.200, 0.942	40.200, 0.885	40.200, 0.914	40.200, 1.077	40.200, 0.959	40.200, 1.001
203	40.400, 1.016	40.400, 0.986	40.400, 0.927	40.400, 0.983	40.400, 1.019	40.400, 0.954	40.400, 0.935	40.400, 0.993	40.400, 0.979	40.400, 0.944	40.400, 0.887	40.400, 0.915	40.400, 1.085	40.400, 0.968	40.400, 1.012
204	40.600, 1.018	40.600, 0.987	40.600, 0.929	40.600, 0.984	40.600, 1.021	40.600, 0.955	40.600, 0.936	40.600, 0.994	40.600, 0.980	40.600, 0.946	40.600, 0.889	40.600, 0.917	40.600, 1.093	40.600, 0.977	40.600, 1.022
205	40.800, 1.019	40.800, 0.988	40.800, 0.930	40.800, 0.986	40.800, 1.023	40.800, 0.957	40.800, 0.938	40.800, 0.996	40.800, 0.982	40.800, 0.947	40.800, 0.890	40.800, 0.919	40.800, 1.100	40.800, 0.986	40.800, 1.032
206	41.000, 1.021	41.000, 0.990	41.000, 0.932	41.000, 0.987	41.000, 1.024	41.000, 0.958	41.000, 0.939	41.000, 0.997	41.000, 0.983	41.000, 0.949	41.000, 0.891	41.000, 0.921	41.000, 1.108	41.000, 0.994	41.000, 1.041
207	41.200, 1.022	41.200, 0.991	41.200, 0.934	41.200, 0.988	41.200, 1.026	41.200, 0.960	41.200, 0.940	41.200, 0.998	41.200, 0.985	41.200, 0.950	41.200, 0.893	41.200, 0.922	41.200, 1.115	41.200, 1.001	41.200, 1.050
208	41.400, 1.024	41.400, 0.993	41.400, 0.936	41.400, 0.990	41.400, 1.028	41.400, 0.961	41.400, 0.941	41.400, 0.999	41.400, 0.986	41.400, 0.952	41.400, 0.894	41.400, 0.924	41.400, 1.122	41.400, 1.008	41.400, 1.058
209	41.600, 1.026	41.600, 0.995	41.600, 0.937	41.600, 0.991	41.600, 1.030	41.600, 0.963	41.600, 0.942	41.600, 1.000	41.600, 0.988	41.600, 0.953	41.600, 0.896	41.600, 0.926	41.600, 1.129	41.600, 1.015	41.600, 1.066
210	41.800, 1.027	41.800, 0.996	41.800, 0.939	41.800, 0.992	41.800, 1.031	41.800, 0.964	41.800, 0.943	41.800, 1.002	41.800, 0.990	41.800, 0.954	41.800, 0.897	41.800, 0.927	41.800, 1.135	41.800, 1.022	41.800, 1.074
211	42.000, 1.029	42.000, 0.998	42.000, 0.940	42.000, 0.993	42.000, 1.033	42.000, 0.966	42.000, 0.944	42.000, 1.003	42.000, 0.991	42.000, 0.955	42.000, 0.899	42.000, 0.928	42.000, 1.142	42.000, 1.028	42.000, 1.081
212	42.200, 1.030	42.200, 1.000	42.200, 0.941	42.200, 0.995	42.200, 1.034	42.200, 0.967	42.200, 0.945	42.200, 1.003	42.200, 0.993	42.200, 0.956	42.200, 0.900	42.200, 0.929	42.200, 1.148	42.200, 1.034	42.200, 1.088
213	42.400, 1.032	42.400, 1.001	42.400, 0.942	42.400, 0.996	42.400, 1.035	42.400, 0.969	42.400, 0.946	42.400, 1.004	42.400, 0.994	42.400, 0.958	42.400, 0.901	42.400, 0.931	42.400, 1.154	42.400, 1.041	42.400, 1.095
214	42.600, 1.033	42.600, 1.003	42.600, 0.942	42.600, 0.997	42.600, 1.037	42.600, 0.970	42.600, 0.947	42.600, 1.005	42.600, 0.996	42.600, 0.959	42.600, 0.901	42.600, 0.932	42.600, 1.160	42.600, 1.046	42.600, 1.102
215	42.800, 1.035	42.800, 1.004	42.800, 0.943	42.800, 0.998	42.800, 1.037	42.800, 0.971	42.800, 0.948	42.800, 1.006	42.800, 0.997	42.800, 0.960	42.800, 0.902	42.800, 0.933	42.800, 1.166	42.800, 1.052	42.800, 1.109
216	43.000, 1.036	43.000, 1.005	43.000, 0.944	43.000, 0.999	43.000, 1.038	43.000, 0.973	43.000, 0.950	43.000, 1.007	43.000, 0.999	43.000, 0.961	43.000, 0.904	43.000, 0.934	43.000, 1.172	43.000, 1.058	43.000, 1.116
217	43.200, 1.038	43.200, 1.006	43.200, 0.946	43.200, 1.000	43.200, 1.039	43.200, 0.974	43.200, 0.951	43.200, 1.008	43.200, 1.000	43.200, 0.962	43.200, 0.905	43.200, 0.935	43.200, 1.178	43.200, 1.063	43.200, 1.122
218	43.400, 1.040	43.400, 1.007	43.400, 0.947	43.400, 1.000	43.400, 1.040	43.400, 0.975	43.400, 0.952	43.400, 1.009	43.400, 1.001	43.400, 0.962	43.400, 0.906	43.400, 0.936	43.400, 1.184	43.400, 1.069	43.400, 1.128
219	43.600, 1.041	43.600, 1.009	43.600, 0.948	43.600, 1.001	43.600, 1.040	43.600, 0.976	43.600, 0.953	43.600, 1.010	43.600, 1.002	43.600, 0.963	43.600, 0.908	43.600, 0.937	43.600, 1.189	43.600, 1.074	43.600, 1.134
220	43.800, 1.043	43.800, 1.010	43.800, 0.949	43.800, 1.002	43.800, 1.041	43.800, 0.977	43.800, 0.955	43.800, 1.011	43.800, 1.003	43.800, 0.964	43.800, 0.909	43.800, 0.938	43.800, 1.195	43.800, 1.079	43.800, 1.140
221	44.000, 1.045	44.000, 1.011	44.000, 0.950	44.000, 1.002	44.000, 1.042	44.000, 0.978	44.000, 0.956	44.000, 1.012	44.000, 1.004	44.000, 0.965	44.000, 0.910	44.000, 0.939	44.000, 1.200	44.000, 1.084	44.000, 1.145
222	44.200, 1.046	44.200, 1.012	44.200, 0.952	44.200, 1.003	44.200, 1.043	44.200, 0.979	44.200, 0.957	44.200, 1.012	44.200, 1.005	44.200, 0.966	44.200, 0.912	44.200, 0.940	44.200, 1.206	44.200, 1.090	44.200, 1.151
223	44.400, 1.048	44.400, 1.013	44.400, 0.953	44.400, 1.004	44.400, 1.045	44.400, 0.980	44.400, 0.958	44.400, 1.013	44.400, 1.006	44.400, 0.968	44.400, 0.913	44.400, 0.941	44.400, 1.211	44.400, 1.095	44.400, 1.156
224	44.600, 1.049	44.600, 1.014	44.600, 0.954	44.600, 1.005	44.600, 1.046	44.600, 0.981	44.600, 0.959	44.600, 1.014	44.600, 1.007	44.600, 0.969	44.600, 0.914	44.600, 0.942	44.600, 1.216	44.600, 1.100	44.600, 1.162
225	44.800, 1.051	44.800, 1.015	44.800, 0.955	44.800, 1.006	44.800, 1.047	44.800, 0.982	44.800, 0.960	44.800, 1.015	44.800, 1.008	44.800, 0.970	44.800, 0.915	44.800, 0.943	44.800, 1.222	44.800, 1.104	44.800, 1.167
226	45.000, 1.052	45.000, 1.016	45.000, 0.957	45.000, 1.007	45.000, 1.048	45.000, 0.983	45.000, 0.961	45.000, 1.016	45.000, 1.009	45.000, 0.971	45.000, 0.917	45.000, 0.944	45.000, 1.227	45.000, 1.109	45.000, 1.172
227	45.200, 1.053	45.200, 1.017	45.200, 0.958	45.200, 1.008	45.200, 1.050	45.200, 0.984	45.200, 0.962	45.200, 1.017	45.200, 1.010	45.200, 0.973	45.200, 0.918	45.200, 0.945	45.200, 1.233	45.200, 1.114	45.200, 1.177
228	45.400, 1.054	45.400, 1.018	45.400, 0.959	45.400, 1.009	45.400, 1.051	45.400, 0.985	45.400, 0.963	45.400, 1.018	45.400, 1.011	45.400, 0.974	45.400, 0.919	45.400, 0.946	45.400, 1.238	45.400, 1.119	45.400, 1.182
229	45.600, 1.056	45.600, 1.019	45.600, 0.959	45.600, 1.010	45.600, 1.053	45.600, 0.986	45.600, 0.964	45.600, 1.019	45.600, 1.012	45.600, 0.975	45.600, 0.920	45.600, 0.947	45.600, 1.243	45.600, 1.123	45.600, 1.187
230	45.800, 1.057	45.800, 1.020	45.800, 0.960	45.800, 1.012	45.800, 1.054	45.800, 0.987	45.800, 0.965	45.800, 1.020	45.800, 1.013	45.800, 0.977	45.800, 0.921	45.800, 0.949	45.800, 1.248	45.800, 1.128	45.800, 1.191
231	46.000, 1.058	46.000, 1.021	46.000, 0.961	46.000, 1.013	46.000, 1.055	46.000, 0.988	46.000, 0.967	46.000, 1.021	46.000, 1.014	46.000, 0.978	46.000, 0.922	46.000, 0.950	46.000, 1.253	46.000, 1.133	46.000, 1.196
232	46.200, 1.059	46.200, 1.022	46.200, 0.961	46.200, 1.014	46.200, 1.057	46.200, 0.990	46.200, 0.968	46.200, 1.022	46.200, 1.015	46.200, 0.980	46.200, 0.922	46.200, 0.951	46.200, 1.258	46.200, 1.137	46.200, 1.201
233	46.400, 1.059	46.400, 1.023	46.400, 0.962	46.400, 1.015	46.400, 1.058	46.400, 0.991	46.400, 0.969	46.400, 1.023	46.400, 1.016	46.400, 0.981	46.400, 0.923	46.400, 0.952	46.400, 1.263	46.400, 1.142	46.400, 1.206
234	46.600, 1.060	46.600, 1.024	46.600, 0.963	46.600, 1.016	46.600, 1.059	46.600, 0.992	46.600, 0.970	46.600, 1.024	46.600, 1.017	46.600, 0.982	46.600, 0.924	46.600, 0.954	46.600, 1.268	46.600, 1.146	46.600, 1.211
235	46.800, 1.061	46.800, 1.024	46.800, 0.964	46.800, 1.017	46.800, 1.060	46.800, 0.993	46.800, 0.971	46.800, 1.024	46.800, 1.018	46.800, 0.983	46.800, 0.925	46.800, 0.955	46.800, 1.272	46.800, 1.151	46.800, 1.216
236	47.000, 1.062	47.000, 1.025	47.000, 0.965	47.000, 1.017	47.000, 1.061	47.000, 0.995	47.000, 0.972	47.000, 1.026	47.000, 1.019	47.000, 0.984	47.000, 0.926	47.000, 0.957	47.000, 1.277	47.000, 1.155	47.000, 1.221
237	47.200, 1.063	47.200, 1.026	47.200, 0.965	47.200, 1.018	47.200, 1.063	47.200, 0.996	47.200, 0.974	47.200, 1.027	47.200, 1.020	47.200, 0.985	47.200, 0.927	47.200, 0.958	47.200, 1.281	47.200, 1.159	47.200, 1.225
238	47.400, 1.064	47.400, 1.027	47.400, 0.966	47.400, 1.019	47.400, 1.063	47.400, 0.997	47.400, 0.975	47.400, 1.028	47.400, 1.021	47.400, 0.986	47.400, 0.928	47.400, 0.960	47.400, 1.286	47.400, 1.164	47.400, 1.230
239	47.600, 1.065	47.600, 1.028	47.600, 0.967	47.600, 1.019	47.600, 1.064	47.600, 0.998	47.600, 0.976	47.600, 1.029	47.600, 1.022	47.600, 0.987	47.600, 0.929	47.600, 0.961	47.600, 1.290	47.600, 1.168	47.600, 1.234
240	47.800, 1.066	47.800, 1.029	47.800, 0.967	47.800, 1.020	47.800, 1.066	47.800, 0.999	47.800, 0.977	47.800, 1.030	47.800, 1.024	47.800, 0.988	47.800, 0.930	47.800, 0.962	47.800, 1.295	47.800, 1.172	47.800, 1.238
241	48.000, 1.067	48.000, 1.030	48.000, 0.968	48.000, 1.021	48.000, 1.067	48.000, 1.000	48.000, 0.978	48.000, 1.031	48.000, 1.025	48.000, 0.989	48.000, 0.931	48.000, 0.963	48.000, 1.299	48.000, 1.176	48.000, 1.242
242	48.200, 1.069	48.200, 1.032	48.200, 0.969	48.200, 1.022	48.200, 1.068	48.200, 1.001	48.200, 0.979	48.200, 1.031	48.200, 1.026	48.200, 0.990	48.200, 0.932	48.200, 0.963	48.200, 1.303	48.200, 1.180	48.200, 1.246
243	48.400, 1.070	48.400, 1.033	48.400, 0.969	48.400, 1.023	48.400, 1.069	48.400, 1.002	48.400, 0.980	48.400, 1.032	48.400, 1.028	48.400, 0.991	48.400, 0.933	48.400, 0.964	48.400, 1.307	48.400, 1.184	48.400, 1.250
244	48.600, 1.071	48.600, 1.034	48.600, 0.970	48.600, 1.023	48.600, 1.070	48.600, 1.003	48.600, 0.981	48.600, 1.033	48.600, 1.029	48.600, 0.992	48.600, 0.934	48.600, 0.965	48.600, 1.311	48.600, 1.188	48.600, 1.255
245	48.800, 1.072	48.800, 1.035	48.800, 0.971	48.800, 1.023	48.800, 1.071	48.800, 1.004	48.800, 0.982	48.800, 1.033	48.800, 1.030	48.800, 0.993	48.800, 0.935	48.800, 0.966	48.800, 1.315	48.800, 1.192	48.800, 1.259
246	49.000, 1.073	49.000, 1.037	49.000, 0.971	49.000, 1.024	49.000, 1.072	49.000, 1.004	49.000, 0.983	49.000, 1.034	49.000, 1.031	49.000, 0.995	49.000, 0.936	49.000, 0.967	49.000, 1.319	49.000, 1.196	49.000, 1.263
247	49.200, 1.075	49.200, 1.038	49.200, 0.972	49.200, 1.025	49.200, 1.073	49.200, 1.005	49.200, 0.984	49.200, 1.035	49.200, 1.032	49.200, 0.996	49.200, 0.937	49.200, 0.967	49.200, 1.323	49.200, 1.200	49.200, 1.267
248	49.400, 1.076	49.400, 1.039	49.400, 0.973	49.400, 1.025	49.400, 1.074	49.400, 1.007	49.400, 0.985	49.400, 1.036	49.400, 1.033	49.400, 0.997	49.400, 0.937	49.400, 0.968	49.400, 1.327	49.400, 1.204	49.400, 1.270
249	49.600, 1.077	49.600, 1.040	49.600, 0.974	49.600, 1.026	49.600, 1.075	49.600, 1.008	49.600, 0.986	49.600, 1.037	49.600, 1.034	49.600, 0.998	49.600, 0.938	49.600, 0.969	49.600, 1.331	49.600, 1.208	49.600, 1.274
250	49.800, 1.078	49.800, 1.042	49.800, 0.975	49.800, 1.027	49.800, 1.076	49.800, 1.009	49.800, 0.987	49.800, 1.037	49.800, 1.035	49.800, 0.999	49.800, 0.939	49.800, 0.970	49.800, 1.335	49.800, 1.212	49.800, 1.278
251	50.000, 1.079	50.000, 1.043	50.000, 0.976	50.000, 1.028	50.000, 1.077	50.000, 1.010	50.000, 0.988	50.000, 1.038	50.000, 1.036	50.000, 1.001	50.000, 0.940	50.000, 0.971	50.000, 1.339	50.000, 1.216	50.000, 1.282
252	50.200, 1.080	50.200, 1.044	50.200, 0.978	50.200, 1.029	50.200, 1.079	50.200, 1.011	50.200, 0.989	50.200, 1.039	50.200, 1.037	50.200, 1.002	50.200, 0.941	50.200, 0.972	50.200, 1.343	50.200, 1.220	50.200, 1.285
253	50.400, 1.081	50.400, 1.045	50.400, 0.979	50.400, 1.030	50.400, 1.080	50.400, 1.013	50.400, 0.990	50.400, 1.040	50.400, 1.038	50.400, 1.003	50.400, 0.942	50.400, 0.973	50.400, 1.346	50.400, 1.223	50.400, 1.289
254	50.600, 1.082	50.600, 1.047	50.600, 0.981	50.600, 1.031	50.600, 1.081	50.600, 1.013	50.600, 0.991	50.600, 1.041	50.600, 1.039	50.600, 1.004	50.600, 0.943	50.600, 0.974	50.600, 1.350	50.600, 1.227	50.600, 1.293
255	50.800, 1.083	50.800, 1.048	50.800, 0.982	50.800, 1.032	50.800, 1.082	50.800, 1.014	50.800, 0.992	50.800, 1.042	50.800, 1.040	50.800, 1.005	50.800, 0.944	50.800, 0.975	50.800, 1.354	50.800, 1.231	50.800, 1.296
256	51.000, 1.084	51.000, 1.049	51.000, 0.983	51.000, 1.033	51.000, 1.083	51.000, 1.016	51.000, 0.993	51.000, 1.043	51.000, 1.041	51.000, 1.006	51.000, 0.945	51.000, 0.976	51.000, 1.357	51.000, 1.234	51.000, 1.300
257	51.200, 1.084	51.200, 1.050	51.200, 0.985	51.200, 1.035	51.200, 1.084	51.200, 1.017	51.200, 0.994	51.200, 1.044	51.200, 1.041	51.200, 1.007	51.200, 0.946	51.200, 0.977	51.200, 1.362	51.200, 1.238	51.200, 1.303
258	51.400, 1.086	51.400, 1.051	51.400, 0.986	51.400, 1.036	51.400, 1.085	51.400, 1.018	51.400, 0.996	51.400, 1.046	51.400, 1.042	51.400, 1.008	51.400, 0.948	51.400, 0.978	51.400, 1.366	51.400, 1.241	51.400, 1.306
259	51.600, 1.087	51.600, 1.052	51.600, 0.987	51.600, 1.037	51.600, 1.085	51.600, 1.018	51.600, 0.997	51.600, 1.047	51.600, 1.043	51.600, 1.009	51.600, 0.949	51.600, 0.979	51.600, 1.370	51.600, 1.245	51.600, 1.309
260	51.800, 1.088	51.800, 1.053	51.800, 0.988	51.800, 1.038	51.800, 1.087	51.800, 1.019	51.800, 0.998	51.800, 1.048	51.800, 1.044	51.800, 1.010	51.800, 0.950	51.800, 0.980	51.800, 1.373	51.800, 1.248	51.800, 1.313
261	52.000, 1.089	52.000, 1.054	52.000, 0.988	52.000, 1.039	52.000, 1.088	52.000, 1.020	52.000, 0.999	52.000, 1.049	52.000, 1.045	52.000, 1.011	52.000, 0.951	52.000, 0.981	52.000, 1.377	52.000, 1.251	52.000, 1.316
262	52.200, 1.091	52.200, 1.055	52.200, 0.989	52.200, 1.040	52.200, 1.089	52.200, 1.021	52.200, 1.000	52.200, 1.050	52.200, 1.047	52.200, 1.012	52.200, 0.952	52.200, 0.982	52.200, 1.381	52.200, 1.254	52.200, 1.320
263	52.400, 1.092	52.400, 1.055	52.400, 0.990	52.400, 1.040	52.400, 1.090	52.400, 1.022	52.400, 1.001	52.400, 1.050	52.400, 1.048	52.400, 1.013	52.400, 0.952	52.400, 0.983	52.400, 1.384	52.400, 1.257	52.400, 1.323
264	52.600, 1.093	52.600, 1.056	52.600, 0.990	52.600, 1.041	52.600, 1.091	52.600, 1.022	52.600, 1.002	52.600, 1.051	52.600, 1.049	52.600, 1.014	52.600, 0.953	52.600, 0.984	52.600, 1.387	52.600, 1.260	52.600, 1.327
265	52.800, 1.095	52.800, 1.056	52.800, 0.991	52.800, 1.041	52.800, 1.092	52.800, 1.023	52.800, 1.003	52.800, 1.052	52.800, 1.051	52.800, 1.015	52.800, 0.954	52.800, 0.985	52.800, 1.390	52.800, 1.263	52.800, 1.330
266	53.000, 1.096	53.000, 1.057	53.000, 0.992	53.000, 1.042	53.000, 1.092	53.000, 1.024	53.000, 1.004	53.000, 1.053	53.000, 1.052	53.000, 1.016	53.000, 0.955	53.000, 0.986	53.000, 1.394	53.000, 1.266	53.000, 1.334
267	53.200, 1.097	53.200, 1.057	53.200, 0.993	53.200, 1.043	53.200, 1.093	53.200, 1.025	53.200, 1.005	53.200, 1.054	53.200, 1.053	53.200, 1.017	53.200, 0.956	53.200, 0.987	53.200, 1.397	53.200, 1.269	53.200, 1.338
268	53.400, 1.098	53.400, 1.058	53.400, 0.993	53.400, 1.044	53.400, 1.095	53.400, 1.026	53.400, 1.006	53.400, 1.055	53.400, 1.054	53.400, 1.017	53.400, 0.957	53.400, 0.988	53.400, 1.400	53.400, 1.272	53.400, 1.341
269	53.600, 1.099	53.600, 1.059	53.600, 0.994	53.600, 1.044	53.600, 1.096	53.600, 1.027	53.600, 1.007	53.600, 1.056	53.600, 1.055	53.600, 1.018	53.600, 0.958	53.600, 0.989	53.600, 1.403	53.600, 1.276	53.600, 1.345
270	53.800, 1.100	53.800, 1.060	53.800, 0.995	53.800, 1.045	53.800, 1.097	53.800, 1.029	53.800, 1.008	53.800, 1.056	53.800, 1.056	53.800, 1.019	53.800, 0.959	53.800, 0.990	53.800, 1.407	53.800, 1.279	53.800, 1.348
271	54.000, 1.101	54.000, 1.061	54.000, 0.996	54.000, 1.046	54.000, 1.098	54.000, 1.030	54.000, 1.009	54.000, 1.056	54.000, 1.056	54.000, 1.020	54.000, 0.960	54.000, 0.991	54.000, 1.410	54.000, 1.282	54.000, 1.352
272	54.200, 1.102	54.200, 1.063	54.200, 0.997	54.200, 1.047	54.200, 1.099	54.200, 1.031	54.200, 1.009	54.200, 1.057	54.200, 1.057	54.200, 1.020	54.200, 0.961	54.200, 0.992	54.200, 1.413	54.200, 1.285	54.200, 1.355
273	54.400, 1.103	54.400, 1.064	54.400, 0.998	54.400, 1.048	54.400, 1.100	54.400, 1.032	54.400, 1.010	54.400, 1.057	54.400, 1.058	54.400, 1.021	54.400, 0.961	54.400, 0.993	54.400, 1.416	54.400, 1.288	54.400, 1.359
274	54.600, 1.104	54.600, 1.065	54.600, 0.999	54.600, 1.049	54.600, 1.102	54.600, 1.033	54.600, 1.011	54.600, 1.058	54.600, 1.059	54.600, 1.022	54.600, 0.962	54.600, 0.993	54.600, 1.419	54.600, 1.292	54.600, 1.362
275	54.800, 1.104	54.800, 1.066	54.800, 1.000	54.800, 1.050	54.800, 1.103	54.800, 1.034	54.800, 1.011	54.800, 1.059	54.800, 1.060	54.800, 1.023	54.800, 0.963	54.800, 0.994	54.800, 1.422	54.800, 1.295	54.800, 1.366
276	55.000, 1.105	55.000, 1.068	55.000, 1.001	55.000, 1.051	55.000, 1.104	55.000, 1.036	55.000, 1.012	55.000, 1.060	55.000, 1.061	55.000, 1.024	55.000, 0.964	55.000, 0.995	55.000, 1.425	55.000, 1.298	55.000, 1.369
277	55.200, 1.106	55.200, 1.069	55.200, 1.002	55.200, 1.052	55.200, 1.105	55.200, 1.037	55.200, 1.013	55.200, 1.061	55.200, 1.062	55.200, 1.024	55.200, 0.965	55.200, 0.996	55.200, 1.429	55.200, 1.300	55.200, 1.372
278	55.400, 1.107	55.400, 1.070	55.400, 1.003	55.400, 1.053	55.400, 1.106	55.400, 1.038	55.400, 1.014	55.400, 1.062	55.400, 1.063	55.400, 1.026	55.400, 0.966	55.400, 0.996	55.400, 1.432	55.400, 1.303	55.400, 1.375
279	55.600, 1.107	55.600, 1.071	55.600, 1.004	55.600, 1.054	55.600, 1.106	55.600, 1.039	55.600, 1.015	55.600, 1.063	55.600, 1.063	55.600, 1.027	55.600, 0.967	55.600, 0.997	55.600, 1.435	55.600, 1.305	55.600, 1.378
280	55.800, 1.108	55.800, 1.071	55.800, 1.005	55.800, 1.055	55.800, 1.107	55.800, 1.040	55.800, 1.016	55.800, 1.064	55.800, 1.064	55.800, 1.028	55.800, 0.968	55.800, 0.999	55.800, 1.438	55.800, 1.308	55.800, 1.380
281	56.000, 1.109	56.000, 1.072	56.000, 1.005	56.000, 1.056	56.000, 1.108	56.000, 1.040	56.000, 1.017	56.000, 1.065	56.000, 1.065	56.000, 1.029	56.000, 0.969	56.000, 1.000	56.000, 1.441	56.000, 1.310	56.000, 1.383
282	56.200, 1.110	56.200, 1.072	56.200, 1.006	56.200, 1.057	56.200, 1.109	56.200, 1.041	56.200, 1.018	56.200, 1.066	56.200, 1.066	56.200, 1.030	56.200, 0.969	56.200, 1.001	56.200, 1.445	56.200, 1.312	56.200, 1.385
283	56.400, 1.111	56.400, 1.072	56.400, 1.006	56.400, 1.057	56.400, 1.110	56.400, 1.042	56.400, 1.019	56.400, 1.067	56.400, 1.067	56.400, 1.031	56.400, 0.970	56.400, 1.002	56.400, 1.448	56.400, 1.315	56.400, 1.388
284	56.600, 1.112	56.600, 1.073	56.600, 1.007	56.600, 1.058	56.600, 1.112	56.600, 1.042	56.600, 1.020	56.600, 1.068	56.600, 1.068	56.600, 1.032	56.600, 0.970	56.600, 1.004	56.600, 1.451	56.600, 1.318	56.600, 1.391
285	56.800, 1.113	56.800, 1.073	56.800, 1.008	56.800, 1.059	56.800, 1.113	56.800, 1.043	56.800, 1.021	56.800, 1.069	56.800, 1.069	56.800, 1.033	56.800, 0.971	56.800, 1.005	56.800, 1.454	56.800, 1.320	56.800, 1.393
286	57.000, 1.114	57.000, 1.074	57.000, 1.008	57.000, 1.060	57.000, 1.114	57.000, 1.044	57.000, 1.022	57.000, 1.070	57.000, 1.069	57.000, 1.034	57.000, 0.972	57.000, 1.006	57.000, 1.456	57.000, 1.323	57.000, 1.396
287	57.200, 1.115	57.200, 1.075	57.200, 1.009	57.200, 1.061	57.200, 1.115	57.200, 1.045	57.200, 1.023	57.200, 1.071	57.200, 1.070	57.200, 1.035	57.200, 0.973	57.200, 1.007	57.200, 1.459	57.200, 1.326	57.200, 1.399
288	57.400, 1.116	57.400, 1.076	57.400, 1.010	57.400, 1.062	57.400, 1.117	57.400, 1.045	57.400, 1.024	57.400, 1.072	57.400, 1.070	57.400, 1.036	57.400, 0.974	57.400, 1.008	57.400, 1.462	57.400, 1.329	57.400, 1.402
289	57.600, 1.117	57.600, 1.077	57.600, 1.011	57.600, 1.062	57.600, 1.118	57.600, 1.046	57.600, 1.024	57.600, 1.072	57.600, 1.071	57.600, 1.036	57.600, 0.975	57.600, 1.009	57.600, 1.465	57.600, 1.332	57.600, 1.404
290	57.800, 1.118	57.800, 1.079	57.800, 1.012	57.800, 1.063	57.800, 1.119	57.800, 1.047	57.800, 1.025	57.800, 1.073	57.800, 1.071	57.800, 1.037	57.800, 0.976	57.800, 1.010	57.800, 1.468	57.800, 1.335	57.800, 1.407
291	58.000, 1.119	58.000, 1.080	58.000, 1.013	58.000, 1.063	58.000, 1.121	58.000, 1.048	58.000, 1.025	58.000, 1.074	58.000, 1.072	58.000, 1.038	58.000, 0.977	58.000, 1.010	58.000, 1.471	58.000, 1.338	58.000, 1.409
292	58.200, 1.120	58.200, 1.081	58.200, 1.014	58.200, 1.064	58.200, 1.122	58.200, 1.048	58.200, 1.026	58.200, 1.074	58.200, 1.073	58.200, 1.039	58.200, 0.977	58.200, 1.011	58.200, 1.474	58.200, 1.341	58.200, 1.411
293	58.400, 1.121	58.400, 1.082	58.400, 1.015	58.400, 1.064	58.400, 1.123	58.400, 1.049	58.400, 1.027	58.400, 1.075	58.400, 1.074	58.400, 1.040	58.400, 0.978	58.400, 1.012	58.400, 1.477	58.400, 1.343	58.400, 1.414
294	58.600, 1.122	58.600, 1.083	58.600, 1.016	58.600, 1.065	58.600, 1.123	58.600, 1.050	58.600, 1.027	58.600, 1.076	58.600, 1.075	58.600, 1.040	58.600, 0.979	58.600, 1.013	58.600, 1.480	58.600, 1.346	58.600, 1.416
295	58.800, 1.124	58.800, 1.084	58.800, 1.017	58.800, 1.066	58.800, 1.124	58.800, 1.051	58.800, 1.028	58.800, 1.077	58.800, 1.076	58.800, 1.041	58.800, 0.980	58.800, 1.013	58.800, 1.483	58.800, 1.348	58.800, 1.418
296	59.000, 1.124	59.000, 1.085	59.000, 1.019	59.000, 1.066	59.000, 1.125	59.000, 1.051	59.000, 1.029	59.000, 1.078	59.000, 1.077	59.000, 1.042	59.000, 0.982	59.000, 1.014	59.000, 1.486	59.000, 1.351	59.000, 1.421
297	59.200, 1.125	59.200, 1.086	59.200, 1.019	59.200, 1.067	59.200, 1.125	59.200, 1.052	59.200, 1.030	59.200, 1.078	59.200, 1.078	59.200, 1.043	59.200, 0.983	59.200, 1.014	59.200, 1.489	59.200, 1.353	59.200, 1.423
298	59.400, 1.126	59.400, 1.087	59.400, 1.020	59.400, 1.068	59.400, 1.125	59.400, 1.053	59.400, 1.031	59.400, 1.079	59.400, 1.079	59.400, 1.044	59.400, 0.984	59.400, 1.015	59.400, 1.492	59.400, 1.356	59.400, 1.425
299	59.600, 1.127	59.600, 1.088	59.600, 1.021	59.600, 1.068	59.600, 1.125	59.600, 1.054	59.600, 1.032	59.600, 1.080	59.600, 1.079	59.600, 1.045	59.600, 0.985	59.600, 1.016	59.600, 1.495	59.600, 1.358	59.600, 1.427
300	59.800, 1.128	59.800, 1.088	59.800, 1.022	59.800, 1.069	59.800, 1.126	59.800, 1.055	59.800, 1.033	59.800, 1.080	59.800, 1.080	59.800, 1.046	59.800, 0.986	59.800, 1.017	59.800, 1.497	59.800, 1.360	59.800, 1.429
301	60.000, 1.129	60.000, 1.088	60.000, 1.022	60.000, 1.069	60.000, 1.126	60.000, 1.056	60.000, 1.034	60.000, 1.081	60.000, 1.081	60.000, 1.047	60.000, 0.987	60.000, 1.018	60.000, 1.500	60.000, 1.363	60.000, 1.432
302	60.200, 1.130	60.200, 1.089	60.200, 1.022	60.200, 1.071	60.200, 1.127	60.200, 1.057	60.200, 1.035	60.200, 1.081	60.200, 1.082	60.200, 1.049	60.200, 0.988	60.200, 1.019	60.200, 1.502	60.200, 1.365	60.200, 1.434
303	60.400, 1.131	60.400, 1.089	60.400, 1.023	60.400, 1.071	60.400, 1.128	60.400, 1.059	60.400, 1.036	60.400, 1.082	60.400, 1.083	60.400, 1.049	60.400, 0.988	60.400, 1.020	60.400, 1.504	60.400, 1.368	60.400, 1.437
304	60.600, 1.132	60.600, 1.090	60.600, 1.024	60.600, 1.073	60.600, 1.129	60.600, 1.060	60.600, 1.038	60.600, 1.083	60.600, 1.084	60.600, 1.050	60.600, 0.989	60.600, 1.020	60.600, 1.506	60.600, 1.370	60.600, 1.440
305	60.800, 1.133	60.800, 1.090	60.800, 1.024	60.800, 1.074	60.800, 1.129	60.800, 1.061	60.800, 1.038	60.800, 1.084	60.800, 1.085	60.800, 1.052	60.800, 0.990	60.800, 1.021	60.800, 1.508	60.800, 1.373	60.800, 1.442
306	61.000, 1.134	61.000, 1.091	61.000, 1.025	61.000, 1.075	61.000, 1.130	61.000, 1.062	61.000, 1.039	61.000, 1.084	61.000, 1.085	61.000, 1.052	61.000, 0.990	61.000, 1.022	61.000, 1.510	61.000, 1.375	61.000, 1.445
307	61.200, 1.134	61.200, 1.092	61.200, 1.026	61.200, 1.075	61.200, 1.132	61.200, 1.063	61.200, 1.040	61.200, 1.085	61.200, 1.086	61.200, 1.054	61.200, 0.991	61.200, 1.023	61.200, 1.512	61.200, 1.377	61.200, 1.448
308	61.400, 1.135	61.400, 1.094	61.400, 1.026	61.400, 1.076	61.400, 1.133	61.400, 1.064	61.400, 1.041	61.400, 1.086	61.400, 1.087	61.400, 1.055	61.400, 0.992	61.400, 1.024	61.400, 1.515	61.400, 1.380	61.400, 1.450
309	61.600, 1.136	61.600, 1.094	61.600, 1.027	61.600, 1.077	61.600, 1.134	61.600, 1.065	61.600, 1.042	61.600, 1.087	61.600, 1.089	61.600, 1.056	61.600, 0.993	61.600, 1.025	61.600, 1.517	61.600, 1.382	61.600, 1.452
310	61.800, 1.137	61.800, 1.095	61.800, 1.028	61.800, 1.078	61.800, 1.135	61.800, 1.066	61.800, 1.043	61.800, 1.088	61.800, 1.090	61.800, 1.057	61.800, 0.994	61.800, 1.026	61.800, 1.519	61.800, 1.384	61.800, 1.454
311	62.000, 1.138	62.000, 1.096	62.000, 1.029	62.000, 1.078	62.000, 1.136	62.000, 1.067	62.000, 1.044	62.000, 1.089	62.000, 1.091	62.000, 1.058	62.000, 0.995	62.000, 1.027	62.000, 1.522	62.000, 1.386	62.000, 1.456
312	62.200, 1.139	62.200, 1.097	62.200, 1.030	62.200, 1.079	62.200, 1.138	62.200, 1.068	62.200, 1.045	62.200, 1.090	62.200, 1.093	62.200, 1.058	62.200, 0.996	62.200, 1.028	62.200, 1.524	62.200, 1.389	62.200, 1.458
313	62.400, 1.140	62.400, 1.098	62.400, 1.031	62.400, 1.080	62.400, 1.139	62.400, 1.069	62.400, 1.045	62.400, 1.091	62.400, 1.094	62.400, 1.059	62.400, 0.997	62.400, 1.029	62.400, 1.527	62.400, 1.391	62.400, 1.460
314	62.600, 1.141	62.600, 1.099	62.600, 1.032	62.600, 1.081	62.600, 1.140	62.600, 1.069	62.600, 1.046	62.600, 1.092	62.600, 1.095	62.600, 1.060	62.600, 0.998	62.600, 1.030	62.600, 1.529	62.600, 1.393	62.600, 1.463
315	62.800, 1.142	62.800, 1.100	62.800, 1.032	62.800, 1.082	62.800, 1.141	62.800, 1.070	62.800, 1.047	62.800, 1.093	62.800, 1.096	62.800, 1.060	62.800, 0.998	62.800, 1.031	62.800, 1.532	62.800, 1.395	62.800, 1.465
316	63.000, 1.142	63.000, 1.101	63.000, 1.033	63.000, 1.083	63.000, 1.142	63.000, 1.071	63.000, 1.048	63.000, 1.094	63.000, 1.097	63.000, 1.061	63.000, 0.999	63.000, 1.032	63.000, 1.535	63.000, 1.397	63.000, 1.467
317	63.200, 1.143	63.200, 1.102	63.200, 1.034	63.200, 1.083	63.200, 1.143	63.200, 1.072	63.200, 1.048	63.200, 1.094	63.200, 1.098	63.200, 1.062	63.200, 1.000	63.200, 1.033	63.200, 1.537	63.200, 1.399	63.200, 1.470
318	63.400, 1.144	63.400, 1.103	63.400, 1.034	63.400, 1.084	63.400, 1.143	63.400, 1.073	63.400, 1.049	63.400, 1.095	63.400, 1.099	63.400, 1.062	63.400, 1.001	63.400, 1.034	63.400, 1.540	63.400, 1.402	63.400, 1.472
319	63.600, 1.145	63.600, 1.104	63.600, 1.035	63.600, 1.085	63.600, 1.144	63.600, 1.074	63.600, 1.050	63.600, 1.096	63.600, 1.100	63.600, 1.063	63.600, 1.001	63.600, 1.035	63.600, 1.542	63.600, 1.404	63.600, 1.475
320	63.800, 1.146	63.800, 1.104	63.800, 1.035	63.800, 1.085	63.800, 1.145	63.800, 1.074	63.800, 1.050	63.800, 1.096	63.800, 1.101	63.800, 1.064	63.800, 1.002	63.800, 1.036	63.800, 1.545	63.800, 1.406	63.800, 1.478
321	64.000, 1.147	64.000, 1.105	64.000, 1.036	64.000, 1.086	64.000, 1.146	64.000, 1.075	64.000, 1.051	64.000, 1.097	64.000, 1.102	64.000, 1.064	64.000, 1.002	64.000, 1.037	64.000, 1.547	64.000, 1.409	64.000, 1.480
322	64.200, 1.147	64.200, 1.106	64.200, 1.037	64.200, 1.087	64.200, 1.146	64.200, 1.075	64.200, 1.051	64.200, 1.097	64.200, 1.103	64.200, 1.065	64.200, 1.002	64.200, 1.037	64.200, 1.549	64.200, 1.411	64.200, 1.483
323	64.400, 1.148	64.400, 1.107	64.400, 1.037	64.400, 1.087	64.400, 1.147	64.400, 1.076	64.400, 1.052	64.400, 1.098	64.400, 1.103	64.400, 1.066	64.400, 1.003	64.400, 1.038	64.400, 1.552	64.400, 1.413	64.400, 1.485
324	64.600, 1.148	64.600, 1.108	64.600, 1.038	64.600, 1.088	64.600, 1.148	64.600, 1.076	64.600, 1.053	64.600, 1.098	64.600, 1.103	64.600, 1.067	64.600, 1.003	64.600, 1.038	64.600, 1.554	64.600, 1.416	64.600, 1.487
325	64.800, 1.149	64.800, 1.109	64.800, 1.039	64.800, 1.088	64.800, 1.149	64.800, 1.077	64.800, 1.054	64.800, 1.099	64.800, 1.104	64.800, 1.068	64.800, 1.004	64.800, 1.038	64.800, 1.557	64.800, 1.418	64.800, 1.489
326	65.000, 1.150	65.000, 1.109	65.000, 1.040	65.000, 1.089	65.000, 1.150	65.000, 1.078	65.000, 1.055	65.000, 1.099	65.000, 1.104	65.000, 1.069	65.000, 1.005	65.000, 1.039	65.000, 1.559	65.000, 1.420	65.000, 1.491
327	65.200, 1.150	65.200, 1.110	65.200, 1.041	65.200, 1.089	65.200, 1.151	65.200, 1.079	65.200, 1.056	65.200, 1.100	65.200, 1.105	65.200, 1.070	65.200, 1.005	65.200, 1.039	65.200, 1.561	65.200, 1.422	65.200, 1.493
328	65.400, 1.151	65.400, 1.111	65.400, 1.042	65.400, 1.089	65.400, 1.152	65.400, 1.080	65.400, 1.057	65.400, 1.100	65.400, 1.106	65.400, 1.071	65.400, 1.006	65.400, 1.040	65.400, 1.564	65.400, 1.425	65.400, 1.495
329	65.600, 1.152	65.600, 1.111	65.600, 1.043	65.600, 1.090	65.600, 1.153	65.600, 1.081	65.600, 1.058	65.600, 1.101	65.600, 1.107	65.600, 1.072	65.600, 1.007	65.600, 1.040	65.600, 1.567	65.600, 1.427	65.600, 1.496
330	65.800, 1.153	65.800, 1.111	65.800, 1.044	65.800, 1.090	65.800, 1.155	65.800, 1.081	65.800, 1.058	65.800, 1.102	65.800, 1.108	65.800, 1.073	65.800, 1.007	65.800, 1.040	65.800, 1.569	65.800, 1.429	65.800, 1.498
331	66.000, 1.154	66.000, 1.112	66.000, 1.045	66.000, 1.091	66.000, 1.156	66.000, 1.082	66.000, 1.059	66.000, 1.102	66.000, 1.109	66.000, 1.074	66.000, 1.008	66.000, 1.041	66.000, 1.571	66.000, 1.431	66.000, 1.500
332	66.200, 1.156	66.200, 1.112	66.200, 1.045	66.200, 1.092	66.200, 1.156	66.200, 1.083	66.200, 1.060	66.200, 1.103	66.200, 1.110	66.200, 1.074	66.200, 1.009	66.200, 1.042	66.200, 1.574	66.200, 1.433	66.200, 1.502
333	66.400, 1.157	66.400, 1.112	66.400, 1.046	66.400, 1.093	66.400, 1.157	66.400, 1.083	66.400, 1.061	66.400, 1.104	66.400, 1.110	66.400, 1.075	66.400, 1.010	66.400, 1.042	66.400, 1.576	66.400, 1.435	66.400, 1.504
334	66.600, 1.158	66.600, 1.113	66.600, 1.047	66.600, 1.093	66.600, 1.158	66.600, 1.084	66.600, 1.062	66.600, 1.105	66.600, 1.111	66.600, 1.076	66.600, 1.011	66.600, 1.043	66.600, 1.578	66.600, 1.436	66.600, 1.506
335	66.800, 1.159	66.800, 1.113	66.800, 1.048	66.800, 1.094	66.800, 1.158	66.800, 1.084	66.800, 1.063	66.800, 1.105	66.800, 1.112	66.800, 1.076	66.800, 1.012	66.800, 1.044	66.800, 1.580	66.800, 1.438	66.800, 1.508
336	67.000, 1.160	67.000, 1.115	67.000, 1.049	67.000, 1.095	67.000, 1.159	67.000, 1.085	67.000, 1.063	67.000, 1.106	67.000, 1.112	67.000, 1.077	67.000, 1.013	67.000, 1.045	67.000, 1.582	67.000, 1.440	67.000, 1.511
337	67.200, 1.161	67.200, 1.116	67.200, 1.049	67.200, 1.096	67.200, 1.160	67.200, 1.085	67.200, 1.064	67.200, 1.106	67.200, 1.113	67.200, 1.078	67.200, 1.013	67.200, 1.047	67.200, 1.584	67.200, 1.441	67.200, 1.513
338	67.400, 1.162	67.400, 1.117	67.400, 1.049	67.400, 1.096	67.400, 1.161	67.400, 1.086	67.400, 1.065	67.400, 1.107	67.400, 1.114	67.400, 1.078	67.400, 1.014	67.400, 1.048	67.400, 1.586	67.400, 1.443	67.400, 1.515
339	67.600, 1.163	67.600, 1.118	67.600, 1.050	67.600, 1.097	67.600, 1.162	67.600, 1.087	67.600, 1.065	67.600, 1.108	67.600, 1.115	67.600, 1.079	67.600, 1.015	67.600, 1.049	67.600, 1.588	67.600, 1.445	67.600, 1.517
340	67.800, 1.163	67.800, 1.120	67.800, 1.050	67.800, 1.098	67.800, 1.163	67.800, 1.088	67.800, 1.066	67.800, 1.108	67.800, 1.116	67.800, 1.080	67.800, 1.016	67.800, 1.050	67.800, 1.589	67.800, 1.446	67.800, 1.519
341	68.000, 1.164	68.000, 1.121	68.000, 1.050	68.000, 1.098	68.000, 1.164	68.000, 1.088	68.000, 1.067	68.000, 1.109	68.000, 1.116	68.000, 1.081	68.000, 1.017	68.000, 1.051	68.000, 1.591	68.000, 1.448	68.000, 1.521
342	68.200, 1.164	68.200, 1.122	68.200, 1.051	68.200, 1.099	68.200, 1.165	68.200, 1.089	68.200, 1.068	68.200, 1.109	68.200, 1.117	68.200, 1.082	68.200, 1.018	68.200, 1.052	68.200, 1.593	68.200, 1.449	68.200, 1.523
343	68.400, 1.165	68.400, 1.123	68.400, 1.052	68.400, 1.099	68.400, 1.166	68.400, 1.090	68.400, 1.069	68.400, 1.110	68.400, 1.117	68.400, 1.083	68.400, 1.018	68.400, 1.052	68.400, 1.596	68.400, 1.451	68.400, 1.525
344	68.600, 1.165	68.600, 1.124	68.600, 1.052	68.600, 1.100	68.600, 1.167	68.600, 1.091	68.600, 1.070	68.600, 1.111	68.600, 1.118	68.600, 1.084	68.600, 1.019	68.600, 1.053	68.600, 1.598	68.600, 1.453	68.600, 1.527
345	68.800, 1.166	68.800, 1.125	68.800, 1.053	68.800, 1.101	68.800, 1.167	68.800, 1.091	68.800, 1.071	68.800, 1.112	68.800, 1.119	68.800, 1.085	68.800, 1.020	68.800, 1.053	68.800, 1.601	68.800, 1.455	68.800, 1.529
346	69.000, 1.166	69.000, 1.126	69.000, 1.054	69.000, 1.102	69.000, 1.168	69.000, 1.092	69.000, 1.071	69.000, 1.113	69.000, 1.120	69.000, 1.086	69.000, 1.021	69.000, 1.054	69.000, 1.603	69.000, 1.457	69.000, 1.531
347	69.200, 1.167	69.200, 1.127	69.200, 1.055	69.200, 1.103	69.200, 1.169	69.200, 1.093	69.200, 1.072	69.200, 1.114	69.200, 1.121	69.200, 1.087	69.200, 1.022	69.200, 1.054	69.200, 1.606	69.200, 1.459	69.200, 1.533
348	69.400, 1.168	69.400, 1.128	69.400, 1.056	69.400, 1.104	69.400, 1.170	69.400, 1.094	69.400, 1.073	69.400, 1.115	69.400, 1.121	69.400, 1.087	69.400, 1.023	69.400, 1.055	69.400, 1.608	69.400, 1.461	69.400, 1.535
349	69.600, 1.168	69.600, 1.128	69.600, 1.057	69.600, 1.105	69.600, 1.170	69.600, 1.095	69.600, 1.073	69.600, 1.116	69.600, 1.122	69.600, 1.088	69.600, 1.023	69.600, 1.056	69.600, 1.610	69.600, 1.463	69.600, 1.537
350	69.800, 1.169	69.800, 1.129	69.800, 1.057	69.800, 1.106	69.800, 1.171	69.800, 1.095	69.800, 1.074	69.800, 1.116	69.800, 1.123	69.800, 1.089	69.800, 1.024	69.800, 1.057	69.800, 1.612	69.800, 1.465	69.800, 1.539
351	70.000, 1.170	70.000, 1.129	70.000, 1.058	70.000, 1.107	70.000, 1.172	70.000, 1.096	70.000, 1.074	70.000, 1.117	70.000, 1.123	70.000, 1.089	70.000, 1.025	70.000, 1.058	70.000, 1.615	70.000, 1.466	70.000, 1.540
352	70.200, 1.170	70.200, 1.130	70.200, 1.059	70.200, 1.108	70.200, 1.172	70.200, 1.097	70.200, 1.075	70.200, 1.118	70.200, 1.124	70.200, 1.089	70.200, 1.025	70.200, 1.058	70.200, 1.617	70.200, 1.468	70.200, 1.542
353	70.400, 1.171	70.400, 1.130	70.400, 1.060	70.400, 1.108	70.400, 1.173	70.400, 1.098	70.400, 1.075	70.400, 1.118	70.400, 1.124	70.400, 1.090	70.400, 1.026	70.400, 1.059	70.400, 1.619	70.400, 1.470	70.400, 1.544
354	70.600, 1.172	70.600, 1.130	70.600, 1.061	70.600, 1.109	70.600, 1.174	70.600, 1.098	70.600, 1.075	70.600, 1.119	70.600, 1.125	70.600, 1.090	70.600, 1.026	70.600, 1.059	70.600, 1.621	70.600, 1.472	70.600, 1.545
355	70.800, 1.172	70.800, 1.131	70.800, 1.062	70.800, 1.109	70.800, 1.175	70.800, 1.099	70.800, 1.076	70.800, 1.119	70.800, 1.126	70.800, 1.090	70.800, 1.027	70.800, 1.060	70.800, 1.623	70.800, 1.475	70.800, 1.547
356	71.000, 1.173	71.000, 1.131	71.000, 1.062	71.000, 1.109	71.000, 1.176	71.000, 1.101	71.000, 1.076	71.000, 1.120	71.000, 1.127	71.000, 1.090	71.000, 1.027	71.000, 1.061	71.000, 1.624	71.000, 1.476	71.000, 1.548
357	71.200, 1.174	71.200, 1.132	71.200, 1.063	71.200, 1.110	71.200, 1.177	71.200, 1.102	71.200, 1.076	71.200, 1.120	71.200, 1.128	71.200, 1.091	71.200, 1.028	71.200, 1.061	71.200, 1.626	71.200, 1.478	71.200, 1.550
358	71.400, 1.175	71.400, 1.133	71.400, 1.063	71.400, 1.110	71.400, 1.178	71.400, 1.103	71.400, 1.077	71.400, 1.121	71.400, 1.129	71.400, 1.091	71.400, 1.028	71.400, 1.062	71.400, 1.628	71.400, 1.481	71.400, 1.551
359	71.600, 1.176	71.600, 1.133	71.600, 1.064	71.600, 1.110	71.600, 1.179	71.600, 1.104	71.600, 1.078	71.600, 1.122	71.600, 1.129	71.600, 1.092	71.600, 1.029	71.600, 1.063	71.600, 1.629	71.600, 1.482	71.600, 1.553
360	71.800, 1.177	71.800, 1.134	71.800, 1.064	71.800, 1.111	71.800, 1.180	71.800, 1.104	71.800, 1.078	71.800, 1.122	71.800, 1.130	71.800, 1.092	71.800, 1.030	71.800, 1.063	71.800, 1.631	71.800, 1.484	71.800, 1.554
361	72.000, 1.177	72.000, 1.135	72.000, 1.065	72.000, 1.111	72.000, 1.182	72.000, 1.105	72.000, 1.079	72.000, 1.123	72.000, 1.131	72.000, 1.093	72.000, 1.030	72.000, 1.063	72.000, 1.633	72.000, 1.486	72.000, 1.556
362	72.200, 1.178	72.200, 1.136	72.200, 1.065	72.200, 1.112	72.200, 1.183	72.200, 1.105	72.200, 1.080	72.200, 1.123	72.200, 1.132	72.200, 1.094	72.200, 1.031	72.200, 1.064	72.200, 1.635	72.200, 1.488	72.200, 1.558
363	72.400, 1.179	72.400, 1.137	72.400, 1.066	72.400, 1.113	72.400, 1.183	72.400, 1.105	72.400, 1.081	72.400, 1.124	72.400, 1.132	72.400, 1.095	72.400, 1.032	72.400, 1.064	72.400, 1.638	72.400, 1.490	72.400, 1.560
364	72.600, 1.180	72.600, 1.137	72.600, 1.067	72.600, 1.114	72.600, 1.184	72.600, 1.106	72.600, 1.081	72.600, 1.125	72.600, 1.133	72.600, 1.096	72.600, 1.033	72.600, 1.065	72.600, 1.640	72.600, 1.492	72.600, 1.562
365	72.800, 1.180	72.800, 1.138	72.800, 1.068	72.800, 1.114	72.800, 1.185	72.800, 1.106	72.800, 1.082	72.800, 1.125	72.800, 1.134	72.800, 1.097	72.800, 1.034	72.800, 1.065	72.800, 1.642	72.800, 1.493	72.800, 1.564
366	73.000, 1.181	73.000, 1.139	73.000, 1.069	73.000, 1.115	73.000, 1.186	73.000, 1.107	73.000, 1.083	73.000, 1.126	73.000, 1.135	73.000, 1.097	73.000, 1.035	73.000, 1.066	73.000, 1.644	73.000, 1.495	73.000, 1.566
367	73.200, 1.182	73.200, 1.139	73.200, 1.070	73.200, 1.117	73.200, 1.186	73.200, 1.107	73.200, 1.084	73.200, 1.126	73.200, 1.135	73.200, 1.098	73.200, 1.036	73.200, 1.066	73.200, 1.646	73.200, 1.496	73.200, 1.568
368	73.400, 1.183	73.400, 1.140	73.400, 1.070	73.400, 1.117	73.400, 1.186	73.400, 1.108	73.400, 1.084	73.400, 1.127	73.400, 1.136	73.400, 1.099	73.400, 1.037	73.400, 1.067	73.400, 1.648	73.400, 1.496	73.400, 1.569
369	73.600, 1.184	73.600, 1.141	73.600, 1.071	73.600, 1.118	73.600, 1.187	73.600, 1.109	73.600, 1.085	73.600, 1.127	73.600, 1.137	73.600, 1.100	73.600, 1.037	73.600, 1.068	73.600, 1.650	73.600, 1.497	73.600, 1.571
370	73.800, 1.185	73.800, 1.141	73.800, 1.072	73.800, 1.119	73.800, 1.187	73.800, 1.109	73.800, 1.086	73.800, 1.127	73.800, 1.137	73.800, 1.100	73.800, 1.038	73.800, 1.068	73.800, 1.651	73.800, 1.498	73.800, 1.572
371	74.000, 1.186	74.000, 1.142	74.000, 1.072	74.000, 1.120	74.000, 1.187	74.000, 1.110	74.000, 1.086	74.000, 1.128	74.000, 1.138	74.000, 1.101	74.000, 1.039	74.000, 1.069	74.000, 1.653	74.000, 1.500	74.000, 1.573
372	74.200, 1.187	74.200, 1.142	74.200, 1.072	74.200, 1.120	74.200, 1.187	74.200, 1.111	74.200, 1.087	74.200, 1.129	74.200, 1.139	74.200, 1.101	74.200, 1.039	74.200, 1.070	74.200, 1.655	74.200, 1.501	74.200, 1.575
373	74.400, 1.188	74.400, 1.143	74.400, 1.073	74.400, 1.121	74.400, 1.188	74.400, 1.113	74.400, 1.087	74.400, 1.129	74.400, 1.139	74.400, 1.102	74.400, 1.040	74.400, 1.071	74.400, 1.657	74.400, 1.503	74.400, 1.576
374	74.600, 1.189	74.600, 1.143	74.600, 1.073	74.600, 1.121	74.600, 1.188	74.600, 1.114	74.600, 1.088	74.600, 1.130	74.600, 1.140	74.600, 1.102	74.600, 1.041	74.600, 1.071	74.600, 1.658	74.600, 1.505	74.600, 1.578
375	74.800, 1.189	74.800, 1.144	74.800, 1.073	74.800, 1.121	74.800, 1.188	74.800, 1.115	74.800, 1.089	74.800, 1.131	74.800, 1.141	74.800, 1.103	74.800, 1.042	74.800, 1.073	74.800, 1.659	74.800, 1.507	74.800, 1.580
376	75.000, 1.190	75.000, 1.144	75.000, 1.073	75.000, 1.122	75.000, 1.189	75.000, 1.116	75.000, 1.089	75.000, 1.132	75.000, 1.142	75.000, 1.104	75.000, 1.042	75.000, 1.074	75.000, 1.660	75.000, 1.508	75.000, 1.581
377	75.200, 1.191	75.200, 1.145	75.200, 1.074	75.200, 1.122	75.200, 1.190	75.200, 1.117	75.200, 1.090	75.200, 1.132	75.200, 1.142	75.200, 1.105	75.200, 1.043	75.200, 1.075	75.200, 1.662	75.200, 1.510	75.200, 1.583
378	75.400, 1.191	75.400, 1.145	75.400, 1.075	75.400, 1.122	75.400, 1.191	75.400, 1.118	75.400, 1.091	75.400, 1.133	75.400, 1.143	75.400, 1.105	75.400, 1.044	75.400, 1.076	75.400, 1.663	75.400, 1.512	75.400, 1.584
379	75.600, 1.192	75.600, 1.146	75.600, 1.075	75.600, 1.122	75.600, 1.191	75.600, 1.119	75.600, 1.091	75.600, 1.134	75.600, 1.144	75.600, 1.106	75.600, 1.044	75.600, 1.077	75.600, 1.664	75.600, 1.514	75.600, 1.586
380	75.800, 1.192	75.800, 1.147	75.800, 1.076	75.800, 1.123	75.800, 1.192	75.800, 1.119	75.800, 1.092	75.800, 1.135	75.800, 1.145	75.800, 1.107	75.800, 1.045	75.800, 1.078	75.800, 1.666	75.800, 1.516	75.800, 1.588
381	76.000, 1.193	76.000, 1.147	76.000, 1.077	76.000, 1.123	76.000, 1.193	76.000, 1.120	76.000, 1.093	76.000, 1.136	76.000, 1.146	76.000, 1.107	76.000, 1.046	76.000, 1.079	76.000, 1.667	76.000, 1.518	76.000, 1.590
382	76.200, 1.193	76.200, 1.147	76.200, 1.078	76.200, 1.124	76.200, 1.194	76.200, 1.120	76.200, 1.094	76.200, 1.137	76.200, 1.146	76.200, 1.108	76.200, 1.046	76.200, 1.079	76.200, 1.669	76.200, 1.520	76.200, 1.592
383	76.400, 1.194	76.400, 1.148	76.400, 1.079	76.400, 1.124	76.400, 1.195	76.400, 1.120	76.400, 1.094	76.400, 1.138	76.400, 1.147	76.400, 1.109	76.400, 1.047	76.400, 1.080	76.400, 1.670	76.400, 1.522	76.400, 1.594
384	76.600, 1.194	76.600, 1.148	76.600, 1.080	76.600, 1.125	76.600, 1.196	76.600, 1.121	76.600, 1.095	76.600, 1.139	76.600, 1.148	76.600, 1.110	76.600, 1.047	76.600, 1.080	76.600, 1.672	76.600, 1.524	76.600, 1.595
385	76.800, 1.194	76.800, 1.149	76.800, 1.081	76.800, 1.125	76.800, 1.197	76.800, 1.121	76.800, 1.096	76.800, 1.139	76.800, 1.149	76.800, 1.110	76.800, 1.048	76.800, 1.081	76.800, 1.674	76.800, 1.525	76.800, 1.597
386	77.000, 1.195	77.000, 1.150	77.000, 1.082	77.000, 1.126	77.000, 1.198	77.000, 1.122	77.000, 1.096	77.000, 1.140	77.000, 1.150	77.000, 1.111	77.000, 1.048	77.000, 1.081	77.000, 1.676	77.000, 1.527	77.000, 1.598
387	77.200, 1.196	77.200, 1.150	77.200, 1.083	77.200, 1.126	77.200, 1.199	77.200, 1.122	77.200, 1.097	77.200, 1.141	77.200, 1.150	77.200, 1.112	77.200, 1.049	77.200, 1.082	77.200, 1.678	77.200, 1.528	77.200, 1.599
388	77.400, 1.196	77.400, 1.151	77.400, 1.083	77.400, 1.127	77.400, 1.200	77.400, 1.123	77.400, 1.097	77.400, 1.141	77.400, 1.151	77.400, 1.112	77.400, 1.049	77.400, 1.082	77.400, 1.680	77.400, 1.530	77.400, 1.600
389	77.600, 1.197	77.600, 1.152	77.600, 1.084	77.600, 1.128	77.600, 1.201	77.600, 1.123	77.600, 1.098	77.600, 1.142	77.600, 1.151	77.600, 1.113	77.600, 1.050	77.600, 1.083	77.600, 1.682	77.600, 1.532	77.600, 1.601
390	77.800, 1.198	77.800, 1.152	77.800, 1.084	77.800, 1.129	77.800, 1.202	77.800, 1.123	77.800, 1.098	77.800, 1.142	77.800, 1.152	77.800, 1.114	77.800, 1.050	77.800, 1.083	77.800, 1.684	77.800, 1.534	77.800, 1.603
391	78.000, 1.199	78.000, 1.153	78.000, 1.084	78.000, 1.130	78.000, 1.203	78.000, 1.124	78.000, 1.099	78.000, 1.143	78.000, 1.152	78.000, 1.114	78.000, 1.051	78.000, 1.084	78.000, 1.686	78.000, 1.535	78.000, 1.604
392	78.200, 1.200	78.200, 1.154	78.200, 1.084	78.200, 1.131	78.200, 1.204	78.200, 1.124	78.200, 1.099	78.200, 1.143	78.200, 1.153	78.200, 1.115	78.200, 1.051	78.200, 1.084	78.200, 1.687	78.200, 1.537	78.200, 1.606
393	78.400, 1.200	78.400, 1.155	78.400, 1.085	78.400, 1.132	78.400, 1.205	78.400, 1.124	78.400, 1.099	78.400, 1.144	78.400, 1.154	78.400, 1.116	78.400, 1.052	78.400, 1.085	78.400, 1.689	78.400, 1.539	78.400, 1.607
394	78.600, 1.201	78.600, 1.156	78.600, 1.085	78.600, 1.132	78.600, 1.206	78.600, 1.125	78.600, 1.100	78.600, 1.144	78.600, 1.154	78.600, 1.117	78.600, 1.052	78.600, 1.086	78.600, 1.691	78.600, 1.540	78.600, 1.609
395	78.800, 1.202	78.800, 1.157	78.800, 1.086	78.800, 1.133	78.800, 1.206	78.800, 1.125	78.800, 1.100	78.800, 1.144	78.800, 1.155	78.800, 1.117	78.800, 1.053	78.800, 1.086	78.800, 1.692	78.800, 1.542	78.800, 1.610
396	79.000, 1.202	79.000, 1.157	79.000, 1.087	79.000, 1.133	79.000, 1.207	79.000, 1.125	79.000, 1.101	79.000, 1.144	79.000, 1.155	79.000, 1.118	79.000, 1.053	79.000, 1.087	79.000, 1.694	79.000, 1.543	79.000, 1.612
397	79.200, 1.203	79.200, 1.158	79.200, 1.087	79.200, 1.134	79.200, 1.208	79.200, 1.126	79.200, 1.101	79.200, 1.145	79.200, 1.156	79.200, 1.118	79.200, 1.053	79.200, 1.087	79.200, 1.695	79.200, 1.544	79.200, 1.613
398	79.400, 1.204	79.400, 1.158	79.400, 1.088	79.400, 1.134	79.400, 1.208	79.400, 1.126	79.400, 1.101	79.400, 1.145	79.400, 1.157	79.400, 1.119	79.400, 1.054	79.400, 1.088	79.400, 1.697	79.400, 1.546	79.400, 1.614
399	79.600, 1.204	79.600, 1.159	79.600, 1.089	79.600, 1.135	79.600, 1.209	79.600, 1.127	79.600, 1.102	79.600, 1.145	79.600, 1.157	79.600, 1.119	79.600, 1.054	79.600, 1.089	79.600, 1.699	79.600, 1.547	79.600, 1.615
400	79.800, 1.205	79.800, 1.159	79.800, 1.090	79.800, 1.136	79.800, 1.209	79.800, 1.128	79.800, 1.102	79.800, 1.146	79.800, 1.158	79.800, 1.119	79.800, 1.054	79.800, 1.089	79.800, 1.700	79.800, 1.549	79.800, 1.617
401	80.000, 1.206	80.000, 1.159	80.000, 1.091	80.000, 1.136	80.000, 1.209	80.000, 1.128	80.000, 1.103	80.000, 1.146	80.000, 1.158	80.000, 1.119	80.000, 1.055	80.000, 1.090	80.000, 1.702	80.000, 1.550	80.000, 1.618
402	80.200, 1.206	80.200, 1.160	80.200, 1.091	80.200, 1.137	80.200, 1.210	80.200, 1.129	80.200, 1.104	80.200, 1.147	80.200, 1.159	80.200, 1.119	80.200, 1.055	80.200, 1.090	80.200, 1.703	80.200, 1.552	80.200, 1.619
403	80.400, 1.207	80.400, 1.160	80.400, 1.092	80.400, 1.138	80.400, 1.210	80.400, 1.130	80.400, 1.104	80.400, 1.147	80.400, 1.159	80.400, 1.120	80.400, 1.055	80.400, 1.091	80.400, 1.705	80.400, 1.553	80.400, 1.621
404	80.600, 1.208	80.600, 1.160	80.600, 1.093	80.600, 1.138	80.600, 1.211	80.600, 1.130	80.600, 1.105	80.600, 1.148	80.600, 1.159	80.600, 1.120	80.600, 1.056	80.600, 1.091	80.600, 1.706	80.600, 1.555	80.600, 1.622
405	80.800, 1.208	80.800, 1.161	80.800, 1.093	80.800, 1.139	80.800, 1.211	80.800, 1.131	80.800, 1.106	80.800, 1.148	80.800, 1.160	80.800, 1.120	80.800, 1.057	80.800, 1.092	80.800, 1.708	80.800, 1.556	80.800, 1.623
406	81.000, 1.208	81.000, 1.161	81.000, 1.093	81.000, 1.140	81.000, 1.212	81.000, 1.132	81.000, 1.106	81.000, 1.149	81.000, 1.160	81.000, 1.121	81.000, 1.057	81.000, 1.092	81.000, 1.710	81.000, 1.557	81.000, 1.625
407	81.200, 1.209	81.200, 1.162	81.200, 1.093	81.200, 1.140	81.200, 1.213	81.200, 1.132	81.200, 1.107	81.200, 1.150	81.200, 1.161	81.200, 1.121	81.200, 1.058	81.200, 1.093	81.200, 1.711	81.200, 1.559	81.200, 1.627
408	81.400, 1.209	81.400, 1.162	81.400, 1.093	81.400, 1.141	81.400, 1.213	81.400, 1.133	81.400, 1.108	81.400, 1.151	81.400, 1.162	81.400, 1.121	81.400, 1.059	81.400, 1.093	81.400, 1.713	81.400, 1.560	81.400, 1.629
409	81.600, 1.210	81.600, 1.163	81.600, 1.093	81.600, 1.142	81.600, 1.214	81.600, 1.133	81.600, 1.108	81.600, 1.152	81.600, 1.163	81.600, 1.122	81.600, 1.060	81.600, 1.094	81.600, 1.714	81.600, 1.562	81.600, 1.631
410	81.800, 1.210	81.800, 1.163	81.800, 1.093	81.800, 1.142	81.800, 1.215	81.800, 1.134	81.800, 1.109	81.800, 1.152	81.800, 1.164	81.800, 1.122	81.800, 1.060	81.800, 1.095	81.800, 1.716	81.800, 1.563	81.800, 1.633
411	82.000, 1.211	82.000, 1.164	82.000, 1.093	82.000, 1.142	82.000, 1.215	82.000, 1.134	82.000, 1.109	82.000, 1.153	82.000, 1.165	82.000, 1.123	82.000, 1.061	82.000, 1.095	82.000, 1.717	82.000, 1.564	82.000, 1.635
412	82.200, 1.211	82.200, 1.165	82.200, 1.093	82.200, 1.143	82.200, 1.216	82.200, 1.135	82.200, 1.110	82.200, 1.153	82.200, 1.165	82.200, 1.124	82.200, 1.061	82.200, 1.096	82.200, 1.719	82.200, 1.565	82.200, 1.636
413	82.400, 1.212	82.400, 1.165	82.400, 1.094	82.400, 1.143	82.400, 1.217	82.400, 1.135	82.400, 1.110	82.400, 1.153	82.400, 1.166	82.400, 1.125	82.400, 1.062	82.400, 1.096	82.400, 1.720	82.400, 1.566	82.400, 1.638
414	82.600, 1.212	82.600, 1.166	82.600, 1.094	82.600, 1.143	82.600, 1.217	82.600, 1.136	82.600, 1.110	82.600, 1.154	82.600, 1.167	82.600, 1.126	82.600, 1.062	82.600, 1.097	82.600, 1.722	82.600, 1.567	82.600, 1.639
415	82.800, 1.213	82.800, 1.167	82.800, 1.095	82.800, 1.144	82.800, 1.218	82.800, 1.136	82.800, 1.111	82.800, 1.154	82.800, 1.168	82.800, 1.126	82.800, 1.063	82.800, 1.098	82.800, 1.723	82.800, 1.569	82.800, 1.641
416	83.000, 1.213	83.000, 1.167	83.000, 1.096	83.000, 1.144	83.000, 1.218	83.000, 1.137	83.000, 1.111	83.000, 1.154	83.000, 1.168	83.000, 1.127	83.000, 1.064	83.000, 1.098	83.000, 1.725	83.000, 1.570	83.000, 1.642
417	83.200, 1.214	83.200, 1.168	83.200, 1.097	83.200, 1.145	83.200, 1.218	83.200, 1.138	83.200, 1.112	83.200, 1.155	83.200, 1.169	83.200, 1.128	83.200, 1.064	83.200, 1.098	83.200, 1.726	83.200, 1.571	83.200, 1.643
418	83.400, 1.215	83.400, 1.169	83.400, 1.097	83.400, 1.145	83.400, 1.219	83.400, 1.138	83.400, 1.113	83.400, 1.155	83.400, 1.170	83.400, 1.129	83.400, 1.065	83.400, 1.099	83.400, 1.727	83.400, 1.573	83.400, 1.644
419	83.600, 1.215	83.600, 1.170	83.600, 1.098	83.600, 1.146	83.600, 1.219	83.600, 1.139	83.600, 1.113	83.600, 1.156	83.600, 1.170	83.600, 1.130	83.600, 1.065	83.600, 1.100	83.600, 1.729	83.600, 1.575	83.600, 1.646
420	83.800, 1.216	83.800, 1.171	83.800, 1.099	83.800, 1.147	83.800, 1.220	83.800, 1.140	83.800, 1.114	83.800, 1.156	83.800, 1.171	83.800, 1.131	83.800, 1.065	83.800, 1.100	83.800, 1.730	83.800, 1.576	83.800, 1.647
421	84.000, 1.217	84.000, 1.171	84.000, 1.100	84.000, 1.147	84.000, 1.221	84.000, 1.140	84.000, 1.115	84.000, 1.157	84.000, 1.171	84.000, 1.132	84.000, 1.066	84.000, 1.101	84.000, 1.732	84.000, 1.578	84.000, 1.648
422	84.200, 1.217	84.200, 1.172	84.200, 1.100	84.200, 1.148	84.200, 1.221	84.200, 1.141	84.200, 1.115	84.200, 1.158	84.200, 1.172	84.200, 1.132	84.200, 1.066	84.200, 1.102	84.200, 1.733	84.200, 1.579	84.200, 1.649
423	84.400, 1.218	84.400, 1.173	84.400, 1.101	84.400, 1.149	84.400, 1.222	84.400, 1.142	84.400, 1.116	84.400, 1.158	84.400, 1.172	84.400, 1.133	84.400, 1.067	84.400, 1.102	84.400, 1.734	84.400, 1.581	84.400, 1.649
424	84.600, 1.218	84.600, 1.174	84.600, 1.101	84.600, 1.149	84.600, 1.222	84.600, 1.142	84.600, 1.116	84.600, 1.159	84.600, 1.173	84.600, 1.134	84.600, 1.067	84.600, 1.103	84.600, 1.735	84.600, 1.582	84.600, 1.650
425	84.800, 1.219	84.800, 1.174	84.800, 1.101	84.800, 1.150	84.800, 1.223	84.800, 1.142	84.800, 1.117	84.800, 1.160	84.800, 1.173	84.800, 1.134	84.800, 1.068	84.800, 1.104	84.800, 1.737	84.800, 1.583	84.800, 1.652
426	85.000, 1.219	85.000, 1.175	85.000, 1.101	85.000, 1.150	85.000, 1.223	85.000, 1.143	85.000, 1.117	85.000, 1.160	85.000, 1.174	85.000, 1.134	85.000, 1.069	85.000, 1.104	85.000, 1.738	85.000, 1.585	85.000, 1.653
427	85.200, 1.220	85.200, 1.175	85.200, 1.102	85.200, 1.150	85.200, 1.224	85.200, 1.143	85.200, 1.118	85.200, 1.161	85.200, 1.174	85.200, 1.135	85.200, 1.069	85.200, 1.105	85.200, 1.739	85.200, 1.586	85.200, 1.654
428	85.400, 1.221	85.400, 1.175	85.400, 1.102	85.400, 1.150	85.400, 1.225	85.400, 1.144	85.400, 1.118	85.400, 1.162	85.400, 1.175	85.400, 1.135	85.400, 1.070	85.400, 1.106	85.400, 1.740	85.400, 1.587	85.400, 1.656
429	85.600, 1.221	85.600, 1.176	85.600, 1.103	85.600, 1.151	85.600, 1.226	85.600, 1.144	85.600, 1.118	85.600, 1.162	85.600, 1.175	85.600, 1.136	85.600, 1.071	85.600, 1.106	85.600, 1.742	85.600, 1.589	85.600, 1.657
430	85.800, 1.222	85.800, 1.176	85.800, 1.104	85.800, 1.151	85.800, 1.226	85.800, 1.145	85.800, 1.119	85.800, 1.163	85.800, 1.175	85.800, 1.136	85.800, 1.072	85.800, 1.107	85.800, 1.743	85.800, 1.590	85.800, 1.659
431	86.000, 1.223	86.000, 1.177	86.000, 1.104	86.000, 1.151	86.000, 1.227	86.000, 1.146	86.000, 1.119	86.000, 1.163	86.000, 1.175	86.000, 1.137	86.000, 1.072	86.000, 1.107	86.000, 1.744	86.000, 1.591	86.000, 1.660
432	86.200, 1.223	86.200, 1.177	86.200, 1.105	86.200, 1.151	86.200, 1.228	86.200, 1.146	86.200, 1.119	86.200, 1.163	86.200, 1.176	86.200, 1.138	86.200, 1.073	86.200, 1.108	86.200, 1.746	86.200, 1.592	86.200, 1.661
433	86.400, 1.224	86.400, 1.177	86.400, 1.105	86.400, 1.152	86.400, 1.229	86.400, 1.147	86.400, 1.120	86.400, 1.164	86.400, 1.176	86.400, 1.138	86.400, 1.074	86.400, 1.108	86.400, 1.748	86.400, 1.593	86.400, 1.662
434	86.600, 1.224	86.600, 1.178	86.600, 1.106	86.600, 1.152	86.600, 1.229	86.600, 1.147	86.600, 1.121	86.600, 1.164	86.600, 1.177	86.600, 1.139	86.600, 1.075	86.600, 1.108	86.600, 1.749	86.600, 1.595	86.600, 1.662
435	86.800, 1.224	86.800, 1.178	86.800, 1.106	86.800, 1.152	86.800, 1.230	86.800, 1.147	86.800, 1.121	86.800, 1.164	86.800, 1.177	86.800, 1.139	86.800, 1.076	86.800, 1.108	86.800, 1.750	86.800, 1.596	86.800, 1.663
436	87.000, 1.224	87.000, 1.179	87.000, 1.107	87.000, 1.153	87.000, 1.230	87.000, 1.147	87.000, 1.122	87.000, 1.164	87.000, 1.178	87.000, 1.140	87.000, 1.076	87.000, 1.109	87.000, 1.752	87.000, 1.597	87.000, 1.665
437	87.200, 1.225	87.200, 1.179	87.200, 1.107	87.200, 1.153	87.200, 1.231	87.200, 1.148	87.200, 1.122	87.200, 1.165	87.200, 1.179	87.200, 1.141	87.200, 1.077	87.200, 1.109	87.200, 1.753	87.200, 1.598	87.200, 1.666
438	87.400, 1.225	87.400, 1.179	87.400, 1.108	87.400, 1.153	87.400, 1.232	87.400, 1.148	87.400, 1.123	87.400, 1.166	87.400, 1.180	87.400, 1.141	87.400, 1.077	87.400, 1.109	87.400, 1.755	87.400, 1.600	87.400, 1.667
439	87.600, 1.226	87.600, 1.180	87.600, 1.108	87.600, 1.154	87.600, 1.232	87.600, 1.149	87.600, 1.123	87.600, 1.166	87.600, 1.180	87.600, 1.142	87.600, 1.077	87.600, 1.109	87.600, 1.756	87.600, 1.601	87.600, 1.668
440	87.800, 1.226	87.800, 1.180	87.800, 1.108	87.800, 1.154	87.800, 1.233	87.800, 1.149	87.800, 1.124	87.800, 1.167	87.800, 1.181	87.800, 1.142	87.800, 1.077	87.800, 1.110	87.800, 1.758	87.800, 1.601	87.800, 1.668
441	88.000, 1.227	88.000, 1.180	88.000, 1.108	88.000, 1.154	88.000, 1.234	88.000, 1.150	88.000, 1.124	88.000, 1.167	88.000, 1.182	88.000, 1.142	88.000, 1.077	88.000, 1.110	88.000, 1.759	88.000, 1.602	88.000, 1.669
442	88.200, 1.228	88.200, 1.181	88.200, 1.109	88.200, 1.155	88.200, 1.234	88.200, 1.150	88.200, 1.124	88.200, 1.168	88.200, 1.183	88.200, 1.143	88.200, 1.077	88.200, 1.111	88.200, 1.760	88.200, 1.603	88.200, 1.670
443	88.400, 1.228	88.400, 1.181	88.400, 1.109	88.400, 1.155	88.400, 1.235	88.400, 1.151	88.400, 1.124	88.400, 1.168	88.400, 1.184	88.400, 1.143	88.400, 1.078	88.400, 1.111	88.400, 1.762	88.400, 1.604	88.400, 1.671
444	88.600, 1.229	88.600, 1.181	88.600, 1.109	88.600, 1.156	88.600, 1.235	88.600, 1.151	88.600, 1.125	88.600, 1.168	88.600, 1.185	88.600, 1.143	88.600, 1.078	88.600, 1.112	88.600, 1.763	88.600, 1.604	88.600, 1.673
445	88.800, 1.230	88.800, 1.182	88.800, 1.109	88.800, 1.156	88.800, 1.235	88.800, 1.152	88.800, 1.125	88.800, 1.169	88.800, 1.186	88.800, 1.144	88.800, 1.078	88.800, 1.113	88.800, 1.764	88.800, 1.605	88.800, 1.674
446	89.000, 1.231	89.000, 1.182	89.000, 1.109	89.000, 1.157	89.000, 1.236	89.000, 1.152	89.000, 1.125	89.000, 1.169	89.000, 1.186	89.000, 1.144	89.000, 1.078	89.000, 1.113	89.000, 1.765	89.000, 1.606	89.000, 1.675
447	89.200, 1.231	89.200, 1.182	89.200, 1.110	89.200, 1.157	89.200, 1.236	89.200, 1.152	89.200, 1.126	89.200, 1.170	89.200, 1.186	89.200, 1.144	89.200, 1.079	89.200, 1.114	89.200, 1.766	89.200, 1.607	89.200, 1.677
448	89.400, 1.232	89.400, 1.182	89.400, 1.111	89.400, 1.157	89.400, 1.237	89.400, 1.153	89.400, 1.126	89.400, 1.170	89.400, 1.187	89.400, 1.144	89.400, 1.079	89.400, 1.114	89.400, 1.767	89.400, 1.608	89.400, 1.678
449	89.600, 1.232	89.600, 1.183	89.600, 1.111	89.600, 1.158	89.600, 1.237	89.600, 1.153	89.600, 1.126	89.600, 1.171	89.600, 1.187	89.600, 1.144	89.600, 1.080	89.600, 1.114	89.600, 1.768	89.600, 1.610	89.600, 1.680
450	89.800, 1.233	89.800, 1.183	89.800, 1.112	89.800, 1.158	89.800, 1.238	89.800, 1.154	89.800, 1.127	89.800, 1.171	89.800, 1.187	89.800, 1.145	89.800, 1.081	89.800, 1.114	89.800, 1.769	89.800, 1.611	89.800, 1.681
451	90.000, 1.233	90.000, 1.183	90.000, 1.112	90.000, 1.159	90.000, 1.239	90.000, 1.154	90.000, 1.127	90.000, 1.171	90.000, 1.187	90.000, 1.145	90.000, 1.081	90.000, 1.115	90.000, 1.770	90.000, 1.613	90.000, 1.682
452	90.200, 1.234	90.200, 1.184	90.200, 1.113	90.200, 1.159	90.200, 1.239	90.200, 1.155	90.200, 1.128	90.200, 1.171	90.200, 1.187	90.200, 1.146	90.200, 1.082	90.200, 1.115	90.200, 1.772	90.200, 1.614	90.200, 1.683
453	90.400, 1.234	90.400, 1.184	90.400, 1.113	90.400, 1.159	90.400, 1.240	90.400, 1.155	90.400, 1.128	90.400, 1.171	90.400, 1.187	90.400, 1.146	90.400, 1.083	90.400, 1.115	90.400, 1.773	90.400, 1.616	90.400, 1.684
454	90.600, 1.234	90.600, 1.185	90.600, 1.113	90.600, 1.159	90.600, 1.241	90.600, 1.155	90.600, 1.129	90.600, 1.172	90.600, 1.187	90.600, 1.147	90.600, 1.083	90.600, 1.116	90.600, 1.774	90.600, 1.617	90.600, 1.685
455	90.800, 1.235	90.800, 1.185	90.800, 1.114	90.800, 1.160	90.800, 1.241	90.800, 1.156	90.800, 1.130	90.800, 1.172	90.800, 1.187	90.800, 1.147	90.800, 1.083	90.800, 1.116	90.800, 1.775	90.800, 1.619	90.800, 1.687
456	91.000, 1.235	91.000, 1.186	91.000, 1.114	91.000, 1.160	91.000, 1.242	91.000, 1.156	91.000, 1.130	91.000, 1.172	91.000, 1.188	91.000, 1.147	91.000, 1.083	91.000, 1.117	91.000, 1.776	91.000, 1.620	91.000, 1.688
457	91.200, 1.236	91.200, 1.186	91.200, 1.114	91.200, 1.160	91.200, 1.242	91.200, 1.156	91.200, 1.131	91.200, 1.173	91.200, 1.188	91.200, 1.148	91.200, 1.084	91.200, 1.117	91.200, 1.778	91.200, 1.621	91.200, 1.688
458	91.400, 1.236	91.400, 1.187	91.400, 1.114	91.400, 1.161	91.400, 1.242	91.400, 1.156	91.400, 1.131	91.400, 1.174	91.400, 1.189	91.400, 1.148	91.400, 1.083	91.400, 1.118	91.400, 1.779	91.400, 1.622	91.400, 1.689
459	91.600, 1.236	91.600, 1.188	91.600, 1.115	91.600, 1.161	91.600, 1.243	91.600, 1.157	91.600, 1.132	91.600, 1.174	91.600, 1.189	91.600, 1.148	91.600, 1.083	91.600, 1.118	91.600, 1.780	91.600, 1.623	91.600, 1.691
460	91.800, 1.237	91.800, 1.188	91.800, 1.115	91.800, 1.162	91.800, 1.243	91.800, 1.158	91.800, 1.132	91.800, 1.175	91.800, 1.190	91.800, 1.148	91.800, 1.083	91.800, 1.119	91.800, 1.782	91.800, 1.624	91.800, 1.692
461	92.000, 1.237	92.000, 1.189	92.000, 1.116	92.000, 1.162	92.000, 1.243	92.000, 1.158	92.000, 1.133	92.000, 1.175	92.000, 1.190	92.000, 1.149	92.000, 1.083	92.000, 1.120	92.000, 1.783	92.000, 1.625	92.000, 1.693
462	92.200, 1.237	92.200, 1.189	92.200, 1.116	92.200, 1.162	92.200, 1.244	92.200, 1.159	92.200, 1.133	92.200, 1.175	92.200, 1.191	92.200, 1.149	92.200, 1.083	92.200, 1.120	92.200, 1.785	92.200, 1.626	92.200, 1.695
463	92.400, 1.238	92.400, 1.189	92.400, 1.117	92.400, 1.163	92.400, 1.244	92.400, 1.160	92.400, 1.134	92.400, 1.176	92.400, 1.192	92.400, 1.149	92.400, 1.083	92.400, 1.121	92.400, 1.786	92.400, 1.627	92.400, 1.696
464	92.600, 1.238	92.600, 1.189	92.600, 1.117	92.600, 1.164	92.600, 1.245	92.600, 1.160	92.600, 1.134	92.600, 1.176	92.600, 1.192	92.600, 1.149	92.600, 1.084	92.600, 1.122	92.600, 1.788	92.600, 1.628	92.600, 1.698
465	92.800, 1.238	92.800, 1.189	92.800, 1.118	92.800, 1.164	92.800, 1.245	92.800, 1.160	92.800, 1.134	92.800, 1.176	92.800, 1.193	92.800, 1.150	92.800, 1.084	92.800, 1.123	92.800, 1.789	92.800, 1.630	92.800, 1.699
466	93.000, 1.239	93.000, 1.190	93.000, 1.119	93.000, 1.165	93.000, 1.246	93.000, 1.161	93.000, 1.134	93.000, 1.176	93.000, 1.193	93.000, 1.150	93.000, 1.085	93.000, 1.123	93.000, 1.791	93.000, 1.631	93.000, 1.700
467	93.200, 1.239	93.200, 1.190	93.200, 1.120	93.200, 1.165	93.200, 1.247	93.200, 1.162	93.200, 1.134	93.200, 1.176	93.200, 1.194	93.200, 1.150	93.200, 1.085	93.200, 1.123	93.200, 1.792	93.200, 1.632	93.200, 1.701
468	93.400, 1.240	93.400, 1.190	93.400, 1.120	93.400, 1.165	93.400, 1.247	93.400, 1.162	93.400, 1.134	93.400, 1.176	93.400, 1.194	93.400, 1.150	93.400, 1.086	93.400, 1.124	93.400, 1.793	93.400, 1.633	93.400, 1.703
469	93.600, 1.240	93.600, 1.190	93.600, 1.121	93.600, 1.165	93.600, 1.248	93.600, 1.163	93.600, 1.134	93.600, 1.176	93.600, 1.194	93.600, 1.151	93.600, 1.087	93.600, 1.124	93.600, 1.794	93.600, 1.635	93.600, 1.704
470	93.800, 1.241	93.800, 1.191	93.800, 1.121	93.800, 1.165	93.800, 1.248	93.800, 1.164	93.800, 1.135	93.800, 1.177	93.800, 1.195	93.800, 1.152	93.800, 1.087	93.800, 1.124	93.800, 1.795	93.800, 1.636	93.800, 1.705
471	94.000, 1.241	94.000, 1.191	94.000, 1.121	94.000, 1.165	94.000, 1.249	94.000, 1.164	94.000, 1.135	94.000, 1.177	94.000, 1.195	94.000, 1.152	94.000, 1.088	94.000, 1.125	94.000, 1.796	94.000, 1.638	94.000, 1.705
472	94.200, 1.242	94.200, 1.192	94.200, 1.122	94.200, 1.166	94.200, 1.249	94.200, 1.165	94.200, 1.136	94.200, 1.178	94.200, 1.196	94.200, 1.153	94.200, 1.088	94.200, 1.125	94.200, 1.797	94.200, 1.640	94.200, 1.706
473	94.400, 1.242	94.400, 1.193	94.400, 1.122	94.400, 1.166	94.400, 1.249	94.400, 1.165	94.400, 1.136	94.400, 1.179	94.400, 1.196	94.400, 1.154	94.400, 1.088	94.400, 1.125	94.400, 1.798	94.400, 1.641	94.400, 1.706
474	94.600, 1.243	94.600, 1.193	94.600, 1.122	94.600, 1.167	94.600, 1.250	94.600, 1.165	94.600, 1.137	94.600, 1.179	94.600, 1.197	94.600, 1.154	94.600, 1.089	94.600, 1.125	94.600, 1.799	94.600, 1.642	94.600, 1.706
475	94.800, 1.243	94.800, 1.194	94.800, 1.123	94.800, 1.167	94.800, 1.250	94.800, 1.165	94.800, 1.137	94.800, 1.180	94.800, 1.197	94.800, 1.155	94.800, 1.089	94.800, 1.125	94.800, 1.800	94.800, 1.643	94.800, 1.707
476	95.000, 1.243	95.000, 1.195	95.000, 1.123	95.000, 1.168	95.000, 1.251	95.000, 1.165	95.000, 1.138	95.000, 1.180	95.000, 1.198	95.000, 1.155	95.000, 1.090	95.000, 1.126	95.000, 1.800	95.000, 1.644	95.000, 1.707
477	95.200, 1.244	95.200, 1.196	95.200, 1.123	95.200, 1.168	95.200, 1.251	95.200, 1.165	95.200, 1.138	95.200, 1.180	95.200, 1.198	95.200, 1.156	95.200, 1.090	95.200, 1.126	95.200, 1.801	95.200, 1.644	95.200, 1.708
478	95.400, 1.244	95.400, 1.196	95.400, 1.124	95.400, 1.169	95.400, 1.251	95.400, 1.166	95.400, 1.139	95.400, 1.181	95.400, 1.199	95.400, 1.156	95.400, 1.091	95.400, 1.127	95.400, 1.802	95.400, 1.645	95.400, 1.709
479	95.600, 1.244	95.600, 1.197	95.600, 1.124	95.600, 1.170	95.600, 1.252	95.600, 1.166	95.600, 1.139	95.600, 1.181	95.600, 1.199	95.600, 1.157	95.600, 1.092	95.600, 1.128	95.600, 1.803	95.600, 1.646	95.600, 1.710
480	95.800, 1.244	95.800, 1.197	95.800, 1.125	95.800, 1.170	95.800, 1.252	95.800, 1.166	95.800, 1.140	95.800, 1.182	95.800, 1.199	95.800, 1.157	95.800, 1.092	95.800, 1.128	95.800, 1.804	95.800, 1.646	95.800, 1.711
481	96.000, 1.244	96.000, 1.198	96.000, 1.125	96.000, 1.171	96.000, 1.253	96.000, 1.167	96.000, 1.141	96.000, 1.182	96.000, 1.200	96.000, 1.157	96.000, 1.093	96.000, 1.129	96.000, 1.805	96.000, 1.647	96.000, 1.712
482	96.200, 1.245	96.200, 1.198	96.200, 1.126	96.200, 1.172	96.200, 1.253	96.200, 1.167	96.200, 1.141	96.200, 1.182	96.200, 1.201	96.200, 1.158	96.200, 1.094	96.200, 1.129	96.200, 1.806	96.200, 1.647	96.200, 1.714
483	96.400, 1.245	96.400, 1.198	96.400, 1.126	96.400, 1.172	96.400, 1.253	96.400, 1.167	96.400, 1.141	96.400, 1.182	96.400, 1.201	96.400, 1.158	96.400, 1.095	96.400, 1.130	96.400, 1.807	96.400, 1.648	96.400, 1.715
484	96.600, 1.246	96.600, 1.199	96.600, 1.126	96.600, 1.173	96.600, 1.254	96.600, 1.168	96.600, 1.141	96.600, 1.182	96.600, 1.201	96.600, 1.159	96.600, 1.096	96.600, 1.130	96.600, 1.809	96.600, 1.648	96.600, 1.716
485	96.800, 1.246	96.800, 1.199	96.800, 1.126	96.800, 1.173	96.800, 1.255	96.800, 1.168	96.800, 1.142	96.800, 1.183	96.800, 1.202	96.800, 1.159	96.800, 1.096	96.800, 1.131	96.800, 1.810	96.800, 1.648	96.800, 1.717
486	97.000, 1.247	97.000, 1.200	97.000, 1.127	97.000, 1.173	97.000, 1.255	97.000, 1.169	97.000, 1.142	97.000, 1.183	97.000, 1.202	97.000, 1.160	97.000, 1.097	97.000, 1.131	97.000, 1.811	97.000, 1.649	97.000, 1.719
487	97.200, 1.248	97.200, 1.200	97.200, 1.127	97.200, 1.173	97.200, 1.255	97.200, 1.169	97.200, 1.142	97.200, 1.183	97.200, 1.203	97.200, 1.160	97.200, 1.097	97.200, 1.131	97.200, 1.812	97.200, 1.650	97.200, 1.720
488	97.400, 1.249	97.400, 1.200	97.400, 1.127	97.400, 1.173	97.400, 1.256	97.400, 1.170	97.400, 1.142	97.400, 1.184	97.400, 1.203	97.400, 1.160	97.400, 1.098	97.400, 1.132	97.400, 1.813	97.400, 1.651	97.400, 1.721
489	97.600, 1.250	97.600, 1.200	97.600, 1.127	97.600, 1.173	97.600, 1.256	97.600, 1.171	97.600, 1.143	97.600, 1.185	97.600, 1.204	97.600, 1.161	97.600, 1.098	97.600, 1.132	97.600, 1.814	97.600, 1.652	97.600, 1.722
490	97.800, 1.251	97.800, 1.200	97.800, 1.127	97.800, 1.173	97.800, 1.256	97.800, 1.171	97.800, 1.143	97.800, 1.185	97.800, 1.205	97.800, 1.162	97.800, 1.098	97.800, 1.132	97.800, 1.816	97.800, 1.654	97.800, 1.723
491	98.000, 1.252	98.000, 1.201	98.000, 1.127	98.000, 1.173	98.000, 1.257	98.000, 1.171	98.000, 1.143	98.000, 1.186	98.000, 1.205	98.000, 1.162	98.000, 1.098	98.000, 1.133	98.000, 1.817	98.000, 1.655	98.000, 1.724
492	98.200, 1.253	98.200, 1.201	98.200, 1.128	98.200, 1.173	98.200, 1.257	98.200, 1.172	98.200, 1.144	98.200, 1.186	98.200, 1.206	98.200, 1.163	98.200, 1.098	98.200, 1.133	98.200, 1.818	98.200, 1.657	98.200, 1.725
493	98.400, 1.253	98.400, 1.201	98.400, 1.128	98.400, 1.174	98.400, 1.258	98.400, 1.172	98.400, 1.144	98.400, 1.187	98.400, 1.207	98.400, 1.163	98.400, 1.098	98.400, 1.133	98.400, 1.819	98.400, 1.658	98.400, 1.726
494	98.600, 1.254	98.600, 1.202	98.600, 1.129	98.600, 1.174	98.600, 1.258	98.600, 1.173	98.600, 1.145	98.600, 1.187	98.600, 1.208	98.600, 1.164	98.600, 1.098	98.600, 1.134	98.600, 1.820	98.600, 1.660	98.600, 1.726
495	98.800, 1.254	98.800, 1.202	98.800, 1.129	98.800, 1.174	98.800, 1.259	98.800, 1.173	98.800, 1.145	98.800, 1.187	98.800, 1.208	98.800, 1.164	98.800, 1.098	98.800, 1.134	98.800, 1.822	98.800, 1.662	98.800, 1.727
496	99.000, 1.254	99.000, 1.202	99.000, 1.129	99.000, 1.174	99.000, 1.260	99.000, 1.174	99.000, 1.145	99.000, 1.187	99.000, 1.209	99.000, 1.165	99.000, 1.098	99.000, 1.134	99.000, 1.823	99.000, 1.663	99.000, 1.728
497	99.200, 1.254	99.200, 1.203	99.200, 1.129	99.200, 1.174	99.200, 1.260	99.200, 1.174	99.200, 1.145	99.200, 1.187	99.200, 1.209	99.200, 1.165	99.200, 1.099	99.200, 1.135	99.200, 1.824	99.200, 1.664	99.200, 1.729
498	99.400, 1.255	99.400, 1.203	99.400, 1.130	99.400, 1.174	99.400, 1.261	99.400, 1.174	99.400, 1.146	99.400, 1.187	99.400, 1.210	99.400, 1.165	99.400, 1.099	99.400, 1.136	99.400, 1.825	99.400, 1.666	99.400, 1.730
499	99.600, 1.255	99.600, 1.204	99.600, 1.130	99.600, 1.175	99.600, 1.262	99.600, 1.174	99.600, 1.146	99.600, 1.187	99.600, 1.210	99.600, 1.165	99.600, 1.100	99.600, 1.136	99.600, 1.826	99.600, 1.667	99.600, 1.731
500	99.800, 1.255	99.800, 1.204	99.800, 1.131	99.800, 1.175	99.800, 1.262	99.800, 1.175	99.800, 1.146	99.800, 1.188	99.800, 1.211	99.800, 1.166	99.800, 1.100	99.800, 1.136	99.800, 1.827	99.800, 1.667	99.800, 1.732
501	100.000, 1.256	100.000, 1.205	100.000, 1.131	100.000, 1.175	100.000, 1.263	100.000, 1.175	100.000, 1.147	100.000, 1.188	100.000, 1.211	100.000, 1.166	100.000, 1.101	100.000, 1.137	100.000, 1.828	100.000, 1.668	100.000, 1.733
502	100.200, 1.256	100.200, 1.205	100.200, 1.131	100.200, 1.176	100.200, 1.263	100.200, 1.175	100.200, 1.147	100.200, 1.188	100.200, 1.212	100.200, 1.166	100.200, 1.101	100.200, 1.137	100.200, 1.829	100.200, 1.669	100.200, 1.734
503	100.400, 1.256	100.400, 1.205	100.400, 1.131	100.400, 1.176	100.400, 1.264	100.400, 1.176	100.400, 1.147	100.400, 1.189	100.400, 1.212	100.400, 1.166	100.400, 1.102	100.400, 1.137	100.400, 1.830	100.400, 1.669	100.400, 1.735
504	100.600, 1.256	100.600, 1.206	100.600, 1.131	100.600, 1.176	100.600, 1.264	100.600, 1.176	100.600, 1.148	100.600, 1.189	100.600, 1.212	100.600, 1.167	100.600, 1.102	100.600, 1.137	100.600, 1.831	100.600, 1.669	100.600, 1.736
505	100.800, 1.257	100.800, 1.206	100.800, 1.131	100.800, 1.176	100.800, 1.265	100.800, 1.177	100.800, 1.148	100.800, 1.189	100.800, 1.213	100.800, 1.167	100.800, 1.102	100.800, 1.137	100.800, 1.832	100.800, 1.670	100.800, 1.736
506	101.000, 1.257	101.000, 1.207	101.000, 1.131	101.000, 1.176	101.000, 1.265	101.000, 1.177	101.000, 1.148	101.000, 1.190	101.000, 1.213	101.000, 1.167	101.000, 1.103	101.000, 1.137	101.000, 1.833	101.000, 1.671	101.000, 1.737
507	101.200, 1.258	101.200, 1.207	101.200, 1.131	101.200, 1.176	101.200, 1.266	101.200, 1.177	101.200, 1.148	101.200, 1.190	101.200, 1.213	101.200, 1.167	101.200, 1.103	101.200, 1.138	101.200, 1.834	101.200, 1.671	101.200, 1.738
508	101.400, 1.258	101.400, 1.207	101.400, 1.131	101.400, 1.176	101.400, 1.266	101.400, 1.178	101.400, 1.148	101.400, 1.191	101.400, 1.213	101.400, 1.168	101.400, 1.103	101.400, 1.138	101.400, 1.835	101.400, 1.672	101.400, 1.738
509	101.600, 1.258	101.600, 1.207	101.600, 1.132	101.600, 1.176	101.600, 1.266	101.600, 1.178	101.600, 1.148	101.600, 1.191	101.600, 1.214	101.600, 1.168	101.600, 1.104	101.600, 1.138	101.600, 1.836	101.600, 1.672	101.600, 1.739
510	101.800, 1.258	101.800, 1.208	101.800, 1.132	101.800, 1.177	101.800, 1.266	101.800, 1.178	101.800, 1.149	101.800, 1.191	101.800, 1.214	101.800, 1.168	101.800, 1.104	101.800, 1.138	101.800, 1.837	101.800, 1.673	101.800, 1.740
511	102.000, 1.259	102.000, 1.208	102.000, 1.133	102.000, 1.177	102.000, 1.266	102.000, 1.178	102.000, 1.149	102.000, 1.191	102.000, 1.214	102.000, 1.169	102.000, 1.104	102.000, 1.139	102.000, 1.838	102.000, 1.673	102.000, 1.741
512	102.200, 1.258	102.200, 1.209	102.200, 1.133	102.200, 1.177	102.200, 1.266	102.200, 1.178	102.200, 1.149	102.200, 1.191	102.200, 1.215	102.200, 1.169	102.200, 1.104	102.200, 1.139	102.200, 1.839	102.200, 1.674	102.200, 1.742
513	102.400, 1.258	102.400, 1.209	102.400, 1.134	102.400, 1.178	102.400, 1.267	102.400, 1.179	102.400, 1.150	102.400, 1.192	102.400, 1.215	102.400, 1.170	102.400, 1.105	102.400, 1.139	102.400, 1.840	102.400, 1.675	102.400, 1.743
514	102.600, 1.258	102.600, 1.209	102.600, 1.134	102.600, 1.178	102.600, 1.267	102.600, 1.179	102.600, 1.150	102.600, 1.192	102.600, 1.216	102.600, 1.170	102.600, 1.105	102.600, 1.140	102.600, 1.841	102.600, 1.676	102.600, 1.744
515	102.800, 1.258	102.800, 1.209	102.800, 1.135	102.800, 1.178	102.800, 1.267	102.800, 1.179	102.800, 1.150	102.800, 1.192	102.800, 1.216	102.800, 1.170	102.800, 1.106	102.800, 1.140	102.800, 1.842	102.800, 1.677	102.800, 1.745
516	103.000, 1.258	103.000, 1.210	103.000, 1.135	103.000, 1.179	103.000, 1.268	103.000, 1.180	103.000, 1.150	103.000, 1.193	103.000, 1.217	103.000, 1.171	103.000, 1.106	103.000, 1.141	103.000, 1.843	103.000, 1.678	103.000, 1.746
517	103.200, 1.259	103.200, 1.210	103.200, 1.136	103.200, 1.180	103.200, 1.268	103.200, 1.180	103.200, 1.151	103.200, 1.193	103.200, 1.217	103.200, 1.171	103.200, 1.106	103.200, 1.141	103.200, 1.843	103.200, 1.678	103.200, 1.747
518	103.400, 1.259	103.400, 1.210	103.400, 1.136	103.400, 1.180	103.400, 1.269	103.400, 1.181	103.400, 1.151	103.400, 1.194	103.400, 1.217	103.400, 1.172	103.400, 1.107	103.400, 1.142	103.400, 1.844	103.400, 1.679	103.400, 1.749
519	103.600, 1.260	103.600, 1.211	103.600, 1.137	103.600, 1.181	103.600, 1.269	103.600, 1.181	103.600, 1.151	103.600, 1.195	103.600, 1.217	103.600, 1.172	103.600, 1.107	103.600, 1.142	103.600, 1.845	103.600, 1.680	103.600, 1.750
520	103.800, 1.260	103.800, 1.211	103.800, 1.137	103.800, 1.182	103.800, 1.270	103.800, 1.181	103.800, 1.152	103.800, 1.195	103.800, 1.217	103.800, 1.172	103.800, 1.107	103.800, 1.142	103.800, 1.846	103.800, 1.681	103.800, 1.751
521	104.000, 1.261	104.000, 1.212	104.000, 1.137	104.000, 1.182	104.000, 1.270	104.000, 1.182	104.000, 1.153	104.000, 1.196	104.000, 1.218	104.000, 1.173	104.000, 1.107	104.000, 1.143	104.000, 1.848	104.000, 1.682	104.000, 1.752
522	104.200, 1.262	104.200, 1.212	104.200, 1.137	104.200, 1.182	104.200, 1.270	104.200, 1.182	104.200, 1.153	104.200, 1.197	104.200, 1.218	104.200, 1.173	104.200, 1.107	104.200, 1.143	104.200, 1.849	104.200, 1.683	104.200, 1.753
523	104.400, 1.262	104.400, 1.213	104.400, 1.137	104.400, 1.182	104.400, 1.271	104.400, 1.183	104.400, 1.154	104.400, 1.197	104.400, 1.218	104.400, 1.173	104.400, 1.107	104.400, 1.143	104.400, 1.851	104.400, 1.684	104.400, 1.754
524	104.600, 1.263	104.600, 1.213	104.600, 1.137	104.600, 1.183	104.600, 1.271	104.600, 1.183	104.600, 1.154	104.600, 1.198	104.600, 1.219	104.600, 1.174	104.600, 1.107	104.600, 1.143	104.600, 1.852	104.600, 1.684	104.600, 1.754
525	104.800, 1.264	104.800, 1.214	104.800, 1.137	104.800, 1.183	104.800, 1.272	104.800, 1.184	104.800, 1.155	104.800, 1.198	104.800, 1.219	104.800, 1.174	104.800, 1.107	104.800, 1.144	104.800, 1.853	104.800, 1.685	104.800, 1.755
526	105.000, 1.264	105.000, 1.214	105.000, 1.138	105.000, 1.183	105.000, 1.272	105.000, 1.184	105.000, 1.155	105.000, 1.198	105.000, 1.219	105.000, 1.174	105.000, 1.107	105.000, 1.144	105.000, 1.855	105.000, 1.686	105.000, 1.755
527	105.200, 1.264	105.200, 1.214	105.200, 1.138	105.200, 1.183	105.200, 1.273	105.200, 1.184	105.200, 1.156	105.200, 1.198	105.200, 1.220	105.200, 1.174	105.200, 1.107	105.200, 1.145	105.200, 1.856	105.200, 1.686	105.200, 1.755
528	105.400, 1.265	105.400, 1.215	105.400, 1.138	105.400, 1.183	105.400, 1.273	105.400, 1.185	105.400, 1.156	105.400, 1.199	105.400, 1.220	105.400, 1.174	105.400, 1.107	105.400, 1.145	105.400, 1.857	105.400, 1.687	105.400, 1.756
529	105.600, 1.265	105.600, 1.215	105.600, 1.138	105.600, 1.183	105.600, 1.273	105.600, 1.185	105.600, 1.156	105.600, 1.199	105.600, 1.220	105.600, 1.173	105.600, 1.108	105.600, 1.145	105.600, 1.857	105.600, 1.688	105.600, 1.756
530	105.800, 1.265	105.800, 1.215	105.800, 1.139	105.800, 1.183	105.800, 1.273	105.800, 1.185	105.800, 1.157	105.800, 1.199	105.800, 1.220	105.800, 1.174	105.800, 1.108	105.800, 1.146	105.800, 1.858	105.800, 1.688	105.800, 1.757
531	106.000, 1.265	106.000, 1.215	106.000, 1.139	106.000, 1.183	106.000, 1.273	106.000, 1.185	106.000, 1.157	106.000, 1.199	106.000, 1.221	106.000, 1.174	106.000, 1.108	106.000, 1.146	106.000, 1.859	106.000, 1.689	106.000, 1.757
532	106.200, 1.265	106.200, 1.215	106.200, 1.140	106.200, 1.184	106.200, 1.273	106.200, 1.186	106.200, 1.157	106.200, 1.199	106.200, 1.222	106.200, 1.174	106.200, 1.108	106.200, 1.147	106.200, 1.860	106.200, 1.690	106.200, 1.758
533	106.400, 1.266	106.400, 1.215	106.400, 1.140	106.400, 1.184	106.400, 1.273	106.400, 1.186	106.400, 1.157	106.400, 1.199	106.400, 1.223	106.400, 1.175	106.400, 1.108	106.400, 1.147	106.400, 1.861	106.400, 1.691	106.400, 1.759
534	106.600, 1.266	106.600, 1.215	106.600, 1.140	106.600, 1.184	106.600, 1.274	106.600, 1.186	106.600, 1.157	106.600, 1.199	106.600, 1.224	106.600, 1.175	106.600, 1.109	106.600, 1.148	106.600, 1.861	106.600, 1.692	106.600, 1.760
535	106.800, 1.267	106.800, 1.214	106.800, 1.140	106.800, 1.184	106.800, 1.274	106.800, 1.187	106.800, 1.157	106.800, 1.199	106.800, 1.224	106.800, 1.175	106.800, 1.109	106.800, 1.148	106.800, 1.862	106.800, 1.693	106.800, 1.760
536	107.000, 1.267	107.000, 1.214	107.000, 1.141	107.000, 1.185	107.000, 1.274	107.000, 1.187	107.000, 1.157	107.000, 1.199	107.000, 1.224	107.000, 1.176	107.000, 1.110	107.000, 1.148	107.000, 1.862	107.000, 1.694	107.000, 1.761
537	107.200, 1.267	107.200, 1.214	107.200, 1.141	107.200, 1.185	107.200, 1.274	107.200, 1.187	107.200, 1.157	107.200, 1.200	107.200, 1.225	107.200, 1.176	107.200, 1.110	107.200, 1.148	107.200, 1.863	107.200, 1.695	107.200, 1.762
538	107.400, 1.267	107.400, 1.214	107.400, 1.141	107.400, 1.185	107.400, 1.275	107.400, 1.188	107.400, 1.157	107.400, 1.200	107.400, 1.225	107.400, 1.176	107.400, 1.111	107.400, 1.148	107.400, 1.864	107.400, 1.696	107.400, 1.763
539	107.600, 1.268	107.600, 1.215	107.600, 1.141	107.600, 1.185	107.600, 1.275	107.600, 1.188	107.600, 1.157	107.600, 1.200	107.600, 1.224	107.600, 1.177	107.600, 1.112	107.600, 1.147	107.600, 1.865	107.600, 1.698	107.600, 1.764
540	107.800, 1.268	107.800, 1.215	107.800, 1.142	107.800, 1.185	107.800, 1.276	107.800, 1.188	107.800, 1.157	107.800, 1.201	107.800, 1.225	107.800, 1.177	107.800, 1.113	107.800, 1.147	107.800, 1.866	107.800, 1.699	107.800, 1.765
541	108.000, 1.269	108.000, 1.216	108.000, 1.142	108.000, 1.185	108.000, 1.276	108.000, 1.188	108.000, 1.158	108.000, 1.201	108.000, 1.225	108.000, 1.178	108.000, 1.113	108.000, 1.147	108.000, 1.867	108.000, 1.700	108.000, 1.767
542	108.200, 1.269	108.200, 1.217	108.200, 1.142	108.200, 1.185	108.200, 1.276	108.200, 1.189	108.200, 1.158	108.200, 1.201	108.200, 1.225	108.200, 1.178	108.200, 1.114	108.200, 1.148	108.200, 1.868	108.200, 1.701	108.200, 1.768
543	108.400, 1.269	108.400, 1.218	108.400, 1.142	108.400, 1.185	108.400, 1.277	108.400, 1.189	108.400, 1.159	108.400, 1.201	108.400, 1.225	108.400, 1.179	108.400, 1.114	108.400, 1.148	108.400, 1.869	108.400, 1.702	108.400, 1.769
544	108.600, 1.269	108.600, 1.218	108.600, 1.143	108.600, 1.185	108.600, 1.278	108.600, 1.189	108.600, 1.159	108.600, 1.202	108.600, 1.225	108.600, 1.179	108.600, 1.114	108.600, 1.148	108.600, 1.870	108.600, 1.703	108.600, 1.770
545	108.800, 1.269	108.800, 1.219	108.800, 1.143	108.800, 1.186	108.800, 1.278	108.800, 1.189	108.800, 1.160	108.800, 1.202	108.800, 1.225	108.800, 1.179	108.800, 1.114	108.800, 1.149	108.800, 1.871	108.800, 1.703	108.800, 1.770
546	109.000, 1.269	109.000, 1.219	109.000, 1.143	109.000, 1.186	109.000, 1.279	109.000, 1.189	109.000, 1.161	109.000, 1.203	109.000, 1.225	109.000, 1.179	109.000, 1.115	109.000, 1.149	109.000, 1.872	109.000, 1.704	109.000, 1.771
547	109.200, 1.269	109.200, 1.219	109.200, 1.144	109.200, 1.186	109.200, 1.280	109.200, 1.189	109.200, 1.161	109.200, 1.203	109.200, 1.225	109.200, 1.179	109.200, 1.115	109.200, 1.149	109.200, 1.872	109.200, 1.704	109.200, 1.772
548	109.400, 1.270	109.400, 1.219	109.400, 1.144	109.400, 1.186	109.400, 1.280	109.400, 1.189	109.400, 1.162	109.400, 1.204	109.400, 1.225	109.400, 1.179	109.400, 1.115	109.400, 1.150	109.400, 1.873	109.400, 1.705	109.400, 1.772
549	109.600, 1.270	109.600, 1.220	109.600, 1.144	109.600, 1.187	109.600, 1.280	109.600, 1.190	109.600, 1.162	109.600, 1.204	109.600, 1.226	109.600, 1.179	109.600, 1.115	109.600, 1.150	109.600, 1.874	109.600, 1.705	109.600, 1.773
550	109.800, 1.270	109.800, 1.220	109.800, 1.144	109.800, 1.188	109.800, 1.280	109.800, 1.190	109.800, 1.163	109.800, 1.205	109.800, 1.226	109.800, 1.179	109.800, 1.116	109.800, 1.151	109.800, 1.875	109.800, 1.706	109.800, 1.773
551	110.000, 1.271	110.000, 1.220	110.000, 1.144	110.000, 1.188	110.000, 1.280	110.000, 1.190	110.000, 1.163	110.000, 1.205	110.000, 1.227	110.000, 1.180	110.000, 1.116	110.000, 1.152	110.000, 1.876	110.000, 1.707	110.000, 1.773
552	110.200, 1.271	110.200, 1.220	110.200, 1.145	110.200, 1.189	110.200, 1.280	110.200, 1.191	110.200, 1.163	110.200, 1.206	110.200, 1.227	110.200, 1.180	110.200, 1.116	110.200, 1.152	110.200, 1.877	110.200, 1.707	110.200, 1.774
553	110.400, 1.272	110.400, 1.220	110.400, 1.145	110.400, 1.190	110.400, 1.280	110.400, 1.191	110.400, 1.163	110.400, 1.206	110.400, 1.228	110.400, 1.181	110.400, 1.115	110.400, 1.153	110.400, 1.878	110.400, 1.708	110.400, 1.774
554	110.600, 1.273	110.600, 1.219	110.600, 1.145	110.600, 1.190	110.600, 1.281	110.600, 1.192	110.600, 1.163	110.600, 1.207	110.600, 1.228	110.600, 1.181	110.600, 1.116	110.600, 1.153	110.600, 1.878	110.600, 1.709	110.600, 1.775
555	110.800, 1.273	110.800, 1.220	110.800, 1.145	110.800, 1.191	110.800, 1.281	110.800, 1.192	110.800, 1.163	110.800, 1.207	110.800, 1.228	110.800, 1.181	110.800, 1.116	110.800, 1.154	110.800, 1.879	110.800, 1.710	110.800, 1.776
556	111.000, 1.274	111.000, 1.220	111.000, 1.145	111.000, 1.191	111.000, 1.281	111.000, 1.193	111.000, 1.163	111.000, 1.207	111.000, 1.228	111.000, 1.182	111.000, 1.116	111.000, 1.154	111.000, 1.880	111.000, 1.711	111.000, 1.776
557	111.200, 1.274	111.200, 1.220	111.200, 1.146	111.200, 1.192	111.200, 1.282	111.200, 1.193	111.200, 1.163	111.200, 1.207	111.200, 1.229	111.200, 1.182	111.200, 1.117	111.200, 1.154	111.200, 1.880	111.200, 1.712	111.200, 1.777
558	111.400, 1.274	111.400, 1.220	111.400, 1.146	111.400, 1.192	111.400, 1.283	111.400, 1.194	111.400, 1.164	111.400, 1.207	111.400, 1.229	111.400, 1.183	111.400, 1.117	111.400, 1.154	111.400, 1.881	111.400, 1.713	111.400, 1.778
559	111.600, 1.275	111.600, 1.221	111.600, 1.146	111.600, 1.192	111.600, 1.283	111.600, 1.194	111.600, 1.164	111.600, 1.207	111.600, 1.229	111.600, 1.183	111.600, 1.118	111.600, 1.154	111.600, 1.882	111.600, 1.714	111.600, 1.779
560	111.800, 1.275	111.800, 1.221	111.800, 1.147	111.800, 1.193	111.800, 1.284	111.800, 1.194	111.800, 1.164	111.800, 1.207	111.800, 1.229	111.800, 1.183	111.800, 1.119	111.800, 1.154	111.800, 1.883	111.800, 1.715	111.800, 1.780
561	112.000, 1.275	112.000, 1.222	112.000, 1.147	112.000, 1.193	112.000, 1.284	112.000, 1.194	112.000, 1.165	112.000, 1.207	112.000, 1.230	112.000, 1.184	112.000, 1.119	112.000, 1.155	112.000, 1.883	112.000, 1.715	112.000, 1.781
562	112.200, 1.276	112.200, 1.222	112.200, 1.147	112.200, 1.193	112.200, 1.285	112.200, 1.194	112.200, 1.165	112.200, 1.207	112.200, 1.230	112.200, 1.184	112.200, 1.119	112.200, 1.155	112.200, 1.884	112.200, 1.716	112.200, 1.782
563	112.400, 1.276	112.400, 1.222	112.400, 1.147	112.400, 1.193	112.400, 1.285	112.400, 1.195	112.400, 1.165	112.400, 1.207	112.400, 1.230	112.400, 1.184	112.400, 1.119	112.400, 1.155	112.400, 1.885	112.400, 1.717	112.400, 1.783
564	112.600, 1.276	112.600, 1.222	112.600, 1.148	112.600, 1.193	112.600, 1.285	112.600, 1.195	112.600, 1.165	112.600, 1.207	112.600, 1.231	112.600, 1.184	112.600, 1.119	112.600, 1.155	112.600, 1.885	112.600, 1.717	112.600, 1.784
565	112.800, 1.277	112.800, 1.222	112.800, 1.148	112.800, 1.193	112.800, 1.286	112.800, 1.194	112.800, 1.166	112.800, 1.207	112.800, 1.231	112.800, 1.185	112.800, 1.120	112.800, 1.155	112.800, 1.886	112.800, 1.718	112.800, 1.785
566	113.000, 1.277	113.000, 1.222	113.000, 1.148	113.000, 1.194	113.000, 1.286	113.000, 1.194	113.000, 1.166	113.000, 1.207	113.000, 1.231	113.000, 1.185	113.000, 1.120	113.000, 1.155	113.000, 1.887	113.000, 1.719	113.000, 1.785
567	113.200, 1.278	113.200, 1.223	113.200, 1.148	113.200, 1.193	113.200, 1.286	113.200, 1.194	113.200, 1.166	113.200, 1.208	113.200, 1.232	113.200, 1.185	113.200, 1.120	113.200, 1.155	113.200, 1.887	113.200, 1.719	113.200, 1.786
568	113.400, 1.278	113.400, 1.223	113.400, 1.148	113.400, 1.193	113.400, 1.286	113.400, 1.195	113.400, 1.166	113.400, 1.208	113.400, 1.232	113.400, 1.185	113.400, 1.120	113.400, 1.155	113.400, 1.888	113.400, 1.720	113.400, 1.786
569	113.600, 1.278	113.600, 1.224	113.600, 1.148	113.600, 1.193	113.600, 1.286	113.600, 1.195	113.600, 1.167	113.600, 1.209	113.600, 1.233	113.600, 1.185	113.600, 1.120	113.600, 1.156	113.600, 1.889	113.600, 1.721	113.600, 1.786
570	113.800, 1.278	113.800, 1.224	113.800, 1.148	113.800, 1.193	113.800, 1.286	113.800, 1.195	113.800, 1.167	113.800, 1.209	113.800, 1.234	113.800, 1.185	113.800, 1.120	113.800, 1.157	113.800, 1.890	113.800, 1.723	113.800, 1.787
571	114.000, 1.278	114.000, 1.224	114.000, 1.149	114.000, 1.193	114.000, 1.286	114.000, 1.196	114.000, 1.167	114.000, 1.210	114.000, 1.234	114.000, 1.186	114.000, 1.120	114.000, 1.157	114.000, 1.892	114.000, 1.724	114.000, 1.787
572	114.200, 1.278	114.200, 1.225	114.200, 1.149	114.200, 1.193	114.200, 1.286	114.200, 1.196	114.200, 1.167	114.200, 1.210	114.200, 1.235	114.200, 1.186	114.200, 1.119	114.200, 1.158	114.200, 1.893	114.200, 1.725	114.200, 1.787
573	114.400, 1.278	114.400, 1.225	114.400, 1.149	114.400, 1.194	114.400, 1.286	114.400, 1.196	114.400, 1.167	114.400, 1.211	114.400, 1.235	114.400, 1.187	114.400, 1.119	114.400, 1.159	114.400, 1.894	114.400, 1.726	114.400, 1.787
574	114.600, 1.278	114.600, 1.226	114.600, 1.150	114.600, 1.194	114.600, 1.287	114.600, 1.196	114.600, 1.168	114.600, 1.211	114.600, 1.235	114.600, 1.188	114.600, 1.119	114.600, 1.159	114.600, 1.894	114.600, 1.727	114.600, 1.788
575	114.800, 1.278	114.800, 1.227	114.800, 1.151	114.800, 1.194	114.800, 1.287	114.800, 1.197	114.800, 1.168	114.800, 1.212	114.800, 1.236	114.800, 1.188	114.800, 1.119	114.800, 1.160	114.800, 1.895	114.800, 1.728	114.800, 1.788
576	115.000, 1.278	115.000, 1.227	115.000, 1.151	115.000, 1.194	115.000, 1.287	115.000, 1.197	115.000, 1.168	115.000, 1.212	115.000, 1.236	115.000, 1.189	115.000, 1.120	115.000, 1.160	115.000, 1.896	115.000, 1.729	115.000, 1.789
577	115.200, 1.279	115.200, 1.228	115.200, 1.152	115.200, 1.194	115.200, 1.288	115.200, 1.198	115.200, 1.168	115.200, 1.213	115.200, 1.236	115.200, 1.190	115.200, 1.120	115.200, 1.161	115.200, 1.897	115.200, 1.730	115.200, 1.790
578	115.400, 1.279	115.400, 1.228	115.400, 1.152	115.400, 1.195	115.400, 1.288	115.400, 1.198	115.400, 1.169	115.400, 1.213	115.400, 1.236	115.400, 1.191	115.400, 1.120	115.400, 1.161	115.400, 1.898	115.400, 1.730	115.400, 1.790
579	115.600, 1.279	115.600, 1.229	115.600, 1.153	115.600, 1.195	115.600, 1.289	115.600, 1.199	115.600, 1.169	115.600, 1.213	115.600, 1.236	115.600, 1.191	115.600, 1.121	115.600, 1.161	115.600, 1.899	115.600, 1.731	115.600, 1.792
580	115.800, 1.279	115.800, 1.229	115.800, 1.153	115.800, 1.195	115.800, 1.289	115.800, 1.199	115.800, 1.169	115.800, 1.213	115.800, 1.236	115.800, 1.191	115.800, 1.121	115.800, 1.162	115.800, 1.899	115.800, 1.731	115.800, 1.793
581	116.000, 1.280	116.000, 1.229	116.000, 1.153	116.000, 1.196	116.000, 1.289	116.000, 1.199	116.000, 1.169	116.000, 1.213	116.000, 1.236	116.000, 1.192	116.000, 1.121	116.000, 1.162	116.000, 1.900	116.000, 1.731	116.000, 1.793
582	116.200, 1.280	116.200, 1.230	116.200, 1.153	116.200, 1.196	116.200, 1.289	116.200, 1.200	116.200, 1.170	116.200, 1.213	116.200, 1.236	116.200, 1.192	116.200, 1.121	116.200, 1.162	116.200, 1.901	116.200, 1.731	116.200, 1.794
583	116.400, 1.281	116.400, 1.230	116.400, 1.153	116.400, 1.197	116.400, 1.289	116.400, 1.200	116.400, 1.170	116.400, 1.213	116.400, 1.236	116.400, 1.192	116.400, 1.121	116.400, 1.162	116.400, 1.901	116.400, 1.732	116.400, 1.795
584	116.600, 1.281	116.600, 1.230	116.600, 1.153	116.600, 1.197	116.600, 1.289	116.600, 1.200	116.600, 1.170	116.600, 1.213	116.600, 1.236	116.600, 1.192	116.600, 1.121	116.600, 1.162	116.600, 1.902	116.600, 1.732	116.600, 1.796
585	116.800, 1.282	116.800, 1.230	116.800, 1.153	116.800, 1.197	116.800, 1.289	116.800, 1.201	116.800, 1.170	116.800, 1.213	116.800, 1.237	116.800, 1.192	116.800, 1.122	116.800, 1.162	116.800, 1.903	116.800, 1.732	116.800, 1.797
586	117.000, 1.283	117.000, 1.231	117.000, 1.153	117.000, 1.197	117.000, 1.289	117.000, 1.201	117.000, 1.171	117.000, 1.213	117.000, 1.237	117.000, 1.191	117.000, 1.122	117.000, 1.162	117.000, 1.903	117.000, 1.733	117.000, 1.798
587	117.200, 1.283	117.200, 1.231	117.200, 1.153	117.200, 1.197	117.200, 1.289	117.200, 1.202	117.200, 1.171	117.200, 1.213	117.200, 1.237	117.200, 1.191	117.200, 1.123	117.200, 1.162	117.200, 1.904	117.200, 1.733	117.200, 1.799
588	117.400, 1.283	117.400, 1.231	117.400, 1.153	117.400, 1.197	117.400, 1.289	117.400, 1.202	117.400, 1.171	117.400, 1.213	117.400, 1.238	117.400, 1.191	117.400, 1.123	117.400, 1.162	117.400, 1.905	117.400, 1.734	117.400, 1.799
589	117.600, 1.283	117.600, 1.231	117.600, 1.154	117.600, 1.198	117.600, 1.289	117.600, 1.202	117.600, 1.171	117.600, 1.213	117.600, 1.238	117.600, 1.190	117.600, 1.124	117.600, 1.162	117.600, 1.906	117.600, 1.735	117.600, 1.800
590	117.800, 1.283	117.800, 1.231	117.800, 1.154	117.800, 1.198	117.800, 1.290	117.800, 1.202	117.800, 1.171	117.800, 1.213	117.800, 1.239	117.800, 1.190	117.800, 1.124	117.800, 1.162	117.800, 1.906	117.800, 1.736	117.800, 1.801
591	118.000, 1.284	118.000, 1.231	118.000, 1.154	118.000, 1.198	118.000, 1.290	118.000, 1.202	118.000, 1.172	118.000, 1.213	118.000, 1.239	118.000, 1.190	118.000, 1.124	118.000, 1.162	118.000, 1.907	118.000, 1.737	118.000, 1.802
592	118.200, 1.284	118.200, 1.231	118.200, 1.154	118.200, 1.198	118.200, 1.291	118.200, 1.202	118.200, 1.172	118.200, 1.213	118.200, 1.239	118.200, 1.190	118.200, 1.125	118.200, 1.162	118.200, 1.908	118.200, 1.738	118.200, 1.803
593	118.400, 1.284	118.400, 1.231	118.400, 1.154	118.400, 1.198	118.400, 1.291	118.400, 1.202	118.400, 1.172	118.400, 1.214	118.400, 1.240	118.400, 1.190	118.400, 1.125	118.400, 1.162	118.400, 1.909	118.400, 1.738	118.400, 1.804
594	118.600, 1.284	118.600, 1.231	118.600, 1.155	118.600, 1.198	118.600, 1.293	118.600, 1.202	118.600, 1.172	118.600, 1.214	118.600, 1.240	118.600, 1.191	118.600, 1.126	118.600, 1.163	118.600, 1.909	118.600, 1.739	118.600, 1.805
595	118.800, 1.285	118.800, 1.231	118.800, 1.155	118.800, 1.198	118.800, 1.293	118.800, 1.202	118.800, 1.172	118.800, 1.214	118.800, 1.241	118.800, 1.191	118.800, 1.126	118.800, 1.163	118.800, 1.910	118.800, 1.740	118.800, 1.806
596	119.000, 1.285	119.000, 1.231	119.000, 1.156	119.000, 1.198	119.000, 1.294	119.000, 1.202	119.000, 1.172	119.000, 1.215	119.000, 1.242	119.000, 1.192	119.000, 1.127	119.000, 1.163	119.000, 1.910	119.000, 1.740	119.000, 1.807
597	119.200, 1.285	119.200, 1.231	119.200, 1.157	119.200, 1.199	119.200, 1.295	119.200, 1.202	119.200, 1.172	119.200, 1.215	119.200, 1.242	119.200, 1.192	119.200, 1.127	119.200, 1.163	119.200, 1.911	119.200, 1.741	119.200, 1.807
598	119.400, 1.285	119.400, 1.231	119.400, 1.157	119.400, 1.199	119.400, 1.296	119.400, 1.203	119.400, 1.172	119.400, 1.215	119.400, 1.242	119.400, 1.193	119.400, 1.127	119.400, 1.163	119.400, 1.911	119.400, 1.741	119.400, 1.808
599	119.600, 1.285	119.600, 1.231	119.600, 1.158	119.600, 1.199	119.600, 1.296	119.600, 1.203	119.600, 1.172	119.600, 1.216	119.600, 1.243	119.600, 1.193	119.600, 1.128	119.600, 1.163	119.600, 1.912	119.600, 1.741	119.600, 1.808
600	119.800, 1.285	119.800, 1.231	119.800, 1.158	119.800, 1.200	119.800, 1.297	119.800, 1.203	119.800, 1.172	119.800, 1.216	119.800, 1.243	119.800, 1.194	119.800, 1.128	119.800, 1.163	119.800, 1.913	119.800, 1.742	119.800, 1.808
601	120.000, 1.285	120.000, 1.231	120.000, 1.158	120.000, 1.200	120.000, 1.297	120.000, 1.204	120.000, 1.173	120.000, 1.216	120.000, 1.243	120.000, 1.194	120.000, 1.128	120.000, 1.164	120.000, 1.914	120.000, 1.742	120.000, 1.808
602	120.200, 1.285	120.200, 1.231	120.200, 1.159	120.200, 1.201	120.200, 1.297	120.200, 1.205	120.200, 1.173	120.200, 1.216	120.200, 1.242	120.200, 1.195	120.200, 1.128	120.200, 1.164	120.200, 1.914	120.200, 1.743	120.200, 1.808
603	120.400, 1.286	120.400, 1.231	120.400, 1.159	120.400, 1.201	120.400, 1.297	120.400, 1.205	120.400, 1.173	120.400, 1.217	120.400, 1.243	120.400, 1.195	120.400, 1.128	120.400, 1.165	120.400, 1.915	120.400, 1.744	120.400, 1.808
604	120.600, 1.286	120.600, 1.231	120.600, 1.159	120.600, 1.202	120.600, 1.298	120.600, 1.206	120.600, 1.173	120.600, 1.217	120.600, 1.243	120.600, 1.195	120.600, 1.129	120.600, 1.165	120.600, 1.915	120.600, 1.745	120.600, 1.808
605	120.800, 1.286	120.800, 1.231	120.800, 1.159	120.800, 1.202	120.800, 1.298	120.800, 1.206	120.800, 1.174	120.800, 1.217	120.800, 1.243	120.800, 1.196	120.800, 1.129	120.800, 1.166	120.800, 1.916	120.800, 1.745	120.800, 1.809
606	121.000, 1.286	121.000, 1.231	121.000, 1.159	121.000, 1.203	121.000, 1.297	121.000, 1.206	121.000, 1.174	121.000, 1.217	121.000, 1.243	121.000, 1.196	121.000, 1.130	121.000, 1.166	121.000, 1.917	121.000, 1.746	121.000, 1.809
607	121.200, 1.286	121.200, 1.232	121.200, 1.159	121.200, 1.204	121.200, 1.297	121.200, 1.206	121.200, 1.174	121.200, 1.218	121.200, 1.243	121.200, 1.196	121.200, 1.130	121.200, 1.166	121.200, 1.918	121.200, 1.747	121.200, 1.810
608	121.400, 1.287	121.400, 1.232	121.400, 1.160	121.400, 1.204	121.400, 1.297	121.400, 1.206	121.400, 1.174	121.400, 1.218	121.400, 1.243	121.400, 1.196	121.400, 1.131	121.400, 1.166	121.400, 1.919	121.400, 1.748	121.400, 1.811
609	121.600, 1.287	121.600, 1.233	121.600, 1.160	121.600, 1.205	121.600, 1.297	121.600, 1.206	121.600, 1.175	121.600, 1.218	121.600, 1.243	121.600, 1.197	121.600, 1.132	121.600, 1.167	121.600, 1.919	121.600, 1.749	121.600, 1.811
610	121.800, 1.288	121.800, 1.234	121.800, 1.160	121.800, 1.205	121.800, 1.297	121.800, 1.206	121.800, 1.175	121.800, 1.218	121.800, 1.243	121.800, 1.197	121.800, 1.132	121.800, 1.167	121.800, 1.920	121.800, 1.750	121.800, 1.812
611	122.000, 1.288	122.000, 1.235	122.000, 1.159	122.000, 1.205	122.000, 1.297	122.000, 1.206	122.000, 1.175	122.000, 1.218	122.000, 1.243	122.000, 1.197	122.000, 1.132	122.000, 1.167	122.000, 1.921	122.000, 1.751	122.000, 1.813
612	122.200, 1.289	122.200, 1.235	122.200, 1.159	122.200, 1.205	122.200, 1.297	122.200, 1.206	122.200, 1.175	122.200, 1.218	122.200, 1.244	122.200, 1.197	122.200, 1.133	122.200, 1.168	122.200, 1.922	122.200, 1.752	122.200, 1.814
613	122.400, 1.289	122.400, 1.236	122.400, 1.159	122.400, 1.204	122.400, 1.298	122.400, 1.206	122.400, 1.175	122.400, 1.219	122.400, 1.244	122.400, 1.197	122.400, 1.132	122.400, 1.168	122.400, 1.923	122.400, 1.752	122.400, 1.815
614	122.600, 1.289	122.600, 1.237	122.600, 1.159	122.600, 1.204	122.600, 1.298	122.600, 1.206	122.600, 1.175	122.600, 1.219	122.600, 1.244	122.600, 1.197	122.600, 1.132	122.600, 1.168	122.600, 1.924	122.600, 1.753	122.600, 1.816
615	122.800, 1.289	122.800, 1.237	122.800, 1.159	122.800, 1.204	122.800, 1.298	122.800, 1.206	122.800, 1.175	122.800, 1.219	122.800, 1.245	122.800, 1.197	122.800, 1.132	122.800, 1.168	122.800, 1.925	122.800, 1.753	122.800, 1.817
616	123.000, 1.290	123.000, 1.237	123.000, 1.159	123.000, 1.204	123.000, 1.299	123.000, 1.206	123.000, 1.176	123.000, 1.219	123.000, 1.245	123.000, 1.197	123.000, 1.132	123.000, 1.169	123.000, 1.926	123.000, 1.753	123.000, 1.818
617	123.200, 1.290	123.200, 1.237	123.200, 1.159	123.200, 1.204	123.200, 1.299	123.200, 1.207	123.200, 1.176	123.200, 1.219	123.200, 1.246	123.200, 1.198	123.200, 1.132	123.200, 1.169	123.200, 1.927	123.200, 1.753	123.200, 1.818
618	123.400, 1.290	123.400, 1.237	123.400, 1.159	123.400, 1.204	123.400, 1.300	123.400, 1.207	123.400, 1.176	123.400, 1.219	123.400, 1.246	123.400, 1.198	123.400, 1.132	123.400, 1.169	123.400, 1.928	123.400, 1.754	123.400, 1.819
619	123.600, 1.290	123.600, 1.237	123.600, 1.160	123.600, 1.204	123.600, 1.300	123.600, 1.207	123.600, 1.176	123.600, 1.219	123.600, 1.247	123.600, 1.198	123.600, 1.132	123.600, 1.169	123.600, 1.928	123.600, 1.754	123.600, 1.819
620	123.800, 1.291	123.800, 1.237	123.800, 1.160	123.800, 1.205	123.800, 1.300	123.800, 1.208	123.800, 1.177	123.800, 1.219	123.800, 1.247	123.800, 1.199	123.800, 1.132	123.800, 1.169	123.800, 1.929	123.800, 1.754	123.800, 1.820
621	124.000, 1.291	124.000, 1.237	124.000, 1.160	124.000, 1.205	124.000, 1.301	124.000, 1.208	124.000, 1.177	124.000, 1.220	124.000, 1.247	124.000, 1.199	124.000, 1.133	124.000, 1.169	124.000, 1.929	124.000, 1.755	124.000, 1.821
622	124.200, 1.291	124.200, 1.237	124.200, 1.160	124.200, 1.205	124.200, 1.301	124.200, 1.209	124.200, 1.177	124.200, 1.220	124.200, 1.247	124.200, 1.200	124.200, 1.133	124.200, 1.169	124.200, 1.930	124.200, 1.755	124.200, 1.821
623	124.400, 1.291	124.400, 1.237	124.400, 1.160	124.400, 1.205	124.400, 1.301	124.400, 1.209	124.400, 1.177	124.400, 1.220	124.400, 1.248	124.400, 1.200	124.400, 1.133	124.400, 1.169	124.400, 1.930	124.400, 1.756	124.400, 1.822
624	124.600, 1.292	124.600, 1.237	124.600, 1.160	124.600, 1.205	124.600, 1.301	124.600, 1.209	124.600, 1.177	124.600, 1.220	124.600, 1.248	124.600, 1.201	124.600, 1.133	124.600, 1.170	124.600, 1.930	124.600, 1.757	124.600, 1.823
625	124.800, 1.292	124.800, 1.238	124.800, 1.160	124.800, 1.206	124.800, 1.301	124.800, 1.210	124.800, 1.177	124.800, 1.220	124.800, 1.248	124.800, 1.201	124.800, 1.134	124.800, 1.170	124.800, 1.930	124.800, 1.757	124.800, 1.823
626	125.000, 1.293	125.000, 1.238	125.000, 1.161	125.000, 1.206	125.000, 1.301	125.000, 1.210	125.000, 1.177	125.000, 1.220	125.000, 1.249	125.000, 1.202	125.000, 1.134	125.000, 1.170	125.000, 1.931	125.000, 1.758	125.000, 1.824
627	125.200, 1.293	125.200, 1.239	125.200, 1.161	125.200, 1.207	125.200, 1.301	125.200, 1.210	125.200, 1.177	125.200, 1.220	125.200, 1.249	125.200, 1.202	125.200, 1.134	125.200, 1.171	125.200, 1.931	125.200, 1.758	125.200, 1.824
628	125.400, 1.294	125.400, 1.240	125.400, 1.162	125.400, 1.207	125.400, 1.301	125.400, 1.211	125.400, 1.177	125.400, 1.221	125.400, 1.249	125.400, 1.202	125.400, 1.134	125.400, 1.171	125.400, 1.931	125.400, 1.759	125.400, 1.824
629	125.600, 1.294	125.600, 1.240	125.600, 1.162	125.600, 1.208	125.600, 1.301	125.600, 1.211	125.600, 1.177	125.600, 1.221	125.600, 1.250	125.600, 1.203	125.600, 1.135	125.600, 1.171	125.600, 1.932	125.600, 1.760	125.600, 1.824
630	125.800, 1.295	125.800, 1.241	125.800, 1.162	125.800, 1.208	125.800, 1.301	125.800, 1.212	125.800, 1.177	125.800, 1.222	125.800, 1.250	125.800, 1.203	125.800, 1.135	125.800, 1.171	125.800, 1.933	125.800, 1.761	125.800, 1.824
631	126.000, 1.295	126.000, 1.241	126.000, 1.163	126.000, 1.208	126.000, 1.302	126.000, 1.212	126.000, 1.178	126.000, 1.222	126.000, 1.250	126.000, 1.203	126.000, 1.135	126.000, 1.172	126.000, 1.934	126.000, 1.761	126.000, 1.824
632	126.200, 1.296	126.200, 1.242	126.200, 1.163	126.200, 1.209	126.200, 1.302	126.200, 1.213	126.200, 1.178	126.200, 1.222	126.200, 1.251	126.200, 1.203	126.200, 1.135	126.200, 1.172	126.200, 1.935	126.200, 1.762	126.200, 1.824
633	126.400, 1.296	126.400, 1.242	126.400, 1.163	126.400, 1.209	126.400, 1.303	126.400, 1.213	126.400, 1.178	126.400, 1.222	126.400, 1.251	126.400, 1.204	126.400, 1.134	126.400, 1.172	126.400, 1.936	126.400, 1.763	126.400, 1.824
634	126.600, 1.297	126.600, 1.242	126.600, 1.163	126.600, 1.209	126.600, 1.303	126.600, 1.213	126.600, 1.178	126.600, 1.223	126.600, 1.252	126.600, 1.204	126.600, 1.134	126.600, 1.173	126.600, 1.937	126.600, 1.764	126.600, 1.825
635	126.800, 1.297	126.800, 1.242	126.800, 1.163	126.800, 1.209	126.800, 1.304	126.800, 1.214	126.800, 1.179	126.800, 1.223	126.800, 1.252	126.800, 1.204	126.800, 1.134	126.800, 1.173	126.800, 1.938	126.800, 1.764	126.800, 1.825
636	127.000, 1.298	127.000, 1.241	127.000, 1.163	127.000, 1.209	127.000, 1.304	127.000, 1.214	127.000, 1.179	127.000, 1.223	127.000, 1.253	127.000, 1.204	127.000, 1.134	127.000, 1.173	127.000, 1.939	127.000, 1.765	127.000, 1.825
637	127.200, 1.298	127.200, 1.241	127.200, 1.163	127.200, 1.209	127.200, 1.304	127.200, 1.214	127.200, 1.180	127.200, 1.222	127.200, 1.253	127.200, 1.204	127.200, 1.134	127.200, 1.173	127.200, 1.940	127.200, 1.766	127.200, 1.826
638	127.400, 1.298	127.400, 1.241	127.400, 1.163	127.400, 1.210	127.400, 1.305	127.400, 1.214	127.400, 1.180	127.400, 1.222	127.400, 1.253	127.400, 1.204	127.400, 1.135	127.400, 1.173	127.400, 1.941	127.400, 1.766	127.400, 1.827
639	127.600, 1.298	127.600, 1.240	127.600, 1.164	127.600, 1.210	127.600, 1.305	127.600, 1.214	127.600, 1.181	127.600, 1.222	127.600, 1.253	127.600, 1.205	127.600, 1.135	127.600, 1.173	127.600, 1.941	127.600, 1.767	127.600, 1.828
640	127.800, 1.298	127.800, 1.240	127.800, 1.164	127.800, 1.210	127.800, 1.305	127.800, 1.214	127.800, 1.182	127.800, 1.222	127.800, 1.253	127.800, 1.205	127.800, 1.135	127.800, 1.174	127.800, 1.942	127.800, 1.767	127.800, 1.829
641	128.000, 1.298	128.000, 1.240	128.000, 1.164	128.000, 1.210	128.000, 1.305	128.000, 1.214	128.000, 1.183	128.000, 1.222	128.000, 1.253	128.000, 1.205	128.000, 1.136	128.000, 1.174	128.000, 1.942	128.000, 1.768	128.000, 1.830
642	128.200, 1.298	128.200, 1.240	128.200, 1.164	128.200, 1.211	128.200, 1.306	128.200, 1.214	128.200, 1.183	128.200, 1.221	128.200, 1.254	128.200, 1.205	128.200, 1.136	128.200, 1.174	128.200, 1.943	128.200, 1.768	128.200, 1.830
643	128.400, 1.298	128.400, 1.241	128.400, 1.164	128.400, 1.211	128.400, 1.306	128.400, 1.214	128.400, 1.183	128.400, 1.222	128.400, 1.254	128.400, 1.205	128.400, 1.137	128.400, 1.174	128.400, 1.943	128.400, 1.769	128.400, 1.831
644	128.600, 1.298	128.600, 1.241	128.600, 1.164	128.600, 1.211	128.600, 1.306	128.600, 1.214	128.600, 1.183	128.600, 1.222	128.600, 1.254	128.600, 1.205	128.600, 1.137	128.600, 1.175	128.600, 1.944	128.600, 1.769	128.600, 1.832
645	128.800, 1.298	128.800, 1.241	128.800, 1.165	128.800, 1.211	128.800, 1.306	128.800, 1.214	128.800, 1.184	128.800, 1.222	128.800, 1.254	128.800, 1.205	128.800, 1.138	128.800, 1.175	128.800, 1.944	128.800, 1.770	128.800, 1.832
646	129.000, 1.298	129.000, 1.242	129.000, 1.165	129.000, 1.212	129.000, 1.306	129.000, 1.214	129.000, 1.184	129.000, 1.223	129.000, 1.255	129.000, 1.206	129.000, 1.138	129.000, 1.175	129.000, 1.944	129.000, 1.771	129.000, 1.833
647	129.200, 1.298	129.200, 1.242	129.200, 1.165	129.200, 1.212	129.200, 1.306	129.200, 1.215	129.200, 1.184	129.200, 1.223	129.200, 1.255	129.200, 1.206	129.200, 1.139	129.200, 1.176	129.200, 1.945	129.200, 1.771	129.200, 1.833
648	129.400, 1.298	129.400, 1.242	129.400, 1.165	129.400, 1.212	129.400, 1.307	129.400, 1.215	129.400, 1.184	129.400, 1.224	129.400, 1.255	129.400, 1.206	129.400, 1.139	129.400, 1.176	129.400, 1.945	129.400, 1.772	129.400, 1.834
649	129.600, 1.298	129.600, 1.243	129.600, 1.166	129.600, 1.212	129.600, 1.307	129.600, 1.215	129.600, 1.184	129.600, 1.224	129.600, 1.255	129.600, 1.206	129.600, 1.139	129.600, 1.176	129.600, 1.946	129.600, 1.773	129.600, 1.834
650	129.800, 1.298	129.800, 1.243	129.800, 1.166	129.800, 1.212	129.800, 1.307	129.800, 1.215	129.800, 1.184	129.800, 1.225	129.800, 1.255	129.800, 1.206	129.800, 1.139	129.800, 1.176	129.800, 1.947	129.800, 1.773	129.800, 1.835
651	130.000, 1.298	130.000, 1.243	130.000, 1.166	130.000, 1.213	130.000, 1.308	130.000, 1.216	130.000, 1.184	130.000, 1.225	130.000, 1.256	130.000, 1.206	130.000, 1.139	130.000, 1.177	130.000, 1.947	130.000, 1.774	130.000, 1.835
652	130.200, 1.298	130.200, 1.243	130.200, 1.166	130.200, 1.213	130.200, 1.308	130.200, 1.216	130.200, 1.184	130.200, 1.226	130.200, 1.256	130.200, 1.206	130.200, 1.139	130.200, 1.177	130.200, 1.948	130.200, 1.775	130.200, 1.836
653	130.400, 1.298	130.400, 1.243	130.400, 1.167	130.400, 1.213	130.400, 1.308	130.400, 1.216	130.400, 1.184	130.400, 1.226	130.400, 1.256	130.400, 1.206	130.400, 1.139	130.400, 1.177	130.400, 1.949	130.400, 1.775	130.400, 1.837
654	130.600, 1.299	130.600, 1.243	130.600, 1.167	130.600, 1.213	130.600, 1.309	130.600, 1.217	130.600, 1.185	130.600, 1.226	130.600, 1.256	130.600, 1.206	130.600, 1.139	130.600, 1.177	130.600, 1.950	130.600, 1.776	130.600, 1.837
655	130.800, 1.299	130.800, 1.243	130.800, 1.168	130.800, 1.213	130.800, 1.309	130.800, 1.217	130.800, 1.185	130.800, 1.227	130.800, 1.256	130.800, 1.206	130.800, 1.139	130.800, 1.177	130.800, 1.950	130.800, 1.776	130.800, 1.838
656	131.000, 1.299	131.000, 1.243	131.000, 1.168	131.000, 1.213	131.000, 1.310	131.000, 1.217	131.000, 1.185	131.000, 1.227	131.000, 1.256	131.000, 1.206	131.000, 1.138	131.000, 1.177	131.000, 1.951	131.000, 1.776	131.000, 1.838
657	131.200, 1.300	131.200, 1.244	131.200, 1.169	131.200, 1.213	131.200, 1.310	131.200, 1.217	131.200, 1.185	131.200, 1.227	131.200, 1.256	131.200, 1.206	131.200, 1.139	131.200, 1.177	131.200, 1.951	131.200, 1.777	131.200, 1.839
658	131.400, 1.300	131.400, 1.244	131.400, 1.169	131.400, 1.213	131.400, 1.310	131.400, 1.216	131.400, 1.186	131.400, 1.227	131.400, 1.256	131.400, 1.206	131.400, 1.139	131.400, 1.177	131.400, 1.952	131.400, 1.777	131.400, 1.840
659	131.600, 1.301	131.600, 1.244	131.600, 1.170	131.600, 1.214	131.600, 1.310	131.600, 1.216	131.600, 1.186	131.600, 1.227	131.600, 1.257	131.600, 1.206	131.600, 1.139	131.600, 1.178	131.600, 1.952	131.600, 1.777	131.600, 1.841
660	131.800, 1.301	131.800, 1.244	131.800, 1.170	131.800, 1.214	131.800, 1.311	131.800, 1.216	131.800, 1.186	131.800, 1.227	131.800, 1.257	131.800, 1.206	131.800, 1.139	131.800, 1.178	131.800, 1.953	131.800, 1.777	131.800, 1.841
661	132.000, 1.302	132.000, 1.245	132.000, 1.170	132.000, 1.214	132.000, 1.311	132.000, 1.216	132.000, 1.186	132.000, 1.226	132.000, 1.257	132.000, 1.206	132.000, 1.140	132.000, 1.178	132.000, 1.953	132.000, 1.777	132.000, 1.842
662	132.200, 1.302	132.200, 1.245	132.200, 1.170	132.200, 1.215	132.200, 1.311	132.200, 1.216	132.200, 1.186	132.200, 1.226	132.200, 1.257	132.200, 1.206	132.200, 1.140	132.200, 1.178	132.200, 1.954	132.200, 1.777	132.200, 1.842
663	132.400, 1.302	132.400, 1.245	132.400, 1.170	132.400, 1.215	132.400, 1.311	132.400, 1.216	132.400, 1.186	132.400, 1.226	132.400, 1.257	132.400, 1.206	132.400, 1.140	132.400, 1.178	132.400, 1.955	132.400, 1.778	132.400, 1.842
664	132.600, 1.302	132.600, 1.245	132.600, 1.169	132.600, 1.215	132.600, 1.312	132.600, 1.216	132.600, 1.187	132.600, 1.226	132.600, 1.257	132.600, 1.207	132.600, 1.140	132.600, 1.178	132.600, 1.955	132.600, 1.779	132.600, 1.843
665	132.800, 1.303	132.800, 1.246	132.800, 1.169	132.800, 1.215	132.800, 1.312	132.800, 1.216	132.800, 1.187	132.800, 1.226	132.800, 1.258	132.800, 1.207	132.800, 1.141	132.800, 1.179	132.800, 1.956	132.800, 1.780	132.800, 1.843
666	133.000, 1.303	133.000, 1.246	133.000, 1.169	133.000, 1.215	133.000, 1.313	133.000, 1.217	133.000, 1.187	133.000, 1.226	133.000, 1.258	133.000, 1.207	133.000, 1.141	133.000, 1.179	133.000, 1.956	133.000, 1.781	133.000, 1.843
667	133.200, 1.303	133.200, 1.246	133.200, 1.169	133.200, 1.215	133.200, 1.313	133.200, 1.217	133.200, 1.187	133.200, 1.226	133.200, 1.258	133.200, 1.208	133.200, 1.141	133.200, 1.180	133.200, 1.956	133.200, 1.782	133.200, 1.843
668	133.400, 1.303	133.400, 1.246	133.400, 1.169	133.400, 1.215	133.400, 1.314	133.400, 1.217	133.400, 1.188	133.400, 1.226	133.400, 1.259	133.400, 1.208	133.400, 1.142	133.400, 1.180	133.400, 1.957	133.400, 1.782	133.400, 1.844
669	133.600, 1.303	133.600, 1.246	133.600, 1.169	133.600, 1.215	133.600, 1.314	133.600, 1.217	133.600, 1.188	133.600, 1.226	133.600, 1.259	133.600, 1.208	133.600, 1.143	133.600, 1.180	133.600, 1.958	133.600, 1.783	133.600, 1.845
670	133.800, 1.303	133.800, 1.246	133.800, 1.169	133.800, 1.215	133.800, 1.315	133.800, 1.217	133.800, 1.188	133.800, 1.226	133.800, 1.259	133.800, 1.209	133.800, 1.143	133.800, 1.181	133.800, 1.958	133.800, 1.784	133.800, 1.845
671	134.000, 1.303	134.000, 1.246	134.000, 1.169	134.000, 1.214	134.000, 1.315	134.000, 1.217	134.000, 1.188	134.000, 1.227	134.000, 1.259	134.000, 1.209	134.000, 1.144	134.000, 1.181	134.000, 1.959	134.000, 1.784	134.000, 1.846
672	134.200, 1.303	134.200, 1.246	134.200, 1.170	134.200, 1.214	134.200, 1.315	134.200, 1.217	134.200, 1.188	134.200, 1.227	134.200, 1.259	134.200, 1.210	134.200, 1.144	134.200, 1.182	134.200, 1.960	134.200, 1.785	134.200, 1.846
673	134.400, 1.304	134.400, 1.246	134.400, 1.170	134.400, 1.214	134.400, 1.315	134.400, 1.217	134.400, 1.189	134.400, 1.228	134.400, 1.260	134.400, 1.210	134.400, 1.145	134.400, 1.182	134.400, 1.960	134.400, 1.785	134.400, 1.847
674	134.600, 1.304	134.600, 1.247	134.600, 1.170	134.600, 1.213	134.600, 1.315	134.600, 1.217	134.600, 1.189	134.600, 1.228	134.600, 1.260	134.600, 1.210	134.600, 1.145	134.600, 1.183	134.600, 1.961	134.600, 1.786	134.600, 1.847
675	134.800, 1.304	134.800, 1.247	134.800, 1.171	134.800, 1.213	134.800, 1.315	134.800, 1.217	134.800, 1.189	134.800, 1.229	134.800, 1.260	134.800, 1.210	134.800, 1.145	134.800, 1.184	134.800, 1.962	134.800, 1.786	134.800, 1.847
676	135.000, 1.305	135.000, 1.248	135.000, 1.171	135.000, 1.213	135.000, 1.315	135.000, 1.217	135.000, 1.189	135.000, 1.229	135.000, 1.260	135.000, 1.210	135.000, 1.145	135.000, 1.184	135.000, 1.963	135.000, 1.786	135.000, 1.848
677	135.200, 1.306	135.200, 1.248	135.200, 1.172	135.200, 1.213	135.200, 1.315	135.200, 1.217	135.200, 1.190	135.200, 1.230	135.200, 1.260	135.200, 1.210	135.200, 1.145	135.200, 1.184	135.200, 1.964	135.200, 1.787	135.200, 1.849
678	135.400, 1.306	135.400, 1.249	135.400, 1.172	135.400, 1.214	135.400, 1.315	135.400, 1.217	135.400, 1.190	135.400, 1.230	135.400, 1.260	135.400, 1.210	135.400, 1.145	135.400, 1.185	135.400, 1.965	135.400, 1.787	135.400, 1.850
679	135.600, 1.307	135.600, 1.249	135.600, 1.172	135.600, 1.214	135.600, 1.314	135.600, 1.217	135.600, 1.190	135.600, 1.230	135.600, 1.261	135.600, 1.210	135.600, 1.145	135.600, 1.185	135.600, 1.965	135.600, 1.787	135.600, 1.850
680	135.800, 1.307	135.800, 1.250	135.800, 1.172	135.800, 1.215	135.800, 1.314	135.800, 1.218	135.800, 1.190	135.800, 1.231	135.800, 1.261	135.800, 1.210	135.800, 1.145	135.800, 1.185	135.800, 1.966	135.800, 1.787	135.800, 1.851
681	136.000, 1.308	136.000, 1.250	136.000, 1.172	136.000, 1.215	136.000, 1.314	136.000, 1.218	136.000, 1.190	136.000, 1.231	136.000, 1.261	136.000, 1.210	136.000, 1.145	136.000, 1.185	136.000, 1.966	136.000, 1.787	136.000, 1.851
682	136.200, 1.308	136.200, 1.251	136.200, 1.171	136.200, 1.216	136.200, 1.314	136.200, 1.219	136.200, 1.191	136.200, 1.230	136.200, 1.261	136.200, 1.210	136.200, 1.145	136.200, 1.184	136.200, 1.967	136.200, 1.787	136.200, 1.851
683	136.400, 1.308	136.400, 1.251	136.400, 1.171	136.400, 1.216	136.400, 1.315	136.400, 1.219	136.400, 1.191	136.400, 1.230	136.400, 1.262	136.400, 1.210	136.400, 1.145	136.400, 1.184	136.400, 1.967	136.400, 1.788	136.400, 1.851
684	136.600, 1.308	136.600, 1.251	136.600, 1.171	136.600, 1.216	136.600, 1.315	136.600, 1.220	136.600, 1.191	136.600, 1.230	136.600, 1.262	136.600, 1.210	136.600, 1.145	136.600, 1.183	136.600, 1.968	136.600, 1.789	136.600, 1.851
685	136.800, 1.309	136.800, 1.251	136.800, 1.171	136.800, 1.216	136.800, 1.315	136.800, 1.220	136.800, 1.191	136.800, 1.230	136.800, 1.263	136.800, 1.210	136.800, 1.146	136.800, 1.183	136.800, 1.968	136.800, 1.790	136.800, 1.851
686	137.000, 1.309	137.000, 1.251	137.000, 1.171	137.000, 1.216	137.000, 1.316	137.000, 1.221	137.000, 1.191	137.000, 1.230	137.000, 1.264	137.000, 1.211	137.000, 1.146	137.000, 1.182	137.000, 1.969	137.000, 1.791	137.000, 1.851
687	137.200, 1.309	137.200, 1.251	137.200, 1.172	137.200, 1.216	137.200, 1.316	137.200, 1.221	137.200, 1.191	137.200, 1.230	137.200, 1.264	137.200, 1.211	137.200, 1.147	137.200, 1.182	137.200, 1.969	137.200, 1.792	137.200, 1.852
688	137.400, 1.309	137.400, 1.251	137.400, 1.172	137.400, 1.216	137.400, 1.316	137.400, 1.222	137.400, 1.191	137.400, 1.230	137.400, 1.264	137.400, 1.211	137.400, 1.147	137.400, 1.182	137.400, 1.970	137.400, 1.793	137.400, 1.852
689	137.600, 1.308	137.600, 1.251	137.600, 1.172	137.600, 1.216	137.600, 1.317	137.600, 1.222	137.600, 1.191	137.600, 1.230	137.600, 1.265	137.600, 1.212	137.600, 1.148	137.600, 1.181	137.600, 1.970	137.600, 1.793	137.600, 1.853
690	137.800, 1.308	137.800, 1.251	137.800, 1.172	137.800, 1.216	137.800, 1.317	137.800, 1.222	137.800, 1.191	137.800, 1.230	137.800, 1.265	137.800, 1.212	137.800, 1.148	137.800, 1.181	137.800, 1.971	137.800, 1.794	137.800, 1.853
691	138.000, 1.308	138.000, 1.251	138.000, 1.172	138.000, 1.215	138.000, 1.317	138.000, 1.222	138.000, 1.191	138.000, 1.230	138.000, 1.265	138.000, 1.212	138.000, 1.148	138.000, 1.182	138.000, 1.971	138.000, 1.795	138.000, 1.854
692	138.200, 1.308	138.200, 1.251	138.200, 1.173	138.200, 1.215	138.200, 1.318	138.200, 1.223	138.200, 1.191	138.200, 1.230	138.200, 1.265	138.200, 1.212	138.200, 1.148	138.200, 1.182	138.200, 1.971	138.200, 1.796	138.200, 1.854
693	138.400, 1.307	138.400, 1.251	138.400, 1.173	138.400, 1.215	138.400, 1.318	138.400, 1.223	138.400, 1.191	138.400, 1.231	138.400, 1.265	138.400, 1.212	138.400, 1.148	138.400, 1.182	138.400, 1.972	138.400, 1.796	138.400, 1.855
694	138.600, 1.308	138.600, 1.251	138.600, 1.174	138.600, 1.215	138.600, 1.318	138.600, 1.223	138.600, 1.191	138.600, 1.231	138.600, 1.265	138.600, 1.212	138.600, 1.148	138.600, 1.182	138.600, 1.972	138.600, 1.797	138.600, 1.856
695	138.800, 1.308	138.800, 1.251	138.800, 1.174	138.800, 1.215	138.800, 1.318	138.800, 1.223	138.800, 1.191	138.800, 1.231	138.800, 1.265	138.800, 1.212	138.800, 1.148	138.800, 1.183	138.800, 1.972	138.800, 1.797	138.800, 1.856
696	139.000, 1.308	139.000, 1.251	139.000, 1.174	139.000, 1.215	139.000, 1.318	139.000, 1.223	139.000, 1.191	139.000, 1.232	139.000, 1.265	139.000, 1.212	139.000, 1.148	139.000, 1.183	139.000, 1.972	139.000, 1.798	139.000, 1.857
697	139.200, 1.308	139.200, 1.251	139.200, 1.175	139.200, 1.215	139.200, 1.319	139.200, 1.223	139.200, 1.191	139.200, 1.232	139.200, 1.265	139.200, 1.212	139.200, 1.148	139.200, 1.184	139.200, 1.973	139.200, 1.798	139.200, 1.858
698	139.400, 1.309	139.400, 1.252	139.400, 1.175	139.400, 1.216	139.400, 1.319	139.400, 1.223	139.400, 1.191	139.400, 1.232	139.400, 1.264	139.400, 1.212	139.400, 1.148	139.400, 1.185	139.400, 1.973	139.400, 1.798	139.400, 1.859
699	139.600, 1.309	139.600, 1.252	139.600, 1.176	139.600, 1.216	139.600, 1.319	139.600, 1.223	139.600, 1.191	139.600, 1.233	139.600, 1.265	139.600, 1.212	139.600, 1.148	139.600, 1.185	139.600, 1.973	139.600, 1.798	139.600, 1.859
700	139.800, 1.310	139.800, 1.252	139.800, 1.176	139.800, 1.217	139.800, 1.319	139.800, 1.223	139.800, 1.191	139.800, 1.233	139.800, 1.265	139.800, 1.212	139.800, 1.148	139.800, 1.186	139.800, 1.973	139.800, 1.798	139.800, 1.860
701	140.000, 1.310	140.000, 1.252	140.000, 1.177	140.000, 1.217	140.000, 1.320	140.000, 1.223	140.000, 1.192	140.000, 1.233	140.000, 1.265	140.000, 1.212	140.000, 1.148	140.000, 1.186	140.000, 1.973	140.000, 1.799	140.000, 1.860
702	140.200, 1.311	140.200, 1.253	140.200, 1.177	140.200, 1.218	140.200, 1.320	140.200, 1.223	140.200, 1.192	140.200, 1.233	140.200, 1.266	140.200, 1.212	140.200, 1.148	140.200, 1.186	140.200, 1.974	140.200, 1.799	140.200, 1.860
703	140.400, 1.311	140.400, 1.253	140.400, 1.177	140.400, 1.218	140.400, 1.320	140.400, 1.224	140.400, 1.192	140.400, 1.233	140.400, 1.266	140.400, 1.212	140.400, 1.149	140.400, 1.187	140.400, 1.974	140.400, 1.799	140.400, 1.860
704	140.600, 1.312	140.600, 1.253	140.600, 1.177	140.600, 1.218	140.600, 1.320	140.600, 1.224	140.600, 1.192	140.600, 1.233	140.600, 1.267	140.600, 1.213	140.600, 1.149	140.600, 1.187	140.600, 1.975	140.600, 1.800	140.600, 1.860
705	140.800, 1.312	140.800, 1.254	140.800, 1.177	140.800, 1.218	140.800, 1.321	140.800, 1.225	140.800, 1.192	140.800, 1.233	140.800, 1.267	140.800, 1.213	140.800, 1.149	140.800, 1.188	140.800, 1.976	140.800, 1.800	140.800, 1.860
706	141.000, 1.312	141.000, 1.254	141.000, 1.177	141.000, 1.218	141.000, 1.321	141.000, 1.225	141.000, 1.192	141.000, 1.233	141.000, 1.268	141.000, 1.213	141.000, 1.149	141.000, 1.188	141.000, 1.977	141.000, 1.800	141.000, 1.861
707	141.200, 1.312	141.200, 1.254	141.200, 1.177	141.200, 1.218	141.200, 1.321	141.200, 1.225	141.200, 1.192	141.200, 1.233	141.200, 1.268	141.200, 1.214	141.200, 1.149	141.200, 1.189	141.200, 1.977	141.200, 1.801	141.200, 1.861
708	141.400, 1.312	141.400, 1.254	141.400, 1.177	141.400, 1.218	141.400, 1.321	141.400, 1.226	141.400, 1.192	141.400, 1.234	141.400, 1.269	141.400, 1.214	141.400, 1.149	141.400, 1.189	141.400, 1.978	141.400, 1.801	141.400, 1.860
709	141.600, 1.313	141.600, 1.254	141.600, 1.177	141.600, 1.218	141.600, 1.321	141.600, 1.226	141.600, 1.192	141.600, 1.234	141.600, 1.269	141.600, 1.214	141.600, 1.149	141.600, 1.190	141.600, 1.979	141.600, 1.801	141.600, 1.860
710	141.800, 1.313	141.800, 1.255	141.800, 1.177	141.800, 1.218	141.800, 1.322	141.800, 1.226	141.800, 1.193	141.800, 1.234	141.800, 1.269	141.800, 1.214	141.800, 1.149	141.800, 1.190	141.800, 1.980	141.800, 1.801	141.800, 1.861
711	142.000, 1.313	142.000, 1.255	142.000, 1.177	142.000, 1.218	142.000, 1.322	142.000, 1.226	142.000, 1.193	142.000, 1.234	142.000, 1.269	142.000, 1.215	142.000, 1.149	142.000, 1.191	142.000, 1.981	142.000, 1.802	142.000, 1.861
712	142.200, 1.313	142.200, 1.256	142.200, 1.177	142.200, 1.218	142.200, 1.322	142.200, 1.226	142.200, 1.193	142.200, 1.234	142.200, 1.269	142.200, 1.215	142.200, 1.149	142.200, 1.191	142.200, 1.981	142.200, 1.802	142.200, 1.862
713	142.400, 1.313	142.400, 1.256	142.400, 1.178	142.400, 1.218	142.400, 1.322	142.400, 1.226	142.400, 1.193	142.400, 1.234	142.400, 1.269	142.400, 1.215	142.400, 1.150	142.400, 1.191	142.400, 1.982	142.400, 1.803	142.400, 1.862
714	142.600, 1.313	142.600, 1.256	142.600, 1.178	142.600, 1.218	142.600, 1.322	142.600, 1.226	142.600, 1.194	142.600, 1.235	142.600, 1.269	142.600, 1.215	142.600, 1.150	142.600, 1.191	142.600, 1.982	142.600, 1.803	142.600, 1.863
715	142.800, 1.313	142.800, 1.257	142.800, 1.178	142.800, 1.218	142.800, 1.322	142.800, 1.225	142.800, 1.194	142.800, 1.235	142.800, 1.269	142.800, 1.215	142.800, 1.150	142.800, 1.191	142.800, 1.983	142.800, 1.804	142.800, 1.864
716	143.000, 1.313	143.000, 1.257	143.000, 1.178	143.000, 1.218	143.000, 1.322	143.000, 1.226	143.000, 1.194	143.000, 1.235	143.000, 1.269	143.000, 1.215	143.000, 1.150	143.000, 1.191	143.000, 1.984	143.000, 1.804	143.000, 1.865
717	143.200, 1.313	143.200, 1.257	143.200, 1.178	143.200, 1.218	143.200, 1.323	143.200, 1.226	143.200, 1.194	143.200, 1.236	143.200, 1.269	143.200, 1.215	143.200, 1.151	143.200, 1.191	143.200, 1.984	143.200, 1.805	143.200, 1.866
718	143.400, 1.314	143.400, 1.258	143.400, 1.179	143.400, 1.218	143.400, 1.323	143.400, 1.226	143.400, 1.194	143.400, 1.236	143.400, 1.269	143.400, 1.216	143.400, 1.151	143.400, 1.191	143.400, 1.985	143.400, 1.805	143.400, 1.867
719	143.600, 1.314	143.600, 1.258	143.600, 1.179	143.600, 1.218	143.600, 1.324	143.600, 1.226	143.600, 1.195	143.600, 1.236	143.600, 1.270	143.600, 1.216	143.600, 1.152	143.600, 1.191	143.600, 1.985	143.600, 1.806	143.600, 1.867
720	143.800, 1.314	143.800, 1.258	143.800, 1.179	143.800, 1.219	143.800, 1.324	143.800, 1.226	143.800, 1.195	143.800, 1.236	143.800, 1.270	143.800, 1.216	143.800, 1.152	143.800, 1.191	143.800, 1.985	143.800, 1.806	143.800, 1.868
721	144.000, 1.314	144.000, 1.258	144.000, 1.180	144.000, 1.219	144.000, 1.325	144.000, 1.226	144.000, 1.195	144.000, 1.236	144.000, 1.271	144.000, 1.216	144.000, 1.153	144.000, 1.191	144.000, 1.986	144.000, 1.807	144.000, 1.868
722	144.200, 1.314	144.200, 1.258	144.200, 1.180	144.200, 1.220	144.200, 1.325	144.200, 1.226	144.200, 1.196	144.200, 1.236	144.200, 1.271	144.200, 1.217	144.200, 1.153	144.200, 1.191	144.200, 1.986	144.200, 1.808	144.200, 1.868
723	144.400, 1.314	144.400, 1.258	144.400, 1.180	144.400, 1.220	144.400, 1.325	144.400, 1.226	144.400, 1.196	144.400, 1.236	144.400, 1.271	144.400, 1.217	144.400, 1.153	144.400, 1.191	144.400, 1.986	144.400, 1.809	144.400, 1.868
724	144.600, 1.314	144.600, 1.258	144.600, 1.180	144.600, 1.221	144.600, 1.326	144.600, 1.226	144.600, 1.196	144.600, 1.236	144.600, 1.272	144.600, 1.218	144.600, 1.153	144.600, 1.191	144.600, 1.987	144.600, 1.810	144.600, 1.868
725	144.800, 1.314	144.800, 1.257	144.800, 1.180	144.800, 1.221	144.800, 1.326	144.800, 1.227	144.800, 1.196	144.800, 1.237	144.800, 1.272	144.800, 1.218	144.800, 1.153	144.800, 1.191	144.800, 1.987	144.800, 1.810	144.800, 1.868
726	145.000, 1.315	145.000, 1.257	145.000, 1.180	145.000, 1.221	145.000, 1.326	145.000, 1.227	145.000, 1.196	145.000, 1.237	145.000, 1.272	145.000, 1.219	145.000, 1.154	145.000, 1.191	145.000, 1.988	145.000, 1.811	145.000, 1.869
727	145.200, 1.315	145.200, 1.257	145.200, 1.180	145.200, 1.221	145.200, 1.327	145.200, 1.227	145.200, 1.196	145.200, 1.237	145.200, 1.272	145.200, 1.219	145.200, 1.154	145.200, 1.191	145.200, 1.988	145.200, 1.811	145.200, 1.869
728	145.400, 1.315	145.400, 1.257	145.400, 1.180	145.400, 1.222	145.400, 1.327	145.400, 1.227	145.400, 1.196	145.400, 1.237	145.400, 1.272	145.400, 1.219	145.400, 1.154	145.400, 1.191	145.400, 1.989	145.400, 1.812	145.400, 1.869
729	145.600, 1.316	145.600, 1.257	145.600, 1.180	145.600, 1.222	145.600, 1.327	145.600, 1.228	145.600, 1.196	145.600, 1.238	145.600, 1.272	145.600, 1.220	145.600, 1.154	145.600, 1.191	145.600, 1.989	145.600, 1.812	145.600, 1.870
730	145.800, 1.316	145.800, 1.257	145.800, 1.180	145.800, 1.222	145.800, 1.328	145.800, 1.228	145.800, 1.196	145.800, 1.238	145.800, 1.272	145.800, 1.220	145.800, 1.155	145.800, 1.191	145.800, 1.990	145.800, 1.813	145.800, 1.870
731	146.000, 1.316	146.000, 1.257	146.000, 1.180	146.000, 1.222	146.000, 1.328	146.000, 1.228	146.000, 1.197	146.000, 1.238	146.000, 1.272	146.000, 1.220	146.000, 1.155	146.000, 1.191	146.000, 1.991	146.000, 1.813	146.000, 1.871
732	146.200, 1.316	146.200, 1.257	146.200, 1.180	146.200, 1.222	146.200, 1.327	146.200, 1.228	146.200, 1.197	146.200, 1.238	146.200, 1.272	146.200, 1.220	146.200, 1.155	146.200, 1.191	146.200, 1.991	146.200, 1.814	146.200, 1.872
733	146.400, 1.317	146.400, 1.257	146.400, 1.180	146.400, 1.222	146.400, 1.327	146.400, 1.229	146.400, 1.197	146.400, 1.239	146.400, 1.272	146.400, 1.220	146.400, 1.155	146.400, 1.191	146.400, 1.992	146.400, 1.814	146.400, 1.873
734	146.600, 1.317	146.600, 1.257	146.600, 1.180	146.600, 1.222	146.600, 1.327	146.600, 1.229	146.600, 1.197	146.600, 1.239	146.600, 1.272	146.600, 1.220	146.600, 1.155	146.600, 1.191	146.600, 1.992	146.600, 1.814	146.600, 1.874
735	146.800, 1.317	146.800, 1.256	146.800, 1.180	146.800, 1.222	146.800, 1.326	146.800, 1.229	146.800, 1.197	146.800, 1.240	146.800, 1.272	146.800, 1.220	146.800, 1.155	146.800, 1.191	146.800, 1.993	146.800, 1.814	146.800, 1.874
736	147.000, 1.317	147.000, 1.257	147.000, 1.180	147.000, 1.222	147.000, 1.326	147.000, 1.229	147.000, 1.197	147.000, 1.240	147.000, 1.273	147.000, 1.219	147.000, 1.156	147.000, 1.191	147.000, 1.993	147.000, 1.814	147.000, 1.875
737	147.200, 1.318	147.200, 1.257	147.200, 1.181	147.200, 1.222	147.200, 1.327	147.200, 1.230	147.200, 1.197	147.200, 1.240	147.200, 1.273	147.200, 1.219	147.200, 1.156	147.200, 1.191	147.200, 1.994	147.200, 1.814	147.200, 1.875
738	147.400, 1.318	147.400, 1.257	147.400, 1.181	147.400, 1.222	147.400, 1.327	147.400, 1.230	147.400, 1.197	147.400, 1.241	147.400, 1.274	147.400, 1.219	147.400, 1.156	147.400, 1.192	147.400, 1.994	147.400, 1.814	147.400, 1.875
739	147.600, 1.318	147.600, 1.257	147.600, 1.182	147.600, 1.222	147.600, 1.327	147.600, 1.230	147.600, 1.197	147.600, 1.241	147.600, 1.274	147.600, 1.219	147.600, 1.156	147.600, 1.192	147.600, 1.994	147.600, 1.814	147.600, 1.876
740	147.800, 1.318	147.800, 1.258	147.800, 1.182	147.800, 1.223	147.800, 1.327	147.800, 1.230	147.800, 1.197	147.800, 1.241	147.800, 1.274	147.800, 1.219	147.800, 1.156	147.800, 1.192	147.800, 1.994	147.800, 1.814	147.800, 1.876
741	148.000, 1.318	148.000, 1.258	148.000, 1.182	148.000, 1.223	148.000, 1.327	148.000, 1.230	148.000, 1.198	148.000, 1.241	148.000, 1.274	148.000, 1.220	148.000, 1.156	148.000, 1.192	148.000, 1.995	148.000, 1.815	148.000, 1.876
742	148.200, 1.318	148.200, 1.259	148.200, 1.183	148.200, 1.223	148.200, 1.327	148.200, 1.230	148.200, 1.198	148.200, 1.241	148.200, 1.274	148.200, 1.220	148.200, 1.156	148.200, 1.193	148.200, 1.995	148.200, 1.815	148.200, 1.877
743	148.400, 1.318	148.400, 1.259	148.400, 1.183	148.400, 1.224	148.400, 1.328	148.400, 1.231	148.400, 1.198	148.400, 1.241	148.400, 1.274	148.400, 1.220	148.400, 1.156	148.400, 1.193	148.400, 1.995	148.400, 1.815	148.400, 1.877
744	148.600, 1.318	148.600, 1.259	148.600, 1.183	148.600, 1.224	148.600, 1.328	148.600, 1.231	148.600, 1.199	148.600, 1.241	148.600, 1.274	148.600, 1.220	148.600, 1.156	148.600, 1.194	148.600, 1.996	148.600, 1.815	148.600, 1.878
745	148.800, 1.318	148.800, 1.260	148.800, 1.183	148.800, 1.224	148.800, 1.328	148.800, 1.231	148.800, 1.199	148.800, 1.241	148.800, 1.274	148.800, 1.220	148.800, 1.156	148.800, 1.194	148.800, 1.996	148.800, 1.815	148.800, 1.878
746	149.000, 1.318	149.000, 1.260	149.000, 1.184	149.000, 1.224	149.000, 1.329	149.000, 1.231	149.000, 1.199	149.000, 1.241	149.000, 1.274	149.000, 1.221	149.000, 1.156	149.000, 1.194	149.000, 1.996	149.000, 1.815	149.000, 1.879
747	149.200, 1.318	149.200, 1.260	149.200, 1.184	149.200, 1.225	149.200, 1.329	149.200, 1.231	149.200, 1.200	149.200, 1.241	149.200, 1.274	149.200, 1.220	149.200, 1.156	149.200, 1.195	149.200, 1.997	149.200, 1.815	149.200, 1.879
748	149.400, 1.318	149.400, 1.261	149.400, 1.184	149.400, 1.225	149.400, 1.330	149.400, 1.231	149.400, 1.200	149.400, 1.241	149.400, 1.275	149.400, 1.220	149.400, 1.157	149.400, 1.195	149.400, 1.997	149.400, 1.815	149.400, 1.879
749	149.600, 1.318	149.600, 1.261	149.600, 1.184	149.600, 1.225	149.600, 1.330	149.600, 1.231	149.600, 1.200	149.600, 1.241	149.600, 1.275	149.600, 1.220	149.600, 1.157	149.600, 1.196	149.600, 1.997	149.600, 1.816	149.600, 1.880
750	149.800, 1.318	149.800, 1.261	149.800, 1.184	149.800, 1.225	149.800, 1.330	149.800, 1.231	149.800, 1.200	149.800, 1.241	149.800, 1.275	149.800, 1.220	149.800, 1.157	149.800, 1.196	149.800, 1.998	149.800, 1.816	149.800, 1.880
751	150.000, 1.318	150.000, 1.261	150.000, 1.184	150.000, 1.225	150.000, 1.330	150.000, 1.231	150.000, 1.200	150.000, 1.241	150.000, 1.275	150.000, 1.220	150.000, 1.157	150.000, 1.196	150.000, 1.998	150.000, 1.816	150.000, 1.880
752	150.200, 1.320	150.200, 1.263	150.200, 1.187	150.200, 1.227	150.200, 1.332	150.200, 1.233	150.200, 1.203	150.200, 1.242	150.200, 1.275	150.200, 1.223	150.200, 1.159	150.200, 1.198	150.200, 1.998	150.200, 1.816	150.200, 1.881
753	150.400, 1.321	150.400, 1.266	150.400, 1.190	150.400, 1.229	150.400, 1.333	150.400, 1.235	150.400, 1.206	150.400, 1.244	150.400, 1.275	150.400, 1.225	150.400, 1.161	150.400, 1.199	150.400, 1.999	150.400, 1.817	150.400, 1.882
754	150.600, 1.322	150.600, 1.268	150.600, 1.194	150.600, 1.231	150.600, 1.334	150.600, 1.236	150.600, 1.209	150.600, 1.246	150.600, 1.275	150.600, 1.227	150.600, 1.163	150.600, 1.201	150.600, 1.998	150.600, 1.817	150.600, 1.882
755	150.800, 1.323	150.800, 1.271	150.800, 1.198	150.800, 1.233	150.800, 1.336	150.800, 1.238	150.800, 1.212	150.800, 1.247	150.800, 1.275	150.800, 1.229	150.800, 1.165	150.800, 1.203	150.800, 1.998	150.800, 1.818	150.800, 1.882
756	151.000, 1.325	151.000, 1.273	151.000, 1.201	151.000, 1.235	151.000, 1.337	151.000, 1.240	151.000, 1.214	151.000, 1.249	151.000, 1.275	151.000, 1.231	151.000, 1.166	151.000, 1.205	151.000, 1.997	151.000, 1.818	151.000, 1.882
757	151.200, 1.325	151.200, 1.275	151.200, 1.204	151.200, 1.236	151.200, 1.338	151.200, 1.241	151.200, 1.217	151.200, 1.250	151.200, 1.275	151.200, 1.233	151.200, 1.168	151.200, 1.206	151.200, 1.996	151.200, 1.818	151.200, 1.882
758	151.400, 1.326	151.400, 1.278	151.400, 1.207	151.400, 1.238	151.400, 1.339	151.400, 1.243	151.400, 1.219	151.400, 1.250	151.400, 1.275	151.400, 1.234	151.400, 1.169	151.400, 1.207	151.400, 1.995	151.400, 1.817	151.400, 1.880
759	151.600, 1.327	151.600, 1.280	151.600, 1.209	151.600, 1.239	151.600, 1.340	151.600, 1.244	151.600, 1.220	151.600, 1.251	151.600, 1.275	151.600, 1.236	151.600, 1.170	151.600, 1.208	151.600, 1.993	151.600, 1.816	151.600, 1.879
760	151.800, 1.328	151.800, 1.281	151.800, 1.211	151.800, 1.240	151.800, 1.340	151.800, 1.244	151.800, 1.222	151.800, 1.251	151.800, 1.275	151.800, 1.236	151.800, 1.171	151.800, 1.209	151.800, 1.990	151.800, 1.815	151.800, 1.876
761	152.000, 1.328	152.000, 1.282	152.000, 1.212	152.000, 1.241	152.000, 1.341	152.000, 1.245	152.000, 1.222	152.000, 1.250	152.000, 1.275	152.000, 1.237	152.000, 1.172	152.000, 1.209	152.000, 1.987	152.000, 1.813	152.000, 1.874
762	152.200, 1.329	152.200, 1.283	152.200, 1.211	152.200, 1.241	152.200, 1.340	152.200, 1.245	152.200, 1.223	152.200, 1.249	152.200, 1.275	152.200, 1.237	152.200, 1.172	152.200, 1.209	152.200, 1.984	152.200, 1.811	152.200, 1.870
763	152.400, 1.329	152.400, 1.283	152.400, 1.211	152.400, 1.241	152.400, 1.340	152.400, 1.244	152.400, 1.222	152.400, 1.249	152.400, 1.275	152.400, 1.236	152.400, 1.172	152.400, 1.208	152.400, 1.980	152.400, 1.808	152.400, 1.866
764	152.600, 1.329	152.600, 1.283	152.600, 1.211	152.600, 1.241	152.600, 1.340	152.600, 1.244	152.600, 1.223	152.600, 1.249	152.600, 1.274	152.600, 1.236	152.600, 1.172	152.600, 1.208	152.600, 1.976	152.600, 1.805	152.600, 1.862
765	152.800, 1.329	152.800, 1.283	152.800, 1.211	152.800, 1.241	152.800, 1.340	152.800, 1.244	152.800, 1.222	152.800, 1.248	152.800, 1.274	152.800, 1.236	152.800, 1.172	152.800, 1.208	152.800, 1.972	152.800, 1.802	152.800, 1.858
766	153.000, 1.329	153.000, 1.283	153.000, 1.211	153.000, 1.241	153.000, 1.339	153.000, 1.243	153.000, 1.222	153.000, 1.248	153.000, 1.273	153.000, 1.236	153.000, 1.172	153.000, 1.207	153.000, 1.968	153.000, 1.799	153.000, 1.854
767	153.200, 1.329	153.200, 1.283	153.200, 1.210	153.200, 1.241	153.200, 1.339	153.200, 1.243	153.200, 1.222	153.200, 1.247	153.200, 1.273	153.200, 1.235	153.200, 1.172	153.200, 1.207	153.200, 1.964	153.200, 1.795	153.200, 1.850
768	153.400, 1.329	153.400, 1.283	153.400, 1.210	153.400, 1.241	153.400, 1.338	153.400, 1.242	153.400, 1.222	153.400, 1.247	153.400, 1.273	153.400, 1.235	153.400, 1.172	153.400, 1.207	153.400, 1.960	153.400, 1.792	153.400, 1.846
769	153.600, 1.329	153.600, 1.283	153.600, 1.210	153.600, 1.241	153.600, 1.337	153.600, 1.242	153.600, 1.222	153.600, 1.246	153.600, 1.273	153.600, 1.235	153.600, 1.172	153.600, 1.207	153.600, 1.956	153.600, 1.789	153.600, 1.842
770	153.800, 1.329	153.800, 1.283	153.800, 1.210	153.800, 1.241	153.800, 1.336	153.800, 1.241	153.800, 1.221	153.800, 1.246	153.800, 1.272	153.800, 1.235	153.800, 1.171	153.800, 1.207	153.800, 1.953	153.800, 1.786	153.800, 1.838
771	154.000, 1.329	154.000, 1.282	154.000, 1.209	154.000, 1.241	154.000, 1.336	154.000, 1.241	154.000, 1.221	154.000, 1.245	154.000, 1.272	154.000, 1.235	154.000, 1.171	154.000, 1.206	154.000, 1.949	154.000, 1.783	154.000, 1.834
772	154.200, 1.329	154.200, 1.282	154.200, 1.209	154.200, 1.240	154.200, 1.335	154.200, 1.241	154.200, 1.221	154.200, 1.244	154.200, 1.271	154.200, 1.234	154.200, 1.171	154.200, 1.206	154.200, 1.945	154.200, 1.779	154.200, 1.831
773	154.400, 1.328	154.400, 1.282	154.400, 1.209	154.400, 1.240	154.400, 1.335	154.400, 1.240	154.400, 1.221	154.400, 1.244	154.400, 1.271	154.400, 1.234	154.400, 1.170	154.400, 1.206	154.400, 1.941	154.400, 1.776	154.400, 1.827
774	154.600, 1.328	154.600, 1.282	154.600, 1.209	154.600, 1.240	154.600, 1.334	154.600, 1.240	154.600, 1.220	154.600, 1.243	154.600, 1.270	154.600, 1.234	154.600, 1.170	154.600, 1.206	154.600, 1.937	154.600, 1.773	154.600, 1.824
775	154.800, 1.328	154.800, 1.282	154.800, 1.210	154.800, 1.239	154.800, 1.333	154.800, 1.240	154.800, 1.220	154.800, 1.242	154.800, 1.269	154.800, 1.233	154.800, 1.169	154.800, 1.205	154.800, 1.933	154.800, 1.770	154.800, 1.820
776	155.000, 1.328	155.000, 1.282	155.000, 1.210	155.000, 1.239	155.000, 1.333	155.000, 1.240	155.000, 1.220	155.000, 1.242	155.000, 1.269	155.000, 1.233	155.000, 1.169	155.000, 1.205	155.000, 1.929	155.000, 1.767	155.000, 1.817
777	155.200, 1.327	155.200, 1.282	155.200, 1.210	155.200, 1.239	155.200, 1.332	155.200, 1.239	155.200, 1.219	155.200, 1.241	155.200, 1.268	155.200, 1.233	155.200, 1.169	155.200, 1.204	155.200, 1.925	155.200, 1.764	155.200, 1.814
778	155.400, 1.327	155.400, 1.282	155.400, 1.210	155.400, 1.239	155.400, 1.331	155.400, 1.239	155.400, 1.219	155.400, 1.241	155.400, 1.267	155.400, 1.232	155.400, 1.169	155.400, 1.203	155.400, 1.921	155.400, 1.761	155.400, 1.810
779	155.600, 1.327	155.600, 1.282	155.600, 1.211	155.600, 1.239	155.600, 1.331	155.600, 1.239	155.600, 1.219	155.600, 1.240	155.600, 1.266	155.600, 1.232	155.600, 1.169	155.600, 1.203	155.600, 1.917	155.600, 1.757	155.600, 1.807
780	155.800, 1.327	155.800, 1.282	155.800, 1.211	155.800, 1.238	155.800, 1.330	155.800, 1.238	155.800, 1.218	155.800, 1.239	155.800, 1.266	155.800, 1.231	155.800, 1.169	155.800, 1.202	155.800, 1.912	155.800, 1.754	155.800, 1.803
781	156.000, 1.327	156.000, 1.282	156.000, 1.211	156.000, 1.238	156.000, 1.330	156.000, 1.238	156.000, 1.218	156.000, 1.239	156.000, 1.265	156.000, 1.231	156.000, 1.169	156.000, 1.202	156.000, 1.908	156.000, 1.751	156.000, 1.799
782	156.200, 1.327	156.200, 1.282	156.200, 1.211	156.200, 1.238	156.200, 1.330	156.200, 1.237	156.200, 1.218	156.200, 1.238	156.200, 1.265	156.200, 1.231	156.200, 1.169	156.200, 1.201	156.200, 1.904	156.200, 1.748	156.200, 1.796
783	156.400, 1.327	156.400, 1.282	156.400, 1.210	156.400, 1.237	156.400, 1.329	156.400, 1.237	156.400, 1.218	156.400, 1.238	156.400, 1.264	156.400, 1.231	156.400, 1.169	156.400, 1.201	156.400, 1.900	156.400, 1.745	156.400, 1.792
784	156.600, 1.327	156.600, 1.282	156.600, 1.210	156.600, 1.237	156.600, 1.329	156.600, 1.237	156.600, 1.217	156.600, 1.237	156.600, 1.264	156.600, 1.230	156.600, 1.169	156.600, 1.200	156.600, 1.896	156.600, 1.741	156.600, 1.788
785	156.800, 1.326	156.800, 1.282	156.800, 1.210	156.800, 1.237	156.800, 1.329	156.800, 1.237	156.800, 1.217	156.800, 1.237	156.800, 1.264	156.800, 1.230	156.800, 1.168	156.800, 1.200	156.800, 1.892	156.800, 1.738	156.800, 1.784
786	157.000, 1.326	157.000, 1.282	157.000, 1.210	157.000, 1.236	157.000, 1.329	157.000, 1.236	157.000, 1.216	157.000, 1.236	157.000, 1.263	157.000, 1.230	157.000, 1.168	157.000, 1.199	157.000, 1.888	157.000, 1.735	157.000, 1.780
787	157.200, 1.326	157.200, 1.282	157.200, 1.210	157.200, 1.236	157.200, 1.329	157.200, 1.236	157.200, 1.216	157.200, 1.236	157.200, 1.263	157.200, 1.229	157.200, 1.168	157.200, 1.199	157.200, 1.884	157.200, 1.731	157.200, 1.776
788	157.400, 1.326	157.400, 1.282	157.400, 1.210	157.400, 1.236	157.400, 1.328	157.400, 1.236	157.400, 1.215	157.400, 1.235	157.400, 1.263	157.400, 1.229	157.400, 1.167	157.400, 1.198	157.400, 1.880	157.400, 1.728	157.400, 1.772
789	157.600, 1.326	157.600, 1.281	157.600, 1.210	157.600, 1.235	157.600, 1.328	157.600, 1.235	157.600, 1.215	157.600, 1.235	157.600, 1.263	157.600, 1.229	157.600, 1.167	157.600, 1.198	157.600, 1.877	157.600, 1.725	157.600, 1.768
790	157.800, 1.326	157.800, 1.281	157.800, 1.209	157.800, 1.234	157.800, 1.327	157.800, 1.235	157.800, 1.214	157.800, 1.234	157.800, 1.263	157.800, 1.228	157.800, 1.167	157.800, 1.197	157.800, 1.873	157.800, 1.721	157.800, 1.765
791	158.000, 1.326	158.000, 1.280	158.000, 1.209	158.000, 1.234	158.000, 1.327	158.000, 1.235	158.000, 1.214	158.000, 1.234	158.000, 1.262	158.000, 1.228	158.000, 1.166	158.000, 1.197	158.000, 1.870	158.000, 1.718	158.000, 1.761
792	158.200, 1.325	158.200, 1.280	158.200, 1.209	158.200, 1.234	158.200, 1.326	158.200, 1.235	158.200, 1.214	158.200, 1.233	158.200, 1.262	158.200, 1.228	158.200, 1.166	158.200, 1.196	158.200, 1.866	158.200, 1.714	158.200, 1.758
793	158.400, 1.325	158.400, 1.280	158.400, 1.209	158.400, 1.233	158.400, 1.326	158.400, 1.235	158.400, 1.214	158.400, 1.233	158.400, 1.261	158.400, 1.228	158.400, 1.166	158.400, 1.196	158.400, 1.863	158.400, 1.710	158.400, 1.755
794	158.600, 1.325	158.600, 1.279	158.600, 1.209	158.600, 1.233	158.600, 1.326	158.600, 1.234	158.600, 1.214	158.600, 1.232	158.600, 1.260	158.600, 1.228	158.600, 1.166	158.600, 1.195	158.600, 1.860	158.600, 1.707	158.600, 1.751
795	158.800, 1.324	158.800, 1.279	158.800, 1.209	158.800, 1.233	158.800, 1.325	158.800, 1.234	158.800, 1.213	158.800, 1.232	158.800, 1.260	158.800, 1.228	158.800, 1.165	158.800, 1.195	158.800, 1.856	158.800, 1.704	158.800, 1.748
796	159.000, 1.324	159.000, 1.279	159.000, 1.210	159.000, 1.233	159.000, 1.324	159.000, 1.234	159.000, 1.213	159.000, 1.232	159.000, 1.259	159.000, 1.228	159.000, 1.165	159.000, 1.194	159.000, 1.853	159.000, 1.700	159.000, 1.745
797	159.200, 1.324	159.200, 1.279	159.200, 1.210	159.200, 1.232	159.200, 1.324	159.200, 1.234	159.200, 1.213	159.200, 1.231	159.200, 1.259	159.200, 1.228	159.200, 1.165	159.200, 1.194	159.200, 1.850	159.200, 1.697	159.200, 1.741
798	159.400, 1.324	159.400, 1.279	159.400, 1.210	159.400, 1.232	159.400, 1.323	159.400, 1.233	159.400, 1.213	159.400, 1.231	159.400, 1.258	159.400, 1.228	159.400, 1.165	159.400, 1.193	159.400, 1.847	159.400, 1.694	159.400, 1.738
799	159.600, 1.323	159.600, 1.278	159.600, 1.210	159.600, 1.232	159.600, 1.323	159.600, 1.233	159.600, 1.213	159.600, 1.231	159.600, 1.258	159.600, 1.227	159.600, 1.165	159.600, 1.193	159.600, 1.843	159.600, 1.691	159.600, 1.735
800	159.800, 1.323	159.800, 1.278	159.800, 1.210	159.800, 1.232	159.800, 1.322	159.800, 1.232	159.800, 1.213	159.800, 1.230	159.800, 1.258	159.800, 1.227	159.800, 1.164	159.800, 1.192	159.800, 1.840	159.800, 1.688	159.800, 1.731
801	160.000, 1.323	160.000, 1.278	160.000, 1.209	160.000, 1.232	160.000, 1.322	160.000, 1.232	160.000, 1.213	160.000, 1.230	160.000, 1.258	160.000, 1.227	160.000, 1.164	160.000, 1.192	160.000, 1.837	160.000, 1.685	160.000, 1.728
802	160.200, 1.322	160.200, 1.278	160.200, 1.209	160.200, 1.232	160.200, 1.321	160.200, 1.232	160.200, 1.213	160.200, 1.230	160.200, 1.257	160.200, 1.226	160.200, 1.164	160.200, 1.192	160.200, 1.834	160.200, 1.683	160.200, 1.725
803	160.400, 1.322	160.400, 1.278	160.400, 1.209	160.400, 1.233	160.400, 1.321	160.400, 1.231	160.400, 1.212	160.400, 1.229	160.400, 1.257	160.400, 1.226	160.400, 1.163	160.400, 1.191	160.400, 1.831	160.400, 1.680	160.400, 1.721
804	160.600, 1.321	160.600, 1.277	160.600, 1.209	160.600, 1.233	160.600, 1.321	160.600, 1.231	160.600, 1.212	160.600, 1.229	160.600, 1.257	160.600, 1.225	160.600, 1.163	160.600, 1.191	160.600, 1.828	160.600, 1.678	160.600, 1.718
805	160.800, 1.321	160.800, 1.277	160.800, 1.209	160.800, 1.233	160.800, 1.320	160.800, 1.230	160.800, 1.212	160.800, 1.229	160.800, 1.257	160.800, 1.224	160.800, 1.163	160.800, 1.191	160.800, 1.824	160.800, 1.675	160.800, 1.715
806	161.000, 1.320	161.000, 1.277	161.000, 1.209	161.000, 1.233	161.000, 1.320	161.000, 1.230	161.000, 1.211	161.000, 1.229	161.000, 1.256	161.000, 1.224	161.000, 1.162	161.000, 1.191	161.000, 1.821	161.000, 1.673	161.000, 1.712
807	161.200, 1.320	161.200, 1.276	161.200, 1.208	161.200, 1.232	161.200, 1.320	161.200, 1.229	161.200, 1.210	161.200, 1.229	161.200, 1.256	161.200, 1.223	161.200, 1.162	161.200, 1.190	161.200, 1.818	161.200, 1.670	161.200, 1.710
808	161.400, 1.320	161.400, 1.276	161.400, 1.208	161.400, 1.232	161.400, 1.319	161.400, 1.229	161.400, 1.210	161.400, 1.229	161.400, 1.255	161.400, 1.223	161.400, 1.162	161.400, 1.190	161.400, 1.815	161.400, 1.668	161.400, 1.707
809	161.600, 1.319	161.600, 1.276	161.600, 1.208	161.600, 1.231	161.600, 1.319	161.600, 1.229	161.600, 1.209	161.600, 1.229	161.600, 1.255	161.600, 1.223	161.600, 1.162	161.600, 1.190	161.600, 1.812	161.600, 1.665	161.600, 1.704
810	161.800, 1.319	161.800, 1.275	161.800, 1.207	161.800, 1.231	161.800, 1.318	161.800, 1.228	161.800, 1.209	161.800, 1.229	161.800, 1.255	161.800, 1.223	161.800, 1.162	161.800, 1.190	161.800, 1.808	161.800, 1.662	161.800, 1.701
811	162.000, 1.319	162.000, 1.275	162.000, 1.207	162.000, 1.231	162.000, 1.318	162.000, 1.228	162.000, 1.209	162.000, 1.228	162.000, 1.254	162.000, 1.223	162.000, 1.162	162.000, 1.190	162.000, 1.805	162.000, 1.659	162.000, 1.698
812	162.200, 1.318	162.200, 1.275	162.200, 1.207	162.200, 1.230	162.200, 1.318	162.200, 1.227	162.200, 1.208	162.200, 1.228	162.200, 1.254	162.200, 1.222	162.200, 1.162	162.200, 1.190	162.200, 1.802	162.200, 1.656	162.200, 1.695
813	162.400, 1.318	162.400, 1.275	162.400, 1.206	162.400, 1.230	162.400, 1.317	162.400, 1.227	162.400, 1.208	162.400, 1.227	162.400, 1.253	162.400, 1.222	162.400, 1.162	162.400, 1.189	162.400, 1.799	162.400, 1.653	162.400, 1.692
814	162.600, 1.318	162.600, 1.274	162.600, 1.206	162.600, 1.229	162.600, 1.317	162.600, 1.227	162.600, 1.208	162.600, 1.227	162.600, 1.253	162.600, 1.222	162.600, 1.162	162.600, 1.189	162.600, 1.796	162.600, 1.650	162.600, 1.690
815	162.800, 1.318	162.800, 1.274	162.800, 1.206	162.800, 1.229	162.800, 1.317	162.800, 1.227	162.800, 1.208	162.800, 1.226	162.800, 1.252	162.800, 1.222	162.800, 1.162	162.800, 1.188	162.800, 1.793	162.800, 1.648	162.800, 1.687
816	163.000, 1.318	163.000, 1.273	163.000, 1.207	163.000, 1.228	163.000, 1.316	163.000, 1.227	163.000, 1.208	163.000, 1.225	163.000, 1.252	163.000, 1.222	163.000, 1.162	163.000, 1.188	163.000, 1.789	163.000, 1.645	163.000, 1.684
817	163.200, 1.318	163.200, 1.273	163.200, 1.207	163.200, 1.228	163.200, 1.316	163.200, 1.227	163.200, 1.208	163.200, 1.225	163.200, 1.251	163.200, 1.222	163.200, 1.161	163.200, 1.187	163.200, 1.786	163.200, 1.642	163.200, 1.680
818	163.400, 1.318	163.400, 1.273	163.400, 1.206	163.400, 1.227	163.400, 1.316	163.400, 1.227	163.400, 1.208	163.400, 1.224	163.400, 1.251	163.400, 1.221	163.400, 1.161	163.400, 1.187	163.400, 1.783	163.400, 1.640	163.400, 1.678
819	163.600, 1.318	163.600, 1.272	163.600, 1.206	163.600, 1.227	163.600, 1.315	163.600, 1.227	163.600, 1.207	163.600, 1.224	163.600, 1.250	163.600, 1.221	163.600, 1.161	163.600, 1.186	163.600, 1.780	163.600, 1.637	163.600, 1.675
820	163.800, 1.318	163.800, 1.272	163.800, 1.206	163.800, 1.227	163.800, 1.315	163.800, 1.226	163.800, 1.207	163.800, 1.223	163.800, 1.250	163.800, 1.220	163.800, 1.160	163.800, 1.186	163.800, 1.777	163.800, 1.635	163.800, 1.672
821	164.000, 1.318	164.000, 1.272	164.000, 1.206	164.000, 1.227	164.000, 1.315	164.000, 1.226	164.000, 1.207	164.000, 1.223	164.000, 1.249	164.000, 1.220	164.000, 1.160	164.000, 1.185	164.000, 1.774	164.000, 1.632	164.000, 1.669
822	164.200, 1.318	164.200, 1.271	164.200, 1.206	164.200, 1.227	164.200, 1.315	164.200, 1.226	164.200, 1.206	164.200, 1.223	164.200, 1.248	164.200, 1.219	164.200, 1.160	164.200, 1.185	164.200, 1.771	164.200, 1.630	164.200, 1.667
823	164.400, 1.317	164.400, 1.271	164.400, 1.206	164.400, 1.227	164.400, 1.314	164.400, 1.225	164.400, 1.206	164.400, 1.223	164.400, 1.248	164.400, 1.218	164.400, 1.159	164.400, 1.185	164.400, 1.769	164.400, 1.627	164.400, 1.664
824	164.600, 1.317	164.600, 1.271	164.600, 1.205	164.600, 1.227	164.600, 1.314	164.600, 1.225	164.600, 1.206	164.600, 1.223	164.600, 1.247	164.600, 1.218	164.600, 1.159	164.600, 1.184	164.600, 1.766	164.600, 1.624	164.600, 1.661
825	164.800, 1.316	164.800, 1.270	164.800, 1.205	164.800, 1.227	164.800, 1.313	164.800, 1.224	164.800, 1.205	164.800, 1.223	164.800, 1.247	164.800, 1.217	164.800, 1.158	164.800, 1.184	164.800, 1.763	164.800, 1.622	164.800, 1.659
826	165.000, 1.316	165.000, 1.270	165.000, 1.205	165.000, 1.227	165.000, 1.313	165.000, 1.224	165.000, 1.204	165.000, 1.223	165.000, 1.246	165.000, 1.217	165.000, 1.158	165.000, 1.184	165.000, 1.761	165.000, 1.619	165.000, 1.657
827	165.200, 1.316	165.200, 1.270	165.200, 1.204	165.200, 1.227	165.200, 1.312	165.200, 1.224	165.200, 1.204	165.200, 1.222	165.200, 1.246	165.200, 1.217	165.200, 1.157	165.200, 1.184	165.200, 1.758	165.200, 1.617	165.200, 1.654
828	165.400, 1.315	165.400, 1.270	165.400, 1.204	165.400, 1.227	165.400, 1.312	165.400, 1.223	165.400, 1.203	165.400, 1.222	165.400, 1.246	165.400, 1.216	165.400, 1.157	165.400, 1.184	165.400, 1.755	165.400, 1.614	165.400, 1.651
829	165.600, 1.315	165.600, 1.270	165.600, 1.204	165.600, 1.227	165.600, 1.311	165.600, 1.223	165.600, 1.203	165.600, 1.221	165.600, 1.246	165.600, 1.216	165.600, 1.156	165.600, 1.184	165.600, 1.752	165.600, 1.612	165.600, 1.649
830	165.800, 1.314	165.800, 1.270	165.800, 1.203	165.800, 1.227	165.800, 1.311	165.800, 1.223	165.800, 1.203	165.800, 1.220	165.800, 1.246	165.800, 1.216	165.800, 1.156	165.800, 1.183	165.800, 1.749	165.800, 1.609	165.800, 1.646
831	166.000, 1.314	166.000, 1.269	166.000, 1.203	166.000, 1.227	166.000, 1.311	166.000, 1.223	166.000, 1.203	166.000, 1.220	166.000, 1.246	166.000, 1.216	166.000, 1.155	166.000, 1.183	166.000, 1.747	166.000, 1.607	166.000, 1.643
832	166.200, 1.313	166.200, 1.269	166.200, 1.203	166.200, 1.227	166.200, 1.310	166.200, 1.223	166.200, 1.202	166.200, 1.219	166.200, 1.245	166.200, 1.216	166.200, 1.155	166.200, 1.183	166.200, 1.744	166.200, 1.605	166.200, 1.641
833	166.400, 1.313	166.400, 1.269	166.400, 1.202	166.400, 1.227	166.400, 1.310	166.400, 1.223	166.400, 1.202	166.400, 1.218	166.400, 1.245	166.400, 1.216	166.400, 1.154	166.400, 1.182	166.400, 1.741	166.400, 1.603	166.400, 1.638
834	166.600, 1.313	166.600, 1.269	166.600, 1.202	166.600, 1.226	166.600, 1.310	166.600, 1.223	166.600, 1.202	166.600, 1.218	166.600, 1.245	166.600, 1.216	166.600, 1.154	166.600, 1.181	166.600, 1.739	166.600, 1.601	166.600, 1.636
835	166.800, 1.313	166.800, 1.268	166.800, 1.202	166.800, 1.226	166.800, 1.310	166.800, 1.223	166.800, 1.202	166.800, 1.217	166.800, 1.244	166.800, 1.216	166.800, 1.154	166.800, 1.181	166.800, 1.736	166.800, 1.599	166.800, 1.633
836	167.000, 1.313	167.000, 1.268	167.000, 1.202	167.000, 1.225	167.000, 1.309	167.000, 1.222	167.000, 1.202	167.000, 1.217	167.000, 1.244	167.000, 1.216	167.000, 1.153	167.000, 1.181	167.000, 1.733	167.000, 1.596	167.000, 1.631
837	167.200, 1.313	167.200, 1.268	167.200, 1.202	167.200, 1.225	167.200, 1.309	167.200, 1.222	167.200, 1.201	167.200, 1.217	167.200, 1.244	167.200, 1.215	167.200, 1.153	167.200, 1.180	167.200, 1.730	167.200, 1.594	167.200, 1.628
838	167.400, 1.313	167.400, 1.267	167.400, 1.202	167.400, 1.224	167.400, 1.309	167.400, 1.222	167.400, 1.201	167.400, 1.216	167.400, 1.244	167.400, 1.215	167.400, 1.153	167.400, 1.180	167.400, 1.728	167.400, 1.592	167.400, 1.626
839	167.600, 1.313	167.600, 1.267	167.600, 1.202	167.600, 1.223	167.600, 1.309	167.600, 1.221	167.600, 1.201	167.600, 1.216	167.600, 1.244	167.600, 1.215	167.600, 1.153	167.600, 1.180	167.600, 1.725	167.600, 1.590	167.600, 1.624
840	167.800, 1.313	167.800, 1.267	167.800, 1.202	167.800, 1.223	167.800, 1.309	167.800, 1.221	167.800, 1.200	167.800, 1.216	167.800, 1.243	167.800, 1.215	167.800, 1.153	167.800, 1.179	167.800, 1.723	167.800, 1.587	167.800, 1.622
841	168.000, 1.313	168.000, 1.267	168.000, 1.202	168.000, 1.222	168.000, 1.309	168.000, 1.220	168.000, 1.200	168.000, 1.216	168.000, 1.243	168.000, 1.214	168.000, 1.153	168.000, 1.179	168.000, 1.720	168.000, 1.585	168.000, 1.620
842	168.200, 1.313	168.200, 1.266	168.200, 1.202	168.200, 1.222	168.200, 1.309	168.200, 1.220	168.200, 1.200	168.200, 1.215	168.200, 1.243	168.200, 1.213	168.200, 1.152	168.200, 1.178	168.200, 1.717	168.200, 1.582	168.200, 1.618
843	168.400, 1.313	168.400, 1.266	168.400, 1.202	168.400, 1.221	168.400, 1.308	168.400, 1.219	168.400, 1.200	168.400, 1.215	168.400, 1.242	168.400, 1.213	168.400, 1.152	168.400, 1.178	168.400, 1.715	168.400, 1.580	168.400, 1.615
844	168.600, 1.312	168.600, 1.266	168.600, 1.202	168.600, 1.221	168.600, 1.308	168.600, 1.218	168.600, 1.200	168.600, 1.215	168.600, 1.242	168.600, 1.212	168.600, 1.152	168.600, 1.178	168.600, 1.712	168.600, 1.578	168.600, 1.613
845	168.800, 1.312	168.800, 1.266	168.800, 1.202	168.800, 1.221	168.800, 1.308	168.800, 1.218	168.800, 1.200	168.800, 1.215	168.800, 1.242	168.800, 1.212	168.800, 1.152	168.800, 1.178	168.800, 1.710	168.800, 1.576	168.800, 1.610
846	169.000, 1.312	169.000, 1.266	169.000, 1.202	169.000, 1.221	169.000, 1.308	169.000, 1.217	169.000, 1.200	169.000, 1.215	169.000, 1.241	169.000, 1.211	169.000, 1.152	169.000, 1.178	169.000, 1.707	169.000, 1.574	169.000, 1.608
847	169.200, 1.311	169.200, 1.266	169.200, 1.202	169.200, 1.221	169.200, 1.307	169.200, 1.217	169.200, 1.200	169.200, 1.215	169.200, 1.241	169.200, 1.211	169.200, 1.152	169.200, 1.178	169.200, 1.704	169.200, 1.572	169.200, 1.605
848	169.400, 1.311	169.400, 1.266	169.400, 1.201	169.400, 1.221	169.400, 1.307	169.400, 1.216	169.400, 1.200	169.400, 1.215	169.400, 1.241	169.400, 1.210	169.400, 1.152	169.400, 1.177	169.400, 1.701	169.400, 1.570	169.400, 1.603
849	169.600, 1.310	169.600, 1.265	169.600, 1.201	169.600, 1.221	169.600, 1.306	169.600, 1.216	169.600, 1.199	169.600, 1.215	169.600, 1.240	169.600, 1.210	169.600, 1.152	169.600, 1.177	169.600, 1.699	169.600, 1.567	169.600, 1.600
850	169.800, 1.310	169.800, 1.265	169.800, 1.201	169.800, 1.220	169.800, 1.306	169.800, 1.216	169.800, 1.199	169.800, 1.214	169.800, 1.240	169.800, 1.210	169.800, 1.152	169.800, 1.177	169.800, 1.696	169.800, 1.565	169.800, 1.598
851	170.000, 1.309	170.000, 1.265	170.000, 1.200	170.000, 1.220	170.000, 1.306	170.000, 1.216	170.000, 1.199	170.000, 1.214	170.000, 1.240	170.000, 1.209	170.000, 1.152	170.000, 1.176	170.000, 1.694	170.000, 1.563	170.000, 1.596
852	170.200, 1.309	170.200, 1.265	170.200, 1.200	170.200, 1.220	170.200, 1.305	170.200, 1.216	170.200, 1.198	170.200, 1.214	170.200, 1.239	170.200, 1.209	170.200, 1.152	170.200, 1.176	170.200, 1.691	170.200, 1.561	170.200, 1.593
853	170.400, 1.308	170.400, 1.264	170.400, 1.199	170.400, 1.220	170.400, 1.305	170.400, 1.216	170.400, 1.198	170.400, 1.213	170.400, 1.239	170.400, 1.209	170.400, 1.152	170.400, 1.176	170.400, 1.689	170.400, 1.559	170.400, 1.591
854	170.600, 1.308	170.600, 1.264	170.600, 1.199	170.600, 1.220	170.600, 1.304	170.600, 1.216	170.600, 1.198	170.600, 1.213	170.600, 1.239	170.600, 1.208	170.600, 1.152	170.600, 1.176	170.600, 1.687	170.600, 1.557	170.600, 1.589
855	170.800, 1.308	170.800, 1.264	170.800, 1.198	170.800, 1.220	170.800, 1.303	170.800, 1.215	170.800, 1.197	170.800, 1.213	170.800, 1.239	170.800, 1.208	170.800, 1.152	170.800, 1.176	170.800, 1.685	170.800, 1.555	170.800, 1.586
856	171.000, 1.308	171.000, 1.264	171.000, 1.198	171.000, 1.220	171.000, 1.303	171.000, 1.215	171.000, 1.197	171.000, 1.212	171.000, 1.238	171.000, 1.207	171.000, 1.151	171.000, 1.176	171.000, 1.683	171.000, 1.553	171.000, 1.585
857	171.200, 1.308	171.200, 1.264	171.200, 1.198	171.200, 1.220	171.200, 1.302	171.200, 1.215	171.200, 1.197	171.200, 1.212	171.200, 1.238	171.200, 1.207	171.200, 1.151	171.200, 1.176	171.200, 1.680	171.200, 1.551	171.200, 1.583
858	171.400, 1.308	171.400, 1.264	171.400, 1.198	171.400, 1.219	171.400, 1.302	171.400, 1.215	171.400, 1.196	171.400, 1.211	171.400, 1.238	171.400, 1.207	171.400, 1.151	171.400, 1.175	171.400, 1.678	171.400, 1.549	171.400, 1.581
859	171.600, 1.307	171.600, 1.264	171.600, 1.198	171.600, 1.219	171.600, 1.301	171.600, 1.215	171.600, 1.196	171.600, 1.211	171.600, 1.237	171.600, 1.206	171.600, 1.151	171.600, 1.175	171.600, 1.676	171.600, 1.547	171.600, 1.579
860	171.800, 1.307	171.800, 1.263	171.800, 1.198	171.800, 1.219	171.800, 1.301	171.800, 1.215	171.800, 1.196	171.800, 1.211	171.800, 1.237	171.800, 1.206	171.800, 1.150	171.800, 1.175	171.800, 1.675	171.800, 1.545	171.800, 1.578
861	172.000, 1.307	172.000, 1.263	172.000, 1.198	172.000, 1.219	172.000, 1.301	172.000, 1.214	172.000, 1.195	172.000, 1.211	172.000, 1.236	172.000, 1.205	172.000, 1.150	172.000, 1.175	172.000, 1.672	172.000, 1.543	172.000, 1.576
862	172.200, 1.307	172.200, 1.263	172.200, 1.198	172.200, 1.218	172.200, 1.301	172.200, 1.214	172.200, 1.195	172.200, 1.211	172.200, 1.236	172.200, 1.205	172.200, 1.149	172.200, 1.175	172.200, 1.671	172.200, 1.542	172.200, 1.574
863	172.400, 1.306	172.400, 1.263	172.400, 1.198	172.400, 1.218	172.400, 1.300	172.400, 1.214	172.400, 1.195	172.400, 1.211	172.400, 1.236	172.400, 1.204	172.400, 1.149	172.400, 1.175	172.400, 1.668	172.400, 1.540	172.400, 1.572
864	172.600, 1.306	172.600, 1.262	172.600, 1.198	172.600, 1.218	172.600, 1.300	172.600, 1.214	172.600, 1.195	172.600, 1.210	172.600, 1.236	172.600, 1.204	172.600, 1.148	172.600, 1.175	172.600, 1.666	172.600, 1.538	172.600, 1.570
865	172.800, 1.306	172.800, 1.262	172.800, 1.198	172.800, 1.218	172.800, 1.300	172.800, 1.213	172.800, 1.195	172.800, 1.210	172.800, 1.236	172.800, 1.204	172.800, 1.148	172.800, 1.175	172.800, 1.664	172.800, 1.537	172.800, 1.569
866	173.000, 1.306	173.000, 1.262	173.000, 1.198	173.000, 1.218	173.000, 1.300	173.000, 1.213	173.000, 1.195	173.000, 1.210	173.000, 1.235	173.000, 1.204	173.000, 1.147	173.000, 1.175	173.000, 1.662	173.000, 1.535	173.000, 1.567
867	173.200, 1.306	173.200, 1.261	173.200, 1.198	173.200, 1.218	173.200, 1.300	173.200, 1.213	173.200, 1.195	173.200, 1.209	173.200, 1.235	173.200, 1.204	173.200, 1.147	173.200, 1.174	173.200, 1.660	173.200, 1.533	173.200, 1.565
868	173.400, 1.306	173.400, 1.261	173.400, 1.198	173.400, 1.218	173.400, 1.300	173.400, 1.213	173.400, 1.194	173.400, 1.209	173.400, 1.235	173.400, 1.204	173.400, 1.147	173.400, 1.174	173.400, 1.657	173.400, 1.531	173.400, 1.563
869	173.600, 1.306	173.600, 1.261	173.600, 1.197	173.600, 1.217	173.600, 1.300	173.600, 1.213	173.600, 1.194	173.600, 1.209	173.600, 1.235	173.600, 1.204	173.600, 1.146	173.600, 1.174	173.600, 1.655	173.600, 1.529	173.600, 1.561
870	173.800, 1.306	173.800, 1.260	173.800, 1.197	173.800, 1.217	173.800, 1.300	173.800, 1.213	173.800, 1.194	173.800, 1.208	173.800, 1.235	173.800, 1.204	173.800, 1.146	173.800, 1.173	173.800, 1.653	173.800, 1.527	173.800, 1.559
871	174.000, 1.306	174.000, 1.260	174.000, 1.196	174.000, 1.217	174.000, 1.300	174.000, 1.213	174.000, 1.194	174.000, 1.208	174.000, 1.235	174.000, 1.204	174.000, 1.145	174.000, 1.173	174.000, 1.651	174.000, 1.525	174.000, 1.557
872	174.200, 1.306	174.200, 1.260	174.200, 1.196	174.200, 1.217	174.200, 1.300	174.200, 1.213	174.200, 1.194	174.200, 1.208	174.200, 1.234	174.200, 1.204	174.200, 1.145	174.200, 1.172	174.200, 1.648	174.200, 1.523	174.200, 1.555
873	174.400, 1.306	174.400, 1.261	174.400, 1.195	174.400, 1.216	174.400, 1.299	174.400, 1.213	174.400, 1.194	174.400, 1.207	174.400, 1.234	174.400, 1.203	174.400, 1.144	174.400, 1.172	174.400, 1.646	174.400, 1.521	174.400, 1.553
874	174.600, 1.306	174.600, 1.261	174.600, 1.195	174.600, 1.216	174.600, 1.299	174.600, 1.212	174.600, 1.194	174.600, 1.207	174.600, 1.234	174.600, 1.203	174.600, 1.144	174.600, 1.172	174.600, 1.644	174.600, 1.519	174.600, 1.551
875	174.800, 1.306	174.800, 1.261	174.800, 1.195	174.800, 1.216	174.800, 1.299	174.800, 1.212	174.800, 1.193	174.800, 1.207	174.800, 1.233	174.800, 1.203	174.800, 1.144	174.800, 1.171	174.800, 1.642	174.800, 1.517	174.800, 1.549
876	175.000, 1.305	175.000, 1.260	175.000, 1.195	175.000, 1.215	175.000, 1.298	175.000, 1.212	175.000, 1.193	175.000, 1.207	175.000, 1.233	175.000, 1.203	175.000, 1.143	175.000, 1.170	175.000, 1.640	175.000, 1.515	175.000, 1.547
877	175.200, 1.305	175.200, 1.260	175.200, 1.194	175.200, 1.215	175.200, 1.298	175.200, 1.212	175.200, 1.192	175.200, 1.207	175.200, 1.232	175.200, 1.203	175.200, 1.143	175.200, 1.170	175.200, 1.638	175.200, 1.513	175.200, 1.545
878	175.400, 1.304	175.400, 1.259	175.400, 1.194	175.400, 1.215	175.400, 1.298	175.400, 1.211	175.400, 1.191	175.400, 1.207	175.400, 1.232	175.400, 1.203	175.400, 1.143	175.400, 1.170	175.400, 1.636	175.400, 1.511	175.400, 1.544
879	175.600, 1.304	175.600, 1.259	175.600, 1.194	175.600, 1.214	175.600, 1.297	175.600, 1.211	175.600, 1.191	175.600, 1.207	175.600, 1.232	175.600, 1.203	175.600, 1.143	175.600, 1.169	175.600, 1.634	175.600, 1.509	175.600, 1.542
880	175.800, 1.303	175.800, 1.258	175.800, 1.194	175.800, 1.214	175.800, 1.297	175.800, 1.211	175.800, 1.191	175.800, 1.207	175.800, 1.231	175.800, 1.203	175.800, 1.143	175.800, 1.169	175.800, 1.632	175.800, 1.507	175.800, 1.541
881	176.000, 1.303	176.000, 1.258	176.000, 1.194	176.000, 1.213	176.000, 1.297	176.000, 1.211	176.000, 1.190	176.000, 1.207	176.000, 1.231	176.000, 1.203	176.000, 1.143	176.000, 1.168	176.000, 1.630	176.000, 1.505	176.000, 1.539
882	176.200, 1.303	176.200, 1.258	176.200, 1.194	176.200, 1.213	176.200, 1.296	176.200, 1.211	176.200, 1.190	176.200, 1.207	176.200, 1.231	176.200, 1.202	176.200, 1.143	176.200, 1.168	176.200, 1.628	176.200, 1.503	176.200, 1.538
883	176.400, 1.303	176.400, 1.257	176.400, 1.194	176.400, 1.212	176.400, 1.296	176.400, 1.210	176.400, 1.190	176.400, 1.206	176.400, 1.231	176.400, 1.202	176.400, 1.143	176.400, 1.168	176.400, 1.626	176.400, 1.501	176.400, 1.537
884	176.600, 1.302	176.600, 1.257	176.600, 1.194	176.600, 1.212	176.600, 1.296	176.600, 1.210	176.600, 1.190	176.600, 1.206	176.600, 1.231	176.600, 1.202	176.600, 1.143	176.600, 1.168	176.600, 1.624	176.600, 1.499	176.600, 1.536
885	176.800, 1.302	176.800, 1.257	176.800, 1.194	176.800, 1.212	176.800, 1.295	176.800, 1.210	176.800, 1.190	176.800, 1.206	176.800, 1.231	176.800, 1.202	176.800, 1.143	176.800, 1.168	176.800, 1.622	176.800, 1.498	176.800, 1.534
886	177.000, 1.302	177.000, 1.257	177.000, 1.194	177.000, 1.212	177.000, 1.295	177.000, 1.209	177.000, 1.189	177.000, 1.205	177.000, 1.231	177.000, 1.202	177.000, 1.143	177.000, 1.168	177.000, 1.620	177.000, 1.496	177.000, 1.533
887	177.200, 1.302	177.200, 1.257	177.200, 1.194	177.200, 1.212	177.200, 1.295	177.200, 1.209	177.200, 1.189	177.200, 1.205	177.200, 1.231	177.200, 1.202	177.200, 1.144	177.200, 1.168	177.200, 1.618	177.200, 1.494	177.200, 1.531
888	177.400, 1.302	177.400, 1.257	177.400, 1.194	177.400, 1.212	177.400, 1.294	177.400, 1.208	177.400, 1.189	177.400, 1.205	177.400, 1.231	177.400, 1.201	177.400, 1.144	177.400, 1.167	177.400, 1.616	177.400, 1.493	177.400, 1.529
889	177.600, 1.302	177.600, 1.257	177.600, 1.193	177.600, 1.212	177.600, 1.294	177.600, 1.208	177.600, 1.189	177.600, 1.204	177.600, 1.231	177.600, 1.201	177.600, 1.143	177.600, 1.168	177.600, 1.614	177.600, 1.491	177.600, 1.527
890	177.800, 1.302	177.800, 1.257	177.800, 1.193	177.800, 1.212	177.800, 1.294	177.800, 1.208	177.800, 1.189	177.800, 1.204	177.800, 1.231	177.800, 1.200	177.800, 1.143	177.800, 1.168	177.800, 1.612	177.800, 1.490	177.800, 1.525
891	178.000, 1.302	178.000, 1.257	178.000, 1.193	178.000, 1.212	178.000, 1.294	178.000, 1.207	178.000, 1.189	178.000, 1.204	178.000, 1.231	178.000, 1.200	178.000, 1.143	178.000, 1.168	178.000, 1.610	178.000, 1.489	178.000, 1.524
892	178.200, 1.301	178.200, 1.257	178.200, 1.193	178.200, 1.212	178.200, 1.294	178.200, 1.207	178.200, 1.189	178.200, 1.203	178.200, 1.230	178.200, 1.199	178.200, 1.143	178.200, 1.168	178.200, 1.608	178.200, 1.487	178.200, 1.522
893	178.400, 1.301	178.400, 1.257	178.400, 1.193	178.400, 1.212	178.400, 1.294	178.400, 1.207	178.400, 1.189	178.400, 1.203	178.400, 1.230	178.400, 1.199	178.400, 1.142	178.400, 1.168	178.400, 1.607	178.400, 1.486	178.400, 1.520
894	178.600, 1.300	178.600, 1.257	178.600, 1.193	178.600, 1.211	178.600, 1.294	178.600, 1.206	178.600, 1.189	178.600, 1.203	178.600, 1.230	178.600, 1.199	178.600, 1.142	178.600, 1.168	178.600, 1.605	178.600, 1.484	178.600, 1.518
895	178.800, 1.300	178.800, 1.256	178.800, 1.193	178.800, 1.211	178.800, 1.293	178.800, 1.206	178.800, 1.189	178.800, 1.202	178.800, 1.229	178.800, 1.199	178.800, 1.142	178.800, 1.168	178.800, 1.603	178.800, 1.482	178.800, 1.517
896	179.000, 1.300	179.000, 1.256	179.000, 1.193	179.000, 1.210	179.000, 1.293	179.000, 1.206	179.000, 1.189	179.000, 1.202	179.000, 1.229	179.000, 1.198	179.000, 1.142	179.000, 1.167	179.000, 1.601	179.000, 1.480	179.000, 1.515
897	179.200, 1.300	179.200, 1.255	179.200, 1.193	179.200, 1.210	179.200, 1.293	179.200, 1.206	179.200, 1.189	179.200, 1.201	179.200, 1.228	179.200, 1.198	179.200, 1.141	179.200, 1.167	179.200, 1.599	179.200, 1.478	179.200, 1.513
898	179.400, 1.300	179.400, 1.255	179.400, 1.192	179.400, 1.210	179.400, 1.293	179.400, 1.206	179.400, 1.189	179.400, 1.201	179.400, 1.228	179.400, 1.198	179.400, 1.141	179.400, 1.167	179.400, 1.597	179.400, 1.477	179.400, 1.512
899	179.600, 1.299	179.600, 1.254	179.600, 1.192	179.600, 1.209	179.600, 1.292	179.600, 1.206	179.600, 1.189	179.600, 1.201	179.600, 1.228	179.600, 1.197	179.600, 1.141	179.600, 1.167	179.600, 1.596	179.600, 1.475	179.600, 1.510
900	179.800, 1.299	179.800, 1.254	179.800, 1.192	179.800, 1.209	179.800, 1.292	179.800, 1.206	179.800, 1.189	179.800, 1.201	179.800, 1.228	179.800, 1.197	179.800, 1.141	179.800, 1.167	179.800, 1.594	179.800, 1.473	179.800, 1.509
901	180.000, 1.299	180.000, 1.254	180.000, 1.192	180.000, 1.209	180.000, 1.292	180.000, 1.206	180.000, 1.189	180.000, 1.201	180.000, 1.227	180.000, 1.196	180.000, 1.141	180.000, 1.167	180.000, 1.592	180.000, 1.472	180.000, 1.508
902	180.200, 1.299	180.200, 1.254	180.200, 1.192	180.200, 1.209	180.200, 1.291	180.200, 1.205	180.200, 1.189	180.200, 1.201	180.200, 1.227	180.200, 1.196	180.200, 1.141	180.200, 1.166	180.200, 1.590	180.200, 1.470	180.200, 1.506
903	180.400, 1.298	180.400, 1.254	180.400, 1.192	180.400, 1.209	180.400, 1.291	180.400, 1.205	180.400, 1.188	180.400, 1.201	180.400, 1.226	180.400, 1.195	180.400, 1.141	180.400, 1.166	180.400, 1.589	180.400, 1.469	180.400, 1.505
904	180.600, 1.298	180.600, 1.253	180.600, 1.191	180.600, 1.209	180.600, 1.290	180.600, 1.205	180.600, 1.188	180.600, 1.201	180.600, 1.226	180.600, 1.195	180.600, 1.141	180.600, 1.166	180.600, 1.587	180.600, 1.468	180.600, 1.504
905	180.800, 1.298	180.800, 1.253	180.800, 1.191	180.800, 1.208	180.800, 1.290	180.800, 1.204	180.800, 1.188	180.800, 1.201	180.800, 1.225	180.800, 1.194	180.800, 1.141	180.800, 1.165	180.800, 1.585	180.800, 1.466	180.800, 1.502
906	181.000, 1.298	181.000, 1.253	181.000, 1.190	181.000, 1.208	181.000, 1.289	181.000, 1.204	181.000, 1.188	181.000, 1.201	181.000, 1.225	181.000, 1.194	181.000, 1.141	181.000, 1.165	181.000, 1.584	181.000, 1.465	181.000, 1.500
907	181.200, 1.297	181.200, 1.252	181.200, 1.190	181.200, 1.209	181.200, 1.289	181.200, 1.204	181.200, 1.187	181.200, 1.200	181.200, 1.225	181.200, 1.194	181.200, 1.140	181.200, 1.165	181.200, 1.582	181.200, 1.463	181.200, 1.499
908	181.400, 1.297	181.400, 1.252	181.400, 1.190	181.400, 1.209	181.400, 1.289	181.400, 1.203	181.400, 1.187	181.400, 1.200	181.400, 1.224	181.400, 1.193	181.400, 1.140	181.400, 1.164	181.400, 1.580	181.400, 1.462	181.400, 1.497
909	181.600, 1.296	181.600, 1.252	181.600, 1.189	181.600, 1.208	181.600, 1.289	181.600, 1.203	181.600, 1.186	181.600, 1.200	181.600, 1.224	181.600, 1.193	181.600, 1.140	181.600, 1.164	181.600, 1.579	181.600, 1.460	181.600, 1.495
910	181.800, 1.296	181.800, 1.252	181.800, 1.189	181.800, 1.208	181.800, 1.289	181.800, 1.203	181.800, 1.186	181.800, 1.199	181.800, 1.224	181.800, 1.193	181.800, 1.139	181.800, 1.164	181.800, 1.577	181.800, 1.459	181.800, 1.494
911	182.000, 1.296	182.000, 1.252	182.000, 1.189	182.000, 1.208	182.000, 1.288	182.000, 1.202	182.000, 1.186	182.000, 1.199	182.000, 1.224	182.000, 1.193	182.000, 1.139	182.000, 1.163	182.000, 1.576	182.000, 1.457	182.000, 1.492
912	182.200, 1.295	182.200, 1.252	182.200, 1.189	182.200, 1.208	182.200, 1.288	182.200, 1.202	182.200, 1.186	182.200, 1.198	182.200, 1.223	182.200, 1.193	182.200, 1.138	182.200, 1.163	182.200, 1.574	182.200, 1.456	182.200, 1.491
913	182.400, 1.295	182.400, 1.251	182.400, 1.188	182.400, 1.208	182.400, 1.288	182.400, 1.202	182.400, 1.185	182.400, 1.198	182.400, 1.223	182.400, 1.193	182.400, 1.138	182.400, 1.163	182.400, 1.573	182.400, 1.454	182.400, 1.489
914	182.600, 1.295	182.600, 1.251	182.600, 1.188	182.600, 1.207	182.600, 1.288	182.600, 1.201	182.600, 1.185	182.600, 1.197	182.600, 1.223	182.600, 1.193	182.600, 1.138	182.600, 1.162	182.600, 1.571	182.600, 1.452	182.600, 1.488
915	182.800, 1.295	182.800, 1.251	182.800, 1.188	182.800, 1.207	182.800, 1.288	182.800, 1.201	182.800, 1.184	182.800, 1.197	182.800, 1.223	182.800, 1.193	182.800, 1.137	182.800, 1.162	182.800, 1.569	182.800, 1.450	182.800, 1.487
916	183.000, 1.295	183.000, 1.251	183.000, 1.188	183.000, 1.207	183.000, 1.288	183.000, 1.201	183.000, 1.184	183.000, 1.197	183.000, 1.222	183.000, 1.193	183.000, 1.137	183.000, 1.162	183.000, 1.567	183.000, 1.449	183.000, 1.486
917	183.200, 1.294	183.200, 1.250	183.200, 1.188	183.200, 1.206	183.200, 1.287	183.200, 1.200	183.200, 1.184	183.200, 1.196	183.200, 1.222	183.200, 1.193	183.200, 1.137	183.200, 1.161	183.200, 1.565	183.200, 1.447	183.200, 1.484
918	183.400, 1.294	183.400, 1.250	183.400, 1.188	183.400, 1.206	183.400, 1.287	183.400, 1.200	183.400, 1.183	183.400, 1.196	183.400, 1.222	183.400, 1.193	183.400, 1.137	183.400, 1.161	183.400, 1.563	183.400, 1.446	183.400, 1.483
919	183.600, 1.294	183.600, 1.250	183.600, 1.188	183.600, 1.206	183.600, 1.287	183.600, 1.200	183.600, 1.183	183.600, 1.196	183.600, 1.221	183.600, 1.193	183.600, 1.137	183.600, 1.161	183.600, 1.562	183.600, 1.444	183.600, 1.481
920	183.800, 1.294	183.800, 1.250	183.800, 1.188	183.800, 1.206	183.800, 1.287	183.800, 1.199	183.800, 1.183	183.800, 1.197	183.800, 1.221	183.800, 1.193	183.800, 1.137	183.800, 1.161	183.800, 1.560	183.800, 1.443	183.800, 1.480
921	184.000, 1.294	184.000, 1.250	184.000, 1.188	184.000, 1.205	184.000, 1.287	184.000, 1.199	184.000, 1.183	184.000, 1.197	184.000, 1.221	184.000, 1.193	184.000, 1.137	184.000, 1.161	184.000, 1.558	184.000, 1.442	184.000, 1.478
922	184.200, 1.294	184.200, 1.250	184.200, 1.188	184.200, 1.205	184.200, 1.287	184.200, 1.199	184.200, 1.182	184.200, 1.197	184.200, 1.221	184.200, 1.193	184.200, 1.137	184.200, 1.161	184.200, 1.557	184.200, 1.441	184.200, 1.477
923	184.400, 1.294	184.400, 1.250	184.400, 1.187	184.400, 1.205	184.400, 1.287	184.400, 1.200	184.400, 1.182	184.400, 1.197	184.400, 1.221	184.400, 1.193	184.400, 1.137	184.400, 1.161	184.400, 1.555	184.400, 1.439	184.400, 1.475
924	184.600, 1.293	184.600, 1.250	184.600, 1.187	184.600, 1.205	184.600, 1.287	184.600, 1.200	184.600, 1.182	184.600, 1.197	184.600, 1.220	184.600, 1.193	184.600, 1.137	184.600, 1.161	184.600, 1.554	184.600, 1.438	184.600, 1.474
925	184.800, 1.293	184.800, 1.250	184.800, 1.187	184.800, 1.205	184.800, 1.287	184.800, 1.200	184.800, 1.182	184.800, 1.197	184.800, 1.220	184.800, 1.193	184.800, 1.137	184.800, 1.161	184.800, 1.553	184.800, 1.436	184.800, 1.472
926	185.000, 1.293	185.000, 1.250	185.000, 1.187	185.000, 1.205	185.000, 1.286	185.000, 1.200	185.000, 1.181	185.000, 1.197	185.000, 1.220	185.000, 1.193	185.000, 1.137	185.000, 1.160	185.000, 1.551	185.000, 1.435	185.000, 1.471
927	185.200, 1.293	185.200, 1.250	185.200, 1.188	185.200, 1.205	185.200, 1.286	185.200, 1.201	185.200, 1.181	185.200, 1.197	185.200, 1.219	185.200, 1.193	185.200, 1.137	185.200, 1.160	185.200, 1.550	185.200, 1.433	185.200, 1.470
928	185.400, 1.293	185.400, 1.250	185.400, 1.187	185.400, 1.205	185.400, 1.286	185.400, 1.201	185.400, 1.181	185.400, 1.197	185.400, 1.219	185.400, 1.192	185.400, 1.137	185.400, 1.159	185.400, 1.549	185.400, 1.432	185.400, 1.469
929	185.600, 1.293	185.600, 1.250	185.600, 1.187	185.600, 1.205	185.600, 1.285	185.600, 1.200	185.600, 1.181	185.600, 1.196	185.600, 1.219	185.600, 1.192	185.600, 1.136	185.600, 1.159	185.600, 1.547	185.600, 1.431	185.600, 1.467
930	185.800, 1.292	185.800, 1.250	185.800, 1.187	185.800, 1.205	185.800, 1.285	185.800, 1.200	185.800, 1.181	185.800, 1.196	185.800, 1.219	185.800, 1.192	185.800, 1.136	185.800, 1.158	185.800, 1.546	185.800, 1.430	185.800, 1.466
931	186.000, 1.292	186.000, 1.249	186.000, 1.187	186.000, 1.205	186.000, 1.285	186.000, 1.200	186.000, 1.181	186.000, 1.195	186.000, 1.218	186.000, 1.191	186.000, 1.136	186.000, 1.158	186.000, 1.545	186.000, 1.428	186.000, 1.465
932	186.200, 1.292	186.200, 1.249	186.200, 1.187	186.200, 1.205	186.200, 1.285	186.200, 1.199	186.200, 1.181	186.200, 1.195	186.200, 1.218	186.200, 1.191	186.200, 1.135	186.200, 1.157	186.200, 1.543	186.200, 1.427	186.200, 1.464
933	186.400, 1.292	186.400, 1.249	186.400, 1.187	186.400, 1.205	186.400, 1.285	186.400, 1.199	186.400, 1.181	186.400, 1.195	186.400, 1.218	186.400, 1.191	186.400, 1.135	186.400, 1.157	186.400, 1.542	186.400, 1.426	186.400, 1.463
934	186.600, 1.292	186.600, 1.249	186.600, 1.186	186.600, 1.205	186.600, 1.285	186.600, 1.199	186.600, 1.180	186.600, 1.194	186.600, 1.217	186.600, 1.190	186.600, 1.135	186.600, 1.157	186.600, 1.540	186.600, 1.425	186.600, 1.462
935	186.800, 1.292	186.800, 1.248	186.800, 1.186	186.800, 1.205	186.800, 1.284	186.800, 1.199	186.800, 1.180	186.800, 1.194	186.800, 1.217	186.800, 1.190	186.800, 1.135	186.800, 1.157	186.800, 1.538	186.800, 1.424	186.800, 1.461
936	187.000, 1.292	187.000, 1.248	187.000, 1.186	187.000, 1.205	187.000, 1.284	187.000, 1.198	187.000, 1.180	187.000, 1.194	187.000, 1.217	187.000, 1.189	187.000, 1.135	187.000, 1.157	187.000, 1.536	187.000, 1.423	187.000, 1.460
937	187.200, 1.292	187.200, 1.247	187.200, 1.186	187.200, 1.205	187.200, 1.284	187.200, 1.198	187.200, 1.180	187.200, 1.194	187.200, 1.216	187.200, 1.189	187.200, 1.135	187.200, 1.157	187.200, 1.534	187.200, 1.422	187.200, 1.458
938	187.400, 1.292	187.400, 1.247	187.400, 1.186	187.400, 1.205	187.400, 1.283	187.400, 1.197	187.400, 1.180	187.400, 1.194	187.400, 1.216	187.400, 1.189	187.400, 1.134	187.400, 1.157	187.400, 1.533	187.400, 1.421	187.400, 1.457
939	187.600, 1.292	187.600, 1.246	187.600, 1.186	187.600, 1.204	187.600, 1.283	187.600, 1.197	187.600, 1.180	187.600, 1.193	187.600, 1.216	187.600, 1.189	187.600, 1.134	187.600, 1.157	187.600, 1.531	187.600, 1.420	187.600, 1.456
940	187.800, 1.292	187.800, 1.246	187.800, 1.185	187.800, 1.204	187.800, 1.283	187.800, 1.196	187.800, 1.180	187.800, 1.193	187.800, 1.216	187.800, 1.189	187.800, 1.134	187.800, 1.157	187.800, 1.529	187.800, 1.419	187.800, 1.455
941	188.000, 1.292	188.000, 1.245	188.000, 1.185	188.000, 1.204	188.000, 1.283	188.000, 1.196	188.000, 1.179	188.000, 1.194	188.000, 1.216	188.000, 1.189	188.000, 1.133	188.000, 1.157	188.000, 1.527	188.000, 1.417	188.000, 1.453
942	188.200, 1.292	188.200, 1.245	188.200, 1.185	188.200, 1.204	188.200, 1.282	188.200, 1.196	188.200, 1.179	188.200, 1.194	188.200, 1.216	188.200, 1.189	188.200, 1.133	188.200, 1.158	188.200, 1.526	188.200, 1.416	188.200, 1.452
943	188.400, 1.291	188.400, 1.245	188.400, 1.185	188.400, 1.203	188.400, 1.282	188.400, 1.196	188.400, 1.179	188.400, 1.194	188.400, 1.216	188.400, 1.189	188.400, 1.133	188.400, 1.158	188.400, 1.524	188.400, 1.415	188.400, 1.451
944	188.600, 1.291	188.600, 1.244	188.600, 1.185	188.600, 1.203	188.600, 1.282	188.600, 1.196	188.600, 1.179	188.600, 1.194	188.600, 1.216	188.600, 1.189	188.600, 1.133	188.600, 1.158	188.600, 1.522	188.600, 1.413	188.600, 1.450
945	188.800, 1.291	188.800, 1.244	188.800, 1.184	188.800, 1.203	188.800, 1.281	188.800, 1.196	188.800, 1.178	188.800, 1.194	188.800, 1.216	188.800, 1.189	188.800, 1.132	188.800, 1.157	188.800, 1.521	188.800, 1.412	188.800, 1.450
946	189.000, 1.290	189.000, 1.244	189.000, 1.184	189.000, 1.203	189.000, 1.281	189.000, 1.196	189.000, 1.178	189.000, 1.194	189.000, 1.216	189.000, 1.188	189.000, 1.132	189.000, 1.157	189.000, 1.519	189.000, 1.411	189.000, 1.449
947	189.200, 1.290	189.200, 1.244	189.200, 1.184	189.200, 1.203	189.200, 1.281	189.200, 1.195	189.200, 1.178	189.200, 1.193	189.200, 1.215	189.200, 1.188	189.200, 1.132	189.200, 1.156	189.200, 1.517	189.200, 1.410	189.200, 1.448
948	189.400, 1.289	189.400, 1.244	189.400, 1.184	189.400, 1.203	189.400, 1.280	189.400, 1.195	189.400, 1.178	189.400, 1.193	189.400, 1.215	189.400, 1.188	189.400, 1.131	189.400, 1.156	189.400, 1.516	189.400, 1.408	189.400, 1.447
949	189.600, 1.289	189.600, 1.244	189.600, 1.184	189.600, 1.202	189.600, 1.280	189.600, 1.195	189.600, 1.178	189.600, 1.193	189.600, 1.215	189.600, 1.188	189.600, 1.131	189.600, 1.155	189.600, 1.515	189.600, 1.407	189.600, 1.446
950	189.800, 1.289	189.800, 1.244	189.800, 1.184	189.800, 1.202	189.800, 1.280	189.800, 1.194	189.800, 1.178	189.800, 1.193	189.800, 1.215	189.800, 1.188	189.800, 1.131	189.800, 1.155	189.800, 1.514	189.800, 1.406	189.800, 1.445
951	190.000, 1.289	190.000, 1.244	190.000, 1.184	190.000, 1.201	190.000, 1.280	190.000, 1.194	190.000, 1.178	190.000, 1.193	190.000, 1.214	190.000, 1.187	190.000, 1.131	190.000, 1.155	190.000, 1.512	190.000, 1.405	190.000, 1.444
952	190.200, 1.289	190.200, 1.244	190.200, 1.183	190.200, 1.201	190.200, 1.280	190.200, 1.194	190.200, 1.178	190.200, 1.192	190.200, 1.214	190.200, 1.187	190.200, 1.131	190.200, 1.154	190.200, 1.511	190.200, 1.403	190.200, 1.443
953	190.400, 1.289	190.400, 1.244	190.400, 1.183	190.400, 1.200	190.400, 1.280	190.400, 1.194	190.400, 1.177	190.400, 1.192	190.400, 1.214	190.400, 1.187	190.400, 1.132	190.400, 1.154	190.400, 1.510	190.400, 1.402	190.400, 1.442
954	190.600, 1.289	190.600, 1.244	190.600, 1.183	190.600, 1.200	190.600, 1.279	190.600, 1.194	190.600, 1.177	190.600, 1.192	190.600, 1.214	190.600, 1.186	190.600, 1.132	190.600, 1.154	190.600, 1.509	190.600, 1.401	190.600, 1.441
955	190.800, 1.289	190.800, 1.244	190.800, 1.184	190.800, 1.200	190.800, 1.279	190.800, 1.194	190.800, 1.177	190.800, 1.191	190.800, 1.214	190.800, 1.186	190.800, 1.132	190.800, 1.154	190.800, 1.508	190.800, 1.400	190.800, 1.439
956	191.000, 1.289	191.000, 1.244	191.000, 1.184	191.000, 1.200	191.000, 1.279	191.000, 1.194	191.000, 1.177	191.000, 1.191	191.000, 1.213	191.000, 1.186	191.000, 1.132	191.000, 1.154	191.000, 1.507	191.000, 1.398	191.000, 1.438
957	191.200, 1.289	191.200, 1.244	191.200, 1.184	191.200, 1.199	191.200, 1.278	191.200, 1.194	191.200, 1.177	191.200, 1.191	191.200, 1.213	191.200, 1.186	191.200, 1.132	191.200, 1.154	191.200, 1.505	191.200, 1.397	191.200, 1.437
958	191.400, 1.289	191.400, 1.243	191.400, 1.184	191.400, 1.199	191.400, 1.278	191.400, 1.194	191.400, 1.176	191.400, 1.190	191.400, 1.213	191.400, 1.186	191.400, 1.132	191.400, 1.154	191.400, 1.504	191.400, 1.396	191.400, 1.435
959	191.600, 1.289	191.600, 1.243	191.600, 1.184	191.600, 1.199	191.600, 1.278	191.600, 1.194	191.600, 1.176	191.600, 1.190	191.600, 1.213	191.600, 1.186	191.600, 1.131	191.600, 1.154	191.600, 1.503	191.600, 1.395	191.600, 1.434
960	191.800, 1.289	191.800, 1.243	191.800, 1.184	191.800, 1.199	191.800, 1.277	191.800, 1.194	191.800, 1.176	191.800, 1.189	191.800, 1.213	191.800, 1.186	191.800, 1.131	191.800, 1.154	191.800, 1.502	191.800, 1.394	191.800, 1.433
961	192.000, 1.289	192.000, 1.242	192.000, 1.184	192.000, 1.199	192.000, 1.277	192.000, 1.194	192.000, 1.176	192.000, 1.189	192.000, 1.213	192.000, 1.186	192.000, 1.131	192.000, 1.154	192.000, 1.501	192.000, 1.393	192.000, 1.432
962	192.200, 1.289	192.200, 1.242	192.200, 1.183	192.200, 1.199	192.200, 1.277	192.200, 1.193	192.200, 1.176	192.200, 1.189	192.200, 1.213	192.200, 1.186	192.200, 1.131	192.200, 1.154	192.200, 1.500	192.200, 1.392	192.200, 1.431
963	192.400, 1.289	192.400, 1.242	192.400, 1.183	192.400, 1.199	192.400, 1.277	192.400, 1.193	192.400, 1.176	192.400, 1.188	192.400, 1.213	192.400, 1.186	192.400, 1.130	192.400, 1.154	192.400, 1.498	192.400, 1.391	192.400, 1.429
964	192.600, 1.288	192.600, 1.243	192.600, 1.183	192.600, 1.199	192.600, 1.277	192.600, 1.193	192.600, 1.175	192.600, 1.188	192.600, 1.212	192.600, 1.186	192.600, 1.130	192.600, 1.153	192.600, 1.497	192.600, 1.390	192.600, 1.428
965	192.800, 1.288	192.800, 1.243	192.800, 1.183	192.800, 1.199	192.800, 1.277	192.800, 1.192	192.800, 1.175	192.800, 1.188	192.800, 1.212	192.800, 1.186	192.800, 1.130	192.800, 1.153	192.800, 1.495	192.800, 1.389	192.800, 1.427
966	193.000, 1.287	193.000, 1.243	193.000, 1.182	193.000, 1.198	193.000, 1.277	193.000, 1.192	193.000, 1.175	193.000, 1.188	193.000, 1.211	193.000, 1.186	193.000, 1.129	193.000, 1.153	193.000, 1.494	193.000, 1.387	193.000, 1.426
967	193.200, 1.287	193.200, 1.242	193.200, 1.182	193.200, 1.198	193.200, 1.277	193.200, 1.191	193.200, 1.175	193.200, 1.188	193.200, 1.211	193.200, 1.186	193.200, 1.129	193.200, 1.153	193.200, 1.492	193.200, 1.386	193.200, 1.425
968	193.400, 1.287	193.400, 1.242	193.400, 1.182	193.400, 1.198	193.400, 1.277	193.400, 1.191	193.400, 1.175	193.400, 1.188	193.400, 1.211	193.400, 1.186	193.400, 1.128	193.400, 1.153	193.400, 1.491	193.400, 1.385	193.400, 1.424
969	193.600, 1.286	193.600, 1.242	193.600, 1.181	193.600, 1.198	193.600, 1.277	193.600, 1.190	193.600, 1.174	193.600, 1.188	193.600, 1.211	193.600, 1.186	193.600, 1.128	193.600, 1.153	193.600, 1.490	193.600, 1.384	193.600, 1.423
970	193.800, 1.286	193.800, 1.242	193.800, 1.181	193.800, 1.197	193.800, 1.277	193.800, 1.190	193.800, 1.174	193.800, 1.188	193.800, 1.211	193.800, 1.185	193.800, 1.128	193.800, 1.153	193.800, 1.489	193.800, 1.383	193.800, 1.422
971	194.000, 1.286	194.000, 1.242	194.000, 1.181	194.000, 1.197	194.000, 1.277	194.000, 1.190	194.000, 1.174	194.000, 1.188	194.000, 1.210	194.000, 1.185	194.000, 1.128	194.000, 1.152	194.000, 1.487	194.000, 1.382	194.000, 1.421
972	194.200, 1.285	194.200, 1.242	194.200, 1.180	194.200, 1.197	194.200, 1.277	194.200, 1.190	194.200, 1.174	194.200, 1.187	194.200, 1.210	194.200, 1.185	194.200, 1.128	194.200, 1.152	194.200, 1.486	194.200, 1.381	194.200, 1.420
973	194.400, 1.284	194.400, 1.241	194.400, 1.180	194.400, 1.197	194.400, 1.277	194.400, 1.190	194.400, 1.174	194.400, 1.187	194.400, 1.210	194.400, 1.185	194.400, 1.128	194.400, 1.152	194.400, 1.485	194.400, 1.380	194.400, 1.419
974	194.600, 1.284	194.600, 1.241	194.600, 1.180	194.600, 1.197	194.600, 1.276	194.600, 1.189	194.600, 1.174	194.600, 1.187	194.600, 1.210	194.600, 1.184	194.600, 1.129	194.600, 1.151	194.600, 1.484	194.600, 1.379	194.600, 1.418
975	194.800, 1.284	194.800, 1.241	194.800, 1.180	194.800, 1.197	194.800, 1.276	194.800, 1.189	194.800, 1.174	194.800, 1.186	194.800, 1.210	194.800, 1.184	194.800, 1.129	194.800, 1.151	194.800, 1.483	194.800, 1.378	194.800, 1.417
976	195.000, 1.283	195.000, 1.241	195.000, 1.180	195.000, 1.197	195.000, 1.276	195.000, 1.189	195.000, 1.174	195.000, 1.186	195.000, 1.210	195.000, 1.184	195.000, 1.129	195.000, 1.151	195.000, 1.482	195.000, 1.377	195.000, 1.416
977	195.200, 1.283	195.200, 1.240	195.200, 1.180	195.200, 1.197	195.200, 1.275	195.200, 1.189	195.200, 1.174	195.200, 1.186	195.200, 1.210	195.200, 1.184	195.200, 1.128	195.200, 1.151	195.200, 1.481	195.200, 1.376	195.200, 1.415
978	195.400, 1.284	195.400, 1.240	195.400, 1.180	195.400, 1.197	195.400, 1.275	195.400, 1.189	195.400, 1.174	195.400, 1.185	195.400, 1.210	195.400, 1.183	195.400, 1.128	195.400, 1.150	195.400, 1.480	195.400, 1.375	195.400, 1.414
979	195.600, 1.284	195.600, 1.240	195.600, 1.179	195.600, 1.197	195.600, 1.275	195.600, 1.189	195.600, 1.174	195.600, 1.185	195.600, 1.210	195.600, 1.183	195.600, 1.128	195.600, 1.150	195.600, 1.479	195.600, 1.374	195.600, 1.413
980	195.800, 1.284	195.800, 1.239	195.800, 1.179	195.800, 1.197	195.800, 1.275	195.800, 1.189	195.800, 1.174	195.800, 1.185	195.800, 1.210	195.800, 1.182	195.800, 1.128	195.800, 1.150	195.800, 1.478	195.800, 1.373	195.800, 1.412
981	196.000, 1.284	196.000, 1.239	196.000, 1.179	196.000, 1.197	196.000, 1.275	196.000, 1.188	196.000, 1.174	196.000, 1.185	196.000, 1.210	196.000, 1.182	196.000, 1.128	196.000, 1.150	196.000, 1.477	196.000, 1.372	196.000, 1.411
982	196.200, 1.284	196.200, 1.239	196.200, 1.179	196.200, 1.197	196.200, 1.274	196.200, 1.188	196.200, 1.174	196.200, 1.184	196.200, 1.209	196.200, 1.182	196.200, 1.128	196.200, 1.149	196.200, 1.476	196.200, 1.371	196.200, 1.409
983	196.400, 1.284	196.400, 1.239	196.400, 1.179	196.400, 1.197	196.400, 1.274	196.400, 1.188	196.400, 1.173	196.400, 1.184	196.400, 1.209	196.400, 1.182	196.400, 1.127	196.400, 1.149	196.400, 1.475	196.400, 1.370	196.400, 1.408
984	196.600, 1.283	196.600, 1.239	196.600, 1.178	196.600, 1.196	196.600, 1.274	196.600, 1.187	196.600, 1.173	196.600, 1.184	196.600, 1.209	196.600, 1.182	196.600, 1.127	196.600, 1.149	196.600, 1.474	196.600, 1.369	196.600, 1.407
985	196.800, 1.283	196.800, 1.238	196.800, 1.178	196.800, 1.196	196.800, 1.273	196.800, 1.187	196.800, 1.172	196.800, 1.184	196.800, 1.209	196.800, 1.182	196.800, 1.127	196.800, 1.149	196.800, 1.472	196.800, 1.368	196.800, 1.406
986	197.000, 1.283	197.000, 1.238	197.000, 1.178	197.000, 1.196	197.000, 1.273	197.000, 1.187	197.000, 1.172	197.000, 1.185	197.000, 1.208	197.000, 1.182	197.000, 1.127	197.000, 1.149	197.000, 1.471	197.000, 1.367	197.000, 1.405
987	197.200, 1.283	197.200, 1.238	197.200, 1.178	197.200, 1.196	197.200, 1.273	197.200, 1.187	197.200, 1.171	197.200, 1.185	197.200, 1.208	197.200, 1.182	197.200, 1.126	197.200, 1.149	197.200, 1.470	197.200, 1.366	197.200, 1.404
988	197.400, 1.283	197.400, 1.238	197.400, 1.178	197.400, 1.195	197.400, 1.273	197.400, 1.187	197.400, 1.171	197.400, 1.185	197.400, 1.208	197.400, 1.182	197.400, 1.126	197.400, 1.149	197.400, 1.468	197.400, 1.365	197.400, 1.404
989	197.600, 1.283	197.600, 1.238	197.600, 1.178	197.600, 1.195	197.600, 1.272	197.600, 1.187	197.600, 1.171	197.600, 1.185	197.600, 1.208	197.600, 1.181	197.600, 1.126	197.600, 1.149	197.600, 1.467	197.600, 1.364	197.600, 1.403
990	197.800, 1.283	197.800, 1.238	197.800, 1.178	197.800, 1.195	197.800, 1.272	197.800, 1.188	197.800, 1.171	197.800, 1.185	197.800, 1.207	197.800, 1.181	197.800, 1.126	197.800, 1.149	197.800, 1.465	197.800, 1.363	197.800, 1.402
991	198.000, 1.282	198.000, 1.238	198.000, 1.178	198.000, 1.195	198.000, 1.272	198.000, 1.188	198.000, 1.170	198.000, 1.184	198.000, 1.207	198.000, 1.181	198.000, 1.125	198.000, 1.149	198.000, 1.464	198.000, 1.362	198.000, 1.401
992	198.200, 1.282	198.200, 1.238	198.200, 1.178	198.200, 1.195	198.200, 1.271	198.200, 1.188	198.200, 1.170	198.200, 1.184	198.200, 1.206	198.200, 1.180	198.200, 1.125	198.200, 1.149	198.200, 1.462	198.200, 1.361	198.200, 1.400
993	198.400, 1.282	198.400, 1.238	198.400, 1.178	198.400, 1.195	198.400, 1.271	198.400, 1.188	198.400, 1.170	198.400, 1.184	198.400, 1.206	198.400, 1.180	198.400, 1.125	198.400, 1.149	198.400, 1.461	198.400, 1.360	198.400, 1.399
994	198.600, 1.282	198.600, 1.238	198.600, 1.178	198.600, 1.195	198.600, 1.271	198.600, 1.188	198.600, 1.170	198.600, 1.183	198.600, 1.206	198.600, 1.180	198.600, 1.125	198.600, 1.148	198.600, 1.459	198.600, 1.359	198.600, 1.399
995	198.800, 1.282	198.800, 1.238	198.800, 1.178	198.800, 1.195	198.800, 1.271	198.800, 1.188	198.800, 1.171	198.800, 1.183	198.800, 1.206	198.800, 1.180	198.800, 1.125	198.800, 1.148	198.800, 1.458	198.800, 1.357	198.800, 1.398
996	199.000, 1.282	199.000, 1.238	199.000, 1.177	199.000, 1.195	199.000, 1.271	199.000, 1.188	199.000, 1.171	199.000, 1.183	199.000, 1.206	199.000, 1.179	199.000, 1.125	199.000, 1.147	199.000, 1.457	199.000, 1.356	199.000, 1.397
997	199.200, 1.282	199.200, 1.238	199.200, 1.177	199.200, 1.195	199.200, 1.271	199.200, 1.188	199.200, 1.171	199.200, 1.183	199.200, 1.206	199.200, 1.179	199.200, 1.125	199.200, 1.147	199.200, 1.456	199.200, 1.355	199.200, 1.397
998	199.400, 1.281	199.400, 1.238	199.400, 1.177	199.400, 1.195	199.400, 1.271	199.400, 1.188	199.400, 1.171	199.400, 1.182	199.400, 1.205	199.400, 1.179	199.400, 1.125	199.400, 1.147	199.400, 1.455	199.400, 1.354	199.400, 1.396
999	199.600, 1.281	199.600, 1.238	199.600, 1.177	199.600, 1.195	199.600, 1.271	199.600, 1.187	199.600, 1.171	199.600, 1.182	199.600, 1.205	199.600, 1.179	199.600, 1.125	199.600, 1.147	199.600, 1.454	199.600, 1.353	199.600, 1.395
1000	199.800, 1.281	199.800, 1.238	199.800, 1.176	199.800, 1.195	199.800, 1.271	199.800, 1.187	199.800, 1.171	199.800, 1.182	199.800, 1.205	199.800, 1.179	199.800, 1.125	199.800, 1.147	199.800, 1.453	199.800, 1.352	199.800, 1.394
1001	200.000, 1.281	200.000, 1.238	200.000, 1.176	200.000, 1.195	200.000, 1.271	200.000, 1.187	200.000, 1.171	200.000, 1.182	200.000, 1.205	200.000, 1.179	200.000, 1.124	200.000, 1.146	200.000, 1.452	200.000, 1.351	200.000, 1.393
1002	200.200, 1.280	200.200, 1.238	200.200, 1.176	200.200, 1.194	200.200, 1.271	200.200, 1.187	200.200, 1.171	200.200, 1.182	200.200, 1.205	200.200, 1.179	200.200, 1.124	200.200, 1.146	200.200, 1.452	200.200, 1.351	200.200, 1.393
1003	200.400, 1.280	200.400, 1.237	200.400, 1.176	200.400, 1.194	200.400, 1.271	200.400, 1.186	200.400, 1.170	200.400, 1.182	200.400, 1.204	200.400, 1.179	200.400, 1.124	200.400, 1.147	200.400, 1.451	200.400, 1.350	200.400, 1.392
1004	200.600, 1.280	200.600, 1.237	200.600, 1.176	200.600, 1.194	200.600, 1.271	200.600, 1.186	200.600, 1.170	200.600, 1.182	200.600, 1.204	200.600, 1.180	200.600, 1.124	200.600, 1.147	200.600, 1.450	200.600, 1.349	200.600, 1.391
1005	200.800, 1.280	200.800, 1.237	200.800, 1.176	200.800, 1.194	200.800, 1.270	200.800, 1.186	200.800, 1.170	200.800, 1.182	200.800, 1.204	200.800, 1.180	200.800, 1.124	200.800, 1.147	200.800, 1.449	200.800, 1.348	200.800, 1.391
1006	201.000, 1.279	201.000, 1.237	201.000, 1.176	201.000, 1.194	201.000, 1.270	201.000, 1.186	201.000, 1.170	201.000, 1.182	201.000, 1.204	201.000, 1.180	201.000, 1.123	201.000, 1.147	201.000, 1.449	201.000, 1.347	201.000, 1.390
1007	201.200, 1.279	201.200, 1.237	201.200, 1.176	201.200, 1.194	201.200, 1.270	201.200, 1.186	201.200, 1.170	201.200, 1.181	201.200, 1.203	201.200, 1.180	201.200, 1.123	201.200, 1.147	201.200, 1.448	201.200, 1.346	201.200, 1.389
1008	201.400, 1.279	201.400, 1.236	201.400, 1.176	201.400, 1.194	201.400, 1.269	201.400, 1.186	201.400, 1.169	201.400, 1.181	201.400, 1.203	201.400, 1.180	201.400, 1.123	201.400, 1.147	201.400, 1.447	201.400, 1.345	201.400, 1.388
1009	201.600, 1.279	201.600, 1.236	201.600, 1.176	201.600, 1.194	201.600, 1.269	201.600, 1.186	201.600, 1.169	201.600, 1.180	201.600, 1.203	201.600, 1.179	201.600, 1.123	201.600, 1.147	201.600, 1.446	201.600, 1.344	201.600, 1.387
1010	201.800, 1.279	201.800, 1.236	201.800, 1.176	201.800, 1.194	201.800, 1.269	201.800, 1.186	201.800, 1.169	201.800, 1.180	201.800, 1.203	201.800, 1.179	201.800, 1.122	201.800, 1.147	201.800, 1.445	201.800, 1.343	201.800, 1.386
1011	202.000, 1.279	202.000, 1.236	202.000, 1.176	202.000, 1.194	202.000, 1.269	202.000, 1.186	202.000, 1.169	202.000, 1.179	202.000, 1.202	202.000, 1.178	202.000, 1.122	202.000, 1.147	202.000, 1.444	202.000, 1.342	202.000, 1.385
1012	202.200, 1.279	202.200, 1.236	202.200, 1.176	202.200, 1.194	202.200, 1.269	202.200, 1.186	202.200, 1.169	202.200, 1.179	202.200, 1.202	202.200, 1.177	202.200, 1.122	202.200, 1.146	202.200, 1.442	202.200, 1.341	202.200, 1.384
1013	202.400, 1.279	202.400, 1.236	202.400, 1.176	202.400, 1.194	202.400, 1.269	202.400, 1.186	202.400, 1.168	202.400, 1.179	202.400, 1.202	202.400, 1.177	202.400, 1.122	202.400, 1.146	202.400, 1.441	202.400, 1.340	202.400, 1.383
1014	202.600, 1.279	202.600, 1.236	202.600, 1.176	202.600, 1.194	202.600, 1.269	202.600, 1.186	202.600, 1.168	202.600, 1.179	202.600, 1.202	202.600, 1.176	202.600, 1.122	202.600, 1.145	202.600, 1.440	202.600, 1.339	202.600, 1.382
1015	202.800, 1.279	202.800, 1.236	202.800, 1.175	202.800, 1.193	202.800, 1.269	202.800, 1.185	202.800, 1.168	202.800, 1.179	202.800, 1.202	202.800, 1.175	202.800, 1.122	202.800, 1.145	202.800, 1.439	202.800, 1.338	202.800, 1.381
1016	203.000, 1.278	203.000, 1.236	203.000, 1.175	203.000, 1.193	203.000, 1.268	203.000, 1.185	203.000, 1.168	203.000, 1.178	203.000, 1.202	203.000, 1.174	203.000, 1.122	203.000, 1.145	203.000, 1.438	203.000, 1.337	203.000, 1.380
1017	203.200, 1.278	203.200, 1.236	203.200, 1.175	203.200, 1.192	203.200, 1.268	203.200, 1.185	203.200, 1.168	203.200, 1.178	203.200, 1.202	203.200, 1.174	203.200, 1.122	203.200, 1.144	203.200, 1.437	203.200, 1.336	203.200, 1.379
1018	203.400, 1.278	203.400, 1.235	203.400, 1.175	203.400, 1.192	203.400, 1.268	203.400, 1.185	203.400, 1.168	203.400, 1.178	203.400, 1.202	203.400, 1.173	203.400, 1.122	203.400, 1.144	203.400, 1.435	203.400, 1.335	203.400, 1.379
1019	203.600, 1.278	203.600, 1.235	203.600, 1.175	203.600, 1.192	203.600, 1.268	203.600, 1.184	203.600, 1.168	203.600, 1.178	203.600, 1.202	203.600, 1.173	203.600, 1.122	203.600, 1.144	203.600, 1.434	203.600, 1.335	203.600, 1.378
1020	203.800, 1.278	203.800, 1.235	203.800, 1.175	203.800, 1.191	203.800, 1.268	203.800, 1.184	203.800, 1.168	203.800, 1.178	203.800, 1.201	203.800, 1.173	203.800, 1.122	203.800, 1.143	203.800, 1.433	203.800, 1.334	203.800, 1.377
1021	204.000, 1.277	204.000, 1.235	204.000, 1.175	204.000, 1.191	204.000, 1.267	204.000, 1.183	204.000, 1.167	204.000, 1.178	204.000, 1.201	204.000, 1.173	204.000, 1.122	204.000, 1.143	204.000, 1.432	204.000, 1.334	204.000, 1.376
1022	204.200, 1.278	204.200, 1.235	204.200, 1.175	204.200, 1.190	204.200, 1.267	204.200, 1.183	204.200, 1.167	204.200, 1.178	204.200, 1.201	204.200, 1.174	204.200, 1.122	204.200, 1.143	204.200, 1.431	204.200, 1.333	204.200, 1.376
1023	204.400, 1.278	204.400, 1.234	204.400, 1.175	204.400, 1.190	204.400, 1.267	204.400, 1.182	204.400, 1.167	204.400, 1.178	204.400, 1.201	204.400, 1.174	204.400, 1.122	204.400, 1.143	204.400, 1.430	204.400, 1.332	204.400, 1.375
1024	204.600, 1.278	204.600, 1.234	204.600, 1.175	204.600, 1.190	204.600, 1.266	204.600, 1.182	204.600, 1.167	204.600, 1.178	204.600, 1.200	204.600, 1.174	204.600, 1.122	204.600, 1.143	204.600, 1.429	204.600, 1.331	204.600, 1.374
1025	204.800, 1.278	204.800, 1.235	204.800, 1.174	204.800, 1.190	204.800, 1.266	204.800, 1.182	204.800, 1.167	204.800, 1.179	204.800, 1.200	204.800, 1.175	204.800, 1.122	204.800, 1.143	204.800, 1.428	204.800, 1.330	204.800, 1.374
1026	205.000, 1.278	205.000, 1.234	205.000, 1.174	205.000, 1.190	205.000, 1.265	205.000, 1.182	205.000, 1.166	205.000, 1.179	205.000, 1.199	205.000, 1.175	205.000, 1.121	205.000, 1.143	205.000, 1.427	205.000, 1.329	205.000, 1.373
1027	205.200, 1.278	205.200, 1.234	205.200, 1.174	205.200, 1.190	205.200, 1.265	205.200, 1.182	205.200, 1.166	205.200, 1.178	205.200, 1.199	205.200, 1.175	205.200, 1.121	205.200, 1.143	205.200, 1.425	205.200, 1.328	205.200, 1.372
1028	205.400, 1.278	205.400, 1.234	205.400, 1.174	205.400, 1.190	205.400, 1.266	205.400, 1.181	205.400, 1.166	205.400, 1.178	205.400, 1.199	205.400, 1.174	205.400, 1.121	205.400, 1.143	205.400, 1.424	205.400, 1.328	205.400, 1.371
1029	205.600, 1.278	205.600, 1.234	205.600, 1.174	205.600, 1.190	205.600, 1.266	205.600, 1.181	205.600, 1.166	205.600, 1.178	205.600, 1.199	205.600, 1.174	205.600, 1.120	205.600, 1.143	205.600, 1.424	205.600, 1.327	205.600, 1.370
1030	205.800, 1.277	205.800, 1.234	205.800, 1.174	205.800, 1.189	205.800, 1.266	205.800, 1.181	205.800, 1.166	205.800, 1.178	205.800, 1.199	205.800, 1.174	205.800, 1.119	205.800, 1.142	205.800, 1.423	205.800, 1.326	205.800, 1.369
1031	206.000, 1.278	206.000, 1.234	206.000, 1.174	206.000, 1.189	206.000, 1.266	206.000, 1.181	206.000, 1.166	206.000, 1.178	206.000, 1.199	206.000, 1.173	206.000, 1.119	206.000, 1.142	206.000, 1.422	206.000, 1.326	206.000, 1.369
1032	206.200, 1.277	206.200, 1.234	206.200, 1.174	206.200, 1.189	206.200, 1.266	206.200, 1.181	206.200, 1.166	206.200, 1.177	206.200, 1.199	206.200, 1.173	206.200, 1.119	206.200, 1.142	206.200, 1.421	206.200, 1.325	206.200, 1.368
1033	206.400, 1.278	206.400, 1.234	206.400, 1.173	206.400, 1.189	206.400, 1.266	206.400, 1.181	206.400, 1.166	206.400, 1.177	206.400, 1.199	206.400, 1.173	206.400, 1.118	206.400, 1.142	206.400, 1.421	206.400, 1.324	206.400, 1.368
1034	206.600, 1.277	206.600, 1.233	206.600, 1.173	206.600, 1.189	206.600, 1.266	206.600, 1.181	206.600, 1.166	206.600, 1.177	206.600, 1.199	206.600, 1.173	206.600, 1.118	206.600, 1.141	206.600, 1.420	206.600, 1.323	206.600, 1.367
1035	206.800, 1.277	206.800, 1.233	206.800, 1.173	206.800, 1.190	206.800, 1.266	206.800, 1.180	206.800, 1.166	206.800, 1.177	206.800, 1.199	206.800, 1.172	206.800, 1.118	206.800, 1.141	206.800, 1.420	206.800, 1.322	206.800, 1.367
1036	207.000, 1.277	207.000, 1.233	207.000, 1.172	207.000, 1.190	207.000, 1.266	207.000, 1.180	207.000, 1.166	207.000, 1.177	207.000, 1.199	207.000, 1.172	207.000, 1.118	207.000, 1.141	207.000, 1.419	207.000, 1.322	207.000, 1.367
1037	207.200, 1.276	207.200, 1.232	207.200, 1.172	207.200, 1.190	207.200, 1.265	207.200, 1.180	207.200, 1.166	207.200, 1.176	207.200, 1.199	207.200, 1.172	207.200, 1.118	207.200, 1.141	207.200, 1.418	207.200, 1.321	207.200, 1.366
1038	207.400, 1.276	207.400, 1.232	207.400, 1.172	207.400, 1.190	207.400, 1.265	207.400, 1.180	207.400, 1.166	207.400, 1.176	207.400, 1.199	207.400, 1.172	207.400, 1.118	207.400, 1.141	207.400, 1.418	207.400, 1.320	207.400, 1.366
1039	207.600, 1.275	207.600, 1.232	207.600, 1.172	207.600, 1.189	207.600, 1.264	207.600, 1.180	207.600, 1.166	207.600, 1.176	207.600, 1.199	207.600, 1.172	207.600, 1.118	207.600, 1.141	207.600, 1.417	207.600, 1.320	207.600, 1.365
1040	207.800, 1.275	207.800, 1.232	207.800, 1.171	207.800, 1.189	207.800, 1.264	207.800, 1.180	207.800, 1.165	207.800, 1.176	207.800, 1.199	207.800, 1.173	207.800, 1.118	207.800, 1.141	207.800, 1.416	207.800, 1.319	207.800, 1.365
1041	208.000, 1.275	208.000, 1.231	208.000, 1.171	208.000, 1.189	208.000, 1.263	208.000, 1.179	208.000, 1.165	208.000, 1.176	208.000, 1.199	208.000, 1.173	208.000, 1.119	208.000, 1.141	208.000, 1.415	208.000, 1.318	208.000, 1.364
1042	208.200, 1.275	208.200, 1.231	208.200, 1.171	208.200, 1.189	208.200, 1.263	208.200, 1.179	208.200, 1.165	208.200, 1.176	208.200, 1.198	208.200, 1.173	208.200, 1.119	208.200, 1.141	208.200, 1.414	208.200, 1.317	208.200, 1.363
1043	208.400, 1.275	208.400, 1.231	208.400, 1.171	208.400, 1.189	208.400, 1.263	208.400, 1.179	208.400, 1.164	208.400, 1.176	208.400, 1.198	208.400, 1.173	208.400, 1.119	208.400, 1.141	208.400, 1.413	208.400, 1.316	208.400, 1.362
1044	208.600, 1.275	208.600, 1.231	208.600, 1.171	208.600, 1.189	208.600, 1.263	208.600, 1.179	208.600, 1.164	208.600, 1.176	208.600, 1.198	208.600, 1.173	208.600, 1.119	208.600, 1.140	208.600, 1.412	208.600, 1.315	208.600, 1.361
1045	208.800, 1.275	208.800, 1.231	208.800, 1.171	208.800, 1.188	208.800, 1.262	208.800, 1.178	208.800, 1.164	208.800, 1.175	208.800, 1.198	208.800, 1.173	208.800, 1.119	208.800, 1.140	208.800, 1.411	208.800, 1.315	208.800, 1.360
1046	209.000, 1.274	209.000, 1.231	209.000, 1.171	209.000, 1.188	209.000, 1.262	209.000, 1.178	209.000, 1.163	209.000, 1.175	209.000, 1.198	209.000, 1.173	209.000, 1.118	209.000, 1.140	209.000, 1.409	209.000, 1.314	209.000, 1.359
1047	209.200, 1.274	209.200, 1.231	209.200, 1.171	209.200, 1.187	209.200, 1.262	209.200, 1.178	209.200, 1.163	209.200, 1.175	209.200, 1.198	209.200, 1.173	209.200, 1.118	209.200, 1.139	209.200, 1.408	209.200, 1.313	209.200, 1.358
1048	209.400, 1.274	209.400, 1.232	209.400, 1.171	209.400, 1.187	209.400, 1.262	209.400, 1.178	209.400, 1.163	209.400, 1.175	209.400, 1.198	209.400, 1.173	209.400, 1.118	209.400, 1.139	209.400, 1.407	209.400, 1.312	209.400, 1.357
1049	209.600, 1.274	209.600, 1.232	209.600, 1.171	209.600, 1.187	209.600, 1.262	209.600, 1.179	209.600, 1.162	209.600, 1.175	209.600, 1.198	209.600, 1.172	209.600, 1.118	209.600, 1.139	209.600, 1.406	209.600, 1.312	209.600, 1.356
1050	209.800, 1.274	209.800, 1.232	209.800, 1.170	209.800, 1.187	209.800, 1.262	209.800, 1.179	209.800, 1.162	209.800, 1.175	209.800, 1.198	209.800, 1.172	209.800, 1.117	209.800, 1.139	209.800, 1.405	209.800, 1.311	209.800, 1.355
1051	210.000, 1.273	210.000, 1.231	210.000, 1.170	210.000, 1.187	210.000, 1.262	210.000, 1.179	210.000, 1.162	210.000, 1.175	210.000, 1.198	210.000, 1.172	210.000, 1.117	210.000, 1.139	210.000, 1.405	210.000, 1.310	210.000, 1.355
1052	210.200, 1.273	210.200, 1.231	210.200, 1.170	210.200, 1.187	210.200, 1.262	210.200, 1.178	210.200, 1.162	210.200, 1.174	210.200, 1.197	210.200, 1.172	210.200, 1.117	210.200, 1.139	210.200, 1.404	210.200, 1.309	210.200, 1.354
1053	210.400, 1.273	210.400, 1.231	210.400, 1.170	210.400, 1.187	210.400, 1.262	210.400, 1.178	210.400, 1.162	210.400, 1.174	210.400, 1.197	210.400, 1.171	210.400, 1.117	210.400, 1.139	210.400, 1.404	210.400, 1.309	210.400, 1.354
1054	210.600, 1.273	210.600, 1.231	210.600, 1.170	210.600, 1.187	210.600, 1.262	210.600, 1.178	210.600, 1.162	210.600, 1.174	210.600, 1.197	210.600, 1.171	210.600, 1.117	210.600, 1.139	210.600, 1.403	210.600, 1.308	210.600, 1.353
1055	210.800, 1.272	210.800, 1.230	210.800, 1.170	210.800, 1.186	210.800, 1.261	210.800, 1.178	210.800, 1.162	210.800, 1.174	210.800, 1.197	210.800, 1.171	210.800, 1.117	210.800, 1.139	210.800, 1.402	210.800, 1.307	210.800, 1.353
1056	211.000, 1.272	211.000, 1.230	211.000, 1.170	211.000, 1.186	211.000, 1.261	211.000, 1.178	211.000, 1.162	211.000, 1.173	211.000, 1.196	211.000, 1.171	211.000, 1.116	211.000, 1.139	211.000, 1.402	211.000, 1.306	211.000, 1.352
1057	211.200, 1.272	211.200, 1.229	211.200, 1.170	211.200, 1.186	211.200, 1.261	211.200, 1.178	211.200, 1.162	211.200, 1.173	211.200, 1.196	211.200, 1.171	211.200, 1.116	211.200, 1.139	211.200, 1.401	211.200, 1.305	211.200, 1.351
1058	211.400, 1.272	211.400, 1.229	211.400, 1.170	211.400, 1.185	211.400, 1.261	211.400, 1.178	211.400, 1.162	211.400, 1.173	211.400, 1.195	211.400, 1.171	211.400, 1.116	211.400, 1.139	211.400, 1.400	211.400, 1.305	211.400, 1.351
1059	211.600, 1.272	211.600, 1.228	211.600, 1.170	211.600, 1.185	211.600, 1.261	211.600, 1.178	211.600, 1.162	211.600, 1.173	211.600, 1.195	211.600, 1.171	211.600, 1.116	211.600, 1.138	211.600, 1.399	211.600, 1.304	211.600, 1.351
1060	211.800, 1.272	211.800, 1.228	211.800, 1.170	211.800, 1.185	211.800, 1.261	211.800, 1.178	211.800, 1.162	211.800, 1.173	211.800, 1.194	211.800, 1.171	211.800, 1.115	211.800, 1.138	211.800, 1.398	211.800, 1.303	211.800, 1.350
1061	212.000, 1.272	212.000, 1.228	212.000, 1.170	212.000, 1.185	212.000, 1.261	212.000, 1.178	212.000, 1.162	212.000, 1.173	212.000, 1.194	212.000, 1.171	212.000, 1.115	212.000, 1.138	212.000, 1.397	212.000, 1.303	212.000, 1.349
1062	212.200, 1.272	212.200, 1.228	212.200, 1.170	212.200, 1.185	212.200, 1.261	212.200, 1.178	212.200, 1.162	212.200, 1.173	212.200, 1.194	212.200, 1.171	212.200, 1.115	212.200, 1.138	212.200, 1.397	212.200, 1.302	212.200, 1.348
1063	212.400, 1.272	212.400, 1.228	212.400, 1.170	212.400, 1.185	212.400, 1.260	212.400, 1.177	212.400, 1.162	212.400, 1.173	212.400, 1.193	212.400, 1.171	212.400, 1.115	212.400, 1.138	212.400, 1.396	212.400, 1.302	212.400, 1.347
1064	212.600, 1.272	212.600, 1.228	212.600, 1.170	212.600, 1.185	212.600, 1.260	212.600, 1.177	212.600, 1.162	212.600, 1.173	212.600, 1.193	212.600, 1.171	212.600, 1.114	212.600, 1.137	212.600, 1.395	212.600, 1.301	212.600, 1.346
1065	212.800, 1.272	212.800, 1.228	212.800, 1.170	212.800, 1.185	212.800, 1.260	212.800, 1.177	212.800, 1.162	212.800, 1.173	212.800, 1.193	212.800, 1.171	212.800, 1.114	212.800, 1.137	212.800, 1.394	212.800, 1.301	212.800, 1.345
1066	213.000, 1.272	213.000, 1.228	213.000, 1.170	213.000, 1.185	213.000, 1.259	213.000, 1.176	213.000, 1.162	213.000, 1.173	213.000, 1.192	213.000, 1.170	213.000, 1.114	213.000, 1.137	213.000, 1.393	213.000, 1.301	213.000, 1.345
1067	213.200, 1.272	213.200, 1.229	213.200, 1.170	213.200, 1.185	213.200, 1.259	213.200, 1.176	213.200, 1.162	213.200, 1.173	213.200, 1.192	213.200, 1.170	213.200, 1.114	213.200, 1.137	213.200, 1.393	213.200, 1.300	213.200, 1.344
1068	213.400, 1.271	213.400, 1.229	213.400, 1.169	213.400, 1.185	213.400, 1.259	213.400, 1.176	213.400, 1.161	213.400, 1.173	213.400, 1.192	213.400, 1.170	213.400, 1.114	213.400, 1.136	213.400, 1.392	213.400, 1.300	213.400, 1.343
1069	213.600, 1.271	213.600, 1.228	213.600, 1.169	213.600, 1.185	213.600, 1.259	213.600, 1.176	213.600, 1.161	213.600, 1.173	213.600, 1.192	213.600, 1.169	213.600, 1.114	213.600, 1.136	213.600, 1.391	213.600, 1.299	213.600, 1.343
1070	213.800, 1.271	213.800, 1.228	213.800, 1.169	213.800, 1.185	213.800, 1.258	213.800, 1.176	213.800, 1.161	213.800, 1.173	213.800, 1.192	213.800, 1.169	213.800, 1.114	213.800, 1.136	213.800, 1.390	213.800, 1.299	213.800, 1.342
1071	214.000, 1.271	214.000, 1.228	214.000, 1.169	214.000, 1.185	214.000, 1.258	214.000, 1.176	214.000, 1.160	214.000, 1.173	214.000, 1.192	214.000, 1.168	214.000, 1.114	214.000, 1.136	214.000, 1.390	214.000, 1.298	214.000, 1.342
1072	214.200, 1.270	214.200, 1.228	214.200, 1.169	214.200, 1.185	214.200, 1.258	214.200, 1.175	214.200, 1.160	214.200, 1.173	214.200, 1.192	214.200, 1.168	214.200, 1.114	214.200, 1.136	214.200, 1.389	214.200, 1.297	214.200, 1.342
1073	214.400, 1.270	214.400, 1.228	214.400, 1.168	214.400, 1.185	214.400, 1.258	214.400, 1.175	214.400, 1.159	214.400, 1.173	214.400, 1.193	214.400, 1.167	214.400, 1.114	214.400, 1.136	214.400, 1.388	214.400, 1.297	214.400, 1.341
1074	214.600, 1.269	214.600, 1.228	214.600, 1.168	214.600, 1.185	214.600, 1.258	214.600, 1.175	214.600, 1.159	214.600, 1.172	214.600, 1.193	214.600, 1.167	214.600, 1.114	214.600, 1.136	214.600, 1.387	214.600, 1.296	214.600, 1.341
1075	214.800, 1.269	214.800, 1.227	214.800, 1.168	214.800, 1.184	214.800, 1.258	214.800, 1.175	214.800, 1.159	214.800, 1.172	214.800, 1.193	214.800, 1.167	214.800, 1.114	214.800, 1.136	214.800, 1.385	214.800, 1.295	214.800, 1.340
1076	215.000, 1.269	215.000, 1.227	215.000, 1.168	215.000, 1.184	215.000, 1.257	215.000, 1.175	215.000, 1.159	215.000, 1.172	215.000, 1.193	215.000, 1.166	215.000, 1.114	215.000, 1.135	215.000, 1.384	215.000, 1.294	215.000, 1.340
1077	215.200, 1.269	215.200, 1.227	215.200, 1.168	215.200, 1.184	215.200, 1.257	215.200, 1.175	215.200, 1.159	215.200, 1.172	215.200, 1.193	215.200, 1.166	215.200, 1.114	215.200, 1.135	215.200, 1.383	215.200, 1.293	215.200, 1.340
1078	215.400, 1.269	215.400, 1.226	215.400, 1.168	215.400, 1.184	215.400, 1.257	215.400, 1.175	215.400, 1.158	215.400, 1.172	215.400, 1.193	215.400, 1.166	215.400, 1.114	215.400, 1.135	215.400, 1.381	215.400, 1.292	215.400, 1.339
1079	215.600, 1.270	215.600, 1.226	215.600, 1.168	215.600, 1.184	215.600, 1.257	215.600, 1.175	215.600, 1.158	215.600, 1.172	215.600, 1.193	215.600, 1.166	215.600, 1.114	215.600, 1.135	215.600, 1.380	215.600, 1.291	215.600, 1.339
1080	215.800, 1.270	215.800, 1.226	215.800, 1.168	215.800, 1.184	215.800, 1.257	215.800, 1.175	215.800, 1.158	215.800, 1.172	215.800, 1.192	215.800, 1.166	215.800, 1.113	215.800, 1.135	215.800, 1.379	215.800, 1.290	215.800, 1.338
1081	216.000, 1.270	216.000, 1.226	216.000, 1.168	216.000, 1.184	216.000, 1.257	216.000, 1.175	216.000, 1.158	216.000, 1.172	216.000, 1.192	216.000, 1.166	216.000, 1.113	216.000, 1.135	216.000, 1.378	216.000, 1.289	216.000, 1.337
1082	216.200, 1.270	216.200, 1.226	216.200, 1.168	216.200, 1.184	216.200, 1.257	216.200, 1.174	216.200, 1.158	216.200, 1.172	216.200, 1.192	216.200, 1.166	216.200, 1.113	216.200, 1.135	216.200, 1.378	216.200, 1.288	216.200, 1.337
1083	216.400, 1.270	216.400, 1.226	216.400, 1.168	216.400, 1.184	216.400, 1.257	216.400, 1.174	216.400, 1.158	216.400, 1.171	216.400, 1.192	216.400, 1.165	216.400, 1.113	216.400, 1.136	216.400, 1.377	216.400, 1.288	216.400, 1.336
1084	216.600, 1.270	216.600, 1.226	216.600, 1.168	216.600, 1.184	216.600, 1.257	216.600, 1.174	216.600, 1.158	216.600, 1.171	216.600, 1.192	216.600, 1.165	216.600, 1.112	216.600, 1.136	216.600, 1.377	216.600, 1.287	216.600, 1.335
1085	216.800, 1.270	216.800, 1.226	216.800, 1.168	216.800, 1.184	216.800, 1.257	216.800, 1.174	216.800, 1.158	216.800, 1.171	216.800, 1.192	216.800, 1.165	216.800, 1.112	216.800, 1.136	216.800, 1.376	216.800, 1.287	216.800, 1.334
1086	217.000, 1.270	217.000, 1.226	217.000, 1.168	217.000, 1.184	217.000, 1.257	217.000, 1.173	217.000, 1.158	217.000, 1.171	217.000, 1.192	217.000, 1.165	217.000, 1.112	217.000, 1.136	217.000, 1.376	217.000, 1.286	217.000, 1.333
1087	217.200, 1.270	217.200, 1.226	217.200, 1.168	217.200, 1.184	217.200, 1.256	217.200, 1.173	217.200, 1.158	217.200, 1.170	217.200, 1.192	217.200, 1.165	217.200, 1.112	217.200, 1.136	217.200, 1.376	217.200, 1.285	217.200, 1.333
1088	217.400, 1.270	217.400, 1.226	217.400, 1.168	217.400, 1.183	217.400, 1.256	217.400, 1.173	217.400, 1.158	217.400, 1.170	217.400, 1.192	217.400, 1.165	217.400, 1.112	217.400, 1.136	217.400, 1.376	217.400, 1.285	217.400, 1.332
1089	217.600, 1.270	217.600, 1.226	217.600, 1.168	217.600, 1.183	217.600, 1.256	217.600, 1.173	217.600, 1.158	217.600, 1.170	217.600, 1.192	217.600, 1.165	217.600, 1.112	217.600, 1.135	217.600, 1.375	217.600, 1.284	217.600, 1.331
1090	217.800, 1.270	217.800, 1.226	217.800, 1.167	217.800, 1.183	217.800, 1.256	217.800, 1.173	217.800, 1.157	217.800, 1.170	217.800, 1.192	217.800, 1.165	217.800, 1.112	217.800, 1.135	217.800, 1.375	217.800, 1.283	217.800, 1.331
1091	218.000, 1.269	218.000, 1.226	218.000, 1.167	218.000, 1.183	218.000, 1.256	218.000, 1.173	218.000, 1.157	218.000, 1.170	218.000, 1.191	218.000, 1.165	218.000, 1.112	218.000, 1.135	218.000, 1.375	218.000, 1.283	218.000, 1.330
1092	218.200, 1.269	218.200, 1.226	218.200, 1.167	218.200, 1.183	218.200, 1.256	218.200, 1.173	218.200, 1.157	218.200, 1.170	218.200, 1.191	218.200, 1.165	218.200, 1.112	218.200, 1.135	218.200, 1.375	218.200, 1.282	218.200, 1.329
1093	218.400, 1.269	218.400, 1.225	218.400, 1.166	218.400, 1.183	218.400, 1.255	218.400, 1.172	218.400, 1.157	218.400, 1.170	218.400, 1.191	218.400, 1.165	218.400, 1.112	218.400, 1.134	218.400, 1.374	218.400, 1.282	218.400, 1.329
1094	218.600, 1.269	218.600, 1.225	218.600, 1.166	218.600, 1.183	218.600, 1.256	218.600, 1.172	218.600, 1.157	218.600, 1.170	218.600, 1.191	218.600, 1.165	218.600, 1.112	218.600, 1.134	218.600, 1.374	218.600, 1.281	218.600, 1.328
1095	218.800, 1.269	218.800, 1.225	218.800, 1.166	218.800, 1.182	218.800, 1.256	218.800, 1.172	218.800, 1.157	218.800, 1.169	218.800, 1.191	218.800, 1.165	218.800, 1.112	218.800, 1.133	218.800, 1.373	218.800, 1.281	218.800, 1.328
1096	219.000, 1.268	219.000, 1.224	219.000, 1.165	219.000, 1.182	219.000, 1.256	219.000, 1.172	219.000, 1.156	219.000, 1.169	219.000, 1.190	219.000, 1.165	219.000, 1.112	219.000, 1.133	219.000, 1.372	219.000, 1.281	219.000, 1.328
1097	219.200, 1.268	219.200, 1.224	219.200, 1.165	219.200, 1.182	219.200, 1.256	219.200, 1.172	219.200, 1.156	219.200, 1.169	219.200, 1.190	219.200, 1.165	219.200, 1.112	219.200, 1.133	219.200, 1.371	219.200, 1.280	219.200, 1.327
1098	219.400, 1.268	219.400, 1.223	219.400, 1.165	219.400, 1.182	219.400, 1.256	219.400, 1.172	219.400, 1.156	219.400, 1.169	219.400, 1.190	219.400, 1.164	219.400, 1.112	219.400, 1.133	219.400, 1.370	219.400, 1.280	219.400, 1.327
1099	219.600, 1.268	219.600, 1.223	219.600, 1.165	219.600, 1.182	219.600, 1.256	219.600, 1.171	219.600, 1.156	219.600, 1.168	219.600, 1.189	219.600, 1.164	219.600, 1.112	219.600, 1.133	219.600, 1.369	219.600, 1.279	219.600, 1.327
1100	219.800, 1.268	219.800, 1.223	219.800, 1.165	219.800, 1.181	219.800, 1.256	219.800, 1.171	219.800, 1.156	219.800, 1.168	219.800, 1.189	219.800, 1.164	219.800, 1.112	219.800, 1.133	219.800, 1.369	219.800, 1.278	219.800, 1.326
1101	220.000, 1.267	220.000, 1.223	220.000, 1.165	220.000, 1.181	220.000, 1.256	220.000, 1.171	220.000, 1.155	220.000, 1.168	220.000, 1.188	220.000, 1.163	220.000, 1.111	220.000, 1.133	220.000, 1.368	220.000, 1.278	220.000, 1.325
1102	220.200, 1.267	220.200, 1.222	220.200, 1.165	220.200, 1.181	220.200, 1.256	220.200, 1.171	220.200, 1.155	220.200, 1.167	220.200, 1.188	220.200, 1.163	220.200, 1.111	220.200, 1.133	220.200, 1.368	220.200, 1.277	220.200, 1.325
1103	220.400, 1.267	220.400, 1.222	220.400, 1.164	220.400, 1.181	220.400, 1.255	220.400, 1.170	220.400, 1.155	220.400, 1.167	220.400, 1.187	220.400, 1.163	220.400, 1.111	220.400, 1.134	220.400, 1.367	220.400, 1.277	220.400, 1.324
1104	220.600, 1.267	220.600, 1.222	220.600, 1.164	220.600, 1.181	220.600, 1.255	220.600, 1.170	220.600, 1.154	220.600, 1.167	220.600, 1.187	220.600, 1.163	220.600, 1.111	220.600, 1.134	220.600, 1.366	220.600, 1.276	220.600, 1.324
1105	220.800, 1.267	220.800, 1.222	220.800, 1.164	220.800, 1.181	220.800, 1.255	220.800, 1.170	220.800, 1.154	220.800, 1.167	220.800, 1.187	220.800, 1.163	220.800, 1.111	220.800, 1.134	220.800, 1.365	220.800, 1.275	220.800, 1.324
1106	221.000, 1.266	221.000, 1.222	221.000, 1.164	221.000, 1.180	221.000, 1.254	221.000, 1.170	221.000, 1.154	221.000, 1.167	221.000, 1.187	221.000, 1.163	221.000, 1.111	221.000, 1.134	221.000, 1.364	221.000, 1.274	221.000, 1.323
1107	221.200, 1.266	221.200, 1.222	221.200, 1.165	221.200, 1.180	221.200, 1.254	221.200, 1.170	221.200, 1.153	221.200, 1.167	221.200, 1.187	221.200, 1.163	221.200, 1.110	221.200, 1.134	221.200, 1.363	221.200, 1.274	221.200, 1.323
1108	221.400, 1.265	221.400, 1.223	221.400, 1.165	221.400, 1.180	221.400, 1.253	221.400, 1.170	221.400, 1.153	221.400, 1.167	221.400, 1.187	221.400, 1.163	221.400, 1.110	221.400, 1.134	221.400, 1.363	221.400, 1.273	221.400, 1.322
1109	221.600, 1.264	221.600, 1.223	221.600, 1.165	221.600, 1.180	221.600, 1.253	221.600, 1.170	221.600, 1.153	221.600, 1.167	221.600, 1.187	221.600, 1.163	221.600, 1.110	221.600, 1.133	221.600, 1.362	221.600, 1.273	221.600, 1.322
1110	221.800, 1.264	221.800, 1.223	221.800, 1.164	221.800, 1.180	221.800, 1.253	221.800, 1.170	221.800, 1.153	221.800, 1.167	221.800, 1.187	221.800, 1.163	221.800, 1.110	221.800, 1.133	221.800, 1.361	221.800, 1.272	221.800, 1.321
1111	222.000, 1.264	222.000, 1.223	222.000, 1.164	222.000, 1.180	222.000, 1.253	222.000, 1.170	222.000, 1.153	222.000, 1.167	222.000, 1.187	222.000, 1.163	222.000, 1.110	222.000, 1.133	222.000, 1.360	222.000, 1.272	222.000, 1.320
1112	222.200, 1.264	222.200, 1.223	222.200, 1.164	222.200, 1.179	222.200, 1.253	222.200, 1.170	222.200, 1.153	222.200, 1.167	222.200, 1.187	222.200, 1.163	222.200, 1.111	222.200, 1.133	222.200, 1.360	222.200, 1.271	222.200, 1.319
1113	222.400, 1.263	222.400, 1.223	222.400, 1.164	222.400, 1.179	222.400, 1.252	222.400, 1.170	222.400, 1.153	222.400, 1.167	222.400, 1.187	222.400, 1.162	222.400, 1.111	222.400, 1.132	222.400, 1.359	222.400, 1.270	222.400, 1.319
1114	222.600, 1.263	222.600, 1.223	222.600, 1.164	222.600, 1.179	222.600, 1.252	222.600, 1.170	222.600, 1.153	222.600, 1.167	222.600, 1.187	222.600, 1.162	222.600, 1.110	222.600, 1.132	222.600, 1.358	222.600, 1.270	222.600, 1.318
1115	222.800, 1.263	222.800, 1.223	222.800, 1.164	222.800, 1.179	222.800, 1.253	222.800, 1.170	222.800, 1.153	222.800, 1.167	222.800, 1.187	222.800, 1.162	222.800, 1.110	222.800, 1.132	222.800, 1.357	222.800, 1.269	222.800, 1.317
1116	223.000, 1.263	223.000, 1.223	223.000, 1.164	223.000, 1.179	223.000, 1.253	223.000, 1.170	223.000, 1.153	223.000, 1.167	223.000, 1.187	223.000, 1.162	223.000, 1.110	223.000, 1.131	223.000, 1.357	223.000, 1.268	223.000, 1.317
1117	223.200, 1.263	223.200, 1.222	223.200, 1.164	223.200, 1.179	223.200, 1.253	223.200, 1.170	223.200, 1.153	223.200, 1.166	223.200, 1.187	223.200, 1.161	223.200, 1.110	223.200, 1.131	223.200, 1.356	223.200, 1.267	223.200, 1.316
1118	223.400, 1.263	223.400, 1.222	223.400, 1.164	223.400, 1.179	223.400, 1.253	223.400, 1.170	223.400, 1.153	223.400, 1.166	223.400, 1.187	223.400, 1.161	223.400, 1.109	223.400, 1.131	223.400, 1.355	223.400, 1.267	223.400, 1.316
1119	223.600, 1.263	223.600, 1.222	223.600, 1.163	223.600, 1.179	223.600, 1.252	223.600, 1.170	223.600, 1.154	223.600, 1.165	223.600, 1.186	223.600, 1.161	223.600, 1.109	223.600, 1.131	223.600, 1.355	223.600, 1.266	223.600, 1.315
1120	223.800, 1.264	223.800, 1.221	223.800, 1.163	223.800, 1.179	223.800, 1.252	223.800, 1.169	223.800, 1.154	223.800, 1.165	223.800, 1.186	223.800, 1.161	223.800, 1.109	223.800, 1.130	223.800, 1.354	223.800, 1.265	223.800, 1.315
1121	224.000, 1.264	224.000, 1.221	224.000, 1.163	224.000, 1.179	224.000, 1.252	224.000, 1.169	224.000, 1.154	224.000, 1.165	224.000, 1.186	224.000, 1.161	224.000, 1.109	224.000, 1.130	224.000, 1.353	224.000, 1.265	224.000, 1.315
1122	224.200, 1.264	224.200, 1.221	224.200, 1.162	224.200, 1.179	224.200, 1.252	224.200, 1.169	224.200, 1.154	224.200, 1.165	224.200, 1.185	224.200, 1.161	224.200, 1.108	224.200, 1.130	224.200, 1.353	224.200, 1.265	224.200, 1.315
1123	224.400, 1.263	224.400, 1.221	224.400, 1.162	224.400, 1.179	224.400, 1.252	224.400, 1.169	224.400, 1.153	224.400, 1.165	224.400, 1.185	224.400, 1.161	224.400, 1.108	224.400, 1.130	224.400, 1.352	224.400, 1.264	224.400, 1.314
1124	224.600, 1.263	224.600, 1.220	224.600, 1.161	224.600, 1.179	224.600, 1.252	224.600, 1.168	224.600, 1.153	224.600, 1.165	224.600, 1.185	224.600, 1.162	224.600, 1.108	224.600, 1.129	224.600, 1.351	224.600, 1.264	224.600, 1.314
1125	224.800, 1.263	224.800, 1.220	224.800, 1.161	224.800, 1.179	224.800, 1.251	224.800, 1.168	224.800, 1.153	224.800, 1.165	224.800, 1.185	224.800, 1.162	224.800, 1.108	224.800, 1.129	224.800, 1.351	224.800, 1.264	224.800, 1.314
1126	225.000, 1.262	225.000, 1.220	225.000, 1.161	225.000, 1.179	225.000, 1.251	225.000, 1.168	225.000, 1.153	225.000, 1.165	225.000, 1.185	225.000, 1.162	225.000, 1.108	225.000, 1.129	225.000, 1.350	225.000, 1.263	225.000, 1.314
1127	225.200, 1.262	225.200, 1.220	225.200, 1.160	225.200, 1.178	225.200, 1.251	225.200, 1.168	225.200, 1.153	225.200, 1.165	225.200, 1.185	225.200, 1.162	225.200, 1.108	225.200, 1.129	225.200, 1.349	225.200, 1.263	225.200, 1.313
1128	225.400, 1.262	225.400, 1.220	225.400, 1.160	225.400, 1.178	225.400, 1.251	225.400, 1.168	225.400, 1.152	225.400, 1.166	225.400, 1.185	225.400, 1.162	225.400, 1.108	225.400, 1.129	225.400, 1.349	225.400, 1.263	225.400, 1.313
1129	225.600, 1.262	225.600, 1.220	225.600, 1.160	225.600, 1.177	225.600, 1.251	225.600, 1.167	225.600, 1.152	225.600, 1.166	225.600, 1.184	225.600, 1.162	225.600, 1.108	225.600, 1.129	225.600, 1.348	225.600, 1.263	225.600, 1.312
1130	225.800, 1.262	225.800, 1.220	225.800, 1.160	225.800, 1.177	225.800, 1.250	225.800, 1.167	225.800, 1.152	225.800, 1.166	225.800, 1.184	225.800, 1.161	225.800, 1.108	225.800, 1.129	225.800, 1.348	225.800, 1.262	225.800, 1.311
1131	226.000, 1.263	226.000, 1.220	226.000, 1.160	226.000, 1.177	226.000, 1.250	226.000, 1.167	226.000, 1.152	226.000, 1.165	226.000, 1.184	226.000, 1.161	226.000, 1.108	226.000, 1.128	226.000, 1.347	226.000, 1.262	226.000, 1.311
1132	226.200, 1.263	226.200, 1.220	226.200, 1.159	226.200, 1.177	226.200, 1.250	226.200, 1.167	226.200, 1.152	226.200, 1.165	226.200, 1.184	226.200, 1.161	226.200, 1.108	226.200, 1.128	226.200, 1.347	226.200, 1.261	226.200, 1.310
1133	226.400, 1.263	226.400, 1.220	226.400, 1.160	226.400, 1.177	226.400, 1.250	226.400, 1.167	226.400, 1.152	226.400, 1.165	226.400, 1.184	226.400, 1.161	226.400, 1.108	226.400, 1.128	226.400, 1.346	226.400, 1.261	226.400, 1.309
1134	226.600, 1.263	226.600, 1.220	226.600, 1.160	226.600, 1.177	226.600, 1.250	226.600, 1.167	226.600, 1.152	226.600, 1.165	226.600, 1.184	226.600, 1.161	226.600, 1.108	226.600, 1.129	226.600, 1.346	226.600, 1.260	226.600, 1.308
1135	226.800, 1.263	226.800, 1.220	226.800, 1.160	226.800, 1.177	226.800, 1.250	226.800, 1.167	226.800, 1.152	226.800, 1.165	226.800, 1.184	226.800, 1.160	226.800, 1.108	226.800, 1.128	226.800, 1.345	226.800, 1.260	226.800, 1.308
1136	227.000, 1.263	227.000, 1.220	227.000, 1.160	227.000, 1.177	227.000, 1.250	227.000, 1.167	227.000, 1.152	227.000, 1.164	227.000, 1.183	227.000, 1.160	227.000, 1.108	227.000, 1.128	227.000, 1.345	227.000, 1.259	227.000, 1.307
1137	227.200, 1.263	227.200, 1.219	227.200, 1.161	227.200, 1.177	227.200, 1.250	227.200, 1.167	227.200, 1.151	227.200, 1.164	227.200, 1.183	227.200, 1.160	227.200, 1.108	227.200, 1.128	227.200, 1.345	227.200, 1.258	227.200, 1.307
1138	227.400, 1.263	227.400, 1.220	227.400, 1.161	227.400, 1.177	227.400, 1.250	227.400, 1.167	227.400, 1.151	227.400, 1.164	227.400, 1.183	227.400, 1.160	227.400, 1.108	227.400, 1.128	227.400, 1.344	227.400, 1.258	227.400, 1.306
1139	227.600, 1.263	227.600, 1.220	227.600, 1.161	227.600, 1.176	227.600, 1.250	227.600, 1.166	227.600, 1.151	227.600, 1.164	227.600, 1.182	227.600, 1.160	227.600, 1.107	227.600, 1.128	227.600, 1.343	227.600, 1.257	227.600, 1.306
1140	227.800, 1.263	227.800, 1.220	227.800, 1.161	227.800, 1.176	227.800, 1.249	227.800, 1.166	227.800, 1.151	227.800, 1.164	227.800, 1.182	227.800, 1.160	227.800, 1.107	227.800, 1.128	227.800, 1.343	227.800, 1.257	227.800, 1.306
1141	228.000, 1.263	228.000, 1.220	228.000, 1.162	228.000, 1.176	228.000, 1.249	228.000, 1.166	228.000, 1.151	228.000, 1.164	228.000, 1.182	228.000, 1.160	228.000, 1.107	228.000, 1.128	228.000, 1.342	228.000, 1.256	228.000, 1.306
1142	228.200, 1.262	228.200, 1.220	228.200, 1.162	228.200, 1.176	228.200, 1.249	228.200, 1.166	228.200, 1.151	228.200, 1.163	228.200, 1.182	228.200, 1.160	228.200, 1.106	228.200, 1.128	228.200, 1.342	228.200, 1.256	228.200, 1.306
1143	228.400, 1.262	228.400, 1.220	228.400, 1.162	228.400, 1.176	228.400, 1.249	228.400, 1.166	228.400, 1.151	228.400, 1.163	228.400, 1.181	228.400, 1.160	228.400, 1.106	228.400, 1.128	228.400, 1.341	228.400, 1.255	228.400, 1.305
1144	228.600, 1.262	228.600, 1.220	228.600, 1.162	228.600, 1.176	228.600, 1.249	228.600, 1.165	228.600, 1.151	228.600, 1.163	228.600, 1.181	228.600, 1.160	228.600, 1.106	228.600, 1.128	228.600, 1.341	228.600, 1.255	228.600, 1.305
1145	228.800, 1.262	228.800, 1.220	228.800, 1.162	228.800, 1.176	228.800, 1.248	228.800, 1.165	228.800, 1.150	228.800, 1.163	228.800, 1.181	228.800, 1.159	228.800, 1.106	228.800, 1.128	228.800, 1.340	228.800, 1.254	228.800, 1.304
1146	229.000, 1.262	229.000, 1.220	229.000, 1.162	229.000, 1.175	229.000, 1.248	229.000, 1.165	229.000, 1.150	229.000, 1.163	229.000, 1.181	229.000, 1.159	229.000, 1.106	229.000, 1.127	229.000, 1.340	229.000, 1.254	229.000, 1.304
1147	229.200, 1.262	229.200, 1.219	229.200, 1.162	229.200, 1.175	229.200, 1.248	229.200, 1.165	229.200, 1.149	229.200, 1.163	229.200, 1.181	229.200, 1.159	229.200, 1.106	229.200, 1.127	229.200, 1.339	229.200, 1.253	229.200, 1.303
1148	229.400, 1.262	229.400, 1.219	229.400, 1.161	229.400, 1.175	229.400, 1.248	229.400, 1.165	229.400, 1.149	229.400, 1.162	229.400, 1.181	229.400, 1.158	229.400, 1.106	229.400, 1.127	229.400, 1.339	229.400, 1.253	229.400, 1.302
1149	229.600, 1.263	229.600, 1.219	229.600, 1.161	229.600, 1.175	229.600, 1.248	229.600, 1.164	229.600, 1.149	229.600, 1.162	229.600, 1.180	229.600, 1.158	229.600, 1.105	229.600, 1.127	229.600, 1.339	229.600, 1.252	229.600, 1.302
1150	229.800, 1.263	229.800, 1.219	229.800, 1.161	229.800, 1.175	229.800, 1.248	229.800, 1.164	229.800, 1.148	229.800, 1.161	229.800, 1.180	229.800, 1.157	229.800, 1.105	229.800, 1.127	229.800, 1.338	229.800, 1.252	229.800, 1.301
1151	230.000, 1.263	230.000, 1.219	230.000, 1.160	230.000, 1.175	230.000, 1.248	230.000, 1.164	230.000, 1.148	230.000, 1.161	230.000, 1.180	230.000, 1.157	230.000, 1.105	230.000, 1.127	230.000, 1.338	230.000, 1.251	230.000, 1.300
1152	230.200, 1.263	230.200, 1.218	230.200, 1.160	230.200, 1.175	230.200, 1.248	230.200, 1.164	230.200, 1.148	230.200, 1.161	230.200, 1.181	230.200, 1.157	230.200, 1.105	230.200, 1.126	230.200, 1.337	230.200, 1.251	230.200, 1.300
1153	230.400, 1.262	230.400, 1.218	230.400, 1.159	230.400, 1.175	230.400, 1.248	230.400, 1.164	230.400, 1.148	230.400, 1.161	230.400, 1.181	230.400, 1.156	230.400, 1.105	230.400, 1.126	230.400, 1.336	230.400, 1.251	230.400, 1.299
1154	230.600, 1.262	230.600, 1.218	230.600, 1.159	230.600, 1.175	230.600, 1.248	230.600, 1.164	230.600, 1.148	230.600, 1.161	230.600, 1.181	230.600, 1.156	230.600, 1.105	230.600, 1.126	230.600, 1.336	230.600, 1.250	230.600, 1.299
1155	230.800, 1.262	230.800, 1.218	230.800, 1.159	230.800, 1.175	230.800, 1.248	230.800, 1.163	230.800, 1.148	230.800, 1.161	230.800, 1.181	230.800, 1.156	230.800, 1.105	230.800, 1.126	230.800, 1.335	230.800, 1.250	230.800, 1.299
1156	231.000, 1.262	231.000, 1.217	231.000, 1.159	231.000, 1.175	231.000, 1.248	231.000, 1.163	231.000, 1.148	231.000, 1.162	231.000, 1.181	231.000, 1.156	231.000, 1.105	231.000, 1.126	231.000, 1.335	231.000, 1.250	231.000, 1.299
1157	231.200, 1.262	231.200, 1.217	231.200, 1.159	231.200, 1.175	231.200, 1.248	231.200, 1.163	231.200, 1.148	231.200, 1.162	231.200, 1.181	231.200, 1.156	231.200, 1.105	231.200, 1.126	231.200, 1.334	231.200, 1.250	231.200, 1.298
1158	231.400, 1.261	231.400, 1.217	231.400, 1.159	231.400, 1.175	231.400, 1.248	231.400, 1.163	231.400, 1.148	231.400, 1.162	231.400, 1.181	231.400, 1.156	231.400, 1.104	231.400, 1.126	231.400, 1.333	231.400, 1.249	231.400, 1.298
1159	231.600, 1.261	231.600, 1.217	231.600, 1.159	231.600, 1.175	231.600, 1.248	231.600, 1.163	231.600, 1.148	231.600, 1.161	231.600, 1.181	231.600, 1.156	231.600, 1.104	231.600, 1.126	231.600, 1.333	231.600, 1.249	231.600, 1.298
1160	231.800, 1.261	231.800, 1.217	231.800, 1.159	231.800, 1.175	231.800, 1.248	231.800, 1.163	231.800, 1.148	231.800, 1.161	231.800, 1.181	231.800, 1.155	231.800, 1.104	231.800, 1.126	231.800, 1.332	231.800, 1.248	231.800, 1.298
1161	232.000, 1.260	232.000, 1.216	232.000, 1.159	232.000, 1.175	232.000, 1.248	232.000, 1.163	232.000, 1.148	232.000, 1.161	232.000, 1.181	232.000, 1.155	232.000, 1.104	232.000, 1.126	232.000, 1.332	232.000, 1.247	232.000, 1.298
1162	232.200, 1.260	232.200, 1.216	232.200, 1.159	232.200, 1.175	232.200, 1.247	232.200, 1.163	232.200, 1.148	232.200, 1.161	232.200, 1.181	232.200, 1.154	232.200, 1.104	232.200, 1.126	232.200, 1.331	232.200, 1.247	232.200, 1.297
1163	232.400, 1.259	232.400, 1.216	232.400, 1.159	232.400, 1.175	232.400, 1.247	232.400, 1.163	232.400, 1.148	232.400, 1.161	232.400, 1.181	232.400, 1.154	232.400, 1.104	232.400, 1.126	232.400, 1.331	232.400, 1.246	232.400, 1.297
1164	232.600, 1.259	232.600, 1.216	232.600, 1.159	232.600, 1.174	232.600, 1.247	232.600, 1.163	232.600, 1.148	232.600, 1.160	232.600, 1.181	232.600, 1.154	232.600, 1.104	232.600, 1.126	232.600, 1.330	232.600, 1.246	232.600, 1.297
1165	232.800, 1.259	232.800, 1.216	232.800, 1.158	232.800, 1.174	232.800, 1.246	232.800, 1.163	232.800, 1.148	232.800, 1.160	232.800, 1.181	232.800, 1.153	232.800, 1.104	232.800, 1.125	232.800, 1.330	232.800, 1.245	232.800, 1.296
1166	233.000, 1.259	233.000, 1.216	233.000, 1.158	233.000, 1.174	233.000, 1.246	233.000, 1.163	233.000, 1.148	233.000, 1.159	233.000, 1.181	233.000, 1.153	233.000, 1.104	233.000, 1.125	233.000, 1.329	233.000, 1.245	233.000, 1.296
1167	233.200, 1.259	233.200, 1.216	233.200, 1.158	233.200, 1.174	233.200, 1.246	233.200, 1.163	233.200, 1.148	233.200, 1.159	233.200, 1.180	233.200, 1.153	233.200, 1.104	233.200, 1.125	233.200, 1.329	233.200, 1.244	233.200, 1.296
1168	233.400, 1.258	233.400, 1.215	233.400, 1.158	233.400, 1.173	233.400, 1.246	233.400, 1.163	233.400, 1.147	233.400, 1.158	233.400, 1.180	233.400, 1.153	233.400, 1.104	233.400, 1.125	233.400, 1.328	233.400, 1.243	233.400, 1.295
1169	233.600, 1.258	233.600, 1.215	233.600, 1.157	233.600, 1.173	233.600, 1.245	233.600, 1.162	233.600, 1.147	233.600, 1.158	233.600, 1.180	233.600, 1.153	233.600, 1.104	233.600, 1.125	233.600, 1.328	233.600, 1.243	233.600, 1.295
1170	233.800, 1.258	233.800, 1.215	233.800, 1.157	233.800, 1.173	233.800, 1.245	233.800, 1.162	233.800, 1.147	233.800, 1.158	233.800, 1.179	233.800, 1.154	233.800, 1.104	233.800, 1.124	233.800, 1.327	233.800, 1.242	233.800, 1.295
1171	234.000, 1.258	234.000, 1.215	234.000, 1.157	234.000, 1.173	234.000, 1.245	234.000, 1.162	234.000, 1.147	234.000, 1.158	234.000, 1.179	234.000, 1.154	234.000, 1.104	234.000, 1.124	234.000, 1.326	234.000, 1.241	234.000, 1.294
1172	234.200, 1.258	234.200, 1.215	234.200, 1.157	234.200, 1.173	234.200, 1.245	234.200, 1.162	234.200, 1.146	234.200, 1.158	234.200, 1.178	234.200, 1.154	234.200, 1.104	234.200, 1.124	234.200, 1.326	234.200, 1.241	234.200, 1.294
1173	234.400, 1.257	234.400, 1.214	234.400, 1.157	234.400, 1.173	234.400, 1.245	234.400, 1.162	234.400, 1.146	234.400, 1.158	234.400, 1.178	234.400, 1.154	234.400, 1.104	234.400, 1.124	234.400, 1.325	234.400, 1.240	234.400, 1.293
1174	234.600, 1.257	234.600, 1.214	234.600, 1.157	234.600, 1.172	234.600, 1.245	234.600, 1.162	234.600, 1.146	234.600, 1.158	234.600, 1.178	234.600, 1.154	234.600, 1.104	234.600, 1.124	234.600, 1.325	234.600, 1.240	234.600, 1.293
1175	234.800, 1.257	234.800, 1.214	234.800, 1.157	234.800, 1.172	234.800, 1.245	234.800, 1.162	234.800, 1.146	234.800, 1.158	234.800, 1.177	234.800, 1.154	234.800, 1.104	234.800, 1.124	234.800, 1.324	234.800, 1.240	234.800, 1.292
1176	235.000, 1.258	235.000, 1.214	235.000, 1.157	235.000, 1.172	235.000, 1.245	235.000, 1.162	235.000, 1.146	235.000, 1.158	235.000, 1.177	235.000, 1.154	235.000, 1.104	235.000, 1.124	235.000, 1.324	235.000, 1.239	235.000, 1.291
1177	235.200, 1.257	235.200, 1.214	235.200, 1.157	235.200, 1.172	235.200, 1.246	235.200, 1.162	235.200, 1.146	235.200, 1.158	235.200, 1.177	235.200, 1.155	235.200, 1.104	235.200, 1.124	235.200, 1.324	235.200, 1.239	235.200, 1.291
1178	235.400, 1.257	235.400, 1.214	235.400, 1.157	235.400, 1.172	235.400, 1.245	235.400, 1.162	235.400, 1.146	235.400, 1.158	235.400, 1.177	235.400, 1.155	235.400, 1.103	235.400, 1.124	235.400, 1.323	235.400, 1.239	235.400, 1.290
1179	235.600, 1.257	235.600, 1.214	235.600, 1.157	235.600, 1.172	235.600, 1.245	235.600, 1.162	235.600, 1.146	235.600, 1.158	235.600, 1.177	235.600, 1.155	235.600, 1.103	235.600, 1.124	235.600, 1.323	235.600, 1.238	235.600, 1.290
1180	235.800, 1.257	235.800, 1.213	235.800, 1.157	235.800, 1.172	235.800, 1.245	235.800, 1.162	235.800, 1.145	235.800, 1.158	235.800, 1.177	235.800, 1.155	235.800, 1.103	235.800, 1.124	235.800, 1.323	235.800, 1.238	235.800, 1.289
1181	236.000, 1.257	236.000, 1.213	236.000, 1.157	236.000, 1.172	236.000, 1.245	236.000, 1.162	236.000, 1.145	236.000, 1.158	236.000, 1.177	236.000, 1.154	236.000, 1.103	236.000, 1.123	236.000, 1.322	236.000, 1.238	236.000, 1.289
1182	236.200, 1.257	236.200, 1.213	236.200, 1.157	236.200, 1.172	236.200, 1.245	236.200, 1.162	236.200, 1.145	236.200, 1.158	236.200, 1.177	236.200, 1.154	236.200, 1.103	236.200, 1.123	236.200, 1.322	236.200, 1.237	236.200, 1.289
1183	236.400, 1.257	236.400, 1.213	236.400, 1.157	236.400, 1.172	236.400, 1.245	236.400, 1.162	236.400, 1.145	236.400, 1.158	236.400, 1.177	236.400, 1.154	236.400, 1.103	236.400, 1.123	236.400, 1.321	236.400, 1.237	236.400, 1.288
1184	236.600, 1.257	236.600, 1.213	236.600, 1.157	236.600, 1.172	236.600, 1.245	236.600, 1.162	236.600, 1.145	236.600, 1.158	236.600, 1.177	236.600, 1.153	236.600, 1.103	236.600, 1.123	236.600, 1.321	236.600, 1.237	236.600, 1.288
1185	236.800, 1.257	236.800, 1.213	236.800, 1.157	236.800, 1.172	236.800, 1.245	236.800, 1.162	236.800, 1.145	236.800, 1.157	236.800, 1.177	236.800, 1.153	236.800, 1.103	236.800, 1.123	236.800, 1.320	236.800, 1.236	236.800, 1.288
1186	237.000, 1.257	237.000, 1.213	237.000, 1.157	237.000, 1.172	237.000, 1.244	237.000, 1.162	237.000, 1.145	237.000, 1.157	237.000, 1.177	237.000, 1.153	237.000, 1.102	237.000, 1.123	237.000, 1.319	237.000, 1.236	237.000, 1.288
1187	237.200, 1.257	237.200, 1.213	237.200, 1.157	237.200, 1.172	237.200, 1.244	237.200, 1.162	237.200, 1.145	237.200, 1.157	237.200, 1.177	237.200, 1.153	237.200, 1.102	237.200, 1.123	237.200, 1.319	237.200, 1.236	237.200, 1.288
1188	237.400, 1.257	237.400, 1.213	237.400, 1.158	237.400, 1.172	237.400, 1.244	237.400, 1.161	237.400, 1.145	237.400, 1.157	237.400, 1.177	237.400, 1.153	237.400, 1.102	237.400, 1.123	237.400, 1.318	237.400, 1.235	237.400, 1.288
1189	237.600, 1.257	237.600, 1.213	237.600, 1.158	237.600, 1.171	237.600, 1.243	237.600, 1.161	237.600, 1.145	237.600, 1.157	237.600, 1.177	237.600, 1.153	237.600, 1.102	237.600, 1.123	237.600, 1.318	237.600, 1.235	237.600, 1.288
1190	237.800, 1.258	237.800, 1.213	237.800, 1.158	237.800, 1.172	237.800, 1.243	237.800, 1.161	237.800, 1.144	237.800, 1.157	237.800, 1.176	237.800, 1.153	237.800, 1.102	237.800, 1.123	237.800, 1.317	237.800, 1.234	237.800, 1.287
1191	238.000, 1.258	238.000, 1.213	238.000, 1.158	238.000, 1.172	238.000, 1.243	238.000, 1.161	238.000, 1.144	238.000, 1.156	238.000, 1.176	238.000, 1.153	238.000, 1.102	238.000, 1.124	238.000, 1.317	238.000, 1.234	238.000, 1.287
1192	238.200, 1.258	238.200, 1.213	238.200, 1.158	238.200, 1.172	238.200, 1.242	238.200, 1.161	238.200, 1.144	238.200, 1.156	238.200, 1.176	238.200, 1.153	238.200, 1.102	238.200, 1.124	238.200, 1.317	238.200, 1.234	238.200, 1.287
1193	238.400, 1.258	238.400, 1.214	238.400, 1.158	238.400, 1.172	238.400, 1.242	238.400, 1.160	238.400, 1.144	238.400, 1.156	238.400, 1.176	238.400, 1.153	238.400, 1.102	238.400, 1.124	238.400, 1.317	238.400, 1.233	238.400, 1.286
1194	238.600, 1.257	238.600, 1.214	238.600, 1.158	238.600, 1.171	238.600, 1.242	238.600, 1.160	238.600, 1.144	238.600, 1.156	238.600, 1.176	238.600, 1.153	238.600, 1.102	238.600, 1.124	238.600, 1.316	238.600, 1.233	238.600, 1.285
1195	238.800, 1.257	238.800, 1.214	238.800, 1.157	238.800, 1.171	238.800, 1.241	238.800, 1.160	238.800, 1.144	238.800, 1.156	238.800, 1.175	238.800, 1.153	238.800, 1.102	238.800, 1.123	238.800, 1.316	238.800, 1.233	238.800, 1.284
1196	239.000, 1.257	239.000, 1.214	239.000, 1.157	239.000, 1.171	239.000, 1.241	239.000, 1.161	239.000, 1.144	239.000, 1.156	239.000, 1.175	239.000, 1.153	239.000, 1.102	239.000, 1.123	239.000, 1.315	239.000, 1.232	239.000, 1.284
1197	239.200, 1.256	239.200, 1.214	239.200, 1.156	239.200, 1.171	239.200, 1.241	239.200, 1.161	239.200, 1.144	239.200, 1.156	239.200, 1.175	239.200, 1.153	239.200, 1.102	239.200, 1.123	239.200, 1.315	239.200, 1.232	239.200, 1.283
1198	239.400, 1.256	239.400, 1.214	239.400, 1.156	239.400, 1.171	239.400, 1.241	239.400, 1.161	239.400, 1.144	239.400, 1.156	239.400, 1.175	239.400, 1.153	239.400, 1.101	239.400, 1.123	239.400, 1.314	239.400, 1.232	239.400, 1.283
1199	239.600, 1.256	239.600, 1.214	239.600, 1.156	239.600, 1.171	239.600, 1.241	239.600, 1.161	239.600, 1.144	239.600, 1.156	239.600, 1.175	239.600, 1.153	239.600, 1.101	239.600, 1.123	239.600, 1.314	239.600, 1.232	239.600, 1.283
1200	239.800, 1.256	239.800, 1.213	239.800, 1.155	239.800, 1.171	239.800, 1.241	239.800, 1.160	239.800, 1.144	239.800, 1.157	239.800, 1.175	239.800, 1.153	239.800, 1.101	239.800, 1.123	239.800, 1.313	239.800, 1.231	239.800, 1.282
1201	240.000, 1.255	240.000, 1.213	240.000, 1.155	240.000, 1.171	240.000, 1.241	240.000, 1.160	240.000, 1.144	240.000, 1.157	240.000, 1.175	240.000, 1.153	240.000, 1.100	240.000, 1.123	240.000, 1.312	240.000, 1.231	240.000, 1.282
1202	240.200, 1.255	240.200, 1.213	240.200, 1.155	240.200, 1.170	240.200, 1.241	240.200, 1.160	240.200, 1.144	240.200, 1.157	240.200, 1.175	240.200, 1.152	240.200, 1.100	240.200, 1.123	240.200, 1.312	240.200, 1.231	240.200, 1.281
1203	240.400, 1.255	240.400, 1.213	240.400, 1.155	240.400, 1.170	240.400, 1.241	240.400, 1.160	240.400, 1.144	240.400, 1.157	240.400, 1.174	240.400, 1.152	240.400, 1.100	240.400, 1.123	240.400, 1.311	240.400, 1.230	240.400, 1.281
1204	240.600, 1.255	240.600, 1.212	240.600, 1.155	240.600, 1.170	240.600, 1.242	240.600, 1.160	240.600, 1.144	240.600, 1.157	240.600, 1.174	240.600, 1.152	240.600, 1.099	240.600, 1.122	240.600, 1.310	240.600, 1.230	240.600, 1.281
1205	240.800, 1.255	240.800, 1.212	240.800, 1.155	240.800, 1.170	240.800, 1.242	240.800, 1.160	240.800, 1.144	240.800, 1.157	240.800, 1.174	240.800, 1.152	240.800, 1.099	240.800, 1.123	240.800, 1.310	240.800, 1.229	240.800, 1.280
1206	241.000, 1.255	241.000, 1.212	241.000, 1.155	241.000, 1.170	241.000, 1.242	241.000, 1.160	241.000, 1.144	241.000, 1.157	241.000, 1.173	241.000, 1.152	241.000, 1.099	241.000, 1.123	241.000, 1.309	241.000, 1.229	241.000, 1.280
1207	241.200, 1.255	241.200, 1.211	241.200, 1.155	241.200, 1.170	241.200, 1.242	241.200, 1.160	241.200, 1.144	241.200, 1.157	241.200, 1.173	241.200, 1.152	241.200, 1.099	241.200, 1.122	241.200, 1.309	241.200, 1.228	241.200, 1.280
1208	241.400, 1.255	241.400, 1.211	241.400, 1.155	241.400, 1.170	241.400, 1.242	241.400, 1.160	241.400, 1.144	241.400, 1.157	241.400, 1.173	241.400, 1.151	241.400, 1.098	241.400, 1.123	241.400, 1.309	241.400, 1.227	241.400, 1.280
1209	241.600, 1.255	241.600, 1.211	241.600, 1.155	241.600, 1.171	241.600, 1.242	241.600, 1.160	241.600, 1.144	241.600, 1.157	241.600, 1.173	241.600, 1.151	241.600, 1.099	241.600, 1.123	241.600, 1.308	241.600, 1.227	241.600, 1.280
1210	241.800, 1.255	241.800, 1.211	241.800, 1.155	241.800, 1.171	241.800, 1.241	241.800, 1.160	241.800, 1.144	241.800, 1.156	241.800, 1.173	241.800, 1.151	241.800, 1.099	241.800, 1.122	241.800, 1.308	241.800, 1.226	241.800, 1.280
1211	242.000, 1.255	242.000, 1.211	242.000, 1.155	242.000, 1.170	242.000, 1.241	242.000, 1.160	242.000, 1.144	242.000, 1.156	242.000, 1.173	242.000, 1.151	242.000, 1.099	242.000, 1.122	242.000, 1.308	242.000, 1.226	242.000, 1.280
1212	242.200, 1.255	242.200, 1.211	242.200, 1.155	242.200, 1.170	242.200, 1.241	242.200, 1.160	242.200, 1.144	242.200, 1.156	242.200, 1.173	242.200, 1.150	242.200, 1.100	242.200, 1.122	242.200, 1.308	242.200, 1.225	242.200, 1.279
1213	242.400, 1.255	242.400, 1.211	242.400, 1.156	242.400, 1.170	242.400, 1.241	242.400, 1.160	242.400, 1.144	242.400, 1.156	242.400, 1.173	242.400, 1.150	242.400, 1.100	242.400, 1.121	242.400, 1.308	242.400, 1.225	242.400, 1.279
1214	242.600, 1.254	242.600, 1.211	242.600, 1.156	242.600, 1.170	242.600, 1.241	242.600, 1.160	242.600, 1.144	242.600, 1.156	242.600, 1.173	242.600, 1.150	242.600, 1.100	242.600, 1.121	242.600, 1.307	242.600, 1.224	242.600, 1.279
1215	242.800, 1.254	242.800, 1.211	242.800, 1.155	242.800, 1.169	242.800, 1.241	242.800, 1.160	242.800, 1.144	242.800, 1.156	242.800, 1.173	242.800, 1.149	242.800, 1.100	242.800, 1.120	242.800, 1.307	242.800, 1.223	242.800, 1.278
1216	243.000, 1.255	243.000, 1.211	243.000, 1.155	243.000, 1.169	243.000, 1.241	243.000, 1.160	243.000, 1.144	243.000, 1.156	243.000, 1.173	243.000, 1.149	243.000, 1.100	243.000, 1.120	243.000, 1.307	243.000, 1.223	243.000, 1.278
1217	243.200, 1.255	243.200, 1.211	243.200, 1.155	243.200, 1.169	243.200, 1.241	243.200, 1.159	243.200, 1.144	243.200, 1.155	243.200, 1.174	243.200, 1.149	243.200, 1.100	243.200, 1.119	243.200, 1.306	243.200, 1.223	243.200, 1.278
1218	243.400, 1.255	243.400, 1.211	243.400, 1.155	243.400, 1.168	243.400, 1.240	243.400, 1.159	243.400, 1.144	243.400, 1.155	243.400, 1.174	243.400, 1.149	243.400, 1.099	243.400, 1.119	243.400, 1.306	243.400, 1.223	243.400, 1.278
1219	243.600, 1.255	243.600, 1.211	243.600, 1.154	243.600, 1.168	243.600, 1.240	243.600, 1.158	243.600, 1.144	243.600, 1.155	243.600, 1.174	243.600, 1.148	243.600, 1.100	243.600, 1.119	243.600, 1.306	243.600, 1.223	243.600, 1.277
1220	243.800, 1.255	243.800, 1.211	243.800, 1.154	243.800, 1.168	243.800, 1.240	243.800, 1.158	243.800, 1.143	243.800, 1.155	243.800, 1.174	243.800, 1.148	243.800, 1.100	243.800, 1.118	243.800, 1.306	243.800, 1.223	243.800, 1.277
1221	244.000, 1.255	244.000, 1.211	244.000, 1.154	244.000, 1.168	244.000, 1.239	244.000, 1.158	244.000, 1.143	244.000, 1.155	244.000, 1.174	244.000, 1.148	244.000, 1.099	244.000, 1.118	244.000, 1.305	244.000, 1.222	244.000, 1.277
1222	244.200, 1.255	244.200, 1.211	244.200, 1.154	244.200, 1.168	244.200, 1.239	244.200, 1.157	244.200, 1.142	244.200, 1.154	244.200, 1.173	244.200, 1.148	244.200, 1.099	244.200, 1.118	244.200, 1.305	244.200, 1.222	244.200, 1.276
1223	244.400, 1.255	244.400, 1.211	244.400, 1.154	244.400, 1.168	244.400, 1.239	244.400, 1.157	244.400, 1.142	244.400, 1.154	244.400, 1.173	244.400, 1.148	244.400, 1.099	244.400, 1.118	244.400, 1.305	244.400, 1.222	244.400, 1.276
1224	244.600, 1.254	244.600, 1.211	244.600, 1.154	244.600, 1.168	244.600, 1.239	244.600, 1.156	244.600, 1.142	244.600, 1.154	244.600, 1.173	244.600, 1.149	244.600, 1.099	244.600, 1.118	244.600, 1.304	244.600, 1.222	244.600, 1.275
1225	244.800, 1.254	244.800, 1.211	244.800, 1.153	244.800, 1.168	244.800, 1.239	244.800, 1.156	244.800, 1.141	244.800, 1.153	244.800, 1.173	244.800, 1.149	244.800, 1.099	244.800, 1.118	244.800, 1.304	244.800, 1.221	244.800, 1.275
1226	245.000, 1.254	245.000, 1.211	245.000, 1.153	245.000, 1.168	245.000, 1.239	245.000, 1.156	245.000, 1.141	245.000, 1.153	245.000, 1.173	245.000, 1.149	245.000, 1.099	245.000, 1.118	245.000, 1.303	245.000, 1.221	245.000, 1.274
1227	245.200, 1.253	245.200, 1.211	245.200, 1.153	245.200, 1.168	245.200, 1.238	245.200, 1.156	245.200, 1.141	245.200, 1.153	245.200, 1.172	245.200, 1.149	245.200, 1.098	245.200, 1.119	245.200, 1.303	245.200, 1.220	245.200, 1.274
1228	245.400, 1.253	245.400, 1.211	245.400, 1.153	245.400, 1.168	245.400, 1.238	245.400, 1.156	245.400, 1.141	245.400, 1.153	245.400, 1.172	245.400, 1.149	245.400, 1.098	245.400, 1.119	245.400, 1.303	245.400, 1.219	245.400, 1.274
1229	245.600, 1.253	245.600, 1.211	245.600, 1.153	245.600, 1.168	245.600, 1.238	245.600, 1.156	245.600, 1.141	245.600, 1.152	245.600, 1.171	245.600, 1.149	245.600, 1.097	245.600, 1.119	245.600, 1.302	245.600, 1.219	245.600, 1.273
1230	245.800, 1.252	245.800, 1.211	245.800, 1.153	245.800, 1.167	245.800, 1.238	245.800, 1.156	245.800, 1.141	245.800, 1.152	245.800, 1.171	245.800, 1.149	245.800, 1.097	245.800, 1.119	245.800, 1.301	245.800, 1.219	245.800, 1.273
1231	246.000, 1.252	246.000, 1.211	246.000, 1.153	246.000, 1.167	246.000, 1.238	246.000, 1.157	246.000, 1.141	246.000, 1.152	246.000, 1.171	246.000, 1.149	246.000, 1.097	246.000, 1.118	246.000, 1.301	246.000, 1.218	246.000, 1.273
1232	246.200, 1.252	246.200, 1.211	246.200, 1.153	246.200, 1.167	246.200, 1.238	246.200, 1.157	246.200, 1.141	246.200, 1.152	246.200, 1.170	246.200, 1.149	246.200, 1.097	246.200, 1.118	246.200, 1.300	246.200, 1.218	246.200, 1.272
1233	246.400, 1.252	246.400, 1.211	246.400, 1.153	246.400, 1.166	246.400, 1.238	246.400, 1.157	246.400, 1.141	246.400, 1.151	246.400, 1.170	246.400, 1.149	246.400, 1.096	246.400, 1.118	246.400, 1.300	246.400, 1.218	246.400, 1.272
1234	246.600, 1.252	246.600, 1.211	246.600, 1.153	246.600, 1.166	246.600, 1.238	246.600, 1.157	246.600, 1.141	246.600, 1.151	246.600, 1.170	246.600, 1.148	246.600, 1.096	246.600, 1.118	246.600, 1.299	246.600, 1.218	246.600, 1.272
1235	246.800, 1.252	246.800, 1.211	246.800, 1.152	246.800, 1.166	246.800, 1.238	246.800, 1.157	246.800, 1.141	246.800, 1.151	246.800, 1.170	246.800, 1.148	246.800, 1.096	246.800, 1.117	246.800, 1.298	246.800, 1.217	246.800, 1.272
1236	247.000, 1.252	247.000, 1.210	247.000, 1.152	247.000, 1.166	247.000, 1.238	247.000, 1.157	247.000, 1.141	247.000, 1.151	247.000, 1.169	247.000, 1.148	247.000, 1.096	247.000, 1.117	247.000, 1.298	247.000, 1.217	247.000, 1.272
1237	247.200, 1.252	247.200, 1.210	247.200, 1.152	247.200, 1.166	247.200, 1.237	247.200, 1.157	247.200, 1.141	247.200, 1.151	247.200, 1.169	247.200, 1.148	247.200, 1.096	247.200, 1.117	247.200, 1.297	247.200, 1.217	247.200, 1.272
1238	247.400, 1.252	247.400, 1.210	247.400, 1.152	247.400, 1.166	247.400, 1.237	247.400, 1.157	247.400, 1.141	247.400, 1.152	247.400, 1.169	247.400, 1.148	247.400, 1.096	247.400, 1.117	247.400, 1.297	247.400, 1.217	247.400, 1.272
1239	247.600, 1.252	247.600, 1.210	247.600, 1.152	247.600, 1.166	247.600, 1.237	247.600, 1.157	247.600, 1.140	247.600, 1.152	247.600, 1.169	247.600, 1.148	247.600, 1.097	247.600, 1.117	247.600, 1.297	247.600, 1.216	247.600, 1.272
1240	247.800, 1.252	247.800, 1.209	247.800, 1.152	247.800, 1.166	247.800, 1.236	247.800, 1.156	247.800, 1.140	247.800, 1.152	247.800, 1.170	247.800, 1.147	247.800, 1.097	247.800, 1.117	247.800, 1.297	247.800, 1.216	247.800, 1.271
1241	248.000, 1.252	248.000, 1.209	248.000, 1.152	248.000, 1.166	248.000, 1.236	248.000, 1.156	248.000, 1.140	248.000, 1.152	248.000, 1.170	248.000, 1.147	248.000, 1.097	248.000, 1.117	248.000, 1.296	248.000, 1.216	248.000, 1.271
1242	248.200, 1.251	248.200, 1.208	248.200, 1.152	248.200, 1.166	248.200, 1.236	248.200, 1.156	248.200, 1.140	248.200, 1.152	248.200, 1.170	248.200, 1.147	248.200, 1.097	248.200, 1.117	248.200, 1.296	248.200, 1.215	248.200, 1.270
1243	248.400, 1.251	248.400, 1.208	248.400, 1.152	248.400, 1.166	248.400, 1.236	248.400, 1.155	248.400, 1.140	248.400, 1.152	248.400, 1.171	248.400, 1.146	248.400, 1.097	248.400, 1.117	248.400, 1.296	248.400, 1.215	248.400, 1.270
1244	248.600, 1.251	248.600, 1.207	248.600, 1.152	248.600, 1.166	248.600, 1.236	248.600, 1.155	248.600, 1.139	248.600, 1.152	248.600, 1.171	248.600, 1.146	248.600, 1.097	248.600, 1.117	248.600, 1.296	248.600, 1.214	248.600, 1.269
1245	248.800, 1.250	248.800, 1.207	248.800, 1.152	248.800, 1.166	248.800, 1.236	248.800, 1.154	248.800, 1.139	248.800, 1.152	248.800, 1.171	248.800, 1.146	248.800, 1.097	248.800, 1.117	248.800, 1.296	248.800, 1.214	248.800, 1.269
1246	249.000, 1.250	249.000, 1.207	249.000, 1.152	249.000, 1.166	249.000, 1.235	249.000, 1.154	249.000, 1.139	249.000, 1.152	249.000, 1.171	249.000, 1.146	249.000, 1.096	249.000, 1.117	249.000, 1.295	249.000, 1.213	249.000, 1.269
1247	249.200, 1.249	249.200, 1.207	249.200, 1.152	249.200, 1.166	249.200, 1.235	249.200, 1.154	249.200, 1.139	249.200, 1.152	249.200, 1.171	249.200, 1.145	249.200, 1.096	249.200, 1.117	249.200, 1.295	249.200, 1.213	249.200, 1.268
1248	249.400, 1.249	249.400, 1.207	249.400, 1.152	249.400, 1.166	249.400, 1.235	249.400, 1.154	249.400, 1.139	249.400, 1.152	249.400, 1.171	249.400, 1.146	249.400, 1.096	249.400, 1.117	249.400, 1.295	249.400, 1.212	249.400, 1.268
1249	249.600, 1.249	249.600, 1.207	249.600, 1.152	249.600, 1.165	249.600, 1.235	249.600, 1.154	249.600, 1.138	249.600, 1.152	249.600, 1.171	249.600, 1.146	249.600, 1.095	249.600, 1.117	249.600, 1.294	249.600, 1.212	249.600, 1.268
1250	249.800, 1.249	249.800, 1.207	249.800, 1.152	249.800, 1.165	249.800, 1.235	249.800, 1.154	249.800, 1.138	249.800, 1.152	249.800, 1.170	249.800, 1.146	249.800, 1.095	249.800, 1.117	249.800, 1.294	249.800, 1.212	249.800, 1.267
1251	250.000, 1.249	250.000, 1.207	250.000, 1.152	250.000, 1.165	250.000, 1.235	250.000, 1.154	250.000, 1.138	250.000, 1.152	250.000, 1.170	250.000, 1.146	250.000, 1.095	250.000, 1.116	250.000, 1.293	250.000, 1.212	250.000, 1.267
1252	250.200, 1.249	250.200, 1.206	250.200, 1.151	250.200, 1.165	250.200, 1.235	250.200, 1.153	250.200, 1.138	250.200, 1.152	250.200, 1.170	250.200, 1.146	250.200, 1.095	250.200, 1.116	250.200, 1.293	250.200, 1.212	250.200, 1.267
1253	250.400, 1.249	250.400, 1.206	250.400, 1.151	250.400, 1.164	250.400, 1.235	250.400, 1.153	250.400, 1.138	250.400, 1.151	250.400, 1.169	250.400, 1.146	250.400, 1.095	250.400, 1.116	250.400, 1.292	250.400, 1.212	250.400, 1.266
1254	250.600, 1.249	250.600, 1.206	250.600, 1.151	250.600, 1.164	250.600, 1.234	250.600, 1.153	250.600, 1.138	250.600, 1.151	250.600, 1.169	250.600, 1.146	250.600, 1.095	250.600, 1.116	250.600, 1.292	250.600, 1.212	250.600, 1.266
1255	250.800, 1.249	250.800, 1.205	250.800, 1.151	250.800, 1.164	250.800, 1.234	250.800, 1.153	250.800, 1.138	250.800, 1.151	250.800, 1.169	250.800, 1.146	250.800, 1.095	250.800, 1.115	250.800, 1.291	250.800, 1.211	250.800, 1.266
1256	251.000, 1.249	251.000, 1.205	251.000, 1.151	251.000, 1.164	251.000, 1.234	251.000, 1.152	251.000, 1.138	251.000, 1.151	251.000, 1.169	251.000, 1.146	251.000, 1.095	251.000, 1.115	251.000, 1.291	251.000, 1.211	251.000, 1.266
1257	251.200, 1.250	251.200, 1.205	251.200, 1.151	251.200, 1.164	251.200, 1.234	251.200, 1.152	251.200, 1.138	251.200, 1.151	251.200, 1.168	251.200, 1.146	251.200, 1.096	251.200, 1.115	251.200, 1.291	251.200, 1.211	251.200, 1.266
1258	251.400, 1.250	251.400, 1.205	251.400, 1.151	251.400, 1.164	251.400, 1.234	251.400, 1.153	251.400, 1.138	251.400, 1.151	251.400, 1.168	251.400, 1.146	251.400, 1.096	251.400, 1.115	251.400, 1.290	251.400, 1.211	251.400, 1.265
1259	251.600, 1.250	251.600, 1.205	251.600, 1.151	251.600, 1.164	251.600, 1.234	251.600, 1.153	251.600, 1.138	251.600, 1.151	251.600, 1.168	251.600, 1.145	251.600, 1.096	251.600, 1.115	251.600, 1.290	251.600, 1.210	251.600, 1.265
1260	251.800, 1.250	251.800, 1.205	251.800, 1.151	251.800, 1.164	251.800, 1.234	251.800, 1.153	251.800, 1.138	251.800, 1.151	251.800, 1.168	251.800, 1.145	251.800, 1.096	251.800, 1.115	251.800, 1.290	251.800, 1.210	251.800, 1.264
1261	252.000, 1.250	252.000, 1.204	252.000, 1.151	252.000, 1.164	252.000, 1.234	252.000, 1.154	252.000, 1.138	252.000, 1.151	252.000, 1.168	252.000, 1.145	252.000, 1.096	252.000, 1.116	252.000, 1.290	252.000, 1.210	252.000, 1.264
1262	252.200, 1.249	252.200, 1.204	252.200, 1.151	252.200, 1.164	252.200, 1.233	252.200, 1.154	252.200, 1.138	252.200, 1.151	252.200, 1.168	252.200, 1.144	252.200, 1.096	252.200, 1.116	252.200, 1.290	252.200, 1.210	252.200, 1.263
1263	252.400, 1.249	252.400, 1.204	252.400, 1.152	252.400, 1.164	252.400, 1.233	252.400, 1.154	252.400, 1.138	252.400, 1.151	252.400, 1.169	252.400, 1.144	252.400, 1.096	252.400, 1.116	252.400, 1.290	252.400, 1.209	252.400, 1.263
1264	252.600, 1.249	252.600, 1.204	252.600, 1.152	252.600, 1.164	252.600, 1.233	252.600, 1.154	252.600, 1.138	252.600, 1.150	252.600, 1.169	252.600, 1.144	252.600, 1.096	252.600, 1.116	252.600, 1.290	252.600, 1.209	252.600, 1.262
1265	252.800, 1.249	252.800, 1.204	252.800, 1.152	252.800, 1.164	252.800, 1.233	252.800, 1.154	252.800, 1.137	252.800, 1.150	252.800, 1.168	252.800, 1.144	252.800, 1.095	252.800, 1.116	252.800, 1.290	252.800, 1.209	252.800, 1.262
1266	253.000, 1.248	253.000, 1.203	253.000, 1.151	253.000, 1.164	253.000, 1.233	253.000, 1.154	253.000, 1.137	253.000, 1.150	253.000, 1.168	253.000, 1.144	253.000, 1.095	253.000, 1.116	253.000, 1.290	253.000, 1.209	253.000, 1.262
1267	253.200, 1.248	253.200, 1.203	253.200, 1.151	253.200, 1.163	253.200, 1.233	253.200, 1.154	253.200, 1.137	253.200, 1.150	253.200, 1.168	253.200, 1.145	253.200, 1.095	253.200, 1.116	253.200, 1.290	253.200, 1.208	253.200, 1.262
1268	253.400, 1.248	253.400, 1.204	253.400, 1.151	253.400, 1.163	253.400, 1.233	253.400, 1.154	253.400, 1.137	253.400, 1.150	253.400, 1.168	253.400, 1.145	253.400, 1.095	253.400, 1.116	253.400, 1.289	253.400, 1.208	253.400, 1.261
1269	253.600, 1.248	253.600, 1.204	253.600, 1.151	253.600, 1.163	253.600, 1.233	253.600, 1.154	253.600, 1.137	253.600, 1.149	253.600, 1.168	253.600, 1.145	253.600, 1.095	253.600, 1.116	253.600, 1.289	253.600, 1.207	253.600, 1.261
1270	253.800, 1.248	253.800, 1.204	253.800, 1.150	253.800, 1.163	253.800, 1.233	253.800, 1.154	253.800, 1.137	253.800, 1.149	253.800, 1.168	253.800, 1.145	253.800, 1.095	253.800, 1.116	253.800, 1.288	253.800, 1.207	253.800, 1.261
1271	254.000, 1.248	254.000, 1.204	254.000, 1.150	254.000, 1.163	254.000, 1.233	254.000, 1.154	254.000, 1.136	254.000, 1.149	254.000, 1.168	254.000, 1.145	254.000, 1.094	254.000, 1.116	254.000, 1.287	254.000, 1.207	254.000, 1.261
1272	254.200, 1.248	254.200, 1.205	254.200, 1.149	254.200, 1.163	254.200, 1.233	254.200, 1.153	254.200, 1.136	254.200, 1.148	254.200, 1.168	254.200, 1.145	254.200, 1.094	254.200, 1.115	254.200, 1.286	254.200, 1.207	254.200, 1.261
1273	254.400, 1.248	254.400, 1.205	254.400, 1.149	254.400, 1.163	254.400, 1.233	254.400, 1.153	254.400, 1.136	254.400, 1.148	254.400, 1.168	254.400, 1.145	254.400, 1.094	254.400, 1.115	254.400, 1.286	254.400, 1.207	254.400, 1.260
1274	254.600, 1.248	254.600, 1.205	254.600, 1.149	254.600, 1.163	254.600, 1.233	254.600, 1.152	254.600, 1.136	254.600, 1.148	254.600, 1.167	254.600, 1.145	254.600, 1.094	254.600, 1.115	254.600, 1.285	254.600, 1.207	254.600, 1.260
1275	254.800, 1.249	254.800, 1.205	254.800, 1.149	254.800, 1.163	254.800, 1.234	254.800, 1.152	254.800, 1.136	254.800, 1.148	254.800, 1.167	254.800, 1.145	254.800, 1.094	254.800, 1.115	254.800, 1.285	254.800, 1.206	254.800, 1.260
1276	255.000, 1.249	255.000, 1.205	255.000, 1.148	255.000, 1.163	255.000, 1.234	255.000, 1.152	255.000, 1.136	255.000, 1.147	255.000, 1.167	255.000, 1.144	255.000, 1.094	255.000, 1.114	255.000, 1.284	255.000, 1.206	255.000, 1.260
1277	255.200, 1.249	255.200, 1.205	255.200, 1.148	255.200, 1.163	255.200, 1.234	255.200, 1.152	255.200, 1.136	255.200, 1.147	255.200, 1.167	255.200, 1.144	255.200, 1.094	255.200, 1.114	255.200, 1.284	255.200, 1.206	255.200, 1.260
1278	255.400, 1.249	255.400, 1.205	255.400, 1.148	255.400, 1.163	255.400, 1.234	255.400, 1.152	255.400, 1.136	255.400, 1.147	255.400, 1.166	255.400, 1.144	255.400, 1.094	255.400, 1.114	255.400, 1.283	255.400, 1.205	255.400, 1.259
1279	255.600, 1.249	255.600, 1.205	255.600, 1.148	255.600, 1.163	255.600, 1.234	255.600, 1.152	255.600, 1.136	255.600, 1.148	255.600, 1.166	255.600, 1.143	255.600, 1.094	255.600, 1.114	255.600, 1.283	255.600, 1.205	255.600, 1.259
1280	255.800, 1.248	255.800, 1.205	255.800, 1.148	255.800, 1.163	255.800, 1.234	255.800, 1.152	255.800, 1.135	255.800, 1.148	255.800, 1.166	255.800, 1.143	255.800, 1.094	255.800, 1.114	255.800, 1.282	255.800, 1.205	255.800, 1.259
1281	256.000, 1.248	256.000, 1.205	256.000, 1.148	256.000, 1.163	256.000, 1.233	256.000, 1.152	256.000, 1.135	256.000, 1.148	256.000, 1.166	256.000, 1.143	256.000, 1.093	256.000, 1.114	256.000, 1.282	256.000, 1.204	256.000, 1.259
1282	256.200, 1.248	256.200, 1.205	256.200, 1.148	256.200, 1.163	256.200, 1.233	256.200, 1.152	256.200, 1.135	256.200, 1.148	256.200, 1.166	256.200, 1.143	256.200, 1.093	256.200, 1.114	256.200, 1.282	256.200, 1.204	256.200, 1.259
1283	256.400, 1.247	256.400, 1.205	256.400, 1.148	256.400, 1.163	256.400, 1.233	256.400, 1.152	256.400, 1.135	256.400, 1.148	256.400, 1.165	256.400, 1.142	256.400, 1.093	256.400, 1.114	256.400, 1.282	256.400, 1.203	256.400, 1.258
1284	256.600, 1.247	256.600, 1.205	256.600, 1.148	256.600, 1.163	256.600, 1.233	256.600, 1.152	256.600, 1.135	256.600, 1.149	256.600, 1.165	256.600, 1.142	256.600, 1.093	256.600, 1.114	256.600, 1.282	256.600, 1.203	256.600, 1.258
1285	256.800, 1.247	256.800, 1.204	256.800, 1.148	256.800, 1.162	256.800, 1.233	256.800, 1.152	256.800, 1.134	256.800, 1.148	256.800, 1.165	256.800, 1.142	256.800, 1.093	256.800, 1.114	256.800, 1.281	256.800, 1.203	256.800, 1.258
1286	257.000, 1.247	257.000, 1.204	257.000, 1.148	257.000, 1.162	257.000, 1.232	257.000, 1.152	257.000, 1.134	257.000, 1.148	257.000, 1.165	257.000, 1.142	257.000, 1.093	257.000, 1.114	257.000, 1.281	257.000, 1.202	257.000, 1.258
1287	257.200, 1.246	257.200, 1.204	257.200, 1.147	257.200, 1.161	257.200, 1.232	257.200, 1.152	257.200, 1.134	257.200, 1.148	257.200, 1.165	257.200, 1.142	257.200, 1.093	257.200, 1.114	257.200, 1.281	257.200, 1.202	257.200, 1.258
1288	257.400, 1.246	257.400, 1.204	257.400, 1.147	257.400, 1.161	257.400, 1.232	257.400, 1.152	257.400, 1.134	257.400, 1.148	257.400, 1.165	257.400, 1.143	257.400, 1.093	257.400, 1.114	257.400, 1.281	257.400, 1.201	257.400, 1.258
1289	257.600, 1.246	257.600, 1.204	257.600, 1.147	257.600, 1.161	257.600, 1.232	257.600, 1.152	257.600, 1.134	257.600, 1.147	257.600, 1.165	257.600, 1.143	257.600, 1.093	257.600, 1.114	257.600, 1.280	257.600, 1.201	257.600, 1.257
1290	257.800, 1.246	257.800, 1.204	257.800, 1.147	257.800, 1.161	257.800, 1.232	257.800, 1.152	257.800, 1.134	257.800, 1.147	257.800, 1.166	257.800, 1.143	257.800, 1.093	257.800, 1.114	257.800, 1.280	257.800, 1.200	257.800, 1.257
1291	258.000, 1.246	258.000, 1.204	258.000, 1.147	258.000, 1.161	258.000, 1.232	258.000, 1.152	258.000, 1.134	258.000, 1.147	258.000, 1.166	258.000, 1.143	258.000, 1.093	258.000, 1.114	258.000, 1.280	258.000, 1.200	258.000, 1.257
1292	258.200, 1.247	258.200, 1.204	258.200, 1.148	258.200, 1.161	258.200, 1.231	258.200, 1.152	258.200, 1.134	258.200, 1.147	258.200, 1.166	258.200, 1.143	258.200, 1.093	258.200, 1.114	258.200, 1.280	258.200, 1.199	258.200, 1.257
1293	258.400, 1.247	258.400, 1.204	258.400, 1.148	258.400, 1.161	258.400, 1.231	258.400, 1.151	258.400, 1.134	258.400, 1.147	258.400, 1.165	258.400, 1.143	258.400, 1.092	258.400, 1.114	258.400, 1.280	258.400, 1.199	258.400, 1.256
1294	258.600, 1.247	258.600, 1.204	258.600, 1.148	258.600, 1.161	258.600, 1.231	258.600, 1.151	258.600, 1.134	258.600, 1.147	258.600, 1.165	258.600, 1.143	258.600, 1.092	258.600, 1.114	258.600, 1.280	258.600, 1.199	258.600, 1.256
1295	258.800, 1.247	258.800, 1.204	258.800, 1.147	258.800, 1.161	258.800, 1.230	258.800, 1.151	258.800, 1.134	258.800, 1.147	258.800, 1.165	258.800, 1.143	258.800, 1.093	258.800, 1.114	258.800, 1.279	258.800, 1.198	258.800, 1.255
1296	259.000, 1.247	259.000, 1.204	259.000, 1.147	259.000, 1.162	259.000, 1.230	259.000, 1.151	259.000, 1.135	259.000, 1.147	259.000, 1.165	259.000, 1.143	259.000, 1.093	259.000, 1.114	259.000, 1.279	259.000, 1.198	259.000, 1.255
1297	259.200, 1.246	259.200, 1.204	259.200, 1.147	259.200, 1.162	259.200, 1.230	259.200, 1.152	259.200, 1.135	259.200, 1.147	259.200, 1.165	259.200, 1.143	259.200, 1.093	259.200, 1.113	259.200, 1.279	259.200, 1.198	259.200, 1.254
1298	259.400, 1.246	259.400, 1.204	259.400, 1.147	259.400, 1.162	259.400, 1.229	259.400, 1.152	259.400, 1.135	259.400, 1.147	259.400, 1.165	259.400, 1.142	259.400, 1.093	259.400, 1.113	259.400, 1.278	259.400, 1.197	259.400, 1.254
1299	259.600, 1.245	259.600, 1.204	259.600, 1.147	259.600, 1.162	259.600, 1.229	259.600, 1.151	259.600, 1.135	259.600, 1.147	259.600, 1.164	259.600, 1.142	259.600, 1.093	259.600, 1.113	259.600, 1.278	259.600, 1.197	259.600, 1.253
1300	259.800, 1.245	259.800, 1.204	259.800, 1.147	259.800, 1.162	259.800, 1.229	259.800, 1.151	259.800, 1.135	259.800, 1.147	259.800, 1.164	259.800, 1.142	259.800, 1.093	259.800, 1.113	259.800, 1.277	259.800, 1.197	259.800, 1.253
1301	260.000, 1.245	260.000, 1.203	260.000, 1.147	260.000, 1.161	260.000, 1.229	260.000, 1.151	260.000, 1.135	260.000, 1.147	260.000, 1.164	260.000, 1.142	260.000, 1.092	260.000, 1.112	260.000, 1.277	260.000, 1.197	260.000, 1.252
1302	260.200, 1.245	260.200, 1.203	260.200, 1.147	260.200, 1.161	260.200, 1.229	260.200, 1.151	260.200, 1.135	260.200, 1.147	260.200, 1.164	260.200, 1.142	260.200, 1.092	260.200, 1.112	260.200, 1.276	260.200, 1.196	260.200, 1.252
1303	260.400, 1.244	260.400, 1.203	260.400, 1.147	260.400, 1.161	260.400, 1.229	260.400, 1.150	260.400, 1.135	260.400, 1.148	260.400, 1.164	260.400, 1.141	260.400, 1.092	260.400, 1.112	260.400, 1.276	260.400, 1.196	260.400, 1.252
1304	260.600, 1.244	260.600, 1.202	260.600, 1.147	260.600, 1.160	260.600, 1.229	260.600, 1.150	260.600, 1.135	260.600, 1.147	260.600, 1.164	260.600, 1.141	260.600, 1.092	260.600, 1.112	260.600, 1.275	260.600, 1.196	260.600, 1.251
1305	260.800, 1.244	260.800, 1.202	260.800, 1.147	260.800, 1.160	260.800, 1.228	260.800, 1.150	260.800, 1.135	260.800, 1.147	260.800, 1.163	260.800, 1.140	260.800, 1.092	260.800, 1.111	260.800, 1.275	260.800, 1.196	260.800, 1.251
1306	261.000, 1.244	261.000, 1.201	261.000, 1.147	261.000, 1.160	261.000, 1.228	261.000, 1.150	261.000, 1.135	261.000, 1.147	261.000, 1.163	261.000, 1.140	261.000, 1.092	261.000, 1.111	261.000, 1.275	261.000, 1.196	261.000, 1.251
1307	261.200, 1.244	261.200, 1.201	261.200, 1.147	261.200, 1.160	261.200, 1.228	261.200, 1.150	261.200, 1.134	261.200, 1.147	261.200, 1.163	261.200, 1.140	261.200, 1.091	261.200, 1.111	261.200, 1.275	261.200, 1.196	261.200, 1.251
1308	261.400, 1.244	261.400, 1.201	261.400, 1.147	261.400, 1.159	261.400, 1.228	261.400, 1.149	261.400, 1.134	261.400, 1.146	261.400, 1.163	261.400, 1.140	261.400, 1.091	261.400, 1.111	261.400, 1.274	261.400, 1.196	261.400, 1.251
1309	261.600, 1.244	261.600, 1.200	261.600, 1.148	261.600, 1.159	261.600, 1.228	261.600, 1.149	261.600, 1.134	261.600, 1.146	261.600, 1.163	261.600, 1.140	261.600, 1.091	261.600, 1.111	261.600, 1.274	261.600, 1.196	261.600, 1.251
1310	261.800, 1.244	261.800, 1.200	261.800, 1.148	261.800, 1.159	261.800, 1.228	261.800, 1.148	261.800, 1.134	261.800, 1.146	261.800, 1.163	261.800, 1.140	261.800, 1.090	261.800, 1.111	261.800, 1.274	261.800, 1.196	261.800, 1.250
1311	262.000, 1.244	262.000, 1.200	262.000, 1.147	262.000, 1.159	262.000, 1.228	262.000, 1.148	262.000, 1.134	262.000, 1.146	262.000, 1.163	262.000, 1.140	262.000, 1.090	262.000, 1.111	262.000, 1.274	262.000, 1.195	262.000, 1.250
1312	262.200, 1.244	262.200, 1.200	262.200, 1.147	262.200, 1.159	262.200, 1.228	262.200, 1.148	262.200, 1.134	262.200, 1.146	262.200, 1.163	262.200, 1.140	262.200, 1.090	262.200, 1.110	262.200, 1.274	262.200, 1.195	262.200, 1.250
1313	262.400, 1.245	262.400, 1.200	262.400, 1.147	262.400, 1.159	262.400, 1.228	262.400, 1.148	262.400, 1.134	262.400, 1.146	262.400, 1.163	262.400, 1.140	262.400, 1.090	262.400, 1.110	262.400, 1.273	262.400, 1.195	262.400, 1.250
1314	262.600, 1.245	262.600, 1.200	262.600, 1.147	262.600, 1.159	262.600, 1.228	262.600, 1.148	262.600, 1.134	262.600, 1.145	262.600, 1.163	262.600, 1.140	262.600, 1.090	262.600, 1.110	262.600, 1.273	262.600, 1.195	262.600, 1.249
1315	262.800, 1.244	262.800, 1.201	262.800, 1.147	262.800, 1.159	262.800, 1.228	262.800, 1.148	262.800, 1.134	262.800, 1.145	262.800, 1.163	262.800, 1.140	262.800, 1.090	262.800, 1.110	262.800, 1.273	262.800, 1.195	262.800, 1.249
1316	263.000, 1.244	263.000, 1.201	263.000, 1.147	263.000, 1.159	263.000, 1.228	263.000, 1.148	263.000, 1.134	263.000, 1.145	263.000, 1.163	263.000, 1.140	263.000, 1.090	263.000, 1.110	263.000, 1.272	263.000, 1.194	263.000, 1.249
1317	263.200, 1.244	263.200, 1.201	263.200, 1.147	263.200, 1.159	263.200, 1.228	263.200, 1.148	263.200, 1.134	263.200, 1.144	263.200, 1.163	263.200, 1.140	263.200, 1.089	263.200, 1.110	263.200, 1.272	263.200, 1.194	263.200, 1.249
1318	263.400, 1.244	263.400, 1.202	263.400, 1.146	263.400, 1.159	263.400, 1.228	263.400, 1.148	263.400, 1.134	263.400, 1.144	263.400, 1.162	263.400, 1.140	263.400, 1.089	263.400, 1.110	263.400, 1.272	263.400, 1.194	263.400, 1.249
1319	263.600, 1.244	263.600, 1.202	263.600, 1.146	263.600, 1.159	263.600, 1.228	263.600, 1.148	263.600, 1.134	263.600, 1.143	263.600, 1.162	263.600, 1.140	263.600, 1.089	263.600, 1.110	263.600, 1.271	263.600, 1.193	263.600, 1.249
1320	263.800, 1.244	263.800, 1.202	263.800, 1.146	263.800, 1.159	263.800, 1.228	263.800, 1.148	263.800, 1.134	263.800, 1.143	263.800, 1.162	263.800, 1.140	263.800, 1.089	263.800, 1.110	263.800, 1.271	263.800, 1.193	263.800, 1.249
1321	264.000, 1.244	264.000, 1.202	264.000, 1.146	264.000, 1.159	264.000, 1.228	264.000, 1.148	264.000, 1.134	264.000, 1.143	264.000, 1.161	264.000, 1.140	264.000, 1.088	264.000, 1.110	264.000, 1.271	264.000, 1.193	264.000, 1.249
1322	264.200, 1.244	264.200, 1.202	264.200, 1.146	264.200, 1.159	264.200, 1.228	264.200, 1.148	264.200, 1.133	264.200, 1.143	264.200, 1.161	264.200, 1.140	264.200, 1.088	264.200, 1.110	264.200, 1.271	264.200, 1.192	264.200, 1.249
1323	264.400, 1.244	264.400, 1.202	264.400, 1.146	264.400, 1.159	264.400, 1.229	264.400, 1.148	264.400, 1.133	264.400, 1.143	264.400, 1.161	264.400, 1.140	264.400, 1.088	264.400, 1.110	264.400, 1.271	264.400, 1.192	264.400, 1.249
1324	264.600, 1.244	264.600, 1.202	264.600, 1.146	264.600, 1.159	264.600, 1.229	264.600, 1.148	264.600, 1.133	264.600, 1.143	264.600, 1.161	264.600, 1.140	264.600, 1.088	264.600, 1.110	264.600, 1.271	264.600, 1.191	264.600, 1.249
1325	264.800, 1.243	264.800, 1.202	264.800, 1.146	264.800, 1.159	264.800, 1.229	264.800, 1.148	264.800, 1.132	264.800, 1.143	264.800, 1.161	264.800, 1.140	264.800, 1.088	264.800, 1.110	264.800, 1.270	264.800, 1.191	264.800, 1.249
1326	265.000, 1.243	265.000, 1.202	265.000, 1.146	265.000, 1.159	265.000, 1.229	265.000, 1.147	265.000, 1.132	265.000, 1.144	265.000, 1.161	265.000, 1.140	265.000, 1.088	265.000, 1.109	265.000, 1.270	265.000, 1.191	265.000, 1.249
1327	265.200, 1.243	265.200, 1.201	265.200, 1.145	265.200, 1.159	265.200, 1.229	265.200, 1.147	265.200, 1.132	265.200, 1.144	265.200, 1.161	265.200, 1.140	265.200, 1.088	265.200, 1.109	265.200, 1.270	265.200, 1.190	265.200, 1.248
1328	265.400, 1.243	265.400, 1.201	265.400, 1.145	265.400, 1.159	265.400, 1.228	265.400, 1.147	265.400, 1.131	265.400, 1.144	265.400, 1.161	265.400, 1.140	265.400, 1.088	265.400, 1.109	265.400, 1.270	265.400, 1.190	265.400, 1.248
1329	265.600, 1.243	265.600, 1.201	265.600, 1.145	265.600, 1.159	265.600, 1.228	265.600, 1.146	265.600, 1.131	265.600, 1.144	265.600, 1.161	265.600, 1.140	265.600, 1.088	265.600, 1.109	265.600, 1.270	265.600, 1.190	265.600, 1.247
1330	265.800, 1.243	265.800, 1.200	265.800, 1.145	265.800, 1.159	265.800, 1.228	265.800, 1.146	265.800, 1.131	265.800, 1.144	265.800, 1.161	265.800, 1.140	265.800, 1.088	265.800, 1.109	265.800, 1.269	265.800, 1.190	265.800, 1.247
1331	266.000, 1.243	266.000, 1.200	266.000, 1.145	266.000, 1.159	266.000, 1.228	266.000, 1.146	266.000, 1.131	266.000, 1.144	266.000, 1.161	266.000, 1.140	266.000, 1.088	266.000, 1.109	266.000, 1.269	266.000, 1.190	266.000, 1.246
1332	266.200, 1.243	266.200, 1.200	266.200, 1.144	266.200, 1.159	266.200, 1.227	266.200, 1.146	266.200, 1.131	266.200, 1.144	266.200, 1.161	266.200, 1.139	266.200, 1.088	266.200, 1.109	266.200, 1.269	266.200, 1.190	266.200, 1.246
1333	266.400, 1.243	266.400, 1.200	266.400, 1.144	266.400, 1.159	266.400, 1.227	266.400, 1.146	266.400, 1.130	266.400, 1.144	266.400, 1.161	266.400, 1.139	266.400, 1.088	266.400, 1.109	266.400, 1.268	266.400, 1.189	266.400, 1.246
1334	266.600, 1.243	266.600, 1.199	266.600, 1.144	266.600, 1.159	266.600, 1.227	266.600, 1.146	266.600, 1.130	266.600, 1.144	266.600, 1.161	266.600, 1.139	266.600, 1.088	266.600, 1.109	266.600, 1.268	266.600, 1.189	266.600, 1.246
1335	266.800, 1.243	266.800, 1.199	266.800, 1.144	266.800, 1.159	266.800, 1.227	266.800, 1.146	266.800, 1.130	266.800, 1.143	266.800, 1.160	266.800, 1.139	266.800, 1.088	266.800, 1.109	266.800, 1.267	266.800, 1.188	266.800, 1.245
1336	267.000, 1.243	267.000, 1.199	267.000, 1.144	267.000, 1.159	267.000, 1.226	267.000, 1.146	267.000, 1.130	267.000, 1.143	267.000, 1.160	267.000, 1.139	267.000, 1.088	267.000, 1.109	267.000, 1.267	267.000, 1.188	267.000, 1.245
1337	267.200, 1.242	267.200, 1.199	267.200, 1.144	267.200, 1.159	267.200, 1.226	267.200, 1.146	267.200, 1.131	267.200, 1.143	267.200, 1.160	267.200, 1.139	267.200, 1.088	267.200, 1.109	267.200, 1.266	267.200, 1.188	267.200, 1.244
1338	267.400, 1.242	267.400, 1.199	267.400, 1.144	267.400, 1.159	267.400, 1.226	267.400, 1.147	267.400, 1.131	267.400, 1.142	267.400, 1.160	267.400, 1.139	267.400, 1.088	267.400, 1.109	267.400, 1.266	267.400, 1.187	267.400, 1.244
1339	267.600, 1.242	267.600, 1.199	267.600, 1.143	267.600, 1.159	267.600, 1.226	267.600, 1.147	267.600, 1.131	267.600, 1.142	267.600, 1.160	267.600, 1.139	267.600, 1.088	267.600, 1.108	267.600, 1.266	267.600, 1.187	267.600, 1.244
1340	267.800, 1.241	267.800, 1.199	267.800, 1.143	267.800, 1.159	267.800, 1.225	267.800, 1.147	267.800, 1.131	267.800, 1.142	267.800, 1.160	267.800, 1.139	267.800, 1.088	267.800, 1.108	267.800, 1.265	267.800, 1.187	267.800, 1.244
1341	268.000, 1.241	268.000, 1.199	268.000, 1.144	268.000, 1.158	268.000, 1.225	268.000, 1.147	268.000, 1.131	268.000, 1.142	268.000, 1.160	268.000, 1.139	268.000, 1.087	268.000, 1.108	268.000, 1.265	268.000, 1.187	268.000, 1.244
1342	268.200, 1.241	268.200, 1.199	268.200, 1.143	268.200, 1.158	268.200, 1.225	268.200, 1.147	268.200, 1.131	268.200, 1.142	268.200, 1.160	268.200, 1.139	268.200, 1.087	268.200, 1.107	268.200, 1.264	268.200, 1.186	268.200, 1.243
1343	268.400, 1.241	268.400, 1.199	268.400, 1.143	268.400, 1.158	268.400, 1.225	268.400, 1.147	268.400, 1.131	268.400, 1.142	268.400, 1.160	268.400, 1.138	268.400, 1.087	268.400, 1.107	268.400, 1.264	268.400, 1.186	268.400, 1.243
1344	268.600, 1.241	268.600, 1.200	268.600, 1.143	268.600, 1.157	268.600, 1.225	268.600, 1.147	268.600, 1.131	268.600, 1.142	268.600, 1.160	268.600, 1.138	268.600, 1.087	268.600, 1.106	268.600, 1.264	268.600, 1.186	268.600, 1.243
1345	268.800, 1.241	268.800, 1.200	268.800, 1.143	268.800, 1.157	268.800, 1.225	268.800, 1.147	268.800, 1.131	268.800, 1.142	268.800, 1.160	268.800, 1.138	268.800, 1.087	268.800, 1.106	268.800, 1.263	268.800, 1.186	268.800, 1.243
1346	269.000, 1.241	269.000, 1.200	269.000, 1.143	269.000, 1.157	269.000, 1.225	269.000, 1.147	269.000, 1.131	269.000, 1.142	269.000, 1.160	269.000, 1.138	269.000, 1.087	269.000, 1.106	269.000, 1.263	269.000, 1.186	269.000, 1.242
1347	269.200, 1.241	269.200, 1.200	269.200, 1.143	269.200, 1.157	269.200, 1.225	269.200, 1.147	269.200, 1.131	269.200, 1.142	269.200, 1.160	269.200, 1.138	269.200, 1.087	269.200, 1.106	269.200, 1.263	269.200, 1.186	269.200, 1.242
1348	269.400, 1.241	269.400, 1.200	269.400, 1.143	269.400, 1.157	269.400, 1.225	269.400, 1.147	269.400, 1.131	269.400, 1.142	269.400, 1.160	269.400, 1.138	269.400, 1.087	269.400, 1.106	269.400, 1.263	269.400, 1.186	269.400, 1.242
1349	269.600, 1.241	269.600, 1.201	269.600, 1.142	269.600, 1.157	269.600, 1.225	269.600, 1.147	269.600, 1.131	269.600, 1.142	269.600, 1.159	269.600, 1.138	269.600, 1.087	269.600, 1.106	269.600, 1.263	269.600, 1.185	269.600, 1.242
1350	269.800, 1.241	269.800, 1.201	269.800, 1.142	269.800, 1.157	269.800, 1.225	269.800, 1.147	269.800, 1.131	269.800, 1.142	269.800, 1.159	269.800, 1.138	269.800, 1.087	269.800, 1.106	269.800, 1.263	269.800, 1.185	269.800, 1.242
1351	,	,	,	,	,	,	,	,	,	,	,	,	,	,	,
1352	,	,	,	,	,	,	,	,	,	,	,	,	,	,	,
1353	,	,	,	,	,	,	,	,	,	,	,	,	,	,	,
1354	,	,	,	,	,	,	,	,	,	,	,	,	,	,	,
1355	,	,	,	,	,	,	,	,	,	,	,	,	,	,	,
1356	,	,	,	,	,	,	,	,	,	,	,	,	,	,	,
1357	,	,	,	,	,	,	,	,	,	,	,	,	,	,	,
1358	,	,	,	,	,	,	,	,	,	,	,	,	,	,	,
1359	,	,	,	,	,	,	,	,	,	,	,	,	,	,	,
1360	,	,	,	,	,	,	,	,	,	,	,	,	,	,	,
1361	,	,	,	,	,	,	,	,	,	,	,	,	,	,	,
1362	,	,	,	,	,	,	,	,	,	,	,	,	,	,	,
1363	,	,	,	,	,	,	,	,	,	,	,	,	,	,	,
1364	,	,	,	,	,	,	,	,	,	,	,	,	,	,	,
1365	,	,	,	,	,	,	,	,	,	,	,	,	,	,	,
1366	,	,	,	,	,	,	,	,	,	,	,	,	,	,	,
1367	,	,	,	,	,	,	,	,	,	,	,	,	,	,	,
1368	,	,	,	,	,	,	,	,	,	,	,	,	,	,	,
1369	,	,	,	,	,	,	,	,	,	,	,	,	,	,	,
1370	,	,	,	,	,	,	,	,	,	,	,	,	,	,	,
1371	,	,	,	,	,	,	,	,	,	,	,	,	,	,	,
1372	,	,	,	,	,	,	,	,	,	,	,	,	,	,	,
1373	,	,	,	,	,	,	,	,	,	,	,	,	,	,	,
1374	,	,	,	,	,	,	,	,	,	,	,	,	,	,	,
1375	,	,	,	,	,	,	,	,	,	,	,	,	,	,	,
1376	,	,	,	,	,	,	,	,	,	,	,	,	,	,	,
1377	,	,	,	,	,	,	,	,	,	,	,	,	,	,	,
1378	,	,	,	,	,	,	,	,	,	,	,	,	,	,	,
1379	,	,	,	,	,	,	,	,	,	,	,	,	,	,	,
1380	,	,	,	,	,	,	,	,	,	,	,	,	,	,	,
1381	,	,	,	,	,	,	,	,	,	,	,	,	,	,	,
1382	,	,	,	,	,	,	,	,	,	,	,	,	,	,	,
1383	,	,	,	,	,	,	,	,	,	,	,	,	,	,	,
1384	,	,	,	,	,	,	,	,	,	,	,	,	,	,	,
1385	,	,	,	,	,	,	,	,	,	,	,	,	,	,	,
1386	,	,	,	,	,	,	,	,	,	,	,	,	,	,	,
1387	,	,	,	,	,	,	,	,	,	,	,	,	,	,	,
1388	,	,	,	,	,	,	,	,	,	,	,	,	,	,	,
1389	,	,	,	,	,	,	,	,	,	,	,	,	,	,	,
1390	,	,	,	,	,	,	,	,	,	,	,	,	,	,	,
1391	,	,	,	,	,	,	,	,	,	,	,	,	,	,	,
1392	,	,	,	,	,	,	,	,	,	,	,	,	,	,	,
1393	,	,	,	,	,	,	,	,	,	,	,	,	,	,	,
1394	,	,	,	,	,	,	,	,	,	,	,	,	,	,	,
1395	,	,	,	,	,	,	,	,	,	,	,	,	,	,	,
1396	,	,	,	,	,	,	,	,	,	,	,	,	,	,	,
1397	,	,	,	,	,	,	,	,	,	,	,	,	,	,	,
1398	,	,	,	,	,	,	,	,	,	,	,	,	,	,	,
1399	,	,	,	,	,	,	,	,	,	,	,	,	,	,	,
1400	,	,	,	,	,	,	,	,	,	,	,	,	,	,	,
1401	,	,	,	,	,	,	,	,	,	,	,	,	,	,	,
1402	,	,	,	,	,	,	,	,	,	,	,	,	,	,	,
1403	,	,	,	,	,	,	,	,	,	,	,	,	,	,	,
1404	,	,	,	,	,	,	,	,	,	,	,	,	,	,	,
1405	,	,	,	,	,	,	,	,	,	,	,	,	,	,	,
1406	,	,	,	,	,	,	,	,	,	,	,	,	,	,	,
1407	,	,	,	,	,	,	,	,	,	,	,	,	,	,	,
1408	,	,	,	,	,	,	,	,	,	,	,	,	,	,	,
1409	,	,	,	,	,	,	,	,	,	,	,	,	,	,	,
1410	,	,	,	,	,	,	,	,	,	,	,	,	,	,	,
1411	,	,	,	,	,	,	,	,	,	,	,	,	,	,	,
1412	,	,	,	,	,	,	,	,	,	,	,	,	,	,	,
1413	,	,	,	,	,	,	,	,	,	,	,	,	,	,	,
1414	,	,	,	,	,	,	,	,	,	,	,	,	,	,	,
1415	,	,	,	,	,	,	,	,	,	,	,	,	,	,	,
1416	,	,	,	,	,	,	,	,	,	,	,	,	,	,	,
1417	,	,	,	,	,	,	,	,	,	,	,	,	,	,	,
1418	,	,	,	,	,	,	,	,	,	,	,	,	,	,	,
1419	,	,	,	,	,	,	,	,	,	,	,	,	,	,	,
1420	,	,	,	,	,	,	,	,	,	,	,	,	,	,	,
1421	,	,	,	,	,	,	,	,	,	,	,	,	,	,	,
1422	,	,	,	,	,	,	,	,	,	,	,	,	,	,	,
1423	,	,	,	,	,	,	,	,	,	,	,	,	,	,	,
1424	,	,	,	,	,	,	,	,	,	,	,	,	,	,	,
1425	,	,	,	,	,	,	,	,	,	,	,	,	,	,	,
1426	,	,	,	,	,	,	,	,	,	,	,	,	,	,	,
1427	,	,	,	,	,	,	,	,	,	,	,	,	,	,	,
1428	,	,	,	,	,	,	,	,	,	,	,	,	,	,	,
1429	,	,	,	,	,	,	,	,	,	,	,	,	,	,	,
1430	,	,	,	,	,	,	,	,	,	,	,	,	,	,	,
1431	,	,	,	,	,	,	,	,	,	,	,	,	,	,	,
1432	,	,	,	,	,	,	,	,	,	,	,	,	,	,	,
1433	,	,	,	,	,	,	,	,	,	,	,	,	,	,	,
1434	,	,	,	,	,	,	,	,	,	,	,	,	,	,	,
1435	,	,	,	,	,	,	,	,	,	,	,	,	,	,	,
1436	,	,	,	,	,	,	,	,	,	,	,	,	,	,	,
1437	,	,	,	,	,	,	,	,	,	,	,	,	,	,	,
1438	,	,	,	,	,	,	,	,	,	,	,	,	,	,	,
1439	,	,	,	,	,	,	,	,	,	,	,	,	,	,	,
1440	,	,	,	,	,	,	,	,	,	,	,	,	,	,	,
1441	,	,	,	,	,	,	,	,	,	,	,	,	,	,	,
1442	,	,	,	,	,	,	,	,	,	,	,	,	,	,	,
1443	,	,	,	,	,	,	,	,	,	,	,	,	,	,	,
1444	,	,	,	,	,	,	,	,	,	,	,	,	,	,	,
1445	,	,	,	,	,	,	,	,	,	,	,	,	,	,	,
1446	,	,	,	,	,	,	,	,	,	,	,	,	,	,	,
1447	,	,	,	,	,	,	,	,	,	,	,	,	,	,	,
1448	,	,	,	,	,	,	,	,	,	,	,	,	,	,	,
1449	,	,	,	,	,	,	,	,	,	,	,	,	,	,	,
1450	,	,	,	,	,	,	,	,	,	,	,	,	,	,	,
1451	,	,	,	,	,	,	,	,	,	,	,	,	,	,	,
1452	,	,	,	,	,	,	,	,	,	,	,	,	,	,	,
1453	,	,	,	,	,	,	,	,	,	,	,	,	,	,	,
1454	,	,	,	,	,	,	,	,	,	,	,	,	,	,	,
1455	,	,	,	,	,	,	,	,	,	,	,	,	,	,	,
1456	,	,	,	,	,	,	,	,	,	,	,	,	,	,	,
1457	,	,	,	,	,	,	,	,	,	,	,	,	,	,	,
1458	,	,	,	,	,	,	,	,	,	,	,	,	,	,	,
1459	,	,	,	,	,	,	,	,	,	,	,	,	,	,	,
1460	,	,	,	,	,	,	,	,	,	,	,	,	,	,	,
1461	,	,	,	,	,	,	,	,	,	,	,	,	,	,	,
1462	,	,	,	,	,	,	,	,	,	,	,	,	,	,	,
1463	,	,	,	,	,	,	,	,	,	,	,	,	,	,	,
1464	,	,	,	,	,	,	,	,	,	,	,	,	,	,	,
1465	,	,	,	,	,	,	,	,	,	,	,	,	,	,	,
1466	,	,	,	,	,	,	,	,	,	,	,	,	,	,	,
1467	,	,	,	,	,	,	,	,	,	,	,	,	,	,	,
1468	,	,	,	,	,	,	,	,	,	,	,	,	,	,	,
1469	,	,	,	,	,	,	,	,	,	,	,	,	,	,	,
1470	,	,	,	,	,	,	,	,	,	,	,	,	,	,	,
1471	,	,	,	,	,	,	,	,	,	,	,	,	,	,	,
1472	,	,	,	,	,	,	,	,	,	,	,	,	,	,	,
1473	,	,	,	,	,	,	,	,	,	,	,	,	,	,	,
1474	,	,	,	,	,	,	,	,	,	,	,	,	,	,	,
1475	,	,	,	,	,	,	,	,	,	,	,	,	,	,	,
1476	,	,	,	,	,	,	,	,	,	,	,	,	,	,	,
1477	,	,	,	,	,	,	,	,	,	,	,	,	,	,	,
1478	,	,	,	,	,	,	,	,	,	,	,	,	,	,	,
1479	,	,	,	,	,	,	,	,	,	,	,	,	,	,	,
1480	,	,	,	,	,	,	,	,	,	,	,	,	,	,	,
1481	,	,	,	,	,	,	,	,	,	,	,	,	,	,	,
1482	,	,	,	,	,	,	,	,	,	,	,	,	,	,	,
1483	,	,	,	,	,	,	,	,	,	,	,	,	,	,	,
1484	,	,	,	,	,	,	,	,	,	,	,	,	,	,	,
1485	,	,	,	,	,	,	,	,	,	,	,	,	,	,	,
1486	,	,	,	,	,	,	,	,	,	,	,	,	,	,	,
1487	,	,	,	,	,	,	,	,	,	,	,	,	,	,	,
1488	,	,	,	,	,	,	,	,	,	,	,	,	,	,	,
1489	,	,	,	,	,	,	,	,	,	,	,	,	,	,	,
1490	,	,	,	,	,	,	,	,	,	,	,	,	,	,	,
1491	,	,	,	,	,	,	,	,	,	,	,	,	,	,	,
1492	,	,	,	,	,	,	,	,	,	,	,	,	,	,	,
1493	,	,	,	,	,	,	,	,	,	,	,	,	,	,	,
1494	,	,	,	,	,	,	,	,	,	,	,	,	,	,	,
1495	,	,	,	,	,	,	,	,	,	,	,	,	,	,	,
1496	,	,	,	,	,	,	,	,	,	,	,	,	,	,	,
1497	,	,	,	,	,	,	,	,	,	,	,	,	,	,	,
1498	,	,	,	,	,	,	,	,	,	,	,	,	,	,	,
1499	,	,	,	,	,	,	,	,	,	,	,	,	,	,	,
1500	,	,	,	,	,	,	,	,	,	,	,	,	,	,	,
1501	,	,	,	,	,	,	,	,	,	,	,	,	,	,	,
1502	,	,	,	,	,	,	,	,	,	,	,	,	,	,	,
1503	,	,	,	,	,	,	,	,	,	,	,	,	,	,	,
1504	,	,	,	,	,	,	,	,	,	,	,	,	,	,	,
1505	,	,	,	,	,	,	,	,	,	,	,	,	,	,	,
1506	,	,	,	,	,	,	,	,	,	,	,	,	,	,	,
1507	,	,	,	,	,	,	,	,	,	,	,	,	,	,	,
1508	,	,	,	,	,	,	,	,	,	,	,	,	,	,	,
1509	,	,	,	,	,	,	,	,	,	,	,	,	,	,	,
1510	,	,	,	,	,	,	,	,	,	,	,	,	,	,	,
1511	,	,	,	,	,	,	,	,	,	,	,	,	,	,	,
1512	,	,	,	,	,	,	,	,	,	,	,	,	,	,	,
1513	,	,	,	,	,	,	,	,	,	,	,	,	,	,	,
1514	,	,	,	,	,	,	,	,	,	,	,	,	,	,	,
1515	,	,	,	,	,	,	,	,	,	,	,	,	,	,	,
1516	,	,	,	,	,	,	,	,	,	,	,	,	,	,	,
1517	,	,	,	,	,	,	,	,	,	,	,	,	,	,	,
1518	,	,	,	,	,	,	,	,	,	,	,	,	,	,	,
1519	,	,	,	,	,	,	,	,	,	,	,	,	,	,	,
1520	,	,	,	,	,	,	,	,	,	,	,	,	,	,	,
1521	,	,	,	,	,	,	,	,	,	,	,	,	,	,	,
1522	,	,	,	,	,	,	,	,	,	,	,	,	,	,	,
1523	,	,	,	,	,	,	,	,	,	,	,	,	,	,	,
1524	,	,	,	,	,	,	,	,	,	,	,	,	,	,	,
1525	,	,	,	,	,	,	,	,	,	,	,	,	,	,	,
1526	,	,	,	,	,	,	,	,	,	,	,	,	,	,	,
1527	,	,	,	,	,	,	,	,	,	,	,	,	,	,	,
1528	,	,	,	,	,	,	,	,	,	,	,	,	,	,	,
1529	,	,	,	,	,	,	,	,	,	,	,	,	,	,	,
1530	,	,	,	,	,	,	,	,	,	,	,	,	,	,	,
1531	,	,	,	,	,	,	,	,	,	,	,	,	,	,	,
1532	,	,	,	,	,	,	,	,	,	,	,	,	,	,	,
1533	,	,	,	,	,	,	,	,	,	,	,	,	,	,	,
1534	,	,	,	,	,	,	,	,	,	,	,	,	,	,	,
1535	,	,	,	,	,	,	,	,	,	,	,	,	,	,	,
1536	,	,	,	,	,	,	,	,	,	,	,	,	,	,	,
1537	,	,	,	,	,	,	,	,	,	,	,	,	,	,	,
1538	,	,	,	,	,	,	,	,	,	,	,	,	,	,	,
1539	,	,	,	,	,	,	,	,	,	,	,	,	,	,	,
1540	,	,	,	,	,	,	,	,	,	,	,	,	,	,	,
1541	,	,	,	,	,	,	,	,	,	,	,	,	,	,	,
1542	,	,	,	,	,	,	,	,	,	,	,	,	,	,	,
1543	,	,	,	,	,	,	,	,	,	,	,	,	,	,	,
1544	,	,	,	,	,	,	,	,	,	,	,	,	,	,	,
1545	,	,	,	,	,	,	,	,	,	,	,	,	,	,	,
1546	,	,	,	,	,	,	,	,	,	,	,	,	,	,	,
1547	,	,	,	,	,	,	,	,	,	,	,	,	,	,	,
1548	,	,	,	,	,	,	,	,	,	,	,	,	,	,	,
1549	,	,	,	,	,	,	,	,	,	,	,	,	,	,	,
1550	,	,	,	,	,	,	,	,	,	,	,	,	,	,	,
1551	,	,	,	,	,	,	,	,	,	,	,	,	,	,	,
1552	,	,	,	,	,	,	,	,	,	,	,	,	,	,	,
1553	,	,	,	,	,	,	,	,	,	,	,	,	,	,	,
1554	,	,	,	,	,	,	,	,	,	,	,	,	,	,	,
1555	,	,	,	,	,	,	,	,	,	,	,	,	,	,	,
1556	,	,	,	,	,	,	,	,	,	,	,	,	,	,	,
1557	,	,	,	,	,	,	,	,	,	,	,	,	,	,	,
1558	,	,	,	,	,	,	,	,	,	,	,	,	,	,	,
1559	,	,	,	,	,	,	,	,	,	,	,	,	,	,	,
1560	,	,	,	,	,	,	,	,	,	,	,	,	,	,	,
1561	,	,	,	,	,	,	,	,	,	,	,	,	,	,	,
1562	,	,	,	,	,	,	,	,	,	,	,	,	,	,	,
1563	,	,	,	,	,	,	,	,	,	,	,	,	,	,	,
1564	,	,	,	,	,	,	,	,	,	,	,	,	,	,	,
1565	,	,	,	,	,	,	,	,	,	,	,	,	,	,	,
1566	,	,	,	,	,	,	,	,	,	,	,	,	,	,	,
1567	,	,	,	,	,	,	,	,	,	,	,	,	,	,	,
1568	,	,	,	,	,	,	,	,	,	,	,	,	,	,	,
1569	,	,	,	,	,	,	,	,	,	,	,	,	,	,	,
1570	,	,	,	,	,	,	,	,	,	,	,	,	,	,	,
1571	,	,	,	,	,	,	,	,	,	,	,	,	,	,	,
1572	,	,	,	,	,	,	,	,	,	,	,	,	,	,	,
1573	,	,	,	,	,	,	,	,	,	,	,	,	,	,	,
1574	,	,	,	,	,	,	,	,	,	,	,	,	,	,	,
1575	,	,	,	,	,	,	,	,	,	,	,	,	,	,	,
1576	,	,	,	,	,	,	,	,	,	,	,	,	,	,	,
1577	,	,	,	,	,	,	,	,	,	,	,	,	,	,	,
1578	,	,	,	,	,	,	,	,	,	,	,	,	,	,	,
1579	,	,	,	,	,	,	,	,	,	,	,	,	,	,	,
1580	,	,	,	,	,	,	,	,	,	,	,	,	,	,	,
1581	,	,	,	,	,	,	,	,	,	,	,	,	,	,	,
1582	,	,	,	,	,	,	,	,	,	,	,	,	,	,	,
1583	,	,	,	,	,	,	,	,	,	,	,	,	,	,	,
1584	,	,	,	,	,	,	,	,	,	,	,	,	,	,	,
1585	,	,	,	,	,	,	,	,	,	,	,	,	,	,	,
1586	,	,	,	,	,	,	,	,	,	,	,	,	,	,	,
1587	,	,	,	,	,	,	,	,	,	,	,	,	,	,	,
1588	,	,	,	,	,	,	,	,	,	,	,	,	,	,	,
1589	,	,	,	,	,	,	,	,	,	,	,	,	,	,	,
1590	,	,	,	,	,	,	,	,	,	,	,	,	,	,	,
1591	,	,	,	,	,	,	,	,	,	,	,	,	,	,	,
1592	,	,	,	,	,	,	,	,	,	,	,	,	,	,	,
1593	,	,	,	,	,	,	,	,	,	,	,	,	,	,	,
1594	,	,	,	,	,	,	,	,	,	,	,	,	,	,	,
1595	,	,	,	,	,	,	,	,	,	,	,	,	,	,	,
1596	,	,	,	,	,	,	,	,	,	,	,	,	,	,	,
1597	,	,	,	,	,	,	,	,	,	,	,	,	,	,	,
1598	,	,	,	,	,	,	,	,	,	,	,	,	,	,	,
1599	,	,	,	,	,	,	,	,	,	,	,	,	,	,	,
1600	,	,	,	,	,	,	,	,	,	,	,	,	,	,	,
1601	,	,	,	,	,	,	,	,	,	,	,	,	,	,	,
1602	,	,	,	,	,	,	,	,	,	,	,	,	,	,	,
1603	,	,	,	,	,	,	,	,	,	,	,	,	,	,	,
1604	,	,	,	,	,	,	,	,	,	,	,	,	,	,	,
1605	,	,	,	,	,	,	,	,	,	,	,	,	,	,	,
1606	,	,	,	,	,	,	,	,	,	,	,	,	,	,	,
1607	,	,	,	,	,	,	,	,	,	,	,	,	,	,	,
1608	,	,	,	,	,	,	,	,	,	,	,	,	,	,	,
1609	,	,	,	,	,	,	,	,	,	,	,	,	,	,	,
1610	,	,	,	,	,	,	,	,	,	,	,	,	,	,	,
1611	,	,	,	,	,	,	,	,	,	,	,	,	,	,	,
1612	,	,	,	,	,	,	,	,	,	,	,	,	,	,	,
1613	,	,	,	,	,	,	,	,	,	,	,	,	,	,	,
1614	,	,	,	,	,	,	,	,	,	,	,	,	,	,	,
1615	,	,	,	,	,	,	,	,	,	,	,	,	,	,	,
1616	,	,	,	,	,	,	,	,	,	,	,	,	,	,	,
1617	,	,	,	,	,	,	,	,	,	,	,	,	,	,	,
1618	,	,	,	,	,	,	,	,	,	,	,	,	,	,	,
1619	,	,	,	,	,	,	,	,	,	,	,	,	,	,	,
1620	,	,	,	,	,	,	,	,	,	,	,	,	,	,	,
1621	,	,	,	,	,	,	,	,	,	,	,	,	,	,	,
1622	,	,	,	,	,	,	,	,	,	,	,	,	,	,	,
1623	,	,	,	,	,	,	,	,	,	,	,	,	,	,	,
1624	,	,	,	,	,	,	,	,	,	,	,	,	,	,	,
1625	,	,	,	,	,	,	,	,	,	,	,	,	,	,	,
1626	,	,	,	,	,	,	,	,	,	,	,	,	,	,	,
1627	,	,	,	,	,	,	,	,	,	,	,	,	,	,	,
1628	,	,	,	,	,	,	,	,	,	,	,	,	,	,	,
1629	,	,	,	,	,	,	,	,	,	,	,	,	,	,	,
1630	,	,	,	,	,	,	,	,	,	,	,	,	,	,	,
1631	,	,	,	,	,	,	,	,	,	,	,	,	,	,	,
1632	,	,	,	,	,	,	,	,	,	,	,	,	,	,	,
1633	,	,	,	,	,	,	,	,	,	,	,	,	,	,	,
1634	,	,	,	,	,	,	,	,	,	,	,	,	,	,	,
1635	,	,	,	,	,	,	,	,	,	,	,	,	,	,	,
1636	,	,	,	,	,	,	,	,	,	,	,	,	,	,	,
1637	,	,	,	,	,	,	,	,	,	,	,	,	,	,	,
1638	,	,	,	,	,	,	,	,	,	,	,	,	,	,	,
1639	,	,	,	,	,	,	,	,	,	,	,	,	,	,	,
1640	,	,	,	,	,	,	,	,	,	,	,	,	,	,	,
1641	,	,	,	,	,	,	,	,	,	,	,	,	,	,	,
1642	,	,	,	,	,	,	,	,	,	,	,	,	,	,	,
1643	,	,	,	,	,	,	,	,	,	,	,	,	,	,	,
1644	,	,	,	,	,	,	,	,	,	,	,	,	,	,	,
1645	,	,	,	,	,	,	,	,	,	,	,	,	,	,	,
1646	,	,	,	,	,	,	,	,	,	,	,	,	,	,	,
1647	,	,	,	,	,	,	,	,	,	,	,	,	,	,	,
1648	,	,	,	,	,	,	,	,	,	,	,	,	,	,	,
1649	,	,	,	,	,	,	,	,	,	,	,	,	,	,	,
1650	,	,	,	,	,	,	,	,	,	,	,	,	,	,	,
1651	,	,	,	,	,	,	,	,	,	,	,	,	,	,	,
1652	,	,	,	,	,	,	,	,	,	,	,	,	,	,	,
1653	,	,	,	,	,	,	,	,	,	,	,	,	,	,	,
1654	,	,	,	,	,	,	,	,	,	,	,	,	,	,	,
1655	,	,	,	,	,	,	,	,	,	,	,	,	,	,	,
1656	,	,	,	,	,	,	,	,	,	,	,	,	,	,	,
1657	,	,	,	,	,	,	,	,	,	,	,	,	,	,	,
1658	,	,	,	,	,	,	,	,	,	,	,	,	,	,	,
1659	,	,	,	,	,	,	,	,	,	,	,	,	,	,	,
1660	,	,	,	,	,	,	,	,	,	,	,	,	,	,	,
1661	,	,	,	,	,	,	,	,	,	,	,	,	,	,	,
1662	,	,	,	,	,	,	,	,	,	,	,	,	,	,	,
1663	,	,	,	,	,	,	,	,	,	,	,	,	,	,	,
1664	,	,	,	,	,	,	,	,	,	,	,	,	,	,	,
1665	,	,	,	,	,	,	,	,	,	,	,	,	,	,	,
1666	,	,	,	,	,	,	,	,	,	,	,	,	,	,	,
1667	,	,	,	,	,	,	,	,	,	,	,	,	,	,	,
1668	,	,	,	,	,	,	,	,	,	,	,	,	,	,	,
1669	,	,	,	,	,	,	,	,	,	,	,	,	,	,	,
1670	,	,	,	,	,	,	,	,	,	,	,	,	,	,	,
1671	,	,	,	,	,	,	,	,	,	,	,	,	,	,	,
1672	,	,	,	,	,	,	,	,	,	,	,	,	,	,	,
1673	,	,	,	,	,	,	,	,	,	,	,	,	,	,	,
1674	,	,	,	,	,	,	,	,	,	,	,	,	,	,	,
1675	,	,	,	,	,	,	,	,	,	,	,	,	,	,	,
1676	,	,	,	,	,	,	,	,	,	,	,	,	,	,	,
1677	,	,	,	,	,	,	,	,	,	,	,	,	,	,	,
1678	,	,	,	,	,	,	,	,	,	,	,	,	,	,	,
1679	,	,	,	,	,	,	,	,	,	,	,	,	,	,	,
1680	,	,	,	,	,	,	,	,	,	,	,	,	,	,	,
1681	,	,	,	,	,	,	,	,	,	,	,	,	,	,	,
1682	,	,	,	,	,	,	,	,	,	,	,	,	,	,	,
1683	,	,	,	,	,	,	,	,	,	,	,	,	,	,	,
1684	,	,	,	,	,	,	,	,	,	,	,	,	,	,	,
1685	,	,	,	,	,	,	,	,	,	,	,	,	,	,	,
1686	,	,	,	,	,	,	,	,	,	,	,	,	,	,	,
1687	,	,	,	,	,	,	,	,	,	,	,	,	,	,	,
1688	,	,	,	,	,	,	,	,	,	,	,	,	,	,	,
1689	,	,	,	,	,	,	,	,	,	,	,	,	,	,	,
1690	,	,	,	,	,	,	,	,	,	,	,	,	,	,	,
1691	,	,	,	,	,	,	,	,	,	,	,	,	,	,	,
1692	,	,	,	,	,	,	,	,	,	,	,	,	,	,	,
1693	,	,	,	,	,	,	,	,	,	,	,	,	,	,	,
1694	,	,	,	,	,	,	,	,	,	,	,	,	,	,	,
1695	,	,	,	,	,	,	,	,	,	,	,	,	,	,	,
1696	,	,	,	,	,	,	,	,	,	,	,	,	,	,	,
1697	,	,	,	,	,	,	,	,	,	,	,	,	,	,	,
1698	,	,	,	,	,	,	,	,	,	,	,	,	,	,	,
1699	,	,	,	,	,	,	,	,	,	,	,	,	,	,	,
1700	,	,	,	,	,	,	,	,	,	,	,	,	,	,	,
1701	,	,	,	,	,	,	,	,	,	,	,	,	,	,	,
1702	,	,	,	,	,	,	,	,	,	,	,	,	,	,	,
1703	,	,	,	,	,	,	,	,	,	,	,	,	,	,	,
1704	,	,	,	,	,	,	,	,	,	,	,	,	,	,	,
1705	,	,	,	,	,	,	,	,	,	,	,	,	,	,	,
1706	,	,	,	,	,	,	,	,	,	,	,	,	,	,	,
1707	,	,	,	,	,	,	,	,	,	,	,	,	,	,	,
1708	,	,	,	,	,	,	,	,	,	,	,	,	,	,	,
1709	,	,	,	,	,	,	,	,	,	,	,	,	,	,	,
1710	,	,	,	,	,	,	,	,	,	,	,	,	,	,	,
1711	,	,	,	,	,	,	,	,	,	,	,	,	,	,	,
1712	,	,	,	,	,	,	,	,	,	,	,	,	,	,	,
1713	,	,	,	,	,	,	,	,	,	,	,	,	,	,	,
1714	,	,	,	,	,	,	,	,	,	,	,	,	,	,	,
1715	,	,	,	,	,	,	,	,	,	,	,	,	,	,	,
1716	,	,	,	,	,	,	,	,	,	,	,	,	,	,	,
1717	,	,	,	,	,	,	,	,	,	,	,	,	,	,	,
1718	,	,	,	,	,	,	,	,	,	,	,	,	,	,	,
1719	,	,	,	,	,	,	,	,	,	,	,	,	,	,	,
1720	,	,	,	,	,	,	,	,	,	,	,	,	,	,	,
1721	,	,	,	,	,	,	,	,	,	,	,	,	,	,	,
1722	,	,	,	,	,	,	,	,	,	,	,	,	,	,	,
1723	,	,	,	,	,	,	,	,	,	,	,	,	,	,	,
1724	,	,	,	,	,	,	,	,	,	,	,	,	,	,	,
1725	,	,	,	,	,	,	,	,	,	,	,	,	,	,	,
1726	,	,	,	,	,	,	,	,	,	,	,	,	,	,	,
1727	,	,	,	,	,	,	,	,	,	,	,	,	,	,	,
1728	,	,	,	,	,	,	,	,	,	,	,	,	,	,	,
1729	,	,	,	,	,	,	,	,	,	,	,	,	,	,	,
1730	,	,	,	,	,	,	,	,	,	,	,	,	,	,	,
1731	,	,	,	,	,	,	,	,	,	,	,	,	,	,	,
1732	,	,	,	,	,	,	,	,	,	,	,	,	,	,	,
1733	,	,	,	,	,	,	,	,	,	,	,	,	,	,	,
1734	,	,	,	,	,	,	,	,	,	,	,	,	,	,	,
1735	,	,	,	,	,	,	,	,	,	,	,	,	,	,	,
1736	,	,	,	,	,	,	,	,	,	,	,	,	,	,	,
1737	,	,	,	,	,	,	,	,	,	,	,	,	,	,	,
1738	,	,	,	,	,	,	,	,	,	,	,	,	,	,	,
1739	,	,	,	,	,	,	,	,	,	,	,	,	,	,	,
1740	,	,	,	,	,	,	,	,	,	,	,	,	,	,	,
1741	,	,	,	,	,	,	,	,	,	,	,	,	,	,	,
1742	,	,	,	,	,	,	,	,	,	,	,	,	,	,	,
1743	,	,	,	,	,	,	,	,	,	,	,	,	,	,	,
1744	,	,	,	,	,	,	,	,	,	,	,	,	,	,	,
1745	,	,	,	,	,	,	,	,	,	,	,	,	,	,	,
1746	,	,	,	,	,	,	,	,	,	,	,	,	,	,	,
1747	,	,	,	,	,	,	,	,	,	,	,	,	,	,	,
1748	,	,	,	,	,	,	,	,	,	,	,	,	,	,	,
1749	,	,	,	,	,	,	,	,	,	,	,	,	,	,	,
1750	,	,	,	,	,	,	,	,	,	,	,	,	,	,	,
1751	,	,	,	,	,	,	,	,	,	,	,	,	,	,	,
1752	,	,	,	,	,	,	,	,	,	,	,	,	,	,	,
1753	,	,	,	,	,	,	,	,	,	,	,	,	,	,	,
1754	,	,	,	,	,	,	,	,	,	,	,	,	,	,	,
1755	,	,	,	,	,	,	,	,	,	,	,	,	,	,	,
1756	,	,	,	,	,	,	,	,	,	,	,	,	,	,	,
1757	,	,	,	,	,	,	,	,	,	,	,	,	,	,	,
1758	,	,	,	,	,	,	,	,	,	,	,	,	,	,	,
1759	,	,	,	,	,	,	,	,	,	,	,	,	,	,	,
1760	,	,	,	,	,	,	,	,	,	,	,	,	,	,	,
1761	,	,	,	,	,	,	,	,	,	,	,	,	,	,	,
1762	,	,	,	,	,	,	,	,	,	,	,	,	,	,	,
1763	,	,	,	,	,	,	,	,	,	,	,	,	,	,	,
1764	,	,	,	,	,	,	,	,	,	,	,	,	,	,	,
1765	,	,	,	,	,	,	,	,	,	,	,	,	,	,	,
1766	,	,	,	,	,	,	,	,	,	,	,	,	,	,	,
1767	,	,	,	,	,	,	,	,	,	,	,	,	,	,	,
1768	,	,	,	,	,	,	,	,	,	,	,	,	,	,	,
1769	,	,	,	,	,	,	,	,	,	,	,	,	,	,	,
1770	,	,	,	,	,	,	,	,	,	,	,	,	,	,	,
1771	,	,	,	,	,	,	,	,	,	,	,	,	,	,	,
1772	,	,	,	,	,	,	,	,	,	,	,	,	,	,	,
1773	,	,	,	,	,	,	,	,	,	,	,	,	,	,	,
1774	,	,	,	,	,	,	,	,	,	,	,	,	,	,	,
1775	,	,	,	,	,	,	,	,	,	,	,	,	,	,	,
1776	,	,	,	,	,	,	,	,	,	,	,	,	,	,	,
1777	,	,	,	,	,	,	,	,	,	,	,	,	,	,	,
1778	,	,	,	,	,	,	,	,	,	,	,	,	,	,	,
1779	,	,	,	,	,	,	,	,	,	,	,	,	,	,	,
1780	,	,	,	,	,	,	,	,	,	,	,	,	,	,	,
1781	,	,	,	,	,	,	,	,	,	,	,	,	,	,	,
1782	,	,	,	,	,	,	,	,	,	,	,	,	,	,	,
1783	,	,	,	,	,	,	,	,	,	,	,	,	,	,	,
1784	,	,	,	,	,	,	,	,	,	,	,	,	,	,	,
1785	,	,	,	,	,	,	,	,	,	,	,	,	,	,	,
1786	,	,	,	,	,	,	,	,	,	,	,	,	,	,	,
1787	,	,	,	,	,	,	,	,	,	,	,	,	,	,	,
1788	,	,	,	,	,	,	,	,	,	,	,	,	,	,	,
1789	,	,	,	,	,	,	,	,	,	,	,	,	,	,	,
1790	,	,	,	,	,	,	,	,	,	,	,	,	,	,	,
1791	,	,	,	,	,	,	,	,	,	,	,	,	,	,	,
1792	,	,	,	,	,	,	,	,	,	,	,	,	,	,	,
1793	,	,	,	,	,	,	,	,	,	,	,	,	,	,	,
1794	,	,	,	,	,	,	,	,	,	,	,	,	,	,	,
1795	,	,	,	,	,	,	,	,	,	,	,	,	,	,	,
1796	,	,	,	,	,	,	,	,	,	,	,	,	,	,	,
1797	,	,	,	,	,	,	,	,	,	,	,	,	,	,	,
1798	,	,	,	,	,	,	,	,	,	,	,	,	,	,	,
1799	,	,	,	,	,	,	,	,	,	,	,	,	,	,	,
1800	,	,	,	,	,	,	,	,	,	,	,	,	,	,	,
1801	,	,	,	,	,	,	,	,	,	,	,	,	,	,	,
1802	,	,	,	,	,	,	,	,	,	,	,	,	,	,	,
1803	,	,	,	,	,	,	,	,	,	,	,	,	,	,	,
1804	,	,	,	,	,	,	,	,	,	,	,	,	,	,	,
1805	,	,	,	,	,	,	,	,	,	,	,	,	,	,	,
1806	,	,	,	,	,	,	,	,	,	,	,	,	,	,	,
1807	,	,	,	,	,	,	,	,	,	,	,	,	,	,	,
1808	,	,	,	,	,	,	,	,	,	,	,	,	,	,	,
1809	,	,	,	,	,	,	,	,	,	,	,	,	,	,	,
1810	,	,	,	,	,	,	,	,	,	,	,	,	,	,	,
1811	,	,	,	,	,	,	,	,	,	,	,	,	,	,	,
1812	,	,	,	,	,	,	,	,	,	,	,	,	,	,	,
1813	,	,	,	,	,	,	,	,	,	,	,	,	,	,	,
1814	,	,	,	,	,	,	,	,	,	,	,	,	,	,	,
1815	,	,	,	,	,	,	,	,	,	,	,	,	,	,	,
1816	,	,	,	,	,	,	,	,	,	,	,	,	,	,	,
1817	,	,	,	,	,	,	,	,	,	,	,	,	,	,	,
1818	,	,	,	,	,	,	,	,	,	,	,	,	,	,	,
1819	,	,	,	,	,	,	,	,	,	,	,	,	,	,	,
1820	,	,	,	,	,	,	,	,	,	,	,	,	,	,	,
1821	,	,	,	,	,	,	,	,	,	,	,	,	,	,	,
1822	,	,	,	,	,	,	,	,	,	,	,	,	,	,	,
1823	,	,	,	,	,	,	,	,	,	,	,	,	,	,	,
1824	,	,	,	,	,	,	,	,	,	,	,	,	,	,	,
1825	,	,	,	,	,	,	,	,	,	,	,	,	,	,	,
1826	,	,	,	,	,	,	,	,	,	,	,	,	,	,	,
1827	,	,	,	,	,	,	,	,	,	,	,	,	,	,	,
1828	,	,	,	,	,	,	,	,	,	,	,	,	,	,	,
1829	,	,	,	,	,	,	,	,	,	,	,	,	,	,	,
1830	,	,	,	,	,	,	,	,	,	,	,	,	,	,	,
1831	,	,	,	,	,	,	,	,	,	,	,	,	,	,	,
1832	,	,	,	,	,	,	,	,	,	,	,	,	,	,	,
1833	,	,	,	,	,	,	,	,	,	,	,	,	,	,	,
1834	,	,	,	,	,	,	,	,	,	,	,	,	,	,	,
1835	,	,	,	,	,	,	,	,	,	,	,	,	,	,	,
1836	,	,	,	,	,	,	,	,	,	,	,	,	,	,	,
1837	,	,	,	,	,	,	,	,	,	,	,	,	,	,	,
1838	,	,	,	,	,	,	,	,	,	,	,	,	,	,	,
1839	,	,	,	,	,	,	,	,	,	,	,	,	,	,	,
1840	,	,	,	,	,	,	,	,	,	,	,	,	,	,	,
1841	,	,	,	,	,	,	,	,	,	,	,	,	,	,	,
1842	,	,	,	,	,	,	,	,	,	,	,	,	,	,	,
1843	,	,	,	,	,	,	,	,	,	,	,	,	,	,	,
1844	,	,	,	,	,	,	,	,	,	,	,	,	,	,	,
1845	,	,	,	,	,	,	,	,	,	,	,	,	,	,	,
1846	,	,	,	,	,	,	,	,	,	,	,	,	,	,	,
1847	,	,	,	,	,	,	,	,	,	,	,	,	,	,	,
1848	,	,	,	,	,	,	,	,	,	,	,	,	,	,	,
1849	,	,	,	,	,	,	,	,	,	,	,	,	,	,	,
1850	,	,	,	,	,	,	,	,	,	,	,	,	,	,	,
1851	,	,	,	,	,	,	,	,	,	,	,	,	,	,	,
1852	,	,	,	,	,	,	,	,	,	,	,	,	,	,	,
1853	,	,	,	,	,	,	,	,	,	,	,	,	,	,	,
1854	,	,	,	,	,	,	,	,	,	,	,	,	,	,	,
1855	,	,	,	,	,	,	,	,	,	,	,	,	,	,	,
1856	,	,	,	,	,	,	,	,	,	,	,	,	,	,	,
1857	,	,	,	,	,	,	,	,	,	,	,	,	,	,	,
1858	,	,	,	,	,	,	,	,	,	,	,	,	,	,	,
1859	,	,	,	,	,	,	,	,	,	,	,	,	,	,	,
1860	,	,	,	,	,	,	,	,	,	,	,	,	,	,	,
1861	,	,	,	,	,	,	,	,	,	,	,	,	,	,	,
1862	,	,	,	,	,	,	,	,	,	,	,	,	,	,	,
1863	,	,	,	,	,	,	,	,	,	,	,	,	,	,	,
1864	,	,	,	,	,	,	,	,	,	,	,	,	,	,	,
1865	,	,	,	,	,	,	,	,	,	,	,	,	,	,	,
1866	,	,	,	,	,	,	,	,	,	,	,	,	,	,	,
1867	,	,	,	,	,	,	,	,	,	,	,	,	,	,	,
1868	,	,	,	,	,	,	,	,	,	,	,	,	,	,	,
1869	,	,	,	,	,	,	,	,	,	,	,	,	,	,	,
1870	,	,	,	,	,	,	,	,	,	,	,	,	,	,	,
1871	,	,	,	,	,	,	,	,	,	,	,	,	,	,	,
1872	,	,	,	,	,	,	,	,	,	,	,	,	,	,	,
1873	,	,	,	,	,	,	,	,	,	,	,	,	,	,	,
1874	,	,	,	,	,	,	,	,	,	,	,	,	,	,	,
1875	,	,	,	,	,	,	,	,	,	,	,	,	,	,	,
1876	,	,	,	,	,	,	,	,	,	,	,	,	,	,	,
1877	,	,	,	,	,	,	,	,	,	,	,	,	,	,	,
1878	,	,	,	,	,	,	,	,	,	,	,	,	,	,	,
1879	,	,	,	,	,	,	,	,	,	,	,	,	,	,	,
1880	,	,	,	,	,	,	,	,	,	,	,	,	,	,	,
1881	,	,	,	,	,	,	,	,	,	,	,	,	,	,	,
1882	,	,	,	,	,	,	,	,	,	,	,	,	,	,	,
1883	,	,	,	,	,	,	,	,	,	,	,	,	,	,	,
1884	,	,	,	,	,	,	,	,	,	,	,	,	,	,	,
1885	,	,	,	,	,	,	,	,	,	,	,	,	,	,	,
1886	,	,	,	,	,	,	,	,	,	,	,	,	,	,	,
1887	,	,	,	,	,	,	,	,	,	,	,	,	,	,	,
1888	,	,	,	,	,	,	,	,	,	,	,	,	,	,	,
1889	,	,	,	,	,	,	,	,	,	,	,	,	,	,	,
1890	,	,	,	,	,	,	,	,	,	,	,	,	,	,	,
1891	,	,	,	,	,	,	,	,	,	,	,	,	,	,	,
1892	,	,	,	,	,	,	,	,	,	,	,	,	,	,	,
1893	,	,	,	,	,	,	,	,	,	,	,	,	,	,	,
1894	,	,	,	,	,	,	,	,	,	,	,	,	,	,	,
1895	,	,	,	,	,	,	,	,	,	,	,	,	,	,	,
1896	,	,	,	,	,	,	,	,	,	,	,	,	,	,	,
1897	,	,	,	,	,	,	,	,	,	,	,	,	,	,	,
1898	,	,	,	,	,	,	,	,	,	,	,	,	,	,	,
1899	,	,	,	,	,	,	,	,	,	,	,	,	,	,	,
1900	,	,	,	,	,	,	,	,	,	,	,	,	,	,	,
1901	,	,	,	,	,	,	,	,	,	,	,	,	,	,	,
1902	,	,	,	,	,	,	,	,	,	,	,	,	,	,	,
1903	,	,	,	,	,	,	,	,	,	,	,	,	,	,	,
1904	,	,	,	,	,	,	,	,	,	,	,	,	,	,	,
1905	,	,	,	,	,	,	,	,	,	,	,	,	,	,	,
1906	,	,	,	,	,	,	,	,	,	,	,	,	,	,	,
1907	,	,	,	,	,	,	,	,	,	,	,	,	,	,	,
1908	,	,	,	,	,	,	,	,	,	,	,	,	,	,	,
1909	,	,	,	,	,	,	,	,	,	,	,	,	,	,	,
1910	,	,	,	,	,	,	,	,	,	,	,	,	,	,	,
1911	,	,	,	,	,	,	,	,	,	,	,	,	,	,	,
1912	,	,	,	,	,	,	,	,	,	,	,	,	,	,	,
1913	,	,	,	,	,	,	,	,	,	,	,	,	,	,	,
1914	,	,	,	,	,	,	,	,	,	,	,	,	,	,	,
1915	,	,	,	,	,	,	,	,	,	,	,	,	,	,	,
1916	,	,	,	,	,	,	,	,	,	,	,	,	,	,	,
1917	,	,	,	,	,	,	,	,	,	,	,	,	,	,	,
1918	,	,	,	,	,	,	,	,	,	,	,	,	,	,	,
1919	,	,	,	,	,	,	,	,	,	,	,	,	,	,	,
1920	,	,	,	,	,	,	,	,	,	,	,	,	,	,	,
1921	,	,	,	,	,	,	,	,	,	,	,	,	,	,	,
1922	,	,	,	,	,	,	,	,	,	,	,	,	,	,	,
1923	,	,	,	,	,	,	,	,	,	,	,	,	,	,	,
1924	,	,	,	,	,	,	,	,	,	,	,	,	,	,	,
1925	,	,	,	,	,	,	,	,	,	,	,	,	,	,	,
1926	,	,	,	,	,	,	,	,	,	,	,	,	,	,	,
1927	,	,	,	,	,	,	,	,	,	,	,	,	,	,	,
1928	,	,	,	,	,	,	,	,	,	,	,	,	,	,	,
1929	,	,	,	,	,	,	,	,	,	,	,	,	,	,	,
1930	,	,	,	,	,	,	,	,	,	,	,	,	,	,	,
1931	,	,	,	,	,	,	,	,	,	,	,	,	,	,	,
1932	,	,	,	,	,	,	,	,	,	,	,	,	,	,	,
1933	,	,	,	,	,	,	,	,	,	,	,	,	,	,	,
1934	,	,	,	,	,	,	,	,	,	,	,	,	,	,	,
1935	,	,	,	,	,	,	,	,	,	,	,	,	,	,	,
1936	,	,	,	,	,	,	,	,	,	,	,	,	,	,	,
1937	,	,	,	,	,	,	,	,	,	,	,	,	,	,	,
1938	,	,	,	,	,	,	,	,	,	,	,	,	,	,	,
1939	,	,	,	,	,	,	,	,	,	,	,	,	,	,	,
1940	,	,	,	,	,	,	,	,	,	,	,	,	,	,	,
1941	,	,	,	,	,	,	,	,	,	,	,	,	,	,	,
1942	,	,	,	,	,	,	,	,	,	,	,	,	,	,	,
1943	,	,	,	,	,	,	,	,	,	,	,	,	,	,	,
1944	,	,	,	,	,	,	,	,	,	,	,	,	,	,	,
1945	,	,	,	,	,	,	,	,	,	,	,	,	,	,	,
1946	,	,	,	,	,	,	,	,	,	,	,	,	,	,	,
1947	,	,	,	,	,	,	,	,	,	,	,	,	,	,	,
1948	,	,	,	,	,	,	,	,	,	,	,	,	,	,	,
1949	,	,	,	,	,	,	,	,	,	,	,	,	,	,	,
1950	,	,	,	,	,	,	,	,	,	,	,	,	,	,	,
1951	,	,	,	,	,	,	,	,	,	,	,	,	,	,	,
1952	,	,	,	,	,	,	,	,	,	,	,	,	,	,	,
1953	,	,	,	,	,	,	,	,	,	,	,	,	,	,	,
1954	,	,	,	,	,	,	,	,	,	,	,	,	,	,	,
1955	,	,	,	,	,	,	,	,	,	,	,	,	,	,	,
1956	,	,	,	,	,	,	,	,	,	,	,	,	,	,	,
1957	,	,	,	,	,	,	,	,	,	,	,	,	,	,	,
1958	,	,	,	,	,	,	,	,	,	,	,	,	,	,	,
1959	,	,	,	,	,	,	,	,	,	,	,	,	,	,	,
1960	,	,	,	,	,	,	,	,	,	,	,	,	,	,	,
1961	,	,	,	,	,	,	,	,	,	,	,	,	,	,	,
1962	,	,	,	,	,	,	,	,	,	,	,	,	,	,	,
1963	,	,	,	,	,	,	,	,	,	,	,	,	,	,	,
1964	,	,	,	,	,	,	,	,	,	,	,	,	,	,	,
1965	,	,	,	,	,	,	,	,	,	,	,	,	,	,	,
1966	,	,	,	,	,	,	,	,	,	,	,	,	,	,	,
1967	,	,	,	,	,	,	,	,	,	,	,	,	,	,	,
1968	,	,	,	,	,	,	,	,	,	,	,	,	,	,	,
1969	,	,	,	,	,	,	,	,	,	,	,	,	,	,	,
1970	,	,	,	,	,	,	,	,	,	,	,	,	,	,	,
1971	,	,	,	,	,	,	,	,	,	,	,	,	,	,	,
1972	,	,	,	,	,	,	,	,	,	,	,	,	,	,	,
1973	,	,	,	,	,	,	,	,	,	,	,	,	,	,	,
1974	,	,	,	,	,	,	,	,	,	,	,	,	,	,	,
1975	,	,	,	,	,	,	,	,	,	,	,	,	,	,	,
1976	,	,	,	,	,	,	,	,	,	,	,	,	,	,	,
1977	,	,	,	,	,	,	,	,	,	,	,	,	,	,	,
1978	,	,	,	,	,	,	,	,	,	,	,	,	,	,	,
1979	,	,	,	,	,	,	,	,	,	,	,	,	,	,	,
1980	,	,	,	,	,	,	,	,	,	,	,	,	,	,	,
1981	,	,	,	,	,	,	,	,	,	,	,	,	,	,	,
1982	,	,	,	,	,	,	,	,	,	,	,	,	,	,	,
1983	,	,	,	,	,	,	,	,	,	,	,	,	,	,	,
1984	,	,	,	,	,	,	,	,	,	,	,	,	,	,	,
1985	,	,	,	,	,	,	,	,	,	,	,	,	,	,	,
1986	,	,	,	,	,	,	,	,	,	,	,	,	,	,	,
1987	,	,	,	,	,	,	,	,	,	,	,	,	,	,	,
1988	,	,	,	,	,	,	,	,	,	,	,	,	,	,	,
1989	,	,	,	,	,	,	,	,	,	,	,	,	,	,	,
1990	,	,	,	,	,	,	,	,	,	,	,	,	,	,	,
1991	,	,	,	,	,	,	,	,	,	,	,	,	,	,	,
1992	,	,	,	,	,	,	,	,	,	,	,	,	,	,	,
1993	,	,	,	,	,	,	,	,	,	,	,	,	,	,	,
1994	,	,	,	,	,	,	,	,	,	,	,	,	,	,	,
1995	,	,	,	,	,	,	,	,	,	,	,	,	,	,	,
1996	,	,	,	,	,	,	,	,	,	,	,	,	,	,	,
1997	,	,	,	,	,	,	,	,	,	,	,	,	,	,	,
1998	,	,	,	,	,	,	,	,	,	,	,	,	,	,	,
1999	,	,	,	,	,	,	,	,	,	,	,	,	,	,	,
[truncated: 13,001 more rows]
