# Supplementary material for: ParB spreading on DNA requires cytidine triphosphate in vitro
Source: eLife journal article supplement (doi:10.7554/elife.53515), 2020-02-20
Supplement: fig3-figsupp2-data1 [file Fig3_supp2.xlsx]

## Sheet: FORMAT
	sample ID #1	sample ID #2	sample ID #3
data point	time point (sec), wavelength shift (nm)	time point (sec), wavelength shift (nm)	time point (sec), wavelength shift (nm)
1
2
3
.
.
.

## Sheet: Fig3_supp2_rep1_2_3
	169bp parS closed DNA ParB CTP-inactivated BamHI at 150th	169bp parS closed DNA ParB CTP-BamHI at 150th	169bp parS closed DNA ParB CTP-inactivated BamHI at 150th	169bp parS closed DNA ParB CTP-BamHI at 150th	169bp parS closed DNA ParB CTP-inactivated BamHI at 150th	169bp parS closed DNA ParB CTP-BamHI at 150th
1	0.000, 0.025	0.000, 0.104	0.000, 0.010	0.000, 0.118	0.000, -0.003	0.000, 0.111
2	0.200, 0.026	0.200, 0.103	0.200, 0.011	0.200, 0.116	0.200, -0.003	0.200, 0.109
3	0.400, 0.026	0.400, 0.101	0.400, 0.011	0.400, 0.114	0.400, -0.003	0.400, 0.107
4	0.600, 0.026	0.600, 0.100	0.600, 0.012	0.600, 0.112	0.600, -0.003	0.600, 0.104
5	0.800, 0.026	0.800, 0.098	0.800, 0.013	0.800, 0.110	0.800, -0.003	0.800, 0.102
6	1.000, 0.025	1.000, 0.095	1.000, 0.013	1.000, 0.108	1.000, -0.003	1.000, 0.100
7	1.200, 0.025	1.200, 0.093	1.200, 0.014	1.200, 0.105	1.200, -0.003	1.200, 0.097
8	1.400, 0.025	1.400, 0.091	1.400, 0.014	1.400, 0.102	1.400, -0.003	1.400, 0.095
9	1.600, 0.024	1.600, 0.089	1.600, 0.014	1.600, 0.099	1.600, -0.003	1.600, 0.092
10	1.800, 0.024	1.800, 0.088	1.800, 0.015	1.800, 0.097	1.800, -0.003	1.800, 0.090
11	2.000, 0.023	2.000, 0.086	2.000, 0.015	2.000, 0.094	2.000, -0.004	2.000, 0.088
12	2.200, 0.022	2.200, 0.085	2.200, 0.014	2.200, 0.092	2.200, -0.004	2.200, 0.087
13	2.400, 0.022	2.400, 0.083	2.400, 0.014	2.400, 0.089	2.400, -0.005	2.400, 0.085
14	2.600, 0.021	2.600, 0.082	2.600, 0.014	2.600, 0.087	2.600, -0.005	2.600, 0.084
15	2.800, 0.020	2.800, 0.080	2.800, 0.013	2.800, 0.085	2.800, -0.005	2.800, 0.082
16	3.000, 0.020	3.000, 0.079	3.000, 0.013	3.000, 0.083	3.000, -0.005	3.000, 0.081
17	3.200, 0.020	3.200, 0.078	3.200, 0.013	3.200, 0.081	3.200, -0.005	3.200, 0.079
18	3.400, 0.019	3.400, 0.076	3.400, 0.012	3.400, 0.080	3.400, -0.006	3.400, 0.077
19	3.600, 0.019	3.600, 0.075	3.600, 0.012	3.600, 0.078	3.600, -0.006	3.600, 0.076
20	3.800, 0.019	3.800, 0.074	3.800, 0.012	3.800, 0.077	3.800, -0.006	3.800, 0.075
21	4.000, 0.019	4.000, 0.072	4.000, 0.011	4.000, 0.075	4.000, -0.006	4.000, 0.073
22	4.200, 0.019	4.200, 0.071	4.200, 0.011	4.200, 0.074	4.200, -0.007	4.200, 0.072
23	4.400, 0.018	4.400, 0.069	4.400, 0.011	4.400, 0.073	4.400, -0.007	4.400, 0.070
24	4.600, 0.018	4.600, 0.068	4.600, 0.011	4.600, 0.071	4.600, -0.007	4.600, 0.069
25	4.800, 0.018	4.800, 0.067	4.800, 0.010	4.800, 0.070	4.800, -0.007	4.800, 0.067
26	5.000, 0.018	5.000, 0.065	5.000, 0.011	5.000, 0.069	5.000, -0.007	5.000, 0.066
27	5.200, 0.017	5.200, 0.064	5.200, 0.011	5.200, 0.067	5.200, -0.007	5.200, 0.064
28	5.400, 0.017	5.400, 0.063	5.400, 0.011	5.400, 0.066	5.400, -0.007	5.400, 0.063
29	5.600, 0.017	5.600, 0.062	5.600, 0.011	5.600, 0.065	5.600, -0.007	5.600, 0.061
30	5.800, 0.017	5.800, 0.061	5.800, 0.011	5.800, 0.064	5.800, -0.007	5.800, 0.059
31	6.000, 0.017	6.000, 0.060	6.000, 0.010	6.000, 0.063	6.000, -0.007	6.000, 0.058
32	6.200, 0.017	6.200, 0.059	6.200, 0.010	6.200, 0.062	6.200, -0.007	6.200, 0.056
33	6.400, 0.016	6.400, 0.058	6.400, 0.010	6.400, 0.060	6.400, -0.007	6.400, 0.055
34	6.600, 0.016	6.600, 0.057	6.600, 0.009	6.600, 0.059	6.600, -0.007	6.600, 0.053
35	6.800, 0.016	6.800, 0.056	6.800, 0.009	6.800, 0.058	6.800, -0.007	6.800, 0.052
36	7.000, 0.015	7.000, 0.055	7.000, 0.009	7.000, 0.057	7.000, -0.008	7.000, 0.051
37	7.200, 0.015	7.200, 0.054	7.200, 0.009	7.200, 0.056	7.200, -0.008	7.200, 0.050
38	7.400, 0.015	7.400, 0.053	7.400, 0.009	7.400, 0.055	7.400, -0.008	7.400, 0.049
39	7.600, 0.015	7.600, 0.053	7.600, 0.009	7.600, 0.054	7.600, -0.008	7.600, 0.048
40	7.800, 0.015	7.800, 0.052	7.800, 0.009	7.800, 0.053	7.800, -0.008	7.800, 0.048
41	8.000, 0.015	8.000, 0.051	8.000, 0.008	8.000, 0.053	8.000, -0.008	8.000, 0.047
42	8.200, 0.014	8.200, 0.051	8.200, 0.008	8.200, 0.052	8.200, -0.008	8.200, 0.046
43	8.400, 0.014	8.400, 0.050	8.400, 0.008	8.400, 0.051	8.400, -0.008	8.400, 0.045
44	8.600, 0.014	8.600, 0.049	8.600, 0.008	8.600, 0.050	8.600, -0.008	8.600, 0.045
45	8.800, 0.014	8.800, 0.049	8.800, 0.007	8.800, 0.050	8.800, -0.007	8.800, 0.044
46	9.000, 0.013	9.000, 0.048	9.000, 0.007	9.000, 0.049	9.000, -0.007	9.000, 0.043
47	9.200, 0.013	9.200, 0.047	9.200, 0.007	9.200, 0.048	9.200, -0.006	9.200, 0.043
48	9.400, 0.013	9.400, 0.046	9.400, 0.007	9.400, 0.047	9.400, -0.006	9.400, 0.042
49	9.600, 0.013	9.600, 0.045	9.600, 0.007	9.600, 0.046	9.600, -0.006	9.600, 0.041
50	9.800, 0.013	9.800, 0.044	9.800, 0.007	9.800, 0.045	9.800, -0.005	9.800, 0.041
51	10.000, 0.013	10.000, 0.044	10.000, 0.006	10.000, 0.044	10.000, -0.005	10.000, 0.040
52	10.200, 0.012	10.200, 0.043	10.200, 0.006	10.200, 0.043	10.200, -0.005	10.200, 0.039
53	10.400, 0.012	10.400, 0.042	10.400, 0.006	10.400, 0.043	10.400, -0.005	10.400, 0.038
54	10.600, 0.011	10.600, 0.041	10.600, 0.005	10.600, 0.042	10.600, -0.005	10.600, 0.037
55	10.800, 0.011	10.800, 0.040	10.800, 0.005	10.800, 0.041	10.800, -0.006	10.800, 0.037
56	11.000, 0.010	11.000, 0.039	11.000, 0.005	11.000, 0.040	11.000, -0.006	11.000, 0.036
57	11.200, 0.010	11.200, 0.038	11.200, 0.005	11.200, 0.040	11.200, -0.006	11.200, 0.035
58	11.400, 0.010	11.400, 0.037	11.400, 0.005	11.400, 0.039	11.400, -0.006	11.400, 0.035
59	11.600, 0.010	11.600, 0.037	11.600, 0.005	11.600, 0.038	11.600, -0.006	11.600, 0.034
60	11.800, 0.010	11.800, 0.036	11.800, 0.005	11.800, 0.038	11.800, -0.006	11.800, 0.033
61	12.000, 0.009	12.000, 0.036	12.000, 0.005	12.000, 0.037	12.000, -0.005	12.000, 0.032
62	12.200, 0.009	12.200, 0.035	12.200, 0.004	12.200, 0.037	12.200, -0.005	12.200, 0.031
63	12.400, 0.009	12.400, 0.034	12.400, 0.004	12.400, 0.037	12.400, -0.005	12.400, 0.030
64	12.600, 0.009	12.600, 0.034	12.600, 0.004	12.600, 0.036	12.600, -0.005	12.600, 0.030
65	12.800, 0.009	12.800, 0.033	12.800, 0.004	12.800, 0.036	12.800, -0.005	12.800, 0.029
66	13.000, 0.009	13.000, 0.032	13.000, 0.005	13.000, 0.035	13.000, -0.005	13.000, 0.029
67	13.200, 0.009	13.200, 0.032	13.200, 0.004	13.200, 0.035	13.200, -0.005	13.200, 0.028
68	13.400, 0.009	13.400, 0.031	13.400, 0.004	13.400, 0.034	13.400, -0.004	13.400, 0.028
69	13.600, 0.008	13.600, 0.031	13.600, 0.004	13.600, 0.034	13.600, -0.004	13.600, 0.027
70	13.800, 0.008	13.800, 0.030	13.800, 0.004	13.800, 0.033	13.800, -0.004	13.800, 0.027
71	14.000, 0.008	14.000, 0.030	14.000, 0.003	14.000, 0.033	14.000, -0.005	14.000, 0.026
72	14.200, 0.007	14.200, 0.029	14.200, 0.003	14.200, 0.032	14.200, -0.005	14.200, 0.025
73	14.400, 0.007	14.400, 0.028	14.400, 0.003	14.400, 0.031	14.400, -0.005	14.400, 0.025
74	14.600, 0.007	14.600, 0.028	14.600, 0.003	14.600, 0.030	14.600, -0.005	14.600, 0.024
75	14.800, 0.006	14.800, 0.027	14.800, 0.003	14.800, 0.030	14.800, -0.005	14.800, 0.024
76	15.000, 0.006	15.000, 0.027	15.000, 0.003	15.000, 0.029	15.000, -0.005	15.000, 0.023
77	15.200, 0.006	15.200, 0.026	15.200, 0.003	15.200, 0.028	15.200, -0.004	15.200, 0.023
78	15.400, 0.006	15.400, 0.026	15.400, 0.003	15.400, 0.027	15.400, -0.004	15.400, 0.022
79	15.600, 0.006	15.600, 0.025	15.600, 0.003	15.600, 0.027	15.600, -0.004	15.600, 0.022
80	15.800, 0.007	15.800, 0.025	15.800, 0.003	15.800, 0.026	15.800, -0.005	15.800, 0.021
81	16.000, 0.007	16.000, 0.024	16.000, 0.003	16.000, 0.026	16.000, -0.005	16.000, 0.021
82	16.200, 0.007	16.200, 0.024	16.200, 0.003	16.200, 0.026	16.200, -0.005	16.200, 0.021
83	16.400, 0.007	16.400, 0.023	16.400, 0.003	16.400, 0.025	16.400, -0.005	16.400, 0.021
84	16.600, 0.007	16.600, 0.023	16.600, 0.002	16.600, 0.025	16.600, -0.004	16.600, 0.020
85	16.800, 0.007	16.800, 0.023	16.800, 0.002	16.800, 0.024	16.800, -0.004	16.800, 0.020
86	17.000, 0.007	17.000, 0.022	17.000, 0.002	17.000, 0.024	17.000, -0.004	17.000, 0.019
87	17.200, 0.007	17.200, 0.022	17.200, 0.002	17.200, 0.023	17.200, -0.003	17.200, 0.019
88	17.400, 0.007	17.400, 0.022	17.400, 0.002	17.400, 0.023	17.400, -0.003	17.400, 0.019
89	17.600, 0.007	17.600, 0.021	17.600, 0.002	17.600, 0.022	17.600, -0.003	17.600, 0.019
90	17.800, 0.007	17.800, 0.021	17.800, 0.002	17.800, 0.022	17.800, -0.002	17.800, 0.018
91	18.000, 0.006	18.000, 0.020	18.000, 0.002	18.000, 0.021	18.000, -0.002	18.000, 0.018
92	18.200, 0.006	18.200, 0.020	18.200, 0.002	18.200, 0.020	18.200, -0.002	18.200, 0.017
93	18.400, 0.006	18.400, 0.019	18.400, 0.002	18.400, 0.020	18.400, -0.001	18.400, 0.017
94	18.600, 0.005	18.600, 0.018	18.600, 0.002	18.600, 0.019	18.600, -0.001	18.600, 0.016
95	18.800, 0.005	18.800, 0.018	18.800, 0.002	18.800, 0.019	18.800, -0.001	18.800, 0.016
96	19.000, 0.005	19.000, 0.017	19.000, 0.002	19.000, 0.018	19.000, -0.001	19.000, 0.015
97	19.200, 0.005	19.200, 0.016	19.200, 0.002	19.200, 0.018	19.200, -0.001	19.200, 0.015
98	19.400, 0.004	19.400, 0.016	19.400, 0.002	19.400, 0.017	19.400, -0.001	19.400, 0.014
99	19.600, 0.004	19.600, 0.015	19.600, 0.002	19.600, 0.017	19.600, -0.001	19.600, 0.014
100	19.800, 0.004	19.800, 0.015	19.800, 0.002	19.800, 0.016	19.800, -0.002	19.800, 0.013
101	20.000, 0.003	20.000, 0.015	20.000, 0.001	20.000, 0.016	20.000, -0.002	20.000, 0.013
102	20.200, 0.003	20.200, 0.014	20.200, 0.001	20.200, 0.016	20.200, -0.002	20.200, 0.012
103	20.400, 0.003	20.400, 0.014	20.400, 0.001	20.400, 0.016	20.400, -0.002	20.400, 0.012
104	20.600, 0.003	20.600, 0.014	20.600, 0.001	20.600, 0.015	20.600, -0.002	20.600, 0.011
105	20.800, 0.003	20.800, 0.014	20.800, 0.001	20.800, 0.015	20.800, -0.002	20.800, 0.011
106	21.000, 0.002	21.000, 0.013	21.000, 0.001	21.000, 0.014	21.000, -0.002	21.000, 0.011
107	21.200, 0.003	21.200, 0.013	21.200, 0.002	21.200, 0.014	21.200, -0.003	21.200, 0.011
108	21.400, 0.003	21.400, 0.013	21.400, 0.002	21.400, 0.013	21.400, -0.003	21.400, 0.011
109	21.600, 0.003	21.600, 0.012	21.600, 0.002	21.600, 0.013	21.600, -0.003	21.600, 0.011
110	21.800, 0.003	21.800, 0.012	21.800, 0.002	21.800, 0.013	21.800, -0.004	21.800, 0.010
111	22.000, 0.003	22.000, 0.011	22.000, 0.003	22.000, 0.012	22.000, -0.004	22.000, 0.010
112	22.200, 0.003	22.200, 0.010	22.200, 0.003	22.200, 0.012	22.200, -0.004	22.200, 0.009
113	22.400, 0.003	22.400, 0.010	22.400, 0.003	22.400, 0.012	22.400, -0.004	22.400, 0.009
114	22.600, 0.003	22.600, 0.009	22.600, 0.003	22.600, 0.012	22.600, -0.004	22.600, 0.009
115	22.800, 0.003	22.800, 0.009	22.800, 0.003	22.800, 0.011	22.800, -0.003	22.800, 0.008
116	23.000, 0.003	23.000, 0.009	23.000, 0.002	23.000, 0.011	23.000, -0.003	23.000, 0.008
117	23.200, 0.003	23.200, 0.008	23.200, 0.002	23.200, 0.011	23.200, -0.003	23.200, 0.007
118	23.400, 0.003	23.400, 0.008	23.400, 0.002	23.400, 0.010	23.400, -0.003	23.400, 0.007
119	23.600, 0.003	23.600, 0.008	23.600, 0.001	23.600, 0.010	23.600, -0.003	23.600, 0.006
120	23.800, 0.003	23.800, 0.008	23.800, 0.001	23.800, 0.009	23.800, -0.002	23.800, 0.006
121	24.000, 0.003	24.000, 0.008	24.000, 0.001	24.000, 0.009	24.000, -0.002	24.000, 0.005
122	24.200, 0.003	24.200, 0.008	24.200, 0.001	24.200, 0.008	24.200, -0.002	24.200, 0.005
123	24.400, 0.002	24.400, 0.008	24.400, 0.001	24.400, 0.008	24.400, -0.002	24.400, 0.004
124	24.600, 0.002	24.600, 0.007	24.600, 0.001	24.600, 0.007	24.600, -0.002	24.600, 0.004
125	24.800, 0.002	24.800, 0.007	24.800, 0.000	24.800, 0.007	24.800, -0.002	24.800, 0.004
126	25.000, 0.002	25.000, 0.007	25.000, 0.000	25.000, 0.006	25.000, -0.002	25.000, 0.003
127	25.200, 0.003	25.200, 0.006	25.200, 0.000	25.200, 0.005	25.200, -0.002	25.200, 0.003
128	25.400, 0.003	25.400, 0.006	25.400, -0.000	25.400, 0.005	25.400, -0.002	25.400, 0.002
129	25.600, 0.003	25.600, 0.006	25.600, 0.000	25.600, 0.004	25.600, -0.001	25.600, 0.002
130	25.800, 0.003	25.800, 0.005	25.800, 0.000	25.800, 0.004	25.800, -0.001	25.800, 0.001
131	26.000, 0.003	26.000, 0.005	26.000, 0.000	26.000, 0.003	26.000, -0.001	26.000, 0.001
132	26.200, 0.003	26.200, 0.005	26.200, 0.000	26.200, 0.003	26.200, -0.001	26.200, 0.001
133	26.400, 0.002	26.400, 0.004	26.400, 0.000	26.400, 0.003	26.400, -0.001	26.400, 0.001
134	26.600, 0.002	26.600, 0.004	26.600, -0.000	26.600, 0.002	26.600, -0.001	26.600, 0.000
135	26.800, 0.002	26.800, 0.004	26.800, -0.000	26.800, 0.002	26.800, -0.001	26.800, 0.000
136	27.000, 0.002	27.000, 0.003	27.000, -0.001	27.000, 0.002	27.000, -0.001	27.000, 0.000
137	27.200, 0.002	27.200, 0.003	27.200, -0.001	27.200, 0.002	27.200, -0.001	27.200, 0.001
138	27.400, 0.001	27.400, 0.002	27.400, -0.000	27.400, 0.001	27.400, -0.000	27.400, 0.001
139	27.600, 0.001	27.600, 0.002	27.600, -0.000	27.600, 0.001	27.600, -0.000	27.600, 0.000
140	27.800, 0.001	27.800, 0.002	27.800, -0.000	27.800, 0.001	27.800, -0.000	27.800, 0.000
141	28.000, 0.000	28.000, 0.001	28.000, -0.000	28.000, 0.000	28.000, -0.000	28.000, 0.000
142	28.200, 0.000	28.200, 0.000	28.200, -0.000	28.200, 0.000	28.200, -0.000	28.200, 0.000
143	28.400, -0.000	28.400, -0.000	28.400, -0.000	28.400, -0.000	28.400, -0.000	28.400, 0.000
144	28.600, -0.000	28.600, -0.001	28.600, -0.000	28.600, -0.000	28.600, -0.000	28.600, 0.000
145	28.800, -0.001	28.800, -0.001	28.800, 0.000	28.800, -0.001	28.800, 0.000	28.800, -0.000
146	29.000, -0.001	29.000, -0.002	29.000, 0.000	29.000, -0.001	29.000, 0.000	29.000, -0.000
147	29.200, -0.001	29.200, -0.002	29.200, 0.000	29.200, -0.001	29.200, 0.001	29.200, -0.001
148	29.400, -0.001	29.400, -0.002	29.400, 0.000	29.400, -0.001	29.400, 0.001	29.400, -0.001
149	29.600, -0.001	29.600, -0.002	29.600, 0.001	29.600, -0.001	29.600, 0.001	29.600, -0.001
150	29.800, -0.002	29.800, -0.003	29.800, 0.001	29.800, -0.002	29.800, 0.001	29.800, -0.001
151	30.000, 0.000	30.000, 0.000	30.000, 0.000	30.000, 0.000	30.000, 0.000	30.000, 0.000
152	30.200, 0.008	30.200, 0.006	30.200, 0.006	30.200, 0.006	30.200, 0.005	30.200, 0.006
153	30.400, 0.019	30.400, 0.014	30.400, 0.014	30.400, 0.013	30.400, 0.011	30.400, 0.013
154	30.600, 0.031	30.600, 0.023	30.600, 0.023	30.600, 0.022	30.600, 0.018	30.600, 0.023
155	30.800, 0.045	30.800, 0.034	30.800, 0.033	30.800, 0.032	30.800, 0.027	30.800, 0.033
156	31.000, 0.061	31.000, 0.046	31.000, 0.045	31.000, 0.044	31.000, 0.036	31.000, 0.046
157	31.200, 0.078	31.200, 0.059	31.200, 0.058	31.200, 0.057	31.200, 0.047	31.200, 0.059
158	31.400, 0.096	31.400, 0.073	31.400, 0.072	31.400, 0.071	31.400, 0.058	31.400, 0.074
159	31.600, 0.114	31.600, 0.088	31.600, 0.086	31.600, 0.086	31.600, 0.070	31.600, 0.090
160	31.800, 0.134	31.800, 0.104	31.800, 0.101	31.800, 0.102	31.800, 0.082	31.800, 0.106
161	32.000, 0.152	32.000, 0.119	32.000, 0.116	32.000, 0.117	32.000, 0.094	32.000, 0.122
162	32.200, 0.171	32.200, 0.134	32.200, 0.131	32.200, 0.133	32.200, 0.106	32.200, 0.138
163	32.400, 0.189	32.400, 0.149	32.400, 0.145	32.400, 0.147	32.400, 0.118	32.400, 0.153
164	32.600, 0.206	32.600, 0.164	32.600, 0.159	32.600, 0.161	32.600, 0.130	32.600, 0.168
165	32.800, 0.223	32.800, 0.179	32.800, 0.173	32.800, 0.176	32.800, 0.142	32.800, 0.183
166	33.000, 0.241	33.000, 0.194	33.000, 0.187	33.000, 0.190	33.000, 0.154	33.000, 0.198
167	33.200, 0.258	33.200, 0.209	33.200, 0.201	33.200, 0.204	33.200, 0.166	33.200, 0.213
168	33.400, 0.275	33.400, 0.223	33.400, 0.214	33.400, 0.218	33.400, 0.178	33.400, 0.227
169	33.600, 0.292	33.600, 0.238	33.600, 0.228	33.600, 0.232	33.600, 0.190	33.600, 0.242
170	33.800, 0.309	33.800, 0.252	33.800, 0.241	33.800, 0.245	33.800, 0.201	33.800, 0.256
171	34.000, 0.326	34.000, 0.266	34.000, 0.255	34.000, 0.259	34.000, 0.212	34.000, 0.270
172	34.200, 0.342	34.200, 0.280	34.200, 0.268	34.200, 0.272	34.200, 0.223	34.200, 0.284
173	34.400, 0.359	34.400, 0.294	34.400, 0.281	34.400, 0.286	34.400, 0.234	34.400, 0.299
174	34.600, 0.376	34.600, 0.308	34.600, 0.294	34.600, 0.299	34.600, 0.245	34.600, 0.313
175	34.800, 0.392	34.800, 0.322	34.800, 0.307	34.800, 0.312	34.800, 0.256	34.800, 0.328
176	35.000, 0.409	35.000, 0.337	35.000, 0.320	35.000, 0.326	35.000, 0.267	35.000, 0.342
177	35.200, 0.425	35.200, 0.351	35.200, 0.333	35.200, 0.339	35.200, 0.278	35.200, 0.356
178	35.400, 0.442	35.400, 0.365	35.400, 0.346	35.400, 0.353	35.400, 0.289	35.400, 0.371
179	35.600, 0.458	35.600, 0.378	35.600, 0.359	35.600, 0.367	35.600, 0.300	35.600, 0.385
180	35.800, 0.474	35.800, 0.392	35.800, 0.371	35.800, 0.380	35.800, 0.311	35.800, 0.399
181	36.000, 0.490	36.000, 0.406	36.000, 0.384	36.000, 0.394	36.000, 0.322	36.000, 0.413
182	36.200, 0.506	36.200, 0.420	36.200, 0.397	36.200, 0.407	36.200, 0.333	36.200, 0.427
183	36.400, 0.523	36.400, 0.434	36.400, 0.410	36.400, 0.420	36.400, 0.344	36.400, 0.441
184	36.600, 0.539	36.600, 0.447	36.600, 0.423	36.600, 0.433	36.600, 0.355	36.600, 0.455
185	36.800, 0.556	36.800, 0.461	36.800, 0.436	36.800, 0.446	36.800, 0.366	36.800, 0.469
186	37.000, 0.572	37.000, 0.474	37.000, 0.449	37.000, 0.459	37.000, 0.376	37.000, 0.482
187	37.200, 0.588	37.200, 0.488	37.200, 0.462	37.200, 0.472	37.200, 0.387	37.200, 0.496
188	37.400, 0.604	37.400, 0.501	37.400, 0.475	37.400, 0.485	37.400, 0.397	37.400, 0.510
189	37.600, 0.620	37.600, 0.514	37.600, 0.488	37.600, 0.497	37.600, 0.408	37.600, 0.524
190	37.800, 0.636	37.800, 0.528	37.800, 0.501	37.800, 0.510	37.800, 0.418	37.800, 0.538
191	38.000, 0.652	38.000, 0.541	38.000, 0.514	38.000, 0.523	38.000, 0.428	38.000, 0.552
192	38.200, 0.668	38.200, 0.555	38.200, 0.526	38.200, 0.536	38.200, 0.439	38.200, 0.566
193	38.400, 0.684	38.400, 0.568	38.400, 0.539	38.400, 0.548	38.400, 0.449	38.400, 0.580
194	38.600, 0.700	38.600, 0.581	38.600, 0.551	38.600, 0.561	38.600, 0.459	38.600, 0.594
195	38.800, 0.717	38.800, 0.595	38.800, 0.564	38.800, 0.575	38.800, 0.470	38.800, 0.608
196	39.000, 0.733	39.000, 0.608	39.000, 0.576	39.000, 0.588	39.000, 0.480	39.000, 0.622
197	39.200, 0.749	39.200, 0.621	39.200, 0.589	39.200, 0.601	39.200, 0.491	39.200, 0.636
198	39.400, 0.765	39.400, 0.634	39.400, 0.601	39.400, 0.614	39.400, 0.501	39.400, 0.650
199	39.600, 0.781	39.600, 0.648	39.600, 0.614	39.600, 0.627	39.600, 0.512	39.600, 0.664
200	39.800, 0.798	39.800, 0.661	39.800, 0.626	39.800, 0.639	39.800, 0.522	39.800, 0.677
201	40.000, 0.814	40.000, 0.674	40.000, 0.638	40.000, 0.652	40.000, 0.533	40.000, 0.691
202	40.200, 0.830	40.200, 0.687	40.200, 0.650	40.200, 0.665	40.200, 0.544	40.200, 0.704
203	40.400, 0.846	40.400, 0.700	40.400, 0.663	40.400, 0.678	40.400, 0.554	40.400, 0.718
204	40.600, 0.862	40.600, 0.713	40.600, 0.675	40.600, 0.690	40.600, 0.565	40.600, 0.732
205	40.800, 0.877	40.800, 0.726	40.800, 0.688	40.800, 0.703	40.800, 0.575	40.800, 0.745
206	41.000, 0.893	41.000, 0.739	41.000, 0.700	41.000, 0.716	41.000, 0.585	41.000, 0.759
207	41.200, 0.908	41.200, 0.752	41.200, 0.712	41.200, 0.728	41.200, 0.596	41.200, 0.773
208	41.400, 0.923	41.400, 0.764	41.400, 0.724	41.400, 0.740	41.400, 0.606	41.400, 0.786
209	41.600, 0.938	41.600, 0.777	41.600, 0.737	41.600, 0.753	41.600, 0.617	41.600, 0.800
210	41.800, 0.953	41.800, 0.791	41.800, 0.749	41.800, 0.765	41.800, 0.627	41.800, 0.813
211	42.000, 0.968	42.000, 0.804	42.000, 0.761	42.000, 0.778	42.000, 0.638	42.000, 0.827
212	42.200, 0.984	42.200, 0.817	42.200, 0.773	42.200, 0.790	42.200, 0.648	42.200, 0.840
213	42.400, 0.999	42.400, 0.830	42.400, 0.785	42.400, 0.802	42.400, 0.659	42.400, 0.853
214	42.600, 1.014	42.600, 0.843	42.600, 0.797	42.600, 0.815	42.600, 0.669	42.600, 0.867
215	42.800, 1.030	42.800, 0.856	42.800, 0.809	42.800, 0.827	42.800, 0.679	42.800, 0.880
216	43.000, 1.045	43.000, 0.869	43.000, 0.821	43.000, 0.839	43.000, 0.689	43.000, 0.894
217	43.200, 1.061	43.200, 0.882	43.200, 0.833	43.200, 0.852	43.200, 0.700	43.200, 0.907
218	43.400, 1.076	43.400, 0.894	43.400, 0.845	43.400, 0.864	43.400, 0.710	43.400, 0.921
219	43.600, 1.092	43.600, 0.907	43.600, 0.857	43.600, 0.876	43.600, 0.720	43.600, 0.934
220	43.800, 1.107	43.800, 0.920	43.800, 0.869	43.800, 0.888	43.800, 0.730	43.800, 0.948
221	44.000, 1.122	44.000, 0.933	44.000, 0.881	44.000, 0.901	44.000, 0.741	44.000, 0.961
222	44.200, 1.137	44.200, 0.945	44.200, 0.893	44.200, 0.913	44.200, 0.751	44.200, 0.974
223	44.400, 1.152	44.400, 0.958	44.400, 0.905	44.400, 0.925	44.400, 0.762	44.400, 0.988
224	44.600, 1.167	44.600, 0.970	44.600, 0.917	44.600, 0.937	44.600, 0.772	44.600, 1.001
225	44.800, 1.181	44.800, 0.983	44.800, 0.929	44.800, 0.949	44.800, 0.782	44.800, 1.014
226	45.000, 1.196	45.000, 0.995	45.000, 0.941	45.000, 0.961	45.000, 0.793	45.000, 1.027
227	45.200, 1.210	45.200, 1.008	45.200, 0.953	45.200, 0.973	45.200, 0.803	45.200, 1.040
228	45.400, 1.225	45.400, 1.020	45.400, 0.965	45.400, 0.985	45.400, 0.813	45.400, 1.053
229	45.600, 1.239	45.600, 1.033	45.600, 0.977	45.600, 0.997	45.600, 0.823	45.600, 1.066
230	45.800, 1.253	45.800, 1.046	45.800, 0.989	45.800, 1.009	45.800, 0.833	45.800, 1.079
231	46.000, 1.268	46.000, 1.058	46.000, 1.001	46.000, 1.021	46.000, 0.843	46.000, 1.091
232	46.200, 1.283	46.200, 1.071	46.200, 1.012	46.200, 1.033	46.200, 0.853	46.200, 1.104
233	46.400, 1.298	46.400, 1.083	46.400, 1.024	46.400, 1.045	46.400, 0.863	46.400, 1.117
234	46.600, 1.312	46.600, 1.096	46.600, 1.036	46.600, 1.057	46.600, 0.873	46.600, 1.130
235	46.800, 1.327	46.800, 1.108	46.800, 1.048	46.800, 1.069	46.800, 0.883	46.800, 1.143
236	47.000, 1.342	47.000, 1.121	47.000, 1.059	47.000, 1.081	47.000, 0.893	47.000, 1.156
237	47.200, 1.357	47.200, 1.133	47.200, 1.071	47.200, 1.093	47.200, 0.903	47.200, 1.169
238	47.400, 1.371	47.400, 1.145	47.400, 1.083	47.400, 1.105	47.400, 0.912	47.400, 1.181
239	47.600, 1.386	47.600, 1.158	47.600, 1.094	47.600, 1.117	47.600, 0.922	47.600, 1.194
240	47.800, 1.400	47.800, 1.170	47.800, 1.106	47.800, 1.128	47.800, 0.932	47.800, 1.207
241	48.000, 1.415	48.000, 1.182	48.000, 1.118	48.000, 1.140	48.000, 0.942	48.000, 1.220
242	48.200, 1.429	48.200, 1.194	48.200, 1.129	48.200, 1.152	48.200, 0.952	48.200, 1.232
243	48.400, 1.444	48.400, 1.207	48.400, 1.141	48.400, 1.164	48.400, 0.963	48.400, 1.245
244	48.600, 1.458	48.600, 1.219	48.600, 1.152	48.600, 1.175	48.600, 0.973	48.600, 1.258
245	48.800, 1.472	48.800, 1.231	48.800, 1.164	48.800, 1.187	48.800, 0.983	48.800, 1.270
246	49.000, 1.486	49.000, 1.243	49.000, 1.175	49.000, 1.199	49.000, 0.993	49.000, 1.283
247	49.200, 1.500	49.200, 1.255	49.200, 1.187	49.200, 1.211	49.200, 1.003	49.200, 1.295
248	49.400, 1.513	49.400, 1.267	49.400, 1.198	49.400, 1.223	49.400, 1.013	49.400, 1.308
249	49.600, 1.527	49.600, 1.279	49.600, 1.210	49.600, 1.235	49.600, 1.023	49.600, 1.320
250	49.800, 1.541	49.800, 1.292	49.800, 1.221	49.800, 1.247	49.800, 1.033	49.800, 1.333
251	50.000, 1.555	50.000, 1.303	50.000, 1.233	50.000, 1.259	50.000, 1.044	50.000, 1.345
252	50.200, 1.569	50.200, 1.315	50.200, 1.244	50.200, 1.270	50.200, 1.054	50.200, 1.358
253	50.400, 1.582	50.400, 1.327	50.400, 1.255	50.400, 1.282	50.400, 1.064	50.400, 1.370
254	50.600, 1.596	50.600, 1.339	50.600, 1.267	50.600, 1.294	50.600, 1.074	50.600, 1.382
255	50.800, 1.610	50.800, 1.351	50.800, 1.278	50.800, 1.305	50.800, 1.083	50.800, 1.395
256	51.000, 1.623	51.000, 1.364	51.000, 1.289	51.000, 1.316	51.000, 1.093	51.000, 1.407
257	51.200, 1.637	51.200, 1.376	51.200, 1.300	51.200, 1.328	51.200, 1.103	51.200, 1.419
258	51.400, 1.651	51.400, 1.388	51.400, 1.312	51.400, 1.339	51.400, 1.113	51.400, 1.431
259	51.600, 1.665	51.600, 1.400	51.600, 1.323	51.600, 1.350	51.600, 1.122	51.600, 1.443
260	51.800, 1.678	51.800, 1.412	51.800, 1.334	51.800, 1.361	51.800, 1.132	51.800, 1.455
261	52.000, 1.692	52.000, 1.423	52.000, 1.346	52.000, 1.372	52.000, 1.142	52.000, 1.468
262	52.200, 1.706	52.200, 1.435	52.200, 1.357	52.200, 1.383	52.200, 1.152	52.200, 1.480
263	52.400, 1.720	52.400, 1.447	52.400, 1.368	52.400, 1.394	52.400, 1.162	52.400, 1.492
264	52.600, 1.733	52.600, 1.459	52.600, 1.379	52.600, 1.405	52.600, 1.172	52.600, 1.504
265	52.800, 1.747	52.800, 1.471	52.800, 1.390	52.800, 1.416	52.800, 1.181	52.800, 1.516
266	53.000, 1.760	53.000, 1.483	53.000, 1.402	53.000, 1.427	53.000, 1.191	53.000, 1.528
267	53.200, 1.773	53.200, 1.494	53.200, 1.413	53.200, 1.438	53.200, 1.201	53.200, 1.540
268	53.400, 1.786	53.400, 1.506	53.400, 1.424	53.400, 1.450	53.400, 1.210	53.400, 1.552
269	53.600, 1.799	53.600, 1.517	53.600, 1.434	53.600, 1.461	53.600, 1.220	53.600, 1.564
270	53.800, 1.813	53.800, 1.529	53.800, 1.445	53.800, 1.472	53.800, 1.230	53.800, 1.576
271	54.000, 1.826	54.000, 1.540	54.000, 1.456	54.000, 1.483	54.000, 1.239	54.000, 1.588
272	54.200, 1.839	54.200, 1.552	54.200, 1.466	54.200, 1.494	54.200, 1.249	54.200, 1.600
273	54.400, 1.852	54.400, 1.563	54.400, 1.477	54.400, 1.504	54.400, 1.259	54.400, 1.612
274	54.600, 1.865	54.600, 1.575	54.600, 1.488	54.600, 1.515	54.600, 1.268	54.600, 1.624
275	54.800, 1.877	54.800, 1.586	54.800, 1.498	54.800, 1.526	54.800, 1.277	54.800, 1.636
276	55.000, 1.890	55.000, 1.597	55.000, 1.509	55.000, 1.537	55.000, 1.287	55.000, 1.648
277	55.200, 1.903	55.200, 1.608	55.200, 1.520	55.200, 1.548	55.200, 1.296	55.200, 1.660
278	55.400, 1.916	55.400, 1.620	55.400, 1.531	55.400, 1.559	55.400, 1.306	55.400, 1.672
279	55.600, 1.929	55.600, 1.631	55.600, 1.542	55.600, 1.570	55.600, 1.316	55.600, 1.683
280	55.800, 1.942	55.800, 1.642	55.800, 1.553	55.800, 1.581	55.800, 1.325	55.800, 1.695
281	56.000, 1.955	56.000, 1.652	56.000, 1.563	56.000, 1.591	56.000, 1.335	56.000, 1.707
282	56.200, 1.968	56.200, 1.663	56.200, 1.574	56.200, 1.602	56.200, 1.345	56.200, 1.718
283	56.400, 1.981	56.400, 1.674	56.400, 1.585	56.400, 1.613	56.400, 1.354	56.400, 1.729
284	56.600, 1.994	56.600, 1.685	56.600, 1.596	56.600, 1.623	56.600, 1.364	56.600, 1.741
285	56.800, 2.006	56.800, 1.696	56.800, 1.607	56.800, 1.634	56.800, 1.374	56.800, 1.752
286	57.000, 2.019	57.000, 1.707	57.000, 1.617	57.000, 1.644	57.000, 1.383	57.000, 1.763
287	57.200, 2.031	57.200, 1.718	57.200, 1.628	57.200, 1.655	57.200, 1.393	57.200, 1.774
288	57.400, 2.043	57.400, 1.729	57.400, 1.639	57.400, 1.666	57.400, 1.403	57.400, 1.785
289	57.600, 2.055	57.600, 1.740	57.600, 1.650	57.600, 1.676	57.600, 1.413	57.600, 1.796
290	57.800, 2.067	57.800, 1.751	57.800, 1.660	57.800, 1.687	57.800, 1.423	57.800, 1.807
291	58.000, 2.079	58.000, 1.763	58.000, 1.671	58.000, 1.697	58.000, 1.432	58.000, 1.819
292	58.200, 2.091	58.200, 1.774	58.200, 1.682	58.200, 1.707	58.200, 1.442	58.200, 1.830
293	58.400, 2.103	58.400, 1.785	58.400, 1.692	58.400, 1.717	58.400, 1.451	58.400, 1.841
294	58.600, 2.115	58.600, 1.796	58.600, 1.703	58.600, 1.728	58.600, 1.461	58.600, 1.853
295	58.800, 2.126	58.800, 1.806	58.800, 1.713	58.800, 1.739	58.800, 1.470	58.800, 1.864
296	59.000, 2.138	59.000, 1.817	59.000, 1.724	59.000, 1.749	59.000, 1.479	59.000, 1.875
297	59.200, 2.150	59.200, 1.828	59.200, 1.734	59.200, 1.760	59.200, 1.488	59.200, 1.887
298	59.400, 2.162	59.400, 1.839	59.400, 1.744	59.400, 1.771	59.400, 1.497	59.400, 1.898
299	59.600, 2.173	59.600, 1.850	59.600, 1.755	59.600, 1.782	59.600, 1.506	59.600, 1.909
300	59.800, 2.185	59.800, 1.861	59.800, 1.765	59.800, 1.792	59.800, 1.515	59.800, 1.920
301	60.000, 2.197	60.000, 1.871	60.000, 1.775	60.000, 1.803	60.000, 1.524	60.000, 1.931
302	60.200, 2.209	60.200, 1.882	60.200, 1.785	60.200, 1.813	60.200, 1.533	60.200, 1.942
303	60.400, 2.221	60.400, 1.893	60.400, 1.795	60.400, 1.823	60.400, 1.542	60.400, 1.954
304	60.600, 2.232	60.600, 1.903	60.600, 1.805	60.600, 1.833	60.600, 1.551	60.600, 1.965
305	60.800, 2.244	60.800, 1.914	60.800, 1.815	60.800, 1.843	60.800, 1.561	60.800, 1.975
306	61.000, 2.255	61.000, 1.925	61.000, 1.824	61.000, 1.852	61.000, 1.570	61.000, 1.986
307	61.200, 2.267	61.200, 1.935	61.200, 1.835	61.200, 1.862	61.200, 1.579	61.200, 1.997
308	61.400, 2.278	61.400, 1.946	61.400, 1.845	61.400, 1.872	61.400, 1.588	61.400, 2.008
309	61.600, 2.289	61.600, 1.957	61.600, 1.855	61.600, 1.881	61.600, 1.597	61.600, 2.018
310	61.800, 2.301	61.800, 1.967	61.800, 1.865	61.800, 1.891	61.800, 1.606	61.800, 2.029
311	62.000, 2.312	62.000, 1.978	62.000, 1.875	62.000, 1.900	62.000, 1.615	62.000, 2.039
312	62.200, 2.323	62.200, 1.988	62.200, 1.885	62.200, 1.910	62.200, 1.624	62.200, 2.049
313	62.400, 2.334	62.400, 1.998	62.400, 1.895	62.400, 1.920	62.400, 1.633	62.400, 2.060
314	62.600, 2.345	62.600, 2.009	62.600, 1.905	62.600, 1.930	62.600, 1.642	62.600, 2.070
315	62.800, 2.356	62.800, 2.019	62.800, 1.915	62.800, 1.939	62.800, 1.651	62.800, 2.081
316	63.000, 2.367	63.000, 2.029	63.000, 1.925	63.000, 1.949	63.000, 1.660	63.000, 2.091
317	63.200, 2.378	63.200, 2.039	63.200, 1.935	63.200, 1.959	63.200, 1.669	63.200, 2.101
318	63.400, 2.389	63.400, 2.049	63.400, 1.945	63.400, 1.969	63.400, 1.678	63.400, 2.112
319	63.600, 2.400	63.600, 2.059	63.600, 1.955	63.600, 1.978	63.600, 1.687	63.600, 2.123
320	63.800, 2.411	63.800, 2.069	63.800, 1.965	63.800, 1.988	63.800, 1.696	63.800, 2.133
321	64.000, 2.422	64.000, 2.079	64.000, 1.975	64.000, 1.997	64.000, 1.705	64.000, 2.144
322	64.200, 2.432	64.200, 2.088	64.200, 1.984	64.200, 2.007	64.200, 1.714	64.200, 2.155
323	64.400, 2.443	64.400, 2.098	64.400, 1.994	64.400, 2.017	64.400, 1.723	64.400, 2.165
324	64.600, 2.453	64.600, 2.108	64.600, 2.003	64.600, 2.026	64.600, 1.732	64.600, 2.176
325	64.800, 2.464	64.800, 2.118	64.800, 2.012	64.800, 2.036	64.800, 1.741	64.800, 2.186
326	65.000, 2.474	65.000, 2.128	65.000, 2.022	65.000, 2.045	65.000, 1.750	65.000, 2.197
327	65.200, 2.485	65.200, 2.138	65.200, 2.031	65.200, 2.055	65.200, 1.758	65.200, 2.207
328	65.400, 2.495	65.400, 2.148	65.400, 2.040	65.400, 2.064	65.400, 1.767	65.400, 2.217
329	65.600, 2.506	65.600, 2.158	65.600, 2.049	65.600, 2.074	65.600, 1.775	65.600, 2.227
330	65.800, 2.516	65.800, 2.168	65.800, 2.059	65.800, 2.083	65.800, 1.784	65.800, 2.237
331	66.000, 2.527	66.000, 2.178	66.000, 2.068	66.000, 2.093	66.000, 1.793	66.000, 2.247
332	66.200, 2.537	66.200, 2.188	66.200, 2.078	66.200, 2.102	66.200, 1.801	66.200, 2.257
333	66.400, 2.547	66.400, 2.198	66.400, 2.087	66.400, 2.111	66.400, 1.810	66.400, 2.267
334	66.600, 2.558	66.600, 2.208	66.600, 2.096	66.600, 2.121	66.600, 1.819	66.600, 2.278
335	66.800, 2.568	66.800, 2.218	66.800, 2.105	66.800, 2.130	66.800, 1.828	66.800, 2.287
336	67.000, 2.578	67.000, 2.228	67.000, 2.115	67.000, 2.139	67.000, 1.837	67.000, 2.297
337	67.200, 2.588	67.200, 2.237	67.200, 2.124	67.200, 2.148	67.200, 1.845	67.200, 2.307
338	67.400, 2.598	67.400, 2.247	67.400, 2.134	67.400, 2.157	67.400, 1.854	67.400, 2.317
339	67.600, 2.608	67.600, 2.257	67.600, 2.143	67.600, 2.167	67.600, 1.863	67.600, 2.327
340	67.800, 2.617	67.800, 2.266	67.800, 2.152	67.800, 2.176	67.800, 1.872	67.800, 2.337
341	68.000, 2.627	68.000, 2.276	68.000, 2.162	68.000, 2.185	68.000, 1.881	68.000, 2.346
342	68.200, 2.637	68.200, 2.285	68.200, 2.171	68.200, 2.194	68.200, 1.890	68.200, 2.356
343	68.400, 2.647	68.400, 2.294	68.400, 2.180	68.400, 2.203	68.400, 1.899	68.400, 2.365
344	68.600, 2.656	68.600, 2.304	68.600, 2.189	68.600, 2.213	68.600, 1.907	68.600, 2.374
345	68.800, 2.666	68.800, 2.313	68.800, 2.198	68.800, 2.222	68.800, 1.916	68.800, 2.384
346	69.000, 2.676	69.000, 2.323	69.000, 2.207	69.000, 2.231	69.000, 1.924	69.000, 2.394
347	69.200, 2.685	69.200, 2.332	69.200, 2.216	69.200, 2.240	69.200, 1.933	69.200, 2.403
348	69.400, 2.694	69.400, 2.342	69.400, 2.225	69.400, 2.248	69.400, 1.941	69.400, 2.413
349	69.600, 2.704	69.600, 2.351	69.600, 2.234	69.600, 2.257	69.600, 1.950	69.600, 2.422
350	69.800, 2.713	69.800, 2.360	69.800, 2.242	69.800, 2.266	69.800, 1.958	69.800, 2.431
351	70.000, 2.722	70.000, 2.370	70.000, 2.251	70.000, 2.274	70.000, 1.966	70.000, 2.440
352	70.200, 2.731	70.200, 2.379	70.200, 2.260	70.200, 2.283	70.200, 1.975	70.200, 2.450
353	70.400, 2.741	70.400, 2.388	70.400, 2.268	70.400, 2.291	70.400, 1.984	70.400, 2.459
354	70.600, 2.750	70.600, 2.397	70.600, 2.276	70.600, 2.300	70.600, 1.992	70.600, 2.468
355	70.800, 2.759	70.800, 2.407	70.800, 2.285	70.800, 2.309	70.800, 2.001	70.800, 2.477
356	71.000, 2.768	71.000, 2.416	71.000, 2.294	71.000, 2.317	71.000, 2.009	71.000, 2.487
357	71.200, 2.776	71.200, 2.425	71.200, 2.303	71.200, 2.326	71.200, 2.017	71.200, 2.496
358	71.400, 2.785	71.400, 2.434	71.400, 2.312	71.400, 2.334	71.400, 2.025	71.400, 2.505
359	71.600, 2.794	71.600, 2.443	71.600, 2.321	71.600, 2.343	71.600, 2.034	71.600, 2.515
360	71.800, 2.802	71.800, 2.453	71.800, 2.330	71.800, 2.351	71.800, 2.042	71.800, 2.524
361	72.000, 2.811	72.000, 2.462	72.000, 2.338	72.000, 2.359	72.000, 2.051	72.000, 2.533
362	72.200, 2.820	72.200, 2.471	72.200, 2.347	72.200, 2.367	72.200, 2.059	72.200, 2.542
363	72.400, 2.829	72.400, 2.480	72.400, 2.356	72.400, 2.376	72.400, 2.067	72.400, 2.551
364	72.600, 2.838	72.600, 2.489	72.600, 2.365	72.600, 2.383	72.600, 2.075	72.600, 2.560
365	72.800, 2.847	72.800, 2.498	72.800, 2.373	72.800, 2.392	72.800, 2.084	72.800, 2.569
366	73.000, 2.856	73.000, 2.507	73.000, 2.382	73.000, 2.400	73.000, 2.092	73.000, 2.578
367	73.200, 2.865	73.200, 2.515	73.200, 2.390	73.200, 2.408	73.200, 2.100	73.200, 2.587
368	73.400, 2.874	73.400, 2.524	73.400, 2.399	73.400, 2.416	73.400, 2.108	73.400, 2.596
369	73.600, 2.882	73.600, 2.533	73.600, 2.407	73.600, 2.424	73.600, 2.117	73.600, 2.605
370	73.800, 2.891	73.800, 2.542	73.800, 2.415	73.800, 2.432	73.800, 2.125	73.800, 2.614
371	74.000, 2.900	74.000, 2.551	74.000, 2.422	74.000, 2.441	74.000, 2.133	74.000, 2.623
372	74.200, 2.909	74.200, 2.560	74.200, 2.430	74.200, 2.449	74.200, 2.141	74.200, 2.632
373	74.400, 2.918	74.400, 2.569	74.400, 2.438	74.400, 2.458	74.400, 2.149	74.400, 2.641
374	74.600, 2.927	74.600, 2.577	74.600, 2.446	74.600, 2.466	74.600, 2.158	74.600, 2.649
375	74.800, 2.935	74.800, 2.585	74.800, 2.454	74.800, 2.474	74.800, 2.166	74.800, 2.658
376	75.000, 2.944	75.000, 2.594	75.000, 2.462	75.000, 2.482	75.000, 2.173	75.000, 2.667
377	75.200, 2.952	75.200, 2.602	75.200, 2.471	75.200, 2.491	75.200, 2.182	75.200, 2.676
378	75.400, 2.960	75.400, 2.610	75.400, 2.479	75.400, 2.499	75.400, 2.190	75.400, 2.684
379	75.600, 2.969	75.600, 2.618	75.600, 2.488	75.600, 2.507	75.600, 2.197	75.600, 2.693
380	75.800, 2.977	75.800, 2.627	75.800, 2.496	75.800, 2.515	75.800, 2.205	75.800, 2.701
381	76.000, 2.985	76.000, 2.635	76.000, 2.504	76.000, 2.523	76.000, 2.213	76.000, 2.710
382	76.200, 2.993	76.200, 2.643	76.200, 2.512	76.200, 2.531	76.200, 2.221	76.200, 2.718
383	76.400, 3.001	76.400, 2.652	76.400, 2.520	76.400, 2.539	76.400, 2.228	76.400, 2.726
384	76.600, 3.008	76.600, 2.660	76.600, 2.528	76.600, 2.547	76.600, 2.236	76.600, 2.735
385	76.800, 3.016	76.800, 2.668	76.800, 2.536	76.800, 2.555	76.800, 2.243	76.800, 2.743
386	77.000, 3.023	77.000, 2.676	77.000, 2.544	77.000, 2.562	77.000, 2.251	77.000, 2.751
387	77.200, 3.031	77.200, 2.684	77.200, 2.552	77.200, 2.570	77.200, 2.258	77.200, 2.759
388	77.400, 3.038	77.400, 2.693	77.400, 2.559	77.400, 2.578	77.400, 2.266	77.400, 2.768
389	77.600, 3.045	77.600, 2.701	77.600, 2.567	77.600, 2.585	77.600, 2.274	77.600, 2.776
390	77.800, 3.053	77.800, 2.709	77.800, 2.574	77.800, 2.593	77.800, 2.281	77.800, 2.783
391	78.000, 3.060	78.000, 2.717	78.000, 2.582	78.000, 2.601	78.000, 2.289	78.000, 2.792
392	78.200, 3.068	78.200, 2.725	78.200, 2.589	78.200, 2.608	78.200, 2.296	78.200, 2.799
393	78.400, 3.075	78.400, 2.733	78.400, 2.597	78.400, 2.616	78.400, 2.304	78.400, 2.807
394	78.600, 3.082	78.600, 2.742	78.600, 2.604	78.600, 2.624	78.600, 2.312	78.600, 2.815
395	78.800, 3.090	78.800, 2.750	78.800, 2.612	78.800, 2.631	78.800, 2.319	78.800, 2.823
396	79.000, 3.097	79.000, 2.758	79.000, 2.619	79.000, 2.639	79.000, 2.327	79.000, 2.832
397	79.200, 3.105	79.200, 2.766	79.200, 2.627	79.200, 2.646	79.200, 2.335	79.200, 2.840
398	79.400, 3.112	79.400, 2.774	79.400, 2.634	79.400, 2.654	79.400, 2.343	79.400, 2.848
399	79.600, 3.120	79.600, 2.782	79.600, 2.641	79.600, 2.661	79.600, 2.350	79.600, 2.856
400	79.800, 3.128	79.800, 2.790	79.800, 2.649	79.800, 2.669	79.800, 2.358	79.800, 2.864
401	80.000, 3.135	80.000, 2.798	80.000, 2.656	80.000, 2.676	80.000, 2.366	80.000, 2.872
402	80.200, 3.142	80.200, 2.806	80.200, 2.664	80.200, 2.683	80.200, 2.373	80.200, 2.880
403	80.400, 3.149	80.400, 2.813	80.400, 2.672	80.400, 2.690	80.400, 2.381	80.400, 2.888
404	80.600, 3.156	80.600, 2.821	80.600, 2.679	80.600, 2.696	80.600, 2.388	80.600, 2.895
405	80.800, 3.163	80.800, 2.828	80.800, 2.687	80.800, 2.703	80.800, 2.395	80.800, 2.903
406	81.000, 3.170	81.000, 2.835	81.000, 2.695	81.000, 2.710	81.000, 2.403	81.000, 2.911
407	81.200, 3.177	81.200, 2.843	81.200, 2.702	81.200, 2.717	81.200, 2.410	81.200, 2.918
408	81.400, 3.184	81.400, 2.850	81.400, 2.710	81.400, 2.724	81.400, 2.417	81.400, 2.926
409	81.600, 3.191	81.600, 2.857	81.600, 2.718	81.600, 2.731	81.600, 2.425	81.600, 2.933
410	81.800, 3.197	81.800, 2.864	81.800, 2.726	81.800, 2.739	81.800, 2.432	81.800, 2.941
411	82.000, 3.204	82.000, 2.872	82.000, 2.733	82.000, 2.746	82.000, 2.439	82.000, 2.948
412	82.200, 3.211	82.200, 2.879	82.200, 2.740	82.200, 2.754	82.200, 2.446	82.200, 2.956
413	82.400, 3.217	82.400, 2.886	82.400, 2.747	82.400, 2.761	82.400, 2.454	82.400, 2.963
414	82.600, 3.224	82.600, 2.893	82.600, 2.754	82.600, 2.769	82.600, 2.461	82.600, 2.971
415	82.800, 3.230	82.800, 2.901	82.800, 2.761	82.800, 2.776	82.800, 2.468	82.800, 2.978
416	83.000, 3.237	83.000, 2.908	83.000, 2.768	83.000, 2.783	83.000, 2.475	83.000, 2.985
417	83.200, 3.244	83.200, 2.915	83.200, 2.774	83.200, 2.790	83.200, 2.483	83.200, 2.992
418	83.400, 3.250	83.400, 2.921	83.400, 2.781	83.400, 2.797	83.400, 2.490	83.400, 2.999
419	83.600, 3.257	83.600, 2.928	83.600, 2.788	83.600, 2.804	83.600, 2.497	83.600, 3.006
420	83.800, 3.263	83.800, 2.935	83.800, 2.794	83.800, 2.811	83.800, 2.505	83.800, 3.013
421	84.000, 3.270	84.000, 2.942	84.000, 2.801	84.000, 2.817	84.000, 2.512	84.000, 3.021
422	84.200, 3.276	84.200, 2.949	84.200, 2.808	84.200, 2.823	84.200, 2.519	84.200, 3.028
423	84.400, 3.283	84.400, 2.957	84.400, 2.814	84.400, 2.830	84.400, 2.526	84.400, 3.035
424	84.600, 3.289	84.600, 2.964	84.600, 2.821	84.600, 2.836	84.600, 2.533	84.600, 3.042
425	84.800, 3.296	84.800, 2.971	84.800, 2.828	84.800, 2.843	84.800, 2.540	84.800, 3.049
426	85.000, 3.303	85.000, 2.978	85.000, 2.835	85.000, 2.849	85.000, 2.547	85.000, 3.056
427	85.200, 3.309	85.200, 2.986	85.200, 2.841	85.200, 2.855	85.200, 2.554	85.200, 3.063
428	85.400, 3.316	85.400, 2.993	85.400, 2.848	85.400, 2.862	85.400, 2.561	85.400, 3.069
429	85.600, 3.322	85.600, 3.001	85.600, 2.854	85.600, 2.869	85.600, 2.568	85.600, 3.076
430	85.800, 3.328	85.800, 3.008	85.800, 2.861	85.800, 2.875	85.800, 2.575	85.800, 3.083
431	86.000, 3.334	86.000, 3.015	86.000, 2.868	86.000, 2.882	86.000, 2.582	86.000, 3.090
432	86.200, 3.340	86.200, 3.022	86.200, 2.874	86.200, 2.888	86.200, 2.589	86.200, 3.097
433	86.400, 3.346	86.400, 3.029	86.400, 2.881	86.400, 2.894	86.400, 2.596	86.400, 3.104
434	86.600, 3.352	86.600, 3.035	86.600, 2.888	86.600, 2.901	86.600, 2.603	86.600, 3.111
435	86.800, 3.358	86.800, 3.042	86.800, 2.895	86.800, 2.907	86.800, 2.610	86.800, 3.118
436	87.000, 3.364	87.000, 3.049	87.000, 2.902	87.000, 2.913	87.000, 2.617	87.000, 3.125
437	87.200, 3.370	87.200, 3.056	87.200, 2.908	87.200, 2.920	87.200, 2.624	87.200, 3.132
438	87.400, 3.376	87.400, 3.062	87.400, 2.915	87.400, 2.926	87.400, 2.631	87.400, 3.139
439	87.600, 3.381	87.600, 3.069	87.600, 2.922	87.600, 2.932	87.600, 2.637	87.600, 3.145
440	87.800, 3.387	87.800, 3.075	87.800, 2.928	87.800, 2.938	87.800, 2.644	87.800, 3.153
441	88.000, 3.393	88.000, 3.082	88.000, 2.935	88.000, 2.944	88.000, 2.650	88.000, 3.160
442	88.200, 3.399	88.200, 3.088	88.200, 2.942	88.200, 2.951	88.200, 2.657	88.200, 3.167
443	88.400, 3.405	88.400, 3.095	88.400, 2.948	88.400, 2.957	88.400, 2.663	88.400, 3.174
444	88.600, 3.411	88.600, 3.101	88.600, 2.954	88.600, 2.963	88.600, 2.670	88.600, 3.181
445	88.800, 3.416	88.800, 3.108	88.800, 2.960	88.800, 2.969	88.800, 2.676	88.800, 3.187
446	89.000, 3.422	89.000, 3.114	89.000, 2.966	89.000, 2.975	89.000, 2.683	89.000, 3.194
447	89.200, 3.427	89.200, 3.121	89.200, 2.972	89.200, 2.981	89.200, 2.689	89.200, 3.201
448	89.400, 3.433	89.400, 3.127	89.400, 2.978	89.400, 2.987	89.400, 2.696	89.400, 3.208
449	89.600, 3.438	89.600, 3.133	89.600, 2.984	89.600, 2.993	89.600, 2.703	89.600, 3.214
450	89.800, 3.444	89.800, 3.140	89.800, 2.990	89.800, 2.999	89.800, 2.709	89.800, 3.220
451	90.000, 3.449	90.000, 3.146	90.000, 2.996	90.000, 3.005	90.000, 2.716	90.000, 3.226
452	90.200, 3.455	90.200, 3.152	90.200, 3.002	90.200, 3.011	90.200, 2.722	90.200, 3.233
453	90.400, 3.460	90.400, 3.158	90.400, 3.008	90.400, 3.017	90.400, 2.729	90.400, 3.239
454	90.600, 3.466	90.600, 3.164	90.600, 3.015	90.600, 3.022	90.600, 2.736	90.600, 3.245
455	90.800, 3.471	90.800, 3.171	90.800, 3.021	90.800, 3.028	90.800, 2.743	90.800, 3.251
456	91.000, 3.477	91.000, 3.177	91.000, 3.027	91.000, 3.034	91.000, 2.749	91.000, 3.258
457	91.200, 3.482	91.200, 3.183	91.200, 3.033	91.200, 3.040	91.200, 2.756	91.200, 3.264
458	91.400, 3.487	91.400, 3.190	91.400, 3.039	91.400, 3.046	91.400, 2.762	91.400, 3.270
459	91.600, 3.493	91.600, 3.196	91.600, 3.045	91.600, 3.052	91.600, 2.769	91.600, 3.277
460	91.800, 3.498	91.800, 3.203	91.800, 3.051	91.800, 3.058	91.800, 2.775	91.800, 3.283
461	92.000, 3.504	92.000, 3.209	92.000, 3.057	92.000, 3.064	92.000, 2.781	92.000, 3.289
462	92.200, 3.509	92.200, 3.215	92.200, 3.063	92.200, 3.070	92.200, 2.787	92.200, 3.296
463	92.400, 3.514	92.400, 3.222	92.400, 3.069	92.400, 3.076	92.400, 2.793	92.400, 3.302
464	92.600, 3.519	92.600, 3.228	92.600, 3.075	92.600, 3.082	92.600, 2.799	92.600, 3.308
465	92.800, 3.524	92.800, 3.235	92.800, 3.081	92.800, 3.088	92.800, 2.806	92.800, 3.314
466	93.000, 3.529	93.000, 3.241	93.000, 3.087	93.000, 3.093	93.000, 2.812	93.000, 3.321
467	93.200, 3.534	93.200, 3.247	93.200, 3.093	93.200, 3.099	93.200, 2.818	93.200, 3.327
468	93.400, 3.539	93.400, 3.253	93.400, 3.099	93.400, 3.104	93.400, 2.824	93.400, 3.333
469	93.600, 3.544	93.600, 3.259	93.600, 3.105	93.600, 3.110	93.600, 2.830	93.600, 3.338
470	93.800, 3.549	93.800, 3.265	93.800, 3.110	93.800, 3.115	93.800, 2.837	93.800, 3.344
471	94.000, 3.553	94.000, 3.270	94.000, 3.116	94.000, 3.121	94.000, 2.843	94.000, 3.350
472	94.200, 3.558	94.200, 3.276	94.200, 3.122	94.200, 3.126	94.200, 2.849	94.200, 3.355
473	94.400, 3.563	94.400, 3.281	94.400, 3.127	94.400, 3.132	94.400, 2.856	94.400, 3.361
474	94.600, 3.567	94.600, 3.286	94.600, 3.133	94.600, 3.137	94.600, 2.862	94.600, 3.367
475	94.800, 3.571	94.800, 3.292	94.800, 3.138	94.800, 3.142	94.800, 2.869	94.800, 3.372
476	95.000, 3.576	95.000, 3.297	95.000, 3.144	95.000, 3.148	95.000, 2.875	95.000, 3.378
477	95.200, 3.580	95.200, 3.302	95.200, 3.149	95.200, 3.153	95.200, 2.881	95.200, 3.384
478	95.400, 3.585	95.400, 3.307	95.400, 3.154	95.400, 3.159	95.400, 2.888	95.400, 3.389
479	95.600, 3.590	95.600, 3.312	95.600, 3.159	95.600, 3.164	95.600, 2.894	95.600, 3.395
480	95.800, 3.594	95.800, 3.318	95.800, 3.165	95.800, 3.169	95.800, 2.900	95.800, 3.400
481	96.000, 3.599	96.000, 3.323	96.000, 3.170	96.000, 3.174	96.000, 2.906	96.000, 3.406
482	96.200, 3.604	96.200, 3.329	96.200, 3.175	96.200, 3.179	96.200, 2.912	96.200, 3.411
483	96.400, 3.609	96.400, 3.334	96.400, 3.181	96.400, 3.184	96.400, 2.918	96.400, 3.417
484	96.600, 3.614	96.600, 3.340	96.600, 3.186	96.600, 3.189	96.600, 2.924	96.600, 3.422
485	96.800, 3.619	96.800, 3.346	96.800, 3.191	96.800, 3.195	96.800, 2.930	96.800, 3.428
486	97.000, 3.624	97.000, 3.351	97.000, 3.196	97.000, 3.200	97.000, 2.935	97.000, 3.434
487	97.200, 3.628	97.200, 3.357	97.200, 3.202	97.200, 3.205	97.200, 2.941	97.200, 3.440
488	97.400, 3.633	97.400, 3.362	97.400, 3.207	97.400, 3.210	97.400, 2.947	97.400, 3.445
489	97.600, 3.638	97.600, 3.368	97.600, 3.212	97.600, 3.215	97.600, 2.952	97.600, 3.451
490	97.800, 3.642	97.800, 3.373	97.800, 3.218	97.800, 3.220	97.800, 2.958	97.800, 3.457
491	98.000, 3.646	98.000, 3.379	98.000, 3.223	98.000, 3.225	98.000, 2.963	98.000, 3.462
492	98.200, 3.650	98.200, 3.385	98.200, 3.228	98.200, 3.231	98.200, 2.969	98.200, 3.468
493	98.400, 3.655	98.400, 3.390	98.400, 3.234	98.400, 3.236	98.400, 2.974	98.400, 3.473
494	98.600, 3.659	98.600, 3.395	98.600, 3.239	98.600, 3.241	98.600, 2.980	98.600, 3.479
495	98.800, 3.663	98.800, 3.401	98.800, 3.244	98.800, 3.247	98.800, 2.985	98.800, 3.484
496	99.000, 3.667	99.000, 3.406	99.000, 3.250	99.000, 3.252	99.000, 2.991	99.000, 3.489
497	99.200, 3.671	99.200, 3.411	99.200, 3.255	99.200, 3.257	99.200, 2.996	99.200, 3.494
498	99.400, 3.675	99.400, 3.416	99.400, 3.260	99.400, 3.262	99.400, 3.002	99.400, 3.499
499	99.600, 3.679	99.600, 3.422	99.600, 3.266	99.600, 3.267	99.600, 3.007	99.600, 3.504
500	99.800, 3.683	99.800, 3.427	99.800, 3.271	99.800, 3.272	99.800, 3.013	99.800, 3.509
501	100.000, 3.687	100.000, 3.432	100.000, 3.276	100.000, 3.277	100.000, 3.019	100.000, 3.514
502	100.200, 3.691	100.200, 3.437	100.200, 3.281	100.200, 3.282	100.200, 3.025	100.200, 3.519
503	100.400, 3.695	100.400, 3.442	100.400, 3.286	100.400, 3.287	100.400, 3.031	100.400, 3.524
504	100.600, 3.699	100.600, 3.447	100.600, 3.291	100.600, 3.292	100.600, 3.037	100.600, 3.529
505	100.800, 3.704	100.800, 3.452	100.800, 3.296	100.800, 3.297	100.800, 3.043	100.800, 3.535
506	101.000, 3.708	101.000, 3.457	101.000, 3.301	101.000, 3.302	101.000, 3.048	101.000, 3.540
507	101.200, 3.712	101.200, 3.461	101.200, 3.306	101.200, 3.307	101.200, 3.054	101.200, 3.545
508	101.400, 3.716	101.400, 3.466	101.400, 3.310	101.400, 3.311	101.400, 3.059	101.400, 3.550
509	101.600, 3.720	101.600, 3.471	101.600, 3.315	101.600, 3.316	101.600, 3.064	101.600, 3.555
510	101.800, 3.724	101.800, 3.476	101.800, 3.320	101.800, 3.321	101.800, 3.070	101.800, 3.560
511	102.000, 3.728	102.000, 3.481	102.000, 3.325	102.000, 3.326	102.000, 3.075	102.000, 3.564
512	102.200, 3.732	102.200, 3.485	102.200, 3.330	102.200, 3.331	102.200, 3.080	102.200, 3.569
513	102.400, 3.736	102.400, 3.490	102.400, 3.334	102.400, 3.336	102.400, 3.086	102.400, 3.574
514	102.600, 3.739	102.600, 3.495	102.600, 3.339	102.600, 3.340	102.600, 3.091	102.600, 3.578
515	102.800, 3.743	102.800, 3.500	102.800, 3.344	102.800, 3.345	102.800, 3.096	102.800, 3.583
516	103.000, 3.746	103.000, 3.504	103.000, 3.350	103.000, 3.349	103.000, 3.102	103.000, 3.589
517	103.200, 3.750	103.200, 3.509	103.200, 3.354	103.200, 3.353	103.200, 3.107	103.200, 3.594
518	103.400, 3.754	103.400, 3.514	103.400, 3.359	103.400, 3.357	103.400, 3.113	103.400, 3.599
519	103.600, 3.757	103.600, 3.519	103.600, 3.364	103.600, 3.360	103.600, 3.118	103.600, 3.605
520	103.800, 3.761	103.800, 3.525	103.800, 3.368	103.800, 3.364	103.800, 3.124	103.800, 3.610
521	104.000, 3.764	104.000, 3.530	104.000, 3.372	104.000, 3.368	104.000, 3.130	104.000, 3.615
522	104.200, 3.768	104.200, 3.535	104.200, 3.377	104.200, 3.373	104.200, 3.135	104.200, 3.620
523	104.400, 3.772	104.400, 3.540	104.400, 3.381	104.400, 3.377	104.400, 3.140	104.400, 3.625
524	104.600, 3.775	104.600, 3.546	104.600, 3.386	104.600, 3.381	104.600, 3.146	104.600, 3.630
525	104.800, 3.779	104.800, 3.551	104.800, 3.390	104.800, 3.385	104.800, 3.151	104.800, 3.635
526	105.000, 3.783	105.000, 3.555	105.000, 3.394	105.000, 3.390	105.000, 3.156	105.000, 3.640
527	105.200, 3.787	105.200, 3.560	105.200, 3.399	105.200, 3.394	105.200, 3.161	105.200, 3.644
528	105.400, 3.790	105.400, 3.565	105.400, 3.403	105.400, 3.398	105.400, 3.166	105.400, 3.648
529	105.600, 3.794	105.600, 3.569	105.600, 3.408	105.600, 3.403	105.600, 3.170	105.600, 3.653
530	105.800, 3.797	105.800, 3.573	105.800, 3.412	105.800, 3.407	105.800, 3.175	105.800, 3.657
531	106.000, 3.801	106.000, 3.577	106.000, 3.417	106.000, 3.412	106.000, 3.179	106.000, 3.661
532	106.200, 3.804	106.200, 3.581	106.200, 3.422	106.200, 3.417	106.200, 3.184	106.200, 3.666
533	106.400, 3.807	106.400, 3.585	106.400, 3.427	106.400, 3.421	106.400, 3.189	106.400, 3.670
534	106.600, 3.811	106.600, 3.589	106.600, 3.432	106.600, 3.426	106.600, 3.194	106.600, 3.675
535	106.800, 3.814	106.800, 3.593	106.800, 3.437	106.800, 3.430	106.800, 3.198	106.800, 3.679
536	107.000, 3.817	107.000, 3.596	107.000, 3.441	107.000, 3.435	107.000, 3.203	107.000, 3.684
537	107.200, 3.820	107.200, 3.601	107.200, 3.446	107.200, 3.439	107.200, 3.208	107.200, 3.688
538	107.400, 3.823	107.400, 3.605	107.400, 3.450	107.400, 3.443	107.400, 3.213	107.400, 3.693
539	107.600, 3.826	107.600, 3.609	107.600, 3.454	107.600, 3.447	107.600, 3.218	107.600, 3.697
540	107.800, 3.829	107.800, 3.614	107.800, 3.458	107.800, 3.451	107.800, 3.222	107.800, 3.701
541	108.000, 3.832	108.000, 3.618	108.000, 3.462	108.000, 3.455	108.000, 3.227	108.000, 3.705
542	108.200, 3.835	108.200, 3.622	108.200, 3.467	108.200, 3.460	108.200, 3.232	108.200, 3.710
543	108.400, 3.839	108.400, 3.627	108.400, 3.471	108.400, 3.464	108.400, 3.237	108.400, 3.714
544	108.600, 3.842	108.600, 3.631	108.600, 3.475	108.600, 3.468	108.600, 3.242	108.600, 3.718
545	108.800, 3.846	108.800, 3.635	108.800, 3.479	108.800, 3.472	108.800, 3.247	108.800, 3.722
546	109.000, 3.849	109.000, 3.640	109.000, 3.483	109.000, 3.476	109.000, 3.252	109.000, 3.727
547	109.200, 3.852	109.200, 3.644	109.200, 3.487	109.200, 3.480	109.200, 3.257	109.200, 3.731
548	109.400, 3.856	109.400, 3.648	109.400, 3.491	109.400, 3.484	109.400, 3.262	109.400, 3.735
549	109.600, 3.859	109.600, 3.652	109.600, 3.495	109.600, 3.488	109.600, 3.268	109.600, 3.739
550	109.800, 3.862	109.800, 3.656	109.800, 3.499	109.800, 3.493	109.800, 3.273	109.800, 3.744
551	110.000, 3.865	110.000, 3.660	110.000, 3.503	110.000, 3.497	110.000, 3.278	110.000, 3.748
552	110.200, 3.868	110.200, 3.664	110.200, 3.507	110.200, 3.501	110.200, 3.283	110.200, 3.752
553	110.400, 3.871	110.400, 3.668	110.400, 3.512	110.400, 3.505	110.400, 3.288	110.400, 3.756
554	110.600, 3.874	110.600, 3.672	110.600, 3.516	110.600, 3.509	110.600, 3.293	110.600, 3.760
555	110.800, 3.877	110.800, 3.676	110.800, 3.520	110.800, 3.513	110.800, 3.298	110.800, 3.764
556	111.000, 3.880	111.000, 3.680	111.000, 3.524	111.000, 3.517	111.000, 3.302	111.000, 3.768
557	111.200, 3.882	111.200, 3.684	111.200, 3.528	111.200, 3.521	111.200, 3.307	111.200, 3.771
558	111.400, 3.885	111.400, 3.688	111.400, 3.532	111.400, 3.524	111.400, 3.311	111.400, 3.775
559	111.600, 3.888	111.600, 3.692	111.600, 3.536	111.600, 3.528	111.600, 3.316	111.600, 3.778
560	111.800, 3.891	111.800, 3.696	111.800, 3.540	111.800, 3.532	111.800, 3.320	111.800, 3.782
561	112.000, 3.894	112.000, 3.700	112.000, 3.544	112.000, 3.536	112.000, 3.325	112.000, 3.786
562	112.200, 3.897	112.200, 3.703	112.200, 3.548	112.200, 3.539	112.200, 3.329	112.200, 3.790
563	112.400, 3.900	112.400, 3.707	112.400, 3.552	112.400, 3.543	112.400, 3.333	112.400, 3.794
564	112.600, 3.903	112.600, 3.711	112.600, 3.556	112.600, 3.547	112.600, 3.338	112.600, 3.799
565	112.800, 3.906	112.800, 3.715	112.800, 3.560	112.800, 3.550	112.800, 3.342	112.800, 3.803
566	113.000, 3.909	113.000, 3.719	113.000, 3.563	113.000, 3.554	113.000, 3.347	113.000, 3.808
567	113.200, 3.912	113.200, 3.723	113.200, 3.567	113.200, 3.558	113.200, 3.351	113.200, 3.812
568	113.400, 3.915	113.400, 3.727	113.400, 3.570	113.400, 3.561	113.400, 3.356	113.400, 3.816
569	113.600, 3.918	113.600, 3.731	113.600, 3.574	113.600, 3.565	113.600, 3.361	113.600, 3.820
570	113.800, 3.921	113.800, 3.735	113.800, 3.577	113.800, 3.568	113.800, 3.366	113.800, 3.825
571	114.000, 3.924	114.000, 3.739	114.000, 3.581	114.000, 3.571	114.000, 3.371	114.000, 3.829
572	114.200, 3.926	114.200, 3.743	114.200, 3.585	114.200, 3.574	114.200, 3.375	114.200, 3.833
573	114.400, 3.929	114.400, 3.747	114.400, 3.588	114.400, 3.578	114.400, 3.380	114.400, 3.837
574	114.600, 3.931	114.600, 3.750	114.600, 3.592	114.600, 3.581	114.600, 3.384	114.600, 3.840
575	114.800, 3.934	114.800, 3.754	114.800, 3.595	114.800, 3.584	114.800, 3.389	114.800, 3.844
576	115.000, 3.936	115.000, 3.758	115.000, 3.599	115.000, 3.587	115.000, 3.393	115.000, 3.847
577	115.200, 3.938	115.200, 3.761	115.200, 3.602	115.200, 3.591	115.200, 3.398	115.200, 3.851
578	115.400, 3.941	115.400, 3.764	115.400, 3.606	115.400, 3.595	115.400, 3.402	115.400, 3.854
579	115.600, 3.943	115.600, 3.768	115.600, 3.610	115.600, 3.598	115.600, 3.406	115.600, 3.858
580	115.800, 3.946	115.800, 3.771	115.800, 3.614	115.800, 3.602	115.800, 3.410	115.800, 3.861
581	116.000, 3.948	116.000, 3.774	116.000, 3.618	116.000, 3.606	116.000, 3.415	116.000, 3.865
582	116.200, 3.951	116.200, 3.778	116.200, 3.622	116.200, 3.609	116.200, 3.419	116.200, 3.869
583	116.400, 3.954	116.400, 3.781	116.400, 3.626	116.400, 3.613	116.400, 3.423	116.400, 3.872
584	116.600, 3.957	116.600, 3.785	116.600, 3.630	116.600, 3.616	116.600, 3.427	116.600, 3.876
585	116.800, 3.959	116.800, 3.789	116.800, 3.633	116.800, 3.620	116.800, 3.431	116.800, 3.880
586	117.000, 3.962	117.000, 3.792	117.000, 3.637	117.000, 3.624	117.000, 3.436	117.000, 3.883
587	117.200, 3.964	117.200, 3.796	117.200, 3.640	117.200, 3.627	117.200, 3.440	117.200, 3.886
588	117.400, 3.967	117.400, 3.800	117.400, 3.644	117.400, 3.631	117.400, 3.444	117.400, 3.890
589	117.600, 3.969	117.600, 3.803	117.600, 3.647	117.600, 3.634	117.600, 3.448	117.600, 3.893
590	117.800, 3.972	117.800, 3.807	117.800, 3.651	117.800, 3.637	117.800, 3.453	117.800, 3.896
591	118.000, 3.974	118.000, 3.811	118.000, 3.654	118.000, 3.641	118.000, 3.457	118.000, 3.899
592	118.200, 3.977	118.200, 3.814	118.200, 3.657	118.200, 3.644	118.200, 3.461	118.200, 3.902
593	118.400, 3.979	118.400, 3.818	118.400, 3.660	118.400, 3.647	118.400, 3.465	118.400, 3.905
594	118.600, 3.981	118.600, 3.821	118.600, 3.663	118.600, 3.650	118.600, 3.469	118.600, 3.908
595	118.800, 3.983	118.800, 3.824	118.800, 3.666	118.800, 3.654	118.800, 3.473	118.800, 3.911
596	119.000, 3.985	119.000, 3.827	119.000, 3.670	119.000, 3.657	119.000, 3.477	119.000, 3.914
597	119.200, 3.988	119.200, 3.830	119.200, 3.673	119.200, 3.660	119.200, 3.481	119.200, 3.917
598	119.400, 3.990	119.400, 3.833	119.400, 3.676	119.400, 3.663	119.400, 3.485	119.400, 3.920
599	119.600, 3.992	119.600, 3.837	119.600, 3.679	119.600, 3.667	119.600, 3.489	119.600, 3.923
600	119.800, 3.994	119.800, 3.840	119.800, 3.682	119.800, 3.670	119.800, 3.493	119.800, 3.927
601	120.000, 3.997	120.000, 3.843	120.000, 3.686	120.000, 3.672	120.000, 3.497	120.000, 3.930
602	120.200, 3.999	120.200, 3.846	120.200, 3.689	120.200, 3.675	120.200, 3.501	120.200, 3.933
603	120.400, 4.001	120.400, 3.849	120.400, 3.692	120.400, 3.678	120.400, 3.505	120.400, 3.936
604	120.600, 4.003	120.600, 3.852	120.600, 3.695	120.600, 3.681	120.600, 3.509	120.600, 3.939
605	120.800, 4.005	120.800, 3.855	120.800, 3.699	120.800, 3.683	120.800, 3.512	120.800, 3.943
606	121.000, 4.007	121.000, 3.858	121.000, 3.702	121.000, 3.686	121.000, 3.516	121.000, 3.946
607	121.200, 4.009	121.200, 3.862	121.200, 3.705	121.200, 3.689	121.200, 3.520	121.200, 3.949
608	121.400, 4.012	121.400, 3.865	121.400, 3.709	121.400, 3.692	121.400, 3.523	121.400, 3.952
609	121.600, 4.014	121.600, 3.868	121.600, 3.712	121.600, 3.695	121.600, 3.527	121.600, 3.955
610	121.800, 4.016	121.800, 3.872	121.800, 3.716	121.800, 3.698	121.800, 3.531	121.800, 3.958
611	122.000, 4.018	122.000, 3.875	122.000, 3.719	122.000, 3.702	122.000, 3.535	122.000, 3.962
612	122.200, 4.021	122.200, 3.878	122.200, 3.722	122.200, 3.705	122.200, 3.539	122.200, 3.965
613	122.400, 4.023	122.400, 3.881	122.400, 3.726	122.400, 3.708	122.400, 3.543	122.400, 3.969
614	122.600, 4.025	122.600, 3.884	122.600, 3.729	122.600, 3.711	122.600, 3.547	122.600, 3.972
615	122.800, 4.027	122.800, 3.887	122.800, 3.732	122.800, 3.714	122.800, 3.551	122.800, 3.976
616	123.000, 4.030	123.000, 3.890	123.000, 3.735	123.000, 3.718	123.000, 3.555	123.000, 3.980
617	123.200, 4.032	123.200, 3.892	123.200, 3.738	123.200, 3.721	123.200, 3.559	123.200, 3.983
618	123.400, 4.034	123.400, 3.895	123.400, 3.741	123.400, 3.724	123.400, 3.563	123.400, 3.987
619	123.600, 4.036	123.600, 3.898	123.600, 3.744	123.600, 3.727	123.600, 3.566	123.600, 3.990
620	123.800, 4.038	123.800, 3.901	123.800, 3.747	123.800, 3.730	123.800, 3.570	123.800, 3.993
621	124.000, 4.040	124.000, 3.903	124.000, 3.750	124.000, 3.733	124.000, 3.574	124.000, 3.996
622	124.200, 4.042	124.200, 3.906	124.200, 3.753	124.200, 3.736	124.200, 3.577	124.200, 3.999
623	124.400, 4.044	124.400, 3.909	124.400, 3.756	124.400, 3.739	124.400, 3.581	124.400, 4.003
624	124.600, 4.046	124.600, 3.911	124.600, 3.759	124.600, 3.742	124.600, 3.584	124.600, 4.006
625	124.800, 4.047	124.800, 3.914	124.800, 3.761	124.800, 3.744	124.800, 3.588	124.800, 4.009
626	125.000, 4.049	125.000, 3.917	125.000, 3.764	125.000, 3.747	125.000, 3.591	125.000, 4.011
627	125.200, 4.050	125.200, 3.920	125.200, 3.766	125.200, 3.750	125.200, 3.594	125.200, 4.014
628	125.400, 4.052	125.400, 3.924	125.400, 3.769	125.400, 3.752	125.400, 3.598	125.400, 4.016
629	125.600, 4.054	125.600, 3.927	125.600, 3.772	125.600, 3.755	125.600, 3.602	125.600, 4.018
630	125.800, 4.055	125.800, 3.930	125.800, 3.774	125.800, 3.757	125.800, 3.605	125.800, 4.021
631	126.000, 4.057	126.000, 3.933	126.000, 3.777	126.000, 3.759	126.000, 3.609	126.000, 4.023
632	126.200, 4.059	126.200, 3.936	126.200, 3.780	126.200, 3.762	126.200, 3.612	126.200, 4.026
633	126.400, 4.061	126.400, 3.938	126.400, 3.783	126.400, 3.764	126.400, 3.616	126.400, 4.029
634	126.600, 4.063	126.600, 3.941	126.600, 3.786	126.600, 3.766	126.600, 3.619	126.600, 4.032
635	126.800, 4.065	126.800, 3.943	126.800, 3.789	126.800, 3.769	126.800, 3.623	126.800, 4.034
636	127.000, 4.067	127.000, 3.946	127.000, 3.792	127.000, 3.772	127.000, 3.627	127.000, 4.037
637	127.200, 4.069	127.200, 3.948	127.200, 3.795	127.200, 3.774	127.200, 3.630	127.200, 4.040
638	127.400, 4.072	127.400, 3.951	127.400, 3.798	127.400, 3.777	127.400, 3.634	127.400, 4.043
639	127.600, 4.073	127.600, 3.953	127.600, 3.801	127.600, 3.780	127.600, 3.637	127.600, 4.045
640	127.800, 4.075	127.800, 3.955	127.800, 3.804	127.800, 3.783	127.800, 3.641	127.800, 4.048
641	128.000, 4.077	128.000, 3.958	128.000, 3.806	128.000, 3.785	128.000, 3.644	128.000, 4.051
642	128.200, 4.079	128.200, 3.960	128.200, 3.809	128.200, 3.788	128.200, 3.648	128.200, 4.053
643	128.400, 4.080	128.400, 3.963	128.400, 3.811	128.400, 3.791	128.400, 3.652	128.400, 4.056
644	128.600, 4.082	128.600, 3.966	128.600, 3.814	128.600, 3.794	128.600, 3.655	128.600, 4.059
645	128.800, 4.084	128.800, 3.969	128.800, 3.816	128.800, 3.797	128.800, 3.659	128.800, 4.061
646	129.000, 4.085	129.000, 3.971	129.000, 3.818	129.000, 3.800	129.000, 3.662	129.000, 4.064
647	129.200, 4.087	129.200, 3.974	129.200, 3.821	129.200, 3.803	129.200, 3.666	129.200, 4.067
648	129.400, 4.088	129.400, 3.977	129.400, 3.823	129.400, 3.806	129.400, 3.669	129.400, 4.069
649	129.600, 4.090	129.600, 3.980	129.600, 3.826	129.600, 3.808	129.600, 3.673	129.600, 4.072
650	129.800, 4.092	129.800, 3.983	129.800, 3.828	129.800, 3.811	129.800, 3.676	129.800, 4.075
651	130.000, 4.093	130.000, 3.985	130.000, 3.831	130.000, 3.813	130.000, 3.679	130.000, 4.077
652	130.200, 4.095	130.200, 3.988	130.200, 3.834	130.200, 3.816	130.200, 3.682	130.200, 4.080
653	130.400, 4.097	130.400, 3.990	130.400, 3.837	130.400, 3.818	130.400, 3.684	130.400, 4.083
654	130.600, 4.099	130.600, 3.993	130.600, 3.840	130.600, 3.821	130.600, 3.687	130.600, 4.086
655	130.800, 4.101	130.800, 3.995	130.800, 3.842	130.800, 3.823	130.800, 3.690	130.800, 4.088
656	131.000, 4.103	131.000, 3.998	131.000, 3.845	131.000, 3.825	131.000, 3.693	131.000, 4.091
657	131.200, 4.105	131.200, 4.000	131.200, 3.848	131.200, 3.828	131.200, 3.696	131.200, 4.093
658	131.400, 4.107	131.400, 4.002	131.400, 3.851	131.400, 3.830	131.400, 3.700	131.400, 4.096
659	131.600, 4.108	131.600, 4.005	131.600, 3.854	131.600, 3.832	131.600, 3.703	131.600, 4.098
660	131.800, 4.110	131.800, 4.007	131.800, 3.856	131.800, 3.835	131.800, 3.706	131.800, 4.100
661	132.000, 4.111	132.000, 4.010	132.000, 3.859	132.000, 3.838	132.000, 3.709	132.000, 4.102
662	132.200, 4.113	132.200, 4.013	132.200, 3.861	132.200, 3.840	132.200, 3.712	132.200, 4.104
663	132.400, 4.114	132.400, 4.016	132.400, 3.863	132.400, 3.843	132.400, 3.716	132.400, 4.106
664	132.600, 4.116	132.600, 4.018	132.600, 3.865	132.600, 3.845	132.600, 3.719	132.600, 4.109
665	132.800, 4.117	132.800, 4.021	132.800, 3.867	132.800, 3.848	132.800, 3.722	132.800, 4.111
666	133.000, 4.119	133.000, 4.023	133.000, 3.870	133.000, 3.850	133.000, 3.726	133.000, 4.114
667	133.200, 4.121	133.200, 4.026	133.200, 3.872	133.200, 3.852	133.200, 3.729	133.200, 4.116
668	133.400, 4.122	133.400, 4.028	133.400, 3.874	133.400, 3.855	133.400, 3.732	133.400, 4.118
669	133.600, 4.124	133.600, 4.030	133.600, 3.877	133.600, 3.857	133.600, 3.736	133.600, 4.120
670	133.800, 4.126	133.800, 4.032	133.800, 3.879	133.800, 3.859	133.800, 3.739	133.800, 4.122
671	134.000, 4.127	134.000, 4.034	134.000, 3.881	134.000, 3.861	134.000, 3.742	134.000, 4.125
672	134.200, 4.129	134.200, 4.037	134.200, 3.883	134.200, 3.864	134.200, 3.745	134.200, 4.127
673	134.400, 4.130	134.400, 4.039	134.400, 3.885	134.400, 3.866	134.400, 3.748	134.400, 4.129
674	134.600, 4.132	134.600, 4.041	134.600, 3.887	134.600, 3.868	134.600, 3.751	134.600, 4.131
675	134.800, 4.134	134.800, 4.043	134.800, 3.890	134.800, 3.870	134.800, 3.754	134.800, 4.133
676	135.000, 4.135	135.000, 4.045	135.000, 3.892	135.000, 3.872	135.000, 3.757	135.000, 4.136
677	135.200, 4.137	135.200, 4.047	135.200, 3.895	135.200, 3.874	135.200, 3.760	135.200, 4.138
678	135.400, 4.138	135.400, 4.049	135.400, 3.897	135.400, 3.877	135.400, 3.763	135.400, 4.140
679	135.600, 4.140	135.600, 4.051	135.600, 3.900	135.600, 3.879	135.600, 3.766	135.600, 4.142
680	135.800, 4.142	135.800, 4.054	135.800, 3.902	135.800, 3.881	135.800, 3.769	135.800, 4.144
681	136.000, 4.143	136.000, 4.056	136.000, 3.905	136.000, 3.883	136.000, 3.772	136.000, 4.146
682	136.200, 4.145	136.200, 4.058	136.200, 3.907	136.200, 3.886	136.200, 3.775	136.200, 4.149
683	136.400, 4.146	136.400, 4.060	136.400, 3.909	136.400, 3.888	136.400, 3.778	136.400, 4.151
684	136.600, 4.148	136.600, 4.062	136.600, 3.912	136.600, 3.890	136.600, 3.780	136.600, 4.154
685	136.800, 4.149	136.800, 4.064	136.800, 3.914	136.800, 3.892	136.800, 3.783	136.800, 4.156
686	137.000, 4.150	137.000, 4.066	137.000, 3.916	137.000, 3.894	137.000, 3.786	137.000, 4.158
687	137.200, 4.152	137.200, 4.068	137.200, 3.919	137.200, 3.896	137.200, 3.789	137.200, 4.160
688	137.400, 4.153	137.400, 4.070	137.400, 3.921	137.400, 3.898	137.400, 3.792	137.400, 4.162
689	137.600, 4.154	137.600, 4.072	137.600, 3.923	137.600, 3.900	137.600, 3.794	137.600, 4.164
690	137.800, 4.155	137.800, 4.074	137.800, 3.925	137.800, 3.902	137.800, 3.797	137.800, 4.166
691	138.000, 4.156	138.000, 4.077	138.000, 3.927	138.000, 3.905	138.000, 3.800	138.000, 4.169
692	138.200, 4.157	138.200, 4.079	138.200, 3.929	138.200, 3.907	138.200, 3.803	138.200, 4.171
693	138.400, 4.158	138.400, 4.082	138.400, 3.931	138.400, 3.909	138.400, 3.806	138.400, 4.173
694	138.600, 4.159	138.600, 4.084	138.600, 3.933	138.600, 3.911	138.600, 3.809	138.600, 4.175
695	138.800, 4.161	138.800, 4.086	138.800, 3.935	138.800, 3.913	138.800, 3.812	138.800, 4.177
696	139.000, 4.162	139.000, 4.089	139.000, 3.937	139.000, 3.914	139.000, 3.815	139.000, 4.179
697	139.200, 4.164	139.200, 4.091	139.200, 3.940	139.200, 3.916	139.200, 3.817	139.200, 4.181
698	139.400, 4.165	139.400, 4.093	139.400, 3.942	139.400, 3.918	139.400, 3.820	139.400, 4.184
699	139.600, 4.167	139.600, 4.095	139.600, 3.944	139.600, 3.920	139.600, 3.823	139.600, 4.186
700	139.800, 4.168	139.800, 4.097	139.800, 3.946	139.800, 3.921	139.800, 3.826	139.800, 4.188
701	140.000, 4.170	140.000, 4.098	140.000, 3.948	140.000, 3.923	140.000, 3.828	140.000, 4.190
702	140.200, 4.171	140.200, 4.100	140.200, 3.950	140.200, 3.925	140.200, 3.831	140.200, 4.193
703	140.400, 4.172	140.400, 4.102	140.400, 3.952	140.400, 3.927	140.400, 3.834	140.400, 4.195
704	140.600, 4.174	140.600, 4.104	140.600, 3.954	140.600, 3.929	140.600, 3.836	140.600, 4.197
705	140.800, 4.175	140.800, 4.106	140.800, 3.957	140.800, 3.931	140.800, 3.839	140.800, 4.198
706	141.000, 4.177	141.000, 4.108	141.000, 3.958	141.000, 3.933	141.000, 3.842	141.000, 4.200
707	141.200, 4.178	141.200, 4.110	141.200, 3.960	141.200, 3.935	141.200, 3.844	141.200, 4.202
708	141.400, 4.180	141.400, 4.112	141.400, 3.962	141.400, 3.937	141.400, 3.847	141.400, 4.204
709	141.600, 4.181	141.600, 4.114	141.600, 3.964	141.600, 3.939	141.600, 3.850	141.600, 4.206
710	141.800, 4.182	141.800, 4.116	141.800, 3.967	141.800, 3.941	141.800, 3.852	141.800, 4.208
711	142.000, 4.183	142.000, 4.118	142.000, 3.969	142.000, 3.943	142.000, 3.855	142.000, 4.210
712	142.200, 4.184	142.200, 4.120	142.200, 3.971	142.200, 3.945	142.200, 3.858	142.200, 4.212
713	142.400, 4.186	142.400, 4.122	142.400, 3.973	142.400, 3.947	142.400, 3.861	142.400, 4.214
714	142.600, 4.187	142.600, 4.123	142.600, 3.975	142.600, 3.949	142.600, 3.863	142.600, 4.216
715	142.800, 4.188	142.800, 4.125	142.800, 3.978	142.800, 3.951	142.800, 3.866	142.800, 4.217
716	143.000, 4.189	143.000, 4.126	143.000, 3.980	143.000, 3.953	143.000, 3.869	143.000, 4.219
717	143.200, 4.190	143.200, 4.128	143.200, 3.982	143.200, 3.955	143.200, 3.872	143.200, 4.221
718	143.400, 4.192	143.400, 4.130	143.400, 3.984	143.400, 3.957	143.400, 3.875	143.400, 4.222
719	143.600, 4.193	143.600, 4.132	143.600, 3.986	143.600, 3.958	143.600, 3.878	143.600, 4.224
720	143.800, 4.194	143.800, 4.134	143.800, 3.987	143.800, 3.960	143.800, 3.881	143.800, 4.225
721	144.000, 4.195	144.000, 4.136	144.000, 3.989	144.000, 3.962	144.000, 3.883	144.000, 4.227
722	144.200, 4.196	144.200, 4.138	144.200, 3.991	144.200, 3.964	144.200, 3.886	144.200, 4.229
723	144.400, 4.197	144.400, 4.140	144.400, 3.993	144.400, 3.966	144.400, 3.888	144.400, 4.230
724	144.600, 4.198	144.600, 4.142	144.600, 3.995	144.600, 3.968	144.600, 3.891	144.600, 4.232
725	144.800, 4.198	144.800, 4.144	144.800, 3.997	144.800, 3.970	144.800, 3.893	144.800, 4.234
726	145.000, 4.199	145.000, 4.145	145.000, 3.999	145.000, 3.972	145.000, 3.896	145.000, 4.236
727	145.200, 4.200	145.200, 4.147	145.200, 4.001	145.200, 3.974	145.200, 3.898	145.200, 4.238
728	145.400, 4.200	145.400, 4.149	145.400, 4.003	145.400, 3.976	145.400, 3.900	145.400, 4.240
729	145.600, 4.201	145.600, 4.151	145.600, 4.004	145.600, 3.978	145.600, 3.903	145.600, 4.242
730	145.800, 4.202	145.800, 4.152	145.800, 4.006	145.800, 3.980	145.800, 3.905	145.800, 4.244
731	146.000, 4.203	146.000, 4.154	146.000, 4.008	146.000, 3.982	146.000, 3.908	146.000, 4.246
732	146.200, 4.204	146.200, 4.155	146.200, 4.010	146.200, 3.983	146.200, 3.910	146.200, 4.249
733	146.400, 4.204	146.400, 4.157	146.400, 4.012	146.400, 3.985	146.400, 3.912	146.400, 4.251
734	146.600, 4.206	146.600, 4.159	146.600, 4.014	146.600, 3.987	146.600, 3.914	146.600, 4.253
735	146.800, 4.207	146.800, 4.161	146.800, 4.015	146.800, 3.988	146.800, 3.916	146.800, 4.255
736	147.000, 4.208	147.000, 4.162	147.000, 4.017	147.000, 3.990	147.000, 3.919	147.000, 4.257
737	147.200, 4.210	147.200, 4.164	147.200, 4.019	147.200, 3.991	147.200, 3.921	147.200, 4.259
738	147.400, 4.212	147.400, 4.166	147.400, 4.020	147.400, 3.993	147.400, 3.923	147.400, 4.260
739	147.600, 4.214	147.600, 4.168	147.600, 4.022	147.600, 3.994	147.600, 3.926	147.600, 4.262
740	147.800, 4.215	147.800, 4.170	147.800, 4.024	147.800, 3.996	147.800, 3.929	147.800, 4.264
741	148.000, 4.216	148.000, 4.171	148.000, 4.026	148.000, 3.998	148.000, 3.932	148.000, 4.265
742	148.200, 4.218	148.200, 4.173	148.200, 4.028	148.200, 3.999	148.200, 3.934	148.200, 4.267
743	148.400, 4.219	148.400, 4.175	148.400, 4.030	148.400, 4.001	148.400, 3.937	148.400, 4.268
744	148.600, 4.220	148.600, 4.176	148.600, 4.032	148.600, 4.002	148.600, 3.940	148.600, 4.269
745	148.800, 4.221	148.800, 4.177	148.800, 4.034	148.800, 4.004	148.800, 3.942	148.800, 4.271
746	149.000, 4.221	149.000, 4.179	149.000, 4.035	149.000, 4.005	149.000, 3.944	149.000, 4.272
747	149.200, 4.222	149.200, 4.180	149.200, 4.037	149.200, 4.006	149.200, 3.947	149.200, 4.272
748	149.400, 4.222	149.400, 4.181	149.400, 4.038	149.400, 4.008	149.400, 3.948	149.400, 4.273
749	149.600, 4.222	149.600, 4.182	149.600, 4.039	149.600, 4.009	149.600, 3.950	149.600, 4.274
750	149.800, 4.222	149.800, 4.182	149.800, 4.040	149.800, 4.010	149.800, 3.952	149.800, 4.274
751	150.000, 4.222	150.000, 4.182	150.000, 4.040	150.000, 4.010	150.000, 3.952	150.000, 4.274
752	150.200, 4.223	150.200, 4.187	150.200, 4.041	150.200, 4.014	150.200, 3.951	150.200, 4.279
753	150.400, 4.225	150.400, 4.193	150.400, 4.042	150.400, 4.018	150.400, 3.951	150.400, 4.284
754	150.600, 4.226	150.600, 4.198	150.600, 4.043	150.600, 4.022	150.600, 3.951	150.600, 4.289
755	150.800, 4.227	150.800, 4.203	150.800, 4.044	150.800, 4.027	150.800, 3.951	150.800, 4.295
756	151.000, 4.229	151.000, 4.209	151.000, 4.046	151.000, 4.031	151.000, 3.952	151.000, 4.299
757	151.200, 4.230	151.200, 4.214	151.200, 4.047	151.200, 4.036	151.200, 3.952	151.200, 4.304
758	151.400, 4.231	151.400, 4.219	151.400, 4.049	151.400, 4.040	151.400, 3.953	151.400, 4.308
759	151.600, 4.232	151.600, 4.222	151.600, 4.050	151.600, 4.043	151.600, 3.954	151.600, 4.311
760	151.800, 4.233	151.800, 4.225	151.800, 4.051	151.800, 4.046	151.800, 3.955	151.800, 4.313
761	152.000, 4.234	152.000, 4.227	152.000, 4.052	152.000, 4.048	152.000, 3.957	152.000, 4.314
762	152.200, 4.236	152.200, 4.227	152.200, 4.053	152.200, 4.049	152.200, 3.958	152.200, 4.314
763	152.400, 4.237	152.400, 4.227	152.400, 4.054	152.400, 4.049	152.400, 3.960	152.400, 4.314
764	152.600, 4.238	152.600, 4.227	152.600, 4.054	152.600, 4.050	152.600, 3.961	152.600, 4.314
765	152.800, 4.240	152.800, 4.227	152.800, 4.056	152.800, 4.050	152.800, 3.963	152.800, 4.314
766	153.000, 4.241	153.000, 4.227	153.000, 4.056	153.000, 4.051	153.000, 3.964	153.000, 4.313
767	153.200, 4.242	153.200, 4.226	153.200, 4.057	153.200, 4.051	153.200, 3.965	153.200, 4.313
768	153.400, 4.242	153.400, 4.226	153.400, 4.058	153.400, 4.051	153.400, 3.966	153.400, 4.313
769	153.600, 4.243	153.600, 4.225	153.600, 4.059	153.600, 4.051	153.600, 3.967	153.600, 4.313
770	153.800, 4.244	153.800, 4.225	153.800, 4.060	153.800, 4.052	153.800, 3.968	153.800, 4.313
771	154.000, 4.245	154.000, 4.224	154.000, 4.061	154.000, 4.052	154.000, 3.969	154.000, 4.313
772	154.200, 4.246	154.200, 4.224	154.200, 4.062	154.200, 4.052	154.200, 3.969	154.200, 4.313
773	154.400, 4.247	154.400, 4.224	154.400, 4.063	154.400, 4.052	154.400, 3.970	154.400, 4.313
774	154.600, 4.248	154.600, 4.224	154.600, 4.064	154.600, 4.052	154.600, 3.971	154.600, 4.313
775	154.800, 4.249	154.800, 4.224	154.800, 4.065	154.800, 4.053	154.800, 3.971	154.800, 4.313
776	155.000, 4.249	155.000, 4.224	155.000, 4.066	155.000, 4.053	155.000, 3.972	155.000, 4.313
777	155.200, 4.250	155.200, 4.224	155.200, 4.067	155.200, 4.054	155.200, 3.972	155.200, 4.313
778	155.400, 4.251	155.400, 4.225	155.400, 4.068	155.400, 4.054	155.400, 3.973	155.400, 4.312
779	155.600, 4.252	155.600, 4.225	155.600, 4.069	155.600, 4.055	155.600, 3.973	155.600, 4.312
780	155.800, 4.253	155.800, 4.225	155.800, 4.069	155.800, 4.055	155.800, 3.974	155.800, 4.312
781	156.000, 4.254	156.000, 4.224	156.000, 4.070	156.000, 4.055	156.000, 3.974	156.000, 4.312
782	156.200, 4.255	156.200, 4.224	156.200, 4.071	156.200, 4.056	156.200, 3.975	156.200, 4.312
783	156.400, 4.256	156.400, 4.224	156.400, 4.071	156.400, 4.056	156.400, 3.975	156.400, 4.312
784	156.600, 4.257	156.600, 4.224	156.600, 4.072	156.600, 4.057	156.600, 3.976	156.600, 4.312
785	156.800, 4.258	156.800, 4.224	156.800, 4.073	156.800, 4.057	156.800, 3.977	156.800, 4.312
786	157.000, 4.259	157.000, 4.223	157.000, 4.073	157.000, 4.057	157.000, 3.977	157.000, 4.312
787	157.200, 4.260	157.200, 4.223	157.200, 4.074	157.200, 4.057	157.200, 3.978	157.200, 4.311
788	157.400, 4.260	157.400, 4.223	157.400, 4.074	157.400, 4.057	157.400, 3.979	157.400, 4.311
789	157.600, 4.261	157.600, 4.223	157.600, 4.075	157.600, 4.057	157.600, 3.980	157.600, 4.311
790	157.800, 4.262	157.800, 4.223	157.800, 4.076	157.800, 4.057	157.800, 3.981	157.800, 4.311
791	158.000, 4.262	158.000, 4.223	158.000, 4.076	158.000, 4.057	158.000, 3.982	158.000, 4.311
792	158.200, 4.263	158.200, 4.224	158.200, 4.077	158.200, 4.057	158.200, 3.982	158.200, 4.311
793	158.400, 4.264	158.400, 4.224	158.400, 4.078	158.400, 4.057	158.400, 3.983	158.400, 4.311
794	158.600, 4.265	158.600, 4.225	158.600, 4.078	158.600, 4.057	158.600, 3.984	158.600, 4.311
795	158.800, 4.266	158.800, 4.225	158.800, 4.079	158.800, 4.057	158.800, 3.984	158.800, 4.311
796	159.000, 4.267	159.000, 4.225	159.000, 4.079	159.000, 4.058	159.000, 3.985	159.000, 4.311
797	159.200, 4.268	159.200, 4.225	159.200, 4.080	159.200, 4.058	159.200, 3.986	159.200, 4.311
798	159.400, 4.269	159.400, 4.226	159.400, 4.081	159.400, 4.058	159.400, 3.986	159.400, 4.311
799	159.600, 4.270	159.600, 4.226	159.600, 4.081	159.600, 4.059	159.600, 3.987	159.600, 4.311
800	159.800, 4.270	159.800, 4.226	159.800, 4.082	159.800, 4.059	159.800, 3.988	159.800, 4.311
801	160.000, 4.271	160.000, 4.226	160.000, 4.083	160.000, 4.059	160.000, 3.989	160.000, 4.311
802	160.200, 4.272	160.200, 4.225	160.200, 4.083	160.200, 4.060	160.200, 3.989	160.200, 4.311
803	160.400, 4.272	160.400, 4.225	160.400, 4.084	160.400, 4.060	160.400, 3.990	160.400, 4.311
804	160.600, 4.273	160.600, 4.225	160.600, 4.084	160.600, 4.061	160.600, 3.991	160.600, 4.311
805	160.800, 4.274	160.800, 4.224	160.800, 4.085	160.800, 4.061	160.800, 3.992	160.800, 4.311
806	161.000, 4.275	161.000, 4.224	161.000, 4.085	161.000, 4.061	161.000, 3.993	161.000, 4.310
807	161.200, 4.275	161.200, 4.224	161.200, 4.086	161.200, 4.061	161.200, 3.993	161.200, 4.310
808	161.400, 4.276	161.400, 4.224	161.400, 4.086	161.400, 4.061	161.400, 3.994	161.400, 4.310
809	161.600, 4.277	161.600, 4.224	161.600, 4.087	161.600, 4.060	161.600, 3.994	161.600, 4.309
810	161.800, 4.278	161.800, 4.224	161.800, 4.087	161.800, 4.060	161.800, 3.995	161.800, 4.309
811	162.000, 4.278	162.000, 4.224	162.000, 4.088	162.000, 4.060	162.000, 3.995	162.000, 4.309
812	162.200, 4.279	162.200, 4.224	162.200, 4.088	162.200, 4.060	162.200, 3.996	162.200, 4.308
813	162.400, 4.280	162.400, 4.224	162.400, 4.089	162.400, 4.061	162.400, 3.996	162.400, 4.308
814	162.600, 4.281	162.600, 4.225	162.600, 4.090	162.600, 4.061	162.600, 3.996	162.600, 4.307
815	162.800, 4.283	162.800, 4.225	162.800, 4.091	162.800, 4.061	162.800, 3.997	162.800, 4.307
816	163.000, 4.283	163.000, 4.225	163.000, 4.092	163.000, 4.062	163.000, 3.997	163.000, 4.306
817	163.200, 4.284	163.200, 4.225	163.200, 4.093	163.200, 4.062	163.200, 3.997	163.200, 4.306
818	163.400, 4.285	163.400, 4.224	163.400, 4.093	163.400, 4.062	163.400, 3.998	163.400, 4.306
819	163.600, 4.285	163.600, 4.224	163.600, 4.094	163.600, 4.063	163.600, 3.998	163.600, 4.305
820	163.800, 4.286	163.800, 4.224	163.800, 4.095	163.800, 4.063	163.800, 3.999	163.800, 4.305
821	164.000, 4.286	164.000, 4.224	164.000, 4.095	164.000, 4.063	164.000, 3.999	164.000, 4.305
822	164.200, 4.287	164.200, 4.224	164.200, 4.096	164.200, 4.063	164.200, 4.000	164.200, 4.305
823	164.400, 4.288	164.400, 4.224	164.400, 4.097	164.400, 4.064	164.400, 4.000	164.400, 4.305
824	164.600, 4.289	164.600, 4.225	164.600, 4.097	164.600, 4.064	164.600, 4.001	164.600, 4.304
825	164.800, 4.290	164.800, 4.225	164.800, 4.098	164.800, 4.064	164.800, 4.001	164.800, 4.304
826	165.000, 4.290	165.000, 4.225	165.000, 4.098	165.000, 4.064	165.000, 4.002	165.000, 4.304
827	165.200, 4.291	165.200, 4.225	165.200, 4.099	165.200, 4.064	165.200, 4.003	165.200, 4.304
828	165.400, 4.292	165.400, 4.225	165.400, 4.099	165.400, 4.064	165.400, 4.003	165.400, 4.303
829	165.600, 4.293	165.600, 4.225	165.600, 4.100	165.600, 4.064	165.600, 4.004	165.600, 4.303
830	165.800, 4.294	165.800, 4.226	165.800, 4.101	165.800, 4.064	165.800, 4.005	165.800, 4.303
831	166.000, 4.296	166.000, 4.226	166.000, 4.101	166.000, 4.064	166.000, 4.006	166.000, 4.303
832	166.200, 4.297	166.200, 4.226	166.200, 4.102	166.200, 4.065	166.200, 4.007	166.200, 4.303
833	166.400, 4.298	166.400, 4.227	166.400, 4.103	166.400, 4.065	166.400, 4.007	166.400, 4.303
834	166.600, 4.299	166.600, 4.227	166.600, 4.103	166.600, 4.065	166.600, 4.008	166.600, 4.303
835	166.800, 4.300	166.800, 4.227	166.800, 4.104	166.800, 4.065	166.800, 4.009	166.800, 4.303
836	167.000, 4.301	167.000, 4.228	167.000, 4.105	167.000, 4.065	167.000, 4.009	167.000, 4.303
837	167.200, 4.301	167.200, 4.228	167.200, 4.105	167.200, 4.065	167.200, 4.010	167.200, 4.303
838	167.400, 4.302	167.400, 4.228	167.400, 4.106	167.400, 4.065	167.400, 4.010	167.400, 4.303
839	167.600, 4.303	167.600, 4.228	167.600, 4.107	167.600, 4.065	167.600, 4.011	167.600, 4.302
840	167.800, 4.303	167.800, 4.229	167.800, 4.107	167.800, 4.065	167.800, 4.011	167.800, 4.302
841	168.000, 4.304	168.000, 4.229	168.000, 4.108	168.000, 4.066	168.000, 4.012	168.000, 4.302
842	168.200, 4.304	168.200, 4.229	168.200, 4.109	168.200, 4.066	168.200, 4.012	168.200, 4.301
843	168.400, 4.304	168.400, 4.229	168.400, 4.109	168.400, 4.066	168.400, 4.013	168.400, 4.301
844	168.600, 4.305	168.600, 4.229	168.600, 4.110	168.600, 4.066	168.600, 4.013	168.600, 4.301
845	168.800, 4.305	168.800, 4.228	168.800, 4.110	168.800, 4.067	168.800, 4.014	168.800, 4.300
846	169.000, 4.306	169.000, 4.228	169.000, 4.111	169.000, 4.067	169.000, 4.014	169.000, 4.300
847	169.200, 4.306	169.200, 4.227	169.200, 4.111	169.200, 4.067	169.200, 4.015	169.200, 4.300
848	169.400, 4.307	169.400, 4.227	169.400, 4.112	169.400, 4.067	169.400, 4.015	169.400, 4.299
849	169.600, 4.308	169.600, 4.227	169.600, 4.112	169.600, 4.068	169.600, 4.016	169.600, 4.299
850	169.800, 4.308	169.800, 4.227	169.800, 4.113	169.800, 4.068	169.800, 4.016	169.800, 4.299
851	170.000, 4.309	170.000, 4.226	170.000, 4.113	170.000, 4.068	170.000, 4.017	170.000, 4.299
852	170.200, 4.310	170.200, 4.226	170.200, 4.114	170.200, 4.068	170.200, 4.017	170.200, 4.298
853	170.400, 4.311	170.400, 4.226	170.400, 4.114	170.400, 4.068	170.400, 4.018	170.400, 4.298
854	170.600, 4.311	170.600, 4.226	170.600, 4.115	170.600, 4.067	170.600, 4.018	170.600, 4.298
855	170.800, 4.312	170.800, 4.226	170.800, 4.115	170.800, 4.067	170.800, 4.019	170.800, 4.298
856	171.000, 4.312	171.000, 4.226	171.000, 4.116	171.000, 4.067	171.000, 4.019	171.000, 4.297
857	171.200, 4.313	171.200, 4.226	171.200, 4.117	171.200, 4.067	171.200, 4.020	171.200, 4.297
858	171.400, 4.313	171.400, 4.226	171.400, 4.118	171.400, 4.067	171.400, 4.020	171.400, 4.297
859	171.600, 4.314	171.600, 4.226	171.600, 4.119	171.600, 4.067	171.600, 4.021	171.600, 4.296
860	171.800, 4.314	171.800, 4.226	171.800, 4.120	171.800, 4.067	171.800, 4.022	171.800, 4.296
861	172.000, 4.315	172.000, 4.226	172.000, 4.121	172.000, 4.067	172.000, 4.022	172.000, 4.295
862	172.200, 4.315	172.200, 4.225	172.200, 4.121	172.200, 4.068	172.200, 4.023	172.200, 4.295
863	172.400, 4.315	172.400, 4.225	172.400, 4.122	172.400, 4.068	172.400, 4.023	172.400, 4.295
864	172.600, 4.316	172.600, 4.225	172.600, 4.122	172.600, 4.068	172.600, 4.024	172.600, 4.294
865	172.800, 4.316	172.800, 4.225	172.800, 4.122	172.800, 4.068	172.800, 4.024	172.800, 4.294
866	173.000, 4.317	173.000, 4.225	173.000, 4.122	173.000, 4.068	173.000, 4.025	173.000, 4.293
867	173.200, 4.318	173.200, 4.225	173.200, 4.123	173.200, 4.068	173.200, 4.025	173.200, 4.293
868	173.400, 4.318	173.400, 4.225	173.400, 4.123	173.400, 4.069	173.400, 4.026	173.400, 4.292
869	173.600, 4.318	173.600, 4.226	173.600, 4.123	173.600, 4.069	173.600, 4.027	173.600, 4.292
870	173.800, 4.319	173.800, 4.226	173.800, 4.124	173.800, 4.069	173.800, 4.027	173.800, 4.292
871	174.000, 4.320	174.000, 4.226	174.000, 4.124	174.000, 4.069	174.000, 4.028	174.000, 4.291
872	174.200, 4.321	174.200, 4.226	174.200, 4.125	174.200, 4.069	174.200, 4.029	174.200, 4.291
873	174.400, 4.321	174.400, 4.225	174.400, 4.125	174.400, 4.069	174.400, 4.029	174.400, 4.290
874	174.600, 4.322	174.600, 4.225	174.600, 4.126	174.600, 4.069	174.600, 4.030	174.600, 4.290
875	174.800, 4.323	174.800, 4.225	174.800, 4.127	174.800, 4.069	174.800, 4.031	174.800, 4.289
876	175.000, 4.324	175.000, 4.224	175.000, 4.128	175.000, 4.068	175.000, 4.031	175.000, 4.289
877	175.200, 4.324	175.200, 4.224	175.200, 4.128	175.200, 4.068	175.200, 4.032	175.200, 4.288
878	175.400, 4.325	175.400, 4.223	175.400, 4.129	175.400, 4.068	175.400, 4.033	175.400, 4.288
879	175.600, 4.326	175.600, 4.223	175.600, 4.130	175.600, 4.068	175.600, 4.034	175.600, 4.288
880	175.800, 4.327	175.800, 4.222	175.800, 4.130	175.800, 4.068	175.800, 4.034	175.800, 4.287
881	176.000, 4.328	176.000, 4.222	176.000, 4.131	176.000, 4.068	176.000, 4.035	176.000, 4.287
882	176.200, 4.328	176.200, 4.222	176.200, 4.132	176.200, 4.068	176.200, 4.035	176.200, 4.287
883	176.400, 4.329	176.400, 4.222	176.400, 4.132	176.400, 4.067	176.400, 4.036	176.400, 4.287
884	176.600, 4.329	176.600, 4.222	176.600, 4.132	176.600, 4.067	176.600, 4.036	176.600, 4.287
885	176.800, 4.330	176.800, 4.222	176.800, 4.133	176.800, 4.067	176.800, 4.036	176.800, 4.286
886	177.000, 4.330	177.000, 4.222	177.000, 4.133	177.000, 4.067	177.000, 4.037	177.000, 4.286
887	177.200, 4.330	177.200, 4.222	177.200, 4.133	177.200, 4.067	177.200, 4.037	177.200, 4.286
888	177.400, 4.330	177.400, 4.222	177.400, 4.133	177.400, 4.067	177.400, 4.037	177.400, 4.286
889	177.600, 4.330	177.600, 4.222	177.600, 4.134	177.600, 4.067	177.600, 4.038	177.600, 4.286
890	177.800, 4.330	177.800, 4.222	177.800, 4.134	177.800, 4.067	177.800, 4.038	177.800, 4.286
891	178.000, 4.331	178.000, 4.222	178.000, 4.135	178.000, 4.067	178.000, 4.039	178.000, 4.285
892	178.200, 4.331	178.200, 4.221	178.200, 4.135	178.200, 4.067	178.200, 4.039	178.200, 4.285
893	178.400, 4.332	178.400, 4.221	178.400, 4.136	178.400, 4.067	178.400, 4.039	178.400, 4.284
894	178.600, 4.333	178.600, 4.221	178.600, 4.137	178.600, 4.067	178.600, 4.040	178.600, 4.284
895	178.800, 4.333	178.800, 4.220	178.800, 4.137	178.800, 4.067	178.800, 4.040	178.800, 4.283
896	179.000, 4.334	179.000, 4.220	179.000, 4.138	179.000, 4.067	179.000, 4.041	179.000, 4.283
897	179.200, 4.335	179.200, 4.220	179.200, 4.139	179.200, 4.067	179.200, 4.042	179.200, 4.282
898	179.400, 4.336	179.400, 4.220	179.400, 4.140	179.400, 4.067	179.400, 4.042	179.400, 4.282
899	179.600, 4.337	179.600, 4.220	179.600, 4.141	179.600, 4.067	179.600, 4.043	179.600, 4.281
900	179.800, 4.338	179.800, 4.220	179.800, 4.141	179.800, 4.067	179.800, 4.044	179.800, 4.281
901	180.000, 4.339	180.000, 4.221	180.000, 4.142	180.000, 4.067	180.000, 4.045	180.000, 4.280
902	180.200, 4.339	180.200, 4.221	180.200, 4.143	180.200, 4.067	180.200, 4.046	180.200, 4.280
903	180.400, 4.340	180.400, 4.221	180.400, 4.143	180.400, 4.067	180.400, 4.047	180.400, 4.279
904	180.600, 4.340	180.600, 4.221	180.600, 4.144	180.600, 4.067	180.600, 4.047	180.600, 4.279
905	180.800, 4.340	180.800, 4.221	180.800, 4.144	180.800, 4.067	180.800, 4.048	180.800, 4.278
906	181.000, 4.341	181.000, 4.220	181.000, 4.144	181.000, 4.067	181.000, 4.049	181.000, 4.277
907	181.200, 4.341	181.200, 4.220	181.200, 4.145	181.200, 4.067	181.200, 4.049	181.200, 4.277
908	181.400, 4.341	181.400, 4.220	181.400, 4.145	181.400, 4.066	181.400, 4.050	181.400, 4.276
909	181.600, 4.342	181.600, 4.219	181.600, 4.145	181.600, 4.066	181.600, 4.050	181.600, 4.276
910	181.800, 4.342	181.800, 4.219	181.800, 4.146	181.800, 4.066	181.800, 4.051	181.800, 4.275
911	182.000, 4.343	182.000, 4.218	182.000, 4.146	182.000, 4.066	182.000, 4.051	182.000, 4.274
912	182.200, 4.343	182.200, 4.218	182.200, 4.146	182.200, 4.065	182.200, 4.052	182.200, 4.273
913	182.400, 4.343	182.400, 4.217	182.400, 4.147	182.400, 4.065	182.400, 4.052	182.400, 4.272
914	182.600, 4.344	182.600, 4.216	182.600, 4.147	182.600, 4.065	182.600, 4.052	182.600, 4.271
915	182.800, 4.344	182.800, 4.216	182.800, 4.148	182.800, 4.065	182.800, 4.053	182.800, 4.271
916	183.000, 4.345	183.000, 4.216	183.000, 4.148	183.000, 4.064	183.000, 4.053	183.000, 4.271
917	183.200, 4.345	183.200, 4.216	183.200, 4.149	183.200, 4.064	183.200, 4.054	183.200, 4.270
918	183.400, 4.346	183.400, 4.215	183.400, 4.150	183.400, 4.064	183.400, 4.055	183.400, 4.270
919	183.600, 4.346	183.600, 4.215	183.600, 4.150	183.600, 4.064	183.600, 4.055	183.600, 4.270
920	183.800, 4.347	183.800, 4.215	183.800, 4.151	183.800, 4.064	183.800, 4.056	183.800, 4.269
921	184.000, 4.347	184.000, 4.214	184.000, 4.152	184.000, 4.064	184.000, 4.057	184.000, 4.269
922	184.200, 4.347	184.200, 4.214	184.200, 4.152	184.200, 4.064	184.200, 4.057	184.200, 4.268
923	184.400, 4.347	184.400, 4.214	184.400, 4.152	184.400, 4.064	184.400, 4.058	184.400, 4.268
924	184.600, 4.348	184.600, 4.213	184.600, 4.152	184.600, 4.064	184.600, 4.058	184.600, 4.267
925	184.800, 4.348	184.800, 4.213	184.800, 4.153	184.800, 4.064	184.800, 4.059	184.800, 4.267
926	185.000, 4.348	185.000, 4.213	185.000, 4.153	185.000, 4.064	185.000, 4.059	185.000, 4.267
927	185.200, 4.349	185.200, 4.213	185.200, 4.153	185.200, 4.064	185.200, 4.060	185.200, 4.266
928	185.400, 4.350	185.400, 4.213	185.400, 4.154	185.400, 4.064	185.400, 4.060	185.400, 4.266
929	185.600, 4.350	185.600, 4.213	185.600, 4.154	185.600, 4.065	185.600, 4.060	185.600, 4.265
930	185.800, 4.351	185.800, 4.212	185.800, 4.155	185.800, 4.065	185.800, 4.061	185.800, 4.264
931	186.000, 4.351	186.000, 4.212	186.000, 4.155	186.000, 4.065	186.000, 4.061	186.000, 4.263
932	186.200, 4.352	186.200, 4.212	186.200, 4.156	186.200, 4.065	186.200, 4.062	186.200, 4.263
933	186.400, 4.352	186.400, 4.211	186.400, 4.156	186.400, 4.065	186.400, 4.063	186.400, 4.262
934	186.600, 4.352	186.600, 4.211	186.600, 4.157	186.600, 4.065	186.600, 4.064	186.600, 4.261
935	186.800, 4.353	186.800, 4.211	186.800, 4.158	186.800, 4.065	186.800, 4.064	186.800, 4.260
936	187.000, 4.353	187.000, 4.210	187.000, 4.158	187.000, 4.065	187.000, 4.065	187.000, 4.259
937	187.200, 4.353	187.200, 4.210	187.200, 4.159	187.200, 4.065	187.200, 4.065	187.200, 4.259
938	187.400, 4.353	187.400, 4.209	187.400, 4.160	187.400, 4.064	187.400, 4.065	187.400, 4.258
939	187.600, 4.354	187.600, 4.209	187.600, 4.160	187.600, 4.064	187.600, 4.066	187.600, 4.257
940	187.800, 4.354	187.800, 4.208	187.800, 4.161	187.800, 4.064	187.800, 4.066	187.800, 4.256
941	188.000, 4.355	188.000, 4.207	188.000, 4.161	188.000, 4.063	188.000, 4.066	188.000, 4.255
942	188.200, 4.355	188.200, 4.206	188.200, 4.162	188.200, 4.063	188.200, 4.067	188.200, 4.255
943	188.400, 4.356	188.400, 4.206	188.400, 4.162	188.400, 4.062	188.400, 4.067	188.400, 4.254
944	188.600, 4.357	188.600, 4.205	188.600, 4.162	188.600, 4.062	188.600, 4.068	188.600, 4.254
945	188.800, 4.358	188.800, 4.205	188.800, 4.163	188.800, 4.061	188.800, 4.068	188.800, 4.253
946	189.000, 4.359	189.000, 4.204	189.000, 4.163	189.000, 4.061	189.000, 4.068	189.000, 4.253
947	189.200, 4.359	189.200, 4.204	189.200, 4.164	189.200, 4.060	189.200, 4.069	189.200, 4.252
948	189.400, 4.360	189.400, 4.204	189.400, 4.164	189.400, 4.060	189.400, 4.069	189.400, 4.252
949	189.600, 4.361	189.600, 4.204	189.600, 4.165	189.600, 4.060	189.600, 4.070	189.600, 4.251
950	189.800, 4.361	189.800, 4.203	189.800, 4.165	189.800, 4.060	189.800, 4.070	189.800, 4.251
951	190.000, 4.362	190.000, 4.203	190.000, 4.166	190.000, 4.060	190.000, 4.071	190.000, 4.250
952	190.200, 4.362	190.200, 4.203	190.200, 4.166	190.200, 4.060	190.200, 4.072	190.200, 4.250
953	190.400, 4.362	190.400, 4.203	190.400, 4.167	190.400, 4.060	190.400, 4.072	190.400, 4.249
954	190.600, 4.363	190.600, 4.202	190.600, 4.168	190.600, 4.060	190.600, 4.073	190.600, 4.249
955	190.800, 4.363	190.800, 4.202	190.800, 4.168	190.800, 4.060	190.800, 4.073	190.800, 4.248
956	191.000, 4.363	191.000, 4.202	191.000, 4.169	191.000, 4.060	191.000, 4.074	191.000, 4.247
957	191.200, 4.363	191.200, 4.202	191.200, 4.169	191.200, 4.060	191.200, 4.074	191.200, 4.246
958	191.400, 4.363	191.400, 4.201	191.400, 4.170	191.400, 4.060	191.400, 4.075	191.400, 4.246
959	191.600, 4.364	191.600, 4.201	191.600, 4.170	191.600, 4.060	191.600, 4.075	191.600, 4.245
960	191.800, 4.364	191.800, 4.200	191.800, 4.170	191.800, 4.060	191.800, 4.076	191.800, 4.244
961	192.000, 4.365	192.000, 4.200	192.000, 4.171	192.000, 4.060	192.000, 4.076	192.000, 4.244
962	192.200, 4.365	192.200, 4.199	192.200, 4.171	192.200, 4.059	192.200, 4.076	192.200, 4.243
963	192.400, 4.365	192.400, 4.198	192.400, 4.172	192.400, 4.058	192.400, 4.077	192.400, 4.242
964	192.600, 4.366	192.600, 4.198	192.600, 4.172	192.600, 4.058	192.600, 4.077	192.600, 4.242
965	192.800, 4.366	192.800, 4.198	192.800, 4.173	192.800, 4.057	192.800, 4.078	192.800, 4.241
966	193.000, 4.367	193.000, 4.197	193.000, 4.173	193.000, 4.057	193.000, 4.078	193.000, 4.241
967	193.200, 4.367	193.200, 4.197	193.200, 4.174	193.200, 4.056	193.200, 4.079	193.200, 4.240
968	193.400, 4.368	193.400, 4.197	193.400, 4.174	193.400, 4.056	193.400, 4.079	193.400, 4.239
969	193.600, 4.368	193.600, 4.196	193.600, 4.174	193.600, 4.056	193.600, 4.080	193.600, 4.239
970	193.800, 4.369	193.800, 4.196	193.800, 4.174	193.800, 4.056	193.800, 4.080	193.800, 4.238
971	194.000, 4.370	194.000, 4.195	194.000, 4.175	194.000, 4.055	194.000, 4.081	194.000, 4.237
972	194.200, 4.370	194.200, 4.194	194.200, 4.175	194.200, 4.055	194.200, 4.081	194.200, 4.236
973	194.400, 4.371	194.400, 4.194	194.400, 4.176	194.400, 4.055	194.400, 4.082	194.400, 4.235
974	194.600, 4.371	194.600, 4.193	194.600, 4.176	194.600, 4.055	194.600, 4.082	194.600, 4.234
975	194.800, 4.372	194.800, 4.192	194.800, 4.177	194.800, 4.054	194.800, 4.083	194.800, 4.234
976	195.000, 4.372	195.000, 4.191	195.000, 4.177	195.000, 4.054	195.000, 4.084	195.000, 4.233
977	195.200, 4.372	195.200, 4.190	195.200, 4.177	195.200, 4.054	195.200, 4.084	195.200, 4.233
978	195.400, 4.373	195.400, 4.190	195.400, 4.178	195.400, 4.054	195.400, 4.085	195.400, 4.232
979	195.600, 4.373	195.600, 4.189	195.600, 4.178	195.600, 4.053	195.600, 4.085	195.600, 4.231
980	195.800, 4.373	195.800, 4.188	195.800, 4.179	195.800, 4.053	195.800, 4.086	195.800, 4.231
981	196.000, 4.373	196.000, 4.187	196.000, 4.179	196.000, 4.053	196.000, 4.086	196.000, 4.231
982	196.200, 4.373	196.200, 4.187	196.200, 4.180	196.200, 4.053	196.200, 4.087	196.200, 4.230
983	196.400, 4.373	196.400, 4.187	196.400, 4.180	196.400, 4.052	196.400, 4.087	196.400, 4.230
984	196.600, 4.373	196.600, 4.187	196.600, 4.181	196.600, 4.052	196.600, 4.088	196.600, 4.229
985	196.800, 4.374	196.800, 4.186	196.800, 4.181	196.800, 4.052	196.800, 4.088	196.800, 4.228
986	197.000, 4.374	197.000, 4.186	197.000, 4.181	197.000, 4.052	197.000, 4.088	197.000, 4.227
987	197.200, 4.374	197.200, 4.185	197.200, 4.182	197.200, 4.051	197.200, 4.089	197.200, 4.226
988	197.400, 4.374	197.400, 4.185	197.400, 4.182	197.400, 4.051	197.400, 4.089	197.400, 4.225
989	197.600, 4.375	197.600, 4.184	197.600, 4.182	197.600, 4.050	197.600, 4.089	197.600, 4.224
990	197.800, 4.375	197.800, 4.183	197.800, 4.182	197.800, 4.050	197.800, 4.090	197.800, 4.223
991	198.000, 4.375	198.000, 4.183	198.000, 4.183	198.000, 4.049	198.000, 4.090	198.000, 4.222
992	198.200, 4.376	198.200, 4.182	198.200, 4.183	198.200, 4.049	198.200, 4.091	198.200, 4.221
993	198.400, 4.376	198.400, 4.181	198.400, 4.183	198.400, 4.048	198.400, 4.091	198.400, 4.220
994	198.600, 4.376	198.600, 4.180	198.600, 4.184	198.600, 4.047	198.600, 4.092	198.600, 4.219
995	198.800, 4.377	198.800, 4.179	198.800, 4.184	198.800, 4.047	198.800, 4.093	198.800, 4.219
996	199.000, 4.377	199.000, 4.178	199.000, 4.185	199.000, 4.047	199.000, 4.094	199.000, 4.218
997	199.200, 4.377	199.200, 4.178	199.200, 4.186	199.200, 4.046	199.200, 4.095	199.200, 4.217
998	199.400, 4.378	199.400, 4.177	199.400, 4.187	199.400, 4.046	199.400, 4.095	199.400, 4.217
999	199.600, 4.378	199.600, 4.177	199.600, 4.187	199.600, 4.047	199.600, 4.096	199.600, 4.216
1000	199.800, 4.378	199.800, 4.176	199.800, 4.188	199.800, 4.047	199.800, 4.096	199.800, 4.215
1001	200.000, 4.378	200.000, 4.176	200.000, 4.188	200.000, 4.047	200.000, 4.097	200.000, 4.214
1002	200.200, 4.378	200.200, 4.175	200.200, 4.189	200.200, 4.046	200.200, 4.097	200.200, 4.213
1003	200.400, 4.379	200.400, 4.175	200.400, 4.189	200.400, 4.046	200.400, 4.098	200.400, 4.212
1004	200.600, 4.380	200.600, 4.174	200.600, 4.189	200.600, 4.046	200.600, 4.098	200.600, 4.211
1005	200.800, 4.380	200.800, 4.173	200.800, 4.190	200.800, 4.045	200.800, 4.099	200.800, 4.210
1006	201.000, 4.381	201.000, 4.172	201.000, 4.191	201.000, 4.045	201.000, 4.099	201.000, 4.209
1007	201.200, 4.382	201.200, 4.172	201.200, 4.191	201.200, 4.045	201.200, 4.099	201.200, 4.208
1008	201.400, 4.382	201.400, 4.171	201.400, 4.191	201.400, 4.045	201.400, 4.100	201.400, 4.207
1009	201.600, 4.383	201.600, 4.170	201.600, 4.192	201.600, 4.045	201.600, 4.100	201.600, 4.206
1010	201.800, 4.383	201.800, 4.170	201.800, 4.192	201.800, 4.044	201.800, 4.101	201.800, 4.205
1011	202.000, 4.384	202.000, 4.169	202.000, 4.192	202.000, 4.044	202.000, 4.101	202.000, 4.205
1012	202.200, 4.385	202.200, 4.169	202.200, 4.193	202.200, 4.043	202.200, 4.102	202.200, 4.204
1013	202.400, 4.385	202.400, 4.168	202.400, 4.193	202.400, 4.042	202.400, 4.103	202.400, 4.203
1014	202.600, 4.386	202.600, 4.168	202.600, 4.193	202.600, 4.042	202.600, 4.103	202.600, 4.203
1015	202.800, 4.386	202.800, 4.167	202.800, 4.194	202.800, 4.041	202.800, 4.104	202.800, 4.202
1016	203.000, 4.386	203.000, 4.167	203.000, 4.194	203.000, 4.041	203.000, 4.104	203.000, 4.202
1017	203.200, 4.386	203.200, 4.166	203.200, 4.194	203.200, 4.041	203.200, 4.104	203.200, 4.201
1018	203.400, 4.387	203.400, 4.165	203.400, 4.195	203.400, 4.041	203.400, 4.105	203.400, 4.200
1019	203.600, 4.387	203.600, 4.165	203.600, 4.195	203.600, 4.040	203.600, 4.105	203.600, 4.199
1020	203.800, 4.387	203.800, 4.164	203.800, 4.195	203.800, 4.040	203.800, 4.105	203.800, 4.199
1021	204.000, 4.388	204.000, 4.163	204.000, 4.195	204.000, 4.039	204.000, 4.105	204.000, 4.198
1022	204.200, 4.388	204.200, 4.162	204.200, 4.196	204.200, 4.039	204.200, 4.106	204.200, 4.197
1023	204.400, 4.389	204.400, 4.161	204.400, 4.196	204.400, 4.038	204.400, 4.106	204.400, 4.196
1024	204.600, 4.389	204.600, 4.160	204.600, 4.197	204.600, 4.038	204.600, 4.106	204.600, 4.195
1025	204.800, 4.389	204.800, 4.159	204.800, 4.197	204.800, 4.038	204.800, 4.106	204.800, 4.193
1026	205.000, 4.389	205.000, 4.158	205.000, 4.198	205.000, 4.037	205.000, 4.107	205.000, 4.192
1027	205.200, 4.389	205.200, 4.157	205.200, 4.199	205.200, 4.037	205.200, 4.107	205.200, 4.191
1028	205.400, 4.390	205.400, 4.157	205.400, 4.199	205.400, 4.036	205.400, 4.108	205.400, 4.190
1029	205.600, 4.390	205.600, 4.156	205.600, 4.199	205.600, 4.036	205.600, 4.108	205.600, 4.188
1030	205.800, 4.390	205.800, 4.155	205.800, 4.200	205.800, 4.035	205.800, 4.109	205.800, 4.187
1031	206.000, 4.390	206.000, 4.155	206.000, 4.200	206.000, 4.035	206.000, 4.109	206.000, 4.186
1032	206.200, 4.390	206.200, 4.154	206.200, 4.200	206.200, 4.034	206.200, 4.110	206.200, 4.185
1033	206.400, 4.390	206.400, 4.154	206.400, 4.200	206.400, 4.034	206.400, 4.110	206.400, 4.184
1034	206.600, 4.390	206.600, 4.154	206.600, 4.201	206.600, 4.033	206.600, 4.111	206.600, 4.183
1035	206.800, 4.391	206.800, 4.154	206.800, 4.201	206.800, 4.033	206.800, 4.111	206.800, 4.182
1036	207.000, 4.391	207.000, 4.153	207.000, 4.201	207.000, 4.032	207.000, 4.112	207.000, 4.181
1037	207.200, 4.391	207.200, 4.153	207.200, 4.202	207.200, 4.032	207.200, 4.112	207.200, 4.180
1038	207.400, 4.392	207.400, 4.152	207.400, 4.202	207.400, 4.031	207.400, 4.113	207.400, 4.179
1039	207.600, 4.392	207.600, 4.152	207.600, 4.202	207.600, 4.031	207.600, 4.113	207.600, 4.178
1040	207.800, 4.393	207.800, 4.151	207.800, 4.203	207.800, 4.031	207.800, 4.113	207.800, 4.178
1041	208.000, 4.393	208.000, 4.150	208.000, 4.203	208.000, 4.030	208.000, 4.114	208.000, 4.177
1042	208.200, 4.393	208.200, 4.150	208.200, 4.204	208.200, 4.030	208.200, 4.114	208.200, 4.176
1043	208.400, 4.394	208.400, 4.149	208.400, 4.204	208.400, 4.030	208.400, 4.115	208.400, 4.175
1044	208.600, 4.394	208.600, 4.148	208.600, 4.205	208.600, 4.029	208.600, 4.115	208.600, 4.174
1045	208.800, 4.395	208.800, 4.147	208.800, 4.205	208.800, 4.029	208.800, 4.116	208.800, 4.173
1046	209.000, 4.395	209.000, 4.146	209.000, 4.205	209.000, 4.028	209.000, 4.117	209.000, 4.172
1047	209.200, 4.396	209.200, 4.146	209.200, 4.205	209.200, 4.028	209.200, 4.117	209.200, 4.171
1048	209.400, 4.396	209.400, 4.145	209.400, 4.206	209.400, 4.028	209.400, 4.118	209.400, 4.169
1049	209.600, 4.397	209.600, 4.144	209.600, 4.206	209.600, 4.028	209.600, 4.119	209.600, 4.168
1050	209.800, 4.397	209.800, 4.144	209.800, 4.206	209.800, 4.028	209.800, 4.120	209.800, 4.167
1051	210.000, 4.398	210.000, 4.143	210.000, 4.206	210.000, 4.027	210.000, 4.121	210.000, 4.166
1052	210.200, 4.398	210.200, 4.143	210.200, 4.207	210.200, 4.027	210.200, 4.122	210.200, 4.165
1053	210.400, 4.398	210.400, 4.142	210.400, 4.207	210.400, 4.026	210.400, 4.122	210.400, 4.164
1054	210.600, 4.398	210.600, 4.141	210.600, 4.207	210.600, 4.026	210.600, 4.123	210.600, 4.163
1055	210.800, 4.398	210.800, 4.140	210.800, 4.207	210.800, 4.025	210.800, 4.123	210.800, 4.162
1056	211.000, 4.398	211.000, 4.139	211.000, 4.207	211.000, 4.025	211.000, 4.124	211.000, 4.162
1057	211.200, 4.398	211.200, 4.138	211.200, 4.208	211.200, 4.024	211.200, 4.124	211.200, 4.161
1058	211.400, 4.398	211.400, 4.137	211.400, 4.208	211.400, 4.024	211.400, 4.124	211.400, 4.160
1059	211.600, 4.399	211.600, 4.136	211.600, 4.209	211.600, 4.024	211.600, 4.124	211.600, 4.160
1060	211.800, 4.398	211.800, 4.135	211.800, 4.209	211.800, 4.023	211.800, 4.125	211.800, 4.159
1061	212.000, 4.398	212.000, 4.134	212.000, 4.209	212.000, 4.022	212.000, 4.125	212.000, 4.159
1062	212.200, 4.399	212.200, 4.132	212.200, 4.210	212.200, 4.021	212.200, 4.124	212.200, 4.158
1063	212.400, 4.399	212.400, 4.131	212.400, 4.211	212.400, 4.021	212.400, 4.125	212.400, 4.157
1064	212.600, 4.399	212.600, 4.130	212.600, 4.211	212.600, 4.020	212.600, 4.125	212.600, 4.156
1065	212.800, 4.400	212.800, 4.129	212.800, 4.212	212.800, 4.019	212.800, 4.125	212.800, 4.155
1066	213.000, 4.400	213.000, 4.129	213.000, 4.212	213.000, 4.018	213.000, 4.125	213.000, 4.154
1067	213.200, 4.400	213.200, 4.128	213.200, 4.213	213.200, 4.018	213.200, 4.125	213.200, 4.152
1068	213.400, 4.401	213.400, 4.127	213.400, 4.214	213.400, 4.017	213.400, 4.125	213.400, 4.151
1069	213.600, 4.401	213.600, 4.127	213.600, 4.214	213.600, 4.017	213.600, 4.126	213.600, 4.150
1070	213.800, 4.401	213.800, 4.126	213.800, 4.214	213.800, 4.016	213.800, 4.126	213.800, 4.149
1071	214.000, 4.401	214.000, 4.126	214.000, 4.215	214.000, 4.015	214.000, 4.127	214.000, 4.148
1072	214.200, 4.401	214.200, 4.125	214.200, 4.215	214.200, 4.015	214.200, 4.128	214.200, 4.147
1073	214.400, 4.401	214.400, 4.124	214.400, 4.215	214.400, 4.014	214.400, 4.129	214.400, 4.146
1074	214.600, 4.402	214.600, 4.123	214.600, 4.216	214.600, 4.014	214.600, 4.130	214.600, 4.145
1075	214.800, 4.402	214.800, 4.122	214.800, 4.216	214.800, 4.014	214.800, 4.131	214.800, 4.143
1076	215.000, 4.402	215.000, 4.122	215.000, 4.217	215.000, 4.014	215.000, 4.132	215.000, 4.142
1077	215.200, 4.403	215.200, 4.121	215.200, 4.217	215.200, 4.014	215.200, 4.132	215.200, 4.141
1078	215.400, 4.403	215.400, 4.120	215.400, 4.217	215.400, 4.014	215.400, 4.133	215.400, 4.140
1079	215.600, 4.403	215.600, 4.119	215.600, 4.217	215.600, 4.013	215.600, 4.133	215.600, 4.138
1080	215.800, 4.403	215.800, 4.118	215.800, 4.218	215.800, 4.013	215.800, 4.134	215.800, 4.137
1081	216.000, 4.403	216.000, 4.117	216.000, 4.218	216.000, 4.012	216.000, 4.134	216.000, 4.136
1082	216.200, 4.404	216.200, 4.116	216.200, 4.218	216.200, 4.011	216.200, 4.135	216.200, 4.135
1083	216.400, 4.404	216.400, 4.114	216.400, 4.219	216.400, 4.011	216.400, 4.135	216.400, 4.134
1084	216.600, 4.404	216.600, 4.113	216.600, 4.219	216.600, 4.010	216.600, 4.135	216.600, 4.133
1085	216.800, 4.405	216.800, 4.112	216.800, 4.219	216.800, 4.010	216.800, 4.135	216.800, 4.132
1086	217.000, 4.405	217.000, 4.111	217.000, 4.220	217.000, 4.010	217.000, 4.136	217.000, 4.131
1087	217.200, 4.405	217.200, 4.111	217.200, 4.220	217.200, 4.009	217.200, 4.136	217.200, 4.130
1088	217.400, 4.406	217.400, 4.110	217.400, 4.220	217.400, 4.009	217.400, 4.136	217.400, 4.129
1089	217.600, 4.406	217.600, 4.110	217.600, 4.220	217.600, 4.008	217.600, 4.137	217.600, 4.128
1090	217.800, 4.407	217.800, 4.109	217.800, 4.220	217.800, 4.008	217.800, 4.138	217.800, 4.127
1091	218.000, 4.407	218.000, 4.109	218.000, 4.221	218.000, 4.007	218.000, 4.138	218.000, 4.126
1092	218.200, 4.408	218.200, 4.108	218.200, 4.221	218.200, 4.007	218.200, 4.139	218.200, 4.125
1093	218.400, 4.408	218.400, 4.107	218.400, 4.222	218.400, 4.006	218.400, 4.139	218.400, 4.123
1094	218.600, 4.408	218.600, 4.107	218.600, 4.222	218.600, 4.005	218.600, 4.139	218.600, 4.122
1095	218.800, 4.409	218.800, 4.106	218.800, 4.223	218.800, 4.005	218.800, 4.140	218.800, 4.120
1096	219.000, 4.409	219.000, 4.105	219.000, 4.223	219.000, 4.004	219.000, 4.139	219.000, 4.119
1097	219.200, 4.409	219.200, 4.104	219.200, 4.223	219.200, 4.004	219.200, 4.140	219.200, 4.118
1098	219.400, 4.409	219.400, 4.103	219.400, 4.224	219.400, 4.003	219.400, 4.140	219.400, 4.116
1099	219.600, 4.409	219.600, 4.102	219.600, 4.224	219.600, 4.003	219.600, 4.140	219.600, 4.115
1100	219.800, 4.410	219.800, 4.101	219.800, 4.224	219.800, 4.002	219.800, 4.140	219.800, 4.114
1101	220.000, 4.410	220.000, 4.100	220.000, 4.224	220.000, 4.002	220.000, 4.141	220.000, 4.113
1102	220.200, 4.410	220.200, 4.098	220.200, 4.225	220.200, 4.002	220.200, 4.141	220.200, 4.113
1103	220.400, 4.410	220.400, 4.097	220.400, 4.225	220.400, 4.001	220.400, 4.141	220.400, 4.112
1104	220.600, 4.410	220.600, 4.095	220.600, 4.225	220.600, 4.001	220.600, 4.142	220.600, 4.111
1105	220.800, 4.411	220.800, 4.094	220.800, 4.226	220.800, 4.001	220.800, 4.142	220.800, 4.110
1106	221.000, 4.411	221.000, 4.093	221.000, 4.226	221.000, 4.000	221.000, 4.142	221.000, 4.109
1107	221.200, 4.411	221.200, 4.092	221.200, 4.226	221.200, 3.999	221.200, 4.143	221.200, 4.108
1108	221.400, 4.412	221.400, 4.091	221.400, 4.226	221.400, 3.998	221.400, 4.144	221.400, 4.106
1109	221.600, 4.412	221.600, 4.090	221.600, 4.227	221.600, 3.998	221.600, 4.144	221.600, 4.105
1110	221.800, 4.413	221.800, 4.089	221.800, 4.227	221.800, 3.997	221.800, 4.145	221.800, 4.104
1111	222.000, 4.413	222.000, 4.088	222.000, 4.227	222.000, 3.996	222.000, 4.146	222.000, 4.102
1112	222.200, 4.413	222.200, 4.087	222.200, 4.228	222.200, 3.995	222.200, 4.146	222.200, 4.101
1113	222.400, 4.413	222.400, 4.086	222.400, 4.228	222.400, 3.995	222.400, 4.147	222.400, 4.099
1114	222.600, 4.413	222.600, 4.086	222.600, 4.229	222.600, 3.994	222.600, 4.147	222.600, 4.098
1115	222.800, 4.412	222.800, 4.085	222.800, 4.230	222.800, 3.994	222.800, 4.148	222.800, 4.097
1116	223.000, 4.413	223.000, 4.084	223.000, 4.230	223.000, 3.993	223.000, 4.148	223.000, 4.096
1117	223.200, 4.413	223.200, 4.084	223.200, 4.231	223.200, 3.993	223.200, 4.149	223.200, 4.095
1118	223.400, 4.413	223.400, 4.083	223.400, 4.231	223.400, 3.993	223.400, 4.150	223.400, 4.094
1119	223.600, 4.413	223.600, 4.082	223.600, 4.231	223.600, 3.993	223.600, 4.150	223.600, 4.093
1120	223.800, 4.414	223.800, 4.081	223.800, 4.232	223.800, 3.993	223.800, 4.151	223.800, 4.092
1121	224.000, 4.414	224.000, 4.081	224.000, 4.232	224.000, 3.993	224.000, 4.151	224.000, 4.092
1122	224.200, 4.414	224.200, 4.080	224.200, 4.232	224.200, 3.993	224.200, 4.151	224.200, 4.091
1123	224.400, 4.414	224.400, 4.079	224.400, 4.233	224.400, 3.992	224.400, 4.152	224.400, 4.090
1124	224.600, 4.414	224.600, 4.078	224.600, 4.233	224.600, 3.992	224.600, 4.152	224.600, 4.089
1125	224.800, 4.415	224.800, 4.077	224.800, 4.233	224.800, 3.991	224.800, 4.153	224.800, 4.088
1126	225.000, 4.415	225.000, 4.075	225.000, 4.233	225.000, 3.990	225.000, 4.153	225.000, 4.087
1127	225.200, 4.416	225.200, 4.074	225.200, 4.234	225.200, 3.989	225.200, 4.153	225.200, 4.085
1128	225.400, 4.416	225.400, 4.073	225.400, 4.234	225.400, 3.988	225.400, 4.153	225.400, 4.084
1129	225.600, 4.417	225.600, 4.072	225.600, 4.234	225.600, 3.987	225.600, 4.154	225.600, 4.083
1130	225.800, 4.417	225.800, 4.071	225.800, 4.234	225.800, 3.986	225.800, 4.154	225.800, 4.082
1131	226.000, 4.417	226.000, 4.069	226.000, 4.234	226.000, 3.985	226.000, 4.154	226.000, 4.081
1132	226.200, 4.417	226.200, 4.068	226.200, 4.235	226.200, 3.984	226.200, 4.154	226.200, 4.079
1133	226.400, 4.417	226.400, 4.067	226.400, 4.235	226.400, 3.983	226.400, 4.154	226.400, 4.078
1134	226.600, 4.417	226.600, 4.067	226.600, 4.235	226.600, 3.983	226.600, 4.154	226.600, 4.077
1135	226.800, 4.417	226.800, 4.066	226.800, 4.235	226.800, 3.982	226.800, 4.154	226.800, 4.076
1136	227.000, 4.417	227.000, 4.065	227.000, 4.235	227.000, 3.981	227.000, 4.154	227.000, 4.074
1137	227.200, 4.418	227.200, 4.064	227.200, 4.235	227.200, 3.981	227.200, 4.154	227.200, 4.073
1138	227.400, 4.418	227.400, 4.063	227.400, 4.236	227.400, 3.980	227.400, 4.154	227.400, 4.072
1139	227.600, 4.418	227.600, 4.062	227.600, 4.236	227.600, 3.980	227.600, 4.155	227.600, 4.070
1140	227.800, 4.419	227.800, 4.061	227.800, 4.236	227.800, 3.979	227.800, 4.155	227.800, 4.069
1141	228.000, 4.419	228.000, 4.060	228.000, 4.236	228.000, 3.979	228.000, 4.155	228.000, 4.068
1142	228.200, 4.420	228.200, 4.059	228.200, 4.236	228.200, 3.978	228.200, 4.155	228.200, 4.067
1143	228.400, 4.420	228.400, 4.058	228.400, 4.237	228.400, 3.978	228.400, 4.155	228.400, 4.066
1144	228.600, 4.420	228.600, 4.058	228.600, 4.237	228.600, 3.977	228.600, 4.156	228.600, 4.065
1145	228.800, 4.421	228.800, 4.057	228.800, 4.238	228.800, 3.977	228.800, 4.157	228.800, 4.064
1146	229.000, 4.421	229.000, 4.056	229.000, 4.238	229.000, 3.977	229.000, 4.157	229.000, 4.063
1147	229.200, 4.421	229.200, 4.055	229.200, 4.239	229.200, 3.976	229.200, 4.158	229.200, 4.062
1148	229.400, 4.422	229.400, 4.054	229.400, 4.239	229.400, 3.976	229.400, 4.158	229.400, 4.061
1149	229.600, 4.422	229.600, 4.053	229.600, 4.240	229.600, 3.975	229.600, 4.159	229.600, 4.060
1150	229.800, 4.422	229.800, 4.052	229.800, 4.240	229.800, 3.975	229.800, 4.159	229.800, 4.059
1151	230.000, 4.423	230.000, 4.051	230.000, 4.240	230.000, 3.974	230.000, 4.159	230.000, 4.057
1152	230.200, 4.423	230.200, 4.049	230.200, 4.241	230.200, 3.973	230.200, 4.159	230.200, 4.056
1153	230.400, 4.423	230.400, 4.048	230.400, 4.241	230.400, 3.973	230.400, 4.160	230.400, 4.055
1154	230.600, 4.423	230.600, 4.047	230.600, 4.242	230.600, 3.972	230.600, 4.160	230.600, 4.054
1155	230.800, 4.424	230.800, 4.046	230.800, 4.242	230.800, 3.971	230.800, 4.160	230.800, 4.052
1156	231.000, 4.424	231.000, 4.044	231.000, 4.243	231.000, 3.970	231.000, 4.160	231.000, 4.051
1157	231.200, 4.425	231.200, 4.043	231.200, 4.243	231.200, 3.969	231.200, 4.160	231.200, 4.049
1158	231.400, 4.425	231.400, 4.042	231.400, 4.243	231.400, 3.968	231.400, 4.160	231.400, 4.047
1159	231.600, 4.425	231.600, 4.041	231.600, 4.243	231.600, 3.967	231.600, 4.161	231.600, 4.046
1160	231.800, 4.426	231.800, 4.040	231.800, 4.243	231.800, 3.966	231.800, 4.161	231.800, 4.044
1161	232.000, 4.426	232.000, 4.039	232.000, 4.243	232.000, 3.966	232.000, 4.161	232.000, 4.043
1162	232.200, 4.426	232.200, 4.038	232.200, 4.244	232.200, 3.965	232.200, 4.162	232.200, 4.042
1163	232.400, 4.426	232.400, 4.037	232.400, 4.244	232.400, 3.965	232.400, 4.162	232.400, 4.041
1164	232.600, 4.426	232.600, 4.037	232.600, 4.244	232.600, 3.964	232.600, 4.163	232.600, 4.039
1165	232.800, 4.426	232.800, 4.036	232.800, 4.244	232.800, 3.963	232.800, 4.163	232.800, 4.038
1166	233.000, 4.426	233.000, 4.035	233.000, 4.244	233.000, 3.963	233.000, 4.164	233.000, 4.037
1167	233.200, 4.426	233.200, 4.034	233.200, 4.244	233.200, 3.962	233.200, 4.164	233.200, 4.036
1168	233.400, 4.426	233.400, 4.033	233.400, 4.244	233.400, 3.962	233.400, 4.165	233.400, 4.035
1169	233.600, 4.426	233.600, 4.032	233.600, 4.244	233.600, 3.961	233.600, 4.165	233.600, 4.033
1170	233.800, 4.426	233.800, 4.031	233.800, 4.244	233.800, 3.960	233.800, 4.166	233.800, 4.032
1171	234.000, 4.426	234.000, 4.029	234.000, 4.244	234.000, 3.960	234.000, 4.166	234.000, 4.031
1172	234.200, 4.426	234.200, 4.028	234.200, 4.244	234.200, 3.959	234.200, 4.166	234.200, 4.030
1173	234.400, 4.426	234.400, 4.027	234.400, 4.244	234.400, 3.958	234.400, 4.167	234.400, 4.029
1174	234.600, 4.426	234.600, 4.025	234.600, 4.244	234.600, 3.958	234.600, 4.167	234.600, 4.028
1175	234.800, 4.427	234.800, 4.024	234.800, 4.245	234.800, 3.957	234.800, 4.167	234.800, 4.027
1176	235.000, 4.427	235.000, 4.023	235.000, 4.245	235.000, 3.956	235.000, 4.168	235.000, 4.026
1177	235.200, 4.427	235.200, 4.021	235.200, 4.245	235.200, 3.955	235.200, 4.168	235.200, 4.025
1178	235.400, 4.428	235.400, 4.020	235.400, 4.245	235.400, 3.955	235.400, 4.169	235.400, 4.023
1179	235.600, 4.428	235.600, 4.019	235.600, 4.245	235.600, 3.954	235.600, 4.169	235.600, 4.022
1180	235.800, 4.428	235.800, 4.018	235.800, 4.246	235.800, 3.953	235.800, 4.169	235.800, 4.021
1181	236.000, 4.428	236.000, 4.017	236.000, 4.246	236.000, 3.953	236.000, 4.170	236.000, 4.020
1182	236.200, 4.429	236.200, 4.016	236.200, 4.247	236.200, 3.952	236.200, 4.170	236.200, 4.018
1183	236.400, 4.429	236.400, 4.015	236.400, 4.248	236.400, 3.952	236.400, 4.171	236.400, 4.017
1184	236.600, 4.429	236.600, 4.014	236.600, 4.248	236.600, 3.951	236.600, 4.172	236.600, 4.016
1185	236.800, 4.430	236.800, 4.013	236.800, 4.249	236.800, 3.950	236.800, 4.172	236.800, 4.014
1186	237.000, 4.430	237.000, 4.013	237.000, 4.249	237.000, 3.950	237.000, 4.173	237.000, 4.013
1187	237.200, 4.430	237.200, 4.012	237.200, 4.250	237.200, 3.949	237.200, 4.173	237.200, 4.012
1188	237.400, 4.430	237.400, 4.011	237.400, 4.251	237.400, 3.949	237.400, 4.174	237.400, 4.010
1189	237.600, 4.430	237.600, 4.011	237.600, 4.251	237.600, 3.948	237.600, 4.175	237.600, 4.009
1190	237.800, 4.430	237.800, 4.010	237.800, 4.252	237.800, 3.948	237.800, 4.175	237.800, 4.008
1191	238.000, 4.430	238.000, 4.008	238.000, 4.253	238.000, 3.947	238.000, 4.176	238.000, 4.006
1192	238.200, 4.430	238.200, 4.007	238.200, 4.253	238.200, 3.947	238.200, 4.176	238.200, 4.005
1193	238.400, 4.430	238.400, 4.006	238.400, 4.253	238.400, 3.946	238.400, 4.177	238.400, 4.004
1194	238.600, 4.430	238.600, 4.005	238.600, 4.253	238.600, 3.945	238.600, 4.177	238.600, 4.003
1195	238.800, 4.430	238.800, 4.003	238.800, 4.254	238.800, 3.945	238.800, 4.177	238.800, 4.002
1196	239.000, 4.430	239.000, 4.002	239.000, 4.254	239.000, 3.944	239.000, 4.178	239.000, 4.001
1197	239.200, 4.430	239.200, 4.001	239.200, 4.254	239.200, 3.943	239.200, 4.178	239.200, 4.000
1198	239.400, 4.431	239.400, 4.000	239.400, 4.254	239.400, 3.942	239.400, 4.178	239.400, 3.999
1199	239.600, 4.431	239.600, 3.999	239.600, 4.254	239.600, 3.942	239.600, 4.179	239.600, 3.997
1200	239.800, 4.431	239.800, 3.998	239.800, 4.254	239.800, 3.941	239.800, 4.179	239.800, 3.996
1201	240.000, 4.431	240.000, 3.996	240.000, 4.254	240.000, 3.940	240.000, 4.179	240.000, 3.994
1202	240.200, 4.432	240.200, 3.995	240.200, 4.254	240.200, 3.939	240.200, 4.179	240.200, 3.993
1203	240.400, 4.432	240.400, 3.994	240.400, 4.254	240.400, 3.938	240.400, 4.180	240.400, 3.991
1204	240.600, 4.432	240.600, 3.993	240.600, 4.254	240.600, 3.937	240.600, 4.180	240.600, 3.990
1205	240.800, 4.433	240.800, 3.992	240.800, 4.254	240.800, 3.937	240.800, 4.180	240.800, 3.989
1206	241.000, 4.433	241.000, 3.991	241.000, 4.254	241.000, 3.936	241.000, 4.180	241.000, 3.987
1207	241.200, 4.433	241.200, 3.990	241.200, 4.254	241.200, 3.935	241.200, 4.181	241.200, 3.986
1208	241.400, 4.434	241.400, 3.989	241.400, 4.254	241.400, 3.934	241.400, 4.181	241.400, 3.984
1209	241.600, 4.434	241.600, 3.988	241.600, 4.254	241.600, 3.934	241.600, 4.181	241.600, 3.983
1210	241.800, 4.434	241.800, 3.986	241.800, 4.254	241.800, 3.933	241.800, 4.182	241.800, 3.982
1211	242.000, 4.434	242.000, 3.985	242.000, 4.254	242.000, 3.933	242.000, 4.182	242.000, 3.981
1212	242.200, 4.435	242.200, 3.984	242.200, 4.254	242.200, 3.933	242.200, 4.182	242.200, 3.980
1213	242.400, 4.435	242.400, 3.982	242.400, 4.254	242.400, 3.932	242.400, 4.183	242.400, 3.979
1214	242.600, 4.435	242.600, 3.981	242.600, 4.254	242.600, 3.931	242.600, 4.183	242.600, 3.977
1215	242.800, 4.435	242.800, 3.980	242.800, 4.255	242.800, 3.931	242.800, 4.184	242.800, 3.976
1216	243.000, 4.436	243.000, 3.979	243.000, 4.255	243.000, 3.930	243.000, 4.185	243.000, 3.975
1217	243.200, 4.436	243.200, 3.977	243.200, 4.256	243.200, 3.930	243.200, 4.185	243.200, 3.973
1218	243.400, 4.436	243.400, 3.976	243.400, 4.257	243.400, 3.929	243.400, 4.185	243.400, 3.972
1219	243.600, 4.436	243.600, 3.975	243.600, 4.258	243.600, 3.928	243.600, 4.186	243.600, 3.970
1220	243.800, 4.437	243.800, 3.974	243.800, 4.258	243.800, 3.927	243.800, 4.186	243.800, 3.969
1221	244.000, 4.437	244.000, 3.973	244.000, 4.259	244.000, 3.926	244.000, 4.186	244.000, 3.967
1222	244.200, 4.437	244.200, 3.972	244.200, 4.259	244.200, 3.925	244.200, 4.186	244.200, 3.966
1223	244.400, 4.437	244.400, 3.971	244.400, 4.259	244.400, 3.924	244.400, 4.187	244.400, 3.964
1224	244.600, 4.438	244.600, 3.970	244.600, 4.259	244.600, 3.923	244.600, 4.187	244.600, 3.963
1225	244.800, 4.438	244.800, 3.969	244.800, 4.259	244.800, 3.923	244.800, 4.187	244.800, 3.961
1226	245.000, 4.438	245.000, 3.968	245.000, 4.259	245.000, 3.922	245.000, 4.188	245.000, 3.960
1227	245.200, 4.438	245.200, 3.966	245.200, 4.259	245.200, 3.922	245.200, 4.188	245.200, 3.959
1228	245.400, 4.439	245.400, 3.965	245.400, 4.259	245.400, 3.921	245.400, 4.188	245.400, 3.958
1229	245.600, 4.439	245.600, 3.964	245.600, 4.259	245.600, 3.920	245.600, 4.188	245.600, 3.956
1230	245.800, 4.439	245.800, 3.963	245.800, 4.259	245.800, 3.920	245.800, 4.188	245.800, 3.955
1231	246.000, 4.439	246.000, 3.962	246.000, 4.260	246.000, 3.919	246.000, 4.188	246.000, 3.954
1232	246.200, 4.439	246.200, 3.961	246.200, 4.260	246.200, 3.918	246.200, 4.188	246.200, 3.953
1233	246.400, 4.439	246.400, 3.960	246.400, 4.260	246.400, 3.918	246.400, 4.189	246.400, 3.951
1234	246.600, 4.439	246.600, 3.959	246.600, 4.260	246.600, 3.917	246.600, 4.189	246.600, 3.949
1235	246.800, 4.439	246.800, 3.958	246.800, 4.260	246.800, 3.916	246.800, 4.189	246.800, 3.947
1236	247.000, 4.439	247.000, 3.957	247.000, 4.260	247.000, 3.916	247.000, 4.189	247.000, 3.946
1237	247.200, 4.439	247.200, 3.956	247.200, 4.261	247.200, 3.915	247.200, 4.189	247.200, 3.944
1238	247.400, 4.439	247.400, 3.955	247.400, 4.261	247.400, 3.914	247.400, 4.189	247.400, 3.942
1239	247.600, 4.439	247.600, 3.955	247.600, 4.261	247.600, 3.914	247.600, 4.189	247.600, 3.941
1240	247.800, 4.439	247.800, 3.954	247.800, 4.261	247.800, 3.913	247.800, 4.189	247.800, 3.939
1241	248.000, 4.439	248.000, 3.953	248.000, 4.262	248.000, 3.912	248.000, 4.189	248.000, 3.938
1242	248.200, 4.439	248.200, 3.951	248.200, 4.262	248.200, 3.911	248.200, 4.189	248.200, 3.937
1243	248.400, 4.439	248.400, 3.950	248.400, 4.262	248.400, 3.910	248.400, 4.190	248.400, 3.935
1244	248.600, 4.439	248.600, 3.949	248.600, 4.263	248.600, 3.909	248.600, 4.190	248.600, 3.934
1245	248.800, 4.439	248.800, 3.947	248.800, 4.263	248.800, 3.908	248.800, 4.191	248.800, 3.933
1246	249.000, 4.439	249.000, 3.946	249.000, 4.264	249.000, 3.907	249.000, 4.191	249.000, 3.932
1247	249.200, 4.440	249.200, 3.944	249.200, 4.264	249.200, 3.907	249.200, 4.192	249.200, 3.930
1248	249.400, 4.440	249.400, 3.942	249.400, 4.265	249.400, 3.906	249.400, 4.192	249.400, 3.929
1249	249.600, 4.441	249.600, 3.941	249.600, 4.265	249.600, 3.905	249.600, 4.193	249.600, 3.928
1250	249.800, 4.441	249.800, 3.939	249.800, 4.266	249.800, 3.904	249.800, 4.194	249.800, 3.927
1251	250.000, 4.442	250.000, 3.938	250.000, 4.266	250.000, 3.903	250.000, 4.194	250.000, 3.926
1252	250.200, 4.442	250.200, 3.936	250.200, 4.266	250.200, 3.903	250.200, 4.195	250.200, 3.925
1253	250.400, 4.443	250.400, 3.935	250.400, 4.266	250.400, 3.902	250.400, 4.196	250.400, 3.923
1254	250.600, 4.443	250.600, 3.934	250.600, 4.266	250.600, 3.901	250.600, 4.196	250.600, 3.922
1255	250.800, 4.444	250.800, 3.933	250.800, 4.265	250.800, 3.900	250.800, 4.196	250.800, 3.921
1256	251.000, 4.444	251.000, 3.932	251.000, 4.265	251.000, 3.899	251.000, 4.196	251.000, 3.920
1257	251.200, 4.445	251.200, 3.931	251.200, 4.265	251.200, 3.899	251.200, 4.196	251.200, 3.919
1258	251.400, 4.445	251.400, 3.930	251.400, 4.265	251.400, 3.898	251.400, 4.196	251.400, 3.917
1259	251.600, 4.445	251.600, 3.929	251.600, 4.265	251.600, 3.897	251.600, 4.196	251.600, 3.916
1260	251.800, 4.444	251.800, 3.928	251.800, 4.266	251.800, 3.896	251.800, 4.197	251.800, 3.915
1261	252.000, 4.444	252.000, 3.927	252.000, 4.266	252.000, 3.895	252.000, 4.197	252.000, 3.913
1262	252.200, 4.443	252.200, 3.927	252.200, 4.266	252.200, 3.895	252.200, 4.197	252.200, 3.912
1263	252.400, 4.443	252.400, 3.925	252.400, 4.266	252.400, 3.894	252.400, 4.197	252.400, 3.910
1264	252.600, 4.442	252.600, 3.924	252.600, 4.267	252.600, 3.893	252.600, 4.197	252.600, 3.908
1265	252.800, 4.442	252.800, 3.923	252.800, 4.267	252.800, 3.893	252.800, 4.197	252.800, 3.907
1266	253.000, 4.442	253.000, 3.922	253.000, 4.267	253.000, 3.892	253.000, 4.198	253.000, 3.905
1267	253.200, 4.443	253.200, 3.921	253.200, 4.267	253.200, 3.892	253.200, 4.198	253.200, 3.904
1268	253.400, 4.443	253.400, 3.919	253.400, 4.267	253.400, 3.891	253.400, 4.199	253.400, 3.902
1269	253.600, 4.444	253.600, 3.918	253.600, 4.267	253.600, 3.890	253.600, 4.199	253.600, 3.900
1270	253.800, 4.444	253.800, 3.917	253.800, 4.267	253.800, 3.890	253.800, 4.199	253.800, 3.899
1271	254.000, 4.445	254.000, 3.916	254.000, 4.267	254.000, 3.889	254.000, 4.200	254.000, 3.897
1272	254.200, 4.445	254.200, 3.915	254.200, 4.268	254.200, 3.889	254.200, 4.200	254.200, 3.896
1273	254.400, 4.445	254.400, 3.914	254.400, 4.268	254.400, 3.888	254.400, 4.200	254.400, 3.895
1274	254.600, 4.446	254.600, 3.913	254.600, 4.268	254.600, 3.887	254.600, 4.200	254.600, 3.893
1275	254.800, 4.446	254.800, 3.911	254.800, 4.269	254.800, 3.886	254.800, 4.200	254.800, 3.892
1276	255.000, 4.446	255.000, 3.910	255.000, 4.269	255.000, 3.886	255.000, 4.200	255.000, 3.891
1277	255.200, 4.447	255.200, 3.909	255.200, 4.270	255.200, 3.885	255.200, 4.200	255.200, 3.889
1278	255.400, 4.447	255.400, 3.907	255.400, 4.271	255.400, 3.884	255.400, 4.200	255.400, 3.888
1279	255.600, 4.447	255.600, 3.906	255.600, 4.271	255.600, 3.883	255.600, 4.201	255.600, 3.887
1280	255.800, 4.447	255.800, 3.905	255.800, 4.272	255.800, 3.882	255.800, 4.201	255.800, 3.886
1281	256.000, 4.447	256.000, 3.904	256.000, 4.272	256.000, 3.881	256.000, 4.201	256.000, 3.885
1282	256.200, 4.447	256.200, 3.903	256.200, 4.272	256.200, 3.881	256.200, 4.202	256.200, 3.883
1283	256.400, 4.447	256.400, 3.902	256.400, 4.272	256.400, 3.880	256.400, 4.203	256.400, 3.882
1284	256.600, 4.447	256.600, 3.901	256.600, 4.272	256.600, 3.879	256.600, 4.203	256.600, 3.881
1285	256.800, 4.447	256.800, 3.899	256.800, 4.272	256.800, 3.878	256.800, 4.204	256.800, 3.880
1286	257.000, 4.447	257.000, 3.898	257.000, 4.272	257.000, 3.877	257.000, 4.205	257.000, 3.879
1287	257.200, 4.448	257.200, 3.897	257.200, 4.272	257.200, 3.877	257.200, 4.205	257.200, 3.878
1288	257.400, 4.448	257.400, 3.896	257.400, 4.272	257.400, 3.876	257.400, 4.206	257.400, 3.877
1289	257.600, 4.448	257.600, 3.895	257.600, 4.272	257.600, 3.875	257.600, 4.207	257.600, 3.876
1290	257.800, 4.448	257.800, 3.893	257.800, 4.272	257.800, 3.874	257.800, 4.207	257.800, 3.874
1291	258.000, 4.449	258.000, 3.892	258.000, 4.272	258.000, 3.873	258.000, 4.207	258.000, 3.873
1292	258.200, 4.449	258.200, 3.891	258.200, 4.272	258.200, 3.872	258.200, 4.207	258.200, 3.872
1293	258.400, 4.449	258.400, 3.889	258.400, 4.272	258.400, 3.871	258.400, 4.207	258.400, 3.871
1294	258.600, 4.449	258.600, 3.887	258.600, 4.272	258.600, 3.870	258.600, 4.207	258.600, 3.869
1295	258.800, 4.449	258.800, 3.886	258.800, 4.272	258.800, 3.870	258.800, 4.207	258.800, 3.867
1296	259.000, 4.449	259.000, 3.885	259.000, 4.273	259.000, 3.869	259.000, 4.207	259.000, 3.866
1297	259.200, 4.450	259.200, 3.883	259.200, 4.273	259.200, 3.868	259.200, 4.207	259.200, 3.864
1298	259.400, 4.450	259.400, 3.882	259.400, 4.273	259.400, 3.867	259.400, 4.208	259.400, 3.862
1299	259.600, 4.450	259.600, 3.881	259.600, 4.274	259.600, 3.866	259.600, 4.208	259.600, 3.860
1300	259.800, 4.450	259.800, 3.880	259.800, 4.274	259.800, 3.866	259.800, 4.208	259.800, 3.858
1301	260.000, 4.451	260.000, 3.879	260.000, 4.274	260.000, 3.865	260.000, 4.208	260.000, 3.856
1302	260.200, 4.451	260.200, 3.878	260.200, 4.274	260.200, 3.865	260.200, 4.208	260.200, 3.854
1303	260.400, 4.451	260.400, 3.877	260.400, 4.274	260.400, 3.864	260.400, 4.208	260.400, 3.852
1304	260.600, 4.451	260.600, 3.876	260.600, 4.274	260.600, 3.864	260.600, 4.208	260.600, 3.850
1305	260.800, 4.451	260.800, 3.875	260.800, 4.275	260.800, 3.863	260.800, 4.209	260.800, 3.848
1306	261.000, 4.451	261.000, 3.874	261.000, 4.275	261.000, 3.862	261.000, 4.209	261.000, 3.847
1307	261.200, 4.452	261.200, 3.872	261.200, 4.275	261.200, 3.861	261.200, 4.210	261.200, 3.845
1308	261.400, 4.452	261.400, 3.871	261.400, 4.275	261.400, 3.860	261.400, 4.210	261.400, 3.844
1309	261.600, 4.452	261.600, 3.870	261.600, 4.275	261.600, 3.859	261.600, 4.210	261.600, 3.843
1310	261.800, 4.452	261.800, 3.868	261.800, 4.275	261.800, 3.857	261.800, 4.210	261.800, 3.842
1311	262.000, 4.452	262.000, 3.867	262.000, 4.275	262.000, 3.856	262.000, 4.210	262.000, 3.841
1312	262.200, 4.453	262.200, 3.865	262.200, 4.275	262.200, 3.855	262.200, 4.210	262.200, 3.840
1313	262.400, 4.452	262.400, 3.863	262.400, 4.275	262.400, 3.854	262.400, 4.210	262.400, 3.838
1314	262.600, 4.453	262.600, 3.862	262.600, 4.275	262.600, 3.853	262.600, 4.210	262.600, 3.837
1315	262.800, 4.453	262.800, 3.860	262.800, 4.275	262.800, 3.852	262.800, 4.210	262.800, 3.836
1316	263.000, 4.453	263.000, 3.859	263.000, 4.276	263.000, 3.851	263.000, 4.210	263.000, 3.835
1317	263.200, 4.453	263.200, 3.857	263.200, 4.276	263.200, 3.851	263.200, 4.211	263.200, 3.833
1318	263.400, 4.453	263.400, 3.856	263.400, 4.276	263.400, 3.850	263.400, 4.211	263.400, 3.832
1319	263.600, 4.454	263.600, 3.855	263.600, 4.276	263.600, 3.850	263.600, 4.211	263.600, 3.830
1320	263.800, 4.454	263.800, 3.854	263.800, 4.277	263.800, 3.849	263.800, 4.211	263.800, 3.829
1321	264.000, 4.453	264.000, 3.853	264.000, 4.277	264.000, 3.849	264.000, 4.211	264.000, 3.827
1322	264.200, 4.453	264.200, 3.852	264.200, 4.277	264.200, 3.849	264.200, 4.212	264.200, 3.826
1323	264.400, 4.453	264.400, 3.852	264.400, 4.278	264.400, 3.848	264.400, 4.212	264.400, 3.824
1324	264.600, 4.453	264.600, 3.851	264.600, 4.278	264.600, 3.848	264.600, 4.213	264.600, 3.822
1325	264.800, 4.453	264.800, 3.850	264.800, 4.278	264.800, 3.847	264.800, 4.213	264.800, 3.821
1326	265.000, 4.453	265.000, 3.849	265.000, 4.278	265.000, 3.846	265.000, 4.214	265.000, 3.820
1327	265.200, 4.453	265.200, 3.849	265.200, 4.278	265.200, 3.845	265.200, 4.214	265.200, 3.818
1328	265.400, 4.453	265.400, 3.848	265.400, 4.278	265.400, 3.843	265.400, 4.215	265.400, 3.817
1329	265.600, 4.453	265.600, 3.847	265.600, 4.278	265.600, 3.842	265.600, 4.215	265.600, 3.815
1330	265.800, 4.453	265.800, 3.845	265.800, 4.278	265.800, 3.841	265.800, 4.215	265.800, 3.814
1331	266.000, 4.453	266.000, 3.844	266.000, 4.279	266.000, 3.840	266.000, 4.216	266.000, 3.813
1332	266.200, 4.453	266.200, 3.843	266.200, 4.279	266.200, 3.839	266.200, 4.216	266.200, 3.811
1333	266.400, 4.453	266.400, 3.841	266.400, 4.280	266.400, 3.839	266.400, 4.216	266.400, 3.810
1334	266.600, 4.454	266.600, 3.839	266.600, 4.280	266.600, 3.838	266.600, 4.217	266.600, 3.808
1335	266.800, 4.454	266.800, 3.838	266.800, 4.281	266.800, 3.837	266.800, 4.217	266.800, 3.807
1336	267.000, 4.454	267.000, 3.836	267.000, 4.281	267.000, 3.837	267.000, 4.217	267.000, 3.805
1337	267.200, 4.455	267.200, 3.834	267.200, 4.282	267.200, 3.836	267.200, 4.218	267.200, 3.804
1338	267.400, 4.455	267.400, 3.833	267.400, 4.282	267.400, 3.835	267.400, 4.218	267.400, 3.802
1339	267.600, 4.455	267.600, 3.832	267.600, 4.282	267.600, 3.835	267.600, 4.218	267.600, 3.801
1340	267.800, 4.456	267.800, 3.830	267.800, 4.283	267.800, 3.834	267.800, 4.218	267.800, 3.800
1341	268.000, 4.456	268.000, 3.829	268.000, 4.283	268.000, 3.833	268.000, 4.219	268.000, 3.798
1342	268.200, 4.457	268.200, 3.828	268.200, 4.283	268.200, 3.833	268.200, 4.219	268.200, 3.797
1343	268.400, 4.457	268.400, 3.827	268.400, 4.283	268.400, 3.832	268.400, 4.219	268.400, 3.795
1344	268.600, 4.457	268.600, 3.825	268.600, 4.283	268.600, 3.831	268.600, 4.219	268.600, 3.794
1345	268.800, 4.457	268.800, 3.824	268.800, 4.283	268.800, 3.830	268.800, 4.219	268.800, 3.793
1346	269.000, 4.458	269.000, 3.823	269.000, 4.283	269.000, 3.829	269.000, 4.219	269.000, 3.792
1347	269.200, 4.458	269.200, 3.822	269.200, 4.283	269.200, 3.828	269.200, 4.219	269.200, 3.791
1348	269.400, 4.458	269.400, 3.820	269.400, 4.283	269.400, 3.827	269.400, 4.219	269.400, 3.789
1349	269.600, 4.458	269.600, 3.819	269.600, 4.283	269.600, 3.826	269.600, 4.219	269.600, 3.788
1350	269.800, 4.458	269.800, 3.818	269.800, 4.283	269.800, 3.825	269.800, 4.219	269.800, 3.786
1351	270.000, 4.458	270.000, 3.816	270.000, 4.283	270.000, 3.824	270.000, 4.219	270.000, 3.785
1352	270.200, 4.458	270.200, 3.815	270.200, 4.283	270.200, 3.823	270.200, 4.219	270.200, 3.783
1353	270.400, 4.458	270.400, 3.813	270.400, 4.283	270.400, 3.822	270.400, 4.219	270.400, 3.781
1354	270.600, 4.458	270.600, 3.812	270.600, 4.283	270.600, 3.822	270.600, 4.219	270.600, 3.780
1355	270.800, 4.458	270.800, 3.810	270.800, 4.283	270.800, 3.821	270.800, 4.220	270.800, 3.778
1356	271.000, 4.457	271.000, 3.809	271.000, 4.283	271.000, 3.821	271.000, 4.220	271.000, 3.776
1357	271.200, 4.458	271.200, 3.807	271.200, 4.283	271.200, 3.820	271.200, 4.220	271.200, 3.775
1358	271.400, 4.458	271.400, 3.806	271.400, 4.284	271.400, 3.820	271.400, 4.221	271.400, 3.773
1359	271.600, 4.458	271.600, 3.805	271.600, 4.284	271.600, 3.819	271.600, 4.221	271.600, 3.772
1360	271.800, 4.458	271.800, 3.804	271.800, 4.284	271.800, 3.818	271.800, 4.222	271.800, 3.770
1361	272.000, 4.459	272.000, 3.803	272.000, 4.284	272.000, 3.818	272.000, 4.222	272.000, 3.769
1362	272.200, 4.459	272.200, 3.801	272.200, 4.284	272.200, 3.817	272.200, 4.223	272.200, 3.767
1363	272.400, 4.460	272.400, 3.800	272.400, 4.284	272.400, 3.816	272.400, 4.223	272.400, 3.766
1364	272.600, 4.460	272.600, 3.799	272.600, 4.284	272.600, 3.815	272.600, 4.223	272.600, 3.764
1365	272.800, 4.460	272.800, 3.798	272.800, 4.284	272.800, 3.814	272.800, 4.224	272.800, 3.763
1366	273.000, 4.460	273.000, 3.796	273.000, 4.285	273.000, 3.813	273.000, 4.224	273.000, 3.762
1367	273.200, 4.460	273.200, 3.795	273.200, 4.285	273.200, 3.812	273.200, 4.224	273.200, 3.760
1368	273.400, 4.460	273.400, 3.794	273.400, 4.285	273.400, 3.811	273.400, 4.225	273.400, 3.759
1369	273.600, 4.460	273.600, 3.794	273.600, 4.285	273.600, 3.810	273.600, 4.225	273.600, 3.757
1370	273.800, 4.460	273.800, 3.793	273.800, 4.286	273.800, 3.810	273.800, 4.225	273.800, 3.756
1371	274.000, 4.460	274.000, 3.792	274.000, 4.286	274.000, 3.809	274.000, 4.225	274.000, 3.754
1372	274.200, 4.460	274.200, 3.791	274.200, 4.286	274.200, 3.808	274.200, 4.225	274.200, 3.752
1373	274.400, 4.460	274.400, 3.789	274.400, 4.286	274.400, 3.806	274.400, 4.225	274.400, 3.750
1374	274.600, 4.460	274.600, 3.788	274.600, 4.286	274.600, 3.805	274.600, 4.226	274.600, 3.748
1375	274.800, 4.460	274.800, 3.787	274.800, 4.287	274.800, 3.804	274.800, 4.226	274.800, 3.746
1376	275.000, 4.460	275.000, 3.785	275.000, 4.287	275.000, 3.804	275.000, 4.227	275.000, 3.745
1377	275.200, 4.460	275.200, 3.784	275.200, 4.287	275.200, 3.803	275.200, 4.227	275.200, 3.744
1378	275.400, 4.460	275.400, 3.783	275.400, 4.288	275.400, 3.802	275.400, 4.228	275.400, 3.742
1379	275.600, 4.461	275.600, 3.781	275.600, 4.288	275.600, 3.801	275.600, 4.229	275.600, 3.741
1380	275.800, 4.461	275.800, 3.780	275.800, 4.288	275.800, 3.800	275.800, 4.229	275.800, 3.739
1381	276.000, 4.461	276.000, 3.778	276.000, 4.289	276.000, 3.799	276.000, 4.229	276.000, 3.738
1382	276.200, 4.462	276.200, 3.777	276.200, 4.289	276.200, 3.798	276.200, 4.230	276.200, 3.737
1383	276.400, 4.462	276.400, 3.775	276.400, 4.290	276.400, 3.798	276.400, 4.230	276.400, 3.735
1384	276.600, 4.463	276.600, 3.774	276.600, 4.290	276.600, 3.797	276.600, 4.229	276.600, 3.734
1385	276.800, 4.463	276.800, 3.773	276.800, 4.290	276.800, 3.796	276.800, 4.229	276.800, 3.733
1386	277.000, 4.464	277.000, 3.772	277.000, 4.290	277.000, 3.796	277.000, 4.229	277.000, 3.732
1387	277.200, 4.464	277.200, 3.770	277.200, 4.290	277.200, 3.795	277.200, 4.229	277.200, 3.731
1388	277.400, 4.464	277.400, 3.769	277.400, 4.290	277.400, 3.795	277.400, 4.229	277.400, 3.730
1389	277.600, 4.464	277.600, 3.768	277.600, 4.290	277.600, 3.794	277.600, 4.229	277.600, 3.728
1390	277.800, 4.464	277.800, 3.767	277.800, 4.291	277.800, 3.793	277.800, 4.229	277.800, 3.726
1391	278.000, 4.464	278.000, 3.766	278.000, 4.291	278.000, 3.792	278.000, 4.229	278.000, 3.725
1392	278.200, 4.465	278.200, 3.765	278.200, 4.291	278.200, 3.791	278.200, 4.229	278.200, 3.723
1393	278.400, 4.465	278.400, 3.763	278.400, 4.291	278.400, 3.790	278.400, 4.230	278.400, 3.721
1394	278.600, 4.465	278.600, 3.762	278.600, 4.291	278.600, 3.789	278.600, 4.230	278.600, 3.720
1395	278.800, 4.465	278.800, 3.761	278.800, 4.291	278.800, 3.788	278.800, 4.231	278.800, 3.718
1396	279.000, 4.465	279.000, 3.760	279.000, 4.291	279.000, 3.787	279.000, 4.232	279.000, 3.716
1397	279.200, 4.466	279.200, 3.758	279.200, 4.291	279.200, 3.786	279.200, 4.232	279.200, 3.715
1398	279.400, 4.466	279.400, 3.757	279.400, 4.291	279.400, 3.786	279.400, 4.233	279.400, 3.713
1399	279.600, 4.466	279.600, 3.756	279.600, 4.291	279.600, 3.785	279.600, 4.233	279.600, 3.711
1400	279.800, 4.466	279.800, 3.755	279.800, 4.291	279.800, 3.784	279.800, 4.234	279.800, 3.710
1401	280.000, 4.466	280.000, 3.753	280.000, 4.291	280.000, 3.784	280.000, 4.234	280.000, 3.709
1402	280.200, 4.466	280.200, 3.752	280.200, 4.292	280.200, 3.783	280.200, 4.234	280.200, 3.707
1403	280.400, 4.466	280.400, 3.751	280.400, 4.292	280.400, 3.782	280.400, 4.233	280.400, 3.706
1404	280.600, 4.466	280.600, 3.749	280.600, 4.292	280.600, 3.781	280.600, 4.233	280.600, 3.705
1405	280.800, 4.465	280.800, 3.748	280.800, 4.292	280.800, 3.781	280.800, 4.233	280.800, 3.704
1406	281.000, 4.465	281.000, 3.747	281.000, 4.292	281.000, 3.780	281.000, 4.233	281.000, 3.702
1407	281.200, 4.465	281.200, 3.746	281.200, 4.292	281.200, 3.779	281.200, 4.233	281.200, 3.701
1408	281.400, 4.465	281.400, 3.745	281.400, 4.292	281.400, 3.778	281.400, 4.232	281.400, 3.700
1409	281.600, 4.465	281.600, 3.743	281.600, 4.293	281.600, 3.777	281.600, 4.232	281.600, 3.698
1410	281.800, 4.465	281.800, 3.742	281.800, 4.293	281.800, 3.776	281.800, 4.232	281.800, 3.697
1411	282.000, 4.465	282.000, 3.740	282.000, 4.293	282.000, 3.775	282.000, 4.232	282.000, 3.695
1412	282.200, 4.465	282.200, 3.739	282.200, 4.293	282.200, 3.774	282.200, 4.232	282.200, 3.693
1413	282.400, 4.466	282.400, 3.737	282.400, 4.293	282.400, 3.773	282.400, 4.233	282.400, 3.692
1414	282.600, 4.466	282.600, 3.736	282.600, 4.293	282.600, 3.772	282.600, 4.233	282.600, 3.690
1415	282.800, 4.467	282.800, 3.734	282.800, 4.293	282.800, 3.771	282.800, 4.234	282.800, 3.688
1416	283.000, 4.467	283.000, 3.733	283.000, 4.294	283.000, 3.770	283.000, 4.234	283.000, 3.687
1417	283.200, 4.468	283.200, 3.731	283.200, 4.294	283.200, 3.769	283.200, 4.235	283.200, 3.685
1418	283.400, 4.468	283.400, 3.730	283.400, 4.294	283.400, 3.768	283.400, 4.235	283.400, 3.684
1419	283.600, 4.468	283.600, 3.728	283.600, 4.294	283.600, 3.767	283.600, 4.236	283.600, 3.683
1420	283.800, 4.469	283.800, 3.727	283.800, 4.294	283.800, 3.766	283.800, 4.236	283.800, 3.681
1421	284.000, 4.469	284.000, 3.725	284.000, 4.295	284.000, 3.765	284.000, 4.236	284.000, 3.680
1422	284.200, 4.469	284.200, 3.724	284.200, 4.295	284.200, 3.765	284.200, 4.236	284.200, 3.679
1423	284.400, 4.468	284.400, 3.723	284.400, 4.295	284.400, 3.764	284.400, 4.236	284.400, 3.677
1424	284.600, 4.468	284.600, 3.722	284.600, 4.296	284.600, 3.763	284.600, 4.237	284.600, 3.676
1425	284.800, 4.468	284.800, 3.721	284.800, 4.296	284.800, 3.762	284.800, 4.237	284.800, 3.675
1426	285.000, 4.468	285.000, 3.720	285.000, 4.296	285.000, 3.761	285.000, 4.237	285.000, 3.673
1427	285.200, 4.468	285.200, 3.719	285.200, 4.296	285.200, 3.761	285.200, 4.238	285.200, 3.672
1428	285.400, 4.468	285.400, 3.717	285.400, 4.297	285.400, 3.760	285.400, 4.238	285.400, 3.670
1429	285.600, 4.468	285.600, 3.716	285.600, 4.297	285.600, 3.759	285.600, 4.238	285.600, 3.668
1430	285.800, 4.468	285.800, 3.715	285.800, 4.297	285.800, 3.758	285.800, 4.238	285.800, 3.666
1431	286.000, 4.468	286.000, 3.713	286.000, 4.297	286.000, 3.758	286.000, 4.238	286.000, 3.664
1432	286.200, 4.468	286.200, 3.712	286.200, 4.297	286.200, 3.757	286.200, 4.239	286.200, 3.662
1433	286.400, 4.468	286.400, 3.711	286.400, 4.297	286.400, 3.756	286.400, 4.239	286.400, 3.660
1434	286.600, 4.469	286.600, 3.710	286.600, 4.297	286.600, 3.755	286.600, 4.239	286.600, 3.658
1435	286.800, 4.469	286.800, 3.709	286.800, 4.297	286.800, 3.754	286.800, 4.240	286.800, 3.656
1436	287.000, 4.469	287.000, 3.708	287.000, 4.297	287.000, 3.753	287.000, 4.240	287.000, 3.655
1437	287.200, 4.469	287.200, 3.707	287.200, 4.296	287.200, 3.752	287.200, 4.240	287.200, 3.653
1438	287.400, 4.469	287.400, 3.705	287.400, 4.297	287.400, 3.751	287.400, 4.240	287.400, 3.651
1439	287.600, 4.469	287.600, 3.704	287.600, 4.296	287.600, 3.750	287.600, 4.241	287.600, 3.649
1440	287.800, 4.469	287.800, 3.703	287.800, 4.296	287.800, 3.750	287.800, 4.241	287.800, 3.648
1441	288.000, 4.469	288.000, 3.702	288.000, 4.296	288.000, 3.749	288.000, 4.241	288.000, 3.646
1442	288.200, 4.469	288.200, 3.700	288.200, 4.296	288.200, 3.748	288.200, 4.241	288.200, 3.644
1443	288.400, 4.469	288.400, 3.699	288.400, 4.296	288.400, 3.747	288.400, 4.241	288.400, 3.643
1444	288.600, 4.469	288.600, 3.698	288.600, 4.296	288.600, 3.745	288.600, 4.241	288.600, 3.641
1445	288.800, 4.470	288.800, 3.697	288.800, 4.297	288.800, 3.744	288.800, 4.241	288.800, 3.640
1446	289.000, 4.470	289.000, 3.695	289.000, 4.297	289.000, 3.743	289.000, 4.241	289.000, 3.638
1447	289.200, 4.471	289.200, 3.694	289.200, 4.297	289.200, 3.742	289.200, 4.241	289.200, 3.637
1448	289.400, 4.471	289.400, 3.693	289.400, 4.298	289.400, 3.741	289.400, 4.241	289.400, 3.635
1449	289.600, 4.471	289.600, 3.692	289.600, 4.299	289.600, 3.740	289.600, 4.241	289.600, 3.634
1450	289.800, 4.472	289.800, 3.690	289.800, 4.299	289.800, 3.739	289.800, 4.241	289.800, 3.632
1451	290.000, 4.472	290.000, 3.689	290.000, 4.300	290.000, 3.738	290.000, 4.241	290.000, 3.630
1452	290.200, 4.472	290.200, 3.688	290.200, 4.301	290.200, 3.737	290.200, 4.241	290.200, 3.629
1453	290.400, 4.472	290.400, 3.687	290.400, 4.301	290.400, 3.736	290.400, 4.241	290.400, 3.627
1454	290.600, 4.473	290.600, 3.685	290.600, 4.301	290.600, 3.735	290.600, 4.241	290.600, 3.626
1455	290.800, 4.473	290.800, 3.684	290.800, 4.301	290.800, 3.735	290.800, 4.241	290.800, 3.624
1456	291.000, 4.473	291.000, 3.683	291.000, 4.301	291.000, 3.734	291.000, 4.241	291.000, 3.623
1457	291.200, 4.473	291.200, 3.681	291.200, 4.301	291.200, 3.733	291.200, 4.242	291.200, 3.621
1458	291.400, 4.473	291.400, 3.680	291.400, 4.301	291.400, 3.733	291.400, 4.242	291.400, 3.619
1459	291.600, 4.472	291.600, 3.678	291.600, 4.300	291.600, 3.732	291.600, 4.243	291.600, 3.617
1460	291.800, 4.472	291.800, 3.676	291.800, 4.300	291.800, 3.732	291.800, 4.243	291.800, 3.616
1461	292.000, 4.473	292.000, 3.675	292.000, 4.300	292.000, 3.731	292.000, 4.244	292.000, 3.615
1462	292.200, 4.473	292.200, 3.673	292.200, 4.300	292.200, 3.730	292.200, 4.244	292.200, 3.614
1463	292.400, 4.473	292.400, 3.672	292.400, 4.300	292.400, 3.729	292.400, 4.245	292.400, 3.612
1464	292.600, 4.473	292.600, 3.671	292.600, 4.301	292.600, 3.728	292.600, 4.245	292.600, 3.611
1465	292.800, 4.473	292.800, 3.669	292.800, 4.301	292.800, 3.728	292.800, 4.246	292.800, 3.610
1466	293.000, 4.473	293.000, 3.668	293.000, 4.301	293.000, 3.727	293.000, 4.246	293.000, 3.608
1467	293.200, 4.473	293.200, 3.667	293.200, 4.301	293.200, 3.727	293.200, 4.246	293.200, 3.606
1468	293.400, 4.474	293.400, 3.665	293.400, 4.301	293.400, 3.726	293.400, 4.247	293.400, 3.605
1469	293.600, 4.474	293.600, 3.664	293.600, 4.301	293.600, 3.725	293.600, 4.247	293.600, 3.603
1470	293.800, 4.474	293.800, 3.662	293.800, 4.301	293.800, 3.724	293.800, 4.247	293.800, 3.601
1471	294.000, 4.474	294.000, 3.661	294.000, 4.302	294.000, 3.723	294.000, 4.247	294.000, 3.599
1472	294.200, 4.474	294.200, 3.660	294.200, 4.301	294.200, 3.722	294.200, 4.247	294.200, 3.598
1473	294.400, 4.474	294.400, 3.659	294.400, 4.301	294.400, 3.721	294.400, 4.247	294.400, 3.596
1474	294.600, 4.474	294.600, 3.657	294.600, 4.301	294.600, 3.720	294.600, 4.247	294.600, 3.595
1475	294.800, 4.474	294.800, 3.656	294.800, 4.301	294.800, 3.719	294.800, 4.247	294.800, 3.593
1476	295.000, 4.474	295.000, 3.655	295.000, 4.301	295.000, 3.718	295.000, 4.248	295.000, 3.592
1477	295.200, 4.474	295.200, 3.653	295.200, 4.301	295.200, 3.717	295.200, 4.248	295.200, 3.590
1478	295.400, 4.475	295.400, 3.652	295.400, 4.302	295.400, 3.715	295.400, 4.249	295.400, 3.589
1479	295.600, 4.475	295.600, 3.650	295.600, 4.301	295.600, 3.714	295.600, 4.249	295.600, 3.587
1480	295.800, 4.476	295.800, 3.649	295.800, 4.302	295.800, 3.713	295.800, 4.250	295.800, 3.586
1481	296.000, 4.476	296.000, 3.648	296.000, 4.302	296.000, 3.711	296.000, 4.250	296.000, 3.585
1482	296.200, 4.477	296.200, 3.646	296.200, 4.302	296.200, 3.710	296.200, 4.251	296.200, 3.583
1483	296.400, 4.477	296.400, 3.645	296.400, 4.302	296.400, 3.709	296.400, 4.251	296.400, 3.582
1484	296.600, 4.477	296.600, 3.644	296.600, 4.302	296.600, 3.708	296.600, 4.251	296.600, 3.580
1485	296.800, 4.477	296.800, 3.642	296.800, 4.302	296.800, 3.707	296.800, 4.251	296.800, 3.579
1486	297.000, 4.477	297.000, 3.641	297.000, 4.302	297.000, 3.706	297.000, 4.251	297.000, 3.577
1487	297.200, 4.477	297.200, 3.640	297.200, 4.302	297.200, 3.705	297.200, 4.251	297.200, 3.576
1488	297.400, 4.477	297.400, 3.638	297.400, 4.302	297.400, 3.704	297.400, 4.251	297.400, 3.574
1489	297.600, 4.477	297.600, 3.637	297.600, 4.302	297.600, 3.704	297.600, 4.250	297.600, 3.572
1490	297.800, 4.477	297.800, 3.636	297.800, 4.302	297.800, 3.703	297.800, 4.250	297.800, 3.570
1491	298.000, 4.477	298.000, 3.634	298.000, 4.302	298.000, 3.702	298.000, 4.250	298.000, 3.569
1492	298.200, 4.476	298.200, 3.633	298.200, 4.302	298.200, 3.702	298.200, 4.249	298.200, 3.567
1493	298.400, 4.476	298.400, 3.632	298.400, 4.303	298.400, 3.701	298.400, 4.249	298.400, 3.566
1494	298.600, 4.477	298.600, 3.631	298.600, 4.303	298.600, 3.701	298.600, 4.249	298.600, 3.565
1495	298.800, 4.477	298.800, 3.629	298.800, 4.303	298.800, 3.700	298.800, 4.250	298.800, 3.563
1496	299.000, 4.477	299.000, 3.628	299.000, 4.304	299.000, 3.699	299.000, 4.250	299.000, 3.562
1497	299.200, 4.478	299.200, 3.627	299.200, 4.304	299.200, 3.698	299.200, 4.250	299.200, 3.561
1498	299.400, 4.478	299.400, 3.626	299.400, 4.304	299.400, 3.697	299.400, 4.251	299.400, 3.559
1499	299.600, 4.479	299.600, 3.624	299.600, 4.304	299.600, 3.696	299.600, 4.251	299.600, 3.558
1500	299.800, 4.479	299.800, 3.623	299.800, 4.305	299.800, 3.695	299.800, 4.252	299.800, 3.556
1501	300.000, 4.480	300.000, 3.622	300.000, 4.305	300.000, 3.694	300.000, 4.252	300.000, 3.555
1502	300.200, 4.480	300.200, 3.621	300.200, 4.305	300.200, 3.693	300.200, 4.252	300.200, 3.553
1503	300.400, 4.480	300.400, 3.619	300.400, 4.306	300.400, 3.691	300.400, 4.253	300.400, 3.552
1504	300.600, 4.480	300.600, 3.618	300.600, 4.306	300.600, 3.690	300.600, 4.253	300.600, 3.551
1505	300.800, 4.480	300.800, 3.616	300.800, 4.306	300.800, 3.689	300.800, 4.253	300.800, 3.550
1506	301.000, 4.479	301.000, 3.615	301.000, 4.306	301.000, 3.687	301.000, 4.254	301.000, 3.549
1507	301.200, 4.479	301.200, 3.613	301.200, 4.307	301.200, 3.686	301.200, 4.254	301.200, 3.547
1508	301.400, 4.479	301.400, 3.612	301.400, 4.307	301.400, 3.685	301.400, 4.254	301.400, 3.546
1509	301.600, 4.479	301.600, 3.610	301.600, 4.307	301.600, 3.685	301.600, 4.254	301.600, 3.544
1510	301.800, 4.479	301.800, 3.609	301.800, 4.307	301.800, 3.684	301.800, 4.254	301.800, 3.543
1511	302.000, 4.479	302.000, 3.607	302.000, 4.307	302.000, 3.683	302.000, 4.253	302.000, 3.542
1512	302.200, 4.479	302.200, 3.605	302.200, 4.307	302.200, 3.683	302.200, 4.254	302.200, 3.540
1513	302.400, 4.479	302.400, 3.604	302.400, 4.308	302.400, 3.682	302.400, 4.254	302.400, 3.539
1514	302.600, 4.479	302.600, 3.602	302.600, 4.308	302.600, 3.682	302.600, 4.254	302.600, 3.538
1515	302.800, 4.480	302.800, 3.601	302.800, 4.308	302.800, 3.681	302.800, 4.254	302.800, 3.536
1516	303.000, 4.480	303.000, 3.600	303.000, 4.308	303.000, 3.680	303.000, 4.254	303.000, 3.535
1517	303.200, 4.480	303.200, 3.599	303.200, 4.308	303.200, 3.679	303.200, 4.254	303.200, 3.533
1518	303.400, 4.480	303.400, 3.598	303.400, 4.308	303.400, 3.678	303.400, 4.254	303.400, 3.532
1519	303.600, 4.480	303.600, 3.597	303.600, 4.308	303.600, 3.677	303.600, 4.255	303.600, 3.530
1520	303.800, 4.480	303.800, 3.596	303.800, 4.308	303.800, 3.676	303.800, 4.255	303.800, 3.529
1521	304.000, 4.481	304.000, 3.595	304.000, 4.308	304.000, 3.675	304.000, 4.255	304.000, 3.528
1522	304.200, 4.481	304.200, 3.594	304.200, 4.308	304.200, 3.674	304.200, 4.255	304.200, 3.526
1523	304.400, 4.481	304.400, 3.593	304.400, 4.308	304.400, 3.673	304.400, 4.255	304.400, 3.525
1524	304.600, 4.481	304.600, 3.592	304.600, 4.308	304.600, 3.671	304.600, 4.256	304.600, 3.523
1525	304.800, 4.481	304.800, 3.590	304.800, 4.308	304.800, 3.670	304.800, 4.256	304.800, 3.522
1526	305.000, 4.481	305.000, 3.589	305.000, 4.308	305.000, 3.669	305.000, 4.256	305.000, 3.520
1527	305.200, 4.481	305.200, 3.588	305.200, 4.309	305.200, 3.668	305.200, 4.256	305.200, 3.519
1528	305.400, 4.481	305.400, 3.586	305.400, 4.309	305.400, 3.667	305.400, 4.256	305.400, 3.518
1529	305.600, 4.481	305.600, 3.585	305.600, 4.309	305.600, 3.666	305.600, 4.257	305.600, 3.516
1530	305.800, 4.481	305.800, 3.583	305.800, 4.309	305.800, 3.665	305.800, 4.257	305.800, 3.515
1531	306.000, 4.481	306.000, 3.582	306.000, 4.309	306.000, 3.664	306.000, 4.257	306.000, 3.513
1532	306.200, 4.482	306.200, 3.580	306.200, 4.309	306.200, 3.663	306.200, 4.257	306.200, 3.511
1533	306.400, 4.482	306.400, 3.579	306.400, 4.309	306.400, 3.663	306.400, 4.257	306.400, 3.510
1534	306.600, 4.482	306.600, 3.578	306.600, 4.310	306.600, 3.662	306.600, 4.257	306.600, 3.508
1535	306.800, 4.482	306.800, 3.576	306.800, 4.310	306.800, 3.661	306.800, 4.258	306.800, 3.506
1536	307.000, 4.482	307.000, 3.575	307.000, 4.310	307.000, 3.660	307.000, 4.258	307.000, 3.505
1537	307.200, 4.482	307.200, 3.574	307.200, 4.310	307.200, 3.659	307.200, 4.258	307.200, 3.503
1538	307.400, 4.482	307.400, 3.572	307.400, 4.310	307.400, 3.659	307.400, 4.258	307.400, 3.502
1539	307.600, 4.482	307.600, 3.571	307.600, 4.310	307.600, 3.658	307.600, 4.259	307.600, 3.500
1540	307.800, 4.482	307.800, 3.569	307.800, 4.310	307.800, 3.657	307.800, 4.259	307.800, 3.498
1541	308.000, 4.482	308.000, 3.568	308.000, 4.311	308.000, 3.656	308.000, 4.260	308.000, 3.496
1542	308.200, 4.482	308.200, 3.567	308.200, 4.311	308.200, 3.656	308.200, 4.260	308.200, 3.495
1543	308.400, 4.483	308.400, 3.565	308.400, 4.311	308.400, 3.655	308.400, 4.260	308.400, 3.493
1544	308.600, 4.483	308.600, 3.564	308.600, 4.311	308.600, 3.654	308.600, 4.260	308.600, 3.491
1545	308.800, 4.483	308.800, 3.563	308.800, 4.311	308.800, 3.653	308.800, 4.261	308.800, 3.489
1546	309.000, 4.483	309.000, 3.561	309.000, 4.312	309.000, 3.652	309.000, 4.261	309.000, 3.487
1547	309.200, 4.483	309.200, 3.560	309.200, 4.312	309.200, 3.651	309.200, 4.262	309.200, 3.486
1548	309.400, 4.483	309.400, 3.558	309.400, 4.312	309.400, 3.650	309.400, 4.262	309.400, 3.484
1549	309.600, 4.483	309.600, 3.557	309.600, 4.312	309.600, 3.648	309.600, 4.262	309.600, 3.483
1550	309.800, 4.482	309.800, 3.556	309.800, 4.313	309.800, 3.647	309.800, 4.262	309.800, 3.481
1551	310.000, 4.482	310.000, 3.555	310.000, 4.313	310.000, 3.646	310.000, 4.262	310.000, 3.480
1552	310.200, 4.482	310.200, 3.554	310.200, 4.313	310.200, 3.645	310.200, 4.262	310.200, 3.479
1553	310.400, 4.483	310.400, 3.552	310.400, 4.314	310.400, 3.644	310.400, 4.262	310.400, 3.478
1554	310.600, 4.483	310.600, 3.551	310.600, 4.314	310.600, 3.644	310.600, 4.262	310.600, 3.477
1555	310.800, 4.483	310.800, 3.550	310.800, 4.314	310.800, 3.643	310.800, 4.261	310.800, 3.476
1556	311.000, 4.483	311.000, 3.548	311.000, 4.314	311.000, 3.642	311.000, 4.262	311.000, 3.475
1557	311.200, 4.483	311.200, 3.547	311.200, 4.314	311.200, 3.641	311.200, 4.262	311.200, 3.473
1558	311.400, 4.483	311.400, 3.545	311.400, 4.314	311.400, 3.640	311.400, 4.261	311.400, 3.472
1559	311.600, 4.483	311.600, 3.544	311.600, 4.314	311.600, 3.639	311.600, 4.262	311.600, 3.471
1560	311.800, 4.483	311.800, 3.542	311.800, 4.314	311.800, 3.638	311.800, 4.261	311.800, 3.469
1561	312.000, 4.483	312.000, 3.540	312.000, 4.314	312.000, 3.638	312.000, 4.261	312.000, 3.467
1562	312.200, 4.484	312.200, 3.539	312.200, 4.314	312.200, 3.637	312.200, 4.261	312.200, 3.466
1563	312.400, 4.484	312.400, 3.537	312.400, 4.313	312.400, 3.636	312.400, 4.262	312.400, 3.464
1564	312.600, 4.484	312.600, 3.535	312.600, 4.313	312.600, 3.635	312.600, 4.262	312.600, 3.462
1565	312.800, 4.484	312.800, 3.534	312.800, 4.313	312.800, 3.634	312.800, 4.262	312.800, 3.460
1566	313.000, 4.485	313.000, 3.533	313.000, 4.313	313.000, 3.633	313.000, 4.263	313.000, 3.459
1567	313.200, 4.485	313.200, 3.532	313.200, 4.313	313.200, 3.632	313.200, 4.263	313.200, 3.457
1568	313.400, 4.485	313.400, 3.531	313.400, 4.313	313.400, 3.631	313.400, 4.264	313.400, 3.456
1569	313.600, 4.485	313.600, 3.530	313.600, 4.314	313.600, 3.630	313.600, 4.264	313.600, 3.454
1570	313.800, 4.485	313.800, 3.529	313.800, 4.314	313.800, 3.629	313.800, 4.264	313.800, 3.453
1571	314.000, 4.485	314.000, 3.528	314.000, 4.315	314.000, 3.628	314.000, 4.264	314.000, 3.452
1572	314.200, 4.485	314.200, 3.527	314.200, 4.315	314.200, 3.626	314.200, 4.264	314.200, 3.451
1573	314.400, 4.485	314.400, 3.525	314.400, 4.315	314.400, 3.625	314.400, 4.264	314.400, 3.449
1574	314.600, 4.485	314.600, 3.524	314.600, 4.315	314.600, 3.624	314.600, 4.264	314.600, 3.447
1575	314.800, 4.486	314.800, 3.523	314.800, 4.316	314.800, 3.623	314.800, 4.264	314.800, 3.446
1576	315.000, 4.486	315.000, 3.522	315.000, 4.316	315.000, 3.622	315.000, 4.264	315.000, 3.444
1577	315.200, 4.486	315.200, 3.520	315.200, 4.316	315.200, 3.621	315.200, 4.265	315.200, 3.442
1578	315.400, 4.486	315.400, 3.519	315.400, 4.316	315.400, 3.620	315.400, 4.265	315.400, 3.441
1579	315.600, 4.487	315.600, 3.517	315.600, 4.316	315.600, 3.619	315.600, 4.266	315.600, 3.439
1580	315.800, 4.487	315.800, 3.515	315.800, 4.316	315.800, 3.619	315.800, 4.266	315.800, 3.437
1581	316.000, 4.487	316.000, 3.513	316.000, 4.315	316.000, 3.618	316.000, 4.266	316.000, 3.435
1582	316.200, 4.487	316.200, 3.511	316.200, 4.315	316.200, 3.617	316.200, 4.266	316.200, 3.433
1583	316.400, 4.487	316.400, 3.510	316.400, 4.315	316.400, 3.617	316.400, 4.266	316.400, 3.431
1584	316.600, 4.488	316.600, 3.508	316.600, 4.315	316.600, 3.616	316.600, 4.267	316.600, 3.430
1585	316.800, 4.488	316.800, 3.507	316.800, 4.315	316.800, 3.615	316.800, 4.267	316.800, 3.428
1586	317.000, 4.488	317.000, 3.506	317.000, 4.315	317.000, 3.614	317.000, 4.267	317.000, 3.427
1587	317.200, 4.488	317.200, 3.505	317.200, 4.316	317.200, 3.613	317.200, 4.268	317.200, 3.425
1588	317.400, 4.488	317.400, 3.504	317.400, 4.316	317.400, 3.612	317.400, 4.268	317.400, 3.424
1589	317.600, 4.488	317.600, 3.503	317.600, 4.317	317.600, 3.610	317.600, 4.268	317.600, 3.423
1590	317.800, 4.488	317.800, 3.502	317.800, 4.317	317.800, 3.609	317.800, 4.268	317.800, 3.421
1591	318.000, 4.487	318.000, 3.501	318.000, 4.317	318.000, 3.608	318.000, 4.268	318.000, 3.420
1592	318.200, 4.488	318.200, 3.500	318.200, 4.318	318.200, 3.607	318.200, 4.268	318.200, 3.419
1593	318.400, 4.488	318.400, 3.499	318.400, 4.318	318.400, 3.606	318.400, 4.268	318.400, 3.417
1594	318.600, 4.488	318.600, 3.498	318.600, 4.318	318.600, 3.604	318.600, 4.268	318.600, 3.416
1595	318.800, 4.489	318.800, 3.496	318.800, 4.318	318.800, 3.603	318.800, 4.268	318.800, 3.415
1596	319.000, 4.489	319.000, 3.495	319.000, 4.318	319.000, 3.602	319.000, 4.268	319.000, 3.413
1597	319.200, 4.490	319.200, 3.494	319.200, 4.318	319.200, 3.601	319.200, 4.268	319.200, 3.412
1598	319.400, 4.490	319.400, 3.492	319.400, 4.318	319.400, 3.600	319.400, 4.268	319.400, 3.411
1599	319.600, 4.490	319.600, 3.491	319.600, 4.318	319.600, 3.599	319.600, 4.268	319.600, 3.409
1600	319.800, 4.490	319.800, 3.489	319.800, 4.318	319.800, 3.598	319.800, 4.268	319.800, 3.407
1601	320.000, 4.490	320.000, 3.487	320.000, 4.318	320.000, 3.597	320.000, 4.268	320.000, 3.406
1602	320.200, 4.490	320.200, 3.486	320.200, 4.318	320.200, 3.596	320.200, 4.268	320.200, 3.404
1603	320.400, 4.490	320.400, 3.484	320.400, 4.317	320.400, 3.595	320.400, 4.268	320.400, 3.402
1604	320.600, 4.490	320.600, 3.482	320.600, 4.317	320.600, 3.594	320.600, 4.268	320.600, 3.400
1605	320.800, 4.490	320.800, 3.481	320.800, 4.317	320.800, 3.593	320.800, 4.269	320.800, 3.399
1606	321.000, 4.490	321.000, 3.480	321.000, 4.317	321.000, 3.591	321.000, 4.269	321.000, 3.397
1607	321.200, 4.490	321.200, 3.478	321.200, 4.317	321.200, 3.590	321.200, 4.269	321.200, 3.395
1608	321.400, 4.490	321.400, 3.477	321.400, 4.318	321.400, 3.589	321.400, 4.269	321.400, 3.394
1609	321.600, 4.490	321.600, 3.476	321.600, 4.318	321.600, 3.587	321.600, 4.269	321.600, 3.392
1610	321.800, 4.490	321.800, 3.475	321.800, 4.318	321.800, 3.586	321.800, 4.269	321.800, 3.390
1611	322.000, 4.490	322.000, 3.473	322.000, 4.318	322.000, 3.585	322.000, 4.270	322.000, 3.389
1612	322.200, 4.490	322.200, 3.472	322.200, 4.319	322.200, 3.584	322.200, 4.270	322.200, 3.387
1613	322.400, 4.490	322.400, 3.471	322.400, 4.319	322.400, 3.583	322.400, 4.271	322.400, 3.386
1614	322.600, 4.490	322.600, 3.469	322.600, 4.319	322.600, 3.582	322.600, 4.271	322.600, 3.384
1615	322.800, 4.491	322.800, 3.468	322.800, 4.320	322.800, 3.582	322.800, 4.271	322.800, 3.383
1616	323.000, 4.491	323.000, 3.466	323.000, 4.320	323.000, 3.581	323.000, 4.271	323.000, 3.381
1617	323.200, 4.491	323.200, 3.465	323.200, 4.321	323.200, 3.580	323.200, 4.271	323.200, 3.380
1618	323.400, 4.491	323.400, 3.464	323.400, 4.321	323.400, 3.580	323.400, 4.271	323.400, 3.378
1619	323.600, 4.491	323.600, 3.462	323.600, 4.321	323.600, 3.579	323.600, 4.271	323.600, 3.377
1620	323.800, 4.491	323.800, 3.461	323.800, 4.321	323.800, 3.578	323.800, 4.271	323.800, 3.375
1621	324.000, 4.491	324.000, 3.460	324.000, 4.321	324.000, 3.577	324.000, 4.271	324.000, 3.373
1622	324.200, 4.491	324.200, 3.459	324.200, 4.321	324.200, 3.576	324.200, 4.271	324.200, 3.372
1623	324.400, 4.492	324.400, 3.458	324.400, 4.321	324.400, 3.575	324.400, 4.270	324.400, 3.371
1624	324.600, 4.492	324.600, 3.457	324.600, 4.321	324.600, 3.574	324.600, 4.270	324.600, 3.369
1625	324.800, 4.492	324.800, 3.456	324.800, 4.321	324.800, 3.573	324.800, 4.270	324.800, 3.368
1626	325.000, 4.492	325.000, 3.455	325.000, 4.321	325.000, 3.572	325.000, 4.270	325.000, 3.367
1627	325.200, 4.492	325.200, 3.453	325.200, 4.321	325.200, 3.571	325.200, 4.270	325.200, 3.366
1628	325.400, 4.493	325.400, 3.452	325.400, 4.320	325.400, 3.570	325.400, 4.270	325.400, 3.364
1629	325.600, 4.493	325.600, 3.450	325.600, 4.320	325.600, 3.568	325.600, 4.270	325.600, 3.363
1630	325.800, 4.494	325.800, 3.448	325.800, 4.321	325.800, 3.567	325.800, 4.271	325.800, 3.361
1631	326.000, 4.494	326.000, 3.447	326.000, 4.321	326.000, 3.566	326.000, 4.271	326.000, 3.360
1632	326.200, 4.494	326.200, 3.445	326.200, 4.321	326.200, 3.565	326.200, 4.272	326.200, 3.358
1633	326.400, 4.494	326.400, 3.443	326.400, 4.322	326.400, 3.564	326.400, 4.272	326.400, 3.357
1634	326.600, 4.494	326.600, 3.441	326.600, 4.322	326.600, 3.563	326.600, 4.273	326.600, 3.355
1635	326.800, 4.494	326.800, 3.439	326.800, 4.322	326.800, 3.562	326.800, 4.273	326.800, 3.353
1636	327.000, 4.494	327.000, 3.437	327.000, 4.322	327.000, 3.562	327.000, 4.273	327.000, 3.351
1637	327.200, 4.494	327.200, 3.436	327.200, 4.322	327.200, 3.561	327.200, 4.273	327.200, 3.349
1638	327.400, 4.494	327.400, 3.434	327.400, 4.322	327.400, 3.559	327.400, 4.274	327.400, 3.347
1639	327.600, 4.493	327.600, 3.433	327.600, 4.322	327.600, 3.558	327.600, 4.274	327.600, 3.345
1640	327.800, 4.493	327.800, 3.432	327.800, 4.322	327.800, 3.557	327.800, 4.274	327.800, 3.344
1641	328.000, 4.493	328.000, 3.430	328.000, 4.323	328.000, 3.556	328.000, 4.274	328.000, 3.342
1642	328.200, 4.493	328.200, 3.429	328.200, 4.323	328.200, 3.555	328.200, 4.273	328.200, 3.340
1643	328.400, 4.493	328.400, 3.428	328.400, 4.323	328.400, 3.554	328.400, 4.273	328.400, 3.339
1644	328.600, 4.493	328.600, 3.427	328.600, 4.323	328.600, 3.554	328.600, 4.274	328.600, 3.337
1645	328.800, 4.493	328.800, 3.426	328.800, 4.323	328.800, 3.553	328.800, 4.274	328.800, 3.335
1646	329.000, 4.493	329.000, 3.425	329.000, 4.323	329.000, 3.552	329.000, 4.274	329.000, 3.334
1647	329.200, 4.494	329.200, 3.423	329.200, 4.323	329.200, 3.551	329.200, 4.274	329.200, 3.332
1648	329.400, 4.494	329.400, 3.422	329.400, 4.323	329.400, 3.551	329.400, 4.274	329.400, 3.331
1649	329.600, 4.494	329.600, 3.421	329.600, 4.323	329.600, 3.550	329.600, 4.275	329.600, 3.329
1650	329.800, 4.495	329.800, 3.420	329.800, 4.324	329.800, 3.549	329.800, 4.275	329.800, 3.328
1651	330.000, 4.495	330.000, 3.419	330.000, 4.324	330.000, 3.548	330.000, 4.276	330.000, 3.327
1652	330.200, 4.495	330.200, 3.418	330.200, 4.324	330.200, 3.548	330.200, 4.276	330.200, 3.326
1653	330.400, 4.495	330.400, 3.417	330.400, 4.325	330.400, 3.547	330.400, 4.277	330.400, 3.324
1654	330.600, 4.495	330.600, 3.416	330.600, 4.325	330.600, 3.546	330.600, 4.277	330.600, 3.323
1655	330.800, 4.495	330.800, 3.414	330.800, 4.324	330.800, 3.545	330.800, 4.278	330.800, 3.322
1656	331.000, 4.495	331.000, 3.413	331.000, 4.324	331.000, 3.544	331.000, 4.278	331.000, 3.320
1657	331.200, 4.495	331.200, 3.412	331.200, 4.324	331.200, 3.543	331.200, 4.278	331.200, 3.319
1658	331.400, 4.496	331.400, 3.411	331.400, 4.324	331.400, 3.542	331.400, 4.278	331.400, 3.318
1659	331.600, 4.496	331.600, 3.409	331.600, 4.324	331.600, 3.541	331.600, 4.278	331.600, 3.316
1660	331.800, 4.496	331.800, 3.408	331.800, 4.325	331.800, 3.540	331.800, 4.278	331.800, 3.315
1661	332.000, 4.496	332.000, 3.406	332.000, 4.325	332.000, 3.539	332.000, 4.278	332.000, 3.313
1662	332.200, 4.496	332.200, 3.404	332.200, 4.325	332.200, 3.538	332.200, 4.278	332.200, 3.312
1663	332.400, 4.496	332.400, 3.403	332.400, 4.325	332.400, 3.537	332.400, 4.278	332.400, 3.310
1664	332.600, 4.496	332.600, 3.401	332.600, 4.325	332.600, 3.536	332.600, 4.277	332.600, 3.308
1665	332.800, 4.496	332.800, 3.400	332.800, 4.326	332.800, 3.535	332.800, 4.277	332.800, 3.307
1666	333.000, 4.497	333.000, 3.398	333.000, 4.326	333.000, 3.534	333.000, 4.277	333.000, 3.305
1667	333.200, 4.497	333.200, 3.397	333.200, 4.326	333.200, 3.533	333.200, 4.277	333.200, 3.303
1668	333.400, 4.497	333.400, 3.395	333.400, 4.326	333.400, 3.532	333.400, 4.277	333.400, 3.301
1669	333.600, 4.496	333.600, 3.394	333.600, 4.327	333.600, 3.532	333.600, 4.277	333.600, 3.299
1670	333.800, 4.496	333.800, 3.392	333.800, 4.327	333.800, 3.530	333.800, 4.277	333.800, 3.297
1671	334.000, 4.496	334.000, 3.391	334.000, 4.327	334.000, 3.529	334.000, 4.278	334.000, 3.296
1672	334.200, 4.496	334.200, 3.390	334.200, 4.327	334.200, 3.528	334.200, 4.278	334.200, 3.294
1673	334.400, 4.495	334.400, 3.389	334.400, 4.326	334.400, 3.527	334.400, 4.278	334.400, 3.292
1674	334.600, 4.495	334.600, 3.387	334.600, 4.326	334.600, 3.525	334.600, 4.279	334.600, 3.290
1675	334.800, 4.495	334.800, 3.386	334.800, 4.326	334.800, 3.524	334.800, 4.279	334.800, 3.289
1676	335.000, 4.495	335.000, 3.385	335.000, 4.325	335.000, 3.522	335.000, 4.279	335.000, 3.287
1677	335.200, 4.495	335.200, 3.383	335.200, 4.325	335.200, 3.521	335.200, 4.280	335.200, 3.286
1678	335.400, 4.496	335.400, 3.381	335.400, 4.325	335.400, 3.520	335.400, 4.280	335.400, 3.284
1679	335.600, 4.496	335.600, 3.379	335.600, 4.325	335.600, 3.518	335.600, 4.280	335.600, 3.283
1680	335.800, 4.496	335.800, 3.377	335.800, 4.325	335.800, 3.517	335.800, 4.280	335.800, 3.281
1681	336.000, 4.497	336.000, 3.376	336.000, 4.325	336.000, 3.516	336.000, 4.280	336.000, 3.280
1682	336.200, 4.497	336.200, 3.374	336.200, 4.325	336.200, 3.515	336.200, 4.280	336.200, 3.278
1683	336.400, 4.497	336.400, 3.373	336.400, 4.325	336.400, 3.515	336.400, 4.280	336.400, 3.276
1684	336.600, 4.497	336.600, 3.371	336.600, 4.326	336.600, 3.514	336.600, 4.280	336.600, 3.275
1685	336.800, 4.497	336.800, 3.370	336.800, 4.326	336.800, 3.513	336.800, 4.280	336.800, 3.273
1686	337.000, 4.498	337.000, 3.369	337.000, 4.326	337.000, 3.512	337.000, 4.280	337.000, 3.272
1687	337.200, 4.498	337.200, 3.367	337.200, 4.326	337.200, 3.511	337.200, 4.281	337.200, 3.270
1688	337.400, 4.498	337.400, 3.366	337.400, 4.327	337.400, 3.511	337.400, 4.281	337.400, 3.268
1689	337.600, 4.498	337.600, 3.365	337.600, 4.327	337.600, 3.510	337.600, 4.281	337.600, 3.266
1690	337.800, 4.498	337.800, 3.364	337.800, 4.327	337.800, 3.509	337.800, 4.282	337.800, 3.265
1691	338.000, 4.498	338.000, 3.363	338.000, 4.327	338.000, 3.509	338.000, 4.282	338.000, 3.263
1692	338.200, 4.498	338.200, 3.362	338.200, 4.328	338.200, 3.508	338.200, 4.282	338.200, 3.261
1693	338.400, 4.499	338.400, 3.360	338.400, 4.328	338.400, 3.507	338.400, 4.283	338.400, 3.260
1694	338.600, 4.499	338.600, 3.359	338.600, 4.329	338.600, 3.506	338.600, 4.283	338.600, 3.258
1695	338.800, 4.499	338.800, 3.357	338.800, 4.329	338.800, 3.505	338.800, 4.283	338.800, 3.256
1696	339.000, 4.499	339.000, 3.356	339.000, 4.329	339.000, 3.504	339.000, 4.283	339.000, 3.254
1697	339.200, 4.499	339.200, 3.354	339.200, 4.329	339.200, 3.503	339.200, 4.283	339.200, 3.252
1698	339.400, 4.499	339.400, 3.352	339.400, 4.329	339.400, 3.502	339.400, 4.283	339.400, 3.251
1699	339.600, 4.499	339.600, 3.351	339.600, 4.329	339.600, 3.501	339.600, 4.282	339.600, 3.249
1700	339.800, 4.500	339.800, 3.349	339.800, 4.329	339.800, 3.500	339.800, 4.281	339.800, 3.248
1701	340.000, 4.500	340.000, 3.348	340.000, 4.329	340.000, 3.499	340.000, 4.281	340.000, 3.246
1702	340.200, 4.500	340.200, 3.347	340.200, 4.329	340.200, 3.498	340.200, 4.281	340.200, 3.245
1703	340.400, 4.500	340.400, 3.346	340.400, 4.329	340.400, 3.497	340.400, 4.281	340.400, 3.243
1704	340.600, 4.500	340.600, 3.345	340.600, 4.329	340.600, 3.496	340.600, 4.281	340.600, 3.242
1705	340.800, 4.500	340.800, 3.344	340.800, 4.329	340.800, 3.494	340.800, 4.281	340.800, 3.241
1706	341.000, 4.500	341.000, 3.343	341.000, 4.328	341.000, 3.493	341.000, 4.281	341.000, 3.239
1707	341.200, 4.500	341.200, 3.342	341.200, 4.328	341.200, 3.492	341.200, 4.282	341.200, 3.237
1708	341.400, 4.500	341.400, 3.340	341.400, 4.328	341.400, 3.491	341.400, 4.282	341.400, 3.236
1709	341.600, 4.500	341.600, 3.339	341.600, 4.328	341.600, 3.490	341.600, 4.283	341.600, 3.234
1710	341.800, 4.499	341.800, 3.338	341.800, 4.328	341.800, 3.488	341.800, 4.284	341.800, 3.233
1711	342.000, 4.500	342.000, 3.336	342.000, 4.329	342.000, 3.487	342.000, 4.284	342.000, 3.231
1712	342.200, 4.500	342.200, 3.335	342.200, 4.329	342.200, 3.486	342.200, 4.285	342.200, 3.230
1713	342.400, 4.500	342.400, 3.334	342.400, 4.329	342.400, 3.485	342.400, 4.285	342.400, 3.228
1714	342.600, 4.500	342.600, 3.332	342.600, 4.330	342.600, 3.484	342.600, 4.285	342.600, 3.227
1715	342.800, 4.500	342.800, 3.330	342.800, 4.330	342.800, 3.483	342.800, 4.285	342.800, 3.225
1716	343.000, 4.501	343.000, 3.329	343.000, 4.329	343.000, 3.481	343.000, 4.285	343.000, 3.224
1717	343.200, 4.501	343.200, 3.327	343.200, 4.329	343.200, 3.480	343.200, 4.284	343.200, 3.223
1718	343.400, 4.501	343.400, 3.326	343.400, 4.329	343.400, 3.479	343.400, 4.284	343.400, 3.221
1719	343.600, 4.502	343.600, 3.324	343.600, 4.329	343.600, 3.478	343.600, 4.284	343.600, 3.220
1720	343.800, 4.502	343.800, 3.323	343.800, 4.329	343.800, 3.477	343.800, 4.284	343.800, 3.219
1721	344.000, 4.502	344.000, 3.322	344.000, 4.329	344.000, 3.476	344.000, 4.285	344.000, 3.217
1722	344.200, 4.502	344.200, 3.321	344.200, 4.329	344.200, 3.475	344.200, 4.285	344.200, 3.216
1723	344.400, 4.502	344.400, 3.320	344.400, 4.330	344.400, 3.474	344.400, 4.286	344.400, 3.215
1724	344.600, 4.502	344.600, 3.318	344.600, 4.330	344.600, 3.473	344.600, 4.286	344.600, 3.213
1725	344.800, 4.502	344.800, 3.317	344.800, 4.331	344.800, 3.472	344.800, 4.287	344.800, 3.212
1726	345.000, 4.502	345.000, 3.316	345.000, 4.331	345.000, 3.471	345.000, 4.287	345.000, 3.210
1727	345.200, 4.502	345.200, 3.314	345.200, 4.332	345.200, 3.470	345.200, 4.288	345.200, 3.208
1728	345.400, 4.503	345.400, 3.313	345.400, 4.332	345.400, 3.469	345.400, 4.288	345.400, 3.207
1729	345.600, 4.503	345.600, 3.311	345.600, 4.332	345.600, 3.468	345.600, 4.288	345.600, 3.205
1730	345.800, 4.503	345.800, 3.310	345.800, 4.332	345.800, 3.467	345.800, 4.288	345.800, 3.203
1731	346.000, 4.504	346.000, 3.309	346.000, 4.332	346.000, 3.466	346.000, 4.288	346.000, 3.201
1732	346.200, 4.504	346.200, 3.308	346.200, 4.332	346.200, 3.465	346.200, 4.288	346.200, 3.199
1733	346.400, 4.505	346.400, 3.306	346.400, 4.332	346.400, 3.465	346.400, 4.288	346.400, 3.198
1734	346.600, 4.505	346.600, 3.305	346.600, 4.332	346.600, 3.463	346.600, 4.287	346.600, 3.196
1735	346.800, 4.505	346.800, 3.303	346.800, 4.332	346.800, 3.462	346.800, 4.287	346.800, 3.194
1736	347.000, 4.505	347.000, 3.301	347.000, 4.331	347.000, 3.461	347.000, 4.286	347.000, 3.193
1737	347.200, 4.505	347.200, 3.300	347.200, 4.331	347.200, 3.460	347.200, 4.286	347.200, 3.191
1738	347.400, 4.505	347.400, 3.298	347.400, 4.331	347.400, 3.459	347.400, 4.286	347.400, 3.190
1739	347.600, 4.505	347.600, 3.297	347.600, 4.331	347.600, 3.457	347.600, 4.286	347.600, 3.188
1740	347.800, 4.504	347.800, 3.296	347.800, 4.331	347.800, 3.457	347.800, 4.287	347.800, 3.186
1741	348.000, 4.504	348.000, 3.294	348.000, 4.332	348.000, 3.456	348.000, 4.287	348.000, 3.185
1742	348.200, 4.504	348.200, 3.293	348.200, 4.332	348.200, 3.455	348.200, 4.287	348.200, 3.183
1743	348.400, 4.504	348.400, 3.291	348.400, 4.333	348.400, 3.454	348.400, 4.288	348.400, 3.182
1744	348.600, 4.504	348.600, 3.290	348.600, 4.333	348.600, 3.453	348.600, 4.288	348.600, 3.180
1745	348.800, 4.504	348.800, 3.288	348.800, 4.333	348.800, 3.452	348.800, 4.289	348.800, 3.178
1746	349.000, 4.504	349.000, 3.287	349.000, 4.334	349.000, 3.451	349.000, 4.289	349.000, 3.176
1747	349.200, 4.504	349.200, 3.286	349.200, 4.334	349.200, 3.450	349.200, 4.289	349.200, 3.174
1748	349.400, 4.505	349.400, 3.285	349.400, 4.334	349.400, 3.449	349.400, 4.290	349.400, 3.172
1749	349.600, 4.505	349.600, 3.283	349.600, 4.334	349.600, 3.448	349.600, 4.290	349.600, 3.171
1750	349.800, 4.505	349.800, 3.282	349.800, 4.334	349.800, 3.446	349.800, 4.289	349.800, 3.169
1751	350.000, 4.506	350.000, 3.281	350.000, 4.334	350.000, 3.445	350.000, 4.289	350.000, 3.167
1752	350.200, 4.506	350.200, 3.280	350.200, 4.334	350.200, 3.443	350.200, 4.289	350.200, 3.166
1753	350.400, 4.506	350.400, 3.279	350.400, 4.334	350.400, 3.442	350.400, 4.289	350.400, 3.164
1754	350.600, 4.506	350.600, 3.277	350.600, 4.334	350.600, 3.440	350.600, 4.289	350.600, 3.163
1755	350.800, 4.506	350.800, 3.276	350.800, 4.334	350.800, 3.439	350.800, 4.290	350.800, 3.161
1756	351.000, 4.506	351.000, 3.275	351.000, 4.334	351.000, 3.438	351.000, 4.290	351.000, 3.160
1757	351.200, 4.506	351.200, 3.273	351.200, 4.334	351.200, 3.437	351.200, 4.290	351.200, 3.158
1758	351.400, 4.506	351.400, 3.272	351.400, 4.334	351.400, 3.436	351.400, 4.290	351.400, 3.157
1759	351.600, 4.506	351.600, 3.270	351.600, 4.334	351.600, 3.434	351.600, 4.291	351.600, 3.156
1760	351.800, 4.507	351.800, 3.269	351.800, 4.334	351.800, 3.434	351.800, 4.291	351.800, 3.154
1761	352.000, 4.507	352.000, 3.267	352.000, 4.334	352.000, 3.433	352.000, 4.291	352.000, 3.152
1762	352.200, 4.507	352.200, 3.265	352.200, 4.334	352.200, 3.432	352.200, 4.291	352.200, 3.151
1763	352.400, 4.507	352.400, 3.264	352.400, 4.334	352.400, 3.431	352.400, 4.291	352.400, 3.149
1764	352.600, 4.507	352.600, 3.262	352.600, 4.335	352.600, 3.430	352.600, 4.290	352.600, 3.147
1765	352.800, 4.507	352.800, 3.261	352.800, 4.335	352.800, 3.429	352.800, 4.290	352.800, 3.145
1766	353.000, 4.507	353.000, 3.260	353.000, 4.335	353.000, 3.428	353.000, 4.289	353.000, 3.143
1767	353.200, 4.507	353.200, 3.258	353.200, 4.335	353.200, 3.427	353.200, 4.288	353.200, 3.142
1768	353.400, 4.507	353.400, 3.257	353.400, 4.335	353.400, 3.427	353.400, 4.288	353.400, 3.140
1769	353.600, 4.507	353.600, 3.256	353.600, 4.335	353.600, 3.426	353.600, 4.288	353.600, 3.138
1770	353.800, 4.507	353.800, 3.255	353.800, 4.335	353.800, 3.425	353.800, 4.288	353.800, 3.137
1771	354.000, 4.507	354.000, 3.254	354.000, 4.336	354.000, 3.424	354.000, 4.288	354.000, 3.135
1772	354.200, 4.508	354.200, 3.253	354.200, 4.336	354.200, 3.423	354.200, 4.289	354.200, 3.134
1773	354.400, 4.507	354.400, 3.252	354.400, 4.336	354.400, 3.421	354.400, 4.289	354.400, 3.132
1774	354.600, 4.507	354.600, 3.251	354.600, 4.337	354.600, 3.420	354.600, 4.290	354.600, 3.131
1775	354.800, 4.507	354.800, 3.250	354.800, 4.337	354.800, 3.419	354.800, 4.291	354.800, 3.129
1776	355.000, 4.507	355.000, 3.248	355.000, 4.337	355.000, 3.418	355.000, 4.291	355.000, 3.128
1777	355.200, 4.507	355.200, 3.247	355.200, 4.336	355.200, 3.416	355.200, 4.292	355.200, 3.127
1778	355.400, 4.507	355.400, 3.245	355.400, 4.337	355.400, 3.415	355.400, 4.292	355.400, 3.125
1779	355.600, 4.508	355.600, 3.244	355.600, 4.336	355.600, 3.414	355.600, 4.293	355.600, 3.124
1780	355.800, 4.507	355.800, 3.242	355.800, 4.336	355.800, 3.413	355.800, 4.293	355.800, 3.122
1781	356.000, 4.507	356.000, 3.240	356.000, 4.337	356.000, 3.412	356.000, 4.293	356.000, 3.121
1782	356.200, 4.507	356.200, 3.239	356.200, 4.337	356.200, 3.411	356.200, 4.293	356.200, 3.119
1783	356.400, 4.507	356.400, 3.237	356.400, 4.337	356.400, 3.410	356.400, 4.293	356.400, 3.117
1784	356.600, 4.507	356.600, 3.235	356.600, 4.337	356.600, 3.409	356.600, 4.292	356.600, 3.116
1785	356.800, 4.507	356.800, 3.234	356.800, 4.337	356.800, 3.408	356.800, 4.292	356.800, 3.114
1786	357.000, 4.507	357.000, 3.232	357.000, 4.337	357.000, 3.407	357.000, 4.292	357.000, 3.113
1787	357.200, 4.507	357.200, 3.230	357.200, 4.337	357.200, 3.407	357.200, 4.292	357.200, 3.111
1788	357.400, 4.507	357.400, 3.229	357.400, 4.337	357.400, 3.406	357.400, 4.292	357.400, 3.110
1789	357.600, 4.507	357.600, 3.227	357.600, 4.337	357.600, 3.405	357.600, 4.291	357.600, 3.108
1790	357.800, 4.507	357.800, 3.226	357.800, 4.337	357.800, 3.403	357.800, 4.291	357.800, 3.106
1791	358.000, 4.508	358.000, 3.224	358.000, 4.337	358.000, 3.402	358.000, 4.291	358.000, 3.105
1792	358.200, 4.508	358.200, 3.223	358.200, 4.337	358.200, 3.401	358.200, 4.291	358.200, 3.103
1793	358.400, 4.508	358.400, 3.222	358.400, 4.337	358.400, 3.399	358.400, 4.292	358.400, 3.101
1794	358.600, 4.509	358.600, 3.220	358.600, 4.337	358.600, 3.398	358.600, 4.292	358.600, 3.099
1795	358.800, 4.510	358.800, 3.219	358.800, 4.337	358.800, 3.397	358.800, 4.292	358.800, 3.097
1796	359.000, 4.510	359.000, 3.218	359.000, 4.337	359.000, 3.396	359.000, 4.292	359.000, 3.095
1797	359.200, 4.510	359.200, 3.216	359.200, 4.337	359.200, 3.395	359.200, 4.293	359.200, 3.093
1798	359.400, 4.511	359.400, 3.215	359.400, 4.337	359.400, 3.394	359.400, 4.293	359.400, 3.092
1799	359.600, 4.511	359.600, 3.213	359.600, 4.337	359.600, 3.393	359.600, 4.293	359.600, 3.090
1800	359.800, 4.511	359.800, 3.212	359.800, 4.337	359.800, 3.392	359.800, 4.293	359.800, 3.088
1801	360.000, 4.511	360.000, 3.211	360.000, 4.337	360.000, 3.391	360.000, 4.294	360.000, 3.087
1802	360.200, 4.511	360.200, 3.209	360.200, 4.337	360.200, 3.390	360.200, 4.294	360.200, 3.085
1803	360.400, 4.511	360.400, 3.208	360.400, 4.338	360.400, 3.389	360.400, 4.294	360.400, 3.084
1804	360.600, 4.511	360.600, 3.206	360.600, 4.338	360.600, 3.389	360.600, 4.294	360.600, 3.082
1805	360.800, 4.510	360.800, 3.205	360.800, 4.338	360.800, 3.388	360.800, 4.294	360.800, 3.081
1806	361.000, 4.510	361.000, 3.203	361.000, 4.338	361.000, 3.387	361.000, 4.294	361.000, 3.080
1807	361.200, 4.510	361.200, 3.202	361.200, 4.337	361.200, 3.386	361.200, 4.294	361.200, 3.078
1808	361.400, 4.510	361.400, 3.200	361.400, 4.337	361.400, 3.385	361.400, 4.294	361.400, 3.077
1809	361.600, 4.510	361.600, 3.199	361.600, 4.337	361.600, 3.384	361.600, 4.294	361.600, 3.075
1810	361.800, 4.509	361.800, 3.197	361.800, 4.337	361.800, 3.383	361.800, 4.294	361.800, 3.074
1811	362.000, 4.510	362.000, 3.196	362.000, 4.337	362.000, 3.381	362.000, 4.294	362.000, 3.072
1812	362.200, 4.510	362.200, 3.195	362.200, 4.337	362.200, 3.380	362.200, 4.295	362.200, 3.071
1813	362.400, 4.510	362.400, 3.194	362.400, 4.337	362.400, 3.379	362.400, 4.295	362.400, 3.069
1814	362.600, 4.510	362.600, 3.192	362.600, 4.337	362.600, 3.378	362.600, 4.295	362.600, 3.067
1815	362.800, 4.511	362.800, 3.191	362.800, 4.338	362.800, 3.377	362.800, 4.296	362.800, 3.065
1816	363.000, 4.511	363.000, 3.189	363.000, 4.338	363.000, 3.376	363.000, 4.296	363.000, 3.064
1817	363.200, 4.511	363.200, 3.188	363.200, 4.338	363.200, 3.375	363.200, 4.296	363.200, 3.062
1818	363.400, 4.511	363.400, 3.187	363.400, 4.339	363.400, 3.374	363.400, 4.296	363.400, 3.061
1819	363.600, 4.511	363.600, 3.185	363.600, 4.339	363.600, 3.374	363.600, 4.296	363.600, 3.059
1820	363.800, 4.511	363.800, 3.185	363.800, 4.339	363.800, 3.373	363.800, 4.295	363.800, 3.058
1821	364.000, 4.511	364.000, 3.184	364.000, 4.340	364.000, 3.372	364.000, 4.295	364.000, 3.056
1822	364.200, 4.511	364.200, 3.182	364.200, 4.340	364.200, 3.371	364.200, 4.295	364.200, 3.055
1823	364.400, 4.511	364.400, 3.181	364.400, 4.340	364.400, 3.371	364.400, 4.295	364.400, 3.053
1824	364.600, 4.511	364.600, 3.180	364.600, 4.341	364.600, 3.370	364.600, 4.295	364.600, 3.051
1825	364.800, 4.511	364.800, 3.179	364.800, 4.341	364.800, 3.369	364.800, 4.295	364.800, 3.050
1826	365.000, 4.511	365.000, 3.177	365.000, 4.340	365.000, 3.368	365.000, 4.295	365.000, 3.048
1827	365.200, 4.511	365.200, 3.176	365.200, 4.340	365.200, 3.367	365.200, 4.295	365.200, 3.047
1828	365.400, 4.511	365.400, 3.174	365.400, 4.340	365.400, 3.366	365.400, 4.295	365.400, 3.045
1829	365.600, 4.511	365.600, 3.173	365.600, 4.340	365.600, 3.364	365.600, 4.296	365.600, 3.044
1830	365.800, 4.511	365.800, 3.172	365.800, 4.340	365.800, 3.363	365.800, 4.296	365.800, 3.042
1831	366.000, 4.511	366.000, 3.170	366.000, 4.340	366.000, 3.362	366.000, 4.296	366.000, 3.040
1832	366.200, 4.511	366.200, 3.169	366.200, 4.340	366.200, 3.360	366.200, 4.297	366.200, 3.039
1833	366.400, 4.511	366.400, 3.168	366.400, 4.339	366.400, 3.359	366.400, 4.297	366.400, 3.038
1834	366.600, 4.511	366.600, 3.167	366.600, 4.339	366.600, 3.358	366.600, 4.298	366.600, 3.036
1835	366.800, 4.511	366.800, 3.165	366.800, 4.339	366.800, 3.356	366.800, 4.298	366.800, 3.035
1836	367.000, 4.512	367.000, 3.164	367.000, 4.339	367.000, 3.355	367.000, 4.298	367.000, 3.033
1837	367.200, 4.512	367.200, 3.163	367.200, 4.339	367.200, 3.353	367.200, 4.297	367.200, 3.031
1838	367.400, 4.512	367.400, 3.162	367.400, 4.339	367.400, 3.352	367.400, 4.297	367.400, 3.029
1839	367.600, 4.512	367.600, 3.161	367.600, 4.339	367.600, 3.350	367.600, 4.297	367.600, 3.027
1840	367.800, 4.513	367.800, 3.160	367.800, 4.340	367.800, 3.349	367.800, 4.296	367.800, 3.025
1841	368.000, 4.513	368.000, 3.159	368.000, 4.340	368.000, 3.347	368.000, 4.297	368.000, 3.024
1842	368.200, 4.513	368.200, 3.157	368.200, 4.340	368.200, 3.346	368.200, 4.297	368.200, 3.022
1843	368.400, 4.513	368.400, 3.155	368.400, 4.341	368.400, 3.345	368.400, 4.297	368.400, 3.020
1844	368.600, 4.513	368.600, 3.154	368.600, 4.341	368.600, 3.344	368.600, 4.297	368.600, 3.019
1845	368.800, 4.513	368.800, 3.152	368.800, 4.341	368.800, 3.343	368.800, 4.298	368.800, 3.017
1846	369.000, 4.513	369.000, 3.150	369.000, 4.342	369.000, 3.342	369.000, 4.298	369.000, 3.015
1847	369.200, 4.513	369.200, 3.148	369.200, 4.342	369.200, 3.341	369.200, 4.298	369.200, 3.013
1848	369.400, 4.513	369.400, 3.146	369.400, 4.343	369.400, 3.340	369.400, 4.298	369.400, 3.012
1849	369.600, 4.513	369.600, 3.145	369.600, 4.343	369.600, 3.339	369.600, 4.298	369.600, 3.010
1850	369.800, 4.513	369.800, 3.143	369.800, 4.343	369.800, 3.338	369.800, 4.299	369.800, 3.009
1851	370.000, 4.514	370.000, 3.142	370.000, 4.343	370.000, 3.337	370.000, 4.299	370.000, 3.007
1852	370.200, 4.514	370.200, 3.141	370.200, 4.343	370.200, 3.337	370.200, 4.300	370.200, 3.006
1853	370.400, 4.514	370.400, 3.139	370.400, 4.342	370.400, 3.336	370.400, 4.300	370.400, 3.004
1854	370.600, 4.514	370.600, 3.137	370.600, 4.342	370.600, 3.335	370.600, 4.300	370.600, 3.002
1855	370.800, 4.514	370.800, 3.136	370.800, 4.342	370.800, 3.334	370.800, 4.301	370.800, 3.001
1856	371.000, 4.514	371.000, 3.135	371.000, 4.342	371.000, 3.333	371.000, 4.301	371.000, 2.999
1857	371.200, 4.515	371.200, 3.134	371.200, 4.341	371.200, 3.332	371.200, 4.301	371.200, 2.997
1858	371.400, 4.515	371.400, 3.133	371.400, 4.341	371.400, 3.331	371.400, 4.301	371.400, 2.995
1859	371.600, 4.515	371.600, 3.132	371.600, 4.342	371.600, 3.330	371.600, 4.301	371.600, 2.994
1860	371.800, 4.515	371.800, 3.131	371.800, 4.342	371.800, 3.329	371.800, 4.301	371.800, 2.992
1861	372.000, 4.515	372.000, 3.129	372.000, 4.342	372.000, 3.328	372.000, 4.301	372.000, 2.990
1862	372.200, 4.515	372.200, 3.128	372.200, 4.342	372.200, 3.327	372.200, 4.301	372.200, 2.989
1863	372.400, 4.515	372.400, 3.126	372.400, 4.343	372.400, 3.326	372.400, 4.301	372.400, 2.987
1864	372.600, 4.515	372.600, 3.124	372.600, 4.343	372.600, 3.326	372.600, 4.301	372.600, 2.985
1865	372.800, 4.515	372.800, 3.123	372.800, 4.343	372.800, 3.325	372.800, 4.300	372.800, 2.984
1866	373.000, 4.515	373.000, 3.121	373.000, 4.344	373.000, 3.324	373.000, 4.300	373.000, 2.982
1867	373.200, 4.516	373.200, 3.119	373.200, 4.345	373.200, 3.323	373.200, 4.300	373.200, 2.981
1868	373.400, 4.516	373.400, 3.118	373.400, 4.345	373.400, 3.322	373.400, 4.299	373.400, 2.979
1869	373.600, 4.517	373.600, 3.116	373.600, 4.345	373.600, 3.320	373.600, 4.299	373.600, 2.978
1870	373.800, 4.517	373.800, 3.115	373.800, 4.345	373.800, 3.319	373.800, 4.299	373.800, 2.976
1871	374.000, 4.518	374.000, 3.113	374.000, 4.345	374.000, 3.318	374.000, 4.299	374.000, 2.975
1872	374.200, 4.518	374.200, 3.112	374.200, 4.345	374.200, 3.317	374.200, 4.299	374.200, 2.973
1873	374.400, 4.518	374.400, 3.110	374.400, 4.345	374.400, 3.316	374.400, 4.299	374.400, 2.972
1874	374.600, 4.518	374.600, 3.109	374.600, 4.344	374.600, 3.315	374.600, 4.299	374.600, 2.970
1875	374.800, 4.518	374.800, 3.108	374.800, 4.345	374.800, 3.314	374.800, 4.299	374.800, 2.968
1876	375.000, 4.518	375.000, 3.107	375.000, 4.344	375.000, 3.313	375.000, 4.299	375.000, 2.966
1877	375.200, 4.519	375.200, 3.106	375.200, 4.344	375.200, 3.311	375.200, 4.299	375.200, 2.964
1878	375.400, 4.519	375.400, 3.105	375.400, 4.344	375.400, 3.310	375.400, 4.299	375.400, 2.962
1879	375.600, 4.519	375.600, 3.104	375.600, 4.344	375.600, 3.309	375.600, 4.300	375.600, 2.961
1880	375.800, 4.518	375.800, 3.103	375.800, 4.344	375.800, 3.308	375.800, 4.300	375.800, 2.959
1881	376.000, 4.518	376.000, 3.101	376.000, 4.344	376.000, 3.307	376.000, 4.300	376.000, 2.957
1882	376.200, 4.518	376.200, 3.100	376.200, 4.344	376.200, 3.306	376.200, 4.300	376.200, 2.956
1883	376.400, 4.517	376.400, 3.099	376.400, 4.344	376.400, 3.305	376.400, 4.300	376.400, 2.954
1884	376.600, 4.517	376.600, 3.097	376.600, 4.344	376.600, 3.304	376.600, 4.300	376.600, 2.953
1885	376.800, 4.517	376.800, 3.096	376.800, 4.345	376.800, 3.303	376.800, 4.300	376.800, 2.951
1886	377.000, 4.517	377.000, 3.094	377.000, 4.345	377.000, 3.302	377.000, 4.300	377.000, 2.949
1887	377.200, 4.517	377.200, 3.093	377.200, 4.345	377.200, 3.301	377.200, 4.300	377.200, 2.948
1888	377.400, 4.517	377.400, 3.091	377.400, 4.345	377.400, 3.300	377.400, 4.300	377.400, 2.947
1889	377.600, 4.517	377.600, 3.090	377.600, 4.345	377.600, 3.299	377.600, 4.300	377.600, 2.946
1890	377.800, 4.517	377.800, 3.088	377.800, 4.345	377.800, 3.298	377.800, 4.301	377.800, 2.944
1891	378.000, 4.518	378.000, 3.087	378.000, 4.345	378.000, 3.297	378.000, 4.301	378.000, 2.943
1892	378.200, 4.518	378.200, 3.086	378.200, 4.345	378.200, 3.296	378.200, 4.301	378.200, 2.941
1893	378.400, 4.518	378.400, 3.084	378.400, 4.346	378.400, 3.295	378.400, 4.301	378.400, 2.939
1894	378.600, 4.518	378.600, 3.083	378.600, 4.346	378.600, 3.293	378.600, 4.302	378.600, 2.937
1895	378.800, 4.518	378.800, 3.081	378.800, 4.346	378.800, 3.292	378.800, 4.302	378.800, 2.935
1896	379.000, 4.518	379.000, 3.080	379.000, 4.346	379.000, 3.291	379.000, 4.303	379.000, 2.934
1897	379.200, 4.518	379.200, 3.078	379.200, 4.345	379.200, 3.290	379.200, 4.303	379.200, 2.932
1898	379.400, 4.518	379.400, 3.077	379.400, 4.345	379.400, 3.289	379.400, 4.303	379.400, 2.931
1899	379.600, 4.519	379.600, 3.076	379.600, 4.344	379.600, 3.287	379.600, 4.303	379.600, 2.929
1900	379.800, 4.519	379.800, 3.075	379.800, 4.344	379.800, 3.286	379.800, 4.303	379.800, 2.928
1901	380.000, 4.519	380.000, 3.073	380.000, 4.344	380.000, 3.286	380.000, 4.303	380.000, 2.926
1902	380.200, 4.519	380.200, 3.072	380.200, 4.345	380.200, 3.285	380.200, 4.303	380.200, 2.924
1903	380.400, 4.519	380.400, 3.071	380.400, 4.345	380.400, 3.284	380.400, 4.303	380.400, 2.922
1904	380.600, 4.519	380.600, 3.069	380.600, 4.345	380.600, 3.283	380.600, 4.303	380.600, 2.920
1905	380.800, 4.519	380.800, 3.068	380.800, 4.346	380.800, 3.282	380.800, 4.303	380.800, 2.919
1906	381.000, 4.519	381.000, 3.066	381.000, 4.346	381.000, 3.281	381.000, 4.303	381.000, 2.917
1907	381.200, 4.519	381.200, 3.065	381.200, 4.346	381.200, 3.280	381.200, 4.303	381.200, 2.915
1908	381.400, 4.520	381.400, 3.064	381.400, 4.347	381.400, 3.279	381.400, 4.303	381.400, 2.914
1909	381.600, 4.520	381.600, 3.062	381.600, 4.347	381.600, 3.277	381.600, 4.303	381.600, 2.912
1910	381.800, 4.520	381.800, 3.061	381.800, 4.347	381.800, 3.276	381.800, 4.303	381.800, 2.911
1911	382.000, 4.521	382.000, 3.059	382.000, 4.347	382.000, 3.275	382.000, 4.304	382.000, 2.909
1912	382.200, 4.521	382.200, 3.058	382.200, 4.347	382.200, 3.274	382.200, 4.304	382.200, 2.907
1913	382.400, 4.521	382.400, 3.056	382.400, 4.347	382.400, 3.273	382.400, 4.304	382.400, 2.906
1914	382.600, 4.521	382.600, 3.055	382.600, 4.347	382.600, 3.272	382.600, 4.304	382.600, 2.904
1915	382.800, 4.521	382.800, 3.054	382.800, 4.347	382.800, 3.271	382.800, 4.304	382.800, 2.903
1916	383.000, 4.522	383.000, 3.052	383.000, 4.346	383.000, 3.269	383.000, 4.305	383.000, 2.901
1917	383.200, 4.522	383.200, 3.051	383.200, 4.346	383.200, 3.268	383.200, 4.304	383.200, 2.900
1918	383.400, 4.522	383.400, 3.050	383.400, 4.345	383.400, 3.267	383.400, 4.304	383.400, 2.898
1919	383.600, 4.522	383.600, 3.048	383.600, 4.345	383.600, 3.266	383.600, 4.304	383.600, 2.896
1920	383.800, 4.522	383.800, 3.047	383.800, 4.345	383.800, 3.265	383.800, 4.304	383.800, 2.895
1921	384.000, 4.521	384.000, 3.045	384.000, 4.345	384.000, 3.264	384.000, 4.304	384.000, 2.893
1922	384.200, 4.521	384.200, 3.044	384.200, 4.345	384.200, 3.263	384.200, 4.304	384.200, 2.891
1923	384.400, 4.521	384.400, 3.042	384.400, 4.345	384.400, 3.262	384.400, 4.304	384.400, 2.890
1924	384.600, 4.521	384.600, 3.041	384.600, 4.345	384.600, 3.260	384.600, 4.304	384.600, 2.888
1925	384.800, 4.521	384.800, 3.040	384.800, 4.346	384.800, 3.259	384.800, 4.304	384.800, 2.887
1926	385.000, 4.521	385.000, 3.038	385.000, 4.346	385.000, 3.257	385.000, 4.304	385.000, 2.885
1927	385.200, 4.521	385.200, 3.037	385.200, 4.347	385.200, 3.256	385.200, 4.304	385.200, 2.884
1928	385.400, 4.521	385.400, 3.036	385.400, 4.347	385.400, 3.255	385.400, 4.305	385.400, 2.882
1929	385.600, 4.521	385.600, 3.035	385.600, 4.348	385.600, 3.254	385.600, 4.305	385.600, 2.880
1930	385.800, 4.521	385.800, 3.034	385.800, 4.348	385.800, 3.253	385.800, 4.305	385.800, 2.879
1931	386.000, 4.521	386.000, 3.032	386.000, 4.348	386.000, 3.252	386.000, 4.305	386.000, 2.877
1932	386.200, 4.521	386.200, 3.031	386.200, 4.348	386.200, 3.251	386.200, 4.305	386.200, 2.875
1933	386.400, 4.522	386.400, 3.030	386.400, 4.349	386.400, 3.250	386.400, 4.305	386.400, 2.873
1934	386.600, 4.522	386.600, 3.029	386.600, 4.349	386.600, 3.249	386.600, 4.305	386.600, 2.872
1935	386.800, 4.522	386.800, 3.028	386.800, 4.349	386.800, 3.248	386.800, 4.305	386.800, 2.870
1936	387.000, 4.522	387.000, 3.027	387.000, 4.349	387.000, 3.248	387.000, 4.305	387.000, 2.868
1937	387.200, 4.522	387.200, 3.025	387.200, 4.349	387.200, 3.247	387.200, 4.305	387.200, 2.866
1938	387.400, 4.522	387.400, 3.023	387.400, 4.349	387.400, 3.247	387.400, 4.305	387.400, 2.864
1939	387.600, 4.523	387.600, 3.022	387.600, 4.349	387.600, 3.246	387.600, 4.305	387.600, 2.863
1940	387.800, 4.523	387.800, 3.020	387.800, 4.349	387.800, 3.245	387.800, 4.305	387.800, 2.861
1941	388.000, 4.523	388.000, 3.018	388.000, 4.349	388.000, 3.244	388.000, 4.305	388.000, 2.860
1942	388.200, 4.523	388.200, 3.016	388.200, 4.349	388.200, 3.243	388.200, 4.304	388.200, 2.859
1943	388.400, 4.523	388.400, 3.014	388.400, 4.349	388.400, 3.242	388.400, 4.304	388.400, 2.857
1944	388.600, 4.523	388.600, 3.012	388.600, 4.349	388.600, 3.241	388.600, 4.304	388.600, 2.856
1945	388.800, 4.523	388.800, 3.011	388.800, 4.349	388.800, 3.240	388.800, 4.305	388.800, 2.854
1946	389.000, 4.523	389.000, 3.009	389.000, 4.349	389.000, 3.238	389.000, 4.305	389.000, 2.853
1947	389.200, 4.523	389.200, 3.008	389.200, 4.349	389.200, 3.237	389.200, 4.305	389.200, 2.852
1948	389.400, 4.523	389.400, 3.007	389.400, 4.348	389.400, 3.236	389.400, 4.306	389.400, 2.850
1949	389.600, 4.523	389.600, 3.005	389.600, 4.348	389.600, 3.234	389.600, 4.306	389.600, 2.848
1950	389.800, 4.523	389.800, 3.004	389.800, 4.348	389.800, 3.233	389.800, 4.306	389.800, 2.847
1951	390.000, 4.523	390.000, 3.003	390.000, 4.348	390.000, 3.231	390.000, 4.307	390.000, 2.845
1952	390.200, 4.523	390.200, 3.002	390.200, 4.348	390.200, 3.230	390.200, 4.307	390.200, 2.844
1953	390.400, 4.523	390.400, 3.002	390.400, 4.349	390.400, 3.229	390.400, 4.308	390.400, 2.842
1954	390.600, 4.523	390.600, 3.001	390.600, 4.349	390.600, 3.228	390.600, 4.308	390.600, 2.840
1955	390.800, 4.523	390.800, 3.000	390.800, 4.349	390.800, 3.227	390.800, 4.308	390.800, 2.838
1956	391.000, 4.523	391.000, 2.999	391.000, 4.350	391.000, 3.225	391.000, 4.308	391.000, 2.836
1957	391.200, 4.523	391.200, 2.998	391.200, 4.350	391.200, 3.224	391.200, 4.307	391.200, 2.834
1958	391.400, 4.523	391.400, 2.996	391.400, 4.351	391.400, 3.223	391.400, 4.307	391.400, 2.832
1959	391.600, 4.523	391.600, 2.995	391.600, 4.351	391.600, 3.222	391.600, 4.307	391.600, 2.830
1960	391.800, 4.524	391.800, 2.993	391.800, 4.351	391.800, 3.221	391.800, 4.307	391.800, 2.829
1961	392.000, 4.524	392.000, 2.992	392.000, 4.352	392.000, 3.220	392.000, 4.306	392.000, 2.828
1962	392.200, 4.524	392.200, 2.990	392.200, 4.351	392.200, 3.219	392.200, 4.306	392.200, 2.826
1963	392.400, 4.524	392.400, 2.988	392.400, 4.351	392.400, 3.218	392.400, 4.306	392.400, 2.825
1964	392.600, 4.524	392.600, 2.986	392.600, 4.351	392.600, 3.217	392.600, 4.305	392.600, 2.823
1965	392.800, 4.524	392.800, 2.985	392.800, 4.351	392.800, 3.216	392.800, 4.305	392.800, 2.821
1966	393.000, 4.524	393.000, 2.983	393.000, 4.351	393.000, 3.215	393.000, 4.305	393.000, 2.819
1967	393.200, 4.524	393.200, 2.982	393.200, 4.351	393.200, 3.213	393.200, 4.305	393.200, 2.818
1968	393.400, 4.524	393.400, 2.980	393.400, 4.351	393.400, 3.212	393.400, 4.306	393.400, 2.816
1969	393.600, 4.524	393.600, 2.979	393.600, 4.352	393.600, 3.211	393.600, 4.307	393.600, 2.815
1970	393.800, 4.524	393.800, 2.978	393.800, 4.352	393.800, 3.210	393.800, 4.307	393.800, 2.814
1971	394.000, 4.524	394.000, 2.976	394.000, 4.352	394.000, 3.209	394.000, 4.308	394.000, 2.812
1972	394.200, 4.524	394.200, 2.975	394.200, 4.352	394.200, 3.208	394.200, 4.308	394.200, 2.811
1973	394.400, 4.525	394.400, 2.974	394.400, 4.352	394.400, 3.207	394.400, 4.309	394.400, 2.809
1974	394.600, 4.525	394.600, 2.973	394.600, 4.352	394.600, 3.206	394.600, 4.309	394.600, 2.807
1975	394.800, 4.525	394.800, 2.972	394.800, 4.353	394.800, 3.205	394.800, 4.310	394.800, 2.805
1976	395.000, 4.525	395.000, 2.970	395.000, 4.353	395.000, 3.204	395.000, 4.310	395.000, 2.804
1977	395.200, 4.525	395.200, 2.969	395.200, 4.353	395.200, 3.202	395.200, 4.310	395.200, 2.802
1978	395.400, 4.525	395.400, 2.968	395.400, 4.353	395.400, 3.201	395.400, 4.311	395.400, 2.800
1979	395.600, 4.526	395.600, 2.966	395.600, 4.353	395.600, 3.200	395.600, 4.311	395.600, 2.799
1980	395.800, 4.525	395.800, 2.965	395.800, 4.353	395.800, 3.199	395.800, 4.311	395.800, 2.797
1981	396.000, 4.525	396.000, 2.964	396.000, 4.352	396.000, 3.198	396.000, 4.310	396.000, 2.796
1982	396.200, 4.525	396.200, 2.962	396.200, 4.352	396.200, 3.197	396.200, 4.310	396.200, 2.794
1983	396.400, 4.526	396.400, 2.961	396.400, 4.352	396.400, 3.196	396.400, 4.310	396.400, 2.793
1984	396.600, 4.526	396.600, 2.960	396.600, 4.352	396.600, 3.195	396.600, 4.310	396.600, 2.791
1985	396.800, 4.526	396.800, 2.958	396.800, 4.352	396.800, 3.194	396.800, 4.310	396.800, 2.790
1986	397.000, 4.527	397.000, 2.957	397.000, 4.353	397.000, 3.193	397.000, 4.310	397.000, 2.788
1987	397.200, 4.527	397.200, 2.955	397.200, 4.353	397.200, 3.192	397.200, 4.310	397.200, 2.787
1988	397.400, 4.527	397.400, 2.954	397.400, 4.353	397.400, 3.191	397.400, 4.311	397.400, 2.785
1989	397.600, 4.527	397.600, 2.952	397.600, 4.353	397.600, 3.190	397.600, 4.311	397.600, 2.783
1990	397.800, 4.527	397.800, 2.951	397.800, 4.353	397.800, 3.189	397.800, 4.311	397.800, 2.782
1991	398.000, 4.527	398.000, 2.949	398.000, 4.353	398.000, 3.188	398.000, 4.311	398.000, 2.780
1992	398.200, 4.527	398.200, 2.948	398.200, 4.354	398.200, 3.187	398.200, 4.311	398.200, 2.778
1993	398.400, 4.527	398.400, 2.946	398.400, 4.354	398.400, 3.185	398.400, 4.311	398.400, 2.776
1994	398.600, 4.527	398.600, 2.945	398.600, 4.354	398.600, 3.184	398.600, 4.311	398.600, 2.775
1995	398.800, 4.527	398.800, 2.944	398.800, 4.354	398.800, 3.183	398.800, 4.311	398.800, 2.773
1996	399.000, 4.527	399.000, 2.942	399.000, 4.355	399.000, 3.182	399.000, 4.311	399.000, 2.771
1997	399.200, 4.527	399.200, 2.941	399.200, 4.355	399.200, 3.181	399.200, 4.311	399.200, 2.770
1998	399.400, 4.527	399.400, 2.940	399.400, 4.355	399.400, 3.180	399.400, 4.311	399.400, 2.769
1999	399.600, 4.528	399.600, 2.939	399.600, 4.354	399.600, 3.179	399.600, 4.310	399.600, 2.767
[truncated: 13,001 more rows]
