# Supplementary material for: ParB spreading on DNA requires cytidine triphosphate in vitro
Source: eLife journal article supplement (doi:10.7554/elife.53515), 2020-02-20
Supplement: fig4-data1 [file Fig4_panelA_B_C.xlsx]

## Sheet: FORMAT
	sample ID #1	sample ID #2	sample ID #3
data point	time point (sec), wavelength shift (nm)	time point (sec), wavelength shift (nm)	time point (sec), wavelength shift (nm)
1
2
3
.
.
.

## Sheet: Fig4_panelA_B_C_rep1
	170 bp closed parS DNA and ParB	170 bp closed parS DNA and ParB CTP	170 bp closed parS DNA and TetR	170 bp closed parS DNA and ParB TetR CTP	EcoRI cut 170 bp parS DNA and ParB CTP	BamHI cut 170 bp parS DNA and ParB CTP	EcoRI cut 170 bp parS DNA and ParB	BamHI cut 170 bp parS DNA and ParB	EcoRI cut 170 bp parS DNA and ParB TetR CTP	BamHI cut 170 bp parS DNA and ParB TetR CTP
1	0.000, 0.034	0.000, 0.037	0.000, 0.030	0.000, 0.032	0.000, -0.017	0.000, 0.012	0.000, 0.049	0.000, 0.018	0.000, 0.020	0.000, 0.042
2	0.200, 0.033	0.200, 0.036	0.200, 0.031	0.200, 0.031	0.200, -0.016	0.200, 0.011	0.200, 0.047	0.200, 0.017	0.200, 0.020	0.200, 0.041
3	0.400, 0.032	0.400, 0.035	0.400, 0.031	0.400, 0.030	0.400, -0.015	0.400, 0.011	0.400, 0.045	0.400, 0.017	0.400, 0.020	0.400, 0.040
4	0.600, 0.031	0.600, 0.034	0.600, 0.031	0.600, 0.029	0.600, -0.013	0.600, 0.010	0.600, 0.044	0.600, 0.017	0.600, 0.020	0.600, 0.038
5	0.800, 0.030	0.800, 0.033	0.800, 0.031	0.800, 0.028	0.800, -0.012	0.800, 0.010	0.800, 0.042	0.800, 0.016	0.800, 0.020	0.800, 0.037
6	1.000, 0.028	1.000, 0.031	1.000, 0.031	1.000, 0.027	1.000, -0.011	1.000, 0.009	1.000, 0.040	1.000, 0.016	1.000, 0.020	1.000, 0.035
7	1.200, 0.027	1.200, 0.030	1.200, 0.030	1.200, 0.026	1.200, -0.010	1.200, 0.009	1.200, 0.039	1.200, 0.015	1.200, 0.020	1.200, 0.034
8	1.400, 0.026	1.400, 0.029	1.400, 0.030	1.400, 0.026	1.400, -0.010	1.400, 0.008	1.400, 0.037	1.400, 0.015	1.400, 0.020	1.400, 0.032
9	1.600, 0.025	1.600, 0.028	1.600, 0.029	1.600, 0.025	1.600, -0.009	1.600, 0.008	1.600, 0.036	1.600, 0.014	1.600, 0.020	1.600, 0.031
10	1.800, 0.025	1.800, 0.027	1.800, 0.028	1.800, 0.024	1.800, -0.009	1.800, 0.008	1.800, 0.035	1.800, 0.013	1.800, 0.019	1.800, 0.030
11	2.000, 0.024	2.000, 0.026	2.000, 0.027	2.000, 0.023	2.000, -0.009	2.000, 0.008	2.000, 0.034	2.000, 0.013	2.000, 0.019	2.000, 0.029
12	2.200, 0.023	2.200, 0.025	2.200, 0.026	2.200, 0.022	2.200, -0.010	2.200, 0.008	2.200, 0.033	2.200, 0.012	2.200, 0.018	2.200, 0.028
13	2.400, 0.023	2.400, 0.024	2.400, 0.024	2.400, 0.021	2.400, -0.010	2.400, 0.008	2.400, 0.033	2.400, 0.011	2.400, 0.018	2.400, 0.027
14	2.600, 0.023	2.600, 0.023	2.600, 0.023	2.600, 0.021	2.600, -0.010	2.600, 0.008	2.600, 0.032	2.600, 0.010	2.600, 0.017	2.600, 0.027
15	2.800, 0.022	2.800, 0.023	2.800, 0.022	2.800, 0.020	2.800, -0.010	2.800, 0.008	2.800, 0.032	2.800, 0.010	2.800, 0.017	2.800, 0.026
16	3.000, 0.022	3.000, 0.022	3.000, 0.021	3.000, 0.020	3.000, -0.010	3.000, 0.008	3.000, 0.031	3.000, 0.009	3.000, 0.016	3.000, 0.025
17	3.200, 0.021	3.200, 0.022	3.200, 0.021	3.200, 0.019	3.200, -0.010	3.200, 0.008	3.200, 0.030	3.200, 0.009	3.200, 0.016	3.200, 0.025
18	3.400, 0.021	3.400, 0.022	3.400, 0.020	3.400, 0.018	3.400, -0.010	3.400, 0.008	3.400, 0.030	3.400, 0.009	3.400, 0.015	3.400, 0.024
19	3.600, 0.020	3.600, 0.021	3.600, 0.020	3.600, 0.018	3.600, -0.010	3.600, 0.008	3.600, 0.029	3.600, 0.008	3.600, 0.015	3.600, 0.024
20	3.800, 0.020	3.800, 0.021	3.800, 0.019	3.800, 0.017	3.800, -0.010	3.800, 0.008	3.800, 0.028	3.800, 0.009	3.800, 0.014	3.800, 0.024
21	4.000, 0.019	4.000, 0.020	4.000, 0.019	4.000, 0.016	4.000, -0.010	4.000, 0.008	4.000, 0.027	4.000, 0.008	4.000, 0.014	4.000, 0.023
22	4.200, 0.019	4.200, 0.020	4.200, 0.019	4.200, 0.015	4.200, -0.010	4.200, 0.008	4.200, 0.026	4.200, 0.008	4.200, 0.013	4.200, 0.023
23	4.400, 0.019	4.400, 0.019	4.400, 0.018	4.400, 0.015	4.400, -0.010	4.400, 0.007	4.400, 0.026	4.400, 0.009	4.400, 0.013	4.400, 0.023
24	4.600, 0.018	4.600, 0.019	4.600, 0.018	4.600, 0.014	4.600, -0.010	4.600, 0.007	4.600, 0.025	4.600, 0.009	4.600, 0.013	4.600, 0.022
25	4.800, 0.018	4.800, 0.018	4.800, 0.018	4.800, 0.014	4.800, -0.010	4.800, 0.007	4.800, 0.025	4.800, 0.009	4.800, 0.013	4.800, 0.022
26	5.000, 0.018	5.000, 0.018	5.000, 0.018	5.000, 0.014	5.000, -0.010	5.000, 0.007	5.000, 0.024	5.000, 0.009	5.000, 0.013	5.000, 0.021
27	5.200, 0.017	5.200, 0.017	5.200, 0.018	5.200, 0.013	5.200, -0.009	5.200, 0.007	5.200, 0.024	5.200, 0.009	5.200, 0.013	5.200, 0.021
28	5.400, 0.017	5.400, 0.016	5.400, 0.017	5.400, 0.013	5.400, -0.009	5.400, 0.007	5.400, 0.023	5.400, 0.009	5.400, 0.013	5.400, 0.020
29	5.600, 0.017	5.600, 0.016	5.600, 0.017	5.600, 0.012	5.600, -0.009	5.600, 0.006	5.600, 0.023	5.600, 0.009	5.600, 0.013	5.600, 0.020
30	5.800, 0.016	5.800, 0.015	5.800, 0.016	5.800, 0.012	5.800, -0.009	5.800, 0.006	5.800, 0.023	5.800, 0.009	5.800, 0.013	5.800, 0.019
31	6.000, 0.016	6.000, 0.014	6.000, 0.016	6.000, 0.012	6.000, -0.009	6.000, 0.006	6.000, 0.022	6.000, 0.009	6.000, 0.013	6.000, 0.019
32	6.200, 0.016	6.200, 0.014	6.200, 0.016	6.200, 0.011	6.200, -0.009	6.200, 0.006	6.200, 0.022	6.200, 0.008	6.200, 0.013	6.200, 0.018
33	6.400, 0.015	6.400, 0.013	6.400, 0.015	6.400, 0.011	6.400, -0.008	6.400, 0.005	6.400, 0.022	6.400, 0.008	6.400, 0.013	6.400, 0.018
34	6.600, 0.015	6.600, 0.013	6.600, 0.015	6.600, 0.010	6.600, -0.008	6.600, 0.005	6.600, 0.021	6.600, 0.008	6.600, 0.013	6.600, 0.017
35	6.800, 0.015	6.800, 0.012	6.800, 0.015	6.800, 0.010	6.800, -0.008	6.800, 0.005	6.800, 0.021	6.800, 0.007	6.800, 0.013	6.800, 0.017
36	7.000, 0.014	7.000, 0.012	7.000, 0.015	7.000, 0.010	7.000, -0.008	7.000, 0.005	7.000, 0.021	7.000, 0.007	7.000, 0.013	7.000, 0.016
37	7.200, 0.014	7.200, 0.012	7.200, 0.015	7.200, 0.009	7.200, -0.008	7.200, 0.004	7.200, 0.020	7.200, 0.006	7.200, 0.013	7.200, 0.016
38	7.400, 0.014	7.400, 0.012	7.400, 0.015	7.400, 0.009	7.400, -0.008	7.400, 0.004	7.400, 0.020	7.400, 0.006	7.400, 0.012	7.400, 0.015
39	7.600, 0.013	7.600, 0.012	7.600, 0.015	7.600, 0.009	7.600, -0.007	7.600, 0.004	7.600, 0.020	7.600, 0.005	7.600, 0.012	7.600, 0.015
40	7.800, 0.013	7.800, 0.012	7.800, 0.015	7.800, 0.008	7.800, -0.007	7.800, 0.004	7.800, 0.020	7.800, 0.005	7.800, 0.011	7.800, 0.015
41	8.000, 0.012	8.000, 0.012	8.000, 0.014	8.000, 0.008	8.000, -0.007	8.000, 0.003	8.000, 0.020	8.000, 0.004	8.000, 0.011	8.000, 0.015
42	8.200, 0.012	8.200, 0.012	8.200, 0.014	8.200, 0.008	8.200, -0.007	8.200, 0.003	8.200, 0.019	8.200, 0.004	8.200, 0.010	8.200, 0.015
43	8.400, 0.012	8.400, 0.012	8.400, 0.014	8.400, 0.007	8.400, -0.007	8.400, 0.003	8.400, 0.019	8.400, 0.004	8.400, 0.009	8.400, 0.015
44	8.600, 0.011	8.600, 0.012	8.600, 0.013	8.600, 0.007	8.600, -0.007	8.600, 0.003	8.600, 0.019	8.600, 0.004	8.600, 0.009	8.600, 0.015
45	8.800, 0.011	8.800, 0.012	8.800, 0.013	8.800, 0.007	8.800, -0.007	8.800, 0.003	8.800, 0.018	8.800, 0.003	8.800, 0.009	8.800, 0.014
46	9.000, 0.010	9.000, 0.012	9.000, 0.012	9.000, 0.006	9.000, -0.007	9.000, 0.003	9.000, 0.018	9.000, 0.003	9.000, 0.008	9.000, 0.014
47	9.200, 0.010	9.200, 0.012	9.200, 0.012	9.200, 0.006	9.200, -0.007	9.200, 0.003	9.200, 0.017	9.200, 0.003	9.200, 0.008	9.200, 0.014
48	9.400, 0.010	9.400, 0.011	9.400, 0.011	9.400, 0.006	9.400, -0.007	9.400, 0.002	9.400, 0.017	9.400, 0.003	9.400, 0.008	9.400, 0.014
49	9.600, 0.009	9.600, 0.011	9.600, 0.011	9.600, 0.005	9.600, -0.007	9.600, 0.002	9.600, 0.016	9.600, 0.003	9.600, 0.008	9.600, 0.014
50	9.800, 0.009	9.800, 0.011	9.800, 0.010	9.800, 0.005	9.800, -0.007	9.800, 0.003	9.800, 0.016	9.800, 0.003	9.800, 0.008	9.800, 0.014
51	10.000, 0.009	10.000, 0.010	10.000, 0.010	10.000, 0.005	10.000, -0.007	10.000, 0.003	10.000, 0.016	10.000, 0.003	10.000, 0.008	10.000, 0.014
52	10.200, 0.009	10.200, 0.010	10.200, 0.010	10.200, 0.005	10.200, -0.007	10.200, 0.003	10.200, 0.015	10.200, 0.003	10.200, 0.008	10.200, 0.014
53	10.400, 0.010	10.400, 0.010	10.400, 0.010	10.400, 0.004	10.400, -0.007	10.400, 0.003	10.400, 0.015	10.400, 0.003	10.400, 0.008	10.400, 0.013
54	10.600, 0.010	10.600, 0.009	10.600, 0.009	10.600, 0.004	10.600, -0.007	10.600, 0.004	10.600, 0.014	10.600, 0.003	10.600, 0.008	10.600, 0.013
55	10.800, 0.010	10.800, 0.009	10.800, 0.009	10.800, 0.004	10.800, -0.007	10.800, 0.004	10.800, 0.014	10.800, 0.003	10.800, 0.009	10.800, 0.013
56	11.000, 0.010	11.000, 0.009	11.000, 0.009	11.000, 0.004	11.000, -0.007	11.000, 0.004	11.000, 0.014	11.000, 0.003	11.000, 0.009	11.000, 0.012
57	11.200, 0.010	11.200, 0.009	11.200, 0.009	11.200, 0.004	11.200, -0.007	11.200, 0.004	11.200, 0.013	11.200, 0.003	11.200, 0.009	11.200, 0.012
58	11.400, 0.010	11.400, 0.009	11.400, 0.009	11.400, 0.004	11.400, -0.006	11.400, 0.004	11.400, 0.013	11.400, 0.003	11.400, 0.009	11.400, 0.011
59	11.600, 0.010	11.600, 0.009	11.600, 0.008	11.600, 0.003	11.600, -0.006	11.600, 0.004	11.600, 0.013	11.600, 0.003	11.600, 0.009	11.600, 0.011
60	11.800, 0.010	11.800, 0.009	11.800, 0.008	11.800, 0.003	11.800, -0.005	11.800, 0.005	11.800, 0.013	11.800, 0.003	11.800, 0.009	11.800, 0.011
61	12.000, 0.010	12.000, 0.010	12.000, 0.008	12.000, 0.003	12.000, -0.005	12.000, 0.005	12.000, 0.013	12.000, 0.002	12.000, 0.009	12.000, 0.010
62	12.200, 0.010	12.200, 0.010	12.200, 0.008	12.200, 0.003	12.200, -0.005	12.200, 0.005	12.200, 0.013	12.200, 0.002	12.200, 0.009	12.200, 0.010
63	12.400, 0.010	12.400, 0.010	12.400, 0.007	12.400, 0.002	12.400, -0.005	12.400, 0.005	12.400, 0.013	12.400, 0.002	12.400, 0.008	12.400, 0.010
64	12.600, 0.009	12.600, 0.010	12.600, 0.007	12.600, 0.002	12.600, -0.005	12.600, 0.004	12.600, 0.012	12.600, 0.002	12.600, 0.008	12.600, 0.010
65	12.800, 0.009	12.800, 0.010	12.800, 0.007	12.800, 0.002	12.800, -0.005	12.800, 0.004	12.800, 0.012	12.800, 0.001	12.800, 0.007	12.800, 0.010
66	13.000, 0.008	13.000, 0.010	13.000, 0.007	13.000, 0.002	13.000, -0.005	13.000, 0.004	13.000, 0.012	13.000, 0.001	13.000, 0.007	13.000, 0.009
67	13.200, 0.008	13.200, 0.010	13.200, 0.006	13.200, 0.002	13.200, -0.005	13.200, 0.003	13.200, 0.012	13.200, 0.001	13.200, 0.007	13.200, 0.009
68	13.400, 0.008	13.400, 0.009	13.400, 0.006	13.400, 0.003	13.400, -0.005	13.400, 0.003	13.400, 0.011	13.400, 0.001	13.400, 0.006	13.400, 0.009
69	13.600, 0.007	13.600, 0.009	13.600, 0.006	13.600, 0.003	13.600, -0.005	13.600, 0.003	13.600, 0.011	13.600, 0.001	13.600, 0.006	13.600, 0.009
70	13.800, 0.007	13.800, 0.009	13.800, 0.005	13.800, 0.003	13.800, -0.005	13.800, 0.003	13.800, 0.011	13.800, 0.001	13.800, 0.005	13.800, 0.009
71	14.000, 0.007	14.000, 0.008	14.000, 0.005	14.000, 0.003	14.000, -0.005	14.000, 0.003	14.000, 0.011	14.000, 0.001	14.000, 0.005	14.000, 0.009
72	14.200, 0.007	14.200, 0.008	14.200, 0.005	14.200, 0.003	14.200, -0.005	14.200, 0.003	14.200, 0.010	14.200, 0.001	14.200, 0.005	14.200, 0.009
73	14.400, 0.007	14.400, 0.008	14.400, 0.004	14.400, 0.003	14.400, -0.005	14.400, 0.003	14.400, 0.010	14.400, 0.001	14.400, 0.005	14.400, 0.009
74	14.600, 0.007	14.600, 0.007	14.600, 0.004	14.600, 0.003	14.600, -0.005	14.600, 0.003	14.600, 0.010	14.600, 0.000	14.600, 0.005	14.600, 0.008
75	14.800, 0.006	14.800, 0.007	14.800, 0.004	14.800, 0.003	14.800, -0.004	14.800, 0.003	14.800, 0.009	14.800, 0.000	14.800, 0.005	14.800, 0.008
76	15.000, 0.006	15.000, 0.007	15.000, 0.003	15.000, 0.003	15.000, -0.004	15.000, 0.003	15.000, 0.009	15.000, 0.000	15.000, 0.005	15.000, 0.008
77	15.200, 0.006	15.200, 0.007	15.200, 0.003	15.200, 0.003	15.200, -0.004	15.200, 0.003	15.200, 0.009	15.200, 0.000	15.200, 0.005	15.200, 0.007
78	15.400, 0.006	15.400, 0.006	15.400, 0.003	15.400, 0.003	15.400, -0.003	15.400, 0.003	15.400, 0.008	15.400, 0.000	15.400, 0.005	15.400, 0.007
79	15.600, 0.005	15.600, 0.006	15.600, 0.003	15.600, 0.003	15.600, -0.003	15.600, 0.002	15.600, 0.008	15.600, 0.000	15.600, 0.005	15.600, 0.007
80	15.800, 0.005	15.800, 0.006	15.800, 0.003	15.800, 0.003	15.800, -0.003	15.800, 0.002	15.800, 0.008	15.800, 0.000	15.800, 0.006	15.800, 0.007
81	16.000, 0.005	16.000, 0.006	16.000, 0.003	16.000, 0.003	16.000, -0.003	16.000, 0.002	16.000, 0.008	16.000, 0.000	16.000, 0.005	16.000, 0.007
82	16.200, 0.004	16.200, 0.006	16.200, 0.004	16.200, 0.003	16.200, -0.003	16.200, 0.002	16.200, 0.008	16.200, 0.000	16.200, 0.005	16.200, 0.007
83	16.400, 0.004	16.400, 0.006	16.400, 0.004	16.400, 0.003	16.400, -0.004	16.400, 0.002	16.400, 0.008	16.400, 0.001	16.400, 0.005	16.400, 0.007
84	16.600, 0.004	16.600, 0.006	16.600, 0.004	16.600, 0.002	16.600, -0.004	16.600, 0.002	16.600, 0.007	16.600, 0.001	16.600, 0.005	16.600, 0.006
85	16.800, 0.003	16.800, 0.006	16.800, 0.004	16.800, 0.002	16.800, -0.004	16.800, 0.002	16.800, 0.007	16.800, 0.001	16.800, 0.004	16.800, 0.006
86	17.000, 0.003	17.000, 0.005	17.000, 0.004	17.000, 0.002	17.000, -0.004	17.000, 0.002	17.000, 0.006	17.000, 0.002	17.000, 0.004	17.000, 0.006
87	17.200, 0.002	17.200, 0.005	17.200, 0.004	17.200, 0.002	17.200, -0.005	17.200, 0.002	17.200, 0.006	17.200, 0.002	17.200, 0.004	17.200, 0.006
88	17.400, 0.002	17.400, 0.005	17.400, 0.004	17.400, 0.003	17.400, -0.005	17.400, 0.002	17.400, 0.006	17.400, 0.002	17.400, 0.004	17.400, 0.006
89	17.600, 0.001	17.600, 0.005	17.600, 0.004	17.600, 0.003	17.600, -0.005	17.600, 0.002	17.600, 0.006	17.600, 0.002	17.600, 0.004	17.600, 0.006
90	17.800, 0.001	17.800, 0.005	17.800, 0.004	17.800, 0.002	17.800, -0.005	17.800, 0.002	17.800, 0.005	17.800, 0.002	17.800, 0.004	17.800, 0.006
91	18.000, 0.001	18.000, 0.005	18.000, 0.004	18.000, 0.002	18.000, -0.005	18.000, 0.003	18.000, 0.005	18.000, 0.001	18.000, 0.004	18.000, 0.006
92	18.200, 0.001	18.200, 0.005	18.200, 0.004	18.200, 0.002	18.200, -0.004	18.200, 0.003	18.200, 0.005	18.200, 0.001	18.200, 0.004	18.200, 0.006
93	18.400, 0.000	18.400, 0.005	18.400, 0.004	18.400, 0.002	18.400, -0.004	18.400, 0.003	18.400, 0.005	18.400, 0.001	18.400, 0.004	18.400, 0.006
94	18.600, -0.000	18.600, 0.005	18.600, 0.003	18.600, 0.002	18.600, -0.004	18.600, 0.003	18.600, 0.005	18.600, 0.000	18.600, 0.004	18.600, 0.006
95	18.800, -0.001	18.800, 0.004	18.800, 0.003	18.800, 0.002	18.800, -0.003	18.800, 0.003	18.800, 0.005	18.800, -0.000	18.800, 0.004	18.800, 0.006
96	19.000, -0.001	19.000, 0.004	19.000, 0.003	19.000, 0.002	19.000, -0.003	19.000, 0.003	19.000, 0.005	19.000, -0.000	19.000, 0.004	19.000, 0.006
97	19.200, -0.001	19.200, 0.004	19.200, 0.003	19.200, 0.002	19.200, -0.003	19.200, 0.003	19.200, 0.006	19.200, -0.001	19.200, 0.004	19.200, 0.006
98	19.400, -0.001	19.400, 0.003	19.400, 0.003	19.400, 0.002	19.400, -0.002	19.400, 0.003	19.400, 0.006	19.400, -0.001	19.400, 0.004	19.400, 0.006
99	19.600, -0.001	19.600, 0.003	19.600, 0.003	19.600, 0.002	19.600, -0.002	19.600, 0.003	19.600, 0.006	19.600, -0.001	19.600, 0.004	19.600, 0.006
100	19.800, -0.000	19.800, 0.003	19.800, 0.003	19.800, 0.002	19.800, -0.002	19.800, 0.002	19.800, 0.006	19.800, -0.002	19.800, 0.004	19.800, 0.006
101	20.000, -0.000	20.000, 0.003	20.000, 0.003	20.000, 0.002	20.000, -0.002	20.000, 0.002	20.000, 0.006	20.000, -0.002	20.000, 0.004	20.000, 0.006
102	20.200, 0.000	20.200, 0.003	20.200, 0.003	20.200, 0.002	20.200, -0.002	20.200, 0.002	20.200, 0.006	20.200, -0.002	20.200, 0.004	20.200, 0.005
103	20.400, 0.000	20.400, 0.003	20.400, 0.003	20.400, 0.002	20.400, -0.002	20.400, 0.002	20.400, 0.006	20.400, -0.001	20.400, 0.004	20.400, 0.005
104	20.600, 0.001	20.600, 0.003	20.600, 0.003	20.600, 0.002	20.600, -0.002	20.600, 0.002	20.600, 0.006	20.600, -0.001	20.600, 0.003	20.600, 0.005
105	20.800, 0.001	20.800, 0.003	20.800, 0.002	20.800, 0.002	20.800, -0.002	20.800, 0.002	20.800, 0.005	20.800, -0.001	20.800, 0.003	20.800, 0.005
106	21.000, 0.001	21.000, 0.003	21.000, 0.002	21.000, 0.002	21.000, -0.002	21.000, 0.002	21.000, 0.005	21.000, -0.001	21.000, 0.003	21.000, 0.005
107	21.200, 0.002	21.200, 0.003	21.200, 0.002	21.200, 0.002	21.200, -0.002	21.200, 0.002	21.200, 0.004	21.200, -0.001	21.200, 0.003	21.200, 0.005
108	21.400, 0.002	21.400, 0.003	21.400, 0.002	21.400, 0.002	21.400, -0.002	21.400, 0.002	21.400, 0.004	21.400, -0.001	21.400, 0.003	21.400, 0.005
109	21.600, 0.002	21.600, 0.003	21.600, 0.002	21.600, 0.002	21.600, -0.002	21.600, 0.001	21.600, 0.004	21.600, -0.001	21.600, 0.003	21.600, 0.005
110	21.800, 0.002	21.800, 0.003	21.800, 0.002	21.800, 0.002	21.800, -0.002	21.800, 0.001	21.800, 0.003	21.800, -0.001	21.800, 0.002	21.800, 0.005
111	22.000, 0.002	22.000, 0.003	22.000, 0.002	22.000, 0.002	22.000, -0.002	22.000, 0.001	22.000, 0.002	22.000, -0.000	22.000, 0.002	22.000, 0.005
112	22.200, 0.002	22.200, 0.003	22.200, 0.002	22.200, 0.002	22.200, -0.002	22.200, 0.001	22.200, 0.002	22.200, -0.000	22.200, 0.002	22.200, 0.005
113	22.400, 0.002	22.400, 0.002	22.400, 0.003	22.400, 0.001	22.400, -0.002	22.400, 0.001	22.400, 0.002	22.400, 0.000	22.400, 0.002	22.400, 0.005
114	22.600, 0.001	22.600, 0.002	22.600, 0.003	22.600, 0.001	22.600, -0.002	22.600, 0.001	22.600, 0.001	22.600, 0.000	22.600, 0.002	22.600, 0.005
115	22.800, 0.001	22.800, 0.002	22.800, 0.003	22.800, 0.001	22.800, -0.002	22.800, 0.001	22.800, 0.001	22.800, 0.000	22.800, 0.002	22.800, 0.004
116	23.000, 0.001	23.000, 0.002	23.000, 0.003	23.000, 0.000	23.000, -0.002	23.000, 0.001	23.000, 0.001	23.000, 0.000	23.000, 0.002	23.000, 0.004
117	23.200, 0.001	23.200, 0.002	23.200, 0.003	23.200, 0.000	23.200, -0.002	23.200, 0.001	23.200, 0.000	23.200, 0.000	23.200, 0.002	23.200, 0.004
118	23.400, 0.001	23.400, 0.002	23.400, 0.003	23.400, -0.000	23.400, -0.002	23.400, 0.001	23.400, 0.000	23.400, 0.000	23.400, 0.002	23.400, 0.003
119	23.600, 0.002	23.600, 0.002	23.600, 0.003	23.600, -0.001	23.600, -0.002	23.600, 0.001	23.600, 0.000	23.600, 0.000	23.600, 0.002	23.600, 0.003
120	23.800, 0.002	23.800, 0.002	23.800, 0.003	23.800, -0.001	23.800, -0.002	23.800, 0.002	23.800, 0.000	23.800, 0.000	23.800, 0.002	23.800, 0.003
121	24.000, 0.002	24.000, 0.002	24.000, 0.003	24.000, -0.002	24.000, -0.002	24.000, 0.002	24.000, 0.000	24.000, 0.000	24.000, 0.001	24.000, 0.003
122	24.200, 0.002	24.200, 0.003	24.200, 0.003	24.200, -0.002	24.200, -0.002	24.200, 0.002	24.200, 0.000	24.200, -0.000	24.200, 0.001	24.200, 0.002
123	24.400, 0.002	24.400, 0.003	24.400, 0.003	24.400, -0.002	24.400, -0.002	24.400, 0.002	24.400, 0.000	24.400, -0.000	24.400, 0.001	24.400, 0.002
124	24.600, 0.001	24.600, 0.003	24.600, 0.003	24.600, -0.002	24.600, -0.002	24.600, 0.002	24.600, 0.000	24.600, -0.001	24.600, 0.001	24.600, 0.002
125	24.800, 0.001	24.800, 0.003	24.800, 0.003	24.800, -0.002	24.800, -0.001	24.800, 0.002	24.800, 0.000	24.800, -0.001	24.800, 0.001	24.800, 0.002
126	25.000, 0.001	25.000, 0.003	25.000, 0.003	25.000, -0.002	25.000, -0.001	25.000, 0.002	25.000, 0.000	25.000, -0.001	25.000, 0.001	25.000, 0.001
127	25.200, 0.001	25.200, 0.003	25.200, 0.003	25.200, -0.002	25.200, -0.001	25.200, 0.002	25.200, 0.000	25.200, -0.001	25.200, 0.001	25.200, 0.001
128	25.400, 0.001	25.400, 0.003	25.400, 0.002	25.400, -0.001	25.400, -0.001	25.400, 0.002	25.400, 0.000	25.400, -0.001	25.400, 0.001	25.400, 0.001
129	25.600, 0.000	25.600, 0.003	25.600, 0.002	25.600, -0.001	25.600, -0.001	25.600, 0.001	25.600, 0.000	25.600, -0.001	25.600, 0.001	25.600, 0.002
130	25.800, 0.000	25.800, 0.003	25.800, 0.002	25.800, -0.001	25.800, -0.001	25.800, 0.001	25.800, 0.000	25.800, -0.001	25.800, 0.001	25.800, 0.002
131	26.000, -0.000	26.000, 0.003	26.000, 0.001	26.000, -0.001	26.000, -0.001	26.000, 0.001	26.000, 0.000	26.000, -0.001	26.000, 0.001	26.000, 0.002
132	26.200, -0.001	26.200, 0.003	26.200, 0.001	26.200, -0.000	26.200, -0.001	26.200, 0.001	26.200, 0.000	26.200, -0.001	26.200, 0.001	26.200, 0.002
133	26.400, -0.001	26.400, 0.002	26.400, 0.001	26.400, -0.000	26.400, -0.001	26.400, 0.000	26.400, 0.001	26.400, -0.001	26.400, 0.001	26.400, 0.002
134	26.600, -0.001	26.600, 0.002	26.600, 0.001	26.600, 0.000	26.600, -0.001	26.600, 0.000	26.600, 0.001	26.600, -0.001	26.600, 0.001	26.600, 0.001
135	26.800, -0.001	26.800, 0.001	26.800, 0.001	26.800, 0.000	26.800, -0.001	26.800, 0.000	26.800, 0.001	26.800, -0.001	26.800, 0.001	26.800, 0.001
136	27.000, -0.001	27.000, 0.001	27.000, 0.001	27.000, -0.000	27.000, -0.001	27.000, -0.000	27.000, 0.001	27.000, -0.001	27.000, 0.001	27.000, 0.001
137	27.200, -0.000	27.200, 0.000	27.200, 0.001	27.200, -0.000	27.200, -0.001	27.200, -0.000	27.200, 0.001	27.200, -0.000	27.200, 0.001	27.200, 0.001
138	27.400, -0.000	27.400, 0.000	27.400, 0.001	27.400, -0.001	27.400, -0.001	27.400, -0.000	27.400, 0.001	27.400, -0.000	27.400, 0.001	27.400, 0.001
139	27.600, -0.000	27.600, -0.000	27.600, 0.001	27.600, -0.001	27.600, -0.001	27.600, -0.000	27.600, 0.001	27.600, 0.000	27.600, 0.001	27.600, 0.001
140	27.800, -0.000	27.800, -0.000	27.800, 0.001	27.800, -0.001	27.800, -0.000	27.800, -0.000	27.800, 0.001	27.800, 0.000	27.800, 0.000	27.800, 0.001
141	28.000, 0.000	28.000, -0.000	28.000, 0.000	28.000, -0.001	28.000, -0.000	28.000, 0.000	28.000, 0.001	28.000, 0.001	28.000, 0.000	28.000, 0.001
142	28.200, 0.000	28.200, -0.000	28.200, 0.000	28.200, -0.001	28.200, 0.000	28.200, 0.000	28.200, 0.001	28.200, 0.001	28.200, 0.000	28.200, 0.000
143	28.400, 0.000	28.400, -0.001	28.400, 0.000	28.400, -0.001	28.400, 0.001	28.400, 0.000	28.400, 0.000	28.400, 0.001	28.400, 0.000	28.400, 0.000
144	28.600, 0.000	28.600, -0.000	28.600, 0.000	28.600, -0.000	28.600, 0.001	28.600, 0.000	28.600, 0.000	28.600, 0.001	28.600, -0.000	28.600, -0.000
145	28.800, 0.000	28.800, -0.000	28.800, -0.000	28.800, 0.000	28.800, 0.001	28.800, 0.000	28.800, -0.000	28.800, 0.000	28.800, -0.000	28.800, -0.000
146	29.000, 0.000	29.000, -0.000	29.000, -0.000	29.000, 0.000	29.000, 0.001	29.000, 0.000	29.000, -0.000	29.000, 0.000	29.000, -0.000	29.000, -0.001
147	29.200, 0.000	29.200, -0.000	29.200, -0.001	29.200, 0.001	29.200, 0.001	29.200, 0.000	29.200, -0.001	29.200, -0.000	29.200, -0.001	29.200, -0.001
148	29.400, 0.000	29.400, 0.000	29.400, -0.001	29.400, 0.001	29.400, 0.000	29.400, 0.000	29.400, -0.001	29.400, -0.000	29.400, -0.001	29.400, -0.001
149	29.600, -0.000	29.600, 0.001	29.600, -0.001	29.600, 0.002	29.600, 0.000	29.600, 0.000	29.600, -0.002	29.600, -0.001	29.600, -0.001	29.600, -0.001
150	29.800, -0.000	29.800, 0.001	29.800, -0.002	29.800, 0.002	29.800, -0.000	29.800, -0.000	29.800, -0.002	29.800, -0.001	29.800, -0.001	29.800, -0.002
151	30.000, 0.000	30.000, 0.000	30.000, 0.000	30.000, 0.000	30.000, 0.000	30.000, 0.000	30.000, 0.000	30.000, 0.000	30.000, 0.000	30.000, 0.000
152	30.200, 0.012	30.200, 0.009	30.200, 0.005	30.200, 0.014	30.200, -0.001	30.200, 0.006	30.200, 0.003	30.200, 0.009	30.200, 0.003	30.200, 0.005
153	30.400, 0.025	30.400, 0.020	30.400, 0.011	30.400, 0.031	30.400, -0.002	30.400, 0.012	30.400, 0.008	30.400, 0.019	30.400, 0.006	30.400, 0.012
154	30.600, 0.040	30.600, 0.032	30.600, 0.018	30.600, 0.050	30.600, -0.002	30.600, 0.020	30.600, 0.013	30.600, 0.031	30.600, 0.011	30.600, 0.020
155	30.800, 0.056	30.800, 0.046	30.800, 0.026	30.800, 0.072	30.800, -0.002	30.800, 0.028	30.800, 0.019	30.800, 0.044	30.800, 0.015	30.800, 0.029
156	31.000, 0.073	31.000, 0.061	31.000, 0.035	31.000, 0.095	31.000, -0.001	31.000, 0.036	31.000, 0.026	31.000, 0.057	31.000, 0.021	31.000, 0.039
157	31.200, 0.090	31.200, 0.076	31.200, 0.045	31.200, 0.121	31.200, 0.000	31.200, 0.044	31.200, 0.033	31.200, 0.070	31.200, 0.027	31.200, 0.049
158	31.400, 0.107	31.400, 0.093	31.400, 0.056	31.400, 0.147	31.400, 0.002	31.400, 0.052	31.400, 0.041	31.400, 0.084	31.400, 0.033	31.400, 0.060
159	31.600, 0.123	31.600, 0.109	31.600, 0.068	31.600, 0.173	31.600, 0.004	31.600, 0.060	31.600, 0.048	31.600, 0.096	31.600, 0.039	31.600, 0.072
160	31.800, 0.138	31.800, 0.126	31.800, 0.080	31.800, 0.199	31.800, 0.006	31.800, 0.066	31.800, 0.056	31.800, 0.108	31.800, 0.046	31.800, 0.083
161	32.000, 0.151	32.000, 0.142	32.000, 0.092	32.000, 0.224	32.000, 0.009	32.000, 0.072	32.000, 0.063	32.000, 0.118	32.000, 0.052	32.000, 0.094
162	32.200, 0.161	32.200, 0.157	32.200, 0.104	32.200, 0.248	32.200, 0.013	32.200, 0.076	32.200, 0.070	32.200, 0.126	32.200, 0.058	32.200, 0.104
163	32.400, 0.170	32.400, 0.171	32.400, 0.115	32.400, 0.269	32.400, 0.015	32.400, 0.080	32.400, 0.075	32.400, 0.132	32.400, 0.064	32.400, 0.114
164	32.600, 0.177	32.600, 0.185	32.600, 0.126	32.600, 0.290	32.600, 0.017	32.600, 0.082	32.600, 0.079	32.600, 0.138	32.600, 0.069	32.600, 0.123
165	32.800, 0.182	32.800, 0.198	32.800, 0.136	32.800, 0.311	32.800, 0.018	32.800, 0.084	32.800, 0.082	32.800, 0.142	32.800, 0.074	32.800, 0.132
166	33.000, 0.187	33.000, 0.211	33.000, 0.147	33.000, 0.331	33.000, 0.020	33.000, 0.086	33.000, 0.085	33.000, 0.146	33.000, 0.080	33.000, 0.141
167	33.200, 0.191	33.200, 0.224	33.200, 0.157	33.200, 0.350	33.200, 0.020	33.200, 0.087	33.200, 0.088	33.200, 0.149	33.200, 0.085	33.200, 0.150
168	33.400, 0.193	33.400, 0.238	33.400, 0.167	33.400, 0.369	33.400, 0.021	33.400, 0.089	33.400, 0.090	33.400, 0.151	33.400, 0.090	33.400, 0.159
169	33.600, 0.196	33.600, 0.251	33.600, 0.176	33.600, 0.388	33.600, 0.022	33.600, 0.090	33.600, 0.091	33.600, 0.153	33.600, 0.095	33.600, 0.168
170	33.800, 0.197	33.800, 0.264	33.800, 0.185	33.800, 0.405	33.800, 0.023	33.800, 0.091	33.800, 0.093	33.800, 0.154	33.800, 0.100	33.800, 0.178
171	34.000, 0.198	34.000, 0.277	34.000, 0.194	34.000, 0.423	34.000, 0.024	34.000, 0.092	34.000, 0.094	34.000, 0.155	34.000, 0.105	34.000, 0.187
172	34.200, 0.199	34.200, 0.290	34.200, 0.201	34.200, 0.440	34.200, 0.025	34.200, 0.093	34.200, 0.095	34.200, 0.157	34.200, 0.110	34.200, 0.196
173	34.400, 0.200	34.400, 0.303	34.400, 0.209	34.400, 0.457	34.400, 0.025	34.400, 0.093	34.400, 0.096	34.400, 0.157	34.400, 0.114	34.400, 0.205
174	34.600, 0.200	34.600, 0.315	34.600, 0.216	34.600, 0.473	34.600, 0.026	34.600, 0.094	34.600, 0.097	34.600, 0.158	34.600, 0.119	34.600, 0.215
175	34.800, 0.201	34.800, 0.328	34.800, 0.223	34.800, 0.489	34.800, 0.026	34.800, 0.095	34.800, 0.097	34.800, 0.158	34.800, 0.123	34.800, 0.224
176	35.000, 0.201	35.000, 0.340	35.000, 0.229	35.000, 0.505	35.000, 0.027	35.000, 0.095	35.000, 0.098	35.000, 0.159	35.000, 0.127	35.000, 0.234
177	35.200, 0.202	35.200, 0.353	35.200, 0.235	35.200, 0.520	35.200, 0.027	35.200, 0.095	35.200, 0.098	35.200, 0.159	35.200, 0.131	35.200, 0.243
178	35.400, 0.202	35.400, 0.365	35.400, 0.241	35.400, 0.535	35.400, 0.027	35.400, 0.096	35.400, 0.099	35.400, 0.159	35.400, 0.135	35.400, 0.252
179	35.600, 0.202	35.600, 0.378	35.600, 0.246	35.600, 0.550	35.600, 0.027	35.600, 0.096	35.600, 0.099	35.600, 0.159	35.600, 0.139	35.600, 0.261
180	35.800, 0.203	35.800, 0.390	35.800, 0.251	35.800, 0.565	35.800, 0.028	35.800, 0.097	35.800, 0.099	35.800, 0.159	35.800, 0.142	35.800, 0.270
181	36.000, 0.203	36.000, 0.402	36.000, 0.255	36.000, 0.579	36.000, 0.028	36.000, 0.097	36.000, 0.100	36.000, 0.159	36.000, 0.144	36.000, 0.279
182	36.200, 0.203	36.200, 0.415	36.200, 0.259	36.200, 0.593	36.200, 0.028	36.200, 0.097	36.200, 0.100	36.200, 0.159	36.200, 0.147	36.200, 0.288
183	36.400, 0.203	36.400, 0.427	36.400, 0.263	36.400, 0.607	36.400, 0.029	36.400, 0.098	36.400, 0.100	36.400, 0.159	36.400, 0.149	36.400, 0.296
184	36.600, 0.203	36.600, 0.438	36.600, 0.266	36.600, 0.621	36.600, 0.029	36.600, 0.098	36.600, 0.100	36.600, 0.158	36.600, 0.151	36.600, 0.305
185	36.800, 0.203	36.800, 0.450	36.800, 0.269	36.800, 0.635	36.800, 0.030	36.800, 0.099	36.800, 0.101	36.800, 0.158	36.800, 0.153	36.800, 0.313
186	37.000, 0.203	37.000, 0.462	37.000, 0.272	37.000, 0.647	37.000, 0.031	37.000, 0.099	37.000, 0.101	37.000, 0.158	37.000, 0.155	37.000, 0.322
187	37.200, 0.203	37.200, 0.475	37.200, 0.275	37.200, 0.660	37.200, 0.031	37.200, 0.099	37.200, 0.102	37.200, 0.158	37.200, 0.156	37.200, 0.330
188	37.400, 0.203	37.400, 0.487	37.400, 0.277	37.400, 0.673	37.400, 0.032	37.400, 0.100	37.400, 0.102	37.400, 0.158	37.400, 0.157	37.400, 0.338
189	37.600, 0.202	37.600, 0.499	37.600, 0.280	37.600, 0.685	37.600, 0.033	37.600, 0.100	37.600, 0.102	37.600, 0.158	37.600, 0.158	37.600, 0.347
190	37.800, 0.202	37.800, 0.511	37.800, 0.282	37.800, 0.697	37.800, 0.034	37.800, 0.100	37.800, 0.103	37.800, 0.157	37.800, 0.159	37.800, 0.355
191	38.000, 0.202	38.000, 0.522	38.000, 0.284	38.000, 0.709	38.000, 0.034	38.000, 0.101	38.000, 0.103	38.000, 0.157	38.000, 0.160	38.000, 0.363
192	38.200, 0.202	38.200, 0.534	38.200, 0.285	38.200, 0.720	38.200, 0.035	38.200, 0.101	38.200, 0.103	38.200, 0.157	38.200, 0.161	38.200, 0.371
193	38.400, 0.202	38.400, 0.546	38.400, 0.287	38.400, 0.732	38.400, 0.035	38.400, 0.102	38.400, 0.104	38.400, 0.157	38.400, 0.162	38.400, 0.380
194	38.600, 0.201	38.600, 0.557	38.600, 0.288	38.600, 0.744	38.600, 0.035	38.600, 0.102	38.600, 0.104	38.600, 0.157	38.600, 0.162	38.600, 0.388
195	38.800, 0.201	38.800, 0.568	38.800, 0.290	38.800, 0.755	38.800, 0.035	38.800, 0.102	38.800, 0.104	38.800, 0.157	38.800, 0.163	38.800, 0.396
196	39.000, 0.202	39.000, 0.579	39.000, 0.291	39.000, 0.766	39.000, 0.036	39.000, 0.103	39.000, 0.104	39.000, 0.157	39.000, 0.164	39.000, 0.403
197	39.200, 0.202	39.200, 0.590	39.200, 0.292	39.200, 0.778	39.200, 0.036	39.200, 0.103	39.200, 0.104	39.200, 0.156	39.200, 0.164	39.200, 0.411
198	39.400, 0.202	39.400, 0.602	39.400, 0.294	39.400, 0.789	39.400, 0.037	39.400, 0.104	39.400, 0.104	39.400, 0.156	39.400, 0.165	39.400, 0.419
199	39.600, 0.202	39.600, 0.613	39.600, 0.295	39.600, 0.800	39.600, 0.037	39.600, 0.104	39.600, 0.105	39.600, 0.156	39.600, 0.165	39.600, 0.426
200	39.800, 0.201	39.800, 0.624	39.800, 0.296	39.800, 0.811	39.800, 0.037	39.800, 0.105	39.800, 0.105	39.800, 0.155	39.800, 0.166	39.800, 0.434
201	40.000, 0.201	40.000, 0.635	40.000, 0.297	40.000, 0.822	40.000, 0.037	40.000, 0.105	40.000, 0.105	40.000, 0.155	40.000, 0.166	40.000, 0.441
202	40.200, 0.201	40.200, 0.646	40.200, 0.298	40.200, 0.832	40.200, 0.037	40.200, 0.105	40.200, 0.105	40.200, 0.154	40.200, 0.166	40.200, 0.448
203	40.400, 0.200	40.400, 0.657	40.400, 0.298	40.400, 0.843	40.400, 0.038	40.400, 0.106	40.400, 0.106	40.400, 0.154	40.400, 0.167	40.400, 0.455
204	40.600, 0.200	40.600, 0.668	40.600, 0.299	40.600, 0.853	40.600, 0.038	40.600, 0.106	40.600, 0.106	40.600, 0.153	40.600, 0.167	40.600, 0.462
205	40.800, 0.200	40.800, 0.679	40.800, 0.300	40.800, 0.862	40.800, 0.039	40.800, 0.106	40.800, 0.106	40.800, 0.153	40.800, 0.167	40.800, 0.469
206	41.000, 0.200	41.000, 0.690	41.000, 0.300	41.000, 0.872	41.000, 0.039	41.000, 0.107	41.000, 0.106	41.000, 0.153	41.000, 0.167	41.000, 0.476
207	41.200, 0.200	41.200, 0.701	41.200, 0.301	41.200, 0.882	41.200, 0.039	41.200, 0.107	41.200, 0.106	41.200, 0.152	41.200, 0.167	41.200, 0.483
208	41.400, 0.199	41.400, 0.712	41.400, 0.301	41.400, 0.891	41.400, 0.040	41.400, 0.107	41.400, 0.106	41.400, 0.152	41.400, 0.167	41.400, 0.490
209	41.600, 0.199	41.600, 0.723	41.600, 0.302	41.600, 0.900	41.600, 0.040	41.600, 0.108	41.600, 0.106	41.600, 0.152	41.600, 0.167	41.600, 0.497
210	41.800, 0.199	41.800, 0.734	41.800, 0.302	41.800, 0.910	41.800, 0.040	41.800, 0.108	41.800, 0.106	41.800, 0.152	41.800, 0.168	41.800, 0.505
211	42.000, 0.199	42.000, 0.744	42.000, 0.302	42.000, 0.919	42.000, 0.040	42.000, 0.108	42.000, 0.106	42.000, 0.152	42.000, 0.168	42.000, 0.512
212	42.200, 0.198	42.200, 0.755	42.200, 0.302	42.200, 0.928	42.200, 0.041	42.200, 0.108	42.200, 0.106	42.200, 0.152	42.200, 0.168	42.200, 0.519
213	42.400, 0.198	42.400, 0.766	42.400, 0.302	42.400, 0.937	42.400, 0.041	42.400, 0.108	42.400, 0.107	42.400, 0.152	42.400, 0.168	42.400, 0.526
214	42.600, 0.198	42.600, 0.776	42.600, 0.302	42.600, 0.946	42.600, 0.042	42.600, 0.109	42.600, 0.107	42.600, 0.152	42.600, 0.168	42.600, 0.533
215	42.800, 0.198	42.800, 0.786	42.800, 0.302	42.800, 0.955	42.800, 0.042	42.800, 0.109	42.800, 0.107	42.800, 0.152	42.800, 0.168	42.800, 0.541
216	43.000, 0.199	43.000, 0.796	43.000, 0.302	43.000, 0.964	43.000, 0.043	43.000, 0.109	43.000, 0.107	43.000, 0.152	43.000, 0.168	43.000, 0.548
217	43.200, 0.198	43.200, 0.806	43.200, 0.303	43.200, 0.974	43.200, 0.043	43.200, 0.109	43.200, 0.107	43.200, 0.152	43.200, 0.168	43.200, 0.554
218	43.400, 0.198	43.400, 0.816	43.400, 0.303	43.400, 0.983	43.400, 0.044	43.400, 0.109	43.400, 0.108	43.400, 0.152	43.400, 0.168	43.400, 0.561
219	43.600, 0.198	43.600, 0.826	43.600, 0.304	43.600, 0.991	43.600, 0.044	43.600, 0.109	43.600, 0.108	43.600, 0.152	43.600, 0.168	43.600, 0.568
220	43.800, 0.198	43.800, 0.836	43.800, 0.304	43.800, 1.000	43.800, 0.044	43.800, 0.109	43.800, 0.108	43.800, 0.152	43.800, 0.169	43.800, 0.575
221	44.000, 0.198	44.000, 0.846	44.000, 0.304	44.000, 1.009	44.000, 0.045	44.000, 0.110	44.000, 0.108	44.000, 0.151	44.000, 0.169	44.000, 0.581
222	44.200, 0.198	44.200, 0.857	44.200, 0.305	44.200, 1.017	44.200, 0.045	44.200, 0.110	44.200, 0.108	44.200, 0.151	44.200, 0.169	44.200, 0.588
223	44.400, 0.198	44.400, 0.867	44.400, 0.305	44.400, 1.026	44.400, 0.045	44.400, 0.110	44.400, 0.108	44.400, 0.151	44.400, 0.169	44.400, 0.594
224	44.600, 0.198	44.600, 0.876	44.600, 0.306	44.600, 1.034	44.600, 0.045	44.600, 0.111	44.600, 0.108	44.600, 0.151	44.600, 0.169	44.600, 0.601
225	44.800, 0.197	44.800, 0.886	44.800, 0.306	44.800, 1.043	44.800, 0.045	44.800, 0.112	44.800, 0.108	44.800, 0.151	44.800, 0.169	44.800, 0.607
226	45.000, 0.197	45.000, 0.895	45.000, 0.307	45.000, 1.051	45.000, 0.045	45.000, 0.112	45.000, 0.107	45.000, 0.151	45.000, 0.169	45.000, 0.614
227	45.200, 0.197	45.200, 0.904	45.200, 0.307	45.200, 1.059	45.200, 0.045	45.200, 0.113	45.200, 0.107	45.200, 0.150	45.200, 0.169	45.200, 0.620
228	45.400, 0.197	45.400, 0.912	45.400, 0.308	45.400, 1.067	45.400, 0.045	45.400, 0.113	45.400, 0.107	45.400, 0.150	45.400, 0.170	45.400, 0.626
229	45.600, 0.197	45.600, 0.921	45.600, 0.308	45.600, 1.075	45.600, 0.045	45.600, 0.113	45.600, 0.107	45.600, 0.150	45.600, 0.170	45.600, 0.632
230	45.800, 0.197	45.800, 0.929	45.800, 0.308	45.800, 1.083	45.800, 0.045	45.800, 0.113	45.800, 0.107	45.800, 0.150	45.800, 0.170	45.800, 0.639
231	46.000, 0.197	46.000, 0.938	46.000, 0.308	46.000, 1.091	46.000, 0.045	46.000, 0.114	46.000, 0.107	46.000, 0.150	46.000, 0.171	46.000, 0.645
232	46.200, 0.197	46.200, 0.946	46.200, 0.308	46.200, 1.099	46.200, 0.045	46.200, 0.114	46.200, 0.107	46.200, 0.150	46.200, 0.171	46.200, 0.651
233	46.400, 0.197	46.400, 0.954	46.400, 0.307	46.400, 1.107	46.400, 0.046	46.400, 0.114	46.400, 0.108	46.400, 0.150	46.400, 0.171	46.400, 0.657
234	46.600, 0.197	46.600, 0.963	46.600, 0.307	46.600, 1.114	46.600, 0.046	46.600, 0.114	46.600, 0.108	46.600, 0.150	46.600, 0.171	46.600, 0.664
235	46.800, 0.197	46.800, 0.972	46.800, 0.307	46.800, 1.122	46.800, 0.046	46.800, 0.114	46.800, 0.108	46.800, 0.149	46.800, 0.171	46.800, 0.670
236	47.000, 0.197	47.000, 0.980	47.000, 0.307	47.000, 1.129	47.000, 0.047	47.000, 0.114	47.000, 0.108	47.000, 0.149	47.000, 0.171	47.000, 0.676
237	47.200, 0.196	47.200, 0.989	47.200, 0.307	47.200, 1.137	47.200, 0.047	47.200, 0.113	47.200, 0.108	47.200, 0.149	47.200, 0.170	47.200, 0.682
238	47.400, 0.196	47.400, 0.998	47.400, 0.307	47.400, 1.144	47.400, 0.047	47.400, 0.113	47.400, 0.109	47.400, 0.148	47.400, 0.170	47.400, 0.688
239	47.600, 0.196	47.600, 1.006	47.600, 0.307	47.600, 1.151	47.600, 0.047	47.600, 0.113	47.600, 0.109	47.600, 0.148	47.600, 0.170	47.600, 0.694
240	47.800, 0.196	47.800, 1.016	47.800, 0.307	47.800, 1.159	47.800, 0.047	47.800, 0.113	47.800, 0.109	47.800, 0.148	47.800, 0.170	47.800, 0.700
241	48.000, 0.196	48.000, 1.025	48.000, 0.307	48.000, 1.166	48.000, 0.047	48.000, 0.113	48.000, 0.109	48.000, 0.148	48.000, 0.170	48.000, 0.707
242	48.200, 0.196	48.200, 1.034	48.200, 0.307	48.200, 1.173	48.200, 0.047	48.200, 0.113	48.200, 0.109	48.200, 0.148	48.200, 0.170	48.200, 0.713
243	48.400, 0.196	48.400, 1.043	48.400, 0.307	48.400, 1.180	48.400, 0.047	48.400, 0.113	48.400, 0.109	48.400, 0.148	48.400, 0.170	48.400, 0.719
244	48.600, 0.196	48.600, 1.052	48.600, 0.307	48.600, 1.187	48.600, 0.048	48.600, 0.113	48.600, 0.109	48.600, 0.148	48.600, 0.170	48.600, 0.725
245	48.800, 0.196	48.800, 1.060	48.800, 0.307	48.800, 1.194	48.800, 0.048	48.800, 0.114	48.800, 0.109	48.800, 0.148	48.800, 0.170	48.800, 0.731
246	49.000, 0.196	49.000, 1.068	49.000, 0.308	49.000, 1.200	49.000, 0.048	49.000, 0.114	49.000, 0.110	49.000, 0.148	49.000, 0.170	49.000, 0.736
247	49.200, 0.197	49.200, 1.077	49.200, 0.308	49.200, 1.207	49.200, 0.048	49.200, 0.114	49.200, 0.110	49.200, 0.148	49.200, 0.170	49.200, 0.742
248	49.400, 0.197	49.400, 1.086	49.400, 0.308	49.400, 1.214	49.400, 0.048	49.400, 0.114	49.400, 0.110	49.400, 0.148	49.400, 0.171	49.400, 0.748
249	49.600, 0.197	49.600, 1.094	49.600, 0.308	49.600, 1.220	49.600, 0.048	49.600, 0.115	49.600, 0.110	49.600, 0.148	49.600, 0.171	49.600, 0.753
250	49.800, 0.197	49.800, 1.103	49.800, 0.308	49.800, 1.227	49.800, 0.048	49.800, 0.115	49.800, 0.110	49.800, 0.148	49.800, 0.170	49.800, 0.759
251	50.000, 0.197	50.000, 1.112	50.000, 0.308	50.000, 1.233	50.000, 0.048	50.000, 0.115	50.000, 0.111	50.000, 0.148	50.000, 0.170	50.000, 0.765
252	50.200, 0.197	50.200, 1.121	50.200, 0.308	50.200, 1.239	50.200, 0.049	50.200, 0.115	50.200, 0.111	50.200, 0.148	50.200, 0.170	50.200, 0.770
253	50.400, 0.197	50.400, 1.129	50.400, 0.308	50.400, 1.245	50.400, 0.049	50.400, 0.115	50.400, 0.111	50.400, 0.148	50.400, 0.170	50.400, 0.776
254	50.600, 0.197	50.600, 1.138	50.600, 0.308	50.600, 1.252	50.600, 0.049	50.600, 0.115	50.600, 0.111	50.600, 0.147	50.600, 0.170	50.600, 0.781
255	50.800, 0.197	50.800, 1.147	50.800, 0.308	50.800, 1.258	50.800, 0.049	50.800, 0.115	50.800, 0.110	50.800, 0.147	50.800, 0.170	50.800, 0.787
256	51.000, 0.197	51.000, 1.155	51.000, 0.308	51.000, 1.264	51.000, 0.050	51.000, 0.115	51.000, 0.110	51.000, 0.147	51.000, 0.169	51.000, 0.792
257	51.200, 0.197	51.200, 1.164	51.200, 0.308	51.200, 1.271	51.200, 0.050	51.200, 0.115	51.200, 0.110	51.200, 0.147	51.200, 0.169	51.200, 0.798
258	51.400, 0.196	51.400, 1.172	51.400, 0.308	51.400, 1.277	51.400, 0.051	51.400, 0.115	51.400, 0.110	51.400, 0.147	51.400, 0.169	51.400, 0.803
259	51.600, 0.196	51.600, 1.180	51.600, 0.307	51.600, 1.283	51.600, 0.051	51.600, 0.115	51.600, 0.110	51.600, 0.146	51.600, 0.169	51.600, 0.808
260	51.800, 0.196	51.800, 1.188	51.800, 0.307	51.800, 1.289	51.800, 0.051	51.800, 0.116	51.800, 0.109	51.800, 0.146	51.800, 0.169	51.800, 0.813
261	52.000, 0.196	52.000, 1.196	52.000, 0.307	52.000, 1.295	52.000, 0.051	52.000, 0.116	52.000, 0.109	52.000, 0.146	52.000, 0.169	52.000, 0.819
262	52.200, 0.196	52.200, 1.204	52.200, 0.307	52.200, 1.301	52.200, 0.051	52.200, 0.116	52.200, 0.108	52.200, 0.146	52.200, 0.169	52.200, 0.824
263	52.400, 0.197	52.400, 1.212	52.400, 0.307	52.400, 1.307	52.400, 0.051	52.400, 0.116	52.400, 0.108	52.400, 0.146	52.400, 0.169	52.400, 0.829
264	52.600, 0.197	52.600, 1.220	52.600, 0.308	52.600, 1.313	52.600, 0.051	52.600, 0.116	52.600, 0.108	52.600, 0.145	52.600, 0.169	52.600, 0.834
265	52.800, 0.197	52.800, 1.228	52.800, 0.308	52.800, 1.318	52.800, 0.051	52.800, 0.116	52.800, 0.108	52.800, 0.145	52.800, 0.169	52.800, 0.839
266	53.000, 0.197	53.000, 1.236	53.000, 0.308	53.000, 1.324	53.000, 0.051	53.000, 0.116	53.000, 0.108	53.000, 0.145	53.000, 0.169	53.000, 0.844
267	53.200, 0.197	53.200, 1.243	53.200, 0.308	53.200, 1.330	53.200, 0.051	53.200, 0.116	53.200, 0.109	53.200, 0.146	53.200, 0.169	53.200, 0.849
268	53.400, 0.197	53.400, 1.251	53.400, 0.309	53.400, 1.336	53.400, 0.051	53.400, 0.116	53.400, 0.109	53.400, 0.146	53.400, 0.168	53.400, 0.854
269	53.600, 0.197	53.600, 1.259	53.600, 0.309	53.600, 1.341	53.600, 0.051	53.600, 0.116	53.600, 0.110	53.600, 0.146	53.600, 0.168	53.600, 0.859
270	53.800, 0.197	53.800, 1.267	53.800, 0.309	53.800, 1.347	53.800, 0.051	53.800, 0.115	53.800, 0.110	53.800, 0.146	53.800, 0.168	53.800, 0.864
271	54.000, 0.197	54.000, 1.275	54.000, 0.310	54.000, 1.353	54.000, 0.051	54.000, 0.115	54.000, 0.110	54.000, 0.146	54.000, 0.168	54.000, 0.868
272	54.200, 0.196	54.200, 1.283	54.200, 0.310	54.200, 1.358	54.200, 0.051	54.200, 0.115	54.200, 0.111	54.200, 0.146	54.200, 0.169	54.200, 0.873
273	54.400, 0.196	54.400, 1.291	54.400, 0.310	54.400, 1.364	54.400, 0.051	54.400, 0.115	54.400, 0.111	54.400, 0.146	54.400, 0.169	54.400, 0.878
274	54.600, 0.196	54.600, 1.299	54.600, 0.311	54.600, 1.369	54.600, 0.051	54.600, 0.115	54.600, 0.111	54.600, 0.146	54.600, 0.169	54.600, 0.882
275	54.800, 0.196	54.800, 1.307	54.800, 0.311	54.800, 1.374	54.800, 0.052	54.800, 0.115	54.800, 0.111	54.800, 0.146	54.800, 0.170	54.800, 0.887
276	55.000, 0.196	55.000, 1.314	55.000, 0.311	55.000, 1.380	55.000, 0.052	55.000, 0.115	55.000, 0.111	55.000, 0.146	55.000, 0.170	55.000, 0.891
277	55.200, 0.196	55.200, 1.321	55.200, 0.311	55.200, 1.385	55.200, 0.052	55.200, 0.115	55.200, 0.111	55.200, 0.146	55.200, 0.171	55.200, 0.896
278	55.400, 0.196	55.400, 1.328	55.400, 0.310	55.400, 1.390	55.400, 0.053	55.400, 0.115	55.400, 0.111	55.400, 0.146	55.400, 0.171	55.400, 0.900
279	55.600, 0.196	55.600, 1.335	55.600, 0.310	55.600, 1.395	55.600, 0.052	55.600, 0.115	55.600, 0.111	55.600, 0.146	55.600, 0.171	55.600, 0.905
280	55.800, 0.196	55.800, 1.342	55.800, 0.310	55.800, 1.400	55.800, 0.052	55.800, 0.115	55.800, 0.111	55.800, 0.146	55.800, 0.172	55.800, 0.909
281	56.000, 0.196	56.000, 1.349	56.000, 0.310	56.000, 1.405	56.000, 0.052	56.000, 0.116	56.000, 0.111	56.000, 0.146	56.000, 0.172	56.000, 0.913
282	56.200, 0.196	56.200, 1.356	56.200, 0.310	56.200, 1.410	56.200, 0.052	56.200, 0.116	56.200, 0.111	56.200, 0.146	56.200, 0.171	56.200, 0.918
283	56.400, 0.196	56.400, 1.363	56.400, 0.310	56.400, 1.415	56.400, 0.052	56.400, 0.116	56.400, 0.111	56.400, 0.146	56.400, 0.171	56.400, 0.922
284	56.600, 0.196	56.600, 1.370	56.600, 0.310	56.600, 1.420	56.600, 0.053	56.600, 0.116	56.600, 0.111	56.600, 0.146	56.600, 0.171	56.600, 0.926
285	56.800, 0.196	56.800, 1.378	56.800, 0.310	56.800, 1.425	56.800, 0.053	56.800, 0.116	56.800, 0.111	56.800, 0.146	56.800, 0.171	56.800, 0.931
286	57.000, 0.196	57.000, 1.385	57.000, 0.310	57.000, 1.430	57.000, 0.053	57.000, 0.117	57.000, 0.111	57.000, 0.146	57.000, 0.170	57.000, 0.935
287	57.200, 0.196	57.200, 1.392	57.200, 0.310	57.200, 1.435	57.200, 0.053	57.200, 0.117	57.200, 0.112	57.200, 0.146	57.200, 0.170	57.200, 0.939
288	57.400, 0.196	57.400, 1.399	57.400, 0.310	57.400, 1.440	57.400, 0.053	57.400, 0.117	57.400, 0.112	57.400, 0.146	57.400, 0.169	57.400, 0.944
289	57.600, 0.196	57.600, 1.406	57.600, 0.310	57.600, 1.445	57.600, 0.053	57.600, 0.117	57.600, 0.112	57.600, 0.146	57.600, 0.169	57.600, 0.948
290	57.800, 0.196	57.800, 1.413	57.800, 0.310	57.800, 1.449	57.800, 0.053	57.800, 0.117	57.800, 0.112	57.800, 0.146	57.800, 0.169	57.800, 0.952
291	58.000, 0.197	58.000, 1.420	58.000, 0.310	58.000, 1.454	58.000, 0.053	58.000, 0.117	58.000, 0.112	58.000, 0.146	58.000, 0.169	58.000, 0.956
292	58.200, 0.197	58.200, 1.427	58.200, 0.310	58.200, 1.458	58.200, 0.053	58.200, 0.117	58.200, 0.112	58.200, 0.146	58.200, 0.169	58.200, 0.960
293	58.400, 0.196	58.400, 1.434	58.400, 0.310	58.400, 1.463	58.400, 0.053	58.400, 0.117	58.400, 0.112	58.400, 0.146	58.400, 0.169	58.400, 0.964
294	58.600, 0.196	58.600, 1.441	58.600, 0.310	58.600, 1.467	58.600, 0.053	58.600, 0.117	58.600, 0.112	58.600, 0.145	58.600, 0.170	58.600, 0.969
295	58.800, 0.196	58.800, 1.447	58.800, 0.310	58.800, 1.471	58.800, 0.053	58.800, 0.117	58.800, 0.112	58.800, 0.145	58.800, 0.170	58.800, 0.973
296	59.000, 0.196	59.000, 1.454	59.000, 0.309	59.000, 1.476	59.000, 0.053	59.000, 0.117	59.000, 0.111	59.000, 0.145	59.000, 0.170	59.000, 0.977
297	59.200, 0.196	59.200, 1.460	59.200, 0.309	59.200, 1.480	59.200, 0.053	59.200, 0.116	59.200, 0.111	59.200, 0.144	59.200, 0.170	59.200, 0.981
298	59.400, 0.196	59.400, 1.466	59.400, 0.309	59.400, 1.485	59.400, 0.053	59.400, 0.116	59.400, 0.111	59.400, 0.144	59.400, 0.170	59.400, 0.986
299	59.600, 0.196	59.600, 1.472	59.600, 0.308	59.600, 1.489	59.600, 0.053	59.600, 0.116	59.600, 0.111	59.600, 0.144	59.600, 0.170	59.600, 0.990
300	59.800, 0.196	59.800, 1.479	59.800, 0.308	59.800, 1.494	59.800, 0.053	59.800, 0.116	59.800, 0.111	59.800, 0.143	59.800, 0.170	59.800, 0.993
301	60.000, 0.196	60.000, 1.485	60.000, 0.308	60.000, 1.498	60.000, 0.053	60.000, 0.116	60.000, 0.111	60.000, 0.143	60.000, 0.170	60.000, 0.997
302	60.200, 0.196	60.200, 1.491	60.200, 0.308	60.200, 1.502	60.200, 0.053	60.200, 0.116	60.200, 0.112	60.200, 0.143	60.200, 0.170	60.200, 1.001
303	60.400, 0.196	60.400, 1.498	60.400, 0.308	60.400, 1.506	60.400, 0.053	60.400, 0.116	60.400, 0.112	60.400, 0.143	60.400, 0.170	60.400, 1.005
304	60.600, 0.196	60.600, 1.505	60.600, 0.308	60.600, 1.511	60.600, 0.053	60.600, 0.115	60.600, 0.112	60.600, 0.143	60.600, 0.170	60.600, 1.008
305	60.800, 0.197	60.800, 1.511	60.800, 0.308	60.800, 1.515	60.800, 0.053	60.800, 0.115	60.800, 0.112	60.800, 0.143	60.800, 0.170	60.800, 1.012
306	61.000, 0.197	61.000, 1.518	61.000, 0.307	61.000, 1.519	61.000, 0.053	61.000, 0.115	61.000, 0.112	61.000, 0.143	61.000, 0.169	61.000, 1.016
307	61.200, 0.197	61.200, 1.525	61.200, 0.307	61.200, 1.523	61.200, 0.053	61.200, 0.115	61.200, 0.112	61.200, 0.143	61.200, 0.170	61.200, 1.019
308	61.400, 0.197	61.400, 1.531	61.400, 0.307	61.400, 1.528	61.400, 0.053	61.400, 0.115	61.400, 0.111	61.400, 0.143	61.400, 0.170	61.400, 1.022
309	61.600, 0.197	61.600, 1.537	61.600, 0.307	61.600, 1.532	61.600, 0.053	61.600, 0.116	61.600, 0.110	61.600, 0.144	61.600, 0.170	61.600, 1.026
310	61.800, 0.197	61.800, 1.543	61.800, 0.307	61.800, 1.535	61.800, 0.053	61.800, 0.116	61.800, 0.109	61.800, 0.144	61.800, 0.170	61.800, 1.029
311	62.000, 0.197	62.000, 1.550	62.000, 0.307	62.000, 1.539	62.000, 0.052	62.000, 0.116	62.000, 0.108	62.000, 0.144	62.000, 0.170	62.000, 1.033
312	62.200, 0.198	62.200, 1.556	62.200, 0.307	62.200, 1.543	62.200, 0.053	62.200, 0.116	62.200, 0.107	62.200, 0.145	62.200, 0.170	62.200, 1.036
313	62.400, 0.197	62.400, 1.562	62.400, 0.307	62.400, 1.547	62.400, 0.053	62.400, 0.116	62.400, 0.105	62.400, 0.145	62.400, 0.170	62.400, 1.040
314	62.600, 0.197	62.600, 1.569	62.600, 0.307	62.600, 1.551	62.600, 0.053	62.600, 0.117	62.600, 0.104	62.600, 0.145	62.600, 0.170	62.600, 1.043
315	62.800, 0.197	62.800, 1.575	62.800, 0.307	62.800, 1.554	62.800, 0.053	62.800, 0.117	62.800, 0.102	62.800, 0.145	62.800, 0.170	62.800, 1.046
316	63.000, 0.197	63.000, 1.581	63.000, 0.308	63.000, 1.558	63.000, 0.054	63.000, 0.117	63.000, 0.101	63.000, 0.145	63.000, 0.170	63.000, 1.050
317	63.200, 0.196	63.200, 1.587	63.200, 0.308	63.200, 1.562	63.200, 0.054	63.200, 0.117	63.200, 0.100	63.200, 0.144	63.200, 0.170	63.200, 1.053
318	63.400, 0.196	63.400, 1.593	63.400, 0.308	63.400, 1.565	63.400, 0.054	63.400, 0.116	63.400, 0.099	63.400, 0.144	63.400, 0.170	63.400, 1.056
319	63.600, 0.196	63.600, 1.599	63.600, 0.308	63.600, 1.569	63.600, 0.054	63.600, 0.116	63.600, 0.099	63.600, 0.144	63.600, 0.170	63.600, 1.060
320	63.800, 0.195	63.800, 1.604	63.800, 0.308	63.800, 1.572	63.800, 0.054	63.800, 0.116	63.800, 0.098	63.800, 0.144	63.800, 0.170	63.800, 1.063
321	64.000, 0.195	64.000, 1.610	64.000, 0.309	64.000, 1.576	64.000, 0.054	64.000, 0.116	64.000, 0.098	64.000, 0.143	64.000, 0.170	64.000, 1.066
322	64.200, 0.194	64.200, 1.616	64.200, 0.309	64.200, 1.579	64.200, 0.054	64.200, 0.116	64.200, 0.098	64.200, 0.143	64.200, 0.170	64.200, 1.070
323	64.400, 0.194	64.400, 1.622	64.400, 0.309	64.400, 1.583	64.400, 0.054	64.400, 0.116	64.400, 0.099	64.400, 0.143	64.400, 0.170	64.400, 1.073
324	64.600, 0.194	64.600, 1.628	64.600, 0.309	64.600, 1.587	64.600, 0.054	64.600, 0.116	64.600, 0.099	64.600, 0.143	64.600, 0.170	64.600, 1.076
325	64.800, 0.194	64.800, 1.633	64.800, 0.309	64.800, 1.590	64.800, 0.054	64.800, 0.116	64.800, 0.099	64.800, 0.143	64.800, 0.171	64.800, 1.079
326	65.000, 0.194	65.000, 1.639	65.000, 0.309	65.000, 1.594	65.000, 0.054	65.000, 0.116	65.000, 0.099	65.000, 0.143	65.000, 0.170	65.000, 1.082
327	65.200, 0.194	65.200, 1.644	65.200, 0.309	65.200, 1.598	65.200, 0.054	65.200, 0.117	65.200, 0.099	65.200, 0.143	65.200, 0.170	65.200, 1.086
328	65.400, 0.194	65.400, 1.650	65.400, 0.309	65.400, 1.601	65.400, 0.054	65.400, 0.117	65.400, 0.100	65.400, 0.144	65.400, 0.170	65.400, 1.089
329	65.600, 0.194	65.600, 1.655	65.600, 0.308	65.600, 1.605	65.600, 0.055	65.600, 0.117	65.600, 0.100	65.600, 0.144	65.600, 0.170	65.600, 1.092
330	65.800, 0.195	65.800, 1.661	65.800, 0.308	65.800, 1.608	65.800, 0.055	65.800, 0.118	65.800, 0.100	65.800, 0.144	65.800, 0.170	65.800, 1.095
331	66.000, 0.195	66.000, 1.667	66.000, 0.308	66.000, 1.612	66.000, 0.055	66.000, 0.118	66.000, 0.099	66.000, 0.144	66.000, 0.170	66.000, 1.098
332	66.200, 0.195	66.200, 1.672	66.200, 0.307	66.200, 1.615	66.200, 0.055	66.200, 0.118	66.200, 0.099	66.200, 0.144	66.200, 0.170	66.200, 1.101
333	66.400, 0.195	66.400, 1.678	66.400, 0.307	66.400, 1.619	66.400, 0.055	66.400, 0.118	66.400, 0.099	66.400, 0.144	66.400, 0.170	66.400, 1.104
334	66.600, 0.195	66.600, 1.683	66.600, 0.307	66.600, 1.622	66.600, 0.056	66.600, 0.117	66.600, 0.099	66.600, 0.144	66.600, 0.170	66.600, 1.107
335	66.800, 0.195	66.800, 1.689	66.800, 0.308	66.800, 1.626	66.800, 0.056	66.800, 0.117	66.800, 0.099	66.800, 0.145	66.800, 0.170	66.800, 1.110
336	67.000, 0.195	67.000, 1.694	67.000, 0.308	67.000, 1.629	67.000, 0.056	67.000, 0.116	67.000, 0.099	67.000, 0.145	67.000, 0.170	67.000, 1.113
337	67.200, 0.195	67.200, 1.700	67.200, 0.308	67.200, 1.632	67.200, 0.055	67.200, 0.115	67.200, 0.099	67.200, 0.145	67.200, 0.170	67.200, 1.116
338	67.400, 0.195	67.400, 1.705	67.400, 0.308	67.400, 1.635	67.400, 0.055	67.400, 0.115	67.400, 0.099	67.400, 0.145	67.400, 0.169	67.400, 1.119
339	67.600, 0.195	67.600, 1.711	67.600, 0.309	67.600, 1.638	67.600, 0.055	67.600, 0.115	67.600, 0.100	67.600, 0.145	67.600, 0.169	67.600, 1.122
340	67.800, 0.195	67.800, 1.716	67.800, 0.309	67.800, 1.641	67.800, 0.055	67.800, 0.114	67.800, 0.100	67.800, 0.145	67.800, 0.169	67.800, 1.124
341	68.000, 0.195	68.000, 1.722	68.000, 0.310	68.000, 1.644	68.000, 0.054	68.000, 0.114	68.000, 0.100	68.000, 0.145	68.000, 0.169	68.000, 1.127
342	68.200, 0.195	68.200, 1.727	68.200, 0.310	68.200, 1.647	68.200, 0.054	68.200, 0.114	68.200, 0.100	68.200, 0.145	68.200, 0.170	68.200, 1.130
343	68.400, 0.195	68.400, 1.733	68.400, 0.310	68.400, 1.650	68.400, 0.054	68.400, 0.113	68.400, 0.100	68.400, 0.145	68.400, 0.170	68.400, 1.132
344	68.600, 0.195	68.600, 1.738	68.600, 0.310	68.600, 1.653	68.600, 0.053	68.600, 0.113	68.600, 0.100	68.600, 0.144	68.600, 0.170	68.600, 1.135
345	68.800, 0.195	68.800, 1.743	68.800, 0.310	68.800, 1.655	68.800, 0.053	68.800, 0.113	68.800, 0.100	68.800, 0.144	68.800, 0.170	68.800, 1.137
346	69.000, 0.195	69.000, 1.748	69.000, 0.310	69.000, 1.659	69.000, 0.053	69.000, 0.113	69.000, 0.100	69.000, 0.144	69.000, 0.170	69.000, 1.140
347	69.200, 0.195	69.200, 1.753	69.200, 0.310	69.200, 1.662	69.200, 0.053	69.200, 0.114	69.200, 0.100	69.200, 0.143	69.200, 0.170	69.200, 1.142
348	69.400, 0.195	69.400, 1.758	69.400, 0.310	69.400, 1.665	69.400, 0.053	69.400, 0.114	69.400, 0.100	69.400, 0.143	69.400, 0.170	69.400, 1.145
349	69.600, 0.195	69.600, 1.763	69.600, 0.309	69.600, 1.668	69.600, 0.053	69.600, 0.114	69.600, 0.100	69.600, 0.142	69.600, 0.170	69.600, 1.147
350	69.800, 0.195	69.800, 1.768	69.800, 0.309	69.800, 1.671	69.800, 0.053	69.800, 0.114	69.800, 0.100	69.800, 0.142	69.800, 0.170	69.800, 1.149
351	70.000, 0.195	70.000, 1.773	70.000, 0.308	70.000, 1.674	70.000, 0.053	70.000, 0.113	70.000, 0.100	70.000, 0.142	70.000, 0.170	70.000, 1.151
352	70.200, 0.195	70.200, 1.778	70.200, 0.308	70.200, 1.677	70.200, 0.053	70.200, 0.113	70.200, 0.100	70.200, 0.142	70.200, 0.170	70.200, 1.153
353	70.400, 0.195	70.400, 1.783	70.400, 0.307	70.400, 1.680	70.400, 0.054	70.400, 0.113	70.400, 0.101	70.400, 0.142	70.400, 0.170	70.400, 1.156
354	70.600, 0.196	70.600, 1.788	70.600, 0.307	70.600, 1.683	70.600, 0.054	70.600, 0.113	70.600, 0.101	70.600, 0.142	70.600, 0.170	70.600, 1.158
355	70.800, 0.196	70.800, 1.792	70.800, 0.307	70.800, 1.686	70.800, 0.054	70.800, 0.113	70.800, 0.101	70.800, 0.142	70.800, 0.170	70.800, 1.160
356	71.000, 0.196	71.000, 1.797	71.000, 0.307	71.000, 1.688	71.000, 0.054	71.000, 0.113	71.000, 0.101	71.000, 0.142	71.000, 0.170	71.000, 1.162
357	71.200, 0.196	71.200, 1.802	71.200, 0.307	71.200, 1.691	71.200, 0.054	71.200, 0.113	71.200, 0.102	71.200, 0.142	71.200, 0.170	71.200, 1.165
358	71.400, 0.196	71.400, 1.807	71.400, 0.306	71.400, 1.693	71.400, 0.054	71.400, 0.113	71.400, 0.102	71.400, 0.142	71.400, 0.170	71.400, 1.167
359	71.600, 0.195	71.600, 1.812	71.600, 0.306	71.600, 1.696	71.600, 0.053	71.600, 0.113	71.600, 0.102	71.600, 0.142	71.600, 0.170	71.600, 1.169
360	71.800, 0.195	71.800, 1.817	71.800, 0.306	71.800, 1.698	71.800, 0.053	71.800, 0.113	71.800, 0.102	71.800, 0.142	71.800, 0.170	71.800, 1.171
361	72.000, 0.195	72.000, 1.822	72.000, 0.306	72.000, 1.700	72.000, 0.053	72.000, 0.113	72.000, 0.102	72.000, 0.142	72.000, 0.170	72.000, 1.174
362	72.200, 0.195	72.200, 1.827	72.200, 0.306	72.200, 1.703	72.200, 0.053	72.200, 0.113	72.200, 0.102	72.200, 0.142	72.200, 0.170	72.200, 1.176
363	72.400, 0.195	72.400, 1.832	72.400, 0.307	72.400, 1.706	72.400, 0.052	72.400, 0.113	72.400, 0.102	72.400, 0.142	72.400, 0.170	72.400, 1.179
364	72.600, 0.195	72.600, 1.836	72.600, 0.307	72.600, 1.708	72.600, 0.052	72.600, 0.113	72.600, 0.102	72.600, 0.142	72.600, 0.171	72.600, 1.181
365	72.800, 0.195	72.800, 1.841	72.800, 0.307	72.800, 1.711	72.800, 0.052	72.800, 0.113	72.800, 0.102	72.800, 0.142	72.800, 0.171	72.800, 1.184
366	73.000, 0.195	73.000, 1.845	73.000, 0.308	73.000, 1.714	73.000, 0.052	73.000, 0.113	73.000, 0.102	73.000, 0.142	73.000, 0.171	73.000, 1.186
367	73.200, 0.194	73.200, 1.850	73.200, 0.308	73.200, 1.716	73.200, 0.052	73.200, 0.112	73.200, 0.103	73.200, 0.141	73.200, 0.170	73.200, 1.189
368	73.400, 0.194	73.400, 1.855	73.400, 0.308	73.400, 1.719	73.400, 0.052	73.400, 0.112	73.400, 0.102	73.400, 0.142	73.400, 0.170	73.400, 1.191
369	73.600, 0.194	73.600, 1.859	73.600, 0.308	73.600, 1.722	73.600, 0.053	73.600, 0.112	73.600, 0.102	73.600, 0.142	73.600, 0.170	73.600, 1.193
370	73.800, 0.195	73.800, 1.864	73.800, 0.308	73.800, 1.724	73.800, 0.053	73.800, 0.112	73.800, 0.102	73.800, 0.142	73.800, 0.170	73.800, 1.195
371	74.000, 0.195	74.000, 1.868	74.000, 0.308	74.000, 1.726	74.000, 0.053	74.000, 0.112	74.000, 0.102	74.000, 0.143	74.000, 0.170	74.000, 1.197
372	74.200, 0.195	74.200, 1.873	74.200, 0.308	74.200, 1.729	74.200, 0.054	74.200, 0.112	74.200, 0.102	74.200, 0.143	74.200, 0.170	74.200, 1.199
373	74.400, 0.195	74.400, 1.877	74.400, 0.308	74.400, 1.731	74.400, 0.054	74.400, 0.112	74.400, 0.102	74.400, 0.143	74.400, 0.170	74.400, 1.200
374	74.600, 0.195	74.600, 1.882	74.600, 0.308	74.600, 1.733	74.600, 0.055	74.600, 0.112	74.600, 0.101	74.600, 0.144	74.600, 0.170	74.600, 1.202
375	74.800, 0.194	74.800, 1.886	74.800, 0.308	74.800, 1.735	74.800, 0.055	74.800, 0.111	74.800, 0.101	74.800, 0.144	74.800, 0.170	74.800, 1.203
376	75.000, 0.194	75.000, 1.890	75.000, 0.308	75.000, 1.737	75.000, 0.055	75.000, 0.111	75.000, 0.101	75.000, 0.144	75.000, 0.170	75.000, 1.205
377	75.200, 0.194	75.200, 1.895	75.200, 0.307	75.200, 1.739	75.200, 0.054	75.200, 0.111	75.200, 0.101	75.200, 0.144	75.200, 0.170	75.200, 1.206
378	75.400, 0.194	75.400, 1.899	75.400, 0.307	75.400, 1.742	75.400, 0.054	75.400, 0.111	75.400, 0.101	75.400, 0.143	75.400, 0.170	75.400, 1.208
379	75.600, 0.194	75.600, 1.903	75.600, 0.307	75.600, 1.744	75.600, 0.054	75.600, 0.111	75.600, 0.101	75.600, 0.143	75.600, 0.170	75.600, 1.209
380	75.800, 0.193	75.800, 1.908	75.800, 0.307	75.800, 1.746	75.800, 0.053	75.800, 0.111	75.800, 0.101	75.800, 0.143	75.800, 0.170	75.800, 1.211
381	76.000, 0.193	76.000, 1.912	76.000, 0.307	76.000, 1.748	76.000, 0.053	76.000, 0.111	76.000, 0.100	76.000, 0.143	76.000, 0.170	76.000, 1.213
382	76.200, 0.193	76.200, 1.916	76.200, 0.307	76.200, 1.750	76.200, 0.053	76.200, 0.111	76.200, 0.100	76.200, 0.143	76.200, 0.170	76.200, 1.214
383	76.400, 0.193	76.400, 1.920	76.400, 0.307	76.400, 1.753	76.400, 0.052	76.400, 0.111	76.400, 0.101	76.400, 0.142	76.400, 0.170	76.400, 1.216
384	76.600, 0.194	76.600, 1.924	76.600, 0.307	76.600, 1.755	76.600, 0.052	76.600, 0.111	76.600, 0.101	76.600, 0.142	76.600, 0.169	76.600, 1.218
385	76.800, 0.194	76.800, 1.928	76.800, 0.307	76.800, 1.757	76.800, 0.052	76.800, 0.111	76.800, 0.101	76.800, 0.142	76.800, 0.169	76.800, 1.220
386	77.000, 0.194	77.000, 1.932	77.000, 0.308	77.000, 1.759	77.000, 0.052	77.000, 0.111	77.000, 0.101	77.000, 0.142	77.000, 0.169	77.000, 1.223
387	77.200, 0.195	77.200, 1.935	77.200, 0.308	77.200, 1.761	77.200, 0.052	77.200, 0.111	77.200, 0.101	77.200, 0.142	77.200, 0.169	77.200, 1.225
388	77.400, 0.195	77.400, 1.939	77.400, 0.308	77.400, 1.763	77.400, 0.052	77.400, 0.111	77.400, 0.101	77.400, 0.142	77.400, 0.169	77.400, 1.227
389	77.600, 0.195	77.600, 1.943	77.600, 0.308	77.600, 1.765	77.600, 0.052	77.600, 0.111	77.600, 0.101	77.600, 0.142	77.600, 0.169	77.600, 1.228
390	77.800, 0.196	77.800, 1.946	77.800, 0.308	77.800, 1.767	77.800, 0.052	77.800, 0.111	77.800, 0.101	77.800, 0.142	77.800, 0.169	77.800, 1.230
391	78.000, 0.196	78.000, 1.950	78.000, 0.309	78.000, 1.769	78.000, 0.052	78.000, 0.111	78.000, 0.101	78.000, 0.142	78.000, 0.169	78.000, 1.232
392	78.200, 0.196	78.200, 1.954	78.200, 0.309	78.200, 1.771	78.200, 0.053	78.200, 0.111	78.200, 0.101	78.200, 0.142	78.200, 0.169	78.200, 1.233
393	78.400, 0.196	78.400, 1.958	78.400, 0.309	78.400, 1.773	78.400, 0.053	78.400, 0.111	78.400, 0.101	78.400, 0.142	78.400, 0.169	78.400, 1.235
394	78.600, 0.196	78.600, 1.961	78.600, 0.309	78.600, 1.776	78.600, 0.054	78.600, 0.112	78.600, 0.101	78.600, 0.142	78.600, 0.169	78.600, 1.236
395	78.800, 0.196	78.800, 1.965	78.800, 0.309	78.800, 1.778	78.800, 0.054	78.800, 0.112	78.800, 0.100	78.800, 0.142	78.800, 0.169	78.800, 1.238
396	79.000, 0.196	79.000, 1.969	79.000, 0.309	79.000, 1.780	79.000, 0.054	79.000, 0.112	79.000, 0.100	79.000, 0.142	79.000, 0.169	79.000, 1.240
397	79.200, 0.196	79.200, 1.972	79.200, 0.309	79.200, 1.783	79.200, 0.054	79.200, 0.112	79.200, 0.100	79.200, 0.143	79.200, 0.169	79.200, 1.241
398	79.400, 0.196	79.400, 1.976	79.400, 0.309	79.400, 1.785	79.400, 0.054	79.400, 0.112	79.400, 0.100	79.400, 0.143	79.400, 0.169	79.400, 1.243
399	79.600, 0.195	79.600, 1.980	79.600, 0.309	79.600, 1.787	79.600, 0.054	79.600, 0.112	79.600, 0.100	79.600, 0.143	79.600, 0.169	79.600, 1.245
400	79.800, 0.195	79.800, 1.983	79.800, 0.309	79.800, 1.789	79.800, 0.054	79.800, 0.111	79.800, 0.100	79.800, 0.143	79.800, 0.169	79.800, 1.246
401	80.000, 0.195	80.000, 1.987	80.000, 0.308	80.000, 1.791	80.000, 0.054	80.000, 0.111	80.000, 0.100	80.000, 0.143	80.000, 0.169	80.000, 1.248
402	80.200, 0.195	80.200, 1.991	80.200, 0.308	80.200, 1.793	80.200, 0.053	80.200, 0.110	80.200, 0.100	80.200, 0.143	80.200, 0.170	80.200, 1.250
403	80.400, 0.195	80.400, 1.994	80.400, 0.308	80.400, 1.795	80.400, 0.053	80.400, 0.110	80.400, 0.099	80.400, 0.143	80.400, 0.170	80.400, 1.252
404	80.600, 0.195	80.600, 1.998	80.600, 0.307	80.600, 1.797	80.600, 0.053	80.600, 0.109	80.600, 0.100	80.600, 0.143	80.600, 0.170	80.600, 1.254
405	80.800, 0.194	80.800, 2.002	80.800, 0.307	80.800, 1.799	80.800, 0.053	80.800, 0.109	80.800, 0.100	80.800, 0.143	80.800, 0.170	80.800, 1.256
406	81.000, 0.194	81.000, 2.006	81.000, 0.307	81.000, 1.800	81.000, 0.053	81.000, 0.109	81.000, 0.100	81.000, 0.143	81.000, 0.170	81.000, 1.258
407	81.200, 0.194	81.200, 2.009	81.200, 0.307	81.200, 1.802	81.200, 0.053	81.200, 0.108	81.200, 0.100	81.200, 0.143	81.200, 0.171	81.200, 1.259
408	81.400, 0.193	81.400, 2.013	81.400, 0.307	81.400, 1.804	81.400, 0.053	81.400, 0.108	81.400, 0.100	81.400, 0.143	81.400, 0.171	81.400, 1.261
409	81.600, 0.193	81.600, 2.017	81.600, 0.307	81.600, 1.806	81.600, 0.053	81.600, 0.108	81.600, 0.100	81.600, 0.143	81.600, 0.171	81.600, 1.263
410	81.800, 0.193	81.800, 2.021	81.800, 0.307	81.800, 1.808	81.800, 0.053	81.800, 0.108	81.800, 0.100	81.800, 0.142	81.800, 0.171	81.800, 1.264
411	82.000, 0.193	82.000, 2.025	82.000, 0.306	82.000, 1.810	82.000, 0.053	82.000, 0.108	82.000, 0.100	82.000, 0.142	82.000, 0.170	82.000, 1.265
412	82.200, 0.193	82.200, 2.029	82.200, 0.306	82.200, 1.811	82.200, 0.053	82.200, 0.109	82.200, 0.100	82.200, 0.142	82.200, 0.170	82.200, 1.267
413	82.400, 0.193	82.400, 2.033	82.400, 0.306	82.400, 1.813	82.400, 0.053	82.400, 0.109	82.400, 0.100	82.400, 0.142	82.400, 0.169	82.400, 1.268
414	82.600, 0.193	82.600, 2.037	82.600, 0.306	82.600, 1.815	82.600, 0.054	82.600, 0.109	82.600, 0.100	82.600, 0.142	82.600, 0.169	82.600, 1.270
415	82.800, 0.193	82.800, 2.041	82.800, 0.305	82.800, 1.816	82.800, 0.054	82.800, 0.109	82.800, 0.100	82.800, 0.142	82.800, 0.169	82.800, 1.271
416	83.000, 0.193	83.000, 2.044	83.000, 0.305	83.000, 1.818	83.000, 0.054	83.000, 0.110	83.000, 0.100	83.000, 0.143	83.000, 0.168	83.000, 1.273
417	83.200, 0.193	83.200, 2.048	83.200, 0.305	83.200, 1.819	83.200, 0.054	83.200, 0.110	83.200, 0.100	83.200, 0.143	83.200, 0.168	83.200, 1.274
418	83.400, 0.193	83.400, 2.051	83.400, 0.304	83.400, 1.821	83.400, 0.054	83.400, 0.110	83.400, 0.101	83.400, 0.143	83.400, 0.168	83.400, 1.275
419	83.600, 0.193	83.600, 2.054	83.600, 0.304	83.600, 1.822	83.600, 0.053	83.600, 0.109	83.600, 0.101	83.600, 0.143	83.600, 0.168	83.600, 1.276
420	83.800, 0.193	83.800, 2.057	83.800, 0.304	83.800, 1.823	83.800, 0.053	83.800, 0.109	83.800, 0.101	83.800, 0.143	83.800, 0.169	83.800, 1.278
421	84.000, 0.194	84.000, 2.061	84.000, 0.304	84.000, 1.824	84.000, 0.053	84.000, 0.109	84.000, 0.102	84.000, 0.143	84.000, 0.169	84.000, 1.278
422	84.200, 0.194	84.200, 2.064	84.200, 0.304	84.200, 1.826	84.200, 0.053	84.200, 0.108	84.200, 0.102	84.200, 0.143	84.200, 0.169	84.200, 1.280
423	84.400, 0.193	84.400, 2.067	84.400, 0.304	84.400, 1.827	84.400, 0.053	84.400, 0.108	84.400, 0.103	84.400, 0.143	84.400, 0.170	84.400, 1.281
424	84.600, 0.193	84.600, 2.070	84.600, 0.305	84.600, 1.828	84.600, 0.053	84.600, 0.107	84.600, 0.103	84.600, 0.143	84.600, 0.170	84.600, 1.282
425	84.800, 0.193	84.800, 2.073	84.800, 0.305	84.800, 1.830	84.800, 0.053	84.800, 0.107	84.800, 0.104	84.800, 0.144	84.800, 0.170	84.800, 1.283
426	85.000, 0.193	85.000, 2.076	85.000, 0.305	85.000, 1.831	85.000, 0.053	85.000, 0.106	85.000, 0.104	85.000, 0.143	85.000, 0.170	85.000, 1.284
427	85.200, 0.193	85.200, 2.079	85.200, 0.306	85.200, 1.833	85.200, 0.053	85.200, 0.106	85.200, 0.104	85.200, 0.143	85.200, 0.170	85.200, 1.285
428	85.400, 0.193	85.400, 2.082	85.400, 0.306	85.400, 1.834	85.400, 0.053	85.400, 0.106	85.400, 0.104	85.400, 0.143	85.400, 0.170	85.400, 1.286
429	85.600, 0.194	85.600, 2.086	85.600, 0.306	85.600, 1.836	85.600, 0.052	85.600, 0.106	85.600, 0.103	85.600, 0.143	85.600, 0.170	85.600, 1.288
430	85.800, 0.194	85.800, 2.089	85.800, 0.306	85.800, 1.837	85.800, 0.052	85.800, 0.106	85.800, 0.103	85.800, 0.142	85.800, 0.170	85.800, 1.289
431	86.000, 0.194	86.000, 2.092	86.000, 0.306	86.000, 1.839	86.000, 0.052	86.000, 0.106	86.000, 0.103	86.000, 0.142	86.000, 0.170	86.000, 1.290
432	86.200, 0.194	86.200, 2.095	86.200, 0.307	86.200, 1.840	86.200, 0.052	86.200, 0.106	86.200, 0.102	86.200, 0.142	86.200, 0.170	86.200, 1.292
433	86.400, 0.194	86.400, 2.099	86.400, 0.306	86.400, 1.842	86.400, 0.052	86.400, 0.106	86.400, 0.102	86.400, 0.142	86.400, 0.169	86.400, 1.293
434	86.600, 0.194	86.600, 2.102	86.600, 0.306	86.600, 1.843	86.600, 0.052	86.600, 0.106	86.600, 0.102	86.600, 0.143	86.600, 0.169	86.600, 1.294
435	86.800, 0.193	86.800, 2.105	86.800, 0.306	86.800, 1.845	86.800, 0.052	86.800, 0.106	86.800, 0.103	86.800, 0.143	86.800, 0.169	86.800, 1.295
436	87.000, 0.193	87.000, 2.108	87.000, 0.306	87.000, 1.846	87.000, 0.052	87.000, 0.106	87.000, 0.103	87.000, 0.143	87.000, 0.168	87.000, 1.296
437	87.200, 0.193	87.200, 2.111	87.200, 0.306	87.200, 1.848	87.200, 0.052	87.200, 0.106	87.200, 0.103	87.200, 0.143	87.200, 0.168	87.200, 1.297
438	87.400, 0.193	87.400, 2.114	87.400, 0.306	87.400, 1.849	87.400, 0.052	87.400, 0.106	87.400, 0.103	87.400, 0.143	87.400, 0.168	87.400, 1.297
439	87.600, 0.192	87.600, 2.117	87.600, 0.306	87.600, 1.851	87.600, 0.052	87.600, 0.106	87.600, 0.104	87.600, 0.142	87.600, 0.169	87.600, 1.298
440	87.800, 0.192	87.800, 2.120	87.800, 0.306	87.800, 1.853	87.800, 0.052	87.800, 0.106	87.800, 0.104	87.800, 0.142	87.800, 0.169	87.800, 1.298
441	88.000, 0.192	88.000, 2.122	88.000, 0.306	88.000, 1.854	88.000, 0.052	88.000, 0.107	88.000, 0.105	88.000, 0.142	88.000, 0.169	88.000, 1.299
442	88.200, 0.192	88.200, 2.125	88.200, 0.307	88.200, 1.856	88.200, 0.052	88.200, 0.106	88.200, 0.105	88.200, 0.143	88.200, 0.170	88.200, 1.300
443	88.400, 0.192	88.400, 2.128	88.400, 0.307	88.400, 1.858	88.400, 0.052	88.400, 0.106	88.400, 0.106	88.400, 0.143	88.400, 0.170	88.400, 1.301
444	88.600, 0.192	88.600, 2.130	88.600, 0.307	88.600, 1.859	88.600, 0.052	88.600, 0.106	88.600, 0.106	88.600, 0.143	88.600, 0.170	88.600, 1.302
445	88.800, 0.192	88.800, 2.133	88.800, 0.307	88.800, 1.861	88.800, 0.052	88.800, 0.106	88.800, 0.106	88.800, 0.143	88.800, 0.170	88.800, 1.303
446	89.000, 0.193	89.000, 2.136	89.000, 0.307	89.000, 1.862	89.000, 0.052	89.000, 0.106	89.000, 0.106	89.000, 0.143	89.000, 0.170	89.000, 1.304
447	89.200, 0.193	89.200, 2.138	89.200, 0.306	89.200, 1.863	89.200, 0.052	89.200, 0.106	89.200, 0.106	89.200, 0.143	89.200, 0.170	89.200, 1.305
448	89.400, 0.193	89.400, 2.141	89.400, 0.306	89.400, 1.864	89.400, 0.052	89.400, 0.106	89.400, 0.105	89.400, 0.143	89.400, 0.170	89.400, 1.306
449	89.600, 0.194	89.600, 2.144	89.600, 0.306	89.600, 1.865	89.600, 0.052	89.600, 0.106	89.600, 0.105	89.600, 0.143	89.600, 0.170	89.600, 1.307
450	89.800, 0.194	89.800, 2.146	89.800, 0.306	89.800, 1.866	89.800, 0.052	89.800, 0.106	89.800, 0.105	89.800, 0.143	89.800, 0.170	89.800, 1.308
451	90.000, 0.194	90.000, 2.149	90.000, 0.306	90.000, 1.867	90.000, 0.052	90.000, 0.106	90.000, 0.105	90.000, 0.143	90.000, 0.170	90.000, 1.309
452	90.200, 0.194	90.200, 2.152	90.200, 0.306	90.200, 1.868	90.200, 0.051	90.200, 0.106	90.200, 0.105	90.200, 0.143	90.200, 0.170	90.200, 1.309
453	90.400, 0.194	90.400, 2.155	90.400, 0.306	90.400, 1.869	90.400, 0.051	90.400, 0.106	90.400, 0.105	90.400, 0.143	90.400, 0.169	90.400, 1.310
454	90.600, 0.194	90.600, 2.157	90.600, 0.306	90.600, 1.870	90.600, 0.051	90.600, 0.106	90.600, 0.105	90.600, 0.143	90.600, 0.169	90.600, 1.311
455	90.800, 0.194	90.800, 2.160	90.800, 0.306	90.800, 1.872	90.800, 0.051	90.800, 0.106	90.800, 0.106	90.800, 0.143	90.800, 0.169	90.800, 1.312
456	91.000, 0.194	91.000, 2.163	91.000, 0.306	91.000, 1.873	91.000, 0.050	91.000, 0.106	91.000, 0.106	91.000, 0.143	91.000, 0.169	91.000, 1.313
457	91.200, 0.194	91.200, 2.166	91.200, 0.306	91.200, 1.874	91.200, 0.050	91.200, 0.106	91.200, 0.106	91.200, 0.143	91.200, 0.169	91.200, 1.314
458	91.400, 0.194	91.400, 2.168	91.400, 0.307	91.400, 1.876	91.400, 0.050	91.400, 0.106	91.400, 0.106	91.400, 0.143	91.400, 0.169	91.400, 1.315
459	91.600, 0.194	91.600, 2.171	91.600, 0.307	91.600, 1.877	91.600, 0.050	91.600, 0.106	91.600, 0.106	91.600, 0.143	91.600, 0.169	91.600, 1.316
460	91.800, 0.194	91.800, 2.173	91.800, 0.307	91.800, 1.878	91.800, 0.050	91.800, 0.106	91.800, 0.106	91.800, 0.143	91.800, 0.168	91.800, 1.317
461	92.000, 0.194	92.000, 2.176	92.000, 0.307	92.000, 1.880	92.000, 0.050	92.000, 0.106	92.000, 0.106	92.000, 0.143	92.000, 0.168	92.000, 1.319
462	92.200, 0.194	92.200, 2.178	92.200, 0.307	92.200, 1.881	92.200, 0.051	92.200, 0.106	92.200, 0.106	92.200, 0.144	92.200, 0.168	92.200, 1.320
463	92.400, 0.194	92.400, 2.180	92.400, 0.307	92.400, 1.882	92.400, 0.051	92.400, 0.106	92.400, 0.106	92.400, 0.144	92.400, 0.168	92.400, 1.321
464	92.600, 0.194	92.600, 2.183	92.600, 0.307	92.600, 1.884	92.600, 0.051	92.600, 0.106	92.600, 0.106	92.600, 0.144	92.600, 0.168	92.600, 1.322
465	92.800, 0.194	92.800, 2.186	92.800, 0.307	92.800, 1.885	92.800, 0.051	92.800, 0.105	92.800, 0.106	92.800, 0.144	92.800, 0.168	92.800, 1.323
466	93.000, 0.194	93.000, 2.188	93.000, 0.307	93.000, 1.886	93.000, 0.052	93.000, 0.105	93.000, 0.106	93.000, 0.144	93.000, 0.168	93.000, 1.324
467	93.200, 0.194	93.200, 2.190	93.200, 0.306	93.200, 1.887	93.200, 0.052	93.200, 0.105	93.200, 0.105	93.200, 0.144	93.200, 0.168	93.200, 1.324
468	93.400, 0.194	93.400, 2.192	93.400, 0.306	93.400, 1.888	93.400, 0.052	93.400, 0.105	93.400, 0.105	93.400, 0.144	93.400, 0.168	93.400, 1.325
469	93.600, 0.194	93.600, 2.194	93.600, 0.306	93.600, 1.889	93.600, 0.053	93.600, 0.105	93.600, 0.105	93.600, 0.144	93.600, 0.168	93.600, 1.326
470	93.800, 0.194	93.800, 2.197	93.800, 0.305	93.800, 1.890	93.800, 0.053	93.800, 0.105	93.800, 0.105	93.800, 0.144	93.800, 0.168	93.800, 1.326
471	94.000, 0.194	94.000, 2.199	94.000, 0.305	94.000, 1.891	94.000, 0.053	94.000, 0.104	94.000, 0.106	94.000, 0.144	94.000, 0.168	94.000, 1.327
472	94.200, 0.194	94.200, 2.201	94.200, 0.305	94.200, 1.892	94.200, 0.053	94.200, 0.105	94.200, 0.106	94.200, 0.144	94.200, 0.168	94.200, 1.327
473	94.400, 0.194	94.400, 2.204	94.400, 0.306	94.400, 1.893	94.400, 0.053	94.400, 0.105	94.400, 0.107	94.400, 0.144	94.400, 0.169	94.400, 1.328
474	94.600, 0.194	94.600, 2.206	94.600, 0.306	94.600, 1.894	94.600, 0.052	94.600, 0.105	94.600, 0.107	94.600, 0.143	94.600, 0.169	94.600, 1.329
475	94.800, 0.195	94.800, 2.209	94.800, 0.306	94.800, 1.895	94.800, 0.052	94.800, 0.105	94.800, 0.107	94.800, 0.143	94.800, 0.169	94.800, 1.329
476	95.000, 0.195	95.000, 2.211	95.000, 0.307	95.000, 1.896	95.000, 0.052	95.000, 0.105	95.000, 0.108	95.000, 0.143	95.000, 0.169	95.000, 1.330
477	95.200, 0.194	95.200, 2.214	95.200, 0.307	95.200, 1.897	95.200, 0.052	95.200, 0.105	95.200, 0.108	95.200, 0.143	95.200, 0.169	95.200, 1.331
478	95.400, 0.194	95.400, 2.216	95.400, 0.307	95.400, 1.898	95.400, 0.052	95.400, 0.105	95.400, 0.109	95.400, 0.143	95.400, 0.169	95.400, 1.331
479	95.600, 0.194	95.600, 2.218	95.600, 0.307	95.600, 1.898	95.600, 0.051	95.600, 0.105	95.600, 0.109	95.600, 0.143	95.600, 0.169	95.600, 1.332
480	95.800, 0.194	95.800, 2.221	95.800, 0.306	95.800, 1.899	95.800, 0.051	95.800, 0.105	95.800, 0.109	95.800, 0.143	95.800, 0.169	95.800, 1.333
481	96.000, 0.194	96.000, 2.223	96.000, 0.305	96.000, 1.900	96.000, 0.051	96.000, 0.105	96.000, 0.110	96.000, 0.143	96.000, 0.169	96.000, 1.333
482	96.200, 0.194	96.200, 2.225	96.200, 0.305	96.200, 1.901	96.200, 0.051	96.200, 0.105	96.200, 0.110	96.200, 0.143	96.200, 0.169	96.200, 1.334
483	96.400, 0.194	96.400, 2.228	96.400, 0.303	96.400, 1.902	96.400, 0.050	96.400, 0.105	96.400, 0.110	96.400, 0.143	96.400, 0.169	96.400, 1.335
484	96.600, 0.194	96.600, 2.230	96.600, 0.302	96.600, 1.903	96.600, 0.050	96.600, 0.105	96.600, 0.110	96.600, 0.143	96.600, 0.169	96.600, 1.336
485	96.800, 0.193	96.800, 2.232	96.800, 0.301	96.800, 1.903	96.800, 0.050	96.800, 0.105	96.800, 0.110	96.800, 0.143	96.800, 0.169	96.800, 1.337
486	97.000, 0.193	97.000, 2.234	97.000, 0.300	97.000, 1.904	97.000, 0.050	97.000, 0.105	97.000, 0.110	97.000, 0.143	97.000, 0.169	97.000, 1.337
487	97.200, 0.193	97.200, 2.237	97.200, 0.299	97.200, 1.905	97.200, 0.050	97.200, 0.105	97.200, 0.110	97.200, 0.143	97.200, 0.169	97.200, 1.338
488	97.400, 0.193	97.400, 2.239	97.400, 0.299	97.400, 1.906	97.400, 0.050	97.400, 0.105	97.400, 0.110	97.400, 0.144	97.400, 0.168	97.400, 1.339
489	97.600, 0.193	97.600, 2.241	97.600, 0.298	97.600, 1.907	97.600, 0.050	97.600, 0.105	97.600, 0.109	97.600, 0.144	97.600, 0.168	97.600, 1.340
490	97.800, 0.193	97.800, 2.244	97.800, 0.298	97.800, 1.908	97.800, 0.050	97.800, 0.105	97.800, 0.109	97.800, 0.144	97.800, 0.168	97.800, 1.341
491	98.000, 0.193	98.000, 2.246	98.000, 0.298	98.000, 1.909	98.000, 0.050	98.000, 0.105	98.000, 0.109	98.000, 0.144	98.000, 0.168	98.000, 1.341
492	98.200, 0.193	98.200, 2.248	98.200, 0.298	98.200, 1.910	98.200, 0.050	98.200, 0.105	98.200, 0.109	98.200, 0.144	98.200, 0.168	98.200, 1.342
493	98.400, 0.193	98.400, 2.250	98.400, 0.298	98.400, 1.911	98.400, 0.050	98.400, 0.105	98.400, 0.109	98.400, 0.144	98.400, 0.168	98.400, 1.343
494	98.600, 0.192	98.600, 2.252	98.600, 0.298	98.600, 1.912	98.600, 0.050	98.600, 0.105	98.600, 0.109	98.600, 0.144	98.600, 0.168	98.600, 1.343
495	98.800, 0.192	98.800, 2.254	98.800, 0.298	98.800, 1.913	98.800, 0.050	98.800, 0.105	98.800, 0.110	98.800, 0.144	98.800, 0.169	98.800, 1.344
496	99.000, 0.192	99.000, 2.256	99.000, 0.298	99.000, 1.914	99.000, 0.051	99.000, 0.105	99.000, 0.110	99.000, 0.144	99.000, 0.169	99.000, 1.344
497	99.200, 0.191	99.200, 2.258	99.200, 0.298	99.200, 1.915	99.200, 0.051	99.200, 0.105	99.200, 0.110	99.200, 0.144	99.200, 0.169	99.200, 1.345
498	99.400, 0.191	99.400, 2.260	99.400, 0.298	99.400, 1.916	99.400, 0.051	99.400, 0.105	99.400, 0.110	99.400, 0.144	99.400, 0.169	99.400, 1.345
499	99.600, 0.191	99.600, 2.262	99.600, 0.298	99.600, 1.918	99.600, 0.051	99.600, 0.105	99.600, 0.110	99.600, 0.144	99.600, 0.169	99.600, 1.346
500	99.800, 0.191	99.800, 2.264	99.800, 0.298	99.800, 1.919	99.800, 0.051	99.800, 0.105	99.800, 0.110	99.800, 0.144	99.800, 0.169	99.800, 1.346
501	100.000, 0.190	100.000, 2.266	100.000, 0.298	100.000, 1.921	100.000, 0.051	100.000, 0.105	100.000, 0.110	100.000, 0.145	100.000, 0.170	100.000, 1.347
502	100.200, 0.190	100.200, 2.268	100.200, 0.299	100.200, 1.922	100.200, 0.051	100.200, 0.105	100.200, 0.110	100.200, 0.144	100.200, 0.170	100.200, 1.347
503	100.400, 0.190	100.400, 2.270	100.400, 0.299	100.400, 1.923	100.400, 0.051	100.400, 0.105	100.400, 0.110	100.400, 0.145	100.400, 0.170	100.400, 1.348
504	100.600, 0.190	100.600, 2.272	100.600, 0.299	100.600, 1.924	100.600, 0.051	100.600, 0.105	100.600, 0.110	100.600, 0.145	100.600, 0.170	100.600, 1.348
505	100.800, 0.190	100.800, 2.274	100.800, 0.299	100.800, 1.924	100.800, 0.051	100.800, 0.105	100.800, 0.109	100.800, 0.145	100.800, 0.170	100.800, 1.349
506	101.000, 0.189	101.000, 2.276	101.000, 0.300	101.000, 1.925	101.000, 0.051	101.000, 0.105	101.000, 0.109	101.000, 0.145	101.000, 0.170	101.000, 1.349
507	101.200, 0.189	101.200, 2.278	101.200, 0.300	101.200, 1.926	101.200, 0.051	101.200, 0.105	101.200, 0.109	101.200, 0.145	101.200, 0.170	101.200, 1.349
508	101.400, 0.189	101.400, 2.279	101.400, 0.300	101.400, 1.926	101.400, 0.051	101.400, 0.105	101.400, 0.109	101.400, 0.145	101.400, 0.170	101.400, 1.350
509	101.600, 0.189	101.600, 2.281	101.600, 0.300	101.600, 1.927	101.600, 0.051	101.600, 0.105	101.600, 0.109	101.600, 0.144	101.600, 0.169	101.600, 1.350
510	101.800, 0.189	101.800, 2.283	101.800, 0.299	101.800, 1.927	101.800, 0.050	101.800, 0.105	101.800, 0.109	101.800, 0.144	101.800, 0.169	101.800, 1.351
511	102.000, 0.189	102.000, 2.284	102.000, 0.299	102.000, 1.927	102.000, 0.050	102.000, 0.105	102.000, 0.109	102.000, 0.144	102.000, 0.169	102.000, 1.351
512	102.200, 0.189	102.200, 2.286	102.200, 0.299	102.200, 1.927	102.200, 0.050	102.200, 0.105	102.200, 0.109	102.200, 0.144	102.200, 0.169	102.200, 1.352
513	102.400, 0.188	102.400, 2.288	102.400, 0.299	102.400, 1.928	102.400, 0.050	102.400, 0.105	102.400, 0.109	102.400, 0.144	102.400, 0.169	102.400, 1.353
514	102.600, 0.188	102.600, 2.289	102.600, 0.298	102.600, 1.928	102.600, 0.050	102.600, 0.105	102.600, 0.110	102.600, 0.144	102.600, 0.168	102.600, 1.353
515	102.800, 0.188	102.800, 2.291	102.800, 0.298	102.800, 1.929	102.800, 0.049	102.800, 0.105	102.800, 0.110	102.800, 0.144	102.800, 0.168	102.800, 1.354
516	103.000, 0.188	103.000, 2.293	103.000, 0.298	103.000, 1.930	103.000, 0.049	103.000, 0.105	103.000, 0.110	103.000, 0.144	103.000, 0.168	103.000, 1.354
517	103.200, 0.188	103.200, 2.294	103.200, 0.298	103.200, 1.931	103.200, 0.049	103.200, 0.105	103.200, 0.111	103.200, 0.144	103.200, 0.168	103.200, 1.355
518	103.400, 0.188	103.400, 2.296	103.400, 0.298	103.400, 1.932	103.400, 0.049	103.400, 0.105	103.400, 0.111	103.400, 0.144	103.400, 0.168	103.400, 1.355
519	103.600, 0.188	103.600, 2.297	103.600, 0.298	103.600, 1.933	103.600, 0.049	103.600, 0.104	103.600, 0.111	103.600, 0.144	103.600, 0.168	103.600, 1.356
520	103.800, 0.188	103.800, 2.299	103.800, 0.298	103.800, 1.934	103.800, 0.049	103.800, 0.104	103.800, 0.111	103.800, 0.144	103.800, 0.168	103.800, 1.356
521	104.000, 0.188	104.000, 2.301	104.000, 0.298	104.000, 1.936	104.000, 0.048	104.000, 0.104	104.000, 0.111	104.000, 0.144	104.000, 0.168	104.000, 1.356
522	104.200, 0.188	104.200, 2.302	104.200, 0.298	104.200, 1.937	104.200, 0.048	104.200, 0.104	104.200, 0.111	104.200, 0.144	104.200, 0.168	104.200, 1.357
523	104.400, 0.188	104.400, 2.304	104.400, 0.298	104.400, 1.938	104.400, 0.048	104.400, 0.104	104.400, 0.111	104.400, 0.145	104.400, 0.169	104.400, 1.357
524	104.600, 0.188	104.600, 2.306	104.600, 0.298	104.600, 1.939	104.600, 0.048	104.600, 0.104	104.600, 0.111	104.600, 0.145	104.600, 0.169	104.600, 1.357
525	104.800, 0.188	104.800, 2.308	104.800, 0.298	104.800, 1.940	104.800, 0.048	104.800, 0.104	104.800, 0.111	104.800, 0.145	104.800, 0.170	104.800, 1.358
526	105.000, 0.188	105.000, 2.310	105.000, 0.298	105.000, 1.940	105.000, 0.048	105.000, 0.104	105.000, 0.111	105.000, 0.145	105.000, 0.170	105.000, 1.358
527	105.200, 0.189	105.200, 2.312	105.200, 0.298	105.200, 1.941	105.200, 0.047	105.200, 0.104	105.200, 0.111	105.200, 0.145	105.200, 0.170	105.200, 1.359
528	105.400, 0.189	105.400, 2.314	105.400, 0.298	105.400, 1.941	105.400, 0.047	105.400, 0.104	105.400, 0.112	105.400, 0.145	105.400, 0.171	105.400, 1.359
529	105.600, 0.189	105.600, 2.316	105.600, 0.298	105.600, 1.941	105.600, 0.047	105.600, 0.104	105.600, 0.112	105.600, 0.145	105.600, 0.171	105.600, 1.359
530	105.800, 0.189	105.800, 2.318	105.800, 0.298	105.800, 1.942	105.800, 0.046	105.800, 0.104	105.800, 0.112	105.800, 0.144	105.800, 0.171	105.800, 1.360
531	106.000, 0.189	106.000, 2.320	106.000, 0.299	106.000, 1.942	106.000, 0.046	106.000, 0.104	106.000, 0.113	106.000, 0.144	106.000, 0.172	106.000, 1.361
532	106.200, 0.188	106.200, 2.322	106.200, 0.299	106.200, 1.942	106.200, 0.045	106.200, 0.104	106.200, 0.113	106.200, 0.144	106.200, 0.172	106.200, 1.362
533	106.400, 0.188	106.400, 2.323	106.400, 0.299	106.400, 1.942	106.400, 0.045	106.400, 0.104	106.400, 0.113	106.400, 0.144	106.400, 0.172	106.400, 1.363
534	106.600, 0.188	106.600, 2.325	106.600, 0.299	106.600, 1.942	106.600, 0.045	106.600, 0.104	106.600, 0.113	106.600, 0.144	106.600, 0.172	106.600, 1.363
535	106.800, 0.188	106.800, 2.326	106.800, 0.300	106.800, 1.943	106.800, 0.045	106.800, 0.103	106.800, 0.114	106.800, 0.145	106.800, 0.172	106.800, 1.364
536	107.000, 0.188	107.000, 2.327	107.000, 0.300	107.000, 1.943	107.000, 0.045	107.000, 0.103	107.000, 0.114	107.000, 0.145	107.000, 0.171	107.000, 1.365
537	107.200, 0.188	107.200, 2.328	107.200, 0.300	107.200, 1.944	107.200, 0.045	107.200, 0.103	107.200, 0.115	107.200, 0.145	107.200, 0.171	107.200, 1.365
538	107.400, 0.188	107.400, 2.329	107.400, 0.300	107.400, 1.944	107.400, 0.045	107.400, 0.103	107.400, 0.115	107.400, 0.146	107.400, 0.171	107.400, 1.366
539	107.600, 0.188	107.600, 2.330	107.600, 0.300	107.600, 1.945	107.600, 0.045	107.600, 0.102	107.600, 0.115	107.600, 0.146	107.600, 0.170	107.600, 1.366
540	107.800, 0.188	107.800, 2.332	107.800, 0.300	107.800, 1.946	107.800, 0.046	107.800, 0.102	107.800, 0.115	107.800, 0.147	107.800, 0.170	107.800, 1.367
541	108.000, 0.188	108.000, 2.333	108.000, 0.300	108.000, 1.947	108.000, 0.046	108.000, 0.103	108.000, 0.115	108.000, 0.147	108.000, 0.170	108.000, 1.367
542	108.200, 0.187	108.200, 2.335	108.200, 0.299	108.200, 1.948	108.200, 0.046	108.200, 0.102	108.200, 0.115	108.200, 0.147	108.200, 0.170	108.200, 1.367
543	108.400, 0.187	108.400, 2.336	108.400, 0.299	108.400, 1.949	108.400, 0.046	108.400, 0.102	108.400, 0.115	108.400, 0.148	108.400, 0.170	108.400, 1.368
544	108.600, 0.187	108.600, 2.338	108.600, 0.299	108.600, 1.949	108.600, 0.047	108.600, 0.102	108.600, 0.115	108.600, 0.148	108.600, 0.170	108.600, 1.368
545	108.800, 0.187	108.800, 2.340	108.800, 0.299	108.800, 1.950	108.800, 0.047	108.800, 0.102	108.800, 0.115	108.800, 0.148	108.800, 0.170	108.800, 1.369
546	109.000, 0.187	109.000, 2.341	109.000, 0.299	109.000, 1.950	109.000, 0.047	109.000, 0.102	109.000, 0.115	109.000, 0.148	109.000, 0.170	109.000, 1.369
547	109.200, 0.187	109.200, 2.343	109.200, 0.299	109.200, 1.951	109.200, 0.047	109.200, 0.102	109.200, 0.115	109.200, 0.148	109.200, 0.170	109.200, 1.369
548	109.400, 0.187	109.400, 2.345	109.400, 0.299	109.400, 1.951	109.400, 0.047	109.400, 0.102	109.400, 0.115	109.400, 0.148	109.400, 0.170	109.400, 1.369
549	109.600, 0.187	109.600, 2.347	109.600, 0.299	109.600, 1.952	109.600, 0.048	109.600, 0.102	109.600, 0.116	109.600, 0.148	109.600, 0.170	109.600, 1.369
550	109.800, 0.187	109.800, 2.348	109.800, 0.299	109.800, 1.952	109.800, 0.048	109.800, 0.102	109.800, 0.116	109.800, 0.147	109.800, 0.170	109.800, 1.370
551	110.000, 0.187	110.000, 2.349	110.000, 0.299	110.000, 1.953	110.000, 0.048	110.000, 0.102	110.000, 0.116	110.000, 0.147	110.000, 0.170	110.000, 1.370
552	110.200, 0.187	110.200, 2.351	110.200, 0.299	110.200, 1.954	110.200, 0.048	110.200, 0.102	110.200, 0.116	110.200, 0.147	110.200, 0.170	110.200, 1.370
553	110.400, 0.188	110.400, 2.351	110.400, 0.299	110.400, 1.955	110.400, 0.049	110.400, 0.102	110.400, 0.116	110.400, 0.147	110.400, 0.170	110.400, 1.370
554	110.600, 0.188	110.600, 2.352	110.600, 0.299	110.600, 1.955	110.600, 0.049	110.600, 0.101	110.600, 0.116	110.600, 0.147	110.600, 0.170	110.600, 1.371
555	110.800, 0.188	110.800, 2.353	110.800, 0.300	110.800, 1.956	110.800, 0.049	110.800, 0.101	110.800, 0.116	110.800, 0.146	110.800, 0.170	110.800, 1.371
556	111.000, 0.188	111.000, 2.354	111.000, 0.300	111.000, 1.957	111.000, 0.049	111.000, 0.101	111.000, 0.116	111.000, 0.146	111.000, 0.170	111.000, 1.371
557	111.200, 0.188	111.200, 2.354	111.200, 0.300	111.200, 1.958	111.200, 0.049	111.200, 0.101	111.200, 0.116	111.200, 0.146	111.200, 0.170	111.200, 1.371
558	111.400, 0.188	111.400, 2.355	111.400, 0.300	111.400, 1.958	111.400, 0.049	111.400, 0.101	111.400, 0.116	111.400, 0.146	111.400, 0.170	111.400, 1.372
559	111.600, 0.188	111.600, 2.356	111.600, 0.301	111.600, 1.959	111.600, 0.049	111.600, 0.101	111.600, 0.116	111.600, 0.146	111.600, 0.170	111.600, 1.372
560	111.800, 0.188	111.800, 2.357	111.800, 0.301	111.800, 1.960	111.800, 0.049	111.800, 0.101	111.800, 0.116	111.800, 0.146	111.800, 0.170	111.800, 1.373
561	112.000, 0.188	112.000, 2.358	112.000, 0.300	112.000, 1.960	112.000, 0.049	112.000, 0.101	112.000, 0.115	112.000, 0.146	112.000, 0.170	112.000, 1.373
562	112.200, 0.188	112.200, 2.359	112.200, 0.300	112.200, 1.961	112.200, 0.048	112.200, 0.101	112.200, 0.115	112.200, 0.146	112.200, 0.170	112.200, 1.374
563	112.400, 0.188	112.400, 2.360	112.400, 0.300	112.400, 1.961	112.400, 0.048	112.400, 0.101	112.400, 0.115	112.400, 0.146	112.400, 0.170	112.400, 1.375
564	112.600, 0.187	112.600, 2.361	112.600, 0.300	112.600, 1.961	112.600, 0.048	112.600, 0.101	112.600, 0.115	112.600, 0.146	112.600, 0.170	112.600, 1.376
565	112.800, 0.187	112.800, 2.363	112.800, 0.300	112.800, 1.962	112.800, 0.047	112.800, 0.101	112.800, 0.115	112.800, 0.146	112.800, 0.170	112.800, 1.376
566	113.000, 0.187	113.000, 2.364	113.000, 0.299	113.000, 1.962	113.000, 0.047	113.000, 0.101	113.000, 0.115	113.000, 0.146	113.000, 0.170	113.000, 1.377
567	113.200, 0.187	113.200, 2.365	113.200, 0.299	113.200, 1.963	113.200, 0.047	113.200, 0.101	113.200, 0.115	113.200, 0.147	113.200, 0.170	113.200, 1.378
568	113.400, 0.187	113.400, 2.366	113.400, 0.299	113.400, 1.963	113.400, 0.046	113.400, 0.101	113.400, 0.115	113.400, 0.147	113.400, 0.170	113.400, 1.378
569	113.600, 0.188	113.600, 2.367	113.600, 0.300	113.600, 1.964	113.600, 0.046	113.600, 0.101	113.600, 0.116	113.600, 0.147	113.600, 0.170	113.600, 1.378
570	113.800, 0.188	113.800, 2.368	113.800, 0.300	113.800, 1.964	113.800, 0.046	113.800, 0.101	113.800, 0.116	113.800, 0.147	113.800, 0.170	113.800, 1.379
571	114.000, 0.188	114.000, 2.369	114.000, 0.300	114.000, 1.965	114.000, 0.046	114.000, 0.100	114.000, 0.116	114.000, 0.147	114.000, 0.170	114.000, 1.379
572	114.200, 0.187	114.200, 2.370	114.200, 0.300	114.200, 1.966	114.200, 0.046	114.200, 0.100	114.200, 0.117	114.200, 0.146	114.200, 0.170	114.200, 1.378
573	114.400, 0.187	114.400, 2.371	114.400, 0.300	114.400, 1.967	114.400, 0.046	114.400, 0.099	114.400, 0.117	114.400, 0.146	114.400, 0.170	114.400, 1.378
574	114.600, 0.187	114.600, 2.372	114.600, 0.301	114.600, 1.968	114.600, 0.046	114.600, 0.099	114.600, 0.117	114.600, 0.146	114.600, 0.170	114.600, 1.378
575	114.800, 0.187	114.800, 2.374	114.800, 0.301	114.800, 1.969	114.800, 0.047	114.800, 0.099	114.800, 0.117	114.800, 0.145	114.800, 0.170	114.800, 1.378
576	115.000, 0.186	115.000, 2.375	115.000, 0.301	115.000, 1.970	115.000, 0.047	115.000, 0.099	115.000, 0.117	115.000, 0.145	115.000, 0.170	115.000, 1.378
577	115.200, 0.186	115.200, 2.376	115.200, 0.302	115.200, 1.970	115.200, 0.047	115.200, 0.099	115.200, 0.117	115.200, 0.145	115.200, 0.170	115.200, 1.378
578	115.400, 0.186	115.400, 2.377	115.400, 0.302	115.400, 1.971	115.400, 0.047	115.400, 0.099	115.400, 0.117	115.400, 0.145	115.400, 0.170	115.400, 1.378
579	115.600, 0.186	115.600, 2.378	115.600, 0.302	115.600, 1.971	115.600, 0.047	115.600, 0.099	115.600, 0.117	115.600, 0.145	115.600, 0.170	115.600, 1.378
580	115.800, 0.187	115.800, 2.379	115.800, 0.302	115.800, 1.971	115.800, 0.047	115.800, 0.099	115.800, 0.117	115.800, 0.145	115.800, 0.170	115.800, 1.378
581	116.000, 0.187	116.000, 2.380	116.000, 0.302	116.000, 1.972	116.000, 0.047	116.000, 0.099	116.000, 0.117	116.000, 0.145	116.000, 0.170	116.000, 1.378
582	116.200, 0.187	116.200, 2.381	116.200, 0.302	116.200, 1.972	116.200, 0.047	116.200, 0.099	116.200, 0.117	116.200, 0.145	116.200, 0.170	116.200, 1.378
583	116.400, 0.188	116.400, 2.382	116.400, 0.301	116.400, 1.972	116.400, 0.047	116.400, 0.099	116.400, 0.117	116.400, 0.145	116.400, 0.170	116.400, 1.379
584	116.600, 0.188	116.600, 2.383	116.600, 0.301	116.600, 1.973	116.600, 0.047	116.600, 0.100	116.600, 0.117	116.600, 0.145	116.600, 0.170	116.600, 1.379
585	116.800, 0.188	116.800, 2.384	116.800, 0.301	116.800, 1.973	116.800, 0.047	116.800, 0.100	116.800, 0.117	116.800, 0.145	116.800, 0.169	116.800, 1.380
586	117.000, 0.188	117.000, 2.385	117.000, 0.301	117.000, 1.973	117.000, 0.047	117.000, 0.100	117.000, 0.118	117.000, 0.145	117.000, 0.169	117.000, 1.381
587	117.200, 0.188	117.200, 2.386	117.200, 0.301	117.200, 1.973	117.200, 0.047	117.200, 0.100	117.200, 0.118	117.200, 0.145	117.200, 0.169	117.200, 1.381
588	117.400, 0.188	117.400, 2.386	117.400, 0.301	117.400, 1.973	117.400, 0.047	117.400, 0.099	117.400, 0.119	117.400, 0.146	117.400, 0.169	117.400, 1.382
589	117.600, 0.188	117.600, 2.387	117.600, 0.301	117.600, 1.973	117.600, 0.047	117.600, 0.099	117.600, 0.119	117.600, 0.146	117.600, 0.169	117.600, 1.382
590	117.800, 0.188	117.800, 2.388	117.800, 0.301	117.800, 1.974	117.800, 0.047	117.800, 0.099	117.800, 0.119	117.800, 0.146	117.800, 0.169	117.800, 1.383
591	118.000, 0.188	118.000, 2.389	118.000, 0.301	118.000, 1.974	118.000, 0.047	118.000, 0.099	118.000, 0.119	118.000, 0.146	118.000, 0.169	118.000, 1.383
592	118.200, 0.187	118.200, 2.391	118.200, 0.301	118.200, 1.975	118.200, 0.047	118.200, 0.099	118.200, 0.119	118.200, 0.146	118.200, 0.169	118.200, 1.384
593	118.400, 0.187	118.400, 2.392	118.400, 0.302	118.400, 1.975	118.400, 0.047	118.400, 0.100	118.400, 0.119	118.400, 0.146	118.400, 0.169	118.400, 1.385
594	118.600, 0.187	118.600, 2.393	118.600, 0.302	118.600, 1.976	118.600, 0.047	118.600, 0.100	118.600, 0.119	118.600, 0.146	118.600, 0.170	118.600, 1.385
595	118.800, 0.187	118.800, 2.395	118.800, 0.302	118.800, 1.976	118.800, 0.047	118.800, 0.100	118.800, 0.119	118.800, 0.146	118.800, 0.170	118.800, 1.385
596	119.000, 0.187	119.000, 2.396	119.000, 0.302	119.000, 1.976	119.000, 0.047	119.000, 0.100	119.000, 0.119	119.000, 0.146	119.000, 0.170	119.000, 1.386
597	119.200, 0.187	119.200, 2.398	119.200, 0.303	119.200, 1.977	119.200, 0.047	119.200, 0.101	119.200, 0.119	119.200, 0.147	119.200, 0.170	119.200, 1.386
598	119.400, 0.187	119.400, 2.400	119.400, 0.303	119.400, 1.977	119.400, 0.047	119.400, 0.101	119.400, 0.119	119.400, 0.147	119.400, 0.171	119.400, 1.386
599	119.600, 0.187	119.600, 2.401	119.600, 0.303	119.600, 1.977	119.600, 0.047	119.600, 0.101	119.600, 0.118	119.600, 0.147	119.600, 0.171	119.600, 1.386
600	119.800, 0.187	119.800, 2.402	119.800, 0.303	119.800, 1.978	119.800, 0.047	119.800, 0.100	119.800, 0.118	119.800, 0.147	119.800, 0.171	119.800, 1.386
601	120.000, 0.187	120.000, 2.404	120.000, 0.303	120.000, 1.978	120.000, 0.047	120.000, 0.100	120.000, 0.118	120.000, 0.147	120.000, 0.171	120.000, 1.385
602	120.200, 0.187	120.200, 2.405	120.200, 0.302	120.200, 1.979	120.200, 0.047	120.200, 0.100	120.200, 0.118	120.200, 0.146	120.200, 0.171	120.200, 1.386
603	120.400, 0.187	120.400, 2.405	120.400, 0.302	120.400, 1.979	120.400, 0.046	120.400, 0.099	120.400, 0.118	120.400, 0.146	120.400, 0.171	120.400, 1.386
604	120.600, 0.187	120.600, 2.406	120.600, 0.301	120.600, 1.979	120.600, 0.046	120.600, 0.099	120.600, 0.119	120.600, 0.146	120.600, 0.171	120.600, 1.386
605	120.800, 0.186	120.800, 2.407	120.800, 0.301	120.800, 1.980	120.800, 0.046	120.800, 0.099	120.800, 0.119	120.800, 0.146	120.800, 0.170	120.800, 1.386
606	121.000, 0.186	121.000, 2.407	121.000, 0.301	121.000, 1.980	121.000, 0.046	121.000, 0.098	121.000, 0.120	121.000, 0.146	121.000, 0.170	121.000, 1.386
607	121.200, 0.186	121.200, 2.407	121.200, 0.300	121.200, 1.980	121.200, 0.046	121.200, 0.098	121.200, 0.120	121.200, 0.146	121.200, 0.170	121.200, 1.387
608	121.400, 0.186	121.400, 2.408	121.400, 0.300	121.400, 1.981	121.400, 0.046	121.400, 0.097	121.400, 0.120	121.400, 0.146	121.400, 0.170	121.400, 1.387
609	121.600, 0.186	121.600, 2.409	121.600, 0.300	121.600, 1.981	121.600, 0.046	121.600, 0.097	121.600, 0.121	121.600, 0.146	121.600, 0.170	121.600, 1.387
610	121.800, 0.186	121.800, 2.410	121.800, 0.300	121.800, 1.981	121.800, 0.046	121.800, 0.097	121.800, 0.121	121.800, 0.146	121.800, 0.169	121.800, 1.387
611	122.000, 0.186	122.000, 2.410	122.000, 0.300	122.000, 1.982	122.000, 0.046	122.000, 0.097	122.000, 0.120	122.000, 0.146	122.000, 0.170	122.000, 1.387
612	122.200, 0.186	122.200, 2.411	122.200, 0.300	122.200, 1.982	122.200, 0.046	122.200, 0.097	122.200, 0.120	122.200, 0.146	122.200, 0.170	122.200, 1.387
613	122.400, 0.186	122.400, 2.412	122.400, 0.301	122.400, 1.982	122.400, 0.046	122.400, 0.097	122.400, 0.120	122.400, 0.146	122.400, 0.170	122.400, 1.387
614	122.600, 0.186	122.600, 2.413	122.600, 0.301	122.600, 1.983	122.600, 0.046	122.600, 0.097	122.600, 0.120	122.600, 0.146	122.600, 0.170	122.600, 1.387
615	122.800, 0.186	122.800, 2.414	122.800, 0.301	122.800, 1.983	122.800, 0.046	122.800, 0.098	122.800, 0.120	122.800, 0.146	122.800, 0.170	122.800, 1.387
616	123.000, 0.186	123.000, 2.415	123.000, 0.301	123.000, 1.983	123.000, 0.047	123.000, 0.098	123.000, 0.120	123.000, 0.146	123.000, 0.170	123.000, 1.387
617	123.200, 0.186	123.200, 2.416	123.200, 0.301	123.200, 1.983	123.200, 0.047	123.200, 0.098	123.200, 0.120	123.200, 0.146	123.200, 0.170	123.200, 1.387
618	123.400, 0.185	123.400, 2.416	123.400, 0.301	123.400, 1.983	123.400, 0.047	123.400, 0.098	123.400, 0.120	123.400, 0.146	123.400, 0.170	123.400, 1.386
619	123.600, 0.185	123.600, 2.417	123.600, 0.301	123.600, 1.984	123.600, 0.047	123.600, 0.098	123.600, 0.120	123.600, 0.146	123.600, 0.170	123.600, 1.386
620	123.800, 0.185	123.800, 2.418	123.800, 0.301	123.800, 1.984	123.800, 0.047	123.800, 0.098	123.800, 0.120	123.800, 0.146	123.800, 0.171	123.800, 1.387
621	124.000, 0.185	124.000, 2.418	124.000, 0.300	124.000, 1.985	124.000, 0.047	124.000, 0.098	124.000, 0.120	124.000, 0.146	124.000, 0.171	124.000, 1.387
622	124.200, 0.184	124.200, 2.419	124.200, 0.300	124.200, 1.985	124.200, 0.047	124.200, 0.099	124.200, 0.120	124.200, 0.146	124.200, 0.172	124.200, 1.388
623	124.400, 0.184	124.400, 2.420	124.400, 0.299	124.400, 1.986	124.400, 0.047	124.400, 0.099	124.400, 0.120	124.400, 0.146	124.400, 0.172	124.400, 1.388
624	124.600, 0.184	124.600, 2.420	124.600, 0.299	124.600, 1.986	124.600, 0.047	124.600, 0.099	124.600, 0.119	124.600, 0.146	124.600, 0.172	124.600, 1.389
625	124.800, 0.185	124.800, 2.421	124.800, 0.299	124.800, 1.987	124.800, 0.047	124.800, 0.099	124.800, 0.119	124.800, 0.146	124.800, 0.172	124.800, 1.389
626	125.000, 0.185	125.000, 2.422	125.000, 0.299	125.000, 1.987	125.000, 0.047	125.000, 0.099	125.000, 0.119	125.000, 0.146	125.000, 0.172	125.000, 1.389
627	125.200, 0.186	125.200, 2.423	125.200, 0.298	125.200, 1.988	125.200, 0.047	125.200, 0.099	125.200, 0.119	125.200, 0.146	125.200, 0.172	125.200, 1.389
628	125.400, 0.186	125.400, 2.424	125.400, 0.298	125.400, 1.988	125.400, 0.047	125.400, 0.099	125.400, 0.119	125.400, 0.146	125.400, 0.172	125.400, 1.390
629	125.600, 0.186	125.600, 2.425	125.600, 0.298	125.600, 1.988	125.600, 0.047	125.600, 0.099	125.600, 0.118	125.600, 0.146	125.600, 0.172	125.600, 1.390
630	125.800, 0.187	125.800, 2.427	125.800, 0.298	125.800, 1.988	125.800, 0.047	125.800, 0.099	125.800, 0.118	125.800, 0.146	125.800, 0.172	125.800, 1.390
631	126.000, 0.187	126.000, 2.428	126.000, 0.298	126.000, 1.988	126.000, 0.047	126.000, 0.099	126.000, 0.118	126.000, 0.146	126.000, 0.172	126.000, 1.390
632	126.200, 0.187	126.200, 2.429	126.200, 0.298	126.200, 1.988	126.200, 0.047	126.200, 0.099	126.200, 0.119	126.200, 0.146	126.200, 0.171	126.200, 1.390
633	126.400, 0.187	126.400, 2.430	126.400, 0.298	126.400, 1.988	126.400, 0.047	126.400, 0.099	126.400, 0.119	126.400, 0.147	126.400, 0.171	126.400, 1.390
634	126.600, 0.187	126.600, 2.431	126.600, 0.298	126.600, 1.988	126.600, 0.047	126.600, 0.099	126.600, 0.119	126.600, 0.147	126.600, 0.171	126.600, 1.391
635	126.800, 0.187	126.800, 2.432	126.800, 0.298	126.800, 1.988	126.800, 0.047	126.800, 0.099	126.800, 0.119	126.800, 0.147	126.800, 0.171	126.800, 1.391
636	127.000, 0.187	127.000, 2.433	127.000, 0.298	127.000, 1.988	127.000, 0.047	127.000, 0.099	127.000, 0.119	127.000, 0.148	127.000, 0.171	127.000, 1.391
637	127.200, 0.187	127.200, 2.433	127.200, 0.298	127.200, 1.988	127.200, 0.047	127.200, 0.098	127.200, 0.120	127.200, 0.148	127.200, 0.171	127.200, 1.391
638	127.400, 0.186	127.400, 2.434	127.400, 0.298	127.400, 1.988	127.400, 0.047	127.400, 0.098	127.400, 0.120	127.400, 0.148	127.400, 0.171	127.400, 1.391
639	127.600, 0.186	127.600, 2.435	127.600, 0.298	127.600, 1.988	127.600, 0.047	127.600, 0.098	127.600, 0.120	127.600, 0.149	127.600, 0.171	127.600, 1.392
640	127.800, 0.186	127.800, 2.435	127.800, 0.298	127.800, 1.989	127.800, 0.047	127.800, 0.098	127.800, 0.120	127.800, 0.149	127.800, 0.171	127.800, 1.392
641	128.000, 0.186	128.000, 2.436	128.000, 0.298	128.000, 1.989	128.000, 0.047	128.000, 0.098	128.000, 0.119	128.000, 0.149	128.000, 0.171	128.000, 1.392
642	128.200, 0.185	128.200, 2.437	128.200, 0.298	128.200, 1.989	128.200, 0.047	128.200, 0.098	128.200, 0.119	128.200, 0.148	128.200, 0.171	128.200, 1.393
643	128.400, 0.185	128.400, 2.437	128.400, 0.298	128.400, 1.990	128.400, 0.047	128.400, 0.098	128.400, 0.119	128.400, 0.148	128.400, 0.171	128.400, 1.393
644	128.600, 0.185	128.600, 2.438	128.600, 0.299	128.600, 1.991	128.600, 0.046	128.600, 0.098	128.600, 0.119	128.600, 0.148	128.600, 0.171	128.600, 1.393
645	128.800, 0.184	128.800, 2.438	128.800, 0.299	128.800, 1.991	128.800, 0.046	128.800, 0.098	128.800, 0.119	128.800, 0.149	128.800, 0.171	128.800, 1.393
646	129.000, 0.184	129.000, 2.439	129.000, 0.299	129.000, 1.991	129.000, 0.046	129.000, 0.098	129.000, 0.119	129.000, 0.149	129.000, 0.171	129.000, 1.393
647	129.200, 0.184	129.200, 2.439	129.200, 0.300	129.200, 1.992	129.200, 0.046	129.200, 0.098	129.200, 0.119	129.200, 0.149	129.200, 0.171	129.200, 1.393
648	129.400, 0.184	129.400, 2.440	129.400, 0.300	129.400, 1.992	129.400, 0.046	129.400, 0.098	129.400, 0.119	129.400, 0.149	129.400, 0.171	129.400, 1.393
649	129.600, 0.185	129.600, 2.441	129.600, 0.300	129.600, 1.992	129.600, 0.046	129.600, 0.098	129.600, 0.119	129.600, 0.149	129.600, 0.171	129.600, 1.394
650	129.800, 0.185	129.800, 2.441	129.800, 0.300	129.800, 1.992	129.800, 0.046	129.800, 0.098	129.800, 0.119	129.800, 0.149	129.800, 0.171	129.800, 1.394
651	130.000, 0.185	130.000, 2.442	130.000, 0.300	130.000, 1.993	130.000, 0.046	130.000, 0.098	130.000, 0.120	130.000, 0.149	130.000, 0.171	130.000, 1.394
652	130.200, 0.185	130.200, 2.442	130.200, 0.300	130.200, 1.993	130.200, 0.046	130.200, 0.097	130.200, 0.120	130.200, 0.149	130.200, 0.171	130.200, 1.395
653	130.400, 0.185	130.400, 2.443	130.400, 0.300	130.400, 1.994	130.400, 0.045	130.400, 0.097	130.400, 0.121	130.400, 0.149	130.400, 0.171	130.400, 1.395
654	130.600, 0.185	130.600, 2.443	130.600, 0.300	130.600, 1.994	130.600, 0.045	130.600, 0.097	130.600, 0.121	130.600, 0.149	130.600, 0.171	130.600, 1.395
655	130.800, 0.185	130.800, 2.444	130.800, 0.300	130.800, 1.994	130.800, 0.045	130.800, 0.097	130.800, 0.122	130.800, 0.150	130.800, 0.171	130.800, 1.395
656	131.000, 0.185	131.000, 2.444	131.000, 0.300	131.000, 1.994	131.000, 0.045	131.000, 0.097	131.000, 0.122	131.000, 0.150	131.000, 0.171	131.000, 1.395
657	131.200, 0.185	131.200, 2.445	131.200, 0.300	131.200, 1.994	131.200, 0.045	131.200, 0.097	131.200, 0.122	131.200, 0.150	131.200, 0.171	131.200, 1.395
658	131.400, 0.185	131.400, 2.445	131.400, 0.300	131.400, 1.995	131.400, 0.045	131.400, 0.096	131.400, 0.122	131.400, 0.150	131.400, 0.171	131.400, 1.395
659	131.600, 0.185	131.600, 2.445	131.600, 0.300	131.600, 1.995	131.600, 0.045	131.600, 0.096	131.600, 0.122	131.600, 0.149	131.600, 0.171	131.600, 1.395
660	131.800, 0.185	131.800, 2.446	131.800, 0.300	131.800, 1.995	131.800, 0.045	131.800, 0.096	131.800, 0.121	131.800, 0.149	131.800, 0.171	131.800, 1.395
661	132.000, 0.185	132.000, 2.446	132.000, 0.300	132.000, 1.995	132.000, 0.045	132.000, 0.096	132.000, 0.121	132.000, 0.149	132.000, 0.171	132.000, 1.395
662	132.200, 0.184	132.200, 2.446	132.200, 0.301	132.200, 1.995	132.200, 0.045	132.200, 0.096	132.200, 0.121	132.200, 0.149	132.200, 0.171	132.200, 1.395
663	132.400, 0.184	132.400, 2.447	132.400, 0.301	132.400, 1.995	132.400, 0.045	132.400, 0.095	132.400, 0.120	132.400, 0.149	132.400, 0.171	132.400, 1.395
664	132.600, 0.184	132.600, 2.447	132.600, 0.301	132.600, 1.995	132.600, 0.044	132.600, 0.095	132.600, 0.119	132.600, 0.149	132.600, 0.171	132.600, 1.395
665	132.800, 0.184	132.800, 2.448	132.800, 0.301	132.800, 1.995	132.800, 0.044	132.800, 0.095	132.800, 0.119	132.800, 0.148	132.800, 0.171	132.800, 1.396
666	133.000, 0.184	133.000, 2.449	133.000, 0.301	133.000, 1.995	133.000, 0.044	133.000, 0.095	133.000, 0.119	133.000, 0.148	133.000, 0.171	133.000, 1.396
667	133.200, 0.185	133.200, 2.449	133.200, 0.301	133.200, 1.995	133.200, 0.044	133.200, 0.095	133.200, 0.118	133.200, 0.148	133.200, 0.171	133.200, 1.396
668	133.400, 0.185	133.400, 2.450	133.400, 0.301	133.400, 1.995	133.400, 0.044	133.400, 0.095	133.400, 0.118	133.400, 0.147	133.400, 0.171	133.400, 1.396
669	133.600, 0.185	133.600, 2.451	133.600, 0.301	133.600, 1.995	133.600, 0.045	133.600, 0.095	133.600, 0.118	133.600, 0.147	133.600, 0.171	133.600, 1.395
670	133.800, 0.186	133.800, 2.452	133.800, 0.301	133.800, 1.996	133.800, 0.045	133.800, 0.095	133.800, 0.118	133.800, 0.147	133.800, 0.171	133.800, 1.395
671	134.000, 0.186	134.000, 2.453	134.000, 0.301	134.000, 1.997	134.000, 0.045	134.000, 0.095	134.000, 0.118	134.000, 0.147	134.000, 0.171	134.000, 1.395
672	134.200, 0.187	134.200, 2.454	134.200, 0.302	134.200, 1.997	134.200, 0.046	134.200, 0.095	134.200, 0.118	134.200, 0.146	134.200, 0.171	134.200, 1.395
673	134.400, 0.187	134.400, 2.455	134.400, 0.302	134.400, 1.998	134.400, 0.046	134.400, 0.095	134.400, 0.119	134.400, 0.146	134.400, 0.171	134.400, 1.395
674	134.600, 0.187	134.600, 2.455	134.600, 0.302	134.600, 1.998	134.600, 0.047	134.600, 0.095	134.600, 0.119	134.600, 0.146	134.600, 0.171	134.600, 1.395
675	134.800, 0.187	134.800, 2.456	134.800, 0.302	134.800, 1.999	134.800, 0.047	134.800, 0.095	134.800, 0.120	134.800, 0.146	134.800, 0.171	134.800, 1.395
676	135.000, 0.187	135.000, 2.457	135.000, 0.302	135.000, 1.999	135.000, 0.047	135.000, 0.095	135.000, 0.120	135.000, 0.145	135.000, 0.171	135.000, 1.395
677	135.200, 0.187	135.200, 2.458	135.200, 0.302	135.200, 2.000	135.200, 0.048	135.200, 0.095	135.200, 0.120	135.200, 0.145	135.200, 0.171	135.200, 1.395
678	135.400, 0.187	135.400, 2.458	135.400, 0.302	135.400, 2.000	135.400, 0.048	135.400, 0.095	135.400, 0.120	135.400, 0.144	135.400, 0.172	135.400, 1.395
679	135.600, 0.187	135.600, 2.459	135.600, 0.302	135.600, 2.000	135.600, 0.048	135.600, 0.095	135.600, 0.120	135.600, 0.144	135.600, 0.172	135.600, 1.395
680	135.800, 0.187	135.800, 2.459	135.800, 0.301	135.800, 2.000	135.800, 0.048	135.800, 0.096	135.800, 0.120	135.800, 0.144	135.800, 0.172	135.800, 1.395
681	136.000, 0.186	136.000, 2.460	136.000, 0.301	136.000, 2.000	136.000, 0.048	136.000, 0.096	136.000, 0.120	136.000, 0.143	136.000, 0.172	136.000, 1.395
682	136.200, 0.186	136.200, 2.460	136.200, 0.301	136.200, 1.999	136.200, 0.048	136.200, 0.096	136.200, 0.120	136.200, 0.143	136.200, 0.172	136.200, 1.394
683	136.400, 0.186	136.400, 2.461	136.400, 0.300	136.400, 1.999	136.400, 0.047	136.400, 0.096	136.400, 0.120	136.400, 0.142	136.400, 0.173	136.400, 1.395
684	136.600, 0.186	136.600, 2.461	136.600, 0.300	136.600, 1.999	136.600, 0.047	136.600, 0.096	136.600, 0.121	136.600, 0.141	136.600, 0.173	136.600, 1.395
685	136.800, 0.186	136.800, 2.461	136.800, 0.300	136.800, 1.999	136.800, 0.047	136.800, 0.096	136.800, 0.121	136.800, 0.141	136.800, 0.173	136.800, 1.395
686	137.000, 0.186	137.000, 2.461	137.000, 0.300	137.000, 2.000	137.000, 0.047	137.000, 0.096	137.000, 0.121	137.000, 0.140	137.000, 0.173	137.000, 1.396
687	137.200, 0.186	137.200, 2.462	137.200, 0.300	137.200, 2.000	137.200, 0.047	137.200, 0.096	137.200, 0.121	137.200, 0.140	137.200, 0.173	137.200, 1.396
688	137.400, 0.186	137.400, 2.462	137.400, 0.300	137.400, 2.000	137.400, 0.046	137.400, 0.096	137.400, 0.121	137.400, 0.140	137.400, 0.173	137.400, 1.396
689	137.600, 0.186	137.600, 2.462	137.600, 0.300	137.600, 2.000	137.600, 0.046	137.600, 0.096	137.600, 0.121	137.600, 0.140	137.600, 0.173	137.600, 1.397
690	137.800, 0.186	137.800, 2.463	137.800, 0.301	137.800, 2.001	137.800, 0.045	137.800, 0.096	137.800, 0.122	137.800, 0.140	137.800, 0.173	137.800, 1.397
691	138.000, 0.186	138.000, 2.463	138.000, 0.301	138.000, 2.001	138.000, 0.045	138.000, 0.095	138.000, 0.122	138.000, 0.140	138.000, 0.174	138.000, 1.397
692	138.200, 0.186	138.200, 2.464	138.200, 0.301	138.200, 2.002	138.200, 0.045	138.200, 0.095	138.200, 0.122	138.200, 0.141	138.200, 0.174	138.200, 1.397
693	138.400, 0.186	138.400, 2.465	138.400, 0.301	138.400, 2.002	138.400, 0.045	138.400, 0.095	138.400, 0.122	138.400, 0.141	138.400, 0.174	138.400, 1.398
694	138.600, 0.185	138.600, 2.465	138.600, 0.302	138.600, 2.003	138.600, 0.044	138.600, 0.095	138.600, 0.122	138.600, 0.140	138.600, 0.174	138.600, 1.398
695	138.800, 0.185	138.800, 2.466	138.800, 0.301	138.800, 2.003	138.800, 0.044	138.800, 0.095	138.800, 0.121	138.800, 0.140	138.800, 0.174	138.800, 1.398
696	139.000, 0.185	139.000, 2.466	139.000, 0.301	139.000, 2.004	139.000, 0.044	139.000, 0.095	139.000, 0.121	139.000, 0.140	139.000, 0.174	139.000, 1.399
697	139.200, 0.184	139.200, 2.466	139.200, 0.301	139.200, 2.004	139.200, 0.044	139.200, 0.095	139.200, 0.120	139.200, 0.140	139.200, 0.174	139.200, 1.399
698	139.400, 0.184	139.400, 2.467	139.400, 0.300	139.400, 2.004	139.400, 0.044	139.400, 0.095	139.400, 0.119	139.400, 0.140	139.400, 0.174	139.400, 1.399
699	139.600, 0.184	139.600, 2.467	139.600, 0.300	139.600, 2.004	139.600, 0.044	139.600, 0.095	139.600, 0.118	139.600, 0.140	139.600, 0.175	139.600, 1.399
700	139.800, 0.183	139.800, 2.467	139.800, 0.300	139.800, 2.003	139.800, 0.044	139.800, 0.095	139.800, 0.116	139.800, 0.141	139.800, 0.175	139.800, 1.399
701	140.000, 0.183	140.000, 2.467	140.000, 0.299	140.000, 2.003	140.000, 0.045	140.000, 0.095	140.000, 0.115	140.000, 0.141	140.000, 0.174	140.000, 1.399
702	140.200, 0.183	140.200, 2.467	140.200, 0.299	140.200, 2.003	140.200, 0.045	140.200, 0.095	140.200, 0.114	140.200, 0.140	140.200, 0.174	140.200, 1.398
703	140.400, 0.183	140.400, 2.468	140.400, 0.299	140.400, 2.002	140.400, 0.046	140.400, 0.095	140.400, 0.113	140.400, 0.140	140.400, 0.174	140.400, 1.399
704	140.600, 0.184	140.600, 2.468	140.600, 0.299	140.600, 2.002	140.600, 0.046	140.600, 0.094	140.600, 0.113	140.600, 0.141	140.600, 0.174	140.600, 1.399
705	140.800, 0.184	140.800, 2.469	140.800, 0.299	140.800, 2.002	140.800, 0.046	140.800, 0.094	140.800, 0.112	140.800, 0.141	140.800, 0.174	140.800, 1.399
706	141.000, 0.184	141.000, 2.469	141.000, 0.299	141.000, 2.002	141.000, 0.046	141.000, 0.094	141.000, 0.112	141.000, 0.141	141.000, 0.173	141.000, 1.399
707	141.200, 0.184	141.200, 2.470	141.200, 0.300	141.200, 2.002	141.200, 0.046	141.200, 0.094	141.200, 0.111	141.200, 0.141	141.200, 0.173	141.200, 1.399
708	141.400, 0.184	141.400, 2.470	141.400, 0.300	141.400, 2.002	141.400, 0.046	141.400, 0.094	141.400, 0.112	141.400, 0.142	141.400, 0.173	141.400, 1.399
709	141.600, 0.184	141.600, 2.471	141.600, 0.300	141.600, 2.003	141.600, 0.045	141.600, 0.094	141.600, 0.112	141.600, 0.142	141.600, 0.173	141.600, 1.399
710	141.800, 0.184	141.800, 2.471	141.800, 0.300	141.800, 2.003	141.800, 0.045	141.800, 0.093	141.800, 0.112	141.800, 0.142	141.800, 0.173	141.800, 1.399
711	142.000, 0.184	142.000, 2.472	142.000, 0.300	142.000, 2.003	142.000, 0.044	142.000, 0.093	142.000, 0.112	142.000, 0.142	142.000, 0.173	142.000, 1.399
712	142.200, 0.183	142.200, 2.472	142.200, 0.300	142.200, 2.004	142.200, 0.044	142.200, 0.093	142.200, 0.113	142.200, 0.142	142.200, 0.172	142.200, 1.399
713	142.400, 0.183	142.400, 2.473	142.400, 0.300	142.400, 2.004	142.400, 0.044	142.400, 0.093	142.400, 0.113	142.400, 0.141	142.400, 0.172	142.400, 1.400
714	142.600, 0.183	142.600, 2.474	142.600, 0.299	142.600, 2.004	142.600, 0.044	142.600, 0.094	142.600, 0.113	142.600, 0.141	142.600, 0.172	142.600, 1.400
715	142.800, 0.183	142.800, 2.474	142.800, 0.299	142.800, 2.004	142.800, 0.044	142.800, 0.094	142.800, 0.113	142.800, 0.141	142.800, 0.172	142.800, 1.400
716	143.000, 0.183	143.000, 2.474	143.000, 0.299	143.000, 2.004	143.000, 0.044	143.000, 0.094	143.000, 0.113	143.000, 0.141	143.000, 0.173	143.000, 1.400
717	143.200, 0.183	143.200, 2.475	143.200, 0.298	143.200, 2.004	143.200, 0.044	143.200, 0.094	143.200, 0.113	143.200, 0.140	143.200, 0.173	143.200, 1.400
718	143.400, 0.183	143.400, 2.475	143.400, 0.298	143.400, 2.004	143.400, 0.044	143.400, 0.095	143.400, 0.113	143.400, 0.140	143.400, 0.173	143.400, 1.400
719	143.600, 0.183	143.600, 2.475	143.600, 0.298	143.600, 2.004	143.600, 0.045	143.600, 0.095	143.600, 0.113	143.600, 0.140	143.600, 0.174	143.600, 1.400
720	143.800, 0.183	143.800, 2.475	143.800, 0.297	143.800, 2.004	143.800, 0.045	143.800, 0.095	143.800, 0.113	143.800, 0.139	143.800, 0.174	143.800, 1.400
721	144.000, 0.184	144.000, 2.476	144.000, 0.298	144.000, 2.003	144.000, 0.045	144.000, 0.095	144.000, 0.113	144.000, 0.139	144.000, 0.174	144.000, 1.400
722	144.200, 0.184	144.200, 2.476	144.200, 0.298	144.200, 2.003	144.200, 0.045	144.200, 0.095	144.200, 0.114	144.200, 0.139	144.200, 0.174	144.200, 1.400
723	144.400, 0.184	144.400, 2.476	144.400, 0.298	144.400, 2.003	144.400, 0.046	144.400, 0.095	144.400, 0.114	144.400, 0.139	144.400, 0.174	144.400, 1.400
724	144.600, 0.184	144.600, 2.476	144.600, 0.299	144.600, 2.003	144.600, 0.046	144.600, 0.095	144.600, 0.114	144.600, 0.140	144.600, 0.174	144.600, 1.400
725	144.800, 0.184	144.800, 2.476	144.800, 0.299	144.800, 2.003	144.800, 0.045	144.800, 0.095	144.800, 0.114	144.800, 0.140	144.800, 0.174	144.800, 1.400
726	145.000, 0.184	145.000, 2.476	145.000, 0.299	145.000, 2.003	145.000, 0.045	145.000, 0.095	145.000, 0.114	145.000, 0.141	145.000, 0.174	145.000, 1.400
727	145.200, 0.184	145.200, 2.477	145.200, 0.300	145.200, 2.004	145.200, 0.045	145.200, 0.095	145.200, 0.113	145.200, 0.142	145.200, 0.174	145.200, 1.400
728	145.400, 0.184	145.400, 2.477	145.400, 0.299	145.400, 2.004	145.400, 0.045	145.400, 0.094	145.400, 0.113	145.400, 0.142	145.400, 0.174	145.400, 1.401
729	145.600, 0.183	145.600, 2.477	145.600, 0.299	145.600, 2.005	145.600, 0.044	145.600, 0.094	145.600, 0.113	145.600, 0.143	145.600, 0.174	145.600, 1.401
730	145.800, 0.183	145.800, 2.478	145.800, 0.299	145.800, 2.005	145.800, 0.044	145.800, 0.094	145.800, 0.113	145.800, 0.143	145.800, 0.174	145.800, 1.401
731	146.000, 0.183	146.000, 2.478	146.000, 0.299	146.000, 2.005	146.000, 0.044	146.000, 0.094	146.000, 0.112	146.000, 0.143	146.000, 0.174	146.000, 1.401
732	146.200, 0.183	146.200, 2.478	146.200, 0.298	146.200, 2.005	146.200, 0.045	146.200, 0.094	146.200, 0.112	146.200, 0.143	146.200, 0.174	146.200, 1.401
733	146.400, 0.182	146.400, 2.479	146.400, 0.297	146.400, 2.006	146.400, 0.045	146.400, 0.094	146.400, 0.112	146.400, 0.143	146.400, 0.174	146.400, 1.401
734	146.600, 0.182	146.600, 2.479	146.600, 0.297	146.600, 2.006	146.600, 0.045	146.600, 0.094	146.600, 0.112	146.600, 0.143	146.600, 0.175	146.600, 1.401
735	146.800, 0.182	146.800, 2.480	146.800, 0.296	146.800, 2.006	146.800, 0.045	146.800, 0.094	146.800, 0.112	146.800, 0.143	146.800, 0.175	146.800, 1.401
736	147.000, 0.182	147.000, 2.480	147.000, 0.295	147.000, 2.006	147.000, 0.045	147.000, 0.094	147.000, 0.112	147.000, 0.143	147.000, 0.175	147.000, 1.401
737	147.200, 0.182	147.200, 2.480	147.200, 0.295	147.200, 2.007	147.200, 0.046	147.200, 0.094	147.200, 0.112	147.200, 0.142	147.200, 0.174	147.200, 1.400
738	147.400, 0.182	147.400, 2.481	147.400, 0.295	147.400, 2.007	147.400, 0.046	147.400, 0.094	147.400, 0.112	147.400, 0.142	147.400, 0.174	147.400, 1.400
739	147.600, 0.182	147.600, 2.481	147.600, 0.294	147.600, 2.007	147.600, 0.046	147.600, 0.094	147.600, 0.113	147.600, 0.142	147.600, 0.174	147.600, 1.400
740	147.800, 0.182	147.800, 2.482	147.800, 0.294	147.800, 2.007	147.800, 0.046	147.800, 0.094	147.800, 0.113	147.800, 0.142	147.800, 0.173	147.800, 1.400
741	148.000, 0.182	148.000, 2.482	148.000, 0.294	148.000, 2.007	148.000, 0.046	148.000, 0.094	148.000, 0.113	148.000, 0.141	148.000, 0.173	148.000, 1.400
742	148.200, 0.182	148.200, 2.483	148.200, 0.295	148.200, 2.007	148.200, 0.046	148.200, 0.094	148.200, 0.113	148.200, 0.141	148.200, 0.173	148.200, 1.399
743	148.400, 0.182	148.400, 2.483	148.400, 0.295	148.400, 2.008	148.400, 0.046	148.400, 0.095	148.400, 0.114	148.400, 0.142	148.400, 0.172	148.400, 1.399
744	148.600, 0.182	148.600, 2.484	148.600, 0.295	148.600, 2.008	148.600, 0.046	148.600, 0.095	148.600, 0.114	148.600, 0.142	148.600, 0.172	148.600, 1.399
745	148.800, 0.182	148.800, 2.484	148.800, 0.295	148.800, 2.008	148.800, 0.046	148.800, 0.095	148.800, 0.114	148.800, 0.142	148.800, 0.172	148.800, 1.400
746	149.000, 0.181	149.000, 2.484	149.000, 0.295	149.000, 2.008	149.000, 0.046	149.000, 0.095	149.000, 0.114	149.000, 0.142	149.000, 0.172	149.000, 1.400
747	149.200, 0.181	149.200, 2.485	149.200, 0.295	149.200, 2.008	149.200, 0.046	149.200, 0.095	149.200, 0.113	149.200, 0.143	149.200, 0.173	149.200, 1.400
748	149.400, 0.181	149.400, 2.485	149.400, 0.295	149.400, 2.008	149.400, 0.046	149.400, 0.096	149.400, 0.113	149.400, 0.143	149.400, 0.173	149.400, 1.400
749	149.600, 0.181	149.600, 2.485	149.600, 0.295	149.600, 2.008	149.600, 0.046	149.600, 0.096	149.600, 0.113	149.600, 0.143	149.600, 0.173	149.600, 1.400
750	149.800, 0.181	149.800, 2.485	149.800, 0.295	149.800, 2.008	149.800, 0.047	149.800, 0.097	149.800, 0.112	149.800, 0.143	149.800, 0.174	149.800, 1.400
751	150.000, 0.181	150.000, 2.485	150.000, 0.295	150.000, 2.008	150.000, 0.047	150.000, 0.097	150.000, 0.112	150.000, 0.143	150.000, 0.174	150.000, 1.400
752	150.200, 0.177	150.200, 2.478	150.200, 0.295	150.200, 2.004	150.200, 0.043	150.200, 0.094	150.200, 0.107	150.200, 0.139	150.200, 0.171	150.200, 1.393
753	150.400, 0.174	150.400, 2.470	150.400, 0.296	150.400, 1.998	150.400, 0.040	150.400, 0.092	150.400, 0.101	150.400, 0.134	150.400, 0.169	150.400, 1.384
754	150.600, 0.170	150.600, 2.459	150.600, 0.297	150.600, 1.991	150.600, 0.036	150.600, 0.089	150.600, 0.095	150.600, 0.130	150.600, 0.167	150.600, 1.375
755	150.800, 0.167	150.800, 2.447	150.800, 0.298	150.800, 1.982	150.800, 0.033	150.800, 0.087	150.800, 0.089	150.800, 0.125	150.800, 0.165	150.800, 1.364
756	151.000, 0.163	151.000, 2.433	151.000, 0.299	151.000, 1.973	151.000, 0.029	151.000, 0.084	151.000, 0.084	151.000, 0.120	151.000, 0.164	151.000, 1.352
757	151.200, 0.159	151.200, 2.417	151.200, 0.300	151.200, 1.961	151.200, 0.026	151.200, 0.082	151.200, 0.079	151.200, 0.116	151.200, 0.163	151.200, 1.339
758	151.400, 0.156	151.400, 2.399	151.400, 0.302	151.400, 1.949	151.400, 0.024	151.400, 0.080	151.400, 0.075	151.400, 0.112	151.400, 0.162	151.400, 1.325
759	151.600, 0.153	151.600, 2.380	151.600, 0.303	151.600, 1.935	151.600, 0.022	151.600, 0.079	151.600, 0.071	151.600, 0.108	151.600, 0.162	151.600, 1.311
760	151.800, 0.151	151.800, 2.360	151.800, 0.305	151.800, 1.920	151.800, 0.021	151.800, 0.078	151.800, 0.069	151.800, 0.105	151.800, 0.162	151.800, 1.297
761	152.000, 0.150	152.000, 2.339	152.000, 0.307	152.000, 1.904	152.000, 0.020	152.000, 0.078	152.000, 0.067	152.000, 0.103	152.000, 0.163	152.000, 1.283
762	152.200, 0.149	152.200, 2.317	152.200, 0.308	152.200, 1.888	152.200, 0.020	152.200, 0.079	152.200, 0.067	152.200, 0.102	152.200, 0.165	152.200, 1.270
763	152.400, 0.148	152.400, 2.295	152.400, 0.309	152.400, 1.872	152.400, 0.020	152.400, 0.079	152.400, 0.066	152.400, 0.100	152.400, 0.166	152.400, 1.255
764	152.600, 0.148	152.600, 2.272	152.600, 0.310	152.600, 1.855	152.600, 0.020	152.600, 0.079	152.600, 0.066	152.600, 0.099	152.600, 0.168	152.600, 1.240
765	152.800, 0.147	152.800, 2.248	152.800, 0.311	152.800, 1.838	152.800, 0.020	152.800, 0.079	152.800, 0.065	152.800, 0.099	152.800, 0.169	152.800, 1.225
766	153.000, 0.147	153.000, 2.224	153.000, 0.312	153.000, 1.820	153.000, 0.020	153.000, 0.079	153.000, 0.065	153.000, 0.098	153.000, 0.170	153.000, 1.209
767	153.200, 0.146	153.200, 2.200	153.200, 0.312	153.200, 1.802	153.200, 0.021	153.200, 0.079	153.200, 0.065	153.200, 0.097	153.200, 0.170	153.200, 1.194
768	153.400, 0.145	153.400, 2.176	153.400, 0.313	153.400, 1.784	153.400, 0.021	153.400, 0.079	153.400, 0.064	153.400, 0.097	153.400, 0.171	153.400, 1.178
769	153.600, 0.145	153.600, 2.151	153.600, 0.314	153.600, 1.766	153.600, 0.021	153.600, 0.079	153.600, 0.064	153.600, 0.096	153.600, 0.172	153.600, 1.162
770	153.800, 0.145	153.800, 2.127	153.800, 0.315	153.800, 1.749	153.800, 0.022	153.800, 0.079	153.800, 0.064	153.800, 0.095	153.800, 0.173	153.800, 1.147
771	154.000, 0.144	154.000, 2.103	154.000, 0.316	154.000, 1.731	154.000, 0.022	154.000, 0.080	154.000, 0.064	154.000, 0.095	154.000, 0.174	154.000, 1.132
772	154.200, 0.144	154.200, 2.079	154.200, 0.316	154.200, 1.713	154.200, 0.022	154.200, 0.080	154.200, 0.064	154.200, 0.095	154.200, 0.174	154.200, 1.117
773	154.400, 0.143	154.400, 2.056	154.400, 0.317	154.400, 1.696	154.400, 0.023	154.400, 0.080	154.400, 0.064	154.400, 0.094	154.400, 0.175	154.400, 1.102
774	154.600, 0.143	154.600, 2.032	154.600, 0.318	154.600, 1.679	154.600, 0.023	154.600, 0.080	154.600, 0.064	154.600, 0.094	154.600, 0.175	154.600, 1.087
775	154.800, 0.142	154.800, 2.009	154.800, 0.319	154.800, 1.661	154.800, 0.023	154.800, 0.080	154.800, 0.065	154.800, 0.094	154.800, 0.176	154.800, 1.072
776	155.000, 0.142	155.000, 1.986	155.000, 0.320	155.000, 1.645	155.000, 0.023	155.000, 0.080	155.000, 0.065	155.000, 0.094	155.000, 0.176	155.000, 1.058
777	155.200, 0.142	155.200, 1.963	155.200, 0.320	155.200, 1.628	155.200, 0.023	155.200, 0.080	155.200, 0.066	155.200, 0.094	155.200, 0.177	155.200, 1.043
778	155.400, 0.141	155.400, 1.941	155.400, 0.321	155.400, 1.611	155.400, 0.023	155.400, 0.080	155.400, 0.066	155.400, 0.094	155.400, 0.177	155.400, 1.029
779	155.600, 0.141	155.600, 1.918	155.600, 0.322	155.600, 1.595	155.600, 0.023	155.600, 0.080	155.600, 0.066	155.600, 0.094	155.600, 0.178	155.600, 1.014
780	155.800, 0.141	155.800, 1.896	155.800, 0.323	155.800, 1.579	155.800, 0.023	155.800, 0.080	155.800, 0.067	155.800, 0.094	155.800, 0.179	155.800, 1.000
781	156.000, 0.140	156.000, 1.873	156.000, 0.323	156.000, 1.564	156.000, 0.022	156.000, 0.080	156.000, 0.067	156.000, 0.094	156.000, 0.179	156.000, 0.987
782	156.200, 0.140	156.200, 1.852	156.200, 0.324	156.200, 1.549	156.200, 0.022	156.200, 0.080	156.200, 0.067	156.200, 0.094	156.200, 0.180	156.200, 0.973
783	156.400, 0.140	156.400, 1.830	156.400, 0.324	156.400, 1.534	156.400, 0.022	156.400, 0.080	156.400, 0.067	156.400, 0.094	156.400, 0.181	156.400, 0.960
784	156.600, 0.139	156.600, 1.809	156.600, 0.325	156.600, 1.519	156.600, 0.022	156.600, 0.080	156.600, 0.068	156.600, 0.094	156.600, 0.182	156.600, 0.947
785	156.800, 0.139	156.800, 1.787	156.800, 0.325	156.800, 1.505	156.800, 0.022	156.800, 0.080	156.800, 0.068	156.800, 0.094	156.800, 0.183	156.800, 0.935
786	157.000, 0.139	157.000, 1.767	157.000, 0.325	157.000, 1.491	157.000, 0.022	157.000, 0.080	157.000, 0.068	157.000, 0.094	157.000, 0.183	157.000, 0.922
787	157.200, 0.139	157.200, 1.746	157.200, 0.325	157.200, 1.477	157.200, 0.022	157.200, 0.080	157.200, 0.068	157.200, 0.094	157.200, 0.184	157.200, 0.910
788	157.400, 0.139	157.400, 1.726	157.400, 0.326	157.400, 1.463	157.400, 0.022	157.400, 0.080	157.400, 0.068	157.400, 0.094	157.400, 0.185	157.400, 0.898
789	157.600, 0.139	157.600, 1.706	157.600, 0.326	157.600, 1.450	157.600, 0.023	157.600, 0.079	157.600, 0.067	157.600, 0.094	157.600, 0.185	157.600, 0.886
790	157.800, 0.139	157.800, 1.687	157.800, 0.327	157.800, 1.437	157.800, 0.023	157.800, 0.079	157.800, 0.067	157.800, 0.094	157.800, 0.186	157.800, 0.875
791	158.000, 0.139	158.000, 1.668	158.000, 0.328	158.000, 1.423	158.000, 0.023	158.000, 0.080	158.000, 0.067	158.000, 0.094	158.000, 0.186	158.000, 0.863
792	158.200, 0.139	158.200, 1.649	158.200, 0.328	158.200, 1.410	158.200, 0.023	158.200, 0.080	158.200, 0.067	158.200, 0.094	158.200, 0.187	158.200, 0.853
793	158.400, 0.139	158.400, 1.631	158.400, 0.329	158.400, 1.398	158.400, 0.023	158.400, 0.080	158.400, 0.068	158.400, 0.095	158.400, 0.187	158.400, 0.842
794	158.600, 0.139	158.600, 1.613	158.600, 0.329	158.600, 1.385	158.600, 0.023	158.600, 0.080	158.600, 0.068	158.600, 0.095	158.600, 0.187	158.600, 0.831
795	158.800, 0.139	158.800, 1.595	158.800, 0.329	158.800, 1.373	158.800, 0.023	158.800, 0.081	158.800, 0.068	158.800, 0.095	158.800, 0.187	158.800, 0.821
796	159.000, 0.139	159.000, 1.578	159.000, 0.330	159.000, 1.361	159.000, 0.023	159.000, 0.081	159.000, 0.068	159.000, 0.095	159.000, 0.188	159.000, 0.810
797	159.200, 0.139	159.200, 1.561	159.200, 0.330	159.200, 1.349	159.200, 0.024	159.200, 0.081	159.200, 0.068	159.200, 0.095	159.200, 0.188	159.200, 0.801
798	159.400, 0.139	159.400, 1.545	159.400, 0.330	159.400, 1.338	159.400, 0.023	159.400, 0.081	159.400, 0.068	159.400, 0.095	159.400, 0.188	159.400, 0.791
799	159.600, 0.139	159.600, 1.529	159.600, 0.331	159.600, 1.326	159.600, 0.023	159.600, 0.082	159.600, 0.068	159.600, 0.095	159.600, 0.189	159.600, 0.782
800	159.800, 0.139	159.800, 1.513	159.800, 0.331	159.800, 1.316	159.800, 0.023	159.800, 0.082	159.800, 0.068	159.800, 0.095	159.800, 0.189	159.800, 0.773
801	160.000, 0.139	160.000, 1.497	160.000, 0.331	160.000, 1.305	160.000, 0.023	160.000, 0.082	160.000, 0.068	160.000, 0.096	160.000, 0.190	160.000, 0.764
802	160.200, 0.139	160.200, 1.482	160.200, 0.331	160.200, 1.295	160.200, 0.023	160.200, 0.083	160.200, 0.069	160.200, 0.095	160.200, 0.191	160.200, 0.756
803	160.400, 0.139	160.400, 1.467	160.400, 0.332	160.400, 1.284	160.400, 0.023	160.400, 0.083	160.400, 0.069	160.400, 0.095	160.400, 0.191	160.400, 0.748
804	160.600, 0.139	160.600, 1.452	160.600, 0.332	160.600, 1.274	160.600, 0.024	160.600, 0.083	160.600, 0.069	160.600, 0.095	160.600, 0.192	160.600, 0.740
805	160.800, 0.139	160.800, 1.438	160.800, 0.332	160.800, 1.265	160.800, 0.024	160.800, 0.083	160.800, 0.069	160.800, 0.095	160.800, 0.193	160.800, 0.732
806	161.000, 0.139	161.000, 1.424	161.000, 0.332	161.000, 1.255	161.000, 0.024	161.000, 0.083	161.000, 0.069	161.000, 0.095	161.000, 0.193	161.000, 0.725
807	161.200, 0.139	161.200, 1.410	161.200, 0.333	161.200, 1.246	161.200, 0.024	161.200, 0.083	161.200, 0.069	161.200, 0.095	161.200, 0.194	161.200, 0.717
808	161.400, 0.139	161.400, 1.396	161.400, 0.333	161.400, 1.237	161.400, 0.024	161.400, 0.082	161.400, 0.070	161.400, 0.095	161.400, 0.194	161.400, 0.710
809	161.600, 0.139	161.600, 1.383	161.600, 0.333	161.600, 1.228	161.600, 0.024	161.600, 0.082	161.600, 0.070	161.600, 0.095	161.600, 0.195	161.600, 0.703
810	161.800, 0.139	161.800, 1.370	161.800, 0.334	161.800, 1.219	161.800, 0.024	161.800, 0.082	161.800, 0.071	161.800, 0.095	161.800, 0.195	161.800, 0.695
811	162.000, 0.139	162.000, 1.357	162.000, 0.334	162.000, 1.210	162.000, 0.024	162.000, 0.082	162.000, 0.071	162.000, 0.095	162.000, 0.196	162.000, 0.688
812	162.200, 0.139	162.200, 1.345	162.200, 0.335	162.200, 1.202	162.200, 0.024	162.200, 0.081	162.200, 0.071	162.200, 0.095	162.200, 0.196	162.200, 0.682
813	162.400, 0.139	162.400, 1.333	162.400, 0.335	162.400, 1.194	162.400, 0.024	162.400, 0.081	162.400, 0.071	162.400, 0.095	162.400, 0.196	162.400, 0.675
814	162.600, 0.139	162.600, 1.321	162.600, 0.335	162.600, 1.185	162.600, 0.024	162.600, 0.081	162.600, 0.071	162.600, 0.095	162.600, 0.197	162.600, 0.669
815	162.800, 0.139	162.800, 1.309	162.800, 0.336	162.800, 1.177	162.800, 0.024	162.800, 0.081	162.800, 0.071	162.800, 0.096	162.800, 0.197	162.800, 0.663
816	163.000, 0.138	163.000, 1.298	163.000, 0.336	163.000, 1.170	163.000, 0.024	163.000, 0.081	163.000, 0.072	163.000, 0.096	163.000, 0.198	163.000, 0.657
817	163.200, 0.138	163.200, 1.287	163.200, 0.336	163.200, 1.162	163.200, 0.024	163.200, 0.081	163.200, 0.071	163.200, 0.096	163.200, 0.198	163.200, 0.651
818	163.400, 0.138	163.400, 1.276	163.400, 0.336	163.400, 1.155	163.400, 0.024	163.400, 0.081	163.400, 0.072	163.400, 0.096	163.400, 0.198	163.400, 0.645
819	163.600, 0.138	163.600, 1.265	163.600, 0.336	163.600, 1.148	163.600, 0.024	163.600, 0.081	163.600, 0.072	163.600, 0.096	163.600, 0.199	163.600, 0.640
820	163.800, 0.138	163.800, 1.255	163.800, 0.337	163.800, 1.141	163.800, 0.024	163.800, 0.081	163.800, 0.071	163.800, 0.096	163.800, 0.199	163.800, 0.634
821	164.000, 0.138	164.000, 1.245	164.000, 0.337	164.000, 1.134	164.000, 0.025	164.000, 0.081	164.000, 0.071	164.000, 0.097	164.000, 0.200	164.000, 0.629
822	164.200, 0.138	164.200, 1.235	164.200, 0.337	164.200, 1.127	164.200, 0.025	164.200, 0.081	164.200, 0.071	164.200, 0.097	164.200, 0.200	164.200, 0.624
823	164.400, 0.138	164.400, 1.225	164.400, 0.337	164.400, 1.120	164.400, 0.025	164.400, 0.082	164.400, 0.071	164.400, 0.097	164.400, 0.200	164.400, 0.619
824	164.600, 0.138	164.600, 1.216	164.600, 0.337	164.600, 1.113	164.600, 0.026	164.600, 0.082	164.600, 0.071	164.600, 0.097	164.600, 0.201	164.600, 0.615
825	164.800, 0.137	164.800, 1.206	164.800, 0.337	164.800, 1.107	164.800, 0.026	164.800, 0.082	164.800, 0.071	164.800, 0.097	164.800, 0.201	164.800, 0.610
826	165.000, 0.137	165.000, 1.197	165.000, 0.337	165.000, 1.100	165.000, 0.026	165.000, 0.082	165.000, 0.071	165.000, 0.097	165.000, 0.201	165.000, 0.606
827	165.200, 0.137	165.200, 1.188	165.200, 0.338	165.200, 1.094	165.200, 0.026	165.200, 0.082	165.200, 0.071	165.200, 0.097	165.200, 0.202	165.200, 0.601
828	165.400, 0.137	165.400, 1.180	165.400, 0.338	165.400, 1.088	165.400, 0.026	165.400, 0.082	165.400, 0.071	165.400, 0.097	165.400, 0.202	165.400, 0.597
829	165.600, 0.137	165.600, 1.172	165.600, 0.339	165.600, 1.082	165.600, 0.026	165.600, 0.082	165.600, 0.071	165.600, 0.096	165.600, 0.202	165.600, 0.592
830	165.800, 0.136	165.800, 1.164	165.800, 0.339	165.800, 1.075	165.800, 0.026	165.800, 0.082	165.800, 0.071	165.800, 0.096	165.800, 0.202	165.800, 0.588
831	166.000, 0.136	166.000, 1.155	166.000, 0.339	166.000, 1.069	166.000, 0.026	166.000, 0.082	166.000, 0.071	166.000, 0.096	166.000, 0.202	166.000, 0.584
832	166.200, 0.136	166.200, 1.147	166.200, 0.340	166.200, 1.063	166.200, 0.026	166.200, 0.082	166.200, 0.071	166.200, 0.096	166.200, 0.203	166.200, 0.580
833	166.400, 0.136	166.400, 1.139	166.400, 0.340	166.400, 1.057	166.400, 0.026	166.400, 0.082	166.400, 0.071	166.400, 0.096	166.400, 0.203	166.400, 0.576
834	166.600, 0.135	166.600, 1.132	166.600, 0.340	166.600, 1.052	166.600, 0.026	166.600, 0.081	166.600, 0.071	166.600, 0.096	166.600, 0.203	166.600, 0.573
835	166.800, 0.135	166.800, 1.124	166.800, 0.340	166.800, 1.046	166.800, 0.026	166.800, 0.081	166.800, 0.072	166.800, 0.097	166.800, 0.203	166.800, 0.569
836	167.000, 0.135	167.000, 1.117	167.000, 0.340	167.000, 1.041	167.000, 0.027	167.000, 0.081	167.000, 0.072	167.000, 0.097	167.000, 0.203	167.000, 0.565
837	167.200, 0.135	167.200, 1.110	167.200, 0.340	167.200, 1.036	167.200, 0.027	167.200, 0.081	167.200, 0.072	167.200, 0.097	167.200, 0.203	167.200, 0.562
838	167.400, 0.136	167.400, 1.103	167.400, 0.340	167.400, 1.031	167.400, 0.026	167.400, 0.081	167.400, 0.072	167.400, 0.097	167.400, 0.204	167.400, 0.558
839	167.600, 0.136	167.600, 1.096	167.600, 0.340	167.600, 1.026	167.600, 0.026	167.600, 0.081	167.600, 0.072	167.600, 0.098	167.600, 0.204	167.600, 0.555
840	167.800, 0.136	167.800, 1.090	167.800, 0.340	167.800, 1.021	167.800, 0.026	167.800, 0.081	167.800, 0.072	167.800, 0.098	167.800, 0.205	167.800, 0.552
841	168.000, 0.136	168.000, 1.083	168.000, 0.340	168.000, 1.016	168.000, 0.026	168.000, 0.081	168.000, 0.072	168.000, 0.098	168.000, 0.205	168.000, 0.548
842	168.200, 0.136	168.200, 1.077	168.200, 0.339	168.200, 1.011	168.200, 0.026	168.200, 0.081	168.200, 0.073	168.200, 0.097	168.200, 0.206	168.200, 0.545
843	168.400, 0.136	168.400, 1.071	168.400, 0.339	168.400, 1.007	168.400, 0.026	168.400, 0.082	168.400, 0.073	168.400, 0.097	168.400, 0.206	168.400, 0.542
844	168.600, 0.136	168.600, 1.065	168.600, 0.339	168.600, 1.003	168.600, 0.026	168.600, 0.082	168.600, 0.073	168.600, 0.097	168.600, 0.207	168.600, 0.539
845	168.800, 0.136	168.800, 1.059	168.800, 0.339	168.800, 0.999	168.800, 0.026	168.800, 0.082	168.800, 0.073	168.800, 0.097	168.800, 0.207	168.800, 0.536
846	169.000, 0.136	169.000, 1.053	169.000, 0.340	169.000, 0.995	169.000, 0.026	169.000, 0.082	169.000, 0.073	169.000, 0.096	169.000, 0.207	169.000, 0.534
847	169.200, 0.136	169.200, 1.048	169.200, 0.340	169.200, 0.991	169.200, 0.026	169.200, 0.082	169.200, 0.073	169.200, 0.096	169.200, 0.208	169.200, 0.531
848	169.400, 0.136	169.400, 1.042	169.400, 0.340	169.400, 0.987	169.400, 0.026	169.400, 0.082	169.400, 0.073	169.400, 0.096	169.400, 0.208	169.400, 0.528
849	169.600, 0.135	169.600, 1.036	169.600, 0.340	169.600, 0.983	169.600, 0.026	169.600, 0.082	169.600, 0.072	169.600, 0.096	169.600, 0.208	169.600, 0.526
850	169.800, 0.135	169.800, 1.031	169.800, 0.340	169.800, 0.979	169.800, 0.026	169.800, 0.083	169.800, 0.072	169.800, 0.096	169.800, 0.208	169.800, 0.524
851	170.000, 0.135	170.000, 1.025	170.000, 0.340	170.000, 0.975	170.000, 0.026	170.000, 0.083	170.000, 0.072	170.000, 0.095	170.000, 0.208	170.000, 0.521
852	170.200, 0.135	170.200, 1.020	170.200, 0.341	170.200, 0.971	170.200, 0.026	170.200, 0.083	170.200, 0.071	170.200, 0.095	170.200, 0.209	170.200, 0.519
853	170.400, 0.135	170.400, 1.014	170.400, 0.341	170.400, 0.967	170.400, 0.026	170.400, 0.082	170.400, 0.071	170.400, 0.095	170.400, 0.209	170.400, 0.517
854	170.600, 0.134	170.600, 1.009	170.600, 0.341	170.600, 0.963	170.600, 0.026	170.600, 0.082	170.600, 0.071	170.600, 0.096	170.600, 0.209	170.600, 0.514
855	170.800, 0.134	170.800, 1.004	170.800, 0.341	170.800, 0.959	170.800, 0.026	170.800, 0.081	170.800, 0.071	170.800, 0.096	170.800, 0.210	170.800, 0.512
856	171.000, 0.134	171.000, 0.999	171.000, 0.342	171.000, 0.955	171.000, 0.026	171.000, 0.081	171.000, 0.071	171.000, 0.096	171.000, 0.210	171.000, 0.510
857	171.200, 0.134	171.200, 0.994	171.200, 0.342	171.200, 0.951	171.200, 0.026	171.200, 0.080	171.200, 0.071	171.200, 0.096	171.200, 0.211	171.200, 0.509
858	171.400, 0.134	171.400, 0.989	171.400, 0.342	171.400, 0.948	171.400, 0.026	171.400, 0.080	171.400, 0.071	171.400, 0.097	171.400, 0.211	171.400, 0.507
859	171.600, 0.134	171.600, 0.985	171.600, 0.342	171.600, 0.944	171.600, 0.025	171.600, 0.079	171.600, 0.071	171.600, 0.096	171.600, 0.212	171.600, 0.505
860	171.800, 0.134	171.800, 0.980	171.800, 0.342	171.800, 0.941	171.800, 0.025	171.800, 0.079	171.800, 0.071	171.800, 0.096	171.800, 0.213	171.800, 0.503
861	172.000, 0.134	172.000, 0.976	172.000, 0.342	172.000, 0.937	172.000, 0.025	172.000, 0.079	172.000, 0.072	172.000, 0.096	172.000, 0.213	172.000, 0.501
862	172.200, 0.134	172.200, 0.971	172.200, 0.342	172.200, 0.934	172.200, 0.025	172.200, 0.079	172.200, 0.072	172.200, 0.096	172.200, 0.214	172.200, 0.499
863	172.400, 0.134	172.400, 0.967	172.400, 0.342	172.400, 0.931	172.400, 0.025	172.400, 0.079	172.400, 0.072	172.400, 0.096	172.400, 0.214	172.400, 0.497
864	172.600, 0.134	172.600, 0.963	172.600, 0.343	172.600, 0.927	172.600, 0.025	172.600, 0.079	172.600, 0.072	172.600, 0.096	172.600, 0.215	172.600, 0.495
865	172.800, 0.134	172.800, 0.959	172.800, 0.343	172.800, 0.924	172.800, 0.025	172.800, 0.079	172.800, 0.072	172.800, 0.096	172.800, 0.215	172.800, 0.494
866	173.000, 0.134	173.000, 0.954	173.000, 0.343	173.000, 0.921	173.000, 0.025	173.000, 0.079	173.000, 0.072	173.000, 0.096	173.000, 0.215	173.000, 0.492
867	173.200, 0.134	173.200, 0.950	173.200, 0.343	173.200, 0.919	173.200, 0.025	173.200, 0.079	173.200, 0.072	173.200, 0.096	173.200, 0.214	173.200, 0.490
868	173.400, 0.133	173.400, 0.946	173.400, 0.344	173.400, 0.916	173.400, 0.025	173.400, 0.079	173.400, 0.071	173.400, 0.096	173.400, 0.214	173.400, 0.489
869	173.600, 0.133	173.600, 0.942	173.600, 0.344	173.600, 0.913	173.600, 0.025	173.600, 0.080	173.600, 0.071	173.600, 0.095	173.600, 0.214	173.600, 0.487
870	173.800, 0.133	173.800, 0.938	173.800, 0.344	173.800, 0.910	173.800, 0.025	173.800, 0.080	173.800, 0.070	173.800, 0.095	173.800, 0.215	173.800, 0.486
871	174.000, 0.132	174.000, 0.933	174.000, 0.345	174.000, 0.908	174.000, 0.025	174.000, 0.080	174.000, 0.070	174.000, 0.095	174.000, 0.215	174.000, 0.484
872	174.200, 0.132	174.200, 0.929	174.200, 0.345	174.200, 0.905	174.200, 0.025	174.200, 0.080	174.200, 0.070	174.200, 0.095	174.200, 0.215	174.200, 0.483
873	174.400, 0.132	174.400, 0.925	174.400, 0.345	174.400, 0.903	174.400, 0.025	174.400, 0.080	174.400, 0.070	174.400, 0.096	174.400, 0.215	174.400, 0.481
874	174.600, 0.132	174.600, 0.921	174.600, 0.345	174.600, 0.900	174.600, 0.025	174.600, 0.080	174.600, 0.071	174.600, 0.096	174.600, 0.216	174.600, 0.480
875	174.800, 0.132	174.800, 0.917	174.800, 0.345	174.800, 0.898	174.800, 0.025	174.800, 0.080	174.800, 0.071	174.800, 0.096	174.800, 0.216	174.800, 0.479
876	175.000, 0.132	175.000, 0.913	175.000, 0.345	175.000, 0.895	175.000, 0.025	175.000, 0.080	175.000, 0.071	175.000, 0.096	175.000, 0.217	175.000, 0.477
877	175.200, 0.132	175.200, 0.909	175.200, 0.344	175.200, 0.893	175.200, 0.025	175.200, 0.080	175.200, 0.072	175.200, 0.096	175.200, 0.217	175.200, 0.476
878	175.400, 0.132	175.400, 0.905	175.400, 0.344	175.400, 0.890	175.400, 0.024	175.400, 0.080	175.400, 0.072	175.400, 0.096	175.400, 0.218	175.400, 0.475
879	175.600, 0.133	175.600, 0.902	175.600, 0.344	175.600, 0.887	175.600, 0.024	175.600, 0.079	175.600, 0.072	175.600, 0.095	175.600, 0.218	175.600, 0.474
880	175.800, 0.133	175.800, 0.898	175.800, 0.344	175.800, 0.885	175.800, 0.024	175.800, 0.079	175.800, 0.072	175.800, 0.095	175.800, 0.219	175.800, 0.473
881	176.000, 0.133	176.000, 0.895	176.000, 0.344	176.000, 0.882	176.000, 0.024	176.000, 0.079	176.000, 0.072	176.000, 0.095	176.000, 0.219	176.000, 0.471
882	176.200, 0.133	176.200, 0.892	176.200, 0.344	176.200, 0.879	176.200, 0.024	176.200, 0.079	176.200, 0.072	176.200, 0.095	176.200, 0.219	176.200, 0.470
883	176.400, 0.133	176.400, 0.889	176.400, 0.344	176.400, 0.876	176.400, 0.024	176.400, 0.079	176.400, 0.072	176.400, 0.094	176.400, 0.220	176.400, 0.469
884	176.600, 0.133	176.600, 0.885	176.600, 0.344	176.600, 0.874	176.600, 0.024	176.600, 0.079	176.600, 0.072	176.600, 0.094	176.600, 0.220	176.600, 0.468
885	176.800, 0.134	176.800, 0.882	176.800, 0.344	176.800, 0.871	176.800, 0.024	176.800, 0.079	176.800, 0.072	176.800, 0.094	176.800, 0.220	176.800, 0.466
886	177.000, 0.133	177.000, 0.878	177.000, 0.345	177.000, 0.869	177.000, 0.024	177.000, 0.079	177.000, 0.072	177.000, 0.093	177.000, 0.220	177.000, 0.465
887	177.200, 0.133	177.200, 0.875	177.200, 0.345	177.200, 0.867	177.200, 0.024	177.200, 0.079	177.200, 0.071	177.200, 0.093	177.200, 0.220	177.200, 0.465
888	177.400, 0.133	177.400, 0.872	177.400, 0.345	177.400, 0.865	177.400, 0.024	177.400, 0.079	177.400, 0.071	177.400, 0.093	177.400, 0.220	177.400, 0.464
889	177.600, 0.133	177.600, 0.868	177.600, 0.345	177.600, 0.863	177.600, 0.024	177.600, 0.079	177.600, 0.071	177.600, 0.093	177.600, 0.220	177.600, 0.463
890	177.800, 0.132	177.800, 0.865	177.800, 0.345	177.800, 0.861	177.800, 0.024	177.800, 0.079	177.800, 0.070	177.800, 0.093	177.800, 0.220	177.800, 0.462
891	178.000, 0.132	178.000, 0.862	178.000, 0.346	178.000, 0.859	178.000, 0.024	178.000, 0.078	178.000, 0.070	178.000, 0.093	178.000, 0.220	178.000, 0.461
892	178.200, 0.132	178.200, 0.858	178.200, 0.346	178.200, 0.857	178.200, 0.024	178.200, 0.078	178.200, 0.070	178.200, 0.093	178.200, 0.220	178.200, 0.460
893	178.400, 0.132	178.400, 0.855	178.400, 0.346	178.400, 0.855	178.400, 0.024	178.400, 0.078	178.400, 0.070	178.400, 0.093	178.400, 0.221	178.400, 0.459
894	178.600, 0.132	178.600, 0.851	178.600, 0.346	178.600, 0.853	178.600, 0.024	178.600, 0.078	178.600, 0.070	178.600, 0.094	178.600, 0.221	178.600, 0.458
895	178.800, 0.131	178.800, 0.848	178.800, 0.346	178.800, 0.851	178.800, 0.024	178.800, 0.077	178.800, 0.070	178.800, 0.094	178.800, 0.221	178.800, 0.457
896	179.000, 0.131	179.000, 0.845	179.000, 0.346	179.000, 0.849	179.000, 0.024	179.000, 0.077	179.000, 0.070	179.000, 0.094	179.000, 0.222	179.000, 0.456
897	179.200, 0.131	179.200, 0.841	179.200, 0.346	179.200, 0.847	179.200, 0.024	179.200, 0.077	179.200, 0.070	179.200, 0.095	179.200, 0.222	179.200, 0.455
898	179.400, 0.131	179.400, 0.838	179.400, 0.346	179.400, 0.845	179.400, 0.025	179.400, 0.076	179.400, 0.070	179.400, 0.095	179.400, 0.223	179.400, 0.454
899	179.600, 0.131	179.600, 0.835	179.600, 0.346	179.600, 0.843	179.600, 0.025	179.600, 0.076	179.600, 0.070	179.600, 0.095	179.600, 0.223	179.600, 0.453
900	179.800, 0.131	179.800, 0.831	179.800, 0.346	179.800, 0.840	179.800, 0.025	179.800, 0.076	179.800, 0.071	179.800, 0.095	179.800, 0.224	179.800, 0.453
901	180.000, 0.131	180.000, 0.828	180.000, 0.346	180.000, 0.838	180.000, 0.025	180.000, 0.076	180.000, 0.071	180.000, 0.095	180.000, 0.224	180.000, 0.452
902	180.200, 0.131	180.200, 0.825	180.200, 0.346	180.200, 0.836	180.200, 0.025	180.200, 0.075	180.200, 0.071	180.200, 0.095	180.200, 0.225	180.200, 0.451
903	180.400, 0.131	180.400, 0.822	180.400, 0.346	180.400, 0.834	180.400, 0.025	180.400, 0.075	180.400, 0.071	180.400, 0.095	180.400, 0.225	180.400, 0.451
904	180.600, 0.131	180.600, 0.818	180.600, 0.347	180.600, 0.832	180.600, 0.025	180.600, 0.075	180.600, 0.071	180.600, 0.094	180.600, 0.225	180.600, 0.450
905	180.800, 0.131	180.800, 0.815	180.800, 0.347	180.800, 0.831	180.800, 0.025	180.800, 0.075	180.800, 0.071	180.800, 0.094	180.800, 0.225	180.800, 0.450
906	181.000, 0.131	181.000, 0.812	181.000, 0.347	181.000, 0.829	181.000, 0.025	181.000, 0.075	181.000, 0.071	181.000, 0.094	181.000, 0.226	181.000, 0.449
907	181.200, 0.131	181.200, 0.809	181.200, 0.347	181.200, 0.827	181.200, 0.025	181.200, 0.075	181.200, 0.071	181.200, 0.094	181.200, 0.226	181.200, 0.449
908	181.400, 0.131	181.400, 0.806	181.400, 0.347	181.400, 0.826	181.400, 0.025	181.400, 0.075	181.400, 0.072	181.400, 0.094	181.400, 0.226	181.400, 0.448
909	181.600, 0.131	181.600, 0.803	181.600, 0.347	181.600, 0.824	181.600, 0.025	181.600, 0.074	181.600, 0.072	181.600, 0.094	181.600, 0.226	181.600, 0.448
910	181.800, 0.131	181.800, 0.800	181.800, 0.347	181.800, 0.823	181.800, 0.025	181.800, 0.074	181.800, 0.072	181.800, 0.094	181.800, 0.226	181.800, 0.447
911	182.000, 0.131	182.000, 0.797	182.000, 0.347	182.000, 0.821	182.000, 0.024	182.000, 0.075	182.000, 0.072	182.000, 0.094	182.000, 0.226	182.000, 0.446
912	182.200, 0.130	182.200, 0.795	182.200, 0.347	182.200, 0.820	182.200, 0.024	182.200, 0.075	182.200, 0.073	182.200, 0.094	182.200, 0.226	182.200, 0.445
913	182.400, 0.130	182.400, 0.792	182.400, 0.348	182.400, 0.818	182.400, 0.024	182.400, 0.075	182.400, 0.072	182.400, 0.094	182.400, 0.227	182.400, 0.445
914	182.600, 0.129	182.600, 0.789	182.600, 0.348	182.600, 0.817	182.600, 0.024	182.600, 0.075	182.600, 0.072	182.600, 0.095	182.600, 0.227	182.600, 0.444
915	182.800, 0.129	182.800, 0.787	182.800, 0.348	182.800, 0.815	182.800, 0.024	182.800, 0.075	182.800, 0.072	182.800, 0.095	182.800, 0.227	182.800, 0.444
916	183.000, 0.129	183.000, 0.784	183.000, 0.348	183.000, 0.814	183.000, 0.024	183.000, 0.076	183.000, 0.072	183.000, 0.095	183.000, 0.227	183.000, 0.443
917	183.200, 0.128	183.200, 0.781	183.200, 0.348	183.200, 0.813	183.200, 0.024	183.200, 0.076	183.200, 0.071	183.200, 0.095	183.200, 0.227	183.200, 0.442
918	183.400, 0.128	183.400, 0.778	183.400, 0.348	183.400, 0.811	183.400, 0.024	183.400, 0.076	183.400, 0.071	183.400, 0.095	183.400, 0.227	183.400, 0.442
919	183.600, 0.128	183.600, 0.776	183.600, 0.348	183.600, 0.810	183.600, 0.024	183.600, 0.076	183.600, 0.071	183.600, 0.095	183.600, 0.227	183.600, 0.441
920	183.800, 0.128	183.800, 0.773	183.800, 0.348	183.800, 0.808	183.800, 0.024	183.800, 0.076	183.800, 0.071	183.800, 0.095	183.800, 0.227	183.800, 0.440
921	184.000, 0.128	184.000, 0.770	184.000, 0.348	184.000, 0.807	184.000, 0.024	184.000, 0.076	184.000, 0.070	184.000, 0.095	184.000, 0.227	184.000, 0.439
922	184.200, 0.128	184.200, 0.767	184.200, 0.348	184.200, 0.806	184.200, 0.024	184.200, 0.076	184.200, 0.070	184.200, 0.095	184.200, 0.227	184.200, 0.439
923	184.400, 0.128	184.400, 0.764	184.400, 0.348	184.400, 0.804	184.400, 0.024	184.400, 0.076	184.400, 0.070	184.400, 0.094	184.400, 0.227	184.400, 0.438
924	184.600, 0.128	184.600, 0.761	184.600, 0.347	184.600, 0.803	184.600, 0.024	184.600, 0.076	184.600, 0.070	184.600, 0.094	184.600, 0.227	184.600, 0.438
925	184.800, 0.128	184.800, 0.757	184.800, 0.347	184.800, 0.801	184.800, 0.024	184.800, 0.076	184.800, 0.070	184.800, 0.094	184.800, 0.228	184.800, 0.437
926	185.000, 0.128	185.000, 0.754	185.000, 0.347	185.000, 0.800	185.000, 0.024	185.000, 0.076	185.000, 0.070	185.000, 0.094	185.000, 0.228	185.000, 0.437
927	185.200, 0.129	185.200, 0.751	185.200, 0.347	185.200, 0.798	185.200, 0.024	185.200, 0.076	185.200, 0.071	185.200, 0.094	185.200, 0.228	185.200, 0.436
928	185.400, 0.129	185.400, 0.749	185.400, 0.347	185.400, 0.797	185.400, 0.024	185.400, 0.075	185.400, 0.071	185.400, 0.094	185.400, 0.228	185.400, 0.435
929	185.600, 0.129	185.600, 0.746	185.600, 0.347	185.600, 0.795	185.600, 0.024	185.600, 0.075	185.600, 0.071	185.600, 0.094	185.600, 0.229	185.600, 0.435
930	185.800, 0.129	185.800, 0.743	185.800, 0.347	185.800, 0.794	185.800, 0.024	185.800, 0.075	185.800, 0.071	185.800, 0.094	185.800, 0.229	185.800, 0.434
931	186.000, 0.129	186.000, 0.741	186.000, 0.347	186.000, 0.792	186.000, 0.023	186.000, 0.075	186.000, 0.071	186.000, 0.094	186.000, 0.229	186.000, 0.434
932	186.200, 0.129	186.200, 0.738	186.200, 0.347	186.200, 0.791	186.200, 0.023	186.200, 0.075	186.200, 0.071	186.200, 0.093	186.200, 0.229	186.200, 0.433
933	186.400, 0.129	186.400, 0.736	186.400, 0.347	186.400, 0.789	186.400, 0.024	186.400, 0.074	186.400, 0.071	186.400, 0.093	186.400, 0.229	186.400, 0.433
934	186.600, 0.129	186.600, 0.734	186.600, 0.347	186.600, 0.788	186.600, 0.024	186.600, 0.074	186.600, 0.071	186.600, 0.093	186.600, 0.230	186.600, 0.432
935	186.800, 0.129	186.800, 0.731	186.800, 0.347	186.800, 0.787	186.800, 0.024	186.800, 0.074	186.800, 0.071	186.800, 0.093	186.800, 0.230	186.800, 0.432
936	187.000, 0.129	187.000, 0.729	187.000, 0.347	187.000, 0.786	187.000, 0.024	187.000, 0.074	187.000, 0.071	187.000, 0.092	187.000, 0.230	187.000, 0.431
937	187.200, 0.129	187.200, 0.727	187.200, 0.347	187.200, 0.784	187.200, 0.024	187.200, 0.074	187.200, 0.071	187.200, 0.092	187.200, 0.231	187.200, 0.431
938	187.400, 0.129	187.400, 0.724	187.400, 0.347	187.400, 0.783	187.400, 0.024	187.400, 0.073	187.400, 0.070	187.400, 0.092	187.400, 0.231	187.400, 0.431
939	187.600, 0.129	187.600, 0.722	187.600, 0.347	187.600, 0.782	187.600, 0.024	187.600, 0.073	187.600, 0.070	187.600, 0.092	187.600, 0.231	187.600, 0.431
940	187.800, 0.129	187.800, 0.719	187.800, 0.347	187.800, 0.781	187.800, 0.024	187.800, 0.073	187.800, 0.070	187.800, 0.092	187.800, 0.231	187.800, 0.430
941	188.000, 0.129	188.000, 0.716	188.000, 0.347	188.000, 0.779	188.000, 0.024	188.000, 0.072	188.000, 0.070	188.000, 0.092	188.000, 0.231	188.000, 0.430
942	188.200, 0.129	188.200, 0.714	188.200, 0.347	188.200, 0.778	188.200, 0.024	188.200, 0.072	188.200, 0.070	188.200, 0.092	188.200, 0.232	188.200, 0.430
943	188.400, 0.128	188.400, 0.711	188.400, 0.347	188.400, 0.777	188.400, 0.024	188.400, 0.072	188.400, 0.071	188.400, 0.091	188.400, 0.232	188.400, 0.430
944	188.600, 0.128	188.600, 0.708	188.600, 0.347	188.600, 0.775	188.600, 0.024	188.600, 0.072	188.600, 0.071	188.600, 0.091	188.600, 0.232	188.600, 0.429
945	188.800, 0.128	188.800, 0.706	188.800, 0.347	188.800, 0.774	188.800, 0.024	188.800, 0.072	188.800, 0.071	188.800, 0.091	188.800, 0.232	188.800, 0.429
946	189.000, 0.128	189.000, 0.703	189.000, 0.347	189.000, 0.773	189.000, 0.025	189.000, 0.071	189.000, 0.071	189.000, 0.092	189.000, 0.232	189.000, 0.429
947	189.200, 0.128	189.200, 0.701	189.200, 0.347	189.200, 0.771	189.200, 0.025	189.200, 0.071	189.200, 0.071	189.200, 0.092	189.200, 0.232	189.200, 0.429
948	189.400, 0.128	189.400, 0.699	189.400, 0.347	189.400, 0.770	189.400, 0.024	189.400, 0.071	189.400, 0.071	189.400, 0.092	189.400, 0.231	189.400, 0.429
949	189.600, 0.128	189.600, 0.696	189.600, 0.347	189.600, 0.769	189.600, 0.024	189.600, 0.071	189.600, 0.071	189.600, 0.092	189.600, 0.231	189.600, 0.428
950	189.800, 0.128	189.800, 0.694	189.800, 0.348	189.800, 0.768	189.800, 0.024	189.800, 0.071	189.800, 0.071	189.800, 0.092	189.800, 0.232	189.800, 0.428
951	190.000, 0.127	190.000, 0.692	190.000, 0.348	190.000, 0.767	190.000, 0.024	190.000, 0.072	190.000, 0.071	190.000, 0.092	190.000, 0.232	190.000, 0.428
952	190.200, 0.127	190.200, 0.689	190.200, 0.348	190.200, 0.766	190.200, 0.024	190.200, 0.072	190.200, 0.071	190.200, 0.092	190.200, 0.232	190.200, 0.428
953	190.400, 0.127	190.400, 0.687	190.400, 0.348	190.400, 0.764	190.400, 0.024	190.400, 0.072	190.400, 0.070	190.400, 0.091	190.400, 0.232	190.400, 0.427
954	190.600, 0.127	190.600, 0.684	190.600, 0.348	190.600, 0.763	190.600, 0.025	190.600, 0.072	190.600, 0.070	190.600, 0.091	190.600, 0.233	190.600, 0.427
955	190.800, 0.127	190.800, 0.682	190.800, 0.348	190.800, 0.762	190.800, 0.025	190.800, 0.072	190.800, 0.070	190.800, 0.091	190.800, 0.233	190.800, 0.427
956	191.000, 0.126	191.000, 0.680	191.000, 0.348	191.000, 0.761	191.000, 0.025	191.000, 0.072	191.000, 0.070	191.000, 0.091	191.000, 0.233	191.000, 0.426
957	191.200, 0.126	191.200, 0.677	191.200, 0.348	191.200, 0.760	191.200, 0.025	191.200, 0.072	191.200, 0.070	191.200, 0.091	191.200, 0.234	191.200, 0.426
958	191.400, 0.126	191.400, 0.675	191.400, 0.348	191.400, 0.759	191.400, 0.025	191.400, 0.072	191.400, 0.071	191.400, 0.091	191.400, 0.234	191.400, 0.426
959	191.600, 0.126	191.600, 0.673	191.600, 0.348	191.600, 0.758	191.600, 0.024	191.600, 0.071	191.600, 0.071	191.600, 0.091	191.600, 0.234	191.600, 0.425
960	191.800, 0.126	191.800, 0.671	191.800, 0.348	191.800, 0.758	191.800, 0.024	191.800, 0.071	191.800, 0.070	191.800, 0.091	191.800, 0.234	191.800, 0.425
961	192.000, 0.126	192.000, 0.669	192.000, 0.348	192.000, 0.757	192.000, 0.024	192.000, 0.071	192.000, 0.070	192.000, 0.091	192.000, 0.234	192.000, 0.424
962	192.200, 0.126	192.200, 0.667	192.200, 0.348	192.200, 0.755	192.200, 0.024	192.200, 0.071	192.200, 0.070	192.200, 0.091	192.200, 0.234	192.200, 0.423
963	192.400, 0.126	192.400, 0.665	192.400, 0.348	192.400, 0.754	192.400, 0.024	192.400, 0.071	192.400, 0.070	192.400, 0.091	192.400, 0.234	192.400, 0.423
964	192.600, 0.126	192.600, 0.662	192.600, 0.348	192.600, 0.753	192.600, 0.024	192.600, 0.071	192.600, 0.070	192.600, 0.091	192.600, 0.233	192.600, 0.422
965	192.800, 0.126	192.800, 0.660	192.800, 0.348	192.800, 0.752	192.800, 0.024	192.800, 0.071	192.800, 0.070	192.800, 0.091	192.800, 0.233	192.800, 0.422
966	193.000, 0.126	193.000, 0.658	193.000, 0.348	193.000, 0.751	193.000, 0.023	193.000, 0.071	193.000, 0.070	193.000, 0.091	193.000, 0.233	193.000, 0.422
967	193.200, 0.126	193.200, 0.656	193.200, 0.348	193.200, 0.750	193.200, 0.023	193.200, 0.071	193.200, 0.070	193.200, 0.092	193.200, 0.233	193.200, 0.421
968	193.400, 0.126	193.400, 0.653	193.400, 0.348	193.400, 0.749	193.400, 0.023	193.400, 0.071	193.400, 0.070	193.400, 0.092	193.400, 0.234	193.400, 0.421
969	193.600, 0.126	193.600, 0.651	193.600, 0.347	193.600, 0.748	193.600, 0.022	193.600, 0.071	193.600, 0.070	193.600, 0.092	193.600, 0.234	193.600, 0.421
970	193.800, 0.126	193.800, 0.648	193.800, 0.347	193.800, 0.747	193.800, 0.022	193.800, 0.071	193.800, 0.069	193.800, 0.092	193.800, 0.234	193.800, 0.420
971	194.000, 0.126	194.000, 0.646	194.000, 0.347	194.000, 0.746	194.000, 0.022	194.000, 0.071	194.000, 0.069	194.000, 0.092	194.000, 0.235	194.000, 0.420
972	194.200, 0.126	194.200, 0.643	194.200, 0.347	194.200, 0.745	194.200, 0.022	194.200, 0.071	194.200, 0.069	194.200, 0.091	194.200, 0.235	194.200, 0.420
973	194.400, 0.126	194.400, 0.641	194.400, 0.347	194.400, 0.743	194.400, 0.022	194.400, 0.071	194.400, 0.069	194.400, 0.091	194.400, 0.235	194.400, 0.419
974	194.600, 0.126	194.600, 0.639	194.600, 0.346	194.600, 0.742	194.600, 0.022	194.600, 0.071	194.600, 0.069	194.600, 0.091	194.600, 0.235	194.600, 0.419
975	194.800, 0.126	194.800, 0.637	194.800, 0.346	194.800, 0.742	194.800, 0.022	194.800, 0.070	194.800, 0.069	194.800, 0.090	194.800, 0.236	194.800, 0.419
976	195.000, 0.126	195.000, 0.635	195.000, 0.346	195.000, 0.741	195.000, 0.022	195.000, 0.070	195.000, 0.069	195.000, 0.090	195.000, 0.236	195.000, 0.419
977	195.200, 0.126	195.200, 0.633	195.200, 0.346	195.200, 0.740	195.200, 0.022	195.200, 0.069	195.200, 0.069	195.200, 0.090	195.200, 0.236	195.200, 0.419
978	195.400, 0.126	195.400, 0.631	195.400, 0.346	195.400, 0.739	195.400, 0.021	195.400, 0.069	195.400, 0.068	195.400, 0.089	195.400, 0.236	195.400, 0.419
979	195.600, 0.126	195.600, 0.630	195.600, 0.346	195.600, 0.738	195.600, 0.021	195.600, 0.068	195.600, 0.068	195.600, 0.089	195.600, 0.235	195.600, 0.419
980	195.800, 0.125	195.800, 0.628	195.800, 0.346	195.800, 0.737	195.800, 0.021	195.800, 0.068	195.800, 0.068	195.800, 0.089	195.800, 0.235	195.800, 0.419
981	196.000, 0.125	196.000, 0.626	196.000, 0.346	196.000, 0.736	196.000, 0.021	196.000, 0.068	196.000, 0.068	196.000, 0.089	196.000, 0.235	196.000, 0.419
982	196.200, 0.125	196.200, 0.624	196.200, 0.346	196.200, 0.735	196.200, 0.021	196.200, 0.067	196.200, 0.068	196.200, 0.089	196.200, 0.235	196.200, 0.419
983	196.400, 0.125	196.400, 0.622	196.400, 0.347	196.400, 0.734	196.400, 0.021	196.400, 0.067	196.400, 0.067	196.400, 0.090	196.400, 0.235	196.400, 0.419
984	196.600, 0.125	196.600, 0.621	196.600, 0.347	196.600, 0.733	196.600, 0.021	196.600, 0.067	196.600, 0.067	196.600, 0.090	196.600, 0.235	196.600, 0.419
985	196.800, 0.125	196.800, 0.618	196.800, 0.347	196.800, 0.732	196.800, 0.021	196.800, 0.067	196.800, 0.067	196.800, 0.090	196.800, 0.235	196.800, 0.419
986	197.000, 0.124	197.000, 0.616	197.000, 0.347	197.000, 0.732	197.000, 0.021	197.000, 0.067	197.000, 0.067	197.000, 0.090	197.000, 0.235	197.000, 0.419
987	197.200, 0.124	197.200, 0.614	197.200, 0.347	197.200, 0.731	197.200, 0.021	197.200, 0.067	197.200, 0.067	197.200, 0.090	197.200, 0.235	197.200, 0.418
988	197.400, 0.124	197.400, 0.612	197.400, 0.347	197.400, 0.730	197.400, 0.021	197.400, 0.067	197.400, 0.067	197.400, 0.091	197.400, 0.235	197.400, 0.418
989	197.600, 0.124	197.600, 0.609	197.600, 0.347	197.600, 0.729	197.600, 0.021	197.600, 0.067	197.600, 0.068	197.600, 0.091	197.600, 0.235	197.600, 0.417
990	197.800, 0.124	197.800, 0.607	197.800, 0.347	197.800, 0.728	197.800, 0.022	197.800, 0.067	197.800, 0.068	197.800, 0.091	197.800, 0.235	197.800, 0.416
991	198.000, 0.123	198.000, 0.605	198.000, 0.347	198.000, 0.727	198.000, 0.022	198.000, 0.067	198.000, 0.068	198.000, 0.091	198.000, 0.236	198.000, 0.416
992	198.200, 0.123	198.200, 0.603	198.200, 0.346	198.200, 0.727	198.200, 0.022	198.200, 0.068	198.200, 0.069	198.200, 0.091	198.200, 0.236	198.200, 0.415
993	198.400, 0.123	198.400, 0.601	198.400, 0.346	198.400, 0.726	198.400, 0.022	198.400, 0.068	198.400, 0.069	198.400, 0.091	198.400, 0.236	198.400, 0.415
994	198.600, 0.123	198.600, 0.599	198.600, 0.346	198.600, 0.725	198.600, 0.022	198.600, 0.068	198.600, 0.069	198.600, 0.091	198.600, 0.236	198.600, 0.414
995	198.800, 0.123	198.800, 0.597	198.800, 0.346	198.800, 0.724	198.800, 0.022	198.800, 0.069	198.800, 0.070	198.800, 0.090	198.800, 0.236	198.800, 0.414
996	199.000, 0.123	199.000, 0.596	199.000, 0.346	199.000, 0.723	199.000, 0.022	199.000, 0.069	199.000, 0.070	199.000, 0.090	199.000, 0.236	199.000, 0.414
997	199.200, 0.123	199.200, 0.594	199.200, 0.346	199.200, 0.722	199.200, 0.022	199.200, 0.069	199.200, 0.070	199.200, 0.090	199.200, 0.236	199.200, 0.414
998	199.400, 0.123	199.400, 0.592	199.400, 0.346	199.400, 0.721	199.400, 0.021	199.400, 0.069	199.400, 0.070	199.400, 0.090	199.400, 0.237	199.400, 0.414
999	199.600, 0.123	199.600, 0.591	199.600, 0.346	199.600, 0.720	199.600, 0.021	199.600, 0.069	199.600, 0.070	199.600, 0.089	199.600, 0.237	199.600, 0.414
1000	199.800, 0.123	199.800, 0.589	199.800, 0.346	199.800, 0.719	199.800, 0.021	199.800, 0.069	199.800, 0.070	199.800, 0.089	199.800, 0.237	199.800, 0.414
1001	200.000, 0.123	200.000, 0.587	200.000, 0.346	200.000, 0.719	200.000, 0.022	200.000, 0.069	200.000, 0.070	200.000, 0.089	200.000, 0.237	200.000, 0.414
1002	200.200, 0.123	200.200, 0.586	200.200, 0.346	200.200, 0.718	200.200, 0.022	200.200, 0.069	200.200, 0.070	200.200, 0.090	200.200, 0.237	200.200, 0.414
1003	200.400, 0.123	200.400, 0.584	200.400, 0.346	200.400, 0.717	200.400, 0.022	200.400, 0.069	200.400, 0.070	200.400, 0.090	200.400, 0.237	200.400, 0.414
1004	200.600, 0.123	200.600, 0.583	200.600, 0.347	200.600, 0.716	200.600, 0.022	200.600, 0.068	200.600, 0.070	200.600, 0.090	200.600, 0.237	200.600, 0.413
1005	200.800, 0.123	200.800, 0.581	200.800, 0.347	200.800, 0.716	200.800, 0.022	200.800, 0.068	200.800, 0.070	200.800, 0.091	200.800, 0.237	200.800, 0.413
1006	201.000, 0.123	201.000, 0.580	201.000, 0.347	201.000, 0.715	201.000, 0.022	201.000, 0.068	201.000, 0.070	201.000, 0.091	201.000, 0.237	201.000, 0.413
1007	201.200, 0.123	201.200, 0.578	201.200, 0.347	201.200, 0.714	201.200, 0.022	201.200, 0.068	201.200, 0.070	201.200, 0.091	201.200, 0.237	201.200, 0.413
1008	201.400, 0.123	201.400, 0.576	201.400, 0.346	201.400, 0.714	201.400, 0.022	201.400, 0.068	201.400, 0.069	201.400, 0.091	201.400, 0.237	201.400, 0.413
1009	201.600, 0.123	201.600, 0.574	201.600, 0.346	201.600, 0.713	201.600, 0.021	201.600, 0.067	201.600, 0.069	201.600, 0.091	201.600, 0.238	201.600, 0.412
1010	201.800, 0.123	201.800, 0.573	201.800, 0.346	201.800, 0.712	201.800, 0.021	201.800, 0.067	201.800, 0.069	201.800, 0.092	201.800, 0.238	201.800, 0.412
1011	202.000, 0.123	202.000, 0.571	202.000, 0.346	202.000, 0.711	202.000, 0.021	202.000, 0.067	202.000, 0.069	202.000, 0.092	202.000, 0.238	202.000, 0.411
1012	202.200, 0.123	202.200, 0.570	202.200, 0.346	202.200, 0.710	202.200, 0.021	202.200, 0.067	202.200, 0.068	202.200, 0.092	202.200, 0.238	202.200, 0.411
1013	202.400, 0.123	202.400, 0.568	202.400, 0.346	202.400, 0.710	202.400, 0.021	202.400, 0.067	202.400, 0.068	202.400, 0.092	202.400, 0.238	202.400, 0.411
1014	202.600, 0.123	202.600, 0.567	202.600, 0.346	202.600, 0.709	202.600, 0.021	202.600, 0.067	202.600, 0.068	202.600, 0.091	202.600, 0.238	202.600, 0.411
1015	202.800, 0.123	202.800, 0.565	202.800, 0.346	202.800, 0.708	202.800, 0.020	202.800, 0.067	202.800, 0.068	202.800, 0.091	202.800, 0.238	202.800, 0.411
1016	203.000, 0.122	203.000, 0.563	203.000, 0.346	203.000, 0.707	203.000, 0.020	203.000, 0.067	203.000, 0.068	203.000, 0.091	203.000, 0.238	203.000, 0.411
1017	203.200, 0.122	203.200, 0.562	203.200, 0.347	203.200, 0.707	203.200, 0.020	203.200, 0.067	203.200, 0.067	203.200, 0.090	203.200, 0.238	203.200, 0.411
1018	203.400, 0.122	203.400, 0.560	203.400, 0.347	203.400, 0.706	203.400, 0.020	203.400, 0.067	203.400, 0.067	203.400, 0.090	203.400, 0.238	203.400, 0.410
1019	203.600, 0.122	203.600, 0.558	203.600, 0.347	203.600, 0.706	203.600, 0.020	203.600, 0.067	203.600, 0.067	203.600, 0.090	203.600, 0.238	203.600, 0.410
1020	203.800, 0.122	203.800, 0.557	203.800, 0.346	203.800, 0.705	203.800, 0.020	203.800, 0.067	203.800, 0.067	203.800, 0.090	203.800, 0.238	203.800, 0.410
1021	204.000, 0.122	204.000, 0.555	204.000, 0.346	204.000, 0.705	204.000, 0.020	204.000, 0.067	204.000, 0.068	204.000, 0.090	204.000, 0.238	204.000, 0.409
1022	204.200, 0.122	204.200, 0.553	204.200, 0.346	204.200, 0.704	204.200, 0.020	204.200, 0.066	204.200, 0.068	204.200, 0.090	204.200, 0.238	204.200, 0.409
1023	204.400, 0.122	204.400, 0.551	204.400, 0.346	204.400, 0.703	204.400, 0.020	204.400, 0.066	204.400, 0.068	204.400, 0.090	204.400, 0.238	204.400, 0.409
1024	204.600, 0.122	204.600, 0.550	204.600, 0.346	204.600, 0.702	204.600, 0.020	204.600, 0.066	204.600, 0.068	204.600, 0.090	204.600, 0.238	204.600, 0.409
1025	204.800, 0.121	204.800, 0.548	204.800, 0.345	204.800, 0.702	204.800, 0.020	204.800, 0.066	204.800, 0.067	204.800, 0.089	204.800, 0.238	204.800, 0.408
1026	205.000, 0.121	205.000, 0.546	205.000, 0.345	205.000, 0.701	205.000, 0.020	205.000, 0.066	205.000, 0.067	205.000, 0.089	205.000, 0.238	205.000, 0.408
1027	205.200, 0.121	205.200, 0.544	205.200, 0.345	205.200, 0.700	205.200, 0.020	205.200, 0.066	205.200, 0.067	205.200, 0.088	205.200, 0.238	205.200, 0.408
1028	205.400, 0.121	205.400, 0.543	205.400, 0.344	205.400, 0.700	205.400, 0.020	205.400, 0.066	205.400, 0.067	205.400, 0.088	205.400, 0.238	205.400, 0.407
1029	205.600, 0.121	205.600, 0.541	205.600, 0.344	205.600, 0.699	205.600, 0.020	205.600, 0.066	205.600, 0.067	205.600, 0.088	205.600, 0.238	205.600, 0.407
1030	205.800, 0.121	205.800, 0.540	205.800, 0.344	205.800, 0.698	205.800, 0.020	205.800, 0.067	205.800, 0.067	205.800, 0.087	205.800, 0.238	205.800, 0.406
1031	206.000, 0.121	206.000, 0.538	206.000, 0.344	206.000, 0.698	206.000, 0.020	206.000, 0.067	206.000, 0.067	206.000, 0.087	206.000, 0.238	206.000, 0.406
1032	206.200, 0.121	206.200, 0.537	206.200, 0.344	206.200, 0.697	206.200, 0.020	206.200, 0.067	206.200, 0.067	206.200, 0.087	206.200, 0.238	206.200, 0.406
1033	206.400, 0.121	206.400, 0.535	206.400, 0.344	206.400, 0.696	206.400, 0.020	206.400, 0.067	206.400, 0.067	206.400, 0.087	206.400, 0.238	206.400, 0.406
1034	206.600, 0.121	206.600, 0.534	206.600, 0.344	206.600, 0.695	206.600, 0.020	206.600, 0.067	206.600, 0.067	206.600, 0.087	206.600, 0.238	206.600, 0.406
1035	206.800, 0.122	206.800, 0.532	206.800, 0.345	206.800, 0.694	206.800, 0.020	206.800, 0.067	206.800, 0.067	206.800, 0.087	206.800, 0.238	206.800, 0.406
1036	207.000, 0.122	207.000, 0.531	207.000, 0.345	207.000, 0.693	207.000, 0.020	207.000, 0.067	207.000, 0.067	207.000, 0.088	207.000, 0.238	207.000, 0.406
1037	207.200, 0.122	207.200, 0.530	207.200, 0.345	207.200, 0.693	207.200, 0.020	207.200, 0.067	207.200, 0.067	207.200, 0.088	207.200, 0.238	207.200, 0.406
1038	207.400, 0.122	207.400, 0.528	207.400, 0.345	207.400, 0.692	207.400, 0.021	207.400, 0.067	207.400, 0.067	207.400, 0.088	207.400, 0.238	207.400, 0.406
1039	207.600, 0.122	207.600, 0.527	207.600, 0.345	207.600, 0.692	207.600, 0.021	207.600, 0.067	207.600, 0.067	207.600, 0.089	207.600, 0.238	207.600, 0.406
1040	207.800, 0.122	207.800, 0.525	207.800, 0.345	207.800, 0.691	207.800, 0.021	207.800, 0.067	207.800, 0.067	207.800, 0.089	207.800, 0.238	207.800, 0.406
1041	208.000, 0.121	208.000, 0.524	208.000, 0.346	208.000, 0.690	208.000, 0.021	208.000, 0.066	208.000, 0.067	208.000, 0.089	208.000, 0.238	208.000, 0.406
1042	208.200, 0.121	208.200, 0.523	208.200, 0.345	208.200, 0.689	208.200, 0.021	208.200, 0.066	208.200, 0.067	208.200, 0.090	208.200, 0.239	208.200, 0.406
1043	208.400, 0.121	208.400, 0.521	208.400, 0.345	208.400, 0.689	208.400, 0.022	208.400, 0.066	208.400, 0.067	208.400, 0.089	208.400, 0.239	208.400, 0.406
1044	208.600, 0.121	208.600, 0.520	208.600, 0.345	208.600, 0.688	208.600, 0.022	208.600, 0.066	208.600, 0.067	208.600, 0.089	208.600, 0.239	208.600, 0.405
1045	208.800, 0.121	208.800, 0.519	208.800, 0.345	208.800, 0.687	208.800, 0.022	208.800, 0.065	208.800, 0.068	208.800, 0.089	208.800, 0.239	208.800, 0.405
1046	209.000, 0.121	209.000, 0.518	209.000, 0.345	209.000, 0.687	209.000, 0.022	209.000, 0.065	209.000, 0.068	209.000, 0.089	209.000, 0.239	209.000, 0.405
1047	209.200, 0.120	209.200, 0.517	209.200, 0.345	209.200, 0.686	209.200, 0.022	209.200, 0.065	209.200, 0.068	209.200, 0.088	209.200, 0.239	209.200, 0.404
1048	209.400, 0.120	209.400, 0.515	209.400, 0.345	209.400, 0.685	209.400, 0.022	209.400, 0.066	209.400, 0.068	209.400, 0.088	209.400, 0.240	209.400, 0.404
1049	209.600, 0.120	209.600, 0.514	209.600, 0.344	209.600, 0.685	209.600, 0.022	209.600, 0.066	209.600, 0.068	209.600, 0.088	209.600, 0.240	209.600, 0.404
1050	209.800, 0.120	209.800, 0.513	209.800, 0.344	209.800, 0.684	209.800, 0.022	209.800, 0.066	209.800, 0.067	209.800, 0.088	209.800, 0.240	209.800, 0.403
1051	210.000, 0.120	210.000, 0.512	210.000, 0.344	210.000, 0.683	210.000, 0.022	210.000, 0.066	210.000, 0.067	210.000, 0.088	210.000, 0.240	210.000, 0.403
1052	210.200, 0.120	210.200, 0.511	210.200, 0.344	210.200, 0.683	210.200, 0.022	210.200, 0.066	210.200, 0.067	210.200, 0.088	210.200, 0.240	210.200, 0.403
1053	210.400, 0.120	210.400, 0.509	210.400, 0.344	210.400, 0.682	210.400, 0.022	210.400, 0.066	210.400, 0.066	210.400, 0.088	210.400, 0.240	210.400, 0.403
1054	210.600, 0.120	210.600, 0.508	210.600, 0.344	210.600, 0.682	210.600, 0.022	210.600, 0.066	210.600, 0.066	210.600, 0.088	210.600, 0.240	210.600, 0.403
1055	210.800, 0.120	210.800, 0.507	210.800, 0.344	210.800, 0.681	210.800, 0.022	210.800, 0.066	210.800, 0.066	210.800, 0.088	210.800, 0.240	210.800, 0.403
1056	211.000, 0.120	211.000, 0.505	211.000, 0.344	211.000, 0.681	211.000, 0.022	211.000, 0.065	211.000, 0.065	211.000, 0.088	211.000, 0.240	211.000, 0.403
1057	211.200, 0.120	211.200, 0.504	211.200, 0.344	211.200, 0.680	211.200, 0.022	211.200, 0.065	211.200, 0.065	211.200, 0.088	211.200, 0.240	211.200, 0.403
1058	211.400, 0.120	211.400, 0.503	211.400, 0.344	211.400, 0.680	211.400, 0.021	211.400, 0.065	211.400, 0.065	211.400, 0.088	211.400, 0.239	211.400, 0.403
1059	211.600, 0.120	211.600, 0.502	211.600, 0.344	211.600, 0.679	211.600, 0.021	211.600, 0.065	211.600, 0.065	211.600, 0.088	211.600, 0.239	211.600, 0.402
1060	211.800, 0.120	211.800, 0.501	211.800, 0.344	211.800, 0.679	211.800, 0.021	211.800, 0.065	211.800, 0.065	211.800, 0.088	211.800, 0.239	211.800, 0.402
1061	212.000, 0.119	212.000, 0.499	212.000, 0.344	212.000, 0.678	212.000, 0.020	212.000, 0.064	212.000, 0.065	212.000, 0.088	212.000, 0.239	212.000, 0.402
1062	212.200, 0.119	212.200, 0.498	212.200, 0.344	212.200, 0.678	212.200, 0.020	212.200, 0.064	212.200, 0.065	212.200, 0.088	212.200, 0.239	212.200, 0.402
1063	212.400, 0.119	212.400, 0.497	212.400, 0.344	212.400, 0.677	212.400, 0.020	212.400, 0.064	212.400, 0.065	212.400, 0.088	212.400, 0.239	212.400, 0.402
1064	212.600, 0.119	212.600, 0.496	212.600, 0.344	212.600, 0.676	212.600, 0.019	212.600, 0.063	212.600, 0.065	212.600, 0.088	212.600, 0.239	212.600, 0.402
1065	212.800, 0.119	212.800, 0.495	212.800, 0.344	212.800, 0.675	212.800, 0.019	212.800, 0.063	212.800, 0.065	212.800, 0.088	212.800, 0.239	212.800, 0.401
1066	213.000, 0.119	213.000, 0.494	213.000, 0.345	213.000, 0.675	213.000, 0.019	213.000, 0.063	213.000, 0.065	213.000, 0.088	213.000, 0.239	213.000, 0.401
1067	213.200, 0.118	213.200, 0.493	213.200, 0.345	213.200, 0.674	213.200, 0.019	213.200, 0.063	213.200, 0.065	213.200, 0.088	213.200, 0.239	213.200, 0.401
1068	213.400, 0.118	213.400, 0.492	213.400, 0.345	213.400, 0.673	213.400, 0.019	213.400, 0.062	213.400, 0.065	213.400, 0.088	213.400, 0.239	213.400, 0.401
1069	213.600, 0.118	213.600, 0.491	213.600, 0.344	213.600, 0.672	213.600, 0.019	213.600, 0.062	213.600, 0.065	213.600, 0.088	213.600, 0.239	213.600, 0.401
1070	213.800, 0.118	213.800, 0.489	213.800, 0.344	213.800, 0.672	213.800, 0.019	213.800, 0.062	213.800, 0.065	213.800, 0.088	213.800, 0.239	213.800, 0.401
1071	214.000, 0.117	214.000, 0.488	214.000, 0.344	214.000, 0.671	214.000, 0.019	214.000, 0.062	214.000, 0.065	214.000, 0.088	214.000, 0.239	214.000, 0.401
1072	214.200, 0.117	214.200, 0.487	214.200, 0.344	214.200, 0.671	214.200, 0.020	214.200, 0.062	214.200, 0.065	214.200, 0.089	214.200, 0.239	214.200, 0.401
1073	214.400, 0.117	214.400, 0.485	214.400, 0.344	214.400, 0.671	214.400, 0.020	214.400, 0.062	214.400, 0.065	214.400, 0.089	214.400, 0.239	214.400, 0.401
1074	214.600, 0.117	214.600, 0.484	214.600, 0.344	214.600, 0.670	214.600, 0.020	214.600, 0.062	214.600, 0.066	214.600, 0.088	214.600, 0.239	214.600, 0.401
1075	214.800, 0.117	214.800, 0.483	214.800, 0.344	214.800, 0.670	214.800, 0.020	214.800, 0.063	214.800, 0.066	214.800, 0.088	214.800, 0.239	214.800, 0.400
1076	215.000, 0.117	215.000, 0.482	215.000, 0.343	215.000, 0.669	215.000, 0.021	215.000, 0.063	215.000, 0.066	215.000, 0.088	215.000, 0.239	215.000, 0.400
1077	215.200, 0.118	215.200, 0.481	215.200, 0.343	215.200, 0.669	215.200, 0.021	215.200, 0.063	215.200, 0.066	215.200, 0.088	215.200, 0.239	215.200, 0.400
1078	215.400, 0.118	215.400, 0.480	215.400, 0.343	215.400, 0.668	215.400, 0.021	215.400, 0.064	215.400, 0.066	215.400, 0.087	215.400, 0.239	215.400, 0.400
1079	215.600, 0.118	215.600, 0.479	215.600, 0.343	215.600, 0.668	215.600, 0.021	215.600, 0.064	215.600, 0.066	215.600, 0.087	215.600, 0.239	215.600, 0.400
1080	215.800, 0.118	215.800, 0.479	215.800, 0.343	215.800, 0.667	215.800, 0.021	215.800, 0.064	215.800, 0.066	215.800, 0.087	215.800, 0.239	215.800, 0.400
1081	216.000, 0.118	216.000, 0.478	216.000, 0.343	216.000, 0.667	216.000, 0.021	216.000, 0.064	216.000, 0.067	216.000, 0.087	216.000, 0.239	216.000, 0.400
1082	216.200, 0.118	216.200, 0.477	216.200, 0.343	216.200, 0.666	216.200, 0.021	216.200, 0.064	216.200, 0.067	216.200, 0.087	216.200, 0.239	216.200, 0.400
1083	216.400, 0.118	216.400, 0.476	216.400, 0.343	216.400, 0.666	216.400, 0.021	216.400, 0.064	216.400, 0.067	216.400, 0.087	216.400, 0.239	216.400, 0.400
1084	216.600, 0.118	216.600, 0.475	216.600, 0.343	216.600, 0.665	216.600, 0.021	216.600, 0.064	216.600, 0.067	216.600, 0.088	216.600, 0.239	216.600, 0.400
1085	216.800, 0.118	216.800, 0.474	216.800, 0.343	216.800, 0.665	216.800, 0.021	216.800, 0.064	216.800, 0.067	216.800, 0.088	216.800, 0.239	216.800, 0.400
1086	217.000, 0.118	217.000, 0.473	217.000, 0.343	217.000, 0.664	217.000, 0.021	217.000, 0.063	217.000, 0.067	217.000, 0.088	217.000, 0.239	217.000, 0.400
1087	217.200, 0.118	217.200, 0.472	217.200, 0.343	217.200, 0.664	217.200, 0.021	217.200, 0.063	217.200, 0.067	217.200, 0.088	217.200, 0.239	217.200, 0.400
1088	217.400, 0.117	217.400, 0.472	217.400, 0.343	217.400, 0.664	217.400, 0.020	217.400, 0.063	217.400, 0.067	217.400, 0.088	217.400, 0.239	217.400, 0.399
1089	217.600, 0.117	217.600, 0.471	217.600, 0.343	217.600, 0.663	217.600, 0.020	217.600, 0.063	217.600, 0.066	217.600, 0.088	217.600, 0.239	217.600, 0.399
1090	217.800, 0.117	217.800, 0.469	217.800, 0.343	217.800, 0.663	217.800, 0.020	217.800, 0.063	217.800, 0.066	217.800, 0.088	217.800, 0.239	217.800, 0.399
1091	218.000, 0.117	218.000, 0.468	218.000, 0.343	218.000, 0.662	218.000, 0.020	218.000, 0.063	218.000, 0.066	218.000, 0.088	218.000, 0.239	218.000, 0.398
1092	218.200, 0.117	218.200, 0.467	218.200, 0.343	218.200, 0.662	218.200, 0.020	218.200, 0.063	218.200, 0.065	218.200, 0.087	218.200, 0.239	218.200, 0.398
1093	218.400, 0.117	218.400, 0.466	218.400, 0.343	218.400, 0.661	218.400, 0.020	218.400, 0.063	218.400, 0.065	218.400, 0.087	218.400, 0.239	218.400, 0.397
1094	218.600, 0.117	218.600, 0.464	218.600, 0.343	218.600, 0.660	218.600, 0.020	218.600, 0.063	218.600, 0.065	218.600, 0.087	218.600, 0.239	218.600, 0.397
1095	218.800, 0.117	218.800, 0.463	218.800, 0.342	218.800, 0.660	218.800, 0.020	218.800, 0.064	218.800, 0.065	218.800, 0.087	218.800, 0.239	218.800, 0.397
1096	219.000, 0.117	219.000, 0.462	219.000, 0.342	219.000, 0.659	219.000, 0.020	219.000, 0.064	219.000, 0.065	219.000, 0.086	219.000, 0.239	219.000, 0.397
1097	219.200, 0.117	219.200, 0.462	219.200, 0.342	219.200, 0.658	219.200, 0.020	219.200, 0.064	219.200, 0.065	219.200, 0.086	219.200, 0.238	219.200, 0.396
1098	219.400, 0.117	219.400, 0.461	219.400, 0.342	219.400, 0.657	219.400, 0.020	219.400, 0.064	219.400, 0.065	219.400, 0.086	219.400, 0.238	219.400, 0.396
1099	219.600, 0.117	219.600, 0.460	219.600, 0.342	219.600, 0.657	219.600, 0.020	219.600, 0.064	219.600, 0.065	219.600, 0.086	219.600, 0.238	219.600, 0.396
1100	219.800, 0.117	219.800, 0.459	219.800, 0.343	219.800, 0.656	219.800, 0.020	219.800, 0.064	219.800, 0.065	219.800, 0.086	219.800, 0.238	219.800, 0.396
1101	220.000, 0.117	220.000, 0.458	220.000, 0.343	220.000, 0.655	220.000, 0.021	220.000, 0.064	220.000, 0.065	220.000, 0.086	220.000, 0.239	220.000, 0.396
1102	220.200, 0.117	220.200, 0.457	220.200, 0.343	220.200, 0.654	220.200, 0.021	220.200, 0.063	220.200, 0.065	220.200, 0.086	220.200, 0.239	220.200, 0.396
1103	220.400, 0.117	220.400, 0.456	220.400, 0.343	220.400, 0.654	220.400, 0.022	220.400, 0.063	220.400, 0.065	220.400, 0.086	220.400, 0.239	220.400, 0.396
1104	220.600, 0.116	220.600, 0.456	220.600, 0.344	220.600, 0.653	220.600, 0.022	220.600, 0.063	220.600, 0.065	220.600, 0.086	220.600, 0.239	220.600, 0.396
1105	220.800, 0.116	220.800, 0.455	220.800, 0.344	220.800, 0.653	220.800, 0.022	220.800, 0.063	220.800, 0.066	220.800, 0.086	220.800, 0.239	220.800, 0.395
1106	221.000, 0.116	221.000, 0.454	221.000, 0.344	221.000, 0.652	221.000, 0.022	221.000, 0.063	221.000, 0.065	221.000, 0.086	221.000, 0.239	221.000, 0.395
1107	221.200, 0.116	221.200, 0.454	221.200, 0.344	221.200, 0.652	221.200, 0.022	221.200, 0.063	221.200, 0.065	221.200, 0.086	221.200, 0.239	221.200, 0.395
1108	221.400, 0.115	221.400, 0.453	221.400, 0.344	221.400, 0.651	221.400, 0.021	221.400, 0.062	221.400, 0.065	221.400, 0.086	221.400, 0.239	221.400, 0.395
1109	221.600, 0.115	221.600, 0.453	221.600, 0.344	221.600, 0.651	221.600, 0.021	221.600, 0.062	221.600, 0.065	221.600, 0.086	221.600, 0.238	221.600, 0.395
1110	221.800, 0.115	221.800, 0.452	221.800, 0.344	221.800, 0.651	221.800, 0.021	221.800, 0.062	221.800, 0.064	221.800, 0.086	221.800, 0.238	221.800, 0.395
1111	222.000, 0.115	222.000, 0.451	222.000, 0.344	222.000, 0.650	222.000, 0.021	222.000, 0.062	222.000, 0.064	222.000, 0.086	222.000, 0.238	222.000, 0.395
1112	222.200, 0.115	222.200, 0.451	222.200, 0.344	222.200, 0.650	222.200, 0.021	222.200, 0.063	222.200, 0.064	222.200, 0.086	222.200, 0.238	222.200, 0.395
1113	222.400, 0.115	222.400, 0.450	222.400, 0.343	222.400, 0.650	222.400, 0.020	222.400, 0.063	222.400, 0.064	222.400, 0.086	222.400, 0.238	222.400, 0.395
1114	222.600, 0.115	222.600, 0.449	222.600, 0.343	222.600, 0.650	222.600, 0.020	222.600, 0.063	222.600, 0.064	222.600, 0.087	222.600, 0.238	222.600, 0.395
1115	222.800, 0.115	222.800, 0.448	222.800, 0.343	222.800, 0.649	222.800, 0.020	222.800, 0.063	222.800, 0.064	222.800, 0.087	222.800, 0.238	222.800, 0.395
1116	223.000, 0.115	223.000, 0.447	223.000, 0.342	223.000, 0.649	223.000, 0.020	223.000, 0.063	223.000, 0.064	223.000, 0.088	223.000, 0.237	223.000, 0.395
1117	223.200, 0.115	223.200, 0.446	223.200, 0.342	223.200, 0.649	223.200, 0.020	223.200, 0.064	223.200, 0.064	223.200, 0.088	223.200, 0.237	223.200, 0.396
1118	223.400, 0.115	223.400, 0.445	223.400, 0.341	223.400, 0.648	223.400, 0.020	223.400, 0.064	223.400, 0.064	223.400, 0.088	223.400, 0.237	223.400, 0.396
1119	223.600, 0.115	223.600, 0.444	223.600, 0.341	223.600, 0.648	223.600, 0.020	223.600, 0.063	223.600, 0.064	223.600, 0.088	223.600, 0.238	223.600, 0.395
1120	223.800, 0.115	223.800, 0.442	223.800, 0.341	223.800, 0.647	223.800, 0.020	223.800, 0.063	223.800, 0.064	223.800, 0.088	223.800, 0.238	223.800, 0.395
1121	224.000, 0.115	224.000, 0.441	224.000, 0.341	224.000, 0.647	224.000, 0.020	224.000, 0.063	224.000, 0.064	224.000, 0.088	224.000, 0.238	224.000, 0.395
1122	224.200, 0.115	224.200, 0.440	224.200, 0.341	224.200, 0.646	224.200, 0.020	224.200, 0.063	224.200, 0.063	224.200, 0.088	224.200, 0.238	224.200, 0.394
1123	224.400, 0.115	224.400, 0.439	224.400, 0.340	224.400, 0.645	224.400, 0.020	224.400, 0.063	224.400, 0.063	224.400, 0.088	224.400, 0.238	224.400, 0.394
1124	224.600, 0.115	224.600, 0.439	224.600, 0.340	224.600, 0.645	224.600, 0.020	224.600, 0.062	224.600, 0.063	224.600, 0.088	224.600, 0.238	224.600, 0.393
1125	224.800, 0.115	224.800, 0.438	224.800, 0.340	224.800, 0.644	224.800, 0.020	224.800, 0.062	224.800, 0.063	224.800, 0.087	224.800, 0.238	224.800, 0.393
1126	225.000, 0.115	225.000, 0.437	225.000, 0.340	225.000, 0.643	225.000, 0.020	225.000, 0.061	225.000, 0.063	225.000, 0.087	225.000, 0.237	225.000, 0.392
1127	225.200, 0.115	225.200, 0.436	225.200, 0.340	225.200, 0.643	225.200, 0.020	225.200, 0.061	225.200, 0.062	225.200, 0.087	225.200, 0.237	225.200, 0.392
1128	225.400, 0.115	225.400, 0.436	225.400, 0.340	225.400, 0.642	225.400, 0.020	225.400, 0.061	225.400, 0.062	225.400, 0.086	225.400, 0.237	225.400, 0.392
1129	225.600, 0.115	225.600, 0.435	225.600, 0.340	225.600, 0.641	225.600, 0.020	225.600, 0.061	225.600, 0.062	225.600, 0.086	225.600, 0.237	225.600, 0.392
1130	225.800, 0.115	225.800, 0.434	225.800, 0.340	225.800, 0.641	225.800, 0.020	225.800, 0.061	225.800, 0.062	225.800, 0.086	225.800, 0.237	225.800, 0.392
1131	226.000, 0.115	226.000, 0.433	226.000, 0.340	226.000, 0.640	226.000, 0.020	226.000, 0.061	226.000, 0.062	226.000, 0.085	226.000, 0.237	226.000, 0.392
1132	226.200, 0.115	226.200, 0.433	226.200, 0.340	226.200, 0.640	226.200, 0.020	226.200, 0.061	226.200, 0.063	226.200, 0.085	226.200, 0.238	226.200, 0.392
1133	226.400, 0.115	226.400, 0.432	226.400, 0.340	226.400, 0.639	226.400, 0.020	226.400, 0.061	226.400, 0.063	226.400, 0.085	226.400, 0.238	226.400, 0.393
1134	226.600, 0.116	226.600, 0.431	226.600, 0.340	226.600, 0.639	226.600, 0.020	226.600, 0.062	226.600, 0.063	226.600, 0.085	226.600, 0.238	226.600, 0.393
1135	226.800, 0.116	226.800, 0.430	226.800, 0.340	226.800, 0.639	226.800, 0.020	226.800, 0.062	226.800, 0.063	226.800, 0.086	226.800, 0.238	226.800, 0.393
1136	227.000, 0.116	227.000, 0.430	227.000, 0.341	227.000, 0.639	227.000, 0.020	227.000, 0.062	227.000, 0.063	227.000, 0.086	227.000, 0.238	227.000, 0.393
1137	227.200, 0.116	227.200, 0.429	227.200, 0.341	227.200, 0.639	227.200, 0.020	227.200, 0.063	227.200, 0.063	227.200, 0.086	227.200, 0.238	227.200, 0.394
1138	227.400, 0.116	227.400, 0.428	227.400, 0.341	227.400, 0.639	227.400, 0.020	227.400, 0.063	227.400, 0.063	227.400, 0.086	227.400, 0.238	227.400, 0.394
1139	227.600, 0.116	227.600, 0.427	227.600, 0.341	227.600, 0.639	227.600, 0.020	227.600, 0.063	227.600, 0.063	227.600, 0.087	227.600, 0.238	227.600, 0.394
1140	227.800, 0.116	227.800, 0.427	227.800, 0.340	227.800, 0.639	227.800, 0.020	227.800, 0.063	227.800, 0.063	227.800, 0.087	227.800, 0.238	227.800, 0.393
1141	228.000, 0.116	228.000, 0.426	228.000, 0.340	228.000, 0.639	228.000, 0.020	228.000, 0.063	228.000, 0.063	228.000, 0.087	228.000, 0.238	228.000, 0.393
1142	228.200, 0.116	228.200, 0.425	228.200, 0.340	228.200, 0.639	228.200, 0.020	228.200, 0.063	228.200, 0.063	228.200, 0.087	228.200, 0.238	228.200, 0.392
1143	228.400, 0.116	228.400, 0.425	228.400, 0.340	228.400, 0.639	228.400, 0.020	228.400, 0.063	228.400, 0.063	228.400, 0.087	228.400, 0.238	228.400, 0.392
1144	228.600, 0.116	228.600, 0.424	228.600, 0.340	228.600, 0.639	228.600, 0.020	228.600, 0.063	228.600, 0.063	228.600, 0.086	228.600, 0.238	228.600, 0.391
1145	228.800, 0.116	228.800, 0.424	228.800, 0.340	228.800, 0.638	228.800, 0.019	228.800, 0.063	228.800, 0.063	228.800, 0.086	228.800, 0.238	228.800, 0.391
1146	229.000, 0.115	229.000, 0.423	229.000, 0.340	229.000, 0.638	229.000, 0.019	229.000, 0.063	229.000, 0.063	229.000, 0.086	229.000, 0.238	229.000, 0.390
1147	229.200, 0.115	229.200, 0.422	229.200, 0.340	229.200, 0.637	229.200, 0.019	229.200, 0.063	229.200, 0.063	229.200, 0.086	229.200, 0.238	229.200, 0.390
1148	229.400, 0.115	229.400, 0.422	229.400, 0.340	229.400, 0.637	229.400, 0.020	229.400, 0.063	229.400, 0.062	229.400, 0.085	229.400, 0.238	229.400, 0.390
1149	229.600, 0.114	229.600, 0.421	229.600, 0.340	229.600, 0.636	229.600, 0.020	229.600, 0.063	229.600, 0.062	229.600, 0.085	229.600, 0.237	229.600, 0.390
1150	229.800, 0.114	229.800, 0.420	229.800, 0.340	229.800, 0.635	229.800, 0.020	229.800, 0.063	229.800, 0.062	229.800, 0.085	229.800, 0.237	229.800, 0.389
1151	230.000, 0.114	230.000, 0.420	230.000, 0.340	230.000, 0.635	230.000, 0.020	230.000, 0.063	230.000, 0.062	230.000, 0.084	230.000, 0.237	230.000, 0.389
1152	230.200, 0.114	230.200, 0.419	230.200, 0.340	230.200, 0.634	230.200, 0.020	230.200, 0.063	230.200, 0.062	230.200, 0.084	230.200, 0.236	230.200, 0.389
1153	230.400, 0.114	230.400, 0.418	230.400, 0.340	230.400, 0.634	230.400, 0.019	230.400, 0.063	230.400, 0.062	230.400, 0.084	230.400, 0.236	230.400, 0.389
1154	230.600, 0.114	230.600, 0.418	230.600, 0.340	230.600, 0.633	230.600, 0.019	230.600, 0.063	230.600, 0.062	230.600, 0.084	230.600, 0.236	230.600, 0.389
1155	230.800, 0.113	230.800, 0.417	230.800, 0.340	230.800, 0.633	230.800, 0.019	230.800, 0.063	230.800, 0.062	230.800, 0.084	230.800, 0.236	230.800, 0.389
1156	231.000, 0.113	231.000, 0.416	231.000, 0.340	231.000, 0.633	231.000, 0.019	231.000, 0.063	231.000, 0.062	231.000, 0.085	231.000, 0.236	231.000, 0.389
1157	231.200, 0.114	231.200, 0.416	231.200, 0.340	231.200, 0.632	231.200, 0.019	231.200, 0.063	231.200, 0.062	231.200, 0.085	231.200, 0.236	231.200, 0.389
1158	231.400, 0.114	231.400, 0.415	231.400, 0.340	231.400, 0.632	231.400, 0.019	231.400, 0.063	231.400, 0.062	231.400, 0.085	231.400, 0.236	231.400, 0.389
1159	231.600, 0.114	231.600, 0.415	231.600, 0.340	231.600, 0.631	231.600, 0.018	231.600, 0.063	231.600, 0.062	231.600, 0.086	231.600, 0.236	231.600, 0.389
1160	231.800, 0.114	231.800, 0.414	231.800, 0.340	231.800, 0.631	231.800, 0.018	231.800, 0.063	231.800, 0.062	231.800, 0.086	231.800, 0.236	231.800, 0.389
1161	232.000, 0.114	232.000, 0.413	232.000, 0.340	232.000, 0.630	232.000, 0.018	232.000, 0.063	232.000, 0.062	232.000, 0.086	232.000, 0.236	232.000, 0.388
1162	232.200, 0.114	232.200, 0.413	232.200, 0.340	232.200, 0.630	232.200, 0.018	232.200, 0.063	232.200, 0.062	232.200, 0.086	232.200, 0.236	232.200, 0.388
1163	232.400, 0.115	232.400, 0.412	232.400, 0.340	232.400, 0.629	232.400, 0.019	232.400, 0.063	232.400, 0.062	232.400, 0.086	232.400, 0.236	232.400, 0.388
1164	232.600, 0.115	232.600, 0.411	232.600, 0.340	232.600, 0.629	232.600, 0.019	232.600, 0.062	232.600, 0.061	232.600, 0.086	232.600, 0.237	232.600, 0.388
1165	232.800, 0.115	232.800, 0.410	232.800, 0.340	232.800, 0.628	232.800, 0.020	232.800, 0.062	232.800, 0.061	232.800, 0.086	232.800, 0.237	232.800, 0.388
1166	233.000, 0.115	233.000, 0.410	233.000, 0.340	233.000, 0.628	233.000, 0.020	233.000, 0.062	233.000, 0.061	233.000, 0.086	233.000, 0.237	233.000, 0.388
1167	233.200, 0.114	233.200, 0.409	233.200, 0.340	233.200, 0.628	233.200, 0.021	233.200, 0.062	233.200, 0.061	233.200, 0.086	233.200, 0.237	233.200, 0.388
1168	233.400, 0.114	233.400, 0.408	233.400, 0.340	233.400, 0.628	233.400, 0.021	233.400, 0.062	233.400, 0.061	233.400, 0.086	233.400, 0.237	233.400, 0.388
1169	233.600, 0.114	233.600, 0.408	233.600, 0.340	233.600, 0.628	233.600, 0.021	233.600, 0.062	233.600, 0.061	233.600, 0.086	233.600, 0.237	233.600, 0.388
1170	233.800, 0.114	233.800, 0.407	233.800, 0.340	233.800, 0.628	233.800, 0.021	233.800, 0.062	233.800, 0.062	233.800, 0.086	233.800, 0.237	233.800, 0.388
1171	234.000, 0.114	234.000, 0.406	234.000, 0.340	234.000, 0.627	234.000, 0.021	234.000, 0.061	234.000, 0.062	234.000, 0.086	234.000, 0.237	234.000, 0.388
1172	234.200, 0.114	234.200, 0.406	234.200, 0.339	234.200, 0.627	234.200, 0.021	234.200, 0.061	234.200, 0.062	234.200, 0.086	234.200, 0.237	234.200, 0.387
1173	234.400, 0.113	234.400, 0.405	234.400, 0.339	234.400, 0.627	234.400, 0.021	234.400, 0.061	234.400, 0.062	234.400, 0.086	234.400, 0.237	234.400, 0.387
1174	234.600, 0.113	234.600, 0.404	234.600, 0.339	234.600, 0.626	234.600, 0.020	234.600, 0.061	234.600, 0.062	234.600, 0.086	234.600, 0.237	234.600, 0.387
1175	234.800, 0.113	234.800, 0.404	234.800, 0.338	234.800, 0.626	234.800, 0.020	234.800, 0.061	234.800, 0.062	234.800, 0.086	234.800, 0.237	234.800, 0.387
1176	235.000, 0.113	235.000, 0.403	235.000, 0.338	235.000, 0.625	235.000, 0.020	235.000, 0.061	235.000, 0.062	235.000, 0.086	235.000, 0.237	235.000, 0.387
1177	235.200, 0.112	235.200, 0.403	235.200, 0.337	235.200, 0.625	235.200, 0.019	235.200, 0.061	235.200, 0.062	235.200, 0.086	235.200, 0.236	235.200, 0.387
1178	235.400, 0.112	235.400, 0.402	235.400, 0.337	235.400, 0.624	235.400, 0.019	235.400, 0.061	235.400, 0.062	235.400, 0.086	235.400, 0.236	235.400, 0.387
1179	235.600, 0.112	235.600, 0.401	235.600, 0.337	235.600, 0.624	235.600, 0.019	235.600, 0.062	235.600, 0.061	235.600, 0.086	235.600, 0.236	235.600, 0.387
1180	235.800, 0.112	235.800, 0.400	235.800, 0.337	235.800, 0.624	235.800, 0.019	235.800, 0.062	235.800, 0.061	235.800, 0.086	235.800, 0.236	235.800, 0.386
1181	236.000, 0.111	236.000, 0.400	236.000, 0.337	236.000, 0.623	236.000, 0.019	236.000, 0.062	236.000, 0.061	236.000, 0.086	236.000, 0.235	236.000, 0.386
1182	236.200, 0.111	236.200, 0.399	236.200, 0.337	236.200, 0.623	236.200, 0.019	236.200, 0.062	236.200, 0.061	236.200, 0.086	236.200, 0.235	236.200, 0.386
1183	236.400, 0.111	236.400, 0.398	236.400, 0.337	236.400, 0.623	236.400, 0.020	236.400, 0.061	236.400, 0.061	236.400, 0.086	236.400, 0.235	236.400, 0.386
1184	236.600, 0.111	236.600, 0.398	236.600, 0.337	236.600, 0.622	236.600, 0.020	236.600, 0.061	236.600, 0.061	236.600, 0.085	236.600, 0.235	236.600, 0.386
1185	236.800, 0.111	236.800, 0.397	236.800, 0.337	236.800, 0.622	236.800, 0.020	236.800, 0.061	236.800, 0.061	236.800, 0.085	236.800, 0.235	236.800, 0.386
1186	237.000, 0.111	237.000, 0.396	237.000, 0.338	237.000, 0.622	237.000, 0.020	237.000, 0.061	237.000, 0.061	237.000, 0.085	237.000, 0.235	237.000, 0.386
1187	237.200, 0.111	237.200, 0.396	237.200, 0.338	237.200, 0.622	237.200, 0.020	237.200, 0.060	237.200, 0.061	237.200, 0.085	237.200, 0.235	237.200, 0.387
1188	237.400, 0.111	237.400, 0.396	237.400, 0.338	237.400, 0.622	237.400, 0.019	237.400, 0.060	237.400, 0.061	237.400, 0.085	237.400, 0.235	237.400, 0.386
1189	237.600, 0.111	237.600, 0.395	237.600, 0.338	237.600, 0.621	237.600, 0.019	237.600, 0.060	237.600, 0.061	237.600, 0.085	237.600, 0.235	237.600, 0.386
1190	237.800, 0.111	237.800, 0.395	237.800, 0.338	237.800, 0.621	237.800, 0.018	237.800, 0.060	237.800, 0.060	237.800, 0.085	237.800, 0.235	237.800, 0.386
1191	238.000, 0.111	238.000, 0.395	238.000, 0.338	238.000, 0.621	238.000, 0.018	238.000, 0.060	238.000, 0.060	238.000, 0.085	238.000, 0.236	238.000, 0.386
1192	238.200, 0.111	238.200, 0.395	238.200, 0.338	238.200, 0.621	238.200, 0.018	238.200, 0.060	238.200, 0.060	238.200, 0.085	238.200, 0.236	238.200, 0.386
1193	238.400, 0.111	238.400, 0.395	238.400, 0.338	238.400, 0.620	238.400, 0.017	238.400, 0.060	238.400, 0.060	238.400, 0.085	238.400, 0.235	238.400, 0.386
1194	238.600, 0.111	238.600, 0.395	238.600, 0.338	238.600, 0.620	238.600, 0.017	238.600, 0.060	238.600, 0.060	238.600, 0.084	238.600, 0.236	238.600, 0.386
1195	238.800, 0.111	238.800, 0.395	238.800, 0.338	238.800, 0.619	238.800, 0.017	238.800, 0.060	238.800, 0.060	238.800, 0.084	238.800, 0.235	238.800, 0.386
1196	239.000, 0.111	239.000, 0.394	239.000, 0.338	239.000, 0.619	239.000, 0.017	239.000, 0.060	239.000, 0.060	239.000, 0.084	239.000, 0.235	239.000, 0.386
1197	239.200, 0.111	239.200, 0.394	239.200, 0.338	239.200, 0.619	239.200, 0.017	239.200, 0.060	239.200, 0.060	239.200, 0.084	239.200, 0.235	239.200, 0.386
1198	239.400, 0.111	239.400, 0.394	239.400, 0.338	239.400, 0.618	239.400, 0.018	239.400, 0.061	239.400, 0.060	239.400, 0.084	239.400, 0.236	239.400, 0.386
1199	239.600, 0.111	239.600, 0.393	239.600, 0.337	239.600, 0.618	239.600, 0.018	239.600, 0.061	239.600, 0.060	239.600, 0.084	239.600, 0.235	239.600, 0.386
1200	239.800, 0.111	239.800, 0.393	239.800, 0.337	239.800, 0.618	239.800, 0.018	239.800, 0.061	239.800, 0.060	239.800, 0.084	239.800, 0.235	239.800, 0.386
1201	240.000, 0.111	240.000, 0.392	240.000, 0.337	240.000, 0.617	240.000, 0.019	240.000, 0.062	240.000, 0.060	240.000, 0.084	240.000, 0.235	240.000, 0.385
1202	240.200, 0.111	240.200, 0.391	240.200, 0.337	240.200, 0.617	240.200, 0.019	240.200, 0.062	240.200, 0.060	240.200, 0.084	240.200, 0.235	240.200, 0.385
1203	240.400, 0.111	240.400, 0.391	240.400, 0.336	240.400, 0.616	240.400, 0.019	240.400, 0.062	240.400, 0.060	240.400, 0.084	240.400, 0.235	240.400, 0.385
1204	240.600, 0.111	240.600, 0.390	240.600, 0.336	240.600, 0.616	240.600, 0.019	240.600, 0.062	240.600, 0.060	240.600, 0.084	240.600, 0.236	240.600, 0.385
1205	240.800, 0.111	240.800, 0.390	240.800, 0.336	240.800, 0.615	240.800, 0.019	240.800, 0.061	240.800, 0.060	240.800, 0.085	240.800, 0.236	240.800, 0.385
1206	241.000, 0.111	241.000, 0.389	241.000, 0.336	241.000, 0.615	241.000, 0.019	241.000, 0.061	241.000, 0.060	241.000, 0.085	241.000, 0.236	241.000, 0.384
1207	241.200, 0.111	241.200, 0.389	241.200, 0.336	241.200, 0.614	241.200, 0.019	241.200, 0.061	241.200, 0.060	241.200, 0.085	241.200, 0.236	241.200, 0.384
1208	241.400, 0.111	241.400, 0.388	241.400, 0.336	241.400, 0.614	241.400, 0.019	241.400, 0.060	241.400, 0.060	241.400, 0.085	241.400, 0.236	241.400, 0.383
1209	241.600, 0.111	241.600, 0.387	241.600, 0.336	241.600, 0.613	241.600, 0.019	241.600, 0.060	241.600, 0.060	241.600, 0.085	241.600, 0.236	241.600, 0.383
1210	241.800, 0.111	241.800, 0.387	241.800, 0.336	241.800, 0.613	241.800, 0.019	241.800, 0.059	241.800, 0.060	241.800, 0.085	241.800, 0.236	241.800, 0.383
1211	242.000, 0.112	242.000, 0.386	242.000, 0.336	242.000, 0.613	242.000, 0.019	242.000, 0.059	242.000, 0.060	242.000, 0.085	242.000, 0.235	242.000, 0.383
1212	242.200, 0.112	242.200, 0.386	242.200, 0.336	242.200, 0.612	242.200, 0.019	242.200, 0.059	242.200, 0.060	242.200, 0.085	242.200, 0.235	242.200, 0.383
1213	242.400, 0.112	242.400, 0.386	242.400, 0.336	242.400, 0.612	242.400, 0.019	242.400, 0.059	242.400, 0.060	242.400, 0.085	242.400, 0.235	242.400, 0.383
1214	242.600, 0.112	242.600, 0.385	242.600, 0.336	242.600, 0.612	242.600, 0.019	242.600, 0.058	242.600, 0.060	242.600, 0.085	242.600, 0.235	242.600, 0.382
1215	242.800, 0.112	242.800, 0.385	242.800, 0.336	242.800, 0.612	242.800, 0.019	242.800, 0.058	242.800, 0.060	242.800, 0.085	242.800, 0.235	242.800, 0.382
1216	243.000, 0.112	243.000, 0.385	243.000, 0.336	243.000, 0.612	243.000, 0.019	243.000, 0.059	243.000, 0.060	243.000, 0.085	243.000, 0.235	243.000, 0.382
1217	243.200, 0.112	243.200, 0.384	243.200, 0.336	243.200, 0.611	243.200, 0.019	243.200, 0.059	243.200, 0.060	243.200, 0.085	243.200, 0.235	243.200, 0.382
1218	243.400, 0.112	243.400, 0.384	243.400, 0.336	243.400, 0.611	243.400, 0.019	243.400, 0.059	243.400, 0.060	243.400, 0.085	243.400, 0.235	243.400, 0.382
1219	243.600, 0.112	243.600, 0.384	243.600, 0.336	243.600, 0.611	243.600, 0.019	243.600, 0.059	243.600, 0.059	243.600, 0.084	243.600, 0.235	243.600, 0.382
1220	243.800, 0.111	243.800, 0.383	243.800, 0.336	243.800, 0.610	243.800, 0.019	243.800, 0.060	243.800, 0.059	243.800, 0.084	243.800, 0.235	243.800, 0.382
1221	244.000, 0.111	244.000, 0.383	244.000, 0.336	244.000, 0.610	244.000, 0.019	244.000, 0.060	244.000, 0.059	244.000, 0.084	244.000, 0.235	244.000, 0.382
1222	244.200, 0.111	244.200, 0.382	244.200, 0.336	244.200, 0.610	244.200, 0.019	244.200, 0.060	244.200, 0.059	244.200, 0.084	244.200, 0.235	244.200, 0.382
1223	244.400, 0.111	244.400, 0.382	244.400, 0.336	244.400, 0.609	244.400, 0.019	244.400, 0.060	244.400, 0.059	244.400, 0.084	244.400, 0.236	244.400, 0.382
1224	244.600, 0.111	244.600, 0.381	244.600, 0.336	244.600, 0.609	244.600, 0.018	244.600, 0.060	244.600, 0.059	244.600, 0.084	244.600, 0.236	244.600, 0.382
1225	244.800, 0.111	244.800, 0.381	244.800, 0.336	244.800, 0.609	244.800, 0.018	244.800, 0.060	244.800, 0.059	244.800, 0.084	244.800, 0.236	244.800, 0.382
1226	245.000, 0.111	245.000, 0.380	245.000, 0.337	245.000, 0.609	245.000, 0.017	245.000, 0.060	245.000, 0.059	245.000, 0.084	245.000, 0.236	245.000, 0.382
1227	245.200, 0.111	245.200, 0.380	245.200, 0.337	245.200, 0.609	245.200, 0.017	245.200, 0.060	245.200, 0.059	245.200, 0.084	245.200, 0.236	245.200, 0.382
1228	245.400, 0.112	245.400, 0.379	245.400, 0.337	245.400, 0.609	245.400, 0.017	245.400, 0.060	245.400, 0.058	245.400, 0.084	245.400, 0.236	245.400, 0.382
1229	245.600, 0.111	245.600, 0.379	245.600, 0.337	245.600, 0.609	245.600, 0.017	245.600, 0.060	245.600, 0.058	245.600, 0.083	245.600, 0.236	245.600, 0.382
1230	245.800, 0.111	245.800, 0.378	245.800, 0.337	245.800, 0.609	245.800, 0.017	245.800, 0.060	245.800, 0.058	245.800, 0.083	245.800, 0.236	245.800, 0.383
1231	246.000, 0.111	246.000, 0.378	246.000, 0.337	246.000, 0.609	246.000, 0.017	246.000, 0.060	246.000, 0.059	246.000, 0.083	246.000, 0.236	246.000, 0.383
1232	246.200, 0.111	246.200, 0.377	246.200, 0.336	246.200, 0.609	246.200, 0.017	246.200, 0.060	246.200, 0.059	246.200, 0.083	246.200, 0.235	246.200, 0.383
1233	246.400, 0.111	246.400, 0.377	246.400, 0.336	246.400, 0.608	246.400, 0.017	246.400, 0.060	246.400, 0.059	246.400, 0.083	246.400, 0.235	246.400, 0.383
1234	246.600, 0.111	246.600, 0.377	246.600, 0.336	246.600, 0.608	246.600, 0.017	246.600, 0.059	246.600, 0.059	246.600, 0.084	246.600, 0.235	246.600, 0.382
1235	246.800, 0.111	246.800, 0.376	246.800, 0.335	246.800, 0.608	246.800, 0.018	246.800, 0.059	246.800, 0.059	246.800, 0.084	246.800, 0.235	246.800, 0.382
1236	247.000, 0.110	247.000, 0.376	247.000, 0.335	247.000, 0.607	247.000, 0.018	247.000, 0.060	247.000, 0.058	247.000, 0.084	247.000, 0.234	247.000, 0.382
1237	247.200, 0.110	247.200, 0.376	247.200, 0.335	247.200, 0.606	247.200, 0.018	247.200, 0.060	247.200, 0.059	247.200, 0.084	247.200, 0.234	247.200, 0.382
1238	247.400, 0.110	247.400, 0.376	247.400, 0.335	247.400, 0.606	247.400, 0.019	247.400, 0.059	247.400, 0.058	247.400, 0.084	247.400, 0.234	247.400, 0.382
1239	247.600, 0.110	247.600, 0.376	247.600, 0.334	247.600, 0.605	247.600, 0.019	247.600, 0.059	247.600, 0.058	247.600, 0.084	247.600, 0.234	247.600, 0.381
1240	247.800, 0.109	247.800, 0.375	247.800, 0.334	247.800, 0.604	247.800, 0.019	247.800, 0.060	247.800, 0.058	247.800, 0.085	247.800, 0.234	247.800, 0.381
1241	248.000, 0.109	248.000, 0.375	248.000, 0.334	248.000, 0.604	248.000, 0.019	248.000, 0.060	248.000, 0.058	248.000, 0.085	248.000, 0.235	248.000, 0.380
1242	248.200, 0.108	248.200, 0.375	248.200, 0.334	248.200, 0.603	248.200, 0.019	248.200, 0.060	248.200, 0.058	248.200, 0.084	248.200, 0.235	248.200, 0.380
1243	248.400, 0.108	248.400, 0.375	248.400, 0.335	248.400, 0.603	248.400, 0.019	248.400, 0.060	248.400, 0.058	248.400, 0.084	248.400, 0.235	248.400, 0.380
1244	248.600, 0.108	248.600, 0.374	248.600, 0.335	248.600, 0.602	248.600, 0.019	248.600, 0.060	248.600, 0.058	248.600, 0.084	248.600, 0.236	248.600, 0.380
1245	248.800, 0.108	248.800, 0.374	248.800, 0.335	248.800, 0.602	248.800, 0.019	248.800, 0.060	248.800, 0.058	248.800, 0.084	248.800, 0.236	248.800, 0.380
1246	249.000, 0.108	249.000, 0.374	249.000, 0.335	249.000, 0.601	249.000, 0.019	249.000, 0.060	249.000, 0.058	249.000, 0.084	249.000, 0.236	249.000, 0.380
1247	249.200, 0.108	249.200, 0.373	249.200, 0.336	249.200, 0.601	249.200, 0.019	249.200, 0.060	249.200, 0.058	249.200, 0.084	249.200, 0.236	249.200, 0.380
1248	249.400, 0.108	249.400, 0.373	249.400, 0.336	249.400, 0.601	249.400, 0.019	249.400, 0.060	249.400, 0.058	249.400, 0.083	249.400, 0.236	249.400, 0.380
1249	249.600, 0.108	249.600, 0.373	249.600, 0.336	249.600, 0.601	249.600, 0.019	249.600, 0.060	249.600, 0.058	249.600, 0.083	249.600, 0.236	249.600, 0.380
1250	249.800, 0.108	249.800, 0.372	249.800, 0.336	249.800, 0.601	249.800, 0.019	249.800, 0.061	249.800, 0.058	249.800, 0.083	249.800, 0.236	249.800, 0.380
1251	250.000, 0.108	250.000, 0.372	250.000, 0.336	250.000, 0.601	250.000, 0.018	250.000, 0.061	250.000, 0.058	250.000, 0.083	250.000, 0.236	250.000, 0.380
1252	250.200, 0.109	250.200, 0.371	250.200, 0.336	250.200, 0.601	250.200, 0.018	250.200, 0.060	250.200, 0.058	250.200, 0.083	250.200, 0.236	250.200, 0.381
1253	250.400, 0.109	250.400, 0.371	250.400, 0.336	250.400, 0.601	250.400, 0.018	250.400, 0.060	250.400, 0.058	250.400, 0.083	250.400, 0.235	250.400, 0.381
1254	250.600, 0.109	250.600, 0.370	250.600, 0.336	250.600, 0.601	250.600, 0.018	250.600, 0.060	250.600, 0.058	250.600, 0.083	250.600, 0.235	250.600, 0.381
1255	250.800, 0.109	250.800, 0.370	250.800, 0.336	250.800, 0.601	250.800, 0.017	250.800, 0.060	250.800, 0.058	250.800, 0.083	250.800, 0.235	250.800, 0.381
1256	251.000, 0.109	251.000, 0.370	251.000, 0.335	251.000, 0.601	251.000, 0.017	251.000, 0.059	251.000, 0.058	251.000, 0.083	251.000, 0.235	251.000, 0.380
1257	251.200, 0.109	251.200, 0.369	251.200, 0.335	251.200, 0.601	251.200, 0.017	251.200, 0.059	251.200, 0.057	251.200, 0.083	251.200, 0.235	251.200, 0.380
1258	251.400, 0.109	251.400, 0.369	251.400, 0.335	251.400, 0.601	251.400, 0.017	251.400, 0.059	251.400, 0.057	251.400, 0.083	251.400, 0.235	251.400, 0.380
1259	251.600, 0.109	251.600, 0.368	251.600, 0.335	251.600, 0.600	251.600, 0.017	251.600, 0.059	251.600, 0.057	251.600, 0.083	251.600, 0.235	251.600, 0.380
1260	251.800, 0.109	251.800, 0.368	251.800, 0.335	251.800, 0.600	251.800, 0.017	251.800, 0.059	251.800, 0.057	251.800, 0.084	251.800, 0.234	251.800, 0.379
1261	252.000, 0.109	252.000, 0.367	252.000, 0.334	252.000, 0.600	252.000, 0.017	252.000, 0.059	252.000, 0.057	252.000, 0.084	252.000, 0.234	252.000, 0.379
1262	252.200, 0.109	252.200, 0.367	252.200, 0.334	252.200, 0.600	252.200, 0.018	252.200, 0.059	252.200, 0.057	252.200, 0.084	252.200, 0.234	252.200, 0.379
1263	252.400, 0.109	252.400, 0.367	252.400, 0.334	252.400, 0.599	252.400, 0.018	252.400, 0.059	252.400, 0.057	252.400, 0.084	252.400, 0.233	252.400, 0.379
1264	252.600, 0.109	252.600, 0.366	252.600, 0.333	252.600, 0.599	252.600, 0.018	252.600, 0.059	252.600, 0.057	252.600, 0.083	252.600, 0.233	252.600, 0.379
1265	252.800, 0.109	252.800, 0.366	252.800, 0.333	252.800, 0.599	252.800, 0.018	252.800, 0.059	252.800, 0.057	252.800, 0.083	252.800, 0.233	252.800, 0.379
1266	253.000, 0.109	253.000, 0.366	253.000, 0.333	253.000, 0.598	253.000, 0.019	253.000, 0.059	253.000, 0.057	253.000, 0.083	253.000, 0.232	253.000, 0.379
1267	253.200, 0.109	253.200, 0.365	253.200, 0.333	253.200, 0.597	253.200, 0.019	253.200, 0.059	253.200, 0.057	253.200, 0.083	253.200, 0.232	253.200, 0.378
1268	253.400, 0.108	253.400, 0.365	253.400, 0.333	253.400, 0.597	253.400, 0.019	253.400, 0.059	253.400, 0.057	253.400, 0.083	253.400, 0.232	253.400, 0.378
1269	253.600, 0.108	253.600, 0.364	253.600, 0.333	253.600, 0.597	253.600, 0.019	253.600, 0.060	253.600, 0.057	253.600, 0.083	253.600, 0.232	253.600, 0.378
1270	253.800, 0.108	253.800, 0.364	253.800, 0.333	253.800, 0.596	253.800, 0.018	253.800, 0.060	253.800, 0.057	253.800, 0.083	253.800, 0.232	253.800, 0.378
1271	254.000, 0.108	254.000, 0.363	254.000, 0.334	254.000, 0.596	254.000, 0.018	254.000, 0.060	254.000, 0.057	254.000, 0.083	254.000, 0.232	254.000, 0.378
1272	254.200, 0.108	254.200, 0.363	254.200, 0.334	254.200, 0.596	254.200, 0.017	254.200, 0.060	254.200, 0.057	254.200, 0.082	254.200, 0.232	254.200, 0.378
1273	254.400, 0.108	254.400, 0.363	254.400, 0.334	254.400, 0.596	254.400, 0.017	254.400, 0.060	254.400, 0.057	254.400, 0.082	254.400, 0.233	254.400, 0.378
1274	254.600, 0.108	254.600, 0.362	254.600, 0.334	254.600, 0.595	254.600, 0.017	254.600, 0.060	254.600, 0.057	254.600, 0.082	254.600, 0.233	254.600, 0.378
1275	254.800, 0.108	254.800, 0.362	254.800, 0.334	254.800, 0.595	254.800, 0.017	254.800, 0.060	254.800, 0.057	254.800, 0.082	254.800, 0.233	254.800, 0.378
1276	255.000, 0.108	255.000, 0.362	255.000, 0.334	255.000, 0.595	255.000, 0.016	255.000, 0.059	255.000, 0.057	255.000, 0.082	255.000, 0.234	255.000, 0.378
1277	255.200, 0.108	255.200, 0.362	255.200, 0.334	255.200, 0.594	255.200, 0.016	255.200, 0.059	255.200, 0.056	255.200, 0.082	255.200, 0.234	255.200, 0.378
1278	255.400, 0.108	255.400, 0.362	255.400, 0.333	255.400, 0.594	255.400, 0.016	255.400, 0.059	255.400, 0.056	255.400, 0.083	255.400, 0.234	255.400, 0.378
1279	255.600, 0.108	255.600, 0.362	255.600, 0.333	255.600, 0.594	255.600, 0.016	255.600, 0.059	255.600, 0.055	255.600, 0.083	255.600, 0.234	255.600, 0.378
1280	255.800, 0.108	255.800, 0.362	255.800, 0.333	255.800, 0.593	255.800, 0.016	255.800, 0.059	255.800, 0.055	255.800, 0.083	255.800, 0.234	255.800, 0.378
1281	256.000, 0.108	256.000, 0.362	256.000, 0.332	256.000, 0.593	256.000, 0.017	256.000, 0.059	256.000, 0.055	256.000, 0.083	256.000, 0.234	256.000, 0.378
1282	256.200, 0.108	256.200, 0.361	256.200, 0.332	256.200, 0.593	256.200, 0.017	256.200, 0.059	256.200, 0.055	256.200, 0.084	256.200, 0.234	256.200, 0.378
1283	256.400, 0.108	256.400, 0.361	256.400, 0.332	256.400, 0.593	256.400, 0.017	256.400, 0.059	256.400, 0.055	256.400, 0.084	256.400, 0.234	256.400, 0.378
1284	256.600, 0.108	256.600, 0.361	256.600, 0.332	256.600, 0.593	256.600, 0.017	256.600, 0.059	256.600, 0.055	256.600, 0.084	256.600, 0.234	256.600, 0.378
1285	256.800, 0.108	256.800, 0.360	256.800, 0.332	256.800, 0.593	256.800, 0.018	256.800, 0.059	256.800, 0.055	256.800, 0.084	256.800, 0.234	256.800, 0.378
1286	257.000, 0.109	257.000, 0.360	257.000, 0.332	257.000, 0.592	257.000, 0.018	257.000, 0.059	257.000, 0.055	257.000, 0.084	257.000, 0.235	257.000, 0.377
1287	257.200, 0.109	257.200, 0.360	257.200, 0.331	257.200, 0.592	257.200, 0.018	257.200, 0.059	257.200, 0.055	257.200, 0.084	257.200, 0.235	257.200, 0.377
1288	257.400, 0.108	257.400, 0.359	257.400, 0.331	257.400, 0.592	257.400, 0.018	257.400, 0.058	257.400, 0.056	257.400, 0.084	257.400, 0.235	257.400, 0.377
1289	257.600, 0.108	257.600, 0.359	257.600, 0.332	257.600, 0.592	257.600, 0.018	257.600, 0.058	257.600, 0.056	257.600, 0.084	257.600, 0.235	257.600, 0.377
1290	257.800, 0.108	257.800, 0.358	257.800, 0.332	257.800, 0.591	257.800, 0.018	257.800, 0.058	257.800, 0.056	257.800, 0.084	257.800, 0.235	257.800, 0.377
1291	258.000, 0.108	258.000, 0.358	258.000, 0.332	258.000, 0.591	258.000, 0.018	258.000, 0.058	258.000, 0.056	258.000, 0.084	258.000, 0.235	258.000, 0.377
1292	258.200, 0.108	258.200, 0.357	258.200, 0.332	258.200, 0.591	258.200, 0.019	258.200, 0.058	258.200, 0.057	258.200, 0.084	258.200, 0.235	258.200, 0.376
1293	258.400, 0.108	258.400, 0.357	258.400, 0.333	258.400, 0.591	258.400, 0.019	258.400, 0.058	258.400, 0.057	258.400, 0.083	258.400, 0.235	258.400, 0.376
1294	258.600, 0.107	258.600, 0.356	258.600, 0.333	258.600, 0.591	258.600, 0.019	258.600, 0.058	258.600, 0.057	258.600, 0.083	258.600, 0.235	258.600, 0.376
1295	258.800, 0.107	258.800, 0.356	258.800, 0.333	258.800, 0.590	258.800, 0.019	258.800, 0.058	258.800, 0.057	258.800, 0.083	258.800, 0.235	258.800, 0.376
1296	259.000, 0.107	259.000, 0.356	259.000, 0.333	259.000, 0.590	259.000, 0.019	259.000, 0.058	259.000, 0.056	259.000, 0.083	259.000, 0.235	259.000, 0.376
1297	259.200, 0.107	259.200, 0.355	259.200, 0.333	259.200, 0.590	259.200, 0.019	259.200, 0.058	259.200, 0.056	259.200, 0.083	259.200, 0.234	259.200, 0.376
1298	259.400, 0.107	259.400, 0.355	259.400, 0.333	259.400, 0.590	259.400, 0.019	259.400, 0.058	259.400, 0.056	259.400, 0.083	259.400, 0.233	259.400, 0.375
1299	259.600, 0.107	259.600, 0.354	259.600, 0.332	259.600, 0.590	259.600, 0.019	259.600, 0.058	259.600, 0.055	259.600, 0.083	259.600, 0.233	259.600, 0.375
1300	259.800, 0.106	259.800, 0.354	259.800, 0.332	259.800, 0.590	259.800, 0.019	259.800, 0.058	259.800, 0.055	259.800, 0.083	259.800, 0.232	259.800, 0.375
1301	260.000, 0.106	260.000, 0.353	260.000, 0.332	260.000, 0.589	260.000, 0.019	260.000, 0.059	260.000, 0.055	260.000, 0.083	260.000, 0.232	260.000, 0.375
1302	260.200, 0.106	260.200, 0.353	260.200, 0.332	260.200, 0.589	260.200, 0.019	260.200, 0.059	260.200, 0.054	260.200, 0.083	260.200, 0.231	260.200, 0.375
1303	260.400, 0.106	260.400, 0.353	260.400, 0.332	260.400, 0.589	260.400, 0.019	260.400, 0.059	260.400, 0.054	260.400, 0.083	260.400, 0.231	260.400, 0.374
1304	260.600, 0.106	260.600, 0.353	260.600, 0.332	260.600, 0.589	260.600, 0.019	260.600, 0.059	260.600, 0.054	260.600, 0.083	260.600, 0.231	260.600, 0.374
1305	260.800, 0.106	260.800, 0.353	260.800, 0.332	260.800, 0.588	260.800, 0.018	260.800, 0.059	260.800, 0.054	260.800, 0.083	260.800, 0.230	260.800, 0.374
1306	261.000, 0.107	261.000, 0.353	261.000, 0.332	261.000, 0.588	261.000, 0.018	261.000, 0.060	261.000, 0.054	261.000, 0.083	261.000, 0.230	261.000, 0.375
1307	261.200, 0.107	261.200, 0.353	261.200, 0.332	261.200, 0.587	261.200, 0.018	261.200, 0.060	261.200, 0.054	261.200, 0.082	261.200, 0.230	261.200, 0.374
1308	261.400, 0.106	261.400, 0.353	261.400, 0.332	261.400, 0.587	261.400, 0.018	261.400, 0.060	261.400, 0.054	261.400, 0.082	261.400, 0.230	261.400, 0.374
1309	261.600, 0.106	261.600, 0.353	261.600, 0.332	261.600, 0.587	261.600, 0.018	261.600, 0.060	261.600, 0.055	261.600, 0.082	261.600, 0.230	261.600, 0.374
1310	261.800, 0.106	261.800, 0.353	261.800, 0.332	261.800, 0.586	261.800, 0.018	261.800, 0.060	261.800, 0.055	261.800, 0.082	261.800, 0.231	261.800, 0.374
1311	262.000, 0.106	262.000, 0.353	262.000, 0.332	262.000, 0.586	262.000, 0.017	262.000, 0.059	262.000, 0.055	262.000, 0.082	262.000, 0.231	262.000, 0.374
1312	262.200, 0.105	262.200, 0.353	262.200, 0.332	262.200, 0.586	262.200, 0.017	262.200, 0.059	262.200, 0.055	262.200, 0.082	262.200, 0.231	262.200, 0.374
1313	262.400, 0.105	262.400, 0.352	262.400, 0.332	262.400, 0.586	262.400, 0.017	262.400, 0.059	262.400, 0.055	262.400, 0.082	262.400, 0.231	262.400, 0.374
1314	262.600, 0.105	262.600, 0.352	262.600, 0.332	262.600, 0.586	262.600, 0.017	262.600, 0.058	262.600, 0.055	262.600, 0.082	262.600, 0.231	262.600, 0.374
1315	262.800, 0.105	262.800, 0.352	262.800, 0.332	262.800, 0.586	262.800, 0.016	262.800, 0.058	262.800, 0.055	262.800, 0.082	262.800, 0.231	262.800, 0.373
1316	263.000, 0.105	263.000, 0.351	263.000, 0.332	263.000, 0.585	263.000, 0.016	263.000, 0.058	263.000, 0.055	263.000, 0.082	263.000, 0.231	263.000, 0.373
1317	263.200, 0.106	263.200, 0.351	263.200, 0.332	263.200, 0.585	263.200, 0.016	263.200, 0.058	263.200, 0.055	263.200, 0.082	263.200, 0.231	263.200, 0.373
1318	263.400, 0.106	263.400, 0.351	263.400, 0.331	263.400, 0.585	263.400, 0.016	263.400, 0.058	263.400, 0.055	263.400, 0.082	263.400, 0.231	263.400, 0.373
1319	263.600, 0.106	263.600, 0.351	263.600, 0.331	263.600, 0.585	263.600, 0.016	263.600, 0.058	263.600, 0.054	263.600, 0.082	263.600, 0.232	263.600, 0.372
1320	263.800, 0.106	263.800, 0.351	263.800, 0.331	263.800, 0.585	263.800, 0.015	263.800, 0.058	263.800, 0.054	263.800, 0.082	263.800, 0.232	263.800, 0.372
1321	264.000, 0.106	264.000, 0.351	264.000, 0.331	264.000, 0.585	264.000, 0.015	264.000, 0.058	264.000, 0.054	264.000, 0.081	264.000, 0.232	264.000, 0.372
1322	264.200, 0.107	264.200, 0.350	264.200, 0.331	264.200, 0.584	264.200, 0.015	264.200, 0.057	264.200, 0.054	264.200, 0.081	264.200, 0.232	264.200, 0.372
1323	264.400, 0.107	264.400, 0.350	264.400, 0.332	264.400, 0.584	264.400, 0.016	264.400, 0.057	264.400, 0.054	264.400, 0.081	264.400, 0.233	264.400, 0.373
1324	264.600, 0.107	264.600, 0.350	264.600, 0.332	264.600, 0.584	264.600, 0.016	264.600, 0.058	264.600, 0.054	264.600, 0.081	264.600, 0.233	264.600, 0.373
1325	264.800, 0.107	264.800, 0.350	264.800, 0.332	264.800, 0.583	264.800, 0.016	264.800, 0.058	264.800, 0.055	264.800, 0.081	264.800, 0.233	264.800, 0.374
1326	265.000, 0.107	265.000, 0.350	265.000, 0.332	265.000, 0.583	265.000, 0.016	265.000, 0.058	265.000, 0.055	265.000, 0.081	265.000, 0.233	265.000, 0.374
1327	265.200, 0.106	265.200, 0.350	265.200, 0.332	265.200, 0.582	265.200, 0.016	265.200, 0.058	265.200, 0.055	265.200, 0.081	265.200, 0.233	265.200, 0.374
1328	265.400, 0.106	265.400, 0.350	265.400, 0.331	265.400, 0.582	265.400, 0.016	265.400, 0.059	265.400, 0.055	265.400, 0.081	265.400, 0.233	265.400, 0.374
1329	265.600, 0.106	265.600, 0.350	265.600, 0.331	265.600, 0.582	265.600, 0.016	265.600, 0.059	265.600, 0.055	265.600, 0.081	265.600, 0.233	265.600, 0.374
1330	265.800, 0.105	265.800, 0.350	265.800, 0.331	265.800, 0.582	265.800, 0.016	265.800, 0.059	265.800, 0.055	265.800, 0.081	265.800, 0.232	265.800, 0.374
1331	266.000, 0.105	266.000, 0.349	266.000, 0.331	266.000, 0.582	266.000, 0.017	266.000, 0.060	266.000, 0.055	266.000, 0.080	266.000, 0.232	266.000, 0.374
1332	266.200, 0.105	266.200, 0.349	266.200, 0.331	266.200, 0.581	266.200, 0.017	266.200, 0.060	266.200, 0.055	266.200, 0.080	266.200, 0.232	266.200, 0.374
1333	266.400, 0.105	266.400, 0.349	266.400, 0.330	266.400, 0.581	266.400, 0.017	266.400, 0.060	266.400, 0.055	266.400, 0.080	266.400, 0.231	266.400, 0.374
1334	266.600, 0.105	266.600, 0.348	266.600, 0.330	266.600, 0.581	266.600, 0.017	266.600, 0.060	266.600, 0.055	266.600, 0.080	266.600, 0.231	266.600, 0.373
1335	266.800, 0.105	266.800, 0.348	266.800, 0.331	266.800, 0.581	266.800, 0.017	266.800, 0.060	266.800, 0.054	266.800, 0.081	266.800, 0.230	266.800, 0.373
1336	267.000, 0.105	267.000, 0.347	267.000, 0.331	267.000, 0.581	267.000, 0.017	267.000, 0.060	267.000, 0.054	267.000, 0.081	267.000, 0.230	267.000, 0.373
1337	267.200, 0.105	267.200, 0.347	267.200, 0.331	267.200, 0.581	267.200, 0.017	267.200, 0.060	267.200, 0.054	267.200, 0.081	267.200, 0.230	267.200, 0.372
1338	267.400, 0.105	267.400, 0.346	267.400, 0.331	267.400, 0.581	267.400, 0.017	267.400, 0.060	267.400, 0.054	267.400, 0.081	267.400, 0.230	267.400, 0.372
1339	267.600, 0.105	267.600, 0.346	267.600, 0.330	267.600, 0.580	267.600, 0.017	267.600, 0.059	267.600, 0.053	267.600, 0.081	267.600, 0.230	267.600, 0.372
1340	267.800, 0.105	267.800, 0.346	267.800, 0.330	267.800, 0.580	267.800, 0.017	267.800, 0.059	267.800, 0.053	267.800, 0.081	267.800, 0.230	267.800, 0.372
1341	268.000, 0.105	268.000, 0.345	268.000, 0.330	268.000, 0.580	268.000, 0.017	268.000, 0.059	268.000, 0.053	268.000, 0.081	268.000, 0.230	268.000, 0.373
1342	268.200, 0.105	268.200, 0.345	268.200, 0.330	268.200, 0.579	268.200, 0.017	268.200, 0.059	268.200, 0.053	268.200, 0.081	268.200, 0.230	268.200, 0.373
1343	268.400, 0.105	268.400, 0.345	268.400, 0.330	268.400, 0.579	268.400, 0.017	268.400, 0.058	268.400, 0.053	268.400, 0.081	268.400, 0.231	268.400, 0.373
1344	268.600, 0.106	268.600, 0.345	268.600, 0.330	268.600, 0.579	268.600, 0.017	268.600, 0.058	268.600, 0.053	268.600, 0.081	268.600, 0.231	268.600, 0.373
1345	268.800, 0.106	268.800, 0.345	268.800, 0.330	268.800, 0.579	268.800, 0.017	268.800, 0.058	268.800, 0.053	268.800, 0.081	268.800, 0.231	268.800, 0.373
1346	269.000, 0.106	269.000, 0.345	269.000, 0.330	269.000, 0.578	269.000, 0.017	269.000, 0.058	269.000, 0.054	269.000, 0.081	269.000, 0.231	269.000, 0.373
1347	269.200, 0.106	269.200, 0.345	269.200, 0.330	269.200, 0.578	269.200, 0.017	269.200, 0.058	269.200, 0.054	269.200, 0.081	269.200, 0.231	269.200, 0.373
1348	269.400, 0.106	269.400, 0.345	269.400, 0.330	269.400, 0.578	269.400, 0.017	269.400, 0.058	269.400, 0.054	269.400, 0.081	269.400, 0.230	269.400, 0.373
1349	269.600, 0.107	269.600, 0.345	269.600, 0.330	269.600, 0.578	269.600, 0.017	269.600, 0.059	269.600, 0.054	269.600, 0.080	269.600, 0.230	269.600, 0.373
1350	269.800, 0.107	269.800, 0.345	269.800, 0.331	269.800, 0.578	269.800, 0.017	269.800, 0.059	269.800, 0.054	269.800, 0.080	269.800, 0.230	269.800, 0.372
1351	,	,	,	,	,	,	,	,	,	,
1352	,	,	,	,	,	,	,	,	,	,
1353	,	,	,	,	,	,	,	,	,	,
1354	,	,	,	,	,	,	,	,	,	,
1355	,	,	,	,	,	,	,	,	,	,
1356	,	,	,	,	,	,	,	,	,	,
1357	,	,	,	,	,	,	,	,	,	,
1358	,	,	,	,	,	,	,	,	,	,
1359	,	,	,	,	,	,	,	,	,	,
1360	,	,	,	,	,	,	,	,	,	,
1361	,	,	,	,	,	,	,	,	,	,
1362	,	,	,	,	,	,	,	,	,	,
1363	,	,	,	,	,	,	,	,	,	,
1364	,	,	,	,	,	,	,	,	,	,
1365	,	,	,	,	,	,	,	,	,	,
1366	,	,	,	,	,	,	,	,	,	,
1367	,	,	,	,	,	,	,	,	,	,
1368	,	,	,	,	,	,	,	,	,	,
1369	,	,	,	,	,	,	,	,	,	,
1370	,	,	,	,	,	,	,	,	,	,
1371	,	,	,	,	,	,	,	,	,	,
1372	,	,	,	,	,	,	,	,	,	,
1373	,	,	,	,	,	,	,	,	,	,
1374	,	,	,	,	,	,	,	,	,	,
1375	,	,	,	,	,	,	,	,	,	,
1376	,	,	,	,	,	,	,	,	,	,
1377	,	,	,	,	,	,	,	,	,	,
1378	,	,	,	,	,	,	,	,	,	,
1379	,	,	,	,	,	,	,	,	,	,
1380	,	,	,	,	,	,	,	,	,	,
1381	,	,	,	,	,	,	,	,	,	,
1382	,	,	,	,	,	,	,	,	,	,
1383	,	,	,	,	,	,	,	,	,	,
1384	,	,	,	,	,	,	,	,	,	,
1385	,	,	,	,	,	,	,	,	,	,
1386	,	,	,	,	,	,	,	,	,	,
1387	,	,	,	,	,	,	,	,	,	,
1388	,	,	,	,	,	,	,	,	,	,
1389	,	,	,	,	,	,	,	,	,	,
1390	,	,	,	,	,	,	,	,	,	,
1391	,	,	,	,	,	,	,	,	,	,
1392	,	,	,	,	,	,	,	,	,	,
1393	,	,	,	,	,	,	,	,	,	,
1394	,	,	,	,	,	,	,	,	,	,
1395	,	,	,	,	,	,	,	,	,	,
1396	,	,	,	,	,	,	,	,	,	,
1397	,	,	,	,	,	,	,	,	,	,
1398	,	,	,	,	,	,	,	,	,	,
1399	,	,	,	,	,	,	,	,	,	,
1400	,	,	,	,	,	,	,	,	,	,
1401	,	,	,	,	,	,	,	,	,	,
1402	,	,	,	,	,	,	,	,	,	,
1403	,	,	,	,	,	,	,	,	,	,
1404	,	,	,	,	,	,	,	,	,	,
1405	,	,	,	,	,	,	,	,	,	,
1406	,	,	,	,	,	,	,	,	,	,
1407	,	,	,	,	,	,	,	,	,	,
1408	,	,	,	,	,	,	,	,	,	,
1409	,	,	,	,	,	,	,	,	,	,
1410	,	,	,	,	,	,	,	,	,	,
1411	,	,	,	,	,	,	,	,	,	,
1412	,	,	,	,	,	,	,	,	,	,
1413	,	,	,	,	,	,	,	,	,	,
1414	,	,	,	,	,	,	,	,	,	,
1415	,	,	,	,	,	,	,	,	,	,
1416	,	,	,	,	,	,	,	,	,	,
1417	,	,	,	,	,	,	,	,	,	,
1418	,	,	,	,	,	,	,	,	,	,
1419	,	,	,	,	,	,	,	,	,	,
1420	,	,	,	,	,	,	,	,	,	,
1421	,	,	,	,	,	,	,	,	,	,
1422	,	,	,	,	,	,	,	,	,	,
1423	,	,	,	,	,	,	,	,	,	,
1424	,	,	,	,	,	,	,	,	,	,
1425	,	,	,	,	,	,	,	,	,	,
1426	,	,	,	,	,	,	,	,	,	,
1427	,	,	,	,	,	,	,	,	,	,
1428	,	,	,	,	,	,	,	,	,	,
1429	,	,	,	,	,	,	,	,	,	,
1430	,	,	,	,	,	,	,	,	,	,
1431	,	,	,	,	,	,	,	,	,	,
1432	,	,	,	,	,	,	,	,	,	,
1433	,	,	,	,	,	,	,	,	,	,
1434	,	,	,	,	,	,	,	,	,	,
1435	,	,	,	,	,	,	,	,	,	,
1436	,	,	,	,	,	,	,	,	,	,
1437	,	,	,	,	,	,	,	,	,	,
1438	,	,	,	,	,	,	,	,	,	,
1439	,	,	,	,	,	,	,	,	,	,
1440	,	,	,	,	,	,	,	,	,	,
1441	,	,	,	,	,	,	,	,	,	,
1442	,	,	,	,	,	,	,	,	,	,
1443	,	,	,	,	,	,	,	,	,	,
1444	,	,	,	,	,	,	,	,	,	,
1445	,	,	,	,	,	,	,	,	,	,
1446	,	,	,	,	,	,	,	,	,	,
1447	,	,	,	,	,	,	,	,	,	,
1448	,	,	,	,	,	,	,	,	,	,
1449	,	,	,	,	,	,	,	,	,	,
1450	,	,	,	,	,	,	,	,	,	,
1451	,	,	,	,	,	,	,	,	,	,
1452	,	,	,	,	,	,	,	,	,	,
1453	,	,	,	,	,	,	,	,	,	,
1454	,	,	,	,	,	,	,	,	,	,
1455	,	,	,	,	,	,	,	,	,	,
1456	,	,	,	,	,	,	,	,	,	,
1457	,	,	,	,	,	,	,	,	,	,
1458	,	,	,	,	,	,	,	,	,	,
1459	,	,	,	,	,	,	,	,	,	,
1460	,	,	,	,	,	,	,	,	,	,
1461	,	,	,	,	,	,	,	,	,	,
1462	,	,	,	,	,	,	,	,	,	,
1463	,	,	,	,	,	,	,	,	,	,
1464	,	,	,	,	,	,	,	,	,	,
1465	,	,	,	,	,	,	,	,	,	,
1466	,	,	,	,	,	,	,	,	,	,
1467	,	,	,	,	,	,	,	,	,	,
1468	,	,	,	,	,	,	,	,	,	,
1469	,	,	,	,	,	,	,	,	,	,
1470	,	,	,	,	,	,	,	,	,	,
1471	,	,	,	,	,	,	,	,	,	,
1472	,	,	,	,	,	,	,	,	,	,
1473	,	,	,	,	,	,	,	,	,	,
1474	,	,	,	,	,	,	,	,	,	,
1475	,	,	,	,	,	,	,	,	,	,
1476	,	,	,	,	,	,	,	,	,	,
1477	,	,	,	,	,	,	,	,	,	,
1478	,	,	,	,	,	,	,	,	,	,
1479	,	,	,	,	,	,	,	,	,	,
1480	,	,	,	,	,	,	,	,	,	,
1481	,	,	,	,	,	,	,	,	,	,
1482	,	,	,	,	,	,	,	,	,	,
1483	,	,	,	,	,	,	,	,	,	,
1484	,	,	,	,	,	,	,	,	,	,
1485	,	,	,	,	,	,	,	,	,	,
1486	,	,	,	,	,	,	,	,	,	,
1487	,	,	,	,	,	,	,	,	,	,
1488	,	,	,	,	,	,	,	,	,	,
1489	,	,	,	,	,	,	,	,	,	,
1490	,	,	,	,	,	,	,	,	,	,
1491	,	,	,	,	,	,	,	,	,	,
1492	,	,	,	,	,	,	,	,	,	,
1493	,	,	,	,	,	,	,	,	,	,
1494	,	,	,	,	,	,	,	,	,	,
1495	,	,	,	,	,	,	,	,	,	,
1496	,	,	,	,	,	,	,	,	,	,
1497	,	,	,	,	,	,	,	,	,	,
1498	,	,	,	,	,	,	,	,	,	,
1499	,	,	,	,	,	,	,	,	,	,
1500	,	,	,	,	,	,	,	,	,	,
1501	,	,	,	,	,	,	,	,	,	,
1502	,	,	,	,	,	,	,	,	,	,
1503	,	,	,	,	,	,	,	,	,	,
1504	,	,	,	,	,	,	,	,	,	,
1505	,	,	,	,	,	,	,	,	,	,
1506	,	,	,	,	,	,	,	,	,	,
1507	,	,	,	,	,	,	,	,	,	,
1508	,	,	,	,	,	,	,	,	,	,
1509	,	,	,	,	,	,	,	,	,	,
1510	,	,	,	,	,	,	,	,	,	,
1511	,	,	,	,	,	,	,	,	,	,
1512	,	,	,	,	,	,	,	,	,	,
1513	,	,	,	,	,	,	,	,	,	,
1514	,	,	,	,	,	,	,	,	,	,
1515	,	,	,	,	,	,	,	,	,	,
1516	,	,	,	,	,	,	,	,	,	,
1517	,	,	,	,	,	,	,	,	,	,
1518	,	,	,	,	,	,	,	,	,	,
1519	,	,	,	,	,	,	,	,	,	,
1520	,	,	,	,	,	,	,	,	,	,
1521	,	,	,	,	,	,	,	,	,	,
1522	,	,	,	,	,	,	,	,	,	,
1523	,	,	,	,	,	,	,	,	,	,
1524	,	,	,	,	,	,	,	,	,	,
1525	,	,	,	,	,	,	,	,	,	,
1526	,	,	,	,	,	,	,	,	,	,
1527	,	,	,	,	,	,	,	,	,	,
1528	,	,	,	,	,	,	,	,	,	,
1529	,	,	,	,	,	,	,	,	,	,
1530	,	,	,	,	,	,	,	,	,	,
1531	,	,	,	,	,	,	,	,	,	,
1532	,	,	,	,	,	,	,	,	,	,
1533	,	,	,	,	,	,	,	,	,	,
1534	,	,	,	,	,	,	,	,	,	,
1535	,	,	,	,	,	,	,	,	,	,
1536	,	,	,	,	,	,	,	,	,	,
1537	,	,	,	,	,	,	,	,	,	,
1538	,	,	,	,	,	,	,	,	,	,
1539	,	,	,	,	,	,	,	,	,	,
1540	,	,	,	,	,	,	,	,	,	,
1541	,	,	,	,	,	,	,	,	,	,
1542	,	,	,	,	,	,	,	,	,	,
1543	,	,	,	,	,	,	,	,	,	,
1544	,	,	,	,	,	,	,	,	,	,
1545	,	,	,	,	,	,	,	,	,	,
1546	,	,	,	,	,	,	,	,	,	,
1547	,	,	,	,	,	,	,	,	,	,
1548	,	,	,	,	,	,	,	,	,	,
1549	,	,	,	,	,	,	,	,	,	,
1550	,	,	,	,	,	,	,	,	,	,
1551	,	,	,	,	,	,	,	,	,	,
1552	,	,	,	,	,	,	,	,	,	,
1553	,	,	,	,	,	,	,	,	,	,
1554	,	,	,	,	,	,	,	,	,	,
1555	,	,	,	,	,	,	,	,	,	,
1556	,	,	,	,	,	,	,	,	,	,
1557	,	,	,	,	,	,	,	,	,	,
1558	,	,	,	,	,	,	,	,	,	,
1559	,	,	,	,	,	,	,	,	,	,
1560	,	,	,	,	,	,	,	,	,	,
1561	,	,	,	,	,	,	,	,	,	,
1562	,	,	,	,	,	,	,	,	,	,
1563	,	,	,	,	,	,	,	,	,	,
1564	,	,	,	,	,	,	,	,	,	,
1565	,	,	,	,	,	,	,	,	,	,
1566	,	,	,	,	,	,	,	,	,	,
1567	,	,	,	,	,	,	,	,	,	,
1568	,	,	,	,	,	,	,	,	,	,
1569	,	,	,	,	,	,	,	,	,	,
1570	,	,	,	,	,	,	,	,	,	,
1571	,	,	,	,	,	,	,	,	,	,
1572	,	,	,	,	,	,	,	,	,	,
1573	,	,	,	,	,	,	,	,	,	,
1574	,	,	,	,	,	,	,	,	,	,
1575	,	,	,	,	,	,	,	,	,	,
1576	,	,	,	,	,	,	,	,	,	,
1577	,	,	,	,	,	,	,	,	,	,
1578	,	,	,	,	,	,	,	,	,	,
1579	,	,	,	,	,	,	,	,	,	,
1580	,	,	,	,	,	,	,	,	,	,
1581	,	,	,	,	,	,	,	,	,	,
1582	,	,	,	,	,	,	,	,	,	,
1583	,	,	,	,	,	,	,	,	,	,
1584	,	,	,	,	,	,	,	,	,	,
1585	,	,	,	,	,	,	,	,	,	,
1586	,	,	,	,	,	,	,	,	,	,
1587	,	,	,	,	,	,	,	,	,	,
1588	,	,	,	,	,	,	,	,	,	,
1589	,	,	,	,	,	,	,	,	,	,
1590	,	,	,	,	,	,	,	,	,	,
1591	,	,	,	,	,	,	,	,	,	,
1592	,	,	,	,	,	,	,	,	,	,
1593	,	,	,	,	,	,	,	,	,	,
1594	,	,	,	,	,	,	,	,	,	,
1595	,	,	,	,	,	,	,	,	,	,
1596	,	,	,	,	,	,	,	,	,	,
1597	,	,	,	,	,	,	,	,	,	,
1598	,	,	,	,	,	,	,	,	,	,
1599	,	,	,	,	,	,	,	,	,	,
1600	,	,	,	,	,	,	,	,	,	,
1601	,	,	,	,	,	,	,	,	,	,
1602	,	,	,	,	,	,	,	,	,	,
1603	,	,	,	,	,	,	,	,	,	,
1604	,	,	,	,	,	,	,	,	,	,
1605	,	,	,	,	,	,	,	,	,	,
1606	,	,	,	,	,	,	,	,	,	,
1607	,	,	,	,	,	,	,	,	,	,
1608	,	,	,	,	,	,	,	,	,	,
1609	,	,	,	,	,	,	,	,	,	,
1610	,	,	,	,	,	,	,	,	,	,
1611	,	,	,	,	,	,	,	,	,	,
1612	,	,	,	,	,	,	,	,	,	,
1613	,	,	,	,	,	,	,	,	,	,
1614	,	,	,	,	,	,	,	,	,	,
1615	,	,	,	,	,	,	,	,	,	,
1616	,	,	,	,	,	,	,	,	,	,
1617	,	,	,	,	,	,	,	,	,	,
1618	,	,	,	,	,	,	,	,	,	,
1619	,	,	,	,	,	,	,	,	,	,
1620	,	,	,	,	,	,	,	,	,	,
1621	,	,	,	,	,	,	,	,	,	,
1622	,	,	,	,	,	,	,	,	,	,
1623	,	,	,	,	,	,	,	,	,	,
1624	,	,	,	,	,	,	,	,	,	,
1625	,	,	,	,	,	,	,	,	,	,
1626	,	,	,	,	,	,	,	,	,	,
1627	,	,	,	,	,	,	,	,	,	,
1628	,	,	,	,	,	,	,	,	,	,
1629	,	,	,	,	,	,	,	,	,	,
1630	,	,	,	,	,	,	,	,	,	,
1631	,	,	,	,	,	,	,	,	,	,
1632	,	,	,	,	,	,	,	,	,	,
1633	,	,	,	,	,	,	,	,	,	,
1634	,	,	,	,	,	,	,	,	,	,
1635	,	,	,	,	,	,	,	,	,	,
1636	,	,	,	,	,	,	,	,	,	,
1637	,	,	,	,	,	,	,	,	,	,
1638	,	,	,	,	,	,	,	,	,	,
1639	,	,	,	,	,	,	,	,	,	,
1640	,	,	,	,	,	,	,	,	,	,
1641	,	,	,	,	,	,	,	,	,	,
1642	,	,	,	,	,	,	,	,	,	,
1643	,	,	,	,	,	,	,	,	,	,
1644	,	,	,	,	,	,	,	,	,	,
1645	,	,	,	,	,	,	,	,	,	,
1646	,	,	,	,	,	,	,	,	,	,
1647	,	,	,	,	,	,	,	,	,	,
1648	,	,	,	,	,	,	,	,	,	,
1649	,	,	,	,	,	,	,	,	,	,
1650	,	,	,	,	,	,	,	,	,	,
1651	,	,	,	,	,	,	,	,	,	,
1652	,	,	,	,	,	,	,	,	,	,
1653	,	,	,	,	,	,	,	,	,	,
1654	,	,	,	,	,	,	,	,	,	,
1655	,	,	,	,	,	,	,	,	,	,
1656	,	,	,	,	,	,	,	,	,	,
1657	,	,	,	,	,	,	,	,	,	,
1658	,	,	,	,	,	,	,	,	,	,
1659	,	,	,	,	,	,	,	,	,	,
1660	,	,	,	,	,	,	,	,	,	,
1661	,	,	,	,	,	,	,	,	,	,
1662	,	,	,	,	,	,	,	,	,	,
1663	,	,	,	,	,	,	,	,	,	,
1664	,	,	,	,	,	,	,	,	,	,
1665	,	,	,	,	,	,	,	,	,	,
1666	,	,	,	,	,	,	,	,	,	,
1667	,	,	,	,	,	,	,	,	,	,
1668	,	,	,	,	,	,	,	,	,	,
1669	,	,	,	,	,	,	,	,	,	,
1670	,	,	,	,	,	,	,	,	,	,
1671	,	,	,	,	,	,	,	,	,	,
1672	,	,	,	,	,	,	,	,	,	,
1673	,	,	,	,	,	,	,	,	,	,
1674	,	,	,	,	,	,	,	,	,	,
1675	,	,	,	,	,	,	,	,	,	,
1676	,	,	,	,	,	,	,	,	,	,
1677	,	,	,	,	,	,	,	,	,	,
1678	,	,	,	,	,	,	,	,	,	,
1679	,	,	,	,	,	,	,	,	,	,
1680	,	,	,	,	,	,	,	,	,	,
1681	,	,	,	,	,	,	,	,	,	,
1682	,	,	,	,	,	,	,	,	,	,
1683	,	,	,	,	,	,	,	,	,	,
1684	,	,	,	,	,	,	,	,	,	,
1685	,	,	,	,	,	,	,	,	,	,
1686	,	,	,	,	,	,	,	,	,	,
1687	,	,	,	,	,	,	,	,	,	,
1688	,	,	,	,	,	,	,	,	,	,
1689	,	,	,	,	,	,	,	,	,	,
1690	,	,	,	,	,	,	,	,	,	,
1691	,	,	,	,	,	,	,	,	,	,
1692	,	,	,	,	,	,	,	,	,	,
1693	,	,	,	,	,	,	,	,	,	,
1694	,	,	,	,	,	,	,	,	,	,
1695	,	,	,	,	,	,	,	,	,	,
1696	,	,	,	,	,	,	,	,	,	,
1697	,	,	,	,	,	,	,	,	,	,
1698	,	,	,	,	,	,	,	,	,	,
1699	,	,	,	,	,	,	,	,	,	,
1700	,	,	,	,	,	,	,	,	,	,
1701	,	,	,	,	,	,	,	,	,	,
1702	,	,	,	,	,	,	,	,	,	,
1703	,	,	,	,	,	,	,	,	,	,
1704	,	,	,	,	,	,	,	,	,	,
1705	,	,	,	,	,	,	,	,	,	,
1706	,	,	,	,	,	,	,	,	,	,
1707	,	,	,	,	,	,	,	,	,	,
1708	,	,	,	,	,	,	,	,	,	,
1709	,	,	,	,	,	,	,	,	,	,
1710	,	,	,	,	,	,	,	,	,	,
1711	,	,	,	,	,	,	,	,	,	,
1712	,	,	,	,	,	,	,	,	,	,
1713	,	,	,	,	,	,	,	,	,	,
1714	,	,	,	,	,	,	,	,	,	,
1715	,	,	,	,	,	,	,	,	,	,
1716	,	,	,	,	,	,	,	,	,	,
1717	,	,	,	,	,	,	,	,	,	,
1718	,	,	,	,	,	,	,	,	,	,
1719	,	,	,	,	,	,	,	,	,	,
1720	,	,	,	,	,	,	,	,	,	,
1721	,	,	,	,	,	,	,	,	,	,
1722	,	,	,	,	,	,	,	,	,	,
1723	,	,	,	,	,	,	,	,	,	,
1724	,	,	,	,	,	,	,	,	,	,
1725	,	,	,	,	,	,	,	,	,	,
1726	,	,	,	,	,	,	,	,	,	,
1727	,	,	,	,	,	,	,	,	,	,
1728	,	,	,	,	,	,	,	,	,	,
1729	,	,	,	,	,	,	,	,	,	,
1730	,	,	,	,	,	,	,	,	,	,
1731	,	,	,	,	,	,	,	,	,	,
1732	,	,	,	,	,	,	,	,	,	,
1733	,	,	,	,	,	,	,	,	,	,
1734	,	,	,	,	,	,	,	,	,	,
1735	,	,	,	,	,	,	,	,	,	,
1736	,	,	,	,	,	,	,	,	,	,
1737	,	,	,	,	,	,	,	,	,	,
1738	,	,	,	,	,	,	,	,	,	,
1739	,	,	,	,	,	,	,	,	,	,
1740	,	,	,	,	,	,	,	,	,	,
1741	,	,	,	,	,	,	,	,	,	,
1742	,	,	,	,	,	,	,	,	,	,
1743	,	,	,	,	,	,	,	,	,	,
1744	,	,	,	,	,	,	,	,	,	,
1745	,	,	,	,	,	,	,	,	,	,
1746	,	,	,	,	,	,	,	,	,	,
1747	,	,	,	,	,	,	,	,	,	,
1748	,	,	,	,	,	,	,	,	,	,
1749	,	,	,	,	,	,	,	,	,	,
1750	,	,	,	,	,	,	,	,	,	,
1751	,	,	,	,	,	,	,	,	,	,
1752	,	,	,	,	,	,	,	,	,	,
1753	,	,	,	,	,	,	,	,	,	,
1754	,	,	,	,	,	,	,	,	,	,
1755	,	,	,	,	,	,	,	,	,	,
1756	,	,	,	,	,	,	,	,	,	,
1757	,	,	,	,	,	,	,	,	,	,
1758	,	,	,	,	,	,	,	,	,	,
1759	,	,	,	,	,	,	,	,	,	,
1760	,	,	,	,	,	,	,	,	,	,
1761	,	,	,	,	,	,	,	,	,	,
1762	,	,	,	,	,	,	,	,	,	,
1763	,	,	,	,	,	,	,	,	,	,
1764	,	,	,	,	,	,	,	,	,	,
1765	,	,	,	,	,	,	,	,	,	,
1766	,	,	,	,	,	,	,	,	,	,
1767	,	,	,	,	,	,	,	,	,	,
1768	,	,	,	,	,	,	,	,	,	,
1769	,	,	,	,	,	,	,	,	,	,
1770	,	,	,	,	,	,	,	,	,	,
1771	,	,	,	,	,	,	,	,	,	,
1772	,	,	,	,	,	,	,	,	,	,
1773	,	,	,	,	,	,	,	,	,	,
1774	,	,	,	,	,	,	,	,	,	,
1775	,	,	,	,	,	,	,	,	,	,
1776	,	,	,	,	,	,	,	,	,	,
1777	,	,	,	,	,	,	,	,	,	,
1778	,	,	,	,	,	,	,	,	,	,
1779	,	,	,	,	,	,	,	,	,	,
1780	,	,	,	,	,	,	,	,	,	,
1781	,	,	,	,	,	,	,	,	,	,
1782	,	,	,	,	,	,	,	,	,	,
1783	,	,	,	,	,	,	,	,	,	,
1784	,	,	,	,	,	,	,	,	,	,
1785	,	,	,	,	,	,	,	,	,	,
1786	,	,	,	,	,	,	,	,	,	,
1787	,	,	,	,	,	,	,	,	,	,
1788	,	,	,	,	,	,	,	,	,	,
1789	,	,	,	,	,	,	,	,	,	,
1790	,	,	,	,	,	,	,	,	,	,
1791	,	,	,	,	,	,	,	,	,	,
1792	,	,	,	,	,	,	,	,	,	,
1793	,	,	,	,	,	,	,	,	,	,
1794	,	,	,	,	,	,	,	,	,	,
1795	,	,	,	,	,	,	,	,	,	,
1796	,	,	,	,	,	,	,	,	,	,
1797	,	,	,	,	,	,	,	,	,	,
1798	,	,	,	,	,	,	,	,	,	,
1799	,	,	,	,	,	,	,	,	,	,
1800	,	,	,	,	,	,	,	,	,	,
1801	,	,	,	,	,	,	,	,	,	,
1802	,	,	,	,	,	,	,	,	,	,
1803	,	,	,	,	,	,	,	,	,	,
1804	,	,	,	,	,	,	,	,	,	,
1805	,	,	,	,	,	,	,	,	,	,
1806	,	,	,	,	,	,	,	,	,	,
1807	,	,	,	,	,	,	,	,	,	,
1808	,	,	,	,	,	,	,	,	,	,
1809	,	,	,	,	,	,	,	,	,	,
1810	,	,	,	,	,	,	,	,	,	,
1811	,	,	,	,	,	,	,	,	,	,
1812	,	,	,	,	,	,	,	,	,	,
1813	,	,	,	,	,	,	,	,	,	,
1814	,	,	,	,	,	,	,	,	,	,
1815	,	,	,	,	,	,	,	,	,	,
1816	,	,	,	,	,	,	,	,	,	,
1817	,	,	,	,	,	,	,	,	,	,
1818	,	,	,	,	,	,	,	,	,	,
1819	,	,	,	,	,	,	,	,	,	,
1820	,	,	,	,	,	,	,	,	,	,
1821	,	,	,	,	,	,	,	,	,	,
1822	,	,	,	,	,	,	,	,	,	,
1823	,	,	,	,	,	,	,	,	,	,
1824	,	,	,	,	,	,	,	,	,	,
1825	,	,	,	,	,	,	,	,	,	,
1826	,	,	,	,	,	,	,	,	,	,
1827	,	,	,	,	,	,	,	,	,	,
1828	,	,	,	,	,	,	,	,	,	,
1829	,	,	,	,	,	,	,	,	,	,
1830	,	,	,	,	,	,	,	,	,	,
1831	,	,	,	,	,	,	,	,	,	,
1832	,	,	,	,	,	,	,	,	,	,
1833	,	,	,	,	,	,	,	,	,	,
1834	,	,	,	,	,	,	,	,	,	,
1835	,	,	,	,	,	,	,	,	,	,
1836	,	,	,	,	,	,	,	,	,	,
1837	,	,	,	,	,	,	,	,	,	,
1838	,	,	,	,	,	,	,	,	,	,
1839	,	,	,	,	,	,	,	,	,	,
1840	,	,	,	,	,	,	,	,	,	,
1841	,	,	,	,	,	,	,	,	,	,
1842	,	,	,	,	,	,	,	,	,	,
1843	,	,	,	,	,	,	,	,	,	,
1844	,	,	,	,	,	,	,	,	,	,
1845	,	,	,	,	,	,	,	,	,	,
1846	,	,	,	,	,	,	,	,	,	,
1847	,	,	,	,	,	,	,	,	,	,
1848	,	,	,	,	,	,	,	,	,	,
1849	,	,	,	,	,	,	,	,	,	,
1850	,	,	,	,	,	,	,	,	,	,
1851	,	,	,	,	,	,	,	,	,	,
1852	,	,	,	,	,	,	,	,	,	,
1853	,	,	,	,	,	,	,	,	,	,
1854	,	,	,	,	,	,	,	,	,	,
1855	,	,	,	,	,	,	,	,	,	,
1856	,	,	,	,	,	,	,	,	,	,
1857	,	,	,	,	,	,	,	,	,	,
1858	,	,	,	,	,	,	,	,	,	,
1859	,	,	,	,	,	,	,	,	,	,
1860	,	,	,	,	,	,	,	,	,	,
1861	,	,	,	,	,	,	,	,	,	,
1862	,	,	,	,	,	,	,	,	,	,
1863	,	,	,	,	,	,	,	,	,	,
1864	,	,	,	,	,	,	,	,	,	,
1865	,	,	,	,	,	,	,	,	,	,
1866	,	,	,	,	,	,	,	,	,	,
1867	,	,	,	,	,	,	,	,	,	,
1868	,	,	,	,	,	,	,	,	,	,
1869	,	,	,	,	,	,	,	,	,	,
1870	,	,	,	,	,	,	,	,	,	,
1871	,	,	,	,	,	,	,	,	,	,
1872	,	,	,	,	,	,	,	,	,	,
1873	,	,	,	,	,	,	,	,	,	,
1874	,	,	,	,	,	,	,	,	,	,
1875	,	,	,	,	,	,	,	,	,	,
1876	,	,	,	,	,	,	,	,	,	,
1877	,	,	,	,	,	,	,	,	,	,
1878	,	,	,	,	,	,	,	,	,	,
1879	,	,	,	,	,	,	,	,	,	,
1880	,	,	,	,	,	,	,	,	,	,
1881	,	,	,	,	,	,	,	,	,	,
1882	,	,	,	,	,	,	,	,	,	,
1883	,	,	,	,	,	,	,	,	,	,
1884	,	,	,	,	,	,	,	,	,	,
1885	,	,	,	,	,	,	,	,	,	,
1886	,	,	,	,	,	,	,	,	,	,
1887	,	,	,	,	,	,	,	,	,	,
1888	,	,	,	,	,	,	,	,	,	,
1889	,	,	,	,	,	,	,	,	,	,
1890	,	,	,	,	,	,	,	,	,	,
1891	,	,	,	,	,	,	,	,	,	,
1892	,	,	,	,	,	,	,	,	,	,
1893	,	,	,	,	,	,	,	,	,	,
1894	,	,	,	,	,	,	,	,	,	,
1895	,	,	,	,	,	,	,	,	,	,
1896	,	,	,	,	,	,	,	,	,	,
1897	,	,	,	,	,	,	,	,	,	,
1898	,	,	,	,	,	,	,	,	,	,
1899	,	,	,	,	,	,	,	,	,	,
1900	,	,	,	,	,	,	,	,	,	,
1901	,	,	,	,	,	,	,	,	,	,
1902	,	,	,	,	,	,	,	,	,	,
1903	,	,	,	,	,	,	,	,	,	,
1904	,	,	,	,	,	,	,	,	,	,
1905	,	,	,	,	,	,	,	,	,	,
1906	,	,	,	,	,	,	,	,	,	,
1907	,	,	,	,	,	,	,	,	,	,
1908	,	,	,	,	,	,	,	,	,	,
1909	,	,	,	,	,	,	,	,	,	,
1910	,	,	,	,	,	,	,	,	,	,
1911	,	,	,	,	,	,	,	,	,	,
1912	,	,	,	,	,	,	,	,	,	,
1913	,	,	,	,	,	,	,	,	,	,
1914	,	,	,	,	,	,	,	,	,	,
1915	,	,	,	,	,	,	,	,	,	,
1916	,	,	,	,	,	,	,	,	,	,
1917	,	,	,	,	,	,	,	,	,	,
1918	,	,	,	,	,	,	,	,	,	,
1919	,	,	,	,	,	,	,	,	,	,
1920	,	,	,	,	,	,	,	,	,	,
1921	,	,	,	,	,	,	,	,	,	,
1922	,	,	,	,	,	,	,	,	,	,
1923	,	,	,	,	,	,	,	,	,	,
1924	,	,	,	,	,	,	,	,	,	,
1925	,	,	,	,	,	,	,	,	,	,
1926	,	,	,	,	,	,	,	,	,	,
1927	,	,	,	,	,	,	,	,	,	,
1928	,	,	,	,	,	,	,	,	,	,
1929	,	,	,	,	,	,	,	,	,	,
1930	,	,	,	,	,	,	,	,	,	,
1931	,	,	,	,	,	,	,	,	,	,
1932	,	,	,	,	,	,	,	,	,	,
1933	,	,	,	,	,	,	,	,	,	,
1934	,	,	,	,	,	,	,	,	,	,
1935	,	,	,	,	,	,	,	,	,	,
1936	,	,	,	,	,	,	,	,	,	,
1937	,	,	,	,	,	,	,	,	,	,
1938	,	,	,	,	,	,	,	,	,	,
1939	,	,	,	,	,	,	,	,	,	,
1940	,	,	,	,	,	,	,	,	,	,
1941	,	,	,	,	,	,	,	,	,	,
1942	,	,	,	,	,	,	,	,	,	,
1943	,	,	,	,	,	,	,	,	,	,
1944	,	,	,	,	,	,	,	,	,	,
1945	,	,	,	,	,	,	,	,	,	,
1946	,	,	,	,	,	,	,	,	,	,
1947	,	,	,	,	,	,	,	,	,	,
1948	,	,	,	,	,	,	,	,	,	,
1949	,	,	,	,	,	,	,	,	,	,
1950	,	,	,	,	,	,	,	,	,	,
1951	,	,	,	,	,	,	,	,	,	,
1952	,	,	,	,	,	,	,	,	,	,
1953	,	,	,	,	,	,	,	,	,	,
1954	,	,	,	,	,	,	,	,	,	,
1955	,	,	,	,	,	,	,	,	,	,
1956	,	,	,	,	,	,	,	,	,	,
1957	,	,	,	,	,	,	,	,	,	,
1958	,	,	,	,	,	,	,	,	,	,
1959	,	,	,	,	,	,	,	,	,	,
1960	,	,	,	,	,	,	,	,	,	,
1961	,	,	,	,	,	,	,	,	,	,
1962	,	,	,	,	,	,	,	,	,	,
1963	,	,	,	,	,	,	,	,	,	,
1964	,	,	,	,	,	,	,	,	,	,
1965	,	,	,	,	,	,	,	,	,	,
1966	,	,	,	,	,	,	,	,	,	,
1967	,	,	,	,	,	,	,	,	,	,
1968	,	,	,	,	,	,	,	,	,	,
1969	,	,	,	,	,	,	,	,	,	,
1970	,	,	,	,	,	,	,	,	,	,
1971	,	,	,	,	,	,	,	,	,	,
1972	,	,	,	,	,	,	,	,	,	,
1973	,	,	,	,	,	,	,	,	,	,
1974	,	,	,	,	,	,	,	,	,	,
1975	,	,	,	,	,	,	,	,	,	,
1976	,	,	,	,	,	,	,	,	,	,
1977	,	,	,	,	,	,	,	,	,	,
1978	,	,	,	,	,	,	,	,	,	,
1979	,	,	,	,	,	,	,	,	,	,
1980	,	,	,	,	,	,	,	,	,	,
1981	,	,	,	,	,	,	,	,	,	,
1982	,	,	,	,	,	,	,	,	,	,
1983	,	,	,	,	,	,	,	,	,	,
1984	,	,	,	,	,	,	,	,	,	,
1985	,	,	,	,	,	,	,	,	,	,
1986	,	,	,	,	,	,	,	,	,	,
1987	,	,	,	,	,	,	,	,	,	,
1988	,	,	,	,	,	,	,	,	,	,
1989	,	,	,	,	,	,	,	,	,	,
1990	,	,	,	,	,	,	,	,	,	,
1991	,	,	,	,	,	,	,	,	,	,
1992	,	,	,	,	,	,	,	,	,	,
1993	,	,	,	,	,	,	,	,	,	,
1994	,	,	,	,	,	,	,	,	,	,
1995	,	,	,	,	,	,	,	,	,	,
1996	,	,	,	,	,	,	,	,	,	,
1997	,	,	,	,	,	,	,	,	,	,
1998	,	,	,	,	,	,	,	,	,	,
1999	,	,	,	,	,	,	,	,	,	,
[truncated: 13,001 more rows]

## Sheet: Fig4_panelA_B_C_rep2
	170 bp closed parS DNA and ParB CTP	170 bp closed parS DNA and ParB	170 bp closed parS DNA and ParB TetR CTP	BamHI cut 170 bp parS DNA and ParB	EcoRI cut 170 bp parS DNA and ParB	BamHI cut 170 bp parS DNA and ParB CTP	BamHI cut 170 bp parS DNA and ParB TetR CTP	EcoRI cut 170 bp parS DNA and ParB TetR CTP	EcoRI cut 170 bp parS DNA and ParB CTP
1	0.000, 0.005	0.000, 0.036	0.000, 0.029	0.000, 0.044	0.000, 0.016	0.000, 0.054	0.000, 0.046	0.000, 0.029	0.000, 0.031
2	0.200, 0.005	0.200, 0.035	0.200, 0.028	0.200, 0.043	0.200, 0.016	0.200, 0.053	0.200, 0.044	0.200, 0.029	0.200, 0.030
3	0.400, 0.005	0.400, 0.033	0.400, 0.027	0.400, 0.043	0.400, 0.016	0.400, 0.052	0.400, 0.042	0.400, 0.029	0.400, 0.029
4	0.600, 0.005	0.600, 0.032	0.600, 0.026	0.600, 0.042	0.600, 0.016	0.600, 0.050	0.600, 0.040	0.600, 0.028	0.600, 0.027
5	0.800, 0.004	0.800, 0.031	0.800, 0.025	0.800, 0.041	0.800, 0.017	0.800, 0.049	0.800, 0.037	0.800, 0.028	0.800, 0.026
6	1.000, 0.004	1.000, 0.029	1.000, 0.023	1.000, 0.040	1.000, 0.017	1.000, 0.048	1.000, 0.034	1.000, 0.028	1.000, 0.024
7	1.200, 0.003	1.200, 0.028	1.200, 0.022	1.200, 0.040	1.200, 0.017	1.200, 0.047	1.200, 0.031	1.200, 0.027	1.200, 0.023
8	1.400, 0.003	1.400, 0.027	1.400, 0.022	1.400, 0.039	1.400, 0.017	1.400, 0.045	1.400, 0.029	1.400, 0.027	1.400, 0.022
9	1.600, 0.002	1.600, 0.025	1.600, 0.021	1.600, 0.038	1.600, 0.017	1.600, 0.044	1.600, 0.026	1.600, 0.026	1.600, 0.020
10	1.800, 0.002	1.800, 0.025	1.800, 0.020	1.800, 0.037	1.800, 0.017	1.800, 0.043	1.800, 0.024	1.800, 0.025	1.800, 0.019
11	2.000, 0.002	2.000, 0.024	2.000, 0.020	2.000, 0.036	2.000, 0.017	2.000, 0.042	2.000, 0.021	2.000, 0.025	2.000, 0.019
12	2.200, 0.002	2.200, 0.024	2.200, 0.020	2.200, 0.035	2.200, 0.017	2.200, 0.041	2.200, 0.020	2.200, 0.024	2.200, 0.018
13	2.400, 0.002	2.400, 0.023	2.400, 0.020	2.400, 0.035	2.400, 0.017	2.400, 0.040	2.400, 0.018	2.400, 0.023	2.400, 0.018
14	2.600, 0.002	2.600, 0.023	2.600, 0.020	2.600, 0.034	2.600, 0.016	2.600, 0.039	2.600, 0.017	2.600, 0.023	2.600, 0.017
15	2.800, 0.002	2.800, 0.022	2.800, 0.019	2.800, 0.034	2.800, 0.016	2.800, 0.038	2.800, 0.016	2.800, 0.022	2.800, 0.016
16	3.000, 0.002	3.000, 0.022	3.000, 0.019	3.000, 0.033	3.000, 0.016	3.000, 0.037	3.000, 0.015	3.000, 0.022	3.000, 0.016
17	3.200, 0.002	3.200, 0.021	3.200, 0.019	3.200, 0.033	3.200, 0.015	3.200, 0.036	3.200, 0.014	3.200, 0.022	3.200, 0.015
18	3.400, 0.003	3.400, 0.021	3.400, 0.018	3.400, 0.032	3.400, 0.015	3.400, 0.034	3.400, 0.014	3.400, 0.021	3.400, 0.015
19	3.600, 0.003	3.600, 0.020	3.600, 0.018	3.600, 0.031	3.600, 0.015	3.600, 0.033	3.600, 0.013	3.600, 0.021	3.600, 0.014
20	3.800, 0.003	3.800, 0.020	3.800, 0.018	3.800, 0.031	3.800, 0.014	3.800, 0.032	3.800, 0.012	3.800, 0.020	3.800, 0.013
21	4.000, 0.004	4.000, 0.019	4.000, 0.017	4.000, 0.031	4.000, 0.014	4.000, 0.031	4.000, 0.012	4.000, 0.020	4.000, 0.013
22	4.200, 0.004	4.200, 0.019	4.200, 0.017	4.200, 0.030	4.200, 0.013	4.200, 0.030	4.200, 0.011	4.200, 0.019	4.200, 0.012
23	4.400, 0.005	4.400, 0.018	4.400, 0.017	4.400, 0.030	4.400, 0.013	4.400, 0.030	4.400, 0.010	4.400, 0.019	4.400, 0.012
24	4.600, 0.005	4.600, 0.017	4.600, 0.017	4.600, 0.030	4.600, 0.013	4.600, 0.029	4.600, 0.009	4.600, 0.019	4.600, 0.012
25	4.800, 0.005	4.800, 0.017	4.800, 0.017	4.800, 0.029	4.800, 0.013	4.800, 0.028	4.800, 0.009	4.800, 0.018	4.800, 0.011
26	5.000, 0.005	5.000, 0.016	5.000, 0.017	5.000, 0.029	5.000, 0.013	5.000, 0.027	5.000, 0.008	5.000, 0.018	5.000, 0.011
27	5.200, 0.005	5.200, 0.016	5.200, 0.016	5.200, 0.028	5.200, 0.013	5.200, 0.026	5.200, 0.007	5.200, 0.017	5.200, 0.011
28	5.400, 0.005	5.400, 0.016	5.400, 0.016	5.400, 0.028	5.400, 0.012	5.400, 0.026	5.400, 0.007	5.400, 0.017	5.400, 0.010
29	5.600, 0.005	5.600, 0.015	5.600, 0.016	5.600, 0.027	5.600, 0.012	5.600, 0.025	5.600, 0.007	5.600, 0.016	5.600, 0.010
30	5.800, 0.005	5.800, 0.015	5.800, 0.016	5.800, 0.027	5.800, 0.012	5.800, 0.025	5.800, 0.007	5.800, 0.016	5.800, 0.009
31	6.000, 0.005	6.000, 0.015	6.000, 0.015	6.000, 0.027	6.000, 0.012	6.000, 0.025	6.000, 0.006	6.000, 0.016	6.000, 0.009
32	6.200, 0.005	6.200, 0.015	6.200, 0.015	6.200, 0.026	6.200, 0.011	6.200, 0.025	6.200, 0.006	6.200, 0.016	6.200, 0.008
33	6.400, 0.005	6.400, 0.015	6.400, 0.014	6.400, 0.026	6.400, 0.011	6.400, 0.025	6.400, 0.006	6.400, 0.016	6.400, 0.008
34	6.600, 0.005	6.600, 0.015	6.600, 0.014	6.600, 0.025	6.600, 0.011	6.600, 0.025	6.600, 0.006	6.600, 0.016	6.600, 0.007
35	6.800, 0.005	6.800, 0.014	6.800, 0.014	6.800, 0.025	6.800, 0.011	6.800, 0.025	6.800, 0.006	6.800, 0.016	6.800, 0.007
36	7.000, 0.005	7.000, 0.014	7.000, 0.013	7.000, 0.025	7.000, 0.010	7.000, 0.024	7.000, 0.006	7.000, 0.015	7.000, 0.007
37	7.200, 0.005	7.200, 0.014	7.200, 0.013	7.200, 0.024	7.200, 0.010	7.200, 0.024	7.200, 0.006	7.200, 0.015	7.200, 0.006
38	7.400, 0.005	7.400, 0.013	7.400, 0.013	7.400, 0.024	7.400, 0.010	7.400, 0.024	7.400, 0.006	7.400, 0.015	7.400, 0.006
39	7.600, 0.005	7.600, 0.013	7.600, 0.013	7.600, 0.023	7.600, 0.009	7.600, 0.024	7.600, 0.005	7.600, 0.014	7.600, 0.006
40	7.800, 0.005	7.800, 0.013	7.800, 0.013	7.800, 0.023	7.800, 0.009	7.800, 0.023	7.800, 0.005	7.800, 0.014	7.800, 0.005
41	8.000, 0.005	8.000, 0.012	8.000, 0.012	8.000, 0.023	8.000, 0.009	8.000, 0.023	8.000, 0.005	8.000, 0.013	8.000, 0.005
42	8.200, 0.004	8.200, 0.012	8.200, 0.012	8.200, 0.022	8.200, 0.009	8.200, 0.022	8.200, 0.005	8.200, 0.013	8.200, 0.004
43	8.400, 0.004	8.400, 0.011	8.400, 0.012	8.400, 0.022	8.400, 0.008	8.400, 0.021	8.400, 0.004	8.400, 0.013	8.400, 0.004
44	8.600, 0.004	8.600, 0.011	8.600, 0.012	8.600, 0.022	8.600, 0.008	8.600, 0.020	8.600, 0.004	8.600, 0.012	8.600, 0.004
45	8.800, 0.004	8.800, 0.010	8.800, 0.012	8.800, 0.022	8.800, 0.008	8.800, 0.019	8.800, 0.004	8.800, 0.012	8.800, 0.004
46	9.000, 0.004	9.000, 0.010	9.000, 0.012	9.000, 0.022	9.000, 0.008	9.000, 0.019	9.000, 0.003	9.000, 0.011	9.000, 0.004
47	9.200, 0.004	9.200, 0.010	9.200, 0.012	9.200, 0.022	9.200, 0.008	9.200, 0.018	9.200, 0.003	9.200, 0.011	9.200, 0.004
48	9.400, 0.004	9.400, 0.010	9.400, 0.012	9.400, 0.022	9.400, 0.007	9.400, 0.018	9.400, 0.003	9.400, 0.011	9.400, 0.004
49	9.600, 0.004	9.600, 0.010	9.600, 0.012	9.600, 0.022	9.600, 0.007	9.600, 0.018	9.600, 0.003	9.600, 0.010	9.600, 0.004
50	9.800, 0.004	9.800, 0.010	9.800, 0.012	9.800, 0.022	9.800, 0.007	9.800, 0.017	9.800, 0.002	9.800, 0.010	9.800, 0.004
51	10.000, 0.004	10.000, 0.009	10.000, 0.012	10.000, 0.021	10.000, 0.007	10.000, 0.018	10.000, 0.002	10.000, 0.010	10.000, 0.004
52	10.200, 0.004	10.200, 0.009	10.200, 0.011	10.200, 0.021	10.200, 0.007	10.200, 0.018	10.200, 0.002	10.200, 0.009	10.200, 0.004
53	10.400, 0.004	10.400, 0.009	10.400, 0.011	10.400, 0.021	10.400, 0.007	10.400, 0.018	10.400, 0.002	10.400, 0.009	10.400, 0.004
54	10.600, 0.004	10.600, 0.009	10.600, 0.011	10.600, 0.021	10.600, 0.007	10.600, 0.018	10.600, 0.002	10.600, 0.009	10.600, 0.004
55	10.800, 0.005	10.800, 0.009	10.800, 0.011	10.800, 0.021	10.800, 0.006	10.800, 0.018	10.800, 0.002	10.800, 0.009	10.800, 0.005
56	11.000, 0.005	11.000, 0.008	11.000, 0.011	11.000, 0.021	11.000, 0.006	11.000, 0.018	11.000, 0.003	11.000, 0.009	11.000, 0.005
57	11.200, 0.005	11.200, 0.008	11.200, 0.011	11.200, 0.020	11.200, 0.006	11.200, 0.018	11.200, 0.003	11.200, 0.009	11.200, 0.005
58	11.400, 0.005	11.400, 0.008	11.400, 0.011	11.400, 0.020	11.400, 0.005	11.400, 0.018	11.400, 0.003	11.400, 0.009	11.400, 0.005
59	11.600, 0.005	11.600, 0.008	11.600, 0.011	11.600, 0.019	11.600, 0.005	11.600, 0.018	11.600, 0.003	11.600, 0.009	11.600, 0.005
60	11.800, 0.005	11.800, 0.008	11.800, 0.011	11.800, 0.019	11.800, 0.004	11.800, 0.018	11.800, 0.003	11.800, 0.009	11.800, 0.005
61	12.000, 0.005	12.000, 0.007	12.000, 0.010	12.000, 0.019	12.000, 0.004	12.000, 0.017	12.000, 0.003	12.000, 0.009	12.000, 0.004
62	12.200, 0.005	12.200, 0.007	12.200, 0.010	12.200, 0.018	12.200, 0.004	12.200, 0.017	12.200, 0.003	12.200, 0.008	12.200, 0.004
63	12.400, 0.006	12.400, 0.007	12.400, 0.010	12.400, 0.018	12.400, 0.003	12.400, 0.016	12.400, 0.002	12.400, 0.008	12.400, 0.003
64	12.600, 0.006	12.600, 0.006	12.600, 0.009	12.600, 0.017	12.600, 0.003	12.600, 0.016	12.600, 0.002	12.600, 0.008	12.600, 0.003
65	12.800, 0.007	12.800, 0.006	12.800, 0.009	12.800, 0.017	12.800, 0.003	12.800, 0.016	12.800, 0.002	12.800, 0.008	12.800, 0.003
66	13.000, 0.007	13.000, 0.006	13.000, 0.008	13.000, 0.017	13.000, 0.003	13.000, 0.015	13.000, 0.001	13.000, 0.008	13.000, 0.003
67	13.200, 0.007	13.200, 0.006	13.200, 0.008	13.200, 0.017	13.200, 0.003	13.200, 0.015	13.200, 0.001	13.200, 0.008	13.200, 0.003
68	13.400, 0.008	13.400, 0.005	13.400, 0.008	13.400, 0.017	13.400, 0.003	13.400, 0.015	13.400, 0.001	13.400, 0.007	13.400, 0.002
69	13.600, 0.008	13.600, 0.005	13.600, 0.008	13.600, 0.016	13.600, 0.003	13.600, 0.015	13.600, 0.000	13.600, 0.007	13.600, 0.002
70	13.800, 0.008	13.800, 0.005	13.800, 0.008	13.800, 0.016	13.800, 0.003	13.800, 0.015	13.800, 0.000	13.800, 0.006	13.800, 0.002
71	14.000, 0.008	14.000, 0.005	14.000, 0.008	14.000, 0.016	14.000, 0.003	14.000, 0.014	14.000, 0.000	14.000, 0.006	14.000, 0.002
72	14.200, 0.008	14.200, 0.005	14.200, 0.008	14.200, 0.016	14.200, 0.003	14.200, 0.014	14.200, 0.000	14.200, 0.006	14.200, 0.002
73	14.400, 0.008	14.400, 0.005	14.400, 0.008	14.400, 0.016	14.400, 0.003	14.400, 0.014	14.400, 0.000	14.400, 0.005	14.400, 0.002
74	14.600, 0.008	14.600, 0.005	14.600, 0.008	14.600, 0.016	14.600, 0.003	14.600, 0.014	14.600, 0.000	14.600, 0.005	14.600, 0.002
75	14.800, 0.007	14.800, 0.005	14.800, 0.008	14.800, 0.015	14.800, 0.003	14.800, 0.013	14.800, 0.000	14.800, 0.005	14.800, 0.002
76	15.000, 0.007	15.000, 0.005	15.000, 0.008	15.000, 0.015	15.000, 0.003	15.000, 0.013	15.000, 0.000	15.000, 0.005	15.000, 0.002
77	15.200, 0.007	15.200, 0.005	15.200, 0.008	15.200, 0.015	15.200, 0.003	15.200, 0.013	15.200, 0.001	15.200, 0.005	15.200, 0.002
78	15.400, 0.006	15.400, 0.005	15.400, 0.008	15.400, 0.015	15.400, 0.003	15.400, 0.013	15.400, 0.001	15.400, 0.005	15.400, 0.002
79	15.600, 0.006	15.600, 0.005	15.600, 0.008	15.600, 0.015	15.600, 0.003	15.600, 0.013	15.600, 0.001	15.600, 0.005	15.600, 0.001
80	15.800, 0.006	15.800, 0.005	15.800, 0.008	15.800, 0.014	15.800, 0.003	15.800, 0.012	15.800, 0.001	15.800, 0.005	15.800, 0.001
81	16.000, 0.006	16.000, 0.005	16.000, 0.007	16.000, 0.014	16.000, 0.003	16.000, 0.012	16.000, 0.001	16.000, 0.005	16.000, 0.001
82	16.200, 0.006	16.200, 0.005	16.200, 0.007	16.200, 0.014	16.200, 0.003	16.200, 0.011	16.200, 0.002	16.200, 0.005	16.200, 0.001
83	16.400, 0.006	16.400, 0.005	16.400, 0.007	16.400, 0.014	16.400, 0.002	16.400, 0.011	16.400, 0.002	16.400, 0.005	16.400, 0.001
84	16.600, 0.006	16.600, 0.005	16.600, 0.007	16.600, 0.014	16.600, 0.002	16.600, 0.010	16.600, 0.002	16.600, 0.005	16.600, 0.000
85	16.800, 0.006	16.800, 0.005	16.800, 0.006	16.800, 0.013	16.800, 0.002	16.800, 0.010	16.800, 0.002	16.800, 0.005	16.800, 0.001
86	17.000, 0.006	17.000, 0.004	17.000, 0.006	17.000, 0.013	17.000, 0.002	17.000, 0.009	17.000, 0.002	17.000, 0.004	17.000, 0.000
87	17.200, 0.006	17.200, 0.004	17.200, 0.006	17.200, 0.013	17.200, 0.002	17.200, 0.009	17.200, 0.002	17.200, 0.004	17.200, 0.000
88	17.400, 0.006	17.400, 0.004	17.400, 0.006	17.400, 0.012	17.400, 0.002	17.400, 0.008	17.400, 0.002	17.400, 0.004	17.400, 0.000
89	17.600, 0.006	17.600, 0.003	17.600, 0.005	17.600, 0.012	17.600, 0.002	17.600, 0.008	17.600, 0.001	17.600, 0.003	17.600, 0.000
90	17.800, 0.006	17.800, 0.003	17.800, 0.005	17.800, 0.011	17.800, 0.002	17.800, 0.008	17.800, 0.001	17.800, 0.003	17.800, 0.000
91	18.000, 0.006	18.000, 0.003	18.000, 0.005	18.000, 0.011	18.000, 0.002	18.000, 0.008	18.000, 0.001	18.000, 0.003	18.000, 0.000
92	18.200, 0.006	18.200, 0.003	18.200, 0.005	18.200, 0.010	18.200, 0.002	18.200, 0.007	18.200, 0.001	18.200, 0.003	18.200, 0.000
93	18.400, 0.006	18.400, 0.003	18.400, 0.005	18.400, 0.010	18.400, 0.002	18.400, 0.007	18.400, 0.001	18.400, 0.002	18.400, 0.000
94	18.600, 0.006	18.600, 0.003	18.600, 0.004	18.600, 0.009	18.600, 0.002	18.600, 0.007	18.600, 0.001	18.600, 0.002	18.600, 0.000
95	18.800, 0.005	18.800, 0.003	18.800, 0.004	18.800, 0.009	18.800, 0.002	18.800, 0.007	18.800, 0.001	18.800, 0.002	18.800, 0.000
96	19.000, 0.005	19.000, 0.003	19.000, 0.004	19.000, 0.009	19.000, 0.002	19.000, 0.007	19.000, 0.001	19.000, 0.002	19.000, 0.000
97	19.200, 0.005	19.200, 0.002	19.200, 0.004	19.200, 0.009	19.200, 0.003	19.200, 0.007	19.200, 0.001	19.200, 0.002	19.200, 0.000
98	19.400, 0.005	19.400, 0.002	19.400, 0.004	19.400, 0.009	19.400, 0.002	19.400, 0.007	19.400, 0.001	19.400, 0.002	19.400, 0.000
99	19.600, 0.004	19.600, 0.002	19.600, 0.004	19.600, 0.009	19.600, 0.002	19.600, 0.007	19.600, 0.001	19.600, 0.002	19.600, 0.000
100	19.800, 0.004	19.800, 0.002	19.800, 0.004	19.800, 0.009	19.800, 0.002	19.800, 0.008	19.800, 0.002	19.800, 0.002	19.800, 0.000
101	20.000, 0.004	20.000, 0.002	20.000, 0.004	20.000, 0.009	20.000, 0.002	20.000, 0.008	20.000, 0.002	20.000, 0.001	20.000, 0.000
102	20.200, 0.004	20.200, 0.002	20.200, 0.004	20.200, 0.009	20.200, 0.002	20.200, 0.008	20.200, 0.002	20.200, 0.002	20.200, 0.001
103	20.400, 0.003	20.400, 0.002	20.400, 0.003	20.400, 0.009	20.400, 0.002	20.400, 0.008	20.400, 0.002	20.400, 0.002	20.400, 0.001
104	20.600, 0.003	20.600, 0.003	20.600, 0.003	20.600, 0.009	20.600, 0.001	20.600, 0.008	20.600, 0.002	20.600, 0.002	20.600, 0.001
105	20.800, 0.003	20.800, 0.003	20.800, 0.003	20.800, 0.009	20.800, 0.001	20.800, 0.008	20.800, 0.001	20.800, 0.002	20.800, 0.001
106	21.000, 0.003	21.000, 0.003	21.000, 0.003	21.000, 0.009	21.000, 0.001	21.000, 0.007	21.000, 0.001	21.000, 0.002	21.000, 0.001
107	21.200, 0.003	21.200, 0.003	21.200, 0.002	21.200, 0.008	21.200, 0.001	21.200, 0.007	21.200, 0.001	21.200, 0.002	21.200, 0.001
108	21.400, 0.003	21.400, 0.003	21.400, 0.002	21.400, 0.008	21.400, 0.001	21.400, 0.007	21.400, 0.001	21.400, 0.002	21.400, 0.001
109	21.600, 0.003	21.600, 0.003	21.600, 0.002	21.600, 0.008	21.600, 0.001	21.600, 0.007	21.600, 0.001	21.600, 0.002	21.600, 0.001
110	21.800, 0.003	21.800, 0.003	21.800, 0.001	21.800, 0.007	21.800, 0.001	21.800, 0.007	21.800, 0.001	21.800, 0.002	21.800, 0.001
111	22.000, 0.003	22.000, 0.003	22.000, 0.001	22.000, 0.007	22.000, 0.001	22.000, 0.006	22.000, 0.001	22.000, 0.003	22.000, 0.002
112	22.200, 0.003	22.200, 0.003	22.200, 0.001	22.200, 0.006	22.200, 0.001	22.200, 0.006	22.200, 0.001	22.200, 0.003	22.200, 0.001
113	22.400, 0.003	22.400, 0.003	22.400, 0.002	22.400, 0.006	22.400, 0.001	22.400, 0.006	22.400, 0.001	22.400, 0.003	22.400, 0.001
114	22.600, 0.003	22.600, 0.003	22.600, 0.002	22.600, 0.006	22.600, 0.001	22.600, 0.006	22.600, 0.001	22.600, 0.003	22.600, 0.001
115	22.800, 0.003	22.800, 0.002	22.800, 0.002	22.800, 0.006	22.800, 0.001	22.800, 0.005	22.800, 0.001	22.800, 0.003	22.800, 0.001
116	23.000, 0.003	23.000, 0.002	23.000, 0.002	23.000, 0.006	23.000, 0.000	23.000, 0.005	23.000, 0.001	23.000, 0.003	23.000, 0.001
117	23.200, 0.003	23.200, 0.002	23.200, 0.002	23.200, 0.006	23.200, 0.000	23.200, 0.005	23.200, 0.002	23.200, 0.003	23.200, 0.001
118	23.400, 0.003	23.400, 0.001	23.400, 0.002	23.400, 0.006	23.400, -0.000	23.400, 0.005	23.400, 0.002	23.400, 0.002	23.400, 0.001
119	23.600, 0.003	23.600, 0.001	23.600, 0.002	23.600, 0.006	23.600, -0.000	23.600, 0.004	23.600, 0.002	23.600, 0.002	23.600, 0.002
120	23.800, 0.003	23.800, 0.001	23.800, 0.002	23.800, 0.006	23.800, -0.001	23.800, 0.004	23.800, 0.002	23.800, 0.002	23.800, 0.002
121	24.000, 0.003	24.000, 0.001	24.000, 0.002	24.000, 0.006	24.000, -0.001	24.000, 0.004	24.000, 0.001	24.000, 0.002	24.000, 0.002
122	24.200, 0.003	24.200, 0.001	24.200, 0.002	24.200, 0.006	24.200, -0.001	24.200, 0.004	24.200, 0.001	24.200, 0.001	24.200, 0.002
123	24.400, 0.003	24.400, 0.001	24.400, 0.002	24.400, 0.006	24.400, -0.001	24.400, 0.004	24.400, 0.001	24.400, 0.001	24.400, 0.002
124	24.600, 0.003	24.600, 0.002	24.600, 0.002	24.600, 0.005	24.600, -0.002	24.600, 0.003	24.600, 0.001	24.600, 0.001	24.600, 0.002
125	24.800, 0.003	24.800, 0.002	24.800, 0.001	24.800, 0.005	24.800, -0.002	24.800, 0.003	24.800, 0.001	24.800, 0.001	24.800, 0.002
126	25.000, 0.003	25.000, 0.002	25.000, 0.001	25.000, 0.005	25.000, -0.002	25.000, 0.003	25.000, 0.001	25.000, 0.000	25.000, 0.002
127	25.200, 0.002	25.200, 0.002	25.200, 0.001	25.200, 0.004	25.200, -0.002	25.200, 0.003	25.200, 0.001	25.200, -0.000	25.200, 0.002
128	25.400, 0.002	25.400, 0.002	25.400, 0.001	25.400, 0.004	25.400, -0.002	25.400, 0.002	25.400, 0.001	25.400, -0.000	25.400, 0.002
129	25.600, 0.002	25.600, 0.002	25.600, 0.000	25.600, 0.004	25.600, -0.002	25.600, 0.002	25.600, 0.001	25.600, -0.000	25.600, 0.002
130	25.800, 0.002	25.800, 0.002	25.800, 0.000	25.800, 0.004	25.800, -0.002	25.800, 0.002	25.800, 0.001	25.800, -0.000	25.800, 0.002
131	26.000, 0.001	26.000, 0.002	26.000, 0.000	26.000, 0.003	26.000, -0.001	26.000, 0.002	26.000, 0.001	26.000, -0.000	26.000, 0.002
132	26.200, 0.001	26.200, 0.001	26.200, 0.000	26.200, 0.003	26.200, -0.001	26.200, 0.001	26.200, 0.001	26.200, 0.000	26.200, 0.002
133	26.400, 0.001	26.400, 0.001	26.400, 0.000	26.400, 0.003	26.400, -0.001	26.400, 0.001	26.400, 0.001	26.400, 0.000	26.400, 0.002
134	26.600, 0.001	26.600, 0.001	26.600, 0.000	26.600, 0.003	26.600, -0.001	26.600, 0.001	26.600, 0.002	26.600, 0.001	26.600, 0.002
135	26.800, 0.001	26.800, 0.001	26.800, 0.000	26.800, 0.003	26.800, -0.001	26.800, 0.001	26.800, 0.002	26.800, 0.001	26.800, 0.002
136	27.000, 0.001	27.000, 0.001	27.000, 0.000	27.000, 0.002	27.000, -0.000	27.000, 0.001	27.000, 0.001	27.000, 0.001	27.000, 0.001
137	27.200, 0.000	27.200, 0.001	27.200, 0.000	27.200, 0.002	27.200, -0.000	27.200, 0.001	27.200, 0.001	27.200, 0.001	27.200, 0.001
138	27.400, 0.000	27.400, 0.000	27.400, 0.000	27.400, 0.002	27.400, 0.000	27.400, 0.000	27.400, 0.001	27.400, 0.001	27.400, 0.001
139	27.600, 0.000	27.600, 0.000	27.600, 0.000	27.600, 0.001	27.600, 0.000	27.600, 0.000	27.600, 0.001	27.600, 0.001	27.600, 0.000
140	27.800, 0.000	27.800, 0.000	27.800, 0.000	27.800, 0.001	27.800, 0.000	27.800, 0.000	27.800, 0.000	27.800, 0.001	27.800, 0.000
141	28.000, 0.000	28.000, 0.000	28.000, 0.000	28.000, 0.000	28.000, 0.000	28.000, 0.000	28.000, 0.000	28.000, 0.001	28.000, -0.000
142	28.200, 0.000	28.200, 0.000	28.200, 0.000	28.200, -0.000	28.200, 0.000	28.200, 0.000	28.200, -0.000	28.200, 0.001	28.200, -0.000
143	28.400, 0.000	28.400, -0.000	28.400, 0.000	28.400, -0.001	28.400, 0.000	28.400, 0.000	28.400, -0.000	28.400, 0.000	28.400, -0.000
144	28.600, 0.000	28.600, -0.000	28.600, 0.000	28.600, -0.001	28.600, 0.000	28.600, 0.000	28.600, -0.000	28.600, -0.000	28.600, -0.000
145	28.800, -0.000	28.800, -0.000	28.800, 0.000	28.800, -0.001	28.800, 0.000	28.800, -0.000	28.800, -0.001	28.800, -0.000	28.800, -0.001
146	29.000, -0.000	29.000, -0.000	29.000, -0.000	29.000, -0.001	29.000, -0.000	29.000, -0.000	29.000, -0.001	29.000, -0.001	29.000, -0.000
147	29.200, -0.000	29.200, -0.000	29.200, -0.000	29.200, -0.001	29.200, -0.000	29.200, -0.001	29.200, -0.001	29.200, -0.001	29.200, -0.000
148	29.400, -0.000	29.400, -0.000	29.400, -0.000	29.400, -0.001	29.400, -0.000	29.400, -0.001	29.400, -0.001	29.400, -0.001	29.400, -0.000
149	29.600, -0.000	29.600, -0.000	29.600, -0.001	29.600, -0.001	29.600, -0.001	29.600, -0.001	29.600, -0.001	29.600, -0.001	29.600, -0.000
150	29.800, -0.000	29.800, -0.000	29.800, -0.001	29.800, -0.001	29.800, -0.001	29.800, -0.001	29.800, -0.001	29.800, -0.001	29.800, 0.000
151	30.000, 0.000	30.000, 0.000	30.000, 0.000	30.000, 0.000	30.000, 0.000	30.000, 0.000	30.000, 0.000	30.000, 0.000	30.000, 0.000
152	30.200, 0.008	30.200, 0.009	30.200, 0.008	30.200, 0.005	30.200, 0.005	30.200, 0.004	30.200, 0.003	30.200, 0.001	30.200, -0.005
153	30.400, 0.017	30.400, 0.019	30.400, 0.017	30.400, 0.011	30.400, 0.011	30.400, 0.008	30.400, 0.008	30.400, 0.002	30.400, -0.010
154	30.600, 0.028	30.600, 0.030	30.600, 0.028	30.600, 0.017	30.600, 0.017	30.600, 0.014	30.600, 0.013	30.600, 0.004	30.600, -0.014
155	30.800, 0.040	30.800, 0.042	30.800, 0.042	30.800, 0.025	30.800, 0.025	30.800, 0.019	30.800, 0.020	30.800, 0.006	30.800, -0.019
156	31.000, 0.053	31.000, 0.054	31.000, 0.056	31.000, 0.033	31.000, 0.032	31.000, 0.025	31.000, 0.027	31.000, 0.009	31.000, -0.023
157	31.200, 0.066	31.200, 0.066	31.200, 0.072	31.200, 0.042	31.200, 0.040	31.200, 0.031	31.200, 0.034	31.200, 0.012	31.200, -0.026
158	31.400, 0.080	31.400, 0.078	31.400, 0.090	31.400, 0.050	31.400, 0.048	31.400, 0.037	31.400, 0.042	31.400, 0.016	31.400, -0.029
159	31.600, 0.095	31.600, 0.090	31.600, 0.108	31.600, 0.059	31.600, 0.056	31.600, 0.042	31.600, 0.050	31.600, 0.020	31.600, -0.031
160	31.800, 0.109	31.800, 0.100	31.800, 0.126	31.800, 0.067	31.800, 0.063	31.800, 0.047	31.800, 0.059	31.800, 0.024	31.800, -0.031
161	32.000, 0.122	32.000, 0.108	32.000, 0.144	32.000, 0.075	32.000, 0.069	32.000, 0.051	32.000, 0.067	32.000, 0.028	32.000, -0.031
162	32.200, 0.135	32.200, 0.115	32.200, 0.162	32.200, 0.081	32.200, 0.074	32.200, 0.054	32.200, 0.075	32.200, 0.032	32.200, -0.029
163	32.400, 0.148	32.400, 0.120	32.400, 0.179	32.400, 0.086	32.400, 0.078	32.400, 0.056	32.400, 0.082	32.400, 0.035	32.400, -0.029
164	32.600, 0.160	32.600, 0.125	32.600, 0.196	32.600, 0.090	32.600, 0.082	32.600, 0.058	32.600, 0.089	32.600, 0.038	32.600, -0.028
165	32.800, 0.172	32.800, 0.129	32.800, 0.214	32.800, 0.093	32.800, 0.085	32.800, 0.059	32.800, 0.095	32.800, 0.041	32.800, -0.028
166	33.000, 0.184	33.000, 0.132	33.000, 0.231	33.000, 0.096	33.000, 0.088	33.000, 0.059	33.000, 0.102	33.000, 0.044	33.000, -0.028
167	33.200, 0.195	33.200, 0.134	33.200, 0.248	33.200, 0.099	33.200, 0.090	33.200, 0.060	33.200, 0.108	33.200, 0.047	33.200, -0.028
168	33.400, 0.206	33.400, 0.136	33.400, 0.265	33.400, 0.100	33.400, 0.091	33.400, 0.059	33.400, 0.114	33.400, 0.050	33.400, -0.029
169	33.600, 0.217	33.600, 0.137	33.600, 0.282	33.600, 0.102	33.600, 0.093	33.600, 0.059	33.600, 0.120	33.600, 0.053	33.600, -0.029
170	33.800, 0.228	33.800, 0.138	33.800, 0.298	33.800, 0.103	33.800, 0.094	33.800, 0.059	33.800, 0.126	33.800, 0.057	33.800, -0.029
171	34.000, 0.239	34.000, 0.139	34.000, 0.315	34.000, 0.103	34.000, 0.095	34.000, 0.059	34.000, 0.132	34.000, 0.060	34.000, -0.029
172	34.200, 0.250	34.200, 0.139	34.200, 0.331	34.200, 0.104	34.200, 0.096	34.200, 0.059	34.200, 0.138	34.200, 0.064	34.200, -0.030
173	34.400, 0.261	34.400, 0.139	34.400, 0.347	34.400, 0.104	34.400, 0.096	34.400, 0.059	34.400, 0.144	34.400, 0.067	34.400, -0.030
174	34.600, 0.272	34.600, 0.139	34.600, 0.363	34.600, 0.105	34.600, 0.097	34.600, 0.059	34.600, 0.150	34.600, 0.071	34.600, -0.030
175	34.800, 0.283	34.800, 0.138	34.800, 0.379	34.800, 0.105	34.800, 0.097	34.800, 0.059	34.800, 0.156	34.800, 0.074	34.800, -0.031
176	35.000, 0.293	35.000, 0.138	35.000, 0.394	35.000, 0.105	35.000, 0.097	35.000, 0.058	35.000, 0.163	35.000, 0.077	35.000, -0.031
177	35.200, 0.304	35.200, 0.138	35.200, 0.410	35.200, 0.105	35.200, 0.097	35.200, 0.058	35.200, 0.169	35.200, 0.081	35.200, -0.031
178	35.400, 0.315	35.400, 0.137	35.400, 0.425	35.400, 0.105	35.400, 0.097	35.400, 0.058	35.400, 0.176	35.400, 0.084	35.400, -0.031
179	35.600, 0.326	35.600, 0.137	35.600, 0.439	35.600, 0.105	35.600, 0.097	35.600, 0.058	35.600, 0.182	35.600, 0.087	35.600, -0.032
180	35.800, 0.336	35.800, 0.136	35.800, 0.454	35.800, 0.105	35.800, 0.097	35.800, 0.058	35.800, 0.189	35.800, 0.090	35.800, -0.032
181	36.000, 0.348	36.000, 0.136	36.000, 0.468	36.000, 0.105	36.000, 0.097	36.000, 0.058	36.000, 0.196	36.000, 0.093	36.000, -0.032
182	36.200, 0.359	36.200, 0.136	36.200, 0.482	36.200, 0.104	36.200, 0.097	36.200, 0.058	36.200, 0.202	36.200, 0.096	36.200, -0.032
183	36.400, 0.370	36.400, 0.135	36.400, 0.496	36.400, 0.104	36.400, 0.097	36.400, 0.059	36.400, 0.209	36.400, 0.099	36.400, -0.033
184	36.600, 0.381	36.600, 0.135	36.600, 0.510	36.600, 0.104	36.600, 0.096	36.600, 0.059	36.600, 0.216	36.600, 0.101	36.600, -0.033
185	36.800, 0.392	36.800, 0.135	36.800, 0.524	36.800, 0.103	36.800, 0.096	36.800, 0.060	36.800, 0.223	36.800, 0.103	36.800, -0.033
186	37.000, 0.403	37.000, 0.135	37.000, 0.537	37.000, 0.103	37.000, 0.096	37.000, 0.060	37.000, 0.230	37.000, 0.105	37.000, -0.032
187	37.200, 0.414	37.200, 0.135	37.200, 0.551	37.200, 0.103	37.200, 0.096	37.200, 0.060	37.200, 0.237	37.200, 0.107	37.200, -0.032
188	37.400, 0.424	37.400, 0.136	37.400, 0.565	37.400, 0.102	37.400, 0.097	37.400, 0.061	37.400, 0.244	37.400, 0.109	37.400, -0.032
189	37.600, 0.435	37.600, 0.136	37.600, 0.578	37.600, 0.102	37.600, 0.097	37.600, 0.061	37.600, 0.251	37.600, 0.111	37.600, -0.031
190	37.800, 0.446	37.800, 0.136	37.800, 0.591	37.800, 0.101	37.800, 0.097	37.800, 0.061	37.800, 0.258	37.800, 0.113	37.800, -0.031
191	38.000, 0.456	38.000, 0.136	38.000, 0.603	38.000, 0.101	38.000, 0.097	38.000, 0.062	38.000, 0.265	38.000, 0.115	38.000, -0.031
192	38.200, 0.467	38.200, 0.136	38.200, 0.616	38.200, 0.101	38.200, 0.097	38.200, 0.062	38.200, 0.272	38.200, 0.116	38.200, -0.031
193	38.400, 0.477	38.400, 0.136	38.400, 0.628	38.400, 0.100	38.400, 0.096	38.400, 0.062	38.400, 0.278	38.400, 0.117	38.400, -0.031
194	38.600, 0.487	38.600, 0.136	38.600, 0.639	38.600, 0.100	38.600, 0.096	38.600, 0.062	38.600, 0.285	38.600, 0.119	38.600, -0.031
195	38.800, 0.497	38.800, 0.136	38.800, 0.651	38.800, 0.100	38.800, 0.096	38.800, 0.062	38.800, 0.291	38.800, 0.120	38.800, -0.031
196	39.000, 0.508	39.000, 0.136	39.000, 0.662	39.000, 0.100	39.000, 0.096	39.000, 0.061	39.000, 0.298	39.000, 0.121	39.000, -0.031
197	39.200, 0.518	39.200, 0.135	39.200, 0.674	39.200, 0.100	39.200, 0.096	39.200, 0.061	39.200, 0.304	39.200, 0.122	39.200, -0.031
198	39.400, 0.528	39.400, 0.135	39.400, 0.685	39.400, 0.100	39.400, 0.096	39.400, 0.061	39.400, 0.311	39.400, 0.123	39.400, -0.031
199	39.600, 0.539	39.600, 0.134	39.600, 0.696	39.600, 0.099	39.600, 0.095	39.600, 0.061	39.600, 0.317	39.600, 0.124	39.600, -0.031
200	39.800, 0.549	39.800, 0.134	39.800, 0.706	39.800, 0.099	39.800, 0.095	39.800, 0.061	39.800, 0.324	39.800, 0.124	39.800, -0.031
201	40.000, 0.559	40.000, 0.133	40.000, 0.716	40.000, 0.099	40.000, 0.095	40.000, 0.061	40.000, 0.330	40.000, 0.125	40.000, -0.031
202	40.200, 0.570	40.200, 0.133	40.200, 0.727	40.200, 0.098	40.200, 0.094	40.200, 0.061	40.200, 0.336	40.200, 0.126	40.200, -0.031
203	40.400, 0.580	40.400, 0.133	40.400, 0.737	40.400, 0.098	40.400, 0.094	40.400, 0.061	40.400, 0.343	40.400, 0.127	40.400, -0.031
204	40.600, 0.590	40.600, 0.133	40.600, 0.747	40.600, 0.098	40.600, 0.095	40.600, 0.061	40.600, 0.349	40.600, 0.127	40.600, -0.031
205	40.800, 0.600	40.800, 0.133	40.800, 0.757	40.800, 0.098	40.800, 0.095	40.800, 0.060	40.800, 0.356	40.800, 0.128	40.800, -0.031
206	41.000, 0.610	41.000, 0.133	41.000, 0.767	41.000, 0.098	41.000, 0.095	41.000, 0.061	41.000, 0.363	41.000, 0.128	41.000, -0.031
207	41.200, 0.620	41.200, 0.132	41.200, 0.777	41.200, 0.097	41.200, 0.096	41.200, 0.061	41.200, 0.370	41.200, 0.129	41.200, -0.031
208	41.400, 0.629	41.400, 0.132	41.400, 0.787	41.400, 0.097	41.400, 0.096	41.400, 0.061	41.400, 0.377	41.400, 0.129	41.400, -0.031
209	41.600, 0.639	41.600, 0.132	41.600, 0.797	41.600, 0.097	41.600, 0.096	41.600, 0.062	41.600, 0.383	41.600, 0.130	41.600, -0.031
210	41.800, 0.649	41.800, 0.132	41.800, 0.806	41.800, 0.096	41.800, 0.097	41.800, 0.063	41.800, 0.389	41.800, 0.130	41.800, -0.032
211	42.000, 0.658	42.000, 0.132	42.000, 0.816	42.000, 0.096	42.000, 0.097	42.000, 0.064	42.000, 0.395	42.000, 0.130	42.000, -0.032
212	42.200, 0.667	42.200, 0.132	42.200, 0.825	42.200, 0.096	42.200, 0.097	42.200, 0.065	42.200, 0.402	42.200, 0.130	42.200, -0.033
213	42.400, 0.676	42.400, 0.132	42.400, 0.835	42.400, 0.096	42.400, 0.098	42.400, 0.066	42.400, 0.408	42.400, 0.130	42.400, -0.033
214	42.600, 0.685	42.600, 0.132	42.600, 0.844	42.600, 0.096	42.600, 0.098	42.600, 0.067	42.600, 0.413	42.600, 0.131	42.600, -0.033
215	42.800, 0.695	42.800, 0.132	42.800, 0.853	42.800, 0.096	42.800, 0.098	42.800, 0.067	42.800, 0.419	42.800, 0.131	42.800, -0.033
216	43.000, 0.704	43.000, 0.131	43.000, 0.863	43.000, 0.095	43.000, 0.099	43.000, 0.068	43.000, 0.425	43.000, 0.131	43.000, -0.033
217	43.200, 0.713	43.200, 0.131	43.200, 0.871	43.200, 0.095	43.200, 0.099	43.200, 0.068	43.200, 0.431	43.200, 0.131	43.200, -0.033
218	43.400, 0.723	43.400, 0.131	43.400, 0.880	43.400, 0.095	43.400, 0.098	43.400, 0.069	43.400, 0.436	43.400, 0.132	43.400, -0.033
219	43.600, 0.732	43.600, 0.131	43.600, 0.888	43.600, 0.094	43.600, 0.098	43.600, 0.069	43.600, 0.442	43.600, 0.132	43.600, -0.033
220	43.800, 0.742	43.800, 0.131	43.800, 0.897	43.800, 0.094	43.800, 0.098	43.800, 0.069	43.800, 0.448	43.800, 0.132	43.800, -0.033
221	44.000, 0.751	44.000, 0.131	44.000, 0.905	44.000, 0.094	44.000, 0.097	44.000, 0.069	44.000, 0.454	44.000, 0.133	44.000, -0.033
222	44.200, 0.760	44.200, 0.131	44.200, 0.913	44.200, 0.094	44.200, 0.097	44.200, 0.069	44.200, 0.459	44.200, 0.133	44.200, -0.034
223	44.400, 0.769	44.400, 0.131	44.400, 0.921	44.400, 0.094	44.400, 0.097	44.400, 0.069	44.400, 0.465	44.400, 0.133	44.400, -0.034
224	44.600, 0.779	44.600, 0.131	44.600, 0.929	44.600, 0.094	44.600, 0.097	44.600, 0.069	44.600, 0.471	44.600, 0.133	44.600, -0.034
225	44.800, 0.788	44.800, 0.131	44.800, 0.937	44.800, 0.094	44.800, 0.097	44.800, 0.069	44.800, 0.477	44.800, 0.133	44.800, -0.035
226	45.000, 0.797	45.000, 0.131	45.000, 0.945	45.000, 0.093	45.000, 0.097	45.000, 0.068	45.000, 0.483	45.000, 0.133	45.000, -0.035
227	45.200, 0.807	45.200, 0.131	45.200, 0.952	45.200, 0.093	45.200, 0.097	45.200, 0.068	45.200, 0.488	45.200, 0.132	45.200, -0.035
228	45.400, 0.816	45.400, 0.131	45.400, 0.960	45.400, 0.093	45.400, 0.097	45.400, 0.068	45.400, 0.494	45.400, 0.132	45.400, -0.035
229	45.600, 0.825	45.600, 0.131	45.600, 0.968	45.600, 0.093	45.600, 0.098	45.600, 0.068	45.600, 0.500	45.600, 0.132	45.600, -0.035
230	45.800, 0.834	45.800, 0.131	45.800, 0.975	45.800, 0.093	45.800, 0.098	45.800, 0.068	45.800, 0.505	45.800, 0.132	45.800, -0.034
231	46.000, 0.843	46.000, 0.131	46.000, 0.983	46.000, 0.093	46.000, 0.098	46.000, 0.069	46.000, 0.511	46.000, 0.131	46.000, -0.034
232	46.200, 0.851	46.200, 0.131	46.200, 0.991	46.200, 0.093	46.200, 0.099	46.200, 0.069	46.200, 0.517	46.200, 0.131	46.200, -0.033
233	46.400, 0.860	46.400, 0.131	46.400, 0.999	46.400, 0.093	46.400, 0.100	46.400, 0.070	46.400, 0.522	46.400, 0.132	46.400, -0.033
234	46.600, 0.868	46.600, 0.131	46.600, 1.007	46.600, 0.093	46.600, 0.100	46.600, 0.070	46.600, 0.528	46.600, 0.132	46.600, -0.033
235	46.800, 0.877	46.800, 0.131	46.800, 1.014	46.800, 0.093	46.800, 0.101	46.800, 0.070	46.800, 0.533	46.800, 0.133	46.800, -0.032
236	47.000, 0.885	47.000, 0.131	47.000, 1.022	47.000, 0.093	47.000, 0.101	47.000, 0.070	47.000, 0.538	47.000, 0.133	47.000, -0.032
237	47.200, 0.893	47.200, 0.131	47.200, 1.029	47.200, 0.093	47.200, 0.101	47.200, 0.070	47.200, 0.544	47.200, 0.134	47.200, -0.032
238	47.400, 0.902	47.400, 0.130	47.400, 1.036	47.400, 0.093	47.400, 0.101	47.400, 0.071	47.400, 0.549	47.400, 0.134	47.400, -0.032
239	47.600, 0.910	47.600, 0.130	47.600, 1.044	47.600, 0.093	47.600, 0.101	47.600, 0.071	47.600, 0.554	47.600, 0.134	47.600, -0.032
240	47.800, 0.918	47.800, 0.130	47.800, 1.050	47.800, 0.092	47.800, 0.102	47.800, 0.071	47.800, 0.559	47.800, 0.135	47.800, -0.032
241	48.000, 0.926	48.000, 0.130	48.000, 1.057	48.000, 0.092	48.000, 0.102	48.000, 0.072	48.000, 0.565	48.000, 0.135	48.000, -0.032
242	48.200, 0.934	48.200, 0.130	48.200, 1.064	48.200, 0.092	48.200, 0.102	48.200, 0.072	48.200, 0.570	48.200, 0.135	48.200, -0.033
243	48.400, 0.942	48.400, 0.130	48.400, 1.071	48.400, 0.092	48.400, 0.102	48.400, 0.072	48.400, 0.576	48.400, 0.135	48.400, -0.033
244	48.600, 0.950	48.600, 0.130	48.600, 1.078	48.600, 0.091	48.600, 0.103	48.600, 0.072	48.600, 0.581	48.600, 0.136	48.600, -0.034
245	48.800, 0.958	48.800, 0.130	48.800, 1.084	48.800, 0.091	48.800, 0.103	48.800, 0.072	48.800, 0.586	48.800, 0.136	48.800, -0.034
246	49.000, 0.966	49.000, 0.130	49.000, 1.090	49.000, 0.090	49.000, 0.103	49.000, 0.072	49.000, 0.591	49.000, 0.135	49.000, -0.034
247	49.200, 0.974	49.200, 0.130	49.200, 1.097	49.200, 0.090	49.200, 0.103	49.200, 0.072	49.200, 0.596	49.200, 0.135	49.200, -0.034
248	49.400, 0.982	49.400, 0.130	49.400, 1.103	49.400, 0.090	49.400, 0.104	49.400, 0.073	49.400, 0.601	49.400, 0.135	49.400, -0.034
249	49.600, 0.990	49.600, 0.130	49.600, 1.110	49.600, 0.091	49.600, 0.104	49.600, 0.073	49.600, 0.606	49.600, 0.135	49.600, -0.033
250	49.800, 0.998	49.800, 0.130	49.800, 1.116	49.800, 0.091	49.800, 0.104	49.800, 0.074	49.800, 0.610	49.800, 0.134	49.800, -0.033
251	50.000, 1.005	50.000, 0.130	50.000, 1.123	50.000, 0.091	50.000, 0.104	50.000, 0.074	50.000, 0.615	50.000, 0.134	50.000, -0.033
252	50.200, 1.013	50.200, 0.130	50.200, 1.129	50.200, 0.091	50.200, 0.104	50.200, 0.075	50.200, 0.620	50.200, 0.134	50.200, -0.033
253	50.400, 1.021	50.400, 0.130	50.400, 1.135	50.400, 0.092	50.400, 0.104	50.400, 0.075	50.400, 0.625	50.400, 0.134	50.400, -0.033
254	50.600, 1.028	50.600, 0.130	50.600, 1.142	50.600, 0.092	50.600, 0.104	50.600, 0.075	50.600, 0.630	50.600, 0.134	50.600, -0.033
255	50.800, 1.036	50.800, 0.130	50.800, 1.148	50.800, 0.092	50.800, 0.104	50.800, 0.075	50.800, 0.634	50.800, 0.134	50.800, -0.033
256	51.000, 1.044	51.000, 0.130	51.000, 1.154	51.000, 0.092	51.000, 0.104	51.000, 0.075	51.000, 0.639	51.000, 0.134	51.000, -0.033
257	51.200, 1.052	51.200, 0.130	51.200, 1.160	51.200, 0.092	51.200, 0.104	51.200, 0.075	51.200, 0.644	51.200, 0.134	51.200, -0.033
258	51.400, 1.059	51.400, 0.130	51.400, 1.166	51.400, 0.092	51.400, 0.104	51.400, 0.075	51.400, 0.648	51.400, 0.134	51.400, -0.033
259	51.600, 1.067	51.600, 0.129	51.600, 1.171	51.600, 0.092	51.600, 0.104	51.600, 0.076	51.600, 0.653	51.600, 0.134	51.600, -0.033
260	51.800, 1.074	51.800, 0.129	51.800, 1.177	51.800, 0.092	51.800, 0.104	51.800, 0.076	51.800, 0.657	51.800, 0.134	51.800, -0.033
261	52.000, 1.082	52.000, 0.129	52.000, 1.183	52.000, 0.091	52.000, 0.104	52.000, 0.076	52.000, 0.662	52.000, 0.135	52.000, -0.033
262	52.200, 1.089	52.200, 0.128	52.200, 1.188	52.200, 0.091	52.200, 0.104	52.200, 0.075	52.200, 0.666	52.200, 0.136	52.200, -0.034
263	52.400, 1.096	52.400, 0.128	52.400, 1.194	52.400, 0.090	52.400, 0.104	52.400, 0.075	52.400, 0.670	52.400, 0.136	52.400, -0.034
264	52.600, 1.104	52.600, 0.128	52.600, 1.200	52.600, 0.089	52.600, 0.105	52.600, 0.075	52.600, 0.675	52.600, 0.137	52.600, -0.034
265	52.800, 1.111	52.800, 0.128	52.800, 1.206	52.800, 0.089	52.800, 0.105	52.800, 0.075	52.800, 0.679	52.800, 0.137	52.800, -0.033
266	53.000, 1.118	53.000, 0.127	53.000, 1.212	53.000, 0.089	53.000, 0.105	53.000, 0.075	53.000, 0.683	53.000, 0.137	53.000, -0.033
267	53.200, 1.125	53.200, 0.128	53.200, 1.217	53.200, 0.088	53.200, 0.105	53.200, 0.076	53.200, 0.688	53.200, 0.138	53.200, -0.033
268	53.400, 1.133	53.400, 0.128	53.400, 1.223	53.400, 0.088	53.400, 0.105	53.400, 0.076	53.400, 0.692	53.400, 0.138	53.400, -0.032
269	53.600, 1.139	53.600, 0.127	53.600, 1.229	53.600, 0.088	53.600, 0.105	53.600, 0.076	53.600, 0.696	53.600, 0.138	53.600, -0.032
270	53.800, 1.146	53.800, 0.127	53.800, 1.235	53.800, 0.088	53.800, 0.105	53.800, 0.076	53.800, 0.701	53.800, 0.138	53.800, -0.032
271	54.000, 1.153	54.000, 0.127	54.000, 1.240	54.000, 0.088	54.000, 0.105	54.000, 0.077	54.000, 0.705	54.000, 0.137	54.000, -0.031
272	54.200, 1.160	54.200, 0.127	54.200, 1.246	54.200, 0.088	54.200, 0.105	54.200, 0.077	54.200, 0.709	54.200, 0.137	54.200, -0.032
273	54.400, 1.167	54.400, 0.127	54.400, 1.251	54.400, 0.088	54.400, 0.105	54.400, 0.077	54.400, 0.714	54.400, 0.137	54.400, -0.032
274	54.600, 1.174	54.600, 0.127	54.600, 1.256	54.600, 0.088	54.600, 0.106	54.600, 0.077	54.600, 0.718	54.600, 0.137	54.600, -0.032
275	54.800, 1.181	54.800, 0.127	54.800, 1.261	54.800, 0.089	54.800, 0.106	54.800, 0.077	54.800, 0.722	54.800, 0.137	54.800, -0.032
276	55.000, 1.188	55.000, 0.127	55.000, 1.266	55.000, 0.089	55.000, 0.106	55.000, 0.077	55.000, 0.726	55.000, 0.137	55.000, -0.032
277	55.200, 1.195	55.200, 0.127	55.200, 1.271	55.200, 0.089	55.200, 0.106	55.200, 0.077	55.200, 0.729	55.200, 0.137	55.200, -0.033
278	55.400, 1.202	55.400, 0.127	55.400, 1.276	55.400, 0.089	55.400, 0.107	55.400, 0.077	55.400, 0.733	55.400, 0.137	55.400, -0.033
279	55.600, 1.209	55.600, 0.127	55.600, 1.281	55.600, 0.089	55.600, 0.107	55.600, 0.077	55.600, 0.737	55.600, 0.136	55.600, -0.033
280	55.800, 1.216	55.800, 0.127	55.800, 1.286	55.800, 0.089	55.800, 0.107	55.800, 0.077	55.800, 0.741	55.800, 0.137	55.800, -0.034
281	56.000, 1.222	56.000, 0.126	56.000, 1.291	56.000, 0.089	56.000, 0.107	56.000, 0.077	56.000, 0.745	56.000, 0.137	56.000, -0.034
282	56.200, 1.229	56.200, 0.126	56.200, 1.296	56.200, 0.089	56.200, 0.107	56.200, 0.076	56.200, 0.749	56.200, 0.137	56.200, -0.034
283	56.400, 1.235	56.400, 0.126	56.400, 1.302	56.400, 0.089	56.400, 0.107	56.400, 0.077	56.400, 0.753	56.400, 0.138	56.400, -0.034
284	56.600, 1.242	56.600, 0.126	56.600, 1.306	56.600, 0.089	56.600, 0.107	56.600, 0.077	56.600, 0.757	56.600, 0.138	56.600, -0.035
285	56.800, 1.248	56.800, 0.127	56.800, 1.312	56.800, 0.089	56.800, 0.107	56.800, 0.077	56.800, 0.761	56.800, 0.138	56.800, -0.035
286	57.000, 1.255	57.000, 0.127	57.000, 1.317	57.000, 0.089	57.000, 0.107	57.000, 0.078	57.000, 0.765	57.000, 0.139	57.000, -0.035
287	57.200, 1.261	57.200, 0.127	57.200, 1.322	57.200, 0.089	57.200, 0.107	57.200, 0.078	57.200, 0.769	57.200, 0.139	57.200, -0.035
288	57.400, 1.268	57.400, 0.127	57.400, 1.327	57.400, 0.088	57.400, 0.108	57.400, 0.078	57.400, 0.773	57.400, 0.139	57.400, -0.035
289	57.600, 1.274	57.600, 0.127	57.600, 1.332	57.600, 0.088	57.600, 0.108	57.600, 0.078	57.600, 0.777	57.600, 0.139	57.600, -0.035
290	57.800, 1.281	57.800, 0.127	57.800, 1.336	57.800, 0.088	57.800, 0.108	57.800, 0.078	57.800, 0.780	57.800, 0.139	57.800, -0.035
291	58.000, 1.287	58.000, 0.127	58.000, 1.341	58.000, 0.088	58.000, 0.108	58.000, 0.078	58.000, 0.784	58.000, 0.139	58.000, -0.035
292	58.200, 1.294	58.200, 0.127	58.200, 1.345	58.200, 0.088	58.200, 0.108	58.200, 0.079	58.200, 0.787	58.200, 0.139	58.200, -0.035
293	58.400, 1.300	58.400, 0.127	58.400, 1.349	58.400, 0.088	58.400, 0.109	58.400, 0.079	58.400, 0.791	58.400, 0.139	58.400, -0.035
294	58.600, 1.307	58.600, 0.127	58.600, 1.353	58.600, 0.088	58.600, 0.109	58.600, 0.079	58.600, 0.794	58.600, 0.138	58.600, -0.035
295	58.800, 1.313	58.800, 0.127	58.800, 1.358	58.800, 0.088	58.800, 0.109	58.800, 0.079	58.800, 0.797	58.800, 0.138	58.800, -0.035
296	59.000, 1.320	59.000, 0.127	59.000, 1.362	59.000, 0.088	59.000, 0.109	59.000, 0.079	59.000, 0.800	59.000, 0.138	59.000, -0.034
297	59.200, 1.326	59.200, 0.127	59.200, 1.366	59.200, 0.088	59.200, 0.109	59.200, 0.078	59.200, 0.803	59.200, 0.138	59.200, -0.034
298	59.400, 1.332	59.400, 0.127	59.400, 1.370	59.400, 0.088	59.400, 0.109	59.400, 0.078	59.400, 0.806	59.400, 0.138	59.400, -0.034
299	59.600, 1.337	59.600, 0.127	59.600, 1.375	59.600, 0.088	59.600, 0.109	59.600, 0.078	59.600, 0.810	59.600, 0.138	59.600, -0.034
300	59.800, 1.343	59.800, 0.126	59.800, 1.379	59.800, 0.088	59.800, 0.109	59.800, 0.078	59.800, 0.813	59.800, 0.138	59.800, -0.033
301	60.000, 1.348	60.000, 0.126	60.000, 1.383	60.000, 0.089	60.000, 0.109	60.000, 0.078	60.000, 0.816	60.000, 0.139	60.000, -0.033
302	60.200, 1.354	60.200, 0.126	60.200, 1.388	60.200, 0.089	60.200, 0.109	60.200, 0.078	60.200, 0.819	60.200, 0.140	60.200, -0.033
303	60.400, 1.359	60.400, 0.127	60.400, 1.392	60.400, 0.089	60.400, 0.109	60.400, 0.078	60.400, 0.822	60.400, 0.140	60.400, -0.033
304	60.600, 1.365	60.600, 0.127	60.600, 1.397	60.600, 0.090	60.600, 0.109	60.600, 0.079	60.600, 0.825	60.600, 0.141	60.600, -0.033
305	60.800, 1.370	60.800, 0.127	60.800, 1.401	60.800, 0.090	60.800, 0.109	60.800, 0.079	60.800, 0.828	60.800, 0.141	60.800, -0.033
306	61.000, 1.376	61.000, 0.127	61.000, 1.405	61.000, 0.090	61.000, 0.109	61.000, 0.079	61.000, 0.831	61.000, 0.141	61.000, -0.033
307	61.200, 1.382	61.200, 0.127	61.200, 1.409	61.200, 0.090	61.200, 0.109	61.200, 0.079	61.200, 0.835	61.200, 0.141	61.200, -0.033
308	61.400, 1.388	61.400, 0.127	61.400, 1.413	61.400, 0.090	61.400, 0.109	61.400, 0.079	61.400, 0.838	61.400, 0.141	61.400, -0.033
309	61.600, 1.394	61.600, 0.127	61.600, 1.417	61.600, 0.090	61.600, 0.109	61.600, 0.080	61.600, 0.841	61.600, 0.141	61.600, -0.034
310	61.800, 1.400	61.800, 0.127	61.800, 1.421	61.800, 0.090	61.800, 0.110	61.800, 0.080	61.800, 0.844	61.800, 0.141	61.800, -0.034
311	62.000, 1.406	62.000, 0.127	62.000, 1.425	62.000, 0.090	62.000, 0.110	62.000, 0.080	62.000, 0.847	62.000, 0.141	62.000, -0.034
312	62.200, 1.412	62.200, 0.128	62.200, 1.429	62.200, 0.090	62.200, 0.110	62.200, 0.081	62.200, 0.850	62.200, 0.141	62.200, -0.035
313	62.400, 1.418	62.400, 0.127	62.400, 1.432	62.400, 0.090	62.400, 0.110	62.400, 0.081	62.400, 0.853	62.400, 0.141	62.400, -0.035
314	62.600, 1.423	62.600, 0.127	62.600, 1.436	62.600, 0.090	62.600, 0.110	62.600, 0.081	62.600, 0.856	62.600, 0.141	62.600, -0.035
315	62.800, 1.429	62.800, 0.127	62.800, 1.440	62.800, 0.089	62.800, 0.110	62.800, 0.081	62.800, 0.859	62.800, 0.140	62.800, -0.035
316	63.000, 1.435	63.000, 0.127	63.000, 1.443	63.000, 0.089	63.000, 0.111	63.000, 0.081	63.000, 0.862	63.000, 0.140	63.000, -0.035
317	63.200, 1.440	63.200, 0.127	63.200, 1.447	63.200, 0.089	63.200, 0.111	63.200, 0.081	63.200, 0.865	63.200, 0.140	63.200, -0.035
318	63.400, 1.445	63.400, 0.127	63.400, 1.450	63.400, 0.089	63.400, 0.111	63.400, 0.081	63.400, 0.868	63.400, 0.140	63.400, -0.035
319	63.600, 1.451	63.600, 0.127	63.600, 1.454	63.600, 0.089	63.600, 0.112	63.600, 0.081	63.600, 0.871	63.600, 0.140	63.600, -0.035
320	63.800, 1.456	63.800, 0.126	63.800, 1.458	63.800, 0.089	63.800, 0.112	63.800, 0.081	63.800, 0.873	63.800, 0.140	63.800, -0.035
321	64.000, 1.461	64.000, 0.126	64.000, 1.461	64.000, 0.088	64.000, 0.112	64.000, 0.081	64.000, 0.876	64.000, 0.140	64.000, -0.035
322	64.200, 1.466	64.200, 0.126	64.200, 1.465	64.200, 0.088	64.200, 0.113	64.200, 0.081	64.200, 0.879	64.200, 0.140	64.200, -0.035
323	64.400, 1.471	64.400, 0.126	64.400, 1.469	64.400, 0.088	64.400, 0.113	64.400, 0.081	64.400, 0.881	64.400, 0.140	64.400, -0.035
324	64.600, 1.476	64.600, 0.126	64.600, 1.473	64.600, 0.088	64.600, 0.113	64.600, 0.081	64.600, 0.884	64.600, 0.140	64.600, -0.035
325	64.800, 1.482	64.800, 0.126	64.800, 1.476	64.800, 0.088	64.800, 0.113	64.800, 0.081	64.800, 0.886	64.800, 0.140	64.800, -0.034
326	65.000, 1.487	65.000, 0.126	65.000, 1.480	65.000, 0.087	65.000, 0.113	65.000, 0.080	65.000, 0.889	65.000, 0.140	65.000, -0.034
327	65.200, 1.493	65.200, 0.125	65.200, 1.484	65.200, 0.087	65.200, 0.113	65.200, 0.080	65.200, 0.891	65.200, 0.140	65.200, -0.034
328	65.400, 1.498	65.400, 0.125	65.400, 1.487	65.400, 0.087	65.400, 0.113	65.400, 0.080	65.400, 0.894	65.400, 0.139	65.400, -0.034
329	65.600, 1.503	65.600, 0.125	65.600, 1.491	65.600, 0.086	65.600, 0.113	65.600, 0.081	65.600, 0.896	65.600, 0.139	65.600, -0.034
330	65.800, 1.509	65.800, 0.124	65.800, 1.494	65.800, 0.086	65.800, 0.113	65.800, 0.081	65.800, 0.899	65.800, 0.139	65.800, -0.034
331	66.000, 1.514	66.000, 0.124	66.000, 1.498	66.000, 0.087	66.000, 0.113	66.000, 0.081	66.000, 0.901	66.000, 0.140	66.000, -0.034
332	66.200, 1.520	66.200, 0.124	66.200, 1.501	66.200, 0.087	66.200, 0.113	66.200, 0.081	66.200, 0.904	66.200, 0.140	66.200, -0.035
333	66.400, 1.525	66.400, 0.124	66.400, 1.505	66.400, 0.087	66.400, 0.112	66.400, 0.081	66.400, 0.906	66.400, 0.140	66.400, -0.035
334	66.600, 1.530	66.600, 0.124	66.600, 1.508	66.600, 0.088	66.600, 0.112	66.600, 0.081	66.600, 0.909	66.600, 0.140	66.600, -0.036
335	66.800, 1.535	66.800, 0.124	66.800, 1.511	66.800, 0.088	66.800, 0.112	66.800, 0.081	66.800, 0.911	66.800, 0.140	66.800, -0.036
336	67.000, 1.540	67.000, 0.124	67.000, 1.514	67.000, 0.088	67.000, 0.112	67.000, 0.081	67.000, 0.914	67.000, 0.140	67.000, -0.036
337	67.200, 1.545	67.200, 0.124	67.200, 1.517	67.200, 0.088	67.200, 0.112	67.200, 0.081	67.200, 0.916	67.200, 0.139	67.200, -0.037
338	67.400, 1.550	67.400, 0.125	67.400, 1.520	67.400, 0.088	67.400, 0.112	67.400, 0.082	67.400, 0.919	67.400, 0.139	67.400, -0.037
339	67.600, 1.554	67.600, 0.125	67.600, 1.523	67.600, 0.088	67.600, 0.112	67.600, 0.082	67.600, 0.921	67.600, 0.139	67.600, -0.037
340	67.800, 1.559	67.800, 0.125	67.800, 1.526	67.800, 0.088	67.800, 0.112	67.800, 0.083	67.800, 0.924	67.800, 0.139	67.800, -0.038
341	68.000, 1.564	68.000, 0.125	68.000, 1.529	68.000, 0.088	68.000, 0.112	68.000, 0.083	68.000, 0.926	68.000, 0.139	68.000, -0.038
342	68.200, 1.568	68.200, 0.126	68.200, 1.532	68.200, 0.088	68.200, 0.112	68.200, 0.084	68.200, 0.928	68.200, 0.139	68.200, -0.038
343	68.400, 1.573	68.400, 0.126	68.400, 1.535	68.400, 0.088	68.400, 0.112	68.400, 0.084	68.400, 0.930	68.400, 0.139	68.400, -0.038
344	68.600, 1.578	68.600, 0.126	68.600, 1.538	68.600, 0.088	68.600, 0.113	68.600, 0.084	68.600, 0.932	68.600, 0.139	68.600, -0.038
345	68.800, 1.582	68.800, 0.125	68.800, 1.541	68.800, 0.088	68.800, 0.113	68.800, 0.084	68.800, 0.934	68.800, 0.138	68.800, -0.038
346	69.000, 1.587	69.000, 0.125	69.000, 1.544	69.000, 0.088	69.000, 0.113	69.000, 0.084	69.000, 0.936	69.000, 0.138	69.000, -0.038
347	69.200, 1.591	69.200, 0.125	69.200, 1.548	69.200, 0.088	69.200, 0.114	69.200, 0.084	69.200, 0.938	69.200, 0.139	69.200, -0.037
348	69.400, 1.595	69.400, 0.125	69.400, 1.551	69.400, 0.088	69.400, 0.114	69.400, 0.084	69.400, 0.940	69.400, 0.139	69.400, -0.037
349	69.600, 1.600	69.600, 0.124	69.600, 1.554	69.600, 0.089	69.600, 0.114	69.600, 0.083	69.600, 0.942	69.600, 0.140	69.600, -0.037
350	69.800, 1.604	69.800, 0.124	69.800, 1.557	69.800, 0.089	69.800, 0.114	69.800, 0.083	69.800, 0.944	69.800, 0.140	69.800, -0.037
351	70.000, 1.609	70.000, 0.124	70.000, 1.560	70.000, 0.090	70.000, 0.114	70.000, 0.083	70.000, 0.946	70.000, 0.141	70.000, -0.037
352	70.200, 1.613	70.200, 0.123	70.200, 1.563	70.200, 0.090	70.200, 0.114	70.200, 0.083	70.200, 0.948	70.200, 0.141	70.200, -0.037
353	70.400, 1.617	70.400, 0.123	70.400, 1.566	70.400, 0.090	70.400, 0.114	70.400, 0.082	70.400, 0.950	70.400, 0.141	70.400, -0.037
354	70.600, 1.622	70.600, 0.123	70.600, 1.569	70.600, 0.090	70.600, 0.114	70.600, 0.082	70.600, 0.952	70.600, 0.141	70.600, -0.038
355	70.800, 1.626	70.800, 0.123	70.800, 1.572	70.800, 0.090	70.800, 0.114	70.800, 0.082	70.800, 0.954	70.800, 0.141	70.800, -0.038
356	71.000, 1.630	71.000, 0.123	71.000, 1.574	71.000, 0.090	71.000, 0.115	71.000, 0.082	71.000, 0.956	71.000, 0.141	71.000, -0.038
357	71.200, 1.634	71.200, 0.123	71.200, 1.577	71.200, 0.089	71.200, 0.115	71.200, 0.082	71.200, 0.958	71.200, 0.142	71.200, -0.037
358	71.400, 1.638	71.400, 0.123	71.400, 1.579	71.400, 0.089	71.400, 0.115	71.400, 0.082	71.400, 0.961	71.400, 0.142	71.400, -0.037
359	71.600, 1.643	71.600, 0.123	71.600, 1.582	71.600, 0.090	71.600, 0.115	71.600, 0.082	71.600, 0.963	71.600, 0.142	71.600, -0.037
360	71.800, 1.647	71.800, 0.124	71.800, 1.584	71.800, 0.090	71.800, 0.115	71.800, 0.083	71.800, 0.965	71.800, 0.142	71.800, -0.037
361	72.000, 1.651	72.000, 0.124	72.000, 1.587	72.000, 0.090	72.000, 0.115	72.000, 0.083	72.000, 0.967	72.000, 0.142	72.000, -0.037
362	72.200, 1.655	72.200, 0.124	72.200, 1.589	72.200, 0.090	72.200, 0.116	72.200, 0.084	72.200, 0.969	72.200, 0.141	72.200, -0.038
363	72.400, 1.659	72.400, 0.124	72.400, 1.592	72.400, 0.090	72.400, 0.116	72.400, 0.084	72.400, 0.971	72.400, 0.141	72.400, -0.038
364	72.600, 1.663	72.600, 0.124	72.600, 1.594	72.600, 0.090	72.600, 0.116	72.600, 0.084	72.600, 0.973	72.600, 0.140	72.600, -0.038
365	72.800, 1.667	72.800, 0.124	72.800, 1.597	72.800, 0.090	72.800, 0.116	72.800, 0.084	72.800, 0.974	72.800, 0.140	72.800, -0.038
366	73.000, 1.671	73.000, 0.125	73.000, 1.599	73.000, 0.090	73.000, 0.116	73.000, 0.084	73.000, 0.976	73.000, 0.140	73.000, -0.038
367	73.200, 1.675	73.200, 0.125	73.200, 1.602	73.200, 0.090	73.200, 0.116	73.200, 0.084	73.200, 0.978	73.200, 0.140	73.200, -0.038
368	73.400, 1.679	73.400, 0.125	73.400, 1.605	73.400, 0.091	73.400, 0.116	73.400, 0.084	73.400, 0.979	73.400, 0.140	73.400, -0.038
369	73.600, 1.683	73.600, 0.126	73.600, 1.607	73.600, 0.091	73.600, 0.116	73.600, 0.084	73.600, 0.981	73.600, 0.141	73.600, -0.038
370	73.800, 1.687	73.800, 0.126	73.800, 1.610	73.800, 0.090	73.800, 0.116	73.800, 0.084	73.800, 0.982	73.800, 0.141	73.800, -0.039
371	74.000, 1.692	74.000, 0.125	74.000, 1.612	74.000, 0.090	74.000, 0.116	74.000, 0.084	74.000, 0.984	74.000, 0.141	74.000, -0.039
372	74.200, 1.696	74.200, 0.125	74.200, 1.615	74.200, 0.090	74.200, 0.116	74.200, 0.083	74.200, 0.985	74.200, 0.141	74.200, -0.039
373	74.400, 1.700	74.400, 0.125	74.400, 1.617	74.400, 0.090	74.400, 0.116	74.400, 0.083	74.400, 0.987	74.400, 0.141	74.400, -0.039
374	74.600, 1.704	74.600, 0.125	74.600, 1.619	74.600, 0.090	74.600, 0.116	74.600, 0.083	74.600, 0.989	74.600, 0.141	74.600, -0.039
375	74.800, 1.707	74.800, 0.124	74.800, 1.622	74.800, 0.090	74.800, 0.116	74.800, 0.082	74.800, 0.991	74.800, 0.141	74.800, -0.039
376	75.000, 1.711	75.000, 0.124	75.000, 1.624	75.000, 0.090	75.000, 0.116	75.000, 0.082	75.000, 0.993	75.000, 0.141	75.000, -0.039
377	75.200, 1.715	75.200, 0.124	75.200, 1.626	75.200, 0.090	75.200, 0.116	75.200, 0.082	75.200, 0.996	75.200, 0.141	75.200, -0.039
378	75.400, 1.718	75.400, 0.124	75.400, 1.629	75.400, 0.090	75.400, 0.116	75.400, 0.082	75.400, 0.998	75.400, 0.142	75.400, -0.039
379	75.600, 1.722	75.600, 0.124	75.600, 1.631	75.600, 0.091	75.600, 0.116	75.600, 0.082	75.600, 1.000	75.600, 0.141	75.600, -0.040
380	75.800, 1.726	75.800, 0.124	75.800, 1.634	75.800, 0.091	75.800, 0.117	75.800, 0.083	75.800, 1.002	75.800, 0.142	75.800, -0.040
381	76.000, 1.729	76.000, 0.124	76.000, 1.636	76.000, 0.091	76.000, 0.117	76.000, 0.083	76.000, 1.004	76.000, 0.141	76.000, -0.040
382	76.200, 1.733	76.200, 0.123	76.200, 1.639	76.200, 0.091	76.200, 0.117	76.200, 0.082	76.200, 1.005	76.200, 0.141	76.200, -0.040
383	76.400, 1.737	76.400, 0.123	76.400, 1.641	76.400, 0.091	76.400, 0.117	76.400, 0.083	76.400, 1.007	76.400, 0.141	76.400, -0.040
384	76.600, 1.740	76.600, 0.124	76.600, 1.643	76.600, 0.091	76.600, 0.117	76.600, 0.083	76.600, 1.008	76.600, 0.141	76.600, -0.040
385	76.800, 1.744	76.800, 0.124	76.800, 1.645	76.800, 0.091	76.800, 0.117	76.800, 0.083	76.800, 1.009	76.800, 0.141	76.800, -0.040
386	77.000, 1.747	77.000, 0.124	77.000, 1.647	77.000, 0.091	77.000, 0.117	77.000, 0.083	77.000, 1.010	77.000, 0.141	77.000, -0.041
387	77.200, 1.751	77.200, 0.125	77.200, 1.649	77.200, 0.091	77.200, 0.117	77.200, 0.083	77.200, 1.011	77.200, 0.141	77.200, -0.041
388	77.400, 1.755	77.400, 0.125	77.400, 1.651	77.400, 0.091	77.400, 0.117	77.400, 0.083	77.400, 1.012	77.400, 0.141	77.400, -0.041
389	77.600, 1.758	77.600, 0.125	77.600, 1.652	77.600, 0.092	77.600, 0.117	77.600, 0.083	77.600, 1.013	77.600, 0.141	77.600, -0.042
390	77.800, 1.762	77.800, 0.125	77.800, 1.654	77.800, 0.092	77.800, 0.117	77.800, 0.083	77.800, 1.014	77.800, 0.141	77.800, -0.042
391	78.000, 1.765	78.000, 0.125	78.000, 1.656	78.000, 0.092	78.000, 0.117	78.000, 0.083	78.000, 1.015	78.000, 0.141	78.000, -0.042
392	78.200, 1.768	78.200, 0.125	78.200, 1.658	78.200, 0.092	78.200, 0.117	78.200, 0.083	78.200, 1.016	78.200, 0.141	78.200, -0.042
393	78.400, 1.770	78.400, 0.124	78.400, 1.660	78.400, 0.092	78.400, 0.117	78.400, 0.083	78.400, 1.018	78.400, 0.141	78.400, -0.042
394	78.600, 1.773	78.600, 0.124	78.600, 1.662	78.600, 0.092	78.600, 0.117	78.600, 0.083	78.600, 1.019	78.600, 0.140	78.600, -0.042
395	78.800, 1.776	78.800, 0.124	78.800, 1.664	78.800, 0.092	78.800, 0.117	78.800, 0.083	78.800, 1.020	78.800, 0.140	78.800, -0.042
396	79.000, 1.779	79.000, 0.124	79.000, 1.666	79.000, 0.092	79.000, 0.117	79.000, 0.083	79.000, 1.022	79.000, 0.140	79.000, -0.041
397	79.200, 1.782	79.200, 0.124	79.200, 1.668	79.200, 0.092	79.200, 0.118	79.200, 0.083	79.200, 1.023	79.200, 0.140	79.200, -0.041
398	79.400, 1.785	79.400, 0.124	79.400, 1.671	79.400, 0.091	79.400, 0.118	79.400, 0.083	79.400, 1.025	79.400, 0.140	79.400, -0.040
399	79.600, 1.788	79.600, 0.124	79.600, 1.673	79.600, 0.091	79.600, 0.118	79.600, 0.083	79.600, 1.027	79.600, 0.140	79.600, -0.040
400	79.800, 1.791	79.800, 0.123	79.800, 1.675	79.800, 0.091	79.800, 0.118	79.800, 0.083	79.800, 1.028	79.800, 0.140	79.800, -0.039
401	80.000, 1.795	80.000, 0.123	80.000, 1.678	80.000, 0.091	80.000, 0.118	80.000, 0.083	80.000, 1.030	80.000, 0.140	80.000, -0.039
402	80.200, 1.798	80.200, 0.123	80.200, 1.680	80.200, 0.091	80.200, 0.118	80.200, 0.083	80.200, 1.031	80.200, 0.141	80.200, -0.038
403	80.400, 1.802	80.400, 0.123	80.400, 1.682	80.400, 0.090	80.400, 0.119	80.400, 0.083	80.400, 1.033	80.400, 0.141	80.400, -0.038
404	80.600, 1.805	80.600, 0.124	80.600, 1.684	80.600, 0.090	80.600, 0.119	80.600, 0.083	80.600, 1.034	80.600, 0.141	80.600, -0.038
405	80.800, 1.809	80.800, 0.124	80.800, 1.686	80.800, 0.090	80.800, 0.119	80.800, 0.084	80.800, 1.035	80.800, 0.141	80.800, -0.038
406	81.000, 1.812	81.000, 0.124	81.000, 1.687	81.000, 0.090	81.000, 0.118	81.000, 0.084	81.000, 1.037	81.000, 0.142	81.000, -0.039
407	81.200, 1.816	81.200, 0.124	81.200, 1.689	81.200, 0.091	81.200, 0.118	81.200, 0.084	81.200, 1.038	81.200, 0.142	81.200, -0.039
408	81.400, 1.819	81.400, 0.124	81.400, 1.690	81.400, 0.091	81.400, 0.118	81.400, 0.084	81.400, 1.039	81.400, 0.142	81.400, -0.040
409	81.600, 1.822	81.600, 0.124	81.600, 1.692	81.600, 0.092	81.600, 0.118	81.600, 0.084	81.600, 1.041	81.600, 0.142	81.600, -0.041
410	81.800, 1.825	81.800, 0.124	81.800, 1.693	81.800, 0.092	81.800, 0.119	81.800, 0.085	81.800, 1.042	81.800, 0.142	81.800, -0.041
411	82.000, 1.828	82.000, 0.124	82.000, 1.695	82.000, 0.093	82.000, 0.119	82.000, 0.085	82.000, 1.043	82.000, 0.142	82.000, -0.042
412	82.200, 1.831	82.200, 0.123	82.200, 1.696	82.200, 0.093	82.200, 0.119	82.200, 0.085	82.200, 1.044	82.200, 0.142	82.200, -0.043
413	82.400, 1.834	82.400, 0.123	82.400, 1.698	82.400, 0.093	82.400, 0.119	82.400, 0.085	82.400, 1.045	82.400, 0.142	82.400, -0.043
414	82.600, 1.838	82.600, 0.122	82.600, 1.700	82.600, 0.094	82.600, 0.119	82.600, 0.085	82.600, 1.046	82.600, 0.142	82.600, -0.043
415	82.800, 1.841	82.800, 0.122	82.800, 1.701	82.800, 0.094	82.800, 0.120	82.800, 0.085	82.800, 1.047	82.800, 0.142	82.800, -0.043
416	83.000, 1.844	83.000, 0.122	83.000, 1.703	83.000, 0.094	83.000, 0.120	83.000, 0.085	83.000, 1.048	83.000, 0.142	83.000, -0.044
417	83.200, 1.847	83.200, 0.122	83.200, 1.705	83.200, 0.094	83.200, 0.120	83.200, 0.085	83.200, 1.050	83.200, 0.142	83.200, -0.044
418	83.400, 1.850	83.400, 0.122	83.400, 1.706	83.400, 0.093	83.400, 0.120	83.400, 0.084	83.400, 1.051	83.400, 0.142	83.400, -0.044
419	83.600, 1.852	83.600, 0.122	83.600, 1.708	83.600, 0.093	83.600, 0.120	83.600, 0.084	83.600, 1.052	83.600, 0.142	83.600, -0.043
420	83.800, 1.855	83.800, 0.122	83.800, 1.710	83.800, 0.093	83.800, 0.120	83.800, 0.084	83.800, 1.053	83.800, 0.143	83.800, -0.043
421	84.000, 1.858	84.000, 0.123	84.000, 1.711	84.000, 0.092	84.000, 0.119	84.000, 0.084	84.000, 1.054	84.000, 0.143	84.000, -0.042
422	84.200, 1.861	84.200, 0.123	84.200, 1.713	84.200, 0.092	84.200, 0.119	84.200, 0.084	84.200, 1.055	84.200, 0.143	84.200, -0.042
423	84.400, 1.864	84.400, 0.123	84.400, 1.715	84.400, 0.091	84.400, 0.119	84.400, 0.084	84.400, 1.056	84.400, 0.143	84.400, -0.042
424	84.600, 1.866	84.600, 0.123	84.600, 1.716	84.600, 0.091	84.600, 0.119	84.600, 0.084	84.600, 1.057	84.600, 0.142	84.600, -0.041
425	84.800, 1.869	84.800, 0.123	84.800, 1.718	84.800, 0.091	84.800, 0.118	84.800, 0.084	84.800, 1.058	84.800, 0.142	84.800, -0.041
426	85.000, 1.871	85.000, 0.123	85.000, 1.719	85.000, 0.090	85.000, 0.118	85.000, 0.084	85.000, 1.059	85.000, 0.142	85.000, -0.041
427	85.200, 1.874	85.200, 0.123	85.200, 1.721	85.200, 0.090	85.200, 0.119	85.200, 0.084	85.200, 1.060	85.200, 0.142	85.200, -0.041
428	85.400, 1.876	85.400, 0.123	85.400, 1.722	85.400, 0.090	85.400, 0.119	85.400, 0.083	85.400, 1.061	85.400, 0.142	85.400, -0.041
429	85.600, 1.878	85.600, 0.122	85.600, 1.724	85.600, 0.090	85.600, 0.119	85.600, 0.083	85.600, 1.061	85.600, 0.142	85.600, -0.041
430	85.800, 1.881	85.800, 0.122	85.800, 1.726	85.800, 0.090	85.800, 0.119	85.800, 0.083	85.800, 1.062	85.800, 0.142	85.800, -0.041
431	86.000, 1.883	86.000, 0.122	86.000, 1.727	86.000, 0.090	86.000, 0.119	86.000, 0.083	86.000, 1.063	86.000, 0.142	86.000, -0.041
432	86.200, 1.886	86.200, 0.121	86.200, 1.729	86.200, 0.090	86.200, 0.120	86.200, 0.082	86.200, 1.065	86.200, 0.142	86.200, -0.040
433	86.400, 1.889	86.400, 0.121	86.400, 1.731	86.400, 0.090	86.400, 0.120	86.400, 0.082	86.400, 1.066	86.400, 0.142	86.400, -0.040
434	86.600, 1.892	86.600, 0.121	86.600, 1.732	86.600, 0.091	86.600, 0.120	86.600, 0.082	86.600, 1.067	86.600, 0.142	86.600, -0.040
435	86.800, 1.895	86.800, 0.121	86.800, 1.734	86.800, 0.091	86.800, 0.121	86.800, 0.082	86.800, 1.068	86.800, 0.142	86.800, -0.041
436	87.000, 1.898	87.000, 0.121	87.000, 1.735	87.000, 0.091	87.000, 0.121	87.000, 0.082	87.000, 1.070	87.000, 0.142	87.000, -0.040
437	87.200, 1.901	87.200, 0.121	87.200, 1.737	87.200, 0.091	87.200, 0.122	87.200, 0.082	87.200, 1.071	87.200, 0.142	87.200, -0.040
438	87.400, 1.904	87.400, 0.121	87.400, 1.738	87.400, 0.091	87.400, 0.122	87.400, 0.082	87.400, 1.072	87.400, 0.142	87.400, -0.040
439	87.600, 1.907	87.600, 0.122	87.600, 1.740	87.600, 0.091	87.600, 0.122	87.600, 0.083	87.600, 1.074	87.600, 0.143	87.600, -0.039
440	87.800, 1.909	87.800, 0.122	87.800, 1.741	87.800, 0.091	87.800, 0.122	87.800, 0.083	87.800, 1.075	87.800, 0.143	87.800, -0.039
441	88.000, 1.912	88.000, 0.122	88.000, 1.742	88.000, 0.091	88.000, 0.122	88.000, 0.083	88.000, 1.076	88.000, 0.143	88.000, -0.039
442	88.200, 1.914	88.200, 0.121	88.200, 1.743	88.200, 0.091	88.200, 0.122	88.200, 0.084	88.200, 1.077	88.200, 0.143	88.200, -0.040
443	88.400, 1.916	88.400, 0.121	88.400, 1.744	88.400, 0.091	88.400, 0.121	88.400, 0.084	88.400, 1.077	88.400, 0.143	88.400, -0.040
444	88.600, 1.918	88.600, 0.121	88.600, 1.746	88.600, 0.091	88.600, 0.121	88.600, 0.084	88.600, 1.078	88.600, 0.143	88.600, -0.040
445	88.800, 1.921	88.800, 0.120	88.800, 1.747	88.800, 0.091	88.800, 0.120	88.800, 0.084	88.800, 1.079	88.800, 0.143	88.800, -0.041
446	89.000, 1.923	89.000, 0.120	89.000, 1.748	89.000, 0.091	89.000, 0.120	89.000, 0.085	89.000, 1.079	89.000, 0.143	89.000, -0.041
447	89.200, 1.925	89.200, 0.119	89.200, 1.749	89.200, 0.092	89.200, 0.120	89.200, 0.085	89.200, 1.080	89.200, 0.143	89.200, -0.041
448	89.400, 1.927	89.400, 0.119	89.400, 1.751	89.400, 0.092	89.400, 0.120	89.400, 0.085	89.400, 1.080	89.400, 0.143	89.400, -0.042
449	89.600, 1.930	89.600, 0.119	89.600, 1.752	89.600, 0.092	89.600, 0.120	89.600, 0.084	89.600, 1.081	89.600, 0.143	89.600, -0.042
450	89.800, 1.932	89.800, 0.119	89.800, 1.754	89.800, 0.092	89.800, 0.120	89.800, 0.084	89.800, 1.081	89.800, 0.143	89.800, -0.042
451	90.000, 1.935	90.000, 0.118	90.000, 1.756	90.000, 0.093	90.000, 0.120	90.000, 0.084	90.000, 1.082	90.000, 0.142	90.000, -0.042
452	90.200, 1.937	90.200, 0.118	90.200, 1.757	90.200, 0.093	90.200, 0.120	90.200, 0.084	90.200, 1.083	90.200, 0.142	90.200, -0.043
453	90.400, 1.939	90.400, 0.118	90.400, 1.759	90.400, 0.093	90.400, 0.120	90.400, 0.083	90.400, 1.083	90.400, 0.142	90.400, -0.042
454	90.600, 1.942	90.600, 0.118	90.600, 1.760	90.600, 0.093	90.600, 0.120	90.600, 0.083	90.600, 1.084	90.600, 0.142	90.600, -0.042
455	90.800, 1.944	90.800, 0.118	90.800, 1.762	90.800, 0.093	90.800, 0.120	90.800, 0.083	90.800, 1.084	90.800, 0.142	90.800, -0.042
456	91.000, 1.947	91.000, 0.119	91.000, 1.764	91.000, 0.093	91.000, 0.120	91.000, 0.083	91.000, 1.085	91.000, 0.142	91.000, -0.042
457	91.200, 1.949	91.200, 0.119	91.200, 1.765	91.200, 0.093	91.200, 0.121	91.200, 0.083	91.200, 1.086	91.200, 0.141	91.200, -0.042
458	91.400, 1.951	91.400, 0.119	91.400, 1.767	91.400, 0.093	91.400, 0.121	91.400, 0.084	91.400, 1.087	91.400, 0.141	91.400, -0.042
459	91.600, 1.954	91.600, 0.119	91.600, 1.768	91.600, 0.093	91.600, 0.121	91.600, 0.084	91.600, 1.088	91.600, 0.141	91.600, -0.042
460	91.800, 1.956	91.800, 0.119	91.800, 1.769	91.800, 0.093	91.800, 0.121	91.800, 0.085	91.800, 1.089	91.800, 0.141	91.800, -0.042
461	92.000, 1.958	92.000, 0.119	92.000, 1.770	92.000, 0.093	92.000, 0.122	92.000, 0.085	92.000, 1.089	92.000, 0.142	92.000, -0.042
462	92.200, 1.961	92.200, 0.119	92.200, 1.771	92.200, 0.093	92.200, 0.122	92.200, 0.085	92.200, 1.090	92.200, 0.142	92.200, -0.042
463	92.400, 1.963	92.400, 0.119	92.400, 1.772	92.400, 0.093	92.400, 0.122	92.400, 0.085	92.400, 1.091	92.400, 0.142	92.400, -0.042
464	92.600, 1.965	92.600, 0.118	92.600, 1.773	92.600, 0.093	92.600, 0.123	92.600, 0.085	92.600, 1.091	92.600, 0.142	92.600, -0.042
465	92.800, 1.967	92.800, 0.118	92.800, 1.774	92.800, 0.094	92.800, 0.123	92.800, 0.085	92.800, 1.092	92.800, 0.142	92.800, -0.041
466	93.000, 1.969	93.000, 0.118	93.000, 1.775	93.000, 0.094	93.000, 0.123	93.000, 0.085	93.000, 1.093	93.000, 0.142	93.000, -0.041
467	93.200, 1.972	93.200, 0.118	93.200, 1.776	93.200, 0.094	93.200, 0.123	93.200, 0.085	93.200, 1.094	93.200, 0.142	93.200, -0.041
468	93.400, 1.974	93.400, 0.118	93.400, 1.777	93.400, 0.094	93.400, 0.123	93.400, 0.085	93.400, 1.095	93.400, 0.142	93.400, -0.041
469	93.600, 1.976	93.600, 0.118	93.600, 1.778	93.600, 0.095	93.600, 0.124	93.600, 0.085	93.600, 1.095	93.600, 0.142	93.600, -0.041
470	93.800, 1.978	93.800, 0.118	93.800, 1.779	93.800, 0.095	93.800, 0.124	93.800, 0.084	93.800, 1.096	93.800, 0.141	93.800, -0.041
471	94.000, 1.980	94.000, 0.118	94.000, 1.780	94.000, 0.095	94.000, 0.124	94.000, 0.084	94.000, 1.097	94.000, 0.141	94.000, -0.041
472	94.200, 1.982	94.200, 0.118	94.200, 1.782	94.200, 0.095	94.200, 0.123	94.200, 0.084	94.200, 1.097	94.200, 0.141	94.200, -0.041
473	94.400, 1.984	94.400, 0.118	94.400, 1.783	94.400, 0.095	94.400, 0.123	94.400, 0.084	94.400, 1.098	94.400, 0.141	94.400, -0.041
474	94.600, 1.986	94.600, 0.119	94.600, 1.784	94.600, 0.095	94.600, 0.123	94.600, 0.084	94.600, 1.099	94.600, 0.141	94.600, -0.041
475	94.800, 1.988	94.800, 0.119	94.800, 1.785	94.800, 0.094	94.800, 0.123	94.800, 0.084	94.800, 1.100	94.800, 0.141	94.800, -0.041
476	95.000, 1.990	95.000, 0.119	95.000, 1.786	95.000, 0.094	95.000, 0.123	95.000, 0.084	95.000, 1.101	95.000, 0.141	95.000, -0.041
477	95.200, 1.992	95.200, 0.119	95.200, 1.787	95.200, 0.094	95.200, 0.123	95.200, 0.085	95.200, 1.101	95.200, 0.141	95.200, -0.042
478	95.400, 1.994	95.400, 0.120	95.400, 1.788	95.400, 0.094	95.400, 0.123	95.400, 0.085	95.400, 1.102	95.400, 0.141	95.400, -0.042
479	95.600, 1.996	95.600, 0.120	95.600, 1.789	95.600, 0.094	95.600, 0.123	95.600, 0.085	95.600, 1.103	95.600, 0.142	95.600, -0.042
480	95.800, 1.998	95.800, 0.120	95.800, 1.791	95.800, 0.094	95.800, 0.124	95.800, 0.086	95.800, 1.104	95.800, 0.142	95.800, -0.042
481	96.000, 2.000	96.000, 0.120	96.000, 1.792	96.000, 0.094	96.000, 0.124	96.000, 0.086	96.000, 1.104	96.000, 0.142	96.000, -0.043
482	96.200, 2.002	96.200, 0.120	96.200, 1.793	96.200, 0.094	96.200, 0.124	96.200, 0.086	96.200, 1.105	96.200, 0.143	96.200, -0.043
483	96.400, 2.003	96.400, 0.120	96.400, 1.793	96.400, 0.094	96.400, 0.124	96.400, 0.085	96.400, 1.105	96.400, 0.143	96.400, -0.043
484	96.600, 2.005	96.600, 0.119	96.600, 1.794	96.600, 0.094	96.600, 0.124	96.600, 0.085	96.600, 1.106	96.600, 0.143	96.600, -0.043
485	96.800, 2.007	96.800, 0.119	96.800, 1.795	96.800, 0.095	96.800, 0.124	96.800, 0.084	96.800, 1.106	96.800, 0.143	96.800, -0.042
486	97.000, 2.009	97.000, 0.119	97.000, 1.796	97.000, 0.095	97.000, 0.124	97.000, 0.084	97.000, 1.107	97.000, 0.144	97.000, -0.042
487	97.200, 2.011	97.200, 0.118	97.200, 1.796	97.200, 0.095	97.200, 0.124	97.200, 0.084	97.200, 1.107	97.200, 0.144	97.200, -0.042
488	97.400, 2.012	97.400, 0.118	97.400, 1.797	97.400, 0.095	97.400, 0.124	97.400, 0.084	97.400, 1.108	97.400, 0.144	97.400, -0.042
489	97.600, 2.014	97.600, 0.117	97.600, 1.798	97.600, 0.094	97.600, 0.123	97.600, 0.084	97.600, 1.108	97.600, 0.143	97.600, -0.042
490	97.800, 2.016	97.800, 0.117	97.800, 1.798	97.800, 0.094	97.800, 0.123	97.800, 0.083	97.800, 1.108	97.800, 0.144	97.800, -0.042
491	98.000, 2.018	98.000, 0.116	98.000, 1.799	98.000, 0.094	98.000, 0.122	98.000, 0.083	98.000, 1.108	98.000, 0.144	98.000, -0.041
492	98.200, 2.020	98.200, 0.116	98.200, 1.800	98.200, 0.094	98.200, 0.122	98.200, 0.083	98.200, 1.109	98.200, 0.144	98.200, -0.041
493	98.400, 2.021	98.400, 0.116	98.400, 1.801	98.400, 0.094	98.400, 0.122	98.400, 0.083	98.400, 1.109	98.400, 0.144	98.400, -0.041
494	98.600, 2.023	98.600, 0.116	98.600, 1.802	98.600, 0.093	98.600, 0.122	98.600, 0.083	98.600, 1.110	98.600, 0.144	98.600, -0.041
495	98.800, 2.025	98.800, 0.117	98.800, 1.803	98.800, 0.093	98.800, 0.122	98.800, 0.084	98.800, 1.111	98.800, 0.144	98.800, -0.041
496	99.000, 2.027	99.000, 0.117	99.000, 1.804	99.000, 0.093	99.000, 0.122	99.000, 0.084	99.000, 1.111	99.000, 0.144	99.000, -0.041
497	99.200, 2.029	99.200, 0.117	99.200, 1.805	99.200, 0.093	99.200, 0.123	99.200, 0.084	99.200, 1.112	99.200, 0.144	99.200, -0.041
498	99.400, 2.030	99.400, 0.118	99.400, 1.806	99.400, 0.093	99.400, 0.123	99.400, 0.085	99.400, 1.113	99.400, 0.144	99.400, -0.042
499	99.600, 2.032	99.600, 0.118	99.600, 1.807	99.600, 0.093	99.600, 0.123	99.600, 0.085	99.600, 1.113	99.600, 0.144	99.600, -0.042
500	99.800, 2.034	99.800, 0.119	99.800, 1.808	99.800, 0.094	99.800, 0.123	99.800, 0.086	99.800, 1.114	99.800, 0.144	99.800, -0.042
501	100.000, 2.035	100.000, 0.119	100.000, 1.809	100.000, 0.094	100.000, 0.124	100.000, 0.086	100.000, 1.114	100.000, 0.144	100.000, -0.042
502	100.200, 2.037	100.200, 0.119	100.200, 1.810	100.200, 0.094	100.200, 0.124	100.200, 0.086	100.200, 1.115	100.200, 0.144	100.200, -0.042
503	100.400, 2.039	100.400, 0.119	100.400, 1.811	100.400, 0.094	100.400, 0.124	100.400, 0.086	100.400, 1.115	100.400, 0.144	100.400, -0.042
504	100.600, 2.041	100.600, 0.119	100.600, 1.812	100.600, 0.094	100.600, 0.124	100.600, 0.085	100.600, 1.116	100.600, 0.143	100.600, -0.042
505	100.800, 2.043	100.800, 0.118	100.800, 1.812	100.800, 0.095	100.800, 0.124	100.800, 0.085	100.800, 1.117	100.800, 0.143	100.800, -0.042
506	101.000, 2.044	101.000, 0.118	101.000, 1.813	101.000, 0.095	101.000, 0.124	101.000, 0.085	101.000, 1.118	101.000, 0.143	101.000, -0.042
507	101.200, 2.045	101.200, 0.117	101.200, 1.814	101.200, 0.095	101.200, 0.123	101.200, 0.085	101.200, 1.119	101.200, 0.143	101.200, -0.042
508	101.400, 2.047	101.400, 0.117	101.400, 1.815	101.400, 0.095	101.400, 0.123	101.400, 0.085	101.400, 1.120	101.400, 0.143	101.400, -0.042
509	101.600, 2.049	101.600, 0.117	101.600, 1.816	101.600, 0.095	101.600, 0.123	101.600, 0.085	101.600, 1.120	101.600, 0.143	101.600, -0.043
510	101.800, 2.050	101.800, 0.117	101.800, 1.817	101.800, 0.095	101.800, 0.123	101.800, 0.085	101.800, 1.121	101.800, 0.143	101.800, -0.043
511	102.000, 2.052	102.000, 0.117	102.000, 1.819	102.000, 0.095	102.000, 0.122	102.000, 0.085	102.000, 1.122	102.000, 0.143	102.000, -0.043
512	102.200, 2.054	102.200, 0.117	102.200, 1.820	102.200, 0.096	102.200, 0.122	102.200, 0.085	102.200, 1.123	102.200, 0.143	102.200, -0.043
513	102.400, 2.056	102.400, 0.117	102.400, 1.821	102.400, 0.096	102.400, 0.122	102.400, 0.085	102.400, 1.123	102.400, 0.143	102.400, -0.042
514	102.600, 2.057	102.600, 0.118	102.600, 1.822	102.600, 0.096	102.600, 0.122	102.600, 0.085	102.600, 1.124	102.600, 0.143	102.600, -0.042
515	102.800, 2.059	102.800, 0.118	102.800, 1.823	102.800, 0.096	102.800, 0.122	102.800, 0.085	102.800, 1.124	102.800, 0.143	102.800, -0.042
516	103.000, 2.060	103.000, 0.118	103.000, 1.823	103.000, 0.096	103.000, 0.123	103.000, 0.085	103.000, 1.124	103.000, 0.143	103.000, -0.042
517	103.200, 2.062	103.200, 0.119	103.200, 1.824	103.200, 0.097	103.200, 0.123	103.200, 0.085	103.200, 1.124	103.200, 0.143	103.200, -0.042
518	103.400, 2.063	103.400, 0.119	103.400, 1.825	103.400, 0.097	103.400, 0.124	103.400, 0.084	103.400, 1.124	103.400, 0.143	103.400, -0.042
519	103.600, 2.064	103.600, 0.119	103.600, 1.825	103.600, 0.097	103.600, 0.124	103.600, 0.084	103.600, 1.124	103.600, 0.143	103.600, -0.042
520	103.800, 2.066	103.800, 0.119	103.800, 1.826	103.800, 0.097	103.800, 0.124	103.800, 0.084	103.800, 1.124	103.800, 0.143	103.800, -0.042
521	104.000, 2.067	104.000, 0.119	104.000, 1.826	104.000, 0.097	104.000, 0.125	104.000, 0.084	104.000, 1.124	104.000, 0.143	104.000, -0.041
522	104.200, 2.068	104.200, 0.119	104.200, 1.827	104.200, 0.097	104.200, 0.125	104.200, 0.084	104.200, 1.125	104.200, 0.143	104.200, -0.041
523	104.400, 2.069	104.400, 0.118	104.400, 1.828	104.400, 0.097	104.400, 0.125	104.400, 0.084	104.400, 1.125	104.400, 0.143	104.400, -0.041
524	104.600, 2.070	104.600, 0.118	104.600, 1.828	104.600, 0.097	104.600, 0.125	104.600, 0.084	104.600, 1.125	104.600, 0.143	104.600, -0.041
525	104.800, 2.071	104.800, 0.117	104.800, 1.828	104.800, 0.097	104.800, 0.126	104.800, 0.084	104.800, 1.125	104.800, 0.142	104.800, -0.041
526	105.000, 2.072	105.000, 0.117	105.000, 1.829	105.000, 0.097	105.000, 0.126	105.000, 0.085	105.000, 1.126	105.000, 0.142	105.000, -0.041
527	105.200, 2.073	105.200, 0.117	105.200, 1.829	105.200, 0.097	105.200, 0.126	105.200, 0.085	105.200, 1.126	105.200, 0.142	105.200, -0.041
528	105.400, 2.074	105.400, 0.116	105.400, 1.830	105.400, 0.096	105.400, 0.126	105.400, 0.085	105.400, 1.127	105.400, 0.142	105.400, -0.041
529	105.600, 2.075	105.600, 0.116	105.600, 1.831	105.600, 0.096	105.600, 0.126	105.600, 0.086	105.600, 1.127	105.600, 0.142	105.600, -0.041
530	105.800, 2.077	105.800, 0.116	105.800, 1.831	105.800, 0.096	105.800, 0.126	105.800, 0.086	105.800, 1.128	105.800, 0.142	105.800, -0.041
531	106.000, 2.078	106.000, 0.116	106.000, 1.832	106.000, 0.096	106.000, 0.126	106.000, 0.086	106.000, 1.128	106.000, 0.142	106.000, -0.041
532	106.200, 2.080	106.200, 0.117	106.200, 1.833	106.200, 0.096	106.200, 0.126	106.200, 0.086	106.200, 1.129	106.200, 0.141	106.200, -0.041
533	106.400, 2.081	106.400, 0.117	106.400, 1.833	106.400, 0.096	106.400, 0.126	106.400, 0.085	106.400, 1.129	106.400, 0.141	106.400, -0.041
534	106.600, 2.083	106.600, 0.117	106.600, 1.834	106.600, 0.096	106.600, 0.126	106.600, 0.085	106.600, 1.130	106.600, 0.141	106.600, -0.041
535	106.800, 2.085	106.800, 0.117	106.800, 1.835	106.800, 0.096	106.800, 0.126	106.800, 0.085	106.800, 1.130	106.800, 0.141	106.800, -0.041
536	107.000, 2.086	107.000, 0.118	107.000, 1.835	107.000, 0.096	107.000, 0.126	107.000, 0.084	107.000, 1.130	107.000, 0.141	107.000, -0.041
537	107.200, 2.088	107.200, 0.118	107.200, 1.836	107.200, 0.097	107.200, 0.126	107.200, 0.084	107.200, 1.130	107.200, 0.142	107.200, -0.041
538	107.400, 2.089	107.400, 0.118	107.400, 1.837	107.400, 0.097	107.400, 0.125	107.400, 0.084	107.400, 1.131	107.400, 0.142	107.400, -0.040
539	107.600, 2.091	107.600, 0.119	107.600, 1.838	107.600, 0.097	107.600, 0.125	107.600, 0.083	107.600, 1.131	107.600, 0.143	107.600, -0.040
540	107.800, 2.092	107.800, 0.119	107.800, 1.839	107.800, 0.097	107.800, 0.125	107.800, 0.083	107.800, 1.131	107.800, 0.143	107.800, -0.040
541	108.000, 2.094	108.000, 0.118	108.000, 1.840	108.000, 0.098	108.000, 0.125	108.000, 0.083	108.000, 1.132	108.000, 0.144	108.000, -0.040
542	108.200, 2.095	108.200, 0.118	108.200, 1.841	108.200, 0.098	108.200, 0.125	108.200, 0.083	108.200, 1.132	108.200, 0.144	108.200, -0.040
543	108.400, 2.096	108.400, 0.118	108.400, 1.841	108.400, 0.098	108.400, 0.125	108.400, 0.084	108.400, 1.132	108.400, 0.144	108.400, -0.040
544	108.600, 2.098	108.600, 0.118	108.600, 1.842	108.600, 0.098	108.600, 0.125	108.600, 0.084	108.600, 1.133	108.600, 0.144	108.600, -0.040
545	108.800, 2.099	108.800, 0.117	108.800, 1.842	108.800, 0.098	108.800, 0.125	108.800, 0.084	108.800, 1.133	108.800, 0.144	108.800, -0.040
546	109.000, 2.100	109.000, 0.117	109.000, 1.843	109.000, 0.098	109.000, 0.125	109.000, 0.084	109.000, 1.133	109.000, 0.144	109.000, -0.040
547	109.200, 2.101	109.200, 0.117	109.200, 1.844	109.200, 0.098	109.200, 0.125	109.200, 0.084	109.200, 1.134	109.200, 0.144	109.200, -0.040
548	109.400, 2.102	109.400, 0.117	109.400, 1.845	109.400, 0.097	109.400, 0.125	109.400, 0.084	109.400, 1.134	109.400, 0.144	109.400, -0.040
549	109.600, 2.104	109.600, 0.117	109.600, 1.846	109.600, 0.097	109.600, 0.125	109.600, 0.084	109.600, 1.135	109.600, 0.144	109.600, -0.040
550	109.800, 2.105	109.800, 0.117	109.800, 1.847	109.800, 0.097	109.800, 0.125	109.800, 0.084	109.800, 1.135	109.800, 0.144	109.800, -0.040
551	110.000, 2.106	110.000, 0.117	110.000, 1.847	110.000, 0.097	110.000, 0.125	110.000, 0.084	110.000, 1.136	110.000, 0.143	110.000, -0.041
552	110.200, 2.108	110.200, 0.117	110.200, 1.848	110.200, 0.096	110.200, 0.126	110.200, 0.085	110.200, 1.136	110.200, 0.143	110.200, -0.041
553	110.400, 2.109	110.400, 0.117	110.400, 1.849	110.400, 0.096	110.400, 0.126	110.400, 0.085	110.400, 1.137	110.400, 0.142	110.400, -0.041
554	110.600, 2.110	110.600, 0.117	110.600, 1.849	110.600, 0.096	110.600, 0.126	110.600, 0.085	110.600, 1.137	110.600, 0.142	110.600, -0.040
555	110.800, 2.112	110.800, 0.117	110.800, 1.850	110.800, 0.096	110.800, 0.126	110.800, 0.085	110.800, 1.138	110.800, 0.141	110.800, -0.040
556	111.000, 2.113	111.000, 0.117	111.000, 1.851	111.000, 0.097	111.000, 0.126	111.000, 0.085	111.000, 1.138	111.000, 0.141	111.000, -0.040
557	111.200, 2.114	111.200, 0.117	111.200, 1.852	111.200, 0.097	111.200, 0.126	111.200, 0.085	111.200, 1.138	111.200, 0.141	111.200, -0.040
558	111.400, 2.115	111.400, 0.117	111.400, 1.852	111.400, 0.097	111.400, 0.126	111.400, 0.085	111.400, 1.139	111.400, 0.141	111.400, -0.040
559	111.600, 2.116	111.600, 0.117	111.600, 1.853	111.600, 0.097	111.600, 0.126	111.600, 0.085	111.600, 1.139	111.600, 0.142	111.600, -0.040
560	111.800, 2.117	111.800, 0.116	111.800, 1.854	111.800, 0.097	111.800, 0.125	111.800, 0.085	111.800, 1.139	111.800, 0.142	111.800, -0.040
561	112.000, 2.119	112.000, 0.116	112.000, 1.855	112.000, 0.097	112.000, 0.125	112.000, 0.086	112.000, 1.140	112.000, 0.142	112.000, -0.040
562	112.200, 2.120	112.200, 0.116	112.200, 1.855	112.200, 0.097	112.200, 0.125	112.200, 0.086	112.200, 1.140	112.200, 0.142	112.200, -0.040
563	112.400, 2.121	112.400, 0.116	112.400, 1.855	112.400, 0.097	112.400, 0.125	112.400, 0.086	112.400, 1.140	112.400, 0.142	112.400, -0.040
564	112.600, 2.122	112.600, 0.116	112.600, 1.856	112.600, 0.097	112.600, 0.125	112.600, 0.086	112.600, 1.140	112.600, 0.143	112.600, -0.041
565	112.800, 2.122	112.800, 0.116	112.800, 1.856	112.800, 0.098	112.800, 0.125	112.800, 0.086	112.800, 1.141	112.800, 0.143	112.800, -0.041
566	113.000, 2.123	113.000, 0.116	113.000, 1.856	113.000, 0.098	113.000, 0.125	113.000, 0.086	113.000, 1.141	113.000, 0.143	113.000, -0.041
567	113.200, 2.125	113.200, 0.116	113.200, 1.857	113.200, 0.098	113.200, 0.125	113.200, 0.085	113.200, 1.141	113.200, 0.143	113.200, -0.041
568	113.400, 2.126	113.400, 0.116	113.400, 1.857	113.400, 0.098	113.400, 0.125	113.400, 0.085	113.400, 1.142	113.400, 0.143	113.400, -0.041
569	113.600, 2.127	113.600, 0.116	113.600, 1.857	113.600, 0.098	113.600, 0.125	113.600, 0.085	113.600, 1.142	113.600, 0.143	113.600, -0.041
570	113.800, 2.128	113.800, 0.116	113.800, 1.857	113.800, 0.098	113.800, 0.125	113.800, 0.085	113.800, 1.143	113.800, 0.144	113.800, -0.041
571	114.000, 2.128	114.000, 0.116	114.000, 1.857	114.000, 0.099	114.000, 0.125	114.000, 0.085	114.000, 1.143	114.000, 0.144	114.000, -0.041
572	114.200, 2.129	114.200, 0.116	114.200, 1.857	114.200, 0.099	114.200, 0.125	114.200, 0.085	114.200, 1.143	114.200, 0.144	114.200, -0.041
573	114.400, 2.130	114.400, 0.116	114.400, 1.858	114.400, 0.099	114.400, 0.125	114.400, 0.086	114.400, 1.143	114.400, 0.144	114.400, -0.041
574	114.600, 2.131	114.600, 0.116	114.600, 1.858	114.600, 0.099	114.600, 0.125	114.600, 0.086	114.600, 1.143	114.600, 0.144	114.600, -0.041
575	114.800, 2.132	114.800, 0.116	114.800, 1.859	114.800, 0.099	114.800, 0.125	114.800, 0.086	114.800, 1.143	114.800, 0.144	114.800, -0.041
576	115.000, 2.132	115.000, 0.116	115.000, 1.860	115.000, 0.099	115.000, 0.125	115.000, 0.086	115.000, 1.143	115.000, 0.144	115.000, -0.041
577	115.200, 2.133	115.200, 0.116	115.200, 1.860	115.200, 0.099	115.200, 0.125	115.200, 0.085	115.200, 1.143	115.200, 0.144	115.200, -0.041
578	115.400, 2.134	115.400, 0.115	115.400, 1.861	115.400, 0.099	115.400, 0.125	115.400, 0.085	115.400, 1.143	115.400, 0.144	115.400, -0.041
579	115.600, 2.134	115.600, 0.115	115.600, 1.862	115.600, 0.099	115.600, 0.125	115.600, 0.085	115.600, 1.143	115.600, 0.143	115.600, -0.040
580	115.800, 2.135	115.800, 0.115	115.800, 1.863	115.800, 0.098	115.800, 0.125	115.800, 0.085	115.800, 1.144	115.800, 0.143	115.800, -0.040
581	116.000, 2.137	116.000, 0.115	116.000, 1.863	116.000, 0.098	116.000, 0.125	116.000, 0.085	116.000, 1.144	116.000, 0.143	116.000, -0.039
582	116.200, 2.138	116.200, 0.115	116.200, 1.864	116.200, 0.098	116.200, 0.126	116.200, 0.086	116.200, 1.144	116.200, 0.143	116.200, -0.039
583	116.400, 2.139	116.400, 0.115	116.400, 1.865	116.400, 0.098	116.400, 0.126	116.400, 0.086	116.400, 1.145	116.400, 0.143	116.400, -0.038
584	116.600, 2.140	116.600, 0.114	116.600, 1.865	116.600, 0.097	116.600, 0.126	116.600, 0.087	116.600, 1.146	116.600, 0.143	116.600, -0.038
585	116.800, 2.141	116.800, 0.114	116.800, 1.865	116.800, 0.097	116.800, 0.126	116.800, 0.087	116.800, 1.146	116.800, 0.143	116.800, -0.038
586	117.000, 2.143	117.000, 0.114	117.000, 1.866	117.000, 0.097	117.000, 0.126	117.000, 0.087	117.000, 1.146	117.000, 0.143	117.000, -0.038
587	117.200, 2.144	117.200, 0.114	117.200, 1.866	117.200, 0.097	117.200, 0.126	117.200, 0.087	117.200, 1.147	117.200, 0.143	117.200, -0.037
588	117.400, 2.145	117.400, 0.114	117.400, 1.866	117.400, 0.097	117.400, 0.126	117.400, 0.087	117.400, 1.147	117.400, 0.143	117.400, -0.038
589	117.600, 2.146	117.600, 0.114	117.600, 1.866	117.600, 0.097	117.600, 0.126	117.600, 0.087	117.600, 1.147	117.600, 0.144	117.600, -0.038
590	117.800, 2.147	117.800, 0.115	117.800, 1.866	117.800, 0.097	117.800, 0.126	117.800, 0.087	117.800, 1.148	117.800, 0.144	117.800, -0.038
591	118.000, 2.148	118.000, 0.115	118.000, 1.866	118.000, 0.097	118.000, 0.126	118.000, 0.087	118.000, 1.148	118.000, 0.144	118.000, -0.038
592	118.200, 2.148	118.200, 0.115	118.200, 1.867	118.200, 0.098	118.200, 0.126	118.200, 0.087	118.200, 1.148	118.200, 0.145	118.200, -0.038
593	118.400, 2.149	118.400, 0.115	118.400, 1.867	118.400, 0.098	118.400, 0.126	118.400, 0.087	118.400, 1.148	118.400, 0.145	118.400, -0.039
594	118.600, 2.150	118.600, 0.115	118.600, 1.868	118.600, 0.098	118.600, 0.126	118.600, 0.086	118.600, 1.148	118.600, 0.145	118.600, -0.039
595	118.800, 2.151	118.800, 0.115	118.800, 1.869	118.800, 0.098	118.800, 0.125	118.800, 0.086	118.800, 1.148	118.800, 0.144	118.800, -0.040
596	119.000, 2.151	119.000, 0.115	119.000, 1.869	119.000, 0.098	119.000, 0.125	119.000, 0.086	119.000, 1.148	119.000, 0.144	119.000, -0.041
597	119.200, 2.152	119.200, 0.114	119.200, 1.870	119.200, 0.098	119.200, 0.125	119.200, 0.085	119.200, 1.148	119.200, 0.144	119.200, -0.041
598	119.400, 2.153	119.400, 0.114	119.400, 1.870	119.400, 0.098	119.400, 0.125	119.400, 0.085	119.400, 1.148	119.400, 0.144	119.400, -0.041
599	119.600, 2.154	119.600, 0.114	119.600, 1.870	119.600, 0.098	119.600, 0.125	119.600, 0.085	119.600, 1.149	119.600, 0.144	119.600, -0.041
600	119.800, 2.155	119.800, 0.113	119.800, 1.870	119.800, 0.098	119.800, 0.125	119.800, 0.086	119.800, 1.149	119.800, 0.144	119.800, -0.041
601	120.000, 2.156	120.000, 0.113	120.000, 1.870	120.000, 0.098	120.000, 0.125	120.000, 0.086	120.000, 1.149	120.000, 0.144	120.000, -0.041
602	120.200, 2.157	120.200, 0.112	120.200, 1.871	120.200, 0.097	120.200, 0.125	120.200, 0.086	120.200, 1.150	120.200, 0.144	120.200, -0.040
603	120.400, 2.158	120.400, 0.112	120.400, 1.871	120.400, 0.097	120.400, 0.126	120.400, 0.087	120.400, 1.150	120.400, 0.144	120.400, -0.039
604	120.600, 2.159	120.600, 0.112	120.600, 1.871	120.600, 0.097	120.600, 0.126	120.600, 0.087	120.600, 1.150	120.600, 0.144	120.600, -0.039
605	120.800, 2.160	120.800, 0.111	120.800, 1.871	120.800, 0.098	120.800, 0.126	120.800, 0.087	120.800, 1.150	120.800, 0.144	120.800, -0.039
606	121.000, 2.161	121.000, 0.111	121.000, 1.871	121.000, 0.098	121.000, 0.127	121.000, 0.086	121.000, 1.150	121.000, 0.144	121.000, -0.038
607	121.200, 2.162	121.200, 0.111	121.200, 1.871	121.200, 0.098	121.200, 0.127	121.200, 0.086	121.200, 1.150	121.200, 0.144	121.200, -0.038
608	121.400, 2.162	121.400, 0.111	121.400, 1.871	121.400, 0.098	121.400, 0.128	121.400, 0.086	121.400, 1.150	121.400, 0.144	121.400, -0.037
609	121.600, 2.163	121.600, 0.111	121.600, 1.872	121.600, 0.098	121.600, 0.128	121.600, 0.085	121.600, 1.150	121.600, 0.144	121.600, -0.037
610	121.800, 2.164	121.800, 0.111	121.800, 1.872	121.800, 0.099	121.800, 0.128	121.800, 0.085	121.800, 1.150	121.800, 0.143	121.800, -0.037
611	122.000, 2.164	122.000, 0.111	122.000, 1.873	122.000, 0.099	122.000, 0.128	122.000, 0.086	122.000, 1.150	122.000, 0.143	122.000, -0.037
612	122.200, 2.165	122.200, 0.111	122.200, 1.874	122.200, 0.099	122.200, 0.128	122.200, 0.086	122.200, 1.150	122.200, 0.143	122.200, -0.037
613	122.400, 2.166	122.400, 0.112	122.400, 1.875	122.400, 0.100	122.400, 0.128	122.400, 0.086	122.400, 1.150	122.400, 0.143	122.400, -0.037
614	122.600, 2.167	122.600, 0.112	122.600, 1.876	122.600, 0.100	122.600, 0.127	122.600, 0.087	122.600, 1.151	122.600, 0.143	122.600, -0.038
615	122.800, 2.168	122.800, 0.112	122.800, 1.877	122.800, 0.100	122.800, 0.127	122.800, 0.087	122.800, 1.151	122.800, 0.143	122.800, -0.038
616	123.000, 2.169	123.000, 0.112	123.000, 1.877	123.000, 0.100	123.000, 0.127	123.000, 0.087	123.000, 1.152	123.000, 0.143	123.000, -0.038
617	123.200, 2.170	123.200, 0.112	123.200, 1.878	123.200, 0.100	123.200, 0.126	123.200, 0.088	123.200, 1.152	123.200, 0.143	123.200, -0.039
618	123.400, 2.171	123.400, 0.112	123.400, 1.878	123.400, 0.100	123.400, 0.126	123.400, 0.088	123.400, 1.153	123.400, 0.144	123.400, -0.038
619	123.600, 2.172	123.600, 0.113	123.600, 1.879	123.600, 0.100	123.600, 0.126	123.600, 0.088	123.600, 1.154	123.600, 0.144	123.600, -0.038
620	123.800, 2.173	123.800, 0.113	123.800, 1.879	123.800, 0.100	123.800, 0.126	123.800, 0.089	123.800, 1.154	123.800, 0.144	123.800, -0.038
621	124.000, 2.173	124.000, 0.113	124.000, 1.879	124.000, 0.100	124.000, 0.126	124.000, 0.089	124.000, 1.155	124.000, 0.145	124.000, -0.038
622	124.200, 2.174	124.200, 0.113	124.200, 1.879	124.200, 0.100	124.200, 0.127	124.200, 0.089	124.200, 1.155	124.200, 0.145	124.200, -0.038
623	124.400, 2.175	124.400, 0.113	124.400, 1.879	124.400, 0.100	124.400, 0.127	124.400, 0.088	124.400, 1.156	124.400, 0.146	124.400, -0.039
624	124.600, 2.176	124.600, 0.113	124.600, 1.879	124.600, 0.100	124.600, 0.127	124.600, 0.088	124.600, 1.156	124.600, 0.146	124.600, -0.038
625	124.800, 2.176	124.800, 0.113	124.800, 1.879	124.800, 0.100	124.800, 0.127	124.800, 0.088	124.800, 1.156	124.800, 0.146	124.800, -0.038
626	125.000, 2.177	125.000, 0.113	125.000, 1.879	125.000, 0.099	125.000, 0.128	125.000, 0.087	125.000, 1.156	125.000, 0.147	125.000, -0.038
627	125.200, 2.177	125.200, 0.112	125.200, 1.879	125.200, 0.099	125.200, 0.128	125.200, 0.086	125.200, 1.156	125.200, 0.147	125.200, -0.038
628	125.400, 2.178	125.400, 0.112	125.400, 1.880	125.400, 0.099	125.400, 0.128	125.400, 0.085	125.400, 1.156	125.400, 0.147	125.400, -0.038
629	125.600, 2.178	125.600, 0.112	125.600, 1.881	125.600, 0.099	125.600, 0.128	125.600, 0.085	125.600, 1.156	125.600, 0.147	125.600, -0.038
630	125.800, 2.179	125.800, 0.112	125.800, 1.881	125.800, 0.099	125.800, 0.128	125.800, 0.085	125.800, 1.156	125.800, 0.147	125.800, -0.038
631	126.000, 2.179	126.000, 0.111	126.000, 1.882	126.000, 0.099	126.000, 0.128	126.000, 0.085	126.000, 1.155	126.000, 0.147	126.000, -0.038
632	126.200, 2.180	126.200, 0.111	126.200, 1.883	126.200, 0.099	126.200, 0.128	126.200, 0.085	126.200, 1.155	126.200, 0.147	126.200, -0.038
633	126.400, 2.181	126.400, 0.111	126.400, 1.883	126.400, 0.099	126.400, 0.128	126.400, 0.085	126.400, 1.155	126.400, 0.147	126.400, -0.038
634	126.600, 2.181	126.600, 0.111	126.600, 1.884	126.600, 0.099	126.600, 0.128	126.600, 0.085	126.600, 1.155	126.600, 0.147	126.600, -0.038
635	126.800, 2.182	126.800, 0.111	126.800, 1.885	126.800, 0.099	126.800, 0.128	126.800, 0.085	126.800, 1.155	126.800, 0.147	126.800, -0.038
636	127.000, 2.183	127.000, 0.111	127.000, 1.885	127.000, 0.099	127.000, 0.128	127.000, 0.085	127.000, 1.156	127.000, 0.147	127.000, -0.037
637	127.200, 2.184	127.200, 0.110	127.200, 1.886	127.200, 0.099	127.200, 0.128	127.200, 0.086	127.200, 1.156	127.200, 0.147	127.200, -0.037
638	127.400, 2.185	127.400, 0.110	127.400, 1.886	127.400, 0.099	127.400, 0.128	127.400, 0.086	127.400, 1.156	127.400, 0.146	127.400, -0.037
639	127.600, 2.186	127.600, 0.110	127.600, 1.886	127.600, 0.099	127.600, 0.128	127.600, 0.086	127.600, 1.156	127.600, 0.146	127.600, -0.037
640	127.800, 2.187	127.800, 0.110	127.800, 1.886	127.800, 0.099	127.800, 0.128	127.800, 0.087	127.800, 1.156	127.800, 0.146	127.800, -0.038
641	128.000, 2.188	128.000, 0.110	128.000, 1.886	128.000, 0.098	128.000, 0.128	128.000, 0.087	128.000, 1.157	128.000, 0.146	128.000, -0.038
642	128.200, 2.189	128.200, 0.110	128.200, 1.886	128.200, 0.098	128.200, 0.128	128.200, 0.087	128.200, 1.157	128.200, 0.146	128.200, -0.038
643	128.400, 2.190	128.400, 0.110	128.400, 1.886	128.400, 0.098	128.400, 0.128	128.400, 0.088	128.400, 1.158	128.400, 0.146	128.400, -0.038
644	128.600, 2.190	128.600, 0.111	128.600, 1.886	128.600, 0.098	128.600, 0.128	128.600, 0.088	128.600, 1.158	128.600, 0.146	128.600, -0.038
645	128.800, 2.191	128.800, 0.111	128.800, 1.886	128.800, 0.098	128.800, 0.128	128.800, 0.088	128.800, 1.158	128.800, 0.146	128.800, -0.038
646	129.000, 2.191	129.000, 0.111	129.000, 1.886	129.000, 0.098	129.000, 0.128	129.000, 0.088	129.000, 1.158	129.000, 0.146	129.000, -0.038
647	129.200, 2.191	129.200, 0.112	129.200, 1.886	129.200, 0.099	129.200, 0.128	129.200, 0.088	129.200, 1.158	129.200, 0.146	129.200, -0.038
648	129.400, 2.191	129.400, 0.112	129.400, 1.887	129.400, 0.099	129.400, 0.128	129.400, 0.088	129.400, 1.159	129.400, 0.146	129.400, -0.038
649	129.600, 2.192	129.600, 0.112	129.600, 1.887	129.600, 0.099	129.600, 0.128	129.600, 0.088	129.600, 1.158	129.600, 0.147	129.600, -0.038
650	129.800, 2.192	129.800, 0.112	129.800, 1.888	129.800, 0.100	129.800, 0.128	129.800, 0.088	129.800, 1.158	129.800, 0.147	129.800, -0.038
651	130.000, 2.192	130.000, 0.112	130.000, 1.888	130.000, 0.100	130.000, 0.128	130.000, 0.087	130.000, 1.158	130.000, 0.147	130.000, -0.038
652	130.200, 2.192	130.200, 0.113	130.200, 1.889	130.200, 0.099	130.200, 0.129	130.200, 0.087	130.200, 1.159	130.200, 0.146	130.200, -0.038
653	130.400, 2.193	130.400, 0.113	130.400, 1.889	130.400, 0.099	130.400, 0.129	130.400, 0.087	130.400, 1.159	130.400, 0.146	130.400, -0.038
654	130.600, 2.194	130.600, 0.113	130.600, 1.890	130.600, 0.099	130.600, 0.129	130.600, 0.086	130.600, 1.159	130.600, 0.146	130.600, -0.038
655	130.800, 2.194	130.800, 0.112	130.800, 1.890	130.800, 0.099	130.800, 0.129	130.800, 0.086	130.800, 1.160	130.800, 0.146	130.800, -0.038
656	131.000, 2.195	131.000, 0.112	131.000, 1.891	131.000, 0.099	131.000, 0.128	131.000, 0.086	131.000, 1.160	131.000, 0.147	131.000, -0.038
657	131.200, 2.196	131.200, 0.112	131.200, 1.891	131.200, 0.099	131.200, 0.128	131.200, 0.086	131.200, 1.160	131.200, 0.147	131.200, -0.038
658	131.400, 2.196	131.400, 0.111	131.400, 1.891	131.400, 0.099	131.400, 0.128	131.400, 0.086	131.400, 1.160	131.400, 0.147	131.400, -0.038
659	131.600, 2.197	131.600, 0.111	131.600, 1.891	131.600, 0.099	131.600, 0.128	131.600, 0.086	131.600, 1.160	131.600, 0.147	131.600, -0.038
660	131.800, 2.197	131.800, 0.111	131.800, 1.892	131.800, 0.099	131.800, 0.128	131.800, 0.086	131.800, 1.161	131.800, 0.148	131.800, -0.038
661	132.000, 2.198	132.000, 0.111	132.000, 1.892	132.000, 0.099	132.000, 0.128	132.000, 0.086	132.000, 1.161	132.000, 0.148	132.000, -0.039
662	132.200, 2.198	132.200, 0.110	132.200, 1.892	132.200, 0.099	132.200, 0.128	132.200, 0.086	132.200, 1.162	132.200, 0.148	132.200, -0.039
663	132.400, 2.199	132.400, 0.110	132.400, 1.892	132.400, 0.098	132.400, 0.128	132.400, 0.086	132.400, 1.162	132.400, 0.149	132.400, -0.039
664	132.600, 2.199	132.600, 0.110	132.600, 1.892	132.600, 0.099	132.600, 0.128	132.600, 0.086	132.600, 1.163	132.600, 0.149	132.600, -0.039
665	132.800, 2.200	132.800, 0.110	132.800, 1.892	132.800, 0.098	132.800, 0.128	132.800, 0.087	132.800, 1.163	132.800, 0.149	132.800, -0.039
666	133.000, 2.201	133.000, 0.110	133.000, 1.892	133.000, 0.099	133.000, 0.128	133.000, 0.087	133.000, 1.163	133.000, 0.149	133.000, -0.038
667	133.200, 2.202	133.200, 0.109	133.200, 1.892	133.200, 0.099	133.200, 0.128	133.200, 0.087	133.200, 1.163	133.200, 0.149	133.200, -0.038
668	133.400, 2.202	133.400, 0.109	133.400, 1.892	133.400, 0.099	133.400, 0.128	133.400, 0.087	133.400, 1.163	133.400, 0.149	133.400, -0.038
669	133.600, 2.203	133.600, 0.109	133.600, 1.893	133.600, 0.099	133.600, 0.128	133.600, 0.087	133.600, 1.163	133.600, 0.148	133.600, -0.038
670	133.800, 2.204	133.800, 0.110	133.800, 1.893	133.800, 0.099	133.800, 0.128	133.800, 0.088	133.800, 1.164	133.800, 0.148	133.800, -0.038
671	134.000, 2.205	134.000, 0.110	134.000, 1.893	134.000, 0.099	134.000, 0.128	134.000, 0.088	134.000, 1.164	134.000, 0.147	134.000, -0.038
672	134.200, 2.206	134.200, 0.110	134.200, 1.893	134.200, 0.099	134.200, 0.128	134.200, 0.088	134.200, 1.164	134.200, 0.147	134.200, -0.038
673	134.400, 2.206	134.400, 0.110	134.400, 1.894	134.400, 0.099	134.400, 0.128	134.400, 0.088	134.400, 1.165	134.400, 0.146	134.400, -0.038
674	134.600, 2.207	134.600, 0.110	134.600, 1.894	134.600, 0.099	134.600, 0.128	134.600, 0.088	134.600, 1.165	134.600, 0.146	134.600, -0.038
675	134.800, 2.207	134.800, 0.109	134.800, 1.894	134.800, 0.099	134.800, 0.128	134.800, 0.088	134.800, 1.165	134.800, 0.146	134.800, -0.037
676	135.000, 2.208	135.000, 0.109	135.000, 1.895	135.000, 0.099	135.000, 0.128	135.000, 0.088	135.000, 1.165	135.000, 0.146	135.000, -0.037
677	135.200, 2.208	135.200, 0.109	135.200, 1.895	135.200, 0.099	135.200, 0.128	135.200, 0.088	135.200, 1.165	135.200, 0.147	135.200, -0.037
678	135.400, 2.209	135.400, 0.109	135.400, 1.895	135.400, 0.099	135.400, 0.128	135.400, 0.088	135.400, 1.165	135.400, 0.147	135.400, -0.036
679	135.600, 2.209	135.600, 0.109	135.600, 1.896	135.600, 0.099	135.600, 0.128	135.600, 0.088	135.600, 1.165	135.600, 0.147	135.600, -0.036
680	135.800, 2.209	135.800, 0.109	135.800, 1.896	135.800, 0.099	135.800, 0.128	135.800, 0.087	135.800, 1.165	135.800, 0.148	135.800, -0.036
681	136.000, 2.210	136.000, 0.109	136.000, 1.896	136.000, 0.098	136.000, 0.128	136.000, 0.087	136.000, 1.165	136.000, 0.148	136.000, -0.036
682	136.200, 2.210	136.200, 0.108	136.200, 1.896	136.200, 0.098	136.200, 0.128	136.200, 0.086	136.200, 1.165	136.200, 0.148	136.200, -0.036
683	136.400, 2.210	136.400, 0.108	136.400, 1.896	136.400, 0.098	136.400, 0.129	136.400, 0.086	136.400, 1.165	136.400, 0.149	136.400, -0.036
684	136.600, 2.211	136.600, 0.108	136.600, 1.896	136.600, 0.097	136.600, 0.129	136.600, 0.086	136.600, 1.165	136.600, 0.149	136.600, -0.035
685	136.800, 2.211	136.800, 0.107	136.800, 1.896	136.800, 0.097	136.800, 0.129	136.800, 0.086	136.800, 1.165	136.800, 0.149	136.800, -0.035
686	137.000, 2.211	137.000, 0.107	137.000, 1.895	137.000, 0.097	137.000, 0.129	137.000, 0.086	137.000, 1.165	137.000, 0.149	137.000, -0.035
687	137.200, 2.212	137.200, 0.107	137.200, 1.895	137.200, 0.097	137.200, 0.128	137.200, 0.086	137.200, 1.165	137.200, 0.149	137.200, -0.036
688	137.400, 2.212	137.400, 0.107	137.400, 1.895	137.400, 0.097	137.400, 0.128	137.400, 0.086	137.400, 1.165	137.400, 0.149	137.400, -0.036
689	137.600, 2.212	137.600, 0.107	137.600, 1.895	137.600, 0.097	137.600, 0.128	137.600, 0.086	137.600, 1.165	137.600, 0.149	137.600, -0.036
690	137.800, 2.212	137.800, 0.108	137.800, 1.895	137.800, 0.097	137.800, 0.128	137.800, 0.086	137.800, 1.165	137.800, 0.148	137.800, -0.037
691	138.000, 2.212	138.000, 0.108	138.000, 1.895	138.000, 0.097	138.000, 0.128	138.000, 0.087	138.000, 1.165	138.000, 0.148	138.000, -0.037
692	138.200, 2.212	138.200, 0.108	138.200, 1.896	138.200, 0.097	138.200, 0.128	138.200, 0.087	138.200, 1.166	138.200, 0.148	138.200, -0.037
693	138.400, 2.212	138.400, 0.108	138.400, 1.896	138.400, 0.097	138.400, 0.128	138.400, 0.087	138.400, 1.166	138.400, 0.147	138.400, -0.037
694	138.600, 2.212	138.600, 0.108	138.600, 1.896	138.600, 0.097	138.600, 0.128	138.600, 0.087	138.600, 1.166	138.600, 0.147	138.600, -0.037
695	138.800, 2.212	138.800, 0.108	138.800, 1.897	138.800, 0.097	138.800, 0.127	138.800, 0.087	138.800, 1.166	138.800, 0.147	138.800, -0.037
696	139.000, 2.213	139.000, 0.108	139.000, 1.897	139.000, 0.097	139.000, 0.127	139.000, 0.087	139.000, 1.167	139.000, 0.147	139.000, -0.037
697	139.200, 2.213	139.200, 0.108	139.200, 1.898	139.200, 0.097	139.200, 0.127	139.200, 0.087	139.200, 1.167	139.200, 0.147	139.200, -0.036
698	139.400, 2.213	139.400, 0.108	139.400, 1.898	139.400, 0.097	139.400, 0.127	139.400, 0.088	139.400, 1.166	139.400, 0.147	139.400, -0.036
699	139.600, 2.214	139.600, 0.108	139.600, 1.899	139.600, 0.097	139.600, 0.127	139.600, 0.088	139.600, 1.167	139.600, 0.147	139.600, -0.036
700	139.800, 2.214	139.800, 0.108	139.800, 1.900	139.800, 0.097	139.800, 0.127	139.800, 0.088	139.800, 1.167	139.800, 0.147	139.800, -0.036
701	140.000, 2.215	140.000, 0.108	140.000, 1.900	140.000, 0.098	140.000, 0.127	140.000, 0.088	140.000, 1.167	140.000, 0.147	140.000, -0.036
702	140.200, 2.215	140.200, 0.108	140.200, 1.900	140.200, 0.098	140.200, 0.127	140.200, 0.088	140.200, 1.167	140.200, 0.147	140.200, -0.035
703	140.400, 2.216	140.400, 0.108	140.400, 1.900	140.400, 0.099	140.400, 0.127	140.400, 0.088	140.400, 1.167	140.400, 0.147	140.400, -0.035
704	140.600, 2.217	140.600, 0.108	140.600, 1.901	140.600, 0.099	140.600, 0.127	140.600, 0.088	140.600, 1.167	140.600, 0.147	140.600, -0.035
705	140.800, 2.217	140.800, 0.108	140.800, 1.901	140.800, 0.100	140.800, 0.127	140.800, 0.089	140.800, 1.168	140.800, 0.148	140.800, -0.035
706	141.000, 2.218	141.000, 0.108	141.000, 1.901	141.000, 0.100	141.000, 0.127	141.000, 0.089	141.000, 1.168	141.000, 0.148	141.000, -0.035
707	141.200, 2.218	141.200, 0.108	141.200, 1.902	141.200, 0.100	141.200, 0.127	141.200, 0.089	141.200, 1.168	141.200, 0.148	141.200, -0.035
708	141.400, 2.219	141.400, 0.108	141.400, 1.902	141.400, 0.101	141.400, 0.127	141.400, 0.089	141.400, 1.168	141.400, 0.148	141.400, -0.036
709	141.600, 2.219	141.600, 0.108	141.600, 1.901	141.600, 0.101	141.600, 0.127	141.600, 0.089	141.600, 1.168	141.600, 0.148	141.600, -0.036
710	141.800, 2.220	141.800, 0.109	141.800, 1.901	141.800, 0.101	141.800, 0.127	141.800, 0.089	141.800, 1.169	141.800, 0.148	141.800, -0.036
711	142.000, 2.220	142.000, 0.109	142.000, 1.901	142.000, 0.101	142.000, 0.127	142.000, 0.089	142.000, 1.169	142.000, 0.148	142.000, -0.037
712	142.200, 2.221	142.200, 0.109	142.200, 1.901	142.200, 0.101	142.200, 0.127	142.200, 0.089	142.200, 1.170	142.200, 0.148	142.200, -0.037
713	142.400, 2.221	142.400, 0.109	142.400, 1.901	142.400, 0.101	142.400, 0.127	142.400, 0.089	142.400, 1.170	142.400, 0.148	142.400, -0.037
714	142.600, 2.222	142.600, 0.109	142.600, 1.901	142.600, 0.100	142.600, 0.128	142.600, 0.089	142.600, 1.170	142.600, 0.148	142.600, -0.037
715	142.800, 2.222	142.800, 0.109	142.800, 1.902	142.800, 0.100	142.800, 0.128	142.800, 0.089	142.800, 1.170	142.800, 0.148	142.800, -0.037
716	143.000, 2.223	143.000, 0.109	143.000, 1.902	143.000, 0.099	143.000, 0.129	143.000, 0.089	143.000, 1.171	143.000, 0.148	143.000, -0.037
717	143.200, 2.223	143.200, 0.109	143.200, 1.902	143.200, 0.099	143.200, 0.129	143.200, 0.089	143.200, 1.171	143.200, 0.148	143.200, -0.037
718	143.400, 2.223	143.400, 0.109	143.400, 1.902	143.400, 0.099	143.400, 0.129	143.400, 0.089	143.400, 1.171	143.400, 0.148	143.400, -0.037
719	143.600, 2.223	143.600, 0.109	143.600, 1.902	143.600, 0.099	143.600, 0.129	143.600, 0.089	143.600, 1.171	143.600, 0.148	143.600, -0.037
720	143.800, 2.224	143.800, 0.109	143.800, 1.903	143.800, 0.099	143.800, 0.129	143.800, 0.088	143.800, 1.171	143.800, 0.148	143.800, -0.037
721	144.000, 2.224	144.000, 0.109	144.000, 1.903	144.000, 0.099	144.000, 0.129	144.000, 0.088	144.000, 1.171	144.000, 0.148	144.000, -0.037
722	144.200, 2.224	144.200, 0.109	144.200, 1.904	144.200, 0.099	144.200, 0.129	144.200, 0.088	144.200, 1.171	144.200, 0.148	144.200, -0.036
723	144.400, 2.224	144.400, 0.109	144.400, 1.904	144.400, 0.099	144.400, 0.130	144.400, 0.087	144.400, 1.170	144.400, 0.148	144.400, -0.036
724	144.600, 2.224	144.600, 0.109	144.600, 1.904	144.600, 0.098	144.600, 0.129	144.600, 0.088	144.600, 1.170	144.600, 0.148	144.600, -0.036
725	144.800, 2.224	144.800, 0.109	144.800, 1.905	144.800, 0.098	144.800, 0.129	144.800, 0.088	144.800, 1.170	144.800, 0.148	144.800, -0.036
726	145.000, 2.224	145.000, 0.109	145.000, 1.905	145.000, 0.098	145.000, 0.130	145.000, 0.088	145.000, 1.170	145.000, 0.148	145.000, -0.036
727	145.200, 2.224	145.200, 0.109	145.200, 1.905	145.200, 0.098	145.200, 0.129	145.200, 0.088	145.200, 1.170	145.200, 0.148	145.200, -0.036
728	145.400, 2.224	145.400, 0.108	145.400, 1.905	145.400, 0.098	145.400, 0.129	145.400, 0.089	145.400, 1.169	145.400, 0.148	145.400, -0.036
729	145.600, 2.224	145.600, 0.108	145.600, 1.904	145.600, 0.098	145.600, 0.129	145.600, 0.089	145.600, 1.169	145.600, 0.149	145.600, -0.036
730	145.800, 2.224	145.800, 0.108	145.800, 1.904	145.800, 0.098	145.800, 0.128	145.800, 0.090	145.800, 1.169	145.800, 0.149	145.800, -0.035
731	146.000, 2.225	146.000, 0.107	146.000, 1.904	146.000, 0.098	146.000, 0.128	146.000, 0.090	146.000, 1.169	146.000, 0.149	146.000, -0.035
732	146.200, 2.225	146.200, 0.107	146.200, 1.904	146.200, 0.098	146.200, 0.128	146.200, 0.090	146.200, 1.169	146.200, 0.149	146.200, -0.035
733	146.400, 2.226	146.400, 0.107	146.400, 1.904	146.400, 0.098	146.400, 0.128	146.400, 0.090	146.400, 1.169	146.400, 0.149	146.400, -0.034
734	146.600, 2.226	146.600, 0.107	146.600, 1.904	146.600, 0.099	146.600, 0.128	146.600, 0.090	146.600, 1.170	146.600, 0.149	146.600, -0.034
735	146.800, 2.227	146.800, 0.106	146.800, 1.904	146.800, 0.099	146.800, 0.129	146.800, 0.090	146.800, 1.170	146.800, 0.149	146.800, -0.034
736	147.000, 2.227	147.000, 0.106	147.000, 1.904	147.000, 0.099	147.000, 0.129	147.000, 0.090	147.000, 1.170	147.000, 0.149	147.000, -0.034
737	147.200, 2.228	147.200, 0.106	147.200, 1.904	147.200, 0.099	147.200, 0.129	147.200, 0.090	147.200, 1.171	147.200, 0.149	147.200, -0.033
738	147.400, 2.228	147.400, 0.106	147.400, 1.904	147.400, 0.100	147.400, 0.129	147.400, 0.090	147.400, 1.171	147.400, 0.149	147.400, -0.033
739	147.600, 2.229	147.600, 0.107	147.600, 1.904	147.600, 0.100	147.600, 0.129	147.600, 0.090	147.600, 1.171	147.600, 0.149	147.600, -0.033
740	147.800, 2.229	147.800, 0.107	147.800, 1.905	147.800, 0.100	147.800, 0.129	147.800, 0.090	147.800, 1.172	147.800, 0.149	147.800, -0.033
741	148.000, 2.230	148.000, 0.107	148.000, 1.905	148.000, 0.100	148.000, 0.129	148.000, 0.090	148.000, 1.172	148.000, 0.149	148.000, -0.033
742	148.200, 2.230	148.200, 0.107	148.200, 1.906	148.200, 0.100	148.200, 0.129	148.200, 0.090	148.200, 1.173	148.200, 0.149	148.200, -0.033
743	148.400, 2.230	148.400, 0.108	148.400, 1.906	148.400, 0.100	148.400, 0.129	148.400, 0.090	148.400, 1.173	148.400, 0.149	148.400, -0.034
744	148.600, 2.231	148.600, 0.108	148.600, 1.907	148.600, 0.100	148.600, 0.129	148.600, 0.090	148.600, 1.173	148.600, 0.149	148.600, -0.034
745	148.800, 2.231	148.800, 0.108	148.800, 1.907	148.800, 0.100	148.800, 0.129	148.800, 0.090	148.800, 1.173	148.800, 0.149	148.800, -0.034
746	149.000, 2.231	149.000, 0.108	149.000, 1.908	149.000, 0.100	149.000, 0.129	149.000, 0.090	149.000, 1.173	149.000, 0.149	149.000, -0.035
747	149.200, 2.232	149.200, 0.108	149.200, 1.908	149.200, 0.100	149.200, 0.129	149.200, 0.089	149.200, 1.173	149.200, 0.149	149.200, -0.035
748	149.400, 2.232	149.400, 0.108	149.400, 1.909	149.400, 0.100	149.400, 0.128	149.400, 0.089	149.400, 1.173	149.400, 0.149	149.400, -0.035
749	149.600, 2.232	149.600, 0.108	149.600, 1.909	149.600, 0.100	149.600, 0.128	149.600, 0.089	149.600, 1.173	149.600, 0.149	149.600, -0.035
750	149.800, 2.232	149.800, 0.108	149.800, 1.909	149.800, 0.100	149.800, 0.128	149.800, 0.089	149.800, 1.173	149.800, 0.150	149.800, -0.035
751	150.000, 2.232	150.000, 0.108	150.000, 1.909	150.000, 0.100	150.000, 0.128	150.000, 0.089	150.000, 1.173	150.000, 0.150	150.000, -0.035
752	150.200, 2.228	150.200, 0.106	150.200, 1.906	150.200, 0.096	150.200, 0.124	150.200, 0.084	150.200, 1.166	150.200, 0.149	150.200, -0.040
753	150.400, 2.223	150.400, 0.104	150.400, 1.902	150.400, 0.092	150.400, 0.121	150.400, 0.079	150.400, 1.157	150.400, 0.148	150.400, -0.044
754	150.600, 2.217	150.600, 0.102	150.600, 1.896	150.600, 0.087	150.600, 0.117	150.600, 0.073	150.600, 1.147	150.600, 0.148	150.600, -0.049
755	150.800, 2.209	150.800, 0.100	150.800, 1.890	150.800, 0.083	150.800, 0.114	150.800, 0.067	150.800, 1.136	150.800, 0.147	150.800, -0.054
756	151.000, 2.200	151.000, 0.099	151.000, 1.882	151.000, 0.079	151.000, 0.110	151.000, 0.061	151.000, 1.125	151.000, 0.146	151.000, -0.058
757	151.200, 2.190	151.200, 0.097	151.200, 1.874	151.200, 0.075	151.200, 0.106	151.200, 0.055	151.200, 1.112	151.200, 0.146	151.200, -0.061
758	151.400, 2.178	151.400, 0.095	151.400, 1.864	151.400, 0.071	151.400, 0.103	151.400, 0.050	151.400, 1.099	151.400, 0.146	151.400, -0.064
759	151.600, 2.165	151.600, 0.094	151.600, 1.853	151.600, 0.067	151.600, 0.100	151.600, 0.045	151.600, 1.086	151.600, 0.145	151.600, -0.066
760	151.800, 2.151	151.800, 0.092	151.800, 1.841	151.800, 0.064	151.800, 0.098	151.800, 0.041	151.800, 1.073	151.800, 0.145	151.800, -0.067
761	152.000, 2.136	152.000, 0.091	152.000, 1.829	152.000, 0.062	152.000, 0.096	152.000, 0.037	152.000, 1.060	152.000, 0.145	152.000, -0.066
762	152.200, 2.120	152.200, 0.091	152.200, 1.817	152.200, 0.061	152.200, 0.096	152.200, 0.035	152.200, 1.048	152.200, 0.145	152.200, -0.064
763	152.400, 2.104	152.400, 0.090	152.400, 1.803	152.400, 0.060	152.400, 0.095	152.400, 0.033	152.400, 1.035	152.400, 0.145	152.400, -0.063
764	152.600, 2.087	152.600, 0.089	152.600, 1.789	152.600, 0.059	152.600, 0.094	152.600, 0.031	152.600, 1.022	152.600, 0.146	152.600, -0.062
765	152.800, 2.069	152.800, 0.089	152.800, 1.775	152.800, 0.058	152.800, 0.093	152.800, 0.030	152.800, 1.010	152.800, 0.146	152.800, -0.061
766	153.000, 2.051	153.000, 0.088	153.000, 1.761	153.000, 0.058	153.000, 0.093	153.000, 0.028	153.000, 0.997	153.000, 0.146	153.000, -0.059
767	153.200, 2.032	153.200, 0.088	153.200, 1.747	153.200, 0.057	153.200, 0.093	153.200, 0.027	153.200, 0.984	153.200, 0.146	153.200, -0.058
768	153.400, 2.014	153.400, 0.088	153.400, 1.733	153.400, 0.057	153.400, 0.092	153.400, 0.025	153.400, 0.971	153.400, 0.146	153.400, -0.056
769	153.600, 1.995	153.600, 0.088	153.600, 1.719	153.600, 0.057	153.600, 0.092	153.600, 0.024	153.600, 0.959	153.600, 0.146	153.600, -0.055
770	153.800, 1.977	153.800, 0.088	153.800, 1.705	153.800, 0.056	153.800, 0.092	153.800, 0.023	153.800, 0.946	153.800, 0.146	153.800, -0.054
771	154.000, 1.958	154.000, 0.088	154.000, 1.691	154.000, 0.056	154.000, 0.093	154.000, 0.022	154.000, 0.934	154.000, 0.146	154.000, -0.052
772	154.200, 1.940	154.200, 0.088	154.200, 1.677	154.200, 0.056	154.200, 0.093	154.200, 0.022	154.200, 0.922	154.200, 0.146	154.200, -0.051
773	154.400, 1.922	154.400, 0.088	154.400, 1.663	154.400, 0.056	154.400, 0.093	154.400, 0.021	154.400, 0.910	154.400, 0.146	154.400, -0.050
774	154.600, 1.903	154.600, 0.088	154.600, 1.649	154.600, 0.057	154.600, 0.093	154.600, 0.020	154.600, 0.898	154.600, 0.146	154.600, -0.049
775	154.800, 1.885	154.800, 0.089	154.800, 1.635	154.800, 0.057	154.800, 0.093	154.800, 0.019	154.800, 0.887	154.800, 0.146	154.800, -0.048
776	155.000, 1.867	155.000, 0.089	155.000, 1.622	155.000, 0.057	155.000, 0.093	155.000, 0.019	155.000, 0.876	155.000, 0.146	155.000, -0.047
777	155.200, 1.849	155.200, 0.089	155.200, 1.608	155.200, 0.057	155.200, 0.093	155.200, 0.018	155.200, 0.865	155.200, 0.147	155.200, -0.046
778	155.400, 1.832	155.400, 0.089	155.400, 1.595	155.400, 0.057	155.400, 0.093	155.400, 0.018	155.400, 0.854	155.400, 0.147	155.400, -0.045
779	155.600, 1.814	155.600, 0.089	155.600, 1.582	155.600, 0.056	155.600, 0.093	155.600, 0.017	155.600, 0.843	155.600, 0.147	155.600, -0.045
780	155.800, 1.796	155.800, 0.089	155.800, 1.569	155.800, 0.056	155.800, 0.092	155.800, 0.017	155.800, 0.833	155.800, 0.148	155.800, -0.044
781	156.000, 1.779	156.000, 0.089	156.000, 1.556	156.000, 0.056	156.000, 0.092	156.000, 0.016	156.000, 0.823	156.000, 0.148	156.000, -0.043
782	156.200, 1.762	156.200, 0.090	156.200, 1.543	156.200, 0.056	156.200, 0.092	156.200, 0.016	156.200, 0.813	156.200, 0.148	156.200, -0.042
783	156.400, 1.744	156.400, 0.090	156.400, 1.531	156.400, 0.056	156.400, 0.092	156.400, 0.015	156.400, 0.803	156.400, 0.149	156.400, -0.042
784	156.600, 1.727	156.600, 0.090	156.600, 1.518	156.600, 0.056	156.600, 0.092	156.600, 0.015	156.600, 0.794	156.600, 0.149	156.600, -0.041
785	156.800, 1.710	156.800, 0.090	156.800, 1.506	156.800, 0.056	156.800, 0.092	156.800, 0.014	156.800, 0.784	156.800, 0.149	156.800, -0.040
786	157.000, 1.694	157.000, 0.090	157.000, 1.493	157.000, 0.056	157.000, 0.092	157.000, 0.014	157.000, 0.775	157.000, 0.149	157.000, -0.040
787	157.200, 1.677	157.200, 0.090	157.200, 1.482	157.200, 0.055	157.200, 0.092	157.200, 0.014	157.200, 0.766	157.200, 0.149	157.200, -0.039
788	157.400, 1.661	157.400, 0.090	157.400, 1.470	157.400, 0.055	157.400, 0.092	157.400, 0.013	157.400, 0.757	157.400, 0.149	157.400, -0.038
789	157.600, 1.645	157.600, 0.090	157.600, 1.459	157.600, 0.056	157.600, 0.092	157.600, 0.013	157.600, 0.749	157.600, 0.149	157.600, -0.037
790	157.800, 1.629	157.800, 0.090	157.800, 1.448	157.800, 0.056	157.800, 0.093	157.800, 0.012	157.800, 0.740	157.800, 0.149	157.800, -0.037
791	158.000, 1.613	158.000, 0.090	158.000, 1.437	158.000, 0.056	158.000, 0.093	158.000, 0.011	158.000, 0.731	158.000, 0.148	158.000, -0.036
792	158.200, 1.598	158.200, 0.090	158.200, 1.426	158.200, 0.056	158.200, 0.093	158.200, 0.011	158.200, 0.723	158.200, 0.148	158.200, -0.035
793	158.400, 1.583	158.400, 0.090	158.400, 1.416	158.400, 0.056	158.400, 0.093	158.400, 0.011	158.400, 0.715	158.400, 0.148	158.400, -0.034
794	158.600, 1.568	158.600, 0.090	158.600, 1.406	158.600, 0.056	158.600, 0.093	158.600, 0.011	158.600, 0.707	158.600, 0.148	158.600, -0.033
795	158.800, 1.553	158.800, 0.090	158.800, 1.395	158.800, 0.056	158.800, 0.093	158.800, 0.011	158.800, 0.699	158.800, 0.148	158.800, -0.033
796	159.000, 1.539	159.000, 0.090	159.000, 1.385	159.000, 0.056	159.000, 0.093	159.000, 0.011	159.000, 0.691	159.000, 0.147	159.000, -0.032
797	159.200, 1.524	159.200, 0.091	159.200, 1.376	159.200, 0.057	159.200, 0.093	159.200, 0.010	159.200, 0.684	159.200, 0.148	159.200, -0.032
798	159.400, 1.510	159.400, 0.091	159.400, 1.366	159.400, 0.057	159.400, 0.094	159.400, 0.010	159.400, 0.677	159.400, 0.148	159.400, -0.031
799	159.600, 1.496	159.600, 0.091	159.600, 1.357	159.600, 0.057	159.600, 0.094	159.600, 0.010	159.600, 0.670	159.600, 0.148	159.600, -0.031
800	159.800, 1.483	159.800, 0.091	159.800, 1.347	159.800, 0.058	159.800, 0.094	159.800, 0.010	159.800, 0.663	159.800, 0.148	159.800, -0.030
801	160.000, 1.469	160.000, 0.091	160.000, 1.338	160.000, 0.058	160.000, 0.093	160.000, 0.010	160.000, 0.657	160.000, 0.148	160.000, -0.030
802	160.200, 1.456	160.200, 0.091	160.200, 1.329	160.200, 0.059	160.200, 0.093	160.200, 0.009	160.200, 0.650	160.200, 0.149	160.200, -0.029
803	160.400, 1.444	160.400, 0.091	160.400, 1.320	160.400, 0.059	160.400, 0.093	160.400, 0.009	160.400, 0.644	160.400, 0.149	160.400, -0.028
804	160.600, 1.431	160.600, 0.091	160.600, 1.311	160.600, 0.059	160.600, 0.093	160.600, 0.009	160.600, 0.638	160.600, 0.149	160.600, -0.028
805	160.800, 1.418	160.800, 0.091	160.800, 1.302	160.800, 0.060	160.800, 0.093	160.800, 0.009	160.800, 0.632	160.800, 0.149	160.800, -0.028
806	161.000, 1.406	161.000, 0.091	161.000, 1.294	161.000, 0.060	161.000, 0.093	161.000, 0.008	161.000, 0.627	161.000, 0.150	161.000, -0.027
807	161.200, 1.394	161.200, 0.091	161.200, 1.286	161.200, 0.060	161.200, 0.094	161.200, 0.008	161.200, 0.621	161.200, 0.150	161.200, -0.027
808	161.400, 1.382	161.400, 0.091	161.400, 1.278	161.400, 0.060	161.400, 0.094	161.400, 0.008	161.400, 0.616	161.400, 0.150	161.400, -0.027
809	161.600, 1.371	161.600, 0.091	161.600, 1.270	161.600, 0.060	161.600, 0.094	161.600, 0.007	161.600, 0.611	161.600, 0.151	161.600, -0.027
810	161.800, 1.359	161.800, 0.091	161.800, 1.262	161.800, 0.060	161.800, 0.094	161.800, 0.007	161.800, 0.606	161.800, 0.151	161.800, -0.026
811	162.000, 1.348	162.000, 0.092	162.000, 1.255	162.000, 0.060	162.000, 0.094	162.000, 0.006	162.000, 0.601	162.000, 0.151	162.000, -0.026
812	162.200, 1.337	162.200, 0.092	162.200, 1.247	162.200, 0.060	162.200, 0.095	162.200, 0.006	162.200, 0.596	162.200, 0.151	162.200, -0.026
813	162.400, 1.326	162.400, 0.092	162.400, 1.240	162.400, 0.060	162.400, 0.095	162.400, 0.006	162.400, 0.592	162.400, 0.151	162.400, -0.025
814	162.600, 1.315	162.600, 0.092	162.600, 1.233	162.600, 0.060	162.600, 0.095	162.600, 0.006	162.600, 0.587	162.600, 0.151	162.600, -0.025
815	162.800, 1.304	162.800, 0.093	162.800, 1.226	162.800, 0.060	162.800, 0.095	162.800, 0.005	162.800, 0.583	162.800, 0.152	162.800, -0.024
816	163.000, 1.294	163.000, 0.093	163.000, 1.219	163.000, 0.060	163.000, 0.095	163.000, 0.005	163.000, 0.578	163.000, 0.152	163.000, -0.024
817	163.200, 1.283	163.200, 0.094	163.200, 1.212	163.200, 0.060	163.200, 0.095	163.200, 0.005	163.200, 0.574	163.200, 0.152	163.200, -0.023
818	163.400, 1.273	163.400, 0.094	163.400, 1.206	163.400, 0.060	163.400, 0.095	163.400, 0.005	163.400, 0.569	163.400, 0.152	163.400, -0.023
819	163.600, 1.263	163.600, 0.094	163.600, 1.200	163.600, 0.060	163.600, 0.095	163.600, 0.005	163.600, 0.565	163.600, 0.153	163.600, -0.023
820	163.800, 1.254	163.800, 0.095	163.800, 1.193	163.800, 0.061	163.800, 0.095	163.800, 0.005	163.800, 0.561	163.800, 0.153	163.800, -0.022
821	164.000, 1.244	164.000, 0.095	164.000, 1.187	164.000, 0.061	164.000, 0.095	164.000, 0.006	164.000, 0.557	164.000, 0.153	164.000, -0.022
822	164.200, 1.235	164.200, 0.095	164.200, 1.182	164.200, 0.061	164.200, 0.095	164.200, 0.006	164.200, 0.553	164.200, 0.153	164.200, -0.022
823	164.400, 1.226	164.400, 0.095	164.400, 1.176	164.400, 0.061	164.400, 0.095	164.400, 0.006	164.400, 0.550	164.400, 0.153	164.400, -0.021
824	164.600, 1.217	164.600, 0.095	164.600, 1.170	164.600, 0.061	164.600, 0.095	164.600, 0.006	164.600, 0.546	164.600, 0.153	164.600, -0.021
825	164.800, 1.208	164.800, 0.095	164.800, 1.164	164.800, 0.061	164.800, 0.095	164.800, 0.006	164.800, 0.543	164.800, 0.154	164.800, -0.021
826	165.000, 1.200	165.000, 0.095	165.000, 1.159	165.000, 0.061	165.000, 0.095	165.000, 0.005	165.000, 0.540	165.000, 0.154	165.000, -0.021
827	165.200, 1.191	165.200, 0.095	165.200, 1.153	165.200, 0.061	165.200, 0.095	165.200, 0.005	165.200, 0.537	165.200, 0.154	165.200, -0.021
828	165.400, 1.183	165.400, 0.095	165.400, 1.148	165.400, 0.061	165.400, 0.095	165.400, 0.005	165.400, 0.534	165.400, 0.154	165.400, -0.020
829	165.600, 1.175	165.600, 0.095	165.600, 1.143	165.600, 0.061	165.600, 0.095	165.600, 0.004	165.600, 0.531	165.600, 0.155	165.600, -0.020
830	165.800, 1.167	165.800, 0.095	165.800, 1.137	165.800, 0.061	165.800, 0.095	165.800, 0.004	165.800, 0.528	165.800, 0.155	165.800, -0.020
831	166.000, 1.159	166.000, 0.095	166.000, 1.132	166.000, 0.061	166.000, 0.095	166.000, 0.004	166.000, 0.525	166.000, 0.155	166.000, -0.019
832	166.200, 1.152	166.200, 0.095	166.200, 1.127	166.200, 0.061	166.200, 0.095	166.200, 0.004	166.200, 0.523	166.200, 0.155	166.200, -0.019
833	166.400, 1.144	166.400, 0.095	166.400, 1.122	166.400, 0.061	166.400, 0.095	166.400, 0.004	166.400, 0.520	166.400, 0.155	166.400, -0.019
834	166.600, 1.137	166.600, 0.096	166.600, 1.117	166.600, 0.061	166.600, 0.095	166.600, 0.004	166.600, 0.517	166.600, 0.155	166.600, -0.018
835	166.800, 1.129	166.800, 0.096	166.800, 1.113	166.800, 0.061	166.800, 0.095	166.800, 0.004	166.800, 0.515	166.800, 0.155	166.800, -0.018
836	167.000, 1.122	167.000, 0.096	167.000, 1.108	167.000, 0.061	167.000, 0.095	167.000, 0.004	167.000, 0.512	167.000, 0.156	167.000, -0.018
837	167.200, 1.115	167.200, 0.096	167.200, 1.103	167.200, 0.061	167.200, 0.095	167.200, 0.004	167.200, 0.509	167.200, 0.156	167.200, -0.018
838	167.400, 1.109	167.400, 0.097	167.400, 1.099	167.400, 0.061	167.400, 0.095	167.400, 0.004	167.400, 0.507	167.400, 0.157	167.400, -0.018
839	167.600, 1.102	167.600, 0.097	167.600, 1.095	167.600, 0.062	167.600, 0.095	167.600, 0.004	167.600, 0.504	167.600, 0.157	167.600, -0.018
840	167.800, 1.096	167.800, 0.097	167.800, 1.091	167.800, 0.062	167.800, 0.095	167.800, 0.004	167.800, 0.502	167.800, 0.158	167.800, -0.018
841	168.000, 1.089	168.000, 0.097	168.000, 1.087	168.000, 0.062	168.000, 0.095	168.000, 0.004	168.000, 0.499	168.000, 0.158	168.000, -0.018
842	168.200, 1.083	168.200, 0.097	168.200, 1.083	168.200, 0.062	168.200, 0.094	168.200, 0.004	168.200, 0.497	168.200, 0.159	168.200, -0.018
843	168.400, 1.077	168.400, 0.097	168.400, 1.078	168.400, 0.062	168.400, 0.094	168.400, 0.004	168.400, 0.495	168.400, 0.159	168.400, -0.018
844	168.600, 1.071	168.600, 0.097	168.600, 1.074	168.600, 0.062	168.600, 0.094	168.600, 0.004	168.600, 0.493	168.600, 0.160	168.600, -0.017
845	168.800, 1.066	168.800, 0.097	168.800, 1.070	168.800, 0.062	168.800, 0.094	168.800, 0.004	168.800, 0.490	168.800, 0.160	168.800, -0.017
846	169.000, 1.060	169.000, 0.097	169.000, 1.066	169.000, 0.062	169.000, 0.094	169.000, 0.004	169.000, 0.488	169.000, 0.161	169.000, -0.017
847	169.200, 1.054	169.200, 0.097	169.200, 1.063	169.200, 0.062	169.200, 0.094	169.200, 0.004	169.200, 0.486	169.200, 0.161	169.200, -0.016
848	169.400, 1.049	169.400, 0.097	169.400, 1.059	169.400, 0.062	169.400, 0.094	169.400, 0.004	169.400, 0.484	169.400, 0.161	169.400, -0.015
849	169.600, 1.043	169.600, 0.097	169.600, 1.055	169.600, 0.061	169.600, 0.094	169.600, 0.003	169.600, 0.482	169.600, 0.161	169.600, -0.015
850	169.800, 1.038	169.800, 0.097	169.800, 1.051	169.800, 0.061	169.800, 0.094	169.800, 0.003	169.800, 0.481	169.800, 0.161	169.800, -0.015
851	170.000, 1.032	170.000, 0.097	170.000, 1.048	170.000, 0.061	170.000, 0.095	170.000, 0.003	170.000, 0.479	170.000, 0.161	170.000, -0.014
852	170.200, 1.026	170.200, 0.097	170.200, 1.044	170.200, 0.061	170.200, 0.095	170.200, 0.003	170.200, 0.478	170.200, 0.161	170.200, -0.014
853	170.400, 1.021	170.400, 0.097	170.400, 1.041	170.400, 0.061	170.400, 0.095	170.400, 0.003	170.400, 0.476	170.400, 0.161	170.400, -0.014
854	170.600, 1.016	170.600, 0.097	170.600, 1.037	170.600, 0.061	170.600, 0.096	170.600, 0.003	170.600, 0.475	170.600, 0.161	170.600, -0.014
855	170.800, 1.010	170.800, 0.097	170.800, 1.034	170.800, 0.061	170.800, 0.096	170.800, 0.003	170.800, 0.474	170.800, 0.161	170.800, -0.014
856	171.000, 1.005	171.000, 0.097	171.000, 1.030	171.000, 0.062	171.000, 0.097	171.000, 0.003	171.000, 0.472	171.000, 0.162	171.000, -0.014
857	171.200, 1.000	171.200, 0.097	171.200, 1.026	171.200, 0.062	171.200, 0.097	171.200, 0.003	171.200, 0.471	171.200, 0.162	171.200, -0.014
858	171.400, 0.996	171.400, 0.097	171.400, 1.023	171.400, 0.062	171.400, 0.097	171.400, 0.003	171.400, 0.469	171.400, 0.162	171.400, -0.014
859	171.600, 0.991	171.600, 0.097	171.600, 1.020	171.600, 0.062	171.600, 0.097	171.600, 0.002	171.600, 0.467	171.600, 0.163	171.600, -0.014
860	171.800, 0.986	171.800, 0.097	171.800, 1.016	171.800, 0.062	171.800, 0.097	171.800, 0.002	171.800, 0.466	171.800, 0.163	171.800, -0.013
861	172.000, 0.982	172.000, 0.097	172.000, 1.013	172.000, 0.062	172.000, 0.097	172.000, 0.002	172.000, 0.464	172.000, 0.164	172.000, -0.013
862	172.200, 0.978	172.200, 0.097	172.200, 1.010	172.200, 0.061	172.200, 0.096	172.200, 0.002	172.200, 0.463	172.200, 0.164	172.200, -0.013
863	172.400, 0.973	172.400, 0.097	172.400, 1.007	172.400, 0.061	172.400, 0.096	172.400, 0.002	172.400, 0.462	172.400, 0.164	172.400, -0.013
864	172.600, 0.969	172.600, 0.097	172.600, 1.003	172.600, 0.061	172.600, 0.095	172.600, 0.002	172.600, 0.461	172.600, 0.164	172.600, -0.012
865	172.800, 0.965	172.800, 0.097	172.800, 1.001	172.800, 0.061	172.800, 0.095	172.800, 0.002	172.800, 0.460	172.800, 0.164	172.800, -0.012
866	173.000, 0.961	173.000, 0.097	173.000, 0.998	173.000, 0.061	173.000, 0.095	173.000, 0.001	173.000, 0.459	173.000, 0.165	173.000, -0.011
867	173.200, 0.957	173.200, 0.097	173.200, 0.995	173.200, 0.061	173.200, 0.095	173.200, 0.001	173.200, 0.458	173.200, 0.165	173.200, -0.011
868	173.400, 0.953	173.400, 0.097	173.400, 0.992	173.400, 0.061	173.400, 0.095	173.400, 0.001	173.400, 0.457	173.400, 0.165	173.400, -0.010
869	173.600, 0.949	173.600, 0.097	173.600, 0.990	173.600, 0.061	173.600, 0.095	173.600, 0.001	173.600, 0.456	173.600, 0.165	173.600, -0.010
870	173.800, 0.945	173.800, 0.098	173.800, 0.987	173.800, 0.061	173.800, 0.096	173.800, 0.001	173.800, 0.455	173.800, 0.165	173.800, -0.010
871	174.000, 0.941	174.000, 0.098	174.000, 0.985	174.000, 0.061	174.000, 0.096	174.000, 0.001	174.000, 0.454	174.000, 0.165	174.000, -0.009
872	174.200, 0.936	174.200, 0.098	174.200, 0.982	174.200, 0.061	174.200, 0.096	174.200, 0.001	174.200, 0.453	174.200, 0.165	174.200, -0.010
873	174.400, 0.933	174.400, 0.098	174.400, 0.980	174.400, 0.061	174.400, 0.096	174.400, 0.001	174.400, 0.452	174.400, 0.165	174.400, -0.010
874	174.600, 0.929	174.600, 0.098	174.600, 0.978	174.600, 0.061	174.600, 0.096	174.600, 0.001	174.600, 0.451	174.600, 0.165	174.600, -0.010
875	174.800, 0.925	174.800, 0.098	174.800, 0.976	174.800, 0.061	174.800, 0.096	174.800, 0.001	174.800, 0.450	174.800, 0.165	174.800, -0.010
876	175.000, 0.921	175.000, 0.097	175.000, 0.973	175.000, 0.061	175.000, 0.096	175.000, 0.001	175.000, 0.449	175.000, 0.166	175.000, -0.010
877	175.200, 0.918	175.200, 0.097	175.200, 0.971	175.200, 0.061	175.200, 0.096	175.200, 0.001	175.200, 0.447	175.200, 0.166	175.200, -0.010
878	175.400, 0.915	175.400, 0.097	175.400, 0.969	175.400, 0.061	175.400, 0.096	175.400, 0.001	175.400, 0.446	175.400, 0.167	175.400, -0.011
879	175.600, 0.911	175.600, 0.098	175.600, 0.967	175.600, 0.061	175.600, 0.095	175.600, 0.000	175.600, 0.445	175.600, 0.167	175.600, -0.011
880	175.800, 0.908	175.800, 0.098	175.800, 0.965	175.800, 0.061	175.800, 0.095	175.800, 0.000	175.800, 0.444	175.800, 0.167	175.800, -0.011
881	176.000, 0.904	176.000, 0.098	176.000, 0.963	176.000, 0.060	176.000, 0.095	176.000, -0.000	176.000, 0.443	176.000, 0.168	176.000, -0.011
882	176.200, 0.901	176.200, 0.098	176.200, 0.961	176.200, 0.060	176.200, 0.095	176.200, -0.000	176.200, 0.442	176.200, 0.168	176.200, -0.011
883	176.400, 0.897	176.400, 0.099	176.400, 0.958	176.400, 0.060	176.400, 0.095	176.400, -0.001	176.400, 0.441	176.400, 0.168	176.400, -0.011
884	176.600, 0.894	176.600, 0.099	176.600, 0.956	176.600, 0.060	176.600, 0.095	176.600, -0.001	176.600, 0.441	176.600, 0.168	176.600, -0.011
885	176.800, 0.891	176.800, 0.099	176.800, 0.954	176.800, 0.060	176.800, 0.095	176.800, -0.001	176.800, 0.440	176.800, 0.168	176.800, -0.010
886	177.000, 0.887	177.000, 0.099	177.000, 0.952	177.000, 0.060	177.000, 0.094	177.000, -0.001	177.000, 0.439	177.000, 0.168	177.000, -0.010
887	177.200, 0.884	177.200, 0.099	177.200, 0.949	177.200, 0.060	177.200, 0.094	177.200, -0.001	177.200, 0.438	177.200, 0.168	177.200, -0.010
888	177.400, 0.881	177.400, 0.099	177.400, 0.947	177.400, 0.060	177.400, 0.094	177.400, -0.001	177.400, 0.438	177.400, 0.169	177.400, -0.010
889	177.600, 0.878	177.600, 0.099	177.600, 0.945	177.600, 0.060	177.600, 0.094	177.600, -0.001	177.600, 0.437	177.600, 0.169	177.600, -0.009
890	177.800, 0.874	177.800, 0.098	177.800, 0.943	177.800, 0.060	177.800, 0.094	177.800, -0.001	177.800, 0.436	177.800, 0.169	177.800, -0.009
891	178.000, 0.871	178.000, 0.098	178.000, 0.941	178.000, 0.060	178.000, 0.095	178.000, -0.001	178.000, 0.436	178.000, 0.169	178.000, -0.008
892	178.200, 0.868	178.200, 0.098	178.200, 0.938	178.200, 0.060	178.200, 0.095	178.200, -0.001	178.200, 0.435	178.200, 0.170	178.200, -0.008
893	178.400, 0.865	178.400, 0.098	178.400, 0.936	178.400, 0.060	178.400, 0.095	178.400, -0.001	178.400, 0.434	178.400, 0.170	178.400, -0.008
894	178.600, 0.863	178.600, 0.097	178.600, 0.934	178.600, 0.061	178.600, 0.095	178.600, -0.001	178.600, 0.433	178.600, 0.170	178.600, -0.008
895	178.800, 0.860	178.800, 0.097	178.800, 0.932	178.800, 0.061	178.800, 0.095	178.800, -0.001	178.800, 0.433	178.800, 0.170	178.800, -0.007
896	179.000, 0.857	179.000, 0.097	179.000, 0.930	179.000, 0.061	179.000, 0.095	179.000, -0.001	179.000, 0.432	179.000, 0.171	179.000, -0.007
897	179.200, 0.854	179.200, 0.097	179.200, 0.929	179.200, 0.061	179.200, 0.095	179.200, -0.001	179.200, 0.431	179.200, 0.171	179.200, -0.007
898	179.400, 0.851	179.400, 0.097	179.400, 0.927	179.400, 0.061	179.400, 0.095	179.400, -0.001	179.400, 0.431	179.400, 0.171	179.400, -0.007
899	179.600, 0.848	179.600, 0.097	179.600, 0.926	179.600, 0.061	179.600, 0.095	179.600, -0.001	179.600, 0.430	179.600, 0.171	179.600, -0.007
900	179.800, 0.845	179.800, 0.097	179.800, 0.924	179.800, 0.060	179.800, 0.096	179.800, -0.001	179.800, 0.430	179.800, 0.171	179.800, -0.007
901	180.000, 0.842	180.000, 0.097	180.000, 0.923	180.000, 0.060	180.000, 0.096	180.000, -0.001	180.000, 0.430	180.000, 0.171	180.000, -0.007
902	180.200, 0.839	180.200, 0.097	180.200, 0.921	180.200, 0.060	180.200, 0.096	180.200, -0.001	180.200, 0.429	180.200, 0.172	180.200, -0.007
903	180.400, 0.837	180.400, 0.098	180.400, 0.920	180.400, 0.060	180.400, 0.095	180.400, -0.002	180.400, 0.429	180.400, 0.172	180.400, -0.008
904	180.600, 0.834	180.600, 0.098	180.600, 0.918	180.600, 0.060	180.600, 0.095	180.600, -0.002	180.600, 0.428	180.600, 0.172	180.600, -0.008
905	180.800, 0.831	180.800, 0.098	180.800, 0.916	180.800, 0.060	180.800, 0.095	180.800, -0.002	180.800, 0.427	180.800, 0.172	180.800, -0.008
906	181.000, 0.828	181.000, 0.098	181.000, 0.915	181.000, 0.060	181.000, 0.096	181.000, -0.003	181.000, 0.427	181.000, 0.172	181.000, -0.008
907	181.200, 0.826	181.200, 0.098	181.200, 0.913	181.200, 0.060	181.200, 0.096	181.200, -0.003	181.200, 0.426	181.200, 0.172	181.200, -0.008
908	181.400, 0.823	181.400, 0.097	181.400, 0.912	181.400, 0.060	181.400, 0.096	181.400, -0.003	181.400, 0.426	181.400, 0.172	181.400, -0.008
909	181.600, 0.820	181.600, 0.098	181.600, 0.911	181.600, 0.060	181.600, 0.097	181.600, -0.003	181.600, 0.425	181.600, 0.173	181.600, -0.008
910	181.800, 0.818	181.800, 0.098	181.800, 0.909	181.800, 0.060	181.800, 0.097	181.800, -0.003	181.800, 0.425	181.800, 0.173	181.800, -0.008
911	182.000, 0.815	182.000, 0.098	182.000, 0.907	182.000, 0.060	182.000, 0.097	182.000, -0.003	182.000, 0.424	182.000, 0.173	182.000, -0.008
912	182.200, 0.812	182.200, 0.097	182.200, 0.906	182.200, 0.060	182.200, 0.097	182.200, -0.003	182.200, 0.424	182.200, 0.173	182.200, -0.007
913	182.400, 0.810	182.400, 0.097	182.400, 0.904	182.400, 0.060	182.400, 0.097	182.400, -0.003	182.400, 0.423	182.400, 0.173	182.400, -0.007
914	182.600, 0.807	182.600, 0.097	182.600, 0.903	182.600, 0.060	182.600, 0.097	182.600, -0.003	182.600, 0.422	182.600, 0.173	182.600, -0.007
915	182.800, 0.804	182.800, 0.097	182.800, 0.901	182.800, 0.060	182.800, 0.097	182.800, -0.003	182.800, 0.422	182.800, 0.173	182.800, -0.007
916	183.000, 0.801	183.000, 0.097	183.000, 0.900	183.000, 0.060	183.000, 0.096	183.000, -0.003	183.000, 0.421	183.000, 0.174	183.000, -0.007
917	183.200, 0.798	183.200, 0.097	183.200, 0.899	183.200, 0.060	183.200, 0.096	183.200, -0.003	183.200, 0.421	183.200, 0.174	183.200, -0.007
918	183.400, 0.796	183.400, 0.097	183.400, 0.898	183.400, 0.060	183.400, 0.096	183.400, -0.003	183.400, 0.421	183.400, 0.174	183.400, -0.007
919	183.600, 0.793	183.600, 0.097	183.600, 0.896	183.600, 0.060	183.600, 0.096	183.600, -0.003	183.600, 0.421	183.600, 0.174	183.600, -0.007
920	183.800, 0.791	183.800, 0.097	183.800, 0.895	183.800, 0.060	183.800, 0.096	183.800, -0.003	183.800, 0.420	183.800, 0.174	183.800, -0.007
921	184.000, 0.789	184.000, 0.097	184.000, 0.893	184.000, 0.060	184.000, 0.096	184.000, -0.003	184.000, 0.420	184.000, 0.174	184.000, -0.006
922	184.200, 0.787	184.200, 0.097	184.200, 0.892	184.200, 0.060	184.200, 0.096	184.200, -0.004	184.200, 0.420	184.200, 0.174	184.200, -0.006
923	184.400, 0.784	184.400, 0.097	184.400, 0.891	184.400, 0.060	184.400, 0.096	184.400, -0.004	184.400, 0.419	184.400, 0.174	184.400, -0.006
924	184.600, 0.782	184.600, 0.097	184.600, 0.889	184.600, 0.060	184.600, 0.096	184.600, -0.004	184.600, 0.419	184.600, 0.174	184.600, -0.006
925	184.800, 0.780	184.800, 0.097	184.800, 0.887	184.800, 0.060	184.800, 0.096	184.800, -0.005	184.800, 0.418	184.800, 0.174	184.800, -0.006
926	185.000, 0.777	185.000, 0.097	185.000, 0.886	185.000, 0.060	185.000, 0.096	185.000, -0.005	185.000, 0.418	185.000, 0.174	185.000, -0.006
927	185.200, 0.775	185.200, 0.097	185.200, 0.884	185.200, 0.060	185.200, 0.096	185.200, -0.005	185.200, 0.417	185.200, 0.174	185.200, -0.006
928	185.400, 0.773	185.400, 0.097	185.400, 0.882	185.400, 0.060	185.400, 0.096	185.400, -0.005	185.400, 0.417	185.400, 0.174	185.400, -0.006
929	185.600, 0.771	185.600, 0.097	185.600, 0.881	185.600, 0.059	185.600, 0.096	185.600, -0.005	185.600, 0.417	185.600, 0.175	185.600, -0.006
930	185.800, 0.769	185.800, 0.097	185.800, 0.880	185.800, 0.059	185.800, 0.096	185.800, -0.005	185.800, 0.416	185.800, 0.175	185.800, -0.006
931	186.000, 0.766	186.000, 0.097	186.000, 0.879	186.000, 0.059	186.000, 0.096	186.000, -0.005	186.000, 0.416	186.000, 0.174	186.000, -0.006
932	186.200, 0.764	186.200, 0.098	186.200, 0.877	186.200, 0.059	186.200, 0.096	186.200, -0.005	186.200, 0.415	186.200, 0.174	186.200, -0.006
933	186.400, 0.762	186.400, 0.098	186.400, 0.876	186.400, 0.059	186.400, 0.096	186.400, -0.005	186.400, 0.415	186.400, 0.174	186.400, -0.006
934	186.600, 0.759	186.600, 0.098	186.600, 0.875	186.600, 0.059	186.600, 0.096	186.600, -0.005	186.600, 0.415	186.600, 0.174	186.600, -0.006
935	186.800, 0.757	186.800, 0.098	186.800, 0.874	186.800, 0.059	186.800, 0.096	186.800, -0.005	186.800, 0.415	186.800, 0.174	186.800, -0.006
936	187.000, 0.754	187.000, 0.097	187.000, 0.873	187.000, 0.058	187.000, 0.095	187.000, -0.005	187.000, 0.414	187.000, 0.174	187.000, -0.006
937	187.200, 0.752	187.200, 0.097	187.200, 0.872	187.200, 0.058	187.200, 0.095	187.200, -0.005	187.200, 0.414	187.200, 0.174	187.200, -0.006
938	187.400, 0.749	187.400, 0.097	187.400, 0.871	187.400, 0.058	187.400, 0.095	187.400, -0.006	187.400, 0.414	187.400, 0.174	187.400, -0.006
939	187.600, 0.747	187.600, 0.097	187.600, 0.871	187.600, 0.059	187.600, 0.095	187.600, -0.006	187.600, 0.414	187.600, 0.174	187.600, -0.006
940	187.800, 0.745	187.800, 0.097	187.800, 0.870	187.800, 0.059	187.800, 0.095	187.800, -0.006	187.800, 0.413	187.800, 0.174	187.800, -0.006
941	188.000, 0.742	188.000, 0.097	188.000, 0.869	188.000, 0.059	188.000, 0.095	188.000, -0.006	188.000, 0.413	188.000, 0.174	188.000, -0.006
942	188.200, 0.740	188.200, 0.097	188.200, 0.868	188.200, 0.059	188.200, 0.095	188.200, -0.006	188.200, 0.413	188.200, 0.175	188.200, -0.006
943	188.400, 0.738	188.400, 0.097	188.400, 0.867	188.400, 0.059	188.400, 0.095	188.400, -0.006	188.400, 0.412	188.400, 0.175	188.400, -0.006
944	188.600, 0.735	188.600, 0.097	188.600, 0.866	188.600, 0.059	188.600, 0.094	188.600, -0.006	188.600, 0.412	188.600, 0.175	188.600, -0.006
945	188.800, 0.733	188.800, 0.097	188.800, 0.865	188.800, 0.059	188.800, 0.094	188.800, -0.006	188.800, 0.411	188.800, 0.175	188.800, -0.006
946	189.000, 0.730	189.000, 0.097	189.000, 0.864	189.000, 0.060	189.000, 0.094	189.000, -0.006	189.000, 0.411	189.000, 0.176	189.000, -0.006
947	189.200, 0.728	189.200, 0.097	189.200, 0.863	189.200, 0.060	189.200, 0.094	189.200, -0.006	189.200, 0.410	189.200, 0.176	189.200, -0.006
948	189.400, 0.726	189.400, 0.097	189.400, 0.862	189.400, 0.060	189.400, 0.094	189.400, -0.006	189.400, 0.410	189.400, 0.176	189.400, -0.007
949	189.600, 0.724	189.600, 0.097	189.600, 0.861	189.600, 0.060	189.600, 0.094	189.600, -0.006	189.600, 0.410	189.600, 0.176	189.600, -0.006
950	189.800, 0.722	189.800, 0.097	189.800, 0.861	189.800, 0.060	189.800, 0.094	189.800, -0.007	189.800, 0.409	189.800, 0.177	189.800, -0.006
951	190.000, 0.720	190.000, 0.097	190.000, 0.860	190.000, 0.060	190.000, 0.094	190.000, -0.007	190.000, 0.409	190.000, 0.177	190.000, -0.006
952	190.200, 0.718	190.200, 0.097	190.200, 0.859	190.200, 0.060	190.200, 0.094	190.200, -0.007	190.200, 0.409	190.200, 0.177	190.200, -0.006
953	190.400, 0.716	190.400, 0.097	190.400, 0.858	190.400, 0.060	190.400, 0.094	190.400, -0.007	190.400, 0.409	190.400, 0.177	190.400, -0.005
954	190.600, 0.714	190.600, 0.097	190.600, 0.857	190.600, 0.059	190.600, 0.094	190.600, -0.007	190.600, 0.409	190.600, 0.177	190.600, -0.005
955	190.800, 0.712	190.800, 0.097	190.800, 0.856	190.800, 0.059	190.800, 0.094	190.800, -0.007	190.800, 0.409	190.800, 0.177	190.800, -0.004
956	191.000, 0.710	191.000, 0.097	191.000, 0.855	191.000, 0.058	191.000, 0.094	191.000, -0.007	191.000, 0.409	191.000, 0.177	191.000, -0.004
957	191.200, 0.708	191.200, 0.097	191.200, 0.855	191.200, 0.058	191.200, 0.094	191.200, -0.007	191.200, 0.409	191.200, 0.177	191.200, -0.004
958	191.400, 0.706	191.400, 0.097	191.400, 0.854	191.400, 0.058	191.400, 0.094	191.400, -0.007	191.400, 0.409	191.400, 0.177	191.400, -0.004
959	191.600, 0.704	191.600, 0.097	191.600, 0.853	191.600, 0.058	191.600, 0.094	191.600, -0.007	191.600, 0.409	191.600, 0.177	191.600, -0.004
960	191.800, 0.702	191.800, 0.097	191.800, 0.852	191.800, 0.058	191.800, 0.093	191.800, -0.007	191.800, 0.409	191.800, 0.176	191.800, -0.004
961	192.000, 0.700	192.000, 0.098	192.000, 0.851	192.000, 0.058	192.000, 0.093	192.000, -0.007	192.000, 0.409	192.000, 0.176	192.000, -0.005
962	192.200, 0.698	192.200, 0.098	192.200, 0.850	192.200, 0.058	192.200, 0.093	192.200, -0.007	192.200, 0.408	192.200, 0.176	192.200, -0.005
963	192.400, 0.696	192.400, 0.098	192.400, 0.849	192.400, 0.058	192.400, 0.093	192.400, -0.007	192.400, 0.408	192.400, 0.176	192.400, -0.005
964	192.600, 0.694	192.600, 0.098	192.600, 0.848	192.600, 0.058	192.600, 0.093	192.600, -0.007	192.600, 0.408	192.600, 0.176	192.600, -0.006
965	192.800, 0.692	192.800, 0.097	192.800, 0.848	192.800, 0.058	192.800, 0.092	192.800, -0.007	192.800, 0.408	192.800, 0.176	192.800, -0.006
966	193.000, 0.690	193.000, 0.097	193.000, 0.847	193.000, 0.058	193.000, 0.092	193.000, -0.007	193.000, 0.407	193.000, 0.176	193.000, -0.006
967	193.200, 0.688	193.200, 0.097	193.200, 0.846	193.200, 0.058	193.200, 0.092	193.200, -0.008	193.200, 0.407	193.200, 0.176	193.200, -0.006
968	193.400, 0.686	193.400, 0.096	193.400, 0.844	193.400, 0.058	193.400, 0.092	193.400, -0.008	193.400, 0.407	193.400, 0.177	193.400, -0.006
969	193.600, 0.684	193.600, 0.096	193.600, 0.843	193.600, 0.058	193.600, 0.092	193.600, -0.008	193.600, 0.406	193.600, 0.177	193.600, -0.006
970	193.800, 0.682	193.800, 0.096	193.800, 0.843	193.800, 0.059	193.800, 0.092	193.800, -0.008	193.800, 0.406	193.800, 0.177	193.800, -0.006
971	194.000, 0.681	194.000, 0.095	194.000, 0.842	194.000, 0.059	194.000, 0.092	194.000, -0.008	194.000, 0.405	194.000, 0.177	194.000, -0.006
972	194.200, 0.679	194.200, 0.095	194.200, 0.841	194.200, 0.059	194.200, 0.092	194.200, -0.008	194.200, 0.405	194.200, 0.178	194.200, -0.005
973	194.400, 0.677	194.400, 0.095	194.400, 0.840	194.400, 0.058	194.400, 0.093	194.400, -0.008	194.400, 0.405	194.400, 0.178	194.400, -0.005
974	194.600, 0.675	194.600, 0.095	194.600, 0.839	194.600, 0.058	194.600, 0.093	194.600, -0.008	194.600, 0.405	194.600, 0.178	194.600, -0.005
975	194.800, 0.673	194.800, 0.095	194.800, 0.838	194.800, 0.058	194.800, 0.093	194.800, -0.008	194.800, 0.405	194.800, 0.178	194.800, -0.005
976	195.000, 0.671	195.000, 0.095	195.000, 0.837	195.000, 0.057	195.000, 0.094	195.000, -0.008	195.000, 0.405	195.000, 0.178	195.000, -0.005
977	195.200, 0.669	195.200, 0.095	195.200, 0.837	195.200, 0.057	195.200, 0.094	195.200, -0.008	195.200, 0.405	195.200, 0.178	195.200, -0.005
978	195.400, 0.667	195.400, 0.095	195.400, 0.836	195.400, 0.057	195.400, 0.094	195.400, -0.008	195.400, 0.404	195.400, 0.178	195.400, -0.005
979	195.600, 0.665	195.600, 0.095	195.600, 0.835	195.600, 0.056	195.600, 0.094	195.600, -0.008	195.600, 0.404	195.600, 0.178	195.600, -0.005
980	195.800, 0.663	195.800, 0.095	195.800, 0.835	195.800, 0.056	195.800, 0.094	195.800, -0.008	195.800, 0.404	195.800, 0.178	195.800, -0.005
981	196.000, 0.661	196.000, 0.095	196.000, 0.834	196.000, 0.056	196.000, 0.094	196.000, -0.008	196.000, 0.404	196.000, 0.178	196.000, -0.005
982	196.200, 0.659	196.200, 0.095	196.200, 0.834	196.200, 0.056	196.200, 0.094	196.200, -0.008	196.200, 0.404	196.200, 0.178	196.200, -0.005
983	196.400, 0.658	196.400, 0.095	196.400, 0.833	196.400, 0.056	196.400, 0.094	196.400, -0.008	196.400, 0.403	196.400, 0.178	196.400, -0.005
984	196.600, 0.656	196.600, 0.095	196.600, 0.833	196.600, 0.056	196.600, 0.094	196.600, -0.008	196.600, 0.403	196.600, 0.178	196.600, -0.005
985	196.800, 0.654	196.800, 0.095	196.800, 0.832	196.800, 0.056	196.800, 0.094	196.800, -0.008	196.800, 0.403	196.800, 0.178	196.800, -0.005
986	197.000, 0.653	197.000, 0.095	197.000, 0.831	197.000, 0.056	197.000, 0.094	197.000, -0.009	197.000, 0.403	197.000, 0.177	197.000, -0.005
987	197.200, 0.651	197.200, 0.095	197.200, 0.830	197.200, 0.056	197.200, 0.093	197.200, -0.009	197.200, 0.403	197.200, 0.177	197.200, -0.005
988	197.400, 0.649	197.400, 0.095	197.400, 0.829	197.400, 0.056	197.400, 0.093	197.400, -0.009	197.400, 0.403	197.400, 0.177	197.400, -0.005
989	197.600, 0.647	197.600, 0.096	197.600, 0.829	197.600, 0.056	197.600, 0.093	197.600, -0.010	197.600, 0.402	197.600, 0.176	197.600, -0.005
990	197.800, 0.646	197.800, 0.096	197.800, 0.828	197.800, 0.056	197.800, 0.093	197.800, -0.010	197.800, 0.402	197.800, 0.176	197.800, -0.005
991	198.000, 0.644	198.000, 0.096	198.000, 0.827	198.000, 0.056	198.000, 0.093	198.000, -0.010	198.000, 0.402	198.000, 0.176	198.000, -0.005
992	198.200, 0.642	198.200, 0.096	198.200, 0.827	198.200, 0.057	198.200, 0.093	198.200, -0.010	198.200, 0.402	198.200, 0.175	198.200, -0.005
993	198.400, 0.640	198.400, 0.096	198.400, 0.826	198.400, 0.057	198.400, 0.093	198.400, -0.010	198.400, 0.402	198.400, 0.175	198.400, -0.005
994	198.600, 0.638	198.600, 0.096	198.600, 0.825	198.600, 0.057	198.600, 0.093	198.600, -0.010	198.600, 0.402	198.600, 0.175	198.600, -0.005
995	198.800, 0.637	198.800, 0.096	198.800, 0.825	198.800, 0.057	198.800, 0.093	198.800, -0.010	198.800, 0.402	198.800, 0.175	198.800, -0.005
996	199.000, 0.635	199.000, 0.096	199.000, 0.824	199.000, 0.056	199.000, 0.093	199.000, -0.009	199.000, 0.402	199.000, 0.176	199.000, -0.006
997	199.200, 0.633	199.200, 0.096	199.200, 0.823	199.200, 0.056	199.200, 0.092	199.200, -0.009	199.200, 0.402	199.200, 0.176	199.200, -0.006
998	199.400, 0.631	199.400, 0.096	199.400, 0.823	199.400, 0.057	199.400, 0.092	199.400, -0.009	199.400, 0.402	199.400, 0.176	199.400, -0.006
999	199.600, 0.629	199.600, 0.096	199.600, 0.822	199.600, 0.057	199.600, 0.092	199.600, -0.009	199.600, 0.401	199.600, 0.176	199.600, -0.006
1000	199.800, 0.628	199.800, 0.096	199.800, 0.822	199.800, 0.057	199.800, 0.092	199.800, -0.009	199.800, 0.401	199.800, 0.177	199.800, -0.006
1001	200.000, 0.626	200.000, 0.096	200.000, 0.821	200.000, 0.057	200.000, 0.092	200.000, -0.009	200.000, 0.401	200.000, 0.177	200.000, -0.005
1002	200.200, 0.625	200.200, 0.096	200.200, 0.821	200.200, 0.057	200.200, 0.092	200.200, -0.009	200.200, 0.401	200.200, 0.177	200.200, -0.005
1003	200.400, 0.623	200.400, 0.096	200.400, 0.821	200.400, 0.057	200.400, 0.091	200.400, -0.009	200.400, 0.401	200.400, 0.177	200.400, -0.005
1004	200.600, 0.621	200.600, 0.096	200.600, 0.820	200.600, 0.057	200.600, 0.091	200.600, -0.009	200.600, 0.400	200.600, 0.178	200.600, -0.006
1005	200.800, 0.620	200.800, 0.096	200.800, 0.819	200.800, 0.057	200.800, 0.092	200.800, -0.010	200.800, 0.400	200.800, 0.178	200.800, -0.006
1006	201.000, 0.618	201.000, 0.096	201.000, 0.819	201.000, 0.057	201.000, 0.092	201.000, -0.010	201.000, 0.400	201.000, 0.178	201.000, -0.006
1007	201.200, 0.617	201.200, 0.096	201.200, 0.818	201.200, 0.057	201.200, 0.092	201.200, -0.010	201.200, 0.399	201.200, 0.178	201.200, -0.006
1008	201.400, 0.615	201.400, 0.096	201.400, 0.817	201.400, 0.057	201.400, 0.092	201.400, -0.010	201.400, 0.399	201.400, 0.178	201.400, -0.006
1009	201.600, 0.614	201.600, 0.096	201.600, 0.817	201.600, 0.056	201.600, 0.092	201.600, -0.010	201.600, 0.398	201.600, 0.177	201.600, -0.006
1010	201.800, 0.613	201.800, 0.096	201.800, 0.816	201.800, 0.056	201.800, 0.093	201.800, -0.010	201.800, 0.398	201.800, 0.177	201.800, -0.006
1011	202.000, 0.611	202.000, 0.096	202.000, 0.816	202.000, 0.056	202.000, 0.093	202.000, -0.010	202.000, 0.398	202.000, 0.177	202.000, -0.006
1012	202.200, 0.610	202.200, 0.096	202.200, 0.815	202.200, 0.055	202.200, 0.093	202.200, -0.010	202.200, 0.397	202.200, 0.176	202.200, -0.006
1013	202.400, 0.608	202.400, 0.096	202.400, 0.815	202.400, 0.055	202.400, 0.092	202.400, -0.010	202.400, 0.397	202.400, 0.176	202.400, -0.006
1014	202.600, 0.607	202.600, 0.095	202.600, 0.814	202.600, 0.055	202.600, 0.092	202.600, -0.010	202.600, 0.397	202.600, 0.176	202.600, -0.006
1015	202.800, 0.605	202.800, 0.095	202.800, 0.813	202.800, 0.055	202.800, 0.092	202.800, -0.010	202.800, 0.397	202.800, 0.177	202.800, -0.006
1016	203.000, 0.604	203.000, 0.095	203.000, 0.813	203.000, 0.054	203.000, 0.092	203.000, -0.010	203.000, 0.397	203.000, 0.177	203.000, -0.005
1017	203.200, 0.603	203.200, 0.095	203.200, 0.812	203.200, 0.054	203.200, 0.092	203.200, -0.010	203.200, 0.397	203.200, 0.177	203.200, -0.005
1018	203.400, 0.601	203.400, 0.095	203.400, 0.811	203.400, 0.054	203.400, 0.091	203.400, -0.010	203.400, 0.397	203.400, 0.177	203.400, -0.005
1019	203.600, 0.600	203.600, 0.095	203.600, 0.811	203.600, 0.055	203.600, 0.091	203.600, -0.010	203.600, 0.397	203.600, 0.177	203.600, -0.005
1020	203.800, 0.598	203.800, 0.095	203.800, 0.810	203.800, 0.055	203.800, 0.091	203.800, -0.010	203.800, 0.397	203.800, 0.177	203.800, -0.005
1021	204.000, 0.597	204.000, 0.094	204.000, 0.810	204.000, 0.055	204.000, 0.091	204.000, -0.010	204.000, 0.397	204.000, 0.177	204.000, -0.005
1022	204.200, 0.595	204.200, 0.094	204.200, 0.809	204.200, 0.055	204.200, 0.091	204.200, -0.010	204.200, 0.397	204.200, 0.178	204.200, -0.005
1023	204.400, 0.593	204.400, 0.094	204.400, 0.809	204.400, 0.055	204.400, 0.092	204.400, -0.010	204.400, 0.397	204.400, 0.178	204.400, -0.005
1024	204.600, 0.591	204.600, 0.094	204.600, 0.808	204.600, 0.055	204.600, 0.092	204.600, -0.010	204.600, 0.397	204.600, 0.178	204.600, -0.005
1025	204.800, 0.590	204.800, 0.094	204.800, 0.807	204.800, 0.055	204.800, 0.092	204.800, -0.010	204.800, 0.397	204.800, 0.178	204.800, -0.005
1026	205.000, 0.588	205.000, 0.094	205.000, 0.807	205.000, 0.055	205.000, 0.092	205.000, -0.011	205.000, 0.397	205.000, 0.178	205.000, -0.005
1027	205.200, 0.586	205.200, 0.094	205.200, 0.806	205.200, 0.055	205.200, 0.092	205.200, -0.011	205.200, 0.397	205.200, 0.178	205.200, -0.005
1028	205.400, 0.584	205.400, 0.094	205.400, 0.806	205.400, 0.055	205.400, 0.091	205.400, -0.011	205.400, 0.396	205.400, 0.178	205.400, -0.005
1029	205.600, 0.582	205.600, 0.094	205.600, 0.805	205.600, 0.055	205.600, 0.091	205.600, -0.011	205.600, 0.396	205.600, 0.178	205.600, -0.005
1030	205.800, 0.581	205.800, 0.094	205.800, 0.805	205.800, 0.055	205.800, 0.091	205.800, -0.011	205.800, 0.396	205.800, 0.177	205.800, -0.005
1031	206.000, 0.579	206.000, 0.094	206.000, 0.805	206.000, 0.055	206.000, 0.091	206.000, -0.011	206.000, 0.396	206.000, 0.177	206.000, -0.005
1032	206.200, 0.578	206.200, 0.094	206.200, 0.804	206.200, 0.054	206.200, 0.091	206.200, -0.011	206.200, 0.395	206.200, 0.178	206.200, -0.005
1033	206.400, 0.576	206.400, 0.094	206.400, 0.804	206.400, 0.054	206.400, 0.090	206.400, -0.012	206.400, 0.395	206.400, 0.178	206.400, -0.006
1034	206.600, 0.575	206.600, 0.094	206.600, 0.804	206.600, 0.054	206.600, 0.090	206.600, -0.012	206.600, 0.395	206.600, 0.178	206.600, -0.006
1035	206.800, 0.574	206.800, 0.094	206.800, 0.803	206.800, 0.054	206.800, 0.090	206.800, -0.012	206.800, 0.395	206.800, 0.178	206.800, -0.006
1036	207.000, 0.573	207.000, 0.094	207.000, 0.803	207.000, 0.054	207.000, 0.090	207.000, -0.012	207.000, 0.394	207.000, 0.178	207.000, -0.006
1037	207.200, 0.572	207.200, 0.094	207.200, 0.802	207.200, 0.054	207.200, 0.090	207.200, -0.012	207.200, 0.394	207.200, 0.178	207.200, -0.006
1038	207.400, 0.571	207.400, 0.094	207.400, 0.802	207.400, 0.054	207.400, 0.090	207.400, -0.012	207.400, 0.394	207.400, 0.178	207.400, -0.006
1039	207.600, 0.570	207.600, 0.094	207.600, 0.801	207.600, 0.054	207.600, 0.090	207.600, -0.012	207.600, 0.394	207.600, 0.178	207.600, -0.006
1040	207.800, 0.569	207.800, 0.094	207.800, 0.800	207.800, 0.054	207.800, 0.090	207.800, -0.012	207.800, 0.394	207.800, 0.178	207.800, -0.006
1041	208.000, 0.568	208.000, 0.094	208.000, 0.799	208.000, 0.054	208.000, 0.090	208.000, -0.013	208.000, 0.394	208.000, 0.178	208.000, -0.006
1042	208.200, 0.567	208.200, 0.094	208.200, 0.799	208.200, 0.054	208.200, 0.091	208.200, -0.013	208.200, 0.394	208.200, 0.177	208.200, -0.006
1043	208.400, 0.566	208.400, 0.094	208.400, 0.798	208.400, 0.054	208.400, 0.091	208.400, -0.013	208.400, 0.394	208.400, 0.177	208.400, -0.006
1044	208.600, 0.564	208.600, 0.094	208.600, 0.798	208.600, 0.054	208.600, 0.090	208.600, -0.013	208.600, 0.394	208.600, 0.176	208.600, -0.005
1045	208.800, 0.563	208.800, 0.094	208.800, 0.797	208.800, 0.054	208.800, 0.090	208.800, -0.013	208.800, 0.394	208.800, 0.176	208.800, -0.005
1046	209.000, 0.562	209.000, 0.094	209.000, 0.797	209.000, 0.054	209.000, 0.090	209.000, -0.013	209.000, 0.394	209.000, 0.176	209.000, -0.005
1047	209.200, 0.560	209.200, 0.094	209.200, 0.796	209.200, 0.054	209.200, 0.090	209.200, -0.013	209.200, 0.394	209.200, 0.175	209.200, -0.004
1048	209.400, 0.559	209.400, 0.094	209.400, 0.796	209.400, 0.054	209.400, 0.089	209.400, -0.013	209.400, 0.394	209.400, 0.175	209.400, -0.004
1049	209.600, 0.557	209.600, 0.094	209.600, 0.796	209.600, 0.054	209.600, 0.089	209.600, -0.013	209.600, 0.394	209.600, 0.175	209.600, -0.004
1050	209.800, 0.556	209.800, 0.094	209.800, 0.795	209.800, 0.054	209.800, 0.089	209.800, -0.013	209.800, 0.394	209.800, 0.175	209.800, -0.004
1051	210.000, 0.555	210.000, 0.093	210.000, 0.795	210.000, 0.055	210.000, 0.089	210.000, -0.013	210.000, 0.394	210.000, 0.175	210.000, -0.004
1052	210.200, 0.553	210.200, 0.093	210.200, 0.795	210.200, 0.055	210.200, 0.089	210.200, -0.013	210.200, 0.393	210.200, 0.175	210.200, -0.004
1053	210.400, 0.552	210.400, 0.093	210.400, 0.794	210.400, 0.055	210.400, 0.089	210.400, -0.013	210.400, 0.393	210.400, 0.176	210.400, -0.004
1054	210.600, 0.551	210.600, 0.093	210.600, 0.794	210.600, 0.055	210.600, 0.089	210.600, -0.013	210.600, 0.393	210.600, 0.176	210.600, -0.004
1055	210.800, 0.550	210.800, 0.093	210.800, 0.793	210.800, 0.055	210.800, 0.089	210.800, -0.013	210.800, 0.392	210.800, 0.176	210.800, -0.005
1056	211.000, 0.549	211.000, 0.093	211.000, 0.793	211.000, 0.054	211.000, 0.089	211.000, -0.013	211.000, 0.392	211.000, 0.176	211.000, -0.005
1057	211.200, 0.548	211.200, 0.093	211.200, 0.793	211.200, 0.054	211.200, 0.089	211.200, -0.013	211.200, 0.392	211.200, 0.176	211.200, -0.005
1058	211.400, 0.547	211.400, 0.093	211.400, 0.792	211.400, 0.054	211.400, 0.089	211.400, -0.013	211.400, 0.391	211.400, 0.177	211.400, -0.005
1059	211.600, 0.545	211.600, 0.094	211.600, 0.792	211.600, 0.054	211.600, 0.090	211.600, -0.013	211.600, 0.391	211.600, 0.177	211.600, -0.005
1060	211.800, 0.544	211.800, 0.094	211.800, 0.792	211.800, 0.054	211.800, 0.090	211.800, -0.013	211.800, 0.391	211.800, 0.177	211.800, -0.005
1061	212.000, 0.543	212.000, 0.094	212.000, 0.791	212.000, 0.053	212.000, 0.090	212.000, -0.013	212.000, 0.391	212.000, 0.177	212.000, -0.005
1062	212.200, 0.542	212.200, 0.095	212.200, 0.791	212.200, 0.053	212.200, 0.090	212.200, -0.014	212.200, 0.391	212.200, 0.177	212.200, -0.005
1063	212.400, 0.541	212.400, 0.095	212.400, 0.791	212.400, 0.053	212.400, 0.090	212.400, -0.014	212.400, 0.391	212.400, 0.177	212.400, -0.005
1064	212.600, 0.539	212.600, 0.095	212.600, 0.790	212.600, 0.053	212.600, 0.091	212.600, -0.014	212.600, 0.391	212.600, 0.177	212.600, -0.006
1065	212.800, 0.538	212.800, 0.095	212.800, 0.790	212.800, 0.053	212.800, 0.091	212.800, -0.014	212.800, 0.390	212.800, 0.177	212.800, -0.006
1066	213.000, 0.537	213.000, 0.095	213.000, 0.790	213.000, 0.053	213.000, 0.091	213.000, -0.014	213.000, 0.390	213.000, 0.177	213.000, -0.005
1067	213.200, 0.536	213.200, 0.095	213.200, 0.789	213.200, 0.053	213.200, 0.091	213.200, -0.014	213.200, 0.390	213.200, 0.177	213.200, -0.005
1068	213.400, 0.535	213.400, 0.095	213.400, 0.789	213.400, 0.053	213.400, 0.091	213.400, -0.014	213.400, 0.390	213.400, 0.176	213.400, -0.005
1069	213.600, 0.534	213.600, 0.094	213.600, 0.788	213.600, 0.053	213.600, 0.091	213.600, -0.014	213.600, 0.390	213.600, 0.176	213.600, -0.005
1070	213.800, 0.532	213.800, 0.094	213.800, 0.787	213.800, 0.053	213.800, 0.091	213.800, -0.014	213.800, 0.390	213.800, 0.176	213.800, -0.005
1071	214.000, 0.531	214.000, 0.093	214.000, 0.787	214.000, 0.053	214.000, 0.090	214.000, -0.014	214.000, 0.390	214.000, 0.176	214.000, -0.005
1072	214.200, 0.530	214.200, 0.093	214.200, 0.786	214.200, 0.052	214.200, 0.090	214.200, -0.014	214.200, 0.390	214.200, 0.176	214.200, -0.005
1073	214.400, 0.529	214.400, 0.093	214.400, 0.786	214.400, 0.052	214.400, 0.090	214.400, -0.014	214.400, 0.389	214.400, 0.176	214.400, -0.005
1074	214.600, 0.528	214.600, 0.093	214.600, 0.785	214.600, 0.052	214.600, 0.089	214.600, -0.014	214.600, 0.389	214.600, 0.176	214.600, -0.004
1075	214.800, 0.527	214.800, 0.092	214.800, 0.785	214.800, 0.052	214.800, 0.089	214.800, -0.014	214.800, 0.389	214.800, 0.176	214.800, -0.004
1076	215.000, 0.526	215.000, 0.092	215.000, 0.785	215.000, 0.052	215.000, 0.088	215.000, -0.014	215.000, 0.389	215.000, 0.176	215.000, -0.004
1077	215.200, 0.525	215.200, 0.092	215.200, 0.784	215.200, 0.052	215.200, 0.088	215.200, -0.014	215.200, 0.389	215.200, 0.176	215.200, -0.004
1078	215.400, 0.524	215.400, 0.092	215.400, 0.784	215.400, 0.052	215.400, 0.088	215.400, -0.014	215.400, 0.388	215.400, 0.176	215.400, -0.004
1079	215.600, 0.522	215.600, 0.093	215.600, 0.783	215.600, 0.052	215.600, 0.088	215.600, -0.014	215.600, 0.389	215.600, 0.176	215.600, -0.004
1080	215.800, 0.521	215.800, 0.093	215.800, 0.783	215.800, 0.052	215.800, 0.088	215.800, -0.014	215.800, 0.389	215.800, 0.176	215.800, -0.004
1081	216.000, 0.520	216.000, 0.093	216.000, 0.782	216.000, 0.052	216.000, 0.088	216.000, -0.014	216.000, 0.389	216.000, 0.176	216.000, -0.005
1082	216.200, 0.519	216.200, 0.093	216.200, 0.782	216.200, 0.052	216.200, 0.088	216.200, -0.014	216.200, 0.389	216.200, 0.176	216.200, -0.005
1083	216.400, 0.518	216.400, 0.093	216.400, 0.781	216.400, 0.052	216.400, 0.088	216.400, -0.014	216.400, 0.389	216.400, 0.176	216.400, -0.005
1084	216.600, 0.517	216.600, 0.093	216.600, 0.781	216.600, 0.052	216.600, 0.088	216.600, -0.014	216.600, 0.389	216.600, 0.176	216.600, -0.005
1085	216.800, 0.517	216.800, 0.094	216.800, 0.780	216.800, 0.052	216.800, 0.088	216.800, -0.014	216.800, 0.389	216.800, 0.176	216.800, -0.005
1086	217.000, 0.516	217.000, 0.093	217.000, 0.780	217.000, 0.052	217.000, 0.088	217.000, -0.014	217.000, 0.389	217.000, 0.175	217.000, -0.005
1087	217.200, 0.515	217.200, 0.093	217.200, 0.780	217.200, 0.052	217.200, 0.088	217.200, -0.014	217.200, 0.389	217.200, 0.175	217.200, -0.005
1088	217.400, 0.514	217.400, 0.093	217.400, 0.779	217.400, 0.052	217.400, 0.088	217.400, -0.014	217.400, 0.389	217.400, 0.175	217.400, -0.005
1089	217.600, 0.513	217.600, 0.093	217.600, 0.779	217.600, 0.052	217.600, 0.088	217.600, -0.013	217.600, 0.389	217.600, 0.175	217.600, -0.005
1090	217.800, 0.512	217.800, 0.093	217.800, 0.778	217.800, 0.052	217.800, 0.088	217.800, -0.013	217.800, 0.388	217.800, 0.175	217.800, -0.005
1091	218.000, 0.511	218.000, 0.093	218.000, 0.778	218.000, 0.052	218.000, 0.088	218.000, -0.013	218.000, 0.388	218.000, 0.175	218.000, -0.005
1092	218.200, 0.510	218.200, 0.093	218.200, 0.778	218.200, 0.052	218.200, 0.088	218.200, -0.013	218.200, 0.388	218.200, 0.175	218.200, -0.005
1093	218.400, 0.509	218.400, 0.093	218.400, 0.778	218.400, 0.051	218.400, 0.088	218.400, -0.013	218.400, 0.387	218.400, 0.174	218.400, -0.005
1094	218.600, 0.508	218.600, 0.093	218.600, 0.777	218.600, 0.051	218.600, 0.088	218.600, -0.013	218.600, 0.387	218.600, 0.174	218.600, -0.005
1095	218.800, 0.507	218.800, 0.093	218.800, 0.777	218.800, 0.052	218.800, 0.088	218.800, -0.014	218.800, 0.387	218.800, 0.174	218.800, -0.005
1096	219.000, 0.506	219.000, 0.093	219.000, 0.777	219.000, 0.052	219.000, 0.088	219.000, -0.014	219.000, 0.386	219.000, 0.174	219.000, -0.004
1097	219.200, 0.505	219.200, 0.093	219.200, 0.776	219.200, 0.052	219.200, 0.088	219.200, -0.014	219.200, 0.386	219.200, 0.173	219.200, -0.004
1098	219.400, 0.504	219.400, 0.092	219.400, 0.776	219.400, 0.052	219.400, 0.088	219.400, -0.015	219.400, 0.386	219.400, 0.173	219.400, -0.004
1099	219.600, 0.503	219.600, 0.092	219.600, 0.776	219.600, 0.051	219.600, 0.088	219.600, -0.015	219.600, 0.385	219.600, 0.173	219.600, -0.004
1100	219.800, 0.501	219.800, 0.092	219.800, 0.775	219.800, 0.051	219.800, 0.088	219.800, -0.015	219.800, 0.385	219.800, 0.173	219.800, -0.004
1101	220.000, 0.500	220.000, 0.092	220.000, 0.775	220.000, 0.051	220.000, 0.089	220.000, -0.015	220.000, 0.385	220.000, 0.173	220.000, -0.004
1102	220.200, 0.499	220.200, 0.092	220.200, 0.775	220.200, 0.051	220.200, 0.089	220.200, -0.015	220.200, 0.385	220.200, 0.173	220.200, -0.004
1103	220.400, 0.498	220.400, 0.091	220.400, 0.775	220.400, 0.051	220.400, 0.089	220.400, -0.015	220.400, 0.385	220.400, 0.173	220.400, -0.004
1104	220.600, 0.497	220.600, 0.091	220.600, 0.774	220.600, 0.051	220.600, 0.088	220.600, -0.015	220.600, 0.385	220.600, 0.173	220.600, -0.004
1105	220.800, 0.496	220.800, 0.091	220.800, 0.774	220.800, 0.050	220.800, 0.088	220.800, -0.015	220.800, 0.385	220.800, 0.173	220.800, -0.005
1106	221.000, 0.495	221.000, 0.091	221.000, 0.774	221.000, 0.050	221.000, 0.088	221.000, -0.015	221.000, 0.385	221.000, 0.174	221.000, -0.005
1107	221.200, 0.495	221.200, 0.092	221.200, 0.773	221.200, 0.050	221.200, 0.088	221.200, -0.016	221.200, 0.385	221.200, 0.174	221.200, -0.005
1108	221.400, 0.494	221.400, 0.092	221.400, 0.773	221.400, 0.050	221.400, 0.088	221.400, -0.016	221.400, 0.385	221.400, 0.174	221.400, -0.005
1109	221.600, 0.493	221.600, 0.092	221.600, 0.773	221.600, 0.049	221.600, 0.088	221.600, -0.016	221.600, 0.385	221.600, 0.175	221.600, -0.005
1110	221.800, 0.493	221.800, 0.093	221.800, 0.773	221.800, 0.049	221.800, 0.088	221.800, -0.016	221.800, 0.384	221.800, 0.175	221.800, -0.005
1111	222.000, 0.492	222.000, 0.093	222.000, 0.772	222.000, 0.049	222.000, 0.088	222.000, -0.016	222.000, 0.384	222.000, 0.175	222.000, -0.006
1112	222.200, 0.492	222.200, 0.093	222.200, 0.772	222.200, 0.049	222.200, 0.088	222.200, -0.015	222.200, 0.384	222.200, 0.175	222.200, -0.006
1113	222.400, 0.491	222.400, 0.093	222.400, 0.772	222.400, 0.049	222.400, 0.088	222.400, -0.015	222.400, 0.384	222.400, 0.175	222.400, -0.006
1114	222.600, 0.490	222.600, 0.093	222.600, 0.771	222.600, 0.049	222.600, 0.087	222.600, -0.016	222.600, 0.384	222.600, 0.175	222.600, -0.006
1115	222.800, 0.490	222.800, 0.093	222.800, 0.771	222.800, 0.049	222.800, 0.087	222.800, -0.016	222.800, 0.384	222.800, 0.175	222.800, -0.006
1116	223.000, 0.489	223.000, 0.092	223.000, 0.771	223.000, 0.049	223.000, 0.087	223.000, -0.016	223.000, 0.384	223.000, 0.175	223.000, -0.006
1117	223.200, 0.488	223.200, 0.092	223.200, 0.770	223.200, 0.049	223.200, 0.087	223.200, -0.016	223.200, 0.384	223.200, 0.175	223.200, -0.006
1118	223.400, 0.487	223.400, 0.092	223.400, 0.770	223.400, 0.049	223.400, 0.087	223.400, -0.016	223.400, 0.384	223.400, 0.175	223.400, -0.006
1119	223.600, 0.486	223.600, 0.091	223.600, 0.770	223.600, 0.050	223.600, 0.087	223.600, -0.016	223.600, 0.383	223.600, 0.175	223.600, -0.006
1120	223.800, 0.485	223.800, 0.091	223.800, 0.769	223.800, 0.050	223.800, 0.087	223.800, -0.017	223.800, 0.383	223.800, 0.175	223.800, -0.006
1121	224.000, 0.484	224.000, 0.090	224.000, 0.769	224.000, 0.050	224.000, 0.087	224.000, -0.017	224.000, 0.383	224.000, 0.175	224.000, -0.006
1122	224.200, 0.483	224.200, 0.090	224.200, 0.768	224.200, 0.050	224.200, 0.087	224.200, -0.017	224.200, 0.383	224.200, 0.175	224.200, -0.006
1123	224.400, 0.482	224.400, 0.090	224.400, 0.768	224.400, 0.050	224.400, 0.087	224.400, -0.017	224.400, 0.382	224.400, 0.175	224.400, -0.006
1124	224.600, 0.482	224.600, 0.090	224.600, 0.767	224.600, 0.050	224.600, 0.087	224.600, -0.017	224.600, 0.382	224.600, 0.175	224.600, -0.006
1125	224.800, 0.481	224.800, 0.090	224.800, 0.767	224.800, 0.050	224.800, 0.087	224.800, -0.017	224.800, 0.382	224.800, 0.175	224.800, -0.005
1126	225.000, 0.480	225.000, 0.090	225.000, 0.767	225.000, 0.050	225.000, 0.086	225.000, -0.017	225.000, 0.382	225.000, 0.175	225.000, -0.005
1127	225.200, 0.480	225.200, 0.090	225.200, 0.766	225.200, 0.050	225.200, 0.086	225.200, -0.017	225.200, 0.382	225.200, 0.175	225.200, -0.005
1128	225.400, 0.480	225.400, 0.090	225.400, 0.766	225.400, 0.050	225.400, 0.086	225.400, -0.017	225.400, 0.382	225.400, 0.175	225.400, -0.005
1129	225.600, 0.479	225.600, 0.091	225.600, 0.766	225.600, 0.049	225.600, 0.086	225.600, -0.017	225.600, 0.382	225.600, 0.175	225.600, -0.005
1130	225.800, 0.478	225.800, 0.091	225.800, 0.766	225.800, 0.049	225.800, 0.086	225.800, -0.017	225.800, 0.382	225.800, 0.175	225.800, -0.005
1131	226.000, 0.478	226.000, 0.091	226.000, 0.765	226.000, 0.049	226.000, 0.085	226.000, -0.017	226.000, 0.382	226.000, 0.174	226.000, -0.005
1132	226.200, 0.477	226.200, 0.091	226.200, 0.765	226.200, 0.049	226.200, 0.085	226.200, -0.017	226.200, 0.382	226.200, 0.174	226.200, -0.005
1133	226.400, 0.477	226.400, 0.091	226.400, 0.765	226.400, 0.049	226.400, 0.085	226.400, -0.017	226.400, 0.382	226.400, 0.174	226.400, -0.005
1134	226.600, 0.476	226.600, 0.091	226.600, 0.764	226.600, 0.049	226.600, 0.085	226.600, -0.017	226.600, 0.382	226.600, 0.174	226.600, -0.005
1135	226.800, 0.475	226.800, 0.091	226.800, 0.764	226.800, 0.049	226.800, 0.085	226.800, -0.017	226.800, 0.383	226.800, 0.174	226.800, -0.005
1136	227.000, 0.475	227.000, 0.091	227.000, 0.764	227.000, 0.049	227.000, 0.085	227.000, -0.017	227.000, 0.383	227.000, 0.173	227.000, -0.005
1137	227.200, 0.474	227.200, 0.090	227.200, 0.763	227.200, 0.049	227.200, 0.085	227.200, -0.017	227.200, 0.383	227.200, 0.173	227.200, -0.005
1138	227.400, 0.473	227.400, 0.090	227.400, 0.763	227.400, 0.048	227.400, 0.085	227.400, -0.017	227.400, 0.383	227.400, 0.173	227.400, -0.005
1139	227.600, 0.472	227.600, 0.090	227.600, 0.763	227.600, 0.048	227.600, 0.085	227.600, -0.017	227.600, 0.383	227.600, 0.172	227.600, -0.006
1140	227.800, 0.472	227.800, 0.090	227.800, 0.762	227.800, 0.048	227.800, 0.085	227.800, -0.017	227.800, 0.383	227.800, 0.172	227.800, -0.006
1141	228.000, 0.471	228.000, 0.090	228.000, 0.762	228.000, 0.048	228.000, 0.085	228.000, -0.017	228.000, 0.383	228.000, 0.173	228.000, -0.006
1142	228.200, 0.470	228.200, 0.090	228.200, 0.762	228.200, 0.048	228.200, 0.085	228.200, -0.017	228.200, 0.383	228.200, 0.173	228.200, -0.006
1143	228.400, 0.469	228.400, 0.089	228.400, 0.761	228.400, 0.048	228.400, 0.085	228.400, -0.017	228.400, 0.382	228.400, 0.173	228.400, -0.006
1144	228.600, 0.468	228.600, 0.089	228.600, 0.761	228.600, 0.049	228.600, 0.085	228.600, -0.017	228.600, 0.382	228.600, 0.173	228.600, -0.006
1145	228.800, 0.467	228.800, 0.089	228.800, 0.760	228.800, 0.049	228.800, 0.086	228.800, -0.017	228.800, 0.382	228.800, 0.173	228.800, -0.006
1146	229.000, 0.467	229.000, 0.090	229.000, 0.760	229.000, 0.049	229.000, 0.086	229.000, -0.017	229.000, 0.382	229.000, 0.173	229.000, -0.006
1147	229.200, 0.466	229.200, 0.090	229.200, 0.760	229.200, 0.049	229.200, 0.086	229.200, -0.017	229.200, 0.382	229.200, 0.173	229.200, -0.006
1148	229.400, 0.465	229.400, 0.090	229.400, 0.760	229.400, 0.049	229.400, 0.086	229.400, -0.017	229.400, 0.382	229.400, 0.173	229.400, -0.006
1149	229.600, 0.464	229.600, 0.090	229.600, 0.760	229.600, 0.049	229.600, 0.086	229.600, -0.017	229.600, 0.382	229.600, 0.174	229.600, -0.006
1150	229.800, 0.463	229.800, 0.090	229.800, 0.760	229.800, 0.049	229.800, 0.086	229.800, -0.018	229.800, 0.382	229.800, 0.174	229.800, -0.006
1151	230.000, 0.463	230.000, 0.090	230.000, 0.759	230.000, 0.049	230.000, 0.086	230.000, -0.018	230.000, 0.382	230.000, 0.174	230.000, -0.006
1152	230.200, 0.462	230.200, 0.090	230.200, 0.759	230.200, 0.049	230.200, 0.086	230.200, -0.018	230.200, 0.382	230.200, 0.174	230.200, -0.006
1153	230.400, 0.462	230.400, 0.090	230.400, 0.759	230.400, 0.049	230.400, 0.085	230.400, -0.018	230.400, 0.382	230.400, 0.174	230.400, -0.006
1154	230.600, 0.461	230.600, 0.090	230.600, 0.758	230.600, 0.049	230.600, 0.085	230.600, -0.018	230.600, 0.382	230.600, 0.174	230.600, -0.006
1155	230.800, 0.460	230.800, 0.090	230.800, 0.758	230.800, 0.049	230.800, 0.085	230.800, -0.018	230.800, 0.381	230.800, 0.174	230.800, -0.007
1156	231.000, 0.460	231.000, 0.090	231.000, 0.758	231.000, 0.049	231.000, 0.085	231.000, -0.018	231.000, 0.381	231.000, 0.174	231.000, -0.006
1157	231.200, 0.459	231.200, 0.089	231.200, 0.757	231.200, 0.049	231.200, 0.085	231.200, -0.018	231.200, 0.381	231.200, 0.174	231.200, -0.006
1158	231.400, 0.458	231.400, 0.089	231.400, 0.757	231.400, 0.048	231.400, 0.084	231.400, -0.018	231.400, 0.381	231.400, 0.174	231.400, -0.006
1159	231.600, 0.458	231.600, 0.089	231.600, 0.756	231.600, 0.048	231.600, 0.084	231.600, -0.018	231.600, 0.381	231.600, 0.174	231.600, -0.006
1160	231.800, 0.457	231.800, 0.089	231.800, 0.756	231.800, 0.048	231.800, 0.084	231.800, -0.017	231.800, 0.380	231.800, 0.174	231.800, -0.005
1161	232.000, 0.457	232.000, 0.089	232.000, 0.756	232.000, 0.048	232.000, 0.084	232.000, -0.017	232.000, 0.380	232.000, 0.174	232.000, -0.005
1162	232.200, 0.456	232.200, 0.089	232.200, 0.755	232.200, 0.047	232.200, 0.084	232.200, -0.017	232.200, 0.380	232.200, 0.173	232.200, -0.005
1163	232.400, 0.456	232.400, 0.089	232.400, 0.755	232.400, 0.047	232.400, 0.084	232.400, -0.017	232.400, 0.380	232.400, 0.173	232.400, -0.004
1164	232.600, 0.455	232.600, 0.089	232.600, 0.755	232.600, 0.047	232.600, 0.084	232.600, -0.017	232.600, 0.380	232.600, 0.173	232.600, -0.004
1165	232.800, 0.454	232.800, 0.089	232.800, 0.755	232.800, 0.047	232.800, 0.084	232.800, -0.017	232.800, 0.380	232.800, 0.173	232.800, -0.004
1166	233.000, 0.454	233.000, 0.089	233.000, 0.755	233.000, 0.047	233.000, 0.084	233.000, -0.017	233.000, 0.380	233.000, 0.173	233.000, -0.004
1167	233.200, 0.453	233.200, 0.089	233.200, 0.755	233.200, 0.046	233.200, 0.084	233.200, -0.017	233.200, 0.379	233.200, 0.173	233.200, -0.004
1168	233.400, 0.453	233.400, 0.090	233.400, 0.755	233.400, 0.046	233.400, 0.084	233.400, -0.017	233.400, 0.379	233.400, 0.173	233.400, -0.004
1169	233.600, 0.452	233.600, 0.090	233.600, 0.755	233.600, 0.046	233.600, 0.084	233.600, -0.017	233.600, 0.379	233.600, 0.173	233.600, -0.004
1170	233.800, 0.452	233.800, 0.090	233.800, 0.755	233.800, 0.046	233.800, 0.085	233.800, -0.017	233.800, 0.379	233.800, 0.173	233.800, -0.005
1171	234.000, 0.451	234.000, 0.090	234.000, 0.754	234.000, 0.046	234.000, 0.085	234.000, -0.017	234.000, 0.379	234.000, 0.173	234.000, -0.005
1172	234.200, 0.450	234.200, 0.090	234.200, 0.754	234.200, 0.047	234.200, 0.085	234.200, -0.017	234.200, 0.379	234.200, 0.173	234.200, -0.005
1173	234.400, 0.449	234.400, 0.090	234.400, 0.753	234.400, 0.047	234.400, 0.085	234.400, -0.017	234.400, 0.379	234.400, 0.173	234.400, -0.006
1174	234.600, 0.448	234.600, 0.090	234.600, 0.753	234.600, 0.047	234.600, 0.085	234.600, -0.017	234.600, 0.379	234.600, 0.173	234.600, -0.006
1175	234.800, 0.447	234.800, 0.090	234.800, 0.752	234.800, 0.047	234.800, 0.085	234.800, -0.017	234.800, 0.379	234.800, 0.173	234.800, -0.006
1176	235.000, 0.447	235.000, 0.090	235.000, 0.751	235.000, 0.047	235.000, 0.085	235.000, -0.017	235.000, 0.379	235.000, 0.173	235.000, -0.006
1177	235.200, 0.446	235.200, 0.089	235.200, 0.751	235.200, 0.047	235.200, 0.084	235.200, -0.017	235.200, 0.379	235.200, 0.172	235.200, -0.006
1178	235.400, 0.445	235.400, 0.089	235.400, 0.750	235.400, 0.047	235.400, 0.084	235.400, -0.018	235.400, 0.378	235.400, 0.172	235.400, -0.006
1179	235.600, 0.445	235.600, 0.089	235.600, 0.750	235.600, 0.047	235.600, 0.084	235.600, -0.018	235.600, 0.378	235.600, 0.172	235.600, -0.006
1180	235.800, 0.444	235.800, 0.089	235.800, 0.749	235.800, 0.047	235.800, 0.084	235.800, -0.018	235.800, 0.378	235.800, 0.172	235.800, -0.006
1181	236.000, 0.444	236.000, 0.089	236.000, 0.749	236.000, 0.047	236.000, 0.084	236.000, -0.019	236.000, 0.378	236.000, 0.172	236.000, -0.005
1182	236.200, 0.443	236.200, 0.088	236.200, 0.749	236.200, 0.047	236.200, 0.084	236.200, -0.019	236.200, 0.378	236.200, 0.171	236.200, -0.005
1183	236.400, 0.442	236.400, 0.088	236.400, 0.749	236.400, 0.047	236.400, 0.084	236.400, -0.019	236.400, 0.377	236.400, 0.171	236.400, -0.005
1184	236.600, 0.442	236.600, 0.088	236.600, 0.748	236.600, 0.047	236.600, 0.084	236.600, -0.019	236.600, 0.377	236.600, 0.171	236.600, -0.005
1185	236.800, 0.441	236.800, 0.088	236.800, 0.748	236.800, 0.047	236.800, 0.084	236.800, -0.019	236.800, 0.377	236.800, 0.171	236.800, -0.005
1186	237.000, 0.441	237.000, 0.088	237.000, 0.748	237.000, 0.047	237.000, 0.084	237.000, -0.019	237.000, 0.377	237.000, 0.171	237.000, -0.005
1187	237.200, 0.440	237.200, 0.088	237.200, 0.748	237.200, 0.047	237.200, 0.084	237.200, -0.019	237.200, 0.377	237.200, 0.171	237.200, -0.005
1188	237.400, 0.440	237.400, 0.088	237.400, 0.747	237.400, 0.047	237.400, 0.084	237.400, -0.019	237.400, 0.377	237.400, 0.171	237.400, -0.005
1189	237.600, 0.439	237.600, 0.088	237.600, 0.747	237.600, 0.047	237.600, 0.084	237.600, -0.019	237.600, 0.377	237.600, 0.171	237.600, -0.006
1190	237.800, 0.439	237.800, 0.088	237.800, 0.747	237.800, 0.047	237.800, 0.084	237.800, -0.019	237.800, 0.378	237.800, 0.171	237.800, -0.006
1191	238.000, 0.439	238.000, 0.088	238.000, 0.747	238.000, 0.047	238.000, 0.084	238.000, -0.019	238.000, 0.378	238.000, 0.171	238.000, -0.006
1192	238.200, 0.438	238.200, 0.089	238.200, 0.746	238.200, 0.047	238.200, 0.084	238.200, -0.019	238.200, 0.378	238.200, 0.171	238.200, -0.006
1193	238.400, 0.438	238.400, 0.089	238.400, 0.746	238.400, 0.047	238.400, 0.084	238.400, -0.019	238.400, 0.378	238.400, 0.171	238.400, -0.006
1194	238.600, 0.438	238.600, 0.089	238.600, 0.746	238.600, 0.047	238.600, 0.084	238.600, -0.019	238.600, 0.378	238.600, 0.171	238.600, -0.006
1195	238.800, 0.438	238.800, 0.089	238.800, 0.746	238.800, 0.047	238.800, 0.084	238.800, -0.019	238.800, 0.377	238.800, 0.171	238.800, -0.006
1196	239.000, 0.437	239.000, 0.089	239.000, 0.746	239.000, 0.047	239.000, 0.084	239.000, -0.019	239.000, 0.377	239.000, 0.171	239.000, -0.006
1197	239.200, 0.437	239.200, 0.089	239.200, 0.746	239.200, 0.047	239.200, 0.084	239.200, -0.019	239.200, 0.377	239.200, 0.171	239.200, -0.006
1198	239.400, 0.437	239.400, 0.089	239.400, 0.746	239.400, 0.046	239.400, 0.084	239.400, -0.019	239.400, 0.377	239.400, 0.171	239.400, -0.006
1199	239.600, 0.436	239.600, 0.089	239.600, 0.746	239.600, 0.046	239.600, 0.083	239.600, -0.019	239.600, 0.376	239.600, 0.171	239.600, -0.005
1200	239.800, 0.436	239.800, 0.089	239.800, 0.746	239.800, 0.046	239.800, 0.083	239.800, -0.019	239.800, 0.376	239.800, 0.171	239.800, -0.005
1201	240.000, 0.435	240.000, 0.089	240.000, 0.746	240.000, 0.046	240.000, 0.083	240.000, -0.019	240.000, 0.376	240.000, 0.171	240.000, -0.005
1202	240.200, 0.435	240.200, 0.088	240.200, 0.746	240.200, 0.046	240.200, 0.083	240.200, -0.019	240.200, 0.376	240.200, 0.171	240.200, -0.005
1203	240.400, 0.434	240.400, 0.088	240.400, 0.746	240.400, 0.046	240.400, 0.083	240.400, -0.019	240.400, 0.376	240.400, 0.172	240.400, -0.005
1204	240.600, 0.434	240.600, 0.088	240.600, 0.746	240.600, 0.046	240.600, 0.083	240.600, -0.019	240.600, 0.376	240.600, 0.171	240.600, -0.005
1205	240.800, 0.433	240.800, 0.088	240.800, 0.745	240.800, 0.046	240.800, 0.083	240.800, -0.019	240.800, 0.376	240.800, 0.171	240.800, -0.005
1206	241.000, 0.433	241.000, 0.088	241.000, 0.745	241.000, 0.046	241.000, 0.083	241.000, -0.019	241.000, 0.376	241.000, 0.171	241.000, -0.005
1207	241.200, 0.432	241.200, 0.088	241.200, 0.745	241.200, 0.046	241.200, 0.083	241.200, -0.019	241.200, 0.376	241.200, 0.171	241.200, -0.005
1208	241.400, 0.432	241.400, 0.088	241.400, 0.744	241.400, 0.045	241.400, 0.083	241.400, -0.019	241.400, 0.376	241.400, 0.171	241.400, -0.005
1209	241.600, 0.432	241.600, 0.088	241.600, 0.744	241.600, 0.045	241.600, 0.083	241.600, -0.019	241.600, 0.376	241.600, 0.171	241.600, -0.005
1210	241.800, 0.431	241.800, 0.088	241.800, 0.744	241.800, 0.045	241.800, 0.083	241.800, -0.019	241.800, 0.376	241.800, 0.171	241.800, -0.005
1211	242.000, 0.431	242.000, 0.087	242.000, 0.743	242.000, 0.045	242.000, 0.083	242.000, -0.019	242.000, 0.375	242.000, 0.171	242.000, -0.005
1212	242.200, 0.431	242.200, 0.087	242.200, 0.743	242.200, 0.045	242.200, 0.083	242.200, -0.019	242.200, 0.375	242.200, 0.171	242.200, -0.005
1213	242.400, 0.430	242.400, 0.088	242.400, 0.742	242.400, 0.045	242.400, 0.083	242.400, -0.019	242.400, 0.375	242.400, 0.171	242.400, -0.005
1214	242.600, 0.429	242.600, 0.088	242.600, 0.742	242.600, 0.045	242.600, 0.083	242.600, -0.019	242.600, 0.375	242.600, 0.171	242.600, -0.005
1215	242.800, 0.429	242.800, 0.088	242.800, 0.741	242.800, 0.045	242.800, 0.083	242.800, -0.019	242.800, 0.375	242.800, 0.171	242.800, -0.005
1216	243.000, 0.428	243.000, 0.088	243.000, 0.741	243.000, 0.044	243.000, 0.083	243.000, -0.019	243.000, 0.375	243.000, 0.171	243.000, -0.005
1217	243.200, 0.427	243.200, 0.088	243.200, 0.741	243.200, 0.044	243.200, 0.083	243.200, -0.019	243.200, 0.375	243.200, 0.171	243.200, -0.005
1218	243.400, 0.427	243.400, 0.088	243.400, 0.741	243.400, 0.044	243.400, 0.083	243.400, -0.019	243.400, 0.376	243.400, 0.171	243.400, -0.005
1219	243.600, 0.426	243.600, 0.088	243.600, 0.741	243.600, 0.044	243.600, 0.083	243.600, -0.019	243.600, 0.376	243.600, 0.171	243.600, -0.005
1220	243.800, 0.426	243.800, 0.088	243.800, 0.741	243.800, 0.044	243.800, 0.083	243.800, -0.019	243.800, 0.376	243.800, 0.171	243.800, -0.005
1221	244.000, 0.425	244.000, 0.087	244.000, 0.740	244.000, 0.044	244.000, 0.082	244.000, -0.019	244.000, 0.376	244.000, 0.170	244.000, -0.005
1222	244.200, 0.424	244.200, 0.087	244.200, 0.740	244.200, 0.044	244.200, 0.082	244.200, -0.019	244.200, 0.376	244.200, 0.170	244.200, -0.005
1223	244.400, 0.424	244.400, 0.087	244.400, 0.740	244.400, 0.044	244.400, 0.082	244.400, -0.019	244.400, 0.376	244.400, 0.170	244.400, -0.005
1224	244.600, 0.424	244.600, 0.087	244.600, 0.740	244.600, 0.044	244.600, 0.082	244.600, -0.019	244.600, 0.376	244.600, 0.170	244.600, -0.005
1225	244.800, 0.423	244.800, 0.087	244.800, 0.741	244.800, 0.044	244.800, 0.082	244.800, -0.019	244.800, 0.376	244.800, 0.170	244.800, -0.005
1226	245.000, 0.423	245.000, 0.087	245.000, 0.741	245.000, 0.044	245.000, 0.082	245.000, -0.019	245.000, 0.376	245.000, 0.170	245.000, -0.005
1227	245.200, 0.423	245.200, 0.087	245.200, 0.741	245.200, 0.044	245.200, 0.082	245.200, -0.019	245.200, 0.376	245.200, 0.170	245.200, -0.005
1228	245.400, 0.423	245.400, 0.087	245.400, 0.740	245.400, 0.044	245.400, 0.082	245.400, -0.020	245.400, 0.375	245.400, 0.170	245.400, -0.005
1229	245.600, 0.423	245.600, 0.087	245.600, 0.740	245.600, 0.044	245.600, 0.082	245.600, -0.020	245.600, 0.375	245.600, 0.170	245.600, -0.005
1230	245.800, 0.423	245.800, 0.087	245.800, 0.740	245.800, 0.045	245.800, 0.082	245.800, -0.020	245.800, 0.374	245.800, 0.170	245.800, -0.005
1231	246.000, 0.422	246.000, 0.087	246.000, 0.740	246.000, 0.045	246.000, 0.082	246.000, -0.020	246.000, 0.374	246.000, 0.170	246.000, -0.005
1232	246.200, 0.422	246.200, 0.087	246.200, 0.739	246.200, 0.045	246.200, 0.082	246.200, -0.020	246.200, 0.374	246.200, 0.170	246.200, -0.005
1233	246.400, 0.421	246.400, 0.087	246.400, 0.739	246.400, 0.045	246.400, 0.082	246.400, -0.020	246.400, 0.374	246.400, 0.170	246.400, -0.005
1234	246.600, 0.420	246.600, 0.087	246.600, 0.739	246.600, 0.045	246.600, 0.082	246.600, -0.021	246.600, 0.374	246.600, 0.170	246.600, -0.005
1235	246.800, 0.419	246.800, 0.086	246.800, 0.738	246.800, 0.045	246.800, 0.082	246.800, -0.021	246.800, 0.373	246.800, 0.170	246.800, -0.005
1236	247.000, 0.419	247.000, 0.086	247.000, 0.738	247.000, 0.045	247.000, 0.082	247.000, -0.021	247.000, 0.373	247.000, 0.169	247.000, -0.005
1237	247.200, 0.418	247.200, 0.086	247.200, 0.738	247.200, 0.045	247.200, 0.082	247.200, -0.020	247.200, 0.373	247.200, 0.169	247.200, -0.005
1238	247.400, 0.418	247.400, 0.085	247.400, 0.737	247.400, 0.044	247.400, 0.082	247.400, -0.020	247.400, 0.373	247.400, 0.169	247.400, -0.005
1239	247.600, 0.417	247.600, 0.085	247.600, 0.737	247.600, 0.044	247.600, 0.082	247.600, -0.020	247.600, 0.373	247.600, 0.168	247.600, -0.005
1240	247.800, 0.417	247.800, 0.085	247.800, 0.737	247.800, 0.044	247.800, 0.082	247.800, -0.020	247.800, 0.373	247.800, 0.168	247.800, -0.005
1241	248.000, 0.416	248.000, 0.085	248.000, 0.737	248.000, 0.044	248.000, 0.082	248.000, -0.020	248.000, 0.373	248.000, 0.168	248.000, -0.005
1242	248.200, 0.416	248.200, 0.085	248.200, 0.736	248.200, 0.044	248.200, 0.081	248.200, -0.020	248.200, 0.373	248.200, 0.168	248.200, -0.005
1243	248.400, 0.416	248.400, 0.085	248.400, 0.736	248.400, 0.043	248.400, 0.081	248.400, -0.020	248.400, 0.373	248.400, 0.168	248.400, -0.005
1244	248.600, 0.416	248.600, 0.086	248.600, 0.736	248.600, 0.043	248.600, 0.081	248.600, -0.020	248.600, 0.373	248.600, 0.168	248.600, -0.005
1245	248.800, 0.416	248.800, 0.086	248.800, 0.735	248.800, 0.043	248.800, 0.081	248.800, -0.019	248.800, 0.373	248.800, 0.168	248.800, -0.005
1246	249.000, 0.415	249.000, 0.086	249.000, 0.735	249.000, 0.043	249.000, 0.081	249.000, -0.019	249.000, 0.373	249.000, 0.168	249.000, -0.005
1247	249.200, 0.415	249.200, 0.086	249.200, 0.735	249.200, 0.043	249.200, 0.081	249.200, -0.019	249.200, 0.373	249.200, 0.168	249.200, -0.005
1248	249.400, 0.415	249.400, 0.086	249.400, 0.735	249.400, 0.043	249.400, 0.081	249.400, -0.019	249.400, 0.373	249.400, 0.168	249.400, -0.005
1249	249.600, 0.415	249.600, 0.086	249.600, 0.734	249.600, 0.043	249.600, 0.081	249.600, -0.019	249.600, 0.373	249.600, 0.168	249.600, -0.005
1250	249.800, 0.414	249.800, 0.087	249.800, 0.734	249.800, 0.043	249.800, 0.081	249.800, -0.019	249.800, 0.373	249.800, 0.168	249.800, -0.005
1251	250.000, 0.414	250.000, 0.087	250.000, 0.734	250.000, 0.043	250.000, 0.081	250.000, -0.020	250.000, 0.373	250.000, 0.168	250.000, -0.005
1252	250.200, 0.413	250.200, 0.087	250.200, 0.734	250.200, 0.043	250.200, 0.081	250.200, -0.020	250.200, 0.373	250.200, 0.169	250.200, -0.005
1253	250.400, 0.413	250.400, 0.086	250.400, 0.733	250.400, 0.044	250.400, 0.081	250.400, -0.020	250.400, 0.373	250.400, 0.169	250.400, -0.005
1254	250.600, 0.413	250.600, 0.086	250.600, 0.733	250.600, 0.044	250.600, 0.081	250.600, -0.020	250.600, 0.373	250.600, 0.168	250.600, -0.005
1255	250.800, 0.412	250.800, 0.086	250.800, 0.733	250.800, 0.044	250.800, 0.081	250.800, -0.020	250.800, 0.372	250.800, 0.168	250.800, -0.005
1256	251.000, 0.412	251.000, 0.086	251.000, 0.733	251.000, 0.044	251.000, 0.081	251.000, -0.021	251.000, 0.372	251.000, 0.168	251.000, -0.005
1257	251.200, 0.411	251.200, 0.086	251.200, 0.733	251.200, 0.044	251.200, 0.081	251.200, -0.021	251.200, 0.372	251.200, 0.168	251.200, -0.005
1258	251.400, 0.411	251.400, 0.086	251.400, 0.733	251.400, 0.044	251.400, 0.081	251.400, -0.021	251.400, 0.371	251.400, 0.167	251.400, -0.005
1259	251.600, 0.411	251.600, 0.086	251.600, 0.733	251.600, 0.044	251.600, 0.081	251.600, -0.021	251.600, 0.371	251.600, 0.167	251.600, -0.005
1260	251.800, 0.410	251.800, 0.086	251.800, 0.733	251.800, 0.044	251.800, 0.080	251.800, -0.022	251.800, 0.371	251.800, 0.167	251.800, -0.005
1261	252.000, 0.410	252.000, 0.086	252.000, 0.733	252.000, 0.043	252.000, 0.080	252.000, -0.022	252.000, 0.371	252.000, 0.167	252.000, -0.005
1262	252.200, 0.410	252.200, 0.086	252.200, 0.732	252.200, 0.043	252.200, 0.080	252.200, -0.022	252.200, 0.370	252.200, 0.166	252.200, -0.005
1263	252.400, 0.410	252.400, 0.086	252.400, 0.732	252.400, 0.043	252.400, 0.080	252.400, -0.022	252.400, 0.370	252.400, 0.166	252.400, -0.005
1264	252.600, 0.409	252.600, 0.086	252.600, 0.732	252.600, 0.043	252.600, 0.079	252.600, -0.022	252.600, 0.370	252.600, 0.166	252.600, -0.005
1265	252.800, 0.409	252.800, 0.086	252.800, 0.732	252.800, 0.043	252.800, 0.079	252.800, -0.022	252.800, 0.370	252.800, 0.166	252.800, -0.005
1266	253.000, 0.408	253.000, 0.086	253.000, 0.731	253.000, 0.043	253.000, 0.079	253.000, -0.022	253.000, 0.370	253.000, 0.167	253.000, -0.005
1267	253.200, 0.407	253.200, 0.086	253.200, 0.731	253.200, 0.042	253.200, 0.079	253.200, -0.021	253.200, 0.370	253.200, 0.167	253.200, -0.005
1268	253.400, 0.407	253.400, 0.086	253.400, 0.731	253.400, 0.042	253.400, 0.079	253.400, -0.021	253.400, 0.370	253.400, 0.167	253.400, -0.005
1269	253.600, 0.406	253.600, 0.086	253.600, 0.730	253.600, 0.042	253.600, 0.079	253.600, -0.020	253.600, 0.370	253.600, 0.167	253.600, -0.004
1270	253.800, 0.406	253.800, 0.086	253.800, 0.730	253.800, 0.042	253.800, 0.079	253.800, -0.020	253.800, 0.371	253.800, 0.167	253.800, -0.004
1271	254.000, 0.405	254.000, 0.086	254.000, 0.730	254.000, 0.041	254.000, 0.079	254.000, -0.020	254.000, 0.371	254.000, 0.168	254.000, -0.004
1272	254.200, 0.405	254.200, 0.086	254.200, 0.729	254.200, 0.041	254.200, 0.079	254.200, -0.020	254.200, 0.371	254.200, 0.167	254.200, -0.004
1273	254.400, 0.404	254.400, 0.086	254.400, 0.729	254.400, 0.041	254.400, 0.079	254.400, -0.020	254.400, 0.371	254.400, 0.167	254.400, -0.004
1274	254.600, 0.404	254.600, 0.086	254.600, 0.729	254.600, 0.041	254.600, 0.080	254.600, -0.020	254.600, 0.371	254.600, 0.167	254.600, -0.004
1275	254.800, 0.404	254.800, 0.086	254.800, 0.729	254.800, 0.041	254.800, 0.080	254.800, -0.020	254.800, 0.371	254.800, 0.167	254.800, -0.004
1276	255.000, 0.404	255.000, 0.086	255.000, 0.729	255.000, 0.041	255.000, 0.080	255.000, -0.019	255.000, 0.372	255.000, 0.167	255.000, -0.004
1277	255.200, 0.403	255.200, 0.086	255.200, 0.729	255.200, 0.041	255.200, 0.080	255.200, -0.019	255.200, 0.372	255.200, 0.167	255.200, -0.004
1278	255.400, 0.403	255.400, 0.086	255.400, 0.729	255.400, 0.041	255.400, 0.080	255.400, -0.019	255.400, 0.372	255.400, 0.167	255.400, -0.005
1279	255.600, 0.403	255.600, 0.086	255.600, 0.729	255.600, 0.041	255.600, 0.080	255.600, -0.020	255.600, 0.372	255.600, 0.167	255.600, -0.005
1280	255.800, 0.403	255.800, 0.086	255.800, 0.729	255.800, 0.042	255.800, 0.081	255.800, -0.020	255.800, 0.372	255.800, 0.168	255.800, -0.005
1281	256.000, 0.403	256.000, 0.086	256.000, 0.729	256.000, 0.041	256.000, 0.081	256.000, -0.020	256.000, 0.371	256.000, 0.168	256.000, -0.005
1282	256.200, 0.403	256.200, 0.086	256.200, 0.728	256.200, 0.041	256.200, 0.081	256.200, -0.021	256.200, 0.371	256.200, 0.168	256.200, -0.006
1283	256.400, 0.402	256.400, 0.085	256.400, 0.728	256.400, 0.041	256.400, 0.081	256.400, -0.021	256.400, 0.371	256.400, 0.168	256.400, -0.006
1284	256.600, 0.402	256.600, 0.085	256.600, 0.727	256.600, 0.041	256.600, 0.081	256.600, -0.021	256.600, 0.371	256.600, 0.169	256.600, -0.006
1285	256.800, 0.402	256.800, 0.085	256.800, 0.727	256.800, 0.041	256.800, 0.081	256.800, -0.021	256.800, 0.371	256.800, 0.169	256.800, -0.006
1286	257.000, 0.401	257.000, 0.085	257.000, 0.727	257.000, 0.041	257.000, 0.081	257.000, -0.021	257.000, 0.370	257.000, 0.169	257.000, -0.006
1287	257.200, 0.401	257.200, 0.085	257.200, 0.726	257.200, 0.041	257.200, 0.081	257.200, -0.021	257.200, 0.370	257.200, 0.169	257.200, -0.006
[truncated: 13,713 more rows]

## Sheet: Fig4_panelA_B_C_rep3
	170 bp closed parS DNA and ParB CTP	170 bp closed parS DNA and ParB	170 bp closed parS DNA and ParB TetR CTP	BamHI cut 170 bp parS DNA and ParB	EcoRI cut 170 bp parS DNA and ParB	BamHI cut 170 bp parS DNA and ParB CTP	BamHI cut 170 bp parS DNA and ParB TetR CTP	EcoRI cut 170 bp parS DNA and ParB CTP	EcoRI cut 170 bp parS DNA and ParB TetR CTP
[truncated: 15,000 more rows]
