# Supplementary material for: ParB spreading on DNA requires cytidine triphosphate in vitro
Source: eLife journal article supplement (doi:10.7554/elife.53515), 2020-02-20
Supplement: fig4-figsupp1-data1 [file elife-53515-fig4-figsupp1-data1-v2.zip]

## Sheet: FORMAT
	sample ID #1	sample ID #2	sample ID #3
data point	time point (sec), wavelength shift (nm)	time point (sec), wavelength shift (nm)	time point (sec), wavelength shift (nm)
1
2
3
.
.
.

## Sheet: Fig4_supp1_rep1_2_3
	170bp closed parS DNA ParB CTP and mock treatment at 150th	170bp closed parS DNA ParB CTP TetR and mock treatment at 150th	170bp closed parS DNA ParB CTP and mock treatment at 150th	170bp closed parS DNA ParB CTP TetR and ahTc treatment at 150th	170bp closed parS DNA ParB CTP and mock treatment at 150th	170bp closed parS DNA ParB CTP and AhTc treatment at 150th	170bp closed parS DNA ParB CTP and AhTc treatment at 150th	170bp closed parS DNA ParB CTP and AhTc treatment at 150th	170bp closed parS DNA ParB CTP TetR and mock treatment at 150th	170bp closed parS DNA ParB CTP TetR and mock treatment at 150th	170bp closed parS DNA ParB CTP TetR and ahTc treatment at 150th	170bp closed parS DNA ParB CTP TetR and ahTc treatment at 150th
1	0.000, -0.001	0.000, 0.001	0.000, -0.023	0.000, -0.027	0.000, -0.041	0.000, -0.028	0.000, -0.011	0.000, -0.032	0.000, -0.060	0.000, -0.031	0.000, -0.026	0.000, -0.010
2	0.200, -0.001	0.200, 0.000	0.200, -0.023	0.200, -0.027	0.200, -0.040	0.200, -0.028	0.200, -0.011	0.200, -0.031	0.200, -0.060	0.200, -0.031	0.200, -0.026	0.200, -0.011
3	0.400, -0.002	0.400, -0.001	0.400, -0.024	0.400, -0.027	0.400, -0.039	0.400, -0.028	0.400, -0.012	0.400, -0.031	0.400, -0.060	0.400, -0.031	0.400, -0.025	0.400, -0.012
4	0.600, -0.002	0.600, -0.002	0.600, -0.024	0.600, -0.026	0.600, -0.039	0.600, -0.028	0.600, -0.012	0.600, -0.030	0.600, -0.060	0.600, -0.031	0.600, -0.025	0.600, -0.013
5	0.800, -0.002	0.800, -0.003	0.800, -0.025	0.800, -0.026	0.800, -0.038	0.800, -0.028	0.800, -0.013	0.800, -0.029	0.800, -0.059	0.800, -0.031	0.800, -0.024	0.800, -0.013
6	1.000, -0.002	1.000, -0.004	1.000, -0.025	1.000, -0.026	1.000, -0.037	1.000, -0.028	1.000, -0.013	1.000, -0.029	1.000, -0.059	1.000, -0.031	1.000, -0.024	1.000, -0.014
7	1.200, -0.003	1.200, -0.004	1.200, -0.025	1.200, -0.025	1.200, -0.036	1.200, -0.028	1.200, -0.013	1.200, -0.028	1.200, -0.058	1.200, -0.031	1.200, -0.023	1.200, -0.015
8	1.400, -0.002	1.400, -0.004	1.400, -0.025	1.400, -0.025	1.400, -0.036	1.400, -0.028	1.400, -0.014	1.400, -0.027	1.400, -0.057	1.400, -0.031	1.400, -0.023	1.400, -0.015
9	1.600, -0.002	1.600, -0.004	1.600, -0.025	1.600, -0.025	1.600, -0.035	1.600, -0.028	1.600, -0.014	1.600, -0.027	1.600, -0.056	1.600, -0.031	1.600, -0.022	1.600, -0.016
10	1.800, -0.002	1.800, -0.004	1.800, -0.025	1.800, -0.024	1.800, -0.034	1.800, -0.028	1.800, -0.014	1.800, -0.026	1.800, -0.055	1.800, -0.031	1.800, -0.022	1.800, -0.016
11	2.000, -0.002	2.000, -0.003	2.000, -0.025	2.000, -0.024	2.000, -0.034	2.000, -0.028	2.000, -0.014	2.000, -0.026	2.000, -0.054	2.000, -0.031	2.000, -0.022	2.000, -0.015
12	2.200, -0.001	2.200, -0.003	2.200, -0.025	2.200, -0.025	2.200, -0.033	2.200, -0.028	2.200, -0.015	2.200, -0.026	2.200, -0.053	2.200, -0.031	2.200, -0.022	2.200, -0.015
13	2.400, -0.001	2.400, -0.002	2.400, -0.025	2.400, -0.025	2.400, -0.033	2.400, -0.028	2.400, -0.015	2.400, -0.026	2.400, -0.052	2.400, -0.031	2.400, -0.022	2.400, -0.014
14	2.600, -0.001	2.600, -0.002	2.600, -0.025	2.600, -0.025	2.600, -0.033	2.600, -0.027	2.600, -0.015	2.600, -0.025	2.600, -0.051	2.600, -0.031	2.600, -0.022	2.600, -0.014
15	2.800, -0.000	2.800, -0.002	2.800, -0.025	2.800, -0.025	2.800, -0.032	2.800, -0.027	2.800, -0.015	2.800, -0.025	2.800, -0.050	2.800, -0.031	2.800, -0.022	2.800, -0.014
16	3.000, -0.000	3.000, -0.002	3.000, -0.025	3.000, -0.025	3.000, -0.032	3.000, -0.027	3.000, -0.015	3.000, -0.025	3.000, -0.049	3.000, -0.031	3.000, -0.022	3.000, -0.013
17	3.200, -0.000	3.200, -0.002	3.200, -0.025	3.200, -0.024	3.200, -0.031	3.200, -0.027	3.200, -0.015	3.200, -0.025	3.200, -0.048	3.200, -0.030	3.200, -0.021	3.200, -0.013
18	3.400, -0.000	3.400, -0.002	3.400, -0.025	3.400, -0.024	3.400, -0.030	3.400, -0.026	3.400, -0.015	3.400, -0.024	3.400, -0.047	3.400, -0.030	3.400, -0.021	3.400, -0.013
19	3.600, -0.000	3.600, -0.002	3.600, -0.025	3.600, -0.024	3.600, -0.030	3.600, -0.026	3.600, -0.015	3.600, -0.024	3.600, -0.046	3.600, -0.030	3.600, -0.021	3.600, -0.013
20	3.800, -0.000	3.800, -0.003	3.800, -0.025	3.800, -0.024	3.800, -0.029	3.800, -0.025	3.800, -0.015	3.800, -0.024	3.800, -0.045	3.800, -0.029	3.800, -0.020	3.800, -0.012
21	4.000, -0.001	4.000, -0.003	4.000, -0.025	4.000, -0.024	4.000, -0.028	4.000, -0.025	4.000, -0.015	4.000, -0.023	4.000, -0.044	4.000, -0.029	4.000, -0.020	4.000, -0.012
22	4.200, -0.001	4.200, -0.003	4.200, -0.025	4.200, -0.024	4.200, -0.028	4.200, -0.024	4.200, -0.014	4.200, -0.022	4.200, -0.044	4.200, -0.028	4.200, -0.020	4.200, -0.012
23	4.400, -0.001	4.400, -0.004	4.400, -0.025	4.400, -0.024	4.400, -0.027	4.400, -0.024	4.400, -0.014	4.400, -0.022	4.400, -0.043	4.400, -0.028	4.400, -0.020	4.400, -0.012
24	4.600, -0.001	4.600, -0.004	4.600, -0.025	4.600, -0.024	4.600, -0.027	4.600, -0.023	4.600, -0.014	4.600, -0.022	4.600, -0.042	4.600, -0.027	4.600, -0.019	4.600, -0.011
25	4.800, -0.001	4.800, -0.004	4.800, -0.025	4.800, -0.024	4.800, -0.027	4.800, -0.022	4.800, -0.013	4.800, -0.021	4.800, -0.041	4.800, -0.027	4.800, -0.019	4.800, -0.011
26	5.000, -0.001	5.000, -0.004	5.000, -0.024	5.000, -0.024	5.000, -0.026	5.000, -0.022	5.000, -0.013	5.000, -0.021	5.000, -0.040	5.000, -0.027	5.000, -0.019	5.000, -0.011
27	5.200, -0.001	5.200, -0.003	5.200, -0.024	5.200, -0.023	5.200, -0.026	5.200, -0.021	5.200, -0.013	5.200, -0.020	5.200, -0.039	5.200, -0.026	5.200, -0.018	5.200, -0.011
28	5.400, -0.001	5.400, -0.003	5.400, -0.024	5.400, -0.023	5.400, -0.026	5.400, -0.021	5.400, -0.013	5.400, -0.020	5.400, -0.038	5.400, -0.026	5.400, -0.018	5.400, -0.011
29	5.600, -0.001	5.600, -0.002	5.600, -0.023	5.600, -0.023	5.600, -0.026	5.600, -0.021	5.600, -0.013	5.600, -0.020	5.600, -0.038	5.600, -0.025	5.600, -0.017	5.600, -0.010
30	5.800, -0.000	5.800, -0.002	5.800, -0.023	5.800, -0.023	5.800, -0.026	5.800, -0.021	5.800, -0.013	5.800, -0.019	5.800, -0.037	5.800, -0.025	5.800, -0.017	5.800, -0.010
31	6.000, -0.000	6.000, -0.002	6.000, -0.023	6.000, -0.023	6.000, -0.026	6.000, -0.020	6.000, -0.013	6.000, -0.019	6.000, -0.036	6.000, -0.025	6.000, -0.017	6.000, -0.010
32	6.200, -0.000	6.200, -0.002	6.200, -0.022	6.200, -0.023	6.200, -0.026	6.200, -0.020	6.200, -0.013	6.200, -0.019	6.200, -0.036	6.200, -0.024	6.200, -0.016	6.200, -0.010
33	6.400, 0.000	6.400, -0.002	6.400, -0.022	6.400, -0.022	6.400, -0.026	6.400, -0.019	6.400, -0.013	6.400, -0.019	6.400, -0.035	6.400, -0.024	6.400, -0.016	6.400, -0.009
34	6.600, 0.000	6.600, -0.002	6.600, -0.022	6.600, -0.022	6.600, -0.026	6.600, -0.019	6.600, -0.013	6.600, -0.019	6.600, -0.034	6.600, -0.024	6.600, -0.015	6.600, -0.009
35	6.800, 0.001	6.800, -0.002	6.800, -0.022	6.800, -0.022	6.800, -0.026	6.800, -0.018	6.800, -0.013	6.800, -0.019	6.800, -0.033	6.800, -0.024	6.800, -0.015	6.800, -0.009
36	7.000, 0.001	7.000, -0.001	7.000, -0.022	7.000, -0.022	7.000, -0.025	7.000, -0.018	7.000, -0.013	7.000, -0.019	7.000, -0.032	7.000, -0.023	7.000, -0.015	7.000, -0.009
37	7.200, 0.001	7.200, -0.001	7.200, -0.021	7.200, -0.021	7.200, -0.025	7.200, -0.018	7.200, -0.012	7.200, -0.019	7.200, -0.032	7.200, -0.023	7.200, -0.014	7.200, -0.009
38	7.400, 0.000	7.400, -0.001	7.400, -0.021	7.400, -0.021	7.400, -0.024	7.400, -0.018	7.400, -0.012	7.400, -0.019	7.400, -0.031	7.400, -0.023	7.400, -0.014	7.400, -0.009
39	7.600, 0.001	7.600, -0.001	7.600, -0.021	7.600, -0.020	7.600, -0.024	7.600, -0.017	7.600, -0.012	7.600, -0.019	7.600, -0.031	7.600, -0.022	7.600, -0.014	7.600, -0.008
40	7.800, 0.001	7.800, -0.002	7.800, -0.021	7.800, -0.020	7.800, -0.023	7.800, -0.017	7.800, -0.012	7.800, -0.018	7.800, -0.030	7.800, -0.022	7.800, -0.014	7.800, -0.008
41	8.000, 0.001	8.000, -0.002	8.000, -0.021	8.000, -0.020	8.000, -0.022	8.000, -0.017	8.000, -0.012	8.000, -0.018	8.000, -0.029	8.000, -0.022	8.000, -0.014	8.000, -0.008
42	8.200, 0.001	8.200, -0.002	8.200, -0.021	8.200, -0.020	8.200, -0.022	8.200, -0.016	8.200, -0.012	8.200, -0.018	8.200, -0.029	8.200, -0.021	8.200, -0.014	8.200, -0.008
43	8.400, 0.001	8.400, -0.002	8.400, -0.021	8.400, -0.019	8.400, -0.021	8.400, -0.016	8.400, -0.011	8.400, -0.018	8.400, -0.028	8.400, -0.021	8.400, -0.014	8.400, -0.007
44	8.600, 0.001	8.600, -0.002	8.600, -0.021	8.600, -0.019	8.600, -0.021	8.600, -0.016	8.600, -0.011	8.600, -0.018	8.600, -0.027	8.600, -0.020	8.600, -0.014	8.600, -0.007
45	8.800, 0.001	8.800, -0.002	8.800, -0.021	8.800, -0.018	8.800, -0.021	8.800, -0.015	8.800, -0.011	8.800, -0.017	8.800, -0.027	8.800, -0.020	8.800, -0.013	8.800, -0.007
46	9.000, 0.001	9.000, -0.002	9.000, -0.020	9.000, -0.018	9.000, -0.020	9.000, -0.015	9.000, -0.011	9.000, -0.017	9.000, -0.026	9.000, -0.019	9.000, -0.013	9.000, -0.007
47	9.200, 0.002	9.200, -0.002	9.200, -0.020	9.200, -0.018	9.200, -0.020	9.200, -0.015	9.200, -0.011	9.200, -0.016	9.200, -0.026	9.200, -0.019	9.200, -0.013	9.200, -0.007
48	9.400, 0.002	9.400, -0.002	9.400, -0.020	9.400, -0.017	9.400, -0.020	9.400, -0.015	9.400, -0.011	9.400, -0.016	9.400, -0.025	9.400, -0.018	9.400, -0.012	9.400, -0.007
49	9.600, 0.002	9.600, -0.002	9.600, -0.019	9.600, -0.017	9.600, -0.020	9.600, -0.015	9.600, -0.010	9.600, -0.015	9.600, -0.024	9.600, -0.018	9.600, -0.012	9.600, -0.006
50	9.800, 0.002	9.800, -0.003	9.800, -0.019	9.800, -0.017	9.800, -0.020	9.800, -0.014	9.800, -0.010	9.800, -0.015	9.800, -0.024	9.800, -0.018	9.800, -0.012	9.800, -0.006
51	10.000, 0.002	10.000, -0.003	10.000, -0.019	10.000, -0.016	10.000, -0.020	10.000, -0.014	10.000, -0.010	10.000, -0.015	10.000, -0.023	10.000, -0.017	10.000, -0.011	10.000, -0.006
52	10.200, 0.002	10.200, -0.003	10.200, -0.018	10.200, -0.016	10.200, -0.019	10.200, -0.014	10.200, -0.009	10.200, -0.014	10.200, -0.022	10.200, -0.017	10.200, -0.011	10.200, -0.006
53	10.400, 0.002	10.400, -0.003	10.400, -0.018	10.400, -0.016	10.400, -0.019	10.400, -0.013	10.400, -0.009	10.400, -0.014	10.400, -0.022	10.400, -0.017	10.400, -0.011	10.400, -0.006
54	10.600, 0.001	10.600, -0.003	10.600, -0.018	10.600, -0.015	10.600, -0.019	10.600, -0.013	10.600, -0.009	10.600, -0.013	10.600, -0.021	10.600, -0.017	10.600, -0.010	10.600, -0.006
55	10.800, 0.001	10.800, -0.003	10.800, -0.017	10.800, -0.015	10.800, -0.019	10.800, -0.012	10.800, -0.009	10.800, -0.013	10.800, -0.021	10.800, -0.017	10.800, -0.010	10.800, -0.006
56	11.000, 0.001	11.000, -0.002	11.000, -0.017	11.000, -0.015	11.000, -0.018	11.000, -0.012	11.000, -0.009	11.000, -0.012	11.000, -0.020	11.000, -0.017	11.000, -0.010	11.000, -0.006
57	11.200, 0.001	11.200, -0.002	11.200, -0.016	11.200, -0.014	11.200, -0.018	11.200, -0.011	11.200, -0.009	11.200, -0.012	11.200, -0.020	11.200, -0.017	11.200, -0.010	11.200, -0.006
58	11.400, 0.001	11.400, -0.002	11.400, -0.016	11.400, -0.014	11.400, -0.018	11.400, -0.011	11.400, -0.009	11.400, -0.012	11.400, -0.019	11.400, -0.017	11.400, -0.010	11.400, -0.006
59	11.600, 0.001	11.600, -0.002	11.600, -0.015	11.600, -0.014	11.600, -0.017	11.600, -0.011	11.600, -0.009	11.600, -0.012	11.600, -0.018	11.600, -0.017	11.600, -0.010	11.600, -0.006
60	11.800, 0.001	11.800, -0.002	11.800, -0.015	11.800, -0.014	11.800, -0.017	11.800, -0.010	11.800, -0.009	11.800, -0.012	11.800, -0.018	11.800, -0.017	11.800, -0.010	11.800, -0.006
61	12.000, 0.002	12.000, -0.002	12.000, -0.014	12.000, -0.014	12.000, -0.016	12.000, -0.010	12.000, -0.009	12.000, -0.012	12.000, -0.017	12.000, -0.016	12.000, -0.009	12.000, -0.005
62	12.200, 0.002	12.200, -0.002	12.200, -0.014	12.200, -0.014	12.200, -0.016	12.200, -0.009	12.200, -0.009	12.200, -0.012	12.200, -0.017	12.200, -0.016	12.200, -0.009	12.200, -0.005
63	12.400, 0.002	12.400, -0.002	12.400, -0.013	12.400, -0.014	12.400, -0.016	12.400, -0.009	12.400, -0.009	12.400, -0.012	12.400, -0.017	12.400, -0.015	12.400, -0.009	12.400, -0.005
64	12.600, 0.002	12.600, -0.003	12.600, -0.013	12.600, -0.013	12.600, -0.016	12.600, -0.009	12.600, -0.009	12.600, -0.011	12.600, -0.016	12.600, -0.015	12.600, -0.008	12.600, -0.005
65	12.800, 0.003	12.800, -0.003	12.800, -0.013	12.800, -0.013	12.800, -0.016	12.800, -0.009	12.800, -0.008	12.800, -0.011	12.800, -0.016	12.800, -0.015	12.800, -0.008	12.800, -0.005
66	13.000, 0.003	13.000, -0.003	13.000, -0.012	13.000, -0.013	13.000, -0.015	13.000, -0.009	13.000, -0.008	13.000, -0.011	13.000, -0.015	13.000, -0.014	13.000, -0.007	13.000, -0.005
67	13.200, 0.003	13.200, -0.003	13.200, -0.012	13.200, -0.013	13.200, -0.015	13.200, -0.009	13.200, -0.008	13.200, -0.010	13.200, -0.015	13.200, -0.014	13.200, -0.007	13.200, -0.004
68	13.400, 0.003	13.400, -0.003	13.400, -0.012	13.400, -0.013	13.400, -0.015	13.400, -0.009	13.400, -0.007	13.400, -0.010	13.400, -0.014	13.400, -0.014	13.400, -0.007	13.400, -0.004
69	13.600, 0.003	13.600, -0.003	13.600, -0.012	13.600, -0.012	13.600, -0.015	13.600, -0.009	13.600, -0.007	13.600, -0.010	13.600, -0.014	13.600, -0.013	13.600, -0.007	13.600, -0.004
70	13.800, 0.002	13.800, -0.003	13.800, -0.012	13.800, -0.012	13.800, -0.015	13.800, -0.009	13.800, -0.007	13.800, -0.009	13.800, -0.014	13.800, -0.013	13.800, -0.006	13.800, -0.003
71	14.000, 0.002	14.000, -0.003	14.000, -0.012	14.000, -0.012	14.000, -0.014	14.000, -0.009	14.000, -0.007	14.000, -0.009	14.000, -0.013	14.000, -0.013	14.000, -0.006	14.000, -0.003
72	14.200, 0.002	14.200, -0.003	14.200, -0.012	14.200, -0.012	14.200, -0.014	14.200, -0.008	14.200, -0.006	14.200, -0.009	14.200, -0.013	14.200, -0.012	14.200, -0.006	14.200, -0.003
73	14.400, 0.002	14.400, -0.003	14.400, -0.012	14.400, -0.012	14.400, -0.013	14.400, -0.008	14.400, -0.006	14.400, -0.008	14.400, -0.013	14.400, -0.012	14.400, -0.006	14.400, -0.003
74	14.600, 0.002	14.600, -0.003	14.600, -0.012	14.600, -0.011	14.600, -0.013	14.600, -0.008	14.600, -0.007	14.600, -0.008	14.600, -0.013	14.600, -0.012	14.600, -0.006	14.600, -0.003
75	14.800, 0.002	14.800, -0.003	14.800, -0.012	14.800, -0.011	14.800, -0.012	14.800, -0.008	14.800, -0.007	14.800, -0.008	14.800, -0.013	14.800, -0.012	14.800, -0.006	14.800, -0.003
76	15.000, 0.002	15.000, -0.002	15.000, -0.012	15.000, -0.011	15.000, -0.012	15.000, -0.008	15.000, -0.007	15.000, -0.007	15.000, -0.013	15.000, -0.012	15.000, -0.006	15.000, -0.003
77	15.200, 0.002	15.200, -0.002	15.200, -0.012	15.200, -0.011	15.200, -0.011	15.200, -0.008	15.200, -0.007	15.200, -0.007	15.200, -0.013	15.200, -0.012	15.200, -0.006	15.200, -0.004
78	15.400, 0.002	15.400, -0.002	15.400, -0.012	15.400, -0.010	15.400, -0.011	15.400, -0.007	15.400, -0.007	15.400, -0.008	15.400, -0.013	15.400, -0.011	15.400, -0.006	15.400, -0.004
79	15.600, 0.002	15.600, -0.002	15.600, -0.012	15.600, -0.010	15.600, -0.011	15.600, -0.007	15.600, -0.007	15.600, -0.008	15.600, -0.013	15.600, -0.011	15.600, -0.006	15.600, -0.004
80	15.800, 0.002	15.800, -0.002	15.800, -0.012	15.800, -0.010	15.800, -0.010	15.800, -0.007	15.800, -0.007	15.800, -0.008	15.800, -0.012	15.800, -0.011	15.800, -0.006	15.800, -0.004
81	16.000, 0.003	16.000, -0.002	16.000, -0.011	16.000, -0.010	16.000, -0.010	16.000, -0.007	16.000, -0.006	16.000, -0.008	16.000, -0.012	16.000, -0.011	16.000, -0.006	16.000, -0.004
82	16.200, 0.003	16.200, -0.001	16.200, -0.011	16.200, -0.010	16.200, -0.010	16.200, -0.007	16.200, -0.006	16.200, -0.008	16.200, -0.012	16.200, -0.011	16.200, -0.006	16.200, -0.004
83	16.400, 0.003	16.400, -0.002	16.400, -0.010	16.400, -0.009	16.400, -0.010	16.400, -0.007	16.400, -0.006	16.400, -0.007	16.400, -0.011	16.400, -0.011	16.400, -0.006	16.400, -0.004
84	16.600, 0.003	16.600, -0.001	16.600, -0.010	16.600, -0.009	16.600, -0.010	16.600, -0.007	16.600, -0.006	16.600, -0.007	16.600, -0.011	16.600, -0.011	16.600, -0.006	16.600, -0.004
85	16.800, 0.003	16.800, -0.002	16.800, -0.010	16.800, -0.009	16.800, -0.010	16.800, -0.007	16.800, -0.006	16.800, -0.007	16.800, -0.010	16.800, -0.011	16.800, -0.006	16.800, -0.004
86	17.000, 0.003	17.000, -0.002	17.000, -0.009	17.000, -0.009	17.000, -0.010	17.000, -0.006	17.000, -0.006	17.000, -0.007	17.000, -0.010	17.000, -0.011	17.000, -0.006	17.000, -0.004
87	17.200, 0.002	17.200, -0.002	17.200, -0.009	17.200, -0.008	17.200, -0.009	17.200, -0.006	17.200, -0.006	17.200, -0.007	17.200, -0.009	17.200, -0.011	17.200, -0.006	17.200, -0.004
88	17.400, 0.002	17.400, -0.002	17.400, -0.009	17.400, -0.008	17.400, -0.009	17.400, -0.005	17.400, -0.006	17.400, -0.007	17.400, -0.009	17.400, -0.011	17.400, -0.006	17.400, -0.004
89	17.600, 0.002	17.600, -0.002	17.600, -0.009	17.600, -0.008	17.600, -0.009	17.600, -0.005	17.600, -0.006	17.600, -0.007	17.600, -0.009	17.600, -0.010	17.600, -0.005	17.600, -0.004
90	17.800, 0.002	17.800, -0.002	17.800, -0.009	17.800, -0.007	17.800, -0.009	17.800, -0.005	17.800, -0.005	17.800, -0.007	17.800, -0.008	17.800, -0.010	17.800, -0.006	17.800, -0.004
91	18.000, 0.002	18.000, -0.002	18.000, -0.009	18.000, -0.007	18.000, -0.009	18.000, -0.005	18.000, -0.005	18.000, -0.007	18.000, -0.008	18.000, -0.009	18.000, -0.006	18.000, -0.004
92	18.200, 0.002	18.200, -0.001	18.200, -0.009	18.200, -0.007	18.200, -0.009	18.200, -0.005	18.200, -0.005	18.200, -0.007	18.200, -0.008	18.200, -0.009	18.200, -0.006	18.200, -0.004
93	18.400, 0.002	18.400, -0.001	18.400, -0.009	18.400, -0.007	18.400, -0.009	18.400, -0.005	18.400, -0.005	18.400, -0.007	18.400, -0.008	18.400, -0.008	18.400, -0.006	18.400, -0.004
94	18.600, 0.002	18.600, -0.001	18.600, -0.009	18.600, -0.007	18.600, -0.009	18.600, -0.005	18.600, -0.005	18.600, -0.007	18.600, -0.008	18.600, -0.008	18.600, -0.006	18.600, -0.004
95	18.800, 0.002	18.800, -0.001	18.800, -0.009	18.800, -0.007	18.800, -0.009	18.800, -0.005	18.800, -0.004	18.800, -0.007	18.800, -0.007	18.800, -0.007	18.800, -0.006	18.800, -0.004
96	19.000, 0.002	19.000, -0.001	19.000, -0.009	19.000, -0.007	19.000, -0.009	19.000, -0.005	19.000, -0.004	19.000, -0.006	19.000, -0.007	19.000, -0.007	19.000, -0.005	19.000, -0.004
97	19.200, 0.002	19.200, -0.001	19.200, -0.009	19.200, -0.007	19.200, -0.008	19.200, -0.005	19.200, -0.004	19.200, -0.006	19.200, -0.007	19.200, -0.006	19.200, -0.005	19.200, -0.003
98	19.400, 0.002	19.400, -0.001	19.400, -0.009	19.400, -0.007	19.400, -0.008	19.400, -0.005	19.400, -0.003	19.400, -0.006	19.400, -0.008	19.400, -0.006	19.400, -0.005	19.400, -0.003
99	19.600, 0.002	19.600, -0.001	19.600, -0.009	19.600, -0.007	19.600, -0.008	19.600, -0.005	19.600, -0.003	19.600, -0.006	19.600, -0.007	19.600, -0.006	19.600, -0.004	19.600, -0.003
100	19.800, 0.002	19.800, -0.001	19.800, -0.009	19.800, -0.007	19.800, -0.008	19.800, -0.005	19.800, -0.003	19.800, -0.006	19.800, -0.007	19.800, -0.006	19.800, -0.004	19.800, -0.002
101	20.000, 0.001	20.000, -0.001	20.000, -0.009	20.000, -0.007	20.000, -0.007	20.000, -0.005	20.000, -0.003	20.000, -0.005	20.000, -0.007	20.000, -0.005	20.000, -0.004	20.000, -0.002
102	20.200, 0.001	20.200, -0.001	20.200, -0.008	20.200, -0.007	20.200, -0.007	20.200, -0.005	20.200, -0.003	20.200, -0.005	20.200, -0.007	20.200, -0.005	20.200, -0.004	20.200, -0.002
103	20.400, 0.001	20.400, -0.001	20.400, -0.008	20.400, -0.007	20.400, -0.006	20.400, -0.005	20.400, -0.003	20.400, -0.005	20.400, -0.007	20.400, -0.005	20.400, -0.004	20.400, -0.002
104	20.600, 0.001	20.600, -0.001	20.600, -0.008	20.600, -0.007	20.600, -0.006	20.600, -0.004	20.600, -0.003	20.600, -0.005	20.600, -0.007	20.600, -0.005	20.600, -0.003	20.600, -0.002
105	20.800, 0.001	20.800, -0.001	20.800, -0.007	20.800, -0.007	20.800, -0.005	20.800, -0.004	20.800, -0.003	20.800, -0.005	20.800, -0.006	20.800, -0.005	20.800, -0.003	20.800, -0.002
106	21.000, 0.001	21.000, -0.002	21.000, -0.007	21.000, -0.007	21.000, -0.005	21.000, -0.004	21.000, -0.003	21.000, -0.005	21.000, -0.006	21.000, -0.004	21.000, -0.003	21.000, -0.002
107	21.200, 0.001	21.200, -0.002	21.200, -0.007	21.200, -0.007	21.200, -0.004	21.200, -0.004	21.200, -0.004	21.200, -0.004	21.200, -0.006	21.200, -0.004	21.200, -0.003	21.200, -0.002
108	21.400, 0.001	21.400, -0.002	21.400, -0.007	21.400, -0.007	21.400, -0.004	21.400, -0.004	21.400, -0.004	21.400, -0.004	21.400, -0.006	21.400, -0.004	21.400, -0.002	21.400, -0.002
109	21.600, 0.001	21.600, -0.002	21.600, -0.006	21.600, -0.007	21.600, -0.004	21.600, -0.004	21.600, -0.004	21.600, -0.004	21.600, -0.005	21.600, -0.004	21.600, -0.002	21.600, -0.002
110	21.800, 0.002	21.800, -0.002	21.800, -0.006	21.800, -0.006	21.800, -0.004	21.800, -0.004	21.800, -0.004	21.800, -0.004	21.800, -0.005	21.800, -0.004	21.800, -0.002	21.800, -0.002
111	22.000, 0.002	22.000, -0.002	22.000, -0.006	22.000, -0.006	22.000, -0.004	22.000, -0.004	22.000, -0.004	22.000, -0.004	22.000, -0.005	22.000, -0.004	22.000, -0.001	22.000, -0.002
112	22.200, 0.002	22.200, -0.002	22.200, -0.005	22.200, -0.006	22.200, -0.003	22.200, -0.004	22.200, -0.004	22.200, -0.004	22.200, -0.004	22.200, -0.004	22.200, -0.001	22.200, -0.002
113	22.400, 0.002	22.400, -0.002	22.400, -0.005	22.400, -0.005	22.400, -0.003	22.400, -0.004	22.400, -0.004	22.400, -0.004	22.400, -0.004	22.400, -0.004	22.400, -0.000	22.400, -0.002
114	22.600, 0.002	22.600, -0.002	22.600, -0.004	22.600, -0.005	22.600, -0.003	22.600, -0.003	22.600, -0.003	22.600, -0.004	22.600, -0.004	22.600, -0.004	22.600, -0.000	22.600, -0.002
115	22.800, 0.002	22.800, -0.002	22.800, -0.004	22.800, -0.004	22.800, -0.003	22.800, -0.003	22.800, -0.003	22.800, -0.004	22.800, -0.003	22.800, -0.004	22.800, -0.000	22.800, -0.002
116	23.000, 0.002	23.000, -0.002	23.000, -0.004	23.000, -0.004	23.000, -0.003	23.000, -0.003	23.000, -0.003	23.000, -0.004	23.000, -0.003	23.000, -0.004	23.000, -0.000	23.000, -0.002
117	23.200, 0.001	23.200, -0.002	23.200, -0.004	23.200, -0.003	23.200, -0.003	23.200, -0.003	23.200, -0.003	23.200, -0.004	23.200, -0.003	23.200, -0.004	23.200, -0.000	23.200, -0.002
118	23.400, 0.001	23.400, -0.002	23.400, -0.004	23.400, -0.003	23.400, -0.003	23.400, -0.003	23.400, -0.003	23.400, -0.004	23.400, -0.003	23.400, -0.004	23.400, -0.001	23.400, -0.001
119	23.600, 0.001	23.600, -0.002	23.600, -0.004	23.600, -0.003	23.600, -0.004	23.600, -0.003	23.600, -0.002	23.600, -0.004	23.600, -0.003	23.600, -0.004	23.600, -0.001	23.600, -0.001
120	23.800, 0.000	23.800, -0.002	23.800, -0.003	23.800, -0.003	23.800, -0.003	23.800, -0.002	23.800, -0.002	23.800, -0.003	23.800, -0.002	23.800, -0.003	23.800, -0.001	23.800, -0.001
121	24.000, 0.000	24.000, -0.002	24.000, -0.003	24.000, -0.002	24.000, -0.003	24.000, -0.002	24.000, -0.002	24.000, -0.003	24.000, -0.002	24.000, -0.003	24.000, -0.001	24.000, -0.001
122	24.200, -0.000	24.200, -0.002	24.200, -0.003	24.200, -0.002	24.200, -0.003	24.200, -0.002	24.200, -0.002	24.200, -0.003	24.200, -0.002	24.200, -0.003	24.200, -0.001	24.200, -0.001
123	24.400, -0.000	24.400, -0.002	24.400, -0.003	24.400, -0.002	24.400, -0.003	24.400, -0.002	24.400, -0.002	24.400, -0.003	24.400, -0.002	24.400, -0.002	24.400, -0.001	24.400, -0.001
124	24.600, -0.001	24.600, -0.002	24.600, -0.003	24.600, -0.002	24.600, -0.003	24.600, -0.002	24.600, -0.002	24.600, -0.003	24.600, -0.002	24.600, -0.002	24.600, -0.001	24.600, -0.001
125	24.800, -0.001	24.800, -0.002	24.800, -0.003	24.800, -0.002	24.800, -0.003	24.800, -0.002	24.800, -0.001	24.800, -0.003	24.800, -0.002	24.800, -0.002	24.800, -0.001	24.800, -0.001
126	25.000, -0.001	25.000, -0.002	25.000, -0.003	25.000, -0.002	25.000, -0.003	25.000, -0.001	25.000, -0.001	25.000, -0.003	25.000, -0.003	25.000, -0.001	25.000, -0.000	25.000, -0.001
127	25.200, -0.001	25.200, -0.003	25.200, -0.003	25.200, -0.002	25.200, -0.002	25.200, -0.001	25.200, -0.001	25.200, -0.003	25.200, -0.003	25.200, -0.001	25.200, 0.000	25.200, -0.001
128	25.400, -0.000	25.400, -0.003	25.400, -0.003	25.400, -0.002	25.400, -0.002	25.400, -0.001	25.400, -0.001	25.400, -0.003	25.400, -0.003	25.400, -0.001	25.400, 0.000	25.400, -0.001
129	25.600, -0.000	25.600, -0.002	25.600, -0.003	25.600, -0.002	25.600, -0.002	25.600, -0.001	25.600, -0.001	25.600, -0.002	25.600, -0.003	25.600, -0.001	25.600, 0.000	25.600, -0.002
130	25.800, -0.000	25.800, -0.002	25.800, -0.002	25.800, -0.002	25.800, -0.002	25.800, -0.002	25.800, -0.001	25.800, -0.002	25.800, -0.003	25.800, -0.001	25.800, 0.001	25.800, -0.002
131	26.000, 0.000	26.000, -0.002	26.000, -0.003	26.000, -0.002	26.000, -0.001	26.000, -0.002	26.000, -0.000	26.000, -0.002	26.000, -0.003	26.000, -0.001	26.000, 0.001	26.000, -0.002
132	26.200, 0.000	26.200, -0.002	26.200, -0.002	26.200, -0.002	26.200, -0.001	26.200, -0.002	26.200, -0.000	26.200, -0.002	26.200, -0.003	26.200, -0.001	26.200, 0.001	26.200, -0.002
133	26.400, 0.000	26.400, -0.001	26.400, -0.002	26.400, -0.001	26.400, -0.001	26.400, -0.002	26.400, -0.000	26.400, -0.002	26.400, -0.002	26.400, -0.001	26.400, 0.001	26.400, -0.002
134	26.600, 0.000	26.600, -0.001	26.600, -0.002	26.600, -0.001	26.600, -0.000	26.600, -0.002	26.600, -0.000	26.600, -0.002	26.600, -0.002	26.600, -0.001	26.600, 0.001	26.600, -0.002
135	26.800, 0.000	26.800, -0.001	26.800, -0.002	26.800, -0.001	26.800, -0.000	26.800, -0.002	26.800, -0.000	26.800, -0.001	26.800, -0.001	26.800, -0.001	26.800, 0.000	26.800, -0.002
136	27.000, 0.000	27.000, -0.001	27.000, -0.002	27.000, -0.001	27.000, -0.000	27.000, -0.002	27.000, -0.000	27.000, -0.001	27.000, -0.001	27.000, -0.001	27.000, -0.000	27.000, -0.001
137	27.200, 0.000	27.200, -0.001	27.200, -0.001	27.200, -0.001	27.200, 0.000	27.200, -0.002	27.200, 0.000	27.200, -0.001	27.200, -0.001	27.200, -0.001	27.200, -0.000	27.200, -0.001
138	27.400, 0.000	27.400, -0.001	27.400, -0.001	27.400, -0.001	27.400, 0.000	27.400, -0.002	27.400, 0.000	27.400, -0.001	27.400, -0.000	27.400, -0.001	27.400, -0.001	27.400, -0.000
139	27.600, 0.000	27.600, -0.000	27.600, -0.001	27.600, -0.000	27.600, 0.000	27.600, -0.001	27.600, 0.000	27.600, -0.001	27.600, 0.000	27.600, -0.001	27.600, -0.001	27.600, -0.000
140	27.800, 0.000	27.800, -0.000	27.800, -0.001	27.800, -0.000	27.800, 0.001	27.800, -0.001	27.800, 0.000	27.800, -0.000	27.800, 0.000	27.800, -0.000	27.800, -0.001	27.800, 0.000
141	28.000, 0.000	28.000, -0.000	28.000, -0.000	28.000, -0.000	28.000, 0.001	28.000, -0.001	28.000, 0.000	28.000, -0.000	28.000, 0.001	28.000, -0.000	28.000, -0.001	28.000, 0.001
142	28.200, -0.000	28.200, 0.000	28.200, -0.000	28.200, -0.000	28.200, 0.001	28.200, -0.000	28.200, 0.000	28.200, -0.000	28.200, 0.001	28.200, -0.000	28.200, -0.001	28.200, 0.001
143	28.400, -0.000	28.400, 0.000	28.400, 0.000	28.400, -0.000	28.400, 0.001	28.400, -0.000	28.400, 0.000	28.400, -0.000	28.400, 0.001	28.400, -0.000	28.400, -0.000	28.400, 0.001
144	28.600, -0.000	28.600, 0.000	28.600, 0.000	28.600, 0.000	28.600, 0.000	28.600, 0.000	28.600, -0.000	28.600, 0.000	28.600, 0.001	28.600, 0.000	28.600, -0.000	28.600, 0.001
145	28.800, -0.000	28.800, 0.000	28.800, 0.001	28.800, 0.000	28.800, 0.000	28.800, 0.001	28.800, -0.000	28.800, 0.000	28.800, 0.000	28.800, 0.000	28.800, 0.000	28.800, 0.001
146	29.000, -0.000	29.000, 0.000	29.000, 0.001	29.000, 0.000	29.000, -0.000	29.000, 0.001	29.000, -0.000	29.000, 0.000	29.000, 0.000	29.000, 0.000	29.000, 0.000	29.000, 0.000
147	29.200, -0.000	29.200, 0.000	29.200, 0.001	29.200, 0.000	29.200, -0.000	29.200, 0.001	29.200, -0.000	29.200, 0.001	29.200, -0.000	29.200, 0.001	29.200, 0.001	29.200, 0.000
148	29.400, -0.000	29.400, 0.000	29.400, 0.001	29.400, 0.001	29.400, -0.001	29.400, 0.002	29.400, -0.000	29.400, 0.001	29.400, -0.000	29.400, 0.001	29.400, 0.001	29.400, -0.000
149	29.600, -0.000	29.600, 0.000	29.600, 0.001	29.600, 0.001	29.600, -0.001	29.600, 0.002	29.600, -0.000	29.600, 0.001	29.600, -0.001	29.600, 0.001	29.600, 0.001	29.600, -0.000
150	29.800, -0.000	29.800, 0.000	29.800, 0.001	29.800, 0.001	29.800, -0.001	29.800, 0.002	29.800, -0.000	29.800, 0.001	29.800, -0.001	29.800, 0.001	29.800, 0.001	29.800, -0.001
151	30.000, 0.000	30.000, 0.000	30.000, 0.000	30.000, 0.000	30.000, 0.000	30.000, 0.000	30.000, 0.000	30.000, 0.000	30.000, 0.000	30.000, 0.000	30.000, 0.000	30.000, 0.000
152	30.200, 0.007	30.200, 0.010	30.200, 0.007	30.200, 0.011	30.200, 0.007	30.200, 0.007	30.200, 0.006	30.200, 0.006	30.200, 0.010	30.200, 0.011	30.200, 0.011	30.200, 0.011
153	30.400, 0.015	30.400, 0.021	30.400, 0.015	30.400, 0.025	30.400, 0.015	30.400, 0.015	30.400, 0.013	30.400, 0.014	30.400, 0.023	30.400, 0.024	30.400, 0.025	30.400, 0.024
154	30.600, 0.025	30.600, 0.035	30.600, 0.024	30.600, 0.041	30.600, 0.025	30.600, 0.024	30.600, 0.022	30.600, 0.022	30.600, 0.037	30.600, 0.039	30.600, 0.040	30.600, 0.039
155	30.800, 0.037	30.800, 0.051	30.800, 0.034	30.800, 0.059	30.800, 0.036	30.800, 0.035	30.800, 0.032	30.800, 0.032	30.800, 0.054	30.800, 0.057	30.800, 0.059	30.800, 0.055
156	31.000, 0.050	31.000, 0.069	31.000, 0.046	31.000, 0.079	31.000, 0.049	31.000, 0.047	31.000, 0.043	31.000, 0.044	31.000, 0.072	31.000, 0.076	31.000, 0.079	31.000, 0.074
157	31.200, 0.064	31.200, 0.088	31.200, 0.059	31.200, 0.101	31.200, 0.062	31.200, 0.059	31.200, 0.055	31.200, 0.056	31.200, 0.093	31.200, 0.096	31.200, 0.101	31.200, 0.094
158	31.400, 0.079	31.400, 0.108	31.400, 0.073	31.400, 0.123	31.400, 0.076	31.400, 0.072	31.400, 0.068	31.400, 0.069	31.400, 0.114	31.400, 0.118	31.400, 0.124	31.400, 0.116
159	31.600, 0.094	31.600, 0.129	31.600, 0.088	31.600, 0.147	31.600, 0.090	31.600, 0.086	31.600, 0.081	31.600, 0.083	31.600, 0.136	31.600, 0.141	31.600, 0.148	31.600, 0.138
160	31.800, 0.110	31.800, 0.150	31.800, 0.102	31.800, 0.171	31.800, 0.105	31.800, 0.100	31.800, 0.095	31.800, 0.096	31.800, 0.159	31.800, 0.164	31.800, 0.172	31.800, 0.160
161	32.000, 0.126	32.000, 0.171	32.000, 0.117	32.000, 0.195	32.000, 0.119	32.000, 0.113	32.000, 0.109	32.000, 0.110	32.000, 0.181	32.000, 0.186	32.000, 0.196	32.000, 0.182
162	32.200, 0.141	32.200, 0.191	32.200, 0.131	32.200, 0.218	32.200, 0.133	32.200, 0.126	32.200, 0.122	32.200, 0.124	32.200, 0.203	32.200, 0.208	32.200, 0.219	32.200, 0.203
163	32.400, 0.156	32.400, 0.211	32.400, 0.144	32.400, 0.240	32.400, 0.146	32.400, 0.139	32.400, 0.134	32.400, 0.136	32.400, 0.224	32.400, 0.229	32.400, 0.241	32.400, 0.223
164	32.600, 0.171	32.600, 0.230	32.600, 0.157	32.600, 0.262	32.600, 0.158	32.600, 0.151	32.600, 0.147	32.600, 0.149	32.600, 0.245	32.600, 0.250	32.600, 0.263	32.600, 0.243
165	32.800, 0.185	32.800, 0.249	32.800, 0.170	32.800, 0.283	32.800, 0.171	32.800, 0.163	32.800, 0.159	32.800, 0.162	32.800, 0.265	32.800, 0.270	32.800, 0.285	32.800, 0.263
166	33.000, 0.200	33.000, 0.268	33.000, 0.183	33.000, 0.305	33.000, 0.184	33.000, 0.176	33.000, 0.171	33.000, 0.174	33.000, 0.286	33.000, 0.290	33.000, 0.306	33.000, 0.283
167	33.200, 0.214	33.200, 0.286	33.200, 0.196	33.200, 0.325	33.200, 0.197	33.200, 0.188	33.200, 0.183	33.200, 0.187	33.200, 0.305	33.200, 0.309	33.200, 0.327	33.200, 0.302
168	33.400, 0.229	33.400, 0.304	33.400, 0.209	33.400, 0.345	33.400, 0.209	33.400, 0.200	33.400, 0.195	33.400, 0.199	33.400, 0.325	33.400, 0.329	33.400, 0.347	33.400, 0.321
169	33.600, 0.243	33.600, 0.322	33.600, 0.222	33.600, 0.366	33.600, 0.222	33.600, 0.212	33.600, 0.207	33.600, 0.212	33.600, 0.344	33.600, 0.348	33.600, 0.367	33.600, 0.340
170	33.800, 0.257	33.800, 0.340	33.800, 0.235	33.800, 0.385	33.800, 0.234	33.800, 0.225	33.800, 0.219	33.800, 0.224	33.800, 0.363	33.800, 0.366	33.800, 0.386	33.800, 0.358
171	34.000, 0.271	34.000, 0.358	34.000, 0.247	34.000, 0.404	34.000, 0.247	34.000, 0.237	34.000, 0.231	34.000, 0.236	34.000, 0.381	34.000, 0.384	34.000, 0.405	34.000, 0.376
172	34.200, 0.285	34.200, 0.375	34.200, 0.260	34.200, 0.423	34.200, 0.259	34.200, 0.249	34.200, 0.243	34.200, 0.248	34.200, 0.398	34.200, 0.401	34.200, 0.423	34.200, 0.393
173	34.400, 0.299	34.400, 0.392	34.400, 0.272	34.400, 0.442	34.400, 0.272	34.400, 0.261	34.400, 0.255	34.400, 0.260	34.400, 0.416	34.400, 0.418	34.400, 0.441	34.400, 0.409
174	34.600, 0.313	34.600, 0.409	34.600, 0.285	34.600, 0.460	34.600, 0.284	34.600, 0.274	34.600, 0.267	34.600, 0.272	34.600, 0.432	34.600, 0.435	34.600, 0.458	34.600, 0.426
175	34.800, 0.327	34.800, 0.426	34.800, 0.297	34.800, 0.477	34.800, 0.297	34.800, 0.285	34.800, 0.279	34.800, 0.284	34.800, 0.448	34.800, 0.451	34.800, 0.474	34.800, 0.441
176	35.000, 0.341	35.000, 0.442	35.000, 0.309	35.000, 0.494	35.000, 0.309	35.000, 0.297	35.000, 0.290	35.000, 0.295	35.000, 0.464	35.000, 0.466	35.000, 0.490	35.000, 0.456
177	35.200, 0.354	35.200, 0.458	35.200, 0.321	35.200, 0.511	35.200, 0.321	35.200, 0.309	35.200, 0.303	35.200, 0.307	35.200, 0.479	35.200, 0.481	35.200, 0.505	35.200, 0.471
178	35.400, 0.368	35.400, 0.474	35.400, 0.334	35.400, 0.527	35.400, 0.334	35.400, 0.321	35.400, 0.314	35.400, 0.318	35.400, 0.494	35.400, 0.496	35.400, 0.520	35.400, 0.485
179	35.600, 0.381	35.600, 0.490	35.600, 0.346	35.600, 0.543	35.600, 0.346	35.600, 0.333	35.600, 0.326	35.600, 0.330	35.600, 0.508	35.600, 0.510	35.600, 0.535	35.600, 0.499
180	35.800, 0.395	35.800, 0.505	35.800, 0.358	35.800, 0.559	35.800, 0.358	35.800, 0.345	35.800, 0.338	35.800, 0.341	35.800, 0.522	35.800, 0.524	35.800, 0.549	35.800, 0.512
181	36.000, 0.408	36.000, 0.520	36.000, 0.371	36.000, 0.574	36.000, 0.370	36.000, 0.357	36.000, 0.350	36.000, 0.352	36.000, 0.535	36.000, 0.537	36.000, 0.563	36.000, 0.525
182	36.200, 0.421	36.200, 0.534	36.200, 0.383	36.200, 0.589	36.200, 0.383	36.200, 0.369	36.200, 0.362	36.200, 0.364	36.200, 0.548	36.200, 0.550	36.200, 0.577	36.200, 0.538
183	36.400, 0.435	36.400, 0.548	36.400, 0.395	36.400, 0.603	36.400, 0.395	36.400, 0.381	36.400, 0.373	36.400, 0.375	36.400, 0.561	36.400, 0.563	36.400, 0.590	36.400, 0.550
184	36.600, 0.448	36.600, 0.562	36.600, 0.408	36.600, 0.616	36.600, 0.407	36.600, 0.393	36.600, 0.385	36.600, 0.387	36.600, 0.573	36.600, 0.575	36.600, 0.604	36.600, 0.562
185	36.800, 0.462	36.800, 0.576	36.800, 0.420	36.800, 0.629	36.800, 0.420	36.800, 0.405	36.800, 0.397	36.800, 0.398	36.800, 0.586	36.800, 0.587	36.800, 0.617	36.800, 0.574
186	37.000, 0.475	37.000, 0.589	37.000, 0.433	37.000, 0.642	37.000, 0.432	37.000, 0.417	37.000, 0.408	37.000, 0.409	37.000, 0.597	37.000, 0.598	37.000, 0.629	37.000, 0.586
187	37.200, 0.488	37.200, 0.602	37.200, 0.445	37.200, 0.654	37.200, 0.444	37.200, 0.429	37.200, 0.420	37.200, 0.421	37.200, 0.609	37.200, 0.609	37.200, 0.642	37.200, 0.597
188	37.400, 0.502	37.400, 0.615	37.400, 0.458	37.400, 0.667	37.400, 0.456	37.400, 0.441	37.400, 0.432	37.400, 0.433	37.400, 0.620	37.400, 0.620	37.400, 0.654	37.400, 0.608
189	37.600, 0.515	37.600, 0.627	37.600, 0.470	37.600, 0.679	37.600, 0.468	37.600, 0.453	37.600, 0.443	37.600, 0.445	37.600, 0.631	37.600, 0.631	37.600, 0.666	37.600, 0.619
190	37.800, 0.528	37.800, 0.640	37.800, 0.482	37.800, 0.691	37.800, 0.480	37.800, 0.465	37.800, 0.455	37.800, 0.457	37.800, 0.642	37.800, 0.642	37.800, 0.677	37.800, 0.630
191	38.000, 0.541	38.000, 0.651	38.000, 0.494	38.000, 0.703	38.000, 0.492	38.000, 0.476	38.000, 0.466	38.000, 0.468	38.000, 0.653	38.000, 0.653	38.000, 0.689	38.000, 0.641
192	38.200, 0.554	38.200, 0.663	38.200, 0.506	38.200, 0.715	38.200, 0.504	38.200, 0.488	38.200, 0.477	38.200, 0.480	38.200, 0.664	38.200, 0.664	38.200, 0.700	38.200, 0.652
193	38.400, 0.567	38.400, 0.675	38.400, 0.518	38.400, 0.727	38.400, 0.516	38.400, 0.499	38.400, 0.488	38.400, 0.492	38.400, 0.674	38.400, 0.674	38.400, 0.711	38.400, 0.662
194	38.600, 0.580	38.600, 0.687	38.600, 0.529	38.600, 0.739	38.600, 0.528	38.600, 0.510	38.600, 0.499	38.600, 0.503	38.600, 0.684	38.600, 0.685	38.600, 0.722	38.600, 0.672
195	38.800, 0.593	38.800, 0.698	38.800, 0.541	38.800, 0.750	38.800, 0.540	38.800, 0.521	38.800, 0.510	38.800, 0.515	38.800, 0.694	38.800, 0.695	38.800, 0.732	38.800, 0.682
196	39.000, 0.606	39.000, 0.709	39.000, 0.552	39.000, 0.762	39.000, 0.552	39.000, 0.533	39.000, 0.521	39.000, 0.527	39.000, 0.704	39.000, 0.705	39.000, 0.743	39.000, 0.692
197	39.200, 0.619	39.200, 0.721	39.200, 0.564	39.200, 0.773	39.200, 0.563	39.200, 0.544	39.200, 0.532	39.200, 0.538	39.200, 0.714	39.200, 0.715	39.200, 0.754	39.200, 0.702
198	39.400, 0.631	39.400, 0.731	39.400, 0.576	39.400, 0.785	39.400, 0.575	39.400, 0.555	39.400, 0.543	39.400, 0.550	39.400, 0.724	39.400, 0.725	39.400, 0.764	39.400, 0.712
199	39.600, 0.644	39.600, 0.742	39.600, 0.587	39.600, 0.796	39.600, 0.587	39.600, 0.566	39.600, 0.554	39.600, 0.561	39.600, 0.734	39.600, 0.735	39.600, 0.774	39.600, 0.721
200	39.800, 0.657	39.800, 0.753	39.800, 0.599	39.800, 0.807	39.800, 0.599	39.800, 0.577	39.800, 0.565	39.800, 0.572	39.800, 0.743	39.800, 0.744	39.800, 0.785	39.800, 0.731
201	40.000, 0.669	40.000, 0.764	40.000, 0.610	40.000, 0.818	40.000, 0.611	40.000, 0.588	40.000, 0.576	40.000, 0.584	40.000, 0.753	40.000, 0.754	40.000, 0.795	40.000, 0.740
202	40.200, 0.682	40.200, 0.774	40.200, 0.622	40.200, 0.828	40.200, 0.622	40.200, 0.599	40.200, 0.586	40.200, 0.595	40.200, 0.762	40.200, 0.763	40.200, 0.805	40.200, 0.749
203	40.400, 0.694	40.400, 0.785	40.400, 0.633	40.400, 0.839	40.400, 0.634	40.400, 0.610	40.400, 0.597	40.400, 0.607	40.400, 0.771	40.400, 0.772	40.400, 0.815	40.400, 0.759
204	40.600, 0.706	40.600, 0.795	40.600, 0.645	40.600, 0.849	40.600, 0.646	40.600, 0.621	40.600, 0.608	40.600, 0.618	40.600, 0.780	40.600, 0.781	40.600, 0.825	40.600, 0.768
205	40.800, 0.718	40.800, 0.806	40.800, 0.656	40.800, 0.859	40.800, 0.658	40.800, 0.632	40.800, 0.619	40.800, 0.629	40.800, 0.789	40.800, 0.790	40.800, 0.835	40.800, 0.777
206	41.000, 0.731	41.000, 0.816	41.000, 0.668	41.000, 0.868	41.000, 0.670	41.000, 0.643	41.000, 0.630	41.000, 0.641	41.000, 0.798	41.000, 0.799	41.000, 0.844	41.000, 0.785
207	41.200, 0.743	41.200, 0.826	41.200, 0.679	41.200, 0.878	41.200, 0.681	41.200, 0.654	41.200, 0.641	41.200, 0.652	41.200, 0.807	41.200, 0.808	41.200, 0.854	41.200, 0.794
208	41.400, 0.755	41.400, 0.836	41.400, 0.691	41.400, 0.888	41.400, 0.692	41.400, 0.665	41.400, 0.652	41.400, 0.663	41.400, 0.816	41.400, 0.816	41.400, 0.863	41.400, 0.803
209	41.600, 0.767	41.600, 0.845	41.600, 0.702	41.600, 0.898	41.600, 0.703	41.600, 0.676	41.600, 0.663	41.600, 0.675	41.600, 0.825	41.600, 0.825	41.600, 0.873	41.600, 0.811
210	41.800, 0.779	41.800, 0.854	41.800, 0.713	41.800, 0.908	41.800, 0.714	41.800, 0.686	41.800, 0.673	41.800, 0.686	41.800, 0.834	41.800, 0.834	41.800, 0.882	41.800, 0.820
211	42.000, 0.791	42.000, 0.864	42.000, 0.725	42.000, 0.917	42.000, 0.725	42.000, 0.697	42.000, 0.684	42.000, 0.696	42.000, 0.843	42.000, 0.843	42.000, 0.892	42.000, 0.828
212	42.200, 0.803	42.200, 0.873	42.200, 0.736	42.200, 0.927	42.200, 0.737	42.200, 0.708	42.200, 0.694	42.200, 0.707	42.200, 0.852	42.200, 0.853	42.200, 0.901	42.200, 0.837
213	42.400, 0.815	42.400, 0.882	42.400, 0.747	42.400, 0.937	42.400, 0.748	42.400, 0.718	42.400, 0.704	42.400, 0.718	42.400, 0.860	42.400, 0.862	42.400, 0.910	42.400, 0.845
214	42.600, 0.827	42.600, 0.891	42.600, 0.758	42.600, 0.946	42.600, 0.759	42.600, 0.729	42.600, 0.714	42.600, 0.729	42.600, 0.869	42.600, 0.871	42.600, 0.920	42.600, 0.853
215	42.800, 0.839	42.800, 0.899	42.800, 0.770	42.800, 0.956	42.800, 0.770	42.800, 0.739	42.800, 0.725	42.800, 0.740	42.800, 0.878	42.800, 0.879	42.800, 0.929	42.800, 0.862
216	43.000, 0.851	43.000, 0.908	43.000, 0.781	43.000, 0.965	43.000, 0.781	43.000, 0.750	43.000, 0.735	43.000, 0.751	43.000, 0.886	43.000, 0.888	43.000, 0.938	43.000, 0.870
217	43.200, 0.863	43.200, 0.917	43.200, 0.792	43.200, 0.974	43.200, 0.792	43.200, 0.761	43.200, 0.745	43.200, 0.761	43.200, 0.894	43.200, 0.897	43.200, 0.947	43.200, 0.878
218	43.400, 0.874	43.400, 0.925	43.400, 0.803	43.400, 0.984	43.400, 0.803	43.400, 0.771	43.400, 0.755	43.400, 0.772	43.400, 0.903	43.400, 0.905	43.400, 0.956	43.400, 0.887
219	43.600, 0.886	43.600, 0.934	43.600, 0.814	43.600, 0.993	43.600, 0.814	43.600, 0.782	43.600, 0.766	43.600, 0.783	43.600, 0.911	43.600, 0.914	43.600, 0.964	43.600, 0.895
220	43.800, 0.898	43.800, 0.943	43.800, 0.825	43.800, 1.002	43.800, 0.825	43.800, 0.793	43.800, 0.776	43.800, 0.793	43.800, 0.919	43.800, 0.922	43.800, 0.973	43.800, 0.903
221	44.000, 0.909	44.000, 0.951	44.000, 0.836	44.000, 1.011	44.000, 0.836	44.000, 0.804	44.000, 0.786	44.000, 0.804	44.000, 0.927	44.000, 0.931	44.000, 0.981	44.000, 0.912
222	44.200, 0.920	44.200, 0.960	44.200, 0.847	44.200, 1.019	44.200, 0.847	44.200, 0.815	44.200, 0.797	44.200, 0.815	44.200, 0.935	44.200, 0.939	44.200, 0.989	44.200, 0.920
223	44.400, 0.932	44.400, 0.969	44.400, 0.857	44.400, 1.028	44.400, 0.858	44.400, 0.826	44.400, 0.807	44.400, 0.825	44.400, 0.943	44.400, 0.947	44.400, 0.998	44.400, 0.928
224	44.600, 0.943	44.600, 0.978	44.600, 0.868	44.600, 1.036	44.600, 0.869	44.600, 0.836	44.600, 0.817	44.600, 0.836	44.600, 0.950	44.600, 0.955	44.600, 1.006	44.600, 0.936
225	44.800, 0.954	44.800, 0.986	44.800, 0.878	44.800, 1.044	44.800, 0.880	44.800, 0.847	44.800, 0.828	44.800, 0.847	44.800, 0.958	44.800, 0.963	44.800, 1.014	44.800, 0.944
226	45.000, 0.965	45.000, 0.995	45.000, 0.889	45.000, 1.053	45.000, 0.890	45.000, 0.857	45.000, 0.838	45.000, 0.857	45.000, 0.966	45.000, 0.971	45.000, 1.022	45.000, 0.951
227	45.200, 0.976	45.200, 1.004	45.200, 0.900	45.200, 1.061	45.200, 0.901	45.200, 0.867	45.200, 0.848	45.200, 0.868	45.200, 0.974	45.200, 0.979	45.200, 1.030	45.200, 0.959
228	45.400, 0.987	45.400, 1.012	45.400, 0.910	45.400, 1.069	45.400, 0.911	45.400, 0.877	45.400, 0.858	45.400, 0.878	45.400, 0.981	45.400, 0.986	45.400, 1.038	45.400, 0.967
229	45.600, 0.998	45.600, 1.020	45.600, 0.921	45.600, 1.077	45.600, 0.922	45.600, 0.888	45.600, 0.867	45.600, 0.889	45.600, 0.989	45.600, 0.994	45.600, 1.046	45.600, 0.974
230	45.800, 1.009	45.800, 1.028	45.800, 0.931	45.800, 1.086	45.800, 0.932	45.800, 0.898	45.800, 0.877	45.800, 0.899	45.800, 0.997	45.800, 1.002	45.800, 1.055	45.800, 0.982
231	46.000, 1.020	46.000, 1.036	46.000, 0.942	46.000, 1.094	46.000, 0.942	46.000, 0.908	46.000, 0.887	46.000, 0.909	46.000, 1.004	46.000, 1.009	46.000, 1.062	46.000, 0.989
232	46.200, 1.031	46.200, 1.044	46.200, 0.952	46.200, 1.102	46.200, 0.953	46.200, 0.918	46.200, 0.896	46.200, 0.920	46.200, 1.012	46.200, 1.017	46.200, 1.070	46.200, 0.997
233	46.400, 1.042	46.400, 1.052	46.400, 0.962	46.400, 1.111	46.400, 0.963	46.400, 0.928	46.400, 0.906	46.400, 0.931	46.400, 1.019	46.400, 1.024	46.400, 1.078	46.400, 1.004
234	46.600, 1.052	46.600, 1.060	46.600, 0.973	46.600, 1.119	46.600, 0.974	46.600, 0.937	46.600, 0.915	46.600, 0.941	46.600, 1.027	46.600, 1.031	46.600, 1.086	46.600, 1.011
235	46.800, 1.063	46.800, 1.067	46.800, 0.983	46.800, 1.127	46.800, 0.984	46.800, 0.947	46.800, 0.925	46.800, 0.951	46.800, 1.034	46.800, 1.039	46.800, 1.094	46.800, 1.018
236	47.000, 1.074	47.000, 1.075	47.000, 0.993	47.000, 1.136	47.000, 0.994	47.000, 0.957	47.000, 0.934	47.000, 0.961	47.000, 1.041	47.000, 1.046	47.000, 1.101	47.000, 1.026
237	47.200, 1.084	47.200, 1.082	47.200, 1.003	47.200, 1.144	47.200, 1.004	47.200, 0.967	47.200, 0.944	47.200, 0.971	47.200, 1.048	47.200, 1.053	47.200, 1.109	47.200, 1.033
238	47.400, 1.095	47.400, 1.090	47.400, 1.013	47.400, 1.152	47.400, 1.015	47.400, 0.977	47.400, 0.953	47.400, 0.981	47.400, 1.056	47.400, 1.061	47.400, 1.116	47.400, 1.040
239	47.600, 1.106	47.600, 1.097	47.600, 1.023	47.600, 1.160	47.600, 1.025	47.600, 0.987	47.600, 0.963	47.600, 0.991	47.600, 1.063	47.600, 1.068	47.600, 1.124	47.600, 1.047
240	47.800, 1.116	47.800, 1.105	47.800, 1.033	47.800, 1.168	47.800, 1.035	47.800, 0.997	47.800, 0.973	47.800, 1.001	47.800, 1.070	47.800, 1.076	47.800, 1.131	47.800, 1.055
241	48.000, 1.127	48.000, 1.113	48.000, 1.042	48.000, 1.176	48.000, 1.045	48.000, 1.008	48.000, 0.982	48.000, 1.010	48.000, 1.077	48.000, 1.083	48.000, 1.138	48.000, 1.062
242	48.200, 1.137	48.200, 1.120	48.200, 1.052	48.200, 1.183	48.200, 1.055	48.200, 1.018	48.200, 0.992	48.200, 1.020	48.200, 1.084	48.200, 1.090	48.200, 1.146	48.200, 1.069
243	48.400, 1.148	48.400, 1.128	48.400, 1.062	48.400, 1.190	48.400, 1.065	48.400, 1.027	48.400, 1.002	48.400, 1.029	48.400, 1.091	48.400, 1.098	48.400, 1.153	48.400, 1.075
244	48.600, 1.158	48.600, 1.135	48.600, 1.072	48.600, 1.198	48.600, 1.075	48.600, 1.037	48.600, 1.011	48.600, 1.039	48.600, 1.098	48.600, 1.105	48.600, 1.160	48.600, 1.082
245	48.800, 1.168	48.800, 1.143	48.800, 1.082	48.800, 1.205	48.800, 1.085	48.800, 1.047	48.800, 1.021	48.800, 1.048	48.800, 1.104	48.800, 1.113	48.800, 1.167	48.800, 1.089
246	49.000, 1.178	49.000, 1.150	49.000, 1.092	49.000, 1.212	49.000, 1.095	49.000, 1.056	49.000, 1.030	49.000, 1.057	49.000, 1.111	49.000, 1.120	49.000, 1.175	49.000, 1.096
247	49.200, 1.188	49.200, 1.158	49.200, 1.102	49.200, 1.219	49.200, 1.105	49.200, 1.065	49.200, 1.039	49.200, 1.067	49.200, 1.118	49.200, 1.127	49.200, 1.182	49.200, 1.103
248	49.400, 1.199	49.400, 1.165	49.400, 1.112	49.400, 1.226	49.400, 1.115	49.400, 1.075	49.400, 1.049	49.400, 1.076	49.400, 1.124	49.400, 1.134	49.400, 1.189	49.400, 1.109
249	49.600, 1.209	49.600, 1.172	49.600, 1.121	49.600, 1.233	49.600, 1.124	49.600, 1.084	49.600, 1.058	49.600, 1.086	49.600, 1.131	49.600, 1.141	49.600, 1.196	49.600, 1.116
250	49.800, 1.219	49.800, 1.179	49.800, 1.131	49.800, 1.241	49.800, 1.134	49.800, 1.094	49.800, 1.067	49.800, 1.095	49.800, 1.138	49.800, 1.148	49.800, 1.203	49.800, 1.122
251	50.000, 1.229	50.000, 1.186	50.000, 1.141	50.000, 1.248	50.000, 1.143	50.000, 1.103	50.000, 1.076	50.000, 1.105	50.000, 1.144	50.000, 1.155	50.000, 1.210	50.000, 1.129
252	50.200, 1.239	50.200, 1.193	50.200, 1.150	50.200, 1.255	50.200, 1.153	50.200, 1.113	50.200, 1.084	50.200, 1.114	50.200, 1.151	50.200, 1.162	50.200, 1.216	50.200, 1.135
253	50.400, 1.249	50.400, 1.199	50.400, 1.160	50.400, 1.262	50.400, 1.162	50.400, 1.122	50.400, 1.093	50.400, 1.124	50.400, 1.157	50.400, 1.168	50.400, 1.223	50.400, 1.141
254	50.600, 1.259	50.600, 1.206	50.600, 1.169	50.600, 1.269	50.600, 1.172	50.600, 1.132	50.600, 1.102	50.600, 1.133	50.600, 1.164	50.600, 1.174	50.600, 1.230	50.600, 1.147
255	50.800, 1.268	50.800, 1.213	50.800, 1.179	50.800, 1.276	50.800, 1.181	50.800, 1.141	50.800, 1.111	50.800, 1.142	50.800, 1.170	50.800, 1.181	50.800, 1.236	50.800, 1.153
256	51.000, 1.278	51.000, 1.219	51.000, 1.188	51.000, 1.283	51.000, 1.190	51.000, 1.150	51.000, 1.119	51.000, 1.152	51.000, 1.177	51.000, 1.187	51.000, 1.243	51.000, 1.159
257	51.200, 1.288	51.200, 1.226	51.200, 1.197	51.200, 1.290	51.200, 1.200	51.200, 1.160	51.200, 1.128	51.200, 1.161	51.200, 1.183	51.200, 1.193	51.200, 1.249	51.200, 1.165
258	51.400, 1.297	51.400, 1.232	51.400, 1.206	51.400, 1.297	51.400, 1.209	51.400, 1.170	51.400, 1.137	51.400, 1.170	51.400, 1.189	51.400, 1.199	51.400, 1.256	51.400, 1.172
259	51.600, 1.307	51.600, 1.239	51.600, 1.215	51.600, 1.304	51.600, 1.218	51.600, 1.179	51.600, 1.146	51.600, 1.179	51.600, 1.196	51.600, 1.205	51.600, 1.262	51.600, 1.178
260	51.800, 1.316	51.800, 1.245	51.800, 1.224	51.800, 1.311	51.800, 1.228	51.800, 1.189	51.800, 1.154	51.800, 1.187	51.800, 1.202	51.800, 1.211	51.800, 1.268	51.800, 1.184
261	52.000, 1.325	52.000, 1.252	52.000, 1.233	52.000, 1.318	52.000, 1.237	52.000, 1.198	52.000, 1.163	52.000, 1.196	52.000, 1.208	52.000, 1.217	52.000, 1.275	52.000, 1.190
262	52.200, 1.334	52.200, 1.258	52.200, 1.242	52.200, 1.324	52.200, 1.247	52.200, 1.207	52.200, 1.171	52.200, 1.205	52.200, 1.213	52.200, 1.223	52.200, 1.281	52.200, 1.196
263	52.400, 1.343	52.400, 1.264	52.400, 1.251	52.400, 1.330	52.400, 1.256	52.400, 1.216	52.400, 1.180	52.400, 1.213	52.400, 1.219	52.400, 1.229	52.400, 1.287	52.400, 1.202
264	52.600, 1.351	52.600, 1.271	52.600, 1.260	52.600, 1.337	52.600, 1.266	52.600, 1.225	52.600, 1.188	52.600, 1.222	52.600, 1.225	52.600, 1.235	52.600, 1.293	52.600, 1.208
265	52.800, 1.360	52.800, 1.277	52.800, 1.269	52.800, 1.343	52.800, 1.275	52.800, 1.234	52.800, 1.197	52.800, 1.231	52.800, 1.230	52.800, 1.241	52.800, 1.299	52.800, 1.214
266	53.000, 1.369	53.000, 1.283	53.000, 1.278	53.000, 1.349	53.000, 1.284	53.000, 1.242	53.000, 1.206	53.000, 1.239	53.000, 1.236	53.000, 1.247	53.000, 1.305	53.000, 1.220
267	53.200, 1.378	53.200, 1.290	53.200, 1.287	53.200, 1.355	53.200, 1.293	53.200, 1.251	53.200, 1.214	53.200, 1.248	53.200, 1.242	53.200, 1.253	53.200, 1.312	53.200, 1.226
268	53.400, 1.387	53.400, 1.296	53.400, 1.296	53.400, 1.362	53.400, 1.302	53.400, 1.260	53.400, 1.223	53.400, 1.257	53.400, 1.247	53.400, 1.259	53.400, 1.318	53.400, 1.232
269	53.600, 1.396	53.600, 1.302	53.600, 1.305	53.600, 1.368	53.600, 1.310	53.600, 1.269	53.600, 1.231	53.600, 1.266	53.600, 1.253	53.600, 1.265	53.600, 1.324	53.600, 1.238
270	53.800, 1.405	53.800, 1.308	53.800, 1.314	53.800, 1.374	53.800, 1.319	53.800, 1.278	53.800, 1.240	53.800, 1.275	53.800, 1.259	53.800, 1.271	53.800, 1.330	53.800, 1.244
271	54.000, 1.414	54.000, 1.314	54.000, 1.323	54.000, 1.380	54.000, 1.327	54.000, 1.287	54.000, 1.249	54.000, 1.283	54.000, 1.265	54.000, 1.277	54.000, 1.336	54.000, 1.250
272	54.200, 1.423	54.200, 1.320	54.200, 1.332	54.200, 1.386	54.200, 1.336	54.200, 1.295	54.200, 1.257	54.200, 1.292	54.200, 1.271	54.200, 1.282	54.200, 1.342	54.200, 1.255
273	54.400, 1.432	54.400, 1.325	54.400, 1.341	54.400, 1.392	54.400, 1.344	54.400, 1.304	54.400, 1.266	54.400, 1.300	54.400, 1.277	54.400, 1.288	54.400, 1.348	54.400, 1.261
274	54.600, 1.441	54.600, 1.331	54.600, 1.350	54.600, 1.399	54.600, 1.353	54.600, 1.313	54.600, 1.274	54.600, 1.309	54.600, 1.283	54.600, 1.293	54.600, 1.354	54.600, 1.267
275	54.800, 1.450	54.800, 1.337	54.800, 1.358	54.800, 1.405	54.800, 1.361	54.800, 1.321	54.800, 1.282	54.800, 1.317	54.800, 1.288	54.800, 1.299	54.800, 1.360	54.800, 1.272
276	55.000, 1.459	55.000, 1.342	55.000, 1.367	55.000, 1.411	55.000, 1.369	55.000, 1.330	55.000, 1.291	55.000, 1.325	55.000, 1.294	55.000, 1.304	55.000, 1.365	55.000, 1.278
277	55.200, 1.468	55.200, 1.348	55.200, 1.375	55.200, 1.416	55.200, 1.377	55.200, 1.338	55.200, 1.299	55.200, 1.333	55.200, 1.299	55.200, 1.310	55.200, 1.371	55.200, 1.283
278	55.400, 1.477	55.400, 1.354	55.400, 1.384	55.400, 1.422	55.400, 1.386	55.400, 1.347	55.400, 1.307	55.400, 1.341	55.400, 1.305	55.400, 1.316	55.400, 1.377	55.400, 1.288
279	55.600, 1.486	55.600, 1.359	55.600, 1.392	55.600, 1.428	55.600, 1.394	55.600, 1.355	55.600, 1.316	55.600, 1.349	55.600, 1.310	55.600, 1.322	55.600, 1.383	55.600, 1.294
280	55.800, 1.494	55.800, 1.365	55.800, 1.400	55.800, 1.434	55.800, 1.402	55.800, 1.364	55.800, 1.324	55.800, 1.356	55.800, 1.316	55.800, 1.327	55.800, 1.388	55.800, 1.299
281	56.000, 1.502	56.000, 1.370	56.000, 1.408	56.000, 1.440	56.000, 1.411	56.000, 1.372	56.000, 1.332	56.000, 1.364	56.000, 1.321	56.000, 1.333	56.000, 1.394	56.000, 1.304
282	56.200, 1.511	56.200, 1.375	56.200, 1.416	56.200, 1.445	56.200, 1.419	56.200, 1.381	56.200, 1.339	56.200, 1.372	56.200, 1.326	56.200, 1.339	56.200, 1.399	56.200, 1.309
283	56.400, 1.519	56.400, 1.381	56.400, 1.424	56.400, 1.451	56.400, 1.428	56.400, 1.389	56.400, 1.347	56.400, 1.380	56.400, 1.331	56.400, 1.344	56.400, 1.404	56.400, 1.314
284	56.600, 1.527	56.600, 1.386	56.600, 1.433	56.600, 1.456	56.600, 1.436	56.600, 1.397	56.600, 1.355	56.600, 1.388	56.600, 1.336	56.600, 1.349	56.600, 1.410	56.600, 1.319
285	56.800, 1.535	56.800, 1.391	56.800, 1.441	56.800, 1.462	56.800, 1.444	56.800, 1.405	56.800, 1.363	56.800, 1.396	56.800, 1.341	56.800, 1.355	56.800, 1.415	56.800, 1.324
286	57.000, 1.543	57.000, 1.397	57.000, 1.448	57.000, 1.467	57.000, 1.452	57.000, 1.414	57.000, 1.370	57.000, 1.404	57.000, 1.346	57.000, 1.360	57.000, 1.420	57.000, 1.329
287	57.200, 1.551	57.200, 1.403	57.200, 1.456	57.200, 1.473	57.200, 1.460	57.200, 1.422	57.200, 1.378	57.200, 1.411	57.200, 1.350	57.200, 1.366	57.200, 1.426	57.200, 1.334
288	57.400, 1.559	57.400, 1.408	57.400, 1.464	57.400, 1.478	57.400, 1.468	57.400, 1.430	57.400, 1.385	57.400, 1.419	57.400, 1.355	57.400, 1.371	57.400, 1.431	57.400, 1.339
289	57.600, 1.566	57.600, 1.414	57.600, 1.472	57.600, 1.484	57.600, 1.476	57.600, 1.438	57.600, 1.392	57.600, 1.427	57.600, 1.360	57.600, 1.376	57.600, 1.436	57.600, 1.344
290	57.800, 1.574	57.800, 1.419	57.800, 1.480	57.800, 1.489	57.800, 1.483	57.800, 1.446	57.800, 1.400	57.800, 1.434	57.800, 1.365	57.800, 1.381	57.800, 1.441	57.800, 1.349
291	58.000, 1.582	58.000, 1.424	58.000, 1.487	58.000, 1.494	58.000, 1.491	58.000, 1.454	58.000, 1.407	58.000, 1.442	58.000, 1.370	58.000, 1.386	58.000, 1.445	58.000, 1.353
292	58.200, 1.589	58.200, 1.430	58.200, 1.495	58.200, 1.500	58.200, 1.499	58.200, 1.462	58.200, 1.414	58.200, 1.450	58.200, 1.374	58.200, 1.391	58.200, 1.450	58.200, 1.359
293	58.400, 1.597	58.400, 1.435	58.400, 1.503	58.400, 1.505	58.400, 1.507	58.400, 1.471	58.400, 1.421	58.400, 1.457	58.400, 1.379	58.400, 1.396	58.400, 1.455	58.400, 1.364
294	58.600, 1.604	58.600, 1.440	58.600, 1.511	58.600, 1.510	58.600, 1.515	58.600, 1.479	58.600, 1.428	58.600, 1.465	58.600, 1.384	58.600, 1.401	58.600, 1.460	58.600, 1.369
295	58.800, 1.612	58.800, 1.445	58.800, 1.519	58.800, 1.515	58.800, 1.523	58.800, 1.487	58.800, 1.435	58.800, 1.472	58.800, 1.388	58.800, 1.406	58.800, 1.465	58.800, 1.374
296	59.000, 1.619	59.000, 1.450	59.000, 1.526	59.000, 1.520	59.000, 1.530	59.000, 1.494	59.000, 1.442	59.000, 1.480	59.000, 1.393	59.000, 1.411	59.000, 1.470	59.000, 1.379
297	59.200, 1.627	59.200, 1.455	59.200, 1.534	59.200, 1.525	59.200, 1.538	59.200, 1.502	59.200, 1.449	59.200, 1.487	59.200, 1.398	59.200, 1.415	59.200, 1.475	59.200, 1.384
298	59.400, 1.634	59.400, 1.460	59.400, 1.541	59.400, 1.530	59.400, 1.545	59.400, 1.510	59.400, 1.457	59.400, 1.495	59.400, 1.402	59.400, 1.420	59.400, 1.480	59.400, 1.389
299	59.600, 1.642	59.600, 1.465	59.600, 1.548	59.600, 1.535	59.600, 1.553	59.600, 1.518	59.600, 1.464	59.600, 1.502	59.600, 1.407	59.600, 1.424	59.600, 1.484	59.600, 1.394
300	59.800, 1.649	59.800, 1.470	59.800, 1.556	59.800, 1.540	59.800, 1.560	59.800, 1.526	59.800, 1.472	59.800, 1.509	59.800, 1.412	59.800, 1.428	59.800, 1.489	59.800, 1.398
301	60.000, 1.657	60.000, 1.475	60.000, 1.563	60.000, 1.545	60.000, 1.568	60.000, 1.533	60.000, 1.479	60.000, 1.516	60.000, 1.416	60.000, 1.432	60.000, 1.493	60.000, 1.403
302	60.200, 1.664	60.200, 1.480	60.200, 1.570	60.200, 1.550	60.200, 1.575	60.200, 1.541	60.200, 1.487	60.200, 1.524	60.200, 1.421	60.200, 1.436	60.200, 1.498	60.200, 1.407
303	60.400, 1.671	60.400, 1.484	60.400, 1.577	60.400, 1.555	60.400, 1.583	60.400, 1.549	60.400, 1.494	60.400, 1.531	60.400, 1.426	60.400, 1.440	60.400, 1.502	60.400, 1.412
304	60.600, 1.679	60.600, 1.489	60.600, 1.585	60.600, 1.559	60.600, 1.590	60.600, 1.556	60.600, 1.502	60.600, 1.538	60.600, 1.430	60.600, 1.444	60.600, 1.507	60.600, 1.416
305	60.800, 1.686	60.800, 1.493	60.800, 1.591	60.800, 1.564	60.800, 1.598	60.800, 1.564	60.800, 1.509	60.800, 1.545	60.800, 1.435	60.800, 1.448	60.800, 1.512	60.800, 1.420
306	61.000, 1.694	61.000, 1.498	61.000, 1.598	61.000, 1.568	61.000, 1.605	61.000, 1.571	61.000, 1.515	61.000, 1.552	61.000, 1.439	61.000, 1.452	61.000, 1.516	61.000, 1.425
307	61.200, 1.701	61.200, 1.503	61.200, 1.605	61.200, 1.573	61.200, 1.613	61.200, 1.578	61.200, 1.522	61.200, 1.559	61.200, 1.443	61.200, 1.457	61.200, 1.521	61.200, 1.429
308	61.400, 1.708	61.400, 1.507	61.400, 1.612	61.400, 1.578	61.400, 1.620	61.400, 1.586	61.400, 1.529	61.400, 1.565	61.400, 1.447	61.400, 1.461	61.400, 1.525	61.400, 1.433
309	61.600, 1.715	61.600, 1.512	61.600, 1.619	61.600, 1.582	61.600, 1.627	61.600, 1.593	61.600, 1.535	61.600, 1.572	61.600, 1.452	61.600, 1.465	61.600, 1.529	61.600, 1.437
310	61.800, 1.723	61.800, 1.517	61.800, 1.627	61.800, 1.587	61.800, 1.634	61.800, 1.600	61.800, 1.542	61.800, 1.579	61.800, 1.456	61.800, 1.469	61.800, 1.534	61.800, 1.441
311	62.000, 1.729	62.000, 1.521	62.000, 1.634	62.000, 1.592	62.000, 1.642	62.000, 1.607	62.000, 1.548	62.000, 1.586	62.000, 1.460	62.000, 1.473	62.000, 1.538	62.000, 1.445
312	62.200, 1.737	62.200, 1.525	62.200, 1.641	62.200, 1.596	62.200, 1.649	62.200, 1.614	62.200, 1.554	62.200, 1.593	62.200, 1.463	62.200, 1.478	62.200, 1.542	62.200, 1.449
313	62.400, 1.743	62.400, 1.530	62.400, 1.648	62.400, 1.601	62.400, 1.655	62.400, 1.622	62.400, 1.561	62.400, 1.599	62.400, 1.467	62.400, 1.482	62.400, 1.547	62.400, 1.453
314	62.600, 1.750	62.600, 1.534	62.600, 1.655	62.600, 1.605	62.600, 1.662	62.600, 1.629	62.600, 1.567	62.600, 1.606	62.600, 1.471	62.600, 1.486	62.600, 1.551	62.600, 1.457
315	62.800, 1.757	62.800, 1.539	62.800, 1.663	62.800, 1.609	62.800, 1.669	62.800, 1.636	62.800, 1.574	62.800, 1.612	62.800, 1.475	62.800, 1.490	62.800, 1.555	62.800, 1.461
316	63.000, 1.764	63.000, 1.543	63.000, 1.670	63.000, 1.613	63.000, 1.676	63.000, 1.643	63.000, 1.580	63.000, 1.619	63.000, 1.478	63.000, 1.494	63.000, 1.560	63.000, 1.465
317	63.200, 1.771	63.200, 1.547	63.200, 1.677	63.200, 1.618	63.200, 1.682	63.200, 1.650	63.200, 1.587	63.200, 1.625	63.200, 1.482	63.200, 1.498	63.200, 1.564	63.200, 1.469
318	63.400, 1.777	63.400, 1.552	63.400, 1.684	63.400, 1.622	63.400, 1.689	63.400, 1.657	63.400, 1.594	63.400, 1.631	63.400, 1.486	63.400, 1.502	63.400, 1.568	63.400, 1.473
319	63.600, 1.784	63.600, 1.556	63.600, 1.691	63.600, 1.626	63.600, 1.695	63.600, 1.664	63.600, 1.600	63.600, 1.637	63.600, 1.489	63.600, 1.506	63.600, 1.571	63.600, 1.477
320	63.800, 1.791	63.800, 1.560	63.800, 1.697	63.800, 1.630	63.800, 1.702	63.800, 1.671	63.800, 1.607	63.800, 1.644	63.800, 1.493	63.800, 1.510	63.800, 1.575	63.800, 1.481
321	64.000, 1.797	64.000, 1.564	64.000, 1.704	64.000, 1.634	64.000, 1.708	64.000, 1.678	64.000, 1.613	64.000, 1.650	64.000, 1.497	64.000, 1.514	64.000, 1.579	64.000, 1.485
322	64.200, 1.804	64.200, 1.568	64.200, 1.710	64.200, 1.638	64.200, 1.715	64.200, 1.685	64.200, 1.620	64.200, 1.657	64.200, 1.501	64.200, 1.518	64.200, 1.583	64.200, 1.489
323	64.400, 1.810	64.400, 1.572	64.400, 1.717	64.400, 1.642	64.400, 1.721	64.400, 1.691	64.400, 1.626	64.400, 1.663	64.400, 1.505	64.400, 1.522	64.400, 1.587	64.400, 1.493
324	64.600, 1.817	64.600, 1.576	64.600, 1.723	64.600, 1.646	64.600, 1.728	64.600, 1.698	64.600, 1.632	64.600, 1.669	64.600, 1.509	64.600, 1.526	64.600, 1.591	64.600, 1.497
325	64.800, 1.823	64.800, 1.580	64.800, 1.729	64.800, 1.650	64.800, 1.734	64.800, 1.705	64.800, 1.638	64.800, 1.676	64.800, 1.512	64.800, 1.530	64.800, 1.595	64.800, 1.501
326	65.000, 1.829	65.000, 1.584	65.000, 1.735	65.000, 1.654	65.000, 1.741	65.000, 1.711	65.000, 1.644	65.000, 1.682	65.000, 1.516	65.000, 1.534	65.000, 1.599	65.000, 1.505
327	65.200, 1.835	65.200, 1.588	65.200, 1.741	65.200, 1.658	65.200, 1.747	65.200, 1.718	65.200, 1.650	65.200, 1.688	65.200, 1.520	65.200, 1.538	65.200, 1.603	65.200, 1.509
328	65.400, 1.841	65.400, 1.592	65.400, 1.747	65.400, 1.662	65.400, 1.754	65.400, 1.725	65.400, 1.656	65.400, 1.694	65.400, 1.523	65.400, 1.542	65.400, 1.606	65.400, 1.512
329	65.600, 1.847	65.600, 1.596	65.600, 1.753	65.600, 1.666	65.600, 1.761	65.600, 1.731	65.600, 1.662	65.600, 1.700	65.600, 1.527	65.600, 1.545	65.600, 1.610	65.600, 1.516
330	65.800, 1.853	65.800, 1.600	65.800, 1.759	65.800, 1.670	65.800, 1.767	65.800, 1.737	65.800, 1.669	65.800, 1.706	65.800, 1.531	65.800, 1.549	65.800, 1.614	65.800, 1.520
331	66.000, 1.859	66.000, 1.604	66.000, 1.765	66.000, 1.674	66.000, 1.774	66.000, 1.744	66.000, 1.675	66.000, 1.712	66.000, 1.534	66.000, 1.552	66.000, 1.617	66.000, 1.524
332	66.200, 1.865	66.200, 1.608	66.200, 1.771	66.200, 1.678	66.200, 1.780	66.200, 1.750	66.200, 1.681	66.200, 1.718	66.200, 1.538	66.200, 1.556	66.200, 1.621	66.200, 1.527
333	66.400, 1.871	66.400, 1.612	66.400, 1.777	66.400, 1.682	66.400, 1.787	66.400, 1.756	66.400, 1.687	66.400, 1.724	66.400, 1.541	66.400, 1.559	66.400, 1.624	66.400, 1.531
334	66.600, 1.877	66.600, 1.616	66.600, 1.784	66.600, 1.685	66.600, 1.793	66.600, 1.762	66.600, 1.693	66.600, 1.729	66.600, 1.544	66.600, 1.563	66.600, 1.628	66.600, 1.534
335	66.800, 1.883	66.800, 1.620	66.800, 1.790	66.800, 1.689	66.800, 1.799	66.800, 1.769	66.800, 1.699	66.800, 1.735	66.800, 1.548	66.800, 1.566	66.800, 1.632	66.800, 1.537
336	67.000, 1.889	67.000, 1.624	67.000, 1.796	67.000, 1.692	67.000, 1.806	67.000, 1.775	67.000, 1.704	67.000, 1.741	67.000, 1.551	67.000, 1.569	67.000, 1.635	67.000, 1.541
337	67.200, 1.895	67.200, 1.627	67.200, 1.803	67.200, 1.696	67.200, 1.812	67.200, 1.781	67.200, 1.710	67.200, 1.746	67.200, 1.554	67.200, 1.573	67.200, 1.639	67.200, 1.544
338	67.400, 1.901	67.400, 1.631	67.400, 1.809	67.400, 1.700	67.400, 1.818	67.400, 1.787	67.400, 1.716	67.400, 1.752	67.400, 1.558	67.400, 1.576	67.400, 1.642	67.400, 1.547
339	67.600, 1.907	67.600, 1.634	67.600, 1.815	67.600, 1.703	67.600, 1.825	67.600, 1.794	67.600, 1.722	67.600, 1.757	67.600, 1.561	67.600, 1.579	67.600, 1.645	67.600, 1.551
340	67.800, 1.913	67.800, 1.638	67.800, 1.821	67.800, 1.706	67.800, 1.830	67.800, 1.800	67.800, 1.728	67.800, 1.763	67.800, 1.565	67.800, 1.582	67.800, 1.649	67.800, 1.554
341	68.000, 1.919	68.000, 1.641	68.000, 1.827	68.000, 1.710	68.000, 1.836	68.000, 1.806	68.000, 1.734	68.000, 1.769	68.000, 1.568	68.000, 1.585	68.000, 1.652	68.000, 1.557
342	68.200, 1.925	68.200, 1.645	68.200, 1.833	68.200, 1.713	68.200, 1.842	68.200, 1.812	68.200, 1.739	68.200, 1.775	68.200, 1.572	68.200, 1.588	68.200, 1.655	68.200, 1.560
343	68.400, 1.930	68.400, 1.648	68.400, 1.839	68.400, 1.717	68.400, 1.848	68.400, 1.819	68.400, 1.745	68.400, 1.781	68.400, 1.575	68.400, 1.591	68.400, 1.659	68.400, 1.563
344	68.600, 1.936	68.600, 1.651	68.600, 1.845	68.600, 1.720	68.600, 1.854	68.600, 1.825	68.600, 1.751	68.600, 1.786	68.600, 1.578	68.600, 1.594	68.600, 1.662	68.600, 1.566
345	68.800, 1.941	68.800, 1.655	68.800, 1.851	68.800, 1.724	68.800, 1.860	68.800, 1.831	68.800, 1.756	68.800, 1.792	68.800, 1.581	68.800, 1.597	68.800, 1.665	68.800, 1.570
346	69.000, 1.946	69.000, 1.658	69.000, 1.857	69.000, 1.727	69.000, 1.866	69.000, 1.837	69.000, 1.762	69.000, 1.798	69.000, 1.584	69.000, 1.600	69.000, 1.668	69.000, 1.573
347	69.200, 1.952	69.200, 1.661	69.200, 1.862	69.200, 1.731	69.200, 1.872	69.200, 1.843	69.200, 1.767	69.200, 1.803	69.200, 1.587	69.200, 1.604	69.200, 1.671	69.200, 1.576
348	69.400, 1.957	69.400, 1.665	69.400, 1.868	69.400, 1.734	69.400, 1.878	69.400, 1.849	69.400, 1.773	69.400, 1.809	69.400, 1.591	69.400, 1.607	69.400, 1.674	69.400, 1.579
349	69.600, 1.962	69.600, 1.668	69.600, 1.873	69.600, 1.738	69.600, 1.883	69.600, 1.855	69.600, 1.778	69.600, 1.814	69.600, 1.593	69.600, 1.610	69.600, 1.677	69.600, 1.582
350	69.800, 1.968	69.800, 1.671	69.800, 1.879	69.800, 1.741	69.800, 1.889	69.800, 1.861	69.800, 1.784	69.800, 1.820	69.800, 1.596	69.800, 1.613	69.800, 1.680	69.800, 1.585
351	70.000, 1.973	70.000, 1.675	70.000, 1.884	70.000, 1.744	70.000, 1.894	70.000, 1.867	70.000, 1.789	70.000, 1.825	70.000, 1.599	70.000, 1.616	70.000, 1.683	70.000, 1.589
352	70.200, 1.978	70.200, 1.678	70.200, 1.889	70.200, 1.747	70.200, 1.900	70.200, 1.873	70.200, 1.794	70.200, 1.831	70.200, 1.602	70.200, 1.619	70.200, 1.686	70.200, 1.592
353	70.400, 1.983	70.400, 1.681	70.400, 1.894	70.400, 1.750	70.400, 1.905	70.400, 1.878	70.400, 1.799	70.400, 1.836	70.400, 1.605	70.400, 1.622	70.400, 1.689	70.400, 1.595
354	70.600, 1.988	70.600, 1.684	70.600, 1.900	70.600, 1.753	70.600, 1.911	70.600, 1.884	70.600, 1.804	70.600, 1.841	70.600, 1.608	70.600, 1.625	70.600, 1.692	70.600, 1.598
355	70.800, 1.993	70.800, 1.687	70.800, 1.905	70.800, 1.756	70.800, 1.916	70.800, 1.890	70.800, 1.810	70.800, 1.847	70.800, 1.611	70.800, 1.629	70.800, 1.695	70.800, 1.601
356	71.000, 1.999	71.000, 1.690	71.000, 1.910	71.000, 1.759	71.000, 1.921	71.000, 1.896	71.000, 1.815	71.000, 1.852	71.000, 1.614	71.000, 1.632	71.000, 1.698	71.000, 1.604
357	71.200, 2.004	71.200, 1.693	71.200, 1.916	71.200, 1.762	71.200, 1.927	71.200, 1.901	71.200, 1.820	71.200, 1.857	71.200, 1.617	71.200, 1.634	71.200, 1.701	71.200, 1.606
358	71.400, 2.009	71.400, 1.697	71.400, 1.921	71.400, 1.765	71.400, 1.932	71.400, 1.906	71.400, 1.825	71.400, 1.862	71.400, 1.620	71.400, 1.637	71.400, 1.704	71.400, 1.609
359	71.600, 2.015	71.600, 1.700	71.600, 1.926	71.600, 1.768	71.600, 1.938	71.600, 1.912	71.600, 1.830	71.600, 1.867	71.600, 1.623	71.600, 1.639	71.600, 1.706	71.600, 1.612
360	71.800, 2.020	71.800, 1.703	71.800, 1.932	71.800, 1.771	71.800, 1.943	71.800, 1.917	71.800, 1.835	71.800, 1.873	71.800, 1.626	71.800, 1.642	71.800, 1.709	71.800, 1.615
361	72.000, 2.025	72.000, 1.706	72.000, 1.937	72.000, 1.774	72.000, 1.949	72.000, 1.922	72.000, 1.840	72.000, 1.878	72.000, 1.629	72.000, 1.644	72.000, 1.712	72.000, 1.617
362	72.200, 2.030	72.200, 1.710	72.200, 1.942	72.200, 1.777	72.200, 1.954	72.200, 1.927	72.200, 1.844	72.200, 1.883	72.200, 1.632	72.200, 1.647	72.200, 1.715	72.200, 1.620
363	72.400, 2.035	72.400, 1.713	72.400, 1.947	72.400, 1.781	72.400, 1.960	72.400, 1.932	72.400, 1.849	72.400, 1.889	72.400, 1.635	72.400, 1.649	72.400, 1.717	72.400, 1.623
364	72.600, 2.040	72.600, 1.716	72.600, 1.952	72.600, 1.784	72.600, 1.965	72.600, 1.937	72.600, 1.854	72.600, 1.894	72.600, 1.638	72.600, 1.652	72.600, 1.720	72.600, 1.625
365	72.800, 2.045	72.800, 1.720	72.800, 1.957	72.800, 1.787	72.800, 1.970	72.800, 1.942	72.800, 1.859	72.800, 1.898	72.800, 1.640	72.800, 1.655	72.800, 1.723	72.800, 1.628
366	73.000, 2.050	73.000, 1.723	73.000, 1.962	73.000, 1.790	73.000, 1.976	73.000, 1.947	73.000, 1.864	73.000, 1.903	73.000, 1.643	73.000, 1.658	73.000, 1.725	73.000, 1.631
367	73.200, 2.054	73.200, 1.726	73.200, 1.967	73.200, 1.793	73.200, 1.981	73.200, 1.952	73.200, 1.869	73.200, 1.908	73.200, 1.645	73.200, 1.660	73.200, 1.728	73.200, 1.634
368	73.400, 2.059	73.400, 1.729	73.400, 1.972	73.400, 1.796	73.400, 1.986	73.400, 1.957	73.400, 1.874	73.400, 1.912	73.400, 1.648	73.400, 1.663	73.400, 1.731	73.400, 1.637
369	73.600, 2.064	73.600, 1.732	73.600, 1.977	73.600, 1.799	73.600, 1.991	73.600, 1.962	73.600, 1.879	73.600, 1.917	73.600, 1.650	73.600, 1.666	73.600, 1.734	73.600, 1.639
370	73.800, 2.069	73.800, 1.735	73.800, 1.981	73.800, 1.801	73.800, 1.995	73.800, 1.968	73.800, 1.884	73.800, 1.921	73.800, 1.653	73.800, 1.669	73.800, 1.736	73.800, 1.642
371	74.000, 2.073	74.000, 1.738	74.000, 1.986	74.000, 1.804	74.000, 2.000	74.000, 1.973	74.000, 1.888	74.000, 1.926	74.000, 1.655	74.000, 1.671	74.000, 1.739	74.000, 1.645
372	74.200, 2.077	74.200, 1.741	74.200, 1.990	74.200, 1.807	74.200, 2.005	74.200, 1.978	74.200, 1.893	74.200, 1.930	74.200, 1.657	74.200, 1.674	74.200, 1.742	74.200, 1.648
373	74.400, 2.082	74.400, 1.743	74.400, 1.995	74.400, 1.809	74.400, 2.010	74.400, 1.983	74.400, 1.897	74.400, 1.935	74.400, 1.659	74.400, 1.676	74.400, 1.744	74.400, 1.651
374	74.600, 2.086	74.600, 1.746	74.600, 2.000	74.600, 1.812	74.600, 2.015	74.600, 1.988	74.600, 1.902	74.600, 1.939	74.600, 1.661	74.600, 1.679	74.600, 1.747	74.600, 1.653
375	74.800, 2.090	74.800, 1.748	74.800, 2.004	74.800, 1.815	74.800, 2.020	74.800, 1.993	74.800, 1.906	74.800, 1.943	74.800, 1.663	74.800, 1.681	74.800, 1.749	74.800, 1.655
376	75.000, 2.095	75.000, 1.751	75.000, 2.009	75.000, 1.817	75.000, 2.024	75.000, 1.999	75.000, 1.910	75.000, 1.947	75.000, 1.666	75.000, 1.684	75.000, 1.752	75.000, 1.657
377	75.200, 2.099	75.200, 1.753	75.200, 2.014	75.200, 1.820	75.200, 2.029	75.200, 2.003	75.200, 1.915	75.200, 1.952	75.200, 1.668	75.200, 1.686	75.200, 1.754	75.200, 1.659
378	75.400, 2.104	75.400, 1.756	75.400, 2.019	75.400, 1.822	75.400, 2.034	75.400, 2.008	75.400, 1.919	75.400, 1.956	75.400, 1.670	75.400, 1.688	75.400, 1.757	75.400, 1.661
379	75.600, 2.109	75.600, 1.758	75.600, 2.024	75.600, 1.825	75.600, 2.038	75.600, 2.013	75.600, 1.923	75.600, 1.961	75.600, 1.673	75.600, 1.691	75.600, 1.759	75.600, 1.664
380	75.800, 2.113	75.800, 1.761	75.800, 2.028	75.800, 1.828	75.800, 2.043	75.800, 2.017	75.800, 1.927	75.800, 1.966	75.800, 1.675	75.800, 1.693	75.800, 1.762	75.800, 1.666
381	76.000, 2.118	76.000, 1.763	76.000, 2.033	76.000, 1.831	76.000, 2.047	76.000, 2.022	76.000, 1.931	76.000, 1.970	76.000, 1.678	76.000, 1.696	76.000, 1.764	76.000, 1.669
382	76.200, 2.122	76.200, 1.766	76.200, 2.038	76.200, 1.833	76.200, 2.052	76.200, 2.027	76.200, 1.936	76.200, 1.975	76.200, 1.680	76.200, 1.698	76.200, 1.767	76.200, 1.671
383	76.400, 2.126	76.400, 1.769	76.400, 2.043	76.400, 1.836	76.400, 2.056	76.400, 2.031	76.400, 1.940	76.400, 1.979	76.400, 1.682	76.400, 1.701	76.400, 1.769	76.400, 1.674
384	76.600, 2.130	76.600, 1.771	76.600, 2.047	76.600, 1.839	76.600, 2.060	76.600, 2.036	76.600, 1.945	76.600, 1.984	76.600, 1.684	76.600, 1.704	76.600, 1.771	76.600, 1.676
385	76.800, 2.134	76.800, 1.774	76.800, 2.051	76.800, 1.841	76.800, 2.065	76.800, 2.041	76.800, 1.949	76.800, 1.988	76.800, 1.686	76.800, 1.706	76.800, 1.773	76.800, 1.679
386	77.000, 2.138	77.000, 1.777	77.000, 2.056	77.000, 1.843	77.000, 2.069	77.000, 2.046	77.000, 1.954	77.000, 1.993	77.000, 1.689	77.000, 1.708	77.000, 1.775	77.000, 1.681
387	77.200, 2.142	77.200, 1.780	77.200, 2.060	77.200, 1.846	77.200, 2.074	77.200, 2.050	77.200, 1.959	77.200, 1.997	77.200, 1.691	77.200, 1.711	77.200, 1.778	77.200, 1.684
388	77.400, 2.147	77.400, 1.782	77.400, 2.064	77.400, 1.848	77.400, 2.078	77.400, 2.055	77.400, 1.963	77.400, 2.001	77.400, 1.694	77.400, 1.713	77.400, 1.780	77.400, 1.686
389	77.600, 2.151	77.600, 1.785	77.600, 2.068	77.600, 1.850	77.600, 2.083	77.600, 2.059	77.600, 1.968	77.600, 2.006	77.600, 1.696	77.600, 1.715	77.600, 1.782	77.600, 1.689
390	77.800, 2.155	77.800, 1.788	77.800, 2.073	77.800, 1.852	77.800, 2.088	77.800, 2.064	77.800, 1.972	77.800, 2.010	77.800, 1.698	77.800, 1.717	77.800, 1.785	77.800, 1.691
391	78.000, 2.159	78.000, 1.790	78.000, 2.077	78.000, 1.855	78.000, 2.092	78.000, 2.068	78.000, 1.977	78.000, 2.014	78.000, 1.700	78.000, 1.719	78.000, 1.787	78.000, 1.693
392	78.200, 2.163	78.200, 1.793	78.200, 2.081	78.200, 1.857	78.200, 2.097	78.200, 2.073	78.200, 1.981	78.200, 2.018	78.200, 1.702	78.200, 1.721	78.200, 1.789	78.200, 1.695
393	78.400, 2.168	78.400, 1.795	78.400, 2.085	78.400, 1.859	78.400, 2.101	78.400, 2.078	78.400, 1.985	78.400, 2.022	78.400, 1.705	78.400, 1.723	78.400, 1.791	78.400, 1.697
394	78.600, 2.172	78.600, 1.798	78.600, 2.089	78.600, 1.861	78.600, 2.106	78.600, 2.083	78.600, 1.989	78.600, 2.026	78.600, 1.706	78.600, 1.725	78.600, 1.794	78.600, 1.699
395	78.800, 2.176	78.800, 1.800	78.800, 2.093	78.800, 1.863	78.800, 2.110	78.800, 2.087	78.800, 1.993	78.800, 2.030	78.800, 1.708	78.800, 1.727	78.800, 1.796	78.800, 1.701
396	79.000, 2.180	79.000, 1.802	79.000, 2.097	79.000, 1.865	79.000, 2.115	79.000, 2.092	79.000, 1.997	79.000, 2.034	79.000, 1.710	79.000, 1.729	79.000, 1.798	79.000, 1.702
397	79.200, 2.184	79.200, 1.804	79.200, 2.101	79.200, 1.867	79.200, 2.119	79.200, 2.096	79.200, 2.000	79.200, 2.038	79.200, 1.712	79.200, 1.731	79.200, 1.800	79.200, 1.704
398	79.400, 2.188	79.400, 1.806	79.400, 2.105	79.400, 1.870	79.400, 2.123	79.400, 2.100	79.400, 2.004	79.400, 2.041	79.400, 1.714	79.400, 1.734	79.400, 1.802	79.400, 1.706
399	79.600, 2.191	79.600, 1.808	79.600, 2.109	79.600, 1.872	79.600, 2.127	79.600, 2.104	79.600, 2.007	79.600, 2.045	79.600, 1.716	79.600, 1.736	79.600, 1.804	79.600, 1.708
400	79.800, 2.195	79.800, 1.810	79.800, 2.113	79.800, 1.875	79.800, 2.131	79.800, 2.109	79.800, 2.011	79.800, 2.049	79.800, 1.718	79.800, 1.738	79.800, 1.805	79.800, 1.711
401	80.000, 2.199	80.000, 1.812	80.000, 2.117	80.000, 1.877	80.000, 2.135	80.000, 2.113	80.000, 2.015	80.000, 2.052	80.000, 1.720	80.000, 1.740	80.000, 1.807	80.000, 1.713
402	80.200, 2.202	80.200, 1.815	80.200, 2.121	80.200, 1.879	80.200, 2.139	80.200, 2.117	80.200, 2.019	80.200, 2.056	80.200, 1.722	80.200, 1.742	80.200, 1.809	80.200, 1.715
403	80.400, 2.206	80.400, 1.817	80.400, 2.125	80.400, 1.882	80.400, 2.142	80.400, 2.121	80.400, 2.022	80.400, 2.059	80.400, 1.724	80.400, 1.744	80.400, 1.811	80.400, 1.717
404	80.600, 2.209	80.600, 1.819	80.600, 2.129	80.600, 1.884	80.600, 2.146	80.600, 2.125	80.600, 2.026	80.600, 2.063	80.600, 1.726	80.600, 1.746	80.600, 1.813	80.600, 1.719
405	80.800, 2.213	80.800, 1.821	80.800, 2.133	80.800, 1.886	80.800, 2.149	80.800, 2.129	80.800, 2.030	80.800, 2.066	80.800, 1.727	80.800, 1.747	80.800, 1.815	80.800, 1.721
406	81.000, 2.216	81.000, 1.823	81.000, 2.137	81.000, 1.888	81.000, 2.153	81.000, 2.133	81.000, 2.034	81.000, 2.070	81.000, 1.729	81.000, 1.749	81.000, 1.817	81.000, 1.722
407	81.200, 2.220	81.200, 1.826	81.200, 2.141	81.200, 1.891	81.200, 2.156	81.200, 2.136	81.200, 2.038	81.200, 2.073	81.200, 1.731	81.200, 1.751	81.200, 1.819	81.200, 1.724
408	81.400, 2.223	81.400, 1.828	81.400, 2.145	81.400, 1.893	81.400, 2.160	81.400, 2.140	81.400, 2.042	81.400, 2.077	81.400, 1.733	81.400, 1.753	81.400, 1.821	81.400, 1.726
409	81.600, 2.227	81.600, 1.830	81.600, 2.149	81.600, 1.895	81.600, 2.164	81.600, 2.144	81.600, 2.046	81.600, 2.080	81.600, 1.735	81.600, 1.755	81.600, 1.823	81.600, 1.728
410	81.800, 2.230	81.800, 1.832	81.800, 2.153	81.800, 1.897	81.800, 2.168	81.800, 2.148	81.800, 2.050	81.800, 2.084	81.800, 1.737	81.800, 1.756	81.800, 1.825	81.800, 1.730
411	82.000, 2.234	82.000, 1.835	82.000, 2.157	82.000, 1.898	82.000, 2.171	82.000, 2.152	82.000, 2.054	82.000, 2.088	82.000, 1.739	82.000, 1.758	82.000, 1.827	82.000, 1.732
412	82.200, 2.237	82.200, 1.837	82.200, 2.160	82.200, 1.900	82.200, 2.175	82.200, 2.156	82.200, 2.057	82.200, 2.091	82.200, 1.741	82.200, 1.760	82.200, 1.829	82.200, 1.734
413	82.400, 2.241	82.400, 1.839	82.400, 2.164	82.400, 1.902	82.400, 2.179	82.400, 2.160	82.400, 2.061	82.400, 2.095	82.400, 1.743	82.400, 1.762	82.400, 1.831	82.400, 1.736
414	82.600, 2.244	82.600, 1.841	82.600, 2.167	82.600, 1.903	82.600, 2.183	82.600, 2.164	82.600, 2.064	82.600, 2.099	82.600, 1.746	82.600, 1.764	82.600, 1.833	82.600, 1.738
415	82.800, 2.248	82.800, 1.843	82.800, 2.170	82.800, 1.905	82.800, 2.187	82.800, 2.167	82.800, 2.067	82.800, 2.102	82.800, 1.748	82.800, 1.766	82.800, 1.835	82.800, 1.741
416	83.000, 2.251	83.000, 1.845	83.000, 2.174	83.000, 1.907	83.000, 2.190	83.000, 2.171	83.000, 2.071	83.000, 2.106	83.000, 1.749	83.000, 1.768	83.000, 1.837	83.000, 1.742
417	83.200, 2.254	83.200, 1.847	83.200, 2.177	83.200, 1.909	83.200, 2.194	83.200, 2.175	83.200, 2.074	83.200, 2.110	83.200, 1.751	83.200, 1.770	83.200, 1.839	83.200, 1.744
418	83.400, 2.258	83.400, 1.849	83.400, 2.180	83.400, 1.911	83.400, 2.198	83.400, 2.179	83.400, 2.078	83.400, 2.113	83.400, 1.753	83.400, 1.771	83.400, 1.841	83.400, 1.746
419	83.600, 2.261	83.600, 1.851	83.600, 2.184	83.600, 1.912	83.600, 2.201	83.600, 2.182	83.600, 2.081	83.600, 2.117	83.600, 1.754	83.600, 1.773	83.600, 1.842	83.600, 1.748
420	83.800, 2.264	83.800, 1.853	83.800, 2.187	83.800, 1.914	83.800, 2.205	83.800, 2.186	83.800, 2.085	83.800, 2.120	83.800, 1.756	83.800, 1.775	83.800, 1.844	83.800, 1.750
421	84.000, 2.267	84.000, 1.855	84.000, 2.190	84.000, 1.916	84.000, 2.209	84.000, 2.189	84.000, 2.088	84.000, 2.124	84.000, 1.757	84.000, 1.777	84.000, 1.846	84.000, 1.752
422	84.200, 2.271	84.200, 1.857	84.200, 2.193	84.200, 1.918	84.200, 2.212	84.200, 2.193	84.200, 2.091	84.200, 2.127	84.200, 1.759	84.200, 1.779	84.200, 1.848	84.200, 1.754
423	84.400, 2.274	84.400, 1.859	84.400, 2.197	84.400, 1.920	84.400, 2.216	84.400, 2.196	84.400, 2.095	84.400, 2.130	84.400, 1.761	84.400, 1.780	84.400, 1.849	84.400, 1.755
424	84.600, 2.277	84.600, 1.861	84.600, 2.200	84.600, 1.922	84.600, 2.219	84.600, 2.200	84.600, 2.098	84.600, 2.133	84.600, 1.762	84.600, 1.782	84.600, 1.851	84.600, 1.757
425	84.800, 2.280	84.800, 1.863	84.800, 2.203	84.800, 1.924	84.800, 2.223	84.800, 2.204	84.800, 2.102	84.800, 2.137	84.800, 1.764	84.800, 1.783	84.800, 1.853	84.800, 1.758
426	85.000, 2.283	85.000, 1.866	85.000, 2.207	85.000, 1.925	85.000, 2.226	85.000, 2.207	85.000, 2.105	85.000, 2.140	85.000, 1.765	85.000, 1.785	85.000, 1.854	85.000, 1.760
427	85.200, 2.286	85.200, 1.868	85.200, 2.210	85.200, 1.927	85.200, 2.230	85.200, 2.211	85.200, 2.109	85.200, 2.143	85.200, 1.766	85.200, 1.786	85.200, 1.856	85.200, 1.761
428	85.400, 2.289	85.400, 1.870	85.400, 2.213	85.400, 1.929	85.400, 2.233	85.400, 2.214	85.400, 2.112	85.400, 2.146	85.400, 1.767	85.400, 1.788	85.400, 1.857	85.400, 1.763
429	85.600, 2.292	85.600, 1.872	85.600, 2.217	85.600, 1.931	85.600, 2.237	85.600, 2.218	85.600, 2.116	85.600, 2.149	85.600, 1.768	85.600, 1.789	85.600, 1.859	85.600, 1.764
430	85.800, 2.295	85.800, 1.874	85.800, 2.220	85.800, 1.932	85.800, 2.240	85.800, 2.221	85.800, 2.119	85.800, 2.152	85.800, 1.770	85.800, 1.791	85.800, 1.860	85.800, 1.766
431	86.000, 2.298	86.000, 1.876	86.000, 2.223	86.000, 1.934	86.000, 2.243	86.000, 2.225	86.000, 2.122	86.000, 2.155	86.000, 1.771	86.000, 1.793	86.000, 1.862	86.000, 1.768
432	86.200, 2.301	86.200, 1.877	86.200, 2.227	86.200, 1.935	86.200, 2.246	86.200, 2.228	86.200, 2.125	86.200, 2.158	86.200, 1.773	86.200, 1.794	86.200, 1.863	86.200, 1.769
433	86.400, 2.304	86.400, 1.879	86.400, 2.230	86.400, 1.937	86.400, 2.248	86.400, 2.231	86.400, 2.128	86.400, 2.161	86.400, 1.775	86.400, 1.796	86.400, 1.865	86.400, 1.771
434	86.600, 2.306	86.600, 1.881	86.600, 2.233	86.600, 1.938	86.600, 2.251	86.600, 2.235	86.600, 2.131	86.600, 2.164	86.600, 1.777	86.600, 1.797	86.600, 1.866	86.600, 1.773
435	86.800, 2.309	86.800, 1.882	86.800, 2.237	86.800, 1.940	86.800, 2.254	86.800, 2.238	86.800, 2.134	86.800, 2.167	86.800, 1.778	86.800, 1.799	86.800, 1.867	86.800, 1.774
436	87.000, 2.312	87.000, 1.884	87.000, 2.240	87.000, 1.942	87.000, 2.257	87.000, 2.242	87.000, 2.137	87.000, 2.170	87.000, 1.780	87.000, 1.800	87.000, 1.869	87.000, 1.776
437	87.200, 2.315	87.200, 1.886	87.200, 2.243	87.200, 1.944	87.200, 2.260	87.200, 2.245	87.200, 2.140	87.200, 2.173	87.200, 1.781	87.200, 1.802	87.200, 1.870	87.200, 1.778
438	87.400, 2.318	87.400, 1.887	87.400, 2.246	87.400, 1.946	87.400, 2.263	87.400, 2.249	87.400, 2.143	87.400, 2.176	87.400, 1.783	87.400, 1.803	87.400, 1.871	87.400, 1.780
439	87.600, 2.320	87.600, 1.889	87.600, 2.250	87.600, 1.948	87.600, 2.266	87.600, 2.252	87.600, 2.146	87.600, 2.179	87.600, 1.784	87.600, 1.805	87.600, 1.872	87.600, 1.781
440	87.800, 2.323	87.800, 1.890	87.800, 2.253	87.800, 1.949	87.800, 2.269	87.800, 2.255	87.800, 2.149	87.800, 2.181	87.800, 1.786	87.800, 1.806	87.800, 1.873	87.800, 1.783
441	88.000, 2.326	88.000, 1.892	88.000, 2.256	88.000, 1.951	88.000, 2.272	88.000, 2.258	88.000, 2.152	88.000, 2.184	88.000, 1.787	88.000, 1.808	88.000, 1.875	88.000, 1.785
442	88.200, 2.329	88.200, 1.893	88.200, 2.258	88.200, 1.952	88.200, 2.276	88.200, 2.262	88.200, 2.155	88.200, 2.187	88.200, 1.789	88.200, 1.809	88.200, 1.876	88.200, 1.786
443	88.400, 2.332	88.400, 1.895	88.400, 2.261	88.400, 1.954	88.400, 2.279	88.400, 2.265	88.400, 2.158	88.400, 2.190	88.400, 1.790	88.400, 1.811	88.400, 1.878	88.400, 1.787
444	88.600, 2.335	88.600, 1.897	88.600, 2.264	88.600, 1.956	88.600, 2.282	88.600, 2.268	88.600, 2.161	88.600, 2.193	88.600, 1.791	88.600, 1.812	88.600, 1.879	88.600, 1.789
445	88.800, 2.338	88.800, 1.898	88.800, 2.267	88.800, 1.958	88.800, 2.285	88.800, 2.272	88.800, 2.164	88.800, 2.196	88.800, 1.792	88.800, 1.813	88.800, 1.881	88.800, 1.790
446	89.000, 2.341	89.000, 1.900	89.000, 2.269	89.000, 1.959	89.000, 2.288	89.000, 2.275	89.000, 2.167	89.000, 2.198	89.000, 1.793	89.000, 1.815	89.000, 1.882	89.000, 1.791
447	89.200, 2.344	89.200, 1.902	89.200, 2.272	89.200, 1.961	89.200, 2.291	89.200, 2.278	89.200, 2.170	89.200, 2.201	89.200, 1.794	89.200, 1.816	89.200, 1.884	89.200, 1.792
448	89.400, 2.346	89.400, 1.903	89.400, 2.275	89.400, 1.962	89.400, 2.294	89.400, 2.281	89.400, 2.173	89.400, 2.204	89.400, 1.796	89.400, 1.817	89.400, 1.885	89.400, 1.793
449	89.600, 2.349	89.600, 1.905	89.600, 2.277	89.600, 1.964	89.600, 2.297	89.600, 2.284	89.600, 2.176	89.600, 2.207	89.600, 1.797	89.600, 1.818	89.600, 1.887	89.600, 1.794
450	89.800, 2.351	89.800, 1.906	89.800, 2.280	89.800, 1.965	89.800, 2.300	89.800, 2.287	89.800, 2.178	89.800, 2.210	89.800, 1.798	89.800, 1.819	89.800, 1.889	89.800, 1.795
451	90.000, 2.353	90.000, 1.908	90.000, 2.283	90.000, 1.967	90.000, 2.303	90.000, 2.290	90.000, 2.181	90.000, 2.213	90.000, 1.800	90.000, 1.820	90.000, 1.890	90.000, 1.796
452	90.200, 2.356	90.200, 1.909	90.200, 2.285	90.200, 1.969	90.200, 2.305	90.200, 2.293	90.200, 2.184	90.200, 2.215	90.200, 1.801	90.200, 1.821	90.200, 1.891	90.200, 1.797
453	90.400, 2.358	90.400, 1.910	90.400, 2.288	90.400, 1.970	90.400, 2.308	90.400, 2.296	90.400, 2.187	90.400, 2.217	90.400, 1.802	90.400, 1.822	90.400, 1.892	90.400, 1.798
454	90.600, 2.360	90.600, 1.912	90.600, 2.291	90.600, 1.972	90.600, 2.311	90.600, 2.298	90.600, 2.189	90.600, 2.220	90.600, 1.804	90.600, 1.824	90.600, 1.893	90.600, 1.800
455	90.800, 2.362	90.800, 1.913	90.800, 2.293	90.800, 1.973	90.800, 2.313	90.800, 2.301	90.800, 2.192	90.800, 2.223	90.800, 1.805	90.800, 1.825	90.800, 1.894	90.800, 1.801
456	91.000, 2.364	91.000, 1.914	91.000, 2.296	91.000, 1.975	91.000, 2.316	91.000, 2.304	91.000, 2.194	91.000, 2.225	91.000, 1.806	91.000, 1.826	91.000, 1.895	91.000, 1.802
457	91.200, 2.367	91.200, 1.916	91.200, 2.299	91.200, 1.976	91.200, 2.319	91.200, 2.306	91.200, 2.197	91.200, 2.228	91.200, 1.808	91.200, 1.827	91.200, 1.896	91.200, 1.803
458	91.400, 2.370	91.400, 1.917	91.400, 2.302	91.400, 1.977	91.400, 2.321	91.400, 2.308	91.400, 2.199	91.400, 2.230	91.400, 1.809	91.400, 1.829	91.400, 1.897	91.400, 1.805
459	91.600, 2.372	91.600, 1.918	91.600, 2.305	91.600, 1.978	91.600, 2.324	91.600, 2.311	91.600, 2.202	91.600, 2.232	91.600, 1.810	91.600, 1.830	91.600, 1.898	91.600, 1.806
460	91.800, 2.375	91.800, 1.920	91.800, 2.308	91.800, 1.979	91.800, 2.326	91.800, 2.314	91.800, 2.204	91.800, 2.235	91.800, 1.811	91.800, 1.831	91.800, 1.899	91.800, 1.808
461	92.000, 2.377	92.000, 1.921	92.000, 2.310	92.000, 1.980	92.000, 2.329	92.000, 2.316	92.000, 2.207	92.000, 2.237	92.000, 1.813	92.000, 1.833	92.000, 1.900	92.000, 1.809
462	92.200, 2.380	92.200, 1.922	92.200, 2.313	92.200, 1.981	92.200, 2.332	92.200, 2.319	92.200, 2.209	92.200, 2.240	92.200, 1.814	92.200, 1.835	92.200, 1.902	92.200, 1.811
463	92.400, 2.382	92.400, 1.924	92.400, 2.316	92.400, 1.982	92.400, 2.334	92.400, 2.322	92.400, 2.212	92.400, 2.242	92.400, 1.815	92.400, 1.836	92.400, 1.903	92.400, 1.812
464	92.600, 2.384	92.600, 1.925	92.600, 2.319	92.600, 1.984	92.600, 2.336	92.600, 2.325	92.600, 2.214	92.600, 2.245	92.600, 1.816	92.600, 1.838	92.600, 1.905	92.600, 1.814
465	92.800, 2.387	92.800, 1.927	92.800, 2.321	92.800, 1.985	92.800, 2.339	92.800, 2.327	92.800, 2.216	92.800, 2.247	92.800, 1.818	92.800, 1.839	92.800, 1.906	92.800, 1.815
466	93.000, 2.389	93.000, 1.928	93.000, 2.324	93.000, 1.986	93.000, 2.341	93.000, 2.330	93.000, 2.219	93.000, 2.250	93.000, 1.819	93.000, 1.840	93.000, 1.908	93.000, 1.817
467	93.200, 2.391	93.200, 1.930	93.200, 2.326	93.200, 1.987	93.200, 2.344	93.200, 2.333	93.200, 2.221	93.200, 2.252	93.200, 1.820	93.200, 1.841	93.200, 1.909	93.200, 1.818
468	93.400, 2.394	93.400, 1.931	93.400, 2.328	93.400, 1.989	93.400, 2.347	93.400, 2.335	93.400, 2.224	93.400, 2.255	93.400, 1.821	93.400, 1.842	93.400, 1.911	93.400, 1.819
469	93.600, 2.396	93.600, 1.932	93.600, 2.330	93.600, 1.990	93.600, 2.349	93.600, 2.338	93.600, 2.226	93.600, 2.257	93.600, 1.822	93.600, 1.844	93.600, 1.913	93.600, 1.821
470	93.800, 2.398	93.800, 1.934	93.800, 2.332	93.800, 1.991	93.800, 2.352	93.800, 2.341	93.800, 2.229	93.800, 2.259	93.800, 1.823	93.800, 1.845	93.800, 1.914	93.800, 1.822
471	94.000, 2.401	94.000, 1.935	94.000, 2.334	94.000, 1.993	94.000, 2.354	94.000, 2.344	94.000, 2.231	94.000, 2.261	94.000, 1.824	94.000, 1.846	94.000, 1.915	94.000, 1.823
472	94.200, 2.403	94.200, 1.937	94.200, 2.336	94.200, 1.994	94.200, 2.357	94.200, 2.346	94.200, 2.233	94.200, 2.263	94.200, 1.825	94.200, 1.847	94.200, 1.917	94.200, 1.824
473	94.400, 2.405	94.400, 1.938	94.400, 2.338	94.400, 1.996	94.400, 2.359	94.400, 2.349	94.400, 2.235	94.400, 2.265	94.400, 1.826	94.400, 1.849	94.400, 1.918	94.400, 1.826
474	94.600, 2.408	94.600, 1.940	94.600, 2.341	94.600, 1.998	94.600, 2.362	94.600, 2.351	94.600, 2.237	94.600, 2.267	94.600, 1.827	94.600, 1.850	94.600, 1.919	94.600, 1.827
475	94.800, 2.410	94.800, 1.941	94.800, 2.343	94.800, 1.999	94.800, 2.364	94.800, 2.354	94.800, 2.239	94.800, 2.269	94.800, 1.827	94.800, 1.851	94.800, 1.920	94.800, 1.828
476	95.000, 2.412	95.000, 1.942	95.000, 2.345	95.000, 2.000	95.000, 2.367	95.000, 2.356	95.000, 2.241	95.000, 2.271	95.000, 1.829	95.000, 1.852	95.000, 1.922	95.000, 1.829
477	95.200, 2.415	95.200, 1.944	95.200, 2.348	95.200, 2.002	95.200, 2.369	95.200, 2.359	95.200, 2.244	95.200, 2.273	95.200, 1.829	95.200, 1.853	95.200, 1.923	95.200, 1.830
478	95.400, 2.417	95.400, 1.946	95.400, 2.350	95.400, 2.003	95.400, 2.371	95.400, 2.361	95.400, 2.246	95.400, 2.275	95.400, 1.830	95.400, 1.854	95.400, 1.924	95.400, 1.831
479	95.600, 2.419	95.600, 1.947	95.600, 2.353	95.600, 2.004	95.600, 2.374	95.600, 2.364	95.600, 2.248	95.600, 2.277	95.600, 1.831	95.600, 1.855	95.600, 1.925	95.600, 1.833
480	95.800, 2.421	95.800, 1.949	95.800, 2.355	95.800, 2.005	95.800, 2.376	95.800, 2.366	95.800, 2.250	95.800, 2.279	95.800, 1.833	95.800, 1.856	95.800, 1.925	95.800, 1.834
481	96.000, 2.422	96.000, 1.950	96.000, 2.358	96.000, 2.006	96.000, 2.378	96.000, 2.369	96.000, 2.252	96.000, 2.282	96.000, 1.834	96.000, 1.857	96.000, 1.926	96.000, 1.835
482	96.200, 2.424	96.200, 1.952	96.200, 2.361	96.200, 2.007	96.200, 2.381	96.200, 2.371	96.200, 2.255	96.200, 2.284	96.200, 1.835	96.200, 1.858	96.200, 1.927	96.200, 1.836
483	96.400, 2.426	96.400, 1.953	96.400, 2.363	96.400, 2.009	96.400, 2.383	96.400, 2.373	96.400, 2.257	96.400, 2.286	96.400, 1.836	96.400, 1.859	96.400, 1.928	96.400, 1.837
484	96.600, 2.428	96.600, 1.954	96.600, 2.366	96.600, 2.010	96.600, 2.385	96.600, 2.375	96.600, 2.260	96.600, 2.288	96.600, 1.837	96.600, 1.860	96.600, 1.929	96.600, 1.838
485	96.800, 2.430	96.800, 1.955	96.800, 2.368	96.800, 2.011	96.800, 2.387	96.800, 2.377	96.800, 2.262	96.800, 2.290	96.800, 1.838	96.800, 1.860	96.800, 1.930	96.800, 1.839
486	97.000, 2.432	97.000, 1.956	97.000, 2.371	97.000, 2.012	97.000, 2.389	97.000, 2.379	97.000, 2.265	97.000, 2.293	97.000, 1.839	97.000, 1.861	97.000, 1.931	97.000, 1.840
487	97.200, 2.434	97.200, 1.956	97.200, 2.373	97.200, 2.013	97.200, 2.391	97.200, 2.382	97.200, 2.267	97.200, 2.295	97.200, 1.840	97.200, 1.861	97.200, 1.932	97.200, 1.840
488	97.400, 2.436	97.400, 1.957	97.400, 2.375	97.400, 2.014	97.400, 2.393	97.400, 2.384	97.400, 2.270	97.400, 2.297	97.400, 1.841	97.400, 1.862	97.400, 1.932	97.400, 1.841
489	97.600, 2.438	97.600, 1.958	97.600, 2.377	97.600, 2.015	97.600, 2.395	97.600, 2.387	97.600, 2.272	97.600, 2.299	97.600, 1.842	97.600, 1.863	97.600, 1.933	97.600, 1.842
490	97.800, 2.440	97.800, 1.959	97.800, 2.379	97.800, 2.016	97.800, 2.397	97.800, 2.389	97.800, 2.275	97.800, 2.301	97.800, 1.843	97.800, 1.863	97.800, 1.934	97.800, 1.843
491	98.000, 2.442	98.000, 1.960	98.000, 2.382	98.000, 2.017	98.000, 2.399	98.000, 2.392	98.000, 2.277	98.000, 2.303	98.000, 1.844	98.000, 1.864	98.000, 1.935	98.000, 1.844
492	98.200, 2.444	98.200, 1.961	98.200, 2.384	98.200, 2.018	98.200, 2.401	98.200, 2.394	98.200, 2.279	98.200, 2.305	98.200, 1.845	98.200, 1.865	98.200, 1.936	98.200, 1.845
493	98.400, 2.446	98.400, 1.962	98.400, 2.386	98.400, 2.019	98.400, 2.403	98.400, 2.397	98.400, 2.280	98.400, 2.307	98.400, 1.846	98.400, 1.866	98.400, 1.937	98.400, 1.846
494	98.600, 2.448	98.600, 1.963	98.600, 2.388	98.600, 2.020	98.600, 2.405	98.600, 2.399	98.600, 2.282	98.600, 2.308	98.600, 1.847	98.600, 1.867	98.600, 1.938	98.600, 1.847
495	98.800, 2.450	98.800, 1.964	98.800, 2.390	98.800, 2.021	98.800, 2.407	98.800, 2.402	98.800, 2.284	98.800, 2.310	98.800, 1.848	98.800, 1.869	98.800, 1.939	98.800, 1.848
496	99.000, 2.451	99.000, 1.965	99.000, 2.391	99.000, 2.021	99.000, 2.409	99.000, 2.404	99.000, 2.286	99.000, 2.311	99.000, 1.849	99.000, 1.870	99.000, 1.941	99.000, 1.849
497	99.200, 2.453	99.200, 1.966	99.200, 2.393	99.200, 2.022	99.200, 2.411	99.200, 2.407	99.200, 2.288	99.200, 2.313	99.200, 1.850	99.200, 1.872	99.200, 1.942	99.200, 1.850
498	99.400, 2.455	99.400, 1.967	99.400, 2.394	99.400, 2.023	99.400, 2.413	99.400, 2.409	99.400, 2.290	99.400, 2.315	99.400, 1.851	99.400, 1.873	99.400, 1.943	99.400, 1.851
499	99.600, 2.456	99.600, 1.968	99.600, 2.396	99.600, 2.024	99.600, 2.415	99.600, 2.411	99.600, 2.292	99.600, 2.317	99.600, 1.852	99.600, 1.875	99.600, 1.944	99.600, 1.852
500	99.800, 2.458	99.800, 1.969	99.800, 2.398	99.800, 2.025	99.800, 2.417	99.800, 2.413	99.800, 2.294	99.800, 2.319	99.800, 1.853	99.800, 1.876	99.800, 1.945	99.800, 1.853
501	100.000, 2.459	100.000, 1.971	100.000, 2.400	100.000, 2.026	100.000, 2.419	100.000, 2.414	100.000, 2.296	100.000, 2.321	100.000, 1.854	100.000, 1.877	100.000, 1.947	100.000, 1.854
502	100.200, 2.461	100.200, 1.972	100.200, 2.402	100.200, 2.027	100.200, 2.421	100.200, 2.416	100.200, 2.298	100.200, 2.323	100.200, 1.855	100.200, 1.879	100.200, 1.948	100.200, 1.855
503	100.400, 2.463	100.400, 1.973	100.400, 2.404	100.400, 2.028	100.400, 2.423	100.400, 2.417	100.400, 2.300	100.400, 2.325	100.400, 1.856	100.400, 1.880	100.400, 1.948	100.400, 1.856
504	100.600, 2.465	100.600, 1.974	100.600, 2.406	100.600, 2.029	100.600, 2.425	100.600, 2.419	100.600, 2.302	100.600, 2.327	100.600, 1.857	100.600, 1.881	100.600, 1.949	100.600, 1.857
505	100.800, 2.467	100.800, 1.975	100.800, 2.408	100.800, 2.030	100.800, 2.427	100.800, 2.420	100.800, 2.304	100.800, 2.329	100.800, 1.858	100.800, 1.881	100.800, 1.950	100.800, 1.858
506	101.000, 2.468	101.000, 1.976	101.000, 2.409	101.000, 2.031	101.000, 2.429	101.000, 2.422	101.000, 2.307	101.000, 2.331	101.000, 1.859	101.000, 1.882	101.000, 1.951	101.000, 1.859
507	101.200, 2.470	101.200, 1.977	101.200, 2.411	101.200, 2.032	101.200, 2.431	101.200, 2.424	101.200, 2.309	101.200, 2.333	101.200, 1.859	101.200, 1.883	101.200, 1.951	101.200, 1.860
508	101.400, 2.472	101.400, 1.979	101.400, 2.413	101.400, 2.033	101.400, 2.433	101.400, 2.426	101.400, 2.311	101.400, 2.336	101.400, 1.860	101.400, 1.883	101.400, 1.952	101.400, 1.860
509	101.600, 2.473	101.600, 1.980	101.600, 2.415	101.600, 2.034	101.600, 2.435	101.600, 2.428	101.600, 2.313	101.600, 2.338	101.600, 1.861	101.600, 1.883	101.600, 1.953	101.600, 1.861
510	101.800, 2.474	101.800, 1.981	101.800, 2.417	101.800, 2.035	101.800, 2.437	101.800, 2.430	101.800, 2.314	101.800, 2.340	101.800, 1.861	101.800, 1.884	101.800, 1.953	101.800, 1.862
511	102.000, 2.476	102.000, 1.983	102.000, 2.419	102.000, 2.036	102.000, 2.439	102.000, 2.432	102.000, 2.316	102.000, 2.341	102.000, 1.862	102.000, 1.885	102.000, 1.954	102.000, 1.863
512	102.200, 2.477	102.200, 1.984	102.200, 2.421	102.200, 2.037	102.200, 2.440	102.200, 2.434	102.200, 2.318	102.200, 2.343	102.200, 1.863	102.200, 1.885	102.200, 1.955	102.200, 1.863
513	102.400, 2.478	102.400, 1.985	102.400, 2.423	102.400, 2.038	102.400, 2.442	102.400, 2.436	102.400, 2.319	102.400, 2.345	102.400, 1.863	102.400, 1.886	102.400, 1.956	102.400, 1.864
514	102.600, 2.479	102.600, 1.986	102.600, 2.424	102.600, 2.039	102.600, 2.444	102.600, 2.438	102.600, 2.320	102.600, 2.346	102.600, 1.864	102.600, 1.887	102.600, 1.957	102.600, 1.865
515	102.800, 2.481	102.800, 1.987	102.800, 2.426	102.800, 2.040	102.800, 2.446	102.800, 2.440	102.800, 2.322	102.800, 2.348	102.800, 1.865	102.800, 1.888	102.800, 1.957	102.800, 1.866
516	103.000, 2.482	103.000, 1.988	103.000, 2.427	103.000, 2.041	103.000, 2.448	103.000, 2.442	103.000, 2.323	103.000, 2.349	103.000, 1.866	103.000, 1.888	103.000, 1.958	103.000, 1.867
517	103.200, 2.483	103.200, 1.989	103.200, 2.429	103.200, 2.041	103.200, 2.450	103.200, 2.444	103.200, 2.325	103.200, 2.351	103.200, 1.866	103.200, 1.889	103.200, 1.959	103.200, 1.868
518	103.400, 2.485	103.400, 1.990	103.400, 2.431	103.400, 2.042	103.400, 2.451	103.400, 2.446	103.400, 2.326	103.400, 2.352	103.400, 1.867	103.400, 1.890	103.400, 1.960	103.400, 1.869
519	103.600, 2.486	103.600, 1.991	103.600, 2.433	103.600, 2.043	103.600, 2.453	103.600, 2.447	103.600, 2.328	103.600, 2.354	103.600, 1.868	103.600, 1.890	103.600, 1.961	103.600, 1.870
520	103.800, 2.488	103.800, 1.992	103.800, 2.435	103.800, 2.044	103.800, 2.454	103.800, 2.449	103.800, 2.330	103.800, 2.355	103.800, 1.869	103.800, 1.891	103.800, 1.962	103.800, 1.871
521	104.000, 2.489	104.000, 1.993	104.000, 2.436	104.000, 2.045	104.000, 2.456	104.000, 2.450	104.000, 2.331	104.000, 2.357	104.000, 1.870	104.000, 1.892	104.000, 1.962	104.000, 1.872
522	104.200, 2.491	104.200, 1.994	104.200, 2.438	104.200, 2.046	104.200, 2.458	104.200, 2.451	104.200, 2.333	104.200, 2.358	104.200, 1.871	104.200, 1.893	104.200, 1.963	104.200, 1.873
523	104.400, 2.493	104.400, 1.995	104.400, 2.440	104.400, 2.047	104.400, 2.459	104.400, 2.453	104.400, 2.335	104.400, 2.359	104.400, 1.872	104.400, 1.894	104.400, 1.964	104.400, 1.873
524	104.600, 2.494	104.600, 1.996	104.600, 2.441	104.600, 2.048	104.600, 2.461	104.600, 2.455	104.600, 2.336	104.600, 2.360	104.600, 1.873	104.600, 1.895	104.600, 1.964	104.600, 1.874
525	104.800, 2.496	104.800, 1.996	104.800, 2.443	104.800, 2.049	104.800, 2.463	104.800, 2.456	104.800, 2.338	104.800, 2.361	104.800, 1.873	104.800, 1.896	104.800, 1.965	104.800, 1.875
526	105.000, 2.498	105.000, 1.997	105.000, 2.444	105.000, 2.050	105.000, 2.464	105.000, 2.458	105.000, 2.339	105.000, 2.362	105.000, 1.874	105.000, 1.897	105.000, 1.966	105.000, 1.875
527	105.200, 2.499	105.200, 1.998	105.200, 2.446	105.200, 2.051	105.200, 2.466	105.200, 2.460	105.200, 2.341	105.200, 2.364	105.200, 1.875	105.200, 1.898	105.200, 1.967	105.200, 1.876
528	105.400, 2.501	105.400, 1.999	105.400, 2.447	105.400, 2.051	105.400, 2.468	105.400, 2.462	105.400, 2.342	105.400, 2.366	105.400, 1.875	105.400, 1.898	105.400, 1.968	105.400, 1.877
529	105.600, 2.502	105.600, 2.000	105.600, 2.449	105.600, 2.052	105.600, 2.469	105.600, 2.464	105.600, 2.344	105.600, 2.367	105.600, 1.876	105.600, 1.899	105.600, 1.969	105.600, 1.877
530	105.800, 2.504	105.800, 2.001	105.800, 2.451	105.800, 2.052	105.800, 2.471	105.800, 2.466	105.800, 2.345	105.800, 2.369	105.800, 1.877	105.800, 1.900	105.800, 1.969	105.800, 1.878
531	106.000, 2.505	106.000, 2.002	106.000, 2.452	106.000, 2.053	106.000, 2.472	106.000, 2.468	106.000, 2.347	106.000, 2.370	106.000, 1.878	106.000, 1.901	106.000, 1.970	106.000, 1.879
532	106.200, 2.506	106.200, 2.002	106.200, 2.454	106.200, 2.054	106.200, 2.474	106.200, 2.470	106.200, 2.348	106.200, 2.372	106.200, 1.879	106.200, 1.901	106.200, 1.971	106.200, 1.880
533	106.400, 2.508	106.400, 2.003	106.400, 2.455	106.400, 2.054	106.400, 2.475	106.400, 2.472	106.400, 2.350	106.400, 2.373	106.400, 1.880	106.400, 1.902	106.400, 1.971	106.400, 1.880
534	106.600, 2.509	106.600, 2.004	106.600, 2.457	106.600, 2.055	106.600, 2.477	106.600, 2.473	106.600, 2.351	106.600, 2.375	106.600, 1.880	106.600, 1.903	106.600, 1.972	106.600, 1.881
535	106.800, 2.510	106.800, 2.004	106.800, 2.458	106.800, 2.055	106.800, 2.479	106.800, 2.475	106.800, 2.353	106.800, 2.376	106.800, 1.881	106.800, 1.903	106.800, 1.973	106.800, 1.882
536	107.000, 2.511	107.000, 2.005	107.000, 2.460	107.000, 2.056	107.000, 2.480	107.000, 2.477	107.000, 2.354	107.000, 2.378	107.000, 1.882	107.000, 1.904	107.000, 1.974	107.000, 1.883
537	107.200, 2.513	107.200, 2.005	107.200, 2.462	107.200, 2.056	107.200, 2.482	107.200, 2.478	107.200, 2.356	107.200, 2.380	107.200, 1.882	107.200, 1.905	107.200, 1.975	107.200, 1.883
538	107.400, 2.514	107.400, 2.006	107.400, 2.463	107.400, 2.057	107.400, 2.483	107.400, 2.480	107.400, 2.358	107.400, 2.381	107.400, 1.883	107.400, 1.906	107.400, 1.975	107.400, 1.884
539	107.600, 2.515	107.600, 2.007	107.600, 2.465	107.600, 2.058	107.600, 2.485	107.600, 2.481	107.600, 2.360	107.600, 2.383	107.600, 1.883	107.600, 1.906	107.600, 1.976	107.600, 1.884
540	107.800, 2.516	107.800, 2.007	107.800, 2.466	107.800, 2.058	107.800, 2.486	107.800, 2.483	107.800, 2.361	107.800, 2.384	107.800, 1.884	107.800, 1.907	107.800, 1.977	107.800, 1.885
541	108.000, 2.517	108.000, 2.008	108.000, 2.467	108.000, 2.059	108.000, 2.488	108.000, 2.484	108.000, 2.363	108.000, 2.385	108.000, 1.884	108.000, 1.908	108.000, 1.977	108.000, 1.886
542	108.200, 2.519	108.200, 2.009	108.200, 2.469	108.200, 2.060	108.200, 2.490	108.200, 2.486	108.200, 2.364	108.200, 2.387	108.200, 1.884	108.200, 1.909	108.200, 1.978	108.200, 1.886
543	108.400, 2.520	108.400, 2.009	108.400, 2.470	108.400, 2.061	108.400, 2.491	108.400, 2.487	108.400, 2.366	108.400, 2.388	108.400, 1.885	108.400, 1.910	108.400, 1.978	108.400, 1.887
544	108.600, 2.522	108.600, 2.010	108.600, 2.471	108.600, 2.062	108.600, 2.492	108.600, 2.489	108.600, 2.367	108.600, 2.389	108.600, 1.885	108.600, 1.911	108.600, 1.979	108.600, 1.888
545	108.800, 2.523	108.800, 2.011	108.800, 2.472	108.800, 2.063	108.800, 2.494	108.800, 2.490	108.800, 2.369	108.800, 2.391	108.800, 1.886	108.800, 1.911	108.800, 1.980	108.800, 1.888
546	109.000, 2.524	109.000, 2.011	109.000, 2.474	109.000, 2.064	109.000, 2.495	109.000, 2.492	109.000, 2.370	109.000, 2.392	109.000, 1.886	109.000, 1.912	109.000, 1.982	109.000, 1.889
547	109.200, 2.525	109.200, 2.012	109.200, 2.475	109.200, 2.065	109.200, 2.497	109.200, 2.493	109.200, 2.372	109.200, 2.393	109.200, 1.887	109.200, 1.913	109.200, 1.982	109.200, 1.890
548	109.400, 2.526	109.400, 2.013	109.400, 2.477	109.400, 2.066	109.400, 2.498	109.400, 2.495	109.400, 2.373	109.400, 2.394	109.400, 1.888	109.400, 1.914	109.400, 1.983	109.400, 1.891
549	109.600, 2.527	109.600, 2.014	109.600, 2.478	109.600, 2.066	109.600, 2.499	109.600, 2.496	109.600, 2.375	109.600, 2.395	109.600, 1.888	109.600, 1.914	109.600, 1.984	109.600, 1.891
550	109.800, 2.528	109.800, 2.016	109.800, 2.479	109.800, 2.067	109.800, 2.500	109.800, 2.498	109.800, 2.376	109.800, 2.396	109.800, 1.889	109.800, 1.914	109.800, 1.985	109.800, 1.892
551	110.000, 2.529	110.000, 2.017	110.000, 2.481	110.000, 2.068	110.000, 2.502	110.000, 2.499	110.000, 2.377	110.000, 2.397	110.000, 1.890	110.000, 1.915	110.000, 1.986	110.000, 1.893
552	110.200, 2.530	110.200, 2.018	110.200, 2.482	110.200, 2.069	110.200, 2.503	110.200, 2.501	110.200, 2.379	110.200, 2.398	110.200, 1.891	110.200, 1.916	110.200, 1.986	110.200, 1.894
553	110.400, 2.531	110.400, 2.019	110.400, 2.484	110.400, 2.069	110.400, 2.504	110.400, 2.502	110.400, 2.380	110.400, 2.400	110.400, 1.892	110.400, 1.916	110.400, 1.987	110.400, 1.894
554	110.600, 2.532	110.600, 2.019	110.600, 2.485	110.600, 2.070	110.600, 2.506	110.600, 2.504	110.600, 2.381	110.600, 2.401	110.600, 1.893	110.600, 1.917	110.600, 1.988	110.600, 1.895
555	110.800, 2.533	110.800, 2.020	110.800, 2.487	110.800, 2.070	110.800, 2.507	110.800, 2.506	110.800, 2.382	110.800, 2.402	110.800, 1.893	110.800, 1.917	110.800, 1.989	110.800, 1.896
556	111.000, 2.534	111.000, 2.021	111.000, 2.488	111.000, 2.071	111.000, 2.508	111.000, 2.507	111.000, 2.384	111.000, 2.404	111.000, 1.893	111.000, 1.918	111.000, 1.989	111.000, 1.896
557	111.200, 2.535	111.200, 2.022	111.200, 2.489	111.200, 2.071	111.200, 2.509	111.200, 2.508	111.200, 2.385	111.200, 2.405	111.200, 1.894	111.200, 1.918	111.200, 1.990	111.200, 1.897
558	111.400, 2.536	111.400, 2.023	111.400, 2.491	111.400, 2.072	111.400, 2.511	111.400, 2.510	111.400, 2.386	111.400, 2.406	111.400, 1.894	111.400, 1.919	111.400, 1.991	111.400, 1.898
559	111.600, 2.537	111.600, 2.023	111.600, 2.492	111.600, 2.073	111.600, 2.512	111.600, 2.511	111.600, 2.387	111.600, 2.408	111.600, 1.895	111.600, 1.919	111.600, 1.991	111.600, 1.899
560	111.800, 2.538	111.800, 2.024	111.800, 2.493	111.800, 2.074	111.800, 2.513	111.800, 2.512	111.800, 2.389	111.800, 2.409	111.800, 1.895	111.800, 1.920	111.800, 1.991	111.800, 1.899
561	112.000, 2.539	112.000, 2.024	112.000, 2.494	112.000, 2.074	112.000, 2.514	112.000, 2.514	112.000, 2.390	112.000, 2.410	112.000, 1.896	112.000, 1.920	112.000, 1.991	112.000, 1.900
562	112.200, 2.540	112.200, 2.024	112.200, 2.496	112.200, 2.075	112.200, 2.516	112.200, 2.515	112.200, 2.391	112.200, 2.411	112.200, 1.896	112.200, 1.921	112.200, 1.992	112.200, 1.901
563	112.400, 2.542	112.400, 2.025	112.400, 2.497	112.400, 2.076	112.400, 2.517	112.400, 2.516	112.400, 2.392	112.400, 2.412	112.400, 1.897	112.400, 1.921	112.400, 1.993	112.400, 1.902
564	112.600, 2.543	112.600, 2.025	112.600, 2.498	112.600, 2.076	112.600, 2.518	112.600, 2.518	112.600, 2.394	112.600, 2.413	112.600, 1.898	112.600, 1.922	112.600, 1.993	112.600, 1.902
565	112.800, 2.544	112.800, 2.026	112.800, 2.499	112.800, 2.077	112.800, 2.520	112.800, 2.519	112.800, 2.395	112.800, 2.414	112.800, 1.898	112.800, 1.922	112.800, 1.994	112.800, 1.903
566	113.000, 2.545	113.000, 2.026	113.000, 2.500	113.000, 2.077	113.000, 2.521	113.000, 2.520	113.000, 2.396	113.000, 2.415	113.000, 1.899	113.000, 1.922	113.000, 1.994	113.000, 1.904
567	113.200, 2.546	113.200, 2.027	113.200, 2.502	113.200, 2.078	113.200, 2.522	113.200, 2.522	113.200, 2.398	113.200, 2.416	113.200, 1.900	113.200, 1.923	113.200, 1.995	113.200, 1.904
568	113.400, 2.547	113.400, 2.028	113.400, 2.503	113.400, 2.079	113.400, 2.523	113.400, 2.523	113.400, 2.399	113.400, 2.417	113.400, 1.901	113.400, 1.923	113.400, 1.995	113.400, 1.904
569	113.600, 2.548	113.600, 2.029	113.600, 2.504	113.600, 2.079	113.600, 2.525	113.600, 2.524	113.600, 2.400	113.600, 2.418	113.600, 1.902	113.600, 1.923	113.600, 1.996	113.600, 1.905
570	113.800, 2.549	113.800, 2.030	113.800, 2.505	113.800, 2.080	113.800, 2.526	113.800, 2.525	113.800, 2.401	113.800, 2.419	113.800, 1.902	113.800, 1.923	113.800, 1.996	113.800, 1.905
571	114.000, 2.550	114.000, 2.031	114.000, 2.507	114.000, 2.080	114.000, 2.527	114.000, 2.526	114.000, 2.402	114.000, 2.420	114.000, 1.903	114.000, 1.924	114.000, 1.997	114.000, 1.906
572	114.200, 2.551	114.200, 2.031	114.200, 2.508	114.200, 2.081	114.200, 2.529	114.200, 2.528	114.200, 2.403	114.200, 2.421	114.200, 1.904	114.200, 1.924	114.200, 1.997	114.200, 1.906
573	114.400, 2.552	114.400, 2.032	114.400, 2.509	114.400, 2.081	114.400, 2.530	114.400, 2.529	114.400, 2.404	114.400, 2.423	114.400, 1.904	114.400, 1.925	114.400, 1.998	114.400, 1.907
574	114.600, 2.553	114.600, 2.033	114.600, 2.510	114.600, 2.081	114.600, 2.531	114.600, 2.530	114.600, 2.405	114.600, 2.424	114.600, 1.905	114.600, 1.926	114.600, 1.998	114.600, 1.907
575	114.800, 2.554	114.800, 2.034	114.800, 2.511	114.800, 2.082	114.800, 2.532	114.800, 2.531	114.800, 2.406	114.800, 2.425	114.800, 1.905	114.800, 1.927	114.800, 1.999	114.800, 1.908
576	115.000, 2.554	115.000, 2.035	115.000, 2.512	115.000, 2.082	115.000, 2.533	115.000, 2.532	115.000, 2.407	115.000, 2.426	115.000, 1.906	115.000, 1.928	115.000, 2.000	115.000, 1.908
577	115.200, 2.555	115.200, 2.035	115.200, 2.513	115.200, 2.083	115.200, 2.535	115.200, 2.533	115.200, 2.408	115.200, 2.427	115.200, 1.906	115.200, 1.928	115.200, 2.000	115.200, 1.909
578	115.400, 2.555	115.400, 2.036	115.400, 2.514	115.400, 2.084	115.400, 2.536	115.400, 2.535	115.400, 2.409	115.400, 2.428	115.400, 1.906	115.400, 1.929	115.400, 2.001	115.400, 1.909
579	115.600, 2.556	115.600, 2.036	115.600, 2.515	115.600, 2.085	115.600, 2.537	115.600, 2.536	115.600, 2.410	115.600, 2.429	115.600, 1.907	115.600, 1.930	115.600, 2.001	115.600, 1.909
580	115.800, 2.557	115.800, 2.037	115.800, 2.517	115.800, 2.085	115.800, 2.538	115.800, 2.537	115.800, 2.412	115.800, 2.430	115.800, 1.907	115.800, 1.931	115.800, 2.002	115.800, 1.910
581	116.000, 2.557	116.000, 2.037	116.000, 2.518	116.000, 2.086	116.000, 2.539	116.000, 2.538	116.000, 2.413	116.000, 2.431	116.000, 1.907	116.000, 1.932	116.000, 2.002	116.000, 1.910
582	116.200, 2.558	116.200, 2.037	116.200, 2.519	116.200, 2.086	116.200, 2.540	116.200, 2.539	116.200, 2.414	116.200, 2.431	116.200, 1.908	116.200, 1.932	116.200, 2.002	116.200, 1.911
583	116.400, 2.559	116.400, 2.038	116.400, 2.520	116.400, 2.087	116.400, 2.541	116.400, 2.540	116.400, 2.415	116.400, 2.432	116.400, 1.908	116.400, 1.933	116.400, 2.003	116.400, 1.912
584	116.600, 2.560	116.600, 2.039	116.600, 2.522	116.600, 2.088	116.600, 2.542	116.600, 2.541	116.600, 2.417	116.600, 2.433	116.600, 1.909	116.600, 1.933	116.600, 2.003	116.600, 1.913
585	116.800, 2.561	116.800, 2.039	116.800, 2.523	116.800, 2.088	116.800, 2.542	116.800, 2.542	116.800, 2.418	116.800, 2.434	116.800, 1.909	116.800, 1.934	116.800, 2.004	116.800, 1.913
586	117.000, 2.562	117.000, 2.040	117.000, 2.524	117.000, 2.089	117.000, 2.543	117.000, 2.543	117.000, 2.419	117.000, 2.435	117.000, 1.910	117.000, 1.934	117.000, 2.004	117.000, 1.914
587	117.200, 2.564	117.200, 2.041	117.200, 2.525	117.200, 2.090	117.200, 2.544	117.200, 2.544	117.200, 2.420	117.200, 2.436	117.200, 1.911	117.200, 1.934	117.200, 2.005	117.200, 1.914
588	117.400, 2.565	117.400, 2.041	117.400, 2.526	117.400, 2.090	117.400, 2.545	117.400, 2.545	117.400, 2.421	117.400, 2.436	117.400, 1.911	117.400, 1.935	117.400, 2.006	117.400, 1.914
589	117.600, 2.566	117.600, 2.042	117.600, 2.527	117.600, 2.090	117.600, 2.546	117.600, 2.546	117.600, 2.422	117.600, 2.437	117.600, 1.911	117.600, 1.935	117.600, 2.006	117.600, 1.915
590	117.800, 2.567	117.800, 2.043	117.800, 2.528	117.800, 2.091	117.800, 2.547	117.800, 2.547	117.800, 2.424	117.800, 2.438	117.800, 1.911	117.800, 1.935	117.800, 2.007	117.800, 1.915
591	118.000, 2.568	118.000, 2.043	118.000, 2.529	118.000, 2.091	118.000, 2.548	118.000, 2.548	118.000, 2.425	118.000, 2.438	118.000, 1.912	118.000, 1.935	118.000, 2.007	118.000, 1.916
592	118.200, 2.569	118.200, 2.044	118.200, 2.530	118.200, 2.092	118.200, 2.549	118.200, 2.549	118.200, 2.426	118.200, 2.439	118.200, 1.912	118.200, 1.936	118.200, 2.008	118.200, 1.916
593	118.400, 2.570	118.400, 2.044	118.400, 2.531	118.400, 2.092	118.400, 2.550	118.400, 2.550	118.400, 2.427	118.400, 2.440	118.400, 1.913	118.400, 1.937	118.400, 2.008	118.400, 1.916
594	118.600, 2.570	118.600, 2.045	118.600, 2.531	118.600, 2.092	118.600, 2.551	118.600, 2.551	118.600, 2.428	118.600, 2.441	118.600, 1.913	118.600, 1.937	118.600, 2.009	118.600, 1.917
595	118.800, 2.571	118.800, 2.045	118.800, 2.532	118.800, 2.093	118.800, 2.552	118.800, 2.553	118.800, 2.429	118.800, 2.442	118.800, 1.913	118.800, 1.938	118.800, 2.009	118.800, 1.917
596	119.000, 2.571	119.000, 2.046	119.000, 2.533	119.000, 2.093	119.000, 2.552	119.000, 2.554	119.000, 2.430	119.000, 2.443	119.000, 1.914	119.000, 1.938	119.000, 2.010	119.000, 1.917
597	119.200, 2.572	119.200, 2.046	119.200, 2.533	119.200, 2.093	119.200, 2.553	119.200, 2.556	119.200, 2.431	119.200, 2.444	119.200, 1.914	119.200, 1.939	119.200, 2.010	119.200, 1.918
598	119.400, 2.572	119.400, 2.046	119.400, 2.534	119.400, 2.093	119.400, 2.553	119.400, 2.557	119.400, 2.432	119.400, 2.446	119.400, 1.915	119.400, 1.939	119.400, 2.011	119.400, 1.918
599	119.600, 2.573	119.600, 2.047	119.600, 2.535	119.600, 2.094	119.600, 2.553	119.600, 2.559	119.600, 2.433	119.600, 2.447	119.600, 1.915	119.600, 1.939	119.600, 2.011	119.600, 1.919
600	119.800, 2.573	119.800, 2.047	119.800, 2.536	119.800, 2.094	119.800, 2.552	119.800, 2.560	119.800, 2.434	119.800, 2.448	119.800, 1.916	119.800, 1.940	119.800, 2.011	119.800, 1.919
601	120.000, 2.573	120.000, 2.047	120.000, 2.536	120.000, 2.095	120.000, 2.552	120.000, 2.561	120.000, 2.436	120.000, 2.449	120.000, 1.916	120.000, 1.940	120.000, 2.011	120.000, 1.920
602	120.200, 2.574	120.200, 2.048	120.200, 2.537	120.200, 2.096	120.200, 2.552	120.200, 2.562	120.200, 2.437	120.200, 2.450	120.200, 1.917	120.200, 1.941	120.200, 2.012	120.200, 1.920
603	120.400, 2.574	120.400, 2.048	120.400, 2.538	120.400, 2.096	120.400, 2.551	120.400, 2.564	120.400, 2.438	120.400, 2.451	120.400, 1.918	120.400, 1.941	120.400, 2.012	120.400, 1.921
604	120.600, 2.575	120.600, 2.048	120.600, 2.539	120.600, 2.097	120.600, 2.551	120.600, 2.565	120.600, 2.439	120.600, 2.452	120.600, 1.918	120.600, 1.941	120.600, 2.012	120.600, 1.921
605	120.800, 2.575	120.800, 2.049	120.800, 2.540	120.800, 2.098	120.800, 2.551	120.800, 2.566	120.800, 2.439	120.800, 2.453	120.800, 1.919	120.800, 1.942	120.800, 2.013	120.800, 1.921
606	121.000, 2.576	121.000, 2.049	121.000, 2.541	121.000, 2.098	121.000, 2.551	121.000, 2.567	121.000, 2.440	121.000, 2.454	121.000, 1.919	121.000, 1.942	121.000, 2.013	121.000, 1.922
607	121.200, 2.577	121.200, 2.049	121.200, 2.543	121.200, 2.099	121.200, 2.551	121.200, 2.568	121.200, 2.441	121.200, 2.454	121.200, 1.920	121.200, 1.942	121.200, 2.014	121.200, 1.923
608	121.400, 2.578	121.400, 2.050	121.400, 2.544	121.400, 2.099	121.400, 2.552	121.400, 2.568	121.400, 2.441	121.400, 2.455	121.400, 1.920	121.400, 1.942	121.400, 2.014	121.400, 1.923
609	121.600, 2.579	121.600, 2.050	121.600, 2.545	121.600, 2.100	121.600, 2.552	121.600, 2.569	121.600, 2.442	121.600, 2.456	121.600, 1.920	121.600, 1.943	121.600, 2.015	121.600, 1.924
610	121.800, 2.579	121.800, 2.050	121.800, 2.546	121.800, 2.101	121.800, 2.553	121.800, 2.569	121.800, 2.443	121.800, 2.456	121.800, 1.920	121.800, 1.943	121.800, 2.016	121.800, 1.924
611	122.000, 2.580	122.000, 2.051	122.000, 2.548	122.000, 2.102	122.000, 2.555	122.000, 2.570	122.000, 2.444	122.000, 2.457	122.000, 1.920	122.000, 1.944	122.000, 2.016	122.000, 1.924
612	122.200, 2.581	122.200, 2.051	122.200, 2.549	122.200, 2.102	122.200, 2.556	122.200, 2.570	122.200, 2.445	122.200, 2.458	122.200, 1.921	122.200, 1.944	122.200, 2.017	122.200, 1.925
613	122.400, 2.582	122.400, 2.052	122.400, 2.550	122.400, 2.103	122.400, 2.557	122.400, 2.571	122.400, 2.445	122.400, 2.459	122.400, 1.921	122.400, 1.945	122.400, 2.018	122.400, 1.925
614	122.600, 2.583	122.600, 2.053	122.600, 2.551	122.600, 2.103	122.600, 2.557	122.600, 2.572	122.600, 2.446	122.600, 2.460	122.600, 1.921	122.600, 1.946	122.600, 2.019	122.600, 1.926
615	122.800, 2.584	122.800, 2.053	122.800, 2.552	122.800, 2.103	122.800, 2.558	122.800, 2.572	122.800, 2.447	122.800, 2.461	122.800, 1.921	122.800, 1.946	122.800, 2.020	122.800, 1.926
616	123.000, 2.584	123.000, 2.054	123.000, 2.553	123.000, 2.103	123.000, 2.559	123.000, 2.573	123.000, 2.448	123.000, 2.462	123.000, 1.922	123.000, 1.947	123.000, 2.020	123.000, 1.927
617	123.200, 2.585	123.200, 2.055	123.200, 2.553	123.200, 2.103	123.200, 2.559	123.200, 2.574	123.200, 2.449	123.200, 2.463	123.200, 1.922	123.200, 1.947	123.200, 2.021	123.200, 1.927
618	123.400, 2.586	123.400, 2.056	123.400, 2.554	123.400, 2.103	123.400, 2.560	123.400, 2.575	123.400, 2.450	123.400, 2.464	123.400, 1.923	123.400, 1.948	123.400, 2.021	123.400, 1.928
619	123.600, 2.586	123.600, 2.056	123.600, 2.554	123.600, 2.104	123.600, 2.561	123.600, 2.576	123.600, 2.451	123.600, 2.465	123.600, 1.923	123.600, 1.948	123.600, 2.021	123.600, 1.928
620	123.800, 2.587	123.800, 2.057	123.800, 2.555	123.800, 2.104	123.800, 2.562	123.800, 2.576	123.800, 2.452	123.800, 2.466	123.800, 1.924	123.800, 1.949	123.800, 2.021	123.800, 1.929
621	124.000, 2.587	124.000, 2.058	124.000, 2.556	124.000, 2.105	124.000, 2.562	124.000, 2.577	124.000, 2.453	124.000, 2.466	124.000, 1.925	124.000, 1.949	124.000, 2.021	124.000, 1.929
622	124.200, 2.588	124.200, 2.058	124.200, 2.556	124.200, 2.105	124.200, 2.563	124.200, 2.578	124.200, 2.454	124.200, 2.467	124.200, 1.925	124.200, 1.950	124.200, 2.021	124.200, 1.930
623	124.400, 2.588	124.400, 2.058	124.400, 2.557	124.400, 2.105	124.400, 2.564	124.400, 2.579	124.400, 2.454	124.400, 2.468	124.400, 1.926	124.400, 1.950	124.400, 2.021	124.400, 1.930
624	124.600, 2.589	124.600, 2.058	124.600, 2.558	124.600, 2.106	124.600, 2.564	124.600, 2.580	124.600, 2.455	124.600, 2.468	124.600, 1.926	124.600, 1.951	124.600, 2.021	124.600, 1.930
625	124.800, 2.589	124.800, 2.059	124.800, 2.559	124.800, 2.106	124.800, 2.565	124.800, 2.581	124.800, 2.455	124.800, 2.469	124.800, 1.926	124.800, 1.951	124.800, 2.022	124.800, 1.931
626	125.000, 2.590	125.000, 2.059	125.000, 2.560	125.000, 2.106	125.000, 2.566	125.000, 2.582	125.000, 2.455	125.000, 2.469	125.000, 1.927	125.000, 1.951	125.000, 2.022	125.000, 1.931
627	125.200, 2.591	125.200, 2.059	125.200, 2.561	125.200, 2.107	125.200, 2.566	125.200, 2.583	125.200, 2.456	125.200, 2.470	125.200, 1.927	125.200, 1.951	125.200, 2.022	125.200, 1.932
628	125.400, 2.591	125.400, 2.059	125.400, 2.561	125.400, 2.107	125.400, 2.567	125.400, 2.584	125.400, 2.456	125.400, 2.470	125.400, 1.927	125.400, 1.951	125.400, 2.022	125.400, 1.932
629	125.600, 2.592	125.600, 2.059	125.600, 2.562	125.600, 2.108	125.600, 2.568	125.600, 2.585	125.600, 2.457	125.600, 2.471	125.600, 1.927	125.600, 1.952	125.600, 2.023	125.600, 1.933
630	125.800, 2.593	125.800, 2.060	125.800, 2.563	125.800, 2.108	125.800, 2.569	125.800, 2.586	125.800, 2.458	125.800, 2.472	125.800, 1.928	125.800, 1.952	125.800, 2.023	125.800, 1.933
631	126.000, 2.594	126.000, 2.060	126.000, 2.564	126.000, 2.109	126.000, 2.570	126.000, 2.587	126.000, 2.459	126.000, 2.472	126.000, 1.928	126.000, 1.952	126.000, 2.024	126.000, 1.933
632	126.200, 2.594	126.200, 2.061	126.200, 2.564	126.200, 2.110	126.200, 2.571	126.200, 2.587	126.200, 2.460	126.200, 2.473	126.200, 1.929	126.200, 1.952	126.200, 2.025	126.200, 1.934
633	126.400, 2.595	126.400, 2.061	126.400, 2.565	126.400, 2.110	126.400, 2.571	126.400, 2.588	126.400, 2.461	126.400, 2.474	126.400, 1.929	126.400, 1.953	126.400, 2.025	126.400, 1.934
634	126.600, 2.595	126.600, 2.062	126.600, 2.566	126.600, 2.110	126.600, 2.572	126.600, 2.589	126.600, 2.461	126.600, 2.474	126.600, 1.929	126.600, 1.953	126.600, 2.026	126.600, 1.935
635	126.800, 2.596	126.800, 2.062	126.800, 2.566	126.800, 2.111	126.800, 2.573	126.800, 2.589	126.800, 2.462	126.800, 2.475	126.800, 1.930	126.800, 1.953	126.800, 2.026	126.800, 1.935
636	127.000, 2.596	127.000, 2.063	127.000, 2.567	127.000, 2.111	127.000, 2.574	127.000, 2.590	127.000, 2.463	127.000, 2.475	127.000, 1.930	127.000, 1.954	127.000, 2.026	127.000, 1.936
637	127.200, 2.597	127.200, 2.064	127.200, 2.568	127.200, 2.112	127.200, 2.574	127.200, 2.590	127.200, 2.464	127.200, 2.476	127.200, 1.931	127.200, 1.954	127.200, 2.026	127.200, 1.936
638	127.400, 2.597	127.400, 2.064	127.400, 2.568	127.400, 2.112	127.400, 2.575	127.400, 2.591	127.400, 2.465	127.400, 2.477	127.400, 1.931	127.400, 1.954	127.400, 2.027	127.400, 1.937
639	127.600, 2.598	127.600, 2.065	127.600, 2.569	127.600, 2.112	127.600, 2.576	127.600, 2.592	127.600, 2.466	127.600, 2.477	127.600, 1.932	127.600, 1.955	127.600, 2.027	127.600, 1.937
640	127.800, 2.598	127.800, 2.065	127.800, 2.570	127.800, 2.113	127.800, 2.577	127.800, 2.593	127.800, 2.467	127.800, 2.478	127.800, 1.932	127.800, 1.956	127.800, 2.027	127.800, 1.938
641	128.000, 2.598	128.000, 2.065	128.000, 2.571	128.000, 2.113	128.000, 2.577	128.000, 2.594	128.000, 2.467	128.000, 2.479	128.000, 1.932	128.000, 1.956	128.000, 2.027	128.000, 1.938
642	128.200, 2.599	128.200, 2.065	128.200, 2.572	128.200, 2.114	128.200, 2.578	128.200, 2.595	128.200, 2.467	128.200, 2.479	128.200, 1.933	128.200, 1.957	128.200, 2.028	128.200, 1.939
643	128.400, 2.599	128.400, 2.066	128.400, 2.573	128.400, 2.114	128.400, 2.578	128.400, 2.596	128.400, 2.468	128.400, 2.479	128.400, 1.933	128.400, 1.957	128.400, 2.028	128.400, 1.939
644	128.600, 2.599	128.600, 2.066	128.600, 2.574	128.600, 2.114	128.600, 2.579	128.600, 2.597	128.600, 2.468	128.600, 2.480	128.600, 1.933	128.600, 1.957	128.600, 2.028	128.600, 1.940
645	128.800, 2.600	128.800, 2.067	128.800, 2.575	128.800, 2.114	128.800, 2.579	128.800, 2.598	128.800, 2.469	128.800, 2.480	128.800, 1.933	128.800, 1.958	128.800, 2.028	128.800, 1.940
646	129.000, 2.600	129.000, 2.067	129.000, 2.576	129.000, 2.114	129.000, 2.580	129.000, 2.599	129.000, 2.469	129.000, 2.481	129.000, 1.934	129.000, 1.958	129.000, 2.028	129.000, 1.941
647	129.200, 2.600	129.200, 2.068	129.200, 2.577	129.200, 2.114	129.200, 2.581	129.200, 2.600	129.200, 2.470	129.200, 2.482	129.200, 1.934	129.200, 1.958	129.200, 2.028	129.200, 1.941
648	129.400, 2.600	129.400, 2.068	129.400, 2.578	129.400, 2.115	129.400, 2.582	129.400, 2.600	129.400, 2.471	129.400, 2.482	129.400, 1.934	129.400, 1.959	129.400, 2.029	129.400, 1.942
649	129.600, 2.600	129.600, 2.069	129.600, 2.578	129.600, 2.115	129.600, 2.582	129.600, 2.601	129.600, 2.471	129.600, 2.483	129.600, 1.935	129.600, 1.959	129.600, 2.029	129.600, 1.942
650	129.800, 2.600	129.800, 2.069	129.800, 2.579	129.800, 2.115	129.800, 2.583	129.800, 2.602	129.800, 2.472	129.800, 2.483	129.800, 1.935	129.800, 1.960	129.800, 2.029	129.800, 1.943
651	130.000, 2.601	130.000, 2.070	130.000, 2.579	130.000, 2.116	130.000, 2.584	130.000, 2.603	130.000, 2.473	130.000, 2.484	130.000, 1.935	130.000, 1.960	130.000, 2.029	130.000, 1.943
652	130.200, 2.601	130.200, 2.070	130.200, 2.579	130.200, 2.116	130.200, 2.584	130.200, 2.603	130.200, 2.474	130.200, 2.484	130.200, 1.936	130.200, 1.960	130.200, 2.030	130.200, 1.943
653	130.400, 2.602	130.400, 2.071	130.400, 2.580	130.400, 2.117	130.400, 2.585	130.400, 2.604	130.400, 2.475	130.400, 2.485	130.400, 1.936	130.400, 1.961	130.400, 2.030	130.400, 1.943
654	130.600, 2.602	130.600, 2.071	130.600, 2.580	130.600, 2.117	130.600, 2.586	130.600, 2.605	130.600, 2.476	130.600, 2.485	130.600, 1.936	130.600, 1.961	130.600, 2.030	130.600, 1.944
655	130.800, 2.603	130.800, 2.071	130.800, 2.580	130.800, 2.117	130.800, 2.586	130.800, 2.605	130.800, 2.477	130.800, 2.486	130.800, 1.937	130.800, 1.962	130.800, 2.031	130.800, 1.944
656	131.000, 2.603	131.000, 2.071	131.000, 2.581	131.000, 2.118	131.000, 2.587	131.000, 2.605	131.000, 2.478	131.000, 2.487	131.000, 1.937	131.000, 1.962	131.000, 2.031	131.000, 1.944
657	131.200, 2.604	131.200, 2.071	131.200, 2.581	131.200, 2.118	131.200, 2.588	131.200, 2.606	131.200, 2.478	131.200, 2.487	131.200, 1.937	131.200, 1.962	131.200, 2.032	131.200, 1.944
658	131.400, 2.605	131.400, 2.071	131.400, 2.581	131.400, 2.118	131.400, 2.589	131.400, 2.606	131.400, 2.479	131.400, 2.488	131.400, 1.938	131.400, 1.962	131.400, 2.032	131.400, 1.944
659	131.600, 2.606	131.600, 2.071	131.600, 2.581	131.600, 2.119	131.600, 2.590	131.600, 2.607	131.600, 2.479	131.600, 2.488	131.600, 1.938	131.600, 1.963	131.600, 2.032	131.600, 1.945
660	131.800, 2.606	131.800, 2.071	131.800, 2.582	131.800, 2.119	131.800, 2.590	131.800, 2.608	131.800, 2.480	131.800, 2.489	131.800, 1.938	131.800, 1.963	131.800, 2.033	131.800, 1.945
661	132.000, 2.607	132.000, 2.071	132.000, 2.582	132.000, 2.119	132.000, 2.591	132.000, 2.608	132.000, 2.480	132.000, 2.489	132.000, 1.938	132.000, 1.963	132.000, 2.033	132.000, 1.945
662	132.200, 2.608	132.200, 2.071	132.200, 2.583	132.200, 2.120	132.200, 2.592	132.200, 2.609	132.200, 2.481	132.200, 2.490	132.200, 1.938	132.200, 1.963	132.200, 2.033	132.200, 1.945
663	132.400, 2.608	132.400, 2.072	132.400, 2.583	132.400, 2.120	132.400, 2.593	132.400, 2.610	132.400, 2.481	132.400, 2.490	132.400, 1.938	132.400, 1.964	132.400, 2.034	132.400, 1.945
664	132.600, 2.609	132.600, 2.072	132.600, 2.584	132.600, 2.120	132.600, 2.593	132.600, 2.610	132.600, 2.482	132.600, 2.491	132.600, 1.938	132.600, 1.964	132.600, 2.034	132.600, 1.946
665	132.800, 2.609	132.800, 2.073	132.800, 2.585	132.800, 2.120	132.800, 2.594	132.800, 2.611	132.800, 2.482	132.800, 2.491	132.800, 1.938	132.800, 1.964	132.800, 2.035	132.800, 1.946
666	133.000, 2.609	133.000, 2.073	133.000, 2.585	133.000, 2.121	133.000, 2.595	133.000, 2.612	133.000, 2.483	133.000, 2.492	133.000, 1.938	133.000, 1.964	133.000, 2.035	133.000, 1.946
667	133.200, 2.610	133.200, 2.073	133.200, 2.586	133.200, 2.121	133.200, 2.595	133.200, 2.612	133.200, 2.484	133.200, 2.492	133.200, 1.938	133.200, 1.965	133.200, 2.036	133.200, 1.947
668	133.400, 2.610	133.400, 2.074	133.400, 2.587	133.400, 2.121	133.400, 2.596	133.400, 2.613	133.400, 2.485	133.400, 2.492	133.400, 1.938	133.400, 1.965	133.400, 2.037	133.400, 1.947
669	133.600, 2.610	133.600, 2.074	133.600, 2.587	133.600, 2.121	133.600, 2.596	133.600, 2.613	133.600, 2.486	133.600, 2.493	133.600, 1.938	133.600, 1.965	133.600, 2.037	133.600, 1.947
670	133.800, 2.610	133.800, 2.074	133.800, 2.588	133.800, 2.122	133.800, 2.596	133.800, 2.614	133.800, 2.486	133.800, 2.493	133.800, 1.938	133.800, 1.966	133.800, 2.038	133.800, 1.947
671	134.000, 2.611	134.000, 2.075	134.000, 2.589	134.000, 2.122	134.000, 2.596	134.000, 2.614	134.000, 2.487	134.000, 2.493	134.000, 1.938	134.000, 1.966	134.000, 2.039	134.000, 1.947
672	134.200, 2.611	134.200, 2.075	134.200, 2.590	134.200, 2.123	134.200, 2.597	134.200, 2.615	134.200, 2.487	134.200, 2.494	134.200, 1.939	134.200, 1.967	134.200, 2.039	134.200, 1.947
673	134.400, 2.611	134.400, 2.076	134.400, 2.590	134.400, 2.123	134.400, 2.597	134.400, 2.615	134.400, 2.488	134.400, 2.494	134.400, 1.939	134.400, 1.967	134.400, 2.040	134.400, 1.947
674	134.600, 2.612	134.600, 2.076	134.600, 2.591	134.600, 2.124	134.600, 2.598	134.600, 2.616	134.600, 2.488	134.600, 2.495	134.600, 1.940	134.600, 1.967	134.600, 2.040	134.600, 1.947
675	134.800, 2.612	134.800, 2.076	134.800, 2.591	134.800, 2.124	134.800, 2.599	134.800, 2.616	134.800, 2.489	134.800, 2.496	134.800, 1.940	134.800, 1.967	134.800, 2.040	134.800, 1.948
676	135.000, 2.612	135.000, 2.076	135.000, 2.592	135.000, 2.124	135.000, 2.599	135.000, 2.617	135.000, 2.489	135.000, 2.497	135.000, 1.941	135.000, 1.967	135.000, 2.041	135.000, 1.948
677	135.200, 2.613	135.200, 2.077	135.200, 2.593	135.200, 2.124	135.200, 2.600	135.200, 2.617	135.200, 2.490	135.200, 2.497	135.200, 1.941	135.200, 1.967	135.200, 2.041	135.200, 1.948
678	135.400, 2.613	135.400, 2.077	135.400, 2.593	135.400, 2.125	135.400, 2.601	135.400, 2.617	135.400, 2.490	135.400, 2.498	135.400, 1.942	135.400, 1.968	135.400, 2.041	135.400, 1.949
679	135.600, 2.614	135.600, 2.077	135.600, 2.594	135.600, 2.125	135.600, 2.602	135.600, 2.618	135.600, 2.491	135.600, 2.499	135.600, 1.942	135.600, 1.968	135.600, 2.041	135.600, 1.949
680	135.800, 2.614	135.800, 2.077	135.800, 2.595	135.800, 2.125	135.800, 2.602	135.800, 2.618	135.800, 2.491	135.800, 2.499	135.800, 1.943	135.800, 1.968	135.800, 2.041	135.800, 1.950
681	136.000, 2.615	136.000, 2.077	136.000, 2.595	136.000, 2.126	136.000, 2.603	136.000, 2.619	136.000, 2.492	136.000, 2.500	136.000, 1.943	136.000, 1.969	136.000, 2.041	136.000, 1.950
682	136.200, 2.616	136.200, 2.078	136.200, 2.596	136.200, 2.126	136.200, 2.604	136.200, 2.619	136.200, 2.492	136.200, 2.500	136.200, 1.944	136.200, 1.969	136.200, 2.041	136.200, 1.951
683	136.400, 2.616	136.400, 2.078	136.400, 2.596	136.400, 2.126	136.400, 2.604	136.400, 2.620	136.400, 2.493	136.400, 2.501	136.400, 1.944	136.400, 1.969	136.400, 2.041	136.400, 1.951
684	136.600, 2.617	136.600, 2.079	136.600, 2.597	136.600, 2.127	136.600, 2.605	136.600, 2.620	136.600, 2.493	136.600, 2.501	136.600, 1.944	136.600, 1.969	136.600, 2.041	136.600, 1.951
685	136.800, 2.617	136.800, 2.079	136.800, 2.597	136.800, 2.127	136.800, 2.605	136.800, 2.621	136.800, 2.494	136.800, 2.502	136.800, 1.945	136.800, 1.969	136.800, 2.042	136.800, 1.952
686	137.000, 2.618	137.000, 2.079	137.000, 2.597	137.000, 2.127	137.000, 2.606	137.000, 2.621	137.000, 2.494	137.000, 2.502	137.000, 1.945	137.000, 1.970	137.000, 2.042	137.000, 1.952
687	137.200, 2.618	137.200, 2.079	137.200, 2.598	137.200, 2.127	137.200, 2.606	137.200, 2.621	137.200, 2.495	137.200, 2.502	137.200, 1.945	137.200, 1.970	137.200, 2.042	137.200, 1.952
688	137.400, 2.618	137.400, 2.080	137.400, 2.598	137.400, 2.127	137.400, 2.606	137.400, 2.622	137.400, 2.495	137.400, 2.503	137.400, 1.946	137.400, 1.970	137.400, 2.042	137.400, 1.953
689	137.600, 2.618	137.600, 2.080	137.600, 2.599	137.600, 2.128	137.600, 2.607	137.600, 2.622	137.600, 2.496	137.600, 2.503	137.600, 1.946	137.600, 1.970	137.600, 2.042	137.600, 1.953
690	137.800, 2.619	137.800, 2.081	137.800, 2.600	137.800, 2.128	137.800, 2.607	137.800, 2.622	137.800, 2.496	137.800, 2.503	137.800, 1.946	137.800, 1.970	137.800, 2.043	137.800, 1.953
691	138.000, 2.619	138.000, 2.081	138.000, 2.600	138.000, 2.129	138.000, 2.608	138.000, 2.623	138.000, 2.497	138.000, 2.503	138.000, 1.946	138.000, 1.970	138.000, 2.043	138.000, 1.953
692	138.200, 2.619	138.200, 2.082	138.200, 2.601	138.200, 2.129	138.200, 2.608	138.200, 2.624	138.200, 2.497	138.200, 2.503	138.200, 1.946	138.200, 1.970	138.200, 2.043	138.200, 1.953
693	138.400, 2.620	138.400, 2.082	138.400, 2.601	138.400, 2.129	138.400, 2.609	138.400, 2.624	138.400, 2.498	138.400, 2.504	138.400, 1.946	138.400, 1.970	138.400, 2.043	138.400, 1.953
694	138.600, 2.620	138.600, 2.083	138.600, 2.601	138.600, 2.129	138.600, 2.609	138.600, 2.625	138.600, 2.498	138.600, 2.504	138.600, 1.946	138.600, 1.970	138.600, 2.043	138.600, 1.953
695	138.800, 2.620	138.800, 2.083	138.800, 2.602	138.800, 2.129	138.800, 2.610	138.800, 2.626	138.800, 2.498	138.800, 2.505	138.800, 1.947	138.800, 1.970	138.800, 2.044	138.800, 1.953
696	139.000, 2.620	139.000, 2.083	139.000, 2.602	139.000, 2.130	139.000, 2.611	139.000, 2.627	139.000, 2.499	139.000, 2.506	139.000, 1.947	139.000, 1.970	139.000, 2.045	139.000, 1.954
697	139.200, 2.620	139.200, 2.083	139.200, 2.603	139.200, 2.130	139.200, 2.612	139.200, 2.627	139.200, 2.499	139.200, 2.506	139.200, 1.947	139.200, 1.971	139.200, 2.045	139.200, 1.954
698	139.400, 2.621	139.400, 2.084	139.400, 2.603	139.400, 2.130	139.400, 2.612	139.400, 2.628	139.400, 2.500	139.400, 2.507	139.400, 1.947	139.400, 1.971	139.400, 2.045	139.400, 1.954
699	139.600, 2.621	139.600, 2.084	139.600, 2.604	139.600, 2.131	139.600, 2.613	139.600, 2.629	139.600, 2.500	139.600, 2.507	139.600, 1.947	139.600, 1.972	139.600, 2.046	139.600, 1.955
700	139.800, 2.622	139.800, 2.084	139.800, 2.604	139.800, 2.131	139.800, 2.613	139.800, 2.629	139.800, 2.500	139.800, 2.508	139.800, 1.948	139.800, 1.972	139.800, 2.045	139.800, 1.956
701	140.000, 2.622	140.000, 2.085	140.000, 2.605	140.000, 2.131	140.000, 2.613	140.000, 2.630	140.000, 2.501	140.000, 2.508	140.000, 1.948	140.000, 1.972	140.000, 2.045	140.000, 1.956
702	140.200, 2.623	140.200, 2.085	140.200, 2.605	140.200, 2.131	140.200, 2.614	140.200, 2.631	140.200, 2.501	140.200, 2.509	140.200, 1.948	140.200, 1.973	140.200, 2.045	140.200, 1.956
703	140.400, 2.623	140.400, 2.085	140.400, 2.606	140.400, 2.131	140.400, 2.614	140.400, 2.631	140.400, 2.502	140.400, 2.509	140.400, 1.949	140.400, 1.973	140.400, 2.046	140.400, 1.957
704	140.600, 2.623	140.600, 2.086	140.600, 2.607	140.600, 2.131	140.600, 2.614	140.600, 2.632	140.600, 2.502	140.600, 2.510	140.600, 1.949	140.600, 1.974	140.600, 2.046	140.600, 1.957
705	140.800, 2.624	140.800, 2.086	140.800, 2.607	140.800, 2.132	140.800, 2.615	140.800, 2.632	140.800, 2.502	140.800, 2.510	140.800, 1.950	140.800, 1.974	140.800, 2.046	140.800, 1.957
706	141.000, 2.624	141.000, 2.086	141.000, 2.608	141.000, 2.132	141.000, 2.615	141.000, 2.632	141.000, 2.503	141.000, 2.511	141.000, 1.950	141.000, 1.975	141.000, 2.046	141.000, 1.957
707	141.200, 2.624	141.200, 2.086	141.200, 2.608	141.200, 2.132	141.200, 2.616	141.200, 2.633	141.200, 2.503	141.200, 2.511	141.200, 1.950	141.200, 1.975	141.200, 2.046	141.200, 1.957
708	141.400, 2.624	141.400, 2.086	141.400, 2.609	141.400, 2.133	141.400, 2.616	141.400, 2.633	141.400, 2.504	141.400, 2.511	141.400, 1.950	141.400, 1.975	141.400, 2.046	141.400, 1.957
709	141.600, 2.625	141.600, 2.086	141.600, 2.610	141.600, 2.133	141.600, 2.617	141.600, 2.633	141.600, 2.504	141.600, 2.511	141.600, 1.951	141.600, 1.975	141.600, 2.046	141.600, 1.957
710	141.800, 2.625	141.800, 2.086	141.800, 2.610	141.800, 2.133	141.800, 2.617	141.800, 2.634	141.800, 2.505	141.800, 2.512	141.800, 1.951	141.800, 1.975	141.800, 2.046	141.800, 1.957
711	142.000, 2.625	142.000, 2.087	142.000, 2.611	142.000, 2.134	142.000, 2.618	142.000, 2.634	142.000, 2.505	142.000, 2.512	142.000, 1.951	142.000, 1.975	142.000, 2.046	142.000, 1.958
712	142.200, 2.625	142.200, 2.087	142.200, 2.611	142.200, 2.134	142.200, 2.619	142.200, 2.635	142.200, 2.505	142.200, 2.513	142.200, 1.952	142.200, 1.975	142.200, 2.047	142.200, 1.958
713	142.400, 2.625	142.400, 2.087	142.400, 2.611	142.400, 2.134	142.400, 2.620	142.400, 2.635	142.400, 2.506	142.400, 2.513	142.400, 1.952	142.400, 1.975	142.400, 2.047	142.400, 1.958
714	142.600, 2.625	142.600, 2.088	142.600, 2.611	142.600, 2.134	142.600, 2.620	142.600, 2.636	142.600, 2.506	142.600, 2.514	142.600, 1.952	142.600, 1.976	142.600, 2.048	142.600, 1.958
715	142.800, 2.625	142.800, 2.088	142.800, 2.611	142.800, 2.134	142.800, 2.621	142.800, 2.636	142.800, 2.507	142.800, 2.515	142.800, 1.952	142.800, 1.976	142.800, 2.048	142.800, 1.958
716	143.000, 2.625	143.000, 2.088	143.000, 2.612	143.000, 2.134	143.000, 2.621	143.000, 2.637	143.000, 2.507	143.000, 2.515	143.000, 1.952	143.000, 1.976	143.000, 2.049	143.000, 1.959
717	143.200, 2.625	143.200, 2.088	143.200, 2.612	143.200, 2.134	143.200, 2.621	143.200, 2.637	143.200, 2.508	143.200, 2.516	143.200, 1.952	143.200, 1.977	143.200, 2.049	143.200, 1.959
718	143.400, 2.625	143.400, 2.088	143.400, 2.612	143.400, 2.134	143.400, 2.621	143.400, 2.637	143.400, 2.508	143.400, 2.516	143.400, 1.952	143.400, 1.977	143.400, 2.049	143.400, 1.959
719	143.600, 2.626	143.600, 2.089	143.600, 2.613	143.600, 2.134	143.600, 2.621	143.600, 2.637	143.600, 2.509	143.600, 2.517	143.600, 1.952	143.600, 1.977	143.600, 2.049	143.600, 1.960
720	143.800, 2.626	143.800, 2.089	143.800, 2.613	143.800, 2.134	143.800, 2.621	143.800, 2.637	143.800, 2.510	143.800, 2.518	143.800, 1.952	143.800, 1.978	143.800, 2.049	143.800, 1.960
721	144.000, 2.626	144.000, 2.089	144.000, 2.614	144.000, 2.134	144.000, 2.621	144.000, 2.637	144.000, 2.510	144.000, 2.518	144.000, 1.953	144.000, 1.978	144.000, 2.049	144.000, 1.960
722	144.200, 2.626	144.200, 2.089	144.200, 2.614	144.200, 2.134	144.200, 2.622	144.200, 2.638	144.200, 2.511	144.200, 2.518	144.200, 1.953	144.200, 1.978	144.200, 2.050	144.200, 1.961
723	144.400, 2.626	144.400, 2.089	144.400, 2.614	144.400, 2.134	144.400, 2.622	144.400, 2.638	144.400, 2.511	144.400, 2.518	144.400, 1.953	144.400, 1.979	144.400, 2.050	144.400, 1.961
724	144.600, 2.626	144.600, 2.089	144.600, 2.615	144.600, 2.135	144.600, 2.622	144.600, 2.639	144.600, 2.512	144.600, 2.518	144.600, 1.953	144.600, 1.979	144.600, 2.050	144.600, 1.960
725	144.800, 2.626	144.800, 2.089	144.800, 2.615	144.800, 2.135	144.800, 2.622	144.800, 2.639	144.800, 2.512	144.800, 2.518	144.800, 1.953	144.800, 1.979	144.800, 2.050	144.800, 1.960
726	145.000, 2.626	145.000, 2.090	145.000, 2.616	145.000, 2.136	145.000, 2.623	145.000, 2.640	145.000, 2.512	145.000, 2.518	145.000, 1.954	145.000, 1.979	145.000, 2.051	145.000, 1.960
727	145.200, 2.626	145.200, 2.090	145.200, 2.616	145.200, 2.136	145.200, 2.624	145.200, 2.640	145.200, 2.513	145.200, 2.519	145.200, 1.954	145.200, 1.979	145.200, 2.051	145.200, 1.961
728	145.400, 2.626	145.400, 2.090	145.400, 2.617	145.400, 2.137	145.400, 2.624	145.400, 2.641	145.400, 2.513	145.400, 2.519	145.400, 1.954	145.400, 1.980	145.400, 2.051	145.400, 1.961
729	145.600, 2.626	145.600, 2.090	145.600, 2.617	145.600, 2.137	145.600, 2.625	145.600, 2.642	145.600, 2.513	145.600, 2.519	145.600, 1.955	145.600, 1.980	145.600, 2.052	145.600, 1.961
730	145.800, 2.627	145.800, 2.090	145.800, 2.618	145.800, 2.137	145.800, 2.626	145.800, 2.642	145.800, 2.514	145.800, 2.519	145.800, 1.955	145.800, 1.980	145.800, 2.052	145.800, 1.962
731	146.000, 2.627	146.000, 2.090	146.000, 2.618	146.000, 2.138	146.000, 2.627	146.000, 2.643	146.000, 2.514	146.000, 2.520	146.000, 1.956	146.000, 1.980	146.000, 2.052	146.000, 1.962
732	146.200, 2.627	146.200, 2.091	146.200, 2.618	146.200, 2.139	146.200, 2.628	146.200, 2.644	146.200, 2.514	146.200, 2.520	146.200, 1.956	146.200, 1.981	146.200, 2.053	146.200, 1.963
733	146.400, 2.627	146.400, 2.092	146.400, 2.619	146.400, 2.139	146.400, 2.628	146.400, 2.644	146.400, 2.515	146.400, 2.521	146.400, 1.957	146.400, 1.981	146.400, 2.053	146.400, 1.963
734	146.600, 2.628	146.600, 2.092	146.600, 2.619	146.600, 2.139	146.600, 2.629	146.600, 2.645	146.600, 2.515	146.600, 2.521	146.600, 1.957	146.600, 1.981	146.600, 2.053	146.600, 1.963
735	146.800, 2.628	146.800, 2.093	146.800, 2.619	146.800, 2.140	146.800, 2.629	146.800, 2.645	146.800, 2.516	146.800, 2.522	146.800, 1.957	146.800, 1.981	146.800, 2.053	146.800, 1.963
736	147.000, 2.628	147.000, 2.093	147.000, 2.619	147.000, 2.140	147.000, 2.629	147.000, 2.646	147.000, 2.516	147.000, 2.522	147.000, 1.958	147.000, 1.982	147.000, 2.054	147.000, 1.963
737	147.200, 2.629	147.200, 2.094	147.200, 2.620	147.200, 2.139	147.200, 2.629	147.200, 2.646	147.200, 2.517	147.200, 2.523	147.200, 1.958	147.200, 1.982	147.200, 2.054	147.200, 1.964
738	147.400, 2.629	147.400, 2.094	147.400, 2.620	147.400, 2.139	147.400, 2.629	147.400, 2.646	147.400, 2.517	147.400, 2.523	147.400, 1.958	147.400, 1.983	147.400, 2.054	147.400, 1.964
739	147.600, 2.629	147.600, 2.095	147.600, 2.620	147.600, 2.139	147.600, 2.630	147.600, 2.646	147.600, 2.518	147.600, 2.524	147.600, 1.958	147.600, 1.983	147.600, 2.054	147.600, 1.964
740	147.800, 2.629	147.800, 2.095	147.800, 2.620	147.800, 2.139	147.800, 2.630	147.800, 2.646	147.800, 2.519	147.800, 2.524	147.800, 1.958	147.800, 1.983	147.800, 2.054	147.800, 1.964
741	148.000, 2.630	148.000, 2.095	148.000, 2.620	148.000, 2.139	148.000, 2.630	148.000, 2.647	148.000, 2.520	148.000, 2.524	148.000, 1.959	148.000, 1.984	148.000, 2.055	148.000, 1.965
742	148.200, 2.630	148.200, 2.095	148.200, 2.621	148.200, 2.139	148.200, 2.631	148.200, 2.647	148.200, 2.520	148.200, 2.524	148.200, 1.959	148.200, 1.984	148.200, 2.055	148.200, 1.965
743	148.400, 2.630	148.400, 2.095	148.400, 2.621	148.400, 2.139	148.400, 2.631	148.400, 2.647	148.400, 2.521	148.400, 2.524	148.400, 1.959	148.400, 1.984	148.400, 2.055	148.400, 1.965
744	148.600, 2.630	148.600, 2.095	148.600, 2.621	148.600, 2.139	148.600, 2.632	148.600, 2.647	148.600, 2.521	148.600, 2.524	148.600, 1.959	148.600, 1.984	148.600, 2.055	148.600, 1.965
745	148.800, 2.631	148.800, 2.095	148.800, 2.621	148.800, 2.139	148.800, 2.632	148.800, 2.648	148.800, 2.522	148.800, 2.525	148.800, 1.959	148.800, 1.984	148.800, 2.056	148.800, 1.965
746	149.000, 2.631	149.000, 2.095	149.000, 2.622	149.000, 2.139	149.000, 2.633	149.000, 2.648	149.000, 2.522	149.000, 2.525	149.000, 1.959	149.000, 1.984	149.000, 2.056	149.000, 1.965
747	149.200, 2.632	149.200, 2.095	149.200, 2.622	149.200, 2.140	149.200, 2.633	149.200, 2.648	149.200, 2.522	149.200, 2.525	149.200, 1.959	149.200, 1.984	149.200, 2.056	149.200, 1.966
748	149.400, 2.632	149.400, 2.095	149.400, 2.622	149.400, 2.140	149.400, 2.634	149.400, 2.648	149.400, 2.523	149.400, 2.525	149.400, 1.959	149.400, 1.984	149.400, 2.056	149.400, 1.966
749	149.600, 2.633	149.600, 2.095	149.600, 2.623	149.600, 2.140	149.600, 2.635	149.600, 2.648	149.600, 2.523	149.600, 2.525	149.600, 1.959	149.600, 1.984	149.600, 2.057	149.600, 1.966
750	149.800, 2.633	149.800, 2.095	149.800, 2.623	149.800, 2.140	149.800, 2.635	149.800, 2.648	149.800, 2.523	149.800, 2.525	149.800, 1.959	149.800, 1.984	149.800, 2.057	149.800, 1.967
751	150.000, 2.633	150.000, 2.095	150.000, 2.623	150.000, 2.140	150.000, 2.635	150.000, 2.648	150.000, 2.523	150.000, 2.525	150.000, 1.959	150.000, 1.984	150.000, 2.057	150.000, 1.967
752	150.200, 2.632	150.200, 2.095	150.200, 2.623	150.200, 2.115	150.200, 2.635	150.200, 2.647	150.200, 2.522	150.200, 2.525	150.200, 1.959	150.200, 1.984	150.200, 2.034	150.200, 1.946
753	150.400, 2.632	150.400, 2.095	150.400, 2.623	150.400, 2.089	150.400, 2.635	150.400, 2.646	150.400, 2.520	150.400, 2.524	150.400, 1.958	150.400, 1.984	150.400, 2.009	150.400, 1.924
754	150.600, 2.631	150.600, 2.095	150.600, 2.623	150.600, 2.062	150.600, 2.636	150.600, 2.644	150.600, 2.519	150.600, 2.524	150.600, 1.958	150.600, 1.984	150.600, 1.984	150.600, 1.902
755	150.800, 2.630	150.800, 2.095	150.800, 2.623	150.800, 2.035	150.800, 2.636	150.800, 2.643	150.800, 2.517	150.800, 2.523	150.800, 1.958	150.800, 1.984	150.800, 1.959	150.800, 1.880
756	151.000, 2.629	151.000, 2.096	151.000, 2.623	151.000, 2.009	151.000, 2.637	151.000, 2.642	151.000, 2.516	151.000, 2.523	151.000, 1.957	151.000, 1.985	151.000, 1.935	151.000, 1.859
757	151.200, 2.629	151.200, 2.096	151.200, 2.624	151.200, 1.986	151.200, 2.637	151.200, 2.641	151.200, 2.515	151.200, 2.522	151.200, 1.957	151.200, 1.985	151.200, 1.913	151.200, 1.840
758	151.400, 2.629	151.400, 2.097	151.400, 2.624	151.400, 1.965	151.400, 2.638	151.400, 2.640	151.400, 2.515	151.400, 2.522	151.400, 1.957	151.400, 1.985	151.400, 1.894	151.400, 1.824
759	151.600, 2.629	151.600, 2.097	151.600, 2.624	151.600, 1.949	151.600, 2.639	151.600, 2.640	151.600, 2.515	151.600, 2.522	151.600, 1.957	151.600, 1.986	151.600, 1.879	151.600, 1.812
760	151.800, 2.629	151.800, 2.098	151.800, 2.625	151.800, 1.938	151.800, 2.640	151.800, 2.640	151.800, 2.515	151.800, 2.522	151.800, 1.957	151.800, 1.987	151.800, 1.869	151.800, 1.803
761	152.000, 2.629	152.000, 2.099	152.000, 2.626	152.000, 1.932	152.000, 2.640	152.000, 2.640	152.000, 2.516	152.000, 2.523	152.000, 1.958	152.000, 1.988	152.000, 1.863	152.000, 1.800
762	152.200, 2.630	152.200, 2.100	152.200, 2.626	152.200, 1.934	152.200, 2.641	152.200, 2.640	152.200, 2.517	152.200, 2.523	152.200, 1.959	152.200, 1.989	152.200, 1.864	152.200, 1.803
763	152.400, 2.630	152.400, 2.101	152.400, 2.626	152.400, 1.938	152.400, 2.642	152.400, 2.640	152.400, 2.518	152.400, 2.523	152.400, 1.959	152.400, 1.990	152.400, 1.868	152.400, 1.807
764	152.600, 2.631	152.600, 2.102	152.600, 2.627	152.600, 1.943	152.600, 2.642	152.600, 2.640	152.600, 2.518	152.600, 2.523	152.600, 1.960	152.600, 1.991	152.600, 1.873	152.600, 1.813
765	152.800, 2.631	152.800, 2.103	152.800, 2.627	152.800, 1.949	152.800, 2.643	152.800, 2.641	152.800, 2.519	152.800, 2.524	152.800, 1.960	152.800, 1.992	152.800, 1.879	152.800, 1.819
766	153.000, 2.632	153.000, 2.103	153.000, 2.627	153.000, 1.956	153.000, 2.643	153.000, 2.641	153.000, 2.520	153.000, 2.524	153.000, 1.961	153.000, 1.993	153.000, 1.885	153.000, 1.826
767	153.200, 2.632	153.200, 2.104	153.200, 2.627	153.200, 1.963	153.200, 2.644	153.200, 2.641	153.200, 2.520	153.200, 2.524	153.200, 1.961	153.200, 1.993	153.200, 1.891	153.200, 1.832
768	153.400, 2.633	153.400, 2.104	153.400, 2.627	153.400, 1.969	153.400, 2.644	153.400, 2.641	153.400, 2.521	153.400, 2.525	153.400, 1.962	153.400, 1.994	153.400, 1.897	153.400, 1.838
769	153.600, 2.633	153.600, 2.105	153.600, 2.627	153.600, 1.975	153.600, 2.645	153.600, 2.641	153.600, 2.521	153.600, 2.525	153.600, 1.962	153.600, 1.994	153.600, 1.902	153.600, 1.844
770	153.800, 2.633	153.800, 2.105	153.800, 2.628	153.800, 1.981	153.800, 2.645	153.800, 2.642	153.800, 2.522	153.800, 2.526	153.800, 1.963	153.800, 1.994	153.800, 1.907	153.800, 1.850
771	154.000, 2.633	154.000, 2.105	154.000, 2.628	154.000, 1.987	154.000, 2.646	154.000, 2.642	154.000, 2.522	154.000, 2.526	154.000, 1.963	154.000, 1.995	154.000, 1.913	154.000, 1.855
772	154.200, 2.633	154.200, 2.105	154.200, 2.629	154.200, 1.992	154.200, 2.646	154.200, 2.642	154.200, 2.522	154.200, 2.527	154.200, 1.964	154.200, 1.995	154.200, 1.918	154.200, 1.860
773	154.400, 2.633	154.400, 2.106	154.400, 2.630	154.400, 1.998	154.400, 2.646	154.400, 2.642	154.400, 2.523	154.400, 2.527	154.400, 1.964	154.400, 1.996	154.400, 1.923	154.400, 1.866
774	154.600, 2.634	154.600, 2.106	154.600, 2.630	154.600, 2.004	154.600, 2.647	154.600, 2.643	154.600, 2.523	154.600, 2.527	154.600, 1.965	154.600, 1.996	154.600, 1.928	154.600, 1.871
775	154.800, 2.634	154.800, 2.106	154.800, 2.631	154.800, 2.010	154.800, 2.648	154.800, 2.643	154.800, 2.523	154.800, 2.528	154.800, 1.965	154.800, 1.997	154.800, 1.934	154.800, 1.876
776	155.000, 2.634	155.000, 2.106	155.000, 2.632	155.000, 2.016	155.000, 2.648	155.000, 2.644	155.000, 2.523	155.000, 2.528	155.000, 1.965	155.000, 1.997	155.000, 1.939	155.000, 1.882
777	155.200, 2.634	155.200, 2.106	155.200, 2.632	155.200, 2.021	155.200, 2.649	155.200, 2.644	155.200, 2.524	155.200, 2.528	155.200, 1.965	155.200, 1.997	155.200, 1.944	155.200, 1.888
778	155.400, 2.634	155.400, 2.107	155.400, 2.633	155.400, 2.026	155.400, 2.649	155.400, 2.645	155.400, 2.524	155.400, 2.529	155.400, 1.966	155.400, 1.997	155.400, 1.950	155.400, 1.893
779	155.600, 2.635	155.600, 2.107	155.600, 2.633	155.600, 2.032	155.600, 2.650	155.600, 2.646	155.600, 2.524	155.600, 2.529	155.600, 1.966	155.600, 1.998	155.600, 1.955	155.600, 1.899
780	155.800, 2.635	155.800, 2.107	155.800, 2.633	155.800, 2.037	155.800, 2.651	155.800, 2.647	155.800, 2.525	155.800, 2.530	155.800, 1.967	155.800, 1.998	155.800, 1.961	155.800, 1.904
781	156.000, 2.635	156.000, 2.107	156.000, 2.633	156.000, 2.042	156.000, 2.651	156.000, 2.647	156.000, 2.525	156.000, 2.530	156.000, 1.967	156.000, 1.999	156.000, 1.967	156.000, 1.910
782	156.200, 2.635	156.200, 2.107	156.200, 2.634	156.200, 2.048	156.200, 2.652	156.200, 2.648	156.200, 2.525	156.200, 2.530	156.200, 1.968	156.200, 2.000	156.200, 1.972	156.200, 1.916
783	156.400, 2.635	156.400, 2.108	156.400, 2.634	156.400, 2.053	156.400, 2.653	156.400, 2.649	156.400, 2.526	156.400, 2.530	156.400, 1.968	156.400, 2.001	156.400, 1.978	156.400, 1.921
784	156.600, 2.636	156.600, 2.108	156.600, 2.634	156.600, 2.059	156.600, 2.654	156.600, 2.649	156.600, 2.526	156.600, 2.530	156.600, 1.969	156.600, 2.001	156.600, 1.984	156.600, 1.927
785	156.800, 2.636	156.800, 2.108	156.800, 2.634	156.800, 2.064	156.800, 2.654	156.800, 2.650	156.800, 2.527	156.800, 2.530	156.800, 1.969	156.800, 2.001	156.800, 1.990	156.800, 1.932
786	157.000, 2.636	157.000, 2.109	157.000, 2.635	157.000, 2.069	157.000, 2.655	157.000, 2.650	157.000, 2.527	157.000, 2.531	157.000, 1.970	157.000, 2.002	157.000, 1.995	157.000, 1.938
787	157.200, 2.636	157.200, 2.109	157.200, 2.635	157.200, 2.074	157.200, 2.656	157.200, 2.651	157.200, 2.528	157.200, 2.531	157.200, 1.970	157.200, 2.002	157.200, 2.001	157.200, 1.943
788	157.400, 2.636	157.400, 2.109	157.400, 2.635	157.400, 2.079	157.400, 2.656	157.400, 2.651	157.400, 2.528	157.400, 2.531	157.400, 1.971	157.400, 2.002	157.400, 2.006	157.400, 1.949
789	157.600, 2.636	157.600, 2.110	157.600, 2.635	157.600, 2.084	157.600, 2.657	157.600, 2.652	157.600, 2.529	157.600, 2.532	157.600, 1.971	157.600, 2.003	157.600, 2.011	157.600, 1.954
790	157.800, 2.636	157.800, 2.110	157.800, 2.635	157.800, 2.089	157.800, 2.657	157.800, 2.652	157.800, 2.529	157.800, 2.532	157.800, 1.972	157.800, 2.003	157.800, 2.017	157.800, 1.959
791	158.000, 2.637	158.000, 2.110	158.000, 2.636	158.000, 2.094	158.000, 2.658	158.000, 2.652	158.000, 2.530	158.000, 2.533	158.000, 1.972	158.000, 2.004	158.000, 2.022	158.000, 1.965
792	158.200, 2.637	158.200, 2.111	158.200, 2.636	158.200, 2.099	158.200, 2.658	158.200, 2.653	158.200, 2.530	158.200, 2.533	158.200, 1.973	158.200, 2.004	158.200, 2.027	158.200, 1.970
793	158.400, 2.637	158.400, 2.111	158.400, 2.636	158.400, 2.104	158.400, 2.659	158.400, 2.654	158.400, 2.531	158.400, 2.534	158.400, 1.973	158.400, 2.004	158.400, 2.032	158.400, 1.975
794	158.600, 2.638	158.600, 2.111	158.600, 2.637	158.600, 2.109	158.600, 2.660	158.600, 2.654	158.600, 2.531	158.600, 2.535	158.600, 1.973	158.600, 2.005	158.600, 2.037	158.600, 1.981
795	158.800, 2.638	158.800, 2.112	158.800, 2.637	158.800, 2.114	158.800, 2.661	158.800, 2.655	158.800, 2.532	158.800, 2.535	158.800, 1.973	158.800, 2.005	158.800, 2.042	158.800, 1.986
796	159.000, 2.638	159.000, 2.112	159.000, 2.637	159.000, 2.119	159.000, 2.661	159.000, 2.655	159.000, 2.532	159.000, 2.536	159.000, 1.974	159.000, 2.005	159.000, 2.046	159.000, 1.992
797	159.200, 2.639	159.200, 2.113	159.200, 2.638	159.200, 2.123	159.200, 2.662	159.200, 2.655	159.200, 2.533	159.200, 2.537	159.200, 1.974	159.200, 2.006	159.200, 2.051	159.200, 1.997
798	159.400, 2.639	159.400, 2.113	159.400, 2.638	159.400, 2.128	159.400, 2.662	159.400, 2.655	159.400, 2.533	159.400, 2.537	159.400, 1.974	159.400, 2.006	159.400, 2.055	159.400, 2.002
799	159.600, 2.639	159.600, 2.113	159.600, 2.639	159.600, 2.133	159.600, 2.663	159.600, 2.656	159.600, 2.533	159.600, 2.537	159.600, 1.974	159.600, 2.007	159.600, 2.060	159.600, 2.007
800	159.800, 2.639	159.800, 2.114	159.800, 2.639	159.800, 2.138	159.800, 2.663	159.800, 2.656	159.800, 2.534	159.800, 2.538	159.800, 1.974	159.800, 2.007	159.800, 2.065	159.800, 2.012
801	160.000, 2.640	160.000, 2.114	160.000, 2.640	160.000, 2.143	160.000, 2.663	160.000, 2.656	160.000, 2.533	160.000, 2.538	160.000, 1.974	160.000, 2.007	160.000, 2.069	160.000, 2.017
802	160.200, 2.640	160.200, 2.114	160.200, 2.641	160.200, 2.147	160.200, 2.663	160.200, 2.657	160.200, 2.534	160.200, 2.538	160.200, 1.974	160.200, 2.007	160.200, 2.074	160.200, 2.022
803	160.400, 2.640	160.400, 2.114	160.400, 2.641	160.400, 2.152	160.400, 2.664	160.400, 2.657	160.400, 2.534	160.400, 2.539	160.400, 1.974	160.400, 2.008	160.400, 2.079	160.400, 2.027
804	160.600, 2.640	160.600, 2.114	160.600, 2.642	160.600, 2.157	160.600, 2.664	160.600, 2.657	160.600, 2.534	160.600, 2.539	160.600, 1.975	160.600, 2.008	160.600, 2.084	160.600, 2.032
805	160.800, 2.640	160.800, 2.114	160.800, 2.643	160.800, 2.161	160.800, 2.664	160.800, 2.657	160.800, 2.534	160.800, 2.539	160.800, 1.975	160.800, 2.009	160.800, 2.088	160.800, 2.036
806	161.000, 2.639	161.000, 2.114	161.000, 2.643	161.000, 2.165	161.000, 2.664	161.000, 2.657	161.000, 2.535	161.000, 2.539	161.000, 1.976	161.000, 2.009	161.000, 2.093	161.000, 2.041
807	161.200, 2.639	161.200, 2.114	161.200, 2.643	161.200, 2.170	161.200, 2.664	161.200, 2.657	161.200, 2.535	161.200, 2.540	161.200, 1.976	161.200, 2.010	161.200, 2.097	161.200, 2.046
808	161.400, 2.639	161.400, 2.114	161.400, 2.644	161.400, 2.174	161.400, 2.665	161.400, 2.658	161.400, 2.536	161.400, 2.540	161.400, 1.977	161.400, 2.011	161.400, 2.102	161.400, 2.051
809	161.600, 2.639	161.600, 2.115	161.600, 2.644	161.600, 2.178	161.600, 2.665	161.600, 2.658	161.600, 2.536	161.600, 2.540	161.600, 1.977	161.600, 2.011	161.600, 2.106	161.600, 2.055
810	161.800, 2.639	161.800, 2.115	161.800, 2.645	161.800, 2.183	161.800, 2.666	161.800, 2.658	161.800, 2.536	161.800, 2.540	161.800, 1.978	161.800, 2.011	161.800, 2.111	161.800, 2.060
811	162.000, 2.640	162.000, 2.115	162.000, 2.645	162.000, 2.187	162.000, 2.666	162.000, 2.658	162.000, 2.537	162.000, 2.540	162.000, 1.978	162.000, 2.011	162.000, 2.115	162.000, 2.065
812	162.200, 2.640	162.200, 2.116	162.200, 2.645	162.200, 2.192	162.200, 2.667	162.200, 2.658	162.200, 2.538	162.200, 2.541	162.200, 1.978	162.200, 2.011	162.200, 2.120	162.200, 2.070
813	162.400, 2.640	162.400, 2.116	162.400, 2.645	162.400, 2.196	162.400, 2.668	162.400, 2.659	162.400, 2.538	162.400, 2.541	162.400, 1.979	162.400, 2.011	162.400, 2.124	162.400, 2.075
814	162.600, 2.641	162.600, 2.116	162.600, 2.646	162.600, 2.201	162.600, 2.669	162.600, 2.659	162.600, 2.539	162.600, 2.542	162.600, 1.979	162.600, 2.011	162.600, 2.128	162.600, 2.080
815	162.800, 2.641	162.800, 2.117	162.800, 2.646	162.800, 2.205	162.800, 2.670	162.800, 2.659	162.800, 2.539	162.800, 2.542	162.800, 1.979	162.800, 2.011	162.800, 2.132	162.800, 2.085
816	163.000, 2.641	163.000, 2.117	163.000, 2.646	163.000, 2.210	163.000, 2.671	163.000, 2.659	163.000, 2.540	163.000, 2.542	163.000, 1.980	163.000, 2.011	163.000, 2.136	163.000, 2.089
817	163.200, 2.641	163.200, 2.117	163.200, 2.647	163.200, 2.214	163.200, 2.672	163.200, 2.659	163.200, 2.540	163.200, 2.542	163.200, 1.980	163.200, 2.011	163.200, 2.140	163.200, 2.094
818	163.400, 2.642	163.400, 2.117	163.400, 2.647	163.400, 2.219	163.400, 2.672	163.400, 2.659	163.400, 2.540	163.400, 2.542	163.400, 1.981	163.400, 2.012	163.400, 2.144	163.400, 2.099
819	163.600, 2.642	163.600, 2.117	163.600, 2.647	163.600, 2.223	163.600, 2.672	163.600, 2.659	163.600, 2.540	163.600, 2.543	163.600, 1.981	163.600, 2.012	163.600, 2.148	163.600, 2.103
820	163.800, 2.642	163.800, 2.117	163.800, 2.648	163.800, 2.228	163.800, 2.673	163.800, 2.660	163.800, 2.541	163.800, 2.543	163.800, 1.981	163.800, 2.012	163.800, 2.152	163.800, 2.108
821	164.000, 2.642	164.000, 2.117	164.000, 2.648	164.000, 2.232	164.000, 2.673	164.000, 2.660	164.000, 2.541	164.000, 2.543	164.000, 1.981	164.000, 2.012	164.000, 2.156	164.000, 2.112
822	164.200, 2.642	164.200, 2.117	164.200, 2.648	164.200, 2.236	164.200, 2.673	164.200, 2.660	164.200, 2.542	164.200, 2.543	164.200, 1.982	164.200, 2.012	164.200, 2.160	164.200, 2.117
823	164.400, 2.642	164.400, 2.118	164.400, 2.648	164.400, 2.240	164.400, 2.674	164.400, 2.661	164.400, 2.542	164.400, 2.543	164.400, 1.982	164.400, 2.013	164.400, 2.164	164.400, 2.121
824	164.600, 2.642	164.600, 2.118	164.600, 2.648	164.600, 2.244	164.600, 2.674	164.600, 2.661	164.600, 2.543	164.600, 2.543	164.600, 1.982	164.600, 2.013	164.600, 2.167	164.600, 2.126
825	164.800, 2.643	164.800, 2.118	164.800, 2.648	164.800, 2.248	164.800, 2.674	164.800, 2.662	164.800, 2.544	164.800, 2.543	164.800, 1.982	164.800, 2.014	164.800, 2.171	164.800, 2.130
826	165.000, 2.643	165.000, 2.119	165.000, 2.649	165.000, 2.252	165.000, 2.675	165.000, 2.663	165.000, 2.544	165.000, 2.544	165.000, 1.983	165.000, 2.014	165.000, 2.175	165.000, 2.134
827	165.200, 2.643	165.200, 2.119	165.200, 2.649	165.200, 2.255	165.200, 2.675	165.200, 2.664	165.200, 2.545	165.200, 2.544	165.200, 1.983	165.200, 2.015	165.200, 2.178	165.200, 2.139
828	165.400, 2.643	165.400, 2.120	165.400, 2.649	165.400, 2.259	165.400, 2.675	165.400, 2.664	165.400, 2.545	165.400, 2.544	165.400, 1.984	165.400, 2.016	165.400, 2.182	165.400, 2.143
829	165.600, 2.644	165.600, 2.120	165.600, 2.649	165.600, 2.262	165.600, 2.675	165.600, 2.665	165.600, 2.546	165.600, 2.545	165.600, 1.984	165.600, 2.016	165.600, 2.186	165.600, 2.147
830	165.800, 2.644	165.800, 2.121	165.800, 2.650	165.800, 2.266	165.800, 2.675	165.800, 2.666	165.800, 2.546	165.800, 2.546	165.800, 1.984	165.800, 2.016	165.800, 2.189	165.800, 2.151
831	166.000, 2.644	166.000, 2.121	166.000, 2.650	166.000, 2.269	166.000, 2.676	166.000, 2.666	166.000, 2.547	166.000, 2.547	166.000, 1.984	166.000, 2.017	166.000, 2.193	166.000, 2.156
832	166.200, 2.645	166.200, 2.121	166.200, 2.650	166.200, 2.273	166.200, 2.676	166.200, 2.667	166.200, 2.547	166.200, 2.548	166.200, 1.985	166.200, 2.017	166.200, 2.197	166.200, 2.160
833	166.400, 2.645	166.400, 2.122	166.400, 2.651	166.400, 2.276	166.400, 2.677	166.400, 2.668	166.400, 2.547	166.400, 2.548	166.400, 1.985	166.400, 2.017	166.400, 2.201	166.400, 2.164
834	166.600, 2.645	166.600, 2.122	166.600, 2.651	166.600, 2.280	166.600, 2.677	166.600, 2.668	166.600, 2.547	166.600, 2.549	166.600, 1.985	166.600, 2.017	166.600, 2.205	166.600, 2.168
835	166.800, 2.645	166.800, 2.122	166.800, 2.652	166.800, 2.284	166.800, 2.677	166.800, 2.668	166.800, 2.547	166.800, 2.549	166.800, 1.985	166.800, 2.017	166.800, 2.209	166.800, 2.172
836	167.000, 2.645	167.000, 2.122	167.000, 2.652	167.000, 2.287	167.000, 2.678	167.000, 2.668	167.000, 2.547	167.000, 2.550	167.000, 1.985	167.000, 2.018	167.000, 2.213	167.000, 2.176
837	167.200, 2.645	167.200, 2.122	167.200, 2.652	167.200, 2.291	167.200, 2.678	167.200, 2.669	167.200, 2.547	167.200, 2.550	167.200, 1.985	167.200, 2.018	167.200, 2.217	167.200, 2.179
838	167.400, 2.645	167.400, 2.122	167.400, 2.652	167.400, 2.295	167.400, 2.678	167.400, 2.669	167.400, 2.547	167.400, 2.550	167.400, 1.985	167.400, 2.018	167.400, 2.221	167.400, 2.183
839	167.600, 2.645	167.600, 2.121	167.600, 2.652	167.600, 2.298	167.600, 2.678	167.600, 2.669	167.600, 2.547	167.600, 2.550	167.600, 1.985	167.600, 2.018	167.600, 2.225	167.600, 2.187
840	167.800, 2.645	167.800, 2.121	167.800, 2.652	167.800, 2.302	167.800, 2.679	167.800, 2.669	167.800, 2.548	167.800, 2.549	167.800, 1.986	167.800, 2.018	167.800, 2.229	167.800, 2.191
841	168.000, 2.645	168.000, 2.121	168.000, 2.652	168.000, 2.305	168.000, 2.679	168.000, 2.669	168.000, 2.548	168.000, 2.550	168.000, 1.986	168.000, 2.018	168.000, 2.233	168.000, 2.195
842	168.200, 2.645	168.200, 2.121	168.200, 2.653	168.200, 2.309	168.200, 2.680	168.200, 2.669	168.200, 2.548	168.200, 2.550	168.200, 1.986	168.200, 2.018	168.200, 2.236	168.200, 2.199
843	168.400, 2.645	168.400, 2.121	168.400, 2.653	168.400, 2.312	168.400, 2.680	168.400, 2.669	168.400, 2.548	168.400, 2.550	168.400, 1.986	168.400, 2.018	168.400, 2.240	168.400, 2.203
844	168.600, 2.645	168.600, 2.121	168.600, 2.653	168.600, 2.316	168.600, 2.680	168.600, 2.669	168.600, 2.549	168.600, 2.550	168.600, 1.986	168.600, 2.019	168.600, 2.243	168.600, 2.207
845	168.800, 2.645	168.800, 2.121	168.800, 2.654	168.800, 2.319	168.800, 2.681	168.800, 2.670	168.800, 2.549	168.800, 2.550	168.800, 1.987	168.800, 2.019	168.800, 2.246	168.800, 2.211
846	169.000, 2.645	169.000, 2.121	169.000, 2.654	169.000, 2.323	169.000, 2.681	169.000, 2.670	169.000, 2.549	169.000, 2.550	169.000, 1.987	169.000, 2.020	169.000, 2.250	169.000, 2.215
847	169.200, 2.645	169.200, 2.121	169.200, 2.654	169.200, 2.326	169.200, 2.681	169.200, 2.670	169.200, 2.549	169.200, 2.551	169.200, 1.987	169.200, 2.020	169.200, 2.253	169.200, 2.219
848	169.400, 2.645	169.400, 2.122	169.400, 2.655	169.400, 2.329	169.400, 2.682	169.400, 2.671	169.400, 2.550	169.400, 2.551	169.400, 1.987	169.400, 2.021	169.400, 2.256	169.400, 2.223
849	169.600, 2.645	169.600, 2.122	169.600, 2.655	169.600, 2.333	169.600, 2.682	169.600, 2.671	169.600, 2.550	169.600, 2.551	169.600, 1.988	169.600, 2.021	169.600, 2.259	169.600, 2.226
850	169.800, 2.645	169.800, 2.122	169.800, 2.655	169.800, 2.336	169.800, 2.682	169.800, 2.671	169.800, 2.550	169.800, 2.552	169.800, 1.988	169.800, 2.021	169.800, 2.262	169.800, 2.230
851	170.000, 2.645	170.000, 2.123	170.000, 2.655	170.000, 2.339	170.000, 2.683	170.000, 2.671	170.000, 2.551	170.000, 2.552	170.000, 1.988	170.000, 2.021	170.000, 2.265	170.000, 2.234
852	170.200, 2.645	170.200, 2.123	170.200, 2.655	170.200, 2.342	170.200, 2.683	170.200, 2.672	170.200, 2.552	170.200, 2.553	170.200, 1.988	170.200, 2.021	170.200, 2.268	170.200, 2.237
853	170.400, 2.645	170.400, 2.124	170.400, 2.655	170.400, 2.346	170.400, 2.684	170.400, 2.672	170.400, 2.552	170.400, 2.553	170.400, 1.989	170.400, 2.021	170.400, 2.271	170.400, 2.241
854	170.600, 2.645	170.600, 2.124	170.600, 2.656	170.600, 2.349	170.600, 2.684	170.600, 2.672	170.600, 2.553	170.600, 2.553	170.600, 1.989	170.600, 2.021	170.600, 2.274	170.600, 2.244
855	170.800, 2.645	170.800, 2.124	170.800, 2.656	170.800, 2.352	170.800, 2.684	170.800, 2.672	170.800, 2.553	170.800, 2.553	170.800, 1.989	170.800, 2.021	170.800, 2.276	170.800, 2.248
856	171.000, 2.645	171.000, 2.125	171.000, 2.656	171.000, 2.355	171.000, 2.685	171.000, 2.673	171.000, 2.554	171.000, 2.554	171.000, 1.989	171.000, 2.021	171.000, 2.279	171.000, 2.251
857	171.200, 2.645	171.200, 2.125	171.200, 2.657	171.200, 2.358	171.200, 2.686	171.200, 2.673	171.200, 2.554	171.200, 2.554	171.200, 1.990	171.200, 2.021	171.200, 2.282	171.200, 2.255
858	171.400, 2.645	171.400, 2.124	171.400, 2.657	171.400, 2.361	171.400, 2.686	171.400, 2.674	171.400, 2.555	171.400, 2.554	171.400, 1.990	171.400, 2.021	171.400, 2.285	171.400, 2.258
859	171.600, 2.645	171.600, 2.124	171.600, 2.657	171.600, 2.364	171.600, 2.687	171.600, 2.674	171.600, 2.555	171.600, 2.555	171.600, 1.991	171.600, 2.022	171.600, 2.288	171.600, 2.262
860	171.800, 2.646	171.800, 2.125	171.800, 2.658	171.800, 2.367	171.800, 2.687	171.800, 2.674	171.800, 2.556	171.800, 2.555	171.800, 1.991	171.800, 2.022	171.800, 2.290	171.800, 2.265
861	172.000, 2.646	172.000, 2.125	172.000, 2.658	172.000, 2.370	172.000, 2.688	172.000, 2.674	172.000, 2.556	172.000, 2.556	172.000, 1.992	172.000, 2.022	172.000, 2.293	172.000, 2.268
862	172.200, 2.646	172.200, 2.125	172.200, 2.659	172.200, 2.373	172.200, 2.688	172.200, 2.675	172.200, 2.556	172.200, 2.556	172.200, 1.992	172.200, 2.023	172.200, 2.296	172.200, 2.272
863	172.400, 2.646	172.400, 2.125	172.400, 2.659	172.400, 2.376	172.400, 2.689	172.400, 2.675	172.400, 2.557	172.400, 2.557	172.400, 1.993	172.400, 2.023	172.400, 2.299	172.400, 2.275
864	172.600, 2.647	172.600, 2.125	172.600, 2.659	172.600, 2.379	172.600, 2.689	172.600, 2.675	172.600, 2.557	172.600, 2.557	172.600, 1.993	172.600, 2.023	172.600, 2.303	172.600, 2.279
865	172.800, 2.647	172.800, 2.125	172.800, 2.659	172.800, 2.382	172.800, 2.689	172.800, 2.675	172.800, 2.556	172.800, 2.557	172.800, 1.993	172.800, 2.024	172.800, 2.306	172.800, 2.282
866	173.000, 2.647	173.000, 2.125	173.000, 2.659	173.000, 2.385	173.000, 2.689	173.000, 2.675	173.000, 2.556	173.000, 2.557	173.000, 1.994	173.000, 2.024	173.000, 2.309	173.000, 2.285
867	173.200, 2.648	173.200, 2.126	173.200, 2.659	173.200, 2.388	173.200, 2.690	173.200, 2.676	173.200, 2.556	173.200, 2.557	173.200, 1.994	173.200, 2.025	173.200, 2.312	173.200, 2.288
868	173.400, 2.648	173.400, 2.126	173.400, 2.659	173.400, 2.391	173.400, 2.690	173.400, 2.676	173.400, 2.556	173.400, 2.557	173.400, 1.994	173.400, 2.025	173.400, 2.315	173.400, 2.291
869	173.600, 2.648	173.600, 2.126	173.600, 2.659	173.600, 2.393	173.600, 2.690	173.600, 2.677	173.600, 2.556	173.600, 2.557	173.600, 1.994	173.600, 2.025	173.600, 2.318	173.600, 2.295
870	173.800, 2.648	173.800, 2.126	173.800, 2.658	173.800, 2.396	173.800, 2.690	173.800, 2.677	173.800, 2.557	173.800, 2.558	173.800, 1.994	173.800, 2.025	173.800, 2.321	173.800, 2.298
871	174.000, 2.648	174.000, 2.127	174.000, 2.658	174.000, 2.398	174.000, 2.690	174.000, 2.677	174.000, 2.557	174.000, 2.558	174.000, 1.995	174.000, 2.025	174.000, 2.325	174.000, 2.301
872	174.200, 2.648	174.200, 2.127	174.200, 2.659	174.200, 2.400	174.200, 2.691	174.200, 2.677	174.200, 2.557	174.200, 2.558	174.200, 1.995	174.200, 2.025	174.200, 2.328	174.200, 2.305
873	174.400, 2.648	174.400, 2.127	174.400, 2.659	174.400, 2.402	174.400, 2.691	174.400, 2.677	174.400, 2.558	174.400, 2.558	174.400, 1.994	174.400, 2.025	174.400, 2.330	174.400, 2.308
874	174.600, 2.648	174.600, 2.127	174.600, 2.659	174.600, 2.405	174.600, 2.691	174.600, 2.677	174.600, 2.558	174.600, 2.558	174.600, 1.994	174.600, 2.025	174.600, 2.333	174.600, 2.311
875	174.800, 2.648	174.800, 2.127	174.800, 2.660	174.800, 2.407	174.800, 2.691	174.800, 2.677	174.800, 2.559	174.800, 2.558	174.800, 1.994	174.800, 2.024	174.800, 2.336	174.800, 2.314
876	175.000, 2.649	175.000, 2.127	175.000, 2.660	175.000, 2.409	175.000, 2.692	175.000, 2.677	175.000, 2.559	175.000, 2.559	175.000, 1.994	175.000, 2.024	175.000, 2.338	175.000, 2.317
877	175.200, 2.649	175.200, 2.127	175.200, 2.661	175.200, 2.412	175.200, 2.692	175.200, 2.677	175.200, 2.559	175.200, 2.559	175.200, 1.994	175.200, 2.025	175.200, 2.341	175.200, 2.321
878	175.400, 2.649	175.400, 2.127	175.400, 2.662	175.400, 2.415	175.400, 2.693	175.400, 2.678	175.400, 2.559	175.400, 2.560	175.400, 1.994	175.400, 2.025	175.400, 2.343	175.400, 2.324
879	175.600, 2.649	175.600, 2.128	175.600, 2.662	175.600, 2.417	175.600, 2.693	175.600, 2.678	175.600, 2.560	175.600, 2.560	175.600, 1.994	175.600, 2.025	175.600, 2.345	175.600, 2.327
880	175.800, 2.649	175.800, 2.128	175.800, 2.663	175.800, 2.420	175.800, 2.694	175.800, 2.678	175.800, 2.560	175.800, 2.561	175.800, 1.994	175.800, 2.025	175.800, 2.348	175.800, 2.330
881	176.000, 2.649	176.000, 2.128	176.000, 2.663	176.000, 2.423	176.000, 2.694	176.000, 2.678	176.000, 2.560	176.000, 2.561	176.000, 1.995	176.000, 2.026	176.000, 2.350	176.000, 2.334
882	176.200, 2.649	176.200, 2.128	176.200, 2.663	176.200, 2.426	176.200, 2.695	176.200, 2.679	176.200, 2.560	176.200, 2.561	176.200, 1.995	176.200, 2.026	176.200, 2.353	176.200, 2.337
883	176.400, 2.649	176.400, 2.129	176.400, 2.664	176.400, 2.428	176.400, 2.695	176.400, 2.679	176.400, 2.560	176.400, 2.561	176.400, 1.995	176.400, 2.026	176.400, 2.355	176.400, 2.340
884	176.600, 2.649	176.600, 2.128	176.600, 2.664	176.600, 2.431	176.600, 2.696	176.600, 2.680	176.600, 2.560	176.600, 2.561	176.600, 1.996	176.600, 2.027	176.600, 2.357	176.600, 2.343
885	176.800, 2.650	176.800, 2.128	176.800, 2.664	176.800, 2.434	176.800, 2.696	176.800, 2.680	176.800, 2.560	176.800, 2.560	176.800, 1.996	176.800, 2.027	176.800, 2.359	176.800, 2.346
886	177.000, 2.650	177.000, 2.128	177.000, 2.664	177.000, 2.437	177.000, 2.696	177.000, 2.681	177.000, 2.560	177.000, 2.560	177.000, 1.996	177.000, 2.028	177.000, 2.361	177.000, 2.349
887	177.200, 2.650	177.200, 2.128	177.200, 2.664	177.200, 2.439	177.200, 2.697	177.200, 2.681	177.200, 2.560	177.200, 2.560	177.200, 1.997	177.200, 2.028	177.200, 2.363	177.200, 2.352
888	177.400, 2.650	177.400, 2.128	177.400, 2.664	177.400, 2.442	177.400, 2.697	177.400, 2.681	177.400, 2.560	177.400, 2.560	177.400, 1.997	177.400, 2.028	177.400, 2.366	177.400, 2.355
889	177.600, 2.650	177.600, 2.128	177.600, 2.664	177.600, 2.444	177.600, 2.697	177.600, 2.682	177.600, 2.561	177.600, 2.560	177.600, 1.998	177.600, 2.029	177.600, 2.368	177.600, 2.358
890	177.800, 2.650	177.800, 2.128	177.800, 2.665	177.800, 2.447	177.800, 2.697	177.800, 2.682	177.800, 2.561	177.800, 2.561	177.800, 1.998	177.800, 2.029	177.800, 2.371	177.800, 2.361
891	178.000, 2.649	178.000, 2.128	178.000, 2.665	178.000, 2.449	178.000, 2.697	178.000, 2.682	178.000, 2.562	178.000, 2.561	178.000, 1.998	178.000, 2.029	178.000, 2.374	178.000, 2.364
892	178.200, 2.649	178.200, 2.128	178.200, 2.665	178.200, 2.451	178.200, 2.697	178.200, 2.682	178.200, 2.563	178.200, 2.562	178.200, 1.999	178.200, 2.029	178.200, 2.376	178.200, 2.366
893	178.400, 2.649	178.400, 2.128	178.400, 2.665	178.400, 2.454	178.400, 2.696	178.400, 2.681	178.400, 2.563	178.400, 2.562	178.400, 1.999	178.400, 2.029	178.400, 2.379	178.400, 2.369
894	178.600, 2.649	178.600, 2.128	178.600, 2.665	178.600, 2.456	178.600, 2.696	178.600, 2.681	178.600, 2.564	178.600, 2.563	178.600, 1.999	178.600, 2.029	178.600, 2.381	178.600, 2.371
895	178.800, 2.649	178.800, 2.128	178.800, 2.666	178.800, 2.459	178.800, 2.696	178.800, 2.681	178.800, 2.564	178.800, 2.564	178.800, 1.999	178.800, 2.029	178.800, 2.384	178.800, 2.374
896	179.000, 2.649	179.000, 2.129	179.000, 2.666	179.000, 2.461	179.000, 2.696	179.000, 2.681	179.000, 2.565	179.000, 2.564	179.000, 1.999	179.000, 2.029	179.000, 2.386	179.000, 2.377
897	179.200, 2.649	179.200, 2.129	179.200, 2.666	179.200, 2.464	179.200, 2.696	179.200, 2.681	179.200, 2.565	179.200, 2.565	179.200, 1.999	179.200, 2.029	179.200, 2.388	179.200, 2.379
898	179.400, 2.649	179.400, 2.129	179.400, 2.666	179.400, 2.466	179.400, 2.696	179.400, 2.682	179.400, 2.566	179.400, 2.565	179.400, 1.999	179.400, 2.029	179.400, 2.391	179.400, 2.382
899	179.600, 2.649	179.600, 2.129	179.600, 2.666	179.600, 2.468	179.600, 2.697	179.600, 2.682	179.600, 2.566	179.600, 2.566	179.600, 2.000	179.600, 2.029	179.600, 2.393	179.600, 2.385
900	179.800, 2.649	179.800, 2.129	179.800, 2.666	179.800, 2.471	179.800, 2.697	179.800, 2.682	179.800, 2.566	179.800, 2.566	179.800, 2.000	179.800, 2.029	179.800, 2.395	179.800, 2.388
901	180.000, 2.648	180.000, 2.130	180.000, 2.666	180.000, 2.473	180.000, 2.697	180.000, 2.682	180.000, 2.566	180.000, 2.566	180.000, 2.000	180.000, 2.029	180.000, 2.397	180.000, 2.391
902	180.200, 2.648	180.200, 2.130	180.200, 2.666	180.200, 2.475	180.200, 2.697	180.200, 2.682	180.200, 2.566	180.200, 2.566	180.200, 2.000	180.200, 2.029	180.200, 2.399	180.200, 2.394
903	180.400, 2.648	180.400, 2.130	180.400, 2.666	180.400, 2.477	180.400, 2.698	180.400, 2.683	180.400, 2.566	180.400, 2.566	180.400, 2.000	180.400, 2.029	180.400, 2.401	180.400, 2.397
904	180.600, 2.648	180.600, 2.130	180.600, 2.667	180.600, 2.479	180.600, 2.698	180.600, 2.683	180.600, 2.566	180.600, 2.566	180.600, 2.000	180.600, 2.029	180.600, 2.403	180.600, 2.399
905	180.800, 2.648	180.800, 2.130	180.800, 2.667	180.800, 2.481	180.800, 2.698	180.800, 2.683	180.800, 2.566	180.800, 2.566	180.800, 2.000	180.800, 2.029	180.800, 2.405	180.800, 2.402
906	181.000, 2.648	181.000, 2.130	181.000, 2.667	181.000, 2.483	181.000, 2.699	181.000, 2.684	181.000, 2.566	181.000, 2.566	181.000, 2.000	181.000, 2.030	181.000, 2.407	181.000, 2.404
907	181.200, 2.648	181.200, 2.130	181.200, 2.668	181.200, 2.485	181.200, 2.699	181.200, 2.684	181.200, 2.566	181.200, 2.566	181.200, 2.000	181.200, 2.030	181.200, 2.410	181.200, 2.407
908	181.400, 2.648	181.400, 2.130	181.400, 2.668	181.400, 2.486	181.400, 2.699	181.400, 2.684	181.400, 2.566	181.400, 2.566	181.400, 2.000	181.400, 2.030	181.400, 2.412	181.400, 2.409
909	181.600, 2.648	181.600, 2.131	181.600, 2.669	181.600, 2.488	181.600, 2.700	181.600, 2.684	181.600, 2.567	181.600, 2.566	181.600, 2.000	181.600, 2.030	181.600, 2.414	181.600, 2.411
910	181.800, 2.648	181.800, 2.131	181.800, 2.669	181.800, 2.490	181.800, 2.700	181.800, 2.684	181.800, 2.567	181.800, 2.567	181.800, 2.000	181.800, 2.030	181.800, 2.416	181.800, 2.413
911	182.000, 2.648	182.000, 2.131	182.000, 2.669	182.000, 2.492	182.000, 2.700	182.000, 2.684	182.000, 2.567	182.000, 2.567	182.000, 2.000	182.000, 2.030	182.000, 2.418	182.000, 2.416
912	182.200, 2.649	182.200, 2.132	182.200, 2.669	182.200, 2.494	182.200, 2.701	182.200, 2.684	182.200, 2.568	182.200, 2.567	182.200, 2.000	182.200, 2.030	182.200, 2.420	182.200, 2.418
913	182.400, 2.649	182.400, 2.132	182.400, 2.669	182.400, 2.496	182.400, 2.701	182.400, 2.684	182.400, 2.568	182.400, 2.567	182.400, 2.000	182.400, 2.030	182.400, 2.422	182.400, 2.421
914	182.600, 2.649	182.600, 2.132	182.600, 2.669	182.600, 2.498	182.600, 2.701	182.600, 2.684	182.600, 2.568	182.600, 2.568	182.600, 2.000	182.600, 2.030	182.600, 2.424	182.600, 2.423
915	182.800, 2.649	182.800, 2.132	182.800, 2.669	182.800, 2.500	182.800, 2.702	182.800, 2.684	182.800, 2.569	182.800, 2.568	182.800, 2.000	182.800, 2.031	182.800, 2.426	182.800, 2.426
916	183.000, 2.650	183.000, 2.133	183.000, 2.669	183.000, 2.502	183.000, 2.702	183.000, 2.684	183.000, 2.569	183.000, 2.568	183.000, 2.000	183.000, 2.031	183.000, 2.428	183.000, 2.428
917	183.200, 2.650	183.200, 2.133	183.200, 2.669	183.200, 2.504	183.200, 2.702	183.200, 2.684	183.200, 2.569	183.200, 2.568	183.200, 2.000	183.200, 2.031	183.200, 2.430	183.200, 2.431
918	183.400, 2.650	183.400, 2.133	183.400, 2.669	183.400, 2.506	183.400, 2.702	183.400, 2.684	183.400, 2.569	183.400, 2.568	183.400, 2.000	183.400, 2.032	183.400, 2.432	183.400, 2.433
919	183.600, 2.651	183.600, 2.133	183.600, 2.669	183.600, 2.508	183.600, 2.703	183.600, 2.684	183.600, 2.569	183.600, 2.568	183.600, 2.001	183.600, 2.032	183.600, 2.434	183.600, 2.436
920	183.800, 2.651	183.800, 2.133	183.800, 2.670	183.800, 2.510	183.800, 2.703	183.800, 2.684	183.800, 2.569	183.800, 2.568	183.800, 2.001	183.800, 2.032	183.800, 2.436	183.800, 2.439
921	184.000, 2.651	184.000, 2.133	184.000, 2.670	184.000, 2.512	184.000, 2.703	184.000, 2.684	184.000, 2.569	184.000, 2.568	184.000, 2.002	184.000, 2.032	184.000, 2.438	184.000, 2.441
922	184.200, 2.651	184.200, 2.133	184.200, 2.670	184.200, 2.514	184.200, 2.703	184.200, 2.685	184.200, 2.569	184.200, 2.568	184.200, 2.002	184.200, 2.032	184.200, 2.440	184.200, 2.444
923	184.400, 2.650	184.400, 2.133	184.400, 2.671	184.400, 2.516	184.400, 2.703	184.400, 2.685	184.400, 2.569	184.400, 2.567	184.400, 2.002	184.400, 2.033	184.400, 2.442	184.400, 2.446
924	184.600, 2.650	184.600, 2.133	184.600, 2.671	184.600, 2.518	184.600, 2.703	184.600, 2.685	184.600, 2.569	184.600, 2.567	184.600, 2.003	184.600, 2.033	184.600, 2.444	184.600, 2.448
925	184.800, 2.651	184.800, 2.132	184.800, 2.672	184.800, 2.520	184.800, 2.704	184.800, 2.685	184.800, 2.570	184.800, 2.568	184.800, 2.003	184.800, 2.033	184.800, 2.446	184.800, 2.450
926	185.000, 2.650	185.000, 2.132	185.000, 2.672	185.000, 2.522	185.000, 2.704	185.000, 2.686	185.000, 2.570	185.000, 2.568	185.000, 2.004	185.000, 2.033	185.000, 2.447	185.000, 2.452
927	185.200, 2.650	185.200, 2.132	185.200, 2.672	185.200, 2.523	185.200, 2.704	185.200, 2.686	185.200, 2.570	185.200, 2.568	185.200, 2.004	185.200, 2.033	185.200, 2.450	185.200, 2.454
928	185.400, 2.650	185.400, 2.132	185.400, 2.672	185.400, 2.525	185.400, 2.704	185.400, 2.686	185.400, 2.571	185.400, 2.568	185.400, 2.004	185.400, 2.033	185.400, 2.452	185.400, 2.456
929	185.600, 2.650	185.600, 2.132	185.600, 2.672	185.600, 2.527	185.600, 2.705	185.600, 2.687	185.600, 2.571	185.600, 2.568	185.600, 2.004	185.600, 2.033	185.600, 2.453	185.600, 2.459
930	185.800, 2.650	185.800, 2.132	185.800, 2.672	185.800, 2.529	185.800, 2.705	185.800, 2.687	185.800, 2.571	185.800, 2.569	185.800, 2.004	185.800, 2.033	185.800, 2.455	185.800, 2.461
931	186.000, 2.650	186.000, 2.132	186.000, 2.672	186.000, 2.531	186.000, 2.705	186.000, 2.688	186.000, 2.571	186.000, 2.569	186.000, 2.004	186.000, 2.033	186.000, 2.457	186.000, 2.463
932	186.200, 2.650	186.200, 2.133	186.200, 2.671	186.200, 2.533	186.200, 2.706	186.200, 2.688	186.200, 2.571	186.200, 2.569	186.200, 2.004	186.200, 2.033	186.200, 2.458	186.200, 2.466
933	186.400, 2.650	186.400, 2.133	186.400, 2.671	186.400, 2.535	186.400, 2.706	186.400, 2.688	186.400, 2.572	186.400, 2.570	186.400, 2.004	186.400, 2.033	186.400, 2.460	186.400, 2.468
934	186.600, 2.650	186.600, 2.133	186.600, 2.671	186.600, 2.537	186.600, 2.706	186.600, 2.689	186.600, 2.572	186.600, 2.570	186.600, 2.004	186.600, 2.033	186.600, 2.462	186.600, 2.470
935	186.800, 2.650	186.800, 2.134	186.800, 2.671	186.800, 2.538	186.800, 2.707	186.800, 2.689	186.800, 2.572	186.800, 2.571	186.800, 2.004	186.800, 2.033	186.800, 2.463	186.800, 2.472
936	187.000, 2.650	187.000, 2.134	187.000, 2.672	187.000, 2.540	187.000, 2.707	187.000, 2.689	187.000, 2.572	187.000, 2.571	187.000, 2.004	187.000, 2.033	187.000, 2.465	187.000, 2.474
937	187.200, 2.650	187.200, 2.134	187.200, 2.672	187.200, 2.542	187.200, 2.708	187.200, 2.689	187.200, 2.572	187.200, 2.571	187.200, 2.004	187.200, 2.033	187.200, 2.467	187.200, 2.476
938	187.400, 2.650	187.400, 2.135	187.400, 2.673	187.400, 2.544	187.400, 2.708	187.400, 2.689	187.400, 2.572	187.400, 2.571	187.400, 2.005	187.400, 2.033	187.400, 2.468	187.400, 2.478
939	187.600, 2.650	187.600, 2.135	187.600, 2.673	187.600, 2.546	187.600, 2.709	187.600, 2.689	187.600, 2.572	187.600, 2.571	187.600, 2.005	187.600, 2.034	187.600, 2.470	187.600, 2.480
940	187.800, 2.650	187.800, 2.135	187.800, 2.674	187.800, 2.548	187.800, 2.709	187.800, 2.690	187.800, 2.573	187.800, 2.571	187.800, 2.005	187.800, 2.034	187.800, 2.471	187.800, 2.482
941	188.000, 2.650	188.000, 2.135	188.000, 2.674	188.000, 2.549	188.000, 2.709	188.000, 2.690	188.000, 2.573	188.000, 2.571	188.000, 2.005	188.000, 2.034	188.000, 2.473	188.000, 2.484
942	188.200, 2.651	188.200, 2.135	188.200, 2.674	188.200, 2.551	188.200, 2.709	188.200, 2.690	188.200, 2.573	188.200, 2.571	188.200, 2.006	188.200, 2.034	188.200, 2.474	188.200, 2.486
943	188.400, 2.651	188.400, 2.134	188.400, 2.674	188.400, 2.552	188.400, 2.709	188.400, 2.690	188.400, 2.573	188.400, 2.571	188.400, 2.006	188.400, 2.034	188.400, 2.476	188.400, 2.488
944	188.600, 2.651	188.600, 2.134	188.600, 2.674	188.600, 2.554	188.600, 2.709	188.600, 2.690	188.600, 2.574	188.600, 2.572	188.600, 2.006	188.600, 2.034	188.600, 2.478	188.600, 2.490
945	188.800, 2.651	188.800, 2.134	188.800, 2.674	188.800, 2.555	188.800, 2.710	188.800, 2.691	188.800, 2.574	188.800, 2.572	188.800, 2.006	188.800, 2.034	188.800, 2.480	188.800, 2.492
946	189.000, 2.651	189.000, 2.134	189.000, 2.674	189.000, 2.557	189.000, 2.710	189.000, 2.691	189.000, 2.574	189.000, 2.572	189.000, 2.006	189.000, 2.035	189.000, 2.481	189.000, 2.493
947	189.200, 2.651	189.200, 2.134	189.200, 2.674	189.200, 2.558	189.200, 2.710	189.200, 2.691	189.200, 2.575	189.200, 2.572	189.200, 2.006	189.200, 2.035	189.200, 2.483	189.200, 2.495
948	189.400, 2.651	189.400, 2.134	189.400, 2.675	189.400, 2.560	189.400, 2.710	189.400, 2.692	189.400, 2.575	189.400, 2.573	189.400, 2.006	189.400, 2.035	189.400, 2.485	189.400, 2.497
949	189.600, 2.652	189.600, 2.134	189.600, 2.675	189.600, 2.561	189.600, 2.710	189.600, 2.692	189.600, 2.575	189.600, 2.573	189.600, 2.006	189.600, 2.035	189.600, 2.487	189.600, 2.499
950	189.800, 2.652	189.800, 2.134	189.800, 2.675	189.800, 2.563	189.800, 2.709	189.800, 2.692	189.800, 2.576	189.800, 2.573	189.800, 2.007	189.800, 2.035	189.800, 2.488	189.800, 2.501
951	190.000, 2.652	190.000, 2.135	190.000, 2.674	190.000, 2.564	190.000, 2.709	190.000, 2.692	190.000, 2.576	190.000, 2.574	190.000, 2.007	190.000, 2.035	190.000, 2.489	190.000, 2.503
952	190.200, 2.651	190.200, 2.135	190.200, 2.674	190.200, 2.565	190.200, 2.709	190.200, 2.692	190.200, 2.576	190.200, 2.574	190.200, 2.007	190.200, 2.035	190.200, 2.491	190.200, 2.505
953	190.400, 2.651	190.400, 2.135	190.400, 2.674	190.400, 2.566	190.400, 2.709	190.400, 2.692	190.400, 2.576	190.400, 2.575	190.400, 2.007	190.400, 2.035	190.400, 2.492	190.400, 2.508
954	190.600, 2.651	190.600, 2.135	190.600, 2.675	190.600, 2.568	190.600, 2.709	190.600, 2.692	190.600, 2.576	190.600, 2.575	190.600, 2.007	190.600, 2.035	190.600, 2.494	190.600, 2.510
955	190.800, 2.651	190.800, 2.135	190.800, 2.675	190.800, 2.569	190.800, 2.709	190.800, 2.692	190.800, 2.576	190.800, 2.576	190.800, 2.008	190.800, 2.036	190.800, 2.495	190.800, 2.512
956	191.000, 2.651	191.000, 2.135	191.000, 2.675	191.000, 2.570	191.000, 2.710	191.000, 2.692	191.000, 2.576	191.000, 2.576	191.000, 2.008	191.000, 2.036	191.000, 2.497	191.000, 2.514
957	191.200, 2.651	191.200, 2.135	191.200, 2.675	191.200, 2.571	191.200, 2.710	191.200, 2.692	191.200, 2.577	191.200, 2.576	191.200, 2.008	191.200, 2.036	191.200, 2.499	191.200, 2.516
958	191.400, 2.651	191.400, 2.135	191.400, 2.676	191.400, 2.572	191.400, 2.710	191.400, 2.692	191.400, 2.577	191.400, 2.576	191.400, 2.008	191.400, 2.036	191.400, 2.500	191.400, 2.518
959	191.600, 2.651	191.600, 2.135	191.600, 2.676	191.600, 2.573	191.600, 2.711	191.600, 2.693	191.600, 2.577	191.600, 2.576	191.600, 2.008	191.600, 2.036	191.600, 2.502	191.600, 2.519
960	191.800, 2.651	191.800, 2.135	191.800, 2.676	191.800, 2.575	191.800, 2.711	191.800, 2.693	191.800, 2.577	191.800, 2.576	191.800, 2.007	191.800, 2.036	191.800, 2.503	191.800, 2.521
961	192.000, 2.651	192.000, 2.135	192.000, 2.676	192.000, 2.576	192.000, 2.712	192.000, 2.693	192.000, 2.578	192.000, 2.577	192.000, 2.007	192.000, 2.036	192.000, 2.505	192.000, 2.523
962	192.200, 2.651	192.200, 2.135	192.200, 2.676	192.200, 2.577	192.200, 2.712	192.200, 2.693	192.200, 2.578	192.200, 2.577	192.200, 2.007	192.200, 2.037	192.200, 2.506	192.200, 2.525
963	192.400, 2.650	192.400, 2.135	192.400, 2.676	192.400, 2.579	192.400, 2.713	192.400, 2.693	192.400, 2.578	192.400, 2.577	192.400, 2.006	192.400, 2.037	192.400, 2.507	192.400, 2.527
964	192.600, 2.650	192.600, 2.135	192.600, 2.677	192.600, 2.580	192.600, 2.713	192.600, 2.694	192.600, 2.578	192.600, 2.577	192.600, 2.006	192.600, 2.037	192.600, 2.509	192.600, 2.528
965	192.800, 2.650	192.800, 2.135	192.800, 2.677	192.800, 2.582	192.800, 2.714	192.800, 2.694	192.800, 2.578	192.800, 2.577	192.800, 2.006	192.800, 2.037	192.800, 2.510	192.800, 2.530
966	193.000, 2.650	193.000, 2.135	193.000, 2.677	193.000, 2.583	193.000, 2.714	193.000, 2.694	193.000, 2.579	193.000, 2.577	193.000, 2.006	193.000, 2.037	193.000, 2.512	193.000, 2.531
967	193.200, 2.650	193.200, 2.135	193.200, 2.677	193.200, 2.585	193.200, 2.714	193.200, 2.694	193.200, 2.579	193.200, 2.577	193.200, 2.007	193.200, 2.037	193.200, 2.513	193.200, 2.532
968	193.400, 2.650	193.400, 2.135	193.400, 2.677	193.400, 2.586	193.400, 2.714	193.400, 2.694	193.400, 2.579	193.400, 2.577	193.400, 2.007	193.400, 2.038	193.400, 2.514	193.400, 2.534
969	193.600, 2.650	193.600, 2.135	193.600, 2.677	193.600, 2.588	193.600, 2.714	193.600, 2.694	193.600, 2.580	193.600, 2.577	193.600, 2.007	193.600, 2.038	193.600, 2.515	193.600, 2.535
970	193.800, 2.650	193.800, 2.135	193.800, 2.677	193.800, 2.589	193.800, 2.713	193.800, 2.694	193.800, 2.580	193.800, 2.577	193.800, 2.008	193.800, 2.038	193.800, 2.516	193.800, 2.536
971	194.000, 2.650	194.000, 2.134	194.000, 2.677	194.000, 2.590	194.000, 2.713	194.000, 2.694	194.000, 2.580	194.000, 2.577	194.000, 2.008	194.000, 2.038	194.000, 2.517	194.000, 2.538
972	194.200, 2.650	194.200, 2.134	194.200, 2.678	194.200, 2.591	194.200, 2.713	194.200, 2.694	194.200, 2.580	194.200, 2.577	194.200, 2.008	194.200, 2.038	194.200, 2.519	194.200, 2.539
973	194.400, 2.651	194.400, 2.134	194.400, 2.678	194.400, 2.592	194.400, 2.713	194.400, 2.694	194.400, 2.580	194.400, 2.577	194.400, 2.009	194.400, 2.039	194.400, 2.520	194.400, 2.541
974	194.600, 2.651	194.600, 2.134	194.600, 2.678	194.600, 2.594	194.600, 2.712	194.600, 2.694	194.600, 2.580	194.600, 2.578	194.600, 2.009	194.600, 2.039	194.600, 2.521	194.600, 2.543
975	194.800, 2.651	194.800, 2.134	194.800, 2.678	194.800, 2.595	194.800, 2.712	194.800, 2.694	194.800, 2.580	194.800, 2.578	194.800, 2.009	194.800, 2.039	194.800, 2.522	194.800, 2.545
976	195.000, 2.651	195.000, 2.134	195.000, 2.679	195.000, 2.596	195.000, 2.713	195.000, 2.694	195.000, 2.581	195.000, 2.578	195.000, 2.010	195.000, 2.040	195.000, 2.523	195.000, 2.547
977	195.200, 2.651	195.200, 2.134	195.200, 2.679	195.200, 2.598	195.200, 2.713	195.200, 2.695	195.200, 2.581	195.200, 2.578	195.200, 2.010	195.200, 2.040	195.200, 2.524	195.200, 2.548
978	195.400, 2.651	195.400, 2.134	195.400, 2.679	195.400, 2.599	195.400, 2.713	195.400, 2.695	195.400, 2.581	195.400, 2.578	195.400, 2.010	195.400, 2.040	195.400, 2.526	195.400, 2.550
979	195.600, 2.652	195.600, 2.134	195.600, 2.679	195.600, 2.600	195.600, 2.713	195.600, 2.695	195.600, 2.581	195.600, 2.578	195.600, 2.010	195.600, 2.040	195.600, 2.527	195.600, 2.552
980	195.800, 2.652	195.800, 2.134	195.800, 2.679	195.800, 2.601	195.800, 2.714	195.800, 2.695	195.800, 2.581	195.800, 2.578	195.800, 2.010	195.800, 2.040	195.800, 2.528	195.800, 2.553
981	196.000, 2.652	196.000, 2.135	196.000, 2.679	196.000, 2.603	196.000, 2.714	196.000, 2.695	196.000, 2.581	196.000, 2.578	196.000, 2.010	196.000, 2.040	196.000, 2.529	196.000, 2.555
982	196.200, 2.652	196.200, 2.135	196.200, 2.679	196.200, 2.604	196.200, 2.714	196.200, 2.696	196.200, 2.581	196.200, 2.579	196.200, 2.010	196.200, 2.040	196.200, 2.530	196.200, 2.556
983	196.400, 2.653	196.400, 2.135	196.400, 2.679	196.400, 2.605	196.400, 2.715	196.400, 2.696	196.400, 2.580	196.400, 2.579	196.400, 2.010	196.400, 2.040	196.400, 2.531	196.400, 2.558
984	196.600, 2.653	196.600, 2.135	196.600, 2.679	196.600, 2.606	196.600, 2.715	196.600, 2.697	196.600, 2.580	196.600, 2.579	196.600, 2.010	196.600, 2.040	196.600, 2.532	196.600, 2.559
985	196.800, 2.653	196.800, 2.135	196.800, 2.679	196.800, 2.608	196.800, 2.715	196.800, 2.697	196.800, 2.580	196.800, 2.580	196.800, 2.010	196.800, 2.039	196.800, 2.533	196.800, 2.561
986	197.000, 2.653	197.000, 2.135	197.000, 2.678	197.000, 2.609	197.000, 2.716	197.000, 2.697	197.000, 2.580	197.000, 2.580	197.000, 2.010	197.000, 2.039	197.000, 2.535	197.000, 2.562
987	197.200, 2.653	197.200, 2.135	197.200, 2.678	197.200, 2.610	197.200, 2.716	197.200, 2.698	197.200, 2.580	197.200, 2.580	197.200, 2.011	197.200, 2.039	197.200, 2.536	197.200, 2.563
988	197.400, 2.652	197.400, 2.135	197.400, 2.678	197.400, 2.611	197.400, 2.716	197.400, 2.698	197.400, 2.580	197.400, 2.581	197.400, 2.011	197.400, 2.039	197.400, 2.537	197.400, 2.565
989	197.600, 2.652	197.600, 2.135	197.600, 2.678	197.600, 2.612	197.600, 2.716	197.600, 2.698	197.600, 2.580	197.600, 2.581	197.600, 2.011	197.600, 2.039	197.600, 2.539	197.600, 2.566
990	197.800, 2.652	197.800, 2.134	197.800, 2.678	197.800, 2.612	197.800, 2.716	197.800, 2.699	197.800, 2.580	197.800, 2.581	197.800, 2.011	197.800, 2.040	197.800, 2.540	197.800, 2.567
991	198.000, 2.652	198.000, 2.134	198.000, 2.678	198.000, 2.613	198.000, 2.716	198.000, 2.699	198.000, 2.580	198.000, 2.582	198.000, 2.012	198.000, 2.040	198.000, 2.541	198.000, 2.569
992	198.200, 2.651	198.200, 2.134	198.200, 2.678	198.200, 2.615	198.200, 2.716	198.200, 2.699	198.200, 2.581	198.200, 2.582	198.200, 2.012	198.200, 2.040	198.200, 2.542	198.200, 2.570
993	198.400, 2.651	198.400, 2.134	198.400, 2.678	198.400, 2.615	198.400, 2.716	198.400, 2.699	198.400, 2.581	198.400, 2.583	198.400, 2.012	198.400, 2.040	198.400, 2.544	198.400, 2.572
994	198.600, 2.651	198.600, 2.135	198.600, 2.678	198.600, 2.616	198.600, 2.716	198.600, 2.699	198.600, 2.581	198.600, 2.583	198.600, 2.012	198.600, 2.040	198.600, 2.545	198.600, 2.573
995	198.800, 2.651	198.800, 2.135	198.800, 2.678	198.800, 2.617	198.800, 2.717	198.800, 2.698	198.800, 2.581	198.800, 2.583	198.800, 2.012	198.800, 2.040	198.800, 2.546	198.800, 2.575
996	199.000, 2.651	199.000, 2.135	199.000, 2.679	199.000, 2.618	199.000, 2.717	199.000, 2.698	199.000, 2.581	199.000, 2.583	199.000, 2.011	199.000, 2.040	199.000, 2.548	199.000, 2.577
997	199.200, 2.651	199.200, 2.136	199.200, 2.679	199.200, 2.619	199.200, 2.717	199.200, 2.698	199.200, 2.581	199.200, 2.584	199.200, 2.011	199.200, 2.040	199.200, 2.549	199.200, 2.578
998	199.400, 2.651	199.400, 2.136	199.400, 2.679	199.400, 2.620	199.400, 2.717	199.400, 2.698	199.400, 2.581	199.400, 2.584	199.400, 2.011	199.400, 2.041	199.400, 2.550	199.400, 2.580
999	199.600, 2.651	199.600, 2.137	199.600, 2.680	199.600, 2.621	199.600, 2.717	199.600, 2.698	199.600, 2.581	199.600, 2.584	199.600, 2.011	199.600, 2.041	199.600, 2.551	199.600, 2.581
1000	199.800, 2.651	199.800, 2.137	199.800, 2.680	199.800, 2.622	199.800, 2.717	199.800, 2.698	199.800, 2.582	199.800, 2.584	199.800, 2.011	199.800, 2.041	199.800, 2.552	199.800, 2.582
1001	200.000, 2.652	200.000, 2.138	200.000, 2.680	200.000, 2.623	200.000, 2.717	200.000, 2.699	200.000, 2.582	200.000, 2.584	200.000, 2.011	200.000, 2.041	200.000, 2.552	200.000, 2.584
1002	200.200, 2.652	200.200, 2.138	200.200, 2.680	200.200, 2.624	200.200, 2.717	200.200, 2.699	200.200, 2.582	200.200, 2.584	200.200, 2.011	200.200, 2.041	200.200, 2.553	200.200, 2.586
1003	200.400, 2.652	200.400, 2.138	200.400, 2.680	200.400, 2.625	200.400, 2.717	200.400, 2.699	200.400, 2.582	200.400, 2.585	200.400, 2.011	200.400, 2.041	200.400, 2.554	200.400, 2.587
1004	200.600, 2.652	200.600, 2.138	200.600, 2.680	200.600, 2.626	200.600, 2.718	200.600, 2.700	200.600, 2.582	200.600, 2.585	200.600, 2.011	200.600, 2.041	200.600, 2.555	200.600, 2.589
1005	200.800, 2.651	200.800, 2.138	200.800, 2.680	200.800, 2.627	200.800, 2.718	200.800, 2.700	200.800, 2.582	200.800, 2.585	200.800, 2.012	200.800, 2.041	200.800, 2.556	200.800, 2.590
1006	201.000, 2.651	201.000, 2.138	201.000, 2.680	201.000, 2.628	201.000, 2.719	201.000, 2.700	201.000, 2.582	201.000, 2.586	201.000, 2.012	201.000, 2.041	201.000, 2.557	201.000, 2.592
1007	201.200, 2.651	201.200, 2.137	201.200, 2.680	201.200, 2.629	201.200, 2.719	201.200, 2.700	201.200, 2.582	201.200, 2.586	201.200, 2.012	201.200, 2.042	201.200, 2.558	201.200, 2.593
1008	201.400, 2.651	201.400, 2.137	201.400, 2.681	201.400, 2.630	201.400, 2.719	201.400, 2.700	201.400, 2.583	201.400, 2.586	201.400, 2.012	201.400, 2.042	201.400, 2.559	201.400, 2.595
1009	201.600, 2.650	201.600, 2.137	201.600, 2.681	201.600, 2.631	201.600, 2.720	201.600, 2.700	201.600, 2.583	201.600, 2.587	201.600, 2.013	201.600, 2.042	201.600, 2.560	201.600, 2.596
1010	201.800, 2.650	201.800, 2.137	201.800, 2.681	201.800, 2.632	201.800, 2.720	201.800, 2.700	201.800, 2.583	201.800, 2.587	201.800, 2.013	201.800, 2.042	201.800, 2.561	201.800, 2.598
1011	202.000, 2.650	202.000, 2.137	202.000, 2.681	202.000, 2.633	202.000, 2.720	202.000, 2.700	202.000, 2.583	202.000, 2.587	202.000, 2.013	202.000, 2.042	202.000, 2.562	202.000, 2.599
1012	202.200, 2.649	202.200, 2.138	202.200, 2.681	202.200, 2.634	202.200, 2.720	202.200, 2.700	202.200, 2.584	202.200, 2.587	202.200, 2.013	202.200, 2.042	202.200, 2.563	202.200, 2.600
1013	202.400, 2.649	202.400, 2.138	202.400, 2.681	202.400, 2.634	202.400, 2.720	202.400, 2.699	202.400, 2.584	202.400, 2.588	202.400, 2.013	202.400, 2.042	202.400, 2.564	202.400, 2.602
1014	202.600, 2.649	202.600, 2.138	202.600, 2.681	202.600, 2.635	202.600, 2.720	202.600, 2.699	202.600, 2.584	202.600, 2.588	202.600, 2.013	202.600, 2.042	202.600, 2.565	202.600, 2.603
1015	202.800, 2.649	202.800, 2.138	202.800, 2.681	202.800, 2.636	202.800, 2.720	202.800, 2.699	202.800, 2.584	202.800, 2.588	202.800, 2.013	202.800, 2.042	202.800, 2.566	202.800, 2.604
1016	203.000, 2.649	203.000, 2.138	203.000, 2.682	203.000, 2.636	203.000, 2.720	203.000, 2.699	203.000, 2.584	203.000, 2.588	203.000, 2.013	203.000, 2.042	203.000, 2.567	203.000, 2.605
1017	203.200, 2.649	203.200, 2.138	203.200, 2.682	203.200, 2.637	203.200, 2.720	203.200, 2.698	203.200, 2.584	203.200, 2.588	203.200, 2.013	203.200, 2.042	203.200, 2.568	203.200, 2.606
1018	203.400, 2.650	203.400, 2.138	203.400, 2.682	203.400, 2.638	203.400, 2.720	203.400, 2.698	203.400, 2.584	203.400, 2.588	203.400, 2.014	203.400, 2.042	203.400, 2.569	203.400, 2.607
1019	203.600, 2.650	203.600, 2.138	203.600, 2.683	203.600, 2.639	203.600, 2.720	203.600, 2.698	203.600, 2.584	203.600, 2.588	203.600, 2.014	203.600, 2.042	203.600, 2.570	203.600, 2.608
1020	203.800, 2.650	203.800, 2.138	203.800, 2.683	203.800, 2.640	203.800, 2.720	203.800, 2.698	203.800, 2.585	203.800, 2.588	203.800, 2.014	203.800, 2.043	203.800, 2.570	203.800, 2.609
1021	204.000, 2.650	204.000, 2.138	204.000, 2.683	204.000, 2.641	204.000, 2.720	204.000, 2.698	204.000, 2.585	204.000, 2.588	204.000, 2.014	204.000, 2.043	204.000, 2.571	204.000, 2.610
1022	204.200, 2.650	204.200, 2.138	204.200, 2.684	204.200, 2.642	204.200, 2.720	204.200, 2.699	204.200, 2.585	204.200, 2.588	204.200, 2.014	204.200, 2.043	204.200, 2.572	204.200, 2.611
1023	204.400, 2.651	204.400, 2.138	204.400, 2.684	204.400, 2.642	204.400, 2.721	204.400, 2.699	204.400, 2.585	204.400, 2.588	204.400, 2.014	204.400, 2.043	204.400, 2.573	204.400, 2.612
1024	204.600, 2.651	204.600, 2.138	204.600, 2.684	204.600, 2.643	204.600, 2.721	204.600, 2.699	204.600, 2.585	204.600, 2.588	204.600, 2.014	204.600, 2.043	204.600, 2.573	204.600, 2.613
1025	204.800, 2.651	204.800, 2.138	204.800, 2.685	204.800, 2.644	204.800, 2.721	204.800, 2.699	204.800, 2.585	204.800, 2.589	204.800, 2.015	204.800, 2.042	204.800, 2.574	204.800, 2.614
1026	205.000, 2.651	205.000, 2.138	205.000, 2.685	205.000, 2.644	205.000, 2.722	205.000, 2.699	205.000, 2.585	205.000, 2.589	205.000, 2.015	205.000, 2.042	205.000, 2.575	205.000, 2.615
1027	205.200, 2.651	205.200, 2.138	205.200, 2.685	205.200, 2.645	205.200, 2.722	205.200, 2.699	205.200, 2.584	205.200, 2.589	205.200, 2.014	205.200, 2.042	205.200, 2.575	205.200, 2.616
1028	205.400, 2.651	205.400, 2.139	205.400, 2.685	205.400, 2.646	205.400, 2.722	205.400, 2.699	205.400, 2.584	205.400, 2.590	205.400, 2.014	205.400, 2.042	205.400, 2.576	205.400, 2.617
1029	205.600, 2.651	205.600, 2.139	205.600, 2.685	205.600, 2.646	205.600, 2.723	205.600, 2.699	205.600, 2.584	205.600, 2.591	205.600, 2.014	205.600, 2.042	205.600, 2.577	205.600, 2.619
1030	205.800, 2.651	205.800, 2.139	205.800, 2.685	205.800, 2.647	205.800, 2.723	205.800, 2.700	205.800, 2.584	205.800, 2.591	205.800, 2.014	205.800, 2.042	205.800, 2.578	205.800, 2.620
1031	206.000, 2.651	206.000, 2.138	206.000, 2.685	206.000, 2.648	206.000, 2.723	206.000, 2.700	206.000, 2.584	206.000, 2.592	206.000, 2.014	206.000, 2.042	206.000, 2.579	206.000, 2.621
1032	206.200, 2.651	206.200, 2.138	206.200, 2.685	206.200, 2.648	206.200, 2.723	206.200, 2.700	206.200, 2.584	206.200, 2.592	206.200, 2.014	206.200, 2.042	206.200, 2.580	206.200, 2.622
1033	206.400, 2.650	206.400, 2.138	206.400, 2.685	206.400, 2.649	206.400, 2.723	206.400, 2.700	206.400, 2.584	206.400, 2.593	206.400, 2.014	206.400, 2.042	206.400, 2.581	206.400, 2.623
1034	206.600, 2.650	206.600, 2.138	206.600, 2.685	206.600, 2.650	206.600, 2.723	206.600, 2.700	206.600, 2.585	206.600, 2.593	206.600, 2.014	206.600, 2.042	206.600, 2.582	206.600, 2.624
1035	206.800, 2.650	206.800, 2.138	206.800, 2.685	206.800, 2.651	206.800, 2.724	206.800, 2.701	206.800, 2.585	206.800, 2.593	206.800, 2.014	206.800, 2.042	206.800, 2.583	206.800, 2.625
1036	207.000, 2.650	207.000, 2.138	207.000, 2.685	207.000, 2.652	207.000, 2.724	207.000, 2.701	207.000, 2.585	207.000, 2.594	207.000, 2.014	207.000, 2.042	207.000, 2.584	207.000, 2.626
1037	207.200, 2.650	207.200, 2.138	207.200, 2.685	207.200, 2.653	207.200, 2.723	207.200, 2.701	207.200, 2.585	207.200, 2.594	207.200, 2.014	207.200, 2.042	207.200, 2.585	207.200, 2.628
1038	207.400, 2.650	207.400, 2.138	207.400, 2.685	207.400, 2.654	207.400, 2.723	207.400, 2.701	207.400, 2.586	207.400, 2.594	207.400, 2.014	207.400, 2.043	207.400, 2.586	207.400, 2.629
1039	207.600, 2.650	207.600, 2.138	207.600, 2.685	207.600, 2.655	207.600, 2.723	207.600, 2.701	207.600, 2.586	207.600, 2.594	207.600, 2.014	207.600, 2.043	207.600, 2.586	207.600, 2.630
1040	207.800, 2.650	207.800, 2.139	207.800, 2.685	207.800, 2.656	207.800, 2.723	207.800, 2.702	207.800, 2.586	207.800, 2.594	207.800, 2.014	207.800, 2.043	207.800, 2.587	207.800, 2.631
1041	208.000, 2.650	208.000, 2.139	208.000, 2.685	208.000, 2.657	208.000, 2.723	208.000, 2.702	208.000, 2.587	208.000, 2.594	208.000, 2.014	208.000, 2.043	208.000, 2.588	208.000, 2.632
1042	208.200, 2.650	208.200, 2.139	208.200, 2.685	208.200, 2.657	208.200, 2.723	208.200, 2.702	208.200, 2.587	208.200, 2.594	208.200, 2.015	208.200, 2.043	208.200, 2.588	208.200, 2.633
1043	208.400, 2.650	208.400, 2.140	208.400, 2.685	208.400, 2.658	208.400, 2.723	208.400, 2.703	208.400, 2.587	208.400, 2.594	208.400, 2.015	208.400, 2.043	208.400, 2.589	208.400, 2.634
1044	208.600, 2.650	208.600, 2.140	208.600, 2.685	208.600, 2.659	208.600, 2.723	208.600, 2.703	208.600, 2.588	208.600, 2.595	208.600, 2.015	208.600, 2.043	208.600, 2.589	208.600, 2.636
1045	208.800, 2.650	208.800, 2.140	208.800, 2.685	208.800, 2.659	208.800, 2.723	208.800, 2.703	208.800, 2.588	208.800, 2.595	208.800, 2.015	208.800, 2.043	208.800, 2.590	208.800, 2.637
1046	209.000, 2.650	209.000, 2.140	209.000, 2.685	209.000, 2.660	209.000, 2.723	209.000, 2.703	209.000, 2.587	209.000, 2.596	209.000, 2.016	209.000, 2.043	209.000, 2.591	209.000, 2.638
1047	209.200, 2.650	209.200, 2.140	209.200, 2.685	209.200, 2.660	209.200, 2.723	209.200, 2.703	209.200, 2.587	209.200, 2.596	209.200, 2.016	209.200, 2.042	209.200, 2.591	209.200, 2.640
1048	209.400, 2.650	209.400, 2.140	209.400, 2.685	209.400, 2.661	209.400, 2.724	209.400, 2.703	209.400, 2.587	209.400, 2.597	209.400, 2.016	209.400, 2.042	209.400, 2.592	209.400, 2.640
1049	209.600, 2.651	209.600, 2.141	209.600, 2.685	209.600, 2.662	209.600, 2.724	209.600, 2.703	209.600, 2.587	209.600, 2.597	209.600, 2.016	209.600, 2.042	209.600, 2.593	209.600, 2.641
1050	209.800, 2.651	209.800, 2.141	209.800, 2.685	209.800, 2.662	209.800, 2.724	209.800, 2.703	209.800, 2.587	209.800, 2.597	209.800, 2.016	209.800, 2.042	209.800, 2.594	209.800, 2.642
1051	210.000, 2.651	210.000, 2.140	210.000, 2.686	210.000, 2.663	210.000, 2.724	210.000, 2.703	210.000, 2.587	210.000, 2.598	210.000, 2.016	210.000, 2.042	210.000, 2.595	210.000, 2.642
1052	210.200, 2.651	210.200, 2.140	210.200, 2.686	210.200, 2.664	210.200, 2.724	210.200, 2.703	210.200, 2.588	210.200, 2.598	210.200, 2.016	210.200, 2.042	210.200, 2.595	210.200, 2.643
1053	210.400, 2.651	210.400, 2.140	210.400, 2.686	210.400, 2.664	210.400, 2.725	210.400, 2.703	210.400, 2.588	210.400, 2.598	210.400, 2.016	210.400, 2.043	210.400, 2.596	210.400, 2.644
1054	210.600, 2.651	210.600, 2.140	210.600, 2.686	210.600, 2.665	210.600, 2.725	210.600, 2.703	210.600, 2.587	210.600, 2.598	210.600, 2.016	210.600, 2.043	210.600, 2.597	210.600, 2.645
1055	210.800, 2.651	210.800, 2.140	210.800, 2.686	210.800, 2.665	210.800, 2.725	210.800, 2.703	210.800, 2.587	210.800, 2.598	210.800, 2.016	210.800, 2.044	210.800, 2.597	210.800, 2.645
1056	211.000, 2.651	211.000, 2.139	211.000, 2.686	211.000, 2.666	211.000, 2.725	211.000, 2.703	211.000, 2.587	211.000, 2.598	211.000, 2.015	211.000, 2.044	211.000, 2.598	211.000, 2.646
1057	211.200, 2.651	211.200, 2.139	211.200, 2.685	211.200, 2.667	211.200, 2.725	211.200, 2.702	211.200, 2.587	211.200, 2.598	211.200, 2.015	211.200, 2.045	211.200, 2.599	211.200, 2.647
1058	211.400, 2.651	211.400, 2.139	211.400, 2.685	211.400, 2.667	211.400, 2.725	211.400, 2.703	211.400, 2.587	211.400, 2.598	211.400, 2.015	211.400, 2.045	211.400, 2.599	211.400, 2.648
1059	211.600, 2.651	211.600, 2.139	211.600, 2.685	211.600, 2.668	211.600, 2.725	211.600, 2.703	211.600, 2.587	211.600, 2.599	211.600, 2.015	211.600, 2.046	211.600, 2.600	211.600, 2.649
1060	211.800, 2.651	211.800, 2.139	211.800, 2.685	211.800, 2.668	211.800, 2.726	211.800, 2.703	211.800, 2.587	211.800, 2.599	211.800, 2.015	211.800, 2.046	211.800, 2.601	211.800, 2.650
1061	212.000, 2.651	212.000, 2.139	212.000, 2.685	212.000, 2.669	212.000, 2.726	212.000, 2.703	212.000, 2.587	212.000, 2.599	212.000, 2.015	212.000, 2.047	212.000, 2.601	212.000, 2.651
1062	212.200, 2.651	212.200, 2.139	212.200, 2.685	212.200, 2.669	212.200, 2.726	212.200, 2.703	212.200, 2.587	212.200, 2.600	212.200, 2.015	212.200, 2.047	212.200, 2.601	212.200, 2.652
1063	212.400, 2.650	212.400, 2.139	212.400, 2.684	212.400, 2.669	212.400, 2.726	212.400, 2.702	212.400, 2.588	212.400, 2.600	212.400, 2.015	212.400, 2.047	212.400, 2.602	212.400, 2.653
1064	212.600, 2.650	212.600, 2.139	212.600, 2.684	212.600, 2.670	212.600, 2.726	212.600, 2.702	212.600, 2.588	212.600, 2.600	212.600, 2.016	212.600, 2.047	212.600, 2.602	212.600, 2.654
1065	212.800, 2.650	212.800, 2.139	212.800, 2.684	212.800, 2.670	212.800, 2.727	212.800, 2.702	212.800, 2.588	212.800, 2.600	212.800, 2.016	212.800, 2.046	212.800, 2.603	212.800, 2.655
1066	213.000, 2.650	213.000, 2.139	213.000, 2.684	213.000, 2.671	213.000, 2.727	213.000, 2.702	213.000, 2.588	213.000, 2.600	213.000, 2.016	213.000, 2.046	213.000, 2.603	213.000, 2.656
1067	213.200, 2.650	213.200, 2.140	213.200, 2.684	213.200, 2.672	213.200, 2.727	213.200, 2.702	213.200, 2.588	213.200, 2.600	213.200, 2.017	213.200, 2.046	213.200, 2.604	213.200, 2.657
1068	213.400, 2.650	213.400, 2.140	213.400, 2.684	213.400, 2.673	213.400, 2.727	213.400, 2.702	213.400, 2.588	213.400, 2.600	213.400, 2.017	213.400, 2.046	213.400, 2.604	213.400, 2.657
1069	213.600, 2.650	213.600, 2.140	213.600, 2.684	213.600, 2.674	213.600, 2.728	213.600, 2.702	213.600, 2.589	213.600, 2.600	213.600, 2.018	213.600, 2.046	213.600, 2.605	213.600, 2.658
1070	213.800, 2.650	213.800, 2.141	213.800, 2.685	213.800, 2.674	213.800, 2.728	213.800, 2.703	213.800, 2.589	213.800, 2.600	213.800, 2.018	213.800, 2.046	213.800, 2.605	213.800, 2.659
1071	214.000, 2.650	214.000, 2.141	214.000, 2.685	214.000, 2.675	214.000, 2.728	214.000, 2.703	214.000, 2.589	214.000, 2.600	214.000, 2.018	214.000, 2.045	214.000, 2.606	214.000, 2.660
1072	214.200, 2.650	214.200, 2.141	214.200, 2.685	214.200, 2.676	214.200, 2.728	214.200, 2.703	214.200, 2.589	214.200, 2.600	214.200, 2.019	214.200, 2.045	214.200, 2.607	214.200, 2.660
1073	214.400, 2.650	214.400, 2.141	214.400, 2.685	214.400, 2.677	214.400, 2.728	214.400, 2.704	214.400, 2.589	214.400, 2.600	214.400, 2.019	214.400, 2.045	214.400, 2.608	214.400, 2.661
1074	214.600, 2.650	214.600, 2.141	214.600, 2.686	214.600, 2.678	214.600, 2.728	214.600, 2.704	214.600, 2.589	214.600, 2.600	214.600, 2.019	214.600, 2.045	214.600, 2.609	214.600, 2.661
1075	214.800, 2.650	214.800, 2.141	214.800, 2.686	214.800, 2.678	214.800, 2.728	214.800, 2.705	214.800, 2.589	214.800, 2.600	214.800, 2.019	214.800, 2.046	214.800, 2.609	214.800, 2.662
1076	215.000, 2.649	215.000, 2.141	215.000, 2.687	215.000, 2.679	215.000, 2.728	215.000, 2.705	215.000, 2.589	215.000, 2.600	215.000, 2.019	215.000, 2.046	215.000, 2.610	215.000, 2.663
1077	215.200, 2.649	215.200, 2.141	215.200, 2.687	215.200, 2.680	215.200, 2.728	215.200, 2.706	215.200, 2.589	215.200, 2.601	215.200, 2.019	215.200, 2.046	215.200, 2.611	215.200, 2.663
1078	215.400, 2.649	215.400, 2.141	215.400, 2.687	215.400, 2.680	215.400, 2.728	215.400, 2.706	215.400, 2.589	215.400, 2.602	215.400, 2.019	215.400, 2.047	215.400, 2.612	215.400, 2.664
1079	215.600, 2.649	215.600, 2.141	215.600, 2.687	215.600, 2.680	215.600, 2.728	215.600, 2.706	215.600, 2.590	215.600, 2.602	215.600, 2.019	215.600, 2.047	215.600, 2.613	215.600, 2.665
1080	215.800, 2.649	215.800, 2.141	215.800, 2.687	215.800, 2.681	215.800, 2.728	215.800, 2.706	215.800, 2.590	215.800, 2.602	215.800, 2.019	215.800, 2.047	215.800, 2.614	215.800, 2.665
1081	216.000, 2.649	216.000, 2.142	216.000, 2.688	216.000, 2.681	216.000, 2.728	216.000, 2.706	216.000, 2.590	216.000, 2.603	216.000, 2.018	216.000, 2.047	216.000, 2.614	216.000, 2.666
1082	216.200, 2.649	216.200, 2.142	216.200, 2.688	216.200, 2.681	216.200, 2.728	216.200, 2.706	216.200, 2.590	216.200, 2.603	216.200, 2.018	216.200, 2.047	216.200, 2.615	216.200, 2.667
1083	216.400, 2.649	216.400, 2.142	216.400, 2.688	216.400, 2.681	216.400, 2.728	216.400, 2.706	216.400, 2.591	216.400, 2.604	216.400, 2.018	216.400, 2.047	216.400, 2.615	216.400, 2.667
1084	216.600, 2.649	216.600, 2.142	216.600, 2.688	216.600, 2.681	216.600, 2.728	216.600, 2.706	216.600, 2.591	216.600, 2.604	216.600, 2.018	216.600, 2.047	216.600, 2.616	216.600, 2.668
1085	216.800, 2.648	216.800, 2.142	216.800, 2.687	216.800, 2.682	216.800, 2.728	216.800, 2.706	216.800, 2.590	216.800, 2.604	216.800, 2.018	216.800, 2.047	216.800, 2.616	216.800, 2.669
1086	217.000, 2.648	217.000, 2.142	217.000, 2.687	217.000, 2.682	217.000, 2.728	217.000, 2.706	217.000, 2.590	217.000, 2.604	217.000, 2.018	217.000, 2.047	217.000, 2.616	217.000, 2.670
1087	217.200, 2.648	217.200, 2.141	217.200, 2.687	217.200, 2.683	217.200, 2.728	217.200, 2.706	217.200, 2.590	217.200, 2.604	217.200, 2.018	217.200, 2.047	217.200, 2.617	217.200, 2.672
1088	217.400, 2.648	217.400, 2.141	217.400, 2.686	217.400, 2.683	217.400, 2.728	217.400, 2.706	217.400, 2.590	217.400, 2.603	217.400, 2.018	217.400, 2.047	217.400, 2.617	217.400, 2.673
1089	217.600, 2.648	217.600, 2.141	217.600, 2.686	217.600, 2.684	217.600, 2.728	217.600, 2.706	217.600, 2.590	217.600, 2.603	217.600, 2.017	217.600, 2.047	217.600, 2.618	217.600, 2.674
1090	217.800, 2.648	217.800, 2.141	217.800, 2.686	217.800, 2.684	217.800, 2.728	217.800, 2.706	217.800, 2.590	217.800, 2.603	217.800, 2.017	217.800, 2.047	217.800, 2.618	217.800, 2.675
1091	218.000, 2.648	218.000, 2.141	218.000, 2.686	218.000, 2.685	218.000, 2.728	218.000, 2.706	218.000, 2.589	218.000, 2.603	218.000, 2.017	218.000, 2.047	218.000, 2.619	218.000, 2.676
1092	218.200, 2.648	218.200, 2.140	218.200, 2.686	218.200, 2.685	218.200, 2.728	218.200, 2.706	218.200, 2.590	218.200, 2.603	218.200, 2.017	218.200, 2.047	218.200, 2.619	218.200, 2.677
1093	218.400, 2.649	218.400, 2.140	218.400, 2.686	218.400, 2.686	218.400, 2.729	218.400, 2.706	218.400, 2.590	218.400, 2.603	218.400, 2.017	218.400, 2.047	218.400, 2.620	218.400, 2.679
1094	218.600, 2.649	218.600, 2.140	218.600, 2.686	218.600, 2.687	218.600, 2.729	218.600, 2.706	218.600, 2.590	218.600, 2.603	218.600, 2.016	218.600, 2.048	218.600, 2.620	218.600, 2.680
1095	218.800, 2.650	218.800, 2.141	218.800, 2.686	218.800, 2.687	218.800, 2.729	218.800, 2.706	218.800, 2.591	218.800, 2.603	218.800, 2.017	218.800, 2.048	218.800, 2.620	218.800, 2.681
1096	219.000, 2.650	219.000, 2.141	219.000, 2.686	219.000, 2.688	219.000, 2.730	219.000, 2.706	219.000, 2.591	219.000, 2.603	219.000, 2.017	219.000, 2.048	219.000, 2.621	219.000, 2.681
1097	219.200, 2.650	219.200, 2.141	219.200, 2.686	219.200, 2.689	219.200, 2.730	219.200, 2.706	219.200, 2.591	219.200, 2.604	219.200, 2.017	219.200, 2.048	219.200, 2.622	219.200, 2.682
1098	219.400, 2.651	219.400, 2.141	219.400, 2.686	219.400, 2.690	219.400, 2.730	219.400, 2.706	219.400, 2.591	219.400, 2.604	219.400, 2.017	219.400, 2.048	219.400, 2.622	219.400, 2.683
1099	219.600, 2.651	219.600, 2.141	219.600, 2.686	219.600, 2.691	219.600, 2.730	219.600, 2.706	219.600, 2.592	219.600, 2.604	219.600, 2.017	219.600, 2.047	219.600, 2.623	219.600, 2.683
1100	219.800, 2.651	219.800, 2.142	219.800, 2.687	219.800, 2.691	219.800, 2.730	219.800, 2.706	219.800, 2.592	219.800, 2.605	219.800, 2.018	219.800, 2.047	219.800, 2.623	219.800, 2.683
1101	220.000, 2.650	220.000, 2.142	220.000, 2.687	220.000, 2.692	220.000, 2.730	220.000, 2.706	220.000, 2.592	220.000, 2.605	220.000, 2.018	220.000, 2.047	220.000, 2.623	220.000, 2.684
1102	220.200, 2.650	220.200, 2.142	220.200, 2.688	220.200, 2.692	220.200, 2.731	220.200, 2.705	220.200, 2.593	220.200, 2.605	220.200, 2.018	220.200, 2.047	220.200, 2.624	220.200, 2.684
1103	220.400, 2.650	220.400, 2.143	220.400, 2.688	220.400, 2.692	220.400, 2.731	220.400, 2.705	220.400, 2.593	220.400, 2.606	220.400, 2.018	220.400, 2.047	220.400, 2.624	220.400, 2.684
1104	220.600, 2.649	220.600, 2.143	220.600, 2.688	220.600, 2.692	220.600, 2.730	220.600, 2.706	220.600, 2.593	220.600, 2.606	220.600, 2.018	220.600, 2.047	220.600, 2.625	220.600, 2.685
1105	220.800, 2.649	220.800, 2.143	220.800, 2.688	220.800, 2.693	220.800, 2.730	220.800, 2.706	220.800, 2.593	220.800, 2.606	220.800, 2.018	220.800, 2.047	220.800, 2.625	220.800, 2.685
1106	221.000, 2.648	221.000, 2.142	221.000, 2.688	221.000, 2.693	221.000, 2.730	221.000, 2.706	221.000, 2.593	221.000, 2.606	221.000, 2.019	221.000, 2.047	221.000, 2.625	221.000, 2.686
1107	221.200, 2.648	221.200, 2.142	221.200, 2.689	221.200, 2.693	221.200, 2.730	221.200, 2.706	221.200, 2.593	221.200, 2.606	221.200, 2.019	221.200, 2.047	221.200, 2.626	221.200, 2.686
1108	221.400, 2.648	221.400, 2.142	221.400, 2.689	221.400, 2.693	221.400, 2.730	221.400, 2.706	221.400, 2.593	221.400, 2.606	221.400, 2.019	221.400, 2.047	221.400, 2.627	221.400, 2.687
1109	221.600, 2.647	221.600, 2.142	221.600, 2.689	221.600, 2.693	221.600, 2.730	221.600, 2.707	221.600, 2.592	221.600, 2.606	221.600, 2.019	221.600, 2.048	221.600, 2.627	221.600, 2.688
1110	221.800, 2.647	221.800, 2.142	221.800, 2.689	221.800, 2.693	221.800, 2.730	221.800, 2.707	221.800, 2.592	221.800, 2.606	221.800, 2.019	221.800, 2.048	221.800, 2.628	221.800, 2.688
1111	222.000, 2.648	222.000, 2.142	222.000, 2.689	222.000, 2.694	222.000, 2.730	222.000, 2.707	222.000, 2.592	222.000, 2.606	222.000, 2.019	222.000, 2.048	222.000, 2.628	222.000, 2.689
1112	222.200, 2.648	222.200, 2.141	222.200, 2.689	222.200, 2.694	222.200, 2.730	222.200, 2.708	222.200, 2.592	222.200, 2.606	222.200, 2.019	222.200, 2.048	222.200, 2.629	222.200, 2.690
1113	222.400, 2.648	222.400, 2.141	222.400, 2.689	222.400, 2.694	222.400, 2.730	222.400, 2.708	222.400, 2.592	222.400, 2.607	222.400, 2.019	222.400, 2.048	222.400, 2.629	222.400, 2.691
1114	222.600, 2.648	222.600, 2.141	222.600, 2.689	222.600, 2.695	222.600, 2.730	222.600, 2.708	222.600, 2.592	222.600, 2.607	222.600, 2.020	222.600, 2.048	222.600, 2.630	222.600, 2.692
1115	222.800, 2.648	222.800, 2.141	222.800, 2.688	222.800, 2.695	222.800, 2.730	222.800, 2.709	222.800, 2.592	222.800, 2.607	222.800, 2.020	222.800, 2.048	222.800, 2.630	222.800, 2.693
1116	223.000, 2.648	223.000, 2.141	223.000, 2.688	223.000, 2.696	223.000, 2.730	223.000, 2.709	223.000, 2.592	223.000, 2.608	223.000, 2.020	223.000, 2.048	223.000, 2.631	223.000, 2.693
1117	223.200, 2.648	223.200, 2.141	223.200, 2.688	223.200, 2.697	223.200, 2.730	223.200, 2.709	223.200, 2.592	223.200, 2.608	223.200, 2.020	223.200, 2.048	223.200, 2.631	223.200, 2.694
1118	223.400, 2.648	223.400, 2.141	223.400, 2.688	223.400, 2.698	223.400, 2.731	223.400, 2.709	223.400, 2.592	223.400, 2.609	223.400, 2.020	223.400, 2.048	223.400, 2.632	223.400, 2.694
1119	223.600, 2.648	223.600, 2.141	223.600, 2.688	223.600, 2.699	223.600, 2.731	223.600, 2.709	223.600, 2.592	223.600, 2.609	223.600, 2.020	223.600, 2.047	223.600, 2.632	223.600, 2.695
1120	223.800, 2.647	223.800, 2.141	223.800, 2.688	223.800, 2.699	223.800, 2.731	223.800, 2.709	223.800, 2.592	223.800, 2.610	223.800, 2.019	223.800, 2.048	223.800, 2.633	223.800, 2.696
1121	224.000, 2.647	224.000, 2.142	224.000, 2.688	224.000, 2.700	224.000, 2.731	224.000, 2.708	224.000, 2.592	224.000, 2.610	224.000, 2.019	224.000, 2.048	224.000, 2.633	224.000, 2.696
1122	224.200, 2.647	224.200, 2.142	224.200, 2.688	224.200, 2.701	224.200, 2.732	224.200, 2.708	224.200, 2.592	224.200, 2.610	224.200, 2.019	224.200, 2.048	224.200, 2.634	224.200, 2.697
1123	224.400, 2.647	224.400, 2.142	224.400, 2.688	224.400, 2.701	224.400, 2.732	224.400, 2.708	224.400, 2.592	224.400, 2.610	224.400, 2.019	224.400, 2.048	224.400, 2.634	224.400, 2.697
1124	224.600, 2.647	224.600, 2.142	224.600, 2.688	224.600, 2.701	224.600, 2.732	224.600, 2.708	224.600, 2.592	224.600, 2.609	224.600, 2.020	224.600, 2.048	224.600, 2.635	224.600, 2.698
1125	224.800, 2.647	224.800, 2.143	224.800, 2.688	224.800, 2.701	224.800, 2.732	224.800, 2.708	224.800, 2.592	224.800, 2.609	224.800, 2.020	224.800, 2.048	224.800, 2.635	224.800, 2.699
1126	225.000, 2.647	225.000, 2.143	225.000, 2.688	225.000, 2.701	225.000, 2.733	225.000, 2.709	225.000, 2.592	225.000, 2.608	225.000, 2.020	225.000, 2.048	225.000, 2.636	225.000, 2.699
1127	225.200, 2.647	225.200, 2.143	225.200, 2.688	225.200, 2.701	225.200, 2.733	225.200, 2.709	225.200, 2.592	225.200, 2.608	225.200, 2.020	225.200, 2.048	225.200, 2.636	225.200, 2.700
1128	225.400, 2.647	225.400, 2.143	225.400, 2.689	225.400, 2.702	225.400, 2.733	225.400, 2.709	225.400, 2.593	225.400, 2.607	225.400, 2.021	225.400, 2.048	225.400, 2.637	225.400, 2.701
1129	225.600, 2.647	225.600, 2.143	225.600, 2.689	225.600, 2.702	225.600, 2.733	225.600, 2.709	225.600, 2.593	225.600, 2.607	225.600, 2.021	225.600, 2.048	225.600, 2.637	225.600, 2.701
1130	225.800, 2.647	225.800, 2.143	225.800, 2.689	225.800, 2.702	225.800, 2.732	225.800, 2.710	225.800, 2.593	225.800, 2.607	225.800, 2.021	225.800, 2.048	225.800, 2.637	225.800, 2.702
1131	226.000, 2.647	226.000, 2.142	226.000, 2.689	226.000, 2.702	226.000, 2.732	226.000, 2.710	226.000, 2.593	226.000, 2.607	226.000, 2.022	226.000, 2.048	226.000, 2.638	226.000, 2.703
1132	226.200, 2.648	226.200, 2.142	226.200, 2.690	226.200, 2.702	226.200, 2.732	226.200, 2.710	226.200, 2.593	226.200, 2.607	226.200, 2.022	226.200, 2.048	226.200, 2.638	226.200, 2.703
1133	226.400, 2.648	226.400, 2.142	226.400, 2.690	226.400, 2.702	226.400, 2.731	226.400, 2.710	226.400, 2.593	226.400, 2.607	226.400, 2.022	226.400, 2.048	226.400, 2.638	226.400, 2.704
1134	226.600, 2.648	226.600, 2.142	226.600, 2.690	226.600, 2.703	226.600, 2.731	226.600, 2.710	226.600, 2.593	226.600, 2.607	226.600, 2.022	226.600, 2.048	226.600, 2.639	226.600, 2.704
1135	226.800, 2.648	226.800, 2.142	226.800, 2.690	226.800, 2.703	226.800, 2.731	226.800, 2.710	226.800, 2.593	226.800, 2.607	226.800, 2.022	226.800, 2.048	226.800, 2.639	226.800, 2.705
1136	227.000, 2.648	227.000, 2.142	227.000, 2.690	227.000, 2.703	227.000, 2.731	227.000, 2.709	227.000, 2.593	227.000, 2.608	227.000, 2.022	227.000, 2.049	227.000, 2.640	227.000, 2.705
1137	227.200, 2.647	227.200, 2.142	227.200, 2.690	227.200, 2.704	227.200, 2.731	227.200, 2.709	227.200, 2.593	227.200, 2.609	227.200, 2.022	227.200, 2.049	227.200, 2.640	227.200, 2.706
1138	227.400, 2.647	227.400, 2.142	227.400, 2.690	227.400, 2.704	227.400, 2.731	227.400, 2.709	227.400, 2.592	227.400, 2.609	227.400, 2.021	227.400, 2.050	227.400, 2.640	227.400, 2.706
1139	227.600, 2.647	227.600, 2.142	227.600, 2.690	227.600, 2.705	227.600, 2.731	227.600, 2.709	227.600, 2.592	227.600, 2.610	227.600, 2.021	227.600, 2.050	227.600, 2.641	227.600, 2.707
1140	227.800, 2.647	227.800, 2.141	227.800, 2.690	227.800, 2.705	227.800, 2.731	227.800, 2.709	227.800, 2.592	227.800, 2.610	227.800, 2.021	227.800, 2.050	227.800, 2.641	227.800, 2.707
1141	228.000, 2.646	228.000, 2.141	228.000, 2.689	228.000, 2.706	228.000, 2.732	228.000, 2.708	228.000, 2.592	228.000, 2.610	228.000, 2.020	228.000, 2.050	228.000, 2.641	228.000, 2.707
1142	228.200, 2.646	228.200, 2.141	228.200, 2.689	228.200, 2.706	228.200, 2.732	228.200, 2.708	228.200, 2.592	228.200, 2.611	228.200, 2.020	228.200, 2.051	228.200, 2.642	228.200, 2.708
1143	228.400, 2.646	228.400, 2.141	228.400, 2.689	228.400, 2.706	228.400, 2.732	228.400, 2.708	228.400, 2.592	228.400, 2.611	228.400, 2.020	228.400, 2.051	228.400, 2.642	228.400, 2.708
1144	228.600, 2.646	228.600, 2.141	228.600, 2.689	228.600, 2.706	228.600, 2.732	228.600, 2.708	228.600, 2.592	228.600, 2.611	228.600, 2.020	228.600, 2.050	228.600, 2.642	228.600, 2.709
1145	228.800, 2.646	228.800, 2.142	228.800, 2.689	228.800, 2.706	228.800, 2.732	228.800, 2.708	228.800, 2.592	228.800, 2.610	228.800, 2.020	228.800, 2.050	228.800, 2.642	228.800, 2.709
1146	229.000, 2.647	229.000, 2.142	229.000, 2.689	229.000, 2.707	229.000, 2.732	229.000, 2.708	229.000, 2.592	229.000, 2.610	229.000, 2.020	229.000, 2.050	229.000, 2.643	229.000, 2.710
1147	229.200, 2.647	229.200, 2.142	229.200, 2.689	229.200, 2.707	229.200, 2.733	229.200, 2.708	229.200, 2.592	229.200, 2.610	229.200, 2.021	229.200, 2.050	229.200, 2.643	229.200, 2.710
1148	229.400, 2.647	229.400, 2.142	229.400, 2.690	229.400, 2.707	229.400, 2.733	229.400, 2.708	229.400, 2.592	229.400, 2.610	229.400, 2.021	229.400, 2.050	229.400, 2.643	229.400, 2.711
1149	229.600, 2.647	229.600, 2.143	229.600, 2.690	229.600, 2.707	229.600, 2.733	229.600, 2.708	229.600, 2.592	229.600, 2.610	229.600, 2.022	229.600, 2.049	229.600, 2.644	229.600, 2.711
1150	229.800, 2.647	229.800, 2.143	229.800, 2.690	229.800, 2.707	229.800, 2.733	229.800, 2.708	229.800, 2.593	229.800, 2.610	229.800, 2.022	229.800, 2.049	229.800, 2.644	229.800, 2.712
1151	230.000, 2.647	230.000, 2.143	230.000, 2.690	230.000, 2.707	230.000, 2.733	230.000, 2.709	230.000, 2.593	230.000, 2.610	230.000, 2.022	230.000, 2.049	230.000, 2.645	230.000, 2.712
1152	230.200, 2.647	230.200, 2.144	230.200, 2.690	230.200, 2.707	230.200, 2.733	230.200, 2.709	230.200, 2.593	230.200, 2.610	230.200, 2.023	230.200, 2.049	230.200, 2.645	230.200, 2.713
1153	230.400, 2.647	230.400, 2.144	230.400, 2.690	230.400, 2.707	230.400, 2.733	230.400, 2.709	230.400, 2.593	230.400, 2.610	230.400, 2.023	230.400, 2.049	230.400, 2.646	230.400, 2.713
1154	230.600, 2.647	230.600, 2.144	230.600, 2.690	230.600, 2.707	230.600, 2.733	230.600, 2.709	230.600, 2.593	230.600, 2.610	230.600, 2.023	230.600, 2.049	230.600, 2.646	230.600, 2.714
1155	230.800, 2.647	230.800, 2.144	230.800, 2.690	230.800, 2.708	230.800, 2.733	230.800, 2.709	230.800, 2.593	230.800, 2.611	230.800, 2.023	230.800, 2.049	230.800, 2.646	230.800, 2.714
1156	231.000, 2.647	231.000, 2.144	231.000, 2.690	231.000, 2.708	231.000, 2.733	231.000, 2.709	231.000, 2.593	231.000, 2.611	231.000, 2.023	231.000, 2.049	231.000, 2.646	231.000, 2.715
1157	231.200, 2.647	231.200, 2.144	231.200, 2.690	231.200, 2.709	231.200, 2.733	231.200, 2.710	231.200, 2.593	231.200, 2.611	231.200, 2.023	231.200, 2.049	231.200, 2.646	231.200, 2.715
1158	231.400, 2.646	231.400, 2.144	231.400, 2.689	231.400, 2.709	231.400, 2.733	231.400, 2.710	231.400, 2.593	231.400, 2.612	231.400, 2.022	231.400, 2.049	231.400, 2.646	231.400, 2.716
1159	231.600, 2.646	231.600, 2.144	231.600, 2.689	231.600, 2.710	231.600, 2.733	231.600, 2.710	231.600, 2.593	231.600, 2.612	231.600, 2.022	231.600, 2.049	231.600, 2.646	231.600, 2.716
1160	231.800, 2.646	231.800, 2.143	231.800, 2.689	231.800, 2.710	231.800, 2.733	231.800, 2.710	231.800, 2.594	231.800, 2.612	231.800, 2.022	231.800, 2.049	231.800, 2.646	231.800, 2.717
1161	232.000, 2.646	232.000, 2.143	232.000, 2.689	232.000, 2.711	232.000, 2.733	232.000, 2.710	232.000, 2.594	232.000, 2.612	232.000, 2.021	232.000, 2.049	232.000, 2.646	232.000, 2.718
1162	232.200, 2.646	232.200, 2.143	232.200, 2.688	232.200, 2.711	232.200, 2.733	232.200, 2.710	232.200, 2.594	232.200, 2.612	232.200, 2.021	232.200, 2.049	232.200, 2.646	232.200, 2.718
1163	232.400, 2.645	232.400, 2.143	232.400, 2.688	232.400, 2.711	232.400, 2.733	232.400, 2.710	232.400, 2.594	232.400, 2.612	232.400, 2.021	232.400, 2.049	232.400, 2.647	232.400, 2.719
1164	232.600, 2.645	232.600, 2.143	232.600, 2.688	232.600, 2.712	232.600, 2.733	232.600, 2.710	232.600, 2.594	232.600, 2.612	232.600, 2.021	232.600, 2.050	232.600, 2.647	232.600, 2.719
1165	232.800, 2.645	232.800, 2.143	232.800, 2.689	232.800, 2.712	232.800, 2.733	232.800, 2.710	232.800, 2.594	232.800, 2.613	232.800, 2.021	232.800, 2.050	232.800, 2.647	232.800, 2.720
1166	233.000, 2.645	233.000, 2.143	233.000, 2.689	233.000, 2.713	233.000, 2.733	233.000, 2.710	233.000, 2.594	233.000, 2.613	233.000, 2.021	233.000, 2.050	233.000, 2.648	233.000, 2.720
1167	233.200, 2.645	233.200, 2.143	233.200, 2.690	233.200, 2.713	233.200, 2.733	233.200, 2.710	233.200, 2.594	233.200, 2.613	233.200, 2.021	233.200, 2.050	233.200, 2.649	233.200, 2.721
1168	233.400, 2.645	233.400, 2.143	233.400, 2.690	233.400, 2.713	233.400, 2.734	233.400, 2.711	233.400, 2.594	233.400, 2.613	233.400, 2.022	233.400, 2.050	233.400, 2.650	233.400, 2.721
1169	233.600, 2.645	233.600, 2.143	233.600, 2.690	233.600, 2.713	233.600, 2.734	233.600, 2.711	233.600, 2.595	233.600, 2.613	233.600, 2.022	233.600, 2.050	233.600, 2.650	233.600, 2.722
1170	233.800, 2.645	233.800, 2.143	233.800, 2.691	233.800, 2.714	233.800, 2.734	233.800, 2.711	233.800, 2.595	233.800, 2.613	233.800, 2.022	233.800, 2.050	233.800, 2.651	233.800, 2.722
1171	234.000, 2.645	234.000, 2.144	234.000, 2.691	234.000, 2.714	234.000, 2.734	234.000, 2.711	234.000, 2.595	234.000, 2.613	234.000, 2.022	234.000, 2.050	234.000, 2.652	234.000, 2.722
1172	234.200, 2.645	234.200, 2.144	234.200, 2.691	234.200, 2.714	234.200, 2.734	234.200, 2.711	234.200, 2.595	234.200, 2.613	234.200, 2.022	234.200, 2.051	234.200, 2.652	234.200, 2.723
1173	234.400, 2.645	234.400, 2.143	234.400, 2.692	234.400, 2.714	234.400, 2.734	234.400, 2.711	234.400, 2.595	234.400, 2.613	234.400, 2.022	234.400, 2.051	234.400, 2.652	234.400, 2.723
1174	234.600, 2.645	234.600, 2.143	234.600, 2.692	234.600, 2.715	234.600, 2.734	234.600, 2.711	234.600, 2.595	234.600, 2.613	234.600, 2.022	234.600, 2.051	234.600, 2.653	234.600, 2.723
1175	234.800, 2.646	234.800, 2.143	234.800, 2.692	234.800, 2.715	234.800, 2.734	234.800, 2.711	234.800, 2.596	234.800, 2.613	234.800, 2.022	234.800, 2.051	234.800, 2.653	234.800, 2.724
1176	235.000, 2.646	235.000, 2.143	235.000, 2.692	235.000, 2.716	235.000, 2.735	235.000, 2.711	235.000, 2.596	235.000, 2.613	235.000, 2.022	235.000, 2.051	235.000, 2.653	235.000, 2.724
1177	235.200, 2.646	235.200, 2.143	235.200, 2.692	235.200, 2.716	235.200, 2.735	235.200, 2.711	235.200, 2.596	235.200, 2.613	235.200, 2.021	235.200, 2.051	235.200, 2.653	235.200, 2.725
1178	235.400, 2.646	235.400, 2.143	235.400, 2.692	235.400, 2.716	235.400, 2.735	235.400, 2.711	235.400, 2.596	235.400, 2.613	235.400, 2.021	235.400, 2.051	235.400, 2.654	235.400, 2.725
1179	235.600, 2.646	235.600, 2.143	235.600, 2.692	235.600, 2.716	235.600, 2.735	235.600, 2.711	235.600, 2.596	235.600, 2.612	235.600, 2.021	235.600, 2.051	235.600, 2.654	235.600, 2.726
1180	235.800, 2.646	235.800, 2.143	235.800, 2.691	235.800, 2.716	235.800, 2.735	235.800, 2.712	235.800, 2.596	235.800, 2.613	235.800, 2.021	235.800, 2.051	235.800, 2.654	235.800, 2.727
1181	236.000, 2.646	236.000, 2.143	236.000, 2.691	236.000, 2.716	236.000, 2.735	236.000, 2.713	236.000, 2.596	236.000, 2.613	236.000, 2.021	236.000, 2.051	236.000, 2.654	236.000, 2.727
1182	236.200, 2.646	236.200, 2.143	236.200, 2.691	236.200, 2.716	236.200, 2.736	236.200, 2.713	236.200, 2.596	236.200, 2.613	236.200, 2.021	236.200, 2.051	236.200, 2.654	236.200, 2.728
1183	236.400, 2.646	236.400, 2.143	236.400, 2.691	236.400, 2.717	236.400, 2.736	236.400, 2.714	236.400, 2.596	236.400, 2.613	236.400, 2.021	236.400, 2.051	236.400, 2.654	236.400, 2.728
1184	236.600, 2.646	236.600, 2.144	236.600, 2.691	236.600, 2.717	236.600, 2.736	236.600, 2.714	236.600, 2.596	236.600, 2.613	236.600, 2.021	236.600, 2.051	236.600, 2.655	236.600, 2.729
1185	236.800, 2.646	236.800, 2.144	236.800, 2.691	236.800, 2.718	236.800, 2.736	236.800, 2.714	236.800, 2.596	236.800, 2.614	236.800, 2.022	236.800, 2.051	236.800, 2.655	236.800, 2.729
1186	237.000, 2.646	237.000, 2.144	237.000, 2.691	237.000, 2.718	237.000, 2.735	237.000, 2.714	237.000, 2.596	237.000, 2.614	237.000, 2.022	237.000, 2.051	237.000, 2.656	237.000, 2.729
1187	237.200, 2.646	237.200, 2.144	237.200, 2.691	237.200, 2.719	237.200, 2.735	237.200, 2.714	237.200, 2.596	237.200, 2.614	237.200, 2.022	237.200, 2.051	237.200, 2.656	237.200, 2.730
1188	237.400, 2.646	237.400, 2.144	237.400, 2.691	237.400, 2.719	237.400, 2.735	237.400, 2.714	237.400, 2.596	237.400, 2.615	237.400, 2.023	237.400, 2.051	237.400, 2.656	237.400, 2.730
1189	237.600, 2.646	237.600, 2.145	237.600, 2.691	237.600, 2.720	237.600, 2.735	237.600, 2.714	237.600, 2.596	237.600, 2.615	237.600, 2.023	237.600, 2.051	237.600, 2.657	237.600, 2.730
1190	237.800, 2.646	237.800, 2.145	237.800, 2.691	237.800, 2.721	237.800, 2.735	237.800, 2.714	237.800, 2.596	237.800, 2.615	237.800, 2.023	237.800, 2.051	237.800, 2.657	237.800, 2.730
1191	238.000, 2.645	238.000, 2.144	238.000, 2.691	238.000, 2.721	238.000, 2.735	238.000, 2.714	238.000, 2.596	238.000, 2.615	238.000, 2.023	238.000, 2.051	238.000, 2.657	238.000, 2.731
1192	238.200, 2.645	238.200, 2.144	238.200, 2.691	238.200, 2.722	238.200, 2.735	238.200, 2.714	238.200, 2.596	238.200, 2.615	238.200, 2.023	238.200, 2.052	238.200, 2.657	238.200, 2.731
1193	238.400, 2.645	238.400, 2.144	238.400, 2.691	238.400, 2.722	238.400, 2.736	238.400, 2.713	238.400, 2.596	238.400, 2.616	238.400, 2.023	238.400, 2.052	238.400, 2.657	238.400, 2.731
1194	238.600, 2.645	238.600, 2.144	238.600, 2.691	238.600, 2.722	238.600, 2.736	238.600, 2.712	238.600, 2.596	238.600, 2.615	238.600, 2.024	238.600, 2.052	238.600, 2.658	238.600, 2.731
1195	238.800, 2.645	238.800, 2.144	238.800, 2.691	238.800, 2.722	238.800, 2.736	238.800, 2.712	238.800, 2.596	238.800, 2.615	238.800, 2.024	238.800, 2.052	238.800, 2.659	238.800, 2.732
1196	239.000, 2.645	239.000, 2.144	239.000, 2.691	239.000, 2.722	239.000, 2.736	239.000, 2.711	239.000, 2.596	239.000, 2.615	239.000, 2.024	239.000, 2.052	239.000, 2.659	239.000, 2.732
1197	239.200, 2.645	239.200, 2.144	239.200, 2.691	239.200, 2.722	239.200, 2.736	239.200, 2.711	239.200, 2.596	239.200, 2.615	239.200, 2.024	239.200, 2.052	239.200, 2.660	239.200, 2.732
1198	239.400, 2.645	239.400, 2.144	239.400, 2.691	239.400, 2.722	239.400, 2.736	239.400, 2.711	239.400, 2.596	239.400, 2.615	239.400, 2.024	239.400, 2.052	239.400, 2.660	239.400, 2.732
1199	239.600, 2.645	239.600, 2.144	239.600, 2.691	239.600, 2.722	239.600, 2.736	239.600, 2.711	239.600, 2.596	239.600, 2.615	239.600, 2.024	239.600, 2.052	239.600, 2.660	239.600, 2.732
1200	239.800, 2.645	239.800, 2.144	239.800, 2.692	239.800, 2.722	239.800, 2.736	239.800, 2.711	239.800, 2.596	239.800, 2.615	239.800, 2.024	239.800, 2.053	239.800, 2.661	239.800, 2.733
1201	240.000, 2.645	240.000, 2.143	240.000, 2.692	240.000, 2.722	240.000, 2.736	240.000, 2.711	240.000, 2.596	240.000, 2.614	240.000, 2.024	240.000, 2.053	240.000, 2.661	240.000, 2.733
1202	240.200, 2.644	240.200, 2.143	240.200, 2.692	240.200, 2.722	240.200, 2.736	240.200, 2.711	240.200, 2.596	240.200, 2.614	240.200, 2.024	240.200, 2.053	240.200, 2.661	240.200, 2.734
1203	240.400, 2.644	240.400, 2.143	240.400, 2.692	240.400, 2.722	240.400, 2.736	240.400, 2.711	240.400, 2.596	240.400, 2.614	240.400, 2.024	240.400, 2.053	240.400, 2.661	240.400, 2.734
1204	240.600, 2.644	240.600, 2.143	240.600, 2.693	240.600, 2.722	240.600, 2.736	240.600, 2.712	240.600, 2.596	240.600, 2.614	240.600, 2.024	240.600, 2.053	240.600, 2.661	240.600, 2.735
1205	240.800, 2.644	240.800, 2.143	240.800, 2.693	240.800, 2.723	240.800, 2.735	240.800, 2.712	240.800, 2.596	240.800, 2.615	240.800, 2.024	240.800, 2.053	240.800, 2.661	240.800, 2.735
1206	241.000, 2.644	241.000, 2.144	241.000, 2.692	241.000, 2.723	241.000, 2.735	241.000, 2.712	241.000, 2.596	241.000, 2.615	241.000, 2.025	241.000, 2.053	241.000, 2.661	241.000, 2.736
1207	241.200, 2.644	241.200, 2.144	241.200, 2.692	241.200, 2.724	241.200, 2.735	241.200, 2.713	241.200, 2.596	241.200, 2.616	241.200, 2.025	241.200, 2.052	241.200, 2.661	241.200, 2.736
1208	241.400, 2.644	241.400, 2.144	241.400, 2.692	241.400, 2.724	241.400, 2.735	241.400, 2.713	241.400, 2.597	241.400, 2.616	241.400, 2.025	241.400, 2.052	241.400, 2.661	241.400, 2.736
1209	241.600, 2.645	241.600, 2.144	241.600, 2.692	241.600, 2.724	241.600, 2.735	241.600, 2.714	241.600, 2.597	241.600, 2.616	241.600, 2.025	241.600, 2.052	241.600, 2.661	241.600, 2.737
1210	241.800, 2.645	241.800, 2.144	241.800, 2.691	241.800, 2.725	241.800, 2.735	241.800, 2.714	241.800, 2.597	241.800, 2.616	241.800, 2.025	241.800, 2.052	241.800, 2.660	241.800, 2.737
1211	242.000, 2.645	242.000, 2.144	242.000, 2.691	242.000, 2.725	242.000, 2.736	242.000, 2.714	242.000, 2.597	242.000, 2.616	242.000, 2.025	242.000, 2.052	242.000, 2.660	242.000, 2.737
1212	242.200, 2.645	242.200, 2.144	242.200, 2.691	242.200, 2.725	242.200, 2.736	242.200, 2.714	242.200, 2.597	242.200, 2.616	242.200, 2.025	242.200, 2.052	242.200, 2.660	242.200, 2.737
1213	242.400, 2.645	242.400, 2.144	242.400, 2.691	242.400, 2.726	242.400, 2.737	242.400, 2.714	242.400, 2.597	242.400, 2.615	242.400, 2.025	242.400, 2.052	242.400, 2.660	242.400, 2.738
1214	242.600, 2.646	242.600, 2.144	242.600, 2.691	242.600, 2.726	242.600, 2.737	242.600, 2.714	242.600, 2.598	242.600, 2.615	242.600, 2.026	242.600, 2.052	242.600, 2.661	242.600, 2.738
1215	242.800, 2.646	242.800, 2.144	242.800, 2.690	242.800, 2.726	242.800, 2.738	242.800, 2.714	242.800, 2.598	242.800, 2.615	242.800, 2.026	242.800, 2.052	242.800, 2.661	242.800, 2.738
1216	243.000, 2.646	243.000, 2.145	243.000, 2.690	243.000, 2.727	243.000, 2.738	243.000, 2.714	243.000, 2.598	243.000, 2.615	243.000, 2.026	243.000, 2.051	243.000, 2.662	243.000, 2.739
1217	243.200, 2.646	243.200, 2.145	243.200, 2.690	243.200, 2.727	243.200, 2.738	243.200, 2.714	243.200, 2.599	243.200, 2.615	243.200, 2.026	243.200, 2.051	243.200, 2.662	243.200, 2.739
1218	243.400, 2.646	243.400, 2.144	243.400, 2.690	243.400, 2.727	243.400, 2.739	243.400, 2.714	243.400, 2.599	243.400, 2.615	243.400, 2.026	243.400, 2.051	243.400, 2.663	243.400, 2.740
1219	243.600, 2.645	243.600, 2.144	243.600, 2.690	243.600, 2.728	243.600, 2.739	243.600, 2.714	243.600, 2.599	243.600, 2.615	243.600, 2.025	243.600, 2.051	243.600, 2.663	243.600, 2.740
1220	243.800, 2.645	243.800, 2.144	243.800, 2.691	243.800, 2.728	243.800, 2.739	243.800, 2.714	243.800, 2.599	243.800, 2.615	243.800, 2.025	243.800, 2.051	243.800, 2.664	243.800, 2.741
1221	244.000, 2.644	244.000, 2.144	244.000, 2.691	244.000, 2.728	244.000, 2.739	244.000, 2.714	244.000, 2.599	244.000, 2.616	244.000, 2.025	244.000, 2.051	244.000, 2.664	244.000, 2.742
1222	244.200, 2.644	244.200, 2.144	244.200, 2.691	244.200, 2.728	244.200, 2.739	244.200, 2.714	244.200, 2.599	244.200, 2.616	244.200, 2.025	244.200, 2.051	244.200, 2.664	244.200, 2.743
1223	244.400, 2.643	244.400, 2.144	244.400, 2.691	244.400, 2.729	244.400, 2.739	244.400, 2.714	244.400, 2.599	244.400, 2.616	244.400, 2.025	244.400, 2.051	244.400, 2.664	244.400, 2.744
1224	244.600, 2.643	244.600, 2.144	244.600, 2.691	244.600, 2.729	244.600, 2.739	244.600, 2.714	244.600, 2.599	244.600, 2.617	244.600, 2.025	244.600, 2.051	244.600, 2.665	244.600, 2.745
1225	244.800, 2.643	244.800, 2.144	244.800, 2.692	244.800, 2.729	244.800, 2.739	244.800, 2.714	244.800, 2.599	244.800, 2.617	244.800, 2.025	244.800, 2.051	244.800, 2.665	244.800, 2.745
1226	245.000, 2.643	245.000, 2.144	245.000, 2.692	245.000, 2.729	245.000, 2.739	245.000, 2.714	245.000, 2.599	245.000, 2.617	245.000, 2.024	245.000, 2.052	245.000, 2.665	245.000, 2.746
1227	245.200, 2.643	245.200, 2.144	245.200, 2.692	245.200, 2.729	245.200, 2.739	245.200, 2.714	245.200, 2.599	245.200, 2.617	245.200, 2.024	245.200, 2.052	245.200, 2.665	245.200, 2.746
1228	245.400, 2.643	245.400, 2.144	245.400, 2.692	245.400, 2.729	245.400, 2.739	245.400, 2.714	245.400, 2.599	245.400, 2.617	245.400, 2.024	245.400, 2.052	245.400, 2.665	245.400, 2.746
1229	245.600, 2.643	245.600, 2.144	245.600, 2.692	245.600, 2.730	245.600, 2.739	245.600, 2.714	245.600, 2.599	245.600, 2.617	245.600, 2.024	245.600, 2.053	245.600, 2.665	245.600, 2.746
1230	245.800, 2.643	245.800, 2.144	245.800, 2.692	245.800, 2.730	245.800, 2.739	245.800, 2.714	245.800, 2.599	245.800, 2.617	245.800, 2.024	245.800, 2.053	245.800, 2.665	245.800, 2.746
1231	246.000, 2.643	246.000, 2.144	246.000, 2.692	246.000, 2.730	246.000, 2.738	246.000, 2.714	246.000, 2.598	246.000, 2.616	246.000, 2.024	246.000, 2.053	246.000, 2.665	246.000, 2.746
1232	246.200, 2.643	246.200, 2.144	246.200, 2.692	246.200, 2.730	246.200, 2.738	246.200, 2.714	246.200, 2.598	246.200, 2.616	246.200, 2.024	246.200, 2.053	246.200, 2.665	246.200, 2.746
1233	246.400, 2.643	246.400, 2.144	246.400, 2.692	246.400, 2.731	246.400, 2.738	246.400, 2.714	246.400, 2.598	246.400, 2.616	246.400, 2.025	246.400, 2.053	246.400, 2.665	246.400, 2.746
1234	246.600, 2.643	246.600, 2.144	246.600, 2.692	246.600, 2.731	246.600, 2.738	246.600, 2.713	246.600, 2.599	246.600, 2.616	246.600, 2.025	246.600, 2.054	246.600, 2.665	246.600, 2.745
1235	246.800, 2.643	246.800, 2.144	246.800, 2.693	246.800, 2.731	246.800, 2.738	246.800, 2.713	246.800, 2.599	246.800, 2.616	246.800, 2.025	246.800, 2.054	246.800, 2.666	246.800, 2.745
1236	247.000, 2.643	247.000, 2.144	247.000, 2.693	247.000, 2.731	247.000, 2.738	247.000, 2.713	247.000, 2.599	247.000, 2.616	247.000, 2.025	247.000, 2.054	247.000, 2.666	247.000, 2.745
1237	247.200, 2.643	247.200, 2.145	247.200, 2.693	247.200, 2.731	247.200, 2.739	247.200, 2.713	247.200, 2.599	247.200, 2.616	247.200, 2.025	247.200, 2.054	247.200, 2.666	247.200, 2.745
1238	247.400, 2.643	247.400, 2.145	247.400, 2.693	247.400, 2.732	247.400, 2.739	247.400, 2.713	247.400, 2.599	247.400, 2.616	247.400, 2.025	247.400, 2.054	247.400, 2.666	247.400, 2.745
1239	247.600, 2.643	247.600, 2.145	247.600, 2.693	247.600, 2.732	247.600, 2.739	247.600, 2.713	247.600, 2.598	247.600, 2.616	247.600, 2.025	247.600, 2.053	247.600, 2.666	247.600, 2.745
1240	247.800, 2.643	247.800, 2.145	247.800, 2.692	247.800, 2.733	247.800, 2.739	247.800, 2.713	247.800, 2.598	247.800, 2.616	247.800, 2.025	247.800, 2.053	247.800, 2.667	247.800, 2.745
1241	248.000, 2.643	248.000, 2.146	248.000, 2.692	248.000, 2.733	248.000, 2.739	248.000, 2.713	248.000, 2.599	248.000, 2.616	248.000, 2.025	248.000, 2.052	248.000, 2.667	248.000, 2.746
1242	248.200, 2.643	248.200, 2.146	248.200, 2.692	248.200, 2.734	248.200, 2.739	248.200, 2.714	248.200, 2.599	248.200, 2.616	248.200, 2.025	248.200, 2.052	248.200, 2.667	248.200, 2.746
1243	248.400, 2.643	248.400, 2.146	248.400, 2.692	248.400, 2.734	248.400, 2.740	248.400, 2.714	248.400, 2.599	248.400, 2.616	248.400, 2.024	248.400, 2.052	248.400, 2.667	248.400, 2.746
1244	248.600, 2.643	248.600, 2.146	248.600, 2.692	248.600, 2.734	248.600, 2.740	248.600, 2.714	248.600, 2.599	248.600, 2.616	248.600, 2.024	248.600, 2.052	248.600, 2.668	248.600, 2.746
1245	248.800, 2.643	248.800, 2.146	248.800, 2.691	248.800, 2.734	248.800, 2.740	248.800, 2.714	248.800, 2.599	248.800, 2.616	248.800, 2.024	248.800, 2.052	248.800, 2.668	248.800, 2.746
1246	249.000, 2.643	249.000, 2.146	249.000, 2.691	249.000, 2.734	249.000, 2.740	249.000, 2.715	249.000, 2.599	249.000, 2.616	249.000, 2.024	249.000, 2.052	249.000, 2.669	249.000, 2.747
1247	249.200, 2.643	249.200, 2.146	249.200, 2.691	249.200, 2.734	249.200, 2.740	249.200, 2.715	249.200, 2.599	249.200, 2.616	249.200, 2.024	249.200, 2.052	249.200, 2.669	249.200, 2.747
1248	249.400, 2.643	249.400, 2.146	249.400, 2.691	249.400, 2.734	249.400, 2.740	249.400, 2.715	249.400, 2.599	249.400, 2.616	249.400, 2.024	249.400, 2.053	249.400, 2.670	249.400, 2.748
1249	249.600, 2.643	249.600, 2.146	249.600, 2.691	249.600, 2.734	249.600, 2.740	249.600, 2.715	249.600, 2.599	249.600, 2.616	249.600, 2.024	249.600, 2.053	249.600, 2.670	249.600, 2.749
1250	249.800, 2.643	249.800, 2.146	249.800, 2.691	249.800, 2.734	249.800, 2.740	249.800, 2.715	249.800, 2.599	249.800, 2.617	249.800, 2.024	249.800, 2.053	249.800, 2.671	249.800, 2.749
1251	250.000, 2.642	250.000, 2.145	250.000, 2.691	250.000, 2.735	250.000, 2.739	250.000, 2.715	250.000, 2.599	250.000, 2.617	250.000, 2.024	250.000, 2.053	250.000, 2.671	250.000, 2.750
1252	250.200, 2.642	250.200, 2.145	250.200, 2.691	250.200, 2.735	250.200, 2.739	250.200, 2.715	250.200, 2.599	250.200, 2.617	250.200, 2.024	250.200, 2.053	250.200, 2.671	250.200, 2.751
1253	250.400, 2.642	250.400, 2.145	250.400, 2.692	250.400, 2.734	250.400, 2.739	250.400, 2.715	250.400, 2.599	250.400, 2.617	250.400, 2.025	250.400, 2.053	250.400, 2.672	250.400, 2.751
1254	250.600, 2.642	250.600, 2.145	250.600, 2.692	250.600, 2.734	250.600, 2.739	250.600, 2.715	250.600, 2.599	250.600, 2.617	250.600, 2.025	250.600, 2.053	250.600, 2.672	250.600, 2.752
1255	250.800, 2.642	250.800, 2.145	250.800, 2.693	250.800, 2.734	250.800, 2.739	250.800, 2.715	250.800, 2.599	250.800, 2.617	250.800, 2.025	250.800, 2.054	250.800, 2.672	250.800, 2.752
1256	251.000, 2.642	251.000, 2.145	251.000, 2.693	251.000, 2.734	251.000, 2.738	251.000, 2.715	251.000, 2.598	251.000, 2.617	251.000, 2.025	251.000, 2.054	251.000, 2.671	251.000, 2.753
1257	251.200, 2.642	251.200, 2.145	251.200, 2.693	251.200, 2.734	251.200, 2.738	251.200, 2.715	251.200, 2.598	251.200, 2.617	251.200, 2.025	251.200, 2.054	251.200, 2.671	251.200, 2.753
1258	251.400, 2.642	251.400, 2.145	251.400, 2.693	251.400, 2.734	251.400, 2.739	251.400, 2.715	251.400, 2.598	251.400, 2.616	251.400, 2.026	251.400, 2.054	251.400, 2.671	251.400, 2.753
1259	251.600, 2.642	251.600, 2.145	251.600, 2.693	251.600, 2.734	251.600, 2.739	251.600, 2.715	251.600, 2.599	251.600, 2.616	251.600, 2.026	251.600, 2.054	251.600, 2.671	251.600, 2.753
1260	251.800, 2.642	251.800, 2.145	251.800, 2.693	251.800, 2.734	251.800, 2.739	251.800, 2.715	251.800, 2.599	251.800, 2.616	251.800, 2.026	251.800, 2.053	251.800, 2.671	251.800, 2.753
1261	252.000, 2.642	252.000, 2.145	252.000, 2.694	252.000, 2.734	252.000, 2.739	252.000, 2.715	252.000, 2.599	252.000, 2.616	252.000, 2.026	252.000, 2.053	252.000, 2.671	252.000, 2.753
1262	252.200, 2.642	252.200, 2.145	252.200, 2.694	252.200, 2.734	252.200, 2.739	252.200, 2.715	252.200, 2.599	252.200, 2.615	252.200, 2.026	252.200, 2.053	252.200, 2.671	252.200, 2.753
1263	252.400, 2.642	252.400, 2.145	252.400, 2.694	252.400, 2.734	252.400, 2.739	252.400, 2.714	252.400, 2.599	252.400, 2.615	252.400, 2.026	252.400, 2.053	252.400, 2.671	252.400, 2.753
1264	252.600, 2.642	252.600, 2.145	252.600, 2.693	252.600, 2.734	252.600, 2.739	252.600, 2.714	252.600, 2.598	252.600, 2.615	252.600, 2.027	252.600, 2.054	252.600, 2.672	252.600, 2.753
1265	252.800, 2.642	252.800, 2.145	252.800, 2.693	252.800, 2.734	252.800, 2.740	252.800, 2.714	252.800, 2.598	252.800, 2.615	252.800, 2.027	252.800, 2.054	252.800, 2.672	252.800, 2.753
1266	253.000, 2.642	253.000, 2.145	253.000, 2.693	253.000, 2.734	253.000, 2.740	253.000, 2.714	253.000, 2.598	253.000, 2.614	253.000, 2.027	253.000, 2.054	253.000, 2.672	253.000, 2.753
1267	253.200, 2.643	253.200, 2.145	253.200, 2.693	253.200, 2.734	253.200, 2.740	253.200, 2.714	253.200, 2.598	253.200, 2.614	253.200, 2.027	253.200, 2.054	253.200, 2.672	253.200, 2.753
1268	253.400, 2.642	253.400, 2.145	253.400, 2.693	253.400, 2.735	253.400, 2.740	253.400, 2.715	253.400, 2.598	253.400, 2.615	253.400, 2.028	253.400, 2.054	253.400, 2.673	253.400, 2.753
1269	253.600, 2.642	253.600, 2.145	253.600, 2.694	253.600, 2.735	253.600, 2.740	253.600, 2.715	253.600, 2.598	253.600, 2.615	253.600, 2.028	253.600, 2.053	253.600, 2.673	253.600, 2.754
1270	253.800, 2.643	253.800, 2.144	253.800, 2.694	253.800, 2.735	253.800, 2.740	253.800, 2.715	253.800, 2.598	253.800, 2.615	253.800, 2.028	253.800, 2.053	253.800, 2.673	253.800, 2.754
1271	254.000, 2.643	254.000, 2.144	254.000, 2.694	254.000, 2.735	254.000, 2.740	254.000, 2.715	254.000, 2.598	254.000, 2.615	254.000, 2.028	254.000, 2.053	254.000, 2.674	254.000, 2.754
1272	254.200, 2.643	254.200, 2.144	254.200, 2.694	254.200, 2.735	254.200, 2.740	254.200, 2.715	254.200, 2.598	254.200, 2.615	254.200, 2.028	254.200, 2.053	254.200, 2.674	254.200, 2.755
1273	254.400, 2.643	254.400, 2.144	254.400, 2.695	254.400, 2.735	254.400, 2.740	254.400, 2.715	254.400, 2.598	254.400, 2.615	254.400, 2.027	254.400, 2.053	254.400, 2.674	254.400, 2.755
1274	254.600, 2.643	254.600, 2.144	254.600, 2.695	254.600, 2.735	254.600, 2.740	254.600, 2.716	254.600, 2.598	254.600, 2.615	254.600, 2.027	254.600, 2.053	254.600, 2.673	254.600, 2.755
1275	254.800, 2.643	254.800, 2.144	254.800, 2.695	254.800, 2.735	254.800, 2.740	254.800, 2.716	254.800, 2.598	254.800, 2.615	254.800, 2.027	254.800, 2.053	254.800, 2.673	254.800, 2.756
1276	255.000, 2.643	255.000, 2.144	255.000, 2.695	255.000, 2.735	255.000, 2.740	255.000, 2.716	255.000, 2.598	255.000, 2.615	255.000, 2.027	255.000, 2.053	255.000, 2.673	255.000, 2.757
1277	255.200, 2.643	255.200, 2.144	255.200, 2.695	255.200, 2.735	255.200, 2.740	255.200, 2.716	255.200, 2.598	255.200, 2.615	255.200, 2.027	255.200, 2.054	255.200, 2.673	255.200, 2.757
1278	255.400, 2.643	255.400, 2.143	255.400, 2.694	255.400, 2.736	255.400, 2.740	255.400, 2.716	255.400, 2.599	255.400, 2.615	255.400, 2.027	255.400, 2.054	255.400, 2.673	255.400, 2.758
1279	255.600, 2.643	255.600, 2.143	255.600, 2.694	255.600, 2.736	255.600, 2.740	255.600, 2.716	255.600, 2.599	255.600, 2.615	255.600, 2.027	255.600, 2.054	255.600, 2.673	255.600, 2.758
1280	255.800, 2.643	255.800, 2.143	255.800, 2.694	255.800, 2.736	255.800, 2.739	255.800, 2.716	255.800, 2.599	255.800, 2.614	255.800, 2.027	255.800, 2.054	255.800, 2.673	255.800, 2.758
1281	256.000, 2.643	256.000, 2.143	256.000, 2.694	256.000, 2.737	256.000, 2.739	256.000, 2.716	256.000, 2.600	256.000, 2.614	256.000, 2.027	256.000, 2.054	256.000, 2.674	256.000, 2.758
1282	256.200, 2.642	256.200, 2.143	256.200, 2.694	256.200, 2.737	256.200, 2.739	256.200, 2.716	256.200, 2.600	256.200, 2.614	256.200, 2.027	256.200, 2.054	256.200, 2.674	256.200, 2.758
1283	256.400, 2.642	256.400, 2.143	256.400, 2.694	256.400, 2.738	256.400, 2.739	256.400, 2.716	256.400, 2.600	256.400, 2.614	256.400, 2.027	256.400, 2.054	256.400, 2.674	256.400, 2.759
1284	256.600, 2.641	256.600, 2.143	256.600, 2.694	256.600, 2.738	256.600, 2.740	256.600, 2.715	256.600, 2.600	256.600, 2.614	256.600, 2.027	256.600, 2.055	256.600, 2.674	256.600, 2.759
1285	256.800, 2.641	256.800, 2.144	256.800, 2.694	256.800, 2.738	256.800, 2.740	256.800, 2.715	256.800, 2.601	256.800, 2.614	256.800, 2.027	256.800, 2.055	256.800, 2.674	256.800, 2.759
1286	257.000, 2.641	257.000, 2.144	257.000, 2.694	257.000, 2.739	257.000, 2.740	257.000, 2.715	257.000, 2.601	257.000, 2.614	257.000, 2.028	257.000, 2.055	257.000, 2.674	257.000, 2.759
1287	257.200, 2.640	257.200, 2.145	257.200, 2.694	257.200, 2.739	257.200, 2.740	257.200, 2.715	257.200, 2.601	257.200, 2.614	257.200, 2.028	257.200, 2.055	257.200, 2.675	257.200, 2.759
1288	257.400, 2.640	257.400, 2.145	257.400, 2.694	257.400, 2.739	257.400, 2.740	257.400, 2.715	257.400, 2.601	257.400, 2.614	257.400, 2.028	257.400, 2.055	257.400, 2.675	257.400, 2.759
1289	257.600, 2.640	257.600, 2.146	257.600, 2.694	257.600, 2.740	257.600, 2.740	257.600, 2.715	257.600, 2.601	257.600, 2.614	257.600, 2.028	257.600, 2.054	257.600, 2.676	257.600, 2.759
1290	257.800, 2.640	257.800, 2.146	257.800, 2.694	257.800, 2.740	257.800, 2.740	257.800, 2.715	257.800, 2.601	257.800, 2.614	257.800, 2.028	257.800, 2.054	257.800, 2.676	257.800, 2.759
1291	258.000, 2.639	258.000, 2.147	258.000, 2.694	258.000, 2.740	258.000, 2.740	258.000, 2.716	258.000, 2.601	258.000, 2.614	258.000, 2.028	258.000, 2.054	258.000, 2.676	258.000, 2.759
1292	258.200, 2.639	258.200, 2.147	258.200, 2.694	258.200, 2.740	258.200, 2.741	258.200, 2.716	258.200, 2.601	258.200, 2.613	258.200, 2.028	258.200, 2.054	258.200, 2.677	258.200, 2.759
1293	258.400, 2.639	258.400, 2.147	258.400, 2.694	258.400, 2.739	258.400, 2.741	258.400, 2.716	258.400, 2.601	258.400, 2.613	258.400, 2.028	258.400, 2.053	258.400, 2.677	258.400, 2.760
1294	258.600, 2.639	258.600, 2.148	258.600, 2.694	258.600, 2.739	258.600, 2.741	258.600, 2.717	258.600, 2.601	258.600, 2.613	258.600, 2.028	258.600, 2.053	258.600, 2.677	258.600, 2.761
1295	258.800, 2.639	258.800, 2.147	258.800, 2.694	258.800, 2.739	258.800, 2.742	258.800, 2.717	258.800, 2.601	258.800, 2.612	258.800, 2.028	258.800, 2.054	258.800, 2.678	258.800, 2.761
1296	259.000, 2.639	259.000, 2.147	259.000, 2.694	259.000, 2.739	259.000, 2.742	259.000, 2.718	259.000, 2.601	259.000, 2.612	259.000, 2.027	259.000, 2.054	259.000, 2.678	259.000, 2.761
1297	259.200, 2.640	259.200, 2.146	259.200, 2.694	259.200, 2.739	259.200, 2.742	259.200, 2.718	259.200, 2.601	259.200, 2.611	259.200, 2.027	259.200, 2.054	259.200, 2.678	259.200, 2.762
1298	259.400, 2.640	259.400, 2.146	259.400, 2.694	259.400, 2.739	259.400, 2.742	259.400, 2.718	259.400, 2.601	259.400, 2.611	259.400, 2.027	259.400, 2.054	259.400, 2.678	259.400, 2.762
1299	259.600, 2.640	259.600, 2.145	259.600, 2.694	259.600, 2.739	259.600, 2.742	259.600, 2.718	259.600, 2.602	259.600, 2.610	259.600, 2.027	259.600, 2.054	259.600, 2.678	259.600, 2.763
1300	259.800, 2.640	259.800, 2.145	259.800, 2.694	259.800, 2.739	259.800, 2.742	259.800, 2.718	259.800, 2.602	259.800, 2.610	259.800, 2.026	259.800, 2.054	259.800, 2.678	259.800, 2.763
1301	260.000, 2.640	260.000, 2.144	260.000, 2.694	260.000, 2.739	260.000, 2.742	260.000, 2.717	260.000, 2.602	260.000, 2.610	260.000, 2.026	260.000, 2.055	260.000, 2.678	260.000, 2.763
1302	260.200, 2.640	260.200, 2.144	260.200, 2.694	260.200, 2.739	260.200, 2.742	260.200, 2.717	260.200, 2.601	260.200, 2.610	260.200, 2.026	260.200, 2.055	260.200, 2.677	260.200, 2.763
1303	260.400, 2.640	260.400, 2.144	260.400, 2.694	260.400, 2.739	260.400, 2.742	260.400, 2.717	260.400, 2.601	260.400, 2.610	260.400, 2.025	260.400, 2.055	260.400, 2.677	260.400, 2.763
1304	260.600, 2.640	260.600, 2.144	260.600, 2.693	260.600, 2.739	260.600, 2.741	260.600, 2.716	260.600, 2.601	260.600, 2.610	260.600, 2.025	260.600, 2.056	260.600, 2.677	260.600, 2.763
1305	260.800, 2.640	260.800, 2.144	260.800, 2.693	260.800, 2.739	260.800, 2.741	260.800, 2.716	260.800, 2.600	260.800, 2.610	260.800, 2.025	260.800, 2.056	260.800, 2.676	260.800, 2.763
1306	261.000, 2.640	261.000, 2.144	261.000, 2.693	261.000, 2.740	261.000, 2.741	261.000, 2.716	261.000, 2.600	261.000, 2.610	261.000, 2.025	261.000, 2.056	261.000, 2.676	261.000, 2.764
1307	261.200, 2.640	261.200, 2.144	261.200, 2.693	261.200, 2.740	261.200, 2.741	261.200, 2.715	261.200, 2.600	261.200, 2.610	261.200, 2.025	261.200, 2.056	261.200, 2.676	261.200, 2.764
1308	261.400, 2.640	261.400, 2.144	261.400, 2.694	261.400, 2.739	261.400, 2.740	261.400, 2.715	261.400, 2.599	261.400, 2.610	261.400, 2.025	261.400, 2.056	261.400, 2.677	261.400, 2.764
1309	261.600, 2.640	261.600, 2.144	261.600, 2.694	261.600, 2.739	261.600, 2.740	261.600, 2.715	261.600, 2.599	261.600, 2.611	261.600, 2.025	261.600, 2.056	261.600, 2.677	261.600, 2.764
1310	261.800, 2.640	261.800, 2.144	261.800, 2.694	261.800, 2.739	261.800, 2.740	261.800, 2.716	261.800, 2.599	261.800, 2.611	261.800, 2.025	261.800, 2.056	261.800, 2.677	261.800, 2.765
1311	262.000, 2.640	262.000, 2.144	262.000, 2.694	262.000, 2.739	262.000, 2.740	262.000, 2.716	262.000, 2.599	262.000, 2.611	262.000, 2.026	262.000, 2.056	262.000, 2.678	262.000, 2.765
1312	262.200, 2.640	262.200, 2.144	262.200, 2.694	262.200, 2.738	262.200, 2.740	262.200, 2.717	262.200, 2.599	262.200, 2.611	262.200, 2.026	262.200, 2.056	262.200, 2.678	262.200, 2.765
1313	262.400, 2.640	262.400, 2.144	262.400, 2.694	262.400, 2.738	262.400, 2.740	262.400, 2.717	262.400, 2.599	262.400, 2.611	262.400, 2.027	262.400, 2.057	262.400, 2.679	262.400, 2.765
1314	262.600, 2.639	262.600, 2.144	262.600, 2.694	262.600, 2.739	262.600, 2.740	262.600, 2.718	262.600, 2.599	262.600, 2.611	262.600, 2.027	262.600, 2.057	262.600, 2.679	262.600, 2.765
1315	262.800, 2.639	262.800, 2.144	262.800, 2.694	262.800, 2.739	262.800, 2.740	262.800, 2.718	262.800, 2.599	262.800, 2.611	262.800, 2.028	262.800, 2.057	262.800, 2.680	262.800, 2.765
1316	263.000, 2.639	263.000, 2.144	263.000, 2.694	263.000, 2.739	263.000, 2.740	263.000, 2.718	263.000, 2.599	263.000, 2.611	263.000, 2.028	263.000, 2.057	263.000, 2.680	263.000, 2.765
1317	263.200, 2.639	263.200, 2.144	263.200, 2.694	263.200, 2.739	263.200, 2.740	263.200, 2.718	263.200, 2.600	263.200, 2.611	263.200, 2.029	263.200, 2.057	263.200, 2.680	263.200, 2.765
1318	263.400, 2.639	263.400, 2.144	263.400, 2.694	263.400, 2.740	263.400, 2.740	263.400, 2.718	263.400, 2.600	263.400, 2.611	263.400, 2.029	263.400, 2.057	263.400, 2.680	263.400, 2.765
1319	263.600, 2.639	263.600, 2.143	263.600, 2.694	263.600, 2.740	263.600, 2.741	263.600, 2.718	263.600, 2.600	263.600, 2.611	263.600, 2.029	263.600, 2.057	263.600, 2.680	263.600, 2.765
1320	263.800, 2.639	263.800, 2.143	263.800, 2.694	263.800, 2.741	263.800, 2.741	263.800, 2.718	263.800, 2.601	263.800, 2.611	263.800, 2.029	263.800, 2.057	263.800, 2.680	263.800, 2.765
1321	264.000, 2.639	264.000, 2.144	264.000, 2.694	264.000, 2.741	264.000, 2.741	264.000, 2.718	264.000, 2.601	264.000, 2.611	264.000, 2.029	264.000, 2.057	264.000, 2.680	264.000, 2.765
1322	264.200, 2.639	264.200, 2.144	264.200, 2.694	264.200, 2.742	264.200, 2.741	264.200, 2.718	264.200, 2.601	264.200, 2.611	264.200, 2.029	264.200, 2.057	264.200, 2.680	264.200, 2.765
1323	264.400, 2.639	264.400, 2.144	264.400, 2.695	264.400, 2.742	264.400, 2.741	264.400, 2.717	264.400, 2.602	264.400, 2.611	264.400, 2.029	264.400, 2.057	264.400, 2.680	264.400, 2.766
1324	264.600, 2.639	264.600, 2.144	264.600, 2.695	264.600, 2.742	264.600, 2.741	264.600, 2.717	264.600, 2.602	264.600, 2.610	264.600, 2.029	264.600, 2.056	264.600, 2.680	264.600, 2.766
1325	264.800, 2.639	264.800, 2.144	264.800, 2.695	264.800, 2.743	264.800, 2.741	264.800, 2.717	264.800, 2.602	264.800, 2.610	264.800, 2.029	264.800, 2.056	264.800, 2.680	264.800, 2.766
1326	265.000, 2.640	265.000, 2.144	265.000, 2.695	265.000, 2.743	265.000, 2.741	265.000, 2.717	265.000, 2.602	265.000, 2.610	265.000, 2.029	265.000, 2.056	265.000, 2.681	265.000, 2.766
1327	265.200, 2.640	265.200, 2.144	265.200, 2.695	265.200, 2.742	265.200, 2.741	265.200, 2.717	265.200, 2.602	265.200, 2.609	265.200, 2.029	265.200, 2.056	265.200, 2.681	265.200, 2.766
1328	265.400, 2.640	265.400, 2.145	265.400, 2.695	265.400, 2.742	265.400, 2.741	265.400, 2.717	265.400, 2.603	265.400, 2.609	265.400, 2.029	265.400, 2.056	265.400, 2.682	265.400, 2.766
1329	265.600, 2.640	265.600, 2.145	265.600, 2.695	265.600, 2.742	265.600, 2.740	265.600, 2.717	265.600, 2.603	265.600, 2.609	265.600, 2.029	265.600, 2.056	265.600, 2.682	265.600, 2.766
1330	265.800, 2.640	265.800, 2.145	265.800, 2.695	265.800, 2.742	265.800, 2.740	265.800, 2.717	265.800, 2.603	265.800, 2.609	265.800, 2.030	265.800, 2.056	265.800, 2.682	265.800, 2.767
1331	266.000, 2.640	266.000, 2.145	266.000, 2.695	266.000, 2.742	266.000, 2.741	266.000, 2.717	266.000, 2.603	266.000, 2.609	266.000, 2.030	266.000, 2.056	266.000, 2.682	266.000, 2.767
1332	266.200, 2.640	266.200, 2.146	266.200, 2.695	266.200, 2.742	266.200, 2.741	266.200, 2.717	266.200, 2.603	266.200, 2.609	266.200, 2.030	266.200, 2.056	266.200, 2.682	266.200, 2.767
1333	266.400, 2.640	266.400, 2.146	266.400, 2.695	266.400, 2.742	266.400, 2.741	266.400, 2.717	266.400, 2.603	266.400, 2.609	266.400, 2.031	266.400, 2.056	266.400, 2.682	266.400, 2.767
1334	266.600, 2.639	266.600, 2.146	266.600, 2.695	266.600, 2.742	266.600, 2.741	266.600, 2.717	266.600, 2.603	266.600, 2.609	266.600, 2.031	266.600, 2.056	266.600, 2.683	266.600, 2.767
1335	266.800, 2.639	266.800, 2.146	266.800, 2.695	266.800, 2.742	266.800, 2.742	266.800, 2.717	266.800, 2.603	266.800, 2.608	266.800, 2.031	266.800, 2.056	266.800, 2.682	266.800, 2.767
1336	267.000, 2.639	267.000, 2.146	267.000, 2.695	267.000, 2.742	267.000, 2.742	267.000, 2.717	267.000, 2.603	267.000, 2.608	267.000, 2.031	267.000, 2.056	267.000, 2.683	267.000, 2.767
1337	267.200, 2.638	267.200, 2.145	267.200, 2.695	267.200, 2.742	267.200, 2.742	267.200, 2.717	267.200, 2.603	267.200, 2.608	267.200, 2.031	267.200, 2.056	267.200, 2.683	267.200, 2.767
1338	267.400, 2.638	267.400, 2.145	267.400, 2.695	267.400, 2.742	267.400, 2.742	267.400, 2.716	267.400, 2.603	267.400, 2.608	267.400, 2.030	267.400, 2.056	267.400, 2.683	267.400, 2.767
1339	267.600, 2.638	267.600, 2.145	267.600, 2.695	267.600, 2.742	267.600, 2.742	267.600, 2.716	267.600, 2.603	267.600, 2.608	267.600, 2.030	267.600, 2.056	267.600, 2.683	267.600, 2.767
1340	267.800, 2.638	267.800, 2.145	267.800, 2.695	267.800, 2.743	267.800, 2.743	267.800, 2.716	267.800, 2.603	267.800, 2.608	267.800, 2.030	267.800, 2.056	267.800, 2.684	267.800, 2.767
1341	268.000, 2.638	268.000, 2.145	268.000, 2.695	268.000, 2.743	268.000, 2.743	268.000, 2.716	268.000, 2.603	268.000, 2.609	268.000, 2.030	268.000, 2.056	268.000, 2.684	268.000, 2.768
1342	268.200, 2.638	268.200, 2.145	268.200, 2.695	268.200, 2.743	268.200, 2.743	268.200, 2.716	268.200, 2.603	268.200, 2.608	268.200, 2.029	268.200, 2.056	268.200, 2.684	268.200, 2.768
1343	268.400, 2.638	268.400, 2.145	268.400, 2.695	268.400, 2.743	268.400, 2.743	268.400, 2.716	268.400, 2.603	268.400, 2.608	268.400, 2.029	268.400, 2.056	268.400, 2.684	268.400, 2.768
1344	268.600, 2.638	268.600, 2.145	268.600, 2.695	268.600, 2.743	268.600, 2.743	268.600, 2.717	268.600, 2.602	268.600, 2.608	268.600, 2.029	268.600, 2.056	268.600, 2.684	268.600, 2.768
1345	268.800, 2.638	268.800, 2.145	268.800, 2.695	268.800, 2.743	268.800, 2.743	268.800, 2.717	268.800, 2.602	268.800, 2.608	268.800, 2.029	268.800, 2.057	268.800, 2.684	268.800, 2.768
1346	269.000, 2.638	269.000, 2.145	269.000, 2.696	269.000, 2.743	269.000, 2.743	269.000, 2.717	269.000, 2.602	269.000, 2.608	269.000, 2.029	269.000, 2.057	269.000, 2.684	269.000, 2.768
1347	269.200, 2.638	269.200, 2.145	269.200, 2.696	269.200, 2.743	269.200, 2.743	269.200, 2.718	269.200, 2.602	269.200, 2.608	269.200, 2.029	269.200, 2.057	269.200, 2.684	269.200, 2.768
1348	269.400, 2.638	269.400, 2.145	269.400, 2.696	269.400, 2.743	269.400, 2.743	269.400, 2.718	269.400, 2.602	269.400, 2.608	269.400, 2.029	269.400, 2.057	269.400, 2.684	269.400, 2.768
1349	269.600, 2.638	269.600, 2.146	269.600, 2.696	269.600, 2.743	269.600, 2.743	269.600, 2.718	269.600, 2.602	269.600, 2.608	269.600, 2.029	269.600, 2.057	269.600, 2.683	269.600, 2.768
1350	269.800, 2.638	269.800, 2.145	269.800, 2.696	269.800, 2.744	269.800, 2.743	269.800, 2.718	269.800, 2.602	269.800, 2.608	269.800, 2.029	269.800, 2.057	269.800, 2.683	269.800, 2.768
1351	,	,	,	,	,	,	,	,	,	,	,	,
1352	,	,	,	,	,	,	,	,	,	,	,	,
1353	,	,	,	,	,	,	,	,	,	,	,	,
1354	,	,	,	,	,	,	,	,	,	,	,	,
1355	,	,	,	,	,	,	,	,	,	,	,	,
1356	,	,	,	,	,	,	,	,	,	,	,	,
1357	,	,	,	,	,	,	,	,	,	,	,	,
1358	,	,	,	,	,	,	,	,	,	,	,	,
1359	,	,	,	,	,	,	,	,	,	,	,	,
1360	,	,	,	,	,	,	,	,	,	,	,	,
1361	,	,	,	,	,	,	,	,	,	,	,	,
1362	,	,	,	,	,	,	,	,	,	,	,	,
1363	,	,	,	,	,	,	,	,	,	,	,	,
1364	,	,	,	,	,	,	,	,	,	,	,	,
1365	,	,	,	,	,	,	,	,	,	,	,	,
1366	,	,	,	,	,	,	,	,	,	,	,	,
1367	,	,	,	,	,	,	,	,	,	,	,	,
1368	,	,	,	,	,	,	,	,	,	,	,	,
1369	,	,	,	,	,	,	,	,	,	,	,	,
1370	,	,	,	,	,	,	,	,	,	,	,	,
1371	,	,	,	,	,	,	,	,	,	,	,	,
1372	,	,	,	,	,	,	,	,	,	,	,	,
1373	,	,	,	,	,	,	,	,	,	,	,	,
1374	,	,	,	,	,	,	,	,	,	,	,	,
1375	,	,	,	,	,	,	,	,	,	,	,	,
1376	,	,	,	,	,	,	,	,	,	,	,	,
1377	,	,	,	,	,	,	,	,	,	,	,	,
1378	,	,	,	,	,	,	,	,	,	,	,	,
1379	,	,	,	,	,	,	,	,	,	,	,	,
1380	,	,	,	,	,	,	,	,	,	,	,	,
1381	,	,	,	,	,	,	,	,	,	,	,	,
1382	,	,	,	,	,	,	,	,	,	,	,	,
1383	,	,	,	,	,	,	,	,	,	,	,	,
1384	,	,	,	,	,	,	,	,	,	,	,	,
1385	,	,	,	,	,	,	,	,	,	,	,	,
1386	,	,	,	,	,	,	,	,	,	,	,	,
1387	,	,	,	,	,	,	,	,	,	,	,	,
1388	,	,	,	,	,	,	,	,	,	,	,	,
1389	,	,	,	,	,	,	,	,	,	,	,	,
1390	,	,	,	,	,	,	,	,	,	,	,	,
1391	,	,	,	,	,	,	,	,	,	,	,	,
1392	,	,	,	,	,	,	,	,	,	,	,	,
1393	,	,	,	,	,	,	,	,	,	,	,	,
1394	,	,	,	,	,	,	,	,	,	,	,	,
1395	,	,	,	,	,	,	,	,	,	,	,	,
1396	,	,	,	,	,	,	,	,	,	,	,	,
1397	,	,	,	,	,	,	,	,	,	,	,	,
1398	,	,	,	,	,	,	,	,	,	,	,	,
1399	,	,	,	,	,	,	,	,	,	,	,	,
1400	,	,	,	,	,	,	,	,	,	,	,	,
1401	,	,	,	,	,	,	,	,	,	,	,	,
1402	,	,	,	,	,	,	,	,	,	,	,	,
1403	,	,	,	,	,	,	,	,	,	,	,	,
1404	,	,	,	,	,	,	,	,	,	,	,	,
1405	,	,	,	,	,	,	,	,	,	,	,	,
1406	,	,	,	,	,	,	,	,	,	,	,	,
1407	,	,	,	,	,	,	,	,	,	,	,	,
1408	,	,	,	,	,	,	,	,	,	,	,	,
1409	,	,	,	,	,	,	,	,	,	,	,	,
1410	,	,	,	,	,	,	,	,	,	,	,	,
1411	,	,	,	,	,	,	,	,	,	,	,	,
1412	,	,	,	,	,	,	,	,	,	,	,	,
1413	,	,	,	,	,	,	,	,	,	,	,	,
1414	,	,	,	,	,	,	,	,	,	,	,	,
1415	,	,	,	,	,	,	,	,	,	,	,	,
1416	,	,	,	,	,	,	,	,	,	,	,	,
1417	,	,	,	,	,	,	,	,	,	,	,	,
1418	,	,	,	,	,	,	,	,	,	,	,	,
1419	,	,	,	,	,	,	,	,	,	,	,	,
1420	,	,	,	,	,	,	,	,	,	,	,	,
1421	,	,	,	,	,	,	,	,	,	,	,	,
1422	,	,	,	,	,	,	,	,	,	,	,	,
1423	,	,	,	,	,	,	,	,	,	,	,	,
1424	,	,	,	,	,	,	,	,	,	,	,	,
1425	,	,	,	,	,	,	,	,	,	,	,	,
1426	,	,	,	,	,	,	,	,	,	,	,	,
1427	,	,	,	,	,	,	,	,	,	,	,	,
1428	,	,	,	,	,	,	,	,	,	,	,	,
1429	,	,	,	,	,	,	,	,	,	,	,	,
1430	,	,	,	,	,	,	,	,	,	,	,	,
1431	,	,	,	,	,	,	,	,	,	,	,	,
1432	,	,	,	,	,	,	,	,	,	,	,	,
1433	,	,	,	,	,	,	,	,	,	,	,	,
1434	,	,	,	,	,	,	,	,	,	,	,	,
1435	,	,	,	,	,	,	,	,	,	,	,	,
1436	,	,	,	,	,	,	,	,	,	,	,	,
1437	,	,	,	,	,	,	,	,	,	,	,	,
1438	,	,	,	,	,	,	,	,	,	,	,	,
1439	,	,	,	,	,	,	,	,	,	,	,	,
1440	,	,	,	,	,	,	,	,	,	,	,	,
1441	,	,	,	,	,	,	,	,	,	,	,	,
1442	,	,	,	,	,	,	,	,	,	,	,	,
1443	,	,	,	,	,	,	,	,	,	,	,	,
1444	,	,	,	,	,	,	,	,	,	,	,	,
1445	,	,	,	,	,	,	,	,	,	,	,	,
1446	,	,	,	,	,	,	,	,	,	,	,	,
1447	,	,	,	,	,	,	,	,	,	,	,	,
1448	,	,	,	,	,	,	,	,	,	,	,	,
1449	,	,	,	,	,	,	,	,	,	,	,	,
1450	,	,	,	,	,	,	,	,	,	,	,	,
1451	,	,	,	,	,	,	,	,	,	,	,	,
1452	,	,	,	,	,	,	,	,	,	,	,	,
1453	,	,	,	,	,	,	,	,	,	,	,	,
1454	,	,	,	,	,	,	,	,	,	,	,	,
1455	,	,	,	,	,	,	,	,	,	,	,	,
1456	,	,	,	,	,	,	,	,	,	,	,	,
1457	,	,	,	,	,	,	,	,	,	,	,	,
1458	,	,	,	,	,	,	,	,	,	,	,	,
1459	,	,	,	,	,	,	,	,	,	,	,	,
1460	,	,	,	,	,	,	,	,	,	,	,	,
1461	,	,	,	,	,	,	,	,	,	,	,	,
1462	,	,	,	,	,	,	,	,	,	,	,	,
1463	,	,	,	,	,	,	,	,	,	,	,	,
1464	,	,	,	,	,	,	,	,	,	,	,	,
1465	,	,	,	,	,	,	,	,	,	,	,	,
1466	,	,	,	,	,	,	,	,	,	,	,	,
1467	,	,	,	,	,	,	,	,	,	,	,	,
1468	,	,	,	,	,	,	,	,	,	,	,	,
1469	,	,	,	,	,	,	,	,	,	,	,	,
1470	,	,	,	,	,	,	,	,	,	,	,	,
1471	,	,	,	,	,	,	,	,	,	,	,	,
1472	,	,	,	,	,	,	,	,	,	,	,	,
1473	,	,	,	,	,	,	,	,	,	,	,	,
1474	,	,	,	,	,	,	,	,	,	,	,	,
1475	,	,	,	,	,	,	,	,	,	,	,	,
1476	,	,	,	,	,	,	,	,	,	,	,	,
1477	,	,	,	,	,	,	,	,	,	,	,	,
1478	,	,	,	,	,	,	,	,	,	,	,	,
1479	,	,	,	,	,	,	,	,	,	,	,	,
1480	,	,	,	,	,	,	,	,	,	,	,	,
1481	,	,	,	,	,	,	,	,	,	,	,	,
1482	,	,	,	,	,	,	,	,	,	,	,	,
1483	,	,	,	,	,	,	,	,	,	,	,	,
1484	,	,	,	,	,	,	,	,	,	,	,	,
1485	,	,	,	,	,	,	,	,	,	,	,	,
1486	,	,	,	,	,	,	,	,	,	,	,	,
1487	,	,	,	,	,	,	,	,	,	,	,	,
1488	,	,	,	,	,	,	,	,	,	,	,	,
1489	,	,	,	,	,	,	,	,	,	,	,	,
1490	,	,	,	,	,	,	,	,	,	,	,	,
1491	,	,	,	,	,	,	,	,	,	,	,	,
1492	,	,	,	,	,	,	,	,	,	,	,	,
1493	,	,	,	,	,	,	,	,	,	,	,	,
1494	,	,	,	,	,	,	,	,	,	,	,	,
1495	,	,	,	,	,	,	,	,	,	,	,	,
1496	,	,	,	,	,	,	,	,	,	,	,	,
1497	,	,	,	,	,	,	,	,	,	,	,	,
1498	,	,	,	,	,	,	,	,	,	,	,	,
1499	,	,	,	,	,	,	,	,	,	,	,	,
1500	,	,	,	,	,	,	,	,	,	,	,	,
1501	,	,	,	,	,	,	,	,	,	,	,	,
1502	,	,	,	,	,	,	,	,	,	,	,	,
1503	,	,	,	,	,	,	,	,	,	,	,	,
1504	,	,	,	,	,	,	,	,	,	,	,	,
1505	,	,	,	,	,	,	,	,	,	,	,	,
1506	,	,	,	,	,	,	,	,	,	,	,	,
1507	,	,	,	,	,	,	,	,	,	,	,	,
1508	,	,	,	,	,	,	,	,	,	,	,	,
1509	,	,	,	,	,	,	,	,	,	,	,	,
1510	,	,	,	,	,	,	,	,	,	,	,	,
1511	,	,	,	,	,	,	,	,	,	,	,	,
1512	,	,	,	,	,	,	,	,	,	,	,	,
1513	,	,	,	,	,	,	,	,	,	,	,	,
1514	,	,	,	,	,	,	,	,	,	,	,	,
1515	,	,	,	,	,	,	,	,	,	,	,	,
1516	,	,	,	,	,	,	,	,	,	,	,	,
1517	,	,	,	,	,	,	,	,	,	,	,	,
1518	,	,	,	,	,	,	,	,	,	,	,	,
1519	,	,	,	,	,	,	,	,	,	,	,	,
1520	,	,	,	,	,	,	,	,	,	,	,	,
1521	,	,	,	,	,	,	,	,	,	,	,	,
1522	,	,	,	,	,	,	,	,	,	,	,	,
1523	,	,	,	,	,	,	,	,	,	,	,	,
1524	,	,	,	,	,	,	,	,	,	,	,	,
1525	,	,	,	,	,	,	,	,	,	,	,	,
1526	,	,	,	,	,	,	,	,	,	,	,	,
1527	,	,	,	,	,	,	,	,	,	,	,	,
1528	,	,	,	,	,	,	,	,	,	,	,	,
1529	,	,	,	,	,	,	,	,	,	,	,	,
1530	,	,	,	,	,	,	,	,	,	,	,	,
1531	,	,	,	,	,	,	,	,	,	,	,	,
1532	,	,	,	,	,	,	,	,	,	,	,	,
1533	,	,	,	,	,	,	,	,	,	,	,	,
1534	,	,	,	,	,	,	,	,	,	,	,	,
1535	,	,	,	,	,	,	,	,	,	,	,	,
1536	,	,	,	,	,	,	,	,	,	,	,	,
1537	,	,	,	,	,	,	,	,	,	,	,	,
1538	,	,	,	,	,	,	,	,	,	,	,	,
1539	,	,	,	,	,	,	,	,	,	,	,	,
1540	,	,	,	,	,	,	,	,	,	,	,	,
1541	,	,	,	,	,	,	,	,	,	,	,	,
1542	,	,	,	,	,	,	,	,	,	,	,	,
1543	,	,	,	,	,	,	,	,	,	,	,	,
1544	,	,	,	,	,	,	,	,	,	,	,	,
1545	,	,	,	,	,	,	,	,	,	,	,	,
1546	,	,	,	,	,	,	,	,	,	,	,	,
1547	,	,	,	,	,	,	,	,	,	,	,	,
1548	,	,	,	,	,	,	,	,	,	,	,	,
1549	,	,	,	,	,	,	,	,	,	,	,	,
1550	,	,	,	,	,	,	,	,	,	,	,	,
1551	,	,	,	,	,	,	,	,	,	,	,	,
1552	,	,	,	,	,	,	,	,	,	,	,	,
1553	,	,	,	,	,	,	,	,	,	,	,	,
1554	,	,	,	,	,	,	,	,	,	,	,	,
1555	,	,	,	,	,	,	,	,	,	,	,	,
1556	,	,	,	,	,	,	,	,	,	,	,	,
1557	,	,	,	,	,	,	,	,	,	,	,	,
1558	,	,	,	,	,	,	,	,	,	,	,	,
1559	,	,	,	,	,	,	,	,	,	,	,	,
1560	,	,	,	,	,	,	,	,	,	,	,	,
1561	,	,	,	,	,	,	,	,	,	,	,	,
1562	,	,	,	,	,	,	,	,	,	,	,	,
1563	,	,	,	,	,	,	,	,	,	,	,	,
1564	,	,	,	,	,	,	,	,	,	,	,	,
1565	,	,	,	,	,	,	,	,	,	,	,	,
1566	,	,	,	,	,	,	,	,	,	,	,	,
1567	,	,	,	,	,	,	,	,	,	,	,	,
1568	,	,	,	,	,	,	,	,	,	,	,	,
1569	,	,	,	,	,	,	,	,	,	,	,	,
1570	,	,	,	,	,	,	,	,	,	,	,	,
1571	,	,	,	,	,	,	,	,	,	,	,	,
1572	,	,	,	,	,	,	,	,	,	,	,	,
1573	,	,	,	,	,	,	,	,	,	,	,	,
1574	,	,	,	,	,	,	,	,	,	,	,	,
1575	,	,	,	,	,	,	,	,	,	,	,	,
1576	,	,	,	,	,	,	,	,	,	,	,	,
1577	,	,	,	,	,	,	,	,	,	,	,	,
1578	,	,	,	,	,	,	,	,	,	,	,	,
1579	,	,	,	,	,	,	,	,	,	,	,	,
1580	,	,	,	,	,	,	,	,	,	,	,	,
1581	,	,	,	,	,	,	,	,	,	,	,	,
1582	,	,	,	,	,	,	,	,	,	,	,	,
1583	,	,	,	,	,	,	,	,	,	,	,	,
1584	,	,	,	,	,	,	,	,	,	,	,	,
1585	,	,	,	,	,	,	,	,	,	,	,	,
1586	,	,	,	,	,	,	,	,	,	,	,	,
1587	,	,	,	,	,	,	,	,	,	,	,	,
1588	,	,	,	,	,	,	,	,	,	,	,	,
1589	,	,	,	,	,	,	,	,	,	,	,	,
1590	,	,	,	,	,	,	,	,	,	,	,	,
1591	,	,	,	,	,	,	,	,	,	,	,	,
1592	,	,	,	,	,	,	,	,	,	,	,	,
1593	,	,	,	,	,	,	,	,	,	,	,	,
1594	,	,	,	,	,	,	,	,	,	,	,	,
1595	,	,	,	,	,	,	,	,	,	,	,	,
1596	,	,	,	,	,	,	,	,	,	,	,	,
1597	,	,	,	,	,	,	,	,	,	,	,	,
1598	,	,	,	,	,	,	,	,	,	,	,	,
1599	,	,	,	,	,	,	,	,	,	,	,	,
1600	,	,	,	,	,	,	,	,	,	,	,	,
1601	,	,	,	,	,	,	,	,	,	,	,	,
1602	,	,	,	,	,	,	,	,	,	,	,	,
1603	,	,	,	,	,	,	,	,	,	,	,	,
1604	,	,	,	,	,	,	,	,	,	,	,	,
1605	,	,	,	,	,	,	,	,	,	,	,	,
1606	,	,	,	,	,	,	,	,	,	,	,	,
1607	,	,	,	,	,	,	,	,	,	,	,	,
1608	,	,	,	,	,	,	,	,	,	,	,	,
1609	,	,	,	,	,	,	,	,	,	,	,	,
1610	,	,	,	,	,	,	,	,	,	,	,	,
1611	,	,	,	,	,	,	,	,	,	,	,	,
1612	,	,	,	,	,	,	,	,	,	,	,	,
1613	,	,	,	,	,	,	,	,	,	,	,	,
1614	,	,	,	,	,	,	,	,	,	,	,	,
1615	,	,	,	,	,	,	,	,	,	,	,	,
1616	,	,	,	,	,	,	,	,	,	,	,	,
1617	,	,	,	,	,	,	,	,	,	,	,	,
1618	,	,	,	,	,	,	,	,	,	,	,	,
1619	,	,	,	,	,	,	,	,	,	,	,	,
1620	,	,	,	,	,	,	,	,	,	,	,	,
1621	,	,	,	,	,	,	,	,	,	,	,	,
1622	,	,	,	,	,	,	,	,	,	,	,	,
1623	,	,	,	,	,	,	,	,	,	,	,	,
1624	,	,	,	,	,	,	,	,	,	,	,	,
1625	,	,	,	,	,	,	,	,	,	,	,	,
1626	,	,	,	,	,	,	,	,	,	,	,	,
1627	,	,	,	,	,	,	,	,	,	,	,	,
1628	,	,	,	,	,	,	,	,	,	,	,	,
1629	,	,	,	,	,	,	,	,	,	,	,	,
1630	,	,	,	,	,	,	,	,	,	,	,	,
1631	,	,	,	,	,	,	,	,	,	,	,	,
1632	,	,	,	,	,	,	,	,	,	,	,	,
1633	,	,	,	,	,	,	,	,	,	,	,	,
1634	,	,	,	,	,	,	,	,	,	,	,	,
1635	,	,	,	,	,	,	,	,	,	,	,	,
1636	,	,	,	,	,	,	,	,	,	,	,	,
1637	,	,	,	,	,	,	,	,	,	,	,	,
1638	,	,	,	,	,	,	,	,	,	,	,	,
1639	,	,	,	,	,	,	,	,	,	,	,	,
1640	,	,	,	,	,	,	,	,	,	,	,	,
1641	,	,	,	,	,	,	,	,	,	,	,	,
1642	,	,	,	,	,	,	,	,	,	,	,	,
1643	,	,	,	,	,	,	,	,	,	,	,	,
1644	,	,	,	,	,	,	,	,	,	,	,	,
1645	,	,	,	,	,	,	,	,	,	,	,	,
1646	,	,	,	,	,	,	,	,	,	,	,	,
1647	,	,	,	,	,	,	,	,	,	,	,	,
1648	,	,	,	,	,	,	,	,	,	,	,	,
1649	,	,	,	,	,	,	,	,	,	,	,	,
1650	,	,	,	,	,	,	,	,	,	,	,	,
1651	,	,	,	,	,	,	,	,	,	,	,	,
1652	,	,	,	,	,	,	,	,	,	,	,	,
1653	,	,	,	,	,	,	,	,	,	,	,	,
1654	,	,	,	,	,	,	,	,	,	,	,	,
1655	,	,	,	,	,	,	,	,	,	,	,	,
1656	,	,	,	,	,	,	,	,	,	,	,	,
1657	,	,	,	,	,	,	,	,	,	,	,	,
1658	,	,	,	,	,	,	,	,	,	,	,	,
1659	,	,	,	,	,	,	,	,	,	,	,	,
1660	,	,	,	,	,	,	,	,	,	,	,	,
1661	,	,	,	,	,	,	,	,	,	,	,	,
1662	,	,	,	,	,	,	,	,	,	,	,	,
1663	,	,	,	,	,	,	,	,	,	,	,	,
1664	,	,	,	,	,	,	,	,	,	,	,	,
1665	,	,	,	,	,	,	,	,	,	,	,	,
1666	,	,	,	,	,	,	,	,	,	,	,	,
1667	,	,	,	,	,	,	,	,	,	,	,	,
1668	,	,	,	,	,	,	,	,	,	,	,	,
1669	,	,	,	,	,	,	,	,	,	,	,	,
1670	,	,	,	,	,	,	,	,	,	,	,	,
1671	,	,	,	,	,	,	,	,	,	,	,	,
1672	,	,	,	,	,	,	,	,	,	,	,	,
1673	,	,	,	,	,	,	,	,	,	,	,	,
1674	,	,	,	,	,	,	,	,	,	,	,	,
1675	,	,	,	,	,	,	,	,	,	,	,	,
1676	,	,	,	,	,	,	,	,	,	,	,	,
1677	,	,	,	,	,	,	,	,	,	,	,	,
1678	,	,	,	,	,	,	,	,	,	,	,	,
1679	,	,	,	,	,	,	,	,	,	,	,	,
1680	,	,	,	,	,	,	,	,	,	,	,	,
1681	,	,	,	,	,	,	,	,	,	,	,	,
1682	,	,	,	,	,	,	,	,	,	,	,	,
1683	,	,	,	,	,	,	,	,	,	,	,	,
1684	,	,	,	,	,	,	,	,	,	,	,	,
1685	,	,	,	,	,	,	,	,	,	,	,	,
1686	,	,	,	,	,	,	,	,	,	,	,	,
1687	,	,	,	,	,	,	,	,	,	,	,	,
1688	,	,	,	,	,	,	,	,	,	,	,	,
1689	,	,	,	,	,	,	,	,	,	,	,	,
1690	,	,	,	,	,	,	,	,	,	,	,	,
1691	,	,	,	,	,	,	,	,	,	,	,	,
1692	,	,	,	,	,	,	,	,	,	,	,	,
1693	,	,	,	,	,	,	,	,	,	,	,	,
1694	,	,	,	,	,	,	,	,	,	,	,	,
1695	,	,	,	,	,	,	,	,	,	,	,	,
1696	,	,	,	,	,	,	,	,	,	,	,	,
1697	,	,	,	,	,	,	,	,	,	,	,	,
1698	,	,	,	,	,	,	,	,	,	,	,	,
1699	,	,	,	,	,	,	,	,	,	,	,	,
1700	,	,	,	,	,	,	,	,	,	,	,	,
1701	,	,	,	,	,	,	,	,	,	,	,	,
1702	,	,	,	,	,	,	,	,	,	,	,	,
1703	,	,	,	,	,	,	,	,	,	,	,	,
1704	,	,	,	,	,	,	,	,	,	,	,	,
1705	,	,	,	,	,	,	,	,	,	,	,	,
1706	,	,	,	,	,	,	,	,	,	,	,	,
1707	,	,	,	,	,	,	,	,	,	,	,	,
1708	,	,	,	,	,	,	,	,	,	,	,	,
1709	,	,	,	,	,	,	,	,	,	,	,	,
1710	,	,	,	,	,	,	,	,	,	,	,	,
1711	,	,	,	,	,	,	,	,	,	,	,	,
1712	,	,	,	,	,	,	,	,	,	,	,	,
1713	,	,	,	,	,	,	,	,	,	,	,	,
1714	,	,	,	,	,	,	,	,	,	,	,	,
1715	,	,	,	,	,	,	,	,	,	,	,	,
1716	,	,	,	,	,	,	,	,	,	,	,	,
1717	,	,	,	,	,	,	,	,	,	,	,	,
1718	,	,	,	,	,	,	,	,	,	,	,	,
1719	,	,	,	,	,	,	,	,	,	,	,	,
1720	,	,	,	,	,	,	,	,	,	,	,	,
1721	,	,	,	,	,	,	,	,	,	,	,	,
1722	,	,	,	,	,	,	,	,	,	,	,	,
1723	,	,	,	,	,	,	,	,	,	,	,	,
1724	,	,	,	,	,	,	,	,	,	,	,	,
1725	,	,	,	,	,	,	,	,	,	,	,	,
1726	,	,	,	,	,	,	,	,	,	,	,	,
1727	,	,	,	,	,	,	,	,	,	,	,	,
1728	,	,	,	,	,	,	,	,	,	,	,	,
1729	,	,	,	,	,	,	,	,	,	,	,	,
1730	,	,	,	,	,	,	,	,	,	,	,	,
1731	,	,	,	,	,	,	,	,	,	,	,	,
1732	,	,	,	,	,	,	,	,	,	,	,	,
1733	,	,	,	,	,	,	,	,	,	,	,	,
1734	,	,	,	,	,	,	,	,	,	,	,	,
1735	,	,	,	,	,	,	,	,	,	,	,	,
1736	,	,	,	,	,	,	,	,	,	,	,	,
1737	,	,	,	,	,	,	,	,	,	,	,	,
1738	,	,	,	,	,	,	,	,	,	,	,	,
1739	,	,	,	,	,	,	,	,	,	,	,	,
1740	,	,	,	,	,	,	,	,	,	,	,	,
1741	,	,	,	,	,	,	,	,	,	,	,	,
1742	,	,	,	,	,	,	,	,	,	,	,	,
1743	,	,	,	,	,	,	,	,	,	,	,	,
1744	,	,	,	,	,	,	,	,	,	,	,	,
1745	,	,	,	,	,	,	,	,	,	,	,	,
1746	,	,	,	,	,	,	,	,	,	,	,	,
1747	,	,	,	,	,	,	,	,	,	,	,	,
1748	,	,	,	,	,	,	,	,	,	,	,	,
1749	,	,	,	,	,	,	,	,	,	,	,	,
1750	,	,	,	,	,	,	,	,	,	,	,	,
1751	,	,	,	,	,	,	,	,	,	,	,	,
1752	,	,	,	,	,	,	,	,	,	,	,	,
1753	,	,	,	,	,	,	,	,	,	,	,	,
1754	,	,	,	,	,	,	,	,	,	,	,	,
1755	,	,	,	,	,	,	,	,	,	,	,	,
1756	,	,	,	,	,	,	,	,	,	,	,	,
1757	,	,	,	,	,	,	,	,	,	,	,	,
1758	,	,	,	,	,	,	,	,	,	,	,	,
1759	,	,	,	,	,	,	,	,	,	,	,	,
1760	,	,	,	,	,	,	,	,	,	,	,	,
1761	,	,	,	,	,	,	,	,	,	,	,	,
1762	,	,	,	,	,	,	,	,	,	,	,	,
1763	,	,	,	,	,	,	,	,	,	,	,	,
1764	,	,	,	,	,	,	,	,	,	,	,	,
1765	,	,	,	,	,	,	,	,	,	,	,	,
1766	,	,	,	,	,	,	,	,	,	,	,	,
1767	,	,	,	,	,	,	,	,	,	,	,	,
1768	,	,	,	,	,	,	,	,	,	,	,	,
1769	,	,	,	,	,	,	,	,	,	,	,	,
1770	,	,	,	,	,	,	,	,	,	,	,	,
1771	,	,	,	,	,	,	,	,	,	,	,	,
1772	,	,	,	,	,	,	,	,	,	,	,	,
1773	,	,	,	,	,	,	,	,	,	,	,	,
1774	,	,	,	,	,	,	,	,	,	,	,	,
1775	,	,	,	,	,	,	,	,	,	,	,	,
1776	,	,	,	,	,	,	,	,	,	,	,	,
1777	,	,	,	,	,	,	,	,	,	,	,	,
1778	,	,	,	,	,	,	,	,	,	,	,	,
1779	,	,	,	,	,	,	,	,	,	,	,	,
1780	,	,	,	,	,	,	,	,	,	,	,	,
1781	,	,	,	,	,	,	,	,	,	,	,	,
1782	,	,	,	,	,	,	,	,	,	,	,	,
1783	,	,	,	,	,	,	,	,	,	,	,	,
1784	,	,	,	,	,	,	,	,	,	,	,	,
1785	,	,	,	,	,	,	,	,	,	,	,	,
1786	,	,	,	,	,	,	,	,	,	,	,	,
1787	,	,	,	,	,	,	,	,	,	,	,	,
1788	,	,	,	,	,	,	,	,	,	,	,	,
1789	,	,	,	,	,	,	,	,	,	,	,	,
1790	,	,	,	,	,	,	,	,	,	,	,	,
1791	,	,	,	,	,	,	,	,	,	,	,	,
1792	,	,	,	,	,	,	,	,	,	,	,	,
1793	,	,	,	,	,	,	,	,	,	,	,	,
1794	,	,	,	,	,	,	,	,	,	,	,	,
1795	,	,	,	,	,	,	,	,	,	,	,	,
1796	,	,	,	,	,	,	,	,	,	,	,	,
1797	,	,	,	,	,	,	,	,	,	,	,	,
1798	,	,	,	,	,	,	,	,	,	,	,	,
1799	,	,	,	,	,	,	,	,	,	,	,	,
1800	,	,	,	,	,	,	,	,	,	,	,	,
1801	,	,	,	,	,	,	,	,	,	,	,	,
1802	,	,	,	,	,	,	,	,	,	,	,	,
1803	,	,	,	,	,	,	,	,	,	,	,	,
1804	,	,	,	,	,	,	,	,	,	,	,	,
1805	,	,	,	,	,	,	,	,	,	,	,	,
1806	,	,	,	,	,	,	,	,	,	,	,	,
1807	,	,	,	,	,	,	,	,	,	,	,	,
1808	,	,	,	,	,	,	,	,	,	,	,	,
1809	,	,	,	,	,	,	,	,	,	,	,	,
1810	,	,	,	,	,	,	,	,	,	,	,	,
1811	,	,	,	,	,	,	,	,	,	,	,	,
1812	,	,	,	,	,	,	,	,	,	,	,	,
1813	,	,	,	,	,	,	,	,	,	,	,	,
1814	,	,	,	,	,	,	,	,	,	,	,	,
1815	,	,	,	,	,	,	,	,	,	,	,	,
1816	,	,	,	,	,	,	,	,	,	,	,	,
1817	,	,	,	,	,	,	,	,	,	,	,	,
1818	,	,	,	,	,	,	,	,	,	,	,	,
1819	,	,	,	,	,	,	,	,	,	,	,	,
1820	,	,	,	,	,	,	,	,	,	,	,	,
1821	,	,	,	,	,	,	,	,	,	,	,	,
1822	,	,	,	,	,	,	,	,	,	,	,	,
1823	,	,	,	,	,	,	,	,	,	,	,	,
1824	,	,	,	,	,	,	,	,	,	,	,	,
1825	,	,	,	,	,	,	,	,	,	,	,	,
1826	,	,	,	,	,	,	,	,	,	,	,	,
1827	,	,	,	,	,	,	,	,	,	,	,	,
1828	,	,	,	,	,	,	,	,	,	,	,	,
1829	,	,	,	,	,	,	,	,	,	,	,	,
1830	,	,	,	,	,	,	,	,	,	,	,	,
1831	,	,	,	,	,	,	,	,	,	,	,	,
1832	,	,	,	,	,	,	,	,	,	,	,	,
1833	,	,	,	,	,	,	,	,	,	,	,	,
1834	,	,	,	,	,	,	,	,	,	,	,	,
1835	,	,	,	,	,	,	,	,	,	,	,	,
1836	,	,	,	,	,	,	,	,	,	,	,	,
1837	,	,	,	,	,	,	,	,	,	,	,	,
1838	,	,	,	,	,	,	,	,	,	,	,	,
1839	,	,	,	,	,	,	,	,	,	,	,	,
1840	,	,	,	,	,	,	,	,	,	,	,	,
1841	,	,	,	,	,	,	,	,	,	,	,	,
1842	,	,	,	,	,	,	,	,	,	,	,	,
1843	,	,	,	,	,	,	,	,	,	,	,	,
1844	,	,	,	,	,	,	,	,	,	,	,	,
1845	,	,	,	,	,	,	,	,	,	,	,	,
1846	,	,	,	,	,	,	,	,	,	,	,	,
1847	,	,	,	,	,	,	,	,	,	,	,	,
1848	,	,	,	,	,	,	,	,	,	,	,	,
1849	,	,	,	,	,	,	,	,	,	,	,	,
1850	,	,	,	,	,	,	,	,	,	,	,	,
1851	,	,	,	,	,	,	,	,	,	,	,	,
1852	,	,	,	,	,	,	,	,	,	,	,	,
1853	,	,	,	,	,	,	,	,	,	,	,	,
1854	,	,	,	,	,	,	,	,	,	,	,	,
1855	,	,	,	,	,	,	,	,	,	,	,	,
1856	,	,	,	,	,	,	,	,	,	,	,	,
1857	,	,	,	,	,	,	,	,	,	,	,	,
1858	,	,	,	,	,	,	,	,	,	,	,	,
1859	,	,	,	,	,	,	,	,	,	,	,	,
1860	,	,	,	,	,	,	,	,	,	,	,	,
1861	,	,	,	,	,	,	,	,	,	,	,	,
1862	,	,	,	,	,	,	,	,	,	,	,	,
1863	,	,	,	,	,	,	,	,	,	,	,	,
1864	,	,	,	,	,	,	,	,	,	,	,	,
1865	,	,	,	,	,	,	,	,	,	,	,	,
1866	,	,	,	,	,	,	,	,	,	,	,	,
1867	,	,	,	,	,	,	,	,	,	,	,	,
1868	,	,	,	,	,	,	,	,	,	,	,	,
1869	,	,	,	,	,	,	,	,	,	,	,	,
1870	,	,	,	,	,	,	,	,	,	,	,	,
1871	,	,	,	,	,	,	,	,	,	,	,	,
1872	,	,	,	,	,	,	,	,	,	,	,	,
1873	,	,	,	,	,	,	,	,	,	,	,	,
1874	,	,	,	,	,	,	,	,	,	,	,	,
1875	,	,	,	,	,	,	,	,	,	,	,	,
1876	,	,	,	,	,	,	,	,	,	,	,	,
1877	,	,	,	,	,	,	,	,	,	,	,	,
1878	,	,	,	,	,	,	,	,	,	,	,	,
1879	,	,	,	,	,	,	,	,	,	,	,	,
1880	,	,	,	,	,	,	,	,	,	,	,	,
1881	,	,	,	,	,	,	,	,	,	,	,	,
1882	,	,	,	,	,	,	,	,	,	,	,	,
1883	,	,	,	,	,	,	,	,	,	,	,	,
1884	,	,	,	,	,	,	,	,	,	,	,	,
1885	,	,	,	,	,	,	,	,	,	,	,	,
1886	,	,	,	,	,	,	,	,	,	,	,	,
1887	,	,	,	,	,	,	,	,	,	,	,	,
1888	,	,	,	,	,	,	,	,	,	,	,	,
1889	,	,	,	,	,	,	,	,	,	,	,	,
1890	,	,	,	,	,	,	,	,	,	,	,	,
1891	,	,	,	,	,	,	,	,	,	,	,	,
1892	,	,	,	,	,	,	,	,	,	,	,	,
1893	,	,	,	,	,	,	,	,	,	,	,	,
1894	,	,	,	,	,	,	,	,	,	,	,	,
1895	,	,	,	,	,	,	,	,	,	,	,	,
1896	,	,	,	,	,	,	,	,	,	,	,	,
1897	,	,	,	,	,	,	,	,	,	,	,	,
1898	,	,	,	,	,	,	,	,	,	,	,	,
1899	,	,	,	,	,	,	,	,	,	,	,	,
1900	,	,	,	,	,	,	,	,	,	,	,	,
1901	,	,	,	,	,	,	,	,	,	,	,	,
1902	,	,	,	,	,	,	,	,	,	,	,	,
1903	,	,	,	,	,	,	,	,	,	,	,	,
1904	,	,	,	,	,	,	,	,	,	,	,	,
1905	,	,	,	,	,	,	,	,	,	,	,	,
1906	,	,	,	,	,	,	,	,	,	,	,	,
1907	,	,	,	,	,	,	,	,	,	,	,	,
1908	,	,	,	,	,	,	,	,	,	,	,	,
1909	,	,	,	,	,	,	,	,	,	,	,	,
1910	,	,	,	,	,	,	,	,	,	,	,	,
1911	,	,	,	,	,	,	,	,	,	,	,	,
1912	,	,	,	,	,	,	,	,	,	,	,	,
1913	,	,	,	,	,	,	,	,	,	,	,	,
1914	,	,	,	,	,	,	,	,	,	,	,	,
1915	,	,	,	,	,	,	,	,	,	,	,	,
1916	,	,	,	,	,	,	,	,	,	,	,	,
1917	,	,	,	,	,	,	,	,	,	,	,	,
1918	,	,	,	,	,	,	,	,	,	,	,	,
1919	,	,	,	,	,	,	,	,	,	,	,	,
1920	,	,	,	,	,	,	,	,	,	,	,	,
1921	,	,	,	,	,	,	,	,	,	,	,	,
1922	,	,	,	,	,	,	,	,	,	,	,	,
1923	,	,	,	,	,	,	,	,	,	,	,	,
1924	,	,	,	,	,	,	,	,	,	,	,	,
1925	,	,	,	,	,	,	,	,	,	,	,	,
1926	,	,	,	,	,	,	,	,	,	,	,	,
1927	,	,	,	,	,	,	,	,	,	,	,	,
1928	,	,	,	,	,	,	,	,	,	,	,	,
1929	,	,	,	,	,	,	,	,	,	,	,	,
1930	,	,	,	,	,	,	,	,	,	,	,	,
1931	,	,	,	,	,	,	,	,	,	,	,	,
1932	,	,	,	,	,	,	,	,	,	,	,	,
1933	,	,	,	,	,	,	,	,	,	,	,	,
1934	,	,	,	,	,	,	,	,	,	,	,	,
1935	,	,	,	,	,	,	,	,	,	,	,	,
1936	,	,	,	,	,	,	,	,	,	,	,	,
1937	,	,	,	,	,	,	,	,	,	,	,	,
1938	,	,	,	,	,	,	,	,	,	,	,	,
1939	,	,	,	,	,	,	,	,	,	,	,	,
1940	,	,	,	,	,	,	,	,	,	,	,	,
1941	,	,	,	,	,	,	,	,	,	,	,	,
1942	,	,	,	,	,	,	,	,	,	,	,	,
1943	,	,	,	,	,	,	,	,	,	,	,	,
1944	,	,	,	,	,	,	,	,	,	,	,	,
1945	,	,	,	,	,	,	,	,	,	,	,	,
1946	,	,	,	,	,	,	,	,	,	,	,	,
1947	,	,	,	,	,	,	,	,	,	,	,	,
1948	,	,	,	,	,	,	,	,	,	,	,	,
1949	,	,	,	,	,	,	,	,	,	,	,	,
1950	,	,	,	,	,	,	,	,	,	,	,	,
1951	,	,	,	,	,	,	,	,	,	,	,	,
1952	,	,	,	,	,	,	,	,	,	,	,	,
1953	,	,	,	,	,	,	,	,	,	,	,	,
1954	,	,	,	,	,	,	,	,	,	,	,	,
1955	,	,	,	,	,	,	,	,	,	,	,	,
1956	,	,	,	,	,	,	,	,	,	,	,	,
1957	,	,	,	,	,	,	,	,	,	,	,	,
1958	,	,	,	,	,	,	,	,	,	,	,	,
1959	,	,	,	,	,	,	,	,	,	,	,	,
1960	,	,	,	,	,	,	,	,	,	,	,	,
1961	,	,	,	,	,	,	,	,	,	,	,	,
1962	,	,	,	,	,	,	,	,	,	,	,	,
1963	,	,	,	,	,	,	,	,	,	,	,	,
1964	,	,	,	,	,	,	,	,	,	,	,	,
1965	,	,	,	,	,	,	,	,	,	,	,	,
1966	,	,	,	,	,	,	,	,	,	,	,	,
1967	,	,	,	,	,	,	,	,	,	,	,	,
1968	,	,	,	,	,	,	,	,	,	,	,	,
1969	,	,	,	,	,	,	,	,	,	,	,	,
1970	,	,	,	,	,	,	,	,	,	,	,	,
1971	,	,	,	,	,	,	,	,	,	,	,	,
1972	,	,	,	,	,	,	,	,	,	,	,	,
1973	,	,	,	,	,	,	,	,	,	,	,	,
1974	,	,	,	,	,	,	,	,	,	,	,	,
1975	,	,	,	,	,	,	,	,	,	,	,	,
1976	,	,	,	,	,	,	,	,	,	,	,	,
1977	,	,	,	,	,	,	,	,	,	,	,	,
1978	,	,	,	,	,	,	,	,	,	,	,	,
1979	,	,	,	,	,	,	,	,	,	,	,	,
1980	,	,	,	,	,	,	,	,	,	,	,	,
1981	,	,	,	,	,	,	,	,	,	,	,	,
1982	,	,	,	,	,	,	,	,	,	,	,	,
1983	,	,	,	,	,	,	,	,	,	,	,	,
1984	,	,	,	,	,	,	,	,	,	,	,	,
1985	,	,	,	,	,	,	,	,	,	,	,	,
1986	,	,	,	,	,	,	,	,	,	,	,	,
1987	,	,	,	,	,	,	,	,	,	,	,	,
1988	,	,	,	,	,	,	,	,	,	,	,	,
1989	,	,	,	,	,	,	,	,	,	,	,	,
1990	,	,	,	,	,	,	,	,	,	,	,	,
1991	,	,	,	,	,	,	,	,	,	,	,	,
1992	,	,	,	,	,	,	,	,	,	,	,	,
1993	,	,	,	,	,	,	,	,	,	,	,	,
1994	,	,	,	,	,	,	,	,	,	,	,	,
1995	,	,	,	,	,	,	,	,	,	,	,	,
1996	,	,	,	,	,	,	,	,	,	,	,	,
1997	,	,	,	,	,	,	,	,	,	,	,	,
1998	,	,	,	,	,	,	,	,	,	,	,	,
1999	,	,	,	,	,	,	,	,	,	,	,	,
[truncated: 13,001 more rows]
