# Supplementary material for: ParB spreading on DNA requires cytidine triphosphate in vitro
Source: eLife journal article supplement (doi:10.7554/elife.53515), 2020-02-20
Supplement: fig6-data1 [file Fig6_panelA.xlsx]

## Sheet: FORMAT
	sample ID #1	sample ID #2	sample ID #3
data point	time point (sec), wavelength shift (nm)	time point (sec), wavelength shift (nm)	time point (sec), wavelength shift (nm)
1
2
3
.
.
.

## Sheet: Fig6_panelA_rep1_2_3
	169bp closed parS DNA and 1 min premix ParB CTPyS	169bp closed parS DNA and 5 min premix ParB CTPyS	169bp closed parS DNA and 15 min premix ParB CTPyS	169bp closed parS DNA and 30 min premix ParB CTPyS	169bp closed parS DNA and 1 min premix ParB CTPyS	169bp closed parS DNA and 5 min premix ParB CTPyS	169bp closed parS DNA and 15 min premix ParB CTPyS	169bp closed parS DNA and 60 min premix ParB CTPyS	169bp closed parS DNA and 30 min premix ParB CTPyS	169bp closed parS DNA and 1 min premix ParB CTP	169bp closed parS DNA and 5 min premix ParB CTP	169bp closed parS DNA and 15 min premix ParB CTP	169bp closed parS DNA and 60 min premix ParB CTPyS	169bp closed parS DNA and 30 min premix ParB CTP	169bp closed parS DNA and 1 min premix ParB CTP	169bp closed parS DNA and 5 min premix ParB CTP	169bp closed parS DNA and 15 min premix ParB CTP	169bp closed parS DNA and 60 min premix ParB CTP	169bp closed parS DNA and 30 min premix ParB CTP	169bp closed parS DNA and 60 min premix ParB CTP	169bp closed parS DNA and 1 min premix ParB CTPyS	169bp closed parS DNA and 5 min premix ParB CTPyS	169bp closed parS DNA and 15 min premix ParB CTPyS	169bp closed parS DNA and 30 min premix ParB CTPyS	169bp closed parS DNA and 1 min premix ParB CTP	169bp closed parS DNA and 5 min premix ParB CTP	169bp closed parS DNA and 15 min premix ParB CTP	169bp closed parS DNA and 60 min premix ParB CTPyS	169bp closed parS DNA and 30 min premix ParB CTP	169bp closed parS DNA and 60 min premix ParB CTP
1	0.000, 0.001	0.000, -0.000	0.000, -0.003	0.000, 0.008	0.000, 0.002	0.000, 0.010	0.000, -0.001	0.000, 0.001	0.000, 0.011	0.000, 0.004	0.000, -0.002	0.000, -0.004	0.000, 0.007	0.000, 0.003	0.000, 0.006	0.000, 0.010	0.000, 0.011	0.000, 0.006	0.000, -0.007	0.000, 0.003	0.000, 0.006	0.000, 0.009	0.000, 0.008	0.000, 0.012	0.000, 0.007	0.000, 0.013	0.000, 0.010	0.000, 0.007	0.000, 0.008	0.000, 0.014
2	0.200, 0.001	0.200, -0.000	0.200, -0.002	0.200, 0.008	0.200, 0.002	0.200, 0.009	0.200, -0.000	0.200, 0.001	0.200, 0.010	0.200, 0.005	0.200, -0.003	0.200, -0.003	0.200, 0.007	0.200, 0.003	0.200, 0.006	0.200, 0.009	0.200, 0.010	0.200, 0.006	0.200, -0.007	0.200, 0.003	0.200, 0.005	0.200, 0.009	0.200, 0.008	0.200, 0.012	0.200, 0.007	0.200, 0.013	0.200, 0.010	0.200, 0.007	0.200, 0.007	0.200, 0.014
3	0.400, 0.000	0.400, -0.000	0.400, -0.002	0.400, 0.008	0.400, 0.002	0.400, 0.009	0.400, -0.000	0.400, 0.001	0.400, 0.010	0.400, 0.005	0.400, -0.003	0.400, -0.003	0.400, 0.007	0.400, 0.003	0.400, 0.006	0.400, 0.009	0.400, 0.010	0.400, 0.006	0.400, -0.006	0.400, 0.003	0.400, 0.004	0.400, 0.009	0.400, 0.008	0.400, 0.011	0.400, 0.006	0.400, 0.012	0.400, 0.011	0.400, 0.007	0.400, 0.006	0.400, 0.014
4	0.600, 0.000	0.600, -0.000	0.600, -0.001	0.600, 0.007	0.600, 0.001	0.600, 0.008	0.600, 0.000	0.600, 0.001	0.600, 0.009	0.600, 0.005	0.600, -0.003	0.600, -0.003	0.600, 0.007	0.600, 0.003	0.600, 0.006	0.600, 0.008	0.600, 0.009	0.600, 0.006	0.600, -0.005	0.600, 0.003	0.600, 0.002	0.600, 0.008	0.600, 0.008	0.600, 0.010	0.600, 0.005	0.600, 0.012	0.600, 0.011	0.600, 0.007	0.600, 0.005	0.600, 0.014
5	0.800, -0.000	0.800, -0.000	0.800, -0.000	0.800, 0.007	0.800, 0.001	0.800, 0.008	0.800, 0.000	0.800, 0.001	0.800, 0.009	0.800, 0.005	0.800, -0.003	0.800, -0.003	0.800, 0.008	0.800, 0.003	0.800, 0.006	0.800, 0.008	0.800, 0.008	0.800, 0.006	0.800, -0.005	0.800, 0.002	0.800, 0.001	0.800, 0.008	0.800, 0.008	0.800, 0.010	0.800, 0.004	0.800, 0.011	0.800, 0.011	0.800, 0.007	0.800, 0.004	0.800, 0.013
6	1.000, -0.001	1.000, -0.000	1.000, -0.000	1.000, 0.007	1.000, 0.000	1.000, 0.007	1.000, 0.001	1.000, 0.001	1.000, 0.008	1.000, 0.006	1.000, -0.003	1.000, -0.003	1.000, 0.008	1.000, 0.003	1.000, 0.006	1.000, 0.007	1.000, 0.008	1.000, 0.006	1.000, -0.005	1.000, 0.002	1.000, -0.000	1.000, 0.007	1.000, 0.008	1.000, 0.009	1.000, 0.004	1.000, 0.011	1.000, 0.011	1.000, 0.007	1.000, 0.004	1.000, 0.013
7	1.200, -0.001	1.200, 0.000	1.200, 0.000	1.200, 0.007	1.200, 0.000	1.200, 0.006	1.200, 0.001	1.200, 0.001	1.200, 0.008	1.200, 0.006	1.200, -0.004	1.200, -0.003	1.200, 0.008	1.200, 0.002	1.200, 0.005	1.200, 0.007	1.200, 0.007	1.200, 0.006	1.200, -0.004	1.200, 0.002	1.200, -0.001	1.200, 0.006	1.200, 0.008	1.200, 0.009	1.200, 0.003	1.200, 0.010	1.200, 0.011	1.200, 0.007	1.200, 0.003	1.200, 0.012
8	1.400, -0.001	1.400, 0.000	1.400, 0.001	1.400, 0.007	1.400, -0.000	1.400, 0.006	1.400, 0.001	1.400, 0.001	1.400, 0.008	1.400, 0.006	1.400, -0.004	1.400, -0.002	1.400, 0.008	1.400, 0.002	1.400, 0.005	1.400, 0.006	1.400, 0.006	1.400, 0.006	1.400, -0.004	1.400, 0.001	1.400, -0.002	1.400, 0.006	1.400, 0.008	1.400, 0.009	1.400, 0.003	1.400, 0.009	1.400, 0.011	1.400, 0.006	1.400, 0.003	1.400, 0.011
9	1.600, -0.002	1.600, 0.000	1.600, 0.001	1.600, 0.007	1.600, -0.000	1.600, 0.005	1.600, 0.001	1.600, 0.001	1.600, 0.008	1.600, 0.006	1.600, -0.004	1.600, -0.002	1.600, 0.008	1.600, 0.002	1.600, 0.005	1.600, 0.006	1.600, 0.006	1.600, 0.006	1.600, -0.004	1.600, 0.001	1.600, -0.003	1.600, 0.005	1.600, 0.007	1.600, 0.008	1.600, 0.002	1.600, 0.009	1.600, 0.011	1.600, 0.006	1.600, 0.002	1.600, 0.010
10	1.800, -0.002	1.800, 0.001	1.800, 0.001	1.800, 0.007	1.800, -0.000	1.800, 0.005	1.800, 0.001	1.800, 0.001	1.800, 0.007	1.800, 0.006	1.800, -0.004	1.800, -0.002	1.800, 0.008	1.800, 0.002	1.800, 0.004	1.800, 0.005	1.800, 0.005	1.800, 0.005	1.800, -0.003	1.800, -0.000	1.800, -0.004	1.800, 0.004	1.800, 0.007	1.800, 0.007	1.800, 0.002	1.800, 0.009	1.800, 0.011	1.800, 0.006	1.800, 0.002	1.800, 0.009
11	2.000, -0.002	2.000, 0.001	2.000, 0.001	2.000, 0.007	2.000, -0.000	2.000, 0.004	2.000, 0.001	2.000, 0.001	2.000, 0.007	2.000, 0.006	2.000, -0.004	2.000, -0.002	2.000, 0.008	2.000, 0.001	2.000, 0.004	2.000, 0.005	2.000, 0.005	2.000, 0.005	2.000, -0.003	2.000, -0.001	2.000, -0.005	2.000, 0.003	2.000, 0.007	2.000, 0.007	2.000, 0.002	2.000, 0.008	2.000, 0.010	2.000, 0.006	2.000, 0.002	2.000, 0.008
12	2.200, -0.002	2.200, 0.001	2.200, 0.000	2.200, 0.007	2.200, 0.000	2.200, 0.004	2.200, 0.001	2.200, 0.001	2.200, 0.007	2.200, 0.005	2.200, -0.004	2.200, -0.002	2.200, 0.007	2.200, 0.001	2.200, 0.004	2.200, 0.004	2.200, 0.005	2.200, 0.004	2.200, -0.004	2.200, -0.001	2.200, -0.005	2.200, 0.003	2.200, 0.007	2.200, 0.006	2.200, 0.003	2.200, 0.008	2.200, 0.010	2.200, 0.006	2.200, 0.001	2.200, 0.007
13	2.400, -0.002	2.400, 0.001	2.400, 0.000	2.400, 0.007	2.400, 0.001	2.400, 0.004	2.400, 0.001	2.400, 0.001	2.400, 0.007	2.400, 0.005	2.400, -0.003	2.400, -0.002	2.400, 0.007	2.400, 0.001	2.400, 0.004	2.400, 0.004	2.400, 0.005	2.400, 0.004	2.400, -0.004	2.400, -0.002	2.400, -0.005	2.400, 0.002	2.400, 0.006	2.400, 0.005	2.400, 0.003	2.400, 0.008	2.400, 0.010	2.400, 0.005	2.400, 0.001	2.400, 0.006
14	2.600, -0.002	2.600, 0.002	2.600, -0.000	2.600, 0.007	2.600, 0.001	2.600, 0.004	2.600, 0.001	2.600, 0.001	2.600, 0.006	2.600, 0.005	2.600, -0.003	2.600, -0.002	2.600, 0.007	2.600, 0.000	2.600, 0.004	2.600, 0.004	2.600, 0.004	2.600, 0.003	2.600, -0.004	2.600, -0.003	2.600, -0.005	2.600, 0.001	2.600, 0.006	2.600, 0.005	2.600, 0.003	2.600, 0.007	2.600, 0.010	2.600, 0.006	2.600, 0.001	2.600, 0.006
15	2.800, -0.002	2.800, 0.002	2.800, -0.000	2.800, 0.007	2.800, 0.001	2.800, 0.004	2.800, 0.002	2.800, 0.000	2.800, 0.006	2.800, 0.005	2.800, -0.003	2.800, -0.002	2.800, 0.007	2.800, 0.000	2.800, 0.004	2.800, 0.004	2.800, 0.004	2.800, 0.003	2.800, -0.004	2.800, -0.003	2.800, -0.005	2.800, 0.001	2.800, 0.006	2.800, 0.004	2.800, 0.003	2.800, 0.007	2.800, 0.010	2.800, 0.006	2.800, 0.001	2.800, 0.005
16	3.000, -0.002	3.000, 0.002	3.000, -0.001	3.000, 0.006	3.000, 0.001	3.000, 0.003	3.000, 0.002	3.000, 0.000	3.000, 0.005	3.000, 0.005	3.000, -0.003	3.000, -0.003	3.000, 0.007	3.000, 0.000	3.000, 0.004	3.000, 0.004	3.000, 0.004	3.000, 0.003	3.000, -0.004	3.000, -0.004	3.000, -0.005	3.000, 0.000	3.000, 0.005	3.000, 0.004	3.000, 0.003	3.000, 0.007	3.000, 0.010	3.000, 0.006	3.000, 0.001	3.000, 0.005
17	3.200, -0.002	3.200, 0.002	3.200, -0.001	3.200, 0.006	3.200, 0.001	3.200, 0.003	3.200, 0.002	3.200, 0.000	3.200, 0.005	3.200, 0.004	3.200, -0.003	3.200, -0.003	3.200, 0.007	3.200, 0.001	3.200, 0.004	3.200, 0.004	3.200, 0.003	3.200, 0.002	3.200, -0.004	3.200, -0.004	3.200, -0.005	3.200, -0.001	3.200, 0.005	3.200, 0.004	3.200, 0.003	3.200, 0.006	3.200, 0.010	3.200, 0.006	3.200, 0.001	3.200, 0.004
18	3.400, -0.002	3.400, 0.002	3.400, -0.001	3.400, 0.006	3.400, 0.001	3.400, 0.003	3.400, 0.002	3.400, -0.000	3.400, 0.005	3.400, 0.004	3.400, -0.003	3.400, -0.003	3.400, 0.006	3.400, 0.001	3.400, 0.004	3.400, 0.004	3.400, 0.003	3.400, 0.002	3.400, -0.003	3.400, -0.004	3.400, -0.005	3.400, -0.001	3.400, 0.005	3.400, 0.004	3.400, 0.003	3.400, 0.006	3.400, 0.010	3.400, 0.007	3.400, 0.001	3.400, 0.004
19	3.600, -0.001	3.600, 0.002	3.600, -0.000	3.600, 0.005	3.600, 0.001	3.600, 0.003	3.600, 0.002	3.600, -0.001	3.600, 0.005	3.600, 0.004	3.600, -0.004	3.600, -0.003	3.600, 0.006	3.600, 0.001	3.600, 0.004	3.600, 0.004	3.600, 0.002	3.600, 0.001	3.600, -0.003	3.600, -0.004	3.600, -0.005	3.600, -0.002	3.600, 0.004	3.600, 0.004	3.600, 0.003	3.600, 0.006	3.600, 0.010	3.600, 0.007	3.600, 0.001	3.600, 0.003
20	3.800, -0.001	3.800, 0.002	3.800, -0.000	3.800, 0.005	3.800, 0.001	3.800, 0.003	3.800, 0.002	3.800, -0.001	3.800, 0.005	3.800, 0.004	3.800, -0.004	3.800, -0.003	3.800, 0.005	3.800, 0.001	3.800, 0.004	3.800, 0.003	3.800, 0.002	3.800, 0.001	3.800, -0.003	3.800, -0.004	3.800, -0.005	3.800, -0.003	3.800, 0.004	3.800, 0.004	3.800, 0.003	3.800, 0.006	3.800, 0.010	3.800, 0.007	3.800, 0.001	3.800, 0.003
21	4.000, -0.001	4.000, 0.002	4.000, 0.000	4.000, 0.005	4.000, 0.000	4.000, 0.003	4.000, 0.001	4.000, -0.001	4.000, 0.004	4.000, 0.005	4.000, -0.004	4.000, -0.003	4.000, 0.005	4.000, 0.001	4.000, 0.004	4.000, 0.003	4.000, 0.002	4.000, 0.001	4.000, -0.003	4.000, -0.004	4.000, -0.006	4.000, -0.003	4.000, 0.003	4.000, 0.004	4.000, 0.002	4.000, 0.006	4.000, 0.010	4.000, 0.007	4.000, 0.000	4.000, 0.003
22	4.200, -0.001	4.200, 0.003	4.200, 0.000	4.200, 0.005	4.200, 0.000	4.200, 0.003	4.200, 0.001	4.200, -0.001	4.200, 0.004	4.200, 0.005	4.200, -0.004	4.200, -0.003	4.200, 0.005	4.200, 0.000	4.200, 0.004	4.200, 0.003	4.200, 0.002	4.200, 0.001	4.200, -0.003	4.200, -0.003	4.200, -0.006	4.200, -0.003	4.200, 0.003	4.200, 0.004	4.200, 0.002	4.200, 0.005	4.200, 0.009	4.200, 0.006	4.200, -0.000	4.200, 0.002
23	4.400, -0.001	4.400, 0.003	4.400, 0.001	4.400, 0.005	4.400, -0.000	4.400, 0.003	4.400, 0.001	4.400, -0.001	4.400, 0.004	4.400, 0.005	4.400, -0.004	4.400, -0.003	4.400, 0.005	4.400, 0.000	4.400, 0.004	4.400, 0.003	4.400, 0.001	4.400, 0.000	4.400, -0.004	4.400, -0.003	4.400, -0.006	4.400, -0.004	4.400, 0.003	4.400, 0.004	4.400, 0.002	4.400, 0.005	4.400, 0.009	4.400, 0.006	4.400, -0.000	4.400, 0.002
24	4.600, -0.001	4.600, 0.003	4.600, 0.001	4.600, 0.005	4.600, -0.001	4.600, 0.003	4.600, 0.001	4.600, -0.001	4.600, 0.004	4.600, 0.005	4.600, -0.004	4.600, -0.003	4.600, 0.004	4.600, 0.000	4.600, 0.004	4.600, 0.003	4.600, 0.001	4.600, 0.000	4.600, -0.004	4.600, -0.003	4.600, -0.007	4.600, -0.004	4.600, 0.002	4.600, 0.004	4.600, 0.002	4.600, 0.005	4.600, 0.009	4.600, 0.006	4.600, -0.001	4.600, 0.002
25	4.800, -0.001	4.800, 0.003	4.800, 0.001	4.800, 0.005	4.800, -0.001	4.800, 0.003	4.800, 0.001	4.800, -0.001	4.800, 0.004	4.800, 0.005	4.800, -0.004	4.800, -0.003	4.800, 0.004	4.800, -0.000	4.800, 0.003	4.800, 0.003	4.800, 0.001	4.800, 0.000	4.800, -0.004	4.800, -0.003	4.800, -0.007	4.800, -0.004	4.800, 0.002	4.800, 0.004	4.800, 0.001	4.800, 0.005	4.800, 0.009	4.800, 0.005	4.800, -0.001	4.800, 0.001
26	5.000, -0.000	5.000, 0.003	5.000, 0.002	5.000, 0.005	5.000, -0.001	5.000, 0.002	5.000, 0.000	5.000, -0.001	5.000, 0.004	5.000, 0.006	5.000, -0.004	5.000, -0.003	5.000, 0.004	5.000, -0.000	5.000, 0.003	5.000, 0.003	5.000, 0.000	5.000, -0.000	5.000, -0.004	5.000, -0.003	5.000, -0.008	5.000, -0.004	5.000, 0.002	5.000, 0.004	5.000, 0.001	5.000, 0.005	5.000, 0.008	5.000, 0.005	5.000, -0.000	5.000, 0.001
27	5.200, -0.000	5.200, 0.003	5.200, 0.002	5.200, 0.005	5.200, -0.001	5.200, 0.002	5.200, -0.000	5.200, -0.000	5.200, 0.004	5.200, 0.006	5.200, -0.003	5.200, -0.003	5.200, 0.004	5.200, -0.001	5.200, 0.002	5.200, 0.002	5.200, 0.000	5.200, -0.000	5.200, -0.004	5.200, -0.003	5.200, -0.008	5.200, -0.005	5.200, 0.001	5.200, 0.004	5.200, 0.000	5.200, 0.005	5.200, 0.008	5.200, 0.005	5.200, -0.000	5.200, 0.001
28	5.400, -0.000	5.400, 0.002	5.400, 0.002	5.400, 0.005	5.400, -0.002	5.400, 0.002	5.400, -0.000	5.400, -0.000	5.400, 0.004	5.400, 0.006	5.400, -0.003	5.400, -0.003	5.400, 0.004	5.400, -0.001	5.400, 0.002	5.400, 0.002	5.400, 0.000	5.400, -0.001	5.400, -0.004	5.400, -0.002	5.400, -0.008	5.400, -0.005	5.400, 0.001	5.400, 0.004	5.400, 0.000	5.400, 0.005	5.400, 0.008	5.400, 0.005	5.400, -0.000	5.400, 0.001
29	5.600, -0.000	5.600, 0.002	5.600, 0.002	5.600, 0.005	5.600, -0.001	5.600, 0.001	5.600, -0.001	5.600, -0.000	5.600, 0.004	5.600, 0.006	5.600, -0.002	5.600, -0.003	5.600, 0.004	5.600, -0.001	5.600, 0.001	5.600, 0.002	5.600, 0.000	5.600, -0.001	5.600, -0.004	5.600, -0.002	5.600, -0.008	5.600, -0.005	5.600, 0.001	5.600, 0.003	5.600, -0.000	5.600, 0.005	5.600, 0.008	5.600, 0.005	5.600, -0.000	5.600, 0.001
30	5.800, -0.001	5.800, 0.002	5.800, 0.002	5.800, 0.004	5.800, -0.001	5.800, 0.001	5.800, -0.001	5.800, 0.000	5.800, 0.004	5.800, 0.006	5.800, -0.002	5.800, -0.002	5.800, 0.003	5.800, -0.001	5.800, 0.001	5.800, 0.001	5.800, -0.000	5.800, -0.001	5.800, -0.004	5.800, -0.002	5.800, -0.007	5.800, -0.005	5.800, 0.001	5.800, 0.003	5.800, -0.000	5.800, 0.005	5.800, 0.008	5.800, 0.005	5.800, -0.000	5.800, 0.000
31	6.000, -0.001	6.000, 0.002	6.000, 0.003	6.000, 0.004	6.000, -0.001	6.000, 0.001	6.000, -0.001	6.000, 0.000	6.000, 0.004	6.000, 0.005	6.000, -0.001	6.000, -0.002	6.000, 0.003	6.000, -0.002	6.000, 0.001	6.000, 0.001	6.000, -0.000	6.000, -0.002	6.000, -0.004	6.000, -0.002	6.000, -0.007	6.000, -0.005	6.000, 0.001	6.000, 0.002	6.000, -0.000	6.000, 0.004	6.000, 0.008	6.000, 0.004	6.000, -0.000	6.000, 0.000
32	6.200, -0.001	6.200, 0.002	6.200, 0.003	6.200, 0.005	6.200, -0.001	6.200, 0.001	6.200, -0.001	6.200, 0.000	6.200, 0.004	6.200, 0.005	6.200, -0.001	6.200, -0.002	6.200, 0.003	6.200, -0.002	6.200, 0.000	6.200, 0.001	6.200, -0.000	6.200, -0.002	6.200, -0.004	6.200, -0.002	6.200, -0.007	6.200, -0.005	6.200, 0.000	6.200, 0.002	6.200, -0.000	6.200, 0.004	6.200, 0.008	6.200, 0.004	6.200, 0.000	6.200, 0.000
33	6.400, -0.001	6.400, 0.002	6.400, 0.003	6.400, 0.005	6.400, -0.002	6.400, 0.000	6.400, -0.001	6.400, 0.000	6.400, 0.004	6.400, 0.005	6.400, -0.001	6.400, -0.002	6.400, 0.003	6.400, -0.002	6.400, 0.000	6.400, 0.001	6.400, 0.000	6.400, -0.002	6.400, -0.004	6.400, -0.002	6.400, -0.007	6.400, -0.005	6.400, 0.000	6.400, 0.001	6.400, -0.000	6.400, 0.004	6.400, 0.008	6.400, 0.004	6.400, 0.000	6.400, 0.000
34	6.600, -0.001	6.600, 0.002	6.600, 0.003	6.600, 0.005	6.600, -0.002	6.600, 0.000	6.600, -0.001	6.600, 0.000	6.600, 0.003	6.600, 0.005	6.600, -0.000	6.600, -0.002	6.600, 0.003	6.600, -0.001	6.600, 0.000	6.600, 0.001	6.600, 0.000	6.600, -0.002	6.600, -0.005	6.600, -0.002	6.600, -0.006	6.600, -0.005	6.600, 0.000	6.600, 0.001	6.600, 0.000	6.600, 0.003	6.600, 0.007	6.600, 0.004	6.600, 0.000	6.600, 0.000
35	6.800, -0.001	6.800, 0.002	6.800, 0.003	6.800, 0.005	6.800, -0.002	6.800, 0.000	6.800, -0.001	6.800, -0.000	6.800, 0.003	6.800, 0.004	6.800, -0.000	6.800, -0.002	6.800, 0.003	6.800, -0.001	6.800, 0.000	6.800, 0.001	6.800, 0.000	6.800, -0.002	6.800, -0.005	6.800, -0.002	6.800, -0.006	6.800, -0.005	6.800, 0.000	6.800, 0.001	6.800, 0.000	6.800, 0.003	6.800, 0.007	6.800, 0.005	6.800, 0.001	6.800, 0.000
36	7.000, -0.001	7.000, 0.002	7.000, 0.003	7.000, 0.005	7.000, -0.002	7.000, 0.000	7.000, -0.001	7.000, -0.000	7.000, 0.003	7.000, 0.004	7.000, -0.000	7.000, -0.002	7.000, 0.003	7.000, -0.002	7.000, -0.000	7.000, 0.001	7.000, 0.000	7.000, -0.002	7.000, -0.005	7.000, -0.003	7.000, -0.006	7.000, -0.005	7.000, -0.000	7.000, 0.001	7.000, 0.001	7.000, 0.003	7.000, 0.007	7.000, 0.004	7.000, 0.001	7.000, 0.000
37	7.200, -0.002	7.200, 0.002	7.200, 0.003	7.200, 0.005	7.200, -0.002	7.200, 0.000	7.200, -0.001	7.200, -0.000	7.200, 0.003	7.200, 0.004	7.200, -0.000	7.200, -0.002	7.200, 0.003	7.200, -0.002	7.200, -0.000	7.200, 0.001	7.200, 0.000	7.200, -0.002	7.200, -0.005	7.200, -0.003	7.200, -0.006	7.200, -0.005	7.200, -0.000	7.200, 0.001	7.200, 0.001	7.200, 0.003	7.200, 0.006	7.200, 0.004	7.200, 0.001	7.200, 0.000
38	7.400, -0.002	7.400, 0.002	7.400, 0.002	7.400, 0.005	7.400, -0.002	7.400, 0.000	7.400, -0.001	7.400, -0.001	7.400, 0.003	7.400, 0.004	7.400, -0.001	7.400, -0.002	7.400, 0.003	7.400, -0.002	7.400, -0.000	7.400, 0.001	7.400, 0.000	7.400, -0.002	7.400, -0.005	7.400, -0.003	7.400, -0.006	7.400, -0.004	7.400, -0.000	7.400, 0.001	7.400, 0.001	7.400, 0.003	7.400, 0.006	7.400, 0.004	7.400, 0.001	7.400, 0.000
39	7.600, -0.002	7.600, 0.003	7.600, 0.002	7.600, 0.005	7.600, -0.002	7.600, -0.000	7.600, -0.001	7.600, -0.001	7.600, 0.004	7.600, 0.004	7.600, -0.001	7.600, -0.001	7.600, 0.003	7.600, -0.002	7.600, -0.000	7.600, 0.001	7.600, 0.000	7.600, -0.002	7.600, -0.005	7.600, -0.003	7.600, -0.006	7.600, -0.004	7.600, -0.001	7.600, 0.001	7.600, 0.001	7.600, 0.003	7.600, 0.005	7.600, 0.004	7.600, 0.001	7.600, -0.000
40	7.800, -0.003	7.800, 0.003	7.800, 0.002	7.800, 0.005	7.800, -0.003	7.800, -0.000	7.800, -0.001	7.800, -0.001	7.800, 0.004	7.800, 0.004	7.800, -0.001	7.800, -0.001	7.800, 0.003	7.800, -0.002	7.800, -0.000	7.800, 0.001	7.800, -0.000	7.800, -0.001	7.800, -0.005	7.800, -0.003	7.800, -0.006	7.800, -0.004	7.800, -0.001	7.800, 0.001	7.800, 0.002	7.800, 0.003	7.800, 0.005	7.800, 0.004	7.800, 0.001	7.800, -0.000
41	8.000, -0.003	8.000, 0.003	8.000, 0.002	8.000, 0.005	8.000, -0.003	8.000, -0.001	8.000, -0.001	8.000, -0.001	8.000, 0.004	8.000, 0.004	8.000, -0.001	8.000, -0.001	8.000, 0.003	8.000, -0.002	8.000, -0.000	8.000, 0.001	8.000, -0.000	8.000, -0.001	8.000, -0.005	8.000, -0.004	8.000, -0.005	8.000, -0.004	8.000, -0.001	8.000, 0.001	8.000, 0.002	8.000, 0.003	8.000, 0.005	8.000, 0.004	8.000, 0.001	8.000, -0.001
42	8.200, -0.003	8.200, 0.003	8.200, 0.002	8.200, 0.005	8.200, -0.003	8.200, -0.001	8.200, -0.001	8.200, -0.000	8.200, 0.004	8.200, 0.004	8.200, -0.002	8.200, -0.001	8.200, 0.002	8.200, -0.002	8.200, -0.001	8.200, 0.001	8.200, -0.001	8.200, -0.001	8.200, -0.005	8.200, -0.004	8.200, -0.005	8.200, -0.005	8.200, -0.001	8.200, 0.001	8.200, 0.002	8.200, 0.003	8.200, 0.005	8.200, 0.003	8.200, 0.001	8.200, -0.001
43	8.400, -0.003	8.400, 0.003	8.400, 0.001	8.400, 0.006	8.400, -0.003	8.400, -0.001	8.400, -0.001	8.400, -0.000	8.400, 0.004	8.400, 0.004	8.400, -0.002	8.400, -0.001	8.400, 0.002	8.400, -0.002	8.400, -0.001	8.400, 0.002	8.400, -0.001	8.400, -0.001	8.400, -0.005	8.400, -0.004	8.400, -0.005	8.400, -0.005	8.400, -0.001	8.400, 0.001	8.400, 0.002	8.400, 0.003	8.400, 0.005	8.400, 0.003	8.400, 0.001	8.400, -0.001
44	8.600, -0.003	8.600, 0.003	8.600, 0.001	8.600, 0.006	8.600, -0.003	8.600, -0.001	8.600, -0.001	8.600, -0.000	8.600, 0.004	8.600, 0.004	8.600, -0.002	8.600, -0.000	8.600, 0.002	8.600, -0.002	8.600, -0.001	8.600, 0.002	8.600, -0.002	8.600, -0.001	8.600, -0.005	8.600, -0.005	8.600, -0.005	8.600, -0.005	8.600, -0.001	8.600, 0.001	8.600, 0.002	8.600, 0.003	8.600, 0.004	8.600, 0.003	8.600, 0.001	8.600, -0.002
45	8.800, -0.002	8.800, 0.003	8.800, 0.001	8.800, 0.006	8.800, -0.003	8.800, -0.001	8.800, -0.001	8.800, -0.000	8.800, 0.004	8.800, 0.004	8.800, -0.002	8.800, -0.000	8.800, 0.002	8.800, -0.003	8.800, -0.001	8.800, 0.002	8.800, -0.002	8.800, -0.001	8.800, -0.005	8.800, -0.005	8.800, -0.005	8.800, -0.005	8.800, -0.001	8.800, 0.002	8.800, 0.001	8.800, 0.004	8.800, 0.004	8.800, 0.003	8.800, 0.001	8.800, -0.002
46	9.000, -0.002	9.000, 0.003	9.000, 0.001	9.000, 0.006	9.000, -0.003	9.000, -0.002	9.000, -0.001	9.000, -0.000	9.000, 0.004	9.000, 0.004	9.000, -0.002	9.000, -0.000	9.000, 0.002	9.000, -0.003	9.000, -0.001	9.000, 0.002	9.000, -0.002	9.000, -0.001	9.000, -0.004	9.000, -0.005	9.000, -0.005	9.000, -0.005	9.000, -0.001	9.000, 0.001	9.000, 0.001	9.000, 0.004	9.000, 0.004	9.000, 0.003	9.000, 0.001	9.000, -0.002
47	9.200, -0.002	9.200, 0.003	9.200, 0.001	9.200, 0.006	9.200, -0.003	9.200, -0.002	9.200, -0.001	9.200, 0.000	9.200, 0.003	9.200, 0.004	9.200, -0.003	9.200, -0.000	9.200, 0.002	9.200, -0.003	9.200, -0.001	9.200, 0.001	9.200, -0.002	9.200, -0.001	9.200, -0.004	9.200, -0.005	9.200, -0.005	9.200, -0.005	9.200, -0.001	9.200, 0.001	9.200, 0.001	9.200, 0.004	9.200, 0.004	9.200, 0.003	9.200, 0.001	9.200, -0.002
48	9.400, -0.002	9.400, 0.003	9.400, 0.001	9.400, 0.005	9.400, -0.003	9.400, -0.002	9.400, -0.001	9.400, 0.000	9.400, 0.003	9.400, 0.004	9.400, -0.003	9.400, -0.000	9.400, 0.002	9.400, -0.003	9.400, -0.001	9.400, 0.001	9.400, -0.002	9.400, -0.001	9.400, -0.003	9.400, -0.005	9.400, -0.005	9.400, -0.005	9.400, -0.001	9.400, 0.001	9.400, 0.001	9.400, 0.004	9.400, 0.004	9.400, 0.003	9.400, 0.001	9.400, -0.002
49	9.600, -0.002	9.600, 0.003	9.600, 0.001	9.600, 0.005	9.600, -0.003	9.600, -0.001	9.600, -0.001	9.600, 0.001	9.600, 0.003	9.600, 0.004	9.600, -0.003	9.600, -0.000	9.600, 0.002	9.600, -0.003	9.600, -0.002	9.600, 0.001	9.600, -0.003	9.600, -0.001	9.600, -0.003	9.600, -0.005	9.600, -0.005	9.600, -0.005	9.600, -0.001	9.600, 0.001	9.600, 0.000	9.600, 0.004	9.600, 0.004	9.600, 0.003	9.600, 0.001	9.600, -0.002
50	9.800, -0.002	9.800, 0.003	9.800, 0.001	9.800, 0.006	9.800, -0.003	9.800, -0.001	9.800, -0.001	9.800, 0.001	9.800, 0.003	9.800, 0.004	9.800, -0.003	9.800, -0.000	9.800, 0.001	9.800, -0.003	9.800, -0.002	9.800, 0.001	9.800, -0.003	9.800, -0.001	9.800, -0.003	9.800, -0.005	9.800, -0.005	9.800, -0.005	9.800, -0.001	9.800, 0.001	9.800, -0.000	9.800, 0.004	9.800, 0.004	9.800, 0.004	9.800, 0.000	9.800, -0.002
51	10.000, -0.002	10.000, 0.002	10.000, 0.001	10.000, 0.006	10.000, -0.003	10.000, -0.001	10.000, -0.000	10.000, 0.001	10.000, 0.003	10.000, 0.004	10.000, -0.004	10.000, -0.000	10.000, 0.001	10.000, -0.003	10.000, -0.002	10.000, 0.001	10.000, -0.003	10.000, -0.002	10.000, -0.002	10.000, -0.005	10.000, -0.005	10.000, -0.005	10.000, -0.001	10.000, 0.001	10.000, -0.000	10.000, 0.004	10.000, 0.004	10.000, 0.004	10.000, 0.000	10.000, -0.003
52	10.200, -0.002	10.200, 0.002	10.200, 0.002	10.200, 0.006	10.200, -0.003	10.200, -0.001	10.200, -0.000	10.200, 0.001	10.200, 0.003	10.200, 0.004	10.200, -0.004	10.200, -0.000	10.200, 0.001	10.200, -0.003	10.200, -0.001	10.200, 0.001	10.200, -0.003	10.200, -0.002	10.200, -0.002	10.200, -0.005	10.200, -0.005	10.200, -0.005	10.200, -0.001	10.200, 0.000	10.200, -0.001	10.200, 0.004	10.200, 0.004	10.200, 0.004	10.200, 0.000	10.200, -0.003
53	10.400, -0.001	10.400, 0.002	10.400, 0.002	10.400, 0.006	10.400, -0.003	10.400, -0.001	10.400, -0.000	10.400, 0.001	10.400, 0.002	10.400, 0.004	10.400, -0.004	10.400, -0.001	10.400, 0.002	10.400, -0.002	10.400, -0.001	10.400, 0.001	10.400, -0.002	10.400, -0.002	10.400, -0.002	10.400, -0.005	10.400, -0.005	10.400, -0.004	10.400, -0.001	10.400, 0.000	10.400, -0.001	10.400, 0.004	10.400, 0.004	10.400, 0.004	10.400, 0.000	10.400, -0.003
54	10.600, -0.001	10.600, 0.002	10.600, 0.002	10.600, 0.006	10.600, -0.003	10.600, -0.001	10.600, -0.000	10.600, 0.001	10.600, 0.002	10.600, 0.004	10.600, -0.004	10.600, -0.001	10.600, 0.002	10.600, -0.002	10.600, -0.001	10.600, 0.000	10.600, -0.002	10.600, -0.002	10.600, -0.002	10.600, -0.005	10.600, -0.005	10.600, -0.004	10.600, -0.001	10.600, 0.000	10.600, -0.001	10.600, 0.004	10.600, 0.004	10.600, 0.004	10.600, 0.000	10.600, -0.003
55	10.800, -0.001	10.800, 0.002	10.800, 0.002	10.800, 0.006	10.800, -0.003	10.800, -0.001	10.800, -0.000	10.800, 0.001	10.800, 0.002	10.800, 0.004	10.800, -0.004	10.800, -0.001	10.800, 0.002	10.800, -0.002	10.800, -0.001	10.800, 0.000	10.800, -0.002	10.800, -0.002	10.800, -0.002	10.800, -0.005	10.800, -0.005	10.800, -0.004	10.800, -0.001	10.800, 0.000	10.800, -0.001	10.800, 0.004	10.800, 0.004	10.800, 0.004	10.800, 0.000	10.800, -0.003
56	11.000, -0.001	11.000, 0.002	11.000, 0.002	11.000, 0.006	11.000, -0.003	11.000, -0.001	11.000, -0.001	11.000, 0.001	11.000, 0.002	11.000, 0.005	11.000, -0.004	11.000, -0.001	11.000, 0.002	11.000, -0.002	11.000, -0.001	11.000, 0.000	11.000, -0.002	11.000, -0.002	11.000, -0.002	11.000, -0.005	11.000, -0.005	11.000, -0.003	11.000, -0.001	11.000, 0.000	11.000, -0.000	11.000, 0.004	11.000, 0.004	11.000, 0.004	11.000, 0.000	11.000, -0.003
57	11.200, -0.001	11.200, 0.002	11.200, 0.002	11.200, 0.006	11.200, -0.003	11.200, -0.001	11.200, -0.001	11.200, 0.001	11.200, 0.002	11.200, 0.005	11.200, -0.004	11.200, -0.001	11.200, 0.003	11.200, -0.002	11.200, -0.001	11.200, 0.000	11.200, -0.002	11.200, -0.002	11.200, -0.002	11.200, -0.005	11.200, -0.005	11.200, -0.003	11.200, -0.001	11.200, 0.000	11.200, 0.000	11.200, 0.004	11.200, 0.003	11.200, 0.004	11.200, 0.000	11.200, -0.003
58	11.400, -0.001	11.400, 0.002	11.400, 0.002	11.400, 0.006	11.400, -0.004	11.400, -0.001	11.400, -0.001	11.400, 0.001	11.400, 0.002	11.400, 0.005	11.400, -0.004	11.400, -0.001	11.400, 0.003	11.400, -0.001	11.400, -0.001	11.400, -0.000	11.400, -0.002	11.400, -0.002	11.400, -0.002	11.400, -0.005	11.400, -0.004	11.400, -0.003	11.400, -0.001	11.400, 0.000	11.400, 0.000	11.400, 0.004	11.400, 0.003	11.400, 0.004	11.400, 0.001	11.400, -0.003
59	11.600, -0.001	11.600, 0.002	11.600, 0.001	11.600, 0.006	11.600, -0.004	11.600, -0.002	11.600, -0.001	11.600, 0.001	11.600, 0.003	11.600, 0.005	11.600, -0.004	11.600, -0.001	11.600, 0.003	11.600, -0.001	11.600, -0.001	11.600, -0.001	11.600, -0.002	11.600, -0.002	11.600, -0.002	11.600, -0.005	11.600, -0.004	11.600, -0.003	11.600, -0.001	11.600, 0.000	11.600, 0.001	11.600, 0.003	11.600, 0.003	11.600, 0.004	11.600, 0.000	11.600, -0.003
60	11.800, -0.001	11.800, 0.002	11.800, 0.001	11.800, 0.006	11.800, -0.004	11.800, -0.002	11.800, -0.002	11.800, 0.001	11.800, 0.003	11.800, 0.005	11.800, -0.004	11.800, -0.001	11.800, 0.003	11.800, -0.001	11.800, -0.001	11.800, -0.001	11.800, -0.002	11.800, -0.003	11.800, -0.002	11.800, -0.005	11.800, -0.004	11.800, -0.003	11.800, -0.001	11.800, 0.000	11.800, 0.001	11.800, 0.003	11.800, 0.003	11.800, 0.003	11.800, 0.001	11.800, -0.003
61	12.000, -0.001	12.000, 0.002	12.000, 0.001	12.000, 0.006	12.000, -0.004	12.000, -0.002	12.000, -0.002	12.000, 0.001	12.000, 0.004	12.000, 0.005	12.000, -0.004	12.000, -0.001	12.000, 0.003	12.000, -0.001	12.000, -0.001	12.000, -0.001	12.000, -0.002	12.000, -0.003	12.000, -0.002	12.000, -0.005	12.000, -0.004	12.000, -0.004	12.000, -0.001	12.000, 0.000	12.000, 0.002	12.000, 0.003	12.000, 0.003	12.000, 0.003	12.000, 0.001	12.000, -0.003
62	12.200, -0.001	12.200, 0.002	12.200, 0.001	12.200, 0.006	12.200, -0.004	12.200, -0.002	12.200, -0.002	12.200, 0.001	12.200, 0.004	12.200, 0.004	12.200, -0.003	12.200, -0.001	12.200, 0.003	12.200, -0.000	12.200, -0.001	12.200, -0.001	12.200, -0.003	12.200, -0.003	12.200, -0.002	12.200, -0.005	12.200, -0.004	12.200, -0.004	12.200, -0.001	12.200, 0.000	12.200, 0.002	12.200, 0.003	12.200, 0.003	12.200, 0.003	12.200, 0.000	12.200, -0.003
63	12.400, -0.001	12.400, 0.002	12.400, 0.001	12.400, 0.006	12.400, -0.004	12.400, -0.002	12.400, -0.002	12.400, 0.001	12.400, 0.004	12.400, 0.004	12.400, -0.003	12.400, -0.001	12.400, 0.003	12.400, -0.000	12.400, -0.001	12.400, -0.001	12.400, -0.003	12.400, -0.003	12.400, -0.003	12.400, -0.005	12.400, -0.004	12.400, -0.004	12.400, -0.001	12.400, 0.000	12.400, 0.002	12.400, 0.002	12.400, 0.003	12.400, 0.003	12.400, 0.000	12.400, -0.003
64	12.600, -0.001	12.600, 0.002	12.600, 0.001	12.600, 0.006	12.600, -0.004	12.600, -0.002	12.600, -0.002	12.600, 0.001	12.600, 0.004	12.600, 0.004	12.600, -0.003	12.600, -0.001	12.600, 0.002	12.600, 0.000	12.600, -0.001	12.600, -0.001	12.600, -0.003	12.600, -0.003	12.600, -0.003	12.600, -0.005	12.600, -0.004	12.600, -0.004	12.600, -0.001	12.600, 0.000	12.600, 0.002	12.600, 0.002	12.600, 0.003	12.600, 0.002	12.600, 0.000	12.600, -0.003
65	12.800, -0.000	12.800, 0.002	12.800, 0.001	12.800, 0.005	12.800, -0.004	12.800, -0.003	12.800, -0.001	12.800, 0.001	12.800, 0.004	12.800, 0.003	12.800, -0.002	12.800, -0.001	12.800, 0.002	12.800, 0.000	12.800, -0.001	12.800, -0.001	12.800, -0.003	12.800, -0.003	12.800, -0.003	12.800, -0.005	12.800, -0.004	12.800, -0.004	12.800, -0.001	12.800, 0.000	12.800, 0.002	12.800, 0.001	12.800, 0.003	12.800, 0.002	12.800, 0.000	12.800, -0.003
66	13.000, -0.000	13.000, 0.002	13.000, 0.001	13.000, 0.006	13.000, -0.004	13.000, -0.003	13.000, -0.001	13.000, 0.001	13.000, 0.004	13.000, 0.003	13.000, -0.002	13.000, -0.001	13.000, 0.002	13.000, 0.000	13.000, -0.001	13.000, -0.001	13.000, -0.003	13.000, -0.002	13.000, -0.003	13.000, -0.005	13.000, -0.004	13.000, -0.004	13.000, -0.002	13.000, 0.000	13.000, 0.002	13.000, 0.001	13.000, 0.003	13.000, 0.002	13.000, -0.000	13.000, -0.003
67	13.200, -0.000	13.200, 0.002	13.200, 0.001	13.200, 0.006	13.200, -0.004	13.200, -0.003	13.200, -0.001	13.200, 0.001	13.200, 0.004	13.200, 0.003	13.200, -0.002	13.200, -0.000	13.200, 0.002	13.200, 0.000	13.200, -0.001	13.200, -0.001	13.200, -0.003	13.200, -0.002	13.200, -0.003	13.200, -0.005	13.200, -0.004	13.200, -0.004	13.200, -0.002	13.200, 0.000	13.200, 0.002	13.200, 0.001	13.200, 0.003	13.200, 0.002	13.200, -0.000	13.200, -0.003
68	13.400, 0.000	13.400, 0.002	13.400, 0.001	13.400, 0.006	13.400, -0.004	13.400, -0.003	13.400, -0.001	13.400, 0.001	13.400, 0.004	13.400, 0.003	13.400, -0.002	13.400, -0.000	13.400, 0.001	13.400, 0.000	13.400, -0.001	13.400, -0.001	13.400, -0.003	13.400, -0.002	13.400, -0.003	13.400, -0.005	13.400, -0.004	13.400, -0.004	13.400, -0.002	13.400, 0.000	13.400, 0.001	13.400, 0.001	13.400, 0.002	13.400, 0.003	13.400, -0.000	13.400, -0.003
69	13.600, 0.000	13.600, 0.002	13.600, 0.001	13.600, 0.006	13.600, -0.005	13.600, -0.003	13.600, -0.001	13.600, 0.002	13.600, 0.004	13.600, 0.003	13.600, -0.002	13.600, -0.000	13.600, 0.001	13.600, 0.000	13.600, -0.001	13.600, -0.001	13.600, -0.003	13.600, -0.002	13.600, -0.003	13.600, -0.005	13.600, -0.004	13.600, -0.004	13.600, -0.002	13.600, 0.000	13.600, 0.001	13.600, 0.001	13.600, 0.002	13.600, 0.003	13.600, -0.000	13.600, -0.003
70	13.800, 0.000	13.800, 0.002	13.800, 0.001	13.800, 0.006	13.800, -0.005	13.800, -0.003	13.800, -0.001	13.800, 0.002	13.800, 0.004	13.800, 0.003	13.800, -0.002	13.800, -0.000	13.800, 0.001	13.800, 0.000	13.800, -0.000	13.800, -0.001	13.800, -0.003	13.800, -0.002	13.800, -0.003	13.800, -0.006	13.800, -0.004	13.800, -0.004	13.800, -0.002	13.800, 0.000	13.800, 0.000	13.800, 0.000	13.800, 0.002	13.800, 0.003	13.800, -0.000	13.800, -0.004
71	14.000, 0.000	14.000, 0.002	14.000, 0.001	14.000, 0.006	14.000, -0.005	14.000, -0.003	14.000, -0.001	14.000, 0.002	14.000, 0.004	14.000, 0.003	14.000, -0.002	14.000, -0.000	14.000, 0.001	14.000, 0.000	14.000, -0.000	14.000, -0.001	14.000, -0.003	14.000, -0.002	14.000, -0.003	14.000, -0.006	14.000, -0.004	14.000, -0.003	14.000, -0.003	14.000, 0.000	14.000, 0.000	14.000, 0.000	14.000, 0.002	14.000, 0.003	14.000, -0.000	14.000, -0.004
72	14.200, 0.000	14.200, 0.002	14.200, 0.000	14.200, 0.006	14.200, -0.005	14.200, -0.003	14.200, -0.001	14.200, 0.002	14.200, 0.003	14.200, 0.003	14.200, -0.001	14.200, -0.001	14.200, 0.001	14.200, -0.000	14.200, -0.000	14.200, -0.000	14.200, -0.003	14.200, -0.001	14.200, -0.003	14.200, -0.006	14.200, -0.003	14.200, -0.003	14.200, -0.003	14.200, 0.000	14.200, -0.000	14.200, 0.000	14.200, 0.002	14.200, 0.003	14.200, -0.001	14.200, -0.004
73	14.400, 0.000	14.400, 0.002	14.400, 0.000	14.400, 0.006	14.400, -0.005	14.400, -0.003	14.400, -0.001	14.400, 0.002	14.400, 0.003	14.400, 0.003	14.400, -0.001	14.400, -0.001	14.400, 0.001	14.400, -0.000	14.400, -0.000	14.400, -0.000	14.400, -0.002	14.400, -0.001	14.400, -0.003	14.400, -0.006	14.400, -0.003	14.400, -0.003	14.400, -0.003	14.400, 0.000	14.400, -0.001	14.400, 0.000	14.400, 0.002	14.400, 0.003	14.400, -0.001	14.400, -0.004
74	14.600, -0.000	14.600, 0.002	14.600, 0.000	14.600, 0.006	14.600, -0.005	14.600, -0.002	14.600, -0.001	14.600, 0.001	14.600, 0.003	14.600, 0.003	14.600, -0.001	14.600, -0.001	14.600, 0.001	14.600, -0.000	14.600, -0.001	14.600, -0.000	14.600, -0.002	14.600, -0.001	14.600, -0.003	14.600, -0.006	14.600, -0.002	14.600, -0.003	14.600, -0.003	14.600, 0.000	14.600, -0.001	14.600, -0.000	14.600, 0.002	14.600, 0.004	14.600, -0.001	14.600, -0.004
75	14.800, -0.000	14.800, 0.002	14.800, 0.000	14.800, 0.005	14.800, -0.005	14.800, -0.002	14.800, -0.001	14.800, 0.001	14.800, 0.002	14.800, 0.003	14.800, -0.001	14.800, -0.001	14.800, 0.001	14.800, -0.000	14.800, -0.001	14.800, 0.000	14.800, -0.002	14.800, -0.001	14.800, -0.003	14.800, -0.005	14.800, -0.002	14.800, -0.003	14.800, -0.003	14.800, 0.000	14.800, -0.001	14.800, -0.000	14.800, 0.002	14.800, 0.004	14.800, -0.001	14.800, -0.004
76	15.000, -0.001	15.000, 0.002	15.000, -0.000	15.000, 0.005	15.000, -0.005	15.000, -0.002	15.000, -0.001	15.000, 0.001	15.000, 0.002	15.000, 0.003	15.000, -0.001	15.000, -0.001	15.000, 0.001	15.000, -0.000	15.000, -0.001	15.000, 0.000	15.000, -0.002	15.000, -0.001	15.000, -0.003	15.000, -0.005	15.000, -0.002	15.000, -0.003	15.000, -0.003	15.000, 0.000	15.000, -0.001	15.000, -0.000	15.000, 0.001	15.000, 0.004	15.000, -0.001	15.000, -0.004
77	15.200, -0.001	15.200, 0.002	15.200, -0.000	15.200, 0.005	15.200, -0.005	15.200, -0.002	15.200, -0.002	15.200, 0.001	15.200, 0.002	15.200, 0.003	15.200, -0.001	15.200, -0.002	15.200, 0.001	15.200, -0.000	15.200, -0.001	15.200, 0.000	15.200, -0.002	15.200, -0.001	15.200, -0.003	15.200, -0.005	15.200, -0.001	15.200, -0.003	15.200, -0.003	15.200, -0.000	15.200, -0.001	15.200, -0.000	15.200, 0.001	15.200, 0.004	15.200, -0.002	15.200, -0.004
78	15.400, -0.001	15.400, 0.002	15.400, -0.001	15.400, 0.005	15.400, -0.005	15.400, -0.002	15.400, -0.002	15.400, 0.001	15.400, 0.002	15.400, 0.003	15.400, -0.001	15.400, -0.002	15.400, 0.001	15.400, -0.000	15.400, -0.001	15.400, 0.001	15.400, -0.002	15.400, -0.001	15.400, -0.002	15.400, -0.005	15.400, -0.001	15.400, -0.003	15.400, -0.003	15.400, -0.000	15.400, -0.001	15.400, -0.000	15.400, 0.001	15.400, 0.004	15.400, -0.002	15.400, -0.004
79	15.600, -0.001	15.600, 0.002	15.600, -0.001	15.600, 0.005	15.600, -0.005	15.600, -0.002	15.600, -0.002	15.600, 0.001	15.600, 0.002	15.600, 0.003	15.600, -0.001	15.600, -0.002	15.600, 0.001	15.600, 0.000	15.600, -0.001	15.600, 0.001	15.600, -0.002	15.600, -0.001	15.600, -0.002	15.600, -0.004	15.600, -0.001	15.600, -0.003	15.600, -0.003	15.600, -0.000	15.600, -0.001	15.600, -0.000	15.600, 0.001	15.600, 0.004	15.600, -0.002	15.600, -0.004
80	15.800, -0.001	15.800, 0.002	15.800, -0.001	15.800, 0.005	15.800, -0.005	15.800, -0.001	15.800, -0.002	15.800, 0.001	15.800, 0.002	15.800, 0.003	15.800, -0.001	15.800, -0.002	15.800, 0.001	15.800, 0.000	15.800, -0.001	15.800, 0.001	15.800, -0.002	15.800, -0.001	15.800, -0.002	15.800, -0.004	15.800, -0.001	15.800, -0.003	15.800, -0.002	15.800, -0.000	15.800, -0.000	15.800, -0.000	15.800, 0.001	15.800, 0.004	15.800, -0.002	15.800, -0.003
81	16.000, -0.001	16.000, 0.002	16.000, -0.001	16.000, 0.005	16.000, -0.004	16.000, -0.001	16.000, -0.002	16.000, 0.001	16.000, 0.002	16.000, 0.002	16.000, -0.001	16.000, -0.002	16.000, 0.001	16.000, 0.000	16.000, -0.001	16.000, 0.001	16.000, -0.002	16.000, -0.002	16.000, -0.002	16.000, -0.004	16.000, -0.001	16.000, -0.003	16.000, -0.002	16.000, -0.000	16.000, -0.000	16.000, -0.000	16.000, 0.001	16.000, 0.004	16.000, -0.003	16.000, -0.003
82	16.200, -0.001	16.200, 0.002	16.200, -0.000	16.200, 0.005	16.200, -0.004	16.200, -0.001	16.200, -0.002	16.200, 0.001	16.200, 0.002	16.200, 0.002	16.200, -0.001	16.200, -0.001	16.200, 0.001	16.200, 0.000	16.200, -0.001	16.200, 0.001	16.200, -0.002	16.200, -0.002	16.200, -0.002	16.200, -0.004	16.200, -0.001	16.200, -0.003	16.200, -0.002	16.200, -0.001	16.200, -0.000	16.200, -0.000	16.200, 0.001	16.200, 0.004	16.200, -0.003	16.200, -0.003
83	16.400, -0.001	16.400, 0.002	16.400, -0.000	16.400, 0.005	16.400, -0.004	16.400, -0.001	16.400, -0.002	16.400, 0.000	16.400, 0.002	16.400, 0.002	16.400, -0.001	16.400, -0.001	16.400, 0.001	16.400, 0.000	16.400, -0.002	16.400, 0.001	16.400, -0.002	16.400, -0.002	16.400, -0.002	16.400, -0.004	16.400, -0.002	16.400, -0.003	16.400, -0.002	16.400, -0.001	16.400, 0.000	16.400, -0.000	16.400, 0.001	16.400, 0.003	16.400, -0.003	16.400, -0.002
84	16.600, -0.001	16.600, 0.002	16.600, -0.000	16.600, 0.005	16.600, -0.003	16.600, -0.001	16.600, -0.002	16.600, 0.000	16.600, 0.002	16.600, 0.002	16.600, -0.000	16.600, -0.001	16.600, 0.001	16.600, 0.000	16.600, -0.002	16.600, 0.001	16.600, -0.002	16.600, -0.002	16.600, -0.002	16.600, -0.004	16.600, -0.002	16.600, -0.004	16.600, -0.001	16.600, -0.001	16.600, 0.000	16.600, -0.000	16.600, 0.001	16.600, 0.003	16.600, -0.003	16.600, -0.002
85	16.800, -0.001	16.800, 0.001	16.800, 0.000	16.800, 0.005	16.800, -0.003	16.800, -0.001	16.800, -0.002	16.800, 0.000	16.800, 0.002	16.800, 0.002	16.800, 0.000	16.800, -0.000	16.800, 0.001	16.800, 0.000	16.800, -0.002	16.800, 0.001	16.800, -0.002	16.800, -0.002	16.800, -0.002	16.800, -0.004	16.800, -0.002	16.800, -0.004	16.800, -0.001	16.800, -0.001	16.800, 0.000	16.800, -0.000	16.800, 0.001	16.800, 0.003	16.800, -0.003	16.800, -0.002
86	17.000, -0.001	17.000, 0.001	17.000, 0.000	17.000, 0.005	17.000, -0.003	17.000, -0.001	17.000, -0.002	17.000, 0.000	17.000, 0.002	17.000, 0.002	17.000, 0.000	17.000, -0.000	17.000, 0.001	17.000, 0.000	17.000, -0.002	17.000, 0.001	17.000, -0.003	17.000, -0.001	17.000, -0.002	17.000, -0.004	17.000, -0.002	17.000, -0.004	17.000, -0.001	17.000, -0.001	17.000, 0.000	17.000, -0.000	17.000, 0.001	17.000, 0.003	17.000, -0.003	17.000, -0.002
87	17.200, -0.000	17.200, 0.001	17.200, 0.001	17.200, 0.004	17.200, -0.003	17.200, -0.001	17.200, -0.001	17.200, 0.000	17.200, 0.002	17.200, 0.001	17.200, 0.000	17.200, -0.000	17.200, 0.001	17.200, 0.000	17.200, -0.002	17.200, 0.000	17.200, -0.003	17.200, -0.001	17.200, -0.002	17.200, -0.003	17.200, -0.002	17.200, -0.004	17.200, -0.002	17.200, -0.001	17.200, 0.000	17.200, -0.000	17.200, 0.001	17.200, 0.003	17.200, -0.002	17.200, -0.002
88	17.400, -0.000	17.400, 0.001	17.400, 0.001	17.400, 0.004	17.400, -0.003	17.400, -0.001	17.400, -0.001	17.400, 0.000	17.400, 0.003	17.400, 0.001	17.400, 0.000	17.400, -0.000	17.400, 0.001	17.400, 0.000	17.400, -0.002	17.400, 0.000	17.400, -0.003	17.400, -0.001	17.400, -0.002	17.400, -0.003	17.400, -0.002	17.400, -0.004	17.400, -0.002	17.400, -0.001	17.400, 0.000	17.400, -0.000	17.400, 0.001	17.400, 0.003	17.400, -0.002	17.400, -0.002
89	17.600, -0.000	17.600, 0.001	17.600, 0.001	17.600, 0.004	17.600, -0.003	17.600, -0.001	17.600, -0.001	17.600, 0.000	17.600, 0.003	17.600, 0.001	17.600, 0.000	17.600, -0.000	17.600, 0.001	17.600, -0.000	17.600, -0.002	17.600, -0.000	17.600, -0.003	17.600, -0.001	17.600, -0.002	17.600, -0.003	17.600, -0.002	17.600, -0.004	17.600, -0.002	17.600, -0.001	17.600, 0.000	17.600, -0.000	17.600, 0.001	17.600, 0.003	17.600, -0.002	17.600, -0.002
90	17.800, 0.000	17.800, 0.001	17.800, 0.001	17.800, 0.003	17.800, -0.003	17.800, -0.001	17.800, -0.001	17.800, 0.000	17.800, 0.003	17.800, 0.001	17.800, -0.000	17.800, -0.000	17.800, 0.001	17.800, -0.000	17.800, -0.002	17.800, -0.000	17.800, -0.003	17.800, -0.000	17.800, -0.003	17.800, -0.003	17.800, -0.002	17.800, -0.004	17.800, -0.001	17.800, -0.001	17.800, 0.001	17.800, -0.000	17.800, 0.001	17.800, 0.003	17.800, -0.002	17.800, -0.002
91	18.000, 0.000	18.000, 0.001	18.000, 0.001	18.000, 0.003	18.000, -0.003	18.000, -0.001	18.000, -0.000	18.000, -0.000	18.000, 0.003	18.000, 0.001	18.000, -0.000	18.000, -0.000	18.000, 0.001	18.000, -0.000	18.000, -0.002	18.000, -0.000	18.000, -0.003	18.000, -0.000	18.000, -0.003	18.000, -0.003	18.000, -0.003	18.000, -0.004	18.000, -0.001	18.000, -0.001	18.000, 0.001	18.000, -0.001	18.000, 0.001	18.000, 0.003	18.000, -0.001	18.000, -0.002
92	18.200, 0.000	18.200, 0.001	18.200, 0.001	18.200, 0.003	18.200, -0.003	18.200, -0.001	18.200, -0.000	18.200, -0.000	18.200, 0.003	18.200, 0.001	18.200, -0.000	18.200, -0.000	18.200, 0.001	18.200, -0.001	18.200, -0.002	18.200, -0.001	18.200, -0.002	18.200, 0.000	18.200, -0.003	18.200, -0.002	18.200, -0.003	18.200, -0.004	18.200, -0.001	18.200, -0.001	18.200, 0.001	18.200, -0.001	18.200, 0.001	18.200, 0.003	18.200, -0.001	18.200, -0.003
93	18.400, 0.000	18.400, 0.001	18.400, 0.001	18.400, 0.003	18.400, -0.003	18.400, -0.001	18.400, -0.000	18.400, -0.000	18.400, 0.003	18.400, 0.001	18.400, -0.000	18.400, -0.000	18.400, 0.001	18.400, -0.001	18.400, -0.001	18.400, -0.001	18.400, -0.002	18.400, 0.001	18.400, -0.003	18.400, -0.002	18.400, -0.003	18.400, -0.004	18.400, -0.001	18.400, -0.001	18.400, 0.001	18.400, -0.001	18.400, 0.002	18.400, 0.004	18.400, -0.001	18.400, -0.003
94	18.600, -0.000	18.600, 0.001	18.600, 0.001	18.600, 0.003	18.600, -0.003	18.600, -0.001	18.600, 0.000	18.600, -0.000	18.600, 0.003	18.600, 0.001	18.600, -0.001	18.600, -0.000	18.600, 0.001	18.600, -0.001	18.600, -0.001	18.600, -0.001	18.600, -0.002	18.600, 0.001	18.600, -0.003	18.600, -0.002	18.600, -0.003	18.600, -0.004	18.600, -0.001	18.600, -0.001	18.600, 0.001	18.600, -0.001	18.600, 0.002	18.600, 0.003	18.600, -0.001	18.600, -0.003
95	18.800, -0.000	18.800, 0.001	18.800, 0.001	18.800, 0.003	18.800, -0.002	18.800, -0.001	18.800, 0.000	18.800, -0.000	18.800, 0.003	18.800, 0.001	18.800, -0.001	18.800, -0.000	18.800, 0.001	18.800, -0.001	18.800, -0.001	18.800, -0.001	18.800, -0.002	18.800, 0.001	18.800, -0.003	18.800, -0.002	18.800, -0.003	18.800, -0.004	18.800, -0.001	18.800, -0.001	18.800, 0.001	18.800, -0.001	18.800, 0.002	18.800, 0.003	18.800, -0.001	18.800, -0.003
96	19.000, -0.000	19.000, 0.001	19.000, 0.001	19.000, 0.003	19.000, -0.002	19.000, -0.001	19.000, 0.000	19.000, -0.000	19.000, 0.003	19.000, 0.001	19.000, -0.001	19.000, -0.000	19.000, 0.001	19.000, -0.001	19.000, -0.001	19.000, -0.000	19.000, -0.002	19.000, 0.001	19.000, -0.003	19.000, -0.002	19.000, -0.003	19.000, -0.003	19.000, -0.000	19.000, -0.001	19.000, 0.001	19.000, -0.001	19.000, 0.002	19.000, 0.003	19.000, -0.001	19.000, -0.003
97	19.200, -0.000	19.200, 0.001	19.200, 0.000	19.200, 0.003	19.200, -0.002	19.200, -0.001	19.200, 0.000	19.200, -0.000	19.200, 0.003	19.200, 0.001	19.200, -0.001	19.200, -0.000	19.200, 0.000	19.200, -0.001	19.200, -0.001	19.200, -0.000	19.200, -0.002	19.200, 0.001	19.200, -0.003	19.200, -0.002	19.200, -0.003	19.200, -0.003	19.200, -0.000	19.200, -0.001	19.200, 0.002	19.200, -0.001	19.200, 0.001	19.200, 0.003	19.200, -0.001	19.200, -0.003
98	19.400, -0.000	19.400, 0.001	19.400, 0.000	19.400, 0.003	19.400, -0.002	19.400, -0.001	19.400, 0.000	19.400, 0.000	19.400, 0.003	19.400, 0.002	19.400, -0.001	19.400, 0.000	19.400, 0.000	19.400, -0.001	19.400, -0.001	19.400, -0.000	19.400, -0.002	19.400, 0.001	19.400, -0.003	19.400, -0.001	19.400, -0.003	19.400, -0.002	19.400, -0.000	19.400, -0.001	19.400, 0.002	19.400, -0.001	19.400, 0.001	19.400, 0.002	19.400, -0.001	19.400, -0.003
99	19.600, 0.000	19.600, 0.001	19.600, -0.000	19.600, 0.003	19.600, -0.002	19.600, -0.001	19.600, 0.000	19.600, 0.000	19.600, 0.002	19.600, 0.002	19.600, -0.001	19.600, 0.001	19.600, 0.000	19.600, -0.001	19.600, -0.001	19.600, -0.000	19.600, -0.002	19.600, 0.001	19.600, -0.003	19.600, -0.001	19.600, -0.003	19.600, -0.002	19.600, 0.000	19.600, -0.001	19.600, 0.002	19.600, -0.001	19.600, 0.001	19.600, 0.002	19.600, -0.001	19.600, -0.003
100	19.800, 0.000	19.800, 0.001	19.800, -0.000	19.800, 0.003	19.800, -0.001	19.800, -0.001	19.800, 0.000	19.800, 0.001	19.800, 0.002	19.800, 0.002	19.800, -0.001	19.800, 0.001	19.800, -0.000	19.800, -0.001	19.800, -0.001	19.800, -0.000	19.800, -0.002	19.800, 0.001	19.800, -0.003	19.800, -0.002	19.800, -0.003	19.800, -0.002	19.800, 0.000	19.800, -0.001	19.800, 0.002	19.800, -0.000	19.800, 0.001	19.800, 0.001	19.800, -0.001	19.800, -0.003
101	20.000, 0.001	20.000, 0.000	20.000, -0.000	20.000, 0.003	20.000, -0.001	20.000, -0.001	20.000, 0.000	20.000, 0.001	20.000, 0.002	20.000, 0.002	20.000, -0.001	20.000, 0.002	20.000, -0.000	20.000, -0.001	20.000, -0.001	20.000, -0.000	20.000, -0.002	20.000, 0.000	20.000, -0.002	20.000, -0.002	20.000, -0.003	20.000, -0.001	20.000, 0.000	20.000, -0.001	20.000, 0.002	20.000, -0.000	20.000, 0.001	20.000, 0.001	20.000, -0.001	20.000, -0.003
102	20.200, 0.001	20.200, 0.000	20.200, -0.000	20.200, 0.003	20.200, -0.001	20.200, -0.001	20.200, 0.000	20.200, 0.001	20.200, 0.002	20.200, 0.002	20.200, -0.000	20.200, 0.002	20.200, -0.000	20.200, -0.001	20.200, -0.001	20.200, 0.000	20.200, -0.002	20.200, 0.000	20.200, -0.002	20.200, -0.002	20.200, -0.003	20.200, -0.001	20.200, 0.000	20.200, -0.001	20.200, 0.002	20.200, -0.000	20.200, 0.001	20.200, 0.000	20.200, -0.001	20.200, -0.003
103	20.400, 0.001	20.400, 0.000	20.400, 0.000	20.400, 0.003	20.400, -0.001	20.400, -0.001	20.400, 0.000	20.400, 0.001	20.400, 0.002	20.400, 0.002	20.400, -0.000	20.400, 0.002	20.400, -0.000	20.400, -0.001	20.400, -0.001	20.400, -0.000	20.400, -0.002	20.400, -0.000	20.400, -0.001	20.400, -0.002	20.400, -0.003	20.400, -0.001	20.400, 0.000	20.400, -0.001	20.400, 0.002	20.400, 0.000	20.400, 0.000	20.400, 0.000	20.400, -0.001	20.400, -0.003
104	20.600, 0.001	20.600, 0.000	20.600, 0.000	20.600, 0.003	20.600, -0.002	20.600, -0.001	20.600, 0.001	20.600, 0.000	20.600, 0.002	20.600, 0.002	20.600, 0.000	20.600, 0.002	20.600, -0.000	20.600, -0.002	20.600, -0.001	20.600, -0.000	20.600, -0.002	20.600, -0.000	20.600, -0.001	20.600, -0.002	20.600, -0.002	20.600, -0.001	20.600, -0.000	20.600, -0.001	20.600, 0.001	20.600, 0.000	20.600, 0.000	20.600, 0.000	20.600, -0.001	20.600, -0.003
105	20.800, 0.001	20.800, 0.000	20.800, 0.000	20.800, 0.003	20.800, -0.002	20.800, -0.001	20.800, 0.001	20.800, 0.000	20.800, 0.002	20.800, 0.002	20.800, 0.000	20.800, 0.002	20.800, -0.000	20.800, -0.002	20.800, -0.001	20.800, -0.001	20.800, -0.002	20.800, -0.000	20.800, -0.001	20.800, -0.001	20.800, -0.002	20.800, -0.001	20.800, -0.000	20.800, -0.001	20.800, 0.001	20.800, 0.001	20.800, -0.000	20.800, 0.000	20.800, -0.001	20.800, -0.002
106	21.000, 0.002	21.000, 0.000	21.000, 0.000	21.000, 0.003	21.000, -0.002	21.000, -0.001	21.000, 0.001	21.000, -0.000	21.000, 0.002	21.000, 0.002	21.000, 0.000	21.000, 0.002	21.000, -0.000	21.000, -0.002	21.000, -0.001	21.000, -0.001	21.000, -0.001	21.000, -0.000	21.000, -0.001	21.000, -0.001	21.000, -0.002	21.000, -0.001	21.000, -0.001	21.000, -0.001	21.000, 0.000	21.000, 0.001	21.000, -0.000	21.000, 0.000	21.000, -0.001	21.000, -0.002
107	21.200, 0.002	21.200, 0.000	21.200, 0.000	21.200, 0.003	21.200, -0.002	21.200, -0.001	21.200, 0.001	21.200, -0.000	21.200, 0.002	21.200, 0.002	21.200, 0.000	21.200, 0.001	21.200, -0.000	21.200, -0.002	21.200, -0.001	21.200, -0.001	21.200, -0.001	21.200, -0.000	21.200, -0.001	21.200, -0.001	21.200, -0.002	21.200, -0.001	21.200, -0.001	21.200, -0.001	21.200, -0.000	21.200, 0.001	21.200, -0.000	21.200, 0.001	21.200, -0.001	21.200, -0.002
108	21.400, 0.002	21.400, 0.000	21.400, 0.000	21.400, 0.003	21.400, -0.002	21.400, -0.001	21.400, 0.001	21.400, -0.000	21.400, 0.002	21.400, 0.002	21.400, -0.000	21.400, 0.001	21.400, 0.000	21.400, -0.003	21.400, -0.001	21.400, -0.001	21.400, -0.001	21.400, -0.000	21.400, -0.001	21.400, -0.001	21.400, -0.002	21.400, -0.001	21.400, -0.001	21.400, -0.001	21.400, -0.001	21.400, 0.001	21.400, -0.000	21.400, 0.001	21.400, -0.001	21.400, -0.002
109	21.600, 0.002	21.600, 0.000	21.600, 0.000	21.600, 0.003	21.600, -0.002	21.600, -0.001	21.600, 0.001	21.600, -0.000	21.600, 0.002	21.600, 0.002	21.600, -0.000	21.600, 0.001	21.600, 0.000	21.600, -0.002	21.600, -0.001	21.600, -0.001	21.600, -0.001	21.600, -0.000	21.600, -0.001	21.600, -0.000	21.600, -0.001	21.600, -0.002	21.600, -0.001	21.600, -0.002	21.600, -0.001	21.600, 0.001	21.600, 0.000	21.600, 0.001	21.600, -0.001	21.600, -0.002
110	21.800, 0.002	21.800, 0.000	21.800, 0.000	21.800, 0.003	21.800, -0.002	21.800, -0.001	21.800, 0.001	21.800, -0.000	21.800, 0.001	21.800, 0.002	21.800, -0.001	21.800, 0.001	21.800, 0.001	21.800, -0.002	21.800, -0.001	21.800, -0.001	21.800, -0.001	21.800, -0.000	21.800, -0.001	21.800, -0.000	21.800, -0.001	21.800, -0.002	21.800, -0.002	21.800, -0.002	21.800, -0.001	21.800, 0.001	21.800, 0.000	21.800, 0.001	21.800, -0.001	21.800, -0.002
111	22.000, 0.001	22.000, 0.000	22.000, 0.000	22.000, 0.003	22.000, -0.002	22.000, -0.000	22.000, 0.001	22.000, -0.000	22.000, 0.001	22.000, 0.002	22.000, -0.001	22.000, 0.000	22.000, 0.001	22.000, -0.002	22.000, -0.000	22.000, -0.001	22.000, -0.001	22.000, -0.000	22.000, -0.001	22.000, 0.000	22.000, -0.001	22.000, -0.002	22.000, -0.002	22.000, -0.002	22.000, -0.002	22.000, 0.000	22.000, 0.001	22.000, 0.001	22.000, -0.001	22.000, -0.002
112	22.200, 0.001	22.200, 0.000	22.200, 0.000	22.200, 0.003	22.200, -0.002	22.200, -0.000	22.200, 0.001	22.200, -0.000	22.200, 0.001	22.200, 0.002	22.200, -0.001	22.200, 0.000	22.200, 0.001	22.200, -0.002	22.200, -0.000	22.200, -0.001	22.200, -0.001	22.200, -0.000	22.200, -0.001	22.200, 0.000	22.200, -0.001	22.200, -0.002	22.200, -0.002	22.200, -0.002	22.200, -0.002	22.200, 0.000	22.200, 0.001	22.200, 0.001	22.200, -0.001	22.200, -0.002
113	22.400, 0.001	22.400, 0.000	22.400, 0.000	22.400, 0.003	22.400, -0.001	22.400, 0.000	22.400, 0.001	22.400, -0.000	22.400, 0.000	22.400, 0.002	22.400, -0.001	22.400, -0.000	22.400, 0.001	22.400, -0.002	22.400, -0.000	22.400, -0.000	22.400, -0.001	22.400, 0.000	22.400, -0.002	22.400, 0.000	22.400, -0.000	22.400, -0.002	22.400, -0.002	22.400, -0.002	22.400, -0.002	22.400, 0.000	22.400, 0.001	22.400, 0.001	22.400, -0.001	22.400, -0.001
114	22.600, 0.000	22.600, 0.000	22.600, 0.000	22.600, 0.002	22.600, -0.001	22.600, 0.000	22.600, 0.001	22.600, -0.000	22.600, 0.000	22.600, 0.002	22.600, -0.001	22.600, -0.000	22.600, 0.001	22.600, -0.001	22.600, 0.000	22.600, -0.000	22.600, -0.001	22.600, 0.000	22.600, -0.002	22.600, 0.000	22.600, -0.000	22.600, -0.001	22.600, -0.003	22.600, -0.002	22.600, -0.002	22.600, -0.000	22.600, 0.001	22.600, 0.001	22.600, -0.000	22.600, -0.001
115	22.800, 0.000	22.800, 0.000	22.800, -0.000	22.800, 0.002	22.800, -0.001	22.800, 0.000	22.800, 0.001	22.800, -0.000	22.800, -0.000	22.800, 0.002	22.800, -0.001	22.800, -0.001	22.800, 0.001	22.800, -0.001	22.800, 0.000	22.800, -0.001	22.800, -0.001	22.800, 0.000	22.800, -0.002	22.800, 0.000	22.800, 0.000	22.800, -0.001	22.800, -0.003	22.800, -0.002	22.800, -0.002	22.800, -0.000	22.800, 0.001	22.800, 0.001	22.800, -0.000	22.800, -0.001
116	23.000, -0.000	23.000, 0.000	23.000, -0.000	23.000, 0.002	23.000, -0.001	23.000, 0.001	23.000, 0.001	23.000, 0.000	23.000, -0.000	23.000, 0.002	23.000, -0.001	23.000, -0.001	23.000, 0.001	23.000, -0.001	23.000, 0.000	23.000, -0.000	23.000, -0.002	23.000, 0.000	23.000, -0.002	23.000, 0.000	23.000, 0.000	23.000, -0.001	23.000, -0.003	23.000, -0.002	23.000, -0.002	23.000, -0.000	23.000, 0.001	23.000, 0.001	23.000, 0.000	23.000, -0.001
117	23.200, -0.000	23.200, 0.000	23.200, -0.000	23.200, 0.002	23.200, -0.001	23.200, 0.001	23.200, 0.001	23.200, 0.000	23.200, -0.000	23.200, 0.002	23.200, -0.001	23.200, -0.000	23.200, 0.001	23.200, -0.000	23.200, 0.001	23.200, -0.000	23.200, -0.002	23.200, 0.001	23.200, -0.003	23.200, 0.000	23.200, 0.000	23.200, -0.001	23.200, -0.003	23.200, -0.002	23.200, -0.002	23.200, -0.000	23.200, 0.001	23.200, 0.001	23.200, 0.000	23.200, -0.001
118	23.400, -0.001	23.400, 0.000	23.400, -0.000	23.400, 0.002	23.400, -0.001	23.400, 0.001	23.400, 0.001	23.400, 0.000	23.400, -0.000	23.400, 0.002	23.400, -0.001	23.400, -0.000	23.400, 0.001	23.400, 0.000	23.400, 0.001	23.400, -0.000	23.400, -0.002	23.400, 0.001	23.400, -0.003	23.400, 0.000	23.400, 0.001	23.400, -0.001	23.400, -0.003	23.400, -0.001	23.400, -0.002	23.400, -0.000	23.400, 0.002	23.400, 0.001	23.400, 0.001	23.400, -0.001
119	23.600, -0.001	23.600, -0.000	23.600, 0.000	23.600, 0.001	23.600, -0.001	23.600, 0.001	23.600, 0.000	23.600, 0.000	23.600, -0.000	23.600, 0.001	23.600, -0.001	23.600, 0.000	23.600, 0.001	23.600, 0.001	23.600, 0.001	23.600, 0.000	23.600, -0.003	23.600, 0.001	23.600, -0.003	23.600, -0.000	23.600, 0.001	23.600, -0.000	23.600, -0.003	23.600, -0.001	23.600, -0.002	23.600, -0.000	23.600, 0.002	23.600, 0.001	23.600, 0.001	23.600, -0.001
120	23.800, -0.001	23.800, -0.000	23.800, 0.000	23.800, 0.001	23.800, -0.001	23.800, 0.000	23.800, 0.000	23.800, 0.000	23.800, -0.000	23.800, 0.001	23.800, -0.001	23.800, 0.000	23.800, 0.001	23.800, 0.001	23.800, 0.001	23.800, 0.000	23.800, -0.003	23.800, 0.001	23.800, -0.002	23.800, -0.000	23.800, 0.001	23.800, 0.000	23.800, -0.003	23.800, -0.000	23.800, -0.002	23.800, -0.000	23.800, 0.002	23.800, 0.001	23.800, 0.001	23.800, -0.001
121	24.000, -0.001	24.000, 0.000	24.000, 0.000	24.000, 0.002	24.000, -0.001	24.000, 0.000	24.000, 0.000	24.000, -0.000	24.000, -0.000	24.000, 0.001	24.000, -0.001	24.000, 0.000	24.000, 0.001	24.000, 0.001	24.000, 0.001	24.000, 0.000	24.000, -0.003	24.000, 0.001	24.000, -0.002	24.000, -0.001	24.000, 0.001	24.000, 0.000	24.000, -0.003	24.000, -0.000	24.000, -0.002	24.000, -0.000	24.000, 0.001	24.000, 0.001	24.000, 0.001	24.000, -0.001
122	24.200, -0.001	24.200, 0.000	24.200, 0.000	24.200, 0.002	24.200, -0.002	24.200, 0.000	24.200, 0.000	24.200, -0.000	24.200, -0.000	24.200, 0.001	24.200, -0.001	24.200, 0.000	24.200, 0.001	24.200, 0.001	24.200, 0.001	24.200, 0.000	24.200, -0.003	24.200, 0.001	24.200, -0.002	24.200, -0.001	24.200, 0.000	24.200, 0.001	24.200, -0.002	24.200, 0.000	24.200, -0.002	24.200, -0.000	24.200, 0.001	24.200, 0.001	24.200, 0.001	24.200, -0.001
123	24.400, -0.001	24.400, 0.000	24.400, -0.000	24.400, 0.002	24.400, -0.002	24.400, -0.000	24.400, 0.000	24.400, -0.001	24.400, -0.000	24.400, 0.001	24.400, -0.001	24.400, 0.000	24.400, 0.001	24.400, 0.000	24.400, 0.001	24.400, -0.000	24.400, -0.002	24.400, 0.001	24.400, -0.002	24.400, -0.001	24.400, 0.000	24.400, 0.000	24.400, -0.002	24.400, 0.001	24.400, -0.002	24.400, 0.000	24.400, 0.001	24.400, 0.001	24.400, 0.001	24.400, -0.001
124	24.600, -0.001	24.600, 0.000	24.600, -0.000	24.600, 0.002	24.600, -0.002	24.600, -0.000	24.600, 0.000	24.600, -0.001	24.600, -0.000	24.600, 0.001	24.600, -0.002	24.600, 0.000	24.600, 0.001	24.600, -0.000	24.600, 0.001	24.600, -0.000	24.600, -0.002	24.600, 0.001	24.600, -0.001	24.600, -0.001	24.600, 0.000	24.600, 0.000	24.600, -0.002	24.600, 0.001	24.600, -0.001	24.600, 0.000	24.600, 0.001	24.600, 0.001	24.600, 0.001	24.600, -0.001
125	24.800, -0.000	24.800, 0.001	24.800, -0.000	24.800, 0.001	24.800, -0.002	24.800, -0.000	24.800, -0.000	24.800, -0.001	24.800, -0.000	24.800, 0.001	24.800, -0.002	24.800, 0.001	24.800, 0.001	24.800, -0.001	24.800, 0.001	24.800, -0.000	24.800, -0.002	24.800, 0.001	24.800, -0.001	24.800, -0.001	24.800, -0.000	24.800, -0.000	24.800, -0.001	24.800, 0.001	24.800, -0.001	24.800, 0.001	24.800, 0.001	24.800, 0.001	24.800, 0.001	24.800, -0.001
126	25.000, -0.000	25.000, 0.001	25.000, -0.000	25.000, 0.001	25.000, -0.001	25.000, -0.001	25.000, -0.000	25.000, -0.001	25.000, 0.000	25.000, 0.000	25.000, -0.002	25.000, 0.000	25.000, 0.001	25.000, -0.001	25.000, 0.001	25.000, -0.000	25.000, -0.001	25.000, 0.001	25.000, -0.001	25.000, -0.001	25.000, -0.000	25.000, -0.000	25.000, -0.001	25.000, 0.001	25.000, -0.001	25.000, 0.001	25.000, 0.001	25.000, 0.001	25.000, 0.000	25.000, -0.001
127	25.200, -0.000	25.200, 0.001	25.200, -0.001	25.200, 0.001	25.200, -0.001	25.200, -0.001	25.200, -0.000	25.200, -0.000	25.200, 0.000	25.200, 0.000	25.200, -0.002	25.200, 0.000	25.200, 0.001	25.200, -0.001	25.200, 0.001	25.200, -0.000	25.200, -0.001	25.200, 0.001	25.200, -0.000	25.200, -0.001	25.200, -0.001	25.200, -0.001	25.200, -0.001	25.200, 0.001	25.200, -0.000	25.200, 0.001	25.200, 0.001	25.200, 0.001	25.200, 0.000	25.200, -0.001
128	25.400, 0.000	25.400, 0.001	25.400, -0.000	25.400, 0.001	25.400, -0.001	25.400, -0.001	25.400, -0.001	25.400, -0.000	25.400, 0.000	25.400, 0.000	25.400, -0.002	25.400, 0.000	25.400, 0.001	25.400, -0.002	25.400, 0.001	25.400, -0.000	25.400, -0.001	25.400, 0.001	25.400, 0.000	25.400, -0.001	25.400, -0.001	25.400, -0.001	25.400, -0.000	25.400, 0.001	25.400, 0.000	25.400, 0.001	25.400, 0.001	25.400, 0.001	25.400, 0.000	25.400, -0.002
129	25.600, 0.000	25.600, 0.001	25.600, -0.000	25.600, 0.001	25.600, -0.001	25.600, -0.001	25.600, -0.001	25.600, -0.000	25.600, 0.001	25.600, 0.000	25.600, -0.001	25.600, 0.000	25.600, 0.001	25.600, -0.002	25.600, 0.002	25.600, 0.000	25.600, -0.001	25.600, 0.001	25.600, 0.000	25.600, -0.000	25.600, -0.001	25.600, -0.001	25.600, -0.000	25.600, 0.000	25.600, 0.001	25.600, 0.000	25.600, 0.001	25.600, 0.000	25.600, -0.000	25.600, -0.002
130	25.800, 0.000	25.800, 0.001	25.800, -0.000	25.800, 0.001	25.800, -0.000	25.800, -0.000	25.800, -0.001	25.800, 0.000	25.800, 0.001	25.800, 0.000	25.800, -0.001	25.800, -0.000	25.800, 0.001	25.800, -0.002	25.800, 0.002	25.800, 0.000	25.800, -0.000	25.800, 0.001	25.800, 0.000	25.800, -0.000	25.800, -0.001	25.800, -0.001	25.800, -0.000	25.800, 0.000	25.800, 0.001	25.800, 0.000	25.800, 0.001	25.800, 0.000	25.800, -0.000	25.800, -0.002
131	26.000, 0.001	26.000, 0.001	26.000, -0.000	26.000, 0.001	26.000, 0.000	26.000, -0.000	26.000, -0.001	26.000, 0.000	26.000, 0.001	26.000, 0.000	26.000, -0.001	26.000, -0.000	26.000, 0.001	26.000, -0.001	26.000, 0.002	26.000, 0.000	26.000, -0.000	26.000, 0.001	26.000, 0.001	26.000, 0.000	26.000, -0.001	26.000, -0.001	26.000, -0.000	26.000, -0.000	26.000, 0.001	26.000, 0.000	26.000, 0.001	26.000, 0.000	26.000, -0.000	26.000, -0.002
132	26.200, 0.001	26.200, 0.001	26.200, -0.000	26.200, 0.001	26.200, 0.000	26.200, 0.000	26.200, -0.000	26.200, 0.001	26.200, 0.001	26.200, 0.000	26.200, -0.001	26.200, -0.001	26.200, 0.000	26.200, -0.001	26.200, 0.002	26.200, 0.000	26.200, 0.000	26.200, 0.000	26.200, 0.000	26.200, 0.000	26.200, -0.001	26.200, -0.001	26.200, -0.000	26.200, -0.001	26.200, 0.001	26.200, 0.000	26.200, 0.001	26.200, 0.000	26.200, 0.000	26.200, -0.001
133	26.400, 0.001	26.400, 0.001	26.400, 0.000	26.400, 0.000	26.400, 0.001	26.400, 0.000	26.400, -0.000	26.400, 0.001	26.400, 0.001	26.400, 0.000	26.400, -0.000	26.400, -0.001	26.400, -0.000	26.400, -0.001	26.400, 0.001	26.400, 0.000	26.400, 0.000	26.400, 0.000	26.400, 0.000	26.400, 0.000	26.400, -0.001	26.400, -0.001	26.400, -0.000	26.400, -0.001	26.400, 0.001	26.400, 0.000	26.400, 0.001	26.400, 0.000	26.400, 0.000	26.400, -0.001
134	26.600, 0.001	26.600, 0.001	26.600, 0.000	26.600, 0.000	26.600, 0.001	26.600, 0.000	26.600, -0.000	26.600, 0.001	26.600, 0.001	26.600, 0.000	26.600, -0.000	26.600, -0.000	26.600, -0.001	26.600, -0.001	26.600, 0.001	26.600, 0.000	26.600, 0.000	26.600, 0.000	26.600, 0.000	26.600, 0.001	26.600, -0.001	26.600, -0.001	26.600, -0.000	26.600, -0.001	26.600, 0.001	26.600, 0.000	26.600, 0.001	26.600, 0.000	26.600, 0.000	26.600, -0.001
135	26.800, 0.000	26.800, 0.001	26.800, 0.000	26.800, -0.000	26.800, 0.001	26.800, 0.000	26.800, -0.000	26.800, 0.001	26.800, 0.001	26.800, 0.000	26.800, -0.000	26.800, -0.000	26.800, -0.001	26.800, -0.001	26.800, 0.001	26.800, -0.000	26.800, 0.000	26.800, 0.000	26.800, -0.000	26.800, 0.000	26.800, -0.001	26.800, -0.001	26.800, -0.000	26.800, -0.001	26.800, 0.001	26.800, 0.000	26.800, 0.001	26.800, -0.000	26.800, 0.000	26.800, -0.001
136	27.000, 0.000	27.000, 0.000	27.000, 0.000	27.000, -0.000	27.000, 0.001	27.000, 0.000	27.000, -0.000	27.000, 0.001	27.000, 0.001	27.000, 0.000	27.000, -0.000	27.000, -0.000	27.000, -0.001	27.000, -0.000	27.000, 0.000	27.000, -0.000	27.000, 0.000	27.000, 0.000	27.000, -0.000	27.000, 0.000	27.000, -0.001	27.000, -0.000	27.000, -0.000	27.000, -0.001	27.000, 0.000	27.000, 0.000	27.000, 0.000	27.000, -0.000	27.000, 0.000	27.000, -0.000
137	27.200, -0.000	27.200, 0.000	27.200, 0.000	27.200, -0.000	27.200, 0.001	27.200, 0.000	27.200, -0.000	27.200, 0.001	27.200, 0.001	27.200, 0.000	27.200, -0.000	27.200, -0.000	27.200, -0.001	27.200, -0.000	27.200, -0.000	27.200, -0.000	27.200, 0.000	27.200, 0.000	27.200, -0.000	27.200, 0.000	27.200, -0.000	27.200, -0.001	27.200, -0.000	27.200, -0.001	27.200, 0.000	27.200, 0.000	27.200, 0.000	27.200, -0.000	27.200, 0.000	27.200, -0.000
138	27.400, -0.000	27.400, 0.000	27.400, 0.000	27.400, -0.000	27.400, 0.001	27.400, 0.000	27.400, -0.000	27.400, 0.001	27.400, 0.000	27.400, 0.000	27.400, -0.000	27.400, -0.000	27.400, -0.001	27.400, 0.000	27.400, -0.000	27.400, -0.000	27.400, 0.000	27.400, 0.000	27.400, -0.000	27.400, 0.000	27.400, -0.000	27.400, -0.001	27.400, -0.000	27.400, -0.001	27.400, 0.000	27.400, 0.000	27.400, 0.000	27.400, -0.000	27.400, 0.000	27.400, -0.000
139	27.600, -0.000	27.600, 0.000	27.600, 0.000	27.600, -0.000	27.600, 0.001	27.600, 0.000	27.600, -0.000	27.600, 0.001	27.600, -0.000	27.600, 0.000	27.600, -0.000	27.600, -0.000	27.600, -0.000	27.600, 0.000	27.600, -0.001	27.600, -0.000	27.600, 0.000	27.600, 0.000	27.600, -0.000	27.600, -0.000	27.600, -0.000	27.600, -0.001	27.600, -0.000	27.600, -0.001	27.600, -0.000	27.600, -0.000	27.600, 0.000	27.600, 0.000	27.600, 0.000	27.600, -0.000
140	27.800, -0.000	27.800, -0.000	27.800, 0.000	27.800, -0.000	27.800, 0.000	27.800, 0.000	27.800, -0.000	27.800, 0.000	27.800, -0.000	27.800, 0.000	27.800, -0.000	27.800, -0.000	27.800, 0.000	27.800, 0.000	27.800, -0.001	27.800, -0.000	27.800, 0.000	27.800, 0.000	27.800, -0.000	27.800, -0.000	27.800, 0.000	27.800, -0.001	27.800, -0.000	27.800, -0.001	27.800, -0.000	27.800, -0.000	27.800, 0.000	27.800, 0.000	27.800, 0.000	27.800, -0.000
141	28.000, -0.000	28.000, -0.000	28.000, 0.000	28.000, -0.000	28.000, 0.000	28.000, 0.000	28.000, -0.000	28.000, 0.000	28.000, -0.000	28.000, 0.000	28.000, -0.000	28.000, -0.000	28.000, 0.000	28.000, 0.000	28.000, -0.001	28.000, -0.000	28.000, 0.000	28.000, 0.000	28.000, -0.000	28.000, -0.000	28.000, 0.000	28.000, -0.001	28.000, 0.000	28.000, -0.001	28.000, -0.000	28.000, -0.000	28.000, 0.000	28.000, 0.001	28.000, 0.000	28.000, 0.000
142	28.200, -0.000	28.200, -0.000	28.200, 0.000	28.200, -0.000	28.200, -0.000	28.200, 0.000	28.200, -0.000	28.200, -0.000	28.200, -0.001	28.200, 0.000	28.200, -0.000	28.200, -0.000	28.200, 0.000	28.200, 0.000	28.200, -0.001	28.200, -0.000	28.200, 0.000	28.200, -0.000	28.200, -0.000	28.200, -0.000	28.200, 0.000	28.200, -0.001	28.200, 0.000	28.200, -0.000	28.200, -0.000	28.200, -0.000	28.200, 0.000	28.200, 0.001	28.200, 0.000	28.200, 0.000
143	28.400, -0.000	28.400, -0.000	28.400, -0.000	28.400, -0.000	28.400, -0.000	28.400, -0.000	28.400, 0.000	28.400, -0.000	28.400, -0.001	28.400, 0.000	28.400, -0.000	28.400, -0.000	28.400, 0.000	28.400, 0.000	28.400, -0.001	28.400, -0.000	28.400, 0.000	28.400, -0.000	28.400, -0.000	28.400, -0.000	28.400, 0.000	28.400, -0.000	28.400, 0.000	28.400, -0.000	28.400, -0.000	28.400, 0.000	28.400, -0.000	28.400, 0.001	28.400, 0.000	28.400, 0.000
144	28.600, -0.000	28.600, -0.000	28.600, -0.000	28.600, -0.000	28.600, -0.001	28.600, -0.000	28.600, 0.000	28.600, -0.000	28.600, -0.000	28.600, 0.000	28.600, -0.000	28.600, 0.000	28.600, 0.001	28.600, -0.000	28.600, -0.000	28.600, -0.000	28.600, 0.000	28.600, -0.000	28.600, 0.000	28.600, -0.000	28.600, 0.000	28.600, -0.000	28.600, 0.000	28.600, 0.000	28.600, -0.000	28.600, 0.000	28.600, -0.000	28.600, 0.001	28.600, 0.000	28.600, 0.000
145	28.800, -0.000	28.800, -0.000	28.800, -0.000	28.800, -0.000	28.800, -0.001	28.800, -0.000	28.800, 0.000	28.800, -0.000	28.800, -0.000	28.800, -0.000	28.800, -0.000	28.800, 0.000	28.800, 0.001	28.800, -0.000	28.800, -0.000	28.800, -0.000	28.800, 0.000	28.800, -0.000	28.800, 0.000	28.800, -0.000	28.800, 0.000	28.800, 0.000	28.800, 0.000	28.800, 0.000	28.800, 0.000	28.800, 0.000	28.800, -0.000	28.800, 0.000	28.800, -0.000	28.800, 0.000
146	29.000, 0.000	29.000, -0.000	29.000, -0.000	29.000, 0.000	29.000, -0.001	29.000, -0.000	29.000, 0.000	29.000, -0.001	29.000, -0.000	29.000, -0.000	29.000, 0.000	29.000, 0.000	29.000, 0.000	29.000, -0.000	29.000, 0.000	29.000, 0.000	29.000, -0.000	29.000, -0.000	29.000, 0.000	29.000, -0.000	29.000, 0.000	29.000, 0.000	29.000, 0.000	29.000, 0.001	29.000, 0.000	29.000, 0.000	29.000, -0.000	29.000, 0.000	29.000, -0.000	29.000, 0.000
147	29.200, 0.000	29.200, -0.000	29.200, -0.000	29.200, 0.000	29.200, -0.001	29.200, -0.000	29.200, 0.000	29.200, -0.001	29.200, -0.000	29.200, -0.000	29.200, 0.000	29.200, 0.000	29.200, 0.000	29.200, -0.000	29.200, 0.001	29.200, 0.000	29.200, -0.000	29.200, -0.000	29.200, 0.000	29.200, -0.000	29.200, 0.000	29.200, 0.001	29.200, 0.000	29.200, 0.001	29.200, 0.000	29.200, 0.000	29.200, -0.000	29.200, -0.000	29.200, -0.000	29.200, 0.000
148	29.400, 0.000	29.400, -0.000	29.400, -0.000	29.400, 0.000	29.400, -0.001	29.400, -0.000	29.400, 0.000	29.400, -0.001	29.400, 0.000	29.400, -0.000	29.400, 0.001	29.400, 0.000	29.400, 0.000	29.400, -0.000	29.400, 0.001	29.400, 0.000	29.400, -0.001	29.400, -0.000	29.400, 0.000	29.400, 0.000	29.400, 0.000	29.400, 0.001	29.400, 0.000	29.400, 0.001	29.400, 0.000	29.400, -0.000	29.400, -0.000	29.400, -0.001	29.400, -0.000	29.400, -0.000
149	29.600, 0.001	29.600, 0.000	29.600, -0.000	29.600, 0.001	29.600, -0.001	29.600, -0.000	29.600, 0.000	29.600, -0.001	29.600, 0.000	29.600, -0.000	29.600, 0.001	29.600, 0.000	29.600, -0.000	29.600, -0.000	29.600, 0.001	29.600, 0.000	29.600, -0.001	29.600, -0.000	29.600, 0.000	29.600, 0.000	29.600, -0.000	29.600, 0.001	29.600, -0.000	29.600, 0.001	29.600, -0.000	29.600, -0.000	29.600, -0.001	29.600, -0.001	29.600, -0.001	29.600, -0.000
150	29.800, 0.001	29.800, 0.000	29.800, -0.000	29.800, 0.001	29.800, -0.001	29.800, -0.000	29.800, 0.000	29.800, -0.000	29.800, 0.001	29.800, -0.000	29.800, 0.001	29.800, 0.001	29.800, -0.000	29.800, -0.000	29.800, 0.001	29.800, 0.000	29.800, -0.001	29.800, -0.000	29.800, 0.000	29.800, 0.000	29.800, -0.000	29.800, 0.002	29.800, -0.000	29.800, 0.001	29.800, -0.000	29.800, -0.000	29.800, -0.001	29.800, -0.001	29.800, -0.001	29.800, -0.000
151	30.000, 0.000	30.000, 0.000	30.000, 0.000	30.000, 0.000	30.000, 0.000	30.000, 0.000	30.000, 0.000	30.000, 0.000	30.000, 0.000	30.000, 0.000	30.000, 0.000	30.000, 0.000	30.000, 0.000	30.000, 0.000	30.000, 0.000	30.000, 0.000	30.000, 0.000	30.000, 0.000	30.000, 0.000	30.000, 0.000	30.000, 0.000	30.000, 0.000	30.000, 0.000	30.000, 0.000	30.000, 0.000	30.000, 0.000	30.000, 0.000	30.000, 0.000	30.000, 0.000	30.000, 0.000
152	30.200, 0.005	30.200, 0.002	30.200, 0.000	30.200, -0.001	30.200, 0.008	30.200, 0.002	30.200, 0.001	30.200, -0.002	30.200, -0.001	30.200, 0.009	30.200, 0.004	30.200, 0.006	30.200, -0.002	30.200, 0.007	30.200, 0.010	30.200, 0.006	30.200, 0.007	30.200, 0.005	30.200, 0.008	30.200, 0.006	30.200, 0.007	30.200, 0.003	30.200, 0.001	30.200, -0.001	30.200, 0.010	30.200, 0.006	30.200, 0.004	30.200, -0.001	30.200, 0.007	30.200, 0.006
153	30.400, 0.011	30.400, 0.004	30.400, 0.001	30.400, -0.001	30.400, 0.019	30.400, 0.004	30.400, 0.002	30.400, -0.004	30.400, -0.002	30.400, 0.020	30.400, 0.009	30.400, 0.013	30.400, -0.004	30.400, 0.015	30.400, 0.023	30.400, 0.014	30.400, 0.016	30.400, 0.011	30.400, 0.017	30.400, 0.013	30.400, 0.016	30.400, 0.007	30.400, 0.003	30.400, -0.001	30.400, 0.021	30.400, 0.013	30.400, 0.009	30.400, -0.002	30.400, 0.015	30.400, 0.013
154	30.600, 0.019	30.600, 0.008	30.600, 0.002	30.600, -0.001	30.600, 0.031	30.600, 0.007	30.600, 0.004	30.600, -0.007	30.600, -0.003	30.600, 0.033	30.600, 0.016	30.600, 0.022	30.600, -0.006	30.600, 0.024	30.600, 0.037	30.600, 0.023	30.600, 0.026	30.600, 0.019	30.600, 0.028	30.600, 0.022	30.600, 0.026	30.600, 0.012	30.600, 0.006	30.600, -0.001	30.600, 0.035	30.600, 0.021	30.600, 0.015	30.600, -0.004	30.600, 0.024	30.600, 0.021
155	30.800, 0.028	30.800, 0.012	30.800, 0.004	30.800, -0.000	30.800, 0.044	30.800, 0.011	30.800, 0.006	30.800, -0.009	30.800, -0.004	30.800, 0.047	30.800, 0.024	30.800, 0.032	30.800, -0.008	30.800, 0.035	30.800, 0.053	30.800, 0.033	30.800, 0.037	30.800, 0.028	30.800, 0.040	30.800, 0.033	30.800, 0.037	30.800, 0.018	30.800, 0.009	30.800, -0.001	30.800, 0.051	30.800, 0.031	30.800, 0.023	30.800, -0.005	30.800, 0.035	30.800, 0.031
156	31.000, 0.038	31.000, 0.017	31.000, 0.006	31.000, 0.000	31.000, 0.059	31.000, 0.016	31.000, 0.009	31.000, -0.011	31.000, -0.004	31.000, 0.063	31.000, 0.033	31.000, 0.044	31.000, -0.010	31.000, 0.047	31.000, 0.070	31.000, 0.045	31.000, 0.050	31.000, 0.039	31.000, 0.053	31.000, 0.045	31.000, 0.050	31.000, 0.026	31.000, 0.013	31.000, -0.000	31.000, 0.068	31.000, 0.042	31.000, 0.032	31.000, -0.006	31.000, 0.047	31.000, 0.042
157	31.200, 0.050	31.200, 0.023	31.200, 0.009	31.200, 0.001	31.200, 0.075	31.200, 0.022	31.200, 0.013	31.200, -0.012	31.200, -0.004	31.200, 0.080	31.200, 0.043	31.200, 0.056	31.200, -0.011	31.200, 0.061	31.200, 0.089	31.200, 0.058	31.200, 0.064	31.200, 0.051	31.200, 0.068	31.200, 0.058	31.200, 0.065	31.200, 0.034	31.200, 0.017	31.200, 0.001	31.200, 0.086	31.200, 0.054	31.200, 0.042	31.200, -0.007	31.200, 0.060	31.200, 0.054
158	31.400, 0.063	31.400, 0.029	31.400, 0.012	31.400, 0.003	31.400, 0.093	31.400, 0.028	31.400, 0.016	31.400, -0.014	31.400, -0.004	31.400, 0.098	31.400, 0.054	31.400, 0.069	31.400, -0.013	31.400, 0.075	31.400, 0.108	31.400, 0.073	31.400, 0.078	31.400, 0.064	31.400, 0.083	31.400, 0.073	31.400, 0.080	31.400, 0.043	31.400, 0.022	31.400, 0.003	31.400, 0.105	31.400, 0.066	31.400, 0.052	31.400, -0.008	31.400, 0.074	31.400, 0.067
159	31.600, 0.077	31.600, 0.037	31.600, 0.016	31.600, 0.005	31.600, 0.111	31.600, 0.036	31.600, 0.021	31.600, -0.015	31.600, -0.003	31.600, 0.117	31.600, 0.065	31.600, 0.083	31.600, -0.014	31.600, 0.089	31.600, 0.128	31.600, 0.087	31.600, 0.093	31.600, 0.077	31.600, 0.098	31.600, 0.088	31.600, 0.096	31.600, 0.053	31.600, 0.028	31.600, 0.005	31.600, 0.125	31.600, 0.079	31.600, 0.064	31.600, -0.009	31.600, 0.089	31.600, 0.080
160	31.800, 0.091	31.800, 0.045	31.800, 0.020	31.800, 0.007	31.800, 0.129	31.800, 0.044	31.800, 0.025	31.800, -0.016	31.800, -0.002	31.800, 0.135	31.800, 0.078	31.800, 0.096	31.800, -0.015	31.800, 0.103	31.800, 0.147	31.800, 0.103	31.800, 0.108	31.800, 0.092	31.800, 0.114	31.800, 0.103	31.800, 0.112	31.800, 0.063	31.800, 0.034	31.800, 0.008	31.800, 0.145	31.800, 0.092	31.800, 0.076	31.800, -0.010	31.800, 0.103	31.800, 0.094
161	32.000, 0.106	32.000, 0.053	32.000, 0.024	32.000, 0.010	32.000, 0.147	32.000, 0.052	32.000, 0.030	32.000, -0.016	32.000, -0.001	32.000, 0.154	32.000, 0.090	32.000, 0.110	32.000, -0.016	32.000, 0.118	32.000, 0.166	32.000, 0.118	32.000, 0.122	32.000, 0.106	32.000, 0.129	32.000, 0.119	32.000, 0.128	32.000, 0.073	32.000, 0.040	32.000, 0.011	32.000, 0.164	32.000, 0.105	32.000, 0.088	32.000, -0.010	32.000, 0.117	32.000, 0.107
162	32.200, 0.120	32.200, 0.062	32.200, 0.029	32.200, 0.013	32.200, 0.164	32.200, 0.061	32.200, 0.035	32.200, -0.016	32.200, 0.000	32.200, 0.171	32.200, 0.102	32.200, 0.123	32.200, -0.016	32.200, 0.132	32.200, 0.184	32.200, 0.133	32.200, 0.136	32.200, 0.120	32.200, 0.143	32.200, 0.134	32.200, 0.144	32.200, 0.084	32.200, 0.046	32.200, 0.015	32.200, 0.181	32.200, 0.118	32.200, 0.101	32.200, -0.009	32.200, 0.131	32.200, 0.120
163	32.400, 0.134	32.400, 0.070	32.400, 0.033	32.400, 0.015	32.400, 0.182	32.400, 0.070	32.400, 0.040	32.400, -0.016	32.400, 0.002	32.400, 0.187	32.400, 0.114	32.400, 0.136	32.400, -0.017	32.400, 0.145	32.400, 0.201	32.400, 0.147	32.400, 0.150	32.400, 0.133	32.400, 0.157	32.400, 0.148	32.400, 0.159	32.400, 0.094	32.400, 0.052	32.400, 0.018	32.400, 0.198	32.400, 0.130	32.400, 0.112	32.400, -0.009	32.400, 0.144	32.400, 0.133
164	32.600, 0.149	32.600, 0.079	32.600, 0.038	32.600, 0.018	32.600, 0.198	32.600, 0.079	32.600, 0.044	32.600, -0.016	32.600, 0.003	32.600, 0.203	32.600, 0.125	32.600, 0.148	32.600, -0.017	32.600, 0.157	32.600, 0.218	32.600, 0.161	32.600, 0.163	32.600, 0.146	32.600, 0.170	32.600, 0.162	32.600, 0.174	32.600, 0.104	32.600, 0.057	32.600, 0.021	32.600, 0.214	32.600, 0.142	32.600, 0.123	32.600, -0.008	32.600, 0.157	32.600, 0.145
165	32.800, 0.163	32.800, 0.087	32.800, 0.043	32.800, 0.020	32.800, 0.215	32.800, 0.088	32.800, 0.049	32.800, -0.016	32.800, 0.005	32.800, 0.219	32.800, 0.136	32.800, 0.160	32.800, -0.017	32.800, 0.170	32.800, 0.235	32.800, 0.174	32.800, 0.176	32.800, 0.160	32.800, 0.183	32.800, 0.176	32.800, 0.189	32.800, 0.114	32.800, 0.063	32.800, 0.024	32.800, 0.230	32.800, 0.154	32.800, 0.134	32.800, -0.007	32.800, 0.170	32.800, 0.157
166	33.000, 0.177	33.000, 0.096	33.000, 0.047	33.000, 0.023	33.000, 0.231	33.000, 0.096	33.000, 0.054	33.000, -0.016	33.000, 0.007	33.000, 0.234	33.000, 0.147	33.000, 0.172	33.000, -0.018	33.000, 0.183	33.000, 0.251	33.000, 0.187	33.000, 0.189	33.000, 0.173	33.000, 0.197	33.000, 0.189	33.000, 0.204	33.000, 0.124	33.000, 0.068	33.000, 0.027	33.000, 0.246	33.000, 0.166	33.000, 0.145	33.000, -0.006	33.000, 0.183	33.000, 0.169
167	33.200, 0.191	33.200, 0.105	33.200, 0.052	33.200, 0.025	33.200, 0.248	33.200, 0.105	33.200, 0.059	33.200, -0.016	33.200, 0.008	33.200, 0.250	33.200, 0.158	33.200, 0.184	33.200, -0.018	33.200, 0.195	33.200, 0.267	33.200, 0.200	33.200, 0.202	33.200, 0.185	33.200, 0.210	33.200, 0.202	33.200, 0.219	33.200, 0.134	33.200, 0.074	33.200, 0.030	33.200, 0.261	33.200, 0.177	33.200, 0.156	33.200, -0.005	33.200, 0.195	33.200, 0.180
168	33.400, 0.205	33.400, 0.114	33.400, 0.056	33.400, 0.028	33.400, 0.264	33.400, 0.113	33.400, 0.064	33.400, -0.016	33.400, 0.010	33.400, 0.265	33.400, 0.169	33.400, 0.195	33.400, -0.018	33.400, 0.208	33.400, 0.282	33.400, 0.212	33.400, 0.214	33.400, 0.197	33.400, 0.223	33.400, 0.214	33.400, 0.233	33.400, 0.144	33.400, 0.080	33.400, 0.033	33.400, 0.276	33.400, 0.187	33.400, 0.167	33.400, -0.004	33.400, 0.208	33.400, 0.192
169	33.600, 0.219	33.600, 0.123	33.600, 0.061	33.600, 0.030	33.600, 0.280	33.600, 0.121	33.600, 0.069	33.600, -0.015	33.600, 0.011	33.600, 0.280	33.600, 0.179	33.600, 0.207	33.600, -0.019	33.600, 0.220	33.600, 0.298	33.600, 0.224	33.600, 0.227	33.600, 0.209	33.600, 0.237	33.600, 0.227	33.600, 0.248	33.600, 0.154	33.600, 0.085	33.600, 0.036	33.600, 0.290	33.600, 0.198	33.600, 0.177	33.600, -0.003	33.600, 0.220	33.600, 0.203
170	33.800, 0.232	33.800, 0.132	33.800, 0.065	33.800, 0.033	33.800, 0.296	33.800, 0.129	33.800, 0.074	33.800, -0.015	33.800, 0.012	33.800, 0.296	33.800, 0.190	33.800, 0.219	33.800, -0.019	33.800, 0.232	33.800, 0.313	33.800, 0.236	33.800, 0.239	33.800, 0.221	33.800, 0.250	33.800, 0.239	33.800, 0.263	33.800, 0.164	33.800, 0.091	33.800, 0.039	33.800, 0.305	33.800, 0.209	33.800, 0.188	33.800, -0.002	33.800, 0.232	33.800, 0.215
171	34.000, 0.246	34.000, 0.141	34.000, 0.070	34.000, 0.035	34.000, 0.312	34.000, 0.137	34.000, 0.079	34.000, -0.014	34.000, 0.014	34.000, 0.310	34.000, 0.201	34.000, 0.231	34.000, -0.019	34.000, 0.245	34.000, 0.328	34.000, 0.247	34.000, 0.252	34.000, 0.233	34.000, 0.263	34.000, 0.251	34.000, 0.277	34.000, 0.174	34.000, 0.097	34.000, 0.042	34.000, 0.319	34.000, 0.220	34.000, 0.199	34.000, -0.001	34.000, 0.244	34.000, 0.226
172	34.200, 0.260	34.200, 0.150	34.200, 0.075	34.200, 0.038	34.200, 0.328	34.200, 0.146	34.200, 0.083	34.200, -0.014	34.200, 0.015	34.200, 0.325	34.200, 0.211	34.200, 0.242	34.200, -0.019	34.200, 0.257	34.200, 0.344	34.200, 0.259	34.200, 0.265	34.200, 0.245	34.200, 0.276	34.200, 0.264	34.200, 0.292	34.200, 0.184	34.200, 0.103	34.200, 0.045	34.200, 0.334	34.200, 0.231	34.200, 0.210	34.200, -0.001	34.200, 0.257	34.200, 0.237
173	34.400, 0.273	34.400, 0.159	34.400, 0.080	34.400, 0.041	34.400, 0.344	34.400, 0.154	34.400, 0.088	34.400, -0.013	34.400, 0.017	34.400, 0.340	34.400, 0.222	34.400, 0.254	34.400, -0.019	34.400, 0.269	34.400, 0.359	34.400, 0.270	34.400, 0.277	34.400, 0.256	34.400, 0.289	34.400, 0.276	34.400, 0.306	34.400, 0.194	34.400, 0.109	34.400, 0.048	34.400, 0.348	34.400, 0.241	34.400, 0.220	34.400, -0.000	34.400, 0.269	34.400, 0.248
174	34.600, 0.286	34.600, 0.168	34.600, 0.085	34.600, 0.044	34.600, 0.359	34.600, 0.162	34.600, 0.093	34.600, -0.012	34.600, 0.018	34.600, 0.354	34.600, 0.233	34.600, 0.266	34.600, -0.019	34.600, 0.280	34.600, 0.374	34.600, 0.281	34.600, 0.290	34.600, 0.268	34.600, 0.302	34.600, 0.288	34.600, 0.321	34.600, 0.204	34.600, 0.115	34.600, 0.051	34.600, 0.362	34.600, 0.252	34.600, 0.231	34.600, 0.000	34.600, 0.281	34.600, 0.260
175	34.800, 0.300	34.800, 0.177	34.800, 0.091	34.800, 0.047	34.800, 0.375	34.800, 0.170	34.800, 0.098	34.800, -0.011	34.800, 0.020	34.800, 0.368	34.800, 0.244	34.800, 0.277	34.800, -0.019	34.800, 0.292	34.800, 0.388	34.800, 0.292	34.800, 0.303	34.800, 0.279	34.800, 0.315	34.800, 0.301	34.800, 0.335	34.800, 0.214	34.800, 0.121	34.800, 0.054	34.800, 0.377	34.800, 0.263	34.800, 0.241	34.800, 0.000	34.800, 0.293	34.800, 0.271
176	35.000, 0.313	35.000, 0.187	35.000, 0.096	35.000, 0.050	35.000, 0.390	35.000, 0.178	35.000, 0.103	35.000, -0.010	35.000, 0.022	35.000, 0.382	35.000, 0.254	35.000, 0.288	35.000, -0.019	35.000, 0.304	35.000, 0.403	35.000, 0.302	35.000, 0.315	35.000, 0.290	35.000, 0.328	35.000, 0.313	35.000, 0.350	35.000, 0.224	35.000, 0.128	35.000, 0.057	35.000, 0.391	35.000, 0.273	35.000, 0.252	35.000, 0.001	35.000, 0.306	35.000, 0.282
177	35.200, 0.327	35.200, 0.196	35.200, 0.102	35.200, 0.052	35.200, 0.405	35.200, 0.186	35.200, 0.107	35.200, -0.009	35.200, 0.024	35.200, 0.395	35.200, 0.265	35.200, 0.300	35.200, -0.019	35.200, 0.315	35.200, 0.417	35.200, 0.313	35.200, 0.328	35.200, 0.302	35.200, 0.340	35.200, 0.325	35.200, 0.364	35.200, 0.235	35.200, 0.134	35.200, 0.060	35.200, 0.405	35.200, 0.283	35.200, 0.262	35.200, 0.001	35.200, 0.318	35.200, 0.293
178	35.400, 0.341	35.400, 0.205	35.400, 0.107	35.400, 0.055	35.400, 0.420	35.400, 0.194	35.400, 0.112	35.400, -0.008	35.400, 0.026	35.400, 0.409	35.400, 0.276	35.400, 0.310	35.400, -0.019	35.400, 0.326	35.400, 0.431	35.400, 0.324	35.400, 0.340	35.400, 0.313	35.400, 0.353	35.400, 0.338	35.400, 0.378	35.400, 0.245	35.400, 0.140	35.400, 0.063	35.400, 0.419	35.400, 0.294	35.400, 0.272	35.400, 0.001	35.400, 0.330	35.400, 0.304
179	35.600, 0.354	35.600, 0.215	35.600, 0.112	35.600, 0.057	35.600, 0.435	35.600, 0.203	35.600, 0.117	35.600, -0.008	35.600, 0.028	35.600, 0.422	35.600, 0.286	35.600, 0.321	35.600, -0.019	35.600, 0.338	35.600, 0.445	35.600, 0.335	35.600, 0.352	35.600, 0.324	35.600, 0.365	35.600, 0.350	35.600, 0.393	35.600, 0.254	35.600, 0.146	35.600, 0.066	35.600, 0.434	35.600, 0.305	35.600, 0.283	35.600, 0.001	35.600, 0.342	35.600, 0.315
180	35.800, 0.368	35.800, 0.224	35.800, 0.118	35.800, 0.060	35.800, 0.450	35.800, 0.212	35.800, 0.122	35.800, -0.007	35.800, 0.030	35.800, 0.435	35.800, 0.297	35.800, 0.332	35.800, -0.019	35.800, 0.349	35.800, 0.459	35.800, 0.346	35.800, 0.364	35.800, 0.335	35.800, 0.377	35.800, 0.362	35.800, 0.407	35.800, 0.264	35.800, 0.153	35.800, 0.068	35.800, 0.447	35.800, 0.315	35.800, 0.293	35.800, 0.001	35.800, 0.354	35.800, 0.326
181	36.000, 0.382	36.000, 0.233	36.000, 0.123	36.000, 0.062	36.000, 0.466	36.000, 0.220	36.000, 0.127	36.000, -0.006	36.000, 0.033	36.000, 0.448	36.000, 0.307	36.000, 0.343	36.000, -0.019	36.000, 0.360	36.000, 0.473	36.000, 0.357	36.000, 0.376	36.000, 0.347	36.000, 0.390	36.000, 0.374	36.000, 0.421	36.000, 0.274	36.000, 0.159	36.000, 0.071	36.000, 0.461	36.000, 0.326	36.000, 0.303	36.000, 0.002	36.000, 0.366	36.000, 0.337
182	36.200, 0.395	36.200, 0.242	36.200, 0.129	36.200, 0.064	36.200, 0.481	36.200, 0.229	36.200, 0.132	36.200, -0.005	36.200, 0.035	36.200, 0.461	36.200, 0.318	36.200, 0.353	36.200, -0.019	36.200, 0.371	36.200, 0.487	36.200, 0.368	36.200, 0.388	36.200, 0.358	36.200, 0.402	36.200, 0.386	36.200, 0.435	36.200, 0.284	36.200, 0.164	36.200, 0.074	36.200, 0.474	36.200, 0.337	36.200, 0.313	36.200, 0.002	36.200, 0.378	36.200, 0.348
183	36.400, 0.409	36.400, 0.252	36.400, 0.134	36.400, 0.067	36.400, 0.496	36.400, 0.237	36.400, 0.137	36.400, -0.004	36.400, 0.037	36.400, 0.474	36.400, 0.328	36.400, 0.364	36.400, -0.019	36.400, 0.382	36.400, 0.501	36.400, 0.379	36.400, 0.400	36.400, 0.369	36.400, 0.414	36.400, 0.397	36.400, 0.448	36.400, 0.293	36.400, 0.170	36.400, 0.077	36.400, 0.488	36.400, 0.347	36.400, 0.323	36.400, 0.003	36.400, 0.389	36.400, 0.359
184	36.600, 0.423	36.600, 0.261	36.600, 0.140	36.600, 0.069	36.600, 0.511	36.600, 0.246	36.600, 0.142	36.600, -0.003	36.600, 0.040	36.600, 0.487	36.600, 0.338	36.600, 0.375	36.600, -0.019	36.600, 0.393	36.600, 0.515	36.600, 0.390	36.600, 0.411	36.600, 0.380	36.600, 0.426	36.600, 0.409	36.600, 0.462	36.600, 0.303	36.600, 0.176	36.600, 0.081	36.600, 0.501	36.600, 0.358	36.600, 0.332	36.600, 0.004	36.600, 0.401	36.600, 0.370
185	36.800, 0.436	36.800, 0.270	36.800, 0.145	36.800, 0.072	36.800, 0.526	36.800, 0.254	36.800, 0.147	36.800, -0.002	36.800, 0.042	36.800, 0.500	36.800, 0.348	36.800, 0.386	36.800, -0.019	36.800, 0.404	36.800, 0.529	36.800, 0.401	36.800, 0.423	36.800, 0.392	36.800, 0.437	36.800, 0.420	36.800, 0.475	36.800, 0.313	36.800, 0.182	36.800, 0.084	36.800, 0.514	36.800, 0.368	36.800, 0.342	36.800, 0.005	36.800, 0.412	36.800, 0.380
186	37.000, 0.450	37.000, 0.279	37.000, 0.150	37.000, 0.074	37.000, 0.541	37.000, 0.262	37.000, 0.152	37.000, -0.001	37.000, 0.045	37.000, 0.512	37.000, 0.358	37.000, 0.397	37.000, -0.019	37.000, 0.415	37.000, 0.543	37.000, 0.412	37.000, 0.434	37.000, 0.403	37.000, 0.450	37.000, 0.431	37.000, 0.489	37.000, 0.322	37.000, 0.187	37.000, 0.087	37.000, 0.527	37.000, 0.379	37.000, 0.352	37.000, 0.006	37.000, 0.424	37.000, 0.391
187	37.200, 0.464	37.200, 0.288	37.200, 0.155	37.200, 0.077	37.200, 0.555	37.200, 0.270	37.200, 0.158	37.200, -0.001	37.200, 0.047	37.200, 0.525	37.200, 0.368	37.200, 0.407	37.200, -0.019	37.200, 0.426	37.200, 0.556	37.200, 0.422	37.200, 0.446	37.200, 0.414	37.200, 0.462	37.200, 0.442	37.200, 0.502	37.200, 0.332	37.200, 0.193	37.200, 0.090	37.200, 0.539	37.200, 0.389	37.200, 0.363	37.200, 0.007	37.200, 0.435	37.200, 0.402
188	37.400, 0.477	37.400, 0.296	37.400, 0.160	37.400, 0.079	37.400, 0.570	37.400, 0.278	37.400, 0.163	37.400, -0.000	37.400, 0.049	37.400, 0.538	37.400, 0.378	37.400, 0.418	37.400, -0.019	37.400, 0.437	37.400, 0.570	37.400, 0.433	37.400, 0.457	37.400, 0.425	37.400, 0.474	37.400, 0.452	37.400, 0.515	37.400, 0.341	37.400, 0.199	37.400, 0.093	37.400, 0.552	37.400, 0.399	37.400, 0.373	37.400, 0.008	37.400, 0.447	37.400, 0.412
189	37.600, 0.491	37.600, 0.305	37.600, 0.165	37.600, 0.082	37.600, 0.585	37.600, 0.286	37.600, 0.168	37.600, 0.000	37.600, 0.051	37.600, 0.550	37.600, 0.388	37.600, 0.429	37.600, -0.019	37.600, 0.448	37.600, 0.584	37.600, 0.444	37.600, 0.468	37.600, 0.436	37.600, 0.486	37.600, 0.463	37.600, 0.528	37.600, 0.350	37.600, 0.205	37.600, 0.096	37.600, 0.565	37.600, 0.409	37.600, 0.383	37.600, 0.009	37.600, 0.458	37.600, 0.423
190	37.800, 0.504	37.800, 0.314	37.800, 0.170	37.800, 0.084	37.800, 0.599	37.800, 0.294	37.800, 0.173	37.800, 0.001	37.800, 0.054	37.800, 0.562	37.800, 0.398	37.800, 0.439	37.800, -0.018	37.800, 0.459	37.800, 0.597	37.800, 0.454	37.800, 0.479	37.800, 0.447	37.800, 0.498	37.800, 0.474	37.800, 0.541	37.800, 0.360	37.800, 0.210	37.800, 0.099	37.800, 0.577	37.800, 0.419	37.800, 0.393	37.800, 0.010	37.800, 0.469	37.800, 0.434
191	38.000, 0.517	38.000, 0.322	38.000, 0.175	38.000, 0.087	38.000, 0.614	38.000, 0.302	38.000, 0.178	38.000, 0.001	38.000, 0.056	38.000, 0.574	38.000, 0.408	38.000, 0.450	38.000, -0.018	38.000, 0.470	38.000, 0.611	38.000, 0.465	38.000, 0.490	38.000, 0.457	38.000, 0.509	38.000, 0.485	38.000, 0.554	38.000, 0.369	38.000, 0.216	38.000, 0.102	38.000, 0.589	38.000, 0.429	38.000, 0.402	38.000, 0.010	38.000, 0.480	38.000, 0.445
192	38.200, 0.531	38.200, 0.331	38.200, 0.180	38.200, 0.090	38.200, 0.628	38.200, 0.310	38.200, 0.182	38.200, 0.002	38.200, 0.058	38.200, 0.586	38.200, 0.417	38.200, 0.460	38.200, -0.018	38.200, 0.481	38.200, 0.624	38.200, 0.476	38.200, 0.502	38.200, 0.468	38.200, 0.521	38.200, 0.495	38.200, 0.567	38.200, 0.378	38.200, 0.222	38.200, 0.105	38.200, 0.602	38.200, 0.439	38.200, 0.412	38.200, 0.011	38.200, 0.491	38.200, 0.455
193	38.400, 0.544	38.400, 0.340	38.400, 0.185	38.400, 0.093	38.400, 0.642	38.400, 0.318	38.400, 0.187	38.400, 0.002	38.400, 0.060	38.400, 0.597	38.400, 0.427	38.400, 0.470	38.400, -0.017	38.400, 0.492	38.400, 0.638	38.400, 0.486	38.400, 0.513	38.400, 0.479	38.400, 0.533	38.400, 0.506	38.400, 0.579	38.400, 0.388	38.400, 0.228	38.400, 0.108	38.400, 0.614	38.400, 0.448	38.400, 0.423	38.400, 0.011	38.400, 0.501	38.400, 0.466
194	38.600, 0.557	38.600, 0.349	38.600, 0.191	38.600, 0.095	38.600, 0.656	38.600, 0.326	38.600, 0.192	38.600, 0.002	38.600, 0.062	38.600, 0.609	38.600, 0.436	38.600, 0.481	38.600, -0.017	38.600, 0.503	38.600, 0.651	38.600, 0.497	38.600, 0.524	38.600, 0.489	38.600, 0.545	38.600, 0.516	38.600, 0.592	38.600, 0.397	38.600, 0.234	38.600, 0.111	38.600, 0.627	38.600, 0.458	38.600, 0.433	38.600, 0.012	38.600, 0.512	38.600, 0.476
195	38.800, 0.569	38.800, 0.359	38.800, 0.196	38.800, 0.098	38.800, 0.669	38.800, 0.334	38.800, 0.197	38.800, 0.003	38.800, 0.063	38.800, 0.620	38.800, 0.446	38.800, 0.491	38.800, -0.016	38.800, 0.514	38.800, 0.664	38.800, 0.507	38.800, 0.535	38.800, 0.500	38.800, 0.556	38.800, 0.527	38.800, 0.604	38.800, 0.406	38.800, 0.239	38.800, 0.114	38.800, 0.639	38.800, 0.468	38.800, 0.443	38.800, 0.013	38.800, 0.522	38.800, 0.486
196	39.000, 0.582	39.000, 0.368	39.000, 0.201	39.000, 0.101	39.000, 0.683	39.000, 0.343	39.000, 0.201	39.000, 0.003	39.000, 0.065	39.000, 0.632	39.000, 0.456	39.000, 0.501	39.000, -0.016	39.000, 0.525	39.000, 0.677	39.000, 0.518	39.000, 0.547	39.000, 0.510	39.000, 0.568	39.000, 0.538	39.000, 0.617	39.000, 0.416	39.000, 0.245	39.000, 0.117	39.000, 0.651	39.000, 0.477	39.000, 0.453	39.000, 0.014	39.000, 0.533	39.000, 0.496
197	39.200, 0.595	39.200, 0.377	39.200, 0.206	39.200, 0.103	39.200, 0.696	39.200, 0.351	39.200, 0.206	39.200, 0.004	39.200, 0.067	39.200, 0.643	39.200, 0.465	39.200, 0.511	39.200, -0.015	39.200, 0.536	39.200, 0.690	39.200, 0.528	39.200, 0.558	39.200, 0.521	39.200, 0.580	39.200, 0.548	39.200, 0.630	39.200, 0.425	39.200, 0.251	39.200, 0.120	39.200, 0.663	39.200, 0.487	39.200, 0.463	39.200, 0.015	39.200, 0.543	39.200, 0.506
198	39.400, 0.607	39.400, 0.386	39.400, 0.212	39.400, 0.106	39.400, 0.710	39.400, 0.359	39.400, 0.212	39.400, 0.004	39.400, 0.069	39.400, 0.655	39.400, 0.475	39.400, 0.521	39.400, -0.014	39.400, 0.547	39.400, 0.703	39.400, 0.539	39.400, 0.569	39.400, 0.531	39.400, 0.591	39.400, 0.559	39.400, 0.642	39.400, 0.435	39.400, 0.257	39.400, 0.124	39.400, 0.675	39.400, 0.497	39.400, 0.472	39.400, 0.016	39.400, 0.554	39.400, 0.516
199	39.600, 0.620	39.600, 0.395	39.600, 0.216	39.600, 0.109	39.600, 0.723	39.600, 0.367	39.600, 0.217	39.600, 0.005	39.600, 0.071	39.600, 0.666	39.600, 0.485	39.600, 0.530	39.600, -0.013	39.600, 0.558	39.600, 0.715	39.600, 0.549	39.600, 0.581	39.600, 0.542	39.600, 0.602	39.600, 0.569	39.600, 0.655	39.600, 0.444	39.600, 0.262	39.600, 0.127	39.600, 0.687	39.600, 0.506	39.600, 0.482	39.600, 0.017	39.600, 0.564	39.600, 0.526
200	39.800, 0.632	39.800, 0.404	39.800, 0.221	39.800, 0.111	39.800, 0.737	39.800, 0.376	39.800, 0.222	39.800, 0.006	39.800, 0.073	39.800, 0.677	39.800, 0.494	39.800, 0.540	39.800, -0.013	39.800, 0.569	39.800, 0.728	39.800, 0.560	39.800, 0.592	39.800, 0.552	39.800, 0.614	39.800, 0.580	39.800, 0.668	39.800, 0.453	39.800, 0.268	39.800, 0.130	39.800, 0.699	39.800, 0.516	39.800, 0.492	39.800, 0.018	39.800, 0.574	39.800, 0.536
201	40.000, 0.645	40.000, 0.413	40.000, 0.226	40.000, 0.114	40.000, 0.750	40.000, 0.384	40.000, 0.227	40.000, 0.007	40.000, 0.075	40.000, 0.689	40.000, 0.504	40.000, 0.550	40.000, -0.012	40.000, 0.579	40.000, 0.740	40.000, 0.570	40.000, 0.603	40.000, 0.562	40.000, 0.625	40.000, 0.590	40.000, 0.680	40.000, 0.463	40.000, 0.273	40.000, 0.134	40.000, 0.711	40.000, 0.526	40.000, 0.501	40.000, 0.019	40.000, 0.585	40.000, 0.546
202	40.200, 0.658	40.200, 0.421	40.200, 0.232	40.200, 0.116	40.200, 0.764	40.200, 0.392	40.200, 0.232	40.200, 0.008	40.200, 0.077	40.200, 0.700	40.200, 0.514	40.200, 0.560	40.200, -0.012	40.200, 0.590	40.200, 0.753	40.200, 0.580	40.200, 0.614	40.200, 0.572	40.200, 0.636	40.200, 0.601	40.200, 0.693	40.200, 0.472	40.200, 0.279	40.200, 0.137	40.200, 0.723	40.200, 0.535	40.200, 0.510	40.200, 0.020	40.200, 0.595	40.200, 0.556
203	40.400, 0.670	40.400, 0.430	40.400, 0.237	40.400, 0.119	40.400, 0.778	40.400, 0.400	40.400, 0.237	40.400, 0.009	40.400, 0.079	40.400, 0.711	40.400, 0.524	40.400, 0.570	40.400, -0.012	40.400, 0.600	40.400, 0.765	40.400, 0.589	40.400, 0.625	40.400, 0.582	40.400, 0.646	40.400, 0.611	40.400, 0.705	40.400, 0.482	40.400, 0.285	40.400, 0.140	40.400, 0.734	40.400, 0.544	40.400, 0.519	40.400, 0.021	40.400, 0.606	40.400, 0.566
204	40.600, 0.683	40.600, 0.439	40.600, 0.242	40.600, 0.121	40.600, 0.791	40.600, 0.408	40.600, 0.242	40.600, 0.010	40.600, 0.081	40.600, 0.723	40.600, 0.533	40.600, 0.580	40.600, -0.011	40.600, 0.610	40.600, 0.778	40.600, 0.599	40.600, 0.635	40.600, 0.592	40.600, 0.657	40.600, 0.622	40.600, 0.718	40.600, 0.491	40.600, 0.290	40.600, 0.143	40.600, 0.746	40.600, 0.554	40.600, 0.528	40.600, 0.021	40.600, 0.616	40.600, 0.575
205	40.800, 0.695	40.800, 0.447	40.800, 0.247	40.800, 0.124	40.800, 0.804	40.800, 0.416	40.800, 0.247	40.800, 0.010	40.800, 0.083	40.800, 0.734	40.800, 0.543	40.800, 0.590	40.800, -0.011	40.800, 0.620	40.800, 0.790	40.800, 0.608	40.800, 0.646	40.800, 0.601	40.800, 0.668	40.800, 0.632	40.800, 0.730	40.800, 0.500	40.800, 0.296	40.800, 0.146	40.800, 0.757	40.800, 0.563	40.800, 0.537	40.800, 0.022	40.800, 0.627	40.800, 0.585
206	41.000, 0.707	41.000, 0.455	41.000, 0.252	41.000, 0.126	41.000, 0.817	41.000, 0.424	41.000, 0.253	41.000, 0.011	41.000, 0.086	41.000, 0.745	41.000, 0.552	41.000, 0.599	41.000, -0.010	41.000, 0.630	41.000, 0.802	41.000, 0.618	41.000, 0.657	41.000, 0.611	41.000, 0.678	41.000, 0.643	41.000, 0.742	41.000, 0.509	41.000, 0.302	41.000, 0.149	41.000, 0.768	41.000, 0.573	41.000, 0.546	41.000, 0.023	41.000, 0.637	41.000, 0.594
207	41.200, 0.719	41.200, 0.464	41.200, 0.257	41.200, 0.129	41.200, 0.830	41.200, 0.432	41.200, 0.258	41.200, 0.012	41.200, 0.088	41.200, 0.756	41.200, 0.561	41.200, 0.609	41.200, -0.010	41.200, 0.640	41.200, 0.813	41.200, 0.627	41.200, 0.667	41.200, 0.621	41.200, 0.689	41.200, 0.653	41.200, 0.755	41.200, 0.518	41.200, 0.307	41.200, 0.152	41.200, 0.779	41.200, 0.582	41.200, 0.554	41.200, 0.023	41.200, 0.647	41.200, 0.604
208	41.400, 0.732	41.400, 0.472	41.400, 0.262	41.400, 0.131	41.400, 0.843	41.400, 0.439	41.400, 0.263	41.400, 0.012	41.400, 0.090	41.400, 0.767	41.400, 0.570	41.400, 0.618	41.400, -0.010	41.400, 0.650	41.400, 0.825	41.400, 0.637	41.400, 0.677	41.400, 0.630	41.400, 0.699	41.400, 0.664	41.400, 0.767	41.400, 0.527	41.400, 0.313	41.400, 0.154	41.400, 0.790	41.400, 0.591	41.400, 0.563	41.400, 0.024	41.400, 0.657	41.400, 0.614
209	41.600, 0.744	41.600, 0.481	41.600, 0.267	41.600, 0.133	41.600, 0.856	41.600, 0.447	41.600, 0.268	41.600, 0.013	41.600, 0.092	41.600, 0.777	41.600, 0.580	41.600, 0.628	41.600, -0.009	41.600, 0.660	41.600, 0.837	41.600, 0.646	41.600, 0.688	41.600, 0.640	41.600, 0.710	41.600, 0.674	41.600, 0.779	41.600, 0.536	41.600, 0.319	41.600, 0.157	41.600, 0.801	41.600, 0.600	41.600, 0.572	41.600, 0.024	41.600, 0.667	41.600, 0.624
210	41.800, 0.756	41.800, 0.489	41.800, 0.272	41.800, 0.136	41.800, 0.869	41.800, 0.454	41.800, 0.273	41.800, 0.014	41.800, 0.095	41.800, 0.788	41.800, 0.589	41.800, 0.637	41.800, -0.009	41.800, 0.669	41.800, 0.848	41.800, 0.656	41.800, 0.698	41.800, 0.650	41.800, 0.720	41.800, 0.684	41.800, 0.791	41.800, 0.545	41.800, 0.324	41.800, 0.160	41.800, 0.812	41.800, 0.610	41.800, 0.580	41.800, 0.025	41.800, 0.677	41.800, 0.633
211	42.000, 0.768	42.000, 0.498	42.000, 0.277	42.000, 0.138	42.000, 0.882	42.000, 0.461	42.000, 0.278	42.000, 0.014	42.000, 0.097	42.000, 0.799	42.000, 0.598	42.000, 0.646	42.000, -0.009	42.000, 0.679	42.000, 0.860	42.000, 0.665	42.000, 0.708	42.000, 0.659	42.000, 0.731	42.000, 0.695	42.000, 0.802	42.000, 0.554	42.000, 0.330	42.000, 0.163	42.000, 0.823	42.000, 0.619	42.000, 0.590	42.000, 0.025	42.000, 0.687	42.000, 0.643
212	42.200, 0.780	42.200, 0.506	42.200, 0.283	42.200, 0.141	42.200, 0.894	42.200, 0.469	42.200, 0.283	42.200, 0.015	42.200, 0.099	42.200, 0.809	42.200, 0.607	42.200, 0.656	42.200, -0.008	42.200, 0.689	42.200, 0.871	42.200, 0.675	42.200, 0.718	42.200, 0.669	42.200, 0.741	42.200, 0.705	42.200, 0.814	42.200, 0.563	42.200, 0.336	42.200, 0.166	42.200, 0.834	42.200, 0.628	42.200, 0.599	42.200, 0.026	42.200, 0.696	42.200, 0.652
213	42.400, 0.792	42.400, 0.515	42.400, 0.288	42.400, 0.144	42.400, 0.907	42.400, 0.476	42.400, 0.288	42.400, 0.016	42.400, 0.101	42.400, 0.820	42.400, 0.616	42.400, 0.665	42.400, -0.008	42.400, 0.699	42.400, 0.882	42.400, 0.685	42.400, 0.728	42.400, 0.678	42.400, 0.751	42.400, 0.715	42.400, 0.826	42.400, 0.571	42.400, 0.341	42.400, 0.169	42.400, 0.844	42.400, 0.637	42.400, 0.608	42.400, 0.026	42.400, 0.706	42.400, 0.662
214	42.600, 0.803	42.600, 0.524	42.600, 0.294	42.600, 0.147	42.600, 0.919	42.600, 0.483	42.600, 0.293	42.600, 0.017	42.600, 0.104	42.600, 0.830	42.600, 0.624	42.600, 0.674	42.600, -0.007	42.600, 0.709	42.600, 0.893	42.600, 0.695	42.600, 0.738	42.600, 0.687	42.600, 0.762	42.600, 0.725	42.600, 0.837	42.600, 0.580	42.600, 0.347	42.600, 0.172	42.600, 0.855	42.600, 0.645	42.600, 0.617	42.600, 0.027	42.600, 0.715	42.600, 0.671
215	42.800, 0.815	42.800, 0.532	42.800, 0.299	42.800, 0.149	42.800, 0.931	42.800, 0.490	42.800, 0.298	42.800, 0.018	42.800, 0.106	42.800, 0.840	42.800, 0.633	42.800, 0.683	42.800, -0.006	42.800, 0.719	42.800, 0.904	42.800, 0.705	42.800, 0.748	42.800, 0.697	42.800, 0.773	42.800, 0.734	42.800, 0.849	42.800, 0.589	42.800, 0.353	42.800, 0.175	42.800, 0.866	42.800, 0.654	42.800, 0.626	42.800, 0.028	42.800, 0.725	42.800, 0.681
216	43.000, 0.826	43.000, 0.541	43.000, 0.305	43.000, 0.152	43.000, 0.943	43.000, 0.498	43.000, 0.303	43.000, 0.019	43.000, 0.108	43.000, 0.850	43.000, 0.641	43.000, 0.692	43.000, -0.006	43.000, 0.729	43.000, 0.915	43.000, 0.715	43.000, 0.759	43.000, 0.706	43.000, 0.783	43.000, 0.744	43.000, 0.861	43.000, 0.597	43.000, 0.358	43.000, 0.178	43.000, 0.876	43.000, 0.662	43.000, 0.635	43.000, 0.029	43.000, 0.735	43.000, 0.690
217	43.200, 0.838	43.200, 0.550	43.200, 0.310	43.200, 0.155	43.200, 0.955	43.200, 0.505	43.200, 0.308	43.200, 0.020	43.200, 0.110	43.200, 0.860	43.200, 0.649	43.200, 0.702	43.200, -0.006	43.200, 0.738	43.200, 0.926	43.200, 0.724	43.200, 0.769	43.200, 0.715	43.200, 0.794	43.200, 0.754	43.200, 0.872	43.200, 0.606	43.200, 0.364	43.200, 0.181	43.200, 0.887	43.200, 0.670	43.200, 0.644	43.200, 0.029	43.200, 0.745	43.200, 0.700
218	43.400, 0.849	43.400, 0.558	43.400, 0.315	43.400, 0.158	43.400, 0.966	43.400, 0.512	43.400, 0.313	43.400, 0.021	43.400, 0.112	43.400, 0.870	43.400, 0.658	43.400, 0.711	43.400, -0.005	43.400, 0.748	43.400, 0.937	43.400, 0.734	43.400, 0.779	43.400, 0.724	43.400, 0.804	43.400, 0.763	43.400, 0.884	43.400, 0.615	43.400, 0.369	43.400, 0.185	43.400, 0.898	43.400, 0.679	43.400, 0.653	43.400, 0.030	43.400, 0.754	43.400, 0.709
219	43.600, 0.861	43.600, 0.566	43.600, 0.320	43.600, 0.161	43.600, 0.978	43.600, 0.519	43.600, 0.318	43.600, 0.021	43.600, 0.114	43.600, 0.880	43.600, 0.666	43.600, 0.720	43.600, -0.005	43.600, 0.757	43.600, 0.948	43.600, 0.744	43.600, 0.788	43.600, 0.734	43.600, 0.815	43.600, 0.772	43.600, 0.896	43.600, 0.624	43.600, 0.374	43.600, 0.188	43.600, 0.909	43.600, 0.687	43.600, 0.661	43.600, 0.031	43.600, 0.764	43.600, 0.718
220	43.800, 0.873	43.800, 0.575	43.800, 0.325	43.800, 0.163	43.800, 0.990	43.800, 0.526	43.800, 0.323	43.800, 0.022	43.800, 0.117	43.800, 0.890	43.800, 0.675	43.800, 0.729	43.800, -0.005	43.800, 0.767	43.800, 0.959	43.800, 0.753	43.800, 0.798	43.800, 0.743	43.800, 0.825	43.800, 0.782	43.800, 0.907	43.800, 0.632	43.800, 0.380	43.800, 0.192	43.800, 0.920	43.800, 0.695	43.800, 0.670	43.800, 0.032	43.800, 0.773	43.800, 0.727
221	44.000, 0.885	44.000, 0.583	44.000, 0.331	44.000, 0.166	44.000, 1.001	44.000, 0.533	44.000, 0.328	44.000, 0.023	44.000, 0.119	44.000, 0.900	44.000, 0.683	44.000, 0.737	44.000, -0.005	44.000, 0.776	44.000, 0.969	44.000, 0.762	44.000, 0.808	44.000, 0.752	44.000, 0.835	44.000, 0.791	44.000, 0.918	44.000, 0.641	44.000, 0.385	44.000, 0.195	44.000, 0.930	44.000, 0.703	44.000, 0.678	44.000, 0.033	44.000, 0.783	44.000, 0.736
222	44.200, 0.896	44.200, 0.591	44.200, 0.336	44.200, 0.168	44.200, 1.013	44.200, 0.540	44.200, 0.333	44.200, 0.024	44.200, 0.121	44.200, 0.910	44.200, 0.692	44.200, 0.746	44.200, -0.004	44.200, 0.785	44.200, 0.980	44.200, 0.771	44.200, 0.818	44.200, 0.761	44.200, 0.846	44.200, 0.800	44.200, 0.930	44.200, 0.649	44.200, 0.390	44.200, 0.198	44.200, 0.940	44.200, 0.711	44.200, 0.687	44.200, 0.033	44.200, 0.792	44.200, 0.744
223	44.400, 0.908	44.400, 0.599	44.400, 0.341	44.400, 0.171	44.400, 1.024	44.400, 0.548	44.400, 0.338	44.400, 0.025	44.400, 0.123	44.400, 0.919	44.400, 0.700	44.400, 0.754	44.400, -0.004	44.400, 0.794	44.400, 0.991	44.400, 0.780	44.400, 0.827	44.400, 0.770	44.400, 0.856	44.400, 0.809	44.400, 0.941	44.400, 0.657	44.400, 0.396	44.400, 0.201	44.400, 0.950	44.400, 0.719	44.400, 0.694	44.400, 0.034	44.400, 0.802	44.400, 0.753
224	44.600, 0.920	44.600, 0.607	44.600, 0.345	44.600, 0.173	44.600, 1.036	44.600, 0.555	44.600, 0.342	44.600, 0.026	44.600, 0.126	44.600, 0.929	44.600, 0.708	44.600, 0.763	44.600, -0.004	44.600, 0.803	44.600, 1.001	44.600, 0.789	44.600, 0.837	44.600, 0.779	44.600, 0.865	44.600, 0.818	44.600, 0.951	44.600, 0.665	44.600, 0.401	44.600, 0.204	44.600, 0.960	44.600, 0.727	44.600, 0.702	44.600, 0.035	44.600, 0.811	44.600, 0.762
225	44.800, 0.931	44.800, 0.616	44.800, 0.350	44.800, 0.175	44.800, 1.047	44.800, 0.562	44.800, 0.347	44.800, 0.027	44.800, 0.128	44.800, 0.938	44.800, 0.716	44.800, 0.771	44.800, -0.003	44.800, 0.812	44.800, 1.011	44.800, 0.797	44.800, 0.847	44.800, 0.788	44.800, 0.875	44.800, 0.827	44.800, 0.962	44.800, 0.673	44.800, 0.406	44.800, 0.207	44.800, 0.970	44.800, 0.735	44.800, 0.710	44.800, 0.036	44.800, 0.820	44.800, 0.770
226	45.000, 0.942	45.000, 0.624	45.000, 0.355	45.000, 0.178	45.000, 1.058	45.000, 0.569	45.000, 0.351	45.000, 0.028	45.000, 0.130	45.000, 0.947	45.000, 0.724	45.000, 0.780	45.000, -0.003	45.000, 0.821	45.000, 1.022	45.000, 0.806	45.000, 0.857	45.000, 0.797	45.000, 0.885	45.000, 0.836	45.000, 0.973	45.000, 0.681	45.000, 0.412	45.000, 0.210	45.000, 0.979	45.000, 0.744	45.000, 0.717	45.000, 0.037	45.000, 0.830	45.000, 0.779
227	45.200, 0.953	45.200, 0.632	45.200, 0.359	45.200, 0.180	45.200, 1.069	45.200, 0.576	45.200, 0.356	45.200, 0.028	45.200, 0.132	45.200, 0.957	45.200, 0.732	45.200, 0.788	45.200, -0.002	45.200, 0.830	45.200, 1.032	45.200, 0.815	45.200, 0.866	45.200, 0.806	45.200, 0.895	45.200, 0.846	45.200, 0.983	45.200, 0.689	45.200, 0.417	45.200, 0.213	45.200, 0.989	45.200, 0.752	45.200, 0.725	45.200, 0.038	45.200, 0.839	45.200, 0.788
228	45.400, 0.965	45.400, 0.640	45.400, 0.364	45.400, 0.183	45.400, 1.080	45.400, 0.582	45.400, 0.360	45.400, 0.029	45.400, 0.134	45.400, 0.966	45.400, 0.741	45.400, 0.797	45.400, -0.002	45.400, 0.838	45.400, 1.043	45.400, 0.823	45.400, 0.876	45.400, 0.815	45.400, 0.904	45.400, 0.855	45.400, 0.994	45.400, 0.698	45.400, 0.422	45.400, 0.215	45.400, 0.998	45.400, 0.760	45.400, 0.733	45.400, 0.039	45.400, 0.848	45.400, 0.797
229	45.600, 0.976	45.600, 0.648	45.600, 0.368	45.600, 0.185	45.600, 1.091	45.600, 0.589	45.600, 0.364	45.600, 0.030	45.600, 0.136	45.600, 0.976	45.600, 0.749	45.600, 0.805	45.600, -0.001	45.600, 0.847	45.600, 1.053	45.600, 0.832	45.600, 0.885	45.600, 0.824	45.600, 0.914	45.600, 0.864	45.600, 1.004	45.600, 0.706	45.600, 0.427	45.600, 0.218	45.600, 1.008	45.600, 0.768	45.600, 0.740	45.600, 0.040	45.600, 0.857	45.600, 0.806
230	45.800, 0.987	45.800, 0.656	45.800, 0.373	45.800, 0.188	45.800, 1.103	45.800, 0.596	45.800, 0.368	45.800, 0.030	45.800, 0.138	45.800, 0.985	45.800, 0.757	45.800, 0.813	45.800, -0.000	45.800, 0.856	45.800, 1.063	45.800, 0.840	45.800, 0.894	45.800, 0.833	45.800, 0.923	45.800, 0.874	45.800, 1.014	45.800, 0.714	45.800, 0.432	45.800, 0.220	45.800, 1.017	45.800, 0.777	45.800, 0.748	45.800, 0.041	45.800, 0.866	45.800, 0.814
231	46.000, 0.998	46.000, 0.664	46.000, 0.377	46.000, 0.190	46.000, 1.114	46.000, 0.603	46.000, 0.373	46.000, 0.031	46.000, 0.140	46.000, 0.994	46.000, 0.765	46.000, 0.821	46.000, 0.000	46.000, 0.864	46.000, 1.073	46.000, 0.849	46.000, 0.903	46.000, 0.841	46.000, 0.932	46.000, 0.883	46.000, 1.025	46.000, 0.722	46.000, 0.437	46.000, 0.223	46.000, 1.027	46.000, 0.785	46.000, 0.755	46.000, 0.042	46.000, 0.875	46.000, 0.823
232	46.200, 1.008	46.200, 0.672	46.200, 0.382	46.200, 0.193	46.200, 1.125	46.200, 0.610	46.200, 0.377	46.200, 0.032	46.200, 0.142	46.200, 1.003	46.200, 0.773	46.200, 0.829	46.200, 0.001	46.200, 0.873	46.200, 1.083	46.200, 0.858	46.200, 0.912	46.200, 0.850	46.200, 0.941	46.200, 0.893	46.200, 1.035	46.200, 0.730	46.200, 0.442	46.200, 0.226	46.200, 1.036	46.200, 0.793	46.200, 0.763	46.200, 0.043	46.200, 0.884	46.200, 0.832
233	46.400, 1.019	46.400, 0.679	46.400, 0.387	46.400, 0.196	46.400, 1.135	46.400, 0.616	46.400, 0.382	46.400, 0.032	46.400, 0.144	46.400, 1.012	46.400, 0.781	46.400, 0.837	46.400, 0.002	46.400, 0.882	46.400, 1.094	46.400, 0.867	46.400, 0.921	46.400, 0.858	46.400, 0.951	46.400, 0.902	46.400, 1.045	46.400, 0.738	46.400, 0.448	46.400, 0.228	46.400, 1.045	46.400, 0.801	46.400, 0.771	46.400, 0.044	46.400, 0.893	46.400, 0.840
234	46.600, 1.029	46.600, 0.687	46.600, 0.392	46.600, 0.198	46.600, 1.146	46.600, 0.623	46.600, 0.386	46.600, 0.033	46.600, 0.146	46.600, 1.020	46.600, 0.788	46.600, 0.845	46.600, 0.002	46.600, 0.891	46.600, 1.104	46.600, 0.876	46.600, 0.930	46.600, 0.866	46.600, 0.960	46.600, 0.911	46.600, 1.056	46.600, 0.746	46.600, 0.453	46.600, 0.231	46.600, 1.055	46.600, 0.809	46.600, 0.778	46.600, 0.045	46.600, 0.901	46.600, 0.849
235	46.800, 1.040	46.800, 0.695	46.800, 0.397	46.800, 0.201	46.800, 1.157	46.800, 0.630	46.800, 0.391	46.800, 0.033	46.800, 0.148	46.800, 1.029	46.800, 0.796	46.800, 0.853	46.800, 0.003	46.800, 0.900	46.800, 1.114	46.800, 0.885	46.800, 0.938	46.800, 0.875	46.800, 0.970	46.800, 0.920	46.800, 1.066	46.800, 0.755	46.800, 0.459	46.800, 0.234	46.800, 1.064	46.800, 0.817	46.800, 0.786	46.800, 0.045	46.800, 0.910	46.800, 0.858
236	47.000, 1.050	47.000, 0.702	47.000, 0.402	47.000, 0.204	47.000, 1.167	47.000, 0.637	47.000, 0.396	47.000, 0.034	47.000, 0.150	47.000, 1.037	47.000, 0.804	47.000, 0.861	47.000, 0.003	47.000, 0.908	47.000, 1.124	47.000, 0.893	47.000, 0.947	47.000, 0.883	47.000, 0.979	47.000, 0.929	47.000, 1.076	47.000, 0.763	47.000, 0.464	47.000, 0.237	47.000, 1.074	47.000, 0.825	47.000, 0.794	47.000, 0.046	47.000, 0.918	47.000, 0.867
237	47.200, 1.061	47.200, 0.710	47.200, 0.407	47.200, 0.207	47.200, 1.178	47.200, 0.643	47.200, 0.400	47.200, 0.034	47.200, 0.152	47.200, 1.046	47.200, 0.812	47.200, 0.870	47.200, 0.003	47.200, 0.917	47.200, 1.134	47.200, 0.902	47.200, 0.956	47.200, 0.891	47.200, 0.989	47.200, 0.938	47.200, 1.086	47.200, 0.771	47.200, 0.469	47.200, 0.240	47.200, 1.083	47.200, 0.832	47.200, 0.803	47.200, 0.047	47.200, 0.927	47.200, 0.875
238	47.400, 1.071	47.400, 0.717	47.400, 0.412	47.400, 0.209	47.400, 1.188	47.400, 0.650	47.400, 0.405	47.400, 0.035	47.400, 0.154	47.400, 1.054	47.400, 0.820	47.400, 0.878	47.400, 0.004	47.400, 0.925	47.400, 1.143	47.400, 0.911	47.400, 0.964	47.400, 0.900	47.400, 0.998	47.400, 0.947	47.400, 1.097	47.400, 0.779	47.400, 0.474	47.400, 0.243	47.400, 1.092	47.400, 0.840	47.400, 0.811	47.400, 0.048	47.400, 0.935	47.400, 0.884
239	47.600, 1.082	47.600, 0.725	47.600, 0.418	47.600, 0.211	47.600, 1.198	47.600, 0.657	47.600, 0.410	47.600, 0.035	47.600, 0.156	47.600, 1.063	47.600, 0.828	47.600, 0.886	47.600, 0.004	47.600, 0.933	47.600, 1.153	47.600, 0.919	47.600, 0.972	47.600, 0.908	47.600, 1.007	47.600, 0.955	47.600, 1.106	47.600, 0.787	47.600, 0.479	47.600, 0.246	47.600, 1.101	47.600, 0.847	47.600, 0.819	47.600, 0.049	47.600, 0.943	47.600, 0.892
240	47.800, 1.092	47.800, 0.732	47.800, 0.423	47.800, 0.214	47.800, 1.208	47.800, 0.663	47.800, 0.414	47.800, 0.036	47.800, 0.159	47.800, 1.072	47.800, 0.836	47.800, 0.894	47.800, 0.004	47.800, 0.942	47.800, 1.162	47.800, 0.927	47.800, 0.980	47.800, 0.916	47.800, 1.016	47.800, 0.964	47.800, 1.116	47.800, 0.795	47.800, 0.484	47.800, 0.249	47.800, 1.110	47.800, 0.855	47.800, 0.827	47.800, 0.049	47.800, 0.951	47.800, 0.900
241	48.000, 1.103	48.000, 0.739	48.000, 0.428	48.000, 0.216	48.000, 1.218	48.000, 0.670	48.000, 0.419	48.000, 0.036	48.000, 0.161	48.000, 1.080	48.000, 0.844	48.000, 0.902	48.000, 0.005	48.000, 0.950	48.000, 1.172	48.000, 0.936	48.000, 0.989	48.000, 0.924	48.000, 1.025	48.000, 0.972	48.000, 1.126	48.000, 0.802	48.000, 0.489	48.000, 0.252	48.000, 1.118	48.000, 0.862	48.000, 0.834	48.000, 0.050	48.000, 0.959	48.000, 0.908
242	48.200, 1.113	48.200, 0.747	48.200, 0.433	48.200, 0.218	48.200, 1.228	48.200, 0.676	48.200, 0.423	48.200, 0.037	48.200, 0.163	48.200, 1.089	48.200, 0.852	48.200, 0.910	48.200, 0.005	48.200, 0.958	48.200, 1.181	48.200, 0.944	48.200, 0.997	48.200, 0.932	48.200, 1.033	48.200, 0.980	48.200, 1.136	48.200, 0.810	48.200, 0.494	48.200, 0.255	48.200, 1.127	48.200, 0.870	48.200, 0.842	48.200, 0.051	48.200, 0.968	48.200, 0.915
243	48.400, 1.123	48.400, 0.754	48.400, 0.438	48.400, 0.220	48.400, 1.237	48.400, 0.682	48.400, 0.427	48.400, 0.038	48.400, 0.165	48.400, 1.097	48.400, 0.860	48.400, 0.918	48.400, 0.006	48.400, 0.966	48.400, 1.190	48.400, 0.952	48.400, 1.005	48.400, 0.941	48.400, 1.042	48.400, 0.988	48.400, 1.145	48.400, 0.818	48.400, 0.499	48.400, 0.258	48.400, 1.135	48.400, 0.877	48.400, 0.849	48.400, 0.051	48.400, 0.976	48.400, 0.923
244	48.600, 1.133	48.600, 0.762	48.600, 0.442	48.600, 0.222	48.600, 1.247	48.600, 0.688	48.600, 0.431	48.600, 0.038	48.600, 0.167	48.600, 1.106	48.600, 0.867	48.600, 0.926	48.600, 0.006	48.600, 0.974	48.600, 1.199	48.600, 0.960	48.600, 1.014	48.600, 0.949	48.600, 1.051	48.600, 0.996	48.600, 1.155	48.600, 0.825	48.600, 0.504	48.600, 0.260	48.600, 1.143	48.600, 0.885	48.600, 0.857	48.600, 0.052	48.600, 0.984	48.600, 0.931
245	48.800, 1.144	48.800, 0.769	48.800, 0.447	48.800, 0.224	48.800, 1.256	48.800, 0.695	48.800, 0.435	48.800, 0.039	48.800, 0.170	48.800, 1.114	48.800, 0.874	48.800, 0.934	48.800, 0.007	48.800, 0.982	48.800, 1.209	48.800, 0.968	48.800, 1.022	48.800, 0.957	48.800, 1.059	48.800, 1.004	48.800, 1.164	48.800, 0.833	48.800, 0.508	48.800, 0.263	48.800, 1.151	48.800, 0.892	48.800, 0.865	48.800, 0.053	48.800, 0.992	48.800, 0.939
246	49.000, 1.154	49.000, 0.777	49.000, 0.451	49.000, 0.227	49.000, 1.266	49.000, 0.701	49.000, 0.440	49.000, 0.040	49.000, 0.172	49.000, 1.122	49.000, 0.882	49.000, 0.942	49.000, 0.008	49.000, 0.990	49.000, 1.218	49.000, 0.976	49.000, 1.030	49.000, 0.965	49.000, 1.067	49.000, 1.012	49.000, 1.174	49.000, 0.840	49.000, 0.513	49.000, 0.266	49.000, 1.159	49.000, 0.900	49.000, 0.872	49.000, 0.054	49.000, 1.000	49.000, 0.946
247	49.200, 1.164	49.200, 0.784	49.200, 0.455	49.200, 0.230	49.200, 1.275	49.200, 0.708	49.200, 0.444	49.200, 0.041	49.200, 0.173	49.200, 1.130	49.200, 0.889	49.200, 0.950	49.200, 0.008	49.200, 0.998	49.200, 1.227	49.200, 0.983	49.200, 1.038	49.200, 0.974	49.200, 1.076	49.200, 1.019	49.200, 1.183	49.200, 0.848	49.200, 0.518	49.200, 0.268	49.200, 1.168	49.200, 0.907	49.200, 0.879	49.200, 0.055	49.200, 1.009	49.200, 0.954
248	49.400, 1.173	49.400, 0.792	49.400, 0.460	49.400, 0.232	49.400, 1.284	49.400, 0.714	49.400, 0.448	49.400, 0.041	49.400, 0.175	49.400, 1.138	49.400, 0.896	49.400, 0.957	49.400, 0.009	49.400, 1.006	49.400, 1.236	49.400, 0.991	49.400, 1.047	49.400, 0.982	49.400, 1.084	49.400, 1.027	49.400, 1.193	49.400, 0.855	49.400, 0.523	49.400, 0.271	49.400, 1.176	49.400, 0.915	49.400, 0.887	49.400, 0.056	49.400, 1.017	49.400, 0.962
249	49.600, 1.183	49.600, 0.800	49.600, 0.464	49.600, 0.235	49.600, 1.294	49.600, 0.720	49.600, 0.453	49.600, 0.042	49.600, 0.177	49.600, 1.146	49.600, 0.904	49.600, 0.965	49.600, 0.010	49.600, 1.014	49.600, 1.245	49.600, 0.998	49.600, 1.055	49.600, 0.990	49.600, 1.092	49.600, 1.036	49.600, 1.203	49.600, 0.863	49.600, 0.528	49.600, 0.274	49.600, 1.184	49.600, 0.922	49.600, 0.894	49.600, 0.057	49.600, 1.025	49.600, 0.970
250	49.800, 1.193	49.800, 0.807	49.800, 0.468	49.800, 0.237	49.800, 1.303	49.800, 0.727	49.800, 0.457	49.800, 0.043	49.800, 0.179	49.800, 1.154	49.800, 0.911	49.800, 0.972	49.800, 0.010	49.800, 1.022	49.800, 1.253	49.800, 1.006	49.800, 1.063	49.800, 0.997	49.800, 1.100	49.800, 1.044	49.800, 1.213	49.800, 0.870	49.800, 0.533	49.800, 0.276	49.800, 1.193	49.800, 0.929	49.800, 0.901	49.800, 0.057	49.800, 1.033	49.800, 0.978
251	50.000, 1.203	50.000, 0.815	50.000, 0.473	50.000, 0.239	50.000, 1.313	50.000, 0.733	50.000, 0.462	50.000, 0.044	50.000, 0.181	50.000, 1.162	50.000, 0.918	50.000, 0.980	50.000, 0.011	50.000, 1.030	50.000, 1.262	50.000, 1.014	50.000, 1.071	50.000, 1.005	50.000, 1.109	50.000, 1.052	50.000, 1.222	50.000, 0.877	50.000, 0.538	50.000, 0.279	50.000, 1.201	50.000, 0.936	50.000, 0.908	50.000, 0.058	50.000, 1.041	50.000, 0.986
252	50.200, 1.213	50.200, 0.822	50.200, 0.477	50.200, 0.242	50.200, 1.322	50.200, 0.740	50.200, 0.466	50.200, 0.045	50.200, 0.183	50.200, 1.169	50.200, 0.925	50.200, 0.987	50.200, 0.011	50.200, 1.038	50.200, 1.271	50.200, 1.021	50.200, 1.080	50.200, 1.012	50.200, 1.117	50.200, 1.059	50.200, 1.232	50.200, 0.884	50.200, 0.543	50.200, 0.282	50.200, 1.209	50.200, 0.944	50.200, 0.915	50.200, 0.059	50.200, 1.049	50.200, 0.994
253	50.400, 1.222	50.400, 0.830	50.400, 0.482	50.400, 0.245	50.400, 1.331	50.400, 0.746	50.400, 0.471	50.400, 0.046	50.400, 0.185	50.400, 1.177	50.400, 0.932	50.400, 0.995	50.400, 0.011	50.400, 1.046	50.400, 1.280	50.400, 1.029	50.400, 1.088	50.400, 1.020	50.400, 1.125	50.400, 1.067	50.400, 1.241	50.400, 0.891	50.400, 0.548	50.400, 0.284	50.400, 1.217	50.400, 0.951	50.400, 0.922	50.400, 0.059	50.400, 1.057	50.400, 1.001
254	50.600, 1.232	50.600, 0.837	50.600, 0.487	50.600, 0.247	50.600, 1.340	50.600, 0.752	50.600, 0.475	50.600, 0.047	50.600, 0.187	50.600, 1.184	50.600, 0.939	50.600, 1.002	50.600, 0.012	50.600, 1.055	50.600, 1.288	50.600, 1.036	50.600, 1.096	50.600, 1.027	50.600, 1.134	50.600, 1.075	50.600, 1.251	50.600, 0.898	50.600, 0.553	50.600, 0.287	50.600, 1.225	50.600, 0.958	50.600, 0.929	50.600, 0.060	50.600, 1.065	50.600, 1.009
255	50.800, 1.242	50.800, 0.844	50.800, 0.491	50.800, 0.250	50.800, 1.349	50.800, 0.759	50.800, 0.480	50.800, 0.048	50.800, 0.189	50.800, 1.192	50.800, 0.946	50.800, 1.009	50.800, 0.012	50.800, 1.063	50.800, 1.297	50.800, 1.044	50.800, 1.104	50.800, 1.034	50.800, 1.143	50.800, 1.083	50.800, 1.260	50.800, 0.905	50.800, 0.558	50.800, 0.290	50.800, 1.233	50.800, 0.965	50.800, 0.936	50.800, 0.061	50.800, 1.073	50.800, 1.017
256	51.000, 1.251	51.000, 0.851	51.000, 0.496	51.000, 0.253	51.000, 1.358	51.000, 0.765	51.000, 0.484	51.000, 0.048	51.000, 0.191	51.000, 1.200	51.000, 0.953	51.000, 1.016	51.000, 0.012	51.000, 1.071	51.000, 1.305	51.000, 1.051	51.000, 1.112	51.000, 1.042	51.000, 1.151	51.000, 1.091	51.000, 1.269	51.000, 0.912	51.000, 0.563	51.000, 0.292	51.000, 1.241	51.000, 0.972	51.000, 0.943	51.000, 0.062	51.000, 1.081	51.000, 1.024
257	51.200, 1.261	51.200, 0.858	51.200, 0.501	51.200, 0.255	51.200, 1.367	51.200, 0.772	51.200, 0.489	51.200, 0.049	51.200, 0.193	51.200, 1.207	51.200, 0.959	51.200, 1.023	51.200, 0.013	51.200, 1.079	51.200, 1.314	51.200, 1.059	51.200, 1.120	51.200, 1.049	51.200, 1.160	51.200, 1.099	51.200, 1.278	51.200, 0.919	51.200, 0.567	51.200, 0.295	51.200, 1.248	51.200, 0.979	51.200, 0.950	51.200, 0.062	51.200, 1.089	51.200, 1.032
258	51.400, 1.270	51.400, 0.864	51.400, 0.506	51.400, 0.258	51.400, 1.376	51.400, 0.778	51.400, 0.493	51.400, 0.050	51.400, 0.195	51.400, 1.215	51.400, 0.966	51.400, 1.030	51.400, 0.013	51.400, 1.087	51.400, 1.321	51.400, 1.067	51.400, 1.128	51.400, 1.056	51.400, 1.168	51.400, 1.107	51.400, 1.287	51.400, 0.926	51.400, 0.572	51.400, 0.297	51.400, 1.256	51.400, 0.985	51.400, 0.956	51.400, 0.063	51.400, 1.096	51.400, 1.039
259	51.600, 1.280	51.600, 0.871	51.600, 0.510	51.600, 0.260	51.600, 1.384	51.600, 0.784	51.600, 0.497	51.600, 0.050	51.600, 0.197	51.600, 1.223	51.600, 0.973	51.600, 1.036	51.600, 0.013	51.600, 1.094	51.600, 1.329	51.600, 1.074	51.600, 1.136	51.600, 1.063	51.600, 1.176	51.600, 1.115	51.600, 1.295	51.600, 0.933	51.600, 0.577	51.600, 0.300	51.600, 1.264	51.600, 0.991	51.600, 0.963	51.600, 0.063	51.600, 1.104	51.600, 1.046
260	51.800, 1.289	51.800, 0.878	51.800, 0.515	51.800, 0.262	51.800, 1.393	51.800, 0.790	51.800, 0.501	51.800, 0.051	51.800, 0.199	51.800, 1.231	51.800, 0.980	51.800, 1.043	51.800, 0.014	51.800, 1.102	51.800, 1.337	51.800, 1.082	51.800, 1.144	51.800, 1.070	51.800, 1.185	51.800, 1.123	51.800, 1.304	51.800, 0.941	51.800, 0.582	51.800, 0.303	51.800, 1.272	51.800, 0.997	51.800, 0.970	51.800, 0.064	51.800, 1.111	51.800, 1.054
261	52.000, 1.298	52.000, 0.885	52.000, 0.520	52.000, 0.264	52.000, 1.402	52.000, 0.796	52.000, 0.505	52.000, 0.051	52.000, 0.201	52.000, 1.238	52.000, 0.987	52.000, 1.050	52.000, 0.014	52.000, 1.109	52.000, 1.345	52.000, 1.089	52.000, 1.152	52.000, 1.078	52.000, 1.193	52.000, 1.131	52.000, 1.312	52.000, 0.948	52.000, 0.587	52.000, 0.305	52.000, 1.279	52.000, 1.004	52.000, 0.976	52.000, 0.065	52.000, 1.119	52.000, 1.060
262	52.200, 1.307	52.200, 0.892	52.200, 0.524	52.200, 0.267	52.200, 1.411	52.200, 0.801	52.200, 0.509	52.200, 0.052	52.200, 0.203	52.200, 1.246	52.200, 0.993	52.200, 1.056	52.200, 0.015	52.200, 1.117	52.200, 1.353	52.200, 1.096	52.200, 1.160	52.200, 1.085	52.200, 1.201	52.200, 1.139	52.200, 1.321	52.200, 0.956	52.200, 0.592	52.200, 0.308	52.200, 1.286	52.200, 1.010	52.200, 0.982	52.200, 0.066	52.200, 1.127	52.200, 1.068
263	52.400, 1.316	52.400, 0.898	52.400, 0.528	52.400, 0.269	52.400, 1.419	52.400, 0.807	52.400, 0.513	52.400, 0.052	52.400, 0.205	52.400, 1.254	52.400, 1.000	52.400, 1.063	52.400, 0.015	52.400, 1.124	52.400, 1.361	52.400, 1.103	52.400, 1.168	52.400, 1.093	52.400, 1.209	52.400, 1.147	52.400, 1.329	52.400, 0.963	52.400, 0.596	52.400, 0.310	52.400, 1.294	52.400, 1.017	52.400, 0.988	52.400, 0.066	52.400, 1.134	52.400, 1.075
264	52.600, 1.325	52.600, 0.905	52.600, 0.533	52.600, 0.271	52.600, 1.428	52.600, 0.813	52.600, 0.517	52.600, 0.052	52.600, 0.208	52.600, 1.261	52.600, 1.006	52.600, 1.070	52.600, 0.016	52.600, 1.131	52.600, 1.369	52.600, 1.110	52.600, 1.175	52.600, 1.100	52.600, 1.217	52.600, 1.154	52.600, 1.338	52.600, 0.970	52.600, 0.601	52.600, 0.313	52.600, 1.301	52.600, 1.023	52.600, 0.994	52.600, 0.067	52.600, 1.142	52.600, 1.082
265	52.800, 1.334	52.800, 0.912	52.800, 0.537	52.800, 0.274	52.800, 1.436	52.800, 0.819	52.800, 0.522	52.800, 0.053	52.800, 0.210	52.800, 1.268	52.800, 1.013	52.800, 1.076	52.800, 0.017	52.800, 1.138	52.800, 1.377	52.800, 1.117	52.800, 1.183	52.800, 1.107	52.800, 1.224	52.800, 1.162	52.800, 1.346	52.800, 0.977	52.800, 0.606	52.800, 0.315	52.800, 1.308	52.800, 1.030	52.800, 1.000	52.800, 0.068	52.800, 1.149	52.800, 1.089
266	53.000, 1.343	53.000, 0.919	53.000, 0.541	53.000, 0.276	53.000, 1.444	53.000, 0.825	53.000, 0.526	53.000, 0.053	53.000, 0.212	53.000, 1.275	53.000, 1.020	53.000, 1.083	53.000, 0.017	53.000, 1.145	53.000, 1.385	53.000, 1.125	53.000, 1.191	53.000, 1.115	53.000, 1.232	53.000, 1.169	53.000, 1.355	53.000, 0.984	53.000, 0.611	53.000, 0.318	53.000, 1.316	53.000, 1.036	53.000, 1.006	53.000, 0.069	53.000, 1.156	53.000, 1.096
267	53.200, 1.352	53.200, 0.925	53.200, 0.546	53.200, 0.278	53.200, 1.453	53.200, 0.831	53.200, 0.530	53.200, 0.054	53.200, 0.214	53.200, 1.282	53.200, 1.026	53.200, 1.090	53.200, 0.018	53.200, 1.152	53.200, 1.393	53.200, 1.132	53.200, 1.199	53.200, 1.122	53.200, 1.240	53.200, 1.177	53.200, 1.363	53.200, 0.991	53.200, 0.616	53.200, 0.321	53.200, 1.323	53.200, 1.043	53.200, 1.013	53.200, 0.069	53.200, 1.163	53.200, 1.103
268	53.400, 1.361	53.400, 0.932	53.400, 0.550	53.400, 0.280	53.400, 1.461	53.400, 0.837	53.400, 0.534	53.400, 0.055	53.400, 0.216	53.400, 1.289	53.400, 1.033	53.400, 1.097	53.400, 0.018	53.400, 1.159	53.400, 1.401	53.400, 1.139	53.400, 1.206	53.400, 1.129	53.400, 1.247	53.400, 1.184	53.400, 1.372	53.400, 0.998	53.400, 0.620	53.400, 0.323	53.400, 1.331	53.400, 1.049	53.400, 1.019	53.400, 0.070	53.400, 1.170	53.400, 1.110
269	53.600, 1.370	53.600, 0.939	53.600, 0.555	53.600, 0.283	53.600, 1.470	53.600, 0.842	53.600, 0.538	53.600, 0.055	53.600, 0.218	53.600, 1.296	53.600, 1.040	53.600, 1.103	53.600, 0.019	53.600, 1.166	53.600, 1.409	53.600, 1.146	53.600, 1.214	53.600, 1.135	53.600, 1.255	53.600, 1.192	53.600, 1.380	53.600, 1.004	53.600, 0.625	53.600, 0.326	53.600, 1.338	53.600, 1.056	53.600, 1.025	53.600, 0.071	53.600, 1.177	53.600, 1.118
270	53.800, 1.379	53.800, 0.946	53.800, 0.560	53.800, 0.285	53.800, 1.479	53.800, 0.848	53.800, 0.542	53.800, 0.056	53.800, 0.220	53.800, 1.303	53.800, 1.047	53.800, 1.110	53.800, 0.020	53.800, 1.173	53.800, 1.416	53.800, 1.153	53.800, 1.221	53.800, 1.142	53.800, 1.262	53.800, 1.199	53.800, 1.388	53.800, 1.010	53.800, 0.629	53.800, 0.328	53.800, 1.345	53.800, 1.062	53.800, 1.031	53.800, 0.072	53.800, 1.185	53.800, 1.125
271	54.000, 1.388	54.000, 0.953	54.000, 0.564	54.000, 0.287	54.000, 1.487	54.000, 0.854	54.000, 0.546	54.000, 0.057	54.000, 0.222	54.000, 1.309	54.000, 1.053	54.000, 1.118	54.000, 0.020	54.000, 1.180	54.000, 1.424	54.000, 1.160	54.000, 1.228	54.000, 1.149	54.000, 1.270	54.000, 1.206	54.000, 1.397	54.000, 1.017	54.000, 0.634	54.000, 0.331	54.000, 1.353	54.000, 1.069	54.000, 1.038	54.000, 0.073	54.000, 1.192	54.000, 1.132
272	54.200, 1.397	54.200, 0.959	54.200, 0.569	54.200, 0.289	54.200, 1.495	54.200, 0.859	54.200, 0.551	54.200, 0.058	54.200, 0.224	54.200, 1.316	54.200, 1.059	54.200, 1.124	54.200, 0.021	54.200, 1.187	54.200, 1.431	54.200, 1.167	54.200, 1.235	54.200, 1.155	54.200, 1.277	54.200, 1.212	54.200, 1.405	54.200, 1.023	54.200, 0.638	54.200, 0.334	54.200, 1.360	54.200, 1.075	54.200, 1.044	54.200, 0.074	54.200, 1.199	54.200, 1.139
273	54.400, 1.405	54.400, 0.966	54.400, 0.573	54.400, 0.291	54.400, 1.503	54.400, 0.865	54.400, 0.555	54.400, 0.059	54.400, 0.226	54.400, 1.322	54.400, 1.065	54.400, 1.131	54.400, 0.022	54.400, 1.195	54.400, 1.439	54.400, 1.174	54.400, 1.242	54.400, 1.162	54.400, 1.285	54.400, 1.219	54.400, 1.412	54.400, 1.029	54.400, 0.643	54.400, 0.337	54.400, 1.366	54.400, 1.082	54.400, 1.050	54.400, 0.076	54.400, 1.206	54.400, 1.147
274	54.600, 1.414	54.600, 0.973	54.600, 0.578	54.600, 0.293	54.600, 1.511	54.600, 0.871	54.600, 0.560	54.600, 0.059	54.600, 0.228	54.600, 1.329	54.600, 1.071	54.600, 1.138	54.600, 0.022	54.600, 1.202	54.600, 1.446	54.600, 1.181	54.600, 1.248	54.600, 1.169	54.600, 1.292	54.600, 1.226	54.600, 1.420	54.600, 1.036	54.600, 0.647	54.600, 0.340	54.600, 1.373	54.600, 1.088	54.600, 1.057	54.600, 0.077	54.600, 1.213	54.600, 1.154
275	54.800, 1.422	54.800, 0.980	54.800, 0.582	54.800, 0.295	54.800, 1.519	54.800, 0.876	54.800, 0.564	54.800, 0.060	54.800, 0.230	54.800, 1.335	54.800, 1.078	54.800, 1.144	54.800, 0.023	54.800, 1.209	54.800, 1.454	54.800, 1.188	54.800, 1.255	54.800, 1.176	54.800, 1.299	54.800, 1.233	54.800, 1.428	54.800, 1.042	54.800, 0.652	54.800, 0.343	54.800, 1.380	54.800, 1.094	54.800, 1.064	54.800, 0.078	54.800, 1.220	54.800, 1.161
276	55.000, 1.431	55.000, 0.987	55.000, 0.586	55.000, 0.298	55.000, 1.527	55.000, 0.881	55.000, 0.568	55.000, 0.061	55.000, 0.231	55.000, 1.341	55.000, 1.084	55.000, 1.150	55.000, 0.023	55.000, 1.216	55.000, 1.461	55.000, 1.195	55.000, 1.262	55.000, 1.183	55.000, 1.306	55.000, 1.240	55.000, 1.435	55.000, 1.049	55.000, 0.656	55.000, 0.346	55.000, 1.386	55.000, 1.100	55.000, 1.070	55.000, 0.079	55.000, 1.226	55.000, 1.168
277	55.200, 1.439	55.200, 0.993	55.200, 0.591	55.200, 0.300	55.200, 1.535	55.200, 0.887	55.200, 0.572	55.200, 0.061	55.200, 0.233	55.200, 1.348	55.200, 1.090	55.200, 1.157	55.200, 0.024	55.200, 1.223	55.200, 1.468	55.200, 1.202	55.200, 1.268	55.200, 1.190	55.200, 1.313	55.200, 1.247	55.200, 1.443	55.200, 1.056	55.200, 0.661	55.200, 0.348	55.200, 1.393	55.200, 1.106	55.200, 1.077	55.200, 0.079	55.200, 1.233	55.200, 1.175
278	55.400, 1.447	55.400, 1.000	55.400, 0.595	55.400, 0.302	55.400, 1.542	55.400, 0.892	55.400, 0.576	55.400, 0.062	55.400, 0.235	55.400, 1.354	55.400, 1.096	55.400, 1.163	55.400, 0.024	55.400, 1.230	55.400, 1.476	55.400, 1.209	55.400, 1.275	55.400, 1.197	55.400, 1.320	55.400, 1.254	55.400, 1.451	55.400, 1.063	55.400, 0.666	55.400, 0.351	55.400, 1.399	55.400, 1.112	55.400, 1.084	55.400, 0.080	55.400, 1.240	55.400, 1.182
279	55.600, 1.455	55.600, 1.007	55.600, 0.599	55.600, 0.304	55.600, 1.550	55.600, 0.897	55.600, 0.580	55.600, 0.063	55.600, 0.237	55.600, 1.361	55.600, 1.102	55.600, 1.169	55.600, 0.025	55.600, 1.237	55.600, 1.483	55.600, 1.215	55.600, 1.282	55.600, 1.203	55.600, 1.327	55.600, 1.261	55.600, 1.459	55.600, 1.070	55.600, 0.671	55.600, 0.353	55.600, 1.406	55.600, 1.118	55.600, 1.090	55.600, 0.081	55.600, 1.246	55.600, 1.189
280	55.800, 1.463	55.800, 1.013	55.800, 0.603	55.800, 0.306	55.800, 1.557	55.800, 0.902	55.800, 0.584	55.800, 0.063	55.800, 0.239	55.800, 1.367	55.800, 1.108	55.800, 1.176	55.800, 0.025	55.800, 1.244	55.800, 1.490	55.800, 1.222	55.800, 1.289	55.800, 1.210	55.800, 1.334	55.800, 1.269	55.800, 1.467	55.800, 1.077	55.800, 0.675	55.800, 0.355	55.800, 1.413	55.800, 1.124	55.800, 1.096	55.800, 0.082	55.800, 1.253	55.800, 1.196
281	56.000, 1.471	56.000, 1.019	56.000, 0.607	56.000, 0.309	56.000, 1.565	56.000, 0.908	56.000, 0.589	56.000, 0.064	56.000, 0.240	56.000, 1.374	56.000, 1.113	56.000, 1.182	56.000, 0.026	56.000, 1.250	56.000, 1.498	56.000, 1.228	56.000, 1.296	56.000, 1.217	56.000, 1.341	56.000, 1.276	56.000, 1.475	56.000, 1.084	56.000, 0.680	56.000, 0.358	56.000, 1.419	56.000, 1.130	56.000, 1.102	56.000, 0.082	56.000, 1.260	56.000, 1.203
282	56.200, 1.480	56.200, 1.026	56.200, 0.611	56.200, 0.312	56.200, 1.572	56.200, 0.913	56.200, 0.593	56.200, 0.065	56.200, 0.242	56.200, 1.380	56.200, 1.119	56.200, 1.188	56.200, 0.026	56.200, 1.257	56.200, 1.505	56.200, 1.234	56.200, 1.303	56.200, 1.224	56.200, 1.348	56.200, 1.283	56.200, 1.483	56.200, 1.091	56.200, 0.685	56.200, 0.360	56.200, 1.426	56.200, 1.136	56.200, 1.107	56.200, 0.083	56.200, 1.266	56.200, 1.209
283	56.400, 1.488	56.400, 1.032	56.400, 0.615	56.400, 0.314	56.400, 1.579	56.400, 0.918	56.400, 0.597	56.400, 0.066	56.400, 0.244	56.400, 1.386	56.400, 1.125	56.400, 1.194	56.400, 0.026	56.400, 1.264	56.400, 1.512	56.400, 1.240	56.400, 1.309	56.400, 1.231	56.400, 1.355	56.400, 1.290	56.400, 1.491	56.400, 1.098	56.400, 0.689	56.400, 0.363	56.400, 1.433	56.400, 1.142	56.400, 1.113	56.400, 0.083	56.400, 1.273	56.400, 1.215
284	56.600, 1.496	56.600, 1.038	56.600, 0.619	56.600, 0.317	56.600, 1.587	56.600, 0.923	56.600, 0.601	56.600, 0.066	56.600, 0.246	56.600, 1.393	56.600, 1.131	56.600, 1.200	56.600, 0.026	56.600, 1.271	56.600, 1.520	56.600, 1.246	56.600, 1.316	56.600, 1.237	56.600, 1.362	56.600, 1.297	56.600, 1.499	56.600, 1.104	56.600, 0.694	56.600, 0.366	56.600, 1.439	56.600, 1.148	56.600, 1.118	56.600, 0.084	56.600, 1.279	56.600, 1.222
285	56.800, 1.504	56.800, 1.044	56.800, 0.624	56.800, 0.319	56.800, 1.594	56.800, 0.929	56.800, 0.605	56.800, 0.067	56.800, 0.249	56.800, 1.399	56.800, 1.137	56.800, 1.206	56.800, 0.026	56.800, 1.277	56.800, 1.527	56.800, 1.253	56.800, 1.323	56.800, 1.243	56.800, 1.369	56.800, 1.304	56.800, 1.507	56.800, 1.111	56.800, 0.698	56.800, 0.368	56.800, 1.446	56.800, 1.153	56.800, 1.123	56.800, 0.084	56.800, 1.286	56.800, 1.228
286	57.000, 1.512	57.000, 1.051	57.000, 0.628	57.000, 0.322	57.000, 1.601	57.000, 0.934	57.000, 0.609	57.000, 0.068	57.000, 0.251	57.000, 1.405	57.000, 1.143	57.000, 1.212	57.000, 0.026	57.000, 1.283	57.000, 1.534	57.000, 1.259	57.000, 1.330	57.000, 1.249	57.000, 1.376	57.000, 1.310	57.000, 1.515	57.000, 1.117	57.000, 0.702	57.000, 0.371	57.000, 1.452	57.000, 1.159	57.000, 1.128	57.000, 0.085	57.000, 1.292	57.000, 1.233
287	57.200, 1.520	57.200, 1.057	57.200, 0.633	57.200, 0.325	57.200, 1.609	57.200, 0.939	57.200, 0.613	57.200, 0.068	57.200, 0.253	57.200, 1.411	57.200, 1.149	57.200, 1.218	57.200, 0.027	57.200, 1.290	57.200, 1.541	57.200, 1.265	57.200, 1.337	57.200, 1.256	57.200, 1.383	57.200, 1.317	57.200, 1.523	57.200, 1.124	57.200, 0.706	57.200, 0.374	57.200, 1.459	57.200, 1.165	57.200, 1.134	57.200, 0.086	57.200, 1.299	57.200, 1.239
288	57.400, 1.528	57.400, 1.063	57.400, 0.637	57.400, 0.327	57.400, 1.616	57.400, 0.945	57.400, 0.616	57.400, 0.069	57.400, 0.255	57.400, 1.417	57.400, 1.154	57.400, 1.224	57.400, 0.027	57.400, 1.296	57.400, 1.548	57.400, 1.271	57.400, 1.343	57.400, 1.262	57.400, 1.390	57.400, 1.324	57.400, 1.531	57.400, 1.130	57.400, 0.710	57.400, 0.376	57.400, 1.465	57.400, 1.170	57.400, 1.139	57.400, 0.087	57.400, 1.305	57.400, 1.245
289	57.600, 1.536	57.600, 1.069	57.600, 0.641	57.600, 0.330	57.600, 1.624	57.600, 0.950	57.600, 0.620	57.600, 0.070	57.600, 0.257	57.600, 1.423	57.600, 1.160	57.600, 1.230	57.600, 0.028	57.600, 1.302	57.600, 1.555	57.600, 1.277	57.600, 1.350	57.600, 1.268	57.600, 1.397	57.600, 1.330	57.600, 1.539	57.600, 1.136	57.600, 0.715	57.600, 0.379	57.600, 1.471	57.600, 1.176	57.600, 1.145	57.600, 0.088	57.600, 1.312	57.600, 1.251
290	57.800, 1.544	57.800, 1.075	57.800, 0.646	57.800, 0.332	57.800, 1.631	57.800, 0.956	57.800, 0.624	57.800, 0.070	57.800, 0.259	57.800, 1.429	57.800, 1.165	57.800, 1.236	57.800, 0.028	57.800, 1.308	57.800, 1.562	57.800, 1.283	57.800, 1.356	57.800, 1.274	57.800, 1.404	57.800, 1.337	57.800, 1.547	57.800, 1.142	57.800, 0.719	57.800, 0.381	57.800, 1.477	57.800, 1.182	57.800, 1.150	57.800, 0.088	57.800, 1.319	57.800, 1.257
291	58.000, 1.552	58.000, 1.081	58.000, 0.650	58.000, 0.334	58.000, 1.638	58.000, 0.961	58.000, 0.628	58.000, 0.071	58.000, 0.261	58.000, 1.434	58.000, 1.171	58.000, 1.242	58.000, 0.029	58.000, 1.314	58.000, 1.569	58.000, 1.289	58.000, 1.362	58.000, 1.280	58.000, 1.411	58.000, 1.343	58.000, 1.554	58.000, 1.148	58.000, 0.723	58.000, 0.384	58.000, 1.483	58.000, 1.187	58.000, 1.155	58.000, 0.089	58.000, 1.325	58.000, 1.262
292	58.200, 1.559	58.200, 1.087	58.200, 0.654	58.200, 0.336	58.200, 1.646	58.200, 0.967	58.200, 0.631	58.200, 0.071	58.200, 0.263	58.200, 1.440	58.200, 1.176	58.200, 1.248	58.200, 0.029	58.200, 1.320	58.200, 1.575	58.200, 1.296	58.200, 1.368	58.200, 1.286	58.200, 1.418	58.200, 1.350	58.200, 1.561	58.200, 1.154	58.200, 0.727	58.200, 0.387	58.200, 1.488	58.200, 1.192	58.200, 1.161	58.200, 0.090	58.200, 1.332	58.200, 1.268
293	58.400, 1.567	58.400, 1.093	58.400, 0.658	58.400, 0.338	58.400, 1.653	58.400, 0.972	58.400, 0.635	58.400, 0.072	58.400, 0.264	58.400, 1.446	58.400, 1.181	58.400, 1.254	58.400, 0.030	58.400, 1.326	58.400, 1.582	58.400, 1.302	58.400, 1.375	58.400, 1.292	58.400, 1.424	58.400, 1.356	58.400, 1.568	58.400, 1.160	58.400, 0.731	58.400, 0.389	58.400, 1.494	58.400, 1.198	58.400, 1.166	58.400, 0.090	58.400, 1.338	58.400, 1.274
294	58.600, 1.574	58.600, 1.099	58.600, 0.662	58.600, 0.340	58.600, 1.660	58.600, 0.977	58.600, 0.638	58.600, 0.072	58.600, 0.266	58.600, 1.452	58.600, 1.187	58.600, 1.259	58.600, 0.030	58.600, 1.332	58.600, 1.589	58.600, 1.308	58.600, 1.381	58.600, 1.299	58.600, 1.430	58.600, 1.363	58.600, 1.575	58.600, 1.166	58.600, 0.735	58.600, 0.392	58.600, 1.500	58.600, 1.203	58.600, 1.172	58.600, 0.091	58.600, 1.345	58.600, 1.280
295	58.800, 1.582	58.800, 1.105	58.800, 0.666	58.800, 0.342	58.800, 1.667	58.800, 0.982	58.800, 0.642	58.800, 0.073	58.800, 0.267	58.800, 1.458	58.800, 1.192	58.800, 1.265	58.800, 0.031	58.800, 1.339	58.800, 1.595	58.800, 1.313	58.800, 1.387	58.800, 1.305	58.800, 1.436	58.800, 1.370	58.800, 1.581	58.800, 1.172	58.800, 0.739	58.800, 0.394	58.800, 1.505	58.800, 1.208	58.800, 1.177	58.800, 0.091	58.800, 1.351	58.800, 1.285
296	59.000, 1.590	59.000, 1.111	59.000, 0.669	59.000, 0.345	59.000, 1.674	59.000, 0.987	59.000, 0.645	59.000, 0.074	59.000, 0.269	59.000, 1.464	59.000, 1.197	59.000, 1.271	59.000, 0.031	59.000, 1.345	59.000, 1.602	59.000, 1.319	59.000, 1.394	59.000, 1.311	59.000, 1.443	59.000, 1.376	59.000, 1.588	59.000, 1.178	59.000, 0.743	59.000, 0.397	59.000, 1.511	59.000, 1.213	59.000, 1.182	59.000, 0.092	59.000, 1.357	59.000, 1.291
297	59.200, 1.598	59.200, 1.117	59.200, 0.673	59.200, 0.347	59.200, 1.681	59.200, 0.992	59.200, 0.649	59.200, 0.075	59.200, 0.271	59.200, 1.470	59.200, 1.202	59.200, 1.277	59.200, 0.032	59.200, 1.351	59.200, 1.608	59.200, 1.325	59.200, 1.400	59.200, 1.318	59.200, 1.449	59.200, 1.383	59.200, 1.594	59.200, 1.184	59.200, 0.748	59.200, 0.399	59.200, 1.517	59.200, 1.219	59.200, 1.188	59.200, 0.093	59.200, 1.363	59.200, 1.297
298	59.400, 1.605	59.400, 1.123	59.400, 0.677	59.400, 0.349	59.400, 1.688	59.400, 0.997	59.400, 0.653	59.400, 0.075	59.400, 0.272	59.400, 1.476	59.400, 1.207	59.400, 1.282	59.400, 0.032	59.400, 1.357	59.400, 1.615	59.400, 1.330	59.400, 1.406	59.400, 1.324	59.400, 1.455	59.400, 1.390	59.400, 1.601	59.400, 1.190	59.400, 0.752	59.400, 0.401	59.400, 1.523	59.400, 1.224	59.400, 1.193	59.400, 0.093	59.400, 1.369	59.400, 1.304
299	59.600, 1.613	59.600, 1.129	59.600, 0.680	59.600, 0.351	59.600, 1.694	59.600, 1.003	59.600, 0.657	59.600, 0.076	59.600, 0.274	59.600, 1.482	59.600, 1.212	59.600, 1.288	59.600, 0.033	59.600, 1.363	59.600, 1.621	59.600, 1.336	59.600, 1.412	59.600, 1.330	59.600, 1.461	59.600, 1.397	59.600, 1.608	59.600, 1.195	59.600, 0.756	59.600, 0.404	59.600, 1.529	59.600, 1.229	59.600, 1.198	59.600, 0.094	59.600, 1.375	59.600, 1.310
300	59.800, 1.620	59.800, 1.134	59.800, 0.684	59.800, 0.353	59.800, 1.701	59.800, 1.008	59.800, 0.660	59.800, 0.076	59.800, 0.276	59.800, 1.488	59.800, 1.217	59.800, 1.294	59.800, 0.034	59.800, 1.370	59.800, 1.627	59.800, 1.341	59.800, 1.418	59.800, 1.336	59.800, 1.467	59.800, 1.404	59.800, 1.615	59.800, 1.201	59.800, 0.761	59.800, 0.406	59.800, 1.535	59.800, 1.235	59.800, 1.204	59.800, 0.095	59.800, 1.381	59.800, 1.316
301	60.000, 1.628	60.000, 1.140	60.000, 0.688	60.000, 0.355	60.000, 1.708	60.000, 1.013	60.000, 0.664	60.000, 0.077	60.000, 0.277	60.000, 1.494	60.000, 1.223	60.000, 1.299	60.000, 0.034	60.000, 1.376	60.000, 1.633	60.000, 1.346	60.000, 1.424	60.000, 1.342	60.000, 1.473	60.000, 1.410	60.000, 1.622	60.000, 1.206	60.000, 0.765	60.000, 0.409	60.000, 1.541	60.000, 1.240	60.000, 1.209	60.000, 0.096	60.000, 1.386	60.000, 1.322
302	60.200, 1.635	60.200, 1.146	60.200, 0.693	60.200, 0.358	60.200, 1.714	60.200, 1.018	60.200, 0.668	60.200, 0.077	60.200, 0.279	60.200, 1.500	60.200, 1.228	60.200, 1.305	60.200, 0.035	60.200, 1.383	60.200, 1.639	60.200, 1.352	60.200, 1.430	60.200, 1.348	60.200, 1.479	60.200, 1.417	60.200, 1.628	60.200, 1.212	60.200, 0.769	60.200, 0.412	60.200, 1.547	60.200, 1.245	60.200, 1.214	60.200, 0.096	60.200, 1.392	60.200, 1.329
303	60.400, 1.642	60.400, 1.152	60.400, 0.697	60.400, 0.360	60.400, 1.721	60.400, 1.022	60.400, 0.672	60.400, 0.078	60.400, 0.281	60.400, 1.505	60.400, 1.234	60.400, 1.310	60.400, 0.036	60.400, 1.389	60.400, 1.645	60.400, 1.357	60.400, 1.436	60.400, 1.354	60.400, 1.486	60.400, 1.423	60.400, 1.635	60.400, 1.218	60.400, 0.773	60.400, 0.415	60.400, 1.552	60.400, 1.251	60.400, 1.219	60.400, 0.097	60.400, 1.398	60.400, 1.335
304	60.600, 1.650	60.600, 1.158	60.600, 0.701	60.600, 0.362	60.600, 1.727	60.600, 1.027	60.600, 0.677	60.600, 0.078	60.600, 0.283	60.600, 1.511	60.600, 1.239	60.600, 1.315	60.600, 0.036	60.600, 1.395	60.600, 1.651	60.600, 1.363	60.600, 1.442	60.600, 1.360	60.600, 1.491	60.600, 1.429	60.600, 1.643	60.600, 1.223	60.600, 0.778	60.600, 0.418	60.600, 1.558	60.600, 1.256	60.600, 1.224	60.600, 0.099	60.600, 1.403	60.600, 1.341
305	60.800, 1.657	60.800, 1.164	60.800, 0.706	60.800, 0.364	60.800, 1.734	60.800, 1.032	60.800, 0.681	60.800, 0.079	60.800, 0.285	60.800, 1.516	60.800, 1.245	60.800, 1.321	60.800, 0.037	60.800, 1.401	60.800, 1.657	60.800, 1.368	60.800, 1.448	60.800, 1.366	60.800, 1.497	60.800, 1.435	60.800, 1.649	60.800, 1.229	60.800, 0.782	60.800, 0.420	60.800, 1.564	60.800, 1.261	60.800, 1.229	60.800, 0.100	60.800, 1.409	60.800, 1.347
306	61.000, 1.664	61.000, 1.169	61.000, 0.710	61.000, 0.367	61.000, 1.740	61.000, 1.037	61.000, 0.685	61.000, 0.080	61.000, 0.287	61.000, 1.521	61.000, 1.250	61.000, 1.326	61.000, 0.037	61.000, 1.407	61.000, 1.663	61.000, 1.374	61.000, 1.453	61.000, 1.371	61.000, 1.503	61.000, 1.441	61.000, 1.656	61.000, 1.235	61.000, 0.786	61.000, 0.423	61.000, 1.569	61.000, 1.266	61.000, 1.235	61.000, 0.101	61.000, 1.414	61.000, 1.353
307	61.200, 1.671	61.200, 1.175	61.200, 0.714	61.200, 0.369	61.200, 1.747	61.200, 1.042	61.200, 0.688	61.200, 0.081	61.200, 0.289	61.200, 1.527	61.200, 1.255	61.200, 1.331	61.200, 0.038	61.200, 1.412	61.200, 1.668	61.200, 1.379	61.200, 1.459	61.200, 1.377	61.200, 1.509	61.200, 1.447	61.200, 1.663	61.200, 1.240	61.200, 0.790	61.200, 0.425	61.200, 1.575	61.200, 1.271	61.200, 1.240	61.200, 0.102	61.200, 1.420	61.200, 1.359
308	61.400, 1.677	61.400, 1.181	61.400, 0.719	61.400, 0.371	61.400, 1.753	61.400, 1.047	61.400, 0.692	61.400, 0.082	61.400, 0.291	61.400, 1.532	61.400, 1.260	61.400, 1.337	61.400, 0.038	61.400, 1.418	61.400, 1.674	61.400, 1.385	61.400, 1.464	61.400, 1.382	61.400, 1.515	61.400, 1.453	61.400, 1.671	61.400, 1.246	61.400, 0.795	61.400, 0.428	61.400, 1.580	61.400, 1.276	61.400, 1.245	61.400, 0.103	61.400, 1.426	61.400, 1.365
309	61.600, 1.684	61.600, 1.186	61.600, 0.723	61.600, 0.372	61.600, 1.759	61.600, 1.052	61.600, 0.695	61.600, 0.083	61.600, 0.292	61.600, 1.537	61.600, 1.265	61.600, 1.342	61.600, 0.039	61.600, 1.423	61.600, 1.680	61.600, 1.391	61.600, 1.470	61.600, 1.388	61.600, 1.521	61.600, 1.459	61.600, 1.678	61.600, 1.252	61.600, 0.799	61.600, 0.430	61.600, 1.585	61.600, 1.281	61.600, 1.250	61.600, 0.104	61.600, 1.431	61.600, 1.371
310	61.800, 1.690	61.800, 1.192	61.800, 0.727	61.800, 0.374	61.800, 1.766	61.800, 1.057	61.800, 0.699	61.800, 0.084	61.800, 0.294	61.800, 1.542	61.800, 1.270	61.800, 1.347	61.800, 0.040	61.800, 1.429	61.800, 1.686	61.800, 1.397	61.800, 1.475	61.800, 1.393	61.800, 1.527	61.800, 1.464	61.800, 1.685	61.800, 1.257	61.800, 0.803	61.800, 0.433	61.800, 1.590	61.800, 1.285	61.800, 1.255	61.800, 0.105	61.800, 1.437	61.800, 1.377
311	62.000, 1.697	62.000, 1.198	62.000, 0.731	62.000, 0.376	62.000, 1.772	62.000, 1.063	62.000, 0.702	62.000, 0.084	62.000, 0.295	62.000, 1.547	62.000, 1.275	62.000, 1.352	62.000, 0.040	62.000, 1.435	62.000, 1.691	62.000, 1.402	62.000, 1.481	62.000, 1.398	62.000, 1.533	62.000, 1.470	62.000, 1.691	62.000, 1.263	62.000, 0.808	62.000, 0.435	62.000, 1.595	62.000, 1.290	62.000, 1.260	62.000, 0.105	62.000, 1.443	62.000, 1.383
312	62.200, 1.703	62.200, 1.203	62.200, 0.736	62.200, 0.378	62.200, 1.778	62.200, 1.067	62.200, 0.705	62.200, 0.085	62.200, 0.297	62.200, 1.551	62.200, 1.279	62.200, 1.357	62.200, 0.041	62.200, 1.440	62.200, 1.697	62.200, 1.408	62.200, 1.487	62.200, 1.404	62.200, 1.539	62.200, 1.476	62.200, 1.698	62.200, 1.268	62.200, 0.812	62.200, 0.437	62.200, 1.601	62.200, 1.295	62.200, 1.265	62.200, 0.106	62.200, 1.448	62.200, 1.388
313	62.400, 1.710	62.400, 1.209	62.400, 0.739	62.400, 0.380	62.400, 1.785	62.400, 1.072	62.400, 0.708	62.400, 0.086	62.400, 0.298	62.400, 1.556	62.400, 1.284	62.400, 1.362	62.400, 0.041	62.400, 1.446	62.400, 1.703	62.400, 1.414	62.400, 1.493	62.400, 1.409	62.400, 1.545	62.400, 1.481	62.400, 1.704	62.400, 1.274	62.400, 0.816	62.400, 0.439	62.400, 1.606	62.400, 1.300	62.400, 1.270	62.400, 0.106	62.400, 1.454	62.400, 1.394
314	62.600, 1.717	62.600, 1.214	62.600, 0.743	62.600, 0.382	62.600, 1.791	62.600, 1.077	62.600, 0.712	62.600, 0.086	62.600, 0.300	62.600, 1.561	62.600, 1.289	62.600, 1.367	62.600, 0.041	62.600, 1.452	62.600, 1.709	62.600, 1.420	62.600, 1.499	62.600, 1.414	62.600, 1.551	62.600, 1.487	62.600, 1.711	62.600, 1.280	62.600, 0.820	62.600, 0.442	62.600, 1.611	62.600, 1.305	62.600, 1.274	62.600, 0.107	62.600, 1.459	62.600, 1.400
315	62.800, 1.724	62.800, 1.220	62.800, 0.746	62.800, 0.385	62.800, 1.797	62.800, 1.082	62.800, 0.715	62.800, 0.087	62.800, 0.301	62.800, 1.566	62.800, 1.293	62.800, 1.373	62.800, 0.042	62.800, 1.457	62.800, 1.715	62.800, 1.426	62.800, 1.504	62.800, 1.419	62.800, 1.557	62.800, 1.492	62.800, 1.717	62.800, 1.285	62.800, 0.824	62.800, 0.444	62.800, 1.616	62.800, 1.309	62.800, 1.279	62.800, 0.107	62.800, 1.465	62.800, 1.405
316	63.000, 1.731	63.000, 1.226	63.000, 0.750	63.000, 0.387	63.000, 1.803	63.000, 1.087	63.000, 0.719	63.000, 0.088	63.000, 0.303	63.000, 1.571	63.000, 1.298	63.000, 1.377	63.000, 0.042	63.000, 1.463	63.000, 1.720	63.000, 1.431	63.000, 1.510	63.000, 1.425	63.000, 1.563	63.000, 1.497	63.000, 1.724	63.000, 1.290	63.000, 0.828	63.000, 0.446	63.000, 1.622	63.000, 1.314	63.000, 1.284	63.000, 0.108	63.000, 1.470	63.000, 1.410
317	63.200, 1.738	63.200, 1.231	63.200, 0.753	63.200, 0.389	63.200, 1.810	63.200, 1.091	63.200, 0.722	63.200, 0.088	63.200, 0.304	63.200, 1.576	63.200, 1.302	63.200, 1.382	63.200, 0.042	63.200, 1.468	63.200, 1.726	63.200, 1.437	63.200, 1.515	63.200, 1.430	63.200, 1.569	63.200, 1.503	63.200, 1.730	63.200, 1.296	63.200, 0.832	63.200, 0.449	63.200, 1.627	63.200, 1.319	63.200, 1.289	63.200, 0.109	63.200, 1.476	63.200, 1.415
318	63.400, 1.745	63.400, 1.237	63.400, 0.756	63.400, 0.391	63.400, 1.816	63.400, 1.096	63.400, 0.726	63.400, 0.089	63.400, 0.306	63.400, 1.582	63.400, 1.307	63.400, 1.387	63.400, 0.043	63.400, 1.474	63.400, 1.732	63.400, 1.443	63.400, 1.520	63.400, 1.436	63.400, 1.575	63.400, 1.508	63.400, 1.737	63.400, 1.301	63.400, 0.836	63.400, 0.451	63.400, 1.632	63.400, 1.324	63.400, 1.294	63.400, 0.110	63.400, 1.482	63.400, 1.420
319	63.600, 1.752	63.600, 1.243	63.600, 0.760	63.600, 0.393	63.600, 1.822	63.600, 1.101	63.600, 0.729	63.600, 0.089	63.600, 0.308	63.600, 1.587	63.600, 1.311	63.600, 1.392	63.600, 0.043	63.600, 1.479	63.600, 1.737	63.600, 1.448	63.600, 1.525	63.600, 1.442	63.600, 1.580	63.600, 1.513	63.600, 1.743	63.600, 1.306	63.600, 0.840	63.600, 0.453	63.600, 1.637	63.600, 1.328	63.600, 1.298	63.600, 0.110	63.600, 1.487	63.600, 1.425
320	63.800, 1.759	63.800, 1.248	63.800, 0.764	63.800, 0.396	63.800, 1.828	63.800, 1.105	63.800, 0.733	63.800, 0.089	63.800, 0.310	63.800, 1.592	63.800, 1.316	63.800, 1.397	63.800, 0.044	63.800, 1.484	63.800, 1.742	63.800, 1.454	63.800, 1.530	63.800, 1.447	63.800, 1.586	63.800, 1.518	63.800, 1.749	63.800, 1.311	63.800, 0.843	63.800, 0.456	63.800, 1.642	63.800, 1.333	63.800, 1.303	63.800, 0.111	63.800, 1.492	63.800, 1.431
321	64.000, 1.766	64.000, 1.253	64.000, 0.767	64.000, 0.398	64.000, 1.833	64.000, 1.110	64.000, 0.737	64.000, 0.089	64.000, 0.312	64.000, 1.597	64.000, 1.321	64.000, 1.402	64.000, 0.044	64.000, 1.490	64.000, 1.748	64.000, 1.459	64.000, 1.536	64.000, 1.453	64.000, 1.592	64.000, 1.523	64.000, 1.756	64.000, 1.317	64.000, 0.847	64.000, 0.459	64.000, 1.647	64.000, 1.338	64.000, 1.308	64.000, 0.111	64.000, 1.498	64.000, 1.436
322	64.200, 1.774	64.200, 1.259	64.200, 0.771	64.200, 0.401	64.200, 1.839	64.200, 1.114	64.200, 0.741	64.200, 0.090	64.200, 0.314	64.200, 1.602	64.200, 1.326	64.200, 1.407	64.200, 0.045	64.200, 1.495	64.200, 1.753	64.200, 1.464	64.200, 1.541	64.200, 1.459	64.200, 1.598	64.200, 1.528	64.200, 1.762	64.200, 1.322	64.200, 0.851	64.200, 0.461	64.200, 1.652	64.200, 1.342	64.200, 1.313	64.200, 0.112	64.200, 1.503	64.200, 1.441
323	64.400, 1.780	64.400, 1.264	64.400, 0.775	64.400, 0.403	64.400, 1.845	64.400, 1.118	64.400, 0.744	64.400, 0.090	64.400, 0.316	64.400, 1.607	64.400, 1.331	64.400, 1.413	64.400, 0.046	64.400, 1.500	64.400, 1.759	64.400, 1.469	64.400, 1.547	64.400, 1.465	64.400, 1.604	64.400, 1.534	64.400, 1.768	64.400, 1.328	64.400, 0.854	64.400, 0.464	64.400, 1.657	64.400, 1.347	64.400, 1.317	64.400, 0.113	64.400, 1.508	64.400, 1.446
324	64.600, 1.787	64.600, 1.269	64.600, 0.779	64.600, 0.405	64.600, 1.851	64.600, 1.123	64.600, 0.748	64.600, 0.091	64.600, 0.318	64.600, 1.612	64.600, 1.336	64.600, 1.418	64.600, 0.046	64.600, 1.505	64.600, 1.764	64.600, 1.474	64.600, 1.552	64.600, 1.470	64.600, 1.610	64.600, 1.539	64.600, 1.774	64.600, 1.333	64.600, 0.858	64.600, 0.466	64.600, 1.661	64.600, 1.351	64.600, 1.322	64.600, 0.113	64.600, 1.513	64.600, 1.451
325	64.800, 1.794	64.800, 1.274	64.800, 0.783	64.800, 0.407	64.800, 1.857	64.800, 1.127	64.800, 0.751	64.800, 0.092	64.800, 0.320	64.800, 1.617	64.800, 1.341	64.800, 1.422	64.800, 0.047	64.800, 1.509	64.800, 1.769	64.800, 1.479	64.800, 1.558	64.800, 1.475	64.800, 1.615	64.800, 1.544	64.800, 1.779	64.800, 1.338	64.800, 0.862	64.800, 0.468	64.800, 1.666	64.800, 1.356	64.800, 1.326	64.800, 0.114	64.800, 1.518	64.800, 1.455
326	65.000, 1.800	65.000, 1.279	65.000, 0.786	65.000, 0.409	65.000, 1.863	65.000, 1.132	65.000, 0.755	65.000, 0.092	65.000, 0.322	65.000, 1.622	65.000, 1.346	65.000, 1.427	65.000, 0.047	65.000, 1.514	65.000, 1.774	65.000, 1.484	65.000, 1.563	65.000, 1.480	65.000, 1.620	65.000, 1.550	65.000, 1.786	65.000, 1.344	65.000, 0.866	65.000, 0.471	65.000, 1.671	65.000, 1.360	65.000, 1.331	65.000, 0.115	65.000, 1.523	65.000, 1.460
327	65.200, 1.806	65.200, 1.284	65.200, 0.790	65.200, 0.411	65.200, 1.869	65.200, 1.137	65.200, 0.758	65.200, 0.093	65.200, 0.324	65.200, 1.627	65.200, 1.350	65.200, 1.432	65.200, 0.048	65.200, 1.519	65.200, 1.779	65.200, 1.489	65.200, 1.569	65.200, 1.485	65.200, 1.626	65.200, 1.555	65.200, 1.792	65.200, 1.349	65.200, 0.870	65.200, 0.473	65.200, 1.675	65.200, 1.365	65.200, 1.335	65.200, 0.116	65.200, 1.528	65.200, 1.466
328	65.400, 1.813	65.400, 1.289	65.400, 0.794	65.400, 0.413	65.400, 1.875	65.400, 1.141	65.400, 0.762	65.400, 0.094	65.400, 0.326	65.400, 1.632	65.400, 1.355	65.400, 1.437	65.400, 0.048	65.400, 1.524	65.400, 1.785	65.400, 1.494	65.400, 1.574	65.400, 1.489	65.400, 1.631	65.400, 1.561	65.400, 1.798	65.400, 1.354	65.400, 0.874	65.400, 0.475	65.400, 1.680	65.400, 1.369	65.400, 1.340	65.400, 0.116	65.400, 1.533	65.400, 1.471
329	65.600, 1.819	65.600, 1.295	65.600, 0.798	65.600, 0.415	65.600, 1.881	65.600, 1.146	65.600, 0.765	65.600, 0.095	65.600, 0.328	65.600, 1.636	65.600, 1.360	65.600, 1.442	65.600, 0.049	65.600, 1.529	65.600, 1.790	65.600, 1.498	65.600, 1.580	65.600, 1.494	65.600, 1.636	65.600, 1.566	65.600, 1.804	65.600, 1.359	65.600, 0.878	65.600, 0.477	65.600, 1.684	65.600, 1.374	65.600, 1.344	65.600, 0.117	65.600, 1.538	65.600, 1.476
330	65.800, 1.825	65.800, 1.300	65.800, 0.802	65.800, 0.417	65.800, 1.887	65.800, 1.151	65.800, 0.769	65.800, 0.095	65.800, 0.329	65.800, 1.641	65.800, 1.365	65.800, 1.446	65.800, 0.049	65.800, 1.535	65.800, 1.795	65.800, 1.503	65.800, 1.585	65.800, 1.499	65.800, 1.641	65.800, 1.571	65.800, 1.810	65.800, 1.364	65.800, 0.882	65.800, 0.480	65.800, 1.689	65.800, 1.379	65.800, 1.348	65.800, 0.118	65.800, 1.543	65.800, 1.482
331	66.000, 1.831	66.000, 1.305	66.000, 0.806	66.000, 0.418	66.000, 1.892	66.000, 1.155	66.000, 0.772	66.000, 0.096	66.000, 0.331	66.000, 1.645	66.000, 1.369	66.000, 1.450	66.000, 0.050	66.000, 1.540	66.000, 1.800	66.000, 1.508	66.000, 1.590	66.000, 1.503	66.000, 1.646	66.000, 1.577	66.000, 1.816	66.000, 1.370	66.000, 0.886	66.000, 0.482	66.000, 1.693	66.000, 1.383	66.000, 1.353	66.000, 0.118	66.000, 1.547	66.000, 1.487
332	66.200, 1.837	66.200, 1.310	66.200, 0.809	66.200, 0.420	66.200, 1.898	66.200, 1.160	66.200, 0.776	66.200, 0.096	66.200, 0.333	66.200, 1.650	66.200, 1.374	66.200, 1.455	66.200, 0.050	66.200, 1.545	66.200, 1.805	66.200, 1.513	66.200, 1.596	66.200, 1.508	66.200, 1.652	66.200, 1.582	66.200, 1.822	66.200, 1.375	66.200, 0.890	66.200, 0.485	66.200, 1.698	66.200, 1.388	66.200, 1.358	66.200, 0.119	66.200, 1.552	66.200, 1.492
333	66.400, 1.843	66.400, 1.315	66.400, 0.813	66.400, 0.422	66.400, 1.904	66.400, 1.164	66.400, 0.779	66.400, 0.097	66.400, 0.335	66.400, 1.654	66.400, 1.378	66.400, 1.459	66.400, 0.051	66.400, 1.551	66.400, 1.811	66.400, 1.518	66.400, 1.600	66.400, 1.512	66.400, 1.657	66.400, 1.587	66.400, 1.828	66.400, 1.380	66.400, 0.894	66.400, 0.487	66.400, 1.702	66.400, 1.392	66.400, 1.362	66.400, 0.120	66.400, 1.557	66.400, 1.497
334	66.600, 1.848	66.600, 1.320	66.600, 0.817	66.600, 0.424	66.600, 1.909	66.600, 1.169	66.600, 0.783	66.600, 0.097	66.600, 0.337	66.600, 1.659	66.600, 1.382	66.600, 1.463	66.600, 0.051	66.600, 1.556	66.600, 1.816	66.600, 1.522	66.600, 1.605	66.600, 1.516	66.600, 1.662	66.600, 1.592	66.600, 1.834	66.600, 1.385	66.600, 0.898	66.600, 0.489	66.600, 1.707	66.600, 1.397	66.600, 1.366	66.600, 0.121	66.600, 1.562	66.600, 1.502
335	66.800, 1.854	66.800, 1.325	66.800, 0.821	66.800, 0.425	66.800, 1.915	66.800, 1.173	66.800, 0.787	66.800, 0.098	66.800, 0.339	66.800, 1.663	66.800, 1.386	66.800, 1.467	66.800, 0.052	66.800, 1.562	66.800, 1.821	66.800, 1.527	66.800, 1.610	66.800, 1.521	66.800, 1.667	66.800, 1.596	66.800, 1.839	66.800, 1.390	66.800, 0.902	66.800, 0.491	66.800, 1.712	66.800, 1.401	66.800, 1.371	66.800, 0.122	66.800, 1.567	66.800, 1.506
336	67.000, 1.860	67.000, 1.330	67.000, 0.824	67.000, 0.427	67.000, 1.920	67.000, 1.177	67.000, 0.790	67.000, 0.099	67.000, 0.340	67.000, 1.668	67.000, 1.389	67.000, 1.472	67.000, 0.053	67.000, 1.567	67.000, 1.826	67.000, 1.532	67.000, 1.614	67.000, 1.526	67.000, 1.671	67.000, 1.601	67.000, 1.845	67.000, 1.395	67.000, 0.906	67.000, 0.494	67.000, 1.716	67.000, 1.405	67.000, 1.375	67.000, 0.123	67.000, 1.572	67.000, 1.511
337	67.200, 1.866	67.200, 1.335	67.200, 0.828	67.200, 0.429	67.200, 1.925	67.200, 1.181	67.200, 0.794	67.200, 0.099	67.200, 0.342	67.200, 1.673	67.200, 1.393	67.200, 1.476	67.200, 0.053	67.200, 1.572	67.200, 1.830	67.200, 1.536	67.200, 1.618	67.200, 1.531	67.200, 1.676	67.200, 1.606	67.200, 1.851	67.200, 1.400	67.200, 0.910	67.200, 0.496	67.200, 1.720	67.200, 1.409	67.200, 1.379	67.200, 0.124	67.200, 1.577	67.200, 1.516
338	67.400, 1.873	67.400, 1.340	67.400, 0.832	67.400, 0.431	67.400, 1.930	67.400, 1.185	67.400, 0.797	67.400, 0.100	67.400, 0.344	67.400, 1.677	67.400, 1.397	67.400, 1.480	67.400, 0.054	67.400, 1.577	67.400, 1.835	67.400, 1.540	67.400, 1.623	67.400, 1.536	67.400, 1.680	67.400, 1.611	67.400, 1.856	67.400, 1.406	67.400, 0.914	67.400, 0.499	67.400, 1.725	67.400, 1.413	67.400, 1.384	67.400, 0.125	67.400, 1.582	67.400, 1.520
339	67.600, 1.879	67.600, 1.345	67.600, 0.835	67.600, 0.433	67.600, 1.935	67.600, 1.189	67.600, 0.800	67.600, 0.100	67.600, 0.346	67.600, 1.682	67.600, 1.401	67.600, 1.485	67.600, 0.054	67.600, 1.582	67.600, 1.840	67.600, 1.545	67.600, 1.627	67.600, 1.541	67.600, 1.685	67.600, 1.616	67.600, 1.862	67.600, 1.411	67.600, 0.918	67.600, 0.501	67.600, 1.729	67.600, 1.417	67.600, 1.388	67.600, 0.125	67.600, 1.586	67.600, 1.525
340	67.800, 1.886	67.800, 1.349	67.800, 0.839	67.800, 0.435	67.800, 1.940	67.800, 1.193	67.800, 0.803	67.800, 0.100	67.800, 0.348	67.800, 1.686	67.800, 1.405	67.800, 1.490	67.800, 0.054	67.800, 1.587	67.800, 1.845	67.800, 1.549	67.800, 1.632	67.800, 1.546	67.800, 1.690	67.800, 1.621	67.800, 1.868	67.800, 1.416	67.800, 0.921	67.800, 0.503	67.800, 1.734	67.800, 1.421	67.800, 1.392	67.800, 0.126	67.800, 1.591	67.800, 1.530
341	68.000, 1.892	68.000, 1.354	68.000, 0.842	68.000, 0.437	68.000, 1.945	68.000, 1.197	68.000, 0.806	68.000, 0.100	68.000, 0.350	68.000, 1.691	68.000, 1.408	68.000, 1.494	68.000, 0.055	68.000, 1.592	68.000, 1.849	68.000, 1.553	68.000, 1.637	68.000, 1.552	68.000, 1.695	68.000, 1.626	68.000, 1.873	68.000, 1.421	68.000, 0.924	68.000, 0.506	68.000, 1.738	68.000, 1.425	68.000, 1.397	68.000, 0.126	68.000, 1.595	68.000, 1.535
342	68.200, 1.898	68.200, 1.358	68.200, 0.846	68.200, 0.439	68.200, 1.950	68.200, 1.201	68.200, 0.809	68.200, 0.101	68.200, 0.351	68.200, 1.695	68.200, 1.412	68.200, 1.499	68.200, 0.055	68.200, 1.597	68.200, 1.854	68.200, 1.557	68.200, 1.642	68.200, 1.557	68.200, 1.700	68.200, 1.631	68.200, 1.879	68.200, 1.426	68.200, 0.928	68.200, 0.508	68.200, 1.743	68.200, 1.429	68.200, 1.401	68.200, 0.127	68.200, 1.600	68.200, 1.540
343	68.400, 1.904	68.400, 1.363	68.400, 0.849	68.400, 0.441	68.400, 1.955	68.400, 1.204	68.400, 0.812	68.400, 0.102	68.400, 0.353	68.400, 1.699	68.400, 1.416	68.400, 1.504	68.400, 0.055	68.400, 1.601	68.400, 1.859	68.400, 1.561	68.400, 1.647	68.400, 1.562	68.400, 1.705	68.400, 1.637	68.400, 1.884	68.400, 1.431	68.400, 0.931	68.400, 0.510	68.400, 1.748	68.400, 1.433	68.400, 1.405	68.400, 0.128	68.400, 1.604	68.400, 1.545
344	68.600, 1.910	68.600, 1.368	68.600, 0.852	68.600, 0.443	68.600, 1.960	68.600, 1.208	68.600, 0.815	68.600, 0.102	68.600, 0.354	68.600, 1.703	68.600, 1.420	68.600, 1.508	68.600, 0.056	68.600, 1.606	68.600, 1.863	68.600, 1.565	68.600, 1.652	68.600, 1.566	68.600, 1.710	68.600, 1.642	68.600, 1.890	68.600, 1.435	68.600, 0.935	68.600, 0.512	68.600, 1.752	68.600, 1.437	68.600, 1.409	68.600, 0.129	68.600, 1.609	68.600, 1.550
345	68.800, 1.916	68.800, 1.372	68.800, 0.856	68.800, 0.445	68.800, 1.966	68.800, 1.212	68.800, 0.818	68.800, 0.103	68.800, 0.355	68.800, 1.707	68.800, 1.424	68.800, 1.512	68.800, 0.056	68.800, 1.610	68.800, 1.867	68.800, 1.569	68.800, 1.657	68.800, 1.571	68.800, 1.715	68.800, 1.647	68.800, 1.895	68.800, 1.440	68.800, 0.938	68.800, 0.515	68.800, 1.757	68.800, 1.441	68.800, 1.413	68.800, 0.129	68.800, 1.613	68.800, 1.555
346	69.000, 1.922	69.000, 1.377	69.000, 0.859	69.000, 0.447	69.000, 1.971	69.000, 1.216	69.000, 0.821	69.000, 0.104	69.000, 0.357	69.000, 1.712	69.000, 1.428	69.000, 1.517	69.000, 0.056	69.000, 1.614	69.000, 1.872	69.000, 1.573	69.000, 1.661	69.000, 1.575	69.000, 1.719	69.000, 1.653	69.000, 1.901	69.000, 1.445	69.000, 0.942	69.000, 0.517	69.000, 1.762	69.000, 1.445	69.000, 1.417	69.000, 0.130	69.000, 1.618	69.000, 1.560
347	69.200, 1.928	69.200, 1.382	69.200, 0.862	69.200, 0.449	69.200, 1.977	69.200, 1.220	69.200, 0.824	69.200, 0.105	69.200, 0.358	69.200, 1.716	69.200, 1.432	69.200, 1.521	69.200, 0.057	69.200, 1.619	69.200, 1.876	69.200, 1.577	69.200, 1.666	69.200, 1.579	69.200, 1.724	69.200, 1.658	69.200, 1.906	69.200, 1.450	69.200, 0.945	69.200, 0.519	69.200, 1.766	69.200, 1.448	69.200, 1.422	69.200, 0.131	69.200, 1.622	69.200, 1.564
348	69.400, 1.934	69.400, 1.387	69.400, 0.865	69.400, 0.451	69.400, 1.982	69.400, 1.225	69.400, 0.827	69.400, 0.106	69.400, 0.359	69.400, 1.720	69.400, 1.436	69.400, 1.525	69.400, 0.057	69.400, 1.623	69.400, 1.881	69.400, 1.581	69.400, 1.671	69.400, 1.584	69.400, 1.729	69.400, 1.663	69.400, 1.912	69.400, 1.454	69.400, 0.949	69.400, 0.522	69.400, 1.770	69.400, 1.452	69.400, 1.426	69.400, 0.131	69.400, 1.627	69.400, 1.569
349	69.600, 1.940	69.600, 1.392	69.600, 0.868	69.600, 0.453	69.600, 1.988	69.600, 1.229	69.600, 0.830	69.600, 0.107	69.600, 0.361	69.600, 1.724	69.600, 1.440	69.600, 1.529	69.600, 0.058	69.600, 1.628	69.600, 1.886	69.600, 1.585	69.600, 1.675	69.600, 1.589	69.600, 1.734	69.600, 1.668	69.600, 1.917	69.600, 1.459	69.600, 0.953	69.600, 0.524	69.600, 1.774	69.600, 1.456	69.600, 1.430	69.600, 0.132	69.600, 1.632	69.600, 1.574
350	69.800, 1.945	69.800, 1.397	69.800, 0.871	69.800, 0.455	69.800, 1.993	69.800, 1.233	69.800, 0.833	69.800, 0.107	69.800, 0.363	69.800, 1.728	69.800, 1.445	69.800, 1.533	69.800, 0.059	69.800, 1.632	69.800, 1.890	69.800, 1.589	69.800, 1.680	69.800, 1.594	69.800, 1.739	69.800, 1.673	69.800, 1.922	69.800, 1.463	69.800, 0.956	69.800, 0.527	69.800, 1.778	69.800, 1.460	69.800, 1.434	69.800, 0.133	69.800, 1.636	69.800, 1.579
351	70.000, 1.951	70.000, 1.402	70.000, 0.875	70.000, 0.457	70.000, 1.998	70.000, 1.237	70.000, 0.836	70.000, 0.108	70.000, 0.364	70.000, 1.733	70.000, 1.448	70.000, 1.536	70.000, 0.059	70.000, 1.637	70.000, 1.895	70.000, 1.593	70.000, 1.684	70.000, 1.598	70.000, 1.743	70.000, 1.678	70.000, 1.927	70.000, 1.468	70.000, 0.960	70.000, 0.530	70.000, 1.782	70.000, 1.464	70.000, 1.438	70.000, 0.134	70.000, 1.641	70.000, 1.583
352	70.200, 1.956	70.200, 1.407	70.200, 0.879	70.200, 0.459	70.200, 2.004	70.200, 1.241	70.200, 0.840	70.200, 0.109	70.200, 0.366	70.200, 1.737	70.200, 1.452	70.200, 1.540	70.200, 0.060	70.200, 1.641	70.200, 1.899	70.200, 1.597	70.200, 1.688	70.200, 1.603	70.200, 1.748	70.200, 1.682	70.200, 1.932	70.200, 1.472	70.200, 0.964	70.200, 0.532	70.200, 1.786	70.200, 1.467	70.200, 1.442	70.200, 0.135	70.200, 1.645	70.200, 1.587
353	70.400, 1.962	70.400, 1.412	70.400, 0.882	70.400, 0.461	70.400, 2.009	70.400, 1.245	70.400, 0.843	70.400, 0.109	70.400, 0.368	70.400, 1.741	70.400, 1.456	70.400, 1.544	70.400, 0.061	70.400, 1.646	70.400, 1.904	70.400, 1.601	70.400, 1.692	70.400, 1.607	70.400, 1.753	70.400, 1.687	70.400, 1.937	70.400, 1.477	70.400, 0.967	70.400, 0.534	70.400, 1.790	70.400, 1.471	70.400, 1.447	70.400, 0.136	70.400, 1.650	70.400, 1.592
354	70.600, 1.967	70.600, 1.417	70.600, 0.886	70.600, 0.464	70.600, 2.014	70.600, 1.249	70.600, 0.847	70.600, 0.110	70.600, 0.369	70.600, 1.745	70.600, 1.460	70.600, 1.548	70.600, 0.061	70.600, 1.650	70.600, 1.908	70.600, 1.606	70.600, 1.696	70.600, 1.612	70.600, 1.757	70.600, 1.691	70.600, 1.942	70.600, 1.481	70.600, 0.971	70.600, 0.537	70.600, 1.794	70.600, 1.475	70.600, 1.451	70.600, 0.137	70.600, 1.654	70.600, 1.596
355	70.800, 1.973	70.800, 1.422	70.800, 0.890	70.800, 0.466	70.800, 2.018	70.800, 1.253	70.800, 0.850	70.800, 0.110	70.800, 0.371	70.800, 1.749	70.800, 1.464	70.800, 1.552	70.800, 0.062	70.800, 1.655	70.800, 1.912	70.800, 1.610	70.800, 1.700	70.800, 1.616	70.800, 1.762	70.800, 1.696	70.800, 1.947	70.800, 1.486	70.800, 0.975	70.800, 0.539	70.800, 1.797	70.800, 1.479	70.800, 1.455	70.800, 0.138	70.800, 1.659	70.800, 1.601
356	71.000, 1.978	71.000, 1.427	71.000, 0.893	71.000, 0.468	71.000, 2.023	71.000, 1.257	71.000, 0.854	71.000, 0.111	71.000, 0.372	71.000, 1.753	71.000, 1.468	71.000, 1.556	71.000, 0.062	71.000, 1.659	71.000, 1.917	71.000, 1.614	71.000, 1.704	71.000, 1.621	71.000, 1.767	71.000, 1.700	71.000, 1.952	71.000, 1.490	71.000, 0.979	71.000, 0.541	71.000, 1.801	71.000, 1.483	71.000, 1.458	71.000, 0.139	71.000, 1.663	71.000, 1.605
357	71.200, 1.984	71.200, 1.431	71.200, 0.897	71.200, 0.470	71.200, 2.028	71.200, 1.261	71.200, 0.857	71.200, 0.111	71.200, 0.374	71.200, 1.757	71.200, 1.472	71.200, 1.560	71.200, 0.063	71.200, 1.663	71.200, 1.921	71.200, 1.619	71.200, 1.708	71.200, 1.625	71.200, 1.772	71.200, 1.704	71.200, 1.957	71.200, 1.495	71.200, 0.982	71.200, 0.543	71.200, 1.804	71.200, 1.486	71.200, 1.462	71.200, 0.139	71.200, 1.668	71.200, 1.609
358	71.400, 1.989	71.400, 1.436	71.400, 0.901	71.400, 0.472	71.400, 2.032	71.400, 1.265	71.400, 0.860	71.400, 0.111	71.400, 0.376	71.400, 1.761	71.400, 1.476	71.400, 1.564	71.400, 0.063	71.400, 1.668	71.400, 1.925	71.400, 1.623	71.400, 1.713	71.400, 1.630	71.400, 1.776	71.400, 1.709	71.400, 1.963	71.400, 1.500	71.400, 0.986	71.400, 0.546	71.400, 1.808	71.400, 1.490	71.400, 1.466	71.400, 0.140	71.400, 1.672	71.400, 1.614
359	71.600, 1.995	71.600, 1.440	71.600, 0.904	71.600, 0.474	71.600, 2.037	71.600, 1.269	71.600, 0.863	71.600, 0.111	71.600, 0.378	71.600, 1.765	71.600, 1.480	71.600, 1.569	71.600, 0.064	71.600, 1.672	71.600, 1.929	71.600, 1.628	71.600, 1.717	71.600, 1.634	71.600, 1.781	71.600, 1.713	71.600, 1.968	71.600, 1.505	71.600, 0.989	71.600, 0.548	71.600, 1.812	71.600, 1.494	71.600, 1.469	71.600, 0.140	71.600, 1.676	71.600, 1.618
360	71.800, 2.000	71.800, 1.445	71.800, 0.907	71.800, 0.476	71.800, 2.041	71.800, 1.273	71.800, 0.867	71.800, 0.112	71.800, 0.380	71.800, 1.769	71.800, 1.483	71.800, 1.573	71.800, 0.064	71.800, 1.676	71.800, 1.933	71.800, 1.632	71.800, 1.721	71.800, 1.638	71.800, 1.785	71.800, 1.717	71.800, 1.974	71.800, 1.509	71.800, 0.992	71.800, 0.550	71.800, 1.815	71.800, 1.498	71.800, 1.473	71.800, 0.140	71.800, 1.680	71.800, 1.622
361	72.000, 2.006	72.000, 1.449	72.000, 0.911	72.000, 0.478	72.000, 2.046	72.000, 1.277	72.000, 0.870	72.000, 0.112	72.000, 0.381	72.000, 1.773	72.000, 1.487	72.000, 1.577	72.000, 0.064	72.000, 1.680	72.000, 1.938	72.000, 1.636	72.000, 1.725	72.000, 1.642	72.000, 1.790	72.000, 1.722	72.000, 1.979	72.000, 1.514	72.000, 0.996	72.000, 0.552	72.000, 1.819	72.000, 1.502	72.000, 1.476	72.000, 0.141	72.000, 1.684	72.000, 1.626
362	72.200, 2.011	72.200, 1.453	72.200, 0.914	72.200, 0.480	72.200, 2.050	72.200, 1.281	72.200, 0.873	72.200, 0.113	72.200, 0.383	72.200, 1.776	72.200, 1.490	72.200, 1.581	72.200, 0.065	72.200, 1.685	72.200, 1.942	72.200, 1.640	72.200, 1.729	72.200, 1.646	72.200, 1.794	72.200, 1.726	72.200, 1.985	72.200, 1.519	72.200, 0.999	72.200, 0.554	72.200, 1.823	72.200, 1.506	72.200, 1.480	72.200, 0.141	72.200, 1.688	72.200, 1.630
363	72.400, 2.016	72.400, 1.458	72.400, 0.917	72.400, 0.481	72.400, 2.055	72.400, 1.285	72.400, 0.876	72.400, 0.113	72.400, 0.385	72.400, 1.780	72.400, 1.494	72.400, 1.585	72.400, 0.065	72.400, 1.688	72.400, 1.945	72.400, 1.644	72.400, 1.733	72.400, 1.650	72.400, 1.799	72.400, 1.731	72.400, 1.990	72.400, 1.523	72.400, 1.002	72.400, 0.556	72.400, 1.827	72.400, 1.510	72.400, 1.483	72.400, 0.141	72.400, 1.692	72.400, 1.634
364	72.600, 2.022	72.600, 1.462	72.600, 0.920	72.600, 0.483	72.600, 2.059	72.600, 1.289	72.600, 0.879	72.600, 0.114	72.600, 0.386	72.600, 1.784	72.600, 1.498	72.600, 1.589	72.600, 0.066	72.600, 1.692	72.600, 1.949	72.600, 1.648	72.600, 1.738	72.600, 1.654	72.600, 1.803	72.600, 1.735	72.600, 1.995	72.600, 1.528	72.600, 1.006	72.600, 0.558	72.600, 1.831	72.600, 1.514	72.600, 1.487	72.600, 0.142	72.600, 1.696	72.600, 1.638
365	72.800, 2.027	72.800, 1.467	72.800, 0.924	72.800, 0.485	72.800, 2.064	72.800, 1.293	72.800, 0.882	72.800, 0.115	72.800, 0.387	72.800, 1.788	72.800, 1.501	72.800, 1.593	72.800, 0.066	72.800, 1.696	72.800, 1.953	72.800, 1.651	72.800, 1.742	72.800, 1.658	72.800, 1.807	72.800, 1.739	72.800, 2.000	72.800, 1.532	72.800, 1.009	72.800, 0.560	72.800, 1.835	72.800, 1.518	72.800, 1.491	72.800, 0.142	72.800, 1.700	72.800, 1.642
366	73.000, 2.032	73.000, 1.471	73.000, 0.927	73.000, 0.487	73.000, 2.069	73.000, 1.296	73.000, 0.885	73.000, 0.116	73.000, 0.389	73.000, 1.792	73.000, 1.505	73.000, 1.597	73.000, 0.066	73.000, 1.700	73.000, 1.957	73.000, 1.655	73.000, 1.746	73.000, 1.662	73.000, 1.811	73.000, 1.743	73.000, 2.005	73.000, 1.537	73.000, 1.013	73.000, 0.563	73.000, 1.838	73.000, 1.521	73.000, 1.495	73.000, 0.142	73.000, 1.704	73.000, 1.646
367	73.200, 2.038	73.200, 1.476	73.200, 0.930	73.200, 0.490	73.200, 2.074	73.200, 1.300	73.200, 0.888	73.200, 0.117	73.200, 0.391	73.200, 1.795	73.200, 1.509	73.200, 1.600	73.200, 0.067	73.200, 1.704	73.200, 1.960	73.200, 1.659	73.200, 1.750	73.200, 1.666	73.200, 1.816	73.200, 1.747	73.200, 2.010	73.200, 1.541	73.200, 1.016	73.200, 0.565	73.200, 1.842	73.200, 1.525	73.200, 1.499	73.200, 0.143	73.200, 1.708	73.200, 1.650
368	73.400, 2.043	73.400, 1.480	73.400, 0.933	73.400, 0.492	73.400, 2.078	73.400, 1.303	73.400, 0.891	73.400, 0.118	73.400, 0.393	73.400, 1.799	73.400, 1.512	73.400, 1.604	73.400, 0.067	73.400, 1.707	73.400, 1.964	73.400, 1.663	73.400, 1.755	73.400, 1.670	73.400, 1.820	73.400, 1.751	73.400, 2.015	73.400, 1.546	73.400, 1.019	73.400, 0.567	73.400, 1.845	73.400, 1.528	73.400, 1.502	73.400, 0.144	73.400, 1.712	73.400, 1.654
369	73.600, 2.049	73.600, 1.484	73.600, 0.937	73.600, 0.494	73.600, 2.083	73.600, 1.307	73.600, 0.894	73.600, 0.118	73.600, 0.394	73.600, 1.803	73.600, 1.516	73.600, 1.607	73.600, 0.068	73.600, 1.711	73.600, 1.968	73.600, 1.667	73.600, 1.759	73.600, 1.674	73.600, 1.824	73.600, 1.755	73.600, 2.019	73.600, 1.550	73.600, 1.023	73.600, 0.569	73.600, 1.849	73.600, 1.531	73.600, 1.506	73.600, 0.144	73.600, 1.716	73.600, 1.658
370	73.800, 2.054	73.800, 1.488	73.800, 0.940	73.800, 0.496	73.800, 2.087	73.800, 1.310	73.800, 0.897	73.800, 0.119	73.800, 0.396	73.800, 1.806	73.800, 1.519	73.800, 1.611	73.800, 0.068	73.800, 1.715	73.800, 1.972	73.800, 1.671	73.800, 1.763	73.800, 1.679	73.800, 1.828	73.800, 1.759	73.800, 2.024	73.800, 1.555	73.800, 1.027	73.800, 0.571	73.800, 1.853	73.800, 1.535	73.800, 1.510	73.800, 0.145	73.800, 1.721	73.800, 1.662
371	74.000, 2.059	74.000, 1.492	74.000, 0.943	74.000, 0.498	74.000, 2.092	74.000, 1.314	74.000, 0.900	74.000, 0.120	74.000, 0.398	74.000, 1.809	74.000, 1.523	74.000, 1.615	74.000, 0.069	74.000, 1.718	74.000, 1.976	74.000, 1.674	74.000, 1.767	74.000, 1.683	74.000, 1.832	74.000, 1.764	74.000, 2.029	74.000, 1.559	74.000, 1.030	74.000, 0.574	74.000, 1.857	74.000, 1.538	74.000, 1.514	74.000, 0.146	74.000, 1.725	74.000, 1.667
372	74.200, 2.064	74.200, 1.496	74.200, 0.946	74.200, 0.500	74.200, 2.096	74.200, 1.317	74.200, 0.903	74.200, 0.121	74.200, 0.400	74.200, 1.813	74.200, 1.526	74.200, 1.618	74.200, 0.069	74.200, 1.722	74.200, 1.979	74.200, 1.678	74.200, 1.771	74.200, 1.687	74.200, 1.837	74.200, 1.768	74.200, 2.033	74.200, 1.563	74.200, 1.034	74.200, 0.576	74.200, 1.860	74.200, 1.541	74.200, 1.517	74.200, 0.147	74.200, 1.729	74.200, 1.671
373	74.400, 2.070	74.400, 1.500	74.400, 0.949	74.400, 0.503	74.400, 2.100	74.400, 1.321	74.400, 0.907	74.400, 0.121	74.400, 0.402	74.400, 1.816	74.400, 1.529	74.400, 1.622	74.400, 0.069	74.400, 1.726	74.400, 1.983	74.400, 1.682	74.400, 1.775	74.400, 1.691	74.400, 1.841	74.400, 1.772	74.400, 2.038	74.400, 1.568	74.400, 1.037	74.400, 0.578	74.400, 1.864	74.400, 1.545	74.400, 1.520	74.400, 0.149	74.400, 1.733	74.400, 1.676
374	74.600, 2.075	74.600, 1.505	74.600, 0.952	74.600, 0.505	74.600, 2.105	74.600, 1.324	74.600, 0.910	74.600, 0.122	74.600, 0.404	74.600, 1.820	74.600, 1.533	74.600, 1.625	74.600, 0.070	74.600, 1.730	74.600, 1.987	74.600, 1.686	74.600, 1.778	74.600, 1.695	74.600, 1.845	74.600, 1.776	74.600, 2.042	74.600, 1.572	74.600, 1.041	74.600, 0.580	74.600, 1.868	74.600, 1.548	74.600, 1.523	74.600, 0.150	74.600, 1.737	74.600, 1.680
375	74.800, 2.080	74.800, 1.508	74.800, 0.956	74.800, 0.507	74.800, 2.109	74.800, 1.328	74.800, 0.913	74.800, 0.123	74.800, 0.405	74.800, 1.823	74.800, 1.537	74.800, 1.629	74.800, 0.070	74.800, 1.734	74.800, 1.991	74.800, 1.690	74.800, 1.782	74.800, 1.699	74.800, 1.850	74.800, 1.780	74.800, 2.047	74.800, 1.576	74.800, 1.044	74.800, 0.582	74.800, 1.871	74.800, 1.551	74.800, 1.526	74.800, 0.151	74.800, 1.741	74.800, 1.685
376	75.000, 2.085	75.000, 1.513	75.000, 0.959	75.000, 0.509	75.000, 2.114	75.000, 1.332	75.000, 0.916	75.000, 0.123	75.000, 0.407	75.000, 1.826	75.000, 1.540	75.000, 1.632	75.000, 0.071	75.000, 1.739	75.000, 1.994	75.000, 1.694	75.000, 1.786	75.000, 1.703	75.000, 1.854	75.000, 1.784	75.000, 2.051	75.000, 1.581	75.000, 1.047	75.000, 0.584	75.000, 1.874	75.000, 1.554	75.000, 1.529	75.000, 0.152	75.000, 1.745	75.000, 1.689
377	75.200, 2.090	75.200, 1.517	75.200, 0.962	75.200, 0.511	75.200, 2.118	75.200, 1.335	75.200, 0.919	75.200, 0.124	75.200, 0.409	75.200, 1.829	75.200, 1.544	75.200, 1.636	75.200, 0.071	75.200, 1.743	75.200, 1.998	75.200, 1.698	75.200, 1.790	75.200, 1.707	75.200, 1.858	75.200, 1.789	75.200, 2.056	75.200, 1.585	75.200, 1.051	75.200, 0.585	75.200, 1.877	75.200, 1.556	75.200, 1.532	75.200, 0.153	75.200, 1.748	75.200, 1.693
378	75.400, 2.095	75.400, 1.521	75.400, 0.965	75.400, 0.512	75.400, 2.122	75.400, 1.339	75.400, 0.922	75.400, 0.125	75.400, 0.411	75.400, 1.833	75.400, 1.547	75.400, 1.639	75.400, 0.072	75.400, 1.747	75.400, 2.002	75.400, 1.702	75.400, 1.794	75.400, 1.711	75.400, 1.861	75.400, 1.793	75.400, 2.061	75.400, 1.589	75.400, 1.054	75.400, 0.587	75.400, 1.880	75.400, 1.560	75.400, 1.535	75.400, 0.153	75.400, 1.752	75.400, 1.697
379	75.600, 2.100	75.600, 1.525	75.600, 0.968	75.600, 0.514	75.600, 2.127	75.600, 1.342	75.600, 0.924	75.600, 0.125	75.600, 0.412	75.600, 1.836	75.600, 1.550	75.600, 1.643	75.600, 0.073	75.600, 1.752	75.600, 2.006	75.600, 1.705	75.600, 1.798	75.600, 1.715	75.600, 1.865	75.600, 1.797	75.600, 2.066	75.600, 1.593	75.600, 1.057	75.600, 0.589	75.600, 1.883	75.600, 1.563	75.600, 1.538	75.600, 0.154	75.600, 1.755	75.600, 1.700
380	75.800, 2.105	75.800, 1.529	75.800, 0.971	75.800, 0.516	75.800, 2.131	75.800, 1.346	75.800, 0.927	75.800, 0.125	75.800, 0.414	75.800, 1.839	75.800, 1.553	75.800, 1.647	75.800, 0.074	75.800, 1.756	75.800, 2.010	75.800, 1.709	75.800, 1.802	75.800, 1.719	75.800, 1.869	75.800, 1.802	75.800, 2.071	75.800, 1.597	75.800, 1.060	75.800, 0.591	75.800, 1.887	75.800, 1.566	75.800, 1.542	75.800, 0.155	75.800, 1.759	75.800, 1.704
381	76.000, 2.111	76.000, 1.534	76.000, 0.975	76.000, 0.518	76.000, 2.136	76.000, 1.350	76.000, 0.929	76.000, 0.126	76.000, 0.415	76.000, 1.843	76.000, 1.556	76.000, 1.650	76.000, 0.074	76.000, 1.760	76.000, 2.014	76.000, 1.712	76.000, 1.806	76.000, 1.723	76.000, 1.872	76.000, 1.806	76.000, 2.075	76.000, 1.601	76.000, 1.064	76.000, 0.593	76.000, 1.890	76.000, 1.570	76.000, 1.545	76.000, 0.156	76.000, 1.762	76.000, 1.708
382	76.200, 2.116	76.200, 1.538	76.200, 0.978	76.200, 0.520	76.200, 2.140	76.200, 1.354	76.200, 0.932	76.200, 0.126	76.200, 0.417	76.200, 1.846	76.200, 1.559	76.200, 1.653	76.200, 0.075	76.200, 1.764	76.200, 2.018	76.200, 1.715	76.200, 1.810	76.200, 1.726	76.200, 1.876	76.200, 1.811	76.200, 2.080	76.200, 1.605	76.200, 1.067	76.200, 0.595	76.200, 1.893	76.200, 1.573	76.200, 1.548	76.200, 0.156	76.200, 1.765	76.200, 1.711
383	76.400, 2.121	76.400, 1.542	76.400, 0.982	76.400, 0.522	76.400, 2.144	76.400, 1.357	76.400, 0.935	76.400, 0.126	76.400, 0.418	76.400, 1.850	76.400, 1.562	76.400, 1.657	76.400, 0.075	76.400, 1.767	76.400, 2.022	76.400, 1.718	76.400, 1.814	76.400, 1.730	76.400, 1.880	76.400, 1.815	76.400, 2.084	76.400, 1.609	76.400, 1.070	76.400, 0.597	76.400, 1.897	76.400, 1.576	76.400, 1.552	76.400, 0.157	76.400, 1.769	76.400, 1.715
384	76.600, 2.126	76.600, 1.546	76.600, 0.985	76.600, 0.524	76.600, 2.149	76.600, 1.361	76.600, 0.937	76.600, 0.127	76.600, 0.420	76.600, 1.854	76.600, 1.565	76.600, 1.660	76.600, 0.076	76.600, 1.771	76.600, 2.026	76.600, 1.721	76.600, 1.817	76.600, 1.734	76.600, 1.883	76.600, 1.819	76.600, 2.089	76.600, 1.614	76.600, 1.073	76.600, 0.600	76.600, 1.900	76.600, 1.579	76.600, 1.555	76.600, 0.157	76.600, 1.772	76.600, 1.719
385	76.800, 2.131	76.800, 1.550	76.800, 0.989	76.800, 0.526	76.800, 2.153	76.800, 1.364	76.800, 0.940	76.800, 0.127	76.800, 0.421	76.800, 1.857	76.800, 1.568	76.800, 1.663	76.800, 0.076	76.800, 1.774	76.800, 2.029	76.800, 1.725	76.800, 1.821	76.800, 1.737	76.800, 1.887	76.800, 1.823	76.800, 2.093	76.800, 1.618	76.800, 1.077	76.800, 0.601	76.800, 1.903	76.800, 1.582	76.800, 1.559	76.800, 0.158	76.800, 1.776	76.800, 1.723
386	77.000, 2.136	77.000, 1.554	77.000, 0.993	77.000, 0.528	77.000, 2.157	77.000, 1.368	77.000, 0.943	77.000, 0.128	77.000, 0.423	77.000, 1.861	77.000, 1.571	77.000, 1.666	77.000, 0.077	77.000, 1.777	77.000, 2.033	77.000, 1.728	77.000, 1.824	77.000, 1.741	77.000, 1.890	77.000, 1.826	77.000, 2.098	77.000, 1.622	77.000, 1.080	77.000, 0.603	77.000, 1.906	77.000, 1.586	77.000, 1.562	77.000, 0.159	77.000, 1.780	77.000, 1.726
387	77.200, 2.141	77.200, 1.558	77.200, 0.996	77.200, 0.530	77.200, 2.162	77.200, 1.371	77.200, 0.947	77.200, 0.128	77.200, 0.425	77.200, 1.864	77.200, 1.574	77.200, 1.670	77.200, 0.077	77.200, 1.780	77.200, 2.036	77.200, 1.732	77.200, 1.828	77.200, 1.745	77.200, 1.894	77.200, 1.830	77.200, 2.103	77.200, 1.626	77.200, 1.083	77.200, 0.605	77.200, 1.909	77.200, 1.589	77.200, 1.566	77.200, 0.159	77.200, 1.783	77.200, 1.730
388	77.400, 2.145	77.400, 1.562	77.400, 1.000	77.400, 0.531	77.400, 2.166	77.400, 1.375	77.400, 0.950	77.400, 0.129	77.400, 0.426	77.400, 1.868	77.400, 1.577	77.400, 1.673	77.400, 0.078	77.400, 1.784	77.400, 2.039	77.400, 1.735	77.400, 1.831	77.400, 1.748	77.400, 1.898	77.400, 1.834	77.400, 2.108	77.400, 1.630	77.400, 1.087	77.400, 0.608	77.400, 1.913	77.400, 1.592	77.400, 1.569	77.400, 0.160	77.400, 1.787	77.400, 1.733
389	77.600, 2.150	77.600, 1.566	77.600, 1.003	77.600, 0.533	77.600, 2.170	77.600, 1.378	77.600, 0.953	77.600, 0.129	77.600, 0.428	77.600, 1.871	77.600, 1.579	77.600, 1.676	77.600, 0.078	77.600, 1.787	77.600, 2.042	77.600, 1.738	77.600, 1.834	77.600, 1.752	77.600, 1.902	77.600, 1.837	77.600, 2.112	77.600, 1.634	77.600, 1.090	77.600, 0.610	77.600, 1.916	77.600, 1.595	77.600, 1.573	77.600, 0.161	77.600, 1.791	77.600, 1.737
390	77.800, 2.155	77.800, 1.570	77.800, 1.006	77.800, 0.535	77.800, 2.175	77.800, 1.382	77.800, 0.956	77.800, 0.130	77.800, 0.429	77.800, 1.874	77.800, 1.582	77.800, 1.679	77.800, 0.079	77.800, 1.790	77.800, 2.045	77.800, 1.742	77.800, 1.837	77.800, 1.756	77.800, 1.906	77.800, 1.841	77.800, 2.117	77.800, 1.638	77.800, 1.093	77.800, 0.612	77.800, 1.919	77.800, 1.598	77.800, 1.576	77.800, 0.161	77.800, 1.795	77.800, 1.741
391	78.000, 2.160	78.000, 1.574	78.000, 1.009	78.000, 0.537	78.000, 2.179	78.000, 1.385	78.000, 0.959	78.000, 0.130	78.000, 0.431	78.000, 1.878	78.000, 1.585	78.000, 1.682	78.000, 0.079	78.000, 1.793	78.000, 2.048	78.000, 1.745	78.000, 1.840	78.000, 1.759	78.000, 1.909	78.000, 1.844	78.000, 2.121	78.000, 1.642	78.000, 1.097	78.000, 0.615	78.000, 1.922	78.000, 1.601	78.000, 1.579	78.000, 0.162	78.000, 1.798	78.000, 1.744
392	78.200, 2.164	78.200, 1.578	78.200, 1.012	78.200, 0.538	78.200, 2.184	78.200, 1.388	78.200, 0.961	78.200, 0.130	78.200, 0.432	78.200, 1.881	78.200, 1.588	78.200, 1.685	78.200, 0.080	78.200, 1.796	78.200, 2.051	78.200, 1.748	78.200, 1.843	78.200, 1.763	78.200, 1.913	78.200, 1.847	78.200, 2.126	78.200, 1.646	78.200, 1.100	78.200, 0.617	78.200, 1.925	78.200, 1.604	78.200, 1.582	78.200, 0.162	78.200, 1.802	78.200, 1.747
393	78.400, 2.169	78.400, 1.582	78.400, 1.015	78.400, 0.540	78.400, 2.188	78.400, 1.391	78.400, 0.964	78.400, 0.131	78.400, 0.434	78.400, 1.884	78.400, 1.592	78.400, 1.689	78.400, 0.080	78.400, 1.800	78.400, 2.054	78.400, 1.752	78.400, 1.846	78.400, 1.767	78.400, 1.917	78.400, 1.850	78.400, 2.130	78.400, 1.650	78.400, 1.103	78.400, 0.620	78.400, 1.928	78.400, 1.607	78.400, 1.585	78.400, 0.163	78.400, 1.806	78.400, 1.751
394	78.600, 2.173	78.600, 1.586	78.600, 1.018	78.600, 0.542	78.600, 2.192	78.600, 1.394	78.600, 0.967	78.600, 0.131	78.600, 0.436	78.600, 1.887	78.600, 1.595	78.600, 1.692	78.600, 0.081	78.600, 1.803	78.600, 2.056	78.600, 1.755	78.600, 1.849	78.600, 1.770	78.600, 1.920	78.600, 1.854	78.600, 2.134	78.600, 1.654	78.600, 1.107	78.600, 0.622	78.600, 1.931	78.600, 1.610	78.600, 1.588	78.600, 0.163	78.600, 1.809	78.600, 1.754
395	78.800, 2.177	78.800, 1.590	78.800, 1.021	78.800, 0.544	78.800, 2.196	78.800, 1.397	78.800, 0.970	78.800, 0.132	78.800, 0.437	78.800, 1.889	78.800, 1.599	78.800, 1.696	78.800, 0.081	78.800, 1.807	78.800, 2.059	78.800, 1.759	78.800, 1.853	78.800, 1.773	78.800, 1.924	78.800, 1.857	78.800, 2.139	78.800, 1.658	78.800, 1.110	78.800, 0.624	78.800, 1.933	78.800, 1.613	78.800, 1.591	78.800, 0.163	78.800, 1.813	78.800, 1.758
396	79.000, 2.182	79.000, 1.594	79.000, 1.024	79.000, 0.545	79.000, 2.200	79.000, 1.401	79.000, 0.972	79.000, 0.132	79.000, 0.439	79.000, 1.892	79.000, 1.602	79.000, 1.699	79.000, 0.082	79.000, 1.811	79.000, 2.062	79.000, 1.762	79.000, 1.856	79.000, 1.777	79.000, 1.927	79.000, 1.861	79.000, 2.143	79.000, 1.662	79.000, 1.113	79.000, 0.627	79.000, 1.936	79.000, 1.615	79.000, 1.594	79.000, 0.164	79.000, 1.817	79.000, 1.761
397	79.200, 2.186	79.200, 1.598	79.200, 1.027	79.200, 0.547	79.200, 2.204	79.200, 1.404	79.200, 0.975	79.200, 0.132	79.200, 0.440	79.200, 1.894	79.200, 1.605	79.200, 1.703	79.200, 0.082	79.200, 1.814	79.200, 2.065	79.200, 1.765	79.200, 1.859	79.200, 1.780	79.200, 1.930	79.200, 1.864	79.200, 2.148	79.200, 1.666	79.200, 1.117	79.200, 0.629	79.200, 1.938	79.200, 1.618	79.200, 1.597	79.200, 0.164	79.200, 1.820	79.200, 1.764
398	79.400, 2.191	79.400, 1.602	79.400, 1.030	79.400, 0.548	79.400, 2.208	79.400, 1.407	79.400, 0.978	79.400, 0.132	79.400, 0.442	79.400, 1.897	79.400, 1.608	79.400, 1.706	79.400, 0.083	79.400, 1.817	79.400, 2.068	79.400, 1.768	79.400, 1.863	79.400, 1.784	79.400, 1.934	79.400, 1.868	79.400, 2.152	79.400, 1.670	79.400, 1.120	79.400, 0.631	79.400, 1.941	79.400, 1.621	79.400, 1.600	79.400, 0.165	79.400, 1.823	79.400, 1.768
399	79.600, 2.195	79.600, 1.606	79.600, 1.033	79.600, 0.550	79.600, 2.212	79.600, 1.410	79.600, 0.981	79.600, 0.132	79.600, 0.443	79.600, 1.900	79.600, 1.611	79.600, 1.709	79.600, 0.083	79.600, 1.821	79.600, 2.072	79.600, 1.772	79.600, 1.866	79.600, 1.787	79.600, 1.937	79.600, 1.871	79.600, 2.156	79.600, 1.674	79.600, 1.123	79.600, 0.633	79.600, 1.943	79.600, 1.624	79.600, 1.603	79.600, 0.166	79.600, 1.826	79.600, 1.771
400	79.800, 2.200	79.800, 1.610	79.800, 1.036	79.800, 0.551	79.800, 2.216	79.800, 1.413	79.800, 0.984	79.800, 0.133	79.800, 0.445	79.800, 1.903	79.800, 1.614	79.800, 1.712	79.800, 0.084	79.800, 1.824	79.800, 2.075	79.800, 1.775	79.800, 1.870	79.800, 1.791	79.800, 1.939	79.800, 1.875	79.800, 2.161	79.800, 1.678	79.800, 1.126	79.800, 0.635	79.800, 1.946	79.800, 1.626	79.800, 1.606	79.800, 0.167	79.800, 1.830	79.800, 1.775
401	80.000, 2.205	80.000, 1.614	80.000, 1.040	80.000, 0.553	80.000, 2.220	80.000, 1.417	80.000, 0.987	80.000, 0.133	80.000, 0.446	80.000, 1.906	80.000, 1.617	80.000, 1.715	80.000, 0.084	80.000, 1.827	80.000, 2.079	80.000, 1.777	80.000, 1.873	80.000, 1.794	80.000, 1.942	80.000, 1.879	80.000, 2.165	80.000, 1.682	80.000, 1.129	80.000, 0.637	80.000, 1.949	80.000, 1.629	80.000, 1.608	80.000, 0.168	80.000, 1.833	80.000, 1.778
402	80.200, 2.209	80.200, 1.617	80.200, 1.043	80.200, 0.555	80.200, 2.224	80.200, 1.420	80.200, 0.990	80.200, 0.134	80.200, 0.448	80.200, 1.909	80.200, 1.620	80.200, 1.717	80.200, 0.084	80.200, 1.830	80.200, 2.083	80.200, 1.780	80.200, 1.877	80.200, 1.797	80.200, 1.946	80.200, 1.882	80.200, 2.169	80.200, 1.686	80.200, 1.132	80.200, 0.639	80.200, 1.952	80.200, 1.632	80.200, 1.611	80.200, 0.169	80.200, 1.836	80.200, 1.782
403	80.400, 2.214	80.400, 1.621	80.400, 1.046	80.400, 0.557	80.400, 2.227	80.400, 1.423	80.400, 0.993	80.400, 0.134	80.400, 0.449	80.400, 1.912	80.400, 1.623	80.400, 1.720	80.400, 0.085	80.400, 1.833	80.400, 2.086	80.400, 1.783	80.400, 1.880	80.400, 1.801	80.400, 1.949	80.400, 1.886	80.400, 2.173	80.400, 1.690	80.400, 1.135	80.400, 0.642	80.400, 1.955	80.400, 1.635	80.400, 1.614	80.400, 0.170	80.400, 1.840	80.400, 1.786
404	80.600, 2.218	80.600, 1.625	80.600, 1.049	80.600, 0.560	80.600, 2.230	80.600, 1.427	80.600, 0.996	80.600, 0.135	80.600, 0.450	80.600, 1.915	80.600, 1.626	80.600, 1.723	80.600, 0.085	80.600, 1.836	80.600, 2.090	80.600, 1.786	80.600, 1.883	80.600, 1.804	80.600, 1.952	80.600, 1.889	80.600, 2.177	80.600, 1.694	80.600, 1.138	80.600, 0.644	80.600, 1.958	80.600, 1.637	80.600, 1.617	80.600, 0.171	80.600, 1.843	80.600, 1.790
405	80.800, 2.223	80.800, 1.628	80.800, 1.052	80.800, 0.562	80.800, 2.234	80.800, 1.430	80.800, 0.999	80.800, 0.136	80.800, 0.452	80.800, 1.918	80.800, 1.629	80.800, 1.726	80.800, 0.085	80.800, 1.839	80.800, 2.093	80.800, 1.789	80.800, 1.886	80.800, 1.808	80.800, 1.956	80.800, 1.892	80.800, 2.181	80.800, 1.697	80.800, 1.141	80.800, 0.645	80.800, 1.961	80.800, 1.640	80.800, 1.620	80.800, 0.171	80.800, 1.846	80.800, 1.793
406	81.000, 2.227	81.000, 1.632	81.000, 1.054	81.000, 0.564	81.000, 2.237	81.000, 1.433	81.000, 1.002	81.000, 0.136	81.000, 0.453	81.000, 1.921	81.000, 1.632	81.000, 1.729	81.000, 0.086	81.000, 1.843	81.000, 2.096	81.000, 1.792	81.000, 1.889	81.000, 1.811	81.000, 1.960	81.000, 1.896	81.000, 2.186	81.000, 1.701	81.000, 1.144	81.000, 0.647	81.000, 1.963	81.000, 1.643	81.000, 1.623	81.000, 0.172	81.000, 1.849	81.000, 1.797
407	81.200, 2.232	81.200, 1.636	81.200, 1.057	81.200, 0.566	81.200, 2.241	81.200, 1.437	81.200, 1.004	81.200, 0.137	81.200, 0.455	81.200, 1.924	81.200, 1.635	81.200, 1.732	81.200, 0.086	81.200, 1.846	81.200, 2.099	81.200, 1.795	81.200, 1.892	81.200, 1.815	81.200, 1.964	81.200, 1.899	81.200, 2.190	81.200, 1.705	81.200, 1.147	81.200, 0.649	81.200, 1.966	81.200, 1.646	81.200, 1.626	81.200, 0.173	81.200, 1.852	81.200, 1.800
408	81.400, 2.236	81.400, 1.640	81.400, 1.060	81.400, 0.568	81.400, 2.244	81.400, 1.440	81.400, 1.007	81.400, 0.138	81.400, 0.456	81.400, 1.927	81.400, 1.637	81.400, 1.734	81.400, 0.087	81.400, 1.849	81.400, 2.103	81.400, 1.798	81.400, 1.895	81.400, 1.818	81.400, 1.967	81.400, 1.902	81.400, 2.194	81.400, 1.708	81.400, 1.149	81.400, 0.651	81.400, 1.969	81.400, 1.648	81.400, 1.629	81.400, 0.174	81.400, 1.855	81.400, 1.804
409	81.600, 2.241	81.600, 1.644	81.600, 1.062	81.600, 0.570	81.600, 2.248	81.600, 1.443	81.600, 1.010	81.600, 0.139	81.600, 0.458	81.600, 1.930	81.600, 1.640	81.600, 1.737	81.600, 0.087	81.600, 1.853	81.600, 2.105	81.600, 1.801	81.600, 1.898	81.600, 1.821	81.600, 1.971	81.600, 1.906	81.600, 2.198	81.600, 1.712	81.600, 1.152	81.600, 0.652	81.600, 1.972	81.600, 1.651	81.600, 1.631	81.600, 0.174	81.600, 1.858	81.600, 1.808
410	81.800, 2.245	81.800, 1.648	81.800, 1.065	81.800, 0.571	81.800, 2.251	81.800, 1.446	81.800, 1.012	81.800, 0.140	81.800, 0.459	81.800, 1.933	81.800, 1.642	81.800, 1.740	81.800, 0.088	81.800, 1.856	81.800, 2.108	81.800, 1.804	81.800, 1.901	81.800, 1.824	81.800, 1.975	81.800, 1.909	81.800, 2.202	81.800, 1.716	81.800, 1.155	81.800, 0.654	81.800, 1.975	81.800, 1.654	81.800, 1.634	81.800, 0.175	81.800, 1.861	81.800, 1.811
411	82.000, 2.249	82.000, 1.651	82.000, 1.068	82.000, 0.573	82.000, 2.255	82.000, 1.449	82.000, 1.015	82.000, 0.141	82.000, 0.461	82.000, 1.936	82.000, 1.645	82.000, 1.743	82.000, 0.089	82.000, 1.859	82.000, 2.111	82.000, 1.807	82.000, 1.904	82.000, 1.827	82.000, 1.978	82.000, 1.912	82.000, 2.206	82.000, 1.720	82.000, 1.157	82.000, 0.656	82.000, 1.978	82.000, 1.657	82.000, 1.637	82.000, 0.176	82.000, 1.865	82.000, 1.814
412	82.200, 2.253	82.200, 1.655	82.200, 1.070	82.200, 0.575	82.200, 2.259	82.200, 1.452	82.200, 1.017	82.200, 0.142	82.200, 0.463	82.200, 1.939	82.200, 1.648	82.200, 1.746	82.200, 0.089	82.200, 1.862	82.200, 2.113	82.200, 1.810	82.200, 1.907	82.200, 1.830	82.200, 1.982	82.200, 1.915	82.200, 2.210	82.200, 1.723	82.200, 1.160	82.200, 0.658	82.200, 1.981	82.200, 1.659	82.200, 1.640	82.200, 0.177	82.200, 1.868	82.200, 1.818
413	82.400, 2.258	82.400, 1.658	82.400, 1.073	82.400, 0.576	82.400, 2.262	82.400, 1.455	82.400, 1.020	82.400, 0.142	82.400, 0.464	82.400, 1.941	82.400, 1.651	82.400, 1.748	82.400, 0.090	82.400, 1.866	82.400, 2.115	82.400, 1.813	82.400, 1.911	82.400, 1.833	82.400, 1.985	82.400, 1.919	82.400, 2.214	82.400, 1.727	82.400, 1.163	82.400, 0.660	82.400, 1.984	82.400, 1.662	82.400, 1.643	82.400, 0.177	82.400, 1.871	82.400, 1.821
414	82.600, 2.262	82.600, 1.662	82.600, 1.076	82.600, 0.578	82.600, 2.266	82.600, 1.458	82.600, 1.023	82.600, 0.143	82.600, 0.466	82.600, 1.944	82.600, 1.653	82.600, 1.751	82.600, 0.090	82.600, 1.869	82.600, 2.118	82.600, 1.816	82.600, 1.914	82.600, 1.836	82.600, 1.989	82.600, 1.922	82.600, 2.218	82.600, 1.731	82.600, 1.166	82.600, 0.662	82.600, 1.987	82.600, 1.665	82.600, 1.645	82.600, 0.178	82.600, 1.874	82.600, 1.825
415	82.800, 2.265	82.800, 1.666	82.800, 1.078	82.800, 0.579	82.800, 2.270	82.800, 1.461	82.800, 1.025	82.800, 0.144	82.800, 0.468	82.800, 1.947	82.800, 1.656	82.800, 1.754	82.800, 0.091	82.800, 1.872	82.800, 2.120	82.800, 1.819	82.800, 1.918	82.800, 1.839	82.800, 1.992	82.800, 1.926	82.800, 2.222	82.800, 1.734	82.800, 1.169	82.800, 0.664	82.800, 1.989	82.800, 1.668	82.800, 1.648	82.800, 0.178	82.800, 1.877	82.800, 1.828
416	83.000, 2.269	83.000, 1.669	83.000, 1.081	83.000, 0.581	83.000, 2.274	83.000, 1.464	83.000, 1.028	83.000, 0.144	83.000, 0.469	83.000, 1.949	83.000, 1.659	83.000, 1.757	83.000, 0.091	83.000, 1.875	83.000, 2.123	83.000, 1.822	83.000, 1.921	83.000, 1.842	83.000, 1.995	83.000, 1.929	83.000, 2.225	83.000, 1.738	83.000, 1.172	83.000, 0.666	83.000, 1.992	83.000, 1.671	83.000, 1.651	83.000, 0.179	83.000, 1.880	83.000, 1.831
417	83.200, 2.274	83.200, 1.673	83.200, 1.084	83.200, 0.582	83.200, 2.277	83.200, 1.467	83.200, 1.031	83.200, 0.145	83.200, 0.470	83.200, 1.952	83.200, 1.662	83.200, 1.760	83.200, 0.092	83.200, 1.878	83.200, 2.125	83.200, 1.825	83.200, 1.924	83.200, 1.846	83.200, 1.998	83.200, 1.933	83.200, 2.229	83.200, 1.741	83.200, 1.175	83.200, 0.668	83.200, 1.994	83.200, 1.674	83.200, 1.653	83.200, 0.180	83.200, 1.882	83.200, 1.834
418	83.400, 2.278	83.400, 1.676	83.400, 1.087	83.400, 0.584	83.400, 2.281	83.400, 1.470	83.400, 1.033	83.400, 0.145	83.400, 0.472	83.400, 1.955	83.400, 1.665	83.400, 1.763	83.400, 0.093	83.400, 1.881	83.400, 2.128	83.400, 1.828	83.400, 1.928	83.400, 1.849	83.400, 2.001	83.400, 1.936	83.400, 2.233	83.400, 1.745	83.400, 1.178	83.400, 0.670	83.400, 1.997	83.400, 1.677	83.400, 1.656	83.400, 0.180	83.400, 1.885	83.400, 1.837
419	83.600, 2.282	83.600, 1.680	83.600, 1.090	83.600, 0.586	83.600, 2.285	83.600, 1.473	83.600, 1.036	83.600, 0.146	83.600, 0.473	83.600, 1.958	83.600, 1.667	83.600, 1.765	83.600, 0.093	83.600, 1.884	83.600, 2.130	83.600, 1.831	83.600, 1.931	83.600, 1.852	83.600, 2.003	83.600, 1.939	83.600, 2.236	83.600, 1.748	83.600, 1.182	83.600, 0.672	83.600, 2.000	83.600, 1.680	83.600, 1.659	83.600, 0.181	83.600, 1.888	83.600, 1.840
420	83.800, 2.287	83.800, 1.683	83.800, 1.093	83.800, 0.587	83.800, 2.289	83.800, 1.476	83.800, 1.039	83.800, 0.146	83.800, 0.474	83.800, 1.960	83.800, 1.670	83.800, 1.768	83.800, 0.094	83.800, 1.887	83.800, 2.133	83.800, 1.834	83.800, 1.934	83.800, 1.855	83.800, 2.006	83.800, 1.943	83.800, 2.240	83.800, 1.752	83.800, 1.185	83.800, 0.674	83.800, 2.002	83.800, 1.682	83.800, 1.661	83.800, 0.181	83.800, 1.891	83.800, 1.843
421	84.000, 2.291	84.000, 1.687	84.000, 1.095	84.000, 0.589	84.000, 2.292	84.000, 1.479	84.000, 1.041	84.000, 0.147	84.000, 0.475	84.000, 1.963	84.000, 1.672	84.000, 1.771	84.000, 0.095	84.000, 1.889	84.000, 2.136	84.000, 1.836	84.000, 1.937	84.000, 1.858	84.000, 2.009	84.000, 1.946	84.000, 2.244	84.000, 1.756	84.000, 1.188	84.000, 0.676	84.000, 2.005	84.000, 1.685	84.000, 1.663	84.000, 0.182	84.000, 1.894	84.000, 1.846
422	84.200, 2.296	84.200, 1.690	84.200, 1.098	84.200, 0.591	84.200, 2.296	84.200, 1.483	84.200, 1.044	84.200, 0.147	84.200, 0.476	84.200, 1.966	84.200, 1.675	84.200, 1.773	84.200, 0.095	84.200, 1.892	84.200, 2.139	84.200, 1.839	84.200, 1.940	84.200, 1.862	84.200, 2.011	84.200, 1.949	84.200, 2.248	84.200, 1.759	84.200, 1.190	84.200, 0.679	84.200, 2.007	84.200, 1.687	84.200, 1.666	84.200, 0.182	84.200, 1.897	84.200, 1.850
423	84.400, 2.300	84.400, 1.693	84.400, 1.101	84.400, 0.593	84.400, 2.300	84.400, 1.486	84.400, 1.046	84.400, 0.148	84.400, 0.477	84.400, 1.968	84.400, 1.677	84.400, 1.776	84.400, 0.095	84.400, 1.895	84.400, 2.141	84.400, 1.841	84.400, 1.942	84.400, 1.865	84.400, 2.014	84.400, 1.953	84.400, 2.252	84.400, 1.762	84.400, 1.193	84.400, 0.681	84.400, 2.010	84.400, 1.690	84.400, 1.668	84.400, 0.182	84.400, 1.900	84.400, 1.853
424	84.600, 2.304	84.600, 1.697	84.600, 1.104	84.600, 0.595	84.600, 2.303	84.600, 1.489	84.600, 1.049	84.600, 0.148	84.600, 0.479	84.600, 1.970	84.600, 1.680	84.600, 1.778	84.600, 0.096	84.600, 1.899	84.600, 2.144	84.600, 1.844	84.600, 1.945	84.600, 1.868	84.600, 2.017	84.600, 1.956	84.600, 2.256	84.600, 1.766	84.600, 1.196	84.600, 0.683	84.600, 2.012	84.600, 1.692	84.600, 1.671	84.600, 0.183	84.600, 1.903	84.600, 1.856
425	84.800, 2.308	84.800, 1.700	84.800, 1.106	84.800, 0.597	84.800, 2.307	84.800, 1.492	84.800, 1.051	84.800, 0.149	84.800, 0.480	84.800, 1.973	84.800, 1.682	84.800, 1.781	84.800, 0.096	84.800, 1.902	84.800, 2.147	84.800, 1.847	84.800, 1.948	84.800, 1.871	84.800, 2.020	84.800, 1.959	84.800, 2.260	84.800, 1.769	84.800, 1.199	84.800, 0.685	84.800, 2.015	84.800, 1.695	84.800, 1.673	84.800, 0.183	84.800, 1.905	84.800, 1.859
426	85.000, 2.312	85.000, 1.704	85.000, 1.109	85.000, 0.598	85.000, 2.310	85.000, 1.495	85.000, 1.054	85.000, 0.149	85.000, 0.481	85.000, 1.975	85.000, 1.684	85.000, 1.783	85.000, 0.096	85.000, 1.905	85.000, 2.150	85.000, 1.849	85.000, 1.950	85.000, 1.875	85.000, 2.023	85.000, 1.962	85.000, 2.264	85.000, 1.772	85.000, 1.201	85.000, 0.687	85.000, 2.017	85.000, 1.697	85.000, 1.676	85.000, 0.184	85.000, 1.908	85.000, 1.862
427	85.200, 2.316	85.200, 1.708	85.200, 1.112	85.200, 0.600	85.200, 2.314	85.200, 1.498	85.200, 1.056	85.200, 0.150	85.200, 0.483	85.200, 1.977	85.200, 1.686	85.200, 1.785	85.200, 0.097	85.200, 1.908	85.200, 2.153	85.200, 1.852	85.200, 1.952	85.200, 1.878	85.200, 2.025	85.200, 1.965	85.200, 2.267	85.200, 1.775	85.200, 1.204	85.200, 0.689	85.200, 2.020	85.200, 1.699	85.200, 1.678	85.200, 0.185	85.200, 1.911	85.200, 1.864
428	85.400, 2.321	85.400, 1.711	85.400, 1.114	85.400, 0.602	85.400, 2.317	85.400, 1.501	85.400, 1.059	85.400, 0.151	85.400, 0.485	85.400, 1.980	85.400, 1.688	85.400, 1.788	85.400, 0.097	85.400, 1.911	85.400, 2.156	85.400, 1.855	85.400, 1.955	85.400, 1.881	85.400, 2.028	85.400, 1.968	85.400, 2.271	85.400, 1.779	85.400, 1.206	85.400, 0.691	85.400, 2.023	85.400, 1.701	85.400, 1.681	85.400, 0.186	85.400, 1.914	85.400, 1.867
429	85.600, 2.325	85.600, 1.715	85.600, 1.117	85.600, 0.603	85.600, 2.320	85.600, 1.504	85.600, 1.062	85.600, 0.151	85.600, 0.486	85.600, 1.982	85.600, 1.691	85.600, 1.791	85.600, 0.097	85.600, 1.914	85.600, 2.158	85.600, 1.857	85.600, 1.957	85.600, 1.883	85.600, 2.031	85.600, 1.971	85.600, 2.275	85.600, 1.782	85.600, 1.209	85.600, 0.693	85.600, 2.025	85.600, 1.703	85.600, 1.683	85.600, 0.187	85.600, 1.917	85.600, 1.870
430	85.800, 2.328	85.800, 1.718	85.800, 1.120	85.800, 0.604	85.800, 2.323	85.800, 1.507	85.800, 1.064	85.800, 0.152	85.800, 0.488	85.800, 1.984	85.800, 1.693	85.800, 1.793	85.800, 0.098	85.800, 1.917	85.800, 2.161	85.800, 1.860	85.800, 1.959	85.800, 1.886	85.800, 2.033	85.800, 1.974	85.800, 2.279	85.800, 1.785	85.800, 1.211	85.800, 0.694	85.800, 2.027	85.800, 1.705	85.800, 1.686	85.800, 0.188	85.800, 1.920	85.800, 1.873
431	86.000, 2.332	86.000, 1.722	86.000, 1.122	86.000, 0.606	86.000, 2.327	86.000, 1.510	86.000, 1.067	86.000, 0.153	86.000, 0.489	86.000, 1.987	86.000, 1.696	86.000, 1.796	86.000, 0.098	86.000, 1.920	86.000, 2.163	86.000, 1.862	86.000, 1.962	86.000, 1.889	86.000, 2.036	86.000, 1.976	86.000, 2.283	86.000, 1.788	86.000, 1.214	86.000, 0.696	86.000, 2.030	86.000, 1.708	86.000, 1.688	86.000, 0.189	86.000, 1.923	86.000, 1.876
432	86.200, 2.336	86.200, 1.725	86.200, 1.125	86.200, 0.607	86.200, 2.330	86.200, 1.513	86.200, 1.069	86.200, 0.153	86.200, 0.491	86.200, 1.989	86.200, 1.698	86.200, 1.799	86.200, 0.098	86.200, 1.923	86.200, 2.166	86.200, 1.865	86.200, 1.964	86.200, 1.891	86.200, 2.039	86.200, 1.979	86.200, 2.286	86.200, 1.792	86.200, 1.217	86.200, 0.698	86.200, 2.032	86.200, 1.710	86.200, 1.691	86.200, 0.190	86.200, 1.926	86.200, 1.879
433	86.400, 2.339	86.400, 1.729	86.400, 1.127	86.400, 0.609	86.400, 2.334	86.400, 1.516	86.400, 1.072	86.400, 0.154	86.400, 0.493	86.400, 1.992	86.400, 1.701	86.400, 1.802	86.400, 0.098	86.400, 1.926	86.400, 2.168	86.400, 1.867	86.400, 1.967	86.400, 1.894	86.400, 2.042	86.400, 1.982	86.400, 2.290	86.400, 1.795	86.400, 1.219	86.400, 0.700	86.400, 2.034	86.400, 1.713	86.400, 1.694	86.400, 0.190	86.400, 1.929	86.400, 1.882
434	86.600, 2.342	86.600, 1.732	86.600, 1.130	86.600, 0.611	86.600, 2.337	86.600, 1.519	86.600, 1.074	86.600, 0.154	86.600, 0.495	86.600, 1.994	86.600, 1.703	86.600, 1.804	86.600, 0.098	86.600, 1.928	86.600, 2.171	86.600, 1.870	86.600, 1.969	86.600, 1.896	86.600, 2.045	86.600, 1.985	86.600, 2.294	86.600, 1.799	86.600, 1.222	86.600, 0.701	86.600, 2.036	86.600, 1.715	86.600, 1.697	86.600, 0.191	86.600, 1.932	86.600, 1.884
435	86.800, 2.346	86.800, 1.736	86.800, 1.133	86.800, 0.613	86.800, 2.340	86.800, 1.522	86.800, 1.076	86.800, 0.154	86.800, 0.496	86.800, 1.997	86.800, 1.706	86.800, 1.807	86.800, 0.099	86.800, 1.931	86.800, 2.174	86.800, 1.872	86.800, 1.972	86.800, 1.899	86.800, 2.048	86.800, 1.988	86.800, 2.297	86.800, 1.802	86.800, 1.225	86.800, 0.703	86.800, 2.038	86.800, 1.718	86.800, 1.699	86.800, 0.191	86.800, 1.935	86.800, 1.887
436	87.000, 2.350	87.000, 1.739	87.000, 1.136	87.000, 0.614	87.000, 2.343	87.000, 1.525	87.000, 1.079	87.000, 0.154	87.000, 0.498	87.000, 2.000	87.000, 1.709	87.000, 1.809	87.000, 0.099	87.000, 1.933	87.000, 2.176	87.000, 1.875	87.000, 1.975	87.000, 1.901	87.000, 2.050	87.000, 1.990	87.000, 2.301	87.000, 1.806	87.000, 1.227	87.000, 0.705	87.000, 2.040	87.000, 1.720	87.000, 1.702	87.000, 0.192	87.000, 1.937	87.000, 1.890
437	87.200, 2.354	87.200, 1.743	87.200, 1.138	87.200, 0.616	87.200, 2.346	87.200, 1.528	87.200, 1.081	87.200, 0.154	87.200, 0.500	87.200, 2.002	87.200, 1.711	87.200, 1.812	87.200, 0.100	87.200, 1.936	87.200, 2.179	87.200, 1.877	87.200, 1.977	87.200, 1.904	87.200, 2.053	87.200, 1.993	87.200, 2.304	87.200, 1.809	87.200, 1.230	87.200, 0.707	87.200, 2.042	87.200, 1.722	87.200, 1.705	87.200, 0.193	87.200, 1.940	87.200, 1.892
438	87.400, 2.358	87.400, 1.746	87.400, 1.141	87.400, 0.619	87.400, 2.349	87.400, 1.531	87.400, 1.083	87.400, 0.154	87.400, 0.501	87.400, 2.005	87.400, 1.714	87.400, 1.815	87.400, 0.100	87.400, 1.938	87.400, 2.181	87.400, 1.879	87.400, 1.980	87.400, 1.906	87.400, 2.056	87.400, 1.996	87.400, 2.308	87.400, 1.813	87.400, 1.233	87.400, 0.709	87.400, 2.044	87.400, 1.725	87.400, 1.707	87.400, 0.193	87.400, 1.943	87.400, 1.895
439	87.600, 2.362	87.600, 1.750	87.600, 1.143	87.600, 0.620	87.600, 2.353	87.600, 1.534	87.600, 1.086	87.600, 0.155	87.600, 0.502	87.600, 2.007	87.600, 1.716	87.600, 1.817	87.600, 0.100	87.600, 1.941	87.600, 2.183	87.600, 1.882	87.600, 1.983	87.600, 1.909	87.600, 2.058	87.600, 1.998	87.600, 2.312	87.600, 1.816	87.600, 1.236	87.600, 0.711	87.600, 2.046	87.600, 1.727	87.600, 1.709	87.600, 0.193	87.600, 1.946	87.600, 1.897
440	87.800, 2.366	87.800, 1.753	87.800, 1.145	87.800, 0.622	87.800, 2.356	87.800, 1.537	87.800, 1.088	87.800, 0.155	87.800, 0.504	87.800, 2.009	87.800, 1.718	87.800, 1.820	87.800, 0.101	87.800, 1.943	87.800, 2.186	87.800, 1.884	87.800, 1.985	87.800, 1.911	87.800, 2.061	87.800, 2.001	87.800, 2.315	87.800, 1.820	87.800, 1.238	87.800, 0.713	87.800, 2.048	87.800, 1.729	87.800, 1.711	87.800, 0.194	87.800, 1.948	87.800, 1.900
441	88.000, 2.369	88.000, 1.756	88.000, 1.148	88.000, 0.624	88.000, 2.359	88.000, 1.539	88.000, 1.091	88.000, 0.155	88.000, 0.505	88.000, 2.012	88.000, 1.720	88.000, 1.822	88.000, 0.101	88.000, 1.946	88.000, 2.188	88.000, 1.886	88.000, 1.988	88.000, 1.914	88.000, 2.063	88.000, 2.004	88.000, 2.319	88.000, 1.824	88.000, 1.241	88.000, 0.715	88.000, 2.051	88.000, 1.731	88.000, 1.713	88.000, 0.194	88.000, 1.950	88.000, 1.903
442	88.200, 2.373	88.200, 1.760	88.200, 1.150	88.200, 0.626	88.200, 2.363	88.200, 1.542	88.200, 1.093	88.200, 0.156	88.200, 0.506	88.200, 2.014	88.200, 1.722	88.200, 1.824	88.200, 0.102	88.200, 1.948	88.200, 2.190	88.200, 1.889	88.200, 1.991	88.200, 1.916	88.200, 2.066	88.200, 2.007	88.200, 2.323	88.200, 1.827	88.200, 1.244	88.200, 0.717	88.200, 2.053	88.200, 1.733	88.200, 1.716	88.200, 0.195	88.200, 1.953	88.200, 1.906
443	88.400, 2.377	88.400, 1.763	88.400, 1.153	88.400, 0.628	88.400, 2.366	88.400, 1.544	88.400, 1.096	88.400, 0.156	88.400, 0.507	88.400, 2.016	88.400, 1.724	88.400, 1.827	88.400, 0.103	88.400, 1.951	88.400, 2.192	88.400, 1.891	88.400, 1.994	88.400, 1.919	88.400, 2.068	88.400, 2.010	88.400, 2.327	88.400, 1.830	88.400, 1.246	88.400, 0.720	88.400, 2.055	88.400, 1.736	88.400, 1.718	88.400, 0.196	88.400, 1.955	88.400, 1.908
444	88.600, 2.380	88.600, 1.766	88.600, 1.156	88.600, 0.630	88.600, 2.370	88.600, 1.547	88.600, 1.099	88.600, 0.157	88.600, 0.508	88.600, 2.019	88.600, 1.727	88.600, 1.829	88.600, 0.104	88.600, 1.953	88.600, 2.194	88.600, 1.894	88.600, 1.996	88.600, 1.922	88.600, 2.070	88.600, 2.013	88.600, 2.331	88.600, 1.834	88.600, 1.249	88.600, 0.722	88.600, 2.057	88.600, 1.738	88.600, 1.721	88.600, 0.196	88.600, 1.958	88.600, 1.911
445	88.800, 2.384	88.800, 1.769	88.800, 1.158	88.800, 0.632	88.800, 2.373	88.800, 1.550	88.800, 1.101	88.800, 0.157	88.800, 0.509	88.800, 2.021	88.800, 1.729	88.800, 1.832	88.800, 0.104	88.800, 1.956	88.800, 2.196	88.800, 1.896	88.800, 1.999	88.800, 1.925	88.800, 2.072	88.800, 2.016	88.800, 2.334	88.800, 1.837	88.800, 1.252	88.800, 0.724	88.800, 2.059	88.800, 1.740	88.800, 1.723	88.800, 0.197	88.800, 1.960	88.800, 1.914
446	89.000, 2.388	89.000, 1.772	89.000, 1.161	89.000, 0.633	89.000, 2.376	89.000, 1.553	89.000, 1.104	89.000, 0.158	89.000, 0.511	89.000, 2.023	89.000, 1.730	89.000, 1.834	89.000, 0.105	89.000, 1.959	89.000, 2.198	89.000, 1.898	89.000, 2.002	89.000, 1.928	89.000, 2.075	89.000, 2.018	89.000, 2.338	89.000, 1.840	89.000, 1.255	89.000, 0.727	89.000, 2.061	89.000, 1.742	89.000, 1.726	89.000, 0.198	89.000, 1.963	89.000, 1.916
447	89.200, 2.391	89.200, 1.774	89.200, 1.164	89.200, 0.635	89.200, 2.379	89.200, 1.556	89.200, 1.106	89.200, 0.159	89.200, 0.512	89.200, 2.025	89.200, 1.733	89.200, 1.837	89.200, 0.106	89.200, 1.961	89.200, 2.201	89.200, 1.901	89.200, 2.004	89.200, 1.930	89.200, 2.077	89.200, 2.021	89.200, 2.341	89.200, 1.843	89.200, 1.258	89.200, 0.729	89.200, 2.064	89.200, 1.744	89.200, 1.728	89.200, 0.199	89.200, 1.966	89.200, 1.919
448	89.400, 2.395	89.400, 1.777	89.400, 1.167	89.400, 0.637	89.400, 2.382	89.400, 1.559	89.400, 1.109	89.400, 0.160	89.400, 0.513	89.400, 2.028	89.400, 1.735	89.400, 1.839	89.400, 0.107	89.400, 1.964	89.400, 2.203	89.400, 1.903	89.400, 2.007	89.400, 1.933	89.400, 2.079	89.400, 2.024	89.400, 2.345	89.400, 1.846	89.400, 1.261	89.400, 0.731	89.400, 2.066	89.400, 1.747	89.400, 1.730	89.400, 0.199	89.400, 1.969	89.400, 1.922
449	89.600, 2.399	89.600, 1.780	89.600, 1.170	89.600, 0.638	89.600, 2.385	89.600, 1.562	89.600, 1.111	89.600, 0.161	89.600, 0.514	89.600, 2.030	89.600, 1.737	89.600, 1.841	89.600, 0.107	89.600, 1.966	89.600, 2.205	89.600, 1.905	89.600, 2.009	89.600, 1.936	89.600, 2.082	89.600, 2.027	89.600, 2.348	89.600, 1.849	89.600, 1.263	89.600, 0.733	89.600, 2.068	89.600, 1.749	89.600, 1.732	89.600, 0.200	89.600, 1.971	89.600, 1.925
450	89.800, 2.402	89.800, 1.783	89.800, 1.172	89.800, 0.640	89.800, 2.388	89.800, 1.565	89.800, 1.113	89.800, 0.161	89.800, 0.516	89.800, 2.033	89.800, 1.739	89.800, 1.844	89.800, 0.108	89.800, 1.969	89.800, 2.207	89.800, 1.907	89.800, 2.011	89.800, 1.939	89.800, 2.084	89.800, 2.030	89.800, 2.352	89.800, 1.852	89.800, 1.266	89.800, 0.735	89.800, 2.070	89.800, 1.751	89.800, 1.734	89.800, 0.201	89.800, 1.974	89.800, 1.927
451	90.000, 2.406	90.000, 1.786	90.000, 1.175	90.000, 0.641	90.000, 2.391	90.000, 1.568	90.000, 1.115	90.000, 0.162	90.000, 0.517	90.000, 2.035	90.000, 1.742	90.000, 1.846	90.000, 0.109	90.000, 1.971	90.000, 2.209	90.000, 1.909	90.000, 2.014	90.000, 1.941	90.000, 2.087	90.000, 2.033	90.000, 2.355	90.000, 1.856	90.000, 1.269	90.000, 0.737	90.000, 2.072	90.000, 1.753	90.000, 1.736	90.000, 0.201	90.000, 1.977	90.000, 1.930
452	90.200, 2.410	90.200, 1.788	90.200, 1.178	90.200, 0.643	90.200, 2.394	90.200, 1.571	90.200, 1.117	90.200, 0.162	90.200, 0.519	90.200, 2.037	90.200, 1.745	90.200, 1.848	90.200, 0.109	90.200, 1.974	90.200, 2.212	90.200, 1.911	90.200, 2.016	90.200, 1.944	90.200, 2.090	90.200, 2.036	90.200, 2.359	90.200, 1.859	90.200, 1.272	90.200, 0.739	90.200, 2.074	90.200, 1.755	90.200, 1.738	90.200, 0.202	90.200, 1.979	90.200, 1.932
453	90.400, 2.413	90.400, 1.791	90.400, 1.180	90.400, 0.644	90.400, 2.397	90.400, 1.574	90.400, 1.118	90.400, 0.163	90.400, 0.521	90.400, 2.039	90.400, 1.747	90.400, 1.850	90.400, 0.109	90.400, 1.976	90.400, 2.214	90.400, 1.913	90.400, 2.018	90.400, 1.946	90.400, 2.092	90.400, 2.039	90.400, 2.362	90.400, 1.862	90.400, 1.274	90.400, 0.740	90.400, 2.076	90.400, 1.757	90.400, 1.740	90.400, 0.202	90.400, 1.982	90.400, 1.935
454	90.600, 2.417	90.600, 1.794	90.600, 1.183	90.600, 0.646	90.600, 2.400	90.600, 1.577	90.600, 1.120	90.600, 0.163	90.600, 0.522	90.600, 2.041	90.600, 1.749	90.600, 1.852	90.600, 0.110	90.600, 1.979	90.600, 2.216	90.600, 1.916	90.600, 2.020	90.600, 1.949	90.600, 2.095	90.600, 2.042	90.600, 2.365	90.600, 1.865	90.600, 1.277	90.600, 0.742	90.600, 2.078	90.600, 1.760	90.600, 1.742	90.600, 0.203	90.600, 1.985	90.600, 1.938
455	90.800, 2.420	90.800, 1.797	90.800, 1.186	90.800, 0.648	90.800, 2.402	90.800, 1.580	90.800, 1.122	90.800, 0.164	90.800, 0.524	90.800, 2.043	90.800, 1.751	90.800, 1.854	90.800, 0.110	90.800, 1.982	90.800, 2.218	90.800, 1.918	90.800, 2.022	90.800, 1.951	90.800, 2.098	90.800, 2.044	90.800, 2.368	90.800, 1.868	90.800, 1.280	90.800, 0.744	90.800, 2.080	90.800, 1.762	90.800, 1.743	90.800, 0.204	90.800, 1.987	90.800, 1.940
456	91.000, 2.424	91.000, 1.800	91.000, 1.189	91.000, 0.649	91.000, 2.405	91.000, 1.582	91.000, 1.124	91.000, 0.164	91.000, 0.526	91.000, 2.045	91.000, 1.754	91.000, 1.856	91.000, 0.111	91.000, 1.984	91.000, 2.221	91.000, 1.921	91.000, 2.024	91.000, 1.953	91.000, 2.100	91.000, 2.047	91.000, 2.371	91.000, 1.871	91.000, 1.282	91.000, 0.745	91.000, 2.082	91.000, 1.764	91.000, 1.745	91.000, 0.204	91.000, 1.990	91.000, 1.943
457	91.200, 2.428	91.200, 1.803	91.200, 1.191	91.200, 0.650	91.200, 2.408	91.200, 1.585	91.200, 1.126	91.200, 0.165	91.200, 0.527	91.200, 2.048	91.200, 1.755	91.200, 1.858	91.200, 0.111	91.200, 1.987	91.200, 2.223	91.200, 1.923	91.200, 2.027	91.200, 1.956	91.200, 2.103	91.200, 2.050	91.200, 2.375	91.200, 1.875	91.200, 1.285	91.200, 0.747	91.200, 2.084	91.200, 1.766	91.200, 1.747	91.200, 0.204	91.200, 1.993	91.200, 1.945
458	91.400, 2.431	91.400, 1.807	91.400, 1.194	91.400, 0.652	91.400, 2.411	91.400, 1.588	91.400, 1.128	91.400, 0.165	91.400, 0.529	91.400, 2.050	91.400, 1.757	91.400, 1.860	91.400, 0.111	91.400, 1.990	91.400, 2.225	91.400, 1.926	91.400, 2.029	91.400, 1.958	91.400, 2.106	91.400, 2.052	91.400, 2.378	91.400, 1.878	91.400, 1.288	91.400, 0.748	91.400, 2.086	91.400, 1.768	91.400, 1.749	91.400, 0.205	91.400, 1.995	91.400, 1.948
459	91.600, 2.435	91.600, 1.810	91.600, 1.196	91.600, 0.653	91.600, 2.414	91.600, 1.590	91.600, 1.130	91.600, 0.166	91.600, 0.530	91.600, 2.052	91.600, 1.759	91.600, 1.862	91.600, 0.112	91.600, 1.992	91.600, 2.227	91.600, 1.928	91.600, 2.031	91.600, 1.960	91.600, 2.108	91.600, 2.054	91.600, 2.381	91.600, 1.881	91.600, 1.290	91.600, 0.749	91.600, 2.088	91.600, 1.770	91.600, 1.751	91.600, 0.205	91.600, 1.997	91.600, 1.951
460	91.800, 2.438	91.800, 1.813	91.800, 1.198	91.800, 0.655	91.800, 2.418	91.800, 1.592	91.800, 1.133	91.800, 0.167	91.800, 0.532	91.800, 2.054	91.800, 1.761	91.800, 1.864	91.800, 0.112	91.800, 1.994	91.800, 2.230	91.800, 1.931	91.800, 2.033	91.800, 1.962	91.800, 2.110	91.800, 2.057	91.800, 2.384	91.800, 1.885	91.800, 1.293	91.800, 0.751	91.800, 2.090	91.800, 1.772	91.800, 1.753	91.800, 0.205	91.800, 1.999	91.800, 1.953
461	92.000, 2.442	92.000, 1.816	92.000, 1.200	92.000, 0.657	92.000, 2.421	92.000, 1.595	92.000, 1.136	92.000, 0.167	92.000, 0.533	92.000, 2.056	92.000, 1.763	92.000, 1.866	92.000, 0.112	92.000, 1.997	92.000, 2.231	92.000, 1.933	92.000, 2.036	92.000, 1.964	92.000, 2.113	92.000, 2.059	92.000, 2.388	92.000, 1.888	92.000, 1.295	92.000, 0.753	92.000, 2.092	92.000, 1.774	92.000, 1.756	92.000, 0.206	92.000, 2.000	92.000, 1.956
462	92.200, 2.445	92.200, 1.820	92.200, 1.202	92.200, 0.658	92.200, 2.424	92.200, 1.598	92.200, 1.138	92.200, 0.168	92.200, 0.534	92.200, 2.057	92.200, 1.764	92.200, 1.868	92.200, 0.113	92.200, 1.999	92.200, 2.233	92.200, 1.935	92.200, 2.038	92.200, 1.966	92.200, 2.115	92.200, 2.062	92.200, 2.391	92.200, 1.891	92.200, 1.297	92.200, 0.754	92.200, 2.094	92.200, 1.776	92.200, 1.758	92.200, 0.206	92.200, 2.002	92.200, 1.958
463	92.400, 2.449	92.400, 1.823	92.400, 1.204	92.400, 0.660	92.400, 2.427	92.400, 1.600	92.400, 1.141	92.400, 0.169	92.400, 0.536	92.400, 2.059	92.400, 1.767	92.400, 1.870	92.400, 0.113	92.400, 2.001	92.400, 2.235	92.400, 1.937	92.400, 2.040	92.400, 1.968	92.400, 2.117	92.400, 2.064	92.400, 2.394	92.400, 1.894	92.400, 1.300	92.400, 0.756	92.400, 2.096	92.400, 1.778	92.400, 1.761	92.400, 0.207	92.400, 2.004	92.400, 1.960
464	92.600, 2.452	92.600, 1.826	92.600, 1.206	92.600, 0.662	92.600, 2.429	92.600, 1.603	92.600, 1.144	92.600, 0.169	92.600, 0.537	92.600, 2.061	92.600, 1.769	92.600, 1.872	92.600, 0.114	92.600, 2.003	92.600, 2.237	92.600, 1.939	92.600, 2.043	92.600, 1.971	92.600, 2.120	92.600, 2.066	92.600, 2.397	92.600, 1.897	92.600, 1.302	92.600, 0.758	92.600, 2.098	92.600, 1.781	92.600, 1.763	92.600, 0.207	92.600, 2.006	92.600, 1.963
465	92.800, 2.456	92.800, 1.829	92.800, 1.209	92.800, 0.663	92.800, 2.432	92.800, 1.605	92.800, 1.146	92.800, 0.170	92.800, 0.538	92.800, 2.062	92.800, 1.771	92.800, 1.874	92.800, 0.114	92.800, 2.005	92.800, 2.239	92.800, 1.941	92.800, 2.045	92.800, 1.973	92.800, 2.122	92.800, 2.068	92.800, 2.401	92.800, 1.899	92.800, 1.305	92.800, 0.759	92.800, 2.100	92.800, 1.783	92.800, 1.766	92.800, 0.207	92.800, 2.008	92.800, 1.965
466	93.000, 2.459	93.000, 1.832	93.000, 1.211	93.000, 0.665	93.000, 2.435	93.000, 1.607	93.000, 1.149	93.000, 0.170	93.000, 0.539	93.000, 2.064	93.000, 1.773	93.000, 1.876	93.000, 0.115	93.000, 2.008	93.000, 2.241	93.000, 1.943	93.000, 2.047	93.000, 1.976	93.000, 2.124	93.000, 2.070	93.000, 2.404	93.000, 1.902	93.000, 1.307	93.000, 0.761	93.000, 2.102	93.000, 1.785	93.000, 1.768	93.000, 0.208	93.000, 2.010	93.000, 1.967
467	93.200, 2.463	93.200, 1.835	93.200, 1.214	93.200, 0.666	93.200, 2.437	93.200, 1.610	93.200, 1.151	93.200, 0.171	93.200, 0.540	93.200, 2.066	93.200, 1.775	93.200, 1.878	93.200, 0.115	93.200, 2.010	93.200, 2.243	93.200, 1.944	93.200, 2.049	93.200, 1.978	93.200, 2.126	93.200, 2.071	93.200, 2.407	93.200, 1.905	93.200, 1.310	93.200, 0.763	93.200, 2.104	93.200, 1.787	93.200, 1.770	93.200, 0.209	93.200, 2.012	93.200, 1.969
468	93.400, 2.466	93.400, 1.838	93.400, 1.216	93.400, 0.668	93.400, 2.440	93.400, 1.612	93.400, 1.154	93.400, 0.171	93.400, 0.542	93.400, 2.068	93.400, 1.777	93.400, 1.880	93.400, 0.116	93.400, 2.012	93.400, 2.245	93.400, 1.945	93.400, 2.052	93.400, 1.981	93.400, 2.128	93.400, 2.073	93.400, 2.411	93.400, 1.909	93.400, 1.312	93.400, 0.765	93.400, 2.105	93.400, 1.789	93.400, 1.772	93.400, 0.210	93.400, 2.014	93.400, 1.971
469	93.600, 2.470	93.600, 1.841	93.600, 1.218	93.600, 0.669	93.600, 2.443	93.600, 1.615	93.600, 1.156	93.600, 0.171	93.600, 0.543	93.600, 2.070	93.600, 1.779	93.600, 1.882	93.600, 0.116	93.600, 2.014	93.600, 2.246	93.600, 1.947	93.600, 2.054	93.600, 1.983	93.600, 2.130	93.600, 2.075	93.600, 2.414	93.600, 1.912	93.600, 1.315	93.600, 0.767	93.600, 2.107	93.600, 1.791	93.600, 1.774	93.600, 0.210	93.600, 2.015	93.600, 1.974
470	93.800, 2.474	93.800, 1.844	93.800, 1.221	93.800, 0.671	93.800, 2.446	93.800, 1.617	93.800, 1.159	93.800, 0.172	93.800, 0.544	93.800, 2.072	93.800, 1.781	93.800, 1.884	93.800, 0.117	93.800, 2.016	93.800, 2.248	93.800, 1.948	93.800, 2.056	93.800, 1.985	93.800, 2.132	93.800, 2.077	93.800, 2.417	93.800, 1.915	93.800, 1.318	93.800, 0.769	93.800, 2.109	93.800, 1.792	93.800, 1.776	93.800, 0.211	93.800, 2.018	93.800, 1.976
471	94.000, 2.477	94.000, 1.847	94.000, 1.223	94.000, 0.672	94.000, 2.448	94.000, 1.619	94.000, 1.161	94.000, 0.172	94.000, 0.545	94.000, 2.073	94.000, 1.783	94.000, 1.886	94.000, 0.117	94.000, 2.018	94.000, 2.250	94.000, 1.950	94.000, 2.059	94.000, 1.987	94.000, 2.134	94.000, 2.079	94.000, 2.420	94.000, 1.918	94.000, 1.320	94.000, 0.771	94.000, 2.111	94.000, 1.794	94.000, 1.777	94.000, 0.212	94.000, 2.020	94.000, 1.978
472	94.200, 2.481	94.200, 1.850	94.200, 1.226	94.200, 0.673	94.200, 2.451	94.200, 1.622	94.200, 1.163	94.200, 0.172	94.200, 0.546	94.200, 2.075	94.200, 1.785	94.200, 1.888	94.200, 0.118	94.200, 2.020	94.200, 2.251	94.200, 1.952	94.200, 2.061	94.200, 1.990	94.200, 2.137	94.200, 2.082	94.200, 2.423	94.200, 1.921	94.200, 1.322	94.200, 0.774	94.200, 2.113	94.200, 1.795	94.200, 1.779	94.200, 0.213	94.200, 2.022	94.200, 1.980
473	94.400, 2.484	94.400, 1.852	94.400, 1.229	94.400, 0.675	94.400, 2.454	94.400, 1.624	94.400, 1.165	94.400, 0.173	94.400, 0.548	94.400, 2.077	94.400, 1.787	94.400, 1.890	94.400, 0.118	94.400, 2.022	94.400, 2.253	94.400, 1.954	94.400, 2.063	94.400, 1.992	94.400, 2.139	94.400, 2.084	94.400, 2.426	94.400, 1.924	94.400, 1.325	94.400, 0.776	94.400, 2.114	94.400, 1.797	94.400, 1.780	94.400, 0.214	94.400, 2.024	94.400, 1.983
474	94.600, 2.487	94.600, 1.855	94.600, 1.232	94.600, 0.676	94.600, 2.457	94.600, 1.626	94.600, 1.167	94.600, 0.173	94.600, 0.549	94.600, 2.079	94.600, 1.789	94.600, 1.892	94.600, 0.119	94.600, 2.025	94.600, 2.255	94.600, 1.957	94.600, 2.065	94.600, 1.994	94.600, 2.141	94.600, 2.086	94.600, 2.429	94.600, 1.927	94.600, 1.327	94.600, 0.778	94.600, 2.116	94.600, 1.798	94.600, 1.782	94.600, 0.214	94.600, 2.026	94.600, 1.985
475	94.800, 2.490	94.800, 1.858	94.800, 1.234	94.800, 0.678	94.800, 2.460	94.800, 1.628	94.800, 1.169	94.800, 0.173	94.800, 0.551	94.800, 2.081	94.800, 1.790	94.800, 1.894	94.800, 0.119	94.800, 2.027	94.800, 2.256	94.800, 1.959	94.800, 2.067	94.800, 1.996	94.800, 2.144	94.800, 2.088	94.800, 2.432	94.800, 1.930	94.800, 1.329	94.800, 0.780	94.800, 2.118	94.800, 1.800	94.800, 1.784	94.800, 0.215	94.800, 2.028	94.800, 1.987
476	95.000, 2.493	95.000, 1.861	95.000, 1.237	95.000, 0.679	95.000, 2.464	95.000, 1.631	95.000, 1.171	95.000, 0.174	95.000, 0.552	95.000, 2.084	95.000, 1.792	95.000, 1.896	95.000, 0.119	95.000, 2.030	95.000, 2.258	95.000, 1.961	95.000, 2.069	95.000, 1.998	95.000, 2.146	95.000, 2.090	95.000, 2.435	95.000, 1.933	95.000, 1.331	95.000, 0.782	95.000, 2.120	95.000, 1.802	95.000, 1.785	95.000, 0.216	95.000, 2.030	95.000, 1.990
477	95.200, 2.496	95.200, 1.864	95.200, 1.239	95.200, 0.681	95.200, 2.467	95.200, 1.633	95.200, 1.173	95.200, 0.174	95.200, 0.554	95.200, 2.086	95.200, 1.794	95.200, 1.898	95.200, 0.120	95.200, 2.032	95.200, 2.260	95.200, 1.964	95.200, 2.071	95.200, 2.000	95.200, 2.149	95.200, 2.093	95.200, 2.438	95.200, 1.937	95.200, 1.333	95.200, 0.784	95.200, 2.121	95.200, 1.803	95.200, 1.787	95.200, 0.217	95.200, 2.033	95.200, 1.992
478	95.400, 2.499	95.400, 1.867	95.400, 1.241	95.400, 0.683	95.400, 2.470	95.400, 1.636	95.400, 1.175	95.400, 0.175	95.400, 0.555	95.400, 2.088	95.400, 1.795	95.400, 1.900	95.400, 0.120	95.400, 2.035	95.400, 2.261	95.400, 1.966	95.400, 2.073	95.400, 2.003	95.400, 2.151	95.400, 2.095	95.400, 2.441	95.400, 1.940	95.400, 1.336	95.400, 0.785	95.400, 2.123	95.400, 1.805	95.400, 1.789	95.400, 0.218	95.400, 2.035	95.400, 1.995
479	95.600, 2.502	95.600, 1.870	95.600, 1.244	95.600, 0.684	95.600, 2.472	95.600, 1.638	95.600, 1.177	95.600, 0.175	95.600, 0.556	95.600, 2.090	95.600, 1.797	95.600, 1.901	95.600, 0.120	95.600, 2.037	95.600, 2.263	95.600, 1.968	95.600, 2.075	95.600, 2.005	95.600, 2.153	95.600, 2.097	95.600, 2.444	95.600, 1.943	95.600, 1.338	95.600, 0.787	95.600, 2.125	95.600, 1.806	95.600, 1.791	95.600, 0.219	95.600, 2.037	95.600, 1.997
480	95.800, 2.505	95.800, 1.872	95.800, 1.246	95.800, 0.686	95.800, 2.475	95.800, 1.641	95.800, 1.179	95.800, 0.176	95.800, 0.557	95.800, 2.092	95.800, 1.799	95.800, 1.903	95.800, 0.121	95.800, 2.039	95.800, 2.265	95.800, 1.970	95.800, 2.077	95.800, 2.007	95.800, 2.155	95.800, 2.099	95.800, 2.447	95.800, 1.946	95.800, 1.341	95.800, 0.789	95.800, 2.127	95.800, 1.808	95.800, 1.792	95.800, 0.219	95.800, 2.039	95.800, 1.999
481	96.000, 2.508	96.000, 1.876	96.000, 1.248	96.000, 0.687	96.000, 2.477	96.000, 1.644	96.000, 1.181	96.000, 0.177	96.000, 0.559	96.000, 2.094	96.000, 1.801	96.000, 1.905	96.000, 0.121	96.000, 2.041	96.000, 2.267	96.000, 1.972	96.000, 2.079	96.000, 2.010	96.000, 2.157	96.000, 2.101	96.000, 2.451	96.000, 1.949	96.000, 1.343	96.000, 0.790	96.000, 2.128	96.000, 1.809	96.000, 1.794	96.000, 0.220	96.000, 2.042	96.000, 2.002
482	96.200, 2.511	96.200, 1.879	96.200, 1.250	96.200, 0.689	96.200, 2.480	96.200, 1.646	96.200, 1.183	96.200, 0.177	96.200, 0.560	96.200, 2.096	96.200, 1.802	96.200, 1.907	96.200, 0.122	96.200, 2.043	96.200, 2.268	96.200, 1.974	96.200, 2.081	96.200, 2.012	96.200, 2.159	96.200, 2.104	96.200, 2.454	96.200, 1.951	96.200, 1.345	96.200, 0.792	96.200, 2.130	96.200, 1.811	96.200, 1.796	96.200, 0.221	96.200, 2.044	96.200, 2.004
483	96.400, 2.515	96.400, 1.881	96.400, 1.253	96.400, 0.690	96.400, 2.482	96.400, 1.649	96.400, 1.185	96.400, 0.177	96.400, 0.561	96.400, 2.098	96.400, 1.804	96.400, 1.909	96.400, 0.123	96.400, 2.046	96.400, 2.270	96.400, 1.976	96.400, 2.083	96.400, 2.014	96.400, 2.161	96.400, 2.106	96.400, 2.457	96.400, 1.954	96.400, 1.348	96.400, 0.794	96.400, 2.131	96.400, 1.813	96.400, 1.798	96.400, 0.221	96.400, 2.046	96.400, 2.006
484	96.600, 2.518	96.600, 1.884	96.600, 1.255	96.600, 0.692	96.600, 2.485	96.600, 1.652	96.600, 1.187	96.600, 0.178	96.600, 0.562	96.600, 2.099	96.600, 1.806	96.600, 1.911	96.600, 0.123	96.600, 2.048	96.600, 2.272	96.600, 1.977	96.600, 2.085	96.600, 2.017	96.600, 2.163	96.600, 2.108	96.600, 2.460	96.600, 1.956	96.600, 1.351	96.600, 0.796	96.600, 2.133	96.600, 1.815	96.600, 1.800	96.600, 0.222	96.600, 2.048	96.600, 2.008
485	96.800, 2.521	96.800, 1.887	96.800, 1.257	96.800, 0.693	96.800, 2.487	96.800, 1.654	96.800, 1.189	96.800, 0.178	96.800, 0.563	96.800, 2.101	96.800, 1.808	96.800, 1.913	96.800, 0.124	96.800, 2.050	96.800, 2.274	96.800, 1.979	96.800, 2.086	96.800, 2.019	96.800, 2.165	96.800, 2.110	96.800, 2.463	96.800, 1.958	96.800, 1.353	96.800, 0.797	96.800, 2.134	96.800, 1.816	96.800, 1.802	96.800, 0.222	96.800, 2.051	96.800, 2.010
486	97.000, 2.524	97.000, 1.889	97.000, 1.259	97.000, 0.694	97.000, 2.489	97.000, 1.657	97.000, 1.191	97.000, 0.179	97.000, 0.564	97.000, 2.103	97.000, 1.809	97.000, 1.915	97.000, 0.124	97.000, 2.051	97.000, 2.276	97.000, 1.981	97.000, 2.088	97.000, 2.021	97.000, 2.166	97.000, 2.112	97.000, 2.466	97.000, 1.961	97.000, 1.356	97.000, 0.799	97.000, 2.136	97.000, 1.818	97.000, 1.804	97.000, 0.223	97.000, 2.053	97.000, 2.012
487	97.200, 2.526	97.200, 1.892	97.200, 1.261	97.200, 0.696	97.200, 2.492	97.200, 1.659	97.200, 1.194	97.200, 0.179	97.200, 0.565	97.200, 2.104	97.200, 1.811	97.200, 1.916	97.200, 0.125	97.200, 2.053	97.200, 2.278	97.200, 1.982	97.200, 2.090	97.200, 2.023	97.200, 2.168	97.200, 2.115	97.200, 2.469	97.200, 1.963	97.200, 1.359	97.200, 0.801	97.200, 2.137	97.200, 1.820	97.200, 1.806	97.200, 0.224	97.200, 2.055	97.200, 2.014
488	97.400, 2.529	97.400, 1.894	97.400, 1.263	97.400, 0.697	97.400, 2.494	97.400, 1.662	97.400, 1.196	97.400, 0.180	97.400, 0.566	97.400, 2.106	97.400, 1.813	97.400, 1.918	97.400, 0.125	97.400, 2.054	97.400, 2.279	97.400, 1.984	97.400, 2.091	97.400, 2.025	97.400, 2.170	97.400, 2.117	97.400, 2.471	97.400, 1.966	97.400, 1.362	97.400, 0.802	97.400, 2.139	97.400, 1.822	97.400, 1.808	97.400, 0.224	97.400, 2.057	97.400, 2.016
489	97.600, 2.532	97.600, 1.897	97.600, 1.265	97.600, 0.699	97.600, 2.497	97.600, 1.664	97.600, 1.198	97.600, 0.180	97.600, 0.567	97.600, 2.107	97.600, 1.815	97.600, 1.920	97.600, 0.126	97.600, 2.056	97.600, 2.281	97.600, 1.986	97.600, 2.093	97.600, 2.026	97.600, 2.172	97.600, 2.119	97.600, 2.474	97.600, 1.968	97.600, 1.364	97.600, 0.804	97.600, 2.140	97.600, 1.824	97.600, 1.809	97.600, 0.225	97.600, 2.059	97.600, 2.018
490	97.800, 2.535	97.800, 1.899	97.800, 1.267	97.800, 0.700	97.800, 2.499	97.800, 1.666	97.800, 1.201	97.800, 0.181	97.800, 0.569	97.800, 2.108	97.800, 1.817	97.800, 1.922	97.800, 0.127	97.800, 2.058	97.800, 2.283	97.800, 1.987	97.800, 2.095	97.800, 2.028	97.800, 2.173	97.800, 2.122	97.800, 2.476	97.800, 1.971	97.800, 1.367	97.800, 0.805	97.800, 2.142	97.800, 1.826	97.800, 1.810	97.800, 0.225	97.800, 2.062	97.800, 2.020
491	98.000, 2.538	98.000, 1.902	98.000, 1.270	98.000, 0.701	98.000, 2.502	98.000, 1.668	98.000, 1.203	98.000, 0.181	98.000, 0.570	98.000, 2.110	98.000, 1.818	98.000, 1.924	98.000, 0.127	98.000, 2.060	98.000, 2.285	98.000, 1.989	98.000, 2.097	98.000, 2.030	98.000, 2.175	98.000, 2.124	98.000, 2.479	98.000, 1.974	98.000, 1.369	98.000, 0.807	98.000, 2.143	98.000, 1.827	98.000, 1.812	98.000, 0.225	98.000, 2.064	98.000, 2.022
492	98.200, 2.541	98.200, 1.904	98.200, 1.272	98.200, 0.703	98.200, 2.505	98.200, 1.670	98.200, 1.205	98.200, 0.182	98.200, 0.571	98.200, 2.111	98.200, 1.820	98.200, 1.926	98.200, 0.127	98.200, 2.061	98.200, 2.286	98.200, 1.991	98.200, 2.099	98.200, 2.032	98.200, 2.177	98.200, 2.127	98.200, 2.482	98.200, 1.977	98.200, 1.371	98.200, 0.809	98.200, 2.145	98.200, 1.829	98.200, 1.813	98.200, 0.226	98.200, 2.066	98.200, 2.024
493	98.400, 2.544	98.400, 1.906	98.400, 1.274	98.400, 0.704	98.400, 2.507	98.400, 1.672	98.400, 1.207	98.400, 0.182	98.400, 0.573	98.400, 2.113	98.400, 1.822	98.400, 1.929	98.400, 0.128	98.400, 2.063	98.400, 2.288	98.400, 1.993	98.400, 2.101	98.400, 2.034	98.400, 2.179	98.400, 2.129	98.400, 2.484	98.400, 1.980	98.400, 1.373	98.400, 0.810	98.400, 2.146	98.400, 1.831	98.400, 1.815	98.400, 0.226	98.400, 2.067	98.400, 2.026
494	98.600, 2.548	98.600, 1.909	98.600, 1.276	98.600, 0.705	98.600, 2.510	98.600, 1.674	98.600, 1.209	98.600, 0.182	98.600, 0.574	98.600, 2.115	98.600, 1.823	98.600, 1.930	98.600, 0.128	98.600, 2.066	98.600, 2.290	98.600, 1.995	98.600, 2.103	98.600, 2.036	98.600, 2.181	98.600, 2.131	98.600, 2.487	98.600, 1.983	98.600, 1.376	98.600, 0.812	98.600, 2.148	98.600, 1.832	98.600, 1.816	98.600, 0.226	98.600, 2.069	98.600, 2.028
495	98.800, 2.551	98.800, 1.911	98.800, 1.278	98.800, 0.707	98.800, 2.513	98.800, 1.676	98.800, 1.211	98.800, 0.183	98.800, 0.576	98.800, 2.117	98.800, 1.825	98.800, 1.932	98.800, 0.128	98.800, 2.067	98.800, 2.291	98.800, 1.997	98.800, 2.104	98.800, 2.038	98.800, 2.183	98.800, 2.134	98.800, 2.490	98.800, 1.986	98.800, 1.378	98.800, 0.814	98.800, 2.149	98.800, 1.834	98.800, 1.818	98.800, 0.227	98.800, 2.070	98.800, 2.030
496	99.000, 2.554	99.000, 1.914	99.000, 1.281	99.000, 0.708	99.000, 2.516	99.000, 1.678	99.000, 1.213	99.000, 0.183	99.000, 0.577	99.000, 2.118	99.000, 1.826	99.000, 1.934	99.000, 0.128	99.000, 2.069	99.000, 2.293	99.000, 1.999	99.000, 2.106	99.000, 2.040	99.000, 2.185	99.000, 2.136	99.000, 2.492	99.000, 1.989	99.000, 1.380	99.000, 0.815	99.000, 2.151	99.000, 1.835	99.000, 1.820	99.000, 0.227	99.000, 2.072	99.000, 2.032
497	99.200, 2.557	99.200, 1.917	99.200, 1.283	99.200, 0.710	99.200, 2.519	99.200, 1.680	99.200, 1.215	99.200, 0.184	99.200, 0.579	99.200, 2.120	99.200, 1.828	99.200, 1.936	99.200, 0.129	99.200, 2.071	99.200, 2.294	99.200, 2.000	99.200, 2.107	99.200, 2.042	99.200, 2.188	99.200, 2.138	99.200, 2.495	99.200, 1.992	99.200, 1.383	99.200, 0.817	99.200, 2.153	99.200, 1.837	99.200, 1.821	99.200, 0.228	99.200, 2.073	99.200, 2.035
498	99.400, 2.560	99.400, 1.919	99.400, 1.285	99.400, 0.711	99.400, 2.521	99.400, 1.682	99.400, 1.217	99.400, 0.184	99.400, 0.580	99.400, 2.122	99.400, 1.830	99.400, 1.937	99.400, 0.129	99.400, 2.073	99.400, 2.296	99.400, 2.002	99.400, 2.109	99.400, 2.044	99.400, 2.190	99.400, 2.140	99.400, 2.498	99.400, 1.995	99.400, 1.385	99.400, 0.818	99.400, 2.154	99.400, 1.838	99.400, 1.823	99.400, 0.229	99.400, 2.075	99.400, 2.037
499	99.600, 2.563	99.600, 1.922	99.600, 1.287	99.600, 0.713	99.600, 2.524	99.600, 1.684	99.600, 1.220	99.600, 0.184	99.600, 0.581	99.600, 2.123	99.600, 1.832	99.600, 1.939	99.600, 0.129	99.600, 2.075	99.600, 2.298	99.600, 2.003	99.600, 2.111	99.600, 2.046	99.600, 2.192	99.600, 2.142	99.600, 2.501	99.600, 1.997	99.600, 1.387	99.600, 0.820	99.600, 2.156	99.600, 1.840	99.600, 1.824	99.600, 0.229	99.600, 2.076	99.600, 2.039
500	99.800, 2.566	99.800, 1.925	99.800, 1.289	99.800, 0.715	99.800, 2.527	99.800, 1.687	99.800, 1.222	99.800, 0.185	99.800, 0.582	99.800, 2.125	99.800, 1.833	99.800, 1.940	99.800, 0.130	99.800, 2.077	99.800, 2.299	99.800, 2.005	99.800, 2.112	99.800, 2.048	99.800, 2.194	99.800, 2.144	99.800, 2.504	99.800, 2.000	99.800, 1.390	99.800, 0.822	99.800, 2.157	99.800, 1.841	99.800, 1.826	99.800, 0.229	99.800, 2.078	99.800, 2.041
501	100.000, 2.570	100.000, 1.927	100.000, 1.291	100.000, 0.717	100.000, 2.529	100.000, 1.689	100.000, 1.224	100.000, 0.185	100.000, 0.584	100.000, 2.126	100.000, 1.835	100.000, 1.941	100.000, 0.130	100.000, 2.080	100.000, 2.301	100.000, 2.006	100.000, 2.114	100.000, 2.050	100.000, 2.196	100.000, 2.146	100.000, 2.507	100.000, 2.002	100.000, 1.392	100.000, 0.824	100.000, 2.159	100.000, 1.842	100.000, 1.828	100.000, 0.230	100.000, 2.080	100.000, 2.043
502	100.200, 2.573	100.200, 1.930	100.200, 1.294	100.200, 0.719	100.200, 2.532	100.200, 1.692	100.200, 1.226	100.200, 0.185	100.200, 0.585	100.200, 2.128	100.200, 1.837	100.200, 1.943	100.200, 0.130	100.200, 2.082	100.200, 2.302	100.200, 2.007	100.200, 2.116	100.200, 2.052	100.200, 2.198	100.200, 2.148	100.200, 2.510	100.200, 2.004	100.200, 1.394	100.200, 0.826	100.200, 2.160	100.200, 1.844	100.200, 1.830	100.200, 0.230	100.200, 2.082	100.200, 2.044
503	100.400, 2.576	100.400, 1.933	100.400, 1.296	100.400, 0.720	100.400, 2.534	100.400, 1.694	100.400, 1.228	100.400, 0.186	100.400, 0.587	100.400, 2.129	100.400, 1.838	100.400, 1.944	100.400, 0.130	100.400, 2.084	100.400, 2.303	100.400, 2.009	100.400, 2.117	100.400, 2.053	100.400, 2.199	100.400, 2.150	100.400, 2.513	100.400, 2.007	100.400, 1.397	100.400, 0.828	100.400, 2.162	100.400, 1.846	100.400, 1.832	100.400, 0.231	100.400, 2.084	100.400, 2.046
504	100.600, 2.579	100.600, 1.935	100.600, 1.298	100.600, 0.722	100.600, 2.536	100.600, 1.696	100.600, 1.230	100.600, 0.186	100.600, 0.588	100.600, 2.131	100.600, 1.840	100.600, 1.946	100.600, 0.131	100.600, 2.085	100.600, 2.304	100.600, 2.010	100.600, 2.119	100.600, 2.055	100.600, 2.201	100.600, 2.151	100.600, 2.516	100.600, 2.009	100.600, 1.399	100.600, 0.830	100.600, 2.164	100.600, 1.847	100.600, 1.834	100.600, 0.231	100.600, 2.086	100.600, 2.048
505	100.800, 2.582	100.800, 1.938	100.800, 1.300	100.800, 0.724	100.800, 2.539	100.800, 1.699	100.800, 1.233	100.800, 0.187	100.800, 0.589	100.800, 2.133	100.800, 1.841	100.800, 1.947	100.800, 0.131	100.800, 2.087	100.800, 2.305	100.800, 2.011	100.800, 2.120	100.800, 2.057	100.800, 2.203	100.800, 2.153	100.800, 2.518	100.800, 2.011	100.800, 1.401	100.800, 0.831	100.800, 2.166	100.800, 1.849	100.800, 1.835	100.800, 0.232	100.800, 2.088	100.800, 2.050
506	101.000, 2.585	101.000, 1.940	101.000, 1.303	101.000, 0.726	101.000, 2.541	101.000, 1.701	101.000, 1.235	101.000, 0.187	101.000, 0.590	101.000, 2.134	101.000, 1.843	101.000, 1.949	101.000, 0.132	101.000, 2.089	101.000, 2.306	101.000, 2.013	101.000, 2.122	101.000, 2.058	101.000, 2.204	101.000, 2.155	101.000, 2.521	101.000, 2.013	101.000, 1.403	101.000, 0.833	101.000, 2.167	101.000, 1.851	101.000, 1.837	101.000, 0.233	101.000, 2.090	101.000, 2.052
507	101.200, 2.588	101.200, 1.943	101.200, 1.305	101.200, 0.728	101.200, 2.543	101.200, 1.704	101.200, 1.237	101.200, 0.187	101.200, 0.592	101.200, 2.136	101.200, 1.844	101.200, 1.950	101.200, 0.132	101.200, 2.091	101.200, 2.307	101.200, 2.014	101.200, 2.123	101.200, 2.059	101.200, 2.206	101.200, 2.156	101.200, 2.523	101.200, 2.016	101.200, 1.405	101.200, 0.834	101.200, 2.169	101.200, 1.853	101.200, 1.839	101.200, 0.233	101.200, 2.092	101.200, 2.054
508	101.400, 2.591	101.400, 1.946	101.400, 1.308	101.400, 0.729	101.400, 2.545	101.400, 1.706	101.400, 1.239	101.400, 0.188	101.400, 0.593	101.400, 2.137	101.400, 1.846	101.400, 1.951	101.400, 0.133	101.400, 2.093	101.400, 2.309	101.400, 2.016	101.400, 2.125	101.400, 2.061	101.400, 2.207	101.400, 2.158	101.400, 2.526	101.400, 2.018	101.400, 1.408	101.400, 0.836	101.400, 2.171	101.400, 1.855	101.400, 1.841	101.400, 0.234	101.400, 2.094	101.400, 2.055
509	101.600, 2.593	101.600, 1.948	101.600, 1.310	101.600, 0.731	101.600, 2.548	101.600, 1.708	101.600, 1.242	101.600, 0.189	101.600, 0.594	101.600, 2.138	101.600, 1.847	101.600, 1.953	101.600, 0.133	101.600, 2.094	101.600, 2.310	101.600, 2.017	101.600, 2.127	101.600, 2.063	101.600, 2.209	101.600, 2.159	101.600, 2.528	101.600, 2.021	101.600, 1.410	101.600, 0.837	101.600, 2.173	101.600, 1.856	101.600, 1.842	101.600, 0.235	101.600, 2.096	101.600, 2.057
510	101.800, 2.596	101.800, 1.951	101.800, 1.312	101.800, 0.732	101.800, 2.550	101.800, 1.711	101.800, 1.244	101.800, 0.189	101.800, 0.595	101.800, 2.139	101.800, 1.849	101.800, 1.955	101.800, 0.134	101.800, 2.096	101.800, 2.312	101.800, 2.019	101.800, 2.128	101.800, 2.064	101.800, 2.210	101.800, 2.161	101.800, 2.531	101.800, 2.024	101.800, 1.412	101.800, 0.838	101.800, 2.174	101.800, 1.858	101.800, 1.843	101.800, 0.236	101.800, 2.098	101.800, 2.060
511	102.000, 2.599	102.000, 1.953	102.000, 1.314	102.000, 0.733	102.000, 2.552	102.000, 1.713	102.000, 1.246	102.000, 0.190	102.000, 0.596	102.000, 2.140	102.000, 1.850	102.000, 1.956	102.000, 0.134	102.000, 2.098	102.000, 2.314	102.000, 2.021	102.000, 2.130	102.000, 2.066	102.000, 2.212	102.000, 2.162	102.000, 2.534	102.000, 2.026	102.000, 1.414	102.000, 0.840	102.000, 2.175	102.000, 1.859	102.000, 1.845	102.000, 0.237	102.000, 2.100	102.000, 2.062
512	102.200, 2.602	102.200, 1.956	102.200, 1.317	102.200, 0.734	102.200, 2.554	102.200, 1.715	102.200, 1.248	102.200, 0.191	102.200, 0.597	102.200, 2.141	102.200, 1.851	102.200, 1.958	102.200, 0.135	102.200, 2.099	102.200, 2.315	102.200, 2.023	102.200, 2.132	102.200, 2.068	102.200, 2.213	102.200, 2.164	102.200, 2.536	102.200, 2.029	102.200, 1.416	102.200, 0.842	102.200, 2.176	102.200, 1.860	102.200, 1.846	102.200, 0.237	102.200, 2.102	102.200, 2.064
513	102.400, 2.605	102.400, 1.958	102.400, 1.318	102.400, 0.735	102.400, 2.556	102.400, 1.717	102.400, 1.250	102.400, 0.191	102.400, 0.599	102.400, 2.143	102.400, 1.852	102.400, 1.959	102.400, 0.135	102.400, 2.101	102.400, 2.317	102.400, 2.025	102.400, 2.133	102.400, 2.070	102.400, 2.215	102.400, 2.166	102.400, 2.539	102.400, 2.032	102.400, 1.418	102.400, 0.843	102.400, 2.177	102.400, 1.862	102.400, 1.848	102.400, 0.238	102.400, 2.104	102.400, 2.066
514	102.600, 2.608	102.600, 1.961	102.600, 1.320	102.600, 0.736	102.600, 2.559	102.600, 1.719	102.600, 1.252	102.600, 0.192	102.600, 0.600	102.600, 2.144	102.600, 1.853	102.600, 1.961	102.600, 0.136	102.600, 2.102	102.600, 2.318	102.600, 2.026	102.600, 2.135	102.600, 2.072	102.600, 2.217	102.600, 2.168	102.600, 2.542	102.600, 2.035	102.600, 1.421	102.600, 0.845	102.600, 2.179	102.600, 1.863	102.600, 1.850	102.600, 0.239	102.600, 2.105	102.600, 2.068
515	102.800, 2.610	102.800, 1.964	102.800, 1.322	102.800, 0.737	102.800, 2.561	102.800, 1.722	102.800, 1.254	102.800, 0.192	102.800, 0.601	102.800, 2.145	102.800, 1.854	102.800, 1.962	102.800, 0.137	102.800, 2.104	102.800, 2.320	102.800, 2.028	102.800, 2.136	102.800, 2.074	102.800, 2.218	102.800, 2.170	102.800, 2.544	102.800, 2.037	102.800, 1.423	102.800, 0.847	102.800, 2.180	102.800, 1.865	102.800, 1.851	102.800, 0.239	102.800, 2.106	102.800, 2.070
516	103.000, 2.613	103.000, 1.966	103.000, 1.324	103.000, 0.738	103.000, 2.563	103.000, 1.724	103.000, 1.256	103.000, 0.193	103.000, 0.603	103.000, 2.146	103.000, 1.856	103.000, 1.964	103.000, 0.137	103.000, 2.105	103.000, 2.321	103.000, 2.030	103.000, 2.138	103.000, 2.077	103.000, 2.220	103.000, 2.171	103.000, 2.547	103.000, 2.040	103.000, 1.425	103.000, 0.849	103.000, 2.181	103.000, 1.866	103.000, 1.852	103.000, 0.240	103.000, 2.108	103.000, 2.072
517	103.200, 2.616	103.200, 1.969	103.200, 1.325	103.200, 0.740	103.200, 2.566	103.200, 1.726	103.200, 1.257	103.200, 0.194	103.200, 0.604	103.200, 2.148	103.200, 1.857	103.200, 1.966	103.200, 0.138	103.200, 2.107	103.200, 2.323	103.200, 2.031	103.200, 2.140	103.200, 2.079	103.200, 2.221	103.200, 2.173	103.200, 2.550	103.200, 2.042	103.200, 1.427	103.200, 0.851	103.200, 2.183	103.200, 1.867	103.200, 1.854	103.200, 0.241	103.200, 2.110	103.200, 2.074
518	103.400, 2.619	103.400, 1.971	103.400, 1.327	103.400, 0.741	103.400, 2.568	103.400, 1.728	103.400, 1.259	103.400, 0.194	103.400, 0.605	103.400, 2.149	103.400, 1.859	103.400, 1.967	103.400, 0.138	103.400, 2.108	103.400, 2.324	103.400, 2.033	103.400, 2.142	103.400, 2.081	103.400, 2.223	103.400, 2.175	103.400, 2.553	103.400, 2.045	103.400, 1.430	103.400, 0.852	103.400, 2.184	103.400, 1.869	103.400, 1.855	103.400, 0.241	103.400, 2.111	103.400, 2.075
519	103.600, 2.622	103.600, 1.973	103.600, 1.329	103.600, 0.743	103.600, 2.571	103.600, 1.730	103.600, 1.261	103.600, 0.195	103.600, 0.607	103.600, 2.151	103.600, 1.860	103.600, 1.969	103.600, 0.138	103.600, 2.110	103.600, 2.325	103.600, 2.035	103.600, 2.143	103.600, 2.083	103.600, 2.224	103.600, 2.177	103.600, 2.556	103.600, 2.047	103.600, 1.432	103.600, 0.854	103.600, 2.185	103.600, 1.870	103.600, 1.856	103.600, 0.242	103.600, 2.113	103.600, 2.077
520	103.800, 2.624	103.800, 1.976	103.800, 1.331	103.800, 0.744	103.800, 2.573	103.800, 1.732	103.800, 1.262	103.800, 0.195	103.800, 0.608	103.800, 2.152	103.800, 1.862	103.800, 1.970	103.800, 0.139	103.800, 2.112	103.800, 2.327	103.800, 2.036	103.800, 2.145	103.800, 2.085	103.800, 2.226	103.800, 2.179	103.800, 2.559	103.800, 2.049	103.800, 1.434	103.800, 0.856	103.800, 2.187	103.800, 1.871	103.800, 1.858	103.800, 0.242	103.800, 2.115	103.800, 2.079
521	104.000, 2.627	104.000, 1.978	104.000, 1.333	104.000, 0.746	104.000, 2.575	104.000, 1.734	104.000, 1.264	104.000, 0.196	104.000, 0.609	104.000, 2.154	104.000, 1.863	104.000, 1.972	104.000, 0.139	104.000, 2.113	104.000, 2.328	104.000, 2.038	104.000, 2.146	104.000, 2.087	104.000, 2.227	104.000, 2.181	104.000, 2.562	104.000, 2.052	104.000, 1.436	104.000, 0.858	104.000, 2.188	104.000, 1.873	104.000, 1.859	104.000, 0.243	104.000, 2.117	104.000, 2.080
522	104.200, 2.630	104.200, 1.980	104.200, 1.335	104.200, 0.747	104.200, 2.577	104.200, 1.735	104.200, 1.265	104.200, 0.196	104.200, 0.610	104.200, 2.156	104.200, 1.865	104.200, 1.974	104.200, 0.139	104.200, 2.115	104.200, 2.329	104.200, 2.040	104.200, 2.148	104.200, 2.088	104.200, 2.228	104.200, 2.183	104.200, 2.565	104.200, 2.054	104.200, 1.438	104.200, 0.860	104.200, 2.190	104.200, 1.874	104.200, 1.861	104.200, 0.243	104.200, 2.118	104.200, 2.082
523	104.400, 2.633	104.400, 1.983	104.400, 1.336	104.400, 0.748	104.400, 2.579	104.400, 1.737	104.400, 1.267	104.400, 0.197	104.400, 0.611	104.400, 2.157	104.400, 1.867	104.400, 1.976	104.400, 0.140	104.400, 2.116	104.400, 2.330	104.400, 2.041	104.400, 2.149	104.400, 2.090	104.400, 2.230	104.400, 2.185	104.400, 2.567	104.400, 2.057	104.400, 1.441	104.400, 0.861	104.400, 2.191	104.400, 1.876	104.400, 1.862	104.400, 0.243	104.400, 2.120	104.400, 2.084
524	104.600, 2.636	104.600, 1.985	104.600, 1.338	104.600, 0.750	104.600, 2.582	104.600, 1.739	104.600, 1.268	104.600, 0.197	104.600, 0.612	104.600, 2.159	104.600, 1.868	104.600, 1.978	104.600, 0.140	104.600, 2.118	104.600, 2.331	104.600, 2.043	104.600, 2.151	104.600, 2.091	104.600, 2.231	104.600, 2.187	104.600, 2.570	104.600, 2.059	104.600, 1.443	104.600, 0.863	104.600, 2.193	104.600, 1.877	104.600, 1.864	104.600, 0.244	104.600, 2.122	104.600, 2.085
525	104.800, 2.639	104.800, 1.988	104.800, 1.340	104.800, 0.752	104.800, 2.584	104.800, 1.741	104.800, 1.270	104.800, 0.198	104.800, 0.612	104.800, 2.161	104.800, 1.870	104.800, 1.980	104.800, 0.140	104.800, 2.119	104.800, 2.332	104.800, 2.044	104.800, 2.152	104.800, 2.092	104.800, 2.232	104.800, 2.189	104.800, 2.572	104.800, 2.062	104.800, 1.445	104.800, 0.864	104.800, 2.194	104.800, 1.879	104.800, 1.865	104.800, 0.244	104.800, 2.123	104.800, 2.087
526	105.000, 2.641	105.000, 1.990	105.000, 1.343	105.000, 0.753	105.000, 2.586	105.000, 1.744	105.000, 1.272	105.000, 0.198	105.000, 0.613	105.000, 2.162	105.000, 1.871	105.000, 1.982	105.000, 0.140	105.000, 2.121	105.000, 2.333	105.000, 2.045	105.000, 2.153	105.000, 2.093	105.000, 2.234	105.000, 2.190	105.000, 2.575	105.000, 2.064	105.000, 1.447	105.000, 0.866	105.000, 2.195	105.000, 1.880	105.000, 1.866	105.000, 0.245	105.000, 2.125	105.000, 2.088
527	105.200, 2.644	105.200, 1.992	105.200, 1.345	105.200, 0.755	105.200, 2.588	105.200, 1.746	105.200, 1.274	105.200, 0.198	105.200, 0.614	105.200, 2.164	105.200, 1.872	105.200, 1.983	105.200, 0.140	105.200, 2.122	105.200, 2.334	105.200, 2.047	105.200, 2.155	105.200, 2.095	105.200, 2.235	105.200, 2.191	105.200, 2.577	105.200, 2.066	105.200, 1.449	105.200, 0.868	105.200, 2.197	105.200, 1.881	105.200, 1.867	105.200, 0.246	105.200, 2.126	105.200, 2.090
528	105.400, 2.647	105.400, 1.995	105.400, 1.347	105.400, 0.756	105.400, 2.590	105.400, 1.748	105.400, 1.276	105.400, 0.199	105.400, 0.615	105.400, 2.165	105.400, 1.874	105.400, 1.985	105.400, 0.141	105.400, 2.124	105.400, 2.335	105.400, 2.048	105.400, 2.156	105.400, 2.096	105.400, 2.236	105.400, 2.192	105.400, 2.579	105.400, 2.069	105.400, 1.451	105.400, 0.869	105.400, 2.198	105.400, 1.881	105.400, 1.869	105.400, 0.246	105.400, 2.128	105.400, 2.092
529	105.600, 2.649	105.600, 1.997	105.600, 1.349	105.600, 0.758	105.600, 2.593	105.600, 1.750	105.600, 1.277	105.600, 0.199	105.600, 0.616	105.600, 2.166	105.600, 1.875	105.600, 1.986	105.600, 0.141	105.600, 2.126	105.600, 2.337	105.600, 2.049	105.600, 2.158	105.600, 2.097	105.600, 2.238	105.600, 2.194	105.600, 2.581	105.600, 2.071	105.600, 1.453	105.600, 0.871	105.600, 2.199	105.600, 1.882	105.600, 1.870	105.600, 0.247	105.600, 2.129	105.600, 2.094
530	105.800, 2.651	105.800, 1.999	105.800, 1.351	105.800, 0.759	105.800, 2.595	105.800, 1.752	105.800, 1.279	105.800, 0.200	105.800, 0.617	105.800, 2.167	105.800, 1.876	105.800, 1.987	105.800, 0.141	105.800, 2.127	105.800, 2.338	105.800, 2.050	105.800, 2.159	105.800, 2.099	105.800, 2.240	105.800, 2.195	105.800, 2.584	105.800, 2.074	105.800, 1.454	105.800, 0.873	105.800, 2.200	105.800, 1.883	105.800, 1.871	105.800, 0.247	105.800, 2.131	105.800, 2.095
531	106.000, 2.654	106.000, 2.002	106.000, 1.353	106.000, 0.760	106.000, 2.597	106.000, 1.754	106.000, 1.281	106.000, 0.201	106.000, 0.618	106.000, 2.168	106.000, 1.877	106.000, 1.988	106.000, 0.142	106.000, 2.129	106.000, 2.339	106.000, 2.051	106.000, 2.161	106.000, 2.101	106.000, 2.241	106.000, 2.196	106.000, 2.586	106.000, 2.077	106.000, 1.456	106.000, 0.875	106.000, 2.201	106.000, 1.884	106.000, 1.873	106.000, 0.248	106.000, 2.132	106.000, 2.097
532	106.200, 2.656	106.200, 2.004	106.200, 1.356	106.200, 0.761	106.200, 2.600	106.200, 1.757	106.200, 1.283	106.200, 0.201	106.200, 0.620	106.200, 2.169	106.200, 1.878	106.200, 1.989	106.200, 0.142	106.200, 2.131	106.200, 2.341	106.200, 2.051	106.200, 2.162	106.200, 2.102	106.200, 2.243	106.200, 2.198	106.200, 2.588	106.200, 2.080	106.200, 1.458	106.200, 0.877	106.200, 2.201	106.200, 1.885	106.200, 1.874	106.200, 0.249	106.200, 2.133	106.200, 2.098
533	106.400, 2.659	106.400, 2.006	106.400, 1.358	106.400, 0.762	106.400, 2.603	106.400, 1.759	106.400, 1.285	106.400, 0.201	106.400, 0.621	106.400, 2.170	106.400, 1.880	106.400, 1.989	106.400, 0.143	106.400, 2.132	106.400, 2.342	106.400, 2.053	106.400, 2.164	106.400, 2.104	106.400, 2.245	106.400, 2.199	106.400, 2.591	106.400, 2.083	106.400, 1.460	106.400, 0.878	106.400, 2.202	106.400, 1.887	106.400, 1.876	106.400, 0.250	106.400, 2.134	106.400, 2.100
534	106.600, 2.661	106.600, 2.009	106.600, 1.360	106.600, 0.763	106.600, 2.606	106.600, 1.761	106.600, 1.288	106.600, 0.202	106.600, 0.622	106.600, 2.171	106.600, 1.881	106.600, 1.990	106.600, 0.143	106.600, 2.134	106.600, 2.343	106.600, 2.054	106.600, 2.165	106.600, 2.106	106.600, 2.247	106.600, 2.200	106.600, 2.593	106.600, 2.085	106.600, 1.462	106.600, 0.880	106.600, 2.203	106.600, 1.888	106.600, 1.877	106.600, 0.250	106.600, 2.135	106.600, 2.101
535	106.800, 2.663	106.800, 2.011	106.800, 1.362	106.800, 0.764	106.800, 2.609	106.800, 1.762	106.800, 1.290	106.800, 0.202	106.800, 0.624	106.800, 2.172	106.800, 1.882	106.800, 1.991	106.800, 0.143	106.800, 2.135	106.800, 2.344	106.800, 2.055	106.800, 2.167	106.800, 2.108	106.800, 2.248	106.800, 2.202	106.800, 2.595	106.800, 2.088	106.800, 1.464	106.800, 0.882	106.800, 2.204	106.800, 1.889	106.800, 1.878	106.800, 0.251	106.800, 2.136	106.800, 2.103
536	107.000, 2.666	107.000, 2.014	107.000, 1.364	107.000, 0.766	107.000, 2.611	107.000, 1.764	107.000, 1.292	107.000, 0.202	107.000, 0.625	107.000, 2.173	107.000, 1.883	107.000, 1.993	107.000, 0.143	107.000, 2.137	107.000, 2.345	107.000, 2.056	107.000, 2.168	107.000, 2.110	107.000, 2.250	107.000, 2.203	107.000, 2.597	107.000, 2.090	107.000, 1.466	107.000, 0.883	107.000, 2.205	107.000, 1.891	107.000, 1.879	107.000, 0.251	107.000, 2.138	107.000, 2.104
537	107.200, 2.668	107.200, 2.016	107.200, 1.366	107.200, 0.767	107.200, 2.614	107.200, 1.766	107.200, 1.295	107.200, 0.203	107.200, 0.627	107.200, 2.175	107.200, 1.884	107.200, 1.994	107.200, 0.144	107.200, 2.139	107.200, 2.347	107.200, 2.058	107.200, 2.169	107.200, 2.112	107.200, 2.251	107.200, 2.205	107.200, 2.599	107.200, 2.093	107.200, 1.468	107.200, 0.884	107.200, 2.206	107.200, 1.892	107.200, 1.880	107.200, 0.252	107.200, 2.139	107.200, 2.105
538	107.400, 2.671	107.400, 2.018	107.400, 1.368	107.400, 0.768	107.400, 2.616	107.400, 1.768	107.400, 1.297	107.400, 0.203	107.400, 0.628	107.400, 2.176	107.400, 1.886	107.400, 1.995	107.400, 0.144	107.400, 2.140	107.400, 2.348	107.400, 2.059	107.400, 2.170	107.400, 2.113	107.400, 2.253	107.400, 2.207	107.400, 2.602	107.400, 2.095	107.400, 1.470	107.400, 0.886	107.400, 2.207	107.400, 1.894	107.400, 1.881	107.400, 0.252	107.400, 2.140	107.400, 2.107
539	107.600, 2.673	107.600, 2.020	107.600, 1.370	107.600, 0.769	107.600, 2.619	107.600, 1.770	107.600, 1.299	107.600, 0.203	107.600, 0.630	107.600, 2.177	107.600, 1.887	107.600, 1.997	107.600, 0.145	107.600, 2.142	107.600, 2.349	107.600, 2.061	107.600, 2.171	107.600, 2.115	107.600, 2.254	107.600, 2.208	107.600, 2.605	107.600, 2.097	107.600, 1.472	107.600, 0.887	107.600, 2.209	107.600, 1.896	107.600, 1.882	107.600, 0.252	107.600, 2.142	107.600, 2.109
540	107.800, 2.676	107.800, 2.023	107.800, 1.372	107.800, 0.771	107.800, 2.621	107.800, 1.772	107.800, 1.300	107.800, 0.204	107.800, 0.631	107.800, 2.179	107.800, 1.888	107.800, 1.998	107.800, 0.146	107.800, 2.143	107.800, 2.351	107.800, 2.062	107.800, 2.173	107.800, 2.116	107.800, 2.256	107.800, 2.210	107.800, 2.607	107.800, 2.099	107.800, 1.474	107.800, 0.889	107.800, 2.210	107.800, 1.897	107.800, 1.883	107.800, 0.253	107.800, 2.143	107.800, 2.110
541	108.000, 2.679	108.000, 2.025	108.000, 1.374	108.000, 0.772	108.000, 2.623	108.000, 1.773	108.000, 1.302	108.000, 0.204	108.000, 0.633	108.000, 2.180	108.000, 1.889	108.000, 2.000	108.000, 0.146	108.000, 2.145	108.000, 2.352	108.000, 2.064	108.000, 2.174	108.000, 2.117	108.000, 2.258	108.000, 2.212	108.000, 2.610	108.000, 2.101	108.000, 1.476	108.000, 0.890	108.000, 2.211	108.000, 1.899	108.000, 1.885	108.000, 0.253	108.000, 2.145	108.000, 2.111
542	108.200, 2.681	108.200, 2.027	108.200, 1.376	108.200, 0.773	108.200, 2.625	108.200, 1.775	108.200, 1.304	108.200, 0.204	108.200, 0.634	108.200, 2.182	108.200, 1.890	108.200, 2.001	108.200, 0.147	108.200, 2.146	108.200, 2.354	108.200, 2.065	108.200, 2.175	108.200, 2.119	108.200, 2.259	108.200, 2.213	108.200, 2.613	108.200, 2.103	108.200, 1.478	108.200, 0.891	108.200, 2.212	108.200, 1.901	108.200, 1.887	108.200, 0.253	108.200, 2.147	108.200, 2.113
543	108.400, 2.684	108.400, 2.029	108.400, 1.378	108.400, 0.775	108.400, 2.627	108.400, 1.777	108.400, 1.305	108.400, 0.205	108.400, 0.635	108.400, 2.183	108.400, 1.891	108.400, 2.003	108.400, 0.148	108.400, 2.147	108.400, 2.355	108.400, 2.067	108.400, 2.177	108.400, 2.120	108.400, 2.261	108.400, 2.215	108.400, 2.615	108.400, 2.106	108.400, 1.480	108.400, 0.893	108.400, 2.213	108.400, 1.902	108.400, 1.888	108.400, 0.254	108.400, 2.148	108.400, 2.114
544	108.600, 2.687	108.600, 2.031	108.600, 1.380	108.600, 0.777	108.600, 2.629	108.600, 1.779	108.600, 1.307	108.600, 0.205	108.600, 0.636	108.600, 2.185	108.600, 1.892	108.600, 2.004	108.600, 0.149	108.600, 2.149	108.600, 2.356	108.600, 2.068	108.600, 2.178	108.600, 2.121	108.600, 2.262	108.600, 2.217	108.600, 2.618	108.600, 2.108	108.600, 1.482	108.600, 0.895	108.600, 2.214	108.600, 1.903	108.600, 1.889	108.600, 0.254	108.600, 2.150	108.600, 2.116
545	108.800, 2.689	108.800, 2.033	108.800, 1.382	108.800, 0.778	108.800, 2.631	108.800, 1.781	108.800, 1.309	108.800, 0.206	108.800, 0.637	108.800, 2.186	108.800, 1.894	108.800, 2.006	108.800, 0.149	108.800, 2.150	108.800, 2.358	108.800, 2.070	108.800, 2.179	108.800, 2.122	108.800, 2.263	108.800, 2.218	108.800, 2.621	108.800, 2.110	108.800, 1.484	108.800, 0.896	108.800, 2.215	108.800, 1.905	108.800, 1.891	108.800, 0.255	108.800, 2.151	108.800, 2.117
546	109.000, 2.692	109.000, 2.034	109.000, 1.384	109.000, 0.780	109.000, 2.633	109.000, 1.783	109.000, 1.311	109.000, 0.207	109.000, 0.638	109.000, 2.187	109.000, 1.895	109.000, 2.007	109.000, 0.150	109.000, 2.151	109.000, 2.359	109.000, 2.071	109.000, 2.180	109.000, 2.124	109.000, 2.264	109.000, 2.220	109.000, 2.623	109.000, 2.112	109.000, 1.485	109.000, 0.898	109.000, 2.216	109.000, 1.906	109.000, 1.892	109.000, 0.256	109.000, 2.153	109.000, 2.119
547	109.200, 2.695	109.200, 2.036	109.200, 1.386	109.200, 0.781	109.200, 2.635	109.200, 1.785	109.200, 1.313	109.200, 0.207	109.200, 0.640	109.200, 2.189	109.200, 1.896	109.200, 2.008	109.200, 0.150	109.200, 2.152	109.200, 2.360	109.200, 2.073	109.200, 2.182	109.200, 2.125	109.200, 2.265	109.200, 2.222	109.200, 2.626	109.200, 2.114	109.200, 1.487	109.200, 0.899	109.200, 2.217	109.200, 1.907	109.200, 1.893	109.200, 0.256	109.200, 2.155	109.200, 2.120
548	109.400, 2.697	109.400, 2.038	109.400, 1.387	109.400, 0.783	109.400, 2.637	109.400, 1.788	109.400, 1.314	109.400, 0.208	109.400, 0.641	109.400, 2.190	109.400, 1.897	109.400, 2.009	109.400, 0.151	109.400, 2.153	109.400, 2.360	109.400, 2.074	109.400, 2.183	109.400, 2.126	109.400, 2.267	109.400, 2.223	109.400, 2.628	109.400, 2.116	109.400, 1.489	109.400, 0.901	109.400, 2.219	109.400, 1.908	109.400, 1.894	109.400, 0.257	109.400, 2.156	109.400, 2.122
549	109.600, 2.700	109.600, 2.040	109.600, 1.389	109.600, 0.784	109.600, 2.639	109.600, 1.789	109.600, 1.316	109.600, 0.209	109.600, 0.642	109.600, 2.192	109.600, 1.899	109.600, 2.010	109.600, 0.151	109.600, 2.154	109.600, 2.361	109.600, 2.076	109.600, 2.184	109.600, 2.127	109.600, 2.268	109.600, 2.225	109.600, 2.630	109.600, 2.118	109.600, 1.491	109.600, 0.903	109.600, 2.220	109.600, 1.909	109.600, 1.896	109.600, 0.257	109.600, 2.158	109.600, 2.124
550	109.800, 2.703	109.800, 2.042	109.800, 1.391	109.800, 0.785	109.800, 2.641	109.800, 1.792	109.800, 1.318	109.800, 0.210	109.800, 0.643	109.800, 2.193	109.800, 1.900	109.800, 2.011	109.800, 0.151	109.800, 2.156	109.800, 2.362	109.800, 2.077	109.800, 2.186	109.800, 2.128	109.800, 2.269	109.800, 2.226	109.800, 2.633	109.800, 2.121	109.800, 1.493	109.800, 0.904	109.800, 2.221	109.800, 1.910	109.800, 1.897	109.800, 0.258	109.800, 2.159	109.800, 2.125
551	110.000, 2.705	110.000, 2.044	110.000, 1.393	110.000, 0.787	110.000, 2.644	110.000, 1.793	110.000, 1.319	110.000, 0.210	110.000, 0.644	110.000, 2.194	110.000, 1.901	110.000, 2.012	110.000, 0.151	110.000, 2.157	110.000, 2.363	110.000, 2.078	110.000, 2.187	110.000, 2.130	110.000, 2.271	110.000, 2.228	110.000, 2.635	110.000, 2.123	110.000, 1.496	110.000, 0.906	110.000, 2.223	110.000, 1.911	110.000, 1.899	110.000, 0.259	110.000, 2.160	110.000, 2.127
552	110.200, 2.708	110.200, 2.047	110.200, 1.396	110.200, 0.788	110.200, 2.646	110.200, 1.795	110.200, 1.321	110.200, 0.211	110.200, 0.645	110.200, 2.196	110.200, 1.903	110.200, 2.013	110.200, 0.151	110.200, 2.159	110.200, 2.363	110.200, 2.080	110.200, 2.189	110.200, 2.131	110.200, 2.272	110.200, 2.229	110.200, 2.637	110.200, 2.125	110.200, 1.498	110.200, 0.907	110.200, 2.224	110.200, 1.912	110.200, 1.900	110.200, 0.260	110.200, 2.162	110.200, 2.129
553	110.400, 2.710	110.400, 2.049	110.400, 1.398	110.400, 0.790	110.400, 2.648	110.400, 1.797	110.400, 1.322	110.400, 0.211	110.400, 0.646	110.400, 2.197	110.400, 1.904	110.400, 2.014	110.400, 0.151	110.400, 2.160	110.400, 2.364	110.400, 2.081	110.400, 2.190	110.400, 2.133	110.400, 2.273	110.400, 2.231	110.400, 2.639	110.400, 2.128	110.400, 1.500	110.400, 0.909	110.400, 2.225	110.400, 1.912	110.400, 1.902	110.400, 0.260	110.400, 2.163	110.400, 2.131
554	110.600, 2.712	110.600, 2.052	110.600, 1.400	110.600, 0.791	110.600, 2.650	110.600, 1.799	110.600, 1.324	110.600, 0.211	110.600, 0.647	110.600, 2.198	110.600, 1.905	110.600, 2.016	110.600, 0.151	110.600, 2.162	110.600, 2.365	110.600, 2.082	110.600, 2.191	110.600, 2.134	110.600, 2.274	110.600, 2.233	110.600, 2.641	110.600, 2.130	110.600, 1.503	110.600, 0.910	110.600, 2.225	110.600, 1.913	110.600, 1.903	110.600, 0.261	110.600, 2.164	110.600, 2.133
555	110.800, 2.715	110.800, 2.054	110.800, 1.402	110.800, 0.793	110.800, 2.652	110.800, 1.801	110.800, 1.325	110.800, 0.211	110.800, 0.648	110.800, 2.199	110.800, 1.906	110.800, 2.017	110.800, 0.151	110.800, 2.163	110.800, 2.366	110.800, 2.083	110.800, 2.192	110.800, 2.136	110.800, 2.275	110.800, 2.235	110.800, 2.642	110.800, 2.132	110.800, 1.505	110.800, 0.911	110.800, 2.226	110.800, 1.914	110.800, 1.904	110.800, 0.262	110.800, 2.165	110.800, 2.134
556	111.000, 2.717	111.000, 2.057	111.000, 1.404	111.000, 0.794	111.000, 2.654	111.000, 1.802	111.000, 1.327	111.000, 0.211	111.000, 0.649	111.000, 2.200	111.000, 1.907	111.000, 2.018	111.000, 0.152	111.000, 2.164	111.000, 2.367	111.000, 2.083	111.000, 2.193	111.000, 2.137	111.000, 2.276	111.000, 2.236	111.000, 2.644	111.000, 2.134	111.000, 1.507	111.000, 0.912	111.000, 2.227	111.000, 1.915	111.000, 1.905	111.000, 0.262	111.000, 2.166	111.000, 2.136
557	111.200, 2.719	111.200, 2.060	111.200, 1.406	111.200, 0.795	111.200, 2.656	111.200, 1.804	111.200, 1.329	111.200, 0.212	111.200, 0.650	111.200, 2.201	111.200, 1.908	111.200, 2.019	111.200, 0.152	111.200, 2.166	111.200, 2.368	111.200, 2.084	111.200, 2.195	111.200, 2.138	111.200, 2.278	111.200, 2.238	111.200, 2.646	111.200, 2.136	111.200, 1.509	111.200, 0.913	111.200, 2.228	111.200, 1.916	111.200, 1.906	111.200, 0.263	111.200, 2.168	111.200, 2.137
558	111.400, 2.722	111.400, 2.062	111.400, 1.408	111.400, 0.796	111.400, 2.658	111.400, 1.806	111.400, 1.331	111.400, 0.212	111.400, 0.651	111.400, 2.202	111.400, 1.909	111.400, 2.020	111.400, 0.152	111.400, 2.167	111.400, 2.369	111.400, 2.085	111.400, 2.196	111.400, 2.140	111.400, 2.279	111.400, 2.239	111.400, 2.648	111.400, 2.138	111.400, 1.511	111.400, 0.915	111.400, 2.229	111.400, 1.917	111.400, 1.907	111.400, 0.263	111.400, 2.169	111.400, 2.138
559	111.600, 2.724	111.600, 2.064	111.600, 1.409	111.600, 0.797	111.600, 2.660	111.600, 1.808	111.600, 1.333	111.600, 0.212	111.600, 0.652	111.600, 2.202	111.600, 1.910	111.600, 2.021	111.600, 0.153	111.600, 2.169	111.600, 2.370	111.600, 2.085	111.600, 2.197	111.600, 2.141	111.600, 2.281	111.600, 2.241	111.600, 2.651	111.600, 2.140	111.600, 1.513	111.600, 0.916	111.600, 2.230	111.600, 1.918	111.600, 1.908	111.600, 0.264	111.600, 2.170	111.600, 2.140
560	111.800, 2.727	111.800, 2.067	111.800, 1.411	111.800, 0.799	111.800, 2.662	111.800, 1.810	111.800, 1.334	111.800, 0.212	111.800, 0.653	111.800, 2.203	111.800, 1.911	111.800, 2.022	111.800, 0.153	111.800, 2.171	111.800, 2.372	111.800, 2.086	111.800, 2.199	111.800, 2.142	111.800, 2.282	111.800, 2.242	111.800, 2.653	111.800, 2.143	111.800, 1.515	111.800, 0.918	111.800, 2.231	111.800, 1.919	111.800, 1.909	111.800, 0.264	111.800, 2.171	111.800, 2.141
561	112.000, 2.729	112.000, 2.069	112.000, 1.412	112.000, 0.800	112.000, 2.665	112.000, 1.811	112.000, 1.336	112.000, 0.212	112.000, 0.654	112.000, 2.204	112.000, 1.912	112.000, 2.023	112.000, 0.154	112.000, 2.172	112.000, 2.373	112.000, 2.087	112.000, 2.200	112.000, 2.144	112.000, 2.284	112.000, 2.244	112.000, 2.655	112.000, 2.145	112.000, 1.517	112.000, 0.919	112.000, 2.231	112.000, 1.920	112.000, 1.911	112.000, 0.265	112.000, 2.173	112.000, 2.142
562	112.200, 2.731	112.200, 2.070	112.200, 1.414	112.200, 0.801	112.200, 2.667	112.200, 1.813	112.200, 1.338	112.200, 0.212	112.200, 0.655	112.200, 2.205	112.200, 1.912	112.200, 2.025	112.200, 0.154	112.200, 2.174	112.200, 2.374	112.200, 2.088	112.200, 2.200	112.200, 2.145	112.200, 2.285	112.200, 2.245	112.200, 2.658	112.200, 2.147	112.200, 1.519	112.200, 0.921	112.200, 2.232	112.200, 1.920	112.200, 1.912	112.200, 0.265	112.200, 2.174	112.200, 2.143
563	112.400, 2.734	112.400, 2.072	112.400, 1.416	112.400, 0.802	112.400, 2.669	112.400, 1.814	112.400, 1.340	112.400, 0.213	112.400, 0.656	112.400, 2.206	112.400, 1.913	112.400, 2.026	112.400, 0.155	112.400, 2.175	112.400, 2.375	112.400, 2.089	112.400, 2.201	112.400, 2.146	112.400, 2.286	112.400, 2.247	112.400, 2.660	112.400, 2.149	112.400, 1.521	112.400, 0.923	112.400, 2.233	112.400, 1.922	112.400, 1.913	112.400, 0.266	112.400, 2.175	112.400, 2.144
564	112.600, 2.736	112.600, 2.074	112.600, 1.418	112.600, 0.803	112.600, 2.671	112.600, 1.816	112.600, 1.342	112.600, 0.213	112.600, 0.657	112.600, 2.207	112.600, 1.914	112.600, 2.027	112.600, 0.156	112.600, 2.177	112.600, 2.377	112.600, 2.090	112.600, 2.202	112.600, 2.148	112.600, 2.287	112.600, 2.248	112.600, 2.662	112.600, 2.151	112.600, 1.523	112.600, 0.924	112.600, 2.234	112.600, 1.923	112.600, 1.914	112.600, 0.266	112.600, 2.176	112.600, 2.146
565	112.800, 2.738	112.800, 2.076	112.800, 1.419	112.800, 0.805	112.800, 2.673	112.800, 1.818	112.800, 1.344	112.800, 0.214	112.800, 0.658	112.800, 2.208	112.800, 1.915	112.800, 2.028	112.800, 0.156	112.800, 2.178	112.800, 2.378	112.800, 2.092	112.800, 2.203	112.800, 2.149	112.800, 2.288	112.800, 2.249	112.800, 2.664	112.800, 2.153	112.800, 1.524	112.800, 0.926	112.800, 2.235	112.800, 1.924	112.800, 1.915	112.800, 0.266	112.800, 2.177	112.800, 2.147
566	113.000, 2.740	113.000, 2.077	113.000, 1.421	113.000, 0.806	113.000, 2.675	113.000, 1.820	113.000, 1.346	113.000, 0.214	113.000, 0.659	113.000, 2.208	113.000, 1.916	113.000, 2.029	113.000, 0.157	113.000, 2.179	113.000, 2.379	113.000, 2.093	113.000, 2.204	113.000, 2.151	113.000, 2.289	113.000, 2.250	113.000, 2.667	113.000, 2.155	113.000, 1.526	113.000, 0.928	113.000, 2.236	113.000, 1.925	113.000, 1.916	113.000, 0.267	113.000, 2.177	113.000, 2.148
567	113.200, 2.742	113.200, 2.079	113.200, 1.422	113.200, 0.807	113.200, 2.677	113.200, 1.822	113.200, 1.347	113.200, 0.215	113.200, 0.660	113.200, 2.209	113.200, 1.917	113.200, 2.031	113.200, 0.157	113.200, 2.179	113.200, 2.380	113.200, 2.094	113.200, 2.204	113.200, 2.152	113.200, 2.291	113.200, 2.251	113.200, 2.669	113.200, 2.157	113.200, 1.528	113.200, 0.929	113.200, 2.237	113.200, 1.926	113.200, 1.917	113.200, 0.267	113.200, 2.178	113.200, 2.149
568	113.400, 2.744	113.400, 2.081	113.400, 1.424	113.400, 0.808	113.400, 2.679	113.400, 1.824	113.400, 1.349	113.400, 0.215	113.400, 0.661	113.400, 2.210	113.400, 1.918	113.400, 2.032	113.400, 0.157	113.400, 2.180	113.400, 2.380	113.400, 2.096	113.400, 2.205	113.400, 2.153	113.400, 2.292	113.400, 2.252	113.400, 2.671	113.400, 2.159	113.400, 1.530	113.400, 0.931	113.400, 2.239	113.400, 1.927	113.400, 1.919	113.400, 0.267	113.400, 2.179	113.400, 2.151
569	113.600, 2.746	113.600, 2.083	113.600, 1.426	113.600, 0.809	113.600, 2.681	113.600, 1.825	113.600, 1.350	113.600, 0.216	113.600, 0.662	113.600, 2.211	113.600, 1.919	113.600, 2.034	113.600, 0.158	113.600, 2.182	113.600, 2.381	113.600, 2.097	113.600, 2.206	113.600, 2.154	113.600, 2.293	113.600, 2.253	113.600, 2.674	113.600, 2.161	113.600, 1.532	113.600, 0.933	113.600, 2.240	113.600, 1.929	113.600, 1.920	113.600, 0.267	113.600, 2.181	113.600, 2.152
570	113.800, 2.748	113.800, 2.084	113.800, 1.427	113.800, 0.810	113.800, 2.682	113.800, 1.827	113.800, 1.351	113.800, 0.216	113.800, 0.663	113.800, 2.212	113.800, 1.920	113.800, 2.035	113.800, 0.158	113.800, 2.183	113.800, 2.382	113.800, 2.098	113.800, 2.207	113.800, 2.156	113.800, 2.295	113.800, 2.254	113.800, 2.676	113.800, 2.163	113.800, 1.534	113.800, 0.934	113.800, 2.241	113.800, 1.930	113.800, 1.921	113.800, 0.267	113.800, 2.182	113.800, 2.153
571	114.000, 2.750	114.000, 2.086	114.000, 1.429	114.000, 0.812	114.000, 2.684	114.000, 1.829	114.000, 1.352	114.000, 0.217	114.000, 0.665	114.000, 2.213	114.000, 1.920	114.000, 2.036	114.000, 0.158	114.000, 2.184	114.000, 2.383	114.000, 2.099	114.000, 2.208	114.000, 2.157	114.000, 2.296	114.000, 2.254	114.000, 2.678	114.000, 2.165	114.000, 1.536	114.000, 0.936	114.000, 2.242	114.000, 1.931	114.000, 1.922	114.000, 0.268	114.000, 2.183	114.000, 2.154
572	114.200, 2.752	114.200, 2.088	114.200, 1.431	114.200, 0.813	114.200, 2.685	114.200, 1.831	114.200, 1.354	114.200, 0.217	114.200, 0.666	114.200, 2.214	114.200, 1.921	114.200, 2.038	114.200, 0.159	114.200, 2.185	114.200, 2.384	114.200, 2.100	114.200, 2.209	114.200, 2.159	114.200, 2.296	114.200, 2.255	114.200, 2.681	114.200, 2.167	114.200, 1.538	114.200, 0.937	114.200, 2.243	114.200, 1.933	114.200, 1.922	114.200, 0.268	114.200, 2.185	114.200, 2.155
573	114.400, 2.754	114.400, 2.090	114.400, 1.433	114.400, 0.814	114.400, 2.687	114.400, 1.833	114.400, 1.355	114.400, 0.218	114.400, 0.667	114.400, 2.215	114.400, 1.922	114.400, 2.039	114.400, 0.159	114.400, 2.186	114.400, 2.385	114.400, 2.101	114.400, 2.210	114.400, 2.160	114.400, 2.297	114.400, 2.256	114.400, 2.683	114.400, 2.169	114.400, 1.540	114.400, 0.938	114.400, 2.244	114.400, 1.934	114.400, 1.923	114.400, 0.269	114.400, 2.186	114.400, 2.156
574	114.600, 2.755	114.600, 2.092	114.600, 1.435	114.600, 0.816	114.600, 2.689	114.600, 1.835	114.600, 1.357	114.600, 0.218	114.600, 0.668	114.600, 2.216	114.600, 1.923	114.600, 2.040	114.600, 0.159	114.600, 2.187	114.600, 2.386	114.600, 2.102	114.600, 2.212	114.600, 2.162	114.600, 2.298	114.600, 2.257	114.600, 2.685	114.600, 2.172	114.600, 1.542	114.600, 0.939	114.600, 2.245	114.600, 1.935	114.600, 1.924	114.600, 0.270	114.600, 2.187	114.600, 2.157
575	114.800, 2.757	114.800, 2.095	114.800, 1.437	114.800, 0.817	114.800, 2.690	114.800, 1.837	114.800, 1.358	114.800, 0.219	114.800, 0.670	114.800, 2.217	114.800, 1.924	114.800, 2.040	114.800, 0.160	114.800, 2.188	114.800, 2.387	114.800, 2.102	114.800, 2.213	114.800, 2.163	114.800, 2.299	114.800, 2.258	114.800, 2.687	114.800, 2.174	114.800, 1.544	114.800, 0.941	114.800, 2.246	114.800, 1.936	114.800, 1.924	114.800, 0.271	114.800, 2.188	114.800, 2.158
576	115.000, 2.759	115.000, 2.097	115.000, 1.439	115.000, 0.819	115.000, 2.692	115.000, 1.839	115.000, 1.360	115.000, 0.220	115.000, 0.671	115.000, 2.218	115.000, 1.926	115.000, 2.041	115.000, 0.160	115.000, 2.189	115.000, 2.387	115.000, 2.103	115.000, 2.215	115.000, 2.164	115.000, 2.300	115.000, 2.259	115.000, 2.690	115.000, 2.177	115.000, 1.546	115.000, 0.942	115.000, 2.247	115.000, 1.937	115.000, 1.925	115.000, 0.271	115.000, 2.189	115.000, 2.160
577	115.200, 2.761	115.200, 2.099	115.200, 1.441	115.200, 0.820	115.200, 2.693	115.200, 1.841	115.200, 1.363	115.200, 0.220	115.200, 0.672	115.200, 2.219	115.200, 1.927	115.200, 2.042	115.200, 0.160	115.200, 2.190	115.200, 2.388	115.200, 2.104	115.200, 2.216	115.200, 2.165	115.200, 2.302	115.200, 2.260	115.200, 2.692	115.200, 2.179	115.200, 1.547	115.200, 0.943	115.200, 2.248	115.200, 1.938	115.200, 1.926	115.200, 0.272	115.200, 2.190	115.200, 2.161
578	115.400, 2.764	115.400, 2.101	115.400, 1.443	115.400, 0.821	115.400, 2.695	115.400, 1.843	115.400, 1.365	115.400, 0.221	115.400, 0.673	115.400, 2.220	115.400, 1.928	115.400, 2.042	115.400, 0.160	115.400, 2.191	115.400, 2.389	115.400, 2.105	115.400, 2.217	115.400, 2.166	115.400, 2.303	115.400, 2.262	115.400, 2.695	115.400, 2.182	115.400, 1.549	115.400, 0.944	115.400, 2.250	115.400, 1.939	115.400, 1.927	115.400, 0.273	115.400, 2.191	115.400, 2.162
579	115.600, 2.766	115.600, 2.103	115.600, 1.445	115.600, 0.823	115.600, 2.697	115.600, 1.844	115.600, 1.367	115.600, 0.221	115.600, 0.674	115.600, 2.221	115.600, 1.929	115.600, 2.043	115.600, 0.160	115.600, 2.192	115.600, 2.389	115.600, 2.106	115.600, 2.218	115.600, 2.167	115.600, 2.304	115.600, 2.263	115.600, 2.697	115.600, 2.184	115.600, 1.551	115.600, 0.946	115.600, 2.251	115.600, 1.940	115.600, 1.928	115.600, 0.274	115.600, 2.193	115.600, 2.163
580	115.800, 2.768	115.800, 2.105	115.800, 1.447	115.800, 0.824	115.800, 2.699	115.800, 1.846	115.800, 1.369	115.800, 0.221	115.800, 0.675	115.800, 2.222	115.800, 1.930	115.800, 2.044	115.800, 0.160	115.800, 2.193	115.800, 2.390	115.800, 2.107	115.800, 2.219	115.800, 2.168	115.800, 2.305	115.800, 2.264	115.800, 2.699	115.800, 2.186	115.800, 1.552	115.800, 0.947	115.800, 2.252	115.800, 1.941	115.800, 1.929	115.800, 0.275	115.800, 2.194	115.800, 2.164
581	116.000, 2.770	116.000, 2.106	116.000, 1.449	116.000, 0.825	116.000, 2.702	116.000, 1.848	116.000, 1.371	116.000, 0.222	116.000, 0.676	116.000, 2.223	116.000, 1.931	116.000, 2.045	116.000, 0.161	116.000, 2.194	116.000, 2.391	116.000, 2.108	116.000, 2.220	116.000, 2.169	116.000, 2.306	116.000, 2.266	116.000, 2.701	116.000, 2.188	116.000, 1.554	116.000, 0.948	116.000, 2.253	116.000, 1.941	116.000, 1.930	116.000, 0.276	116.000, 2.196	116.000, 2.166
582	116.200, 2.772	116.200, 2.108	116.200, 1.451	116.200, 0.826	116.200, 2.704	116.200, 1.849	116.200, 1.373	116.200, 0.222	116.200, 0.676	116.200, 2.225	116.200, 1.932	116.200, 2.046	116.200, 0.161	116.200, 2.195	116.200, 2.392	116.200, 2.110	116.200, 2.221	116.200, 2.170	116.200, 2.307	116.200, 2.267	116.200, 2.703	116.200, 2.190	116.200, 1.556	116.200, 0.950	116.200, 2.253	116.200, 1.942	116.200, 1.931	116.200, 0.277	116.200, 2.197	116.200, 2.167
583	116.400, 2.774	116.400, 2.110	116.400, 1.453	116.400, 0.827	116.400, 2.706	116.400, 1.851	116.400, 1.374	116.400, 0.222	116.400, 0.677	116.400, 2.226	116.400, 1.932	116.400, 2.047	116.400, 0.162	116.400, 2.196	116.400, 2.392	116.400, 2.111	116.400, 2.222	116.400, 2.171	116.400, 2.308	116.400, 2.268	116.400, 2.705	116.400, 2.192	116.400, 1.557	116.400, 0.951	116.400, 2.254	116.400, 1.943	116.400, 1.932	116.400, 0.277	116.400, 2.198	116.400, 2.168
584	116.600, 2.777	116.600, 2.112	116.600, 1.454	116.600, 0.828	116.600, 2.709	116.600, 1.852	116.600, 1.376	116.600, 0.222	116.600, 0.678	116.600, 2.227	116.600, 1.933	116.600, 2.048	116.600, 0.162	116.600, 2.197	116.600, 2.393	116.600, 2.112	116.600, 2.224	116.600, 2.172	116.600, 2.310	116.600, 2.269	116.600, 2.707	116.600, 2.194	116.600, 1.559	116.600, 0.953	116.600, 2.255	116.600, 1.944	116.600, 1.933	116.600, 0.277	116.600, 2.199	116.600, 2.169
585	116.800, 2.780	116.800, 2.114	116.800, 1.456	116.800, 0.829	116.800, 2.711	116.800, 1.854	116.800, 1.378	116.800, 0.222	116.800, 0.679	116.800, 2.228	116.800, 1.934	116.800, 2.049	116.800, 0.163	116.800, 2.199	116.800, 2.394	116.800, 2.113	116.800, 2.225	116.800, 2.173	116.800, 2.311	116.800, 2.271	116.800, 2.710	116.800, 2.196	116.800, 1.561	116.800, 0.954	116.800, 2.256	116.800, 1.944	116.800, 1.935	116.800, 0.278	116.800, 2.201	116.800, 2.171
586	117.000, 2.782	117.000, 2.116	117.000, 1.457	117.000, 0.830	117.000, 2.713	117.000, 1.856	117.000, 1.379	117.000, 0.222	117.000, 0.680	117.000, 2.229	117.000, 1.934	117.000, 2.050	117.000, 0.163	117.000, 2.200	117.000, 2.395	117.000, 2.114	117.000, 2.226	117.000, 2.174	117.000, 2.312	117.000, 2.272	117.000, 2.712	117.000, 2.198	117.000, 1.562	117.000, 0.956	117.000, 2.257	117.000, 1.945	117.000, 1.936	117.000, 0.278	117.000, 2.202	117.000, 2.172
587	117.200, 2.785	117.200, 2.118	117.200, 1.459	117.200, 0.831	117.200, 2.715	117.200, 1.857	117.200, 1.381	117.200, 0.223	117.200, 0.681	117.200, 2.230	117.200, 1.935	117.200, 2.052	117.200, 0.163	117.200, 2.201	117.200, 2.396	117.200, 2.115	117.200, 2.227	117.200, 2.175	117.200, 2.314	117.200, 2.274	117.200, 2.714	117.200, 2.199	117.200, 1.564	117.200, 0.957	117.200, 2.258	117.200, 1.946	117.200, 1.937	117.200, 0.278	117.200, 2.203	117.200, 2.173
588	117.400, 2.788	117.400, 2.119	117.400, 1.461	117.400, 0.832	117.400, 2.717	117.400, 1.859	117.400, 1.382	117.400, 0.223	117.400, 0.683	117.400, 2.231	117.400, 1.936	117.400, 2.053	117.400, 0.164	117.400, 2.202	117.400, 2.397	117.400, 2.116	117.400, 2.228	117.400, 2.176	117.400, 2.315	117.400, 2.275	117.400, 2.717	117.400, 2.201	117.400, 1.566	117.400, 0.958	117.400, 2.258	117.400, 1.947	117.400, 1.939	117.400, 0.278	117.400, 2.204	117.400, 2.175
589	117.600, 2.790	117.600, 2.121	117.600, 1.462	117.600, 0.833	117.600, 2.719	117.600, 1.860	117.600, 1.384	117.600, 0.223	117.600, 0.684	117.600, 2.232	117.600, 1.937	117.600, 2.054	117.600, 0.164	117.600, 2.204	117.600, 2.398	117.600, 2.117	117.600, 2.229	117.600, 2.177	117.600, 2.315	117.600, 2.276	117.600, 2.719	117.600, 2.203	117.600, 1.567	117.600, 0.960	117.600, 2.259	117.600, 1.948	117.600, 1.940	117.600, 0.279	117.600, 2.205	117.600, 2.176
590	117.800, 2.792	117.800, 2.123	117.800, 1.464	117.800, 0.834	117.800, 2.720	117.800, 1.862	117.800, 1.385	117.800, 0.223	117.800, 0.685	117.800, 2.232	117.800, 1.938	117.800, 2.055	117.800, 0.165	117.800, 2.205	117.800, 2.399	117.800, 2.118	117.800, 2.230	117.800, 2.177	117.800, 2.316	117.800, 2.277	117.800, 2.721	117.800, 2.205	117.800, 1.569	117.800, 0.961	117.800, 2.259	117.800, 1.949	117.800, 1.941	117.800, 0.279	117.800, 2.206	117.800, 2.177
591	118.000, 2.795	118.000, 2.125	118.000, 1.466	118.000, 0.835	118.000, 2.722	118.000, 1.863	118.000, 1.387	118.000, 0.224	118.000, 0.687	118.000, 2.233	118.000, 1.939	118.000, 2.056	118.000, 0.166	118.000, 2.206	118.000, 2.400	118.000, 2.119	118.000, 2.231	118.000, 2.178	118.000, 2.317	118.000, 2.278	118.000, 2.723	118.000, 2.207	118.000, 1.571	118.000, 0.962	118.000, 2.260	118.000, 1.950	118.000, 1.942	118.000, 0.280	118.000, 2.206	118.000, 2.179
592	118.200, 2.797	118.200, 2.127	118.200, 1.468	118.200, 0.836	118.200, 2.723	118.200, 1.865	118.200, 1.388	118.200, 0.224	118.200, 0.688	118.200, 2.233	118.200, 1.940	118.200, 2.057	118.200, 0.166	118.200, 2.207	118.200, 2.401	118.200, 2.119	118.200, 2.232	118.200, 2.179	118.200, 2.317	118.200, 2.279	118.200, 2.724	118.200, 2.209	118.200, 1.573	118.200, 0.964	118.200, 2.260	118.200, 1.951	118.200, 1.942	118.200, 0.281	118.200, 2.207	118.200, 2.180
593	118.400, 2.799	118.400, 2.129	118.400, 1.469	118.400, 0.837	118.400, 2.725	118.400, 1.866	118.400, 1.390	118.400, 0.224	118.400, 0.689	118.400, 2.234	118.400, 1.941	118.400, 2.058	118.400, 0.167	118.400, 2.208	118.400, 2.402	118.400, 2.120	118.400, 2.233	118.400, 2.180	118.400, 2.318	118.400, 2.280	118.400, 2.726	118.400, 2.210	118.400, 1.574	118.400, 0.965	118.400, 2.261	118.400, 1.952	118.400, 1.943	118.400, 0.282	118.400, 2.207	118.400, 2.182
594	118.600, 2.800	118.600, 2.131	118.600, 1.471	118.600, 0.839	118.600, 2.726	118.600, 1.868	118.600, 1.392	118.600, 0.225	118.600, 0.690	118.600, 2.235	118.600, 1.943	118.600, 2.059	118.600, 0.167	118.600, 2.209	118.600, 2.403	118.600, 2.120	118.600, 2.234	118.600, 2.181	118.600, 2.319	118.600, 2.281	118.600, 2.728	118.600, 2.212	118.600, 1.576	118.600, 0.967	118.600, 2.261	118.600, 1.953	118.600, 1.944	118.600, 0.283	118.600, 2.208	118.600, 2.183
595	118.800, 2.802	118.800, 2.133	118.800, 1.473	118.800, 0.840	118.800, 2.728	118.800, 1.869	118.800, 1.394	118.800, 0.225	118.800, 0.691	118.800, 2.236	118.800, 1.944	118.800, 2.059	118.800, 0.167	118.800, 2.210	118.800, 2.404	118.800, 2.120	118.800, 2.235	118.800, 2.182	118.800, 2.320	118.800, 2.281	118.800, 2.730	118.800, 2.214	118.800, 1.578	118.800, 0.969	118.800, 2.262	118.800, 1.954	118.800, 1.946	118.800, 0.283	118.800, 2.209	118.800, 2.184
596	119.000, 2.804	119.000, 2.135	119.000, 1.474	119.000, 0.841	119.000, 2.729	119.000, 1.871	119.000, 1.396	119.000, 0.226	119.000, 0.692	119.000, 2.237	119.000, 1.945	119.000, 2.060	119.000, 0.167	119.000, 2.210	119.000, 2.404	119.000, 2.121	119.000, 2.235	119.000, 2.183	119.000, 2.321	119.000, 2.282	119.000, 2.732	119.000, 2.215	119.000, 1.580	119.000, 0.970	119.000, 2.263	119.000, 1.955	119.000, 1.947	119.000, 0.284	119.000, 2.209	119.000, 2.186
597	119.200, 2.806	119.200, 2.137	119.200, 1.476	119.200, 0.842	119.200, 2.731	119.200, 1.873	119.200, 1.398	119.200, 0.226	119.200, 0.693	119.200, 2.238	119.200, 1.947	119.200, 2.061	119.200, 0.168	119.200, 2.211	119.200, 2.405	119.200, 2.121	119.200, 2.236	119.200, 2.184	119.200, 2.322	119.200, 2.283	119.200, 2.733	119.200, 2.217	119.200, 1.581	119.200, 0.972	119.200, 2.263	119.200, 1.956	119.200, 1.948	119.200, 0.285	119.200, 2.210	119.200, 2.187
598	119.400, 2.807	119.400, 2.139	119.400, 1.477	119.400, 0.843	119.400, 2.733	119.400, 1.874	119.400, 1.399	119.400, 0.227	119.400, 0.694	119.400, 2.239	119.400, 1.948	119.400, 2.062	119.400, 0.168	119.400, 2.212	119.400, 2.406	119.400, 2.122	119.400, 2.236	119.400, 2.186	119.400, 2.323	119.400, 2.284	119.400, 2.735	119.400, 2.219	119.400, 1.583	119.400, 0.973	119.400, 2.264	119.400, 1.958	119.400, 1.949	119.400, 0.285	119.400, 2.211	119.400, 2.188
599	119.600, 2.809	119.600, 2.140	119.600, 1.479	119.600, 0.844	119.600, 2.735	119.600, 1.876	119.600, 1.401	119.600, 0.227	119.600, 0.695	119.600, 2.240	119.600, 1.948	119.600, 2.063	119.600, 0.168	119.600, 2.213	119.600, 2.407	119.600, 2.123	119.600, 2.236	119.600, 2.187	119.600, 2.324	119.600, 2.285	119.600, 2.737	119.600, 2.220	119.600, 1.585	119.600, 0.975	119.600, 2.265	119.600, 1.959	119.600, 1.950	119.600, 0.285	119.600, 2.212	119.600, 2.189
600	119.800, 2.811	119.800, 2.142	119.800, 1.480	119.800, 0.845	119.800, 2.737	119.800, 1.877	119.800, 1.403	119.800, 0.228	119.800, 0.696	119.800, 2.241	119.800, 1.949	119.800, 2.064	119.800, 0.168	119.800, 2.214	119.800, 2.408	119.800, 2.124	119.800, 2.237	119.800, 2.189	119.800, 2.325	119.800, 2.286	119.800, 2.739	119.800, 2.222	119.800, 1.586	119.800, 0.976	119.800, 2.266	119.800, 1.960	119.800, 1.951	119.800, 0.286	119.800, 2.213	119.800, 2.190
601	120.000, 2.813	120.000, 2.144	120.000, 1.481	120.000, 0.846	120.000, 2.739	120.000, 1.879	120.000, 1.405	120.000, 0.228	120.000, 0.697	120.000, 2.242	120.000, 1.950	120.000, 2.065	120.000, 0.168	120.000, 2.214	120.000, 2.408	120.000, 2.125	120.000, 2.237	120.000, 2.190	120.000, 2.326	120.000, 2.287	120.000, 2.741	120.000, 2.224	120.000, 1.588	120.000, 0.978	120.000, 2.266	120.000, 1.961	120.000, 1.951	120.000, 0.286	120.000, 2.215	120.000, 2.191
602	120.200, 2.815	120.200, 2.146	120.200, 1.483	120.200, 0.847	120.200, 2.741	120.200, 1.880	120.200, 1.406	120.200, 0.228	120.200, 0.698	120.200, 2.243	120.200, 1.951	120.200, 2.066	120.200, 0.169	120.200, 2.215	120.200, 2.409	120.200, 2.126	120.200, 2.238	120.200, 2.191	120.200, 2.328	120.200, 2.288	120.200, 2.743	120.200, 2.227	120.200, 1.590	120.200, 0.979	120.200, 2.267	120.200, 1.961	120.200, 1.952	120.200, 0.286	120.200, 2.216	120.200, 2.192
603	120.400, 2.817	120.400, 2.148	120.400, 1.484	120.400, 0.849	120.400, 2.743	120.400, 1.882	120.400, 1.408	120.400, 0.228	120.400, 0.699	120.400, 2.244	120.400, 1.951	120.400, 2.067	120.400, 0.169	120.400, 2.217	120.400, 2.410	120.400, 2.127	120.400, 2.239	120.400, 2.193	120.400, 2.329	120.400, 2.289	120.400, 2.746	120.400, 2.229	120.400, 1.592	120.400, 0.981	120.400, 2.268	120.400, 1.962	120.400, 1.952	120.400, 0.286	120.400, 2.218	120.400, 2.193
604	120.600, 2.819	120.600, 2.149	120.600, 1.486	120.600, 0.850	120.600, 2.745	120.600, 1.884	120.600, 1.409	120.600, 0.229	120.600, 0.701	120.600, 2.245	120.600, 1.952	120.600, 2.067	120.600, 0.169	120.600, 2.218	120.600, 2.411	120.600, 2.129	120.600, 2.239	120.600, 2.194	120.600, 2.330	120.600, 2.290	120.600, 2.748	120.600, 2.231	120.600, 1.594	120.600, 0.982	120.600, 2.269	120.600, 1.962	120.600, 1.953	120.600, 0.287	120.600, 2.219	120.600, 2.194
605	120.800, 2.822	120.800, 2.151	120.800, 1.488	120.800, 0.852	120.800, 2.747	120.800, 1.886	120.800, 1.411	120.800, 0.229	120.800, 0.702	120.800, 2.246	120.800, 1.953	120.800, 2.068	120.800, 0.170	120.800, 2.219	120.800, 2.411	120.800, 2.129	120.800, 2.240	120.800, 2.195	120.800, 2.331	120.800, 2.292	120.800, 2.750	120.800, 2.234	120.800, 1.595	120.800, 0.983	120.800, 2.270	120.800, 1.963	120.800, 1.954	120.800, 0.287	120.800, 2.220	120.800, 2.196
606	121.000, 2.824	121.000, 2.152	121.000, 1.490	121.000, 0.854	121.000, 2.749	121.000, 1.888	121.000, 1.412	121.000, 0.229	121.000, 0.703	121.000, 2.246	121.000, 1.954	121.000, 2.069	121.000, 0.170	121.000, 2.220	121.000, 2.412	121.000, 2.130	121.000, 2.241	121.000, 2.196	121.000, 2.332	121.000, 2.293	121.000, 2.752	121.000, 2.236	121.000, 1.597	121.000, 0.984	121.000, 2.271	121.000, 1.963	121.000, 1.954	121.000, 0.287	121.000, 2.222	121.000, 2.197
607	121.200, 2.826	121.200, 2.154	121.200, 1.492	121.200, 0.855	121.200, 2.751	121.200, 1.889	121.200, 1.413	121.200, 0.230	121.200, 0.704	121.200, 2.246	121.200, 1.954	121.200, 2.069	121.200, 0.171	121.200, 2.221	121.200, 2.413	121.200, 2.131	121.200, 2.242	121.200, 2.197	121.200, 2.333	121.200, 2.295	121.200, 2.755	121.200, 2.239	121.200, 1.599	121.200, 0.985	121.200, 2.272	121.200, 1.964	121.200, 1.955	121.200, 0.287	121.200, 2.223	121.200, 2.198
608	121.400, 2.827	121.400, 2.155	121.400, 1.494	121.400, 0.857	121.400, 2.752	121.400, 1.890	121.400, 1.415	121.400, 0.230	121.400, 0.705	121.400, 2.247	121.400, 1.955	121.400, 2.070	121.400, 0.172	121.400, 2.222	121.400, 2.413	121.400, 2.132	121.400, 2.243	121.400, 2.198	121.400, 2.334	121.400, 2.296	121.400, 2.757	121.400, 2.241	121.400, 1.600	121.400, 0.986	121.400, 2.272	121.400, 1.965	121.400, 1.956	121.400, 0.288	121.400, 2.224	121.400, 2.200
609	121.600, 2.829	121.600, 2.157	121.600, 1.495	121.600, 0.859	121.600, 2.754	121.600, 1.892	121.600, 1.416	121.600, 0.231	121.600, 0.706	121.600, 2.247	121.600, 1.955	121.600, 2.070	121.600, 0.172	121.600, 2.223	121.600, 2.414	121.600, 2.133	121.600, 2.244	121.600, 2.198	121.600, 2.334	121.600, 2.297	121.600, 2.759	121.600, 2.244	121.600, 1.602	121.600, 0.988	121.600, 2.273	121.600, 1.965	121.600, 1.956	121.600, 0.288	121.600, 2.225	121.600, 2.201
610	121.800, 2.831	121.800, 2.159	121.800, 1.497	121.800, 0.860	121.800, 2.756	121.800, 1.893	121.800, 1.418	121.800, 0.231	121.800, 0.707	121.800, 2.247	121.800, 1.955	121.800, 2.071	121.800, 0.173	121.800, 2.225	121.800, 2.414	121.800, 2.133	121.800, 2.246	121.800, 2.199	121.800, 2.335	121.800, 2.299	121.800, 2.762	121.800, 2.246	121.800, 1.604	121.800, 0.989	121.800, 2.273	121.800, 1.965	121.800, 1.957	121.800, 0.288	121.800, 2.225	121.800, 2.202
611	122.000, 2.832	122.000, 2.160	122.000, 1.499	122.000, 0.862	122.000, 2.758	122.000, 1.895	122.000, 1.419	122.000, 0.232	122.000, 0.708	122.000, 2.248	122.000, 1.956	122.000, 2.071	122.000, 0.173	122.000, 2.226	122.000, 2.415	122.000, 2.134	122.000, 2.247	122.000, 2.199	122.000, 2.336	122.000, 2.300	122.000, 2.763	122.000, 2.247	122.000, 1.606	122.000, 0.991	122.000, 2.273	122.000, 1.966	122.000, 1.958	122.000, 0.289	122.000, 2.226	122.000, 2.203
612	122.200, 2.834	122.200, 2.162	122.200, 1.500	122.200, 0.863	122.200, 2.759	122.200, 1.896	122.200, 1.421	122.200, 0.232	122.200, 0.709	122.200, 2.248	122.200, 1.956	122.200, 2.072	122.200, 0.174	122.200, 2.227	122.200, 2.416	122.200, 2.134	122.200, 2.248	122.200, 2.200	122.200, 2.337	122.200, 2.301	122.200, 2.765	122.200, 2.249	122.200, 1.607	122.200, 0.992	122.200, 2.274	122.200, 1.967	122.200, 1.959	122.200, 0.290	122.200, 2.227	122.200, 2.204
613	122.400, 2.835	122.400, 2.164	122.400, 1.501	122.400, 0.864	122.400, 2.761	122.400, 1.898	122.400, 1.423	122.400, 0.233	122.400, 0.709	122.400, 2.249	122.400, 1.957	122.400, 2.073	122.400, 0.174	122.400, 2.228	122.400, 2.416	122.400, 2.134	122.400, 2.249	122.400, 2.201	122.400, 2.338	122.400, 2.302	122.400, 2.767	122.400, 2.250	122.400, 1.609	122.400, 0.994	122.400, 2.274	122.400, 1.968	122.400, 1.960	122.400, 0.290	122.400, 2.228	122.400, 2.205
614	122.600, 2.837	122.600, 2.166	122.600, 1.503	122.600, 0.865	122.600, 2.763	122.600, 1.899	122.600, 1.424	122.600, 0.233	122.600, 0.710	122.600, 2.249	122.600, 1.958	122.600, 2.074	122.600, 0.175	122.600, 2.229	122.600, 2.417	122.600, 2.134	122.600, 2.250	122.600, 2.201	122.600, 2.339	122.600, 2.303	122.600, 2.769	122.600, 2.252	122.600, 1.611	122.600, 0.995	122.600, 2.274	122.600, 1.969	122.600, 1.960	122.600, 0.291	122.600, 2.229	122.600, 2.206
615	122.800, 2.838	122.800, 2.168	122.800, 1.504	122.800, 0.867	122.800, 2.764	122.800, 1.901	122.800, 1.426	122.800, 0.234	122.800, 0.711	122.800, 2.250	122.800, 1.959	122.800, 2.075	122.800, 0.175	122.800, 2.230	122.800, 2.417	122.800, 2.135	122.800, 2.251	122.800, 2.202	122.800, 2.340	122.800, 2.304	122.800, 2.771	122.800, 2.253	122.800, 1.613	122.800, 0.997	122.800, 2.275	122.800, 1.970	122.800, 1.961	122.800, 0.292	122.800, 2.230	122.800, 2.207
616	123.000, 2.840	123.000, 2.170	123.000, 1.506	123.000, 0.868	123.000, 2.766	123.000, 1.903	123.000, 1.428	123.000, 0.235	123.000, 0.712	123.000, 2.251	123.000, 1.959	123.000, 2.076	123.000, 0.176	123.000, 2.231	123.000, 2.417	123.000, 2.135	123.000, 2.251	123.000, 2.202	123.000, 2.341	123.000, 2.304	123.000, 2.772	123.000, 2.255	123.000, 1.615	123.000, 0.999	123.000, 2.276	123.000, 1.971	123.000, 1.963	123.000, 0.292	123.000, 2.230	123.000, 2.207
617	123.200, 2.842	123.200, 2.172	123.200, 1.507	123.200, 0.869	123.200, 2.767	123.200, 1.904	123.200, 1.430	123.200, 0.235	123.200, 0.713	123.200, 2.252	123.200, 1.960	123.200, 2.077	123.200, 0.176	123.200, 2.232	123.200, 2.418	123.200, 2.136	123.200, 2.252	123.200, 2.203	123.200, 2.342	123.200, 2.305	123.200, 2.774	123.200, 2.257	123.200, 1.617	123.200, 1.000	123.200, 2.276	123.200, 1.972	123.200, 1.964	123.200, 0.293	123.200, 2.231	123.200, 2.208
618	123.400, 2.844	123.400, 2.173	123.400, 1.508	123.400, 0.870	123.400, 2.768	123.400, 1.906	123.400, 1.431	123.400, 0.236	123.400, 0.714	123.400, 2.253	123.400, 1.961	123.400, 2.078	123.400, 0.176	123.400, 2.233	123.400, 2.418	123.400, 2.137	123.400, 2.252	123.400, 2.204	123.400, 2.343	123.400, 2.306	123.400, 2.776	123.400, 2.258	123.400, 1.619	123.400, 1.001	123.400, 2.277	123.400, 1.974	123.400, 1.964	123.400, 0.293	123.400, 2.233	123.400, 2.209
619	123.600, 2.847	123.600, 2.175	123.600, 1.509	123.600, 0.871	123.600, 2.769	123.600, 1.907	123.600, 1.433	123.600, 0.236	123.600, 0.715	123.600, 2.254	123.600, 1.961	123.600, 2.079	123.600, 0.177	123.600, 2.234	123.600, 2.419	123.600, 2.137	123.600, 2.253	123.600, 2.205	123.600, 2.344	123.600, 2.307	123.600, 2.778	123.600, 2.260	123.600, 1.620	123.600, 1.003	123.600, 2.277	123.600, 1.975	123.600, 1.965	123.600, 0.293	123.600, 2.234	123.600, 2.210
620	123.800, 2.849	123.800, 2.177	123.800, 1.511	123.800, 0.871	123.800, 2.771	123.800, 1.909	123.800, 1.434	123.800, 0.236	123.800, 0.716	123.800, 2.254	123.800, 1.962	123.800, 2.080	123.800, 0.177	123.800, 2.234	123.800, 2.419	123.800, 2.138	123.800, 2.253	123.800, 2.206	123.800, 2.344	123.800, 2.308	123.800, 2.779	123.800, 2.261	123.800, 1.622	123.800, 1.004	123.800, 2.278	123.800, 1.975	123.800, 1.966	123.800, 0.293	123.800, 2.235	123.800, 2.210
621	124.000, 2.851	124.000, 2.179	124.000, 1.512	124.000, 0.872	124.000, 2.772	124.000, 1.910	124.000, 1.436	124.000, 0.237	124.000, 0.716	124.000, 2.255	124.000, 1.963	124.000, 2.081	124.000, 0.177	124.000, 2.235	124.000, 2.419	124.000, 2.140	124.000, 2.254	124.000, 2.207	124.000, 2.345	124.000, 2.309	124.000, 2.780	124.000, 2.263	124.000, 1.623	124.000, 1.005	124.000, 2.279	124.000, 1.976	124.000, 1.967	124.000, 0.294	124.000, 2.236	124.000, 2.211
622	124.200, 2.854	124.200, 2.181	124.200, 1.513	124.200, 0.873	124.200, 2.774	124.200, 1.912	124.200, 1.437	124.200, 0.237	124.200, 0.717	124.200, 2.256	124.200, 1.963	124.200, 2.082	124.200, 0.178	124.200, 2.235	124.200, 2.420	124.200, 2.141	124.200, 2.255	124.200, 2.208	124.200, 2.346	124.200, 2.310	124.200, 2.782	124.200, 2.264	124.200, 1.625	124.200, 1.006	124.200, 2.280	124.200, 1.977	124.200, 1.968	124.200, 0.294	124.200, 2.237	124.200, 2.211
623	124.400, 2.856	124.400, 2.182	124.400, 1.515	124.400, 0.874	124.400, 2.775	124.400, 1.913	124.400, 1.438	124.400, 0.237	124.400, 0.718	124.400, 2.257	124.400, 1.964	124.400, 2.083	124.400, 0.178	124.400, 2.235	124.400, 2.420	124.400, 2.142	124.400, 2.255	124.400, 2.208	124.400, 2.346	124.400, 2.311	124.400, 2.784	124.400, 2.266	124.400, 1.626	124.400, 1.007	124.400, 2.280	124.400, 1.977	124.400, 1.968	124.400, 0.295	124.400, 2.238	124.400, 2.212
624	124.600, 2.858	124.600, 2.184	124.600, 1.516	124.600, 0.876	124.600, 2.777	124.600, 1.915	124.600, 1.439	124.600, 0.238	124.600, 0.719	124.600, 2.257	124.600, 1.965	124.600, 2.084	124.600, 0.178	124.600, 2.235	124.600, 2.421	124.600, 2.143	124.600, 2.256	124.600, 2.209	124.600, 2.347	124.600, 2.312	124.600, 2.786	124.600, 2.268	124.600, 1.628	124.600, 1.008	124.600, 2.281	124.600, 1.978	124.600, 1.969	124.600, 0.296	124.600, 2.239	124.600, 2.213
625	124.800, 2.860	124.800, 2.186	124.800, 1.518	124.800, 0.877	124.800, 2.779	124.800, 1.916	124.800, 1.441	124.800, 0.238	124.800, 0.721	124.800, 2.258	124.800, 1.966	124.800, 2.085	124.800, 0.179	124.800, 2.235	124.800, 2.422	124.800, 2.144	124.800, 2.257	124.800, 2.210	124.800, 2.348	124.800, 2.314	124.800, 2.788	124.800, 2.269	124.800, 1.629	124.800, 1.009	124.800, 2.282	124.800, 1.978	124.800, 1.969	124.800, 0.296	124.800, 2.240	124.800, 2.214
626	125.000, 2.862	125.000, 2.188	125.000, 1.519	125.000, 0.878	125.000, 2.780	125.000, 1.918	125.000, 1.441	125.000, 0.239	125.000, 0.722	125.000, 2.260	125.000, 1.967	125.000, 2.086	125.000, 0.179	125.000, 2.235	125.000, 2.422	125.000, 2.145	125.000, 2.258	125.000, 2.211	125.000, 2.349	125.000, 2.315	125.000, 2.789	125.000, 2.271	125.000, 1.631	125.000, 1.010	125.000, 2.282	125.000, 1.978	125.000, 1.970	125.000, 0.297	125.000, 2.241	125.000, 2.216
627	125.200, 2.864	125.200, 2.190	125.200, 1.521	125.200, 0.879	125.200, 2.782	125.200, 1.920	125.200, 1.443	125.200, 0.239	125.200, 0.723	125.200, 2.261	125.200, 1.967	125.200, 2.086	125.200, 0.180	125.200, 2.235	125.200, 2.423	125.200, 2.146	125.200, 2.259	125.200, 2.212	125.200, 2.349	125.200, 2.316	125.200, 2.791	125.200, 2.273	125.200, 1.632	125.200, 1.011	125.200, 2.284	125.200, 1.978	125.200, 1.971	125.200, 0.298	125.200, 2.241	125.200, 2.217
628	125.400, 2.866	125.400, 2.192	125.400, 1.522	125.400, 0.880	125.400, 2.783	125.400, 1.922	125.400, 1.444	125.400, 0.240	125.400, 0.724	125.400, 2.262	125.400, 1.968	125.400, 2.087	125.400, 0.180	125.400, 2.236	125.400, 2.423	125.400, 2.147	125.400, 2.260	125.400, 2.213	125.400, 2.350	125.400, 2.317	125.400, 2.793	125.400, 2.275	125.400, 1.634	125.400, 1.012	125.400, 2.285	125.400, 1.979	125.400, 1.971	125.400, 0.298	125.400, 2.241	125.400, 2.218
629	125.600, 2.867	125.600, 2.194	125.600, 1.524	125.600, 0.881	125.600, 2.785	125.600, 1.923	125.600, 1.445	125.600, 0.240	125.600, 0.724	125.600, 2.263	125.600, 1.969	125.600, 2.088	125.600, 0.180	125.600, 2.237	125.600, 2.424	125.600, 2.148	125.600, 2.261	125.600, 2.214	125.600, 2.351	125.600, 2.318	125.600, 2.795	125.600, 2.276	125.600, 1.635	125.600, 1.014	125.600, 2.286	125.600, 1.979	125.600, 1.972	125.600, 0.299	125.600, 2.242	125.600, 2.219
630	125.800, 2.869	125.800, 2.196	125.800, 1.525	125.800, 0.882	125.800, 2.787	125.800, 1.925	125.800, 1.446	125.800, 0.240	125.800, 0.725	125.800, 2.264	125.800, 1.970	125.800, 2.088	125.800, 0.181	125.800, 2.237	125.800, 2.425	125.800, 2.148	125.800, 2.262	125.800, 2.216	125.800, 2.352	125.800, 2.319	125.800, 2.797	125.800, 2.278	125.800, 1.637	125.800, 1.015	125.800, 2.287	125.800, 1.980	125.800, 1.972	125.800, 0.300	125.800, 2.242	125.800, 2.220
631	126.000, 2.871	126.000, 2.198	126.000, 1.527	126.000, 0.883	126.000, 2.788	126.000, 1.926	126.000, 1.448	126.000, 0.241	126.000, 0.727	126.000, 2.265	126.000, 1.971	126.000, 2.089	126.000, 0.182	126.000, 2.238	126.000, 2.425	126.000, 2.149	126.000, 2.263	126.000, 2.217	126.000, 2.353	126.000, 2.319	126.000, 2.799	126.000, 2.280	126.000, 1.639	126.000, 1.016	126.000, 2.288	126.000, 1.980	126.000, 1.973	126.000, 0.301	126.000, 2.243	126.000, 2.221
632	126.200, 2.873	126.200, 2.199	126.200, 1.529	126.200, 0.884	126.200, 2.790	126.200, 1.928	126.200, 1.449	126.200, 0.241	126.200, 0.728	126.200, 2.265	126.200, 1.972	126.200, 2.089	126.200, 0.182	126.200, 2.239	126.200, 2.426	126.200, 2.149	126.200, 2.264	126.200, 2.218	126.200, 2.354	126.200, 2.320	126.200, 2.801	126.200, 2.281	126.200, 1.640	126.200, 1.018	126.200, 2.288	126.200, 1.981	126.200, 1.973	126.200, 0.301	126.200, 2.244	126.200, 2.222
633	126.400, 2.875	126.400, 2.200	126.400, 1.531	126.400, 0.885	126.400, 2.791	126.400, 1.929	126.400, 1.450	126.400, 0.242	126.400, 0.729	126.400, 2.266	126.400, 1.973	126.400, 2.090	126.400, 0.183	126.400, 2.241	126.400, 2.427	126.400, 2.149	126.400, 2.265	126.400, 2.219	126.400, 2.354	126.400, 2.320	126.400, 2.803	126.400, 2.283	126.400, 1.642	126.400, 1.019	126.400, 2.289	126.400, 1.982	126.400, 1.974	126.400, 0.302	126.400, 2.245	126.400, 2.223
634	126.600, 2.876	126.600, 2.202	126.600, 1.532	126.600, 0.886	126.600, 2.792	126.600, 1.931	126.600, 1.451	126.600, 0.242	126.600, 0.730	126.600, 2.267	126.600, 1.973	126.600, 2.090	126.600, 0.183	126.600, 2.242	126.600, 2.428	126.600, 2.149	126.600, 2.265	126.600, 2.220	126.600, 2.355	126.600, 2.320	126.600, 2.805	126.600, 2.285	126.600, 1.644	126.600, 1.021	126.600, 2.289	126.600, 1.983	126.600, 1.975	126.600, 0.303	126.600, 2.245	126.600, 2.224
635	126.800, 2.878	126.800, 2.203	126.800, 1.534	126.800, 0.887	126.800, 2.794	126.800, 1.933	126.800, 1.453	126.800, 0.243	126.800, 0.731	126.800, 2.268	126.800, 1.974	126.800, 2.091	126.800, 0.184	126.800, 2.243	126.800, 2.428	126.800, 2.150	126.800, 2.266	126.800, 2.221	126.800, 2.356	126.800, 2.321	126.800, 2.807	126.800, 2.286	126.800, 1.645	126.800, 1.022	126.800, 2.290	126.800, 1.984	126.800, 1.976	126.800, 0.303	126.800, 2.246	126.800, 2.225
636	127.000, 2.880	127.000, 2.204	127.000, 1.536	127.000, 0.888	127.000, 2.795	127.000, 1.934	127.000, 1.454	127.000, 0.243	127.000, 0.733	127.000, 2.269	127.000, 1.975	127.000, 2.091	127.000, 0.184	127.000, 2.244	127.000, 2.429	127.000, 2.150	127.000, 2.267	127.000, 2.222	127.000, 2.357	127.000, 2.321	127.000, 2.809	127.000, 2.288	127.000, 1.647	127.000, 1.024	127.000, 2.290	127.000, 1.985	127.000, 1.977	127.000, 0.303	127.000, 2.246	127.000, 2.226
637	127.200, 2.881	127.200, 2.206	127.200, 1.537	127.200, 0.889	127.200, 2.796	127.200, 1.935	127.200, 1.455	127.200, 0.243	127.200, 0.734	127.200, 2.269	127.200, 1.976	127.200, 2.092	127.200, 0.185	127.200, 2.246	127.200, 2.429	127.200, 2.150	127.200, 2.267	127.200, 2.223	127.200, 2.357	127.200, 2.322	127.200, 2.811	127.200, 2.290	127.200, 1.648	127.200, 1.025	127.200, 2.290	127.200, 1.986	127.200, 1.978	127.200, 0.303	127.200, 2.246	127.200, 2.227
638	127.400, 2.883	127.400, 2.207	127.400, 1.539	127.400, 0.890	127.400, 2.798	127.400, 1.937	127.400, 1.456	127.400, 0.244	127.400, 0.735	127.400, 2.270	127.400, 1.977	127.400, 2.092	127.400, 0.185	127.400, 2.247	127.400, 2.430	127.400, 2.151	127.400, 2.268	127.400, 2.224	127.400, 2.358	127.400, 2.322	127.400, 2.813	127.400, 2.292	127.400, 1.650	127.400, 1.026	127.400, 2.291	127.400, 1.987	127.400, 1.978	127.400, 0.303	127.400, 2.247	127.400, 2.228
639	127.600, 2.885	127.600, 2.208	127.600, 1.541	127.600, 0.891	127.600, 2.799	127.600, 1.938	127.600, 1.458	127.600, 0.244	127.600, 0.736	127.600, 2.270	127.600, 1.977	127.600, 2.093	127.600, 0.185	127.600, 2.248	127.600, 2.430	127.600, 2.151	127.600, 2.269	127.600, 2.225	127.600, 2.358	127.600, 2.323	127.600, 2.815	127.600, 2.293	127.600, 1.651	127.600, 1.027	127.600, 2.291	127.600, 1.987	127.600, 1.979	127.600, 0.303	127.600, 2.248	127.600, 2.229
640	127.800, 2.887	127.800, 2.210	127.800, 1.542	127.800, 0.892	127.800, 2.801	127.800, 1.939	127.800, 1.459	127.800, 0.244	127.800, 0.736	127.800, 2.270	127.800, 1.978	127.800, 2.093	127.800, 0.185	127.800, 2.249	127.800, 2.431	127.800, 2.152	127.800, 2.269	127.800, 2.226	127.800, 2.359	127.800, 2.324	127.800, 2.817	127.800, 2.295	127.800, 1.652	127.800, 1.028	127.800, 2.291	127.800, 1.988	127.800, 1.979	127.800, 0.304	127.800, 2.248	127.800, 2.229
641	128.000, 2.889	128.000, 2.211	128.000, 1.543	128.000, 0.893	128.000, 2.802	128.000, 1.940	128.000, 1.461	128.000, 0.245	128.000, 0.737	128.000, 2.271	128.000, 1.978	128.000, 2.094	128.000, 0.185	128.000, 2.250	128.000, 2.431	128.000, 2.152	128.000, 2.269	128.000, 2.226	128.000, 2.359	128.000, 2.325	128.000, 2.819	128.000, 2.296	128.000, 1.654	128.000, 1.029	128.000, 2.291	128.000, 1.989	128.000, 1.980	128.000, 0.304	128.000, 2.249	128.000, 2.230
642	128.200, 2.891	128.200, 2.212	128.200, 1.544	128.200, 0.894	128.200, 2.804	128.200, 1.941	128.200, 1.462	128.200, 0.245	128.200, 0.738	128.200, 2.271	128.200, 1.979	128.200, 2.094	128.200, 0.185	128.200, 2.251	128.200, 2.432	128.200, 2.153	128.200, 2.270	128.200, 2.227	128.200, 2.360	128.200, 2.326	128.200, 2.821	128.200, 2.298	128.200, 1.655	128.200, 1.031	128.200, 2.291	128.200, 1.990	128.200, 1.980	128.200, 0.304	128.200, 2.250	128.200, 2.231
643	128.400, 2.892	128.400, 2.214	128.400, 1.545	128.400, 0.896	128.400, 2.805	128.400, 1.942	128.400, 1.463	128.400, 0.245	128.400, 0.738	128.400, 2.271	128.400, 1.980	128.400, 2.095	128.400, 0.186	128.400, 2.251	128.400, 2.432	128.400, 2.154	128.400, 2.270	128.400, 2.227	128.400, 2.360	128.400, 2.327	128.400, 2.822	128.400, 2.300	128.400, 1.656	128.400, 1.032	128.400, 2.291	128.400, 1.990	128.400, 1.980	128.400, 0.305	128.400, 2.251	128.400, 2.232
644	128.600, 2.894	128.600, 2.215	128.600, 1.547	128.600, 0.897	128.600, 2.807	128.600, 1.943	128.600, 1.465	128.600, 0.246	128.600, 0.739	128.600, 2.272	128.600, 1.980	128.600, 2.096	128.600, 0.186	128.600, 2.252	128.600, 2.432	128.600, 2.155	128.600, 2.270	128.600, 2.228	128.600, 2.361	128.600, 2.328	128.600, 2.824	128.600, 2.301	128.600, 1.658	128.600, 1.034	128.600, 2.292	128.600, 1.990	128.600, 1.981	128.600, 0.306	128.600, 2.252	128.600, 2.232
645	128.800, 2.896	128.800, 2.217	128.800, 1.548	128.800, 0.898	128.800, 2.809	128.800, 1.944	128.800, 1.466	128.800, 0.246	128.800, 0.740	128.800, 2.272	128.800, 1.981	128.800, 2.096	128.800, 0.186	128.800, 2.252	128.800, 2.433	128.800, 2.156	128.800, 2.271	128.800, 2.228	128.800, 2.362	128.800, 2.329	128.800, 2.826	128.800, 2.303	128.800, 1.659	128.800, 1.035	128.800, 2.293	128.800, 1.990	128.800, 1.981	128.800, 0.307	128.800, 2.253	128.800, 2.233
646	129.000, 2.898	129.000, 2.219	129.000, 1.549	129.000, 0.899	129.000, 2.811	129.000, 1.946	129.000, 1.468	129.000, 0.247	129.000, 0.741	129.000, 2.272	129.000, 1.981	129.000, 2.097	129.000, 0.186	129.000, 2.253	129.000, 2.433	129.000, 2.157	129.000, 2.271	129.000, 2.229	129.000, 2.362	129.000, 2.330	129.000, 2.827	129.000, 2.305	129.000, 1.661	129.000, 1.037	129.000, 2.293	129.000, 1.990	129.000, 1.982	129.000, 0.308	129.000, 2.253	129.000, 2.234
647	129.200, 2.899	129.200, 2.221	129.200, 1.550	129.200, 0.900	129.200, 2.813	129.200, 1.947	129.200, 1.469	129.200, 0.247	129.200, 0.741	129.200, 2.273	129.200, 1.982	129.200, 2.097	129.200, 0.187	129.200, 2.254	129.200, 2.433	129.200, 2.158	129.200, 2.271	129.200, 2.229	129.200, 2.363	129.200, 2.331	129.200, 2.829	129.200, 2.308	129.200, 1.662	129.200, 1.038	129.200, 2.295	129.200, 1.990	129.200, 1.982	129.200, 0.308	129.200, 2.254	129.200, 2.235
648	129.400, 2.901	129.400, 2.222	129.400, 1.551	129.400, 0.901	129.400, 2.814	129.400, 1.949	129.400, 1.471	129.400, 0.248	129.400, 0.742	129.400, 2.273	129.400, 1.982	129.400, 2.098	129.400, 0.187	129.400, 2.254	129.400, 2.434	129.400, 2.159	129.400, 2.272	129.400, 2.230	129.400, 2.364	129.400, 2.331	129.400, 2.830	129.400, 2.310	129.400, 1.664	129.400, 1.040	129.400, 2.296	129.400, 1.991	129.400, 1.983	129.400, 0.309	129.400, 2.255	129.400, 2.236
649	129.600, 2.903	129.600, 2.224	129.600, 1.553	129.600, 0.902	129.600, 2.816	129.600, 1.950	129.600, 1.473	129.600, 0.248	129.600, 0.743	129.600, 2.274	129.600, 1.983	129.600, 2.099	129.600, 0.187	129.600, 2.255	129.600, 2.434	129.600, 2.160	129.600, 2.272	129.600, 2.231	129.600, 2.364	129.600, 2.332	129.600, 2.832	129.600, 2.312	129.600, 1.666	129.600, 1.041	129.600, 2.297	129.600, 1.991	129.600, 1.983	129.600, 0.309	129.600, 2.255	129.600, 2.237
650	129.800, 2.905	129.800, 2.226	129.800, 1.554	129.800, 0.903	129.800, 2.818	129.800, 1.952	129.800, 1.474	129.800, 0.249	129.800, 0.744	129.800, 2.274	129.800, 1.983	129.800, 2.099	129.800, 0.188	129.800, 2.256	129.800, 2.435	129.800, 2.160	129.800, 2.273	129.800, 2.231	129.800, 2.365	129.800, 2.332	129.800, 2.833	129.800, 2.313	129.800, 1.668	129.800, 1.043	129.800, 2.297	129.800, 1.991	129.800, 1.984	129.800, 0.310	129.800, 2.256	129.800, 2.238
651	130.000, 2.906	130.000, 2.227	130.000, 1.556	130.000, 0.904	130.000, 2.819	130.000, 1.954	130.000, 1.476	130.000, 0.249	130.000, 0.744	130.000, 2.275	130.000, 1.984	130.000, 2.100	130.000, 0.188	130.000, 2.257	130.000, 2.436	130.000, 2.161	130.000, 2.273	130.000, 2.232	130.000, 2.365	130.000, 2.333	130.000, 2.835	130.000, 2.315	130.000, 1.669	130.000, 1.044	130.000, 2.298	130.000, 1.992	130.000, 1.985	130.000, 0.310	130.000, 2.257	130.000, 2.238
652	130.200, 2.908	130.200, 2.229	130.200, 1.557	130.200, 0.906	130.200, 2.821	130.200, 1.956	130.200, 1.477	130.200, 0.249	130.200, 0.745	130.200, 2.275	130.200, 1.984	130.200, 2.101	130.200, 0.188	130.200, 2.257	130.200, 2.436	130.200, 2.161	130.200, 2.274	130.200, 2.232	130.200, 2.366	130.200, 2.333	130.200, 2.837	130.200, 2.317	130.200, 1.671	130.200, 1.046	130.200, 2.298	130.200, 1.992	130.200, 1.985	130.200, 0.311	130.200, 2.258	130.200, 2.239
653	130.400, 2.909	130.400, 2.230	130.400, 1.559	130.400, 0.907	130.400, 2.822	130.400, 1.958	130.400, 1.478	130.400, 0.249	130.400, 0.746	130.400, 2.276	130.400, 1.985	130.400, 2.101	130.400, 0.189	130.400, 2.258	130.400, 2.437	130.400, 2.161	130.400, 2.275	130.400, 2.232	130.400, 2.367	130.400, 2.333	130.400, 2.838	130.400, 2.319	130.400, 1.672	130.400, 1.047	130.400, 2.298	130.400, 1.993	130.400, 1.986	130.400, 0.311	130.400, 2.258	130.400, 2.240
654	130.600, 2.910	130.600, 2.232	130.600, 1.561	130.600, 0.908	130.600, 2.824	130.600, 1.959	130.600, 1.480	130.600, 0.250	130.600, 0.748	130.600, 2.277	130.600, 1.985	130.600, 2.102	130.600, 0.189	130.600, 2.259	130.600, 2.438	130.600, 2.162	130.600, 2.275	130.600, 2.233	130.600, 2.367	130.600, 2.333	130.600, 2.840	130.600, 2.320	130.600, 1.673	130.600, 1.048	130.600, 2.298	130.600, 1.994	130.600, 1.987	130.600, 0.311	130.600, 2.259	130.600, 2.240
655	130.800, 2.911	130.800, 2.233	130.800, 1.562	130.800, 0.909	130.800, 2.825	130.800, 1.961	130.800, 1.481	130.800, 0.250	130.800, 0.749	130.800, 2.277	130.800, 1.985	130.800, 2.102	130.800, 0.189	130.800, 2.260	130.800, 2.438	130.800, 2.162	130.800, 2.276	130.800, 2.234	130.800, 2.368	130.800, 2.334	130.800, 2.842	130.800, 2.322	130.800, 1.675	130.800, 1.050	130.800, 2.299	130.800, 1.995	130.800, 1.988	130.800, 0.311	130.800, 2.259	130.800, 2.241
656	131.000, 2.912	131.000, 2.235	131.000, 1.564	131.000, 0.910	131.000, 2.826	131.000, 1.963	131.000, 1.482	131.000, 0.250	131.000, 0.750	131.000, 2.279	131.000, 1.986	131.000, 2.103	131.000, 0.190	131.000, 2.260	131.000, 2.439	131.000, 2.163	131.000, 2.277	131.000, 2.234	131.000, 2.369	131.000, 2.334	131.000, 2.843	131.000, 2.324	131.000, 1.676	131.000, 1.051	131.000, 2.299	131.000, 1.996	131.000, 1.989	131.000, 0.311	131.000, 2.260	131.000, 2.242
657	131.200, 2.914	131.200, 2.236	131.200, 1.566	131.200, 0.911	131.200, 2.828	131.200, 1.964	131.200, 1.484	131.200, 0.250	131.200, 0.751	131.200, 2.279	131.200, 1.986	131.200, 2.103	131.200, 0.190	131.200, 2.261	131.200, 2.439	131.200, 2.164	131.200, 2.278	131.200, 2.235	131.200, 2.369	131.200, 2.334	131.200, 2.845	131.200, 2.325	131.200, 1.677	131.200, 1.052	131.200, 2.299	131.200, 1.997	131.200, 1.989	131.200, 0.312	131.200, 2.261	131.200, 2.243
658	131.400, 2.916	131.400, 2.238	131.400, 1.567	131.400, 0.912	131.400, 2.829	131.400, 1.965	131.400, 1.485	131.400, 0.250	131.400, 0.752	131.400, 2.280	131.400, 1.986	131.400, 2.104	131.400, 0.190	131.400, 2.262	131.400, 2.440	131.400, 2.164	131.400, 2.279	131.400, 2.235	131.400, 2.370	131.400, 2.335	131.400, 2.847	131.400, 2.327	131.400, 1.679	131.400, 1.053	131.400, 2.300	131.400, 1.998	131.400, 1.990	131.400, 0.312	131.400, 2.262	131.400, 2.243
659	131.600, 2.917	131.600, 2.239	131.600, 1.568	131.600, 0.912	131.600, 2.830	131.600, 1.967	131.600, 1.486	131.600, 0.251	131.600, 0.753	131.600, 2.281	131.600, 1.987	131.600, 2.104	131.600, 0.190	131.600, 2.263	131.600, 2.440	131.600, 2.165	131.600, 2.280	131.600, 2.236	131.600, 2.370	131.600, 2.336	131.600, 2.849	131.600, 2.328	131.600, 1.680	131.600, 1.054	131.600, 2.300	131.600, 1.999	131.600, 1.991	131.600, 0.313	131.600, 2.263	131.600, 2.244
660	131.800, 2.919	131.800, 2.241	131.800, 1.569	131.800, 0.914	131.800, 2.831	131.800, 1.968	131.800, 1.488	131.800, 0.251	131.800, 0.754	131.800, 2.282	131.800, 1.987	131.800, 2.105	131.800, 0.190	131.800, 2.264	131.800, 2.441	131.800, 2.166	131.800, 2.280	131.800, 2.237	131.800, 2.371	131.800, 2.336	131.800, 2.851	131.800, 2.330	131.800, 1.681	131.800, 1.055	131.800, 2.300	131.800, 2.000	131.800, 1.991	131.800, 0.313	131.800, 2.263	131.800, 2.245
661	132.000, 2.921	132.000, 2.242	132.000, 1.570	132.000, 0.915	132.000, 2.832	132.000, 1.969	132.000, 1.489	132.000, 0.251	132.000, 0.754	132.000, 2.283	132.000, 1.988	132.000, 2.105	132.000, 0.191	132.000, 2.265	132.000, 2.441	132.000, 2.167	132.000, 2.281	132.000, 2.237	132.000, 2.372	132.000, 2.337	132.000, 2.853	132.000, 2.331	132.000, 1.682	132.000, 1.056	132.000, 2.301	132.000, 2.001	132.000, 1.992	132.000, 0.314	132.000, 2.264	132.000, 2.245
662	132.200, 2.923	132.200, 2.244	132.200, 1.572	132.200, 0.916	132.200, 2.834	132.200, 1.971	132.200, 1.491	132.200, 0.251	132.200, 0.755	132.200, 2.284	132.200, 1.988	132.200, 2.106	132.200, 0.191	132.200, 2.266	132.200, 2.442	132.200, 2.167	132.200, 2.281	132.200, 2.238	132.200, 2.372	132.200, 2.338	132.200, 2.855	132.200, 2.332	132.200, 1.683	132.200, 1.057	132.200, 2.302	132.200, 2.001	132.200, 1.993	132.200, 0.314	132.200, 2.265	132.200, 2.246
663	132.400, 2.925	132.400, 2.245	132.400, 1.573	132.400, 0.917	132.400, 2.835	132.400, 1.972	132.400, 1.492	132.400, 0.252	132.400, 0.756	132.400, 2.284	132.400, 1.989	132.400, 2.106	132.400, 0.191	132.400, 2.266	132.400, 2.442	132.400, 2.168	132.400, 2.282	132.400, 2.239	132.400, 2.373	132.400, 2.340	132.400, 2.856	132.400, 2.334	132.400, 1.685	132.400, 1.058	132.400, 2.302	132.400, 2.002	132.400, 1.994	132.400, 0.315	132.400, 2.266	132.400, 2.247
664	132.600, 2.926	132.600, 2.247	132.600, 1.574	132.600, 0.918	132.600, 2.836	132.600, 1.973	132.600, 1.494	132.600, 0.252	132.600, 0.757	132.600, 2.285	132.600, 1.989	132.600, 2.107	132.600, 0.192	132.600, 2.267	132.600, 2.442	132.600, 2.169	132.600, 2.283	132.600, 2.240	132.600, 2.373	132.600, 2.341	132.600, 2.858	132.600, 2.335	132.600, 1.686	132.600, 1.060	132.600, 2.303	132.600, 2.002	132.600, 1.995	132.600, 0.315	132.600, 2.267	132.600, 2.248
665	132.800, 2.928	132.800, 2.248	132.800, 1.575	132.800, 0.920	132.800, 2.837	132.800, 1.974	132.800, 1.495	132.800, 0.252	132.800, 0.758	132.800, 2.285	132.800, 1.990	132.800, 2.107	132.800, 0.192	132.800, 2.267	132.800, 2.443	132.800, 2.169	132.800, 2.284	132.800, 2.240	132.800, 2.374	132.800, 2.342	132.800, 2.859	132.800, 2.337	132.800, 1.687	132.800, 1.061	132.800, 2.304	132.800, 2.002	132.800, 1.996	132.800, 0.316	132.800, 2.269	132.800, 2.248
666	133.000, 2.930	133.000, 2.250	133.000, 1.576	133.000, 0.921	133.000, 2.839	133.000, 1.976	133.000, 1.497	133.000, 0.252	133.000, 0.759	133.000, 2.286	133.000, 1.990	133.000, 2.107	133.000, 0.193	133.000, 2.268	133.000, 2.443	133.000, 2.170	133.000, 2.285	133.000, 2.241	133.000, 2.375	133.000, 2.343	133.000, 2.861	133.000, 2.338	133.000, 1.689	133.000, 1.062	133.000, 2.305	133.000, 2.003	133.000, 1.997	133.000, 0.316	133.000, 2.269	133.000, 2.249
667	133.200, 2.932	133.200, 2.251	133.200, 1.577	133.200, 0.922	133.200, 2.840	133.200, 1.977	133.200, 1.498	133.200, 0.253	133.200, 0.760	133.200, 2.286	133.200, 1.991	133.200, 2.108	133.200, 0.193	133.200, 2.268	133.200, 2.443	133.200, 2.171	133.200, 2.285	133.200, 2.242	133.200, 2.376	133.200, 2.343	133.200, 2.863	133.200, 2.340	133.200, 1.690	133.200, 1.063	133.200, 2.305	133.200, 2.003	133.200, 1.997	133.200, 0.317	133.200, 2.270	133.200, 2.250
668	133.400, 2.934	133.400, 2.252	133.400, 1.578	133.400, 0.923	133.400, 2.842	133.400, 1.978	133.400, 1.500	133.400, 0.254	133.400, 0.761	133.400, 2.287	133.400, 1.991	133.400, 2.108	133.400, 0.194	133.400, 2.269	133.400, 2.444	133.400, 2.171	133.400, 2.286	133.400, 2.243	133.400, 2.377	133.400, 2.344	133.400, 2.864	133.400, 2.341	133.400, 1.692	133.400, 1.064	133.400, 2.306	133.400, 2.004	133.400, 1.998	133.400, 0.318	133.400, 2.271	133.400, 2.251
669	133.600, 2.936	133.600, 2.254	133.600, 1.579	133.600, 0.924	133.600, 2.843	133.600, 1.980	133.600, 1.501	133.600, 0.254	133.600, 0.762	133.600, 2.287	133.600, 1.992	133.600, 2.109	133.600, 0.194	133.600, 2.269	133.600, 2.444	133.600, 2.172	133.600, 2.286	133.600, 2.244	133.600, 2.378	133.600, 2.345	133.600, 2.866	133.600, 2.342	133.600, 1.693	133.600, 1.065	133.600, 2.307	133.600, 2.004	133.600, 1.999	133.600, 0.318	133.600, 2.271	133.600, 2.252
670	133.800, 2.937	133.800, 2.255	133.800, 1.581	133.800, 0.926	133.800, 2.844	133.800, 1.981	133.800, 1.502	133.800, 0.255	133.800, 0.762	133.800, 2.288	133.800, 1.993	133.800, 2.110	133.800, 0.195	133.800, 2.270	133.800, 2.444	133.800, 2.172	133.800, 2.287	133.800, 2.245	133.800, 2.378	133.800, 2.346	133.800, 2.868	133.800, 2.343	133.800, 1.695	133.800, 1.066	133.800, 2.307	133.800, 2.005	133.800, 2.000	133.800, 0.318	133.800, 2.272	133.800, 2.253
671	134.000, 2.938	134.000, 2.257	134.000, 1.582	134.000, 0.927	134.000, 2.845	134.000, 1.983	134.000, 1.504	134.000, 0.256	134.000, 0.763	134.000, 2.288	134.000, 1.993	134.000, 2.111	134.000, 0.195	134.000, 2.270	134.000, 2.444	134.000, 2.172	134.000, 2.287	134.000, 2.245	134.000, 2.379	134.000, 2.347	134.000, 2.869	134.000, 2.345	134.000, 1.696	134.000, 1.067	134.000, 2.308	134.000, 2.006	134.000, 2.000	134.000, 0.319	134.000, 2.272	134.000, 2.254
672	134.200, 2.939	134.200, 2.258	134.200, 1.583	134.200, 0.928	134.200, 2.847	134.200, 1.984	134.200, 1.505	134.200, 0.256	134.200, 0.764	134.200, 2.289	134.200, 1.994	134.200, 2.112	134.200, 0.195	134.200, 2.271	134.200, 2.445	134.200, 2.172	134.200, 2.288	134.200, 2.246	134.200, 2.380	134.200, 2.347	134.200, 2.871	134.200, 2.346	134.200, 1.698	134.200, 1.069	134.200, 2.308	134.200, 2.007	134.200, 2.001	134.200, 0.319	134.200, 2.273	134.200, 2.255
673	134.400, 2.941	134.400, 2.260	134.400, 1.584	134.400, 0.929	134.400, 2.848	134.400, 1.986	134.400, 1.506	134.400, 0.257	134.400, 0.765	134.400, 2.290	134.400, 1.994	134.400, 2.113	134.400, 0.196	134.400, 2.271	134.400, 2.445	134.400, 2.172	134.400, 2.288	134.400, 2.246	134.400, 2.380	134.400, 2.348	134.400, 2.872	134.400, 2.348	134.400, 1.699	134.400, 1.070	134.400, 2.309	134.400, 2.007	134.400, 2.002	134.400, 0.320	134.400, 2.273	134.400, 2.255
674	134.600, 2.942	134.600, 2.261	134.600, 1.586	134.600, 0.930	134.600, 2.849	134.600, 1.987	134.600, 1.507	134.600, 0.257	134.600, 0.766	134.600, 2.291	134.600, 1.995	134.600, 2.114	134.600, 0.196	134.600, 2.271	134.600, 2.445	134.600, 2.173	134.600, 2.288	134.600, 2.246	134.600, 2.381	134.600, 2.348	134.600, 2.874	134.600, 2.349	134.600, 1.701	134.600, 1.071	134.600, 2.309	134.600, 2.008	134.600, 2.002	134.600, 0.320	134.600, 2.273	134.600, 2.256
675	134.800, 2.944	134.800, 2.263	134.800, 1.587	134.800, 0.931	134.800, 2.850	134.800, 1.988	134.800, 1.509	134.800, 0.258	134.800, 0.767	134.800, 2.292	134.800, 1.995	134.800, 2.115	134.800, 0.196	134.800, 2.272	134.800, 2.446	134.800, 2.173	134.800, 2.289	134.800, 2.247	134.800, 2.382	134.800, 2.348	134.800, 2.875	134.800, 2.351	134.800, 1.702	134.800, 1.073	134.800, 2.309	134.800, 2.008	134.800, 2.002	134.800, 0.321	134.800, 2.273	134.800, 2.256
676	135.000, 2.945	135.000, 2.264	135.000, 1.588	135.000, 0.932	135.000, 2.851	135.000, 1.989	135.000, 1.510	135.000, 0.259	135.000, 0.767	135.000, 2.293	135.000, 1.996	135.000, 2.116	135.000, 0.197	135.000, 2.272	135.000, 2.446	135.000, 2.173	135.000, 2.289	135.000, 2.247	135.000, 2.382	135.000, 2.349	135.000, 2.877	135.000, 2.352	135.000, 1.704	135.000, 1.074	135.000, 2.310	135.000, 2.009	135.000, 2.002	135.000, 0.322	135.000, 2.274	135.000, 2.256
677	135.200, 2.946	135.200, 2.266	135.200, 1.589	135.200, 0.933	135.200, 2.852	135.200, 1.990	135.200, 1.511	135.200, 0.259	135.200, 0.768	135.200, 2.293	135.200, 1.997	135.200, 2.117	135.200, 0.197	135.200, 2.273	135.200, 2.447	135.200, 2.174	135.200, 2.289	135.200, 2.248	135.200, 2.383	135.200, 2.350	135.200, 2.879	135.200, 2.354	135.200, 1.706	135.200, 1.076	135.200, 2.310	135.200, 2.009	135.200, 2.002	135.200, 0.322	135.200, 2.274	135.200, 2.257
678	135.400, 2.948	135.400, 2.267	135.400, 1.591	135.400, 0.934	135.400, 2.854	135.400, 1.991	135.400, 1.512	135.400, 0.260	135.400, 0.769	135.400, 2.294	135.400, 1.997	135.400, 2.118	135.400, 0.197	135.400, 2.274	135.400, 2.447	135.400, 2.174	135.400, 2.289	135.400, 2.248	135.400, 2.384	135.400, 2.350	135.400, 2.880	135.400, 2.355	135.400, 1.707	135.400, 1.077	135.400, 2.310	135.400, 2.009	135.400, 2.002	135.400, 0.323	135.400, 2.275	135.400, 2.258
679	135.600, 2.949	135.600, 2.268	135.600, 1.592	135.600, 0.934	135.600, 2.855	135.600, 1.992	135.600, 1.514	135.600, 0.260	135.600, 0.769	135.600, 2.294	135.600, 1.998	135.600, 2.119	135.600, 0.198	135.600, 2.274	135.600, 2.448	135.600, 2.175	135.600, 2.290	135.600, 2.249	135.600, 2.384	135.600, 2.351	135.600, 2.882	135.600, 2.357	135.600, 1.708	135.600, 1.079	135.600, 2.311	135.600, 2.009	135.600, 2.002	135.600, 0.323	135.600, 2.275	135.600, 2.258
680	135.800, 2.951	135.800, 2.270	135.800, 1.594	135.800, 0.935	135.800, 2.857	135.800, 1.993	135.800, 1.515	135.800, 0.260	135.800, 0.770	135.800, 2.295	135.800, 1.998	135.800, 2.119	135.800, 0.198	135.800, 2.275	135.800, 2.448	135.800, 2.175	135.800, 2.290	135.800, 2.249	135.800, 2.384	135.800, 2.352	135.800, 2.883	135.800, 2.358	135.800, 1.710	135.800, 1.080	135.800, 2.311	135.800, 2.009	135.800, 2.002	135.800, 0.324	135.800, 2.276	135.800, 2.259
681	136.000, 2.952	136.000, 2.271	136.000, 1.595	136.000, 0.936	136.000, 2.859	136.000, 1.994	136.000, 1.517	136.000, 0.260	136.000, 0.771	136.000, 2.295	136.000, 1.999	136.000, 2.120	136.000, 0.198	136.000, 2.276	136.000, 2.449	136.000, 2.176	136.000, 2.291	136.000, 2.250	136.000, 2.385	136.000, 2.353	136.000, 2.885	136.000, 2.360	136.000, 1.711	136.000, 1.081	136.000, 2.312	136.000, 2.010	136.000, 2.002	136.000, 0.324	136.000, 2.277	136.000, 2.260
682	136.200, 2.954	136.200, 2.272	136.200, 1.597	136.200, 0.937	136.200, 2.860	136.200, 1.996	136.200, 1.518	136.200, 0.260	136.200, 0.771	136.200, 2.296	136.200, 2.000	136.200, 2.120	136.200, 0.198	136.200, 2.276	136.200, 2.450	136.200, 2.176	136.200, 2.291	136.200, 2.251	136.200, 2.385	136.200, 2.354	136.200, 2.886	136.200, 2.361	136.200, 1.712	136.200, 1.082	136.200, 2.312	136.200, 2.010	136.200, 2.002	136.200, 0.324	136.200, 2.277	136.200, 2.260
683	136.400, 2.956	136.400, 2.273	136.400, 1.599	136.400, 0.938	136.400, 2.862	136.400, 1.997	136.400, 1.519	136.400, 0.260	136.400, 0.772	136.400, 2.296	136.400, 2.000	136.400, 2.120	136.400, 0.198	136.400, 2.277	136.400, 2.450	136.400, 2.177	136.400, 2.292	136.400, 2.252	136.400, 2.386	136.400, 2.355	136.400, 2.887	136.400, 2.363	136.400, 1.714	136.400, 1.083	136.400, 2.312	136.400, 2.010	136.400, 2.002	136.400, 0.325	136.400, 2.278	136.400, 2.261
684	136.600, 2.957	136.600, 2.274	136.600, 1.600	136.600, 0.939	136.600, 2.864	136.600, 1.998	136.600, 1.521	136.600, 0.261	136.600, 0.773	136.600, 2.296	136.600, 2.001	136.600, 2.120	136.600, 0.199	136.600, 2.278	136.600, 2.451	136.600, 2.177	136.600, 2.292	136.600, 2.252	136.600, 2.386	136.600, 2.356	136.600, 2.888	136.600, 2.364	136.600, 1.715	136.600, 1.084	136.600, 2.312	136.600, 2.011	136.600, 2.002	136.600, 0.325	136.600, 2.278	136.600, 2.261
685	136.800, 2.959	136.800, 2.275	136.800, 1.601	136.800, 0.939	136.800, 2.865	136.800, 1.999	136.800, 1.522	136.800, 0.261	136.800, 0.774	136.800, 2.296	136.800, 2.002	136.800, 2.120	136.800, 0.199	136.800, 2.278	136.800, 2.451	136.800, 2.178	136.800, 2.293	136.800, 2.253	136.800, 2.387	136.800, 2.356	136.800, 2.890	136.800, 2.366	136.800, 1.717	136.800, 1.085	136.800, 2.313	136.800, 2.011	136.800, 2.002	136.800, 0.325	136.800, 2.279	136.800, 2.262
686	137.000, 2.961	137.000, 2.276	137.000, 1.603	137.000, 0.940	137.000, 2.867	137.000, 2.000	137.000, 1.523	137.000, 0.261	137.000, 0.775	137.000, 2.296	137.000, 2.002	137.000, 2.121	137.000, 0.200	137.000, 2.279	137.000, 2.452	137.000, 2.178	137.000, 2.293	137.000, 2.254	137.000, 2.387	137.000, 2.357	137.000, 2.892	137.000, 2.368	137.000, 1.718	137.000, 1.085	137.000, 2.313	137.000, 2.011	137.000, 2.002	137.000, 0.326	137.000, 2.279	137.000, 2.262
687	137.200, 2.963	137.200, 2.278	137.200, 1.604	137.200, 0.941	137.200, 2.869	137.200, 2.002	137.200, 1.524	137.200, 0.261	137.200, 0.776	137.200, 2.296	137.200, 2.003	137.200, 2.121	137.200, 0.200	137.200, 2.279	137.200, 2.452	137.200, 2.179	137.200, 2.294	137.200, 2.255	137.200, 2.387	137.200, 2.358	137.200, 2.893	137.200, 2.369	137.200, 1.719	137.200, 1.086	137.200, 2.313	137.200, 2.012	137.200, 2.002	137.200, 0.326	137.200, 2.280	137.200, 2.263
688	137.400, 2.964	137.400, 2.279	137.400, 1.605	137.400, 0.942	137.400, 2.870	137.400, 2.003	137.400, 1.525	137.400, 0.262	137.400, 0.777	137.400, 2.297	137.400, 2.003	137.400, 2.121	137.400, 0.200	137.400, 2.280	137.400, 2.452	137.400, 2.179	137.400, 2.294	137.400, 2.256	137.400, 2.388	137.400, 2.359	137.400, 2.895	137.400, 2.371	137.400, 1.721	137.400, 1.087	137.400, 2.313	137.400, 2.013	137.400, 2.003	137.400, 0.327	137.400, 2.280	137.400, 2.263
689	137.600, 2.965	137.600, 2.281	137.600, 1.607	137.600, 0.943	137.600, 2.871	137.600, 2.004	137.600, 1.525	137.600, 0.262	137.600, 0.778	137.600, 2.297	137.600, 2.003	137.600, 2.122	137.600, 0.201	137.600, 2.280	137.600, 2.452	137.600, 2.179	137.600, 2.295	137.600, 2.257	137.600, 2.388	137.600, 2.360	137.600, 2.897	137.600, 2.373	137.600, 1.722	137.600, 1.088	137.600, 2.313	137.600, 2.014	137.600, 2.004	137.600, 0.327	137.600, 2.281	137.600, 2.264
690	137.800, 2.967	137.800, 2.282	137.800, 1.608	137.800, 0.944	137.800, 2.872	137.800, 2.006	137.800, 1.526	137.800, 0.262	137.800, 0.779	137.800, 2.297	137.800, 2.003	137.800, 2.122	137.800, 0.201	137.800, 2.281	137.800, 2.453	137.800, 2.179	137.800, 2.295	137.800, 2.257	137.800, 2.388	137.800, 2.360	137.800, 2.898	137.800, 2.375	137.800, 1.724	137.800, 1.090	137.800, 2.313	137.800, 2.014	137.800, 2.005	137.800, 0.328	137.800, 2.282	137.800, 2.264
691	138.000, 2.968	138.000, 2.284	138.000, 1.609	138.000, 0.945	138.000, 2.873	138.000, 2.007	138.000, 1.527	138.000, 0.263	138.000, 0.780	138.000, 2.297	138.000, 2.004	138.000, 2.122	138.000, 0.201	138.000, 2.281	138.000, 2.453	138.000, 2.179	138.000, 2.296	138.000, 2.258	138.000, 2.389	138.000, 2.361	138.000, 2.900	138.000, 2.376	138.000, 1.725	138.000, 1.091	138.000, 2.313	138.000, 2.015	138.000, 2.005	138.000, 0.328	138.000, 2.282	138.000, 2.265
692	138.200, 2.970	138.200, 2.285	138.200, 1.610	138.200, 0.946	138.200, 2.875	138.200, 2.009	138.200, 1.528	138.200, 0.263	138.200, 0.781	138.200, 2.298	138.200, 2.004	138.200, 2.123	138.200, 0.201	138.200, 2.282	138.200, 2.454	138.200, 2.179	138.200, 2.296	138.200, 2.258	138.200, 2.389	138.200, 2.361	138.200, 2.901	138.200, 2.378	138.200, 1.727	138.200, 1.092	138.200, 2.313	138.200, 2.015	138.200, 2.006	138.200, 0.329	138.200, 2.283	138.200, 2.265
693	138.400, 2.971	138.400, 2.287	138.400, 1.611	138.400, 0.947	138.400, 2.875	138.400, 2.010	138.400, 1.529	138.400, 0.264	138.400, 0.781	138.400, 2.299	138.400, 2.004	138.400, 2.123	138.400, 0.201	138.400, 2.283	138.400, 2.454	138.400, 2.180	138.400, 2.297	138.400, 2.259	138.400, 2.390	138.400, 2.361	138.400, 2.903	138.400, 2.380	138.400, 1.728	138.400, 1.094	138.400, 2.314	138.400, 2.015	138.400, 2.007	138.400, 0.329	138.400, 2.283	138.400, 2.266
694	138.600, 2.973	138.600, 2.288	138.600, 1.613	138.600, 0.948	138.600, 2.877	138.600, 2.011	138.600, 1.530	138.600, 0.264	138.600, 0.782	138.600, 2.299	138.600, 2.004	138.600, 2.124	138.600, 0.202	138.600, 2.283	138.600, 2.454	138.600, 2.181	138.600, 2.297	138.600, 2.259	138.600, 2.390	138.600, 2.362	138.600, 2.905	138.600, 2.382	138.600, 1.729	138.600, 1.095	138.600, 2.314	138.600, 2.015	138.600, 2.007	138.600, 0.329	138.600, 2.284	138.600, 2.266
695	138.800, 2.974	138.800, 2.290	138.800, 1.614	138.800, 0.950	138.800, 2.878	138.800, 2.013	138.800, 1.531	138.800, 0.264	138.800, 0.783	138.800, 2.300	138.800, 2.005	138.800, 2.124	138.800, 0.202	138.800, 2.284	138.800, 2.454	138.800, 2.181	138.800, 2.298	138.800, 2.259	138.800, 2.391	138.800, 2.362	138.800, 2.907	138.800, 2.383	138.800, 1.731	138.800, 1.097	138.800, 2.315	138.800, 2.015	138.800, 2.007	138.800, 0.330	138.800, 2.284	138.800, 2.267
696	139.000, 2.975	139.000, 2.292	139.000, 1.615	139.000, 0.951	139.000, 2.879	139.000, 2.014	139.000, 1.532	139.000, 0.264	139.000, 0.784	139.000, 2.300	139.000, 2.005	139.000, 2.125	139.000, 0.203	139.000, 2.285	139.000, 2.455	139.000, 2.182	139.000, 2.298	139.000, 2.260	139.000, 2.392	139.000, 2.363	139.000, 2.909	139.000, 2.385	139.000, 1.732	139.000, 1.099	139.000, 2.315	139.000, 2.015	139.000, 2.008	139.000, 0.330	139.000, 2.285	139.000, 2.268
697	139.200, 2.976	139.200, 2.293	139.200, 1.617	139.200, 0.952	139.200, 2.880	139.200, 2.016	139.200, 1.534	139.200, 0.264	139.200, 0.785	139.200, 2.301	139.200, 2.005	139.200, 2.125	139.200, 0.203	139.200, 2.285	139.200, 2.455	139.200, 2.182	139.200, 2.299	139.200, 2.261	139.200, 2.392	139.200, 2.363	139.200, 2.911	139.200, 2.386	139.200, 1.734	139.200, 1.100	139.200, 2.316	139.200, 2.015	139.200, 2.009	139.200, 0.331	139.200, 2.285	139.200, 2.269
698	139.400, 2.978	139.400, 2.295	139.400, 1.618	139.400, 0.953	139.400, 2.882	139.400, 2.017	139.400, 1.535	139.400, 0.264	139.400, 0.786	139.400, 2.301	139.400, 2.006	139.400, 2.126	139.400, 0.204	139.400, 2.286	139.400, 2.455	139.400, 2.183	139.400, 2.300	139.400, 2.261	139.400, 2.393	139.400, 2.364	139.400, 2.912	139.400, 2.387	139.400, 1.735	139.400, 1.101	139.400, 2.316	139.400, 2.015	139.400, 2.009	139.400, 0.331	139.400, 2.286	139.400, 2.270
699	139.600, 2.980	139.600, 2.296	139.600, 1.620	139.600, 0.954	139.600, 2.883	139.600, 2.018	139.600, 1.536	139.600, 0.264	139.600, 0.787	139.600, 2.302	139.600, 2.006	139.600, 2.126	139.600, 0.204	139.600, 2.286	139.600, 2.456	139.600, 2.183	139.600, 2.300	139.600, 2.262	139.600, 2.393	139.600, 2.364	139.600, 2.914	139.600, 2.389	139.600, 1.736	139.600, 1.103	139.600, 2.317	139.600, 2.016	139.600, 2.010	139.600, 0.332	139.600, 2.286	139.600, 2.271
700	139.800, 2.981	139.800, 2.297	139.800, 1.621	139.800, 0.955	139.800, 2.885	139.800, 2.019	139.800, 1.537	139.800, 0.265	139.800, 0.788	139.800, 2.303	139.800, 2.006	139.800, 2.127	139.800, 0.205	139.800, 2.287	139.800, 2.457	139.800, 2.184	139.800, 2.301	139.800, 2.263	139.800, 2.394	139.800, 2.365	139.800, 2.915	139.800, 2.390	139.800, 1.737	139.800, 1.104	139.800, 2.318	139.800, 2.016	139.800, 2.011	139.800, 0.332	139.800, 2.286	139.800, 2.272
701	140.000, 2.983	140.000, 2.298	140.000, 1.622	140.000, 0.956	140.000, 2.886	140.000, 2.020	140.000, 1.538	140.000, 0.265	140.000, 0.789	140.000, 2.304	140.000, 2.007	140.000, 2.127	140.000, 0.205	140.000, 2.287	140.000, 2.457	140.000, 2.184	140.000, 2.302	140.000, 2.263	140.000, 2.394	140.000, 2.365	140.000, 2.916	140.000, 2.391	140.000, 1.739	140.000, 1.105	140.000, 2.318	140.000, 2.017	140.000, 2.012	140.000, 0.333	140.000, 2.287	140.000, 2.273
702	140.200, 2.984	140.200, 2.300	140.200, 1.623	140.200, 0.956	140.200, 2.887	140.200, 2.021	140.200, 1.539	140.200, 0.265	140.200, 0.789	140.200, 2.304	140.200, 2.007	140.200, 2.127	140.200, 0.206	140.200, 2.288	140.200, 2.458	140.200, 2.185	140.200, 2.302	140.200, 2.264	140.200, 2.395	140.200, 2.366	140.200, 2.917	140.200, 2.392	140.200, 1.740	140.200, 1.106	140.200, 2.319	140.200, 2.017	140.200, 2.012	140.200, 0.333	140.200, 2.287	140.200, 2.274
703	140.400, 2.986	140.400, 2.301	140.400, 1.624	140.400, 0.957	140.400, 2.888	140.400, 2.021	140.400, 1.540	140.400, 0.265	140.400, 0.790	140.400, 2.305	140.400, 2.007	140.400, 2.128	140.400, 0.206	140.400, 2.288	140.400, 2.458	140.400, 2.186	140.400, 2.303	140.400, 2.265	140.400, 2.395	140.400, 2.366	140.400, 2.919	140.400, 2.393	140.400, 1.741	140.400, 1.107	140.400, 2.320	140.400, 2.018	140.400, 2.013	140.400, 0.334	140.400, 2.288	140.400, 2.275
704	140.600, 2.987	140.600, 2.301	140.600, 1.624	140.600, 0.958	140.600, 2.889	140.600, 2.022	140.600, 1.541	140.600, 0.266	140.600, 0.791	140.600, 2.305	140.600, 2.008	140.600, 2.128	140.600, 0.207	140.600, 2.289	140.600, 2.459	140.600, 2.186	140.600, 2.303	140.600, 2.265	140.600, 2.396	140.600, 2.366	140.600, 2.920	140.600, 2.395	140.600, 1.742	140.600, 1.108	140.600, 2.320	140.600, 2.018	140.600, 2.014	140.600, 0.334	140.600, 2.288	140.600, 2.275
705	140.800, 2.988	140.800, 2.303	140.800, 1.625	140.800, 0.959	140.800, 2.890	140.800, 2.022	140.800, 1.542	140.800, 0.266	140.800, 0.791	140.800, 2.305	140.800, 2.008	140.800, 2.128	140.800, 0.207	140.800, 2.289	140.800, 2.459	140.800, 2.186	140.800, 2.304	140.800, 2.266	140.800, 2.397	140.800, 2.367	140.800, 2.921	140.800, 2.396	140.800, 1.743	140.800, 1.109	140.800, 2.321	140.800, 2.019	140.800, 2.014	140.800, 0.335	140.800, 2.289	140.800, 2.276
706	141.000, 2.989	141.000, 2.304	141.000, 1.626	141.000, 0.960	141.000, 2.892	141.000, 2.023	141.000, 1.542	141.000, 0.266	141.000, 0.792	141.000, 2.305	141.000, 2.008	141.000, 2.129	141.000, 0.208	141.000, 2.290	141.000, 2.460	141.000, 2.187	141.000, 2.304	141.000, 2.267	141.000, 2.397	141.000, 2.367	141.000, 2.922	141.000, 2.398	141.000, 1.744	141.000, 1.110	141.000, 2.321	141.000, 2.020	141.000, 2.015	141.000, 0.336	141.000, 2.290	141.000, 2.276
707	141.200, 2.990	141.200, 2.305	141.200, 1.627	141.200, 0.961	141.200, 2.893	141.200, 2.023	141.200, 1.543	141.200, 0.267	141.200, 0.793	141.200, 2.306	141.200, 2.008	141.200, 2.129	141.200, 0.208	141.200, 2.290	141.200, 2.460	141.200, 2.187	141.200, 2.304	141.200, 2.267	141.200, 2.398	141.200, 2.367	141.200, 2.923	141.200, 2.399	141.200, 1.745	141.200, 1.112	141.200, 2.321	141.200, 2.020	141.200, 2.015	141.200, 0.336	141.200, 2.291	141.200, 2.276
708	141.400, 2.991	141.400, 2.306	141.400, 1.628	141.400, 0.962	141.400, 2.894	141.400, 2.024	141.400, 1.544	141.400, 0.267	141.400, 0.794	141.400, 2.306	141.400, 2.009	141.400, 2.129	141.400, 0.209	141.400, 2.291	141.400, 2.460	141.400, 2.187	141.400, 2.304	141.400, 2.268	141.400, 2.398	141.400, 2.368	141.400, 2.924	141.400, 2.400	141.400, 1.747	141.400, 1.113	141.400, 2.321	141.400, 2.020	141.400, 2.016	141.400, 0.336	141.400, 2.292	141.400, 2.277
709	141.600, 2.992	141.600, 2.307	141.600, 1.630	141.600, 0.963	141.600, 2.895	141.600, 2.025	141.600, 1.546	141.600, 0.268	141.600, 0.795	141.600, 2.306	141.600, 2.009	141.600, 2.130	141.600, 0.209	141.600, 2.291	141.600, 2.461	141.600, 2.187	141.600, 2.305	141.600, 2.268	141.600, 2.399	141.600, 2.368	141.600, 2.926	141.600, 2.402	141.600, 1.748	141.600, 1.114	141.600, 2.322	141.600, 2.021	141.600, 2.016	141.600, 0.337	141.600, 2.293	141.600, 2.277
710	141.800, 2.994	141.800, 2.309	141.800, 1.630	141.800, 0.964	141.800, 2.896	141.800, 2.026	141.800, 1.547	141.800, 0.269	141.800, 0.795	141.800, 2.307	141.800, 2.009	141.800, 2.130	141.800, 0.209	141.800, 2.292	141.800, 2.461	141.800, 2.187	141.800, 2.305	141.800, 2.269	141.800, 2.399	141.800, 2.368	141.800, 2.927	141.800, 2.403	141.800, 1.749	141.800, 1.115	141.800, 2.322	141.800, 2.021	141.800, 2.016	141.800, 0.337	141.800, 2.294	141.800, 2.278
711	142.000, 2.995	142.000, 2.310	142.000, 1.631	142.000, 0.965	142.000, 2.897	142.000, 2.027	142.000, 1.548	142.000, 0.270	142.000, 0.796	142.000, 2.307	142.000, 2.010	142.000, 2.130	142.000, 0.210	142.000, 2.292	142.000, 2.461	142.000, 2.187	142.000, 2.305	142.000, 2.269	142.000, 2.400	142.000, 2.369	142.000, 2.928	142.000, 2.405	142.000, 1.751	142.000, 1.116	142.000, 2.323	142.000, 2.021	142.000, 2.016	142.000, 0.337	142.000, 2.295	142.000, 2.278
712	142.200, 2.996	142.200, 2.312	142.200, 1.633	142.200, 0.966	142.200, 2.898	142.200, 2.028	142.200, 1.550	142.200, 0.270	142.200, 0.797	142.200, 2.307	142.200, 2.010	142.200, 2.131	142.200, 0.210	142.200, 2.293	142.200, 2.461	142.200, 2.187	142.200, 2.305	142.200, 2.270	142.200, 2.400	142.200, 2.369	142.200, 2.930	142.200, 2.406	142.200, 1.752	142.200, 1.117	142.200, 2.323	142.200, 2.021	142.200, 2.016	142.200, 0.337	142.200, 2.295	142.200, 2.278
713	142.400, 2.998	142.400, 2.313	142.400, 1.634	142.400, 0.967	142.400, 2.899	142.400, 2.029	142.400, 1.551	142.400, 0.271	142.400, 0.798	142.400, 2.307	142.400, 2.011	142.400, 2.131	142.400, 0.210	142.400, 2.293	142.400, 2.461	142.400, 2.187	142.400, 2.305	142.400, 2.270	142.400, 2.400	142.400, 2.370	142.400, 2.931	142.400, 2.408	142.400, 1.754	142.400, 1.118	142.400, 2.323	142.400, 2.021	142.400, 2.016	142.400, 0.338	142.400, 2.296	142.400, 2.279
714	142.600, 2.999	142.600, 2.314	142.600, 1.635	142.600, 0.968	142.600, 2.900	142.600, 2.031	142.600, 1.552	142.600, 0.271	142.600, 0.799	142.600, 2.308	142.600, 2.011	142.600, 2.131	142.600, 0.210	142.600, 2.294	142.600, 2.461	142.600, 2.188	142.600, 2.305	142.600, 2.270	142.600, 2.401	142.600, 2.370	142.600, 2.933	142.600, 2.409	142.600, 1.755	142.600, 1.119	142.600, 2.323	142.600, 2.021	142.600, 2.017	142.600, 0.338	142.600, 2.296	142.600, 2.279
715	142.800, 3.000	142.800, 2.316	142.800, 1.636	142.800, 0.969	142.800, 2.901	142.800, 2.032	142.800, 1.553	142.800, 0.271	142.800, 0.800	142.800, 2.308	142.800, 2.011	142.800, 2.132	142.800, 0.210	142.800, 2.294	142.800, 2.461	142.800, 2.188	142.800, 2.305	142.800, 2.271	142.800, 2.401	142.800, 2.370	142.800, 2.934	142.800, 2.410	142.800, 1.757	142.800, 1.120	142.800, 2.323	142.800, 2.021	142.800, 2.017	142.800, 0.338	142.800, 2.296	142.800, 2.280
716	143.000, 3.002	143.000, 2.317	143.000, 1.638	143.000, 0.969	143.000, 2.902	143.000, 2.033	143.000, 1.555	143.000, 0.272	143.000, 0.801	143.000, 2.308	143.000, 2.012	143.000, 2.132	143.000, 0.211	143.000, 2.295	143.000, 2.461	143.000, 2.188	143.000, 2.305	143.000, 2.271	143.000, 2.401	143.000, 2.371	143.000, 2.936	143.000, 2.412	143.000, 1.758	143.000, 1.121	143.000, 2.323	143.000, 2.021	143.000, 2.018	143.000, 0.338	143.000, 2.296	143.000, 2.281
717	143.200, 3.003	143.200, 2.318	143.200, 1.639	143.200, 0.970	143.200, 2.903	143.200, 2.035	143.200, 1.556	143.200, 0.272	143.200, 0.802	143.200, 2.309	143.200, 2.012	143.200, 2.133	143.200, 0.211	143.200, 2.295	143.200, 2.461	143.200, 2.188	143.200, 2.305	143.200, 2.271	143.200, 2.402	143.200, 2.371	143.200, 2.938	143.200, 2.413	143.200, 1.759	143.200, 1.121	143.200, 2.323	143.200, 2.022	143.200, 2.018	143.200, 0.338	143.200, 2.296	143.200, 2.281
718	143.400, 3.005	143.400, 2.319	143.400, 1.641	143.400, 0.971	143.400, 2.904	143.400, 2.036	143.400, 1.557	143.400, 0.273	143.400, 0.802	143.400, 2.309	143.400, 2.012	143.400, 2.133	143.400, 0.211	143.400, 2.295	143.400, 2.461	143.400, 2.189	143.400, 2.306	143.400, 2.272	143.400, 2.402	143.400, 2.372	143.400, 2.939	143.400, 2.415	143.400, 1.761	143.400, 1.122	143.400, 2.324	143.400, 2.022	143.400, 2.019	143.400, 0.338	143.400, 2.296	143.400, 2.282
719	143.600, 3.006	143.600, 2.320	143.600, 1.642	143.600, 0.972	143.600, 2.906	143.600, 2.037	143.600, 1.559	143.600, 0.273	143.600, 0.803	143.600, 2.309	143.600, 2.012	143.600, 2.133	143.600, 0.212	143.600, 2.295	143.600, 2.461	143.600, 2.189	143.600, 2.306	143.600, 2.272	143.600, 2.402	143.600, 2.372	143.600, 2.941	143.600, 2.416	143.600, 1.762	143.600, 1.123	143.600, 2.324	143.600, 2.023	143.600, 2.019	143.600, 0.339	143.600, 2.296	143.600, 2.283
720	143.800, 3.008	143.800, 2.321	143.800, 1.644	143.800, 0.972	143.800, 2.907	143.800, 2.038	143.800, 1.560	143.800, 0.273	143.800, 0.803	143.800, 2.310	143.800, 2.012	143.800, 2.134	143.800, 0.212	143.800, 2.295	143.800, 2.461	143.800, 2.190	143.800, 2.307	143.800, 2.272	143.800, 2.403	143.800, 2.373	143.800, 2.943	143.800, 2.417	143.800, 1.764	143.800, 1.124	143.800, 2.324	143.800, 2.023	143.800, 2.019	143.800, 0.340	143.800, 2.296	143.800, 2.283
721	144.000, 3.009	144.000, 2.322	144.000, 1.645	144.000, 0.973	144.000, 2.908	144.000, 2.040	144.000, 1.561	144.000, 0.273	144.000, 0.804	144.000, 2.310	144.000, 2.012	144.000, 2.134	144.000, 0.212	144.000, 2.295	144.000, 2.461	144.000, 2.191	144.000, 2.308	144.000, 2.273	144.000, 2.403	144.000, 2.373	144.000, 2.944	144.000, 2.418	144.000, 1.765	144.000, 1.125	144.000, 2.324	144.000, 2.024	144.000, 2.020	144.000, 0.340	144.000, 2.296	144.000, 2.284
722	144.200, 3.011	144.200, 2.323	144.200, 1.646	144.200, 0.974	144.200, 2.910	144.200, 2.041	144.200, 1.562	144.200, 0.273	144.200, 0.804	144.200, 2.310	144.200, 2.013	144.200, 2.135	144.200, 0.212	144.200, 2.296	144.200, 2.462	144.200, 2.192	144.200, 2.308	144.200, 2.273	144.200, 2.403	144.200, 2.374	144.200, 2.945	144.200, 2.420	144.200, 1.766	144.200, 1.126	144.200, 2.324	144.200, 2.025	144.200, 2.020	144.200, 0.341	144.200, 2.296	144.200, 2.285
723	144.400, 3.012	144.400, 2.324	144.400, 1.647	144.400, 0.974	144.400, 2.911	144.400, 2.042	144.400, 1.563	144.400, 0.273	144.400, 0.804	144.400, 2.311	144.400, 2.013	144.400, 2.135	144.400, 0.213	144.400, 2.296	144.400, 2.462	144.400, 2.193	144.400, 2.309	144.400, 2.274	144.400, 2.403	144.400, 2.374	144.400, 2.947	144.400, 2.421	144.400, 1.767	144.400, 1.127	144.400, 2.324	144.400, 2.025	144.400, 2.020	144.400, 0.341	144.400, 2.297	144.400, 2.286
724	144.600, 3.013	144.600, 2.325	144.600, 1.648	144.600, 0.975	144.600, 2.912	144.600, 2.043	144.600, 1.564	144.600, 0.273	144.600, 0.805	144.600, 2.311	144.600, 2.014	144.600, 2.136	144.600, 0.213	144.600, 2.296	144.600, 2.462	144.600, 2.193	144.600, 2.309	144.600, 2.274	144.600, 2.404	144.600, 2.374	144.600, 2.948	144.600, 2.422	144.600, 1.769	144.600, 1.128	144.600, 2.324	144.600, 2.026	144.600, 2.020	144.600, 0.342	144.600, 2.297	144.600, 2.287
725	144.800, 3.014	144.800, 2.325	144.800, 1.650	144.800, 0.976	144.800, 2.914	144.800, 2.044	144.800, 1.565	144.800, 0.273	144.800, 0.805	144.800, 2.311	144.800, 2.014	144.800, 2.136	144.800, 0.214	144.800, 2.297	144.800, 2.463	144.800, 2.194	144.800, 2.310	144.800, 2.275	144.800, 2.404	144.800, 2.374	144.800, 2.949	144.800, 2.423	144.800, 1.770	144.800, 1.129	144.800, 2.324	144.800, 2.026	144.800, 2.020	144.800, 0.342	144.800, 2.297	144.800, 2.287
726	145.000, 3.015	145.000, 2.326	145.000, 1.651	145.000, 0.977	145.000, 2.915	145.000, 2.045	145.000, 1.566	145.000, 0.273	145.000, 0.806	145.000, 2.311	145.000, 2.015	145.000, 2.136	145.000, 0.214	145.000, 2.297	145.000, 2.463	145.000, 2.195	145.000, 2.310	145.000, 2.275	145.000, 2.404	145.000, 2.375	145.000, 2.951	145.000, 2.425	145.000, 1.771	145.000, 1.130	145.000, 2.325	145.000, 2.026	145.000, 2.020	145.000, 0.343	145.000, 2.298	145.000, 2.288
727	145.200, 3.016	145.200, 2.327	145.200, 1.652	145.200, 0.979	145.200, 2.916	145.200, 2.046	145.200, 1.568	145.200, 0.273	145.200, 0.807	145.200, 2.311	145.200, 2.015	145.200, 2.137	145.200, 0.214	145.200, 2.298	145.200, 2.463	145.200, 2.195	145.200, 2.311	145.200, 2.275	145.200, 2.404	145.200, 2.375	145.200, 2.952	145.200, 2.426	145.200, 1.772	145.200, 1.131	145.200, 2.325	145.200, 2.026	145.200, 2.020	145.200, 0.344	145.200, 2.299	145.200, 2.288
728	145.400, 3.017	145.400, 2.329	145.400, 1.654	145.400, 0.980	145.400, 2.918	145.400, 2.047	145.400, 1.569	145.400, 0.274	145.400, 0.807	145.400, 2.311	145.400, 2.016	145.400, 2.137	145.400, 0.215	145.400, 2.298	145.400, 2.464	145.400, 2.196	145.400, 2.311	145.400, 2.276	145.400, 2.405	145.400, 2.376	145.400, 2.954	145.400, 2.427	145.400, 1.773	145.400, 1.132	145.400, 2.325	145.400, 2.026	145.400, 2.021	145.400, 0.344	145.400, 2.299	145.400, 2.288
729	145.600, 3.019	145.600, 2.330	145.600, 1.654	145.600, 0.981	145.600, 2.918	145.600, 2.048	145.600, 1.570	145.600, 0.274	145.600, 0.808	145.600, 2.311	145.600, 2.016	145.600, 2.137	145.600, 0.215	145.600, 2.298	145.600, 2.464	145.600, 2.196	145.600, 2.312	145.600, 2.276	145.600, 2.405	145.600, 2.377	145.600, 2.955	145.600, 2.428	145.600, 1.774	145.600, 1.133	145.600, 2.326	145.600, 2.027	145.600, 2.021	145.600, 0.345	145.600, 2.300	145.600, 2.289
730	145.800, 3.020	145.800, 2.331	145.800, 1.655	145.800, 0.983	145.800, 2.919	145.800, 2.049	145.800, 1.571	145.800, 0.275	145.800, 0.809	145.800, 2.312	145.800, 2.016	145.800, 2.137	145.800, 0.216	145.800, 2.299	145.800, 2.464	145.800, 2.196	145.800, 2.312	145.800, 2.277	145.800, 2.406	145.800, 2.378	145.800, 2.956	145.800, 2.429	145.800, 1.775	145.800, 1.135	145.800, 2.326	145.800, 2.027	145.800, 2.021	145.800, 0.345	145.800, 2.300	145.800, 2.289
731	146.000, 3.022	146.000, 2.333	146.000, 1.656	146.000, 0.984	146.000, 2.920	146.000, 2.050	146.000, 1.572	146.000, 0.275	146.000, 0.809	146.000, 2.312	146.000, 2.016	146.000, 2.138	146.000, 0.216	146.000, 2.300	146.000, 2.465	146.000, 2.196	146.000, 2.312	146.000, 2.277	146.000, 2.406	146.000, 2.379	146.000, 2.957	146.000, 2.431	146.000, 1.776	146.000, 1.136	146.000, 2.327	146.000, 2.027	146.000, 2.021	146.000, 0.346	146.000, 2.301	146.000, 2.289
732	146.200, 3.023	146.200, 2.334	146.200, 1.658	146.200, 0.985	146.200, 2.921	146.200, 2.051	146.200, 1.573	146.200, 0.276	146.200, 0.810	146.200, 2.312	146.200, 2.017	146.200, 2.138	146.200, 0.217	146.200, 2.300	146.200, 2.465	146.200, 2.196	146.200, 2.312	146.200, 2.278	146.200, 2.407	146.200, 2.380	146.200, 2.958	146.200, 2.432	146.200, 1.777	146.200, 1.137	146.200, 2.327	146.200, 2.027	146.200, 2.022	146.200, 0.346	146.200, 2.302	146.200, 2.289
733	146.400, 3.025	146.400, 2.336	146.400, 1.658	146.400, 0.986	146.400, 2.921	146.400, 2.052	146.400, 1.574	146.400, 0.276	146.400, 0.811	146.400, 2.312	146.400, 2.017	146.400, 2.138	146.400, 0.217	146.400, 2.301	146.400, 2.466	146.400, 2.196	146.400, 2.312	146.400, 2.278	146.400, 2.407	146.400, 2.381	146.400, 2.959	146.400, 2.433	146.400, 1.778	146.400, 1.138	146.400, 2.327	146.400, 2.027	146.400, 2.022	146.400, 0.347	146.400, 2.302	146.400, 2.290
734	146.600, 3.026	146.600, 2.337	146.600, 1.659	146.600, 0.987	146.600, 2.922	146.600, 2.053	146.600, 1.575	146.600, 0.277	146.600, 0.812	146.600, 2.313	146.600, 2.018	146.600, 2.138	146.600, 0.218	146.600, 2.302	146.600, 2.466	146.600, 2.196	146.600, 2.312	146.600, 2.279	146.600, 2.408	146.600, 2.381	146.600, 2.960	146.600, 2.434	146.600, 1.780	146.600, 1.140	146.600, 2.328	146.600, 2.028	146.600, 2.023	146.600, 0.347	146.600, 2.303	146.600, 2.290
735	146.800, 3.027	146.800, 2.338	146.800, 1.660	146.800, 0.988	146.800, 2.923	146.800, 2.054	146.800, 1.576	146.800, 0.278	146.800, 0.813	146.800, 2.313	146.800, 2.018	146.800, 2.138	146.800, 0.218	146.800, 2.303	146.800, 2.467	146.800, 2.196	146.800, 2.312	146.800, 2.280	146.800, 2.408	146.800, 2.382	146.800, 2.962	146.800, 2.435	146.800, 1.781	146.800, 1.141	146.800, 2.328	146.800, 2.028	146.800, 2.024	146.800, 0.347	146.800, 2.304	146.800, 2.290
736	147.000, 3.028	147.000, 2.339	147.000, 1.661	147.000, 0.988	147.000, 2.924	147.000, 2.055	147.000, 1.577	147.000, 0.278	147.000, 0.814	147.000, 2.313	147.000, 2.019	147.000, 2.139	147.000, 0.219	147.000, 2.303	147.000, 2.467	147.000, 2.196	147.000, 2.312	147.000, 2.280	147.000, 2.408	147.000, 2.383	147.000, 2.963	147.000, 2.437	147.000, 1.782	147.000, 1.143	147.000, 2.328	147.000, 2.028	147.000, 2.025	147.000, 0.348	147.000, 2.304	147.000, 2.291
737	147.200, 3.029	147.200, 2.341	147.200, 1.662	147.200, 0.989	147.200, 2.926	147.200, 2.056	147.200, 1.578	147.200, 0.279	147.200, 0.815	147.200, 2.314	147.200, 2.019	147.200, 2.139	147.200, 0.219	147.200, 2.304	147.200, 2.467	147.200, 2.196	147.200, 2.312	147.200, 2.281	147.200, 2.409	147.200, 2.384	147.200, 2.964	147.200, 2.438	147.200, 1.784	147.200, 1.144	147.200, 2.328	147.200, 2.029	147.200, 2.025	147.200, 0.348	147.200, 2.305	147.200, 2.291
738	147.400, 3.030	147.400, 2.342	147.400, 1.663	147.400, 0.990	147.400, 2.927	147.400, 2.057	147.400, 1.579	147.400, 0.279	147.400, 0.817	147.400, 2.315	147.400, 2.020	147.400, 2.139	147.400, 0.220	147.400, 2.304	147.400, 2.467	147.400, 2.196	147.400, 2.312	147.400, 2.281	147.400, 2.409	147.400, 2.384	147.400, 2.966	147.400, 2.439	147.400, 1.785	147.400, 1.145	147.400, 2.328	147.400, 2.030	147.400, 2.026	147.400, 0.349	147.400, 2.305	147.400, 2.292
739	147.600, 3.031	147.600, 2.343	147.600, 1.665	147.600, 0.990	147.600, 2.928	147.600, 2.059	147.600, 1.580	147.600, 0.279	147.600, 0.818	147.600, 2.315	147.600, 2.020	147.600, 2.140	147.600, 0.220	147.600, 2.304	147.600, 2.467	147.600, 2.197	147.600, 2.313	147.600, 2.282	147.600, 2.410	147.600, 2.385	147.600, 2.967	147.600, 2.441	147.600, 1.786	147.600, 1.146	147.600, 2.328	147.600, 2.031	147.600, 2.026	147.600, 0.349	147.600, 2.305	147.600, 2.292
740	147.800, 3.032	147.800, 2.344	147.800, 1.666	147.800, 0.991	147.800, 2.929	147.800, 2.060	147.800, 1.581	147.800, 0.280	147.800, 0.819	147.800, 2.316	147.800, 2.021	147.800, 2.140	147.800, 0.220	147.800, 2.305	147.800, 2.467	147.800, 2.197	147.800, 2.313	147.800, 2.282	147.800, 2.410	147.800, 2.386	147.800, 2.968	147.800, 2.442	147.800, 1.788	147.800, 1.147	147.800, 2.329	147.800, 2.031	147.800, 2.026	147.800, 0.350	147.800, 2.305	147.800, 2.293
741	148.000, 3.033	148.000, 2.345	148.000, 1.667	148.000, 0.992	148.000, 2.931	148.000, 2.061	148.000, 1.582	148.000, 0.280	148.000, 0.820	148.000, 2.316	148.000, 2.021	148.000, 2.141	148.000, 0.220	148.000, 2.305	148.000, 2.467	148.000, 2.197	148.000, 2.313	148.000, 2.282	148.000, 2.410	148.000, 2.386	148.000, 2.970	148.000, 2.443	148.000, 1.789	148.000, 1.148	148.000, 2.329	148.000, 2.032	148.000, 2.027	148.000, 0.350	148.000, 2.306	148.000, 2.293
742	148.200, 3.034	148.200, 2.346	148.200, 1.668	148.200, 0.992	148.200, 2.932	148.200, 2.062	148.200, 1.583	148.200, 0.280	148.200, 0.821	148.200, 2.317	148.200, 2.022	148.200, 2.142	148.200, 0.220	148.200, 2.305	148.200, 2.467	148.200, 2.197	148.200, 2.314	148.200, 2.283	148.200, 2.410	148.200, 2.387	148.200, 2.971	148.200, 2.445	148.200, 1.791	148.200, 1.149	148.200, 2.329	148.200, 2.033	148.200, 2.027	148.200, 0.351	148.200, 2.306	148.200, 2.294
743	148.400, 3.035	148.400, 2.347	148.400, 1.669	148.400, 0.993	148.400, 2.934	148.400, 2.063	148.400, 1.585	148.400, 0.281	148.400, 0.822	148.400, 2.317	148.400, 2.022	148.400, 2.143	148.400, 0.221	148.400, 2.305	148.400, 2.468	148.400, 2.198	148.400, 2.314	148.400, 2.283	148.400, 2.411	148.400, 2.387	148.400, 2.972	148.400, 2.446	148.400, 1.792	148.400, 1.150	148.400, 2.330	148.400, 2.033	148.400, 2.027	148.400, 0.351	148.400, 2.306	148.400, 2.295
744	148.600, 3.036	148.600, 2.348	148.600, 1.671	148.600, 0.994	148.600, 2.935	148.600, 2.065	148.600, 1.586	148.600, 0.281	148.600, 0.823	148.600, 2.318	148.600, 2.023	148.600, 2.144	148.600, 0.221	148.600, 2.305	148.600, 2.467	148.600, 2.198	148.600, 2.314	148.600, 2.283	148.600, 2.411	148.600, 2.387	148.600, 2.974	148.600, 2.447	148.600, 1.793	148.600, 1.151	148.600, 2.330	148.600, 2.033	148.600, 2.027	148.600, 0.352	148.600, 2.306	148.600, 2.295
745	148.800, 3.037	148.800, 2.349	148.800, 1.671	148.800, 0.995	148.800, 2.936	148.800, 2.065	148.800, 1.587	148.800, 0.281	148.800, 0.823	148.800, 2.318	148.800, 2.023	148.800, 2.144	148.800, 0.221	148.800, 2.305	148.800, 2.468	148.800, 2.199	148.800, 2.315	148.800, 2.283	148.800, 2.411	148.800, 2.386	148.800, 2.975	148.800, 2.449	148.800, 1.795	148.800, 1.152	148.800, 2.331	148.800, 2.034	148.800, 2.027	148.800, 0.352	148.800, 2.306	148.800, 2.296
746	149.000, 3.038	149.000, 2.350	149.000, 1.672	149.000, 0.996	149.000, 2.938	149.000, 2.066	149.000, 1.588	149.000, 0.281	149.000, 0.824	149.000, 2.318	149.000, 2.023	149.000, 2.145	149.000, 0.221	149.000, 2.305	149.000, 2.468	149.000, 2.199	149.000, 2.315	149.000, 2.283	149.000, 2.412	149.000, 2.386	149.000, 2.976	149.000, 2.450	149.000, 1.796	149.000, 1.153	149.000, 2.332	149.000, 2.034	149.000, 2.028	149.000, 0.353	149.000, 2.306	149.000, 2.296
747	149.200, 3.039	149.200, 2.351	149.200, 1.673	149.200, 0.997	149.200, 2.939	149.200, 2.067	149.200, 1.589	149.200, 0.282	149.200, 0.825	149.200, 2.319	149.200, 2.023	149.200, 2.146	149.200, 0.221	149.200, 2.306	149.200, 2.467	149.200, 2.199	149.200, 2.315	149.200, 2.283	149.200, 2.412	149.200, 2.386	149.200, 2.977	149.200, 2.451	149.200, 1.797	149.200, 1.154	149.200, 2.332	149.200, 2.035	149.200, 2.028	149.200, 0.353	149.200, 2.307	149.200, 2.296
748	149.400, 3.040	149.400, 2.352	149.400, 1.674	149.400, 0.998	149.400, 2.940	149.400, 2.068	149.400, 1.590	149.400, 0.282	149.400, 0.825	149.400, 2.319	149.400, 2.023	149.400, 2.146	149.400, 0.221	149.400, 2.306	149.400, 2.468	149.400, 2.199	149.400, 2.315	149.400, 2.283	149.400, 2.413	149.400, 2.386	149.400, 2.978	149.400, 2.452	149.400, 1.797	149.400, 1.155	149.400, 2.333	149.400, 2.035	149.400, 2.028	149.400, 0.353	149.400, 2.307	149.400, 2.297
749	149.600, 3.041	149.600, 2.352	149.600, 1.674	149.600, 0.999	149.600, 2.941	149.600, 2.068	149.600, 1.590	149.600, 0.282	149.600, 0.826	149.600, 2.319	149.600, 2.023	149.600, 2.146	149.600, 0.221	149.600, 2.306	149.600, 2.468	149.600, 2.199	149.600, 2.315	149.600, 2.283	149.600, 2.413	149.600, 2.386	149.600, 2.979	149.600, 2.453	149.600, 1.798	149.600, 1.155	149.600, 2.334	149.600, 2.035	149.600, 2.028	149.600, 0.353	149.600, 2.307	149.600, 2.297
750	149.800, 3.042	149.800, 2.353	149.800, 1.674	149.800, 1.000	149.800, 2.941	149.800, 2.069	149.800, 1.591	149.800, 0.283	149.800, 0.826	149.800, 2.320	149.800, 2.023	149.800, 2.147	149.800, 0.221	149.800, 2.306	149.800, 2.468	149.800, 2.199	149.800, 2.315	149.800, 2.283	149.800, 2.414	149.800, 2.386	149.800, 2.979	149.800, 2.454	149.800, 1.799	149.800, 1.156	149.800, 2.334	149.800, 2.036	149.800, 2.028	149.800, 0.353	149.800, 2.307	149.800, 2.297
751	150.000, 3.042	150.000, 2.353	150.000, 1.674	150.000, 1.000	150.000, 2.941	150.000, 2.069	150.000, 1.591	150.000, 0.283	150.000, 0.826	150.000, 2.320	150.000, 2.023	150.000, 2.147	150.000, 0.221	150.000, 2.306	150.000, 2.468	150.000, 2.199	150.000, 2.315	150.000, 2.283	150.000, 2.414	150.000, 2.386	150.000, 2.979	150.000, 2.454	150.000, 1.799	150.000, 1.156	150.000, 2.334	150.000, 2.036	150.000, 2.028	150.000, 0.353	150.000, 2.307	150.000, 2.297
752	150.200, 3.040	150.200, 2.352	150.200, 1.675	150.200, 1.001	150.200, 2.939	150.200, 2.069	150.200, 1.590	150.200, 0.283	150.200, 0.826	150.200, 2.317	150.200, 2.020	150.200, 2.144	150.200, 0.222	150.200, 2.303	150.200, 2.463	150.200, 2.196	150.200, 2.312	150.200, 2.279	150.200, 2.409	150.200, 2.383	150.200, 2.980	150.200, 2.453	150.200, 1.799	150.200, 1.156	150.200, 2.331	150.200, 2.033	150.200, 2.025	150.200, 0.355	150.200, 2.304	150.200, 2.294
753	150.400, 3.037	150.400, 2.351	150.400, 1.674	150.400, 1.002	150.400, 2.937	150.400, 2.069	150.400, 1.590	150.400, 0.283	150.400, 0.826	150.400, 2.312	150.400, 2.016	150.400, 2.140	150.400, 0.224	150.400, 2.299	150.400, 2.458	150.400, 2.190	150.400, 2.306	150.400, 2.274	150.400, 2.402	150.400, 2.380	150.400, 2.979	150.400, 2.452	150.400, 1.798	150.400, 1.157	150.400, 2.326	150.400, 2.029	150.400, 2.022	150.400, 0.357	150.400, 2.298	150.400, 2.289
754	150.600, 3.033	150.600, 2.348	150.600, 1.674	150.600, 1.003	150.600, 2.933	150.600, 2.068	150.600, 1.589	150.600, 0.283	150.600, 0.827	150.600, 2.306	150.600, 2.010	150.600, 2.134	150.600, 0.225	150.600, 2.293	150.600, 2.450	150.600, 2.184	150.600, 2.299	150.600, 2.267	150.600, 2.393	150.600, 2.374	150.600, 2.979	150.600, 2.451	150.600, 1.797	150.600, 1.157	150.600, 2.320	150.600, 2.023	150.600, 2.017	150.600, 0.359	150.600, 2.292	150.600, 2.284
755	150.800, 3.028	150.800, 2.345	150.800, 1.672	150.800, 1.004	150.800, 2.928	150.800, 2.067	150.800, 1.587	150.800, 0.283	150.800, 0.827	150.800, 2.299	150.800, 2.003	150.800, 2.127	150.800, 0.227	150.800, 2.285	150.800, 2.441	150.800, 2.175	150.800, 2.290	150.800, 2.258	150.800, 2.383	150.800, 2.368	150.800, 2.977	150.800, 2.449	150.800, 1.796	150.800, 1.158	150.800, 2.313	150.800, 2.017	150.800, 2.011	150.800, 0.361	150.800, 2.283	150.800, 2.277
756	151.000, 3.022	151.000, 2.341	151.000, 1.670	151.000, 1.005	151.000, 2.922	151.000, 2.064	151.000, 1.585	151.000, 0.283	151.000, 0.826	151.000, 2.290	151.000, 1.995	151.000, 2.118	151.000, 0.229	151.000, 2.276	151.000, 2.430	151.000, 2.165	151.000, 2.278	151.000, 2.248	151.000, 2.370	151.000, 2.359	151.000, 2.975	151.000, 2.445	151.000, 1.794	151.000, 1.158	151.000, 2.305	151.000, 2.009	151.000, 2.003	151.000, 0.363	151.000, 2.273	151.000, 2.268
757	151.200, 3.014	151.200, 2.335	151.200, 1.668	151.200, 1.006	151.200, 2.915	151.200, 2.060	151.200, 1.582	151.200, 0.282	151.200, 0.826	151.200, 2.279	151.200, 1.985	151.200, 2.107	151.200, 0.231	151.200, 2.264	151.200, 2.417	151.200, 2.153	151.200, 2.264	151.200, 2.235	151.200, 2.355	151.200, 2.349	151.200, 2.971	151.200, 2.442	151.200, 1.791	151.200, 1.157	151.200, 2.295	151.200, 2.000	151.200, 1.994	151.200, 0.366	151.200, 2.261	151.200, 2.257
758	151.400, 3.005	151.400, 2.329	151.400, 1.664	151.400, 1.006	151.400, 2.906	151.400, 2.055	151.400, 1.578	151.400, 0.282	151.400, 0.825	151.400, 2.267	151.400, 1.973	151.400, 2.094	151.400, 0.233	151.400, 2.250	151.400, 2.402	151.400, 2.139	151.400, 2.249	151.400, 2.221	151.400, 2.338	151.400, 2.336	151.400, 2.967	151.400, 2.437	151.400, 1.788	151.400, 1.157	151.400, 2.284	151.400, 1.989	151.400, 1.984	151.400, 0.368	151.400, 2.248	151.400, 2.246
759	151.600, 2.995	151.600, 2.321	151.600, 1.660	151.600, 1.006	151.600, 2.896	151.600, 2.049	151.600, 1.574	151.600, 0.282	151.600, 0.824	151.600, 2.253	151.600, 1.960	151.600, 2.079	151.600, 0.234	151.600, 2.235	151.600, 2.385	151.600, 2.123	151.600, 2.231	151.600, 2.204	151.600, 2.320	151.600, 2.322	151.600, 2.962	151.600, 2.431	151.600, 1.783	151.600, 1.155	151.600, 2.272	151.600, 1.977	151.600, 1.973	151.600, 0.370	151.600, 2.233	151.600, 2.232
760	151.800, 2.983	151.800, 2.312	151.800, 1.654	151.800, 1.004	151.800, 2.886	151.800, 2.042	151.800, 1.568	151.800, 0.282	151.800, 0.823	151.800, 2.238	151.800, 1.945	151.800, 2.062	151.800, 0.236	151.800, 2.218	151.800, 2.368	151.800, 2.106	151.800, 2.212	151.800, 2.186	151.800, 2.299	151.800, 2.306	151.800, 2.955	151.800, 2.424	151.800, 1.778	151.800, 1.154	151.800, 2.258	151.800, 1.964	151.800, 1.960	151.800, 0.371	151.800, 2.217	151.800, 2.217
761	152.000, 2.970	152.000, 2.302	152.000, 1.648	152.000, 1.002	152.000, 2.874	152.000, 2.033	152.000, 1.561	152.000, 0.281	152.000, 0.821	152.000, 2.221	152.000, 1.929	152.000, 2.044	152.000, 0.237	152.000, 2.199	152.000, 2.348	152.000, 2.088	152.000, 2.191	152.000, 2.167	152.000, 2.278	152.000, 2.289	152.000, 2.948	152.000, 2.416	152.000, 1.773	152.000, 1.151	152.000, 2.244	152.000, 1.950	152.000, 1.946	152.000, 0.373	152.000, 2.200	152.000, 2.201
762	152.200, 2.957	152.200, 2.292	152.200, 1.641	152.200, 1.000	152.200, 2.862	152.200, 2.024	152.200, 1.554	152.200, 0.281	152.200, 0.819	152.200, 2.204	152.200, 1.913	152.200, 2.025	152.200, 0.238	152.200, 2.179	152.200, 2.329	152.200, 2.069	152.200, 2.169	152.200, 2.146	152.200, 2.256	152.200, 2.270	152.200, 2.939	152.200, 2.408	152.200, 1.766	152.200, 1.148	152.200, 2.230	152.200, 1.935	152.200, 1.931	152.200, 0.373	152.200, 2.182	152.200, 2.183
763	152.400, 2.942	152.400, 2.280	152.400, 1.634	152.400, 0.997	152.400, 2.847	152.400, 2.014	152.400, 1.546	152.400, 0.281	152.400, 0.816	152.400, 2.186	152.400, 1.896	152.400, 2.005	152.400, 0.239	152.400, 2.158	152.400, 2.309	152.400, 2.049	152.400, 2.146	152.400, 2.124	152.400, 2.232	152.400, 2.251	152.400, 2.930	152.400, 2.399	152.400, 1.759	152.400, 1.145	152.400, 2.214	152.400, 1.919	152.400, 1.915	152.400, 0.374	152.400, 2.163	152.400, 2.165
764	152.600, 2.927	152.600, 2.267	152.600, 1.626	152.600, 0.992	152.600, 2.833	152.600, 2.003	152.600, 1.537	152.600, 0.280	152.600, 0.812	152.600, 2.168	152.600, 1.879	152.600, 1.984	152.600, 0.240	152.600, 2.136	152.600, 2.288	152.600, 2.030	152.600, 2.122	152.600, 2.102	152.600, 2.208	152.600, 2.231	152.600, 2.920	152.600, 2.389	152.600, 1.752	152.600, 1.141	152.600, 2.198	152.600, 1.902	152.600, 1.898	152.600, 0.375	152.600, 2.144	152.600, 2.146
765	152.800, 2.912	152.800, 2.255	152.800, 1.617	152.800, 0.988	152.800, 2.818	152.800, 1.992	152.800, 1.529	152.800, 0.280	152.800, 0.808	152.800, 2.150	152.800, 1.861	152.800, 1.963	152.800, 0.241	152.800, 2.113	152.800, 2.267	152.800, 2.009	152.800, 2.098	152.800, 2.078	152.800, 2.184	152.800, 2.210	152.800, 2.909	152.800, 2.380	152.800, 1.744	152.800, 1.136	152.800, 2.182	152.800, 1.886	152.800, 1.881	152.800, 0.375	152.800, 2.124	152.800, 2.126
766	153.000, 2.896	153.000, 2.242	153.000, 1.609	153.000, 0.983	153.000, 2.803	153.000, 1.981	153.000, 1.519	153.000, 0.279	153.000, 0.804	153.000, 2.132	153.000, 1.843	153.000, 1.941	153.000, 0.242	153.000, 2.090	153.000, 2.245	153.000, 1.988	153.000, 2.074	153.000, 2.055	153.000, 2.158	153.000, 2.188	153.000, 2.898	153.000, 2.369	153.000, 1.736	153.000, 1.131	153.000, 2.165	153.000, 1.869	153.000, 1.863	153.000, 0.375	153.000, 2.104	153.000, 2.106
767	153.200, 2.880	153.200, 2.229	153.200, 1.600	153.200, 0.978	153.200, 2.788	153.200, 1.969	153.200, 1.510	153.200, 0.279	153.200, 0.800	153.200, 2.114	153.200, 1.825	153.200, 1.920	153.200, 0.242	153.200, 2.067	153.200, 2.224	153.200, 1.968	153.200, 2.050	153.200, 2.031	153.200, 2.133	153.200, 2.167	153.200, 2.886	153.200, 2.359	153.200, 1.728	153.200, 1.126	153.200, 2.149	153.200, 1.852	153.200, 1.846	153.200, 0.376	153.200, 2.083	153.200, 2.086
768	153.400, 2.865	153.400, 2.217	153.400, 1.591	153.400, 0.973	153.400, 2.774	153.400, 1.958	153.400, 1.500	153.400, 0.279	153.400, 0.796	153.400, 2.095	153.400, 1.807	153.400, 1.898	153.400, 0.242	153.400, 2.043	153.400, 2.202	153.400, 1.947	153.400, 2.026	153.400, 2.007	153.400, 2.108	153.400, 2.145	153.400, 2.875	153.400, 2.348	153.400, 1.719	153.400, 1.120	153.400, 2.132	153.400, 1.834	153.400, 1.828	153.400, 0.376	153.400, 2.063	153.400, 2.066
769	153.600, 2.849	153.600, 2.204	153.600, 1.582	153.600, 0.967	153.600, 2.759	153.600, 1.947	153.600, 1.491	153.600, 0.278	153.600, 0.792	153.600, 2.077	153.600, 1.789	153.600, 1.876	153.600, 0.243	153.600, 2.020	153.600, 2.181	153.600, 1.926	153.600, 2.001	153.600, 1.982	153.600, 2.082	153.600, 2.123	153.600, 2.863	153.600, 2.337	153.600, 1.711	153.600, 1.114	153.600, 2.115	153.600, 1.817	153.600, 1.810	153.600, 0.375	153.600, 2.042	153.600, 2.045
770	153.800, 2.833	153.800, 2.191	153.800, 1.572	153.800, 0.962	153.800, 2.745	153.800, 1.935	153.800, 1.481	153.800, 0.278	153.800, 0.788	153.800, 2.059	153.800, 1.770	153.800, 1.854	153.800, 0.243	153.800, 1.997	153.800, 2.160	153.800, 1.905	153.800, 1.977	153.800, 1.958	153.800, 2.057	153.800, 2.101	153.800, 2.851	153.800, 2.327	153.800, 1.702	153.800, 1.109	153.800, 2.098	153.800, 1.800	153.800, 1.792	153.800, 0.375	153.800, 2.022	153.800, 2.025
771	154.000, 2.817	154.000, 2.178	154.000, 1.563	154.000, 0.956	154.000, 2.731	154.000, 1.924	154.000, 1.471	154.000, 0.278	154.000, 0.784	154.000, 2.040	154.000, 1.752	154.000, 1.832	154.000, 0.243	154.000, 1.973	154.000, 2.139	154.000, 1.883	154.000, 1.953	154.000, 1.934	154.000, 2.031	154.000, 2.078	154.000, 2.839	154.000, 2.316	154.000, 1.693	154.000, 1.103	154.000, 2.082	154.000, 1.783	154.000, 1.774	154.000, 0.375	154.000, 2.002	154.000, 2.004
772	154.200, 2.802	154.200, 2.166	154.200, 1.553	154.200, 0.950	154.200, 2.717	154.200, 1.913	154.200, 1.462	154.200, 0.278	154.200, 0.780	154.200, 2.022	154.200, 1.734	154.200, 1.811	154.200, 0.243	154.200, 1.949	154.200, 2.119	154.200, 1.862	154.200, 1.929	154.200, 1.909	154.200, 2.006	154.200, 2.056	154.200, 2.827	154.200, 2.306	154.200, 1.684	154.200, 1.097	154.200, 2.065	154.200, 1.766	154.200, 1.755	154.200, 0.374	154.200, 1.981	154.200, 1.983
773	154.400, 2.786	154.400, 2.153	154.400, 1.543	154.400, 0.945	154.400, 2.703	154.400, 1.902	154.400, 1.452	154.400, 0.277	154.400, 0.776	154.400, 2.004	154.400, 1.716	154.400, 1.789	154.400, 0.243	154.400, 1.926	154.400, 2.098	154.400, 1.841	154.400, 1.905	154.400, 1.885	154.400, 1.981	154.400, 2.033	154.400, 2.815	154.400, 2.295	154.400, 1.675	154.400, 1.091	154.400, 2.048	154.400, 1.749	154.400, 1.737	154.400, 0.374	154.400, 1.961	154.400, 1.963
774	154.600, 2.771	154.600, 2.140	154.600, 1.533	154.600, 0.939	154.600, 2.689	154.600, 1.891	154.600, 1.443	154.600, 0.277	154.600, 0.772	154.600, 1.986	154.600, 1.698	154.600, 1.768	154.600, 0.244	154.600, 1.902	154.600, 2.078	154.600, 1.820	154.600, 1.881	154.600, 1.861	154.600, 1.956	154.600, 2.011	154.600, 2.804	154.600, 2.285	154.600, 1.666	154.600, 1.084	154.600, 2.032	154.600, 1.732	154.600, 1.719	154.600, 0.373	154.600, 1.940	154.600, 1.943
775	154.800, 2.756	154.800, 2.128	154.800, 1.524	154.800, 0.934	154.800, 2.675	154.800, 1.880	154.800, 1.434	154.800, 0.277	154.800, 0.767	154.800, 1.968	154.800, 1.680	154.800, 1.746	154.800, 0.244	154.800, 1.879	154.800, 2.057	154.800, 1.799	154.800, 1.857	154.800, 1.837	154.800, 1.931	154.800, 1.989	154.800, 2.792	154.800, 2.275	154.800, 1.657	154.800, 1.078	154.800, 2.016	154.800, 1.715	154.800, 1.700	154.800, 0.372	154.800, 1.920	154.800, 1.923
776	155.000, 2.741	155.000, 2.116	155.000, 1.514	155.000, 0.929	155.000, 2.662	155.000, 1.869	155.000, 1.425	155.000, 0.276	155.000, 0.763	155.000, 1.951	155.000, 1.662	155.000, 1.725	155.000, 0.244	155.000, 1.855	155.000, 2.037	155.000, 1.778	155.000, 1.833	155.000, 1.814	155.000, 1.907	155.000, 1.966	155.000, 2.780	155.000, 2.264	155.000, 1.648	155.000, 1.072	155.000, 2.000	155.000, 1.698	155.000, 1.682	155.000, 0.372	155.000, 1.900	155.000, 1.903
777	155.200, 2.726	155.200, 2.104	155.200, 1.505	155.200, 0.923	155.200, 2.648	155.200, 1.859	155.200, 1.415	155.200, 0.276	155.200, 0.758	155.200, 1.933	155.200, 1.644	155.200, 1.704	155.200, 0.244	155.200, 1.832	155.200, 2.017	155.200, 1.757	155.200, 1.809	155.200, 1.790	155.200, 1.883	155.200, 1.944	155.200, 2.768	155.200, 2.254	155.200, 1.639	155.200, 1.066	155.200, 1.984	155.200, 1.682	155.200, 1.664	155.200, 0.370	155.200, 1.879	155.200, 1.883
778	155.400, 2.711	155.400, 2.092	155.400, 1.495	155.400, 0.918	155.400, 2.635	155.400, 1.848	155.400, 1.407	155.400, 0.276	155.400, 0.754	155.400, 1.916	155.400, 1.627	155.400, 1.683	155.400, 0.244	155.400, 1.809	155.400, 1.996	155.400, 1.736	155.400, 1.786	155.400, 1.767	155.400, 1.859	155.400, 1.922	155.400, 2.757	155.400, 2.244	155.400, 1.630	155.400, 1.060	155.400, 1.968	155.400, 1.665	155.400, 1.646	155.400, 0.369	155.400, 1.860	155.400, 1.863
779	155.600, 2.697	155.600, 2.081	155.600, 1.486	155.600, 0.913	155.600, 2.622	155.600, 1.838	155.600, 1.397	155.600, 0.275	155.600, 0.750	155.600, 1.899	155.600, 1.610	155.600, 1.662	155.600, 0.244	155.600, 1.786	155.600, 1.976	155.600, 1.716	155.600, 1.763	155.600, 1.743	155.600, 1.835	155.600, 1.900	155.600, 2.745	155.600, 2.234	155.600, 1.622	155.600, 1.054	155.600, 1.953	155.600, 1.648	155.600, 1.628	155.600, 0.368	155.600, 1.840	155.600, 1.843
780	155.800, 2.683	155.800, 2.069	155.800, 1.477	155.800, 0.907	155.800, 2.609	155.800, 1.828	155.800, 1.389	155.800, 0.275	155.800, 0.745	155.800, 1.882	155.800, 1.593	155.800, 1.641	155.800, 0.244	155.800, 1.764	155.800, 1.956	155.800, 1.695	155.800, 1.740	155.800, 1.720	155.800, 1.811	155.800, 1.878	155.800, 2.734	155.800, 2.224	155.800, 1.613	155.800, 1.048	155.800, 1.938	155.800, 1.632	155.800, 1.610	155.800, 0.367	155.800, 1.820	155.800, 1.824
781	156.000, 2.669	156.000, 2.058	156.000, 1.468	156.000, 0.901	156.000, 2.596	156.000, 1.818	156.000, 1.380	156.000, 0.274	156.000, 0.741	156.000, 1.865	156.000, 1.575	156.000, 1.620	156.000, 0.244	156.000, 1.741	156.000, 1.936	156.000, 1.675	156.000, 1.717	156.000, 1.697	156.000, 1.788	156.000, 1.857	156.000, 2.723	156.000, 2.214	156.000, 1.605	156.000, 1.041	156.000, 1.923	156.000, 1.615	156.000, 1.592	156.000, 0.365	156.000, 1.801	156.000, 1.804
782	156.200, 2.656	156.200, 2.047	156.200, 1.459	156.200, 0.896	156.200, 2.584	156.200, 1.808	156.200, 1.371	156.200, 0.274	156.200, 0.736	156.200, 1.849	156.200, 1.558	156.200, 1.599	156.200, 0.244	156.200, 1.719	156.200, 1.917	156.200, 1.655	156.200, 1.694	156.200, 1.674	156.200, 1.764	156.200, 1.835	156.200, 2.711	156.200, 2.203	156.200, 1.597	156.200, 1.035	156.200, 1.908	156.200, 1.599	156.200, 1.574	156.200, 0.364	156.200, 1.781	156.200, 1.785
783	156.400, 2.642	156.400, 2.035	156.400, 1.450	156.400, 0.890	156.400, 2.571	156.400, 1.798	156.400, 1.362	156.400, 0.273	156.400, 0.731	156.400, 1.833	156.400, 1.542	156.400, 1.579	156.400, 0.243	156.400, 1.697	156.400, 1.898	156.400, 1.636	156.400, 1.672	156.400, 1.651	156.400, 1.741	156.400, 1.814	156.400, 2.700	156.400, 2.193	156.400, 1.589	156.400, 1.029	156.400, 1.893	156.400, 1.583	156.400, 1.557	156.400, 0.363	156.400, 1.762	156.400, 1.766
784	156.600, 2.629	156.600, 2.024	156.600, 1.442	156.600, 0.885	156.600, 2.558	156.600, 1.789	156.600, 1.354	156.600, 0.273	156.600, 0.727	156.600, 1.817	156.600, 1.525	156.600, 1.558	156.600, 0.243	156.600, 1.675	156.600, 1.879	156.600, 1.617	156.600, 1.650	156.600, 1.628	156.600, 1.718	156.600, 1.793	156.600, 2.689	156.600, 2.183	156.600, 1.580	156.600, 1.023	156.600, 1.879	156.600, 1.566	156.600, 1.539	156.600, 0.362	156.600, 1.743	156.600, 1.747
785	156.800, 2.615	156.800, 2.013	156.800, 1.433	156.800, 0.880	156.800, 2.546	156.800, 1.779	156.800, 1.346	156.800, 0.272	156.800, 0.722	156.800, 1.801	156.800, 1.509	156.800, 1.539	156.800, 0.243	156.800, 1.653	156.800, 1.861	156.800, 1.598	156.800, 1.628	156.800, 1.606	156.800, 1.696	156.800, 1.771	156.800, 2.679	156.800, 2.173	156.800, 1.572	156.800, 1.017	156.800, 1.864	156.800, 1.550	156.800, 1.522	156.800, 0.361	156.800, 1.725	156.800, 1.728
786	157.000, 2.602	157.000, 2.002	157.000, 1.425	157.000, 0.875	157.000, 2.534	157.000, 1.769	157.000, 1.337	157.000, 0.272	157.000, 0.717	157.000, 1.786	157.000, 1.492	157.000, 1.519	157.000, 0.243	157.000, 1.632	157.000, 1.843	157.000, 1.579	157.000, 1.606	157.000, 1.584	157.000, 1.673	157.000, 1.750	157.000, 2.668	157.000, 2.163	157.000, 1.564	157.000, 1.011	157.000, 1.849	157.000, 1.534	157.000, 1.505	157.000, 0.360	157.000, 1.707	157.000, 1.710
787	157.200, 2.589	157.200, 1.991	157.200, 1.416	157.200, 0.870	157.200, 2.522	157.200, 1.760	157.200, 1.329	157.200, 0.272	157.200, 0.713	157.200, 1.771	157.200, 1.477	157.200, 1.500	157.200, 0.243	157.200, 1.611	157.200, 1.825	157.200, 1.561	157.200, 1.585	157.200, 1.561	157.200, 1.650	157.200, 1.729	157.200, 2.658	157.200, 2.153	157.200, 1.556	157.200, 1.005	157.200, 1.835	157.200, 1.519	157.200, 1.489	157.200, 0.359	157.200, 1.689	157.200, 1.692
788	157.400, 2.576	157.400, 1.980	157.400, 1.408	157.400, 0.865	157.400, 2.511	157.400, 1.750	157.400, 1.321	157.400, 0.272	157.400, 0.709	157.400, 1.755	157.400, 1.461	157.400, 1.481	157.400, 0.243	157.400, 1.590	157.400, 1.808	157.400, 1.543	157.400, 1.564	157.400, 1.540	157.400, 1.628	157.400, 1.708	157.400, 2.647	157.400, 2.144	157.400, 1.548	157.400, 0.998	157.400, 1.820	157.400, 1.503	157.400, 1.472	157.400, 0.359	157.400, 1.671	157.400, 1.675
789	157.600, 2.563	157.600, 1.969	157.600, 1.399	157.600, 0.860	157.600, 2.499	157.600, 1.741	157.600, 1.314	157.600, 0.271	157.600, 0.704	157.600, 1.740	157.600, 1.446	157.600, 1.462	157.600, 0.243	157.600, 1.570	157.600, 1.790	157.600, 1.525	157.600, 1.543	157.600, 1.518	157.600, 1.606	157.600, 1.688	157.600, 2.637	157.600, 2.134	157.600, 1.540	157.600, 0.992	157.600, 1.806	157.600, 1.487	157.600, 1.456	157.600, 0.358	157.600, 1.654	157.600, 1.657
790	157.800, 2.550	157.800, 1.959	157.800, 1.390	157.800, 0.855	157.800, 2.488	157.800, 1.732	157.800, 1.306	157.800, 0.271	157.800, 0.700	157.800, 1.725	157.800, 1.430	157.800, 1.443	157.800, 0.242	157.800, 1.550	157.800, 1.773	157.800, 1.507	157.800, 1.522	157.800, 1.497	157.800, 1.584	157.800, 1.667	157.800, 2.627	157.800, 2.125	157.800, 1.532	157.800, 0.986	157.800, 1.792	157.800, 1.472	157.800, 1.439	157.800, 0.357	157.800, 1.637	157.800, 1.639
791	158.000, 2.537	158.000, 1.948	158.000, 1.382	158.000, 0.850	158.000, 2.477	158.000, 1.723	158.000, 1.298	158.000, 0.271	158.000, 0.696	158.000, 1.711	158.000, 1.415	158.000, 1.425	158.000, 0.242	158.000, 1.530	158.000, 1.757	158.000, 1.489	158.000, 1.502	158.000, 1.476	158.000, 1.562	158.000, 1.647	158.000, 2.616	158.000, 2.115	158.000, 1.525	158.000, 0.979	158.000, 1.778	158.000, 1.457	158.000, 1.423	158.000, 0.357	158.000, 1.620	158.000, 1.622
792	158.200, 2.524	158.200, 1.937	158.200, 1.373	158.200, 0.845	158.200, 2.466	158.200, 1.714	158.200, 1.291	158.200, 0.270	158.200, 0.692	158.200, 1.696	158.200, 1.401	158.200, 1.408	158.200, 0.242	158.200, 1.511	158.200, 1.740	158.200, 1.472	158.200, 1.482	158.200, 1.456	158.200, 1.541	158.200, 1.627	158.200, 2.606	158.200, 2.107	158.200, 1.517	158.200, 0.973	158.200, 1.764	158.200, 1.442	158.200, 1.407	158.200, 0.356	158.200, 1.603	158.200, 1.605
793	158.400, 2.511	158.400, 1.926	158.400, 1.365	158.400, 0.840	158.400, 2.455	158.400, 1.705	158.400, 1.283	158.400, 0.270	158.400, 0.688	158.400, 1.682	158.400, 1.386	158.400, 1.390	158.400, 0.241	158.400, 1.492	158.400, 1.724	158.400, 1.455	158.400, 1.462	158.400, 1.436	158.400, 1.520	158.400, 1.607	158.400, 2.596	158.400, 2.098	158.400, 1.509	158.400, 0.966	158.400, 1.751	158.400, 1.428	158.400, 1.391	158.400, 0.355	158.400, 1.586	158.400, 1.588
794	158.600, 2.499	158.600, 1.916	158.600, 1.357	158.600, 0.835	158.600, 2.444	158.600, 1.696	158.600, 1.275	158.600, 0.269	158.600, 0.684	158.600, 1.669	158.600, 1.372	158.600, 1.373	158.600, 0.241	158.600, 1.473	158.600, 1.708	158.600, 1.438	158.600, 1.442	158.600, 1.416	158.600, 1.499	158.600, 1.587	158.600, 2.586	158.600, 2.089	158.600, 1.502	158.600, 0.960	158.600, 1.737	158.600, 1.413	158.600, 1.376	158.600, 0.354	158.600, 1.569	158.600, 1.572
795	158.800, 2.486	158.800, 1.905	158.800, 1.349	158.800, 0.830	158.800, 2.433	158.800, 1.687	158.800, 1.268	158.800, 0.269	158.800, 0.680	158.800, 1.655	158.800, 1.358	158.800, 1.356	158.800, 0.241	158.800, 1.454	158.800, 1.692	158.800, 1.421	158.800, 1.423	158.800, 1.396	158.800, 1.479	158.800, 1.567	158.800, 2.576	158.800, 2.080	158.800, 1.494	158.800, 0.954	158.800, 1.724	158.800, 1.399	158.800, 1.360	158.800, 0.353	158.800, 1.553	158.800, 1.556
796	159.000, 2.474	159.000, 1.895	159.000, 1.341	159.000, 0.825	159.000, 2.423	159.000, 1.679	159.000, 1.260	159.000, 0.268	159.000, 0.676	159.000, 1.642	159.000, 1.345	159.000, 1.339	159.000, 0.241	159.000, 1.436	159.000, 1.676	159.000, 1.404	159.000, 1.404	159.000, 1.377	159.000, 1.459	159.000, 1.548	159.000, 2.566	159.000, 2.072	159.000, 1.486	159.000, 0.949	159.000, 1.712	159.000, 1.386	159.000, 1.345	159.000, 0.352	159.000, 1.537	159.000, 1.540
797	159.200, 2.462	159.200, 1.885	159.200, 1.333	159.200, 0.821	159.200, 2.413	159.200, 1.670	159.200, 1.253	159.200, 0.267	159.200, 0.673	159.200, 1.628	159.200, 1.331	159.200, 1.323	159.200, 0.240	159.200, 1.418	159.200, 1.661	159.200, 1.388	159.200, 1.385	159.200, 1.358	159.200, 1.439	159.200, 1.529	159.200, 2.557	159.200, 2.063	159.200, 1.479	159.200, 0.943	159.200, 1.699	159.200, 1.372	159.200, 1.330	159.200, 0.351	159.200, 1.521	159.200, 1.524
798	159.400, 2.450	159.400, 1.876	159.400, 1.326	159.400, 0.816	159.400, 2.403	159.400, 1.662	159.400, 1.246	159.400, 0.266	159.400, 0.669	159.400, 1.615	159.400, 1.318	159.400, 1.307	159.400, 0.240	159.400, 1.400	159.400, 1.646	159.400, 1.372	159.400, 1.366	159.400, 1.339	159.400, 1.420	159.400, 1.511	159.400, 2.547	159.400, 2.054	159.400, 1.471	159.400, 0.937	159.400, 1.687	159.400, 1.358	159.400, 1.315	159.400, 0.350	159.400, 1.506	159.400, 1.509
799	159.600, 2.438	159.600, 1.866	159.600, 1.318	159.600, 0.811	159.600, 2.393	159.600, 1.654	159.600, 1.238	159.600, 0.265	159.600, 0.666	159.600, 1.602	159.600, 1.305	159.600, 1.291	159.600, 0.240	159.600, 1.383	159.600, 1.631	159.600, 1.356	159.600, 1.347	159.600, 1.320	159.600, 1.401	159.600, 1.492	159.600, 2.537	159.600, 2.046	159.600, 1.464	159.600, 0.932	159.600, 1.675	159.600, 1.345	159.600, 1.300	159.600, 0.349	159.600, 1.491	159.600, 1.494
800	159.800, 2.427	159.800, 1.856	159.800, 1.311	159.800, 0.807	159.800, 2.383	159.800, 1.646	159.800, 1.231	159.800, 0.264	159.800, 0.662	159.800, 1.589	159.800, 1.291	159.800, 1.276	159.800, 0.239	159.800, 1.365	159.800, 1.616	159.800, 1.340	159.800, 1.329	159.800, 1.302	159.800, 1.383	159.800, 1.474	159.800, 2.527	159.800, 2.037	159.800, 1.456	159.800, 0.927	159.800, 1.663	159.800, 1.332	159.800, 1.286	159.800, 0.348	159.800, 1.476	159.800, 1.479
801	160.000, 2.416	160.000, 1.847	160.000, 1.304	160.000, 0.802	160.000, 2.373	160.000, 1.638	160.000, 1.224	160.000, 0.264	160.000, 0.659	160.000, 1.577	160.000, 1.278	160.000, 1.260	160.000, 0.239	160.000, 1.348	160.000, 1.602	160.000, 1.325	160.000, 1.312	160.000, 1.284	160.000, 1.365	160.000, 1.456	160.000, 2.517	160.000, 2.028	160.000, 1.449	160.000, 0.922	160.000, 1.651	160.000, 1.319	160.000, 1.271	160.000, 0.347	160.000, 1.461	160.000, 1.464
802	160.200, 2.404	160.200, 1.838	160.200, 1.297	160.200, 0.798	160.200, 2.364	160.200, 1.630	160.200, 1.218	160.200, 0.263	160.200, 0.656	160.200, 1.565	160.200, 1.265	160.200, 1.245	160.200, 0.239	160.200, 1.331	160.200, 1.588	160.200, 1.310	160.200, 1.294	160.200, 1.267	160.200, 1.347	160.200, 1.438	160.200, 2.508	160.200, 2.020	160.200, 1.442	160.200, 0.917	160.200, 1.640	160.200, 1.306	160.200, 1.257	160.200, 0.346	160.200, 1.446	160.200, 1.450
803	160.400, 2.393	160.400, 1.828	160.400, 1.290	160.400, 0.794	160.400, 2.354	160.400, 1.622	160.400, 1.211	160.400, 0.263	160.400, 0.652	160.400, 1.552	160.400, 1.253	160.400, 1.231	160.400, 0.239	160.400, 1.315	160.400, 1.574	160.400, 1.296	160.400, 1.277	160.400, 1.249	160.400, 1.330	160.400, 1.420	160.400, 2.498	160.400, 2.011	160.400, 1.435	160.400, 0.912	160.400, 1.629	160.400, 1.293	160.400, 1.244	160.400, 0.345	160.400, 1.432	160.400, 1.436
804	160.600, 2.382	160.600, 1.819	160.600, 1.283	160.600, 0.790	160.600, 2.344	160.600, 1.615	160.600, 1.205	160.600, 0.263	160.600, 0.649	160.600, 1.540	160.600, 1.240	160.600, 1.216	160.600, 0.239	160.600, 1.298	160.600, 1.561	160.600, 1.282	160.600, 1.260	160.600, 1.232	160.600, 1.312	160.600, 1.402	160.600, 2.489	160.600, 2.003	160.600, 1.428	160.600, 0.907	160.600, 1.617	160.600, 1.281	160.600, 1.230	160.600, 0.344	160.600, 1.418	160.600, 1.422
805	160.800, 2.371	160.800, 1.810	160.800, 1.276	160.800, 0.786	160.800, 2.335	160.800, 1.607	160.800, 1.199	160.800, 0.263	160.800, 0.647	160.800, 1.529	160.800, 1.228	160.800, 1.202	160.800, 0.238	160.800, 1.282	160.800, 1.547	160.800, 1.268	160.800, 1.244	160.800, 1.216	160.800, 1.295	160.800, 1.384	160.800, 2.480	160.800, 1.995	160.800, 1.421	160.800, 0.902	160.800, 1.606	160.800, 1.268	160.800, 1.217	160.800, 0.344	160.800, 1.404	160.800, 1.409
806	161.000, 2.361	161.000, 1.801	161.000, 1.270	161.000, 0.782	161.000, 2.326	161.000, 1.600	161.000, 1.193	161.000, 0.263	161.000, 0.644	161.000, 1.517	161.000, 1.217	161.000, 1.189	161.000, 0.238	161.000, 1.266	161.000, 1.534	161.000, 1.254	161.000, 1.228	161.000, 1.199	161.000, 1.279	161.000, 1.367	161.000, 2.471	161.000, 1.987	161.000, 1.414	161.000, 0.897	161.000, 1.595	161.000, 1.256	161.000, 1.204	161.000, 0.343	161.000, 1.390	161.000, 1.396
807	161.200, 2.350	161.200, 1.792	161.200, 1.263	161.200, 0.778	161.200, 2.316	161.200, 1.592	161.200, 1.186	161.200, 0.263	161.200, 0.641	161.200, 1.506	161.200, 1.205	161.200, 1.175	161.200, 0.237	161.200, 1.251	161.200, 1.521	161.200, 1.241	161.200, 1.212	161.200, 1.183	161.200, 1.262	161.200, 1.350	161.200, 2.462	161.200, 1.979	161.200, 1.407	161.200, 0.892	161.200, 1.584	161.200, 1.245	161.200, 1.191	161.200, 0.342	161.200, 1.377	161.200, 1.383
808	161.400, 2.340	161.400, 1.784	161.400, 1.256	161.400, 0.775	161.400, 2.307	161.400, 1.585	161.400, 1.180	161.400, 0.263	161.400, 0.638	161.400, 1.495	161.400, 1.194	161.400, 1.162	161.400, 0.237	161.400, 1.236	161.400, 1.508	161.400, 1.228	161.400, 1.196	161.400, 1.167	161.400, 1.246	161.400, 1.333	161.400, 2.453	161.400, 1.970	161.400, 1.401	161.400, 0.886	161.400, 1.573	161.400, 1.233	161.400, 1.179	161.400, 0.341	161.400, 1.365	161.400, 1.370
809	161.600, 2.330	161.600, 1.775	161.600, 1.250	161.600, 0.771	161.600, 2.298	161.600, 1.578	161.600, 1.174	161.600, 0.263	161.600, 0.636	161.600, 1.485	161.600, 1.183	161.600, 1.149	161.600, 0.236	161.600, 1.221	161.600, 1.496	161.600, 1.214	161.600, 1.181	161.600, 1.152	161.600, 1.230	161.600, 1.317	161.600, 2.444	161.600, 1.962	161.600, 1.394	161.600, 0.881	161.600, 1.563	161.600, 1.222	161.600, 1.166	161.600, 0.341	161.600, 1.352	161.600, 1.357
810	161.800, 2.320	161.800, 1.767	161.800, 1.243	161.800, 0.767	161.800, 2.289	161.800, 1.571	161.800, 1.168	161.800, 0.263	161.800, 0.633	161.800, 1.475	161.800, 1.172	161.800, 1.136	161.800, 0.236	161.800, 1.206	161.800, 1.483	161.800, 1.201	161.800, 1.166	161.800, 1.137	161.800, 1.214	161.800, 1.301	161.800, 2.435	161.800, 1.954	161.800, 1.387	161.800, 0.876	161.800, 1.552	161.800, 1.211	161.800, 1.154	161.800, 0.340	161.800, 1.339	161.800, 1.345
811	162.000, 2.310	162.000, 1.759	162.000, 1.236	162.000, 0.764	162.000, 2.280	162.000, 1.564	162.000, 1.162	162.000, 0.263	162.000, 0.630	162.000, 1.465	162.000, 1.162	162.000, 1.124	162.000, 0.235	162.000, 1.192	162.000, 1.471	162.000, 1.189	162.000, 1.151	162.000, 1.122	162.000, 1.199	162.000, 1.285	162.000, 2.427	162.000, 1.946	162.000, 1.381	162.000, 0.871	162.000, 1.542	162.000, 1.200	162.000, 1.142	162.000, 0.339	162.000, 1.327	162.000, 1.332
812	162.200, 2.300	162.200, 1.751	162.200, 1.230	162.200, 0.761	162.200, 2.271	162.200, 1.557	162.200, 1.156	162.200, 0.263	162.200, 0.627	162.200, 1.455	162.200, 1.152	162.200, 1.112	162.200, 0.235	162.200, 1.179	162.200, 1.459	162.200, 1.176	162.200, 1.137	162.200, 1.107	162.200, 1.183	162.200, 1.269	162.200, 2.419	162.200, 1.938	162.200, 1.374	162.200, 0.866	162.200, 1.532	162.200, 1.190	162.200, 1.130	162.200, 0.338	162.200, 1.315	162.200, 1.320
813	162.400, 2.290	162.400, 1.743	162.400, 1.224	162.400, 0.757	162.400, 2.263	162.400, 1.551	162.400, 1.150	162.400, 0.262	162.400, 0.624	162.400, 1.445	162.400, 1.142	162.400, 1.100	162.400, 0.234	162.400, 1.165	162.400, 1.448	162.400, 1.164	162.400, 1.123	162.400, 1.093	162.400, 1.168	162.400, 1.254	162.400, 2.410	162.400, 1.931	162.400, 1.368	162.400, 0.861	162.400, 1.522	162.400, 1.179	162.400, 1.118	162.400, 0.337	162.400, 1.303	162.400, 1.308
814	162.600, 2.280	162.600, 1.735	162.600, 1.217	162.600, 0.754	162.600, 2.255	162.600, 1.544	162.600, 1.144	162.600, 0.262	162.600, 0.621	162.600, 1.435	162.600, 1.132	162.600, 1.088	162.600, 0.234	162.600, 1.152	162.600, 1.436	162.600, 1.152	162.600, 1.110	162.600, 1.078	162.600, 1.153	162.600, 1.239	162.600, 2.402	162.600, 1.923	162.600, 1.361	162.600, 0.856	162.600, 1.512	162.600, 1.169	162.600, 1.107	162.600, 0.336	162.600, 1.291	162.600, 1.296
815	162.800, 2.271	162.800, 1.727	162.800, 1.211	162.800, 0.751	162.800, 2.246	162.800, 1.537	162.800, 1.138	162.800, 0.262	162.800, 0.618	162.800, 1.426	162.800, 1.122	162.800, 1.077	162.800, 0.233	162.800, 1.139	162.800, 1.425	162.800, 1.140	162.800, 1.096	162.800, 1.064	162.800, 1.139	162.800, 1.225	162.800, 2.394	162.800, 1.916	162.800, 1.355	162.800, 0.851	162.800, 1.502	162.800, 1.159	162.800, 1.096	162.800, 0.335	162.800, 1.279	162.800, 1.285
816	163.000, 2.262	163.000, 1.719	163.000, 1.205	163.000, 0.748	163.000, 2.238	163.000, 1.530	163.000, 1.132	163.000, 0.261	163.000, 0.615	163.000, 1.416	163.000, 1.113	163.000, 1.065	163.000, 0.233	163.000, 1.127	163.000, 1.414	163.000, 1.129	163.000, 1.084	163.000, 1.051	163.000, 1.125	163.000, 1.210	163.000, 2.386	163.000, 1.908	163.000, 1.348	163.000, 0.846	163.000, 1.492	163.000, 1.149	163.000, 1.084	163.000, 0.334	163.000, 1.268	163.000, 1.274
817	163.200, 2.253	163.200, 1.711	163.200, 1.199	163.200, 0.745	163.200, 2.230	163.200, 1.524	163.200, 1.126	163.200, 0.261	163.200, 0.612	163.200, 1.407	163.200, 1.103	163.200, 1.054	163.200, 0.233	163.200, 1.114	163.200, 1.403	163.200, 1.118	163.200, 1.071	163.200, 1.038	163.200, 1.111	163.200, 1.196	163.200, 2.378	163.200, 1.901	163.200, 1.342	163.200, 0.842	163.200, 1.483	163.200, 1.139	163.200, 1.073	163.200, 0.334	163.200, 1.257	163.200, 1.264
818	163.400, 2.244	163.400, 1.703	163.400, 1.193	163.400, 0.741	163.400, 2.222	163.400, 1.517	163.400, 1.121	163.400, 0.261	163.400, 0.609	163.400, 1.397	163.400, 1.094	163.400, 1.043	163.400, 0.233	163.400, 1.102	163.400, 1.393	163.400, 1.107	163.400, 1.059	163.400, 1.025	163.400, 1.097	163.400, 1.182	163.400, 2.370	163.400, 1.894	163.400, 1.335	163.400, 0.838	163.400, 1.473	163.400, 1.129	163.400, 1.063	163.400, 0.333	163.400, 1.246	163.400, 1.253
819	163.600, 2.235	163.600, 1.696	163.600, 1.187	163.600, 0.738	163.600, 2.214	163.600, 1.511	163.600, 1.115	163.600, 0.261	163.600, 0.606	163.600, 1.388	163.600, 1.084	163.600, 1.033	163.600, 0.233	163.600, 1.090	163.600, 1.383	163.600, 1.097	163.600, 1.047	163.600, 1.012	163.600, 1.084	163.600, 1.169	163.600, 2.362	163.600, 1.887	163.600, 1.329	163.600, 0.833	163.600, 1.464	163.600, 1.120	163.600, 1.052	163.600, 0.332	163.600, 1.236	163.600, 1.243
820	163.800, 2.226	163.800, 1.688	163.800, 1.182	163.800, 0.735	163.800, 2.207	163.800, 1.505	163.800, 1.110	163.800, 0.260	163.800, 0.604	163.800, 1.379	163.800, 1.075	163.800, 1.022	163.800, 0.233	163.800, 1.079	163.800, 1.373	163.800, 1.086	163.800, 1.035	163.800, 1.000	163.800, 1.071	163.800, 1.155	163.800, 2.355	163.800, 1.880	163.800, 1.323	163.800, 0.829	163.800, 1.455	163.800, 1.110	163.800, 1.041	163.800, 0.332	163.800, 1.225	163.800, 1.233
821	164.000, 2.218	164.000, 1.681	164.000, 1.176	164.000, 0.732	164.000, 2.199	164.000, 1.498	164.000, 1.105	164.000, 0.260	164.000, 0.601	164.000, 1.371	164.000, 1.066	164.000, 1.012	164.000, 0.233	164.000, 1.067	164.000, 1.363	164.000, 1.076	164.000, 1.024	164.000, 0.988	164.000, 1.059	164.000, 1.142	164.000, 2.347	164.000, 1.872	164.000, 1.317	164.000, 0.825	164.000, 1.446	164.000, 1.100	164.000, 1.031	164.000, 0.331	164.000, 1.215	164.000, 1.223
822	164.200, 2.209	164.200, 1.673	164.200, 1.170	164.200, 0.728	164.200, 2.192	164.200, 1.492	164.200, 1.100	164.200, 0.260	164.200, 0.599	164.200, 1.362	164.200, 1.058	164.200, 1.003	164.200, 0.233	164.200, 1.056	164.200, 1.353	164.200, 1.067	164.200, 1.012	164.200, 0.976	164.200, 1.046	164.200, 1.129	164.200, 2.340	164.200, 1.866	164.200, 1.311	164.200, 0.820	164.200, 1.437	164.200, 1.091	164.200, 1.021	164.200, 0.330	164.200, 1.205	164.200, 1.213
823	164.400, 2.200	164.400, 1.665	164.400, 1.165	164.400, 0.725	164.400, 2.184	164.400, 1.486	164.400, 1.095	164.400, 0.260	164.400, 0.596	164.400, 1.353	164.400, 1.049	164.400, 0.993	164.400, 0.232	164.400, 1.045	164.400, 1.344	164.400, 1.057	164.400, 1.001	164.400, 0.964	164.400, 1.034	164.400, 1.116	164.400, 2.332	164.400, 1.859	164.400, 1.305	164.400, 0.816	164.400, 1.429	164.400, 1.082	164.400, 1.011	164.400, 0.330	164.400, 1.195	164.400, 1.204
824	164.600, 2.191	164.600, 1.658	164.600, 1.159	164.600, 0.722	164.600, 2.177	164.600, 1.480	164.600, 1.090	164.600, 0.259	164.600, 0.594	164.600, 1.345	164.600, 1.041	164.600, 0.984	164.600, 0.232	164.600, 1.035	164.600, 1.335	164.600, 1.047	164.600, 0.990	164.600, 0.953	164.600, 1.021	164.600, 1.103	164.600, 2.324	164.600, 1.852	164.600, 1.299	164.600, 0.812	164.600, 1.420	164.600, 1.073	164.600, 1.001	164.600, 0.330	164.600, 1.186	164.600, 1.194
825	164.800, 2.183	164.800, 1.651	164.800, 1.154	164.800, 0.719	164.800, 2.169	164.800, 1.474	164.800, 1.085	164.800, 0.259	164.800, 0.593	164.800, 1.337	164.800, 1.033	164.800, 0.975	164.800, 0.232	164.800, 1.025	164.800, 1.326	164.800, 1.038	164.800, 0.979	164.800, 0.942	164.800, 1.010	164.800, 1.090	164.800, 2.317	164.800, 1.846	164.800, 1.294	164.800, 0.807	164.800, 1.412	164.800, 1.064	164.800, 0.992	164.800, 0.329	164.800, 1.176	164.800, 1.185
826	165.000, 2.174	165.000, 1.643	165.000, 1.148	165.000, 0.716	165.000, 2.162	165.000, 1.469	165.000, 1.080	165.000, 0.259	165.000, 0.591	165.000, 1.329	165.000, 1.025	165.000, 0.966	165.000, 0.232	165.000, 1.014	165.000, 1.317	165.000, 1.029	165.000, 0.968	165.000, 0.930	165.000, 0.998	165.000, 1.078	165.000, 2.309	165.000, 1.839	165.000, 1.288	165.000, 0.803	165.000, 1.404	165.000, 1.055	165.000, 0.983	165.000, 0.329	165.000, 1.167	165.000, 1.175
827	165.200, 2.166	165.200, 1.636	165.200, 1.143	165.200, 0.713	165.200, 2.155	165.200, 1.463	165.200, 1.075	165.200, 0.259	165.200, 0.589	165.200, 1.322	165.200, 1.018	165.200, 0.958	165.200, 0.231	165.200, 1.004	165.200, 1.308	165.200, 1.020	165.200, 0.957	165.200, 0.920	165.200, 0.986	165.200, 1.066	165.200, 2.301	165.200, 1.832	165.200, 1.283	165.200, 0.799	165.200, 1.396	165.200, 1.047	165.200, 0.973	165.200, 0.328	165.200, 1.158	165.200, 1.166
828	165.400, 2.157	165.400, 1.629	165.400, 1.137	165.400, 0.710	165.400, 2.148	165.400, 1.457	165.400, 1.070	165.400, 0.258	165.400, 0.587	165.400, 1.314	165.400, 1.010	165.400, 0.949	165.400, 0.231	165.400, 0.995	165.400, 1.299	165.400, 1.012	165.400, 0.947	165.400, 0.909	165.400, 0.975	165.400, 1.054	165.400, 2.293	165.400, 1.825	165.400, 1.277	165.400, 0.795	165.400, 1.388	165.400, 1.038	165.400, 0.964	165.400, 0.327	165.400, 1.149	165.400, 1.157
829	165.600, 2.149	165.600, 1.622	165.600, 1.132	165.600, 0.707	165.600, 2.141	165.600, 1.451	165.600, 1.065	165.600, 0.258	165.600, 0.584	165.600, 1.307	165.600, 1.003	165.600, 0.941	165.600, 0.231	165.600, 0.985	165.600, 1.290	165.600, 1.003	165.600, 0.937	165.600, 0.899	165.600, 0.965	165.600, 1.042	165.600, 2.286	165.600, 1.818	165.600, 1.272	165.600, 0.791	165.600, 1.381	165.600, 1.030	165.600, 0.956	165.600, 0.327	165.600, 1.141	165.600, 1.148
830	165.800, 2.140	165.800, 1.616	165.800, 1.127	165.800, 0.705	165.800, 2.134	165.800, 1.446	165.800, 1.061	165.800, 0.258	165.800, 0.582	165.800, 1.300	165.800, 0.996	165.800, 0.933	165.800, 0.230	165.800, 0.975	165.800, 1.281	165.800, 0.995	165.800, 0.927	165.800, 0.889	165.800, 0.954	165.800, 1.031	165.800, 2.279	165.800, 1.811	165.800, 1.266	165.800, 0.787	165.800, 1.373	165.800, 1.022	165.800, 0.947	165.800, 0.326	165.800, 1.132	165.800, 1.139
831	166.000, 2.132	166.000, 1.609	166.000, 1.122	166.000, 0.702	166.000, 2.128	166.000, 1.440	166.000, 1.056	166.000, 0.257	166.000, 0.580	166.000, 1.292	166.000, 0.989	166.000, 0.925	166.000, 0.230	166.000, 0.966	166.000, 1.273	166.000, 0.986	166.000, 0.917	166.000, 0.879	166.000, 0.944	166.000, 1.020	166.000, 2.272	166.000, 1.805	166.000, 1.261	166.000, 0.783	166.000, 1.366	166.000, 1.014	166.000, 0.938	166.000, 0.326	166.000, 1.124	166.000, 1.131
832	166.200, 2.124	166.200, 1.603	166.200, 1.117	166.200, 0.700	166.200, 2.121	166.200, 1.434	166.200, 1.052	166.200, 0.257	166.200, 0.578	166.200, 1.285	166.200, 0.982	166.200, 0.917	166.200, 0.230	166.200, 0.957	166.200, 1.264	166.200, 0.978	166.200, 0.908	166.200, 0.869	166.200, 0.933	166.200, 1.009	166.200, 2.265	166.200, 1.798	166.200, 1.255	166.200, 0.779	166.200, 1.359	166.200, 1.007	166.200, 0.930	166.200, 0.325	166.200, 1.116	166.200, 1.123
833	166.400, 2.116	166.400, 1.596	166.400, 1.112	166.400, 0.697	166.400, 2.115	166.400, 1.428	166.400, 1.047	166.400, 0.257	166.400, 0.575	166.400, 1.278	166.400, 0.975	166.400, 0.910	166.400, 0.230	166.400, 0.948	166.400, 1.256	166.400, 0.971	166.400, 0.899	166.400, 0.860	166.400, 0.923	166.400, 0.998	166.400, 2.258	166.400, 1.791	166.400, 1.250	166.400, 0.775	166.400, 1.352	166.400, 1.000	166.400, 0.922	166.400, 0.324	166.400, 1.108	166.400, 1.115
834	166.600, 2.108	166.600, 1.590	166.600, 1.107	166.600, 0.695	166.600, 2.108	166.600, 1.423	166.600, 1.043	166.600, 0.257	166.600, 0.573	166.600, 1.271	166.600, 0.968	166.600, 0.903	166.600, 0.229	166.600, 0.940	166.600, 1.248	166.600, 0.963	166.600, 0.890	166.600, 0.850	166.600, 0.913	166.600, 0.988	166.600, 2.251	166.600, 1.785	166.600, 1.244	166.600, 0.771	166.600, 1.346	166.600, 0.993	166.600, 0.914	166.600, 0.324	166.600, 1.100	166.600, 1.107
835	166.800, 2.100	166.800, 1.583	166.800, 1.102	166.800, 0.693	166.800, 2.102	166.800, 1.418	166.800, 1.038	166.800, 0.257	166.800, 0.571	166.800, 1.264	166.800, 0.961	166.800, 0.895	166.800, 0.229	166.800, 0.931	166.800, 1.240	166.800, 0.955	166.800, 0.881	166.800, 0.841	166.800, 0.904	166.800, 0.977	166.800, 2.244	166.800, 1.779	166.800, 1.239	166.800, 0.767	166.800, 1.339	166.800, 0.986	166.800, 0.906	166.800, 0.323	166.800, 1.092	166.800, 1.099
836	167.000, 2.092	167.000, 1.577	167.000, 1.098	167.000, 0.690	167.000, 2.096	167.000, 1.413	167.000, 1.034	167.000, 0.257	167.000, 0.569	167.000, 1.258	167.000, 0.954	167.000, 0.888	167.000, 0.228	167.000, 0.923	167.000, 1.233	167.000, 0.947	167.000, 0.873	167.000, 0.833	167.000, 0.895	167.000, 0.967	167.000, 2.238	167.000, 1.772	167.000, 1.234	167.000, 0.763	167.000, 1.332	167.000, 0.979	167.000, 0.898	167.000, 0.322	167.000, 1.085	167.000, 1.092
837	167.200, 2.085	167.200, 1.571	167.200, 1.093	167.200, 0.688	167.200, 2.090	167.200, 1.408	167.200, 1.030	167.200, 0.258	167.200, 0.568	167.200, 1.251	167.200, 0.947	167.200, 0.881	167.200, 0.228	167.200, 0.915	167.200, 1.225	167.200, 0.940	167.200, 0.865	167.200, 0.824	167.200, 0.886	167.200, 0.957	167.200, 2.231	167.200, 1.766	167.200, 1.228	167.200, 0.759	167.200, 1.325	167.200, 0.972	167.200, 0.890	167.200, 0.322	167.200, 1.078	167.200, 1.085
838	167.400, 2.077	167.400, 1.565	167.400, 1.089	167.400, 0.685	167.400, 2.083	167.400, 1.403	167.400, 1.026	167.400, 0.257	167.400, 0.566	167.400, 1.245	167.400, 0.941	167.400, 0.874	167.400, 0.228	167.400, 0.908	167.400, 1.218	167.400, 0.932	167.400, 0.857	167.400, 0.815	167.400, 0.877	167.400, 0.947	167.400, 2.224	167.400, 1.760	167.400, 1.223	167.400, 0.755	167.400, 1.318	167.400, 0.965	167.400, 0.882	167.400, 0.321	167.400, 1.071	167.400, 1.078
839	167.600, 2.070	167.600, 1.559	167.600, 1.084	167.600, 0.683	167.600, 2.077	167.600, 1.398	167.600, 1.022	167.600, 0.257	167.600, 0.564	167.600, 1.238	167.600, 0.934	167.600, 0.868	167.600, 0.228	167.600, 0.900	167.600, 1.211	167.600, 0.925	167.600, 0.850	167.600, 0.807	167.600, 0.868	167.600, 0.938	167.600, 2.218	167.600, 1.754	167.600, 1.218	167.600, 0.751	167.600, 1.312	167.600, 0.959	167.600, 0.875	167.600, 0.321	167.600, 1.064	167.600, 1.070
840	167.800, 2.063	167.800, 1.553	167.800, 1.080	167.800, 0.681	167.800, 2.071	167.800, 1.394	167.800, 1.018	167.800, 0.257	167.800, 0.562	167.800, 1.232	167.800, 0.928	167.800, 0.861	167.800, 0.227	167.800, 0.893	167.800, 1.204	167.800, 0.918	167.800, 0.842	167.800, 0.799	167.800, 0.860	167.800, 0.928	167.800, 2.211	167.800, 1.748	167.800, 1.213	167.800, 0.747	167.800, 1.305	167.800, 0.952	167.800, 0.868	167.800, 0.320	167.800, 1.057	167.800, 1.063
841	168.000, 2.055	168.000, 1.547	168.000, 1.076	168.000, 0.678	168.000, 2.065	168.000, 1.389	168.000, 1.014	168.000, 0.257	168.000, 0.561	168.000, 1.226	168.000, 0.922	168.000, 0.855	168.000, 0.227	168.000, 0.886	168.000, 1.198	168.000, 0.910	168.000, 0.834	168.000, 0.791	168.000, 0.851	168.000, 0.918	168.000, 2.205	168.000, 1.742	168.000, 1.208	168.000, 0.743	168.000, 1.299	168.000, 0.946	168.000, 0.861	168.000, 0.319	168.000, 1.051	168.000, 1.056
842	168.200, 2.048	168.200, 1.541	168.200, 1.072	168.200, 0.676	168.200, 2.059	168.200, 1.385	168.200, 1.010	168.200, 0.256	168.200, 0.559	168.200, 1.220	168.200, 0.916	168.200, 0.849	168.200, 0.227	168.200, 0.879	168.200, 1.191	168.200, 0.904	168.200, 0.827	168.200, 0.783	168.200, 0.843	168.200, 0.909	168.200, 2.199	168.200, 1.737	168.200, 1.203	168.200, 0.739	168.200, 1.293	168.200, 0.939	168.200, 0.854	168.200, 0.319	168.200, 1.044	168.200, 1.050
843	168.400, 2.041	168.400, 1.535	168.400, 1.067	168.400, 0.674	168.400, 2.053	168.400, 1.380	168.400, 1.006	168.400, 0.256	168.400, 0.558	168.400, 1.214	168.400, 0.911	168.400, 0.843	168.400, 0.227	168.400, 0.872	168.400, 1.185	168.400, 0.897	168.400, 0.820	168.400, 0.775	168.400, 0.835	168.400, 0.900	168.400, 2.192	168.400, 1.732	168.400, 1.198	168.400, 0.735	168.400, 1.286	168.400, 0.933	168.400, 0.847	168.400, 0.318	168.400, 1.038	168.400, 1.043
844	168.600, 2.034	168.600, 1.529	168.600, 1.063	168.600, 0.672	168.600, 2.047	168.600, 1.376	168.600, 1.002	168.600, 0.256	168.600, 0.556	168.600, 1.208	168.600, 0.906	168.600, 0.837	168.600, 0.227	168.600, 0.866	168.600, 1.179	168.600, 0.891	168.600, 0.813	168.600, 0.767	168.600, 0.827	168.600, 0.891	168.600, 2.186	168.600, 1.726	168.600, 1.193	168.600, 0.731	168.600, 1.280	168.600, 0.926	168.600, 0.840	168.600, 0.318	168.600, 1.032	168.600, 1.037
845	168.800, 2.027	168.800, 1.524	168.800, 1.059	168.800, 0.670	168.800, 2.042	168.800, 1.372	168.800, 0.998	168.800, 0.256	168.800, 0.555	168.800, 1.202	168.800, 0.901	168.800, 0.831	168.800, 0.226	168.800, 0.859	168.800, 1.172	168.800, 0.885	168.800, 0.806	168.800, 0.759	168.800, 0.819	168.800, 0.882	168.800, 2.179	168.800, 1.721	168.800, 1.189	168.800, 0.728	168.800, 1.274	168.800, 0.920	168.800, 0.834	168.800, 0.317	168.800, 1.025	168.800, 1.031
846	169.000, 2.021	169.000, 1.518	169.000, 1.054	169.000, 0.668	169.000, 2.036	169.000, 1.368	169.000, 0.995	169.000, 0.256	169.000, 0.554	169.000, 1.196	169.000, 0.896	169.000, 0.825	169.000, 0.226	169.000, 0.853	169.000, 1.166	169.000, 0.879	169.000, 0.798	169.000, 0.752	169.000, 0.811	169.000, 0.874	169.000, 2.173	169.000, 1.715	169.000, 1.184	169.000, 0.724	169.000, 1.268	169.000, 0.914	169.000, 0.827	169.000, 0.317	169.000, 1.019	169.000, 1.025
847	169.200, 2.014	169.200, 1.513	169.200, 1.050	169.200, 0.666	169.200, 2.030	169.200, 1.363	169.200, 0.991	169.200, 0.256	169.200, 0.552	169.200, 1.190	169.200, 0.891	169.200, 0.820	169.200, 0.226	169.200, 0.846	169.200, 1.160	169.200, 0.873	169.200, 0.791	169.200, 0.745	169.200, 0.803	169.200, 0.865	169.200, 2.166	169.200, 1.710	169.200, 1.179	169.200, 0.721	169.200, 1.262	169.200, 0.908	169.200, 0.821	169.200, 0.316	169.200, 1.012	169.200, 1.019
848	169.400, 2.008	169.400, 1.507	169.400, 1.046	169.400, 0.664	169.400, 2.025	169.400, 1.359	169.400, 0.987	169.400, 0.256	169.400, 0.551	169.400, 1.185	169.400, 0.886	169.400, 0.814	169.400, 0.226	169.400, 0.840	169.400, 1.154	169.400, 0.868	169.400, 0.785	169.400, 0.738	169.400, 0.796	169.400, 0.857	169.400, 2.160	169.400, 1.704	169.400, 1.175	169.400, 0.717	169.400, 1.256	169.400, 0.903	169.400, 0.815	169.400, 0.316	169.400, 1.006	169.400, 1.013
849	169.600, 2.001	169.600, 1.502	169.600, 1.042	169.600, 0.662	169.600, 2.019	169.600, 1.355	169.600, 0.983	169.600, 0.255	169.600, 0.549	169.600, 1.179	169.600, 0.882	169.600, 0.809	169.600, 0.225	169.600, 0.834	169.600, 1.148	169.600, 0.862	169.600, 0.778	169.600, 0.731	169.600, 0.788	169.600, 0.849	169.600, 2.154	169.600, 1.699	169.600, 1.170	169.600, 0.714	169.600, 1.250	169.600, 0.897	169.600, 0.809	169.600, 0.315	169.600, 1.000	169.600, 1.007
850	169.800, 1.995	169.800, 1.496	169.800, 1.038	169.800, 0.660	169.800, 2.014	169.800, 1.351	169.800, 0.980	169.800, 0.255	169.800, 0.548	169.800, 1.174	169.800, 0.877	169.800, 0.804	169.800, 0.225	169.800, 0.828	169.800, 1.142	169.800, 0.857	169.800, 0.771	169.800, 0.725	169.800, 0.781	169.800, 0.841	169.800, 2.148	169.800, 1.694	169.800, 1.165	169.800, 0.710	169.800, 1.245	169.800, 0.892	169.800, 0.803	169.800, 0.314	169.800, 0.994	169.800, 1.001
851	170.000, 1.989	170.000, 1.491	170.000, 1.034	170.000, 0.658	170.000, 2.009	170.000, 1.347	170.000, 0.976	170.000, 0.255	170.000, 0.546	170.000, 1.169	170.000, 0.873	170.000, 0.799	170.000, 0.225	170.000, 0.822	170.000, 1.137	170.000, 0.851	170.000, 0.765	170.000, 0.719	170.000, 0.774	170.000, 0.834	170.000, 2.142	170.000, 1.688	170.000, 1.160	170.000, 0.707	170.000, 1.239	170.000, 0.886	170.000, 0.798	170.000, 0.314	170.000, 0.988	170.000, 0.995
852	170.200, 1.983	170.200, 1.485	170.200, 1.031	170.200, 0.656	170.200, 2.004	170.200, 1.342	170.200, 0.973	170.200, 0.254	170.200, 0.545	170.200, 1.163	170.200, 0.868	170.200, 0.793	170.200, 0.224	170.200, 0.816	170.200, 1.131	170.200, 0.846	170.200, 0.759	170.200, 0.713	170.200, 0.767	170.200, 0.826	170.200, 2.136	170.200, 1.683	170.200, 1.156	170.200, 0.703	170.200, 1.234	170.200, 0.881	170.200, 0.792	170.200, 0.313	170.200, 0.982	170.200, 0.989
853	170.400, 1.977	170.400, 1.480	170.400, 1.027	170.400, 0.654	170.400, 1.999	170.400, 1.338	170.400, 0.970	170.400, 0.254	170.400, 0.543	170.400, 1.158	170.400, 0.863	170.400, 0.788	170.400, 0.224	170.400, 0.810	170.400, 1.125	170.400, 0.841	170.400, 0.753	170.400, 0.707	170.400, 0.761	170.400, 0.819	170.400, 2.131	170.400, 1.678	170.400, 1.151	170.400, 0.700	170.400, 1.229	170.400, 0.876	170.400, 0.787	170.400, 0.313	170.400, 0.976	170.400, 0.983
854	170.600, 1.971	170.600, 1.474	170.600, 1.023	170.600, 0.652	170.600, 1.994	170.600, 1.334	170.600, 0.967	170.600, 0.254	170.600, 0.542	170.600, 1.153	170.600, 0.859	170.600, 0.784	170.600, 0.224	170.600, 0.805	170.600, 1.120	170.600, 0.835	170.600, 0.748	170.600, 0.701	170.600, 0.754	170.600, 0.812	170.600, 2.125	170.600, 1.673	170.600, 1.147	170.600, 0.697	170.600, 1.223	170.600, 0.871	170.600, 0.782	170.600, 0.312	170.600, 0.971	170.600, 0.978
855	170.800, 1.966	170.800, 1.469	170.800, 1.019	170.800, 0.651	170.800, 1.989	170.800, 1.330	170.800, 0.963	170.800, 0.253	170.800, 0.540	170.800, 1.148	170.800, 0.854	170.800, 0.779	170.800, 0.224	170.800, 0.800	170.800, 1.115	170.800, 0.830	170.800, 0.742	170.800, 0.695	170.800, 0.748	170.800, 0.804	170.800, 2.119	170.800, 1.668	170.800, 1.142	170.800, 0.694	170.800, 1.218	170.800, 0.867	170.800, 0.776	170.800, 0.312	170.800, 0.966	170.800, 0.972
856	171.000, 1.960	171.000, 1.464	171.000, 1.015	171.000, 0.649	171.000, 1.985	171.000, 1.326	171.000, 0.960	171.000, 0.253	171.000, 0.539	171.000, 1.143	171.000, 0.849	171.000, 0.774	171.000, 0.223	171.000, 0.795	171.000, 1.110	171.000, 0.825	171.000, 0.737	171.000, 0.689	171.000, 0.742	171.000, 0.797	171.000, 2.113	171.000, 1.662	171.000, 1.138	171.000, 0.691	171.000, 1.213	171.000, 0.862	171.000, 0.771	171.000, 0.312	171.000, 0.961	171.000, 0.967
857	171.200, 1.954	171.200, 1.459	171.200, 1.012	171.200, 0.647	171.200, 1.980	171.200, 1.322	171.200, 0.957	171.200, 0.252	171.200, 0.537	171.200, 1.138	171.200, 0.845	171.200, 0.769	171.200, 0.223	171.200, 0.789	171.200, 1.105	171.200, 0.820	171.200, 0.731	171.200, 0.683	171.200, 0.735	171.200, 0.790	171.200, 2.108	171.200, 1.657	171.200, 1.134	171.200, 0.687	171.200, 1.208	171.200, 0.857	171.200, 0.766	171.200, 0.311	171.200, 0.956	171.200, 0.962
858	171.400, 1.948	171.400, 1.454	171.400, 1.008	171.400, 0.645	171.400, 1.975	171.400, 1.318	171.400, 0.954	171.400, 0.251	171.400, 0.536	171.400, 1.133	171.400, 0.840	171.400, 0.764	171.400, 0.223	171.400, 0.784	171.400, 1.100	171.400, 0.815	171.400, 0.726	171.400, 0.677	171.400, 0.729	171.400, 0.783	171.400, 2.103	171.400, 1.652	171.400, 1.129	171.400, 0.684	171.400, 1.202	171.400, 0.852	171.400, 0.761	171.400, 0.311	171.400, 0.951	171.400, 0.957
859	171.600, 1.942	171.600, 1.449	171.600, 1.005	171.600, 0.644	171.600, 1.970	171.600, 1.314	171.600, 0.951	171.600, 0.251	171.600, 0.535	171.600, 1.128	171.600, 0.836	171.600, 0.760	171.600, 0.223	171.600, 0.779	171.600, 1.094	171.600, 0.811	171.600, 0.721	171.600, 0.672	171.600, 0.723	171.600, 0.777	171.600, 2.097	171.600, 1.647	171.600, 1.125	171.600, 0.680	171.600, 1.197	171.600, 0.847	171.600, 0.756	171.600, 0.311	171.600, 0.946	171.600, 0.952
860	171.800, 1.937	171.800, 1.444	171.800, 1.002	171.800, 0.642	171.800, 1.966	171.800, 1.311	171.800, 0.948	171.800, 0.250	171.800, 0.534	171.800, 1.123	171.800, 0.831	171.800, 0.755	171.800, 0.222	171.800, 0.774	171.800, 1.089	171.800, 0.806	171.800, 0.716	171.800, 0.666	171.800, 0.718	171.800, 0.770	171.800, 2.092	171.800, 1.641	171.800, 1.121	171.800, 0.677	171.800, 1.193	171.800, 0.842	171.800, 0.751	171.800, 0.310	171.800, 0.942	171.800, 0.947
861	172.000, 1.931	172.000, 1.440	172.000, 0.999	172.000, 0.640	172.000, 1.961	172.000, 1.307	172.000, 0.945	172.000, 0.250	172.000, 0.532	172.000, 1.118	172.000, 0.827	172.000, 0.751	172.000, 0.222	172.000, 0.770	172.000, 1.085	172.000, 0.802	172.000, 0.711	172.000, 0.661	172.000, 0.712	172.000, 0.763	172.000, 2.087	172.000, 1.636	172.000, 1.117	172.000, 0.674	172.000, 1.188	172.000, 0.838	172.000, 0.746	172.000, 0.310	172.000, 0.937	172.000, 0.943
862	172.200, 1.926	172.200, 1.435	172.200, 0.996	172.200, 0.639	172.200, 1.956	172.200, 1.303	172.200, 0.942	172.200, 0.250	172.200, 0.531	172.200, 1.114	172.200, 0.823	172.200, 0.747	172.200, 0.222	172.200, 0.765	172.200, 1.080	172.200, 0.797	172.200, 0.706	172.200, 0.655	172.200, 0.706	172.200, 0.757	172.200, 2.082	172.200, 1.631	172.200, 1.113	172.200, 0.671	172.200, 1.183	172.200, 0.833	172.200, 0.741	172.200, 0.309	172.200, 0.932	172.200, 0.938
863	172.400, 1.920	172.400, 1.431	172.400, 0.992	172.400, 0.637	172.400, 1.952	172.400, 1.299	172.400, 0.939	172.400, 0.250	172.400, 0.530	172.400, 1.109	172.400, 0.819	172.400, 0.743	172.400, 0.222	172.400, 0.761	172.400, 1.075	172.400, 0.793	172.400, 0.701	172.400, 0.650	172.400, 0.701	172.400, 0.751	172.400, 2.077	172.400, 1.626	172.400, 1.109	172.400, 0.668	172.400, 1.178	172.400, 0.828	172.400, 0.736	172.400, 0.309	172.400, 0.927	172.400, 0.934
864	172.600, 1.915	172.600, 1.426	172.600, 0.989	172.600, 0.636	172.600, 1.947	172.600, 1.296	172.600, 0.936	172.600, 0.250	172.600, 0.529	172.600, 1.105	172.600, 0.815	172.600, 0.739	172.600, 0.222	172.600, 0.756	172.600, 1.071	172.600, 0.789	172.600, 0.696	172.600, 0.645	172.600, 0.696	172.600, 0.744	172.600, 2.072	172.600, 1.622	172.600, 1.105	172.600, 0.665	172.600, 1.174	172.600, 0.824	172.600, 0.731	172.600, 0.308	172.600, 0.923	172.600, 0.930
865	172.800, 1.909	172.800, 1.422	172.800, 0.986	172.800, 0.635	172.800, 1.942	172.800, 1.293	172.800, 0.933	172.800, 0.251	172.800, 0.528	172.800, 1.101	172.800, 0.811	172.800, 0.735	172.800, 0.222	172.800, 0.751	172.800, 1.066	172.800, 0.785	172.800, 0.691	172.800, 0.640	172.800, 0.690	172.800, 0.738	172.800, 2.067	172.800, 1.617	172.800, 1.101	172.800, 0.662	172.800, 1.170	172.800, 0.820	172.800, 0.726	172.800, 0.308	172.800, 0.918	172.800, 0.926
866	173.000, 1.904	173.000, 1.417	173.000, 0.983	173.000, 0.634	173.000, 1.938	173.000, 1.289	173.000, 0.931	173.000, 0.251	173.000, 0.527	173.000, 1.096	173.000, 0.807	173.000, 0.731	173.000, 0.222	173.000, 0.747	173.000, 1.061	173.000, 0.781	173.000, 0.686	173.000, 0.635	173.000, 0.685	173.000, 0.733	173.000, 2.061	173.000, 1.612	173.000, 1.097	173.000, 0.659	173.000, 1.165	173.000, 0.815	173.000, 0.722	173.000, 0.307	173.000, 0.913	173.000, 0.922
867	173.200, 1.899	173.200, 1.413	173.200, 0.980	173.200, 0.632	173.200, 1.934	173.200, 1.286	173.200, 0.928	173.200, 0.251	173.200, 0.526	173.200, 1.092	173.200, 0.803	173.200, 0.728	173.200, 0.222	173.200, 0.743	173.200, 1.057	173.200, 0.777	173.200, 0.681	173.200, 0.631	173.200, 0.680	173.200, 0.727	173.200, 2.056	173.200, 1.608	173.200, 1.093	173.200, 0.656	173.200, 1.161	173.200, 0.811	173.200, 0.718	173.200, 0.307	173.200, 0.909	173.200, 0.918
868	173.400, 1.893	173.400, 1.409	173.400, 0.977	173.400, 0.630	173.400, 1.929	173.400, 1.283	173.400, 0.925	173.400, 0.251	173.400, 0.525	173.400, 1.088	173.400, 0.799	173.400, 0.724	173.400, 0.222	173.400, 0.738	173.400, 1.052	173.400, 0.773	173.400, 0.677	173.400, 0.626	173.400, 0.675	173.400, 0.721	173.400, 2.051	173.400, 1.603	173.400, 1.089	173.400, 0.653	173.400, 1.157	173.400, 0.807	173.400, 0.713	173.400, 0.306	173.400, 0.904	173.400, 0.914
869	173.600, 1.888	173.600, 1.404	173.600, 0.974	173.600, 0.628	173.600, 1.925	173.600, 1.280	173.600, 0.923	173.600, 0.251	173.600, 0.524	173.600, 1.084	173.600, 0.796	173.600, 0.720	173.600, 0.221	173.600, 0.734	173.600, 1.048	173.600, 0.769	173.600, 0.673	173.600, 0.622	173.600, 0.670	173.600, 0.715	173.600, 2.045	173.600, 1.599	173.600, 1.085	173.600, 0.650	173.600, 1.153	173.600, 0.803	173.600, 0.709	173.600, 0.306	173.600, 0.900	173.600, 0.910
870	173.800, 1.883	173.800, 1.400	173.800, 0.971	173.800, 0.627	173.800, 1.921	173.800, 1.277	173.800, 0.921	173.800, 0.251	173.800, 0.523	173.800, 1.080	173.800, 0.792	173.800, 0.716	173.800, 0.221	173.800, 0.730	173.800, 1.044	173.800, 0.765	173.800, 0.669	173.800, 0.617	173.800, 0.665	173.800, 0.710	173.800, 2.040	173.800, 1.594	173.800, 1.081	173.800, 0.647	173.800, 1.148	173.800, 0.799	173.800, 0.705	173.800, 0.305	173.800, 0.895	173.800, 0.905
871	174.000, 1.878	174.000, 1.396	174.000, 0.968	174.000, 0.625	174.000, 1.916	174.000, 1.273	174.000, 0.918	174.000, 0.251	174.000, 0.522	174.000, 1.076	174.000, 0.789	174.000, 0.712	174.000, 0.221	174.000, 0.726	174.000, 1.040	174.000, 0.761	174.000, 0.665	174.000, 0.613	174.000, 0.660	174.000, 0.704	174.000, 2.035	174.000, 1.590	174.000, 1.077	174.000, 0.645	174.000, 1.144	174.000, 0.795	174.000, 0.701	174.000, 0.305	174.000, 0.891	174.000, 0.901
872	174.200, 1.873	174.200, 1.392	174.200, 0.964	174.200, 0.624	174.200, 1.912	174.200, 1.270	174.200, 0.916	174.200, 0.251	174.200, 0.521	174.200, 1.071	174.200, 0.786	174.200, 0.708	174.200, 0.220	174.200, 0.722	174.200, 1.037	174.200, 0.757	174.200, 0.661	174.200, 0.609	174.200, 0.656	174.200, 0.699	174.200, 2.030	174.200, 1.585	174.200, 1.073	174.200, 0.642	174.200, 1.139	174.200, 0.792	174.200, 0.697	174.200, 0.304	174.200, 0.888	174.200, 0.897
873	174.400, 1.868	174.400, 1.388	174.400, 0.961	174.400, 0.622	174.400, 1.908	174.400, 1.267	174.400, 0.913	174.400, 0.251	174.400, 0.520	174.400, 1.067	174.400, 0.783	174.400, 0.704	174.400, 0.220	174.400, 0.718	174.400, 1.033	174.400, 0.753	174.400, 0.657	174.400, 0.605	174.400, 0.651	174.400, 0.694	174.400, 2.025	174.400, 1.581	174.400, 1.070	174.400, 0.639	174.400, 1.135	174.400, 0.788	174.400, 0.694	174.400, 0.304	174.400, 0.884	174.400, 0.893
874	174.600, 1.863	174.600, 1.384	174.600, 0.958	174.600, 0.621	174.600, 1.904	174.600, 1.264	174.600, 0.911	174.600, 0.250	174.600, 0.518	174.600, 1.063	174.600, 0.780	174.600, 0.701	174.600, 0.219	174.600, 0.714	174.600, 1.029	174.600, 0.749	174.600, 0.653	174.600, 0.601	174.600, 0.647	174.600, 0.688	174.600, 2.021	174.600, 1.577	174.600, 1.066	174.600, 0.637	174.600, 1.130	174.600, 0.785	174.600, 0.690	174.600, 0.303	174.600, 0.880	174.600, 0.889
875	174.800, 1.858	174.800, 1.380	174.800, 0.955	174.800, 0.619	174.800, 1.900	174.800, 1.261	174.800, 0.908	174.800, 0.250	174.800, 0.517	174.800, 1.059	174.800, 0.776	174.800, 0.697	174.800, 0.219	174.800, 0.711	174.800, 1.025	174.800, 0.746	174.800, 0.650	174.800, 0.597	174.800, 0.643	174.800, 0.683	174.800, 2.017	174.800, 1.572	174.800, 1.062	174.800, 0.634	174.800, 1.126	174.800, 0.782	174.800, 0.686	174.800, 0.302	174.800, 0.877	174.800, 0.886
876	175.000, 1.853	175.000, 1.376	175.000, 0.952	175.000, 0.617	175.000, 1.896	175.000, 1.258	175.000, 0.906	175.000, 0.249	175.000, 0.516	175.000, 1.054	175.000, 0.773	175.000, 0.694	175.000, 0.218	175.000, 0.707	175.000, 1.021	175.000, 0.742	175.000, 0.646	175.000, 0.593	175.000, 0.638	175.000, 0.678	175.000, 2.012	175.000, 1.568	175.000, 1.059	175.000, 0.631	175.000, 1.122	175.000, 0.778	175.000, 0.682	175.000, 0.302	175.000, 0.873	175.000, 0.882
877	175.200, 1.849	175.200, 1.372	175.200, 0.949	175.200, 0.616	175.200, 1.893	175.200, 1.255	175.200, 0.903	175.200, 0.249	175.200, 0.515	175.200, 1.050	175.200, 0.770	175.200, 0.690	175.200, 0.218	175.200, 0.704	175.200, 1.018	175.200, 0.738	175.200, 0.643	175.200, 0.590	175.200, 0.634	175.200, 0.673	175.200, 2.008	175.200, 1.564	175.200, 1.055	175.200, 0.629	175.200, 1.118	175.200, 0.775	175.200, 0.678	175.200, 0.301	175.200, 0.869	175.200, 0.879
878	175.400, 1.844	175.400, 1.368	175.400, 0.946	175.400, 0.615	175.400, 1.889	175.400, 1.252	175.400, 0.901	175.400, 0.248	175.400, 0.514	175.400, 1.047	175.400, 0.767	175.400, 0.687	175.400, 0.217	175.400, 0.700	175.400, 1.014	175.400, 0.735	175.400, 0.639	175.400, 0.586	175.400, 0.630	175.400, 0.669	175.400, 2.004	175.400, 1.560	175.400, 1.052	175.400, 0.626	175.400, 1.114	175.400, 0.771	175.400, 0.675	175.400, 0.301	175.400, 0.865	175.400, 0.875
879	175.600, 1.839	175.600, 1.364	175.600, 0.943	175.600, 0.614	175.600, 1.885	175.600, 1.249	175.600, 0.899	175.600, 0.248	175.600, 0.513	175.600, 1.043	175.600, 0.764	175.600, 0.684	175.600, 0.217	175.600, 0.697	175.600, 1.010	175.600, 0.731	175.600, 0.635	175.600, 0.582	175.600, 0.625	175.600, 0.664	175.600, 2.000	175.600, 1.556	175.600, 1.048	175.600, 0.624	175.600, 1.110	175.600, 0.768	175.600, 0.671	175.600, 0.300	175.600, 0.862	175.600, 0.872
880	175.800, 1.835	175.800, 1.360	175.800, 0.941	175.800, 0.612	175.800, 1.882	175.800, 1.246	175.800, 0.896	175.800, 0.248	175.800, 0.512	175.800, 1.040	175.800, 0.761	175.800, 0.681	175.800, 0.216	175.800, 0.693	175.800, 1.006	175.800, 0.728	175.800, 0.631	175.800, 0.579	175.800, 0.621	175.800, 0.659	175.800, 1.997	175.800, 1.552	175.800, 1.045	175.800, 0.621	175.800, 1.106	175.800, 0.764	175.800, 0.668	175.800, 0.300	175.800, 0.858	175.800, 0.868
881	176.000, 1.830	176.000, 1.356	176.000, 0.938	176.000, 0.611	176.000, 1.878	176.000, 1.244	176.000, 0.894	176.000, 0.248	176.000, 0.511	176.000, 1.036	176.000, 0.757	176.000, 0.678	176.000, 0.216	176.000, 0.690	176.000, 1.003	176.000, 0.724	176.000, 0.627	176.000, 0.575	176.000, 0.617	176.000, 0.654	176.000, 1.993	176.000, 1.547	176.000, 1.042	176.000, 0.619	176.000, 1.103	176.000, 0.761	176.000, 0.664	176.000, 0.300	176.000, 0.855	176.000, 0.865
882	176.200, 1.826	176.200, 1.353	176.200, 0.935	176.200, 0.610	176.200, 1.875	176.200, 1.241	176.200, 0.891	176.200, 0.248	176.200, 0.510	176.200, 1.033	176.200, 0.754	176.200, 0.675	176.200, 0.215	176.200, 0.687	176.200, 0.999	176.200, 0.721	176.200, 0.624	176.200, 0.572	176.200, 0.613	176.200, 0.650	176.200, 1.988	176.200, 1.544	176.200, 1.039	176.200, 0.616	176.200, 1.099	176.200, 0.757	176.200, 0.660	176.200, 0.300	176.200, 0.851	176.200, 0.861
883	176.400, 1.822	176.400, 1.349	176.400, 0.933	176.400, 0.609	176.400, 1.871	176.400, 1.238	176.400, 0.889	176.400, 0.248	176.400, 0.509	176.400, 1.029	176.400, 0.751	176.400, 0.673	176.400, 0.215	176.400, 0.683	176.400, 0.995	176.400, 0.718	176.400, 0.620	176.400, 0.568	176.400, 0.609	176.400, 0.646	176.400, 1.984	176.400, 1.540	176.400, 1.036	176.400, 0.614	176.400, 1.096	176.400, 0.754	176.400, 0.657	176.400, 0.299	176.400, 0.848	176.400, 0.858
884	176.600, 1.818	176.600, 1.345	176.600, 0.930	176.600, 0.608	176.600, 1.868	176.600, 1.236	176.600, 0.886	176.600, 0.248	176.600, 0.508	176.600, 1.025	176.600, 0.748	176.600, 0.670	176.600, 0.215	176.600, 0.680	176.600, 0.992	176.600, 0.715	176.600, 0.617	176.600, 0.565	176.600, 0.606	176.600, 0.642	176.600, 1.980	176.600, 1.536	176.600, 1.033	176.600, 0.611	176.600, 1.092	176.600, 0.751	176.600, 0.653	176.600, 0.299	176.600, 0.845	176.600, 0.855
885	176.800, 1.813	176.800, 1.342	176.800, 0.928	176.800, 0.607	176.800, 1.865	176.800, 1.233	176.800, 0.884	176.800, 0.248	176.800, 0.507	176.800, 1.021	176.800, 0.746	176.800, 0.668	176.800, 0.215	176.800, 0.677	176.800, 0.988	176.800, 0.712	176.800, 0.613	176.800, 0.562	176.800, 0.602	176.800, 0.638	176.800, 1.975	176.800, 1.533	176.800, 1.029	176.800, 0.609	176.800, 1.088	176.800, 0.747	176.800, 0.650	176.800, 0.299	176.800, 0.841	176.800, 0.851
886	177.000, 1.809	177.000, 1.338	177.000, 0.926	177.000, 0.605	177.000, 1.861	177.000, 1.231	177.000, 0.881	177.000, 0.248	177.000, 0.506	177.000, 1.017	177.000, 0.743	177.000, 0.665	177.000, 0.215	177.000, 0.674	177.000, 0.984	177.000, 0.709	177.000, 0.610	177.000, 0.559	177.000, 0.599	177.000, 0.634	177.000, 1.970	177.000, 1.529	177.000, 1.026	177.000, 0.606	177.000, 1.085	177.000, 0.744	177.000, 0.647	177.000, 0.299	177.000, 0.838	177.000, 0.848
887	177.200, 1.806	177.200, 1.335	177.200, 0.923	177.200, 0.604	177.200, 1.858	177.200, 1.228	177.200, 0.879	177.200, 0.248	177.200, 0.505	177.200, 1.013	177.200, 0.740	177.200, 0.663	177.200, 0.215	177.200, 0.671	177.200, 0.980	177.200, 0.706	177.200, 0.606	177.200, 0.555	177.200, 0.595	177.200, 0.630	177.200, 1.966	177.200, 1.526	177.200, 1.023	177.200, 0.604	177.200, 1.081	177.200, 0.741	177.200, 0.644	177.200, 0.299	177.200, 0.835	177.200, 0.845
888	177.400, 1.802	177.400, 1.331	177.400, 0.921	177.400, 0.603	177.400, 1.855	177.400, 1.225	177.400, 0.877	177.400, 0.248	177.400, 0.504	177.400, 1.010	177.400, 0.737	177.400, 0.660	177.400, 0.215	177.400, 0.668	177.400, 0.977	177.400, 0.703	177.400, 0.603	177.400, 0.552	177.400, 0.591	177.400, 0.626	177.400, 1.962	177.400, 1.522	177.400, 1.020	177.400, 0.602	177.400, 1.077	177.400, 0.738	177.400, 0.641	177.400, 0.298	177.400, 0.832	177.400, 0.842
889	177.600, 1.798	177.600, 1.328	177.600, 0.919	177.600, 0.602	177.600, 1.851	177.600, 1.222	177.600, 0.875	177.600, 0.248	177.600, 0.503	177.600, 1.006	177.600, 0.734	177.600, 0.657	177.600, 0.215	177.600, 0.665	177.600, 0.974	177.600, 0.701	177.600, 0.600	177.600, 0.549	177.600, 0.588	177.600, 0.622	177.600, 1.957	177.600, 1.519	177.600, 1.017	177.600, 0.599	177.600, 1.073	177.600, 0.735	177.600, 0.638	177.600, 0.298	177.600, 0.828	177.600, 0.840
890	177.800, 1.794	177.800, 1.324	177.800, 0.917	177.800, 0.601	177.800, 1.848	177.800, 1.220	177.800, 0.873	177.800, 0.248	177.800, 0.502	177.800, 1.002	177.800, 0.731	177.800, 0.655	177.800, 0.215	177.800, 0.662	177.800, 0.970	177.800, 0.698	177.800, 0.597	177.800, 0.546	177.800, 0.584	177.800, 0.618	177.800, 1.953	177.800, 1.515	177.800, 1.013	177.800, 0.597	177.800, 1.069	177.800, 0.732	177.800, 0.635	177.800, 0.298	177.800, 0.825	177.800, 0.837
891	178.000, 1.790	178.000, 1.321	178.000, 0.915	178.000, 0.599	178.000, 1.845	178.000, 1.217	178.000, 0.870	178.000, 0.247	178.000, 0.502	178.000, 0.999	178.000, 0.729	178.000, 0.652	178.000, 0.215	178.000, 0.659	178.000, 0.967	178.000, 0.695	178.000, 0.594	178.000, 0.543	178.000, 0.580	178.000, 0.615	178.000, 1.949	178.000, 1.511	178.000, 1.010	178.000, 0.595	178.000, 1.065	178.000, 0.730	178.000, 0.633	178.000, 0.297	178.000, 0.822	178.000, 0.834
892	178.200, 1.786	178.200, 1.318	178.200, 0.912	178.200, 0.598	178.200, 1.842	178.200, 1.215	178.200, 0.868	178.200, 0.247	178.200, 0.501	178.200, 0.995	178.200, 0.726	178.200, 0.650	178.200, 0.215	178.200, 0.656	178.200, 0.963	178.200, 0.692	178.200, 0.592	178.200, 0.540	178.200, 0.577	178.200, 0.611	178.200, 1.944	178.200, 1.508	178.200, 1.007	178.200, 0.592	178.200, 1.061	178.200, 0.727	178.200, 0.630	178.200, 0.297	178.200, 0.819	178.200, 0.830
893	178.400, 1.782	178.400, 1.314	178.400, 0.910	178.400, 0.597	178.400, 1.838	178.400, 1.212	178.400, 0.867	178.400, 0.247	178.400, 0.500	178.400, 0.992	178.400, 0.724	178.400, 0.647	178.400, 0.214	178.400, 0.653	178.400, 0.960	178.400, 0.689	178.400, 0.589	178.400, 0.536	178.400, 0.574	178.400, 0.608	178.400, 1.940	178.400, 1.504	178.400, 1.004	178.400, 0.590	178.400, 1.058	178.400, 0.724	178.400, 0.627	178.400, 0.296	178.400, 0.816	178.400, 0.827
894	178.600, 1.778	178.600, 1.311	178.600, 0.908	178.600, 0.596	178.600, 1.835	178.600, 1.210	178.600, 0.865	178.600, 0.246	178.600, 0.499	178.600, 0.988	178.600, 0.721	178.600, 0.645	178.600, 0.214	178.600, 0.650	178.600, 0.956	178.600, 0.687	178.600, 0.587	178.600, 0.534	178.600, 0.571	178.600, 0.604	178.600, 1.936	178.600, 1.500	178.600, 1.001	178.600, 0.587	178.600, 1.054	178.600, 0.721	178.600, 0.625	178.600, 0.296	178.600, 0.813	178.600, 0.824
895	178.800, 1.774	178.800, 1.308	178.800, 0.906	178.800, 0.595	178.800, 1.832	178.800, 1.207	178.800, 0.863	178.800, 0.246	178.800, 0.498	178.800, 0.985	178.800, 0.719	178.800, 0.642	178.800, 0.214	178.800, 0.648	178.800, 0.953	178.800, 0.684	178.800, 0.584	178.800, 0.531	178.800, 0.568	178.800, 0.601	178.800, 1.932	178.800, 1.497	178.800, 0.998	178.800, 0.585	178.800, 1.051	178.800, 0.719	178.800, 0.622	178.800, 0.295	178.800, 0.810	178.800, 0.822
896	179.000, 1.770	179.000, 1.305	179.000, 0.904	179.000, 0.594	179.000, 1.829	179.000, 1.205	179.000, 0.861	179.000, 0.246	179.000, 0.497	179.000, 0.982	179.000, 0.716	179.000, 0.639	179.000, 0.214	179.000, 0.645	179.000, 0.950	179.000, 0.681	179.000, 0.581	179.000, 0.528	179.000, 0.564	179.000, 0.597	179.000, 1.928	179.000, 1.493	179.000, 0.995	179.000, 0.583	179.000, 1.047	179.000, 0.716	179.000, 0.620	179.000, 0.295	179.000, 0.807	179.000, 0.819
897	179.200, 1.766	179.200, 1.302	179.200, 0.902	179.200, 0.593	179.200, 1.827	179.200, 1.202	179.200, 0.860	179.200, 0.245	179.200, 0.496	179.200, 0.979	179.200, 0.713	179.200, 0.636	179.200, 0.214	179.200, 0.642	179.200, 0.946	179.200, 0.679	179.200, 0.579	179.200, 0.525	179.200, 0.561	179.200, 0.594	179.200, 1.924	179.200, 1.490	179.200, 0.992	179.200, 0.580	179.200, 1.044	179.200, 0.713	179.200, 0.617	179.200, 0.294	179.200, 0.804	179.200, 0.816
898	179.400, 1.762	179.400, 1.299	179.400, 0.900	179.400, 0.592	179.400, 1.824	179.400, 1.200	179.400, 0.858	179.400, 0.245	179.400, 0.495	179.400, 0.976	179.400, 0.711	179.400, 0.633	179.400, 0.213	179.400, 0.639	179.400, 0.943	179.400, 0.676	179.400, 0.576	179.400, 0.522	179.400, 0.558	179.400, 0.591	179.400, 1.921	179.400, 1.486	179.400, 0.989	179.400, 0.578	179.400, 1.041	179.400, 0.710	179.400, 0.614	179.400, 0.294	179.400, 0.801	179.400, 0.813
899	179.600, 1.758	179.600, 1.295	179.600, 0.898	179.600, 0.591	179.600, 1.821	179.600, 1.197	179.600, 0.857	179.600, 0.245	179.600, 0.494	179.600, 0.973	179.600, 0.708	179.600, 0.630	179.600, 0.213	179.600, 0.637	179.600, 0.940	179.600, 0.673	179.600, 0.573	179.600, 0.519	179.600, 0.554	179.600, 0.587	179.600, 1.917	179.600, 1.483	179.600, 0.986	179.600, 0.576	179.600, 1.037	179.600, 0.707	179.600, 0.611	179.600, 0.294	179.600, 0.798	179.600, 0.810
[truncated: 14,101 more rows]
