# Supplementary material for: ParB spreading on DNA requires cytidine triphosphate in vitro
Source: eLife journal article supplement (doi:10.7554/elife.53515), 2020-02-20
Supplement: fig6-data1 [file Fig6_panelC.xlsx]

## Sheet: FORMAT
	sample ID #1	sample ID #2	sample ID #3
data point	time point (sec), wavelength shift (nm)	time point (sec), wavelength shift (nm)	time point (sec), wavelength shift (nm)
1
2
3
.
.
.

## Sheet: Fig6_panelC_rep1
	169bp closed parS DNA ParB CTPyS	169bp closed parS DNA ParB CTP
1	0.000, 0.004	0.000, 0.010
2	0.400, 0.002	0.400, 0.010
3	0.800, 0.000	0.800, 0.011
4	1.200, -0.001	1.200, 0.012
5	1.600, -0.002	1.600, 0.012
6	2.000, -0.002	2.000, 0.011
7	2.400, -0.001	2.400, 0.011
8	2.800, -0.000	2.800, 0.010
9	3.200, -0.001	3.200, 0.009
10	3.600, -0.001	3.600, 0.009
11	4.000, -0.001	4.000, 0.009
12	4.400, -0.001	4.400, 0.008
13	4.800, -0.002	4.800, 0.008
14	5.200, -0.002	5.200, 0.008
15	5.600, -0.003	5.600, 0.007
16	6.000, -0.003	6.000, 0.005
17	6.400, -0.003	6.400, 0.004
18	6.800, -0.003	6.800, 0.004
19	7.200, -0.002	7.200, 0.003
20	7.600, -0.002	7.600, 0.004
21	8.000, -0.001	8.000, 0.004
22	8.400, -0.000	8.400, 0.004
23	8.800, -0.000	8.800, 0.004
24	9.200, -0.001	9.200, 0.004
25	9.600, -0.001	9.600, 0.003
26	10.000, -0.001	10.000, 0.003
27	10.400, -0.001	10.400, 0.002
28	10.800, -0.001	10.800, 0.001
29	11.200, -0.001	11.200, 0.001
30	11.600, -0.001	11.600, 0.001
31	12.000, -0.001	12.000, 0.000
32	12.400, -0.001	12.400, 0.000
33	12.800, -0.000	12.800, 0.000
34	13.200, -0.000	13.200, 0.000
35	13.600, -0.000	13.600, 0.000
36	14.000, 0.000	14.000, 0.000
37	14.400, 0.000	14.400, 0.001
38	14.800, 0.000	14.800, 0.001
39	15.200, -0.000	15.200, 0.001
40	15.600, -0.000	15.600, 0.001
41	16.000, -0.000	16.000, 0.001
42	16.400, -0.001	16.400, 0.001
43	16.800, -0.001	16.800, 0.001
44	17.200, -0.001	17.200, 0.001
45	17.600, -0.001	17.600, 0.001
46	18.000, -0.001	18.000, 0.001
47	18.400, -0.000	18.400, 0.001
48	18.800, -0.001	18.800, 0.000
49	19.200, -0.001	19.200, -0.000
50	19.600, -0.001	19.600, -0.000
51	20.000, -0.001	20.000, -0.000
52	20.400, -0.001	20.400, 0.000
53	20.800, -0.001	20.800, 0.000
54	21.200, -0.000	21.200, 0.000
55	21.600, -0.000	21.600, 0.000
56	22.000, 0.000	22.000, 0.000
57	22.400, 0.000	22.400, 0.000
58	22.800, 0.000	22.800, 0.000
59	23.200, -0.000	23.200, 0.001
60	23.600, -0.001	23.600, 0.001
61	24.000, -0.001	24.000, 0.001
62	24.400, -0.001	24.400, 0.000
63	24.800, -0.002	24.800, 0.000
64	25.200, -0.002	25.200, 0.000
65	25.600, -0.002	25.600, 0.000
66	26.000, -0.001	26.000, 0.000
67	26.400, -0.001	26.400, 0.000
68	26.800, -0.001	26.800, 0.000
69	27.200, -0.001	27.200, 0.001
70	27.600, -0.000	27.600, 0.000
71	28.000, 0.000	28.000, 0.000
72	28.400, 0.001	28.400, -0.000
73	28.800, 0.000	28.800, -0.000
74	29.200, 0.000	29.200, -0.000
75	29.600, -0.000	29.600, -0.000
76	30.000, 0.000	30.000, 0.000
77	30.400, 0.004	30.400, 0.005
78	30.800, 0.010	30.800, 0.014
79	31.200, 0.019	31.200, 0.024
80	31.600, 0.030	31.600, 0.036
81	32.000, 0.042	32.000, 0.050
82	32.400, 0.054	32.400, 0.063
83	32.800, 0.066	32.800, 0.077
84	33.200, 0.078	33.200, 0.090
85	33.600, 0.089	33.600, 0.104
86	34.000, 0.100	34.000, 0.117
87	34.400, 0.111	34.400, 0.131
88	34.800, 0.122	34.800, 0.144
89	35.200, 0.134	35.200, 0.158
90	35.600, 0.146	35.600, 0.172
91	36.000, 0.158	36.000, 0.186
92	36.400, 0.170	36.400, 0.200
93	36.800, 0.183	36.800, 0.213
94	37.200, 0.195	37.200, 0.227
95	37.600, 0.207	37.600, 0.240
96	38.000, 0.219	38.000, 0.253
97	38.400, 0.230	38.400, 0.266
98	38.800, 0.242	38.800, 0.279
99	39.200, 0.253	39.200, 0.292
100	39.600, 0.265	39.600, 0.305
101	40.000, 0.278	40.000, 0.318
102	40.400, 0.290	40.400, 0.331
103	40.800, 0.301	40.800, 0.344
104	41.200, 0.313	41.200, 0.357
105	41.600, 0.325	41.600, 0.371
106	42.000, 0.336	42.000, 0.384
107	42.400, 0.348	42.400, 0.397
108	42.800, 0.360	42.800, 0.409
109	43.200, 0.373	43.200, 0.422
110	43.600, 0.385	43.600, 0.435
111	44.000, 0.397	44.000, 0.447
112	44.400, 0.409	44.400, 0.460
113	44.800, 0.420	44.800, 0.472
114	45.200, 0.432	45.200, 0.486
115	45.600, 0.443	45.600, 0.499
116	46.000, 0.454	46.000, 0.511
117	46.400, 0.466	46.400, 0.523
118	46.800, 0.478	46.800, 0.535
119	47.200, 0.490	47.200, 0.547
120	47.600, 0.502	47.600, 0.559
121	48.000, 0.513	48.000, 0.571
122	48.400, 0.525	48.400, 0.584
123	48.800, 0.537	48.800, 0.597
124	49.200, 0.548	49.200, 0.610
125	49.600, 0.559	49.600, 0.623
126	50.000, 0.570	50.000, 0.635
127	50.400, 0.580	50.400, 0.647
128	50.800, 0.591	50.800, 0.659
129	51.200, 0.602	51.200, 0.671
130	51.600, 0.614	51.600, 0.684
131	52.000, 0.625	52.000, 0.695
132	52.400, 0.637	52.400, 0.707
133	52.800, 0.648	52.800, 0.720
134	53.200, 0.660	53.200, 0.732
135	53.600, 0.671	53.600, 0.743
136	54.000, 0.682	54.000, 0.754
137	54.400, 0.693	54.400, 0.765
138	54.800, 0.704	54.800, 0.777
139	55.200, 0.715	55.200, 0.788
140	55.600, 0.725	55.600, 0.799
141	56.000, 0.736	56.000, 0.810
142	56.400, 0.747	56.400, 0.822
143	56.800, 0.758	56.800, 0.833
144	57.200, 0.769	57.200, 0.844
145	57.600, 0.780	57.600, 0.854
146	58.000, 0.790	58.000, 0.865
147	58.400, 0.801	58.400, 0.876
148	58.800, 0.811	58.800, 0.887
149	59.200, 0.821	59.200, 0.899
150	59.600, 0.831	59.600, 0.910
151	60.000, 0.841	60.000, 0.921
152	60.400, 0.851	60.400, 0.932
153	60.800, 0.862	60.800, 0.942
154	61.200, 0.872	61.200, 0.953
155	61.600, 0.883	61.600, 0.963
156	62.000, 0.893	62.000, 0.973
157	62.400, 0.903	62.400, 0.983
158	62.800, 0.913	62.800, 0.994
159	63.200, 0.923	63.200, 1.004
160	63.600, 0.933	63.600, 1.014
161	64.000, 0.942	64.000, 1.024
162	64.400, 0.952	64.400, 1.034
163	64.800, 0.962	64.800, 1.044
164	65.200, 0.972	65.200, 1.054
165	65.600, 0.981	65.600, 1.064
166	66.000, 0.991	66.000, 1.075
167	66.400, 1.000	66.400, 1.084
168	66.800, 1.010	66.800, 1.094
169	67.200, 1.019	67.200, 1.104
170	67.600, 1.029	67.600, 1.113
171	68.000, 1.038	68.000, 1.123
172	68.400, 1.047	68.400, 1.133
173	68.800, 1.057	68.800, 1.142
174	69.200, 1.066	69.200, 1.152
175	69.600, 1.075	69.600, 1.161
176	70.000, 1.084	70.000, 1.171
177	70.400, 1.093	70.400, 1.180
178	70.800, 1.101	70.800, 1.189
179	71.200, 1.110	71.200, 1.197
180	71.600, 1.119	71.600, 1.206
181	72.000, 1.127	72.000, 1.216
182	72.400, 1.136	72.400, 1.225
183	72.800, 1.144	72.800, 1.234
184	73.200, 1.153	73.200, 1.243
185	73.600, 1.161	73.600, 1.252
186	74.000, 1.170	74.000, 1.261
187	74.400, 1.179	74.400, 1.269
188	74.800, 1.188	74.800, 1.277
189	75.200, 1.197	75.200, 1.284
190	75.600, 1.206	75.600, 1.292
191	76.000, 1.215	76.000, 1.300
192	76.400, 1.223	76.400, 1.309
193	76.800, 1.232	76.800, 1.318
194	77.200, 1.239	77.200, 1.326
195	77.600, 1.247	77.600, 1.335
196	78.000, 1.254	78.000, 1.343
197	78.400, 1.262	78.400, 1.351
198	78.800, 1.270	78.800, 1.359
199	79.200, 1.278	79.200, 1.366
200	79.600, 1.286	79.600, 1.374
201	80.000, 1.294	80.000, 1.382
202	80.400, 1.302	80.400, 1.391
203	80.800, 1.310	80.800, 1.398
204	81.200, 1.318	81.200, 1.406
205	81.600, 1.325	81.600, 1.413
206	82.000, 1.333	82.000, 1.421
207	82.400, 1.340	82.400, 1.428
208	82.800, 1.348	82.800, 1.435
209	83.200, 1.355	83.200, 1.442
210	83.600, 1.363	83.600, 1.450
211	84.000, 1.370	84.000, 1.457
212	84.400, 1.378	84.400, 1.465
213	84.800, 1.385	84.800, 1.472
214	85.200, 1.392	85.200, 1.479
215	85.600, 1.399	85.600, 1.486
216	86.000, 1.405	86.000, 1.492
217	86.400, 1.412	86.400, 1.499
218	86.800, 1.419	86.800, 1.506
219	87.200, 1.427	87.200, 1.512
220	87.600, 1.434	87.600, 1.519
221	88.000, 1.441	88.000, 1.527
222	88.400, 1.449	88.400, 1.534
223	88.800, 1.455	88.800, 1.541
224	89.200, 1.462	89.200, 1.547
225	89.600, 1.468	89.600, 1.554
226	90.000, 1.475	90.000, 1.561
227	90.400, 1.481	90.400, 1.568
228	90.800, 1.488	90.800, 1.574
229	91.200, 1.495	91.200, 1.581
230	91.600, 1.501	91.600, 1.588
231	92.000, 1.508	92.000, 1.594
232	92.400, 1.514	92.400, 1.600
233	92.800, 1.520	92.800, 1.606
234	93.200, 1.527	93.200, 1.611
235	93.600, 1.533	93.600, 1.616
236	94.000, 1.540	94.000, 1.622
237	94.400, 1.546	94.400, 1.628
238	94.800, 1.553	94.800, 1.634
239	95.200, 1.559	95.200, 1.641
240	95.600, 1.565	95.600, 1.647
241	96.000, 1.571	96.000, 1.653
242	96.400, 1.577	96.400, 1.658
243	96.800, 1.582	96.800, 1.662
244	97.200, 1.588	97.200, 1.667
245	97.600, 1.594	97.600, 1.672
246	98.000, 1.600	98.000, 1.678
247	98.400, 1.607	98.400, 1.684
248	98.800, 1.613	98.800, 1.690
249	99.200, 1.619	99.200, 1.696
250	99.600, 1.624	99.600, 1.702
251	100.000, 1.630	100.000, 1.707
252	100.400, 1.635	100.400, 1.712
253	100.800, 1.640	100.800, 1.716
254	101.200, 1.645	101.200, 1.721
255	101.600, 1.651	101.600, 1.726
256	102.000, 1.657	102.000, 1.731
257	102.400, 1.663	102.400, 1.736
258	102.800, 1.669	102.800, 1.741
259	103.200, 1.675	103.200, 1.746
260	103.600, 1.681	103.600, 1.751
261	104.000, 1.686	104.000, 1.755
262	104.400, 1.691	104.400, 1.760
263	104.800, 1.696	104.800, 1.765
264	105.200, 1.702	105.200, 1.770
265	105.600, 1.707	105.600, 1.774
266	106.000, 1.713	106.000, 1.778
267	106.400, 1.718	106.400, 1.782
268	106.800, 1.723	106.800, 1.787
269	107.200, 1.728	107.200, 1.792
270	107.600, 1.733	107.600, 1.796
271	108.000, 1.737	108.000, 1.801
272	108.400, 1.742	108.400, 1.806
273	108.800, 1.747	108.800, 1.811
274	109.200, 1.752	109.200, 1.815
275	109.600, 1.757	109.600, 1.819
276	110.000, 1.762	110.000, 1.822
277	110.400, 1.767	110.400, 1.826
278	110.800, 1.772	110.800, 1.830
279	111.200, 1.778	111.200, 1.834
280	111.600, 1.783	111.600, 1.838
281	112.000, 1.788	112.000, 1.841
282	112.400, 1.793	112.400, 1.845
283	112.800, 1.797	112.800, 1.850
284	113.200, 1.801	113.200, 1.854
285	113.600, 1.805	113.600, 1.859
286	114.000, 1.810	114.000, 1.862
287	114.400, 1.814	114.400, 1.866
288	114.800, 1.819	114.800, 1.870
289	115.200, 1.824	115.200, 1.873
290	115.600, 1.829	115.600, 1.876
291	116.000, 1.834	116.000, 1.880
292	116.400, 1.839	116.400, 1.883
293	116.800, 1.843	116.800, 1.887
294	117.200, 1.848	117.200, 1.891
295	117.600, 1.852	117.600, 1.894
296	118.000, 1.856	118.000, 1.897
297	118.400, 1.860	118.400, 1.900
298	118.800, 1.864	118.800, 1.903
299	119.200, 1.869	119.200, 1.907
300	119.600, 1.873	119.600, 1.910
301	120.000, 1.877	120.000, 1.914
302	120.400, 1.881	120.400, 1.918
303	120.800, 1.885	120.800, 1.922
304	121.200, 1.889	121.200, 1.925
305	121.600, 1.893	121.600, 1.929
306	122.000, 1.897	122.000, 1.932
307	122.400, 1.901	122.400, 1.935
308	122.800, 1.906	122.800, 1.938
309	123.200, 1.910	123.200, 1.941
310	123.600, 1.915	123.600, 1.944
311	124.000, 1.919	124.000, 1.947
312	124.400, 1.923	124.400, 1.949
313	124.800, 1.927	124.800, 1.952
314	125.200, 1.930	125.200, 1.955
315	125.600, 1.933	125.600, 1.959
316	126.000, 1.937	126.000, 1.962
317	126.400, 1.941	126.400, 1.965
318	126.800, 1.944	126.800, 1.968
319	127.200, 1.948	127.200, 1.971
320	127.600, 1.953	127.600, 1.973
321	128.000, 1.957	128.000, 1.975
322	128.400, 1.961	128.400, 1.977
323	128.800, 1.965	128.800, 1.979
324	129.200, 1.969	129.200, 1.982
325	129.600, 1.973	129.600, 1.985
326	130.000, 1.977	130.000, 1.988
327	130.400, 1.981	130.400, 1.991
328	130.800, 1.984	130.800, 1.994
329	131.200, 1.988	131.200, 1.997
330	131.600, 1.991	131.600, 2.000
331	132.000, 1.994	132.000, 2.003
332	132.400, 1.998	132.400, 2.006
333	132.800, 2.001	132.800, 2.008
334	133.200, 2.004	133.200, 2.010
335	133.600, 2.007	133.600, 2.012
336	134.000, 2.011	134.000, 2.013
337	134.400, 2.015	134.400, 2.015
338	134.800, 2.018	134.800, 2.018
339	135.200, 2.022	135.200, 2.020
340	135.600, 2.025	135.600, 2.023
341	136.000, 2.028	136.000, 2.025
342	136.400, 2.031	136.400, 2.027
343	136.800, 2.034	136.800, 2.029
344	137.200, 2.036	137.200, 2.031
345	137.600, 2.040	137.600, 2.033
346	138.000, 2.044	138.000, 2.035
347	138.400, 2.047	138.400, 2.038
348	138.800, 2.051	138.800, 2.040
349	139.200, 2.055	139.200, 2.042
350	139.600, 2.058	139.600, 2.044
351	140.000, 2.060	140.000, 2.046
352	140.400, 2.063	140.400, 2.048
353	140.800, 2.067	140.800, 2.051
354	141.200, 2.071	141.200, 2.053
355	141.600, 2.074	141.600, 2.055
356	142.000, 2.078	142.000, 2.057
357	142.400, 2.082	142.400, 2.058
358	142.800, 2.085	142.800, 2.060
359	143.200, 2.087	143.200, 2.063
360	143.600, 2.090	143.600, 2.065
361	144.000, 2.092	144.000, 2.067
362	144.400, 2.095	144.400, 2.069
363	144.800, 2.099	144.800, 2.071
364	145.200, 2.102	145.200, 2.072
365	145.600, 2.105	145.600, 2.074
366	146.000, 2.108	146.000, 2.075
367	146.400, 2.111	146.400, 2.076
368	146.800, 2.114	146.800, 2.077
369	147.200, 2.117	147.200, 2.079
370	147.600, 2.119	147.600, 2.081
371	148.000, 2.122	148.000, 2.083
372	148.400, 2.125	148.400, 2.085
373	148.800, 2.128	148.800, 2.087
374	149.200, 2.131	149.200, 2.089
375	149.600, 2.134	149.600, 2.091
376	150.000, 2.137	150.000, 2.093
377	150.400, 2.139	150.400, 2.094
378	150.800, 2.142	150.800, 2.096
379	151.200, 2.145	151.200, 2.098
380	151.600, 2.148	151.600, 2.099
381	152.000, 2.150	152.000, 2.101
382	152.400, 2.153	152.400, 2.103
383	152.800, 2.156	152.800, 2.104
384	153.200, 2.158	153.200, 2.106
385	153.600, 2.161	153.600, 2.107
386	154.000, 2.164	154.000, 2.108
387	154.400, 2.166	154.400, 2.110
388	154.800, 2.169	154.800, 2.111
389	155.200, 2.173	155.200, 2.113
390	155.600, 2.176	155.600, 2.115
391	156.000, 2.179	156.000, 2.116
392	156.400, 2.182	156.400, 2.118
393	156.800, 2.185	156.800, 2.119
394	157.200, 2.187	157.200, 2.121
395	157.600, 2.190	157.600, 2.122
396	158.000, 2.193	158.000, 2.123
397	158.400, 2.195	158.400, 2.124
398	158.800, 2.197	158.800, 2.125
399	159.200, 2.200	159.200, 2.126
400	159.600, 2.202	159.600, 2.127
401	160.000, 2.204	160.000, 2.128
402	160.400, 2.206	160.400, 2.129
403	160.800, 2.208	160.800, 2.130
404	161.200, 2.211	161.200, 2.131
405	161.600, 2.213	161.600, 2.132
406	162.000, 2.216	162.000, 2.134
407	162.400, 2.218	162.400, 2.136
408	162.800, 2.221	162.800, 2.137
409	163.200, 2.223	163.200, 2.138
410	163.600, 2.225	163.600, 2.139
411	164.000, 2.228	164.000, 2.140
412	164.400, 2.230	164.400, 2.141
413	164.800, 2.232	164.800, 2.143
414	165.200, 2.235	165.200, 2.144
415	165.600, 2.237	165.600, 2.146
416	166.000, 2.239	166.000, 2.147
417	166.400, 2.242	166.400, 2.149
418	166.800, 2.244	166.800, 2.150
419	167.200, 2.246	167.200, 2.150
420	167.600, 2.249	167.600, 2.151
421	168.000, 2.252	168.000, 2.152
422	168.400, 2.254	168.400, 2.152
423	168.800, 2.257	168.800, 2.154
424	169.200, 2.259	169.200, 2.155
425	169.600, 2.261	169.600, 2.156
426	170.000, 2.262	170.000, 2.157
427	170.400, 2.264	170.400, 2.158
428	170.800, 2.265	170.800, 2.160
429	171.200, 2.267	171.200, 2.161
430	171.600, 2.269	171.600, 2.162
431	172.000, 2.272	172.000, 2.162
432	172.400, 2.274	172.400, 2.162
433	172.800, 2.277	172.800, 2.163
434	173.200, 2.279	173.200, 2.163
435	173.600, 2.281	173.600, 2.165
436	174.000, 2.283	174.000, 2.166
437	174.400, 2.286	174.400, 2.167
438	174.800, 2.288	174.800, 2.169
439	175.200, 2.291	175.200, 2.170
440	175.600, 2.293	175.600, 2.170
441	176.000, 2.295	176.000, 2.171
442	176.400, 2.296	176.400, 2.172
443	176.800, 2.298	176.800, 2.173
444	177.200, 2.300	177.200, 2.174
445	177.600, 2.303	177.600, 2.175
446	178.000, 2.305	178.000, 2.176
447	178.400, 2.308	178.400, 2.177
448	178.800, 2.310	178.800, 2.177
449	179.200, 2.312	179.200, 2.178
450	179.600, 2.314	179.600, 2.178
451	180.000, 2.315	180.000, 2.180
452	180.400, 2.316	180.400, 2.181
453	180.800, 2.318	180.800, 2.182
454	181.200, 2.320	181.200, 2.183
455	181.600, 2.322	181.600, 2.183
456	182.000, 2.324	182.000, 2.184
457	182.400, 2.326	182.400, 2.185
458	182.800, 2.328	182.800, 2.186
459	183.200, 2.330	183.200, 2.187
460	183.600, 2.332	183.600, 2.188
461	184.000, 2.333	184.000, 2.189
462	184.400, 2.334	184.400, 2.189
463	184.800, 2.336	184.800, 2.190
464	185.200, 2.337	185.200, 2.190
465	185.600, 2.339	185.600, 2.191
466	186.000, 2.341	186.000, 2.191
467	186.400, 2.343	186.400, 2.191
468	186.800, 2.345	186.800, 2.191
469	187.200, 2.347	187.200, 2.192
470	187.600, 2.349	187.600, 2.192
471	188.000, 2.351	188.000, 2.193
472	188.400, 2.353	188.400, 2.194
473	188.800, 2.355	188.800, 2.196
474	189.200, 2.357	189.200, 2.197
475	189.600, 2.359	189.600, 2.198
476	190.000, 2.361	190.000, 2.199
477	190.400, 2.363	190.400, 2.199
478	190.800, 2.365	190.800, 2.200
479	191.200, 2.367	191.200, 2.200
480	191.600, 2.369	191.600, 2.200
481	192.000, 2.370	192.000, 2.200
482	192.400, 2.372	192.400, 2.200
483	192.800, 2.373	192.800, 2.200
484	193.200, 2.375	193.200, 2.201
485	193.600, 2.377	193.600, 2.202
486	194.000, 2.379	194.000, 2.206
487	194.400, 2.381	194.400, 2.210
488	194.800, 2.382	194.800, 2.216
489	195.200, 2.383	195.200, 2.222
490	195.600, 2.385	195.600, 2.227
491	196.000, 2.386	196.000, 2.230
492	196.400, 2.387	196.400, 2.232
493	196.800, 2.389	196.800, 2.231
494	197.200, 2.391	197.200, 2.230
495	197.600, 2.393	197.600, 2.230
496	198.000, 2.395	198.000, 2.230
497	198.400, 2.397	198.400, 2.230
498	198.800, 2.398	198.800, 2.230
499	199.200, 2.400	199.200, 2.231
500	199.600, 2.401	199.600, 2.231
501	200.000, 2.402	200.000, 2.232
502	200.400, 2.404	200.400, 2.232
503	200.800, 2.405	200.800, 2.233
504	201.200, 2.407	201.200, 2.234
505	201.600, 2.408	201.600, 2.236
506	202.000, 2.410	202.000, 2.236
507	202.400, 2.411	202.400, 2.236
508	202.800, 2.413	202.800, 2.236
509	203.200, 2.415	203.200, 2.236
510	203.600, 2.417	203.600, 2.236
511	204.000, 2.419	204.000, 2.236
512	204.400, 2.420	204.400, 2.237
513	204.800, 2.420	204.800, 2.238
514	205.200, 2.421	205.200, 2.238
515	205.600, 2.422	205.600, 2.239
516	206.000, 2.423	206.000, 2.239
517	206.400, 2.425	206.400, 2.240
518	206.800, 2.427	206.800, 2.241
519	207.200, 2.429	207.200, 2.241
520	207.600, 2.431	207.600, 2.242
521	208.000, 2.433	208.000, 2.242
522	208.400, 2.434	208.400, 2.242
523	208.800, 2.436	208.800, 2.242
524	209.200, 2.437	209.200, 2.242
525	209.600, 2.439	209.600, 2.242
526	210.000, 2.441	210.000, 2.242
527	210.400, 2.443	210.400, 2.243
528	210.800, 2.444	210.800, 2.243
529	211.200, 2.444	211.200, 2.244
530	211.600, 2.445	211.600, 2.244
531	212.000, 2.447	212.000, 2.245
532	212.400, 2.448	212.400, 2.245
533	212.800, 2.449	212.800, 2.246
534	213.200, 2.451	213.200, 2.247
535	213.600, 2.451	213.600, 2.247
536	214.000, 2.452	214.000, 2.247
537	214.400, 2.454	214.400, 2.248
538	214.800, 2.455	214.800, 2.248
539	215.200, 2.456	215.200, 2.249
540	215.600, 2.458	215.600, 2.249
541	216.000, 2.460	216.000, 2.249
542	216.400, 2.462	216.400, 2.249
543	216.800, 2.463	216.800, 2.250
544	217.200, 2.464	217.200, 2.250
545	217.600, 2.465	217.600, 2.251
546	218.000, 2.466	218.000, 2.251
547	218.400, 2.467	218.400, 2.252
548	218.800, 2.468	218.800, 2.253
549	219.200, 2.470	219.200, 2.254
550	219.600, 2.471	219.600, 2.253
551	220.000, 2.472	220.000, 2.253
552	220.400, 2.474	220.400, 2.253
553	220.800, 2.475	220.800, 2.254
554	221.200, 2.477	221.200, 2.253
555	221.600, 2.478	221.600, 2.253
556	222.000, 2.480	222.000, 2.253
557	222.400, 2.481	222.400, 2.253
558	222.800, 2.482	222.800, 2.254
559	223.200, 2.483	223.200, 2.254
560	223.600, 2.484	223.600, 2.255
561	224.000, 2.485	224.000, 2.256
562	224.400, 2.486	224.400, 2.257
563	224.800, 2.487	224.800, 2.258
564	225.200, 2.489	225.200, 2.258
565	225.600, 2.490	225.600, 2.258
566	226.000, 2.492	226.000, 2.258
567	226.400, 2.493	226.400, 2.258
568	226.800, 2.494	226.800, 2.258
569	227.200, 2.495	227.200, 2.258
570	227.600, 2.496	227.600, 2.258
571	228.000, 2.496	228.000, 2.259
572	228.400, 2.498	228.400, 2.259
573	228.800, 2.499	228.800, 2.260
574	229.200, 2.500	229.200, 2.260
575	229.600, 2.502	229.600, 2.261
576	230.000, 2.503	230.000, 2.261
577	230.400, 2.505	230.400, 2.261
578	230.800, 2.506	230.800, 2.261
579	231.200, 2.506	231.200, 2.262
580	231.600, 2.507	231.600, 2.263
581	232.000, 2.509	232.000, 2.263
582	232.400, 2.510	232.400, 2.263
583	232.800, 2.511	232.800, 2.263
584	233.200, 2.513	233.200, 2.263
585	233.600, 2.514	233.600, 2.262
586	234.000, 2.515	234.000, 2.262
587	234.400, 2.516	234.400, 2.262
588	234.800, 2.518	234.800, 2.263
589	235.200, 2.520	235.200, 2.264
590	235.600, 2.521	235.600, 2.264
591	236.000, 2.523	236.000, 2.264
592	236.400, 2.523	236.400, 2.264
593	236.800, 2.524	236.800, 2.265
594	237.200, 2.524	237.200, 2.266
595	237.600, 2.524	237.600, 2.267
596	238.000, 2.525	238.000, 2.267
597	238.400, 2.526	238.400, 2.267
598	238.800, 2.528	238.800, 2.266
599	239.200, 2.530	239.200, 2.266
600	239.600, 2.531	239.600, 2.266
601	240.000, 2.532	240.000, 2.267
602	240.400, 2.532	240.400, 2.267
603	240.800, 2.533	240.800, 2.268
604	241.200, 2.533	241.200, 2.269
605	241.600, 2.534	241.600, 2.268
606	242.000, 2.535	242.000, 2.268
607	242.400, 2.536	242.400, 2.268
608	242.800, 2.537	242.800, 2.267
609	243.200, 2.538	243.200, 2.267
610	243.600, 2.539	243.600, 2.267
611	244.000, 2.540	244.000, 2.267
612	244.400, 2.541	244.400, 2.268
613	244.800, 2.542	244.800, 2.268
614	245.200, 2.543	245.200, 2.269
615	245.600, 2.544	245.600, 2.269
616	246.000, 2.545	246.000, 2.269
617	246.400, 2.546	246.400, 2.270
618	246.800, 2.548	246.800, 2.270
619	247.200, 2.550	247.200, 2.271
620	247.600, 2.551	247.600, 2.272
621	248.000, 2.553	248.000, 2.272
622	248.400, 2.554	248.400, 2.273
623	248.800, 2.555	248.800, 2.273
624	249.200, 2.556	249.200, 2.273
625	249.600, 2.557	249.600, 2.273
626	250.000, 2.558	250.000, 2.273
627	250.400, 2.558	250.400, 2.272
628	250.800, 2.559	250.800, 2.271
629	251.200, 2.560	251.200, 2.271
630	251.600, 2.561	251.600, 2.272
631	252.000, 2.561	252.000, 2.272
632	252.400, 2.562	252.400, 2.273
633	252.800, 2.563	252.800, 2.274
634	253.200, 2.564	253.200, 2.275
635	253.600, 2.566	253.600, 2.276
636	254.000, 2.567	254.000, 2.276
637	254.400, 2.568	254.400, 2.276
638	254.800, 2.569	254.800, 2.276
639	255.200, 2.570	255.200, 2.276
640	255.600, 2.570	255.600, 2.275
641	256.000, 2.571	256.000, 2.274
642	256.400, 2.571	256.400, 2.274
643	256.800, 2.571	256.800, 2.273
644	257.200, 2.572	257.200, 2.273
645	257.600, 2.572	257.600, 2.273
646	258.000, 2.573	258.000, 2.274
647	258.400, 2.574	258.400, 2.274
648	258.800, 2.576	258.800, 2.275
649	259.200, 2.577	259.200, 2.275
650	259.600, 2.578	259.600, 2.275
651	260.000, 2.580	260.000, 2.275
652	260.400, 2.582	260.400, 2.275
653	260.800, 2.583	260.800, 2.274
654	261.200, 2.583	261.200, 2.275
655	261.600, 2.583	261.600, 2.275
656	262.000, 2.584	262.000, 2.275
657	262.400, 2.585	262.400, 2.276
658	262.800, 2.585	262.800, 2.277
659	263.200, 2.585	263.200, 2.277
660	263.600, 2.586	263.600, 2.278
661	264.000, 2.587	264.000, 2.278
662	264.400, 2.589	264.400, 2.278
663	264.800, 2.590	264.800, 2.279
664	265.200, 2.590	265.200, 2.279
665	265.600, 2.591	265.600, 2.280
666	266.000, 2.592	266.000, 2.280
667	266.400, 2.593	266.400, 2.279
668	266.800, 2.594	266.800, 2.279
669	267.200, 2.595	267.200, 2.280
670	267.600, 2.596	267.600, 2.280
671	268.000, 2.596	268.000, 2.280
672	268.400, 2.596	268.400, 2.280
673	268.800, 2.597	268.800, 2.280
674	269.200, 2.597	269.200, 2.280
675	269.600, 2.598	269.600, 2.280
676	270.000, 2.599	270.000, 2.280
677	270.400, 2.600	270.400, 2.280
678	270.800, 2.602	270.800, 2.280
679	271.200, 2.603	271.200, 2.281
680	271.600, 2.603	271.600, 2.281
681	272.000, 2.604	272.000, 2.281
682	272.400, 2.605	272.400, 2.281
683	272.800, 2.606	272.800, 2.282
684	273.200, 2.607	273.200, 2.282
685	273.600, 2.607	273.600, 2.282
686	274.000, 2.608	274.000, 2.282
687	274.400, 2.609	274.400, 2.281
688	274.800, 2.609	274.800, 2.281
689	275.200, 2.610	275.200, 2.280
690	275.600, 2.611	275.600, 2.279
691	276.000, 2.612	276.000, 2.279
692	276.400, 2.613	276.400, 2.280
693	276.800, 2.613	276.800, 2.280
694	277.200, 2.614	277.200, 2.281
695	277.600, 2.615	277.600, 2.282
696	278.000, 2.616	278.000, 2.283
697	278.400, 2.616	278.400, 2.283
698	278.800, 2.616	278.800, 2.283
699	279.200, 2.616	279.200, 2.283
700	279.600, 2.616	279.600, 2.283
701	280.000, 2.617	280.000, 2.283
702	280.400, 2.618	280.400, 2.282
703	280.800, 2.619	280.800, 2.282
704	281.200, 2.620	281.200, 2.282
705	281.600, 2.622	281.600, 2.282
706	282.000, 2.623	282.000, 2.282
707	282.400, 2.623	282.400, 2.282
708	282.800, 2.624	282.800, 2.282
709	283.200, 2.624	283.200, 2.283
710	283.600, 2.625	283.600, 2.283
711	284.000, 2.626	284.000, 2.284
712	284.400, 2.626	284.400, 2.285
713	284.800, 2.627	284.800, 2.285
714	285.200, 2.627	285.200, 2.286
715	285.600, 2.628	285.600, 2.286
716	286.000, 2.629	286.000, 2.286
717	286.400, 2.629	286.400, 2.286
718	286.800, 2.630	286.800, 2.285
719	287.200, 2.631	287.200, 2.285
720	287.600, 2.631	287.600, 2.285
721	288.000, 2.631	288.000, 2.285
722	288.400, 2.631	288.400, 2.285
723	288.800, 2.631	288.800, 2.285
724	289.200, 2.632	289.200, 2.286
725	289.600, 2.633	289.600, 2.286
726	290.000, 2.634	290.000, 2.287
727	290.400, 2.635	290.400, 2.287
728	290.800, 2.636	290.800, 2.287
729	291.200, 2.637	291.200, 2.287
730	291.600, 2.638	291.600, 2.287
731	292.000, 2.639	292.000, 2.287
732	292.400, 2.639	292.400, 2.287
733	292.800, 2.640	292.800, 2.287
734	293.200, 2.641	293.200, 2.287
735	293.600, 2.641	293.600, 2.287
736	294.000, 2.641	294.000, 2.287
737	294.400, 2.642	294.400, 2.287
738	294.800, 2.643	294.800, 2.287
739	295.200, 2.644	295.200, 2.286
740	295.600, 2.644	295.600, 2.287
741	296.000, 2.645	296.000, 2.287
742	296.400, 2.646	296.400, 2.287
743	296.800, 2.646	296.800, 2.287
744	297.200, 2.647	297.200, 2.287
745	297.600, 2.648	297.600, 2.287
746	298.000, 2.649	298.000, 2.286
747	298.400, 2.649	298.400, 2.287
748	298.800, 2.650	298.800, 2.287
749	299.200, 2.650	299.200, 2.287
750	299.600, 2.651	299.600, 2.287
751	300.000, 2.651	300.000, 2.287
752	300.400, 2.651	300.400, 2.288
753	300.800, 2.652	300.800, 2.288
754	301.200, 2.653	301.200, 2.288
755	301.600, 2.654	301.600, 2.288
756	302.000, 2.655	302.000, 2.288
757	302.400, 2.655	302.400, 2.288
758	302.800, 2.656	302.800, 2.288
759	303.200, 2.657	303.200, 2.288
760	303.600, 2.658	303.600, 2.288
761	304.000, 2.658	304.000, 2.288
762	304.400, 2.658	304.400, 2.288
763	304.800, 2.658	304.800, 2.289
764	305.200, 2.659	305.200, 2.289
765	305.600, 2.660	305.600, 2.289
766	306.000, 2.661	306.000, 2.290
767	306.400, 2.661	306.400, 2.291
768	306.800, 2.662	306.800, 2.291
769	307.200, 2.663	307.200, 2.291
770	307.600, 2.662	307.600, 2.291
771	308.000, 2.662	308.000, 2.290
772	308.400, 2.663	308.400, 2.289
773	308.800, 2.663	308.800, 2.289
774	309.200, 2.663	309.200, 2.288
775	309.600, 2.663	309.600, 2.289
776	310.000, 2.663	310.000, 2.289
777	310.400, 2.664	310.400, 2.290
778	310.800, 2.666	310.800, 2.290
779	311.200, 2.667	311.200, 2.290
780	311.600, 2.667	311.600, 2.290
781	312.000, 2.668	312.000, 2.290
782	312.400, 2.669	312.400, 2.289
783	312.800, 2.669	312.800, 2.288
784	313.200, 2.670	313.200, 2.288
785	313.600, 2.670	313.600, 2.287
786	314.000, 2.671	314.000, 2.287
787	314.400, 2.671	314.400, 2.287
788	314.800, 2.672	314.800, 2.288
789	315.200, 2.673	315.200, 2.289
790	315.600, 2.674	315.600, 2.290
791	316.000, 2.675	316.000, 2.291
792	316.400, 2.675	316.400, 2.291
793	316.800, 2.675	316.800, 2.291
794	317.200, 2.676	317.200, 2.290
795	317.600, 2.676	317.600, 2.290
796	318.000, 2.676	318.000, 2.289
797	318.400, 2.677	318.400, 2.289
798	318.800, 2.677	318.800, 2.289
799	319.200, 2.678	319.200, 2.289
800	319.600, 2.679	319.600, 2.290
801	320.000, 2.679	320.000, 2.291
802	320.400, 2.679	320.400, 2.291
803	320.800, 2.680	320.800, 2.291
804	321.200, 2.680	321.200, 2.291
805	321.600, 2.681	321.600, 2.291
806	322.000, 2.681	322.000, 2.291
807	322.400, 2.681	322.400, 2.291
808	322.800, 2.682	322.800, 2.291
809	323.200, 2.682	323.200, 2.291
810	323.600, 2.683	323.600, 2.291
811	324.000, 2.683	324.000, 2.291
812	324.400, 2.684	324.400, 2.292
813	324.800, 2.685	324.800, 2.293
814	325.200, 2.685	325.200, 2.293
815	325.600, 2.685	325.600, 2.293
816	326.000, 2.686	326.000, 2.293
817	326.400, 2.686	326.400, 2.294
818	326.800, 2.687	326.800, 2.294
819	327.200, 2.688	327.200, 2.293
820	327.600, 2.688	327.600, 2.293
821	328.000, 2.689	328.000, 2.292
822	328.400, 2.689	328.400, 2.292
823	328.800, 2.689	328.800, 2.292
824	329.200, 2.688	329.200, 2.292
825	329.600, 2.688	329.600, 2.292
826	330.000, 2.688	330.000, 2.292
827	330.400, 2.689	330.400, 2.292
828	330.800, 2.690	330.800, 2.293
829	331.200, 2.690	331.200, 2.293
830	331.600, 2.690	331.600, 2.294
831	332.000, 2.691	332.000, 2.293
832	332.400, 2.691	332.400, 2.293
833	332.800, 2.692	332.800, 2.292
834	333.200, 2.692	333.200, 2.292
835	333.600, 2.692	333.600, 2.292
836	334.000, 2.693	334.000, 2.292
837	334.400, 2.694	334.400, 2.292
838	334.800, 2.694	334.800, 2.293
839	335.200, 2.695	335.200, 2.293
840	335.600, 2.696	335.600, 2.294
841	336.000, 2.696	336.000, 2.294
842	336.400, 2.697	336.400, 2.293
843	336.800, 2.697	336.800, 2.293
844	337.200, 2.698	337.200, 2.293
845	337.600, 2.698	337.600, 2.293
846	338.000, 2.698	338.000, 2.293
847	338.400, 2.699	338.400, 2.293
848	338.800, 2.700	338.800, 2.293
849	339.200, 2.700	339.200, 2.293
850	339.600, 2.700	339.600, 2.294
851	340.000, 2.700	340.000, 2.294
852	340.400, 2.700	340.400, 2.294
853	340.800, 2.701	340.800, 2.294
854	341.200, 2.701	341.200, 2.294
855	341.600, 2.702	341.600, 2.294
856	342.000, 2.703	342.000, 2.294
857	342.400, 2.703	342.400, 2.295
858	342.800, 2.703	342.800, 2.295
859	343.200, 2.703	343.200, 2.295
860	343.600, 2.703	343.600, 2.295
861	344.000, 2.703	344.000, 2.295
862	344.400, 2.703	344.400, 2.295
863	344.800, 2.703	344.800, 2.295
864	345.200, 2.703	345.200, 2.294
865	345.600, 2.704	345.600, 2.294
866	346.000, 2.705	346.000, 2.294
867	346.400, 2.705	346.400, 2.294
868	346.800, 2.705	346.800, 2.294
869	347.200, 2.706	347.200, 2.293
870	347.600, 2.707	347.600, 2.293
871	348.000, 2.708	348.000, 2.294
872	348.400, 2.708	348.400, 2.294
873	348.800, 2.709	348.800, 2.294
874	349.200, 2.709	349.200, 2.295
875	349.600, 2.710	349.600, 2.296
876	350.000, 2.710	350.000, 2.296
877	350.400, 2.710	350.400, 2.296
878	350.800, 2.710	350.800, 2.296
879	351.200, 2.711	351.200, 2.296
880	351.600, 2.711	351.600, 2.295
881	352.000, 2.712	352.000, 2.294
882	352.400, 2.713	352.400, 2.293
883	352.800, 2.714	352.800, 2.293
884	353.200, 2.715	353.200, 2.293
885	353.600, 2.716	353.600, 2.294
886	354.000, 2.716	354.000, 2.295
887	354.400, 2.716	354.400, 2.295
888	354.800, 2.716	354.800, 2.296
889	355.200, 2.716	355.200, 2.296
890	355.600, 2.715	355.600, 2.297
891	356.000, 2.715	356.000, 2.296
892	356.400, 2.715	356.400, 2.296
893	356.800, 2.715	356.800, 2.296
894	357.200, 2.716	357.200, 2.296
895	357.600, 2.716	357.600, 2.296
896	358.000, 2.716	358.000, 2.296
897	358.400, 2.717	358.400, 2.296
898	358.800, 2.718	358.800, 2.297
899	359.200, 2.719	359.200, 2.297
900	359.600, 2.719	359.600, 2.297
901	360.000, 2.720	360.000, 2.297
902	360.400, 2.720	360.400, 2.297
903	360.800, 2.720	360.800, 2.297
904	361.200, 2.720	361.200, 2.297
905	361.600, 2.719	361.600, 2.297
906	362.000, 2.719	362.000, 2.297
907	362.400, 2.719	362.400, 2.297
908	362.800, 2.720	362.800, 2.297
909	363.200, 2.721	363.200, 2.297
910	363.600, 2.722	363.600, 2.297
911	364.000, 2.722	364.000, 2.297
912	364.400, 2.723	364.400, 2.297
913	364.800, 2.723	364.800, 2.297
914	365.200, 2.723	365.200, 2.297
915	365.600, 2.723	365.600, 2.297
916	366.000, 2.723	366.000, 2.297
917	366.400, 2.724	366.400, 2.297
918	366.800, 2.725	366.800, 2.297
919	367.200, 2.725	367.200, 2.297
920	367.600, 2.726	367.600, 2.297
921	368.000, 2.726	368.000, 2.297
922	368.400, 2.725	368.400, 2.297
923	368.800, 2.725	368.800, 2.297
924	369.200, 2.725	369.200, 2.297
925	369.600, 2.726	369.600, 2.297
926	370.000, 2.726	370.000, 2.297
927	370.400, 2.727	370.400, 2.297
928	370.800, 2.727	370.800, 2.297
929	371.200, 2.728	371.200, 2.297
930	371.600, 2.728	371.600, 2.297
931	372.000, 2.728	372.000, 2.297
932	372.400, 2.728	372.400, 2.297
933	372.800, 2.728	372.800, 2.297
934	373.200, 2.729	373.200, 2.297
935	373.600, 2.729	373.600, 2.297
936	374.000, 2.730	374.000, 2.297
937	374.400, 2.730	374.400, 2.297
938	374.800, 2.731	374.800, 2.297
939	375.200, 2.731	375.200, 2.297
940	375.600, 2.731	375.600, 2.296
941	376.000, 2.732	376.000, 2.296
942	376.400, 2.732	376.400, 2.296
943	376.800, 2.733	376.800, 2.296
944	377.200, 2.733	377.200, 2.296
945	377.600, 2.733	377.600, 2.296
946	378.000, 2.732	378.000, 2.296
947	378.400, 2.732	378.400, 2.297
948	378.800, 2.732	378.800, 2.297
949	379.200, 2.732	379.200, 2.298
950	379.600, 2.733	379.600, 2.297
951	380.000, 2.733	380.000, 2.297
952	380.400, 2.733	380.400, 2.296
953	380.800, 2.733	380.800, 2.296
954	381.200, 2.734	381.200, 2.296
955	381.600, 2.734	381.600, 2.296
956	382.000, 2.734	382.000, 2.295
957	382.400, 2.735	382.400, 2.296
958	382.800, 2.736	382.800, 2.296
959	383.200, 2.737	383.200, 2.295
960	383.600, 2.738	383.600, 2.295
961	384.000, 2.738	384.000, 2.295
962	384.400, 2.739	384.400, 2.295
963	384.800, 2.739	384.800, 2.295
964	385.200, 2.739	385.200, 2.296
965	385.600, 2.739	385.600, 2.296
966	386.000, 2.738	386.000, 2.296
967	386.400, 2.738	386.400, 2.296
968	386.800, 2.739	386.800, 2.295
969	387.200, 2.739	387.200, 2.295
970	387.600, 2.739	387.600, 2.295
971	388.000, 2.739	388.000, 2.295
972	388.400, 2.740	388.400, 2.295
973	388.800, 2.741	388.800, 2.296
974	389.200, 2.741	389.200, 2.297
975	389.600, 2.741	389.600, 2.297
976	390.000, 2.741	390.000, 2.297
977	390.400, 2.742	390.400, 2.297
978	390.800, 2.742	390.800, 2.298
979	391.200, 2.741	391.200, 2.298
980	391.600, 2.741	391.600, 2.299
981	392.000, 2.741	392.000, 2.299
982	392.400, 2.741	392.400, 2.299
983	392.800, 2.741	392.800, 2.300
984	393.200, 2.742	393.200, 2.299
985	393.600, 2.742	393.600, 2.298
986	394.000, 2.743	394.000, 2.297
987	394.400, 2.743	394.400, 2.297
988	394.800, 2.744	394.800, 2.297
989	395.200, 2.744	395.200, 2.296
990	395.600, 2.744	395.600, 2.296
991	396.000, 2.744	396.000, 2.295
992	396.400, 2.744	396.400, 2.295
993	396.800, 2.744	396.800, 2.296
994	397.200, 2.745	397.200, 2.296
995	397.600, 2.746	397.600, 2.296
996	398.000, 2.747	398.000, 2.296
997	398.400, 2.747	398.400, 2.297
998	398.800, 2.747	398.800, 2.297
999	399.200, 2.747	399.200, 2.296
1000	399.600, 2.747	399.600, 2.296
1001	400.000, 2.747	400.000, 2.296
1002	400.400, 2.746	400.400, 2.297
1003	400.800, 2.746	400.800, 2.297
1004	401.200, 2.746	401.200, 2.298
1005	401.600, 2.747	401.600, 2.298
1006	402.000, 2.747	402.000, 2.298
1007	402.400, 2.747	402.400, 2.298
1008	402.800, 2.748	402.800, 2.297
1009	403.200, 2.748	403.200, 2.297
1010	403.600, 2.749	403.600, 2.297
1011	404.000, 2.750	404.000, 2.297
1012	404.400, 2.750	404.400, 2.297
1013	404.800, 2.750	404.800, 2.298
1014	405.200, 2.750	405.200, 2.299
1015	405.600, 2.750	405.600, 2.299
1016	406.000, 2.750	406.000, 2.299
1017	406.400, 2.750	406.400, 2.298
1018	406.800, 2.750	406.800, 2.298
1019	407.200, 2.751	407.200, 2.297
1020	407.600, 2.751	407.600, 2.297
1021	408.000, 2.751	408.000, 2.296
1022	408.400, 2.751	408.400, 2.296
1023	408.800, 2.751	408.800, 2.297
1024	409.200, 2.751	409.200, 2.297
1025	409.600, 2.752	409.600, 2.297
1026	410.000, 2.753	410.000, 2.297
1027	410.400, 2.753	410.400, 2.297
1028	410.800, 2.754	410.800, 2.297
1029	411.200, 2.754	411.200, 2.297
1030	411.600, 2.754	411.600, 2.297
1031	412.000, 2.753	412.000, 2.296
1032	412.400, 2.752	412.400, 2.297
1033	412.800, 2.751	412.800, 2.297
1034	413.200, 2.751	413.200, 2.297
1035	413.600, 2.752	413.600, 2.297
1036	414.000, 2.753	414.000, 2.297
1037	414.400, 2.754	414.400, 2.297
1038	414.800, 2.755	414.800, 2.297
1039	415.200, 2.756	415.200, 2.297
1040	415.600, 2.756	415.600, 2.297
1041	416.000, 2.757	416.000, 2.297
1042	416.400, 2.757	416.400, 2.297
1043	416.800, 2.757	416.800, 2.297
1044	417.200, 2.758	417.200, 2.298
1045	417.600, 2.758	417.600, 2.299
1046	418.000, 2.757	418.000, 2.299
1047	418.400, 2.756	418.400, 2.300
1048	418.800, 2.756	418.800, 2.300
1049	419.200, 2.756	419.200, 2.300
1050	419.600, 2.756	419.600, 2.300
1051	420.000, 2.756	420.000, 2.299
1052	420.400, 2.756	420.400, 2.299
1053	420.800, 2.757	420.800, 2.299
1054	421.200, 2.758	421.200, 2.298
1055	421.600, 2.759	421.600, 2.299
1056	422.000, 2.759	422.000, 2.299
1057	422.400, 2.759	422.400, 2.299
1058	422.800, 2.759	422.800, 2.299
1059	423.200, 2.759	423.200, 2.298
1060	423.600, 2.759	423.600, 2.298
1061	424.000, 2.758	424.000, 2.298
1062	424.400, 2.758	424.400, 2.298
1063	424.800, 2.758	424.800, 2.298
1064	425.200, 2.759	425.200, 2.298
1065	425.600, 2.759	425.600, 2.299
1066	426.000, 2.760	426.000, 2.300
1067	426.400, 2.760	426.400, 2.300
1068	426.800, 2.761	426.800, 2.300
1069	427.200, 2.762	427.200, 2.300
1070	427.600, 2.762	427.600, 2.299
1071	428.000, 2.762	428.000, 2.299
1072	428.400, 2.762	428.400, 2.298
1073	428.800, 2.762	428.800, 2.298
1074	429.200, 2.762	429.200, 2.298
1075	429.600, 2.762	429.600, 2.298
1076	430.000, 2.762	430.000, 2.298
1077	430.400, 2.763	430.400, 2.299
1078	430.800, 2.762	430.800, 2.299
1079	431.200, 2.762	431.200, 2.299
1080	431.600, 2.761	431.600, 2.299
1081	432.000, 2.761	432.000, 2.299
1082	432.400, 2.760	432.400, 2.299
1083	432.800, 2.760	432.800, 2.298
1084	433.200, 2.761	433.200, 2.298
1085	433.600, 2.762	433.600, 2.298
1086	434.000, 2.762	434.000, 2.298
1087	434.400, 2.763	434.400, 2.298
1088	434.800, 2.764	434.800, 2.298
1089	435.200, 2.765	435.200, 2.298
1090	435.600, 2.765	435.600, 2.299
1091	436.000, 2.765	436.000, 2.299
1092	436.400, 2.765	436.400, 2.299
1093	436.800, 2.765	436.800, 2.298
1094	437.200, 2.764	437.200, 2.298
1095	437.600, 2.765	437.600, 2.298
1096	438.000, 2.765	438.000, 2.297
1097	438.400, 2.765	438.400, 2.297
1098	438.800, 2.764	438.800, 2.297
1099	439.200, 2.764	439.200, 2.297
1100	439.600, 2.764	439.600, 2.298
1101	440.000, 2.764	440.000, 2.299
1102	440.400, 2.764	440.400, 2.299
1103	440.800, 2.764	440.800, 2.299
1104	441.200, 2.765	441.200, 2.299
1105	441.600, 2.766	441.600, 2.300
1106	442.000, 2.766	442.000, 2.300
1107	442.400, 2.767	442.400, 2.300
1108	442.800, 2.767	442.800, 2.301
1109	443.200, 2.768	443.200, 2.300
1110	443.600, 2.768	443.600, 2.300
1111	444.000, 2.768	444.000, 2.300
1112	444.400, 2.767	444.400, 2.299
1113	444.800, 2.766	444.800, 2.299
1114	445.200, 2.766	445.200, 2.299
1115	445.600, 2.766	445.600, 2.299
1116	446.000, 2.766	446.000, 2.299
1117	446.400, 2.767	446.400, 2.300
1118	446.800, 2.767	446.800, 2.300
1119	447.200, 2.767	447.200, 2.300
1120	447.600, 2.767	447.600, 2.300
1121	448.000, 2.767	448.000, 2.300
1122	448.400, 2.766	448.400, 2.300
1123	448.800, 2.766	448.800, 2.300
1124	449.200, 2.766	449.200, 2.299
1125	449.600, 2.766	449.600, 2.299
1126	450.000, 2.767	450.000, 2.299
1127	450.400, 2.767	450.400, 2.299
1128	450.800, 2.767	450.800, 2.299
1129	451.200, 2.768	451.200, 2.299
1130	451.600, 2.768	451.600, 2.299
1131	452.000, 2.768	452.000, 2.299
1132	452.400, 2.769	452.400, 2.299
1133	452.800, 2.769	452.800, 2.299
1134	453.200, 2.769	453.200, 2.299
1135	453.600, 2.769	453.600, 2.299
1136	454.000, 2.770	454.000, 2.300
1137	454.400, 2.770	454.400, 2.299
1138	454.800, 2.769	454.800, 2.299
1139	455.200, 2.769	455.200, 2.299
1140	455.600, 2.770	455.600, 2.299
1141	456.000, 2.770	456.000, 2.299
1142	456.400, 2.770	456.400, 2.299
1143	456.800, 2.770	456.800, 2.299
1144	457.200, 2.769	457.200, 2.300
1145	457.600, 2.769	457.600, 2.300
1146	458.000, 2.769	458.000, 2.300
1147	458.400, 2.768	458.400, 2.299
1148	458.800, 2.768	458.800, 2.299
1149	459.200, 2.769	459.200, 2.299
1150	459.600, 2.770	459.600, 2.298
1151	460.000, 2.771	460.000, 2.298
1152	460.400, 2.771	460.400, 2.299
1153	460.800, 2.772	460.800, 2.299
1154	461.200, 2.772	461.200, 2.299
1155	461.600, 2.772	461.600, 2.298
1156	462.000, 2.771	462.000, 2.298
1157	462.400, 2.771	462.400, 2.298
1158	462.800, 2.771	462.800, 2.298
1159	463.200, 2.771	463.200, 2.298
1160	463.600, 2.771	463.600, 2.298
1161	464.000, 2.771	464.000, 2.298
1162	464.400, 2.771	464.400, 2.298
1163	464.800, 2.771	464.800, 2.298
1164	465.200, 2.771	465.200, 2.298
1165	465.600, 2.771	465.600, 2.299
1166	466.000, 2.771	466.000, 2.300
1167	466.400, 2.771	466.400, 2.301
1168	466.800, 2.771	466.800, 2.301
1169	467.200, 2.771	467.200, 2.301
1170	467.600, 2.772	467.600, 2.300
1171	468.000, 2.772	468.000, 2.299
1172	468.400, 2.772	468.400, 2.298
1173	468.800, 2.772	468.800, 2.298
1174	469.200, 2.772	469.200, 2.297
1175	469.600, 2.771	469.600, 2.297
1176	470.000, 2.771	470.000, 2.297
1177	470.400, 2.771	470.400, 2.298
1178	470.800, 2.771	470.800, 2.298
1179	471.200, 2.772	471.200, 2.299
1180	471.600, 2.773	471.600, 2.300
1181	472.000, 2.774	472.000, 2.300
1182	472.400, 2.775	472.400, 2.301
1183	472.800, 2.776	472.800, 2.301
1184	473.200, 2.776	473.200, 2.300
1185	473.600, 2.777	473.600, 2.300
1186	474.000, 2.776	474.000, 2.299
1187	474.400, 2.776	474.400, 2.299
1188	474.800, 2.775	474.800, 2.299
1189	475.200, 2.775	475.200, 2.299
1190	475.600, 2.775	475.600, 2.299
1191	476.000, 2.775	476.000, 2.299
1192	476.400, 2.775	476.400, 2.299
1193	476.800, 2.775	476.800, 2.299
1194	477.200, 2.775	477.200, 2.299
1195	477.600, 2.774	477.600, 2.298
1196	478.000, 2.774	478.000, 2.298
1197	478.400, 2.774	478.400, 2.298
1198	478.800, 2.775	478.800, 2.298
1199	479.200, 2.775	479.200, 2.298
1200	479.600, 2.775	479.600, 2.298
1201	480.000, 2.775	480.000, 2.298
1202	480.400, 2.775	480.400, 2.299
1203	480.800, 2.775	480.800, 2.299
1204	481.200, 2.775	481.200, 2.299
1205	481.600, 2.775	481.600, 2.299
1206	482.000, 2.776	482.000, 2.300
1207	482.400, 2.776	482.400, 2.300
1208	482.800, 2.776	482.800, 2.300
1209	483.200, 2.776	483.200, 2.299
1210	483.600, 2.775	483.600, 2.299
1211	484.000, 2.774	484.000, 2.298
1212	484.400, 2.774	484.400, 2.298
1213	484.800, 2.774	484.800, 2.298
1214	485.200, 2.774	485.200, 2.298
1215	485.600, 2.775	485.600, 2.298
1216	486.000, 2.775	486.000, 2.298
1217	486.400, 2.775	486.400, 2.299
1218	486.800, 2.776	486.800, 2.298
1219	487.200, 2.776	487.200, 2.298
1220	487.600, 2.775	487.600, 2.298
1221	488.000, 2.775	488.000, 2.297
1222	488.400, 2.775	488.400, 2.298
1223	488.800, 2.775	488.800, 2.298
1224	489.200, 2.775	489.200, 2.298
1225	489.600, 2.775	489.600, 2.298
1226	490.000, 2.775	490.000, 2.299
1227	490.400, 2.775	490.400, 2.299
1228	490.800, 2.776	490.800, 2.298
1229	491.200, 2.776	491.200, 2.297
1230	491.600, 2.776	491.600, 2.297
1231	492.000, 2.776	492.000, 2.297
1232	492.400, 2.776	492.400, 2.298
1233	492.800, 2.776	492.800, 2.298
1234	493.200, 2.777	493.200, 2.298
1235	493.600, 2.777	493.600, 2.299
1236	494.000, 2.777	494.000, 2.299
1237	494.400, 2.777	494.400, 2.299
1238	494.800, 2.777	494.800, 2.299
1239	495.200, 2.777	495.200, 2.299
1240	495.600, 2.777	495.600, 2.299
1241	496.000, 2.777	496.000, 2.299
1242	496.400, 2.777	496.400, 2.299
1243	496.800, 2.777	496.800, 2.299
1244	497.200, 2.777	497.200, 2.300
1245	497.600, 2.777	497.600, 2.300
1246	498.000, 2.777	498.000, 2.299
1247	498.400, 2.778	498.400, 2.299
1248	498.800, 2.778	498.800, 2.298
1249	499.200, 2.779	499.200, 2.298
1250	499.600, 2.778	499.600, 2.297
1251	500.000, 2.778	500.000, 2.297
1252	500.400, 2.779	500.400, 2.298
1253	500.800, 2.779	500.800, 2.298
1254	501.200, 2.779	501.200, 2.299
1255	501.600, 2.779	501.600, 2.299
1256	502.000, 2.779	502.000, 2.299
1257	502.400, 2.779	502.400, 2.299
1258	502.800, 2.779	502.800, 2.299
1259	503.200, 2.778	503.200, 2.299
1260	503.600, 2.777	503.600, 2.299
1261	504.000, 2.777	504.000, 2.299
1262	504.400, 2.777	504.400, 2.299
1263	504.800, 2.777	504.800, 2.298
1264	505.200, 2.777	505.200, 2.298
1265	505.600, 2.777	505.600, 2.298
1266	506.000, 2.777	506.000, 2.298
1267	506.400, 2.778	506.400, 2.298
1268	506.800, 2.779	506.800, 2.298
1269	507.200, 2.779	507.200, 2.298
1270	507.600, 2.779	507.600, 2.299
1271	508.000, 2.780	508.000, 2.299
1272	508.400, 2.780	508.400, 2.299
1273	508.800, 2.779	508.800, 2.299
1274	509.200, 2.779	509.200, 2.300
1275	509.600, 2.779	509.600, 2.300
1276	510.000, 2.779	510.000, 2.299
1277	510.400, 2.779	510.400, 2.299
1278	510.800, 2.779	510.800, 2.299
1279	511.200, 2.780	511.200, 2.299
1280	511.600, 2.780	511.600, 2.299
1281	512.000, 2.780	512.000, 2.299
1282	512.400, 2.779	512.400, 2.298
1283	512.800, 2.778	512.800, 2.298
1284	513.200, 2.778	513.200, 2.298
1285	513.600, 2.777	513.600, 2.298
1286	514.000, 2.777	514.000, 2.298
1287	514.400, 2.777	514.400, 2.298
1288	514.800, 2.778	514.800, 2.298
1289	515.200, 2.778	515.200, 2.299
1290	515.600, 2.778	515.600, 2.300
1291	516.000, 2.779	516.000, 2.300
1292	516.400, 2.779	516.400, 2.300
1293	516.800, 2.780	516.800, 2.300
1294	517.200, 2.780	517.200, 2.299
1295	517.600, 2.780	517.600, 2.299
1296	518.000, 2.780	518.000, 2.298
1297	518.400, 2.779	518.400, 2.298
1298	518.800, 2.779	518.800, 2.298
1299	519.200, 2.778	519.200, 2.299
1300	519.600, 2.777	519.600, 2.299
1301	520.000, 2.777	520.000, 2.299
1302	520.400, 2.777	520.400, 2.299
1303	520.800, 2.778	520.800, 2.299
1304	521.200, 2.778	521.200, 2.299
1305	521.600, 2.778	521.600, 2.299
1306	522.000, 2.779	522.000, 2.299
1307	522.400, 2.779	522.400, 2.299
1308	522.800, 2.779	522.800, 2.300
1309	523.200, 2.779	523.200, 2.300
1310	523.600, 2.779	523.600, 2.300
1311	524.000, 2.779	524.000, 2.300
1312	524.400, 2.779	524.400, 2.300
1313	524.800, 2.779	524.800, 2.300
1314	525.200, 2.779	525.200, 2.299
1315	525.600, 2.779	525.600, 2.299
1316	526.000, 2.778	526.000, 2.299
1317	526.400, 2.778	526.400, 2.298
1318	526.800, 2.778	526.800, 2.298
1319	527.200, 2.779	527.200, 2.299
1320	527.600, 2.779	527.600, 2.299
1321	528.000, 2.779	528.000, 2.299
1322	528.400, 2.779	528.400, 2.299
1323	528.800, 2.780	528.800, 2.299
1324	529.200, 2.781	529.200, 2.299
1325	529.600, 2.781	529.600, 2.299
1326	530.000, 2.781	530.000, 2.299
1327	530.400, 2.781	530.400, 2.299
1328	530.800, 2.781	530.800, 2.299
1329	531.200, 2.780	531.200, 2.299
1330	531.600, 2.779	531.600, 2.298
1331	532.000, 2.779	532.000, 2.298
1332	532.400, 2.779	532.400, 2.298
1333	532.800, 2.778	532.800, 2.298
1334	533.200, 2.778	533.200, 2.298
1335	533.600, 2.778	533.600, 2.298
1336	534.000, 2.777	534.000, 2.299
1337	534.400, 2.777	534.400, 2.299
1338	534.800, 2.777	534.800, 2.299
1339	535.200, 2.778	535.200, 2.299
1340	535.600, 2.779	535.600, 2.299
1341	536.000, 2.779	536.000, 2.300
1342	536.400, 2.779	536.400, 2.301
1343	536.800, 2.780	536.800, 2.301
1344	537.200, 2.780	537.200, 2.301
1345	537.600, 2.780	537.600, 2.301
1346	538.000, 2.779	538.000, 2.301
1347	538.400, 2.778	538.400, 2.301
1348	538.800, 2.778	538.800, 2.300
1349	539.200, 2.777	539.200, 2.300
1350	539.600, 2.777	539.600, 2.301
1351	540.000, 2.777	540.000, 2.301
1352	540.400, 2.777	540.400, 2.301
1353	540.800, 2.778	540.800, 2.300
1354	541.200, 2.778	541.200, 2.300
1355	541.600, 2.778	541.600, 2.300
1356	542.000, 2.778	542.000, 2.299
1357	542.400, 2.778	542.400, 2.299
1358	542.800, 2.778	542.800, 2.298
1359	543.200, 2.779	543.200, 2.299
1360	543.600, 2.779	543.600, 2.299
1361	544.000, 2.779	544.000, 2.299
1362	544.400, 2.779	544.400, 2.299
1363	544.800, 2.779	544.800, 2.299
1364	545.200, 2.779	545.200, 2.299
1365	545.600, 2.779	545.600, 2.300
1366	546.000, 2.780	546.000, 2.300
1367	546.400, 2.780	546.400, 2.301
1368	546.800, 2.781	546.800, 2.300
1369	547.200, 2.781	547.200, 2.300
1370	547.600, 2.781	547.600, 2.300
1371	548.000, 2.781	548.000, 2.300
1372	548.400, 2.781	548.400, 2.300
1373	548.800, 2.780	548.800, 2.299
1374	549.200, 2.780	549.200, 2.299
1375	549.600, 2.779	549.600, 2.299
1376	550.000, 2.779	550.000, 2.299
1377	550.400, 2.779	550.400, 2.299
1378	550.800, 2.779	550.800, 2.299
1379	551.200, 2.778	551.200, 2.299
1380	551.600, 2.778	551.600, 2.299
1381	552.000, 2.778	552.000, 2.300
1382	552.400, 2.777	552.400, 2.300
1383	552.800, 2.777	552.800, 2.300
1384	553.200, 2.778	553.200, 2.300
1385	553.600, 2.778	553.600, 2.300
1386	554.000, 2.778	554.000, 2.301
1387	554.400, 2.779	554.400, 2.300
1388	554.800, 2.778	554.800, 2.300
1389	555.200, 2.778	555.200, 2.299
1390	555.600, 2.778	555.600, 2.299
1391	556.000, 2.778	556.000, 2.299
1392	556.400, 2.778	556.400, 2.299
1393	556.800, 2.778	556.800, 2.299
1394	557.200, 2.778	557.200, 2.300
1395	557.600, 2.778	557.600, 2.300
1396	558.000, 2.777	558.000, 2.300
1397	558.400, 2.777	558.400, 2.300
1398	558.800, 2.777	558.800, 2.299
1399	559.200, 2.776	559.200, 2.298
1400	559.600, 2.777	559.600, 2.297
1401	560.000, 2.777	560.000, 2.297
1402	560.400, 2.778	560.400, 2.297
1403	560.800, 2.778	560.800, 2.297
1404	561.200, 2.779	561.200, 2.298
1405	561.600, 2.779	561.600, 2.298
1406	562.000, 2.779	562.000, 2.298
1407	562.400, 2.778	562.400, 2.298
1408	562.800, 2.777	562.800, 2.298
1409	563.200, 2.777	563.200, 2.299
1410	563.600, 2.777	563.600, 2.299
1411	564.000, 2.777	564.000, 2.299
1412	564.400, 2.777	564.400, 2.299
1413	564.800, 2.777	564.800, 2.299
1414	565.200, 2.777	565.200, 2.299
1415	565.600, 2.778	565.600, 2.299
1416	566.000, 2.778	566.000, 2.299
1417	566.400, 2.778	566.400, 2.299
1418	566.800, 2.778	566.800, 2.299
1419	567.200, 2.778	567.200, 2.299
1420	567.600, 2.778	567.600, 2.300
1421	568.000, 2.778	568.000, 2.300
1422	568.400, 2.777	568.400, 2.300
1423	568.800, 2.777	568.800, 2.300
1424	569.200, 2.777	569.200, 2.301
1425	569.600, 2.777	569.600, 2.301
1426	570.000, 2.778	570.000, 2.301
1427	570.400, 2.778	570.400, 2.301
1428	570.800, 2.778	570.800, 2.301
1429	571.200, 2.778	571.200, 2.301
1430	571.600, 2.778	571.600, 2.300
1431	572.000, 2.778	572.000, 2.299
1432	572.400, 2.777	572.400, 2.299
1433	572.800, 2.777	572.800, 2.299
1434	573.200, 2.777	573.200, 2.300
1435	573.600, 2.777	573.600, 2.300
1436	574.000, 2.778	574.000, 2.300
1437	574.400, 2.778	574.400, 2.300
1438	574.800, 2.778	574.800, 2.300
1439	575.200, 2.777	575.200, 2.299
1440	575.600, 2.777	575.600, 2.299
1441	576.000, 2.777	576.000, 2.298
1442	576.400, 2.776	576.400, 2.298
1443	576.800, 2.775	576.800, 2.297
1444	577.200, 2.775	577.200, 2.297
1445	577.600, 2.776	577.600, 2.297
1446	578.000, 2.776	578.000, 2.298
1447	578.400, 2.776	578.400, 2.299
1448	578.800, 2.777	578.800, 2.300
1449	579.200, 2.777	579.200, 2.300
1450	579.600, 2.778	579.600, 2.300
1451	580.000, 2.778	580.000, 2.300
1452	580.400, 2.778	580.400, 2.299
1453	580.800, 2.778	580.800, 2.298
1454	581.200, 2.777	581.200, 2.298
1455	581.600, 2.777	581.600, 2.298
1456	582.000, 2.776	582.000, 2.299
1457	582.400, 2.776	582.400, 2.300
1458	582.800, 2.776	582.800, 2.300
1459	583.200, 2.777	583.200, 2.300
1460	583.600, 2.778	583.600, 2.299
1461	584.000, 2.778	584.000, 2.299
1462	584.400, 2.779	584.400, 2.299
1463	584.800, 2.778	584.800, 2.299
1464	585.200, 2.777	585.200, 2.299
1465	585.600, 2.776	585.600, 2.300
1466	586.000, 2.776	586.000, 2.300
1467	586.400, 2.776	586.400, 2.299
1468	586.800, 2.776	586.800, 2.299
1469	587.200, 2.776	587.200, 2.299
1470	587.600, 2.776	587.600, 2.298
1471	588.000, 2.777	588.000, 2.298
1472	588.400, 2.777	588.400, 2.298
1473	588.800, 2.777	588.800, 2.298
1474	589.200, 2.777	589.200, 2.298
1475	589.600, 2.777	589.600, 2.299
1476	590.000, 2.777	590.000, 2.299
1477	590.400, 2.777	590.400, 2.299
1478	590.800, 2.777	590.800, 2.299
1479	591.200, 2.776	591.200, 2.299
1480	591.600, 2.776	591.600, 2.299
1481	592.000, 2.775	592.000, 2.299
1482	592.400, 2.775	592.400, 2.299
1483	592.800, 2.775	592.800, 2.299
1484	593.200, 2.775	593.200, 2.299
1485	593.600, 2.775	593.600, 2.299
1486	594.000, 2.776	594.000, 2.298
1487	594.400, 2.777	594.400, 2.298
1488	594.800, 2.776	594.800, 2.298
1489	595.200, 2.776	595.200, 2.299
1490	595.600, 2.775	595.600, 2.299
1491	596.000, 2.775	596.000, 2.299
1492	596.400, 2.774	596.400, 2.299
1493	596.800, 2.774	596.800, 2.299
1494	597.200, 2.775	597.200, 2.299
1495	597.600, 2.775	597.600, 2.298
1496	598.000, 2.776	598.000, 2.297
1497	598.400, 2.775	598.400, 2.297
1498	598.800, 2.775	598.800, 2.297
1499	599.200, 2.775	599.200, 2.296
1500	599.600, 2.774	599.600, 2.296
1501	600.000, 2.774	600.000, 2.296
1502	600.400, 2.774	600.400, 2.297
1503	600.800, 2.774	600.800, 2.297
1504	601.200, 2.774	601.200, 2.297
1505	601.600, 2.774	601.600, 2.297
1506	602.000, 2.774	602.000, 2.298
1507	602.400, 2.774	602.400, 2.298
1508	602.800, 2.773	602.800, 2.298
1509	603.200, 2.773	603.200, 2.298
1510	603.600, 2.772	603.600, 2.298
1511	604.000, 2.772	604.000, 2.298
1512	604.400, 2.773	604.400, 2.298
1513	604.800, 2.773	604.800, 2.298
1514	605.200, 2.774	605.200, 2.298
1515	605.600, 2.774	605.600, 2.298
1516	606.000, 2.775	606.000, 2.299
1517	606.400, 2.775	606.400, 2.299
1518	606.800, 2.775	606.800, 2.300
1519	607.200, 2.775	607.200, 2.300
1520	607.600, 2.775	607.600, 2.299
1521	608.000, 2.775	608.000, 2.299
1522	608.400, 2.775	608.400, 2.299
1523	608.800, 2.775	608.800, 2.299
1524	609.200, 2.774	609.200, 2.299
1525	609.600, 2.773	609.600, 2.299
1526	610.000, 2.772	610.000, 2.299
1527	610.400, 2.772	610.400, 2.299
1528	610.800, 2.771	610.800, 2.298
1529	611.200, 2.771	611.200, 2.298
1530	611.600, 2.772	611.600, 2.298
1531	612.000, 2.772	612.000, 2.298
1532	612.400, 2.772	612.400, 2.298
1533	612.800, 2.773	612.800, 2.298
1534	613.200, 2.773	613.200, 2.298
1535	613.600, 2.774	613.600, 2.298
1536	614.000, 2.774	614.000, 2.299
1537	614.400, 2.774	614.400, 2.299
1538	614.800, 2.774	614.800, 2.298
1539	615.200, 2.773	615.200, 2.298
1540	615.600, 2.773	615.600, 2.297
1541	616.000, 2.772	616.000, 2.297
1542	616.400, 2.771	616.400, 2.297
1543	616.800, 2.771	616.800, 2.297
1544	617.200, 2.771	617.200, 2.297
1545	617.600, 2.771	617.600, 2.298
1546	618.000, 2.771	618.000, 2.298
1547	618.400, 2.772	618.400, 2.299
1548	618.800, 2.772	618.800, 2.298
1549	619.200, 2.772	619.200, 2.299
1550	619.600, 2.771	619.600, 2.299
1551	620.000, 2.771	620.000, 2.299
1552	620.400, 2.771	620.400, 2.299
1553	620.800, 2.772	620.800, 2.298
1554	621.200, 2.772	621.200, 2.297
1555	621.600, 2.772	621.600, 2.297
1556	622.000, 2.772	622.000, 2.297
1557	622.400, 2.772	622.400, 2.297
1558	622.800, 2.771	622.800, 2.298
1559	623.200, 2.770	623.200, 2.298
1560	623.600, 2.770	623.600, 2.299
1561	624.000, 2.769	624.000, 2.299
1562	624.400, 2.769	624.400, 2.299
1563	624.800, 2.769	624.800, 2.299
1564	625.200, 2.769	625.200, 2.298
1565	625.600, 2.770	625.600, 2.298
1566	626.000, 2.770	626.000, 2.298
1567	626.400, 2.771	626.400, 2.298
1568	626.800, 2.771	626.800, 2.298
1569	627.200, 2.772	627.200, 2.298
1570	627.600, 2.772	627.600, 2.298
1571	628.000, 2.772	628.000, 2.298
1572	628.400, 2.772	628.400, 2.298
1573	628.800, 2.772	628.800, 2.298
1574	629.200, 2.772	629.200, 2.299
1575	629.600, 2.771	629.600, 2.299
1576	630.000, 2.771	630.000, 2.300
1577	630.400, 2.771	630.400, 2.300
1578	630.800, 2.771	630.800, 2.299
1579	631.200, 2.771	631.200, 2.299
1580	631.600, 2.771	631.600, 2.298
1581	632.000, 2.770	632.000, 2.298
1582	632.400, 2.771	632.400, 2.299
1583	632.800, 2.770	632.800, 2.299
1584	633.200, 2.770	633.200, 2.299
1585	633.600, 2.770	633.600, 2.300
1586	634.000, 2.769	634.000, 2.299
1587	634.400, 2.768	634.400, 2.299
1588	634.800, 2.768	634.800, 2.298
1589	635.200, 2.768	635.200, 2.298
1590	635.600, 2.768	635.600, 2.297
1591	636.000, 2.769	636.000, 2.297
1592	636.400, 2.769	636.400, 2.297
1593	636.800, 2.770	636.800, 2.297
1594	637.200, 2.770	637.200, 2.298
1595	637.600, 2.770	637.600, 2.299
1596	638.000, 2.770	638.000, 2.299
1597	638.400, 2.769	638.400, 2.300
1598	638.800, 2.769	638.800, 2.300
1599	639.200, 2.769	639.200, 2.299
1600	639.600, 2.769	639.600, 2.298
1601	640.000, 2.769	640.000, 2.297
1602	640.400, 2.769	640.400, 2.296
1603	640.800, 2.769	640.800, 2.296
1604	641.200, 2.769	641.200, 2.296
1605	641.600, 2.769	641.600, 2.296
1606	642.000, 2.768	642.000, 2.297
1607	642.400, 2.767	642.400, 2.297
1608	642.800, 2.767	642.800, 2.297
1609	643.200, 2.767	643.200, 2.297
1610	643.600, 2.767	643.600, 2.296
1611	644.000, 2.766	644.000, 2.297
1612	644.400, 2.766	644.400, 2.297
1613	644.800, 2.766	644.800, 2.297
1614	645.200, 2.765	645.200, 2.297
1615	645.600, 2.765	645.600, 2.297
1616	646.000, 2.765	646.000, 2.298
1617	646.400, 2.766	646.400, 2.298
1618	646.800, 2.767	646.800, 2.298
1619	647.200, 2.767	647.200, 2.298
1620	647.600, 2.767	647.600, 2.298
1621	648.000, 2.767	648.000, 2.299
1622	648.400, 2.767	648.400, 2.299
1623	648.800, 2.766	648.800, 2.300
1624	649.200, 2.767	649.200, 2.299
1625	649.600, 2.767	649.600, 2.299
1626	650.000, 2.767	650.000, 2.299
1627	650.400, 2.766	650.400, 2.299
1628	650.800, 2.765	650.800, 2.298
1629	651.200, 2.764	651.200, 2.298
1630	651.600, 2.764	651.600, 2.298
1631	652.000, 2.764	652.000, 2.298
1632	652.400, 2.763	652.400, 2.299
1633	652.800, 2.763	652.800, 2.299
1634	653.200, 2.763	653.200, 2.299
1635	653.600, 2.763	653.600, 2.299
1636	654.000, 2.763	654.000, 2.299
1637	654.400, 2.763	654.400, 2.299
1638	654.800, 2.763	654.800, 2.299
1639	655.200, 2.764	655.200, 2.298
1640	655.600, 2.764	655.600, 2.298
1641	656.000, 2.765	656.000, 2.298
1642	656.400, 2.765	656.400, 2.298
1643	656.800, 2.764	656.800, 2.298
1644	657.200, 2.764	657.200, 2.299
1645	657.600, 2.763	657.600, 2.299
1646	658.000, 2.763	658.000, 2.299
1647	658.400, 2.763	658.400, 2.299
1648	658.800, 2.763	658.800, 2.299
1649	659.200, 2.763	659.200, 2.299
1650	659.600, 2.763	659.600, 2.299
1651	660.000, 2.763	660.000, 2.299
1652	660.400, 2.763	660.400, 2.299
1653	660.800, 2.763	660.800, 2.299
1654	661.200, 2.763	661.200, 2.298
1655	661.600, 2.763	661.600, 2.298
1656	662.000, 2.763	662.000, 2.298
1657	662.400, 2.763	662.400, 2.298
1658	662.800, 2.763	662.800, 2.298
1659	663.200, 2.763	663.200, 2.298
1660	663.600, 2.762	663.600, 2.298
1661	664.000, 2.762	664.000, 2.298
1662	664.400, 2.763	664.400, 2.298
1663	664.800, 2.763	664.800, 2.298
1664	665.200, 2.762	665.200, 2.298
1665	665.600, 2.762	665.600, 2.298
1666	666.000, 2.763	666.000, 2.298
1667	666.400, 2.763	666.400, 2.298
1668	666.800, 2.763	666.800, 2.298
1669	667.200, 2.763	667.200, 2.298
1670	667.600, 2.763	667.600, 2.297
1671	668.000, 2.762	668.000, 2.296
1672	668.400, 2.762	668.400, 2.296
1673	668.800, 2.761	668.800, 2.295
1674	669.200, 2.761	669.200, 2.296
1675	669.600, 2.761	669.600, 2.296
1676	670.000, 2.762	670.000, 2.297
1677	670.400, 2.762	670.400, 2.298
1678	670.800, 2.762	670.800, 2.298
1679	671.200, 2.761	671.200, 2.298
1680	671.600, 2.761	671.600, 2.298
1681	672.000, 2.760	672.000, 2.298
1682	672.400, 2.760	672.400, 2.297
1683	672.800, 2.759	672.800, 2.297
1684	673.200, 2.759	673.200, 2.297
1685	673.600, 2.760	673.600, 2.296
1686	674.000, 2.760	674.000, 2.296
1687	674.400, 2.761	674.400, 2.297
1688	674.800, 2.761	674.800, 2.297
1689	675.200, 2.762	675.200, 2.298
1690	675.600, 2.762	675.600, 2.298
1691	676.000, 2.762	676.000, 2.299
1692	676.400, 2.762	676.400, 2.299
1693	676.800, 2.761	676.800, 2.299
1694	677.200, 2.760	677.200, 2.298
1695	677.600, 2.760	677.600, 2.298
1696	678.000, 2.759	678.000, 2.298
1697	678.400, 2.759	678.400, 2.298
1698	678.800, 2.759	678.800, 2.297
1699	679.200, 2.759	679.200, 2.297
1700	679.600, 2.760	679.600, 2.297
1701	680.000, 2.760	680.000, 2.296
1702	680.400, 2.760	680.400, 2.296
1703	680.800, 2.760	680.800, 2.296
1704	681.200, 2.759	681.200, 2.296
1705	681.600, 2.759	681.600, 2.297
1706	682.000, 2.759	682.000, 2.297
1707	682.400, 2.758	682.400, 2.298
1708	682.800, 2.758	682.800, 2.298
1709	683.200, 2.758	683.200, 2.298
1710	683.600, 2.759	683.600, 2.297
1711	684.000, 2.759	684.000, 2.297
1712	684.400, 2.760	684.400, 2.296
1713	684.800, 2.760	684.800, 2.297
1714	685.200, 2.760	685.200, 2.297
1715	685.600, 2.760	685.600, 2.297
1716	686.000, 2.760	686.000, 2.298
1717	686.400, 2.759	686.400, 2.298
1718	686.800, 2.759	686.800, 2.298
1719	687.200, 2.758	687.200, 2.298
1720	687.600, 2.758	687.600, 2.298
1721	688.000, 2.758	688.000, 2.298
1722	688.400, 2.758	688.400, 2.298
1723	688.800, 2.757	688.800, 2.298
1724	689.200, 2.757	689.200, 2.298
1725	689.600, 2.756	689.600, 2.297
1726	690.000, 2.756	690.000, 2.298
1727	690.400, 2.757	690.400, 2.298
1728	690.800, 2.757	690.800, 2.298
1729	691.200, 2.757	691.200, 2.297
1730	691.600, 2.757	691.600, 2.297
1731	692.000, 2.758	692.000, 2.297
1732	692.400, 2.758	692.400, 2.296
1733	692.800, 2.758	692.800, 2.296
1734	693.200, 2.757	693.200, 2.296
1735	693.600, 2.757	693.600, 2.297
1736	694.000, 2.756	694.000, 2.297
1737	694.400, 2.756	694.400, 2.298
1738	694.800, 2.755	694.800, 2.297
1739	695.200, 2.755	695.200, 2.297
1740	695.600, 2.755	695.600, 2.296
1741	696.000, 2.755	696.000, 2.296
1742	696.400, 2.755	696.400, 2.295
1743	696.800, 2.754	696.800, 2.295
1744	697.200, 2.754	697.200, 2.296
1745	697.600, 2.754	697.600, 2.296
1746	698.000, 2.754	698.000, 2.296
1747	698.400, 2.754	698.400, 2.296
1748	698.800, 2.755	698.800, 2.297
1749	699.200, 2.755	699.200, 2.297
1750	699.600, 2.756	699.600, 2.296
1751	700.000, 2.756	700.000, 2.296
1752	700.400, 2.755	700.400, 2.296
1753	700.800, 2.755	700.800, 2.296
1754	701.200, 2.755	701.200, 2.296
1755	701.600, 2.754	701.600, 2.296
1756	702.000, 2.754	702.000, 2.296
1757	702.400, 2.754	702.400, 2.296
1758	702.800, 2.753	702.800, 2.296
1759	703.200, 2.753	703.200, 2.296
1760	703.600, 2.752	703.600, 2.295
1761	704.000, 2.752	704.000, 2.295
1762	704.400, 2.752	704.400, 2.296
1763	704.800, 2.752	704.800, 2.296
1764	705.200, 2.752	705.200, 2.297
1765	705.600, 2.752	705.600, 2.298
1766	706.000, 2.752	706.000, 2.299
1767	706.400, 2.753	706.400, 2.299
1768	706.800, 2.753	706.800, 2.298
1769	707.200, 2.753	707.200, 2.297
1770	707.600, 2.753	707.600, 2.297
1771	708.000, 2.753	708.000, 2.297
1772	708.400, 2.752	708.400, 2.297
1773	708.800, 2.752	708.800, 2.297
1774	709.200, 2.752	709.200, 2.298
1775	709.600, 2.751	709.600, 2.298
1776	710.000, 2.750	710.000, 2.298
1777	710.400, 2.750	710.400, 2.297
1778	710.800, 2.750	710.800, 2.296
1779	711.200, 2.750	711.200, 2.295
1780	711.600, 2.750	711.600, 2.295
1781	712.000, 2.751	712.000, 2.295
1782	712.400, 2.751	712.400, 2.295
1783	712.800, 2.751	712.800, 2.296
1784	713.200, 2.750	713.200, 2.296
1785	713.600, 2.750	713.600, 2.297
1786	714.000, 2.750	714.000, 2.297
1787	714.400, 2.749	714.400, 2.296
1788	714.800, 2.749	714.800, 2.296
1789	715.200, 2.748	715.200, 2.296
1790	715.600, 2.748	715.600, 2.296
1791	716.000, 2.747	716.000, 2.296
1792	716.400, 2.746	716.400, 2.297
1793	716.800, 2.746	716.800, 2.296
1794	717.200, 2.747	717.200, 2.296
1795	717.600, 2.748	717.600, 2.296
1796	718.000, 2.749	718.000, 2.296
1797	718.400, 2.749	718.400, 2.296
1798	718.800, 2.748	718.800, 2.296
1799	719.200, 2.748	719.200, 2.296
1800	719.600, 2.747	719.600, 2.296
1801	720.000, 2.746	720.000, 2.296
1802	720.400, 2.746	720.400, 2.296
1803	720.800, 2.747	720.800, 2.296
1804	721.200, 2.748	721.200, 2.296
1805	721.600, 2.749	721.600, 2.296
1806	722.000, 2.749	722.000, 2.296
1807	722.400, 2.749	722.400, 2.296
1808	722.800, 2.749	722.800, 2.296
1809	723.200, 2.748	723.200, 2.296
1810	723.600, 2.748	723.600, 2.297
1811	724.000, 2.747	724.000, 2.297
1812	724.400, 2.747	724.400, 2.297
1813	724.800, 2.747	724.800, 2.297
1814	725.200, 2.747	725.200, 2.297
1815	725.600, 2.747	725.600, 2.298
1816	726.000, 2.746	726.000, 2.298
1817	726.400, 2.746	726.400, 2.297
1818	726.800, 2.745	726.800, 2.297
1819	727.200, 2.745	727.200, 2.297
1820	727.600, 2.745	727.600, 2.297
1821	728.000, 2.745	728.000, 2.297
1822	728.400, 2.745	728.400, 2.297
1823	728.800, 2.745	728.800, 2.297
1824	729.200, 2.744	729.200, 2.298
1825	729.600, 2.744	729.600, 2.298
1826	730.000, 2.744	730.000, 2.298
1827	730.400, 2.744	730.400, 2.297
1828	730.800, 2.744	730.800, 2.297
1829	731.200, 2.745	731.200, 2.297
1830	731.600, 2.745	731.600, 2.296
1831	732.000, 2.745	732.000, 2.296
1832	732.400, 2.745	732.400, 2.295
1833	732.800, 2.744	732.800, 2.295
1834	733.200, 2.744	733.200, 2.295
1835	733.600, 2.744	733.600, 2.295
1836	734.000, 2.744	734.000, 2.295
1837	734.400, 2.744	734.400, 2.295
1838	734.800, 2.744	734.800, 2.296
1839	735.200, 2.744	735.200, 2.296
1840	735.600, 2.744	735.600, 2.296
1841	736.000, 2.744	736.000, 2.296
1842	736.400, 2.744	736.400, 2.296
1843	736.800, 2.744	736.800, 2.296
1844	737.200, 2.744	737.200, 2.295
1845	737.600, 2.743	737.600, 2.295
1846	738.000, 2.743	738.000, 2.295
1847	738.400, 2.743	738.400, 2.294
1848	738.800, 2.743	738.800, 2.294
1849	739.200, 2.742	739.200, 2.295
1850	739.600, 2.742	739.600, 2.296
1851	740.000, 2.741	740.000, 2.296
1852	740.400, 2.741	740.400, 2.296
1853	740.800, 2.741	740.800, 2.296
1854	741.200, 2.741	741.200, 2.296
1855	741.600, 2.741	741.600, 2.296
1856	742.000, 2.741	742.000, 2.296
1857	742.400, 2.741	742.400, 2.296
1858	742.800, 2.741	742.800, 2.296
1859	743.200, 2.741	743.200, 2.295
1860	743.600, 2.741	743.600, 2.295
1861	744.000, 2.741	744.000, 2.294
1862	744.400, 2.742	744.400, 2.294
1863	744.800, 2.742	744.800, 2.295
1864	745.200, 2.742	745.200, 2.295
1865	745.600, 2.741	745.600, 2.296
1866	746.000, 2.741	746.000, 2.296
1867	746.400, 2.740	746.400, 2.296
1868	746.800, 2.740	746.800, 2.295
1869	747.200, 2.740	747.200, 2.295
1870	747.600, 2.740	747.600, 2.295
1871	748.000, 2.740	748.000, 2.295
1872	748.400, 2.740	748.400, 2.295
1873	748.800, 2.740	748.800, 2.295
1874	749.200, 2.740	749.200, 2.295
1875	749.600, 2.739	749.600, 2.296
1876	750.000, 2.739	750.000, 2.296
1877	750.400, 2.739	750.400, 2.295
1878	750.800, 2.739	750.800, 2.295
1879	751.200, 2.738	751.200, 2.295
1880	751.600, 2.739	751.600, 2.296
1881	752.000, 2.738	752.000, 2.296
1882	752.400, 2.738	752.400, 2.296
1883	752.800, 2.737	752.800, 2.296
1884	753.200, 2.736	753.200, 2.297
1885	753.600, 2.736	753.600, 2.297
1886	754.000, 2.737	754.000, 2.297
1887	754.400, 2.737	754.400, 2.296
1888	754.800, 2.738	754.800, 2.296
1889	755.200, 2.738	755.200, 2.297
1890	755.600, 2.738	755.600, 2.297
1891	756.000, 2.738	756.000, 2.296
1892	756.400, 2.737	756.400, 2.296
1893	756.800, 2.736	756.800, 2.296
1894	757.200, 2.735	757.200, 2.296
1895	757.600, 2.735	757.600, 2.296
1896	758.000, 2.735	758.000, 2.296
1897	758.400, 2.735	758.400, 2.296
1898	758.800, 2.736	758.800, 2.297
1899	759.200, 2.736	759.200, 2.297
1900	759.600, 2.736	759.600, 2.296
1901	760.000, 2.736	760.000, 2.296
1902	760.400, 2.736	760.400, 2.296
1903	760.800, 2.735	760.800, 2.296
1904	761.200, 2.735	761.200, 2.296
1905	761.600, 2.735	761.600, 2.296
1906	762.000, 2.734	762.000, 2.295
1907	762.400, 2.734	762.400, 2.295
1908	762.800, 2.734	762.800, 2.295
1909	763.200, 2.733	763.200, 2.296
1910	763.600, 2.733	763.600, 2.296
1911	764.000, 2.733	764.000, 2.296
1912	764.400, 2.734	764.400, 2.296
1913	764.800, 2.734	764.800, 2.295
1914	765.200, 2.734	765.200, 2.294
1915	765.600, 2.733	765.600, 2.294
1916	766.000, 2.733	766.000, 2.293
1917	766.400, 2.733	766.400, 2.293
1918	766.800, 2.733	766.800, 2.294
1919	767.200, 2.733	767.200, 2.295
1920	767.600, 2.733	767.600, 2.295
1921	768.000, 2.734	768.000, 2.296
1922	768.400, 2.734	768.400, 2.296
1923	768.800, 2.734	768.800, 2.296
1924	769.200, 2.734	769.200, 2.296
1925	769.600, 2.734	769.600, 2.296
1926	770.000, 2.733	770.000, 2.296
1927	770.400, 2.733	770.400, 2.296
1928	770.800, 2.733	770.800, 2.295
1929	771.200, 2.732	771.200, 2.295
1930	771.600, 2.731	771.600, 2.295
1931	772.000, 2.732	772.000, 2.295
1932	772.400, 2.732	772.400, 2.295
1933	772.800, 2.732	772.800, 2.295
1934	773.200, 2.732	773.200, 2.295
1935	773.600, 2.732	773.600, 2.294
1936	774.000, 2.732	774.000, 2.294
1937	774.400, 2.732	774.400, 2.294
1938	774.800, 2.731	774.800, 2.294
1939	775.200, 2.730	775.200, 2.294
1940	775.600, 2.730	775.600, 2.294
1941	776.000, 2.730	776.000, 2.294
1942	776.400, 2.730	776.400, 2.294
1943	776.800, 2.730	776.800, 2.294
1944	777.200, 2.730	777.200, 2.294
1945	777.600, 2.730	777.600, 2.294
1946	778.000, 2.729	778.000, 2.294
1947	778.400, 2.729	778.400, 2.294
1948	778.800, 2.730	778.800, 2.294
1949	779.200, 2.730	779.200, 2.294
1950	779.600, 2.731	779.600, 2.294
1951	780.000, 2.731	780.000, 2.294
1952	780.400, 2.731	780.400, 2.294
1953	780.800, 2.730	780.800, 2.294
1954	781.200, 2.729	781.200, 2.294
1955	781.600, 2.728	781.600, 2.294
1956	782.000, 2.727	782.000, 2.294
1957	782.400, 2.726	782.400, 2.294
1958	782.800, 2.726	782.800, 2.295
1959	783.200, 2.726	783.200, 2.296
1960	783.600, 2.727	783.600, 2.296
1961	784.000, 2.727	784.000, 2.296
1962	784.400, 2.728	784.400, 2.296
1963	784.800, 2.728	784.800, 2.296
1964	785.200, 2.728	785.200, 2.295
1965	785.600, 2.728	785.600, 2.295
1966	786.000, 2.728	786.000, 2.295
1967	786.400, 2.728	786.400, 2.295
1968	786.800, 2.728	786.800, 2.295
1969	787.200, 2.727	787.200, 2.295
1970	787.600, 2.726	787.600, 2.295
1971	788.000, 2.726	788.000, 2.295
1972	788.400, 2.725	788.400, 2.295
1973	788.800, 2.725	788.800, 2.295
1974	789.200, 2.725	789.200, 2.296
1975	789.600, 2.724	789.600, 2.297
1976	790.000, 2.724	790.000, 2.297
1977	790.400, 2.725	790.400, 2.297
1978	790.800, 2.725	790.800, 2.296
1979	791.200, 2.725	791.200, 2.295
1980	791.600, 2.725	791.600, 2.295
1981	792.000, 2.725	792.000, 2.295
1982	792.400, 2.725	792.400, 2.295
1983	792.800, 2.724	792.800, 2.296
1984	793.200, 2.724	793.200, 2.296
1985	793.600, 2.723	793.600, 2.296
1986	794.000, 2.724	794.000, 2.296
1987	794.400, 2.724	794.400, 2.295
1988	794.800, 2.724	794.800, 2.295
1989	795.200, 2.724	795.200, 2.296
1990	795.600, 2.724	795.600, 2.297
1991	796.000, 2.724	796.000, 2.297
1992	796.400, 2.724	796.400, 2.296
1993	796.800, 2.724	796.800, 2.296
1994	797.200, 2.723	797.200, 2.295
1995	797.600, 2.723	797.600, 2.294
1996	798.000, 2.723	798.000, 2.293
1997	798.400, 2.724	798.400, 2.293
1998	798.800, 2.723	798.800, 2.293
1999	799.200, 2.723	799.200, 2.294
[truncated: 13,001 more rows]

## Sheet: Fig6_panelC_rep2
	169bp closed parS DNA ParB CTPyS	169bp closed parS DNA ParB CTP
1	0.000, 0.005	0.000, 0.009
2	0.200, 0.005	0.200, 0.009
3	0.400, 0.005	0.400, 0.008
4	0.600, 0.005	0.600, 0.008
5	0.800, 0.006	0.800, 0.008
6	1.000, 0.006	1.000, 0.007
7	1.200, 0.006	1.200, 0.007
8	1.400, 0.006	1.400, 0.006
9	1.600, 0.006	1.600, 0.006
10	1.800, 0.006	1.800, 0.005
11	2.000, 0.006	2.000, 0.005
12	2.200, 0.005	2.200, 0.005
13	2.400, 0.005	2.400, 0.005
14	2.600, 0.005	2.600, 0.004
15	2.800, 0.005	2.800, 0.004
16	3.000, 0.005	3.000, 0.004
17	3.200, 0.004	3.200, 0.003
18	3.400, 0.004	3.400, 0.003
19	3.600, 0.004	3.600, 0.003
20	3.800, 0.003	3.800, 0.003
21	4.000, 0.003	4.000, 0.004
22	4.200, 0.003	4.200, 0.004
23	4.400, 0.003	4.400, 0.004
24	4.600, 0.003	4.600, 0.004
25	4.800, 0.003	4.800, 0.004
26	5.000, 0.003	5.000, 0.004
27	5.200, 0.003	5.200, 0.004
28	5.400, 0.004	5.400, 0.004
29	5.600, 0.004	5.600, 0.004
30	5.800, 0.004	5.800, 0.003
31	6.000, 0.004	6.000, 0.003
32	6.200, 0.004	6.200, 0.002
33	6.400, 0.004	6.400, 0.002
34	6.600, 0.004	6.600, 0.001
35	6.800, 0.004	6.800, 0.001
36	7.000, 0.003	7.000, 0.001
37	7.200, 0.003	7.200, 0.001
38	7.400, 0.003	7.400, 0.001
39	7.600, 0.002	7.600, 0.001
40	7.800, 0.002	7.800, 0.001
41	8.000, 0.002	8.000, 0.001
42	8.200, 0.001	8.200, 0.001
43	8.400, 0.001	8.400, 0.001
44	8.600, 0.001	8.600, 0.001
45	8.800, 0.001	8.800, 0.001
46	9.000, 0.001	9.000, 0.001
47	9.200, 0.002	9.200, 0.001
48	9.400, 0.002	9.400, 0.001
49	9.600, 0.002	9.600, 0.000
50	9.800, 0.002	9.800, 0.000
51	10.000, 0.002	10.000, -0.000
52	10.200, 0.002	10.200, -0.001
53	10.400, 0.003	10.400, -0.001
54	10.600, 0.003	10.600, -0.001
55	10.800, 0.003	10.800, -0.002
56	11.000, 0.003	11.000, -0.002
57	11.200, 0.003	11.200, -0.002
58	11.400, 0.003	11.400, -0.002
59	11.600, 0.003	11.600, -0.002
60	11.800, 0.003	11.800, -0.002
61	12.000, 0.002	12.000, -0.002
62	12.200, 0.002	12.200, -0.002
63	12.400, 0.002	12.400, -0.002
64	12.600, 0.002	12.600, -0.001
65	12.800, 0.002	12.800, -0.001
66	13.000, 0.002	13.000, -0.001
67	13.200, 0.002	13.200, -0.001
68	13.400, 0.002	13.400, -0.001
69	13.600, 0.002	13.600, -0.001
70	13.800, 0.002	13.800, -0.001
71	14.000, 0.001	14.000, -0.001
72	14.200, 0.001	14.200, -0.001
73	14.400, 0.001	14.400, -0.001
74	14.600, 0.001	14.600, -0.001
75	14.800, 0.001	14.800, -0.001
76	15.000, 0.001	15.000, -0.002
77	15.200, 0.001	15.200, -0.002
78	15.400, 0.001	15.400, -0.002
79	15.600, 0.001	15.600, -0.002
80	15.800, 0.001	15.800, -0.002
81	16.000, 0.001	16.000, -0.001
82	16.200, 0.001	16.200, -0.001
83	16.400, 0.001	16.400, -0.001
84	16.600, 0.001	16.600, -0.001
85	16.800, 0.001	16.800, -0.001
86	17.000, 0.001	17.000, -0.001
87	17.200, 0.001	17.200, -0.001
88	17.400, 0.001	17.400, -0.001
89	17.600, 0.001	17.600, -0.001
90	17.800, 0.001	17.800, -0.000
91	18.000, 0.001	18.000, -0.000
92	18.200, 0.001	18.200, -0.000
93	18.400, 0.001	18.400, -0.000
94	18.600, 0.001	18.600, -0.001
95	18.800, 0.001	18.800, -0.001
96	19.000, 0.001	19.000, -0.001
97	19.200, 0.001	19.200, -0.001
98	19.400, 0.001	19.400, -0.001
99	19.600, 0.001	19.600, -0.001
100	19.800, 0.001	19.800, -0.001
101	20.000, 0.001	20.000, -0.001
102	20.200, 0.001	20.200, -0.001
103	20.400, 0.001	20.400, -0.001
104	20.600, 0.001	20.600, -0.000
105	20.800, 0.001	20.800, -0.000
106	21.000, 0.001	21.000, -0.000
107	21.200, 0.001	21.200, -0.000
108	21.400, 0.001	21.400, -0.000
109	21.600, 0.001	21.600, -0.000
110	21.800, 0.001	21.800, -0.001
111	22.000, 0.001	22.000, -0.001
112	22.200, 0.001	22.200, -0.001
113	22.400, 0.000	22.400, -0.001
114	22.600, 0.000	22.600, -0.001
115	22.800, 0.000	22.800, -0.001
116	23.000, 0.000	23.000, -0.001
117	23.200, -0.000	23.200, -0.001
118	23.400, -0.000	23.400, -0.002
119	23.600, -0.000	23.600, -0.002
120	23.800, -0.000	23.800, -0.002
121	24.000, -0.000	24.000, -0.002
122	24.200, 0.000	24.200, -0.002
123	24.400, 0.000	24.400, -0.002
124	24.600, 0.000	24.600, -0.002
125	24.800, 0.000	24.800, -0.002
126	25.000, 0.000	25.000, -0.002
127	25.200, 0.001	25.200, -0.002
128	25.400, 0.001	25.400, -0.002
129	25.600, 0.001	25.600, -0.002
130	25.800, 0.001	25.800, -0.002
131	26.000, 0.001	26.000, -0.002
132	26.200, 0.001	26.200, -0.001
133	26.400, 0.001	26.400, -0.001
134	26.600, 0.001	26.600, -0.001
135	26.800, 0.000	26.800, -0.001
136	27.000, 0.000	27.000, -0.001
137	27.200, -0.000	27.200, -0.000
138	27.400, -0.001	27.400, -0.000
139	27.600, -0.001	27.600, -0.000
140	27.800, -0.001	27.800, -0.000
141	28.000, -0.001	28.000, -0.000
142	28.200, -0.001	28.200, 0.000
143	28.400, -0.001	28.400, 0.000
144	28.600, -0.000	28.600, 0.000
145	28.800, -0.000	28.800, 0.000
146	29.000, 0.000	29.000, 0.000
147	29.200, 0.001	29.200, 0.000
148	29.400, 0.001	29.400, 0.000
149	29.600, 0.002	29.600, 0.000
150	29.800, 0.002	29.800, -0.000
151	30.000, 0.000	30.000, 0.000
152	30.200, 0.002	30.200, 0.003
153	30.400, 0.006	30.400, 0.006
154	30.600, 0.009	30.600, 0.010
155	30.800, 0.014	30.800, 0.015
156	31.000, 0.019	31.000, 0.020
157	31.200, 0.024	31.200, 0.026
158	31.400, 0.030	31.400, 0.033
159	31.600, 0.036	31.600, 0.040
160	31.800, 0.042	31.800, 0.047
161	32.000, 0.048	32.000, 0.054
162	32.200, 0.054	32.200, 0.061
163	32.400, 0.061	32.400, 0.069
164	32.600, 0.068	32.600, 0.076
165	32.800, 0.075	32.800, 0.083
166	33.000, 0.081	33.000, 0.091
167	33.200, 0.088	33.200, 0.098
168	33.400, 0.094	33.400, 0.106
169	33.600, 0.101	33.600, 0.113
170	33.800, 0.107	33.800, 0.120
171	34.000, 0.114	34.000, 0.127
172	34.200, 0.121	34.200, 0.134
173	34.400, 0.128	34.400, 0.141
174	34.600, 0.135	34.600, 0.148
175	34.800, 0.142	34.800, 0.155
176	35.000, 0.149	35.000, 0.162
177	35.200, 0.156	35.200, 0.169
178	35.400, 0.163	35.400, 0.176
179	35.600, 0.170	35.600, 0.183
180	35.800, 0.177	35.800, 0.190
181	36.000, 0.184	36.000, 0.197
182	36.200, 0.191	36.200, 0.204
183	36.400, 0.198	36.400, 0.211
184	36.600, 0.205	36.600, 0.218
185	36.800, 0.212	36.800, 0.226
186	37.000, 0.219	37.000, 0.233
187	37.200, 0.225	37.200, 0.240
188	37.400, 0.232	37.400, 0.247
189	37.600, 0.239	37.600, 0.254
190	37.800, 0.245	37.800, 0.261
191	38.000, 0.252	38.000, 0.269
192	38.200, 0.259	38.200, 0.276
193	38.400, 0.266	38.400, 0.283
194	38.600, 0.273	38.600, 0.290
195	38.800, 0.280	38.800, 0.298
196	39.000, 0.287	39.000, 0.305
197	39.200, 0.294	39.200, 0.312
198	39.400, 0.301	39.400, 0.319
199	39.600, 0.308	39.600, 0.326
200	39.800, 0.315	39.800, 0.333
201	40.000, 0.321	40.000, 0.340
202	40.200, 0.328	40.200, 0.346
203	40.400, 0.336	40.400, 0.353
204	40.600, 0.343	40.600, 0.360
205	40.800, 0.350	40.800, 0.367
206	41.000, 0.357	41.000, 0.374
207	41.200, 0.364	41.200, 0.381
208	41.400, 0.371	41.400, 0.388
209	41.600, 0.378	41.600, 0.395
210	41.800, 0.384	41.800, 0.402
211	42.000, 0.391	42.000, 0.409
212	42.200, 0.398	42.200, 0.415
213	42.400, 0.404	42.400, 0.422
214	42.600, 0.411	42.600, 0.429
215	42.800, 0.418	42.800, 0.436
216	43.000, 0.425	43.000, 0.443
217	43.200, 0.432	43.200, 0.450
218	43.400, 0.439	43.400, 0.457
219	43.600, 0.446	43.600, 0.464
220	43.800, 0.454	43.800, 0.471
221	44.000, 0.461	44.000, 0.477
222	44.200, 0.468	44.200, 0.484
223	44.400, 0.474	44.400, 0.491
224	44.600, 0.481	44.600, 0.497
225	44.800, 0.488	44.800, 0.504
226	45.000, 0.494	45.000, 0.511
227	45.200, 0.501	45.200, 0.517
228	45.400, 0.507	45.400, 0.524
229	45.600, 0.514	45.600, 0.530
230	45.800, 0.520	45.800, 0.537
231	46.000, 0.527	46.000, 0.544
232	46.200, 0.533	46.200, 0.550
233	46.400, 0.540	46.400, 0.557
234	46.600, 0.547	46.600, 0.564
235	46.800, 0.554	46.800, 0.571
236	47.000, 0.561	47.000, 0.578
237	47.200, 0.568	47.200, 0.585
238	47.400, 0.575	47.400, 0.592
239	47.600, 0.582	47.600, 0.598
240	47.800, 0.589	47.800, 0.605
241	48.000, 0.595	48.000, 0.612
242	48.200, 0.602	48.200, 0.618
243	48.400, 0.608	48.400, 0.625
244	48.600, 0.615	48.600, 0.631
245	48.800, 0.621	48.800, 0.638
246	49.000, 0.628	49.000, 0.644
247	49.200, 0.634	49.200, 0.650
248	49.400, 0.641	49.400, 0.657
249	49.600, 0.648	49.600, 0.663
250	49.800, 0.654	49.800, 0.670
251	50.000, 0.661	50.000, 0.676
252	50.200, 0.667	50.200, 0.682
253	50.400, 0.674	50.400, 0.689
254	50.600, 0.680	50.600, 0.695
255	50.800, 0.687	50.800, 0.701
256	51.000, 0.694	51.000, 0.708
257	51.200, 0.700	51.200, 0.714
258	51.400, 0.706	51.400, 0.720
259	51.600, 0.713	51.600, 0.726
260	51.800, 0.720	51.800, 0.733
261	52.000, 0.726	52.000, 0.739
262	52.200, 0.733	52.200, 0.745
263	52.400, 0.739	52.400, 0.752
264	52.600, 0.746	52.600, 0.758
265	52.800, 0.752	52.800, 0.764
266	53.000, 0.758	53.000, 0.770
267	53.200, 0.765	53.200, 0.776
268	53.400, 0.771	53.400, 0.782
269	53.600, 0.778	53.600, 0.788
270	53.800, 0.784	53.800, 0.794
271	54.000, 0.790	54.000, 0.800
272	54.200, 0.797	54.200, 0.807
273	54.400, 0.803	54.400, 0.813
274	54.600, 0.809	54.600, 0.819
275	54.800, 0.816	54.800, 0.825
276	55.000, 0.822	55.000, 0.832
277	55.200, 0.829	55.200, 0.838
278	55.400, 0.835	55.400, 0.844
279	55.600, 0.841	55.600, 0.850
280	55.800, 0.848	55.800, 0.856
281	56.000, 0.854	56.000, 0.863
282	56.200, 0.860	56.200, 0.869
283	56.400, 0.866	56.400, 0.875
284	56.600, 0.872	56.600, 0.881
285	56.800, 0.878	56.800, 0.887
286	57.000, 0.885	57.000, 0.893
287	57.200, 0.891	57.200, 0.899
288	57.400, 0.897	57.400, 0.905
289	57.600, 0.903	57.600, 0.911
290	57.800, 0.910	57.800, 0.916
291	58.000, 0.916	58.000, 0.922
292	58.200, 0.922	58.200, 0.928
293	58.400, 0.929	58.400, 0.934
294	58.600, 0.935	58.600, 0.940
295	58.800, 0.942	58.800, 0.946
296	59.000, 0.948	59.000, 0.951
297	59.200, 0.954	59.200, 0.957
298	59.400, 0.960	59.400, 0.963
299	59.600, 0.966	59.600, 0.969
300	59.800, 0.972	59.800, 0.975
301	60.000, 0.978	60.000, 0.980
302	60.200, 0.983	60.200, 0.986
303	60.400, 0.989	60.400, 0.992
304	60.600, 0.995	60.600, 0.998
305	60.800, 1.000	60.800, 1.004
306	61.000, 1.006	61.000, 1.010
307	61.200, 1.012	61.200, 1.015
308	61.400, 1.018	61.400, 1.021
309	61.600, 1.023	61.600, 1.027
310	61.800, 1.029	61.800, 1.032
311	62.000, 1.035	62.000, 1.038
312	62.200, 1.041	62.200, 1.043
313	62.400, 1.047	62.400, 1.049
314	62.600, 1.053	62.600, 1.054
315	62.800, 1.058	62.800, 1.060
316	63.000, 1.064	63.000, 1.065
317	63.200, 1.070	63.200, 1.070
318	63.400, 1.075	63.400, 1.076
319	63.600, 1.081	63.600, 1.081
320	63.800, 1.087	63.800, 1.086
321	64.000, 1.092	64.000, 1.091
322	64.200, 1.098	64.200, 1.096
323	64.400, 1.104	64.400, 1.102
324	64.600, 1.109	64.600, 1.107
325	64.800, 1.114	64.800, 1.112
326	65.000, 1.120	65.000, 1.118
327	65.200, 1.125	65.200, 1.123
328	65.400, 1.131	65.400, 1.129
329	65.600, 1.137	65.600, 1.134
330	65.800, 1.142	65.800, 1.139
331	66.000, 1.148	66.000, 1.145
332	66.200, 1.154	66.200, 1.150
333	66.400, 1.160	66.400, 1.155
334	66.600, 1.166	66.600, 1.161
335	66.800, 1.171	66.800, 1.166
336	67.000, 1.177	67.000, 1.172
337	67.200, 1.182	67.200, 1.177
338	67.400, 1.188	67.400, 1.182
339	67.600, 1.193	67.600, 1.187
340	67.800, 1.199	67.800, 1.193
341	68.000, 1.204	68.000, 1.198
342	68.200, 1.210	68.200, 1.202
343	68.400, 1.215	68.400, 1.207
344	68.600, 1.220	68.600, 1.212
345	68.800, 1.225	68.800, 1.217
346	69.000, 1.230	69.000, 1.222
347	69.200, 1.235	69.200, 1.227
348	69.400, 1.240	69.400, 1.232
349	69.600, 1.245	69.600, 1.237
350	69.800, 1.251	69.800, 1.241
351	70.000, 1.256	70.000, 1.246
352	70.200, 1.262	70.200, 1.251
353	70.400, 1.268	70.400, 1.257
354	70.600, 1.273	70.600, 1.262
355	70.800, 1.278	70.800, 1.267
356	71.000, 1.284	71.000, 1.272
357	71.200, 1.289	71.200, 1.277
358	71.400, 1.294	71.400, 1.281
359	71.600, 1.300	71.600, 1.286
360	71.800, 1.305	71.800, 1.291
361	72.000, 1.310	72.000, 1.295
362	72.200, 1.315	72.200, 1.300
363	72.400, 1.320	72.400, 1.305
364	72.600, 1.325	72.600, 1.310
365	72.800, 1.330	72.800, 1.315
366	73.000, 1.335	73.000, 1.319
367	73.200, 1.340	73.200, 1.324
368	73.400, 1.344	73.400, 1.329
369	73.600, 1.349	73.600, 1.333
370	73.800, 1.354	73.800, 1.338
371	74.000, 1.358	74.000, 1.342
372	74.200, 1.363	74.200, 1.347
373	74.400, 1.367	74.400, 1.351
374	74.600, 1.372	74.600, 1.356
375	74.800, 1.377	74.800, 1.360
376	75.000, 1.381	75.000, 1.364
377	75.200, 1.386	75.200, 1.369
378	75.400, 1.391	75.400, 1.373
379	75.600, 1.396	75.600, 1.378
380	75.800, 1.401	75.800, 1.382
381	76.000, 1.406	76.000, 1.386
382	76.200, 1.411	76.200, 1.391
383	76.400, 1.416	76.400, 1.395
384	76.600, 1.421	76.600, 1.400
385	76.800, 1.426	76.800, 1.405
386	77.000, 1.430	77.000, 1.409
387	77.200, 1.435	77.200, 1.414
388	77.400, 1.440	77.400, 1.418
389	77.600, 1.444	77.600, 1.423
390	77.800, 1.449	77.800, 1.427
391	78.000, 1.454	78.000, 1.431
392	78.200, 1.458	78.200, 1.435
393	78.400, 1.463	78.400, 1.439
394	78.600, 1.467	78.600, 1.443
395	78.800, 1.471	78.800, 1.447
396	79.000, 1.476	79.000, 1.451
397	79.200, 1.481	79.200, 1.455
398	79.400, 1.485	79.400, 1.459
399	79.600, 1.490	79.600, 1.463
400	79.800, 1.494	79.800, 1.467
401	80.000, 1.499	80.000, 1.471
402	80.200, 1.503	80.200, 1.475
403	80.400, 1.507	80.400, 1.479
404	80.600, 1.512	80.600, 1.484
405	80.800, 1.516	80.800, 1.488
406	81.000, 1.521	81.000, 1.493
407	81.200, 1.525	81.200, 1.497
408	81.400, 1.530	81.400, 1.501
409	81.600, 1.535	81.600, 1.505
410	81.800, 1.540	81.800, 1.509
411	82.000, 1.544	82.000, 1.513
412	82.200, 1.549	82.200, 1.517
413	82.400, 1.553	82.400, 1.521
414	82.600, 1.557	82.600, 1.525
415	82.800, 1.561	82.800, 1.529
416	83.000, 1.566	83.000, 1.533
417	83.200, 1.570	83.200, 1.537
418	83.400, 1.574	83.400, 1.541
419	83.600, 1.579	83.600, 1.544
420	83.800, 1.583	83.800, 1.548
421	84.000, 1.588	84.000, 1.552
422	84.200, 1.592	84.200, 1.555
423	84.400, 1.596	84.400, 1.559
424	84.600, 1.600	84.600, 1.562
425	84.800, 1.605	84.800, 1.566
426	85.000, 1.609	85.000, 1.570
427	85.200, 1.613	85.200, 1.574
428	85.400, 1.617	85.400, 1.578
429	85.600, 1.621	85.600, 1.582
430	85.800, 1.625	85.800, 1.586
431	86.000, 1.629	86.000, 1.590
432	86.200, 1.633	86.200, 1.595
433	86.400, 1.637	86.400, 1.599
434	86.600, 1.641	86.600, 1.603
435	86.800, 1.644	86.800, 1.607
436	87.000, 1.649	87.000, 1.611
437	87.200, 1.653	87.200, 1.614
438	87.400, 1.657	87.400, 1.618
439	87.600, 1.661	87.600, 1.622
440	87.800, 1.665	87.800, 1.625
441	88.000, 1.669	88.000, 1.628
442	88.200, 1.674	88.200, 1.632
443	88.400, 1.678	88.400, 1.635
444	88.600, 1.682	88.600, 1.639
445	88.800, 1.686	88.800, 1.642
446	89.000, 1.690	89.000, 1.646
447	89.200, 1.695	89.200, 1.649
448	89.400, 1.699	89.400, 1.652
449	89.600, 1.703	89.600, 1.655
450	89.800, 1.708	89.800, 1.658
451	90.000, 1.712	90.000, 1.662
452	90.200, 1.716	90.200, 1.665
453	90.400, 1.720	90.400, 1.668
454	90.600, 1.724	90.600, 1.672
455	90.800, 1.728	90.800, 1.675
456	91.000, 1.732	91.000, 1.678
457	91.200, 1.735	91.200, 1.681
458	91.400, 1.739	91.400, 1.685
459	91.600, 1.743	91.600, 1.688
460	91.800, 1.746	91.800, 1.691
461	92.000, 1.750	92.000, 1.695
462	92.200, 1.753	92.200, 1.698
463	92.400, 1.757	92.400, 1.702
464	92.600, 1.761	92.600, 1.705
465	92.800, 1.764	92.800, 1.708
466	93.000, 1.768	93.000, 1.711
467	93.200, 1.772	93.200, 1.714
468	93.400, 1.776	93.400, 1.717
469	93.600, 1.780	93.600, 1.720
470	93.800, 1.783	93.800, 1.723
471	94.000, 1.787	94.000, 1.727
472	94.200, 1.791	94.200, 1.730
473	94.400, 1.795	94.400, 1.733
474	94.600, 1.799	94.600, 1.736
475	94.800, 1.803	94.800, 1.739
476	95.000, 1.807	95.000, 1.743
477	95.200, 1.810	95.200, 1.746
478	95.400, 1.814	95.400, 1.749
479	95.600, 1.817	95.600, 1.752
480	95.800, 1.821	95.800, 1.755
481	96.000, 1.824	96.000, 1.758
482	96.200, 1.827	96.200, 1.761
483	96.400, 1.830	96.400, 1.764
484	96.600, 1.833	96.600, 1.766
485	96.800, 1.836	96.800, 1.769
486	97.000, 1.840	97.000, 1.772
487	97.200, 1.843	97.200, 1.775
488	97.400, 1.846	97.400, 1.778
489	97.600, 1.849	97.600, 1.781
490	97.800, 1.853	97.800, 1.784
491	98.000, 1.857	98.000, 1.787
492	98.200, 1.861	98.200, 1.790
493	98.400, 1.865	98.400, 1.793
494	98.600, 1.869	98.600, 1.796
495	98.800, 1.872	98.800, 1.799
496	99.000, 1.876	99.000, 1.802
497	99.200, 1.880	99.200, 1.805
498	99.400, 1.883	99.400, 1.808
499	99.600, 1.887	99.600, 1.811
500	99.800, 1.890	99.800, 1.814
501	100.000, 1.894	100.000, 1.817
502	100.200, 1.897	100.200, 1.820
503	100.400, 1.900	100.400, 1.822
504	100.600, 1.903	100.600, 1.825
505	100.800, 1.906	100.800, 1.827
506	101.000, 1.909	101.000, 1.830
507	101.200, 1.912	101.200, 1.832
508	101.400, 1.916	101.400, 1.834
509	101.600, 1.919	101.600, 1.837
510	101.800, 1.922	101.800, 1.839
511	102.000, 1.926	102.000, 1.841
512	102.200, 1.929	102.200, 1.844
513	102.400, 1.933	102.400, 1.847
514	102.600, 1.936	102.600, 1.849
515	102.800, 1.940	102.800, 1.852
516	103.000, 1.943	103.000, 1.855
517	103.200, 1.946	103.200, 1.858
518	103.400, 1.949	103.400, 1.861
519	103.600, 1.953	103.600, 1.864
520	103.800, 1.956	103.800, 1.866
521	104.000, 1.959	104.000, 1.869
522	104.200, 1.962	104.200, 1.872
523	104.400, 1.965	104.400, 1.874
524	104.600, 1.968	104.600, 1.877
525	104.800, 1.971	104.800, 1.879
526	105.000, 1.974	105.000, 1.882
527	105.200, 1.978	105.200, 1.884
528	105.400, 1.981	105.400, 1.886
529	105.600, 1.984	105.600, 1.889
530	105.800, 1.988	105.800, 1.891
531	106.000, 1.991	106.000, 1.894
532	106.200, 1.993	106.200, 1.896
533	106.400, 1.996	106.400, 1.898
534	106.600, 1.999	106.600, 1.900
535	106.800, 2.002	106.800, 1.902
536	107.000, 2.005	107.000, 1.904
537	107.200, 2.007	107.200, 1.907
538	107.400, 2.010	107.400, 1.909
539	107.600, 2.013	107.600, 1.911
540	107.800, 2.016	107.800, 1.913
541	108.000, 2.019	108.000, 1.916
542	108.200, 2.022	108.200, 1.918
543	108.400, 2.025	108.400, 1.920
544	108.600, 2.028	108.600, 1.923
545	108.800, 2.031	108.800, 1.925
546	109.000, 2.035	109.000, 1.928
547	109.200, 2.038	109.200, 1.930
548	109.400, 2.042	109.400, 1.932
549	109.600, 2.045	109.600, 1.934
550	109.800, 2.049	109.800, 1.936
551	110.000, 2.052	110.000, 1.939
552	110.200, 2.055	110.200, 1.941
553	110.400, 2.058	110.400, 1.943
554	110.600, 2.061	110.600, 1.945
555	110.800, 2.064	110.800, 1.948
556	111.000, 2.066	111.000, 1.950
557	111.200, 2.069	111.200, 1.953
558	111.400, 2.072	111.400, 1.955
559	111.600, 2.074	111.600, 1.957
560	111.800, 2.077	111.800, 1.959
561	112.000, 2.080	112.000, 1.961
562	112.200, 2.082	112.200, 1.963
563	112.400, 2.085	112.400, 1.965
564	112.600, 2.088	112.600, 1.967
565	112.800, 2.091	112.800, 1.968
566	113.000, 2.095	113.000, 1.970
567	113.200, 2.098	113.200, 1.972
568	113.400, 2.101	113.400, 1.973
569	113.600, 2.104	113.600, 1.975
570	113.800, 2.108	113.800, 1.977
571	114.000, 2.110	114.000, 1.979
572	114.200, 2.113	114.200, 1.981
573	114.400, 2.116	114.400, 1.983
574	114.600, 2.119	114.600, 1.985
575	114.800, 2.121	114.800, 1.987
576	115.000, 2.124	115.000, 1.989
577	115.200, 2.126	115.200, 1.991
578	115.400, 2.128	115.400, 1.993
579	115.600, 2.131	115.600, 1.996
580	115.800, 2.133	115.800, 1.997
581	116.000, 2.136	116.000, 1.999
582	116.200, 2.138	116.200, 2.001
583	116.400, 2.141	116.400, 2.003
584	116.600, 2.144	116.600, 2.005
585	116.800, 2.147	116.800, 2.007
586	117.000, 2.150	117.000, 2.010
587	117.200, 2.152	117.200, 2.012
588	117.400, 2.155	117.400, 2.013
589	117.600, 2.158	117.600, 2.015
590	117.800, 2.161	117.800, 2.017
591	118.000, 2.163	118.000, 2.019
592	118.200, 2.166	118.200, 2.020
593	118.400, 2.169	118.400, 2.022
594	118.600, 2.171	118.600, 2.024
595	118.800, 2.174	118.800, 2.026
596	119.000, 2.176	119.000, 2.027
597	119.200, 2.179	119.200, 2.029
598	119.400, 2.181	119.400, 2.030
599	119.600, 2.184	119.600, 2.032
600	119.800, 2.186	119.800, 2.033
601	120.000, 2.189	120.000, 2.035
602	120.200, 2.192	120.200, 2.036
603	120.400, 2.194	120.400, 2.038
604	120.600, 2.197	120.600, 2.039
605	120.800, 2.200	120.800, 2.041
606	121.000, 2.202	121.000, 2.043
607	121.200, 2.205	121.200, 2.045
608	121.400, 2.207	121.400, 2.047
609	121.600, 2.209	121.600, 2.048
610	121.800, 2.212	121.800, 2.050
611	122.000, 2.214	122.000, 2.052
612	122.200, 2.216	122.200, 2.053
613	122.400, 2.219	122.400, 2.055
614	122.600, 2.221	122.600, 2.057
615	122.800, 2.223	122.800, 2.058
616	123.000, 2.226	123.000, 2.060
617	123.200, 2.228	123.200, 2.061
618	123.400, 2.230	123.400, 2.063
619	123.600, 2.233	123.600, 2.064
620	123.800, 2.236	123.800, 2.065
621	124.000, 2.238	124.000, 2.067
622	124.200, 2.241	124.200, 2.068
623	124.400, 2.244	124.400, 2.070
624	124.600, 2.246	124.600, 2.071
625	124.800, 2.249	124.800, 2.073
626	125.000, 2.252	125.000, 2.075
627	125.200, 2.255	125.200, 2.076
628	125.400, 2.257	125.400, 2.078
629	125.600, 2.260	125.600, 2.079
630	125.800, 2.262	125.800, 2.080
631	126.000, 2.264	126.000, 2.082
632	126.200, 2.266	126.200, 2.083
633	126.400, 2.269	126.400, 2.085
634	126.600, 2.271	126.600, 2.086
635	126.800, 2.273	126.800, 2.088
636	127.000, 2.275	127.000, 2.090
637	127.200, 2.277	127.200, 2.091
638	127.400, 2.279	127.400, 2.093
639	127.600, 2.281	127.600, 2.094
640	127.800, 2.283	127.800, 2.096
641	128.000, 2.286	128.000, 2.098
642	128.200, 2.288	128.200, 2.099
643	128.400, 2.290	128.400, 2.100
644	128.600, 2.293	128.600, 2.102
645	128.800, 2.295	128.800, 2.103
646	129.000, 2.298	129.000, 2.104
647	129.200, 2.300	129.200, 2.105
648	129.400, 2.303	129.400, 2.106
649	129.600, 2.305	129.600, 2.107
650	129.800, 2.307	129.800, 2.108
651	130.000, 2.309	130.000, 2.109
652	130.200, 2.311	130.200, 2.111
653	130.400, 2.313	130.400, 2.112
654	130.600, 2.315	130.600, 2.114
655	130.800, 2.317	130.800, 2.115
656	131.000, 2.319	131.000, 2.117
657	131.200, 2.321	131.200, 2.118
658	131.400, 2.323	131.400, 2.120
659	131.600, 2.325	131.600, 2.122
660	131.800, 2.327	131.800, 2.123
661	132.000, 2.329	132.000, 2.124
662	132.200, 2.331	132.200, 2.125
663	132.400, 2.334	132.400, 2.126
664	132.600, 2.337	132.600, 2.127
665	132.800, 2.339	132.800, 2.128
666	133.000, 2.341	133.000, 2.129
667	133.200, 2.344	133.200, 2.130
668	133.400, 2.346	133.400, 2.131
669	133.600, 2.349	133.600, 2.132
670	133.800, 2.351	133.800, 2.133
671	134.000, 2.353	134.000, 2.135
672	134.200, 2.355	134.200, 2.136
673	134.400, 2.357	134.400, 2.137
674	134.600, 2.359	134.600, 2.139
675	134.800, 2.361	134.800, 2.140
676	135.000, 2.363	135.000, 2.142
677	135.200, 2.365	135.200, 2.143
678	135.400, 2.367	135.400, 2.145
679	135.600, 2.369	135.600, 2.146
680	135.800, 2.371	135.800, 2.147
681	136.000, 2.373	136.000, 2.148
682	136.200, 2.375	136.200, 2.149
683	136.400, 2.377	136.400, 2.150
684	136.600, 2.379	136.600, 2.152
685	136.800, 2.381	136.800, 2.152
686	137.000, 2.383	137.000, 2.153
687	137.200, 2.385	137.200, 2.154
688	137.400, 2.387	137.400, 2.155
689	137.600, 2.389	137.600, 2.156
690	137.800, 2.391	137.800, 2.157
691	138.000, 2.393	138.000, 2.158
692	138.200, 2.395	138.200, 2.159
693	138.400, 2.397	138.400, 2.160
694	138.600, 2.399	138.600, 2.161
695	138.800, 2.401	138.800, 2.162
696	139.000, 2.403	139.000, 2.163
697	139.200, 2.405	139.200, 2.164
698	139.400, 2.407	139.400, 2.165
699	139.600, 2.409	139.600, 2.166
700	139.800, 2.411	139.800, 2.167
701	140.000, 2.413	140.000, 2.168
702	140.200, 2.415	140.200, 2.169
703	140.400, 2.417	140.400, 2.170
704	140.600, 2.419	140.600, 2.171
705	140.800, 2.420	140.800, 2.172
706	141.000, 2.422	141.000, 2.173
707	141.200, 2.424	141.200, 2.174
708	141.400, 2.426	141.400, 2.175
709	141.600, 2.428	141.600, 2.177
710	141.800, 2.430	141.800, 2.178
711	142.000, 2.431	142.000, 2.179
712	142.200, 2.433	142.200, 2.180
713	142.400, 2.435	142.400, 2.181
714	142.600, 2.437	142.600, 2.182
715	142.800, 2.439	142.800, 2.183
716	143.000, 2.441	143.000, 2.184
717	143.200, 2.443	143.200, 2.185
718	143.400, 2.444	143.400, 2.186
719	143.600, 2.446	143.600, 2.187
720	143.800, 2.448	143.800, 2.188
721	144.000, 2.450	144.000, 2.189
722	144.200, 2.452	144.200, 2.189
723	144.400, 2.454	144.400, 2.190
724	144.600, 2.455	144.600, 2.191
725	144.800, 2.457	144.800, 2.192
726	145.000, 2.459	145.000, 2.192
727	145.200, 2.461	145.200, 2.193
728	145.400, 2.463	145.400, 2.195
729	145.600, 2.465	145.600, 2.196
730	145.800, 2.467	145.800, 2.197
731	146.000, 2.469	146.000, 2.198
732	146.200, 2.471	146.200, 2.199
733	146.400, 2.473	146.400, 2.200
734	146.600, 2.475	146.600, 2.201
735	146.800, 2.476	146.800, 2.201
736	147.000, 2.478	147.000, 2.202
737	147.200, 2.480	147.200, 2.202
738	147.400, 2.481	147.400, 2.203
739	147.600, 2.483	147.600, 2.204
740	147.800, 2.484	147.800, 2.204
741	148.000, 2.486	148.000, 2.205
742	148.200, 2.488	148.200, 2.206
743	148.400, 2.490	148.400, 2.206
744	148.600, 2.492	148.600, 2.207
745	148.800, 2.494	148.800, 2.207
746	149.000, 2.496	149.000, 2.208
747	149.200, 2.498	149.200, 2.209
748	149.400, 2.500	149.400, 2.210
749	149.600, 2.502	149.600, 2.210
750	149.800, 2.503	149.800, 2.211
751	150.000, 2.505	150.000, 2.212
752	150.200, 2.507	150.200, 2.213
753	150.400, 2.508	150.400, 2.214
754	150.600, 2.509	150.600, 2.215
755	150.800, 2.511	150.800, 2.215
756	151.000, 2.512	151.000, 2.216
757	151.200, 2.513	151.200, 2.217
758	151.400, 2.515	151.400, 2.218
759	151.600, 2.517	151.600, 2.219
760	151.800, 2.518	151.800, 2.220
761	152.000, 2.520	152.000, 2.221
762	152.200, 2.522	152.200, 2.222
763	152.400, 2.523	152.400, 2.223
764	152.600, 2.525	152.600, 2.223
765	152.800, 2.527	152.800, 2.224
766	153.000, 2.529	153.000, 2.225
767	153.200, 2.531	153.200, 2.226
768	153.400, 2.532	153.400, 2.226
769	153.600, 2.534	153.600, 2.227
770	153.800, 2.536	153.800, 2.228
771	154.000, 2.538	154.000, 2.228
772	154.200, 2.539	154.200, 2.229
773	154.400, 2.541	154.400, 2.230
774	154.600, 2.542	154.600, 2.230
775	154.800, 2.544	154.800, 2.231
776	155.000, 2.545	155.000, 2.232
777	155.200, 2.547	155.200, 2.233
778	155.400, 2.549	155.400, 2.234
779	155.600, 2.551	155.600, 2.234
780	155.800, 2.552	155.800, 2.235
781	156.000, 2.554	156.000, 2.236
782	156.200, 2.555	156.200, 2.236
783	156.400, 2.557	156.400, 2.237
784	156.600, 2.558	156.600, 2.237
785	156.800, 2.559	156.800, 2.238
786	157.000, 2.561	157.000, 2.239
787	157.200, 2.562	157.200, 2.239
788	157.400, 2.563	157.400, 2.240
789	157.600, 2.565	157.600, 2.241
790	157.800, 2.566	157.800, 2.242
791	158.000, 2.568	158.000, 2.242
792	158.200, 2.569	158.200, 2.243
793	158.400, 2.571	158.400, 2.243
794	158.600, 2.572	158.600, 2.244
795	158.800, 2.574	158.800, 2.244
796	159.000, 2.575	159.000, 2.245
797	159.200, 2.577	159.200, 2.245
798	159.400, 2.579	159.400, 2.245
799	159.600, 2.580	159.600, 2.245
800	159.800, 2.582	159.800, 2.246
801	160.000, 2.584	160.000, 2.246
802	160.200, 2.585	160.200, 2.247
803	160.400, 2.587	160.400, 2.247
804	160.600, 2.589	160.600, 2.248
805	160.800, 2.590	160.800, 2.249
806	161.000, 2.592	161.000, 2.249
807	161.200, 2.593	161.200, 2.250
808	161.400, 2.595	161.400, 2.250
809	161.600, 2.597	161.600, 2.251
810	161.800, 2.598	161.800, 2.252
811	162.000, 2.600	162.000, 2.253
812	162.200, 2.602	162.200, 2.253
813	162.400, 2.603	162.400, 2.254
814	162.600, 2.604	162.600, 2.254
815	162.800, 2.606	162.800, 2.254
816	163.000, 2.607	163.000, 2.255
817	163.200, 2.608	163.200, 2.255
818	163.400, 2.610	163.400, 2.256
819	163.600, 2.611	163.600, 2.257
820	163.800, 2.613	163.800, 2.257
821	164.000, 2.614	164.000, 2.258
822	164.200, 2.616	164.200, 2.259
823	164.400, 2.617	164.400, 2.259
824	164.600, 2.619	164.600, 2.260
825	164.800, 2.620	164.800, 2.260
826	165.000, 2.622	165.000, 2.261
827	165.200, 2.623	165.200, 2.261
828	165.400, 2.625	165.400, 2.262
829	165.600, 2.626	165.600, 2.262
830	165.800, 2.627	165.800, 2.262
831	166.000, 2.629	166.000, 2.263
832	166.200, 2.630	166.200, 2.263
833	166.400, 2.631	166.400, 2.263
834	166.600, 2.632	166.600, 2.264
835	166.800, 2.633	166.800, 2.264
836	167.000, 2.635	167.000, 2.265
837	167.200, 2.636	167.200, 2.266
838	167.400, 2.637	167.400, 2.266
839	167.600, 2.639	167.600, 2.267
840	167.800, 2.640	167.800, 2.268
841	168.000, 2.641	168.000, 2.269
842	168.200, 2.642	168.200, 2.269
843	168.400, 2.644	168.400, 2.270
844	168.600, 2.645	168.600, 2.270
845	168.800, 2.647	168.800, 2.271
846	169.000, 2.648	169.000, 2.272
847	169.200, 2.650	169.200, 2.272
848	169.400, 2.652	169.400, 2.273
849	169.600, 2.653	169.600, 2.273
850	169.800, 2.655	169.800, 2.273
851	170.000, 2.656	170.000, 2.273
852	170.200, 2.658	170.200, 2.273
853	170.400, 2.660	170.400, 2.274
854	170.600, 2.661	170.600, 2.274
855	170.800, 2.663	170.800, 2.274
856	171.000, 2.664	171.000, 2.275
857	171.200, 2.665	171.200, 2.275
858	171.400, 2.666	171.400, 2.276
859	171.600, 2.667	171.600, 2.276
860	171.800, 2.668	171.800, 2.276
861	172.000, 2.669	172.000, 2.277
862	172.200, 2.670	172.200, 2.277
863	172.400, 2.671	172.400, 2.277
864	172.600, 2.672	172.600, 2.277
865	172.800, 2.673	172.800, 2.278
866	173.000, 2.675	173.000, 2.278
867	173.200, 2.676	173.200, 2.278
868	173.400, 2.677	173.400, 2.278
869	173.600, 2.679	173.600, 2.279
870	173.800, 2.680	173.800, 2.279
871	174.000, 2.681	174.000, 2.279
872	174.200, 2.683	174.200, 2.280
873	174.400, 2.684	174.400, 2.280
874	174.600, 2.685	174.600, 2.280
875	174.800, 2.687	174.800, 2.281
876	175.000, 2.688	175.000, 2.282
877	175.200, 2.690	175.200, 2.283
878	175.400, 2.691	175.400, 2.283
879	175.600, 2.692	175.600, 2.284
880	175.800, 2.693	175.800, 2.284
881	176.000, 2.695	176.000, 2.284
882	176.200, 2.696	176.200, 2.285
883	176.400, 2.697	176.400, 2.285
884	176.600, 2.698	176.600, 2.285
885	176.800, 2.699	176.800, 2.285
886	177.000, 2.700	177.000, 2.286
887	177.200, 2.701	177.200, 2.286
888	177.400, 2.702	177.400, 2.287
889	177.600, 2.703	177.600, 2.287
890	177.800, 2.704	177.800, 2.288
891	178.000, 2.705	178.000, 2.288
892	178.200, 2.707	178.200, 2.289
893	178.400, 2.708	178.400, 2.289
894	178.600, 2.709	178.600, 2.289
895	178.800, 2.711	178.800, 2.290
896	179.000, 2.712	179.000, 2.290
897	179.200, 2.713	179.200, 2.291
898	179.400, 2.714	179.400, 2.291
899	179.600, 2.716	179.600, 2.292
900	179.800, 2.717	179.800, 2.292
901	180.000, 2.718	180.000, 2.292
902	180.200, 2.719	180.200, 2.292
903	180.400, 2.721	180.400, 2.292
904	180.600, 2.722	180.600, 2.292
905	180.800, 2.723	180.800, 2.292
906	181.000, 2.724	181.000, 2.293
907	181.200, 2.726	181.200, 2.293
908	181.400, 2.727	181.400, 2.293
909	181.600, 2.728	181.600, 2.293
910	181.800, 2.730	181.800, 2.294
911	182.000, 2.731	182.000, 2.294
912	182.200, 2.732	182.200, 2.294
913	182.400, 2.733	182.400, 2.295
914	182.600, 2.734	182.600, 2.295
915	182.800, 2.735	182.800, 2.295
916	183.000, 2.736	183.000, 2.296
917	183.200, 2.737	183.200, 2.297
918	183.400, 2.738	183.400, 2.297
919	183.600, 2.739	183.600, 2.298
920	183.800, 2.741	183.800, 2.298
921	184.000, 2.742	184.000, 2.298
922	184.200, 2.743	184.200, 2.298
923	184.400, 2.744	184.400, 2.299
924	184.600, 2.745	184.600, 2.299
925	184.800, 2.746	184.800, 2.299
926	185.000, 2.748	185.000, 2.299
927	185.200, 2.749	185.200, 2.299
928	185.400, 2.751	185.400, 2.299
929	185.600, 2.752	185.600, 2.299
930	185.800, 2.753	185.800, 2.299
931	186.000, 2.754	186.000, 2.299
932	186.200, 2.755	186.200, 2.300
933	186.400, 2.756	186.400, 2.300
934	186.600, 2.757	186.600, 2.300
935	186.800, 2.758	186.800, 2.301
936	187.000, 2.759	187.000, 2.301
937	187.200, 2.761	187.200, 2.301
938	187.400, 2.762	187.400, 2.301
939	187.600, 2.763	187.600, 2.302
940	187.800, 2.765	187.800, 2.302
941	188.000, 2.766	188.000, 2.302
942	188.200, 2.767	188.200, 2.303
943	188.400, 2.768	188.400, 2.303
944	188.600, 2.769	188.600, 2.303
945	188.800, 2.770	188.800, 2.303
946	189.000, 2.771	189.000, 2.303
947	189.200, 2.772	189.200, 2.304
948	189.400, 2.773	189.400, 2.304
949	189.600, 2.773	189.600, 2.304
950	189.800, 2.774	189.800, 2.304
951	190.000, 2.775	190.000, 2.304
952	190.200, 2.776	190.200, 2.305
953	190.400, 2.777	190.400, 2.305
954	190.600, 2.778	190.600, 2.306
955	190.800, 2.779	190.800, 2.306
956	191.000, 2.780	191.000, 2.307
957	191.200, 2.781	191.200, 2.307
958	191.400, 2.783	191.400, 2.307
959	191.600, 2.784	191.600, 2.307
960	191.800, 2.785	191.800, 2.308
961	192.000, 2.786	192.000, 2.308
962	192.200, 2.787	192.200, 2.308
963	192.400, 2.788	192.400, 2.308
964	192.600, 2.789	192.600, 2.308
965	192.800, 2.790	192.800, 2.308
966	193.000, 2.790	193.000, 2.308
967	193.200, 2.791	193.200, 2.308
968	193.400, 2.792	193.400, 2.308
969	193.600, 2.793	193.600, 2.308
970	193.800, 2.794	193.800, 2.308
971	194.000, 2.795	194.000, 2.308
972	194.200, 2.796	194.200, 2.309
973	194.400, 2.797	194.400, 2.309
974	194.600, 2.798	194.600, 2.309
975	194.800, 2.799	194.800, 2.310
976	195.000, 2.800	195.000, 2.310
977	195.200, 2.801	195.200, 2.310
978	195.400, 2.802	195.400, 2.311
979	195.600, 2.804	195.600, 2.311
980	195.800, 2.805	195.800, 2.311
981	196.000, 2.806	196.000, 2.312
982	196.200, 2.807	196.200, 2.312
983	196.400, 2.808	196.400, 2.312
984	196.600, 2.809	196.600, 2.312
985	196.800, 2.810	196.800, 2.312
986	197.000, 2.811	197.000, 2.312
987	197.200, 2.812	197.200, 2.312
988	197.400, 2.813	197.400, 2.313
989	197.600, 2.814	197.600, 2.313
990	197.800, 2.815	197.800, 2.313
991	198.000, 2.816	198.000, 2.313
992	198.200, 2.817	198.200, 2.313
993	198.400, 2.817	198.400, 2.314
994	198.600, 2.818	198.600, 2.314
995	198.800, 2.818	198.800, 2.314
996	199.000, 2.819	199.000, 2.314
997	199.200, 2.820	199.200, 2.314
998	199.400, 2.821	199.400, 2.315
999	199.600, 2.822	199.600, 2.315
1000	199.800, 2.823	199.800, 2.315
1001	200.000, 2.824	200.000, 2.316
1002	200.200, 2.825	200.200, 2.316
1003	200.400, 2.826	200.400, 2.316
1004	200.600, 2.827	200.600, 2.317
1005	200.800, 2.828	200.800, 2.317
1006	201.000, 2.829	201.000, 2.317
1007	201.200, 2.830	201.200, 2.318
1008	201.400, 2.831	201.400, 2.318
1009	201.600, 2.833	201.600, 2.318
1010	201.800, 2.834	201.800, 2.318
1011	202.000, 2.835	202.000, 2.319
1012	202.200, 2.836	202.200, 2.319
1013	202.400, 2.837	202.400, 2.319
1014	202.600, 2.838	202.600, 2.318
1015	202.800, 2.839	202.800, 2.318
1016	203.000, 2.840	203.000, 2.318
1017	203.200, 2.841	203.200, 2.318
1018	203.400, 2.842	203.400, 2.318
1019	203.600, 2.843	203.600, 2.318
1020	203.800, 2.844	203.800, 2.318
1021	204.000, 2.845	204.000, 2.318
1022	204.200, 2.846	204.200, 2.318
1023	204.400, 2.846	204.400, 2.318
1024	204.600, 2.847	204.600, 2.319
1025	204.800, 2.848	204.800, 2.319
1026	205.000, 2.849	205.000, 2.319
1027	205.200, 2.850	205.200, 2.320
1028	205.400, 2.851	205.400, 2.320
1029	205.600, 2.852	205.600, 2.320
1030	205.800, 2.853	205.800, 2.321
1031	206.000, 2.854	206.000, 2.321
1032	206.200, 2.855	206.200, 2.321
1033	206.400, 2.856	206.400, 2.321
1034	206.600, 2.857	206.600, 2.321
1035	206.800, 2.858	206.800, 2.321
1036	207.000, 2.858	207.000, 2.322
1037	207.200, 2.859	207.200, 2.322
1038	207.400, 2.861	207.400, 2.322
1039	207.600, 2.861	207.600, 2.322
1040	207.800, 2.862	207.800, 2.322
1041	208.000, 2.863	208.000, 2.322
1042	208.200, 2.864	208.200, 2.322
1043	208.400, 2.864	208.400, 2.322
1044	208.600, 2.865	208.600, 2.323
1045	208.800, 2.866	208.800, 2.323
1046	209.000, 2.867	209.000, 2.323
1047	209.200, 2.868	209.200, 2.323
1048	209.400, 2.869	209.400, 2.323
1049	209.600, 2.870	209.600, 2.324
1050	209.800, 2.871	209.800, 2.324
1051	210.000, 2.871	210.000, 2.324
1052	210.200, 2.872	210.200, 2.324
1053	210.400, 2.872	210.400, 2.324
1054	210.600, 2.873	210.600, 2.324
1055	210.800, 2.874	210.800, 2.324
1056	211.000, 2.874	211.000, 2.325
1057	211.200, 2.875	211.200, 2.325
1058	211.400, 2.875	211.400, 2.325
1059	211.600, 2.876	211.600, 2.325
1060	211.800, 2.877	211.800, 2.325
1061	212.000, 2.878	212.000, 2.325
1062	212.200, 2.878	212.200, 2.325
1063	212.400, 2.879	212.400, 2.325
1064	212.600, 2.880	212.600, 2.325
1065	212.800, 2.880	212.800, 2.325
1066	213.000, 2.881	213.000, 2.325
1067	213.200, 2.882	213.200, 2.325
1068	213.400, 2.883	213.400, 2.325
1069	213.600, 2.884	213.600, 2.325
1070	213.800, 2.885	213.800, 2.325
1071	214.000, 2.886	214.000, 2.326
1072	214.200, 2.887	214.200, 2.326
1073	214.400, 2.889	214.400, 2.326
1074	214.600, 2.890	214.600, 2.326
1075	214.800, 2.891	214.800, 2.326
1076	215.000, 2.892	215.000, 2.327
1077	215.200, 2.893	215.200, 2.327
1078	215.400, 2.895	215.400, 2.327
1079	215.600, 2.896	215.600, 2.328
1080	215.800, 2.896	215.800, 2.328
1081	216.000, 2.897	216.000, 2.328
1082	216.200, 2.898	216.200, 2.328
1083	216.400, 2.899	216.400, 2.328
1084	216.600, 2.899	216.600, 2.328
1085	216.800, 2.900	216.800, 2.328
1086	217.000, 2.901	217.000, 2.329
1087	217.200, 2.901	217.200, 2.329
1088	217.400, 2.902	217.400, 2.329
1089	217.600, 2.902	217.600, 2.329
1090	217.800, 2.903	217.800, 2.329
1091	218.000, 2.904	218.000, 2.329
1092	218.200, 2.904	218.200, 2.328
1093	218.400, 2.905	218.400, 2.328
1094	218.600, 2.905	218.600, 2.328
1095	218.800, 2.906	218.800, 2.328
1096	219.000, 2.907	219.000, 2.328
1097	219.200, 2.908	219.200, 2.328
1098	219.400, 2.908	219.400, 2.327
1099	219.600, 2.909	219.600, 2.327
1100	219.800, 2.910	219.800, 2.327
1101	220.000, 2.911	220.000, 2.327
1102	220.200, 2.912	220.200, 2.327
1103	220.400, 2.913	220.400, 2.327
1104	220.600, 2.913	220.600, 2.327
1105	220.800, 2.914	220.800, 2.327
1106	221.000, 2.915	221.000, 2.327
1107	221.200, 2.915	221.200, 2.327
1108	221.400, 2.916	221.400, 2.328
1109	221.600, 2.916	221.600, 2.328
1110	221.800, 2.917	221.800, 2.328
1111	222.000, 2.918	222.000, 2.329
1112	222.200, 2.919	222.200, 2.329
1113	222.400, 2.920	222.400, 2.330
1114	222.600, 2.920	222.600, 2.331
1115	222.800, 2.921	222.800, 2.331
1116	223.000, 2.922	223.000, 2.331
1117	223.200, 2.923	223.200, 2.332
1118	223.400, 2.924	223.400, 2.332
1119	223.600, 2.925	223.600, 2.332
1120	223.800, 2.925	223.800, 2.333
1121	224.000, 2.926	224.000, 2.333
1122	224.200, 2.927	224.200, 2.333
1123	224.400, 2.928	224.400, 2.333
1124	224.600, 2.928	224.600, 2.333
1125	224.800, 2.929	224.800, 2.333
1126	225.000, 2.930	225.000, 2.332
1127	225.200, 2.930	225.200, 2.332
1128	225.400, 2.931	225.400, 2.332
1129	225.600, 2.932	225.600, 2.332
1130	225.800, 2.933	225.800, 2.332
1131	226.000, 2.934	226.000, 2.331
1132	226.200, 2.935	226.200, 2.331
1133	226.400, 2.936	226.400, 2.331
1134	226.600, 2.936	226.600, 2.331
1135	226.800, 2.937	226.800, 2.331
1136	227.000, 2.938	227.000, 2.331
1137	227.200, 2.938	227.200, 2.330
1138	227.400, 2.939	227.400, 2.331
1139	227.600, 2.940	227.600, 2.331
1140	227.800, 2.941	227.800, 2.331
1141	228.000, 2.942	228.000, 2.331
1142	228.200, 2.942	228.200, 2.331
1143	228.400, 2.942	228.400, 2.331
1144	228.600, 2.943	228.600, 2.332
1145	228.800, 2.944	228.800, 2.332
1146	229.000, 2.944	229.000, 2.332
1147	229.200, 2.945	229.200, 2.332
1148	229.400, 2.945	229.400, 2.332
1149	229.600, 2.946	229.600, 2.332
1150	229.800, 2.947	229.800, 2.332
1151	230.000, 2.947	230.000, 2.332
1152	230.200, 2.948	230.200, 2.332
1153	230.400, 2.948	230.400, 2.332
1154	230.600, 2.949	230.600, 2.332
1155	230.800, 2.950	230.800, 2.332
1156	231.000, 2.951	231.000, 2.332
1157	231.200, 2.952	231.200, 2.332
1158	231.400, 2.953	231.400, 2.332
1159	231.600, 2.954	231.600, 2.333
1160	231.800, 2.954	231.800, 2.333
1161	232.000, 2.955	232.000, 2.333
1162	232.200, 2.955	232.200, 2.334
1163	232.400, 2.956	232.400, 2.334
1164	232.600, 2.957	232.600, 2.334
1165	232.800, 2.957	232.800, 2.334
1166	233.000, 2.958	233.000, 2.334
1167	233.200, 2.958	233.200, 2.334
1168	233.400, 2.959	233.400, 2.334
1169	233.600, 2.960	233.600, 2.334
1170	233.800, 2.960	233.800, 2.334
1171	234.000, 2.961	234.000, 2.334
1172	234.200, 2.961	234.200, 2.334
1173	234.400, 2.962	234.400, 2.334
1174	234.600, 2.963	234.600, 2.334
1175	234.800, 2.964	234.800, 2.334
1176	235.000, 2.965	235.000, 2.334
1177	235.200, 2.966	235.200, 2.334
1178	235.400, 2.966	235.400, 2.335
1179	235.600, 2.967	235.600, 2.335
1180	235.800, 2.967	235.800, 2.335
1181	236.000, 2.967	236.000, 2.335
1182	236.200, 2.968	236.200, 2.336
1183	236.400, 2.968	236.400, 2.336
1184	236.600, 2.969	236.600, 2.336
1185	236.800, 2.969	236.800, 2.336
1186	237.000, 2.970	237.000, 2.336
1187	237.200, 2.970	237.200, 2.336
1188	237.400, 2.970	237.400, 2.336
1189	237.600, 2.971	237.600, 2.336
1190	237.800, 2.971	237.800, 2.336
1191	238.000, 2.972	238.000, 2.335
1192	238.200, 2.973	238.200, 2.335
1193	238.400, 2.974	238.400, 2.335
1194	238.600, 2.975	238.600, 2.335
1195	238.800, 2.976	238.800, 2.335
1196	239.000, 2.977	239.000, 2.335
1197	239.200, 2.978	239.200, 2.335
1198	239.400, 2.978	239.400, 2.335
1199	239.600, 2.979	239.600, 2.336
1200	239.800, 2.980	239.800, 2.336
1201	240.000, 2.981	240.000, 2.336
1202	240.200, 2.981	240.200, 2.337
1203	240.400, 2.982	240.400, 2.337
1204	240.600, 2.983	240.600, 2.337
1205	240.800, 2.983	240.800, 2.337
1206	241.000, 2.984	241.000, 2.337
1207	241.200, 2.984	241.200, 2.337
1208	241.400, 2.984	241.400, 2.337
1209	241.600, 2.985	241.600, 2.337
1210	241.800, 2.985	241.800, 2.337
1211	242.000, 2.985	242.000, 2.337
1212	242.200, 2.986	242.200, 2.337
1213	242.400, 2.987	242.400, 2.337
1214	242.600, 2.988	242.600, 2.337
1215	242.800, 2.989	242.800, 2.336
1216	243.000, 2.989	243.000, 2.336
1217	243.200, 2.990	243.200, 2.336
1218	243.400, 2.991	243.400, 2.336
1219	243.600, 2.992	243.600, 2.336
1220	243.800, 2.992	243.800, 2.337
1221	244.000, 2.993	244.000, 2.337
1222	244.200, 2.993	244.200, 2.337
1223	244.400, 2.993	244.400, 2.337
1224	244.600, 2.994	244.600, 2.338
1225	244.800, 2.994	244.800, 2.338
1226	245.000, 2.995	245.000, 2.338
1227	245.200, 2.995	245.200, 2.338
1228	245.400, 2.996	245.400, 2.338
1229	245.600, 2.996	245.600, 2.338
1230	245.800, 2.997	245.800, 2.338
1231	246.000, 2.998	246.000, 2.338
1232	246.200, 2.998	246.200, 2.338
1233	246.400, 2.999	246.400, 2.338
1234	246.600, 3.000	246.600, 2.338
1235	246.800, 3.000	246.800, 2.337
1236	247.000, 3.001	247.000, 2.337
1237	247.200, 3.001	247.200, 2.337
1238	247.400, 3.002	247.400, 2.336
1239	247.600, 3.002	247.600, 2.336
1240	247.800, 3.003	247.800, 2.336
1241	248.000, 3.003	248.000, 2.336
1242	248.200, 3.003	248.200, 2.336
1243	248.400, 3.004	248.400, 2.336
1244	248.600, 3.004	248.600, 2.336
1245	248.800, 3.005	248.800, 2.336
1246	249.000, 3.006	249.000, 2.336
1247	249.200, 3.006	249.200, 2.336
1248	249.400, 3.007	249.400, 2.336
1249	249.600, 3.007	249.600, 2.337
1250	249.800, 3.008	249.800, 2.337
1251	250.000, 3.008	250.000, 2.337
1252	250.200, 3.009	250.200, 2.337
1253	250.400, 3.010	250.400, 2.337
1254	250.600, 3.010	250.600, 2.337
1255	250.800, 3.011	250.800, 2.337
1256	251.000, 3.012	251.000, 2.337
1257	251.200, 3.012	251.200, 2.338
1258	251.400, 3.013	251.400, 2.338
1259	251.600, 3.013	251.600, 2.338
1260	251.800, 3.014	251.800, 2.338
1261	252.000, 3.015	252.000, 2.338
1262	252.200, 3.016	252.200, 2.338
1263	252.400, 3.016	252.400, 2.338
1264	252.600, 3.017	252.600, 2.338
1265	252.800, 3.018	252.800, 2.338
1266	253.000, 3.018	253.000, 2.338
1267	253.200, 3.019	253.200, 2.338
1268	253.400, 3.019	253.400, 2.338
1269	253.600, 3.020	253.600, 2.338
1270	253.800, 3.021	253.800, 2.337
1271	254.000, 3.021	254.000, 2.337
1272	254.200, 3.022	254.200, 2.337
1273	254.400, 3.022	254.400, 2.337
1274	254.600, 3.022	254.600, 2.337
1275	254.800, 3.022	254.800, 2.337
1276	255.000, 3.023	255.000, 2.337
1277	255.200, 3.023	255.200, 2.337
1278	255.400, 3.024	255.400, 2.337
1279	255.600, 3.024	255.600, 2.337
1280	255.800, 3.025	255.800, 2.337
1281	256.000, 3.025	256.000, 2.337
1282	256.200, 3.026	256.200, 2.337
1283	256.400, 3.027	256.400, 2.338
1284	256.600, 3.028	256.600, 2.338
1285	256.800, 3.029	256.800, 2.338
1286	257.000, 3.030	257.000, 2.338
1287	257.200, 3.030	257.200, 2.338
1288	257.400, 3.031	257.400, 2.338
1289	257.600, 3.032	257.600, 2.338
1290	257.800, 3.032	257.800, 2.338
1291	258.000, 3.032	258.000, 2.338
1292	258.200, 3.032	258.200, 2.338
1293	258.400, 3.033	258.400, 2.338
1294	258.600, 3.033	258.600, 2.338
1295	258.800, 3.033	258.800, 2.338
1296	259.000, 3.034	259.000, 2.338
1297	259.200, 3.034	259.200, 2.338
1298	259.400, 3.034	259.400, 2.338
1299	259.600, 3.035	259.600, 2.338
1300	259.800, 3.035	259.800, 2.338
1301	260.000, 3.036	260.000, 2.338
1302	260.200, 3.036	260.200, 2.338
1303	260.400, 3.037	260.400, 2.338
1304	260.600, 3.038	260.600, 2.338
1305	260.800, 3.039	260.800, 2.338
1306	261.000, 3.040	261.000, 2.338
1307	261.200, 3.040	261.200, 2.338
1308	261.400, 3.041	261.400, 2.338
1309	261.600, 3.041	261.600, 2.338
1310	261.800, 3.042	261.800, 2.338
1311	262.000, 3.042	262.000, 2.338
1312	262.200, 3.043	262.200, 2.338
1313	262.400, 3.044	262.400, 2.338
1314	262.600, 3.045	262.600, 2.339
1315	262.800, 3.045	262.800, 2.339
1316	263.000, 3.046	263.000, 2.338
1317	263.200, 3.046	263.200, 2.338
1318	263.400, 3.046	263.400, 2.339
1319	263.600, 3.047	263.600, 2.339
1320	263.800, 3.047	263.800, 2.339
1321	264.000, 3.047	264.000, 2.339
1322	264.200, 3.047	264.200, 2.339
1323	264.400, 3.048	264.400, 2.338
1324	264.600, 3.048	264.600, 2.338
1325	264.800, 3.048	264.800, 2.338
1326	265.000, 3.048	265.000, 2.338
1327	265.200, 3.049	265.200, 2.338
1328	265.400, 3.049	265.400, 2.338
1329	265.600, 3.050	265.600, 2.338
1330	265.800, 3.051	265.800, 2.338
1331	266.000, 3.052	266.000, 2.338
1332	266.200, 3.052	266.200, 2.338
1333	266.400, 3.053	266.400, 2.338
1334	266.600, 3.054	266.600, 2.338
1335	266.800, 3.054	266.800, 2.338
1336	267.000, 3.055	267.000, 2.338
1337	267.200, 3.055	267.200, 2.338
1338	267.400, 3.056	267.400, 2.338
1339	267.600, 3.056	267.600, 2.338
1340	267.800, 3.056	267.800, 2.338
1341	268.000, 3.056	268.000, 2.338
1342	268.200, 3.056	268.200, 2.338
1343	268.400, 3.057	268.400, 2.338
1344	268.600, 3.057	268.600, 2.338
1345	268.800, 3.057	268.800, 2.338
1346	269.000, 3.058	269.000, 2.338
1347	269.200, 3.058	269.200, 2.338
1348	269.400, 3.059	269.400, 2.338
1349	269.600, 3.059	269.600, 2.338
1350	269.800, 3.060	269.800, 2.338
1351	270.000, 3.060	270.000, 2.338
1352	270.200, 3.061	270.200, 2.338
1353	270.400, 3.061	270.400, 2.338
1354	270.600, 3.062	270.600, 2.338
1355	270.800, 3.063	270.800, 2.338
1356	271.000, 3.063	271.000, 2.339
1357	271.200, 3.064	271.200, 2.339
1358	271.400, 3.064	271.400, 2.339
1359	271.600, 3.064	271.600, 2.338
1360	271.800, 3.065	271.800, 2.338
1361	272.000, 3.065	272.000, 2.338
1362	272.200, 3.065	272.200, 2.338
1363	272.400, 3.066	272.400, 2.338
1364	272.600, 3.066	272.600, 2.338
1365	272.800, 3.067	272.800, 2.338
1366	273.000, 3.068	273.000, 2.338
1367	273.200, 3.069	273.200, 2.338
1368	273.400, 3.070	273.400, 2.338
1369	273.600, 3.070	273.600, 2.337
1370	273.800, 3.071	273.800, 2.337
1371	274.000, 3.072	274.000, 2.337
1372	274.200, 3.072	274.200, 2.337
1373	274.400, 3.073	274.400, 2.337
1374	274.600, 3.073	274.600, 2.337
1375	274.800, 3.074	274.800, 2.337
1376	275.000, 3.074	275.000, 2.337
1377	275.200, 3.075	275.200, 2.337
1378	275.400, 3.075	275.400, 2.337
1379	275.600, 3.075	275.600, 2.337
1380	275.800, 3.076	275.800, 2.337
1381	276.000, 3.076	276.000, 2.337
1382	276.200, 3.076	276.200, 2.337
1383	276.400, 3.077	276.400, 2.338
1384	276.600, 3.077	276.600, 2.338
1385	276.800, 3.078	276.800, 2.338
1386	277.000, 3.078	277.000, 2.338
1387	277.200, 3.078	277.200, 2.338
1388	277.400, 3.079	277.400, 2.338
1389	277.600, 3.079	277.600, 2.338
1390	277.800, 3.079	277.800, 2.338
1391	278.000, 3.079	278.000, 2.338
1392	278.200, 3.079	278.200, 2.338
1393	278.400, 3.079	278.400, 2.338
1394	278.600, 3.079	278.600, 2.338
1395	278.800, 3.080	278.800, 2.338
1396	279.000, 3.080	279.000, 2.338
1397	279.200, 3.081	279.200, 2.338
1398	279.400, 3.081	279.400, 2.338
1399	279.600, 3.082	279.600, 2.338
1400	279.800, 3.082	279.800, 2.338
1401	280.000, 3.083	280.000, 2.338
1402	280.200, 3.084	280.200, 2.338
1403	280.400, 3.085	280.400, 2.337
1404	280.600, 3.085	280.600, 2.337
1405	280.800, 3.086	280.800, 2.337
1406	281.000, 3.087	281.000, 2.337
1407	281.200, 3.087	281.200, 2.337
1408	281.400, 3.088	281.400, 2.338
1409	281.600, 3.088	281.600, 2.338
1410	281.800, 3.088	281.800, 2.338
1411	282.000, 3.089	282.000, 2.338
1412	282.200, 3.089	282.200, 2.338
1413	282.400, 3.089	282.400, 2.338
1414	282.600, 3.090	282.600, 2.338
1415	282.800, 3.090	282.800, 2.338
1416	283.000, 3.090	283.000, 2.338
1417	283.200, 3.091	283.200, 2.338
1418	283.400, 3.091	283.400, 2.338
1419	283.600, 3.092	283.600, 2.338
1420	283.800, 3.092	283.800, 2.338
1421	284.000, 3.092	284.000, 2.338
1422	284.200, 3.093	284.200, 2.338
1423	284.400, 3.093	284.400, 2.338
1424	284.600, 3.093	284.600, 2.338
1425	284.800, 3.094	284.800, 2.339
1426	285.000, 3.094	285.000, 2.339
1427	285.200, 3.094	285.200, 2.338
1428	285.400, 3.094	285.400, 2.338
1429	285.600, 3.095	285.600, 2.338
1430	285.800, 3.095	285.800, 2.338
1431	286.000, 3.096	286.000, 2.337
1432	286.200, 3.096	286.200, 2.337
1433	286.400, 3.096	286.400, 2.337
1434	286.600, 3.096	286.600, 2.337
1435	286.800, 3.097	286.800, 2.337
1436	287.000, 3.097	287.000, 2.337
1437	287.200, 3.097	287.200, 2.338
1438	287.400, 3.097	287.400, 2.338
1439	287.600, 3.097	287.600, 2.338
1440	287.800, 3.098	287.800, 2.338
1441	288.000, 3.098	288.000, 2.339
1442	288.200, 3.099	288.200, 2.339
1443	288.400, 3.099	288.400, 2.339
1444	288.600, 3.100	288.600, 2.339
1445	288.800, 3.100	288.800, 2.338
1446	289.000, 3.101	289.000, 2.338
1447	289.200, 3.101	289.200, 2.337
1448	289.400, 3.102	289.400, 2.337
1449	289.600, 3.102	289.600, 2.336
1450	289.800, 3.102	289.800, 2.336
1451	290.000, 3.103	290.000, 2.336
1452	290.200, 3.103	290.200, 2.336
1453	290.400, 3.103	290.400, 2.335
1454	290.600, 3.103	290.600, 2.335
1455	290.800, 3.104	290.800, 2.335
1456	291.000, 3.104	291.000, 2.336
1457	291.200, 3.105	291.200, 2.336
1458	291.400, 3.106	291.400, 2.336
1459	291.600, 3.106	291.600, 2.337
1460	291.800, 3.107	291.800, 2.337
1461	292.000, 3.108	292.000, 2.337
1462	292.200, 3.108	292.200, 2.337
1463	292.400, 3.108	292.400, 2.337
1464	292.600, 3.109	292.600, 2.337
1465	292.800, 3.109	292.800, 2.337
1466	293.000, 3.110	293.000, 2.337
1467	293.200, 3.110	293.200, 2.337
1468	293.400, 3.110	293.400, 2.338
1469	293.600, 3.111	293.600, 2.338
1470	293.800, 3.111	293.800, 2.337
1471	294.000, 3.111	294.000, 2.337
1472	294.200, 3.111	294.200, 2.337
1473	294.400, 3.112	294.400, 2.337
1474	294.600, 3.112	294.600, 2.337
1475	294.800, 3.113	294.800, 2.337
1476	295.000, 3.113	295.000, 2.337
1477	295.200, 3.113	295.200, 2.338
1478	295.400, 3.113	295.400, 2.338
1479	295.600, 3.113	295.600, 2.338
1480	295.800, 3.114	295.800, 2.337
1481	296.000, 3.114	296.000, 2.337
1482	296.200, 3.114	296.200, 2.337
1483	296.400, 3.115	296.400, 2.337
1484	296.600, 3.115	296.600, 2.337
1485	296.800, 3.116	296.800, 2.337
1486	297.000, 3.116	297.000, 2.337
1487	297.200, 3.117	297.200, 2.337
1488	297.400, 3.118	297.400, 2.337
1489	297.600, 3.118	297.600, 2.337
1490	297.800, 3.119	297.800, 2.337
1491	298.000, 3.119	298.000, 2.337
1492	298.200, 3.119	298.200, 2.337
1493	298.400, 3.120	298.400, 2.337
1494	298.600, 3.120	298.600, 2.337
1495	298.800, 3.120	298.800, 2.337
1496	299.000, 3.120	299.000, 2.337
1497	299.200, 3.120	299.200, 2.337
1498	299.400, 3.121	299.400, 2.336
1499	299.600, 3.121	299.600, 2.336
1500	299.800, 3.121	299.800, 2.336
1501	300.000, 3.121	300.000, 2.336
1502	300.200, 3.121	300.200, 2.336
1503	300.400, 3.121	300.400, 2.336
1504	300.600, 3.122	300.600, 2.336
1505	300.800, 3.122	300.800, 2.336
1506	301.000, 3.123	301.000, 2.336
1507	301.200, 3.123	301.200, 2.336
1508	301.400, 3.124	301.400, 2.336
1509	301.600, 3.124	301.600, 2.336
1510	301.800, 3.125	301.800, 2.336
1511	302.000, 3.125	302.000, 2.336
1512	302.200, 3.126	302.200, 2.336
1513	302.400, 3.126	302.400, 2.336
1514	302.600, 3.126	302.600, 2.336
1515	302.800, 3.127	302.800, 2.336
1516	303.000, 3.127	303.000, 2.336
1517	303.200, 3.127	303.200, 2.336
1518	303.400, 3.127	303.400, 2.336
1519	303.600, 3.128	303.600, 2.336
1520	303.800, 3.128	303.800, 2.336
1521	304.000, 3.129	304.000, 2.336
1522	304.200, 3.129	304.200, 2.337
1523	304.400, 3.129	304.400, 2.337
1524	304.600, 3.129	304.600, 2.337
1525	304.800, 3.129	304.800, 2.337
1526	305.000, 3.130	305.000, 2.337
1527	305.200, 3.130	305.200, 2.337
1528	305.400, 3.131	305.400, 2.337
1529	305.600, 3.131	305.600, 2.337
1530	305.800, 3.131	305.800, 2.338
1531	306.000, 3.131	306.000, 2.338
1532	306.200, 3.132	306.200, 2.338
1533	306.400, 3.132	306.400, 2.337
1534	306.600, 3.132	306.600, 2.337
1535	306.800, 3.132	306.800, 2.337
1536	307.000, 3.132	307.000, 2.337
1537	307.200, 3.133	307.200, 2.336
1538	307.400, 3.134	307.400, 2.336
1539	307.600, 3.134	307.600, 2.336
1540	307.800, 3.135	307.800, 2.336
1541	308.000, 3.135	308.000, 2.335
1542	308.200, 3.135	308.200, 2.336
1543	308.400, 3.135	308.400, 2.336
1544	308.600, 3.135	308.600, 2.336
1545	308.800, 3.135	308.800, 2.336
1546	309.000, 3.136	309.000, 2.336
1547	309.200, 3.136	309.200, 2.336
1548	309.400, 3.136	309.400, 2.336
1549	309.600, 3.137	309.600, 2.336
1550	309.800, 3.137	309.800, 2.336
1551	310.000, 3.137	310.000, 2.336
1552	310.200, 3.138	310.200, 2.337
1553	310.400, 3.138	310.400, 2.337
1554	310.600, 3.139	310.600, 2.337
1555	310.800, 3.139	310.800, 2.337
1556	311.000, 3.140	311.000, 2.337
1557	311.200, 3.140	311.200, 2.337
1558	311.400, 3.141	311.400, 2.337
1559	311.600, 3.141	311.600, 2.337
1560	311.800, 3.142	311.800, 2.337
1561	312.000, 3.142	312.000, 2.337
1562	312.200, 3.143	312.200, 2.337
1563	312.400, 3.143	312.400, 2.337
1564	312.600, 3.144	312.600, 2.337
1565	312.800, 3.144	312.800, 2.337
1566	313.000, 3.144	313.000, 2.337
1567	313.200, 3.144	313.200, 2.336
1568	313.400, 3.144	313.400, 2.336
1569	313.600, 3.144	313.600, 2.336
1570	313.800, 3.144	313.800, 2.336
1571	314.000, 3.144	314.000, 2.336
1572	314.200, 3.144	314.200, 2.335
1573	314.400, 3.144	314.400, 2.335
1574	314.600, 3.144	314.600, 2.335
1575	314.800, 3.145	314.800, 2.335
1576	315.000, 3.145	315.000, 2.334
1577	315.200, 3.145	315.200, 2.334
1578	315.400, 3.146	315.400, 2.334
1579	315.600, 3.146	315.600, 2.334
1580	315.800, 3.147	315.800, 2.334
1581	316.000, 3.147	316.000, 2.334
1582	316.200, 3.148	316.200, 2.335
1583	316.400, 3.148	316.400, 2.335
1584	316.600, 3.149	316.600, 2.335
1585	316.800, 3.149	316.800, 2.335
1586	317.000, 3.150	317.000, 2.336
1587	317.200, 3.150	317.200, 2.336
1588	317.400, 3.150	317.400, 2.336
1589	317.600, 3.150	317.600, 2.336
1590	317.800, 3.150	317.800, 2.336
1591	318.000, 3.150	318.000, 2.336
1592	318.200, 3.150	318.200, 2.335
1593	318.400, 3.150	318.400, 2.335
1594	318.600, 3.150	318.600, 2.335
1595	318.800, 3.151	318.800, 2.334
1596	319.000, 3.151	319.000, 2.334
1597	319.200, 3.151	319.200, 2.334
1598	319.400, 3.151	319.400, 2.334
1599	319.600, 3.151	319.600, 2.334
1600	319.800, 3.152	319.800, 2.334
1601	320.000, 3.152	320.000, 2.334
1602	320.200, 3.152	320.200, 2.334
1603	320.400, 3.152	320.400, 2.334
1604	320.600, 3.153	320.600, 2.334
1605	320.800, 3.153	320.800, 2.334
1606	321.000, 3.153	321.000, 2.334
1607	321.200, 3.154	321.200, 2.335
1608	321.400, 3.154	321.400, 2.335
1609	321.600, 3.154	321.600, 2.335
1610	321.800, 3.155	321.800, 2.335
1611	322.000, 3.155	322.000, 2.335
1612	322.200, 3.155	322.200, 2.335
1613	322.400, 3.156	322.400, 2.335
1614	322.600, 3.156	322.600, 2.335
1615	322.800, 3.156	322.800, 2.335
1616	323.000, 3.157	323.000, 2.335
1617	323.200, 3.157	323.200, 2.335
1618	323.400, 3.158	323.400, 2.335
1619	323.600, 3.158	323.600, 2.335
1620	323.800, 3.158	323.800, 2.335
1621	324.000, 3.159	324.000, 2.334
1622	324.200, 3.159	324.200, 2.334
1623	324.400, 3.160	324.400, 2.334
1624	324.600, 3.160	324.600, 2.334
1625	324.800, 3.160	324.800, 2.334
1626	325.000, 3.161	325.000, 2.334
1627	325.200, 3.161	325.200, 2.334
1628	325.400, 3.161	325.400, 2.334
1629	325.600, 3.161	325.600, 2.334
1630	325.800, 3.161	325.800, 2.334
1631	326.000, 3.161	326.000, 2.333
1632	326.200, 3.161	326.200, 2.333
1633	326.400, 3.161	326.400, 2.333
1634	326.600, 3.161	326.600, 2.333
1635	326.800, 3.162	326.800, 2.333
1636	327.000, 3.162	327.000, 2.333
1637	327.200, 3.162	327.200, 2.333
1638	327.400, 3.163	327.400, 2.334
1639	327.600, 3.163	327.600, 2.333
1640	327.800, 3.164	327.800, 2.334
1641	328.000, 3.164	328.000, 2.333
1642	328.200, 3.165	328.200, 2.333
1643	328.400, 3.165	328.400, 2.333
1644	328.600, 3.165	328.600, 2.334
1645	328.800, 3.165	328.800, 2.334
1646	329.000, 3.165	329.000, 2.334
1647	329.200, 3.165	329.200, 2.334
1648	329.400, 3.165	329.400, 2.334
1649	329.600, 3.165	329.600, 2.334
1650	329.800, 3.165	329.800, 2.334
1651	330.000, 3.165	330.000, 2.334
1652	330.200, 3.165	330.200, 2.334
1653	330.400, 3.165	330.400, 2.334
1654	330.600, 3.165	330.600, 2.334
1655	330.800, 3.165	330.800, 2.334
1656	331.000, 3.166	331.000, 2.335
1657	331.200, 3.167	331.200, 2.335
1658	331.400, 3.168	331.400, 2.335
1659	331.600, 3.169	331.600, 2.334
1660	331.800, 3.169	331.800, 2.334
1661	332.000, 3.170	332.000, 2.334
1662	332.200, 3.170	332.200, 2.334
1663	332.400, 3.171	332.400, 2.334
1664	332.600, 3.171	332.600, 2.333
1665	332.800, 3.171	332.800, 2.333
1666	333.000, 3.171	333.000, 2.333
1667	333.200, 3.172	333.200, 2.333
1668	333.400, 3.172	333.400, 2.332
1669	333.600, 3.172	333.600, 2.332
1670	333.800, 3.172	333.800, 2.332
1671	334.000, 3.171	334.000, 2.332
1672	334.200, 3.171	334.200, 2.333
1673	334.400, 3.171	334.400, 2.333
1674	334.600, 3.171	334.600, 2.333
1675	334.800, 3.171	334.800, 2.333
1676	335.000, 3.172	335.000, 2.334
1677	335.200, 3.172	335.200, 2.334
1678	335.400, 3.172	335.400, 2.334
1679	335.600, 3.172	335.600, 2.334
1680	335.800, 3.172	335.800, 2.334
1681	336.000, 3.172	336.000, 2.334
1682	336.200, 3.172	336.200, 2.334
1683	336.400, 3.173	336.400, 2.334
1684	336.600, 3.173	336.600, 2.333
1685	336.800, 3.173	336.800, 2.333
1686	337.000, 3.173	337.000, 2.333
1687	337.200, 3.173	337.200, 2.333
1688	337.400, 3.174	337.400, 2.333
1689	337.600, 3.174	337.600, 2.333
1690	337.800, 3.174	337.800, 2.334
1691	338.000, 3.175	338.000, 2.334
1692	338.200, 3.175	338.200, 2.333
1693	338.400, 3.175	338.400, 2.333
1694	338.600, 3.176	338.600, 2.333
1695	338.800, 3.176	338.800, 2.333
1696	339.000, 3.176	339.000, 2.333
1697	339.200, 3.177	339.200, 2.333
1698	339.400, 3.177	339.400, 2.332
1699	339.600, 3.177	339.600, 2.332
1700	339.800, 3.177	339.800, 2.332
1701	340.000, 3.178	340.000, 2.332
1702	340.200, 3.178	340.200, 2.332
1703	340.400, 3.179	340.400, 2.331
1704	340.600, 3.179	340.600, 2.331
1705	340.800, 3.179	340.800, 2.332
1706	341.000, 3.180	341.000, 2.332
1707	341.200, 3.180	341.200, 2.332
1708	341.400, 3.180	341.400, 2.332
1709	341.600, 3.181	341.600, 2.332
1710	341.800, 3.181	341.800, 2.332
1711	342.000, 3.182	342.000, 2.332
1712	342.200, 3.182	342.200, 2.332
1713	342.400, 3.182	342.400, 2.332
1714	342.600, 3.182	342.600, 2.331
1715	342.800, 3.181	342.800, 2.331
1716	343.000, 3.181	343.000, 2.331
1717	343.200, 3.181	343.200, 2.331
1718	343.400, 3.181	343.400, 2.330
1719	343.600, 3.182	343.600, 2.330
1720	343.800, 3.182	343.800, 2.330
1721	344.000, 3.182	344.000, 2.330
1722	344.200, 3.182	344.200, 2.329
1723	344.400, 3.182	344.400, 2.329
1724	344.600, 3.181	344.600, 2.330
1725	344.800, 3.181	344.800, 2.330
1726	345.000, 3.181	345.000, 2.330
1727	345.200, 3.182	345.200, 2.330
1728	345.400, 3.182	345.400, 2.330
1729	345.600, 3.182	345.600, 2.331
1730	345.800, 3.182	345.800, 2.331
1731	346.000, 3.183	346.000, 2.331
1732	346.200, 3.183	346.200, 2.331
1733	346.400, 3.183	346.400, 2.331
1734	346.600, 3.184	346.600, 2.331
1735	346.800, 3.185	346.800, 2.331
1736	347.000, 3.186	347.000, 2.331
1737	347.200, 3.186	347.200, 2.331
1738	347.400, 3.187	347.400, 2.331
1739	347.600, 3.188	347.600, 2.330
1740	347.800, 3.188	347.800, 2.330
1741	348.000, 3.189	348.000, 2.330
1742	348.200, 3.189	348.200, 2.330
1743	348.400, 3.189	348.400, 2.330
1744	348.600, 3.189	348.600, 2.330
1745	348.800, 3.189	348.800, 2.330
1746	349.000, 3.189	349.000, 2.330
1747	349.200, 3.189	349.200, 2.330
1748	349.400, 3.189	349.400, 2.330
1749	349.600, 3.189	349.600, 2.330
1750	349.800, 3.189	349.800, 2.330
1751	350.000, 3.189	350.000, 2.330
1752	350.200, 3.189	350.200, 2.331
1753	350.400, 3.190	350.400, 2.331
1754	350.600, 3.190	350.600, 2.331
1755	350.800, 3.190	350.800, 2.331
1756	351.000, 3.190	351.000, 2.331
1757	351.200, 3.190	351.200, 2.331
1758	351.400, 3.190	351.400, 2.331
1759	351.600, 3.190	351.600, 2.331
1760	351.800, 3.190	351.800, 2.331
1761	352.000, 3.190	352.000, 2.331
1762	352.200, 3.190	352.200, 2.331
1763	352.400, 3.191	352.400, 2.331
1764	352.600, 3.191	352.600, 2.331
1765	352.800, 3.191	352.800, 2.331
1766	353.000, 3.191	353.000, 2.331
1767	353.200, 3.191	353.200, 2.331
1768	353.400, 3.191	353.400, 2.331
1769	353.600, 3.192	353.600, 2.331
1770	353.800, 3.192	353.800, 2.330
1771	354.000, 3.193	354.000, 2.330
1772	354.200, 3.193	354.200, 2.330
1773	354.400, 3.194	354.400, 2.330
1774	354.600, 3.194	354.600, 2.330
1775	354.800, 3.195	354.800, 2.331
1776	355.000, 3.195	355.000, 2.331
1777	355.200, 3.195	355.200, 2.331
1778	355.400, 3.195	355.400, 2.331
1779	355.600, 3.195	355.600, 2.331
1780	355.800, 3.196	355.800, 2.331
1781	356.000, 3.196	356.000, 2.331
1782	356.200, 3.196	356.200, 2.331
1783	356.400, 3.196	356.400, 2.331
1784	356.600, 3.196	356.600, 2.331
1785	356.800, 3.196	356.800, 2.331
1786	357.000, 3.196	357.000, 2.331
1787	357.200, 3.196	357.200, 2.331
1788	357.400, 3.196	357.400, 2.331
1789	357.600, 3.196	357.600, 2.331
1790	357.800, 3.196	357.800, 2.330
1791	358.000, 3.197	358.000, 2.330
1792	358.200, 3.197	358.200, 2.330
1793	358.400, 3.197	358.400, 2.330
1794	358.600, 3.196	358.600, 2.330
1795	358.800, 3.196	358.800, 2.330
1796	359.000, 3.196	359.000, 2.330
1797	359.200, 3.196	359.200, 2.330
1798	359.400, 3.196	359.400, 2.330
1799	359.600, 3.196	359.600, 2.330
1800	359.800, 3.196	359.800, 2.330
1801	360.000, 3.197	360.000, 2.330
1802	360.200, 3.197	360.200, 2.330
1803	360.400, 3.198	360.400, 2.330
1804	360.600, 3.198	360.600, 2.330
1805	360.800, 3.199	360.800, 2.330
1806	361.000, 3.199	361.000, 2.330
1807	361.200, 3.200	361.200, 2.330
1808	361.400, 3.201	361.400, 2.330
1809	361.600, 3.201	361.600, 2.330
1810	361.800, 3.202	361.800, 2.330
1811	362.000, 3.202	362.000, 2.330
1812	362.200, 3.202	362.200, 2.330
1813	362.400, 3.202	362.400, 2.330
1814	362.600, 3.202	362.600, 2.330
1815	362.800, 3.202	362.800, 2.330
1816	363.000, 3.202	363.000, 2.330
1817	363.200, 3.202	363.200, 2.330
1818	363.400, 3.203	363.400, 2.330
1819	363.600, 3.203	363.600, 2.330
1820	363.800, 3.203	363.800, 2.330
1821	364.000, 3.203	364.000, 2.330
1822	364.200, 3.203	364.200, 2.330
1823	364.400, 3.202	364.400, 2.330
1824	364.600, 3.202	364.600, 2.330
1825	364.800, 3.202	364.800, 2.330
1826	365.000, 3.202	365.000, 2.330
1827	365.200, 3.202	365.200, 2.330
1828	365.400, 3.202	365.400, 2.330
1829	365.600, 3.202	365.600, 2.329
1830	365.800, 3.202	365.800, 2.329
1831	366.000, 3.202	366.000, 2.329
1832	366.200, 3.203	366.200, 2.329
1833	366.400, 3.203	366.400, 2.329
1834	366.600, 3.203	366.600, 2.329
1835	366.800, 3.203	366.800, 2.329
1836	367.000, 3.204	367.000, 2.329
1837	367.200, 3.204	367.200, 2.329
1838	367.400, 3.205	367.400, 2.329
1839	367.600, 3.205	367.600, 2.329
1840	367.800, 3.205	367.800, 2.329
1841	368.000, 3.205	368.000, 2.329
1842	368.200, 3.205	368.200, 2.329
1843	368.400, 3.205	368.400, 2.329
1844	368.600, 3.205	368.600, 2.329
1845	368.800, 3.205	368.800, 2.329
1846	369.000, 3.205	369.000, 2.329
1847	369.200, 3.205	369.200, 2.329
1848	369.400, 3.205	369.400, 2.329
1849	369.600, 3.206	369.600, 2.329
1850	369.800, 3.206	369.800, 2.329
1851	370.000, 3.206	370.000, 2.329
1852	370.200, 3.206	370.200, 2.329
1853	370.400, 3.207	370.400, 2.330
1854	370.600, 3.207	370.600, 2.330
1855	370.800, 3.208	370.800, 2.330
1856	371.000, 3.208	371.000, 2.330
1857	371.200, 3.208	371.200, 2.330
1858	371.400, 3.208	371.400, 2.330
1859	371.600, 3.209	371.600, 2.330
1860	371.800, 3.209	371.800, 2.330
1861	372.000, 3.209	372.000, 2.330
1862	372.200, 3.209	372.200, 2.330
1863	372.400, 3.209	372.400, 2.330
1864	372.600, 3.209	372.600, 2.330
1865	372.800, 3.209	372.800, 2.329
1866	373.000, 3.209	373.000, 2.329
1867	373.200, 3.209	373.200, 2.329
1868	373.400, 3.209	373.400, 2.329
1869	373.600, 3.209	373.600, 2.329
1870	373.800, 3.209	373.800, 2.329
1871	374.000, 3.209	374.000, 2.329
1872	374.200, 3.210	374.200, 2.329
1873	374.400, 3.210	374.400, 2.328
1874	374.600, 3.210	374.600, 2.328
1875	374.800, 3.211	374.800, 2.328
1876	375.000, 3.211	375.000, 2.328
1877	375.200, 3.212	375.200, 2.328
1878	375.400, 3.212	375.400, 2.328
1879	375.600, 3.212	375.600, 2.328
1880	375.800, 3.213	375.800, 2.328
1881	376.000, 3.213	376.000, 2.328
1882	376.200, 3.213	376.200, 2.327
1883	376.400, 3.214	376.400, 2.327
1884	376.600, 3.214	376.600, 2.327
1885	376.800, 3.214	376.800, 2.327
1886	377.000, 3.214	377.000, 2.327
1887	377.200, 3.215	377.200, 2.326
1888	377.400, 3.215	377.400, 2.326
1889	377.600, 3.215	377.600, 2.326
1890	377.800, 3.216	377.800, 2.326
1891	378.000, 3.216	378.000, 2.326
1892	378.200, 3.216	378.200, 2.327
1893	378.400, 3.216	378.400, 2.327
1894	378.600, 3.216	378.600, 2.327
1895	378.800, 3.215	378.800, 2.328
1896	379.000, 3.215	379.000, 2.328
1897	379.200, 3.215	379.200, 2.329
1898	379.400, 3.215	379.400, 2.329
1899	379.600, 3.215	379.600, 2.329
1900	379.800, 3.215	379.800, 2.329
1901	380.000, 3.215	380.000, 2.329
1902	380.200, 3.215	380.200, 2.329
1903	380.400, 3.215	380.400, 2.330
1904	380.600, 3.215	380.600, 2.329
1905	380.800, 3.215	380.800, 2.329
1906	381.000, 3.216	381.000, 2.329
1907	381.200, 3.216	381.200, 2.329
1908	381.400, 3.217	381.400, 2.329
1909	381.600, 3.217	381.600, 2.328
1910	381.800, 3.217	381.800, 2.328
1911	382.000, 3.218	382.000, 2.328
1912	382.200, 3.218	382.200, 2.328
1913	382.400, 3.218	382.400, 2.328
1914	382.600, 3.218	382.600, 2.328
1915	382.800, 3.218	382.800, 2.328
1916	383.000, 3.218	383.000, 2.328
1917	383.200, 3.219	383.200, 2.328
1918	383.400, 3.219	383.400, 2.328
1919	383.600, 3.219	383.600, 2.328
1920	383.800, 3.219	383.800, 2.328
1921	384.000, 3.219	384.000, 2.328
1922	384.200, 3.218	384.200, 2.328
1923	384.400, 3.218	384.400, 2.328
1924	384.600, 3.218	384.600, 2.328
1925	384.800, 3.218	384.800, 2.328
1926	385.000, 3.218	385.000, 2.328
1927	385.200, 3.218	385.200, 2.327
1928	385.400, 3.218	385.400, 2.327
1929	385.600, 3.218	385.600, 2.326
1930	385.800, 3.218	385.800, 2.325
1931	386.000, 3.219	386.000, 2.325
1932	386.200, 3.219	386.200, 2.325
1933	386.400, 3.219	386.400, 2.324
1934	386.600, 3.219	386.600, 2.324
1935	386.800, 3.220	386.800, 2.324
1936	387.000, 3.220	387.000, 2.324
1937	387.200, 3.221	387.200, 2.325
1938	387.400, 3.221	387.400, 2.325
1939	387.600, 3.221	387.600, 2.325
1940	387.800, 3.221	387.800, 2.326
1941	388.000, 3.221	388.000, 2.326
1942	388.200, 3.222	388.200, 2.327
1943	388.400, 3.222	388.400, 2.327
1944	388.600, 3.222	388.600, 2.328
1945	388.800, 3.222	388.800, 2.328
1946	389.000, 3.222	389.000, 2.328
1947	389.200, 3.222	389.200, 2.328
1948	389.400, 3.222	389.400, 2.327
1949	389.600, 3.223	389.600, 2.327
1950	389.800, 3.223	389.800, 2.327
1951	390.000, 3.223	390.000, 2.327
1952	390.200, 3.223	390.200, 2.326
1953	390.400, 3.224	390.400, 2.326
1954	390.600, 3.224	390.600, 2.325
1955	390.800, 3.224	390.800, 2.325
1956	391.000, 3.224	391.000, 2.325
1957	391.200, 3.224	391.200, 2.325
1958	391.400, 3.224	391.400, 2.325
1959	391.600, 3.224	391.600, 2.325
1960	391.800, 3.225	391.800, 2.325
1961	392.000, 3.225	392.000, 2.325
1962	392.200, 3.225	392.200, 2.325
1963	392.400, 3.225	392.400, 2.326
1964	392.600, 3.225	392.600, 2.326
1965	392.800, 3.224	392.800, 2.326
1966	393.000, 3.225	393.000, 2.326
1967	393.200, 3.225	393.200, 2.326
1968	393.400, 3.225	393.400, 2.326
1969	393.600, 3.226	393.600, 2.326
1970	393.800, 3.226	393.800, 2.326
1971	394.000, 3.227	394.000, 2.326
1972	394.200, 3.227	394.200, 2.326
1973	394.400, 3.227	394.400, 2.327
1974	394.600, 3.227	394.600, 2.327
1975	394.800, 3.227	394.800, 2.327
1976	395.000, 3.227	395.000, 2.327
1977	395.200, 3.227	395.200, 2.327
1978	395.400, 3.227	395.400, 2.327
1979	395.600, 3.227	395.600, 2.327
1980	395.800, 3.227	395.800, 2.326
1981	396.000, 3.227	396.000, 2.326
1982	396.200, 3.226	396.200, 2.326
1983	396.400, 3.226	396.400, 2.326
1984	396.600, 3.226	396.600, 2.326
1985	396.800, 3.226	396.800, 2.326
1986	397.000, 3.226	397.000, 2.327
1987	397.200, 3.227	397.200, 2.327
1988	397.400, 3.227	397.400, 2.327
1989	397.600, 3.228	397.600, 2.327
1990	397.800, 3.228	397.800, 2.327
1991	398.000, 3.228	398.000, 2.327
1992	398.200, 3.228	398.200, 2.327
1993	398.400, 3.228	398.400, 2.327
1994	398.600, 3.228	398.600, 2.327
1995	398.800, 3.228	398.800, 2.327
1996	399.000, 3.229	399.000, 2.327
1997	399.200, 3.229	399.200, 2.327
1998	399.400, 3.229	399.400, 2.327
1999	399.600, 3.228	399.600, 2.326
[truncated: 13,001 more rows]

## Sheet: Fig6_panelC_rep3
	169bp closed parS DNA ParB CTPyS	169bp closed parS DNA ParB CTP
1	0.000, 0.003	0.000, 0.047
2	0.200, 0.003	0.200, 0.046
3	0.400, 0.003	0.400, 0.044
4	0.600, 0.003	0.600, 0.042
5	0.800, 0.003	0.800, 0.041
6	1.000, 0.003	1.000, 0.038
7	1.200, 0.004	1.200, 0.036
8	1.400, 0.004	1.400, 0.034
9	1.600, 0.004	1.600, 0.032
10	1.800, 0.004	1.800, 0.030
11	2.000, 0.004	2.000, 0.029
12	2.200, 0.004	2.200, 0.027
13	2.400, 0.004	2.400, 0.026
14	2.600, 0.004	2.600, 0.025
15	2.800, 0.004	2.800, 0.024
16	3.000, 0.004	3.000, 0.022
17	3.200, 0.004	3.200, 0.021
18	3.400, 0.004	3.400, 0.020
19	3.600, 0.004	3.600, 0.020
20	3.800, 0.004	3.800, 0.019
21	4.000, 0.004	4.000, 0.018
22	4.200, 0.004	4.200, 0.017
23	4.400, 0.004	4.400, 0.016
24	4.600, 0.004	4.600, 0.015
25	4.800, 0.004	4.800, 0.014
26	5.000, 0.004	5.000, 0.013
27	5.200, 0.004	5.200, 0.012
28	5.400, 0.004	5.400, 0.011
29	5.600, 0.005	5.600, 0.011
30	5.800, 0.005	5.800, 0.010
31	6.000, 0.005	6.000, 0.010
32	6.200, 0.005	6.200, 0.009
33	6.400, 0.005	6.400, 0.009
34	6.600, 0.006	6.600, 0.009
35	6.800, 0.006	6.800, 0.008
36	7.000, 0.006	7.000, 0.008
37	7.200, 0.006	7.200, 0.007
38	7.400, 0.006	7.400, 0.007
39	7.600, 0.006	7.600, 0.007
40	7.800, 0.006	7.800, 0.006
41	8.000, 0.006	8.000, 0.006
42	8.200, 0.006	8.200, 0.006
43	8.400, 0.006	8.400, 0.005
44	8.600, 0.006	8.600, 0.005
45	8.800, 0.006	8.800, 0.004
46	9.000, 0.006	9.000, 0.004
47	9.200, 0.006	9.200, 0.004
48	9.400, 0.006	9.400, 0.003
49	9.600, 0.006	9.600, 0.003
50	9.800, 0.006	9.800, 0.002
51	10.000, 0.006	10.000, 0.002
52	10.200, 0.006	10.200, 0.002
53	10.400, 0.005	10.400, 0.002
54	10.600, 0.005	10.600, 0.002
55	10.800, 0.005	10.800, 0.002
56	11.000, 0.005	11.000, 0.002
57	11.200, 0.004	11.200, 0.001
58	11.400, 0.004	11.400, 0.001
59	11.600, 0.004	11.600, 0.001
60	11.800, 0.004	11.800, 0.001
61	12.000, 0.005	12.000, 0.001
62	12.200, 0.005	12.200, 0.001
63	12.400, 0.005	12.400, 0.001
64	12.600, 0.005	12.600, 0.001
65	12.800, 0.005	12.800, 0.001
66	13.000, 0.005	13.000, 0.000
67	13.200, 0.004	13.200, 0.000
68	13.400, 0.004	13.400, 0.000
69	13.600, 0.004	13.600, -0.000
70	13.800, 0.004	13.800, -0.000
71	14.000, 0.004	14.000, -0.000
72	14.200, 0.004	14.200, -0.000
73	14.400, 0.004	14.400, -0.000
74	14.600, 0.004	14.600, -0.000
75	14.800, 0.003	14.800, 0.000
76	15.000, 0.003	15.000, 0.001
77	15.200, 0.003	15.200, 0.001
78	15.400, 0.003	15.400, 0.001
79	15.600, 0.003	15.600, 0.001
80	15.800, 0.003	15.800, 0.001
81	16.000, 0.003	16.000, 0.001
82	16.200, 0.003	16.200, 0.001
83	16.400, 0.003	16.400, 0.001
84	16.600, 0.003	16.600, 0.001
85	16.800, 0.003	16.800, 0.001
86	17.000, 0.003	17.000, 0.001
87	17.200, 0.003	17.200, 0.001
88	17.400, 0.003	17.400, 0.000
89	17.600, 0.003	17.600, 0.000
90	17.800, 0.003	17.800, -0.000
91	18.000, 0.003	18.000, -0.000
92	18.200, 0.003	18.200, -0.000
93	18.400, 0.003	18.400, -0.000
94	18.600, 0.003	18.600, -0.000
95	18.800, 0.002	18.800, -0.000
96	19.000, 0.002	19.000, -0.000
97	19.200, 0.002	19.200, 0.000
98	19.400, 0.002	19.400, 0.000
99	19.600, 0.001	19.600, 0.000
100	19.800, 0.001	19.800, 0.000
101	20.000, 0.001	20.000, 0.000
102	20.200, 0.001	20.200, 0.001
103	20.400, 0.001	20.400, 0.001
104	20.600, 0.001	20.600, 0.001
105	20.800, 0.001	20.800, 0.001
106	21.000, 0.001	21.000, 0.001
107	21.200, 0.001	21.200, 0.001
108	21.400, 0.001	21.400, 0.000
109	21.600, 0.001	21.600, 0.000
110	21.800, 0.001	21.800, 0.000
111	22.000, 0.001	22.000, 0.000
112	22.200, 0.001	22.200, 0.000
113	22.400, 0.001	22.400, 0.000
114	22.600, 0.001	22.600, 0.000
115	22.800, 0.001	22.800, 0.000
116	23.000, 0.001	23.000, 0.000
117	23.200, 0.001	23.200, 0.001
118	23.400, 0.000	23.400, 0.001
119	23.600, 0.000	23.600, 0.001
120	23.800, -0.000	23.800, 0.001
121	24.000, -0.000	24.000, 0.001
122	24.200, -0.000	24.200, 0.001
123	24.400, -0.000	24.400, 0.001
124	24.600, -0.000	24.600, 0.001
125	24.800, -0.000	24.800, 0.000
126	25.000, 0.000	25.000, -0.000
127	25.200, 0.000	25.200, -0.001
128	25.400, 0.001	25.400, -0.001
129	25.600, 0.001	25.600, -0.001
130	25.800, 0.001	25.800, -0.001
131	26.000, 0.001	26.000, -0.002
132	26.200, 0.001	26.200, -0.002
133	26.400, 0.001	26.400, -0.001
134	26.600, 0.001	26.600, -0.001
135	26.800, 0.000	26.800, -0.001
136	27.000, 0.000	27.000, -0.001
137	27.200, -0.000	27.200, -0.000
138	27.400, -0.000	27.400, 0.000
139	27.600, -0.000	27.600, 0.000
140	27.800, -0.001	27.800, 0.000
141	28.000, -0.001	28.000, 0.001
142	28.200, -0.001	28.200, 0.000
143	28.400, -0.001	28.400, 0.000
144	28.600, -0.000	28.600, 0.000
145	28.800, -0.000	28.800, 0.000
146	29.000, 0.000	29.000, -0.000
147	29.200, 0.001	29.200, -0.000
148	29.400, 0.001	29.400, -0.000
149	29.600, 0.001	29.600, -0.000
150	29.800, 0.001	29.800, -0.001
151	30.000, 0.000	30.000, 0.000
152	30.200, 0.003	30.200, 0.002
153	30.400, 0.006	30.400, 0.005
154	30.600, 0.011	30.600, 0.009
155	30.800, 0.016	30.800, 0.013
156	31.000, 0.021	31.000, 0.018
157	31.200, 0.027	31.200, 0.024
158	31.400, 0.034	31.400, 0.030
159	31.600, 0.040	31.600, 0.037
160	31.800, 0.047	31.800, 0.044
161	32.000, 0.054	32.000, 0.051
162	32.200, 0.061	32.200, 0.058
163	32.400, 0.068	32.400, 0.065
164	32.600, 0.075	32.600, 0.072
165	32.800, 0.082	32.800, 0.079
166	33.000, 0.089	33.000, 0.087
167	33.200, 0.095	33.200, 0.094
168	33.400, 0.102	33.400, 0.101
169	33.600, 0.109	33.600, 0.108
170	33.800, 0.116	33.800, 0.115
171	34.000, 0.122	34.000, 0.121
172	34.200, 0.129	34.200, 0.128
173	34.400, 0.135	34.400, 0.135
174	34.600, 0.142	34.600, 0.142
175	34.800, 0.148	34.800, 0.149
176	35.000, 0.155	35.000, 0.155
177	35.200, 0.162	35.200, 0.162
178	35.400, 0.169	35.400, 0.169
179	35.600, 0.176	35.600, 0.176
180	35.800, 0.183	35.800, 0.183
181	36.000, 0.190	36.000, 0.190
182	36.200, 0.197	36.200, 0.197
183	36.400, 0.204	36.400, 0.204
184	36.600, 0.210	36.600, 0.211
185	36.800, 0.217	36.800, 0.218
186	37.000, 0.224	37.000, 0.225
187	37.200, 0.230	37.200, 0.232
188	37.400, 0.237	37.400, 0.239
189	37.600, 0.244	37.600, 0.246
190	37.800, 0.251	37.800, 0.253
191	38.000, 0.258	38.000, 0.259
192	38.200, 0.265	38.200, 0.266
193	38.400, 0.272	38.400, 0.273
194	38.600, 0.279	38.600, 0.280
195	38.800, 0.286	38.800, 0.287
196	39.000, 0.293	39.000, 0.293
197	39.200, 0.300	39.200, 0.300
198	39.400, 0.307	39.400, 0.307
199	39.600, 0.314	39.600, 0.314
200	39.800, 0.321	39.800, 0.320
201	40.000, 0.328	40.000, 0.327
202	40.200, 0.334	40.200, 0.334
203	40.400, 0.341	40.400, 0.341
204	40.600, 0.348	40.600, 0.348
205	40.800, 0.354	40.800, 0.355
206	41.000, 0.361	41.000, 0.362
207	41.200, 0.368	41.200, 0.369
208	41.400, 0.375	41.400, 0.376
209	41.600, 0.381	41.600, 0.383
210	41.800, 0.388	41.800, 0.389
211	42.000, 0.395	42.000, 0.396
212	42.200, 0.402	42.200, 0.403
213	42.400, 0.409	42.400, 0.409
214	42.600, 0.416	42.600, 0.416
215	42.800, 0.424	42.800, 0.422
216	43.000, 0.431	43.000, 0.429
217	43.200, 0.438	43.200, 0.436
218	43.400, 0.445	43.400, 0.443
219	43.600, 0.452	43.600, 0.449
220	43.800, 0.459	43.800, 0.456
221	44.000, 0.466	44.000, 0.463
222	44.200, 0.473	44.200, 0.470
223	44.400, 0.480	44.400, 0.476
224	44.600, 0.487	44.600, 0.483
225	44.800, 0.494	44.800, 0.489
226	45.000, 0.501	45.000, 0.496
227	45.200, 0.508	45.200, 0.502
228	45.400, 0.515	45.400, 0.509
229	45.600, 0.522	45.600, 0.515
230	45.800, 0.528	45.800, 0.521
231	46.000, 0.534	46.000, 0.528
232	46.200, 0.541	46.200, 0.534
233	46.400, 0.547	46.400, 0.540
234	46.600, 0.554	46.600, 0.547
235	46.800, 0.561	46.800, 0.553
236	47.000, 0.568	47.000, 0.560
237	47.200, 0.574	47.200, 0.566
238	47.400, 0.581	47.400, 0.573
239	47.600, 0.587	47.600, 0.580
240	47.800, 0.594	47.800, 0.587
241	48.000, 0.601	48.000, 0.593
242	48.200, 0.607	48.200, 0.600
243	48.400, 0.614	48.400, 0.606
244	48.600, 0.620	48.600, 0.612
245	48.800, 0.627	48.800, 0.619
246	49.000, 0.634	49.000, 0.625
247	49.200, 0.640	49.200, 0.631
248	49.400, 0.647	49.400, 0.637
249	49.600, 0.653	49.600, 0.644
250	49.800, 0.659	49.800, 0.650
251	50.000, 0.666	50.000, 0.656
252	50.200, 0.673	50.200, 0.662
253	50.400, 0.679	50.400, 0.668
254	50.600, 0.686	50.600, 0.675
255	50.800, 0.692	50.800, 0.681
256	51.000, 0.699	51.000, 0.687
257	51.200, 0.705	51.200, 0.693
258	51.400, 0.711	51.400, 0.699
259	51.600, 0.718	51.600, 0.705
260	51.800, 0.724	51.800, 0.711
261	52.000, 0.730	52.000, 0.717
262	52.200, 0.737	52.200, 0.723
263	52.400, 0.743	52.400, 0.730
264	52.600, 0.750	52.600, 0.736
265	52.800, 0.756	52.800, 0.742
266	53.000, 0.763	53.000, 0.748
267	53.200, 0.770	53.200, 0.755
268	53.400, 0.776	53.400, 0.761
269	53.600, 0.783	53.600, 0.767
270	53.800, 0.789	53.800, 0.773
271	54.000, 0.795	54.000, 0.779
272	54.200, 0.802	54.200, 0.785
273	54.400, 0.808	54.400, 0.791
274	54.600, 0.814	54.600, 0.797
275	54.800, 0.821	54.800, 0.803
276	55.000, 0.827	55.000, 0.809
277	55.200, 0.834	55.200, 0.815
278	55.400, 0.840	55.400, 0.821
279	55.600, 0.846	55.600, 0.828
280	55.800, 0.852	55.800, 0.834
281	56.000, 0.859	56.000, 0.840
282	56.200, 0.865	56.200, 0.846
283	56.400, 0.871	56.400, 0.852
284	56.600, 0.877	56.600, 0.858
285	56.800, 0.884	56.800, 0.864
286	57.000, 0.890	57.000, 0.870
287	57.200, 0.896	57.200, 0.876
288	57.400, 0.902	57.400, 0.882
289	57.600, 0.908	57.600, 0.887
290	57.800, 0.914	57.800, 0.893
291	58.000, 0.920	58.000, 0.899
292	58.200, 0.926	58.200, 0.905
293	58.400, 0.932	58.400, 0.911
294	58.600, 0.938	58.600, 0.916
295	58.800, 0.944	58.800, 0.922
296	59.000, 0.950	59.000, 0.928
297	59.200, 0.956	59.200, 0.933
298	59.400, 0.962	59.400, 0.939
299	59.600, 0.968	59.600, 0.944
300	59.800, 0.973	59.800, 0.949
301	60.000, 0.979	60.000, 0.955
302	60.200, 0.985	60.200, 0.960
303	60.400, 0.990	60.400, 0.966
304	60.600, 0.996	60.600, 0.971
305	60.800, 1.002	60.800, 0.977
306	61.000, 1.007	61.000, 0.983
307	61.200, 1.013	61.200, 0.989
308	61.400, 1.019	61.400, 0.995
309	61.600, 1.025	61.600, 1.000
310	61.800, 1.031	61.800, 1.006
311	62.000, 1.037	62.000, 1.012
312	62.200, 1.043	62.200, 1.017
313	62.400, 1.049	62.400, 1.023
314	62.600, 1.055	62.600, 1.028
315	62.800, 1.061	62.800, 1.034
316	63.000, 1.067	63.000, 1.039
317	63.200, 1.073	63.200, 1.044
318	63.400, 1.079	63.400, 1.050
319	63.600, 1.085	63.600, 1.055
320	63.800, 1.090	63.800, 1.060
321	64.000, 1.096	64.000, 1.065
322	64.200, 1.102	64.200, 1.070
323	64.400, 1.107	64.400, 1.075
324	64.600, 1.113	64.600, 1.080
325	64.800, 1.118	64.800, 1.086
326	65.000, 1.124	65.000, 1.091
327	65.200, 1.129	65.200, 1.096
328	65.400, 1.135	65.400, 1.101
329	65.600, 1.140	65.600, 1.106
330	65.800, 1.146	65.800, 1.111
331	66.000, 1.151	66.000, 1.117
332	66.200, 1.157	66.200, 1.122
333	66.400, 1.162	66.400, 1.127
334	66.600, 1.168	66.600, 1.132
335	66.800, 1.173	66.800, 1.137
336	67.000, 1.179	67.000, 1.142
337	67.200, 1.184	67.200, 1.148
338	67.400, 1.189	67.400, 1.153
339	67.600, 1.194	67.600, 1.158
340	67.800, 1.199	67.800, 1.163
341	68.000, 1.204	68.000, 1.168
342	68.200, 1.210	68.200, 1.173
343	68.400, 1.215	68.400, 1.178
344	68.600, 1.220	68.600, 1.183
345	68.800, 1.225	68.800, 1.188
346	69.000, 1.230	69.000, 1.193
347	69.200, 1.236	69.200, 1.199
348	69.400, 1.241	69.400, 1.204
349	69.600, 1.246	69.600, 1.209
350	69.800, 1.252	69.800, 1.214
351	70.000, 1.257	70.000, 1.218
352	70.200, 1.263	70.200, 1.223
353	70.400, 1.268	70.400, 1.227
354	70.600, 1.274	70.600, 1.232
355	70.800, 1.279	70.800, 1.236
356	71.000, 1.284	71.000, 1.241
357	71.200, 1.290	71.200, 1.246
358	71.400, 1.295	71.400, 1.250
359	71.600, 1.301	71.600, 1.255
360	71.800, 1.306	71.800, 1.260
361	72.000, 1.311	72.000, 1.265
362	72.200, 1.316	72.200, 1.269
363	72.400, 1.321	72.400, 1.274
364	72.600, 1.326	72.600, 1.279
365	72.800, 1.331	72.800, 1.284
366	73.000, 1.335	73.000, 1.289
367	73.200, 1.340	73.200, 1.294
368	73.400, 1.344	73.400, 1.298
369	73.600, 1.349	73.600, 1.303
370	73.800, 1.354	73.800, 1.307
371	74.000, 1.358	74.000, 1.312
372	74.200, 1.363	74.200, 1.316
373	74.400, 1.368	74.400, 1.320
374	74.600, 1.372	74.600, 1.325
375	74.800, 1.377	74.800, 1.329
376	75.000, 1.382	75.000, 1.334
377	75.200, 1.387	75.200, 1.338
378	75.400, 1.392	75.400, 1.343
379	75.600, 1.397	75.600, 1.348
380	75.800, 1.402	75.800, 1.352
381	76.000, 1.407	76.000, 1.357
382	76.200, 1.412	76.200, 1.362
383	76.400, 1.416	76.400, 1.366
384	76.600, 1.421	76.600, 1.371
385	76.800, 1.426	76.800, 1.375
386	77.000, 1.431	77.000, 1.380
387	77.200, 1.436	77.200, 1.384
388	77.400, 1.441	77.400, 1.389
389	77.600, 1.445	77.600, 1.393
390	77.800, 1.450	77.800, 1.398
391	78.000, 1.455	78.000, 1.402
392	78.200, 1.459	78.200, 1.406
393	78.400, 1.464	78.400, 1.410
394	78.600, 1.468	78.600, 1.414
395	78.800, 1.473	78.800, 1.418
396	79.000, 1.477	79.000, 1.422
397	79.200, 1.482	79.200, 1.426
398	79.400, 1.486	79.400, 1.430
399	79.600, 1.490	79.600, 1.434
400	79.800, 1.495	79.800, 1.439
401	80.000, 1.499	80.000, 1.443
402	80.200, 1.504	80.200, 1.447
403	80.400, 1.508	80.400, 1.452
404	80.600, 1.513	80.600, 1.456
405	80.800, 1.518	80.800, 1.460
406	81.000, 1.523	81.000, 1.464
407	81.200, 1.527	81.200, 1.468
408	81.400, 1.532	81.400, 1.472
409	81.600, 1.537	81.600, 1.476
410	81.800, 1.541	81.800, 1.479
411	82.000, 1.546	82.000, 1.483
412	82.200, 1.550	82.200, 1.487
413	82.400, 1.554	82.400, 1.490
414	82.600, 1.558	82.600, 1.494
415	82.800, 1.562	82.800, 1.498
416	83.000, 1.566	83.000, 1.502
417	83.200, 1.570	83.200, 1.505
418	83.400, 1.574	83.400, 1.509
419	83.600, 1.579	83.600, 1.513
420	83.800, 1.583	83.800, 1.517
421	84.000, 1.587	84.000, 1.521
422	84.200, 1.592	84.200, 1.525
423	84.400, 1.596	84.400, 1.529
424	84.600, 1.600	84.600, 1.533
425	84.800, 1.605	84.800, 1.537
426	85.000, 1.609	85.000, 1.540
427	85.200, 1.613	85.200, 1.544
428	85.400, 1.617	85.400, 1.548
429	85.600, 1.621	85.600, 1.552
430	85.800, 1.625	85.800, 1.555
431	86.000, 1.629	86.000, 1.559
432	86.200, 1.634	86.200, 1.562
433	86.400, 1.637	86.400, 1.566
434	86.600, 1.641	86.600, 1.570
435	86.800, 1.645	86.800, 1.573
436	87.000, 1.649	87.000, 1.576
437	87.200, 1.653	87.200, 1.580
438	87.400, 1.657	87.400, 1.583
439	87.600, 1.662	87.600, 1.587
440	87.800, 1.666	87.800, 1.590
441	88.000, 1.670	88.000, 1.594
442	88.200, 1.675	88.200, 1.597
443	88.400, 1.679	88.400, 1.600
444	88.600, 1.683	88.600, 1.604
445	88.800, 1.687	88.800, 1.607
446	89.000, 1.691	89.000, 1.611
447	89.200, 1.696	89.200, 1.614
448	89.400, 1.700	89.400, 1.618
449	89.600, 1.704	89.600, 1.621
450	89.800, 1.708	89.800, 1.625
451	90.000, 1.712	90.000, 1.629
452	90.200, 1.716	90.200, 1.632
453	90.400, 1.720	90.400, 1.636
454	90.600, 1.723	90.600, 1.639
455	90.800, 1.727	90.800, 1.642
456	91.000, 1.731	91.000, 1.646
457	91.200, 1.735	91.200, 1.649
458	91.400, 1.739	91.400, 1.652
459	91.600, 1.743	91.600, 1.655
460	91.800, 1.747	91.800, 1.658
461	92.000, 1.750	92.000, 1.661
462	92.200, 1.754	92.200, 1.664
463	92.400, 1.758	92.400, 1.667
464	92.600, 1.762	92.600, 1.670
465	92.800, 1.766	92.800, 1.672
466	93.000, 1.769	93.000, 1.676
467	93.200, 1.773	93.200, 1.679
468	93.400, 1.777	93.400, 1.682
469	93.600, 1.780	93.600, 1.685
470	93.800, 1.784	93.800, 1.689
471	94.000, 1.787	94.000, 1.692
472	94.200, 1.791	94.200, 1.695
473	94.400, 1.794	94.400, 1.698
474	94.600, 1.798	94.600, 1.701
475	94.800, 1.801	94.800, 1.705
476	95.000, 1.805	95.000, 1.708
477	95.200, 1.808	95.200, 1.711
478	95.400, 1.811	95.400, 1.714
479	95.600, 1.815	95.600, 1.717
480	95.800, 1.818	95.800, 1.720
481	96.000, 1.822	96.000, 1.723
482	96.200, 1.825	96.200, 1.726
483	96.400, 1.829	96.400, 1.729
484	96.600, 1.832	96.600, 1.732
485	96.800, 1.836	96.800, 1.734
486	97.000, 1.839	97.000, 1.737
487	97.200, 1.843	97.200, 1.740
488	97.400, 1.846	97.400, 1.743
489	97.600, 1.850	97.600, 1.746
490	97.800, 1.854	97.800, 1.748
491	98.000, 1.858	98.000, 1.751
492	98.200, 1.861	98.200, 1.754
493	98.400, 1.865	98.400, 1.756
494	98.600, 1.869	98.600, 1.759
495	98.800, 1.872	98.800, 1.762
496	99.000, 1.876	99.000, 1.765
497	99.200, 1.879	99.200, 1.768
498	99.400, 1.883	99.400, 1.771
499	99.600, 1.886	99.600, 1.774
500	99.800, 1.890	99.800, 1.777
501	100.000, 1.893	100.000, 1.780
502	100.200, 1.897	100.200, 1.783
503	100.400, 1.900	100.400, 1.785
504	100.600, 1.904	100.600, 1.788
505	100.800, 1.907	100.800, 1.790
506	101.000, 1.911	101.000, 1.792
507	101.200, 1.915	101.200, 1.795
508	101.400, 1.918	101.400, 1.797
509	101.600, 1.921	101.600, 1.799
510	101.800, 1.925	101.800, 1.802
511	102.000, 1.928	102.000, 1.804
512	102.200, 1.932	102.200, 1.806
513	102.400, 1.935	102.400, 1.809
514	102.600, 1.938	102.600, 1.811
515	102.800, 1.942	102.800, 1.814
516	103.000, 1.945	103.000, 1.817
517	103.200, 1.948	103.200, 1.819
518	103.400, 1.951	103.400, 1.822
519	103.600, 1.954	103.600, 1.824
520	103.800, 1.956	103.800, 1.827
521	104.000, 1.959	104.000, 1.829
522	104.200, 1.962	104.200, 1.832
523	104.400, 1.966	104.400, 1.834
524	104.600, 1.969	104.600, 1.836
525	104.800, 1.972	104.800, 1.839
526	105.000, 1.975	105.000, 1.841
527	105.200, 1.979	105.200, 1.844
528	105.400, 1.982	105.400, 1.846
529	105.600, 1.985	105.600, 1.848
530	105.800, 1.988	105.800, 1.851
531	106.000, 1.992	106.000, 1.853
532	106.200, 1.995	106.200, 1.856
533	106.400, 1.998	106.400, 1.858
534	106.600, 2.001	106.600, 1.861
535	106.800, 2.004	106.800, 1.863
536	107.000, 2.006	107.000, 1.866
537	107.200, 2.009	107.200, 1.868
538	107.400, 2.012	107.400, 1.870
539	107.600, 2.014	107.600, 1.873
540	107.800, 2.017	107.800, 1.875
541	108.000, 2.020	108.000, 1.877
542	108.200, 2.023	108.200, 1.879
543	108.400, 2.026	108.400, 1.881
544	108.600, 2.029	108.600, 1.882
545	108.800, 2.032	108.800, 1.884
546	109.000, 2.035	109.000, 1.886
547	109.200, 2.038	109.200, 1.888
548	109.400, 2.042	109.400, 1.891
549	109.600, 2.045	109.600, 1.893
550	109.800, 2.048	109.800, 1.895
551	110.000, 2.051	110.000, 1.897
552	110.200, 2.054	110.200, 1.899
553	110.400, 2.057	110.400, 1.902
554	110.600, 2.060	110.600, 1.904
555	110.800, 2.063	110.800, 1.907
556	111.000, 2.066	111.000, 1.909
557	111.200, 2.069	111.200, 1.911
558	111.400, 2.072	111.400, 1.914
559	111.600, 2.075	111.600, 1.916
560	111.800, 2.078	111.800, 1.918
561	112.000, 2.081	112.000, 1.920
562	112.200, 2.083	112.200, 1.922
563	112.400, 2.087	112.400, 1.924
564	112.600, 2.090	112.600, 1.926
565	112.800, 2.092	112.800, 1.928
566	113.000, 2.095	113.000, 1.930
567	113.200, 2.098	113.200, 1.932
568	113.400, 2.101	113.400, 1.934
569	113.600, 2.104	113.600, 1.936
570	113.800, 2.107	113.800, 1.938
571	114.000, 2.110	114.000, 1.940
572	114.200, 2.112	114.200, 1.942
573	114.400, 2.115	114.400, 1.944
574	114.600, 2.118	114.600, 1.946
575	114.800, 2.121	114.800, 1.948
576	115.000, 2.123	115.000, 1.950
577	115.200, 2.126	115.200, 1.952
578	115.400, 2.129	115.400, 1.954
579	115.600, 2.131	115.600, 1.956
580	115.800, 2.134	115.800, 1.958
581	116.000, 2.137	116.000, 1.960
582	116.200, 2.139	116.200, 1.962
583	116.400, 2.142	116.400, 1.964
584	116.600, 2.145	116.600, 1.965
585	116.800, 2.147	116.800, 1.967
586	117.000, 2.150	117.000, 1.968
587	117.200, 2.152	117.200, 1.970
588	117.400, 2.154	117.400, 1.971
589	117.600, 2.157	117.600, 1.973
590	117.800, 2.159	117.800, 1.974
591	118.000, 2.162	118.000, 1.975
592	118.200, 2.164	118.200, 1.977
593	118.400, 2.167	118.400, 1.978
594	118.600, 2.170	118.600, 1.980
595	118.800, 2.172	118.800, 1.982
596	119.000, 2.175	119.000, 1.984
597	119.200, 2.178	119.200, 1.986
598	119.400, 2.180	119.400, 1.987
599	119.600, 2.183	119.600, 1.989
600	119.800, 2.185	119.800, 1.991
601	120.000, 2.188	120.000, 1.993
602	120.200, 2.191	120.200, 1.995
603	120.400, 2.193	120.400, 1.997
604	120.600, 2.196	120.600, 1.998
605	120.800, 2.198	120.800, 2.000
606	121.000, 2.201	121.000, 2.002
607	121.200, 2.203	121.200, 2.003
608	121.400, 2.206	121.400, 2.005
609	121.600, 2.208	121.600, 2.006
610	121.800, 2.211	121.800, 2.007
611	122.000, 2.213	122.000, 2.008
612	122.200, 2.216	122.200, 2.010
613	122.400, 2.218	122.400, 2.011
614	122.600, 2.221	122.600, 2.012
615	122.800, 2.223	122.800, 2.014
616	123.000, 2.226	123.000, 2.015
617	123.200, 2.228	123.200, 2.017
618	123.400, 2.231	123.400, 2.018
619	123.600, 2.233	123.600, 2.019
620	123.800, 2.236	123.800, 2.021
621	124.000, 2.239	124.000, 2.023
622	124.200, 2.241	124.200, 2.024
623	124.400, 2.244	124.400, 2.026
624	124.600, 2.246	124.600, 2.028
625	124.800, 2.248	124.800, 2.029
626	125.000, 2.251	125.000, 2.031
627	125.200, 2.253	125.200, 2.032
628	125.400, 2.255	125.400, 2.034
629	125.600, 2.257	125.600, 2.035
630	125.800, 2.259	125.800, 2.036
631	126.000, 2.261	126.000, 2.038
632	126.200, 2.264	126.200, 2.039
633	126.400, 2.266	126.400, 2.040
634	126.600, 2.268	126.600, 2.042
635	126.800, 2.270	126.800, 2.043
636	127.000, 2.272	127.000, 2.044
637	127.200, 2.274	127.200, 2.046
638	127.400, 2.276	127.400, 2.047
639	127.600, 2.278	127.600, 2.049
640	127.800, 2.281	127.800, 2.050
641	128.000, 2.283	128.000, 2.052
642	128.200, 2.285	128.200, 2.053
643	128.400, 2.287	128.400, 2.055
644	128.600, 2.289	128.600, 2.057
645	128.800, 2.292	128.800, 2.058
646	129.000, 2.294	129.000, 2.059
647	129.200, 2.297	129.200, 2.061
648	129.400, 2.299	129.400, 2.062
649	129.600, 2.302	129.600, 2.063
650	129.800, 2.305	129.800, 2.064
651	130.000, 2.307	130.000, 2.065
652	130.200, 2.310	130.200, 2.067
653	130.400, 2.312	130.400, 2.068
654	130.600, 2.315	130.600, 2.069
655	130.800, 2.317	130.800, 2.069
656	131.000, 2.320	131.000, 2.070
657	131.200, 2.322	131.200, 2.071
658	131.400, 2.325	131.400, 2.073
659	131.600, 2.327	131.600, 2.074
660	131.800, 2.329	131.800, 2.075
661	132.000, 2.331	132.000, 2.076
662	132.200, 2.333	132.200, 2.077
663	132.400, 2.335	132.400, 2.079
664	132.600, 2.337	132.600, 2.080
665	132.800, 2.339	132.800, 2.081
666	133.000, 2.341	133.000, 2.083
667	133.200, 2.343	133.200, 2.084
668	133.400, 2.345	133.400, 2.085
669	133.600, 2.347	133.600, 2.087
670	133.800, 2.349	133.800, 2.088
671	134.000, 2.351	134.000, 2.089
672	134.200, 2.353	134.200, 2.090
673	134.400, 2.355	134.400, 2.091
674	134.600, 2.358	134.600, 2.092
675	134.800, 2.360	134.800, 2.093
676	135.000, 2.362	135.000, 2.094
677	135.200, 2.364	135.200, 2.096
678	135.400, 2.366	135.400, 2.097
679	135.600, 2.368	135.600, 2.098
680	135.800, 2.370	135.800, 2.099
681	136.000, 2.372	136.000, 2.100
682	136.200, 2.374	136.200, 2.102
683	136.400, 2.376	136.400, 2.103
684	136.600, 2.378	136.600, 2.104
685	136.800, 2.380	136.800, 2.105
686	137.000, 2.382	137.000, 2.107
687	137.200, 2.384	137.200, 2.108
688	137.400, 2.386	137.400, 2.109
689	137.600, 2.388	137.600, 2.110
690	137.800, 2.390	137.800, 2.110
691	138.000, 2.392	138.000, 2.111
692	138.200, 2.393	138.200, 2.112
693	138.400, 2.395	138.400, 2.113
694	138.600, 2.397	138.600, 2.114
695	138.800, 2.399	138.800, 2.115
696	139.000, 2.401	139.000, 2.115
697	139.200, 2.403	139.200, 2.116
698	139.400, 2.405	139.400, 2.117
699	139.600, 2.407	139.600, 2.118
700	139.800, 2.409	139.800, 2.119
701	140.000, 2.410	140.000, 2.120
702	140.200, 2.412	140.200, 2.121
703	140.400, 2.414	140.400, 2.122
704	140.600, 2.416	140.600, 2.123
705	140.800, 2.418	140.800, 2.124
706	141.000, 2.420	141.000, 2.125
707	141.200, 2.422	141.200, 2.126
708	141.400, 2.424	141.400, 2.127
709	141.600, 2.426	141.600, 2.128
710	141.800, 2.428	141.800, 2.129
711	142.000, 2.430	142.000, 2.130
712	142.200, 2.432	142.200, 2.131
713	142.400, 2.434	142.400, 2.131
714	142.600, 2.436	142.600, 2.132
715	142.800, 2.438	142.800, 2.133
716	143.000, 2.440	143.000, 2.134
717	143.200, 2.442	143.200, 2.134
718	143.400, 2.444	143.400, 2.135
719	143.600, 2.446	143.600, 2.136
720	143.800, 2.448	143.800, 2.137
721	144.000, 2.449	144.000, 2.138
722	144.200, 2.451	144.200, 2.139
723	144.400, 2.453	144.400, 2.139
724	144.600, 2.455	144.600, 2.140
725	144.800, 2.457	144.800, 2.141
726	145.000, 2.458	145.000, 2.142
727	145.200, 2.460	145.200, 2.143
728	145.400, 2.462	145.400, 2.143
729	145.600, 2.464	145.600, 2.144
730	145.800, 2.466	145.800, 2.145
731	146.000, 2.468	146.000, 2.146
732	146.200, 2.471	146.200, 2.147
733	146.400, 2.473	146.400, 2.148
734	146.600, 2.475	146.600, 2.149
735	146.800, 2.477	146.800, 2.150
736	147.000, 2.479	147.000, 2.151
737	147.200, 2.480	147.200, 2.152
738	147.400, 2.482	147.400, 2.152
739	147.600, 2.484	147.600, 2.153
740	147.800, 2.486	147.800, 2.154
741	148.000, 2.487	148.000, 2.155
742	148.200, 2.489	148.200, 2.156
743	148.400, 2.491	148.400, 2.157
744	148.600, 2.492	148.600, 2.158
745	148.800, 2.493	148.800, 2.159
746	149.000, 2.495	149.000, 2.160
747	149.200, 2.496	149.200, 2.161
748	149.400, 2.498	149.400, 2.161
749	149.600, 2.499	149.600, 2.162
750	149.800, 2.501	149.800, 2.163
751	150.000, 2.503	150.000, 2.163
752	150.200, 2.504	150.200, 2.164
753	150.400, 2.506	150.400, 2.165
754	150.600, 2.508	150.600, 2.165
755	150.800, 2.509	150.800, 2.166
756	151.000, 2.511	151.000, 2.166
757	151.200, 2.513	151.200, 2.167
758	151.400, 2.515	151.400, 2.167
759	151.600, 2.516	151.600, 2.168
760	151.800, 2.518	151.800, 2.169
761	152.000, 2.520	152.000, 2.170
762	152.200, 2.522	152.200, 2.171
763	152.400, 2.523	152.400, 2.172
764	152.600, 2.525	152.600, 2.173
765	152.800, 2.526	152.800, 2.174
766	153.000, 2.528	153.000, 2.175
767	153.200, 2.529	153.200, 2.176
768	153.400, 2.531	153.400, 2.176
769	153.600, 2.532	153.600, 2.177
770	153.800, 2.534	153.800, 2.178
771	154.000, 2.535	154.000, 2.178
772	154.200, 2.537	154.200, 2.178
773	154.400, 2.538	154.400, 2.179
774	154.600, 2.540	154.600, 2.179
775	154.800, 2.541	154.800, 2.180
776	155.000, 2.542	155.000, 2.181
777	155.200, 2.544	155.200, 2.181
778	155.400, 2.545	155.400, 2.182
779	155.600, 2.547	155.600, 2.183
780	155.800, 2.549	155.800, 2.184
781	156.000, 2.551	156.000, 2.185
782	156.200, 2.553	156.200, 2.186
783	156.400, 2.554	156.400, 2.187
784	156.600, 2.556	156.600, 2.187
785	156.800, 2.558	156.800, 2.188
786	157.000, 2.559	157.000, 2.188
787	157.200, 2.561	157.200, 2.189
788	157.400, 2.563	157.400, 2.189
789	157.600, 2.565	157.600, 2.189
790	157.800, 2.566	157.800, 2.189
791	158.000, 2.568	158.000, 2.189
792	158.200, 2.570	158.200, 2.189
793	158.400, 2.571	158.400, 2.189
794	158.600, 2.572	158.600, 2.190
795	158.800, 2.574	158.800, 2.190
796	159.000, 2.575	159.000, 2.191
797	159.200, 2.576	159.200, 2.192
798	159.400, 2.578	159.400, 2.193
799	159.600, 2.579	159.600, 2.194
800	159.800, 2.581	159.800, 2.195
801	160.000, 2.583	160.000, 2.196
802	160.200, 2.584	160.200, 2.196
803	160.400, 2.585	160.400, 2.197
804	160.600, 2.587	160.600, 2.197
805	160.800, 2.588	160.800, 2.198
806	161.000, 2.589	161.000, 2.198
807	161.200, 2.591	161.200, 2.198
808	161.400, 2.593	161.400, 2.199
809	161.600, 2.594	161.600, 2.199
810	161.800, 2.596	161.800, 2.199
811	162.000, 2.597	162.000, 2.200
812	162.200, 2.599	162.200, 2.200
813	162.400, 2.600	162.400, 2.201
814	162.600, 2.602	162.600, 2.201
815	162.800, 2.603	162.800, 2.202
816	163.000, 2.605	163.000, 2.203
817	163.200, 2.607	163.200, 2.204
818	163.400, 2.608	163.400, 2.204
819	163.600, 2.610	163.600, 2.204
820	163.800, 2.611	163.800, 2.205
821	164.000, 2.613	164.000, 2.205
822	164.200, 2.614	164.200, 2.205
823	164.400, 2.615	164.400, 2.205
824	164.600, 2.616	164.600, 2.206
825	164.800, 2.617	164.800, 2.206
826	165.000, 2.619	165.000, 2.206
827	165.200, 2.620	165.200, 2.207
828	165.400, 2.622	165.400, 2.207
829	165.600, 2.623	165.600, 2.207
830	165.800, 2.624	165.800, 2.208
831	166.000, 2.626	166.000, 2.208
832	166.200, 2.627	166.200, 2.209
833	166.400, 2.629	166.400, 2.209
834	166.600, 2.631	166.600, 2.210
835	166.800, 2.632	166.800, 2.210
836	167.000, 2.634	167.000, 2.210
837	167.200, 2.636	167.200, 2.211
838	167.400, 2.637	167.400, 2.211
839	167.600, 2.639	167.600, 2.211
840	167.800, 2.640	167.800, 2.212
841	168.000, 2.641	168.000, 2.212
842	168.200, 2.642	168.200, 2.213
843	168.400, 2.643	168.400, 2.213
844	168.600, 2.645	168.600, 2.214
845	168.800, 2.646	168.800, 2.214
846	169.000, 2.647	169.000, 2.215
847	169.200, 2.648	169.200, 2.216
848	169.400, 2.649	169.400, 2.216
849	169.600, 2.650	169.600, 2.217
850	169.800, 2.652	169.800, 2.218
851	170.000, 2.653	170.000, 2.218
852	170.200, 2.654	170.200, 2.219
853	170.400, 2.656	170.400, 2.219
854	170.600, 2.657	170.600, 2.220
855	170.800, 2.658	170.800, 2.220
856	171.000, 2.660	171.000, 2.221
857	171.200, 2.661	171.200, 2.221
858	171.400, 2.662	171.400, 2.222
859	171.600, 2.663	171.600, 2.222
860	171.800, 2.664	171.800, 2.223
861	172.000, 2.665	172.000, 2.223
862	172.200, 2.667	172.200, 2.223
863	172.400, 2.668	172.400, 2.224
864	172.600, 2.669	172.600, 2.224
865	172.800, 2.671	172.800, 2.225
866	173.000, 2.673	173.000, 2.225
867	173.200, 2.674	173.200, 2.225
868	173.400, 2.676	173.400, 2.226
869	173.600, 2.677	173.600, 2.226
870	173.800, 2.679	173.800, 2.226
871	174.000, 2.680	174.000, 2.226
872	174.200, 2.681	174.200, 2.227
873	174.400, 2.683	174.400, 2.227
874	174.600, 2.684	174.600, 2.227
875	174.800, 2.685	174.800, 2.228
876	175.000, 2.686	175.000, 2.229
877	175.200, 2.687	175.200, 2.229
878	175.400, 2.687	175.400, 2.230
879	175.600, 2.688	175.600, 2.230
880	175.800, 2.689	175.800, 2.231
881	176.000, 2.690	176.000, 2.231
882	176.200, 2.692	176.200, 2.231
883	176.400, 2.693	176.400, 2.231
884	176.600, 2.694	176.600, 2.232
885	176.800, 2.696	176.800, 2.232
886	177.000, 2.697	177.000, 2.232
887	177.200, 2.699	177.200, 2.232
888	177.400, 2.700	177.400, 2.233
889	177.600, 2.701	177.600, 2.233
890	177.800, 2.702	177.800, 2.233
891	178.000, 2.703	178.000, 2.233
892	178.200, 2.705	178.200, 2.234
893	178.400, 2.706	178.400, 2.234
894	178.600, 2.707	178.600, 2.235
895	178.800, 2.708	178.800, 2.236
896	179.000, 2.709	179.000, 2.236
897	179.200, 2.710	179.200, 2.236
898	179.400, 2.711	179.400, 2.237
899	179.600, 2.713	179.600, 2.237
900	179.800, 2.714	179.800, 2.237
901	180.000, 2.715	180.000, 2.237
902	180.200, 2.717	180.200, 2.238
903	180.400, 2.718	180.400, 2.238
904	180.600, 2.720	180.600, 2.238
905	180.800, 2.721	180.800, 2.238
906	181.000, 2.723	181.000, 2.238
907	181.200, 2.724	181.200, 2.238
908	181.400, 2.725	181.400, 2.238
909	181.600, 2.726	181.600, 2.238
910	181.800, 2.727	181.800, 2.239
911	182.000, 2.728	182.000, 2.239
912	182.200, 2.729	182.200, 2.240
913	182.400, 2.729	182.400, 2.240
914	182.600, 2.730	182.600, 2.240
915	182.800, 2.731	182.800, 2.240
916	183.000, 2.732	183.000, 2.241
917	183.200, 2.733	183.200, 2.241
918	183.400, 2.734	183.400, 2.241
919	183.600, 2.735	183.600, 2.241
920	183.800, 2.737	183.800, 2.241
921	184.000, 2.738	184.000, 2.241
922	184.200, 2.740	184.200, 2.241
923	184.400, 2.741	184.400, 2.241
924	184.600, 2.743	184.600, 2.242
925	184.800, 2.744	184.800, 2.242
926	185.000, 2.745	185.000, 2.242
927	185.200, 2.747	185.200, 2.242
928	185.400, 2.748	185.400, 2.243
929	185.600, 2.749	185.600, 2.243
930	185.800, 2.750	185.800, 2.244
931	186.000, 2.751	186.000, 2.244
932	186.200, 2.752	186.200, 2.245
933	186.400, 2.753	186.400, 2.245
934	186.600, 2.753	186.600, 2.245
935	186.800, 2.754	186.800, 2.246
936	187.000, 2.755	187.000, 2.246
937	187.200, 2.756	187.200, 2.246
938	187.400, 2.757	187.400, 2.246
939	187.600, 2.758	187.600, 2.246
940	187.800, 2.759	187.800, 2.246
941	188.000, 2.760	188.000, 2.247
942	188.200, 2.762	188.200, 2.247
943	188.400, 2.763	188.400, 2.248
944	188.600, 2.764	188.600, 2.248
945	188.800, 2.765	188.800, 2.249
946	189.000, 2.766	189.000, 2.249
947	189.200, 2.767	189.200, 2.250
948	189.400, 2.768	189.400, 2.250
949	189.600, 2.769	189.600, 2.251
950	189.800, 2.771	189.800, 2.251
951	190.000, 2.772	190.000, 2.252
952	190.200, 2.773	190.200, 2.252
953	190.400, 2.774	190.400, 2.252
954	190.600, 2.775	190.600, 2.252
955	190.800, 2.776	190.800, 2.252
956	191.000, 2.776	191.000, 2.252
957	191.200, 2.777	191.200, 2.251
958	191.400, 2.779	191.400, 2.251
959	191.600, 2.780	191.600, 2.251
960	191.800, 2.781	191.800, 2.251
961	192.000, 2.782	192.000, 2.251
962	192.200, 2.784	192.200, 2.251
963	192.400, 2.785	192.400, 2.251
964	192.600, 2.786	192.600, 2.252
965	192.800, 2.787	192.800, 2.252
966	193.000, 2.788	193.000, 2.253
967	193.200, 2.789	193.200, 2.253
968	193.400, 2.790	193.400, 2.254
969	193.600, 2.791	193.600, 2.254
970	193.800, 2.792	193.800, 2.255
971	194.000, 2.793	194.000, 2.255
972	194.200, 2.793	194.200, 2.255
973	194.400, 2.794	194.400, 2.255
974	194.600, 2.795	194.600, 2.255
975	194.800, 2.796	194.800, 2.255
976	195.000, 2.797	195.000, 2.255
977	195.200, 2.798	195.200, 2.254
978	195.400, 2.799	195.400, 2.254
979	195.600, 2.800	195.600, 2.254
980	195.800, 2.801	195.800, 2.255
981	196.000, 2.802	196.000, 2.255
982	196.200, 2.803	196.200, 2.256
983	196.400, 2.805	196.400, 2.256
984	196.600, 2.806	196.600, 2.256
985	196.800, 2.807	196.800, 2.257
986	197.000, 2.808	197.000, 2.257
987	197.200, 2.809	197.200, 2.258
988	197.400, 2.810	197.400, 2.258
989	197.600, 2.811	197.600, 2.258
990	197.800, 2.812	197.800, 2.258
991	198.000, 2.813	198.000, 2.258
992	198.200, 2.814	198.200, 2.258
993	198.400, 2.815	198.400, 2.258
994	198.600, 2.815	198.600, 2.258
995	198.800, 2.816	198.800, 2.257
996	199.000, 2.817	199.000, 2.257
997	199.200, 2.818	199.200, 2.257
998	199.400, 2.819	199.400, 2.257
999	199.600, 2.819	199.600, 2.258
1000	199.800, 2.820	199.800, 2.258
1001	200.000, 2.821	200.000, 2.258
1002	200.200, 2.822	200.200, 2.259
1003	200.400, 2.823	200.400, 2.259
1004	200.600, 2.824	200.600, 2.259
1005	200.800, 2.825	200.800, 2.259
1006	201.000, 2.826	201.000, 2.259
1007	201.200, 2.827	201.200, 2.260
1008	201.400, 2.829	201.400, 2.260
1009	201.600, 2.830	201.600, 2.260
1010	201.800, 2.831	201.800, 2.260
1011	202.000, 2.831	202.000, 2.260
1012	202.200, 2.832	202.200, 2.260
1013	202.400, 2.833	202.400, 2.261
1014	202.600, 2.834	202.600, 2.261
1015	202.800, 2.835	202.800, 2.261
1016	203.000, 2.835	203.000, 2.261
1017	203.200, 2.836	203.200, 2.262
1018	203.400, 2.837	203.400, 2.262
1019	203.600, 2.838	203.600, 2.262
1020	203.800, 2.839	203.800, 2.262
1021	204.000, 2.840	204.000, 2.262
1022	204.200, 2.841	204.200, 2.262
1023	204.400, 2.842	204.400, 2.262
1024	204.600, 2.843	204.600, 2.262
1025	204.800, 2.844	204.800, 2.262
1026	205.000, 2.846	205.000, 2.261
1027	205.200, 2.847	205.200, 2.261
1028	205.400, 2.848	205.400, 2.261
1029	205.600, 2.848	205.600, 2.261
1030	205.800, 2.849	205.800, 2.262
1031	206.000, 2.850	206.000, 2.262
1032	206.200, 2.850	206.200, 2.263
1033	206.400, 2.851	206.400, 2.263
1034	206.600, 2.852	206.600, 2.263
1035	206.800, 2.853	206.800, 2.263
1036	207.000, 2.854	207.000, 2.263
1037	207.200, 2.855	207.200, 2.263
1038	207.400, 2.856	207.400, 2.264
1039	207.600, 2.857	207.600, 2.264
1040	207.800, 2.857	207.800, 2.264
1041	208.000, 2.858	208.000, 2.264
1042	208.200, 2.859	208.200, 2.265
1043	208.400, 2.860	208.400, 2.265
1044	208.600, 2.861	208.600, 2.265
1045	208.800, 2.862	208.800, 2.265
1046	209.000, 2.862	209.000, 2.265
1047	209.200, 2.863	209.200, 2.265
1048	209.400, 2.864	209.400, 2.265
1049	209.600, 2.864	209.600, 2.265
1050	209.800, 2.865	209.800, 2.265
1051	210.000, 2.865	210.000, 2.265
1052	210.200, 2.866	210.200, 2.265
1053	210.400, 2.867	210.400, 2.265
1054	210.600, 2.868	210.600, 2.265
1055	210.800, 2.869	210.800, 2.265
1056	211.000, 2.869	211.000, 2.265
1057	211.200, 2.870	211.200, 2.265
1058	211.400, 2.871	211.400, 2.265
1059	211.600, 2.872	211.600, 2.265
1060	211.800, 2.873	211.800, 2.265
1061	212.000, 2.874	212.000, 2.265
1062	212.200, 2.875	212.200, 2.265
1063	212.400, 2.876	212.400, 2.264
1064	212.600, 2.877	212.600, 2.265
1065	212.800, 2.878	212.800, 2.265
1066	213.000, 2.879	213.000, 2.266
1067	213.200, 2.880	213.200, 2.266
1068	213.400, 2.881	213.400, 2.267
1069	213.600, 2.881	213.600, 2.267
1070	213.800, 2.882	213.800, 2.268
1071	214.000, 2.883	214.000, 2.268
1072	214.200, 2.884	214.200, 2.269
1073	214.400, 2.885	214.400, 2.269
1074	214.600, 2.886	214.600, 2.269
1075	214.800, 2.887	214.800, 2.269
1076	215.000, 2.888	215.000, 2.269
1077	215.200, 2.889	215.200, 2.269
1078	215.400, 2.890	215.400, 2.269
1079	215.600, 2.892	215.600, 2.268
1080	215.800, 2.893	215.800, 2.268
1081	216.000, 2.894	216.000, 2.268
1082	216.200, 2.895	216.200, 2.267
1083	216.400, 2.896	216.400, 2.267
1084	216.600, 2.897	216.600, 2.268
1085	216.800, 2.898	216.800, 2.268
1086	217.000, 2.899	217.000, 2.268
1087	217.200, 2.899	217.200, 2.268
1088	217.400, 2.899	217.400, 2.269
1089	217.600, 2.900	217.600, 2.269
1090	217.800, 2.900	217.800, 2.269
1091	218.000, 2.900	218.000, 2.269
1092	218.200, 2.901	218.200, 2.269
1093	218.400, 2.902	218.400, 2.269
1094	218.600, 2.902	218.600, 2.269
1095	218.800, 2.903	218.800, 2.269
1096	219.000, 2.904	219.000, 2.269
1097	219.200, 2.905	219.200, 2.269
1098	219.400, 2.906	219.400, 2.269
1099	219.600, 2.907	219.600, 2.269
1100	219.800, 2.908	219.800, 2.269
1101	220.000, 2.908	220.000, 2.269
1102	220.200, 2.909	220.200, 2.269
1103	220.400, 2.910	220.400, 2.269
1104	220.600, 2.911	220.600, 2.269
1105	220.800, 2.911	220.800, 2.270
1106	221.000, 2.912	221.000, 2.270
1107	221.200, 2.913	221.200, 2.270
1108	221.400, 2.914	221.400, 2.270
1109	221.600, 2.915	221.600, 2.270
1110	221.800, 2.915	221.800, 2.270
1111	222.000, 2.916	222.000, 2.271
1112	222.200, 2.917	222.200, 2.271
1113	222.400, 2.917	222.400, 2.271
1114	222.600, 2.918	222.600, 2.271
1115	222.800, 2.919	222.800, 2.271
1116	223.000, 2.920	223.000, 2.271
1117	223.200, 2.921	223.200, 2.271
1118	223.400, 2.922	223.400, 2.272
1119	223.600, 2.923	223.600, 2.272
1120	223.800, 2.924	223.800, 2.272
1121	224.000, 2.924	224.000, 2.272
1122	224.200, 2.925	224.200, 2.273
1123	224.400, 2.926	224.400, 2.273
1124	224.600, 2.926	224.600, 2.273
1125	224.800, 2.927	224.800, 2.273
1126	225.000, 2.928	225.000, 2.273
1127	225.200, 2.928	225.200, 2.273
1128	225.400, 2.929	225.400, 2.273
1129	225.600, 2.930	225.600, 2.273
1130	225.800, 2.930	225.800, 2.273
1131	226.000, 2.931	226.000, 2.273
1132	226.200, 2.932	226.200, 2.273
1133	226.400, 2.933	226.400, 2.273
1134	226.600, 2.934	226.600, 2.273
1135	226.800, 2.934	226.800, 2.273
1136	227.000, 2.935	227.000, 2.273
1137	227.200, 2.936	227.200, 2.272
1138	227.400, 2.937	227.400, 2.272
1139	227.600, 2.938	227.600, 2.272
1140	227.800, 2.938	227.800, 2.272
1141	228.000, 2.939	228.000, 2.272
1142	228.200, 2.939	228.200, 2.272
1143	228.400, 2.940	228.400, 2.272
1144	228.600, 2.941	228.600, 2.272
1145	228.800, 2.941	228.800, 2.272
1146	229.000, 2.942	229.000, 2.272
1147	229.200, 2.943	229.200, 2.272
1148	229.400, 2.943	229.400, 2.272
1149	229.600, 2.944	229.600, 2.272
1150	229.800, 2.945	229.800, 2.272
1151	230.000, 2.946	230.000, 2.273
1152	230.200, 2.946	230.200, 2.273
1153	230.400, 2.947	230.400, 2.274
1154	230.600, 2.948	230.600, 2.274
1155	230.800, 2.948	230.800, 2.275
1156	231.000, 2.949	231.000, 2.275
1157	231.200, 2.950	231.200, 2.275
1158	231.400, 2.951	231.400, 2.276
1159	231.600, 2.951	231.600, 2.276
1160	231.800, 2.952	231.800, 2.276
1161	232.000, 2.953	232.000, 2.276
1162	232.200, 2.953	232.200, 2.275
1163	232.400, 2.954	232.400, 2.275
1164	232.600, 2.954	232.600, 2.275
1165	232.800, 2.955	232.800, 2.275
1166	233.000, 2.956	233.000, 2.275
1167	233.200, 2.956	233.200, 2.275
1168	233.400, 2.957	233.400, 2.275
1169	233.600, 2.958	233.600, 2.275
1170	233.800, 2.958	233.800, 2.275
1171	234.000, 2.959	234.000, 2.275
1172	234.200, 2.960	234.200, 2.275
1173	234.400, 2.960	234.400, 2.275
1174	234.600, 2.961	234.600, 2.275
1175	234.800, 2.962	234.800, 2.275
1176	235.000, 2.962	235.000, 2.275
1177	235.200, 2.963	235.200, 2.275
1178	235.400, 2.963	235.400, 2.275
1179	235.600, 2.964	235.600, 2.275
1180	235.800, 2.964	235.800, 2.275
1181	236.000, 2.965	236.000, 2.276
1182	236.200, 2.965	236.200, 2.276
1183	236.400, 2.965	236.400, 2.276
1184	236.600, 2.966	236.600, 2.276
1185	236.800, 2.966	236.800, 2.276
1186	237.000, 2.966	237.000, 2.276
1187	237.200, 2.967	237.200, 2.276
1188	237.400, 2.968	237.400, 2.276
1189	237.600, 2.968	237.600, 2.276
1190	237.800, 2.969	237.800, 2.276
1191	238.000, 2.970	238.000, 2.275
1192	238.200, 2.971	238.200, 2.275
1193	238.400, 2.972	238.400, 2.275
1194	238.600, 2.972	238.600, 2.275
1195	238.800, 2.973	238.800, 2.275
1196	239.000, 2.974	239.000, 2.275
1197	239.200, 2.975	239.200, 2.275
1198	239.400, 2.975	239.400, 2.275
1199	239.600, 2.976	239.600, 2.275
1200	239.800, 2.977	239.800, 2.275
1201	240.000, 2.977	240.000, 2.275
1202	240.200, 2.977	240.200, 2.275
1203	240.400, 2.977	240.400, 2.275
1204	240.600, 2.978	240.600, 2.276
1205	240.800, 2.978	240.800, 2.276
1206	241.000, 2.979	241.000, 2.276
1207	241.200, 2.979	241.200, 2.276
1208	241.400, 2.980	241.400, 2.276
1209	241.600, 2.981	241.600, 2.276
1210	241.800, 2.981	241.800, 2.276
1211	242.000, 2.982	242.000, 2.277
1212	242.200, 2.983	242.200, 2.277
1213	242.400, 2.984	242.400, 2.277
1214	242.600, 2.985	242.600, 2.277
1215	242.800, 2.986	242.800, 2.277
1216	243.000, 2.987	243.000, 2.277
1217	243.200, 2.988	243.200, 2.276
1218	243.400, 2.989	243.400, 2.276
1219	243.600, 2.990	243.600, 2.276
1220	243.800, 2.990	243.800, 2.276
1221	244.000, 2.991	244.000, 2.276
1222	244.200, 2.992	244.200, 2.276
1223	244.400, 2.992	244.400, 2.276
1224	244.600, 2.993	244.600, 2.276
1225	244.800, 2.994	244.800, 2.276
1226	245.000, 2.994	245.000, 2.276
1227	245.200, 2.995	245.200, 2.277
1228	245.400, 2.995	245.400, 2.277
1229	245.600, 2.996	245.600, 2.278
1230	245.800, 2.996	245.800, 2.278
1231	246.000, 2.997	246.000, 2.278
1232	246.200, 2.997	246.200, 2.278
1233	246.400, 2.998	246.400, 2.278
1234	246.600, 2.998	246.600, 2.279
1235	246.800, 2.999	246.800, 2.279
1236	247.000, 2.999	247.000, 2.279
1237	247.200, 3.000	247.200, 2.279
1238	247.400, 3.001	247.400, 2.279
1239	247.600, 3.001	247.600, 2.278
1240	247.800, 3.002	247.800, 2.278
1241	248.000, 3.002	248.000, 2.278
1242	248.200, 3.003	248.200, 2.277
1243	248.400, 3.003	248.400, 2.277
1244	248.600, 3.003	248.600, 2.277
1245	248.800, 3.003	248.800, 2.277
1246	249.000, 3.003	249.000, 2.276
1247	249.200, 3.004	249.200, 2.276
1248	249.400, 3.004	249.400, 2.276
1249	249.600, 3.004	249.600, 2.276
1250	249.800, 3.004	249.800, 2.277
1251	250.000, 3.005	250.000, 2.277
1252	250.200, 3.005	250.200, 2.277
1253	250.400, 3.006	250.400, 2.277
1254	250.600, 3.007	250.600, 2.277
1255	250.800, 3.008	250.800, 2.277
1256	251.000, 3.009	251.000, 2.277
1257	251.200, 3.010	251.200, 2.277
1258	251.400, 3.011	251.400, 2.277
1259	251.600, 3.012	251.600, 2.277
1260	251.800, 3.013	251.800, 2.277
1261	252.000, 3.014	252.000, 2.277
1262	252.200, 3.014	252.200, 2.277
1263	252.400, 3.015	252.400, 2.277
1264	252.600, 3.015	252.600, 2.277
1265	252.800, 3.016	252.800, 2.277
1266	253.000, 3.016	253.000, 2.277
1267	253.200, 3.017	253.200, 2.277
1268	253.400, 3.018	253.400, 2.277
1269	253.600, 3.018	253.600, 2.277
1270	253.800, 3.019	253.800, 2.278
1271	254.000, 3.020	254.000, 2.278
1272	254.200, 3.021	254.200, 2.278
1273	254.400, 3.022	254.400, 2.279
1274	254.600, 3.022	254.600, 2.279
1275	254.800, 3.023	254.800, 2.278
1276	255.000, 3.023	255.000, 2.278
1277	255.200, 3.023	255.200, 2.278
1278	255.400, 3.024	255.400, 2.278
1279	255.600, 3.024	255.600, 2.277
1280	255.800, 3.024	255.800, 2.277
1281	256.000, 3.025	256.000, 2.277
1282	256.200, 3.025	256.200, 2.277
1283	256.400, 3.025	256.400, 2.277
1284	256.600, 3.025	256.600, 2.277
1285	256.800, 3.026	256.800, 2.277
1286	257.000, 3.026	257.000, 2.277
1287	257.200, 3.027	257.200, 2.277
1288	257.400, 3.028	257.400, 2.278
1289	257.600, 3.029	257.600, 2.278
1290	257.800, 3.029	257.800, 2.278
1291	258.000, 3.030	258.000, 2.279
1292	258.200, 3.031	258.200, 2.279
1293	258.400, 3.031	258.400, 2.278
1294	258.600, 3.032	258.600, 2.278
1295	258.800, 3.033	258.800, 2.278
1296	259.000, 3.034	259.000, 2.277
1297	259.200, 3.035	259.200, 2.277
1298	259.400, 3.036	259.400, 2.277
1299	259.600, 3.036	259.600, 2.277
1300	259.800, 3.036	259.800, 2.277
1301	260.000, 3.037	260.000, 2.278
1302	260.200, 3.037	260.200, 2.278
1303	260.400, 3.037	260.400, 2.278
1304	260.600, 3.037	260.600, 2.278
1305	260.800, 3.037	260.800, 2.277
1306	261.000, 3.037	261.000, 2.278
1307	261.200, 3.038	261.200, 2.278
1308	261.400, 3.038	261.400, 2.278
1309	261.600, 3.038	261.600, 2.278
1310	261.800, 3.038	261.800, 2.278
1311	262.000, 3.038	262.000, 2.278
1312	262.200, 3.039	262.200, 2.278
1313	262.400, 3.039	262.400, 2.278
1314	262.600, 3.040	262.600, 2.278
1315	262.800, 3.041	262.800, 2.278
1316	263.000, 3.041	263.000, 2.278
1317	263.200, 3.042	263.200, 2.278
1318	263.400, 3.042	263.400, 2.278
1319	263.600, 3.043	263.600, 2.278
1320	263.800, 3.043	263.800, 2.278
1321	264.000, 3.043	264.000, 2.278
1322	264.200, 3.044	264.200, 2.278
1323	264.400, 3.044	264.400, 2.278
1324	264.600, 3.045	264.600, 2.278
1325	264.800, 3.045	264.800, 2.278
1326	265.000, 3.046	265.000, 2.278
1327	265.200, 3.047	265.200, 2.278
1328	265.400, 3.047	265.400, 2.278
1329	265.600, 3.048	265.600, 2.279
1330	265.800, 3.048	265.800, 2.279
1331	266.000, 3.049	266.000, 2.279
1332	266.200, 3.049	266.200, 2.279
1333	266.400, 3.050	266.400, 2.279
1334	266.600, 3.050	266.600, 2.279
1335	266.800, 3.050	266.800, 2.279
1336	267.000, 3.051	267.000, 2.279
1337	267.200, 3.051	267.200, 2.279
1338	267.400, 3.052	267.400, 2.279
1339	267.600, 3.052	267.600, 2.279
1340	267.800, 3.053	267.800, 2.279
1341	268.000, 3.054	268.000, 2.279
1342	268.200, 3.054	268.200, 2.279
1343	268.400, 3.055	268.400, 2.279
1344	268.600, 3.055	268.600, 2.279
1345	268.800, 3.056	268.800, 2.279
1346	269.000, 3.057	269.000, 2.279
1347	269.200, 3.058	269.200, 2.278
1348	269.400, 3.059	269.400, 2.278
1349	269.600, 3.060	269.600, 2.278
1350	269.800, 3.060	269.800, 2.278
1351	270.000, 3.061	270.000, 2.278
1352	270.200, 3.061	270.200, 2.278
1353	270.400, 3.061	270.400, 2.278
1354	270.600, 3.062	270.600, 2.278
1355	270.800, 3.062	270.800, 2.278
1356	271.000, 3.062	271.000, 2.278
1357	271.200, 3.063	271.200, 2.278
1358	271.400, 3.063	271.400, 2.278
1359	271.600, 3.064	271.600, 2.278
1360	271.800, 3.064	271.800, 2.279
1361	272.000, 3.064	272.000, 2.279
1362	272.200, 3.064	272.200, 2.279
1363	272.400, 3.064	272.400, 2.279
1364	272.600, 3.065	272.600, 2.279
1365	272.800, 3.065	272.800, 2.279
1366	273.000, 3.066	273.000, 2.278
1367	273.200, 3.066	273.200, 2.278
1368	273.400, 3.067	273.400, 2.278
1369	273.600, 3.067	273.600, 2.278
1370	273.800, 3.068	273.800, 2.279
1371	274.000, 3.068	274.000, 2.279
1372	274.200, 3.069	274.200, 2.278
1373	274.400, 3.069	274.400, 2.278
1374	274.600, 3.070	274.600, 2.278
1375	274.800, 3.070	274.800, 2.278
1376	275.000, 3.071	275.000, 2.278
1377	275.200, 3.072	275.200, 2.278
1378	275.400, 3.072	275.400, 2.278
1379	275.600, 3.073	275.600, 2.278
1380	275.800, 3.073	275.800, 2.277
1381	276.000, 3.073	276.000, 2.277
1382	276.200, 3.074	276.200, 2.277
1383	276.400, 3.074	276.400, 2.277
1384	276.600, 3.074	276.600, 2.277
1385	276.800, 3.075	276.800, 2.277
1386	277.000, 3.075	277.000, 2.277
1387	277.200, 3.076	277.200, 2.278
1388	277.400, 3.076	277.400, 2.278
1389	277.600, 3.076	277.600, 2.278
1390	277.800, 3.077	277.800, 2.278
1391	278.000, 3.077	278.000, 2.278
1392	278.200, 3.078	278.200, 2.278
1393	278.400, 3.078	278.400, 2.278
1394	278.600, 3.078	278.600, 2.278
1395	278.800, 3.078	278.800, 2.277
1396	279.000, 3.078	279.000, 2.277
1397	279.200, 3.079	279.200, 2.277
1398	279.400, 3.079	279.400, 2.277
1399	279.600, 3.079	279.600, 2.277
1400	279.800, 3.079	279.800, 2.277
1401	280.000, 3.080	280.000, 2.277
1402	280.200, 3.080	280.200, 2.277
1403	280.400, 3.080	280.400, 2.278
1404	280.600, 3.081	280.600, 2.278
1405	280.800, 3.082	280.800, 2.278
1406	281.000, 3.082	281.000, 2.278
1407	281.200, 3.083	281.200, 2.278
1408	281.400, 3.084	281.400, 2.278
1409	281.600, 3.085	281.600, 2.278
1410	281.800, 3.086	281.800, 2.278
1411	282.000, 3.086	282.000, 2.277
1412	282.200, 3.087	282.200, 2.277
1413	282.400, 3.087	282.400, 2.277
1414	282.600, 3.087	282.600, 2.277
1415	282.800, 3.088	282.800, 2.277
1416	283.000, 3.088	283.000, 2.277
1417	283.200, 3.088	283.200, 2.277
1418	283.400, 3.088	283.400, 2.277
1419	283.600, 3.088	283.600, 2.277
1420	283.800, 3.089	283.800, 2.277
1421	284.000, 3.089	284.000, 2.277
1422	284.200, 3.090	284.200, 2.277
1423	284.400, 3.090	284.400, 2.277
1424	284.600, 3.091	284.600, 2.277
1425	284.800, 3.091	284.800, 2.277
1426	285.000, 3.092	285.000, 2.277
1427	285.200, 3.092	285.200, 2.276
1428	285.400, 3.093	285.400, 2.276
1429	285.600, 3.093	285.600, 2.276
1430	285.800, 3.093	285.800, 2.276
1431	286.000, 3.094	286.000, 2.276
1432	286.200, 3.094	286.200, 2.276
1433	286.400, 3.095	286.400, 2.276
1434	286.600, 3.096	286.600, 2.276
1435	286.800, 3.096	286.800, 2.277
1436	287.000, 3.096	287.000, 2.277
1437	287.200, 3.096	287.200, 2.277
1438	287.400, 3.096	287.400, 2.278
1439	287.600, 3.096	287.600, 2.278
1440	287.800, 3.096	287.800, 2.278
1441	288.000, 3.097	288.000, 2.278
1442	288.200, 3.097	288.200, 2.279
1443	288.400, 3.097	288.400, 2.279
1444	288.600, 3.097	288.600, 2.279
1445	288.800, 3.098	288.800, 2.279
1446	289.000, 3.098	289.000, 2.279
1447	289.200, 3.099	289.200, 2.279
1448	289.400, 3.099	289.400, 2.279
1449	289.600, 3.100	289.600, 2.278
1450	289.800, 3.101	289.800, 2.278
1451	290.000, 3.102	290.000, 2.278
1452	290.200, 3.103	290.200, 2.278
1453	290.400, 3.103	290.400, 2.277
1454	290.600, 3.104	290.600, 2.277
1455	290.800, 3.105	290.800, 2.278
1456	291.000, 3.105	291.000, 2.278
1457	291.200, 3.105	291.200, 2.278
1458	291.400, 3.106	291.400, 2.278
1459	291.600, 3.106	291.600, 2.278
1460	291.800, 3.106	291.800, 2.278
1461	292.000, 3.106	292.000, 2.278
1462	292.200, 3.106	292.200, 2.278
1463	292.400, 3.106	292.400, 2.278
1464	292.600, 3.106	292.600, 2.278
1465	292.800, 3.106	292.800, 2.277
1466	293.000, 3.106	293.000, 2.277
1467	293.200, 3.107	293.200, 2.277
1468	293.400, 3.107	293.400, 2.277
1469	293.600, 3.108	293.600, 2.276
1470	293.800, 3.108	293.800, 2.276
1471	294.000, 3.109	294.000, 2.276
1472	294.200, 3.109	294.200, 2.275
1473	294.400, 3.109	294.400, 2.275
1474	294.600, 3.110	294.600, 2.276
1475	294.800, 3.110	294.800, 2.276
1476	295.000, 3.111	295.000, 2.276
1477	295.200, 3.111	295.200, 2.276
1478	295.400, 3.111	295.400, 2.277
1479	295.600, 3.112	295.600, 2.277
1480	295.800, 3.112	295.800, 2.277
1481	296.000, 3.112	296.000, 2.278
1482	296.200, 3.112	296.200, 2.278
1483	296.400, 3.113	296.400, 2.278
1484	296.600, 3.113	296.600, 2.278
1485	296.800, 3.114	296.800, 2.278
1486	297.000, 3.114	297.000, 2.279
1487	297.200, 3.115	297.200, 2.279
1488	297.400, 3.115	297.400, 2.279
1489	297.600, 3.115	297.600, 2.279
1490	297.800, 3.116	297.800, 2.279
1491	298.000, 3.116	298.000, 2.279
1492	298.200, 3.117	298.200, 2.279
1493	298.400, 3.117	298.400, 2.279
1494	298.600, 3.117	298.600, 2.279
1495	298.800, 3.118	298.800, 2.279
1496	299.000, 3.118	299.000, 2.278
1497	299.200, 3.119	299.200, 2.278
1498	299.400, 3.120	299.400, 2.278
1499	299.600, 3.120	299.600, 2.277
1500	299.800, 3.121	299.800, 2.277
1501	300.000, 3.121	300.000, 2.277
1502	300.200, 3.121	300.200, 2.277
1503	300.400, 3.122	300.400, 2.276
1504	300.600, 3.122	300.600, 2.276
1505	300.800, 3.122	300.800, 2.276
1506	301.000, 3.122	301.000, 2.276
1507	301.200, 3.121	301.200, 2.276
1508	301.400, 3.121	301.400, 2.276
1509	301.600, 3.121	301.600, 2.276
1510	301.800, 3.121	301.800, 2.277
1511	302.000, 3.121	302.000, 2.277
1512	302.200, 3.121	302.200, 2.277
1513	302.400, 3.121	302.400, 2.278
1514	302.600, 3.122	302.600, 2.278
1515	302.800, 3.122	302.800, 2.278
1516	303.000, 3.123	303.000, 2.278
1517	303.200, 3.124	303.200, 2.278
1518	303.400, 3.125	303.400, 2.278
1519	303.600, 3.126	303.600, 2.277
1520	303.800, 3.126	303.800, 2.277
1521	304.000, 3.127	304.000, 2.277
1522	304.200, 3.128	304.200, 2.277
1523	304.400, 3.128	304.400, 2.277
1524	304.600, 3.128	304.600, 2.277
1525	304.800, 3.129	304.800, 2.277
1526	305.000, 3.129	305.000, 2.277
1527	305.200, 3.129	305.200, 2.277
1528	305.400, 3.129	305.400, 2.277
1529	305.600, 3.130	305.600, 2.277
1530	305.800, 3.130	305.800, 2.277
1531	306.000, 3.131	306.000, 2.277
1532	306.200, 3.131	306.200, 2.277
1533	306.400, 3.132	306.400, 2.276
1534	306.600, 3.133	306.600, 2.276
1535	306.800, 3.133	306.800, 2.277
1536	307.000, 3.134	307.000, 2.277
1537	307.200, 3.134	307.200, 2.277
1538	307.400, 3.134	307.400, 2.277
1539	307.600, 3.135	307.600, 2.277
1540	307.800, 3.135	307.800, 2.277
1541	308.000, 3.135	308.000, 2.277
1542	308.200, 3.136	308.200, 2.277
1543	308.400, 3.136	308.400, 2.277
1544	308.600, 3.136	308.600, 2.277
1545	308.800, 3.136	308.800, 2.277
1546	309.000, 3.136	309.000, 2.277
1547	309.200, 3.136	309.200, 2.276
1548	309.400, 3.136	309.400, 2.276
1549	309.600, 3.136	309.600, 2.276
1550	309.800, 3.136	309.800, 2.276
1551	310.000, 3.137	310.000, 2.276
1552	310.200, 3.137	310.200, 2.276
1553	310.400, 3.137	310.400, 2.276
1554	310.600, 3.137	310.600, 2.276
1555	310.800, 3.138	310.800, 2.276
1556	311.000, 3.138	311.000, 2.276
1557	311.200, 3.139	311.200, 2.276
1558	311.400, 3.139	311.400, 2.276
1559	311.600, 3.140	311.600, 2.276
1560	311.800, 3.140	311.800, 2.276
1561	312.000, 3.141	312.000, 2.275
1562	312.200, 3.141	312.200, 2.275
1563	312.400, 3.142	312.400, 2.275
1564	312.600, 3.142	312.600, 2.275
1565	312.800, 3.142	312.800, 2.275
1566	313.000, 3.143	313.000, 2.274
1567	313.200, 3.143	313.200, 2.274
1568	313.400, 3.143	313.400, 2.274
1569	313.600, 3.143	313.600, 2.274
1570	313.800, 3.144	313.800, 2.274
1571	314.000, 3.144	314.000, 2.274
1572	314.200, 3.143	314.200, 2.274
1573	314.400, 3.143	314.400, 2.274
1574	314.600, 3.143	314.600, 2.274
1575	314.800, 3.143	314.800, 2.274
1576	315.000, 3.143	315.000, 2.275
1577	315.200, 3.143	315.200, 2.275
1578	315.400, 3.143	315.400, 2.275
1579	315.600, 3.144	315.600, 2.276
1580	315.800, 3.144	315.800, 2.276
1581	316.000, 3.145	316.000, 2.277
1582	316.200, 3.145	316.200, 2.277
1583	316.400, 3.146	316.400, 2.277
1584	316.600, 3.147	316.600, 2.277
1585	316.800, 3.147	316.800, 2.277
1586	317.000, 3.148	317.000, 2.277
1587	317.200, 3.149	317.200, 2.277
1588	317.400, 3.149	317.400, 2.277
1589	317.600, 3.150	317.600, 2.277
1590	317.800, 3.150	317.800, 2.276
1591	318.000, 3.150	318.000, 2.276
1592	318.200, 3.150	318.200, 2.276
1593	318.400, 3.150	318.400, 2.276
1594	318.600, 3.150	318.600, 2.275
1595	318.800, 3.150	318.800, 2.275
1596	319.000, 3.150	319.000, 2.275
1597	319.200, 3.150	319.200, 2.275
1598	319.400, 3.151	319.400, 2.275
1599	319.600, 3.151	319.600, 2.275
1600	319.800, 3.151	319.800, 2.275
1601	320.000, 3.152	320.000, 2.275
1602	320.200, 3.153	320.200, 2.275
1603	320.400, 3.153	320.400, 2.275
1604	320.600, 3.153	320.600, 2.275
1605	320.800, 3.154	320.800, 2.275
1606	321.000, 3.154	321.000, 2.275
1607	321.200, 3.155	321.200, 2.275
1608	321.400, 3.155	321.400, 2.275
1609	321.600, 3.155	321.600, 2.276
1610	321.800, 3.156	321.800, 2.276
1611	322.000, 3.156	322.000, 2.276
1612	322.200, 3.156	322.200, 2.276
1613	322.400, 3.157	322.400, 2.276
1614	322.600, 3.157	322.600, 2.276
1615	322.800, 3.157	322.800, 2.276
1616	323.000, 3.157	323.000, 2.276
1617	323.200, 3.157	323.200, 2.276
1618	323.400, 3.157	323.400, 2.276
1619	323.600, 3.157	323.600, 2.276
1620	323.800, 3.157	323.800, 2.276
1621	324.000, 3.157	324.000, 2.276
1622	324.200, 3.158	324.200, 2.276
1623	324.400, 3.158	324.400, 2.276
1624	324.600, 3.158	324.600, 2.276
1625	324.800, 3.159	324.800, 2.276
1626	325.000, 3.159	325.000, 2.276
1627	325.200, 3.160	325.200, 2.276
1628	325.400, 3.160	325.400, 2.275
1629	325.600, 3.160	325.600, 2.275
1630	325.800, 3.161	325.800, 2.275
1631	326.000, 3.161	326.000, 2.275
1632	326.200, 3.161	326.200, 2.274
1633	326.400, 3.162	326.400, 2.274
1634	326.600, 3.162	326.600, 2.274
1635	326.800, 3.162	326.800, 2.274
1636	327.000, 3.161	327.000, 2.274
1637	327.200, 3.161	327.200, 2.275
1638	327.400, 3.161	327.400, 2.275
1639	327.600, 3.161	327.600, 2.275
1640	327.800, 3.161	327.800, 2.275
1641	328.000, 3.162	328.000, 2.275
1642	328.200, 3.162	328.200, 2.275
1643	328.400, 3.162	328.400, 2.275
1644	328.600, 3.163	328.600, 2.275
1645	328.800, 3.163	328.800, 2.275
1646	329.000, 3.164	329.000, 2.275
1647	329.200, 3.164	329.200, 2.275
1648	329.400, 3.165	329.400, 2.275
1649	329.600, 3.165	329.600, 2.274
1650	329.800, 3.165	329.800, 2.274
1651	330.000, 3.165	330.000, 2.274
1652	330.200, 3.165	330.200, 2.274
1653	330.400, 3.166	330.400, 2.274
1654	330.600, 3.166	330.600, 2.274
1655	330.800, 3.166	330.800, 2.274
1656	331.000, 3.166	331.000, 2.274
1657	331.200, 3.166	331.200, 2.274
1658	331.400, 3.166	331.400, 2.274
1659	331.600, 3.166	331.600, 2.274
1660	331.800, 3.167	331.800, 2.274
1661	332.000, 3.167	332.000, 2.274
1662	332.200, 3.168	332.200, 2.274
1663	332.400, 3.168	332.400, 2.274
1664	332.600, 3.169	332.600, 2.274
1665	332.800, 3.169	332.800, 2.275
1666	333.000, 3.169	333.000, 2.275
1667	333.200, 3.169	333.200, 2.275
1668	333.400, 3.169	333.400, 2.275
1669	333.600, 3.169	333.600, 2.275
1670	333.800, 3.169	333.800, 2.275
1671	334.000, 3.169	334.000, 2.275
1672	334.200, 3.169	334.200, 2.275
1673	334.400, 3.170	334.400, 2.274
1674	334.600, 3.170	334.600, 2.274
1675	334.800, 3.170	334.800, 2.274
1676	335.000, 3.171	335.000, 2.274
1677	335.200, 3.171	335.200, 2.273
1678	335.400, 3.172	335.400, 2.273
1679	335.600, 3.172	335.600, 2.273
1680	335.800, 3.173	335.800, 2.273
1681	336.000, 3.173	336.000, 2.273
1682	336.200, 3.174	336.200, 2.273
1683	336.400, 3.174	336.400, 2.273
1684	336.600, 3.174	336.600, 2.274
1685	336.800, 3.174	336.800, 2.274
1686	337.000, 3.174	337.000, 2.274
1687	337.200, 3.174	337.200, 2.274
1688	337.400, 3.175	337.400, 2.274
1689	337.600, 3.175	337.600, 2.274
1690	337.800, 3.175	337.800, 2.274
1691	338.000, 3.175	338.000, 2.274
1692	338.200, 3.175	338.200, 2.274
1693	338.400, 3.175	338.400, 2.274
1694	338.600, 3.176	338.600, 2.274
1695	338.800, 3.176	338.800, 2.274
1696	339.000, 3.176	339.000, 2.274
1697	339.200, 3.176	339.200, 2.274
1698	339.400, 3.177	339.400, 2.274
1699	339.600, 3.178	339.600, 2.274
1700	339.800, 3.178	339.800, 2.274
1701	340.000, 3.179	340.000, 2.274
1702	340.200, 3.179	340.200, 2.275
1703	340.400, 3.179	340.400, 2.275
1704	340.600, 3.179	340.600, 2.275
1705	340.800, 3.179	340.800, 2.275
1706	341.000, 3.179	341.000, 2.275
1707	341.200, 3.179	341.200, 2.275
1708	341.400, 3.179	341.400, 2.274
1709	341.600, 3.179	341.600, 2.274
1710	341.800, 3.179	341.800, 2.274
1711	342.000, 3.180	342.000, 2.274
1712	342.200, 3.180	342.200, 2.274
1713	342.400, 3.180	342.400, 2.274
1714	342.600, 3.180	342.600, 2.274
1715	342.800, 3.181	342.800, 2.274
1716	343.000, 3.181	343.000, 2.273
1717	343.200, 3.182	343.200, 2.273
1718	343.400, 3.183	343.400, 2.273
1719	343.600, 3.183	343.600, 2.273
1720	343.800, 3.184	343.800, 2.273
1721	344.000, 3.185	344.000, 2.273
1722	344.200, 3.185	344.200, 2.273
1723	344.400, 3.185	344.400, 2.273
1724	344.600, 3.186	344.600, 2.273
1725	344.800, 3.185	344.800, 2.273
1726	345.000, 3.185	345.000, 2.273
1727	345.200, 3.186	345.200, 2.273
1728	345.400, 3.186	345.400, 2.273
1729	345.600, 3.186	345.600, 2.274
1730	345.800, 3.187	345.800, 2.274
1731	346.000, 3.187	346.000, 2.274
1732	346.200, 3.187	346.200, 2.274
1733	346.400, 3.187	346.400, 2.274
1734	346.600, 3.188	346.600, 2.274
1735	346.800, 3.188	346.800, 2.274
1736	347.000, 3.188	347.000, 2.274
1737	347.200, 3.187	347.200, 2.274
1738	347.400, 3.187	347.400, 2.274
1739	347.600, 3.187	347.600, 2.274
1740	347.800, 3.187	347.800, 2.274
1741	348.000, 3.188	348.000, 2.274
1742	348.200, 3.188	348.200, 2.274
1743	348.400, 3.188	348.400, 2.274
1744	348.600, 3.187	348.600, 2.274
1745	348.800, 3.187	348.800, 2.274
1746	349.000, 3.187	349.000, 2.274
1747	349.200, 3.188	349.200, 2.274
1748	349.400, 3.188	349.400, 2.274
1749	349.600, 3.188	349.600, 2.274
1750	349.800, 3.189	349.800, 2.273
1751	350.000, 3.190	350.000, 2.273
1752	350.200, 3.190	350.200, 2.273
1753	350.400, 3.190	350.400, 2.273
1754	350.600, 3.191	350.600, 2.273
1755	350.800, 3.191	350.800, 2.273
1756	351.000, 3.191	351.000, 2.273
1757	351.200, 3.191	351.200, 2.273
1758	351.400, 3.191	351.400, 2.273
1759	351.600, 3.192	351.600, 2.273
1760	351.800, 3.192	351.800, 2.274
1761	352.000, 3.193	352.000, 2.274
1762	352.200, 3.193	352.200, 2.274
1763	352.400, 3.193	352.400, 2.274
1764	352.600, 3.193	352.600, 2.274
1765	352.800, 3.194	352.800, 2.274
1766	353.000, 3.194	353.000, 2.274
1767	353.200, 3.194	353.200, 2.274
1768	353.400, 3.194	353.400, 2.273
1769	353.600, 3.194	353.600, 2.273
1770	353.800, 3.194	353.800, 2.273
1771	354.000, 3.194	354.000, 2.272
1772	354.200, 3.194	354.200, 2.272
1773	354.400, 3.195	354.400, 2.271
1774	354.600, 3.195	354.600, 2.271
1775	354.800, 3.195	354.800, 2.271
1776	355.000, 3.195	355.000, 2.270
1777	355.200, 3.195	355.200, 2.271
1778	355.400, 3.195	355.400, 2.271
1779	355.600, 3.195	355.600, 2.271
1780	355.800, 3.196	355.800, 2.272
1781	356.000, 3.196	356.000, 2.272
1782	356.200, 3.197	356.200, 2.272
1783	356.400, 3.197	356.400, 2.273
1784	356.600, 3.198	356.600, 2.273
1785	356.800, 3.198	356.800, 2.273
1786	357.000, 3.198	357.000, 2.273
1787	357.200, 3.198	357.200, 2.273
1788	357.400, 3.198	357.400, 2.273
1789	357.600, 3.198	357.600, 2.273
1790	357.800, 3.199	357.800, 2.273
1791	358.000, 3.199	358.000, 2.273
1792	358.200, 3.199	358.200, 2.273
1793	358.400, 3.199	358.400, 2.273
1794	358.600, 3.199	358.600, 2.272
1795	358.800, 3.200	358.800, 2.272
1796	359.000, 3.199	359.000, 2.272
1797	359.200, 3.200	359.200, 2.273
1798	359.400, 3.200	359.400, 2.273
1799	359.600, 3.200	359.600, 2.273
1800	359.800, 3.200	359.800, 2.273
1801	360.000, 3.200	360.000, 2.272
1802	360.200, 3.200	360.200, 2.272
1803	360.400, 3.200	360.400, 2.272
1804	360.600, 3.199	360.600, 2.272
1805	360.800, 3.199	360.800, 2.272
1806	361.000, 3.199	361.000, 2.272
1807	361.200, 3.199	361.200, 2.272
1808	361.400, 3.199	361.400, 2.271
1809	361.600, 3.199	361.600, 2.271
1810	361.800, 3.199	361.800, 2.271
1811	362.000, 3.199	362.000, 2.271
1812	362.200, 3.200	362.200, 2.271
1813	362.400, 3.200	362.400, 2.271
1814	362.600, 3.200	362.600, 2.271
1815	362.800, 3.201	362.800, 2.271
1816	363.000, 3.201	363.000, 2.271
1817	363.200, 3.202	363.200, 2.271
1818	363.400, 3.203	363.400, 2.271
1819	363.600, 3.203	363.600, 2.271
1820	363.800, 3.204	363.800, 2.271
1821	364.000, 3.204	364.000, 2.271
1822	364.200, 3.205	364.200, 2.271
1823	364.400, 3.205	364.400, 2.272
1824	364.600, 3.205	364.600, 2.272
1825	364.800, 3.206	364.800, 2.272
1826	365.000, 3.206	365.000, 2.272
1827	365.200, 3.206	365.200, 2.272
1828	365.400, 3.206	365.400, 2.272
1829	365.600, 3.206	365.600, 2.272
1830	365.800, 3.205	365.800, 2.271
1831	366.000, 3.205	366.000, 2.271
1832	366.200, 3.205	366.200, 2.271
1833	366.400, 3.205	366.400, 2.271
1834	366.600, 3.205	366.600, 2.271
1835	366.800, 3.205	366.800, 2.271
1836	367.000, 3.205	367.000, 2.271
1837	367.200, 3.206	367.200, 2.271
1838	367.400, 3.206	367.400, 2.270
1839	367.600, 3.207	367.600, 2.270
1840	367.800, 3.207	367.800, 2.270
1841	368.000, 3.208	368.000, 2.270
1842	368.200, 3.208	368.200, 2.271
1843	368.400, 3.208	368.400, 2.271
1844	368.600, 3.209	368.600, 2.271
1845	368.800, 3.209	368.800, 2.271
1846	369.000, 3.209	369.000, 2.271
1847	369.200, 3.210	369.200, 2.271
1848	369.400, 3.210	369.400, 2.271
1849	369.600, 3.210	369.600, 2.271
1850	369.800, 3.210	369.800, 2.271
1851	370.000, 3.210	370.000, 2.271
1852	370.200, 3.210	370.200, 2.272
1853	370.400, 3.210	370.400, 2.272
1854	370.600, 3.210	370.600, 2.272
1855	370.800, 3.210	370.800, 2.272
1856	371.000, 3.210	371.000, 2.271
1857	371.200, 3.210	371.200, 2.271
1858	371.400, 3.210	371.400, 2.271
1859	371.600, 3.210	371.600, 2.271
1860	371.800, 3.210	371.800, 2.271
1861	372.000, 3.210	372.000, 2.271
1862	372.200, 3.210	372.200, 2.271
1863	372.400, 3.210	372.400, 2.271
1864	372.600, 3.210	372.600, 2.270
1865	372.800, 3.211	372.800, 2.270
1866	373.000, 3.211	373.000, 2.271
1867	373.200, 3.211	373.200, 2.271
1868	373.400, 3.212	373.400, 2.271
1869	373.600, 3.212	373.600, 2.271
1870	373.800, 3.213	373.800, 2.271
1871	374.000, 3.214	374.000, 2.271
1872	374.200, 3.214	374.200, 2.272
1873	374.400, 3.215	374.400, 2.271
1874	374.600, 3.215	374.600, 2.271
1875	374.800, 3.215	374.800, 2.271
1876	375.000, 3.215	375.000, 2.271
1877	375.200, 3.215	375.200, 2.272
1878	375.400, 3.214	375.400, 2.272
1879	375.600, 3.214	375.600, 2.272
1880	375.800, 3.214	375.800, 2.272
1881	376.000, 3.215	376.000, 2.272
1882	376.200, 3.214	376.200, 2.272
1883	376.400, 3.214	376.400, 2.272
1884	376.600, 3.214	376.600, 2.271
1885	376.800, 3.214	376.800, 2.271
1886	377.000, 3.214	377.000, 2.271
1887	377.200, 3.214	377.200, 2.271
1888	377.400, 3.214	377.400, 2.271
1889	377.600, 3.215	377.600, 2.271
1890	377.800, 3.215	377.800, 2.271
1891	378.000, 3.215	378.000, 2.271
1892	378.200, 3.215	378.200, 2.271
1893	378.400, 3.215	378.400, 2.271
1894	378.600, 3.215	378.600, 2.271
1895	378.800, 3.215	378.800, 2.271
1896	379.000, 3.215	379.000, 2.271
1897	379.200, 3.216	379.200, 2.271
1898	379.400, 3.216	379.400, 2.271
1899	379.600, 3.216	379.600, 2.271
1900	379.800, 3.217	379.800, 2.271
1901	380.000, 3.217	380.000, 2.270
1902	380.200, 3.218	380.200, 2.270
1903	380.400, 3.218	380.400, 2.270
1904	380.600, 3.218	380.600, 2.270
1905	380.800, 3.218	380.800, 2.270
1906	381.000, 3.218	381.000, 2.270
1907	381.200, 3.218	381.200, 2.270
1908	381.400, 3.218	381.400, 2.270
1909	381.600, 3.218	381.600, 2.270
1910	381.800, 3.218	381.800, 2.270
1911	382.000, 3.217	382.000, 2.270
1912	382.200, 3.217	382.200, 2.270
1913	382.400, 3.217	382.400, 2.270
1914	382.600, 3.217	382.600, 2.270
1915	382.800, 3.217	382.800, 2.270
1916	383.000, 3.217	383.000, 2.270
1917	383.200, 3.217	383.200, 2.269
1918	383.400, 3.218	383.400, 2.269
1919	383.600, 3.218	383.600, 2.269
1920	383.800, 3.218	383.800, 2.269
1921	384.000, 3.218	384.000, 2.269
1922	384.200, 3.218	384.200, 2.269
1923	384.400, 3.219	384.400, 2.269
1924	384.600, 3.219	384.600, 2.269
1925	384.800, 3.219	384.800, 2.269
1926	385.000, 3.220	385.000, 2.269
1927	385.200, 3.221	385.200, 2.269
1928	385.400, 3.221	385.400, 2.269
1929	385.600, 3.221	385.600, 2.269
1930	385.800, 3.221	385.800, 2.270
1931	386.000, 3.221	386.000, 2.270
1932	386.200, 3.221	386.200, 2.270
1933	386.400, 3.221	386.400, 2.270
1934	386.600, 3.221	386.600, 2.270
1935	386.800, 3.221	386.800, 2.270
1936	387.000, 3.222	387.000, 2.270
1937	387.200, 3.222	387.200, 2.270
1938	387.400, 3.222	387.400, 2.270
1939	387.600, 3.222	387.600, 2.270
1940	387.800, 3.222	387.800, 2.270
1941	388.000, 3.222	388.000, 2.270
1942	388.200, 3.222	388.200, 2.270
1943	388.400, 3.222	388.400, 2.270
1944	388.600, 3.223	388.600, 2.269
1945	388.800, 3.223	388.800, 2.269
1946	389.000, 3.223	389.000, 2.269
1947	389.200, 3.223	389.200, 2.269
1948	389.400, 3.223	389.400, 2.269
1949	389.600, 3.223	389.600, 2.269
1950	389.800, 3.223	389.800, 2.269
1951	390.000, 3.223	390.000, 2.269
1952	390.200, 3.223	390.200, 2.269
1953	390.400, 3.223	390.400, 2.269
1954	390.600, 3.223	390.600, 2.269
1955	390.800, 3.223	390.800, 2.269
1956	391.000, 3.223	391.000, 2.268
1957	391.200, 3.223	391.200, 2.268
1958	391.400, 3.223	391.400, 2.268
1959	391.600, 3.224	391.600, 2.268
1960	391.800, 3.224	391.800, 2.268
1961	392.000, 3.224	392.000, 2.268
1962	392.200, 3.225	392.200, 2.268
1963	392.400, 3.225	392.400, 2.268
1964	392.600, 3.225	392.600, 2.269
1965	392.800, 3.225	392.800, 2.269
1966	393.000, 3.225	393.000, 2.269
1967	393.200, 3.226	393.200, 2.270
1968	393.400, 3.226	393.400, 2.270
1969	393.600, 3.226	393.600, 2.270
1970	393.800, 3.227	393.800, 2.271
1971	394.000, 3.227	394.000, 2.271
1972	394.200, 3.228	394.200, 2.271
1973	394.400, 3.228	394.400, 2.271
1974	394.600, 3.228	394.600, 2.271
1975	394.800, 3.228	394.800, 2.270
1976	395.000, 3.228	395.000, 2.270
1977	395.200, 3.228	395.200, 2.270
1978	395.400, 3.228	395.400, 2.269
1979	395.600, 3.228	395.600, 2.269
1980	395.800, 3.228	395.800, 2.269
1981	396.000, 3.227	396.000, 2.269
1982	396.200, 3.227	396.200, 2.269
1983	396.400, 3.227	396.400, 2.269
1984	396.600, 3.227	396.600, 2.269
1985	396.800, 3.227	396.800, 2.269
1986	397.000, 3.227	397.000, 2.269
1987	397.200, 3.228	397.200, 2.269
1988	397.400, 3.228	397.400, 2.269
1989	397.600, 3.228	397.600, 2.269
1990	397.800, 3.228	397.800, 2.269
1991	398.000, 3.228	398.000, 2.270
1992	398.200, 3.229	398.200, 2.270
1993	398.400, 3.228	398.400, 2.270
1994	398.600, 3.228	398.600, 2.270
1995	398.800, 3.229	398.800, 2.270
1996	399.000, 3.229	399.000, 2.269
1997	399.200, 3.229	399.200, 2.269
1998	399.400, 3.228	399.400, 2.269
1999	399.600, 3.228	399.600, 2.269
[truncated: 13,001 more rows]
