# Supplementary material for: ParB spreading on DNA requires cytidine triphosphate in vitro
Source: eLife journal article supplement (doi:10.7554/elife.53515), 2020-02-20
Supplement: fig6-figsupp2-data1 [file Fig6_supp2_panelA.xlsx]

## Sheet: FORMAT
	sample ID #1	sample ID #2	sample ID #3
data point	time point (sec), wavelength shift (nm)	time point (sec), wavelength shift (nm)	time point (sec), wavelength shift (nm)
1
2
3
.
.
.

## Sheet: Fig6_supp2_panelA_rep1_2_3
	169bp closed parS DNA ParB (C297S)	169bp closed parS DNA ParB (Q35C C297S)	169bp closed parS DNA ParB (C297S) CTP	169bp closed parS DNA ParB (Q35C C297S) CTP	169bp closed parS DNA ParB (C297S) CTP	169bp closed parS DNA ParB (Q35C C297S) CTP	169bp closed parS DNA ParB (C297S) CTP	169bp closed parS DNA ParB (Q35C C297S) CTP
1	0.000, -0.026	0.000, 0.000	0.000, 0.019	0.000, 0.025	0.000, 0.050	0.000, 0.033	0.000, 0.021	0.000, 0.057
2	0.200, -0.025	0.200, 0.000	0.200, 0.018	0.200, 0.024	0.200, 0.048	0.200, 0.032	0.200, 0.021	0.200, 0.055
3	0.400, -0.025	0.400, -0.000	0.400, 0.018	0.400, 0.023	0.400, 0.046	0.400, 0.031	0.400, 0.021	0.400, 0.053
4	0.600, -0.024	0.600, -0.001	0.600, 0.017	0.600, 0.023	0.600, 0.044	0.600, 0.031	0.600, 0.020	0.600, 0.050
5	0.800, -0.023	0.800, -0.001	0.800, 0.016	0.800, 0.022	0.800, 0.041	0.800, 0.030	0.800, 0.020	0.800, 0.048
6	1.000, -0.022	1.000, -0.002	1.000, 0.015	1.000, 0.021	1.000, 0.039	1.000, 0.029	1.000, 0.019	1.000, 0.045
7	1.200, -0.022	1.200, -0.002	1.200, 0.014	1.200, 0.020	1.200, 0.036	1.200, 0.028	1.200, 0.019	1.200, 0.043
8	1.400, -0.021	1.400, -0.003	1.400, 0.013	1.400, 0.019	1.400, 0.034	1.400, 0.026	1.400, 0.018	1.400, 0.040
9	1.600, -0.021	1.600, -0.003	1.600, 0.012	1.600, 0.018	1.600, 0.032	1.600, 0.025	1.600, 0.017	1.600, 0.038
10	1.800, -0.020	1.800, -0.003	1.800, 0.011	1.800, 0.017	1.800, 0.030	1.800, 0.024	1.800, 0.016	1.800, 0.036
11	2.000, -0.020	2.000, -0.004	2.000, 0.010	2.000, 0.016	2.000, 0.029	2.000, 0.022	2.000, 0.016	2.000, 0.034
12	2.200, -0.020	2.200, -0.004	2.200, 0.009	2.200, 0.015	2.200, 0.028	2.200, 0.021	2.200, 0.015	2.200, 0.033
13	2.400, -0.019	2.400, -0.004	2.400, 0.008	2.400, 0.014	2.400, 0.027	2.400, 0.020	2.400, 0.014	2.400, 0.031
14	2.600, -0.019	2.600, -0.004	2.600, 0.008	2.600, 0.014	2.600, 0.026	2.600, 0.019	2.600, 0.013	2.600, 0.030
15	2.800, -0.019	2.800, -0.004	2.800, 0.007	2.800, 0.013	2.800, 0.025	2.800, 0.018	2.800, 0.013	2.800, 0.029
16	3.000, -0.018	3.000, -0.004	3.000, 0.007	3.000, 0.013	3.000, 0.024	3.000, 0.017	3.000, 0.012	3.000, 0.028
17	3.200, -0.018	3.200, -0.005	3.200, 0.006	3.200, 0.012	3.200, 0.024	3.200, 0.016	3.200, 0.011	3.200, 0.026
18	3.400, -0.018	3.400, -0.005	3.400, 0.006	3.400, 0.012	3.400, 0.023	3.400, 0.016	3.400, 0.011	3.400, 0.025
19	3.600, -0.017	3.600, -0.005	3.600, 0.006	3.600, 0.011	3.600, 0.022	3.600, 0.015	3.600, 0.011	3.600, 0.024
20	3.800, -0.017	3.800, -0.005	3.800, 0.005	3.800, 0.010	3.800, 0.021	3.800, 0.014	3.800, 0.010	3.800, 0.023
21	4.000, -0.017	4.000, -0.004	4.000, 0.005	4.000, 0.010	4.000, 0.020	4.000, 0.014	4.000, 0.010	4.000, 0.022
22	4.200, -0.016	4.200, -0.004	4.200, 0.005	4.200, 0.009	4.200, 0.019	4.200, 0.014	4.200, 0.010	4.200, 0.021
23	4.400, -0.016	4.400, -0.004	4.400, 0.004	4.400, 0.008	4.400, 0.019	4.400, 0.013	4.400, 0.009	4.400, 0.020
24	4.600, -0.016	4.600, -0.004	4.600, 0.004	4.600, 0.008	4.600, 0.018	4.600, 0.013	4.600, 0.009	4.600, 0.020
25	4.800, -0.016	4.800, -0.005	4.800, 0.004	4.800, 0.007	4.800, 0.017	4.800, 0.013	4.800, 0.009	4.800, 0.019
26	5.000, -0.015	5.000, -0.005	5.000, 0.004	5.000, 0.006	5.000, 0.017	5.000, 0.013	5.000, 0.008	5.000, 0.018
27	5.200, -0.015	5.200, -0.005	5.200, 0.004	5.200, 0.006	5.200, 0.016	5.200, 0.012	5.200, 0.008	5.200, 0.018
28	5.400, -0.015	5.400, -0.005	5.400, 0.003	5.400, 0.005	5.400, 0.016	5.400, 0.011	5.400, 0.007	5.400, 0.017
29	5.600, -0.015	5.600, -0.004	5.600, 0.003	5.600, 0.005	5.600, 0.015	5.600, 0.010	5.600, 0.007	5.600, 0.017
30	5.800, -0.014	5.800, -0.004	5.800, 0.003	5.800, 0.004	5.800, 0.014	5.800, 0.010	5.800, 0.007	5.800, 0.016
31	6.000, -0.014	6.000, -0.004	6.000, 0.003	6.000, 0.004	6.000, 0.014	6.000, 0.009	6.000, 0.006	6.000, 0.015
32	6.200, -0.014	6.200, -0.004	6.200, 0.003	6.200, 0.004	6.200, 0.013	6.200, 0.008	6.200, 0.006	6.200, 0.015
33	6.400, -0.014	6.400, -0.004	6.400, 0.003	6.400, 0.003	6.400, 0.012	6.400, 0.008	6.400, 0.005	6.400, 0.014
34	6.600, -0.013	6.600, -0.005	6.600, 0.003	6.600, 0.003	6.600, 0.012	6.600, 0.008	6.600, 0.005	6.600, 0.014
35	6.800, -0.013	6.800, -0.005	6.800, 0.003	6.800, 0.003	6.800, 0.011	6.800, 0.007	6.800, 0.004	6.800, 0.013
36	7.000, -0.013	7.000, -0.005	7.000, 0.003	7.000, 0.003	7.000, 0.011	7.000, 0.007	7.000, 0.004	7.000, 0.013
37	7.200, -0.013	7.200, -0.005	7.200, 0.002	7.200, 0.002	7.200, 0.010	7.200, 0.007	7.200, 0.004	7.200, 0.012
38	7.400, -0.012	7.400, -0.005	7.400, 0.002	7.400, 0.002	7.400, 0.010	7.400, 0.007	7.400, 0.004	7.400, 0.012
39	7.600, -0.012	7.600, -0.004	7.600, 0.002	7.600, 0.002	7.600, 0.009	7.600, 0.007	7.600, 0.003	7.600, 0.011
40	7.800, -0.012	7.800, -0.004	7.800, 0.002	7.800, 0.002	7.800, 0.008	7.800, 0.007	7.800, 0.003	7.800, 0.011
41	8.000, -0.012	8.000, -0.004	8.000, 0.002	8.000, 0.002	8.000, 0.008	8.000, 0.007	8.000, 0.002	8.000, 0.010
42	8.200, -0.011	8.200, -0.004	8.200, 0.002	8.200, 0.002	8.200, 0.007	8.200, 0.007	8.200, 0.002	8.200, 0.010
43	8.400, -0.011	8.400, -0.004	8.400, 0.001	8.400, 0.002	8.400, 0.007	8.400, 0.007	8.400, 0.002	8.400, 0.009
44	8.600, -0.010	8.600, -0.004	8.600, 0.001	8.600, 0.002	8.600, 0.006	8.600, 0.007	8.600, 0.002	8.600, 0.009
45	8.800, -0.010	8.800, -0.003	8.800, 0.001	8.800, 0.001	8.800, 0.006	8.800, 0.006	8.800, 0.002	8.800, 0.009
46	9.000, -0.009	9.000, -0.003	9.000, 0.001	9.000, 0.001	9.000, 0.006	9.000, 0.006	9.000, 0.002	9.000, 0.008
47	9.200, -0.009	9.200, -0.003	9.200, 0.001	9.200, 0.001	9.200, 0.005	9.200, 0.006	9.200, 0.002	9.200, 0.008
48	9.400, -0.008	9.400, -0.003	9.400, 0.001	9.400, 0.001	9.400, 0.005	9.400, 0.006	9.400, 0.002	9.400, 0.008
49	9.600, -0.008	9.600, -0.003	9.600, 0.001	9.600, 0.001	9.600, 0.004	9.600, 0.005	9.600, 0.002	9.600, 0.007
50	9.800, -0.008	9.800, -0.003	9.800, 0.001	9.800, 0.001	9.800, 0.004	9.800, 0.005	9.800, 0.001	9.800, 0.007
51	10.000, -0.007	10.000, -0.003	10.000, 0.001	10.000, 0.001	10.000, 0.003	10.000, 0.005	10.000, 0.001	10.000, 0.007
52	10.200, -0.007	10.200, -0.003	10.200, 0.001	10.200, 0.000	10.200, 0.003	10.200, 0.004	10.200, 0.001	10.200, 0.006
53	10.400, -0.007	10.400, -0.004	10.400, 0.001	10.400, 0.000	10.400, 0.003	10.400, 0.004	10.400, 0.001	10.400, 0.006
54	10.600, -0.007	10.600, -0.004	10.600, 0.001	10.600, 0.000	10.600, 0.003	10.600, 0.004	10.600, 0.001	10.600, 0.006
55	10.800, -0.007	10.800, -0.004	10.800, 0.001	10.800, 0.000	10.800, 0.003	10.800, 0.003	10.800, 0.000	10.800, 0.006
56	11.000, -0.007	11.000, -0.004	11.000, 0.001	11.000, 0.000	11.000, 0.002	11.000, 0.003	11.000, 0.000	11.000, 0.006
57	11.200, -0.007	11.200, -0.004	11.200, 0.001	11.200, 0.000	11.200, 0.002	11.200, 0.003	11.200, 0.000	11.200, 0.006
58	11.400, -0.007	11.400, -0.003	11.400, 0.001	11.400, -0.000	11.400, 0.002	11.400, 0.003	11.400, -0.000	11.400, 0.006
59	11.600, -0.007	11.600, -0.003	11.600, 0.001	11.600, -0.000	11.600, 0.002	11.600, 0.003	11.600, -0.000	11.600, 0.005
60	11.800, -0.007	11.800, -0.003	11.800, 0.001	11.800, -0.001	11.800, 0.002	11.800, 0.002	11.800, -0.000	11.800, 0.005
61	12.000, -0.007	12.000, -0.003	12.000, 0.001	12.000, -0.001	12.000, 0.002	12.000, 0.002	12.000, -0.000	12.000, 0.005
62	12.200, -0.007	12.200, -0.003	12.200, 0.001	12.200, -0.001	12.200, 0.002	12.200, 0.002	12.200, -0.001	12.200, 0.005
63	12.400, -0.007	12.400, -0.003	12.400, 0.001	12.400, -0.001	12.400, 0.002	12.400, 0.002	12.400, -0.001	12.400, 0.004
64	12.600, -0.007	12.600, -0.003	12.600, 0.001	12.600, -0.001	12.600, 0.002	12.600, 0.002	12.600, -0.000	12.600, 0.004
65	12.800, -0.006	12.800, -0.003	12.800, 0.002	12.800, -0.001	12.800, 0.002	12.800, 0.002	12.800, -0.000	12.800, 0.004
66	13.000, -0.006	13.000, -0.003	13.000, 0.002	13.000, -0.002	13.000, 0.002	13.000, 0.002	13.000, 0.000	13.000, 0.003
67	13.200, -0.005	13.200, -0.003	13.200, 0.002	13.200, -0.002	13.200, 0.002	13.200, 0.002	13.200, 0.000	13.200, 0.003
68	13.400, -0.005	13.400, -0.003	13.400, 0.002	13.400, -0.002	13.400, 0.002	13.400, 0.002	13.400, 0.000	13.400, 0.003
69	13.600, -0.005	13.600, -0.003	13.600, 0.002	13.600, -0.002	13.600, 0.002	13.600, 0.002	13.600, 0.000	13.600, 0.003
70	13.800, -0.005	13.800, -0.003	13.800, 0.002	13.800, -0.002	13.800, 0.002	13.800, 0.002	13.800, 0.000	13.800, 0.002
71	14.000, -0.005	14.000, -0.003	14.000, 0.002	14.000, -0.002	14.000, 0.001	14.000, 0.002	14.000, 0.000	14.000, 0.002
72	14.200, -0.005	14.200, -0.003	14.200, 0.002	14.200, -0.002	14.200, 0.001	14.200, 0.002	14.200, 0.000	14.200, 0.002
73	14.400, -0.005	14.400, -0.003	14.400, 0.002	14.400, -0.001	14.400, 0.001	14.400, 0.002	14.400, 0.000	14.400, 0.002
74	14.600, -0.005	14.600, -0.003	14.600, 0.001	14.600, -0.001	14.600, 0.001	14.600, 0.002	14.600, 0.000	14.600, 0.002
75	14.800, -0.005	14.800, -0.003	14.800, 0.001	14.800, -0.001	14.800, 0.001	14.800, 0.002	14.800, 0.000	14.800, 0.002
76	15.000, -0.005	15.000, -0.002	15.000, 0.001	15.000, -0.001	15.000, 0.000	15.000, 0.002	15.000, 0.000	15.000, 0.003
77	15.200, -0.005	15.200, -0.002	15.200, 0.001	15.200, -0.001	15.200, 0.000	15.200, 0.002	15.200, 0.000	15.200, 0.003
78	15.400, -0.005	15.400, -0.002	15.400, 0.000	15.400, -0.001	15.400, -0.000	15.400, 0.002	15.400, 0.001	15.400, 0.003
79	15.600, -0.005	15.600, -0.002	15.600, 0.000	15.600, -0.001	15.600, -0.000	15.600, 0.002	15.600, 0.001	15.600, 0.003
80	15.800, -0.005	15.800, -0.002	15.800, -0.000	15.800, -0.001	15.800, -0.000	15.800, 0.002	15.800, 0.001	15.800, 0.003
81	16.000, -0.005	16.000, -0.001	16.000, -0.001	16.000, -0.001	16.000, -0.000	16.000, 0.002	16.000, 0.001	16.000, 0.003
82	16.200, -0.005	16.200, -0.001	16.200, -0.001	16.200, -0.001	16.200, -0.000	16.200, 0.002	16.200, 0.000	16.200, 0.003
83	16.400, -0.005	16.400, -0.002	16.400, -0.001	16.400, -0.001	16.400, -0.000	16.400, 0.001	16.400, 0.000	16.400, 0.003
84	16.600, -0.005	16.600, -0.002	16.600, -0.000	16.600, -0.001	16.600, 0.000	16.600, 0.001	16.600, -0.000	16.600, 0.002
85	16.800, -0.005	16.800, -0.002	16.800, -0.000	16.800, -0.001	16.800, 0.000	16.800, 0.001	16.800, -0.000	16.800, 0.002
86	17.000, -0.005	17.000, -0.002	17.000, 0.000	17.000, -0.001	17.000, 0.001	17.000, 0.001	17.000, -0.000	17.000, 0.002
87	17.200, -0.004	17.200, -0.002	17.200, 0.000	17.200, -0.002	17.200, 0.001	17.200, 0.001	17.200, -0.000	17.200, 0.002
88	17.400, -0.004	17.400, -0.002	17.400, 0.000	17.400, -0.002	17.400, 0.001	17.400, 0.001	17.400, -0.001	17.400, 0.001
89	17.600, -0.004	17.600, -0.002	17.600, 0.000	17.600, -0.002	17.600, 0.001	17.600, 0.001	17.600, -0.001	17.600, 0.001
90	17.800, -0.004	17.800, -0.002	17.800, 0.000	17.800, -0.003	17.800, 0.001	17.800, 0.001	17.800, -0.001	17.800, 0.000
91	18.000, -0.004	18.000, -0.002	18.000, 0.000	18.000, -0.003	18.000, 0.001	18.000, 0.001	18.000, -0.001	18.000, -0.000
92	18.200, -0.004	18.200, -0.002	18.200, 0.000	18.200, -0.003	18.200, 0.001	18.200, 0.001	18.200, -0.001	18.200, -0.001
93	18.400, -0.004	18.400, -0.002	18.400, 0.001	18.400, -0.003	18.400, 0.000	18.400, 0.001	18.400, -0.001	18.400, -0.001
94	18.600, -0.003	18.600, -0.001	18.600, 0.001	18.600, -0.003	18.600, 0.000	18.600, 0.001	18.600, -0.001	18.600, -0.001
95	18.800, -0.003	18.800, -0.001	18.800, 0.000	18.800, -0.003	18.800, 0.000	18.800, 0.001	18.800, -0.001	18.800, -0.000
96	19.000, -0.003	19.000, -0.001	19.000, 0.000	19.000, -0.003	19.000, -0.000	19.000, 0.001	19.000, -0.001	19.000, -0.000
97	19.200, -0.003	19.200, -0.001	19.200, 0.000	19.200, -0.003	19.200, -0.000	19.200, 0.002	19.200, -0.000	19.200, 0.000
98	19.400, -0.002	19.400, -0.001	19.400, -0.000	19.400, -0.003	19.400, -0.001	19.400, 0.002	19.400, -0.000	19.400, 0.000
99	19.600, -0.002	19.600, -0.001	19.600, -0.000	19.600, -0.002	19.600, -0.001	19.600, 0.002	19.600, 0.000	19.600, 0.001
100	19.800, -0.002	19.800, -0.001	19.800, -0.001	19.800, -0.002	19.800, -0.001	19.800, 0.001	19.800, 0.000	19.800, 0.001
101	20.000, -0.002	20.000, -0.002	20.000, -0.001	20.000, -0.002	20.000, -0.001	20.000, 0.001	20.000, 0.000	20.000, 0.001
102	20.200, -0.002	20.200, -0.002	20.200, -0.001	20.200, -0.002	20.200, -0.001	20.200, 0.001	20.200, 0.000	20.200, 0.001
103	20.400, -0.002	20.400, -0.002	20.400, -0.001	20.400, -0.002	20.400, -0.000	20.400, 0.001	20.400, 0.000	20.400, 0.001
104	20.600, -0.002	20.600, -0.002	20.600, -0.000	20.600, -0.002	20.600, -0.000	20.600, 0.001	20.600, 0.001	20.600, 0.001
105	20.800, -0.002	20.800, -0.002	20.800, -0.000	20.800, -0.003	20.800, -0.000	20.800, 0.001	20.800, 0.001	20.800, 0.001
106	21.000, -0.002	21.000, -0.002	21.000, -0.000	21.000, -0.003	21.000, -0.000	21.000, 0.001	21.000, 0.001	21.000, 0.001
107	21.200, -0.002	21.200, -0.002	21.200, -0.000	21.200, -0.003	21.200, -0.000	21.200, 0.001	21.200, 0.001	21.200, 0.001
108	21.400, -0.002	21.400, -0.002	21.400, -0.000	21.400, -0.003	21.400, 0.000	21.400, 0.001	21.400, 0.001	21.400, 0.001
109	21.600, -0.002	21.600, -0.002	21.600, -0.000	21.600, -0.003	21.600, 0.000	21.600, 0.002	21.600, 0.001	21.600, 0.001
110	21.800, -0.003	21.800, -0.002	21.800, -0.000	21.800, -0.003	21.800, 0.000	21.800, 0.002	21.800, 0.000	21.800, 0.001
111	22.000, -0.003	22.000, -0.001	22.000, 0.000	22.000, -0.004	22.000, 0.000	22.000, 0.002	22.000, 0.000	22.000, 0.001
112	22.200, -0.003	22.200, -0.001	22.200, 0.000	22.200, -0.004	22.200, 0.000	22.200, 0.002	22.200, 0.000	22.200, 0.001
113	22.400, -0.003	22.400, -0.000	22.400, 0.000	22.400, -0.004	22.400, 0.000	22.400, 0.002	22.400, 0.000	22.400, 0.001
114	22.600, -0.003	22.600, -0.000	22.600, 0.000	22.600, -0.004	22.600, 0.000	22.600, 0.002	22.600, 0.000	22.600, 0.002
115	22.800, -0.003	22.800, 0.000	22.800, 0.001	22.800, -0.004	22.800, -0.000	22.800, 0.002	22.800, 0.000	22.800, 0.002
116	23.000, -0.003	23.000, 0.001	23.000, 0.000	23.000, -0.004	23.000, -0.000	23.000, 0.002	23.000, 0.000	23.000, 0.001
117	23.200, -0.003	23.200, 0.001	23.200, 0.000	23.200, -0.004	23.200, -0.000	23.200, 0.001	23.200, -0.000	23.200, 0.001
118	23.400, -0.003	23.400, 0.001	23.400, 0.000	23.400, -0.003	23.400, -0.000	23.400, 0.001	23.400, -0.000	23.400, 0.001
119	23.600, -0.003	23.600, 0.002	23.600, -0.000	23.600, -0.003	23.600, -0.000	23.600, 0.001	23.600, -0.001	23.600, 0.001
120	23.800, -0.002	23.800, 0.002	23.800, -0.000	23.800, -0.003	23.800, -0.000	23.800, 0.001	23.800, -0.001	23.800, 0.001
121	24.000, -0.002	24.000, 0.002	24.000, -0.000	24.000, -0.003	24.000, -0.000	24.000, 0.001	24.000, -0.001	24.000, 0.000
122	24.200, -0.002	24.200, 0.002	24.200, -0.001	24.200, -0.003	24.200, -0.000	24.200, 0.001	24.200, -0.001	24.200, 0.000
123	24.400, -0.002	24.400, 0.002	24.400, -0.000	24.400, -0.002	24.400, -0.001	24.400, 0.001	24.400, -0.001	24.400, 0.000
124	24.600, -0.001	24.600, 0.002	24.600, -0.000	24.600, -0.002	24.600, -0.001	24.600, 0.001	24.600, -0.000	24.600, 0.000
125	24.800, -0.001	24.800, 0.001	24.800, 0.000	24.800, -0.002	24.800, -0.001	24.800, 0.001	24.800, -0.000	24.800, 0.000
126	25.000, -0.001	25.000, 0.001	25.000, 0.000	25.000, -0.001	25.000, -0.001	25.000, 0.001	25.000, -0.000	25.000, 0.001
127	25.200, -0.001	25.200, 0.001	25.200, 0.001	25.200, -0.001	25.200, -0.001	25.200, 0.001	25.200, -0.000	25.200, 0.001
128	25.400, -0.001	25.400, 0.000	25.400, 0.001	25.400, -0.001	25.400, -0.001	25.400, 0.001	25.400, -0.000	25.400, 0.001
129	25.600, -0.001	25.600, 0.000	25.600, 0.001	25.600, -0.001	25.600, -0.001	25.600, 0.002	25.600, -0.000	25.600, 0.001
130	25.800, -0.001	25.800, 0.000	25.800, 0.001	25.800, -0.001	25.800, -0.001	25.800, 0.002	25.800, 0.000	25.800, 0.001
131	26.000, -0.001	26.000, -0.000	26.000, 0.001	26.000, -0.001	26.000, -0.001	26.000, 0.001	26.000, 0.000	26.000, 0.001
132	26.200, -0.001	26.200, -0.000	26.200, 0.002	26.200, -0.001	26.200, -0.001	26.200, 0.001	26.200, 0.000	26.200, 0.001
133	26.400, -0.001	26.400, -0.001	26.400, 0.002	26.400, -0.001	26.400, -0.001	26.400, 0.001	26.400, 0.001	26.400, 0.002
134	26.600, -0.001	26.600, -0.001	26.600, 0.002	26.600, -0.001	26.600, -0.001	26.600, 0.001	26.600, 0.001	26.600, 0.001
135	26.800, -0.001	26.800, -0.001	26.800, 0.002	26.800, -0.001	26.800, -0.001	26.800, 0.000	26.800, 0.000	26.800, 0.001
136	27.000, -0.001	27.000, -0.001	27.000, 0.002	27.000, -0.001	27.000, -0.001	27.000, 0.000	27.000, 0.000	27.000, 0.001
137	27.200, -0.001	27.200, -0.001	27.200, 0.002	27.200, -0.001	27.200, -0.001	27.200, -0.000	27.200, 0.000	27.200, 0.001
138	27.400, -0.001	27.400, -0.001	27.400, 0.001	27.400, -0.001	27.400, -0.001	27.400, -0.000	27.400, 0.000	27.400, 0.000
139	27.600, -0.001	27.600, -0.001	27.600, 0.001	27.600, -0.001	27.600, -0.001	27.600, -0.001	27.600, -0.000	27.600, 0.000
140	27.800, -0.000	27.800, -0.000	27.800, 0.001	27.800, -0.001	27.800, -0.000	27.800, -0.001	27.800, -0.000	27.800, -0.000
141	28.000, -0.000	28.000, -0.000	28.000, 0.000	28.000, -0.001	28.000, -0.000	28.000, -0.001	28.000, -0.000	28.000, -0.000
142	28.200, 0.000	28.200, -0.000	28.200, -0.000	28.200, -0.000	28.200, -0.000	28.200, -0.000	28.200, -0.000	28.200, -0.000
143	28.400, 0.000	28.400, 0.000	28.400, -0.000	28.400, -0.000	28.400, -0.000	28.400, -0.000	28.400, -0.000	28.400, -0.000
144	28.600, 0.000	28.600, 0.000	28.600, -0.000	28.600, 0.000	28.600, 0.000	28.600, -0.000	28.600, -0.000	28.600, -0.000
145	28.800, 0.000	28.800, 0.000	28.800, -0.000	28.800, 0.000	28.800, 0.000	28.800, 0.000	28.800, -0.000	28.800, -0.000
146	29.000, 0.001	29.000, 0.001	29.000, -0.001	29.000, 0.001	29.000, 0.000	29.000, 0.000	29.000, -0.000	29.000, -0.000
147	29.200, 0.001	29.200, 0.001	29.200, -0.001	29.200, 0.001	29.200, 0.001	29.200, 0.000	29.200, -0.000	29.200, -0.000
148	29.400, 0.001	29.400, 0.001	29.400, -0.001	29.400, 0.001	29.400, 0.001	29.400, 0.001	29.400, 0.000	29.400, -0.000
149	29.600, 0.001	29.600, 0.001	29.600, -0.001	29.600, 0.001	29.600, 0.001	29.600, 0.001	29.600, 0.000	29.600, -0.000
150	29.800, 0.001	29.800, 0.001	29.800, -0.002	29.800, 0.001	29.800, 0.001	29.800, 0.001	29.800, 0.000	29.800, 0.000
151	30.000, 0.000	30.000, 0.000	30.000, 0.000	30.000, 0.000	30.000, 0.000	30.000, 0.000	30.000, 0.000	30.000, 0.000
152	30.200, 0.017	30.200, 0.013	30.200, 0.011	30.200, 0.007	30.200, 0.012	30.200, 0.006	30.200, 0.009	30.200, 0.005
153	30.400, 0.036	30.400, 0.029	30.400, 0.025	30.400, 0.016	30.400, 0.026	30.400, 0.013	30.400, 0.021	30.400, 0.012
154	30.600, 0.058	30.600, 0.047	30.600, 0.041	30.600, 0.026	30.600, 0.043	30.600, 0.021	30.600, 0.035	30.600, 0.020
155	30.800, 0.081	30.800, 0.067	30.800, 0.059	30.800, 0.037	30.800, 0.063	30.800, 0.031	30.800, 0.051	30.800, 0.029
156	31.000, 0.106	31.000, 0.088	31.000, 0.079	31.000, 0.050	31.000, 0.084	31.000, 0.042	31.000, 0.068	31.000, 0.039
157	31.200, 0.130	31.200, 0.110	31.200, 0.100	31.200, 0.065	31.200, 0.106	31.200, 0.055	31.200, 0.087	31.200, 0.051
158	31.400, 0.155	31.400, 0.132	31.400, 0.123	31.400, 0.080	31.400, 0.130	31.400, 0.068	31.400, 0.108	31.400, 0.063
159	31.600, 0.178	31.600, 0.154	31.600, 0.146	31.600, 0.096	31.600, 0.155	31.600, 0.082	31.600, 0.129	31.600, 0.076
160	31.800, 0.199	31.800, 0.174	31.800, 0.170	31.800, 0.113	31.800, 0.180	31.800, 0.096	31.800, 0.150	31.800, 0.089
161	32.000, 0.217	32.000, 0.193	32.000, 0.193	32.000, 0.129	32.000, 0.204	32.000, 0.111	32.000, 0.172	32.000, 0.102
162	32.200, 0.231	32.200, 0.208	32.200, 0.215	32.200, 0.145	32.200, 0.226	32.200, 0.125	32.200, 0.193	32.200, 0.115
163	32.400, 0.242	32.400, 0.222	32.400, 0.236	32.400, 0.161	32.400, 0.248	32.400, 0.139	32.400, 0.212	32.400, 0.128
164	32.600, 0.250	32.600, 0.234	32.600, 0.257	32.600, 0.177	32.600, 0.269	32.600, 0.153	32.600, 0.232	32.600, 0.141
165	32.800, 0.257	32.800, 0.244	32.800, 0.278	32.800, 0.192	32.800, 0.290	32.800, 0.167	32.800, 0.251	32.800, 0.153
166	33.000, 0.262	33.000, 0.252	33.000, 0.298	33.000, 0.208	33.000, 0.310	33.000, 0.182	33.000, 0.270	33.000, 0.166
167	33.200, 0.265	33.200, 0.259	33.200, 0.319	33.200, 0.224	33.200, 0.331	33.200, 0.196	33.200, 0.289	33.200, 0.179
168	33.400, 0.268	33.400, 0.265	33.400, 0.339	33.400, 0.239	33.400, 0.351	33.400, 0.210	33.400, 0.308	33.400, 0.191
169	33.600, 0.271	33.600, 0.270	33.600, 0.359	33.600, 0.255	33.600, 0.371	33.600, 0.223	33.600, 0.327	33.600, 0.204
170	33.800, 0.273	33.800, 0.274	33.800, 0.379	33.800, 0.270	33.800, 0.391	33.800, 0.237	33.800, 0.346	33.800, 0.216
171	34.000, 0.274	34.000, 0.277	34.000, 0.399	34.000, 0.285	34.000, 0.411	34.000, 0.251	34.000, 0.365	34.000, 0.229
172	34.200, 0.276	34.200, 0.280	34.200, 0.419	34.200, 0.300	34.200, 0.431	34.200, 0.265	34.200, 0.384	34.200, 0.241
173	34.400, 0.277	34.400, 0.282	34.400, 0.439	34.400, 0.315	34.400, 0.450	34.400, 0.279	34.400, 0.403	34.400, 0.254
174	34.600, 0.278	34.600, 0.284	34.600, 0.459	34.600, 0.330	34.600, 0.470	34.600, 0.292	34.600, 0.422	34.600, 0.266
175	34.800, 0.279	34.800, 0.286	34.800, 0.479	34.800, 0.345	34.800, 0.489	34.800, 0.306	34.800, 0.441	34.800, 0.279
176	35.000, 0.280	35.000, 0.288	35.000, 0.498	35.000, 0.360	35.000, 0.508	35.000, 0.320	35.000, 0.459	35.000, 0.292
177	35.200, 0.281	35.200, 0.289	35.200, 0.518	35.200, 0.375	35.200, 0.527	35.200, 0.334	35.200, 0.478	35.200, 0.304
178	35.400, 0.282	35.400, 0.290	35.400, 0.537	35.400, 0.390	35.400, 0.546	35.400, 0.347	35.400, 0.496	35.400, 0.317
179	35.600, 0.283	35.600, 0.292	35.600, 0.556	35.600, 0.405	35.600, 0.565	35.600, 0.361	35.600, 0.515	35.600, 0.329
180	35.800, 0.283	35.800, 0.293	35.800, 0.574	35.800, 0.420	35.800, 0.583	35.800, 0.374	35.800, 0.533	35.800, 0.342
181	36.000, 0.284	36.000, 0.294	36.000, 0.593	36.000, 0.435	36.000, 0.601	36.000, 0.388	36.000, 0.551	36.000, 0.354
182	36.200, 0.285	36.200, 0.295	36.200, 0.611	36.200, 0.449	36.200, 0.619	36.200, 0.401	36.200, 0.569	36.200, 0.367
183	36.400, 0.285	36.400, 0.296	36.400, 0.628	36.400, 0.464	36.400, 0.637	36.400, 0.414	36.400, 0.587	36.400, 0.379
184	36.600, 0.286	36.600, 0.297	36.600, 0.646	36.600, 0.478	36.600, 0.655	36.600, 0.428	36.600, 0.605	36.600, 0.391
185	36.800, 0.287	36.800, 0.298	36.800, 0.664	36.800, 0.493	36.800, 0.672	36.800, 0.441	36.800, 0.622	36.800, 0.403
186	37.000, 0.287	37.000, 0.298	37.000, 0.682	37.000, 0.508	37.000, 0.690	37.000, 0.454	37.000, 0.640	37.000, 0.415
187	37.200, 0.288	37.200, 0.299	37.200, 0.699	37.200, 0.522	37.200, 0.708	37.200, 0.467	37.200, 0.657	37.200, 0.427
188	37.400, 0.289	37.400, 0.300	37.400, 0.717	37.400, 0.537	37.400, 0.726	37.400, 0.479	37.400, 0.674	37.400, 0.439
189	37.600, 0.289	37.600, 0.300	37.600, 0.735	37.600, 0.551	37.600, 0.744	37.600, 0.492	37.600, 0.691	37.600, 0.451
190	37.800, 0.290	37.800, 0.301	37.800, 0.752	37.800, 0.565	37.800, 0.762	37.800, 0.505	37.800, 0.709	37.800, 0.464
191	38.000, 0.290	38.000, 0.302	38.000, 0.770	38.000, 0.579	38.000, 0.780	38.000, 0.519	38.000, 0.726	38.000, 0.475
192	38.200, 0.291	38.200, 0.303	38.200, 0.787	38.200, 0.593	38.200, 0.797	38.200, 0.532	38.200, 0.743	38.200, 0.487
193	38.400, 0.291	38.400, 0.303	38.400, 0.805	38.400, 0.607	38.400, 0.815	38.400, 0.545	38.400, 0.760	38.400, 0.498
194	38.600, 0.292	38.600, 0.304	38.600, 0.822	38.600, 0.621	38.600, 0.832	38.600, 0.558	38.600, 0.776	38.600, 0.510
195	38.800, 0.292	38.800, 0.305	38.800, 0.839	38.800, 0.635	38.800, 0.849	38.800, 0.570	38.800, 0.793	38.800, 0.521
196	39.000, 0.293	39.000, 0.306	39.000, 0.856	39.000, 0.649	39.000, 0.865	39.000, 0.583	39.000, 0.810	39.000, 0.533
197	39.200, 0.293	39.200, 0.307	39.200, 0.873	39.200, 0.663	39.200, 0.882	39.200, 0.596	39.200, 0.826	39.200, 0.544
198	39.400, 0.294	39.400, 0.307	39.400, 0.890	39.400, 0.677	39.400, 0.898	39.400, 0.609	39.400, 0.842	39.400, 0.555
199	39.600, 0.294	39.600, 0.308	39.600, 0.907	39.600, 0.690	39.600, 0.914	39.600, 0.621	39.600, 0.858	39.600, 0.567
200	39.800, 0.295	39.800, 0.309	39.800, 0.923	39.800, 0.704	39.800, 0.930	39.800, 0.634	39.800, 0.874	39.800, 0.578
201	40.000, 0.295	40.000, 0.309	40.000, 0.940	40.000, 0.718	40.000, 0.946	40.000, 0.646	40.000, 0.890	40.000, 0.589
202	40.200, 0.296	40.200, 0.310	40.200, 0.956	40.200, 0.732	40.200, 0.961	40.200, 0.658	40.200, 0.906	40.200, 0.600
203	40.400, 0.297	40.400, 0.311	40.400, 0.972	40.400, 0.745	40.400, 0.977	40.400, 0.670	40.400, 0.922	40.400, 0.611
204	40.600, 0.297	40.600, 0.312	40.600, 0.988	40.600, 0.759	40.600, 0.993	40.600, 0.682	40.600, 0.938	40.600, 0.622
205	40.800, 0.298	40.800, 0.312	40.800, 1.004	40.800, 0.772	40.800, 1.008	40.800, 0.694	40.800, 0.953	40.800, 0.633
206	41.000, 0.299	41.000, 0.313	41.000, 1.020	41.000, 0.785	41.000, 1.024	41.000, 0.706	41.000, 0.969	41.000, 0.644
207	41.200, 0.299	41.200, 0.313	41.200, 1.035	41.200, 0.799	41.200, 1.040	41.200, 0.718	41.200, 0.984	41.200, 0.655
208	41.400, 0.300	41.400, 0.314	41.400, 1.051	41.400, 0.812	41.400, 1.055	41.400, 0.730	41.400, 1.000	41.400, 0.666
209	41.600, 0.301	41.600, 0.314	41.600, 1.066	41.600, 0.825	41.600, 1.071	41.600, 0.742	41.600, 1.015	41.600, 0.677
210	41.800, 0.301	41.800, 0.315	41.800, 1.082	41.800, 0.838	41.800, 1.086	41.800, 0.754	41.800, 1.031	41.800, 0.687
211	42.000, 0.301	42.000, 0.315	42.000, 1.097	42.000, 0.850	42.000, 1.101	42.000, 0.766	42.000, 1.046	42.000, 0.698
212	42.200, 0.302	42.200, 0.316	42.200, 1.112	42.200, 0.863	42.200, 1.116	42.200, 0.778	42.200, 1.061	42.200, 0.709
213	42.400, 0.302	42.400, 0.316	42.400, 1.127	42.400, 0.876	42.400, 1.131	42.400, 0.789	42.400, 1.076	42.400, 0.719
214	42.600, 0.302	42.600, 0.317	42.600, 1.142	42.600, 0.889	42.600, 1.146	42.600, 0.801	42.600, 1.091	42.600, 0.730
215	42.800, 0.303	42.800, 0.317	42.800, 1.156	42.800, 0.901	42.800, 1.160	42.800, 0.813	42.800, 1.105	42.800, 0.740
216	43.000, 0.303	43.000, 0.318	43.000, 1.171	43.000, 0.914	43.000, 1.174	43.000, 0.824	43.000, 1.119	43.000, 0.751
217	43.200, 0.304	43.200, 0.318	43.200, 1.186	43.200, 0.926	43.200, 1.189	43.200, 0.836	43.200, 1.133	43.200, 0.761
218	43.400, 0.304	43.400, 0.318	43.400, 1.200	43.400, 0.939	43.400, 1.203	43.400, 0.847	43.400, 1.148	43.400, 0.771
219	43.600, 0.305	43.600, 0.319	43.600, 1.214	43.600, 0.951	43.600, 1.217	43.600, 0.859	43.600, 1.162	43.600, 0.782
220	43.800, 0.305	43.800, 0.320	43.800, 1.229	43.800, 0.964	43.800, 1.232	43.800, 0.870	43.800, 1.176	43.800, 0.792
221	44.000, 0.306	44.000, 0.320	44.000, 1.243	44.000, 0.976	44.000, 1.246	44.000, 0.881	44.000, 1.190	44.000, 0.802
222	44.200, 0.306	44.200, 0.321	44.200, 1.257	44.200, 0.989	44.200, 1.260	44.200, 0.893	44.200, 1.204	44.200, 0.813
223	44.400, 0.307	44.400, 0.321	44.400, 1.271	44.400, 1.001	44.400, 1.274	44.400, 0.904	44.400, 1.218	44.400, 0.823
224	44.600, 0.307	44.600, 0.322	44.600, 1.285	44.600, 1.012	44.600, 1.288	44.600, 0.915	44.600, 1.232	44.600, 0.833
225	44.800, 0.308	44.800, 0.322	44.800, 1.298	44.800, 1.024	44.800, 1.302	44.800, 0.926	44.800, 1.246	44.800, 0.843
226	45.000, 0.309	45.000, 0.323	45.000, 1.312	45.000, 1.036	45.000, 1.316	45.000, 0.938	45.000, 1.260	45.000, 0.852
227	45.200, 0.309	45.200, 0.324	45.200, 1.325	45.200, 1.048	45.200, 1.329	45.200, 0.949	45.200, 1.274	45.200, 0.862
228	45.400, 0.310	45.400, 0.324	45.400, 1.339	45.400, 1.059	45.400, 1.343	45.400, 0.960	45.400, 1.289	45.400, 0.872
229	45.600, 0.310	45.600, 0.325	45.600, 1.352	45.600, 1.071	45.600, 1.356	45.600, 0.971	45.600, 1.303	45.600, 0.882
230	45.800, 0.310	45.800, 0.326	45.800, 1.365	45.800, 1.083	45.800, 1.369	45.800, 0.983	45.800, 1.316	45.800, 0.891
231	46.000, 0.310	46.000, 0.326	46.000, 1.378	46.000, 1.094	46.000, 1.382	46.000, 0.994	46.000, 1.330	46.000, 0.901
232	46.200, 0.311	46.200, 0.327	46.200, 1.391	46.200, 1.106	46.200, 1.395	46.200, 1.005	46.200, 1.343	46.200, 0.911
233	46.400, 0.311	46.400, 0.328	46.400, 1.404	46.400, 1.117	46.400, 1.408	46.400, 1.016	46.400, 1.356	46.400, 0.920
234	46.600, 0.312	46.600, 0.328	46.600, 1.417	46.600, 1.129	46.600, 1.420	46.600, 1.027	46.600, 1.369	46.600, 0.929
235	46.800, 0.312	46.800, 0.329	46.800, 1.429	46.800, 1.140	46.800, 1.433	46.800, 1.037	46.800, 1.382	46.800, 0.939
236	47.000, 0.313	47.000, 0.329	47.000, 1.442	47.000, 1.152	47.000, 1.445	47.000, 1.048	47.000, 1.394	47.000, 0.948
237	47.200, 0.313	47.200, 0.330	47.200, 1.454	47.200, 1.164	47.200, 1.457	47.200, 1.059	47.200, 1.407	47.200, 0.957
238	47.400, 0.314	47.400, 0.331	47.400, 1.466	47.400, 1.175	47.400, 1.470	47.400, 1.070	47.400, 1.420	47.400, 0.967
239	47.600, 0.315	47.600, 0.331	47.600, 1.478	47.600, 1.187	47.600, 1.482	47.600, 1.080	47.600, 1.432	47.600, 0.976
240	47.800, 0.315	47.800, 0.332	47.800, 1.491	47.800, 1.198	47.800, 1.495	47.800, 1.090	47.800, 1.444	47.800, 0.986
241	48.000, 0.316	48.000, 0.332	48.000, 1.503	48.000, 1.209	48.000, 1.507	48.000, 1.101	48.000, 1.456	48.000, 0.995
242	48.200, 0.316	48.200, 0.332	48.200, 1.515	48.200, 1.220	48.200, 1.520	48.200, 1.111	48.200, 1.468	48.200, 1.005
243	48.400, 0.317	48.400, 0.332	48.400, 1.527	48.400, 1.231	48.400, 1.532	48.400, 1.121	48.400, 1.480	48.400, 1.014
244	48.600, 0.318	48.600, 0.332	48.600, 1.540	48.600, 1.242	48.600, 1.544	48.600, 1.131	48.600, 1.492	48.600, 1.023
245	48.800, 0.318	48.800, 0.332	48.800, 1.552	48.800, 1.252	48.800, 1.557	48.800, 1.140	48.800, 1.504	48.800, 1.031
246	49.000, 0.318	49.000, 0.333	49.000, 1.563	49.000, 1.263	49.000, 1.568	49.000, 1.150	49.000, 1.516	49.000, 1.040
247	49.200, 0.319	49.200, 0.333	49.200, 1.575	49.200, 1.273	49.200, 1.580	49.200, 1.160	49.200, 1.528	49.200, 1.049
248	49.400, 0.319	49.400, 0.334	49.400, 1.587	49.400, 1.283	49.400, 1.592	49.400, 1.170	49.400, 1.540	49.400, 1.057
249	49.600, 0.319	49.600, 0.334	49.600, 1.598	49.600, 1.293	49.600, 1.603	49.600, 1.180	49.600, 1.552	49.600, 1.066
250	49.800, 0.319	49.800, 0.335	49.800, 1.610	49.800, 1.303	49.800, 1.615	49.800, 1.190	49.800, 1.564	49.800, 1.075
251	50.000, 0.319	50.000, 0.336	50.000, 1.621	50.000, 1.313	50.000, 1.626	50.000, 1.200	50.000, 1.576	50.000, 1.083
252	50.200, 0.319	50.200, 0.336	50.200, 1.632	50.200, 1.323	50.200, 1.637	50.200, 1.209	50.200, 1.587	50.200, 1.092
253	50.400, 0.319	50.400, 0.337	50.400, 1.643	50.400, 1.333	50.400, 1.648	50.400, 1.219	50.400, 1.598	50.400, 1.100
254	50.600, 0.319	50.600, 0.337	50.600, 1.654	50.600, 1.344	50.600, 1.659	50.600, 1.229	50.600, 1.609	50.600, 1.108
255	50.800, 0.320	50.800, 0.338	50.800, 1.665	50.800, 1.354	50.800, 1.670	50.800, 1.238	50.800, 1.620	50.800, 1.117
256	51.000, 0.320	51.000, 0.338	51.000, 1.676	51.000, 1.364	51.000, 1.680	51.000, 1.248	51.000, 1.631	51.000, 1.125
257	51.200, 0.320	51.200, 0.339	51.200, 1.686	51.200, 1.374	51.200, 1.691	51.200, 1.257	51.200, 1.642	51.200, 1.133
258	51.400, 0.320	51.400, 0.339	51.400, 1.697	51.400, 1.384	51.400, 1.702	51.400, 1.267	51.400, 1.652	51.400, 1.141
259	51.600, 0.321	51.600, 0.340	51.600, 1.707	51.600, 1.394	51.600, 1.712	51.600, 1.276	51.600, 1.663	51.600, 1.149
260	51.800, 0.321	51.800, 0.340	51.800, 1.718	51.800, 1.404	51.800, 1.723	51.800, 1.286	51.800, 1.673	51.800, 1.157
261	52.000, 0.321	52.000, 0.341	52.000, 1.728	52.000, 1.414	52.000, 1.733	52.000, 1.295	52.000, 1.683	52.000, 1.165
262	52.200, 0.322	52.200, 0.341	52.200, 1.739	52.200, 1.424	52.200, 1.744	52.200, 1.304	52.200, 1.694	52.200, 1.173
263	52.400, 0.322	52.400, 0.341	52.400, 1.749	52.400, 1.434	52.400, 1.754	52.400, 1.314	52.400, 1.703	52.400, 1.181
264	52.600, 0.322	52.600, 0.342	52.600, 1.759	52.600, 1.444	52.600, 1.764	52.600, 1.323	52.600, 1.714	52.600, 1.189
265	52.800, 0.323	52.800, 0.343	52.800, 1.770	52.800, 1.453	52.800, 1.774	52.800, 1.332	52.800, 1.724	52.800, 1.196
266	53.000, 0.323	53.000, 0.343	53.000, 1.780	53.000, 1.463	53.000, 1.784	53.000, 1.341	53.000, 1.734	53.000, 1.204
267	53.200, 0.324	53.200, 0.344	53.200, 1.789	53.200, 1.472	53.200, 1.794	53.200, 1.350	53.200, 1.744	53.200, 1.213
268	53.400, 0.324	53.400, 0.345	53.400, 1.799	53.400, 1.482	53.400, 1.804	53.400, 1.359	53.400, 1.754	53.400, 1.221
269	53.600, 0.325	53.600, 0.345	53.600, 1.809	53.600, 1.491	53.600, 1.814	53.600, 1.368	53.600, 1.764	53.600, 1.228
270	53.800, 0.326	53.800, 0.345	53.800, 1.819	53.800, 1.501	53.800, 1.824	53.800, 1.377	53.800, 1.774	53.800, 1.236
271	54.000, 0.326	54.000, 0.346	54.000, 1.828	54.000, 1.510	54.000, 1.833	54.000, 1.386	54.000, 1.784	54.000, 1.244
272	54.200, 0.326	54.200, 0.346	54.200, 1.837	54.200, 1.519	54.200, 1.842	54.200, 1.395	54.200, 1.794	54.200, 1.251
273	54.400, 0.327	54.400, 0.346	54.400, 1.847	54.400, 1.528	54.400, 1.852	54.400, 1.403	54.400, 1.804	54.400, 1.259
274	54.600, 0.327	54.600, 0.346	54.600, 1.856	54.600, 1.537	54.600, 1.861	54.600, 1.412	54.600, 1.813	54.600, 1.267
275	54.800, 0.327	54.800, 0.346	54.800, 1.866	54.800, 1.546	54.800, 1.870	54.800, 1.421	54.800, 1.823	54.800, 1.274
276	55.000, 0.328	55.000, 0.346	55.000, 1.875	55.000, 1.554	55.000, 1.879	55.000, 1.430	55.000, 1.832	55.000, 1.281
277	55.200, 0.328	55.200, 0.347	55.200, 1.884	55.200, 1.563	55.200, 1.888	55.200, 1.438	55.200, 1.841	55.200, 1.288
278	55.400, 0.328	55.400, 0.347	55.400, 1.893	55.400, 1.572	55.400, 1.897	55.400, 1.447	55.400, 1.850	55.400, 1.296
279	55.600, 0.328	55.600, 0.348	55.600, 1.903	55.600, 1.581	55.600, 1.906	55.600, 1.455	55.600, 1.859	55.600, 1.303
280	55.800, 0.329	55.800, 0.348	55.800, 1.912	55.800, 1.590	55.800, 1.915	55.800, 1.464	55.800, 1.868	55.800, 1.310
281	56.000, 0.329	56.000, 0.349	56.000, 1.921	56.000, 1.599	56.000, 1.924	56.000, 1.472	56.000, 1.877	56.000, 1.317
282	56.200, 0.329	56.200, 0.349	56.200, 1.930	56.200, 1.607	56.200, 1.933	56.200, 1.481	56.200, 1.886	56.200, 1.324
283	56.400, 0.329	56.400, 0.350	56.400, 1.939	56.400, 1.616	56.400, 1.942	56.400, 1.489	56.400, 1.894	56.400, 1.331
284	56.600, 0.330	56.600, 0.350	56.600, 1.948	56.600, 1.625	56.600, 1.951	56.600, 1.497	56.600, 1.903	56.600, 1.338
285	56.800, 0.330	56.800, 0.351	56.800, 1.957	56.800, 1.633	56.800, 1.959	56.800, 1.506	56.800, 1.912	56.800, 1.345
286	57.000, 0.331	57.000, 0.352	57.000, 1.966	57.000, 1.641	57.000, 1.967	57.000, 1.514	57.000, 1.921	57.000, 1.352
287	57.200, 0.331	57.200, 0.352	57.200, 1.974	57.200, 1.650	57.200, 1.976	57.200, 1.522	57.200, 1.930	57.200, 1.359
288	57.400, 0.332	57.400, 0.353	57.400, 1.982	57.400, 1.658	57.400, 1.984	57.400, 1.530	57.400, 1.938	57.400, 1.366
289	57.600, 0.332	57.600, 0.353	57.600, 1.991	57.600, 1.666	57.600, 1.992	57.600, 1.538	57.600, 1.947	57.600, 1.373
290	57.800, 0.333	57.800, 0.353	57.800, 1.999	57.800, 1.674	57.800, 2.001	57.800, 1.545	57.800, 1.956	57.800, 1.380
291	58.000, 0.333	58.000, 0.354	58.000, 2.007	58.000, 1.682	58.000, 2.009	58.000, 1.553	58.000, 1.964	58.000, 1.387
292	58.200, 0.334	58.200, 0.354	58.200, 2.015	58.200, 1.690	58.200, 2.017	58.200, 1.561	58.200, 1.973	58.200, 1.394
293	58.400, 0.334	58.400, 0.354	58.400, 2.023	58.400, 1.698	58.400, 2.025	58.400, 1.568	58.400, 1.981	58.400, 1.401
294	58.600, 0.334	58.600, 0.355	58.600, 2.030	58.600, 1.706	58.600, 2.034	58.600, 1.576	58.600, 1.989	58.600, 1.408
295	58.800, 0.335	58.800, 0.355	58.800, 2.038	58.800, 1.714	58.800, 2.042	58.800, 1.584	58.800, 1.997	58.800, 1.415
296	59.000, 0.335	59.000, 0.356	59.000, 2.046	59.000, 1.722	59.000, 2.050	59.000, 1.591	59.000, 2.005	59.000, 1.422
297	59.200, 0.335	59.200, 0.356	59.200, 2.054	59.200, 1.730	59.200, 2.058	59.200, 1.598	59.200, 2.013	59.200, 1.428
298	59.400, 0.335	59.400, 0.357	59.400, 2.062	59.400, 1.738	59.400, 2.066	59.400, 1.606	59.400, 2.021	59.400, 1.435
299	59.600, 0.335	59.600, 0.357	59.600, 2.070	59.600, 1.746	59.600, 2.074	59.600, 1.613	59.600, 2.029	59.600, 1.441
300	59.800, 0.335	59.800, 0.358	59.800, 2.077	59.800, 1.754	59.800, 2.082	59.800, 1.620	59.800, 2.036	59.800, 1.448
301	60.000, 0.335	60.000, 0.359	60.000, 2.084	60.000, 1.761	60.000, 2.089	60.000, 1.628	60.000, 2.044	60.000, 1.454
302	60.200, 0.336	60.200, 0.359	60.200, 2.092	60.200, 1.769	60.200, 2.097	60.200, 1.635	60.200, 2.052	60.200, 1.460
303	60.400, 0.336	60.400, 0.360	60.400, 2.099	60.400, 1.777	60.400, 2.104	60.400, 1.642	60.400, 2.059	60.400, 1.466
304	60.600, 0.337	60.600, 0.361	60.600, 2.106	60.600, 1.784	60.600, 2.111	60.600, 1.648	60.600, 2.067	60.600, 1.472
305	60.800, 0.337	60.800, 0.362	60.800, 2.113	60.800, 1.792	60.800, 2.118	60.800, 1.656	60.800, 2.075	60.800, 1.478
306	61.000, 0.338	61.000, 0.362	61.000, 2.121	61.000, 1.800	61.000, 2.125	61.000, 1.662	61.000, 2.082	61.000, 1.484
307	61.200, 0.338	61.200, 0.362	61.200, 2.128	61.200, 1.807	61.200, 2.133	61.200, 1.670	61.200, 2.089	61.200, 1.490
308	61.400, 0.339	61.400, 0.362	61.400, 2.135	61.400, 1.815	61.400, 2.140	61.400, 1.677	61.400, 2.096	61.400, 1.496
309	61.600, 0.339	61.600, 0.363	61.600, 2.143	61.600, 1.823	61.600, 2.148	61.600, 1.684	61.600, 2.103	61.600, 1.502
310	61.800, 0.340	61.800, 0.363	61.800, 2.150	61.800, 1.830	61.800, 2.155	61.800, 1.691	61.800, 2.110	61.800, 1.508
311	62.000, 0.340	62.000, 0.363	62.000, 2.157	62.000, 1.837	62.000, 2.162	62.000, 1.698	62.000, 2.117	62.000, 1.514
312	62.200, 0.340	62.200, 0.363	62.200, 2.164	62.200, 1.845	62.200, 2.168	62.200, 1.705	62.200, 2.124	62.200, 1.520
313	62.400, 0.340	62.400, 0.363	62.400, 2.171	62.400, 1.852	62.400, 2.174	62.400, 1.712	62.400, 2.132	62.400, 1.527
314	62.600, 0.340	62.600, 0.363	62.600, 2.178	62.600, 1.860	62.600, 2.180	62.600, 1.719	62.600, 2.139	62.600, 1.533
315	62.800, 0.340	62.800, 0.363	62.800, 2.185	62.800, 1.867	62.800, 2.186	62.800, 1.726	62.800, 2.146	62.800, 1.539
316	63.000, 0.340	63.000, 0.363	63.000, 2.192	63.000, 1.874	63.000, 2.191	63.000, 1.733	63.000, 2.153	63.000, 1.545
317	63.200, 0.340	63.200, 0.364	63.200, 2.199	63.200, 1.882	63.200, 2.197	63.200, 1.740	63.200, 2.160	63.200, 1.551
318	63.400, 0.340	63.400, 0.364	63.400, 2.205	63.400, 1.888	63.400, 2.202	63.400, 1.747	63.400, 2.166	63.400, 1.557
319	63.600, 0.340	63.600, 0.364	63.600, 2.212	63.600, 1.895	63.600, 2.207	63.600, 1.754	63.600, 2.173	63.600, 1.563
320	63.800, 0.340	63.800, 0.365	63.800, 2.218	63.800, 1.902	63.800, 2.212	63.800, 1.760	63.800, 2.180	63.800, 1.568
321	64.000, 0.340	64.000, 0.365	64.000, 2.224	64.000, 1.909	64.000, 2.218	64.000, 1.767	64.000, 2.187	64.000, 1.573
322	64.200, 0.341	64.200, 0.366	64.200, 2.231	64.200, 1.915	64.200, 2.223	64.200, 1.773	64.200, 2.193	64.200, 1.579
323	64.400, 0.341	64.400, 0.366	64.400, 2.237	64.400, 1.923	64.400, 2.229	64.400, 1.780	64.400, 2.200	64.400, 1.584
324	64.600, 0.341	64.600, 0.366	64.600, 2.243	64.600, 1.929	64.600, 2.235	64.600, 1.786	64.600, 2.207	64.600, 1.589
325	64.800, 0.342	64.800, 0.367	64.800, 2.250	64.800, 1.936	64.800, 2.241	64.800, 1.793	64.800, 2.213	64.800, 1.594
326	65.000, 0.342	65.000, 0.367	65.000, 2.256	65.000, 1.943	65.000, 2.247	65.000, 1.800	65.000, 2.219	65.000, 1.599
327	65.200, 0.342	65.200, 0.367	65.200, 2.263	65.200, 1.950	65.200, 2.253	65.200, 1.806	65.200, 2.225	65.200, 1.604
328	65.400, 0.343	65.400, 0.368	65.400, 2.269	65.400, 1.956	65.400, 2.260	65.400, 1.813	65.400, 2.231	65.400, 1.610
329	65.600, 0.344	65.600, 0.368	65.600, 2.275	65.600, 1.963	65.600, 2.266	65.600, 1.819	65.600, 2.238	65.600, 1.615
330	65.800, 0.344	65.800, 0.368	65.800, 2.281	65.800, 1.969	65.800, 2.272	65.800, 1.826	65.800, 2.244	65.800, 1.621
331	66.000, 0.345	66.000, 0.369	66.000, 2.287	66.000, 1.976	66.000, 2.278	66.000, 1.832	66.000, 2.251	66.000, 1.627
332	66.200, 0.345	66.200, 0.369	66.200, 2.293	66.200, 1.982	66.200, 2.284	66.200, 1.839	66.200, 2.257	66.200, 1.633
333	66.400, 0.346	66.400, 0.370	66.400, 2.299	66.400, 1.988	66.400, 2.290	66.400, 1.846	66.400, 2.264	66.400, 1.638
334	66.600, 0.346	66.600, 0.370	66.600, 2.305	66.600, 1.995	66.600, 2.296	66.600, 1.852	66.600, 2.270	66.600, 1.644
335	66.800, 0.347	66.800, 0.370	66.800, 2.310	66.800, 2.001	66.800, 2.302	66.800, 1.858	66.800, 2.276	66.800, 1.649
336	67.000, 0.347	67.000, 0.371	67.000, 2.316	67.000, 2.007	67.000, 2.308	67.000, 1.865	67.000, 2.282	67.000, 1.654
337	67.200, 0.348	67.200, 0.371	67.200, 2.321	67.200, 2.013	67.200, 2.314	67.200, 1.871	67.200, 2.288	67.200, 1.660
338	67.400, 0.348	67.400, 0.372	67.400, 2.327	67.400, 2.019	67.400, 2.319	67.400, 1.877	67.400, 2.294	67.400, 1.665
339	67.600, 0.348	67.600, 0.372	67.600, 2.332	67.600, 2.024	67.600, 2.325	67.600, 1.884	67.600, 2.300	67.600, 1.670
340	67.800, 0.348	67.800, 0.373	67.800, 2.338	67.800, 2.031	67.800, 2.331	67.800, 1.890	67.800, 2.306	67.800, 1.675
341	68.000, 0.349	68.000, 0.373	68.000, 2.343	68.000, 2.037	68.000, 2.337	68.000, 1.896	68.000, 2.312	68.000, 1.680
342	68.200, 0.349	68.200, 0.374	68.200, 2.349	68.200, 2.043	68.200, 2.342	68.200, 1.902	68.200, 2.317	68.200, 1.685
343	68.400, 0.349	68.400, 0.374	68.400, 2.355	68.400, 2.049	68.400, 2.347	68.400, 1.908	68.400, 2.323	68.400, 1.690
344	68.600, 0.349	68.600, 0.375	68.600, 2.360	68.600, 2.055	68.600, 2.352	68.600, 1.914	68.600, 2.328	68.600, 1.695
345	68.800, 0.350	68.800, 0.375	68.800, 2.366	68.800, 2.061	68.800, 2.357	68.800, 1.920	68.800, 2.333	68.800, 1.700
346	69.000, 0.350	69.000, 0.375	69.000, 2.372	69.000, 2.067	69.000, 2.361	69.000, 1.925	69.000, 2.338	69.000, 1.705
347	69.200, 0.350	69.200, 0.376	69.200, 2.377	69.200, 2.073	69.200, 2.365	69.200, 1.931	69.200, 2.343	69.200, 1.710
348	69.400, 0.350	69.400, 0.376	69.400, 2.383	69.400, 2.079	69.400, 2.370	69.400, 1.937	69.400, 2.348	69.400, 1.715
349	69.600, 0.351	69.600, 0.377	69.600, 2.388	69.600, 2.086	69.600, 2.374	69.600, 1.942	69.600, 2.353	69.600, 1.720
350	69.800, 0.351	69.800, 0.377	69.800, 2.394	69.800, 2.092	69.800, 2.378	69.800, 1.948	69.800, 2.358	69.800, 1.725
351	70.000, 0.351	70.000, 0.378	70.000, 2.399	70.000, 2.097	70.000, 2.383	70.000, 1.953	70.000, 2.363	70.000, 1.730
352	70.200, 0.351	70.200, 0.378	70.200, 2.404	70.200, 2.103	70.200, 2.387	70.200, 1.958	70.200, 2.368	70.200, 1.735
353	70.400, 0.351	70.400, 0.378	70.400, 2.409	70.400, 2.109	70.400, 2.392	70.400, 1.964	70.400, 2.372	70.400, 1.739
354	70.600, 0.351	70.600, 0.378	70.600, 2.414	70.600, 2.114	70.600, 2.396	70.600, 1.969	70.600, 2.377	70.600, 1.744
355	70.800, 0.351	70.800, 0.379	70.800, 2.419	70.800, 2.119	70.800, 2.401	70.800, 1.975	70.800, 2.382	70.800, 1.748
356	71.000, 0.351	71.000, 0.379	71.000, 2.424	71.000, 2.125	71.000, 2.405	71.000, 1.980	71.000, 2.387	71.000, 1.752
357	71.200, 0.352	71.200, 0.379	71.200, 2.429	71.200, 2.130	71.200, 2.409	71.200, 1.986	71.200, 2.392	71.200, 1.757
358	71.400, 0.352	71.400, 0.380	71.400, 2.434	71.400, 2.136	71.400, 2.413	71.400, 1.991	71.400, 2.397	71.400, 1.761
359	71.600, 0.353	71.600, 0.380	71.600, 2.438	71.600, 2.141	71.600, 2.417	71.600, 1.997	71.600, 2.402	71.600, 1.766
360	71.800, 0.353	71.800, 0.380	71.800, 2.443	71.800, 2.147	71.800, 2.421	71.800, 2.002	71.800, 2.408	71.800, 1.771
361	72.000, 0.354	72.000, 0.380	72.000, 2.448	72.000, 2.152	72.000, 2.425	72.000, 2.008	72.000, 2.413	72.000, 1.775
362	72.200, 0.354	72.200, 0.380	72.200, 2.452	72.200, 2.158	72.200, 2.429	72.200, 2.013	72.200, 2.418	72.200, 1.780
363	72.400, 0.355	72.400, 0.380	72.400, 2.457	72.400, 2.163	72.400, 2.433	72.400, 2.019	72.400, 2.424	72.400, 1.784
364	72.600, 0.356	72.600, 0.380	72.600, 2.461	72.600, 2.169	72.600, 2.437	72.600, 2.024	72.600, 2.429	72.600, 1.788
365	72.800, 0.356	72.800, 0.380	72.800, 2.465	72.800, 2.175	72.800, 2.440	72.800, 2.029	72.800, 2.434	72.800, 1.793
366	73.000, 0.357	73.000, 0.380	73.000, 2.469	73.000, 2.180	73.000, 2.444	73.000, 2.033	73.000, 2.439	73.000, 1.797
367	73.200, 0.357	73.200, 0.380	73.200, 2.474	73.200, 2.186	73.200, 2.448	73.200, 2.038	73.200, 2.444	73.200, 1.802
368	73.400, 0.357	73.400, 0.380	73.400, 2.478	73.400, 2.192	73.400, 2.452	73.400, 2.043	73.400, 2.448	73.400, 1.806
369	73.600, 0.357	73.600, 0.381	73.600, 2.483	73.600, 2.197	73.600, 2.456	73.600, 2.048	73.600, 2.453	73.600, 1.811
370	73.800, 0.357	73.800, 0.382	73.800, 2.487	73.800, 2.203	73.800, 2.461	73.800, 2.053	73.800, 2.457	73.800, 1.815
371	74.000, 0.357	74.000, 0.382	74.000, 2.492	74.000, 2.208	74.000, 2.465	74.000, 2.058	74.000, 2.461	74.000, 1.820
372	74.200, 0.357	74.200, 0.383	74.200, 2.496	74.200, 2.214	74.200, 2.470	74.200, 2.063	74.200, 2.466	74.200, 1.824
373	74.400, 0.357	74.400, 0.384	74.400, 2.500	74.400, 2.219	74.400, 2.474	74.400, 2.069	74.400, 2.470	74.400, 1.828
374	74.600, 0.357	74.600, 0.384	74.600, 2.505	74.600, 2.224	74.600, 2.479	74.600, 2.074	74.600, 2.474	74.600, 1.832
375	74.800, 0.357	74.800, 0.385	74.800, 2.509	74.800, 2.229	74.800, 2.483	74.800, 2.080	74.800, 2.479	74.800, 1.836
376	75.000, 0.358	75.000, 0.385	75.000, 2.513	75.000, 2.233	75.000, 2.487	75.000, 2.085	75.000, 2.483	75.000, 1.840
377	75.200, 0.358	75.200, 0.386	75.200, 2.517	75.200, 2.238	75.200, 2.492	75.200, 2.090	75.200, 2.487	75.200, 1.844
378	75.400, 0.358	75.400, 0.386	75.400, 2.521	75.400, 2.242	75.400, 2.496	75.400, 2.096	75.400, 2.492	75.400, 1.849
379	75.600, 0.358	75.600, 0.386	75.600, 2.526	75.600, 2.246	75.600, 2.501	75.600, 2.101	75.600, 2.496	75.600, 1.853
380	75.800, 0.358	75.800, 0.386	75.800, 2.530	75.800, 2.251	75.800, 2.505	75.800, 2.106	75.800, 2.501	75.800, 1.857
381	76.000, 0.358	76.000, 0.386	76.000, 2.534	76.000, 2.255	76.000, 2.509	76.000, 2.111	76.000, 2.505	76.000, 1.861
382	76.200, 0.359	76.200, 0.386	76.200, 2.538	76.200, 2.260	76.200, 2.514	76.200, 2.115	76.200, 2.509	76.200, 1.865
383	76.400, 0.359	76.400, 0.386	76.400, 2.542	76.400, 2.264	76.400, 2.518	76.400, 2.120	76.400, 2.513	76.400, 1.869
384	76.600, 0.359	76.600, 0.387	76.600, 2.546	76.600, 2.269	76.600, 2.522	76.600, 2.124	76.600, 2.517	76.600, 1.873
385	76.800, 0.360	76.800, 0.387	76.800, 2.550	76.800, 2.273	76.800, 2.526	76.800, 2.128	76.800, 2.520	76.800, 1.877
386	77.000, 0.360	77.000, 0.387	77.000, 2.554	77.000, 2.278	77.000, 2.530	77.000, 2.132	77.000, 2.524	77.000, 1.882
387	77.200, 0.360	77.200, 0.387	77.200, 2.558	77.200, 2.282	77.200, 2.533	77.200, 2.137	77.200, 2.527	77.200, 1.886
388	77.400, 0.360	77.400, 0.388	77.400, 2.562	77.400, 2.287	77.400, 2.537	77.400, 2.141	77.400, 2.531	77.400, 1.890
389	77.600, 0.360	77.600, 0.388	77.600, 2.566	77.600, 2.292	77.600, 2.540	77.600, 2.146	77.600, 2.535	77.600, 1.894
390	77.800, 0.361	77.800, 0.388	77.800, 2.570	77.800, 2.297	77.800, 2.543	77.800, 2.150	77.800, 2.538	77.800, 1.898
391	78.000, 0.361	78.000, 0.389	78.000, 2.574	78.000, 2.301	78.000, 2.547	78.000, 2.155	78.000, 2.542	78.000, 1.902
392	78.200, 0.361	78.200, 0.389	78.200, 2.577	78.200, 2.306	78.200, 2.550	78.200, 2.159	78.200, 2.545	78.200, 1.906
393	78.400, 0.361	78.400, 0.389	78.400, 2.581	78.400, 2.310	78.400, 2.554	78.400, 2.164	78.400, 2.549	78.400, 1.909
394	78.600, 0.361	78.600, 0.389	78.600, 2.584	78.600, 2.315	78.600, 2.557	78.600, 2.168	78.600, 2.552	78.600, 1.913
395	78.800, 0.361	78.800, 0.389	78.800, 2.588	78.800, 2.319	78.800, 2.560	78.800, 2.173	78.800, 2.556	78.800, 1.917
396	79.000, 0.361	79.000, 0.390	79.000, 2.591	79.000, 2.323	79.000, 2.564	79.000, 2.177	79.000, 2.560	79.000, 1.920
397	79.200, 0.362	79.200, 0.390	79.200, 2.595	79.200, 2.328	79.200, 2.567	79.200, 2.182	79.200, 2.563	79.200, 1.924
398	79.400, 0.362	79.400, 0.390	79.400, 2.598	79.400, 2.332	79.400, 2.571	79.400, 2.186	79.400, 2.567	79.400, 1.927
399	79.600, 0.362	79.600, 0.391	79.600, 2.602	79.600, 2.336	79.600, 2.574	79.600, 2.191	79.600, 2.571	79.600, 1.931
400	79.800, 0.362	79.800, 0.391	79.800, 2.605	79.800, 2.341	79.800, 2.578	79.800, 2.195	79.800, 2.575	79.800, 1.934
401	80.000, 0.362	80.000, 0.391	80.000, 2.608	80.000, 2.345	80.000, 2.581	80.000, 2.200	80.000, 2.579	80.000, 1.938
402	80.200, 0.362	80.200, 0.392	80.200, 2.612	80.200, 2.349	80.200, 2.585	80.200, 2.204	80.200, 2.583	80.200, 1.941
403	80.400, 0.362	80.400, 0.392	80.400, 2.615	80.400, 2.354	80.400, 2.589	80.400, 2.208	80.400, 2.586	80.400, 1.945
404	80.600, 0.362	80.600, 0.393	80.600, 2.618	80.600, 2.358	80.600, 2.593	80.600, 2.213	80.600, 2.590	80.600, 1.948
405	80.800, 0.362	80.800, 0.393	80.800, 2.621	80.800, 2.362	80.800, 2.597	80.800, 2.217	80.800, 2.593	80.800, 1.952
406	81.000, 0.363	81.000, 0.394	81.000, 2.625	81.000, 2.366	81.000, 2.600	81.000, 2.222	81.000, 2.597	81.000, 1.956
407	81.200, 0.363	81.200, 0.394	81.200, 2.628	81.200, 2.370	81.200, 2.604	81.200, 2.226	81.200, 2.600	81.200, 1.959
408	81.400, 0.363	81.400, 0.394	81.400, 2.631	81.400, 2.374	81.400, 2.608	81.400, 2.231	81.400, 2.603	81.400, 1.963
409	81.600, 0.364	81.600, 0.394	81.600, 2.635	81.600, 2.379	81.600, 2.611	81.600, 2.235	81.600, 2.607	81.600, 1.967
410	81.800, 0.364	81.800, 0.394	81.800, 2.638	81.800, 2.383	81.800, 2.615	81.800, 2.239	81.800, 2.610	81.800, 1.970
411	82.000, 0.365	82.000, 0.394	82.000, 2.641	82.000, 2.387	82.000, 2.618	82.000, 2.243	82.000, 2.613	82.000, 1.974
412	82.200, 0.365	82.200, 0.395	82.200, 2.645	82.200, 2.391	82.200, 2.621	82.200, 2.247	82.200, 2.616	82.200, 1.977
413	82.400, 0.366	82.400, 0.395	82.400, 2.648	82.400, 2.395	82.400, 2.624	82.400, 2.250	82.400, 2.619	82.400, 1.981
414	82.600, 0.366	82.600, 0.395	82.600, 2.651	82.600, 2.399	82.600, 2.626	82.600, 2.254	82.600, 2.621	82.600, 1.984
415	82.800, 0.366	82.800, 0.396	82.800, 2.654	82.800, 2.404	82.800, 2.628	82.800, 2.258	82.800, 2.625	82.800, 1.987
416	83.000, 0.367	83.000, 0.396	83.000, 2.658	83.000, 2.408	83.000, 2.630	83.000, 2.262	83.000, 2.628	83.000, 1.990
417	83.200, 0.367	83.200, 0.396	83.200, 2.661	83.200, 2.412	83.200, 2.631	83.200, 2.266	83.200, 2.631	83.200, 1.994
418	83.400, 0.368	83.400, 0.396	83.400, 2.665	83.400, 2.416	83.400, 2.633	83.400, 2.270	83.400, 2.634	83.400, 1.996
419	83.600, 0.368	83.600, 0.397	83.600, 2.668	83.600, 2.420	83.600, 2.635	83.600, 2.274	83.600, 2.637	83.600, 1.999
420	83.800, 0.368	83.800, 0.397	83.800, 2.671	83.800, 2.424	83.800, 2.637	83.800, 2.278	83.800, 2.640	83.800, 2.002
421	84.000, 0.369	84.000, 0.398	84.000, 2.674	84.000, 2.428	84.000, 2.639	84.000, 2.282	84.000, 2.643	84.000, 2.005
422	84.200, 0.369	84.200, 0.398	84.200, 2.677	84.200, 2.432	84.200, 2.642	84.200, 2.286	84.200, 2.647	84.200, 2.009
423	84.400, 0.369	84.400, 0.398	84.400, 2.679	84.400, 2.435	84.400, 2.644	84.400, 2.290	84.400, 2.650	84.400, 2.012
424	84.600, 0.369	84.600, 0.398	84.600, 2.682	84.600, 2.439	84.600, 2.647	84.600, 2.294	84.600, 2.653	84.600, 2.015
425	84.800, 0.369	84.800, 0.398	84.800, 2.685	84.800, 2.443	84.800, 2.650	84.800, 2.298	84.800, 2.657	84.800, 2.018
426	85.000, 0.370	85.000, 0.398	85.000, 2.688	85.000, 2.446	85.000, 2.653	85.000, 2.302	85.000, 2.660	85.000, 2.022
427	85.200, 0.370	85.200, 0.398	85.200, 2.690	85.200, 2.450	85.200, 2.656	85.200, 2.305	85.200, 2.663	85.200, 2.025
428	85.400, 0.370	85.400, 0.399	85.400, 2.693	85.400, 2.454	85.400, 2.659	85.400, 2.309	85.400, 2.666	85.400, 2.028
429	85.600, 0.370	85.600, 0.399	85.600, 2.696	85.600, 2.457	85.600, 2.663	85.600, 2.312	85.600, 2.669	85.600, 2.032
430	85.800, 0.370	85.800, 0.399	85.800, 2.699	85.800, 2.461	85.800, 2.665	85.800, 2.315	85.800, 2.672	85.800, 2.035
431	86.000, 0.370	86.000, 0.399	86.000, 2.702	86.000, 2.464	86.000, 2.668	86.000, 2.319	86.000, 2.675	86.000, 2.038
432	86.200, 0.371	86.200, 0.400	86.200, 2.705	86.200, 2.467	86.200, 2.671	86.200, 2.322	86.200, 2.679	86.200, 2.041
433	86.400, 0.371	86.400, 0.400	86.400, 2.708	86.400, 2.471	86.400, 2.673	86.400, 2.325	86.400, 2.681	86.400, 2.045
434	86.600, 0.371	86.600, 0.400	86.600, 2.711	86.600, 2.474	86.600, 2.676	86.600, 2.329	86.600, 2.684	86.600, 2.047
435	86.800, 0.371	86.800, 0.400	86.800, 2.713	86.800, 2.478	86.800, 2.678	86.800, 2.332	86.800, 2.687	86.800, 2.050
436	87.000, 0.372	87.000, 0.400	87.000, 2.716	87.000, 2.481	87.000, 2.681	87.000, 2.336	87.000, 2.689	87.000, 2.053
437	87.200, 0.372	87.200, 0.401	87.200, 2.719	87.200, 2.485	87.200, 2.683	87.200, 2.340	87.200, 2.692	87.200, 2.056
438	87.400, 0.372	87.400, 0.401	87.400, 2.721	87.400, 2.488	87.400, 2.686	87.400, 2.343	87.400, 2.694	87.400, 2.059
439	87.600, 0.372	87.600, 0.401	87.600, 2.724	87.600, 2.492	87.600, 2.689	87.600, 2.347	87.600, 2.697	87.600, 2.062
440	87.800, 0.372	87.800, 0.401	87.800, 2.726	87.800, 2.496	87.800, 2.691	87.800, 2.350	87.800, 2.699	87.800, 2.065
441	88.000, 0.372	88.000, 0.401	88.000, 2.728	88.000, 2.499	88.000, 2.694	88.000, 2.354	88.000, 2.702	88.000, 2.069
442	88.200, 0.372	88.200, 0.401	88.200, 2.731	88.200, 2.503	88.200, 2.696	88.200, 2.358	88.200, 2.704	88.200, 2.072
443	88.400, 0.372	88.400, 0.401	88.400, 2.733	88.400, 2.506	88.400, 2.699	88.400, 2.361	88.400, 2.707	88.400, 2.075
444	88.600, 0.372	88.600, 0.402	88.600, 2.735	88.600, 2.510	88.600, 2.701	88.600, 2.365	88.600, 2.709	88.600, 2.078
445	88.800, 0.373	88.800, 0.402	88.800, 2.737	88.800, 2.513	88.800, 2.704	88.800, 2.368	88.800, 2.711	88.800, 2.081
446	89.000, 0.373	89.000, 0.402	89.000, 2.740	89.000, 2.517	89.000, 2.706	89.000, 2.371	89.000, 2.713	89.000, 2.084
447	89.200, 0.373	89.200, 0.402	89.200, 2.742	89.200, 2.521	89.200, 2.709	89.200, 2.374	89.200, 2.715	89.200, 2.087
448	89.400, 0.374	89.400, 0.402	89.400, 2.744	89.400, 2.524	89.400, 2.711	89.400, 2.377	89.400, 2.717	89.400, 2.090
449	89.600, 0.375	89.600, 0.403	89.600, 2.747	89.600, 2.528	89.600, 2.714	89.600, 2.381	89.600, 2.719	89.600, 2.092
450	89.800, 0.375	89.800, 0.403	89.800, 2.749	89.800, 2.531	89.800, 2.716	89.800, 2.384	89.800, 2.721	89.800, 2.095
451	90.000, 0.376	90.000, 0.403	90.000, 2.751	90.000, 2.534	90.000, 2.719	90.000, 2.387	90.000, 2.723	90.000, 2.098
452	90.200, 0.376	90.200, 0.404	90.200, 2.754	90.200, 2.537	90.200, 2.721	90.200, 2.390	90.200, 2.725	90.200, 2.100
453	90.400, 0.377	90.400, 0.404	90.400, 2.756	90.400, 2.540	90.400, 2.724	90.400, 2.394	90.400, 2.727	90.400, 2.103
454	90.600, 0.377	90.600, 0.404	90.600, 2.758	90.600, 2.543	90.600, 2.727	90.600, 2.397	90.600, 2.729	90.600, 2.105
455	90.800, 0.378	90.800, 0.405	90.800, 2.760	90.800, 2.546	90.800, 2.730	90.800, 2.400	90.800, 2.732	90.800, 2.107
456	91.000, 0.378	91.000, 0.405	91.000, 2.763	91.000, 2.549	91.000, 2.732	91.000, 2.403	91.000, 2.734	91.000, 2.110
457	91.200, 0.378	91.200, 0.405	91.200, 2.765	91.200, 2.552	91.200, 2.735	91.200, 2.406	91.200, 2.736	91.200, 2.112
458	91.400, 0.378	91.400, 0.406	91.400, 2.767	91.400, 2.555	91.400, 2.737	91.400, 2.409	91.400, 2.739	91.400, 2.115
459	91.600, 0.378	91.600, 0.406	91.600, 2.769	91.600, 2.558	91.600, 2.739	91.600, 2.412	91.600, 2.741	91.600, 2.118
460	91.800, 0.378	91.800, 0.406	91.800, 2.771	91.800, 2.561	91.800, 2.740	91.800, 2.415	91.800, 2.743	91.800, 2.121
461	92.000, 0.378	92.000, 0.406	92.000, 2.773	92.000, 2.563	92.000, 2.742	92.000, 2.418	92.000, 2.746	92.000, 2.123
462	92.200, 0.378	92.200, 0.406	92.200, 2.775	92.200, 2.566	92.200, 2.744	92.200, 2.421	92.200, 2.749	92.200, 2.126
463	92.400, 0.378	92.400, 0.406	92.400, 2.778	92.400, 2.569	92.400, 2.745	92.400, 2.424	92.400, 2.751	92.400, 2.128
464	92.600, 0.378	92.600, 0.406	92.600, 2.780	92.600, 2.572	92.600, 2.747	92.600, 2.427	92.600, 2.753	92.600, 2.130
465	92.800, 0.379	92.800, 0.406	92.800, 2.782	92.800, 2.575	92.800, 2.748	92.800, 2.430	92.800, 2.756	92.800, 2.133
466	93.000, 0.379	93.000, 0.406	93.000, 2.784	93.000, 2.578	93.000, 2.750	93.000, 2.433	93.000, 2.758	93.000, 2.136
467	93.200, 0.379	93.200, 0.406	93.200, 2.787	93.200, 2.581	93.200, 2.752	93.200, 2.436	93.200, 2.760	93.200, 2.138
468	93.400, 0.379	93.400, 0.406	93.400, 2.789	93.400, 2.584	93.400, 2.754	93.400, 2.439	93.400, 2.762	93.400, 2.141
469	93.600, 0.380	93.600, 0.406	93.600, 2.791	93.600, 2.587	93.600, 2.757	93.600, 2.442	93.600, 2.764	93.600, 2.143
470	93.800, 0.380	93.800, 0.406	93.800, 2.793	93.800, 2.590	93.800, 2.759	93.800, 2.445	93.800, 2.767	93.800, 2.146
471	94.000, 0.380	94.000, 0.406	94.000, 2.796	94.000, 2.593	94.000, 2.762	94.000, 2.447	94.000, 2.769	94.000, 2.148
472	94.200, 0.380	94.200, 0.407	94.200, 2.798	94.200, 2.596	94.200, 2.765	94.200, 2.450	94.200, 2.771	94.200, 2.151
473	94.400, 0.380	94.400, 0.407	94.400, 2.800	94.400, 2.599	94.400, 2.767	94.400, 2.453	94.400, 2.773	94.400, 2.153
474	94.600, 0.380	94.600, 0.408	94.600, 2.801	94.600, 2.602	94.600, 2.770	94.600, 2.456	94.600, 2.775	94.600, 2.156
475	94.800, 0.380	94.800, 0.408	94.800, 2.803	94.800, 2.605	94.800, 2.772	94.800, 2.459	94.800, 2.777	94.800, 2.158
476	95.000, 0.380	95.000, 0.408	95.000, 2.805	95.000, 2.608	95.000, 2.774	95.000, 2.462	95.000, 2.778	95.000, 2.161
477	95.200, 0.380	95.200, 0.409	95.200, 2.807	95.200, 2.611	95.200, 2.776	95.200, 2.465	95.200, 2.780	95.200, 2.163
478	95.400, 0.380	95.400, 0.409	95.400, 2.809	95.400, 2.613	95.400, 2.778	95.400, 2.468	95.400, 2.782	95.400, 2.165
479	95.600, 0.380	95.600, 0.410	95.600, 2.811	95.600, 2.616	95.600, 2.779	95.600, 2.471	95.600, 2.784	95.600, 2.168
480	95.800, 0.380	95.800, 0.410	95.800, 2.813	95.800, 2.619	95.800, 2.781	95.800, 2.474	95.800, 2.786	95.800, 2.171
481	96.000, 0.380	96.000, 0.411	96.000, 2.815	96.000, 2.621	96.000, 2.782	96.000, 2.478	96.000, 2.788	96.000, 2.173
482	96.200, 0.380	96.200, 0.411	96.200, 2.817	96.200, 2.624	96.200, 2.784	96.200, 2.481	96.200, 2.790	96.200, 2.175
483	96.400, 0.380	96.400, 0.411	96.400, 2.819	96.400, 2.626	96.400, 2.785	96.400, 2.484	96.400, 2.792	96.400, 2.177
484	96.600, 0.381	96.600, 0.411	96.600, 2.821	96.600, 2.629	96.600, 2.787	96.600, 2.487	96.600, 2.793	96.600, 2.180
485	96.800, 0.381	96.800, 0.411	96.800, 2.823	96.800, 2.631	96.800, 2.788	96.800, 2.490	96.800, 2.795	96.800, 2.182
486	97.000, 0.381	97.000, 0.412	97.000, 2.824	97.000, 2.634	97.000, 2.790	97.000, 2.493	97.000, 2.797	97.000, 2.184
487	97.200, 0.381	97.200, 0.412	97.200, 2.826	97.200, 2.637	97.200, 2.791	97.200, 2.495	97.200, 2.799	97.200, 2.186
488	97.400, 0.382	97.400, 0.412	97.400, 2.828	97.400, 2.639	97.400, 2.792	97.400, 2.497	97.400, 2.801	97.400, 2.188
489	97.600, 0.382	97.600, 0.413	97.600, 2.830	97.600, 2.642	97.600, 2.793	97.600, 2.500	97.600, 2.802	97.600, 2.191
490	97.800, 0.382	97.800, 0.413	97.800, 2.831	97.800, 2.645	97.800, 2.795	97.800, 2.502	97.800, 2.804	97.800, 2.193
491	98.000, 0.383	98.000, 0.413	98.000, 2.833	98.000, 2.648	98.000, 2.796	98.000, 2.505	98.000, 2.806	98.000, 2.195
492	98.200, 0.383	98.200, 0.414	98.200, 2.835	98.200, 2.651	98.200, 2.797	98.200, 2.507	98.200, 2.807	98.200, 2.198
493	98.400, 0.383	98.400, 0.414	98.400, 2.836	98.400, 2.653	98.400, 2.798	98.400, 2.510	98.400, 2.809	98.400, 2.200
494	98.600, 0.383	98.600, 0.414	98.600, 2.838	98.600, 2.656	98.600, 2.799	98.600, 2.513	98.600, 2.810	98.600, 2.202
495	98.800, 0.384	98.800, 0.415	98.800, 2.839	98.800, 2.658	98.800, 2.800	98.800, 2.515	98.800, 2.812	98.800, 2.205
496	99.000, 0.384	99.000, 0.415	99.000, 2.841	99.000, 2.661	99.000, 2.800	99.000, 2.517	99.000, 2.813	99.000, 2.207
497	99.200, 0.384	99.200, 0.415	99.200, 2.843	99.200, 2.663	99.200, 2.800	99.200, 2.520	99.200, 2.815	99.200, 2.210
498	99.400, 0.384	99.400, 0.415	99.400, 2.844	99.400, 2.665	99.400, 2.800	99.400, 2.522	99.400, 2.817	99.400, 2.212
499	99.600, 0.384	99.600, 0.415	99.600, 2.846	99.600, 2.668	99.600, 2.799	99.600, 2.525	99.600, 2.819	99.600, 2.215
500	99.800, 0.384	99.800, 0.415	99.800, 2.847	99.800, 2.670	99.800, 2.799	99.800, 2.527	99.800, 2.821	99.800, 2.217
501	100.000, 0.383	100.000, 0.415	100.000, 2.849	100.000, 2.673	100.000, 2.798	100.000, 2.530	100.000, 2.823	100.000, 2.219
502	100.200, 0.383	100.200, 0.415	100.200, 2.851	100.200, 2.675	100.200, 2.798	100.200, 2.532	100.200, 2.825	100.200, 2.221
503	100.400, 0.383	100.400, 0.415	100.400, 2.852	100.400, 2.677	100.400, 2.798	100.400, 2.534	100.400, 2.827	100.400, 2.223
504	100.600, 0.383	100.600, 0.415	100.600, 2.853	100.600, 2.680	100.600, 2.797	100.600, 2.537	100.600, 2.829	100.600, 2.225
505	100.800, 0.383	100.800, 0.415	100.800, 2.855	100.800, 2.682	100.800, 2.797	100.800, 2.539	100.800, 2.830	100.800, 2.227
506	101.000, 0.383	101.000, 0.415	101.000, 2.856	101.000, 2.685	101.000, 2.797	101.000, 2.541	101.000, 2.832	101.000, 2.229
507	101.200, 0.384	101.200, 0.415	101.200, 2.857	101.200, 2.687	101.200, 2.797	101.200, 2.544	101.200, 2.833	101.200, 2.230
508	101.400, 0.384	101.400, 0.415	101.400, 2.859	101.400, 2.689	101.400, 2.798	101.400, 2.546	101.400, 2.834	101.400, 2.232
509	101.600, 0.384	101.600, 0.416	101.600, 2.860	101.600, 2.692	101.600, 2.798	101.600, 2.548	101.600, 2.835	101.600, 2.234
510	101.800, 0.384	101.800, 0.416	101.800, 2.862	101.800, 2.694	101.800, 2.799	101.800, 2.550	101.800, 2.836	101.800, 2.236
511	102.000, 0.385	102.000, 0.416	102.000, 2.863	102.000, 2.697	102.000, 2.800	102.000, 2.552	102.000, 2.837	102.000, 2.238
512	102.200, 0.385	102.200, 0.417	102.200, 2.865	102.200, 2.699	102.200, 2.801	102.200, 2.554	102.200, 2.838	102.200, 2.240
513	102.400, 0.386	102.400, 0.417	102.400, 2.866	102.400, 2.702	102.400, 2.803	102.400, 2.556	102.400, 2.839	102.400, 2.242
514	102.600, 0.386	102.600, 0.417	102.600, 2.868	102.600, 2.704	102.600, 2.804	102.600, 2.558	102.600, 2.840	102.600, 2.245
515	102.800, 0.386	102.800, 0.417	102.800, 2.869	102.800, 2.706	102.800, 2.805	102.800, 2.560	102.800, 2.841	102.800, 2.247
516	103.000, 0.386	103.000, 0.417	103.000, 2.871	103.000, 2.709	103.000, 2.806	103.000, 2.562	103.000, 2.842	103.000, 2.249
517	103.200, 0.386	103.200, 0.417	103.200, 2.873	103.200, 2.711	103.200, 2.807	103.200, 2.565	103.200, 2.844	103.200, 2.251
518	103.400, 0.386	103.400, 0.417	103.400, 2.875	103.400, 2.714	103.400, 2.808	103.400, 2.567	103.400, 2.845	103.400, 2.253
519	103.600, 0.386	103.600, 0.417	103.600, 2.876	103.600, 2.716	103.600, 2.809	103.600, 2.570	103.600, 2.847	103.600, 2.255
520	103.800, 0.386	103.800, 0.417	103.800, 2.878	103.800, 2.718	103.800, 2.811	103.800, 2.573	103.800, 2.849	103.800, 2.257
521	104.000, 0.387	104.000, 0.417	104.000, 2.880	104.000, 2.721	104.000, 2.812	104.000, 2.576	104.000, 2.850	104.000, 2.259
522	104.200, 0.387	104.200, 0.417	104.200, 2.881	104.200, 2.723	104.200, 2.814	104.200, 2.578	104.200, 2.852	104.200, 2.261
523	104.400, 0.387	104.400, 0.417	104.400, 2.882	104.400, 2.725	104.400, 2.815	104.400, 2.581	104.400, 2.853	104.400, 2.262
524	104.600, 0.388	104.600, 0.417	104.600, 2.883	104.600, 2.727	104.600, 2.816	104.600, 2.583	104.600, 2.855	104.600, 2.264
525	104.800, 0.388	104.800, 0.417	104.800, 2.884	104.800, 2.729	104.800, 2.817	104.800, 2.586	104.800, 2.856	104.800, 2.265
526	105.000, 0.388	105.000, 0.418	105.000, 2.884	105.000, 2.731	105.000, 2.818	105.000, 2.588	105.000, 2.857	105.000, 2.267
527	105.200, 0.389	105.200, 0.418	105.200, 2.885	105.200, 2.733	105.200, 2.819	105.200, 2.591	105.200, 2.859	105.200, 2.268
528	105.400, 0.389	105.400, 0.418	105.400, 2.886	105.400, 2.735	105.400, 2.820	105.400, 2.593	105.400, 2.860	105.400, 2.270
529	105.600, 0.389	105.600, 0.419	105.600, 2.887	105.600, 2.737	105.600, 2.821	105.600, 2.595	105.600, 2.861	105.600, 2.272
530	105.800, 0.390	105.800, 0.419	105.800, 2.887	105.800, 2.739	105.800, 2.822	105.800, 2.597	105.800, 2.862	105.800, 2.274
531	106.000, 0.390	106.000, 0.419	106.000, 2.888	106.000, 2.741	106.000, 2.822	106.000, 2.599	106.000, 2.864	106.000, 2.276
532	106.200, 0.391	106.200, 0.419	106.200, 2.889	106.200, 2.743	106.200, 2.823	106.200, 2.601	106.200, 2.865	106.200, 2.278
533	106.400, 0.391	106.400, 0.420	106.400, 2.891	106.400, 2.745	106.400, 2.824	106.400, 2.602	106.400, 2.867	106.400, 2.280
534	106.600, 0.391	106.600, 0.420	106.600, 2.892	106.600, 2.747	106.600, 2.824	106.600, 2.604	106.600, 2.868	106.600, 2.282
535	106.800, 0.391	106.800, 0.420	106.800, 2.893	106.800, 2.749	106.800, 2.825	106.800, 2.605	106.800, 2.869	106.800, 2.284
536	107.000, 0.392	107.000, 0.421	107.000, 2.895	107.000, 2.751	107.000, 2.825	107.000, 2.607	107.000, 2.871	107.000, 2.286
537	107.200, 0.392	107.200, 0.421	107.200, 2.896	107.200, 2.753	107.200, 2.825	107.200, 2.609	107.200, 2.872	107.200, 2.288
538	107.400, 0.392	107.400, 0.421	107.400, 2.897	107.400, 2.756	107.400, 2.824	107.400, 2.610	107.400, 2.874	107.400, 2.290
539	107.600, 0.392	107.600, 0.422	107.600, 2.899	107.600, 2.758	107.600, 2.824	107.600, 2.612	107.600, 2.875	107.600, 2.291
540	107.800, 0.392	107.800, 0.422	107.800, 2.900	107.800, 2.760	107.800, 2.824	107.800, 2.613	107.800, 2.876	107.800, 2.293
541	108.000, 0.392	108.000, 0.422	108.000, 2.901	108.000, 2.761	108.000, 2.824	108.000, 2.615	108.000, 2.877	108.000, 2.295
542	108.200, 0.392	108.200, 0.422	108.200, 2.902	108.200, 2.763	108.200, 2.824	108.200, 2.617	108.200, 2.878	108.200, 2.297
543	108.400, 0.392	108.400, 0.421	108.400, 2.903	108.400, 2.765	108.400, 2.824	108.400, 2.618	108.400, 2.879	108.400, 2.299
544	108.600, 0.393	108.600, 0.421	108.600, 2.904	108.600, 2.767	108.600, 2.824	108.600, 2.620	108.600, 2.880	108.600, 2.300
545	108.800, 0.393	108.800, 0.421	108.800, 2.905	108.800, 2.769	108.800, 2.825	108.800, 2.622	108.800, 2.881	108.800, 2.302
546	109.000, 0.393	109.000, 0.421	109.000, 2.906	109.000, 2.771	109.000, 2.826	109.000, 2.625	109.000, 2.882	109.000, 2.304
547	109.200, 0.392	109.200, 0.421	109.200, 2.907	109.200, 2.773	109.200, 2.827	109.200, 2.627	109.200, 2.882	109.200, 2.305
548	109.400, 0.392	109.400, 0.421	109.400, 2.908	109.400, 2.775	109.400, 2.828	109.400, 2.629	109.400, 2.883	109.400, 2.307
549	109.600, 0.392	109.600, 0.421	109.600, 2.909	109.600, 2.776	109.600, 2.830	109.600, 2.631	109.600, 2.884	109.600, 2.308
550	109.800, 0.392	109.800, 0.421	109.800, 2.910	109.800, 2.778	109.800, 2.831	109.800, 2.633	109.800, 2.886	109.800, 2.310
551	110.000, 0.392	110.000, 0.422	110.000, 2.911	110.000, 2.780	110.000, 2.832	110.000, 2.635	110.000, 2.887	110.000, 2.312
552	110.200, 0.392	110.200, 0.422	110.200, 2.912	110.200, 2.782	110.200, 2.833	110.200, 2.637	110.200, 2.888	110.200, 2.313
553	110.400, 0.393	110.400, 0.422	110.400, 2.913	110.400, 2.783	110.400, 2.834	110.400, 2.639	110.400, 2.890	110.400, 2.315
554	110.600, 0.393	110.600, 0.422	110.600, 2.915	110.600, 2.785	110.600, 2.835	110.600, 2.641	110.600, 2.891	110.600, 2.317
555	110.800, 0.393	110.800, 0.422	110.800, 2.916	110.800, 2.786	110.800, 2.835	110.800, 2.642	110.800, 2.892	110.800, 2.318
556	111.000, 0.393	111.000, 0.423	111.000, 2.917	111.000, 2.788	111.000, 2.836	111.000, 2.644	111.000, 2.893	111.000, 2.320
557	111.200, 0.394	111.200, 0.423	111.200, 2.918	111.200, 2.790	111.200, 2.835	111.200, 2.646	111.200, 2.894	111.200, 2.321
558	111.400, 0.394	111.400, 0.423	111.400, 2.919	111.400, 2.791	111.400, 2.835	111.400, 2.648	111.400, 2.895	111.400, 2.323
559	111.600, 0.394	111.600, 0.423	111.600, 2.920	111.600, 2.793	111.600, 2.835	111.600, 2.649	111.600, 2.896	111.600, 2.324
560	111.800, 0.394	111.800, 0.423	111.800, 2.921	111.800, 2.795	111.800, 2.835	111.800, 2.651	111.800, 2.897	111.800, 2.326
561	112.000, 0.395	112.000, 0.423	112.000, 2.922	112.000, 2.797	112.000, 2.835	112.000, 2.653	112.000, 2.898	112.000, 2.327
562	112.200, 0.395	112.200, 0.424	112.200, 2.923	112.200, 2.799	112.200, 2.836	112.200, 2.655	112.200, 2.898	112.200, 2.329
563	112.400, 0.395	112.400, 0.424	112.400, 2.924	112.400, 2.801	112.400, 2.837	112.400, 2.657	112.400, 2.899	112.400, 2.330
564	112.600, 0.395	112.600, 0.424	112.600, 2.925	112.600, 2.803	112.600, 2.838	112.600, 2.659	112.600, 2.899	112.600, 2.332
565	112.800, 0.394	112.800, 0.424	112.800, 2.926	112.800, 2.806	112.800, 2.839	112.800, 2.661	112.800, 2.900	112.800, 2.334
566	113.000, 0.394	113.000, 0.425	113.000, 2.926	113.000, 2.808	113.000, 2.841	113.000, 2.663	113.000, 2.901	113.000, 2.336
567	113.200, 0.394	113.200, 0.425	113.200, 2.927	113.200, 2.810	113.200, 2.842	113.200, 2.665	113.200, 2.902	113.200, 2.337
568	113.400, 0.394	113.400, 0.425	113.400, 2.928	113.400, 2.812	113.400, 2.843	113.400, 2.667	113.400, 2.903	113.400, 2.339
569	113.600, 0.394	113.600, 0.426	113.600, 2.929	113.600, 2.814	113.600, 2.843	113.600, 2.668	113.600, 2.904	113.600, 2.341
570	113.800, 0.394	113.800, 0.426	113.800, 2.929	113.800, 2.816	113.800, 2.844	113.800, 2.671	113.800, 2.905	113.800, 2.342
571	114.000, 0.394	114.000, 0.427	114.000, 2.930	114.000, 2.818	114.000, 2.845	114.000, 2.672	114.000, 2.907	114.000, 2.343
572	114.200, 0.395	114.200, 0.427	114.200, 2.931	114.200, 2.819	114.200, 2.845	114.200, 2.674	114.200, 2.908	114.200, 2.345
573	114.400, 0.395	114.400, 0.427	114.400, 2.932	114.400, 2.820	114.400, 2.846	114.400, 2.676	114.400, 2.909	114.400, 2.346
574	114.600, 0.395	114.600, 0.427	114.600, 2.933	114.600, 2.821	114.600, 2.847	114.600, 2.678	114.600, 2.910	114.600, 2.347
575	114.800, 0.396	114.800, 0.427	114.800, 2.934	114.800, 2.823	114.800, 2.847	114.800, 2.680	114.800, 2.911	114.800, 2.349
576	115.000, 0.396	115.000, 0.427	115.000, 2.935	115.000, 2.824	115.000, 2.847	115.000, 2.682	115.000, 2.912	115.000, 2.351
577	115.200, 0.396	115.200, 0.427	115.200, 2.936	115.200, 2.825	115.200, 2.847	115.200, 2.684	115.200, 2.913	115.200, 2.352
578	115.400, 0.397	115.400, 0.427	115.400, 2.937	115.400, 2.827	115.400, 2.847	115.400, 2.685	115.400, 2.913	115.400, 2.354
579	115.600, 0.397	115.600, 0.427	115.600, 2.938	115.600, 2.828	115.600, 2.848	115.600, 2.687	115.600, 2.914	115.600, 2.355
580	115.800, 0.397	115.800, 0.427	115.800, 2.939	115.800, 2.830	115.800, 2.848	115.800, 2.688	115.800, 2.915	115.800, 2.357
581	116.000, 0.397	116.000, 0.427	116.000, 2.940	116.000, 2.831	116.000, 2.849	116.000, 2.689	116.000, 2.915	116.000, 2.358
582	116.200, 0.397	116.200, 0.428	116.200, 2.941	116.200, 2.833	116.200, 2.850	116.200, 2.690	116.200, 2.916	116.200, 2.360
583	116.400, 0.397	116.400, 0.428	116.400, 2.942	116.400, 2.835	116.400, 2.850	116.400, 2.692	116.400, 2.916	116.400, 2.362
584	116.600, 0.397	116.600, 0.428	116.600, 2.943	116.600, 2.837	116.600, 2.851	116.600, 2.693	116.600, 2.917	116.600, 2.363
585	116.800, 0.397	116.800, 0.428	116.800, 2.944	116.800, 2.839	116.800, 2.852	116.800, 2.694	116.800, 2.917	116.800, 2.365
586	117.000, 0.397	117.000, 0.428	117.000, 2.944	117.000, 2.840	117.000, 2.852	117.000, 2.695	117.000, 2.918	117.000, 2.366
587	117.200, 0.397	117.200, 0.428	117.200, 2.945	117.200, 2.842	117.200, 2.852	117.200, 2.697	117.200, 2.919	117.200, 2.368
588	117.400, 0.397	117.400, 0.428	117.400, 2.946	117.400, 2.844	117.400, 2.852	117.400, 2.698	117.400, 2.920	117.400, 2.369
589	117.600, 0.398	117.600, 0.428	117.600, 2.947	117.600, 2.845	117.600, 2.852	117.600, 2.700	117.600, 2.920	117.600, 2.370
590	117.800, 0.398	117.800, 0.428	117.800, 2.947	117.800, 2.847	117.800, 2.853	117.800, 2.701	117.800, 2.921	117.800, 2.371
591	118.000, 0.398	118.000, 0.428	118.000, 2.948	118.000, 2.849	118.000, 2.853	118.000, 2.703	118.000, 2.922	118.000, 2.372
592	118.200, 0.398	118.200, 0.428	118.200, 2.948	118.200, 2.851	118.200, 2.853	118.200, 2.704	118.200, 2.923	118.200, 2.373
593	118.400, 0.398	118.400, 0.428	118.400, 2.949	118.400, 2.853	118.400, 2.853	118.400, 2.706	118.400, 2.924	118.400, 2.374
594	118.600, 0.398	118.600, 0.429	118.600, 2.950	118.600, 2.855	118.600, 2.853	118.600, 2.708	118.600, 2.925	118.600, 2.375
595	118.800, 0.399	118.800, 0.429	118.800, 2.950	118.800, 2.857	118.800, 2.852	118.800, 2.710	118.800, 2.925	118.800, 2.377
596	119.000, 0.399	119.000, 0.429	119.000, 2.951	119.000, 2.859	119.000, 2.852	119.000, 2.711	119.000, 2.926	119.000, 2.378
597	119.200, 0.399	119.200, 0.430	119.200, 2.951	119.200, 2.861	119.200, 2.851	119.200, 2.713	119.200, 2.927	119.200, 2.379
598	119.400, 0.399	119.400, 0.430	119.400, 2.952	119.400, 2.862	119.400, 2.850	119.400, 2.715	119.400, 2.928	119.400, 2.381
599	119.600, 0.399	119.600, 0.430	119.600, 2.953	119.600, 2.864	119.600, 2.850	119.600, 2.716	119.600, 2.928	119.600, 2.382
600	119.800, 0.399	119.800, 0.431	119.800, 2.953	119.800, 2.865	119.800, 2.849	119.800, 2.718	119.800, 2.930	119.800, 2.383
601	120.000, 0.400	120.000, 0.431	120.000, 2.954	120.000, 2.866	120.000, 2.849	120.000, 2.720	120.000, 2.931	120.000, 2.385
602	120.200, 0.400	120.200, 0.431	120.200, 2.954	120.200, 2.867	120.200, 2.849	120.200, 2.723	120.200, 2.932	120.200, 2.386
603	120.400, 0.400	120.400, 0.431	120.400, 2.955	120.400, 2.868	120.400, 2.849	120.400, 2.724	120.400, 2.933	120.400, 2.388
604	120.600, 0.400	120.600, 0.431	120.600, 2.955	120.600, 2.869	120.600, 2.849	120.600, 2.726	120.600, 2.934	120.600, 2.389
605	120.800, 0.400	120.800, 0.431	120.800, 2.956	120.800, 2.870	120.800, 2.849	120.800, 2.728	120.800, 2.934	120.800, 2.390
606	121.000, 0.401	121.000, 0.431	121.000, 2.956	121.000, 2.871	121.000, 2.849	121.000, 2.729	121.000, 2.935	121.000, 2.391
607	121.200, 0.402	121.200, 0.431	121.200, 2.957	121.200, 2.872	121.200, 2.849	121.200, 2.730	121.200, 2.936	121.200, 2.392
608	121.400, 0.402	121.400, 0.431	121.400, 2.957	121.400, 2.873	121.400, 2.850	121.400, 2.732	121.400, 2.936	121.400, 2.394
609	121.600, 0.402	121.600, 0.431	121.600, 2.958	121.600, 2.874	121.600, 2.850	121.600, 2.733	121.600, 2.937	121.600, 2.395
610	121.800, 0.403	121.800, 0.431	121.800, 2.959	121.800, 2.876	121.800, 2.851	121.800, 2.734	121.800, 2.937	121.800, 2.396
611	122.000, 0.402	122.000, 0.431	122.000, 2.960	122.000, 2.877	122.000, 2.851	122.000, 2.735	122.000, 2.938	122.000, 2.397
612	122.200, 0.402	122.200, 0.431	122.200, 2.961	122.200, 2.878	122.200, 2.851	122.200, 2.736	122.200, 2.938	122.200, 2.399
613	122.400, 0.402	122.400, 0.431	122.400, 2.962	122.400, 2.879	122.400, 2.851	122.400, 2.737	122.400, 2.939	122.400, 2.400
614	122.600, 0.402	122.600, 0.431	122.600, 2.963	122.600, 2.880	122.600, 2.851	122.600, 2.737	122.600, 2.939	122.600, 2.401
615	122.800, 0.402	122.800, 0.431	122.800, 2.964	122.800, 2.881	122.800, 2.850	122.800, 2.738	122.800, 2.940	122.800, 2.402
616	123.000, 0.402	123.000, 0.432	123.000, 2.964	123.000, 2.882	123.000, 2.850	123.000, 2.739	123.000, 2.941	123.000, 2.404
617	123.200, 0.401	123.200, 0.432	123.200, 2.965	123.200, 2.883	123.200, 2.850	123.200, 2.739	123.200, 2.942	123.200, 2.405
618	123.400, 0.402	123.400, 0.432	123.400, 2.966	123.400, 2.884	123.400, 2.850	123.400, 2.740	123.400, 2.943	123.400, 2.406
619	123.600, 0.401	123.600, 0.433	123.600, 2.966	123.600, 2.885	123.600, 2.850	123.600, 2.742	123.600, 2.944	123.600, 2.407
620	123.800, 0.401	123.800, 0.433	123.800, 2.967	123.800, 2.886	123.800, 2.850	123.800, 2.743	123.800, 2.944	123.800, 2.408
621	124.000, 0.401	124.000, 0.434	124.000, 2.968	124.000, 2.888	124.000, 2.850	124.000, 2.744	124.000, 2.945	124.000, 2.410
622	124.200, 0.401	124.200, 0.434	124.200, 2.968	124.200, 2.889	124.200, 2.851	124.200, 2.746	124.200, 2.946	124.200, 2.411
623	124.400, 0.401	124.400, 0.434	124.400, 2.969	124.400, 2.891	124.400, 2.852	124.400, 2.747	124.400, 2.946	124.400, 2.412
624	124.600, 0.402	124.600, 0.434	124.600, 2.969	124.600, 2.892	124.600, 2.853	124.600, 2.749	124.600, 2.947	124.600, 2.413
625	124.800, 0.402	124.800, 0.434	124.800, 2.969	124.800, 2.894	124.800, 2.854	124.800, 2.750	124.800, 2.947	124.800, 2.414
626	125.000, 0.403	125.000, 0.434	125.000, 2.969	125.000, 2.895	125.000, 2.855	125.000, 2.752	125.000, 2.947	125.000, 2.415
627	125.200, 0.403	125.200, 0.434	125.200, 2.969	125.200, 2.897	125.200, 2.856	125.200, 2.753	125.200, 2.947	125.200, 2.416
628	125.400, 0.404	125.400, 0.434	125.400, 2.969	125.400, 2.898	125.400, 2.857	125.400, 2.755	125.400, 2.947	125.400, 2.417
629	125.600, 0.404	125.600, 0.434	125.600, 2.970	125.600, 2.900	125.600, 2.858	125.600, 2.756	125.600, 2.947	125.600, 2.419
630	125.800, 0.404	125.800, 0.434	125.800, 2.970	125.800, 2.901	125.800, 2.858	125.800, 2.758	125.800, 2.948	125.800, 2.420
631	126.000, 0.404	126.000, 0.434	126.000, 2.971	126.000, 2.902	126.000, 2.859	126.000, 2.759	126.000, 2.948	126.000, 2.421
632	126.200, 0.405	126.200, 0.434	126.200, 2.971	126.200, 2.904	126.200, 2.859	126.200, 2.760	126.200, 2.949	126.200, 2.422
633	126.400, 0.405	126.400, 0.434	126.400, 2.972	126.400, 2.905	126.400, 2.859	126.400, 2.762	126.400, 2.950	126.400, 2.423
634	126.600, 0.405	126.600, 0.434	126.600, 2.972	126.600, 2.906	126.600, 2.859	126.600, 2.763	126.600, 2.951	126.600, 2.424
635	126.800, 0.405	126.800, 0.435	126.800, 2.972	126.800, 2.907	126.800, 2.860	126.800, 2.764	126.800, 2.952	126.800, 2.425
636	127.000, 0.406	127.000, 0.435	127.000, 2.973	127.000, 2.909	127.000, 2.861	127.000, 2.765	127.000, 2.953	127.000, 2.427
637	127.200, 0.406	127.200, 0.435	127.200, 2.973	127.200, 2.910	127.200, 2.862	127.200, 2.766	127.200, 2.953	127.200, 2.428
638	127.400, 0.406	127.400, 0.436	127.400, 2.974	127.400, 2.911	127.400, 2.863	127.400, 2.767	127.400, 2.954	127.400, 2.430
639	127.600, 0.406	127.600, 0.436	127.600, 2.974	127.600, 2.912	127.600, 2.864	127.600, 2.768	127.600, 2.955	127.600, 2.431
640	127.800, 0.406	127.800, 0.436	127.800, 2.975	127.800, 2.913	127.800, 2.864	127.800, 2.770	127.800, 2.955	127.800, 2.432
641	128.000, 0.406	128.000, 0.437	128.000, 2.976	128.000, 2.914	128.000, 2.864	128.000, 2.771	128.000, 2.955	128.000, 2.434
642	128.200, 0.407	128.200, 0.437	128.200, 2.976	128.200, 2.915	128.200, 2.864	128.200, 2.772	128.200, 2.956	128.200, 2.435
643	128.400, 0.407	128.400, 0.437	128.400, 2.977	128.400, 2.916	128.400, 2.864	128.400, 2.773	128.400, 2.956	128.400, 2.436
644	128.600, 0.407	128.600, 0.437	128.600, 2.978	128.600, 2.917	128.600, 2.864	128.600, 2.775	128.600, 2.956	128.600, 2.436
645	128.800, 0.407	128.800, 0.437	128.800, 2.978	128.800, 2.918	128.800, 2.864	128.800, 2.776	128.800, 2.957	128.800, 2.437
646	129.000, 0.407	129.000, 0.437	129.000, 2.978	129.000, 2.919	129.000, 2.865	129.000, 2.776	129.000, 2.957	129.000, 2.438
647	129.200, 0.407	129.200, 0.437	129.200, 2.979	129.200, 2.920	129.200, 2.865	129.200, 2.777	129.200, 2.957	129.200, 2.439
648	129.400, 0.407	129.400, 0.437	129.400, 2.979	129.400, 2.921	129.400, 2.864	129.400, 2.778	129.400, 2.958	129.400, 2.440
649	129.600, 0.406	129.600, 0.437	129.600, 2.980	129.600, 2.922	129.600, 2.864	129.600, 2.779	129.600, 2.958	129.600, 2.441
650	129.800, 0.406	129.800, 0.437	129.800, 2.981	129.800, 2.923	129.800, 2.864	129.800, 2.780	129.800, 2.958	129.800, 2.442
651	130.000, 0.406	130.000, 0.438	130.000, 2.981	130.000, 2.925	130.000, 2.864	130.000, 2.781	130.000, 2.959	130.000, 2.443
652	130.200, 0.405	130.200, 0.438	130.200, 2.982	130.200, 2.926	130.200, 2.864	130.200, 2.782	130.200, 2.960	130.200, 2.444
653	130.400, 0.406	130.400, 0.438	130.400, 2.983	130.400, 2.928	130.400, 2.865	130.400, 2.783	130.400, 2.960	130.400, 2.444
654	130.600, 0.406	130.600, 0.438	130.600, 2.983	130.600, 2.929	130.600, 2.866	130.600, 2.784	130.600, 2.960	130.600, 2.446
655	130.800, 0.406	130.800, 0.438	130.800, 2.984	130.800, 2.930	130.800, 2.867	130.800, 2.785	130.800, 2.961	130.800, 2.447
656	131.000, 0.407	131.000, 0.438	131.000, 2.984	131.000, 2.931	131.000, 2.868	131.000, 2.786	131.000, 2.961	131.000, 2.448
657	131.200, 0.407	131.200, 0.438	131.200, 2.985	131.200, 2.932	131.200, 2.869	131.200, 2.788	131.200, 2.961	131.200, 2.449
658	131.400, 0.407	131.400, 0.438	131.400, 2.985	131.400, 2.933	131.400, 2.870	131.400, 2.789	131.400, 2.961	131.400, 2.451
659	131.600, 0.407	131.600, 0.438	131.600, 2.986	131.600, 2.934	131.600, 2.870	131.600, 2.790	131.600, 2.961	131.600, 2.452
660	131.800, 0.407	131.800, 0.438	131.800, 2.986	131.800, 2.935	131.800, 2.870	131.800, 2.791	131.800, 2.961	131.800, 2.453
661	132.000, 0.408	132.000, 0.438	132.000, 2.987	132.000, 2.937	132.000, 2.871	132.000, 2.792	132.000, 2.962	132.000, 2.453
662	132.200, 0.408	132.200, 0.438	132.200, 2.988	132.200, 2.938	132.200, 2.871	132.200, 2.793	132.200, 2.962	132.200, 2.454
663	132.400, 0.408	132.400, 0.438	132.400, 2.988	132.400, 2.939	132.400, 2.871	132.400, 2.794	132.400, 2.962	132.400, 2.455
664	132.600, 0.408	132.600, 0.438	132.600, 2.989	132.600, 2.939	132.600, 2.871	132.600, 2.796	132.600, 2.963	132.600, 2.455
665	132.800, 0.408	132.800, 0.438	132.800, 2.989	132.800, 2.941	132.800, 2.872	132.800, 2.797	132.800, 2.963	132.800, 2.456
666	133.000, 0.408	133.000, 0.438	133.000, 2.990	133.000, 2.942	133.000, 2.872	133.000, 2.798	133.000, 2.964	133.000, 2.457
667	133.200, 0.408	133.200, 0.438	133.200, 2.990	133.200, 2.943	133.200, 2.872	133.200, 2.799	133.200, 2.965	133.200, 2.457
668	133.400, 0.408	133.400, 0.439	133.400, 2.991	133.400, 2.944	133.400, 2.872	133.400, 2.800	133.400, 2.965	133.400, 2.459
669	133.600, 0.408	133.600, 0.439	133.600, 2.991	133.600, 2.945	133.600, 2.873	133.600, 2.800	133.600, 2.966	133.600, 2.459
670	133.800, 0.408	133.800, 0.439	133.800, 2.991	133.800, 2.946	133.800, 2.873	133.800, 2.801	133.800, 2.966	133.800, 2.461
671	134.000, 0.408	134.000, 0.440	134.000, 2.992	134.000, 2.947	134.000, 2.873	134.000, 2.802	134.000, 2.967	134.000, 2.462
672	134.200, 0.408	134.200, 0.440	134.200, 2.992	134.200, 2.948	134.200, 2.874	134.200, 2.802	134.200, 2.967	134.200, 2.463
673	134.400, 0.408	134.400, 0.440	134.400, 2.993	134.400, 2.949	134.400, 2.874	134.400, 2.803	134.400, 2.967	134.400, 2.464
674	134.600, 0.409	134.600, 0.440	134.600, 2.994	134.600, 2.950	134.600, 2.874	134.600, 2.804	134.600, 2.968	134.600, 2.465
675	134.800, 0.409	134.800, 0.440	134.800, 2.994	134.800, 2.950	134.800, 2.874	134.800, 2.805	134.800, 2.968	134.800, 2.466
676	135.000, 0.409	135.000, 0.441	135.000, 2.995	135.000, 2.951	135.000, 2.874	135.000, 2.807	135.000, 2.968	135.000, 2.468
677	135.200, 0.410	135.200, 0.441	135.200, 2.995	135.200, 2.952	135.200, 2.874	135.200, 2.808	135.200, 2.969	135.200, 2.469
678	135.400, 0.410	135.400, 0.442	135.400, 2.995	135.400, 2.953	135.400, 2.874	135.400, 2.809	135.400, 2.970	135.400, 2.470
679	135.600, 0.410	135.600, 0.442	135.600, 2.996	135.600, 2.953	135.600, 2.874	135.600, 2.810	135.600, 2.970	135.600, 2.470
680	135.800, 0.410	135.800, 0.442	135.800, 2.996	135.800, 2.954	135.800, 2.874	135.800, 2.811	135.800, 2.971	135.800, 2.471
681	136.000, 0.411	136.000, 0.442	136.000, 2.996	136.000, 2.954	136.000, 2.875	136.000, 2.812	136.000, 2.971	136.000, 2.472
682	136.200, 0.411	136.200, 0.442	136.200, 2.996	136.200, 2.955	136.200, 2.875	136.200, 2.813	136.200, 2.971	136.200, 2.473
683	136.400, 0.411	136.400, 0.443	136.400, 2.996	136.400, 2.956	136.400, 2.876	136.400, 2.815	136.400, 2.971	136.400, 2.474
684	136.600, 0.411	136.600, 0.443	136.600, 2.996	136.600, 2.957	136.600, 2.876	136.600, 2.816	136.600, 2.972	136.600, 2.475
685	136.800, 0.411	136.800, 0.443	136.800, 2.996	136.800, 2.959	136.800, 2.877	136.800, 2.817	136.800, 2.972	136.800, 2.476
686	137.000, 0.411	137.000, 0.444	137.000, 2.997	137.000, 2.960	137.000, 2.877	137.000, 2.818	137.000, 2.973	137.000, 2.477
687	137.200, 0.411	137.200, 0.444	137.200, 2.997	137.200, 2.961	137.200, 2.878	137.200, 2.819	137.200, 2.973	137.200, 2.477
688	137.400, 0.411	137.400, 0.444	137.400, 2.997	137.400, 2.963	137.400, 2.879	137.400, 2.820	137.400, 2.974	137.400, 2.478
689	137.600, 0.411	137.600, 0.444	137.600, 2.997	137.600, 2.964	137.600, 2.879	137.600, 2.821	137.600, 2.974	137.600, 2.479
690	137.800, 0.411	137.800, 0.444	137.800, 2.997	137.800, 2.965	137.800, 2.880	137.800, 2.822	137.800, 2.974	137.800, 2.480
691	138.000, 0.411	138.000, 0.444	138.000, 2.997	138.000, 2.966	138.000, 2.880	138.000, 2.823	138.000, 2.975	138.000, 2.480
692	138.200, 0.411	138.200, 0.444	138.200, 2.998	138.200, 2.967	138.200, 2.880	138.200, 2.824	138.200, 2.975	138.200, 2.481
693	138.400, 0.411	138.400, 0.444	138.400, 2.998	138.400, 2.968	138.400, 2.880	138.400, 2.825	138.400, 2.975	138.400, 2.482
694	138.600, 0.411	138.600, 0.444	138.600, 2.998	138.600, 2.969	138.600, 2.879	138.600, 2.826	138.600, 2.976	138.600, 2.483
695	138.800, 0.412	138.800, 0.444	138.800, 2.999	138.800, 2.970	138.800, 2.879	138.800, 2.828	138.800, 2.976	138.800, 2.483
696	139.000, 0.412	139.000, 0.444	139.000, 2.999	139.000, 2.971	139.000, 2.879	139.000, 2.829	139.000, 2.976	139.000, 2.484
697	139.200, 0.412	139.200, 0.444	139.200, 2.999	139.200, 2.972	139.200, 2.879	139.200, 2.830	139.200, 2.977	139.200, 2.485
698	139.400, 0.412	139.400, 0.444	139.400, 3.000	139.400, 2.972	139.400, 2.879	139.400, 2.830	139.400, 2.977	139.400, 2.485
699	139.600, 0.412	139.600, 0.444	139.600, 3.000	139.600, 2.973	139.600, 2.880	139.600, 2.831	139.600, 2.977	139.600, 2.486
700	139.800, 0.413	139.800, 0.444	139.800, 3.000	139.800, 2.974	139.800, 2.880	139.800, 2.832	139.800, 2.977	139.800, 2.487
701	140.000, 0.413	140.000, 0.443	140.000, 3.001	140.000, 2.975	140.000, 2.881	140.000, 2.833	140.000, 2.977	140.000, 2.488
702	140.200, 0.413	140.200, 0.443	140.200, 3.001	140.200, 2.976	140.200, 2.882	140.200, 2.833	140.200, 2.977	140.200, 2.490
703	140.400, 0.414	140.400, 0.443	140.400, 3.002	140.400, 2.977	140.400, 2.883	140.400, 2.834	140.400, 2.977	140.400, 2.491
704	140.600, 0.414	140.600, 0.443	140.600, 3.003	140.600, 2.978	140.600, 2.883	140.600, 2.834	140.600, 2.977	140.600, 2.493
705	140.800, 0.414	140.800, 0.443	140.800, 3.003	140.800, 2.979	140.800, 2.884	140.800, 2.835	140.800, 2.976	140.800, 2.494
706	141.000, 0.414	141.000, 0.443	141.000, 3.004	141.000, 2.980	141.000, 2.884	141.000, 2.836	141.000, 2.976	141.000, 2.495
707	141.200, 0.415	141.200, 0.444	141.200, 3.004	141.200, 2.981	141.200, 2.885	141.200, 2.837	141.200, 2.976	141.200, 2.496
708	141.400, 0.415	141.400, 0.444	141.400, 3.004	141.400, 2.982	141.400, 2.885	141.400, 2.838	141.400, 2.976	141.400, 2.497
709	141.600, 0.415	141.600, 0.444	141.600, 3.005	141.600, 2.983	141.600, 2.885	141.600, 2.839	141.600, 2.976	141.600, 2.497
710	141.800, 0.416	141.800, 0.445	141.800, 3.005	141.800, 2.984	141.800, 2.885	141.800, 2.840	141.800, 2.977	141.800, 2.498
711	142.000, 0.416	142.000, 0.445	142.000, 3.006	142.000, 2.984	142.000, 2.885	142.000, 2.841	142.000, 2.978	142.000, 2.499
712	142.200, 0.416	142.200, 0.445	142.200, 3.006	142.200, 2.985	142.200, 2.885	142.200, 2.843	142.200, 2.978	142.200, 2.499
713	142.400, 0.416	142.400, 0.445	142.400, 3.007	142.400, 2.986	142.400, 2.885	142.400, 2.844	142.400, 2.979	142.400, 2.500
714	142.600, 0.416	142.600, 0.445	142.600, 3.007	142.600, 2.987	142.600, 2.886	142.600, 2.844	142.600, 2.979	142.600, 2.501
715	142.800, 0.416	142.800, 0.445	142.800, 3.007	142.800, 2.987	142.800, 2.886	142.800, 2.845	142.800, 2.979	142.800, 2.501
716	143.000, 0.416	143.000, 0.446	143.000, 3.007	143.000, 2.988	143.000, 2.886	143.000, 2.846	143.000, 2.980	143.000, 2.502
717	143.200, 0.416	143.200, 0.446	143.200, 3.007	143.200, 2.989	143.200, 2.887	143.200, 2.846	143.200, 2.980	143.200, 2.503
718	143.400, 0.416	143.400, 0.446	143.400, 3.006	143.400, 2.990	143.400, 2.887	143.400, 2.846	143.400, 2.981	143.400, 2.504
719	143.600, 0.416	143.600, 0.446	143.600, 3.006	143.600, 2.991	143.600, 2.887	143.600, 2.846	143.600, 2.981	143.600, 2.505
720	143.800, 0.416	143.800, 0.446	143.800, 3.006	143.800, 2.992	143.800, 2.887	143.800, 2.846	143.800, 2.982	143.800, 2.506
721	144.000, 0.417	144.000, 0.446	144.000, 3.006	144.000, 2.992	144.000, 2.887	144.000, 2.847	144.000, 2.982	144.000, 2.507
722	144.200, 0.417	144.200, 0.446	144.200, 3.006	144.200, 2.993	144.200, 2.888	144.200, 2.847	144.200, 2.982	144.200, 2.508
723	144.400, 0.417	144.400, 0.446	144.400, 3.006	144.400, 2.994	144.400, 2.888	144.400, 2.848	144.400, 2.982	144.400, 2.509
724	144.600, 0.417	144.600, 0.446	144.600, 3.006	144.600, 2.995	144.600, 2.888	144.600, 2.849	144.600, 2.982	144.600, 2.510
725	144.800, 0.417	144.800, 0.446	144.800, 3.005	144.800, 2.996	144.800, 2.887	144.800, 2.849	144.800, 2.982	144.800, 2.511
726	145.000, 0.417	145.000, 0.447	145.000, 3.005	145.000, 2.997	145.000, 2.887	145.000, 2.850	145.000, 2.983	145.000, 2.512
727	145.200, 0.417	145.200, 0.447	145.200, 3.005	145.200, 2.998	145.200, 2.886	145.200, 2.851	145.200, 2.983	145.200, 2.513
728	145.400, 0.417	145.400, 0.447	145.400, 3.005	145.400, 2.999	145.400, 2.885	145.400, 2.852	145.400, 2.984	145.400, 2.513
729	145.600, 0.417	145.600, 0.447	145.600, 3.006	145.600, 3.000	145.600, 2.883	145.600, 2.853	145.600, 2.984	145.600, 2.514
730	145.800, 0.417	145.800, 0.447	145.800, 3.006	145.800, 3.000	145.800, 2.882	145.800, 2.854	145.800, 2.985	145.800, 2.515
731	146.000, 0.417	146.000, 0.447	146.000, 3.006	146.000, 3.001	146.000, 2.880	146.000, 2.855	146.000, 2.985	146.000, 2.515
732	146.200, 0.417	146.200, 0.447	146.200, 3.007	146.200, 3.002	146.200, 2.879	146.200, 2.856	146.200, 2.986	146.200, 2.516
733	146.400, 0.417	146.400, 0.447	146.400, 3.007	146.400, 3.002	146.400, 2.877	146.400, 2.857	146.400, 2.986	146.400, 2.517
734	146.600, 0.417	146.600, 0.447	146.600, 3.007	146.600, 3.003	146.600, 2.876	146.600, 2.858	146.600, 2.986	146.600, 2.518
735	146.800, 0.417	146.800, 0.447	146.800, 3.008	146.800, 3.003	146.800, 2.874	146.800, 2.859	146.800, 2.986	146.800, 2.518
736	147.000, 0.417	147.000, 0.447	147.000, 3.008	147.000, 3.004	147.000, 2.873	147.000, 2.860	147.000, 2.986	147.000, 2.519
737	147.200, 0.417	147.200, 0.448	147.200, 3.008	147.200, 3.005	147.200, 2.872	147.200, 2.861	147.200, 2.986	147.200, 2.519
738	147.400, 0.417	147.400, 0.448	147.400, 3.009	147.400, 3.005	147.400, 2.871	147.400, 2.862	147.400, 2.986	147.400, 2.520
739	147.600, 0.418	147.600, 0.448	147.600, 3.009	147.600, 3.005	147.600, 2.870	147.600, 2.863	147.600, 2.986	147.600, 2.521
740	147.800, 0.418	147.800, 0.448	147.800, 3.009	147.800, 3.006	147.800, 2.870	147.800, 2.864	147.800, 2.986	147.800, 2.521
741	148.000, 0.418	148.000, 0.448	148.000, 3.010	148.000, 3.007	148.000, 2.870	148.000, 2.865	148.000, 2.986	148.000, 2.522
742	148.200, 0.418	148.200, 0.448	148.200, 3.010	148.200, 3.007	148.200, 2.871	148.200, 2.866	148.200, 2.986	148.200, 2.522
743	148.400, 0.418	148.400, 0.449	148.400, 3.010	148.400, 3.008	148.400, 2.872	148.400, 2.867	148.400, 2.986	148.400, 2.523
744	148.600, 0.418	148.600, 0.449	148.600, 3.009	148.600, 3.009	148.600, 2.872	148.600, 2.867	148.600, 2.986	148.600, 2.524
745	148.800, 0.419	148.800, 0.449	148.800, 3.010	148.800, 3.010	148.800, 2.873	148.800, 2.868	148.800, 2.986	148.800, 2.524
746	149.000, 0.419	149.000, 0.448	149.000, 3.010	149.000, 3.010	149.000, 2.873	149.000, 2.868	149.000, 2.986	149.000, 2.525
747	149.200, 0.419	149.200, 0.448	149.200, 3.010	149.200, 3.011	149.200, 2.874	149.200, 2.869	149.200, 2.985	149.200, 2.526
748	149.400, 0.419	149.400, 0.448	149.400, 3.010	149.400, 3.012	149.400, 2.874	149.400, 2.869	149.400, 2.985	149.400, 2.527
749	149.600, 0.418	149.600, 0.448	149.600, 3.010	149.600, 3.012	149.600, 2.874	149.600, 2.869	149.600, 2.985	149.600, 2.527
750	149.800, 0.418	149.800, 0.447	149.800, 3.010	149.800, 3.012	149.800, 2.874	149.800, 2.870	149.800, 2.985	149.800, 2.528
751	150.000, 0.418	150.000, 0.447	150.000, 3.010	150.000, 3.012	150.000, 2.874	150.000, 2.870	150.000, 2.985	150.000, 2.528
752	150.200, 0.415	150.200, 0.444	150.200, 3.004	150.200, 3.010	150.200, 2.869	150.200, 2.868	150.200, 2.978	150.200, 2.526
753	150.400, 0.412	150.400, 0.441	150.400, 2.996	150.400, 3.005	150.400, 2.862	150.400, 2.865	150.400, 2.968	150.400, 2.523
754	150.600, 0.408	150.600, 0.437	150.600, 2.987	150.600, 3.000	150.600, 2.853	150.600, 2.861	150.600, 2.957	150.600, 2.519
755	150.800, 0.405	150.800, 0.433	150.800, 2.975	150.800, 2.993	150.800, 2.842	150.800, 2.855	150.800, 2.944	150.800, 2.515
756	151.000, 0.401	151.000, 0.429	151.000, 2.961	151.000, 2.984	151.000, 2.830	151.000, 2.848	151.000, 2.929	151.000, 2.509
757	151.200, 0.397	151.200, 0.425	151.200, 2.946	151.200, 2.974	151.200, 2.815	151.200, 2.839	151.200, 2.913	151.200, 2.501
758	151.400, 0.393	151.400, 0.422	151.400, 2.928	151.400, 2.963	151.400, 2.799	151.400, 2.829	151.400, 2.894	151.400, 2.493
759	151.600, 0.390	151.600, 0.418	151.600, 2.909	151.600, 2.950	151.600, 2.781	151.600, 2.818	151.600, 2.874	151.600, 2.483
760	151.800, 0.387	151.800, 0.415	151.800, 2.889	151.800, 2.935	151.800, 2.761	151.800, 2.805	151.800, 2.853	151.800, 2.472
761	152.000, 0.385	152.000, 0.413	152.000, 2.868	152.000, 2.920	152.000, 2.741	152.000, 2.790	152.000, 2.832	152.000, 2.460
762	152.200, 0.383	152.200, 0.411	152.200, 2.846	152.200, 2.903	152.200, 2.720	152.200, 2.775	152.200, 2.810	152.200, 2.447
763	152.400, 0.382	152.400, 0.410	152.400, 2.823	152.400, 2.886	152.400, 2.698	152.400, 2.758	152.400, 2.786	152.400, 2.433
764	152.600, 0.381	152.600, 0.409	152.600, 2.800	152.600, 2.868	152.600, 2.676	152.600, 2.741	152.600, 2.763	152.600, 2.420
765	152.800, 0.380	152.800, 0.408	152.800, 2.777	152.800, 2.849	152.800, 2.653	152.800, 2.723	152.800, 2.739	152.800, 2.405
766	153.000, 0.379	153.000, 0.408	153.000, 2.753	153.000, 2.830	153.000, 2.630	153.000, 2.704	153.000, 2.715	153.000, 2.390
767	153.200, 0.379	153.200, 0.407	153.200, 2.729	153.200, 2.811	153.200, 2.607	153.200, 2.685	153.200, 2.691	153.200, 2.375
768	153.400, 0.379	153.400, 0.407	153.400, 2.705	153.400, 2.791	153.400, 2.584	153.400, 2.666	153.400, 2.667	153.400, 2.359
769	153.600, 0.379	153.600, 0.407	153.600, 2.681	153.600, 2.772	153.600, 2.561	153.600, 2.647	153.600, 2.643	153.600, 2.344
770	153.800, 0.379	153.800, 0.406	153.800, 2.657	153.800, 2.752	153.800, 2.538	153.800, 2.627	153.800, 2.620	153.800, 2.329
771	154.000, 0.379	154.000, 0.406	154.000, 2.633	154.000, 2.732	154.000, 2.515	154.000, 2.607	154.000, 2.596	154.000, 2.314
772	154.200, 0.379	154.200, 0.406	154.200, 2.609	154.200, 2.712	154.200, 2.492	154.200, 2.588	154.200, 2.573	154.200, 2.298
773	154.400, 0.379	154.400, 0.405	154.400, 2.585	154.400, 2.692	154.400, 2.470	154.400, 2.568	154.400, 2.549	154.400, 2.283
774	154.600, 0.378	154.600, 0.405	154.600, 2.561	154.600, 2.672	154.600, 2.448	154.600, 2.549	154.600, 2.526	154.600, 2.269
775	154.800, 0.378	154.800, 0.405	154.800, 2.538	154.800, 2.653	154.800, 2.426	154.800, 2.529	154.800, 2.503	154.800, 2.254
776	155.000, 0.378	155.000, 0.405	155.000, 2.514	155.000, 2.634	155.000, 2.404	155.000, 2.510	155.000, 2.481	155.000, 2.239
777	155.200, 0.377	155.200, 0.405	155.200, 2.491	155.200, 2.615	155.200, 2.382	155.200, 2.491	155.200, 2.458	155.200, 2.224
778	155.400, 0.377	155.400, 0.405	155.400, 2.468	155.400, 2.596	155.400, 2.360	155.400, 2.472	155.400, 2.435	155.400, 2.210
779	155.600, 0.377	155.600, 0.405	155.600, 2.446	155.600, 2.577	155.600, 2.339	155.600, 2.454	155.600, 2.413	155.600, 2.195
780	155.800, 0.377	155.800, 0.405	155.800, 2.423	155.800, 2.558	155.800, 2.317	155.800, 2.435	155.800, 2.391	155.800, 2.181
781	156.000, 0.377	156.000, 0.404	156.000, 2.401	156.000, 2.540	156.000, 2.296	156.000, 2.417	156.000, 2.369	156.000, 2.167
782	156.200, 0.376	156.200, 0.405	156.200, 2.379	156.200, 2.522	156.200, 2.275	156.200, 2.399	156.200, 2.347	156.200, 2.153
783	156.400, 0.376	156.400, 0.405	156.400, 2.357	156.400, 2.504	156.400, 2.254	156.400, 2.381	156.400, 2.325	156.400, 2.139
784	156.600, 0.376	156.600, 0.405	156.600, 2.335	156.600, 2.486	156.600, 2.234	156.600, 2.363	156.600, 2.304	156.600, 2.125
785	156.800, 0.377	156.800, 0.405	156.800, 2.313	156.800, 2.469	156.800, 2.213	156.800, 2.345	156.800, 2.283	156.800, 2.111
786	157.000, 0.377	157.000, 0.405	157.000, 2.292	157.000, 2.452	157.000, 2.193	157.000, 2.327	157.000, 2.262	157.000, 2.098
787	157.200, 0.377	157.200, 0.405	157.200, 2.271	157.200, 2.434	157.200, 2.173	157.200, 2.309	157.200, 2.242	157.200, 2.084
788	157.400, 0.377	157.400, 0.405	157.400, 2.250	157.400, 2.417	157.400, 2.153	157.400, 2.292	157.400, 2.222	157.400, 2.071
789	157.600, 0.377	157.600, 0.406	157.600, 2.230	157.600, 2.399	157.600, 2.134	157.600, 2.274	157.600, 2.202	157.600, 2.058
790	157.800, 0.378	157.800, 0.406	157.800, 2.209	157.800, 2.382	157.800, 2.114	157.800, 2.257	157.800, 2.182	157.800, 2.046
791	158.000, 0.378	158.000, 0.406	158.000, 2.189	158.000, 2.366	158.000, 2.095	158.000, 2.240	158.000, 2.163	158.000, 2.033
792	158.200, 0.378	158.200, 0.407	158.200, 2.170	158.200, 2.349	158.200, 2.076	158.200, 2.224	158.200, 2.143	158.200, 2.021
793	158.400, 0.378	158.400, 0.407	158.400, 2.150	158.400, 2.333	158.400, 2.058	158.400, 2.207	158.400, 2.124	158.400, 2.009
794	158.600, 0.378	158.600, 0.407	158.600, 2.131	158.600, 2.317	158.600, 2.039	158.600, 2.191	158.600, 2.106	158.600, 1.997
795	158.800, 0.379	158.800, 0.407	158.800, 2.111	158.800, 2.301	158.800, 2.020	158.800, 2.175	158.800, 2.087	158.800, 1.985
796	159.000, 0.379	159.000, 0.407	159.000, 2.092	159.000, 2.286	159.000, 2.002	159.000, 2.159	159.000, 2.068	159.000, 1.973
797	159.200, 0.379	159.200, 0.407	159.200, 2.073	159.200, 2.270	159.200, 1.985	159.200, 2.144	159.200, 2.050	159.200, 1.961
798	159.400, 0.380	159.400, 0.407	159.400, 2.055	159.400, 2.255	159.400, 1.967	159.400, 2.128	159.400, 2.032	159.400, 1.950
799	159.600, 0.380	159.600, 0.407	159.600, 2.036	159.600, 2.240	159.600, 1.950	159.600, 2.113	159.600, 2.014	159.600, 1.938
800	159.800, 0.380	159.800, 0.407	159.800, 2.018	159.800, 2.225	159.800, 1.933	159.800, 2.098	159.800, 1.997	159.800, 1.927
801	160.000, 0.380	160.000, 0.407	160.000, 2.000	160.000, 2.211	160.000, 1.916	160.000, 2.084	160.000, 1.979	160.000, 1.916
802	160.200, 0.380	160.200, 0.407	160.200, 1.982	160.200, 2.196	160.200, 1.899	160.200, 2.069	160.200, 1.962	160.200, 1.905
803	160.400, 0.380	160.400, 0.407	160.400, 1.964	160.400, 2.182	160.400, 1.882	160.400, 2.055	160.400, 1.945	160.400, 1.894
804	160.600, 0.380	160.600, 0.407	160.600, 1.946	160.600, 2.168	160.600, 1.866	160.600, 2.040	160.600, 1.929	160.600, 1.884
805	160.800, 0.380	160.800, 0.408	160.800, 1.929	160.800, 2.154	160.800, 1.849	160.800, 2.026	160.800, 1.912	160.800, 1.873
806	161.000, 0.379	161.000, 0.408	161.000, 1.913	161.000, 2.141	161.000, 1.833	161.000, 2.012	161.000, 1.896	161.000, 1.863
807	161.200, 0.379	161.200, 0.409	161.200, 1.896	161.200, 2.127	161.200, 1.817	161.200, 1.998	161.200, 1.880	161.200, 1.853
808	161.400, 0.379	161.400, 0.410	161.400, 1.880	161.400, 2.114	161.400, 1.802	161.400, 1.984	161.400, 1.864	161.400, 1.843
809	161.600, 0.379	161.600, 0.410	161.600, 1.864	161.600, 2.101	161.600, 1.786	161.600, 1.971	161.600, 1.849	161.600, 1.833
810	161.800, 0.379	161.800, 0.411	161.800, 1.849	161.800, 2.088	161.800, 1.770	161.800, 1.958	161.800, 1.834	161.800, 1.824
811	162.000, 0.379	162.000, 0.412	162.000, 1.833	162.000, 2.075	162.000, 1.755	162.000, 1.944	162.000, 1.818	162.000, 1.814
812	162.200, 0.379	162.200, 0.412	162.200, 1.818	162.200, 2.063	162.200, 1.740	162.200, 1.931	162.200, 1.803	162.200, 1.805
813	162.400, 0.380	162.400, 0.413	162.400, 1.803	162.400, 2.050	162.400, 1.725	162.400, 1.919	162.400, 1.789	162.400, 1.796
814	162.600, 0.380	162.600, 0.413	162.600, 1.789	162.600, 2.038	162.600, 1.710	162.600, 1.906	162.600, 1.774	162.600, 1.786
815	162.800, 0.381	162.800, 0.413	162.800, 1.774	162.800, 2.025	162.800, 1.696	162.800, 1.894	162.800, 1.760	162.800, 1.778
816	163.000, 0.381	163.000, 0.413	163.000, 1.759	163.000, 2.013	163.000, 1.682	163.000, 1.882	163.000, 1.746	163.000, 1.769
817	163.200, 0.381	163.200, 0.413	163.200, 1.745	163.200, 2.001	163.200, 1.668	163.200, 1.870	163.200, 1.732	163.200, 1.760
818	163.400, 0.381	163.400, 0.412	163.400, 1.730	163.400, 1.989	163.400, 1.654	163.400, 1.858	163.400, 1.718	163.400, 1.751
819	163.600, 0.381	163.600, 0.412	163.600, 1.716	163.600, 1.978	163.600, 1.641	163.600, 1.847	163.600, 1.704	163.600, 1.743
820	163.800, 0.381	163.800, 0.412	163.800, 1.703	163.800, 1.966	163.800, 1.627	163.800, 1.835	163.800, 1.690	163.800, 1.734
821	164.000, 0.381	164.000, 0.412	164.000, 1.689	164.000, 1.955	164.000, 1.614	164.000, 1.824	164.000, 1.677	164.000, 1.725
822	164.200, 0.381	164.200, 0.411	164.200, 1.675	164.200, 1.943	164.200, 1.601	164.200, 1.812	164.200, 1.664	164.200, 1.717
823	164.400, 0.380	164.400, 0.411	164.400, 1.662	164.400, 1.932	164.400, 1.588	164.400, 1.801	164.400, 1.651	164.400, 1.708
824	164.600, 0.380	164.600, 0.411	164.600, 1.649	164.600, 1.921	164.600, 1.575	164.600, 1.789	164.600, 1.638	164.600, 1.700
825	164.800, 0.379	164.800, 0.411	164.800, 1.636	164.800, 1.911	164.800, 1.563	164.800, 1.778	164.800, 1.625	164.800, 1.691
826	165.000, 0.379	165.000, 0.410	165.000, 1.623	165.000, 1.900	165.000, 1.551	165.000, 1.767	165.000, 1.612	165.000, 1.683
827	165.200, 0.379	165.200, 0.410	165.200, 1.610	165.200, 1.890	165.200, 1.538	165.200, 1.757	165.200, 1.600	165.200, 1.675
828	165.400, 0.379	165.400, 0.410	165.400, 1.597	165.400, 1.880	165.400, 1.527	165.400, 1.746	165.400, 1.588	165.400, 1.666
829	165.600, 0.379	165.600, 0.410	165.600, 1.585	165.600, 1.870	165.600, 1.515	165.600, 1.736	165.600, 1.576	165.600, 1.658
830	165.800, 0.379	165.800, 0.411	165.800, 1.573	165.800, 1.860	165.800, 1.504	165.800, 1.726	165.800, 1.564	165.800, 1.651
831	166.000, 0.379	166.000, 0.411	166.000, 1.561	166.000, 1.850	166.000, 1.492	166.000, 1.716	166.000, 1.553	166.000, 1.643
832	166.200, 0.379	166.200, 0.411	166.200, 1.549	166.200, 1.840	166.200, 1.481	166.200, 1.706	166.200, 1.541	166.200, 1.636
833	166.400, 0.379	166.400, 0.411	166.400, 1.538	166.400, 1.831	166.400, 1.470	166.400, 1.696	166.400, 1.530	166.400, 1.629
834	166.600, 0.379	166.600, 0.412	166.600, 1.526	166.600, 1.821	166.600, 1.459	166.600, 1.686	166.600, 1.519	166.600, 1.622
835	166.800, 0.379	166.800, 0.412	166.800, 1.515	166.800, 1.812	166.800, 1.448	166.800, 1.677	166.800, 1.508	166.800, 1.615
836	167.000, 0.379	167.000, 0.412	167.000, 1.505	167.000, 1.803	167.000, 1.437	167.000, 1.667	167.000, 1.497	167.000, 1.608
837	167.200, 0.380	167.200, 0.412	167.200, 1.494	167.200, 1.795	167.200, 1.426	167.200, 1.658	167.200, 1.486	167.200, 1.602
838	167.400, 0.380	167.400, 0.412	167.400, 1.483	167.400, 1.786	167.400, 1.415	167.400, 1.649	167.400, 1.476	167.400, 1.595
839	167.600, 0.381	167.600, 0.413	167.600, 1.473	167.600, 1.777	167.600, 1.404	167.600, 1.640	167.600, 1.465	167.600, 1.589
840	167.800, 0.381	167.800, 0.413	167.800, 1.462	167.800, 1.768	167.800, 1.393	167.800, 1.631	167.800, 1.455	167.800, 1.582
841	168.000, 0.382	168.000, 0.413	168.000, 1.452	168.000, 1.759	168.000, 1.383	168.000, 1.622	168.000, 1.444	168.000, 1.576
842	168.200, 0.382	168.200, 0.413	168.200, 1.441	168.200, 1.750	168.200, 1.372	168.200, 1.613	168.200, 1.434	168.200, 1.569
843	168.400, 0.382	168.400, 0.413	168.400, 1.430	168.400, 1.741	168.400, 1.362	168.400, 1.604	168.400, 1.424	168.400, 1.562
844	168.600, 0.382	168.600, 0.413	168.600, 1.420	168.600, 1.733	168.600, 1.352	168.600, 1.596	168.600, 1.414	168.600, 1.556
845	168.800, 0.382	168.800, 0.413	168.800, 1.410	168.800, 1.724	168.800, 1.342	168.800, 1.588	168.800, 1.405	168.800, 1.549
846	169.000, 0.382	169.000, 0.413	169.000, 1.400	169.000, 1.716	169.000, 1.332	169.000, 1.579	169.000, 1.395	169.000, 1.542
847	169.200, 0.382	169.200, 0.413	169.200, 1.390	169.200, 1.708	169.200, 1.322	169.200, 1.571	169.200, 1.385	169.200, 1.535
848	169.400, 0.382	169.400, 0.414	169.400, 1.380	169.400, 1.701	169.400, 1.313	169.400, 1.563	169.400, 1.376	169.400, 1.529
849	169.600, 0.382	169.600, 0.414	169.600, 1.371	169.600, 1.693	169.600, 1.304	169.600, 1.555	169.600, 1.367	169.600, 1.522
850	169.800, 0.382	169.800, 0.414	169.800, 1.361	169.800, 1.685	169.800, 1.295	169.800, 1.547	169.800, 1.357	169.800, 1.516
851	170.000, 0.382	170.000, 0.414	170.000, 1.352	170.000, 1.678	170.000, 1.286	170.000, 1.539	170.000, 1.348	170.000, 1.510
852	170.200, 0.382	170.200, 0.414	170.200, 1.343	170.200, 1.670	170.200, 1.277	170.200, 1.531	170.200, 1.339	170.200, 1.504
853	170.400, 0.382	170.400, 0.414	170.400, 1.334	170.400, 1.663	170.400, 1.268	170.400, 1.523	170.400, 1.330	170.400, 1.498
854	170.600, 0.382	170.600, 0.414	170.600, 1.326	170.600, 1.655	170.600, 1.259	170.600, 1.516	170.600, 1.321	170.600, 1.492
855	170.800, 0.382	170.800, 0.414	170.800, 1.317	170.800, 1.648	170.800, 1.250	170.800, 1.508	170.800, 1.312	170.800, 1.487
856	171.000, 0.382	171.000, 0.414	171.000, 1.309	171.000, 1.641	171.000, 1.242	171.000, 1.500	171.000, 1.303	171.000, 1.481
857	171.200, 0.382	171.200, 0.414	171.200, 1.300	171.200, 1.633	171.200, 1.233	171.200, 1.493	171.200, 1.295	171.200, 1.475
858	171.400, 0.382	171.400, 0.414	171.400, 1.292	171.400, 1.626	171.400, 1.225	171.400, 1.486	171.400, 1.286	171.400, 1.470
859	171.600, 0.382	171.600, 0.414	171.600, 1.283	171.600, 1.618	171.600, 1.217	171.600, 1.479	171.600, 1.278	171.600, 1.464
860	171.800, 0.382	171.800, 0.414	171.800, 1.275	171.800, 1.611	171.800, 1.209	171.800, 1.472	171.800, 1.270	171.800, 1.459
861	172.000, 0.382	172.000, 0.414	172.000, 1.266	172.000, 1.604	172.000, 1.201	172.000, 1.465	172.000, 1.262	172.000, 1.453
862	172.200, 0.382	172.200, 0.415	172.200, 1.258	172.200, 1.597	172.200, 1.193	172.200, 1.458	172.200, 1.255	172.200, 1.448
863	172.400, 0.381	172.400, 0.415	172.400, 1.250	172.400, 1.590	172.400, 1.185	172.400, 1.452	172.400, 1.247	172.400, 1.442
864	172.600, 0.381	172.600, 0.415	172.600, 1.242	172.600, 1.583	172.600, 1.177	172.600, 1.445	172.600, 1.240	172.600, 1.436
865	172.800, 0.381	172.800, 0.415	172.800, 1.234	172.800, 1.576	172.800, 1.169	172.800, 1.438	172.800, 1.232	172.800, 1.431
866	173.000, 0.381	173.000, 0.415	173.000, 1.226	173.000, 1.569	173.000, 1.161	173.000, 1.432	173.000, 1.225	173.000, 1.425
867	173.200, 0.381	173.200, 0.415	173.200, 1.218	173.200, 1.562	173.200, 1.153	173.200, 1.425	173.200, 1.218	173.200, 1.420
868	173.400, 0.381	173.400, 0.415	173.400, 1.211	173.400, 1.556	173.400, 1.146	173.400, 1.418	173.400, 1.211	173.400, 1.414
869	173.600, 0.380	173.600, 0.415	173.600, 1.204	173.600, 1.549	173.600, 1.139	173.600, 1.412	173.600, 1.204	173.600, 1.409
870	173.800, 0.380	173.800, 0.415	173.800, 1.196	173.800, 1.543	173.800, 1.131	173.800, 1.406	173.800, 1.197	173.800, 1.404
871	174.000, 0.380	174.000, 0.415	174.000, 1.189	174.000, 1.537	174.000, 1.124	174.000, 1.399	174.000, 1.190	174.000, 1.398
872	174.200, 0.380	174.200, 0.415	174.200, 1.182	174.200, 1.531	174.200, 1.117	174.200, 1.393	174.200, 1.183	174.200, 1.393
873	174.400, 0.380	174.400, 0.415	174.400, 1.175	174.400, 1.525	174.400, 1.110	174.400, 1.387	174.400, 1.177	174.400, 1.388
874	174.600, 0.381	174.600, 0.415	174.600, 1.168	174.600, 1.519	174.600, 1.103	174.600, 1.381	174.600, 1.170	174.600, 1.383
875	174.800, 0.381	174.800, 0.414	174.800, 1.162	174.800, 1.513	174.800, 1.096	174.800, 1.375	174.800, 1.164	174.800, 1.378
876	175.000, 0.381	175.000, 0.414	175.000, 1.155	175.000, 1.508	175.000, 1.089	175.000, 1.369	175.000, 1.157	175.000, 1.374
877	175.200, 0.381	175.200, 0.414	175.200, 1.149	175.200, 1.502	175.200, 1.083	175.200, 1.363	175.200, 1.151	175.200, 1.369
878	175.400, 0.381	175.400, 0.414	175.400, 1.142	175.400, 1.496	175.400, 1.077	175.400, 1.357	175.400, 1.145	175.400, 1.364
879	175.600, 0.381	175.600, 0.414	175.600, 1.136	175.600, 1.491	175.600, 1.070	175.600, 1.352	175.600, 1.138	175.600, 1.359
880	175.800, 0.381	175.800, 0.414	175.800, 1.129	175.800, 1.485	175.800, 1.064	175.800, 1.346	175.800, 1.132	175.800, 1.355
881	176.000, 0.381	176.000, 0.414	176.000, 1.123	176.000, 1.480	176.000, 1.058	176.000, 1.340	176.000, 1.126	176.000, 1.350
882	176.200, 0.381	176.200, 0.414	176.200, 1.117	176.200, 1.474	176.200, 1.052	176.200, 1.335	176.200, 1.119	176.200, 1.345
883	176.400, 0.381	176.400, 0.414	176.400, 1.110	176.400, 1.468	176.400, 1.046	176.400, 1.330	176.400, 1.113	176.400, 1.340
884	176.600, 0.381	176.600, 0.414	176.600, 1.104	176.600, 1.463	176.600, 1.039	176.600, 1.325	176.600, 1.107	176.600, 1.336
885	176.800, 0.382	176.800, 0.414	176.800, 1.098	176.800, 1.457	176.800, 1.033	176.800, 1.319	176.800, 1.101	176.800, 1.331
886	177.000, 0.382	177.000, 0.414	177.000, 1.092	177.000, 1.452	177.000, 1.027	177.000, 1.314	177.000, 1.096	177.000, 1.327
887	177.200, 0.382	177.200, 0.414	177.200, 1.086	177.200, 1.447	177.200, 1.021	177.200, 1.309	177.200, 1.090	177.200, 1.322
888	177.400, 0.382	177.400, 0.414	177.400, 1.081	177.400, 1.442	177.400, 1.015	177.400, 1.303	177.400, 1.084	177.400, 1.318
889	177.600, 0.382	177.600, 0.414	177.600, 1.075	177.600, 1.437	177.600, 1.009	177.600, 1.298	177.600, 1.079	177.600, 1.313
890	177.800, 0.381	177.800, 0.414	177.800, 1.069	177.800, 1.432	177.800, 1.003	177.800, 1.293	177.800, 1.073	177.800, 1.309
891	178.000, 0.381	178.000, 0.414	178.000, 1.064	178.000, 1.427	178.000, 0.997	178.000, 1.288	178.000, 1.068	178.000, 1.304
892	178.200, 0.381	178.200, 0.414	178.200, 1.058	178.200, 1.422	178.200, 0.991	178.200, 1.283	178.200, 1.062	178.200, 1.300
893	178.400, 0.381	178.400, 0.414	178.400, 1.052	178.400, 1.417	178.400, 0.985	178.400, 1.278	178.400, 1.057	178.400, 1.295
894	178.600, 0.381	178.600, 0.414	178.600, 1.047	178.600, 1.412	178.600, 0.979	178.600, 1.274	178.600, 1.052	178.600, 1.291
895	178.800, 0.381	178.800, 0.414	178.800, 1.041	178.800, 1.407	178.800, 0.974	178.800, 1.269	178.800, 1.047	178.800, 1.287
896	179.000, 0.381	179.000, 0.414	179.000, 1.036	179.000, 1.403	179.000, 0.969	179.000, 1.264	179.000, 1.042	179.000, 1.282
897	179.200, 0.381	179.200, 0.414	179.200, 1.030	179.200, 1.398	179.200, 0.964	179.200, 1.259	179.200, 1.037	179.200, 1.278
898	179.400, 0.381	179.400, 0.414	179.400, 1.025	179.400, 1.393	179.400, 0.959	179.400, 1.254	179.400, 1.032	179.400, 1.274
899	179.600, 0.382	179.600, 0.413	179.600, 1.020	179.600, 1.388	179.600, 0.955	179.600, 1.250	179.600, 1.027	179.600, 1.270
900	179.800, 0.382	179.800, 0.414	179.800, 1.015	179.800, 1.383	179.800, 0.950	179.800, 1.245	179.800, 1.022	179.800, 1.265
901	180.000, 0.382	180.000, 0.414	180.000, 1.010	180.000, 1.378	180.000, 0.945	180.000, 1.241	180.000, 1.017	180.000, 1.261
902	180.200, 0.382	180.200, 0.413	180.200, 1.005	180.200, 1.373	180.200, 0.940	180.200, 1.236	180.200, 1.013	180.200, 1.257
903	180.400, 0.382	180.400, 0.414	180.400, 1.001	180.400, 1.368	180.400, 0.936	180.400, 1.232	180.400, 1.008	180.400, 1.253
904	180.600, 0.382	180.600, 0.414	180.600, 0.996	180.600, 1.364	180.600, 0.931	180.600, 1.227	180.600, 1.004	180.600, 1.249
905	180.800, 0.382	180.800, 0.414	180.800, 0.992	180.800, 1.359	180.800, 0.926	180.800, 1.223	180.800, 1.000	180.800, 1.245
906	181.000, 0.382	181.000, 0.414	181.000, 0.988	181.000, 1.355	181.000, 0.921	181.000, 1.218	181.000, 0.996	181.000, 1.241
907	181.200, 0.382	181.200, 0.414	181.200, 0.984	181.200, 1.350	181.200, 0.917	181.200, 1.213	181.200, 0.991	181.200, 1.237
908	181.400, 0.382	181.400, 0.414	181.400, 0.979	181.400, 1.346	181.400, 0.912	181.400, 1.209	181.400, 0.987	181.400, 1.233
909	181.600, 0.382	181.600, 0.414	181.600, 0.975	181.600, 1.341	181.600, 0.907	181.600, 1.205	181.600, 0.982	181.600, 1.229
910	181.800, 0.382	181.800, 0.414	181.800, 0.970	181.800, 1.337	181.800, 0.902	181.800, 1.201	181.800, 0.978	181.800, 1.225
911	182.000, 0.381	182.000, 0.414	182.000, 0.966	182.000, 1.332	182.000, 0.898	182.000, 1.197	182.000, 0.973	182.000, 1.221
912	182.200, 0.381	182.200, 0.414	182.200, 0.961	182.200, 1.327	182.200, 0.893	182.200, 1.194	182.200, 0.969	182.200, 1.218
913	182.400, 0.381	182.400, 0.414	182.400, 0.957	182.400, 1.323	182.400, 0.889	182.400, 1.190	182.400, 0.965	182.400, 1.214
914	182.600, 0.381	182.600, 0.414	182.600, 0.952	182.600, 1.318	182.600, 0.885	182.600, 1.186	182.600, 0.961	182.600, 1.210
915	182.800, 0.381	182.800, 0.414	182.800, 0.948	182.800, 1.314	182.800, 0.881	182.800, 1.182	182.800, 0.957	182.800, 1.206
916	183.000, 0.381	183.000, 0.415	183.000, 0.943	183.000, 1.310	183.000, 0.877	183.000, 1.179	183.000, 0.953	183.000, 1.202
917	183.200, 0.381	183.200, 0.415	183.200, 0.939	183.200, 1.305	183.200, 0.873	183.200, 1.175	183.200, 0.948	183.200, 1.199
918	183.400, 0.381	183.400, 0.415	183.400, 0.934	183.400, 1.301	183.400, 0.869	183.400, 1.172	183.400, 0.944	183.400, 1.195
919	183.600, 0.381	183.600, 0.415	183.600, 0.930	183.600, 1.297	183.600, 0.866	183.600, 1.168	183.600, 0.941	183.600, 1.192
920	183.800, 0.381	183.800, 0.415	183.800, 0.926	183.800, 1.293	183.800, 0.862	183.800, 1.165	183.800, 0.937	183.800, 1.188
921	184.000, 0.381	184.000, 0.414	184.000, 0.922	184.000, 1.289	184.000, 0.858	184.000, 1.161	184.000, 0.933	184.000, 1.184
922	184.200, 0.381	184.200, 0.414	184.200, 0.918	184.200, 1.285	184.200, 0.854	184.200, 1.157	184.200, 0.930	184.200, 1.181
923	184.400, 0.381	184.400, 0.414	184.400, 0.914	184.400, 1.281	184.400, 0.850	184.400, 1.153	184.400, 0.927	184.400, 1.178
924	184.600, 0.380	184.600, 0.414	184.600, 0.911	184.600, 1.277	184.600, 0.847	184.600, 1.149	184.600, 0.923	184.600, 1.174
925	184.800, 0.380	184.800, 0.414	184.800, 0.907	184.800, 1.273	184.800, 0.843	184.800, 1.145	184.800, 0.920	184.800, 1.171
926	185.000, 0.380	185.000, 0.414	185.000, 0.904	185.000, 1.270	185.000, 0.839	185.000, 1.141	185.000, 0.917	185.000, 1.168
927	185.200, 0.380	185.200, 0.413	185.200, 0.901	185.200, 1.266	185.200, 0.836	185.200, 1.137	185.200, 0.914	185.200, 1.164
928	185.400, 0.380	185.400, 0.413	185.400, 0.897	185.400, 1.263	185.400, 0.832	185.400, 1.133	185.400, 0.911	185.400, 1.161
929	185.600, 0.380	185.600, 0.413	185.600, 0.894	185.600, 1.259	185.600, 0.828	185.600, 1.129	185.600, 0.908	185.600, 1.158
930	185.800, 0.380	185.800, 0.413	185.800, 0.891	185.800, 1.255	185.800, 0.825	185.800, 1.126	185.800, 0.904	185.800, 1.155
931	186.000, 0.379	186.000, 0.413	186.000, 0.888	186.000, 1.252	186.000, 0.821	186.000, 1.122	186.000, 0.901	186.000, 1.151
932	186.200, 0.380	186.200, 0.413	186.200, 0.884	186.200, 1.249	186.200, 0.818	186.200, 1.119	186.200, 0.898	186.200, 1.148
933	186.400, 0.380	186.400, 0.413	186.400, 0.881	186.400, 1.246	186.400, 0.815	186.400, 1.115	186.400, 0.895	186.400, 1.145
934	186.600, 0.380	186.600, 0.413	186.600, 0.878	186.600, 1.242	186.600, 0.812	186.600, 1.112	186.600, 0.891	186.600, 1.142
935	186.800, 0.380	186.800, 0.413	186.800, 0.874	186.800, 1.239	186.800, 0.808	186.800, 1.109	186.800, 0.888	186.800, 1.138
936	187.000, 0.380	187.000, 0.412	187.000, 0.871	187.000, 1.236	187.000, 0.805	187.000, 1.106	187.000, 0.885	187.000, 1.135
937	187.200, 0.380	187.200, 0.412	187.200, 0.868	187.200, 1.232	187.200, 0.802	187.200, 1.103	187.200, 0.881	187.200, 1.132
938	187.400, 0.380	187.400, 0.412	187.400, 0.864	187.400, 1.229	187.400, 0.799	187.400, 1.100	187.400, 0.878	187.400, 1.129
939	187.600, 0.380	187.600, 0.412	187.600, 0.861	187.600, 1.225	187.600, 0.796	187.600, 1.097	187.600, 0.875	187.600, 1.126
940	187.800, 0.380	187.800, 0.412	187.800, 0.858	187.800, 1.222	187.800, 0.793	187.800, 1.094	187.800, 0.871	187.800, 1.123
941	188.000, 0.380	188.000, 0.411	188.000, 0.855	188.000, 1.218	188.000, 0.790	188.000, 1.091	188.000, 0.868	188.000, 1.120
942	188.200, 0.380	188.200, 0.411	188.200, 0.852	188.200, 1.214	188.200, 0.787	188.200, 1.088	188.200, 0.866	188.200, 1.117
943	188.400, 0.380	188.400, 0.411	188.400, 0.849	188.400, 1.211	188.400, 0.784	188.400, 1.085	188.400, 0.863	188.400, 1.113
944	188.600, 0.380	188.600, 0.411	188.600, 0.847	188.600, 1.207	188.600, 0.781	188.600, 1.083	188.600, 0.860	188.600, 1.110
945	188.800, 0.379	188.800, 0.412	188.800, 0.844	188.800, 1.204	188.800, 0.779	188.800, 1.080	188.800, 0.857	188.800, 1.107
946	189.000, 0.379	189.000, 0.412	189.000, 0.841	189.000, 1.201	189.000, 0.776	189.000, 1.077	189.000, 0.855	189.000, 1.104
947	189.200, 0.379	189.200, 0.412	189.200, 0.838	189.200, 1.198	189.200, 0.773	189.200, 1.074	189.200, 0.852	189.200, 1.101
948	189.400, 0.379	189.400, 0.413	189.400, 0.836	189.400, 1.194	189.400, 0.770	189.400, 1.071	189.400, 0.849	189.400, 1.098
949	189.600, 0.379	189.600, 0.413	189.600, 0.833	189.600, 1.191	189.600, 0.767	189.600, 1.068	189.600, 0.847	189.600, 1.095
950	189.800, 0.379	189.800, 0.413	189.800, 0.830	189.800, 1.189	189.800, 0.765	189.800, 1.065	189.800, 0.844	189.800, 1.093
951	190.000, 0.379	190.000, 0.413	190.000, 0.827	190.000, 1.186	190.000, 0.761	190.000, 1.062	190.000, 0.842	190.000, 1.090
952	190.200, 0.379	190.200, 0.413	190.200, 0.824	190.200, 1.183	190.200, 0.759	190.200, 1.059	190.200, 0.839	190.200, 1.087
953	190.400, 0.379	190.400, 0.413	190.400, 0.821	190.400, 1.181	190.400, 0.756	190.400, 1.056	190.400, 0.837	190.400, 1.084
954	190.600, 0.379	190.600, 0.413	190.600, 0.819	190.600, 1.178	190.600, 0.753	190.600, 1.053	190.600, 0.834	190.600, 1.081
955	190.800, 0.379	190.800, 0.413	190.800, 0.816	190.800, 1.175	190.800, 0.750	190.800, 1.050	190.800, 0.832	190.800, 1.078
956	191.000, 0.378	191.000, 0.413	191.000, 0.813	191.000, 1.172	191.000, 0.747	191.000, 1.048	191.000, 0.829	191.000, 1.075
957	191.200, 0.378	191.200, 0.413	191.200, 0.810	191.200, 1.169	191.200, 0.744	191.200, 1.045	191.200, 0.827	191.200, 1.072
958	191.400, 0.378	191.400, 0.413	191.400, 0.808	191.400, 1.166	191.400, 0.742	191.400, 1.042	191.400, 0.825	191.400, 1.069
959	191.600, 0.378	191.600, 0.413	191.600, 0.805	191.600, 1.163	191.600, 0.740	191.600, 1.040	191.600, 0.822	191.600, 1.066
960	191.800, 0.377	191.800, 0.413	191.800, 0.803	191.800, 1.160	191.800, 0.737	191.800, 1.037	191.800, 0.820	191.800, 1.063
961	192.000, 0.377	192.000, 0.412	192.000, 0.801	192.000, 1.157	192.000, 0.735	192.000, 1.035	192.000, 0.818	192.000, 1.060
962	192.200, 0.377	192.200, 0.412	192.200, 0.798	192.200, 1.154	192.200, 0.733	192.200, 1.032	192.200, 0.815	192.200, 1.057
963	192.400, 0.377	192.400, 0.412	192.400, 0.796	192.400, 1.151	192.400, 0.731	192.400, 1.030	192.400, 0.813	192.400, 1.054
964	192.600, 0.377	192.600, 0.412	192.600, 0.794	192.600, 1.148	192.600, 0.729	192.600, 1.028	192.600, 0.810	192.600, 1.051
965	192.800, 0.377	192.800, 0.413	192.800, 0.792	192.800, 1.145	192.800, 0.727	192.800, 1.026	192.800, 0.808	192.800, 1.049
966	193.000, 0.377	193.000, 0.413	193.000, 0.790	193.000, 1.143	193.000, 0.724	193.000, 1.024	193.000, 0.806	193.000, 1.047
967	193.200, 0.377	193.200, 0.413	193.200, 0.787	193.200, 1.140	193.200, 0.722	193.200, 1.022	193.200, 0.803	193.200, 1.044
968	193.400, 0.377	193.400, 0.413	193.400, 0.785	193.400, 1.137	193.400, 0.720	193.400, 1.019	193.400, 0.801	193.400, 1.042
969	193.600, 0.378	193.600, 0.413	193.600, 0.783	193.600, 1.134	193.600, 0.718	193.600, 1.017	193.600, 0.799	193.600, 1.040
970	193.800, 0.378	193.800, 0.412	193.800, 0.781	193.800, 1.131	193.800, 0.715	193.800, 1.015	193.800, 0.797	193.800, 1.037
971	194.000, 0.378	194.000, 0.412	194.000, 0.778	194.000, 1.129	194.000, 0.713	194.000, 1.013	194.000, 0.795	194.000, 1.035
972	194.200, 0.379	194.200, 0.412	194.200, 0.776	194.200, 1.126	194.200, 0.711	194.200, 1.010	194.200, 0.793	194.200, 1.032
973	194.400, 0.379	194.400, 0.412	194.400, 0.774	194.400, 1.124	194.400, 0.708	194.400, 1.008	194.400, 0.791	194.400, 1.029
974	194.600, 0.378	194.600, 0.412	194.600, 0.772	194.600, 1.121	194.600, 0.706	194.600, 1.006	194.600, 0.789	194.600, 1.027
975	194.800, 0.378	194.800, 0.412	194.800, 0.770	194.800, 1.119	194.800, 0.704	194.800, 1.003	194.800, 0.787	194.800, 1.024
976	195.000, 0.378	195.000, 0.412	195.000, 0.768	195.000, 1.117	195.000, 0.702	195.000, 1.001	195.000, 0.785	195.000, 1.022
977	195.200, 0.378	195.200, 0.412	195.200, 0.766	195.200, 1.114	195.200, 0.700	195.200, 0.999	195.200, 0.783	195.200, 1.019
978	195.400, 0.377	195.400, 0.412	195.400, 0.764	195.400, 1.112	195.400, 0.698	195.400, 0.997	195.400, 0.782	195.400, 1.017
979	195.600, 0.377	195.600, 0.412	195.600, 0.762	195.600, 1.110	195.600, 0.696	195.600, 0.995	195.600, 0.780	195.600, 1.014
980	195.800, 0.377	195.800, 0.412	195.800, 0.760	195.800, 1.107	195.800, 0.694	195.800, 0.992	195.800, 0.778	195.800, 1.011
981	196.000, 0.377	196.000, 0.412	196.000, 0.758	196.000, 1.105	196.000, 0.691	196.000, 0.990	196.000, 0.777	196.000, 1.009
982	196.200, 0.376	196.200, 0.412	196.200, 0.756	196.200, 1.102	196.200, 0.690	196.200, 0.988	196.200, 0.775	196.200, 1.006
983	196.400, 0.376	196.400, 0.412	196.400, 0.755	196.400, 1.100	196.400, 0.688	196.400, 0.985	196.400, 0.773	196.400, 1.004
984	196.600, 0.376	196.600, 0.412	196.600, 0.753	196.600, 1.097	196.600, 0.686	196.600, 0.983	196.600, 0.771	196.600, 1.002
985	196.800, 0.376	196.800, 0.412	196.800, 0.751	196.800, 1.094	196.800, 0.684	196.800, 0.981	196.800, 0.769	196.800, 1.000
986	197.000, 0.376	197.000, 0.412	197.000, 0.749	197.000, 1.092	197.000, 0.682	197.000, 0.979	197.000, 0.768	197.000, 0.997
987	197.200, 0.376	197.200, 0.412	197.200, 0.747	197.200, 1.089	197.200, 0.680	197.200, 0.977	197.200, 0.766	197.200, 0.995
988	197.400, 0.376	197.400, 0.411	197.400, 0.744	197.400, 1.087	197.400, 0.678	197.400, 0.975	197.400, 0.764	197.400, 0.993
989	197.600, 0.376	197.600, 0.411	197.600, 0.742	197.600, 1.084	197.600, 0.676	197.600, 0.972	197.600, 0.762	197.600, 0.991
990	197.800, 0.375	197.800, 0.411	197.800, 0.740	197.800, 1.082	197.800, 0.675	197.800, 0.970	197.800, 0.761	197.800, 0.988
991	198.000, 0.375	198.000, 0.411	198.000, 0.739	198.000, 1.080	198.000, 0.673	198.000, 0.968	198.000, 0.759	198.000, 0.986
992	198.200, 0.375	198.200, 0.411	198.200, 0.737	198.200, 1.078	198.200, 0.672	198.200, 0.966	198.200, 0.757	198.200, 0.984
993	198.400, 0.375	198.400, 0.411	198.400, 0.735	198.400, 1.076	198.400, 0.670	198.400, 0.964	198.400, 0.756	198.400, 0.981
994	198.600, 0.375	198.600, 0.411	198.600, 0.733	198.600, 1.074	198.600, 0.669	198.600, 0.962	198.600, 0.754	198.600, 0.979
995	198.800, 0.375	198.800, 0.411	198.800, 0.732	198.800, 1.072	198.800, 0.667	198.800, 0.960	198.800, 0.753	198.800, 0.977
996	199.000, 0.375	199.000, 0.411	199.000, 0.730	199.000, 1.070	199.000, 0.666	199.000, 0.958	199.000, 0.751	199.000, 0.975
997	199.200, 0.375	199.200, 0.411	199.200, 0.729	199.200, 1.068	199.200, 0.664	199.200, 0.956	199.200, 0.749	199.200, 0.973
998	199.400, 0.375	199.400, 0.411	199.400, 0.727	199.400, 1.066	199.400, 0.662	199.400, 0.955	199.400, 0.748	199.400, 0.970
999	199.600, 0.375	199.600, 0.411	199.600, 0.726	199.600, 1.064	199.600, 0.661	199.600, 0.953	199.600, 0.746	199.600, 0.968
1000	199.800, 0.375	199.800, 0.410	199.800, 0.724	199.800, 1.062	199.800, 0.659	199.800, 0.951	199.800, 0.744	199.800, 0.966
1001	200.000, 0.375	200.000, 0.410	200.000, 0.722	200.000, 1.059	200.000, 0.657	200.000, 0.950	200.000, 0.742	200.000, 0.964
1002	200.200, 0.375	200.200, 0.410	200.200, 0.721	200.200, 1.057	200.200, 0.655	200.200, 0.948	200.200, 0.741	200.200, 0.962
1003	200.400, 0.375	200.400, 0.410	200.400, 0.719	200.400, 1.054	200.400, 0.654	200.400, 0.947	200.400, 0.739	200.400, 0.960
1004	200.600, 0.375	200.600, 0.410	200.600, 0.718	200.600, 1.052	200.600, 0.652	200.600, 0.945	200.600, 0.737	200.600, 0.958
1005	200.800, 0.375	200.800, 0.410	200.800, 0.716	200.800, 1.050	200.800, 0.650	200.800, 0.944	200.800, 0.736	200.800, 0.956
1006	201.000, 0.375	201.000, 0.410	201.000, 0.714	201.000, 1.047	201.000, 0.648	201.000, 0.943	201.000, 0.734	201.000, 0.954
1007	201.200, 0.375	201.200, 0.410	201.200, 0.713	201.200, 1.045	201.200, 0.647	201.200, 0.941	201.200, 0.732	201.200, 0.952
1008	201.400, 0.375	201.400, 0.411	201.400, 0.711	201.400, 1.043	201.400, 0.645	201.400, 0.940	201.400, 0.731	201.400, 0.950
1009	201.600, 0.375	201.600, 0.411	201.600, 0.709	201.600, 1.041	201.600, 0.644	201.600, 0.938	201.600, 0.729	201.600, 0.948
1010	201.800, 0.375	201.800, 0.411	201.800, 0.707	201.800, 1.040	201.800, 0.642	201.800, 0.937	201.800, 0.728	201.800, 0.947
1011	202.000, 0.375	202.000, 0.411	202.000, 0.706	202.000, 1.038	202.000, 0.641	202.000, 0.935	202.000, 0.726	202.000, 0.945
1012	202.200, 0.375	202.200, 0.411	202.200, 0.704	202.200, 1.036	202.200, 0.640	202.200, 0.934	202.200, 0.725	202.200, 0.943
1013	202.400, 0.375	202.400, 0.411	202.400, 0.703	202.400, 1.034	202.400, 0.639	202.400, 0.932	202.400, 0.724	202.400, 0.941
1014	202.600, 0.375	202.600, 0.411	202.600, 0.702	202.600, 1.032	202.600, 0.637	202.600, 0.931	202.600, 0.723	202.600, 0.939
1015	202.800, 0.375	202.800, 0.411	202.800, 0.700	202.800, 1.031	202.800, 0.636	202.800, 0.929	202.800, 0.721	202.800, 0.937
1016	203.000, 0.374	203.000, 0.411	203.000, 0.699	203.000, 1.029	203.000, 0.634	203.000, 0.928	203.000, 0.720	203.000, 0.935
1017	203.200, 0.374	203.200, 0.411	203.200, 0.697	203.200, 1.027	203.200, 0.633	203.200, 0.926	203.200, 0.719	203.200, 0.934
1018	203.400, 0.373	203.400, 0.411	203.400, 0.696	203.400, 1.026	203.400, 0.632	203.400, 0.924	203.400, 0.718	203.400, 0.932
1019	203.600, 0.373	203.600, 0.411	203.600, 0.695	203.600, 1.024	203.600, 0.630	203.600, 0.923	203.600, 0.716	203.600, 0.930
1020	203.800, 0.373	203.800, 0.411	203.800, 0.694	203.800, 1.022	203.800, 0.629	203.800, 0.921	203.800, 0.715	203.800, 0.928
1021	204.000, 0.372	204.000, 0.411	204.000, 0.692	204.000, 1.020	204.000, 0.627	204.000, 0.920	204.000, 0.714	204.000, 0.927
1022	204.200, 0.372	204.200, 0.411	204.200, 0.691	204.200, 1.018	204.200, 0.626	204.200, 0.918	204.200, 0.712	204.200, 0.925
1023	204.400, 0.372	204.400, 0.410	204.400, 0.690	204.400, 1.016	204.400, 0.624	204.400, 0.916	204.400, 0.711	204.400, 0.923
1024	204.600, 0.372	204.600, 0.410	204.600, 0.688	204.600, 1.014	204.600, 0.623	204.600, 0.914	204.600, 0.709	204.600, 0.922
1025	204.800, 0.372	204.800, 0.410	204.800, 0.687	204.800, 1.012	204.800, 0.622	204.800, 0.913	204.800, 0.708	204.800, 0.920
1026	205.000, 0.372	205.000, 0.410	205.000, 0.685	205.000, 1.010	205.000, 0.620	205.000, 0.911	205.000, 0.707	205.000, 0.918
1027	205.200, 0.372	205.200, 0.410	205.200, 0.684	205.200, 1.009	205.200, 0.619	205.200, 0.910	205.200, 0.706	205.200, 0.916
1028	205.400, 0.373	205.400, 0.410	205.400, 0.683	205.400, 1.007	205.400, 0.617	205.400, 0.908	205.400, 0.704	205.400, 0.915
1029	205.600, 0.373	205.600, 0.410	205.600, 0.681	205.600, 1.006	205.600, 0.616	205.600, 0.907	205.600, 0.703	205.600, 0.913
1030	205.800, 0.373	205.800, 0.410	205.800, 0.680	205.800, 1.005	205.800, 0.615	205.800, 0.905	205.800, 0.702	205.800, 0.911
1031	206.000, 0.374	206.000, 0.410	206.000, 0.679	206.000, 1.003	206.000, 0.613	206.000, 0.904	206.000, 0.701	206.000, 0.909
1032	206.200, 0.374	206.200, 0.409	206.200, 0.678	206.200, 1.002	206.200, 0.612	206.200, 0.903	206.200, 0.700	206.200, 0.907
1033	206.400, 0.374	206.400, 0.409	206.400, 0.676	206.400, 1.000	206.400, 0.611	206.400, 0.901	206.400, 0.699	206.400, 0.905
1034	206.600, 0.374	206.600, 0.409	206.600, 0.675	206.600, 0.999	206.600, 0.609	206.600, 0.900	206.600, 0.698	206.600, 0.903
1035	206.800, 0.374	206.800, 0.409	206.800, 0.674	206.800, 0.997	206.800, 0.608	206.800, 0.899	206.800, 0.697	206.800, 0.901
1036	207.000, 0.374	207.000, 0.408	207.000, 0.673	207.000, 0.996	207.000, 0.606	207.000, 0.897	207.000, 0.696	207.000, 0.899
1037	207.200, 0.374	207.200, 0.408	207.200, 0.671	207.200, 0.994	207.200, 0.605	207.200, 0.896	207.200, 0.695	207.200, 0.897
1038	207.400, 0.373	207.400, 0.408	207.400, 0.670	207.400, 0.992	207.400, 0.604	207.400, 0.894	207.400, 0.694	207.400, 0.896
1039	207.600, 0.373	207.600, 0.408	207.600, 0.669	207.600, 0.990	207.600, 0.602	207.600, 0.893	207.600, 0.693	207.600, 0.894
1040	207.800, 0.372	207.800, 0.408	207.800, 0.668	207.800, 0.989	207.800, 0.601	207.800, 0.892	207.800, 0.692	207.800, 0.892
1041	208.000, 0.372	208.000, 0.408	208.000, 0.667	208.000, 0.987	208.000, 0.600	208.000, 0.891	208.000, 0.691	208.000, 0.891
1042	208.200, 0.372	208.200, 0.408	208.200, 0.666	208.200, 0.985	208.200, 0.599	208.200, 0.890	208.200, 0.689	208.200, 0.889
1043	208.400, 0.371	208.400, 0.408	208.400, 0.664	208.400, 0.983	208.400, 0.598	208.400, 0.889	208.400, 0.688	208.400, 0.888
1044	208.600, 0.371	208.600, 0.407	208.600, 0.663	208.600, 0.981	208.600, 0.597	208.600, 0.888	208.600, 0.687	208.600, 0.886
1045	208.800, 0.371	208.800, 0.407	208.800, 0.662	208.800, 0.980	208.800, 0.596	208.800, 0.887	208.800, 0.686	208.800, 0.885
1046	209.000, 0.371	209.000, 0.408	209.000, 0.661	209.000, 0.978	209.000, 0.595	209.000, 0.885	209.000, 0.685	209.000, 0.883
1047	209.200, 0.371	209.200, 0.408	209.200, 0.660	209.200, 0.977	209.200, 0.594	209.200, 0.884	209.200, 0.684	209.200, 0.882
1048	209.400, 0.371	209.400, 0.408	209.400, 0.659	209.400, 0.976	209.400, 0.593	209.400, 0.883	209.400, 0.683	209.400, 0.881
1049	209.600, 0.370	209.600, 0.408	209.600, 0.658	209.600, 0.974	209.600, 0.592	209.600, 0.882	209.600, 0.682	209.600, 0.879
1050	209.800, 0.370	209.800, 0.408	209.800, 0.657	209.800, 0.973	209.800, 0.591	209.800, 0.881	209.800, 0.681	209.800, 0.878
1051	210.000, 0.370	210.000, 0.408	210.000, 0.657	210.000, 0.972	210.000, 0.590	210.000, 0.880	210.000, 0.680	210.000, 0.877
1052	210.200, 0.370	210.200, 0.408	210.200, 0.655	210.200, 0.971	210.200, 0.589	210.200, 0.878	210.200, 0.679	210.200, 0.875
1053	210.400, 0.370	210.400, 0.408	210.400, 0.654	210.400, 0.970	210.400, 0.588	210.400, 0.877	210.400, 0.678	210.400, 0.874
1054	210.600, 0.370	210.600, 0.408	210.600, 0.653	210.600, 0.969	210.600, 0.587	210.600, 0.876	210.600, 0.677	210.600, 0.872
1055	210.800, 0.370	210.800, 0.408	210.800, 0.652	210.800, 0.967	210.800, 0.586	210.800, 0.874	210.800, 0.676	210.800, 0.871
1056	211.000, 0.370	211.000, 0.408	211.000, 0.651	211.000, 0.966	211.000, 0.585	211.000, 0.873	211.000, 0.675	211.000, 0.870
1057	211.200, 0.370	211.200, 0.408	211.200, 0.650	211.200, 0.965	211.200, 0.584	211.200, 0.871	211.200, 0.674	211.200, 0.868
1058	211.400, 0.370	211.400, 0.408	211.400, 0.649	211.400, 0.963	211.400, 0.583	211.400, 0.870	211.400, 0.672	211.400, 0.867
1059	211.600, 0.370	211.600, 0.408	211.600, 0.648	211.600, 0.962	211.600, 0.582	211.600, 0.869	211.600, 0.671	211.600, 0.866
1060	211.800, 0.370	211.800, 0.408	211.800, 0.647	211.800, 0.960	211.800, 0.581	211.800, 0.868	211.800, 0.670	211.800, 0.864
1061	212.000, 0.370	212.000, 0.408	212.000, 0.646	212.000, 0.958	212.000, 0.580	212.000, 0.867	212.000, 0.670	212.000, 0.862
1062	212.200, 0.370	212.200, 0.407	212.200, 0.644	212.200, 0.957	212.200, 0.579	212.200, 0.865	212.200, 0.669	212.200, 0.861
1063	212.400, 0.369	212.400, 0.407	212.400, 0.643	212.400, 0.955	212.400, 0.578	212.400, 0.864	212.400, 0.668	212.400, 0.859
1064	212.600, 0.369	212.600, 0.408	212.600, 0.642	212.600, 0.954	212.600, 0.577	212.600, 0.864	212.600, 0.667	212.600, 0.858
1065	212.800, 0.369	212.800, 0.408	212.800, 0.641	212.800, 0.953	212.800, 0.576	212.800, 0.863	212.800, 0.666	212.800, 0.857
1066	213.000, 0.369	213.000, 0.408	213.000, 0.640	213.000, 0.951	213.000, 0.575	213.000, 0.862	213.000, 0.665	213.000, 0.855
1067	213.200, 0.369	213.200, 0.408	213.200, 0.639	213.200, 0.950	213.200, 0.575	213.200, 0.861	213.200, 0.664	213.200, 0.854
1068	213.400, 0.369	213.400, 0.408	213.400, 0.638	213.400, 0.949	213.400, 0.574	213.400, 0.860	213.400, 0.663	213.400, 0.852
1069	213.600, 0.369	213.600, 0.408	213.600, 0.637	213.600, 0.947	213.600, 0.572	213.600, 0.860	213.600, 0.662	213.600, 0.851
1070	213.800, 0.370	213.800, 0.408	213.800, 0.636	213.800, 0.946	213.800, 0.571	213.800, 0.859	213.800, 0.661	213.800, 0.850
1071	214.000, 0.370	214.000, 0.407	214.000, 0.635	214.000, 0.944	214.000, 0.570	214.000, 0.858	214.000, 0.660	214.000, 0.849
1072	214.200, 0.370	214.200, 0.407	214.200, 0.634	214.200, 0.943	214.200, 0.570	214.200, 0.858	214.200, 0.659	214.200, 0.847
1073	214.400, 0.370	214.400, 0.407	214.400, 0.634	214.400, 0.941	214.400, 0.569	214.400, 0.857	214.400, 0.659	214.400, 0.846
1074	214.600, 0.370	214.600, 0.407	214.600, 0.633	214.600, 0.940	214.600, 0.568	214.600, 0.856	214.600, 0.658	214.600, 0.845
1075	214.800, 0.370	214.800, 0.407	214.800, 0.632	214.800, 0.938	214.800, 0.568	214.800, 0.855	214.800, 0.657	214.800, 0.844
1076	215.000, 0.370	215.000, 0.407	215.000, 0.632	215.000, 0.937	215.000, 0.567	215.000, 0.854	215.000, 0.656	215.000, 0.842
1077	215.200, 0.370	215.200, 0.407	215.200, 0.631	215.200, 0.936	215.200, 0.566	215.200, 0.853	215.200, 0.655	215.200, 0.841
1078	215.400, 0.370	215.400, 0.407	215.400, 0.630	215.400, 0.935	215.400, 0.566	215.400, 0.852	215.400, 0.655	215.400, 0.840
1079	215.600, 0.370	215.600, 0.407	215.600, 0.629	215.600, 0.934	215.600, 0.565	215.600, 0.851	215.600, 0.654	215.600, 0.839
1080	215.800, 0.369	215.800, 0.407	215.800, 0.629	215.800, 0.933	215.800, 0.564	215.800, 0.850	215.800, 0.653	215.800, 0.837
1081	216.000, 0.369	216.000, 0.407	216.000, 0.628	216.000, 0.932	216.000, 0.563	216.000, 0.849	216.000, 0.652	216.000, 0.836
1082	216.200, 0.368	216.200, 0.407	216.200, 0.627	216.200, 0.931	216.200, 0.562	216.200, 0.848	216.200, 0.651	216.200, 0.835
1083	216.400, 0.368	216.400, 0.407	216.400, 0.626	216.400, 0.930	216.400, 0.561	216.400, 0.847	216.400, 0.650	216.400, 0.834
1084	216.600, 0.368	216.600, 0.407	216.600, 0.626	216.600, 0.929	216.600, 0.560	216.600, 0.846	216.600, 0.649	216.600, 0.833
1085	216.800, 0.368	216.800, 0.407	216.800, 0.625	216.800, 0.929	216.800, 0.559	216.800, 0.845	216.800, 0.648	216.800, 0.831
1086	217.000, 0.368	217.000, 0.407	217.000, 0.625	217.000, 0.928	217.000, 0.559	217.000, 0.844	217.000, 0.648	217.000, 0.830
1087	217.200, 0.368	217.200, 0.406	217.200, 0.624	217.200, 0.927	217.200, 0.558	217.200, 0.843	217.200, 0.647	217.200, 0.829
1088	217.400, 0.367	217.400, 0.406	217.400, 0.623	217.400, 0.925	217.400, 0.557	217.400, 0.842	217.400, 0.646	217.400, 0.828
1089	217.600, 0.368	217.600, 0.406	217.600, 0.622	217.600, 0.924	217.600, 0.556	217.600, 0.841	217.600, 0.645	217.600, 0.827
1090	217.800, 0.368	217.800, 0.406	217.800, 0.622	217.800, 0.922	217.800, 0.555	217.800, 0.840	217.800, 0.644	217.800, 0.826
1091	218.000, 0.368	218.000, 0.406	218.000, 0.621	218.000, 0.921	218.000, 0.554	218.000, 0.840	218.000, 0.644	218.000, 0.825
1092	218.200, 0.368	218.200, 0.406	218.200, 0.620	218.200, 0.919	218.200, 0.554	218.200, 0.839	218.200, 0.643	218.200, 0.824
1093	218.400, 0.368	218.400, 0.406	218.400, 0.619	218.400, 0.918	218.400, 0.553	218.400, 0.838	218.400, 0.643	218.400, 0.823
1094	218.600, 0.368	218.600, 0.406	218.600, 0.618	218.600, 0.917	218.600, 0.552	218.600, 0.837	218.600, 0.642	218.600, 0.821
1095	218.800, 0.368	218.800, 0.406	218.800, 0.617	218.800, 0.916	218.800, 0.551	218.800, 0.836	218.800, 0.642	218.800, 0.820
1096	219.000, 0.368	219.000, 0.406	219.000, 0.616	219.000, 0.915	219.000, 0.551	219.000, 0.835	219.000, 0.641	219.000, 0.819
1097	219.200, 0.368	219.200, 0.406	219.200, 0.615	219.200, 0.914	219.200, 0.550	219.200, 0.834	219.200, 0.641	219.200, 0.817
1098	219.400, 0.367	219.400, 0.406	219.400, 0.614	219.400, 0.913	219.400, 0.548	219.400, 0.833	219.400, 0.640	219.400, 0.816
1099	219.600, 0.367	219.600, 0.406	219.600, 0.613	219.600, 0.912	219.600, 0.547	219.600, 0.832	219.600, 0.639	219.600, 0.815
1100	219.800, 0.367	219.800, 0.406	219.800, 0.612	219.800, 0.911	219.800, 0.546	219.800, 0.831	219.800, 0.638	219.800, 0.814
1101	220.000, 0.366	220.000, 0.406	220.000, 0.611	220.000, 0.910	220.000, 0.545	220.000, 0.830	220.000, 0.637	220.000, 0.813
1102	220.200, 0.366	220.200, 0.406	220.200, 0.611	220.200, 0.909	220.200, 0.544	220.200, 0.829	220.200, 0.636	220.200, 0.812
1103	220.400, 0.366	220.400, 0.405	220.400, 0.610	220.400, 0.908	220.400, 0.543	220.400, 0.828	220.400, 0.636	220.400, 0.811
1104	220.600, 0.366	220.600, 0.405	220.600, 0.610	220.600, 0.907	220.600, 0.543	220.600, 0.828	220.600, 0.635	220.600, 0.810
1105	220.800, 0.366	220.800, 0.405	220.800, 0.609	220.800, 0.906	220.800, 0.542	220.800, 0.827	220.800, 0.634	220.800, 0.809
1106	221.000, 0.366	221.000, 0.404	221.000, 0.608	221.000, 0.905	221.000, 0.541	221.000, 0.826	221.000, 0.633	221.000, 0.808
1107	221.200, 0.366	221.200, 0.404	221.200, 0.608	221.200, 0.904	221.200, 0.541	221.200, 0.826	221.200, 0.632	221.200, 0.807
1108	221.400, 0.366	221.400, 0.404	221.400, 0.607	221.400, 0.903	221.400, 0.540	221.400, 0.825	221.400, 0.631	221.400, 0.806
1109	221.600, 0.367	221.600, 0.404	221.600, 0.607	221.600, 0.902	221.600, 0.540	221.600, 0.824	221.600, 0.630	221.600, 0.805
1110	221.800, 0.367	221.800, 0.404	221.800, 0.606	221.800, 0.901	221.800, 0.539	221.800, 0.824	221.800, 0.629	221.800, 0.804
1111	222.000, 0.367	222.000, 0.404	222.000, 0.605	222.000, 0.900	222.000, 0.539	222.000, 0.823	222.000, 0.628	222.000, 0.803
1112	222.200, 0.367	222.200, 0.405	222.200, 0.604	222.200, 0.899	222.200, 0.538	222.200, 0.822	222.200, 0.628	222.200, 0.802
1113	222.400, 0.367	222.400, 0.405	222.400, 0.603	222.400, 0.899	222.400, 0.537	222.400, 0.821	222.400, 0.627	222.400, 0.801
1114	222.600, 0.367	222.600, 0.405	222.600, 0.602	222.600, 0.898	222.600, 0.537	222.600, 0.820	222.600, 0.626	222.600, 0.800
1115	222.800, 0.367	222.800, 0.405	222.800, 0.601	222.800, 0.897	222.800, 0.536	222.800, 0.820	222.800, 0.626	222.800, 0.799
1116	223.000, 0.367	223.000, 0.405	223.000, 0.601	223.000, 0.896	223.000, 0.535	223.000, 0.819	223.000, 0.626	223.000, 0.797
1117	223.200, 0.366	223.200, 0.405	223.200, 0.600	223.200, 0.895	223.200, 0.534	223.200, 0.818	223.200, 0.625	223.200, 0.796
1118	223.400, 0.366	223.400, 0.405	223.400, 0.599	223.400, 0.894	223.400, 0.534	223.400, 0.817	223.400, 0.625	223.400, 0.795
1119	223.600, 0.365	223.600, 0.405	223.600, 0.598	223.600, 0.893	223.600, 0.533	223.600, 0.817	223.600, 0.624	223.600, 0.794
1120	223.800, 0.365	223.800, 0.405	223.800, 0.598	223.800, 0.892	223.800, 0.532	223.800, 0.816	223.800, 0.623	223.800, 0.794
1121	224.000, 0.365	224.000, 0.404	224.000, 0.597	224.000, 0.892	224.000, 0.532	224.000, 0.815	224.000, 0.622	224.000, 0.793
1122	224.200, 0.365	224.200, 0.404	224.200, 0.597	224.200, 0.891	224.200, 0.531	224.200, 0.815	224.200, 0.622	224.200, 0.792
1123	224.400, 0.365	224.400, 0.403	224.400, 0.596	224.400, 0.890	224.400, 0.531	224.400, 0.814	224.400, 0.621	224.400, 0.792
1124	224.600, 0.365	224.600, 0.403	224.600, 0.596	224.600, 0.889	224.600, 0.530	224.600, 0.814	224.600, 0.620	224.600, 0.791
1125	224.800, 0.365	224.800, 0.403	224.800, 0.595	224.800, 0.888	224.800, 0.529	224.800, 0.813	224.800, 0.619	224.800, 0.790
1126	225.000, 0.365	225.000, 0.402	225.000, 0.594	225.000, 0.887	225.000, 0.529	225.000, 0.812	225.000, 0.619	225.000, 0.789
1127	225.200, 0.365	225.200, 0.402	225.200, 0.594	225.200, 0.886	225.200, 0.528	225.200, 0.812	225.200, 0.618	225.200, 0.788
1128	225.400, 0.365	225.400, 0.402	225.400, 0.593	225.400, 0.885	225.400, 0.528	225.400, 0.811	225.400, 0.617	225.400, 0.787
1129	225.600, 0.365	225.600, 0.402	225.600, 0.592	225.600, 0.884	225.600, 0.527	225.600, 0.810	225.600, 0.617	225.600, 0.786
1130	225.800, 0.366	225.800, 0.402	225.800, 0.592	225.800, 0.883	225.800, 0.526	225.800, 0.810	225.800, 0.616	225.800, 0.786
1131	226.000, 0.366	226.000, 0.402	226.000, 0.591	226.000, 0.883	226.000, 0.526	226.000, 0.809	226.000, 0.615	226.000, 0.785
1132	226.200, 0.366	226.200, 0.402	226.200, 0.590	226.200, 0.882	226.200, 0.525	226.200, 0.808	226.200, 0.615	226.200, 0.784
1133	226.400, 0.366	226.400, 0.402	226.400, 0.590	226.400, 0.881	226.400, 0.524	226.400, 0.807	226.400, 0.615	226.400, 0.783
1134	226.600, 0.366	226.600, 0.403	226.600, 0.589	226.600, 0.880	226.600, 0.524	226.600, 0.807	226.600, 0.614	226.600, 0.782
1135	226.800, 0.366	226.800, 0.403	226.800, 0.588	226.800, 0.879	226.800, 0.523	226.800, 0.806	226.800, 0.614	226.800, 0.781
1136	227.000, 0.365	227.000, 0.403	227.000, 0.588	227.000, 0.878	227.000, 0.522	227.000, 0.805	227.000, 0.614	227.000, 0.780
1137	227.200, 0.365	227.200, 0.403	227.200, 0.587	227.200, 0.878	227.200, 0.522	227.200, 0.805	227.200, 0.614	227.200, 0.779
1138	227.400, 0.365	227.400, 0.404	227.400, 0.587	227.400, 0.877	227.400, 0.521	227.400, 0.805	227.400, 0.613	227.400, 0.778
1139	227.600, 0.365	227.600, 0.404	227.600, 0.586	227.600, 0.876	227.600, 0.521	227.600, 0.804	227.600, 0.613	227.600, 0.777
1140	227.800, 0.364	227.800, 0.404	227.800, 0.586	227.800, 0.876	227.800, 0.520	227.800, 0.804	227.800, 0.612	227.800, 0.776
1141	228.000, 0.364	228.000, 0.404	228.000, 0.585	228.000, 0.875	228.000, 0.520	228.000, 0.803	228.000, 0.611	228.000, 0.775
1142	228.200, 0.364	228.200, 0.404	228.200, 0.584	228.200, 0.874	228.200, 0.519	228.200, 0.803	228.200, 0.610	228.200, 0.774
1143	228.400, 0.364	228.400, 0.403	228.400, 0.584	228.400, 0.873	228.400, 0.518	228.400, 0.802	228.400, 0.610	228.400, 0.773
1144	228.600, 0.363	228.600, 0.403	228.600, 0.583	228.600, 0.872	228.600, 0.517	228.600, 0.802	228.600, 0.609	228.600, 0.773
1145	228.800, 0.363	228.800, 0.403	228.800, 0.582	228.800, 0.871	228.800, 0.516	228.800, 0.801	228.800, 0.608	228.800, 0.772
1146	229.000, 0.363	229.000, 0.403	229.000, 0.581	229.000, 0.870	229.000, 0.516	229.000, 0.801	229.000, 0.608	229.000, 0.771
1147	229.200, 0.363	229.200, 0.403	229.200, 0.581	229.200, 0.869	229.200, 0.515	229.200, 0.800	229.200, 0.607	229.200, 0.770
1148	229.400, 0.363	229.400, 0.403	229.400, 0.580	229.400, 0.869	229.400, 0.514	229.400, 0.799	229.400, 0.607	229.400, 0.769
1149	229.600, 0.363	229.600, 0.402	229.600, 0.580	229.600, 0.868	229.600, 0.513	229.600, 0.798	229.600, 0.606	229.600, 0.768
1150	229.800, 0.363	229.800, 0.402	229.800, 0.579	229.800, 0.867	229.800, 0.513	229.800, 0.797	229.800, 0.605	229.800, 0.767
1151	230.000, 0.363	230.000, 0.402	230.000, 0.579	230.000, 0.867	230.000, 0.512	230.000, 0.796	230.000, 0.604	230.000, 0.766
1152	230.200, 0.363	230.200, 0.402	230.200, 0.578	230.200, 0.866	230.200, 0.512	230.200, 0.796	230.200, 0.604	230.200, 0.766
1153	230.400, 0.363	230.400, 0.402	230.400, 0.578	230.400, 0.866	230.400, 0.511	230.400, 0.795	230.400, 0.603	230.400, 0.765
1154	230.600, 0.363	230.600, 0.402	230.600, 0.578	230.600, 0.865	230.600, 0.511	230.600, 0.794	230.600, 0.602	230.600, 0.764
1155	230.800, 0.363	230.800, 0.402	230.800, 0.577	230.800, 0.864	230.800, 0.510	230.800, 0.794	230.800, 0.602	230.800, 0.763
1156	231.000, 0.363	231.000, 0.402	231.000, 0.577	231.000, 0.864	231.000, 0.510	231.000, 0.793	231.000, 0.601	231.000, 0.763
1157	231.200, 0.363	231.200, 0.402	231.200, 0.576	231.200, 0.863	231.200, 0.510	231.200, 0.793	231.200, 0.601	231.200, 0.762
1158	231.400, 0.363	231.400, 0.402	231.400, 0.576	231.400, 0.862	231.400, 0.509	231.400, 0.793	231.400, 0.600	231.400, 0.762
1159	231.600, 0.363	231.600, 0.402	231.600, 0.575	231.600, 0.861	231.600, 0.509	231.600, 0.792	231.600, 0.599	231.600, 0.761
1160	231.800, 0.363	231.800, 0.402	231.800, 0.575	231.800, 0.861	231.800, 0.508	231.800, 0.791	231.800, 0.599	231.800, 0.761
1161	232.000, 0.363	232.000, 0.402	232.000, 0.575	232.000, 0.860	232.000, 0.508	232.000, 0.791	232.000, 0.598	232.000, 0.760
1162	232.200, 0.363	232.200, 0.401	232.200, 0.574	232.200, 0.859	232.200, 0.508	232.200, 0.790	232.200, 0.598	232.200, 0.760
1163	232.400, 0.363	232.400, 0.401	232.400, 0.573	232.400, 0.858	232.400, 0.507	232.400, 0.790	232.400, 0.598	232.400, 0.759
1164	232.600, 0.363	232.600, 0.401	232.600, 0.572	232.600, 0.857	232.600, 0.507	232.600, 0.789	232.600, 0.598	232.600, 0.758
1165	232.800, 0.362	232.800, 0.401	232.800, 0.572	232.800, 0.856	232.800, 0.506	232.800, 0.788	232.800, 0.597	232.800, 0.758
1166	233.000, 0.362	233.000, 0.400	233.000, 0.571	233.000, 0.855	233.000, 0.506	233.000, 0.788	233.000, 0.597	233.000, 0.757
1167	233.200, 0.362	233.200, 0.400	233.200, 0.570	233.200, 0.854	233.200, 0.505	233.200, 0.787	233.200, 0.597	233.200, 0.756
1168	233.400, 0.362	233.400, 0.400	233.400, 0.569	233.400, 0.853	233.400, 0.505	233.400, 0.787	233.400, 0.596	233.400, 0.755
1169	233.600, 0.361	233.600, 0.399	233.600, 0.569	233.600, 0.853	233.600, 0.504	233.600, 0.786	233.600, 0.595	233.600, 0.755
1170	233.800, 0.361	233.800, 0.399	233.800, 0.568	233.800, 0.852	233.800, 0.504	233.800, 0.786	233.800, 0.595	233.800, 0.754
1171	234.000, 0.361	234.000, 0.399	234.000, 0.568	234.000, 0.852	234.000, 0.503	234.000, 0.785	234.000, 0.594	234.000, 0.753
1172	234.200, 0.361	234.200, 0.399	234.200, 0.567	234.200, 0.851	234.200, 0.502	234.200, 0.785	234.200, 0.593	234.200, 0.752
1173	234.400, 0.361	234.400, 0.399	234.400, 0.566	234.400, 0.850	234.400, 0.502	234.400, 0.785	234.400, 0.592	234.400, 0.752
1174	234.600, 0.361	234.600, 0.400	234.600, 0.566	234.600, 0.850	234.600, 0.501	234.600, 0.784	234.600, 0.592	234.600, 0.751
1175	234.800, 0.360	234.800, 0.400	234.800, 0.565	234.800, 0.849	234.800, 0.501	234.800, 0.784	234.800, 0.591	234.800, 0.750
1176	235.000, 0.360	235.000, 0.400	235.000, 0.564	235.000, 0.849	235.000, 0.500	235.000, 0.783	235.000, 0.591	235.000, 0.750
1177	235.200, 0.360	235.200, 0.399	235.200, 0.564	235.200, 0.848	235.200, 0.499	235.200, 0.783	235.200, 0.590	235.200, 0.749
1178	235.400, 0.360	235.400, 0.399	235.400, 0.563	235.400, 0.848	235.400, 0.498	235.400, 0.782	235.400, 0.590	235.400, 0.748
1179	235.600, 0.360	235.600, 0.399	235.600, 0.563	235.600, 0.847	235.600, 0.498	235.600, 0.781	235.600, 0.589	235.600, 0.747
1180	235.800, 0.360	235.800, 0.398	235.800, 0.562	235.800, 0.846	235.800, 0.497	235.800, 0.780	235.800, 0.588	235.800, 0.747
1181	236.000, 0.360	236.000, 0.398	236.000, 0.562	236.000, 0.846	236.000, 0.496	236.000, 0.779	236.000, 0.588	236.000, 0.746
1182	236.200, 0.360	236.200, 0.398	236.200, 0.561	236.200, 0.845	236.200, 0.496	236.200, 0.779	236.200, 0.588	236.200, 0.745
1183	236.400, 0.360	236.400, 0.398	236.400, 0.561	236.400, 0.845	236.400, 0.495	236.400, 0.779	236.400, 0.587	236.400, 0.744
1184	236.600, 0.360	236.600, 0.398	236.600, 0.560	236.600, 0.844	236.600, 0.494	236.600, 0.778	236.600, 0.587	236.600, 0.744
1185	236.800, 0.360	236.800, 0.399	236.800, 0.560	236.800, 0.844	236.800, 0.494	236.800, 0.778	236.800, 0.586	236.800, 0.743
1186	237.000, 0.360	237.000, 0.399	237.000, 0.560	237.000, 0.844	237.000, 0.493	237.000, 0.778	237.000, 0.586	237.000, 0.742
1187	237.200, 0.360	237.200, 0.399	237.200, 0.560	237.200, 0.843	237.200, 0.493	237.200, 0.778	237.200, 0.585	237.200, 0.742
1188	237.400, 0.360	237.400, 0.399	237.400, 0.559	237.400, 0.842	237.400, 0.492	237.400, 0.777	237.400, 0.585	237.400, 0.741
1189	237.600, 0.360	237.600, 0.400	237.600, 0.559	237.600, 0.842	237.600, 0.492	237.600, 0.777	237.600, 0.584	237.600, 0.740
1190	237.800, 0.360	237.800, 0.400	237.800, 0.559	237.800, 0.841	237.800, 0.491	237.800, 0.777	237.800, 0.583	237.800, 0.740
1191	238.000, 0.360	238.000, 0.400	238.000, 0.558	238.000, 0.840	238.000, 0.491	238.000, 0.777	238.000, 0.583	238.000, 0.739
1192	238.200, 0.360	238.200, 0.401	238.200, 0.558	238.200, 0.839	238.200, 0.491	238.200, 0.776	238.200, 0.582	238.200, 0.739
1193	238.400, 0.360	238.400, 0.401	238.400, 0.558	238.400, 0.838	238.400, 0.490	238.400, 0.776	238.400, 0.582	238.400, 0.738
1194	238.600, 0.360	238.600, 0.401	238.600, 0.557	238.600, 0.838	238.600, 0.490	238.600, 0.775	238.600, 0.582	238.600, 0.738
1195	238.800, 0.359	238.800, 0.401	238.800, 0.557	238.800, 0.837	238.800, 0.490	238.800, 0.775	238.800, 0.581	238.800, 0.737
1196	239.000, 0.359	239.000, 0.401	239.000, 0.556	239.000, 0.836	239.000, 0.489	239.000, 0.774	239.000, 0.581	239.000, 0.736
1197	239.200, 0.359	239.200, 0.401	239.200, 0.555	239.200, 0.835	239.200, 0.489	239.200, 0.774	239.200, 0.580	239.200, 0.736
1198	239.400, 0.359	239.400, 0.400	239.400, 0.555	239.400, 0.834	239.400, 0.488	239.400, 0.773	239.400, 0.580	239.400, 0.735
1199	239.600, 0.359	239.600, 0.400	239.600, 0.554	239.600, 0.833	239.600, 0.488	239.600, 0.773	239.600, 0.579	239.600, 0.735
1200	239.800, 0.359	239.800, 0.400	239.800, 0.553	239.800, 0.832	239.800, 0.487	239.800, 0.772	239.800, 0.579	239.800, 0.734
1201	240.000, 0.359	240.000, 0.399	240.000, 0.552	240.000, 0.832	240.000, 0.487	240.000, 0.772	240.000, 0.578	240.000, 0.734
1202	240.200, 0.359	240.200, 0.400	240.200, 0.552	240.200, 0.831	240.200, 0.487	240.200, 0.772	240.200, 0.578	240.200, 0.733
1203	240.400, 0.359	240.400, 0.400	240.400, 0.551	240.400, 0.831	240.400, 0.486	240.400, 0.772	240.400, 0.577	240.400, 0.733
1204	240.600, 0.358	240.600, 0.400	240.600, 0.551	240.600, 0.831	240.600, 0.486	240.600, 0.771	240.600, 0.577	240.600, 0.732
1205	240.800, 0.358	240.800, 0.400	240.800, 0.550	240.800, 0.830	240.800, 0.485	240.800, 0.771	240.800, 0.576	240.800, 0.731
1206	241.000, 0.358	241.000, 0.400	241.000, 0.550	241.000, 0.830	241.000, 0.485	241.000, 0.770	241.000, 0.576	241.000, 0.731
1207	241.200, 0.358	241.200, 0.400	241.200, 0.550	241.200, 0.829	241.200, 0.484	241.200, 0.770	241.200, 0.575	241.200, 0.730
1208	241.400, 0.357	241.400, 0.399	241.400, 0.549	241.400, 0.829	241.400, 0.484	241.400, 0.769	241.400, 0.575	241.400, 0.729
1209	241.600, 0.357	241.600, 0.399	241.600, 0.549	241.600, 0.829	241.600, 0.483	241.600, 0.768	241.600, 0.574	241.600, 0.729
1210	241.800, 0.357	241.800, 0.399	241.800, 0.549	241.800, 0.828	241.800, 0.482	241.800, 0.768	241.800, 0.574	241.800, 0.728
1211	242.000, 0.357	242.000, 0.399	242.000, 0.549	242.000, 0.828	242.000, 0.482	242.000, 0.767	242.000, 0.573	242.000, 0.727
1212	242.200, 0.357	242.200, 0.399	242.200, 0.549	242.200, 0.827	242.200, 0.481	242.200, 0.766	242.200, 0.573	242.200, 0.727
1213	242.400, 0.357	242.400, 0.399	242.400, 0.548	242.400, 0.827	242.400, 0.481	242.400, 0.766	242.400, 0.573	242.400, 0.726
1214	242.600, 0.357	242.600, 0.399	242.600, 0.548	242.600, 0.826	242.600, 0.480	242.600, 0.765	242.600, 0.572	242.600, 0.725
1215	242.800, 0.357	242.800, 0.400	242.800, 0.548	242.800, 0.826	242.800, 0.480	242.800, 0.765	242.800, 0.572	242.800, 0.724
1216	243.000, 0.358	243.000, 0.400	243.000, 0.547	243.000, 0.825	243.000, 0.480	243.000, 0.765	243.000, 0.572	243.000, 0.724
1217	243.200, 0.358	243.200, 0.400	243.200, 0.547	243.200, 0.824	243.200, 0.479	243.200, 0.764	243.200, 0.571	243.200, 0.723
1218	243.400, 0.358	243.400, 0.400	243.400, 0.546	243.400, 0.824	243.400, 0.479	243.400, 0.764	243.400, 0.571	243.400, 0.723
1219	243.600, 0.358	243.600, 0.400	243.600, 0.546	243.600, 0.823	243.600, 0.479	243.600, 0.764	243.600, 0.571	243.600, 0.722
1220	243.800, 0.358	243.800, 0.400	243.800, 0.545	243.800, 0.823	243.800, 0.479	243.800, 0.763	243.800, 0.570	243.800, 0.722
1221	244.000, 0.358	244.000, 0.400	244.000, 0.544	244.000, 0.822	244.000, 0.478	244.000, 0.763	244.000, 0.570	244.000, 0.721
1222	244.200, 0.358	244.200, 0.399	244.200, 0.544	244.200, 0.822	244.200, 0.478	244.200, 0.763	244.200, 0.569	244.200, 0.721
1223	244.400, 0.358	244.400, 0.399	244.400, 0.543	244.400, 0.821	244.400, 0.477	244.400, 0.763	244.400, 0.569	244.400, 0.720
1224	244.600, 0.358	244.600, 0.399	244.600, 0.542	244.600, 0.821	244.600, 0.477	244.600, 0.762	244.600, 0.569	244.600, 0.720
1225	244.800, 0.358	244.800, 0.398	244.800, 0.542	244.800, 0.820	244.800, 0.477	244.800, 0.762	244.800, 0.569	244.800, 0.719
1226	245.000, 0.357	245.000, 0.398	245.000, 0.542	245.000, 0.820	245.000, 0.476	245.000, 0.762	245.000, 0.568	245.000, 0.719
1227	245.200, 0.357	245.200, 0.397	245.200, 0.541	245.200, 0.819	245.200, 0.475	245.200, 0.761	245.200, 0.568	245.200, 0.718
1228	245.400, 0.357	245.400, 0.397	245.400, 0.541	245.400, 0.819	245.400, 0.475	245.400, 0.761	245.400, 0.568	245.400, 0.718
1229	245.600, 0.356	245.600, 0.396	245.600, 0.541	245.600, 0.818	245.600, 0.474	245.600, 0.760	245.600, 0.567	245.600, 0.717
1230	245.800, 0.356	245.800, 0.396	245.800, 0.540	245.800, 0.818	245.800, 0.474	245.800, 0.760	245.800, 0.566	245.800, 0.717
1231	246.000, 0.356	246.000, 0.396	246.000, 0.540	246.000, 0.817	246.000, 0.473	246.000, 0.759	246.000, 0.566	246.000, 0.716
1232	246.200, 0.356	246.200, 0.396	246.200, 0.540	246.200, 0.817	246.200, 0.473	246.200, 0.759	246.200, 0.565	246.200, 0.716
1233	246.400, 0.356	246.400, 0.396	246.400, 0.539	246.400, 0.816	246.400, 0.472	246.400, 0.758	246.400, 0.565	246.400, 0.715
1234	246.600, 0.356	246.600, 0.396	246.600, 0.539	246.600, 0.816	246.600, 0.472	246.600, 0.758	246.600, 0.564	246.600, 0.715
1235	246.800, 0.356	246.800, 0.396	246.800, 0.539	246.800, 0.815	246.800, 0.472	246.800, 0.758	246.800, 0.563	246.800, 0.714
1236	247.000, 0.356	247.000, 0.396	247.000, 0.538	247.000, 0.815	247.000, 0.471	247.000, 0.757	247.000, 0.563	247.000, 0.714
1237	247.200, 0.356	247.200, 0.396	247.200, 0.538	247.200, 0.814	247.200, 0.471	247.200, 0.757	247.200, 0.562	247.200, 0.713
1238	247.400, 0.356	247.400, 0.396	247.400, 0.537	247.400, 0.814	247.400, 0.471	247.400, 0.757	247.400, 0.562	247.400, 0.713
1239	247.600, 0.356	247.600, 0.396	247.600, 0.537	247.600, 0.813	247.600, 0.470	247.600, 0.756	247.600, 0.562	247.600, 0.712
1240	247.800, 0.356	247.800, 0.397	247.800, 0.536	247.800, 0.813	247.800, 0.470	247.800, 0.756	247.800, 0.561	247.800, 0.712
1241	248.000, 0.356	248.000, 0.397	248.000, 0.536	248.000, 0.813	248.000, 0.470	248.000, 0.755	248.000, 0.561	248.000, 0.712
1242	248.200, 0.356	248.200, 0.397	248.200, 0.535	248.200, 0.812	248.200, 0.469	248.200, 0.755	248.200, 0.560	248.200, 0.711
1243	248.400, 0.356	248.400, 0.397	248.400, 0.535	248.400, 0.812	248.400, 0.469	248.400, 0.755	248.400, 0.560	248.400, 0.711
1244	248.600, 0.356	248.600, 0.397	248.600, 0.535	248.600, 0.811	248.600, 0.469	248.600, 0.754	248.600, 0.560	248.600, 0.711
1245	248.800, 0.356	248.800, 0.396	248.800, 0.534	248.800, 0.811	248.800, 0.469	248.800, 0.754	248.800, 0.560	248.800, 0.711
1246	249.000, 0.356	249.000, 0.396	249.000, 0.534	249.000, 0.810	249.000, 0.468	249.000, 0.754	249.000, 0.559	249.000, 0.710
1247	249.200, 0.356	249.200, 0.396	249.200, 0.534	249.200, 0.810	249.200, 0.468	249.200, 0.753	249.200, 0.559	249.200, 0.710
1248	249.400, 0.356	249.400, 0.396	249.400, 0.533	249.400, 0.810	249.400, 0.467	249.400, 0.753	249.400, 0.559	249.400, 0.709
1249	249.600, 0.356	249.600, 0.396	249.600, 0.533	249.600, 0.809	249.600, 0.467	249.600, 0.753	249.600, 0.558	249.600, 0.709
1250	249.800, 0.356	249.800, 0.396	249.800, 0.533	249.800, 0.809	249.800, 0.467	249.800, 0.753	249.800, 0.558	249.800, 0.708
1251	250.000, 0.356	250.000, 0.396	250.000, 0.532	250.000, 0.809	250.000, 0.466	250.000, 0.753	250.000, 0.557	250.000, 0.707
1252	250.200, 0.356	250.200, 0.395	250.200, 0.531	250.200, 0.808	250.200, 0.466	250.200, 0.752	250.200, 0.557	250.200, 0.707
1253	250.400, 0.356	250.400, 0.395	250.400, 0.531	250.400, 0.808	250.400, 0.465	250.400, 0.752	250.400, 0.557	250.400, 0.706
1254	250.600, 0.356	250.600, 0.395	250.600, 0.531	250.600, 0.808	250.600, 0.465	250.600, 0.752	250.600, 0.556	250.600, 0.705
1255	250.800, 0.356	250.800, 0.395	250.800, 0.530	250.800, 0.807	250.800, 0.465	250.800, 0.752	250.800, 0.556	250.800, 0.705
1256	251.000, 0.356	251.000, 0.395	251.000, 0.529	251.000, 0.807	251.000, 0.464	251.000, 0.751	251.000, 0.556	251.000, 0.704
1257	251.200, 0.356	251.200, 0.396	251.200, 0.529	251.200, 0.806	251.200, 0.464	251.200, 0.751	251.200, 0.555	251.200, 0.704
1258	251.400, 0.356	251.400, 0.396	251.400, 0.528	251.400, 0.806	251.400, 0.464	251.400, 0.750	251.400, 0.555	251.400, 0.703
1259	251.600, 0.356	251.600, 0.396	251.600, 0.528	251.600, 0.805	251.600, 0.463	251.600, 0.750	251.600, 0.554	251.600, 0.703
1260	251.800, 0.355	251.800, 0.396	251.800, 0.527	251.800, 0.805	251.800, 0.463	251.800, 0.749	251.800, 0.553	251.800, 0.702
1261	252.000, 0.355	252.000, 0.396	252.000, 0.527	252.000, 0.804	252.000, 0.462	252.000, 0.748	252.000, 0.553	252.000, 0.702
1262	252.200, 0.355	252.200, 0.396	252.200, 0.527	252.200, 0.803	252.200, 0.462	252.200, 0.748	252.200, 0.553	252.200, 0.702
1263	252.400, 0.355	252.400, 0.396	252.400, 0.527	252.400, 0.802	252.400, 0.461	252.400, 0.748	252.400, 0.552	252.400, 0.701
1264	252.600, 0.354	252.600, 0.396	252.600, 0.526	252.600, 0.801	252.600, 0.461	252.600, 0.747	252.600, 0.552	252.600, 0.701
1265	252.800, 0.354	252.800, 0.395	252.800, 0.526	252.800, 0.800	252.800, 0.461	252.800, 0.747	252.800, 0.552	252.800, 0.701
1266	253.000, 0.354	253.000, 0.395	253.000, 0.525	253.000, 0.799	253.000, 0.460	253.000, 0.747	253.000, 0.552	253.000, 0.700
1267	253.200, 0.354	253.200, 0.395	253.200, 0.525	253.200, 0.799	253.200, 0.460	253.200, 0.746	253.200, 0.551	253.200, 0.700
1268	253.400, 0.353	253.400, 0.395	253.400, 0.525	253.400, 0.798	253.400, 0.460	253.400, 0.746	253.400, 0.551	253.400, 0.699
1269	253.600, 0.353	253.600, 0.395	253.600, 0.525	253.600, 0.798	253.600, 0.459	253.600, 0.746	253.600, 0.551	253.600, 0.698
1270	253.800, 0.353	253.800, 0.395	253.800, 0.524	253.800, 0.798	253.800, 0.459	253.800, 0.746	253.800, 0.550	253.800, 0.698
1271	254.000, 0.353	254.000, 0.394	254.000, 0.524	254.000, 0.797	254.000, 0.458	254.000, 0.746	254.000, 0.550	254.000, 0.697
1272	254.200, 0.353	254.200, 0.394	254.200, 0.524	254.200, 0.797	254.200, 0.458	254.200, 0.745	254.200, 0.550	254.200, 0.697
1273	254.400, 0.353	254.400, 0.394	254.400, 0.523	254.400, 0.797	254.400, 0.458	254.400, 0.745	254.400, 0.550	254.400, 0.696
1274	254.600, 0.353	254.600, 0.394	254.600, 0.523	254.600, 0.797	254.600, 0.457	254.600, 0.745	254.600, 0.549	254.600, 0.696
1275	254.800, 0.353	254.800, 0.394	254.800, 0.523	254.800, 0.796	254.800, 0.457	254.800, 0.745	254.800, 0.549	254.800, 0.696
1276	255.000, 0.353	255.000, 0.394	255.000, 0.523	255.000, 0.796	255.000, 0.457	255.000, 0.744	255.000, 0.549	255.000, 0.695
1277	255.200, 0.353	255.200, 0.394	255.200, 0.522	255.200, 0.796	255.200, 0.456	255.200, 0.744	255.200, 0.548	255.200, 0.695
1278	255.400, 0.353	255.400, 0.394	255.400, 0.522	255.400, 0.796	255.400, 0.456	255.400, 0.743	255.400, 0.547	255.400, 0.695
1279	255.600, 0.352	255.600, 0.394	255.600, 0.522	255.600, 0.796	255.600, 0.455	255.600, 0.743	255.600, 0.547	255.600, 0.695
1280	255.800, 0.352	255.800, 0.394	255.800, 0.521	255.800, 0.795	255.800, 0.455	255.800, 0.742	255.800, 0.547	255.800, 0.695
1281	256.000, 0.352	256.000, 0.394	256.000, 0.521	256.000, 0.795	256.000, 0.454	256.000, 0.742	256.000, 0.546	256.000, 0.694
1282	256.200, 0.352	256.200, 0.394	256.200, 0.521	256.200, 0.795	256.200, 0.454	256.200, 0.742	256.200, 0.546	256.200, 0.694
1283	256.400, 0.352	256.400, 0.394	256.400, 0.521	256.400, 0.794	256.400, 0.453	256.400, 0.742	256.400, 0.546	256.400, 0.694
1284	256.600, 0.353	256.600, 0.394	256.600, 0.521	256.600, 0.794	256.600, 0.453	256.600, 0.741	256.600, 0.545	256.600, 0.694
1285	256.800, 0.352	256.800, 0.394	256.800, 0.521	256.800, 0.794	256.800, 0.453	256.800, 0.741	256.800, 0.545	256.800, 0.694
1286	257.000, 0.353	257.000, 0.395	257.000, 0.521	257.000, 0.794	257.000, 0.452	257.000, 0.741	257.000, 0.545	257.000, 0.694
1287	257.200, 0.352	257.200, 0.395	257.200, 0.520	257.200, 0.794	257.200, 0.452	257.200, 0.741	257.200, 0.545	257.200, 0.693
1288	257.400, 0.352	257.400, 0.395	257.400, 0.520	257.400, 0.794	257.400, 0.452	257.400, 0.741	257.400, 0.544	257.400, 0.693
1289	257.600, 0.352	257.600, 0.395	257.600, 0.520	257.600, 0.793	257.600, 0.452	257.600, 0.741	257.600, 0.544	257.600, 0.693
1290	257.800, 0.352	257.800, 0.395	257.800, 0.519	257.800, 0.793	257.800, 0.452	257.800, 0.741	257.800, 0.544	257.800, 0.692
1291	258.000, 0.352	258.000, 0.395	258.000, 0.519	258.000, 0.793	258.000, 0.452	258.000, 0.740	258.000, 0.544	258.000, 0.692
1292	258.200, 0.352	258.200, 0.394	258.200, 0.518	258.200, 0.792	258.200, 0.452	258.200, 0.740	258.200, 0.544	258.200, 0.691
1293	258.400, 0.352	258.400, 0.394	258.400, 0.518	258.400, 0.792	258.400, 0.452	258.400, 0.740	258.400, 0.543	258.400, 0.691
1294	258.600, 0.352	258.600, 0.394	258.600, 0.518	258.600, 0.791	258.600, 0.452	258.600, 0.739	258.600, 0.543	258.600, 0.690
1295	258.800, 0.352	258.800, 0.394	258.800, 0.517	258.800, 0.791	258.800, 0.452	258.800, 0.739	258.800, 0.542	258.800, 0.690
1296	259.000, 0.352	259.000, 0.394	259.000, 0.517	259.000, 0.790	259.000, 0.451	259.000, 0.738	259.000, 0.542	259.000, 0.689
1297	259.200, 0.352	259.200, 0.393	259.200, 0.516	259.200, 0.789	259.200, 0.451	259.200, 0.737	259.200, 0.542	259.200, 0.689
1298	259.400, 0.352	259.400, 0.393	259.400, 0.515	259.400, 0.789	259.400, 0.451	259.400, 0.737	259.400, 0.541	259.400, 0.688
1299	259.600, 0.352	259.600, 0.393	259.600, 0.515	259.600, 0.788	259.600, 0.450	259.600, 0.736	259.600, 0.541	259.600, 0.688
1300	259.800, 0.352	259.800, 0.393	259.800, 0.515	259.800, 0.787	259.800, 0.450	259.800, 0.735	259.800, 0.541	259.800, 0.687
1301	260.000, 0.352	260.000, 0.392	260.000, 0.514	260.000, 0.787	260.000, 0.449	260.000, 0.735	260.000, 0.540	260.000, 0.687
1302	260.200, 0.353	260.200, 0.392	260.200, 0.514	260.200, 0.786	260.200, 0.449	260.200, 0.734	260.200, 0.540	260.200, 0.687
1303	260.400, 0.353	260.400, 0.392	260.400, 0.514	260.400, 0.785	260.400, 0.448	260.400, 0.734	260.400, 0.540	260.400, 0.686
1304	260.600, 0.353	260.600, 0.392	260.600, 0.513	260.600, 0.785	260.600, 0.448	260.600, 0.733	260.600, 0.540	260.600, 0.686
1305	260.800, 0.353	260.800, 0.393	260.800, 0.513	260.800, 0.784	260.800, 0.448	260.800, 0.733	260.800, 0.540	260.800, 0.686
1306	261.000, 0.353	261.000, 0.393	261.000, 0.513	261.000, 0.784	261.000, 0.447	261.000, 0.733	261.000, 0.539	261.000, 0.686
1307	261.200, 0.353	261.200, 0.393	261.200, 0.512	261.200, 0.783	261.200, 0.447	261.200, 0.733	261.200, 0.539	261.200, 0.686
1308	261.400, 0.353	261.400, 0.393	261.400, 0.512	261.400, 0.783	261.400, 0.447	261.400, 0.732	261.400, 0.539	261.400, 0.686
1309	261.600, 0.352	261.600, 0.393	261.600, 0.512	261.600, 0.783	261.600, 0.446	261.600, 0.732	261.600, 0.538	261.600, 0.685
1310	261.800, 0.352	261.800, 0.393	261.800, 0.512	261.800, 0.782	261.800, 0.446	261.800, 0.732	261.800, 0.538	261.800, 0.685
1311	262.000, 0.352	262.000, 0.393	262.000, 0.511	262.000, 0.782	262.000, 0.445	262.000, 0.732	262.000, 0.537	262.000, 0.684
1312	262.200, 0.351	262.200, 0.393	262.200, 0.511	262.200, 0.782	262.200, 0.445	262.200, 0.732	262.200, 0.537	262.200, 0.684
1313	262.400, 0.351	262.400, 0.393	262.400, 0.511	262.400, 0.782	262.400, 0.444	262.400, 0.732	262.400, 0.536	262.400, 0.683
1314	262.600, 0.350	262.600, 0.393	262.600, 0.510	262.600, 0.782	262.600, 0.444	262.600, 0.732	262.600, 0.536	262.600, 0.683
1315	262.800, 0.350	262.800, 0.393	262.800, 0.509	262.800, 0.782	262.800, 0.444	262.800, 0.732	262.800, 0.536	262.800, 0.682
1316	263.000, 0.350	263.000, 0.393	263.000, 0.509	263.000, 0.782	263.000, 0.443	263.000, 0.732	263.000, 0.535	263.000, 0.682
1317	263.200, 0.350	263.200, 0.392	263.200, 0.509	263.200, 0.782	263.200, 0.443	263.200, 0.732	263.200, 0.535	263.200, 0.681
1318	263.400, 0.350	263.400, 0.392	263.400, 0.509	263.400, 0.782	263.400, 0.442	263.400, 0.732	263.400, 0.534	263.400, 0.681
1319	263.600, 0.350	263.600, 0.392	263.600, 0.508	263.600, 0.782	263.600, 0.441	263.600, 0.732	263.600, 0.534	263.600, 0.681
1320	263.800, 0.350	263.800, 0.392	263.800, 0.508	263.800, 0.781	263.800, 0.441	263.800, 0.731	263.800, 0.533	263.800, 0.680
1321	264.000, 0.350	264.000, 0.392	264.000, 0.508	264.000, 0.781	264.000, 0.440	264.000, 0.731	264.000, 0.533	264.000, 0.680
1322	264.200, 0.350	264.200, 0.392	264.200, 0.508	264.200, 0.781	264.200, 0.440	264.200, 0.731	264.200, 0.532	264.200, 0.680
1323	264.400, 0.351	264.400, 0.392	264.400, 0.507	264.400, 0.780	264.400, 0.440	264.400, 0.731	264.400, 0.532	264.400, 0.680
1324	264.600, 0.351	264.600, 0.392	264.600, 0.507	264.600, 0.780	264.600, 0.440	264.600, 0.731	264.600, 0.532	264.600, 0.679
1325	264.800, 0.351	264.800, 0.392	264.800, 0.507	264.800, 0.779	264.800, 0.439	264.800, 0.730	264.800, 0.532	264.800, 0.679
1326	265.000, 0.351	265.000, 0.392	265.000, 0.507	265.000, 0.779	265.000, 0.439	265.000, 0.730	265.000, 0.532	265.000, 0.678
1327	265.200, 0.352	265.200, 0.392	265.200, 0.506	265.200, 0.778	265.200, 0.439	265.200, 0.729	265.200, 0.532	265.200, 0.678
1328	265.400, 0.352	265.400, 0.392	265.400, 0.506	265.400, 0.777	265.400, 0.439	265.400, 0.729	265.400, 0.531	265.400, 0.677
1329	265.600, 0.352	265.600, 0.392	265.600, 0.506	265.600, 0.777	265.600, 0.439	265.600, 0.728	265.600, 0.531	265.600, 0.676
1330	265.800, 0.352	265.800, 0.392	265.800, 0.506	265.800, 0.776	265.800, 0.438	265.800, 0.728	265.800, 0.531	265.800, 0.676
1331	266.000, 0.352	266.000, 0.392	266.000, 0.505	266.000, 0.776	266.000, 0.438	266.000, 0.728	266.000, 0.531	266.000, 0.675
1332	266.200, 0.351	266.200, 0.392	266.200, 0.505	266.200, 0.776	266.200, 0.438	266.200, 0.727	266.200, 0.531	266.200, 0.675
1333	266.400, 0.351	266.400, 0.392	266.400, 0.505	266.400, 0.775	266.400, 0.437	266.400, 0.727	266.400, 0.531	266.400, 0.675
1334	266.600, 0.351	266.600, 0.392	266.600, 0.504	266.600, 0.775	266.600, 0.436	266.600, 0.727	266.600, 0.531	266.600, 0.674
1335	266.800, 0.350	266.800, 0.392	266.800, 0.504	266.800, 0.775	266.800, 0.436	266.800, 0.727	266.800, 0.531	266.800, 0.674
1336	267.000, 0.350	267.000, 0.391	267.000, 0.504	267.000, 0.775	267.000, 0.436	267.000, 0.726	267.000, 0.530	267.000, 0.674
1337	267.200, 0.349	267.200, 0.391	267.200, 0.503	267.200, 0.774	267.200, 0.435	267.200, 0.726	267.200, 0.530	267.200, 0.674
1338	267.400, 0.349	267.400, 0.391	267.400, 0.503	267.400, 0.774	267.400, 0.435	267.400, 0.726	267.400, 0.529	267.400, 0.674
1339	267.600, 0.349	267.600, 0.391	267.600, 0.503	267.600, 0.774	267.600, 0.435	267.600, 0.726	267.600, 0.529	267.600, 0.674
1340	267.800, 0.348	267.800, 0.391	267.800, 0.502	267.800, 0.774	267.800, 0.435	267.800, 0.726	267.800, 0.529	267.800, 0.674
1341	268.000, 0.348	268.000, 0.391	268.000, 0.502	268.000, 0.773	268.000, 0.435	268.000, 0.725	268.000, 0.528	268.000, 0.674
1342	268.200, 0.348	268.200, 0.391	268.200, 0.502	268.200, 0.773	268.200, 0.435	268.200, 0.725	268.200, 0.528	268.200, 0.673
1343	268.400, 0.348	268.400, 0.391	268.400, 0.502	268.400, 0.773	268.400, 0.435	268.400, 0.725	268.400, 0.528	268.400, 0.673
1344	268.600, 0.349	268.600, 0.391	268.600, 0.501	268.600, 0.773	268.600, 0.435	268.600, 0.725	268.600, 0.528	268.600, 0.673
1345	268.800, 0.349	268.800, 0.391	268.800, 0.501	268.800, 0.773	268.800, 0.435	268.800, 0.725	268.800, 0.527	268.800, 0.673
1346	269.000, 0.349	269.000, 0.391	269.000, 0.501	269.000, 0.773	269.000, 0.435	269.000, 0.725	269.000, 0.527	269.000, 0.672
1347	269.200, 0.350	269.200, 0.391	269.200, 0.501	269.200, 0.772	269.200, 0.434	269.200, 0.724	269.200, 0.526	269.200, 0.672
1348	269.400, 0.350	269.400, 0.391	269.400, 0.501	269.400, 0.773	269.400, 0.434	269.400, 0.724	269.400, 0.526	269.400, 0.671
1349	269.600, 0.351	269.600, 0.391	269.600, 0.501	269.600, 0.773	269.600, 0.434	269.600, 0.724	269.600, 0.526	269.600, 0.671
1350	269.800, 0.351	269.800, 0.391	269.800, 0.501	269.800, 0.773	269.800, 0.434	269.800, 0.724	269.800, 0.526	269.800, 0.671
1351	,	,	,	,	,	,	,	,
1352	,	,	,	,	,	,	,	,
1353	,	,	,	,	,	,	,	,
1354	,	,	,	,	,	,	,	,
1355	,	,	,	,	,	,	,	,
1356	,	,	,	,	,	,	,	,
1357	,	,	,	,	,	,	,	,
1358	,	,	,	,	,	,	,	,
1359	,	,	,	,	,	,	,	,
1360	,	,	,	,	,	,	,	,
1361	,	,	,	,	,	,	,	,
1362	,	,	,	,	,	,	,	,
1363	,	,	,	,	,	,	,	,
1364	,	,	,	,	,	,	,	,
1365	,	,	,	,	,	,	,	,
1366	,	,	,	,	,	,	,	,
1367	,	,	,	,	,	,	,	,
1368	,	,	,	,	,	,	,	,
1369	,	,	,	,	,	,	,	,
1370	,	,	,	,	,	,	,	,
1371	,	,	,	,	,	,	,	,
1372	,	,	,	,	,	,	,	,
1373	,	,	,	,	,	,	,	,
1374	,	,	,	,	,	,	,	,
1375	,	,	,	,	,	,	,	,
1376	,	,	,	,	,	,	,	,
1377	,	,	,	,	,	,	,	,
1378	,	,	,	,	,	,	,	,
1379	,	,	,	,	,	,	,	,
1380	,	,	,	,	,	,	,	,
1381	,	,	,	,	,	,	,	,
1382	,	,	,	,	,	,	,	,
1383	,	,	,	,	,	,	,	,
1384	,	,	,	,	,	,	,	,
1385	,	,	,	,	,	,	,	,
1386	,	,	,	,	,	,	,	,
1387	,	,	,	,	,	,	,	,
1388	,	,	,	,	,	,	,	,
1389	,	,	,	,	,	,	,	,
1390	,	,	,	,	,	,	,	,
1391	,	,	,	,	,	,	,	,
1392	,	,	,	,	,	,	,	,
1393	,	,	,	,	,	,	,	,
1394	,	,	,	,	,	,	,	,
1395	,	,	,	,	,	,	,	,
1396	,	,	,	,	,	,	,	,
1397	,	,	,	,	,	,	,	,
1398	,	,	,	,	,	,	,	,
1399	,	,	,	,	,	,	,	,
1400	,	,	,	,	,	,	,	,
1401	,	,	,	,	,	,	,	,
1402	,	,	,	,	,	,	,	,
1403	,	,	,	,	,	,	,	,
1404	,	,	,	,	,	,	,	,
1405	,	,	,	,	,	,	,	,
1406	,	,	,	,	,	,	,	,
1407	,	,	,	,	,	,	,	,
1408	,	,	,	,	,	,	,	,
1409	,	,	,	,	,	,	,	,
1410	,	,	,	,	,	,	,	,
1411	,	,	,	,	,	,	,	,
1412	,	,	,	,	,	,	,	,
1413	,	,	,	,	,	,	,	,
1414	,	,	,	,	,	,	,	,
1415	,	,	,	,	,	,	,	,
1416	,	,	,	,	,	,	,	,
1417	,	,	,	,	,	,	,	,
1418	,	,	,	,	,	,	,	,
1419	,	,	,	,	,	,	,	,
1420	,	,	,	,	,	,	,	,
1421	,	,	,	,	,	,	,	,
1422	,	,	,	,	,	,	,	,
1423	,	,	,	,	,	,	,	,
1424	,	,	,	,	,	,	,	,
1425	,	,	,	,	,	,	,	,
1426	,	,	,	,	,	,	,	,
1427	,	,	,	,	,	,	,	,
1428	,	,	,	,	,	,	,	,
1429	,	,	,	,	,	,	,	,
1430	,	,	,	,	,	,	,	,
1431	,	,	,	,	,	,	,	,
1432	,	,	,	,	,	,	,	,
1433	,	,	,	,	,	,	,	,
1434	,	,	,	,	,	,	,	,
1435	,	,	,	,	,	,	,	,
1436	,	,	,	,	,	,	,	,
1437	,	,	,	,	,	,	,	,
1438	,	,	,	,	,	,	,	,
1439	,	,	,	,	,	,	,	,
1440	,	,	,	,	,	,	,	,
1441	,	,	,	,	,	,	,	,
1442	,	,	,	,	,	,	,	,
1443	,	,	,	,	,	,	,	,
1444	,	,	,	,	,	,	,	,
1445	,	,	,	,	,	,	,	,
1446	,	,	,	,	,	,	,	,
1447	,	,	,	,	,	,	,	,
1448	,	,	,	,	,	,	,	,
1449	,	,	,	,	,	,	,	,
1450	,	,	,	,	,	,	,	,
1451	,	,	,	,	,	,	,	,
1452	,	,	,	,	,	,	,	,
1453	,	,	,	,	,	,	,	,
1454	,	,	,	,	,	,	,	,
1455	,	,	,	,	,	,	,	,
1456	,	,	,	,	,	,	,	,
1457	,	,	,	,	,	,	,	,
1458	,	,	,	,	,	,	,	,
1459	,	,	,	,	,	,	,	,
1460	,	,	,	,	,	,	,	,
1461	,	,	,	,	,	,	,	,
1462	,	,	,	,	,	,	,	,
1463	,	,	,	,	,	,	,	,
1464	,	,	,	,	,	,	,	,
1465	,	,	,	,	,	,	,	,
1466	,	,	,	,	,	,	,	,
1467	,	,	,	,	,	,	,	,
1468	,	,	,	,	,	,	,	,
1469	,	,	,	,	,	,	,	,
1470	,	,	,	,	,	,	,	,
1471	,	,	,	,	,	,	,	,
1472	,	,	,	,	,	,	,	,
1473	,	,	,	,	,	,	,	,
1474	,	,	,	,	,	,	,	,
1475	,	,	,	,	,	,	,	,
1476	,	,	,	,	,	,	,	,
1477	,	,	,	,	,	,	,	,
1478	,	,	,	,	,	,	,	,
1479	,	,	,	,	,	,	,	,
1480	,	,	,	,	,	,	,	,
1481	,	,	,	,	,	,	,	,
1482	,	,	,	,	,	,	,	,
1483	,	,	,	,	,	,	,	,
1484	,	,	,	,	,	,	,	,
1485	,	,	,	,	,	,	,	,
1486	,	,	,	,	,	,	,	,
1487	,	,	,	,	,	,	,	,
1488	,	,	,	,	,	,	,	,
1489	,	,	,	,	,	,	,	,
1490	,	,	,	,	,	,	,	,
1491	,	,	,	,	,	,	,	,
1492	,	,	,	,	,	,	,	,
1493	,	,	,	,	,	,	,	,
1494	,	,	,	,	,	,	,	,
1495	,	,	,	,	,	,	,	,
1496	,	,	,	,	,	,	,	,
1497	,	,	,	,	,	,	,	,
1498	,	,	,	,	,	,	,	,
1499	,	,	,	,	,	,	,	,
1500	,	,	,	,	,	,	,	,
1501	,	,	,	,	,	,	,	,
1502	,	,	,	,	,	,	,	,
1503	,	,	,	,	,	,	,	,
1504	,	,	,	,	,	,	,	,
1505	,	,	,	,	,	,	,	,
1506	,	,	,	,	,	,	,	,
1507	,	,	,	,	,	,	,	,
1508	,	,	,	,	,	,	,	,
1509	,	,	,	,	,	,	,	,
1510	,	,	,	,	,	,	,	,
1511	,	,	,	,	,	,	,	,
1512	,	,	,	,	,	,	,	,
1513	,	,	,	,	,	,	,	,
1514	,	,	,	,	,	,	,	,
1515	,	,	,	,	,	,	,	,
1516	,	,	,	,	,	,	,	,
1517	,	,	,	,	,	,	,	,
1518	,	,	,	,	,	,	,	,
1519	,	,	,	,	,	,	,	,
1520	,	,	,	,	,	,	,	,
1521	,	,	,	,	,	,	,	,
1522	,	,	,	,	,	,	,	,
1523	,	,	,	,	,	,	,	,
1524	,	,	,	,	,	,	,	,
1525	,	,	,	,	,	,	,	,
1526	,	,	,	,	,	,	,	,
1527	,	,	,	,	,	,	,	,
1528	,	,	,	,	,	,	,	,
1529	,	,	,	,	,	,	,	,
1530	,	,	,	,	,	,	,	,
1531	,	,	,	,	,	,	,	,
1532	,	,	,	,	,	,	,	,
1533	,	,	,	,	,	,	,	,
1534	,	,	,	,	,	,	,	,
1535	,	,	,	,	,	,	,	,
1536	,	,	,	,	,	,	,	,
1537	,	,	,	,	,	,	,	,
1538	,	,	,	,	,	,	,	,
1539	,	,	,	,	,	,	,	,
1540	,	,	,	,	,	,	,	,
1541	,	,	,	,	,	,	,	,
1542	,	,	,	,	,	,	,	,
1543	,	,	,	,	,	,	,	,
1544	,	,	,	,	,	,	,	,
1545	,	,	,	,	,	,	,	,
1546	,	,	,	,	,	,	,	,
1547	,	,	,	,	,	,	,	,
1548	,	,	,	,	,	,	,	,
1549	,	,	,	,	,	,	,	,
1550	,	,	,	,	,	,	,	,
1551	,	,	,	,	,	,	,	,
1552	,	,	,	,	,	,	,	,
1553	,	,	,	,	,	,	,	,
1554	,	,	,	,	,	,	,	,
1555	,	,	,	,	,	,	,	,
1556	,	,	,	,	,	,	,	,
1557	,	,	,	,	,	,	,	,
1558	,	,	,	,	,	,	,	,
1559	,	,	,	,	,	,	,	,
1560	,	,	,	,	,	,	,	,
1561	,	,	,	,	,	,	,	,
1562	,	,	,	,	,	,	,	,
1563	,	,	,	,	,	,	,	,
1564	,	,	,	,	,	,	,	,
1565	,	,	,	,	,	,	,	,
1566	,	,	,	,	,	,	,	,
1567	,	,	,	,	,	,	,	,
1568	,	,	,	,	,	,	,	,
1569	,	,	,	,	,	,	,	,
1570	,	,	,	,	,	,	,	,
1571	,	,	,	,	,	,	,	,
1572	,	,	,	,	,	,	,	,
1573	,	,	,	,	,	,	,	,
1574	,	,	,	,	,	,	,	,
1575	,	,	,	,	,	,	,	,
1576	,	,	,	,	,	,	,	,
1577	,	,	,	,	,	,	,	,
1578	,	,	,	,	,	,	,	,
1579	,	,	,	,	,	,	,	,
1580	,	,	,	,	,	,	,	,
1581	,	,	,	,	,	,	,	,
1582	,	,	,	,	,	,	,	,
1583	,	,	,	,	,	,	,	,
1584	,	,	,	,	,	,	,	,
1585	,	,	,	,	,	,	,	,
1586	,	,	,	,	,	,	,	,
1587	,	,	,	,	,	,	,	,
1588	,	,	,	,	,	,	,	,
1589	,	,	,	,	,	,	,	,
1590	,	,	,	,	,	,	,	,
1591	,	,	,	,	,	,	,	,
1592	,	,	,	,	,	,	,	,
1593	,	,	,	,	,	,	,	,
1594	,	,	,	,	,	,	,	,
1595	,	,	,	,	,	,	,	,
1596	,	,	,	,	,	,	,	,
1597	,	,	,	,	,	,	,	,
1598	,	,	,	,	,	,	,	,
1599	,	,	,	,	,	,	,	,
1600	,	,	,	,	,	,	,	,
1601	,	,	,	,	,	,	,	,
1602	,	,	,	,	,	,	,	,
1603	,	,	,	,	,	,	,	,
1604	,	,	,	,	,	,	,	,
1605	,	,	,	,	,	,	,	,
1606	,	,	,	,	,	,	,	,
1607	,	,	,	,	,	,	,	,
1608	,	,	,	,	,	,	,	,
1609	,	,	,	,	,	,	,	,
1610	,	,	,	,	,	,	,	,
1611	,	,	,	,	,	,	,	,
1612	,	,	,	,	,	,	,	,
1613	,	,	,	,	,	,	,	,
1614	,	,	,	,	,	,	,	,
1615	,	,	,	,	,	,	,	,
1616	,	,	,	,	,	,	,	,
1617	,	,	,	,	,	,	,	,
1618	,	,	,	,	,	,	,	,
1619	,	,	,	,	,	,	,	,
1620	,	,	,	,	,	,	,	,
1621	,	,	,	,	,	,	,	,
1622	,	,	,	,	,	,	,	,
1623	,	,	,	,	,	,	,	,
1624	,	,	,	,	,	,	,	,
1625	,	,	,	,	,	,	,	,
1626	,	,	,	,	,	,	,	,
1627	,	,	,	,	,	,	,	,
1628	,	,	,	,	,	,	,	,
1629	,	,	,	,	,	,	,	,
1630	,	,	,	,	,	,	,	,
1631	,	,	,	,	,	,	,	,
1632	,	,	,	,	,	,	,	,
1633	,	,	,	,	,	,	,	,
1634	,	,	,	,	,	,	,	,
1635	,	,	,	,	,	,	,	,
1636	,	,	,	,	,	,	,	,
1637	,	,	,	,	,	,	,	,
1638	,	,	,	,	,	,	,	,
1639	,	,	,	,	,	,	,	,
1640	,	,	,	,	,	,	,	,
1641	,	,	,	,	,	,	,	,
1642	,	,	,	,	,	,	,	,
1643	,	,	,	,	,	,	,	,
1644	,	,	,	,	,	,	,	,
1645	,	,	,	,	,	,	,	,
1646	,	,	,	,	,	,	,	,
1647	,	,	,	,	,	,	,	,
1648	,	,	,	,	,	,	,	,
1649	,	,	,	,	,	,	,	,
1650	,	,	,	,	,	,	,	,
1651	,	,	,	,	,	,	,	,
1652	,	,	,	,	,	,	,	,
1653	,	,	,	,	,	,	,	,
1654	,	,	,	,	,	,	,	,
1655	,	,	,	,	,	,	,	,
1656	,	,	,	,	,	,	,	,
1657	,	,	,	,	,	,	,	,
1658	,	,	,	,	,	,	,	,
1659	,	,	,	,	,	,	,	,
1660	,	,	,	,	,	,	,	,
1661	,	,	,	,	,	,	,	,
1662	,	,	,	,	,	,	,	,
1663	,	,	,	,	,	,	,	,
1664	,	,	,	,	,	,	,	,
1665	,	,	,	,	,	,	,	,
1666	,	,	,	,	,	,	,	,
1667	,	,	,	,	,	,	,	,
1668	,	,	,	,	,	,	,	,
1669	,	,	,	,	,	,	,	,
1670	,	,	,	,	,	,	,	,
1671	,	,	,	,	,	,	,	,
1672	,	,	,	,	,	,	,	,
1673	,	,	,	,	,	,	,	,
1674	,	,	,	,	,	,	,	,
1675	,	,	,	,	,	,	,	,
1676	,	,	,	,	,	,	,	,
1677	,	,	,	,	,	,	,	,
1678	,	,	,	,	,	,	,	,
1679	,	,	,	,	,	,	,	,
1680	,	,	,	,	,	,	,	,
1681	,	,	,	,	,	,	,	,
1682	,	,	,	,	,	,	,	,
1683	,	,	,	,	,	,	,	,
1684	,	,	,	,	,	,	,	,
1685	,	,	,	,	,	,	,	,
1686	,	,	,	,	,	,	,	,
1687	,	,	,	,	,	,	,	,
1688	,	,	,	,	,	,	,	,
1689	,	,	,	,	,	,	,	,
1690	,	,	,	,	,	,	,	,
1691	,	,	,	,	,	,	,	,
1692	,	,	,	,	,	,	,	,
1693	,	,	,	,	,	,	,	,
1694	,	,	,	,	,	,	,	,
1695	,	,	,	,	,	,	,	,
1696	,	,	,	,	,	,	,	,
1697	,	,	,	,	,	,	,	,
1698	,	,	,	,	,	,	,	,
1699	,	,	,	,	,	,	,	,
1700	,	,	,	,	,	,	,	,
1701	,	,	,	,	,	,	,	,
1702	,	,	,	,	,	,	,	,
1703	,	,	,	,	,	,	,	,
1704	,	,	,	,	,	,	,	,
1705	,	,	,	,	,	,	,	,
1706	,	,	,	,	,	,	,	,
1707	,	,	,	,	,	,	,	,
1708	,	,	,	,	,	,	,	,
1709	,	,	,	,	,	,	,	,
1710	,	,	,	,	,	,	,	,
1711	,	,	,	,	,	,	,	,
1712	,	,	,	,	,	,	,	,
1713	,	,	,	,	,	,	,	,
1714	,	,	,	,	,	,	,	,
1715	,	,	,	,	,	,	,	,
1716	,	,	,	,	,	,	,	,
1717	,	,	,	,	,	,	,	,
1718	,	,	,	,	,	,	,	,
1719	,	,	,	,	,	,	,	,
1720	,	,	,	,	,	,	,	,
1721	,	,	,	,	,	,	,	,
1722	,	,	,	,	,	,	,	,
1723	,	,	,	,	,	,	,	,
1724	,	,	,	,	,	,	,	,
1725	,	,	,	,	,	,	,	,
1726	,	,	,	,	,	,	,	,
1727	,	,	,	,	,	,	,	,
1728	,	,	,	,	,	,	,	,
1729	,	,	,	,	,	,	,	,
1730	,	,	,	,	,	,	,	,
1731	,	,	,	,	,	,	,	,
1732	,	,	,	,	,	,	,	,
1733	,	,	,	,	,	,	,	,
1734	,	,	,	,	,	,	,	,
1735	,	,	,	,	,	,	,	,
1736	,	,	,	,	,	,	,	,
1737	,	,	,	,	,	,	,	,
1738	,	,	,	,	,	,	,	,
1739	,	,	,	,	,	,	,	,
1740	,	,	,	,	,	,	,	,
1741	,	,	,	,	,	,	,	,
1742	,	,	,	,	,	,	,	,
1743	,	,	,	,	,	,	,	,
1744	,	,	,	,	,	,	,	,
1745	,	,	,	,	,	,	,	,
1746	,	,	,	,	,	,	,	,
1747	,	,	,	,	,	,	,	,
1748	,	,	,	,	,	,	,	,
1749	,	,	,	,	,	,	,	,
1750	,	,	,	,	,	,	,	,
1751	,	,	,	,	,	,	,	,
1752	,	,	,	,	,	,	,	,
1753	,	,	,	,	,	,	,	,
1754	,	,	,	,	,	,	,	,
1755	,	,	,	,	,	,	,	,
1756	,	,	,	,	,	,	,	,
1757	,	,	,	,	,	,	,	,
1758	,	,	,	,	,	,	,	,
1759	,	,	,	,	,	,	,	,
1760	,	,	,	,	,	,	,	,
1761	,	,	,	,	,	,	,	,
1762	,	,	,	,	,	,	,	,
1763	,	,	,	,	,	,	,	,
1764	,	,	,	,	,	,	,	,
1765	,	,	,	,	,	,	,	,
1766	,	,	,	,	,	,	,	,
1767	,	,	,	,	,	,	,	,
1768	,	,	,	,	,	,	,	,
1769	,	,	,	,	,	,	,	,
1770	,	,	,	,	,	,	,	,
1771	,	,	,	,	,	,	,	,
1772	,	,	,	,	,	,	,	,
1773	,	,	,	,	,	,	,	,
1774	,	,	,	,	,	,	,	,
1775	,	,	,	,	,	,	,	,
1776	,	,	,	,	,	,	,	,
1777	,	,	,	,	,	,	,	,
1778	,	,	,	,	,	,	,	,
1779	,	,	,	,	,	,	,	,
1780	,	,	,	,	,	,	,	,
1781	,	,	,	,	,	,	,	,
1782	,	,	,	,	,	,	,	,
1783	,	,	,	,	,	,	,	,
1784	,	,	,	,	,	,	,	,
1785	,	,	,	,	,	,	,	,
1786	,	,	,	,	,	,	,	,
1787	,	,	,	,	,	,	,	,
1788	,	,	,	,	,	,	,	,
1789	,	,	,	,	,	,	,	,
1790	,	,	,	,	,	,	,	,
1791	,	,	,	,	,	,	,	,
1792	,	,	,	,	,	,	,	,
1793	,	,	,	,	,	,	,	,
1794	,	,	,	,	,	,	,	,
1795	,	,	,	,	,	,	,	,
1796	,	,	,	,	,	,	,	,
1797	,	,	,	,	,	,	,	,
1798	,	,	,	,	,	,	,	,
1799	,	,	,	,	,	,	,	,
1800	,	,	,	,	,	,	,	,
1801	,	,	,	,	,	,	,	,
1802	,	,	,	,	,	,	,	,
1803	,	,	,	,	,	,	,	,
1804	,	,	,	,	,	,	,	,
1805	,	,	,	,	,	,	,	,
1806	,	,	,	,	,	,	,	,
1807	,	,	,	,	,	,	,	,
1808	,	,	,	,	,	,	,	,
1809	,	,	,	,	,	,	,	,
1810	,	,	,	,	,	,	,	,
1811	,	,	,	,	,	,	,	,
1812	,	,	,	,	,	,	,	,
1813	,	,	,	,	,	,	,	,
1814	,	,	,	,	,	,	,	,
1815	,	,	,	,	,	,	,	,
1816	,	,	,	,	,	,	,	,
1817	,	,	,	,	,	,	,	,
1818	,	,	,	,	,	,	,	,
1819	,	,	,	,	,	,	,	,
1820	,	,	,	,	,	,	,	,
1821	,	,	,	,	,	,	,	,
1822	,	,	,	,	,	,	,	,
1823	,	,	,	,	,	,	,	,
1824	,	,	,	,	,	,	,	,
1825	,	,	,	,	,	,	,	,
1826	,	,	,	,	,	,	,	,
1827	,	,	,	,	,	,	,	,
1828	,	,	,	,	,	,	,	,
1829	,	,	,	,	,	,	,	,
1830	,	,	,	,	,	,	,	,
1831	,	,	,	,	,	,	,	,
1832	,	,	,	,	,	,	,	,
1833	,	,	,	,	,	,	,	,
1834	,	,	,	,	,	,	,	,
1835	,	,	,	,	,	,	,	,
1836	,	,	,	,	,	,	,	,
1837	,	,	,	,	,	,	,	,
1838	,	,	,	,	,	,	,	,
1839	,	,	,	,	,	,	,	,
1840	,	,	,	,	,	,	,	,
1841	,	,	,	,	,	,	,	,
1842	,	,	,	,	,	,	,	,
1843	,	,	,	,	,	,	,	,
1844	,	,	,	,	,	,	,	,
1845	,	,	,	,	,	,	,	,
1846	,	,	,	,	,	,	,	,
1847	,	,	,	,	,	,	,	,
1848	,	,	,	,	,	,	,	,
1849	,	,	,	,	,	,	,	,
1850	,	,	,	,	,	,	,	,
1851	,	,	,	,	,	,	,	,
1852	,	,	,	,	,	,	,	,
1853	,	,	,	,	,	,	,	,
1854	,	,	,	,	,	,	,	,
1855	,	,	,	,	,	,	,	,
1856	,	,	,	,	,	,	,	,
1857	,	,	,	,	,	,	,	,
1858	,	,	,	,	,	,	,	,
1859	,	,	,	,	,	,	,	,
1860	,	,	,	,	,	,	,	,
1861	,	,	,	,	,	,	,	,
1862	,	,	,	,	,	,	,	,
1863	,	,	,	,	,	,	,	,
1864	,	,	,	,	,	,	,	,
1865	,	,	,	,	,	,	,	,
1866	,	,	,	,	,	,	,	,
1867	,	,	,	,	,	,	,	,
1868	,	,	,	,	,	,	,	,
1869	,	,	,	,	,	,	,	,
1870	,	,	,	,	,	,	,	,
1871	,	,	,	,	,	,	,	,
1872	,	,	,	,	,	,	,	,
1873	,	,	,	,	,	,	,	,
1874	,	,	,	,	,	,	,	,
1875	,	,	,	,	,	,	,	,
1876	,	,	,	,	,	,	,	,
1877	,	,	,	,	,	,	,	,
1878	,	,	,	,	,	,	,	,
1879	,	,	,	,	,	,	,	,
1880	,	,	,	,	,	,	,	,
1881	,	,	,	,	,	,	,	,
1882	,	,	,	,	,	,	,	,
1883	,	,	,	,	,	,	,	,
1884	,	,	,	,	,	,	,	,
1885	,	,	,	,	,	,	,	,
1886	,	,	,	,	,	,	,	,
1887	,	,	,	,	,	,	,	,
1888	,	,	,	,	,	,	,	,
1889	,	,	,	,	,	,	,	,
1890	,	,	,	,	,	,	,	,
1891	,	,	,	,	,	,	,	,
1892	,	,	,	,	,	,	,	,
1893	,	,	,	,	,	,	,	,
1894	,	,	,	,	,	,	,	,
1895	,	,	,	,	,	,	,	,
1896	,	,	,	,	,	,	,	,
1897	,	,	,	,	,	,	,	,
1898	,	,	,	,	,	,	,	,
1899	,	,	,	,	,	,	,	,
1900	,	,	,	,	,	,	,	,
1901	,	,	,	,	,	,	,	,
1902	,	,	,	,	,	,	,	,
1903	,	,	,	,	,	,	,	,
1904	,	,	,	,	,	,	,	,
1905	,	,	,	,	,	,	,	,
1906	,	,	,	,	,	,	,	,
1907	,	,	,	,	,	,	,	,
1908	,	,	,	,	,	,	,	,
1909	,	,	,	,	,	,	,	,
1910	,	,	,	,	,	,	,	,
1911	,	,	,	,	,	,	,	,
1912	,	,	,	,	,	,	,	,
1913	,	,	,	,	,	,	,	,
1914	,	,	,	,	,	,	,	,
1915	,	,	,	,	,	,	,	,
1916	,	,	,	,	,	,	,	,
1917	,	,	,	,	,	,	,	,
1918	,	,	,	,	,	,	,	,
1919	,	,	,	,	,	,	,	,
1920	,	,	,	,	,	,	,	,
1921	,	,	,	,	,	,	,	,
1922	,	,	,	,	,	,	,	,
1923	,	,	,	,	,	,	,	,
1924	,	,	,	,	,	,	,	,
1925	,	,	,	,	,	,	,	,
1926	,	,	,	,	,	,	,	,
1927	,	,	,	,	,	,	,	,
1928	,	,	,	,	,	,	,	,
1929	,	,	,	,	,	,	,	,
1930	,	,	,	,	,	,	,	,
1931	,	,	,	,	,	,	,	,
1932	,	,	,	,	,	,	,	,
1933	,	,	,	,	,	,	,	,
1934	,	,	,	,	,	,	,	,
1935	,	,	,	,	,	,	,	,
1936	,	,	,	,	,	,	,	,
1937	,	,	,	,	,	,	,	,
1938	,	,	,	,	,	,	,	,
1939	,	,	,	,	,	,	,	,
1940	,	,	,	,	,	,	,	,
1941	,	,	,	,	,	,	,	,
1942	,	,	,	,	,	,	,	,
1943	,	,	,	,	,	,	,	,
1944	,	,	,	,	,	,	,	,
1945	,	,	,	,	,	,	,	,
1946	,	,	,	,	,	,	,	,
1947	,	,	,	,	,	,	,	,
1948	,	,	,	,	,	,	,	,
1949	,	,	,	,	,	,	,	,
1950	,	,	,	,	,	,	,	,
1951	,	,	,	,	,	,	,	,
1952	,	,	,	,	,	,	,	,
1953	,	,	,	,	,	,	,	,
1954	,	,	,	,	,	,	,	,
1955	,	,	,	,	,	,	,	,
1956	,	,	,	,	,	,	,	,
1957	,	,	,	,	,	,	,	,
1958	,	,	,	,	,	,	,	,
1959	,	,	,	,	,	,	,	,
1960	,	,	,	,	,	,	,	,
1961	,	,	,	,	,	,	,	,
1962	,	,	,	,	,	,	,	,
1963	,	,	,	,	,	,	,	,
1964	,	,	,	,	,	,	,	,
1965	,	,	,	,	,	,	,	,
1966	,	,	,	,	,	,	,	,
1967	,	,	,	,	,	,	,	,
1968	,	,	,	,	,	,	,	,
1969	,	,	,	,	,	,	,	,
1970	,	,	,	,	,	,	,	,
1971	,	,	,	,	,	,	,	,
1972	,	,	,	,	,	,	,	,
1973	,	,	,	,	,	,	,	,
1974	,	,	,	,	,	,	,	,
1975	,	,	,	,	,	,	,	,
1976	,	,	,	,	,	,	,	,
1977	,	,	,	,	,	,	,	,
1978	,	,	,	,	,	,	,	,
1979	,	,	,	,	,	,	,	,
1980	,	,	,	,	,	,	,	,
1981	,	,	,	,	,	,	,	,
1982	,	,	,	,	,	,	,	,
1983	,	,	,	,	,	,	,	,
1984	,	,	,	,	,	,	,	,
1985	,	,	,	,	,	,	,	,
1986	,	,	,	,	,	,	,	,
1987	,	,	,	,	,	,	,	,
1988	,	,	,	,	,	,	,	,
1989	,	,	,	,	,	,	,	,
1990	,	,	,	,	,	,	,	,
1991	,	,	,	,	,	,	,	,
1992	,	,	,	,	,	,	,	,
1993	,	,	,	,	,	,	,	,
1994	,	,	,	,	,	,	,	,
1995	,	,	,	,	,	,	,	,
1996	,	,	,	,	,	,	,	,
1997	,	,	,	,	,	,	,	,
1998	,	,	,	,	,	,	,	,
1999	,	,	,	,	,	,	,	,
[truncated: 13,001 more rows]
